# Supplementary material for: Enhancement of the production of L-glutaminase, an anticancer enzyme, from Aeromonas veronii by adaptive and induced mutation techniques
Source: PubMed Central journal article supplement (PMC5558970; doi:10.1371/journal.pone.0181745), 2017-08-16
Supplement: pone.0181745.s001.pdf [file pone.0181745.s001.pdf]

***Aeromonas veronii* strain TH0426, complete genome**

>NZ\_CP012504.1 *Aeromonas veronii* strain TH0426, complete genome **4923009**  
ATGATGGCCTGCTTAACCTGGCGTGTACACTCTGGGTCAACTGAGTACTCCTGTACAAGAGCCGAGCAG  
TCTACCATTACCCCCTGACCCGCAACAATAAAGCGCCGCTTATTAAGAAGTTAATCAATCAATAACGATT  
TCTTCTGCGCTGGCAGGTGAGTCTTGTCTACCCCTTCTCCAATTCGTCGAGGATCGGGCACTCGGGATT  
TTCATCTCCGTGGCAGCAGCAGACCAACCCTTCCAGGGAGGTAAGCATGGCCTGCAGCCCGCAATGCGG  
GCGCGCAGATCGACGATCTTCTCCTGCGCCAGCTTCTTACCTGGGCGCTGGTTCTGTGTTCTGTCCTCCGAT  
AGAGCGCCAGCAGCTCCTGACACTCTTCCAGATTGAAGCCGGTCTCCCGCGCCCGCTTGACGAAACGCAG  
CTCGCGCAGCGCCCCCTCGGTGTAAGTGCAGATAGCCGTTGTCACTGCGTACCGGGGCTGTGATGAGGCCA  
ATGCTCTCGTAATAACGGATGGTCTTGGCGGTTCAGCCAGTGGCCTTGGCAACCTTGCTGATGTTCAATTT  
ATGCCTCCTTACTGATCGGGTTGGATGCTGGCCCCGTGCGCCGCCCTGGGCTGCCAGCGTTTCAATAACAG  
GGAATTGCTCAAAAACCGTGATACTGCTCAGGGCCATGGCCGCCCCCGCCAGCTCGGGGCTCAGGTAGCCC  
AGCGCCGCCAGCGGAATGCCGATGATATTGAACACGAAGGCCAGAACAGATTCTGCTGTATGGTGCGCC  
AGGTCGCGCCGAGATGTCGATGGCATCGGCCACCAGCCGCGGGTCAGATCGCATCAGGGTGTGGAAGC  
TGTCTCCATCGCCACATCGGAGCCGGAGCCCATGGCGATGCCGACGTCGCCCGCCGAGCGCCGGAGCA  
TCGTTCACTCCATCCCCACCATGGCCACCAGCCGCGGGTTTGCGCCCGCAGCGCCTCCACTTCTCCA  
CCTTGCCCGCTGGCAGCAGGAGTCAAAGGCCCGCGCCAGCCCGAGCTTGGCGGCGATATGGCCACCAGG  
CGCCGGTGCATCGCCACTACCAGCCAGCTGGCAATGCCACGCTGGCGCAGGGTGGCGATGGCCACCAGG  
CTTTCGGGGCGCAGGGTATCGGCCAATGCGGCGATACCAGCCACCGTGCCTCGATGGCCACCAGACCC  
GGGTGCGCCCCATCGGCGGCTTGTTCATCCTGTTGCGGCGGTTCAATGCCGAGCTGGGCCAGCAGGGAACC  
ATTGCCGATGGCGACACTGTGGCCCGCCACCTGACCGACTATGCCGGCACCAGCCCGCACCTCGACCGCC  
TCCGGCTGAGGCAGTGCCACCCCGCTGCCGACCGCTCGCGCATGGCCAGCGCCAGCGGGTGTTCGCTCG  
CCTGCTGCAGGGCGGCGGCCAGATGCAACTGCTCGTCTGTTGCCGCTCCAGCTAGCCAGCACAGGCTTGCC  
CTGAGTGAGCGTGCCTGCTTGTGCAAGATCAGCGCCTTGTGCGTGGGCTTCTGCAGGGTATCCACA  
TCCTTGATCAGAATGCCGTGGCGCGCCGCGACGCGGTTACCGGTGACGATGGCCCGCGGGTTCGCCAGCC  
CCAGCGCACAGGGGCGAGCGATCACCAGCACCGCCACCGCTGCCAGCAGGGCCTGACCGAAGTCGTTGCT  
GATGGCGTACCACACCAGCAGGGTGAACAGGGCGATGGCCATCACCACCGGCACGAACACGGCGGAAACC  
TTGTCCACCAGCTGTTGCAGCGGGGCTTGGCCATCTGGGCACTCTCCACCAGTGAATGATCTTGCTGA  
GGCTGGAGTCCCTCCCCACCCTAGTGGCTTCAATATCCAGCACGCCGGAGCGGTTGATGGCGCCACCCAG  
CACCTTGTGCGCCACATTTGCCATCCACCGGCACCCGCTCGCCACCAGCACCCCGCAGCCGATCGCCGCGCA  
GCACCTCGTCGATGGCGACGCTTTGCCAGTCTCGCCACGCCAGACGGTGGCGGTTTCCGGCCGACGCGC  
CATCAGTTCGCGAATGGCGGACTGGGTGCTGCGTCTGGCCCGTGCCTCCAGCAACTTGCCGAGGGAGATC  
AGGGTAATGATGATGGCGCTCGCCTCGAAATAGAGCTTGGCGCTGGCAGCCATCCCCAGCGTCAACAACA  
GATAGAGGCTGTAGAAGTAGGCAGCGCTGTTGCCGTTGCTACCAGCACATCCATATTTGGCTGCGCGGTT  
CTTGATGGCGAGCCAGGCACCGCGATAGAAGCGTCTGCCATCCAGAACTGCACCGGGTGGCGAGCAGC  
AGCTCCAGCCAGGCGGGTAGATGCCAGGGGAACAGTCCGGCCATGGCCAGCATCCCCACCAGCAGCGGCA  
ACGTCAGCAAAGCCGAGACGATGACCCGGGTTTGGAGCTGACGGGCTGTGGCGGCTCCTGCGCTTCCCG  
CTCCAGCAACTGCTGGCGGCGGCGCTGGCCGAGCCTTGTGCCAGCTGGGCGCCAAAGCCGAGCGCTTCG  
ATCTGCTCGCGCAAAGCGGCGGGCTTGCATCCGGGGACCAGCACGATGCGGGCTGTTCGATAGAGA  
AATTGACCTCGGCCGAGATAACGCCGGGCGAGCGGGCCAGCATCTTGTTCACCAGCCGAACAACCGGC  
ACAAGTCATGCCGTAATTTGGAACAAAAAGGTCGCTGCGTAGTCGTAACCCTGACTCTTGATGCTG  
TCGAGCACCGCAGGCAGGCGATCGGGGCTGGCCAGCTCGATGGCCGCTGCTCCAGCGCGAAGTTGACTG  
TGGCCTCGACCCCTTCAAGCTTGTGAGGGCGGTGCGATGCGGCTGCGCAGTTGGCGCAGCTCATGCC  
GCTGAGCGGCAACTGCAGATGAATGGGTGATTGAAGATGAGTGGTCATGTTGTTCCCTCCCGGAACCCGT  
CGGCACAACAAAACGCCGACTGGCAAACCTTAACCTTTACTGTAAGGGCAAGCTCAAGCCACATGATCCA  
CTTTTTGTCAGATGAAAAAACGGCGCCCGTTTGTGTCAGAGAAACAAACGGGCGCCGATTCAGCTATTG  
CGCGGTGCGAGCGGAGCTCAGATACCGTACTGGGCGGATAAGCCTTCATGGCCCGCAGTTGCGCCGCCA  
GCTCCGGCTGTTCCGGCCTGCTTCTCTTCCAGATACTGGATCAAGTCGCTCATCTGGATGATGGCGATGAT  
GTGAGCGCCGTAGTCACGCTCCACTTCTGAATGGCGGAGAGTTCGCCCTTGCCCTTCTCCTGACGGTCC  
AGCCGATCAGTACGCCAGCCAGCGAGGCGCGCTTGGCCTGGATCAGATCCATGGATTCGCGGATGGCCG  
TGCCAGCGGTGATGACGTCATCCACCAGCATGCGCCCTTGAGCGGGCTGCCACCAGATTGCCACC  
CTCGCCGTGATCCTTTGCCTCCTTGCCTTGAAGCACCAGGCGACGTCACATCGTGTCTCCACCAGC  
TGCACCGCGGTAGCGGAGGCGATGGGGATCCCCCTTGTAGGCCGGGCCAAACAGCACATCAAACCTCGATAC  
CGGCATCCATCAGGGCGGCGGCATAGAAGCGGCCGAGACGGGCCAGATCGCGGCGCTGTTGAACAGACC  
GGCGTTGAAGAAGTAGGGCTTTTACGACCGGATTTTCAAGGTAATAATTCACCGAATTTGAGGACCTGTTTC  
TCCAGGGCGAACTCGATAAATTTGACGCTGGTAGGCTTTTCAATCTGGCTCCTTGTGCTTGGCTTGTCTGTC  
TTGTGTGGGGGTATAAAAAACCGGTCATGCGCGTTTTTAAAAATCAGGAGAGCGACTGCTTCTGCAG  
CGCAATGATGTCGGCGATAACCGCCCTTGGCGAGCGCCAGCATCTCCAGCAGCTTTCATGGGTGAAGGGC  
TCGGCCTCCGCGGTGCCCTGCACCTCGATGATGCGACCATCTTCGGTCATCACCACGTTTCATGTCGGTCT

CGGCGGGGAGTCTTCGATGTACTCCAGATCGCAGATGGCTTCACCCTGATACATGCCGACGGATACGGC  
GGCGATCATCTGCTTGAGCGGGCTCTGCTTGAGCATGCCCTTCTCGACCATCCAGTTCAGCGCATCCACC  
AGCGCCACACAGGCACCGGTAATGGAGGCGGTACGGGTGCCGCCATCGGCTTGCAGCACGTACAGTCAA  
CGGTGATGGAGTGTTCGCCCAGCGCAGTCAAGTCTACCGCCGCGCGAGGGAGCGGGCGATCAGACGGGA  
GATCTCCAGAGTGCGGCCACTCTGCTTGCCGGAGGCCGCTTCGCGGTTTCATCCGGGAGTGGGTGGAGCGC  
GGCAGCATGCCGTATTCGGCAGTTACCCAGCCCTGATTTCTTCCCTTTCAGGAAGCGCGGCACGCTGGTGT  
CAACGCTGGCGGTGCAGAGCACGCGAGTGTACCCGAACCTCACCAGCACTGAGCCTTCTGCATGTTTGGT  
GAAATTGCGGGTAATGGTAACCGGGCGAAGTTGCGCGGCACTGCGATCGCTTGGACGTGACATGGAACGG  
ACCTCTGGGCTGGCTCAAATTGGCGAGGGATTATAAGTGATCCCGCCCAAATATCAGCCGCTAAAACCA  
CGGCATCGGCTGACGAGCAGGGCCGGGCTGAGTATACTGGCCGCACACTTCATCAAGCCCCGAACAATCA  
ATGATTACAGCATGACCGCTATCTGAAACCTACATTCAGCTGCGGAGCAACTGCGCAGCCTGGAGCC  
TTCGTTTCGGTCAACCAGCGCTATCTGAAACCTACATTCAGCTGCGGAGCAACTGCGCAGCCTGGAGCC  
AGTACTGCGTGAGCGTTTTCCGCGCCAAGCTGCAGCGCGCAAGGTGGAGTGCAACCTGCGTTTTGAAAGCC  
GCTCAGGCCGCTGCCAGCCAGCTGCACATCAATGAAGAGCTGGCCAAAGCTCATCATCGACAGCGCCAACT  
GGGTAATGAAAGAGGCGGGTCAGGGCCAACTCAATCCGGTTCGACGTACTGCGTTGGCCGGGCGTCATGGC  
TGCCGCGAGCAGGACATGGACGCGGTGCCACCGAGCTGCTCGGCGGTTTTGACCAGACCATGGAAGAT  
TTTTCTCGCCTCCCGCGCCAGCGAAGGGGCCAACTCAAGGCGCTCATCGAACAGCGTCTGGCCGGTATTC  
AGGTGGAAGTGGAGAAGGTGCGCGTCCACCTGCCGAGATCATCGAGTGGCAGCGCCAGAAGCTCACCGA  
CCGTCTGGCCGAAGCCAAGGTGCGAGCTGGACCCGGCCCGCATCGAGCAGGAGATCGTGCTGCTGGCCAG  
AAGATCGACGTGGCCGAAGAGCTGGATCGTCTGGAGATGCACATCAGCGAAACCAACAAGATCATGAAAA  
AGGGTGGCGCCTGCGGTGCTGCTCGACTTCATGATGCAGGAGTCAACC GCGAGTCAACACCTTGGG  
CTCCAAGTCCATCAACGCCGAAGTGACCCAGTCCGCAGTGCAGCTGAAAGTCCCTCATCGAGCAGATGCGC  
GAGCAGATCCAGAACATCGAGTGTGGGTCACTGACCATCCGGTTGTTACCTGCAAAAAGAGCCCTTGATT  
CCTCAAGGGCTCTTTTTATTTTTCAGGCCATGGGGTTTTGCCGCTGTGAGCCAACGAGCAAGAGAAGCCCTA  
GCCTATCGGCATCACCAGCGCCGGTTGGTGCGGGTGCTCAGCCGCTCGGCCAGATAATCCACCAGCAGT  
CGCACCTTGGGGGAGAGGTGGCGGTTGTGGGGATAGAGGGCCAGATCCCTCGGCCGGAGCCCGCAGTT  
CGGGCAGCAGCTGATCAATTCGCTCGGGCCAGATGGTGCCTCACGTAGTAGTCCGGCAGCTGGATAAT  
GCCGATCCCCTTGAGCGCCGATCCAGCAGAGCTGGCCACTGTTGCACTGCAACAGGCCGCGCACCCGC  
ACGCTGTGGGGGGCAGCCGTCAGAGTGAAGTGCCACTGCTGCTGTTGCCACCAGACAGGCTGTGGCGGG  
TCAGCTCGGAGAGGCTGTTGGGCATGCCGTGGCGGGCGGTGTAAGCCGGTGAGGGCGCAGACATAGGGCAC  
CCGCTGCGCCAGCTTGCGCGCCACCAGCGTCAATCCTTGAGGTGGCCAAAGCCGCGAGCGCCAGATCGTAG  
CCTTCGTGCACCAGATCCAGCAGCTGGTTGGTGGAGGTTGAGGGTCACTCCAGCTGGGGGAAACGCACCA  
TGAAGTCGTTACCAGCGGGGCGATGCGGCTCTCGCCGTAGGAGACGGGGGCGGTAATGCGCAGCGACCC  
TTGCGGCACCGCCTGATGGCGCCCCACCGCCAACCTCCGCTCGTAGAGGTTGTCCAGCAGCTGACGGCAG  
TGGCGATAGTAGATCTCGCCAAGCTCGGTGAGCCGCACCTGACGGGTGGTGCAGCAGCAACTTGGCCT  
GCAGCCGATCCTCCAGCTGTGCCACCTGACGGCTGACTTGCGCCACCGACACTCCAGCTTGCAGCGCAGC  
CGGGGTAAAGCCCCCTGCTCCGCCACGCTGACAAATTCACAGATCCCTTCCCAGCCGAACATTATTACC  
TGTGTGTAAGAGTGAATTTGAGATTTGCCCTCATTATACCAAATCGGGCGGAAACTACACTGAATGCCCG  
AACTCATCTCTGTTACCCCTGCTCAACAAGAAGGATGTCATTCATGGCACAGGTTCAAAGCATCAAGTGT  
AAAGCCGCCATCGCCTGGGGCCCGGGTCAGCCCTCTCCATCGAAGAAGTAGAAGTCAATGCCGCGGCAAG  
CGGGCGAGGTGCGGGTGGCATCGTGCAGACCGGCGTCTGTACACCCGATGCCTTCACCCCTCTCCGGTGA  
AGATCCGGAAGGGGTCTTCCCTGCATCCTCGGCCACGAGGGGGGCGGCATCGTCGAATCCGTGCGCGAA  
GGCGTACCCAGCGTCAAGGTGGGCGATCACGTGATCCGCTCTACACCCCGAGTGCGGCGAGTGCAGT  
TCTGCAAATCCGGCAAGACCAACCTATGCCAGAAGATCCGCGCCACTCAGGGCAAGGGGCTGATGCCGGA  
CGGCACCCACCGCTTCTCGAAAGATGGCCAGCCATCTATCACTACATGGGCACCTCCACCTCAGCGAA  
TACACGGTACTGCGGAGATCTCCATCGCCAGGGTGGACCCGCGCCCGCTGGAAGAGGTTGCTGCTGC  
TCGGCTGCGGCGTCAACCACCGCATCGGCGCAGTGAACACCGCCAAGGTGAAAGAGGTTGAGAGCGT  
CGCCATCTTCGGGCTGGGTGGCATCGGCCTCTCGGCAGTGCAGCGCCCGTCTGGCCAAAGGCCGGTTCGC  
ATCATCGCCATCGACATCAACGAGAGCAAGTTCGAACTGGCCCGCAAGCTGGGCGCCACCGACTGCATCA  
ACCCGAACGATTACGACAAACCGATTAGAGGATGATCGTGCAGCTGACCGATGGCGGGCTCGACTTCTC  
CTTCGAGTGCATCGGCAACGTCAAGGTGATGCGTGCGGCGCTGGAGTGTGCCACAAGGGCTGGGGCGAG  
TCGGTCAATTATCGGCGTGCAGGAGCAGGTAGGAGATCAGCACCCGTCGTTCCAACCTGGTGACCGGTC  
GGGTCTGGCGCGCAGCGCCTTCGGCGGGGTACGCGGTGCAGCGAACTGCCGAGTATGTGCAGCGCTA  
CATGCAGGGCGAGTTCCGCTCGATGACTTCATCACCCACACCATGCCGCTGGAGCAGATCAACGAGGCA  
TTCGATCTGATGCATGAAGGCAAGAGCATCCGCACCGTCACTACTGAGCATGATCGCCCCGCCCCG  
CATCGTGGGCGGGGTACAGGAGTCTTCGATGAATCTGGAGATTATCAGCAGCAACAAGAGCTTCGGCGG  
CTGGCACAAGCGCTATCGCCACAGCGCCAGCGTGTGGGCTGCGAGATGAATTTTGCCATCTATCTGCCG  
CCTCAGGCCCTCACCGGCCAGAAGGTACCGGTGCTCTACTGGCTCAGCGGCCCTCACCTGCACCGATGAGA  
ACTTTATGCAGAAGGCGGGTGGCCAGCGCATCGCCGCGGAGCTCGGCATCGCCCTGGTGGCGCCGGACAC  
CAGCCCCCGCGGGCAGCGGCTAGCGGACGATCCCGGTTATGACCTCGGCATGGGCGCAGGCTTTTACGTC  
AATGCCAGCCAGAGCCCTGGCAGGCGCACTACCAGATGTATGACTACGTCACCCGCAACTGCCTGACT

TGATAGAGACCCACTTCCCGGTCTCGACCCGCCGCGCCATCAGCGGCCACTCCATGGGCGGTTCATGGTGC  
GCTGATCGCCGCGCTGCGGGAGCCGGGTGCTACCGCTCGGTCTCGGCGTTCAGCCCGATCTGTCACCCG  
AGCCGCAGCCCTTGGGGCCAGAAGGCCTCGGCGCCTATCTCGGCAGCAATCCTCTGCTGTGGCAGGAGT  
GGGATGCCTGCCAACTGCTGCGCCACCAGCCGGTACGCGCCTACCAACCTTGGTGGATGTGGGGCTGGA  
TGATCCCTTCCCTCGCCGAGCAGCTGCATATCGATGCGCTGGCAGAGGTGGCCGCCAGCAAGGGGTGGCCG  
CTGGAGCTCAACCGCCACGAGGGCTATGACCACAGCTACTACTTCGTGGCGAGCTTTATCGAGGCGCACC  
TGCGCTTTACGCCCCGCCACCTCTGATCAAAAACAGGCCCGTTGCGGGCCTGTTTCAGTTGTGGTATCGG  
TTGATATCAGCTACCGGCGCGGGTCACTCCGCCGAGCCACGATCTGCTGCTCCACCTCGGGGTACCC  
CAGTAGGTGATGTTGCCAGTGCCTGCGATGCCGATCTTGAGCGTTTTCTGGGCCCCGACCTCCACATCAC  
CGCTGCCGGCGATATTGACCTCGACCTCGTTGCCACGCATTTGCTGCCCAGCACATCGCCAGCACCCGGC  
AATGTTACAGTCTGATGCTAGTGGCAGAGCCGCTCCCCAGATCCAGGCTACCTGCACCAGCATATTGCCCT  
TTCAATCGCTGTACCTCAGCTGGCTGGCGACGATACCACCGGTTCCCGCCACTGACAGCTCCAGCGCCT  
CACCTTGAAGCCACTCAGATCGCCGTTGCCGGTACCTGCCAGCGCCATTTCACTGAGCTCTGGCAGGGT  
GATGGTGTATCTCCAGCGGTTCCGGTAGGCCGAGTCGGTAACCATCCTTCACTCGATCTCCAGCTTGCTG  
CCGCGCTCGGTGAGCTCCAGATACGGCAAGAGATTTGCCTGCCCTTGATCAGGATCCCAGCGCTGCTCCC  
CCGCCACCAGATGGAGTGTAGCTGGAGTTCCCGCCAGCACCCGGGTACCCGCTCGCCCAGCGCCTGCTG  
GCGCTCGACCGGGACACCTTCCCCCTTGATCTCGGTGTCGGCAAAGACGTTGCAACCTCCCATCACCAC  
GCCACCAAGACGCCAATCATCCACCGCATAACTGTTCTCCTTTTTATTTATTTGATAAGCCACCTGACAGG  
CCCTGTTGAAACCACAAAAATAGAGGCCGATGAAACCACAGATAGCAATGGCCATGCCAGAATCTAAC  
TATATGATTTTCAATAAAAAATAAATCAACAGTAAGAAGTGGTACGCATTAAGGAGCCATTTAGACCA  
CCATTTGGCGAATCTGACCATCCCCTAACAGGCAGGTGGAGAGCTGGCTGGCGAGCCGCTCTGCCGGTCC  
CTACGCTGACAAGCCGTGGAAGTTTTGGATTGCCCTGCCGGTCTGCTGAGCCAATAGTGGTACTTCGTGC  
GTACCAAGCTCTCCATTGCGGTAATGTCATTACCACTGTCTTGTGAGTCTTCACTGCCAACAAGGAGTCA  
GAGCGTGACCCAAGCAAGCCCTCTCTATGCCACCGCCACCCGGTCTGCCGGAACCGACTCGCACCCCGCAG  
CTGACCGGCAGCGATCCCAGCAGAAACGGCGGAGCTGCTCGCCTACTTCTGCCAGACCTTCGATCTCT  
ACGATTCGCTGTTGACTGTCTGGCCGATGAGCGGGCCTGGTTCAACAAGGCATCCCCTGCGCCACCC  
GCTCATCTTCTACTACGGCCACACCGCCGCTTCTTCTGTAACAAGCTGCTGGCGGCCCGCTCATCGAG  
GGTCGGCTCGACCCCGCATCGAGGCCATGGTCGCCATCGGGGTGGACGAGATGAGCTGGGACGATCTGG  
ACGAGACCCACTACGACTGGCCCAAGGTCAGCGACTGCGCAGCTATCGGGCCAGAGTCCGTCAGCTGGT  
GTGCGACTTTCATCCGCCAGATGCCCTCACCTGCCCATCGACTGGCAAAGCCCGCCTGGGTGATCCTG  
ATGGGGATAGAGCACGTGCGCATCCACCTCGAGACCTCCAGTGTGTTGATCCGCCAGTTGCCGCTCGCCT  
GGGTGCGGCCGAGCCTTATTGGCCCCGCTGCACTGAAAGCCCGCCACCGCATTGATCAGGTGCCCGCCAA  
CAGCCTGCTGCGGTTGGCTGGCGGCAAGGTGCGCCTTGGAAGCGGGACGCCACCTACGGCTGGGACAAC  
GAATATGGCGAGCGCCATATCGAGCTGGCCCCGTTTCAGGCCAGCCGATGCTGGTGGCAATACCGAGT  
ACCTCGCCTTCGTCCAGGCGGGCGGCTACGGCCAGCAACAGTGGTGGGATGAGGAGGGGTGGGGTTGGTG  
TCAGTACGCCAAGGCGCAGATGCCTACCTTCTGGGTGGGTGACCCCGCCAGCCGAACAATTGCAGCTG  
CGGCTGATGACCGAGCAGGTCGCCATGCCATGGGACTGGCCGGTGGAGGTCAACCAGCTGGAAGCGGTTG  
CCTTCTGTGCTGGAAGGCGGCCCGGACCGGACTCCCCATCCAGCTGCCGAGCGAGGCGGAATGGATGCT  
GCTGCGCGAGCAGTACCCGGCGATCAGCCGGTCTGGACACAGGCCCCCGGCAATATAAATCTGGCCCGT  
TTCGCTCCTCCTGCCCGGTGGATGCCTGCCCGCAAGGGGAGTTCTTCGATCTGGTGGGCAATGTCTGGC  
AGTGGACCAGCACCGCCATCGACGGCTTCGACGGCTTTAAAAATCCACCCGCTCTACGACGACTTCTCCAC  
CCCCACCTTTGATGGCAAGCACACCCCTCATCAAGGGCGGCAGCTGGATCAGCACAGGTAACGAAGCGCTC  
AAATCATCCCCTTACGCTTCCGGCGCCACTTCTTCAGCATGCGGGTTTCCGCTATCTGGTCTCCCCTT  
ATCAGGAACCCGTTATCGTGAATCCCTATGAAACCGACACGCTGGTTCGCTCAGTACCTCGACTTCCAGTA  
CGGCCCGAGCCACTTCGGGGTAGCCAACTACGCCAAGACGCTTGCTGATCTTGTGTCGGCAGCTGTGCGAG  
AGCCACCAGCGGGCGCTGGATATCCGCTGCGCCACCGGCCAGCTTCGAACTGGCTCGCCACTTCC  
AGCATGTGGACGGGGTCGACTACTCGGCCCGCTTCATCGACGTGGCGCTGGCCCTCGCCAGCCAGGACAG  
CTTCCGCTACGCCATTCCGCTGGAGGGTGAAGTGGTGGAGTATTGCGAGGCGCGCCTGTGAGCCACGGG  
CTGGGGGCGAGTCAGGCTGAGCGCATCCACTTCAGTCAGGGGGATGCCTGCAACCTCAAGCCCAAATATG  
ACCACTATGATCTGGTGTTCCTTCAACCTGATCGACCGGCTGCGGGAGCCCGCCCGCTTCTGCGGGGA  
TATCGCCCCCGGCTGCGCAGCGGTGGCCTGCTGGTGTCTACCAGCCCTATACTGGCTGGCGGAATAT  
ACCCCGCCCGCAACTGGCTCGGCGGCATTCGCGAAAACGGCGAGGCGCTCACCACTATCAGGCGCTGC  
AACGGCTGCTGGCGGCCGAATTCGAGGAGCACTGCCCGCCGAGGATGTGCCCTTCGTATCCGCGAGAC  
CGCCCGCAAATACCAGCACACGGTGGCGCAGCTGACCGTCTGGCGCAAACGCTAATCCGCCGGTTCGGCAT  
ACAGATGAGAAGAGGGAGGCCAACGGCCCTCCCTCTTGTATGACAGCCAAAACGACACGAGTATCACTC  
TCCCTGCTCGTGATAGCGGCGGCCAGCACGGCGCAGACCATCAGCTGGATCTGGTGGAAAGATCATCAGC  
GGCAGCACCATGACGCCGACGCTGGCGGCCGGGAACATGACGTTGGCCATCGGCACCCCGTTGGCGAGGC  
TCTTCTTGGAGCCGAGAAGACGATGGTGTATCTCGTCCGCTTGTGCAAGCCGAGGCGACGGCTGATCCA  
GACGTTCCAGCAGAGCACCGCCAGCAAGACGCGAGCTCAGCAGCACGATACTGGCCAGATCGTACCAG  
CCGACCTGGTGCAAAATCCCCTGCACCACCGCCTCGCTGAAGGCGACATAGACCACCAGCAGGATCGAGC  
TCTGATCCAGCTTCCCGATGAGCGGACGGTGGCTGTGACCCAGCGACCGAGCAGCGGGCGGACAGGTG

GCCTACCACGAACGGCAGCATCAGCTGCATCATGATGGACTGGATGGAGTGCCAAGTGTGATCCCCCTCC  
CCCTGCACGTGGATCATCATCCCCACCAGCACTGGCGAGAGGAAGATCCCGAGGATGCTGGAGGCCGAGG  
CGCTGCACACCCGCCGCCGACACATTGCCCCCTGCCATCGAGGTAAAGGCGATGGCCGACTGCACGGTGGC  
CGGCAGGGCGCAGAGATAGAGGAAGCCGAGGTAGATAGCCGGGCTCAGCCAGCTGGGCACCAGCGGGGTG  
AGCAGCAGCCCGAGCAGCGGAAACAGCACGAAAGTGCTGAGCATCACCACCAGATGAAGCCGCCAGTGGC  
CGAGACCTGCCAGCAGGTTCTGGCGCGACAGCTTGGCGCCATGCATGAAGAACAAGAGCGCCACCGCCAG  
CTTGGTCAGCAGACCGAACCCAGACGGCCACCTGCCCTCGCAGGGAAAAGAGGGAGGCCAGAGTGACCACC  
GCAATCAGCACAACAGTAAAGGGATCCAGACGCACGAAAGGTCTCCATCAGAAGGGCATCCCCGAGCCAT  
GGCAGCAGTCAGGATTGGGGAGGACAAGAAACAGAGCGGGAGATGTCTGGCACCTCCCGCTAAAACGAAC  
CTCCAGCTTACCCCGATAACGGAGAGGCGCAAAGTTGAGCGGCGAATAATTGTTTCATCAATGCTTAACGC  
CTTCGCCATATCGAGTAGCGAAAGTTGACGATAAAGCGGCCCTGACAGCTCCCAAACGGCTAAAAATGGA  
TAAAAAACGGGCGACCAAGGCCGCCCGTTCCGCTTTTCACTCAGCCGATCAGCGCTGGCTGGCCAGCT  
TGCCGTTGCCGCTTTCTTCTCATTGCCGGCAAGCTTGGCGGCTGCCGCTTCTCGAAGCGGGAGATCCA  
CCAGTAGGCCAGCGCCGAGAAGACCGCGGTATAAAGACGTTGATGAAGAAGGCACGCACCAGATCCACC  
CCGGCCGGGAAGGCGGAGGCACTCATGCTCACCACGAAAGATGGCGATCAGCACCCGACACCACGCCCATCC  
CGAACTTGCGGACCCCATGCGGAAGTCGCGTGGGGTGTGTCATGTTCCAGCGGAACACGAAGTAGGC  
CACCATGATGAAGATCGGCGGCAACATGGCGGTGCCGGCGGTGAGGTTGATGGCGGTGTTTCATCATCTGC  
TGCACCGACTCGGAGCCGAAGCCGTTGACCACCAGCATCGCGAACACGAAGACAACTGCCACCAGGCGG  
CGCGCACCGGCACGCCGTGCTCGTTGAGCTGGGTGGTCTTCTCGCCGTAACCCCTGCGGGATCTCGGA  
GAAGTGGATCTTACCAGCGCCGAGGTCCACATCATCATGGAGCCGAACATGGCGATGAACAGCACCAGC  
CCGACGAAGCGGCCACCAGCGCTCGGAAAGCCGAAATACTGCGCCATGCCGTTGAAGATCTCCACCA  
TGCCGCCGGCATAGGTGAGGCTCTCGCGCGGTACGAACACGTTTACCAGCAGGGAACCGACCGCATAACAT  
GGCACCGATGACGATACCCGCACTGATGATCACCTTGTGATGAAGGACTTCTGGCCGCCCTTACATCATTTG  
AGATAGGCCGCTGCCGTTTCCGGCACCCGCCCGCTTGGAAAGATCCAGCACATGATTCGGAGGGTCCGCC  
AGTTGACGGTGGGAGTCATCGCCTCCAGCGTATGGGCTGGGCGGCACATGATCGCCACTCAGAGCCAT  
CAGGGCACCCAGCGCATAGATGGCGAACAGGGCAAACACCCCGTAGGCCACGATCTCGGCAATCTTGCCA  
AGCCAACCTCGCCCTTGGTGGAGATGTGGGTGCGCCGCCGAAACAGCACGATGGAGATGATCGAGGTGA  
CCATGGGGCGAGAAGTGTACTCATAGCCAGCATGGCGTAGGAGGCGTAGGCGATGACGTTGGCGAGCAG  
GGAGACGAACAGAACAGTTCACGAACCAGTAGAGAAACAGAGCCAGATAGGCCATCCGGGTGCCGAGC  
GGTTTTTTTTCAGCCAGTCGTACATCCCCGACTCGGAGTTTTTTATTGGCCGAGACGAACCTCGGCAATGATGA  
AAACGAACGGAATGAAGTAGACGATGGTTCGCCAGCAGGAAGATGGGGGCGGAGCTGAGCCCCAGCTCAAT  
GTTGTTGTTGACGATGTTGCGCACGTTGAACACGGCGGCAAAGGTCATCGACAACAGGGCAAACCTTGCCCT  
ATGGTGCCGCTACGGATTACAGACATGGTGTCTTCCAGTGGACTCGCGCTCCCTGCGGGTAACGCTGTGA  
CTCTGTGATGTGTTTCGGCAAGGGTCTGTGCGCCCCGCGCTTACTCTCTTGTATGATCGGGCCGCGTGG  
ACGGCCTCGTTGCTGAACCGGTACCGTCTCCCGCACCGGCTCGCAATACCATTACAGACGATCGGAGTACC  
CGGCGCCATCGGCACCCCGCGTTGCAACAGCACGCTCTGGCTCTCGTCCGGGGTCTCGGCGCAGAGCAAC  
ATGCACTCGGATCGCTCACCGCGCATCTGGTGGGCTTGGAGTTGGTTCAGTACCACCACCTCGCTGCCCA  
TCAGCTCCTCTTCGCTGTAGTAGGGCACCAGACTGGTGACGGTCTGCAGCGGCCGCTCGCCACCCACGTC  
GATCTGGACGATGTAGAGTTTGTGCGCACCCGGGTGGCGCACCACTCCAACACCTTGCCCACCTTTCATC  
TCGACCCGTTTGAATTCGGCAAACCTCGATCGTCTCGCTCATGCTCTTTTCTTTCTGGTTCAACGGTTT  
GCGGGTGGCCAACGGCCACCCGGTTTGTATTGGGATTCATTCAGTGGCTATGGCGTCTGCATGGCAACCT  
GCGCTGTGCGGCTGGGCTCTTTGGCACGCGCTTCGGCACTGAGGGAGGCCCTCGTATCTGTTGTATTTCCA  
CCAGGCGAAGCCAAGGAAAATCACGATCCCGCCGACGTTGTAGAAGATGATGGTCATGATGTCCGCACCG  
GTCGGGAAGGTGGAGGCGAGGAAGCCACCGAGAAGATGGCGATCAGCACCGAGACCACGGCGATGCCCG  
TGTTGCGCGAACCATCTTGAACCTCCCGCGGAGGTGATCGAGCTTCAGACGCAGATTGAGGTAGGCCAG  
CATGATGAACAGCGGCGGCAGCATGGAAGCGGCGGTCATGTTGATAACAGTGTTCATCAGATCCTGTC  
GCTGTGTTGGAGCCAGAGTCGGGATCACCATCAGCGGCAGCAGATGAGGTACTGGATCCAGGCTGCAC  
GGGCGGGCACGCCGTTCTCGTTAGCTCGACCGTCTTCTTGGCCGAAGATGCCGGCCGGGATCTCGGAGAA  
GAAGATTTTACCAGGGTTCGCCGTCACATCAGCAGGGAGCCGAACATGGCGGTGAAGGAGACCAGCCCG  
ACGAAGCGGTTTCATCAGGATCTCCGGCAGGCCGAAGTAGGCCGCCAGCCCTCAAATACCTGCACCGAGC  
CGCCGGTATATTTACAGGTACCGCTCGGCACGAAACGTTGATCAAGAGCGAGGCGATGGAGTAGAGCAC  
GCCGATAAAGATCCCGCGATGATGATCACCTTACGAAAGACTTGGAGCCCCCTTTCACGTCATTGACG  
TAGACCGCCACCGACTCGGCGCCACCGGCTGCCATAAAGATCCAGGTGGTGTGATGCCAGGAAGGCCAGC  
TGAAATCGGGGATCATGGCCTTACCCTGATGGGGTTCGGCCGTTGCACGCCGCCACCAGTGCCGCACC  
TGCCAGCAGGATGTAGGAGAGGGTTCAGCAGCAGCATCAGGGACGAGGTACCCGAAGTGTGAGGGCCGAGC  
ATCTTGGCACCGTTAGTGGAGACGTAGGTGGCAAAGGCAAACAGCACCATGCTCAACGCCGTGGTCCGCA  
CCGGAGTGAGAATGTAAGTACTCGTAGCCGAGGAAGGCATAGGAGGCGTAGGCGATGACCCGCGGCAGCAGCGA  
GGTGAAGAAGAACAGGTTACGAACCAGTAGGTGTAGGCCGGAGATAAAGGCCAGCGCCCGCGAGGGAG  
CTCTTACCCAGGCATAAACCCTCGGAGTTCTTATTCAGTGACACGAACTCCGCAATGATCAGAC  
AGAACGGAATGAAGTAGAAAATGGTGGCCAGAAAGAACATCGGGGCCGAGGCCAGACCGATCTCGATGTT  
GTTGTTGATGACGTTGTTGAAGCTGAATACCGCCGCAAAGTGGAGCACAGCAGACCAAACTTGCCATC

GTATTGCGTTTGAATCAGACATGGTGCATCTCCAGACCTGTAGTTATTGCCGCGAAAGGGCGGGGCATG  
ATTTGTAGGGTGAACCCCGCCCTTCCGGCTTTTATCTGTGCAGAACCAGCGGCTTGTATTTGTTCTTGA  
AGTAGCCGCTTCGACGGTGACCTTGATGATCACCTTGCGCACCGGCCGTCGCCGACGAATCGGTAAGC  
CTCGTCGTTCTCGAAGATCACCACCTGCCCGTTGCCACCTGCTGGCGCTCACGCACCTCGCCAGCCAGC  
CACTCGCGGTTCGGTGGTGTGTCGTCATAAGCCTGCTCGACCGCCAGCTCCGATTTGGGGGCCACTCCACCG  
TCTCTGCTCCTTCCAGGTAGTAGTGAACGTGGAAGTAGCGGCGCTGCCCTCGAACAGTGAGGTGGCCGG  
GCTGGCCCCCTCCTGCAAGCGGTAGGTGAGGGAGTACCAATGGAGTGGCAGATGCCGGGCTTGAAGTTT  
GGCAGGTTGTTGATGGCCTCCACGCAGCGGCCCACTTCTTGCTTCCCGGTAGATGTTTTTGAACAGGG  
TCAGGTTGTCCAGGGTATCATGCGAGGTTCTCCCGCGTGTGATGGTGGATCGAGCCCGCCAGCGCA  
GCCGGGTTGAGGTTGCCACGGGCGATGGGAGCAGGGTTCAGGCCAAGCTGAACGGCTCGAAGCGCACCC  
GCCAGGAGTCCAGCACCTCGGAGCCCCAGGAGTTGGAACCCAGCCCCAGTACCTTGTGATCCAGATTGAG  
GGTGAGATAACCACCTCGGCTCCAGCTCGTTGATGTGCTGCGCCGCTGGATATGCTCCCAGCTGTAGGGC  
CAGACGCTCAGGTTGATGGGGGCATCGGGCCGCACGTAGAGACCGCGCCGCTGGCGGTTGGTCAGGGTCC  
CCCAGCGCACCTGCTGGCGGTTGCCGTTGTCTGCGGGAAGGGGTAGTGTCCCACATCTCGCTAACTGT  
GCTCTGGAAGCTGTGATCCAGTTGCTCTGGCGGCTGTCTGATAGTTTTTCGCCCGGCCCCATGCCGTAG  
TAGTGCACCCGGTGCAGATCCTGACGAATGCCAGCTCGAAGCCGATCTTGGGGATGATGTCGTCATAGC  
CGCCGTAGGGCTGACCGGACAGCGCCACGTGCAGCTGACCGTTTCGGGCTCAGGGTGTAGACGTAGCGGCA  
GCACATGCCGAAGTGAACACCGGCGGCGGATCAGACTCTCCACCGTCACCTCGACCGCCTCGCCCAGC  
TGACGCCAGCTCAGCGTGCAGGAGTGTCTCTGCATGATCTGCAGGTGGTTCGGGTGCCACAGGCTCTCGT  
ACTCCTGCTTATGGTTGTGATCATCGGCTTGAAGAAGGTGAGGCGCGGCGAGCGCTCAATCAGCTCGAT  
ACCGTCTGCTGCCAGCTCACCAGCTTGCCGTCGAGGCGCGAGAAGCGCAGGGCAAAGCCGCTACCGCTC  
AAGGTCAACGCGAGGCGCTCGTTCGGCAATCTGCAGCGCAGTAGCGTTGGGGTTGGCAAAGGGCTGCAGCT  
GGCGAGTGCATGCCTTCAGTTGGAAGTGGTACTGGCCCAGCTCGTGCTCCCGGGCACTGTAACGGGTGGC  
GGTGGTCTTGATGACCCGCGAGCTGGACGAAAAGTTTCCCGCGTATCAAGCGTGGGCGAGTTCGAGCTGCAGC  
TCAGTGGTGGCACCCGGGAGCAACCCCTTCCAGCCGATTTGCTGGCTGGCCAGCAGTTCGCCCTTCGGCCT  
TCACTTCGACCCAGCAGGCGGATATCGTCGAGAGTGGAGAACCAGTAGCGGTTTTCCACCGCCAGCTTGCC  
GCTGGCCAGATCCGAGCGCCCGCACCTTGACCGGACAGATCACCTGCTTGTATTTCGCGCAGGCCAGGCCCC  
GGGGCTGATCCGAGATAGATGAGGCCATCCATGCAGAAGTTGTAGTTGTTGGGGTAGTCCGCATAGTCCG  
CGCCGTATTTGTAACAGGGGCGCCCTGCTCGTCTGATCCAGAATGCCGTGATCGCACACCATCCCAGAT  
GTAGTGACCCTGAATGTGGGGATGACGGTTCGAACACCTGCTGGTATTTCGCTGAGGCCACCCGGCCATTA  
CCCATGGCGTGGGCGTATTTCGACAGAGGATGCGCGGCTTCGCCATCGGGAACCTCGCCGAAGCAGTTCATCT  
GGGAGACGCGGAGTACATGGTGTCCACCACATCCACCACCTCGGCATCGCGATCCTCTTCGTAGTGCAC  
CAGCCGGGTCGGATCGAGCGCTTGCAGCGCTGGTACATAGCTCTGATGTTGCAGCCGTAGCCGGACTCG  
TTGCCGAGCGACAGATGATGATGGAGGGGTGGTCTTCTGGGCGTGCACGTGGCGCTCTATGCGATCCA  
CGAACACCGGCTCCAGAAGGGGTATCGGTGATGCGGCTGAGATCGCCGACGTTGGCAAAGCCGTGGGT  
CTCCACGTCCGCTCTCCGCCATCACGAACAGACCGTACTGGTGCACAGCTCGTAGAAGCGCGGGTCTGTT  
GGGTAGTGGGCGAGTGCACCCGAGTTGAGGTTGTGCTGCTTCATCAGCACGATATCGCGTTCAACACGGT  
CCATACCGACCGCGGACTTTTTGAGGTGGTCTGTCGTGACGGTTCACCCCGTGCAGCTTGAAGTAGTG  
GCCGTTGACGTAGAAAAGACCATCCTTGACCTTGATTTACCGCACCCCGACCCGCTGCGGGATCACTTCC  
AGCAGCTCACCCCGACCGTTGTAGAGGGAGAGTTGCAGCTGGTAGAGGTAAGGATCTTCGGCGCTCCACA  
GATGGGGATTGGCCTGATCCAGCGTGAAGCGGCAATCACACTTGCCGTCGATGGTGAGATGATCGAGGGA  
GCCGCTGGCGATCTCGCTGCCCTGATCCAGCAGCGACCAGACCAGACGGTGTACAGGGCAGCCGCCCC  
AGACTTTCCAGCTGGATATCGCAGCTCAGGGTAGCGCTCAGATTTGTCATCGCCAGCGCGGTGCGGATGA  
AGAAGTCTGCACATGGGCGGCCGTTTGGCCACCAGATGACGTCGCGAAAAGATCCCCGCCATCCACCA  
CATGTCTGATCTTCGATATAGTTGGAGTGGGCCACTGCATCACCCGACCCGACAGCAGGTTCTCGCCG  
ATGTTGGCGTAGGCACTGATATCGAACTCGGCGGTGAGACGGTCCCTTGTGAAACCCGACATAGTGGC  
CGTTACATAGACCTCGAAGTAGGTCTCCACCCCGTCAAACCTGATGATCACCTGCTCGCCGTCACAGGC  
CGGGCTCAGCGTGAAGCTGCGCTGATAGGCGCCGGTGGGGTTGTTGGTCCGCACGAAGGGCACGTGATG  
GGGAAGGGAAAACCTTCGTCGGTGTACTGCAGCTGGCCATGTCTTCCATCTGCCACATGTTGGGCACAG  
TGATCTGGCCCCACTCGCTCATGGGGCTGTGATAGAAGGCTCCGGTACCTGCAGGGGGTGGTGAAGTA  
GTGGAACCTGCCACTGGCCGCAAGGCTCAGAAAACGGCGGCTCAGCTCGCGCTGCATGGTGGCCGCCAGC  
GCGTGGTCCGCATAAGAGAAGAAGTAGGCACGCGGGCCAGCCTGTTTTACCAACGAATTGGACGTTTT  
CCCAGTTATTCACATGTCTTCCGGAACAAGGCAACGTTAACTGGGTAACTCTAGATAAACATTTACTA  
AATATCAGCTTTGGATTGGTAAAGTTTTAACCTGATACAATGAACAGATGGTTTTGTGAGCGAGATCAG  
AAGCGGGAGATAAAGGAGGGCAAGATATGGATGAGTGGCATAGATGTTGATAGCCGTTGGTGAACGTGA  
ATAAAATCAACTATAAAACAATACGATATGACGTCACGGGATGATATGGGAAATAAGTTTACTTGGGAGA  
GGAGTGCACACCACCGCAAGATGGCACGACTAAAAAGCAGAGTATTTTACTAAAAATCAGCGAGTGGTGCCA  
CGCAGGGTCAACTTGCTCGGTACCAGTACCCGAAGGGGAATATCACGCTCGTACGCAGCCGCTCAACCA  
GCAAATTGACCCCTGGGAGCCCATCAACTCGGAGTGGATCCGCACCGTGGAGAGCGGGGGAAGGTGAA  
CTTGGCGGTTCGGGATATCGTTGACGCTGATAAGCTCGATCTGCTGGGGAATCGCCAGTCCCTTCTCATGA  
ATGGCACGCAGCACACCGATGGCGATGGAGTGGAGGCGACAAAACAGCGCCTTGGGCCAATCCCTGCCA

GCATCTCCTTCGCCAACTGGTAGCCGGAAGCGCTGGAGAAGTCCCCACGATAGAGATCGCTCTCCTGCAC  
CACCCCCAACCGCTGGCCATAATCCCAGGAGCCAGTTCGCGCAGATCCGGATTCTCATCTGGCCACCG  
ATATAACCGATACGCTGGTGGCCCTGCGCGATGAAGTAATCGACGACCTGCTGGCTGATCAGTGGCAGAT  
CCACATCAACCGAGTCGAACCTCCTGTGAACGGCAGTCGACAAAACCCAGCTGGCTGGAACAAGCCCT  
TAGCTGGACGAGACGTTTCGGCTGTGAGTGTGCCGACAACCAGAATGCCATCCACGGCGCTCAGCTCGCGC  
CCTTACCACAGTTGTAGAGATGAGTCAGCTCGATATTGAGGCGGGCACTCTGGGTCTCGATGCCATAAC  
GGATGGCGAGATAGTAAGGGTCGTTGACCTCGGTACTCTGGGGATAGGCATAGACCACCAGAAAAGTGCAG  
CTTGCTCTTGTGTACCCCTTGGGGCGCTGCTGGTCTTGTACTCCAGCCGTTTCGGCAATCTCGAAGATC  
CGCTGCTTGGTCTCTTCTTACGCTCAGGCTGGGATCCTCGTTCAGTACCCGGGATACCGTGGCGAGAG  
ACACCCCGCTTCTGTGCAATTTCTTCAACGTAGCCATCAATACCTCGCTGGCAGCATCAGTGTAA  
TCGGCAACGGCTAAAGAGTAACGGGCAATCCCTGTATAGCCAGCACTTTTACTAAAATGCCGGCAGCAT  
GACAGATTTTTGGAACGCAGAAATGCAAAAAGCCCTCCCGAATGGGAGGCCCTTCTTAAAATAGGTGCCTG  
ACAGTGTCTACTCTCGCATGGCGAATGCCACACTACCATCGGCGCTACCGCGTTTCACTTCTGAGTTTCG  
GCATGGGATCAGGTGGTTCCACGGCGCTATAGCCGTCAGGCAAAAGCTTTTAAAGACTAACTTGA AAAATGG  
TGCTGATACCCAGAATCGAACTGGGGACCTCATCCTTACCACGGATGCGCTCTACCGACTGAGCCATATC  
AGCACACTAACCGGTAAAGACCACGCTGGGCGTAATCTTGAAAATGGGTGCCAGTGTCTTACTCTC  
GCATGGCGAATGCCACACTACCATCGGCGCTACCGCGTTTCACTTCTGAGTTTCGGCATGGGATCAGGTGG  
TTCCACGGCGCTATTGCCGTCAGGCAAAAGCTTTTAAAGACTAACTTGA AAAATGGTGTGATACCCAGAAT  
CGAACTGGGGACCTCATCCTTACCAAGGATGCGCTCTACCGACTGAGCCATATCAGCACACTAACCGGTA  
AAGACCACGCTGGGCGTAATCTTGAAAATGGGTGCCAGTGTCTTACTCTCGCATGGCGAATGCCAC  
ACTACCATCGGCGCTACCGCGTTTCACTTCTGAGTTTCGGCATGGGATCAGGTGGTTCCACGGCGCTATGG  
CCGCCAGGCAAATTTCTTCAATCTGAGAAAAGCTGACGTAAGTAATTCGTTTCGTATTTGCTACAAGCCTTAG  
AACACTTCTTGGGTGTTGTATGGTTAAGCCTCACGGGTAATTAGTATGGGTTAGCTCAACACGTCGCCGC  
GCTTACACACCCACCTATCAACGTTGTGGTCTCCAACGGCCCTTAGGACCCTCAAGGGGTGAGGGATG  
ACTCATCTCAGGGCTCGCTTCCCGCTTAGATGCTTTCAGCGGTTATCGATTCCGAACCTTAGCTACCGGGC  
AGTGCCACTGGCGTGACAACCCGAACACCAGAGGTTTCGTTCACTCCGGTCTCTCGTACTAGGAGCACT  
CCCTTCAATCAACCAACCGCCACGGCAGATAGGGACCGAACTGTCTCACGACGTTCTGAACCCAGCTCGC  
GTACCACTTAAATGGCGAACAGCCATACCTTGGGACCGACTTCAGCCCCAGGATGTGATGAGCCGACA  
TCGAGGTGCCAAACACCGCTCGATATGAACCTTGGGCGGTATCAGCCTGTTATCCCCGGAGTACCTT  
TTATCCGTTGAGCGATGGCCCTTCCATTCAGAACCACCGGATCACTATGACCTACTTTTCGTACCTGCTCG  
ACCTGTCCGTTCTCGCAGTTAAGCTGGCTTATGCCATTGCACTAACCTCCTGATGTCCGACCAGGATTAGC  
CAACCTTCGTGCTCCTCCGTTACTCTTTGGGAGGAGACCGCCCCAGTCAAACCTACCACCCAGGCAGTGT  
CGCGAGCCCGATTACGGGCCCTGCGTTAGAACATCAAACATACAAGGGTGGTATTTCAAGGACGGCTCCA  
GCGCAACTGGCGTACGCCTTCAAAGCCTCCACCTATCTACACATGTAGGTTCAATGTTTCAGTGCCAA  
GCTGTAGTAAAGGTTACGGGGTCTTTCCGTTAGCCGCGGGTACACCGCATCTTACGGCGAATTCGAT  
TTCACTGAGTCTCGGGTGGAGACAGCATGGCCATGGTTACACCATTCGTGCAGGTGCGAACTTACCCGAC  
AAGGAATTTTCGTACCTTAGGACCCTTATAGTTACGGCCGCGCTTACCGGGGCTTCGATCAAGAGCTTC  
GCTTGCCTAACCCCATCAATTAACCTTCCGGCACCGGGCAGGTGTACACCCCTATACGTCCACTTTTCGT  
GTTTGCAGAGTGTGTGTTTTTGATAAACAGTCCCAGCCATCTGGTCACTGCGACTCCCAACTGCTCCAT  
CCGCAAGGGACTTCACTGTCAAGAGCGAACCTTCTCCCAGGTTACGGTTCATTTTTGCTAGTTCCCTTC  
ACCCGAGTTCTCTCAAGCGCCTTGGTATTCTCTACCCGACCACCTGTGTCCGGTTTGGGGTACGATGACTT  
GTAATCTGAAGCTTAGAGGCTTTTCTTGAAGCAGGGCATCAATGGCTTCCACACCCGTAGTGTGTTTCGTC  
TCGTGTCTCAGTGTGTGTCTCCGATTTGCCATAGAAACACCACCTACGCACTTTCACCAGGACAACCGT  
CGCCTGGCCACCTAGCCTTCTCCGTTCCCCCATCGCAATTAACAAGTCGTGCAGGAATATTAACCTGCTT  
CCCATCGACTACGCTTTTCGGCCTCGCCTTAGGGTTCGACTACCCCTGCCCGATTAACGTTGGACAGGA  
ACCCTTGGTCTTCCGGCGAGGAGGCTTTTCAACCCCTTATCGTTACTTACGTACGATTCGCACCTTCTG  
ATATCTCCAGCATACTCTCGATACACCTTCGCAGACTTACAGAACGCTCCCTACCACCTACACATAAG  
TGTGAATCCGCGGCTTCCGGTGCCTGGTTTTGAGCCCCGTTACATCTTCCGCGCAGGCCGACTCGACTAGTG  
AGCTATTACGCTTTCTTTAAATGATGGCTGCTTCTAAGCCAACATCCTAGCTGTCTGAGCCTTCCACAT  
CGTTTTCCACTTAACCAGAACTTTGGGACCTTAGCCGGCGGTCTGGGTGTTTCCCTCTTACGACGGAC  
GTTAGCACCCCGTGTGTCTCCGGATATTACTTACTGGTATTCGGAGTTTGCATGGGGTTGGTAAGTC  
GGGATGACCCCTAGCCCAAACAGTGTCTACCCCAAGTAGTATTCGTCCGAGGCGCTACCTAAATAGCT  
TTCGGGGAGAACCAGCTATCTCCGAGTTTGATTGGCCTTTCACCCCAAGCCACAGGTCATCCCTAACTT  
TGCAACGTTAGTGGGTTCCGGTCTCCAGTTGATGTTACTCAACCTTCAACCTGCCATGGCTAGATCACC  
CGGTTTTCGGGTCTACACCTTGAACACTAGACGCCAGTTAAGACTCGGTTTCCCTACGGCTCCCTTATACG  
GTTAACCTCGCTACAAAATGTAAGTCGCTGACCCATTATACAAAAGGTACGCAGTCACCCCGAAGGGCTC  
CCACTGCTTGTACGTACACGGTTTTCAGGTTCTATTTCACTCCCTCACAGGGGTTCTTTTCGCCTTTCC  
TCACGGTACTGGTTCACTATCGGTGAGTCAGGAGTATTAGCCTTGGAGGATGGTCCCCCATATTCAGA  
CAGGATGTACGTTGTCGGCCCTACTCGATTTACATCAAGGTCGTTTTCGTGTACGGGGCTATCACCCT  
GTATCGCCGGCCTTTCCAGGACCGTTCCACTAACTTCAAGATGCTTAAGGGCTAATCCCGGTTTCGCTCG  
CCGCTACTGAGGGAATCTCGGTTGATTTCTTTCTCGGGTACTTAGATGTTTCAGTTCTCCCGGTTTCG

CCTCTGTTACCTATGTATTACAGTAACAGATACCCGAGTTATCTCGGGTGGGTTTCCCCATTTCGGAAATCT  
GTGAGTAATAGCGTCTCTTACCGACTTCTCACAGCTTATCGCAGTTAGTACGTCTTCATCGCCTCTGA  
CTGCCAAGGCATCCACCATGTACGCTTAGTCACTTAACCATAACAACCCCAAGAAGTGTGTCGAAACAAC  
GCTTGCTTGTGTGTCGTACAACAAGGACCAAATAAAATTTGGTTTTTCGCCAAGAAGTTTCCAAAGCACTTG  
TAACAAATGTTTTGAGAATACTTTTTAAATCAGCTTTCCAGATTGTTAAAGAGCATGTTTGCAACGGCGC  
AAGGCCGAAGAAAACAGAGTTAAGAATCAGTTCTTAACTCTGCATTCTTGTAGCAAGAAGAGAAGTGGC  
GTCCCTTAGGGGATTGCAACCCCTGTTACCGCCGTGAAAGGGCGGTGTCTAGGCCCTAGACGAAGGGG  
ACCCAAAATCATCTTTGCGCTGCGTCAGCAGTGCAGATTTTGGGTAATGGCGAGTGCCGAGCCTGCGAGG  
CCGAGCGCCATTATTACATCCAAAACCAATGATAGGGCTTCTCTCATCTGACCGAAGCCAGATAAGC  
ACTGACACTTTTCGCATCAGGTCTTTGCTCTAACTACTTTGAATCAAGGCAATCTGTGTGAACACTCAACA  
ACTTCGACACTTTAAGGTAAGGAGGTGATCCAACCCAGGTTCCCTTAGGGTTACCTTGTACGACTTCA  
CCCCAGTCATGAATCACACCGTGGTAAACGCCCTCCCGAAGTTAAGCTATCTACTTCTGGTGC AACCCA  
CTCCCATGGTGTGACGGGCGGTGTGTACAAGGCCCGGAACGTATTACCGCAACATTCTGATTTGCGAT  
TACTAGCGATTCCGACTTCACGGAGTTCGAGTTGCAGACTCCGATCCGGACTACGACGCGCTTTTTGGGAT  
TCGCTCACTATCGCTAGCTTGCAGCCCTCTGTACGCGCCATTGTAGCACGTGTGTAGCCCTGGCCGTAAG  
GGCCATGATGACTTGACGTCACTCCACCTTCTCCGGTTTATCACCGGCAGTCTCCCTTGAGTTCCAC  
CATTACGTGCTGGCAACAAAGGACAGGGGTTGCGCTCGTTGCGGGACTTAACCCAACATCTCACGACAG  
AGCTGACGACAGCCATGCAGCACCTGTGTTCTGATTCCCGAAGGCACTCCCGTATCTCTACAGGATTCCA  
GACATGTCAAGGCCAGGTAAGGTTCTTCGCGTTGCATCGAATTAACCACATGCTCCACCGCTTGTGCGG  
GCCCCCGTCAATTCATTTGAGTTTTAACCTTTCGCGCCGTACTCCCAGGCGGTGATTTAACGCGTTAGC  
TCCGGAAGCCACGTCTCAAGGACACAGCCTCCAAATCGACATCGTTTACGGCGTGGACTACCAGGGTATC  
TAATCCTGTTTGTCTCCCCACGCTTTTCGCACCTGAGCGTCACTTTTGTCCAGGGGGCCGCTTCGCCACC  
GGTATTCTCCAGATCTCTACGCATTTACCGCTACACCTGGAAATTCACCCCCCTCTACAAGACTCTAG  
CCGGACAGTTTTAAATGCAATTTCCAGGTTGAGCCCGGGGCTTTACATCTAACTTATCCAACCGCCTGC  
GTGCGCTTTACGCCCAGTAATTCGATTAACGCTTGCACCTCCGTATTACCGCGGCTGCTGGCACGGAG  
TTAGCCGGTGTCTTCTGCGAGTAACGTACAGCTGGCAGTTATTAGCTACCAACCTTTCTCCTCGCT  
GAAAGTGTCTTACAACCCGAAGGCTTCTTACACACGCGGCATGGCTGCATCAGGGTTTTCCCCATTGT  
GCAATATTTCCCACTGTGCCTCCCGTAGGAGTTCGACCGTGTCTCAGTTCCAGTGTGGCTGATCATCC  
TCTCAGACCAGTAGGATCGTCCCTTGGTGAGCCTTACCTACCAACTAGCTAATCCCACTGGGTT  
CATCCAATCGCGCAAGGCCCGAAGGTCCCTGCTTTCCCGTAGGGCGTATGCGGTATTAGCTACCGTT  
TCCAGTAGTTATCCCCCTCGACTGGGCAGATCCCCAGGCATTACTCACCCGTCCGCGCTCGCCGGCAAA  
AGTAGCAAGCTACTTTCCCGCTGCCGCTCGACTTGCATGTGTTAGGCCGCGCCAGCGTTCAATCTGAG  
CCATGATCAAACCTTTCAATTTAAGTTTGGTTGCTTCGAAAAAGCGGCTCAATGAATTGCTGAAATAAACT  
GTTTCGACTTCTTATTGCTAAGAAATCGTCTTGGTCACTTACCAGACATTTGAAAATCAAAAATTGTTTTG  
ATGTTTCGATGCTGTGAGTGCCACACAGATTGCTTGATTCAAATGTTAAAGAGCGTCACGCTTGTGCG  
TTGAGGAGGCGCATATTACGCTTACTTTCGAAAGTCAAGCGATTCTTTTCGAAAAACTTTTCGGCGCC  
ACTTCGCTAGGAAGCTGGCTCATCAGTTCGGCGTGTTCGCGCTGCTGGTAGGGGCGCATTATAGGGAGC  
CGCGCCGGGATGACAATAGTTTTTTTTGAAGAAAATCACGAAAATTTCAAATTAATCAATTAGAAACAGCT  
TATTCAGTGTATATATAAATGTTATCCACAATCCGGTTATTTCACTCCCATTTTAGCGTCAATTTATGTC  
GCCTTTAGTGACCTTGGGAATGCCATACTGGAGCCGATAAACCCTCCCGAGTGGTCCATGGTAGCGCCAA  
TCAGGAAAGCTGGTTACCATGGAGGTGAATATAGTGTGACCTTTTTTGTCTTTCATTTACAAAAGGTCT  
TTAAGATGAATTTATCCAAGTTTCCCGTATATATGCAGGCCGCAATCCTTGCTCTGGTATTGGCAGTGG  
TTGGCTACCTGGTTGCCAGGCCCTGCAGTTCTCTTTGAAAGCGGAAGTGATTTTTGCAGCAGGTCTGGC  
CATCGGCGGTTTTCGTGGTACCGCTGTTCTTGAAGCGAACCTCGGCTAATGTGCGCGAGTCGATCGCCAAT  
CAGGAGACTTGCACCTTATATGTAGGCAACCTGCCATATCGCGCCAATGAGATTGCAGTGCAGCAATTTGT  
TTGCCGAACAGGCGCAGTCAATTTCCGTGCGGTTGATGAAAGACAAGGCAACCGCAAGCGAGAGGTTT  
CGGTTTTCGTGGAGATGCCCGCCGCGATGCCGCAAAAGCGATTGCGGCTTTGAATGATAAAGAGTACCAG  
CAGCGCACCCCTCAAGGTGCGTGAAGCGAATGACAAAAGTGAATAAAGAGGAAAGAGAAGGTAGCGAAACTG  
ACGCTAACCGCTCGTCACTTACCTCTTCCAGTGTGACAGCCCCCATGCTTGCAGGGGGCTGTC  
AGTTTTTGTAGCCTCCCCATCCAGCCGGGTACAGTAAGCCCTGGCAATTACCTCTTCTATATGTACAGGCT  
GCACGATGGCATGCCCGCCATTGTTTACGCAACCAGGCCACCCGTTTGGCAACGGCACTGCCCGAGTCAAT  
AAGCTGACATTGCGACATCAGTTGCCAATCTCTTCAATGAGTAGCGGGAAGTGAGTGCAACCAAGCACC  
AGCGTATCCGGCTTTTCTTCCCCCTCCAGCCAATCGGCCAATACCTCGCGCAGTAGCGCCATATTGACCG  
GTAGGCCCGCCAGCTTGTGTTCCGGCTTCTATGACCAGCTCGGTGGTGCCTTGTAGCAGCACCTGCTTGC  
GGGAGCAAACCTGGGCGATCAGTTTATGGGTATAGTCGCGGCTGACGTTGCCCGGCTAGCAAGCAGACCG  
ATACAACCGTTGCGAGTCTGTGACGCGGGGCTTGATGGCTGGCACCACCCCAACCGGGAATATCCA  
GTGCCTCACGCAAGGCCGGCAGCGCTATGGTGTGCGCGTGTGAGGCAATCACCACCAGATCGATATG  
ATGACGGGCCACCATGGTGGTCAACAAGCGGGTGCAGGCAACAATCAGGGCGGGCTCGCTCAATTCACCA  
TAGGGGAAGTTGGCATTATCGAAGCAGTAGAAAATAGTTGTGTGCTGCAGAACGCGGGCGGATCTCGCGGT  
AGATGGTCAAGGCCACCCATACCGGAATCAAACACGAGAATATTGGCCACTTGAGCTCCCTTTGGTGC  
GGCGCGATCATACTCCCGCTGCCGCAATAGAAAAGGCCAGCCAATGGCAGGGCCCTGATTTTTCC

ACTTGGCCGGGTCCGGCTTAGAGTGAGTAATCCATCGTCACGTAGTAAGCGCGCTCATCGGCCGGATAAC  
CCACCGCAGTCTGATACTCCTTATCAAGCAGGTTGTTGATCTTGCCAGATACCTTGAGCGCCGGAGTGAC  
CTTGTAGCCGACCGCCAGATTCCACACGCTGTAGCCACCAAGTGTGTGGTGTGGCCACATCGCCATAG  
CGCTCACCTGATAGATCCAGCTCAATGAACCATCAAAGTCTGCTGCCACTGCGCCTGCGTACCCACTTGG  
CCCCTTTGCGGGAGATCAGCTGCAACTGCTTGTTCGGTTACCTTGTCTTTGGGATCCTTGTATTTCGGCAGA  
GACCCGATGACTCACCCAGCCGGTATCAAAGTCCCTTCCAGCTCGATCCCTTCAATTCGCGCCTTGCCA  
ACGTTCTGTGGTGTCCACATACCCTGACTGTTGGGTGCCACTGGATCATCTGCTCGAAATCATTCGGAT  
AACCGGTGGCCCGCCACTCGACACCCGCAGTTTGACCATCCAACATCAGCTCGCTGCTCTTCGACTCTTC  
CGGCTTCAGGGTAGGATTGCCTGACCCCGGATAGTAGAGGTCGTTAAAGGAGGGGGCGCGGAAACCGGTG  
CCGTAGCGGGACTCAGGCGGTAATCCTCGACAAAGCGCCAGCCTGCGCCGTTTGGCAGGTGTTGTGAC  
GACCAAATGCTCGTTGTCTACTGCTGCGCCGCTCAGCTGCGCCTGCCAGGTCTGGTTGTCGAACTGGGC  
AAGGGCATAGAGGCCGGTATTGTCCCCTCTTTGGCGTCGGCCGGATATGTGGCGCCGAGGAGCGGGAG  
CGATCATCCAGTCGATCACTCTGCCAATCGGCCCGCCTCCAGCGTCCAGCTCTCGTTCAATTTCAAGC  
TGTTGACCCAGTTTACGGCTGTACTGGCGGGTGTAGGTCCGGTTATTGGCCTGATCGCGGCCACTGTTGTC  
CTGATAGTCGTACGCATCCTGTTTGGAGAAGGCGCCACGCAACTCACTCAGATAGCGATCATCGTGATAG  
CGCGACCCAGCTGATAGCTCTGGTTTTAGTCCAGGTCTCGTTGCGCTGATGGGTGGCAGGCCCCAGG  
CGGAAGCCGAGAAAGAGCGGTGCTACTGGGCGACATTGCGGAACCAGCGGGTTGTACCGAACAGATCCCA  
ATTGCTGCCGAGCGCCTGCTGGTAGTCCAGCATGGCGTTGTAGCCCTGATGCCCGTGACGGTACCATCG  
TTGATGCCGGGAAGGGGTGTACGTTGTAACCTCTTCATCATCAAACCGCCAGCCACCTTGAGCTGAC  
CCGCCTCACCTACCTGGCTGGCACTACTGAAAGCGGCCCTGACGCTGTTGATGGGAACCAGCACCATATT  
GAACTTGTGCTGATTTGTCCCCTTGTTCGGGACGGGTAATGATGTTGATCACCCACCGATGGCATCGGAG  
CCGTAGATGGTGGCGCTCGGGCCGCGGATATACTCGATCCGCTCGACCTGATTGAGTGGCAGATTGTTCA  
GTTCCGGTCATCCCGCGGTCAAAGAGGCACTGCGCACCCCGTCCACCAGCACCAGCGTCTGAGAAGAGGT  
GCCACCACGCACCCGACGAGCTGAGCTGGCCTCGGCCACCATGCTGACCACTTCCACACCGGGCAGG  
GTCTTGACCACATCGGTACGGTCTGGGCTTGAGGCGATCGATCTCGTCCCGGGTACCACATTGACCG  
GGGAAGCAGCTGGAAGCAGGTTGGGCGACGCGGGTAGCAGTACCACCATGGTGGGATTGACGGGAAT  
GGTCAGCTGCTGGGCAAACCGCCCGCTCGGCAACAGGGCAGCCGCCAGAAATTTCTTCGACATGAGAGAT  
CCTTAAGTTTCGCTAAGTATCTACTTCTGTTGGCGGTTTCTCTCGGCCGAAATACGAACTGTGGCAGT  
TTCGGGCTCGGGGCTGATAGCCTACCCGACGGCTTCCCGCCTGAAGGCAGTGCCTGATGTCGCTTCG  
TTCCCCTTACCCTGCGCGCCAGTCCGGATTCTCACCAGATTCCCTATTAAGCATGATGCGCCAAAGC  
GGGAGGATTATAGGCAGAGCAAAGCTGGATGTATAGCCATCCAGATTTCTATTTCTTGCCAGCCAACGCC  
GCCAGCCGCTGCTGGGCCCCCTCCATCACCCGCTGTACCCCGGGATGGGAGAGATGGCGCCCTGCCGAGA  
CCAGATAATAAGAGAGGGTAACGTGCGGTGAGGGTGCATCCGCTCCACTCCGTAGAGGCGACCAATTT  
GTCAGCCATCGCCAGCGCGCGCGGAAGATCCCATCCCGCCTTGCCGAACGACTTCATCAGGGTGGAG  
TCATCAAAGTCCCCACCAGATGGGGATGAATGCCCTGCTGGCGATACCAGGCCAACAGCCGATCGTGGG  
TAGCCGACTTCTCTCCGGGGATCAGCAACGGCAACCCCTCCAGCGAGGCGGGAAAGCCATCCCGCGCCCG  
CGCCGCCAGCTCCGGGCTGGCAAACAGCGCCAGCGGGCTGCGCCCCAGCTCGTGGTTATAGCCACGCACG  
CCGCTGTCGGGAGGAAGCGGGCGATCGATCAGCACCATGTCGAGCTTGTGGCGGGCCAGCTCGCTGAACA  
GCTGCTCGGCCCGCTCCTCGTGACACACCAGCCGCAACGGAGTCCGACGCGCCATGGCGGGGGCCAGCAG  
CTCGAACGCCAAGGTGCGGGGTACCGAATCGGCGATCCCCACCTGCATAGTCAGCTCCTGACTGGCGTGG  
CGCAGGGTATGCTCCAGCTCGGCACCGAGCGAGAAAATGGCCCCCGCTGCTCCTGCGCCTGCCGACCCG  
CAGCAGTCAGCACCAGACCGCCCGCCACCCGGTTGAACAGCGCCACCCGAGGGACTGCTCCAGCTCTGC  
CACCTGACCGCTGATGGTCTGCGGCGTGAGATGCAGCTGTTTCGGCGCCTGCGTCACGCTGCCGCTGCGT  
GCCACATGCCAGAAGTAGTAGAGCTGTTTGTAGTTGAGCATGCCGTTCCCTATCAATTTTTACCGAACAA  
CCATCAGCGGAGAATCTGATTTTATCGAAACATTGCGGGCTCTAGCATGCAACCATTATCTGAACTGCCCT  
GCGAACCATCATGCTGGACGTTGTTGTACTCTTCTTCTGTTTGGTCTGCTGGCCGGTCTGGTGCCTCC  
GAGCTCAAAGTGCCTCCTGCCCTCTACGACACCCTCTCTCTCTTCTGCTGCTGGCCATCGGCCTCAAGG  
GCGGCGTGGTCTGGCCCAACAATCCCTGCAACCTCTGCTGCCACAACCTGGCGTTGGTGTATCCTGCTCGG  
CGTGGTGCAGACCCTGCTCGGCTTTGCCGTGCTGCGCCTCAAGATGAACCGGGTGGATGCCGCGCCACC  
GCCGCCACTATGGTTCGGTTCAGCGTCCGACCTTTGCCGTGCGGGTGAACCTGGCTCACCGAGCGGGCA  
TCAGCTTTGAATCCCAACTCTCGATCTTCTCGCGGTGATGGAGATCCCGGCCATTCTGGTAGGCATAGT  
GCTGGCCCCGCGCATCAGTCGCGAGACTCGCTGGCGCATGCTGGCCACGAGACCTTCTCGGCAAAGGG  
GTCACCCTGCTGCTGGGCGGCATGGCCATCGGCTATCTGGCCGGCCGGACGGAATTGCCCACTCAAAC  
CGCTGTTTGTGACCTGTTCAAGGGGGCGCTGGCGCTGTTCTGCTGGAGATGGGCCTCATCGTCGCCCG  
CCAGAGTCAGGACTTACGCAAGCATGGCTTCTTCTGCTCGGCTTCGCCCTGTTGATGCCGCTCGCTTCA  
GCGGGACTGGGATTGGCTGCTGGCCAGCTGATGGGGCTCTCCCTCGGCGGCCGACTCTGCTGGCCACCC  
TGGCGGCCAGCGCCTCCTATATTGCCGTGCCGGCCACCTGCGCATCGCCCTACCCAGGCCAACCAGGG  
GCTCTCCCTCAGCGCCGTGCTGGGGGTACCTTCCCCTTCAACATCATGCTGGGGATCCCGCTCTACCAC  
AGCTGGGCCCGCCACTTACGGAGTAGCCACATGCAGACCGAGACCCGACCCCTGCTGACAGTCATCACG  
GAAGCCAATCTGGAGCCGACCCTGCTGCGCACCTCACCCGCGAGGGGGTGGCGGGTACACCATCACAG  
ATGCCCGCGGCAGGGGGGATCATGGCGAACGCAATGCCAGCTGGAGCGAGAGCGGCAACATCCGGCTGGA



GGCGATCTGCAGCCGGGAGCAGGCGGAGCGGCTGCTGGCCACCTGCAGAGTCGCTACTACCCCGATTAC  
GCCATGATCGCCTTTCTGCAACCGGTCGAAATCGTGCGACCCGAGAAATTTCTGAGCCGGCTTGCCGGCTC  
TTTTTGTATTACAAAAGCAAACGTTTGCAGCAAGGAACCAATACACATGAACACCCCTCCCTGATCGG  
CCTGGTAATGGGCTCCGACTCCGACTGGCCCGTGCTGCAGGCCGCCGCCGCATCCTCAAGGAGCACGGC  
GTGCCCTACGAGGCGCAGGTAGTCTCGGCCCATCGCACCCCGGATCTGCTGTTGAGTATGCCGCCACTG  
CCCGCGAGCGCGGACTGCGCGCCATCATCGCCGGGGCCGGTGGCGCTGCCCATCTGCCGGGCATGGTCGC  
CGCCAAGACCACTCTTCCGGTGCTGGGGGTGCCATCCCATCACGCCATCTCAAGGGAATGGACTCGCTA  
CTCTCCATCGTGCAGATGCCCAAAGGGGTGCCAGTGCACCTTCGCCATCGGCCAAGCGGGGGCTGCCA  
ACGCCGCCCTGTTTGGGTCTCTGCTCTCCGTTCACAAGACGACGACGCCCCACGCTACCGGCAGCA  
GCTCGACGACTTCCGCACCCACGAGCAAGATCGAGTGGCTGGCACTGCAACTGGAGGAGCCGACATGATCC  
TGCCCCCGCCACCCTCGCATGCTCGGCCGGTCACTGGCCGCTACTTTGTGATGGCCGCCACC  
CCTCGGCTACAAGGTGGTGGTGGTGGATCCCGATCCCGCCAGCATCGCCGGTGGCCGCCGATCACCAT  
ATTGTGCTTCTATGATGACCAGACCGCCCTGCATGAGCTGGCTAACCGCTGCGAGGCCATCAGCTGCG  
AGTTTCGAGAACGTGCCCGCCGCCACCCTCGCGCTGCTCGAAAAACAAAAACCGGTACGCCGGCCGCCAG  
CGCGGTGCGCATCTGTGAGGATCGCAGCGAGGAGAAAAGCCTTTCTGCGCAGGGCCAACATCCCGGTTGCC  
CCCTCTTGGCGCTACTGCCGGAAGAGCCCATCCCCGCACAGGCCAGCGAACTCTTCCCCGCCATCTCA  
AGACAGCCCGCAAGGGTACGACGGCAAGGGGCAGTGGCAAGTGAACAATCTGGATGAGCTGGCGACGGC  
GCTGGCAGCCAGTGGTGTGCCCTGCGTGTGGAAAAACGGCTGGCGCTGGAGGGGGAGTTTGCCTGACT  
CTGGCCCGCAGTCCGAGCGACACCATCAGCGCCCTGCCGCTGGTGCAGAACTGGCACAGCAGCGGCATTC  
TCGATCAGACCCGCTCCCTGCCAATGTGCCGGCGCTCGAGAGCGAAGCCAAAGGGATCGCCGAGCGGCT  
TATCGCAGCCCTCGATTACGTGGGGGTGCTGACGGTGGAGTCTTTCTGGTGGAAAGGCAGATTGCTGGTC  
AATGAGCTGGCACCCCGCCCCACAACCTCGGGTACCCCGCCTCGACAACGCCGCATGCAGCCAGTTTCG  
AGTTGCAGGTGCCGGCCCTGTGCGATCTGCCGCTGCCGGAGCAGATCGCCGTGCGCCCCGCCCTGTTAAT  
CAACCTGCTGGGGGATCTCTGGCAGAACGGCACGCCAGACTGGGCCGCCCTGCTGGCGCTGCCCGGCTG  
CATCTGCACCTCTATGGCAAGGGCGAACCCCGCCCGGCCGAAGATGGGCCATATCACGGTGACCGGTG  
ACGAGTGGTCAACGGTGGAAAGAGAGCTGCCGTGAGGCCCGCCAGCTGCTGGGACTGGCGCCACGCTGATC  
GAGCATCGGAAATGCAAAGACCCGGGCATGGCCCGGGTCTCTGTTTTTGTGCTGTGGCAGGGAGACTT  
ATCAGGCCCCGCTCGACCGCTACCCGTTGCCGGCAGCGGATGGTGGAGGAGAGCACCAGCCACCACCCAG  
CAACACCAGGATCAGGTGGAAGGTCGCCATAAAGCCGCAAAACAGGGAGGCCACGATGGAGCCGATGATG  
CTGCCAGACCAAAGCCAGATAGATGACGCCGTAGTTCTTGGTCAAGTTGTTGAGACCGAAGAAGTCGC  
TCACCAGCGAGGGGTAGACGGTGGTGGCCACCGAAGCTGAATGCCACACAGGCGACCGCCACAAAGAA  
CAGGTTGGCGTTGAGCGGCACGAACAGCAGCAGCGCCATGCCCGCCAGGGTAATCAGCTGGGCGATGGTG  
ATAACCCGGATGCGGGACATCTTGTGCGAGAGGATACCCAGCACCAGACGGCCACCAGGTTGGCCATGG  
CGATGATGGCGACGGCGTTGGCGGCGACCACGGCAGGCAGACCACCATCTTCTCGCCGATATCCTTGGC  
CACGCCGATGACGTAGAGCCGCTCATGCAGGCGGTGAGGAACATCAGCGCCAGCATCCAGTACTGCGGC  
TTGCGCATCGCCTCGGCCAGGGTGAAGTACGGCTCTCGCTCTGCTGCACGGAGGCGCCTGCTTGGGCG  
CATCCTTCATCAGCATAACCGCCACCAGCACCATGGACATGGCGATCAGCCCCACAGCTGGAAGGTGGT  
CTCAAGGCCGGAGCTGGAGAGCAGCAGCAGGTTGATGTATTTGAAACCGAGACTGCCGAGGCCATAGGCA  
CCGATGGAGCAGGCGGAGATGAGCCCCCTTGGGATCCGGGAACCACTTCACGCAGTTGGAGAGGGTCATCA  
GGTAACCGGTACCGTCCGCAAAACCGACCAGAATGCCCGCGCAGAGGTAGAGCATCGCCAGATTGCTGGC  
ATGGGCGGTGAGGAAGAAGCCGATGCCGAGCAGCACGCCGGCGCCAGGGTCACGTTGCGCACCCCGAAC  
CGCTCCTGCAGCTTGCCCGCCATGGAGGAAGCGACCTCCAGCGAGAGGCTGAGCAGGCCGAAGGCGAAAG  
CGACCTGACTCACCGGCTCGTCCAGCTTGTGCGAGAGCTGGGCGTTGAACAGGCTCCAGGTATAGACAGA  
ACCCAGTGCAAACTGGGTGATGATGGTACCATCAGTGTGAGTACCGGGTGGCGTTCATCTCTTTGGTC  
ATGATGCGTCTCGGTCGATGGCCTTAAGGAAATTTAGGGCCACTATAGGCAAGACGCAGCTCGCGCCGATC  
GATTAAGGCATGAAATGCAGATCGGCCGGAATGAATGACAATCAGAGCCGCATCAGCTGACGGAACGCCCT  
TGATGTTGCTGCGACTGACCGGCACCTCGAACGGCAGATCATGGAGCCGGATGAGATAGGTGCTGTTAAA  
CCAGGGGACGATTTTCGCGGATCTTGTGATGTTGACGCAGTAGGAACGGTGGCAACGGAAGAACCCTCG  
GCAGGCAGCCGGCTGACAAACTCGCTGATGGTTCATGGTTCATCAGTAGCGGTCATCACGGGTGTAGACAT  
AGGTGAGCTTCTCGTCGGCTTCCGCGTAGTAGATCTGCTCGCAGGGGGTACGATAATGCGCTCCCCCTT  
CACCAGATTGACGGTGCATTGTGCGGGCTATGCCCTCACCGCTCGCTCCCCGTGGTGGCTGGCTGC  
GACTTGCCCGCATGCTCGAGCTTTTGCAGCAGATTGATGATGCGGGGCTCGTTGTAGGGCTTGAGGATGT  
AGTCGAACGCCTCCAGCTCGAACGCTTCCACCGCAAACCTCTTGTAGGCGGTAACGAAGACGATGTGGGG  
CGGATGGCTCGACTTGTGCAGGTTCTTGGCCAGCAGCAGGCCATCGATGGAGGGGATCTGGATATCCAGA  
AACACCACATCCACCTCGTGATCCTGCAGGTATTTGAACGCTCCAGCCATCTCAAAGCTCGCCACTA  
TCTCGATCTGGCTGTGCTGATTCACCAGATAGATGAGCTCTTACGAGCCAGATATTCATCTTCGACAAT  
AATGGCTTTTACGATGACAACACCTCTCGCGGCACACACTTATCCTCAACCATGATGGCACTCAGCATGG  
CATCGACTCCTGATCCGGCAGATAGAAACTCACCTCGGTACCCGGCTCCAGCCGCTTGAGGTGCAGGCCG  
TCGCCATAGAGCAGCTTGACCCGCTGATGCAGTTTCATCAGGCCGATGCTGCGGCTCTCCACCCGACCGG  
CGGCTACCCCGTGCATCACTGCCTGACTGATGCCGTAACCGGTATCCCGCACCGATAACCCGGATGCCGCC  
CGCCAGCTGCTTACCTCGATGGTGAACCGACCCGGCGCTGCGGGGCTGGATGCCGTGCAGGATGGCG

TTTTCCACCAGCGGCTGCAACAGCAGGCTCGGTACCTGAATGTGCACATCGTCCACCTCGAATACCACCT  
CCAGCTTGTGCGCGAAGCGGGCCTGCTCGATGGCCACGTAGTCGCGCACCTGCTGCAGCTCCTCCTGAAT  
GTCGATGAGCTCATCCCCCTTGTGAGGTTGTAGCGCAGGTAGTCCGCCAGATTGGCAATCAGCTGACGC  
GCCTGCTGGGGCCGGATGCGGATCAGCGACGAGATGGCGTTGAGGGCATGAAACAGGAAGTGC GGTTGA  
TCTTGCTCTGCAGCGCGGTGAACTCCGCCTTTCGAGTCATCTCCTTGAGCTGCTCGATGCGCGACACCTC  
CATCTGGGTGGAGATGAGCTGGGAGAGGCCACCCGCATCTCCCGCAGGGAGCTGGTAATGCTGTGGGTG  
CGGCGATAGTAGATCTTGAGGGTGCCGCTCACCGAGCCGTTTTCTCGCAGCGGAATAATGATGACCGAGT  
GGAAATCGGAGAGGTGATACTGGCGCAAATCGTTGTTGATGATGATCTGGTCGAGCAGCACCCGCTGCTG  
GGTCATGCCACTGATGGCGTGGTGTCTCATCCAGCTCGTAATAGTCTTGGCCACCCGACATAAGCCAGC  
ACGTCATGGGTATCTGTGATGGCCACCCGATCGGCGCTGATGTGCGCCGGATCACATCACACACCTGAC  
TGAGGGAGTGGCGATCGATGTTCTGGAAGAAGGCAGCGCTTGTGTTGGCGATATCGAGCGCCAGCTTGGC  
CTGCTTGGCAGCAATCAGCTCCTTCTCGTCATCCAGATCCTGCACCAGCTTGATGATGAGGCCGATGCAG  
AGCGCCCCGGCGATCATCGGATAGGCGATGTGGTTAACGATCTCCACCCCGACTTCGTGGGGCTCGGTCA  
GCAGCCAGATCAGCAGCATGGTCAGCCCTTCGCGAGAGCATCCCCGCCAGAAATGCCGTAGAGCCAGAGCCG  
CGACTTGCAGACGCGCAGGTGCAGCCAGGTGGCGAGCAGACCCGGCGATAAGGCAAGGGATGGAGGTGTGG  
CCATCCATGTGATGAGATAGCGGTGCAGACCCGAGATGACCCCGCCGGAATGCCGACCCAGGGGCCAA  
ACAAAATGCCGCCGAGATAATGGCAATGATCCACACATGATCAGCGCCCCCTTACC GGAAATGCCGGT  
GTAGGTACTGAACACCCGAAACAGGCCGAAGATGGAGGCCACCAGCACCAGCTCCGCCGGGGTGTGATCC  
CGCTTCTGGAACAGCCGCTGGAACGGCCGGGTGCGGGTCAGGAAGAAGAGGGTCATCAGCATCAGCGCCG  
CCCGTTGGAACACCCGCAACAACATCATCTGATTCTCAAGCATCTGCGCCCCCTTGC GGCAACCAGACCG  
ATCACCCCTAACCCCTGACCAATAAATCGGGGCCGGATAAACCAGCCCTGTGACATCAACAGTACTGACCG  
GCCACCCAGCCGGAGGACCAGGCCACTGGAAGTTGTAGCCACCCAGCCAGCCGGTCCACATCCACC ACTT  
CGCCGATGAAGTAGAGGCCCGGCACCTTGC GCGCTTCCATGGTCTTGGAGGAGAGCTCGTTGGTATCGAC  
GCCGCCAGGGTCACTTCCGGCGGTGC GATACCCCTCGGTGCCGTTGGGCAGGATCTGCCAGTCACCCAGC  
AAGTTGGCCACCCGCTTCCAGTTC CCGCTCGTTGTA CTGACGCATCGGCTTGCTGACCAGCTGACCCAGCT  
CCACCAACTTGTGACGAAGCGCTTGGGCAGCTCGCGCCCCAGCACGGTTTT CAGCTCCTGCGCCGGGTG  
TGCCTGCGCCACTCAGCAGGGCGGCCGGAATATCCAGCTCCGGCAGCAGGTTGATGTGGATCTTCTCG  
CCAGCTGCCAGTAGGAGGATCTG CAGGATAACGGGGCGGAGAGGCCGCGATGGGTAAACAGCATCG  
CCTCCTTGAAGCGGGTGCATCCTCGCGCTACC CGCCAGGCTGATGCCCGTAAACAGCCTCGCGAA  
CGCCTCTTTCTGCTGATGGAGGGTGAATGGCACCAGACCTGCGCGGGTCCGGCAGCACCTT GAGGCCG  
AACTGCTCCGCCAGCTTGAAGCCATAAGGGGTGCGCCCCAGCTTGGGCATGGAGAGACC GCCGGTGC  
CCACCAGCGAGTGGCAGCCGATCTCCCCCTT GCTGGTCTCAACACAAAACCTTCGCCCTGTTTGCTGAC  
GGTGAGGATCTCGGTCTGGA ACTGCAGGGTCACCCCGGCCAGTCA CACTCGGTGAGCAGCACATCGACG  
ATATCCTTGGCACTCTCGAGACAGAACAGCTGCCCAAGGTGCGCTCGTGATAGTTGACCCCGTGGCGGT  
CCACCAGATCGATAAAGTCTGCTGGGTGTAGCGGGCCAGCGCCGACTTGCTGAAGTGGGGATTCTCCGA  
CAGGTAGGCGTGAGCGCCAGCCTGATGGTTGGTGAAGTTGCAGCGACCCGCCACTGATGAGGATCTTG  
CGCCCCGGCTTCTTGGCGTTGTG CAGCACCAGCACGGAGCGCCACGTTAGCCCGCTGCGCCGCACACA  
TCAATCCGGCCGACCCGGCCCCGATCACCACCACATCGACCTGCTTCATCATCACTCACTTATCAAATA  
GAAACGGCACCTGGCCAGAACC GAGATTGCCTCTGGCTGACATCACAACGGTGGCTGCCACCAGAATAA  
ACAACGGCCCTTAAAAGGGCCGTCATTGTA CTGGCTGAACACTAAGTGTCCAGACTATCAGGGCTTGCT  
GTCCATGATGCTGGCAGGGGGCGCCCTTGGCCAGTTCCGGCCAGCTCCTTGTCGATGAAGTAGAGGCCCTTG  
CCATCTTACCCACCAGACCCAGACGGTCGACGATGCTCTTGAACAGCTTCTCCTCTTCATGCTGCTCGG  
CCACATAACCACTGCAGGAAATTGAAGGTGGAGTAGTCTGGGTGGTGAAGGCCACGTGGGCCAGACCATT  
GATGCACTTGGTGTGATACTCGTGCTCCAGGGTGGTACGGAACACGTGCCCCAGCAGCTTGA ACTCG  
TGGGGAGGGGCATCGATGGCACCAGCTTGGGCATGGCGCCAGTCTCGCTCACATAGGTGAACAGACGCT  
CCATGTGCTGGCGCTCCTCGACCCGCTGCTGGCGCAGGAAGTTCGCCGCCCTTCAAAGCCCTTGTCTTC  
GCACCAGGCGCTCATCTGCAGATAGAGATTGGAGGAGTAGAACTCCAGGTTAATCTGCTCGTTCAACTTC  
TCGATCATGGCTTGGGCCAGCATCTTGT TTTCTCCTCAGTGATTTGGTATCGATTGTGCGCCACACTCCCGT  
CACGAATCAACCCGCCAACGAGAGGGAGATCCCGTTTCTTTCAGCTCAGGGGGT CAGCTCCCCAAGGGAG  
GCGACATCCACCCGGCGCAGCATAATCGACGCCCGGCAGCTCGAAGCCGTTGAGCTGCATGAAGTCTGCC  
GCAGCCCCGCAAAAATCCCCAGCAGCTGGA AATCTCCGGCTCACCTTGGGCCAGAGCGCCGAAACGGC  
GGCCTGAATGGCCGGGTGAGCTCGTGATCATCCATCCGATCAGCCGGTTGCCATCGGCCACCACCCCA  
TTGGGCCCATACATCTTGGCTGCAAACAGCCGCTGCATCTGCTCGATACAGCTTTCGTGTACACCCGCT  
CCTTCATCACCCCATCAGCAAGCCGAGATAAACC GGCAGCACCCGGAATATAGGCGCTCGCCTTGGTTAC  
CAGCGCCTTGCAGGCCGACACCCAGGCATGGCCGCCAATCTCGGCCAGTTGCAGGTTGATGGTCTCGGCG  
GTGGCGTGCAGATGCTCCTTGGCATAACCGATGGTGCCATCCCGATAGAGGGGATAGGTGGATTCCGGGC  
CAATGTAGGAGTAGGCCACGGTTTGC GCGCCGGGAGCGAGACAACCCGGCTGCTGCAACGCCTGCATCCA  
GAGCTGCCAATCCTCGCCCCCATCACGGT GACGGTATCGCGGATCTCCTCTGGCGTGGCCGGGCGCCAGC  
GACTGCTGCACCAGGGTATCGCGCTCCAGATCCAACCCCAACCGCTGAACGGCTGGCCGGTGGTCTTGA  
GCACCAGCGCACTTGCCTGCCGTCGGGCAGCACCCGGATGCCGCTCGCGAGCGAATAGATCACCAGATC  
CACCTGCCCCAGCTGCTGGTGGATGGTATCGATGGCCTGCTGGCGCATCCCGTCGGAGAAGGCATCGCCG

ATCAGGTTGATGGCGATACGCCCTCCTGCTCCGCCTCCTTGCAAAACCAGATGTTGTTGTACCAGCCGG  
CGCTACCCAATCCTTTGTGCGAAGGGCCGCGCTCAAACGAGATGCCAATGGTGTGCGGCACCGGCACCAAA  
GGCGAGTGAATGCGCGACGCCAGTCCAAACCCGGAGGAGGCACCCAGCACCAGCACCCTGTTGGGGCCG  
TTGAACGGGGCCAGCGGCCCTTGATCCGCTCGATCTGCTGCTGCACGGCGGCGCGACAGCCGATAGGGTGAC  
AGTTGCGGGCAACACAACCTTGAATCTGGGGATGAATGATCATGGGAAGGCCCTCAAAGAAACTGGCTAC  
AGCATAACCAAAATCGAAAAGAGATTAACCTTGATGCCGGATCGCTATCAGTCAGAAAAGCCGCGGGAATTGA  
GGCAGAAAAACAAAAGGGAGCACGTGGCTCCCCAAAAGCGGTATTCAGATGCTTTTTGTTGTTTTGTGTTT  
ATTGCGAAGCACGGGCCATCCTATGCCTCTCCCCCTGCTCGGCAAGCCGAGGGGTGTGACCGGCCGTCA  
AACTCTTGTTTAATTTATAGGCAAATAGTGGTTAATAACTGAGTGGCTGACCCTGTGTACACAGTCATTA  
AACTCATTTAAATCCCAAAACTGTGCCTGAGGCACCATTTTAGTTTCAGCAGAGATTGGTATAGTGGGCT  
GAAGGATCGGTAAGGAGAACCCCATGAGTGAACAACCTATTACAAGCATATTCTGGCTGCGATCGACC  
TCTCTGAAGACAACCGCAAGGTGATAGACAAGGCGGTGACACAGAGCCCGCTCCAACGGCGCCAAGCTGTC  
GGTTATCCATGTGATGTGGACCTCAAGGATCTCTACACCGAGATGATCGATATCGACATCGACAACGTG  
CAGGATCAGGTGATCGCCGAAGCGAAAAGAGAAGCTGGAGGCCCTTCTCGCCTCGGTGGACTACCCCATCG  
AGAAGAAGCTGGTGATCTGCGGCGATCTGAGCGAGCGGGTCAATCAGGCGGTCAAGGAGTACGAGATCGA  
CCTGCTGGTGTGCGGCCATCGCCAGAGCTTCTGGAGCCTGCTCACCTCCAGCGCCCGTCAGCTGATGAAT  
ACGGTGCCGTGCGATCTGCTGGTCTGCCCTTGCAGAAGTAATGAAACCGGCGTAGTTTGATTTGCTATG  
AATATGACCGCATTCAATCACAACACTGTTGGTGTGCTCCTAAACAGGCGGCACCGCGTTTTCTATTGT  
AAATTTCCCAAAGAAAACACCGTGACCGCCGAGAGGCGGTCAACTGTTTTTATCCCTTTGTGCGCTCCCG  
GCTCACCAACTGGAGAGAGTGACATGCACAACCCCGTAATCCTGACTGGCGATCGTCCCACCGGCAAAC  
TGCACATCGGCCACTATGTGCGGCTCCCTGCGCCAGCGCGTCGAAGCCAGCACCCTATCGTCAATTCGT  
GATGATCGCCGACTTGACGGCGCTGACCGACAACGGCCACAACCCGGCCAAGGTGACCGACAACGTA  
GAAGTGATGGCCGACTATCTGGCGGTGCGCCTCGACCCGGCCAAGACCACCTTCTGCTGCGAGAGCGCC  
TGCCCGCCCTCGCCGAACCTACCTGCTACTACCTCAATCTGGTCAGCGTCGCCCCGGTGGAGCGTAATCC  
CACCGTCAAGGCGGAGATCCAGCAAAAAGGGTTGCAACGCACGCTGCCGGCCGGTTTTCTGGTCTATCCG  
GTGAGTCAGGCCCGGACATCACCGCCTTTCGCGCCAGCCACGTGCCGGTGGGGGAAGATCAGCTGCCGA  
TGCTGGAGCAGACAAACGAGATCGTCCGCCGCTTCAATTTCTTGGTAGGCAAAGAGGTGTGACCGAGTG  
CCAGCCATCTGAGCGACACCGCCCGCTGCCCGCATCGACGGCAAGGCAAGATGTCAAATCTCTC  
GGCAATACCATAGAGCTCGGCATGTGCGGCAAGAGGTCAAACAGGCGGTGTTGCGCCATGTATACCGACC  
CCAACCACCTCAAAGTGAGCGATCCGGGTGAGGTGGAGGGAAATACGGTGTGTTGCTATCTCGATGCCTT  
CCACCCTGACAAAGCGCTGGTGCAGGAGATGAAGGCCCACTACCGCGCGGTGGACTGGGGGACATGCGC  
TGCAAAACAGGTGCTCAATGACTGCCTGCAGACCCTGCTCGCCCCGATGCGGGAGCGCCGGGCGCGGCCA  
TTGCCGACAAAAGATGCTGCTGGAGCTGCTCTATCAGGGCACCAGCAGGCTCGCATCATCACCAGTGA  
GGTCTTGGTAGAGGTGAAAAGCGCCATGGGGCTCGACTACTTCGCCAGCATCCGCTGAGCGGGAGTCCCG  
AGCGCATCGTCCCGTAGAGGTGAAACACCAGCTGGTGCAGCAGGCTCTTGAACCAGCCGATCGCCTCGT  
CATGGGCGGTGAGCGGGTCCCCCGCCATCAGGTAGACGATAGGGATGGCGGGTTCGAGCTGGTGCATCCG  
CAGCGGGTAGTAACGGCAAAAGTGGCGCCCGATCATCTCGGGCACCACCAGATAGCGGCCGGTTCGCC  
ATCAGTGGCGGCACCGCCATAAAGCTCGGCAACCGCACGCCAGCTCCCGCTCCACCCCGAAGCGGGCCA  
GCCAGAGCTCCACCATCGCCTGACTGTGACCCCAACTGGAGGTATGGATGTGGGGACGGCTCACAGCTC  
GACCGGAGTCAGCACATCGGGCAATTCGCTGCCAAGCGGCGACAGGCAGACCAGCGGGTTGTTGAACCAC  
TCCTCCCGCCACAAGCGGGGTGAGAGGTGATTCGCCCCGGCAAACCCGATCACAGATCCAGCTCCCCCT  
TCTCCAGCTCCCGCTCGTAGTTGCTATCGGCCAGCTCGCACACCTCAAGCCGACAGTGAGGGGCTGCGC  
ATGGAGCCTCTCCACCAGCACCGGCACCAGCCGTGCTCCACCAGCCGGGGTGGCGATGCGGAAAATC  
CGCCGCGCAGTGGCGGGATCAAACCCCTTGGCCTGCCGCAATCCCTGCTCCAGCATCGCCAGCGCTGGC  
GCACCGCCCGGCGAGCCTTGGCCCGCTCGGTGCGCATCATTTGCGGCCACTCATACGAACAGCGG  
ATCATCCAGCGCCACTCGAGCCGCCCAAGGCGTACTGACGGTGGATTGGGAGAGATGCAGCCGTTGCG  
GCGGCGCGGGTGACATTGCGCTCCTGCATCAACATGTGCAATACGGCGAGCAGGTTGAGGTCAAGACGGG  
CGAGCGAGCTATCCATCGATATTAGCCATAGTTAAATGCCAACAAATTCATTTTTTACCATAGTAACAGATT  
GCCTAGAATGCGCTGGCTTAATACATCGGAGATTCAAATGCGTAGCTATCTGTTATTGCTGGCCATTGGC  
CTGCTGTGGGGTTCCCAATTCATTTTTCATGCACCAGGCCGTTGCCGAGTTGCCCCCATTTCTGGTGGCTG  
CCGGTCTGTCCTGTGCGGCAGCCTGACCCTGGGTCTGCTCTGCCTGTTTCATGCGGCTCAAGAGTGAGCA  
CACCCCGTGGCGCACCTATATGCTGATCGCCCTGCTGGATGCCACCATCCCTTCATCATGGTTCGCTGG  
GGCAAACAGTATGTGGATAGCGCCATCGCCCGGTGGTTCATGGGTTGTATCCGTTTTGTGACTATTCTGG  
CTGCACCGCTGTTTTATTTCTGGTGAAGAATCACAAAACCGGTCTGCTCTCCGTGATCATCGGTTTTGTC  
CGGTGTGCTCACCTGTTCTGGCCGAAACTCTCCAGGCATGAACGCCGGTCTGCTTGGTGGCATGGCC  
ATCCTGCTGGGTGCCAGCTGCTTCGCCATCGGCCCTGCTGATGATCAAGCGCTTCGCCAAGGACCATCCGG  
TCGTGGTGCAGCCGAATATCCTGATCTCCTCGGCAATCCAGTTGCTGCTGGTTCGCCCCCTTCATGGTTGA  
CCTCGGCAGCCTGACCCTGCCGAGCACCCAGGCCCTGAGTGCATCACCGTGGTGGTACCCCTCTGTACC  
GGTCTGGTCTACTTCTCTACATGGCGCTGATCCAGAAGGCCGGCCGACGTTCCGCTCCTTCAGCAACT  
ATCTGGTGGCGCTGTTCCGGCGTGTGCTGGGTGCCCTGTTCTCGGCGAGCAGATCCACCCACCACCGG  
CGTGGCCCTGGCCCTGATCCTCGGCTCGGTGCCATGAACCAGTGGGCGCAACAGCGTCCGATGCAGCGC

GAGGTCTCCCTATGTCAGGCATCCTGACCACACTGTGCGGTGGTCTGGTACTGATTGCCGGCTGGCAGTA  
TCGCCAGCGGCTGGCCGGGATCTTGGGCCTGCTGATGGTACTGCTGCCCTGGTTCTTCGATAGTAAGCTG  
CAAGCCATGCTGAGCTATGCCCTGAATGCCTGAAGTCCATCTCTGAATGTGTGACGAGAGTCTATCTCTC  
CTGTTTTTGGGACTGTTTTAAAAAACCTCCGATTTGTCCCCCGCTACCGGGCGCTCTGCGCCGGTTTTTTT  
ATGCCTGCCAACCGGCGTCAGATCAGATAGCGATAGCTGAGTCGCTCGTTCTTGCGCGGCCCGGTGATCT  
GCCAGCTCAGCAGAAAACCACCGTCGATCTCGGTCAACTCGGGCGCTGTAGTGATCCGCCCCCGCACAGATG  
GGGCTCGGCGGTGAGCCAGCGGCCATCCCCCTGCGGCAGCAGCTCGAATAGTTCAACCGGCGCTTCATAA  
CGCAGGTGAGAAAGGCGGATCCCCGCTCGCTGCGTTGCCACCAGAAGCGGTTATGCATGGCGAGCTCCC  
TGCCATGAGGCGTGATGTAACGGCCCTGTTTCGTTAAACAGCCAGCCTCCCTGATGATCGGTCACCTGCAC  
ACGCCCTCGCCCCGACCATTCCAGTCGGTCGCGCAGCCCTCGCCATTGCTGGCGGTAAAGGAAAAATGCT  
CCGACTGTGGCAATCGCGCCATAAACCGTGGATTGCCCTTCCATCTCGGCCATCATAGCCCCCTTAA  
AATTGACAACCTGACGATAAATCAAACACATGAACCTTGGATAGGGGTACCCCTGCTTGGTCATTCTCC  
TTCAGCCTGATCGGGGTCTACCTCGCTGGTCAGGTCGATGCCCTACTTCTCGGTGCTGACCCGCATCGCCC  
TCGCCAGTCTGGTGTCTTCCCCTTCCCTGCGCCGCCGCTGGCTGCGCCCCGATCTGGTGGCCAAGCTGAT  
GGCGCTGGGCGCCATCCAGCTCGGCATCATGTATCTTCTACTACCCTCTTTCTGCTGCTGACGGTG  
CCGGAAGTGCTGGTCTTTACCATCTTACCCCCATCTACGTCACCCCTGCTCCACGACCTGCTGGAAGGGC  
GCTTCAAGCCACCTATCTGTGGGGCGCCCTGCTGGCGGTGATCGGGGCTGCCGTCATCCGCTTCGACGG  
CCTGACCGAAAGCTATGTGCTGGGATTTATGGTGGTGCAGGGGGCCAACCTCTGTTTCGCCCTGGGTCAA  
GTGGGCTACAAGTACTGCTGGCAAGGGAGGCGGAGCAACCGCCGCAACTGGCGGTGTTTCGGCTGCTTCT  
ATCTGGGAGCGCTGGTGTATCGCACTGCCCGCTGGTGGCTACTGGGCAAGCCGCAATACCCAACATCAGG  
GTTGCAAGTGGGGCATTCTGCTCTGGCTGGGGGTGGGTGCCCTCCGGCTCGGCTACTTCCCTCTGGAACAAG  
GGGGCGACGCTGGTCAACAGTGGGGTGTGGCCATCATGAACAATGCGCTCATTCGGGCCGGCTTGTCTGG  
TCAATCTGCTGCTCTGGGGCAAGGATACCGACCTGACCCGGCTGACCATCGGGCGGCTGCTGATGCTGGC  
CTCGCTCTGGATCTGCCAGCGTGACAAGCGCGGCCAACCCCTGACCACACTCAGCCGACGACGGTGTGTG  
CTCCCGTCTGGCCTGACTGTGACAGCTGGCCAGCCGGGCCAGCAGATGATCGAGCTGCTCGCCAGCCCTGA  
CTCTGCACAGCCCGATGCTGACGGTGACCGGCCGCTGTGACAGCAGGCTGGCATCGGCAATCTCGAGGC  
GCAGCCGCTCGGCGATCTCCAGCGCACTCATCCGCTCGGTCTGGGAGAGCATCAGGATAAAACCGTCCCTC  
ATCCCAGCGGGCAAGGGATCTTCCC GCCAGCTCTGTGGCGCACGATACGCGCCAGCTTGGCCAGCATG  
GCGTCGCAAGCCGCTTCGCCAAACAATTGCTGGATTTTGGCCATGTGATCGACCGAAAACTGCAGCAGAC  
TGAAAGTGCCACTCTCGGTGCGCAGCCGCTCCTCCAGCAGTTGCTCGAAGCGGCCACGGCTCTCCAGACC  
GGTCAGCGGATCGGTGCCATGTGCTCCTCCACCAGCACGGCAGCGGGATCGAGGTGACGGACGACCCCC  
AGCAGATAACCCCGCTCATCACGACGCATCCGCTCTTCCAGCCGGATGTAGTGACCGTGATGATGCAGAA  
TACGATATTGAGGGCGCAGACCGCTGCTGCGGCCGCTCTGGCAGGCGAGCAGGGCATCTTCCAGCCGGGC  
AACATCGTCGGGATGCACCCGATCCAGCCAGCCAAGATCATCCGGCCAACCTCTCTCCCAATCCCAACAGG  
CGCAGGCAGGAGGGATCACGCTGCAGTCCATGTTGGGCTGACCAGCTCCAGATCCCCGCCCTCCAGCAGCG  
CCATGGCATCAGACAGCAGACCCGGATCAAGCCGGGCAGTCAATCGACCAAAGGTGTCTTGAGCATTTT  
CATGGGGCGCCTCGAAACAGGATCTGAATACCTGCTCAATAAGTAACATTTGGCGTTCAGCCGAGCAACA  
GGGTGAGATCGCTTTTTCCCTGATACCCGTTTCATCAAGGTCTGCCAGTTCTCCGGTACGAAGTGAAACTG  
GTATGCAGTTGAGACTCTTTATTGAATGAACGGAGCAAGCGTTCCAGATTTGGCCTTCTGCCATTCGCCGG  
GGGAGCGGATCGCACCCCTTGTCAAAAATCGATCACCCACACCTTGCCCTCTTTATCGAGCAGCAGGTTGTG  
GCTGTTGAGATCGGCGTGATAGACCCCGGCATCGTGCAGCTGGCGCACCGTCTGACCTATCTTGTGCCAC  
ACCTCGGTGCGCACCGGCCCTGCTTGGAGCAGCGCCACCATATCCTTGGCACC CGGAATTCGCTCAATCA  
GGATATCGGCACGATAGAATGGGCCCTGTTTGACCATGCGGGCACCAAACGGACGCGGCACCGGCAGCCC  
CAGCTCGCACAGCTTGGCCAGCAGGGTGTATTTCGGCCATGGCACGGCTCGACTCGACCCCTTCGAACCAG  
AAGCGATCCCCGACCACCTTGGCCACCATGCCGCCGCGATAGTAGTGGCGCAGCACCAGATGGCGGGACT  
CATCCTTGACGAACCAAGTCAACCCCGCCGATGGAGTTCCACCACCTGACGTTGTGCTGCCACCA  
GGCAGGATCGAATAACTGGGGAGAGGGGTGCGGAAAGGCCCTTCGGCATAACCAGCAGATCTGGTTGTGT  
TCGGTCTGTAICTGCATCGTGGAGATCCCGCTCGGTGGGTGATGGATCGCAATTTTTCAATTGGCGATGA  
GGCTGCCGCTCTGGCATGCCCGCAATAGTTGCCTTTAATCAACGACGTGCAGAAAACAGGTGATGGCGCTG  
GGCCCGCCTATCCCGCTGACGATTGTGCGCAATTTTACAATCCAGAGGGGAGTTTGCATAATGCCATC  
CACCCTTTTTGGCAGCCGTGCGCCACAACATGCCGCTATTTCAAACGCCCCCTCCTCCATCTGCATCCT  
GCGGCTCTCCGCCATCGGGGATTGCTGCCACGCACTGGCGCTGGTGCAGGTCATCCAGCGGGAGTGGCCA  
CAAACCCGCATCACCTGGATCACCGGCAAAAATCGAGGCAACCCCTGTTTGGCGATCTGCCCGGCTCGAGG  
TAATCCTCTTCGACAAGAGCAAGGGGTGGCGCGGCTATCGCGATCTTGGCAGACCCTCAAGGGGCGCAA  
ATTGATGCCCCTGCTCCACCTGCAGGCGGCGATGCGAGCCAGCATCGCCACCTCGGCATCAAGGCCAAG  
GTCAAACCTCGGGTTTGGATCGGGAACGGGCCAACGACGGCCAGTGCTGTTACCAACCACAAGGTGCCTT  
CGCCTGCCTCCCCCATGTGCTGGACGGTTTCCCTCGCTTTTCGCCAAAGAGCTCGGCATCAAGGATCTGAC  
CCCGACTGGCAACTGCCCATCAGCGCCGAGCATCAGGCGTGGGCAAGGGAGAAGATTGGCGGCAACCCG  
ACCCTGCTGATCTGCGCCGCCAGCAAGGCCTTCAAGAACTGGACGGCCGCGAGGCTATGCCGCGCTGG  
CGGATCACGCCGCCAACAAAGGGCTTTCAAGTTTATCTCTGTGGCGGGCCTGCCAAACTGGAGCGAGATCT  
GGCTGCCGAGATCCGGCAACTCAGCCAGAGTAAACCGGCCGATCTGGTGGGGCAGACCAACCTCAAGCAG

TTATTGGCACTGATTGGCGAGGCGAGTCTGGTACTGGCCCCGATACCGGCCCCACCCATATGGCCACCA  
TTGTGCGGCACGCCGGTATCGGCCCTCTATGCCACCACAATCCGGCGCGCACCGGCCCATATCTCTGCCG  
CGACTACGTGGTCAGCGTCTATCAGGAGCTGGTCGAGCAGGAGACCGGTAAGCCGTGGCCGAATTGAGC  
TGGCGCACCCGTCTCAAAGACCCGGAGGCCATGCGAAAAATCACCAGCGAGCAGGTGACCGCCGCTTCG  
ATCGGCTCTGTGCAGATCGTCAACTGCCGTAGTAACAGGGCACCTCGGGAATTCGGAGCCATCAGGCAGG  
GATAACCTGATAGCCTCTGCCCTCAGCCAAAAGGCACAATGCAGGCTGATGTGGGTACGCTCCCGCAGCA  
AGCTACGAATACTTTGATCGGCTGGAATATGATTCCGGCCGTTTTTTTTATTTCGCCGCATTCTGGTAAAT  
TCGCCGCTTTACATCCCCCTGACTCAAGAATTTTCCGCGTTTTGCGTTTTGGCTGTCTCCCTTTCCGGCA  
CAAGACGGCGGTCTCTGCTACAACCAAAACAGCGGTTTCGATTAAAGGTAATAATATGGCGCAACAAGGC  
ACTCTCTATATCATCTCTTCTCCGAGCGCGCGGGTAAATCCAGTCTGCTCAATGCCTTGCTGACCAACC  
ACAATCAAGCTGGCAAGATGCAGCTATCGGTTTCCACACCACCTCGCGCCACCCGCCCGGCGAAGAGCA  
CGGCTACACTACCACCTTCGTTTCAGGTGGAAGAGTTCAAGGCGCTGATCGAGCGTGGTGATTTTTCTGGAG  
TGGGCCGAAGTATTCGGCAACTACTACGGCACCTCACGCGCCGCATCGAAGCTGCCTGGCCAAGGGGA  
TCGACGTATTCTCGACATCGACTGGCAAGGTGCCCCCAGATCCGCGAGCAGATGCCGACCAATCCAT  
TTTTATCTGCCCCCCAGCCGGAAGAGCTGGAGCGCCGCTGATTGGGCGCGGTGAGGACAGCGCCGAA  
GTGATTGCCGCGCGGATGGCGAAAGCCATTGCCGAAATGGTGCACTACGACGAGTATGACTATGTCATTA  
TCAATGAAGACTTCGAGCAGGCGCTGTTCCAGCTCAGGTCCATTATTGAGTGCCAACGGCTGGAGATGCG  
TCACCAGCAACAGGCTCAAAAAAATGCTGCAACAGCTACTGGCAGAGTAAGCCAAAAACAAGTAACT  
TTTTCGCTCATTTTTTAAACTGCTTTTCTAAATACAGAAAGCCAAACTGGAGTCTGCATGGCACGC  
GTTACTGTAGAAGATGCTGTAAAACAGGTAGGTAACCGTTTTGACCTGGTGTGGTGCCTCGCCGCGCGCCG  
CTCGTCAAATCGCGGTACAAGGCAAGATCCCCTGGTCGACGAAGAGAACGACAAGCCGACTGTGATCGC  
CCTGCGTGAGATCGAGCTGGGTCTGGTGAACAATCAAGTGATGGACACCCAGGACCGCTACGAACAGCAA  
GAGCAGGAAGCCGCGAGCTGGCTGCCGTTGCTGCCATCGCCGAAGGCCGCGGTTAAGTTATTCTCCCGG  
TTGGCACCCGCCCCGGTGCCGACTGTTTCATCCCCATTTACAACCGCTCGAAAACTTCGCAAACTCAGGGC  
TATACCCTCAATTCCACGAATTGCCGTTTACCCTGCGGGGACTGCTTGTATTTATTTGAAAACCTTA  
AAGAAATAGCCAGTTCTACCTGCCGCCAGAGCAGGTTGAGAAGCTCAAGCAAGCCTATGTGGTGGCCCC  
TGATGCCACCACAGGCGAGATGCGTTCAGATGGTGAACCTATATCACCCACCCGTTGCCGTTGCCCGA  
ATCTTGGGTGACATGCGCCTCGATCATGAAACCCCTGATGCGCCGCGTGTGCACGACGTCATCGAAGACA  
CCTCTGTACCAAGCCGATCTGGCCGAACAATTCGCAATGCGGTTGCGAAGTGGTGGCCGGGGTCTC  
CAAGCTCGACAAGCTGAAATTTTCGCGATCGCAAAGAGGCGCAGGCCGAGAACTTCGCAAGATGGTGATG  
GCAATGACCCAGGATATCCGGGTCAATCTGATCAAGCTGGCCGACCCACCAACATGCGCACCCCTGG  
GCTCCCTGCGCCCTGACAAAACGCCCGCCGATCGCCCGGAAAACCTCGAAATCTTCGCTCCCATCGCCAA  
CCGCTCGGTATTACACCATGAAGAACGAGCTGGAAGAGCTGGGTTTCGAGGCGCTCTATCCGATGCGA  
TCCCGCGTGTTCGCGAATCGGTGCGCCGCGCCGTTGGCAATCGTCGCGAGATCATCGACTCCATCCAGA  
GCGAAATCAGCGGTGCGCTGAAAGAGGCGGGGATCGAGCATCAGGTCAGTGCCCGGAGAAGAATCTCTT  
CTCCATCTACAACAAGATGGAGAAAAAGAGCTGCAATTTATGAGGTAATGGATATCTACGCTTCCGG  
GTAAGAGTGAAGGACATAGATACCTGTTACCGAGTGTGGGGCAGATGCACAGCCTCTACAAGCCGCGCC  
CCGGCCGCTTCAAGGATTACATCGCCATCCCCAAGACCAACGGCTACCAGTCGCTGCACACCTCTCTGGT  
GGGGCCGCACGGGTACCGGTGGAGGTGCAAAATTCGTACCGAGTTCATGGATCAGATGGCCGACAAAGGG  
GTTGCCGCCACTGGGCTACAAGCAGGATGGCGACAGTTCGGGCACCACTGCCAGATCCGCGCCGAGC  
GCTGGATGCAGAGCCTGCTGGAATTCGAGCAAAAGCGCCGGCAGCTCGTTTTGAATTTATCGAAGGGTCAA  
GACCGACCTCTTCCCCGACGAGATCTACGTCTTTACCCCGAAGGGCGCATCATGGAGTTGCCCGCTGGC  
GCCACGCGGTGACTTCGCCTATACGGTGACACCGACATCGGCCACGCTGTGTGCGTTTCGCGGGTTCG  
ACCGCCACCCCTACCGCTCAGCAGCCACTGCACTCGGGCCAGACGGTGGAGATCATCACGGCCCGGG  
CGCCGCCCCAACCGCGCCTGGCTCAACTTTGTGGTGACCACCAAGGCACGATCCAAGATCCGCCAGTTC  
CTCAAGAACCTGCGCACCGAAGAGTTCGGTGGTGTGGTTCGCGCTGCTCAACCATGCGCTGGGCGCCA  
AGAATATCGAAGACATTTCCGAGCCACGCATCAAGCAGGTGCTGGCCGATACCAAGCATGAGAACCTGCA  
GGGGCTGCTGGCCGATGTGGGCTCGGCAACGCCATGAGCGTTCATGGTGGCACGCCGATGCTGGGGGAT  
GAACTACCGCCGAAGAGCAACCCAAGCCAGCAGCAAGAAGATGCCGATCAAGGGTGCCGACGGCATGC  
TGGTACCTTCGCCAACTGCTGCCGTCGATCCCGGGAGATGCCATCATCGCCCATATCAGTCCGGGCAA  
GGGTCTGGTGATCCATCAGGAAGCCTGCCGCAACATCAAGGGCTACAGCAAGGAGCCGGACAAGTATCTG  
CCGGTGCAGTGGGAAGTGGACAAGGAGCAGGAACAGGAGTTCGCGACCGGTATCAGCATCGAGATCGTCA  
ACCATCAGGGTGCCTGGCCGAGCTGGCCAACGTGATTGCCGCCACCGGCGCAACATTCACGCCATCAG  
CACCGAAGAGAAGGATGGCCGGTCTATCAGGTCAGCTGCTCATCACCAAGAGCCGCATCCACCTG  
GCCAACATCATGCGCAAGATCCGCGTGTATGCCAACGTGCTCAAGGTGAGCCGACAGAAGAACTGAACAC  
AGGCGCGCAAGCCGCTGCTGCTTTTATAGAGACAAGCCATGACCCCGAACGCTTCAAGCGCATCACC  
GATATGCTGGCCAGCGTCAGCTCGATTTGACCGTCTGTATGGAAGAGGTCCACAAACCTCACAATCTGG  
CCGCATCGTGCTACCGCCGATGCCATCGGCATCCACCGGTACACGCCGCTTGGCCAAAACCTGGAT  
CCACAAGCGCAAGGGCACCGCCCGCGCAGCCAGAACTGGGTGGATGTAAAACCTGCACCCGGACATCGGC  
AGCGCGGTTGCCGAGCTGAAAGCCTCCGGCATGCAGATCTGGCGACTCACCTCTCCGACAGCTCGGTTCG  
ATTTTCGCGCCATCGACTACACCAACCGACCGCCATTCCTGGTGGGTGAGGAGAAACAGGCATCGGTGA

AGAGGGCGTGGCGCTGGCCGATCACCATATCGTCATCCCCATGGTGGGCATGGTGCAGTCCCTCAACGTC  
TCGGTGGCTGCCGCCCATCTCTACGAGGCGCAGCGCCAGCGGAGCTGGCCGTTGCTATCAACGCG  
GCTGCCCGCTCACGCTGGAGGAGCAGAACAGCATCTGTTCGAGGGGGTTATCCTATCTATGCCAGCT  
CTGCAAAGAGAAAGAGATGCCCTACCCCCAGCTCGGCCCGGCCGGTGAATTCGGCGGACGAAGAGTGG  
TGGCAACGGATGCAGCTGACCCGCAAAGGGTGGGCGCAGCAGAGCGAGCAGGACGATCCGCAGGAGGAGT  
GATGGAGAACCCTTTTTGGCAGCTGGCTGGAATCGCAAATCATCCGGGATCACCTGACCAACCCGAACATA  
GAGGCCGGCGACTACAGCTACTACTCCGGCTACTACCACGGTAAGCCGTTTCGAGGATCACTGCGTCCGTT  
ACCTGCTCGGCGATGGCTCGACCCGCGACACCTGGGAGAGCGGCCCTCTGGGGCGAGGTGGACCCGGCTGAT  
CATCGGCAAATTCTGCTCCATCGGCTCGGGCGCCACCTTCATGCTGGCGGGCAATCAGGGCCACCCGGCTG  
GATTTGGTCTCCACCTTCCCCTTCAATCCCGACACCTTTGGCGAAGGGGCCCGCAGCGGCTTTCTGCGCA  
AGGGGGACACCCGGATTGGCAACGATGTCTGGATCGGCTCGGAAGCGATGATCATGCCCGGCATCACCAT  
AGGTGATGGCGCCGTCATCGCCACCCCGCCGCTGGTGGTACCAAGGATGTGGCCCCCTTACACCATAGTCCGCG  
GGCAACCCGGCCAGCCGATCCGCCGCCGTTTCAGCGATGAGCAGATCCTCATGCTGCAAGAGATGCAGT  
GGTGGGACTGGCCCCCTGCCTCGCTTGCAAGCCTGCATGGCGCTGCTCTGCTCGGGGGATATCGCCGCCCT  
TTATCACCATTGGCAACAGGAGTGTGCCTGATGAAAACCCCTCTCTCTTTCCCTGTTGGCCCTGACCCTGT  
TTTCTGCCGAGCCCTTGCCGTGACCAATACCTATCAGCTCACCAGCGAAGCCGATGTACCTAGCCTCTA  
CCAGCAAACCCCTGCCGACTTCTGGCGCCAGCATGCGGTGGAAGGAGAGTTCAAGGGCAAGGATGGCGTA  
ACCATCCGCTATGCCGCGCTGCGGCAAGCCAAGGTGCATCGCGCCATCCTGATCGTCAATGGCCGGGTGCG  
AGAGCTACCTCAAGTATCAGGAGCTGGCGTGGGATCTCTGGCGTCAGGGCTACAGCCTCTATCTCATCGA  
CCATCGCGGTGAGGGGATGTCTGACCCGATGCTGAATGACCCGCAAGGGATATGTCGACCAGTTCGAC  
GATTATGTGGTGCATCTCAAGCAGTTTCAGCACCAGATAATCATGGCGGACCAACCTGCCAAGCTGTTCC  
TGCTGGCCCACTCCATGGGCGGCGCCATCTCGGCCCGCTATCTGGAACGCTGGCCCGATGATATCAAGGC  
GGCCGTGCTCTCCTCCCCCATGCTGGGCATCAATCTCGGCGGTCTGCCCAAGTGGCTGGCCAAGGGATTG  
GCGAGCACCATAGGCACAGTCGGCGGCTGGCTTGGCGAGCCTCCCTACGGCCCCGGTCAGGGCACCTATC  
AGGATCACGGCTTTGCCGATAACGAGCTGACACACAGCCAGTCCCGCTATCAGGCGTTCCGTACAGCTCTA  
CGAACAGCACCCACAGATCAAGCTGGGTGGTGCCACCGCCACTGGATTTATCAAGGGATCACCGGTGCC  
GATGCCGCCATCGCCGATGCGGGCGCTATCAAAAACCCCGCTGCTGGTGTGTCAGGCTGGCAGCGACAGCG  
TGGTAGACAATGCCCGCAGGATCGCTTCTGCACCATTGCCAAGTGTGAAGGGGGCAAACCCGCTGCGCAT  
CGAGGGTGTGTTGGCAGCAGCTGTTTATCGAATCCGACGCAAGCGCCAGCCCGCCCTGACCAGGATGGT  
GACTTTTTTCGCCCGCTTCTGAGCTGGCTATTTTTTTGTAACCTAAATAAATGGGGTGACAGTGCGGGCTA  
AGGTAAACTGCCCTGTTTTCAATCGATGCCGAGGTAATGATGTTCAAGGTAGTTGTATCCGATCTCGAT  
GGCACTCTGCTCAACAAGCAGCACCAGATCTCTCCCCGTACCCGGGATACCTGCACCGCCTGGTAGAAC  
AAGGTGTGAAATTCGTGGTGCACACCGGCCGTCATCACGTTGACGTACGCAGCTTCCGCGATGCGCTGGG  
GATGGACATCTACCTCATTACTTCCAATGGCGCCGTTGGTCCATGACAAAACAGGATCAGCTGATTTTTCAAC  
CAGCCGCTGCCGACCGAGATTGCCGCCGAGCTGATTGCGCTGGAGCGCGATCCCTCTATCCACCTCAATG  
TCTATCAGGGTGTGACTGGGTGGTGGAAAGAGGAGCTGCCCTGGCTGCTGCAGTTCACGACGAGTCAGG  
GTTACCTACCGTCTGGTGCATGACCTGAAGCAGGAACCGAAAAGAGCAGATCAACAAGGTGTTCTACATC  
GGTGACCACGAGAAACTGCTGAAGATCGAGGCGCACCTCAACCAGCGCTACGGCGATCAGCTCAACGTCA  
CCTTCTCATTGCCGACTGCCTCGAAGTGCATGCACCGCGAGTGCATAAGGGCAATGCTGTGCGAGCCGT  
GCTGGAGCAGAATGGTTTTCGATATGTGCGGAGGCGATCGCCTTCGGCGATGGCATGAATGACTTCGAGATG  
CTGACCATGGTGGGACCGGCCATCGTGATGGGCAACGCCCATGACCCGCTGAAAAATGGCGCTGCCGGAGT  
ATGAGCAGACCCTCACCTCCGACGAAGATGGCGTCGCCGTTCTATCTGGAAAACTGTTTCGAGCTGGAGAG  
CGTCAGCGCAGCCTGATCCTCTTCATCCCGACATTCGATTCACAAAAGCCTCACCATGTGAGGCTTTGTT  
TTTTCAGGGTCTCCAGCCAGGGATTGGGCCGCTGCCAGCTGAAGCTCTGGTTCGCCCGCCGTAGCATTC  
AGCCAACCGCAGCGCGCTGCCGGGGTATGGCGTCGCCCGGCCACATCGAGGCAACGGGCAACCTTACTG  
TTGAACAGCCTGTCTTTCTGCCACTCCCACTGCCGCTGACCGTACAGGGTGCCAACATCACTTCGCTGT  
CGTTTTTGGCTTGCAAACAGAGCTCCTGCAGGCGCAACTCACCCAGATCCCACTCGAACAGTTGATCGT  
TTTTCCGCTGCAAGGTTGTGCAACACCTTCTGTTGGGACACCGCAACGCAAAAATCACCGCTGGTCCAGC  
AAGGGGGAGAGAGAACGCTCCTCCTGCGGTTGTGATGCAATAGAGCCCATCATCACATCGGTGGATGGCG  
GCTTGATGGTACAGCCACCCAGCAGCAAGGCCCGCCAGCAGGGCAGGAGAGCAAGCAAAGGAAATTTTGT  
ATTTCATGGAAAAATGCCTGAAATGGGCCGATGACATCCGGTTGTCAGTACTCGAGGCTGAAGCATAACC  
GAAAGGCGGGGCGCTGCCCAAATAGAGTGTAAACAGACGTAACAGGGAGAGAGTACTGGCACGGCGGA  
GGCCAGAAAGCAAAAACCCCGCCGAAGCGAGGTTTTTCTAAATGTGGTCCGTTGATAAAGGATTGCAACC  
TTTGACCCTCTGGTCCCAAACAGATGCGCTACCCGACTGCGCTAATCACCGAGGCTATTTCTTTCAAAA  
TAGTTTTACTTCAAAAAACAAAGACGACCTGATGGTTCATCCTCGTCATACAGCAAGTATGGTGCAGAGAG  
AGGGACTCGAACCTCACACCCGGGGGGCACTAACACCTGAAGCTAGCGCGTCTACCAATTCGCCACCT  
TCGCGTACCTGACAAGCTGTAAAATGGGGTGGCTGATGGGGCTCGAACCCACGACAACCCGGAATCACAAT  
CCGGGACTCTACCAACTGAGCTACAGCCACCACAGCTGTTTTTCGTTCCACAACAACGCCCGTTTAAACCGA  
CGCACTTTTTATGGTGCGCCCGACAGGATTCGAACCTGTGACCTCTGCCTCCGGAGGGCAGCGCTCTATC  
CAGCTGAGCTACGGGCGCTACGCTGTGCAACGGGGCGCATTATTAATGATGGTTGCTGGTTTTGTCTACAC  
TTTTCTGTACCCGAAGCACTGTTTCGTTGTTTTTCAAGCACATTCGCACTTTTTCTCCACTATTTCCCT

GCTGCCAGCCGAAAAGGGGAGATCGCAGTCGCAAATCGCCTTGCTGCCTTGACTTGATTTGATGCCCAT  
CTAGAATGAATGAACGTTCAATTCGAAAGTCACTGATGATTCTGGATAAAAAAGAGAGCATCTTC  
AACCGGGCCCATGAGGTGCTGGGTGAACGGGGTTTTTCATGGTCTGTCGATTGCGGAAGTCGCCAAGAAGG  
CCAATGTTGCCACCGGCACCATCTATCGCTACTTCGGCGACAAGGATGATCTGATCCGGCAACTGCACCA  
GCACACTATCTTGCAGTGTGTGCCCATGGTCATGGCCGATGTAGCAATCGATAAAGTTTCATTTCAACAA  
TTTTCGCCAATTATGGCTCAATATTCATGCCATTTTTGTTAACGAACCCAAACGCTATCCGGTGCAAATTGC  
AGTACGAGAGCTCTCCGCTAGGGGCGAGAATTGGAGACCAATCCTGTCATTTCTGGCTGCCCTGGGAGCCTCT  
GGACCGATTTTTTTGAACAGGGCGTTGAACAAGGACTGTTTATGATTTACCGATACGGGCACTCCAGGTG  
TTGAGTCTGGACAGTGTGCATGCATCTGGCCCTGCAGTGCAGGGTTCACAACATCACGCTGACCGAATCGC  
AGTTGGAAACCGCATCCGGGCGAGCTGGAATGCCATTTTATCCCCAATCTTTCCACCTCAGGAGCCTG  
TTCATGAAAAAGTGGATGGCCATTATGTTGCTGATAGCGATCGCCTTGTTTGGCAGCGTCACTGGCTTCA  
ATTTGTTCAAACAGAAGATGATTGCCAATATATGGCCAACCGGCCGAACCCGAGTTCCCCGTCACCGC  
CATGGTGACCAAGGCGCAGGATTGGGTACCGACCATCGAAGCGATCGGCTTCATCGAACCGAATCAGGGG  
GTGACCCTCTCCACCGAACTGGCAGGTACCATTGACGCCATCACCTTCGAATCAGGCAAACCGGTCAAGG  
CTGACCAGCTGCTGCTGAGCCTGGACTCCACCGTGGAGCGTGCCAATCTGCGCGCCTCCAGGCCAAGCT  
GCCGGCGGCAAAGCCAAGTTTCGATCGTTTTCCAGAACCTCTACAAGACCAGCTCCATCTCCAAAGAGCAG  
CTGGATGAAGCCGAAGCGGCCTATCGCTCGCTGGAAGCGGATATCGAGAGTCTGAAGGCGACCATTGCC  
GTCGTGAAGTGCCTGCGCCCTTTAGCGGCGTGGTTGGCCTGCGCAATGTGTTCTCGGTGAGTATCTGCA  
GCCGGGCGACAGATATCGTGCCTGGAGGATACCAGCGTATGCGCCTGCGCTTACCCTGCCCCAGACC  
GATATATCCAAAATCAAGCTGGGCCAGACCATCAAGATCAATGTGGATGCCTATCCGCAAACCCAGTTTG  
ACGGTCATATCACCGCCATCGAGCCTGCGGTCAACTTCCAGAGCGGCTGATCCAGGTACAGGCAGACAT  
TCCGAACAACGACGGTCAGCTCCGTTCCGGTATGTTCCGCCGCGCCAGCATCATTTCTGCCGACGGTGA  
GATCAGATCGTGATCCCGCAGACCGCTATCTCCTTACCCTTTACGGTCAGAACGCTTACGTGCTCAAAG  
AGGGCGAAGAGACCGACAAAGAGGGTAAACAAGGTGAAAAGTGTGCGAGCCAAGCAGGTTGTGGTCAAGGC  
CGGTGAGCGCCGTGGCAACGATGTGCATGTGCTCTTGGCATCCAGGCCGGTGACCAGATCGTACTGTGCG  
GGTCAGGTTGCGCTGAGCAACGACACCAAGGTGCATGTGGTCGAGAACGATGCTCTGGCCGTTCCGGCAC  
AAACCCCGATGCTGTAAGCGCGGAGATCTGCGATGCGATTTACTGACATATTTATAAAACGGCCTGTGCT  
GGCAGTCTCGCTCAGCTCTCTGATCGCCTTGTCTGGCCTTTTCAGGCCATCTTCAAGATGCAGGTACGGGAA  
TACCCCGAGGTGACCAACAGGTCATCACCGTGCAGCTGGCTACTATGGCGCCAGTTCTGATCTGATCC  
AGGGGTTTCATCACCCAGCCGCTGGAACAGGCGGTGCGCGCAAGCCGACAACATCGACTTCATGACCTCCTC  
CAGCCAGCTGGGCGACTCCACCATCACTGCGTACATGAAGCTCAACACCGACCCCAACGCGCGCTGTCC  
GACATCCTGGCGAAGGTGAACTCGGTGCGATCCCAGTTGCCGAAAAGAGGCGGAAGACCCGTCGGTACCT  
CCTCCACCGGTTCAACCACGGCGGTGCTCTACCTCGGCTTTACCAGCCCGGAGCTCAACTCCAGCCAGAT  
CACCGACTATCTGGAGCGGGTTATCAAGCCGAGCTCTTTACCCTGGGCGGGGTTCTCAAGGTTGACCTC  
TACGGCGGTGTCGAGTTTGCCTGCGGGTATGGCTGGATCCGGCCAAGATGGCGGCCTTCAACCTGACTG  
CCAGTGACGTGATGACGGTGTCAACAGCAACAATATCAGTCCGCGACAGGTGAGGCGACCGGTTACTT  
CACCTGTTCAACGGCAACGCCGAGACCCAGGTCAAGGATGTCGACGAGCTGAAGCGTCTGGTCTGTTGCT  
ACCCGTGACGGCAAGGTGATCCGCCTTTCCGACATTGCCAAGGTGACCCTCGAGAAGAGCCACGACATCT  
ATCGCGCCAGCGCAACGGCCGGAAGCTGTGGTCATGGCGGTCAACGCCGCGCCGACAGCCAACCCCAT  
CAACATCGCCACGATGTGCTGGCGTTGCTGCCGAGCCTTGAGCGCAATATGCCGAGCACCATGCGTCTC  
AACGTGATGTATGACTCCACCGTGGCGATCAACGAGTCCATCCACGAGGTTATCAAGACCATCCTGGAGG  
CAGCCGCCATCGTTCTGGTGGTCATCACCTGTTCTCGGTTCTGTTCCGCGCGGTCATCATCCCGATCAT  
CACCATTCGCTCAGTCTTATCGGCGTAGTGATGATGATGGATATGTTCCGGTCTTCGATAAACCTGATG  
ACCCTGCTGGCGATGGTGTGCTGGCGATCGGTCTGGTGGTGGATGACGCCATCGTGGTGTGGAGAACGTCG  
ACCCCATATCAAGGAGGGGGGAAGAACCCTTCGGGGCCGCAATATCGGTACCCGTGAAATTCGGTGGC  
GGTTATCGCCATGACGGTTACTCTGGCGCGGTATACGCCCTATCGCCCTGATGGGGGGCATCACCGGC  
TCCCTGTTCAAGGAGTTTGCCCTGACGCTGGCTGGCGCGCTGTTCTGTTCTCGGGCATCATCGCCCTGACTC  
TGTCCCAATGATGTGTTCCAAGATGCTCAAGGCCAACGAGCAGCCAGGCAAGTTCGAGAGCACAGTCCA  
CCACCTGCTGGAGCGGATGACCGATCGCTACGACAGCATGCTGCACGCCGTGATGAAAAAGCGCCCCGTC  
ATCGTGGTGTTCGCCGTCATAGTCTTCGCCAGCCTGCCGCTGCTGTTCAAGTTCATCCCGAGCGAACTGG  
CACCGTCAGAGGACAAGGGGGTAATGGCCGTGCTGGGTACCGCACCGTCCAACGCCAACCTGGACTACAT  
CGAAAACACCATGGCGGATGTGAACAAGATCCTGGACGACCAGCCCGAGATCGCCTTCTCCAGGTCTTC  
TCAGGGGTGTTCAACGCCAACAGGCGTTCGGTATCGCCTCCATGGTGCCCTGGAGCCAGCGTGAAGCGA  
GCCAGAAAGAGGTGCTGGACCGGGTCGCAATCTGGTGAAAGACATCCCGGGCATGGCCATCACACCTT  
CCAGTTCCCGGAACCTGCCGGTGCATCGAGTGGTCTGCCGATCCAGTTCGTTCATCACACCCCGAACAGC  
TTCGAAAGCCTGTTCTGGTGGCCGGTGAATTTCTGGCAGCGGCGCAGAGTAACGGTCAGTTCGTCTATT  
CGGATCTCGATCTGAACTACGACTCCGCCACCATGAAGATCCGCATCGACAAGGACAAGGCGGGTGCCTA  
CGGCATCACCATGCAGGATATCGGAATCACCATGGGCACCATGATGGCGGACGGTTACGTCAACCGTATC  
GACCTGGATGGCCGCTCCTACGAGGTGATCCCGCAGGTGAGCGCAAGTACCGTCTCAATCCGGAGTCCA  
TCAAGGGTACTACGTGCGGGCCGAGACGGCAAGTCGATCCCGCTCGGCAGCCTGATCAGCATTAAGT  
GGTTGGCGAGCCCCGCGCCCTGCCCACTTCAACCAGCTGAACTCCGCCACCATGGCGCCGTTCCGGCT

CCGGGCGTGGCCATGGGTGATGCGATCAACTGGTTCAGACCACCGCCGACGAGAAGCTGCCGCAAGGCT  
ATCGTTACGACTTTATGGGTGAAGCCCGTCAGTTCGTCACCGAAGGCAATGCACTCTATGCCACCTTCGC  
GCTGGCACTGGCCATCATCTTCTGGTGGTGGCAATCCAGTTCGAGTCGGTGGTGGTACCCACTGGTCATC  
ATGGTCTCTGTACCGCTCGCCATCAGCGGGGCTTGATTGCCCTAGCATGGGGTATGGCGACCATGAACA  
TCTACTCCCAGGTGGGCTCATCACCTGGTGGGTCTGATTACCAAGCACGGTATCCTGATCTGTGAAGT  
AGCAAAGGAAGAGCAGTTGCTGCGCGGCATGAACCGGATGGAAGCCGTGATGCAGGCCGCAAGGTGCGT  
CTGGCTCCGATCCTGATGACCACCGCCGATGATTGCCGGTCTGATCCCGCTGCTCTACGCCGCTGGTG  
CCGGTGGCGCACAGCGTTTTCAGCATTGGTATCGTCATCGTGGCCGGTCTTGCCATCGGTACCCTGTTTAC  
CCTGTTTCGTGCTACCAGTGTATCTATACCTATCTGGCTTCCGAGCACAAACCTTGCCGGTATTCGATGAA  
ACCATTCGCCCCAAAGCAAACCGCGGACATTAATCATCAATGACATGCAAAGGCCCGTATCGGGGCTT  
TTTTATGCTTTGCAGGAAAGACGACATAAGTGCATGAAGCAGTTAAACTAAAAACACACATCCAGACC  
GCAAGGACGCCATGTGAGGACTCTTCTCCAAGACCGCCAGGGCCGTAGGCCGCAACGGACTCTCATATCG  
CCTGCTCTCTACATTCTGGTCTGCAGTACCGTATTGGCGATGATCATTACGGCGCTGCAACTCGCGTGG  
GATTACCGCAAGGATGTGCGCGTATCGAAGACAGCATCGGCCAGATCGAGGCCCTCGTTCCTGCAACCCA  
TCGCCGCCAGCTTGTGGAACCTGGATGAAGAGCAGGTCAAAGTGCAAAATGAAGGGATCATGAACCTGCC  
CAACATGCAGTTCGTGATGGTCAAGGAGATGCTCGGCAACTCCGAAGTCCCGCTGCTGACCCAGGGGGTC  
GAGCGGGAAAGCTATGATATCTCCCGAGAATTCAACCTCACCTATCAGGGTGAAATCGTCGGCAAGCTGT  
TCGTTGCCGCTCTCTCGAGCAGATCTACCAGCGCTCATCGAAAAATCGGTGCTGATCATGGTCAGCCA  
GACCATCAAGACCCTGGTGGTCTCATTTTGCATCCTGATCATCATTTACTATCTGGTGGTCAGGCACATC  
AACCGCATCGCCAACTACGCCCAGAAGTTCAACCTCGATCGGCTCGACATGGCGCTGGAGCTGGAAGGCC  
GCCCCAGCCGCGCAAGAAACCCGATGAGCTGGATAACCTGGTTCACCCCTCAACCAGATGCGTACCCG  
ACTGCGCGACGAGCTGGTTGCCCGCCATCAGGCGGTGCAACAACCTGCAAAAAGGAGCGGGACTTCTCCGCC  
ACCCTGATCAACTCCGCCAACATGGTTCATCTGCTGCATGGAACCGGATTTGACCATCGCCAGCATCAACC  
CGGCTGCCATACTGCTGACCGGCTACCACCAGCAAGAATTGTTGCAGCACAACTGGCTGGATCTCTTTGT  
CAGCCCCGGCGCAACGGGAAGAGCTGAACGATATTCTGGCAGCGGAAGGTTCACTGGCCGACAAAAGAGT  
ATCATGCATGACCAGCAGGCCCATGAGCTGGTACTGCAATGGACCTTCGTACCCTTCTACGATGGCCCCA  
ACCTCAAGTACCAGATCGGGTTTGGCTACGACATCACCCAGCTGAAAAAGGTGAGCGGGAGATAATCCA  
ACTCAACGAACAGCTGGAAGGCAAGGTGGTAGAGCGCACCCACAGCCTAAGCGAAGCCAACAACCCAGCTC  
GGCAAGGCGTAGCAGACCTGAAACAGGCCCCAGCACCCCTGGTGGAGTCGGAGAAGATGGCCCTCCCTCG  
GCTCGTTGGTAGCCGTTGGTGGCACACGAGATCAACACTCCGATCGGTATCAGCGTACCGCCTCCTCCTA  
CCTGCAGGAGCGAGTCGCCGACTTCAAGTCCCATATCGACTCCAAGCAGCTGTGCGGCTCCTATCTCAAC  
GAGTTTACCGTCAACCTCGACGAGTGCATGCAGCTGCTGCAGAGCAACCTGCGGCGCGCTCCGAGCTGA  
TCGCCAGCTTCAACAGGTGGTGTGACAGTGCATCGGAAGCAGCTACAACCTCAGCTCGCCGACAA  
CCTCCATCAGGTGGTGGTCTCGCTTGGCCACAACTGAAGAAGAGCCAGTGCGAAGTGGATATCCAGTGC  
GATTCCAAGCTGTCAATCTTCTCCTTCCCGGCGAGCTTTACCAGATCTACTCGAACCTGATCCTCAACT  
CCATCAACCACGGGTTTCGACAGCTGGGACAAACCGAAGAAGATCACCATCAAGGTGGAACAGCAGGGAGA  
GGAGCTGTTTATCGACTATTTCGGACAACGGCCGCGCATCCCGCCGAAATCTTGCCGCGCATCTTCGAT  
CCCTTCGTACCTCCAAGCGGGTTCAGGGGGGCGAGGCTTGGGCAACCCACATCATCTACAACCTGGTGG  
TGCAACTGCTGAAAGGCCGTATCAGCTGTGCCAGCGAACCTGGCCAGGGCGCCAGTTCATATTCGCCCT  
GCCGATCCAACATAACTGAGCGCTGGCTCTTGTGAGCCAGCCGCTTTATCCCCATCATGCTGTGATTGCA  
TTCTTAATGAGCGGAGAACCTCGCAATGGCACAGCATTTTACTATATCGCCATCGGCGGGCGGAGCGGC  
GGCATCGCCTCTGCCAACCGGGCTGCCATGTACGGTAAGAAAAGTTGCCCTGATTGAAGCCAAAGAGTTGG  
GTGGAACCTGCGTCAACGTAGGCTGCGTACCGAAGAAGGCCATGTGGTATGCAGGCCAGATCGCCGATGC  
CCTGAAATATGGCGCCGACTACGGCTTTGACACCACCTCAACCACTTCAACTGGGCCAAGCTGGTTCGAG  
TCCCCGCCAGGCTACATCGGCCGCTTTCGTCAGCAGCAACACCATCGAGTTAATGGCGAGCACTACACGGCTGA  
TCACATCCTGATCGCCACCGGTGGCCGCCCCGAAATTCGGCGGATCCCGGGAGCCGAGCTGGGTATCGAC  
TCCGACGGTTTTCTTTGACCTGCAAAAGCCAACCCAAGCGGGTTGCCGTGGTTGGAGCTGGCTACATCGCAG  
TCGAGATCGCCGGCGTATGACAGGCGCTCGGCTCAGAGACCCATCTGGTGGTGGCGAAGCACGCACCGCT  
GCGCAACTTCGACCCCATGCTCCACGAGACACTGGTTCGAAATCATGGCGCAGGAAGGGCCCAAGCTGCAC  
ACCCACGCCATTCCCAAAGCCGTGCTCAAGAACGCTGACAACAGCTGACCTGCAACTGGAAGATGGTTC  
GCCACCTCACCGTGCATGCTGCTGATCTGGGCCATCGGCCGGGTACCGGCTACCGACAACCTCAATCTGGC  
TGCCGCGAGGATCGCGCTGGACGAGAAGGGCTTTATCCCGACCGACAAGTTCCAGAACACTTCCGTCGCC  
AACATCTATGCGGTGGGTGACAACACGGGTGCGATCCAGCTCACGCCGTTAGCCGTCGCGGGCGGGCCGTC  
GCCTCTCCGAGCGGCTGTTCAACAACAAGCTGAACGAACACCTCAACTACGATCTGGTGGCGACCGTGGT  
GTTACAGCCACCCGCCCATCGGCACCATCGGTCTGACCGAACCTGAAGCCATCGCCGAATATGGCGAGGAC  
CAGGTGAAGGTCTACCGCAGCCAGTTCACCGCCATGTACTCGGCACTGACCCAGCATCGCCAACCCACCC  
GGATGAAGCTGGTCTGTGTCGGCCCGGAAGAGAAGGTGGTTCGGTCTGCACGGCATCGGCTTTGCGATGGA  
CGAGATCCTACAAGTTTCGGCGTCCGATGAAGATGGGTGCCACCAAGGCGGACTTCGACAACCTGCGTG  
GCTATCCATCCGACCAGTGCAGAAGAGTTCTGTGACAATGCGATAAGCACGTTTGAAGTTGGCCTGTCAAT  
ATCAGGCCAACTTCAACAACCTGCGTTCCTACGCTCATCCACCAGCGCGGAAGAGTTCGTCACTATGCG



TTAAGGGCAGATGAAGTTGGCCTGCCACGAGCAGCCGGCTTCTACAGCCATGTAATCCCTTCATCCAAAC  
CCGGCTCAGGCCGGGTTTTTTGATCACTCCTCGCTATTTCTCTCGCAAATCCGTCGTTCTTTACGCCGAT  
TTTACGCCTGCCACATGGCGCTTTATGGCGCTTTACGCCGTGTTTTACATACCTTTTTCAGCGTCAATGA  
CACCAACAGAGTCGATATGGTCTTACATCGGCTCTCGCAGCTAATTATCTCAATGGAGTCGATATGAATT  
GGCTATATCTGCTGCTCGTCTCGCCTTGATGGCCTATCTGATGCGCGCACTCACGCGCAGTCAATGAGTG  
AGGGAGTACCTATATGCAGCAAGAAATATCTACCCGGTGGCCAGCAAATGCCGAGCCTCGTGAGCAAT  
CCAATGCGTGCCCTGACGCACCGTGACCACGAGTGAGGAACTAGAACATGTGGCAAGAAATAATCTATCC  
GGTGGCCTTCGTGCTGCTGGTTCTGCTGCCGGCACCGCTGCTGGGCAACTACATCTACCGGGTATTTGAA  
GGCAAATCCGCTGGTTGGCACCGGTGAGCGCGCCACGCTGGCTTGTGTGGCACCAGTGGACGGGAGC  
AGGACTGGAAGTCCATCGCCCTCAGCCTGCTGGCCTTCAATGGCGCCGGTTTTCGGTCTGCTGTTCCGTGAT  
CCTGATGGCGCAGGGTTGCTGCCCTCAACCCGCAACACTGCCGGGTCTGAGCTGGCAACTCGCCTTC  
AACACCGCAGTCAGCTTTATGACCAACACCAACTGGCAAGCCTATTCCGGTGAGGCCAGCCTCTCCTACT  
TCAGCCAGATGGTGGGCTGACCACCCAGAACTTCGTCTCCGAGGGACGGGCGCCGCGCTCGCCATTGC  
CCTGTTCCGCGGCATCGCCCGCCAGCAGACCATCAACCTTGCCAACTTCTGGCAGGATCTGGTGCCTTC  
TGCTCTATGTGCTGCTGCCCATCGCGCTGATCATGGCGCTGGTGTGATGGCAAGGTGTTCCGCAAA  
GCCTCTCCGCTATCTGTGTTCCACGGTGTGGAAGGTGAGGAGCAGCTGCTGCCCTCGGCCCGGCTGC  
CTCGCAGATCGCCATCAAGCAACTGGGCTCCAACGGCGGGCTTCTTCGGCATCAACTCGGCACATCCG  
TTCGAGAACCCGACCGCCTCTCCAACCTGGCTGGAGATGGTGCCTGCTCACCATCGCCCGCCCATGG  
TCTTTACTCTGGGCCGCTATGTGAAGGACATGGCCACAGCCGCGCCATTCTCGGTGCCATGACCCTCAT  
GCTGGTGTGGGGCTTTCATCTCCCTCTCCCAGGAGCTGAAACCGGATCCCGCCTCGCCAGCTCACC  
ACTGACGCCAGCAACATGGCTGGCAACTGGGAAGGCAAGGAGAGCCGCTTCGGCCTGTGCTCTCCAGCA  
TCTGGGAAGTGGCGACCACAGCCGCTCCAACGGAGCCGTC AACGCCATGCACGACAGCTTTACTCCGCT  
CGGTGGCATGGTGGGCATGATCAACATGCTGCTGGGTGAGGTCATCTTCGGCGGGGTCCGGTCCGGTATC  
TACGGCATGATGCTGTTTCGTGCTGCTGACCGTGTTCGTGCGGCCATGATGGTGGGTCGCACCCCGACCT  
ATCTGGGCAAACGCCTCGGTATCACCGAGATGAAGTGGGTGGTGCACAGCATGCTGGTGTGATGCCGGTGGG  
GGTTTTGGTGTGATCGGAGGTGTCACCCTGTTGATGCCAGATGCCAGCACCATCATCGGCCATGATGGCCCC  
CACGGTCTGTACGCCTCATCTATGCCTATGCCTCGGCTGCCGGCAACAACGGCTCCGCCCTCGCCGGTT  
TTGCCGCGGTGACAACACTGGCAGTGCATCGCCATCGGTCTGGCCATGCTGCTCGGCCGCTCGGCTACAT  
CATTCGCGTACTGGCACTCGCCGTCAGCTGGCCCGTCCGCCCCGTGAGGAGACGAGCGAAGGGGACTTC  
CCCATCAGTGGCCCGCTGTTTCGTTACCCTGCTGATCATCACCGTCTGCTAATCGGTGGCCTCTCCTTCC  
TGCCGGTGTGGCGCTGGGTCCGGTGGCCGAACATCTTAGCCTGATCGGAGGGGCATTTCTGATGAACCTG  
ACCCTGTGATCACCATCCGGATGCCAATGGCCAACTATCTGATGCAGGGAGCTTTCCAATGAGCAAGTC  
CACTGCAATGAGCACCGACACCATGTTGGTGAAGGGCAAAAAACAGAAATCACAGATCATCCAGGCAATG  
GTTGAGGCCCTTTATCGCTTCAATCCAAGGCCTGTTTGGCAGCCCCATCCTGTTACCCTCTGGCTGG  
CCGCAGTCATGGCGACGGTGGAGTCCCTGCTGGGGCAGCCGCTCTCCGGCGTCGCCCTTCGCTGGCCTG  
GCAGTTGACCGCCTGGCTCTGGCTGACCCCTCTGGTTTGCCAACTTCGCGGAAACCTGGCCGAGGGGCGC  
GGCAAGGCTCGCGCCGACAGCCTGAAAGCGGGCATGAGCCAGCTCAAGGCCCGCCGGGTGGCTAACGCAA  
AAGATGGTCAGGGCGAATGGGTACCCGCCACCAGCCTGATGAAGGGGGACCTGGTGTGGTACGCAGCGG  
CGAGATGATCCCGGCCGACGGCGAAGTGATCGCCGGCATCGCCTCGGTCAACGAGGCGGCCATCACCGGT  
GAATCCGCCCCCGTCAATCCGCGAGTCGGGTACCGACCGCAGCGGCGTGACCGGCAACACAACCGTGGTCT  
CCGACGAGATCTGGGTGCGCGTCAGCAACAATCCGGGCGAGAGCACGCTGGATCGGATGATCGCACTGGT  
GGAAGGGGCCAAGCGCCAGAAGACCCCAACGAGATGGCGCTCGACGCCCTGCTGGTGGGCTGACCCCTG  
ATCTTCCTGTTGGTGGTTCGCGACCCCTGCCCTGGTTCCCTCGACTACAACGGCACTCAGGTACCGCGTCTCT  
ACCTGATCGCTCTCTTTATCACTCTGATCCCGACCACCATCGCGCGCTGCTCTCCGCCATCGGCATTTGC  
CGGTATGGATCGATTGGTGAAGCTGAACGTACATCGCAAGTCTGGCCGTGCCGTGCAAGCGGCCGTGAT  
GTGCGCACCCCTGCTGCTGGACAAGACCGGCACCATCACCTTCGGTAACCGGATGGCGGATGAGCTGATCC  
CGGCACCGGGTGTGACCCCGCCCTGCTGGCACAAGCGGCCATGCTGGCCTCGCTGGGTGACAACACCC  
GGAGGGCAAATCCATCCTGACTCTGGCCAGCAAGAGCATGGCCAAAGCCGAGTCAGCTGGAGAGCGACAAG  
GTGATCCCCTTACGCGCCGAAACCCGGCTGAGCGGACTGGATCGCAACGGTCAATATCGCAAGGGTG  
CGGTGGATGCCGTGTTGAACTACCTCAGCCTCGACCGCAAGGCGGTGCCTGAGCTGGTGTCAAGTCAGT  
CGACAGCATCGCCCGTCAGGGTGGGACTCCGCTGCTGGTCTGCACTCAGGAGAACTGCTGGGGGTGGTCT  
TACCTCAAGGACATCATCAAGCCCGGTATCAAGGCTCGCTTCCAGATCCTGCGCCACATGGGGATCCGTA  
CCGTGATGATCACCGGTGACAACCCGAAAACCGCCGCCATCGCCGCCGAAGCCGGGGTGGATGACTT  
CATCGCCGAAGCGACGCCGGAGAAGAAGCTGGCCTATATCCGTCAGGAGCAGGCCGATGGTCTGCTGGTCT  
GCCATGTGCGGTGACGGCGCCAACGACGCACCGCGCTGGCGCAGGCTGACGTGGGGTGGCCATGAACG  
AGGGCACCCAGGCCGCAAGGAGGCGGGCAACCTGGTGGATCTCGACTCAAACCCCAAACTGCTGGA  
TGTGGTGTGGTTCGGCAAACAGCTGCTGGTGAACCGTGGCGCCCTGACCACCTTCTCCATCGCCAACGAC  
GTGGCAAAGTACTTCGCCATCCTGCCAGCCCTGTTTCATCGCCGCTACCCGCAACTGGGGGCACTGAACC  
TGATGCAGCTGGGCAGCCCGCAGAGCGCCATCCTGTGCGCCATCATCTTCAACGCCCTGATCATTTGTGGC  
GCTGGTGGCGCTGGCACTGCGCGGTGTGACCTGAAAGGCTCGGCCGCCAGCCTGCTGCGCCGCAACCTG  
CTGATCTACGGTGTGGTGGCCTGCTGGTGCCTTTATCGGCATCAAGCTGATCGATCTGGTCAATTACCG

GCCTGGGTCTGGTGTAAACGGCATAACCGGGGTGCGGGTCAGCCCGCATCCACACAACGAATTCGGAGCAT  
ATCCATCATGATCGCAATCAGAACCCTGCTGACCCTGACCCTGTTGCTGGGAGTGGGTTATCCGCTGGCC  
GTCACCCGGACTGGCCCAGCTGCTCTTCCCTGGCAGGCCAACGGCAGCCAGCTGACCACAGCAAGCAGC  
AACTCATCGGCAGCGCCCTGCTGGGACAGAAATTCGAGCGGGCTGACTACTTCCATCCCCGCCCTCAGC  
CAGCGATTTCAACACCATTGGCGGCAGCGCCAGCAATCTGGGGATGAGCTCACCCTGCGGGCAGAGTTT  
GCCGAACAGGCAGCCAAGGCACAGCCGGGAACCAGCTCCCCCGCCATGCTGACCCGCTCCGCTCCGGCC  
TCGATCCCCACCTGCCGCTGGATGCGGTGCTGGCTCAGGTCGACCCTGCGCCAAAGGACGTGGACTGGA  
TCCCCGCCAACTGACGGAGCAGGTCAAGTCGGCCACACAAGCTGGTATCCTTGGCCCGCAGGTGGTCAAC  
ATTCTCCAGCTGAATCTGCAACTGGATCATAAAAAAGGGCGCTGATGGCGCCATTCGCGTTTGGTGTATG  
ACCTCGATTTTCGCAACGGGCGGTGGCTCGATAGGGATAACAATGGCTGATGTAGCAAGCGCTGACGCC  
CTGCTGGCGAGTCTGATGCAGGAGCATGGGGATGCGTGATGAGGTAAGGGCCGACGCCCTGCTGGCGAGC  
CTGGAACAGGAGCACAAGGGCAAGCTGAAGGTGTTCTCGGCGCCGCTCCCCGGCTCGGCAAGACCTACG  
CCATGTTGCAGGCGGTGCGGGAACAGGCCAAGGAGGGAGTCGACATCTGATCGGCGTGGTGGAGACCCA  
CGGCCGTCAGGAGACGCTGGCCCTGCTCGACAAGCTCGCCATCATGCCGCGCAAGATCCACATGCACCGC  
CAGCAGCGACTGGAGGAGATGGATCTCGACGGCTGCTCGCCCGCAAACCGGCCATCGCCGTGGTGGACG  
AGCTGGCCACAGCAACGCCCCGGCAGCCGCACGAGAAGCGCTGGCAGGATGTGGAGGAGCTGCTCAA  
CGCCGGGATCGACGTCTACACCACCTCAACGTGCAGCATCTGGAGAGTCTCAACGATCTGGTGTGGCAG  
CTGACCCGGGTGAGGTGAAAGAGACCCTGCCGATCAGGTGCTGCTGGAAGCCGACAGTCTGGTGTGTA  
TCGACCTGCCCCCAAGGAGCTGCTCGGCCGCTCAAGGAGGGCAAGGTCTATGTGCCCATCAGGCCAA  
GGCTGCCCTGCAATCCTTCTTCTCCCTCAACAACCTCACCCTGCGGAACTGGCGATGCAGACCGCC  
GCCAGCCATGTGGAGGGCGATCTGCAACTGCAGTGGCAGGCAGCAGGCAAGAGCACCTTGGCGTGGCGG  
GCAAGCTGATGGTTTGCCTCGGTGACCTGCACGGCTCGGCGCTGGTGGCTACGGCCACCGCTTTGCCCA  
GCGCCGTCAGCTCCCGTGGCTGGTGGTGCATGTGACAGCAATGGCCGCGCTCTGCCGATGTGGAGCAG  
GCGCTGGCGCTCGCCTCCACCTCGGTGCCAAGGTGCTGACGCTATCCAGCCGGCGGTGCGCAACACCC  
TGCTGGAGACCGCCGAACAGCAGCAGGTCTCCAGCTGCTGCTCGGCAAAACCCACAAGGCACCGTGGCG  
CCGCTCGCTGGTGAACACCTGCTCAAGCAGGCGCAGGGGCTCGAAATCACGCTGGTGCATACCGAGAAG  
CAGAAGCCGAAGTGGGAATGCGCGTCCCGACCCGAAGGATATTCACCACAGCCTGCTGGCGGTGACCA  
TCATGGGGATCAGCTCGGCCGCGCTGGGGGCTCCTACTGGCTGCCACCCGACGCTTGGCGCTCAT  
CTTTGTACTGGGGGTGCTGGCGACTGCCCTCACCACCTCTGCTGGTGGCCGACACTGGCGCGGTGCTG  
GGCTTTATCGCCACAATCTGCTGTTACCAGCCCTACTTCTCCCTGAGCGTCCGCAACCACAGCGATC  
TGCTCACCTGTTTGTGCTGCTTATCGTCCGATGACGGCGGGACGGCTCGCCTCCCGCCAGCGGCAACA  
GCTGATCGGTCTGCGCGAGACCCAGCAGCTGGGCAATGCCCTGCTCTCCCTCAGTCAGGGGCTGGCCACC  
GCCAGCAGCCCGAGGAGGTGCTGAGACAAGGTGCCAGGCCATTCGCTGGCGCTCGGCCAGCCGACCG  
TGGTGTGACACAAGGAGTTCAACGATCGGCTCGGCAACGAGAAGCACAGGCCCGGCCAGCCGACAAGGC  
GGCTATCGACTGGTGTCTGTCCAGAAGCAGAGCGCCGGGGCCACACCGCCACCTCAATGCCGCGGAG  
GCCCAGTATCATCATCTCAGCGACGATCTGGTGTGCGCATAAACAATGGCCAATCCGCTCTCTCTCTG  
CCGAGCATCAGCTGCAGGCGCTGCTCACCAGATATTCGCGCGCGCTGGCGCGGATCGACCTCAACGAGCG  
GCTGGCCGACAGCCAGCTACAGGCGGAGACCGACCGGATGCGCGCGGCCCTGCTCTCCTCGGTCTCCAC  
GATTTGAAGACGCGCTGGCCACCATCATGGGGGCTGGCAGCACCTGCTGGAATATGGTGACCGGATCC  
CCGCCGAAGACCGCGACGAACTGCTCCACTCGGTGCAGGAGGAGGCGCGCCGCTGCACAGCTATGTGCA  
GAATCTGCTGGATATGACCCGATCGGATCCCCGACTTCCAGCTGAAACGGGACTGGGTGATCTGGCG  
GATCTGGTGGAGAGCGCCGCAAGCGGCTCGACTCCTCCTGGCGCCAGCACAAAGCTGCTGGTCCATTTCC  
ATCAGCATGTGCCCCAGCTCTATGTCCATGGTGCCTGATCGAGCAGGTGCTGGTCAATATCCTCGACAA  
CGCCTCCCGCTACTCACCGGCAGGCACACCCATCGAGTTCAAGGTGATGGTGGCCGAACCCGACCTCATC  
ATCGACATCATCGATATCGGGGTGCGGTATCGCCGAGTCGGATCGGGAGAAGATCTTCAACCTCTTCTACA  
CCCATCCGGTTGGCGATTGCGGTAGCCGTGGCAGCCGGCTTGGCCTCGCCATTTCCCGCTATGATAGA  
GGCCACAGGCGGCAAGATTTGGGCCTTCTCCGGCCCAATGGCAACGGCACCTGCATGCGCATCTCCCTG  
CCGCTCGCACTCAATTCACCGGAGGTTTTGATGGCGCACATTTGGTGCATAGATGATGAAGCGGCGATCCG  
TCGCTTTCTGCGGATCAGCCTGATTGCCGAGGGCCATCAGGTGAGTGAGGCGGTGGGGGTCAATGAAGGG  
CTGGAGCAGTATCGCCACCTCAACCCGATCTGGTGTGCTCGATCTCGGCCCTGCTGACGGCGATGGCA  
TTCAGGTGTTGACGGCCATTCGCGAACACCACCCCAACCCGGTGTGGTGTGCTCGGCCCGTATTCCGA  
GCAGGAGAAGGTGCGGCTGCTCGATGCCGCGCAACGACTACATGAGCAAGCCGTTCCGGCATCGGCGAG  
ATGATGGCCCGCATCCGTGTGCTCTTGCGCCAGCGGGCTGGCGTCAGCAGCGGCGAGCGGCCACTTCC  
CCCAATGCGGCTGACGCTGGATATCAGCAGCCACAAGGTGACCATGAGAGAGGAGGATCCCCCTCTC  
CCGCAAAGAGTTCGCCCTGCTGCAGGCGCTGGTGTGCCACCCCGGCAAGCTGGTGTGATGCAGACCCAGCTG  
CTCAACGACATCTGGGGGCCGAGCCACAAGGAGGACACCCACTACCTGCGCATCGTCATCGCCAGTCTGC  
GCAAAAAGCTGGGGGATAACCCCCAGCAACCGACGCTTATCGAGACCGAATCAGGTATCGGCTACCGCTT  
TATCGGCAACTGATGTTTTACGTGGAACGACGCCACTGCAAAATCAGCGCCAATAGACCGCAGCCACTCA  
GCAACAGGCGGAGATCCTGCAATCCGGCCGCTACCGCAACCCCAAGCTGAGCAGCAGGTAGTAGCCAAG  
CCCGAACAGGGCGCCAGCGCTGCCCTGCCACCTCGGATAGGCCAGCAGCGCTGACTCAGCACATTTGGGG  
ATCGCCAGCCAAAAGCGATGACTACACCCATCATGGGCAACAGGAACCAGAGGCTGGCTGAGTCGCC

ATACCAGCAGCCCGCAACCAGCGCCAGAGCGCAAGCCAATCTGACCAGAGATGACGGCAGCCACCCCT  
CCCCAGCAGATGCTTGTGAGCAGGCTGCCGAGCAGAGTCGCCAGCGCCAGCAAGATCCCCGAATAGCCA  
AACTCGCCGGTGTCAATCCCAATCCGGCAAACAGGAAGGGGGCCAGACTGTAGTAGCCAAACAGCATAG  
TGTTGAACAGGGCGACCAGCATGGCACTGCGCCAGAGTCCGCCATCCTTCATCATCCGACACGCCAGCGG  
CCAGAGCGCGACTCGCTGGCTGGTGGCCGGACGGGTTTTCCGGCAACTGCCAGCAGGTCACCAGCAGCAAA  
CCTACCGCCAGGACCAGCAGACCGCTGAACTCCGAGATAGCCGAACCCGCTCGCCAGCTGGCCACCAC  
TGAGCAGCCCCAGCACTGGGCTCAGTGAGAGCGCAATGCCCATCACCGAGAAGACCCGCGCCAGATCGCT  
ACCCTGATAGCTGTGCGCAGCATGGTCTGGGTCAACACAGAACCACGGCGGCCGCAAAAAGCCGAGATA  
ACCCGGGCCACAAGCAGGGTTTTCAAATGATTAGCCAGCCGCGCCAGCAGGGTGCCGACACCATAGGTGA  
GCAGACCCGCCAGCATGGCGGGACGCCCAATCAGATCGCAGAGCCGCCCCAGCAGACCACGCCATAC  
CGCAAACCCAGAAAATAGACCCAGGGTCTGGGATGCCTGCCCTTCGCTCACCCGAAAATGGCTGGCG  
ATATGGGTGAGGACCGGGCTGTAGATGGTCTCCACAATTTGGGGAACATCATCAATCCACCACCAGCC  
AGAGCGGTGGCAACTTGTGTTTCATGACAAACCTCCTTCACAAGAGGTCGCCATTCATAGAGAGATGCCGA  
TTGTCTGATTACAATAAGCAGGACTATAAACATCAAAAAATCGGACATATGGCCTTTATTTCTCCCGATCA  
CCTTTTGAGCCCGACCAGCTGACGGGCAGCGTGATCGGCATTGCCCTCCGCGCTCGGTTGGCAGACTCG  
GGCCTGCATCAACATCAACGCCATCAGCTGCTGTTCCGCCAATCCGGCTGCATGACCATGGAGCTGGAAG  
GTCGGGTCTGCCTGCTGCCGCCACCCGTGCCGCTGGCTGCCTGCGGGCACTGCCACCAGGTTATGAT  
GCGTGGTGTGGTGGCCTACCGCTCACTCTACTTCCAGCCGACCCAGAGTTGCCCGGCACGGTGGAGGTG  
CTGGCGGTCAATCCGCTGCTGCACGAACTGATCGAGCGGATGGCGCTCTGGCCGTGGGACAAACCGCAAG  
AGCAGCAGCAACGGACGGTGGCACTGTTTATGGAGGAGTTGGGGCAGGCGCCACGGGAGTCGTGGCAGTT  
GCCGCTACCGACCGATCCAGACTGGGTGACTGGCTACAGCAGTTGAAACGGGGAGATGCCCTGCCCGAT  
CGGCTCAACCGGCTGGCCGAACGGGTGGGTGCCAGTGACAAGACCATTGGCCGCATCTTCATGCGGGAGA  
CCGGCATGAGCTATCAGGCGTGGCGTCAGCAGTGGCGGCTGTTGCGCGCCATGGAGCTGCTGGCCGAAAG  
CGAACCCATCAGCCGGATTGCCGCTGCGCTGGAGTTCTCCAGCGACAGCGCCTTCATCAGCTTCTTCAA  
CAACATACGGGACAGACCCCCCTGCGCTACCTCAACTCTCGGGGTGAGTCGCCACAGCCTGACTCGCCTC  
CACCACCAGGGTATCCAGCGCCAGCGGCTTGAGATTGTGCAACGCATCCTGCACCACGGCATGAGATGCC  
TGTTGCAACTCGCTCTGCACATCTTGCTCCAGTTGGGCACTCTCCAGCTCGGGCCGCGGTTTTCGTTGG  
CCATCAGCTCAGGCTCAGGCACTCACAATCAGGTAGCGATCAGGCTTTTCATCTGTTTGGTTCCGGT  
ATGGTTGAGATGACCAGATAGCTATTTCCAATAGTTGTGCCAATCCTCACGCAATTCATAACATTCAGATT  
TTGTTTTAAATTAACATATATATCGATACCAAATGAGTCGCAAAATGCATCCCGCTCGGTCATTTTTTAAAC  
CAACAGTTGGTGCTTTTTAACCACGCTTGATTTTTTGACCATGTTCCACGTGGAACGTCCCATCTTTTTTGA  
TCGACACCCGCTTTTTAAACTGAGCTATGGTGCTACATCCCTGTAACCTCAAATCTGGATCTGTCACTGAAT  
GGAATTTTTCTTGTTCGGCGAGAAGTTCACTCGCCACGCGGTAATTACCCAACTCATGGATGACCTCAAT  
CAGGGGCTGACCAATCCGGACGCCATCATGCTGGGTGGCGCAATCCGGCCCCATCCCCGCTATGCTGG  
AACGCTTTTAGGCGGAGGCCAAGAGCCTGCTCGACAACGGCGAGCTGGTCAAAGCGATGGCCAACCTACGA  
CGGCCACAGGGCAAAGACAGGTTACCAAAGCGCTGGCTGCCCTGCTCAGCAAGGAGTTGGGATGGGAT  
ATCTCGGCCCGCAATATCGCCCTGACCAACGGCAGTCAGAATGCCTTCTTCTACCTGTTCAACCTGCTGG  
CTGGCGAATTTGCCGATGGCCGCAAGAAGAAGGTGCTGTTCCCGCTCGCCCCGAATACATCGGCTATGC  
CGACTCAGCGCTGGCCGACGACTACTTCGTGGCCTACAAGCCACCATCGAGAAGCTGCCCGATGGCCAG  
TTCAAATACCACGTGGATTTTCGAGAGCCTGCAGGTAGGTGACGATATCGGGGTGATCTGCGTCTCCCGCC  
CGACCAACCCGACCCGGCAACGTGCTGACCGACGAAGAGATCGAACACCTCGACCAGATCGCCCCGCGACAA  
GGGAACCCCGCTGCTGATCGACAACGCCTACGGCGTTCCTTCCCGGGCATCATCTTCAGCGAAGCCAAG  
CCGTTCTGGAACGCCAACACCATCCTCTGCATGAGCCTCTCCAAGCTCGGCTTGCCGGGCACCCGCTGCG  
GCATCGTCATCGCCGACGAGAAGATCATTAGGCCATACCAACCTGAGCGGCATCATCAATCTGGCGCC  
GGCAGTCTGGGCCCCGCCATCACCATTCCGATGATCGAGAGCGGCGAGATCATCGCCCTCAGCGAAGCAG  
GTGGTGAAGCCCTTCTATCAGCAGAAGCGGAGCTGGCGGTGCAGCTGCTGCGCGAAGCGATCCCTGACC  
CGCGCTTCCATATTCACAAACCGGAAGGTGCCCTCTTCCCTCTGGCTCTGGTTTGAAGGCTTACCGATTCA  
CTGTGAGGAGCTGTACGAGCGACTGAAGGCGAAGAACCTGCTGATCGTGCCGGGTCACTACTTCTTCCCC  
GGCATCGATGACCCCGAGTGGCGCCACAGTCAGGAGTGATCCGCTCAACTACTCTCAGAGCGAGGAGC  
TGGTGGCGCGGATTCGCCATTCTGGCCGACGAGATCAACGCCCTCTACGCTGGTTAATCCAATCCGGC  
GATACAAAACAGAAAGCCCTGCAGATGCAGGCTTTATTTGTTTATCGCGATCCGGTTTTGCTTAGCCGGG  
CAGCGCCAGCTGCTCGGGTTTTGCCGATGGGGATGGCTCTGGGCTTGAGCGCTCCGGCAGCTCGCGAGCC  
AGATCGATGGTCAACAGACCATGCTCCAGCTTGGCGCCCTGCACTTCCACGTGCTGGCTCAGCTTGAAGG  
CGAGCTCGAAGTCACGCTCGGCAATTCCTGATGGAGGAACTGACGCTCACCGGCCGAGCCCTTTGCG  
CCCCTTCACTTGAAGGTGCCGTTTTCGGTCTCCAGCTCCAGCTCTTCGCGCTCGAAGCCAGCTACGGCG  
ACCGTGATGCGATAGCCATCCTGATCGCGCTTTTTCAATGTTGTACGGGGGGTAAGCAGCGGTCTTCTGAT  
CGAACAGACCTTCCAGCTCACGGGCCATCCGCTCGAAGCCGACGGCGTTGGAATAGAGATGAGAAAAATC  
GAGGTTACGCATAATCCTATCCTTCTAATAAGCAACAGGTTCAAATCTCCACAGGCCCGCTCATCGGCACC  
CGGGAATTTTTAAAATTTTCAGTAAATTCAGGCTATCAGCCGTTGATCTCGATCTTGCGCGGCTTCATCGC  
CTCGGGCACTTACGCACAAGCTCGATGTGCAGCAAGCCGTTTTTCAGGTCGGCCCCCTTTCACCCGCACA  
TAGTCGGCCAGCTGGAAGCGGCGCTCGAAACCACGTTCCGGCGATCCCTGATAGAGATAGTTGCGCCCCG

TGTCGGCCTGCTTGTGGCCCTTACCGTCAACAGATTTTCTGGAAGCTCAGCTCCAGCTCTTCTGGGT  
AAAGCCCGCCACCGCCATGCTGATGCGGTAGTCGTTGTCACCCAGCTGCTCGATGTTGTAGGGGGGATAA  
CCGGCATTGCCATTGCTGGCCGAGATTTCGATGAGATTGGCCAGACGATCGAAACCGATGGCAGAACGAT  
AGAGCGGAGAAAAGTCGATAGAACGCATAGTATTACCTCTTATGAGCGATAACGGATTGTTTGGCCCTCC  
TTATGGACGGGGCCTGGTGCAAAACCTCTGTGCGAGCGTTCCGGCCTTGTACCTATATAGGGGGCTCACTT  
TTTTCTTTCAAGGGGATTTTTTCAAATTTTTTAAATGGCCGCGCCGACCTGTAGAACATCAACCTGTTGG  
CCCGATAGTGATGATAATCGACCCGTGGCCACTGATGGCAATGCTCTCCGCACCCCAATAATTGGGTGCAT  
ATACACCAGCCAACATGGAGCCATCACATGAAGATTACCCAGGTTTCGCAACGCCACCTTGCTGCTCGACT  
ATGCCGGCACCCGCTTTCTGATCGACCCCATGCTCTCGGCCAAGGGTGCCTTCCCCGGCTTTGAGGGCAC  
CGCCAACAGCCAGCTGCGCAATCCGCTGGTTCGAGCTGCCGCTACCAATCGATGAGCTGGTCGATGTGGAC  
GCCGTTATCGTACCCACGACCATCCCGACCATGGGATGACGCCCGCCAGAGCCCTGATCCCCAAGCATC  
TGCCGCTCTTGGTGCAACATCAGAAAAGATGCTGATGCCATTTCGTGCCAGTGGATTGTAGGATGTGCGCCT  
GCTGAGCGACCAGCCGAGTTTGGCCGATTAGCCTGCAGCAGACCGGTGGCCAGCACGGCAGCGACCAG  
TTGATGGCGGTAAGTGGGCGAGCGCATGGGAGAGGTGTGCGGGCTGGTCTTCTCCCACCCCGATGAACAGA  
GCCTCTATCTGGCCGGTGATAACCATCTGGCATCCCACGGTTCGAGCAAGCCCTGCAACAGCATCAACCCGA  
GGTCATCATCCTCAACTGCGGGCATGCACAGGTGCCCGGACTCGGTTCCATCATCATGGGCAAGGAGGAT  
GTCGCGCCGCTTTATCAGGCCGACCCGAAGCCACGCTGATCGCCAGTCATATGGAGGCGGTCAACCACG  
CCGTGCTGTACGCCAGGAGCTGCGCGACTATCTGGTGGACCGGGGCATGATGGATCGGGTACGGGTGCC  
GGAAGATGGCGAGGCGATATCGCTGTGATCCGCGAGAAGGGCCATGCCAGACATGGCCCTTCGGCTTTAC  
TGCCGAACGCTTATGATGAGAGGTCTGCGCGCAGAGAGGAGTCAACATAATGTCCACCCCGATCGTTGCC  
GTGGTGACCTTCGATTACTTCAGCCCTTTTCACTGCGCCGTCCCTGCTCATCTTCGGCGACATCCTGC  
CGGGCCAGCCACTGTTTCGAGCTCAAGATCTGCTGCGGTGATGGCAACCCTCATTCACGCTCGGCGCAAGG  
CTTACCATTCAGGCGCCCATGGGCTGGAGGTGCTGGCCGAGGCGGAGATCATCGTCATTCCCTTCTGG  
CACGACCCGGCAGCACGACCACCAGCACAGCTGCTCGATGCCCTGATTCGCCGCGAGAGCCAGAGGTGCC  
GACTGGTGGGCTCTGTCTCGGCACCTATGTGCTCGCTACGCCGGGTGCTCAATGGTCGCAAGGCATC  
GACCCACTGGGAGTATGAGCAGGATTTCTGCCACCGCTTTCCCTGCGTGCAGCTCGATAACCAACGCCCTC  
TATGTGGATGACGAAGGGCTGGTCACTCGGCAGGACCGCTGCCGGGCTGGACTGCTGCCTCTATCTGG  
TGCCGAGTACCACGGTCAACCATCGCCAAGGATGGCTGGCGGGCGGCTGGTGTATCCCGCCCAACGGGA  
AGGGGGTCAAGCCGATTTATCGAGCAGCCGATGCCCGCTCCACCCGCGATGTCCGGATGAACAGTTG  
CTCGACCATCTGCGTGCCCATCTGGCCGCCCCCATAACCTGGATTCTCTGGCAGATCTCACCTGATGA  
GTCGACGCACCTTTACCCGCGCTTTTCATCAGGCTACCGGCCCTCTCGGTGGGTGAATGGCTGCTGGCGGA  
GCGGCTCAGGCGCAGTCAGGAGCTGCTGGAGGTAAGCGGCCATTCCATCGATCGCATCGCCGAGCTGGTC  
GGCTTCAAAGTGCACCTCTCTGCGCAATCACTTCCGCTCCCGCTTTACCATCTCCCCAGCGAGTGGC  
GACGATCTTTTTCGTGGCAACAATGTCTGATGACATCCTCTATAACCCGCTCACTCCGCTATGGCAGGCTAA  
CCAGAAATCCCGAGGAGTCATCCCATGTCCCGTTCGCAACGCCTGCTGGCCCTGCTCCAGCTGCTGCGCG  
GCCACCGTTACGCCATCACTGGCGCGGAACTGGCCAGCCAGCTAGGCATCAGCTGCGCACCCCTCTATCG  
GGATATCGCCACCCTGCAGGCACAAGGAGCCCATATCGAGGGCGAATCGGGGATCGGCTATGTGTTGCGT  
CCTGGCTTCATGCTGCCACCACTGATGTTTCAGTGAAGAGGAGCTGGATGCGCTGGTGTGTTGCGGTT  
GGGTGCTGCGCCACGGTGACGGAGCCTTGAGTGCATCGGCCAGTAGTGCGCTGGCCAAGATAGAAGCCGT  
GCTGCCCCGAAACTATCGCCAGCAGCTCCAGAGCAATGCCCTGCTGATCGGCACCTCCCGCAGCGACCAG  
CTCACCGATGAAGCCCCGCTGCGCTGCGCCATCCGCCAGCAACGCAAGGTGACCTGAGTTATAGTGACC  
TCAAAGATGAGGCCTCTGAGCGTACCGTCTGGCCCTTTGCCCTCGGCTACTTCGAACAGGTGCGGGTACT  
GGTAGCCTGGTGCAGACTGCGTCAGGGCTTTTCGCCACTTTTCGGGTAGATCGCATCACCCGGATGCAACCG  
CAAGATTGCCACTATCCAAAAGCCGGGAGAGCCTGCTGAAGGAGTGGCGCACCACCAGCAGATCCCGC  
AGCCGAAATTCATTGCTGACAGAAACTGACAGCAGGTAGCGACATCCTGAGTGGGTGCGCGCAGATGTGC  
TATTTTCATCTGTTAGGTCATATACATCGAAACGAGGTTGCTCAAAAACATGAACAATAAAAGTGGTTATA  
TCGGCGTCAACGGTGGTGGTGTATTACGAACTTTTCGGGTAATCCTGATGGTGGAGCCTTTATTGATGCT  
TCATGGTGGCCTTGGTTCCCTTAATGAACTAATAACCATTCAAAAGATATGTTGCCATGGATTATCAGTTG  
ATCAGTGTAGATTTCCGTGGCCATGGAAAATCCCCTCTAGGTAGTAAGCCACTGAGTTACTTGCAGTATC  
AGCAAGATATCCAAACTCCTCGACTATCTGGGCGTTGATAAAATTTCAATATTTGGCTTTAGTGATGG  
TGGTATCGTAGGTTATCGACTAGCCGTACAAGAACCCGATAGCGTTTCTTGTGTTGGTTACACTTGGTGCA  
ACGTGGCGATTAGAGCCTGATGATCCATCACTCGGGTGTAAAGCGGCTTAACAGCAGACTTTTGGATTT  
CAAAGTTTGGCGATGATGTGCGCTATACGAGGCGTCAAATCCCAGCCTGATTTCCAAAACCTGGTCGA  
TGCTGTAAAGGCTGTTTGGCTTGATACAACACCATCTGGCTACCCGAGTAACCTAGTTGAAAAAATTCGT  
TGTCCGACATTAATCATGAGGGGTGATAACGATGTCATATTTTCGCTTGAGGAGTCTGTGGTTTTAAAG  
CAAAAATCGCAGATTCCAGTTTTGCCAATATTCCACTCGCGGCTCACTCAGCTCATCAAGAATCGCCGGA  
ACTGGTAGGTAATAATGCTTCAACAGTTTCATGTACAGCATAAAAACTATTAACCTTCCATAGCACACTG  
CATATAAAGAATCAGCTCTGTGCAAGTGAACCTCATCATCAAAATGCCGAACATCAAATTCGGCATTTTTCT  
TTATCTCAGCCCGATCGCCCATCTTTCAACTGCCAGTGTTCACGTGGAACGTCGGGGCGGCATCCGGCT  
GGGCGTCTGTGCTATCATCCCCGCTCCTTACTCTCTGGAGAAAACATGACCACTCGACATAATCCGCTC  
GAACTGTACCAGCCGACAACAGCTCCCCCGATAAACTGAGCGAACGACAGCTGATGCTATTTGCCCTAC

TACAACAGCGTGAGCAGGAGTTTGGCTTCAACCAGAACGTAATCGTCCACTACCCGGAAGCGAGCTTTCT  
CACCGCTCCGCTCGATTATCTGGATCAGCTGATCCTGGAACAGCAGCAACAGGGTCACCTCATCAATGAG  
GTGGTGATACTCACCACCTTACCCTCAGGTGCACACCCCACTGGTCGAGCGTGACTATCTGCATGAAGCGG  
TTCATATGCCCGCAGGTCCGGATTACACGGCAATCTTCAGATTGGATTATGGTGCTAATCCGGCAGGCAA  
AACCTCTATATCGAGGCCGTCAATGAGCAGGATCCCAAAATCCGGCCGACCTTTGTCTTGATGCTGCAT  
GATGAGAATGGTGAAGTGCAGGGAGGTATGTCCGGGTCTATCTACTCCACAGACAAATCGGCGATACGCCT  
ATATCGGCACTGTGGTGGTGCAACCTGGGCAACCCGCAAGAACCGGCACCCCTGCTCGCCAATACCGTGCT  
GGAGTACCTGACGCAGCAAGGGGTTTACGAGGTCAATCTCGGTACCCAGACCCGCGAGCCCTTCTATGCC  
AACTGGGCTTCCAGACCATTACCACATAGTGCCAGCGTTGCGTCACCGCACAGCCAGCGATGGCGCTG  
TGATACCCCAACAACCTGGTCAATCAGCAAAAATGCTCTGATAAAGCAGACTACAAATGTAAAAAAGCCG  
CTCTTGTGAGCGGCTTTTATTGCAATCAGCGAGTCTGATTAACGTCGAGGTTGGCCACGCGCAGGGCG  
TTGGTCTCGATAAAGTCACGACGGGGCTCAACGGCATCACCCATCAGGGTGGAGAAGAGCTGGTCAGCAC  
CGACGGCATCGTCGATGGTGACGCGCAGCATGCGACGGGCTTCCGGATCCATGGTGGTTTCCCACAGCTG  
GTCCGGTTTCTATCTCACCCAGCCCTTTATAGCGCTGGATGTAGATGCCGCGTTTGCCTTCGCCCATCAAC  
CACTCGACGGCTTCCACAAAGTTGGCAACCGGCTTACCTTCTCGCCACGCTTGATGAAACCACCTTCCCT  
CGATCAGGTTGGCGATCTCCTTGGCCAGCGAAACCAGCTGACGGTACTCACCGGACTGCAGGAAGTCGTA  
GCTGAGCGGATATTCGCGGTCAACACCGTGCTGACGAACCACGGCGTGCAGAACGTACAGGCTGCGCTCT  
TCATCACGACGAACCTGGATCTGGTACTGGATAACCGTGGTTGCTCTCGTTGAGCACGGCTTCCATACCT  
GACACCAGGCCAGCAGATCACTCTCGCTGTTGACGACGCTTTCGTTCAACTCCGGCTGATAGATCAGCTG  
GGTCAGTACCGCTTCCGGCGCAGCAGCAGACATGCGGGTGCATCAGGTGAGTCACCGAGCGGTGCTGGTTG  
ACCAGACGCTCCAACGCTCGCCACCGATAGCCGGGGCAGACTCGTTGACGTGCAGAGTGGCACCATCCA  
GCGCCATGGCGGTCTGGTACTGCAGCAGCGCTTTCGCTTTTCAGATACTGCTCCTGCTTGCCTTCTT  
CACTTTGTAGAGCGGCGGCTGGGCGATGTAGACGTAGCCGCTTCGATGATTTCCGGCATCTGACGATAG  
AAGAAGGTCAGCAGCAGGGTTCCGGATGTGTGCACCATCGACGTCCGCATCGGTGCATGATGATGTTGT  
GATAACGCAGCTTGTCCGGGTTGACTCGTCGCGACCGATAACCGCAACCCAGTGCAGGTGATCAGGGTGCC  
CACCTCTTGCAGGAGATCATCTTGTGAAACGGGCTTCTCCACGTTCAAGATCTTGCCTTGCAGCGGC  
AGGATGGCCTGGTCTTACGGTTGCGACCTGCTTGGCGGAACCGCCAGCAGAGTCCCCTTCCACTATGT  
AGAGTTCGAAAGAGCCGGGCTTTTTCCTGACAGCTCAGCCAGCTTGCAGGGCAGACCCGCGATACCCAG  
CGCGCTTTCGCGGAGTCACTTTCGCGAGCTTTCGCGGCGCTTTCACGGGCAGCGGGCCGATCATGATC  
TTGTTGACCACGATCTTGGCATCGCCGGGTTTCCAGCAGGAAGTCGGCCAGCTTCTCACCCATCGCCT  
GTTCAACGGCGGTCTTCACTTCCGAAAGAGACCAGCTTGTCTTGGTCTGGGAGGAGAAGTGGGATCCGG  
CACCTTGACAGAGATAACGGCAATCAGACCTTACCGCACGTGCTCGCCACTGGCGGCAGACTTGGCCTTC  
TTGCTGTAGTCTCTTTGTCCATATAGGAGTTCAGAGTACGGGTGACGCGGTACGGAAGCCAACGAGGT  
GAGTACCACCATCCCGCTGCGGGATGTTGTTGGTGAAGCAGTAGACCCCTTCTGATAGGCGTCTGTTCCA  
CTGCATCGCCACTTCAACGCCGATAACCATCCTGCTCGGTGGTGAATGGAACACCTTCCGGTGGATCCGG  
GTCTTGTCTGGTTCAGGTATTCAACGAACGCTTGTGATGCCACCTCGTAGCAGAAATGCGCTCGCGGC  
CATCACGCTCGTCTTGCAGACGGATGGAGACACCGGAGTTGAGGAAGGAGAGCTCGCGCAGGCGCTTGGC  
CAGGATCTCGTAGTGGAACAGGGTATCGCTGAAAATGGCAGGGCTCGGCCAGAAGCGAACTTCCGTACCG  
GTGCCGGTGTGTCGCAATCTGCTTGAAGCGGCGCTGCGGCTCACCCAGATGATAGGTCTGCTCGTAGA  
CGTGGCCGTTACGACGAATGGTCAGCAACAGCTTGTGAGAGAGGGCGTTAACTACCGAGACACCCACGCC  
GTGCAGGCCGCGGATAACCTTGTAGGAGTTGTCAAACTTACCGCCAGCGTGCAGCACGGTCATGATG  
ACCTCTGCGGCGGAGCGGCCCTCTCCTCGTGCATGTCTACCGGGATAACCCGGCCATTGTACGCACAG  
AGACAGAACCCTCGAATGGATCTTGACCAGAATATCGGAGCAGTAGCCAGCGAGCGCTCGTCAATGGA  
GTTATCGACGACCTCGAACACCATGTGGTGCAGACCCGAGCCATCATCCGTATCGCCGATATACATCCCC  
GGGCGCTTGCAGACCGCATCCAGGCCCTTACGACCTTGTATATTCGAGGAGTCGTAAGTATTTTCACTCA  
TAGCTTACTCTGCTTCTTAACGTTTCGGAGATTTTACCCTGTTCCACGTGGAACAACCTGACAGTCA  
TTCGCATCCATCATGTCTGCGAGCTGACCGGTGTCGATGGCGGTGATAAACACCTGGGACGCACACTGCT  
TCAGCCTTGCAGCCAGCAAGCGGCGCTTGTGACATCCAGTTCAGAGGCAAAATCGTCAATTAATAAAT  
ACAGCCACGGCTGCTATGTTGATTCAAAATAGAGCCCTTGGGCCAATCGCATGGCGCAGACCAGCAACTTC  
AGCTGACCCCGGGACAAAATATCTGAGCGGGCACCCCGTTGCGCTTGAAGCGCACATCGGCTTTTTGTG  
GACCGACACCGGTATAGCCAGCGCCGATCCCGCTCAAAACCCGCTCCAGCAGATCGCCGAGGGGAGT  
ATCTTTCTCCAGCCCCGGTAAAAGCCGAGACTGATATCGAATTCGGGCAGAAAATCCGCCGTCATCTCC  
TTGATCAGGGGCGTAATGGCCTGACAATAACTGGCGGAAACTCGGCCAGCTCACACCAGCCGTACCA  
ACTCCTGATCCCAGAACGCCAGCTGGCGGTACTGGGTGCTCTGGCGCAGCAGCGCATGCGCTGTTTCAG  
CAGCCGCGCACTCGCCCCACAGGGCAAAGAAGTTCGGCTCCTGATGGAAGACCCCCAATCGAGCCAG  
GCGCGGCGAGCCTGAGGCCCGCCAGTCAAGCAGGTTGAAGCCATCGGGATGGATCAACTGCACCGGCAACA  
GCTCCGCCAAATCAGCCAGCCGCTGGGCTGCGCCCCGGCAATCTTGAAGTGGGTCTCGCCACTCTTGTCT  
TTTGGCAAGACCGATAGGTACCTGACGCCCTCCAGCTCGCACTGGGCAACAGGGTAAATGCCCTCTCC  
CCCTGGCGGATAACCCGCCCGGTCAAATGAGTGCAGAAAGGAGCGCCCCAGACCAAGGTAGTGAATGGCTT  
CCAGCACGCTGGTCTTGCCTGCCATTGACCCGACCAGAATGTTGAGGCCGGGCGACAGCTTGAAGT  
GGCTTGTGATATTGCGAAAGTGCCTGAGCTGGAGTTTGAACAGGGACACACTAGATCCGCATCGGCA

TCACCACGTA CTGAGCATCTGATGTTCAAAAATCCTCAATAATGGCACTGCTGATGGAATCGCTCAGGCT  
AATCCGAATTTGGTCACATTTTAACTGATTTCAGCACGTCCAGCACATAAGAGACGTTAAAGCCGATCTCC  
ATCTCGCCAGCGGCATATTGTACGTCAAGCAGCTCTTCGGCTTCTTCTGTTCCGGGTTGTTGGCGGTGA  
TGCGCAGCAGGTTTTCTGCAGATTGAGACGCACCCACGGAATTTCTCGTTGGAGAGGATGGCGGCGCG  
GGCAAACGCCTGACGCAGATCTCACGGCCGGCGATGAGCGCCTTGTCGCTGTTGCGCGGAATGACGCGG  
CGCCAGTCCGGGAAGCGGCCATCCACCAGCTTGGAGGTGAAGATGAAGCCGTCCAGCGCAGCACGCAGGT  
TGCTGCGACCGATCTGCAGACGTACCGGCTTGTCTTCCGCTTCCAGCAGACGCACCAGCTCCAGTACCC  
TTTACGCGGCAGGATAACCTGATGATCGGGCAGCGATTCCTCAACTACCTCGCGGCGGCAGGTAGCCAGA  
CGGTGACCGTTCGGTCGCCACGGTACGCAGACCGTGACCTTCGCTCTCGAACAGCATGCCGTTACAGGTAGT  
AACGCACGTCTGGCTGGCCATGGAGA ACTGGGTGCGATCGATCAGCTTCTTACAGTCCAGTGGCTGAT  
ATCGAACTCGAGCAGGATTCCCAATCCTCGATGTTTCGATACTCGGTTCGCGCCGCGGTCGAGAGGTTG  
AAGCGGGAACGACCGGACCGGATGATCAGGCGCTCGCTTCGTTATTGAGACGGATCTCGGCGCCTTCCG  
GCAGACCACGGCAGATATCCAGCAGCTTGCAGCGCCGGTACTGTGGTGGCGCCATCTTCGCTGGCCCCGTT  
CAGATAGACCTGACCGATCATCTCTACTTTCGAGATCGGTACCGGTCAGTGACAGCAGACCGTTGCTGACA  
TCAAGCAGCACGTTGCCGAGGATCGGCAGGGTTCGGTTCGGCCGCCGAGGGCGCCGGACACCAGTTGCAGAG  
GACGTAACAGGGCCTCACGGCTAATTTTCGAGCTGCATCTGTGCTCTCCGTTGTGATTAGGAGGAAAAGAT  
TCGGATCAGGTTGGAATATTCGCGCTGCATCTGTCCACTCGATTCGTTATCAGGAAGAAAGGGTACGGA  
TCAGGTTGGAATAGTCTCTTGTGATGTCGACTCTCTCTCCTCAGCTGCTCGATCTTGCGGCAGGCATG  
AAGAACGGTAGTGTGGTCACGGCCACCAAAGGCATCACCTATCTCCGGCAAACGTGGTTGGTCAGCTCC  
TTGGCCAGTGCCATCGCCAACTGGCGCGGACGGGCAACGGAGCGGGAACGACGTTGGAGAGCAGATCCG  
CCAGCTTGATCTTGTAGTACTCCGCCACCGTCTTTCGGATATTGTCGATGGTGACCAGCTTCTCTGCAG  
TGCCAACAGGTCGCGCAGCGCTTCGCGCACGAAATCGATGTTGATGGCACGGCCGGTGAAGTTGGCGTTG  
GCGATCACCCGGTTGAGGGCGCCTTCCAGTTACCGGACGTTGGATCGCAGACGTTTGGCGATGAAGAAGG  
CCACTTCGTCCGGCAGATGGATCTGGTCTCATCAGCTTTGCGCATCAGGATCGCGACGCGGGTCTCCAG  
CTCCGGCGGTTTCGATCGCCACGGTTCAGGCCCCAGCCGAAGCGGGACTTGAGGGGATCCTCGACACCGTTG  
ATCTCTTCGGATAGCGATCCGAGGTGAGGATGATCTGCTGGTTACCTTCAGCAAGGCATTGAAGGTAT  
GGAAGA ACTCTCTGGGAGCGCTCCTTGTGGCGAAGAACTGGATGTCATCGATGAGCAGGGCATCGAC  
GCTGCGGTAGTAACTGAACTCTTCAATGGCGTTATTTTCAGCGCTTTACCATGTCCACTGCAACAAAC  
CGCTCGGAGTGCATATAGATGACTTTGGCATCTTTTACTCTCCTTGATGGCATTTGCCAACGGCGTCA  
GCAGGTGGGTTTTACCAGGCCGGTGGCGCCATAGAGGAACAGCGGGTTGTAAGCACCCCGGATTGTC  
CGCTACCTGGCGGGCAGCCGCACGCGCCAACTGGTTGGACTTACCCTCGACGAAATTTCTCGAAGGTATAG  
TTCACGTTGGTATTGCTCTTGTGGTTCGGCTCGGGCTTGGCTTCAGCCTTGCTTTCCAGCTCTTCTGCA  
AGTTATTACAGGCGCGGCACCCTGTACCGGCTCTGGCGACAGCAACAGGATGGGGACGATTGCCATAT  
ATCAAAACGCAGGGCGGGCCGTCGACCCCGCAGAGTTCGTTGATGATGCCGTTAACCCGGATGAGATAC  
TTGTCTCGTACCCAGTCCAGAACAAGCGATTCGGTGCATACAGGGTCAGAGTATTGCTCACTCAACTCCG  
CTTGAAGCGGCGGATCCACATGCTGAATCTGCGGAGGGCAACTCATCTTGCAGCCGGTTAAGGCACCTG  
CTGCCATAGCGAAGCAGTCACTCTAACTCCTGTCGATTGATTAACCTAAAGACCGGCTATTCTACGTTTT  
TAGCCGCGGATCTCCAGCCATCGCCCGGTGGATCCAGCAAATAAGATCCTTGACTTTCAAGGATCCAGC  
GCCTTTGGATCGGATTTTCATCCCCAAAGTTACCCACAGCTTGATCCACCGTCCGGATTGGTCGATCCCGT  
GCTTCTCTCTGTTATTTTCATATAACCAAATGTCATTTATTTTTTAAATTTTATTTCCAATAACATCAGGG  
CCAAACCAGTTATTACA ACTACAAATACAAGACATTGAGAGAGAGAAAACCCATGAAAACATCCATCAAA  
CTGATTTCCGGCGCAGCCATCTGCTCGCCACCCTGTCCGGTTCAGGCCATCGCCAGGAGACCATCAAGG  
TCGGCATGTCTGGCAAATATTTCCCGTTCACCTTCGTCAAGCAGGACAAGCTGCAAGGCTTTGAAGTGA  
TATGTGGAACAGATCGGCGAGCGTACCGGCTACAAGGTGCAATTCGTGACCGCCAGCTTCTCCGGCCTG  
TTCGGCATGCTGAAACCGCCGCATCGATAACATCTCCAACAGATAACCATCACCGACGAGCGCAAGG  
CGAAGTACGACTTCTCCAGCCTTACGTCTATGACGGCGCCAGATTGTGGTACGCAAGGGCAACAGCAT  
CATTCATGGCATCAAGGATCTGGAAGGCAAGAAGGTGGCCGTGAACCTGGGTTCCAAC TTTGAAGAGCTG  
CTGCGCAAGAATGACCCGAACAAGAAGATCGACATCCGCACCTATGACTCCGCTTCGAGCAGGATGTGCG  
CCCTGGGTCGCATCGATGCCTTCGTGATGGACCGCTTCCACC GCCAGCTGATCAAGGAGTCCAAGCT  
GCCGCTGCAACAGGCTGGCGCACCGTTCGAGACTATCGAGAACGCCCTGCCCTTCTGAAGACCCCGGAG  
AAACAGGCGCTGCTGAAGAAGGTGACGAGGCCCTGACTGCCATGCGCAAGGATGGCTCCCTGCGTCAGA  
TCTCCGAGAAATGGTTCGCTTCCGACATCACCGACAAATAAATGATGGAATTTGACCTCGAATACACGCT  
GGGGCTGTTTTCCATCCTGCTCAAATACTGGGACACAGATGGAAATGGCCCTGTGGGGATTCTGTGCTG  
GCACTCGTACTCTCGCTGGCCCTGGCGATAGTACGGGTGTTTCGCGTCCCTGCGATTCACTGGCTGGCGA  
TGCTCTATATCTCGTTCTTTTCGGGGTACACCGCTACTCGTTTCAGCTGTTCTCTGCTTACTACGGACTGCC  
GCAGCTGTTCCCAATCTTCGTGGGGATGGATGCCTTTACTGCCGCCATCGTCCGGTCTGACCTGCACCTC  
GCCGCTATATGGCCGAGTGCATCCGCGCAGCCATCCTCGGCATTCACAAAAGCCAGATGGAAGCGGCGC  
TCAGTATCGGCATGAGCCGTTATCAGGGCATGCAGCGGATCATCCTGCCGCAGGCGGCCCCGTATCGCCAC  
TCCGTGCTGATGAACTACTTCATCGACATGATCAAAAAGCACCTCGCTGGCC TTCACCTGGGAGTGGCC  
GAGATCATGGGCAAAGCGCAGATGGAAGCCTCCTCTCTTCAAGTTCTTCGAGAGCTTTATGGCGGTGG  
CGCTGATCTACTGGGTGGTGGTATCTTCTTACCCGCTTGCAGCACCTGCTGAAATTCGTCTCAACCG

TGCCTATTAAAGGAGGGCTCTCATGATCAAGCTAACCGGCTCTCCAAGGCATATCACGGCAATCAGGTA  
CTCAACGGCATCGATCTGGAGGTCAAAAAGGGGAAATTGTGTCATCATCGGCCCTCCGGCACC GGCA  
AGTCGACCCTGTTGCGCTGCCTGAACCTGCTGGAGACCCCGGATGCGGGCACCTTGCCATCGACGATCT  
CGAGCTGAATCTGGCCAAGGCCAGCGAACAGCAGGCGATCGAGCTGCGCAAACGGGCTCCTTCGTGTT  
CAGAATTACGCCCTGTTTGCCAACAAGACGGCGCTCGACAACATCGCCGAAGGGGTGATCACCGTCTGGA  
AGCAGCCAAAAGCGGAGGCCGAGCCACAGCGCTCGGCATCCTCAAGGATATAGGCCCTCGCCGACAAGCA  
GGATGCCTATCCGGCTCCCTCTCCGGCGGCCAGCAGCAGCGGGTCGGCATTTGGCCGCGCCATGGCGGCA  
CACTCCAAGGTGATCCTGTTTACGAGCCACCTCGGCCCTCGATCCCAGTGGGTGACGAGGTTTTGG  
GACTGATGAAAGAGTTGGCCCGCCAGCACCAGACCATGGTGGTGGTGA CT CATGAGATTGAATTTGCTCG  
TGATGTTGCCGATCGGGTGATCTTTCATGGAAGGTGGGCGGATCGTCGAGCAGGGCCCGCGGATCAGATA  
TTGGTCGATCCCAAGGATCCCCGTACCCGGAGTTCTTGCAGAAAGTCTTAAATAGCTCTCTTTGGC  
GGCCTGGCCGCTTTTTTATTGAGGGATCCCTTGTTTAACCCCGGGTTGCCAGTATAATCCGGAGCCCTT  
GATCCTCTGGATCCTCACGCTCGGCAGCGGCTTTTTCAAGACCACGGCAGGATGAGAGGGAACAGCGGAT  
TGACTAAAAGCCGAACCTCTGTTTAGAATTCGGCCTCTTTTTGCTAGTCGTCACACGCTATAGCTGGCGCGT  
CGGCTAAGTGTGACAATCAAACTGTACAGAAAATACGGAATCGAATCATGAAACGTACTTTTTCAACCGTC  
CAACCTGAAGCGCAAGCGCTCTCACGGTTTTCCGCGCCCGCATGGCAACTGCCAACGGTCGTAAAGTTCTG  
GCCGCTCGTCGTGCCAAGGGTCGTGCCCGTCTGGTAGTTTAAATGCCACCCAGCACACCTTCTCTCGGGA  
GTTACGTCTGTTAACTCCCGAACACTTCAAACCGTTTTTCGCCGAGCCTGTCCGGGCTGCTTCCCCGCAA  
ATTACGCTTCTCGCCTGCCCCAATCACTCGAACACTCTCGTCTTGGTCTCGCTGTGCCAAAAAAGCAC  
TCAAGCGTGCCGTCTGGCGTAACCGTGTCAAACGGGTGGTCCGGGAAAGTTTCCGCTCAAACAACATCA  
GCTGCCCGCTATCGACATCGTGGTGTACGCCAAGGCAGGTGTGAAAGAGATGGATAACGAGGAACTGTT  
AAGTTACTGGAAAAGCTATGGCGCACTCTGTACGCCGTTGCAATGGGTAGCTATCAAACCTGATACGCC  
GTATCAGCTAATCATTAGCCCTCTGCTCGGGCCGCGCTGCCGTTTTACTCCAACCTGTTCCCAATTTGCG  
ATAGAAGCCATCCGACTTCACGGTTTTATAAAAAGGCGTTTTGGTTAGCTAGCAAACGTCATTTAAAATGCC  
ATCCCTTATCCGAGGGTGGTTATGACCCGTTCCGCAACCAAAAGCGAAGAAACTGAAGACTATGGAATCA  
CAACGCAATCTACTCCTGATCGGTTTTGCTGTTGTCGAGCTTCTGCTCTGGCAACAGTGGGAGTCCGACA  
AGGCTCCGAAGCCGGCCCCGACTACCGTGGCCAAACCGAACATTTCTGACCTGAAGCCGGTCAGACCGG  
TGATATTTCTCAGGTTTCCGAGCAAGCCAACACGACTGCCGACGCAAGCTGATCACCGTCTCCTCAGC  
GTGCTCAAGCTGACCTTGATACCCAGGGTGGTGACGTGCTGTCTGCCGAACCTGCTGTCTACAAACTGG  
AAGAGGGCAAGGACCAACCGTTCTGTGCTGTGACCAGCAAGCCTGAGCACCTCTATATCGCCAGAGCGG  
TCTGGTGGGTGCAACGGTCCGGACAGTCAGGCCGAAGGTGCTCCTACCTATGAAGCCGCCAGACCAGC  
TATCAGCTGGCCGATGGTCAGGATCAAGTCGTGCTTCCGATGACCTGGACCGACAGCAAGGGCGTGGTCT  
TCACCAAGGAGTTCATCCTCAAGCGTGGCGACTATGCCGTTGGCGTTGATTACAAGATCGACAACAAATC  
TGCCGAGCCGTTTCAAGTGCAGTTCTATGGTCAGCTGAAGCAGACCGTAGCAACGCCGAAGGATCAGGAA  
GGTCATGCCATGGTAGCCAGCGCTTACCGTGGTGGTGCCTTCTCCACTGAAGATACCCGCTACAAGAAGT  
ACACCTTCGACGAGATGAAGGATGCCGACCTGAACAAGACCACCAAGGGTGGTTGGGTGCCATGCTGCA  
ACACTACTTCGTCTCTGCCTGGGCACCGAATGCCGACGATACCAACAGCTTCTACAGCCGTGTGATCCCT  
GGTAAAGGCCAGGCCATCATCGGTTACAAGGCCCGCTGGTTGACGTGGCCGCCGCGCCAGCAGGCCGAAG  
TGACCAGCAAGCTGTGGGTTGGTCCCAAGCTGCAAGACCAGATGGCCAAGGTGGCTAACCACCTCGACCT  
GACCGTCGACTACGGCTGGCTGTGGTTTCATCGCCCAACCGCTGCACTGGCTGCTGACCGTGTTCACGGT  
TTCGTCCAGAACTGGGGTCTGGCCATCATCATGCTGACCCTGCTGGTGC GCGGCATCATGTTCCCGCTGA  
CCAAGGCCAGTACACCTCCATGGCCAAGATGCGCATGCTGCAACCCAAGATTTGCGGCCCTGCGCGAGCG  
CTTCCGGCGATGACCGCCAGAAGATGTCTCAGGGCATGATGGAGCTGTACAAGAAGGAGAAGGTCAACCCG  
CTGGGTGGCTGCCTGCCGATCCTGGTTCAGATGCCGATCTTTCATCGCCCTTACTGGGCACTGATGGAGT  
CCGTTGAACTCGCTCACGCGCCGTTTTGCCCTGTGGATCACTGACCTGTCAGTGAAGGACCCCTTCTTCTGT  
GCTGCCAATCCTCATGGGTGCCCTCCATGTGGTATCTGCAGAAGATGAGCCCGACCACCGTAACCGACCG  
ATGCAGCAGAAAAGTATGCAGTTCATGCCGATCATCTTCACTTTCATGTTCCCTCGGTTCCCGGCTGGCC  
TGACTCTCTACTGGCTGGTGAGCAACGTCTATCTCCATCATCCAGCAGACCATCATCTATCGTCAGCTGGA  
GAAGAAAGGACTGCATTCACGCAGCTAATCTTCCCGTATGACAAAAAGAGGCGGCTTCCGGGCCGCTTT  
TTTTATTACAATGTCTCCACTACGTTTTCTTATCAGCGAACAAAACGAGCCAAGCAAGATGACAACAGATA  
CGATCGTGGCCAGGCCACCGCGCCAGGCCGTTGGTGGCGTCGGCATACTCCGGGCTCCTCCGGCCCCGCGC  
CGAACAGGTGCGCGAGATAGTGCTCGGCAAGTGCCCGGGTGCCTACGCCGAATATCTGCCGTTCAAG  
GATGAGCAAGGCCAGGTA CTGGATCAGGGCATCGCCCTGCTGTTCAAAGCCCCAACAGCTTACC GGCG  
AGGATGTGCTGGAGCTGCAGGGCCACGGCGCCCCGTCATCATGGACATGCTGATCCGCCGATTTCTGAA  
AATCGATGGCATCCGCCCTGCCCGCCCCGGCGAGTTCAGCGAGCGCGCTTTCATCAACGACAAGCTGGAT  
CTGGCCAGGCCGAAGCTATCGCTGACCTTATTGAAGCCTCCAGCGAACAGGCCGCCCGCAGCGCCATGC  
ACTCCCTGCAGGGGCGATTCTCCAGCAAAAATCCAGCAACTGGTGGAAAAGCCTGATCCGACTGCGCATCTA  
TGTGGAAGCGGCCATCGACTTCCC GGACGAGGAGATCGACTTCTCTCCGATGGCAAGGTGGCGGGCGAC  
CTCTACGCCATCATGTCCGAGCTGGACGATGTGCGCGGGGAAGCCAAAACAGGGCGCCCTGCTGCGGGAAG  
GGATGAAGGTGGTGTGATCGCCGTTGTCCTCAACCGCTTAAATCGAGCCTGCTCAACGCTTTGGCAGGGCG  
CGAGTCAGCCATCGTCACCGAGATCGCCGGCACACCCCGCAGCTGCTGCGGAACACATCCATCTCGAT

GGCATGCCGCTGCACATCATCGACACCGCTGGTCTGCGCGACACTCAGGACAAGGTGGAGCAGATCGGTA  
TCGAACGCGCCTGGGCCGAGATTGAACAGGCCGATCGGGTGTGTTTATGGTGGATGGCACAACCACAGA  
CGCGGTTGACCCGCGGGAGATCTGGCCGGAATTTGTTGATCGGTTGCCAAAAACATCGGCCTCACCGTC  
ATTGCGAACAAGGCCGATCTGACAGGCGAGGATCTGGCTCCGAGTCAGGAGCTGGGCCACGCCGCTTACC  
GCATCTCCGCCAAGACCGAGCTGGGACTGCCTGCCCTGCGCGAGCACCTGAAAGCCTGCATGGGCTTCCA  
GGGCAACACCGAAGGGGGCTTTATGGCCCGTGCGCCCATCTGGATGCGCTGGAGCGTGTGCCGAGCGG  
CTGCTGGTGGCCAAAGAGCAGCTGGAAGTGTTCGTGGCCGGCGAGCTGGTGGCCGAAGAGTTGCGCCTGG  
CGAAGAGTCCCTCTCCGAGATCACCGGCGAATTCAGCTCAGACGATCTGCTGGGCCGTATCTTCTCCAG  
CTTCTGCATCGGCAAGTAACTCTCCGCACAGCAGGCAACAAAAAGCCCGGGTTCATCCCGGGCTTTTTGT  
TGTGCGTTTTTTTTGTCCGCAAACCTAGAGGCGACGACAGGCCACCATGAAGTAAGCGCCCCCTAACAAAGGT  
GGATACCAGCCCCGACCCGACCTCTGCGGGAAGAGGATCTGCTGGCCGACCCAGTCCGCCGATACCATC  
AACAGGGCGCCGAAGCGGCGGCCCAAGCAGGTGCCAGCTGCCCCGACCCAGCCCCATCAGCTTGGCCA  
TATGCGGCGCCAACAGACCGACGAAGGAGAGCGGCCCGACCACCAGGGTGGCACTGGCGGTGAGCACGGC  
CACAGCAGCAGGATGGCAAGCTGGGCACGGTTGAGGCGAATGCCAGCGCGGTGCTACAGCACTCCCC  
ATCGGCAGCAGATCGAGCCAGCGGCTGACAAGCAGGCAGGCGGCCAGCATCAACAGCGCCAGCCCCACCA  
ACCCATAGGCCACCGGCAGGGTGCAGTAGTAGGTGGAGCCGGACATCCAGGAGAGCAGTTGCTGCACCCG  
CATGTACCATTTGGCCAGCGGATGGCCTGCAGCGGCTCAAACAGTGCCGTGATGGCAATACCTGAAAGC  
AGGATCCGCTCCGGCTGGAAGCCGTGCTTGCATTTGACCACCACTAGCAGCAAGAGACAAGCGAAGGCAC  
CGAGCAGGCCACCGGACAGCATCAGCGGCAGGGGCAATGCAGGCAGCAACAGCGCCGTGCTATACCCC  
CATAAAAGTGCCGCCGCTCACCCCCAGCAGCTCAGGGCTCGCCATAGGATTGTTGCTGACCCGCTGCAAC  
AGAGTGCCCGCCAGCGCCAGTAGCACGCCAGCCGCCCGCCCGCCAGAGTGCGCGGCAACCGCCACTCCA  
GCTGGGCCTGCCAGCGGAGCCAGCTTGGCCAACCTCCAGCCCATCATTCCTTGCCCAACCAGCAGGGAGGC  
GACTACGGCCAGCATCAGCCCGACCAGCAACAGGCCAATAAGGCGAGCCGGCGCCGGGTGGCGGGCCACC  
AGCAGGCCGGCGTTTTGCCTTCGGCGCACCCGACTTGATGCCAAGGCGCGGGATCAGCCAAAGCAGCAGCG  
GCGCCCCCAGCAGAGCGGTTCATTGCGCCGGTGGGGATCAATACCGGCCAGAAGCGGCTCAGGCTCTGCAG  
CAGCAGATCGGTGCGCCAGCAGCAGGGCGCCGAGGATCGGAGCCACAACAACCGCTGGCCGAGCTGG  
CGGATCCCCGAGCAGCCGACCATAGCGGGCGCTGCCAACCCGATAAAGCCGATCAGCCCAACCACGCTCA  
CCACGCAAGCGGTGACAAATACCGCCAAGCCCGCCAGTCGCAAGTGTGGAGGGAGACCCACG  
ACTGCGGGCGCTGGCATCCAGTTCCAGCAGCCCGCGGGCGCACCCAGTACCGCGCCAGCAACCGC  
GCTGCCAGCAGGCGGGTAACAGGTAACCTACCCCGCTCCAGCTGTTCTGCACTAGCGAGCCACTACCCC  
ACACCAGCAAGCCTTTTCAGCTCCTCCTGAAAGAACAGCAAGAGTCCCATGCTGATGGCCGCCAGATAGAG  
GTTGATCACCAGCCCGCAAAGACGATGACCACCGGATTGAGCTGGCGACGCCAGGCCAGGGCAAACACC  
AGTGCCATCGCGAGGCTGCCACCGCCATGGCGATCCACTCCCGCCCCAACAGCAACCAGGAGGGGGCAA  
ACAGGGTACCATCATCAATGCCAGTTGGGCACCGGAGGCCACCCCAAGGTGGTTGGTGACGCGAGCGG  
GTTGCGCAGCACCTGCTGCATCAGGGTGCCCGCCAGCCGAGCGCCCGCCCGGCCAGCAGGGTGACAACC  
AAGCGGGGCGAGCCAGCTGAAATGCACCACTGCTTGGCTGACGTCATCCAGATTGGGGGTGAAGAGGCTCT  
GCCACCAGAGCGCACCCAGGCATCTGGCGAGCCAGCTCCAATACGCGAGCAAGAGGGTCAACCCCAGCAG  
GATCGAGACCGGCCGAGCAGCGGCGATGTGAGCAGTTCGCTTCATCGACCAGCTCCATACGCTCGGCAT  
CTTGCAACAATGCATCGCTGAGCAGACCGGCGAAACGGCGGGCGGCAGGTACGCCGCCAAAACCTCCAGAC  
CGCAGGCAGATGCAGCACGGGGGCTTGGCGTACCAGCGGCAGATGCTGCCACAGCCCAGGCTCCTGCAGC  
CGATTGCTCACCCCTACCGGGATGGGATCGACCACCACCAGCCGCGCGGTTGGCAAGGTCAATAACTGCT  
CGATGCTGACCACCGAGAAACCCAGTCATTGGTCTGCTCCTGCCAGCCATTACGCAGCCCAAGCCGCGT  
CATCACCGCATCGAACAGGCTGTGGCGGCCAAACACCCGCACATGGCGCTCATCGATCAACTGTACCACC  
AGCAGGGGCGGCAGATCCGCAGGCAATCCGGCCTGCATACTGGCAAGATCCCAGTCCAGCCCGGCCAGCA  
GCCGCTCGCCCTCGGTGTTTTGTCCACCATAACGGGCGAGGGTCAGGGTCACCTCGTGACCCGCTGCCA  
CAGATCGGTTTTGCCATCATAGAGGGCGATGGTGTCCAGCGTCAACCGTGCATGCGGGAAAGAGTTGGCGCCAGC  
GGGGCTGCCAGCGGCGAGATGAGGATGCGATCGGGTTTTGAGCTCCGCCAGCAGCTCACGGTTGGGCTGGG  
TGCGCAGGCCGATATCCACCACCCCGGCAGGTAGCCGTGGCTCGCCGACCCATGCCGTGATAGGGGCTGC  
ATCCCCAACGGCCAGCGGCGTACCCCGAGTGCCAGCAGGGTCTCGGCTATGGTCCAGTCGACGGTGGCG  
ATACGGGGTAGCGCGCTGGTGGCCTCGTTTTGTTGCGGATGATTGTACAGCCTGCAACGGGAGCGCCAGCA  
GCAGGCTGACGAGACAAGGGCCATCTTCAATAAAAAGTTCAAGGATGCCCCGGTCCAGACGATGGCGAT  
GGGATGAGCATGAGCCGGTGGCGAATCACCTCCATCGGAATGCCATAGATAGCGTTCAGGGTCTCGCTG  
GTCATGAGCCCCCTCAGGTTACCCGTGGGTAAGCAGGCGGCCGGAGTGGAGCGCCACCAGCCGATCACAGA  
AGCGGGAGGCCATATTGATGTCGTGAATGACGATGATGACGCGAGTTTTAGCTGACGGCTGAGCTGCCT  
GACCAGGGTCAGCACCTCCACCTGATGGGCCACGTCCAGCGCGGCCAGCGGCTCGTCCAGCAGGATGAAG  
CGGCTCTCCTGGGCCAGCAGCATCGCCAGCCAGACCCGCCCGCTCGCCCGCGGAGAGGGTATCCACCA  
ACCGATCGGCAAAGCGTTCCGGTATGGGTAAGGGCGATGGCCCCGATCGACCTGACGGTGCATCTCCGCCCC  
CATCCGGCCCAGCAGGCCGCGCCAGGGGTAGCGGCCCATCTCCACCAGCTCCCGCCCCGAGCAGATTCTCG  
GCGCTCGGCAAATGCTGGGGCAGATAGGCCACCTGACGGGCAAACTCCCGATTGCCCCAGTCGGGCAGCG  
GCTTGCCATCGAACAGGATCTCGCCGTGCTGAGGGGTTGCTGGCGTGCCAGTAGCTTGAGCAGGGTTCGA  
TTTTCCCCGACCCATTGTGGCCGATGAGGCCATAGACCTGTCCCTGCTCGAAACGCAGGTTCGGTGGGGTAC



AGCAGCGTGCATCATTGACCGTGAAGCTGGCTGATTTTCATCTCGAACATAAGCAATTCCTGTGCTGGCT  
TGCCGCCAGTCTCATCGGTGCCGGCATCAAGCCGGCACCTCGCAATCCAGATGGGCGATCGCATCGCGGC  
TCACCTCAGTACGGCGCGCGCCGGTCAGTTCGGTGAGCTGGCCCTGACGCATCTCCAGCAGGCGATCGGC  
CAGCGGGAAGTAGTGATCGTCTGACTGATGGCAATCACCGTCTTGCCCATCTCCTTGAGGCGCGGCAGC  
AGCACCTGATAGAAGATGCGGCGGAACTGGGGATCCTGATCCGCGGCCCACTCATCAAACATCATCACCT  
CGCGCTGCTCGGCCAGCGCCAGCAGGCGACCCGCTTGCGCTGCCCTTGAGAGAGATCGATATCGGC  
GATAAAGCCATCCTCGATGGTGAGCTTGCTGCCCATCTGCAACCCTCCAGCCACTCGGCCACCAGCTCA  
TCCTTGGGTTCCGGCCCCAGCAGGTGCTGGAACAGGTGATAGTCGGTAAAGATGGCGGAGAAGAGAGCCA  
GATAGCCGTTGCGATCGGTGATCGGCTCACCATCCAGCAGGATCCGGCCCCGATACCGGCTGGTAAAGGCC  
GGTCAGCAGCATGGCCAGGGTCGACTTGCCGGAGCCATTGCCGCGATGATGAAGATCTGCTCCCCCTTT  
TCGATGACCAGATCGATGGGGCCAACGGCAAAACCGCCCTCCCCCTGATAGTGAAAGCTCACCTGCTCCA  
ACTCGATACGCTGCCAAGGGCGGATGGCGGGCGCAGCGGGAAGTCCGCATCCGGCTCGGCCAGATTGAG  
GGCGGCATCTTGTGCAACGCCACCTGAGCGGCAAGCAGGGTCCGCGAGGGCGCCAATCCCCTGCAACAGC  
GGGGTGCGCAGGAACAGCAGGGTCAGCGCAAAGGTGGCGGCCACATTGGTGTTGGCCAGCCAAGGCCGT  
TGGCCAGAAAGAAGACCAGACCGATGGCCCCAGCATCATGATATTCGACCAGTTCACCGCGCTCAGGTG  
ATAGGTGTCGGCGCAATGATCTGCTGGCGGTAGTCACGGGCATTTTGTCTCATAGAGCTGGTGGTAAACG  
AAGTGAGCCCGCTCGCGGTTTAGCGCCAGCTCCTTGCTGCCGGCGATGATGGCTGATAGTTCTGATAGA  
GCCGATCTTCGGCTGACGCATGTGGGAGAGATGGCGATAAACACGGTTCACCAGCAACCAGCCCACCAC  
CATGGTGAAGGTGACCCAGAGGGCGGTACCCCGAGCAGGGCCGGAGAGAGCCAGCCGAGGTAAAGGGCA  
GAGCCCAGCGTGAGCACCAGCCCCTGCACCAGCTCAGGCAGGCGCACGAAGGCAATGGTATCTGGCCGA  
TATCGCTGGAGAGGGAGGCCAGCAGTGGCCCCTGACCAATCTGGCGGATGCGGGCGACATCGGTATCCAA  
CAGTTGCTTGAGCAGACGGTTCGCGCAACCGGTAGACAAAATGGTGACCGAGAGTGGTCAGGGCCAGCTGA  
GATCCGAGAGTGATCACCCAGCAGCAACACAATCAGGCCGACCAGCTGACCGAGGATCGGCAGCGGATCAC  
CTATAGATTGATAAAGAGACTGATTGATAAAGGCAATGACGCCAATCCCGCTGACTGCACTGAGCAGACT  
GAGCAGGGTAATGGCGATGAAGGGCCAACGATATTGGCGATAAACAGAGACAAGAGTTCCATAACGGAC  
CGGTATTCCAGAGAGATCAGAACAACCTGCGGGTGAAAAGAAGGGCGGGAATCCGGTTCGCGCCGACTTC  
GATTACCAGCGGTAGTTGATGCTGCCACTACGCTGCGCGGCTCGCCGTAGTAGCAGTAGTAGTCACAAC  
TGGCCACGTAGGTTTACCAGCAGGTTGTTGACGCTGAGCTGGGCACGCCAGTTCTTGGCAAAGTCAATA  
CCCCATCATCGCATCCAGCAGGTATGGGCGCCACTCGGCAGAGCCGTAGATGGGGTGAAATCCGCA  
TTCACGGCGCCAATACCCACGCTGGAACCGATATAACGTACACCGGTACCCAGCTCCAGACCAGCAAGCCA  
CCCCCTTGCTGCACCTTGTAGTTACCCAGAAAGGAGGTCTGGTGGCGCGGGATAAAGGCTGGCACGGCGATC  
GCCACTGCCGGTGTGCTTGGTTTTGGCATCTGTGTAGGTATAAGCAGCGGTCAGACGCAGCGCATCGGTC  
ACCTGCACGCTCCCTTCCAGCTCAATCCCTGAGAGGTCACTTCACCCGCTGGGTCTGCTGGCCGGAAC  
CGGTAGAGACCAGCGAGTTGGTCTGGCCAGATCGAACAGCGCCAGATTGATGTAACCGTCGAGGAAGGC  
AGGCGCATACTTCACGCCGCTCTCGTAGAGCTTGCCCTGAGCGGCTTGTAGGAGTTTCGGGTGTTGGGA  
TCTATCCCCGGCAGCACTTCGAACGACTCGGCATAGGCAAAGTAGGGAGAGAGGCCGTTGTCAGCCAGAT  
ACATCAGGCTGCCCCGAGAGGGAGAGCTCGTGATCGTACTGGCGCTCGTCTTGTGTTGTTGTTGTTG  
GGTCTCCACATAGTCAAACCGGCCACCGCCAGTCAACAACCAGCGATCGTCCCAGCGGATCTGGTGTG  
GCATAGAGGCCGCTCTGGCCCTTGAGCTCTTCTGGTGAGTGGCGGTCGACTCGTCAAACCGGGGAAGC  
CGCTGTAATCCGGGTTTCATGGTATTGATGGAGCCATACTGTAGTTGTGCGGCCCAACCCCTTCATTGAC  
GTGACGCTGCAGATCCACCCCGCAGCAGCAAGGTCTGCTCCGTGCTGTCGGTGTTCAGTAACCCACCATC  
TGTTTATCCATGGTGGCACTCTTGGTATTGCCATCGCGGTAACCCAGACCACGACTGGCGGTTGTGCCTT  
CATAGGTCCGGAAGATATAGGTCTGGCGCAGCAGCAGATCGTGTAGTTGAAGCGGACGTTCTGCTTGAA  
CTCCCAGGCCCTGGTTGAGCTGGTGGGCCAGCTCATAACCGGTGGAGATCTGGGTATTGCGGTTGCGATCG  
TAATCCGGCTGGCTCAGGTTGGTGGAGGGATCAATCTGGCCACTGACGTATTCAGGGTGCCATAGACCG  
GGAAAAAGCCGTTGGTCGGGACCCCTTCGTCGTGACGGAAGCTGGCCAGCAGGGTCAGGCTGGTACGATC  
CGAAAGATCGAAAGTGACGCTGGGCGCCAGATAAACCCGATCGTTGTAAGTACCGGTAAGCACCCATCA  
CGCTCTTTATAGAGAGCAACCATGCGGTAACGGCTGTTGTGCGGAGAGCGCGTCAGAGACGTCCACCCCGA  
CCTGACGATGATCCCGGCTGCCAAGCTGCAGATCCACCTGCCCTTGCGGCGTGGCGGTCGGCCGCTTGCT  
GATGGCATTGATCACCCCGCCGAGGCGCCTCACCGTAAAGGATCGAGGCTGGCCCCCTCAGCACTTCC  
ACACTCTCCAGACCAAACGGTCTGGCGTCCAGACGTAATAGCCGTTGCCAAACAACCGGTTGCCATCCA  
GATAAGAGGGCGCATCGAAGCCACGTACCTTGAACCAGTCCGTGTTGTTGTCGGAACCATAAAGACCGGT  
CAATACGCCGGAACGGTAGCGAATCGCTTCATCCAGCTGCAACACGGCGTGCTGATCCAGTTCTCGCGA  
TTAACCACGGAGACGGCGGAGGGGCTCTCGGCCATCGGCACTTCCACCTTCATGGCCGTACCGGTCACCA  
CCATGGTTTTGCTGGCTTTGGGCAGCTCAGCGGTGGTTTTGTGCGGCCATCAGCGGCAGGGAGACGAGCAA  
ACCGGAGAGCGAAAGCACGCCGAAGGCGCCCTTCTTGCCGGGTCCTGTAGTGTATTTTTGCGCAATCATA  
TTAAAGTCTCGTTTTATCAATGAGTTATGTTGTTTTAATTGTTATTTGTGGTCTGTTGTACAGACATCACC  
CTGTTCCATGGGCGAATAAAGCAGCGCAATCCTACTACAGGATCCGTGATCGAATCGAATCAATAATTGC  
TAATCATTTGCATCTACATTGTTATCTAGCTGCATCATTTGGCAGGATCTCGCAGAGGATGGGAGTCATCA  
GGAGAACCATGAGCGGAGAAGAAAATGAAGAGGAATACAAAGAAGCTGAAAAATGATCGGCGGGATGGAT  
CCGGTGGCATTATCTGACTGGATCCATTATCCCAAGCTTTATCCATATTTATCCACACCCCTTTGGCGGT

AGAATCCGGCTTTCCGCTTCTTTGTCTGAAATCAGGATCCATTCATGGCCAAACTCAATCTCGTCGTCG  
GCTCCATGCTGGGCGCCGCCGAATATGTCGCAGACCACGTGCGCAACCTGCTGGAACAGGCTGGCCACCA  
GACCCGGATCCACAACCCGGCCAAGCTGGCAGAGGTACTGGATGATGCGGGATCCATCCTGCTGGTGGTC  
ACCTCGACCCACGGTGCCGGTGTATGATACCCGACAACCTGCAACCCCTTCGCCAAGGATCTTGCCGAGCAGC  
ATCCGGATCTTAATTCATTGAAATATGGCGTGATCGCCCTTGGTGACAGCAGTTATGACACCTTTTGCCA  
GGGCGGCAAGACGCTGGATCGGCTGCTGGCCAAGTGCGGTGCAGCCGGATCGGCGAGCGGCTCGACATT  
GATGTGACCCAACACGAGATCCCCGAAGATGCAGCAGAAAGTGTGGATCCGCGACTGGATGACGATGATCG  
CCTGATCAGAGTGCGGGAGATCCTGAAAAAAGCTTGATCTCCCCACTTATCCCCAGATCGACTATCCAC  
CATGTTATTAACAGATTGATCCGGGTGAGTTGTTCTACAAGGTTACCCACAACGCCAGGGGTAATGTGT  
ATAACTACGGTGTAAAGCTCTGCAAAACCTATAGTTATCCATGTATTAGATCCAGACTGACAGACCTCTG  
TGTATAAAAGTCTGGTTATCCCCCTCGTTCACCGGCCAGGATCCAAGCTTTTCCACAAGCTAGGATCGT  
CCTTAAATTAATGATCTTTATGATCAAAAAGTCTTATCAACAGAAAAGGTTGGATCCCTAATAAGAGATCC  
AGTAAAAGATCGATCTAAAGATCCTTAAGATCTAATTAGTGGATCCTCCCTTCATACTGAACGTTAAGTA  
GACGTTCCCTCAGGACGCGAAAACAGATAGAATGTTCCGCCCTTTAGCCCAGGCAAATAAAGATCTTCAG  
GCGTGCAGATCAAGGTGATCCCAATGCAATACCATGAACAATTTGATGTGATCGTCGTCGGTGGCGGTCA  
TGCCGGAACCGAAGCAGCAACAGCGGCAGCCCGTATGGGCATGAACACCCCTGTTGCTGACCCACAATATC  
GATACGCTGGGACACATGTCCTGTAATCCGGCGATCGGCGGGATCGGCAAGGGACACCTGGTCAGGGAAG  
TTGACGCACTCGGCGGGATCATGGCGCGTGCCATCGATCTTGGCGGGATCCAGTTCGCGACCCCTCAACTC  
CTCCAAGGGCCCCGGCAGTACGAGCCACTCGTGCCAGGCGGATCGCCTGCTCTACAAGGCTGTCGTTCCG  
CAGATGCTGGAGAACTACCCGAACCTGAAGATCTTCCAGCAGCCCTGTGACGATCTGATCATGGACGGGG  
ATCGTGTGGCGGTGTGGTCACCCAGAGCGGGATCCGCATCAGCGGCAAGACTGTGGTGTGACGGTCCG  
TACCTTCCCTGAATGGTTTTGATCCACATCGGGATGGAAAACCTACAAGGGCGGTGCTGCCGGGGATCCTCCC  
TCGATCGCCCTCGCCCAGCGCCTGCGTGAACCTGCCGCTGCGCATCGATCGTCTCAAGACGGGCACACCCGC  
CGCGCATCGATGCCCCTGCGTTCGATTTCTCCGTTCATGCAGGAACAGCACGGCGACGATCCGCGCCCCGT  
CTTCTCGTTTTATCGGCGATGCCAGCCAGCATCCCCGTGAGGTGCCCTGCTACGTCACCCACACCAACGAG  
CGTACCCACGAGGTGATCCGCAATAACCTGGATCGCAGCCCCATGTACGCCGGGGTGTGCAAGGGATCG  
GCCCCGCTACTGCCCGTTCGATCGAAGACAAGATCACCCGTTTCGCCGACAAGACGGCGCACCAGATCTT  
CGTGCAACCGGAAGGCTGACCAACCCAGCACTTATCCGAACCGGATCTCCACCAGCCCTGCCGTTTGAC  
GTGCAGGTGCAGATCGTCCGTTCCGTGCGCGGCTTCGAGAACGCCACATCACTCGCCCCGGCTTATGCCA  
TCGAATATGATTTCTTCGATCCGCGGGATCTCAAGGCCAACATGGAGAGCAAGTGCATTCCAAATCTGTT  
CTTCCGCCGGCCAGATCAACGGCACGACCCGGCTACGAAGAGGCTGCGGCACAAGGCCCTGATGGCCGGCCTG  
AATGCGGCCCTGCGTGCCAGGACAAGGATCCATGGAATCCTCGTCGGGATCAGGCCCTACATGGGCGTGA  
TGATGGACGATCTCTCCACCCTGGGGACCCGCGAGCCTTACCGCATGTTACCAGCCGCGCCGAATATCG  
CCTGCTGCTGCGGGAAGACAACGCAGATATCCGCTGACCGCCATCGGTCGCGAGTTGGGTCTGGTGGAT  
GACGAGCGCTGGAGCAAATTC AACGCCAAGATGGAACAGGTGAGCTGGAGCTGAGCGCATGCGTTCAA  
CCTGGATCCATCCGCAACATCCGTCACTGGAGGCAGTCAACGCCCTGGTCAACACCCCGCTGACCCGCGA  
ACAGAGTCTGGAAGAGCTGCTGCGTCGCCCCGAGGTGACCTATGATGCGCTGATGGCCATCGAAGGGGTT  
GGCCCTTCCGTGACCGATCCTGCCGCGGCCGAACAGGTTGAGATCCAGATCAAATATGCCGTTTATATCG  
AGCGTCAGCACGATGAAGTGGAAAAGCAGCTGCGCAACGAAAACACTCTGCTGCCGCTGGATCTGGACTA  
TCGCGAGGTGAAAGGCCTCTCCAATGAGGTGAAAAGCCAAAGTTGAACGATGCCAAGCCGCAGACCATTGGT  
CAGGCTTCCCGCATCTCCGGCATCACCCCGGCGGCCATTTCTATCCTGCTGGTTACCCTGAAAAAACAG  
GTCTGCTGCGTAAAACCGCCTGAGGAATCCCATGTTGGAAAAGATTGAACGGCCTGCTCATGCAGGCCGGA  
ATTGTTATCACCGATACCCAAAAGAGCCAACTGGTGCAGTTGGTTCGAGTTGCTGCACAAGTGGAAACAAG  
CTTACAATCTCACCTCGGTGCGAGATCCGGACGCCATGCTGGTCAAGCATATCCTCGATAGCCTGGTGGT  
AAGCCCCCACTTGCATGTTGAGCGCTTTCATCGACGTGGGGACAGGTCCCGCCTGCCGGGATTGCCCTCG  
GCGATCATCAATCCGGACAAGCAGTTTCGCTCTGCTCGACAGTCTGGGCAAGCGGATCAACTTCATCCGCC  
AGGTGATCCAGGAGCTGGGTCTGACCAATGTGACGCCGGTCAAATCCCGGGTTGAAGAGTATCAACCCGA  
GGTGGGATTTGATGGTGTACTGAGTCGGGCATTTGCCTCGCTGGAGGACATGCTGAGCTGGTGTACCAC  
CTGCCGTCAGAACAGGGTTGCTTCCCTGGCACTCAAGGGACAATATCCCGAGCAGGAGCTGGCCAGTTGC  
CTGCCAATATCCGTCTGGTAGCCTGTGATGAGTTGCGGGTGCAGGAGCTGGAAGGGCAACGTCATCTGCT  
GGAATTC AAACATATCCAGCCC GAATAGGGTGCAGTTTCATTTAGGGGATCGTGTGGGAAAAGTCATCG  
CCATAGCCAACCAGAAGGGTGGAGTGGGTAAAACCACCACCTGTGTGAATCTGGCCGCTCCATGGCTGC  
CACCCGGCGCAAGGTGCTGGTGATCGATCTGGATCCGCAGGGCAATGCCACCATGGGCAGCGGTGTGCAC  
AAGTATGACGTCGAGCGCACCCGCTATGAGTTGCTGATCGAGGATGCCCCATCAGCGAAGTGATCATCC  
CCGAAACTACCGGGGTTATCACCTGATCGCCGCAATGCCGACGTGACCGCGGCCGAAATCCGTCTGAT  
GGAATTTTTTCGCCCGGCAAAATCCGCTACGCAATGCGCTGGCCTCGGTGCGGGACAAATACGACTACGTC  
TTCATCGACTGCCCGCCCTCTCTCAACATGCTGACCGTGAACGCCATGGCCGCTGCCGACTCCGTGCTGG  
TGCCCATGCAGTGCGAATATTACGCGCTGGAGGGGCTCACCGCCCTGGTGCACACCATCAGCAAGCTGGC  
CGCTGTGGTCAATCCGGAGCTCAAGATCGAAGGGGTGCTGCGCACCATGTTTCGATCACCAGCAACCGGCTG  
GCCAATGATGTGTCGATCAGCTAAAACAGCACTTTGGCGACAAAAGTCTACCGCACCATCATTCGCCGCA  
ACGTTAGACTGGCTGAGGCCCGGAGTTTCGGTGCCTCCCGCCATGCACTATGACAAATCATCGGTGGGCGC

CAAGGCCTACCTGGCACTGGCTGGCGAGATCCTGCGCCGCCAGGAGCAGGAACGTCAGGCGACCATCGCA  
GACCGAGAGAGCATATGACTCCGAAAAAACGTGGACTGGGCAAGGGGCTGGATGCCCTGCTCAGTACCAG  
CACGGCTGCCCGCCAGAAACAGGTGATGAGCGATCAACGTACTGAAGAGGCCATGGCCCCACCAATCAG  
GGCGAGCTGCGCAAGCTGCCGGTGGAGTGGTTGCAGTCCGGCAAGTACCAGCCCCGCAAGGACATGTCCC  
AGGATGCACTGGAAGAGCTTGCCAACTCCATTGCGGCCAGGGGGTGTCCAGCCCATCGTGGTACGCCC  
TCTCGGCGAAACAATCCTTCGAAATCATCGCCGGTGAACGGCGCTGGCGCGCTCCCAGCTGGCGCGGCTC  
GAGGTGGTGCCTGCATCGTCAAGGATGTACCCGACGAGGCTGCCGTGCGCATCGCGCTGATTGAGAATA  
TTCAGCGGGAAGACCTCAATGCCATCGAAGAGGGCGTCTCTACAAAGACTGCTGACCGAATTTGAACT  
CACCCACCAGCAGGTGGCCGAGGCGGTGGGCAAGTCCCGCACCACGGTGACCAACCTGTTGCGTCTCAAC  
CAGCTCAACGACGACGTGAAGCGTTTCGTGAGACTGGCGACCTCGACATGGGCCATGCCCGTGCCCTGC  
TGGCCCTGAGCGGCCAGGCCAGTCTGAACTGGCCAAGCTGTTGCCAGAAAGGGTACTGTACGCGA  
TACCGAGAAGCTGGTGCAAAAAGCGCTCGAACC GGCAAAAAGCCAGGGTTCGAAACCGGCCGCTGATCCACAG  
ATCGGCTACCTGGAGCGCAACTGGCAGAAAAAATTGGCAATCAGGTGCAACTTCAGCCTGGCAAGCGGG  
ATAGCGGGAAGTTAGTAATAAGTTACGAGAATTTGTCCGATTTGGACC GTATATTGGGCTATTTTGGCGT  
GTCGGAATCGTGATTTTTTACGCTTTTTGTAGTAATAAAAACATCCATTCTTTTTGATATGACCATAACCT  
GATTTGCCCGGAAAGCCGCAAAAATTAAGGATTTTTGTGCATATGCAATAGCTGCCCTCAAGGGTATAA  
TTTTGACCGCTTTAAGAGCTGTTAACATGGGGTCTTCGGATCCCGATTTTTTACAGTTCTGTAATGTTCA  
GGGGTAGGTTGGTGAAGCAGAAAAATAGCCTTGAAAGGTTTGACACTGGCCTTGTTATGCTCGTTTTGTCA  
GCTCATCCTGATCCTGGCGATGAGTGCCGTCTGGTTTTACCTGACTGGTGCCAGCGCCGTTATTCGGCT  
CTCTACGGAGGGGGATGTACTGGGTTCCCTCAAGCCTTGTTTACTGTCTGGGTGCTGCGCCGCAAGGTGA  
CAACCGAGAGTGTGGGCTGGTTTTGCGGGACTTTTATGGTGGGGCAGGGATTAAGCTCATTCTACAAC  
AGGTCTATTTCGCCCTGGTGGTTTTGGTGCGGGAGTCGAGGTTCGTTACCGTCTCGTTTTTTCGCCACTTATATC  
CTCGCCCTCGTTGTACAGTGGATGGTTTTCATTCACGCTTAACAACCACTATTAGGAAAACCTCATGTCTGC  
AACCGGAGAAGTCTGACTCCTCAGGGATATATCTCCCACCACCTGACCCACCTCAAGTCGGGTCCGGG  
TTCTGGACGGTCAATATCGACTCAATGGTATTTTTCCGTCTGTGCTAGGCGCCCTGTTTATCCTGCTGTTCC  
GCAAAGTAGCCGTTAACGCTACCAGCGGGGTGCCGGTAAGCTGCAGTGTCTTGTGGAGATGCTGGTTCGA  
GTTTTGTGAATGGTAACGTCAAAGACATCTTTCACGGTGCACAAGGTCATCGCACCTTTGGGGCTGACG  
GTGTTGTGTGGATCTTCTGATGAACCTTCATGACTCCCCGTTGACTTTATCCCTCAGCTGCAC  
AATTGATGGGTATCCCTATCTGCGTGTGGTTCCTCTGCTGACGTTAACATCACCATCCTCATGGCTTT  
GGGCGTGTCTTCTTGATCCTGTATTACAGCATCAAGGTCAAGGGTATCGGCGGGTTTTGTGAAGGAGCTG  
ACGCTTCAGCCTTTCAACCACCCGGCGGCCATCCCGGTTAACCTCATCCTGGAAACTGTTACGCTGATTT  
CCAAACCTGTTTTCTCTGGGTCTTCGACTGTTTCGGCAACATGTATGCTGGCGAACTGATCTTTATCCTGAT  
TGCTGGTTTTGTTACCCTGGTGGTCACAGTGGATCCTGTCCGTGCCCTGGGCAATTTTCCACATCCTGATC  
ATCACTTTGCAGGCATTCATTTTCATGGTCTGACCATCGTCTATCTGTGATGGCGCAGGAAGACCATG  
GTTGATGCAACTCAAATAATCCTTTTTATACAATCAATTACATCTAAATAACTGGAGATCCTCATGGAAA  
ACTTGAACATGGACCTGCTGTACATCGCTGCTGCAATGATGATGGGTCTGGCTGCTATCGGCGCTTCCAT  
CGGTATCGGTATCCTGGGTGGCAAGTTCCTGGAAGGTGCTGCTCGTCAACCGGATCTGATCCCTGTTCTG  
CGTACCCAGTTCCTCATCGTAATGGGTCTGGTGGATGCGATCCCGATGATCGCCGTTGGTCTGGGTCTGT  
ACGTGATGTTTGCGGTTGCTGGCTAAGTCGTTACGACTCTCCAGGCATAAACCATAACTAACTTAAGAG  
GACATCGGCTGTGAATATCAATGCCACCCTCCTCGGCCAAGCAATTGCTTTTTTCTTCTTCGTAGTGT  
TGCATGAAGTATGTATGGCCGCGCTGATTGCTGCCATCGAAGCCCGTCAGAAAAGCTATTGCTGACGGTC  
TCTCTTCTGCCGAGCGTGCCAAGAAAGATCTGGATTTGGCCAAGGCCAACGCCACCCGATCAGCTGAAAGA  
AGCCAAGCTGCAGGCTGCTGAAATCATTGAGCAGGCTAACAAACGTAAGCCAGATCATTGATGAAGCT  
GCCGCTGGTGCCAGTCTGAGCGGGAAAAAATCCTGGCTCAGGGCCGTGCCGAGATCGAAGCTGAACGTC  
ATCGTGCCAAAGAAGAACTGCGTAAGCAGGTTGCTGCTCTTGCCATTGCTGGTGCAGAGAAGATCCTGGC  
GCGTCAAATCGAACAGGCTGCCAACAGCGACATCGTCGACAAACTGGTAGCAGAACTGTAACGGGAAACGG  
GGCTATGTCTGAACTGACTACAATCGCTCGCCCTACGCCAAGGCTGCTTTCGAGTTTGCCGTTGAGCAC  
AAGGCGGTTGACCAGTGGCTGGGTATGCTCGGTTTTGCTGCGCAAGTAGTGGAACGAGACCATGCACA  
ACCTGGTAAACGGCTCTGTGGCCGCCGAAGAGCTGGCAACGCTGTTTGTGCGGTGCTGCGGTGAGCAACT  
CGACGTGCATGGCCAGAACCTGATCCGGGTGATGGCCGAGAATGGTCGCTTGGGTGTGCTGCCGGCGGTC  
GTTGCTGAATTTGTAGCGTTCAAAGCTGAACTGGATAAAGAGGTTTCAGGCTGACGTGATTTTCGGCGATCG  
AACTGACCGACCAGCAGAAAGCCAATATTAGGCTTCTCTGGAACAACGTCCTCGCGCGCAAAGTGAAGCT  
GAATTGCAGCATCGATGCGTCTTGTATGGCCGGGGTGTCTCATCAAGCCGGTGTCTGGTAATCGACGGC  
ACAGTCCGCGGTAAGCTGGATCGCATGGCTGACGCGCTGCAATCTTGATTGGGGTATTAGAGCATGCAAC  
TGAATTCCTACTGAAATCGCCGAGCTGATCAAGCAGCGCATTGCGCAGTTTGATGTAAAGAGCGAAGCGCG  
TAACGAAGGTACTATCGTCTCTGTGAGCGACGGTATCATTGCTATTACGGCCTGGCTGATGCCATGCAG  
GGTGAGATGATCGAGCTGCCGGGCAACCGCTACGCTCTGGCATTGAACCTGGAGCGTGACTCCGTCGGTG  
CGGTGATTATGGGTTCCCTATGACGGTCTGTGAGAAGGAATGAAAAGTAAAAGGTAAGTGGCCGTTATCTGGA  
AGTGCCGGTAGGTGCTGGTCTGTTGGGCCGGGTGTTGAAACACCTGGGTCAGCCGATCGACGGTAAAGGT  
CCGATCGACAACGACGGCTTCTCGCCGATCGAAGTATCGCACCGGGCGTTATCGAGCGTAAGTCTGTTG  
ACCAGCCGGTCCAGACCGGTCTGAAAGCCATCGATGCCATGATCCCAATCGGTGCTGGCCAGCGTGAGCT

GATCATCGGTGACCGTCAGGTTGGTAAGACCGCCATCGCGATCGACACCATCATCAACCAGAAAAGATTCC  
GGCATTAAAGTGTGTCTACGTTGCGATTGGCCAGAAGGCTCCACCATCGCCAACGTGGTACGCAAGCTGG  
AAGAGCACGGCGCCCTGGCCAACACCATCGTGGTTGTTGCCCTCTGCCCTCCGAAGCGGCTGCTCTGCAGTA  
CCTGGCTCCGTATGCCGGTTGCTCCATGGGTGAGTACTCCGTGACCGCGGTGAAGACGCGCTGATCATC  
TATGATGACCTGTCCAAGCAGGCCGTAGCTTATCGCCAGATCTCCCTGCTGCTGCGCCGTCCGCCAGGAC  
GTGAAGCTTACCCGGGTGACGTTTTTCTATCTGCACTCCCGTCTGCTGGAGCGTGCTGCTCGCGTTAACGC  
CGAGTACGTAGAGAAGTTCACCAAGGGTGAAGTGAAAGGCAAGACCGGCTCTCTGACCGCGCTGCCGATC  
ATCGAAACCCAGGCGGGTGACGTATCTGCGTTCGTTCCGACCAACGTGATCTCCATCACCATGGTTCAGA  
TCTTCCCTGACTTCACAGCTGTTCAACTCCGGTATTCGTCCGGCGGTTGACCCGGGTATCTCCGTATCCCG  
TGTAGGTGGTGTCTGCTCAGACCAAGATCGTCAAGAAGCTGTCCGGTGGTATCCGTACCAGCGTGGCCAG  
TATCGCGAACTGGCGGATTCGCCAGTTCTCTCCGATCTGGACGAGGCGACTCGCAAGCAGCTGGATC  
ACGGTGTGAAAGTGACCGAGCTGATGAAGCAGAAGCAGTACTCTCCGCTGAGCGTGGCTCACCAGTCTCT  
GGTGCTGTTCCGCGCCGAGAAAAGGCTATCTCTCCGATGTCGAGCTGAACAAAATCGTCGACTTCGAAGCC  
GCTCTGCTCTCTTACGCCAATACCCAGCATGCCGAGCTGATGGCTGAAATCAATGCCAAAGCCGACTACA  
ACGACGCGATCGTTGGCAAGCTGACTGCGTTGCTGGATAGCTTCAAAGCAACCCAGACCTGGTAAGCGTG  
TGTGGCAGCGTGAGCTGCCACTTGATGGAGAGTAAGAGATGGCCGGCGCAAAAGAGATACGTAACAAGAT  
CGGGAGTGTGAAAAACTCAGAAGATCACCGGCGCTATGGAAATGGTGGCAGCAAGCAAAATGCGCCGT  
GCGCAGGAACGCATGTCTGCCAGCCGTCCGTACGCTGAAACCATGCGCAAGGTGATCGGCCATATCGCTC  
AGGGGAACCTGGAATACAAGCACCCCTACCTCATTGAACGTGAGGTCAAGCGAGTGGGTTACATCGTCTG  
CTCCACCGACCGTGGCCTGTGTGGTGGTCTGAACATCAACCTGTTCAAGGCTGCCCTCAATGATATGAAG  
CAATGGAGCGCGAAAGGTGCCAAGGTTGACCTGGCATTGATCGGTAACAAGGCCCTCAACTTCTTTGAAC  
GGCACGGCGCCAAGGTTAAAGCTCATGTGCGCAGGACTGGGCGATAGTCCGAGCGTCAATGACCTGATTGG  
TTCAGTCAAGGTCATGCTGAAGGCTTACGACAACGGTGAGATTGACAAGCTGTATCTGGTGTACAACAAG  
TTCGTCAACACCATGGTGCAGCAACCACGGGTGATCAACTGCTGCCTTTGCCCGTAACTGAAGACAGCA  
AGCTCGCCAAGAAAACCCACTGGGATTACCTCTATGAGCCGGATCCCAAGAAGCTGTTGGATAACCTGCT  
GGTTCGCTACGTCGAATCTCAGGTTTACCAGGGTGTAGTGGAAAACTTGGCAAGTGAACAGGCAGCCCGA  
ATGGTTGCCATGCAAGCCGCGACTGACAACGCCGGTAACCTGATTAACGATCTGCAACTGGTATAACAACA  
AGGCCCGTCAGGCCAGTATTACCCAGGAGCTGACAGAGTATCGTATCCGGTGTCTGCTGCGGTGTAGGCA  
GGGTTTCAAAAGGTTAGAGGATTTGACATGAGTACAGGTTTTCATCGTCCAAATCATCGGCGCTGTTGGTG  
GACATCGAGTTCCCGCAGAATGCCGTGCCCCAGGTGTACGATGCACTGAAGGTCGTTAGCGAAGGTCAAG  
GCCTGGGTCTGGTGTGGAAGTTTACGCAACAGATCGGTGGCTGCGTTCGTTGTCATCACCATGGGCTC  
CTCCGACGGTCTGCGTCTGGGTTGGAAGTAGTGAATAGCGGTAAAATCCATCCAGGTTCCGGTCCGGTACT  
GCGACTCTGGGTGCGATCATGAACGTACTGGGCGAGCCAATCGACGAAAAAGGTCCGATCGGTGAAGAAG  
AGTGCTGGTCTATCCACCGCGCTGCCCCAGCTACGAAGATCAGTCCAACAGTAACGATCTGCTGGAGAC  
CGGCATCAAGGTTATCGACCTGGTATGCCCGTTCGCCAAGGGTGGTAAGGTTGGTCTGTTCCGGTGGTGCC  
GGTGTAGGCAAAACCGTAAACATGATGGAGCTGATCCGTAAACATCGCGATCGAGCACAGTGGTTACTCTG  
TGTTTTGCCGGTGTAGGTGAGCGTACCCGTGAGGGTAAACGACTTCTACCACGAGATGATGGAGTCCAACGT  
ACTGGACAAAGTATCTCTGGTTTACGGTCAGATGAACGAGCCGCCCGGAAACCGTCTGCGCGTTGCGCTG  
ACCGGCCTGACCATGGCCGAGAAGTTCCGTGACGAAGGTCGTGACGTGCTGTTCTTTGTGGACAACATCT  
ACCGTTACACCCTGGCCGGTACTGAAGTATCCGCACTGCTGGGCCGTATGCCCTTCCGCAGTAGGTTACCA  
GCCGACCCTGGCCGAGGAGATGGGTGTTCTGCAAGAACGTATCACCTCCACCAAGACCGGTTCCATCACC  
TCCGTACAGGCCGTTTACGTGCCTGCGGATGACTTGACTGACCCGTCTCCGGCGACCACCTTCGCCACC  
TGGATGCGACCGTCTGACTGTCCCGTCAAATCGCGGCACTGGGTATCTACCCGGCCGTTGACCCGCTGGA  
CTCTACCTCTCGTCAGCTGGATCCGCTGGTTGTTGGCAAAGAGCACTACGAGACTGCTCGTGGCGTTCAA  
ACCATAACTGCAGCGCTACAAAGAGCTGAAGGACATCATCGCCATCCTGGGTATGGATGAACTGTCAGAAG  
AAGGACAACTGACCGTAGCCGTTGCCCGTAAGATCGAGCGTTTCCGTGTCAGCCGTTCTTCCGTAGCAGA  
AGTGTTTACCGGTTCTCCGGGTAATAACGTGCCGCTGAAAGAGACCATCCGTGGTTTCCAGGCATCCTG  
AAAGGCGAGTATGACGATCTGCCCCGAGCAGGCGTTTCTACATGGTTGGCGGTATCGACGAAGTCTGCGAGA  
AATCCAAGAACTGTAAGCCTCGACAGGAGGGCCATGGCAGAGATGATCTCCTTTACCTGGACGTGGT  
GAGCGCCGAAGGAAAACCTGTTTTCCGGTTCGCTGCAATCCGCTCAGGTATCAGGCTCCGAAGGTGAGTTG  
GGTCTCCGCCACGGTCATGCTCCGTTGCTGACTGCCATCAAGCCGGGCTGGTCCGCTTGGTGAAGCAGA  
ACGGAACCTGAAGAGGTGCTGTACATCTCCGGCGGTATGCTGGAAGTACAACCTGAATCCGTGACCGTCT  
GGCGGACACTGCGATTCTGCTGACTGAGGCGAAAAGCCAGGAAGCCAAGCGCGCAGCCGAA  
GAGCGGATCCACAGCTCCCATGGTATATCGACTACGCCAGGCCGCCACCGAGCTGGCCAAGGCATGG  
CTCAACTGCGAGTATCGATATCGTCAAAAAGAATTACCGCTAATAACCGTGTATGTA AAAAGCGACCTTC  
GGGTGCTTTTTTTTTTACCCGTTGGATAGACTCCGCCGGGTATTTCCACACAAGTTCAAGGTCAAGTCA  
TGTCTCTCAACGTGCTGATCCTGGCTGCGGGTAAAGGTACCCGTATGCGTTCGGTTTTTGCCAAAGGTA  
GCACCCGGTAGCCAACAAACCCATGGTTTTCCCATGTGATCGATACTGCCCGTCAAGGTAGGCGCTGAGCAG  
CTGCATCTGGTCTATGGCCACGGTGGCGAGCTGCTGAAAGAGCGGATTTGTGGCGGCCGACGTGAACTGGG  
TGCTGCAGGCGCAGCAGCTGGGGACAGGTACGCCGTGCCCCAAGCTATCCCGTTCTGGAAGGATGAAGA  
CAACGTGCTGGTCTTACGGCGATAACCCGCTGATCCAGCCGAGACCTGCAGCGACTGCTGGCTGCC

AAGGCTGAAAACGGGATGGCATTGCTGACCGTGGTGGCTCGACAACCCTACTGGCTATGGCCGTATCGTCC  
GTGAAAACGGTCAGGTAGTCCGTATCGTCGAGCAGAAGGATGCCAATGCCAACAGCTGGCGATCCGCGA  
GGTGAACACCGGCGTGCTGGTGGCCAACGGCGGTACGCTACGCAGCTGGCTATCCCGTCTGGACAACAAG  
AATGCCCAGGGCGAATTCTACCTGACCGACGTGATCGCCATGGCGCACGGCGATGGCTGTCCGATCGCGG  
CGGTCCATCCGGAGCGTGCCGCCGAGGTGGAAGGAGCCAACAATCGGGTGCAATTGGCCCAACTTGAGCG  
CAGCTATCAGCAGATGCAGGCCGAGAAACTGATGATCGCCGGTGCTACCCTGATCGACCCGGCCCGCTTC  
GATCTGCGCGGAACCCTGGAGATTGGTGAAGAGGTGGTGTGATCGACGTC AACGTCATCATCGAAGGCAAGG  
TAACCCTCGGCAACCATGTTTCGTATCGGTGCCGGTGCCGTGCTGAAGGATTGCGTGATCGGCCGATCACAC  
TGAAGTGAAGCCCTACTCCATCGTTGAAGGGGCTCAGGTGGCAGATCAGTGTTTCGGTTCGGCCGTTTGGC  
CGTCTACGCCCCGGGGCTGTGCTCGAGCAGGATGCGCACGTTGGCAACTTCGTTCGAGATGAAGAAGGCC  
GTCTGGGGGTTGGCTCCAAGTGTGGTCATCTGACCTATCTGGGGGATGCCGAGGTGGGCGCAAAGGTGAA  
TATTGGTGCCGGTACCATACCTGCAACTACGACGGGTCAACAAAATTCAGACCATCATCGAGGATGAT  
GTGTTTGTTCGGTTCGATACCCAACCTGGTAGCGCCAGTGCGCATCGGCAAGGGGGCGACTCTGGGGGCGG  
GTTCTACCATCACCAAGGATGTGGCCGAGAACGAGTTGGTGTATCACCCGGGTGCCCCAGCGTACATCAA  
AAACTGGGCTCGTCCGGTCAAGAAGAAGTGTGATGCCCCGATCAATAAAAATAGAACCGGCGCCTGATGGCGCC  
GGTTTTTTTTTTGGCTTATGACTGATGGTTGGTGTCACTGGTTCGATGACTTGGGGGCGCCCATGTGGTTCG  
CGGGTGCCTGTAGTCCATCACTTGATAACAGTGCAGTTTTCGGGTTCAGCAGCATGATCAGCGCAAGGGT  
GGCGAACAACAGCACGGCCCCGAGCAGCAGGGCGATCTCTTCGGCTGCAGCAGGCTGTAGAGGATGGCA  
TAGACCAGCCCCGAGCAGCGCCGCGAAGCCGATCCCTGCTCCGGGCCACCCAGCACATGACTGAGGTAGA  
AGCCGTTGAGCAGCAGCTGGCCAGCGCGGCTACCAGATAGGCCAGCCAAAGCCGAGGTGCTCGGTCAG  
GGCCAGCAGCACCAGATAGAAGATAGCCAGCCCCATGCCTACCAGCGCGTACTGGATCGGGTGAACCCTC  
AGCCCCTTGAGCAGCTCGAACATGAAGAAGCTGATAAAGGTGAGGCCGATGAAGAGCAGGGCATATTTGG  
CCGCCCGTTTCGTTGAGCTGATAGTGTATCCACCGGCTGCACCAGACTGACGCTGAAGGTGGAGAGATTGCT  
ATCGCCCCCGTTTCATCATCCGGTTGAAGCGGGTCTCCATGTGCTGGCGAACCAGCTGGTTTGGCAGTTG  
GCCTCAAACCCTTGTGGGCTCAGGGTGCAGCTGCTCGGCAGAAAAGTCAACGATAAAGTTGGGGTAGGGCC  
AGCTGCCCGCCAGCTGCAGGGTGTCTCCTTGCCAGCGGGACTATGTCGAGGGCGTTTCATCCCTGTAG  
ATTGAGCTCCAGATGGAAGGTGCCATCCTGCTGCGGCAGGCTGTGATCGGGGCATGGATAACCCGCGAGC  
GCATCACCGCGGGCGGGCACCGGGGCAAACGGGATCCGCTGTGTGCGGAGTTGCAGTTCCGGGGATGT  
TGATACCAGCGGGCATCGGAGAGCACCAGGCTCAGTAGGGTTTGCCCGCCACCAGCTCGGCCGTTTACC  
GAGCGGTGAGGTGCGGTCAATTCAGCAAACCTCTGCCGGGTGGGCAGGCGCGCGGATAGGGTGAAGCGGGT  
TGGTAGACCTGCGCCTGATAGATGCCAGCTTGCGCGGGGTGACCTCCATGTTGGCCTTGATATCCAGTT  
GCTCCGGCAGCTGGTAGAGGTAGATCTGCTCCTGACGGACGAAGCGCTTGCCCTCCTGCTCGACCGTCAC  
CGAACGGGTATAGGGTGCACGATAATGGGCCCATCAGTCGTTGCGGGCCGCTGTTGCTGGCCATGATG  
CTGTGAATGGCCTGACTGCGGTAAGCCTGACGCTCCCGGTTTCAGCTCCATGATGGATTGCACCGGCACCA  
TCAACAGCAGGCTGAGCAACAGCAGCAGAAAAGATCTTGTGGGTGAATATCTGTTTGACCATGACACGCTC  
CCTTGTGGATGGAGTGTGCTGAGTCCGGCGTGAAGTGGTGTGATGGCTTGTGTGAAGTGGCGGTGAA  
CTGTTGAAAACGGCGCCATCAGGCGCCGCGGGATTGTTTCAGGGGCGGGAGCGCACCAGTCCGGCGGCTT  
GTGCGAAAACGATCGGTGTGGCCGTGATGAGTCCGTGCATAAAGTCGATGTAGTAGACCAGTTCGGGCAT  
CTCCTCAATGGAGCTAGAGGTCCAGTAGGGGGCTGAATTTTCCCGTTGTCATGGATATCGGAGAAGAAA  
CGCGGGTCTGTATCGGCGCCCGGCAATCTTCGTGAGCAGGGTGAAGAGCTCCTCGATGGTGGGGAGTC  
GCCACCCCTCGCCAAGGCGGGCTGCTTCATCTTTGGCTTCAAGCAGCGTCAGCAGGGCCGGTGTGCCAC  
GCACCCCTTCCCTCCTGCCACTGGCTGCCAGACTGCACGCTGCCATTCGAGGTGGTTTAGCCGATCA  
TGGATGACTTCTCCCTGCCGTGTGAGGCGGTGCGAGAGATCACAGGCAGCCAGCGCCATGCTGGCCGAA  
GCCAGAGCAGCAATAGAAATGATTTTCATGTTTGTCTCGTTTACGAATGGCGGTGAGCCGTCGCTGGTGG  
GCTGACCGTGGTTATCGGGGTTTATCTGGCGGGAAGCGAGCTCACTGCTTTTTAAGTTGTGACAGGAGGG  
CAGCCAGCAGCTTCTTTTCGCCTTGAGGGAGGCGAAGTCTGCTGCGGGGCTTTTGCACCAGGTATGGAC  
GAAGATCAGCTGTTTGCCTGTTGCTGGCCAGCCGACGAACCAGCCAATCTGCTGATCGCGGTTGAGG  
CTGCCATCCAGCTTCTTCGGGTAGCCATGCCGGTTTTTGGCGTGGATCTGCCAGCCGTCGATCTCGCTCA  
CCTTGAGGATATTGGCGGTGACTGCAGGGTCTGCGCCGAGACCAGGCGCTTGGCGCTCAGCATCTTGCC  
GAGGAAGCGAGCCTGCTCCTCCGACTGATGGCGAGGCTGGAGCTGAGCCAGGCTGGGTGAGCCGTC  
TGTTTGGCCGATTGCCGGAGAGATCCCGGTTGCCGTAGTCGAAGCGGTGACGATATTGCTGGAAGCGCT  
CCATCCCCAGCCATTCCGTGATCTGCTGGGAGAACCAGACCACCGAGTAGGTTTCCAGCGGCGCGGGGT  
GGTGGTTTTACGCCAGGCGGGCAGCCAGCCGTCATAGCTCGGTTTGTAAAGCAGTGCCGATGCTCTTCA  
TCCACCAGATAGCCGCTGTGCTAACCCATCAGCGCAGCGGGATCTTGAAGGTGGACGCGGGTGGCAGCT  
GGCTGGAGCAGTCCCTTCGCTGGAGAGGGTCTGGCCGTTGCCGTCAGCATAGAGAAAAGCAGCCGCTGGC  
GGCGGAGGCAGGCAGGGCTGCGAGCAGACCAGCCAGCAGGCTGGAGAGAAGCAGGCGGGACATAGCA  
TTTTCTTGAGCAAATGGATGAGAGAAAAGCGGCAGTCTAATGCCGCTTTGTGTGGGGAATGTGAAGTTGGC  
GGGGACTAGGCGAACGGCAGCCAGAGTTCCGCCAGCGCGCCCCCTTCCGGCCGGTTGCTCAGGGTCA  
GGCCGCCATGCTGGTGGGCTACTTTCATGGGCGAAGCTGAGCCCCAGACCAGCTGCTCTTCCCTTGTCCGG  
TCGTGGCAGGGAGTAGAAGCGCTCGAAGATGCGCGGCAGGGCGTAGTCGGGAATGCCGGGGCCGCTGTG  
GTGACCCGAAAACAGTAGCCCTCCTCCTGCTGGCTGCCGCTCAGGGTGACCTGCCCGTTGGCGGGAGAGA

AGTCGATGGCGTTGTCCAGCAGGTTGCCGATGGCCTGCTCCACCAGCAGCGGATCCCACCTTCTGTTTTCGG  
CGCGCTGGCCAGCTCGGCCACCAACTCGACCTGACGGCGCTGGGCAATGATCTGGCGGGCGTCGAGGGTG  
CGCTTGCCAGTTTTGCCGGTTCACCGACTGGCGATCCAGCCCTGCCCGACTCCAGCCGCGCCAGTT  
GCAGCATTGCTCGATCAGCTGCTGCATGCGCGCGGTTTCTGATTGATGTTGCCGATAAACCGTTTTGGC  
AACTTCGGGGGGCGGCGTTTTCGGCCAAAATCTCCCTGCCCGCGAATGGCGGGCAGCGGGCTCTTCAGC  
TCGTGGGTTCAGGCTGTGCACATAGGCTTCGATGTAGCTTTTTGCCATCGAGCTGGTGGCGCATGGTCTCCA  
GCGAGCGGCGGAGCCGATCCAGCTCGACGGTGTGCAGCCGTGGCAGCGGTGCCGCTCCCCCTTGCTGAC  
CGAGTCGGCGTAGTGCACCAGCTTGCCGATGGCGCGGTTTAGCCACCACACCAGCAGGCTGCCGATCAGC  
AGCGAGATGAGCAGCATCTGGCCGCGGCGCCGAGCAGCTCCTGTTCCCCCGCTCGATGGCAGGCATCA  
GAGTCGATTTGGGTTTGGCGACGGTGAGGGAGCCGATGATCTCGACCCCTTCCCGCAGCGGCGCCGCCA  
ATACATGGTTCGAGCTGGCAGCATCATCGGGATCGGTGCGGGTGTGTCGGGGCGCCATACTGGCCGCGCAGG  
GTGCGGTAGACATCGTTCCAGCGGAATAGTCTTGGCCAGATCCGTGCCGTCCGAGTAAATCACCA  
CACCTTGCCGGTCAGTGACATAGATGCGGTACTCCGCTGCTGCTTGAGGTGGCCATCGATCATTGCATT  
GATGGGATTCTGGTTGAGGCGGGCGAAGGCGCTGGCCAACCGCCGTTTCATCATATTTCCCTCTTGCCAGA  
TCATCGAGGGTGAGCGGCGCCAGCAGCTGGGTTCATGTCTACCAGAGTATCCTCGGTGGCGCTGCGCACTC  
CCGGTTTTATCTCCTCGACGAAGATTTCCAGCCCGAACCAGGCGGCCAGCGCGAAGATCAGCAGCAGGCC  
GCACAGCAGTTGCAACCCGAGTCTCATGCCAGCTCCAGGCTGTAGCCAGCCGCGGTGGGTGAGGATCA  
GGTTGGCTTCTGGATCATGTTTCGCGCAGCTTGGCGCGGATGGTCTTGATGTGGGTATCGACGGTGGCATC  
CAGACTCTCCTCTGCATCCTGCCACACCAGATCCATCAGCTGCTGGCGGGAGTAGACCCGCCCGGCGCC  
AGCATCAGGGTCTTGAGCAGCAGATATTCGTAACGGGTGAGGGCCAGCGGCTGACCGCGAAAAGTGAATGC  
GGGCACGCTCCTCATCCAGCACCAGCAGGGTGTGGGCTGGGGGGCGACGGGTGGTTCGCGCGCAGGAT  
GACCCGCACCCGGGCACACACTTCCCGTGGCGGAGAAGGGTTTTGGCCACATAGTCGTCCGCACCGATCTCC  
AGCCCGATCAGTCGGTCTATCTCCTCGCTGCGGGCGGTGAGGAACATCAGGGGAATATCGGTGAGCGCCC  
TCACCTGCTTGACAGAGTTCAAGCCGCTGATGTGCGGCAGCCCCACATCGAGGATCAGGAAGTCGGGTGCG  
CGTCTGTTCCAGTCGTGTGACAACTGCTGGCCAGCATGAACCACTCCACCTCGAACCCGTCGGTCTGC  
AGGGAGTAAATCAGGGTGTGCGCGATACTGGCCTCATCCTCCACCAGCCAGATGACTCTCTTTTGCATGG  
CATCTCGTCGCAAATTTGGCACCCCATTTCTGGCATCGAACCAATCGGATCCTATTTGCTGTTTTATTTT  
TCCGAAAAGGGGCTAATATTTTCGATGCTCTTTTCGAATCGAACTTAAAAATGACCAAACTAATACTCA  
ACAACGCGCCAGCACCATAGTGACCTGGTACAAGAGCAGGGTGAAGTGAGCGTCGACGCGCTTGGCCAAA  
CACTTTTCTACCTCCGAAGTGACCATCCGTAAGATCTGGCGGTACTGGAGACCGCGGTCTGCTGCTGC  
GCCGTTACGGTGGTGGCCTTCCCTTGCCAAACAGATGGTGGTTCGAGGTCAACCCTGAACAAGTTTTCGAA  
CCGAAAGTTAGCTATTGCCCGTGGCGGCGCCGAGCGGCTGCGTGATCACAACCGCGTCATCATCGACAGC  
GGCAGCACCACCAGCGCCATGATCCCATGCTGGGCAACAAGCGCGGCTCATCGTGATGACCAACTCCC  
TCAATGTGGCCGGTGCCTGCGCGAGCTGGAATAAGAGCTACCCTGTTAATGACCGGTGGCACTTGGGA  
CCCTCACTCCGAATCCTTCCAGGGCAGGTGGCGGAACAGGTGTTGCGCTCCTACGACTTCGACCAGCTC  
TTTATCGGTGCTGACGGCATCGACCCGGAGCGTGGCACCACCCTTCAACGAGCTGGTGGCCCTGTCCG  
GGGTTCATGGCCGAGGTGTGCGGGGAGGTCAATTGTGATGGTGAATCGGAAAAGATCGGCCGCAAGATCCC  
CAATCTCGAACTTCCCTGGTTCGAGCATCCATAACCCTGGTGACCGACGAGGGGTGGCCAGCGAGGCCAGA  
GAACAGATTCAAGCCCAGGGGGTGACGCTTATCTGCGCCCCGGTCACTTGCTGACATCGAGCTCTGAACC  
ATCCAACTGACTTTACGATTTGCATCTCAAGGAGAAGTGTATGTGTGGCATCGTCGGGGCTGTTGCCCAA  
CGTGATGTGGCTGAAATTTCTGGTAGAGGGCCTGCGCCGTCTGGAGTACCGCGGTTATGACTCAGCCGGTG  
TGGCCGTGTTTCAGCGCCAACCAGCCGTTGCAGCGGGTTCGCCGTCTGGGCAAGGTGGCCGAGCTGGCCAA  
GGCGCTCGACGAGCAGTCCGTCCACGGTGGTACCGGCATCGCCATAACCCTGGGCCACTCACGGCGAG  
CCTTCCGAGCGCAATGCCACCCCCACGCTCCGAGCATATCGTGGTGGTACACAACGGCATCATCGAGA  
ACCACGAAGAGCTCGGGGAAGAGTTGAAGGCGCTGGGCTATGTGTTTCAGCTCCGACACTGATACCGAGGT  
GATTGCCCATCTGGTCCATCAGAGCTGAAGAGCGCCGAGCCTGCTGGCCGCCATGCAGACTGCGGTG  
AAGCAGCTGCGCGGTGCCTACGGTACCGTGGTGGTGGACAGCCGCGACGACAGCCGCGGTGGTGGGCC  
GCTCCGGTTACCGCTGGTGGTTCGCGCCGCGGTATCGGCGAGAACTTTATCGCCTCCGACCAGATGGCGCT  
GCTGCCGGTGACCCGTCGTTTTCATCTTCTTGGAAAGAGGGTGGTGGTGGCCGAAGTGACCCGTCGCGATGTG  
CACATCTTCGATAACCAACGGCAACGCCGTGGTGGTGGTGAAGAGCAGGAGTCAGAACTCTCCCACGATGCCG  
GTGACAAGGGTGAATAACCGTCACTACATGCTCAAAGAGATCCACGAGCAACCCAAAGCGATCACCACAC  
CCTGGAAGGGCGTCTGGGCAGCGATCAGTGGTGGTGAATCGTTCGGCAACGGCGCGCGCCATCTTT  
GACAAGGTTCGAGCAGTGCAGATCGTGCCTGCGGCACCTCCTATCACTCCGGCATGGTGGCTCGCTACT  
GGTTCGAAGAGATCGCTGGTGTCTCCTGCGATGTGGAGATCGCTCCGAGTCCGCTATCGCAAATCGGT  
AGTGCCTCCCAACAGCCTGCTGGTGCACCTCTCCAGAGCGGCGAGACCGCCGATACCCTGGCGGCGCTG  
CGTCTGGCCAAGGAATCCGGCTACATGAGCTCGCTGGCTATCTGCAACGTGCCGGGTCTCCTCGCTGGTGC  
GTGAATCGGATCTGGCCTTTATGACCCGTGCCGGTGCCGAGATCGGCGTAGCCTCCACCAAGGCGTTCAC  
CACCCAGCTGGCTGGCCTGCTGATGCTGGTGGCCTCGGTGGTCACTGCCGTGGTCACTGAGCGCCGCC  
GCCGAGGCCGAACCTGGTCAAGGCGCTGCAAGCCCTGCCGCTGCGTATTTAAAGAGAGTCTGGCGCTGGCCA  
AGGATATCGAAACCCTGGCCGAAGAGTTTGGCGACAAGCAGCACAGCCTGTTCTCGGCCGTGGCAGCCA  
GTACCCCATCGCCATGGAGGGGGCGCTCAAGCTCAAAGAGATCTCTACATCCACGCCGAAGCTTACGCC

GCTGGCGAACTGAAGCACGGCCCGCTGGCGCTGATCGATGCCGAAATACCCATCATTGTGGTGGCGCCGA  
ACAACGATCTGCTGGAGAAGCTCAAGTCCAACGTGGAAGAGGTGCGCGCCCGTGGCGGTATCCTCTACGT  
GTTTCGCGGATGCCGATACCGGCTTCAAGAGCGACGAGACCATGCGGGTCAATGAACCTCAACCATGTGGAA  
GAGGTGATCGCCCCATCGTCTATAACCGTGCCGCTGCAGCTGCTCTCTACCACGTTGCCCTGATCAAGG  
GCACCGACGTGGATCAGCCGCGCAACCTGGCAAAATCGGTGACCGTTGAGTAAGTCACTCTCTCAAATGA  
AAAAGAGCCGCAATTGCGGCTCTTTTTGTTTTCGGCTGAGGGTTACGACAGCCGAGGTTGGTGTGGTCA  
CCTCGTCGAGGGAGGGCACTATGATGCCGCTGGTGTATCCCTTTGGCGATGGCCTGACTGCGATTCTTCGA  
GTCGGTTTTGTTGGTACCTGGGTGAGGTGAAAGTTGACCGTCCGCTCACTGATGCCGAGGATGGTGGCG  
ATCTCCCAGGAGGTCTTGCCCTCGCTGGCCAGAACAGGCACTCCTTCTCCCATCCGACAGTTCCGGTCA  
GGTATTTTATCATATACCGGTCTGCTTTTGTATCAGTTCAGTTCAGTTCGCGGAGTTGAAGATGTAGCTGGCGCAGAA  
CGACAGCAGCGGAACATTTTCAAACATCAGATCGGATGGATTTCTCCTTGGTGTATGAATGAGAGGATG  
CCGTGCTCCCCCTGCGGGGTGTGCAGCGGAAAGGAGACGCCATTGCGTACCCCGAAATCAGCGGCCAGGT  
TCATCACGTGCGGGCTGGCGCTAGGCAGCCAAGGCGAATCGCAGTCGAGCTTGTTCAGAAAGATCGGCTG  
GGTCTGTTTTAGCCCCAGATAGACCACCGGATCCTGGGTGAGATACTGGTTTTTCGCTATAGGCGTCAAAC  
CAGGTGGTTCGACAGTTGTTGAACAGTGCACGTTGGGATTTTTGCATGCTGATGGGGAAAATAATCAGCA  
GCCGAAAGTAATCGAAGCCCATTTGATGACTGAAGCGCTCCAGCAGTTGCTGGATATCGCTGGTTTTTGT  
TGCCTTGGTGAACCTGTGCATATGTTCCAGATCGCATCGTTGAGCATTACTTTCTCCTTTTTTCGATCTC  
TATCACACTGATCGAAAAGATTTTTTCTCGTTATTTATATTTGTGCGGTGGCTATTGGCGCCACTTATTC  
CGTGCCTGCTTAAAAATTATCCTGTTTTTGTGCATAAAGGCCAAGAAAATCCTCTCGTTGCCAGTCCGCC  
CAGCATTGAGATAATGATAATAGTTATCATTAGTAAGATGTATTTCAATGAACAAATTATGGGGTGTGG  
CCCTGCTGCCACTGTGAGTCCACTTTGCTGCCATCGGGGATGAGCTGGTGTCTCCCGCCCTCAAGAACAG  
CATAGCTGCTGGGAAAGCTTCCCAGCAGCGGGTGGAAAAAGCCGCCGATGCCGCGCTTGCCGCACGACTG  
GAGCTGCAAAATGCCAGCTGCAACTGCGCGACCTCGAAGCCTACAACCGCTACATGCAATCTCTGGTGG  
CCGATCAGCAAAATGAGCTGGGTAAATTTAGCCAGCAGCTGGAAGCGGTGCAAGAGACCCGTCAGGGCTT  
GATCCCCTGATGCTGCAGATGCAGGCAGATCTGGAACAGCTGGTGCAAAATGACATCCCGCTGCGCAAG  
GAAGATCGTTTGGCGCGGGTTGAACAGTTGAAAGCGACCTGGCTCGCGCAGACGTTAGCGAGGCAGAGA  
AATTCGCTGAGCTGCTGAGGCCTATCAGATTGAAGCCGAGTACGGCAGCAGGATGGACAGCTATTTCCGC  
CGAGCTCGAGCTGGATGGTGGCCCCGCTCGGGTGCATGCTGCGCTGGGTGGGTTCGCTCCCTGCTGGCG  
ATGACGGCCGATCGCAGTCAAGCATGGCGCTGGTCTGCGGAGGCGAAGCAGTGGCAAGCCCTCGACAGCC  
AGTGGCTCTCCCTATCGCCGAGGCGATGGATGTGGCCGCCGACAAGAAAGTTCCCCAGTTGCTCAATGT  
CCCCCTCTCTGTGACCCGTAGTCAGGAGGCCAATCATGAGAGTCACCATGAAGTGGTTCCCCCTCCTTA  
TTGCCCTCTCCTGCGGTACCAACGCTGCTGTGCGCGATGAGTGGCAGCAGCAGGAACAGGCTCGTGAACA  
GCAGGCTCAGCAAGATCTGGCGACCGTTGCCAAGGAGCTCGGCACTGCCCGCACCAGACTGGCCGAGGCC  
CAGCGCCTGAGCAAGGAGCTGGCTGGCAAGTTCGCCAGCAACGAGAAGCAGCTGGTCGAGCTTAACGCC  
AGTGGGAGCAAGCCTCCGGCGACATGAACGAGATCTTCGCGGTACCCGTCAGGGCGCCAGCGATGCGGT  
CAAGCTGCTGAGCGAATCCGCCGTCGAGGGCCAGTACCCGGAGCGTATCGCCCCGCTGAAAGCCATGGCA  
CAGGATAAACAGGTGCCGGATCGTGTCTCTCGCCCTGCTGCCCGCCACGCTGCTGCAGGAGATCCGCG  
AATCTGGCCGGATTGCCAGTTCAACGGCAAGGTGCTCGATGCCAGGGGGTGGCCAGCGAGCAGTCCGCT  
GACCCGGGTGGCAGTTTTGCCCTGCTGGGGAGCGAAGGCTTCTTGCAACCGACAGCCGAAGGCTTGAGC  
CCGGTACTGGGTCTGCCCGGTAGCGTGTCTCTGCCGTTGCGGCTTATCAGGGTCAGGAAGGGGAAGCGC  
TGCCGCTGGATCCTTCTCATGGCACTCTGCTGGCGATGCTGGCACAGGCACCCACCTTCTGGCAGCAGGT  
ACAGCAAGGTGGTCAAGTTCGGCGCAACTGACTCTGGTGCGCCGCCAGCTCAGGAGCGGTGAGTATCACGCCG  
CGGCTGTGGAGTCTCTCGCGCAACTGACTCTGGTGCGCCGCCAGCTCAGGAGCGGTGAGTATCACGCCG  
ACAACGCCCTCGGCCGGGTGCTGACGGTGGCAGACAAACACCCCGAGCTGAGCATGGAGACCCCTCGAGCT  
GCGTCTTGATGAGCGATCCTGCAGGAGACTCCTCGTATGGAGCGCGGCATCGGCATGGTCAAGGTAATC  
GCGGCCATCGCCCCATGCTGGGTCTGCTCGGTACCGTACCAGGATGATCGGCACCTTCCAGGCCATCA  
CCCAGTTTGGTACCGGCGATCCCAAGATCATGGCTGGCGGCATCTCCATGGCGCTGGTCAACCAGGTACA  
GGGTCTGGTTGCGGCCATTCCGCTGATCCTGGCCACAGCCTGCTGCAATCACGCTTACCCGAGCTTTCC  
AATGTACTGGAGCAGCAGGTAGCCGGCATTCTGGCCGAGCGCGCCGAGAGCAATAACGGCGGGATGGAGC  
GAGCAGCATGATGCTCGACATCTGGCAACAGTTGCAGAGCTTTCATGGGCCGTGGCGGCCCTGTGCTCTGG  
GTCATTCTGGCCCTGCTGGTGTGATGTGGATTTTGTGATGATCGAGCGGCTGCTCTACCTCAATCTGGGTT  
TCGGCCCGCTGCAGCAACAGCTGCTCGGCCGCTGGCAAGCCCGCAGCGAGCGCCACAGCTGGCACGCCCG  
GGCGATCCGCAGCCGCTGGCTGGCGCAGGCGGAGCTGGAACCTGAACCGTCATCTGATCTTTCATCCGCACC  
CTGGTGGTGTCTGCCCCATGCTGGGGTTGCTGGGCACTGTGACCGGCATGATCGGCGTATTCGATGCGT  
TGGCTGCGGCCAACCCTTTAACCCGGAGAGTATGGCGGGCGGGATCTCCCGCGCCACCATCCCCACCAT  
GGCAGGCATGGTGGTGGCGCTCTCCGGTGTGTTGTTACTCAGTCGGCTCGAGAGTCAAGCCAAAGCGTGGC  
CTGGCCAAGACCCGGGACGGCTGCGAGAAGAGAAGGTAATGCAATGAGACGGCAATCCAAACGCCAGCG  
TGACGAAGTGCAGATCGACATGACCCCATGCTGGATATCGTGTTCATCATGCTGATCTTCTTTATTGTC  
ACCACCTCCTTCGTGCGCAAGCCGGGCTCGAGGTACACAGACCCCGAGCCAGTCAAGCCAAAGGTGCAGA  
AATCTTCCAGCATCATGCTGGCGATCGGGGCTCAGGGTCAGATCTTCTCGACCGCAAGCAGATCGATGT  
GGAGCGGGTACAGGCCACCATCGTCCGTCTGCTGGCGGAGCAGCCCGATGCCAGCTGGTGTATCCAGGCC

GACGAGCGAGTGCCCCATGGCAAGGTGGTGCGGGTGATGGATGAGGCCAAGGCGGCGGGTATCGCCAATA  
TCGCCGTGGCGGTGGCGCCGAAATGAAATACAAGCTGATGAGCCTGGGGCTGGGGATCGCCCTCAGTCTG  
GGCATCCTGCTGTTTCATGGCCACGCTGGTTGAACCGCCCCACGGCGAGAAGGTGGCGAGTGAACAGAAGC  
CCATCGTCATCAATATGCAGAACGAGGTGACCGAGGTGCAGGTACGCGAGCGTCCGGTACCGCAGGAACC  
CGAGCCTCTGCCAGAGCCTCCCCGCGGCATTGGCCTCGACACCTCTGCCGATGCCCTGCCGCGGCCCCCTTG  
GCGGCCGTTGAGCCGAGTCTGGATCTGGTTTCCAGCCTCAGCGCGGTGCAGGTCTATGCCCCCGGAGTGG  
CGACCAGTACCGCACCGGTATTGAGTGGCAACTACCACGGCCAGCAGCAGGGAGCGGGTATCGGCGCAGG  
TGACATGCTGATGCCGCTGCAACGGATCGAGCCGGTCTACCCCTATCGTGCCAGCAGTCAGGGATCGAA  
GGATTTCGTACCCCTGCGCTTTAGCGTGAATGCTGAAGGTGGCGTGCAGGATGTGGAAGTGGTCGAGGCCA  
AGCCCCAAGCCTCAGTTCGAGCGGGCGGCCATTACGGCGATCAACAAGTGGCGCTATCAGCCGAGACCGGG  
CGTACCAGCAAGCTGGTGCAGATCATCAGCTAAAATTCAAACTGGAGTCATAACTATGTTGCGGATCT  
GGATCTGTCTGCTGGCCCTGGTTCGGCCAAGCCTGTCTGGCGATGGAGGTGAGCCCTACTTCTCCCGTCA  
GCTTGAACCCGTGATGAAGCTCTATCAGTCCGGTTCAGTGGCAACAAGCCAGAGCAAGGCGTCCGGCCTC  
AAGCCAAATAGCGATGCCGAGCGTGCCTGGCTGGCGCAGTTGCAAGCCTCGCTGGCGGCTAATCTGCAAC  
AGACCGCCCAAGCGAGCCGTTATGTGCAACAGGCTCTTGCCTATAAAAGAGTGGCCCGAGCAACAACAGCT  
CCAGCTGCTGCGACTGCGCGGCGATATCCAGGCCAGCAATCCAACCTGGTCTGGTGCCATCGCCAGCTAC  
AAGGCGGCACTGGCACTCAAACAAGACGATGGGCTGCGCCTGCGCCTAGCCGGCCTCTATTACCACAACA  
AACAGTACGGTGACGCTGCCAGCCAGAGCGAACAGTGTGTAAGAAGGGTTGGCAGAAGCAGGCCGCCAT  
CATTCGTCTCTCCGCCCTCACCGCTCAGCAACGTTATGGCGTGGCTGCCGATCAGGCGGCCGAGTTGATC  
AGCCACGAACCCAAAGAGAGCAAATGGTGGCAGCAGCGGTGTGCTCAACCTCTCCGCCAAACGCGGCG  
ATCAGGCGTGGCTCTGTTGCAAAACAGCTATCGACAGAAAAGCTGATGGGTGATGCGTCTGCCCGCAATCA  
GCTGATCCGCCTCTATGCCTGGCAAGGGCTGCCTTATCGTGGTGCCCGTCTGCTGGAAGCGGCCATGGCC  
AAGGGACAGATGAAGCAAAGTGTGAAAACCGCCAACCTGCTTGGCCAAATGTGGGAAGGTGCCCGGGAGT  
GGTCAACAAGCGGTGCATAGCTGGCAGCTGCTCGCCAACCAGCACGGTCAGCCCAAAGCCGCCATGCGCGC  
CGCCGAACTGCTGCTGCAACAGGGCAAGACTGATGCTGCCATGACCCAGCTCGCTGCCATCAAGTCGGTG  
AAGGGCGAGCAAGGCAATCGCGCCAAAGCGTGTGCTGGTGCAGGCACACCTTAATAAGGAGCAGTATGCC  
AGGCGCTGGAACCTGGCCCGTGAAGCTGCAGCAACAGGATAACTGGCAGCAGAAGGCAACCAGCTGGGTCAA  
CTATATCCGGGCACAAAGCGAAGAATTGAGCAAAAAGCGCGGTAAAAGAGATGCCAAGGGTGTGTTTTG  
GGCGTTCAGTTCACCTTTTTTCAGCAAACGAACGATTTTTTGCAAAAGCCCTTGTCATCCCGGCGTGGCG  
CCCTATAATGCGCCCTACCAGCACGGCGGAACACGCCGAAGTATGAGCCAACTTCCTAGCGAAGTGGG  
CGCCGAAAAGAAAAGCGAAAACAATTGCTTGAAGTGAAGCGTAATATGCGCCTCCTCAACGC  
GATAAGCGTGACGCTCTTTAAACAATTTGAATCAAGCAATCTGTGTGGGCACTCACAGCATCGAACATCAA  
AACAATTTTTGATTTTCAATGTCTGGTGAAGTGAACCAAGACGATTTCTTAGCAATAAGAAGTTGAACAGT  
TTATTTTCAGCAATTCATTGAGCCGCTTTTGAAGCAACCAAACCTTAAATTTGAAGAGTTTGATCATGGCTC  
AGATTGAACGCTGGCGGCAGGCCTAACACATGCAAGTGCAGCGGCAGCGGAAAGTAGCTTGCTACTTTTT  
GCCGGCGAGCGGCGGACGGGTGAGTAATGCCTGGGGATCTGCCAGTGCAGGGGGATAACTACTGGAAAC  
GGTAGCTAATACCGCATAACGCCCTACGGGGGAAAGCAGGGGACCTTCGGGCCCTTGCGCGATTGGATGAAC  
CCAGGTGGGATTAGCTAGTTGGTGAAGTAATGGCTCACCAAGGCGACGATCCCTAGCTGGTCTGAGAGGA  
TGATCAGCCACACTGGAAGTGAAGACCGGTCCAGACTCCTACGGGAGGCAGCAGTGGGGAATATTGCACA  
ATGGGGGAAACCCTGATGCAGCCATGCCGCGTGTGTGAAGAAGGCCCTTCGGGTTGTAAAGCACTTTTCAGC  
GAGGAGGAAAGGTTGGTAGCTAATAACTGCCAGCTGTGACGTTACTCGCAGAAGAAGCACCGGCTAATC  
CGTGCCAGCAGCCGCGGTAATACGGAGGGTGAAGCGTTAATCGGAATTAATGCGGCTAAAGCGCACGCA  
GGCGGTTGGATAAGTTAGATGTGAAAGCCCCGGGCTCAACCTGGGAATTCATTTAAACTGTCCGGCTA  
GAGTCTTGTAGAGGGGGGTAGAATTCCAGGTGTAGCGGTGAAATGCGTAGAGATCTGGAGGAATACCGGT  
GGCGAAGGCGGCCCCCTGGACAAAGACTGACGCTCAGGTGCGAAAGCGTGGGGAGCAAACAGGATTAGAT  
ACCCCTGGTAGTCCACGCCGTAACGATGTCGATTTGGAGGCTGTGTCTTGAGACGTGGCTTCCGGAGCT  
AACGCGTTAAATCGACCGCCTGGGGAGTACGGCCGAAGGTTAAAACCTCAAATGAATTGACGGGGCCCCG  
CACAAGCGGTGGAGCATGTGGTTTTAATTCGATGCAACGCGAAGAACCCTTACCTGGCCTTGACATGTCTGG  
AATCCTGTAGAGATACGGGAGTGCCTTCGGGAATCAGAACACAGGTGCTGCATGGCTGTCGTGAGCTCGT  
GTCGTGAGATGTTGGGTTAAGTCCCGCAACGAGCGCAACCCCTGTCTTTGTTGCCAGCACGTAATGGTG  
GGAACTCAAGGGAGACTGCCGCTGATAAACCGGAGGAAGGTGGGGATGACGTCAGTCATCATGGCCCTT  
ACGGCCAGGGCTACACACGTGCTACAATGGCGGTACAGAGGGCTGCAAGCTAGCGATAGTGAAGCAATC  
CCAAAAGCGCGTTCGTAGTCCGGATCGGAGTCTGCAACTCGACTCCGTGAAGTCGGAATCGTAGTAATC  
GCAAATCAGAATGTTGCGGTGAATACGTTCCCGGGCCTTGTACACACCGCCCGTACACCATGGGAGTGG  
GTTGCACCAGAAGTAGATAGCTTAACCTTCGGGAGGGCGTTTACCACGGTGTGATTCATGACTGGGGTGA  
AGTGCATAACAAGGTAACCCCTAGGGGAACCTGGGGTTGGATCACCTCCTTACCTTAAGATGTCGAAGTTGT  
TGAGTGTTCACACAGATTGCCTTGATTCAAAGTAGTTAGAGCAAAGACCTGATGCCAAAGTGTGAGTGTCT  
TATCTGGCTTCGGTTCAGATGAGAGAAGCCCTATCATTGGGTTTTGGGATGTGAATAATGGCGCTCGGCCCT  
CGCAGGCTCGGCACTCGCCATTACCCAAAATCTGCACTGCTGACGCAGCGCAAAGATGATTTTTGGGTCCC  
CTTCGTCTAGAGGCTTAGGACACCGCCCTTTCACGGCGGTAACAGGGGTTGCAATCCCTTAGGGGACGCC  
ACTTCTCTTCTGCTAACAAGAATGCAGAGTTAAGAAGTATCTTAACTCTGTTTTCTTCGGCCTTGGC



CCGTTGCAAACATGCTCTTTAACAATCTGGAAAGCTGATTTAAAAAGTAGTTCTCAAACATTTGTTACAA  
GTGCTTTGGAAACTTCTTGGCGAAAACCAAATTTTATTTGGTCTTGTGTACGACAACAAGCAAGCGTT  
GTTTCGACGACACTTCTTGGGGTTGTATGGTTAAGTACTAAGCGTACATGGTGGATGCCCTGGCAGTCA  
GAGGCGATGAAGGACGTAACCTGCGATAAGCTGTGAGAAGTCGGTAAGAGACGCTATTACTCACAGA  
TTTCCGAATGGGGAAACCCACCCGAGATAACTCGGGTATCTGTTACTGAATACATAGGTAACAGAGGCGA  
ACCGGGAGAACTGAAACATCTAAGTACCCCCGAGGAAAAAGAAATCAACCGAGATTCCTCAGTAGCGGCGA  
GCGAACGGGGATTAGCCCTTAAGCATCTTGGAAAGTTAGTGGAAACGGTCCCTGGAAAGGCCGGCGATAACAG  
GTGATAGCCCCGTACACGAAAACGACCTTGATGTGAAATCGAGTAGGGCGGGACACGTGACATCCTGTCT  
GAATATGGGGGGACCATCCTCCAAGGCTAAATACTCCTGACTGACCGATAGTGAACCAGTACCCTGAGGG  
AAAGGCGAAAAGAACCCCTGTGAGGGGAGTGAATAAGAACCTGAAACCGTGTACGTACAAGCAGTGGGAG  
CCCTTCGGGGTGACTGCGTACCTTTTGTATAAATGGGTACGACTTACATTTTGTAGCGAGGTTAACCGT  
ATAGGGGAGCCGTAGGGAAACCCGAGTCTTAACCTGGGCGTCTAGTTGCAAGGTGTAGACCCGAAACCGGGT  
GATCTAGCCATGGGCAGGTTGAAGGTTGAGTAACATCAACTGGAGGACCGAACCCACTAACGTTGCAAAG  
TTAGGGGATGACCTGTGGCTGGGGGTGAAAAGGCCAATCAAACTCGGAGATAGCTGGTTCTCCCCGAAAGC  
TATTTAGGTAGCGCCTCGGACGAATACTACTGGGGGTAGAGCACTGTTTGGGCTAGGGGGTCACTCCCGAC  
TTACCAACCCCATGCAAACCTCCGAATACCAGTAAGTAATATCCGGGAGACACACGGCGGGTGTAAACGTC  
CGTCGTGAAGAGGGAAACAACCCAGACCCGCGCTAAGGTCCCAAAGTTCTGGTTAAGTGGGAAACGATG  
TGGGAAGGCTCAGACAGCTAGGATGTTGGCTTAGAAGCAGCCATCATTTAAAGAAAAGCGTAATAGCTCAC  
TAGTCGAGTCGGCCTGCGCGGAAGATGTAACGGGGCTCAAACCAGGCACCGAAGCCGCGGATTCACACTT  
ATGTGTGAGTGGTAGGGGAGCGTTCTGTAAGTCTGCGAAGGTGTATCGAGAGGTATGCTGGAGATATCAG  
AAGTGCGAATGCTGACGTAAGTAACGATAAAGGGGGTGAAGGCTCCTCGCCGGAAGACCAAGGGTTC  
TGTCCAACGTTAATCGGGGCAGGGTGAGTCGACCCCTAAGGCGAGGCCGAAAGGCGTAGTTCGATGGGAAG  
CAGGTTAATATTCCTGCACGACTTGTAATTTGCGATGGGGGGACGGGAGAAGGCTAGGTGGGCCAGGCGACG  
GTTGTCTGGTGAAGTGCCTAGGTGGTGTCTTAGGCAAAATCCGGAGACACAACACTGAGACACGAGAC  
GAACACACTACGGTGTGGAAGCCATTGATGCCCTGCTTCCAGGAAAAGCCTCTAAGCTTCAGATTACAAG  
TCATCGTACCCCAAACCGACACAGGTGGTGGGTAGAGAATACCAAGGCGCTTGAGAGAACTCGGGTGAA  
GGAAC TAGGCAAAATAGAACCGTAACTTCGGGAGAAGGTTGCTCTTGACAGTGAAGTCCCTTGCGGATG  
GAGCAGTTGGGATGCGAGTACCAGATGGCTGGGACTGTTTATCAAAAACACAGCACTTGCAAAACACG  
AAAGTGGACGTAAGGTTGACACTGCCCCGTCGGGTAAGGTTAATTGATGGGGTTAGCGAACCGGAA  
GCTCTTGATCGAAGCCCCGTAACCGCGGCCGTAACATAACGGTCCCTAAGGTAGCGAAATTCCTTGTC  
GGGTAAGTTCCGACCTGCACGAATGGTGTAAACCATGGCCATGCTGTCTCCACCCGAGACTCAGTGAATC  
GAATTCGCCGTGAAGATGCGGTGTACCCGCGGCTAGACGGAAAAGACCCCGTGAACCTTTACTACAGCTTG  
GCACTGAACATTGAACCTACATGTGTAGGATAGGTGGGAGGCTTTGAAGGCGTGACGCCAGTTGCGCTGG  
AGCCGTCCTTGAAATACCACCTTGTATGTTTGTATGTTCTAACGCAGGGCCCTGAATCGGGCTCGCGGAC  
AGTGCCTGGTGGTAGTTTACTGAGGGCGGTCTCCTCCCAAAGAGTAACGGAGGAGCACGAAGGTTGGCT  
AATCCTGGTCCGACATCAGGAGGTTAGTGAATGGCATAAGCCAGCTTAACTGCGAGACGGACAGGTCGA  
GCAGGTACGAAAGTAGGTCATAGTATCCGGTGGTCTGAAATGGAAGGGCCATCGCTCAACGGATAAAAG  
GTACTCCGGGGATAACAGGCTGATACCGCCAAAGAGTTCATATCGACGGCGGTGTTTGGCACCTCGATGT  
CGGCTCATCACATCCTGGGGCTGAAGTCGGTCCCAAGGGTATGGCTGTTCGCCATTTAAAGTGGTACGCG  
AGCTGGGTTTCAAGACGTCGTGAGACAGTTCCGGTCCCTATCTGCCGTGGGCGTTGGATGATTGAAGGGAGT  
TGCTCCTAGTACGAGAGGACCGGAGTGAACGAACCTCTGGTGTTCGGGTTGTACGCCAGTGGCACTGCC  
CGGTAGCTAAGTTCCGAATCGATAACCGCTGAAAAGCATCTAAGCGGGAAGCGAGCCCTGAGATGAGTCAT  
CCCTGACCCCTTGAGGGTCCATAAGGGCCGTTGGAGACCACAACGTTGATAGGTGGGGTGTGTAAGCGCG  
GCGACGTGTTGAGCTAACCATACTAATTACCCGTGAGGCTTAACCATAACAACACCCAAGAAGTGTCTA  
AGGCTTGTAGCAAATACGAACGAATTACTACGTCAGCTTTCTCAGATTGAAGAATTTGCCTGGCGGCCA  
TAGCAGCGGTGGAACACCTGATCCCATGCCGAACCTCAGAAGTGAACCGCGGTAGCGCCGATGGTAGTGTG  
GCATTCGCCATGCGAGAGTAGGACACTGCCAGGCACCCAATTTCAAGATTACGCCAGCGTGGTCTTTAC  
CGGTTAGTGTGCTGATATGGCTCAGTCGGTAGAGCGCATCCTTGGTAAGGATGAGGTCCCCAGTTCGATT  
CTGGGTATCAGCACCATTAATAAGAAAGCCTCCCTGAAAAGGGAGGTTTTTTTTGCATCTGTCAGTTTTCT  
TATATCCCCCTACATTCCCTATTTCCCGCAACCCCCCTCTGCTTGCAGTCGACACAGTTTATCTGCTGATT  
TGAGTCCCCTGTGTTACTCATTGACTGCTATTGATGGTTTTATCCAGAGATTTAACCATGATTGATTG  
ATGTAACAGTTTTACATGTAATAACCGCGCGTTTTGCTATTACGTGGAGAGAGAGCATGGCGCAGGA  
TAACGAATACTGTTTGGGGCGGTACCCGCCAAAGGGCGCAAAGGTGTGCTGCTGCTGATGCTGGTGATG  
CTCGGCCTGACCTTCTTCTGCCAGCATGTGGACCGGTGGTGCCTTGGTACCGGTCTGGTGTTCGATG  
ACTTCATCAAGGCGGTACTGATTGGCAACCTGTTGCTGGGGATCTATACCGCCTGTCTCGGTTATATCGG  
TGCTTCAACCGGTCTCTTACCCATCTGCTTGCAGGATACTCCTTCGGCGTCAAAGGTTCCCTGGCTGCCA  
TCCCTGCTGCTGGGCGGTACTCAGGTCCGGTGGTTTTGGCGTGGGCGTGGCGATGTTTGCCCTGCCGGTGC  
AAAAGGCGACCGGCATAGATGTGAACTGGCTGATCGCCATTTTCGGGCATTTTGTGATGACGGTACCGTCTA  
CTTCGGGATCTCTGCTCTGATGGTGTGAGCTTTGTGGCCGTACCGGCTATCGCCCTGCTCGGTGGCTAC  
TCGGTCTGGCTGGCGGTGACCTCGACCGGTGGCATGGCTGCACTGCAGCAGGTACAACCAAGCAATCCCA  
TCGAGTTCACTACGGCGTTGACCATGGTAGTCCGTTCTTTATCAGTGCAGGAACCCCTGACCGCGACTT

TGTCCGCTTTGGTCGCAAACCCCTGGGGCGCCGTCATGATTACCATGGTGGCGTTTTTTTTGGGCAACACG  
CTAATGTTTCGTCTTCGGTGCAGCTGGTGCGGCGGTAACGGGGCAGGCCGATATCTCGAAAGTGATGCTGA  
TGCAGGGGGCTGCTAATCCCCGCCATTCTGGTGTGGCCCTCAATATCTGGACCACCAACGACAACGCGCT  
CTATGCCTCCGGCCTCGGTTTTGCCAACATTACCGGCCCTCAAGAGCAAGCCCCCAGCGTGATCAACGGC  
CTCATCGGTACCGCTTGGCCCTCTGGCTTTACAACAACCTTTGTTCGGCTGGCTGGCCTTTTTTGAGTACGG  
CAATTCCGCGGATCGGTGGCATTATCATCATGGATTTCTGTCTCAATCGTGAGCGTTACCGTCAATTTGC  
CGATCAGCAGTTCGAGACGGTGGCCTGGCAGGCGCTGGTTGCCACGGCAGTCGGGGTGGCTGTCGGCAAG  
TGGCTGCCTGGCATAAGTGCCTCAACGCGGTATTGGGCGCCGCTTACCTATTTTCATTCTGGTTCCGC  
TCACCCAGCGGCCGGTTCTGGTACAGGAAGCTAACAAATGCTGATTCAACATAATTCGTTTTGGCCGATCGG  
GAAGGGTTTTTGGCAGATCCGCTGTGAGGATGGGTTTCATCACAGCCATCGAACCCCATGACGAACATGCCG  
TCGCCGGTTCGGGTGCTGGACGGGGAGGGCGGTCTGGCGATCGCTCCCTTTATCGAACCCCATTTACCT  
CGATAACCCCCAGACGGCGGGCGAGCCGAGCTGGAACCTCTCCGGCACCCGTTCGAGGGGATCGAGCGC  
TGGGCCGAGCGCAAGGCGCTGCTGACCCATGAGGATGTGAAACAGCGCGCCATCCAGACGCTGAAGTGGC  
AGATCGCCAACGGCATCCAGTTTGTCCGTAACGTCAGTGCATGCTCCGATCCCAATCTGGTGGCGCTCAA  
GGCGATGCTGGAGGTGCGGGAAGAGATGAAGGAGTGGGTGGAGCTGCAGATCGTTGCCCTCCCGCAGGAG  
GGGATTCTCTCTACCCCAACGGCAAGGCACTGCTGGAGGAGGCGCTCAAGCTGGGGGGCCGACGTGATTG  
GCGCGATCCCCACTTCGAGTTTACCCGGAATATGGGGTTCGAAAGTCTGCACTACATCTTCGATCTTGC  
CGAGAAGTATCAGGTTCTGGTGCATGTGCACTGTGACGAAATCGATGACGAGCAGTCCCCTTTTATCGAG  
ACGCTGGCAACTCTCGCTACGAGCGGGGTATCGCCATCGGGTGCAGGCCAGTACACCACCGCCATGC  
ACTCCTACAACGGCGCTTATGCTTCCCGCTGTTCCGCTCTGCTCAAGATGGCGGATATCAACTTCGTGGC  
CAATCCGCTGGTGAACATTCACCTGCAGGGGCGGTTTCGATACTATCCCAAACGCCGCGCATTACCCGG  
GTGAAGGAGATGCTGGAGGCGAACATCAACGTCTGTTTTCGGTACGACGACGTGTTTCGATCCCTGGTACC  
CCATGGGCACCGCCAACATGTTGCAGGTGCTGCACATGGGGCTGCATGCTGCCAAATCATGGGTTACGA  
GCAGATCAACGACGGTCTGAAGCTGATCAGCTGCCACAGCGCCCCGACCCCTGAATGTGCAGGATCGCTAT  
GGTATCGAAGTGGGCAAACCGGCCAACCTGTTGGTCTGCCCGCGACAACGGCTTCGATGCGGTGCGCC  
GTCAGGTGCCGGTGCCTTATTCAATTCGTACGGCAAGGTGATTGCCAGACCCCGCCCGCCAGATCGA  
AATCGTCTGAGTCAGCCAGAGCCCATCGATTTTCGCCGCTGAGATTTCAATCAGGCTGGATGTCGATTA  
GTTCCGCTCTGGGCAAGGGCCGCCATTGCGCATAAATGGCGGCTGACCCTGAGGGAGTGACACCAT  
GCAAACCTGGTTCTATGCTGTCAGGGGGCGCCATCGCGCCCTGCCCTTCGTTTTGGGATTGCCGAACCTG  
ATGGCCTTGCTGCTTGGGCGCCACTTTCTTACGGGACTCTGGTGGTCAACGTGGTGGGCTCTTTCATCA  
TGGGGGTGGCGTTTCGCCCTCATCAGTCATGGTTCATGTGGTAGAACACCCGATGAAGCCGCTGCTGATGGT  
GGGGATCCTCGGTGCCCTGACCACGTTTTCTTCTTTCCTTTCGCCCTCGATACGGTAGTGTGGCTCAACATGGG  
GCCTATCTGAAAGCGCTGCTCAATATCGGTCTCAATCTCTTCTCTGCTGCGCCATGGTGGTGTGGGCA  
TGCAGTTGGTTGCGAGCCGGTTTTAAGGTGTCCGGACGCCAGTGGCTCTGGTAAACTGGCGGCCATTTCTT  
TGCTCTATGGGTGTTTTAAGGGATGTCAGAACAAGCAACGACAACGCATTTTGGCTTTAAAACCGTGGCCG  
CGACCGAGAAGGAAACTCTGGTAGCAGGTGTCTTCCATTCGGTGGCAGCCAAGTATGATCTGATGAACGA  
TCTGATGTCGTTCCGCATCCACCGCTGTGGAAGCGCTTACCATCGACTGTTCCGGTGTGCGCAAGGGC  
CAGAAGGTGCTGGATCTGGCCGGTGGTACCGGTGACTTGACCGCAAGTTTTCCCGCATCGTGGCGGAGA  
CCGGTCAGGTGGTGTGGCGGATATCAACGACTCCATGCTGAAAAGTGGGCGCGACAAGCTACACAATCT  
GGGGGTCCGCAACAACGTCTCTACGTGCAGGCCAATGCCGAGGCGCTCCCTTCCCGGATAACCATTTTC  
GACGTGATTACCATCGGCTTCGGCCTGCGCAACGTACCCGACAAGGACAAGGCGCTCGCCTCCATGTTCC  
GGGTGCTCAAGCCGGGTGGCCGTCTGCTGGTGTGGAGTTCTCCAAGCCGGTCAGCGAAGTGATCGCCAA  
GCTCTATGACCTCTACTCCTTCAAACCTGCTGCCGAAAATGGGCGAAAATCGTCGCGAACGACAGTGAAGC  
TACAAATATCTGGCAGAGTCCATCCGTATGACCCCTGATCAGCAGACCCTGGCTGGCATGATGGAAAATG  
TCGGGTTTCGAGCAGGTGGAGTACTTCAATCTGACTCAGGGTGTGGTTCGCCCTGCACCGCGGTTACAAGTT  
TTAAGGTTGCCTATGCCGATGGATGCCATGGTACCAGCGGTGATCGAAACCAGCCTCAACCAGTTGCTGG  
CGCTGGACAAACAGAGCCCGGAGCGGCTGCGCAAACCTGGTGGGCAAGGTGCTCAAGCTGGAGTGGCTGA  
ACTCAAGCCGCTCTGGTTTTGTCTTCTCCGAGCGTCCGCTGGATGTGCTGGCCCAGCATGAAGGGGAGGCC  
GATGCGGTGCTCAGCCTGTGCTGACCGCCCTTGGTCTGCTGAAAAGACCCGTCCGCCCAGCCCGTTATA  
TCCGCGAGGAGAAACTGGATCTGAGCGGTGATCCCCAGCTGGTACAGGCATTCAGCGTGTGCTGGGTGA  
GCTGGATATCGACTGGGAAGAGGAGCTGTGCGCTATAACGGCGACGTGCTGGCCCACACCCTGTTTCACT  
GGTGCCTGTCAGGCGCTGCGCTGGTGGTGGTGGTGGTGGTGGTGGTGGTGGTGGTGGTGGTGGTGGTGGT  
TGACCGAAGAGGCCCCGCTAGCCCCCGTCCGCTGGAAGTGGCGAGTTTCAACGATGACGTCGAGGTGCT  
GGCCCAGCAGCTCAAGGCCGTGCAACTGCGGCTGGCCCGCTTTGAACAGCAGGTGACCTGATGACCCCGA  
AGGAGTTCAAACGCCTCTATCGCATCATACCATCCTGCTGGAGCAGGGCATCGACGAACTGGTGGCCGC  
CCGCTATCAACCCTGGCCGGTCTGCTGGCCCGTCCCTGTTCTGGCTCAAGAACAACAACCGGAT  
CTCAGCCGCGGTGCCCGCATCCGCTTCGAGGCTCTTGGCCCCATCTTCATCAAGTTTGGCCAGA  
TGCTCTCGACCCGCGGACCTGCTGCCCGGGACATTGCCGAGGAGCTGGCCCTGCTGCAGGACAGGGT  
GCCCCCTTCTGTGGTTCAGGCGGCGGCCAGCAGATTGAGCTGAGCCTGGGTTGTCCCATCGAAACCCCTG  
TTTGACGACTTCGACGAGACCGCTGGCGTGGCTTCCATCGCCAGGTGCATACCGCCCGCTTGAAGG  
AGAGTGGCCGCGAGATCGTCATCAAGGTGATCCGTCCCGACATCGAGCCGGTTATCGAGGCTGACCTGCC

GCTGATGCAGGCGCTGGCACGTCTGGTGGCCCGCTTCGTGCCCCAGAGTGCGCGGCTGCGCCCCATCGAG  
GTGGTGGAGGAGTATCGCAAGACCATCCTCGACGAGCTGAATTTGATGCGCGAAGCGGCCAACGCCATCC  
AGCTACGGCGCAATTTACCCGGCTCCGAGGCACTCTATGTGCCGTAATCATTACCGACCTCTGCCGCGA  
GCAGGTGCTGGTGTATGGAGCGCATCTACGGTATTCCGGTCTCCGATATACCGGCGCTGGAAGCCAACGGC  
ACCAATATGAAGCTGCTGGCCGAGCGCGGGGTCGAGGTTTTCTTCAACCAGGTGTTCCGCGACAGCTTCT  
TCCATGCCGACATGCACCCGGGCAACATCTTCGTCTCTTACGAAACATCCGGAAAACCCGCTCTGGATCGG  
CATCGACTGCGGCATCGTCCGTACCCTCAATCGGGAAGACAAAACGCTATCTGGCGGAGAACTTCTCGCC  
TTCTTCAACCCGACTATCGCCGGGTGGCGGAGCTGCATGTGGAGTCGGGCTGGGTACCAGGACACCA  
AGGTGGACGAGTTCGAGTTCGCCATCCGCACCGTCTGGAGCCCATCTTCGAGAAGCCGCTCTCCGAAAT  
TTCGTTCCGGTACGTTGCTCAATCTGTTCAAACTGCCCGCCGCTTCCATATGACGGTGCAGCCACAG  
CTGGTGTGCTGCAAAAAGACCCTGCTCTATGTGGAAGGTTGGGGCGTCAGCTTACCAGGAGCTCGATT  
TGTGGCAGACCGCAAGCCGTTCTCGAAAACCTGGATGCACGAACAGGTAGGGGCCAAGTCGGTATTGAA  
CGCCATCAAGGAGAAGCGCCATTCTGGGCCGAGAAGCTGCCGGAGCTGCCGGAGCTGGTCTATGAGACC  
CTGCGCCAGACCCGTCATCAGCAGCGTCATTTGACCAGATGTTTGGCGAGTTCGGCCGTCACAGCCGTC  
GGCAGGGGCGAGCCCGCTACCTCTTAGGGGTTGGAGCCAGCCTGCTATTGGCGGGTGTATTCTTGCTGAC  
CCAAAACAACACATTGAGTGGGACAAGCCAGTCTCGCCGGTGCAGCCCTCTGCTGGCTGGTCCGGCTGG  
TTGCGAACCCTTCCATTAATCAACAACCGCGCCGTCAGGCGCCTGTTCTGGAGAGAAAATCATGGGTG  
GTATCAGTATTTGGCAATTGTTGATCATTGCAGTCATCGTCTGCTGCTGTTCCGGTACCAAGAACTGCC  
CGGTATTGGCGGTGATCTGGGCGCGGCGGTCAAAGGGTTCAAGAAAGCCCTCTCCGACGAGCCGGCTGAT  
GCCAAGGCCGAGCAGAAAGATGCCGAGTTTCCCCGAAACAGCTGAACGAAGCGGCCACTCAGAGCAGTG  
AGACCGCAAGCAGAAAGACAAAGACCAGGCCTAAGCCATGTTCGATATCGGTTTTTGGGAGCTGGTCGT  
TATCGGTGTGGTAGCACTGGTGGTACTGGGGCCCCGAGCGGCTGCCGGTTGCCATCCGCACGGCTACCCAC  
TGGATCCGCTCATTTGTTTCGACCCGGAACCTCGGTCAAGTCCGAGCTGGAGCAGGAGCTCAAGTTGCAAG  
AGCTGCATAACGACCTCAAGAAGGCCGAACAGTTGCAGATGAGCAACCTGAGCCCCGAGCTGCAGGAGTC  
CATCGAACAGCTCAAAGCGGCGGCCAGTCCGTCAATCGCCCTATCAGGTGGAGAACGAGATCCGTCGG  
CCGCGCCCCGAGCCGGTCCGCCAGGCGGAGCCTGCCACGCCGGTGGAGCCTGCGGTGCAACTGAGCCACG  
ACGTGACCCGCTCAACAGCCAGCGGGAGAGCGACCCGGTCCGGTTCAGCGACTCCGTAGTAAAAGGGGA  
GGTAGCCATGAGTCAGGCCGAACAACCCCTGATCAGCCATCTGGTTGAGCTGAGAACCCTGTTGCTGC  
GCTCCATTACCGCCATCCGTCGTTCTTCTGCGCTGATCTACTTCTCCAACAACATCTACGATTTCTGT  
GGCCAGCCGCTGCTCAGCCAGTTGCCGGAAGGGACCAGCATGATCGCGACGGATGTGGCAGCCCCCTTC  
CTGACGCCGATCAAGCTGACCCTGGTGGTCTCCTTCTTCGTGGCGATCCCCATCTGCTCTATCAGGCCT  
GGGCCTTTATCGCCCCGGTCTGTACCAGCATGAACGGCGCCTGATCATGCCGTTGGTGGTCTCCAGTGC  
CCTGTTGTTCTATGCGGGGATGGCGTTTCGCTACTACGTGGTGTTCGCGCTGGTGTTCGGTTTTCTTACC  
AGTACCGCCCCTGCCGGGTGACGGTGGCGACCGACATCGCCAGCTATCTGGACTTCGTACTGACCCTGT  
TCTTCGCGTTCGGGGTGGCGTTCGAAATTCGGTGGCCACCATACTGCTCTGCTGGACCGGCGTGACCAC  
ACCGCAAACCTGAAGGAGAAACGTCCTACGTGCTGTGCGGGTGTGTTGTTGGTGGCATGCTGCTGACG  
CCGCTGATGTCTTCTCCAGACCCTGCTCGCCATCCCGATGTGGGCGCTGTGGGAGATAGGTCTGTTCT  
TCGCCCCGCTTCTACGTGAAGAAAGAGGATGAAGAGCAACAGGAACAACCGGATGTGGAGAGCTGAGGCTC  
TGTTTCGTACCTGTTTTCGCGGACGGCGAGAGGATGACGAAGTCCGCAGGAATAGCAGAACGAGGGGAGCT  
GAGGCTCCCTTCTTCTTTTTCATGCTCCCCTTCGAGGCGTATGGTAAGACCCCATTCGGTAGATGGTTTTTC  
AAATACCTGATATGATTTCTTTTGTTCGGAACGTCTCATCCATGATCGATATCGGTTTAAACCTGACC  
AGCAGCCAGTTCCGCGGCGAGCAGGCTGAGCTGGTGGCCCGTCTCGCGCCGCGGAGTGGAAAGCGCTGA  
TCCTGACCCGTTACCGATCTGGCTGGCAGCTGCGAGAGCGCCGAGTTGGCCGCCGCTGGCCGGGCTACTG  
CTTCTCCACCCGCGGGTCCATCCCCACGATGCCAAGAGTGTGATGAGGCGACCCCTGCCCGCTTGGCG  
GAGCTGGCGGCGTTCGCGCAGGTGGTGGCTATCGGCGAGTGGCGCTCGATTACAACCCGCACTTCTCC  
CCGCTCCGGTGCAGGATGCGGTATTTCGACGCCAGCTGGCACTGGCTGCCGAGCTCGGGATGCCGATATT  
TCTCCACTGTGCGGATGCCACGCCCGTTTTATCGAGATCCTCCGTCCTGGTTGCCGAAACTACCGGGA  
GCCGTGCTGCACTGCTTACCGGTTCCGACGAGGAGCTGGACGAGTGTCTGGCGCTGGGGCTGCATATCG  
GGGTGACCGGCTGGCTCTGCGACGAGCGCCGAGTCAGCTGCTGCGCGAACAGGTGGCTCGTATTCGGGC  
CGGTCCGGTGTATGATCGAGACCGATGCCCCCTATCTGGTGCCGCGAGATCTGAAACCGCGCCCCGAAACGC  
AACGAACCCGCTTTTTTTCGCGCACATCGCCAGGTGGTGGCGCCTGTCTGGTGAAGCGCCCCGAGGCT  
TGCTGGCCCATACCCGGGCCACCTCCGCCGCTTCTTCCAACCTCTCTCCAGGAGTGATTCATGGCTAC  
AACTCTTCCGGGCGCCTTTCCGGGCCGCGCCTGCGCCGCTGCGCAAACATGATTTAGCCGTCGCTG  
GTGCGCGAGAACGTAAGTACTGACCGTCAACGATCTCATCTATCCGGTGTTCGTGCTGGAGGGGAGAACCGTC  
GGGAAGCCGTTCCCTCCATGCCGGGGTGGAGCGTCTCTCCATCGATCTGCTGCTGATCGAGGCTGCCGA  
GCTGGTGGAGCTGGGCGTGCCTGCCATCGCCCTGTTCCCGGTGACCCCGCTGGAGAACAAGAGCCTGATG  
GCGGAAGAGGCTACAACCCGAACGGGCTGGCCCAGCGCACCGTGCCTGCCCTCAAGGCCCGCTTCCCGG  
AGCTGGGGGTCATCACCGACGTGGCGCTCGATCCGTTTACCACCCACGGTCAGGATGGCATCATCGATGA  
CGAAGGCTATGTAAGTGAACGACATCACACCGAGATCTGATCAAGCAGGCACTCTCCCACGCCGAGGCC  
GGGGTGCATATCGTTCGCGCCGTCGACATGATGGATGGCCGATCGGTGCCATCCGCGCGGCGCTGGAAG  
AGAACGGCTTCATCAACACCCAGATCATGGCCTACTCCGCCAAGTACGCTTCTGCTACTACGGCCCGTT

CCGTGATGCGGTTGGTTCTGCCGGCAACCTCGGCAAGAGCAACAAGGCCACCTATCAGATGGACCCGGCC  
AACAGCAACGAAGCGTTGCATGAAGTGGCGCTGGATATTCAGGAAGGGGCCGATAGTGTGATGGTCAAGC  
CGGGCATGCCCTATCTGGACGTGGTTTCGTCAGGTGAAGGATCAGTTCGGCGTGCCGACTTTCGCCCTATCA  
GGTCAGCGGGCAGTACGCCATGCACATGGCGGGGATCCAGAACGGTTGGCTGAAAGAGAAGGAGACCATC  
ATGGAGTCTCTGCTCTGCTTCAAGCGGGCCGGGGCCGACGGCATCCTTACCTACTTCGCCAAGCGCGTAG  
CGCAGTGGCTGAAAGAAGATGCCCGTTAAGCCGGGTTGAAGAGATAAACGAGAGGGGGAGCCGATGGCTC  
CCCCTCTGTGCTTATGGCTCTCTTTTGGTCACGAGCGGATGATTACAGCTTGATCCAGGCATCGCTCCAG  
TTGCTGCCGGTACCCGGTGCATAGTGGCTGGTCGAGCCGCCACACCACCCACTGTAGGGCCAGGGTTTGC  
ACTCGTAGTCGCCACCCGGCATTGCTGACCCGTTCGCCACTCTGATAAGCGGTGCCCGCAACATAGGCCGG  
GTAGCTGCCGTTACCACCGTCACTGCTACTCCCGGAGCCTGTTCCACCAATGCCAGGGTGAAGCGGGCC  
TCGAAGCCCTGCTTGTCTCCCTCTGCCATGCCCGCCAGCAGCTCGTAACTGCCGGCCGCTAGGCCCG  
ACTGTGCCAGCTGCAGGGAACCCTGACCATCGATCAGGGCGCTGCCGTTGCCGACCCGATTGCCATCCTG  
CAACAGGGTGCGGTGACGGTACCAGGGTTGGCGGTGGTCAGCGTCAGGCTGAAGTCGATCGCGCCGTTG  
ACGATGAGATATTCGGCCGCCAGATCGGTGACGGTGAAGTCACTGCTGCTACCCGGTCTGGGCAGAATGA  
AGTCTCCGCTCAGGTAGGTGACACCGGTCCAGCCGGAGCTGGTCAGCCAGTCTTGCCATTGGTCTGATA  
GACGTTGGGCAACTGGGTGACTGTTTGTGTGCTATTGACGAAGCCGATACCGTAAAAGCCCGCCACATTC  
TTGTAGCAGAGCTGGCGACCATTCTGGTGCAGCACTGGCTGATCCAGCTTGCCCTTGTGGTGGAGTGACA  
GCCAGTCAAACCTGGTTGATGGCCGAGACCAGCGGCACAACTGGCCATCGGGCTGACGATAACGGATCAG  
GGATCCGGCATCACAGAGCAGACCATCAGCCTGCTGTTGACGCTAGCCGTAGTACTGCTCGCCATCCTGG  
AAGGTGAATCGGCAGAGATTGCCTTTCTCCGACTCCTTGGGGATCCAGCCATCAGCAGTGCCTCCTGAT  
TGGTCAGGGCCGCCAGCTGCCCGGCACTGAAGTCGCTGCCGTTGGCTACCCAGCCTTGCGGCATGGTGG  
GAATTGCATGAAGTAGTGGTTCGGTATAGTACATGTGGCTGTCAGCGCGGTGCTTGCAGAGCCCCCTGGCTG  
ACCGAGTTGTAGCGATAGATGTCGTTTTCCGGCTTGTGGAAGCCGTTGAGATCATCGTCCAGATAGGGCA  
GGTCGCCCTTGCAGATATGGTAGTTGGCCATGCCCGTCATCAGGGGATGCCAGCCATGGCTGCCACGGGC  
AAACGCGCTCTCATGGCTGTAGGACTTCCCATCGAAGCCATGGCCAAATTCGTGGGCAATGATGCCCCAG  
CTACCGTAGTAGTGGCTGACAAAGTTAAAGGTATCGACCCCGGTGATGCCACCCTCCCCAGCCCCGCC  
CCATGGCGGTGATCCCCAGGTTGAGGTAGGGGCGCGTCACTCAGGCTGTGGTAGTAGTAGTATAATCGGC  
TGCGGTAAAGATCCCGTTCGGCACATAGCTGTTGCCGCAATTCGCCAACATCTCGTAGCCGTTACCCGCC  
TTGAAGTTGTACCAGAGCTGTTTGAACCTCCTCGGTCCAGACCATGTAGGCTAGGTTGGTGGCGATGATCA  
GCCACTCGCGGGCGTAGAGGGCATTGATGGGGCGCCAGGAGCCGCTGGTGTGGTGGCGAAGCGCACGTT  
CCAGCTTGGCTTGAAGCGTGCCAGCTTCTGGGCAACGGATCCGAGTTGGAGCTGAACCTGTGCTCGAAC  
TGGGCGGGCAGATTGATGCTGTTGTGCGAGCAGGTTGTTGAGATCAAACACGCCATCGCGGTGGCGCTGT  
TGAAGCGTCCCTGCTCGCCAAAGGCGCTCAGTGGCAGGGTGAATTTGGGCATAGGCGGGCAGGCGATCGAG  
CTGGCCAGGATCAGCCACTTGTGATACCGTTCAGGCGTACTCGATATTGATGTCATGCAGCTCTCTG  
GCGGCATAGTTGGTGTGCGCACCGTGTGCTTATCAAGCAGCTCGGTCTTGACCAGCGAATTGATGTTGA  
CCGAACGCTGGGCGCGATCGATCAGCACCTCGTAGGGTTCGTCATTGCGCAGTATGTAGCTGACTGCGGC  
CGGCATCAGCTGATCGAAGATCAGCGGGCAGCCGGCAACTGCTCGTCGCGCCGTGAAGCTGATCTCCTTG  
CTCAGCAGCTGGTTGAAACCCAGGCCGCGCTCGTTGGCGGTGACAAGCGCCGAGCCCGCCAGCTGGAGAT  
CTTTTCAGTGCCGCCACGGGCTGCTGGTTGATCTCCCGAACACTAAAGGTTCGGGTTCTTGAACCTGAAAGTC  
GTTGGCGATCAGGGTATCGGCATCATGCCACTCGATGCGGTCCCTTGAAGTTCACCACCAGCCGATCGCCA  
TCCATGTGATTTTTTGCAGATTGCTGTGCGGCATCACCTGCTCAGGCGCCAGCGGTGTGTTGCTGGCGA  
TGGCATCAGCCAGTTTGCGCAAGTCATAGATGTAGTAGTTTTTTCGGCGGGTATGGGCCAGGAGATAGTC  
ACCCACCTGATGGAGTTGACCAGACGGTGGCTGATTTTTCTTCAAAGCGAGCCGACCCGGCATGGGG  
GTCTGGAGGCTGTTCTCCGGCGTCACATCCTGCTGGCGGTAGACCTTGATCTCGCTCAGCGCATCGGCCA  
CCAGTACGTAATCCTGATTGGCAAAGACGGCCTGGGCGCGGTGCAGGCTGTTGCTGCCGGAATCTCGACC  
GGTTCCAGGGTGGTGACATGGCGATGTTTCATCGGCCAGATCGAAGATATCGACCCGTTGCGAGTAGCGC  
GAGACCAGTAGAGCAGGTTGTTGCGGACAAACAGTTCGCTGACCTGGTTGTAGGCGGTGGCACTGCCGG  
TTGCGGTGCCCGGATCTCGCCAATCTGCTGGCGGCTCGGGATATCGATAATGGCCACATGGCCCCGATT  
GCCGTTCTGGCTGACATAGAGCCGATCCTGATAGCGCTCGACCCCGTGATTAGGTTGGCGTCCAGCCCC  
AGCTGATCGGCCGTGACTCCTCGCCTTTGTCCAGATATTGCAACGAGGTGGCAAACGAGTTGACGCTGC  
AGGAGCTGGTCTCCATACCACCCGGGTGCGTTCGCCATTTCTGGATCTGGCCGTGGGGGAAGTACTCCAG  
CAGACAGCCGTTGCCGTAGTCATAGTTGCCAAAGCGTTTGTGACCGCAACGACCCACCGTCTGATCCAG  
GTCAGCTCCCCTCCTCATCGAAGAAATCAAAGACGTTACGAATGGCTGTTTCGTCGAAAAAGTGGGGTT  
TGGGCAGATCGAACAGGATGTGGTTATCCGCTGTCAGCGGTTAGAGCAGGCCGTTGATGGCAAGGTGTGCG  
CTTGCCATCCTTGTGATGATCAGCTTCTGCTCGTCAGCCGCACTCTGGTGCAGCGCGGCGAGGCGCGCCGTC  
ATCTGCTCGTAGTGCTCCTGATAGGTTTTGTTTTGAAATAGGCTTGTTCGCGCTCATCGGCCACGACATGGG  
CCGACAGCAGCAGACCCGAGCAGGGTGGCAAAGCTTGGTGGTTCTTGGCATGGTGATTTCCCTTATCTTGGTG  
GTTGTTGGACGTTTTTTTTGGTGGTTGGCAAGCATGTAAGAGAGGGGCTAACCCGTCGGGTCAGCGCAT  
CCTGCCCATCGGCAGCGTGGCCAACGGGCAGGATATGGGCGGGGCTGTCGGCCCTCCGTTAGTGGTTGG  
GGCAAGGTGAGAGCTTGTATCCAGGCATCGCTCCAGGCAGAGCCGGTACCCGGCGCATAGTGGCTGGTTCGA  
GCCTCCACACCAGCCGCTGTATGGCCAGGGTTTGCACCTCGTAGTTGCCACCAGGATTTGCTGACCCGATCA

CCGGACTGATAGCCGGTGTGGGGGCGTAGGCCGGGTAGTCACCTTCGCCACCCCGCTGTTCTCTTCGG  
TCAGCGCAACCGGAAGCGCTGTACCACCGGCTGCTGGCCGTCAGCCAGACCGGTGATGACCACCTTCGTA  
GCTGCCATCGGTGACGTTGCTGCCCTGCAGTACCAGGTGCTGTTGCCGTTACCTGGCTGCTGGTGGTA  
CCGTGGCTGTGGCCGCTCTGCTCCAGAGTCGCGGTGATCTGTACCGGGTTGGCGGTGGTCAGGTTGAAGC  
GGATGCTGACCTGACCGTTGACTATGGTGTACTCGCTCGCCATGGCGCTGACGGTGAAGTCGCTGCTGCC  
TTCGGCGGGTGGCGTTGTGCCGCCGAGTGCCTGTACGCGCCAGACGCCCCAGTCACCCGTG  
GTGCCCGGCTCTTCGTTCTGGGTCCACCAGCTGCCAGCCAGTTCTTGCCGTTGTGGCTGACGATGTCGC  
CGCCACGTAGACCTTCTTGGCATCCAGCTGTTTTACAGACGGCGCCCTGCTCCCTGACGGTCACGTT  
GCGCTGCTGGGTTACCTGCTGACCGGCGCTGTCGCTCACCTGATAGGTGAGGGTGTAGCGGCCGACCTTG  
CTGCTGTCGACGTTGCCGCTGACCTTGATTTGGGTGGTCAGGTGCCATCTTCTTCATCATGGACGCTGA  
CGCCGGTCATCGGATCGAAAGCGGTACCCAGTTCAGCGTGGTGTGCGGTGACCCCACTGAATACCGGCTT  
CATGCTGTAGACCTCGATGGTGCCTACCTGCTCGGTGACGTTGTTGTCGCGATCGTCACTACCTTGTAGGTG  
AGGGGGTAGAGGCCGATGCGCTGGCTGTCTACCGAGCTTCTACCTGGATCTGGCCAGTCAGGTGCCAT  
CTTCCCTTGTGCTTGGCGCTGACACCGGCCAGCGGATCAAAGGCGGTGCCCTGCTTGATGCGGGTATCGCT  
CAGGCCGCTGAACACCGGCTTGCCGTTGTGACCGGGGGCGTGATCTCCTGATCGTGGATGAAGGGGCCG  
TAGCTCTTGATGAAGGATTGTTGTAGGACTGACCGGGCGGTTGCGGCCATGTCCCAGTTGATGGACC  
AGGTCATCACGCCACGACGCGGTTGCCCTCGCTCTCAGGCGGTTGAAGGCGTTGTAGAGCTTCTGCGG  
ATCCTGCACATAGCCGGTGGCGGGCGCTCGATGTTGGTCGGAATGCCAACACCAGCTTGTGATGGGGG  
ATCTTGTAGAAGCCGCGGGTACCGTTGCTCAGCGAATCCGCCATGTAGTAGATGAACTCTTCTTTCAGGG  
CATCGTTGTTCTGGGCAATCCAGCCGATGCCATCGATGTAGATACCGTCGCCACCTGGTTGTAGAAGT  
GGGATTGATCCAGTCGTAGTAGCTTCCAGATTGCGGATATAGGGGATGTAGGCGCCAGTCTGGGTGAGA  
TAGGGGAACCTCCGGCGCCATGGTGATGAGGAAGTTTTTCCCTGGGCGCGGTAGTGATCCTTGACCAGCC  
GCAGGGCCGCGGGATCACGGTCTGGTTGTGCGGCGGAGTGATTGCGGCCCTGTTCCAGGTGATATCCAG  
CCCGTCGAAGCCATAGGTCTCCACCAGACGGATGATCTCGTCGGCAAAGGCTGCTCCTGACCCCTGCGC  
AGCTCGATGTGCGCATCGGCACCGCCAGCGCCAGCAGCACGGCACGGCCCTGACGGTTCAGTTCGGCGA  
TCTGCTCGATAAACTGGCTTTGCTCATGCTGATGGCCGGTTCGAGTTTGAAGGTGGGGATGGGATCGCT  
GCCATACACCTTCATGAAGGAGACATCGACCAGTGTATTGCGGGTTGACCTGATCGAGCTTGACGCAG  
GGGGGATACCCGCTTGTAGCCCGAGCCGTCACACAGTTGTGCAATAGCCGACCACGCGGACTGCGGACT  
GGGGGTTGACCATCGCTGACCGGCACCTGGCGGCATGCCATGGGGGCGCCCATGCCAGCAGGCGACCC  
AAGCAGGGATAAATTTGAGTTTGTTCATCGTCTCTCCGTACGGTGCAGATGGGGCGTTCGGTTGTACCGGA  
CGTCCCCGGGGGCGACCCCGCTGTGATAGGTGTTTTCCCTTAGACCGGTGGCTTTGCGTTCGCGCCCTTTC  
GGGTCACTTTGCCTTTTTACCCGATTTCTGTGACGACAGAGAATCAAGTGACCTGCATGGCAGGTTGC  
CTATGATAGATGCTTGAATAAATAAATAAATAAATAAATAAATAAATAAATAAATAAATAAATAAATAA  
AATTTGTTACAGACACCACATTTTGTCCGTTTCCATGATTGAGCATGACGGTACTTGGCTGGCTGCTGTG  
GCGCCGGTAAATGGCGACTTTTTGCCCTTGAAGTAGCGGTAAGAGCCAAAAAAGGCCACAGATTCAT  
TCTGTTACTGGCTGTTGATGGCAAACTGCAGCAACGGCAGAGATCCGGGTCGCAATGGCTGGAAAAGTA  
CAGGGTTGCGGCGGATTCCCGCTTGTATTATTGCGTGGCTTGGCCACATGTTAGAAAAGCCATACAGAGCTG  
CTAAAGCGGTCTGTTCAAGACCAAACAAGAGGTAACCGGGATGAATAACCCTTTGCTGACAATGGATTCCG  
CTGCCCCCTTTCAGCCAGATCAAGCCGGAGCAGGTTACGCTGCCGTTGATTCAGGCGATTGCTGACTGCA  
AGCAGAAGATCAGCGATGTGCTGGCCAGCGTGATCCCCATACCTGGGATAGCCTGATTGCCCCGCTGGA  
AGAGGTAATGACCGTCTGTACGGATCTGGTACCCGGTCAGCCACCTCAACTCCGTACTCAACAGCGAA  
GCGCTGCGCGAGGCCCATGATGCCTGCCTGCCGCTGCTCTCCGAATTCAGACCTATGTCGGTCAGCATG  
AAGGGCTCTATCAGGCCTATCTGGCCCTCTCCAGAGCGATGATTTCCCGCTGCTGAGCGGCGCCAGCG  
CAAGGAGATCCAGAATACCCTGCGTGACTTCCGCCTCTCCGGCATCGGTCTGCCTGCCAGGCGCAGCAG  
CGTTACGGCGAGATTACAGCCCGCTCTCCGAGCTGGCATCCCGTTTCAGCAACAACGTGCTGGATGCGA  
CCCAGGGCTGGCACAAGCTGGTGGCCGATGAAGCCGAATTGGCCGCTGTCGCCGACAGTTCGCTGCCG  
TGCCCGTCAGATGGCTGAATTTAAAGCCAAAGAGGGGTGGCTGTCACTCTGGATATCCCTTCCTACCTG  
CCGGTGATGATGTATGCCGACAACCGCGAGCTGCGCGCCGAGATGTACGAAGCCTTACCACCCGCGCCT  
CCGATCAGGGCCCCAATGCGGGCAAGTGGGACAACCTCCGCCATCATGAGCGAGCTGCTCACCCTGCGCCG  
CGAACTGGCCAGCTGCTGGGCTTTGCCAACTATGCCGAGCTCTCCCTGGCCACCAAGATGGCAGACAAG  
ACCGAACAGGTGGTGTGACTTCTCACCAGCTTGGCGGCCAAATCCCTGCCGCAAGGCAAGGCCGAGCTGG  
AGGAGATCCGCTCCTTCGCCGCCGAACAGCACGGTCAGAGCGAGCTGGCCGCTGGGATCTCGCCTACTA  
CGCCGAGAAGCTCAAGCAGCACAAAGTTCTCCATCTCCGATGAGCAGCTGCGCCCTATTTCCCCGCCAGC  
AAGGTGGTGAAGGGGCTGTTTGAAGTGGTGAAGCGGGTGTTCGGCATGAAGGTGCGCGAGCGCCTCGGCA  
TCGACACCTGGCACCCGGACGTGCGCTTCTACGACATCTTCGATGCCGACGACGAGCTGCGCGGCAGCTT  
CTATCTCGACCTCTACGCCCCGAGCACAAGCAGGGCGGGCCTGGATGGATGTCTGTCTGGGTGCTCGC  
TACCGTCAGGATGGTTCACTGCAAAAAGCCGGTGGCTACCTGACCTGCAACTTCAACGGCCCGGTGGATG  
GTAAGCCTGCACTGTTTACCCACAACGAAGTGGTCAACCTGTTCCATGAGTTTGGCCACGGTATTCACCA  
CATGCTGACCCGATCGATGTGGCCGGTGTGCGCCGATCAACGGCGTGGCTGGGATGCGGTGGAGCTG  
CCGAGCCAGTTCTTCGAGAACTGGTGTGGGAGTCCGAGGCGCTGGCTTTATCTCCGGCCACTACGAGA  
CCGGCGAGCCGCTGCTGCCGATCTGCTGGAGAAGATGCTGACCGCCCGCAACTTCCAGGCGGCGATGCA

GATGCTGCGTCAGCTGGAGTTTCGCCCTGTTTCGATTTCCGTCTCCATCAGGAGTTTGATCCGGCCAATCCG  
GCACAGCTCCCGGCGCTGCTGGATGAGGTGCGCAGTCAGGTAGCAGTGATGACGCCGCCAGCGTTCAACC  
GCTTCCAGCACAGCTTCTCCACATCTTCGCCGGCGGCTATGCGGCGGGCTACTACAGCTACAAGTGGGC  
TGAGGTGCTCTCTGCCGATGCCTTCTCCCGCTTCGAGGAGGAGGGGATCTTCAACCCGGCGACCGGCCAA  
TCCTTCCCTGAAGAATATTCTGGAGAAGGGGGGCTCGAAGGAGCCGATGGAGCTGTTCCGAGCCTTCCGTG  
GTCGTGAGCCCAAGGTGGATGCACTGCTGCGACACAGCGGGATCGCTGCCTGAGATTCCTGACCCGCCGC  
CTGTGTGAGCTTCAAGCAGGTACACTGTTTTGCGGCATAGTGGGATCGAGTCGTGATTTCTGCGACAAAA  
AGGGACCTTTTGGTCCCTTTTTTCAAGGCTTTTTAATATCTTGCTGATTGCATATTTGCACTGCCACGG  
CTCTTACAGTAGAGTCGTGTTCTAACCTTCAAGGAGAGAAAAGCCACTTGCCATGAGGCGAGCACTCGATTC  
CGTCTATCAAATCATCTCAAGTCTGGCTCATTCGAGCGGCCAGGGATATTTTCGATACCTTTGTGAGTGAA  
ATCGCCGCTGCTGTGATGGCTGATGTCCTGCTGATCGCCGAGCTGGGAATCAAATGCTTCCCATCTTACGG  
TTCAGGCTGCCTACCCCTCCTCGCTTGACCCCGATACCCCTGACGCTGCCACTGACTGACTCTCCCGATGC  
CATTACCTGGCAGGAGGGGAAGCCTGGTTACGCGATCGTCTGTGTCAGCTGTTCCCGCGATGCCGCTT  
GCCGATGCGTGGCAAGCCAGGCCTACGCCGGGATCGCCCTCAAGGATGCGGATGGCGAAACCATAGGCA  
TCTGCTGCCTGCTCTATCGTCAGCCGAGGCCAATATGACCAAGGTGATGGGGCTGCTCCGGTTGCTGGG  
GCCGCTGGCCGGTTCGCAACTGGCGCTGATGCTGCAACGCCAGCTGCCGCAACTCTTGCCTGATACCCCC  
CATGTGCTGCAGAGCATGCTGTTTTAGGCCCGGTGGGGATCGGCAAACTCGATCTCACCGGCCGTATTC  
TCTGGGCCAACCCGGCCATCGAGAAGATGCTGGGTTATCCCTCGACGAGCTGCTTCATCGCTCCATCTC  
CGACATCAATCACCCGGAGGATTGGCAGCGCAGCCTTGAGTGCTACGAAGAGATCCGGCGCGGCGAGCGC  
AGCAGTTTTCACCCAGGAGAAGCGCTACTTCTGCAAGGGGGCGAGATCCTGTGGGGCGAGTGACTGTCA  
CCCTGATCCGCGACGAGCAGCAGCAGCCGGACTACCTGATGGTGCTGCTGGAGAATATCGATCCCTCAA  
GCGCCATGCGGAGCAGCTCAAGCTCTCCACCCGGGTCTACGACAACCTCTCCGAAGCGATTCTGGTGTGC  
GATGCCGACAGCCGCATCATCTCGGTCAACCCGGCCTTCGAGCAGATCACCGGCTACAGCAGCGACGAGG  
TGCAGGGCCAGCGTCCCAGCATGCTCAAGTCCGGGCTGCACGATCAGACCTTCTATGCCGACATGTACCA  
CGCGCTGGAGCGGGTGGGGTGTGGCGTGGCGAGGTGTGGAACAAGCGCAAGAACGGCAAGCTCTATCCG  
CAGCAGCTGATGATCAGCACTCTGCGCGAAGCCGGCAAAATTCAGCAATATATCGCCATTTTTAGCGATC  
TTTTCCAGACCAAGTTGGCCGAGCAGAAGATCGCGACCCAGGCCAACTACGACAACCTTACCAGCCTGCC  
CAACCGCTGGCTGTTTTGGCCGCTCCTCACCCGCTCTCTGCGAGCGGGGCGAGCGCTTCGCGCTCATGGTG  
CTCGACTCAACAACCTCAAGCGGTCAACAACAGCATGGATCACCATGCTGGCGATGCCCTGTGCGGG  
AGGTGTGCGGATCGACTGGTGAGCCGGGTGCGCACCGAAGATTTGGTGGCCCGTATCGGTGGCGATGAGTT  
CGCGTTCTGGTGCCTGGCATCGTCAACCCGGCTCAGGCCAGGTGTTTGCCAAGCAGGTGATCGGCAGT  
TTCGCCCCGCCCTTTATGCTGGCCAACCAGCACCTCTATGTGACCGCGACCATCGGCATGACTCTCTGT  
CGGTGATGGCAGCGAGAGCGACGAGCTGCTGCGAAATGCCGAACAGGCGCTGTTTGGCGCCAAGCGGCA  
GGGAAGGTTGCTCGGAGCCTACTGCTCATCCATGCGGGAAGAGGTGCGCCAGCGCCACCAGATGCAGCAG  
GATCTGGCCGAAGCGATCAAGCTGGAGCAGCTGACCATGGCCTACCAGCCGATCTGGGACAATCGCAGCG  
GACGGGTGCGCAAGCTGGAGGCGCTGGTGCCTGGTATCACCCCACTGGGGGCGAGTATCTCCTGCCGA  
GTTTTATTCCGCTGGCGGAAGAGGCGGGATTGATTAGGGGCTGGGTGCGCTGGTATTGTGGCAATCGTGC  
AGGGATCTGGCGCGGTTGCGCAATCCGGCTTCCCTGATCTGCAGATGTCGATCAACCGCTCCACCATGG  
AGTTCAGACCATCGACCCCGAGGCGAGTGAGTGGCTCAAGGTGATCCAGCACTTTGGGCTCGATCCTGC  
CGACATCGTCATCGAAATCACCGAATCTTTGCTGATGGAGAGCAGCGATCAGCACAGGGTGCAGGATCGAT  
GCCCTGCGCGAGGCGGGCTGCAAGCTGGCCATCGACGATTTCCGGTACCGGCTACTCGGCCCTCAACTATC  
TGCGCACCTTCCCGGTGATCTGGTCAAGATCGACCGCTCCTTCGTGCGCCATATCCCCCTCAATGAGCA  
GGATCGGATGCTGCTCGACGGCATCATCAACATAGTGCACAACCTCGGCATGCAGGTGGTGTGATCGAGGGG  
GTAGAGACCCGCGAGCAGCTCAACTTCTCTGCCAGAAGGGGTGTGCTTACCCAAGGTTATCTGCTCA  
GCCGCCCGCTGGCCTATGACGATCTCACCGAATATCTGCAGCTCAATGACAAAGGGATGTTTTCTGCAGAT  
CAGTAGTGGCGCTTACTCCTTCGATGTCACTGTTCCTGTTTGGTTTTCAATGTCCGGTAATCCTCCGCC  
GAGATAGCGCAGATAGATGCGATCCAGTACTCCCTCATCCTGCATCTGTTGCGAGCGCCTTGTGTAGGCA  
GGCAGCAGGTGAGCCTTCTGTTTTGCCAAAACAGAGGTAGAGCGGCGTGAATCGATAAAGGGGGTGGGG  
CGCGGATCCTGACGTCCTGCTCCCTCGACAGAATGGGGGCGAGAGAAGTAGTCCAGGATGATCATATCGAC  
CCGGCTCTTTTCCAGCATCAGTAGCAGCTGTTTGTGCGAGTGAACCTTGATGGGCTCCCAGCCGGTGAAG  
TTCCTGATCTTGGCCGTGTAGTCATACCCCTGACCATTCCTACTTTTCCAGCCCCCTGGCCATCTCCCACG  
AGAAGTTCTGTAACGGACTGTGCGTACGCACATAGGCGGCCAGAGGATAGAAGGCGGTGGCAAGGTGAGA  
GTGATAGCAACCGGGGAGAGGGGCATTGTGAGAATGCCATCCGCCAGCTGGGTGCTGACATATTGCTCG  
CAGCGTCCACAAGGCAGTTTCGAGCAGGGTGGGTTTCATGCCAAGGCGGCGGCCACCTCTTGATGGATCT  
CCACCGAAATGCCCTCTTTTCCAGTTGCCCTGTTTCGGAATAAGAAAAGGGAGGCCAGTCTACGCCGAGAC  
CTTCCAGTTTTGTGCCGCTCTGGGCGGCGAGGAGCAGGGCAATGAACAGGTTTCATGGGATTTCTCCCTAC  
AGCGACTTGAAGGGGCTGTGGTACACTCGGTTCACTGAACTTAGAACGCATCCAAAGACCATGCAATCC  
TCCTTGAAGACCCCGCCAAGGCCGCGCAGGCAGACGCGCTGGCCAGCCAGCTTGCCCAGCTCGACCTTCC  
CCAGTTTGGCCCTGGTGTTTACCCCGGAAAGGTTGGAACTGCGCAAGCTGGATGAGCCCAAGCTGGGTGCT  
GTCTATGTGGACTTCGTGGAAGGGGCGGTGGCACATCGTCGCAAGTTTGGTGGTGGTGCAGGCCAGTCCA  
TCGCCAAGGCAGTGGGGCTCAAGGCCGGTGCCACACCGACCGTGGTGGATGCCACTGCCGGTCTGGGGCG

CGACGCCTTCGTGCTCGCCTCCCTCGGTTGCAAGGTGACTCTGATCGAACGCAGCCCTGTGGTGGCTGCT  
CTGTTGCAGGACGGGCTGGCGCGGGCGGCACAGGATCCCGAGATTGGCCCTGGGTGAGCGAGCGGATGC  
ACCTGCTGCAAGGCCCGGGCGGTGGACAACCTTGCTGGCGCTGCCGGAGCGGCCCGAGGTGATCTACCTCGA  
CCCCATGTTCCCGCACAAGCAGAAGTCGGCGCTGGTGAAAAAGGAGATGCGGGTGTTCAGTTCGCTGGT  
GGGCCGGATCTTGATGCTGATGCTCTGCTGCCAGCTGCGCTTCAAATGGCAGAGAAGCGGGTGGTGGTGA  
AGCGGCCGGACTACGCCGGCTGGCTCAACAAAACAGAAAGCCAGCATGGCTATCGAGACCAAGAGCAACCG  
CTTCGATGTCTATGTGATGGCGGCGCTGGCGGCGAGTTAACGGTCGGTGCAGATTGCGGATGCAAAAAAG  
GAGGGCCAACGTCATGTTGGCCCTCCTTTTTCGTATTGGATTTCAGTTGGTTGGCGGAAGCGGATCAGCT  
TCTCTTCCCTTGCCAGTTTCAGGCGCAGGGTCGCCAGTTCTGCCAGACTGAGCCGCTCGCCACTGTGCAG  
CAGCAGATACTCGACCCCTTCGCTGGCTTCGATAGTGCAGTCTTGTTCATCCATTGGCGATCATCGCGG  
CTGGTGAGGGTCACCGCAGTTGCCAGCTGGCAGCAATTCGAGCCAGTTCGTAGAGATCGCAGCTGATGG  
GTTGATAATCCGGCATGATCGGCTCCAAAACAGCAGGTTGCTGAGTACAGGCTTCCTGTACGCGGGTCGG  
CCAGCCCATCTTCTGCTGGCGTTCCACTTCAAAGCGCAGCTCACTGGCGCGCAGGTAGTGTTCATCCATC  
CAGCCCTTGGGCAGGGTCAGGGTCAGTGACTCCTCTTCTGCCTGCAGGGTGAAGCTGGGCCTGTGCCCT  
GGGTACGGCGCATGCAGAGGATCAGCGCGATGCGCAGGATACGGGCCAGCCGGATCGCTGACGACCGGT  
GACTGCACCCTGTTTCTCCAGTGGTTCAGCTTGAATTCGTCCCGCTGGTTGAACAGCAGGGCCGACAAC  
AGCTTCTTTTTCGCGAGGGGTAAAGCCCGCATGTCAATGTTGTCGATGATGTAAGCGGCGTGTTCGCGCG  
CCTTCTTGTATTTCGATAACAGAGGCCGATCTCGTGCAGCAGGGCGGCATAACGCAAGATTGGGCGACCGTA  
GCGTTTGGAGAGTGCAGAGCCGGTTGCAGCTGGTTGAACGCTCGACAGCGATATCGCGCACCCGTTTCG  
GCGTGTCTTTTATCCAGCTGATAGCGGCTGATCAGGCTGTTCGGCGGTGCGATCCCGGGCATCACAGTCGT  
GATTGTTGCCAAGCAGACCGTAGATCAGCCCTCACGTAGGGCACCACCCGCCAGGGTCATGCTCTCGAT  
ATCGAGGGTTTGAAGATGGCGATCAGGATGGCGAGGCCGGAGGGGAACACGGTCAGCCGCTCGGCCGCC  
AGCCCTTCCAGCTGCAGTCGGTCGAGCTTGCCCGAGGCGATGGCCTGACCCATCAGCTCCTGCAGTTTTG  
GCAGGGTGACCCGTTTCGCTCTTCCCTTGCGCCAGCATGATCTCTTGACGCGCTGCACCGTGCAGGAGGC  
GCCGACACAGGTACGCCAGCCGAGGGCGCGGTAATCTTCCGCCACCTTCTCCAGCACCCGCTTGGCGGCA  
GCAATCGCCTGCTCGAAACGGGCTTCGGAGAGCTCGCCATCACCGAAGTATTGTTGAGCCAGGTAACGC  
AGCCCATGTGCAGGCTGTTGAGCAGTTTTGCTTCGCTATGTTTCGCCGATCACCAGTTCGGTACTGGCACC  
GCCGATGTCGATCACCAGCCGGTTGCCTTCCCGCAGAGGTTCCAGGAGACCCCTTCATAGATGGTCTTTCG  
GCCTCTTCTCGCCGAGATGATCTCGATGCTGTGGTTGAGAACCCTTCCGCTTCGCTGAGGACTCAT  
CGACGTTGGTGGCAAGCCGCAAGGTGGCGGTGCCACCACCCGGATATTGTTCGGCCGGAATGCTCTGCAA  
CTGTTTCGGAGAAGAGACGCAACAGTCCCAGCCCCGCTCCATGGCGGCACGGCTGAGACGAAATTCGGGA  
TCGAGCCCGGCTGCGAGGCGAACCTTGCCTTGACCTTGGCGACGGTGCAGAGCACCAGGCGACCTCGC  
GCACCACAGCATATGAAAGCTGTTGGAGCCGAGGTGATAGCGGCATAGAGAGGGCAGTTGTGCAACGG  
GCCTGTCTTAGCTCTTGCAGCGGCGACGACGACGGTGTGTTGCTGTTGCCACCAGCCCTGACGATCCCGCA  
TGTTGCGGTTACCCGCTGACGGTTGCGGAACACCCGTTTCGGCGGGGTCACGTCATCCAGCAGCGCTTC  
GCGATCATATTTGCTGACCGGAATGGCGTGGTGGATGACTCCTCGATGGCCGGCAGGTTGAAGGCATAG  
TCTTCACAGGCCAGGCTGATGGAGTGACCGCTCTTCCCGCAGCAGCCGTTACGACCGATGCGGTGTACAT  
AGTCTTCGGCGTCGTCGGGCAGGTCATAGTTGAAGACGTGGGTACCGTACGGGATGTGCAGACCACGGGC  
GGCCACGTCGGTGGCGACCAGAATATCGAGCGCACCTTGGTGAAATCCTCGAGGATCTTCATCCGCTTC  
TTCTGTGGCACATCACCAGGTCAGTAGACCGACCGGTGGCCGTCGTTCTCCAGCCAGGCATGGACGTCTT  
CACAGACATGCTTGGTGTGGCGAAGACGATCGCTTTTTCCGGCCACTCCTCTTCCATCAGGGAGAGCAG  
CAGCAACATCTTGTCTTTCATTGGAGGGGTAGAACAGCTCCTCCTTGATCCGCACGCCGGTTCATCTGCTCC  
GGCTCTACCTGCACATGTTCCGGGTGGTTCATGTGTTTCGTAGGCCAGCTCCTGCACACGCAGGGAGAGGG  
TGGCGGAGAACAGCATGCTCAGACGCTCGGTGCGGGCGGCATGCGGCGGAACAGGAAGCGGATGTCTT  
GATGAAGCCCAGATCGAACATGCGATCCGCTTCGTCAGAACACGACCTGAATGTTGCTCAGATCGATG  
ACCTTGGACTTGAAGTAGTCGATGATGCGGCCCTGTGGTGCCGATCAGGATGTCGACGCCCTGCTCCAGCA  
CGCCAGCTGCTTGTGTAACCTTCGCCGCCGTAGGCGAGGCCGAGTTTCAGGCGGGTAGAAGCGGCGAT  
GCTGTGCGCATCGTTATAGATCTGTAAGTTCGCCAGTTCCCGGGTGGGTGCCATGATGATGGCTCTGGGTTGG  
TTAACAGACGGGGCTTGGTCAGCGGGTGGTTCAGCAAAATAGTTGAATGTCGCGGCCAGGAAGGCAATGG  
TCTTGGCGGTTCTGTCTGAGCCTGACCGGCGAGGTCATGACCTTCTACCAGCAGTGGCAGAGACAGTGC  
CTGGATGGGCGTGAATAGTGAATCCCTTTGATTCCAGACCAGCCAGAACTTCGGGTTTCGAGGCCATT  
TGGGCGAATTTGTCGGTTCGTTAAGTGTGTTTTGCTCATGGCGGTAGGTTATCAGGTTAGGCTTGAATAA  
TAAACAGGATCATTTCAAATAGGGCAACTATTGCCTTTGTTGATATGTCAATAAAGCCTTAATTACTGAC  
TGGAGTTGGAGATGAGTGACAAGATTGTTTCAGCTGAGCGATGCCAGCTTCGAGGCAGATGTAATCAAAGC  
CGATGGCGCCGTTCTGGTCGACTTCTGGGCCGAGTGGTGTGGTCCGTGCAAGATGATTGCCCGGATCCTA  
GAAGAAGTTGCCAAGAGTACGAAGGTGCTGTGACCGTAGCCAACTGAACATCGACCATAACTCTGATA  
CTCCGCCCAAGTACGGCATTCGTGGTATCCCGACCTCTTGTGTTCAAGAAATGGCGAAGTGGCAGCGAC  
CAAGGTCGGTGCAGTTCGAAGACTCAGCTGAAAAGATTCTTGGACGGCAACCTGTAATAATTAAGAGG  
AGCGCATTGCAATAATGCGCTCCTTGTGTTTTATCACCTAGACGCTCATCCCGATTGGTGTAGTTTTATC  
GCTCGTTTTGCTAACCTTTTTGCCTGACTCTTGTCTAACACAGCCTGGCAATCAAATCCGATCAGCATCA  
ATCCAGCAGACTGTCTCCTCATTTCAATCCTTGTCTACAGACTTTCACCACTATGAATCTGACTGAATTA

AAGAACACTCCTGTGTCCGAGCTGGTCAAGCTTGGCGAATCCATGGGGTTGAAAAATCTGGCTCGGGCGC  
ACAAGAAAGATATTATTTTTGCAATCCTCAAGGCGCACGCCAAGGGTGGTGAAGATATCTTTGGCGACGG  
TGTGCTGGAAATCCTGACCGATGGTTTTCGGCTTCCCTGCGCAGTGCAGACGGCTCCTATCTGGCAGGCCCT  
GACGATATCTACGTCTCCCCGAGCCAGATCCGCCGCTTCAACCTGCGTACCGGGCGATACCATCTCCGGCA  
AGATCCGGCCACCGAAAGAGGGCGAACGCTACTTCGCACTGCTCAAGGTCAATGAGGTCAACTACGACCG  
TCCGGAAAACTCCC GCAACAAGATCCTGTTTGA AAAACCTTACCCCCCTGCATGCCAACGAACGTCTGCGC  
ATGGAACGGGGTAACGGCTCTACCGAAGATATCACCGCCCGTGTACTGGATCTGGCTTCCCCCATCGGTA  
AAGGCCAGCGTGGCCTGATCGTGGCGCCGCCAAGGCCGGTAAGACCATGCTGCTGCAGAACATCGCCCA  
GAGCATCGCCTACAACCACCCGACTGTGAACTGATCGTTCTGCTGATCGACGAGCGTCCGGAAGAGGTG  
ACCGAGATGCAGCGGATGGTGAAAGGTGAAAGTGAATCGCTTCCACCTTTGACGAACCTGCTTCCCGTCACG  
TTCAGGTTGCCGAAATGGTGATCGAGAAGGCCAAACGCTTGGTCGAGCACAAGAAAGATGTGGTGATCCT  
GCTGGACTCCATCACCCGCTGCGCCCGCTACAACACCTGTTATCCCGTCATCCGGCAAGGTACTGACC  
GGTGGTGTGGATGCCAACGCCCTGCACCGTCCCAAGCGCTTCTTCGGTGCCGCGCTAATGTTGAAGAGG  
GCGGCAGCCTGACCATCATCGCCACCGCGCTGATCGATAACCGCTCCAAGATGGACGAGGTTATCTACGA  
AGAGTTCAAGGGTACCGGCAACATGGA ACTGCACCTCTCGCGCAAGATTGCCGAGAAGCGCGTCTACCCG  
GCTATCGACATCACCCGCTCAGGCACCCGTAAGAAGAGCTGCTCACCTCAGGTGACGAGCTGCAGAAGA  
TGTGGATCCTGCGCAAGATTGTCCACCCGATGGGCGAGATCGACGGTATCGAATTCCTCATCGACAAGCT  
GGCGATGACCAAGACCAACGACGAGTTCTTCGACGCCATGCGGCGCCAGCAGAAGTAAGTCCGGTCAGAA  
AATGACGAAACCGCGGCCATGGTCGCGGTTTTTGT TATCTGTTTCCGGTCGCCCTAGTAGTATGAGAT  
CCCGATGTACATGGATGGAGACGTCATGAAGCCTGTTTTCTGGTTATTGCTGGGGTTGCTGAGTGCAAT  
GCCAGCCTGCGCGCAGAGTGCACCGGTTGCGGTGGCAGCCGAGACGTTGCAGACTCACCAGCGCTATCTG  
GCTGGCCGCTGTCAGGAGGGGCAATTTGCAGCCATCGACTCTCTGCTGGCGACCCTGAGTTCGCGAGCGGC  
GGGAGTTCCCTGCTGTTGCAGCTGCTGCGGGATATTCCCGCGACCACCCCTGCATCCCCTGCGTTGCAACG  
CTGGGTCGAGGCTCAGGCCGACAAGGCCCCCGAGTGGCTCATGGAGCAGCAGGTCGATGGTTTTCTGGTG  
CAGCAACCTGTCTATGATTTTTGCCGCGCAGGCCCGTCAGTTGCTGGGGGAGTGGCAGCTGCAATCACTGG  
TGCAGCGCTATCGGCAGCAGCTTGCCAGGGCAGCTTCCAGCTAAAGTCCATCTACTACAGCAGTAACCC  
CGATCTCGCATTGCAGCAGCAAGCCCTGTTGCTGGCCCTCGATACCTTGGCGCAACCGATCTGGATGCGG  
GAGGCGCAACGCTGGCCAGCCAGAATATCTATCTGCCCCGACAATCATCTGTTGTTCCACCTGTTGCACG  
GCACCCGGGAACCGGACTCTATAGCATGCTGTGGCGCGGCCAGATCAGGATGCATCGCTGCGACT  
CTCCACCATCAACCGCTTCCATCACGGCAGTGTGCTGCCAGCGATTTGCTGATTGCCGCCAGTGGCAACGAA  
GGGTTGAAGGGAGCCGCCCTGCGCCA ACTGAGCGCACTCTCCCCCTTGGCCGCGCAAGCCCAGAAATACC  
TGCTGGCGGAACTCTCCAACCGTCAATACGGGGCGCTGGTGGCCGGTCTGTTGATGGAGGTGGATGAGCC  
CCAGCTGCTCTGCGCTGGCTAGACGCTCGGCCAGCGTGACATGCCACCCATTGCACCGAGTCTGCTG  
CCCGATTCGGGTACACCCGATGGGCAGCCAGGGTTATAATGCGTGACCTCCTGAACCCGGTTGGGAACCT  
GCATGAAATACAAGGATTTGCGTGATTTTCATCGCGCAGCTGGAACAAAACGGACA ACTCAAGCGCATCAC  
CCGCGAGATAGATCCCTATCTGGAGATGACCGAGATCAGCGATCGCACCTGCGTGCGGGTGGCCCGGCT  
CTGCTGTTTCGAAAATCCTAAAGGCTACACCATGCCGGTGTGACCAACCTGTTTCGGTACCCCGGATCGGG  
TTGCCATGGGCATGGGCCAGCCGATGTGGGCGCCCTGCGTCAGGTTCGGGGTCTGGCTCTCCTATCTCAA  
GGAGCCCGAGCCGCCCAAGGGATTCAAGGAGCTGATGGAGAAGCTGCCGATCTTCAAGCAGGTGCTCAAC  
ATGCCGACCAAGCGACTCTCTTCCGCCCCCTGCCAGCAGGTGGTGCAGGAGGGAGATGCGGTGCTGCTCG  
ACCTGATCCCGATCCAGCACTGCTGGCCCGGCGATGTGGCGCCGCTGGTCACCTGGGGCTCACCATCAC  
CCGCGGCCCCCTACAAGAAGCGCCAGAACCTCGGCATCTATCGCCAGCAGAAGATCGCCAAAAACAAGCTG  
ATCATGCGCTGGCTGGATCATCGTGGCGGTGCCATCGATTTTCGCGAGTGGCAGGAGGCCATCCCGGTG  
AGCGATTCCCGGTGGTGGTGGCGCTCGGCGCCGATCCGGCGACCATTCTCGGCGCGGTGACGCCGGTGCC  
GGATACTCTCTCCGAATATGCCTTTGCCGGTCTGCTGCGCGGCAGCCGTACCGAGGTGATCAAGGCCATC  
AGCTGCGATCTGGAGGTGCCCGCAGCGCCGAGATCGTGTGGAAGGCTATCTGGAGCCGGGTGAGATGG  
CGCCAGAAGGCCCTTATGGCGACCACACCGGCTACTACAACGAGGTGGACGAGTTCCCGGTCTTACCAT  
CACCCACATCACCAAGCGGCGCGATGCTATCTATCACAGCACCTACACCGGCCGTCCGCCCGATGAACCG  
GCGGTGCTGGGTCTGGCGCTGAACGAGGTGTTTGTGCCACTGCTGCAGAAGCAGTTCCCCGAGATTGTGG  
ACTTCTATCTGCCGCCGAGGGGTGCTCCTACCGGATGGCTGTGGTGACCATCAAGAAACGCTACCCGGG  
CCACGCCAAGCGGGTATGCTGGGGGTCTGGTCTTCTGCGCCAGTTTATGTACACCAAGTTCGTGGTG  
GTGTGTGACGATGACGTCAACGCCCGGACTGGAAGGATGTGATCTGGGCCATCACCACCCGGATGGACC  
CGGCACGGGACACCACATTGATCGAGCACACCCCGATCGACTATCTGGACTTCGCCTCGCCGGTCTCCGG  
CCTCGGCTCCAAAATGGGGCTGGATGCCACCAACAAGTGGCCGGGCGAGACCAATCGGGAGTGGGGTCAG  
CCCATAGTGCAGGATGAGGCGGTGAAGCAGAAGGTGATGCCATCTGGGATGAGCTCAATATCCTCGGAT  
GAGGCAACATGACAGCTTTGCTGCAAAAAGTGTGATGCGATCCGCACTGATTTGAGTATTCTCGACTGACG  
GGGCCAGGGCTGCTGGTCTCACTCCATAGTGAACAATGAGCGAAGCGGGCCGAGCGAGCCCGCCACAA  
GGACAAGAATGCAACGTATCAAATGCCGCGTAGAGGAACTGCGCGAATATGTGACACCATCTGGCATGT  
GGCCCTGACGCCCGCAGCAAGCGATCAGCTTCAAGCCGGGCCAGTATCTGCTGGTGGTGATGAGCGATTTCG  
GACAAGCGCCCTTCTCCATCGCCAACTCGCCGACCCGCCGGCGTGCTGGAGCTGCAGATCGGCGCCA  
CTCCCGAGAACGCTACGCCGGTCAAGGTGCTGGCCCGCATGCGTGAGCAGGGGGAGATCGAGGTCAATT



GCCGGCTGGCAAGGCGTTCTGCGGATGAATCCCCCGTCCACTGATCCTGATGGCGGGCGGCACCGGT  
TTCTCTTACGCCCCGCTCCATTCTGGAGTACCTGATCGACACGGGCAGCAAGCGCCCGTGTCTTCTACT  
GGGGGGTGCCTCAGGCTCACTGGCTCTATGAGCTGGAGCAGATGCAGCAGTGGGAGCGTGACTATGCGCC  
GCTCACCTTTATTCCGGTGGTGCAGGAGCCGGATGCTGACTGGACCGGCAAGAGCGGGCTGGTACACAAG  
GCGATCATGGATGACTTCGTGAGCCTCCACGACTACGACATCTATGTGCGCCGGCCGTTTCGAGATGGCGG  
GTGCCGCGCGTGAGGAGTTCAAGATCCTCGGCGCCGAGCCGGAGCGCATCTTTGGTGACGCCCTACGAATT  
TATCTGACGGGATCCCCGTCTGGATGACGCAGCCCCGGTTTTGCCGGGGCTTTTTGTTTTTAGGGCTCC  
CGCAGTACCTGATCGTACCGAATGGTTGGATTATCGCGGCGTTATCCCATTATTTTTCAATATTTTGGCT  
ATGAATGGCTACTAATCGAACGTAGCTGATGGCATCTTTGTGGGGGATTGACAAGAGCATCCATAGAGCA  
AGCAACAAGGAGCGCAGTGTGAGTGAAGAGGGCAGGGCATCTGCGGAGGATGACAGGGGAGAGACCGGC  
TCTGTGAGGCGGGTGCACACCTGATCCCCCTCATGGCGGTGAAATGGCCCGTTTTGCAGGCAGAAA  
TCGCGCGCTTTGAAGCATGAAAACGGCCTGTTGCAGGAGAAGCTCAATGCCGCCCTCGATGGCACCGGCAT  
CTGTCTCTGGCAGGGCACCAATCCACCAGCGAGCTGCGGGTCTTCAATCTGCAGAACTTTCAGGCCGGT  
GACATGGCCCCCTCATTTTCGATCAGTGGAGCGCCAAGCTCCATCCCGACGATCGCGCCCATGCCATGGGCA  
GCTACTTTGCCACCTTGAGGGCAAAAACCCCTTCTATGAAGCCGAATACCGCACCATCAGCCCGGCCGG  
AGAGATAACCTGGCTGTGGGATCGGGGCCGGTCTGTCGATCGGGATGGCGATGGCAAGCCGCTGCGGATC  
ATGGGCTCCCATATCGATATCACCCAGCGCAAGGCTTATGAGCAGCGACTGGCGGAGCGCGCAACAGCG  
ACGCGCTGACCGGCTTGTCTCAACCGGCAGGGGTTTTGGCAAGGCGTTCGCCAGCTGCAGCCGAAGGGGC  
GGGGGCGCTGCTCTTTATCGATCTGGATGATTTCAAGGGGATCAATGACCAGCTGGGGCACGCCTGCGGC  
GATCTGGTGTGTCAGCAGATGGCGGACTGGTTGCGCCTCATCATGCTTGGCTCGGCCCTGTGTGGCCGTT  
ACGGCGGCGACGAGTTTGTGGTGCATCTGCACCGGGATGTGTCGAGCCATGGCTGGCGCAACTGGCTGA  
CGCCCTGATCAGCCGGATGCATGGCTATGTGCCCAAACCCGGTTGCTCGCAACGGGTGGGGCTGAGTATC  
GGCATCGCCCTGTGGGAGGAGGAGCCATTGAGCTTCCGGCAGGCGCTGGAGGTGGCCGACAGGGCCATGT  
ATGAGGCCAAGGCACGCGGCAAGCGGGCCTGGTATCTGCTTACAGGTGTGATGTTTTTACAGGTTCAATA  
CAAAGCAAAAACCCAGCCGAGCTGGGGTTTTTGTATTCGCCTTTGGCGCCGAACGCTGCTCGAGCTG  
AGCCAGCTTGCTTTTCGAGGGCGGCCAGTTTTTACGGGTACGCAGCAGCACCTTGGTCTGCACGTCGAAC  
TCTTCGCGGCTGACCAGATCCAGCTTGCCAGCTGGGCTTGCAGTACCTGACGCATCTTCTTCTCGGCCT  
CTTACCACATGCTGCAATCGAATCGCCGGCGGAGGAGTGTGACCTGCTTGGCGATCTCTCCAGTTTCTT  
CGGGTCGATCATGATGTCCTCCTTAAGCGTTGGCGGACATTTACCAGCAATCCCTCACCTTTGCCGAGA  
TCGCGGCGGCTTTTTAGTCGTGATGGTGCCCGCTGGCTGGTGGTGGTGGTGGTGGTGGTGGTGGTGGT  
CCCTTGCGCCCTTTTGTAACTGAAACCATGACATGCACCACAAAAGCTGAGCCAGAAGTGTCCGGCATG  
AGTCTTATTTGGTGTGGTTTTATGTTAACGTTTTGCGAGTCGAGGTCGTGATGACCCCGTTGGCTTGTGA  
TGGATAACAACCTTATAAAAAGAGAATAAAAAATGAAGAAGAAGCTAATTTATGCAGCTGTTGTCAGCGC  
CCTGCTGGCCGGATGTGGTGGAGATGACAACAAGGGAGACACCACAGCTCCCTCGACTACGTCCTGAGT  
GGTGCCAACGGGGTGCGCCCGAGCGTGTGCCCCCGTGCCAGCGACGGTACCCTGAAGTTTTTCGACAG  
AAACTGCTGATCTGTGCAACCCGGTATCTGCCCTCTCCACCTGGATGGCTGGTCAACCACCAACCCGT  
CCAGCTGGTACCGGCGACCGTGACCGGTGTCTCCGTGCCGGCACCGGCGGCCAGCGAGTATGCTTCTGCC  
GTTGCGCCCTCTACCTGCTCGAGCTCACGCTGGATCCGGTCACTCTGCAACCCAACGGAGTCAAGGGCG  
GCAAGCCACTGGTTTTATGGGACCGACTTTGTGGTCACTGGCGGGGACGGCAAGCTCAATCTGGTTCGGCT  
CAAGCCGCTCAATCCCTCTTCTTACTACATGATCGTAGCGACCGATGCCCTCAAGGACAGTCGCGGCACA  
CCGCTCAAGGCGGGAGGCGATTACAGCAGCTTCAAATCGACAGCTGGCGCAACTACTCAGGAGCAGACCA  
TCAACGGCCTGATCTCGCTGCAGGAAGGTCTGTTCAAAGCGGCCACCGGGATCACCAGCGATCGGGTGT  
CTTCTCCGACTGGTTTTGCCACCAATCTGGTGCCGATGTGCTGCTGGCAGTGAAAAGTGGCCCGCTTCC  
GTGCTGAAGAGCCCCGAGCCTGGACGCCCGCGGCGCTGTGAAACAGGATGCCAGAGGCAACACCAGCCTGC  
CAGCAACCTATAACCTCAGCGGTCTTAATAGCGGGGTGGATTTTTCTGACCCAGCTGGCGAATGAACCAT  
CTTGCCCGAGGATCAGAAAGATGCACTGACAGCCGCTTTGGTGTGGTACGCCGCTTAAACGGGGTTGCC  
CAGCTAACCAAGGTGTATAACCGGCACCGTCAAGCTCCCTTACTTCTCTTACCCCGGCGATAGCTGGTT  
CATGGGACAAGGCCAAGACCCAATCCTGGCACGGCGCCATTCCCAGCCTCTATGCCATCGCCAACGCGCT  
GAAAGCGGGCGATAGCGAGGTGATCGGTGGACTGGTGGGTCGGGCGTGGACCCGGCATTTGCTGGGTGAG  
CTGATCGCCGACCCGAGCCGTGAGAGTGAAGTGTGACCGAGGCAAGCAAGCTGATCGGGGTGACTCTCA  
CCTCCGGTGGCAAGCCGCTGGATGCCGAGCGCAATATCGGCCGTTTTCAACCCGTTGCCGACCTGACCGA  
AGTACAATCGGTACCGCTGCGGATCTTTGCCGCTGCACCGCTCAATACCATTACCGATGTGATCATCTAT  
CAGCACGGGGTTACCTCCATCAAGGAGAACGCCTATGCGCTGGCGCTGGGCCAGATTGGTGTGGTCTGC  
AAGTCACACCAACAGCCAAAAATGTCGCTGTGGTAGTGATCGATCATCCGCTGCACGGCGAACGTGGCTA  
CGCCTTGAGCGGCAGCATGGATAACCGTCAACACCTCCGAGAACCCGACTCCCTACCTGAATCTGGGCTAT  
CTGACGGTGGCGCGGGACAACCTGAAGCAGAGCGTGGCCGATCTGCTTGGCCTTCGCCTGGCTGTCCGGT  
TGGCCAATGCCAAGGGGCTGGGTGGCCAATTGGGTGGTGGCGGCTCTGAAGGTGCATTTCTCCTCGGTCACTC  
ACTCGGTGCCATTACCGGGGCAATCTGCTGGCTGTGCCAACCCAGACCACCGGCAGTGTCTCAGGCAGAT  
GCCCTGTTCAAGTTCGATAACCGGTGGTCTGGCGATGCCGGGTGGCGGCATCGCGCCGTTGTTGCTCAACT  
CGCCGAGCTTCGGGCCGACCATCAAGATGAGCGTGTACTTTCGGGCGAGTCCGGCGCTGAAAGCGGGCTT  
TACCGCCTATGCACCGAATTGCAAAAACGGCTGCCGCCACTTGTCTCGTCAACGAGTTCTGCCAGTCTG

GATGCGGCCACGCAGGCGGGTGC GGCGAGCACCTTGCAGAGCTATACTTTGCCGCCAGTCAGTGCTGG  
ACTCTGCTGACCCGATCAATCTGGGCAGTGGCGTCGCCAAGAGCTTCCCGCTGTTCCGCCACCGAAATTGT  
TGGCGATGGTGCCTCAATCTGCCGGATCAGGTGATCCCCAACAGCATCGCCTCTGCGCCGCTGGGTGGC  
ACCGAGCCGCTGTTCCGGGTGCTGGGTTTGCAAGAGCTGAAGGGTTCGGCGCTGCTCCCGCGGGTACC  
ATGCTGTGCGCTTCTGAAAGGTGGCCATAGCTCGCTGCTGGCTCCTGACGAGAACTTCGATCAGGCTGG  
CGCGGTACCACCGAGATCCAGACCCAGTTCGCCAGCTTCTTTATGAGTGGCGGTGCGGCGGTCAAGGTA  
ACCGATGACACCCTGATCAAGCAGTAACTGCCTATCGCGTAAAAAACGCCGCCCTTCGGGGCGGCGTTC  
TCGTTTCTGCAACTGCTGAAAAATCAGGTGGCTGGTGGTTGCGATCCAGCCAGCCTTGCAGCAGGCCGA  
CCAGCAGACCCGTCAGGTGGGCGATGTTGGCGGTGCTGGTGGCAGCATGTCGAAGAAGCCGAGCACCAT  
CCAGAACAGCATAAAGCCCATCAGTGCCTGGTGGCAGAGTGGGCGCAGGCCGTTGCAGCTTGGCTGCGC  
AGCCAGCAGTAGCCGAGCAGGCCATAGACCACCGGAGAGGCCGCAACAGCGGGCCGCTGGCAAAGA  
ACTCGGCGATATTGGGCAGGGCGGCCACCAGCAGCAGGATCAGCAGCTTGGCGTCCGAAGCGCTG  
CTCGACCTGGCCTCCAGATACCACCACCAGAGCAAGTTGAACACCAGATGGAGCACCAGAAAGTGGATC  
AGGGCGGGGTGAAATAGCGCCACGCTGCCAGTCGGTGAACGGGCCAGTGCAGGTGGAATGCCAGTA  
CGTCGTAGATGGCAGGCCGATGGCCTCGATCCCGTAGATGGCGAGACAGGCCGATGATGACCACCAGCGT  
CAGTGGCCCTGCCTGATGGAGGAAGTCGGTGGTGGATCCGTCATCCCTTGTGTAGTCGATGTGGGCA  
TCTGCGCTACCAGATTGCCAGGAGGCTCCATGTAGCGGGTGGCCCGCTCGGTCAGAAAGCGCTTCA  
CCTCCAGCTGGGCTGAGCGAGGCGTGTCTCGTCCGCCAGCCAGATGGTGACCCCTAGCTCGGACTGGGT  
CAGCTCGCAGGAGATCCCCAGGGTCGCCAGATAGTCCACCAGCGCTGCGCCATGCGGGCGTGTGTCGAGC  
ACCAGCAGCTGGATCATGCCTCGCCTGCCTCGATGGGAAACTCCCGCGCCACGCTCGAAACCGCCATC  
CAGACTGTAGACCTCGTCATAACCCTGTTGCAGCAGGTATTGGGCGGCCCTGACTGCTGTTGCCGTGA  
TAGCACATCACGATGACCGGGGTATCGAAATCCACTTCATTCATAAAGCGCACCCAGCGTGCCATTGGTGA  
GGTGAAGGCGCCGACCGCTGGGCGCTTCAAAGGATTGCGGGTCGCGAATATCCACCAGACGGGCTTC  
ACCCGCGCTCAGTTTCTGGTGGGCATCATGGGCATTGATATGGGCAAACTGGTCCATCGGGATGTCTGTC  
GAATAGGTTGATTACGGGCCAGTGTACC GCAAGCTTGGGCGCAAACTAACCCACAAAAGATAAAGGGAGC  
CAGCGGCTCCCTTGTGATATGGCATGCGGGGCTGTGGGTTAACCGCCAGATAGGCCCTGCCCACTGCC  
GGGTTGGCCAGCAGGGCGGGCGCCCGTGTCTTGCAGCACCACGTGGCCGTTCTCCAGCACATAACCGCGGT  
CGGCCAGCTTGCAGCCTGGTGGCGTCTGCTCCACCAGAAAGATGGTTCATCCCTTCTGGCGCAACTG  
CTCTATGGTGTGCAAGATCTGCTGGATGACGATGGGCGCAGCCAGCCAGCGAGGGTTCATCCAGCAGC  
AAGCGCGGCTTGTCTCATCAGGGCGCGCCGATGGCCAGCATCTGTTGCTCGCCGCGGACATGGTGCCTG  
CCCGCTGTTCCAGTCGCTCATGCAGGCGCGGGAACAGGGTAAACACCTGATCCAGCAGGCCATGCTGCTC  
GGCCTTGTCAACGAAGAAGGCGCCCATCAGCAGGTTCTCCTCCACCCTCAGGCGGGCGAAGATACGGTGC  
CCCTCCGGCACCCAGGCGATATCCTTGCAGCATGATGCGGGCGGTGGTGAGGGAGCTGATCTGTTCCCCCT  
CAAACCAGATGGAGCCGCTGCTGGGCTTGGGTTCCGCCAGAGGGTTCATCAGCAGGGTGGTTTTTGCAGC  
GCCGTTGGCACCGATCAGGGTGACGATTTCCCCCTCTTTCACCTCGACGCTGACATCGTGCAGTGCCTGA  
ATTTTGCCTAGTGGGTCGATACGTTGCGAAGTTCTAACATCTTGTGTTTCTTACGACTCGCCAGATAG  
GCCTTGATCACTGCCGGGTTGTTACGGATCTCATCCGGCTTGCCATGGGCCAGCGGGGTGCCCTGGCTGA  
CCACGAAGATACGGTTGGAGATGCCCATCACCAGCTTCATATCGTGTTCGATCAGCAGCACCAGACCCC  
GAATTCGTCCCGCAGGCTGATGATCAGCTCGTCCAGCTCGTCCGGTCTCCTTCGGGTTGAGGCCGGCAGCC  
GGTTCGTCCAGCATCAGCAGCTCGGGCCGGTTCGCCATGCAGCGGGCGATCTCGAGGCCGGCGCTGTTGAC  
CGTAAGCCAGGTTACCGGCGGGCGGGTGGCAAGATCCTTGAAGGCCACTTTATCCAGCCAGAAGCGGGC  
CCGCTCCAGCCCCCTCTGCTCCGCCCGGCGGAAGGCCGGGGTCTTGAACAGACCCGGCGATAAAGCTGGTG  
TTGAGGTGCTGGTGTGGCAACCAGCAGGTTCTCCACCCTGTCATCTCCTTGAATAGCCGCACGTGCT  
GGAAGGTACGCACAATCCCTTGCGGGCGATGAGGTGGCCGGCAGCCCCTGATCTCCTCACCCTTGTGTA  
GCGGATGGTGCCTCGGCTCGGGCAGTAGAAGCCGGTCAGGCAGTTGAAGATGGTGGTCTTGGCCGCGCCG  
TTGGGGCCGATGATGGAGATCACCTCGCCCTGTGTCGATATCCAGTTTTACCCCGTTGACGGCCAGCAGG  
CCCCGAAGCGCATCGACAAATCAGAGACTTCCATTAACTTCTGATGTGTACTCATTTCTTCAACTCCAGA  
TGCGGACGGGTCATCGGCAGCAATCCTTGTGGCCGCCAGATCATCATGAACACCATCAAGAGGCCGAACA  
TCAGCATGCGGTA CTGTTGAATTCGCGGGCCAGCTCCGGCAGCACCCTCATCACGATGGCAGCCAGCAC  
CACCCCGATCTGGGAGCCATAACCACCAGCACCAATCGCCAGCACAATGGCCGACTCGATAAAGACG  
AAGGATTCCGGGCTGATAAAGCCCTGCCGGAGGCAAAGAAACTGCCCGCAAAACCGGCAAAGGTAGCGC  
CTATGGTGAAGGCGGTGAGCTTGTGATGATGGTGGGTTGAGCCCCAGCGATTTGCAGGCGATTTCTGCTC  
CCGACGCTTCCCAGGCGCGGCAAGGGGCATGCGCAGCAGGCGGTTGATGACGAACAGGGTACCACC  
ACCAGCACCAGCGCCATCAGGTAGAGGAAGATCACCTTGTGGTTGGCGTTGTAGGTAATGCCGAAGAAGT  
TGTGGAAGGTATCAAAGCCCCATCCTTGCAGGTGCGGTTGAACTCCAGCCCCCAGCGTCCGTTTGGG  
AATGCCGGAGATCCCGTTCCGGGCGCGGTCAGGGTGGTCATGTTGTTGAGCAGGATGCGGATGATCTCG  
CCAAAACCCAGGGTGACGATGGCCAGATAGTCCCCCGCAGCCGACGACCCGGGAAACCGAGCAGGAAGC  
CGAAGGTAGCGGCCATCAGCCCCGGGATGGGCAGGCACTCCAGAAAGCTCAGCCCCGAAGTAGGTGTTGAG  
CAGGGCATAGCTGTAGGCGCCGACCGCATAGAAGCCGACATAGCCGAGATCGAGCAGACCCGGCGAGGCCG  
ACCACCAGTTTACGCCCCAGCCCCAGCATGATGTAATCAGGGTGGAGGTGGCAAGATCGATGGCGCCG  
GAGAGGCCATAAAGGGCCAGCTCACCGCAAACAGCAGCACCAGCACGGCGGTGAGGTTATAGAGCTTGGG

CGCCTCTTCCGGGCTCGGCAGTACCAGCTTGGTGAAGCCGACCGAGAAGCCGCTGATGGAGGCCTGAAAC  
AGCTTGGCAATCTGGCCGCGCAGCATCTGGAACCAGAAAACGAGGGTGGCGCCCCCAGTAGCCAGGCCA  
GCGACACATCGAGGGCGGCTCACTACCTGCAGGCTGGAGCCATCGGTCTCCAGCTTGAAGCCGAGCAGCCA  
GAAAGAGAGCACCAGCAGCACCAGGCTGGCGATACAGGCGTGGATAAATTGATGTTTCATCACACTTTCT  
CCACTTCCGGACGACCCAGAATGCCGGTTCGGCATAAAGAGCAGCACAAAAATGAGCAGGGCAAACGCCAT  
CACATCCTTGTATTTCGGTGTGAGATAAACC GGCGGTGAGCGCTTCAACCACGCCGAGCAGCAGGCCGCC  
AGTACGGCGCCCGGAATGCTGCCGATACCGCCAATACAGCGGCAGTAAAGGCCCTCAGACCGGCCATAA  
AGCCGAGGTAGGGGTTGATGACGCCGTAATACATGCCGAGCAGCACCCCGGCAGCGGCCAGCGCAGC  
CCCCAGCACGAAGGTGATGGAGATGACCACGTGGGTGTGATGCCAGCAGGTTGGCCATCTTGATATCT  
TCCGAACAGCGCGCGCAGGCGCGGCCATGCCGGAGCGGCCGATGAACTGGGTGAGCGCCAGCATGGTGA  
TGAAGTCAACCAGAGATGATCAGCTGCATATAAGAGAGGCTGGCCTGAAAACCATCTCACCCCCAG  
GGTCCAGCCACCGAGATCAGGCTGGGCATGGCGATATCCCGGAGCCCTGCGCCATCCGCATCATGTTT  
TGAAGGAAGATCGACATGCCGATGGCGGAGATAAGGGGGATCAGCCGTTGCCACCGCGCAGTGGCCGGT  
AGGCGACCCGCTCGATGCTCCAGCCATAGGTGCCGGTGTGATGATACTGACCAGGAAGGCGCCTCCAG  
CAGTAGAAAGGTGCTGTGATGCCATCATCATGAGCCCCGCCATCACCATAAAAAGCGACATAGGAGCCG  
ATCATATACACCTCGCCGTGGGCGAAGTTGATCATGCCGATGATGCCATAGACCATGGTGTAGCCAATGG  
CGATCAACGCATAGGTGCTGCCTATGGTTAATCCGTTTACGAGTTGCTGAACCAGATAGAGGAGGTGTTT  
GGACATACTGCGTTCCTGTACTTGGCCGAAAAGAGAGGAGGGGGTGAAGCTACTCACCCCCGATCGGCA  
GATTATTTGACTTGGCTGGAAGTACCGTCAGCGTGCCACTGGAACACACCGAATTCGAAGCCTTTCAGGT  
CACCGTTCCGGTGGCCAGGTCAGGGGACCCATCACGGTATCGATCGGTGCGGCCCTTGATGGCGGCGGCAAC  
GGCAGCCGGGTGATCTTACCCGCTTGGCGATACCGGCGGCCAGGGTTTGCACCGCGGCATAGGTAGTC  
CAGACGAACGGGCGGAGGAGTCTTGACCTTGGCCTTGAACGCCGCCACCAGCGGGGCGTTGGCAGGCA  
CCAGATCATACTTGTTCGGCAGGGTCACCAGCAGGCCTTCGGAAAGCCGGGCCACCAGTGGCGGAGATATC  
CTTGTTACCCACCCCTTCCGGGCCCATGAACTTGGCTTTCAGCCCCCTTCTCGCCAGCCTGACGCAGGATC  
AGACCCAGCTCAGGGTGTAGCCGCGTAGTAGACGAAATCGACGTTCTCTTTCTGCAGCTTGGCGATCA  
GGGCGGAGAAGTCTTGTACCCGGCGGTGATCCCTTCAAAGGCCACCCTTTCACGCCAGCCTTGTTCGAG  
CGCGGCTTTGACGCTGGAAGCGATCCCTTACCGTACTGCTTCTTGTGCTGGATAACAGCGACGCGCTGG  
GGTTTGACTGCTCGATGTACTTGGCAGCAGCTCGGGCCCTGATCGCTATCCAGGCCGATGGTGGCCCA  
GGGTGAGCTGGTAACCGCGCTCGGTGATCTTGGGTTGGTGGAGGCGGGGGTACCATCAGGATCCCCCT  
GTCTTATAGATGTTCGAGGCGGGCAGGGTGTGTGTCGGAGCAGAGGTGACCGACCACGAACCTTACGCCA  
TCGTTTACCCACCTTGTTCGCAACGGCCACCGCCTGCTTGGGATCGCAGGCATCGTCATAGACGACCGCTT  
CGATCTGCTTGCATTAATGCCGCCAGCCTTGTGATCTGCTCGACCGCCATCTTGCCGCGCGTGAAGT  
CATGTCCCCGTAAGGCTACCGGACCGGTGACCGGGCCTGCGATACCGATCTTGATGGTGTCTGCCGCG  
TGAGCGATGGAGATCGATCCAAACAGAGCCAAAGAAACCGCTGCGCCAACGTGATTTTGTCAACTTAT  
GCATTGATTGCTCCCTAATCAGTGGATTGTTTCAATTTCCGTGTGCCATTCGGATCTACATCCCCTGCA  
TCCGGCTATAGGTATGGTTCTATCATTCCCTCACGGGGCAATAACAAGCTGTTAAAGATACTAACAGAGG  
GGGGTGGATAGGCGGATTTTGAATAAATGACCTGTTATTTTCGGCTAATCAGAGCTTAATTTTGTATTTG  
TTGACTTAACATCTTGGTAACGAGAGGCGATTCCGACAAACGCCAGAGGATTAATCTGGCGATATTTTAC  
TCTGACAACGCTCCCATTTTACCAGAAATCCATTTGCGCAACAGAAATGAGCGCCTAAATTTAGCCGGCA  
TTGACAATTCCTGTCAGAGCTCGTTAAAACCAAGCCTTTTATTCGGGAAATCTGCTAATGTTCCGCTTTT  
GACAGTCAGGAGACAGAGATGGCCACTATCAAGGATGTGCGCTCGCGCGCAGGCGTATCCATCTCCACCG  
TCTCACATGTGCTCAACCACACTCGGCGGGTACGCGAGCAGTCTTAAAATAAATTCGACCAAGACCATTTGGTATG  
CTGGTGACCACAGCGTAAACCCCTTCTTTCGAGAAGTGGTGCAAGGGGTTGAAGCGTACTGCTTCGAAC  
AGGGCTACAGCCTGATCCTCTGCAACACCGAAAACAGCCGCTCGCCAACAGCATTACCTGAGAATGCT  
GATGGAAAAACGGGTGGATGGTCTGCTGGTATTGGGTACCGATATCGACACCCCGTTGCGCGCATGCTG  
CGCATCCACAAGAACGTGCCGAGGTGGTACTGGATTGGGGCACGGAGTGCATTTTCGCAACGTCATCA  
ACGACAACGCCCCGATCGGCGCCCGCATGGCCGTACGCCATCTGCTGGAGCTGGGGCACCGCGACATCGT  
CTGCATCACTGGCCAGCTCTCCAAGCCGACCACCCAGCAGCGACTGGACGGGGTACGTGATGCGCTGGGC  
GAACACGGTCTGACCTCAAAGATGAACAGGTCTTTGAAGGGGACTACGAGAGCCAGAGCGGCTTCGATG  
CCATGCAGCGCATCCTGGCCCTGCAGCCTCGTCCGACTGCGGTTTTTTGCCCTTCGACGACCCCATGGCGAT  
CGGCGCGATTTGCGCTGCCTGGGAAGCCGGAGTCAAGGTGCCGGACGATATCTCCATCATTTGGCTACGAC  
GATGTGGAGATGGCGCGCTTCTCCAGCCCGCGCTGACCACCATCCGCCACCCGAAGGCCGAAC TGGGCC  
AGCTGGCGGTGAAGCATCTGGTCAGCCGGATCCGCAACAAGGAGCTGGAAGTGGAGTCGATGACGGTACA  
GCCCCGAGCTGATTGTCCGTCGCTCGGTCAAACCGCTGCGTTAATCCGCACCCGTTGCCAACACGAAAAAC  
CCCCTCTGTACAGAGGGGGTTTTTTGTTTTATGGGCGGGTTACTTTCAACCTGTGGCTCGCAGTGCCGATCT  
CGGTCTTGTGAGTGAATATTTCCCCCGTTTTGACCCACCTCGCATTTTTGCCCTGTTAATCGTTTTGATCAATA  
TCAACAAAGGGTTAAGTTCTGATGGACTCCCGACTTAACCGTTCCATCCTGTAGGTTGGGTATGACTGTC  
AAAGATGGTGTCTTATGTTCCCCCTCGCAAGCTGGGTACCAGATCACGCTGCTGGCAATCGGCGACTC  
TGATCGCCAGCGGCCGGATGCAGCCAAGGCGGTGGCCGACAAGGATTTGGCAGACCCCTCGCCAATCTGTT  
TGATCCGCTCTGGCCCGCTATCAAGGCGCAGGGGATCGAGCAGTTCCAGTTCCACTTGCCGCCAGCCACT

TCCCTCTATCGGGTACACAAGCCTGAAAAACACGGTGATGACCTCTCTGCCATTGCCCCACTGTGGTTG  
AGGTGAATCGCGAGCATCATGCCGTTGGCGGGCTGGAGATTGGCGTGGCTGGTACCGTTTTGCGCGGGGT  
CGTGCCGGTACCTTCAACGGGCAGCCGGTTCGGTGGAGTTCGGTTCGTGCCCTGGATGAAAAGCTG  
TTTGCCAACTGCTGGACAAGCAGGTGCAGCTCGCCATCTATCTGTTTGAGCAGGGCAAGCTGGTGACGC  
TGTTTGGCACATCCCGGCTTGGTGAGGCGATGGAGTGGTATCAGCCGGTACTGGCCGGTGAGGAACGCTT  
CGTCAATATGACGCAACAGGGGAGTGATTTGCTGGTGATGGCGGCCCCCTGCGCGATTACTCCGGCAAG  
GCGGTTCGGTATCATTGAATTGACCCGGGATCACAGCCTGGTTCGGCGCCGATCTGGTTCGTTCAGGGCTGGC  
AGATGGCGATCATCTCTCTGGTTCGGGCTCTGGTGATTTGCCATGGTGATGGCGTTTCGTCTCAATCGCAT  
CAATCGACCGCTGCTCGACAGCGTCAAGGCGCTGGAGGCGCTGGCCAATGGCTCCGGCGATCTCGGCAGC  
AAGCTGCCGGTGGCGGGGCGGAGGAGATCCGCCGGTTCGGTTCGGTTCGGTTCGGTTCGGTTCGGTTCGGT  
TCCGTCACACCATCAGCCAGCTCACCGCCACTCTGGGCGAACTGGCTGGCGAGAGCGAGCCAGCTGTCGCG  
CAGTGCGGCGGGCAACCTTGGCAGCATGACGCTCAGCAGGAGCAGACCACCCAGCTCGCCACCGCCATG  
ACCGAGATGACCAGCACGGTACACGAGGTGGCCAACAACACGGCACAGGCGGCCGAAGCGGCCAACGAAG  
CGGACAATCAGGCGGTACCGGCGATGAGGTGGTGCAGCAGAGCGTCAACATGATCGAACAGCTGGCGGA  
GGAGATCGCCAGCGCGGGCAACACGGTGAAAAGAGGTTCGCCAAGGCCAGCGAGCAGATAGGCTCTGTGCTG  
GCGGTGATCCAGTCCATCGCCGAGCAGACCAACCTGCTCGCTCTCAACGCTGCCATCGAGGCGGCCCGGG  
CCGGGGAACAGGGGCGTGGTTTTGCGGTGGTGGCCGACGAGGTGCGCTCGCTGGCCGGGCGCACCCAGCA  
CTCCACCGCCGAGATCCGCGGCACCATAGAGCAGTTGCAACGGGCGGTGGGCACCACGGTGACCATGATC  
GAACACAGCGTCTCGCGAGCGGGGGAGTTCGGTGGAGCGGGCCAATCAGGCGGGAGAAGCCCTCGGCCGGA  
TCAAGGGGGCGGTCAACAGCATTTCGCGACATGAACACCCAGATCGCCGCCGCTTCGGAGGAGCAATCCTC  
GGTGAGCGACGAGATCACCCGCAATATCGTTCAGCGTCCACGAGATCTCCAAGCCACCACGCTGGTGGCG  
CGGGATACCGCGCATATCGCCAGCCATGTGGCGACCCTGGTGGACAAGCTGGGGGATCTGGCCGGGCAGT  
TTCAGGATGGTTCCAACGTGCGGATGGTGTGAGTTCGCGCCCGCGCCGCTCACATGGGCTGGAAGACCCG  
GGTGCAGCGCTATCTGGATGGGCAGGAGGGGCTGTGCGCGAGCGAGGCGGTTCAGTGACAAGGAGTGCCGC  
CTTGGTCACTGGTACTTCAGTGAAGGGCAGGCATGCTGCGGCGATCAACCCGCCCTTCAGGGCGATGGCCG  
CCCCCACGCCAGACTGCATCAGGTGATCCAGCAGATTATCGAGCTGAAAAATCAGCACAAAGCATGAAGA  
GGCGGAGGCGCTCTACCGGAGATCGAGCAGAATCAGAGCAGGTAGTGGGCTGCATCGATCAGCTGCTG  
CGGGAGATGACCAAGCCGGAGCGTTAATGACGAGCGGATCGGATAGCCAAAGGGCTGACAGCGATGTCAG  
CCTTTTTTCATGATGCGGGTTTTGGGGTGGGTTACTGCTCCGGGCGCAGCTCCTGATAACGGCGCGGGT  
GATGAACTGGCCGAAGTTTTACACCAGACGATCACGCTGCTGTAGCGGGCCGGATCGATCGTGGCGGGC  
AGCGGCACGATAAAGTTGTGCAAGGTCTTACCGGCCCGACTCGCACCATTTGATCCTTGAGACGGGCAA  
AATCGGCTTTCGGTCTCGACAAAATCGGGGGAGAGGTAGAGCTGGTAGTCCGGCCCGGGGGCCAGCTTGCC  
CATCAAATGACGGCATCCGGCCCTATGCTCACCTTGCCCTCCCCCAGTGCAGACGATCGCTGTCTTTC  
AGATCCCGGCGAAAGGTGCCGTGGAATCTCGCTTGTGCTGGCTGGCCGCTACCTGCTCGGTATCAGGGG  
CGGGTGGCGCGATCAGGATTGGTAGGGTGTAGACACCGGCGGCAAACCCTGCCGCCGCGACCAGCAGATG  
GGTGGCCAGCAGCAGGGCCATGGTTTTGCGTTTCATGATATCTCGGTTCGTTGATGAATTGATGGCAAAAC  
CATAACAGTCCGGGGGCCCCGCTGCCAGTTTGTCTCAGGCCAGAGCCCTGGTTATCCATCTATGGTGACGT  
GGGGTGTGGTTCACGCCAATGGCTCAAGGCCGGATGGTGCCGTCCTGCCCTTTGTTGATCTCGCTGGCGGC  
GTGTACCAGCTGTTCCAGCTGGTGGTGGATCTGGGTGCGATCCAGCTGCTGCAAGGGCTGACGACTCCAC  
AGCACCGGCGTACGGCTCTCGGTATCGAAAACCCAGTACCGGTTTTGCACGGGTCCGGCTGAAGAGGTTCT  
GGGCCGCGGCTTGGGCGCTGGTGGCCGCGTTCGAGGCGGGTAAACATCAGCAGATAATCGGCCGGGTGTTT  
GGTACGGTGCAGGTTCAGTTTCGCCGATCTGCAGGCTGGTGACGCTCTCCTCCTGTTGCGGCGCAGGCAGG  
GAGAGGGAGAGAAACAGCTGGTGGATGGCGGCGTGATAAAGAGAGTTTCATTGATGGCTCCAGATTGATGA  
TGGCGCCATTAGAGCAGGTACCGCCAGCGGCACTGTTAATGGTGGCTCTCTTTTTTTAGCTTTTTTCGGTC  
AGCGAAATAGCGCACCCGCGCTCAGTACAAAAATCGCGACCAATCCCAGATGTCCTGTTGATGGCCTCTC  
CTAGACTGGCGGCGAAACATCACAAGAAGACAATCATCATGCAGATTCAAGCAAACACCGTCGGCACACA  
GGCCGTCGCTCACACAGTGATGCAACCACAGGGGTTGGCCGGATGGGCCAGCTGGAGGCTCGTTCAGGTT  
GCCACCGGACAAGATGCGATCTTGGTGGCAACCGCAGCGAGCCGAGAAAGGGCAGGGGCTGCTCTCGC  
GATTGGGGGCCAACTGGCCCGTCCGTTTCGTGGCCATCAAAGAGTGGATTGGCAACCTGCTGGGGAGCGG  
CAAGAGTGCCGCTGCGCCGAAGGCGCAAACCGCCACGTCCCCGAGGATCTTCAGCGTCTGATGAAGCAG  
GCTGCATTTGGTAGCTCGCTGGGTGGCTTTGCCAAGGCGGACGTGTTGAACAACATCGCCGCCGAACAAC  
TGGGCAAGGAGCACGCCACTCTGGCGACCGGCAACGGCCACTGCGCTCGCTCTGCACCGGCTTGCAGGC  
CGTTGTATCGGCTCCGAGCAGCCGCAACTTCGTGAGTTGGCTGCCGGCTGCTGGCTCGCCCCATCGCC  
GGTATCCCCTCCAGCAGTGGGGCACTGTGGGGGGCAAGGTGACCGAGCTGCTCGCCAGCGCCACCCCA  
AACTGCTGCAGGAGGCGATGAGCCAGCTGCACACCGCGATGGGTGAAGTGGCCGACCTGCAGCGGGCCGT  
CAAGGCTGAAATCGCTGGCGAACC GGCGCAAAGCGCGACCACC ACTGCGGATGCGACGTCCGCCAAAGC  
GGTGATAGCAAAGGGGCTGCTCGCGAACAGGTTCGCCATGGCGCGGCAGACCCCGGCCACCGGCTACAAGC  
TGGCGCTGGATCTTATCAGCTATCAGGCCAGCTACCTGCTGCGGGATCAAACCTCGACCGAGGTGACCC  
GAGCAGCAGCGATCTCAACGCCCTGCATCAACACATTCGCCGATGGCTCCATCAACAGTTCCACATGGCC  
AAGTTGCAGACCCGCGGCGATCTGCAAACCTGCGTACTCTGGCGCTCTCTCTGGCCAACGGCAGCGACG  
CCAAGGGCTCTTCCCTTGGTTCATGCCCTCGACAGTCTCGCCTCGGCGGTCCCAACCAGCGTTGGTGCT

GGGCGGCTGATGCAGTTTGCCGGTCAGACCGATCAGGCGTGGGTGAACCATACGGCTGGCAAGCCGGAG  
GATCGGCTCGATGCCGGGGCGGACTGCGCTTTGACACCGCCATATGCAGGCGGAGCTGGGGCGTCTCG  
GCGACAGCGAGGCACGGCAGGTGCTGCAACAGCTGGAAGGGGCTTTTGGTATCGGGCCAGGGCTATCTG  
CGACTTCGCGGTGGCTCAGGTCTCCGGCTTTGCCGATAGCGAAAAGCAGTCTTGAGGCCGTGCTGGTCTCC  
CGCCTGACCCGCATGGGCAATCTGGTGGGCAGCCTGACCGATGCGCTCAAGGATCGGCTGCAACTGCCCG  
GGTCCGCCCCTGGCGAGCCGACCATGATCGACTCCGCCAGCCAGCTGACACCGCTCGAACTGGCTGCGCT  
GGCTCATATCGGCGTGCATGAGAGCTATCTGTAACCGTCAGCACACAAAACCCCTCTGGGCAAGGTGATA  
TGACATAAAAACGGACACCCTTGGGTGTCCGTTTTCTTATTCGGGCGGGAGTGGGTGAGGGGAGCAGGG  
CAGGCCGACATGGCCTAGAGGCTGGCGAAATCCACTGCGGGCAGGTTTTCAAAGCCGGGGCGGGCAAACA  
GATAACCTGCATCAGGCTGATACCCATCTCCCGCAGGCAGGCCATCTCTCGCGGGTCTCGATTCCCTC  
CGCCAGCGGGATGATCTTCAGCTCCGCAAACAGCGCCAGACAGTGGCGCACTATGGCTTCCCGGGTCGGG  
TCCTGGTGCATGCCGCGCAGCAGGTGCATATCGAGCTTGACGATGTTGGGGTGAAAATCGGCCAGCAGGT  
TGAGGCCCGAGTAACCGGCGCCAAAGTCATCGATTGCCGCTTGAAGCCGAGGGCTGATAGTGATCAAC  
GATACTGCGGAGATGCTGGCTATCCTGCACCTGCTCCACCTCGGTGAGCTCGAACATGATCTGCTCGATG  
GGGAAGAGGTGCTCGCGGGCCGCTGCAGGGTGGTGCAGGATGCAGCGTTCGGGGCGGTAGACCGCATTTGG  
GCAGAAAGTTGATGCTCAGCATGCCCCGCATATCGAGCCGGGCGGCCAGCGCGATAGCCTTGATCCGGCA  
CAGCTGATCGAAGCGGTAGCTGTTGCCGTCGTTGACCCGGGCAATCACGCTCTGCGCTGGCTCATTGTTG  
AGCCCCCGCACCAGCGCTTCGTAGCCGAAGATGGTGCCTTGTGCAATCGACGATGGGTGAAAAGCCA  
TGGTGAAGTGAAGTGCAGATCTGCTTTCTCCTGACACAGCTGGCAGATGGCGGGGACGGGGCGGCAGG  
TATATCCATGACTCTCCTCTCGGGGCGTGGCGGCGCTGGGACTGTCTCAAATGATAACAGCTGATCACC  
CCCCTGTAGGTTGATAGCGAAGCGTAATCGGACGAACGAGACGCTTTGAGCGTACAGCAGAGGTGGCC  
AGCCGTAGGGGAAATCGACTGGCCGTTATGGCGAGAGAACCATTACGCGAACGTCCGATTACGCCTA  
CCGGCTAATCGAACCTACGAGTTGCCCCCTTCTCCCTTGTGGGAGAAGGGTTGGGGATGAGGGGGCGTT  
ATGCCAACCAAGGTCAATGTTGGGCTTCTCGATGTTCCGCGAGCAGCCGGCATGCACCATATCTCACCGC  
CTTATGTAGGTTGATTCGCGCAGCGTAATCGGACGAACGAGATGCTGTTGTTCCGGCCGTTACAGTGAG  
TCAGGGTTGGCCAGCCGGAGGAGAAATGCGGGTGGCCGTGATAGCGTGAGAAATCCATTTACGCGAACGTC  
CGATTACGCCTATCGGCTAATCGAACCTATTGGCTAACAGTGGCGATTCCGTACAATTTCTGATGGCACA  
CCAGTGAATTAATCTCTGCTGATAAGTTAAGAATACGTTTATAATATCAGCCATGGCATGATTAATCA  
ACCGAAAGTTATTTGGCAAGTCAATTATCATCATCGAAATAATTTGTCAAATGAAATAACAAAGTCTTTTAT  
ATCTGACGCTCTGCCATCTAATACTTTTTTTCGGGAGTTCAATATGTTCTGGAGCATGTTGATTGCGTTCCG  
AAAACACAGATGCTATCAATTATTTAGCTCTTGATGGCCAGTATTTTAGATCATATCTACAGCTGAGAG  
ATTCTAACTGGTCAGCAATGTGACTTGTAAATAAATAGTTGTCACTTCCCGCATCAACCATCATATCTAA  
GGCAGACTGATGTTGACCCCTTATAAAACCAGAATGTTGATAAATATCATCCTGCTCCCTGATTAACCTA  
GCAAGTAATGAAGAGCAATCAATGATTTTTTCTTGAATGGCGATTAACTTTTTCTGTAATCTCTAGCTT  
GAACTATTTCTCTTTACAAAATCACCCTCATCAAATATGCTCTAGCGTTAGCCATAGATAAAACCC  
CTTTGGAGTCCGATATTACATAAGTATCAGAGTAGCCAAAAGCGTCTACTAACTCTTGAAAGCGATGCTC  
ATTTCTCTGCTCTAGAGACCATCCTTTCCATTAATTTCCATCTAGTCATCCAGATTTTCTTTTCTTTGA  
AGTCAGATAGTTCTTTCAATAAAGGATTTGCAAAAAGAGTCGGATTTGTGGTGTTCAGAGTCATAGA  
GCCTCACAGTGTTATCTAATCATTGTCTATATAGTACTGCCTCAAGATAGAAAGTGCCTATCTGAACTAA  
AGACTTTTTGTTGCTTCAGATCGCTGAAAGTGAACAAAAAATTTGGGTATCGTATGCACTCGTTTTGATTA  
AAAAATGGCCTTCTGTGTGTTTTAACTCGCAATTAAAAAACGGCGCCGTAAGGCGCCGTTTTTAATATCAC  
TTACTCAACCAAGATCACTGCAGCAGGGAGATATCCGCGACTTGACGGAACAGGTTGCGCAGGTTGTTCA  
GCAGCGCCAGACGGTTGGCCTTGAGGGCTTCGTGCTCGGCCATCACCATCACTTCGTTGAAGAAGGTGTC  
GACCGGCTCGCGCAGGGCGGCCAGACGGGTGAGGGCAGCCTGATAGTCACCGGCAGCGAACAGCGGGGCC  
AGTTCCGGCTTGCAAGTTCCGCAACCTGGGTGGCCAGCGCTTTCTCGCGGCATCGACCAGCAGTTCCGGTT  
TGACGGCAGTCGGCAACTCGCCTTCAACCTTGCCAGAAATGTTGCTCACGCGCTTGTGGCGGCAGCCAG  
TGCCAGTGCGGCATCCAGAGTGCAGGAGTGGCTGACGGCCTTGACGCGGCGATCGAAGTGCAGCGGACCG  
GTCGGGCGGCGGGCCAGTACGGCCAGCACCGTCCGGCACCAGTGCCTTCGTCTGATAGGCGGCGCGGA  
AGCGGCCAGCATAAAGTCGACCACGTCCGTGACGACGGTTTTGTTGGTCAGTTTGTGCGCCGTAGACCGG  
TACCGCTTCTTCAACCAGTTCAACCAGATCCAGATCCAGCTGCTTCTCGGTGATGATGCGCAGGGCACCG  
ATGGCGGCGCAGCAGGGCGAACGGTCTTGTACCCTTCGGCAGCATGCCGATGCCGAAGATACCGG  
CCAGGGTGTGCAACTTGTCCGCCAGCGCAGCGCAGGCAACCAGACCGGACGGCAGGGCATCACCGGC  
AAAGCGCGCATGTACTGCTCGTTAGGGCCACGGCCACCCTTCGTCTTCGCCATCGTGACGGGCGTAG  
TGCATCCCCATGACACCCTGGGTGTCGGTGAACCTCGCCAGCATGTTGGTCACTCAGGTCACACTTGGAGA  
GCAGACCGGCACGCTTGGCCTGAGCCACGTCCGGCCGATACGCTCGGCGATAAAGCCGGCGACGGTCTC  
GATGCGCTCGACCTTGGCCTTACGGTGGCCAGCTGCTGTTGGAACAGCACGGTTTTCAAAGGCGCGGACGG  
CGGGAGGCCAGGGTCTGCTTGAAGGTCGGTCTTGAAGAAGAACTCGGCGTCAGAGAGACGGGGACGAACCA  
CCTTCTCGTTGCCGCTGATGATCTGGCTCGGGTCTTTGGACTCGATGTTGGTGACGAAGATGAACTTCGG  
CAGCAGCTTCCGCTCTTGTGCTAGACCGGGAAGTACTTCTGGTCAACCTTCATGGTGTGACACAGCGCT  
TCAGCCGGAACGGCCAGGAACCTTCTTTCGAAGTTGGCGGTGAGCACCACCGGCCACTCGACAGTGGG  
TCACTTCTTCCAGCAGGGCGTCCAGGTCCGCAACGCCACCAGGCGGCGAGCGCCGCTTCGACGTC

AGCCTTGATCTTGGCCTTGGCGCCATAAAGTCGGCAATCACCATGCCGCGCTCCTGCAGGATCTGCGGG  
TACTGGCTGGCGTTGTTCGATGGTGAATTCGCTCTCGCCATAAAGCGGTGACCGCGGATGGTGCGGGCAG  
AGTCGATACCCAGAATGTGGGCGGGCACCAGATCCCCATCCAGCAGCAGGGTCACGGTGAACACCGGACG  
CACGAACTGGATGGTCTTGTTCGCCCCAGCGCATCATTTTCGGGATCGGCAGCTTGGCCAGTGCCTGGCTA  
ACCAGCTCGCCCAGCAGATCTTTGGCCGGACGGCCTTCGACCTTGGCGGTGTGAACCAGCCACTCACCTT  
TGTTCGGTGACCAGACGCTCGGCCTGCTCAATGGTGTGATGCCGTTGCCACGGGCCCAGCCTTCGGCAGCCTT  
GGTTCGGCTTGCCTTCGGCATCGAACGCTTCGCCACGGCCGGGCCGCGCTTCTCGACGCTCTTGTTCGGC  
TGTTTCGCCGGCCAGCTCGCTTACCTTCAGCGCCAGACGGCGCGGGGAGGCAAACCACCTCGACGTCGCCGA  
AGGCCAGATCGGCCTTGGTTCAGTTCGGCTTTGAAGTTGTTCGGCAAAGGCTTCGGCCAGGGAGCGCAGGGC  
TTTGGGCGGCAGCTCAGCAGTACCAGATCTCTACCAGAAATGTATGTTGTGCCATGTCCGTTCCCTAACCT  
TGCTTGTCTCAGCTCGCTCAGCATGTCTGCTCAGTTCAGTTCGACATAGGGAAGCCAGCGCTTCGCGGG  
AGGCGTAGTATGCCTCTGCCACGGCCTTGGTCAGGGTGCGAATGCGCAGGATATAGCAGCTGACGCTCGGT  
GACCGAGATGGCCTTGGCGGCATCCAGCAGGTTGAAGGAGTGAGCGGCTTTGAGAATGCGCTCGTAGGCA  
GGCAGCGGCAGCGGTTTTTCCAGTGCACAGCAGATTCTGGGCTTCCCTTCTCGTACTGCTCGAAGCAGTGG  
ACAGGAACTCCACATCGGCGTGTTCGAAAGTTGTAGGTGGATTGCTCCACTTCGTTCTGGTGGAAACACGTC  
GCCGTAGGTGGTCTTGGCCAGCGGGCCGTTCAGACCAGACCAGATCGTAGACGCTGTCTACGCCCTGAATG  
TACATGGCCAGACGCTCGAGACCGTAGGTGATCTCGCCGGTGACCGGCTTGCACCTCGAGGCCGCCGACCT  
GCTGGAAGTAGGTGAACTGGGTCACTTCCATGCCGTTTCAGCCACACTTCCCAACCCAGACCCCAGGCACC  
CAGCGTCGGGTTTTCCAGTTGTCTTCCACGAAGCGGATGTCTGGATTTCAGGATCCATGCCAGCTCT  
TTCAGGGAGCCCAGATAGAGTTCCCTGAATGTTGTTCGGGGGAAGGCTTGATGATCACCTGGAAGTGGTAGT  
AGTGCTGCAGGCGGTTTCGGGTTTTACCGTAGCGGCCGTTCAGTCGGACGGCGGGACGGTTGCACGTAGGC  
GCAGGCGATGGGCTCCGGGCCCAGGGCACGCAGACAGGTCATGGGGTGGGAAGTACCGGCACCCACTTCC  
ATATCCAGCGGCTGAATGATGGTACAGCCCTGGCGGGACCAATAGTCTTCGACGCTGCAGGATCAGGCCCT  
GAAAGGTTTTGACATCGAATTTTTGACATAATTTTTTTCGCGCGAAGTGAAAAATCAGAGCAAGATTTGCTG  
AATGTGAACCGAGGGAGTATACCGTCTGGCATGGTTCGGATAATAGGCGAAAATTCGACGCGGATTCGCGGGA  
TGGTGTTCGCCCTGGCTGGTTCGGGCGGGATGTCCGGTATATGATGTGAGCAGTGCAGGCTGCAGAGTGG  
GCAGGGTCGGGCAAACCGCTGAAATAACGAGGGAGAGGAAATGGAAGTGCAGTGCAGCTGGGTGACAAA  
GACCCGGAATACATTGAATACCATGACAAAACAGTGGGCGAGGCCGGTCTATGACGCCCGCAGCTGTTTTG  
CCAAGCTCTGCCTCGACGCCAGCAGGCTGGGCTGTCTGGATCACCATCCTCAAGCTACCCAGAGCTA  
CTACCGCGCTATGCCGACTTTGATCCGGTGCAGATTGCCCGCTTCGACGAGCAGGATGTGGAGCGGCTG  
ATGCAGGACAGTGGCATCATCCGCAACCGGCTCAAGGTACAGTTCGATCATCAGAAAATGCCCGCGCTTATC  
TGGCGTTGCAGGAGCAGGGGATCGACTTCGCCGACTACCTGTGGGGCTTTGTTGGCGGCGCCCCATCGT  
CAATCAGCGGCAGGGCAACGGCGATATTCTGGCGACCTCGCCGGAGTCGGATGCCATGTCGAAAGCGCTC  
AAGAAGCTCGGCTTCAACTTCGTTCGGCAGCACCATCTGTTACGCTTTTATGCAGGCGGTGGGGATGGTGA  
ACGATCATCTGGTTCAGCTGTCTTGCACGCCGAGTGTTCAGTTACCAGCTGACAACCCGTCGATTGCC  
AAAAAACATCACTCTCGCCATCTGTTTCAGGCTTTCGCTCAGACAATGGCGTGCCAGCGGTTACAATCCG  
GCCCCGGCATGGTTCGGGATTGTTTTACAGAGTTTTTTTCATGCGAGCCAAGATCCTGGTGCCTGCTC  
TGGCACTGACCGTTGCCCTGAGCGGCTGTACCACCAACCCCTACACAGGTGAATCCCAGACCTCCAAAGG  
TGCATGGGGCGCGCTGGCTGGCGCCGCTGCCGGTTCGGCCGCTAGGTGCGCTCTCCTCCAGCAAGGGTGC  
CGCAAGAAGGGCATCCTGACCGGCGTTGCTGCTGGCGCGGCGCTGGGTGGCGGTATCGGCTACTACATGG  
ACGTGCAGGAAGCCAAGCTGCGCGAGAAGCTGCAGGGCACCAGGCGTCAGCGTGACCCGCAATGGCAATGA  
GCTGATCCTCAACATGCCGAACAACGTGACCTTCGACAGCTCCAGCTCCCAGCTGAAAGCGGCGGTTGCC  
AACACCCCTCTCCGGCGTGGCCATGGTGGTTGCCGAGTTCGACAAGACCCGCTGAACGTGGTTCGGTCA  
CCGACAGCACAGGTTCCCGCGATCTGAACATGAAGCTTTCCCGCGATCGTGCCGATGCCGTTGCCGCTCA  
GCTGATTGGTTCAGGCGTAGCAGGTAGCCGATCTCCACCACCGGCTGGGCCCGGATCAGCCGTTGCT  
ACCAACAGCACCGCGCTGGCAAAGCCCAGAACCCGCGTGACCATTACCCTGACCCGACCCGCTAAG  
TCGCTCAGGTTTTCGGTAACGAAAAGGCCCGCCAGTGCAGTGGCGGGGCTTTTGCTATCTCAAGCTCAAGC  
CGGGAAGGCTTAGACAGCTGCTGTTCAGCTGTACTTCGACCTTGTAGCCTTCGTGGGCCAGACGGGCTTG  
TACACAGGCTCTAACCGGTGCTGTGCCAGCAGGGATCCAGGCATCCCACTGCTCGTTGAAGGCAGCGATG  
TCACCAATGTCTTTGAGATAGATATTGGCCATCAGGATCTTGTCTACGCCGAGCCGTTGGCTTCCAGCA  
GGCGTTGCAGGCTCGCCAGCACTTCGCGGGTCTGCTGGTGGATGTTCGGCTCTTCGCTGACGGGCACTTC  
CACCACGTAGAGGGTGCCATTGTGGATGACCACGCTGACCAACGCTGGGTGGTGGCGATTCCGGGTAATG  
GTTGTTCATGGAGTGTCTCCGGTACAGGGGCTTATTGACCCTTTCGGATCAGATAGCGGTAGGGGGCTGCT  
CTGTCTCGCTGGCGACCAGGGTGTGATCCATAAAGCGGCAGAACTGGGGATGTTCGGGTTGGTTGAAGG  
ATCGTTCGGCGCTGACCAGCAGGGTCTCGCCATCCGCCATCAGCCGACTTCTTTCGGAACCATCATAACG  
GGTTCCGGGCAACGAAGCCCGATTGCGTCCAACCTCGTGGGTTGCCCGCAGAAATAAATCACTCATCTATT  
ATCAACCTTCAACCTATTTCGGCTGCCAATGATACTCAGGGCTAAAAATAATCAACAAACGCCCCATCA  
ACCAGCATATGTAACCGAAATGTTATTCTGCCCTATCCAGCTTTCGCCCGGACGAGTAATATAAAAAATTGA  
ACCATATTCACAAAGGAGGTGAATATGCAGGCTCTCTACGGCAGATTACAAGCCTATGCAGGCATGGGGT  
TCTTGTCTTCGCCATGATAGTGTGGGCGAGCCCGATCGGGAACACCGGTACCTGGTTCCGGCTCCATGGT  
GATGGTTCGGGTTGGGGCTCTGGATCGAGCTCAGCGATTACTATGACGAGGATGAGGACGAGAACGATCAA

TCCTGAATCGGATGACGATTCAACAACAAAGGCGGAGCAATTCCGCCTTTGTCATTTCTGCCGTTTGGCA  
ATGTGCCCCGGATCAGCGGGTCGAGCGCATCGCCCCCTCCAGATGCAGCGCCGTCTGCTCCGGGTTGGCTT  
TGGGGTCGTTGAAGAAGTTGCTCAGCACATCGAGGATTGCCTGCCGCATATTGGTCGGCGTCGCCATCCC  
TTCCGCCATGCTGGGCAGCAGGTTGTCTGCTTTTCCGCCAGCAGGAAATCCTGATAGGAGCGGACGGCC  
CAGCGGTCAATTTGCTCATGTTCGGGATTGGTCAGCGCCGGAATAGACCCCTTCACCCGATTGAACTCCT  
CCTGGAATTGCGGGCTCATCAGCAGCTGGGCCAGATCCCCCTTGCGCCTGCAGCTGGGCCGGATCCCCGCTG  
TTTGAACATGGCGATGGAGTCGAGGTTGTAGCTGAACAGTCCGGCGCTGCCCGGGCTCGGCAGGCAGGCG  
ATATCCTCACCCGGCCGGTAGTTACCGGCACTCAGTTCACCCCTTCACCCAGTCCCCCATCACCTGCATGG  
CGGCGCCACCGCTCTCCAGCAGATTGGTGGCCTGATGCCACTTCAGACCGGCGTATTTTTGCGGCACATA  
GGCGCGACGCTGCTGGAACCGGTC AACACCCCGCACCATGTCAGGGCCGGTCAGGGTGGCAGATGTCCTGC  
TCGAGGAACGCCTTGCGATAGAATTCTTTACCGCCCTCACCAAGCGCCACCCTTTCAAACAGTACTGCCA  
GCTGCCAGGGCTCGTTGCCAATGGCGAGCGGGGTGATCCCCGTTTTTTAAGCTGGTCGGCGACGGTGAC  
AAATTGGGCCAGTCGGTGGGCGGAGTCAGCTTGTTCGCTCGAAGATCTTGGCGTTGAGCCACAGCCAG  
TTGACCCGGTGGATGCCGGTGGGCACCGCCATCAGGGCGCCATTCTGGCTGAGGGTGGCACGCACCATGG  
GCGGCATCTGACTGTACCAGCCGAGGTGTTGCGCCATCGGGCTGAGATCGCGCAAAAAGCCGAGTCCGGC  
CCACTCCTTGAGCTCGTAGCCCTTGAGGTGGGCGCTTCCGGCGGGTTGGCCGCCAGTGCCCGGCTCTTC  
AATACCGTCATGGCACTCTTGCCGCGCCACCCTGCACTGCAAAAGTCGTTCCACTGGTTGCCCTGTTTGG  
TCCACTCGGATTTGAGCACTTCGACCGCTTTCGCTTCGCCGCTGACGTCCACCAGTGCAGTACCTCCAC  
CTGGGAGGCGGCAACGGGAGTAGAGAGCAGGGCGATGACAGAAAAAGACAACCCTTCATAAGGTTACTG  
CCTTGGTAGGGAGAGCGTGGCCTGCAGGCCACCTTGCGGACGATTTTCCAGCACCAGATCGCCGCCGTGG  
GCGTGGGCAATGTTGCGGGCGATGCCAAGGCCGAGGCCGGTGCCGGCTGATCCGTGCTGAGCCGGTAAT  
AGGGTTCAAGATGCGCTCGAAGTGCATCGTCCGGCAGGCCGGGGCCCTCATCCATGATAAAGAGGATCAG  
CATCTCTTCGTCATCCATGATGATGATGCGCACCTTCTGGCCGTACTTGATGCCGTTGTCTACCAGATTG  
CCGATGCAGCGCTTGAGTGCAGCAGCTTGCCCGGATAGGGCCACTTGCAGTGCCCTTCGATGGTCAGCC  
GCTCGTCGTGCAGGTTTCATCGACTCCGCCATCTGCTCCAGCAGGGCGTTGATGTCGATCTCCTCGATATT  
TTCGTGAATGTCGGTCTCTTTGACCGTCTGCAGCGCCCTTTCACCATCAGCTCCAGCTCGTCGAGATCC  
TTGTTGAACTTGGGAGCTGTACCTCGTCATCGAGCAGTTCGACCCGCAGCCGCAGCCGGGTGATGGGGG  
TCTTGAAGTTCGTTGGGAGATGGAGCTGAACACCGCTCTCTATCGTCGATATAGCGACGAATGCGGTGTG  
CATGATGTTGAAGGCGCGGGTCGCCGCGACGATCTCGGAGCACCTCCTCCTTGAGCGAGGTTGGTTCG  
ATATCCTTGCCAGATTCACCGCCGCTTGGCGAGACGGCGCAGCGGGCGGGTCTGCCAGCGCACCAACA  
TAAAGGTGAAGAAGCAGAGGAACACCGTCATCAGAGCGATGAAAACGCACCTGGTTGCTCGGCATCACGGT  
ATCGTCGAGGGTCATGTAGGGGGCGGGCAGCAGGGCCGCCAGATAGAGCCACTCCCCCTTTTCAATCTCG  
ATCTGGGTACCAGAACTGGCGGATTGAGCGGCTCCAGCGACAGGGTGTAGCGGGCCAGGAGGAGGGGA  
GATCCGCCAGCAGGGTGTGTTGTTGAAGACGTGGAGGTCATCGGGCCGGGAGAAGTCCACCTTGATCGC  
CATGGCGTCGGAGAGCTTGCGGGTCAGCACTCCCTGCACCTCCTCCAGCACCTGCGTCTTGCGTTGCTG  
TCGGGGATGGCGTTGATGTGGATCTCTTCTCGTTGAGCGAGACGAAGAAGCGGCTGCCCCCATGTTGC  
GCAGTTGGTCCAGAGCGATATGGCGATACTGCAGCGCAGGGATTTGAAGAAGTTGACGGTGAAGCGGC  
AGACATGGCGAGGTTGCGGGTGGTGTGAGCATCCCCCTCCAGCTCCCGCTTCTGGATCTGCTGCATCCAG  
ATGCCGGTCAGAATGGTCTGGGAGAGCAGGATGGCCAGCAACAGCAGCAGGATCATCCGTGACAACAGGG  
AGCGGGGCACCAGCGCCCCCAGGACCCTTGTTCATGTCAGCTCGTGCACCTCGGGCATCAGCATG  
TAGCCACTGCCGGAATGGTCTTGATGATGCGCGGGCTCTTGCCGTTGTCGCCCAGCTTCTGGCGCAGGC  
GGCTGATCTGCACGTCGATACCGCGCTCCATCGGCAGGCTTTCGCGGCCGCGGGTGGCATCCGAGATGGT  
GTCCCGATCCAGCACACCGCGGGCTGTTGCAGGAACATGCCGAGCAGCATGGCGTCGCTGCCGGAGAGG  
TCCAGCAGGCTGCCATCGTCATGGGTGAGTGGTGGCTCAGGGTGTGAGGGTCCACTCGGCAAAACGCA  
GGCGGCGGCTCGGCTTTCTCTTTTTCCGGCTGGCGGAATTCGGCGCGGCGCAGCAGTGCCTTGATGCG  
GGCTGCAGTTCACGGGGCTGAACGGCTTGGCGATATAGTCGTGAGCGCCGAGTTCAGGCCGATCACC  
CGGTCCGCTTCGTGCGAGGCGGGTCCAGCATGATGATGGGCACCTGGGAGTCACGACGGATCTGCTGGC  
AGAGGGTAAAACCGTCTCGCCGGGCATCATGATGTCCAGAATAATCAGGTCCGGGCTGTGCTGGGCGAG  
TTGCTGGCGCATCTCGTTGCCCTCCGCCCGCTCAATACCTGAAAAGCCCGCCGGGTCAGGTACTCATTG  
AGCAGCTCGCGGATCTCTGGTGTGATCGACGATCAGCAGTTGTTGCTCATTGACATATGTATGTGCA  
TCCACCCATTTTTTTGTGAGATTGAACCTGTGCGGGGAGTAAAAAGCAAGCAAGCCCCCTATCTAATGT  
GAGGTTTAAAGCAATAACAGCCTATTGATAAGATTAAAATGAAAAAGGCCGACCCAAACGGGACGGCCA  
ACAGACAGCTTCTGACCACTGACGAGCACCCCGTGTGGCGATCGTCACAGACTTGAAAAGGGGCCCGTCA  
GACTGGCCCCGAAAAGGGACAACCTCTCAGTAGTGCATCCCGTCGATCCGGCTGGTTATCACACCCGTTCA  
AACACGGTGGCGATGCCCTGGCCCAGACCGATAACATGGTGGCAACCCCGAGGTGGCATCCTTCTCCT  
CCATCAGATTGATGAGGGTGGTGGAGATGCGGGCGCCGGAGCAGCCAAGGGGGTGACCCAGCGCAATGGC  
GCCGCCGTTGAGGTTACCTTCTCGTCCACCTGATCCTGCAGACCCAGATCCTTCACGCAGGGCAGGGAC  
TGGGCGGCAACGCCTCGTTGAGCTCGAACAGGTGATATCACCGACAGTCAGACCGGCACGCTTGAGCG  
CCTTCTGGGTGCGCGGCACCGGGCCGTAACCCATGATGGCGGGCTCACAGCCGGCGATGGCCATGGCAGC  
CACCTTGGCGCGGGTGTGAGGCCGAGGGCCTTGGCGCGATCCGCGCTCATCACCAGCATGGCGGGCGGC  
CCATCTGACAGCGCCGAGGAGCTGCCGGCGGTGACGGTGGCGTTGACCGGATCAAACACCGGGCGCAGCT

GGCTCAGGGTTTTCGACCGTGGTCTCTGGGCGGATCACCTCGTCATAGTCGTAGAGAAGCGGGCACCGCT  
GGCGTCATGGCCTTCCAGCCCGACGATCTCCTTGCAAAGCGCCCTTCCACGGTGGCGGCGTGAGCGCGG  
CGATGGGAGCGGGCGGCAAACCTCGTCCTGCTGCTGGCGGTTGATGCCGTGCAGCTTGCCGAGCATCTCGG  
CGGTGAGCCCCATCATGCCGGAGGCTTTGCCCACCGACTTGGCCATGCCCGGGTGGAAAGTCGACGCCGTG  
GCTCATCGGCACATGGCCCATGTGCTCGACGCCGCCGATGATGAAGATATCCCCATCACCCACCTGAATG  
GCGCGGGAGGCGTCATGCAGCGCTGCATACTCGAGCCGCACAGGCGGTTGACGGTAACCGCCCCACCT  
GCTTGGGAATGCCGGCCAGCAGTGCGGCGTTGCGGGCGATGTTGAAGCCCTGCTCCAGGGTCTGCTGCAC  
GCAGCCCCAGTAGATATCCTCGATCTCGTTCGGGTGAGGTTGGGGTTGCGCAGCAGGATGGATTTTCATC  
AGGTGCGCGGACAGATCTTCTGCACGCACGTTGCGGAAGGCGCCGCCCTTGGACCGGCCATCGGGGTCC  
GGATACAGTGCACAATGACTACGTCTTTCATGAATGGATCTCCTTTCCGCAATCAGTAGAAGTTTTTGCC  
CTGGGCGGCCATCTCGCGTAAGCGGTGCTGACCGGTTAGAGCGGGCCCAAGTCGGCATACTGGTTCGGCC  
ATGGCCACGTAGCGATCCAGACCGATAGTGTCCAGATAGCGGAACACGCCGCCCGCGGAAGGAGGGAAGC  
CCAGACCGTAGACCAGTGCATGTCGGCTTCGGCTGGCGTGGCGACAATGCCCTCTTCCAGACAGAGCAC  
CACCTCGTTGATCATCGGGATCATCATGCGAGCGATGATGGCGTCTTGTGCGAAATCCTGTTTTCGGCTTG  
GCGATGGGGGCCAGCAGCTCGTAAGCAGCTGCGTTCGGCTACCTTCTTTCGGCTTGCCCTTCTTGTCTGCT  
CGTAGGCGTAGAAGCCCTTGCCGTTCTTCTGACCGAAGCGGTTCACTTCGTACATCACGTGCATGGCGGT  
ACGGCCTTCTTGTCTACATCGTCCGGGAAGCCCTGCGCCATCACGTACCGGCATGGTGGCCGGTGTGCG  
ATGCCGACCACGTCCAGCAGGTAGGCGGGGCCATGGGCCAGCCAACTCCTTCTCCATCACCTTGTGCGA  
CGGCAGCGAAGTCGGCGCCATCGGCGACCAGCTTGTGAAGCCGAAGAAGTAGGGGAACAGCACGCGGTT  
GACGAAGAAGCCCGGGCAGTCTGACTACGACCGGGGACTTGGCCATGGCGGCGGCGTAGGCCACCACG  
CGGTTGATGGTTTTATCGGAGGTCTGCTCGCCCGGATGATCTCCACCAGCGGCATGCGGTGCACCGGTT  
TGAAGAAGTGCATGCCGCAGAAGTTCTGCGGGCGCTTTCAGTCCCTTGGCCAGCAGAGAGATGGGGATGGT  
GGAGGTGTTGCTGGCGAGCACGGCGTCTTTCGCCGATCACGCCCTTCCACTTACCCAGTACGGCGGCCCTT  
ACTTTTCGGGTTCTCGACCACGGCTTTCGACCACGACGTCCACGCCCTTTCGAGTGTGCATAGCTGAGGGTGC  
GAGTGATGGCAGAGAGCACCTGGCCCATCTTATGATGCCATCGATGCGGCCCTTTTCGAGCTGGCCGTTGAG  
CAGCTTGGTGGCTTACCCATGCCAAGTGCAGCGCCTTCTCGTTGATATCCTTTCATCACCGCCGGAATG  
CCCTTGTGTCAGCAGATGGTAGGCGATGCCGCCACCCATGATGCCGGCACCCAGTACGGCGGCGTGGCCAG  
TGGCCTTGTCTGCTGCTTGGCAGCCTTCTTGGCCAGCGCCTTGATGTGTTGATCGTTGAGGAAGATGCC  
GACCCAGCCTTGGCGACATCGGCTTTCGCCAGCTTGATAAAGCCCTGTGCCCTCAACGACGAGCGCTTCG  
TCACGGCCCATGCCAGCAGCGGCTTTCGACGGTTTTTCACCGGGTTCATCGGGCGCCGGTAAATGTTTTGCCCG  
CCACGGCGGAACCATGCCGGCGGCGGTTGGTGAAGCTCATCATTTGCTTCCAGTTTGGAGAGGCGCAGCGG  
GGCTTTCTTGGCGGCACGACGGCTCTGCCAGTCCAGTTTGGCCGCGATGGCGTCTTTCGATCATCTGCAGT  
GCAGACTCTGCAGCGCTCAGGGGCGACCACGGCATCGATGGCTCCCACCTTTCGAGGGCGTTCATCGGCAC  
GGTAATCCTTTCGGGTTGGTATCCACTCGAGCGGTTGTCGGCACCGATCACTCGTGGCAGACGGACGGT  
GCCGCCAAAGCCCGCATGATGCCGAGTTTGGTCTCGGGCAGGCCGATTTTGGCGGTTGGTGTGCGCCAGA  
CGGAAGTCAGTGGAAAGGAGGGTCTCGCAGCCGCCGCCAGAGCGTGGCCCTTTCGATGGCAGAGAGGGTGC  
GAACCGGCAGATCTTCGATGGCATTGAAGATGTCGTTGGCCTTTTTCAGCCAGCCGAGCAGATCTTCTTG  
CGGCAGATCGAACAGTTCCAGGAATTCGGTAATGTCGGCACCGACGATAAAGGCGTCTTTGCGCGAGGTTG  
AGGATCAGACCTTTTAGTTTACGTTCTTGTGTAATGCGGCGATCGCTTCGCTCAGGGAGAGCAGGGTAG  
CGCGATCCAGCTTGTGACTGAACCCGGGGCATCAAACCTCAGCTCGGCAATGCCGTTTTTCGAGGTAGCT  
GACCGACAGGGTTTTCGCCTTGGTAGATCATGAGAGTGTCTCCTTGTTCCTTTCAGTGGGGAGTGGTGTCT  
CCTTAATCCCCAGCAGGGGGCGAGGCTCACTATTGATCCAAAAGGAGACATTTTCAACACCTATTTAAAA  
CATTTGTTTAAACAGTTGTGAGTAAAAGCTCCTCATCAAAAACGGGCAAAAAGAGAGGGCCCTTTCGGCGC  
CCCCGGATGGATGTGAGTTTGTATCAACTGGCCAGTTCCGGCCGGTTGCGATACTGGTTACGACTTTCG  
GGATCGGCGAGGGCGTGGGTATTGTTGACCGGCCGGTTGTGCACCACTTCCCGTACCGCCAGCTCGACGA  
TCTTGGCCGACTTGGTGCATGGGATGGCATCCACCTGCAGGATGCGGGCGGGCAGTGGCGGGCGGTCGCA  
ATGTTGCTTTATTTGCTGGCGAATGCGCTCGCGCAGCGGCTCGTCCAGCTTGCAGCCCGCTTTCGAGCTTG  
ACGAACAGCACACCCTCGTCTGCTGCCACTGCTGGCCGATGACGATGCTCTCCTCCACCTCGTCCA  
GCTGCTCGACATAGCGGTAGATCTCGCTGGTGCCGATGCGCACGCCGCCCGGGTTGAGGGTGGCGTCCGA  
GCGGCGTAGAACAGAATGCCGCCGGTTCGGGGTTCAGCTCGATCCAGTCCCGTGGCACAGATGTTGTGCG  
AACCGCTCGAAGTAGGCGGCATGGTACTTGTGCGCATTTCTCGTCCGCCAGAGTAGATGGGCTGGGCGG  
GGAACGGCTTGGTGCAGACCAGCTCGCCTTCTCCCCCTGCACTGGCTGGCCCGCTCGTTGAATACCTG  
CACCGCAAGACCGAGGCCCGCCCTGACTCTCGCCGCGATAGACAGGGCTGAGCGGGTTGCCGATGACA  
AAGCAGGAGCAGATATCGGTGCCACCTGAGATGGAGCTGAGCTGCACATCCTGCTTTATCTGCTGATAGA  
CGTAGTCAACCCCTTCCGGCGACAGCACAGAGCCGGTGTGCGAGATCAGCTGCAAGTGGCGCAAGTGCCTG  
GCTCTTATGATGGGGCGTAACCTGCTTGTGCAAGTGCCTGCGAGATACTTGGCCGAGGTACCGAACAAGCTG  
ACCTGCTCGTACGGGCGAGATCCACAGCACGTTGCCATCCGGGTAACCGGGAGCCGTCATAGAGCA  
CCAGGGTGGCGCCGGAGGGCGAGGGCGCTCACCAACCAGTTCCACATCATCCAGCCGACGGTGGTGAAGTA  
GAAGATCCGCTCCCTCGGCTTATGTCGAGTGCAGCTGGTGTCTTTCAAATGTTGCAGCAGGGTGGCG  
CCAATGCCGTGCACGATGCACTTGGGTTTTGCCGGTGGTGGCGGAGGAGTAGAGGATATAGAGCGGGTCAT  
TGAAAGCCATCGGCTCGAAGGTGAGCTGGGCATCGTGTGGCTGCCAGCACTTGTGCCAGTTCGTGACC



AAGCTGCAGCGGGTTGCCGAGCAGGGGGATCATCACCGTTTGCTCTATGCTGCCGATCTGGCTCACTACG  
CTGGCGACCTTCTGTTGAATGTCGATAGCTTTGCCGTTGTAGCGATAGCCATCTACCGCAAACAGCACTC  
GTGGTCGGGTCTGGCCGAAGCGCTCCACCACGCTGGCCTCGCCAAAGTCGGGGTGGTGGAGGTCCAGAT  
CGCCCCGAGGCTGGTGGTTGCCAGCATGGCAACCACGGTTCCGGAATATTGGGCAGATAGGCGGCGACC  
ACATCGCCACGACCAATCCCCTGATGACGCAGCCACTGAGCCAGCTGGGCAACCTGATCACTCAGTTCAC  
CCCAGCTAAGAGTACGGCTTGGGCTACCTTCGATACGGGAGATGATGGCCGGGCTCTCGTCTGACGGCG  
CAGCAGGTTTTTCGGCGAAGTTGAGGCGGCTATCGGGGAACCAGCGAGTGCCTGCATATCCTGACGGTTC  
TCCGCCACTATGTTGCCGAGCTCGCCCTGACGCCGAGTGTGCCATACCAGCGGCCAGAAACGGGTGG  
TCTTCTCCACCGACCATTGATAAAGCTGCGGGTAGTTCGCAACTGCAAGCCGTGGAAACGGTTCACCTC  
CGCCATAAAACCGGTAGAGGTTGGATTGCTGCATCCCAGCGGATCCGGTTGCCACAGGCAGAGGTTGTCC  
ATGAGTAATCCCTGACTTCATGTATCTACCGCAGTGTATTGAATTGTTTTAATTTGTTAATGGTTGGT  
TTTCTGTTGATAACAAACACGTTTGTAACTGCGTTACCTCAGCAAGCGGCAGCTTGACGGGTGAGC  
CGCCAAGCGCTTGATGTTATGCTGCAATCACATTCACCTCGGAGCAGGACGCCATGAGCAGCTACAGCCA  
ACTTTTTGCCAGCACCTCGATACCTTGACAGCAGCGCACCCGCGACATTCTGCAACAACAGGGGCTCAGC  
GGACTGGCCATCCACTCCGGCCAGACTCACCGCATCTTCTCGATGATCAGGATTACCCGTTCAAGGTAA  
ACCCGCATTTCAAGGCCTGGTTGCCGGTGTGGACAACCCCCACTGCTGGCTGCTGGTGGACGGGGTGAA  
CAAACCAATCCTGCTGTTCTACCGCCCGGTGGATTTCTGGCACAAGGTGGCGGATCTGCCAACGCCTTC  
TGGGTCGAGTTCTTCGATATCCGTTTCTGACCCGGCCGGAACAGGTGGCCGACCATCTACCTGCCAACA  
AGCAGGAGTGGGCTATCTGGGGGGCCATCTGGAAGTGGCTGAACTGCTGGGGCTGACCCAGCCCAATCC  
GGAGGCGGTGCTCAACTACCTGCTCTATCACCGCGCCTACAAGACCCCTACGAGCTGGAGTGTCTTCGT  
GAGGCGAACCGGATCGGGGTACGCGGCCATATCGCCGCCAAGGACTCCTTTATGGCGGGGGCGAGCGAGT  
TCGAGATCAATCTGGCCTACATGAAAGCGGTTCGGACAGGGAGCCAATGAGGCGCCCTACGGCAATATCGT  
CGCCATCAACCGCAATGCAGCCATCCTTCACTACACCCATTTGTCCGCCGTGCGGGTGCCCGATGCGGAA  
CGTCACTCCTTCTGATCGATGCCGGCGTGCATTTTACGGTTATGCCTCCGACATCACCCGCACCTGGG  
CGTGGCGGGCGCGGCGAGTTCCCGCATCTGATTGCAGCCCTCGACGAGCAGCAGCAGGAGATCATCAAGGA  
GATCAAACCGGGACGCCGCTACAGCGAGCTGCACCTGCAGATGCACCACAAGCTGGCGCGCTGCTGCAA  
GCGACCGAGTGGTGGACATGTCCGGTGGACGAGATGATCAACACCGGAGTGACCAACGTTCTTCCCTC  
ACGGCTCGGCCATTTCCCTCGGTTTACAGGTACACGATGCGGGTGGTTTCATGCAGGATGAGCGCGGAA  
CCACTTGGCGGGCCCGAGCTGTTCCCTATCTCGCTGCACCCGGGTGATGGAGTGGTGGTGGTGGTGGT  
ACCATCGAGCCGGGCTCTACTTCATCGACAGTTTGTGGAGCCGCTGCGTCAGGGCGAACAGGGCAAGC  
GGGTCAACTGGAACAAGGTGGAGGCGCTGCGTCCGTTCCGGCGCATCCGCATCGAAGACAACGTGGTGTCT  
GCACGCCAACGGGTGGAGAACATGACCAGACAAGCAGGACTCTGATGGCGGCAGCGTACTCCATTCCGG  
CTGCCTCGCTGGAGTTGACCGAAGAGATAAAGAAGAGCCGCTTCATTACCCTGATCGCCACACCCCGAC  
CGTCGAGGGCGCCAAGAGGTGGGTCAACGAGATCAAACGCCAACATCCGGCCGCGCGCCATCACTGTTGG  
GCGTTTTGTGGCTGGTGCGCCGAAGATAGTCAGGTTTATGGCTTCAGCGATGATGGCGAACCTTCCGGTA  
CTGCGGGCAAGCCGATCCTGGCCCAGTTGATGGGCTCGGGCTCGGTGAAATCTGCGCCGTGGTGGTGGC  
TTACTACGGCGGCATCCAGCTTGGTACCGGTGGACTGGTCAAAGCTATGGGGCGGGCTCGGTGCCGCC  
CTCAAGCAACTGCCACCCTGCTCAAGGTGCCACGCACTCCCTCTCTCATTCACTGCGATTACGGTGACA  
TGGGGACGGTTCGAGTGCCTGATCAGCAACCATAATGGCGAATTGCTGGCGGCCGATTTCCGGTACGAGGT  
CACCTTGCAGGTGGCGTGGGAGTCCCTCGGTTTGGGCTCAGGTGGACCGTGAATTGACCGACCGGACTCAT  
GGGCGGGTATCCCTCAGTCCCTTAGATGGCTAGAATCCATCGCTCTTTAATTGGGGAAGGGGAGCTGTAA  
TGCACATTCTGAGCATTATTTCGATTGTTGGCCTGCTGGTTGCGCTGTTTCAGCTCGACCATGCTGTTGCC  
TGCCTGGTGGCCTTTGGCTATCGGGATGGTGGTGGTGGTGGCAGTTCGTCAGCTCTTTTCTGATCGCCCTG  
CTGCTCGGCGTGGTGTCTGTTTCCCAATCGCTATCAAGAAGGAGATGCGCTCGAAAGAGGGTTTTCC  
TGATATGTCGGTCTCGGAGCCCTTCTCGAATCTTCTCCGGCTGACCACCCTGGCGCAACGGGTACTG  
ACCGGGCTTGATAATCTGCCCAAGGCGTTCCTGTTCTATCGCCAGTTGCTGCAAGTGGTGGGGGGATGG  
GGATCATTGTAAGTGGCGGTGGCCATTCTGCCACTGCTGGGTATCGGGGGCATGCAGCTCTATCGCGCCGA  
GATCCCGGGGCGGTGAAGGATACCAAGGTGACGCCGCGCATCGCCGAAACGGCCAAGGCGCTCTGGTTC  
ATCTATCTGCTGCTCACCGCACTCTGTGCGCTGGCTACTGGCTCGCCGGAATGACGCTGTTTCGATGCTG  
TGTGCCATTGTTCTCGACTCTGTGCGTGGTGGCTTCTCCACTCACGATGCCAGCATCGGTTTTCTTCAA  
CAGTCCGGTCATCAACCTGATTACCGTGGTGTTCCTGCTGCTGGCCAGCGTGAACCTTTGCGCTCCACTTT  
ACCGTCTTCTCTCACCGCCCGGTGCGGCTCGGTGCTACCTTTACGATTCTGAACTCAAGGTGTTTTCTGG  
CCATCCAGGCGACTCTGGTATGATCTGTTTTGTGCGCTTGTGACCCACGGACACTACGCCACCTGGCA  
AGAGGCGCTCAACCACGGTCTTTTTCCAGGCGGTCTCTCTGGGGACCACCACCGGTACAGCACCACGACC  
TATGCCGACTGGCCCTCGTTCTGCCATGCTGCTGATGTTCTCCGCTTTTATCGGCTGTTGCGCGGGCA  
GTACTGGCGGGCGGCATCAAGGTGATGCGTTTCATGATCCTGTTTCATGCAGGGGATGCGCGAGTTGAAGCG  
GTTGGTTACCCAGAGCCATCTATACTTGAAGCTGGGGAATAGGGCGGTGCCGAGCGCATCGTTCGAG  
GCGGTGTGGGGTACTTCCGCACCTATATTATTCTTCTTTATGTTTCATGCTGCTGTTGCTGATGACGG  
GGCTGAACGAAGTGACCGCATTACCGCTGTGGCTGCGGCTTTCACCAACGTAGGTCCGGGTTTTGGGAGA  
GGTATCAGCCAACCTTCGGCAATATCTCGCCAGCGGCCAGTGGGTACTGGTGTGGCTATGTTGTTTTGGC

CGATTGGAAATTTTCACGCTTCTGGTACTGTTTACTCCTGCATTCTGGCGTAGTTGAGGTTGTTATGGAC  
AAGATTCTGGTGCTTTATTCTCTCGGGATGGCCAAACCCGAAAATAGTCGATGTCATGCTGGAGCAGA  
TGCCGGGATGCGAAGTGGTGATGCACGACCTGCACACCTTGCCGATGTGCAACCTCAGCAAATATGCCAA  
GGTCTTGATCGGCGCCTCCATTTCGTTATGGCAACTTCCACCCAGCCTGTTTCAGCTTTATTTCACGCTCAT  
CAGGAGCAGCTGGAGGTGGCCAATGCGGCCCTTCTTCTGTGTCAACCTTACGGCCCGCAAGCCAGAGAAGC  
AGACGCCGCAAACCAATGCCTATATGAAGAAGTTCTTGCGCCCTCTCTCCCTGGAAGCCGAAAACCTTGGG  
TGTGTTTGCCGGTGCCTGCAGTACTCCCGCTATAACTGGTGGCAGACGCGCATCATCCAGCTGATCATG  
AAGATTACCGGTGGCAGTACTGACACCAGTAAGGACATTGAATTTACCGATTGGGAAAAGGTGCGCAGCT  
TTGCACGCGAATTCTGGTCAAAAAGGTAGCAGCGTGATGTGAATTCAGGGTTTCTGCCGAAAACAGCCCC  
GCCGATGCGGGGCTTTTGTAAATAAAAACAACGGTTGAACCGGAAAACCTGTAAGAAAGTGCATTTTTTTG  
CAGTTTTCTCTTGTTCATCCCGCGCGGCTCCCTATAATGCGCCCTACCAGCAGCGGGAACAGCCGA  
ACTGATGAGCCAGCTTCTTAGCGAAGTGGGCGCCGAAAGAAAAGCGAAAAGAATCGCTTGACTTTTCGAAG  
TGATAGGCGTAATATGCGCCTCCTCAACGCAACAAGCGTGACGCTCTTTAACAATTTGAATCAAGCAATC  
TGTGTGGGCACTCACAGCATCGAACATCAAAAACAATTTTTTGATTTTTCAATGTCTGGTGAAGTGACCAAGA  
CGATTTCTTAGCAATAAGAAGTCAAGCAGTTTATTTTTCAGCAATTCATTGAGCCGCTTTTTCGAAGCAACCA  
AACTTAAATTGAAGAGTTTGTATCATGGCTCAGATTGAACGCTGGCGGCAGGCCAACACATGCAAGTCGA  
GCGGCAGCGGGAAGTAGCTTGTACTTTTGC CGGCAGCGGCGGACGGGTGAGTAATGCCTGGGGATCT  
GCCCAGTCGAGGGGGATAACTACTGGAACCGGTAGCTAATACCGCATAACGCCCTACGGGGGAAAGCAGGG  
GACCTTCGGGCCCTTGC CGCATTTGGATGAACCCAGGTGGGATTAGCTAGTTGGTGAGTAATGGCTACCA  
AGGCGACGATCCCTAGCTGGTCTGAGAGGATGATCAGCCACACTGGAAGTGAAGACAGGTCAGACTCCT  
ACGGGAGGCAGCAGTGGGGAATATTGCACAATGGGGGAAACCCCTGATGCAGCCATGCCGCGTGTGTGAAG  
AAGGCCTTCGGGTTGTAAAGCACTTTTCAGCGAGGAGGAAAAGGTTGGTAGCTAATAACTGCCAGCTGTGAC  
GTTACTCGCAGAAGAAGCACCGGCTAACTCCGTGCCAGCAGCCGCGGTAATACGGGAGGTTGCAAGCGTTA  
ATCGGAATTACTGGGCGTAAAGCGCACGCAGGCGGTTGGATAAGTTAGATGTGAAAGCCCCGGGCTCAAC  
CTGGGAATTGCATTTAAAACCTGTCCGGCTAGAGTCTTGTAGAGGGGGGTAGAATTCAGGTGTAGCGGTG  
AAATGCGTAGAGATCTGGAGGAATACCGGTGGCGAAGGCGGCCCTTGACAAAAGACTGACGCTCAGGTG  
CGAAAGCGTGGGAGCAACACAGGATTAGATAACCTGGTAGTCCACGCCGTAAACGATGTGATTTGGAGG  
CTGTCTCTTGTAGAGCTGGCTTCCGGAGCTAACCGGTTAAATCGACCGCTGGGGAGTACGGCCCAAGG  
TTAAAACCTCAAATGAATGACGGGGGGCCCGCACAGCGGTGGAGCATGTGGTTTAAATTCGATGCAACGCG  
AAGAACCTTACCTGGCCTTGCATGTCTGGAATCCTGTAGAGATACGGGAGTGCCCTTCGGGAATCAGAAC  
ACAGGTGCTGCATGGCTGTGCTGAGCTCGTGTGAGATGTTGGGTTAAGTCCCGCAACGAGCGCAACC  
CCTGTCTTTTGTGGCAGCACGTAATGGTGGGAACTCAAGGGAGACTGCCGGTGATAAACCGGAGGAAGG  
TGGGGATGACGTCAAGTCATCATGGCCCTTACGGCCAGGGCTACACACGTGCTACAATGGCGCGTACAGA  
GGGCTGCAAGCTAGCGATAGTGAGCGAATCCAAAAAGCGGTCGTAGTCCGGATCGGAGTCTGCAACTC  
GACTCCGTGAAGTCGGAATCGCTAGTAATCGCAAATCAGAATGTTGCGGTGAATACGTTCCCGGGCCTTG  
TACACACCGCCCGTACACCATGGGAGTGGGTTGCACCAGAAGTAGATAGCTTAACCTTCGGGAGGGCGT  
TTACCACGGTGTGATTCATGACTGGGGTGAAGTCGTAACAAGGTAACCCCTAGGGGAACCTGGGGTTGGAT  
CACCTCCTTACCTTAAGATGTGCAAGTTGTTGAGTGTTCACACAGATTGCCTTGATTCAAAGTAGTTAGA  
GCAAAGACCTGATGCGAAAGTGTGAGTCTTATCTGGCTTCGGTCAGATGAGAGAAGCCCTATCATTTGGG  
TTTTTGGGATGTGAATAATGGCGCTCGGCCTCGCAGGCTCGGCACTCGCCATTACCCAAAATCTGCACTGC  
TGACGCAGCGCAAAGATGATTTTTGGGTCCCCTTCGTCTAGAGGCTTAGGACACCGCCCTTTCACGGCGGT  
AACAGGGGTTGCAATCCCCTAGGGGACGCCACTTCTCTTCTTGTAAACAAGATGCAGAGTTAAGAAGTGT  
ATTCTTAACTCTGTTTTCTTCGGCCTTGC CGCGTTGCAAACATGCTCTTTAACAATCTGGAAAGCTGATT  
TAAAAGTAGTTCTCAAACATTTGTTACAAGTGTCTTTGAAACTTCTTGGCGAAAACCAAATTTTATTTG  
GTCCTTGTGTGACGACAACAAGCAAGCGTGTGTTTCGACGACACTTCTTGGGGTTGTATGGTTAAGTGACT  
AAGCCTACATGGTGGATTGCCCTTGGCAGTCAGAGCGGATGAAGGACGTAACCTGCGATAAGCTGTGAG  
AAGTCGGTAAGAGACGCTATTACTCACAGATTTCCGAATGGGGAAAACCCACCCGAGATAACTCGGGTATC  
TGTTACTGAATACATAGGTAACAGAGGCGAACCAGGAGAACTGAAAACATCTAAGTACCCCGAGGAAAAGA  
AATCAACCGAGATTCCCTCAGTAGCGGCGAGCGAACCAGGGGATTAGCCCTTAAGCATCTTGGAAAGTTAGTG  
GAACGGTCTTGGAAAGGCCGGCGATACAGGGTGATAGCCCGTACACGAAAACGACCTTGATGTGAAATC  
GAGTAGGGCGGGACACGTGACATCCTGTCTGAATATGGGGGACCATCCTCCAAGGCTAAATACTCTGTA  
CTGACCGATAGTGAACCAGTACCGTGAGGGAAAGGCGAAAAGAACCCTGTGAGGGGAGTGAATAGAAC  
CTGAAACCGTGTACGTACAAGCAGTGGGAGCCCTTCGGGGTACTGCGTACCTTTTGTATAATGGGTCAG  
CGACTTACATTTTGTAGCGAGGTTAACCGTATAGGGGAGCCGTAGGGAAACCGAGTCTTAACTGGGCGTC  
TAGTTGCAAGGTGTAGACCCGAAACCGGGTGTATCTAGCCATGGGCAGGTTGAAGGTTGAGTAACATCAAC  
TGGAGGACCGAACCCTAACGTTGCAAAGTATGGGGATGACCTGTGGCTGGGGGTGAAAGGCCAATCAA  
ACTCGGAGATAGCTGGTTCTCCCCGAAAGCTATTTAGGTAGCGCCTCGGACGAATACTACTGGGGGTAGA  
GCACTGTTTGGGCTAGGGGGTTCATCCCGACTTACCAACCCATGCAAACCTCCGAATACCAGTAAGTAATA  
TCCGGGAGACACACGGCGGGTGCTAACGTTCCGTGCTGAAGAGGGAAAACAACCCAGACCGCCGGCTAAGGT  
CCCAAAGTTCTGGTTAAGTGGGAAACGATGTGGGAAGGCTCAGACAGCTAGGATGTTGGCTTAGAAGCAG  
CCATCATTTAAAGAAAGCGTAATAGCTCACTAGTCGAGTCGGCTGCGCGAAGATGTAACGGGGCTCAA

ACCAGGCACCGAAGCCGCGGATTACACTTATGTGTGAGTGGTAGGGGAGCGTTCTGTAAGTCTGCGAAG  
GTGTATCGAGAGGTATGCTGGAGATATCAGAAGTGCGAATGCTGACGTAAGTAACGATAAAGGGGGTAA  
AAGCCTCCTCGCCGGAAGACCAAGGGTTCCTGTCCAACGTTAATCGGGGCAGGGTGAGTCGACCCCTAAG  
GCGAGGCCGAAAGGCGTAGTCGATGGGAAGCAGGTTAATATTCTGACGACTTGTAATTGCGATGGGGG  
GACGGAGAAGGCTAGGTGGGCCAGGCGACGGTTGTCTTGGTGAAAGTGCGTAGGTGGTGTCTTAGGCAA  
ATCCGGAGACACAACACTGAGACACGAGACGAACACACTACGGTGTGGAAGCCATTGATGCCCTGCTTCC  
AGGAAAAGCCTCTAAGCTTACAGATTACAAGTCATCGTACCCCAAAACCGACACAGGTGGTCCGGTAGAGAA  
TACCAAGGCGCTTGAGAGAACTCGGGTGAAGGAACTAGGCAAAAATAGAACCGTAACCTCGGGAGAAGGTT  
CGCTCTTGACAGTGAAGTCCCTTGCGGATGGAGCAGTTGGGAGTCGCAGTGACCAGATGGCTGGGACTGT  
TTATCAAAAACACAGCACTCTGCAAACACGAAAGTGGACGTATAGGGTGTGACACCTGCCCGGTGCCGGA  
AGGTTAATTGATGGGGTTAGCGCAAGCGAAGCTCTTGATCGAAGCCCCGGTAAACGGCGGGCTAACTAT  
AACGGTCCCTAAGGTAGCGAAATTCCTTGTCTGGGTAAGTTCGACCTGCACGAATGGTGTAAACCATGGCCA  
TGCTGTCTCCACCCGAGACTCAGTGAAATCGAATTCGCCGTGAAGATGCGGTGTACCCGCGGCTAGACGG  
AAAGACCCCGTGAACCTTTACTACAGCTTGGCACTGAACATTGAACCTACATGTGTAGGATAGGTGGGAG  
GCTTTGAAGGCGTGACGCCAGTTGCGCTGGAGCCGTCCTTGAAAATACCACCTTGTATGTTTGTATGTTCT  
AACGCAGGGCCCTGAATCGGGCTCGCGGACAGTGCTGGTGGGTAGTTGACTGGGGCGGTCTCTCCCA  
AAGAGTAACGGAGGAGCACGAAGGTTGGCTAATCCTGGTCCGACATCAGGAGGTTAGTGAATGGCATAA  
GCCAGCTTAACTGCGAGACGGACAGGTCGAGCAGGTACGAAAGTAGGTCATAGTGATCCGGTGGTCTCGA  
ATGGAAGGGCCATCGCTCAACGGATAAAAAGGTTACTCCGGGGATAACAGGCTGATACCGCCAAGAGTTCA  
TATCGACGGCGGTGTTTGGCACCTCGATGTCTGGCTCATCACATCCTGGGGCTGAAGTCGGTCCCAAGGTT  
ATGGCTGTTCCGCAATTTAAAGTGGTACGCGAGCTGGGTTGAGAAGCTCGTGAGACAGTTCGGTCCCTATC  
TGCCGTGGGGCTTGGATGATTGAAGGGAGTTGCTCCTAGTACGAGAGGACCGGAGTGAACGAACCTCTGG  
TGTTCCGGTGTGTACGCCAGTGGCACTGCCCGGTAGCTAAGTTTCGGAATCGATAAACCCTGAAAGCATCT  
AAGCGGGAAGCGAGCCCTGAGATGAGTCATCCCTGACCCCTTGGGGTCTTAAAGGGCCGTTGGAGACCA  
CAACGTTGATAGGTGGGGTGTGTAAGCGCGGACAGTGTGAGCTAACCATACTAATTACCCGTGAGGC  
TTAACCATACAACACCCAAGAAGTGTCTAAGGCTTGTAGCAAAATACGAACGAATTACTTACGTCAGCTT  
TCTCAGATTGAAGAATTTGCCTGGCGCCATAGCGCCGTGGAACCACCTGATCCCATGCCGAACTCAGAA  
GTGAACACGGGATGCTGAGTGTGGCATTGCCATGCGAGAGTAGGACACTGCCAGCCACCCAA  
TTTAAACAGCGATGTGAAAAATCACATCACTGGCTGCGAGGATGACACCTCACTGACGCGCAAACAATTT  
AGCGCAAGCTAACCGAATGCGGAGCGGTAGTTGAGTCGGTTAGAATAACCGGCTGTACGCGGGGGTCCG  
CGGGTTCGAGTCCCGTCCGCTCCGCCACTAATTTTAAAGCCCTTCCCGATTGGGAAGGCCCTTTTTGTATG  
GGCGTTTTGTCCATAAGACCCACAGGTTTGCATACCAGCACAAAATACCAAAGCCCGGCTTAATGACCGGG  
CTTTGGTATTTTTAGCGTGTAAACAGCCAACGTTTGGTTTTTTACCTGCCAAGAGAGGGCCAGATAGCCG  
GTTATTTCCACCATTTTCTGGCTATATTAGAGCCTTGTAGCTTCAATTCGCGGCCAATTGAGCGAGTCTA  
CAGGCGGTCAAATCAGCCTTCTGCTGTCTGCTGACTACAGGGCAGTTCATATTGACCACCCCTCTTCC  
ATTTGCACGTCGATCTTGAAGCCAAGCCGTTTGGCGAGGTTGACCATGCCCGGATTGCTGGGCATGGTCA  
TGCCGGATAGCTGGCCAATCCCTTGTCTTTGGCGTAACGGATGATCTTCTCCATCATCAATTTGCCGAG  
CCCCACCCCTTTCAAGTCCGATCGCACCAGAATGGCAAACCTCGGCATCGCTCAGGTCCGGGGTTCGAGATA  
GCGCGTACCACGCCGAGGATTTGATCCTGCAGCTCGCCATCTTGCCCCACAGCCACGAAGGCCATCTCCC  
GGTCTGTAATCGATCTGGGTCATGCGAGCCAGCTCTTCGTGGCCCAGCTCGCCACATCGGCGAAGAAGCG  
TTTGTACCTGTCTTCATCGGAGACTTGCAGTACGAACTGCTTGTGAGCAGGCTCATCTTCCGGCCGGATC  
GGGCGCAGCAGGATATGGCGCTGATCTTTAAGCCAGGCACCCCTCCTCCAGTTCGGTAGGATAGGGGCGGA  
TCGCCAGTCGGTTGCTGGTCCGGATGGTGGGGTCACTCAGTGTGAGGCTGGCATCCAGCACCACCATTT  
GGCGCCGTACGCTTGCAGCGGGTGCAGGTCCAGCTCCTGAATCTCAGGAAAGGCGAGCAGGTTCCGAG  
AGCTGGCAGAGCACCTGACCGAGGGCATCGATATCCAGTCTGTTCCGGTGTGGCTGCTCAGGATCTTGC  
GGCTCTTGATCGCACCGATGATCTGGTAACGAGCCAGTGCCTGATTGAGCGGTGGCAGGGCAGCCACCAT  
CTCCTGCGGTTCCGCAACCCGACTCACCCAGCAGAATGACGGGGCCAAAGATGGCGTCTTGCTGGATCCGC  
ACCCGCAGCTCCAGGCCGCGCTGCGGCGAGCCATGCGTTGCACCAGCAAGCCTTCGATGCGGGCGCCCG  
GATCATGCTGTTTGACCCTGTCCAGAATGGCATCCGCGAGCTTGCGCCACTTCGGCCGAGGTGCGCAGATT  
GAGCACCACCCCGTGCACGGCAGACTTGTGCAGGATGTCCGGTGAGCGCAGCTTCACCGCTACCGGATAG  
CCGATCTGCTCGGCGGTGAGGGTGCCTTCGATGGCGTCCGTGACGATCCAGGTTGGCAGGGTTCGAGAGAC  
CGGCGGCTTGAAAATCGGGTGCACCAGATGGGTATCCAATCTTAGCTGTTTGCCTCCTGCGCTTGGCG  
GATCAGCTGCTGGCACAGCTCGACATTGAGCTGGTTGCCATGTAGTGACGCCGGTGTCTCCATCAACTGC  
TTCTGGTTGCGGCGGTATTCCACCATGTGCATGAAGGCGGCCATGGCGCTTCCGGTGTGCGGTAGGTGCG  
GGAAGCCCCTTCGGTAAAGAGTTTGCCTCCCTCCTGCGCCGAGTATTCACCCGCCAGTTGGTGAGGAT  
GTTGAAACGGCGCGCTCTGGGGTGTGTTTTCAGATGGGCAATAAGATGGCTGGCCAGCGGCGCGCTCGGT  
GCCGTGAGCGAGGGGGCGTGGATGATCAGGATGGCGTGCATGCCATCTTCTGCAACACGTTGTCCAGCG  
CCTCCTGATAGGTGGTGTAGCATCGCTGCCAATATCGAGCGGGCGGGCGAGCCAGCTTGGCGCCCCG  
CTCCAGCAGCACATCCACCGCCATATTGGCCAGCCCCGCGGCCGTTGGAGATGATGGCGAGCCGCTCTCCC  
TTGAGGGTCATGGAGTGGCTCAAGGTTTCTACCGCGCAAACAGTTCGTGGGTATCCCGTACCCGCAACA  
TGCCGGCGCGGGGATGGCGGCATCATAGACGTTGTGAGACCGTGGGCCGGTTCGTGGCGCCCCGTTTT

CAGCACCAGGATCGGCTTGTTCGCGGAGGCTGCCCGCGCAGCCGAGAGAAAAGTGGCGGGCGTCGTGCAAC  
TTGTCCATGTAGATCAAGATGGCGCGGGTGACGCTGTCGCGGGAGAGCTGATCCAGCAGCTGGCCGAAGT  
CGATGTTCGAGTGCATCGCCAAGGGAGATAAAGGCGGAAAAGCCAGCTCATGCTGCTTGGCCCAATCCAG  
AATGGTGGTGTGCTGACGGCGGGCGGATTGCGACAGAAAAGGCGACCTGCCCGGGCTTGGCGGCAGTGGGTGAA  
AAGCTGGCGTTGATCCCTGGCCGGGCAGCAGCATTCCCATGCTGTTGGGGCCGAGCAGGCGAATGCCGT  
ATTGTTGGCAGACCCGTTTTCAGCTCCAGCCGCTCCTCGGGGGAAAAGTCCGGCGGCCAGTATGATGGCCGC  
CCCCGCACCCTTCTGGCCGAGCGCTTCCAACAACGGCAAGACCCGCTCCCGCCTGGTGCAGATGATGGCG  
AGATCCGGGGTACGCGGCAGGCTGGCGATATCGGGATAGGCCAGCACGCCGGCGATGGCCTTGTTCGCGC  
GGGTACCGGGAGGATAGGCCCTTTGAAGTGGCCCGCCAGCAGGTGGCGCACGATTACGTGACCCGCCTT  
GAGCGGGTCCGTCGAGGCGCCGATCACGGCGATTGAGTGGGGTTTGAACAGCCGATCCAGACCCGTTGCT  
TTCATGGGCACCTCCCGACAAAAGGGGGGAGATACCAGTCTAATACGCCCTTTGCTGCGGGTTCTGTGACCG  
GCTCCTGATCACCCTTGTTCAGGGCATTGGCACGCAGATAAAAAGCGCAGTTCGCCCTTGCACCCGACGAA  
TGGCACCCAGGTGGCGTTCTGCGAGATAGATATCCTGCTCCCGATCGAGCGCTGTACTGGGCACGCCCAT  
GCTCTGCAGATACTCGTCAAACAGGGTTGAACCTTGTATCTCTACCAGATGCTGTTTCATGGCTCTCCTC  
CCTGCGCCTTGGCGTGTGTTGATGAACGCCAGTCTGCGATGACCTGCCGGGTGTTGCCATTGTCACTTT  
TGACACGAGATTTGACAGGAGAGCGCTCACACATCTTTAGAGAGGGCGCCGTTGAGGTGCTGGCTGACG  
TTATAGTATGGCGAGGAGCATGAGGCACGGATGGTGCAGAGGATGATCAGAGTCTGGTGGTGGTGCATGG  
CACTGTGGACGGTTGGCGCAACGGCAACCGAGCAGCCTATCCGCTCTGGAATCTGCTGCTGGATCACCC  
CAACCCCGCCGCTCGTCCAGTTATTGCGCCTCTCCCTCGACCTCACCGTGCCTCAATATGGCCCTACCAG  
CTGGTCTCCAGCCCGCAGATGGAGCAGGGGGCGGGCGGTGAAGGAGCTGCGCAGCGGCGAGCTGGTTCAGG  
TCGGTGTCTTTGCCCGGATGGTACGCGAGAACGGGAGTTGCTGGCGGTCCACATTCGCTGGCCAAGGG  
GCTGCTGGGGTGGCGGGTGTGTCTGGTTCGGCAGGGGGATGAGGGACGTTTTGCGCGCATCGGGTCTGTG  
GCAGACTGGCATCGCGCCGGGCTCTCCATCGGTACAGCACAGATCCTGGCCAGACACCCAGTTGCTGCGGG  
CCAACGGCCTCAAGGTGACGGTGGGCAATCTTTATGAGGCGCTCTTCAACATGCTGCGCAAGAAGCGCTT  
TGACTGCTTCCCTGCGCTCGGTATCGAGGTGAGGATGAGCTCAGGCAGCATCCCGATCTCGCCATCGAG  
CCCCGTCTGGTGTTCGCTATCCGCTGGCGCTGCTCTTCTTTGCTCTCGCCAAAATATCCGGAGCTGGCGC  
AGCGCATCGAGCTCGGCCCTGCTGCGGGCGCGGAGTCTGGTGTCTTTGACCGGGTCTTTGAAGAGGGATT  
TGGCAGCACCATCTCGGCCCTGAAACTGGATGAGCGGGTGCCTCGAGCTGCACAACCCCGACTTGGCCG  
CAGCCCAGTCCGCTGATGAGTGGCCGATCCGGCCCTTATCTATAAACCCGGTGTGAGCGCAGCTGAGCTTGA  
TTCTGCGCGGTATCCAGAAAGGCGCGGATCAGCGGTCTTCCAGCCGCTTCTTGAGCACCCTGATCCCCA  
CATCAAATGGCTTGAAGGCGGGTTTGAAGTTCGATGATCCGCACCTTGTGCGCCGAGCGGGCTGTGGTGCAT  
CACCGCCGCGCGCACCAATCCTACGCCACAACCGAGCGCTACCATGGCGACAATCCCCCTATTACCCGCC  
ACTTCGGCATAGATGTTGGGGGCGATCCCTTGTTCGGAACCACTGATCACTGCGTTTGGCGGGCCAAGC  
CCTGCTCAGAGAGGATGACCGGCAGCTGCTCCAATCCGGCTCGCCCTGACGGAACCACTGGTTCAGTTG  
CGGGGCGTTGCGCGGCGCATAAAGACCAGCGCACCTGCTGCAGGCTGGCGAACTCCAGCTTGGCGGGC  
AGGGCGTCCGGGCGGGCGGCATGGCGAGATCGGCCCTGCTCGGCCAGAAATTTTGTCCACCGCCAGCGCCG  
GGTCCCGGCTCTCCAGCTTGTATCTCCAGCTGGGGATAGCGGCGGCGAAAGCGCTCCAGTACCTCGGGCAG  
CAGAAAGTAACTGGCGGTGACCGAACAGAAGACCCCGAGCCGCCCTGCAGCGGTTTCATCGCTGCGTTTTG  
AGTTCCTGCTTGAAGTGCAGCCACTCCTGCAACAGGCCCGCCCAAATTCGCGCAGCTTCTCGCCGGCGG  
GGGTGAGCCGTACCGAGCGGTTGTCCCGCTCGAACAGGATGCAGCCGGTCTCCTGCTCCAGTTCGCTGGAT  
GGCGCGACTCAGGGTGAAGGGCTGACCGCCATGGCATCGGCACTCTTGGCGAAGTGGAGGGAGTCCGGCG  
AGGTGGAGAAACAGCTCGAGATTGCGAAGGTCCATCTTTCAGCTCCTGGCGCGGCTTGTGTGCCGATAT  
CCAGCGGTTGGCGGCTTGTCTTCCATCTCGCGGTACATTCAGCAGGCGATTATGAAAGGCTAGCGTTT  
CAGTTATTGCAACGTAATGTTTCAATATATCAGTTCAGGCAATAAGTGTCCCGCGCTATAGTGGTTTCAG  
ACAACGCCGCTATCCGGCATGGAATCAATCGAACGGAGCAATCACCATGGCTAACTATTTCAACACCTTG  
AACCTGCGTCAGCAGTTGGCCACAGCTGGGCAAGTGTCTTTTCATGCAGCGGAAGAGTTCCGCGACCGCT  
GCAACGTGCTGAAGGGCAAAAAGGTGGTGTATTGTGGGCTGTGGTGGCCAGGGTCTGAACCGGGTCTGAA  
CATGCGCGACTCCGGGCTGGATATCTCCTACGCCCTGCGCAAGGCTGCCATCACCGAGAAGCGCGCCTCC  
TGGCAGAAGGCTACCGACAACGGCTTCGCGGTGCGGTACCTATGAAGAGCTGATCCCGACCGCCGATCTGG  
TGCTGAACCTGACTCCGGACAACAGCACTCCGACGTGGTGAACCCGTTGATGCCGCTGATGAAGCAGGG  
CGCTGCGCTGGGCTACTCCCACGGCTTCAACGTGGTGAAGAGGGTTCAGCAGATCCGCTCCGACATCACA  
GTTGTTATGGTGGCGCCGAAGTGGCGGGTACCGAAGTGCCTGAAGAGTACAAGCGCGGTTTTGGCGGTAC  
CGACTCTGATCGCTGTTTACCCGAAAATGACCCGAAAAGTGAAGGCATGGCCATCGCAAGGCGTGGGC  
CTCTGCCACCGGCGGCGACCGTGGCGGGGTGCTGGAGTCTCCTTCTGCTGGCGGAAGTGAATCCGACCTG  
ATGGGCGAGCAGACCATCCTCTGCGGCATGCTGCAGGCCGTTCCCTGCTCTGCTACGACAAGCTGGTTG  
CCGAAGGCACAGACCCGGCCTACGCCGGCAAGCTGATCCAGTTTCGGCTGGGAGACCATCACCGAAGCCCT  
GAAACAGGGTGGTATCAGCCTGATGATGGACCGCCTCTCCAACCTGCCAAGCTGCGCGCCTTCGAGCTC  
TCCGAGCAGCTCAAGACCCCTGATGCGCCCGCTGTTTCGAGAAGCATATGGACGACATCATTGCCGGTGAAT  
TCTCTCGCGGCATGATGGCCGACTGGGCCGAAGACGATGCCAAGCTGTTTCGGCTGGCGCGAAGAGACCGG  
TAAATCCGCTTCGAAAACGCCCGGGCTTCGCTGGCAAGATTGCCGAGCAGGAGTACTTCGACAATGGC  
GTGGTGTGGTGGCCATGGTCAAGGCGGGTGTGAGCTGGCATTCGAGACCATGGTGGCTTCCGGTATCT

ACGAGGAGTCCGCCTACTACGAATCCCTGCACGAGTTGCCGCTGATCGCCAACACCGTTGCCCGCAAGCG  
TCTGTACGAGATGAACGTGGTCATCTCCGATACCGCCGAGTACGGCAACTACCTGTTCCGCAACGCCGCC  
GTGCCCTTGCTGCGCGAGCACTTCATGCCGACCCGTAAAGCGGGCGATCTGGGTGCCAGCAAGCGGAAAG  
GGCAGAGCGTGGATAAACCCTGGCGCTGCTGGCGGCCAACGAAGCGACCCGCAACCACCCGATCGAAAAAAT  
CGGCCAGGTAAGTGCAGGTTACATGAAGGACATGAAACGCATCGCCGTTGGCGGTTAAGTCAGCATCGGA  
CTGGAGGATGAAGGGGGCGGGGATGACGATCCCCGTCGCCGGTCCGGACTGGACACCCGACCCGGCCCGCCAG  
AAAACCCAGCCTGACAGCCATAAAATAAAAAAGCCCCGCTCATCGAGCGGGGCTTTTGCATTCAGAAAGGC  
CGGATAAATCAGGCTTTCCACGCTTTCCAGGTGTTGATCAGACCGTTGGTGGAGCAGTCGTGGCTGGTGA  
CAGCCTCGTTGTTGCCAGCTCCGGCAGGATCTTGTGGCCAGCTGTTGCCAGCTCCACGCCCCACTG  
GTCGAAGCTGAAGATGTTCCAGATTGCGCCCTGTACGAAGATCTTGTGCTCGTACATGGCGATCAGGGCA  
CCCAGGGTTTTTCGGGGTCAGGCTCTTGAACAGGATGGAGTTGGTTCGGGCGGTTGCCCTTGAACACCTTGA  
ACGGCACAGATCCTTGACCTGCTCCAGGGTTTTGCCAGCCGAGGAACCTCGGCTTCAACCTCTTCCTT  
GCTCTTGCCGAAAGCCAGCGCCTCGGTCTGGGCGAAGAAGTTGGCCAGCAGTTTCGGGTGATGGTACC  
ATCGGGTTGTGGCTGATGGCCGGCGCCAGGAAGTCACAGGGGATCAGCTTGGTGCCCTTGATGGATCAGCT  
GGTAGAAGGCGTGTGGCCGTTGGTGCCCGGCTCACCCAGATGATGGGGCCGGTCTGGTAGTCAACCGG  
CTTGCCGTTGCGATCCACGTACTTGCCGTTGGACTCCATGTTGCCCTGCTGGAAGTAGGCAGGGAAGCGG  
TGCATGTACTGGTCGTACGGCAGAATCGCTTCGGACTCGGCACCGTAGAAGTTGTTGTACCACAGGCCAA  
TCAGCGCCAGCAGCACCGGCACGTTCTGCTCATAGGAGGCAGTGGCGAAGTGCATGTCCATCTCGAAGGC  
GCCTTGACAGCAGGGCTTGAAGTTCTCGAAACCGACGGAGAGGGCGATGGGCATGCCGATGGCAGACCAG  
GAGGAGTAGCGGCCGCCAACCCAGTCCCAGAACTCGAACATGTTGTTGGTGTGATGCCGAACCTCGGCCA  
CGGCCTTGCCGTTGGTGGAGAGCGCGGCCAAGTGGTTCGGCAACCTGGGCTTGTACCAGCGATGTTGAT  
GAACCAGTCGCGGGCGGTCAGGGCGTTAGTCATGGTCTCCTGGGTGGTGAAGGTTCTGGAGGCCACCAGG  
AACAGGGTGGTTTTCCGGATCGATCTTCTCAGGGTCTCGGCGATGTGGGTGCCATCGACGTTGGAGACGA  
AGTGCATCTGCAGGTGGTTTTTGTAGGGACGCAGAGCCTCGGTGATCATCACCGGACCCAGATCAGAGCC  
ACCGATAACCGATGTTGACCACGTGCTGGATCGCCTTGCCGGTGTAGCCTTTCCACTCGCCGGAGATGATC  
TTCTCGCAGAAGCCCTTCATCTTGCCAGTACGGCGTTCACTTCGGCATCACATCCTTGCCGTCGCACT  
CGATGGGGCGGTCGGAGCGGTTGCGCAGGGCCAGTGCAGTACGGAGCGGCCCTTCGGTTCATGTTGATCTT  
GTCGCAATTGAACATGGCATCGATCGCGCTGCGAAGATCGGTCTCTTTGGCCAGATCAACCGAACCTTG  
AGGGTTTTCTCGGTGATCAGGTTCTTTCGAGTAAACACAGGATGTGCGCCGCCGAAGGTAAGGGAAAACT  
TGTCAAAGCGCTTCGGGTCTGCGCGAACAGCTCCTTGAGTCGGGTCTCTTTGTTGTGCAAAGTGGGC  
TTCCAGTGCTGCCAGGCCTGGGTTTTGGGTTGGATTGATATTTTTTCATAGGATTCCTGAAATGCCAAGTT  
GTGTTTTGAACCTTGACAGCAAGGTCCCGCCAAACCTTATTATCCGAGCATTATAGCGAGCCGATCGGGCG  
GCCCGTGTAACAGATTTTTACCATTGCTTTTTACCCTAATGGGTCACTGTGCGGGAGCATATAGCCAGAA  
CATTGGGATTATGTGTACGAAAGCAAGGCGGATCTTGCGCTTGCTCATGATTGGGGCCACCCCGATAGC  
CTGAAATTGTTTTATCCGGTTGGCGTGGTTATGCACCGACATGGCCATGGGCTGGGGCCAGAAACGACA  
ATGCCAGCCCGAAGGCTGGCATTGTCTGTTGCAGCAGAACCAGGATCACGCCCTCGGTTTTTGCATGTGC  
ATCACCATCTGCGGGAAGGGGATCTCGATGCCCTTCGGCATCAAAGGTCAGTTTCACCTTCTCGTGAAGT  
CGAACAGACACCCAGTAGTCAGCGGTCTTGACCCACGGGCGCACCACGATATTGACCGAGGAGTCGGC  
CAGCGCGGCAACGGCGATGGTAGCGGCCGGATCTTTACAGGATGCGCGGCTCTTCGCTTACCAGACGCTCG  
AGGATCTGTTTTGGCCTTGCGCAGGTGACAGCCGTAACCGATACCGAAGGTCATATCGACGCGGGCGGGTAT  
CCATGCGCGAGTAGTTGACGATGGTGCCGTTGAGGATGGCGGAGTTCGGTACTACCACCATCTTGTGTGC  
ACCGGAGGTGAGGGTAGTGGTAAAGAGCTGAACGGACTGCACCACACCCGAGTGCCTGCCACTTCGATA  
AACTCGCCCGCCTTGATGGGGCGGAAGATGATCAGCAGGAAGCCGGCAGCGAAGTTGGAGAGCGAGCCTT  
GCAGCGCCAGACCGATGGCCAGACCGGGCGCACCGATAATGGCGACGAAGGAGGCGGTCTGCACGCCGAC  
ACGGCCAGCGCGGCGATCACTACGAACACCAGAATGGCGTATTTGAGGATGCTGCCGACGAAGTGGGTG  
ACTGTGGTGTCCAGCTTGCGGGCTGCATCACCTTGACCACGCCACCGCTGATGAGGTTGGCGGCGATAT  
AGCCGACCAGCAGGGTCAGCAGGGCGGCGGCGATATTGACCGCGTATTCGATCAGCAGTCCCTGATTATT  
GACCAGCCAGGTCTGCGCTTCGGTAATGATTTTCGGGTTCCATAGGATGTCTGTCAGGTTCTAAAAGGTT  
TATGGTGGATAAAATCTAACACCGCAGCGGACAGTACGGGTGCGATCTGGTACTTCTTTTTCTGCCATAAA  
AACCTGACACAAAAAGAAGGGAGGCCAAAAGCCTCCCTTCTTTTTGCTGAATGATGCGAAAAAACCATCA  
GCTCTGCAGCAGCTGGCTGCGGATAAAATTGCCACTGATCTTCAAACCGGCGGTCGGCTTGAGCTTGAAC  
TCGGAGCGCACGAACCTGGCTGATGCGGCCTTCGGTGTAGGCCAGCAGCAGATTGGCCAGCATGGTTTTCGT  
CGAGCTGGAAGCCTTGCCCTCGCGCAGCCGCTTCTCGCGCAGCACCTGTTTGTATCTGGGTCTCCAGCTT  
GTCGAACAGGATGCTGATGCGATCCCGCAGCCGATCGTGTCTACCCAGCAGGACGTCGCCATTGAGGATG  
CGGGTGTGTCGGGATTGCGCTCGGCCAACACCAGCAGCAGCTGCAGGATATGGTACAGCGCGCCATGG  
TGTCTTCTCTTCCGCCATGATCAGATTGACCCGTGACAGCAGGGAATCTCGATAAAGTCGATCAGCCC  
CTCGAACATCCGCGCCTTGCTGGGAAAAATGTCGATAGAGGGCTGCTTCAGAGACGCCGACCTCGGCCGCC  
AGACGGGCGGTGGTGTGCGCTGACCCGGACTGGTTTTCCAGCATATGGGCGAGCGCCTGCAGGATCTGAT  
CGCGCCGACTCTGTTTCTGATTACTGCTTGCCATGGATTCCCCTAAAAAAACAATGGCTTGATTCTATTA  
TTAGGCACCGCCATCGGGCTGGTGTGGTCTGTTATTGGCGACCAGAAGAACCAAAACCGCCTTACCC  
GTTTCGCTCTGATTGAACTCATCGACCAGTTGGAAGCTGGCCTGAACCACCGGCATGATCACCAGCTGGGC

GATGCGCTCGCCGGGTTGCATGGTGAACATCATCTTTGCCGCGGTTCCAGACCGATACCATCAGCTGACCC  
TGGTAATCGGAATCGATCAGACCAACCCTATAACGATAAAAAACTGTCTCAATTTCTTAACCACATGAAA  
TTAAAGTCTTTTTATCTTGGTGTTCGGAAAAAGTGTCTCAGGCCCCAGGTTTTGGTATGTTGGCGGTCTAT  
GCTTTACCGGTACTACCGAAACCACCCTACCACGCTCGGTTTCGGTGGAGAAATCCTCAACAACACTCA  
ACGACACCTGTACAACCGGTTGGAACATCAATTGTGCGATCCGGTCACCAGGCTGTACGGTGTAAAGGTC  
TTCGCCATCGTTTTGCCAAGATGACGCCTATTTGCCATGGTAGTCCGCATCAATGACACCAATGCCTTGA  
GCTACGCGAATACCATGTTTTCAATGAGAGCCCAGAACCGGGAAGCTACTATGGCTACTAAGCTCGGGTCCA  
TCATATTGATAGCGAGTCCAGTTTTCAGAAGATGGCGAGCGCCTGGTGCAATCGTCACGGGTTCCAGCGAT  
GCATGCGCGTAGGTCCATGGCTGCGGAGCCATCGGTGCGTAGGTTCGGCATTGGGAGCTGTTCTGTGCCC  
AGAAGGTTATTGACCATGCGTGTCTTATGCGTGCATACATCTTGTGTTCCTCGATAAACTTGAAC TAGC  
AAATTCAAAAATGGGTACAGCGTTACAGGCGCGAAGAGATGGGGCTTGGCTTTTTGTCAAGCAAAGCAAAC  
AAAAAGCCATGAGGTCTCAGCCGCTGACCGGGGGCTAAGATACCAGATTGCCCTCCCTGCATGGCGAGGGT  
AGGGTTTTACCAAACCCTCGTGGTCAGCATCATCAGAGAGACAGGAGCAAACAGAGAGGGATTCATTTTG  
GTCATTTTATCTGTTGGCAGGTAGTGAGCCGCTATAGGTATTTTCATTTTTCGCTAATTTGTTTCGATAGTTAA  
GCATTGTTGCTGTTGGATAAAAACCATGTCTTGCAGTTCTTGCATATGACAATTGAGCTTTGGAATATCTA  
AAAAGTGCCCTCTTGCAAAACTCGATGCAAGAAAATGAAAATAAGGTCTGGATAGTTTTTTTATGTGACCATG  
CCTAAGAAGCAAATTAATATGAAAAGGGCTAGTCTTTTTTTCAGCGGTGTCACCATCTAATTCAGACAAT  
GCAGTATGACAAGCATGATTGAAAACATTTTCGGCATAACCATCATATTTCTGAATTATAGCATCGACCAC  
CTTTTAGAATACTGCCTTCCAAGCAAGCCATAACAGTGGCATTTCCTGTGACCTCAAGCATAAATGATTG  
TAGAGCCTGTGGGGACTGAAAGGAGGCACCATATTTTTCTATAAACTTTGCAACCAAATACACGTGTTCA  
TGAATAGAGGATAAGCTTAATTCTATAACATCACTGTACAATATAGGAACTGGTGTCCCAGCAAATAAGT  
TCAGCTTAATGCTTTGTAGCTTAGCATTTAAGGAAAATATTCTCAACTACATCAATAACAAACGAGTTTTAT  
GTTTACTGTAGGATAAATTAGACTGTTTTGCGAGCATGCACATAACATGATCAATACATAACCACGGTATA  
TTGTTAGCAACAGAGAGTTGAAAAGTAGAATAAACTGTCCCGTCAATCATATCTCTAATACTAATAATT  
CATTCGGGGTGTGAGATGGGATGAGTGATTCAACCTTTACAACCTGACATTAGCGCTTTCAATTCATTTAT  
AAACTGAAATGAGTTCTGTTAATATCTTGTGTGTATATTTACGCATCCCATCATCAGTATATTTCAATG  
GCTAGATAGTCTTCTCTGAGGATGTGAGAAAGCCAAATGCTCATAAAAATTTCTTTGATTGCTCTGATATGA  
CTATTTCAACTGATTTAGTTGGATAAGTAGGTGGAGAACCCTTAGAGAAAAATAGACGGCAGTATATAA  
ATCTATAACTACTTTACTCGGTTTTTAATTCCTCATCATATAGCGCAATGTATTTGGTTCGAATCTGCT  
GATGTCAAATGAGTTACTGCGCCTTTTATTGGATTATCTGGCGCCGTATATCTACCTCTCATAGTAAGAG  
GGATTTTATCACTCCGTAATACATCATGTTTTTTTTCTATCCTTTTTCTGATAGAGCTTTTAATATCTTTTC  
GAAGTATGGTATAAATTCATCTTCACTATCTGGTACAGTATATAGCTTAAATACATCTGTACCATCATTG  
ATTCTATCCCTCAGCTCAATAGCATGTCTAAATGCCGCAATATAAGGTGACAATCGTTCAATTACGGTAA  
ACTCTCCATATATAGGGTCATTTATCGTCTCGCCCTCCTTCATGCTATCTAGAATTTTCCCTGTTGGGGA  
TTCTGCATCGAGTAGAGATGGATGTGTAACATCTAGGTTTTTGCACAATAATGCGATTATAAGTCTTGAAG  
CCATCACTATAACGTTATTCCATCACCGCAATATTCAGGTGTGTATGGATTTTCTGTTATTTCTGGTCTGT  
TTGATAAGGAGGAGACATGAATTTGAGTTAGTGGTTTTGCGACTATTTCTGGTGCCTTCACGAACCAGTC  
AACTAACACTTTTTTCGGCAAAGTTAATATCAACAAAAGATGCTATTTTCGTAATATTTCTTACGTTCAACATTAACCC  
CACTATTTTCGAGTGTAACAACAATAAGTTCCAAGCGAAATGATCATCTGGATCAAGAGCTATTGCTGA  
TCTGGATGCATTTATAGCGTATTGATACTGATTGAGTGCCTCATGAACTTGAGCCTCTAACAACCATACA  
AATGAGGTTTTTTCTTCTGGAGATATTAGCGCAACTTGAGACAAGAAAAGCTGATGCTTTTCACTTGCAA  
CAAGGGCTCGTAAATAACATTCGAACAATGGTGTATGCCATGGTTCCTTAGGTATCATCGGGCTTAAGTA  
GTCTACAGCAGAGAAGAGGGCAGTCCATGTCTATAAAGAGATCACTCAACTCAATAAGTGTAAATGGGGGG  
AGTTGAATAAATAGATCATCATTCAATTGTAATAACTTATTTGCCTCATCTACAAGTGAACATATTTTTT  
TGTTATCCCCATCTTATGTATTAAGGCCCTTTAAATACAGCATGAAAAATGAATTTACATAACTCTCAC  
CGTATCGATGCTCCACCTTGATTTATCCACTGCTCTACGATGGAGCCTTTGATAGTTTTTCTTTTTTAAG  
GCATCAATAAGAAGTAGATAGCGTTCAAATCAATAGATATTTGAGAAAAATCTAATTCAGATTTTTTTAA  
ATGACTTAGATAGCAAAGCTCTATTGATTTTATCGGATATGTCACTATCAAACGTGCTGATCTTATCAGC  
ATGTTTTTGCCCATTATGATTAGGTGAGTGTCTGAAAAATAAAGTTATTTAAGTAGATTTATTAATACA  
ATTGCTAATCTTGCATCCTGCGTATCTATCATATTAGACACTTGAACATAAGCCTATCCACGCGTATTT  
TTACGCTTCTATCAAGTGTCCAGATGTGCTTAGAGTGGCCTTGACTAAGTAAGAGATAGCTTTTCGCAAT  
AAGTAAAAGTATTTGAGAGTTGCTCGATGGAATAACATCGTGAAGATGTGTGCATATTTCCAAAGCTAAT  
TTAAACTATGAACTCTTAATGCTCCTCGGACTAACCACATAGTTCATCTTCTAACAAATCTATTCTGT  
TGCTGGAATTGAAGTGTCTTTAATATCCGATTCTGTAGCGAGGCGCTCTAGGTATACTTCAATAACATG  
AGATGATTTTTTCAAGTAAATGAATTGTATCGTTATGAGCTAAAGATGGCTGTGTTTCGAGACTCTAAATCA  
ATCAAGATTGAAATGACCACTGATGTTATATAATCAGAGTTACTCCTGTGCGGCAAAAAATATAATATCT  
CTTGTCTCGATGACTCGCTTGGAAAGTGAGTTATCTATTAGATTGGTTTTTTATTAACAAACATTCACGAC  
AGTTTTTACTTCACTTTCAAGCGAGCCTATATTTATTTACTCCAATTTTCTCTCTTGTCTTGTATGTC  
TCTCTATGACGGATGTCATGCATTATGTTTTCCGCAACACTCTTCAAGTCCCTGAGCCTTAATGCTACGTA  
TGATATACTCATACTTATTTTTCTACGTTGTGCCAGAACCATAAATGCATTTGTGTAGTCAATAGGTGCTTA

CTTATTGTATACGGTTTTATTTACAACGTTATCACCAGAACCATAATGATTTTGAGTGACGGAACTTTGA  
TTTCTCTCTGGAATTATCTTTTTGCAGATATGATTGAATCTCTGATGCTTCATTTATTTTTTGTCTCAATCG  
CACGCTCAGATAAATCATCTAAATGCATAGATGCAAGCTTATGAGTTAATTCATGTAATGTGTTCTCATC  
GAAAATCCATCCTGTAAGTTTTTCTTAAGAAGATCAATCGTTAATAGGGCCCCGCTTTTAAATCCATCA  
TAAAGTAATCCAGACAAAATCGTGCTCGTTAAAAAATCCATATATTTCCCACTATAATGACATTTAAGTAT  
CCATGTATAATAATGGCTAACTCATTAATAAATATCAACATCTTTTGTAGCGCATTGAGATGGAAGCTA  
TGTTTCGCAAGAGGAGATGGTTGCGACAATATTTGAATGCTTAACATTTGCATCAACGCTCAGATGTAGGG  
GAGGCTGACTGATTGATGAGCCGCTAGGGTGGTAACGTTATGGAAAAATTCAGGCATCCAGATCTGTTTAC  
AGATGTTGCTCTACCTCTCTATAGATTGCTTTCTCTTTTCTTAGGTGTGGTGATCATCCAGATCACAGTC  
AAGATTTCGCTCAACAGCAGCTAGCTTGCCCTGTATTTACGGCTCTCCTCAACAGCATCGCTGACAGCTT  
TGTCGATTATTGGTGCTAACAAGGAAAGTGAGAGCGCAGTTGTTGTTATTTCTGCAAGCTTGAGGTGCTT  
CATCTGCAACGTTTGACGGTAGTGTGTTCTCTCGTACCCAACTTACTCTTAATGGATTCAAGTTCATTC  
TTTACCCTCTCGATCTCCCTGTCTTTCTCCTTATCCTGCTCTGACACCAGAGCCTCCGGCCCAATAAAT  
CCTCCTTGAAATGCACTTCATCGAACTTGGGAGTCCCTTATGAAATGAGAAAAGCGCTTCCCATCATCAAC  
ATGCTTCTTTTTTAGAAGTCCCTGATTTACGAGCTTGATCAGATGCCGATAAATGAAGGTATAACGCCGC  
TGACGTATCTGCGATTCTGCTTTGTCACCAAAAATGGCATTACAAAATCCTGTGCGCAGTGAAGTCATCCA  
TCTGCCATCGAATGAGTGCGGTGTAGAGCGCGGTTGGTAACCACACAGTCTGGGAGTCCATAAGCAGCCC  
TCAGTCTCGAAAGACAAAATTTAGTAGGAATTTAAATTAGGCCGCGGATTATAGTCCCTAGTTGTAGCTCA  
GACAACCTAGAAAATAATATTATGAACCTACTGTGTTACCCATAGCCCCTATTGGGGCTTAGGCCAAAGG  
CTTAAATATTTTTATGGAAAATAATTGTTTCATATATAAATAAATAGATTTATAAACTAATTTGCTTATG  
TAATTTCTCACTATCATACGGGTACAGATATCAATTATTTTGATACTGGCCCTGACCCACGACCGGAAGA  
GTCAAGTTCTACGGCCTGGCGTCCGGTTTTAGAAAGCTGGTTTTGTTCTTCAACACTACAAGCGCTTTGCCT  
ACAAGCCATTTTTGACCGTCATTGAACTCAGCTATCCATTCCAAGGGGAACTAAAGTGAGCGCAGCCGTG  
AAGACAGAGAGAACATGGGTATTTCGTGTTGTTTCATGCTCTATCACCTCTTGAATGCATCGATCCTGTTCA  
TCCAACCTGTCTATGATTGGTTTTAACGATGAATACTCACTGACTGGCTATATGTACTGCTCATGCCCTA  
TCTCTGGGGTTTTGATAACGATACTGGGGGTGATTTTGTCTTGTGTCAGACCCTCTTGGAAATACCTGGCA  
GGCAATCTACTCGGTGGTTCGATCCTTCTCTTCTGTTGGCTTAGACTGGCATCCCAATATTAGTGAGTAT  
CGTCAGGCATATGAATGAGTAGACCGAATGGCATTCTTGGGGGTGATTTCATGCAGCGTAAAGTGCAA  
GCTCACAAGATCTAATTCGAAACGAAAATGAGTTCGCCCTTGTCTATCTACTGGTTGCTGTAGCGCCACA  
CAGCAGCAATAAATCGAGTTTTTCATTAGCTCCGGTCTGAGATTTTCAGCCTAGATCGGCCCTCAATAC  
CGGCTCTGTTGGGTAACAGTTTCGCATCATTTTACGGGGGGGTGAAAGTATGAATCTGAGCATTTTAACT  
TTGCCACCGCCTCCACAGCCAACACCTCAATGTTGCCATTTGTTGTGAGCGTGTAGGCATCGTCACCGGA  
AAAAAATCCCAATCAGGTGCGGTATGTGCGATGAAGAACAACCTGCGCCATTTTACATTGATTCATTTG  
ACTATGCCTTTAGCATAATGAACTCCCAGGTTAGAGGAGATCGTATAGATAGCCTCTGCTGTCCAGC  
AATGGATGACAGTAACAGAGAAACGTGCTTCTGCTCGTTTGGTTAACCTGCTTGTCCAGCAAGCGATAG  
ATGCTCATAGATGAGACCTCGGGAGCCCATTCTGGAGATGAACTAGTGTTACAAGAACTCTTAAAGCAA  
GAATATGGTGGACCAGTAGAGCAAGAATGCAGACTGAGAAAAGGTTGTTATCCAATCATTTTCAAGCTCA  
AGTTGTTTTACTTTTACTCATTTTTCTCTACATGTATAGCTATTTATTTATAAATTTGATAATGCC  
AATGATTTAGCTAACGTGAGCTGGCTTTCTTTTCTATTCTAACAATGATTGCACTATATTTATTAGCA  
CCCTAAGATATAAAGAACGAGCTGATAGTGAAGCAATGCTATGAGTCCCTTGACGTCAATATACAGTGC  
AATCCATCAAGATACTTCCCTCTCAGAGTTATACGCAATCGAAGATAAATAAATTACACCTGTTCACTT  
TGCGAGAATCACTCATCTTCCGATTATGGTGTGCGATCATCAGTGAATATTTAAAAAACGATAAAGATG  
GCAGACAGCGCTTAAGTAAAAAGCCAACGTATCATCTTCGGATAGAAAACAACCTTAAATAAAATCAAACG  
TTTTGTGCTATTGATTGCAATATATTTCCCTGCCAATTTATAGTGTCTTATTTACCGTCAACATAGCACCT  
TCCACACAGACTTATAAATCGAAATTCCTTCGCTTCATTATGTGCGGTGACAATAAATAAATAAATAA  
GTCATTTGAGAGTTTTTTGAAATTGAGAGGCTTGAAAAATGCTATTTCCGAGAAAAATAGCTAAATCCATG  
TCTTCTGGGATTGATAATGTCACTCACGAAATCTTTAGCCAAACCTTAGAGCGGAACTGACAACAATAA  
ATAGGAAGGTGTTAAACGATAAATATCGTTTTACAAAATAAAGCTAAAACTAATCAGTAAAGGAAGAGG  
GAAGATACCAAGAGAAATTTCCATTCCAACGATCAGAGATAGAATTACCTTGCGGTGCTTTTGTGATTAT  
CTTCTCGATACATATAAAGAAAGTATAACACAAGCACTACCGCAACAAATGATTAAGGATGTCATTTCAA  
CAATAGATGATTTGATACGTTTATTAATACTCGATGTGAAGGATTTTTACCTAGCATCAGGCATGATAT  
TTTAAGTTCGATATTGAAACAAATATACCAAAGAGCGCTTGCAGGCTTATCATGGCCGAGTCTCTACT  
CCCCTGTGAGTTGTGAGGAGGAGCAAGTACCCAAAGCTTTATTTGGCGTTCCACAGGGAACATCAATCT  
CTAATATCCTTGCATATATATATCTTTTTGATACAGACAAAAAATACCATTATCAAGAAACGTGTAAATA  
CTTTAGGTATGTTGATGATATTCTAGTTTTGTGCCAACACTCCGATAGTCATAACATTGCAGATAGTTTA  
AAGTCTGACTTTGTAGATTTAGGCCTAAATACACATGAAATAACAACCTTCTCTGAGAAGTCAAAGATAG  
GCTCTACTACCGAAAACTTTCATATCTTGGTTATGAACTCAGTTACAAGAACCACAAACGGATTATTTT  
ATCCAGAAAAAGCTCTGTAGATAACCTTAAAGAACTCCCTGGCATCTATATTTACCTCATATAAATATGCC  
AAAGATAAAGAAATCGAGTATCTAAACTGGAGATTACATCTTAGAATAACTGGGTGCATATATGAAAAAC  
AATGCAAAGGATGGTTGTTCTTTTTTCTGAGATGAATGACTTCTCTCAACTTTACATCCCTCGATAATTA  
TGTAAGAACTAATTACTAGATATAAAGTTCCAGCTTCCCACCTAGCTTCAGCAAGGCAATTCATGAA

ATTAAGCACAATAGATACGAATCAAAAAAATCATGAATTACGATCTCTTTGATGTTAAAGATATGCGTA  
AATTTCTTATCGAGGTTTTTGGTATAAAAAATATTGCAGCAGCAAGGGATAGCGACATTGAAGCTTTGTT  
TCATAAAAAAATGAAGCGAGAAACAACAGACCTTTTAGTCGACATTCAAAGCTTTAGCTAGATAACTATG  
AGTAATGTAATACTAAGATGTACTTGCTCTGTTTGTGTGTCGTGGGGGGATTTACGCCCCACATTTGCTT  
CCTAGGCGCTCATCTGTTCAATTATAAAAAAGACTACCTCAGGCAGTCCCTTAAAAATGCATATAGGTTTTATT  
ATTCTTCTGCGCTATCCGCCAATACTTGATGCCCTAATACATAAAACCCGTCATTCCGTACCTAAATTTGT  
ATTTTAAATGGTGATGACGTTTACACAGGCAGAATTGAATTGAGAAAACTGTGACTTCACTCACGTTGC  
CACGTAATAATGCTCTGTTGGGTAACCGTTCACATCATTTTATGGGGGGGAAAGTATGAATCTGAGCATT  
TTAACTTTTGCCACCGCTCTACTGCCAACATCTCAATGTTGCCATTTGTTGTGAACGTGTAGGCATCGT  
CGCCAGAAAAATAATACCCAATCAGGTACGGATCGGAATGTCGGATTGAAACCTGGCACGTTGAATGAGGAAATA  
ATGGAACCATTTGTGGATTTGGCAACAAGCTGACTGCCCATTTTTCGTTGGCGGGATAGCGAGATATTGC  
CCAGATTACGGCATGTTCAACGCAGGCTGGGAATTCCTAATAGGTAGTCAATCCAGGTTGGGGAACCCCGA  
CCAAACGTTAGATACGTTACTGACTAACATCATCTCCTCATCCGCTATTGAGGGTGAGCGTCTCAATGCC  
CAATCCGTCCGTTCCCTCCCTTGTGGCGGTTAGGGGGGCCACAACTCAATCCTATCCAGTGTGAGATC  
GCTCAGAGGGGCTCGCGGCCATGATGCTGGACGCCATCGATAACCATAACAGCAGTTATCGATTGAGCG  
GTTTTACCAATGGCATCGTTGGTTGTTCCCGTCAACGAATGGTCGGTGCAGCAGCTGAATGTAGGACAG  
TTGCGAGGGCGATGAACCGATGCAGGTTGTCTCTGGACGTGTTGATCGACCCACCGTGCATTTTGGGCAC  
CGCCAGAGCAACTCTGGACGATCAACTGGCCGAGTTCATCCTCTGGTTTAAACCAGACTCAGCATGACCC  
CACGATGGATCCACTGCTTCGTGCGGCGATCTGCCATTTCTGGTTTCGTGACCCTGCATCCCCTTGATGAT  
GGCAATGGGCGGCTAGCACGGGCACTGACCGATCTCGCACTTTCACAGGCTGACAGCAACAGCATCCGGC  
TGTATGCCATGTGAGTTGCTATTCTAGAGCGGCGAGGTGACTACTATCTGGCGCTTGAGTCGGCGCAGAA  
GGACACGCTGGATATTACCTCCTGGCTCTGTTGGTTTTCTCGACACACTGGATTACTCCATAGAGCTCGCA  
TTACAGAGTATTGCTCGTGGCCTTGCCAAGTTATGCTTCTGGCAGCGGCACTGTGATGACGGTCTGAGTC  
CAGAGCAAACCAAAGTGTGAATCGTTTACTGGATGGCGGCGAACAGGGTTTTGAAAAATGGCATCAGTGC  
CAGTCAATATCAAAAAGTCGCCGAGTTAGTAAGCCACGGCTACACGCCATCTTGCGCAACTGTTAGAT  
AGGGGGTGCATTGAGAAATTACCTGGTGGCGGACGCAATACACGCTATCAGATCTGCTTACACACCGAGG  
GAGTTTGA AAAAACATCGCCATGGGAGCGTTAATTTGTTTGGTAGATGAGATCTGCGATTAACGTACCG  
ATGACGATCTTTAGTTAAATATTGACACCATGATGAGTCCGCTCAGGCATATGAACAAAATAACTCAAC  
GACGATCATGGTCTCAACTGATTTTTTGGAGCACAACAAACCATCGAGAACATCGTATCTATCTAGG  
AACATCACCCGTCGCGAGATTTGCAAGCAATTTAGTCACACTCAGACGAACCAATTTGCTCGTCTGCGATA  
TCTTGGGCTCTCTGGACAACCTCTGGTGATTGAGACTTGTGATATCCTCTAATGTCTCCCATACGGT  
GCTCCTACTACAGATAGAATTAAGGCCACCGCCGAGCAGGCATGGGCTCTCAGCACTAGATCAAAAACT  
CTTCCAATGCACGACCATTAGCCACTGCTTCTGAGATGGTCTTGGGCATGCGGCCCTGACCAGTCCAGGT  
CTTTTCTGGCCATCTTCGATGTATTTGTATTTTGCAGGACGGGGAGCACGTTTCACTTTAGCTGAACCG  
TCAGCCTTCGCCGAGCCGCTGTGCCAACAAAGCTCACTCGGATCGATGCCAGCGTCTCTCAGCATCTCGG  
TAAACTCAGCCAGCTTTTGCAGGCGCTCGGCAGATTCGGCTTTGATTTTGTCTTCTGCTGCTCAGCTC  
AGCAAAAACCTCATCAATTTCTCTTTAACTTCGACCAACTGCTCAAATGACAACCTCAGCAACGCAGCT  
CGCAGACTACGAATATTCATCAGTGTTTTCAAAAAATCGTTTCATTTTATCCTCATGTATCACATTTTATA  
TATCAGGAAAATTATCTCTCAATCCCAGCATCAGCTCCACTGTTTTTGGCACCAAGATGATTGCAAAAAG  
CATCATTTAAATTCGTGAGCTAAATTCGTTTTGGATCTACTTATTGGCCTAGCTCCAATCTGCTATGAA  
ACTATGTAGCTAAAAATTAATCCAAGTGGTAGTGAGCGTTGAGACCACCTCACCAGATGAGCCGATGAA  
GGATCTTGTTCGGCTCACGAAATGAGCCGATTGAAAAATATCATTTGGCTCACAGAATGAGCCGATGATAA  
GAGATTTTTATCTCCACACAACTAGAGTATGGGAGCATATTAATCATATTTCCCTATTAGAATAAT  
CACGCCCCAATGTGTCTGGGTTTGCAGCCTCATAGTTATCGTCAAACATATGTTCCCTCGATGCATCTC  
CCTCATTGTTGCGAGTGTACCGAAAAAGCACATTTACACAGATGCACCAGATAACGCTCACCATCGTGA  
CGGGAACCATAGCCAAAATCCGCCGATAACGAGCCGATTTGATTGGTTCCAAAATTCGTTTTGTACTAC  
GACCACAGACATCACAGAGAATGTCAACGACCTGTCTGTGGCACAATTTCTTTTACGAGCATGCTACG  
CTCCTTATTTAAGGCTTTATGAAAACATAATATCTTCTGCTTCTGATGTGGGAGTAACCTGGGCTGGCT  
ATTTATCACTGGCATAACCAGTATTGAACTCTCATTTGTTATTTCTGGATGTCTTTGCACTCAAATTTTG  
GAGGTGTTTTTCAAACCTGTAACGCGCCCGCTGCGTTTGTGATCCTGCGGTATTCATTCCCCAACAGGAT  
TTCCCATTCAGAGCCGTTTTCCGATAGAACCTGAAAAGTAGTCCAGGCTCAATGCCATAACCAGGTTCA  
GTACAGACCAACTCGGCCATCAGCTCTCCTCAATGCAGGGCATTTCTGCTGTGAATCTTCCACTCAAAGC  
GACAGTTTGGAGTAGGATAGCTCATGAGAGGTCGTGTTGTACAATGAGGAATGCTACATGATGCCCTAT  
GCAACCTATCATCTAGTAGTGACGCAGCAGCTACTGCGAACTATCTCTTGGAAAGCCCTTGGTATTCCCTT  
GTGACCCACTAGGAGCACATCAATGGATCGTGGCTGGCGTAGCACCGGACATAGTCTATCGTCTTGGCGGA  
ATTGATGAAGACGGATGTGGGAACGGTTTTGCCAATGGGCTGGTATTAGCCGGAGTACACTGGCCCGCAAG  
CTCCGGATTGCTGCCCCCTTATCAATATCGCAGGGTGCAGGGTATACGGAGTGGCGCAGGCCCTCGATG  
CGGTACTCGTCTTCCACAGGAACGATAACCGTTAAGACACTGTCTGTTTAAACCGCACTGCCTGGGGTCT  
AGGTGGTGTAGCGCCAGCCAACTGCTGAATACCCCGATGGGGGTTCAAGCTGTTATCGATCTTGTGGGA  
CGAATTCAGCATGGGGTGTGCTTATAAATTTAGGCAGCCTGCGGGCCTCATCTTTCAGTTCAAAAAACA  
TCTCCCTTCTCTTTGGTAAATCCAGGTGACATCCACACATGCATAGAAACGTGGATCTGATCATCTGGTG



TAAACTTGTACTGTGTACCGTGCAGATAGATTGATATCTATATGCCAATGAAAAATCAAGTATCACTCTT  
TTTGTTTAACAACAGAAATCTACAGCCATATCATAAAGATTATATTTGTTATACCATGGAAAAATCATC  
TGCATATTAGTCACCATCTTGAATAATACCTTATTTTTTTGTAATTATCTTTTTTTATATTTTTATGAC  
GTAAATAAAGACTTCTTGCTGATATCGTGAAGCCAAGTTGTTTTAAATTTTTTCACAACGCAATCTGTTAT  
TGTTCCCTTGGTTATCCGCTTCGCAGTATATTGCTCTTTTTTTCATTACATGAACGTTCAATAGCTACATAA  
TATGCACCTAGTGTGCCAGCCAACTTGCTTGTGTCCCCGTAACATTCGCTTGTGAATGGTAAACCTAC  
AAATGTTATTTCAGAAGAATTTCCACTTCTTTCTTTCCAATAGCATCTGAGCATCTGAATAAAATGCCAGT  
TATATCTTCATTTCCGAAGAAGAAATCATCTATAAGTTTTTTGTAATAATCAGCTGCGTGTTTTTTTTCT  
ATGCGGGTCATTGAGGGCGCTAGGTCAACTAAAGAAAGCTCTCTTTTATTTTTTTTTATTCAAGAAATGTA  
ATGCTCGCTCCCTCATTATCTTCAATTCAAAAATAGACCTGCTCTTATAAGCATGTCTGACACATCACT  
GTCATCATGATGAATTAACAATCATCTTTGGCAGAGTATTTGACACGATATTATCCCAAGTTGTAGT  
AACTCTCTATAGATCAACAACGGTCCATTGTTAAATTCAAATCGCAAAGCAGCAATCAACAAGGCGAAATC  
TTACTATATCAGGAATACCTAACAATGAATCATCGTGGATCAAATTTTTCGTAGGTTTCGGCCAAAACCTT  
GGTGTCTAAGCAATTATAACTTGCTATTGCAAAATAGTTGAGCGATGCAAAAAGCTTCTTGTGTATTCCATA  
ATTTTTATTATGCTCATCTCGGAAAATGGAGGTGGATTTTTCTGTAAAATTTTTCCATTTGTGAATACAGGG  
AATCTCTCACAGATAAATGAATTTCCAAAGAGCTTAAGAGATAGTGTCTCGCTATATGATACTTTTTTATC  
GCAAAAGCCTAAGTCCAGTAGCCTCTTATCTACGGCTTTCAAATCCGCTCATACCAGATGAAATCAGGA  
TGAGTGTGCATAAATCGCAAGTACACCTGCATAAAGTGAAGTATCAATCATGTTGAAAGCGGCTCTTT  
GCAAGTTTCGTCATGCTGGCATAAGTGTGCAAAAAAGTAGGAAGAATTTTTACCATTATAAGCACTA  
AGTTATTTGTCTACAATTTTCGACTCCTGATTGATTTTCGGGAGCAACAATCTTTTACACAGATTACACA  
TTAGAGGGGTTCAATATGAGCAATGATGTAGTAGCACTGACAGTCCACCAGTTCTTGATGTAGCGCGTG  
CGGCTCAAACCGGAAACGTTCTGAAACTGCATGATGCTGAAGTTAAGTTAATGAACAGTGGTTCGAGAGG  
CATGCAGCGCCTTGCTGCAATGCGTACACAGGATCTGTTAGAACAGTTTCCCTGACATGAATGAATCCGAC  
GCAGATCTGATGGGTAAAGGTTATGTAGTGTCAAAGTCATGGGAATGAATGGGCAACTTATTGACACGA  
CTCAAGCTGAAGTTCAGCGTCTTGAGAACAAAATAATCTGAAAAATATAACAGGTCCTATATTTTTAGAGA  
CCTGTTTTTCATATCGAAAATTTAAGCCACTAAAAGTACATTTGACTAAAAAATATTTTTCATGGTATCGCT  
TTATATAGTTTAGCAAATTTGATGTGTTCCGTACATAAACTCTTATAAAATGCTTAGTAAAAAGAGGCGAT  
TAAAATATAACACTCTTTAGCTAAAAACATTTTTCAATCCTAAAAGTGAATACTTTTTTAATCTCATAT  
GAAAATCTTTACCCTAAGTCAACGTTGGTACATCTGTACGCCATATAACGTGAGCAGTCCCTCTCGTTG  
TTCTTTAAAGGTACTAACTATGAACTCTTACCAATAATAGTGAAGTCAAATGTAGGTCGAAAACGAGGG  
TATGAAGTCCCTGGAGTATCAAACCTATATTAAGCCAAGAGTGACGAGGTTCATTTTTATAAAAATCCAG  
TTCTTACGGGCAATAAATATCCACCATAATTTCTATCATGTCTCAGTAGAACATATGGCATTTGAC  
AGCATTGTTAATTATAGAGAGGTAATTTCTATTTTTGCCCTGCCCCCTGAGCTCCAACCTATTTTTTATC  
TCTAAAAGAACATCTTCTTCTGTCTGTGTCGAATCATTATCTTTCACTTCTATTTAATTCCTGTTTAAAGTT  
CTTGTGCAGATTGAAACCTTCTACTCAATAGAGGTGAAAAACCAGATCAAACAATGTAAACATTGGAAG  
AGCCCTACTGTTAGTGGCATCTCGAAGACGTTCAAGTATCTCTTACGTTGATGGGGGCGGCGACCTGTA  
TCAGAATCTTCTAGTACACTTGGATTTTTCCCCGTCATACATAGAATAAAAATCCCAACTACAAAAGTAA  
TATCACTTCGAGGGTCTCGCTTATTGGGGCTGTCCGGCGCTAGTTTCAATTAAGCCGCAAGAAGCGATTACC  
CAGTTCTTGGCCATCATCGGTTGCGTAGCTGTCTGATCTTGAGGCTGCCATGCGAGACCGAAATCTACC  
AATACAGCATCTGCGGGCTCCCCCCCCCGCAGTATGATATTATCTGGCTTTATATCCCTATGGATGCCGT  
CACTAGAATGGTAGTATTCTACTACATCTAATAGGCGATCTGTTATAGCAACAGCATGTTCAAAATTCAT  
TGGCCCCGTAATCTTCAATGTACTCACGCAATGTGCGGCCTTGAACATAATCTGTAACCAAATAAAGCTTA  
TAATCTTTGTTTTGATAATGATGGCAGTTACTCTTATAAACGCTGGAAATTCCTGGGTGTTTTATAGGTGG  
AAAGAGCAACAGCCTCTCGATACATACGAACCTCGTCGCTCCGAGTCATTTTGACTTTTTCAATAATTTTAA  
AAATGCCACTTTCCCTCAGAACGAATCACTGGCCACGCCTCGCTTGTCCACCCTTTCTTCTCACCAGTA  
GTTACCCAGCCAGCACTCTTCCAATTCAAACAATCTCTCCATACGCCGTTAGTCACTTCCCCCTGTCC  
GTCATAGTATTATGTATCGAGTACCGTTTCGTTACACCTTTACTTTACGAATTATCTTATTTTTTAGGAT  
GTGAATGTAAGACCGATTGAACAAAATTTACCTCTATATGCCATTTTCATCGGTCATCGTCACATAAACAT  
TTACTGCCTGAACCTATTATTTTAGCAAGGCTAATCTAGCATCCAGAATCATTTTTTTGGAGTACATTGTA  
CATCAGCCATTGAGCAGCTTCGATTTGGGGAAAAATGACACTACGATTCACTTAAATAAGATGAGTTACT  
TGTTTTTTCTATAAAGTAGCTGACTATAGTAAAAATAAACACGCTTTTCTAGTCGCCCTGATCTCCTGACT  
AAATATACATCCAGCTCGATTATCACTTGGTGATCTGGTACTACGACAAAATAAACACAGTTTGGAGGA  
TATAGTAGGCCATGCTTCTTGCCACGTTTAAACATCCAATACGGTTTACATATTTTCTCAGACCTCAT  
TAATTTCTTTTGATGTTGAATATTTTCATGATAAACCTATTTTTTAATCTGAAATTTATTTTTTGGTTATTT  
CCTCAAAGAGAAGCTCAATCTTCTCATCATAAGAGTGAATATCCTCCTCCCATGCCAGCTGTAGTTGTCT  
GGTTATATTATTAGCTGCATCTTCTATGCCTTTTTTTAGACCATGGTGCAGCTCGATAGCTACCATCAGGC  
ATTAGTTCAACTAAAGAAATAGTGTAACTTAGATTGTAAGGCTAAGTTTTGCACGTTTTTCCGCAGATA  
ACTTCCACGAGTCACAGGTTAAAGTAATTTCTTCCATTATAAGCATCGACTTTCCATGAGACCTCTGGGAG  
ATGATGGAGATGAGCAGCAACCCCTCTGCTAGACCACCAGTAAGCTTATTAACAATCCAGTAGTGAGCT  
CTACCCTAGCTAAAAGCCATCAAACACCGAATCTTCTTGGTCAGTTAACCAACCTTCGGAATATGCAA  
TCCTGCTCTTAGCATGATCAGTTATCTCAATGATTTTCAGTCTTAAATTTGTTATGCTGATGGATAATT

AAAACCATCATTTAAGGTTACAAAATTAGCTTCATCAAATGCTATTTGGTCTAGCTCAGACAACATCCAT  
TTATCAGCCTCACTGGGTGATACCCATTTTAGTCCATCAGGCTTCGGTAATGTCCTTGAGAAAATGAAGG  
TGGTTTTTATGGAAATCACTAATTTCTGGATGGATAAGATCTATGTGTATCCAGGGATATGCATGCCTAAC  
GTTGACATGCATATCATCTGTATAGAAAATGGCCCACCTTCTTGATGACATCTCGTACCTCCCACATAATC  
TCAGTAAGGCCATACTCCAAACTTGTACTTATTGAATCCATTACAGTCTTACGGATAAACAGTGACCAT  
GTACATTGGCAGGATTTAGAATTTGCTCGCTACTCCAACCTGTAATATCTCGAAGTTTTTATTAACCTCGTC  
AGGTTGTCCAATTAATTGAGCCAGTTCTATTTGGATGCCAAGATCTCTTGCAAAAATCATAGATATCTTTG  
TTCATATCAGGACATTGACTATTATATTTGCTTTGCCACTCACAAAACCTATTATTAAGTGCCTTGGTTAT  
TGCCAAGTTCCAGCTGTGCTTTTAGTTGTTTACTAATTTATCTATATAGTGATAAGACTCAGGAGTATC  
TTTTCCCTTGTAATACCTCTACGGTTGTTTCAAGCACTTGAGCTAGAGCATTGCCAAAAGCCTTGCTGGTA  
TGTCCGTTCTTTTCTACTCGTTGGTAATGACCAATGAGGGTTTTTGAAGCGGCCCTCTGGAGAGCGTCCCA  
AAATCTTGTAAGCCTTACTCATCAACACTTCTTGGGTCAGGCCCTGATTCACACGCGCAGACCCTTCAGCCT  
TTCAGGATTGATGACAAAACGATGTTCTTCCCATATGAATGAGCTCCTAAGTGACGATGCACATATCATGG  
TGAAATAATAAATGTTGTATATACATCATAAATACCACATCTATTTTTTTTGGCATAAGCCGAGCAACAGG  
GTTGCTGAGCTATACGCTTGGTCTTGGCCTTCGTAGGTGCGTGAGAGGTAACGCGATAGTCAGCATCA  
GTTGCAATCTTCATCACTTGCTGTGAGCAGATAGAGCTTACTTCGAGTGGTGAGAAGTAAGAGGTTTAG  
CCTGGTGTGCAGCCAGTTGGCTTACAGGCCCAAACCACAACCTTAGATTTCAGCTCGGTGTGATCGCCCTC  
TCATCTAGTTTTCTCTACTCATAGGTTTGTGACCAAACAACGCTGTAATCTGTTACGATATCACTCATT  
TGGCACCAACTTGTGGCAAGTAAATAAGTCGCATGACGCATTAATTAGAGAGTTGTTAATGAATGAT  
TCCATAGCCAAGCTCTCATTTAACTTTCATTGGGAAAATCCTTGGCTCAGATACTATTGTTGTGCAGGGAG  
ATAATTTAGTATCCTCAAAAAAAGATACTATTTTAGAAAATGACTCTGCATCCGATTTTCAGGAGTTTTGC  
AACTTTTGAACGAAAACCTCTAGGCGGAATACTTACCTACAAAATTTGGAAGTAAGACTAAGAAAACACAAA  
TTTTATTAGATGCGCTGATTCAGATAGCTTCGTTGAGTCGCTAAAATACTTTAATAGCAAAACACATTACAA  
CAACAATAGAGCAGAAAAGTTACTGAGTTAATAGTCTTGCTTTTGACGAGTACCCAAGAGATTCCTGGGT  
GATCAATCTTGCTCAGATATGTATGTCATTGAGCCGCGACTATGAGGCCCAGAGCGAACAAATGGGAAAGA  
TATTTAAATCCTGAACTAATAGAGAAGGTAAAAAACCTAATATCATACCATCCTCTTAATATTGACTACA  
TACGCGAGCAGCAGAAAGAGTATCAACTTATAAAAAAGAAAAGAGTTCTTTGATGTAGTAGAATCAAATCC  
ATTAACATAATGAACAGCGTTTTAGGCGTATTACGTTCAAATGATAGGAATATGGTACTTGCAGACCTGGT  
ACTGGAAAAACACTCCGCTTACTGGTTGCTAAGACCCCTCGATTTGATAGACCAGGATTAGCAGGCCATCGG  
AGATCTTGGTTCTTGCAATAAATAAGACTGCTGCGGGCGAACTAAGTGAACGCTCGAAGATAAAGCTAA  
GAAGTCTAATATTGAGCTAGAATCGACTCCAGAGATTGCTACTTTCCATGCGTTAGGCAGGATGATTCTA  
CGTAATTCAAACGTTGATACCAACATATCTATTTTTACTGAGGATGACGTAAGCTAAAACCTATGGGTCA  
CCTCATGGCTTGAAGAATATTTATCATCAGATATCGATAGAATTTATGACTTTATAAACATGTTCCCAGA  
ACCCGTTAACCTTTTTATTTTAAAGTCAAAATCAGAATATGAAGCGTATATCAGGGACAACGAATTTAGA  
ACCCTCAACAGTGATCTCGTTAAGGGTTACCAGGAACTCCTTATAGCAAATTTCTTTTATGAGAATGGTG  
TTGAGTATAAGTATGAGTCTCCATATGTGACCAAACGGCGTATTGATATTGGTTTTGACTATCGCCCTGA  
CTTTAAAATCATAGAACCTGAACTTTATATTGAGCATTTTGGTATAGACCGTCATGGAAGAACCAGGCCA  
GATATAGACCGTGTTCCTTATAATCAGTCCATTAATAATAAAGAATGCTTCATAATGAATGTGAAACTG  
TTTTAATTGAGACATTCCATTATGAATGGATAGAGGGTGTCTTACTGGAAAACCTCAAGAAAAGCTGTT  
AGATAATGGTGTGCTTCTTAATCCATTATCTTCTGATGAACTGTTCAACAAGCTGCGTGATATGGGTCAT  
ATCACAGGCTGGGGTGAACTTTTGACAAAAGCCCTCCAATCCATTTCGAGTTGAACGCCCTCACGAAAGAGT  
CCATACAGAATAGGTTGATACTACTGGAGTGCATCATTCGAAGAGCTCTCAGAAATCTTGGATTTGCT  
TCATCATGCATATATCAGTGAGCTCAGAGAACAGAATGCAATGACTTTGATGACATGATAATCAGAGCG  
ATTCAGGAGGTGAATGCTGGCAAATATATTCTGAATGGCGATACATACTGGTTGATGAGTTCCAGGATA  
TATCAACAGCTCGAATGGAGTTCATCCAGACCATAATTAATAAATGGGCCACAGCCATCACTAACTGTCGT  
TGGAGATGATTGGCAGTCAATTTATCGATTTAATGGTGGAAAGTTAGAGCTAACAACCTCGCTTTGGTGAA  
ATCGTTGGTAGCTACAGCTTACTAAACTACAAAAGACCTTCCGCTATAACAAATAGCATTGCCGATACTG  
CTGGTCAGTTTATTATGGAATAATCCTGAACAGTATAAAAAAGTATATAGAAAACGCATACTGTGGTTGAGGA  
TTCACAGATTTATCTGCTTGATGACAAAATCCCCAGAAAAAAGAGGTTTGAATAAAAAGAGTTCGCTGAGGTT  
GTTCAAAAAGATTAGAGAGAATGATGCGACTGGAAGCATTGCAGTTATTGCTCGTTATAACTATCTTTTAA  
ATGAGGCTAAGAGTGCATTAACACAGACGAATAGTTTACGCAATGTTAACTTCTGGAGCTTCCATAAATC  
TAAGGGGTTAGAGGCAGACTATGGAATTTTGTATCGGCTTTTTTCAAGGACAGATGGGATTCCTAATGAA  
AATAAAGACAACCTTATAGTTGAATCCCTGCTGCCATCTCTAGACCATATCCTCATTCTGAGGAAAGGC  
GTCTCCTGTATGTAGGCATTACCCGAGCAAGGAAAAAGTCTACATTAATTGCCAATCCTACAGCACCATC  
CGATTTTGTGACGGAGTTACTCTCGCCAAAATACAAGATAAATGTTGTTTCAAAAAGCATTTCAGTGAGGAA  
TCAAAAAAAGGTTCAAGTGCCATACTGTACAGATGGCTATCTAAGGTTGGTCAAGGGGCCGTATAGTG  
ATTTCTATGCTTGTAGCACAGGTTTTGGCTGTCTGTAGGAAAAGGCTAGAGTGTGTGAAAAATGCCACTC  
ACCCTCAATTGATACAAGGAATGAGAGTGTGTTGCAATAATTTCTCTTTGTGGTTGCAAAAATTAATAATGC  
CCTGAGTGGGACGACCAATGAAAATCCGTAATGGTCAGTATGGTGACTTTTGGGGATGTACTGGTTATG  
GGATTAAGGATGACCAGTGAAGGTTACCATCAAGGTCAAGGCAGGCTTATGATAGCTAATTACGTGAGT  
TAAGGTAGGGGAACATATGGATACGTATTCCGAAATCATAAATGAATTCATAGTACGTTTTCTACCAAT

GCTAGCCTGTGTGAAGATTTAAAGGTTGGGTGGGATCTGGGAGATTGTAGGTCTTTTGCCTTTATACCAGT  
TAGTAGAAGACCAACGTAGCGCCCCCTTTGGTACGGTCTATACCACCATATCGGCAGCTACAACACTGG  
TGAGGTATACGAGGTAGAGGGGACAGCAGGCTTCAGGCTCAGCTCACGGCTCGATAGTATTGAAAAATTT  
TTCCCTTTGTCTTCAAACAAGGCGACTCGAAATTTAGAGATTGGGTATCGGTCACCCTGGCTTGGCGGTA  
GCTGTGCATTTTTCTCTATTCCGTTTTAAGCGGTGGTGGGTTGATTCATTTAAACATTTGTGTGCAAATGT  
TCCTGCCCAGGCTGAGCTGGTTAACTCATTCTTGACGCGAGAGATAGAGGTTCTTGCGGACAAAGCTAGA  
AAAAATAACGATAAAAGTGGCTCAGTTTACAAGTGTTCGTAGAACGGTTGGAGTACCATCACCTTCGTG  
TAAATCAAGAATTTCTTGATTCAACAACTACATTTCTCATCCTGAACTGTTTTTTAATGTAGTTTCAA  
TAATTTGGTTAGTTTGAATGAACAAGAGAAAAGGGAGTTGATGAACAAGGCTAGAAGAGATTGCCATTTT  
GATGACCCACTTAAAGAAGTGGTGGTAATCAGCGATGGCAGTCAGCAGTTCTACGCAATCATCAGACTTAT  
GTAAGCAATGGTTGTCTCGACAGGTTGCTTGGTTGCAAATAGTTATCGATTGCGCCCCCTACTAGGTTAA  
CTCATTGGCCCTTTAGAGGATGGGCAGGGCAGGCAGTCCAACAGGGAGGTCATGCAAGCAGAACCCCT  
ACAGCATGTTTTAAAGGGCTGGCCCTTGATACCAATGTCAGTGCACGAAAGTAGCGTAAAAAAGACACC  
AGTTTGAGGTGGTGTACGTCACATTACGCTAGTATGAATGGATAGTTAAGGCATTAGCTTGGTCACGT  
TATCACTTATAATTTTTCTGTAGTCGATTATTTTTCTGCCTGCAATCGTTCATTATCCATCCATAATAGCTG  
GATTTGGTTAGCTCTAAGATTATTAATTTTTTTTTATTTCTTGCTTGCATTCATTAAGCTCCGCACGAAGC  
TTTTTACCTCTGATTCTCGTTGCTGATATGCCTCAAGTAACGTTATAGGAGCATTGTCAGTTCGTTGGA  
GCCATTTTTTCTCAATGCCTCAAACGCATCATTAGGCTTGAATTCATCAAGATATCGATAAATGGT  
TGCTCTGCTAACCCAGCTTCTCGAGCTAAATTAACACTCGTTATTTTTGCCATTTGTTTTGGTGGATAACC  
CCTCTGGCTAATACATCCAGTGCATCAATGATAGCCTGATGATTTTTATCTGCCATCATTCCGCCCTTTT  
TAATTTCTGAACGACACTCTCTAAACTCAGAATTTAGCTTGGAGTTGGTGTCTTCTGAAATACAGAGGTC  
TTCGGGTGCCTGTAAAACCATGGGCTTGAGTTAACTGAGCTTCCCATAGGGATTTATGGCGTTTTGAAA  
TGCAGGCATTACTACAATTACCTGGTTGACAGAAAATTTATTATGGGTTTCTCTATAGATGGGTTTTCTTGA  
TGTGCAAATCGCCTTGGTTCGGGTGCAAGAAAACAAAAATGAAATTTACCTACAAAATAAGCTTTATTTGTG  
TTTGCCAAACATTTTGTATCTGTGATGGTGGATAATCCTCGGCCCGTCCACGAAATTCGCAATGAACT  
GCGATTTAGATGGGTGCCAAATTCACCAGCCACCATTCCCTGTGATAGATCCATTGCTAGTTACCCAA  
AATATCGACATTCGCAAGAATTTTTCTGTTTACGAGCTTATTCCACTCAGGTTCTTACCAGCATAT  
CCCTGGAATATAGCCACCTCAACGTGCTTGTATTGACAGATGCCAGCAATGACCCCGAATGGTTGCTAG  
CTATGAATCTAGCTAATGTTCTACGAAATTCCTGACGTTGAACGCCCATGGCTCCGATACGCCAAATTC  
ATTGCACCAATCGGGTATCGGTGGGCGGTCTAGGTTTTTATTACAGTGGTCTCTGAAATTTGTTAATTTGG  
TAAACAATAGCTTCCATCGTATACTCGGAGAAGGTCTTTCTGTAATTTTTTTATTTTACTAAAGCTGC  
TGTTTTGAACCATCTGTGACGATTAGGCGTTGATCATTTGCGGCTTCCCTAATTTTTTATTGTTAGAGTTTC  
GATAGTTTTAATGGCAGTGACGACCTCCTCGATGACAACCCATGTATCTTTTCTGCCATTACCTGTATGT  
TTATGTAAAATAGTATTGATATAGTAGATAGATTGACCATCTACACTAAAATCTTTTATGTAGCATCCTG  
CGGTCAAGGATAGCAACTCTGTGGTGCGAATACCCGAGTAGGCTAGGATAGTGAGAGTGCATGCTGTGCG  
CAATTTGCTGAAGTTCAACATATAGATCCCGTATGTCTGTATTGGCTTTTTTACGCCAGCCAGAATTAACG  
TCCTTCATTAATTTTTTGGCGACTATAGTGAACCGCTTGGTTTTTATGCTCTCGCTTAAATCTAGGCTGTG  
CAATTTCACTATGCCATAAAATGTGCAACTGCTCCCAAGTGTCCAGGATAACATGGCTGTATTCCAACAC  
GTAATCTAATGCTGCACTCATAATGGCGGTGTAGATGGGTTTCCAGGAATCGGCGGTGTCCGATTTCTAGTA  
TCAACCCGATCTTTTTTATTGGTGAACATTTTTATTGAATGGTCTATCGAACGGCATGTTGGTGGAGCGGCA  
TAGTAATCCGGCTGCTGTACTCCCAAAGGCGATATATGATGCGAAAATATATATATATTTCTATCGTCCGT  
CTTACACTCAACATACATAGTATAATCCAGGTATCGTTCGAGCAGGTTGTTATCAACCTCGTAAAAACCT  
TGTCGGCCCTGACTTGCACAGTATTTAGAGAAGCTTTTTAGAATGTATAGCTCATTATGTAGAGTTAACC  
ATTCATTTCTCGGTATGAGTTGCGACTGCGTGTATAGTCTGGCATATGCATACTCAGCCATTGCTAA  
TGAGAATCCATATGGATAGCCAGGAACGCTCTGAAAAATCCAGGCTTATCGGACTCTGATATACCAGGG  
GTACTCAGGAGCAGGACATCTTCCATAGTGCATTGCTAAATACGGATTGGGTAGAAACAGCCGTTGTCAG  
GAGAGACAAACCTACTGGTTGTTAGTCTGCTTCAAGCAGAGAGGCGGTTGGGTTGAGTTTCATTGCAAT  
ATTACGTCCTGATATCCAGTGGGATGTAAAAAATCTGCTCCTGAGCTAGACGCTCAGCTTCCCTCAATAGC  
ATCGGATGAAAATCGTGGCAGAACATCATGGGTTATTACATGCCAGAGGAACGAAAATTTCCCATTTCCAG  
TCATCTGCGGATAAATCGGTACGGCCTGTATAATCAGGTCGCGAAGTGTATTACGCGAGGCAGCACAT  
GGCGTGAATTTATGGCATTGGAGCATATGAAGCACCCCATGGTTTTATCACATGGCGTATTCGGCTGACC  
ACCAGGCCGATTGTAAAAATCCAAGCAGGATGCAAATAATACATCTGTTACCAGTGGAGATTTTTCTCT  
GCGGTAGTTATATCAGTATCTAGAACTACAGCGATCTTTTTCAGGATTGTCATCTGGCAGCACCTGAGGGC  
GAGCTAGATGCTTACCTCATAAAGTGCATTTCTGATAGCCTGCTCATGGATATGCTTGGTGGAAATCATT  
CGCAACATAATCGACAGTCGTAGTACCTAGCGTATGTGCTGCATCCCGAGTACTCTGCTCAGTTGTCCA  
TACCTTTTTATAGCGGTTGGTGGAGATATGTTACACGCCAGCGTCTCATCGATACACGTAGCGGCTGATCAT  
GTTTATCTGCGAGTTCATGTTGGTTCACACCAACCACCAACGCAGTTCATCTGAGCCTTGATATAGCTAGG  
ATCCAGTTTTTTAACTGGTTCTCGTCCCTGTCCCTCTACAGTTAGTCTTAGGAATAGATATTTTTGATCC  
GCCAAGGGGGCATATTTGACTAGTGGTTCTGTGACTTGTAAAGAGCACCTGTATCAGCGCAACAGGAGAGA  
ATTGCCCTTCAATTATCAATTTTTCTTATATCTACGTGCAGCACCCAGATTTTTCTCATACCAGAGGAC  
AAAGCGCCCATCGTATTCTGTAAACAGTCTCGAGTCAGATTCAGAAATGATGATTCATTGCGGCCGTTT

TTTTTTGCTAGCAGATTTATAAATGGTATTAGATCGGTTGTGAGGGGTATAGCAGAGAGTATGTGTCTT  
TTTTTCTATATGGAACATCATAACATCCCATCATAACATTATTAATGTGCTGTGGCCGCCAGCAAGTAG  
CGCTGATCTTTTTAGGTACTCCCCATTCATGACATTGACGATGTACCACAAAATATTGGGCAGTTGCAGC  
CATGGTCGCTCACTGGGGTCGAGACGCAACATTTCGACCAGTCTGCGGGTCGCGTCTATTATTATGCCCTC  
GTGGATCAGTACCAGTAGTGAGTAGTTGTCTCCCAGTATCGAGCCGAGCCAGCAGTGTCTCGTATATCGCT  
GCGGCAGGCGTGTTCAGATCGAGGGCCTCACCAGCTGTATATGGCTGTATCCGGTCACTATCGGATTTA  
TAAGCGAAATTTTCGAGGGGGGAGAAATCTGAACGTGCGAGGTCAATAGCCTGTGCCGCCGCGAGTAGCC  
TGATTAGGTTACCGAAATGCCGACGTGAATGGCTGGATTTAAAACCACTCGAGGTTAATTTGATGTGTGC  
TCGGTATTCCAATAAAAATTCATACGTGATTTCCATCATTCGGAATTGCTCAGGTAGTTTTTTTTGATCT  
ACGTATTCCAAAACTCCTTAATGGTTTGGGCATAGGTCCAGATTGTGAGGTCACTTGCTATCCGGTGG  
GAGAGGTGTGTTTCATAGAGTGCAGCAATAAAAATCCCGTTCATTAACCTGTTGAGGAAAATGTTAGTGAG  
ATCTAGATGTGCCCGTCGCCCAATTCGTTACGTTTATCGAATACTAGGCTGCCTAGGCTGCGGATATTG  
TTGTTTTGTTTTGGGGATTTTTTCGAACTCTACCCTGGACATAACGCTCTGCTTGCACCAAGTCAGCCTAAA  
CTGGAATGTAGACTAGCCAAGAAAAGTTTTTGTCTTCAATTGGTGTAAGTTATTGATTATTTTTACACTTTA  
ATAATTATCGGAGTCTAAGGAGATTTGATTTTTTCTATCTAAATCAATCATTTGTTGAAGTCTATATTCA  
TAAAGCGAGACATATAAACGCTTTGCTTTGGTGATTTTCTGGAATTATATGCTTGATCTGGCTTAATTA  
AGTTTCATTTGTTCTGCACTATTAATGGGTGTCATTCACTCGCAAATTCATGTTAGCACCTCCAGACCG  
CCACGATTTTGGATAACAACACTGTCAAACCTGTTCTAATTACTGCGGTGAGTGAGCAGCTGTAGTAGAC  
CTCTTAGACCTGCCTGCAAGTACAAGGGGGAGCACTTAGTGGGGGATAACCTTCGGGTTAGGGATTTTCG  
TTTTCCCATTTAGTCCAATCCCCCAAAGATTGATCAACCAGAGCCTCAGAGTCTCTAGGAAGTCGAGGT  
AAATGTAGGTAGTCGATATGTGGGAGTGCCTAACAGTTTCTGTAACCTCTCTGAGTGGGTGCTTCAAGAT  
CTGTGATATGCATCGGACCCATTCTCTCGGAGCTCCCTGAGATTTTGGGCCATGCGTTTTAATCATGGCA  
TCCAGCTGATAGATAGCGAAGGTATGACGGCAGCCATGGGGGGTTAGTCGTATACCAGCTCTGCTGGATA  
TAGCAGCAAAGAAACTCTCCACGGTGCGGCTAGAGAGAGGGCGCCCTGTTCGTGCTAAAAAGATTTTGCT  
GGATTGTTTCGGGGACTTTTTGCGCGTGTGGTCAGATTTTGCCTGAGTGAGGATCTCTGCTCTTTCCCTCA  
TCACAATAGAATCTGATTGCTCGAACGATCCTTTTTGGAATCCGAACATCGCGGCTTTTTTTGCCCTTCC  
CAACTAGTTTAAAGCGTCACACTTCTCAGTCCGGCATAGCATTTGGTCATCTGGATCTGGGAGCTGATGAAC  
GTCGAGGTTTAGCGCCTCTGAAATACGTAACCCCTGAGACTATCAGGGTATCAATTAAGCCAGATTTCCGT  
TGAGAGTTCTCGCCGTGGCTATAAGAGGGGCCAGCTGCGTTGGTAGTTAGTGATGATAAAAAATTTA  
CTGGTTCTGGAGTGATTTAGCAGATAAACTCAGCAGTTTCTACATGTTTCCCGCCGAACCTAGCCTTCGA  
ATGTGCGTACTTGAATGGAGTGCTATCGATGAACCCGTTATCACGGGCGTATTCATACAAGTGCACAATG  
GCGCTTTTAGCCACATTCCATGAGCGATCTTTTAGGGCAGGTTGATTCTGGTATTCACCAGTGGTTCCGA  
TGGTGTAGTAGAGGTCTAAGTACATTTTGTGCTGTTGCCAAGATTTTCCCTGGGCAGTCATAAACCG  
AATGAAGATGGAGACCTGATTGGCGTATGTCTTCAAGTCTGAATACTAGCACGTTGAGGACAGAGTAGG  
TATTTACAAAAGCCGTCGAGTATCTGGTCTGGCAGGCCATTTGTCATCCAAAAAAGGGCCGACCATTTG  
GAATTATATTTGTCTTAAGAAGAGCCCTGAACTTGGTCTTTCTACTGGGGCAGCTGATCAAAGACACC  
CTTATCAAAGTAAAACAGTTCAGCCATCGCTCAGCTCCAGATGATGAGACTATTGAGACACTCTATCCAT  
GTGGCTTATAAATTCATGTGAACCATTGAAAGGACAATATTCTCTACTATGCAACGAATGAGACAGCTTC  
ATTAATGACGTATAACGACCAGGTTGCCAGCAGATGCCGTGCTTATGGCCGAGGCGGAGCGGGGCAG  
GATGGTGGCACACAGACCCGGATCCTGGATGTGAATGGCCAGACCGGTCCGGCACCAGGTGGTATCACCC  
GGAGCCAGAGTCAGCGGCGCATCCAGCAGTGCAGCAGATCCATGCCGGCAGAGCCCGGTGTGGCGTAGG  
CGGGCAGCGGGTACTCGGTACCGATACGGGCATCCAGAATCTTCAGTTCAATTTGTGTAGTCATGAATCG  
CTTTTTTCAGTTGGATCTTGTATTGGCGCCCTCTTGGCAGGCGGGGTGCCGTGAGTCTTGTCTTTCCGG  
ACGCTCAGTGCCGGTAGTGGCGTGCAATCAGGGCGATCAGGTGACGAGCCAGCGTCAGCTTGTCCGGCAG  
CGCGAGGGGGCCTGGCCCCCTTGCAGAACACGGTCAGGGCGTTGTTCATCGGCGTTGAAGCCTTGCCCC  
TCGCGGACACATCGTTGGCGGCGATCATGTCCAGCCGCTTACGCTGCAACTGTGCGAGGCGTATTGTT  
CCACATCCACGGTTTCGGCGGCAAATCCGACGGTGAAGGGTTTGTCTGAAAGGGCACCAACGCGCCGAT  
GATGTGCGGGTTTTTACCAGCTTACCACCATCTGGTCTGTTGTCGCGGTTTTTCTTGATCTTCTGGCTG  
GCCACCTGCTCAGGACGATAGTCCGGTACCGCCGCGCAGCCGATGAAGAGGTCGCACTCGCCGACCCGGC  
TCATCACCGCCTGATGCATCTGCTCGGCGCTCTCGACATCGACGCGGGTAACACCTGCTGGCGTAGCCAG  
CGTCACCGGGCCGCTCACCAGCGTCACTCAGCGCTGCTTACGGGCGGCGGAGCGATGGCGTAGCCC  
ATCTTGCCGGAGCTGTGGTTGCTGATGTAGCGCACCGGATCCAGCGCTCGCGGGTTGGCCCTGCGGTCA  
GCAGCAGTTTACGCGCTGCCAGCAAGGGCTCGGCGGCCAGTTGCTGACAGCAGCGATCCACCAGTTCCGAG  
GGGGGCCAGCATCCGCCCCGGGCCACATCGCCACAGGCCCTGGCTGCCGGCATCCGGCCCCACAGCAGA  
ATGCCGCGGCTGGCCAGGGTCTTGAGGTTGGCCTGGGTGCGGCGTTGAGATACATCTGCTGGTTTCATGG  
CGGGCGCCAGCGGATGGGCGCCGGCGTGGCCAGACAGAGGGTGGTCAGCAGTTCTGTCGGCCATGCCTGC  
AGCCATCCGCGCCATCAGGTTGGCGCTGGCGGGGGCGATCAGTACCAGATCGGCCCCACTTGGCCAGCTCG  
ATATGGCCCATGCCCGCTTCCGGCAGAGGGGTCCAGCAGGCTGTAGGCCACCGGATGACCGGAGACCGCCT  
GCAGGGTCAGCGGGGTGATGAACTCCTTGGCGGAGCGGGTCATCACCAACCGCACTTCGGCGCCCTGATC  
TTTTAGGCGGGCTACCAGCTCGGCACTCTTGTAGGCGGGGATCCCGCCACTGACACCCAACAGGATGCGT  
TTATCGGCAATCTCATCTGCTGTTTTCTATCCGGCTCATCTGACTGGTTCGGCTAAGATACCACACGC

AATGGATGACGACAGGGGTTGGCATCAAGGGGTGTGGTCGGGCGCGCAATTTTTTGTATGTTTTTTC  
TCAACAGGGATGAGGGAGAGACAAATGAGCATCAAAGAGTGGCCGGAAGATGAACGCCCCAGAGAGAAGC  
TGCTGCGTCAGGGGCCCCGCGGCGCTCTCCGATGCCGAGCTGCTCGCCATCTTCTGCGCACTGGCGTCAA  
TGGCCTGAGTGCAGTGGATCTTTCACGTAATCTATTGAATCAATTCGGCTCTTTCGCGCAGCTTGTGGGG  
GCGGATCAACGGGCATTCTGCGAGGCGCACGGCCTTGGCCCCGCCAAATATGCCAGTTGCAGGCGGTGC  
TGGAGATGGCCAGACGCCATCTGGCCGAGCAGCTGCAACGGGGTGATGCGCTCACCTCGCCCCAGCTGAC  
CCGCGACTATCTGCAGGCCAACTGCGGGATCGGCCGAGGGAAAGTGTTCGCCCTGCTGTTGCTCGACAAT  
CAGCACAGAGTCATTCAATTTGTTGAGCTTTTTTTCGGCACAATCGATTCGGCGAGCGTCTGGCCAAGAG  
AAATCGTGCAGATCGCGCTCAAACATAATGCAGCCGCGGTGATTCGGCGCATAATCACCCGTCGGGCGT  
CGCCGAGCCAGCAGGGCCGACCGCCAGATCACGGATCGGATCACGGCCGCTTTGGCCCTGATCGATATC  
AGAGTGTGGATCACTTGGTGAATCGGTGATGGCATCACGGTTTCTTTTGGCCGAGCGGTTGGCTATAAC  
TGTGCTCTGGCACCGTATTAGTTGATCTTTGATCACGGATGCTGTATAAAAATGCCGCTTCTGTTTTGCC  
CGCAATCGAAGGCCAGCGGGCAGATATTTGCTCGAGCAATGAAGTAAGATTTGGAGAGACTGACATGTC  
TAGAGTATGCCAAGTAACCGGCAAGCGCCCGCAGTTGGTAACAACCGTTCGCGACGCTAACAACGCCACC  
AAGCGTCGTTTTCTGCCGAACCTGCACACTCACCGTTTTCTGGGTGAGAGTGAAAAACGCTTCGTAAGCC  
TGCGCGTATCCGCAAAGGCATGCGTATCATCGACAAGCGTGGCGTTGAAGTGGTTCGGCTGAACTGCG  
CGCCAGCGGTGTTAAGGTATAAGGAATTAGATCATGGCTAAAGGTATTCGCGAGAAAAATCGCCTGAACT  
CCAGCGCCGGTACTGGTCACTTCTATAACCACTACCAAAAAACAAGCGCATCATGCCCGAAAAAATGGAGAT  
CAAAAAGTTTTGATCCCCTTGTTCGTCAGCATGTGATCTACAAGGAAGGCAAAATCAAGTAATTACTTGAT  
GCTGCACTCCCAAAAACCCGGCTTCGTGCCGGTTTTTTTTATGCGCTGAATTCAGTACACTGCCGTTCA  
AAGGGAGGCTTGCCATGTTCAAATTGAGCCGCAAAGGCTGGAATAACGTGATCATTGTGGTGGTGTGAT  
CGTGATCACCTGTTGCATCGTATGGAGACTGCCAGCAGGAGAACAGCGCCAAGCGGGCTCGCCCCTTG  
CTGCCGGATGCGGCCGTGGTGTCTACCTGGCAGGGGCCGAGCTGGCAGATTGAGCGGATCGGTGAGGGCT  
GGCGCAGCGTGC CGGATTTGGGGCTCGACACTGCTCAGCTGGATGCCCGTCTGGCGCGCTGGCAGAGTTG  
GTTGCTGCACCCCGCGAGGTGGTGC CGGTACCCCGGTGACCATCAAGGTGTGGATTGCCGGCCAAAGC  
GATCCGGTCGAGATCGGCCTCTATCAGAACAGCGGCCAATATGGCGCCAGCTGCCGTCCGGCTCTGGC  
TCACCCTCACTGCCGAGCAGTATCGCGATTTGCTGCGTCTGCTCCCTGAGTTTTCTTTCCGTGCGAGGT  
GCCCATCCCGAATTTGCCAGAAGTTGAAGTCAGTCGTCAGGGGATCTCCCCCTGGCTCAGCGGTATCAAG  
GTGACGCGTGTGGTGGTGGGATGGCCGCTGCGCTGCGCGATCCCCGTTGAGATTCCAGGAGTGGTGG  
ACCTCACCATCTATCGGGTGCCTGCGCGTCCCAAATACCTGCTGCTGGAGACCGATTTCGGCACAGCAAT  
CCTCCATCTGGGGATGTCCGGCAGTCTGCGGGTACTGGATATCGGCACTCTAGCCGAGAAGCACGACCAC  
GTGGATATCGAGCTGGAGAATGGCAAGCTGCTGCGGCTCAACGATCCGCGCCGTTTTCGGCGCCCTGCTCT  
GGACCCGGAACCGGCCGAAGCCACGCGCTGCTCGCAAGCTGGGGCCAGAGCCGCTCACCGATGCCTT  
CAGTGTGATTACCTGCAGGGGCGCGCAAGGGGCGCAGCACCGCCATCAAACAGTTCTGTATGGACAAT  
CAGGTGGTGGTGGGGTGGGCAACATCTACGGAACGAGGCGCTCTATGCTGCCGGCATTACCCCAAAC  
GGGCGCGGGCAATATCAGTGGCAGCGGCTGGGAACCTGGTGGCCGAGATTAAGCGCGTGTGGCCGA  
GGCGATTGCGCAAGCGGCACTACCCCTCAAGGATTTACCAGTGCCGATGGCAAGCCGGGCTATTTCTGT  
CAGCAGTTGCAGGTCTACGGCCGTGGCGGTCAACCTGTTTCCACTGTCTATACCCTGCTGACCGAGACAA  
GAATAGGCCAGCGCACACCGTTTTTTGAGTCAATTGCCAGCGCTGAGCGCACTTTTTGCCCCGATCCGG  
GGGAAGTTGTAACAGCGTATTTCCACTCTGTTGAAGATTTGCACAGCTGTCACTAGTATCCCGACCGTTC  
AGGCGGTTTTGAGAATATAAAAAATGACAGTTAAATCAATAGACTGGGAATATTTATCCCGGCAGGAGCGCT  
ATTTGCGCAAAATCCATGGCCCGCTTCTCTACCCGAGGGATGTGACCGAAAAACCTTCAATCGCGGCAA  
GTTTTGTGCTGCGCAGCCTGCTCTATCGCAAGTCGCTGAGCCGGGTCTTCAGCCTGTTTCAGTGGACTCG  
CTCAAGGCGCTGCCAGCGGTCTATCCGAGCTGCTCGACAAGCCGATGCGCCCCATCGCTTCGCCTGTG  
CCAGCGCCCCGTGAGCGGGCCGAGATGCTGGAATACTACTACCGTTTGTGCTGCTGGAGTGTACCCGCAGT  
GATCGACCCCTCTATCTGGCGAGGGGATCGAACTTGGGCACTATCCCCAGAGCGGTCGCCGATTTCTG  
TTGCGCCACGATGGCACCTTCCGCGCGAGGCCGAGCTGGCGCTCTCCATCGTCAACGGCGAGGGGCGAGC  
GCCTCTACAGTTGCGCCTTTTTGCTGGCAGGTAGCGTGGATCGTTTTGATTCTGATGATCGGCTCCATGCA  
GGGGCCGAGCCTGCGGTGCAAAATGCCAGGATCGGGTGC CGGAGCTAACCAAAGAGGGACATGGCCTG  
CGGCCAAATCCCTGCTGGTGAACCTGGTGTGCAACTGGCGCAGAGCATGGGGGCGGAGAGGTGCTGG  
CGGTGCGCAAGCGGGCCACGTGTTTTAGGCCAAGCGCTACAGCAGCAAGCAGAAAGCCAACCTGCAGGC  
CGATTACGACGAGTTGTGGCAGGAGTTGACGCCCCGGATGTGGATGCCAACTTCGTCGCTCTGCAAGCC  
CAGCCGCGCAAGCCGCTGGAGGAGATCGCCTCAAAGAAGCGGGCCATGTATCGGCGCCGCTACGAGTGGC  
TCGATCTGCTGGTGCAGGAGATGAATGAGCGGTTTTGCCCGTCAAGTACCAGGCAAGCAGGCTGACCTCTCC  
ATGCGATAGAGAAACGACAAGGGCTACCCGTGGGTAGCCCTTGTGCTTCTGCCATCAGGGGAGGAATTA  
GCGCTGTTGCTGTTGGCTGCGATGGCTTGGGCCACCACGGGGTCGACAAACTGACGAATGTGCCACCG  
TGCAGCGCCACCTCTTTCACCAGAGTGGAGGAGATAAAGGAGTTCTCCTCCGCCGGGGTGGGAAGACGC  
TTTTCCAGCTCCGGCATCAGGCGGCGGTTCAATTTGGCCAGCTGGAACCTCGTACTCGAAGTGGAGACGGC  
GCGCAGGCCGCGGATAAGCACGTTGGCCTGATGCTCTTTGGCAAAAATCGACCAGCAGACCGGAAAAAGCCC  
ACCACCTTGACGTTGGGAAGCGTGTGGTCACTTGTGTTGACAAGCTGGACACGTTCTGCCAGATCGAACA  
GCGGGCGCTTGTCTGGGCTGTTGGCGACGCCGACGATCACCTCGTCAAACAGCTTGGCGGCGGGCCGAT

GAGATCGGCGTGGCCATTGGTAACGGGATCAAAAAGTCCCGGGATAAAATTACCCTGGTAGTCATCTTTGCG  
GTCCTGCAACCTGGAAATTTGGTCGCATTATAAGGTCGTGCTTGAGAATAGCAGTGCATCAGGCAAGAA  
TACGCCATCGCGCATCAAGCCTCCTTGCATTGGTGACAGGGAGCAAAGGGATTTTTTATGAAACGTATTC  
TGGTCGTTTCGCAATGACAAGATTGGTGACTTCATGCTGGCGTGGCCTAGCTTCGCCATGCTCAAAGGCTC  
CATGGAGTGTTCATGTGACTGCCCTGGTTCCGGCCTACACGGCCCCGCTGGCCCCGGCTCTGCCCTGGATT  
GACGAGGTGATCATCGATCCGGGCGTGCGAGCCGACAAGGAGCAACAGCGGGCACTGCTGGCCCCGGATCA  
AGGCGGCGGGCTTCGACGCGTCCATCTGCCTCTTCTCCAACCTCCCGCAACGCCATGCTGGTGTGGAAGGC  
ACACATCCCTTACCGGCTGGCCCCGGCGACCAAGCTGGCGCAGGTGCTCTACAACCAGCGACTGGTGCAG  
CGTCGCTCCCCTCCAGAAACCGGAGTCCGAGTACAACCTGGAGCTGATCCGCCGCTTCTGGCCGATC  
AACAGGTGGCCGTGGTGGAGCCCAAGACCCCTTCTGCGGTTTCGATGACGAGACTCTGCGGCAGGTGGC  
TGAGCAGTGGCACTCAAGCTCAAGCTCGACGCCAGCCGCTGGCTGATGGTACACGCCGCGAGCGGT  
GGCTCGGCCAACAACCTCTCCATCGAGCAGTACGCCCGCATCATCAAACTGAACCAGGCCCTGCCCGG  
AGCTGCAGTGCCTGCTGACCGCCGGCCCCGGCGAGGAGAAGATAGCCGAACAGCTGGCGGCCGAGTTGCT  
GGCCACGGTGGCAACGGCTGGATCTACCGCTCCAGCGATGGTCTGCCGATGTTCTGTGAGGTGCTGGCC  
AACGCCGCCCTGTTTCGTTGCAGGCAGTACTGGCCCGCTCCATATCGCTGGCGCGCTCGACGTGCCGACCA  
TCGGCTTCTTCCCGATGCGCCGCTCCGCCACTCCGCTGCGCTGGAAAGCCCTCAACAGCGAAGGACGCCA  
CCTCGCCTTACGCCCGCCGAGGATAGCGACCATCTGAGGATATGAGTCAACTCGATCCCAAGGCCATG  
GTGCCGGTGTGAGCCCGCTGGGCGGCGCCTTCTGGCGCAAATAACGTATGCAGCAATGCAAACAGGGCC  
CCGCGGGGCCCTGTTTCGATGACGGTTATTCCGGCTGCTGCGGTTGCTGGCGCACCCAGAGGTGCGCGT  
ATTTGACGAAGGTGGAGTGGGCGGAGAGGATCGCCAGCAGCAACCCCTGCTTGCCATCGAGGAAGCCTGC  
CTTGAGCAGATACATCTTGATGAAGCAGCCGACCGCGTGCATCAGCCCTGACTGAGGGAGCCCTTCTTG  
CCGCGAGCGGTGCGCTGATCGGCCAGGCGCGGGCATAACCGCGGATTTACCAGATAGTGTCCAGAT  
CCCGATAGGTGAAGTGGAGCAGGTCAACATGAATGTTGACGATCTTCATGTTGGCCCCGACTTCCACCTT  
TTCGTGACACCAGCGCCTCGTTGTAGCTGGTGTGCTTGGGATAGAGGCGCAGCACCCGATCCGGATAC  
CAGCCACTGTGGCGGATAAAGCGGCCAAAGACCCAGGAGAGGCGCGGGATCGAGTAGATGGTATCGCTGG  
CCGGATTGGTCATCACGTTGGCTATGGCGGTTTTAGCTCGGGGGTGAAGCCGCTCGTCCGATCCAGCCA  
CAGCACCCAGTCGGATTGCACGTGGGACTGGGCCAGTCCGCGCTGTTTGCCAAAGCCGGGCAGTTGGCG  
TTGACGAAGAAGCGGGCCCAAATTCGGCGGCAATGGCCGGGTTCTCGTCTGGCTGCCGGATCCAGAA  
TGACGATCTCGTCCACCAGTCCGTCGAGGGAGGCGAGGCACCTGCGCAGGTTGTGCGGCTTCATTTGAC  
GATCAGAACCGCAGCCAGAGTCGGTTTTTTACGAATGTGGGCTCACGGTTATTGCCCGGCTGGCGGGT  
GAATGCGTATTGATGGCCATTCTAACGGAAAAACGGGTCAAAGAGAGAGCCGCCATTGCCCGTTTTCTAT  
CAGCTGTTTGCCTGTCTCGTCTCGTCCGGTTGGAAGCGGGGCACCCTGGAAAAATGGGGTACCGGCAGC  
GTCTGCCAAGGATCTTCTGTTATTTATCCAGTCATCTTGGGGCATAATCTCGCCAGTGATGATTAACA  
GCCGGGCTAGTCCCAGAGAAGACGCGTGTGAAAATATTGGTGTGATCGGCCCTCCTGGGTCCGGCAGAT  
GGTGTGATGTCCAGAGTCTCTACAAGGCGATCAAGGCCAACCATCCGGAGTGCAGCTGCACGTGATGGCC  
CCCGCCTGGTGTGCGCCCTGCTGGAGCGGATGCCGGAGGTGGACAAGGCGATCACCATGCCCTTGGCC  
ACGGTGACTTCAAACCTGGTGGCGCGCCGCCCTCGCAAGCAGCTGGCGGCGGAGAAGTACGATCAGGC  
CATCGTCCAACCCAACTCCATGAAGTCGGCGCTGATCCCTGGTTTTGCCCGCATTCGGTCCGTACCGGC  
TGAAGGGCGAGAGCCGCTACGGTCTGCTCAACGACCTGCGCAGCAACAAGTCCGCCCTCCCGCTGATGG  
TGGAGGGCTATCTGGCGCTCGCCTATCCCAAGGAGCAGATGAAGAGCCGGGCGGATATTCGGACCATTC  
GCATCCGGCGCTCCATGTGATCTGATAAACAGAGCAAGGCGCTGGAGCGGCTGGGACTGGATCGCGCC  
CGTCCGGTGTGGTGTCTGCCCGGTGCCGAGTTCGGCCCGCCAAGCGCTGGCCGGAAGGGCACTACG  
CCGTGGTGGCCCAACAGCATCTGGACGAGGGGTGGCAGGTGTGGATCTTCGGTTCCAACAAGGATGTGCC  
GGTGGCCAATAACCATCCGGGATCGGGTCAATCTGCTGACTCGCCCCAACTGCCACGTGCTGGCGGGCAAG  
ACCAGCCTGCACGAGGCGATCGATCTGATGGCGCTGGCCAGCCGGGTTCATCTCCAACGACTCCGGCCTGA  
TGCACATCGCCCGCCCTCAACCGCCGCTGGTGGGTGTCTATGGCTCCACTTCGCCGCTCTACACCC  
GCCGCTGGCGGATCGGGTTCGAGATCGTCCACACCGACATCGAGTGTGCCCCCTGCTTCAAGCGCACCTGC  
AAGTTCCGGCCATCTCAAGTGCCTGATCGACCTGGCGCCGAGCAGGTGGTTCGATGCCTGCAAGAAGCTGG  
AGCAGAGTCAGTAAGATGCCCTACCGTCTGCTCTACAACCTGCTGATCCATCTGGGATTGCCGCTGGCGC  
TGCTGGCCCTCTACAAGCCTAAGAAAAGGCAAGCCCGCTTTGGCAAGCGCTGGGCGGAGCATCTCGGGCG  
GCTGCCTGCCACCGACAGGAGGCGCGCTCTGGATCCATGCGGTGAGCGTGGGGGAGACGCTGGCTATC  
ACGCCGCTTATTCGCGCCCTCAAGGCGGAGCGGCCGATTTGCCGATCCTGCTCACCACCACCACCCGCA  
CCGGCGCCGATCAGGCTGCCAAGCTGGGGGATCTGGTGTGATCCATCGCTACGCGCCGCTCGACTACCCCTG  
GGCCATTGCCGCTTTCTCGACACCTTCAAGCCGCGCGCTCTGGGTGATGGAGACCGAGTTGTGGCCG  
AACTGGCTGGCCGCTGTGAGGCGCGCCACCTGCCGGTACCATCATCAACGCCCGCTCTCCGAGCGAT  
CCTGCCAGCGTTATGCCCGTTTTCCACGGCGCTTTTCGACGCCCTGAGCCGGCCACTGACCCATCTGCTCTG  
CCAGCATCAGGATGATGCCGACCGCTTCGCCCGCCTTGGCATCGATCGTTCCGGCTGGCGGTGACCGGC  
TCCATCAAGTTTCGATATCCAGTTTGGTGACGAGGTGCAGGCCAAAGGTCGCGCCCTGCGTACGAGCTGG  
GGGCGGATCGGCCGGTCTGGATCGCCGCCAGCACCCATCTGGGTGAGGACGAGCAGGTGCTGGCCGCTT  
CGATCTGCTGCTCAAACGCCATCCCGCTGCGCTGCTCATGCTGGTGCCGCGCCACCCCGAGCGGTTTCGAT  
CGGGTGGCCGAGCTGTGCGCCCTTATGGCTGCGTGCAGGCGCACTGATGGTGTGCGGTGAGTCCGGAGG

ATAAGGTCTATCTCGGCGATACCATGGGCGAGCTGCCGCTGATGCTGGCGGGCGCCGATGTGGCCTTCGT  
TGGCGGCAGTCTGGTGAAGATTGGCGGTCAACCTGCTGGAGCCGGCGGCCCTCGGCAAGCCCTGCCTG  
ACCGGTCCCGCCTACTTCAACTTCAGCGACATCACCCGCCAGCTGGTGGCTCAGGGGGGCGCCGCCATCG  
TGGCCGATGCCGCCGAGCTGGGCGAGCAGGTGAGCCAGCTGTTTGGCGGCGTAACGTCCGCCCGGAGAT  
GGGGGAGCAGGCCCCGCGCCGTGGTGTACGCAATCAGGGTGGCGTGGCGCGCACCCCTCTCGCACTGCCTC  
ACTGCGCTGGAGAACGACTGAACCCATGATGAGCACCCTGCTGGCTCTCGATTTTCAACTGCAAAAGCGT  
CAAAGCAGCTGATCCCCGTTTACACGTCATCAAAGAGGCAACCATGTTCAAGGCTCTGTTACTGGAAAA  
CCAAGACGGCAAGACTGTTCCGACTCTGACCCGGCTGGCCGAGAGCCAGTTGCCGGAAGGTGAAGTGC GG  
GTAGCGGTTCGCTTACAGCTCCATCAACTACAAGGACGGGTGGCCATCACCGCAAGGGCAAGATAGTAC  
GCCAGTGGCCGCTGGTGGCCCGCATCGACTTTGCCGGTACCGTGTGAGTCTGCCGACAGCCGCTATCA  
GACCGGGGACAAGGTGGTGGTGGTGGGCGCTGGCGAAGGGCACTGGGGCGGCTGGCCGAAACAG  
GCGCGGGTCAAGGGGGACTGGCTGGTGGCTGGCCGCTGGCCGCGGCTGGATGAGCGCCAGGCCATGTGCATCG  
GTACCGCCGGTCTACCGCCATGCTCTGCGTGGTGGCACTGGAAGAGGCGGGTATTACTCCAGATAGCGG  
CGAGGTGCTGGTACCGGTGCGGCAGGCGGGCTGGGGGCCACCTCGGTTGCCCTGCTGGCAGCCCTTGGC  
TATCAGGTGGCTGCGCTGACCGGTGCTCCGGAAGAGCAGGGCGCCATGCTCACTGCGTTGGGTGCCAGCC  
GCATCGTGCCGCGCAGCGAGCTGCTGGTGCCTGCCAAACCGCTGGAGAAGCAGCTGTGGGCCGCTGCCAT  
CGATAACCGTCGGCAGTCAGGTGCTGGCCAAGCTGCTGGCCAGATGAACTATGGCGGCGCTGTGGCGGCC  
TGCGGGTTGGCGGGCGGTTTTGATCTGCCGACCAGTGTGATGCCATTTATCCTGCGCAATGTGCGGTTGC  
AGGGGGTTCGATTCGGTGTGCTGCGCGTTTTGAACGTCGTAACCTGGCGTGGCAGCGACTGGCACGGGATCT  
GCCCGCCAGCTTCTTTGAACAGGCGGTTACCGAGATTGGGCTGGAGCAGGTAGTGGAGGCCGCCGAGGCC  
ATCACGCAAGGCCAGATCGCCGGTTCGCACTCTGGTCAAACCTTTGAACTCCCTCTGACTGGCGAGCCCGAC  
AATTCGGGATAAAAATTGGAGTGCGGGTGAACTATCCAAGGAGAGTGAAGATGGGTGGACACAAGCCGGAT  
TACGACTCCTCTGATGATGACTGGGAGCCGGATTCTGGGAAGAAGAGCTGGATCAGTGGGAAGATGAAA  
GCTGGCAGGATGATGACACTTTTCGATGACCAGTGAACCACGGCATTTGAACGAACAGGCGGGCTTTGGGCC  
CGCCTGATTTTTTTGCGCGCTCACATGGCTGAGCGTTCGTCTTGGTTCAGGGGCGGGCCGCTGGGTAGA  
ATGAACTGCCCAAATGACGCTCAAGGATGACTATGCGACTCTTCATCATATTGTTGGCTGCCCTGCTGGG  
TGGCTGTGTCTCCAACGATGATCCCTGCGAGAAGGTATGGAGTGAAGTTGGGGAGGCGGATGGCAAGCTG  
GGCTTACCACCGGATCGAGTTCATCAGGGCAGTGTGGCAAGAAGGTGGATGCCAAGCTGTGGA  
AGCAGGGACATCAGAAGGGATTGGCATGGTATTGCCCGCCCGAGCATCTCTATCTGGTGGACCTCAGG  
CGAGGAGTATCGCGCGTTTTGCCGAATGATACCCAGGCACGCAGATTGTTTGAACAGGGGCGTCAAGGG  
TGGACCGATCAATAACGCCCTGACAGGGAGGGCGTTACTCCTCTTTCAAACGCAGCGGCTGGCAGAGGT  
AACCCCTTGTCAATTGGCACTGCGGGCGCACTTGGTGCAGACAAAACCTGGGTTTGGCGACTATCTTGC  
CGCCTTGGATCGGTGGGGATCTCGTGGCGGCGCCATTCACACAGGGTTTTGCTGCCATAACGACTACC  
TCTACGACTTGACGGCCGATTGTAATCGATTTTCATTTGAATAAACCGGCAAAGCTCGCTTATTGGCC  
GATATGCCAATAAGCGATTGTTTCGGGAGGGATTACTGGTAGAGGAACTTGGTGAAGATAAGCTCGCGCA  
CCGCTTTCTTGGCGGCTCTTTTACCAGCAGTTGCTTGACGGTTGTCTCGCACTCCTTGCAGCTCTTC  
TCGGTTGGTTCAGGGACTTCACTTGATCGGCATTTTTGCTGCCAATCAGGCGGATGATGGCATCGCGGATC  
AGCGGGTTCATGCTGCTCCAGCAGCTTGAGATCGGCTTCGTTTTCCGCCATCAGCTCTACCGTGACCCGGA  
TATAACCGAGGGTTTTGCTATCACTCAGGTAGTTGGTGGATGATGTCCGGATCGAGCGCGTGGTAGGAGAA  
ACCAGGCTTGGCAGCCCCCTCTGCGCCCTCGGCGGGCGGCTCATCTTACGCCAGAGCTTGGTGTGCTGCAGG  
GCGCCACAGCTCAGTAACAACACCAGCAGAATTTTGAAGATCTTCATATAGATGGCTCATCAGCAAGAGA  
TAACCCATTTTTGATGTTGCCATCGGGGCGGTCAAGCACGGATGTTCTTACATTTTCGCTATTGATTTACG  
GATAATAAACCGGATTTTAACTGAACACGGAAATCTCTGGATGGTGAAGCTGTGAAGTCCGAGTTGACT  
GTTCCCTCACGCCGTTAAGCGGGTGGCTGGCCCCGAATGTTGCGAATTGCCCGCCAGCTTGGCCCCCT  
GGCTGCTGGAGCCCGGCTCCATGACCCGGCGGCTGCGTTCAGCACAATCGCCACTTTTTCGGTGGATGGCT  
GGGCAATCACCCGTCGCCCTTACTGCCGATGAGCAGTGGCTGGTGGATTTCGGCTCGCCCTCGCCGCGGCACC  
TGCCGCGAGGTGATCCTGCACGGGGATCGTGGGCCCGCCGTGGTGGCTGGACCCGTTTTGCGCGATGACG  
CACTGCAAGGGAGTGGCATTGCCGAGCTTGGCGAGCAGCCGCTGGGTGAACGGGTATTGGCCATGAGCC  
TGCCCGCGGTGATCACCTGCAGCTGGCCCGTTTTGATATTGCCGCAATCCCCGTTGCCCGGCCGCACT  
GTCTGGGGGCGTTCGTTCCCGTTTTGTTTCTGGGGCAGTGGCCACTGCTGGTGCACGAGCTGTTTTCTGCCCT  
CTCTCGTCTGTGACAAGGAGCTGGAGTGAATCTGTTAACCAAGGAGCGGGGACTTGGCTATATGCAGTTG  
GCCCCGCTCGACAAACCCATAGGTACTCTGCTGCTGCTATGGCCAACCTGTGGGCGCTCTGGCTGGCCG  
CTGGTGGCCTGCCAATCTCTGGGTGCTGACCGTGTGTTGTTGGTGGCGTCTTTCTGATGCGCTCGGCAGG  
GTGCGTGTATCAACGATTATGCGGATCGCAACTTCGATGGCCACGTCAAACGCACCGCCGGTTCGCCCTTG  
CCCACGGGCAGAGTCAAGCCGTGGGAGGTGCTGGCGCTCTTCTTCGTGTTGGCACTTATCTCGTTTTGGTC  
TGGTGTGACCATGAATCCGCTCACCATCGGTCTGTGCTTTGTCGCCCTGCTGCTGGCGGTGAGCTACCC  
CTTCATGAAGCGCTTTATCTCCAATCCCCAGCTGGTGTCTCGGGATGGCCCTTCTCCTGGTTCGATCCCGATG  
GCCTATGCGGCGCAGGCGGATGCCCTGCCGCTGGTGGCCTGGCTGCTCTTCTTCGCCAACCTGCTCTGGA  
CCGTGGCTTACGACACCCAGTACGCCATGGTGGATCGGGATGACGACCTCAAGATCGGCCCTCAAATCCAG  
CGCCATCCTGTTTGGTTCGTTACGACAAGCGGATCATCGGCGCACTGCAACTCTCGACACTGCTGCTGTTG  
CTGGCGGTTCGGGCGAGCTGATGACGCTGGGGGGCTGGTATTACTGGGGATTGCTGGGGGCGGCGGTGCTGT

TTGTCTATCAGCAGCGGCTTATTCGTGAGCGGCAGCGGGAAGCCTGCTTCCAGGCGTTTCTCAACAACAA  
CTATGTGGGGGGCGCTGGTGTTCGCGGTCTGGTGCTCGATTACCTGCTGGCGTGACATGTTCCACGCAG  
ACTCCGATAAAAATGAAGGCCGCATCATGCGGCCCTTCTTTGTTTTGCGTTGCAGATTAGAGCTGATTGCCT  
GCCTGAATGGTGCGGCGGATCTTGTGCTCAGCAGCGGCACTATGTTGTTCGGCCAGCGCCTGGAAGCGGC  
CGAGATCCGGCTTGCACTCTGGGGAGAGGTAACCCCTCCTTGCGCAAGGTGTGGATCAGGGTGTGAACAG  
CTTCTGGTTCGAAGAACTCGGGGGCGTTGATGCCGTGCAGGGTGCAGGGCGTCTGCCATCATCAGGCCG  
TCCGCTCCAGCTGCTCCGCCTCGATATGGGGCTGGGCCAACACCCGGGTCAGCACGATGGCGTAGCGTT  
GCAGGGTCTCCTGAATGCTCTCCGCCAGCAGCAACAGGCGCATCTGGTTGGCAGGATTGACCCAGTAGCC  
GTCATCGCGGGTCTCGATCAGTTGCTGGGCCTGCAGCGCTCGAGCAGGCTGTCGACCAGCGCTGGCAGC  
TCCTCCTCTTCATAACGCAGGAACAGCTCGGTCCTGAGCAGCGGATAGATGTCGATGCAACGGGCCATGA  
TCTCGCTGCGGGAGATCCCTTCGCACCGTTCCGATCAGTGCCTGATAGCGGTCGAGACTGATGACTGACCCAGC  
GAGGATGTTGTTGCGGTAGTAGGTACGACAGGATCGCTGATAGCGGTCGAGACTGATGACTGACCCAGC  
TTGTCTCGCTCACCTCGAACTTGTGAGCTCCATCGCCTGATCCAGCAGGGTCTTGGCATCCTCATCCG  
GAATGGTGCTCTGCGGGCTGTAAGGCACCGCCTTGGAGCAGATCCAGATAGGTGTTGAGCTGAGCCTGCAA  
CTCGTGCAGGGTTCAGGGCGTGGCGCTCGGCGGCCAGCAGCGCCAGCGCTCAGGGTTCAGGCCGTTGACC  
GCGGCAGCGCCGTTGATGCGGGTTCATCAGCAGTTTCGGCCAGATTTGTTGACGGTGCCCGCCATCCACTCCG  
GACGCTCCTCTTCCCGATGTGCTTTTTCCAGTTCGGGGATATGTTGCTCAGGTAGCTGTTGAGGGTCAG  
CGGCTCGCCGAAGTTGACGAAACCAGGCCGTTAGTTGCGCAGCTTTCGCGAGGATGCCGAGCACCTGCAGG  
AAGCTCTCTTCTCCTTTCGGCTTCCCTTGGAGCTCGTTGTGGTAGGTGTTACCTCCATCACGTGCTCGT  
AACCCAGATAGACCGGCCACCAGAGTGACCGGCTTCCAGTCCGCGCATCATCGCCTGCAGGGTTCATCGC  
CAGCATGCCGGTCTTGGGCGGCAGCAGGCGACCGGTACGGGAGCGACCGCCTTCGGTGAAGAATCCACC  
GAGTAACCCCTTGGCAAACAGCAGGTTGAGGTATTCCCGGAATACCGTGCTGTAGAGCGGGTTGCCCTTGA  
AGGTGCGGCGAATGAAGAAGGCACCGCCGTGGCGGAAGATCGGGCCCCGGCCAGAAGTTGAGGTTGAT  
ACCCGCGCGATATGGGGCGGCACCATCCCCTGGTGGTAGATGACGTAGGAGAGCAGCAGGTAGTCCATG  
TGGCTGCGGTGACAGGGAACGTAGACGATCTCGTGCCCTTCTGCGCCAACTGGCGTACCTTTCGCGCGC  
CATTGACCGACAACCGCGGTAGAGCTTGTTCACAGCCAGCCGAGGAAGCTCTCGCCAGGCGGATCAG  
CCGGTAGGAAAGTTGGAGGCGATCTCGTCCATGTAGCCATGGGCACGCTTTTTGCGCCTTCTCGAGGCTG  
ATCCCTTCGCGCTGGGCCCTCCTCTTCAATCGCTCTGATGATCACCGCGGAGTCGAGCAGCTGTTGAACA  
GCAGGTTGCGGTTTCGGCAGTTTCGGGCCGTTGGCGCAGTCTGTTGGCGGCTGAAGTGGTACGCGCCAC  
TCGCGCCAGCTTGTGGGCGATCGCCTCGTCAGTGCCGTGCTTGTCCGCCATGTAGCGCAGGGAGAGCGGC  
GGCGAGAAGCGCACCCAGATTCTCGCGACCCCTTCAGTATCACGATGAGCGCCTTCTTCAGCCGGTTCGGCG  
CCAGACTGCTGATGATGTTGAGGCCGAGGCTTCTTCTCCTTCCCGACCCGGAGCGCGGCCCCAGAACAG  
GGTGACGGGCACCACCTGGATATCCAGCTCGGGATCCTGCTTGTGCAGATCCAGCAGCTGGTGGAACTCC  
TGCAGGAAGGGGAGCGGTTTGTGCGTTCGCAAACAGGGGAGGCGGACGATCCAGACAGACATAGCGCG  
GCAGCAGCTGGCCGTTTCAGTTCAGCGGCGTGAAGGGACCAGGCGAGATCCTCGCAGCACTGCTG  
CAGGGTTCATCAGGTTCGGTTCGAACTGGTTTTTCAGGGCATAGACGATGGGTCTGGCCGATCCAGATTG  
AGTTCTGTGATGGGATTTTCGGCAGGCTCTTGTGATTGACCAAGCCGCTGACCGGCCATTGCAAGATGG  
CTCTGGAAATCTTCTGTCTAGGGACATGTGCGTCTGCTCTCCAAAAAATGCGGCGTGAGCATAGCAAA  
TCGACAGCCCCTTGTGCGCGAGAGGTACGATGAGTTCGGCTGCGCAGGATCAAACAGCAGTAAATGAGGG  
GTTGGTTGCGACAAATGTCAGCTGCGCCTTGCCTTGGCCACTGCACTGTATATACTGCCAGTGTGCTGTA  
TAAAAAACAGGTGCCAATTCTATGAAACCCCTTACCCCCCGCCAGGCCGAAGTGTGGAGCTGATCAAG  
GTGAACATGAGCGAGACCGGCATGCCGCCGACTCGTGCCGAGATTGCCAGAAAGCTTGGTTTTCAAGTCGG  
CCAATGCGGCCGAAGAACATCTGAAGGCCCTGGCCAAAAAAGGGTTCATCGAGATCATGCCGGGCACGTC  
CCGCGGCATTCGCTTGTGCTCGAAGAGGAAGAGGTGCTGGAAGAGAGCGGCTGCCGCTCATCGGCAAG  
GTTGCCGCCGGTGAACCCATTCTGGCTCAGGAGCATATCGAGAGCCACTATCAGGTTGATCCCGCTCTGT  
TCCATCCGCGCGCAGATTTTCTGCTGCGGGTACAGGGGATGAGCATGAAGAACATCGGCATTCTGGATGG  
CGATCTGCTGGCGGTGCACAAGACCCAGGAAGTGCAGCAACGGTCAGGTGGTGGTCGCCCCCTCGATGAG  
GATGTCACCGTCAAGCGCTTCCAGCGCAAGGGCAGTCAGGTATGGCTGCTGCCGGAGAATGAAGAGCTCT  
CCCCCATCGAGGTGGACCTCTCCTGCCAGCAGCTCACCATCGAGGGGCTGGCTGTCCGGGGTATCCGCAA  
CGCCGACTGGATGTAATCATCCCCGCAACTGCGTTTGCCACACGGCCTCCTTCGGGAGGCGGCTGTGTT  
TCTGGCGCACTTTCCTTGTGATATCAAACAGATCATCGGTGGCGGCATTTTTGTCTGCGCGACCGGCTA  
CCAATCATCCATTTAGATATATGCTCAGATCAGTGCCCTGTGCGCCAGACAGGGCTTGGCACCTCCCTC  
TGACCATCGCAATGCGCCGTGACGGGAGGGCCGGTAAACAACGAGAATCAGGCAGTACACCTTACGGGAT  
ATGAAGGGGGAGTGGGGAGATCCCAGCCTTGTGCGGCAAAGGGGACCACTCGTAATGGTTGCAGATAGT  
CGTGACGGGCTGTTCCAGTTTCAGGCCGACGAAACAACATGACCTGTGCGTCAAGGAGGACTGGTATGG  
CATCAAGATCGCCATGGGATTTCAGAGGCTGGGGCTGCGCCAGCGGAATCGTCAATCACCCGTTTTCGTCAA  
AGGTAGCCGGATGACCTGGTTTTACGGTCTCTGGCTGCACCATCGTGGTTCGCACTGGACGCTCTGGCTG  
GGATGCCCCGAAAGAGAAGGTGGTGGTGTGCTGTTCAAACGTGGTTCATGGCGATCGCCAGGGGG  
AAGAGGGCTGGCTGGCCCCCGTGAATCCCATCGGCGTGGGGCCATCGGCAAGATGTTGCAGCAGGGGGC  
TAACGCTCGCCCCCTGAGCAGAAGAGACAAACAAATCTACCCATAACCGGCACCCGAGGGGGCCGGTTTTT  
TTATGGCCGCAACTGGCGATTAATTATGCCAAATGGTCGACTCTGACAGGGCGTTGCACAAGGTTGAAC



CACCTTGGCGGCTCGCTGGGGTACAATGCCCCCTATTGTCCGGTCACTGCTGGCCATCTGCCTCGAACT  
GAAAGGGTCTCTTGTATGATGAAGCTCCGCTATCCCCTGCTCTTTCTGCTGCTGACAGCCTGCCTGATC  
CTGGTGTCTACGCCACGCAGCCAGAGCAGCCGGAACAGGCCGATTATTATCCGGCGGGGCGGGACATCA  
ATGATTTTCGCTTTACCGATGCGGACAACCAGCCGTTACCCCTGCCAACCTGAAGGGGCACTGGACCTT  
CCTGTTTGTGGCTACACCTTCTGCCCTGATATCTGCCCCACCACCTGGCAGATATGCGCTCCGTCTAT  
GACCAGCTGAAGAAGATGGCGCCCCGACAGTCAGGTAGTGTATCTCGGCGGATCCCCAGCGTGACGATA  
TTCCACGCCTCAAGACCTATAACCGCTTCTTCAATCCCGAATTCAGGCGGCCACCGCCCCCAGACAA  
GCTGTTCCCGTTTGTGCGCAATCTGGGGCTGATCTACTCCATCGCCAATCAGGGGGAGAAGGATTATCTG  
ATCGATCACTCCGCCTCCATCGTGCTCATCAATCCCAAGGGCAAGCTGCAGGCGGTATTCGCCCCGAAG  
TGGCGCCGGGTCAAGTACCACGGGTGCAGATGGCCACCATGCTCTCTGACTTCTCCCGTATCCTGAAGCT  
GACAGGCAACTGAGCGTGACCCGAGCTGTTGCCCTTGGTGGCGAGATCCCTCTCGCCACCGCGCCGTCT  
TTGCGCTCGCTCTGCCCATGGTTTTTTTCCAATATCACCACCCCTTGTGGGGTGGTGACACCTGGGT  
GATCGGTATCTCGGTGAGGCTGGTTTTCTGGGGGCGTCTCGGTTGGTGCGACCTGATCAACCTCATC  
TTCTGGTTGCTCGGCTTTTTTGGCGATGTGACACCAGGCTTGACGGCGCAGGCGCACGGCGCCGCGACG  
GTCGTGCCAGCTCGATAACCTGCTGCGGGCGCTGGGGCTGGCCATTGCTCTTGGCTGGCGCTGCTGTT  
GTTGCTCTTCCCCCTGTTGCCACGACTGATCGCCCTGAGTGGCGGCTCGCCCGAGGTGCAGCTCTATGCG  
GGCCAATACGTGGCGGTACGGATCTGGAGCGCCCCGGCGGCTCTGCAATCTGGTGGTCATGGGCTGGC  
TGTTGGGGATGCAGGATGCCCGCAGCCCCATGGTGTATGTTGATCCTCACCAATCTTGTCAATATGGCGCT  
CGATGCTCTGTTTGTGCTGGGGCTCGGCTGGCAGGTGCGGGGTGTGGCGGCGGCTCGGTATGGCGGAC  
TACTGCGCGCTGGCAGTCGGTATCTGGCTGGTACCCGTCAGCTGCGGCAACTGGCGCCGACGGTGTGGC  
AGGATGGTTGGCAGCGCTGGCGGCAGCTCGCGCCATGGTGGCGTTCGTCGGCTCAACCGCGATATCTT  
CCTGCGCTCCCTCTGTTTGCAGCTCTGCTTCGCTTCATGACTCTTCAAGGGGACGGCTGGGGGATGTG  
GCGGTGGCCGCAATGCGGTGCTGCTCAACTTCTGATGCTCATCTCCTATGGACTCGATGGTTTTGCT  
ATGCGGTGGAGGCCATGGTAGGACGAGCCATCGGTGAGCAGGAGCGGCAGAACTGCGGGAGGCCATCGT  
GCTCAATCTGGGCTGGGCCGCCCTCATTGCCAGTGGTTTTACCTGGTGTGTTGCCCTCTTGGTGGCCAC  
CTTATCGGCTATATCACCACATTCCGGCTGTGGTGGCGGAGGCAAACCGTCAGCTTCCCTGGTTGATCG  
CCATGCCCTTGCCTGGCGGTCTGGTGTTCCTGCTGGATGGCGTATTCATCGGGGCGACTCGGGCGCGGGA  
GATGCGCAACAGCTATTTGCTGGCCGCGTTTGGCGGCTTCTTCCCGTCTGGTGGCTCTGTCAGTCTGG  
GGCGTGGCCGCGTTATGGCGCGGATGGCAGCGCTGATGGTGGGGCGCGGTCTGTCGCTGGGGCTCACTT  
GCTGGCGGCTGGAGCGCAGCGGGCATCTCCTCGACGCCGCCACTGATCATCGGTGGCGCTTACATGGCA  
CCGTCTGAGCCGAGCTGGCGCCAGCTCTCGTAGACAAATACAGATACCCGCTTGGAGAGGTTTATGCTGC  
GGCTCTGGGGACCATAGGGATGCGTAGCCGCTGCTCGAATGGCAGACTCTCGATGATCTCGATGGGCAG  
GCCGCGACTCTCCGGGCCAAACAGCAGGGCGTCGCCAAGGGCATAATTGTGCTGCCGAGTGGCGGTGCGC  
CCCTTGGTGGTGCAGGCAAACACCCGTTTGGGCGCCACGGCGCCAGAAAAGCCTCATAGTTCCGGCCAGC  
GCTTACCTCGGCAAATTCGTGATAGTCAGTCCCGCCGCTTTACCCGCTTGTATCCCACTCAAATCC  
CAGCGGCTCGATCAGATGGAGCCGGTAACCGGTATTGGCGCAAAGCCGGATGATATTGCCGGTGTGGGC  
GGAATTTCCGGCTGGTAGAGGACGATATCGAGCATGACGAGCTCCTGCAAAGAGATGTAAAGCCAAGAAG  
GGGCGCCAGCATAACCAGCGCCCGTCCGGATGAAAAGGATCAAGCGATGGGCAAGCGGATGGTGTGGTC  
AGCCCGGTGGGATGATTGTTGCTGGCCGCAATGGTGCCCGCTGGCGCTGGATCGCTCCGAGGCGATGG  
CCAGCCCCAGCCGGTGGCCCGGCTTGGCGTTCGGGCATCATCGACCCGGAAGAAGGGCTGGAACAG  
CAGCGCCTGCTGCTCGTCAGGCACCCCGGGCCGTATCCCGAATGGTCATCACCCACTCCTGCCCTCC  
CGATAACCAGTCCACCTTGATGAACTCGCGGGCATAATTTGAGGGCGTTGCGCAGGGGGTTCTCCACCGCCC  
GGGCCAGCAGCTCGGGCCACATCTGGATCGACTCGGCAGGCAGCGGCGGCAGTCTGAGCTGTTTGCAGCT  
CTGGTTGCTTTCGAACATCGCATCTTCGAGGATGGGCTCCAGCAGGTTCGCCAGCGGGTGCATCACCGGC  
GCCTCCACATGCTGCTGCACCCGCGACAGATCCAGCAGATCGCCGATCAGCTTGTCCAGCCGTCGATCT  
CCGATTCGATCCGCGCCAGCTCGCGCTGTCAACCTGCTTGGCGGATCGAGCGCTGCGCGAGTTGCAT  
CCTTGTGAGGGGGCTGCGCAGCTCGTGGGAGATATCGGAAAGCAGCTGTTTCTGTTTCTGGATCATGCTC  
TTGAGCGTCTCCACCATGCGGCTGACGTTGTCCGCCAGCTGGCCGATCTCGTCGCCCCGTCCAGGTTGG  
GGATCTGTACCTCCAGATTGCCGGCCCGAGTTGGGAGACCGATTTCTGCAACTGCAGGATGGGGCGGGT  
CAGCCGCCAGGCGAGCAGCAGGCGAGCGGGGTGCTGACCAGCATCGAGATGCCAGAAATGCGGATCGGG  
TGATCCAGCACCTGAATAAACAGGAACAGGTAGGGATTTCTCGGCATGAGGCCGAAATAGACGTGATAGC  
GATGACCGTGGTCTCCATCAGGAAGGGGCCGGCATCGCTTGCATCCTCGTTGCCAGCATGGGATT  
GGCCGGGTCTGACATCCACCATAAAGCGCACACGAACCTGCGCGGATGGGTGGTGGACTGGATCTGC  
CCCTTCTCGTTCGCGCAGGTAGACGTTATCCACCGGCAGCATGGCGATCTTGTCCATCGCCTTGGCCAGAT  
CGAAATCCTGATCCGGCTCGGCGGCGTGTGAGCAGGGCTGCACGTTGTTCTGCATCCGCGCGACTTCTGTG  
GGTGGCGAGCGGGATCTGGTTGCGGGGATCCAGGGTCCGGCAGGCTGATCACGGCGGCCAGCATACCAGC  
AGCATGAACCAGAACCAGAGGAAGATGTGGGTGAGATCCCGTTGAGGGAGTTGATGCGCTCTATTCTTG  
CTCTAGCCACAGGTACCCGCGCCCCCGTACGGTTTTGAAGCGGGGCTGGCCATCAGTGCGGTCCGGCAGC  
TTCTTGGCGAGGTTGCTCAGGTGCATGTGATGGCCGATCGAAGGGCTCCAGCTTCTTGGCCAGCACCT  
GCTCGGAGAGGTGGCTCTTGTGACGATCTGGCCGGATTCGCGCAGCAGACACTCCAGCAGCCGAATTC  
GGTGGCGGTGAGCTCCAGCAGCTGTTCCGCGCAGCGGGCTGCTGCAGGCCGGGTTGCAGCACGATATCC

ATGAAGTGCACCTTCGTGCGAGGAGTTGCCGCGCTGGGGCGGTGCGCTCTGGGTACGGCGCAGGATGGCGC  
GTACCCGGGCCAGCAGCTCCCTGTGCATCGAATGGCTTGCCAGATAGTCGTGCGCACCCGCTTCCAGACC  
GTTAACCCGATCCTGGCTGTACCCGCGGGCGGTGAGCATCAGCACCCGGGTATCGTGGGTCTTGCGCAGC  
TTGGTTAGCATGGCAAAGCCGTTGAGTTTGGGCATCATTACATCCAGCAACACCAGATCGAAGCTCTGCT  
CCGCCAGCCGTTGCAGCCCTCTTACCATCCTCGGCGACCGTGACCTGAAATCCCTCCAGGGTCAAGAT  
TTCGGTGAGCAGTTGGGTCAATTCAAGATCGTTCGTGACCAGGAGTATTTCTGTTCATCTGGTGTATTTC  
GCAGATTTTTCGCGCAAACACTGACGCCGGGGTCAAGGATATAATAAGTTTTCATCGCCAGAGGAAAGCCGG  
TTTTGAGCCATCAACAATATTCCCGTTGGGTGACCTTTGCCAGCATAGCTGCGGTACACCACCGCTACCTT  
GCTGATCATCGGCAAACACTGATCGCCTGGCTGATGACCGACTCGTCGACCTGCTGGCGTCGCTGACCGAC  
TCCTTACATGGATGTGAGTGCCTCCATCATCAACCTGCTGGCCATTCGCTATGCGCTTGCCCCGCGCATG  
ACGAACACCGTTTCGGTCAAGGCAAGGCGGAGTCGCTGGCGGCTCATCCAGTCGGCCTTTATCTCCGG  
CTCCGCTTGCTGCTGGTGTGATGCACGGAATTTTCATCCTTGCTCAATCAGGCGCTTATCTGCGGCTGGAG  
GCGGGTCTCTGGGTGAGTGGCGGCTCCATCGTGTGACCTGCTGCTGGTCACTTCCAGAGCCTTGTCAT  
TTCGCAAGACCAACAGTGTGGCCATCAAGGCCGACATGCTGCACTACCGTTCCGATCTGCTGCTCAATGC  
CGGTGTCTTGCTGGCGCTGGTGTGCTGGCGGGCAGGGGTGGTACTGGGCCGACGGCTGTTTGCCATCCTG  
ATCGGACTGTTTCTGTTGTGGGGGGCGGGACACATCGGCTACGAGTCGGTGCAGGCGCTGCTCGATCGTC  
AGTTGCCAGCGGAAGAACAAGCGAGAATAATGGCGCTCTGCTGTGCCGTAGAAGGTGTACACGGCGTACA  
TGACCTGCGCACCCGTCATCCGGGCCGACCCGATTCGTACAGTTGCATCTTGAACGGATGATCAGATC  
CCCCTGGTCAAGGCCCATCAGATCGCCGATGAAGCCGAACCTGGCGGTACGCCAGTCATTCGAGCGGATGG  
ATGTCATCATCCACATGGACCCATCTCGGTGCTGACAAAAGAACAACAGAGCCCTCACCAGAACAACA  
GTAGGCTGCAACATGGATGAACTGGTTGCCAAAACCTGGCACAAAATTCAGCAAGAAGCACAGTGCATGG  
CGGCCAGGAGCCGATGCTGGCCAGCTTCTTCCACTCCACCATTCTCAATCACAAGAACCTGCGTTCCGGC  
CCTCAGCTTCCAGCTGGCCAACAACTCGACAGCGCAACCATGCCCGCCATCGCCCTGCGCGAGGTGATC  
GAGCTGGCCCTGCGCAGCGAGCCCGAGCTGCTGACGGTAGTGGCGGCCGACATCTGCGCTGTGCAGGAGC  
GGGATCCTGCGGTGCATCTTCTCCACCCGCTGCTTTATCTCAAGGGGTTCATGCCCTGCAGGGGTA  
TCGGGTGCGCAACTGGCTGTGGCGTCAAGGGCGCCGCTCGCTGGCCCTTTATCTGCAAAACCAGATCTCG  
GTGGTGTTCGGGTGGATGTGCATCCGGCCCGCCGATCGGCAAGGGGATCATGTTTGACCATGCCACCG  
GCATGTGGTTCGGGCGAGACCGGTGATTGAAGATGATGCTTCCATCCTGCAGAGCGTGACCCCTCGGCTG  
TACCAGGAAGGAGAGCGGCGATCGCCATCCCAAGATCCCGAAGGGGTGATGATAGGGGCGGGCCCAAG  
GTGCTCGGCAATATCGAAGTGGGCGTGGGCGCCAAAATTTGGCGGGGCGAGCCTGGTGTATCAACCCGTC  
CGCCTCATAACCACGGTTCGCTGGCGTACCCGCCAAGATCGTTCGGCCGTCGGAGTGCAGACAAGCCTTCACT  
GGATATGGATCAGTGTCTCTGATCTCCCGGCCGAGTAGTCGATGGCCAAACGTTGGTTCGGGTTATCTGA  
TTTTGGGGATGTGGCTGCTCAACCTGCTCCATCTCTATCTGGGACTCTCCCCCTGGCTGCGGCCATTGC  
GGCCTGGGGGGCATCACTGCTCACCTGGCCCTGGCTGGTGGGGGCCGCAAGCGGCAGGCGCTGGCCCTG  
TATGGTGGCGCCCTGCTGCTGTTGCTCTTCTCCTGGTGGCAGGGCGGACCCCTCACCGCCGGTACTGGC  
TGCTGCCAACATCAATATGCTCACCATGTTTGGCGGGTGGACCCCTCAACCTCGCCACCTCGGGTCT  
CTTGACCGGCACCACCTCCTGGACCGGGCGAAAGGGGCTGTGGAGCACCATGGCCAGCCTCAATCTGCTG  
GGGGCGGTTCATCAACCTCTCGGTGCTCTTTATCATCGGCGATCGGCTGGAGCGCAATGGCACCCCTGGAGC  
GGCGTCAGGTGATGGTGTGAGCCGGATCTTCTGTGCCGCTGCCCTTCTGGTCACCCCTTCTTTGTGCGCAT  
GGCGGTGGCGCTTACCTATGCGCCGGGCTTGCAGCTCTCTCATATTTCTGCCGTTCCGGGATCCTCGCCGCC  
TTGCTGGCGATGGGGCTGACTGCCTGGCAGGTGGGGCGGATCGGGGTGGCTGACTTTGCCGGTTATCCGC  
TGCGGTTGCAGACCCTGGGGTTGCCGGTACGCTGGCGCTGCTGGTACTGCTCATCAAGCAGATCTGGCC  
CCAGCTCGGCATTTGCGGGTGCATCGCGCTGGCGGCCCGCTGCTGGCGCTGCTCTTTATGCCGAGGGTT  
GGGCGCAAGGCGGCCCTCAAGCGGCAGGTGGTGGAGCGCTTCCCGCCATCGGCGGTGAGCTGGTGTGCT  
TTCTGGGGGGCGGTTTGTGCGGCGAGGCATCAACAGTGCCTTGTGCGTTCATGATTTTCGGCTCCGGTCA  
CGCCTGCGCGCTGTTCAATCACTTTGGTTGGCTCGAAGCATCCCTCACTCTGCTGCTGATCCTGGTGTG  
GCCATCGTTGGGGTGCATCCGCTCATCAGTATCTCCGGGCTGGCGCCACTGCTCTGGCCGCTGGCGCCGG  
ATCCAGCCTGCTCGGCATGTGTTTTCTGCTGGGATGGGGCTTGCCACCGGCACCAGTCCGCTCTCCGG  
CTCCAATCTGGCGCTGGCGTCCCGCTACAACCTCCGTTCCGGGCTGATCCTGCGCTGGAACCTGCTCTAC  
GGCCTGCTGATGTATGTGGTTCGCTGTTGCTGGGGGCTTATATCGCCTTGCCATGGATAACGGCGGC  
GCCGTACAGGAGGGTGCAAATGATGCGCGGGCGGGGCTTTTACGCACGGTTCAGTGTGTTGTGCGGG  
CTCGGGCGCAGGATGCGAGAAAAATAGACGCATATTTAGACAATACATCTATGGAAGGCGCATTTTACAG  
CGCACTGGCTTGTGTTGTGCCGATGCGCTCGGGTATGCTGGCTTACGCGCTTGAATCGCCCTCTGTGGG  
GCATCGCAATTGAACAAACAGGTATGCATATGTCACTAGAAGTCTTTGAGCAACTCGAATCCAAAGTACA  
ATCCGCCGTCGACAACATCTCCTTGTGAAGATGGAGCTGGACGAGCTGAAAGAGCAGAACAGCAAGCTG  
CAAGACGAGAACCATCAGCTGCGCAACGAGCACACTGCATGGCAGGAGCCTGCGCTGCCCTGCTGGGTA  
AAATGGATCAGATGGGCGAAACCATCTAATTCATCGTCTTCAGGCAGAATTGAAAACGGGCGCTCCATG  
AGCGGCCCGTCTGTTTTTGGCGGGATGGGAATTACAGCGCCAGCAGTTGCTTACTGTCTTCTCGATGCC  
GTCCGCCGCTTCGACTATGTTGTTGGCCAGCATGTAGGCGGGGTGGAGATCACCTTGGCTCCTGATCC  
ACCACGAATTCGTTGACCGGGCAGTTGAGATGGCTGCCACCCATCGCTCGATGGCGTTGGCGGTGCCCT  
CGTCATGGCCGATGGTTCGCCAGCGTCCCGGCACCATAGATCAGCGGGATCATGGCGGGCGGATGCAGAT

ATAGGCGGCCGGTTTTGTTGGCTTTGGCAAAGCTCAGGCACGCTTTCAGCACATCGGGCTGGATCTGGCAC  
TCGGCCCCCTTGATAGCAAAGTCGCACAGGTTCTTGGCCGCGCCAAAGCCCGGGCACCAGCAGCGCT  
CGTAATCGGCCGCATCCAGCTCGGCCACATCCTTTATCTGGCCACGGCAGATGCGGGCCGCTTCGACCAG  
CACATTGCGGCTCTCTCCCTCGCTCACTTCACCGGTCAGGTGGTTGATGACATGGAGTTGCGACACGTT  
GGGGCGAAGCACTGGGCGGGCTCCCTGACGGGCCAACGCCAGCAGGCTGATGACGGCCTCGTGGATTT  
CGGCCCCGTCAAAGACACCGCAGCCACTCAAAATCACGGCCACTTTTTTCATGGCAAACCTCCTCGTTGTT  
GAAAATGTGAGCCAGGATGGATTGTTGTACTTTTGTATGGTTATCGCTCGCCCTCCGCTGGTCAAGTCAT  
CTTGCTGTGCTAGGATTGTTTCGTTTTGGATCCTGCCGTACCTACTCCCTTAAATCTTTTTCCACATTGA  
TCAAGATCATTCTAACTGTCTCACGATCGGTTTTTATGATCTCAATGCATTGTTTTTAATGGCTTTTTAT  
ATTATTATGCACAGTTTTATCACTGTGCGCTCTGATGCGCCCATTTTTGAACACAGAGTTATCCACAG  
TTGAGTCCCTTTATCAGCCGCTGTGTGCTGTTGCTGCGCCCTTGGTGTGAGGGGGCCCTGTGGCATCC  
TAGCGGCTGTTTTATCTCTGGCAGGACGATTTTCATGGCCCTAGCAACCCCTTATTTCTGGTTCGACGGCTC  
CTCTTATCTTTACC GCGCTTCTTCGCTCCCAGCAGGCTGATCTGCGCACATCGACCGTTTTGCCGAGC  
GGCGCCGTCCGTGTGATGGCCAACATGATGCGCAGCCTGCGCAAGCAATATCCTGACTGTGATGTGGCCG  
TGGTGTGTTGATGCCAAGGGCAAGACCTTCCGCGACGACATCTATCCCGAGTACAAGGCGACCCGCGCCAG  
CATGCCGACGATCTGCGCAGCCAGGTGCGCCTATCCACCAGATGATCAAGGCGATGGGTTTTCCCTTC  
CTGATGGTGGAGGGGTGGAGGCCGACGACGTGATCGGCACCCTGGCCGCCAGGCGACCGAGAAGCAGC  
TGCCGGTCTGATCAGCACCGGTGACAAGGATATGGCACAGCTGGTCTCCGACCATGTCACCCTGATCGA  
CACCATGAAAGATGTGAAGACCGATCGGGAAGGGGTGATCGAGAAGTTCGGCGTACCGCCGAGCTCATC  
ATCGACTATCTGGCCCTGATGGGTGACAAGGTCGACAACATTTCCCGCATGACCGGTGTCGGCGAGAAGA  
CCGCACTGGCCCTGCTGCAGGGGATTGGCAGCATCGACGAGATTGCCGCCAACCTCGACAAGGTGGCCGC  
GCTCGGCTTTTCGTGGCTCCAAGGCCTTTGCCGACAAGTTCCGCGAGCAGGAGGAGCAGGTTTCGTCTCTCC  
TATCGACTGGCGACCATCAAGACCGACGTGCAACTGGAACAGAGTCTGGAAGAGCTGTTGCTCAAGCCGG  
TCGACAAGGAGTCCCTGCTGGCGGTCTATCGCGAATACGAGCTGCGCAACCTGATCAAGGAGCTGGAATC  
CGGTGGTGAAGAGGGGAGCGAGAGCGCCGGACAGGACGAGGCTGGCGATGAGAGCGCCGCTCCGGTTGCC  
GCCATCGAAACCGACTACCGCTGCATTCTGGACGAAGCCGAGTTTGACGGCTGGCTGGAACAGCTGAAAG  
CGGCACCCTGTTTTGCCTTCGATAACGAAACCACAGTCTCGACTATATGGAGGCGCGGATCGTCCGGCT  
CTCCTTCGCGGTTGAAGCGGGCAAGGCTGCTTATGTAACCGTTTTGGTACGACTATCTGGGGGCAACGGTTA  
CAGCTGAGCGAGGCGTGGTGTGGGCAAGCTCAAACCTGCTGGAAGATCCGACCCCTCAAGGTTGG  
GGCAGAACCTCAAGTACGACCGCAACGTGCTGCTCAACCATGACATCGACCTGCAGGGTATCGCCTACGA  
CACCATGCTCGAGTCTACGTGCTCAACTCCACCGCCAGTCGTCACGATATGGATTTCGCTGGCCAAGCGT  
TACCTCGGGGTCGAGACCACCTCTTTTGAAGATATCGCGGGCAAAGGAGTGAACAGCTCACCTTCAACC  
AGATCGAGCTGGAGCAGGCCGCTCCCTATGCGGGCAAGATGCCGATATCACCTGCGTCTGCACCAGAC  
CTTGTGGGGTCAGCTGGAGGCCGTGCCTGGCTCGCCAAGGTATTCAGCGAGATCGAGCTGCCGCTGCTG  
CCGGTATTGGCACGGATGGAGTTGCTCGGCACCACCATCGATCCAAGCTGCTGCACCAGCAGAGTCAGG  
AGATCGAGCTGCGGTTGGCGGAGCTGGAGAAGCAGGCTCACGAGCTGGCCGGCAGGAGTTCAACCTCTC  
CTCGCCCAAGCAGCTTGGGGAGATCCTCTTACCAAGCTGGGCTGCCGATCATCAAAAAGACTCCGAAG  
GGTGCGCCATCCACCGCAGAAGAGGTGCTGGCCGAGCTGGCGGAGACCTACGAGCTGCCGCAGCTGCTGA  
TGGAGCACCGTGGGCTGGCCAAGCTCAAGTCCACTTACACC GACAAGTTGCCGCTGATGATCAAGCCCCG  
GACCGGGCGGGTGCACACCTCCTATCATCAGGCGGTAGCGGCTACGGGCCGTTTTGTATCATCTGATCCC  
AACCTGCAGAACATCCCGGTGCGCAACGAGCAAGGGCGCCGGATCCGGCAGGCCCTTATCCCGAGCGCCG  
GTTACAAGCTGGTGGCGGGGACTACTCCAGATCGAGCTGCGCATCATGGCGCACCTCTCCGGTGACAA  
GGGGTTGCTGACCGCTTTTGCCGAGGGCAAGGACATCCACAAGGCGACTGCCGCCGAGGTGTTCCGGCTG  
GCGCTCGATGCGGTACCACCGACATGCGCCGACGCGGAAGGCGATCAACTTCGGTCTTATCTACGGCA  
TGAGTGCCTTTGGTCTGGCCAAGCAGCTGGGGATCGGTGCTGCCGAAGCGCAGAAGTACATGGATCTCTA  
CTTCGAGCCTTACCAGCGTGTGCGGTATATGGAGCGCACCCGCCAGCAGGCGGAAGCCAGGGGTAT  
GTCGAGACCCTGTTCCGGCTGCGCTCTATCTGCCGATATCAAGTCCCGCAACGCGGTTCTGCGCAAGG  
CAGCCGAGCGGGCCGCATCAACGCCCCCATGACAGGACAGGCTGCCGATATCATCAAGCGCGCCATGAT  
CAATGTGGACAGCTGGATTCCGGGCATTAAGATGAGTCGATCCGCATGCTGATGCAGGTACACGATGAA  
CTGGTGTTCGAGATCCGCAAGAGAAGCTGGAGGAGTATATCGCCATCATCAAGGAGAAGATGTCTGCCG  
CAGCCGAACTGCATGTGCCGCTGCTGGTTGAAGCGGGTACCAGGTGACAACTGGGATCAGGCCACTGATT  
TCCGGTCAGCCGTTCTGCACGGCTATATAGCTATATAAGAAGCGAAGCCCGCATTATGCCGGCTTCCCT  
GTTTCTGCCAGCCCTATCAGGTCTCTTGAGATACTCATCCTTGAGCAGGACATAGTTGTCCGGCCAGGT  
CTTGAGGAAGGCGATCTCGGCGGGCTTGAGCGGGCAGCCTGTTTACGGGATTACCTATATATAGAAAG  
CCCGACTCGAGTCGCTTGCCCGGTGGCACCAGCGAACCTGCGCCGATCATCACATCATCTTCAACCACGA  
CGCCATCAAGCAGAATGGCACCCATGCCGACCAGCACCCGGTTGCCGATGGTGCAGCCGTGAAGCATCGC  
CTTGTGACCCACAGTGACATCTTACCAGATCAGCAGCGGATAGCCGGTCCGGTTGCTGGCGCTCTTTTCGA  
GTCAGGTGCAGCACAGTGCCGCTCTGAATATTGCTGCGGGTGCCGATGCGGATATGGTTTACATCCCCC  
GCGCCGCCACCATGGGCCAGATGCTGGCATCATCGGCCAGCTCGATATCGCCACCAAGTGTGCGCAGGG  
GTCTACATACACCCGTTTGGCCAGTTGCGGGCGTTTTCCCTTATAGGGTCTCAGTCGCAAGTCCATCTTG  
GCCTCCTGTTTTTCGGCCATTCTAGCAATCCGAAGGGTGATTTCTGTGGATAAGTTTTGTATAAAAGCTGTG

TTTGGATATGAATAACTAAAAAGTGCTATTTTTTGAATTTTATTGCAGATAAGGGGTTGCCAGAAAAGA  
ATCTGTTCCTATAATGCGCCTCCATCGACAGGGCAAGCGGCAACGCAAACACCTCGTCGATAACCTCA  
AAAAGCCTTTGAAAATAAGGCTTGACTCGAGAAGCGGTTGAGTAGAATCCACTCCCGCAGCAACACAC  
TGTTGCGTCGCTCTTTAAACAATTTGAATCAAGCAATCTGTGTGGGCACTCACAGCATCGAACATCAAAAA  
CAATTTTTGATTTTCAATGTCTGGTGAAGTGACCAAGACGATTTCTTAGCAATAAGAAGTGAACAGTTT  
ATTTTCAGCAATTCATTGAGCCGCTTTTCGAAGCAACCAAACTTAAATGAAGAGTTTGATCATGGCTCAG  
ATTGAACGCTGGCGGCAGGCCTAACACATGCAAGTCGAGCGGCAGCGGGAAAAGTAGCTTGCTACTTTTGC  
CGGCGAGCGGCGGACGGGTGAGTAATGCCTGGGGATCTGCCAGTCGAGGGGGATAACTACTGGAAACGG  
TAGCTAATACCGCATAACGCCCTACGGGGGAAAAGCAGGGGACCTTCGGGCCTTGCGCGATTGGATGAACCC  
AGGTGGGATTAGCTAGTTGGTGAAGTAATGGCTCACCAAGGCAGCATCCCTAGCTGGTCTGAGAGGATG  
ATCAGCCACACTGGAAGTGAAGTCCAGACTCCTACGGGAGGCAGCAGTGGGGAAATTTGCACAAT  
GGGGGAAACCCTGATGCAGCCATGCCGCGTGTGTGAAGAAGGCCCTTCGGGTTGTAAAGCACTTTTCAGCGA  
GGAGGAAAGGTTGGTAGCTAATAACTGCCAGCTGTGACGTTACTCGCAGAAGAAGCACCGGCTAACTCCG  
TGCCAGCAGCCGCGGTAATACGGAGGGTGAAGCGTTAATCGGAATTACTGGGCGTAAAGCGCACGCAGG  
CGGTTGGATAAGTTAGATGTGAAAAGCCCCGGGCTCAACCTGGGAATTGCATTTAAAACGTCCGGCTAGA  
GTCTTGTAGAGGGGGGTAGAATTCAGGTGTAGCGGTGAAATGCGTAGAGATCTGGAGGAATACCGGTGG  
CGAAGGCGGCCCTTGACAAAAGACTGACGCTCAGGTGCGAAAAGCGTGGGGAGCAAACAGGATTAGATAC  
CCTGGTAGTCCACGCCGTAACGATGTGATTTGGAGGCTGTGTCTTGAGACGTGGCTTCCGGAGCTAA  
CGCGTTAAATCGACCGCCTGGGGAGTACGGCCGAAGGTTAAAACCTCAAATGAATTGACGGGGCCCCGCA  
CAAGCGGTGGAGCATGTGGTTTAAATTCGATGCAACGCGAAGAACCCTTACCTGGCCTTGACATGTCTGGAA  
TCCTGTAGAGATACGGGAGTGCCTTCGGGAATCAGAACACAGGTGCTGCATGGCTGTCGTCAGCTCGTGT  
CGTGAGATGTTGGGTTAAGTCCCGCAACGAGCGCAACCCCTGTCTTTGTTGCCAGCACGTAATGGTGGG  
AACTCAAGGGAGACTGCCGGTGATAAAACCGGAGGAAGGTGGGGATGACGTCGAAGTCATCATGGCCCTTAC  
GGCCAGGGCTACACACGTGCTACAATGGCGCGTACAGAGGGCTGCAAGCTAGCGATAGTGAGCGAATCCC  
AAAAAGCGCGTTCGTAGTCCGGATCGGAGTCTGCAACTCGACTCCGTGAAGTCGGAATCGCTAGTAATCGC  
AAATCAGAATGTTGCGGTGAATACGTTCCCGGGCCTTGTACACACCGCCCGTCACACCATGGGAGTGGGT  
TGCACCAGAAGTAGATAGCTTAACTTCCGGAGGGCGTTTACCACGGTGTGATTCATGACTGGGGTGAAG  
TCGTAAACAAGTAACTTAGGGAACTGGGGTGGATCACCTCCTTACCTTAAGATGTCGAAGTTGTTG  
AGTGTTCACACAGATTTGCTTGAATCAAAGTGTAGAGCAAAGACCTGATGCGAAAAGTGCAGTCTTA  
TCTGGCTTCGGTCAGATGAGAGAAGCCCTATCATTGGGTTTTGGGATGTGAATAATGGCGCTCGGCCCTCG  
CAGGCTCGGCACTCGCCATTACCCAAAATCTGCACTGCTGACGCAGCGCAAAGATGATTTTGGGTCCCT  
TCGTCTAGAGGCTTAGGACACCGCCCTTTCACGGCGGTAACAGGGGTTGGAATCCCTTAGGGGACGCCAC  
TTCTCTTCTTGCTAACAAGAATGCAGAGTTAAGAAGTATTTCTTAACTCTGTTTTCTTCGGCCTTGCGCC  
GTTGCAAACATGCTCTTTAAACAATCTGAAAAGCTGATTTAAAAAGTAGTTCTCAAACATTTGTTACAAGT  
GCTTTGGAAACTTCTTGGCGAAAACCAAATTTTATTTGGTCTTGTGTGACGACAACAAGCAAGCGTTGT  
TTCGACGACACTTCTTGGGGTTGTATGGTTAAGTACTAAGCGTACATGGTGGATGCCTTGGCAGTCAGA  
GGCGATGAAGGACGTACTAACCTGCGATAAGCTGTGAGAAGTCCGTAAGAGACGCTATTACTCACAGATT  
TCCGAATGGGGAAAACCCACCCGAGATAACTCGGGTATCTGTTACTGAATACATAGGTAACAGAGGCGAAC  
CGGGAGAACTGAAACATCTAAGTACCCCGAGGAAAAGAAAATCAACCGAGATTCCCTCAGTAGCGGCGAGC  
GAACGGGGATTAGCCCTTAAAGCATCTTGGAAAGTTAGTGGAAACGGTCCCTGGAAAGGCCGGCGATACAGGGT  
GATAGCCCCGTACACGAAAACGACCTTGATGTGAAAATCGAGTAGGGCGGGACACGTGACATCCTGTCTGA  
ATATGGGGGGACCATCCTCCAAGGCTAAATACTCCTGACTGACCGATAGTGAACCAGTACCGTGAGGGAA  
AGGCGAAAAGAACCCTGTGAGGGGAGTGAATAGAACCCTGAAACCGTGTACGTACAAGCAGTGGGAGCC  
CTTCGGGGTACTGCGTACCTTTTGTATAATGGGTGACGACTTACATTTTGTAGCGAGGTTAACCGTAT  
AGGGGAGCCGTAGGGAAACCGAGTCTTAACTGGGCGTCTAGTTGCAAGGTGTAGACCCGAAACCGGGTGA  
TCTAGCCATGGGCAGGTTGAAGGTTGAGTAACATCAACTGGAGGACCGAACCCTAACGTTGCAAAGTT  
AGGGGATGACCTGTGGCTGGGGGTGAAAAGGCCAATCAAACCTCGGAGATAGCTGGTTCTCCCGAAAAGCTA  
TTTAGGTAGCGCCTCGGACGAATACTACTGGGGGTAGAGCACTGTTTGGGCTAGGGGGTTCATCCCGACTT  
ACCAACCCCATGCAAACCTCCGAATACCAGTAAGTAATATCCGGGAGACACACGGCGGGTGTAAACGTCCG  
TCGTGAAGAGGGAAAACAACCCAGACCGCCGGCTAAGGTCCCAAAGTTCTGGTTAAGTGGGAAACGATGTG  
GGAAGGCTCAGACAGCTAGGATGTTGGCTTAGAAGCAGCCATCATTTAAAGAAAAGCGTAATAGCTCACTA  
GTCGAGTCCGCTGCGCGAAGATGTAACGGGGCTCAAACCAGGCACCGAAGCCGCGGATTCACACTTAT  
GTGTGAGTGGTAGGGGAGCGTTCTGTAAGTCTGCAAGGTGTATCGAGAGGTATGCTGGAGATATCAGAA  
GTGCGAATGCTGACGTAAGTAACGATAAAGGGGGTGAAGAAGCTCCTCGCCGGAAGACCAAGGGTTCCCTG  
TCCAACGTTAATCGGGGCAGGGTGAGTCGACCCCTAAGGCGAGGCCGAAAGGCGTAGTTCGATGGGAAGCA  
GGTTAATATTCCTGCACGACTTGTAAATTCGATGGGGGGACGGGAGAAGGCTAGGTGGGCCAGGCGACGGT  
TGTCTGGTGAAGTGCCTAGGTGGTGTCTTAGGCAAAATCCGGAGACACAACACTGAGACACGAGACGA  
ACACACTACGGTGTGGAAGCCATTGATGCCCTGCTTCCAGGAAAAGCCTCTAAGCTTCAGATTACAAGTC  
ATCGTACCCCAAACCGACACAGGTGGTCCGGTAGAGAATACCAAGGCGCTTGAGAGAACTCGGGTGAAGG  
AACTAGGCAAAATAGAACCCTAACCTTCGGGAGAAGGTTGCTCTTGACAGTGAAGTCCCTTGGGATGGA  
GCAGTTGGGAGTCGAGTGACAGATGGCTGGGACTGTTTATCAAAAACACAGCACTCTGCAAAACAGAA

AGTGGACGTATAGGGTGTGACACCTGCCCGGTGCCGGAAGGTTAATTGATGGGGTTAGCGCAAGCGAAGC  
TCTTGATCGAAGCCCCGGTAAACGGCGGCCGTAACATAACGGTCTAAGGTAGCGAAATTCCTTGTCCGG  
GTAAGTTCCGACCTGCACGAATGGTGTAAACCATGGCCATGCTGTCTCCACCCGAGACTCAGTGAATTCGA  
ATTCCGCGTGAAGATGCGGTGTACCCGCGGCTAGACGGAAAGACCCCGTGAACCTTTACTACAGCTTGGC  
ACTGAACATTGAACCTACATGTGTAGGATAGGTGGGAGGCTTTGAAGGCGTGACGCCAGTTGCGCTGGAG  
CCGTCTTTGAAATACCACCTTGTATGTTTTGATGTTCTAACGCAGGGCCCTGAATCGGGCTCGCGGACAG  
TGCTTGGTGGGTAGTTTACTGGGGCGGTCTCCTCCAAAAGAGTAACGGAGGAGCACGAAGTTGGCTAA  
TCCTGGTCCGACATCAGGAGGTTAGTGCAATGGCATAAGCCAGCTTAACTGCGAGACGGACAGGTCGAGC  
AGGTACGAAAGTAGGTCATAGTGATCCGGTGGTCTGAATGGAAGGGCCATCGCTCAACGGATAAAAAGGT  
ACTCCGGGGATAACAGGCTGATACCCGCCAAGAGTTCATATCGACGGCGGTGTTTGGCACCTCGATGTCG  
GCTCATCACATCCTGGGGCTGAAGTCGGTCCCAAGGATGGCTGTTTCGCCATTTAAAGTGGTACGCGAG  
CTGGGTTTCCAGAACGTCGTGAGACAGTTCGGTCCCTATCTGCCGTGGGCGTTGGATGATTGAAGGGAGTTG  
CTCCTAGTACGAGAGGACCGGAGTGAACGAACCTCTGGTGTTCGGGTGTTCACGCCAGTGGCACTGCCCCG  
GTAGCTAAGTTCCGAAATCGATAACCGCTGAAAAGCATCTAAGCGGGAAGCGAGCCCTGAGATGAGTCATCC  
CTGACCCCTTGAGGGTCTTAAAGGGCCGTTGGAGACCACAACGTTGATAGGTGGGGTGTGTAAGCGCGGC  
GACGTGTTGAGCTAACCATACTAATTACCCGTGAGGCTTAACCATAACAACACCCCAAGAAGTGTCTAAG  
GCTTGTAGCAAATACGAACGAATTACTTACGTGAGCTTCTCAGATTGAAGAATTTGCCCTGGCGGCCATA  
GCGCCGTGGAACCACTGATCCCATGCCGAACCTCAGAAGTGAACCGCGGTAGCGCCGATGGTAGTGTGGC  
ATTCGCCATGCGAGAGTAGGACACTGCCAGGCACCCAATTTAAGAACCCCGCTCATCGAGCGGGGTTTTT  
TATTGCCTACAATTCATAAAGTCGTCTAATAACTGACCTTTTATTCCTCTTCCCTGCCGTTTTCCCTGT  
TTTTCTCCCTATTTTCTCCGTTCTGCCATCGCGGCTGGCGGTGGTTGCCGTTATAATGGCCGCCCTC  
AAGCAAGGTGGTGGTATGAAAGCAGAATATCTACAGCGATTCCGGGGCATTGCCCGTCTTTATGGTCAGA  
ACGCCCTGCGTTCCCTTTAGCCAGGCCAAGGTCTGTGTGGTGGGGGTTGGCGCGTGGGCTCCTGGGCGGC  
AGAGGCGCTGGCACGCGCTGGTATCAACCAGATCACCTGATCGACATGGACGATATCTGCATCACCAAC  
ACCAATCGCCAGATCCACGCCATGAAGGGGACGGTTGGTGCCTCAAGACCGAGGTGATGGCAGAGCGCA  
TTCGCGCCATCAATCCGATTGCGAAGTGTGAGGTTAGACGATTCGTCACCGCCGACAATCTGGCCGA  
GCATATCAAGCGGGAGTTTACTATGTGGTGGACGCCATCGACTCGGTCAAGGCCAAGGTGGCGCTGATT  
GCCTTCTGCAAGCGAACAAAATCCCGGTGATTGTGGCGGGTGGTGTGCTGGCGGACAGATGGATCCGACCC  
AAATCACCGTGGCCGATCTGGCCAAGACTATTCAGCAAGACTTCAAGACCCGTTGGCGGCCAAGGTGGCTGCCG  
CCGGTTACACAACCTTACGCAAGAATCCGGCGCGCAAATTCGGGGTGGAGTGTGTTTTCTCAACCGAGCAG  
CTGAGCTATCCAGATGGCAATGGTGGCACCTGTGACGCCAAAAGCGGCCAGCGATGGCACCATGAAGATGG  
ATTGCGCCTCCGCTTTGGCGCCGTGACGCCGGTGGACGCCAACCTTTGGGCTGGTTGCCGCGTCCCGGGT  
ATTGAAGAAGATTGCCGAGCGGGGTGCCCGCGCCGAGAAAAGGCGAGGGAATGAAGATGTTGGGTCGATT  
GGCGAAGCCTAATCGACCACTGAACAAGGCGGGTTAGACCGCTTGTTCGCGATCGCCAGCACGATCGCT  
CTGAGCCCCTTACCTCGTACGGGCTCAAGTGTCTCAAGTCCAGTTCGCTGAAATACCTTCCATAT  
CAAAAGCCTGGATCGCCGAGAAAGATTGGTGGTTGAGTGGCGCCAGCACGATGACGATAAGGCCCCGCAC  
GATGCGAGCATCGGAATCACAGGCAAAGTGCCAGCAGCCATCCTCGCTTTGTTCTCCCTCAGCCAAGCC  
TGGCTTTCACACCCCTTGAGGCGAAACTCCTCCTGCTGCCATTCGCGGGTAGCGCTGGCAGCTGTTTGC  
CGAGCTGGATGATGAGCCGTAAGTGTCTCCAGCCGTGGGCGCGGCAAACCTGCTGGCGGATGGTGT  
GGCGTTGGGCTCAAGGCCAATCTGGGTATAGCTTGGCAGGTCACCTCATTCGGTTGTCTGCCCTTAGAAGAA  
GTCACTGAGTTTGTGACGGGCTGCCAGCAGGGTGTGACATCGTCCCGATTGTTGTAGCAGGCCAGCGAG  
GCGCGCATGGTGCCCGGATCCCGAGTGATTCCATCAACGGCATGGCGCAGTGATGGCCGACTCGCAGGG  
CGATAACCTGCATGTGAGCAGGGTAGCAGCATCTTGGCGGTGGATGTCGTCGAGCAGGAAAGAGACCGC  
ACCGGCGCGTTGGCCGGGTTCCGCCAGCAGCAGCCCGGCACCTGTTGACAGCCAGCAGCAGATAG  
TCGGTCAGTGTCTGCTCATGGCTGGCGAGCCATTCGCGATCTTGCCACATCACAAAAGTCGATGGCGGGCG  
CGAGGCCGATAGCGCCAGCGATATGGGGGGTGCCTGCCATTCGAATTTGAAAGGCAGGTTATTGAAGGTGGT  
GCCGCTGAAACTGACCCGATCGATCATCTCGCCACCTGCTTGCCAAGGCGGCATCCGCTCCAATAGCTCG  
GTGCGGCCCCACAACACACCGATGCCGGTCCGGCCATAGAGTTTTGTGGCCGGAGAAGGCGTAGAAGTCGC  
AGCCGATGGCTTGCACATCCACCTCGAGATGAGCCACCGCTTGGGCGCCGTCGATCAGCGTCACGGCGCC  
AACCGCTTTGGCGGCAGCCACCATCCGGGTGACCGGATTGACAGTACCGAGGGCATTTGGATACGTGGGCC  
ACGCTCACCGCCGGGTGCGTGGTCCAGCATGGCGTGATAGGCGGCCAGATCGAGATCGCCCCGCTTAT  
CGAGTGGGATAACCTGGATCACCGCGCCGTTACGCTGGGCGACCAGCTGCCACGGGACGATATTGGCGTG  
GTGTTCCAGCGTGTGAGGATGATCTCGTCCCCGCCTTGAGCTCGCTCATCCCCAGCTCTGGGCCACC  
AGATTGATCGCTCTGTGGTGGCGGGTCCAGATAGCTTCTGTGGTGGCGGGGCGCATTGATAAAGCGGG  
TGACCGTCTCGCGGGCTGTTTCAAGGCGCGGGTCCGCGGCCACTCAGGGCGTGGGCGGCACGGTGCAC  
GTTGGCGTTGTGACCCGATAGTAGTGAGCGATGGCATCCAGTACCGCTTGGCGGCTTCTGGGTGGTGGCG  
GCGTTGTCCAGATAGATCAGAGGGTGGCCGTTTACCTCCTGCGCCAAGGCCGGAAACTGGCTGCGCAGTT  
GGGCGTGTGTTGCTGATTGATGCTCCCTCATCATCTGGAAAAAGTCATCATCTCGAAAGGTCCGTCAT  
GATCCTGAAAATAGCGCCGAACACAAGGCGCGATAAGCCGATTTGGCGGTTGCCGTGCCGTGCAGCAGGT  
ACGGCTCGTGGGTGATTTCTGGTACAATGCCGCCCTCATCATAAGCCAAGAGATCCGGCCCATGAAGC  
TCAACCCCAATCAGAACGAAGCGGTCAAGTATGTCTCCGGCCCTTGCTGGTGTGGCGGGTCCGGATC

GGGCAAGACCCGCGTCATCACCAACAAGATTGCCTATCTGGTGCAGCAGTGC GGCTACAACGCGCGCAAC  
ATAGCTGCGGTACCTTTACCAACAAGGCGGCGGGAGATGAAGGAGCGGGTCGGCCAGACTTTGGGCC  
GCAAGGAGGCGCGGGGGCTGATGGTCTCCACCTTCCATACCTTGGGGCTTGATATTATTCGTCTGAGCA  
CAAGAGCCTGAATCTCAAGGCGAACTTTTCCCTGTTCGATGACACCGACCAGCTGGCGCTGCTGAAAGAA  
TTGACTGAAGACGAGCTCGACAACGACAAGGACAAGCTCTCTGCCCTTATCAGCCAAATCTCCA  
ACTGGAAGAACGATCTTATCCTGCCCCCGCGCCATGCGTATTGCTCGCGGGCCGGAAGAGGTGCTGATGGCCCA  
GCTCTACGAGCGCTATCACCGCCAGATGGTGGCTACAACGCGCTGGATTTTGACGACCTCATCGT  
GATG  
CCGACCCTGCTGCTCAAGAGCAATCAGGAGGTGCGCGAGCGTTGGCAGAACAAAGATCCGCTATCTGCTGG  
TCGATGAGTACCAAGATAACCAACACCAGCCAGTACGAGCTGGTGAAGCAGATCGTCGGCGAGCGCGCCCC  
CTTTACCGTGGTGGGGGATGACGACCAGTCCATCTACTCTCTGGCGTGGGGCCAAGCCG  
CAGAATCTGGTGCTGCTGAGC  
GAAGATTTCCCCAGCCTCAAGCTGATCAAGCTGATCAAGCTGGAGCAGA  
ACTACCGCTCCAAGCGGCGA  
TCCTCAAGTGCGCCAACATCCTGATCGCCAACAACCCCCACGCTCTATGACAAGGCGCTCTTCTCCGAGCT  
TGATGAGGGGGTGAAGCTCAAGGTGCTGTTTCGCCAAGAACGAGGAGCACGAAGCGGAGCGGATCGCTGCC  
GAGATGATGGGCCACAAATTTATGAACCGCACCCGGTTCAAGGATTACGCCATCCTCTATCGGGGCAACC  
ATCAGTCGCGCATCTTCGAGAAGGCGCTGATGACCAACCGGATTCCTATCGCATCTCCGGCGGCACCTC  
GTTTTTCTCCCGCACCGAGATCAAGGACATCATGGCCTACCTCAAGTTGCTGGTGAATCCGGACGAGGAC  
ACCGCCTTCTGCGGGTGGTCAACCTGCCGCGCCGCGAGATTTGGCCCCACTACCTCGAAAAGCTCGGCC  
AATACGCCAATCAGCGCGGAAGAGCCTGTTTGC CGCCAGCTTCGAGCTGGGGCTGGAGCAGCACCTCTC  
AGGCCGTGGCCTCGTGGCCCTGCAGGCCTTACCAACTGGCTGGTACGCCCTTGGCGATCAGGCGCTGCGC  
GGCAATCCGGTGGAGGCGGTGCGGGACATGATTAAGGAGATCCACTACGAAGAGTGGCTCTACGAGACCT  
CCCCAGCCCCGAAAGCGGCCGAAATGCGGATGCAGAACGCTCTCCACCTCTATCGCTGGATCACCGAGAT  
GCTGGAAGGGGATGAGCTGGAGGAGTCGATGACGCTGGCTCAGGTGGTCACTCGCCTCACCTGCGCGAC  
ATGATGGAGCGCAACGAAGGGGAGGATGATGCCGATCAGGTGCAGTTGATGACGCTGCACGCCTCCAAGG  
GGCTGGAGTTTCCCTATGTCTACATGGTGGGGATGGAAGAGGGCTTGTGCCCCACCAGACCAGCATCGA  
CGAAGATAATGTGGAGGAGGAGCGGCGTCTCGCCTACGTGGGGATCACCCGGGCTCAGACCGAACTGACC  
TTCACCTCTGCAAGGAGCGGCGCCAGTTTGGCGAGTCGGTACGTCCGGAGCCAAGCCGCTTCTGCTGG  
AGCTGCCCGAGGATGACCTTGAATGGGAAAACCAGAAGAAGGTGACTGCCGAGGAGCGCCAGCAGAAGGG  
ACAGGTCCGTGTTGCAACCTGCGGGCGTTGTTCAAGAAGGATTAACCTAAGGATTGGCCGGGGTCA  
GTAAGCGGTACTATGTCTGCTCCCGCATGGCGGTGAGATATAGCGCCCTTGCCCCATCCCGCGCGAT  
CAATCAGCTTCTGCAACTGCTGCTGGTTCTCGATCCCCCTCGACCACCGGGTGTAAATCGAGATCCTGACA  
GATATCCCGCATGGCGCGGATCAGCGCCAAATCTTTGGGTGATTGCAGCATCCGCTGGGTAAAGCTGTCA  
TCCACCTTGATGTAATCCACCGGGAAGTGGAAACAGGGCGTTGAGGGAGGAGAAGCCGGTGCCGAAATCAT  
CGAGGCTGATCTGGATAACCTTGGCCCTCAGGTGATGCAGGGATGCCAGCGCATCGGAATCTTGCCGCGA  
CAGCTCCCGCTCGTTGAATTCAAAAATCAGATAGCCGGGGCGACCCCTTCTCTTCGATGATCCCCATC  
AGTCGCATGATGTGGTTCATGGTTGACCAGATGCTTGCCGACAGATTGATGGCGACCTTGAACCTGCCCT  
GCCCCGAGATTGGCAGCCAGTTCTTCAGCTGTTGGCAGGTGTGGCGCAGGATCTGGTAATCCAGCTCCAG  
AATCAGGCCGCACTGCTCCGCCAGCGGAATAAAGTCGAACGCATCCTTCAGAATCCCTCCTCGGTTAGC  
CAGCGCGCCATCACCTCCAGTCCGGTTCAGCCGGCTATCCTGCAGCCGGATCACAGGCTGGAAGTAGGGGA  
CGATACGCCCTCCCGCAGGGCTCTGGCCAGCATCTCTTCGGCGAATTCAGTTCTGGTTGATGCAATC  
ATCCGAGTAGCTGACGATGCGACTGCGACCATTGCGTTTGGCCTGATACATGGCCAAATCGGCCTGATGG  
AGTAGCTGGCTGATATCTGAGGTTTGTCTCGGATACGCTCGATAACCCCAAGGCTGACGGTAATGCTCAGCT  
CGTTGCCGAGTAGCCGGAAGGGTAGGAGAGACGGCTGATAATGCGGTTGAGCACCGGGCTGATGTCTATC  
GTCGCTCTTGCTGCTGTCCAGATAGATGACGAACTCGTTCGCCCCCAGTCTGGCCACCAGATCGTTTTGC  
CGGATGCAGGTTTGCAGGCGGCGGCTCACCTCCTTGAGCAGCTGATCGCCAGCACTGTGGCCAAAGGTAT  
CATTGATCTGCTTGAAGTGAATGATCCACATCGATAAAAAATACCGCGAATCCCGGCGATTTGTAGCGTTGTA  
GTGGGTGATGGCGTGGTTGAGGTGGTTTCATCAACAGCGCGCGGTTGGGAAGTTGGGTGACGCGGTCGTGA  
AGCGCATCGAATGTCAGCCGCCGTTCCAGCTCCTGATGCTGCTGAGCTGCTTTTGCAGCCTGAGGTTGG  
TCTGACGCAGCTGTTGTAGCCGCTGGTTGATGGAGTCTTCGGTATTGATGTCGTTGAGCTGCTGGCGGAT  
CCGTCTCAGCTCCAGCAGCAGGGTGGAGCTGGCCACGCAAGAAGTCGAGAAAACAGCTTGTCTGCTCGGTCTCC  
AGCGGTTGAGCCGTGCTGATGATGAAGTGGGCGAAGTACTGTTGTTGCAGCCGCGAGCGGCATGCTGTGCC  
AGTAGCGTACTCCCTGCTCACCTCGATATTGCTGGTGTGTTGGCACAAGCCGCTGATGAACTCGTCTCC  
CTGATGGGGATGGGCAGGGTAGATCTTTTCCAGCTTCTGACTGGTTAACCTGACCAGCAGCATATCTCA  
ATGGTGAGCATCTGGCGCAGTACCCTTCCAGTTGGGAGAAGAGCGCTGAGCCGGCAGGGTATTGGCGA  
GCCGATGATGCGGCTGATGCTCTCGATTTTCTTTTCCAGTTTGGGTCTTTGCGGATCAGCGGCGAAGG  
CAGCTCGGTGAGATGGGATCCCGCCTGGGTTTCGGTTCAGCCGTTTAGCCAGACACTCCAGCAGCAGACGC  
AGGGTCCGCGAGGTGCGGCTGGTGTGCCACGCGCCAGCAACCACTGTATCTGGCCATGCTCGATGGGGAAGA  
CGCACACCCTTCCGGCTTCATCCAGCTGGGTGAGTTGATCGGTTGATGCGGGACTGCTCCCGGCCAGCTG  
TTGCTTGAAGATGTCGCTGACCTTGTAGGCGTAAAGCCAGTTTCAGACCGGTATCGGAGAGGCCAGCATG  
CCGAAATGTTGCAGCGGGCAGAGTTGGTCAATCTGCTGGATCAGGGCATCGTAATCGTCAGATGTGGCGG  
TTTTGTGGCGCCGGGAAGTCCATAATGGCTGAGACCAACGCCAACAGAGGAGTTGAGTAGTGGGGTTCCGAT  
GGATTGGGCCGACATGTGCAACTCCCGATATGTCTACCTTACAAGAGTAGTCGGAAGCCGATAGATTGAA

AGGGCCGCAATTGCGGCCCTTTCAAATACTTACAGCTTGTGATCATGTAGTGGATGGCGTTTTCAATCT  
CTTCATCACTACAGTTCGCACAGGTACCGCGCGGAGGCATCATGCCGACTTGCCGGTAAAGCCTTCAAT  
GGCATGTTTTCTTGAGAGTATCAATGCCCTGGGCGATGCGAGGATCCCAGGCTGCCTTGTACCCCGTTTTG  
GGGGCACCGGCGCGCCGGTGTCTGTGACAGGCAAAGCAGGCGCCCTGTATACCGTTTTCGCCATCGCGGG  
GACCGGAAGAGGCGGCCGAGTCCGGTGCAGCACTCGCGCCGGCAATACCTTCCAGATCCTTGGCGGTATA  
GACCTGACCGATTGGTTTTGATCCGCTCGGCAATGGCCTCCGGTGACATCTCATCGGCAGCAAGCACTGCC  
CCAGACAAGCTGGCGGCCGTATCCCAGACGCCAGCAAATAGCTCAGTTTTTTTCAACACGCTCATATACT  
CCCAGCAGTCTTTTTATTATCCATGTAAACGACGGGATTATAACCGAATAGTTACAGTCATTTAAACGCTT  
GTGTGTGAAGTGTAAACACTCTGCGTACAAAGTTTTGGCCAATATCACGGCAATTTGGGTGGTAGAGAT  
AAAAAGAAACCCGGCATTGCGCGAGTTTCGAGTAAACCAAGGGGTGAAATGGGTATTTATCCCAGCTCAG  
GATCACCTTGCCGGAGTGGCCGGAGCGCATCGCATCGAACCCCTTGCTGGAATTCGTCGATGTGGAATCTG  
TGGGTGATGATGGGGGAGAGATCCAGCCCGGACTGGATCAGGCTGGCCATTTTGTACCAGGTCTCGAACA  
TCTCGCGGCCATAGATCCCTTTGATAAACAGCCCTTGAAGATCACCTTGTTCAGTCGATGGCCATGGT  
GGAGGGGGGATGCCAAGCATGGCGATCTTGGCGCCGTGATTTCATCTTGTGAGCATCTCCTGGAAGGCG  
CTCGGGACGCCGACATCTCCAGCCCCACGTGCAACCCCTTCGGTTCATGCCAGCTCGTTCATCACGTCGG  
CCAGCTTCTCCTTGGCCACGTTGACCGCGCGGGTGGCGCCATCTTGGGGTAGCTCCAACCGGTATTC  
GTTGACGTCGGTATCACACGTTGGCGCACCCACATGGCGGCAGACGGCGCGGCCATGATGCCGATG  
GGGCCCCGACCAAGTATGAGCACATCTTACCACCAGATCGAAGGAGAGGGCGGTGTGCACCCGATTCG  
CGAACGGGTGCAAGATGGCAGCCAGCTCGTCCGGATATTTATCCGGCAGCTTGAAGGCGTTGAATGCGGG  
GATCACAGATACTCGGCAAAGCAGCCGGCGGTTGACGCCAACCAATGGTGTGCGGCACAGATGA  
GTGCGGCCAGCGCGCAGTTACGGCAGTGACCGCAGGTGATATGCCCTTACCAGGAGACCCGATCGCCGA  
TGGCGAAGCCGCGCACCTCCTGACCGATGGCGACCACTTCCCCAACATATTCATGGCCGACCACCATGGG  
TACCGGAATGGTCTTCTGGGACCACTCGTCCCAGTTGTAGATATGGATATCGGTGCCGCAGATGGCGGTT  
TTGGCGATCTTGATCAGCAGGTCGTTGTGGCCGAGCTCGGGGGCCGGCACATCCGTCATCCAGATGCCGA  
CCTCTTTGTGAGTTTTGGAGAGTGTCTTTCATGGCTGTTCTTCAATATGAATGCAGAAAAAAGGGGCTGC  
AGCCCCCTTGATTCAAATCAGATAACGCCGAGTTCACGGCCGATGCGGATAAAGGCGTCGATCGCCTTGT  
CAGTGCTCGCGGATGAGGCGGACATCTGGGTGCAATGCGGGCCTGACCTTGGGCACGACCCGGG  
AAGGAGAAGCCACCATAGATGCGCGCTGCCAGCATGCGGCTCGCCATTTTCGGAGGCTGTTGGCAT  
CCCCAGCATACCCGGAATGATGGCGTGGTCCGCCCTGCCAGATGAAGCCGGCGCGCTCATCCGCTC  
GCGGAAGTAACGGCTGTTCTCTTTAGACGTTGCGCGCAGGTTCGTGACCTTCCGCCAGCATGTGATCAC  
TTGATAGTGGCGCAACGATGGAGGGGGCCAGCGAGTTGGAGAAGAGGTACGGGGCGGGAGCGCTGGCGCA  
GCCAGTCGATCACCTCTTTCTTGGCGGAGGTATAGCCGCCGGATGCGCCGCCGAGCGCTTGGCCAGAGT  
GCCGGTATGATGTGACCCGATCCATCACGCCGAATATTCGTGGGTGCCACGACCGTTTTTCGCCGATA  
AAGCCGACGGCGTGGGAGTCATCCACCATCACAGCGCATCGTATTTGTCTGCCAGATCGCAGATGGATT  
TGAGGTGCGCGATGACCCATCCATGGAGAAGACACCGTCCGGTGGCGATCAGCTTGAAGCGGGCGCCGTC  
GGCATCAGCCTGCTTGGCTGGGCTTCCAGCTCGCCATGTCGTTGTTGGCGTAGCGATAACGCTTGGCC  
TTGCACAGCCGACGCCGTCGATGATGGAGGCGTGGTTGAGGGCATCGGAGATGATGGCATCTTCGGCGC  
CGAACAGGGTCTCAAAAAGACCCGCTTGGCATCGAAACAGGAGGAGTAGAGGATGGTGTCTTCGGTGCC  
GAGGAAGGCAGACATCTTCTGCTCCAGCGCTTTGTGCTGATCCTGGGTGCCGCAGATGAAGCGCACCGAG  
GCCATGCCGAAGCCGTGGCTGTGAGTCCCTGATGGGCGGGCGGCATCAGATCCGGGTGGTTGGCCAGCC  
CAAGATAGTTGTTGGCACAGAAGTTTACGACCTGCTCACCGCCGACGGCGATGCTGGCCTGCTGGGCGGA  
GGTGATGATGCGCTCCTGCTTGTACAACCTTTCAGCTTGCACCTGGTTTCAGTTGCTCGGTGAGGTGACGA  
TAGAATCCGTTAGACATCCTCGATCCTTAGTGGCTATTTTCAGCTGCGTATCAACAGAGGGCGACATTTTA  
CTGCAATCTGTTGCGGTAAATTCAAATGATTGTGCTGATATTCACAAATGTGAAACAGATCTCACCCAG  
CTGGTTGGGCCAGCTGACGGTAGTGTGTTCCAGTTGCTGGATCTGTCCGGCCACCTGGGGTTGCACATA  
GGGGCGCAGCAGGAACAGCACCTTTAATACGCCCTGATAGAGCAGCGTTTGGTGTGCGGGTGTGGGG  
GCCTGGGCAATCTGGAACGGGATCCAGCAGGTACCACCATCTTGATAGTCTGGCCAGATCCGGCAGGT  
CTTCATCGCTGACATCTATGATGCCCCCTTCGCGCAGGCTTCTGAGCAGGGCGACCACGGAGGAGCGCAT  
CTGCTCCTGGGCTTGGGTACTTCTGTTGCAAGTGGTTCGTCACGGCTCAGGATGTCCGGCAGATTGGCG  
TAGAAGAAGCGGAACCTGCCACATCAGATAGAAGATGGCATCCAGATAGCCCATCAGATCCTGCAGGGTGA  
TTTTACGGTTGCGGGTGGGACGAAGCTCTCGCTCAGGTGACGGGCATACTGGTCAAGATGGAGTGGAT  
GATGTCTTCTTTATTGCGGAAGTGGTAGTAGAGGTTGCCCGGGTGTATCCCATGTGCGCCGCAATATGG  
TTGGTGGTGTGTTGCGTTACCCCTGATCGTTGAACAGCTCGGTGCGCTGTGAATGATCCTGTCTCTGG  
TTTTTCATCACTCATTCCCAACAGGTTCCGCTCGGGGTAGTTTTGAACAAGGTGCAATCCCCGGACGGC  
CCGTGATAAACTTTTCGGCAATTTCAAATTTGGCTCACTATACACAGCTTTAACAAGCAGTCACATGTAGC  
CATCAACGTACGAGAGGCAAACCTCCATGATCGTAGTAACCTGGCGGTGCTGGCTTTATCGGCAGCAATCTG  
GTCAAGCAGCTGAACGCTCAAGGACGGACCGATATCGTGGTTCATGATGACCTGACCGACGGCACCAAGT  
TCGTCAACCTGGTGCATCTGACCATCGCTGACTACATGGACAAAAGACGAGTTTTCAGGCGCGCATCGTCTC  
CGGTGACGAGTTTGAAGAGTGGGATAACGGCATTTGAGGTGATCTTCCACGAAGGCGCCTGCTCTGCCACC  
ACCGAATGGAACGGCAAGTTTCATCATGGAGGTCAACTACGAGTACTCCAAGGATCTGTTCCACTACTGCA  
TCGAGCGTGAATCCCGTTTCAATTTACGCCTCTTCTGCCGCGACCTACGGTGGCCGCAACGACAACCTTCAT

CGAAGATCCCAAGTTCGAACAGCCGCTCAACGTCTACGGCTACTCCAAGCAGCTGTTTGACCAGTACGTG  
CGCCGCTGGATGCCGGAGATCAACTCTCAGGTTGTCGGTCTGAAGTACTTCAACGTCTACGGCCCCGCGG  
AGCAGCACAAAGGGCTCCATGGCTTCCGTTGCCCTTCCACCTCAATACCCAGGTGAAGAAGGGCGAGAATCC  
CAAGCTGTTTGAAGGTTGCGATGGCTTCCCGAACGGTGGCCAGATGCGTGACTTCATCTATATCGACGAC  
GTCTGCAAGGTAAACCTCTGGTTCTGGCAGAACC CGCAGCACTCCGGCATCTTCAACTGTGGTACCGGCC  
GTGCCGAGCCGTTCCAGAACGTGGCCGAAGCGGTGATCAAGCATCATCAGAAGGGGAGCTATCGAGTACAT  
CCCCTTCCCGGATCACCTCAAGGGTGCCTACCAGAGCTTACCCAGGCTGACATGACCAAGCTGCGCAGC  
GTGGGTTATGATGCTGAGTTCAAAACCTGTTGCCGAAGGGGTAGCGGATTACATGGCCTGGCTCAACCGGG  
CTTAATTATTTCGCTCTTGGCGAATGGCCGCAATCAGGCGGCTTTTTTCATTATTTTCTATGTGGTAAGCA  
TGAAGAAAAAAGTTTTATTATAATGGAAACATTTGGGCGGAGGAGGCGCCGAAAAGGTCCCTTATTGAAAC  
GCTTAAGCGTTTTGGATTTTAGTAAGTACGCTATAAATTTGCTTTTATTGAGGCGTGAGGGTGTATATTTA  
TCTCAGGTTCCCAAAAATGTAACAGTAAAATTTCTGTTGCCGACCGAACCATCGGAGTGGTTCAGCGGA  
AAATTTTATTTTCTATTA AAAAACGTTGGTGGAAATTTGTGTGCAATACCAAATGGTTGGCCAGTGT  
ATTTAGCGAACGATATGATGTCGGTGTGGCATTTTTTGGAAAGGGAATAGCTCTCTGTTGTTATCGCACCTG  
AATTCTGTTGTTGAAAAGATAGCATGGGTCCATATAGACTTGTGTGCCATCAAATTCCTTCCAGAAAAG  
TTGAGCGTACCGTTTATAAAAAAATGGATAACATTGTCTGTGTCTCTAAAAGGTGCACAGAATGCATTGTT  
GAAATTGTATCCTGAAGTAAAACCATATACTCAAGTAGTGTATAATCCTGTTGATATAGAAGGCATAATG  
CGGAAAAGTCATGAGCCTATTACGAGTGAGGGGAAAATAAAAAGTTATTGCTATTGGACGGCTATGCAATG  
CCCAAAAAGGATTTCGACATCTTACTGGCTGCTCATAAAAATAAATATTGATGCAGGGGTTAAATATCACCT  
TACTATTTTGGGAGAAGGTGATGATAGAGCTGGGTTAGAGTCATTTATCAATATTAATAATATTGGTGT  
AGTGCTAAATTACTTGGATTCAAGGAAAATCCATATCCATATCTTGCTGATGGCGATCTATTGCTTATGT  
CCTCACATTATGAGGGTTACCCAGTTGTACTCGTAGAAGCAATGGCGTTGGGGAAAGGCCATTGTATCGAC  
AGATTGTACTGGGCCTAATGAAGCTCTCGATGGCGGGAAAATATGGTGTTCGTTACTGTGCGGGGATGCA  
AATGCGCTTGCAATTGGCAATACGAAAAATGATTGATAATCAAAAAATGCTATCAACATATAGTTCCCTTAT  
CGAAGGAGCGAGCCAAGATTTTCAATCTCCGAGAGAGTATGAGGCAGATCGAGCAATTTATTAGATGGGGA  
GAGCAAACATCCTTCCAGTTGCTCTCTTCATTGAGTCTTGTAAACGGAGGTCTAGGGTGAATATATTGA  
TGGCACTCTCCACGCTCGAGGTAACGGGAGCTGAGGTCTATGCCACTACGGTCGGTAACGAACCTGACCCG  
CGGTGGTCAACAACGTTTTTACGTTTTAGATACCTTGACCAAGCCGACTCTTGGTCTTGTCTCAAGCTT  
CGATTCAACAAGCCAGCATTCTGCGCCGCTCTGGCAGCTCTTCTACCTTATCTATCTCATTAAAGAAGC  
ACCATATCCAGTTGGTACATGCTCATTCCCGCCTCCGGCTGGAGCAGCTATGTGCGCTGCAAGCTGAC  
TGGCACCCCGATGATCACCACGGTACATGGTCTGACCCGGTACACGCATCCCGCAAAGCCTTTTCATGCC  
CTCGGCTATCGGGCGGTTGCCGTTTGTGAGGATATTGCCCATCAGATTGTGCGACAATCTGGGGGTGATC  
CTGCGAGCGTACAGGTGCTGCGAAACGGTATCGAGACCGACAAGTTTCAGCCTGTGCCGGCGCCGGACAA  
CCCAAAGCCGGTATCGCCATCATAGGTGCGCTGAGCGGCCCAAGGGGAGCTTTGCTACCGCCTGCTC  
GACGAAGTACTCGATCTGGATGCCTGCAAGGTACGGATTGTGACGGTACCCGCGTGCCGAGCGTTTTG  
CCCGTTTTTCAGGATCGTGCCGAGTTTGTGCGTTATGTGATGATGTGCTGCTCTGCTGGCGGGGTGTGA  
TCTGGTGTATCGGTGCCGGTGGGTGGCGATGGAAGCGCTGCTCTGCGGCCGGCCGCTTTTGCCATTGGC  
GAAGCCAAGGCCATCGGTCTGGTACTGAACAGAATCTGGATGAAGCGCTGGCCAGCAACTTCGGCGATA  
TCGGTCCCAAGGATCTGGCCATCGATTTTGTGCTGCCCTGAAGGGCGAAAATCGAATCCGCCCTCGCAAGCAA  
GGTGGTGGCCGAAGCCATTTCGCCAACGCATTCAGGATGAGTATGGCTTGCAGGGGGTAGTATCTGGCCTC  
GAAACCATCTATCAGGATGCCGTAGTCGAAAACCTGCGCCGCGAGATGCCGGTCATCATGTACCACCGTT  
TTATCGAGCAGGATAGCGAGAAAGGAGTGCATGGCACCTGGATGCCGATCGCCATGTTTCGAGAAGCATCT  
GCGATTGATGAAGTGGCTAGGCTACGAAAACCTGACGTTCCGCGATTTGGCGGACAAAGGCTTTATCCAC  
CGTCTGCAATACGGCAAGAAGTACCTGATGATCACTGCCGATGACGGCTATCAGGACAACCTGACCCGCA  
TGCTGCCGCTGCTGAAAAAATATGTTTATAAAGCCATGGTGTACGTGGTTACCGGTGAAGGCTATAACCG  
TTGGGATGTGGAGCATCCGACCAATCCGGATACCAAGGTTTCATTGATGATGAGTGGTGGAGCAGTCAAGGTG  
CTGGCTGCCTGCGGTGATGTGAAAATGGTGGTCACTCTGACTCACCCCGTTTGAGCAAGCTCACAC  
CCGAACAACAAGCCATGAAATTCAGGAGAATAAACGCCAACTGGAGGCCCTGCTTGGCCATCCGTTGCT  
CTCGTTTTGCTACCCCTTACGGAGATATGAACGAGAGTGCCAAGGAGCAGGCTATCGCCGCGGGGTATCGT  
TTTTGCCGTCGCTACCAATAGCGGCCCAAGCAATGCACCAGGACCCCTTCCAGATCCGCCGGATCGCCA  
TCTTTCCCGCACAGATGTGTTTGGGTTATGGCGAAAATTCGCGGAAAATATGTCTTCAGGAAATCAA  
GTGATATCAAAAAATGCCATAAGCATGGAGCGATTTGCTCTTCTGATCTTTTCATGCACCCTGATTTTTG  
CATTCAGCGTAATGTTTTTCTTACTGATGAAAAACATATCTATCTAACCTCATTGTTGTGGCATCCAT  
AATTGGCATGGTTTTCTTTTTACATCCATCGTTATCCGGTGGGTTTAAAAATCGTCATATAATATGGGTT  
TTATTATTCTATGCCATTTATCTATTTGTAATAGACAAAATTCATGGTGTATCAATATGGCATTATGCGTG  
CCATAATTTATGTCATATTTTTTACATTTTTAATTCCACGGAATGTTTTTTTTATTA AAAAGCTGGTTGTTA  
TGGGGTTATTCTTGGTGGATTTGGCTTGGGGGTTATTAGTATATGGCAGTATAATCATGGGGTTCGCTAGG  
GTAGAGGGTTTTTACAAATGCGATAATTTTTTCTCAAACAGCCCTAACATTGGCTATTCTCAATTTTTGGT  
TTTTCGGTTTTCTTCTCAGAGAATCGCCTTGAAAAATGGTTTCATATCATTTCCGGCATTATTCTCTCTGGG  
GGCACTATATCTTTCACAAAGTCGTGGTGTGGCTAGCATTCATGGTTGTGATTACATGTTTTTTTATTG  
TTTTAAAATAAAAACAAAACCACTGAAATATATTTCAATCACGCTAGGTTTGTGTTAGTACTCGGAATGC



TATGTTTAAACAGCAGTATCGTGAAAAATAGAATAGACTCTGGACTTTCTGATGTTGTAAACATGGAGAA  
TGGAAATTACAGCACATCTCTTGGGCTAAGAGCGGTAGCATGGGAAAGCGCTTGGTTGGGATTTCTCGAC  
TCGCCATTAATAGGTGTGGGCACTGAAGTTTTGATGCGTTAAAGCAAGAGCAAGTGAAGCTGGGTCTTG  
TGCCACAAGCGTTGCTAAACCCCGAACTTGCGCATGCACACAACCAGTATTTACAGACTTTAGTTATTCG  
GGGTGGTATAGGATTCATTTTCTTACTAGGTATACTTATATTGCCGGCAATATTTTTTGCAGAAAGAAATG  
GGTTTTGTGTCTGCAGGCGTCTTTATCCCTATATCATTCGCTGTCGGAGCAGTTTTTGTATGTGCCTTTTG  
AACACCAAAGCATGATGTATTTATACTCATTCACTGATTTTTATTTTTATTTTGTTCATGAACCAAGCA  
GGATTTATTATAGCTATGATACCCGATTTATTTATTTAGTTTGGACACGTAGTGCTGACAGACGGGCCATGG  
TAGAGCGCCAGATGTCTCATTGGGGATTAACCTTTGAGTTTTTCGATGCTGTAGATGGTAAATCATTACC  
ATCAGATCGCTTGGCGAAAGTAGATTTCAATCTGGCAAGAGAGACTTGGCGTCATGATCTTAGCTTGGGT  
GAGGTGCGTTGTGCCATGAGTCATATCAATATATATGAAGTGTAGTGGTGGAGCGAGATATCCACAGCTGTG  
TAATTTTGAAGATGATATATACGTCCACATGCATTTCAAAGCTATCGTCAACGAGGTACATAATAAAAA  
TAGCTCTGACATTGTATTCTTACATCATGGCAAGGCGAAACACTTCCAATATACTCATCTTTGCCAGAG  
GGGTATCGTTTTGGCAAAAATATTTAACACCTAGTAAAAATTCAAAAAGAGGAATTATATCGACAGGTGGAT  
ATATTCTTACATTGGCTGGCGCTCACAAGCTGCTGAAAAATAGCTTATCCAATCAGAATGCCCTGCTGATTA  
CCTCACTGGACGGCTGCAGTGAATAAAATTGAGTGGCGCTGGTGTGGAGCCGTGCTGTCTGGATGTTGGA  
CTATTCCAATCGACGATTGATGACAGAAATTATGGTCAGCATATAGAGTGTAGGAGGTGATTGCTATGAT  
TAAAATATTTCAATTATGGAGGGACGTCCTTCGCCGCAAGCTGGGTATTTTACTTTTTGATCGTCATTCA  
TCAGTGAGAGCGTCATCACATGGTGCCACTGTTTTTGTAGGTGGGATGCTAAGCTTGGTGTGCAATCG  
TCTCTTCCCTGGGTGGCAAGGGAGATTAATAAAATAAATTTCCGGAGCGGAAAGTCTATGTCATTACCAGCTC  
TGAAATGGCGCCATTTTTTAGAGATTTTTTAACTTTGATTGCGTCTTTGAAATGCCCAAGAGGGCTGGC  
TATATAGAGCTCAAAAAATTAGCCAATGAAATTGGGGGGGTAGATTATCTTGTGCAATTTTAGCCAAAAGA  
TGAAGATGAAAGACCTTTATTTTCATCTCCAAAAGTTGGGAGCAAAAAATGTAGCAGGACTCGATGATGAGCT  
TGACTGTATTAATATCAAGTTGGGCCAAAAAACAGCAGGGATGCACTTCGCTAAGAAAATTAAGGTGCTG  
CTGGAGCATATGGGGATTGCTAACCCTGATAACCAGTTATATAGTACCTTCGTGTCAGGGGGCTGAGGATA  
GGGTTGGCTCTTGGTGGCCAAGTAATAAAACGTTGTGTTTTCAATCCATATGGCAGTGGGACATCCCGTTG  
TTTTAGTGTGTAATAAATATATAGCGTTAATTAACACAATGCTTGATTCATCAAAATACAACATTTGTCTC  
TTGATTCACCTGGGCGTGAGAGGGACGTTGAACGAGTTTTATCTCATGTTTTGTGACCCAAACAGGGTTG  
TTAGTATCAGCTGAGAAACCATCTCTGGCTGCACCTTTGCACAGACAAGGCAGTGTGCCGTTATGGTGTG  
TGTGGATACAGCAACGGTGCATATTGCAACAGGTTTTGAATAAACTGTTCTTGGTATTTTACAATGATAAT  
TTCGGGATGCCAGAAAATGTGGAGTGGCATCCCAATAATCCTCGCTCAAGTGTTATCTACGCAGAAACTA  
GGTCTGCACAACAAGACGTAAATTTTATAAACGTTGATGAATTTAAAAACAGTATTTAACAAATGGGTGGC  
TGATTATCTATAGAGAGTTGGGGTTTTCCCAACTCTTTCTCATAAAAGATATAAACTGTTCCGGTCACACT  
TTCACTAGAAAATTTGTTGATAACAGTTTGAATCAATGGAAATTTCTCCTTCGATCAACACCTGTAATTGCC  
ATGGCCAGTCCATGGATATCTTCTATCGGGATTAGAAAATTTATCGAGTGGTTTTCGTCAATATCTCTGCCG  
GTCCAGACGGGCAATCCACGCTGATCACCGGGGTGTGGCAGATAAGTGTCAATAAGCACTGTTGGCAG  
CCCTTCAGCATCGGATGTCAGGATGAGCGCCTGAGCTGCTTTGATATAGGGGTAGGGGTTCTTCTGAAAG  
TCGATGATCTTCACCTTGCTTGAAGATTATCTCCTCGATCATGGCTTCAATGTAAGGGCGTCTGCCCTCC  
CTTTGCCACCAGGACGAGTGGCGTATCAACACCGCTTAGCTGATATGCCGCAAGAGACGATCATGGCG  
TTTTCCGCTCTTGAAGGTGCCAACATGGATAAAAATACTTGTGCAATGGCTTGGCTGAAAGGCTCATTGGCC  
AACGCCTGAATTTTCTCGATATCAAACGGATTGTAGATAAACCAGACGATTTGGGTGTAGCTTTTACAT  
TTTTCCATATCCTTTGGCATGGTCTTTGGCAAAGCCGGTGACATTTCCGTGGATCCAGTAATAAATATTC  
AGTGTATCAGGCAGGTGTCTGGTAATTTTGTACATGAGCATGAGATAATTACGTCAGGCAGATCTCTT  
TGACTTTTTTAAAGATCAGAGATGCTTGTATTTTTTCAACCGCAACATTTGGATATGGCTTTAGTCAGCTT  
TGTGACAAATGCCAAGATTAATCGGGTGAATTTTGTGTCAGTACGCTATGGTCTATTTTTTCCCGCAAGGTA  
AACAAGGTTACATCTGCACCGGCATCTTTTAGCAATGATGCGGTATGAGCAAAACCTTTTCCGCACCAC  
CACCATAACAAGTCTTCAACAATGAATAAAAACTTTTTTAACTGGTGGGGTCATAACTGCTCCGCGGGTCTC  
ATAACTGACTGGTAAATCTACTAAAAATGTGAATCGTAAACGAGCAAAATCAGGTGGCAACTGTTAAAGT  
CGTTAGCAATTTTTTCAATAGGTGTGGATCAATGATTGGTCTTAGTGGGCGCTACCATAACGCATTATTC  
GCGGCCTGTATATTTGCCGGCTGCTGCTTTCTGGTGTGTTTTCCGATCACCAACTCCTCACCAGGCGACC  
AGACCCAGATGCTTTACAAAGGCTACCTTGGTGTATGAGGGGGTCTGGCTCAGCTATGGCAATGCGGC  
GAGTGGCGTGGGCAATGTGCCGGGAGTTTTGTGCGCCTGGCTGATTGGTGGGCGCTGCTGCTGTGGGAT  
TCTCCCTATGCCCCATGGTGTGCTGCTGGCGATGCGGTTGGTGGATTCCTGCTGTTTGTATGCGGTGA  
TCCGTGAGGTGTTTGTATGACAGGGTGCCTGCTGTTTCTGGTGTCTGTGTTGGTCAACCCCTGGTTCCA  
GTACGAGAGTCTGCTCTACAACCCCTCCTATCTGTTCTTCTCGGCCATGCACTGCTGGTCTGCCCTGG  
CATATGCGCGAGCGGGCTCCTTTTTGGCACATGATCGTTTACCTGCTGGCCATCGGTATGGCGATGCAAC  
TGCATACTCCTGGCCGCTGCTGGCGGTAATGTCCACCTATCTGTTCTGGCGCCGCAATCTCAAGGTGAG  
CTGGAGCGGGGTGGTGGTGGCTACCCTGCTGATCGGTGCTTCCCTGATCCCCACGCCATGGAAGTGTG  
AGCAACAGCCATATTACCCAGAAGCTCGATCCCGAGGCGGCCAGCGCTATATCGGCTGGGGGCTGGTGC  
ATGTCTATCCGGTGTGAAATCAGTGTCTACTGGCTGCGTTACGGCTCCTGGCTGTTTGGCAGCAAGCT

GGTCAATGACACCCAGTTCATCTGGCTGGCGGGGACGAATATCTGCAGATGGCGGCAGTCTGGCTTTGG  
CGGGTGGTGTATTTACGGGGTAGGCTCGGCGACTGTGCTGCTGGCGGCAAGGCCAACTGGCAGCTGTGGC  
GCGAACTCAAGCCACGTCTGCTGCGTAGCGACCGCGGCCAGTGGATGGTAAAAGCTGGCTCGGCCTCTA  
TGCGCTGGCGGGGTGCTGGCGGTGCTGGTGGTGGTGGCGCTCTCGCCATCATCTTCAACTACTGGCAC  
CTGATGCTGATCTTCCCCTACGCTCTGTTCCCAGATCCTGCTTTTTGTTGGTGGCGCTGGAGCCGTCTGTCATC  
CACAGTGGGTTGGCAAGGGGCTGCTGGCGGCAACCCTGTTCTGCACCGCTGTGAACCTGATCGCGGCGTG  
CGACAGCACCAAGTTCTCCTATCAGGCGGACTACAAAACCTGGTGGTGGAGTATCTGCAAGAGATGAAG  
CTGCAACCCAAGCAGTGAGTCATCCAAGGCCAGCTCCCCTATCTCGGGGGCTGGCTGTCACTATTTCGAA  
ACGGTCCATATGGGCGAAGTTTTTGGCTTCGGCAACCCAACCCTCACGCCCTGCTTGTCCCGAATTTTT  
ACCCACCATGGTTCTGCGGTGACCGGCCGATCTGATCTCTTTGCGCGCATAGTCATAATCGAGAATAT  
AGGTTTTGCCCTTGTACCAGAACAGGCTATTGCCCTCGCCAGTCCGCCGAGGATATAAAGCGTTTTCCC  
TGCCCTCATATTTCAACAGCGGCCCTTTTCCCTCCTTGCTGTAGCCAGCTTGACCGATCTGAGTATCTCG  
ACAATCCCCGGTTGTTTCGGTAATGACGACCCCGGTGACCCCTTCCACCTGCTGGCCGCGGGGTAGCCGGA  
ACAGCGCTTTGGCCGTGAGGGATGGCTCGGTTCTGACGATCACCTCTTGCTTGGTGGTCCACGCCTGATA  
GGTACAACCCTCAAACGGGCAGCGACCCAGTCGTAATAGGGCAGGCGCGGCTTTTTCATCAGAACTTACA  
GTCGTAGCAAACAGCGACAACAACAGCAAAAACAGTCTCATGAATCTACCTGTCCGGCGGGGCGCTCACC  
CGCCGGTTTTGATGAATGGGGCCGACTATATCTCAAGAGACCAAAAATCCATCAAAGCCGCGGGATTATTG  
ATTTTACCAGCAATAAAAACGGGGACCCATTGGTCATTGGAGTAGGGGGCGCAAGAGGTGAAGCGCGGGC  
GGAGCGGATAGCCCGCTCATTTGCCTTGTCATGCTGATGGCTATCAGGGCATCGGGTCCGCACCTATG  
GGCATCTCTCGTTTCGGCTATGCGTTTTGTTATTACTGCTATCGGCACTTCTTCTCCCTTTATGACCATCA  
GCCAGGCCGTGGCGATCAACGCGCCACTGCGGGGATGCGTCTTTCAGCTGGCGCCGCTGGTACCATTGA  
TCAGCAGGGCGAGGTCTCCGGGCCGGTGATCGACTACTTTTCGCCGTCATATCGAACCCGCGATCGGGCGT  
ACCATCGAGTGGCAGGGGCTCAATGTGGCGCGGCTGCTCAGCAACCTCGAGAGCGGGGAGTGGCATCTGA  
CCCCGCTGCTGAGTTACAGTCCCGAGCGTCTGCTCACTTTTCGCTATATCGACCCCCACCTGTTGCTGCT  
GCGGCCAGTGGTGGTACTGGTGCCATTGCGACTTCACTCGGTGCAACGGCAAGAAGATCTCTTCGGC  
ACCACCATCGGCTGGTTCGAGTCAGGCGATCGTGCCGCGCTGTTAAAGCATCCGCGAGTCCACATCGACA  
CCCTCTCCCAGCTCAGTGGGAGCATGGCAACATGCAGAAGCTGCTGCGCGGGCGCATCGATGCCGCGCT  
CTTCTCCAACGATATTTCCGCCAACCAATTTTCGCGCAAGTTCCCTGCGGCGACCCGCCTCATCTACCTG  
CCGGTCAACCCTGTCAGTGCAGTGCATATCGTGCACAAGTCTGTTGGGGATGGCAATCCCGAGTGGTGC  
AACAGATGCGTCAGATGGTGGAGCGGGTCCCGCTCGCTCGCTGGTGGAAACCAACCCCGCGCTGTGGGG  
GCGTTGAGAGGGGTTGCGTGCAATAATCTACAAGTCCAAGGCCCGCTTCTGGTGTATCTATAACCCATG  
AATACCACCGATTCCCTTATCCGCTACTGGCAATCCCCGCACCTGCCGGGGGTGAGCTGTACACTCCC  
ACCACAGGGCGTTACAGTACGGCCGCATGTCCATCTCGACTACCATATCGGGCTGGTGCAGCGGGGTGG  
CCAGAAGTTTTATCCACAAGGGAAATAGCCACCATCTGGTGCAGGAGTGTCTCTACCGTCAACCCGGAT  
GAGGTGCACGACGGCTCAGCCTGCTGCCGGAAGGGTATGAGGTGCGGGTCTTTGCCATCGATCCGCAGC  
AGCTGGCGCTCTGGCTGCCGGAGCAGCCGGAACCCCTTCTTCGACAAGGGATTGCAGAGCCGCCCGACCT  
CTATCAGGGCTTTGCCAGCTGCACAGCTATCTCGACAACCCCAAGGCCGATAGCCTGCTGATCGAGAGC  
CAGCTGCTTGCCCTGCTGGGGGAGCTGCTGCATCTGGCCCCGAGGTACACCAGCTGGCGGATCCTCAGT  
TGCGATTCTGCGGACTACCTGATGGCCGCCCTCGACGAGCCCCACTCGCTGGAAGAGCTGGCGGGGCT  
GCTCGGGCTCGACCGCTTTCGCTTCTGCGCCAGTTCAAGAAGCGCAGCGGCATGACCCCTACGCCTGG  
CTGAAACGGCTGCGATTGGAGCAGGGCAAGCGGTTGCTGGCGAGCGGGATGGCGGTGAGCGAGGTGGCGC  
TGGCGGTGCGGCTTCTTCGATCAGAGTCACTTCCACCACGGTTTTTCGCCAGGCATTCGGTCTGACACCCG  
CGAATTTTCGTGCCAGATGCAATCTTTTACAAGCCGCGCCCCCGCTGATCCGCCATGCTGGCTCTCCGT  
CGTTAAAGCGAGAGTTGTTATGCTGACCAAGTCTGTTTCGTTACCTCGGCTGATGCACCTGATTGCACTG  
GCCAGCCCCGGCCCCGATTTTCGCCCTGATCCTGCGCACCAGCCTGCACCGGCCGACCGCCCTTGGCGCG  
CGCTGGGCATCTCGCTGGCGATCATGGTGCACGCACTCTGAGCCTGACCGGGATCAGCATGCTGATTGC  
GAGCCATCCGCTGCTGTTTATGGTGGTCAAGTGTGCGGCGCCCTCTATCTGGGCTGGTTGGGGTGGGGC  
GCCCTGATGGCAGCTCGCCAGCAGAGCAGTACAGTGGTGGCCAGCGCCGCCAACGAACGCTGCGCGGTTGGG  
GCAGGGGTGTGCGCACTGGCCTTGCCACCAATCTGCTCAACCCCAAGGCGCTGGTGTCTTTTATCGGTCT  
GCTGGCCGCCATGGTGACACCAGAGGTGGATGGGATGACCCGAGCCTGCTGGTGGGCGAGCTCTTCATC  
ATCTCCCTCTGCTGGTTTCGGGCTGCTGGCGTGGAGCCTCTCCACCGATCGCGCCAGCGCTGCTGCTGC  
GGGTGCAGCGGCCGCTCAATCTGGTGACCGGCTGCTGTTTTCGGTGGTTCAGCCTCTCCATTCTGGCGAG  
CATGGGCGCCGAGCTGGTGGCCTGACGAGTGGCGCATGGGCTATACTCCAGCAAGTTTTACCTGTCAG  
GAGTGGCCGGCCATGCGTCTACTGCTCTTTGCTGGTTGCTGGGGATGACCCCGGCGCTGGCGGCCCGG  
TTCAGCTCAAATGCTGGAGTGGGGCTATCTGCCAGCGGTTATGAACAACAGTTTTGCCGACTACGCCAA  
AGCTCATGGGGTGGAGGCAACGGTCAAGCGGATCGAGCCGCTGCTGACCGATTTTCGACAGCGTCTACCGC  
GCCCTGCGCACCCGCGAGCGCCGATGTGGTGGTGGCGACCGACTACTTCTATAAGGCCCATCACCAGCCGC  
TGTTCAAGCTGCTGCTCCCCATCGATTTTCAGCCGCTGCGAGCACTACCCCGAGGTGAAGCCCGCCCTCAA  
GAACACCGAGTATGACAAGCAGGGAGAGCGCAACTACTCGGTGCCCTTCTCCTACGCCATGTTTCAGCCTC  
GCTTATGACAGCAAGCAGGTGCCGCAAGCGCCACCAGTTGGCAGGTGCTCGCCAACAGCTCGCCGCGG  
GCCAGTTTTGCCGAGTTCTGCGACAGTTTCGAACCGCTGCTGTTCTCGGTGCTGCTCTCCCTTGGCAAGTC

CCCCGCCCTGTTTGCCAGCGGGCAGATGCTGGCCGACAAGACCTTGCAGCAAGAGGTGGAGCAGCAGCTC  
TCGCAGCGGCTGCGAGCCAGTCGCGGCTTCTGGTTCAATCAGGCCAACCGCTGCGAGGATCTGCGCCAGC  
AGACCTTTGCCACCACCTGGGGGTTGGAGCTGGTGGAGTGCAACAAGCAGAACGATCAGCAGTGGCGGAT  
CGCCATGGTGCAGGAGGGGGCCATCTATGCCCTCGATGCGATCTCCATCGCCCCGCCATGTCGGGGATGAT  
CCCCGACGGCTCAAGGCGGCCTACCTGCTGGTGGATTTTCTGCTGAGCGCGCCGCTGCAACGCCAGATGC  
TGGTGGGCACGCCACCATCTCGGCCAGCAATATTGCCCTCCCGGCCGCCCTCAGCCCGCAGGAGCAGGC  
GGTGTGTCGGGATCGCCCCGCTGCCGGAGTTTACGAGGACTGCTGGTGGCCGCGCTGCCCGCCATATC  
AAGAATCGCTACAAACGGATGGTGCAGCAGGCGATCGTCGCCAGCGCAAAGAGGGACTGGTCAAGCAGT  
GCCCCCTGGGATCTCGATAACTGATGAATGAGCCTGCCGCTTCTCCGGCGGCAGGCAAGTTTGGCAAGAT  
GGCTGATGATCGGTTCATCGCCCGTTCCAGGGCATTCCCCCGTTCAACTCAGCCGCTCGCGGGCCCCCAT  
CGTTTGAATAAATCGCGCTTTCCGACGCCCCATTAGCCGATTAACAACCCGAACCCATCGTCAGATT  
GCCGTTTACATACCCTGGCTGACCTGTACGAAAGTTCGCCAATTGTGACAACTTGGATGTGAGCTGAACAA  
TCCTGATCTGTCCCTTGTGGGAAGGTGACGAATAGGTTATTTCTCTGTGACATGGCGGCATCCGGCAGC  
GGTTCTCCAGCCATGTGGTGCGAAATCCACAGCAAAAAACAAACAGTAAAAATGCAGGAGCAAATATGAAAA  
AGGTGATGATGGTTGCCGTGGCTGCGGCCCTTCTGGGTGGCTGCGCCGTCAAGAATCAGGTATCCACAG  
CTTGACAGGCGATCCCGCTGACAGCCTTCCAGCAGAGCGAGAGCAACCCCAATCAGCGCGTCTACAAGGAG  
CCGGGCGTTGATCTGCGCCAATACAATGAGGTGCTGCTCGATCCGCTGCAGTTTATCCGGCAGGAGAACG  
GTCAGTGGTATCTGCTGACCGCCAACGAACAGAACAGATTGGCCGCTACTACCACGACAAGTTCCAGAG  
CGAGCTGATCAAGCAGGGCGTCAAGATCGCCTCCGCCCGGCCGAAAGTCATGCGGATCCAGGCCGCT  
GTCACCAACTTCGACCTGACCCGCCCGACCCCAAGCTGCGTGACCTGCTGCCGGCCAAGATCGCCATCA  
ATGTACCCCGCAAGTGCATCGGCAAGGAGCCCTATCTGCTCAAGGTGGGCAGCATGGCCAGCTGCTCGA  
CTCCCGGAGCGGCAAGCTGCTGGTGCCTGTGATGGATGCCCGGAGAGTACGGATACCACCCACAAGGAT  
GAGCCCATCACTGCCGAGGAGATGGAGAAGATGATCGACCAGTGGGCTGCCAGCCGCGCCAAACAGCTGG  
CGGACAATCTGGGGCGCTGATCGATTGGTGCCTCAAGCGGGGCGCTGCGGGAGCCTTTTGGGCTGCAAT  
AATGGCAAGATGTTGATAAGGTGGTCATTTTGCAGGCAGGAGAAAAATGATATGAAACGTGTGTTGTTACC  
CATCCTTGTGCTGGCCTGTTGAGTGCCTGCAGCACCTCGTTACCCACGCCGGAGTGTGCACCGATGGCG  
GGTGGCTGGCAGAGTACGCCGTTGCCAATGCGGAAGGGGAGGCTGCGCTGGCCAGCGTGTGGCTCGCA  
TGAACACGGCCGCAAACTGCAGAGCATCCGCGAGGTGCGCAGCCAGGTGGTCTCCGGGCTCAACTCGA  
CATCGAGTTCCAGCTCGACAACGGAGAGGTGTGGAACACCCGCTGTCTATCGGGATCTTGCCGCAACTAC  
CAGATGACCCGCCCGCTGCACAGGGCGAGCTTCCCTCCCTTGCCCTGCGTCAAGGCCAAGTAATTCCTGC  
TTGTTGAGCCCTCATCAGAGGGGCTCATCTGACCAGAAAAATTTCTGCTTTTCTCCCCGCATTTCTGACAG  
TCAGGATGACCTTCCCGTGACTGCATCCTCATGGAAAAAGGAACCGCTATGAATCGCCACCCCTGCATCA  
AACACTGGAGCGAGCTGCAAGAGCAGACGCCGCGCTACTACTCCGGCAGTCAGGAGCCCCTTTCTCGAGG  
CTGCGCCCTCGGCAAGCACTTCCGCTTTAGCCGCATCGGCATTCACCACGAGATTGTCGAACCCGGCCAT  
CGCACAGCTGGCCCCACGCCGAAAAGACCGAGGATGAGTTCGTTACGCTGCTGGAAGGGACGCCGGATG  
TCTGGCTCGATGGCGTGTCTATCGGCTGCAACCGGGGGACTCGGTGCGCTTCAAGGCCGTTGACGGGCT  
GGCCACGCTTTTATCAACAACACCGAAGAGACTGTCCGGCTGCTCTGCATTGGCGATACCGATCGGGAG  
GACAACCGCATCCACTACGCCGTGCATCCCAGCGCAATATCACCTCGGCAAGCTGCACCTGGGATGACG  
TACCCGAGCGTGAGTTGGGTGATCACGACGGCCTGCCCGACAAGCTGCGCGAGAGCAACGGCCCTTCTA  
GGGCGCAGCTCTTCTGCGCACCCAGATCTGCACCACCCGATATAAAAAAGCCTGCCGCGTGGCAGGCTTTT  
GCTATCTGTTTCCCGCCTGTGGCGAGCGGCGCTTATTGCAGGTTGAGCCCGCCAGATAGTCACGCTTGC  
CGAGATCGACCCCGGCGTGGCGCAGCAGGGCGTAGGCCATGGTGAGGTGGAAGTAGAAGTTGGGAATGCC  
GTACTCATGGACGCAGGTATGGCCATCCATCCCCTTGCCGCCCGCCAGTGGGGCAGTAACGGCCGCTG  
GCGTACTGGCTGTAGTCCGCCTCCAGCTTGCCTTGCAGATAGCTGATGGTCTTGCCGATATGGGCGCGCA  
GATCCGCCATGGTTTTGGGGTTCATCGCCATGGCCGGCTGCTCGCTGTGGCTGGCGGTGGCGACCACGGC  
GCGGGCCGAATCGCAGCAGATCAGCACCTGCTTGTGAAGGGCAACATATCGACAATCAGCCGATCGCCG  
AAGAAGTTATCCACGTTGAACTGCTTCCGCCGCGGCGTGGCCCTCGGCCCTGGCCAGACAGTATCCAGAT  
TGGTTCAGCATCTTGATGAACTGGGCGGTGATATCGCGATTTCATGAGCACTCTCCATCTTGTGAAACAGC  
GGCCCGCTTGCAGCGCCACGGTGAATGAGACTGGCTAATCGGCCACCAATATACCCCAACCGCTGCCGGG  
TTCGAGCCCGCCACGATGAAAAGGGCAGGGCAGCGCTACTTCCGCGACAACCGTTGGCCAAGGGGCCAT  
GCTCGCTTTCTGAACTGTGAGTCCCTTATCGCCCTTTTTTGTATCTGTGACATACATCACCTTGTTC  
GGGGCGTAGGCTGAATGCCGTTGTCTGGACAGGCGCCCGCATTCGCCAGGACACAAGAAAAGGAGAA  
TGAGATGAAGATCTATGACCGTAACCGCAATGTGCTGAATCAGGGTCAGCGCGTGTGATGATGCCGCCACC  
GGCGCAGTCGACTTTCTGAAAGAGGGCCACACCGACAATATGACCCCTATCAGGCGGAGCATGAGAAGT  
GCGTGTGCTGGCAAACCTCCGGAGAGCGTTACGCCCCATCGAGTTGATTAGACTAGGCTGATCCCTTTC  
CCTGTACCCCTACTCTTTACAATTCACCTGGCCGCCGCGTCCCATCTGGCGGCCGGTTTTCTGAGTTC  
CCCTTCATCCCAAAATGCCGAAAAATGAGCCGGGTACACCCCCGACCGATTGAGCGATTGTGAGCC  
AGCGCAGGCTCATGCGAACCTTTAAACCCCGTTAACTCACTAAAAATAACGACTATGTTTCAAGAAAATA  
ATGATGAGTGCAGCCTTGCTATCGGGCGGCTGCTTTCCGGTTGTGCTTCCGTACCCATGGCCGATGCCA  
CCGCAGATGCGCAGGCCAAGCAGTTTGTGGCGCCAAGGATGCGGCCAACCTCTATATCTATCGCAACGA  
GACCTTTGGTGGCGGGTGAATAATGCCGCTGCTGGTGGACGGTATGGCGGTGCGGATACCGTGGCCAC

ACCTACATCCTCAAGCAGGTACGCGGGCAGCCACACTATCATCTCCAAGTCGGAGAACGATGCCACTC  
TGACCCTCAGCACCGGAGGCAGGTAAAACTACTACGTCTGGCAAGAGGTCAAGATGGGCCTGCTGATGGC  
TCGCTCCAAGCTGAGTCAGGTTAGTGAAGAGGAGGGCAAGCAAGGGGTGATGGAGAGTAAATTAGTTAAA  
CAATAAGGAAATTTTCCAAGTAAAAATTAAGGAGTAAGTGACATGGAACTCTCATTTCAATATAAATGA  
TGTCAATGATCATATTGTAAAGTGTATAGAGAAAGGTGCATCTGCTGTTGAAGTAATAAACAAGATCTAT  
ATAAATAATACTTTTCTTGGGAAGGAGTCTGTTTTATGGGATTATAAATCTGAATTAGTTGCTGATGACG  
TATCTCTTTCTAAAATATTTGTCAAATAGCCTGCTTCCATAATAGCTATGGTGGCTATTTGATTTATGG  
GGTTCAAGAAACAGTTAAAGATAAAAAAGTTTTTCGCTGTTAAGTGCATTTAAGTAAAAATTAACACGGCT  
CAAATACGAAGCTTAATAGAATACTATCTGGACACTCCGATTGACTTTACATTTTCTACTACAACATCT  
CATATGATGGAGATGAGTTTGTATATTGGTGTATTATATATACCCAAGAGAGGTATAAACAATAGAATTCC  
AGTTAGATTTTATTAGGATGCGAAAAAGGATAGAAAAACAGAGATTCAAACCAGTTTTTCTTGATAAT  
GAGGTGCATTTTAGGCGTTTTGGATACATGTATCAAAGCGGAAACCCACAAGATTGGCAGTTTTTATTTT  
CAGATAGAGTATTGAATCAGTTCAAGAGCAACAGAATAAGTATTAGTGTGAGCATAACTTGGCGGATAA  
AAAAATGATTTGTGCTGATTTTTTTCGGTTCGCAAGGACATACTTAATATGCTGTGGGAGTGGTTTTCTGAT  
CCTTTTGAATATACAAAAATACTGGCTGGTGTGAGGGTAAGGGGAAAAACATCTATTGCCATAAGTTCT  
GCCAAGAATTTATAGAGTGCCTCCAGTTGGATTTGAGAGGGTCTTTGGCTCAGCGCAAAAGAAAAGCA  
GTTTTTCAGGAATTGAGAATAAATACTTTGATTTGCGGCAGATAGATTTTTATGACTACAGTAGCTTTTTA  
AAAGCTCTTTTCAGACTTTTGTGCAATAGACACAGATGAAATAAGTTCAACTTCTGCTCATAATATAAAGA  
AAAAACTTAGAATGGCGCTCCCTATATTTCCCGGGTTGATCATTGTTGATAATATAGATTCATTAGCACA  
CAATGATCAATTACAAGTTGTAGATGCATGCAGACAAGTAAAGATGAGAAATCGATTCTTAATTACC  
ACTCGCAATAGATTCTCATATTCTGAAGATGCTTGTATTGAAATTAGTGGTTTAGAACGCAGTGATTATG  
AAGACTTCTTGAATGCAAACGCCACAAAATATGGATTGCCTGTACCAAAGAAGAAACAGATAGATAGTAT  
ATATATAGCTACTGATGGTTACCGTTGCTTACGCAGTCTATTCTTAGGTTATGCAAGCTTGGTGATAAT  
TTCGATGTTGCTGTATCTGATTGGAAAGGGCAGGCAGGGGAGGATGCAAGAAATGCCGCATTGCAGAGGG  
AAATTCAAGGGCTTACATTTGATGCCAAAAGAGTAATTTCTTTGTATCTTTTATTTTGTAGTTGCTCTAA  
GTCTGAATTACAGCAAGCATGCGGGTTAGGAAAAACAAAGTTAAACGATGCTTTACAAGAACCTCAGTCT  
CTTTTTTTAGTGAATGCACCAAGGTTCAATTGATAATGAAGACCGGTTCTCAATTTCCACAACAACAAAGT  
TAATTGTTGATAGTATTACAGATAAATAGCAGATAAATAGCAGATTTTCAAAGTTAAAAAAGAGATTCAAAGGTC  
TAGGTCTGGTTTAAATGCCTCTGGCAAAAAAGGGAATGTAAGAAATTTGGCTTTGCAATTTAGTCAAGCA  
TTGGCGTTGATGAAAGAAAAGAGAGAAGTAGAAGCAATAAATAAACAATAAAGAAATGAATTGAAGAGGCAGC  
CAAATAATCCAGATCTATTACTGGCTCATGCAAGATGTATTATTTCAGTCAGCAAAACCAGATTATGAGAC  
AGCAAGGAAAATATTAAGAGCTCTTATGATAATGGTCAAGACAAGGAGATGTTATTTGACTTTTGGTAT  
AATTGTGAAGGTTATTTAGGCTCAATTGCAGGAGAAAATGAGGTATCTAAGCTAGCTATAAGTAAAAATA  
AATTCAAAGAGTGTAAATGGCTTTATTTATTTGGCTAAAAGTCTGGTTATTCGTTCTTCATTACGAAGTGG  
GCTTGATAAGATAAATGATCTTATGGAAGCCAGCTTGTATCTGTCTCAAGCTATTAAGATCCACAAAAC  
AGGAATAGGGATGAGCAGAAAATGGAATCGAATGAGATTCATAACATTTATATGGCGACTATTGACGAGTG  
ATGTTTCTATTAGCTGGGCTCAATCTTTTGTATCATGTTATGAACATTTATTGAGCATGGTGACCGAAGGAC  
AAATATGTATATGAATGCTCATGAGTGTATTGTAAAGGCTGAGGTGATGCTAAGACAATTAGAGCAAAG  
ATGCACATTGTGAAGTTAAAAGAGAAAATTTAATAAAGCAGTTGAGTTAAGAGGGAAATATGAATGGTGTGT  
TGCGTGAGCTTATTTTCGATATTCCAGTGGTTTTATAGTTAGACTGTAGAACAAAAAATGAGATAGACAT  
ATCAGCCAGCCAGACTAAATCGTCTGGCTGGTTTTCTCATAAAAAATAATGAAACTAAAGCGCTTCCAAT  
CTGGCGTAGGCCGTACCAGCCACTTGGCGCCGACGTCGTCGAACTGGATCTGCACCCGGCTCTGCTGGC  
CCACACCTTCAAGTTGAGTACCACCCCTTACCAGAAATTTGGATGGAGCACCCGCTGGCCAAGTTTGT  
GCCGCTGGCGTCAAAGCTCTGCTGCACCTCGTTCTGGCTAAAGCGACCCGACTGGGTGGGGCGGCTGACC  
TGAGTCCGCGAGCCGATCTCTTCCAGACACTCGGCGGGCATCTCGCGGATAAAGCGGCTCGGCTTGTGGA  
ACATCTCGCGTAGATGCGGCGGCTCTCGGATAACAGATGTAGAGTTTCTCCATGGCGGGGTCAT  
GCCGACGTAACAGAGCGGCGCTCTCTTCCAGCCGGCCGACTCCTCGGTGGATTGCTGGCTGGGGAAC  
ATGCCTTCTTCGACGCCGACCAGCAGCACCAGCGGGAACCTCCAAGCCCTTGGCGCTGTGCAATGTCATCA  
GCTGCACCCGATCGGCATATTCTGTCGCTGATTCTCGCCGGATTCCAGCGACGCGTGGGCGAGGAAGGC  
GGAGAGATCGCTCATATCCTCCAGCTCGTCCGGGCGCTGGTACTGGCGGCAGGCGGTGACCAGTTCTGTC  
AGGTTCTCTACCCGCGCTGGGATTTCTCGCTTTTTTCCGCTAGATACATCGCTTGGAGCCGGAGTTCT  
GGATGGCGATATCCGCTGCTGGTGCAGCGGCAGCATGGCGACCTGCTCCTCCAGCGCTGATCAGCTC  
GACAAAGCCGCGCACCCGCTTACCAGCGCGACCGGTCAGCACCTTGTGCTTGGAGAGGCTTGGCCGAT  
TGCCACAGGTTGAGCCCTGATCGCGGGCGTTGCCGCGCAGGATCTCGAGGTTGCGATCACCAGTGGCCG  
GGGTCCGGGTTGTTGACCACCCGCTCGAAGCTGGCGTCTGCGCACGTTGTTGATAAGCCGAGGTAGGC  
CATGGCGTCTTTAATTTCTGCGCTCGAAGAAGCGCAGGCCCGCTAGATGCGGTAAGGCATGGCGTCC  
TGCATCAGCGCTCTTCCAGCACCCGCGACTGGGCGTTGGAGCGATAGAGGATGGCGCAGTCCGGCAAGA  
GGCCGCCCTTTTCTTCCAATCCTTGGAGACGGCCGACCACGAAGCGGGCTTCGTCACCTCGTTGAAGGC  
GGCGTAGAGGGAGATCGGCTCGCCCTCGGCCCTTCCGTTCCACAGCTCCTTGCCAAGGCGCTCGGCGTTG  
TTGGCGATGACGCTGTTGGCGGCTTTGAGGATATTGGCGGTGGAGCGGTAGTTCTGCTCGAGGCGGATGG  
TCTCGGCGCCCTGATAGTCGGTCAGGAAGCGCTGGATGTTCTCGATTTTGGCGCCGCGCCAGCCGTAGAT

GGACTGGTCATCGTCGCCGACGATCATCACCTTGCCGCTGTTGCCCGCCAGCATCCGCAACCAGGCGTAC  
TGGATGCCGTTGGTATCCTGAAACTCGTCCACCAGGATGTTCTGGAAGCGGTCGCGGTAGTGCTCGAGGA  
TGTGCGGCTTGTTTCAGCCACAACCTCGTGGGCGCGCAGCAAGAGTTCTGCGAAGTCCACCAGACCGGAGCG  
ATCGCAGGTCTCCTGATAGGTCTTGTAGATCTGCTGATAGGTGCGGGTGACGGGGTTCGCCGTAGAGGTCC  
ATGTCGCCGGGGCGCAGCCCCCTCATCCTTCTTGCCGTTGATGTAGCCCATCACGGCGCGCGGGGCCAGT  
GCTTCTCGTCCAGATTGAGCGCCTTGAGCACCCGGCGGATCAGCCGGTACTGGTTCGTCGGAGTCGAGGAT  
CTGGAATCCTGCGGCAAACCCGCATCCAGATGGTGGGCCCCGAGCAATCGGTGGGCGATACCGTGAAAG  
GTGCCGATCCACATGCCGCGCACGCCGTGCGCGATCACCTTCTCGACCCGGCCGCGCATCTCGGCCGCC  
CCTTGTTGGTAAAGGTGACCCGCGATGATGGAGAAAGGTGAACAGCGTTCACCTGCATCAGCCAGGCGAT  
ACGGTGCACCAGCACCCGGGCTTTGCCGAAACCCGACCCGGCCAGCACCAGCAGGTTGCTGCGGGGCC  
GCAACGGCATCTCTTTGCTTGTGCTTGAGCCCTGAGCAGGGTTGAAACGTCCATCACCACCTCTGTTT  
ATTTATACAGGCGGGGATTATACGGCCATCCCCCTGCCAGACCAAATCCAAACTCGGGGGAGGGGCGA  
GATGGGGTCTTGCAGGGGCGCCGGTGCGGCCATTTTTGGCTGGCGCAGAGAAACGGGACGGGGAGGTTT  
CCAGCTGTAGCCAACCTTTGCTCACGCGGTTTTGTGGGGATTTTTGCGAGCCGGATCACGGGCTTGCCGGGG  
GGCTGGATGAATAAGAGGGGAAAACGGTTTTACAGTAACTTGCTGAACAATAAGAGAAATGTCGTTTTGGGT  
CTTTTGGTTGTTAGCATAAAAACTGAAAAGTAGCTAAAAACAACCTGCTTATAAGGTTATTTGCTTAGA  
ATTTCAAACCGTTAGCGCAAACGTTTTTCCCTTATCATTTGCTTGACCCGCATCGGGGCTGACTTAGAGTA  
AGCCTGCGTGCTAGATAGCCTGCTCTGACAGGCAAGCAAGTTCCTCACTTAATAACAATCAAGGATACG  
ATCGTGACTAAAGTGCTCAAGCTGGCCACTGTGGCTCCCTCACTCTCGTGCTCTCTGCTCAGGCTG  
CTTCCGAGCCAGCCGTCATTTATGACACCCGCGGGCAAGTATGACAAATCATTCAACGAAGCCGTGTTCCG  
TAACGGCGTCGAGCTCTACAACAAGGACAAGGGCGTCAAGGTCAAAGAGTTTGAACCCAGAACGAAGCC  
CAGCGCGAGCAGGGTCTGCGTCTGGCCAGCCGTGGCAACGGCCCGATCGTGGCAGTCGGTTTTCAACA  
TGGGTTCCGCGGTAGAGAAGGTTGCGACCGAATTTCCCGAAAACCCAGTTTACCATCATCGACATGGTGGT  
CGACAAGCCGAACGTCCAGTCCGTCATCTTCAAGGAGCATGAAGGTTCCCTTCTTGGTGGGCGCACTGGCT  
GCCATCGCTTCCAAGAGCGGCAAGGTCGGCTTCGTGGGCGGCATGGATATCCCGCTGATCCGCAAATTC  
AGTGGCGGTACGAGCAGGGTGCCAAGTTCGTCAATCCGAAGATCGAAGTGTTCAGAACATGGCAGGGCTC  
CACCCCGCCGCGTTTTGCTGACCCGGCCAAAGGTGCCGAGCTGGCCAAGTCCAGTTGCCCAAAGGTGCT  
GACGTGGTTTTACGCGCAGCTGGCCGTTACCCGATTCGGTGTCTATCAGGCAGCCAAGGACAGCGCAAGT  
TCGCCATCGGGTGGCATCCAACAGAACCCACTGCAACCCGGCACCATGCTGACCTCCATGGTCAAGTC  
TGTGGGTCTGGCCGCTTACCAGACCTGGGATGACGCTGCCAAAGGCGAGTGAAGCCGGGTATCAAGAAC  
CTGGGTCTGGCCGAAGGCGGTGTGGATTGGGCGCTCGACAAGAACAACGAGAAGCTGATCACCCCGGAAA  
TGAAAGCCAAGGTGGATGCCATCAAGGCTGAAATCATCGCTGGCAAGGTCAAGGTTTCATGACTACATGAG  
CGATAACACCTGCAATACTAATTAGATAGTTGCTACGACTCTCAACGCACCACCGGGCCCGCACGGGCCG  
GTTTTTAGTCTTATTTTATGAAACGCAGGGCTGCATCATGGACCAGACAGATCGCTATGCCATCGAATTA  
AGAGGTATCGATAAGCGGTTTCGGCGAAGTGTACGCCAACAAGCTGATCGACCTTAAGGTTTCGCAAAGGCA  
GTATCCACGGCATTGTTCGGCGAAAATGGCGCCGGTAAAGTCCACCCTGATGAGCATCATTTATGGTTTTCTA  
CCATGCCGACAAAGGCGAGATGCTGATCGACGGGAATCCTTTCAAACCCCATGGCTCACAAGATGCGATT  
GCCGAGGGCTGGGCATGGTTTACCAGCACTTCATGCTGGTCAATAACTTCACCCTATTGGAACCGTCA  
TCCTCGGCGCTGAGAACGGCTGGCACCTTCAGCAGAGTGTGGCGTCAGCCGAAAAGTTGCTGGGCGAACT  
GGCGCGAGACTATGGCCTCGACGTGCCGCTGCACGAGAAGGTCGAAGATCTGCCGGTTGGCTTGCAACAG  
CGGGTGCAAATTTCTCAAGGCGCTCTATCGCGGGCGCCGCATCCTGATCCTCGACGAGCCGACCGGGGTAC  
TGACCCCGCAAGAGGCGGATCACCTGTTTCGAGGTGCTGAAAAAGCTGCGGGATCAGGGAGCGACCATCAT  
CCTCATCACCCACAAGCTGCGGGAGATCCTGGCCATTACCAGTACAGGTTCCATCATGCGCCGTGGCGAG  
ATGGTGGCGCACGTCGCCACCAAGGATACCGACAAGGAGCAGCTGGCCGAGCTGATGGTGGGCGCAAGG  
TGCGCCTCAAAGTCAAGGTCGACAAGGGGCCAACCAGCCCGGTGAAGCCAAGCTTAAGATCGAAGGGCTCAGTA  
CTTCGACCCAGCAAGGTGGAGCGGGTCAAATCGGTGAGCTTCGAGGTGCGGGCCGGTGAAGTGGTCCGGC  
ATCGCCGGGGTCTCCGGCAACGGCCAGTCCGAACCTGCTCAGCCTGCTTGGCGGCATTTCTCAAGCCGAGCA  
AGGGTGGCTTACCATCAGCAGCCGACGGCGTGCACAAGGTGAGCGCGGAGCACCCGGCCGATCCCGA  
GCTGGTGCACAACTACGGCCTCGGTTCATGTGCCGGAAGACAGGCACAAGATGGGGCTGATCAACCGCTTC  
GAGGCGAAAGAGGCCTTTATTCTCGGTTATCACCGTCGCCCGCAATACAACAAGGGGTGGCTGCAGAACA  
AGGAGGCGATCCAGCAGGATTGTCAGGCCAAGATGGAGAAGTGGGACGTGCGCCCGCCCCATCCCGATCA  
CAAGACCGCAACTTCTCCGGTGGCAACCAGCAGAAGCTGGTGTGATCGCCCGTGAAGTGGAGCAGGACCCG  
GATGTGCTGTTGATCGGTGACCCGACCCGCGGGTGCACATCGGCGCCATTGAGTATATCCACCAGCAGA  
TCATCGCCATGCGTGACAAGGGCAAGGCCGCTTGTGCTGCTCGGTGGAGCTGGACGAGATCATGAGCCT  
CGCAGACCGGATCCTGGTCAATTGCCGATGGTGCATCGTCCGGCAGCTGGATGGTCCAAGGCGGATGAG  
CGCACCATTGGTCTGATGATGGCAAACATAGTGCCGGACGAAGTTGCCAAGGAGGCCACTGATGAGCCA  
AGTACGTATTCTGCTGGGTCTCCGTAGGCGTCTTGTCTGCGGTCAACATCCTGCTGGCCTTCTCTGGTG  
TCGGCATTCTGTTCTACTACCTCGACATCAACCCGGTTCGATGCCGCAAGATCATGTGGTACGGCGCGT  
TCGGCACCGGTGAAGGGGTTCGGCTTACCCTTACTACGCAACCGGCTTTATCTTTACCAGGCTGTCGGT  
GGCGGTGCGCTTCCACGCCGGTCTGTTCAATATCGGTGGTGAAGGTCAGGCCATATCGGGCGGGCTCGGT  
GTCGGTCTGGTCTGTCTGACGCTCGGCGATGTGCTGCCGTTTTGCCCTGCTGTTGCCGCTCTCCATCATTTG

CCGGTGGTCTGTTTCGGTGCGGCCTGGGCTTTTATTCCGGCCTGGCTGCAAGCCAAGCGCGGCAGCCATAT  
CGTGATCACCACCATCATGTTCAACTTCATCGCCGCTCGCTGATGGCCTATCTGCTGGTGGAGGTGTTT  
AAGCCGCCCCGGTTTCGATGGCGACCGAGAGCAAGGTGTTTGCCGAGGCAAGCTGGCTGCCAAGATGAGCG  
GGATGGCGAGCCTGTTTCGGGATGGAGATCCCCAACAGCCCCCTCAATATCAGCTTCTTCTGGGCGCTGAT  
CTGTGCGGCGCTGGTGTGGGTCTTTATCTGGCACACCCGCTGGGGTTACGAGATCCGCTCGGTTCGGCGCC  
AGCCAGAGTGCCTCCGCTACGCCGGTATCTCCTATCCCAAGGTAGTGATCCTGGCCATGGTGTCTCCG  
GCATGCTGTGGGCTTCTTCGCCCTCAACGTGCTGCAGGGTGAGCTGCACCAGATAAAGCTCAACTTCGT  
GGAAGGGTTTCGGCTTACCGGTATCGCGGTGGCGCTGATGGGGCGCAACCACCCGGTTCGGCGTCATCATC  
GCCAGCCTGCTGTTTCGGTTTCTCTATCAGGGGGGCGCCGAGCTCAGCTTCGAATTCGGTGTGACCCGCA  
ACATCGTCGTGGTGTTCAGGGTCTGGTGATCCTGTCTGTGGCGCCCTTGGACACATGATGCGTCCGCG  
CATCGAGCAGCTCTATCTGGCGTTTGCCAACCCGCTTCGCGCAAGTCAAGGGGGCCTGATCATGTTTGAAA  
TTCTGATCCTGATGCTGGATGCCACCATCCGTACCCGCGCCCTCATTTCTGGCTGCCATGGCCGGCAT  
GTTCTGCGAGCGCTCCGGGTGGTCAACATTGCGCTGGAAGGCAAACTGCTGGCGGCGGCTTCGCCAGT  
GGTTCGGCGGCTGCGGTCTCCGGTTCCGCTGGGTGGGACTGGGTGCCGGGATTGCCATCTCGGTGCTGT  
TTGCCCTGATGCACGGCTTTGCCACCATCACCCACCGCGGTGATCAGGTGGTGAGCGGCATGGCCATCAA  
CATTCTGGCGCCGGTCTGACCGTCAACCCTGGGCCGTTACTGGTTCGATCAGGGTGGCCAGACCCCGGCG  
CTCTCCGGTATGCCCGTTTCGCCCCCATCGATCTGCCCTATGCCAAGGAGCTGTGGGATGTGCCGGTGA  
TCGGCCAGCTCTACAGCGAGCTGCTGAGCGGCCACTCCCTGCTGGAGTACGTGGCCTTCGCCTGCGTGCC  
GCTGGCCTGGTGGGTGATGTTCCGTACCCGCTTCGGTCTGCGTCTGCGGGCGGTGGGCGAGGCGCCCGCA  
GCGGTGCATACCGCCGGTATCTCGGTGGTGCGGATGCGCTACACCGCGCTCCTCATCGGCGGTCTGCTGG  
CCGGTATCGGTGGCACCTATCTGGCGGTGGCCAGACGGCCAGTTCATCCCAACATGAGTGCGGGCAA  
GGGCTTTTATGGCACTGGCGGCGCTGGTGTTCGGCAAGTGGCGTCCCTGGAATGCCATGGCCGCCTGTCTG  
CTGTTTCGGCTTCCCTCGATGCGGTTCGCCATCCGCTGCAAGGGGTGAGCATCGGTGGCTTCGCCATTCCGG  
TGCAGGCCATCGAGGCACTGCCCTACATCCTGACCGTGTCTCTGCTGGCCGGTTTTATCGGCCGCGCGGT  
GGCACCCAAGGCACTTGGTACACCTTATGTGAAGGAGCGGGAGTAACGCTCTTAAGTGCATATTTCCCGA  
TCACACAGATAACAGCAGGCCCACTTCGGTGGGCTGTTTTTTTATGGGCGGTATGGGGCAGGCCAGCCG  
GGAGCTGGATGGTGTGATAGAGGGAGGCGATGGCGTGAAGGGATAAACGGGCTGCGCGATCTGCTGCTGG  
TCGTGGTTGGCGTACAGCGCTGACCCCTTGTGCTCAGTCCATCAAAAACCCCTCGTATCAGGAGGGGGT  
TGCAGAGGTTATTGCCAGATTAGCCCTGAGGATCAGGGGGCCAGCACCCAGCTTGTAGACGCCAAAGCCGG  
GGTGTTCGGCATCGGTGGGCGGAGGGTCTCCACATAGTTCAGCTTGCACCCGGTTCAGGGCTTCGCCCTC  
GCTGCGTGGCGAGCTGTAGATGCGCAGATCCAGATTGGCGGGCAGGGGGCCAGCTGCCAGTTGTTGTCT  
GCCGGGGGCTCGAAACCGGCTGGATTCTTCTCTGCCAGATCCTTGAGGTATTTCGGAGAGCACTTCGCGGG  
TTTTGAACTGATCTTCATGGACGATCACCTTGGCGTTGATGCCCGGGAAGTTGCCACCACCGCTGGCGCG  
GTAGTTGTTGGTACCACGTAGAACATCTGGGTTCGGTTCGATCGCTTGCCTGATAGGTGAGGTTGGTG  
ATGCGATAGCTGTGCTCACCTTGTGGCATCCACATCGTAACGGGCGGGTTTGGTACATCGACCTGAT  
AGTTACCCCGCTCGATCACGTGCAAGTTGTAGGTGCGGTACTTCTCGTTCACTAGCCACTGGGTTCGGGT  
GCTGGCGGCATCGATCTTGTGAACTGGACGGCACTTCTTCCAGCCACTCCTGTACGGTTCGCGCCATTG  
ATGGCGACCACCTGCAGGGTGTGGGGTAGACATAGAGGTTCGCCACGTTGCGCAGGGAGATATCGCCAG  
CCGGTACATAGGTGAAGTTCGGTTCGGGCGGTTGCGACCGCCACGGAATGGCGCAGCGGCGGAGAGGATGGG  
CCATTTCTCCTTGAGCTGACCATCCTGTTGCAAGTTTCTTGGCGTGCCACAGCTGGGCGTTCGCTGACGATC  
TGGATGGAGGGGTCATCCTGCACCAGCGGAAGAAGCTGTGGATCGGCTTGGTGATCTTGTGAGGGGCT  
CGTCCAGCCACTGGTTTGCCTGCTCGTGCTCGGCAATGACCTGATCGACCACCGCTGATCTTCGGTGTCT  
GCTGGCGCTACTGTGATCTTGCAGCTGGGACTGGCTGGAGGCCACTTCCAGCGACCCCTCTTTCCAG  
GTCATGTGCAGGTGATGATGCCGAGGTGGTTACCCAGACGCCCGGCATCACGGTTCGGTACGCCCGCCA  
GGGTGCCTTTCTCGTTGTCCACGTTCGGTTCATGTTGGGGTAGTCAACCGGAAGGTGCGGTGGGCGTGACC  
CAGCAGCAGGGCATCGACCCCTTTTACCTTGGCCAGCGGCAAGGCTGCGTTCTCCATCATGGGTTCCGCG  
GGGTACCAATGATGCCAGTGTGGGCCACGACCACGACGATGTCTGCGCCCTTGGCGCGGATTTCCGGTA  
CATAGTGTTCGGCGGTCTCGACCATATCGGCCACCACCACCTTGCCTTCCAGATTGCGCTTGTCCCACTG  
GGTGATCTGGGAGGAGTTCAGCCCCAGCACACCGACCTTGGGGTCTGGGTAGTGCCTTGGCATCCTTC  
ACCTGACGATCCAGCACACATAGGGTTTGAACCTTCTGCTTGGCTCCAGTTCGATGGTGGCCCTTGCATCAC  
GGCTGAAGGCATCGGCCTGGAAGACGTTGGCGTTGATGTAGGGGTAGTTGGCCCTTTTTCAGGGTCTCTGA  
GAGGAAGTTCGAGACCGAAGTTGAATTCGTGGTTGCCAGGTTGCCGACATCATAGTTCATGGTGTGAGC  
GCCTTGTGATGGCGGGGTGGGTCTGCTTGTCTAGCCACTGCTGTTTACCTGCTGGTTCGTTGATATAGTCGG  
CCAGCGGGGTGCCCTGGATCAGGTTCGCCGTTGTGATCAGCAAGTTGTTGGCGTTCCTTTCGCGGGCCTT  
GCGGATCAGCACAGCGGTTCGGGCGAAGCCAGCGAGGCATCCGGCTTGTCTGGTAGTAGTTCGTAACCTC  
AGCAGGTTGGAGTGGATATCAGAGGTTTCGATCAGCCGAGGGTTCGATCACCAGGGGCTGAGAGTTGT  
TGTTCATCACAGCCGGATAGCAAAAAGATAACTGCCACCGCGCTCAGTTTGGGGTGGTTTTTCATTTGTTGG  
ATTCTCTTGTATGGGTATGCCAGCGTGGTGCATTCTATCGACAGCAAAAAGAAATCCGATTGTGAGCAGGC  
TGGCAATTCGGGCTAATTACCCCTCTATTAATAGAGTTATGACTCTGATTTTCATCTGTTTTTTTCGGGTC  
GCTACCCCTCGCTGCTTTTCCGCCGTTAGTACCCCTGTGCTCACCGCGTTCGGTTCGGGCGAAGCGGCACG  
GCCAAGCGCTTCTGCGAGGCTGTAATGGTTGGTTACAGATCTCCATTCGACTGATAGATGACCTTTCCCT

TAAATTCAGCGGCGATTGATTGCATCTAAAAAATTACAAAGCGACAGCAAGGAATAAAAACTCATGAAAA  
TGCACAACAAAGCGCTGCTGGCCATCGCCTGCGCTGCGGCCCTGTCTGCCTGTGACAGCGAAAAAGCTGC  
CAACAGTATCGCCAAGCGGGTGCCGCTGGCTCTGCCGAGGCGGGTCTTTACCAAGCGAATCTGATGAGC  
CGCGATGGCGACAAGGCGACGCCGCGCATGATCAAGGATCTGGATGGTCTGGCGCTGGTCTACCCGAAGG  
GTGAAACCGTGCAGTACTGGGGTGTCTGGGTGGATCATCAGGTGGGCAAGGTCGAGACCAACAGCCAGTG  
GCTGGGTGAGGCTGACCAGAAAAGCCGACAAAAGACGGGATCTACCCGGTGCAGTTGATCCGCAACAGCGAA  
CGGCTCGGCACCAGCACGGCGCTCAGCTCGGGCAGCAACGACCACAACCTCATCACCTTCCAGGATCAGC  
CGGTTCATCGATCTGCAGGGCAAGGAGATCAAGCGCTGGGTTTTTGTATTTACCCCGACCCGGCACCACCTT  
CTCCGACAACCTCCCCATCTATTCCGGTTTTAGCGGTTCATGTGGCGGTGACAGCCCTGACCACCAAAGCG  
GTAACCAACGGCCAGCTGGAGTGCCACGGACAGCGATGGCTTCAGCAGCGACATGGTGGGCAAGGTGGATA  
CCACCAACAACGGCGGCAAGCTGACGGTAGCGATCGAGTTTCCGCGCGCAGGTTGTACGCTGGTGGGCGA  
GGGGAGTGCCACTGCCGGTTGAGCAAGCTGACCATGACCCGGTTTGGCAAGTGCAACTTCAAGCAATCC  
GCTGCCGCCACGCCGATCGAAAACTCTGGAATGCCGCTCTGGCCCGGGCGATGGATAACCGCGTCGCCCT  
ATGTACCACCTTTACCACGGATGCCAAAAAAGAGGCGCTGGTTCATCGGCTTCCCCGACACCAATGGCTT  
GCTGATCACCGCTGACAAGCGATAAGCAGCCCCAAAGGCAGGGGTGGGCAAAACGCGCTGAAACAACAAGG  
GAGCCAGTGGCTCCCTTGTGTTTTCAACGCACGGTTTTACAGCAGGAACAGGGTCGCCAGCCCCGAGGAAG  
ATAAAGAAGCCGCCGATCGGTGATGGCGGTGATCATCACGCTGGCGCCACGGCCGGATCGCGGCCGA  
GCCGTTTCATGGTTCATGGGGATAATCACCCCATCAGCGCCGCCACCAGCAGGTTGAGCACCATGGCAAG  
CGTTCATCACGGCGCCAGCGCCGCATCCTGATAGAGCAGGAAGTCCGCCACCCCATGGTGCCGCCCCAC  
ACCAGCCCCGTTGATCAGCGCCACCCCGAGTTCCGCGCAGCAGCAGGAAGGAGGTTGCCCGCTGAATGT  
GCTGCAGCGCCAGCGCCCGCACTATCATGGTAATGGTCTGGTTGCCGGTGTGCCGCCGATCCCGCGCAG  
GATTGGCATCAGGGCCGCCAGCGCCACCAGTTGCGAAATGGTGTGCTCGAACAGGCCGATCACCCGCGAG  
GCGACAAAGGCGGTGCAGAGGTTGATGGCAAGCCAGGCCAGCGGGTCTTGACCGCTTGGAGACCGGGG  
CGAACACATCCTCCTTCACTGATACCCCCATCCGGCGCAGGTCGGTGTGCTCTCCTCATAGACCAG  
ATCCACCACCTTTCGACGGTGAGGCGGCCATCAGCTTGCCCTTGCCATCCACCACGGCGGGGAGAGC  
AGGTTCATCCCGCTCGAAGGTGCGGGCCGCCGCTTCGTGCTTATCCTCCGGATCGAAGGTGACCCGATCCC  
GCTCCATCACGTCGCTCACCAGGGTGGCGGGCTTGTGCAGCAGTACCGTGGTGGGGCCAGTCCCCCAG  
CAGGTGGTTGCGCGATCGATGACGAACAGCTGTGCGTGTGGCGGGGATCTTGCCGCGCAGGCGAGCAG  
TAGCGCTGCACCGTGGCGAGCGTACCTCCCGCACCAGATCCCGCTCGGCGGGGGCCATATAGGTGAGCAG  
CCGCCCCATCAGGTTGCGCGGCAGGTATTGGCCCAGATAGATCTGGTGTGATATCCAGGGTGGCGCAGG  
GCGTGCAGCAGCTCCTTGTGCTCATCCCGCTGATGAGGCTGTCCCACACCGTCTCCGACGCTTCGACCA  
AGATCTGGCCGCTTTCTCCTCCTCCACCAGCGCCACAGAGCATGACGCTCATCGGGCGGCAGCGACTC  
CAGCGCATCGGCGACGTCGGCGGGGCAACCCGTTGACCAGCGTTGTGAGTTGCTGGTCTGATCGCGC  
TGCTCGGCATCCTGCACCACCTGCGGATCGAGCAGGCTATCGGTGAGGGCATCATCGCGCAGCAGCAGGG  
TGAGAATGCGGGATCTGTTCATCCGCGCGCTGCCGGGCGCTGTTCTTGTGATGGGAAGAGACATGGGATGAAT  
TCCTGAGATGGTAGCCAAGGGCTCAATGCCCATAGGATAACCAGACTTAAAACAACAGGTTATGACCGTGA  
TGGGAGAAGAGGGGAGGTAAAAGTGAGGCCACCTGCTGGTGGCCTCATGGTGTGAGTTGCCGAGGATACCTCA  
GGCGAGGGCTCGCTGAGCCTGTGGTGCCTCGCCAAACCAGGCGAGCCGGTCCGGCCAGGGTACCACCAGG  
CCCACCATGATGAGGGCAGGACTCTCGACCCCCACCGCCAGTGGGGCAGCTCATCGAGAGTGCCGCGAA  
TGACCCGCTGGCAGGGCTGGGTGCCGCGCTCGATCAGCGCCACCCGGGTGTGCGCTGCCCTGGCGTGGGC  
CAGCAGCTCTTACGGATGGTGGCGCAGGATGAGAGCCCCATGTAGAAGACCAGCGTCTGCCGGTCTTTG  
GCCAGCAGTGGCCAGTCGAGATCCCGGGCGCCCCCTTGCCGTGGGCGGTGACGAAGCGCACGCTCTGGG  
CGTGATCGCGGTGGGTGAGCGGAATGCCGGCGTAGGCGGCGCAGCCGCTGGCCGAGTGATCCCCGGCAC  
CACCTGAAAGCCAATCCCAGTACCAACGAGCGTCTCCAGTTCTTCCGCGCCACGGCCGAAGATAAAGGGG  
TCGCCCCCTTCCAGCCGACCCCGTTGCCCTTCTTCCGCTCCTCCAGCAAGAGCTGGTTGATCCCCCT  
CCTGCGGCACGCGAGTGGTTGCCCGCTGCTTGCCGACGAAGATGCGCTTGGCGTCCGCGCGCACCAGCGC  
CATCACTTCGTGAGAGACCAGCCGGTTCATAGACCACCACGTCAGCCTGCTGCATCTGGCGCAGGGCGTGC  
AGGGTGAGCAGGCCCGGATCGCCGGGACCGGCACCCACCAGCACCACCTCGCCAGCGCTCTGGCTCTCGT  
CGGCAAAACAGGCTGTGCGCCAGCTGGTGGGCGAGGCGCTATCGCCCCGCGCCAGCGCTGACCGAGCCG  
ATCCGCCCCGAGCAGCCGCTCCAGAAGCGGCGCGCTCTCCATGCTGGCGAATCGCGCTTGACCCGCG  
TCCCCGAGGCTGCCGGCGAAGGCCGCCAAGGCCCTTATGCTGCGGCAGCAGGGCTTCCAGTTTTTCCC  
GCAGCAGCCGCGCCAGCACCGGCGCTTGGCGCGGAGGAGATGGCCACCATCAGCGGCGAGCGATCGAT  
GATCGACGGCATGATGAAGCTGGAGCGTTTTCGGGTGTCCACCACGTTGGCAAAGATCCGCGCCCCGTTG  
GCGCTCTGGTAAACCAGCGCATTACCTCGCGCCGATCGGTGGCGGCCACCACCAGCCACTTGCCCGCCA  
GTTGTTCCGGCACAAATTCACCGGCCAGCCACTCGATGCTCCCGTTGGCAGCCAGTTCCGCCAGCTCGGG  
GTCGAGCTCGGGGGCGACTACTGTGAGCTGGGCACCGGCATCCAGCAGCAGGCGCGCTTGGCGTCCGCT  
ACCTCGCCGCCGCCAGCAGCAGCAGCGGTTTTGTTGTGCGAGTCGGCAAAAGATGGGCAAGTAGTCCATGG  
GGCCTCCGGATCAGGCGGTTCCGGTCTGGTTGGCGGTGGGGGTGGTCTCGCTCACTGCGACCGGGCGTTC  
AGCTTTCCGGGTGGCATAACCAGTAGCCGAGGCCATAAAGAGGACGCCGGAGACGGTGTGCCCAGCGTC  
ACCCACAGTAGGTTGTGGCCGATGCCGCTCAGGGTGTAGGCTCCGAGTGGGCGCAAACCAGGAGAGGG

CGAACAGGGTTCATGTTGGCGATGGAGTGCTCGTAGCCGGAAGCGATAAAGGCCAGCAGGCACCACCAGAT  
GGCGATGAAGCGGGCCGCCCTTCGGTGCAGCAGCCATCCAGATGGCGAGGCAGACCAGCCAGTTGCAG  
AGGATCCCCCTTCATAAACAGGGTTCAGCACCCGAGCCTGGGTTTTGGCCAGCGCCACCTTGTGGGCCAGAC  
TGCCTGCGTCCGGCAGCAGGCTGCCGCCGTAGGAGTAGATGAGCGCCACCACGATGGAGCCAATCAGGTT  
ACCGGCCCAGGTCTGCGGCAGGATGCGCAGCAGGTGCGCCATGGTGATCTTGCCCGCCTTCACCCCGAAG  
GTGAGGAACATGGTGTGGCCGGTGAACAGCTCGGAGCCGGCGATGATCACCAGCGTCAGGGCGATGCCGA  
AGGTGGCCCCCATCACCAGCGGCCGGATGGCGGGATCCACCAGATTGCCGAGGGTGAAGATGAGGATGAT  
GCCGAGGCCACATAGGCCCCCGCCATGGCGGAGCTGAGCCAGAAGCCGAGCTTGTGCGTGCCTCGAAG  
CGGTTGATGCGGGCTGCGTTGGCGGCGCACTTGTTAATGGTTTTCCGTGTACATCTTGTGAGTCCCTTGAAA  
GGGTCGCCACAGGCAGCCCCGAAAGAGAGTGAATTTGGTTTTAGACGGCGACCAGATCTGCTGGTTCGG  
TACTTCAACGGGGTAGCTTTGAACCGACATGGCGGGATTGTGAAACAGTGGCCATCGCTCAGGCGAAA  
CGCTGCTTCTTGAGCGGGCTGGCGACCCAGAGCTCGCCGTGTTGCGAAATCAGGCCCCCGCAGACGA  
CGTTGGCGGCGAAGAAGGGATCCCGGTTGTGATGGCGAACACCTCGGCCCGCGCTCGGGCGGAACAG  
AGCGATCTGGCGACCTTCAATGAGTGCAGACGCGGTTCCCGCAGGATGTCGTTGAGTTGGCAGGCA  
AGTTTCATCATTTGGTTTTCCACCTCGATCTGGTAGACGGGGATGCGCTCGGCCGGAGTGGCGGGTCTGTG  
CTGGTGCCTTCTGACGAACGACGTCGCGGTCGCGCTTGTGCTATTTGATGAAGTGGCTGAATCGC  
TTGAGTGCCTCTCTCGTTGAGGGTGCAGACCATTCGCACTCGTAGCTGTGATGAGAGTCTGGATAT  
CGCGCTCCAGCGTCTCGGCCAGCCCCAGCTTGTGCTGACGATCACCTCGCGCAGGTAGTGCAGCCCCC  
TTCCAGATTGCCGAGCCAGACCCGAGGTGCGCTGCAGTTTGTGCGCTGGTGACGTAGAATCATAAAG  
CGGTCGATCAGCTTGTGAGGGTCTCGCGGTGAGGTCAGAAGCCAGCAGGTGCGCGTGGCGCGGTTTTCA  
TGCCGCCGTTGCCCCACATAGAGGTTCCAGCCCGCATCGGTGGCGATGATGCCGACATCCTTGCCCTG  
CGCTTCCGCACATTCGCGGGTACAGCCGGAGACACCGAACTTCATCTTGTGCGGGGTGCGAATGCCCTTG  
TAGCGGTTCTCGAGGAAGACCCCGAGGCCGACGCTGTCTGTACGCCGAAGCGGCACCAGGTGCTGCCGA  
CGCAGGTCTTGGCCATGCGCAGTGCCTTGGCGTAGGCCTGACCGGTCTCGAAACCGGCCCGCAGCAGCTT  
GCGCCAGATGGCGGGCAGATCATCCTTCTGGGCCCGAACAGGCCGATGCGCTGGGCGCCGGTATCTTG  
GTGTAGAGCTTGTAGTCGCGGGCACTTCGGCCACCGCCAGCAGCCCTTCGGGGTCACTTCACCACCGG  
CCATGCGCGGGATGACGGAGTAGCTGCCGTCTTCTGCATGTTGCCGAGGAAGATGTCGTTGGTGTCTTG  
CAGCGGGATGTTGCGGGCTCAGCAGATGCTGTTCCAGCAGGAGGCGAGAATGGAGCCAGCGTCTGGT  
TTGCATACCTCGCAGCCATAGCCCTGACCGTGTGTTGGCCAGCAGCTCGTCAAGCTCTTGATCCCCCTCA  
CCTTGACCAGATGGAACAGCTCCTGACGGGAGTGGGGGAAGTGGGCGCAGAGGTGGTTGTTGATCTCGAT  
GCCCTGCTTACCAGCTCGGCGTTGAGCACCTGACTGATGAGCGGCACGCAGCCGCCAGCCGGTACCG  
GCCTTGGTGTGCTGCTTGTGATGGCGGCCAGGGTGGTGTGACCCCTCGGCGACGGCTGGGCGATGTCGCCCT  
TGGAGACGTGAAGCAGGAGCAGATCTGGGCGCTCTCCGGCAGGGCATCCACCCCGAGCGTCCGGCTTGGC  
ACCGGCGTAGGCGGGCAGGATCAGGGTATCCGGGTGGCTCGGCAGCGGCAGGGCGTTGAGCATCATCTGC  
AGCAGGTTGCCGTAATCTTCCACGTCACCCACCAGCACGGCGCCGAGCAGGCGGCTGTTGTCTTCGCTCA  
CCACGATCTTCTTGTAGACGCCAGCTTGGTCACTCTGAAATACATAGCTGTGGCTGCCTGGGGTGCAGCC  
GTGGGCATCACCGATGGAGCCGACGGAGACCCGAGCAGCTTGTGACTTGGCACTCATGTCCGCCCCCTCG  
AAGCGGCTGTGCGCCCGAGCAGGTGGTGCAGCGTATCTGGGCCATCTTGTAGCCCGGCGCCACCAGCC  
CGAAGAAGCGGCCCTGCCAGGCGGCGCACTCGCCGATGGCATAAGATGTCGGGGTTCGGAGGTGAGGCAGTG  
ATCGTGCATGACGATGCCGCCGCGCTCGGCGATGGCGAGATCACCGTAGCGGCCAACGTATCTTGGCGGA  
CGAATGCCGGTGGAGAAGACCACCAGTCTACTTCCAGCTGGCTGCCGTGAGCGAAAGCGAGGCGGTGCT  
TCGCCTGCTCGCCGCCATGCATCAGGATCTCGCTGGTGTCTTGTGTTGTTGACTGACCCCCATGGA  
TTCAATCTTGGCGGCAGCAGCTGGCCGCCCTGACCGTGCAGCTGCTCGGCCATCAGCACCGGAGCAAAC  
TCCACCACATGGGTCTCGAGACCCAGTGCCTTGTAGGGCACCGGTGCTTGCAGGCCAAGCAGGCCGCCCTC  
CGATCACCACCCCGCTTTCGCCCTCTTGGCGGCGCTGCGGATGGCTTTCAGATCCTCGATGGTGCAGGTA  
GACGAAGCACTCGTGGTGTGACTGCCCCGCAATGGGCGGCACCCAGGGGTAGGAGCCGGTGGCCAGCAC  
AGCTTGTGCTACCCGACCACAGTGCCTTGTGAGTGCCTTTCGCGGTTGGCCCTGTCGATTTTTTTTCA  
CCGCTTTCGCCGAGCAGCAGGCGGATGCCGTGCTTGTGCTAGAAAGCCGGGTTTGACGAGGGAGAGATCTTC  
ACTGGTGTGATGGGAGAAGTAGGAGGAGAGATGGACCGCATCGTAGGCGGGACGGGGTTCTGCACCGAAG  
ACGGTGTGCTCGTAGCGGCCCGGGTGGCCCGCTCGATCAACTCTTCGATGAAGCGGTGCCCCACCATGC  
CGTTGCCACAACGACCAGTCTGACTTTGCTCATGATTGCCTCTAGTTTGGAGTAATAAAACATCATTTCT  
GGGGCTAGGCTACCCAGTCACTCGGGCGGGCAATTTGATGCAAAATCAAGTGTCTATTTATATATCTCGTC  
AGGGGTAATTCGATAAAATTCAAAGATATACAAAATAGGTATACCAGTTGAATGTTTTGCTGCTGGGTGC  
GAGTGGGACATAGAGAGAAGGGGGCTGGGGCTTAAAATGCAAAACGCCCCATTTCTGGAGGCGTTTTTTT  
TACAAACAGAACTTCGCTTACAGAATAAAGCGGCTCAGATCTTCATCTCGACAAGCGCACCGAGGTGGG  
CGTTGACGTAGTCGGTGTGATGACAAAGGTCTCGCCGGACTTCTCGGAGGCGTCTAGGAGATGCTTTC  
CATCAGGCGTTCCATCACGGTGTGCAGACGACGGGCACCGATGTTCTCGGTACGCTCGTTGACCTGCCAG  
GCCGCTTCGGCCAGACGGCGGATGCCATCCTTGGTGAACCTCGATATTGACCCCTTCGGTGGCCATCAGCG  
CCTTGTACTGATCGGTGAGGGAGGCGTTCCGGTTCGGTTCAGGATGCGCTCGAAGTCACTGTGGTTCAGAGC  
GGTCAGCTCGACCCGATCGGCAGACGGCCCTGCAGCTCGGGGATGAGGTGCGACGGCTTGGCGATCTGG  
AAGGCGCCGGAGGCGACAAACAGGATATGGTGGTCTTGACCATGCCGTGCTTGGTGTGACGGTGAAC



CTTCAACCAGCGGCAGCAGGTGCGGCTGTACCCCTTACGGGAGACATCGGGGCCGAGCTCTCGCCGG  
CTTGCAGATCTTGTGATCTCGTCGAGGAAGACGATGCCGTTGTTCTCGACGGCGGCATCGCTTTCTGC  
TTCAGCTCTTCCGGATTGACCAGACGGGCAGCTTCCCTCTCGATCAGCGCTTTCATGGCCTCTTTGACCT  
TGATCTTGGCCTTCTTCTTCTGGTTCTGGCCCAGATTCTGGAACAGTCCCTGCAGCTGGTTGGCCATCTC  
TTCCATGCCCCGGTGGGGTCATGATTTTCGACGCCCATCGGGGAGGCGGAGAGCTCCAGCTCGATCTCCTTG  
TCATCCAGCTGACCTTCCCGCAGTTTCTTTCGCGAAGATCTGGCGGGTGTGGAGTTGTGGCTTTCTCTT  
CCTCACCCAGGTGTTGCGCGGGTGGGCAGCAGGGCGTCGAGGATGCGCTCTTCGGCGGCTTCCTCGGC  
GCGATATTTTCATCTTCTCCATCTCGGTTTCGCGCACCAGCTTGATGGCGGCATCGGTCCAGATCGCGGATG  
ATGCTGTCTACTTCCCTGCGGACATAGCCCACTTCGGTGAACCTTGGTCGCTTCCACCTTGATGAAGGGGG  
CGTTGGCCAGCTTGGCCAGACGACGGGCGATCTCGGTCTTTCGCGACACCGGTTCGGGCCGATCATCAGGAT  
GTTTTTCGGGGTCACTTTCATGGCGCATCTCTTCTGTTGAGTTGCATCCGGCGCCAGCGGTTGCGCAGGGCA  
ACGGCAACGGCGCGCTTGGCATCGGCCTGACCAATGATGTGTCTGTCCAGCTCGTGACGATTTCTCTCG  
GGGTTCATCTCGGACATGATGGTGTTCCTGTATCCGGGGCGGGCAGTGCCTGCCCTTGGGAAATTGGGTT  
GGCTGGCTGCCTTATTTGGCCGACTTATTTAGCTAAATAATCCAGCACTTCGATGGTGTGGTTGCGGTTG  
GTGAAGACGCAGATGTGCGCCGCAATTTGAGGGACTTCTCGACAATGGTCTCGCATCCAGCTCGGTGT  
TTTCCAGCAGCGGATGGCGGCAGACTGGGCGAAGTTGCCCGCTGCCGATGGCGATCAGGTCATGCTC  
CGGCTGCACCACGTACCGTTGCCGGTGTGATGAAGGATTTGTGTTTCGTCGGCCACGGCCAGCAGCGCT  
TCGAGGGCGGCGAGGGCGGATCGGTGCGCAATCTTTGGCCAGCGCCACGGCGGCGGCTCCAGATTAC  
CCTGATGGGCTGCAGTTTTGCTTCGAAACGCTCGAGCAGGGTGAAGGCGTCGGCGGTACCGCCAGCGAA  
ACCGGCCAGCACCTTCCGTTATAGAGGCGATGAACCTTTCGGGGCTTGCCTTCATGACGGTGTGGCA  
AGAGAGACCTGGCCATCGCCACCGATGACGACCTGACCGTTGCGGGCAACTGAAACTATGGTAGTCACTT  
TACTTACCTCGCTTGAGCCGAATGACGGCTGACTGTGCATGGCAAGAAAGATGGGGATGGCAAACGGGC  
TTTTCAACCCTGCCTTTGGTTCGGGATAAACGGGGTAGCAGACAGGGTGAGTGCAGTGACACCAAAGAA  
CAGGGCCGGGTGTTGCCACCCGGCCCTGCGTCATCGGTAAGCGGATTAACCTTTCTTGGGAATGCAGCCG  
CTGATGCCGGAGCTCTGCAGCTTGTGTTGGCCGCTCGGCGGCCCTTGCCTTGAAGGGGGCCACCA  
TCACCTTGTAGACGGTGCCTTGGCGCCATTGATCACCTGCAGGCTGGAAGAGAGGGCCGGCGGTGAAGGC  
GATACGTGCCTTGAGCGACTCTGCGGAATCCTGCGAGCGCAGGGCGGCGCACTGCATCATGTAGCGACTG  
CTGTTCGGCGGCTCGGCTTGGCCAGTGGGCTCGCGCTTTGGCTTGGCCGCTTCGGCGGCTTCCCGCT  
CCAGCTCGGCACGGATCTCCCGCTCCATCCGTTCCCGCTTTCGCTTTCGCTTTCGCGTTCGATCACTTTCGCGC  
GCTGGCAACCGGCGCTCCGGAGGTGGAAGGGGTGGTTCGCCGATTGGGCTGATAGGGCTTGGGCTGGCCG  
ATGGGCGTTCCCGGTTGGGGAATGTGCGTTCGGCACCGGCTGCGGCAGTTTTTCCGGTTGCAGGGTACCGG  
TATCTGCCGGTGGTGGTGGCAGCACACCCGGCTGGGTTCGGCGGCTCTATGATATCGACCTGCTTGTCTC  
AAGCCGTTTCGATGTAGCTCCACTTCTCTGAGGCAGCCGTTATTTCTGCGCTTTTGGCTTGTGGCCTTT  
ACCTGCTCCTCAATGGTGGGGCGTCTGTTGCCCTTGCCATTGATCATGTAAAGGAAGCCACCAAAGCCTG  
CCAGCAGTGCCACGACCAGCAGCACTGGAATAACAGGAAAGCGGCGGAGCCGCTTTCTTGGTATTGCG  
GCCACCCGCCCCGACGTGCGGGCGGCTGCCGACATAATCCCGGTTGCCATCTATTACATGCGCTCCAGG  
GTATGGATGCCAGTACGCCGAGGCCAGTTTCAGCACCTTGGCGGTGGCGGCGCACAGCAGCAGACGGC  
TCTGGCGGGTTGCTTTCGTCACGCCATCCTTGTGATCGGGCAGGCTTCATAGAAGGTCATGAAGTTGCC  
GGACAACCTCGTACAGGTAGGTACAGAGCAGGTGCGGCATGCCTTTGTTCGGCCACGCCGTTGACCGCTCG  
GAGAACTGGATCAGCTTCTGGGCCAGCACCTTTCGGCCTCTTCGTTTCAGGGTCACGTTGCCGGTTCAGCG  
TTTTGGCATCGATGTTGGCCTTTCGCGAAGATGGACTGGATACGGGTGTAGGCGTACTGCAGGTAAGGGGC  
AGTGTTCGCTTCAAAGGAGAGCATCAGATCCAGTCAAGATGTAGTCGGTAGTGCGGTCTTGGAGAGA  
TCCGCATACTTGACCGCGCCATGGCGATGGCGTTGACCACGTTGGCTTCTCTTCGGCAGAGAGGTCGC  
TGTTGCGGCTCTCCAGCAGGGCAGCGGCGGCTCTTCCGCTTCGTTTCAGCAGGTCACACAGCTTTCAGGTT  
GCCACCGGAACGGGTCTTGTAGGGACGGCCATCCTTGGCCAGCATCATGCCGAAGGCGTGGTGTCTCGAC  
GGCAGGATTCGGGCACATAACCCGCTTTCGGGTGATGGTCCAGGCTGCATCAGGTGCTGGTGTCTGAC  
GGGAGTCGATGAAGTACATGACACGGTCTGCGCCAGGGTTTCATAACGGTATTTGGCACAGGCGATGTC  
GGTGGTGGTGTAGAGGAAACCGCCATCGCTCTTCTGGATGATGACGCCCATTTGGCTCGCCATCCTTGTTC  
TTGAACTCGTCTAGGAAGACAACGGTGGCGCTTCGCTCTCGACCGCCAGCCCCTTGGCTTTCAGGTCGG  
CAACGATCTCCGGCAGCATGTGCTTGTACATGGACTCGCCATGATGTCTTGTGGTTCAGGGAGACATT  
CAGGCGGTTCGATGTTGATCTGGTTCTGTTCCATGGTTCATGTCGACCAGCTTCTTCCACATGGTACGGCAG  
TACTCGTCGCCGCCCTGCAGCTTACCACGTAGTTACGGGCACGCTCGGCGAAGGCTTCGCTTCTCGTCTGT  
AGCAACGCTTGGCCTGGGTGTAGAAGGCTTCCAGATCCTTTCAGTGCATGTGCTGGCGTGTCTGTTGGA  
CATCTTCTCCAGATAGGCGATCAGCATGCCGAAGTGGGTGCCCGATGTCGGTGGTGGTGGTGGTGGTGGT  
ACTTTGTGGCCGAGGAATTCAGCGCGCGCGCAGCTACATCACCGAGTACGGTGGAGCGGATGTGGTGGCA  
CCGCCATCTCTTTGGCCACGTTGGGGCGGAGTAGTCCACCACCAGGTTTGTGGCGCCGGCAACCGTAC  
GTTGGCGTTGGCAGAGGTCACCATGGCCTCGACCTGACCGGCCAGCCAGCGCTGGTCAAAGAAGAAGTTG  
ATGAAGCCGGGACCGGCGATCTCGACCTTGGCGATCAGGTCGGAGGCGAGGAGGTCGATGATGGCAG  
CCGCCAGCTCACGGGATTTTCGGGGCTGGTTTGGCCAGCAGCATGGCCAGGTTGGTAGCCAGGTCGCC  
GTGAGCTTTTTCTTGCATCGGTCTACTTGCACGCGGGCTTCCAGGTCGCCCGGACAGCCCTGCTGAC  
TTGAGATTGGCTACCGTTTGTTCAGTAGATGATGAATATGCTCTTTCATAACTGACCACCAAGGTTGCC

CGTCGAAAAATGACTGATATATAAGGGCGTGAATTTTACCCGCATCGGCCCGAGAAAACATATAGGGATGA  
CCCCCGCTCGCTGTCGGGCGGATATTTCACTGCGTTTAGTGCCATATTCAGAAATATTGGGCGGAAATT  
ACGGTGCTTATCCATTTCTACTGCATATCGAAGCGGCTTGTCCAGGCTATTTTCCCCTGATTGTAAAGG  
TTTTTTCCTTTCCGCTGACGGGAATGATCTCCTCCCTCTGGCCCGGCTATCAACAGAGGTTCCCAACCGA  
GGAGTTTTCGATGCGACTGGCGCTGTTTTCCCTATCTGCCACCTGCTGCCCGGCGGCGTCAATGCCGCTG  
CGGATCTTCGAACCGAGATAACAGCGGATGATCGCCGAGGCGGGGAGTCTGGCTTTGCCCTCTGCATGG  
TGGACCCCTCGCCAGCCCGACGCCCTGCGCAACATGCTGCCCATCGCCACCCGGGTCACCATCATCGATTT  
CGACCGGTTGCCGGACGGCATGCTGGGGATCACGGTGCAGGGGATGGAGCGGGTGCAGATAGAGGATCTG  
TGGCAGGAGCCCCGATGGCCTGCGTCTCGGCGAGGTGACGCCGCTGACGGCCTGGCCGCCCCGCCACTCC  
ATCCCCGATCAGCAGCCCGCTGGTTCGAGGCGTTGCGGGAGGTGTTTGGCGATTATCCCGACTACGCCGCCCT  
CTATCCCGCGCCCCGCTGGGACGATGGCAACTGGGTGGCCAGCCAGCGCTGGCTGGAGGTGCTGCCGATCCCC  
CCCGAGCAGAAGCAGTTGCTGCTAGCCGCCGCCGACAATCAGCCCGCCATCGCCCTGCTCAAGGGGGTGC  
TGGTGGCCAGCCACTGATTTTTTCTGACCCGCTGATCCGTCAGCGGCGTAGCGCCGTATAAGTCATCACC  
ACAGCATGTTTCGACAGCACACCAAAGGGATGGCGCAATGGCATATACTGGCCAACCACACTCGACCATA  
GCAGGACCTCGCCCGTGTGATAACCCGGATGGCGACCTCAAACTCTGCTGATCAGGGTGGCAGAGCA  
GGCCGACAAGGCTGCTTTTGGCCGCTGTTCCAACACTTTGCGCCGCGTATTCGTAGCTACGGCCTGCGC  
CACCTCGGCAGCGAGGCCAACGCCATGGAGCTGGTGCAGGAGACCATGCTGCTGGTGTGGCAGAAGGCAC  
GCCTCTACCACCCCGAGAAGGGGGCGCCACTACCTGGATCTACACCGTATGCGCAACCAGTGTTCGA  
CATGCTGCGCCGTCGTCGTGCCAGCAAGGAGGACCTCTGTGCCGAAGAGTTGTGGCCGGTACTGGAATAT  
CAGGCGGAAGAGGAGCACCTGAGCGGTGGTGAAGACGCCGTAAGTACGCGGCAGATGGCCACTATCTGG  
GCACCCTGCCGGAGCCGCAACAGCAGGTGGTGCAGCGCATCTATCTGCAGGAGTTCTCCAGCAGGAGCT  
GGCGGAGCGACTCGGCGTGGCCGCTCGGCACCATCAAGTCCCGCCTCCGGCTGGCATTACAGAAAACGAAA  
GAGCAAGTGGAGCAAGGCCATGATTAAGCCCATCCGACAGACCCTATGCTACGCGCCTTCGCCGCGGAC  
GAGTCCCTCTGCCGCTGGCGGTAGGGCTCTCCGCCACTGTGAACTCTGCCCGGATTTGTGCTGCCGAC  
TAAAGACATTCGAAGAGGAGCTGGCGCAGCAATATCTTGTTCGCCAGCAGAGCCCGAGCTGGCCTCCCG  
CGATGAAGTAGTGTGGATGCCGGATTGACGCCATGCTGGCGGATATTTGCCCGAGCCGCTTGCAGAG  
CCCCCTCCGAGCCAAACATGACCAGCCCCGAACGCAGCACGGCGATCTGGAGGTGGCCGGGCAGCCCT  
ACCGTTTGGCCAGGGTGTGCTGGCCCGTACCGCTCGCCCAAGTGGCGCCATATCGGGGCCATTCGCTCAGCA  
GAGTTCGCGCTGGAGCAGATGGGCGCGCCGCTGCTCCATATCGAGGCGGGTGGCCGCTGCCCCCTCC  
GAGCACACCCATCAGGGCTATGAGCTGACTCTGCTGCTGGCGGGCAATATTCAGGATGGCGACACCCTTT  
ACAAGGCGGGAGATTTTCATCTGGCGCGATGCCAGCCACTCCACAGCCCGCACAGCCCGATGGCTGCCT  
CTGCTACACGGTGCAGGATGCGCCGGTGCAGTTTACCAAGGGGCTGTGCGGGCTGCTGAACGGCATCAGC  
CAGCACCTCTACTGAGCACTATGACACCATAGAAAAAGGGACCAAGTTGGTCCCTTTTGTCAATTTTCATGG  
CTGTGCGGTGAGGCGACAAATACCAGATAGACGGCGAATGCCACGATAAAAACGGTAGATGGCGAACGGGAT  
AAAGTCGATGCGGCGGATCAATGTGAGGAAGGTCTTGATGCAAAACATCGCCACCACGAAGGCAGTGATA  
AAGCCCACGGCAAACATCGGGAAGTGGCCATCGAGAGGAAATCGCGGCTCTTGTAGAGATCAAGTCCGC  
TGGCCGCCACCATCATCGGCACCGCCATGATGAAAGAGAACTCGGCGGCGGCGTGACGGCTGATCCCAT  
CAGCATGCCACCCTGATGGTGGCGCCGGAGCGGGAGAAGCCGGGGCCACAGGGCCAGACATTGGAACAGA  
CCGATGCCGAACGCCTGCTTGTAGCTGATGTCATCCAGGGTTTCGGCTGTGACTGCAGGGCGGAACTTCT  
CGGCGATGATCAGCAGGATGCCCCCGCGACCAGCGGTACATGACGGTCTGCGGACCAAACAGGTTGGC  
CTTGATCCAGCTGTGGATGGCCAGACCGACCAGATGGCGGGCATCATGCCGAGGATGACGTGGATCAGC  
GACAGGGTGGCGTGATCCCGGGACGGCTTCTGGCCAAAGTGGATGCCAATCAGGCCAAACAGGCGACGCC  
AGAAGACGGCGACACGGCGAGGATGGAGCCAAGCTGGATCACCACTTCGAAAGTGGCAGCCTTGGGGCC  
TTCAAAGCCCAGCAGATGGCCGACGATAATCATGTGGCCGGTGGAGGAGACGGGGAGGAACTCGGTGAGT  
CCCTCGACGACGCCAGAATAAAGGCGACACAGCAGGCTATAAGTGTGAGTCAATCGAACAAACAATCCTTA  
ACTTCGTTGATGTAAAAACGCCCGGGAGGGTCTCGGGCGGCTTATCTTGCTCGATGACTGACTGCTGAG  
GCTATGTAAAAATCATGAAACCTTTAAGTCAGTCGCGGATAAAAACGGTAGCGGGTTTGGTGGTGATAACG  
CCCCGCTGGCAGCAGCCAGGGGTTGCCAGCTCGGGGCGATTGGGGCTGTCCGGCAGCTGTTGCGCCTCA  
AGACAGAAGCCGTCGTGATCCCGGTGCGACAGGCCGCTGCGGTTTCGGGGTATTGGCCAGCCAGTTTCCGG  
TGTAGAAGTGAACGAGGGCTGGTTGGTATAGACTTCCATCGCCAGCTGCCTGTCCCCGATACTACGCG  
AGCAGCCACTCTTGCCTTGGGCGTTGAGCACAAAGGCGTGATCGTACCCCTTGGCCTGTTGCTGCTGG  
GGATGGCTCAGCCAATCCTGTCCGACAAGGCGCTCGCGGCGCAGATCGAACGGCCCTCCACCGGGGTGA  
TGGCGATCGGCAAACCGCTCGGGTGGTTCGGCAGGAAGTGGTGGCATTGATGCTGATGAGGTGGTCAGC  
GACATTGCCACCATCGTTTTTGGCCATCGAGATTGAAGTAGGCGTGGCTGGTAAGGCTGACCGGGGTCAC  
GCATCTGTGCTGGCCACAAAATTGACCACCAGATCTCTCTGCTCAAGCCGGTACTCCAGGGTGACCCGCA  
GATTGCCGGGAAAGCCCTGATCCCCCGCTCGGGAGAGCAACGCCAGCTTGACCCGATCTGCTTCCAGTTC  
CCTGATCTGCCAACGCTGGCGATGAAAGCCTGCCTGCCCGCCGTCAGACAGTTGGGTGCCTGATTGGCA  
TTCAGCGGCCAGCGCTGTCCATCACGCACCAGCTCGGCACCACCAGTGCAGGTTGGCAAACGCCCGGCCA  
CCGCACCCAGCCACACCTGCTGGGTGGGATAGGCGTCTGCGGCACAGCCAGCAGCACTTACGCGGTTTT  
GCCACCCAGCCAGGGTGGGGAGGTGAGGGTGGCGCCGAAGTTCAGGCGCGCAGCCGACGCCCTCT  
TCATTTTCCAGCTCGAACGGGGTTCATGGCGCTGCTCATAGCTTGCCTGCACCGGCGCTGGCAGAGCAGAC

GTAGCAGTCGGCCTTGAGGCCCGAGATGGCCGGATACTCCGCTCGACGGCGGCCATCACCTCGGCCACT  
TTCTCCGGGGCGCAGCAGGGCGACCACACAGCCGCCGAAGCCGCCCGGTTCATCCGCACGCCGCCATCTG  
TGCCGATTTTAGTCTTGATGATCTCCACCAGACCGTCGATGGCGGGCACTGTGATCTCGAAGTCATCGCG  
CATGGCGGGCTGCGACTCGGCCATCAGCTTGCCGAGGCGGGTCAGGTCGTGGCTCGCCAGCGCATCGGG  
GCCGCCAGAGTGCGGGCATTTTCCCAACGATGTGGCGGGCACGACGATAGCAAGCATCATCCAGCCCGG  
CCTTGCCCCGCTTCCAGTCCGGCCAGATCGAGGTGCGCGCAGCGCCTTGACTCCGTTAGTGACGGGCGGCCG  
TTCGCACTGCTGGCGACGGGTGTTGTATTTCGCTGTCCACCAGACCGCGGCGCACATTTGGAGTTGACGATC  
AGCACCGCCAGATCCGCCGGCATGGGGATGAGGCGAGTCTCCAGCGAGCGGCAGTCGAGCAGCAGGGCAT  
GATCCGTTTTGCCGCTGGCGGAGATCATCTGATCCATGATGCCGAGTTGCAGCCGACGAACCTTGTCTC  
CGCCTGCTGGCCGTTGAGGGCGATCTCGCCTGGCTGATGTGCGAGCCCCAGCGCCTCTTTGAAGGCCATGA  
CCGATGGCAACTTCCAGTGGCGGAGGAGGAGTCTGCCCTGCGGTACGTTGCCGGAGACCACCA  
GATCAAGGCCGAGCAGGGCATAACCGCGCTCCTGCAGATACTTACCACGCCCGGATGTAGTCGCTCCA  
GCGTTGGCTGGGGTGGTGCTCGATGGGCTGGTCGAGGTCGAACTGGTCGCGCTGGTTGTCGTAGTCGGCG  
GCGATCACCTGCACTTGCCGGTTCATCGCGCAGGCCGATGGCGACGCAGGTCTCGTAGTCGATGGCGCAGG  
GCAGCACGAAGCCGTCGTTGTAGTCGGTATGTTTACCAGATGAGGTTGACGCGGCCGGGGGCGCGCACCAG  
CAGATCGGGCGCTTTGGCAAATTGCTCGGCAAAAACGGTGCTGACGCGTTGGCTGGGGGTTCATTGGGCCCT  
CCTCATTGGTGTGGGTGGTTTGGGTGTAGTGAACAGGGCTCAGGGCACGCAGCCGCTCGGCAGCCTGCTC  
GGGGGTAAGGTACGCTGGGTTTCGGCCAGCATCTCGAAGCCACCATAAAATTTGCGCACGGTGGCGGAA  
CGCAGCAGGGGCGGATAGAAGTGGGCATGCAGTTGCCACGCCCTCGGGGCAATCCGATTTGGGCGGTGCAA  
AGTGCCAGCCCATGGAGTAGGGGAAGCTGCACTCGAACAGGTTGTCTGAGCGGCTGGTGAGCTCCTTGAG  
CGCCACCGCCAGATCCTGTTGCTGGGCCCTTGGTCAGATTGAGCATGGAGGGGACGTGCGCCTTGGGCAGC  
AGCAGGGTTTTCGAACGGCCAGGCGGCCCAGAAGGGGACAACGGCAAGCCAGTGTCTCGGTCTCTACCACGA  
TGCGAGAGCGATCCGCCAGCTCCCCTCCACATACTCCAGCAGCATGGGGCGGCCATGCTCCGCCAGCCA  
GTCGCGCTGGTGCTGCTTTCGCGGGCGATCTCGTTGGGCAGGAAAGTTGCTGCCCCAGATCTGGCCGTGG  
GGGTGCGGGTTGGAGCAGCCCATGACTGCCCTTTGTTTTCAAAGACCTGCACCCACTCCCCTGGGCCG  
ACAGCTCGGGCAGCTGATCCATCCAGGTGGTGATCACCCCTTCGATGGCGGGCAGCGGCAGCTCGGGCAG  
GGTCTTGCCGCTGATCCGGCGAGAAGCAGATGACCCGGCTGGTGCCGCGGGCGCCTCCAGTTTCAGCAGG  
GGATCGTGGCGCTATCGGGCGGGTATCTCCAGTCAGAGCAGCGAAGTCGTTGGTAAAGACGAAGG  
TGCCCTGTAGTCGGGGTGTAGTGTGCGCAGTGCACCCGGTGTTCGCCGCGCAGAGGAAGCAGCGGATC  
GTGGGCCTGTTTTGGGGCCTGACTCACCTTCTCCACTGTCCCTGCCAGGGGCGTTTTGGCCCGATGGGGG  
GAGACCAGCACATACTGGCCGGTCAAGCGGGTGAAGCGGCGATGGGGATGATCGACGGGGTTGAACATCA  
TCTCTCCTGAATAAGGTATTGAAAAATAGGGTTCATCTATTAACAGGGAGCAGGCAGGCCCTACTCCTCGTA  
ACCGTTGCGATTGGCGGATTGCCAGCGCCAGCTGTGCGCGCACATGGCGTCGATGTTGCGGGTCGCCCCG  
CAGACCAGCTCGCGCTCGGCCTTGCCCGGATCAGCCAGCAGGCGGCGATATCGCCCGGGCGACGCGGCT  
CGATGCGAAATGGCAGCGGCTTGCCACAGGCGGCAGAGAAAGCGGCGACCAGCTGCAACACGCTCTGGCC  
CTGACCTGTGCCAGGTTGTAGGTGTGCACGCCACCCTTGCTACGCAAGTGTGACGCGCCTTGACGTGT  
CCTTCGGCAAGATCCATTACATGGATGTAGTCGCGCACGCCGTTGCCGTCCGGGTGGAGTAATCGTTTT  
CAAAGACAGACAAGCAGTCGCGACGGCCGATGGCGACCTGGGTGATATAGGGCATCAGGTTGTTGGGGAT  
CCCCTGCGGGTCTTACCCCATGGTGGCCGATTCGTGGGCGCCGACCGGATTGAAGTAGCGCAGCAGGGTC  
ATGCTCCAGTGGGGCTCGGCCAGCTGCAGATCTTCGAGGATCTCCTCGATGATCAGCTTGGATCGTCCGT  
AGGGGTTGGTGGCGCTGCGAGGGAAATCCTCGCGGATTGGCAGGCTGGCGGGATCGCCATAGACGGTGGC  
CGAGGAGCTGAACACCAGATTGTGCACGCCAGCCGCTTCATCGCTGCAGCAGGGTGAGGGTGGCGCCG  
AGGTTGTTTTCGTAGTAATCCAGTGAATGCGGGTGCAGTCCCGACCGCCTTGAGGGCGGCAAAGTGGA  
TCACTGCATCGATCTGCTGTTTACGCGAAGAGCCGGTCCAGCAGGGTGCATCGCAATATCCCCTTGATA  
GAACAGGGGTTTTCTGGCCGCTGATGGCGGGGATTCGCGCCAGCACGCTGCGCTTGTGTTGCCGAGGTTG  
TCGACCACCAGGGATTTCATGCTGCGCTTGCAAGGCCAGACAGGTTGGCTGCCGATATATCCGCAAC  
CGCCGGTGACCAGAACGTTTCATCTTGCTCTCCACTGAAAAAGTGTCTGGAAGCAGTCTAGCCGAGGGTGT  
GGCGACCAAACGTGTGAGCTTGCTTGCAAAAACAGTGTAAACGATTACACTTTTTTTTGTGGTTCATCCTGACG  
GCAGATATGCGTTTTACCCCTGTTTTCAAAGGGTTTTGCTGGGTATAATGGCGCTCTATTGCACAGTGA  
GAAGTGAACAACAGCATGAGCACCATCAAGGATGTGCGCCGTTTGGCCAATGTGTCAGTGGCAACGGTTTT  
ACGGGTGATGAACAACCTCCCCAAGGCCAGCGCCGCTCTCGCGAAGTGGTGCAGAAGGCCATGGCCGAA  
CTGGGCTACACCCCCAACCCAACCGCGGGCACTGGTGAAGGGGTTCTCCGGCATCGCCGTCGAGCAGAA  
TCGGTGACGTGGCCGATCCCTTCTTCGGTGCAGTGGTGAAGGGGTTCTCCGGCATCGCCGTCGAGCAGAA  
CCTCCACCTGCTGATGGGTAACGGTTTTTACAAGGCGGTCAGGAGCGTGAAGCGATCGAGCTGCTGATC  
GGCAAACGCTGTGAGGCGCTGGTGGTGCACAGCAAGGCGCTGAGCGACGAGGAACCTTACGATTACGCCA  
TGCGGGTGCCCGGATGGTGCTGATCAACCGCGATATTCTGCCCTCAAGGGGCGTGCATCGCTCTCAA  
CAACCGGCTGGGGGCGGCTACGGCGACTCGCCACCTGATCGAACTGGGCCACCGCCATATCGCCTTTATC  
AGCTCGGATCACGCCATCGAGGATGCCACCTTGCCTGTCAGGGGTATCAGGATGGGCTGATGGAAGCCG  
GTCTGGCAGCCGATCCCGAGCTTATCGAGAGTGGCACCCCGAACGAGGAGGGGGGGAGCGCGCCATGCT  
CAACCTGTTGGCCAAGGGGCTCAAGGTGACCGCGTGGTTGCCTATAACGATGCCATGGCGGGGGCGCC  
ATCTCAGTGTGGCCGACAACGGCCTGCGAGTGGCGGAGGAGTCTCGGTAGTGGGCTTCGATGACATCA

TCTATGCCAGATATTTGCGCCCCAAGCTCTCCACCATGCGCTATCCCATCGAGCTGATGGCAGCCCAGGC  
GGCCAAGCTGGCCATTTCAGCTGGCGGGGGGAGAGTGACGCGACCCAGAGCCGGATCTATACCCCCACC  
CTGATCAATCGCCACTCGGTGGCACCGGTTTCGGGCCGGATAGCCCCCTTTTTCGGGTCTGTTTCGGGGCCG  
TTTCTTGCACGGTTATTGTTTTACCTATTTTTAATCATTTTTACTCCGCTTACTTAACAAAATCAGTGT  
AATCGTTTTACATCTGTGTGAGCGAGATCGCCGTTCCCTGCGTCATACTTCTCTAGACTGAATACGTTTTTC  
CAATCGGTAGGGAGAGAGTGAATGCTCAGGGAGATAGTGGCGCGTCAGGATTGGCAGACTCAGGCTATTA  
CGTCGGTAAACCGGCTGGCAGCCCATAACCCCATGTTTCAGCTGGCGCAGCGAAACGGATGCCAAGGGTGA  
TCTGGCCTCTTCCCTCCCGTCTCTTGTCTGATGGCGAGTGGCGCTTCTCCTTCTTTGCCGCTCCCGAGCGG  
GTGCCCGAGAGTTGGCTGGCGCAGGATCTGGTGGATGCTTGGCCATTACAGTGCCGGGCAACTGGCAGC  
TGGATGCCGCCTATCCGGCTGGCGGGCCGCTACCCGATGGCCCCATCTACACCAATATCAAGTACCCCTT  
TCCTTGCAGATCCACCGGAGTCCAGCAGAGAACCCACCGGTTGCTACTCACGCGAGTTCGATCTGCCT  
GCCGGCTGGCTGGCCAGCGGCCAGAGCCGGATCATCTTTGACGGGGTGAGCAGTGCCTTCTATCTCTTCT  
GCAACGCGCGCTGGGTTCGGCTACTCCCAGGACAGCCGGCTGCCCGCGAATTCGATCTGACTCCTTATCT  
GCAGAGCGGTTCGAACCGGTTGGCGGTGCTGGTGGCTGCGCTGGTCCGACGGCTCCTATCTGGAAGATCAG  
GATATGTGGTGGCTGTTCGGGATCTTCCGCTCCGTCAGCCTGCTGCACAAACCGTCCCGCCATCTGATGG  
ATATGCGGGTGACCCCCGAGCTGGATGCCTGCTATCGGGATGGTCTGCTCAAGATTGCCCTGCAGGTGGC  
TAATGGGGCCGGTCTGTTCGGTGGAGGTCAATCTCTATGACGGCGCGAGCGCTCGCGACCCCTGCGCCAG  
CCGATCGGCACCCAAGCCATTGATGAGAAAGGGGCATATGACGATCGCGCCGAGTTCGGCTCGACGTGG  
TTGCGCCGCGCAAGTGGAGCGCCGAGACGCCCCATCTCTATCGCCTGACCCTGACCCTACTGGACGAACA  
GGGCCAGGTTATCGAGAGCGAGGCATGTGATGTGGGCTTTTCGGGTGGTGGAGATCCGTGGCGGCCCTGCTG  
CGGGTCAACGGTCCGCGCTGCTTGTTCGCGGTGCCAACCGTCATGAACACCATCCCGCCAAGGGTTATG  
CCATCGATCGCGCCACCATGGAGCGGGATCTGCTGCTGATGAAGCGGCACAACCTTCAATGCGGTGCGCTG  
CTCTCACTATCCCAACCACCCCGACTTCTATCGCCTGTGCGACCGGCTCGGCCCTCTATGTGGTGGACGAG  
GCGAATCTGGAGACCCACGGCATGACCCCATGGGGCGGTTGGCGCGGGATCCCGCCTGGAGCAATGCCT  
TTCTGGAGCGAGCGACCCGCATGGTGGCACGGGATTTCAACCACCCCTCGATCATCATCTGGTCGCTGGG  
CAACGAGTCGGGTTACGGCCCGGCCACGATGCCATGTATGGCTGGATCAAGCGCAGCGACCCGAGCCGT  
CCGGTGCAGTACGAGGGGGGGCGGGCCGATAACCCGGCCACCGACATCATCTGCCCCATGTATGCCAGAA  
CCCATCAGGATCAACCTTTCCCGGGTGCCCAAGTGGGCGCTGGCCAAGTGGATCGGCCCTGCCCGCGGA  
GCACCGGCTGATCTTTGCGAATATGCCCAACCCGATGGGCAACAGTCTCGGGGGTACGCCCCACTAT  
TGGCAGGCGTTTTTCGCGATCATCCACGTCTGCAAGCGGATTTGTCTGGGATTGGGTTCGATCAGGGGCTCG  
ACAAATACACCGCCGATGGCCGCCACTACTGGGGCTATGGCGCGATTTTGGTGATGCGCAAAACGATCG  
TCAGTTCTGCTGCAACGGCTGCTGTTCCCTGATCGTACCCCCCATCCCGCCCTGTGCGAGGCGAAGCGT  
GCCCAGCAGCCGTTCCGCTTACCCTGCTCGAGCACACCCCGCTGCGGGTGGGATCGAGAGCGAATACC  
TGTTTTCGGGAAACCGACAACGAGCGGCTTTGCTGGCAGCTGTGCGAGAACGGCCATGTGCAGCTGCAGGG  
GGAGAGCTCCCTTGGCTGGCGCCACAGGGAGTGGTTCGAGTTGACCCTGAGCGAGACTGCCCGCCTTT  
GCGGCAGGCTTACTGGCCTGGCTCGATCTGGCCATCGTTTCAGCCGAGGCCACCCCTGGTCGCAGGCGG  
ATCACAAGGTCGCCCCGTCAGCAGTTACCCTGCCGACCCCTTGTCTGCCTGCTCCCGCCGCTGCCGC  
CACCTGAGCGAGCAGCCGGATGGCTGGCGGATCACCGCCGAAACAGCCAGTGGTGGCTCGACAAGCAG  
AGCGGCCGTATCACCAGTTGGCAAAAATCGGGGCAGGAGCAGTTGCTGGCGCCGATCATGGATCACTTCT  
ACCGGGCGCCGCTCGACAACGACATTGGCACAGCGAAGCGGATCACGCCGACCCCTCACTCCTGGATTGC  
CCGCTGGCAGGCGTGTGGTCTCGGTTCAGTGGCTGCACCGCTGCTGGGGATCGCGGTCGCTGGAGGGGAT  
ATCCGGGTTCAGCCATGGCTACTTCCACCACGATGAGCTGCTGCTGGTGAGTCACTGGCATCACCGCTTTA  
CCGACGATGGCACCATGAGCCTGGAGATAGAGACCGAACTGGCGCAGGTTCTGCCGTGCTGCCCGGAT  
TGGCCTGCTGCTTCATCTGGCCGAGGTACCGGCGGAGCCGAATGGTTGGGACGCGGCCCTCACGAGAAC  
TATCCGGATCGTCTGCTGGGCGCTGATCTGGGGCGCTGGAGCCTGCCGCTGGAGGCCATGTACACCCCTT  
ACATTTTCCCGAGTGACAACGGCTTTCGCTGCGATACCCGTCAGTGCAGTGCAGCTGGGCGAGCAGCGGTGAT  
CGGCACCTTCCATTTTCAGTGCCAGCCGCTTCAGTCAGCAACAGCTGGCCGTTGCTCGTCAGCAGGCGAT  
CTGGTGGCCGAAGAGGGGCTGTGGGTCTGCCTCGATGGCGCCCATATGGGGGTGGGCGGGGATGACTCCT  
GGAGCCAAAGCGTTCGCTCCCGAGTATCAACTGCTCGAGCGTTCGTTACCGTTGGGGCTGCACTCTCCGCTA  
AGCCAGCTATTGAGGCGACTGTTCGAGCCAGTGCGCCATTTTGACAACAGACCAGTAACGACTAGCCTCAA  
TGCTGTGGGAAAGATTGAGTCTCAAATCTGATTTTTATTTATATGTATTTGAAAAATAAATAAAAGTTT  
CAATGTAACAGAGTGTAACGTTTTTCATTTTGTGTCATGATCACAGAAGAAATGACAACAAACTGATTA  
CATTGATTGGCGCTTGTCAATTGCTCGCCACCCACAACACAGATAGACACATCGGAGCACACATAATG  
AAAAAACTGACCACAGTTGCCGCCCTGCTGATGGGCATGATGGCTGGAGCCAATGCCAGGCTGACACCC  
GTATCGGGGTAACCGTCTACAAATACGACGACAACCTTCATGGCGGTCTGCGCAAGGCCATCGAGAAGGA  
GGCGGCAGCCACTCCGGGGGTGGAAGTCTGATGAACGACTCCCAGAACGACCAGTCCAAGCAGAACGAC  
CAGATCGACGTAAGTCTGGCCAAAGGGGTGAAGGCGCTGGCCATCAACCTGGTTGACCCGGCTGCGGCAC  
CGGTGGTGGATTGAGAAAGCCGTGGTGAAGATATCCCGGTGGTCTTCTACAACAAGGAGCCGAGCGCTAC  
CGATCTGGCCAGCTACGACAAGGCCTACTACGTGGGCACCGACTCCAAGGAGTCAGGGATCATCCAGGGT  
CAACTGATTGCCAAACACTGGAAAGCCCATCCGGAGTGGGATCTGAACAAGGATGGCGTGATCCAGTTCCG  
TGCTGTTGAAAGGGGAGCCGGGCCACCCGGATGCCGAAGCGCGTACCTCCTACGTGGTCAAGACCTGAA

CGATGGCGGCGTCAAGACCGAGCAACTGCACATGGATAACGGTATGTGGGATAACGCCATGGCGAAAGAC  
AAGATGGACGCCTGGATCTCCGGCCCCAACGCCAACAAGATCGAAGTGGTCATCGCCAACAACGACGGCA  
TGGCAATGGGCGCAGTCAATCACTGAAAGCCCAGGGCAAGACCGCCATTCGGTGTTCGGCGTTCGATGC  
GCTGCCGGAAGCGCTGGCCATGGTCAAGAGTGGTGGCCATGGCGGGTACCGTGCTGAACGATGCGGCCAAC  
CAGGCCAAAGCCACCTTCGAGCTGACCAAGAACCTGGCTGAAGGCAAACCGGCCGGTGAAGGCACCAAGT  
GGAATATCGTTCGACAAGGTAGTACGTGTTGCCACGTGCGGTGGATAAAAGACAACCTGTCCCAATTCGA  
GTAATTCCTCCTCCAGGGCAAGGGAGATCCCCTTGCCCTTTTTTCAACCAGATGTGATGGCTGATATGA  
CAACACAGCAACAATCAGAATGGCTGTTGGAGATGATTGACGTCAGTAAGAGCTTTCCCGCGTCAAGGC  
ACTCGATAATGTCAATTTACGGGTCCGTCTCATTCTGTGCATGCGTTGATGGGCGAGAACGGAGCGGGA  
AAATCCACACTGCTCAAGTGCCTGTTCCGGCATTACGAGAAGGATCAGGGCAAGATCTTTTTCAAGGGGC  
AGGAGATCAACTTCACCTCCTCGAAAGAGGCGCTGAAAAATGGCGTCTCCATGGTGCATCAGGAGCTCAA  
CCTGGTGTTCAGCGTACCGTGTATGGACAACATGTGGCTCGGCCGTACCCCAACAGGGGTGGTTTTATC  
GACCACGGCAAGATGTATGACGACACCAAGCGCATCTTCGATGAGCTGGATATCGACATCGACCCCAAGG  
TGAAGGTGCGGACCCTGTCCGGTCTCCAGATGCAGATGATCGAGATCGCCAAGGCGTTCTCCTACGATGC  
CAAGATCGTCATCATGGACGAACCCACCTCCTCCCTGACCGAGAAAAGAGGTGAATCACCTCTTCAAGATC  
ATCAACAAGTTGAAGGAGAAGGGGTGCGGCATCGTCTACATCTCTCACAAGATGGAGGAGATCTTCTGTC  
TCTGTGACGAGATCACCATATTGCGGGATGGCCAGTGGGTGGCAACCCAGCCGCTCAAGGGCATGACCAT  
GGATCAGATCATCGGCATGATGGTCCGGCTGAACTGACCCAGCGTTTCCCGGAAAAGACCAACCAGCCG  
AAAGAGGTGATCCTCGAGATCGAACACCTGACGGCGAAGAACCAGCCCTCCATTCAGGACATCACTTTCA  
ACCTGCACAAGGGGGAGATCCTCGGCATCGCCGGACTGGTGGGGGCAAGCGCACCGACATCGTTCGAGAC  
CCTGTTCCGGTATTTCGCGATCGCAGTCAAGGCGAGCATCAAGCTGCACGGCAAGAGGTAGCCAACCACAAC  
GCCCACGAAGCGATCCGCAACCGCTTTGCGCTGGTGACGGAAGAGCGCCGCTCCACC GGTTATCTACTCCC  
GACTCGATATCGCCTTCAACTCCCTGATCGCCAACATGGACAGCTACAAGGGCTCCATGGGGGTGCTCAG  
CGACAACAAGATGAAGAGCGATAACCCAGTGGGTTCATCGACTCCATGCGGGTCAAGACGCGCCGACCCAGCAG  
ACCCAGATCGGTTCCCTCTCCGGGGGCAACCAGCAGAAGGTGATCATCGGTGCTGGCTGCTGACCCAGC  
CGGAGATCCTGATGCTCGACGAGCCCACCCGAGGCATCGACGTCGGGGCAAGTTCGAGATCTACCAGCT  
CATCTGGAGCTGGCGAAGAAGGACAAAGGGATCATCATCATCTCGTCAGAGATGCCGGAATTGCTGGGG  
ATCACCCGACCGCATCATGGTGTGATGAGCAATGGCCGGTTCGCGGGATCGTCAATACCAAGAAAACGTAAC  
AGAGCGAGATACTGCGCTGGCATCTCTGTACCTTAGAGACAGGAAGACATTTATGGAGTCAAGGCTAAAA  
ATTTCAATCTGATGACGGCGCTCAAGGAAAACGCCATCTATCTGGTGCTGCTGGTGTGCTCATGGTCAT  
CGTGATCCAGGAGCCCTCCTTCCCTGAGCCTCACCAACTTCAGCAACATCCTGACCCAGTCTCCTGGTGC  
GTCATCATCGCGCTGGGGGTGGCGGGCATCATCATCACCCAGGGGACGGATCTCTCGGCCGGTCTGTCAGG  
TCGGTCTGGCGGCACTCATAGCAGCAACCATGTTGCAGGCGTTGACCAACGTCACAAGGTGTTCCCGAC  
GTTGGGGGAGGTGCCATTCCCTGCGGTGATCCTGCTGGTGTGTGGTGGGGGCGCTGATTGGTCTGGTC  
AACGGTCTCATTGTGGCCTACCTGAACGTTACCCCTTCATTACCCTCTGGGCACCATGATCATCGTCT  
ACGGTATCAACTCCCTCTACTTTGACTCGGTAGGGGCTCGCCGGTGGCCGGGTTTGACCCTCGCTTCTC  
CAGCTTCGCCCCAAGGGTTTATCCGGATAGGAGGATTCAGCTCTCTATCTCACCTTCTATGCGGCCATC  
GCCAGCGTCTTTGTCTGGGTGCTGTGGAACAAGACCCGCTTTGGCAAAAACATCTTCGCCATCGCGGGCA  
ACCCTGAGGCTGCCAAGGTCTCCGGCGTCAACGTGGCGGTCAATCTGGTGATGATCTATGCGCTGGCTGG  
GGTCTTCTACGCCTTCGGCGGCATGCTGGAAGCGGGCCGGATCGGTAGCGCCACCAACAACCTTGGCTTC  
ATGTACGAGCTGGATGCCATCGCGCGTGCCTGGTGGGCGGCGTGTGCTTTGCCGGCGGGGTGGGAACGG  
TCGCTGGTGTGATTACCGGCGTACTTATCTTACCCTGATCAACTATGGTTCGACTATATCGCGCTCAG  
CCCTTACTGGCAGTTCATCATCAAGGGCGGCATCATCATCTGGCGGTGGCCCTGGACTCCATGAAGTAC  
GCCAAGAAGAAATAACGATTGGCAGGGAGGGTGGCGTGGCAGCCCTCTCTTCTGGAGGGAACCCATGC  
CATTCAAGGTCAAGATTTACCTCTTGTGCTGATTTGGCCATCTGGTCACTATCGGCACCGCCGGGCTCAG  
CGTGAATCACTTCACTGAGTGGTTACATTCGACTCAGCCACCAACATCAACGAACAGATCACCTG  
GTCAAAGAGAAGCTGGCCAGCGACATCAATCAGAAGATCCTGTTGGCCGCAACCTCAATTTCCGGGTGA  
CCAACGTCAAGAAAACCTCTGCAAGAGACCGCTTTTCAACAACATCGTCAAGGTGATCGGCAACATGGCCTT  
CGACGTGAGCGGTGTCATCAACGACAGCGCCAAAAGTGGATGCCCTGCGCAAGCTGATCCCGCGCCCAAC  
AACCAGATCACCGTCAGCCCGCTGCAACAGGTGGATGGCAAGCCGGTTCATCACCATCTGGTGGCGCGG  
GTGCCGATTCTGCCTATCTCTACTACCTCGACATGAGCGAGTTCAAAAAGCCTGCTGGAGAAGATGAGTGG  
CGCTGGCCGCTACTTCTCGCTGGCTGACAGTCAAGGCAACAACCTCTATGACAGCAAGCCGAGGGGGAG  
AGCGAAGCGCGCCCCAACAGCTGGATATTCGTGGCAGCAGCTGGACCCTGACCGGTACATCGACCTTG  
ACTACATCCGTGCCATGACCCGGTCACTCAATGGCCAGATCATCATGGCGCTGTGCGCTGTGCGCTGTGC  
GCTGTGCGGTGTGGCGATCGTGGTGTGCTGGCGATGCTGGCGCTCAATGTGGCCTATCGACCCATT  
GTCTCGTTGCGGGATCTGGTGTGAGCTCTCCCGTGGCAGCGGCGATCTCACTCGCCGGTGGCGGTGA  
CCAGCAAGGATGACCTCGGTGAGATCTCGGCCGGGATCAACCGCTTTATCGAGCGGCTGCAGGAGATGAT  
GGGGGAGGTGCGGCAGGCGAGCGGCCAGCTCAACAGCGGTATCGAGGGGCTGGCCAGCCAGACCGGCTCC  
GCCAGTCTCTGCTGGCGGACCATGTACCGGAGACCGAGCAGGTGGTGACCGCCATCAACGAGATGAGCC  
GCACCGCGGTCTCCGTCTCCGAGAGTGGCGCCAGCACCGCCAACTCACCGCCAGAGCCAGCAGCTGGC  
GAGCCAGTCTCGTCAGGTGGTGGATCAGGCGATGGCCAGCGTGTGGCGTGGTGGATGAAGTGAAGCC

ACTGCCCGCTCCATCGAGGGCATGCAGCAGGATGTGCAGCAGATTGGCTCTGTGCTGGGGGTGATCGGCA  
GCATTGCCGAACAGACCAACCTGCTGGCCCTCAACGCCGCCATCGAGGCGCCCCGCGCCGGTGAACAGGG  
GCGCGGTTTTGCGGTGGTGGCAGACGAGGTGCGTTCCCTCGCAGCCCGTACCCAGCAGAGTACAGCCGAG  
ATCCAGACCATGCTGGCCAGTCTGCAGCGGGGCACCAGAAGTGTGGTGGATGCCATGGGCAACACCAAGC  
AGAGCTGTGAGGGGGCGGGCCGAGAACACTACCAGGGTCAACGAGTGCCTGGATCTGATGGCAGGGGAAGT  
GGTGGAGATCAACGATCTCATCAGCCATATCGCCACGGCGGGCAGCAGAGTGCCTGGCCGAAGAG  
ATCAATCGCAACATGAGCGCCATCGCCGAAGTGTGATCCGCCAGCTGACCCACAATGGCGAAGCGACGGTTG  
CCAGCTCCGCTGCGATGCAGCAGACCTACGACCGGCTGCGGGAGATCGTGGGCCACTTCCGGCTGGAGTG  
AGGCCGGTGTTCAGTCAATAACAAAACAGGGCCATCCGGCCCTGTTGTTGTTTTCTGTCTGCCTGAATC  
AACCGGCCTTGGCGGCAGATAGACCCCGCTTCCATGTGATGGGTCTTGGGAACTGGTCAACAGGGC  
GAAACGGGGCATCTCGTGGGTCTCGCCAGTACCAGTGTGGCTGCGAGTCTCGGGGTTGCAGGAG  
ATGTAGAGGATGTTGTCGTACTCCTGCACCAGCTTGACGGTGGCATCATCGAGACCGGGCGGGGCGGGT  
CGACGAAGATGGTGTGCACTGGTAGCTCTTGAGATCGACCCCTTGAGGCGGTTGAACTCCCGCTCGCC  
ACGCATCGCCATGGTGAACCTCCTCGGCGGACATGCGCAGGATGATCAGGTTGTCGACGCCGTTGGCGGGC  
ATGTTGAACTGGGCGGAGTCGACGCTCGGCTTGGCTATTTGCGGTAGCCAGCACCTTGCAGGAAAGTTCTGCG  
CCAGCGGATGGAGAAGTTGCCATTGCCGAATAGAGCTCCAGCAGGTCCCTTCGCTCCCTTGGTCCAC  
ATCCAGCGCCAGGCCAGCATCTGCTCGTTGATGGCGGCGTTGGGCTGGGTGAAGCTGTTCTCCACCTGC  
TTGTAGATGAGCTGGCGACCCGCCACGTTGAGCTGTTGATGACGAAGTCATCCCCAGACAGATCTTCT  
GCTTGTGGGGCGGGCAATCAGCTGTAGCTCGAACCCCTTGGCGCGCAGATCGGCTGCAGCACTTCCGGC  
GGCTTGTGTCATTCCGGCCTCCAGCTTGCAGGTGATAGAGCAGGCTGACAATGATCTGGCCGACTGGGTG  
GAGAGGTAGTCGATCTGGAACAGCTTGCAGGCGCAGCACCGGGTGTGGGCGCAGCCCTCCAGCAGCAGCG  
GCATCAACTGGTTGATGAGGCGGCTGGCGGTGGGGAAGTGGTCTATCTTGATGATCTCTTTGGTCCGCGG  
GGCATACATGCAGTGAAGAGGTCATCCCCCTCGTGCCAGATGCGAAAATTCGGCGCGCATCCGGTAGTAC  
TCCGCGGGCGAGCTGTGCACTTCCAGCGCCGGGAGGGTGAAGCCGGCAACAGCTCCGGTGAAGGCGAGCGC  
GCTTTTCGTCGAGTTGGGCTGATAGTCGGCCGCGGTTCTAGGCGCCGGAGCGTTCCGCGAAGGCTGTTG  
GGATTGGGTCATAAATACCTCACATGCACACCGGCCGGGCGGGTGCAAAATCGGGGGAAGGCAACAGGCC  
ACCCAAAGGGGCGGATTTTTAAAGCCAGCCGAGATGTTCCAGCATTTTGTGGTCAAGAAGTGTTCAGT  
CAGGCCGATAGCTGATCAGGCATGGTGGGAGGACATTTATGCAGATCGAAGGCGTGGGCGCAGCC  
AACCCAAAGGAGTGGGTGTTTTCTCCCAAATCGCCCCAACAGGCGGAGCAGAAACAGGTCGAAGGCGAGGGA  
GGAGGTCTCCTTGACAAAGCCGCCAAGTGGGCGCAGGTGCTGATCCAGCAGGCGTTGCAGTTCTCGCTG  
GAGATCAACGGCCAGGGCTATCAGGCGCCGAAGGTGAAAGAGCCCGAGGAGATCACCCCGGAGACCCTGT  
TCGACTTCCAGTCGGTGGCGGACAACGTGCTGCAGTTTTGTGACCGGGCGGCTTGGTGCCGCGCGGGCCGA  
TGGCAAATCTGACGACGACCTGACCGGGATGATGGAGCAGGCCCGCAAGGGGGTCGACAAGGGCTTTGAG  
GAGGCGAAGAAGCAGCTCGGCAAGTGGGCGACCGACAACGACGATATCAAAACCGGTATCGATCAGAGCT  
ACAAGCTGATCCAGAAAGGGCTCGAGGAGTTCGAGAAGGAGTTCTTCGGCAAGGTCTCCCGACCGACAT  
GGGACAGGCCGAGATGGCCAGTCGCCAGCAGGGGTATCTGGAGATCCAGACCAAGGATGGCGACAAGGTA  
GTGCTGCGCTTCAACGACAGCTGGCAGACCAAGTCCCAGAGCAGCGAGAGCGGCAGCCAGTTTCCAGCTCA  
AATCGAGCCAGAGCTTCCAGCTTCTCGCTGGAGGGGATCTCAACAGTGACGAGATGGAGTCCATCGGCAA  
GCTGGTCAAGGGGATCGACGAGCTGGCGGGGAACTTCTTCTCCGGCAACTTCGAGGATCTGCTGGACAAG  
GCGGGCGAGCTGAAACTGGATGACAGCCAGTTGGCCTCCTACTCCCTCAAGCTCAAGCAGAGCGTCAAGC  
TGAGCCAGACCTATCAGGGGGCGCACTCCCTGCAGGAGCTGATCAAGCCGTTTGCCGACTATCTGCCGAA  
GCTGGATCAGGTGCAGAAACAGGCGGATAGCCTGCTGCCACCATCCAGCAACAGGCGCTGACCCCGGCC  
GTGTTGGCCGCGAGAGGAGAAGAGGAACCGGCGCAGGTCGATCGCTTACCAGCTTCAACCAGCGGATGC  
TGGAGGCGCTGCGGATGATTAACAGTTCAGCCCTCCACCGAGCCCGCCAGTAAGAACGCTGAGCCAC  
AGCGCGTTACGCAAGTAATGACCTGCCGTTTGCCAGCCCTTCCCGGGGCTGGCAAATGGCCTTTTTCTCC  
AATCCGGTTGCCCATGAACCCCAAGAAGCCAAAGAGACAAGCGGAGCTCTGCTACCCCTTTATCTTCGA  
AACCTCGCTCAAATGTGATTTTTGAAATCGCCACCGACGAGCTCTGTTGTCAGGTTGGGGCGCTGCTGTCA  
CACCTTGCGCCGGATGCCGATACCGAGCCCATGCTGGCGGATCTCGCGGCGTTGCAGCGACTTATCTACA  
ACCTAAACGGCTCGGTACCGGCAAGCTGGGGATCTTCGATGCAGATCTTGAGTGGCTCAAGGCCCGTTA  
CGACCACTACAACGAGGCGAGTCGCGGCAGCGTACCAGGTTTTCGTGCTGCCGCGAGGGGCGCAGCCAT  
CCCACCCTCCATCTGTGCCGCTGCGGCAGCAAGAAGGTGGTGGGCTGCTGGTCAGGCTGGAAGAGAGCG  
AGGTGGCCTTCGATCCATTCTCTATCGCTTACCAACCTGCTGGCCAACCTTCTTCTTCGTGCTCACCGT  
CTACCTCAAGCAGCGCTGGCAGGTGCCGGAAGTGCCCTACGTCAGCATCAACTACTGATGGCGGCTGGTT  
AGGGGCTAGACGTCATGGTGGATTGAACGGAATAAAAAACCGGAGCCTTGGGCTCCGGTTTTGTTTTTCA  
GCGCGTCAGTTGCCCGCTCAGCTGGAGATCAGCACCCGGGCGAGTTGGCGGGGATGGTGGAGCTGTACCT  
CGCCCTGCACCACTTCAAACCTTCTCGCCGTTGAAGGCGTCGGTGAAGCGGCTGGCAGGGCTGGCGGTCTG  
CCACAGGGGCGAGGCTGATGGTGCAGGCTCGCTCGGGTGGCGGTTGCAGGCCACTACCACCTGATCGCTT  
TGCAGGGTACGGGCAACACATAGCTGTGGGGGCGGGCTAGAGGGTCTGGATATCGCCACGGCGCAGGG  
AGGGGCGCTGGCGGCGGATCTGGATCAGCCGACGATAGTGGTTCGTGCAGCACGTGATCCAGTCAAGTGGT  
ATCCACGGGAAGCAGCGGCGGAGTCAAGGTCGTTGCCGCCAGAGAGCCCACTTCAATCGCCGTAGTAG  
ATGGAGGGCACCGCATATAGGTGAGCAGCAGGGTGGCGGCGAGACGCATCCGCTGTTTGTCTCTCCCA

GCAGATGGAGGAAGCGGGCGGTGTCGTGGCTGTCCAGCAGGTTGAACTGGGCCAGCTGGTTCCTTGAACGG  
GATGTGGGCCCCGCGCCAGCTTGAGCCAGCGATCCAGCTCTTCGGCGCTGATCTTGATGGGGTGGTAGGCG  
ATGTCTCTTGCAGCCAGGAAGGCGCGGATCGGATGGGCCAAGCCGTAGTAGTTCATGGCACCGTCCCTCT  
GATCTCCTTGCAGCCACTGGCTCGCCTCGAAGAAGTGTTCGCCGAGCACGTAGGCGTCCGGGTTCTCCTG  
CTTCACTGCCCCGGAATGGCGCGTACATGGCTGCGGTTACCCTCGGCCGTGCCGCGCTCACCCAGCATG  
TGGATGACGTCAAAGCGCCAGCCATCGATCTGGTAGGGGGCGCGCATCCAGTAACGGAGGATGGCGTCGT  
CAGCCCAGTAGACGGCGTCTTGCACCTTCTCGCAGGAGAAAGTCGAGCTTTGGCAGGCTGCGAATGCCCTT  
CCAGCTGACGTAATCCCCTTCTTTGTCAAAGGTGTAGAAGCTGCGCCACGGGGAGTCCGGGTTGCTCTGG  
GCCCCAGTGGCGGGCAGAACCAGGGGTGCTCGGTAGAGGTGTGGTTGACCACCGCATCGAGGATGATCT  
TCATGCCACGCTGGTGCAGGTTGCGGGTCAGCTCGGCGAACTGTTTCGTTGCTGCCGAGATGGGCATCCAC  
CTTGAAGTAGTCTGGTGTCTGACTTGTGGTTGCTCGGCGAATCGAAGATGGGGTTGAGGTAGAGCGCC  
GTCACCCCGAGAGATTGCAGATAGTGCAGCTTGGCATCGATCCCTGCCAGATCGCCGCCATAGAATTCGC  
AGGCGCCGTGGCCCTCTTCGTGGCGGCTGACCGGCTCGCCCCACGCCCTTGCTGATCACCGCCTTGCCACG  
GTACTCGTACTCGTGATGCTTGACGCTCAGCGACGGATCGCCGTTGCAGAAGCGGTGGGGAAAGATCTGA  
TAGAACACCTGATCCTGCACCCAGGCAGGTGGCTGGTGCAGGCTGTTGAAGCGAAAATGTTGCTCCCGTG  
GCGGCATGGACGCGCTGACGCCCCCGCTGCAGCCACCACTGCTCCTCGTCGGTGAGGCACCTGAAGCT  
GTAGAGGTGGATATCTTGTCCCTTGTGAGCGGCAGGGTCGCTGCCACACCTGCAGCCGATCGCGGGTG  
GAGACTGCCGTCATCGGGATCAGGTACTCCTCGTTATCCGGCTCGTGGCGCAGCCACACCTCGCGGATCG  
GCGCATCCAGCTCGCTAAAGAGGGTCAATTGCAGTGGTTCGGCGCTCTCTTGAACCAGGGCGCCACCTG  
GGGATGAAACAGAAACGGATGGGTTCATGATGCTTATTGAGTCAGAAGATCGGCGAGGGCATTACCCTGTT  
CATGCAATGTTTCGAGCTGGCCTGCCAGCGACTTGGGATCCAGTCCCAACTGGTTCGGCGAGCGGTTTGGG  
GAAGCGGGCGATGATGGCCTGGGCAGGCACCCCGCGTTCAGGCGAATGAGATAAACACGGCGAGGCGG  
ATCAGCACCGCCTCCTTGCTGACCGGATCGTGGGAGAGCGGGTCAAGCTGTTGGGAGATGGCATCGACGA  
AGGCCTCGGAGAGGTTCCAGCGTCGCGCCAGCTCGGCACCGAGCTGGGCATAGTCGTAGCCCAGCATCTC  
CCGCTGGGCCTCGACCCGGCTGCTGCCGTTCTGGAGCGCCATGTTGATGAGCTCGGCCCTTCCGGCAAG  
GTGCTCTGGATAAGCAGTTCGCCGATGTTGTGGATCAGGGCGCAGGTGAAGGCGGTCTCGGGATCCATCA  
CCTTGGCCTCTCGCCAGGGTTTTGGCGATGGTGGCGACCTGGAAGGTCTCGGTCCAGAACCTGTTCTT  
GTCGAAGCTGGGCGGGCCTTGAAGGTGCCGATGCTGCTCGGAGGGCGACCACCACGGAGCGCAGCGGTTG  
AAGCGAGCGGATCACCCCTGTTTCGATGGAGGTACCTTCGTTGCCCGCGCAGGGCGGCCGAGTTGG  
CCATCCGCAGCACCTTGACGCTGATCACCTGATCCATGGCGATCTTGGCCGCAATCTCGTCGATGCGGGC  
ATTCTCGTCTGTTGAAGCTCTGCATCAACTCGTGCAGCAGCTTGGGAATAGTGGGGAGTTGTTTGATCTTG  
TCAAACAGGCGATCCATCGACATGGCTGAGGCAGCCTCCGTTGCGAACTCTGCCATCATATTGTGCCACAG  
CCGGACAACATGTTCTGTTTGTGATGCGGCTTTGTGAGCGCTAGAACACCCAGTCGCGCAAGGTGTATT  
CCAAACGGTGCTGTTTGCCTGCAGGATCAGGTTCTGGCTGGTGCCGCTCAGGGTCGCACCCCTCGGTAAG  
GGTGGTCAGTACGGCCTGTTTCGATAGTGTGAGCGGCGGCATGCAGGCCATTTCCGGTGTGCCAGACTG  
GTGACCCACAGTTTGTTCATCTTCCAGATGGCCCTGACCGAAGTAGCGGTTGCAACCGGCATGCCGTTGA  
CGGTGAAGTGCTCGCCGATCTCGAAATCGGGGGGATTGTCGCGGGGGCCTTGATCGGTTGCCATCCAG  
TTTGCTCAGTACCCAGTGGTGGTGTTCGAGATCTTGCTGAACAAAGGCGGTTCGAGCTGCAGCCAGCGAGC  
AGTAACAGGGGGATCAGCAACAAAAAGGGCAATCTGGGCATGAGGGGGCTCCGGTTGGGGGAGCGTCAAG  
AATACCCTTTTTGGGCAGTCGGGAGCAGGGCGGGAGAGGGGACGACCGACCGCTTTTGTGCTCCCTTGTG  
CCGCACGACTGTGCTTAATGGCAACACCTTGGTGATATTGCCATCAATTTACGCTATCTCAGGGATCAG  
TTGGTGAATAGACGCTCGGCATAACGGGCGAGACCCGAGCCACCGAGCCAAAGTCATCGCCACCCCAA  
GCGGGATGGAGGGGAGCTTCTGGCGGATAAAGCTGGCGATCAGCGGCGAGCGGGCGCTACCGCCAGTGAC  
GAAGATGCGATCCGGCTGCACACCGGCAGCAGCAATCGCTTCGTCCATCAGCTCGCCAATCTTCTCCAGC  
AGCAGGGCGGAGGCGGTTGGCCAGCTGTTTCGCGGGTCAGTTCGGCTTCCAGCCCTTTTTCCAGCTCGGCCA  
GCGACTGGCGATTGAGCTCCTGCTCCGAGAGGGCGATCTTGCCTGCTCGGCACGCCATACCAGCTGGTG  
GCTCAGCTTGTGGGCCCCGAGGCTGGCCAGACGTCCAGCTTGCCTGCTCGGCACGCCATACCAGCTGGTG  
TCCTGCAGCTGGCGGGCGGTGTGAGGCTGTAGAAGCGGCTCTGGGCGCTGACGTCATTGATGGCGGGCG  
CATCCCAGAACAGCGGGTGGGGCAGCGGCTTGCCGGTCTTGAGGGTCTCGTGATGCCGAGCAGCGGCAT  
CATCCCCTCCACCGTCAGGCGGATATCGAAGTCGTTGCCGCGATCCGCTGGCCGCTGTGGCCGAGCAGA  
TCGCCGCTGCGATCCAGCTGATCGCGGTAGCTGGGGCCATCCGCAGCATGGAGCAGTCGGTGGTACCGC  
CGCCGATATCCACCACAGTACCACGGCGTCTTCGGTGAGGCGCGCCTCGAATTCAAACCCGGCCGCCAC  
CGGTTTCGTAGAGGAACCTCACCTGCTCGAAACCGGCCAGACGGGCTGCCTCGGTCAGGATGGCGATAGCT  
TGCTGGTTGCTCTCTTCCCCCGCCAGACCTGGAAGTTGACCGGACGGCCGATCACCGCCTGGCGGATCG  
GGGCGCCGAGCTGCTGCTCCGCCTGCTGGCGAACCTGGAGCATCATGGCGCAGACGATGTCTTCAAACAG  
GGCGATCTGGGGAGCCTTGAGGCCATAAGCACCGAGGAAGGATTTTCGGCGATTTGATGTAGTAGCCGTCG  
TCCGGCTCTTCCAGATAGCGCTCCAGCGCGGCACCACCAAAGCTCAGCTCGTCGATCAGTCCCTCTTCGC  
GCATCTGGCGGCGAACCATCTGGGCGCGGGTGACCACGGGGCCACGCAGCTTGAGGTACTIONCCGCTGCTG  
GGCGGGTGCCAGCCCTTCGGCAACAGACCGGCGATAGCATCCCGGTGGGGGGCATGCAGGGTGGAGGGG  
AGATAGCGGGATGCACCAAGATTACGAGCCTGGGGCTACCTTGTTCATCACGGCCACGGCACAGTTGG  
AGGTGCCGTAATCAAATCCGATAAACATGGGCGCCAGACTCTGAATAAAAAAGGGGGCTAGCCTACCC

GAAGGCGCCGGGTCTCACAACCCGGCGCGTGACGAAGAGAGGGCGAGCCCTTATTCCACTTCGTTGTCCG  
AGCGGCCCTGGCTCTCGATGGCGCGGATATTGCCGAGGGTGGTATCGGCGATGGCGTGCAGCGCCTCGCG  
GGTCAGGAATGCCTGATGGCCGGTGAACAGCACGTTGTGGCAGGCGGACAGACGGCGGAACACGTCATCG  
GTGATCACTTCGTTGGACTTGTTCGGAGAAGAAGAGATCCTCTCCTCTTCGTAGACATCAAGCCCCAGCG  
CGCCGATACGGGAGGTCTTGAGTGCCTCGATGGCCGCGTGGAGTCGAGCAGGCCGCCACGGCTGGTGT  
GATGATCATCACCCGTCCTTCATCTTGGCGAATGCCTCCTTGTTCACAGGTGGTAGTTCTCTTTGAAC  
AGCGGGCAGTGCAGGCTGATGATGTCCGATTGGCGGAACAGAGTATCGAGATCCACGTACTCGGCCCCCA  
GCTCGATGGCTGCCGGATTCTGGTAAGGATCGTTCACCAGCAGGCGAACCCCGAACCCCTTGAGGATACG  
CAGGGCGGCCAGACCGATCTTGCCGGTACCGATGACGCCAACGGTCTTGCCATGCATGTTGAAGCCGACC  
AGCCCTTCCAGCGAGAAGTTGGCGTCCGGGTGCGGGTGGGATAAGCCTTATGGATGCGGCGGTTGAGGCACA  
TCATCATGCCGACAGCATGCTCGGCGGTCCCTCGGGGAGTAGGCGGGCACTCGCACCACCTTTGAGCCC  
CAGCTCTTTGGCAGCGGCCAGATCCACGTTGTTGTAAACCGCGCAGCGCAGGGCAATCACCTGGGTGCCG  
TTGGCAGCCAGTTCCGTCAATACTCGCGGTCCGATCGTTCATTGACGAACAGACACACTACCGGGAAGC  
CGTGAGCCAGTCCGGCTGTTTTGGCCTCCAGCCGCACATCGAAAAAATCCAGGTCGAAGCCGTACTGGCT  
GTTGGCCTGGTTGAAATGCTCTTTGTATAGCTCTTGGTACTGAATACGGCGACTTTCATGGTATGTGCT  
CCGCAGCGTGTGTGCTCAAATTACAACAAAATGGGTGAGTATCACCGGACAAACCGGCTGGTTATTG  
TCCCCACGGCATGATGGGAACGGCGCTGACTGCACTTTTGTACGAACCATCCACAGTTTGGTGTGTAG  
GTCAGGTAAACCAGTGCATTGCGTTTTCTGTGTAACAAACGCACCACCTTCTGCTCCTTGAACACCAGCG  
AGGTGCTGACATCGAACACCTCTTCCCCGCTTTCAGCTTTTCGGGCAGGGTGTGGGGCCGATCTGGTG  
ACACGACAGGGAGGCGTGGGAGGGATCTTCCGCCAGTCCAGCCCGCTTTTACACCACCGGCTTGGGG  
CGTGCCAGATAGCAAGCGACCCGTCGATGCGCGGGTTCGTAACGCTCCACCAGGATCTTGTGGTTGG  
GGCCGAAGAGCTTGAAGGCGGTGCTCACTTACCAGCCGGGTCGGCCTTGTCCGGCAGTGGCCGGCCGGC  
AAACAGGGCCCCAGTAGCAGGGGCAGGGCGCGGCGCAGGGCGTTATGTCCGGTGTGGTTATGTGTATG  
GTCTCTCCTGTTGGCCCGGCACTCCTCAATAGGGAATGCCAGGCGACGATAGAGGCTGGCAAGCACCCA  
GGCGGGGCTATCAGCAGAAATTGAGGTCCGCGAGGAAGGAGGGGGCGCTTGCCCTCGATCTTGTGGCCG  
ACAAACTGGGCTATCCAGAGCAGCACGAACGCTGCCACGGCGGGCCACAACAGCGGCCCTGCCATTGGT  
GGCAGCAGGCGAGCCGAGCGCTGTACGCCCGCCATCCCCGGAACAGCGAAAACGACAGCTGCAGATA  
GAACAGCAGCACCGAATGGCCCGCACTGCCGCCAGTTGAGGAGCTCTGGCAAGGGCCCGTGGCGAGA  
CACCAGAGCAGCCAGCAGCAGAGATAGATCCCCGCCAGCCAGCTTGTGGATGGCGACGTTGACCG  
GATGGCGATGGCTCTGGCCGTACTCCTCAAACCACTCCTGGATTCCCTTCATGGCACCTCCCTGGCGCAC  
TGTGTTCTCGCAGTCTGACCTTCGTGGTCAGGCGTTCGTGATGCTTATCCTTGCGGTGGATACTCCCAAT  
ATTGGGCGGGAATGGATTTTAGCAACGGGGTCAATCCGGATTGGGCAGGGCGATGGTGACCCGCTGATC  
GAGGTTGGCGCTGGCGAGCGCTTCGCGGATCTTGGGGTGTGATGGAAGAACTTCATAAAGCTGCCATCG  
GCATAGGCACGCTCCAACCCGGTCTGAATCGCCTTGGCCAGCTTGGGGTATTCGGGGCTGACGAAGAAGA  
ACTGGGCGAAGGGGTAGCGGATCAGCAGATGCTGCTCGATGGCGAGGTTGGGATACTGCGCCACCAGCTC  
GCTGCGCTCGGCGAAGATCTCCACCAGGGCGCGCGGGAAGAAGTCGATCTTGTGCGCGTCTGTTGATAAG  
CGAAACAGGCTGCTGTATCGGCCGGAGAAGGTCGGGATACCCGCATTTTCCAGAAATTTGTTATCGGCC  
AACCGACCCCTTGCGCCGCTTCAGCTGTTTGGGTCGGCCAGGATTTGATCTGGTTGAACTTCTCTTG  
GGCATCTGCGTGGATGAAGGACAGGCGCAATCCTTCCAGCCCGCGAAACAGCGGAATGGGGACGGCAATC  
AGGGAGGATTCGAGCTCGCTGGAGGTGCCCATCCAGAAGACGTTGATGGTCTTGCCCTTGCTCAGCTGCT  
GCTGGAGGGTGAAGTGGTTGAGGTCGAGTTCGACAGGCTGGATGCGAAAGGGTGGCCGGAGCGGGTCAG  
GGCCAGTTCAGCAGCTTGTACTGGTACTCCTGGTCAAGATTGTTGACGGGACGGCTGGGGACCTTGACC  
GTCAGAACCTGTGCTTGTGCCAGCAGTGGCAGGCACAAACACAGCTTGTGATGAGCCATTTCACTCTCTGTT  
CTCCTGTAGATTCCGGAAGGTGTCCGGAGTCTAACAGAACTTGTACCATCTTGTGCGAGGCGTTGTGC  
AAGGTTTGGAGCGCGGAGCCCTGCCTTGTGCGGTCTGTTGACCAGAAATGGTGACGGTCTTCGAAGAAT  
CAGGCGACCGACGGAACACGTTGGTATCGTTAAATTCCTTGGTGTCTGGCATTTCGACGCAGAAACGGG  
ATTCCGGACGGGCATGCAGCCGCTTGAGGGAGATCTCGTCACCAGCAAGATTTCGAGTAACCAAAAATCCCC  
TTCGCTGATGCGCTTCAATGCGCCCCGAGCTTGGCGAGGTGCAGCTTGTGCTGCTCGATGCGGTTTCAGC  
TCCAGACGGCGGGCTTCTCGATACTGGCACGGTCAATTTTCATCAGCCATCTCGTTGGTGTGCGTGGCGA  
TGGCCTGGCTGGCTGGGAGTTAGGCGCTCTTCGAGCTCGACGATCTGTGCTCGATCTGCCCTTGTGA  
AAAGGCCAGTTGGTCTTCAATGATGAAATCACACATACGATTAACCTACCAGTCAAGTTTACTAACCCAATT  
ATCCCTGTTTATGGGGCTGTCTGCCTACAGACCAAGCCCTTGTATCCCGATTTGCACCTGTTTTCATGCA  
AGAGAGTGAAATCAGGGCGGGCCTTGTACCAAAAAATGCAGCCAAGCAAAGCAAATAGGATAAGGATT  
GTGCGCCCTTGCAAAGAAATGGTCCGTTCTGCGGGGATGGTGGGATCTGGCGTCCGCTTACCCTC  
TGTTGGCATCGCCTTTGCAGCGATGAGAAGGGTGGGCTTCGTACGGATTTGAGTGTTTAGTATTTGGTGC  
CGCCTTGGTCAATATATGCGCCGTTATTTATAGTTTTTTAAACACGCCCGCTTGACATTGCCCTTGATGG  
CGGGCTTTTATGGTGTGTTGATTACAATTTTATAACAAGGGTGTTCATATATTAGACACCCTTGCCAA  
TGGCAACCGTAAAGTCCGGGTTTAAACATGGACAGTATCAAAGGCTGGATGGAGAGCAATCGCATCACGGA  
AGTGGAGTGCCTGTTCCCGGATTTACCAGGCAACGCCCGGGGCAAGATCATCCCAGCCAACAAGTTTTG  
CGCGAAGGGGGCATGCGTCTGCCCGAGGTGATTTTACCAGACGGTGACCGGCAATATCCGGATGACG  
ACAGCATGATCGACCCGCTGGAGCGGGACATGCAGCTCTATCCTGACCCCAACACCATCCGTTTTGTCCC



CTGGGCGCTGGAGCCCCTGCACAGGTGATCCACGACTGTTTCGACGTCAACGGCAAGCTGATCGACATC  
GCGCCGCGCTCCGTGCTGCGTCCGGTTCGTGTCATTTTACGAGAAGCAGGGCTGGAAGCCGGTGGTGGCAC  
CCGAGCTGGAATTCATCTGGTCAACCGCAACGAGGACCCCGACTATCCGCTGGTGCCGCGGTCGGTCCG  
CAACGGCCGCCCTGAGACCGCCCGCAGTCGTTTCAGTATCGATGCGGTCAACGAGTTCGACCCCATCTTC  
GAGGATATGTATGACTACTGCGAGGCGCAGGAGCTGGAGGTGGACACCCTGATCCACGAGTCGGGCGCCG  
CCCAGATGGAGATCAACTTCCTGCATGGTGATGCCATCGATCTGGCGGATCAGGTGTTCTGTTCAGCG  
CACCATGCGTGAGGCGCTCACCGCCACGGCATCTATGCCACCTTCATGGCCAAGCCGATGAGTGACGAA  
CCGGGGTTCGGCCATGCACATCCACCAGAGTCTGGAAGATGTGAACGGCCACAACCTGTTCCGGCACTCCGA  
ACGGCGGCAACAGCGAACAGTTCATGCACTTCATCGCCGGTCTGCAGAAAATACACCCCGGCGGTGACCGC  
CCTGTGTCGCCCAACGTCACCTCCTACCGCCGCTCACCCTTGGCGAGAGCGCGCCGCAACGTCACG  
TGGGGGTCGAGAACCGCACCTGTGGTCTGCGGGTGCCTTCTCCGACCCGAGCGCACGGCGGTTGGAGA  
ACCGTTTCGCGCGGTCCGATGCCAACCCCTATCTGGCGCTGGCCGCCACTTTCCTGTGGCTATCTCGG  
CATGATGGAGAAGCTGGAGCCGCTGCCGGAGATGAAGTCGAGCGCTATGACCTGCCCTACAGCCTGCC  
CGCTCGCTGGAGGAGGCACTCAGCCATCTCGAACAGTGCAGGCCATCAAGGAGATGCTGGGGGAGCGCT  
TCACCCGCGCCTTCGTGCGGGTCAAACGCAAGAGTACGAGACCTACTTCGGGGTATCAGTCCGCTGGGA  
GCGGGAGTTCTGTGCTGAACGTTTGTATCCCTGTAAACGGGGAGGCCGGAGTCGGCCCTCCCGGCC  
TGTATCGAAGAGACCTGAACGCGAGTCAGGTGGCGGCAGCCACTGTGAGTGGTTGTGGCTGCGAGCATG  
CAAGCCCGCTGATTACCCACCTGACTGTTTACGACTGAATCTTGCTAAATCGAAGGAACCGAGGAGCA  
ACAAATGCAGCAGACAACCCGTGAGTGGCAACAGCTGGATGCCAGCCACCACCTGCACCCCTTTACCGAT  
TTTCAGGCCCTGAACAAGAAGGGCTCGCGCATCATTACCAAGCCAGCGCGTCTATCTGGAAGACTCCG  
ACGGCAAACGCATTCTCGACGGCATGGCGGGCCTGTGGTGCCTCAATATGGGCTATGGCCGCCAGGAGCT  
GGTGGATGCCGCTACCCGTCAGATGCAGCAGTTGCCCTACTACAACCTCTTCTTCCAGACCGCTCACCCG  
CCGGTGATCGAGCTGGCGACCCTGCTGGCCGAGGTGACGCCAGCCCATCTCAACCACGTCTTCTTACCCG  
GCTCCGGCTCCGAGTGCAACGATACCGTGTGCGGATGGTGCGCCACTACTGGGCCAGCAAGGGTCAGCC  
TGACAAACAGGTGATCATCAGCCGCCACAACGCTATCACGGCTCCACCGTGGCGGGGGCGAGTCTGGGT  
GGCATGAAGGGGATGCATGCCAGGGCGGCCTGCCATTCGGGCATAGTGCACATCGATCAGCCCTACC  
ACTTCGGTGAGGGGATGGGGATGAGTGCCACGAGTTCGGGTGGAGCGGGCCCGTCAGCTGGAGCAGAA  
GATTCCTGGAGTGGGGTGGACAAGGTGGCTGCCTTTATCGGCGAGCCGATCCAGGGGGCGGGCGCTC  
ATCATCCGCCTGACAGTACTGGCCGAGATCCAGCGCATCTGCGATCACTACGGCATCTCTGTGCTCG  
CCGACGAGGTGATCTGCGGCTTTGGCCGTACCGGCCACTGGTTTGCAGCGAAGGGTTTGGCATCAAGCC  
GGACCTGATGTGTCTGGCCAAGGGGATCACCTCCGGTTATATGCCGCTCGGCGCTGTGATGGTGGAGCGAC  
CGGGTTGCCAAGGGGTTGGTGGAGGAGGGGGGCGAGTTCAACCACGGCTTCACCTACTCGGGCCATCCGG  
TCTCTTGCGCCGTGGCGGTGGCCAACATCCAGCTTATGCAGAAAAGAGCATAAGTTAAGCGAGTGCATGA  
TACTATCGGCCCTATTTGCAGCGCCGTGGGGCGAGCTGGCCGATCATCCGCTGGTGGGAGAAACCCGT  
GGCAAAGGATTGGTGCAGCGCTGGAATCGTTGAGGACAAGCAGACCAACCGCGTTTCCCGCTCAGG  
CAAATGCGGGGATGACTTGCCGGGAGTTCGTCTTAAACAATGGCTTGGTGATGAGGGCGGTAGGCGATAC  
CATGATCATATCGCCCCCTTGGTCATCACCGAGGAACAGGTTGATGAATTGGTCGATCTGGCCAGGCGC  
AGTCTGGATCTGACAGCCGCAAAGCTGAAGGGTTGAGGCAAGTCGGGCAGGTTGGCATGCGCATACAATT  
TGCTTAGGAGACAAGGATGATGTCTTTCAAACAGGAGTGATCGCTGCCCTGTGGCTCTGGTCATGGCA  
AGTGCCGGAGCAATGGCTGAAGAGAAGGTGCTGCACGTCTACAACCTGGAGCGACTACATAGCGCCGGATA  
CCCTGGATAACTTCAGAAGGAGACGGGGATCAAGGTGGTCTATGACGTGTTTCGACAGTAACGAGGTACT  
GGAAGCCAAGTTGCTGGCGGGTAGCTCGGGCTACGACATCGTGGTGCCATCCAACCCCTTCTGGCCAAG  
CAGATCAAGGCGGGCGTGTTCAGAAACTGGACAAGTCCAAGCTCTCCAACCTGGCAAAATATGGATGTCG  
ACCTGCTCAAGGCGCTCGAGCCGAGCGATCCGGGCAACCAGTACTCCATCCCTATCTGTGGGGCACCAT  
CGGCTATGCCTACAACGCGCAAAAAGTGAAGCCGCTGCTGGGGGCGGATGCCCGGTCAACTCTGGGAT  
CTGGTGTTCAGCCGGAGAACATGGCCAAGTTGAAAGAGTGTGGCGTCTCCTTCCGATTCACCGACC  
AAATGCTGCCGGCGGCCCTGCAATATCTGGGCTTCAAACCGGATAGCCAGAAACCGGCCGAGCTGAAGAA  
GGCTGAGGAGCTGTTCTCTCCATCCGTCCTTATACAGCCTATTTCCACTCCTCCAAGTACATCTCGGAT  
CTGGCCAACGGCAACCTCTGCGTAGCGGTGCGTTACTCCGGTGACTTGCAGCAGTCCAAGGCGCGGGCAG  
CCGAGGCCAAGAATGGCGTCCGCTCACCTACACCATTCGAAAAGAGGGGGCAGGCAGCTTCTTTGACAT  
GATCGCCATTCCGGCAGATGCCAAGAACGTTGAGGCGGCCACACCTTCATCAACTACCTGATGAAGCCC  
GAGGTGATCGCCAATATACCAACGTTGGTGCAGTTCGGAACGGCAACAAGGCGGCGACCCCGCTGGTGG  
ATGAGGCGATCCGCACCGATCCGGGTATCTACCTGATGCGGCGACCCTGCAGAAGATCTACACCTTCCC  
GGATCTGCCGGCCAAGGTGCAGCGTCTGATGACCCGACGCTGGACCAAGATCAAGTCCGGCAAGTAAGTA  
ACGAATGCCCTCCCGGTCCGCAAGTTCGGCCGGGAGGTTAGTATGCCATCCATCCGATGGGCGCGCG  
AATGGATGCGCAGACGGTCAACCACTGAAAACAGGAGAAGTGCACCGTGAATAACAACAGATTGCTAACC  
ATAGCGCTGACCATGGGATTGGCGAATGTGGCCCAGGCTGCCCTGTGCTGCACTTCTACAACCTGGTCTG  
ACTATATCGGCGAGACCACCTCAGCGATTTCCAGCAGGCGACCCGGATCAAGACCGTCTATGACGTGTT  
TGACTCCAACGAGACCTGGAAGGCAAGTTGCTGGCGGGGCGGACCCGGTTACGATCTGGTGGTGCCTCC  
AATAATTTCTGGCCAAGCAGATCAAGGCTGGAGCCTTCCAGAACTGGATAAATCCCTGCTGCCCAATC  
TGGCCAACCTGGATCCCGTACTGCTCAAGCAGCTCGACAAGGTGGATCCGGGTCATCAGTACCGGTGCC

CTATCTGTGGGGACCAACGGCATCGGCTACAACGTCGACAAAATCAAGGCGGTGCTGGGGGTCGACAAG  
ATTGACTCCTGGGCCACCATCTTCGAACCGGAAAACATGGCGAAACTCTCTCGCTGCGGGCTCGCCTTTC  
TCGACTCTGCCGACGAGATGATCCCTGCCGCCCTCAACTACCTCGACTCGATCCCAACAGTCATGCGAC  
GGGGGATATCAAGCAGGCCGAGGCGCTGCTGCTCAAGGTGCGGCCCTATGTGGCTACTTCCACTCCTCC  
AAATACATCGGCGATCTCGCCAATGGCGACATCTGCGTGGCGGCCGGTTTTTCCGGCGACATCCTGCAAG  
CCGCTGCCCCGCGCCGATGAAGCTGGCAAGGGGGGTGAAAATTGCTTACAGCATTCGAAAGAGGGGGGCAA  
TCTCTGGTTTCGACATGATGGCGATCCCGTCCGATGCCACCAATGTCAAAGAGGGCGCACGCCCTCATCAAC  
TACGTCCTGCAGCCCGAAGTGATCGCCAAGGTGAGCGACTATGTGGGTACGCGAATCCCAACTCAAGGG  
CGGGCGAGTTTATGGATGAGGCGGTGCGCAACAATGAGGAGGTTTATCCCCCTCAGGCCGTGCTGGAGCG  
ACTCTATGTGCAGGAAGCACATCCCCGCTCGGTACAGCGTCTAATCACCCGAGTTGGACCAAGATCAAG  
TCCGGAACCTAACCTTGGTGCCTCGGCGCCGCAAAATCGCTTTTATGGATCGGCGCGCAAGGCCGGTA  
TCACGTTGGGGAGTTTGGTAATGGCGATAGCCTCCAGTGCCTACAAGAAAGCCCTCGAAGGGCAGTCAGCA  
GCGCAAAGAAGTGCTGGTGAATAATGATCGGGTAAGCAAGCAGTTGACGAAACGCTGGCGGTGATAAC  
GTATCTCTCAATATTACAAAGGGAGAGATTTTTCGCCCTGCTCGGCGGGTCCGGTTCGGGCAAATCGACCC  
TGCTGCGGATGCTGGCCGGTTTTGAGCGCCCGACCGAGGGGCGGCTGCTCCTCGACGGGGTCGACATCAC  
CGATATGCCCCCTATGAACGCCCCATCAACATGATGTTCCAGTCTACGCCCTGTTCCCCCATATGACG  
GTGGCCCAAACATCGCCTTTGGCCTCAAGCAGGATGGCTGCCAAGGCCGAGATCGATGCCCGCGTGG  
AGGAGATGCTCAAGCTGGTGCAGATGACCCAGTATGCCCGCCGAAACCGCATCAGCTCTCTGGTGGCCA  
GCGCCAGCGGGTGGCGCTGGCCCGTTCCTGGCCAAGCGTCCCAAGTTGCTGCTGCTGGATGAACCCATG  
GGGGCGCTCGACAAGAAGCTGCGTTCCAAGATGCAGCTGGAGCTGGTTGAGATCATCGAGCGGGTCGGGG  
TGACCTGCGTTCATGGTGAACCCAGATCAGGAAGAGGCCATGACCATGGCGGAGCGGATCGCCATCATGCA  
CCTCGGCTGCATCGAGCAGATCGGCAGCCCCGATGGATATCTACGAGACCCCGGCCAGTGGCTGGTGTGC  
GAGTTCATCGGCAACGTCAACCTGTTTCGATGGCCTGCTGGTGGAGGATGAGCAGGACCACGCCACCATCG  
CCTGCGCCGATCTGGAGCAGCCCATCTATGTGGGCCACGGCATCAGCTCCCGCGCCGAAAACAAGAAGGT  
GACCTACGCCCTGCGGCCCGAAAAACTGCTGATGAGTCTGCAAAAAGCCGAGGAGATCGAGCACCCGGAC  
TTCAACTGGACCAAGGGTGAAGTCTATGACATCGCCTATCTGGGCGGTCACTCGGTTTATCACATCCAGC  
TGCCCTCGGGCAAATCGTTTCAGGCTTTCATCGCCAATGCCGAACGCCACGGCAAGCGGCCAACCTGGGA  
TGACCAGGTGTTCTCTACTGGAAGATGACAGCGGGCGTGGTGTGCAATCATGAAGTTCTTGAACAGCA  
TGAAGCGGGTCGGGGGGCGCCGACTGGTATTGGCATCCCCCTCTTCTGGCTGTTCTCTCTCTCTCTCTCT  
GCCCTTCGTTCATCGTGGTGAAGATCAGTTTTGCGGAAGCGGATGTGGCGATCCCGCCCTACCCGATGTG  
GTGAGCTGGGCCGACAATCAGCTCACCATCCTGCTCAACATGGGCAACTACCTGCTGCTGCAGGAGGATG  
AGCTCTATATCGCGCCTATCTGGGCTCCCTCAAGATGGCCTTCGTCAGTACTTTGCTCTGCCTGCTGAT  
TGGCTATCCGATGGCCTACTCCATCGCTCGGGCCAACAAGGAGACCCAGACCGTTCTGCTGCTGCTGATC  
ATGATGCCGACCTGGACCGCCATTCTGATCCGGGTCTATGCGTGGATGGGGATCCTCAGCAACAACGGCC  
TGCTCAACAGCGTCTTGTGGGGATCGGGGTGATCGACGAGCCGCTGCAGATCCTCAACACCAACCTGGC  
GGTCTATATCGGCATCATTTACTCCTACCTGCCCTTCATGGTGTGCCGCTCTACGCCAATCTGGTCAAG  
CATGACCAGAGCCTGCTGGAGGCCGCTCCGATCTGGGGGCCGCAACCTGACCCGTTTCTGGCAGATCA  
CGGTGCCGCTCTCCAAGAACGGCATCATCGCTGGCTGCATGCTGGTGTTCATTCGGGTGGTGGGGGAGTT  
CGTTATTCGGAAATGCTGGGCGGCCCGGAGACCCCTGATGATCGGCAAGGTGCTGTGGCAGGAGTTCTTC  
AACAACCGCGACTGGCCGGTAGCCTCTGCACTGGCGGTGGTGTGCTGGCGGTGCTGATCATTCGGATCA  
TCCTCTTCAACCGTAACCAGGCCAAAGAGCTGGAGGGCAAGGCATGATGAGACGTTTCGGTTTTTGCCAAA  
CTGATGCTCTGGCTGGGGCTGCTGTTTATCTACCTGCCATGATCATCATGGTGATCTACTCCTTCAACG  
CCTCCAAGCTGGTGACGGTGTGGGGTGGCTGGTGCCTCAAGTGGTACTTCGGCTGCTCGATAACAAGCA  
GCTGATCGGGTCTGTGTTCCGCTCGCTGGAGATCGCCTTCTACACCGCGATCGCCGCGGTGGCGCTGGGG  
ACGGTGGCAGCCTTCGTGCTGACCCGAATTCCTCACTTCCGTGGTGCACCCCTGTTTCGGTGGCATGGTGA  
CGGCCCGCTGGTGATCCCCGAGGTGATCACCCTGCTGCTGCTGCTGCTGCTGCTGCTGCTGCTGCTGCTG  
GCTGGTGGGCTGGCCCGCGAGCGGGGCATGCTGACCATCTGGATCGCCATAACCACCTTCTGTACCGCC  
TACGTGGCGATTGTGGTGTGCGGCGCGGTTGCGGGAGTTGGATCTCTCCATCGAGGAGGCGGCGATGGATC  
TTGGCGCAAGCCGTGGAAGGTGTTCTTCTGATCACCATCCCGATGATCGCCCCCTCGCTGGCGGCAGG  
CGGCATGATGTGTTCCGCTGCTGCTGGATGATCTGGTGTGGCGAGCTTCGCTCTCCGGCCCCGGCTCC  
ACTACCTTGGCGATGGAGGTCTTCTCGGCGGTGCGGCTAGGGGTGAAACCCGAGATCAACCGGGTGGCCA  
GCCTGATCCTGTTGTCGGTATCGCTCTTTACCTTCGGCAGCTGGTATCTGATGGCCAGGGCGGAGAAGCG  
CCGTCGTGCCGAGATCGCCATGACCACCCAGATGCAGGCCGTCGCTGACGCCATGATAAGATCCGCCTA  
CTCTCGTCAACCTGGAGGATGAGTATGCGGATCTCCCTTTTTAGCGGTGCTGGCACCGAGCTGGTGGCCG  
GCCTCACCAGCGCCATTACAAAGCAACCGATCTCTGCACCAGTTCGCTGTACCTTTGCCGGTCTGGAAGG  
GGATGAGCAGTGTGACCTGCGCCACCACGGTGGCCCGGATCGTGCGCTCCACTACTATCCTGCCGATCAC  
TATCTCTGGTGGCAGACCTGGCAAACCGCGCTGGGCTTGCCCTGCGCCACGTACACCCCTGGCAACCTGCCG  
CCTTTGGCGAGAACCTCTCCGGTCTCGGGCTGACCGAGGCGCAAGCCTGCATTGGCCGATGTCTATCGACT  
CGGCGAGGCGCTGATCCAGATCAGCCAGCCGAGATCCCCCTGCTTCAAGCTCAACCAGCGCTTTGGCTAT  
GGCCAGATGTGCGAGGTGATGCAGCTAAATGGCCGTGTGGCTGGCTGCTGCGGGTGTGGAGGAGGGCA  
TGAGCGCGCCTGACACGGCCATGGAGCTGGTAGACAGACCCTATCCCGAACTGACGGTGAAGCGCACGGC

GGACATTCTGTTCAATCAGGTGCGCAATGAAGCGGATCTGCTGATGTTGCTGGAGAATCCGGCCCTCTCC  
CCCAACTGGCGCCAGCATGCAGCAGACTGGCTGGAGCATGGCACTGTGGCTGACTGGCAGCGCCGTCTGC  
TGGGGCCAGCATCCCTGCGCCTGGCCTGACGGCCGGTTACCGGAATGTCACCTGCTGGCTGCAGTCCGGT  
AAACGGGTGAAAAGAGTGTGAATAGTTGAGCAAATGGCACTTTTTTTCTGCCAAACGCAAAAAGGCT  
TGTGTGCGGGTCTGGGCTTTCCGGTAAATTTCCCGTCCCGCAGACATCGGTGTGTAGCGCAGCTTGGTAGCGC  
ACTTCGTTCCGGGACGAAGGGGTTCGGAGGTTTCAATCCTCTCACACCGACCAAATTTGAAAAGGCCGCTCA  
ATAGAGCGGCCTTTTTGCATTTATCCTTCTGTTTTCCCGATTTTCTTTAGCTGCTGACCTGTTAATTGG  
CCAAGTGATCTGACTTGATGTATGCAGGGTCAAGCAAGCCACAGACATTAAGGGCCACCCTCGGT  
GGCCATCGGTGGAGTCTGATCCTGACCCCGGCACTCTAGATTGTGGCAATCTCGCTATGGGTCTTGTCT  
ATGGTGGCCTCCTTGCAGCGCCAGGCGCTTACTCAGATATGCCAGTGTGATGCCGCAAAGCCTTGAACCT  
GTGTTGAGGCAGCAAGGCCGCTGCTTGGGGTACTCACTAATGAAATGTTCTATTCCCTCCATCAGTTGT  
GCACGTAATGAAATCACGGGCTCATGCCAGGCTTGACAGCATAAATGGCCGGGATCAACTGCCTCCTGAT  
AATCTTCCAGCAGCTGTTCTGGCCAGGGTTCAATACCGGAATTGCGTTGCAGCAAATAGTGGGCGGCGGG  
TTCACGGGCATAAATGAACTGAATTTGGGCCAGATCGCGTTGGCATAGCGTTTACTGTTGATGTGACAG  
GTCAAATATTTTTCCCGTTTTTCAGATCCAGAAAGTGACCGCGTTGCCGACAGGGAACGATGCCATACCAAG  
GCAAGGGTGAGGAGAGAGAATACCCCTCAAGCTCCTGTTCCAACCAGTGGCGACACTCGGGTGTCTGCAC  
CTCGTCGAGCATGGACTCGAGCTGTGTCAACAAGGCTCTGGATGGTTTGTGATGGCCAGTTTCGCACTCATC  
GCCTGCAATCCTCCCTCTGCACACAATCCCGACTATCAGTATGGACCTTGTTCGGCCAGAGGGGGTAAGG  
AATCTAATGATTAAGAGTGGATTAGCCGCGTGGTTTTTATGCACTAACTTGGTTCAACCCACCAGATAGG  
TACCAGTGCCGAAGGCATGTGGGTGCCCTCTTCGTTGTGCAGTCCATCCGGGCGACGGCGACCTTGCT  
GCCAGCCCGGATGATGTGGGCGGTGGCGATAAACTCGTTGCCGCGCCAGGGCGCAGGTAGTCCACCCGC  
AGATCTATGGTGCCTAGGCGGGCGAAGCGCTCCTTGAGATAACTGGGGGAAAACCTCCTCCAGCTCGTCGA  
CGCAGGAGGCCGCGACGATCATGCCGCCCGCCACATCCAGCAGCGTGGCGGTGACGCCCGCGTGCAGGAT  
GTTGTGGAAAGGGTTGCCGATCAGCTTCTCGTCCATCTTGATGCGCAGTTCACCTTGTGCAAGTCGTAG  
TGGGTACCTGCATGCCGATCAGCTTGTGAAACGGCATCTTCTCGGCAACAGGTTGGCAATGCCACTGA  
GCGCCATCTTCTTGAGCATCTGTTTATTCTCTGATCCCAATCCTTGTCTCAAAGCCGAGTAAAAATC  
CAGCCAGTCTGCAACAGTTTCTTAACAGTGCATGCAATGGCAGGTTTATTGTGGGCGGCGGCTGCTTTAGAAT  
GGCCACCCCAAAGGAGAGCCCATGACCGCGATGCGGAAACCTGCCAGATCCTCAGCCAGAGAGAGTCCGC  
TTGCCCTGCGCAGGCGGCTTTCGGCTATCAGCAGTTTCGGCCGAGTTCAGTTCGAAATCATCAGAGCAGAT  
CGTCTCGGGGCGGATGCGTTGGTGTCTCAAGCCACCGGTGGCGGCAAGTCGCTCTGCTACCAGATCCCG  
GCACTGCTGCGGCCCGGGCTCGGAGTGGTGGTCTCTCCCTTATTTGCTGATGAAGGATCAGGTGACACA  
GCCTGCGCGCAACGGCGTGGCGGCGGTCTACATCAACTCGGCCCTCAGTGGGAGGAGATGATCCAGAA  
CTTTGCCGCCATGCGCCGTGGCGAGATCAAGCTGGTCTATGTCTCCCCGAGCGACTGTTGCAGCACGAG  
TTTTATGGATCGGCTGGCCGAGCTGCCGCTCGGGCTGTTGCCATCGACGAGGCGCACTGTGTCTCCCAGT  
GGGGCCACGATTTCCGGCCTGAGTATGCGGCGCTGGGGCGCTCAAGCAGTGGTTCCCGAGGTGCCGGT  
GGTAGCGCTTACTGCCACCGCCGACGAGGCGACCCGACGACATGCTGCACCGCTAGAGCTGAACGAT  
CCCTTCCATCCACACTGCCAGCTTCGATCGTCCCAACATCCGCTACAGCCTGGTGGAGAAGTTCAAGGCCG  
CTGAGCAGTTGCTGCGTTACGTGCAGAGCCAGAAGGGCAACTGCCGGATCGTCTACTGCTCCAGCCGCAA  
CCGGGTGGAGGAGGTGGCCGAGCGGTTATCCCGCCACGGCTGCAAGGCCGCGCCCTATCATGCGGGGCTA  
CCGCTCGAGCAGCGCCAGCAGACCCAGGATGCCTTCCCTCAAGGATGACATCGAGATAGTGGTGGCGACGG  
TGGCGTTCCGGTATGGGTATCGACAAGCCCAACGTACGCTTCGTGGTGCCTACGACATTCGGAAGAACAT  
CGAATCCTACTATCAGGAGACCGGTGCGCCGGGCGGATGGCACTCCTGCCGAGGCGCTGCTGCTGTAC  
GATCCCGCCGACATCGGTTCGGGTGCGCCGCTGCTCGACAACATCGAGAACC CGCAGCAGTTGCAGGTGG  
AGCAGTACAAGCTCAACGTGATGGCGGCATTTGCCGAGGCGCAGACCTGCCGCCGTGAGTGTCTCAA  
CTACTTCGCGCAGTACAACGACAAGCCGTGCGGCAACTGCGATATCTGTCTCGATCCGCCAAAAAGTTAT  
GACGGCACCCGAAGATGCCAGAAGGCGCTCTCCTGCGTCTGGCGGTTGGGGCAGAAATTCGGGGTGGGCT  
ATGTGGTGGAGGTGCTGCGCGGTTGCTGAACCAGCGCATCAAGGATCACGGCCACGACAGGCTCTCGAC  
CTACGGCATCGGCAAGATCAGAGCCATGAATACTGGATGAGCGTGATCCGCCAGCTGATCCACAAGGGG  
CTGCTGACCCAGAACATCACTCGCAATCTGGTGTGACAGTACCAGGCGGCCCGCCCGTGTGCGTG  
GCGAGGTGAAGCTGGAACCTGGCGGTACCCCGCCTGCAGCCTATCTCCAGCCGCAAGGAGAAGCGCAACGG  
TCTGCTCGACAATGCCAATATGACAAGCGGTTGTTCAAGGAGCTGCGCGGCTGCGCAAGCAGATTGCC  
GAGGATGAAGAGGTGCCGCCCTACGTGGTGTCAACGATGCGACCTGGTGGAGATGGCACAGCTGATGC  
CGATGACCGAGGACGAGATGCTGGCCATCAACGGTGTGCGTACCAGCAAGCTGGAACGTTTTGGCGAAGC  
CTTTATGGACCTGATCATCGACTACTGCCGTCGTTAGGGTTCGATTAGGCAGCCTAATCGACCACGGTAAG  
CGCGGCTCGGAAGAACCTGGGGTCAAGCGCAGGTTATTTCAAGGCTGGCGTAGAAGGCCGCCAGATTGTC  
GATATCCGCATCGGTGAGCGGCCATGAAGGGGTCCATCAAGGGCTCTTTGCGAGTGCCATCCTTGAAC  
GCTTTCAACTGTTTTACCAGATAGGCGGCATTTCTGACCCGCCAGATGGGGATAGTTGGGGATCATCGCCT  
TGCCTTCTACGCCGTGACAGGCGGCACAGACCCGCCCTTGGCCTTGCCTGCCTCGATATCTGCAGCCTT  
GGCCTGATGACCCACGCCAGTGCAGCAAGGGCAGGGCATATACCCATTTTTGCACTTCTTCTCCTTG  
AATTGAAAAATGATGGTTGCCAGTGCAGCAAGCATGGCTGACGGCAGTATAAAGAGTGACACGAGCATA  
CGCAGGGACGAATGGCACAACCATGAAGTTGATCAACACTTTTTCGACCGAGCTGCCTTGGGCTGTGAA

CCCGTGGTCCCCAGCCGCTGCAGCAACCCGGTTGCTTCATCTCAACCGGACTTTGCTGGATGAGCTGG  
GATTGGGAGGCGTCAGCGAGGCTGACTGGATCGCCTGTTGTGGCGAGGAAAAAGTGTGCCCGGTATGCA  
GCCGGTAGCGCAGGTCTATGCGGGCCATCAGTTTCGGGGTTATAGCCCCCGCTTGGGGATGGTCGCGCG  
CTGCTGTTGGGTGAGCAGCAGGCGCCGGATAGTCAGCGCTGGGATCTGCACCTGAAGGGGGCAGGAAAGA  
CGCCGTTTTTCCCGCTTTGGTGACGGCCGCGCCGTGCTGCGCTCGAGCATTCGCGAATATCTAGCCTCCGA  
GGCGCTCCATGCCCTCGGCATACCGACCACCCGGGCGCTGGTGTGGTGGGGAGTCAGGAGCCCGTTTAC  
CGCGAGCAGGTGGAGACGGGAGCGACCGTGTGCGCACCGCCCCAGCCATCTGCGCTTCGGCCATATCG  
AGTATTTTCGCTGGAGCGGGCAGGGAGAGAAGATCCCGCCACTCATCGACTATCTGCTGCGCCACCACCT  
CCCCGAACAGGAGAGTGGTGCCGAAGTGTTCGCCAAGTGGTGCGCCGACCGCGCGGCTGATTGCCAAA  
TGCCAGGCGCGGGCTTCTGTACGGGGTAATGAATACCGACAACATGTGCTGCTCGGCTTGACGCTGG  
ATTACGGGGCATAACGGCTTTATCGATGCTTACGTGCCGATTTTGTCTGCAACCCTCGGATCGTGGG  
CCGCTACGCGCTGGATCAGCAGCCCGCGGTCTGTTACTGGAATCTGCAAAAACCTGGCGCAGGCGCTGGCT  
GGCCATGTAGACGGTATGCGCTGGCTGCAGCGTTGGCCCAGTACGAGCAGCAGCTGATGTTGCACTACT  
CCGAGTTGATGCGGGCCAAGCTCGGACTGGCGGTGTGGGAGGAGGATGACCCGGCGCTGTTCCGCGAGCT  
GTTCCGGTTGCTGGCGGCCACAAGGTGGATTACCACCTGTTCTTCGCCGCTCTCGGTGAGGTGACGCAA  
GAGGGGGCGTGGCCCGCATCTCTGCTGGTCTGTTGCTGAACCCTGGGTTGGCAGGCGTGGCTGGAGC  
GCTATCGGGCGCGGCTAATGCGCGAAGGCAGCGAGGATGCCGTGCGCAAGGCGCAGATGGATGCCATCAA  
TCCCAAGTATGTGCTGCGCAATGCGCTGGCTCAGCAGGTGATAGACGCCGCCGACGCAGGGGATATGCGG  
CCGTTTCGAGCGGCTGTTCCGCCGCTTGCAGCGCCCTTTGATGAACAACCCGAATATGAGGATCTCGCCA  
CCCCGACTCCGGCATGGTATTGCGGTGGTGAGCTCTCCTGCAGTAGCTGAGAGACAGGGAATGAGTTGGC  
AAATCAAACAGGTAGATAGCGAAGCTGGCGTAGTGACGTTGGATTGTCCGGCGCTCGAGTGGGACTCGTT  
TCCGCTGTTGGCGCAGGCCTTGGTGCAGGATTGGGAGCTGCAGCCGCTCGAGCAGGATGCGGGGGCCGAC  
CGCCATAGCTGGTTGCTGGAGTTTGAAGGGAGCCAGTTTCGGCTGGAGTACGAACACTACAGCGGCTGCT  
GGCTGGAGGCGGTGCGCCCGGTAGATCGGGAGGCGCTGCTCTGGCTCGCCAGACAGCACAAGCTGTGACT  
ATCGCCACAAGGCCTGCTCTGCCGCTGGCCAACCTGGACAAGCGTAATCGCATAAAGATTGAACATATCG  
GTTTGGGGGCGTATAATCTCGCCCTCGATTATCGCCAATGGTGGCGATATGGGTTCCCTAACCCCATTA  
ACCAAAAAGGTACAAAGATGAATCTGACCCCTGCGCAGTACCAAAACGGCGCTCGTTCCCTGTGCTTGT  
TCACATCTGATCATTGCCAGCAACTATCTGGTGAGCTGCCGATCACCGTGTGGCTTCCACACC  
ACCTGGGGTGCGTTACGTTCCCGTTTATCTTCTCGCCACTGACCTGACGTTGCGGATCTTCGGTCCCG  
GTCTGGCGCGCAAGATTATCCAGACCGTGATGTGCCAGCACTGGCGGTCTCCTATGCGCTTCCGTA  
CTTCTTTGAAGGGAGCTTCCAGGGCGTTGGTTCATCTGGCTGAATTCAACCTGTTCTGTTGGCGCTATCGCA  
CTGGCCAGCTTTATGGCCTATCTGGTAGGGCAGTTTCATGGATGTGGTGGTGTTC AACCCGCTGCGTCTGC  
TCAAGCAGTGGTGGATTGCGCCAGCGCCTCCACCCTGTTCCGGTAATCTGGTTGATACCATCGCTTTCTT  
CAGTGTGGCCTTCTGGCGCACACAGATCCTTTCATGGCAGCACTGGGTGAGATCGCAACCGTTGAT  
TACGTATTCAAATTGCTGATAAGCCTTGGTTTGTTCGTGCCGCTCTACGGTGTCTTGTGCGCTACCTCA  
GCCGCAAGCTGGTGGGCGAGGCCGGATTATCCAGCCTGCAAAACGGCCACCAGGCAAGCCTGACCAGATTG  
ACCACCCTTCGCGGTGGTCAATTTTTTTGCACTTCTGCAAAATAGCGCTTGCCTAGTTAAATGAGAATGA  
TTATTGTTAACTTGTTCGGGAAAGACTTCATTTCGTTCCAACGTGATGGACTTCTTGTGAAGGCACGA  
CATTGCTCACATTGCTTCCAGTTAAGGGCCAGTTTATCTGGCCCTCTTTTTTTGTCATTTTTTCAGCAAGT  
TGCAGGCATAAAAAACGGGAGCCAAGGCTCCCGTCTGCTACTCTGTCTGTGGCTTACTCGATATCGAGTGC  
CTCGGGGGAGAGGATCACCCCTGTGGTATCGGCGTAGAGGTGGTTCGTCAGGCAGGAAGGTCACGCCACCG  
AAGTTGACCGGCAGATCGGTCTCCCTACATCCTTGTGTCGGCACCGACCGGAATGGCTGCCAGTGCCT  
GAATGCCGATATCCAGATCTTCCAGAATATCGACTTCGCGGACGCAGCCGTAGCAGACAATCCCTTCCCA  
ATCGTTCTCGGCCCGCGTGGTGGCGATGTGCTGTGATCAGGGCTCGGCGCATGGAGCCACCGCCATCG  
ATCAGCAAGACGCGTCCAGTCCGTTCTCTTTGACGAGTTCACGGATCAGGCCATTCGATTCGAAGCATT  
TGACGGTGGTGTGATGACCCCGCAAAGAGGCGCGGCCCGCAAGGAGCAGAGCATGGGTTCAAGCACATC  
CACCATGTCTGATAGATGTGCGCACAGTTCAGAAGTATTGTATTCCATAGTGTCAAATCCACGGCTGGAA  
ACAGGTGCAACCAGTATAAGGAGTGGGTGTGGCATTTCATGAATATTCCTTGCACAGATCACCTGTGCG  
CGTTTTTCTGCATAAGCTCAATGCAGTTCAGTGCAGTTTGCAGAGGTTCCATCGTGTCTTATCCGTCATA  
AGTTGATCCTGAATACCGTGTGGTTGCCGTTGCCATGCTGGTACTGAGCGGCCGTTTATCTACTCCAG  
CCAGGTGCACCGTCACTGACCGAAGCCAGCGTAATATCGACCAGCTGGAGATCGCCATGCTCAACCTG  
CGGCGGGCCGAGAAGGATTTTCTGATCCGCAAGGATATGACCTTCGTCGAGCGCTTCAATCAGGGGCTGT  
CTGACTTTACCAGCACAATCGGGAGCTGGTGACCGATGACAATCTGGCGGCCGTCGAGGGGGAGCTGAC  
CAGACTGGATCAGCAGATCAGCGGTTATGGCAAAGCCTTCAACGATCTGGTGGCCAGCAGCAGAAGATT  
GGTCTGGGGCCTGAGGAGGGGCTCTATGGCAAAGCTGAGGGCGCGGTGCATGAGGTAGAGAATGGGCTCA  
AGCAGCTGGATCAGCAGGGGCTGCTCATCACCATGTTGCAGCTGAGACGGGCGGAGAAAGACTTCATGCT  
GCGCTCCGATATCCAGTATCTGGAGCGTTTCGAAAACCTTGCAACAAGAGTTTTTCAGGATAGCCTTGCCACT  
TTGCCGGAGGCGGGTGCGGCAAGCTGGAGCAGGCCAGCAAGCAGTACCGGCAGGACTTTGTGGCGCTGG  
TGCAGGGGATGCAGATACTGGGGCTGAAAGAGGATGAGGGGCTGCGCAACCAGATGCGGGATCTGGTGC  
TCAGACCGAACAGGGGTTTTGCCCGCTGATCAGCACATTTGTGCTGAGCTGGAGCGGCAGAGCGCTCGC  
CTCAACAGCCTGATGCTGGTCTGTGGCGGGGTGATTGTGGTGTGATCGGCATCATGACCGTGTGCTGG

GGCGCAGCATCGACCGTCCCATTACTCAGGTGAATGACACCGTCAACCGCATTCGTCAGGATAATGACCT  
GCGCCTGAAGATAGAGCTGCGCGGGGCGGATGAAATGGCCAGCTGGCAGGCAATCTCGACGTGATGCTG  
GGCGGGTTTCGCAACCTGATCGGCGATGTGAAGCAGAGCGTGCACACCCTGACAGAAGCGGCTGATCACC  
TCTCGGCCAACGTCAAGCGCACCAGTGAAGGGGCGGCGCTCAGCTGCAGGAGACCGACATGGTGGCAAC  
CGCTTCCACCGAGATGGGCTCCACCATCGAAGAGATCGCCCGCAACACCGAGCAGGCGGCAACAATGCG  
CAGGCGACCAACAACAAGGCGATGGAGGGGCGGACTGCGGTGCGAGAATACTGTGAGCAGATCCGCTCGC  
TGGCGGGCAATCTGGAGAGCTCATCTCGCGAGGTGAGCCAGCTGCAAAAAGAGAGCGAGACCATCGGCTC  
CGTGCTCGACGTGATCCGCGGCATTGCCGAGCAGACCAACCTGCTGGCCCTCAACGCAGCCATCGAAGCA  
GCTCGGGCAGGGGATCAGGGACGTGGTTTTGCGGTGGTGGCCGATGAGGTGCGCAATCTGGCCATCCGTA  
CCCAGAAATCGACCCAGGAGATCGCTGGCATCATCAGGTGCTGCAGAAAAGAGACCAGCAGCATCGTCTGA  
GGTAATGGCAACCTGCCGCGAGCAGGGCAACCCGAGCTCGGATCAGGCCAGTACCAGGAGGAGTTGCTG  
GGCAGATCACTCAGGATGTTACCAACATCATGGACATGAGCACCAGATTGCTGCGGCTATCGAACAGC  
AGAGTCTGGTGGCAACGAGGTGAACCGCAACGTCAACAACATCCGCGACATCGCCAGGAGTCGAGCAT  
CATGGCGGAGGAAAATGCGAGATCCAGCGAGGGCCTCAACGAGCAGGCCAGCGGCTCAACAAGGCGGTG  
GCAAAATATCGGGTTTTAGTGAGCGGACTGGCATCCTTGTGAGGTTTTTACACCAGAGTGGCAATGATTTG  
ATCGTAATGGCTGTTATTGGGAAAATTCGCTCATATAATCGCCGCCACTATGATGATTCGGAAGGATTCG  
ATGGCAAAGTTGCTGGTGGCCGATTCCGGCTGCTCTGTTCTGCTGGTGTGGCAGGATCGGCGCCTC  
AGGCTACCCCACTCAAGCCCGGTATGGAGCCGCTACTCAGCTGGTTCAACGGTGCCTTTACGAGCCGGGA  
GCAGGCCAGTTACGACAGCCGCTTTACCAGTGCCGAGCTGCGCTGATGGAGATTTGGCCCGGCTATCAG  
GGCTATCGCTGGGTCTATGCCGAGCAGTATCTGAGCATGCGCTCCGTCCGCCCTTTCGCCAGCGCATCT  
ATCGCTTCTCACCTGCCCTGACGGGCGGATCCTGATGGCCGAACCTGACCATGCCCGTGCACCGATTT  
TGCCGGTGCCTGGCATGATCCCGCCCTGCTCGACAGTCTGACCCCGCAGCAGCTCTCCTTGCGCCACGGA  
TGCGAGATCTGGTTGACCCGTACCCCTCCGGCGAATATGCCGGTACACCCGGGTGGGCCACTGCTCCA  
CCGATTTTGGCGGTGCCACGACGCTGGTGCAGCATATCTGGATTGGCCCCGACAGCGTCAGATTGCTGGA  
TCGCGCCTATGACAACGCAGGGAGTCCGCGCTGGGGCAGCCCGGGTGAGGGGTATGTCATTTGCGTCGT  
TCCAAGGGGTTTTGGCCAGTAGGGGAGAGTGCCTGCTGGCTGCGGGAACATGAAGGATGAAAAACAGGGATC  
GTAAAAAAGGCGCCCGATGGGCGCCTTTTTCAGAATTTTCAGAAGTAAAAATTACTTCTTGGTGGTTCATC  
GCACCGAAACGCTTGTGAACCTGTCTACGCGCGCCGCTAGAAACTTCTTTCTGCTTGGCGGTGTAGA  
ACGGTGGCATCGGAGCACAGTCCAGGTTACAGTCTTTACCGATGGTAGAGAAAGTGTGATGACGTT  
ACCGCAAGAGCACTTGGCGGTGATGGCTACGTAGTCAGGATGGATACCAGCTTTCATGGACCACTCAAT  
TAATAGGCCGTGTCGCCATCCGATCTCTTGTGCGACACCACACGATTGTTGAACACAGTTTTCAAAGGCTG  
CGAATAATATAGGAAATGCCTGAGATCAGGCAAGTGGCTTCGCAGAAAAAATAGGCAATCCCTGGTGAAT  
TCTTCCCAAACGCTGGATCTGGTTCGTGTCGCTGTCCCGTACCCTTACGCCGTCACCTTCGACTATCTCT  
CTCCCTGCCGTTACCTGCCCGGTTGCCGGTTCGAGATCCCTTTCGGTCCCCAGACCTGGTGGGCT  
GGTGGTGGATCATCCGGCCGACAGCCAGGTGCCCCGCAACAAGCTCAAGCCATCAAGCGCGTACTCGAT  
GCGACGCCGGTGTGGGGCCGATATTCTGGCGCTGATGAACTGGAGCGCCAGCTACTACCAGCATCCGC  
TGGGGGAAGTGTGCCCCACGCCCTGCCGGTGTGGTGCAGCAAGGGGGAACCTGCCGTTATCGTGAAC  
GGAGTTCTGGTTTTGCCACTGAGGCTGGCATGGCCATCGACCTTAACGAGCTCAAGCGGGCGGCAAGCAG  
CAGCAAGCGCTCGCCTTGTGCGCAAGGGGCGCAGACCCCTTGCCTCAAACAGGAGGAGATCCAGA  
GCGCAGCTCTCACCGCGCTGGAGAAGAAGGGGCTGCTGGAGAAGCGTTCGCTGGAGCCGAGCCACGATGG  
CGATTGGGCTGCCCGCTTCGAGCCGGGGGAGGGGCTGCGCCTCAACGGCGAACAGGCATTGGCCGTCTCT  
GCCGTTACCAGCCAGAGCGACAAGTTCGGCGCCTTCTGCTCGATGGCATCACGGGCTCCGGCAAAACCG  
AGGTGTATTTAAGCATCCTCGAGCCGTTGCTCAAGGCGGGCAAGCAGGCGCTGGTATGGTGGCGGAGAT  
CGGCCTCACCCCGCAGACCATCAACCGCTTTCGCCGCGCTTCAACGTGCCGGTGGTGGCGATGAACCTC  
GCCATGAACGACAGGGAGCGGCTCGACGCTGGCTGCTGCTGTCGCGACGGCGGTGCCCCATCCTGATCG  
GCACCCGCTCTGCGGTTCACCCCGTTTTACAACCTCGGCATCATCATCGACGAGGAGCAGCAGCGG  
CTCCTTCAAGCAGCAGGACGGTTTTTCGCTACCACGCGGGATCTGGCGGTGATGCGGGCCATCGTGCC  
GGTATCCCCATCCTGCTTGGCTCGGCTACCCCATCGCTGGAGACATTGCACAACGCCCGCACCGGCAAGT  
ATCACCATCTCACCTGACTCGGCGTGGCGGTAACGCCAGACCAGCCCGTCAAGGTGATCCTGGATATCAA  
GAGCGTGGGCTGCAGGCCGGGCTCTCTCCCCAGCTGGAGCAGCTGATGGCAGAGCATCTGGCGGCGGGC  
AATCAGGTGATGCTGTTTTCTCAACCGCGTGGCTATGCCCGGCTCTGATCTGTCACCAATGTGGCTGGA  
GCGCCGCTTGTGAGCGTTGTGATGCCTGGTACACCTGGCATCAGGCCGGACGACGGCTGCACTGCCATCA  
TTGCGACAGCGTGCGCCCTTGCACCACCTGCCCCGAGTGTGGCAGCAACGAGCTGATCGGATCGGGA  
GTGGGCACCGAGCAGCTGGAACAGCTGCTCACCACGGTGTTCGCGCAATATCCGGTGGTGGCATCGATC  
GGGACAACACCCGCCGCAAGGGGGAGCTGGAGACCCATCTCGGCGACATCAAGGCGGGCAAGTACAAGAT  
CCTGATCGGCACCCAGATGCTCGCCAAGGGCCACCCTTTCGGATGTGACGCTGGTGGGTCTGCTGGAT  
GTGGATGGTGCCTGTTTACGCGCCGATTTTCGCGCCCGGAGAACTGGCCAGCTTTACACCCAGGTGG  
CGGGCCGCGCGGTCGCGCCAGCAAACCCGGGTTGGTAGTGTGTCAGAGCCACCATCCGGAACATGCCCT  
GCTGCAGGATTTGACCCAGAACGGTTACGGCCACTTCGCCGACACGGCGCTGAAAGAGCGTCGCTGCTG  
GGGCTGCCGCCCTTACGCTATCAGGGGCTGTTTCGGGCCGAGGCCAACGGCCGCGACGAGGTGCAGCTGT  
TCCTCTCCCGCTCGCCGATAACCTGCGCAGCGCCCGCTATCCCCACGTTCAAGTGTGGGGCCATCAG

CGGCTTTATGGAGCGCAAGGCGGGCAAGTTCCGCATGCAGTTGCTGGTGCAGGGGCCGAACCGGGCACCG  
CTGGCCCAACTGCTGGATTGGGCGGTGAAGGAGCTGGAAGGCTGGCCTGAGACCAAAGGTTGCGCTGGA  
GTCTGGATATCGACCCACCGAGCTGAGTTGATGGTGGCACCGGAGCCGTCGCTGGCAGTTATCGTCA  
CGACCGATGGGTGATTTCAATTTCAAGGCTCAGACCCGAGATCGATCTGCTGCACCCAGCCTCCTTTACC  
CTGTTCCGGTGAGATAGAGGCCGGATTGGCGCAGCACCCCTGATTGCCGCTCTCCCCAGATGGTTGAAG  
GGGGTGTCTAGGGGGCGTAGCAGAATGGCGCCGATCCCCAGTTTCGACCAGCGGATAGGTGCGTGTCCG  
GATGCCAGAACTGCAGCGCTGAAAAGTGGCTATCCCCTTCGTCCAGCACTCCGTTGCCATCCTCATCCAG  
GGTGGCCAGCTCGCCGAAGCCATTGCCGGAGCGGGCGCCAAAGAGCTCGCCGCCGTCATCTATGGTGGCC  
TTGCCATTGCGATCCAGCGCCACAAAGCCGCTGCCTTCCCGCAGACCCGGCAGGCTATCCTCTTTGCCAT  
CCTGATCAATATCGAAAGTGACCCGCTGCCTCGGTGATCGGCAATCTTGCCATTCAGACTGAGCACCAG  
CGGATCCTTGAGGGCATTGAGGGTGGTGGCTGCTGCTGCTACCTCCAGCTGACGCCAGTCCAGCACAAG  
CCGAGATCGAGCTGAATAGTCTGACCATCTTGAGTCTGCTACGCTGGCCGATGCCACCACGTTGAGTGTCT  
CCTGTTGCAGCAGGGTGTGAGTCACTCCACCAGTTGATCCGGCTCGGCGGCTTGAGCAGCGGCTTCTCC  
TTGCGTCCCCCTTCGCTTCCCTCTTCGGAGGGTTTTGATCGGCTTGGGCAGCTCGATTTCTGTTGGCCAGC  
ATCGCTTCAATCATCAGCTTGTATCAGCCGCTGGCGGTTATCCAGCCATCATCGGGAAATACCATCCTGCT  
CTTTGCCGACGTCCGCTGCGGGCGGGCGGGAGGTGTTGCTGCTTGGTACTGGCGGGCGATTGCCCTCGC  
GGTTTTGTAGCGTCAGGGCGCTGGTGGGGTTCAGGGGGTGTGCGTTCGCCGGCCACTGCCGCTTGTG  
CCTTCCGGTGGATTGACGACGGGTGGCACTGGCCGAGGTTGCGCACCTTGGCGCTCTGGGCTGTGTT  
GCCGGTATTGCACCTCCCCCTGGAGGTGCTAGTGATCGATGCGCATAACATTCGCCCTCGGCGCTATACAT  
CTGGTCAGTTATCGACCGGTTAGTGAGCAGGGCTTAACACCAAATCGACTAATCAGGGAGGTGGTTAGT  
ACTAGGTTGCAAGGTGGTGGCGTGGCAGGATGATGGGCATGCCGGTGTGGCCGTTTGCCCAAGCGCAG  
GGCGCAACAAGTGAAGAGGAAGAGAGGATGAGAAATTGCTGGTGTGGGAGCGGCAGGCTATATCGGTT  
CCTATCTGGTGGCCACCTGCAACGCTGGGCTACAGGGTGTGTTGCCGGGGCGCGCCGTCCTGCCGCTT  
GCCTGAGGGAGTCGAGTTTTCGCTCGCCGACAGCCTCAAACCCATCACACTGCTGCCCTGCGCTGGCGGGC  
ATAGATAACCGTCTTCTATCTGGTGCATGCCATGGGGGCGGGGGCCGATTTTACCGGCTGGAGCAGCAGG  
GGGTGAAGAACTTCGCTGCCGCTGCCCGCGCCGCGGGGTGCGCCGATCATCTATCTCGGGGCAATCCA  
GCCCGAGCAGTGAACAGCCGCATCTCAACTCCCGCCCACTGTGGCGAGCTGTTTCGCGAATCCGGC  
GTACCGAGGTGGAGCTGCGCGCCGCAATTATCATCGGGCAGGGTTCAGCGGCGTTGAGGATGATCGGGG  
ATCTGGTGTTC AACCTGCCGATGATGGTGACGCCCAAATGGGTGCGCTCGCGCACGCGCCGATGTCGCT  
GTCCAACCTGCTGCACTATCTGGGTGGGCTGGTGGAAAGCCGACGAGGTGGATGGCCGATTTTCAATGCG  
GTCGGCCCCGAGCTGCTCAGCTATCAGCAGCAGTTGCAGAAGTTGCGCCGCCATATCGGCAAGCGCTGCC  
CCATCATTCCCATCCCCTTCTGAGTCCGCGCCTCTCTGCCTGGTGGCTGCAGTTTGTACCTCGGTGCC  
GCAGCCGGTGGCCAAGGCGCTGGTGGGTGGCTCAAGCACGATATTCGGGCCGACGATGGCCCGCTGCGC  
GCCTTGCTGCCCCAGACCCTGCTCAGCTTCGACGAGGCGCTGGCGGAGAGTCTGGCGCTGGAGCAGAAGC  
TGGGTGCCGAGCAGCAGGGGCGAGGAGACCCGCTCGGCTGCGCTGGCGCCATCCCGAATATGGTTTCTA  
CGATCGCATCGCCAGCGGGCAGGCCATCTGCCTCGCTCGCCGAGGTGGTGTGGCAGGTGTTGCAGCAA  
CTGGGGGGTGAGCAGCGCTACTTCTACATGAACGAGCTGTGGGTGGTGCGCAATGGATGGATCATCTGA  
TCGGCGGCCCGGCCCGCACCCGTGGCCGACCAATCCGGATCGTTTCGTGAAGGGGGATATGCTCGACTC  
CTGGCAGATCCTCGGGGTGGATGAGGGGCGCAGGCTCGATCTCTTGTTC AACATGAAGGCCCGGGCGTT  
GGGCGGCTAGAGTTCAACATCCTGCCGAGGAGTCCGGGTTGACCCGCATCCGAGTACCAGCTCACTGGC  
ATCCACAGGGCGCCTGGGGGCTGGCTTACTGGCTCGCCATGCTGCCGTTCCACCTCTTCAATTTTCAGGG  
GATGACAGAGGCCATCGCCCGTCAGGCCGAGGCGAGGGCAGGTATCCCGGTGATGGATTAACCTCTTCA  
CATCATTGCCGCTGATAGAGCGCCCCGTTCCGGGCACTTTTATGCGGCGGCCATGCTCGGTTATGGCAG  
ATAGTGGTAGGCGTCTCATGGCAAAGGCTGGCATCATGCCGCGTCTTGTTTACCGCGGATAGATAATCA  
GTCAGAAAAAAGAAGGATTATGAAGAAAAAACCGTCAATTTTGGGGGGCGCTGCATCATTGCCAGCGTC  
TGATGGGGGGCCGCGATGCTCGGTCTGCGGAGTTCGGGGCGGGGGCTGGACCCTCGGTGCGTGTGG  
CACTGACCGTCACTATGGTGTGATGATGACCCCTCTCCGGCTGGATGTTGCTGGAATCCTTCCAGCACCAG  
TATGCGGGTCTCCTTCAATACCGTACTCGCGAGCTGCTGGGGGAGAAGCTCAATCTCCTCAACAACCTC  
TCGGTCTACTTTGTTGGCGGCATTCTGCTTTACGCTTATATCACCTCCTCCGGCGCCATCCTGCAGGGCA  
TTCTGGGGATCGACAGCAAGCTCGCGTCCGTGCTGTTGCTGGCGCTCTTCTCTGCGGTGGTGTGGCACTC  
GACTCGCGCCGTTGACCGTATTTCCGTGGTGTGATCGCTTTATGATCCTCAGTTTCGCCCTCGGTGTG  
GCCGGTCTGCTCGGCAGTATCAAGCTGCCGACCTGCTCGATCTGGCGGGCAGCGGAGTGCCTACGCC  
CCTATGCCATGGCGATGTTGCCAGTGGCGCTCACCTCGTTCGGCTATCACCCTCGGTTGCCTCCCTGCG  
TGCCTATTACCAGAATGAGCAGCAGGCCAGATGGGCCATCTGGGGGAACCTGATCGCGCTGGCGCTC  
TACGTGCTCTGGCTGCTGGGGATCTTCGGCAACCTGCCTCGTCAGGATTTTGTCCGGTGTGTTGCCAAGG  
GCGGCGATGTGAGCGTGTGCTCTCGGCCCTCTCCGGGGTCAATTGAATCGGAGAAGGTGGCCAGCGCCAT  
CAACGGCTTCTCCATGGCGGCGATCCTCTCCTCCTTTATCGGGGTGGGGCTCGGGGTGTTGACTATCTG  
GCTGATCTGTTCAAGTTGCACAACAGCCGCGCCGGTTCGCTGCAAGACCTGGGCGGTACCTTCTGCCGC  
CGCTGGTGTCTCCTGCTCTTCCCGTTCGGCTTCTGCTGGCTATCGGTTATGCCGGTGGCGCCGCCAC  
CATCTGGACCTGCATCATCCCGCACTGCTGGTGTGCGCACCCGGGCGGGCCGAGCGGGGCGAAGTG  
ACACCCCACTTCGTACCCCCGGCGGCAAGCTGATGGCTTGGCTGCTGATCCTGTTCCGATTGGCGACCG

CGCTGTTCCACTTCTGTGCGATGGCAAATCTGTTGCCGGTCTATCTGGGCAACTGAGTCAGGTCTACAGC  
TCTGACAGAAAGGGCGGCAAGGCCAACTTGCCGCCCTTTTTGCGCCATTTTTACCCACATGTCAGGATC  
TATAACTAAAGTGGTAGGTGTGGGTGGGGTAAGGTGCTGAAATAACTGGTCTGATCTGGCTGGCGGCAGC  
ATGATCTGCTGGGCATGCCCCGCCGCTTTCTTTTATGATCCCCGCCCTTCTGCGTGCCCCCTGTCGGCACC  
TCATTTGCACCAACCACATCGGGGTCCCCCATGTCCGATCTGCGTCAAGAAGCACTCGATTACCACGCC  
AGCCCGTACCGGGCAAAATTTGCCATCGCCCTGACCAAGCCTGCCGAAACCGCCCGTGTATCTGGCGCTGGC  
CTACAGCCCGGTGTTGCCGAGCCGGTGCAGGAGATCGCCGCCAACCCGGCCGATGCCATATCGCTATACC  
GGCAAGGGCAATCTGGTGGCCGTCATCTCCAACGGCACCGCCATTTCTGGGTCTGGGCAATCTGGGGCCGC  
TGGCCTCCAAGCCGGTGTATGGAGGGCAAGGCCCTGCTGTTCAAGCGCTTTGCCGGTATCGACGCCATCGA  
CATCGAGGTGAAGCAGAGACCAAGCCAGCAGTTCATCGACACGGTAGCGGCTATCGCCGATACCTTCGGT  
GGCATCAATCTGGAAGATATCAAGGCCCGGAGTGTTCGAGATTGAAGAGGCGCTGATCGCGCGCTGCG  
ACATACCGGTGTTCCACGATGATCAGCATGGTACCCCATCGTCACCGCCCGGCTGTCTCAACCGCCT  
GGAAGTGCAGGGCAAGCAGATCAGTGACAGCCGCATCGTCTGCATGGGGGCGGGGGTGCAGCCACCGCC  
TGCATGGATCTGCTGATCAAGTGTGGCGCCAGAGCGCACAAACATCTTCATGCTGGATCGTCAGGGTGTTA  
TCCACACCGGCCGAGCGATCTCAACAAGTACAAGCAGCGTTTCGCCAACGAGACCCCGCTGCGCACCCCT  
GATGGATGTCATGAAGGGGCGGATGTGTTTGTGCGGCTCTCCGGCCCCGATGTGTTGCCCGCCGAGGGC  
GTCGCCCTGATGGCGCCCAACCCGGTGTCTTTGCCCTGCTCCAACCCGGACCCGGAGATCAAACCCGGCGC  
TGGCCCACGGGGTGCAGTACGACCTCATCATGGGTACCGGCCGCTCCGACTACCCGAACCAGATCAACAA  
CGTGCTCTGTTTTCCCTTCATCTTCCGCGGTGCCCTGACGCCCGTGCAGCCGCATCAACGATGCCATG  
AAGATTGCTGCGGTGAGGCGATCCGCGCGCTGGCTAAGGAGCCGTGCCAGCCGAGGTGCTGACCGCCG  
CCGGGGTACGCGAGCTGGCCTTCGGCAAGGATTACGTCAATTTCCAAGCCGATGGATGCCCGTCTGCTGCC  
GCGGGTTGCCCGCGCCGTGGCGCTGGCGGGTGGCCTCCGGCGTCCGCCGATCGAGCTGCCCGCGGAC  
TACATGCTGTAATCCGGCGTTGCAAACGGCCCCATAGCGGGGCTGTTTTTATTTCTGCTTCTGGCGACAG  
CCAGAGACGCCAGCCGGGTGACAGGTGGGGCAGATGGAGGCAAAATCGGGTGCAAAGGTGGTCAAGCAGC  
GCTCTCCTCTGACACAATATTGCCACTATGACGCTAACGAGAATCAAGATGCAGCAGCCTGTGAGCGGCC  
GTTTGGCCACGCCCTCTCCTTCTTGCGCCATGATGGTGCCTACTTTGCCAGTTTGTCTGGGGCCGTTT  
CCAGCAGGACAGATTGACGGTTACCGCCGGTATCTGGCCTATGTCACTCTGCTTTCACTGGTGCCGATG  
ATCCTGCTGGTCTTTGGCATGATGTCAGCCTTCCCGTGTTCAGAGCCTCAAGCAGGCGATGGAGCAGT  
TCGTCTACCACAACATTTGTGCCGACCGCGGGCAGATGCTCAAGGAGTACATCGACGGCTTCGTCGCCAA  
TGCCACCAACACCACAGCAGTGGGGATTGGGGCGCTGGTGGTGGTGGCGCTGATGCTGATCTCCGCCATC  
GACAAGAACCTCAACTACATCTGGCGTTCGACCCAGGGCCGCCCGCTGGCGCAGGCGTTTGCCATGTACT  
GGATGATCCTGACCCTGGGGCCCGTGTATCGGGGCCAGTATCGCTATCTCCTCCTATATCTTCTCGCT  
GCGGCTGTTTGGCGCCGAGAGCCTGTTCCGTATCGGTTATCTGCTGTTGCGCGGTTTGCCGTTCTCTTTC  
TCGGTGTCTTACCTTCTGCTGGTCTATAACCGTGGTACCCAACGCAAGGTGCGGCTGATCCACGCCTTTA  
TCGGTGCCTGGTAGCGGCGACCCTGTTGAGCTGGCCAAGCGCGGCTTTGCCATCTACATACCAACTT  
CCCCTCCTATCAGGCCATCTACGGCGCGCTGGCCACCATCCCATCCTGTTTGTCTGGGTCTATTTGAGT  
TGGCTGGTGGTATTGCTTGGCGCAGAGACTACCGCTGCCTCGTGAATATGAAAAACCGGCGAGCGAAG  
AGCTGGGCTAAGCCATCGCCTTGCCACCGGTTTATTGGTAGCATCGACGACCGCCCCGCGAGGGGGCG  
GTCGTTCTGTTTTCAAAGGAGAGGGATGTGATTGCATTGATTGACCGGGTCAGCGAGGCCAGCGTGACTG  
TCGAGGGGGAGGTGACCGGCGCCATCGGTGAGGGATTGCTGGTGTGCTCGGGGTGGAGCAGGGGGATGA  
TGAGGCCAAGGCCGACAAGTTGCTGCATCGGGTCACTGGTTATCGCATCTTTCCGGATCAGGAGGGCAAG  
ATGAACCTGAATGTCAGCCAGATCGGCGGCAGTCTGCTGGTGTCTCCCAATTCACGCTGGCGGCGGATA  
CCAAGCGAGGGATGCGTCCCAGCTTCTCCTGCGGTGCTCACCCGAGCGAGGCCGAGCGGCTCTATGACTA  
CTTCGTGGCCAAGGCTTCCGCCAGCGGCATCCCGACCGCAACAGGGTGTTCGCGCCGACATGAAGGTG  
GCGCTGGTCAACGACGGCCCGGTTACCTTCTGGCTACAGGTCTGAGGATGCCTGATCCCGCGGTATGACG  
TGGACGATCACGTTGATGACCCCTGCGACCGGGTAGGGGTAGCCGGGCAATCCACTGCTCGATCAGTG  
TCAGGGCGTGGGTTAGCTCTAGTGCGGTACGCGGCAGCAGGTTGATCACCAGGTGCCGACAGGGCGGGG  
AGCCAGCGCCCGGTAGAGCCGCTCCTGAAAACAGCAGCAGCGGGTTGCCATCCTGACTGAAGAGATCGAGC  
AGGATGAGGTGCTACTGCTGCTGCTGCTGCTGAGAAAAGCGAGGGCATCGGCCGATGGAGTGCCGGCG  
CGGCGTGTTCATCGCTCTCCTGATGCTGGAAAAACTGCTGATAAACGGTCAAGCACCCTTCTGCTGAGGTC  
AACGCACTCGTGGCGAGCATCGGGCCAGCGCTGACTCAGATGGCGGGTGGAGATCGCCGCCACCCAGCCCC  
AGTTTCGAGGATCTGCCCGCCTGTTCTGGCAGCAGGCAGGCGATGACCCGCTGATGGGGTAGACAGAGGG  
CGGCGGGGTTGGCGAGCGACATGGCGGATTGCACCACGCCATCTATCTCCAGCCAGCGGTGCTGGTCATT  
TTCCTGCACGGTGGAGCGGCGCTGGGGTTTGCAGCTGAGGTGCAACAAGTATCGGCTTGGTACGCTTGC  
AGATTGAAGTCCATGAATTTGCACGGCAAGATGGTTTCGACCAAGTGAACCAAGGATGAAACTATGTA  
CCGGGTAGTACCCCTCAGACAGTCCCGGAGCTGGATGCTACTACCAGTTGCGCTGGGAGCTACTGCGT  
AAGCCCTTCAATCTTCCCGTCCGGTTCGAGCGGGACGAATACGACACCGTCCGCCATTCACCGGCTGATGC  
TGGCACCCGATGGTACCCCATCGCGGTGGGCCGCTCTTTATCGGGCGGTGACGAGGCGCAGATCCGCTT  
TATGGCGCTGCGGCCCAATATCGCGGTCAAGGGCTGGGGCCAAAAATGGTGGAGGATCTCGAGGAGCTG  
GCCCCGAGCGAGAAGGTGAAACGGCTGGTGTGAACGCCCGTCAAGGAGCGGTGGAGTTCTATCGCAAGT  
GCGGTTTTCTCGAAGTGGGGGGCGCCCCGCTCTCCTTCGGCCGATTTCCCATCGCCAGATGATCAAATC

CTGAGCCCGTTGCAGACCATCCAGTATCGCCGGAGTGGTGTGTCAGGATCTCACCACCCGCTGGTCGCGC  
GGGGTGGCCATCAGCGAGAAGATGGGGATGCACATCAGCCACTACGACGGCCAGACCTTCCATCTCAAGG  
CCAATCTGGCGGCCAATTTCAACGTGCATGGCAGCATGTTTCGCCGGCAGTGTCTACAGCCAGTGCCTGCT  
GGCGGGCTGGGGGCTGATCTGGCTGCAGCTTAAAGAGGAGGGGCTGGTGGGCGAGCCGGTGTGGCCGAA  
AGTACCATCAAATATCATGGCCCGGTTCGATGAGGAGCCCGAGGCGCGAGTGGCCCGCGAGGGGATGCCCG  
CCGTGCTGCAGCCGCTCAAACGGGGCGAGCCTGCCACCTTCAGCCTCAAGATCCAGCTGTTTCAGCGGCGG  
CAAGCTGGCGGGCGGAGTTTTGCGGTCACTATGTGGTGCAGCCGCCCGCCCGCCGGGGCCAGTAACCGCGT  
CGTTTTCCCATCAAACAACAAGGCCTCATCATGAGGCCTTGTCTGTTTTTACCCTTGTCTGGCTGTCTGCTT  
GTCTGCCCGGCTTGGGTCTGCACTTGGGCTGGTTTTGGGCTTTCGTTGCGGGAGCCGGTTCGCCAGAGCC  
GGGCGCTGTTGCCTTGGCGGGATAGCGTACTCCACTTCCCAGCCGAGGCGTCTCTGCTTCTGCGGGAA  
GCTCCAGGCCAGTGTGGGTTCCGTCAGCGGCCCGCCACTGGCCGAGCAGCTCGGCGCAGCGGTTGCCA  
TTGAGGATCCCAGATCCAGCTGCCACTGCTCGTTGACCAGATCGATCCCCCTTGCAGCGCCAGCAGAT  
GGGTGATGGTGGAGGCGCCAGCCTGCTCGACTTGTAGTTGCCCTTGTTCGATCTTGCCTGCAGCTTGAT  
GCGGTAGAAGGGGTGTACCCCTCCTGCATCGCCTGCCACAGCTGATCCGGCGTCAGGGTGGGCGGGGTC  
GTCCCTTTGAACCACTCATCCAGCAGCGGATCTATCTTACCTTGTCCCAGAACGGCTCGTCGGCATTTGA  
GGGCAAAGCTGCCTTGCAGGGTCTGGCGCCACTCGCCCGCGTTTTTGCCTGTTTCGGCTTGCAGGTCCGC  
GCTCACGTCCGCTTTGCCGGCAAAGGAGACCGGGAGTGGAGTATCTTGCCTTGTGCTGCAGATCCAGC  
TTGGTTGCCTGCAACTGCAGGCGGCTGCTTGGCCCGGTTTCGCGGCCCACTGGCCACTCAGGCTGAGGC  
TGCCCTCATCCGGCAGCGAGCTGGTGAGTTTGCCAGTTGCCAGGAGCTGGGGTTCAGTTCCCATCCAG  
CTCGCCGTTACGGGCGCTGAGGCCATCCACACCAGCTCGAACCACTTGTCTCGATTCGGGCACGGCCG  
AGCAGCGGGCCGGGTTGGTTATCGCGCAGGGCGAGATCGCTCAGATAGAGCTGCCAGCCGGTCAGCGACA  
GGGGCAGGGTATCGTGAAGGAGAGCACCTTGAGCTTGTGCAACGCCAGCTTGCAGGATATCGACCTGCTG  
CGGGCGCCAGCTCTGCCAATCCTGCCACCACCCTTGCGGCAGGCTGATATCCATGCCGCTCAGCGCCATG  
TCTTTCAGGGTTCAGCTTCTGCTGCTGGCTATCGAGGGATAACTCGACATTTGAATCCCCCTTCATAGGCC  
TGCCCTGCAGTTTCGCCGTCGATCTGCTGGGGCGAGAAGGCGAGCTTGCCTTGTATCTCCTCCAGCTGGAA  
CAGGCCACGGCCATGTCCCCAGGGTGCCGCTCAGATAGCCGGTGGGCTGGTTGCCCGCTGCCAGTTG  
AAGGCGGTGAGCTGGCCGCTGAAGTTGTTGAAGGAGAGCTCCTGATTTGATGTCGTTGAGGCTGACGCCGT  
CCAACGTACCCGCTCAGCGACACGCTTTGCAACGGGAAGCGCTGCGGGAAGCCTTGTGTGTGATCAGATC  
CCCCAGCTCCACCCGCTGACCGCCCTTGCAGCTGTCAGTTGCAGAGTACGGGTGCGGTCAGTCCAGC  
ACCATGCCGGTCTCCAGCAGACCGTTCGAACAGGTTGGTACCAGCTTGTTCGGTTCGCGCAGCACTTCTCCTT  
CCAGCCTTCTTGAAGTTGAGACGGGCGAAGGTGAATTCGGGGTCTCCAGCTGGCCGATATTGAGGCT  
CAGGTTGGCCTGTGGCAGCTGTTTCGGATCGATCAGCTCCCAGTCGCTCAGGGTGGCGTTGAGACCGCGC  
AGGGTCAACTCGGGGCTTTCAGACTGAGCCGGTCTATGGTGCTGTCGCTGATGGTGAGGGTGTGCACCG  
GCAGGTTTCGGCAGCTGGTTGGGCGAGCGGAGCTTGTGCGGGACGAATGAGATCGAGATGGGCGATCCG  
CACATCGCGGCTCAGCCAGTCGATGCTCTCGATCTCCAGATAGATCTTGTGAGGGAGACCGCATCGCCG  
TAGCGTACCTGCTCTGCCAGCAGGGTGTAGGGTGGAGCGGGTTGAACACCAGTCGCCCTATGGTGACCG  
GTACGCCGGTCTGCTGGCTGATCCAGCTGGCGATGGGGCTTTCGGCGCTCGGCGTTCGAACAGGCCGAG  
GGCAACCCAGACAAACAGCAGCAGGAAGGCGAAGGTGTAGAGCAGGCCGCTAGCCAGGAATTCATGGTT  
GCTTTCCTCCTGTTTTGGGATTTGTTGTGTCAGGCGTTTGTAGTAGTGATCTCGCAGACCAAGCCAGCGCCGT  
ATCAAGGGGTCGACATGACTCGGATGCCTATCCATAAGGAGATGTGCCCATCTTCTGCATCTATCTCGAT  
CAGGCATTGGAATAGTGATCCCCTAAGCCGAGCCAGCGCCGTATCAAGGGTTCGACATGGCTTGGGTGCC  
TATCCATCAGGAAGCGCGCCATTTTTTGCACCTGTGGAATAAGCGGCTGATCCCGCACCAGATCGGCGAT  
CTTGAGGTTCGGCCAGACCGGTCTGGCGGGTGGCAGCAGTTCCCCCGGGCCGCGCAGTTCCAGATCGCGC  
TGGGCGATGAGGAAGCCGTCGTTGGTCTCACGCAGCACCCGAGCCGGCTCTGGGCCGCTTGGACAAGG  
GGGATGATAGAGCAGCAGCAGTGCAGAGGCCACCGCACCCCGGCCAACCCGGCCGCGCAGCTGGTGCAG  
CTGCGCTAGCCCGAGACGTTCCGGGTTCTCGATGATCATCAGGCTGGCGTTGGGCACGTCCACCCCCACC  
TCGATGACGGTGGTGGCGACCAGCAGTTGCAGTATGCCCGCTTGAACCTCCTGCATCACCCGCTGTTTCT  
CGACCGGACGCATCCGACCGTGCACCAGCCGATGTGCAGGCCGGGCGCAGGTTCTGCAGCTCGGCGGC  
GGTATCTTCGGCGGCTTGGCACTCCAGCACCTCCGACTCCTCGATCAGGGTGCAGACCCAGTAGGCCCTGC  
TTGCCCTCGGTGCAGGCGAGCTTGACCCGCTCGATCACGTGCGCCGCGACGGCTGTCAGGCAGCGGACTG  
TGGTGTGAGGGGTACGGCCCGGCGGCAGTTCTGTCGATGACCGAAGTATCGAGGTTCGGCATAGGCGGTCAT  
CGCCAGGGTTCGGGGGATGGGGTGGCGGTCATGATGAGCTGATGGGGATGTACCCCTTCCCGCTCCCT  
TTCTCGCGCAGTGCAGGCGCTGATGCACCCGAATCTGTGCTGTTTCATCGATGATGACCAGCGCCAGAC  
GCTGGAACACCACCTGCTCCTGAAAGATGGCGTGGGTGCCACCACCATCTTGACGCTGCCATCGGCGAT  
GGCGGCCAGCGCCTCCTCCCGAGCCTTGCCCTTCTGTTTGCAGCCAGCCAGCCGACTCCGATGCCGAGC  
GGCTCCAGCCACTTGGCGAAGTTGATGGCGTGTGTTCCGCCAGCAGTTCCGTCGGCGCCATCAGCCCCA  
CCTGACAGCCGTTGCCGATAGCCTGCAGGGCGGCCAGCGCCGCGACAGGGTCTTGCAGAGCCTACGTC  
ACCCTGCACCAGCCGCATCATGGGGTGGCTCTGTTGCAGATCCTTGCTTATCTCCGCCACTACCCGGCTC  
TGGGCGCCGGTGGGCTTGAACGGCAGGGCGCTGAGCAGCTGTTTCGACCAGCTCGGGCGCCGGTTTTGAGAG  
CGCGAGCCAGCTGGGTTTTGTGCTGAGCACGCACCTTGTAGTACCAGAGGTTGTGCGCCAGCAGCTCCTC  
CAGCACTAGCCGTTGCTGGGCGGATGCTGGCCGCTTTCAGCAGCGGCGACGCCACCAGGGAGGGCGG



CGATGCAGCAGCTTCAGGGCTGCGGCCAGTTCAATCTGATGGGGATAGAGTCCGGCGGGCAACAGCTCCT  
CCACGCCGTAGAGGTGAGCTGGGCCAGCGCCTGATCGGTGAGGTTGCGCAGGGTGAGCTGGCGCAGTCC  
TTCGGTAGTTCGGGTAGACGGGGGTGAGCGCCTCTTCGGTCTGACCGGCCTGCTCTTCGCCGAGCAGCCTG  
TACTCGGGGTGGGCCATCTCCAGCCCCGATTTTCCGGGGCGCACCTCGCCAAAGCAGCGGATCAGACGGC  
CCGCCGCCAGACTGTTTTTCTGGGCGGGCGGTGAAGTTGAAGAAGCGCAAGGTGAGGGTGCCGGTGCCATC  
GCTGATGCGACAGACCATCATGCGGGCGGCCCATCACCAGCTGAGTGTCTCGGATTTTCGCCCTCGACG  
GCGCCGTGACAGGCCGGGGCGGAGATCGCCGATGGGCCACACCTGGGTGCGGTCTCGTAGCGCAGGGGAA  
GGTGAACAGCAGATCCTGTACCGTGGCCAGCCCCAGCCGCTCGAGCTTCTCCAGCATCTTGTGCGCCAC  
ACCCTTGAGGCTATCGAGAGGAATTTTATCCAATTTTCATCAATTAGATGCCCCAAAACACTGTAAATATG  
TCCAGATGATAGGGGTTGTTGAGGGGCGGATGCAAGCCGAGTTGCTGCTGGCAGGGCCGCCAAGGCGGGG  
GAAACGGCGGATATGACAAAGCCCTGCCGAAAACGGGAGGCCCTTGGTGCAGGCTGCCAACTGGATCCGTC  
GGGCGCATGGCGCCCAAGGTACAGATGATGCGTTTAAAGCAGCAAATGGGCCCTTGACCCGATGGATCCGTC  
CAGCAGCTTGCACACCTGTTCCGGGTAGTCTCGGATCTGCTCCACTTGATCGAAGTGGCTGATCCGCTTG  
GTGTTGGTCAGGATGTTTCTCCCGCTCCGCGTTGAACTGGGGACGCAGCAGGTGGCGACGATCGTGACCA  
GCAGGCCATTCTCCAGATCCAGCGCCCAAGCGCGGGGTTGAGGTTGTTGCCGGTGAGCAGGGCCACTC  
GTCATCCACGAAGATCCCCTTGAGATGGTAGGAGTTGCGCTCGCAACACCAGAGCATCAGGTTGAGACGC  
CCGTCGTCGATGTGACGCTGGTTGCGCTCGGCAAACCTTGCAGGTTGGTCTCGTAGAGATAGGGCAGGC  
CACCGATGGTGGAGAACTTCTCTTCCGGCGGAATGAAGAAGTCGTTGGCGGTCTTGTGCGCCACGACGAT  
GGTCACCTTGCAACCGCGCTGCAGCAGATCCTCGATATCCTTGTCAACTCCTTGGGCGGGTTGAAGTAA  
GGGGTGCAGATGAAGATCTCACGCTCGGTGGCGCGCACCAGATTGCGGATCATCAGGTTGAGCTGATTGT  
TGCGCTTGCAGACCCACCATGGGGGTGACGGCCACCTCCTGGGTGTTGACCGGCATGGTGTGAAGCG  
GTACTGGCTCTGGCGCAGGTTCTGCTTGAAGCGGGCGGATCGGCCCTTCAGCTGTTTGGCGCTGGGGATA  
TCGCTGTGATCCAGTCGCTGCACCGCGTCGCTCTTACGAACAGGTCATCCACATAGTTGACCATGCTGC  
GGGCCAGCTCCGGGCTGGTGATCTGGTGATAGCGATCGAAGCGGTAGCGATCCTGCTGATGCAGGTAGAT  
GTCGTTGAGGCTGGCACCGGAGTAGAGCACCACATCATCAAAGATGAAGCCCTTGAGGTTGGAGCACGCCG  
AGCAGCTCGCGCCCTTTGACCGGCACGCCGTAGATTTGATCTGGTGTCTGTTCCGGCAGCCATGGCCT  
GATACATCAGTGGTTGCCGCCCTGCTTGCCTTTGCCGATCAGGCCCGCTGGGCACGGTGAAGTCGAC  
GAACAGCTTGATGTCGAGGGCCGATTGCGCTGCTTGGCGCGTAGAGGGCGGAGAGGATCTCCCGCCCT  
GCTTCGTCATCCTGCAGATAGAGCGCGCAGATAGATGCGCCGGGTGGCACTGGCCATAAGCGCAAGAA  
TGCGCGTTTTGAAATCCTGGGCGCTGTAGAGCACTTCAAACCTGATCCGCTGCGACGGCGATCTGGGGCAG  
GCGCGCCAGCAGTTGTGATAAATGGGCCGATGAATGCATAGATAAACCTGAAATCACGGGGTTAAGCGTT  
CCACTCGGAGCGATGAATAGGCGATTCTAGCAATCTCGCCCTCTCAGCCAAAAGAAAGAAATCATCAGAAAG  
ATGAAAAGGCGCTCACGAGTGAGGCTTTTTTGTGAGCATTTCGCCCTTGTGAGAGGAAGCTATAGATGAT  
CATCGCCATCACGCCCGCGGTGGTGCCGATGATGGTTTCCATCACGGTCCAGGTTCTGCAGGGTTTGTCTC  
TCGGTCAGGCCGAGGTAGCGGTTGGCCAGCCAGAAACCGGAGTCGTTGACGTGGGAGAGCACGATGGCAC  
CGCCGCCGATGGCGATGGTGACGGCCGCCAGCTGGGCTCCGTTGAGGCCGAGGGGTTCCAGCATCGGCAG  
CACCAGACCACAGGCGGTGAGTATGGCGACGGTGGCAGAACCTGAATCACCCGTACCAGCGCGGCCAGAA  
ATGAAGGCCAGCGCAGCAGATGGGCAGACCGGAGTCGGCCAGCATGTTGCCAGCGCGCGCCTACGCCGG  
AATCAACCAGCACCTGCTTGAACACGCCACCGGCACCGGTACCAGGATGATGACACCGGCGGGCTGGAT  
GGCGCTGTTGAGACGCTCATCACCTCGTACCGGGACATGCCCGGGCGAATACCAGCAGGTAGAAGGGC  
GCCAGACAGGCGACCATGATGGCGGTGAAGGGGTGACCGATGAACTCCAGCCAGTTGTGCAGGGTAGAGC  
CCGCCTCGACGAAGCGGCCAACGATAGTCTTGAGGCCGATCAGCAGCAGTGGCAGACCGATGAGACCCAT  
GGCCAGCCCGAAAGAGGGCAGGGATTTGCTGTGATCGTGGATACTGTTCTGGGCATCGGCAGGCAGCGGC  
ACATCGACGATCTTGTGATGAAGTCACAAACAGCGGGCCAGCAAGGATCAGCGCCGGTGCAGGACAGCA  
TCAGACCAAGCAGGATCATGTAGCCGAAGTCGGCAGCCAGCTGGGATGCCACCAGGATCGGGCCCGGCCG  
CGGGATAAGGAAGGCTTGGCAAGTGGCGATACCGGCCAGCAGAGCGATACCGATCTTACCACGCTGCCG  
CCACCACGACGGACGATGGCGAAGGCGACGCCGATCAGCAGCACCACGGCCACGTCAAAGAAGAGCGGCA  
GGGCGCAGACAAAGCCGGTCAGGGCCATGGCCAGTTGGCGCGCTTGACGCGCAACTTGCCGAGCAGGGT  
GTGAGCCACCCGGTCGAGGGCACCGGTCACTTCCATCACCTTGGCCGAACATGGCACCCAGCGCCACCACT  
ACCGCGACGAAGCCGAGGGTGGCGCCATCCCTTTCTGGATGGTGGCGGCGATGTCGGCCGGGTTTCATGC  
CAGCGGCGAGACCCGCCACCATGGAGACCAGGATCAGGGCTACCACGGCGTGGAGCCGGGCTTTCATCAC  
CAGGAAGAGCAGCAGCACAATCGAGCCGGCGGCTGTGATGATCAGGGAGAGGTCAGACATTTGTTATGCGT  
TCCTTTTTTCCAAGTTGAGTGTGACACCTTGGCGATCCGTCGGCAAACCATATCTTTATGATTTATTTAG  
ATTTATGGCAAGGGCTCAACATCATATGCCAGGTGACTATGGGTTTGTGCTCAGTCTGTGGCAGACTTCAC  
ATTTTCAATCGTTACCGGTAACATGTTACCGGTAACGTGTTAGATTAGAACCATCAACAGCTGGTTTTTT  
TGAAAAGTGGGACAGAGGTCAAATATGGCGGGTAAGTGCATTATCGTGATGGGTGTGTGGTAGCGGC  
AAATCCAGCGTGGGTCTGAAAGTGGCCGAAGCGCTGGGCGCCAAAGTTCATCGATGGTGATGACCTGCACC  
CCAAGGCCAACATCCAGAAGATGGCTGGCGGCAACCCCTCAACGATGAGGATCGTGCCCCCTGGCTGGA  
GCGGATCCGCGACGCCGCTACAGTCTCGAGCAGAAGAACGAGACCGGCATCATTTGCTGTTCCGCCCTC  
AAAAAGAAGTACCGCGACCAGATCCGCGAAGGCAACGAGTCGGTCAGCTTTCATCTTCTCGATGGCAGCC  
AGCCGCTGATCCTCGAGCGGATGCGTGCCCGCAAGGGCCACTTTCATGCGTGAAAGCATGGTACAAAGTCA

GTTCGATACCCCTGGAGCGCCCGGATGGCGAAGCCGGTGTATTCCACATTGATATCGACGGCACCTTCGAA  
CAGGTGGTTGACCGCGCCGTACAGCATTGGAGCAAGCCCAATGATTCATCAGGTAATTTCCGACGTCAC  
CGCCCGCATCCGCGAGCGCAGTGTGCCCCGTGCTCAGGCATTTCTGGCCCGCATCCAGCGTCAGGCAGAG  
CAGGGCAAGACCCGCGCCGCGCTGGCCTGTGGCAACCTGGCCACGCGTGGCCGCTGCAGCAGTGACG  
AGAAGGGTTCGATTCTCGATATGACCCGCGCCAACGTCGGCATCGTCAACCGCTACAACGACATGCTGAG  
CGCCCATCAGCCCTATCAGGGCTATCCGGATCAGATCAAGGCAGTGCTGGCCGAGCTGGGCCACAGCGCC  
CAGGTTGCTGGCGGCGTGCCTGCCATGTGCGATGGCGTGACCCAGGGTCAGCCGGGGATGGACATGTCCC  
TCTTCTCCCGGACCTGATCGCCAGGGCACC GCGCTCTCTCTTCTCACAACACCTTCGATGCCACCCT  
GCTGCTCGGCATCTGCGACAAGATCGCTCCGGGCCAGATCATGGGGGCCCTCTCTCACGCTCACCTGCCG  
ACTGCATTTGTTCTCTGCCGGCCGATGGCGAGCGGCATCAGCAACGACGAGAAGGTGAAGGTGCGTCAGA  
AGTACGCCCGCGGTGAAGTGGGTGCGGACGCCCTGCTGGAGATGGAGTGGCGGCGCTACCATCGGGCAGG  
CACCTGCACCTTCTACGGCACCGCCAACACCAACCAAGCTGGTGTTCGAGGCCATGGGCCCTGATGCTGCCG  
GGCTCCGCCTTTGTGCATCCGCACAGCGAGCTGCGCCGCGCCCTGACCGCCGAAGCGGCCCGCCGATCA  
GCGCCATGATCCCAGGCTCTCCGGCCTATCGCCCGCTGAGCGAGGTGCTGGATGAGCGTTTCGCTGGTCAA  
CGGTCTGGTGGCCCTGCTCGCCTCCGGCGGCAGTACCAACCACAGCATCCACATGGTGGCGCTGGCCCGC  
GCGGCCGGTTTGGTACTGACCTGGGATGACATCAGCGATCTCTCTGACGTGGTGCCGCTGCTGGTTTCGA  
TGTACCCGAACGGCCCGGCCGACGTGAACGCTTCGAACAGGCAGGCAGCGCGTGCCTGGCCTGATGCGCCG  
TCTGGCGCAAGAGGGGCTGATCCACATGGATGCCACCCGGTCTTTGGCGAGATGCAGGATTACCTCAGC  
CGTCCGGCATTGGTCGATGGCCAGCTGGTGTGGCAGCCGGTGGCGAGAGCGGCATGCGAGCGTGCTTT  
CACCTTCCGGCAGCGTATTCCAGGCCACCGCGGCACCAAGCTGCTGGCGGGCAATCTGGGCCGCGCCGT  
GGTCAAGGTCTCCGCCGTGGCTCCCGAGTATCGGGTGAATTGAAGCGCCGGCGCGGGTCTTCTCCTCCCAG  
CATGCGGTGGAAGCGGCCCTACAAGCGGGCAATCTCAATCAGGATGCCGTTATCGTGGTGCGCCACAATG  
GTCCGGCCGCAACGGCATGCCGGAGCTGCACAAGCTGATGCCGGTGTTCGGCAACCTGCAGAAGGGCGGG  
TTACAAGGTGGCGCTGGTACCCGATGGCCGCTCTCCGGTGCCTCCGGCAAGATCCCGGCCGCCATCCAC  
GTCACCCCGGAAGCGCTGCACGGCGGGGCCATCGGCCTGCTTGTGACGGCGACCTGCTGCGGGTTGACG  
CGGTAACGGCAGCCTCGACTGCCTGACCGATTTGAGTGGCCGTACCCAGGCCGAGATTGACCTACTCT  
GGAACAAGAGGGGTGGGGCCGTGAACTGTTACGCGTGTGCGTCGCGCGGTATCGAGCGCCGAGTGTGGC  
GCTACCATCTTTGACTAAGGAAGAGCTATGCAGAACTGGAAAGTGACCCCGGCCGAGGTTTTCGCCCT  
CCCCCTGGTATCCCGTATGGTTATCAACGAGCTGGATCAGGCCCTGCCGATGGCCAAGCGCTGCTCGA  
CGGCGGCATCTCTGTCTTCGAAATCACCTGCGCACCCCGGTGGCGCTCGATGCCATCGCCCTCATCGCC  
AAGGCGATGCCGGATGCCATGGTGGTGTGGTACCGTGTCTCAACTGCGAGCAGTTTACGCGAGCCGTTG  
CCGCCGGTGCCTGCTTCGTCATCTCCCCGGGGATGACCCCTGCCCTGCTGGCCACGCGGCCAAGAGCAC  
AGCGCCGCTGATCCCGGTGTGGCAACTCCGTCTGAAGTGATGCAGGCGCTGGAAGCGGGCTATGACCAC  
CTGAAGTTCTTCCCGCTGAAGCGAACGGCGGTACCAAGGCGCTCTCCGCCATTGCCGCGCCGCTGCCCC  
AGGTGAAGTTCTGCCCCACCGCGGTATCGGCCGAAAAACGTTGGCCGACTATCTGGCACTCAAATGCGT  
GGCCACCGTCCGCGGCTCCTGGATGCTGCCGGCCGATGCGGTCAAGAGCGGCAACTGGGAAGAGGTGACC  
CGCCTCTCCCGCGAAGCGGTTGAGCTGGTAAAACGCTAAGCATCAGTTGTGTGCAGAAAACCAAACAGGC  
CACCTCGGGTGGCCTGTTTGTATCGGCGTGACTTAAGTGGGTGAGGGAAGAGATTACCCAGACTCTC  
CCCGATATAGAGGGAGAAGCCGATATCCTTGCGGGTGTCGGGTGGGATTGGCCGCTGAGACGCGCCAGC  
AGCATGGTGGCCGCTCCCGACCGATCGCTTCCCGCGGGGTGGCGATACTGGCCAGCTTGGGGGTGATGG  
CGTGGCCGATGTGAGAGCGTTGCAACCGGCGATGGCGATCTGCTGGGGCACCGGGATCCACTTGGCCTG  
ACACTGCAGCAGGGCGCCACCGCCAGGTTCATCGTTGGTGCAGAACAGGCCGTCGAGGTCGGGATAGCGC  
ACCAGCGCCTGATCCAGCAGCTCGCCCCCAGAGTGAAGCTGGAGGATTGTTTCGGTACGAGATGCTGGC  
CGGTGAGGCCGAAGTCGATCATTGCCTGATAGTAACCTCCATCCGCGAGCTGGGTACGTACATCGAGCCG  
CGCCCCCAGATAGACCACCTTGCAGCGGCCCGGCGCAGCATCTCTGTTACCATGGCCCGGGCGGCGGCT  
CTATGGTCCATGCCGACCACCATGTGCGATGGGGGTTTTCGGCAGATCCATGGTCTCCACCACCGGAATG  
CGGCGGTGGCGATCATCTTGCAGTGCCTCTGTGTGCTGGCTGTCGGAGAGGATCAGCCCATCCACATG  
GTAGGAGAGCAGGGACGCGACCTGCTCCTCCTCCCGCTCCGGGCTGTAGCCGTAGTGGGCCAGCAGGGTC  
TGGTAGCCAGCCGGTCCGGTTACCGACTCGATGCCGTGGATCACCGCCGAGAAGACCTGGTTGGAGAGGG  
AGGGGATCAGGATGCCGATCGCCTTGGTGGTGGTGGAGAGAATATCCGGCGCTCGGTTGGGGATATA  
ACCCAGCTCTTCCACTACAGCTGCGATCCGCTCGCGGGTCCCTCCGCTACGGTCTGCGGGTCCGCGAGA  
TAGCGGCTGACAGTCATCTTGGTACGCGGTTTGGTGGCGATATCTTGCAGGGTGGGGCGGCGCTTGC  
GGGTGGGGCTCATAGGGGTGTCCAGCGTGGATGTTACATGTAACATTACCGTTTTTGGCGGATAAAGTCA  
GCATATGAAGCCGTTTTTGCAGGAGTTTTCCGATGATCAGAGGCAAACAGTTCGTGGATGTCCGGTTCGA  
GCAACAGGATGTGGAGGGGGAGCAGTTCTCGGAGTGCCGCTTTATCGGCTGCAACTTCTCTTGGCTGGAT  
TTGAGCGATAGCCGCTTCATCGACTGCAGCTTCTACGATCGGGAGAGTGAACGGGGTGCCTGTTGCAGG  
GTTGCGATCTGCGCGAGGCCAGCTTCTGCGCTGCGATCTCACCATGGCCGATTGCAGCCGCGAGCCAGTG  
TCTGGGGTTGGAGATGCGCGACTGTGAGGCGGTGGTATTAACCTTCGGCCACGCCAGCTTCGCCAACCAG  
ATCACCGCCAAAAGCTACTTCTGCGAGGCCATCTGACCGGCAACAACCTTCAGCTACGCCAGCTTCGAGG  
GCTGCCTGCTGGAGAAGTGCAGCTTACCGGCAACCGTTGGCAGGGGGCAACCTGTTTGGTGCCTCGCT  
GGCGGGTCCGATCTCAGCGGCTCCGAGTTTGGCCAGATTGACTGGACCAGCATCAAGCTGCAGGGCTGC

GATCTGCGCCAGTGCATCTGCCGGGGCTGGATCTGCGCCGGGTCGATCTGCAGGGAGTACAGATCAACG  
AGGATCAGCAGCAGACCTTGCTGGAGCAGATCGGTCTGGTTGCTTCCCCTGAGCCGAGCGAAAAAATAG  
GTAATTTTTTTCATCAAATGGGAGTGACAGCGGGTGTCTGACTCCTGAAATGACAAAAGCCTGCGTGAGGC  
AGGCTTTTTGCTAGTGAGCGTGTGACGCGTTTTGTCGGCCGGGTTAACTCAACCCTTGGCCAGCCATTTGGT  
TGGGTTGATCGCCTCGCCCTGATAGCGAATTTGAAAGTAGAGGCCCGGTCTGTCTGACCGCCACTGTCA  
CCGACCAGCGCCACCGGCTCACCTGTTCCACATTTGGCCAACTTGGCGCAGCAGCGACTGATTTGTGAC  
CGTAGAGGCTCATGTAGCCCTTGGCGTGGTTCGATCACCAGCAGCATAACCGAAGCCGTCGAGCCAGTCGGC  
GTAAACCACTTGTCCCCTGCGACAGCCTTGACCTGGGTTCTTCGCTGGCGCCGATCAGGGTGCCTTTC  
CACTTGAGCTGGGCGGTACGGGGCGAGCCATAGGAGATGAGGATCGGTCCCTGCACCGGCCAGCGCAGGC  
TGCCATTTGGTCTTGAGGCCGCTATAGTGACCGGCACTGCTGATGCCGAGCCGCGCTCCGGTTTTGCTGCT  
GGCCACCTCTTCGGCAGGTTCTGCCGGTTTTGACGGTTTTATTCTGCTGGGCGGCGAGTCTGCTGCTCG  
GCGCGGCGCTGTTTCGGCCAGCTTGGCGCTGACGCTCCTGCTCCGCTTTCAGCTTGGCCAGCCGTTCCCCT  
CGGCCGTTTACGGCGCTCCTGCTCTTCCCCTTGGCAGCAGCTCTTCCAGCCGGGTTTTAGCGCTTT  
CTCCGCTTGGACAGCTTGGTGAGCTTCTGCTCGTCATCCTGTACCAGCTGCTGCAACTGGTTGCGCACC  
TTGGCCCGGCTCTGCTGGCTGGCCAGCAGGGTCTGGTGATGCTCCTGCTGTTCCGCAAGCAGGGTCTGCA  
GTCTGGTTTTGGTCTCTTTGGTTGCTGCTGGTTTTTTCGCCAGCTTGTTCGGGGTGGCGCGCAGGGCGTC  
GATGGCCTCGATGCGGGCCTTGTGAGGTAGTCGTAGTAGTCGAGTGAGCGGCTCAGTTTTGGCCGGATCC  
TGCTGATTGAGCAGCAGTTTTGAGGTAGTCGTGGTTGCCCGCTTGAAGGCGCTCTCCGCTGTTTTGGCCA  
GCAACTGTTTTTGTATGTTTTGGCTTGAACCTCCAGCCCTGCTTGTCTTTTTTGCAGGGTCCGACGCTCTG  
CTGGTTCTGCTTCAACTGCTGCCTGGTCTGGTTGAGTTTTGGCGGCGGCGCCGAGATGGCCTGCTCGTCA  
GCCTTGAGCTGGGTATTGAGCTTGGCAAGCTCCTGCTTGTGAGCTTGATGGTCTGCTGTTGTTCCCTTGA  
TCTGGGACTGCATGGTCCCCAGCTGCTGATTGGCGGCCAAAGCCGGTTTTGCTGGCGCCAAACGACAGGCA  
AAAAACAGCGCGCCGGCCAATAGGCCGACGCGACTGGTTTTTCTGTGAAATAACTTCGCATCCCCGCATG  
GGGAAGGATTATTTGAGAATCATCAGGGGCTTGGCAGTCATTTCCGGCGGCACCGGCAGACCCATCAGGG  
TCAGCATGGTGGGGGCCAGATCGGACAGTTTTGCCACCCTCAACTACCTCGGCTTTGCGACCGAAATAGAT  
GAGCGGAACCGGCAGATTGGTGTGGGCGGTGTGGGCTGACCAGTCTCTTCGTCACGATCTTCTCGGCG  
TTGCCGTGGTGGCAGTGATCAGGCACTCGCCACCCTTCCGGCCAGGGCGTCGGTGACGCGACCGATGC  
AGTGGTCAACGGCTTACAGGCTTTGACGGCGGCTCGAATAACCGGTGTGACCAACCATGTGCGCCATT  
CGGGTAGTTACAGATGACGCTGCTACTTGGCCTCTTGATGGCCGCAACCAGCTTGTGCTGGTCTGCTCT  
TCGGAGCTCATTTCCGGCTCAGGTCATAGGTAGCCACTTTCCGGGCTGGCCACGATCTCGCGATCTTCGC  
CAGTGAAGCAGGACTCTTCGCCACCGTTGAAGAAGAAGGTGACGTGAGCATACTTCTCGGTTTTCGGAGAT  
GCGCAGCTGGGTCTTGCCCTGCTTGGCCAGCCACTCACCCAGGGTGTGACCAGAGCGGTGCGGCGGGTAG  
GCACAGGCAAGTTTGTATGTCGGCCGCTATTCGGTCAGCATCACGAAGTTCAGCTTCGGCTCAACGGCAC  
GGGCGAAGCCGGTGAAGTCCGGTGTCAACGAAGGCGGGGTGATTTACGGGCACGGTCCGGCACGGAAGTT  
CATGAAATCAGTGCATCACCATCTTCCATCGGTGCAGCTTCGCCGATGCGGGTGGCTTTGACGAACTCG  
TCGTTCTCGTTCGGGGCATAGGCGGCAGCCAGTGTCTCGGTGGCGCTCTCGGCGGTGAACTCGCCCTTGC  
CCTGGGTTCATCAGGTCATAGGCTTGTGTCACGCGATCCAGCGGTTGTACGGTCCATGGCGAAGTAGCG  
GCCGATCATAGAGGCGAAACGACCCTTGCCAGCTTGGCGAACAGGGCGTGAACAGCTCGATGGAGGAC  
TGGGCGGAGCGCGGCGGAACGTCGCGGCCATCCAGGAAGGCGTGCAGGTAGATCTTCTCGGCGCCACGCT  
TGGCAGCCATTTTCGATCATGCCCATGATGTGCTCTTCGTGGCTGTGTACGCCACCCGGGGACATCAGGCC  
CATAATGTGAACGGCTTTGCCGTTGGTGACGGCAGCGTCAACAGCCTTGGCCAGCTCGACGTTCTGGAAG  
AATTCGCCGCTCCTGGATGTCTTTGGAGATGCGGGTCAGCTCCTGATAGACGATGCGACCGGCACCGATGT  
TGACGTGGCCACTTCGGAGTTGCCATCTGGCCATCCGGCAGACCAGCTCCAGACCGGAGCCGGAGAT  
CAGGGTGTGGTGTAGTCACGGGCCAGACGATCGAGGTTGGGAGTCTTGGCGGCAGCGACGGCGTTGTGC  
TCTTGTCTGGTGTCTGAGCCCCAACCGTCCATGATGACCAGAACCAAAGGTTTTCTTAGCTGTTGACATAA  
GACTATGTCTCTCGGATTTGGAAAAAATGCGGGAAATGAAACTAGCGTAATATTACTACATCTGCCGAAA  
TAGTCACCTGATAGCCAAGGGGCGTTCCCAGCGGCCCCGCAAGCCACGCCCTTCCGTCATGCTCGCTGTC  
CAATGATGATGGGAGCCTGCTCGCGCTTTGCCGCCAAGATGGCTGATCTTATCAATACCCCCATGTATAC  
TCGGGCCCTTGTCTTGGTCCCTGGATAGTAGAAGATGCAAGAGTATTTGGATTTTGGCGGCCGTAACCCG  
CTGCTGACCGCAGCCTGGTTGGGTCTGGCTGGCACCCCTGGTTTACACCACTGTGCGTGCCCGTTTTGTCCC  
CGGTA AAAACCGTCAACAACCACACCGCAGCCCTGCTGATCAACCGCAGAAATGCCACCGTGGTGGATAT  
TCGCAGTCAGGAAGAGTATGCCAAGGGCCATCTGGCCGGTGGCCAGCACCTGCCGCTGACCCAGATCCAG  
AGCAATAATCTGGGCCCCGTTGAAAAGCATAAAGATGCCCCCATCATAGTGGTGTGCGAGTCGGGAATGA  
CTGCGGGCGGCGCGGGCCGTCAGCTGAGCAAAGCTGGCTTCAAGCAGGTTTTATGTGCTCGGCGGTGGCAT  
GGCCCAATGGCGTGCAGAAAATCTGCCGGTAACCAAGAAACGCTGATTTAAGCAGGGCCTGAGCCACTT  
ATCCATATAACAAGGAATCAAACGAAATGGCTGACGAGATCAACAACCAGGAAGTACAACCGGAATTTCCA  
CATCCAGCGTGTTTACACCAAGGATGTCTCTTTCGAAGCGCCGAACACCCCGCACATCTTCCAGAAAGAG  
TGGCAGCCGGACGTCAAGCTGGATATGGATACCAAGACCAACATCCTGGCTGAGAACGCTCTACGAGGTTG  
TCCTGACCCTGACCGTGACTTGGAAACTGGAAACCGAAACCGCTTCTGTGCGAAGTACAGCAAGCCGG  
TATCTTACCATCGGTAACCTGCCGGAGCCGCAACTGGCTCACTGCCTGGCTGCCCTTCTGCCGAAACATC  
CTGTTCCCCTATGCCCGCAAGCCGTGGCCAACATGGTGAGCAAGGGTTCTTCCCAGCTGAACCTGG

CACCGGTCAACTTCGATGCCCTGTTTGGCCAGCACATGGCGCAAGCACAGGCCAGCAGGCGACTGCGGA  
AGCCTGATAATGGCTGACCAGATCGCTATCTCGGTCTTGGGGCGGGGTCTTATGGCTCCGCCCTTGCCA  
TTTCTCTGGCGCGCAACGGTTCATCCGACCTGCTGTGGGGTACGACCCCGTTCATGTGCGCGAGCTGGA  
ACAAGACCGCTGCAACAAGGCGTTTTTGGCCGATGTCCCTTTTCTGCGGATCTGCAGCTGACTGCGGAT  
CTGCAACGTGCGGTACAGGCTGCCCCGTGCTGCTGCTGGTTCGTGCCGAGCCATGTATTTGGCGATGTGC  
TGACCCGGATCAAACCTTCTGCGCCCCGATAACCCGTATCGCTTGGGCCACCAAGGGTCTGGAGCCGGA  
CAGTGGCCGTCTGCTGCAGGACGTGGCCCGTGAAGTGTGGGTGACGAGATACCGCTGGCCGTGATCTCC  
GGTCCCACCTTCGCAAGGAGCTGGCTGCCGGTCTGCCGACCCGCATCTCGGTTCGCTTCCGACTCACGATG  
AGTTCGCGGACGATCTCTCCATCTGCTGCACTGTGGCCGCTCGTTCGGGTCTATAACCAATCCGGACTT  
CGTCGGTCTGCAGCTGGGTGGGGCGGTGAAGAAGTTCATCGCCATCGGTGCCGGTCTCTCCGACGGGCTC  
GGTTTGGCGCAATGCCAGAACCAGCTCATACCCGGGTCTGGTGGAGATGCAGCGTTCGCGGTGGCGG  
CGCTGGGGCCGATGCCAAAACCTTTATGGGGATGGCGGGGCTCGGGGATCTGGTGTCTACCTGTACCGA  
CAACCAGTCGCGCAACCGTTCGCTTTCGGGCTGGCCCTCGGGGCTGGCAAGGATGTGAACACCGCCATGACC  
GAGATCGGTTCAGGTGGTGGAGGGATATCGCAACACCAAAAGAGGTGCATCTGCTGGCGGCCCGCTGCGGCG  
TCGAGATGCCCATCTGCGAGCAGATCTTCAAGGTGCTTTACGAGGGTAAGAACCAGAAAGAGGCGGCCAT  
CGCCCTGCTGTGCGAGACAAGAAGGACGAGTAATCTGCCGATTGCCCATGCAAAAGGCCCTCCAGATG  
GCGGGGCTTTTCTTTGCTGCAAGGGCTGCAAAATCAGTAGTAGGAGTGGTCGCCGTGCTGGTGTCTCGGTG  
GCGTCTTTACACCGTTGAGCTCACCCGGAACTTCTCCAGCAGCTGCTTCTCGATTCCCTCTTTCCAGGG  
TGTAATCGACCATGGAGCAACCGTTGCAACCACCGCCAAACTGCAGGATGGCCAGTTTGTCTTCAGTCAG  
CTCGACCGGGTACTTTGCCACCGTGCACCGCCAGCATGGGGTTCACCTTCGACATCAACACGTACTCG  
ATGCGCTCGATCAGCGCGCGTTCGTCGGCCACTTTACGCATCTTGGCGTTCGGTGTCTTCAGGGTGGAGCT  
GGGAGCCCATCTGATCGGTTCACGAAGTCGATGGTGGCATCCACCAGGAAGGGGGCGCTCAGGGGATCAAC  
CATGCAGTCGAAGCCGCTGAAGGGCAGGTGTTGATCTTCCGGGTCCACGGCATCGGGCGGGCAATACGAT  
ACGCCACACTCGGCATTCTGGGTTCGCCGATTGACCACAAACACCCGGATATGGGTGCCATCAGGCTGTT  
TTTCCAGCAGTTTACGGAAATGGGCTGGGCGGCGTTCGAAATGCTGATCATCACTATCCTCATAAACCT  
GAGTGTACGACTAGGGTATTCATGATAACGCGGTATTAATGCTTGGGTAGCATGCCGATGGCTACTTGT  
TGTGCCCGAGGGTTCGACAGATTGCCATACTTCTACCTTTGTGATGCCGCTCTCATGGAGCAAACGGCT  
GAGTTCGCCACCGTGGCGCTGTGGTACGACGCTCATGAGCAGGGCGACATGGCGATAGTGTGGGGG  
CGGATCCGGAATGCCCCGCGCAGATTGCGCCGCTATCCCGCGCTCAGGGTGTGTTGTGGCGGGTCCG  
CCTTGATGCGCTGCAACAAAGTGTGTGTCGAGGGAATGTCGGTGAACCTCGCAAGGGCTTGCAGGATCTC  
CTCCGCTGATTGAACCTTCGCGCCACTGCCGCCACCAGTGCAGGGGAACCGGAATGATCGCCTCCGGC  
GGCTCGCGCCATCCAGATGATCGGCCAAGAGGCGTGCAGTAGCGGCGCCAGCAGGCTCTGGCCGGAAT  
ATTTGAGCCGGGGATCAGCATGGGGTAGGGAGCCTGGTAGTCGCCGATCACCTGCAACCGCTCCAGGG  
GGGAGGTCTGCGCTGGCAGCGGCCGAGACCGGTATGCTCTTCTATATAGTCAGCCAGCGGTGCGGCG  
CAGAGGTGGCATCTCGGCTGTGACTGGTGCAGCGCTGCCGACACCAGCTGCAGAGCAGGGGCTCGTTGT  
CGCAAGGCTGATGACAGAGGAGGCAACTCCCTTGCCAGTCGCCGTGGTTGCCGAGCAGCGGGCTTGCTTT  
AGCGAGCAGTCGCTTTAACATGCTGACCCCAAGAGCATGAACAGGGATCTTGTAGTCTAGATGAGCATATC  
GGTAGAGCAGTTTGGCCAGGGGCCCCGATCTGGTGTGTTGCACGGTTGGGGGATGAACGGTTCGGTCTGG  
CATGGCATTGCCCAACTGTTGGCGCCCCACTATCGGGTTCATCTGGTAGATTTGCCCGGTTTTGGCAACA  
GCCTGCTGGCAGACGAGGTGGATTACAGCCTGCCCTGGCTTGCCGAGCAGGTGGCCGCCATCTTGCCGCA  
GAAGTGTCTGCTTGGCTGGTTCGCTCGGCGGTCTGGTGGCAAGCCAGTTGGCGCTGACTCGTCCCGAT  
CGGTTGCATTCCCTGATCACGGTAGCCAGCTCTCCCTGCTTTATGGCGCGGGACGAGTGGCCCGGAATTG  
CCCCAAGGTAAGTACTGACCGGCTTCAACCAGATGTTGGCGGGGATTTTCGCCAGACCATAGAGCGCTTCT  
GGCGATCCAGGCAATGGGCAGCGAACATGCCCGAGATGATATCCGTGAGTTGCGCCACTGGCTGGCCGAG  
CGCCCGGCGCCCCAGTTTGGCGCACTTGAGGCGGGCTGACGCTGTTGGCCGACATTGACCTGCGCGAAC  
CGCTGCGGGACCTGGATGATCTCTACCCTGCCAGCCGACGCTGACTCTCAATAAGGGCTCACACGCACCT  
TTTATCTCCCACCTGACGAATTCATTGAAATCGTTTCGAGATTTTGTGGCTAAAAAACAGCCGGCAAGC  
TTCATTAATCCTCTGGTCTGGCGGATAAATTAAGCTGTGACCAGAGGAGTAACACCATGCGTATTGATTCT  
GCTTTCAACAGCGGGGTACAGGGATTTACGCGAGCCGAGCAGATTGCCGACAAGGCATCCAATCAGATCG  
CCCGCTCAACACCCCCAGCGGGGATCAGGTGCAAGTGACCGATGAGCTTGTCAATCTCAAGGTGGCCGA  
GCAACAGGCTGGCGCTTCGCCAAGGTAGTGCAGACTGCCAGCGATATGATGGGAACCTGATCGACATC  
CGGGTGTGAGATGAACATCAATGTGAGTCTGCCTCCCTTATCCCGACACAGCTGCAACCCAGGTGGAA  
GCGGCGAGGACGGATAATCGCCGGGCAACTGATCCCGCAGGCCCGAGCGGTCAAGCCTCCGTTGCCG  
AATCCGAAGTTCGGCTCCAGAAAGAGAAATCCAAAGCCGTCAGACCTCCAGCAATCAGACCTCCAGAA  
CAGCCGTGAAACCGGGCAACCGGCGCCGACGACACTGCCAGATAATCGCTTTGTGAGGCAACCGGTGAG  
GATGGTCAGCGCAAGCAGCAGGATCCCAAACAGCAGGAGCAGCAACAGCGGCAAGAGCAGCAGGTTCCAGG  
ATCTTGTGAGCGTGCACAAGGAGGTGCGCACTCACGAGCAGGCGCACCACTGCTGCGGGTGGAGAGTACGC  
CAGCTCGCCACCTATCAGTTTACGCAAGGGCCGGATGGCAAGCGTTATGCGACGGGTGGCGAAGTCCAG  
ATCGATAACAGTGTGTAACCGGTGACCTGCCGCTACCATCGCAAGATGCAGCAGATCCGCTCTGCAG  
CGCTGGCGCTGCCGAGCCTTCGCGCAAGATCTGGCCGTGCGCGCAGCGCCGCCAGTGAAGCCAA

GGCGCGCAAAGAGCTGATGGCCGAGCAGAGCGCAAAATCGGGCGGCGTGCTGAGTGCCTATATGGACAAG  
CGCAACAGCGTCATCGCGGGCCACTATCGACAGGCTGTCAGCCCGCCTCGACCCAGTCCCTCAGTCTGC  
ATATCTGAATCCCCCTCACCAAACCTTTCAGCTGCTTTGCTGTTTTGCAACTAACCTGAAGATCAGGCC  
ATTCCAATTTACAGGAGCTGTGCATGATTTGATGAAGTCAAAGCGGAAGATTTACCACCTTCTCCCC  
TGTACCGCCCCCCCCACCTGCAGATGGAGCAATTTCTGATGCAGCTCGGAGGAGGGGAACTGAAGGAACC  
AGTTTTCAAGAAGAAAGTGATGCTGGCGGCTGGCTGGAGCCACACCGGCGTCTGCTTACGGCAAGTATC  
CGCAAGAGGCCTGCAAGGCATTC AACCGACTGCGGGAGGTGCTGGCCCAGCATGGAGAGCCCCGAGAGCAT  
TCTTGCTGCCCTGGCGCAGTGATCCTGAGCTTCGCGTGTAAAAAAGCCCCTTGCGGGGCTTTTTGCATTC  
AGAGGTGTTCTGGAAGGTGTGCTTACTTTTTGCTTTGGAGAGCGCCGCCGGAAGGCGTTGCCATGGC  
ACCACCCATATGGGGGCTTTGGCGCGGCTCATTCTTGGCTTGGTGTGTCAGCACTGCTGTTGCGCGCT  
TCAGCCGGCTTGCGGCGGGCTGCCCTTTCGTCGAGGCGCATAGTGAGGCTGATCCGCTTGCAGCG  
GGCGTCCACTTCCAGCACCTTGACCCGCACAATGTCGCCCGCTTGACCACCTCACGGGGATCCCTTGAC  
GAAACGGTCGGTCAGGGAGGAGATGTGCACCAGACCGTCTGATGAACACCGATATCGACGAAGGCGCCG  
AAGTTGGTGACGTTGGTGACCACCCCTTCCAGTACCATCTCTGGCACCAGGTCGCTGATCTGCTCCACAC  
CTTCTTGAAGGTGCGGGTTTTGAACTCGGGGCGGGTTCGCGGCCCGGCTTGTCAGCTCGCCGATGAT  
GTCGGTGACGGTAGGTACGCCGAATTGCTCATCGGTATAGTCGGCCGGTTTCAGGCTGCGCAGCAGGCTG  
CTGTTGCCGAGCAGGCTCTCCACGGTCTGCTCCAGCTTGGCGAGGATCCGCTCCACCACCGGATAGGACT  
CCGGGTGTACCGCTGAGCTGTGAGGGGATTGCTGCCGCCGGAATGCGCAGGAAGCCGGCGCACTGTTT  
GAAGGCTTTGGGGCCGAGTCGGCTCACTTTCAGCAATTGCTGACGGCTCTTGAATGCGCCGTGCTCATCC  
CGATAGGCGACGATGTTCTGGGCCAACGTCTGGGAGAGCCGAAACCCGTTGAGCAGGGCGACCGAGG  
CGGTGTTACATCGACCCCGACCGCTTACGCAATCTCAACCACGGCATCCAGCCGGCGGGCCAGCTG  
GCTCTGGCCGACGTCGTGCTGATACTGGCCGACCCCGATACTCTTGGGATCGATTTTGACCAGTTCGGCC  
AGCGGGTCTTGCAGGCGGGCGGGCGATGGAGACGGCGCCACGGATCGAGACGTCGAGATCCGGGAACTCCT  
GGGAGGCGAGTTCGGAGGCGGAGTAGACCGAGGCTCCTGCTTCGCTCACCACTATCTTCTGCGCCTTGGC  
GGCGGGGTAGCGCTCGAACAGGTGCTCACAGCCGGTCGGTCTCTCGCGAAGCGGTGCCGTTGCCGATG  
CTGATGAGCTCGACCTTGTGCTTCTGGCACAACCTGCTCAGGGTCTTGAGGCTTTGATCAATCTGGCGTT  
TTGGTTCGAACGGATAGATGGTGGCGTGATCGACAGCTTGGCGGTGGCATCCACCACGGCAACCTTGAC  
CCCGGTGCGGATGCCCGGATCCAGCCCCATGGTCAGCGCATGCCCGCCGGGGCCGCATCAGCAGATCC  
TTGAGGTTTCATGGCGAACACCTTGATCGCTCCTCCTTCCGATTTCGCGGATACGCGCGATCAGCTCGG  
TCTCCATCTGAAGCGACAACCTTGATCTTCCAGGTCCAGCTCACACCCTTGCAGCCATTTGTGCGCCGG  
GCGGTTCTGCAGATTGAGCTTGAGGTGGTGGGCAATGATCCCTTTCGCAAGGGGCTGGCACTCTCATCGTCA  
CCGGTTACCAGCGCCAGATTGAGGATCCCTTCAATACGGCCGCGCAGCATGGCCAGCACCCGGTGGGAGG  
GGGCTTGTGCAGTGGTTCGTGCTTTCGAAATAGTCTTGAACCTGGCCCCCTCTGCTCCTTGCCTGC  
CACACGCGGGCGCGCAGGGTGGCATTCTGCCACAGGTAGTCGCGCAACTTCTCCAGCAGGTCGGCCTGC  
TCGGCGAAGCGCTCCATCAGGATATAGCGGGCGCCGTCGAGGGCAGCCTTGTGTGCGCAATGCCCTGTT  
CGGGATTGAGGAAGGTGGCTGCAGTTTGTCTGGGATCTGCATCGGGTCGCTGAGCAGCAGGTTGGCAAG  
CGGCTCCAACCCGGCTTCGATCGCCATCTGCCCTTGGTGCAGCGCTTGGGCTTGTAGGGGAGATAGAGG  
TCTTCCAGTCGGGCTTGTGCTGTCGGCGCCATTCAATTTCGCGCATCAGCTCGGGGTCAGTTTGCCTGCT  
CTTCCGATGGAGCGAATGATCACCTGACGGCGATCTTCCAGTTCACGCAGATAGCCGAGGCGGCTCTCCAG  
AGTACGTAGCTGGCTGTGCTCCAGACCGCCGGTACCTCTTTACGGTAACGGGGGATAAAGGGCACGGTC  
GAGCCTTTCATCCAGCAGGCGCACTGCGGCTGCACCTGCTCCGGGCGAGCATTGAGCTCACCGGCAATCT  
GTCTCTCTATGGTTTGCATCATGATGTTGTTGAGGGCTCTGTGGTTCGAGTCCGCGCCATCAGGCGCCAA  
AAAGTCGACGGGAGGGCGTTTATCTTGCATTGCACCTGTGACTCAGGATGTGCTGTGGCAAGCAGTC  
CGGCTATTTGGGCTAGCTGATCTCGTTGATATACCAGCAGACGTACCAACTGGCGTACGGACGATGGCC  
TCAACACCGACTCTTTCTTGAGCAGGGCGCGGGCCATGGGGGAGTCGATGGAGATGTAATCCTTGCCT  
CGAAGATCTCGTCATAGCCGACGATGCGAAAGCGCTTGGTCTCGCCCTCATCGTTTTCCACCTCGACCCA  
GGCGCCGAAGAAGACCTTGCCTCCTGCGCGGGGGCATAAGTCGACGATCCCCAGCTCTTCGAGGCATTTG  
CGCAGGTAGCGCACTCGCCGGTTCGATCTCCCGCAGCCGCTTCTTGTGTACTGGTAGTCGGCATTTTCGC  
TGCGATCCCCAGGCTGGCGGCCATGCCACCTTCTGGTGAACCTCGGGGCGCTCTTGACGCCAGAGGAA  
ATCGAGCTCTTCTTTCAGCTTGTGTAGCCTTCGCGGGTGCATGAGCTTTGCTTTCATGGTGCAGGACC  
TGGTCAAAGAGGAGTATTCATCGCTAACTGCTCGGGAATATTAGCTTTTGTCTCTTGTGCTGTCGAGGGAA  
ATCGTGATGGCTCGGCTGGCGCCATTCAGGGAGTAGCTGGCCAGCGCAGTACTTGATGGCCGTCACGCT  
CTCGGGATGGGTAATAACCGGTAACATATTTGTGCTTTGCTCCCGCTATATCCCCCCTAGTATTGGGGG  
CAGCTAAAGAATGAAGAGGCAAAGCAATGAGTCAGCAGCAATACAAGTCTTGGTCTGGACGATGACCT  
GAAATTACGTTCCCTGTTGGAGCGCTATCTCACCGAGCAGGGATTTCGTAGTGCAGCGGCTGGCCAATGGC  
GAGCAGGCTGATCGCCTGCTGACTCGTGAAAACCTTACGCTGATGGTGTGCTGACCTGATGTTGCCGGGGG  
AGGATGGGCTCTCCATCTGCCGCCGCTTGCGGGAAGCGGGCAACCAGATCCCCGGTGTGATGCTCACCGC  
CAAGGGGGATGAAGTGATCGCATCGTGGGCTCGAGATGGGGGCGGATGACTATCTGCCAAGCCGTTT  
AACCCCGCGAACTGCTGGCGCGGATCCGTGCCGTGCTGCGCCGTCATACCGTCGAGTTGCCGGAGCCC  
CCTCGGCTGCAGAGAAGGTGGTCAACTTCGGCGCCTTCAACTCAATCTGGCGACCCCGAGCTGAGCCG

GGATGGCGAGCCGATGGCACTCACCAGCGGTGAATTTGCGGTGCTGAAAGTATTGGTCAGCCATCCGCGC  
GAGCCGCTCTCCCGGACAAGCTGATGAATCTGGCCCGTGGCCGTGAATACACCGCTACGGAGCGCAGCA  
TCGACGTGCAGGTCTCTCGCCTGCGCCGCTGCTGGAACAGGATCCGCCCCAGCCCCGTATCTGCAGAC  
CGTCTGGGGTCTGGGGTATGTGTTTCGTGCCAGATGGTGACGGTGCAATGAAAAAGGTCGGCAGCATGTTCT  
CACGCATGCTCTGGTTTTCTGGCCGCCGTTCTGGTGGTCTATCAAGCAGTCTCCTACGTACCTTCTACAA  
CTATCTGCTGGCGCCAACCGTCAAGCAGATCAGTCACTTGGTGGCCAATCAGGTCAAGCTGATCTTTCCG  
GTCAACACGGAACAACCTGGCGCTGAGCGAAGATGCCGAGGCGCTGGTCTATGTGACGACCGGTACCGATA  
TCTATACCCAGAGCGAGGCGGTGCAACATGGCTTCAACGAGGCCAAGCCATAACCCATCTGGAGGAGAA  
CATCAGTCGCGAGCTGGGTGGCCCCGGCAAGGTGCGGGTCGAGATCCAGGATCACTACATCATCTGGATC  
CAGCCCGCCGAGGACGCAAAAATCTGGGTGCGGATCCCGCTGACCGAGATTGAAGATGACGATATCGAAC  
CCCTCATCATCTATCTGAGCGTGTGGTGTGATCACCTGTTTTCGCGCTGGCGCTTTGCCCGGCAGCT  
GGTGCGCCCGCTCGAGGATCTCGAGGCTGGTGCCTTGTCTGTTGCCAGGGGCCATTTCCCGAGGCGCTG  
GGGAGCTGGGATCACGGGAAGTGCGGCGATTGACCCGCACCTTCAACCATAATGTCGCACTCCATCAAGA  
GCCTGATCGAAGAGCGTAACTTGTATGATGGCTGGGGTTTTCCACGATCTGCGTACTCCGCTGACCCGCAT  
CCGGCTGGCGACCGAGATGATGTCCTCTGGTGACGAGTACCTCAAGGAGAGCATCAACGCCGATATCGAT  
GAGTCCAATGCCATCATCGATCAGTTCATCGATTACATCCGCCCGGATGAGGGCCAGGATCTGGAGCCGA  
TCGACCTGACCCAGCTGGTGCACGATAACCTTGTGATCTACTCGGAGCAGGGACTGGAAGTTGATCTGGC  
GCTGCCGCAAGAGGCGGTGCGGGTGGCCTGCAATCCGGTCAGTATCCGGCGGGTGTGAAACAACCTCTCA  
AGCAACTCGCAGCGTTATGGGGCGAGCCGCTTGCATGCCGAGCTCAAGGACGACGGGCACCTGGGTGCGCT  
TGCGCCTTTCCGATGATGGCCCCGGCATTCCGGAGCAGGACTACTCCCGGTGCTCAAGCCGTTTACTCA  
GGGTAATGTGGCGCGGACCGTCCGGCGGTAGTGGGCTGGGGTTGGCCATCGTGGCCAAGATAGTCGCCAG  
CACCACGGCACTATCCGGCTGGGAAGTTCGGATCTCGGCGGCCTGCTGGTCGAGATGCGGGTGCCGAAAC  
ATCAGCCACAGGAGTGGATGGATTGAGAGAAGGGCGTATCCGTGGATACGCCCTTCTGCATGGTCAGCTC  
TTGGTTTTGACTGATGCTCGATAGCGTTTGCCTACTTGGAGTCTGGATCAGCAGGGCGGCAACGATGA  
GCGCCAACCCGATGGGGGTGGCCGGATGGATGGCTTCGCCGATCAGCAGATTGAGCAGCACCAGTGAGGC  
AAACGGCGAGATAAAGATGAGGTTGCTGATGGGGCCGTGTTGGTGGCATGGCGCAGCCATCAGCCAG  
AGCACAACCCGAGCCATTTGCAACAGTCCACATAGATGGTCCAGCCATCCCTGCCAGGCGGTCA  
TGGCAAAAATCGGAGAGCAACCAAGTCGCCACGACGATAAAAAGGCAGGCTGATCATAAAGCCGAGCAAC  
GCTGACGATGGGATCGCCCTGATTGCGGGTGTGAGGATCCAGTAGCTGGCCAGATGAGGGTACAGACC  
AGCGCCAGCGTCACGCCGAGGGGGCTGTGCAACTGGAGGCCGAATACATCCCTCTGGTGGCGATACCA  
GTGCGCCAAAGTAGCCGAGCAGATGGCGACGCCATCGCGCCGACGCGCTTCTGGCCGAGGAAGGGGAC  
GGCCAGCAGACTGAGGGTAATGGCCAGGTGTAGTTGAGGGTCTGTGCCTGCTGGGCAGGCAACAGGTCA  
TAGGCCTTGAATAGCAACAGGTAATAGAGAAAAGGGGTTGACGACGCCAGAGTCAGGTAGTAGAAAAGGGC  
GGGCCTTGATGTAGCTTCCAGCAGCGGCAGTTTGCCTGTTTGGCGACGACGGCTGTCAGCGTGAGAGT  
CGAGGTGAAGGCGGCCACAAGCAACAGTTGCACAGGTTGAAAATAGGCGAGGAGATCTTGAAGGCTGTG  
GCGACCGTTCGACCAGAGGGCAACGGCGCAAAGGCCATACTGATAGGCTTTCTTTTATCTTTGAGCATGG  
GATGTGCTTCCACTGACAGAGGCAAGCGCACAGTCTACCAGTCTGCTTGTAAACATTGTGTTTACCTGGGT  
GTTGGCAGCAGAGTGCGTTGCCGCGAGGCGAGATCCATCTGTACATAAAAATGCGCATAATCTGTTGCTT  
CTCCCTTGCGCAAAATTTGAAAAATCCGTATAATCCCTCCGCTTACCCATGAGGTAAGCCAGACGATATG  
TCTGCTGCTGAGTTTTCTGTTTACAGGAGCCAGCCATACAGTCTCCCGATATGGGGGGAAAACGTGAAAA  
ATCACACCTCTGGCGGGGAGAAAATCTCGGTCCGGCGGTGTTGATTTATGTTCTTTTATCTATTGGAGCTCT  
GTCAATGCAGAACCAAGAATCCGTATCCGCTGAAGGCTTTTGTATCATCGCTGATTGATCAATCCACT  
GCGGAAATCGTTGAAACTGCTAAGCGCACTGGCGCGCAGGTTTCGCGGTCTTATCCGCTGCCGACTCGCA  
AAGAGCGCTTACCGTCTGATCTCCCCGACGTCACAAAAGATGCGCGTGATCAGTACGAGATCCGCAC  
TCACAAGCGTCTGGTAGACATCGTTGAGCCGACTGACAAGACCGTAGACGCCCTGATGCGTCTGGATCTG  
GCAGCTGGTGTAGACGTCAGATCAGCCTGGGTTAATTACGGAAAAGAGTTGATAACAATGACAATCCGTT  
CTTGTAGGTTCGCAAAAGTGGGTATGACTCGCATCTTCACTGAAGATGGCGTTTCTATCCCGTACTGTTA  
TCGAAGTTGAAGCTAACCGTGTAACTCAGGTCAAATCTGTAGAAAACCGACGGCTACAACGCTATTCCAGGT  
TACCACTGGCGCCAAGAAAAGCCAGCCGTGTGACCAAGCCGGAAGCTGGCCACTTCGCCAAAGCTGGTGT  
GAAGCCGGTTCGCGGTCTGTGGGAATTCGCCTGAACAACGGTGAACCTTTCACTGTTGGTAGCGAGCTGA  
AAGTAGATCTTCTCGCTGACGTTAAGCTGGTAGACGTTACCGGCACATCCAAAGGTAAGGGCTTTGCTGG  
TACTGTTAAGCGCCACAACCTCCGCACCCAGGATATGACCACGGTAACTCCTTGTCTCACCAGCTTCCG  
GGTCTATCGGTGAGAACCAGACTCCGGGTGCTGATTTCAAGGGCAAAAAGATGGCTGGTACATGGGTG  
CTGAGCGTGTAACTGACTCAGAACCTGGAACCTGGTTCGTGTTGACGCTGAACGCAACCTGCTGCTCATCA  
AGGTGCAGTACCGGGTGAACCAACGGCAACGTGATCGTCAAACCTGCCGTCAAAGCGTAACGTCTGAGG  
AGATAGTAATGGAATTGGTAATGAAAGACGCCAAGAGCGCTCTTGAAGTTTCCGAGACTACCTTCGGGCG  
CGAATTCACGAAGCTCTGGTTACCAGGTGCTGCTTGCATATGCCGCTGGTGCCCGTCCAGGGTACTCGT  
GCGCAGCTGACTCGCTCTGAAGTGTCTGGTGGCGGCAAAAAGCCGTGGCGTCAGAAGGGTACTGGTCTGT  
CCCGTGTGGCTCCATCCGTTTCGCCATCTGGCGTTCCGGTGGTGTGACTTTTGTCTGTAAGCCGCAAGA  
TCACAGCCAGAAAAGTAAACAAGAAGATGTACCAGGCGCTATCCGTAGCATTTCTGTCCGAGCTGGTACGT  
CAAGAGCGCCTGATCGTTGTTGAGAAGTTCCGCATCGAAGCTCCGAAGACCAAGAAGTATCGCCAAGC

TGAAAGAAATGGAAGTACTGACTGACGTTCTGATCGTGACTGCTGAAGTCGATGAGAACCTGTTCTGGCTGC  
TCGCAACCTGTACAAAGTTGACGTGCGTGACGTTGCCGGTATCGACCCGGTCAGCCTGATCGCTTTTCGAC  
AAGGTTCTGATGACTGCTGACGCAGTTAAGCAAATCGAGGAGATGCTGGCATGATCCGTGAAGAGCGTCT  
GCTGAAAGTTCTGAAGGCTCCGCACATCTCTGAAAAGAGCACCATGGTTGCGAGAAAAGCAGAACACTATC  
GTGTTCAAAGTTGCTGTTGATGCTACCAAGGCGGAAGTCAAAGCTGCAGTTGCGAAACTGTTTCGAGGTCG  
AAGTTGAGACCGTCCGTACCCTGAACATGAAGGGTAAGACCAAGCGCGCAGGTGCACGCGTAGGCCGTCG  
TTCCGATTGGAAAAGGCTTATGTGACCCTGAAAAGCTGGTCAGGACATCGACTTCATGGGCGCAGCCGAG  
TAAGAGGAGTTCTCAAAAATGGCAATCGTTAAGTGCAAGCCTACTTCTCCGGGCCGCCACGTCGTCA  
AGATCGTCAATCAAGAGCTGTATAAGGGCAAGCCCTTCGCCGCTCTGCTGGACAGCAAAAGCAAGTCCGG  
TGGTGTAACAACAACAGCCGATCACTACCCGTCATATCGGTGGTGGTCACAAGCAGCACTACCGTATC  
GTCGACTTCAAGCGCAGCAAGACGGTATCCCGGTAAAGTAGAGCGCCTGGAATACCGAACCGTA  
CCGCTAACATCGCTCTGGTGTGTATGCAGATGGTGAGCGTCGTTACATCCTGGCTCCGAAAGGCTGAA  
AGCTGGTGACGCGATCGCTTCTGGTGCTGATGCAGCCATCAAGGTAGGTAACGCCCTGCCGATGCGCAAC  
ATCCCGGTTGGTTTCTACCCTTACGCTGTAGAGATGAAGCCTGGTAAAGGTGCCAGCTGGCTCGTTCCG  
CTGGTACTTTTCATCCAGATCCTGGCTCGTGAAGGTAAGTATGTAAGTCTGCGTCTGCGTTCCGGCGAAGT  
ACGTAAGTCTGGCCGAGTGCAGCGCTACCATCGGTGAAGTCCGTAAGTCCGAGCACATGTTGCGTCAA  
CTGGGTAAAGCCGGTGCAACCCTGGCGTGGTATTCGTCCGACCGTTCGCGGTATGGCGATGAACCCGG  
TTGACCACCCGCACGGTGGTGGTGAGGGTCGTAACAAGGGCATGCAGCCTGTGTCCCCATGGGGCCAGAA  
GGCTAAAGGCTTCAAGACCCGTAAGAACAAGCGTACCGACAAGTACATCGTACGTCGTAACAAGTAA  
TTGTTAACATAGAGGAATCACCATGCCACGTTCTCTCAAGAAGGGTCCATTTATTGACCTGCACCTTGCTG  
AAGAAGGTAGAGAAAAGCGGTGGAAAAGCGGGGATAAAAAGCCGGTTAAAACCTGGTCCCGTCTTCAATGA  
TCATCCCGAACATGATCGGTTTTGACCATCGCTGTCCATAATGGTTCGTCAGCACGTTCCGGTTTTTCGTTAC  
CGAAGAAATGATCGGTACAAAAGTGGGTGAATTCGCACCGACTCGTACTTATCGCGGCCATGCTGCTGAT  
AAGAAGGCTAAGAAGCGCTAAGGGATAAATGATGGAAGCTATCGCTAAACACCGTTATGCCCGTACTTCT  
GCCAGAAAAGCTCGTCTGGTAGCCGATCAAGTACGTGGTCTGTCCGTAGACAAGGCTCTGAATATCCTGA  
CCTTCAGCCCCGAAAAGGCTGCAGTGTGGTAAAGAAAGTGTGGAATCTGCCATTGCAAACGCTGAGCA  
CAACGAAGGCGCCGATATCGACGCGCTGCGTGTGCTACTATCATGGTCGACGAAGGTCCCTCCATGAAG  
CGCATCCGTCGCGTCCAAAGGTCGTGCGGATCGTATCCTCAAGCGTACCGCTCACATCATCTGAGTGG  
TATCCGACGCTAAGGCTGGGAGATAAGCAATGGGTGAGAAAGTACATCCTAATGGCATTTCGCTGGGTAT  
TACCAAGCCTTGAATTTCTACCTGGTTCGCGAACACCAAAGACTTCGCTGACAACCTGTACAGCGATTTT  
CAAGTACGCCAGTTCTGACCAAGGAACTGAAAAACCGCTCCTTGTCCAAGATCACCATTTGAGCGTCCGG  
CCAAGAGCATCCGTGTGACCATTACACCCGCTCGTCCGGGTGTTGTTCATCGGTAAGAAAGGCGAAGACGT  
TGAGAAGCTGCGCAAAGCTGTAGCCACTATTGCTGGCGTGCTGCTCAGATCAACATTTCCGAAGTCCGC  
AAGCCGGAGCTGGATGGCAAACCTCGTTGCCGACAGCATCACTTCCAGCTGGAGCGTCGTGTAATGTTCC  
GTCGTGCTATGAAGCGCGCCGTACAGAACGCAATGCGCCTGGGTGCCAAGGGCATCAAAGTGGAAAGTTTC  
CGGTGCTGTTGGCGGCGCTGAAATCGCGCTACCGAATGGTACCGTGAAGTGTGTCGCTTGCACACC  
CTGCGTGCCGACATCGACTACGCAACTTCTGAAGCCACACCACTTACGGTGTGATCGGCGTTAAAGTTT  
GGATCTTCAAGGGCGAAGTTCTGGGCGGTCTGGCTGCTGTTAACGCTGCCGCTGCTCAAGAGCAAGCTCC  
TGCAAAGCCCAAGCGTGACAACAAGCGCCGCGCTGCTAAGTAAGGAGATTCGGTAAATGTTGCAACCTAA  
GCGTACTAAATTTCCGCAAGACCCACAAGGGTTCGTAACCGCGGTCTGGCCACCTCTGGTAAACGAAGTATCC  
TTCGGTACCTTTGGCCTGAAGGCGACATCCCGTGGTCAACTGACTGCTCGTCAAATCGAAGCAGCCCGTC  
GTGCCATGACCCGTCACGTTAAGCGTCAAGGTAAGATCTGGATCCGTGTGTTCCCGGACAAGCCCATCAC  
CGAAAAGCCCCTCGAAGTTTCGTATGGGTAAAGGTAAGGGTAACGTGGAATACTGGGTTTGGCCGATCCAG  
CCTGGCAAGGTTCTGTACGAGATGGACGGTGTACCTGAGGCTCTGGCGGTGAAGCGTTTGGCCGCGCCG  
CAGTAAGCTGTCTGTTTACAGCACTTTCGTAATTAAGACGGTGTGATGTGATGAAAGCCCAAGATCTGCGT  
CAAAAGAGCGTCAAGAACTGAACCAGGAGCTGCTGGCCCTGCTGCGTGAAGCAATCAACATGCGCATGC  
AAGCGTCCACCGGCCAGCTGGCTCAGACTCACACTCTGAAAACAAGTGCCTCGTGACGTCGCACGTATCAA  
GACTGTACTGACTGAGAAGGCGAGGTGCGTAATGACTGACAAGATCCGTACTCTGCAAGGTGCTGTAATCA  
GCGACAAGATGGACAAGTCCATCACTGTTGCTATCGAGCGCAAGGTAAGCACCCGATCTACGGTAAGAT  
CATCAAGCGCACTACCAAGCTGCACGTACATGACGAAAAACAAGTGCAAAAGCTGGCGACCTCGTGGAA  
ATCCGCGAATGCCGCCGCTGTCCAAGACCAAGTCTTGACCCTGGTTGCCGTTGTAGAAAAGGCTAAT  
CGGTACTTTGTAGTCCAAGCGGCCCTTTTACGGGGCCGTTTGTTTTTTAGGCTACCTTTTCTGAAAATCC  
TGTGTTATAGTTTTCGCGCCTTTTGAAGGCAGCCAGATCCCATTAGGGATAAGAAGTAAACAAAGCGGAGC  
ACTAAGATGATCCAGATGCAAAGTATGCTGGGTGTTGCCGACAACCTCCGGCGCTCGCAGTGAATGTGTA  
TTAAGGTTCTGGGTGGCTCGCACCCGCTTACGCCGCATCGGCGACATCATCAAGTTTCCATCAAGGA  
AGCCATTCCTCGCGGTAAAGTGAAGAAAAGGTGATGTGTATAACGCGGTGGTTCGTACGCACCCGTAAAGGC  
GTTTCGTGTCGCGGACGGCTCTGTATCCGTTTCGACAACAATGCGGCTGTGTTGCTTAAACAACAACCAAC  
AGCCAATCGGTACTCGTATTTTTGGCCCGGTGACCCGTGAACTGCGTAATGAGAAGTTTCATGAAGATTGT  
GTCCCTGGCACCCGAAGTACTGTAAGGAGTCGAACGATGGCAGCTAAAAATCCGTCGCGAAGACGAAGTGA  
TTGTTCTTACCGGCAAAGACAAGGGCAAGCGTGGCAAAGTCACTCAAGTCTGATTGCAAAAAGGTAAGGT  
AATCGTGAAGGCATCAACCAGGTGAAGAAAACACCAGAAGCCGGTACCCGCACTGGGTCAGGCTGGCGGT

ATCGTCACCAAAGAAGCCCCATCGATGTATCAAACGTAGCGCTGTTCAACTCTGCCACCGGCAAAGCTG  
ACCGCGTTGGTTTTCCGGATTGAAGACGGCAAAAAAGTCCGTTTCTTCAAATCCACCGGCGAACTTGTGAA  
GTAATTGGAGTTTAACGATGGCGAAACTGCATGATTACTACAAAATCCGATGTAGTAAATGAACTGTCCAA  
GCAGTTCGGTTACAAGACTATCATGCAAGTCCCTCGGATCGAGAAAATCACCCCTGAACATGGGTGTTGGT  
GAAGCGATCTCTGACAAGAAATTGCTGGAAAATGCTGCTGCCGATATGGCTGCCATTTCCGGTCAGAAGC  
CGCTGATCACCAAAGCTCGCAAAATCTGTTGCGGGCTTCAAGATTCGTGAAGGCTACCCGATAGGTTGTAA  
AGTAACCCGTGCGTGGCGAGCGTATGTGGGAGTTTCTGGAACGGCTGATCTGCATCTCCGTACCGCGTATC  
CGTGACTTCCGTGGCCTGAACGCTAAAGCGTTCGACGGTCGTGGTAACTACTCCATGGGCGTGCCTGAGC  
AGATCATCTTCCCGGAAATCGACTATGACAAAAGTCGATCGCGTCCGTGGTCTGGATATCACCATCACCA  
TTCCGCGAATACCGATGAAGAAGGCCGCTGCTGCTGGCTGCCTTTAACTTCCCATTCCGCAAGTAAGGT  
TAGGGTTATGGCTAAAACATCCATGAAAGCGCGGAAGCAAAGCGTCCCAAGCTGGTACCCAAAGTACGCG  
ACCAAGCGTGGCGAGCTGAAAGCTATCATCATTGACATGAACGCTTCTGAAGAAGCGCGTTGGGATGCTG  
TACTGCAACTGCAACAGCTGCCCGTGATTCCAGTCCGTCCCGCCAGCGTAACCGTTGCAATATTACTGG  
TCGTCCGCACGGTTTTCTGCGCAAGTTTTGGCCTGTCTCGCATCAAGGTGCGTGAGCATGCCATGAAGGGC  
GAAATTTCCGGCCTGAAGAAGGCTTCTTGGTAACGAATCTCGGGAGTTAGACTTATGAGCATGCAAGATC  
CGATCGCGGATATGCTGACCCGCATCCGTAACGGTCAGGCGGCGAGCAAAGTTGCGGTTTTCCATGCCCTC  
TTCCAAGCTGAAAGTGGCTATCGCCAAAGTCTGAAAGAAGAAGGTTACATCGCTGGCTACTCCGTAGCT  
GGTGACGTGAAGCCGGAACCTGGAATTTGAACTGAAATATTTCCAGGGCAAGCCAGTTGTAGAACTGATCC  
AACCGGTAAGCCGTCAGGCCTGCGTATTTACAAGCGCACTACTGATCTGCCGAAAGTTATGGGCGGTCT  
CGGTGTTGCTATCGTGTCCACGTCTAAAGGTGTGATGACTGACCGTGTGCTCGCAAAGCAAGCATGGGC  
GGTGAGATCATCTGCTACGTGCTTAATAGGAGGTAGGAAATGTCTCGTGTGCTAAGGCACCCGTCACT  
ATTCCTGCTGGCGTAGAGGTGACTCTGAACGGCCAGGAACTGACCATCAAAGGTGGTAAAGGTTCTCTGG  
TTCGCTCTATTACGCCGGTGTAGAAGTGACCAAAGAAGACAATGTACTGAAGTTCGCCCCGCGCGGCAG  
CATCGCTGGTGTGACGCTCAGGCCGGTACTGCCCGTGCAATTGGTCAACAACATGGTAATCGGTGTTACC  
CAAGGCTTCGAGCGCAAGCTGCAGCTGGTGGTGTAGGTTATAAAGCCTCCATCAAGGGCAATGCTGTTG  
CGCTGGCTCTGGGCTTCTCTACCCGGTAGAGCATGCGCTGCCGGCTGGTGTGACCGCTGAGTGCCCGAC  
TGCTACAGAAATCGTTCGCGTGGCGTCGACAAGCAGCTTGTGGCCAAGTCGCCCGCGATATCCGTGCT  
TACCCGCTCCCGGACCTACAAGGGCAAGGTTGACGCTATGCCAACGAGCAAGTGCGTACTACTGCTCGGAA  
CTAAGAAGAAGTAAGGTAACACTATGGACAAGAAGAACGCTGCTCTCCGTGCTACTCTGCTCGGAA  
AAAGATGCAGGAAGTGGGAGCTACCCGTCTGGTGTTCACCGTACACCGCGTCATATCTATGCGCAGGTT  
ATTGACGCAACGGTTCCGAAGTCTGGCCTCTGCTTCCACAGTAGAGAAAGCCATCAGTGAAGCTCTGA  
AATACACCGGTAACGCAGATGCTGCTACCGCTGTAGGTAAGCTATCGCTGAGCGTGTATTGCCAAAGG  
CGTTCAGAACGTATCTTTGATCGTTCGGTTTTCAAGTATCACGGTCGCATCGCTGCCCTGGCAGCTGCC  
GCACGTGACGCTGGTCTTCAAGTCTAAGCTAGGAGTCGAAGATGGCTAAAGTCGAATCTCAAGCCGGCGA  
ACTGCAAGAAAAGCTCATTGACGTAACCGTGTTCGAAAAGTAAAGGTGGTTCGATCATGTCCTTC  
ACCGCGTTGACCGTGGTGGGTGATGGTAACGGCCGTGTAGGTTACGGTTACGGTAAAGCCCGTGAAGTTC  
CGGCTGCTATTCAAAAAGCAATGGAACAGGCTAAGCGTAACCTGAACAAGGTTGAGCTGAACAATGGCAC  
TCTGCACCACCCGGTGCCTGGTGTACTCTGGCTCCACCGTGTTCATGAAGCCGGCCTCCCAAGGTACT  
GGTATCATTGCAGGCGGCGCTATGCGTGTGTTCTGGAAGTTGCCGGTATCCACAACGTGCTGGCCAAGA  
CCTACGGTTCCACCAACCCAATCAACGTTGTTTCGCGCTACTGTAGACGCTCTGGTTCACGGTCAATCACC  
GGAACAGATCGCTGCCAAGCGTGGTCTGCGCGTTGAAGAAATTTCTGGGGTAATGCGACATGGCTAACACT  
GTAAGAAGTAACCTCAAACCTCGCAGCTCTATCGGCCGTCTGCCAAAAGCACAAGGCGACTCTGCGTGGTCTGG  
GTCTGCGTCGCATTGGTACACCGTTGAGCTGGAAGATACTCCTTTCGTACGCGGCATGATCAACCAGGT  
TTATTACATGGTTAAGGTGGAGGGCTAAGCATGCGTCTGAACACTCTGTCTCCGGCCGCTGGTTCGAAGC  
CTGAAAAACAACGTCGTGGTTCGTGGTATCGGCTCCGGCCTGGGCAAGACTGGTGGTCTGGTGTAAAGG  
CCAGACCTCTCGTTCCGGTGGCGGTAAGTCCGCAACCGTTTCGAAGGCGGCCAGATGCCTTTGAAAATC  
CGTCTGCCGAAGTTCGGTTTTCTTCTCTCGTAAATCTTTGGTTTTCTACCGAAGTGCCTCTGAACGAAATCG  
CCCTGGTAGAAGGTGATGTGGTTCGACCTGAGCACTCTGAAGCAAGCCGGTGTGTTACTAAGAACATCGT  
GTTGCTGTAAGTTGTTCTGTGACGGCAACATTGACCGTGTGTGACCGTTCGTGGTCTGTCCGTCACCAAA  
GGTGCACGCGCAGCCATCGAGGCCGCTGGCGGTAATAATCGAGGAATAATCAGTACAATGGCTAAGAAACC  
AGGATTGGATGTTAAAGCACAGGGTGGTCTGAGTGAAGTGAAGAGCCGCTGCTCTTCGTTCTCGGGGCG  
ATTATCGTTTTTCCGTGACGGCTCTTATGTGCCGATTCCTGGTATTCAGCGCCCGTACTGGCCGAGTTGT  
TCCAGCAACAGAAGGGCACCATCATTGAGATGTTCAACATGTTTTCAGTGGTGGTGCCTCTCGCGTGTCTC  
TATTCTTTCGTTGGGGATCATGCCGTACATTTCCGGCTCGATCATTATCCAGCTGCTGACAGTGGTTCAC  
CCCGCTCTTGTGAACTCAAGAAAGAAGGTGAATCCGGCCGTCGCAAGATTAGCCAATATACCCGTTGGG  
GCACGCTGGTTTTGGGAACTTTCCAGGCCATTGGTATTGCAACCGGCTGCCGAATATGATGCATGGACT  
CGTGACTAATCCGGGTCTAGGTTTTCTATTTTACAGCGGTTGTGAGTCTGGTCACCGGTACCATGTTTTTG  
ATGTGGTTGGGTGAACAGATTACCGAGCGTGGGATTGGTAATGGTATCTCGTTGATTATTTTTCACAGGTA  
TCGTTGCTGGTCTGCCGCATGCCATTGGCGCTACGGCCGAACAGGCACGTCGAAGGGGAATTGCACATCCT  
GCTGTTGTTGTTGCTGGGCTTATTGTTTTTCGAGTGAATTTTGTGGTGTTCGTGGAGCGTGGTTCAG  
CGTCGTATCGTCTTAACATATGCCAAGCGTCAACAAGGCCGCCAGGTATTTGCCCGCAAAGCACACACC



TGCCGTTGAAAGTGAATATGGCTGGTGTGATTCTCGCATTTTCGCATCCAGTATCATCCTCTTCCCGGG  
GACCATTACCTCCTGGTTTGGTCAGGGTGAAGGTAAAGTAGCTGATATCCTGCAACAGGTCTCTATGGTC  
CTGCAGCCGGGTCAACCCGCTTTACGAGATGCTGTATGCAGCAGCCATTATCTTCTTCTGCTTCTTCTATA  
CCGCGCTGGTGTTCACCCCCGCGAGACAGCAGATAATCTGAAGAAGAGTGGAGCCTTTATCCCGGGGAT  
TCGCCCCGGGCGAGCAGACAGCACGTTACATCGATAAGGTTATGACTCGCCTGACATTGGCAGGTGCGCTC  
TATATAACCTTTATCTGTCTGGTACCCCAAGTTCTTGATGACTGCCTGGAACGTACAGTTCTACTTCGGTG  
GCACTTCGCTGCTGATTATCGTGGTAGTTATCATGGACTTCATGGCTCAGGTACAAACCCATATGATGTC  
TCATCAATATGGCGACGTCCTGAGGAAGGCCAACCTGAAGGGCTACGGCCGCTAAAGGTTCGGCGTAGTTA  
CGGAGTTAAGCAATGAAAGTTTCGTGCTTCCGTTAAGGCAATCTGCCGTAACGTCAAAAATCATCAAGCGTC  
ACGGTGTGGTGCCTGTGATTGTCAGCGAGCAAAGCATAAACAGCGCCAAGGCTAATTTTTTACGGTTAG  
TACTTGCAACAAATAGTTGTGCTGGCTAATATAGCCAGCCAACCTTTGTTGTGTATTGGTTGACCGCCAC  
GTATCCGCTCACGGGCTTTGTGGTGGTCGTAATCTACTATATGTAGGAGTGAATAGTGGCCCGTATCGCT  
GGCATTAAACATTCTGACCATAAGCATGCAGTCATCGCTTTGACTGCGATTATGGCGTCGGTTCGTACCC  
GCTCCAAGGCCATCTGTGCCGACGCCGTTATCGCTGAGAAATGTGAAAAATTAAGACCTGGACGAAGCTCA  
GATCGAGAGTCTGCGTGAACAAGTAGGTAATTCACCGTTGAAGGTGACCTGCGTCGTGAGTTTCCATG  
AACATCAAGCGATTGATGGATCTGGGTTGCTACCGTGGTTTTCGCTCACCGTCGTAGCCTGCCGTTCGTG  
GTCAACGTACCAAGACCAACGCTCGTACCCGCAAGGGTCCGCGCAAGGCTATCAAGAAGTAACGGGAAGG  
TAGAAAATGGCTAAAACCTCCGACTCGTGCTCGCAAGCGCTTAAAAAGCAAGTGAGCGACGGTATTGCGC  
ACGTTTCATGCATCTTTCAACAACACAATCGTGACCATTACTGACCGTCAGGGCAATGCTCTGTCTTGGGC  
TACTTCTGGTGGTTCCGGTTTCCGTGGTTCTCGTAAGTCCACCCGTTTCGCTGCTCAGGTAGCTGCCGAG  
CGCGCTGGTGAGGTGGCCAAAGAATATGGCGTCAAGAACCTGGAAGTCATGGTCAAAGGTCCGGGTCCCG  
GTCGTGAGTCTTCCATCCGCGCCCTGAACGCGGCTGGTTTTCCGCATCACTAACATTACTGATGTGACTCC  
GATCCCGCACAAACGGTTGTGCTCCTCCCAAGAAGCGCCGCTATAACGCTGTAGCTACTTGGTCTAGGAT  
TGTTGGAGAAAGAAGATGGCAAGATATATCGGTCCCTAAGCTTAAGCTTAGCCGTCGTGAGGGCACCGACC  
TCTTCTGAAGTCAGGTGTTTCGTGCGATTGATTCTAAGTGCAAGATTGACACCGCCCCGGTTCAGCACGG  
TGCGCGTAAAGCGCGTCTGTCCGACTACGGTGTTCAGCTGCGCGAGAAAACAAAAAGTTTCGTGATCTAC  
GGCGTATTGGAACAAACAGTTCCGCAACTACTACCGCGACGCTGCCCGTCAAAAAGGGTAACACCGGTGAAA  
ACCTGTTGCAGCTGCTGGAAGGTCGTTTGGACAACGTTGTTTACCGTATGGGCTTCGGCGCTACCCGCTA  
TGAATCTCGTACGCTGGTGGCCACAAGGCCATCATGTTAAACGGTTCGCGTTGTGAACATTCTCTTTTC  
CAGGTTTTCCCTGAGGACGTGATCTGCGTTTCGTGAGAAGGCTAAGAAGCAAGCGCGTATCAAAGCTTCCC  
TGGAAGTTGCTGGTCAGCGTGAGAAGCCGACTTGGGTAGAGGTTGACGCCGCTAAAATGGAAGGTGCTTT  
CAAGCGTCTGCCAGAGCGTTCCGACCTGTCTGCCGACATTAACGAACAGCTGATCGTCGAGCTTTACTCC  
AAGTAAAGCTAGCTTCTAAAGAGAGGACACAATGCTGGGTTCTGTAAACAGATTTTCTTAAACCGCGGCTA  
GTTGACATCGAGCAAGTTAGCCCGACTCATGCGAAAGTGACTCTTGAGCCACTCGAGCGTGGCTTTGGTC  
ACACGCTGGGCAACGCCCTGCGTCGTATTTTGTCTGTATCTATGCCCGTTGTGCAGTTACTGAAGTCGA  
AATTGACGGGGTACTGCATGAGTACAGCAGCAAAGAAGGTGTACAGGAAGACATTTCTGAAATCCTGCTC  
AACCTGAAAGGTATCGCTGTGAAGCTGGAAGGCAAGGACGAGGTAACCTCTGTCCCTGACCAAGTCTGGAA  
CAGGCCCGGTTACCGCTGGTGTATCACTCACGGTGTGAAGTCGAGATCGTAAACCCGGAGCACGTAAT  
CTGCCATCTGACTGGTGCCAATGCTGAAATCAGCATGCGCCTGAAAGTTTCAGCGCGGTTCGTGGTTATGTG  
CCTGCTTCTGCTCGTGTTCACAACGATGACGAAGAGCGTCTATTGGTCGCCCTGCTGCTGGACTCCGCGT  
TCAGCCCCATCGTTTCGTATTGCCTACAATGTTGAGGCAGCACGTGTGGAACAGCGTACCGACTTGGACAA  
GCTGGTCATCGACATGGAGACCAATGGTACCCTGGATCCTGAAGAAGCCATCCGTCGTTCTGCCACTATC  
TTGGCCGAGCAACTGGAAGCCTTCGTGGATCTGCGCGATGTCAGCGTGCCCGAGAAGAAAGAAGAGAAAC  
CCGAGTTTGATCCGATTCTGCTACGTCCTGTGATGATTTGGAGCTGACAGTTTCGTTCTGCGAACTGTCT  
GAAGGCAGAAGCTATCCACTATATTGGTGTATCTGGTACAGCGTACCGAAGTTGAGTTGCTTAAAGACTCCT  
AACCTCGGTAAGAAGTCCCTGACTGAGATCAAGGACGTGTTGGCCTCCCGTGGTCTGTCTCTTGGCATGC  
GCCTTGAGAAGTGGCCCGCCGCGCAGCATCGCTGACGAGTAATCCAGATTACGGGTTTCACAGATTTAGTT  
AGAAGGATAAGGTTCATGCGCCATCGTTTTGAGTGGTTCGTCAACTGAACCCGGAACAGCAGCCATCGTCAGGC  
AATGTTCCGCAACATGGCCAGCTCCCTGGTTTCGTGATGAGATCATCAAGACGACTCTGCCTAAGGCAAAA  
GAGCTGCGTGTGATGTTGAACCGCTGATCACCTTGCCAAGACTGATAGCGTTGCTAATCGTCGCTGCG  
CATTTGCCCGTACTCGCGATAACGCGATCGTGGCTAAGCTGTTCAATGAACTGGGCCCCGCGTACCTGGA  
GCGCGCCGGCGGTTATACTCGCATTCTGAAATGCGGTTTCCGTGACGGCGACAACGCCCTATGGCTTAT  
ATTGAGCTGGTAGACCGCCCGCGCTGCTGAAGCAGCTGCTGAGTGATAAAGAAAAAGCCGGGCTTGTG  
CCGGCTTTTCTTTTAAATCCATTCTGATACTGCCTCAACTGCCTCAACTGCCTCAACTGCCTCAACTGCCT  
CAACTGCCTCAACTGCCTCAACTGCCTCAACTCATTATCAACTTCTTCTATATAGGAAGTAAGAGTTGT  
TCCTGAACCTGGCGAAATGGTGAATTGTCTGTTTCATTTTCATCCGAACATCGCTGGCCAGCTGGATATCTC  
CCACTAGGTTGCGCAGGGATCTACATATAACCCGTTTGCCTATTGCGGGCATTTTCCCTTGTAGGGTCTC  
AGTCGCAAGTCCATCTTGGCCTCCTTGTTTTTCGGCCATTCTAGCAATCTGGAACCAAGTTTCTGTGGATAA  
GTTTGTATAAAAGCTGTGTCTGGATATGAATAACTAAAAAAGTGCGGTTTTTTGCAATTTTATTGCCGAT  
AAGGGGTTGCCAGAAAGAAATCTGTTCCCTATAATGCGCCTCCATCGACAGGGCAAGCGGCAACGCAGAAA  
GCCAAGTCGATAACCTCGAAAAGCCTTTGAAAATAAGGCTTGACTGGAGAAGCGGTTGAGTAGAATTC

ACTCCCGCAGCAACACACTGTTGCGTCGCTCTTTAACAATTTGAATCAAGCAATCTGTGTGGGCACCTCAC  
AGCATCGAACATCAAAAACAATTTTTGATTTTCAATGTCTGGTGAAGTGACCAAGACGATTTCTTAGCAAT  
AAGAAGTCGAACAGTTTATTTTCAGCAATTCATTGAGCCGCTTTTCGAAGCAACCAAACCTTAAATTTGAAGA  
GTTTTGATCATGGCTCAGATTGAACGCTGGCGGCAGGCCAACACATGCAAGTCGAGCGGCAGCGGGAAAG  
TAGCTTGCTACTTTTTGCCGGCGAGCGGGACGGGTGAGTAATGCCTGGGGATCTGCCAGTCGAGGGGG  
ATAACTACTGGAAACGGTAGCTAATACCCGCATACGCCCTACGGGGGAAAGCAGGGGACCTTCGGGCCCTTG  
CGCGATTGGATGAACCCAGGTGGGATTAGCTAGTTGGTGTAGGTAATGGCTCACCAAGGCGACGATCCCTA  
GCTGGTCTGAGAGGATGATCAGCCACACTGGAAGTGTAGACACGGTCCAGACTCCTACGGGAGGCAGCAGT  
GGGGAATATTGCACAATGGGGGAAACCTGATGCAGCCATGCCGCGTGTGTGAAGAAGGCCCTTCGGGTTG  
TAAAGCACTTTTCAGCGAGGAGGAAAGGTTGGTAGCAATTTGAAGAGTTTGTATCATGGCTCAGATTGAACGC  
TGGCGGCAGGCCATAACACATGCAAGTCGAGCGGCAGCGGGAAAGTAGCTTGCTACTTTTTGCCGGCGAGCG  
GCGGACGGGTGAGTAATGCCTGGGGATCTGCCAGTCGAGGGGATAACTACTGGAAACGGTAGCTAATA  
CCGCATACGCCCTACGGGGGAAAGCAGGGGACCTTCGGGCCCTTCGCGGATTGGATGAACCCAGGTGGGAT  
TAGCTAGTTGGTGTAGGTAATGGCTCACCAAGGCGACGATCCCTAGCTGGTCTGAGAGGATGATCAGCCAC  
ACTGGAAGTGTAGACACGGTCCAGACTCCTACGGGAGGCAGCAGTGGGGAATATTGCACAATGGGGGAAAC  
CCTGATGCAGCCATGCCGCGTGTGTGAAGAAGGCCCTTCGGGTTGTAAAGCACTTTTCAGCGAGGAGGAAAG  
GTTGGTAGCTAATAACTGCCAGCTGTGACGTTACTCGCAGAAGAAGCACCGGCTAACTCCGTGCCAGCAG  
CCGCGGTAATACGGAGGGTGCAAGCGTTAATCGGAATTACTGGGCGTAAAGCGCACGCAGGCGGTTGGAT  
AAGTTAGATGTGAAAGCCCCGGGCTCAACCTGGGAATTGCATTTAAAAGTGTCCGGCTAGAGTCTTGTAG  
AGGGGGGTAGAATTCAGGTGTAGCGGTGAAATGCGTAGAGATCTGGAGGAATACCGGTGGCGAAGGCGG  
CCCCCTGGACAAAGACTGACGCTCAGGTGCGAAAGCGTGGGGAGCAAACAGGATTAGATACCCTGGTAGT  
CCACGCCGTAAACGATGTGCGATTTGGAGGCTGTGTCTTGTGAGACGTGGCTTCGGGAGCTAACGCGTTAAA  
TCGACCGCCTGGGGAGTACGGCCGCAAGGTTAAAAGTCAAAATGAATTGACGGGGGCCCCGCACAAGCGGTG  
GAGCATGTGGTTTAAATTCGATGCAACCGGAAGAACCTTACCTGGCCTTGACATGTCTGGAATCCTGTAGA  
GATACGGGAGTGCCTTCGGGAATCAGAACACAGGTGCTGCATGGCTGTGTCGTCAGCTCGTGTCTGTGAGATG  
TTGGGTTAAGTCCCAGCAACGAGCGCAACCCCTGTCTTTGTTGCCAGCACGTAATGGTGGGAACCAAGG  
GAGACTGCCGCTGATAAACCAGGAGGAAGTGGGGATGACGTCAAGTCATCATGGCCCTTACGGCCAGGGC  
TACACACGTGTACAATGGCGCTACAGAGGGTGCAGCTAGCGATAGTGTAGCGAATCCCAAAAAGCGC  
GTCGTAGTCCGGATCGGAGTCTGCAACTCGACTCCGTGGAAGTCGGAATCGCTAGTAATCCGAAATCAGAA  
TGTTGCGGTGAATACGTTCCCGGGCCTTGTACACACCGCCCGTACACCATGGGAGTGGGTTGCACCAGA  
AGTAGATAGCTTAACTTCGGGAGGGCGTTTACCACGGTGTGATTTCATGACTGGGGTGAAGTGTAAACAA  
GGTAACCTTAGGGGAACCTGGGGTTGGATCACCTCCTTACCTTAAAGATGTGGAAGTTGTTGAGTGTTCAC  
ACAGATTGCCTTGATTCAAAGTAGTTAGAGCAAAGACCTGATGCGAAAAGTGTGAGTGCCTTATCTGGCTTC  
GGTCAGATGAGAGAAGCCCTATCATTGGGTTTTGGGATGTGAATAATGGCGCTCGGCCCTCGCAGGCTCGG  
CACTCGCCATTACCCAAAATCTGCACTGCTGACGCAGCGCAAAGATGATTTTGGGTCCCCTTCGTCTAGA  
GGCCTAGGACACCGCCCTTTCACGGCGGTAACAGGGGTTGCAATCCCCTAGGGGACGCCACTTCTCTTCT  
TGCTAACAAGAATGCAGAGTTAAGAAGTGTATCTTAACTCTGTTTTCTTCGGCCTTGCGCCGTTGCAAAC  
ATGCTCTTTAACAATCTGGAAAGCTGATTTAAAAGTAGTTCTCAAACATTTGTTACAAGTGTCTTGGAA  
ACTTCTTGGCGAAAACCAAATTTTATTTGGTCTTGTGTACGACAACAAGCAAGCGTTGTTTCGACGAC  
ACTTCTTGGGGTTGTATGGTTAAGTGAAGTACATGGTGGATGCCTTGGCAGTCAGAGGCGATGAA  
GGACGTACTAACCTGCGATAAGCTGTGAGAAGTCCGTAAGAGACGCTATTACTCACAGATTTCCGAATGG  
GGAAACCCACCCGAGATAACTCGGGTATCTGTTACTGAATACATAGGTAACAGAGGGCGAACCAGGGGAGAAC  
TGAAACATCTAAGTACCCGAGGAAAAGAAATCAACCGAGATTCCTCAGTAGCGGCGAGCGAACGGGGA  
TTAGCCCTTAAAGCATCTTGAAGTTAGTGAACGGTCTTGGAAAGGCCGCGATACAGGGTGATAGCCCC  
GTACACGAAAACGACCTTGTATGTGAAATCGAGTAGGGCGGGACACGTGACATCCTGTCTGAATATGGGGG  
GACCATCCTCCAAGGCTAAATACTCCTGACTGACCGATAGTGAACCAAGTACCCTGAGGGAAAGGCCGAAAA  
GAACCCCTGTGAGGGGAGTGAATAAGAACCTGAAACCGTGTACGTACAAGCAGTGGGAGCCCTTCGGGGT  
GACTGCGTACCTTTTTGTATAATGGGTGACGCACTTACATTTTTGTAGCGAGGTTAACCGTATAGGGGAGCC  
GTAGGGAAACCGAGTCTTAACTGGGCGTCTAGTTGCAAGGTGTAGACCCGAAACCGGGTGTCTAGCCAT  
GGGCAGGTTGAAGGTTGAGTAACATCAACTGGAGGACCGAACCCACTAACGTTGCAAAGTTAGGGGATGA  
CCTGTGGCTGGGGGTGAAAGGCCAATCAAACCTCGGAGATAGCTGGTTCCTCCCGAAAGCTATTTAGGTAG  
CGCCTCGGACGAATACTACTGGGGGTAGAGCACTGTTTGGGCTAGGGGGTCACTCCCGACTTACCAACCC  
ATGCAAACCTCCGAATACCAGTAAGTAATATCCGGGAGACACACGGCGGGTGTAAAGTCCGTCGTGAAGA  
GGGAAACAACCCAGACCGCCGGCTAAGGTCCCAAAGTCTGGTTAAGTGGGAAACGATGTGGGAAGGCTC  
AGACAGCTAGGATGTTGGCTTAGAAGCAGCCATCATTTAAAGAAAGCGTAATAGCTCACTAGTCGAGTCG  
GCCTGCGCGGAAGATGTAACGGGGCTCAAACCAGGCACCGAAGCCGCGGATTACACTTATGTGTGAGTG  
GTAGGGGAGCGTTCTGTAAAGTCTGCGAAGGTGTATCGAGAGGTATGCTGGAGATATCAGAAGTGCGAATG  
CTGACGTAAGTAACGATAAAGGGGGTGAAGAAGCCTCCTCGCCGGAAGACCAAGGGTTCCTGTCCAACGTT  
AATCGGGGCGAGGTTGAGTCGACCCCTAAGGCGAGGCCGAAAGGCGTAGTCGATGGGAAGCAGGTTAATAT  
TCCTGCACGACTTGTAAATTCGATGGGGGGACGGAGAAGGCTAGGTGGGCCAGGCGACGGTTGTCTGGT  
GAAAGTGCCTAGGTGGTGTCTTAGGCAAATCCGGAGACACAACACTGAGACACGAGACGAACACACTAC

GGTGTGGAAGCCATTGATGCCCTGCTTCCAGGAAAAGCCTCTAAGCTTCAGATTACAAGTCATCGTACCC  
CAAACCGACACAGGTGGTCCGGTAGAGAATACCAAGGCGCTTGAGAGAACTCGGGTGAAGGAACTAGGCA  
AAATAGAACCCTAAGTTCGGGAGAAGGTTTCGCTCTTGACAGTGAAGTCCCTTGCAGGATGGAGCAGTTGGG  
AGTCGCAGTGACCAGATGGCTGGGACTGTTTATCAAAAACACAGCACTCTGCAAACACGAAAGTGGACGT  
ATAGGGTGTGACACCTGCCCGGTGCCGGAAGGTTAATTGATGGGGTTAGCGCAAGCAGGCTCTTGATCG  
AAGCCCCGGTAAACGGCGGCCGTAACATAACGGTCTTAAGGTAGCGAAAATTCCTTGTCCGGTAAAGTTCC  
GACCTGCACGAATGGTGTAAACCATGGCCATGCTGTCTCCACCCGAGACTCAGTGAATCGAATTCGCCGT  
GAAGATGCGGTGTACCCGCGGTAGACGGAAGACCCCGTGAACCTTTACTACAGCTTGGCACTGAACAT  
TGAACCTACATGTGTAGGATAGGTGGGAGGCTTTGAAGGCGTGACGCCAGTTGCGCTGGAGCCGTCCTTG  
AAATACCACCCTTGTATGTTTGTATGTTCTAACGCAGGGCCCTGAATCGGGCTCGCGGACAGTGCCTGGTG  
GGTAGTTTTGACTGGGGCGGTCTCTCCCAAAGAGTAACGGAGGACGACGAAGTTGGCTAATCCTGGTGC  
GACATCAGGAGGTTAGTGCAATGGCATAAGCCAGCTTAAGTGCAGAGACGACAGGTCGAGCAGGTACGAA  
AGTAGGTCATAGTGATCCGGTGGTCTGAATGGAAGGGCCATCGCTCAACGGATAAAAAGTACTCCGGGG  
ATAACAGGCTGATACCCGCAAGAGTTTCATATCGACGGCGGTGTTTGGCACCTCGATGTCGGCTCATCAC  
ATCCTGGGGCTGAAGTCCGTCGTCGTCGTCGTCGTCGTCGTCGTCGTCGTCGTCGTCGTCGTCGTCGTCG  
GAACGTCGTGAGACAGTTCGGTCCCTATCTGCCGTGGGCGTTGGATGATTGAAGGGAGTTGCTCCTAGTA  
CGAGAGGACCCGAGTGAACGAACCTCTGGTGTTCGGGTTGTCACGCCAGTGGCACTGCCCGGTAGCTAAG  
TTCGGAATCGATAACCGCTGAAAGCATCTAAGCGGGAAGCGAGCCCTGAGATGAGTCATCCCTGACCCCT  
TGAGGGTCTTAAAGGGCCGTTGGAGACCACAACGTTGATAGGTGGGGTGTGTAAGCGCGGCGACGTGTTG  
AGCTAACCCATACTAATTACCCGTGAGGCTTAACCATAACAACCCAAAGAGTGTCTAAGGCTTGTAGC  
AAATACGAACGAATTAAGTACGTCAGCTTTCTCAGATTGAAGAATTTGCTGGCGGCCATAGCGCCGTGG  
AACCACCTGATCCCATGCCGAACCTCAGAAGTGAACCGCGGTAGCGCCGATGGTAGTGTGGCATTCCGCAT  
GCGAGAGTAGGACACTGCCAGGCACCCAATTATAGCGCCGTGGAACCACCTGATCCCATGCCGAACCTCAG  
AAGTGAAACCGCGGTAGCGCCGATGGTAGTGTGGCATTCCGCATGCGAGAGTAGGACACTGCCAGGCACCC  
AATTAACAGCGATGTGAAAAATCACATCACTGGCTGCGAGGATGACACCTCACTGACGCGGCAAAACAAT  
TTAGCGCAAGCTAACCGAATGCGGAGCGGTAGTTCAGTTCGGTTAGAATACCGCCCTGTCACGCCGGGGGT  
CGCGGGTTCGAGTCCCCTCCGCTCCGCCACTAATTTAAGGCTTCCCATGTGGGAAGGCCTTTTTTCTA  
TGGGCGGTTTTTTGCCATAAGTCCCACAGGTTTGCACACCAGAACCAACACAAAGCCAGTCTCACGACC  
GGGTTTTGATGTTTTTAGCTGCTGGTGAGCTTCCGACATCCACCACGATGCCAATGCCCTCCCTTCCCTT  
CGTTCTTGCTACTATTTCCACCTCTGTATCGCCGCACATCCCATCTTGGCCATAATTGTTCTGCTGCGAGC  
TGATAGAGCTTGAGGATTAATCAGGCCATCTTGCAACGGTACGTCATCGCTTCAACTTGTGTTGCTAAT  
CCTTTTTTTGCTTATGGATTTATTTTCATTAACACAGTCTCTTATCAAGAATGAGCTGTTTTGCAGCAGGA  
ATGCAACACGATATAAATGATAATGATTATGTTTGAATGGTTCGAGGTGGGGTCGTTACAATGCAGGCTG  
ATTAATAAAGTGCTTTTCAAATGAGCCTTTTCTAATGCTGCGTCTGGCCGGATGCCAGGGCGTTGTAATG  
AGTGAAGTAAGGGAATACGTCACCTTCTACTAATAATGTTTCAGGCTAAAACATGACAACAGTGAAACCG  
AACAAGCTTGCTTGTGATCTGCTCCCTTCTTGGACCCAGGCTATGCTGCCAAACAAGAGGTGATGG  
TCGTCACCGCTTCCGGCTTCCAGCAGAAGATTGAAGACTCTGCTGCCTCCATCTCCGTGATTACCCGTGA  
GCAGCTGGAAAAGCGGGCCTATCGCGATGTGACCGATGCCCTGAAGGATGTGCCCGGTGTTGTGGTGACC  
GGCGGTGGCAGTAGCAGTGATATCAGCATTGCGGGTATGGGGTGCAAAATACACCCTGATGCTGGTTGATG  
GCAAGAAGGTGGATAGCCGTGGCACTCGCCGAAACAGCGATGGTCCCGGTATCGAGCAGGGCTGGCTGCC  
GCCACTGCAGGCGATTGAGCGCATTGAGGTGCTCCGTGGCCCCATGTCATCCCGTTATGGTTCCGATGCC  
ATGGGGGGCGTGATTAACGTGATTACCCGCAAGACCACCGGTCTGGCTGGCAGGGCTCGGTTTCATGCTG  
ATTCGACCTTCCAGGAGAACAAGGATGCTGGCAACAGTTTCCAGACCGATGCCTATAACCGCAGGTTCACT  
GATCGATGGCGTGTGGGGCTGCGTTTCAATGGTCAGCTCGCACATCGTGGTGAAGACAAATTTATCCAG  
GGTTTTTGGCAGCAGGAGACTCGCAGTGGCAGGCGCGTGTCTAGCTTCAAGCCTGATGATCATAACCGTT  
TCGATCTGGAAGCCAGTCTGAGTCTGCAGGATCGGGATCGCACGCGCCGCAATTCGCTGGCTGCCAAGGC  
GAAAGATAGCCTTAACCGCTACGAGCGCACCAACTATGCGCTGACCCATGATGGTCAGTATGATTTCCGGC  
TCTTCCAGCAGCTATCTGCAGCAGGAGACCAACACCAATCCCGGCCCGCCAGATGGAGCTCACCAACACCA  
TCGCCGATAACCCATAACCCAGTTTATTTCTGGGTGATCACTACCTGAGTGTGCGGTGGTTCAGTATCGCTATGA  
GGATCTGCACGATCAGGGCAATACCCGAAAAGTGGCCAACCTGCCGAGCAGCTGACCCGCTGGAGTTGG  
GCGATGTTTGTGAGGATGAGTGGTCACTCACTGACAGCTTTGCCCTGACAGGGGGCGCACGCATGGATC  
GGGATCAGAATTACGGCTCTCACTGGAGCCCGCGCTCTACGGCGTCTGGCATCTGGATGATAGCTGGAC  
CCTGAAAGGGGGCGTATCAACCGGTTACCGCTCCCTGACTTGCAGGATGTGCGCGGCCAACTGGGGCCAG  
GTCACCGGTGGTGGCAGCCTGGATGGCATGCTTGTGCGTAATCCTGATCTCAAACCCGAGACTAGCGTGA  
GTGAAGAGATCGGCCTGCTGTGGAACGGTCACTCAGGGCTTCAACCGCGGTGTTACCTGTTCAACACCGA  
CTTCAAGAACAAAATCTCCGAAGTGCCTGCTGCACCAGCAAGAGCGATCCTGCCGTGTTACCTCAATGGT  
TACAGTTATGATTTTATCAGTGATCGGGTCAACGTCGACAAGGCGAATATGCGCGGTGTCGAGGGGATGA  
TGGATTGGGCCATCAATGAGGATTGGTCCGTGAGTTCAGCTACACCTTTACCCAGTCCGAGCAGAAGAG  
TGGCCCACTGGCGGGCCATGCCCTCAACCAGATGCCCGTCAATGTTCAACGGCAGTGTGACTGGCAA  
ACCACCGAGGATCTCAGCCTCTGGTACGGGTCAACTTCCGTGGCGAGACCTCCGAGTACCTGAGCCGGG  
TCAAGATGGCGGAGGGGACCCCTTCTACACCTTCTTTGACATGGGCTGGTCTACAAGGCCAACAAAGCA

TCTGGATCTGACCGCCGGGGTCTACAACCTGTTTCGACAAAACAGTGGATTACAGCAGCTATGGCACTGTG  
CTGGATGGTTCGCGCTACAACCTGGGCGTGACCTACAACCTTCTGATAGGGAACCTGTTATGCGGCCGCCA  
TCTTCCGATGGCGGCCGTTTTTATTGCACGTCCGTCAGGGGGCTATGCCTGATAGGGGCCGGCTTGCCAG  
GTATTGCGCCCCAGTCCCTTGGCCTGATACATGAGGGCGTCAGCCTGCCGCAGTAGTTGGTCGGCATCAG  
CCTCTCTCTCTGCGGGCAGCCAGACTGCCCCGGTGTCTGATGGAGAGGGTCACCTCGCCGCTGCTGGTGTG  
CAGGGTTTTGCGGTTGCTCTCCAGGCAAATACGCTCGGCCCATTTGCTCTGTCTCAGCCAAATGTGGCCAGC  
GGCAGCAGCAGGCAAACCTCCTCGCCCGGATGCGGGCCAGCAGAGCCTCTTCGGGCAACAGGTTTCGTCA  
CAGTCGTGGCCAGCTTTTCCAGCAACAGATCTCCGATGCCATGACCAAAGCGGTCATTGGTCTCCTTGAA  
GTGATCCACATCGAACAGCAGCAGAGCACAGGGCTCCCCGCTTGCCAGTCGTTGCTCCATGGCGGGCATG  
AATGCCCGTCCGTTGAGCAGGCCGGTTCAGGGGATCGGTAAGTGGCTTGTGCTCCAGTCTGGCGTTGGCCG  
GGCTCAACTCGGTGGTGGCTGGCAACAGCAGCGGGCAGTTGCACTATGTAGGCCACCATGATTAACAC  
TCCGGCAAACAGTAGCCAGGGACCGAGATGGATGGGGTAGACGGTCTCAACATGCATCCACTTGC GGATG  
ATCCGCTCCCGATCGCTCTCTTTGATCTTGGCGAATCCCTCTTCCAGCCGGTTTAAACAGGGCAAGGTCGC  
CCTTTTTTCACTGCAAAGCGGATCTGGTCGGTATAGAGGTGGCGAACCGGAATAAAGCGGGTGGGATCGTC  
CGAGGTATAGATGTAGAAGTTGGCGACCTGCAGATCGGCGATAAAAGGCTTGTATGTCGCCCCAAAAGGCT  
GCCGCCAGCAGGGTGTCAATTGTCTGTCGAAGGTCGTCAGTCTGGTGGCGGGGAAGTAGCGTCTGGCGTAAT  
ACTCCTCGTAGCCACCGGCTACCACTCCGACCGTTTTCATGGAGCAGGTAGTAGTGGACATCGGTGCCCGC  
CAGTTTCGCTCGAGAAGAAGAGTTGGGAGTCGAGCTGGGCGAGAGGCCGCCATAGTCGAACAGTTTGTCC  
CGCTCCGGTGACCAGAGCAGTCCGGCGTGAACGTCGCTTTCCTCATGGAGCAGGTGAGGGAGCCTT  
GCCAGTCGACCAGCCTGAACTCGATCTTCTGGTCGGTCACCCGGGCATATTCACGCCACAAATCGATCAG  
CAGGCCATCCGGCTGGCCCGACTCATTGATATAGGAGAAGGGCTGCCAGGCTTTGGAGTTGGTAATGATG  
ATCGGCTCTTCCGGGGCTTTTTGCCAGGCAGGCAGGGCAAGGGCGAGCAGCAGGAGCCCCCATCTGATAC  
TGACTATGACTCCTGTCTTGAAGAGGCCATCCTTGGCTCCAATCCGTTGTCTGATATATCGTCCCGTGGTCA  
CCGATTATCACCGTCTTTCTGATCGAAGAACAAGTGTCTCAAAATATGAAGTTTGCATGATGCAAACGGCG  
CCATGACAAGGCTGGCGGATAGAGTACTTACAGCGGCAGGCTTATCCGCGCTCCAGCCCCCTTG  
TGGCCGATTGAGCAGGGTCAGTTCCGCCACCATGCTGATGCACCAGGGTACGGGCAATGGAGAGCCCCAAC  
CCCACGCTGCCGACTCGGTGTTGCGCGCTTCATCGAGTCGCACGAACGGCTTGAACACATCCTCGAGCC  
GCGCCGGATCGATCCCCGGCCCGTTATCGCAGACCCGGATCAACAGCTCCTCCTTGGCCCGCTCCAGCGA  
CACTTCGGCGCTGCCGCGATATTTGATGGCGTCCGATCAGGTTCTGTCAGCACCCGCGCAGGCGTGTG  
GCCGACAGGCGTAGACCTCTTTGCCCTCCGCCAGACAGGTGACCGGCTGGCCGGTATCGGCATAGTCAT  
CGCACAGGCTGACCAGCAGGCTGACCAGATCCAGTTCGCGGGTAGCCTCCTGCTGTCCCTCCTCGCGGGC  
AAAGCTGAGGGTTCGCCCGCAGCATCTGCTCCATCTGTTGCAGGGTCTGCTGGATCCGCTCCTTGTCTCG  
CCATCGGCCAGAAATTCGGTACGCAGCCGAGGCTGGTGTGAGGGTGGCGAGATCGTGGGAGATGGCCG  
CCAGCATTCCGGTCTGTCTGTCACGAAGCGGTGAGCCGGTGTGCATCCGGTTGAAGGCTGAATCGA  
TTCGCGGATCTCGGTGGCCCCCTCCTCTTTCAAGGGCTCGATATCCTCGCCCCGTCCGAGCCGCTCTGCG  
TTGCCTGCCAGCTGCTTGGCGGGCGAGTGGCACGGCGAAACAGCAGCACCATCAGCCCATCACCAGAC  
TGGCGACCAGCATAAGATTGAGGGTGGTTTGGCACGACCAGCTGCCCGCTCCTTGTGACCCAGTGGCT  
GAACTGCAGCCAACCTCCCTGCGGCAGTTTCGATGGAGCCATAGAGCCGCATATCCCGCGCGGGGGCGGT  
CCCTTGCATCCCGCATCATGCGGGCATGATGTTCCACGCTTGTGCGCTGGGTATCCTCTTTCAGCT  
CGGCGCTGATCTCGACGGTGGAGCCGGGGGGATAGTTGAGGCGCGAGCGCACCAGCTGCTCGAAGCGGGG  
GCTGCGGTTATCCGGTTGCAGCGGTTTCGTCGGAGAGGGCGCAGCAGCAAGGCTCGCTGCGGCTCGCCTTG  
AGGATCTCGTCATAGAGGGACGGGGGGGAGAGGGAGAGCAGCCTGACCACCGAGATGATCCGCTGCATGG  
CATTGCGGCTGTTGACGAAGCCGAGCGCCTCCTCCCGATCCGTGCGGTAGATCTGGATACTGAGCAGCTG  
GATCAGGATCAACCCCGCCAGCGCCACCAGAATGATCTGGCCGGTTCAGCCCCTTGGGCCACATCCGTGCC  
CACAGTCGTGCAAGGTGCCACTGCTTAAACCTGCGTACGTCGGCGGAGAACATATAGCCGCCACCCC  
AGATGGTTTTGATCAGCTCCGATTTTGGGATCCCGTCCAGCTTTCGCGCGCAGGCGGCTCACCAGAT  
ATCGATGGCGCGATCGAAGGCCACCGCTCGCGGCCACGGGCCAGGTCCAGCAGTTGATCCCGGCTCAGC  
ACTCGCTGCGGGCGTTCCAGAAATACCTTTAGTAGATCGAATTCGGCGGTGGAGAGGCTCAGGCCACCC  
CATCCTCATCGACCAGCTCCCGGCGATTGACGTCGAGCAGCCAGCGATCGAAGCGCAGATCCCGGGTCAG  
GGCCTCGGCGCGGGTTGGTTATCCGCTGGGTGCGGCGCATCACCGCTTGTGCGCGCCAGCAGCTCG  
CGCGGATTGAAAGGCTTTGCCAGATAGTCGTCGGCCCCATCTCCAATCCGATGATGCGGTTCGGTCTCTT  
CCCCCATGGCAGTCAGCATGATGATGGGCAGGTTTCGATTTGACCCGCGAGCTCGCGGCAGAGGGTCAGACC  
ATCTTACCCCGCATCATCAGATCCAGCACCAGCAGATCGAACTCCCGCTCCTCCAGCAGTCGCTTTCATC  
TCCTTGGCATCCCGGGCGCAGCTGACCCGCGAGCCGTGCTGTTTCGAGAAAAGCGTTCAACAGATCGCGGA  
TCTCGCTGTGGTTCGTCGACCACCAGAATGTGGGTGTTGCCCTGGTTCATGAATACCTCCCTGCTTGGCG  
TTGGCACGAGTATACGAAAATACGCTGCACGGTTTTGTGTCAAAAGTGTGCCAGATCCGCTGATGCCACAC  
TCTGCTACAAAAAGGGCGATGCTGGCAAAGTTTCAGACACCGACAGGGTGTTTACTTGGGGCAAGGCAA  
GAGCGCCGAACCAGAATCATCCCTACAGGAGATAAAACCATGAAAAAGCTGACCAAAACCTGCTGACCGC  
CACCTGATCCTTGGCCTGCCGCTGGGCGCCTATGCTGCCAGTGAAGCGGCCCCCAGCGCCAGCCGGT  
GCCATGGTGGATTGCCCGATGGACGGTGGTGGCATGATGGGTGGTAAACACCACGGTGGTCCGACGACA  
AGATGGCCCGCATGCAGAACATGACCCCGGAACAGATCCAGGCCAACCTGCAGCAACGTTATGACCACAT

TGAAGATCCTGCCAAGAAGGCGGAGTTCATCAAGAAGCTCAACGAGCGTGCAGCCGGCATGACCAAGCAC  
GCTGAAGCGATGAAGCAGTTCGCCGAAGCGAACAGTAACAACGCCAGCTGTTATCAACCAAGGGTGGC  
CGAGGCCACCCTTTTTGCGCTTACTGCGTTGAGCCGACGCTTGGCTGAGCGCTGGTGAATTGCCAATAAAA  
GAGGGGGAGCATGATGCTCCCCCTCTTGCTATCTGTGTCGGTGCAGTGTGCAACCCACTTCACCCGACG  
AGCGAACTTAGCCCTGAGCCTTGTGCGGTGAGTTCCTACTTTCTTGACGGTTTCGCCTTCGAACTTGATGAC  
CACGTTTTTCTTGGCGGGCTCGGTATCTTTCAGCAGGGTGTGGTGTGCTCTGCCAGCAGTGGAGAGGCC  
TTCTTCAGGGCATCCAGATCATAGGTCCACACTTCCAGACCGGCTCGGTCTTGGTAGAGGCAGGTGCGC  
CCAGCTTCTCTTTGACTGCCTGCTTGTGGAGCCGCCTTCTTGATATCCAGAGCCTTTTTGATGGCTTC  
GTTGGATGCACTGTCCATGGCACCCGATACGGCAGTGTGGCCGCATCCTTGACGCTGCTGGTGACGCTG  
TCGGTCAGCGAATACAGCTCAGGCCCGCATTGGCAAACAGGGCAGGGTGGTGAAGGCAACAGCAAACCTC  
TTTTCATTTTTCTACAGCTTCCATGGGTTCAATAAGGCGGCTATGAAATCAGCAAAGATATTGGGCGTCAA  
GTGAGGCATGCAATTGACATTTCTGTTAAGTGTCTCATTTCTCACCAGTGCCAAACATTTTTGGTATC  
TCCCGCACTAGCCAGCTTTTTGGCCTTGCCCATGGTGTCTCGCCGCCAGGCCAGCACCTGCAATTGAT  
GGCGATATTGGGGCTGATCACCTTGAGCCATCCGGCCGATGTCTCTCAATCCAGCTCTGTGGCAT  
GGTGCCGACCCCGATCCCTGCCAGCAGGGCATCCCGTTTCTCCGTCATGGTGTGACAGTGAAGCGCGGC  
TGCTTGTGAGCAGGCGGTAGGTGAGAACCAGTTTGGCAGGGCTGTGTGCGCCACCAGCGATGGCGCGGT  
AGCGGCGCAGGGTTTTGCTCAGCCAGAGGCTCCGGCTCTGATGCAGCGGGTGTCTGGATGGGCGACGTA  
GAGCATCACCTCGTCTTGTATCACCTGATGCTTGTATGCTGTATCATGATGTCCGGGTTGATGGAGGAG  
ATCAGCAGGTGCGCGCAGCACCTTCCAGACACTCCAGCTACCCGCCAGCACCTCGGCTCGCAGCCGCA  
GTCGGGTATCGGTCTGCTCGGCCAGCTTCTCCACCAAGGGGTAGAGGGCTGCACCCGGGACCAGCGCATC  
GACGGCGACTGTGATGTGCGTCTCCAGCCACGGGCCAGCGCCCGGTCTCGCTACCAGATGCTCGGCT  
GCCTCCAGCAGCACCCGGCCGCGCTCCAGCAGCATGCGTCCGGCTGGGGTGAACCTGGTGGCGTGGCCGC  
TGCGGTCAAACAGCATGGCATCCAGTTTCGTCTTCCAGCTTCTGCACCGTATAGCTCAATGCCGAGGGCAC  
CTTGCCAGCTCGTCCGGCCGCCCGCAAAGCTGCCGCGGGTTCGATGGCGTCCAGCACCCGGATCGCT  
TCCAGGGTGAAGTGGCGTTTCTTGTTCGACTCCTTGGCCATTTTTACCTTCAATTTTTTTGAATATGTT  
CGCCAGATTATCTCGCTAACAAGTTAAGCCAAGCACCTTAATATTCATCATCGCTTAGGCAGGAACGT  
CTGGCGCCAAATATGTGGGAAGTTCCGCACTGTGACAGGCCAAGTCCGCATGTCTGATGTGGTGAAG  
AACAACACATAATTTGATGACTTCTTGCATGGATGCATTTGATTTCTGGCCGAGCTGGCTTGGCAATGAC  
ATATAAAAACAAGAGATGAATGAACATGAAAAACGTAATCAAGATGTGTGGCCGTTGCAGGCCATGATGACC  
ACAGGTTTTCGCCACGCCCGCTACCAGGCTGACTTCAACGCCACCCCGGGTGTGCTGTTTTGTGAAGTGGC  
ACTCCACCGCAGCGCTGGATGGCAAAGCCAACCCGATGCTGGAAGTGCAGCAGGAGTCTGGCGATCTGCT  
GGCATCGGTCCACGCCAACCTGATGGGCACCCAGCAGGTGAAGATCCCGGGTGTACCCAGGGCAACCTG  
ACTGTGAGCCTGGCTGGCGAGAGCAGCGAGTATCGCATTTCCGTTTCGGTCTCGGCCGGTGGTAAAGATCGCT  
AAACCGAACCCCGGATAGATGAGGAGCACACCATGATGAAATGAGAGCCGAGAGGCCGAGGCAAGGC  
CAACTTCGGCTGGCTGGACGCACGCCACAGTTTCTCCTTCGGTCACTACTACGACCCGGAGTGGATGGGA  
CACTCGGTGCTGCGGGTATCAATCAGGATCTGGTTGCGCCGGTGGCGGATTCGCCACCCATCCTCAGC  
CCAATATGGAGATCCTCACTTTCGCTGCTGCAAGGCACCATAGAGCACAAGGACAGCCTCGGCCATGTCGA  
GCAGATCTCGGCAGGGGATTTCCAGCTGATGAGCGCAGGCAGCGGGATCCGTACAGCGAGTACAACCC  
TCGACAGCGGAACCCCTCTCCCTGTTGCAGATCTGGATCGAGCCGAATGAAGTCCGGCACGCCACCCGGAT  
ATCAGCAGAAGAAAATTGAGTCCAGACCCGGTATGACGCTGGTGGCGTCAACCGGATGGTGAAGCGGGATC  
CTTTCGTGATCCGCCAGCAGGCCCGCTATGGCGGCTGGAGCTGGCCCCGGGCGAAAACGCTCAACTGGGCA  
CTGGCTGGCCGACACGGTTACCTGCAGATGATTTAGGGGAGCTGACCCGCAACGGTCTGGCTGCCCGAC  
CCGGCGACGGGGTACTCAGTCGTGATGAATACCGGTGGGAGTTGGTTGCGACAAGTGGCACTCAGGCCCT  
GTTATTTGACCTGCCCTGATTGGTCAAGTGGCGATACGAGTTAAACGAGGAAAAGTGAATGGACAAGATGA  
AAGATGTAGCGCTGCTGGCGGGTCTGTACTGCTGGCACTGATGTTCTGTGATTGCGGGCTGGGGCAAGAT  
CGGTGGTTACGCCGACCCAGGCTATATGGAAGCGATGGGGTGGCGGGCTTTATCCTGCGCGTGGT  
ATCCTGCTTGAGCTGGGTGGTGGCCTCGCCATCATGCTGGGTCTCTTTACCCGACGCTGTCTGGTGTGA  
TGGCCGGTTTTACCCCTGATGGCCGCTTTATTTTTCCACTACCAGCCTGCCGAACAGATGCAGATGCTGAT  
GTTTATGAAGAACGCTCTCCGTCGCCGGTGGTTTTCTGGCGCTGGCGGCAGCCGGAGCAGGGGCTTTCAGT  
GTGGATGCCCGTCTCGGCAAAAACCTGGTAATGCCCTGAAGAGTCAAGTTTTCCAATGCCTTTTGGCCGGT  
GCAGTGCACCCGCTTTTTTCTGTCTGCGTTTTCCGGTTCGATGAGGCTGCTGCACAAATCTGCGGCCCCC  
CTCATGGTTCCGGCGTTTTGCCGCTGCTGGCCACAAGTGCCTTTTGCATCTTATCCCCGATCCCCGAC  
AATTCCTCTCTTGTGAAGTGCAGGAAATGGCTCGCCTTTTCCCTCGCCCCCTCTCATCCACAGGCGGGA  
ATTGCTCATGTTTACCCTCTACCACTCCAATCAGCTGGATCTGCTCAAAGAGCTGCTGGTGAAGCGCATC  
CGGCAGGCCCTCTCTCTCACCCCTTCGATCGGGAGCAGATACTGGTGCAGAGTCCGGGCATGGCCAGT  
GGCTCAAGCTGGAGCTGGCCAAGGCCTTCGGCATCGCCGCAATACCGACTTTCGGCTGCCCGCCAGCTT  
TATCTGGGAGATGTTACCCGGGTGCTGGCGGATGTGCCGCGCCAGAGTCCCTACAACAAAGGCTCCATG  
AGCTGGCAGTTGATGACCATTTCTGCCTGCCTTGTGGATCGCCCCGCTTTGCCCGCTCGCCGCCTATC  
TGGGTGGGGGAGATGAGAAGGATCCCGCCAGGGATCCCGAGCAGGTGCGGCTGTGGCAGCTCTGCCAGAA  
GGTTGCGGATCTCTTTGACCAGTATCTGGTCTACCGGCCGACTGGATCGCCGTTGGGAAGAGGGGGAA  
GGATTGAGTCAGGAGCTGGCCGGGGTGAAGCGGTGAGGATTTGGCAGCCGGAGCTTTGGCGTGAAGTGGTGG

CCCCACGTTGGCGCTTTCTCCGAGTGGCTACCACCGCGCCAACCTCTACGAGGAGTTTATCCACGAGCT  
GGAGCGCACCCGGATCTGCCGGGCAAGCTGCCGACGGGTGTTTCGTGTTTCGGCATCTCGGCGCTGCCG  
CCGCGCTATGTGGAGGCGCTGCTGGCTCTCGGCAGTCGGCCGAGGTGGAGGTGCACCTGTTTCGTACCA  
ACCCCTGCCGCTACTACTGGGGAGATCTGCTGGATCGCAAGACCCCTGGCGCGCCTCGAAAACAAGCTCAA  
ACCCGGCACCGATATCGAGACGTTGCAGGGCCCCGCCAACCCGCTGCTCGCCTCCATGGGCAAGCTGGGG  
CGCGACTACCTGCATCAGCTGATGGAGCTGGAGGTGCCGCAAATCGAGGCCTTCGTGATATCGACGAAG  
TGGATGGCAAGGGCAATGTCAGCCTGCTGCGCGCCATCCAGAAGGATGTGCTGGAGCTGGCCGAACGGGG  
CGCCGGTCAGTTCGATCTCGACAGCAGCCACCACAAGAGCCCGATCGATCCGGCGGATGGATCCTTGCAG  
ATCCACGCCTGCCACGGCCCCGATGCGCGAACTCGAGGTGCTGCACGACCGGCTGCTGGCATTGTTTCGAGC  
AGGACCCGACCCCTACCCCCGAAAGATGTGGTGGTGTGATGATGCCGGATGTGAACAGCTACGGCCCCCTACAT  
TCAGGCGGTGTTTGGTTCGCGCGGCCAGATCCCCTTTCGCGTCTCGGATCGGGCGGCGAGTCAAGGAGAGC  
CCGCTGCTGCAAAGCTTCCCTCGCCCTGCTCAGGCTGCCAACGCCCCGTTTCGGGGCAGGGGAGCTGCTCG  
CCATTCTCGAAGTGCCCGCCGTGCTGCGCCGCTTCGAGCTGGATGACGACGAGTTCAACCAGCTGCGGGT  
CTGGGTACAGGAGACAGGCATTTCGCTGGGGGCTGGATGACGGCTATCCCGTCCGTTTCGATCTGCCGCC  
ATGTCCGGCAACAGCTGGCTGTTTCGGTCTGCGCCGATGTTGCTCGGCTTTGCCATGGGGGATGGCGAGC  
CGGTGGCGGGCATTCTGCCCTACGCCGATATCGAGGGGCGAGGGGCTGGCACTCGGCAAGCTCGCCTG  
GTTTGTGATTCGCTGGCCGAATTCTGCCCGCCTGCAACAGGCGCAGCCGCTGGCCGATTGGAACGCC  
TGCCTGCTGGCGCTGCTGGAGCGCTTCTATCTGGCCGACGAGGATGAAGAGCGTCAGCTCCAGCTCATTC  
GCAGCCAGCTGGCCGAGTGGCAGACCCGGCTTGGCGAAGCCCGCTTCGAGCAGTCCATCACCGCCGATCT  
GTTGCAGGATTATCTCGGCAGCGTCTGGGGGAGTCCCCTCCAGCCAGCGCTTCCCTTGCCTGTCAGGTC  
AACTTCTGCACCCTGATGCCGATGCGCTCCATCCCCTTCAAGCAGGTCGCTGCTCGGCATGAACGACG  
GCGTCTACCCGCGTACCCTGGCCCCCATGGGGTTCGACTTGATGGCGGTGGCGTTCGCGGGCGGGGATCG  
CTCCCGTTCGTGATGATGACCGCTACCTTTTCTTCGAGGCGCTGCTCAGCGCCAGCAGGGGCTCTATATC  
AGTTATCAGGGTTTCAGCGCGCAGGACAACAGCGACAAGGTGCCCTCGGTGCTGCTGGCGGAGCTGCTCG  
ACTATGTGCGGCAGGGCTTTGTGCTGGCGGGGATGAGGATCTCGACGACGAAACCTCCGGCAAGCGGT  
GCTCAACCACCTGATGGTGGCGCACCCGCTCACCCCTACAGCCGCAACTACTTCTATCCGGAGCCGGGT  
TCACGCCTCTTTACCTATGCCCGCGACTGGTTGCCCGCCCTCAATCCGGTTCGCGGTTCGCGCCAACCTTC  
AAAGCGGCGAGCTGCCTTTACCTCCCAGATGGGGCAAGGAGCAGGGGCTGGAGCTGGCGGAGCTGCTCG  
CTTCTATCGCCAGCCACCAATAATTTCTCAACCAGCCCTCAAGGTGTGGTTTGAACGAAGCC  
AACATCGAGGACAGCGACCCGTTTCGAGCTGGATGGCCTGCAACATTATCAGCTGAAAGATCTGCTGCTCG  
ATGCCCATCTGGCGGAAGGTGAAAGTACCGAGCGTCGCGAGCGGTTGCAGCTTACCGGCCTGCTGCCGCA  
AGGGTGGTTTCGGCAGCCTGCTGCTGGACGATCTGGATGCCGAGATGGGCAAGCTGGCGGATCGGCTGCGG  
CCATGGGTTGCTGCCAATGAGTCAGAAAAGCAGGCGGTGGAGATCGATATCTCCCTCACTCAGGGCCAGC  
TGCAAGGGTGGATCGACACTCAGAAGGGGCGCTTGTGGTGGTCAAGCCCGCAGCTTCAACGGCAAGGA  
TCTGCTGCTGGGCTGGATCCAGCACCTTGCCTCTCATTTAGCGACGCCCCGGCGACACCCTGCTGTTTC  
GACGCCAAACAGAGTCTGCGCCTGCCTGTACTGCTGCCGACGAGGCGCGGCCAAGCTGGCGGCGCTGG  
TGGCGTCTGGGCGCAGGGGATGAAGCGGCCGCTGCCCTTCTTCCCAACACCGCTGGGATTGGCTCAA  
GACGATCGAGAAGGATCCCGACAAGCCGGAGGCGGCCGACAAGGCGGCTCTCACCCGTTTCAACGGCGGT  
TGGATGATCAATGGGGAGGGGCAAGATCCTTACGTTGCCCGCTGCTTCCCGAACTTGATGACGAGGTGC  
TTGGTCAGTTGCAGGCGCTGGCCCCGGAACACCTGACCCCGCTGCTCAAGACCATGGAGGAGCTGAAATA  
ATGGCTAACCCGCTCAATACATTGCGTTTTTCCCTCCATGGTGAACGACTGATCGAAGCCTCCGCCGGTA  
CCGGCAAGACCTACACCATCGCCGGTCTCTACCTGCGGTTGCTGCTGGGTACAGGCCCGTTTCATTGAGGA  
GGGTGCCGATGCCGGTCAGCCCAGCGCCACGAGCGGCCACTCTCGGTGACCGAGATTCTGGTGGTGACC  
TTTACCGAAGCGGCCACCGCCGAGCTGCGCGGGCGGATCCGCGCCCGCATCCACGAGGCGCGCTCGCCT  
TTATGCGCGGCCATAGCAATGATGCCCTGCTGGCCAACTGCTGGCAGAGGTGGAGGATCACGAGCTGGC  
GGCCCGCCGCTGCTGGCTGCCGAGCGGCAGATGGACGAGGCGGCGGTCTTTACCATCCACGGCTTCTGC  
CAGCGGATGCTGAAACAGAACGCTTTCGAGTCCGGCGCCCTCTTTGAAACCGAATTTCTCACCCGACGACA  
GCCAGCTCAGGTTGCAGGCGGTGAGCGACTACTGGCGCGCCGAGTTCTATCCGGTGGATAAAGCCCTCGC  
CAGCGCCGTGCGCGGCTCTGGCCGAGCCCCGCCCGCTGCTGCGGGAGATGGGCAGCTGGCTCGACAAC  
AGCGAGCTGGAGATCCACCCGCGCTGGGGGACGAGACCCTCGCCGCCCGCCATCAGGCGGCCATGAGCC  
GCATCGCTGCGGTGAAGAGCGAGTGGCTGGCGCAGACGGACGAGATCCGCCGCCAGACGGATGGGCAAGT  
AAGCCGCTATAACCGCAAGAATACTCGAAGGGTGGCTTGCCAAGATAGCCGACTGGGCGCAGGACGAGAGC  
AGTGGCTACGCCATTTCCAAGGAGCTGGAGCGCTTCGGCCAGACGGTCTGGAGGAGAACCCTCAAGAAGG  
GGGGCGGGTGGCGACCCTGCCGCTGTTTCAGCCAGATAGACGAGTTGCTGGCGAGCCGCCCGGTATTTCG  
GGATCTCATCCTGCAACGGGCGCCAAAGTAGTGCAGCCGGATGCAGGCCAGCAAGCGGCAGGCTCAT  
CAGCTCTCGTTTTGATGACCTGCTTAAAGACCTCGACGGGGCGCTCGGCTCCAGCTTGGGCGAGCGGCTCT  
GTGAGCGCATTTCGCGCCACCTACCGGGTGGCGATGATCGACGAATTTTCAGGATACCGATCCCCAGCAGTA  
CCGCATCTTCCATCGCCTCTACGGCGGCCACACAGACACGGCGCTCTTGATGATCGGTGACCCCAAGCAG  
GCCATCTACGGCTTTTCGCGGCGCCGACATCTTTACCTACATTCAGGCGCGGCGAAATGTGAGCGCCACT  
ACACCCTCGGGCGCAACTGGCGCTCCAGCAGTGCCTGGTGGGGCGGTCAATGGCCTGTTTCGAACGGGC  
CAAGGATCCCTTTATCTACGAAGCGGATATCCCCTTCTGCCGTGGAGGCGCAGGGCAAGAGCAAGGCC

CTGCTGCTCGATGGCGCCACCGCCCCCTGTGCTCCACTGCTGGCAGCTGAGCGGCCAGCCCACCTTCAATC  
GGGGGGATTACCAGAGCAAGATGGCCCCGCGCCACTGCCGCGAGATCCACCGCTGCTGACCCTGGCCCC  
CGAGGGCAAGGCCTCATCGGTGACAAGGCGGTGAAGGCCGAGATATCGCCGTGCTGGTGCACACCGGC  
GCCGAGGGCAAGCTGGTGCAGCAGGAGCTGGCGCGCCTCGCCATCGCTCCGTCTATCTGTGCAACCGCG  
AGAGCGTGCTGGAGCAGACGGAGGCTCGGGAGATCCTGCTGATTTTTGCACGCCTGCCAGAACCCGAGCGA  
GGAGCGCAGCCTGCGGGCGGGCGCTCGCCACCGGCCTGTTTCGATCTCGACGCCAAGGCGCTCGATGGACTG  
GCCAGCGACGAGCGGGCGGTGGGAGAGCGCGGTGCAGGAGTTTATGGAGTACCGCAAGATCTGGCACCGCC  
GCGGCGTGCTGGCCATGCTGCGGGCCCTGCTGCACCGGCGCAATCTCGCTCTTCGCTTTTGGCGAGCCC  
CTATGGCGAGCGGGCGGTGACCAACTTCCCTCCATCTCGGCGAGCTGCTGCAACAGGTGAGCAGCGAGCTG  
GATGGCGAATACGCCCTGCTGCGCTGGCTGGGGGAGGCGGTGAGCCGCCAACGGGCAGGATGCTGAGC  
AGTACTGCGCCTCGAATCCGAGCGGAAATTGGTGCAGATCGTACCATCCACAAATCCAAGGGGCTGGA  
GTACCCGCTGGTGTTCCTGCCCTTTATCTGCAGCCACAGAACCAGCGAGACCCCGCTCTATCACGAGGCG  
GACGAGGCGGGCAATCGCACCATTCTCGATCTGACCGGCGCCGACTCGTCTCGCAGAAAGCGGACAGGG  
AGCGCCTTGCCGAAGATTTGCGGCTGCTATATGTGGCGCTGACCCGGGGCGTCTACGCCACCTGGCTGGG  
GCTGGCGCCGGTGGGGCGGGGGCGGGCAAGTTCGAGAAAGACCGATCTGCACCACACCGCCATCGGCTAC  
CTGCTGCAAAAGGGCGAGGAGGGGGATGCGCAGACGCTGGCCACCGCTCTGACCGAGCTGTCGAGGGCGC  
TGCCCGGGGTGGCCGTGGTGGACCCCTCGCTCACCCGTCCGGCCCCGCTGCCGCCAGAGGAGGAGCAGCT  
GGGCGAGCCACAGGTGCGCCACTTTAGCGGTTCCCTTGAGCGGGACTGGTGGATCAGCTCCTACTCCGGA  
CTGGCGGGCGAGGGTACGGTACAGTAAGGGCGTACTCGCCAATCCCGGCTTCGATGACGAGGTAGTCA  
CCGAAGCAGCCGAGCGCTGGCGGGCGGAACAACCGGACGAGGCGCCCCAGCCCTCCATCTTACCTTCCC  
GAAAGGGGGCGCGCCCCGGCACCTTGTGTCACAGCCTGTTCGAGACCATCGACTTTCAAAGCGCTGGTGGC  
GAGCCGCTGGCAGAGCATATCGCCAGCTTGTGCTGCAAGACGGTTTTGACGAGAGCTGGGCCAAAGTGC  
TGCAACAGCAGGTGGAGGCGGTGCTGGATACCCCGCTCGATACCGGCTTTGGTGATCCGGTGGCGCTGCG  
GGATCTGGCCCCGAGCGCAACAGGTGGAGCTGGAGTTCTTTCTGCCCATGGGTGCGGTGACAGCACCG  
GTGCTGACTGCGCTCTGCCAGCAGCACGACCCGCTGTGCGGGGCAACAAGCCGCTCAGCTTTGCCACCG  
TGCAGGGGATGCTCAAGGGCTTTATCGATCTGGTGTTCGAGTGGCAGGGGCGCTGGTATCTGCTCGACTA  
CAAATCGAATCACCTCGGCATGAGCCCCGCGATTACAGCCGTCCGGCGCTGGAGCGGGCGATGGCCGAG  
CATCGTACTGAGCAATAACAGCTTACTCGTGGCGCTGCACCGGCTGCTCACCTTGCAGGGGGCGAT  
GCTACGACTTCGAGCAGACTTTGGCGGCTTTTCTATCTGTTTCTGCGCGGCATGCCCGAGGGGGGCAT  
TTTTCCATACTCGCCGAGCCGTGAACTGGTTCTGGGGCTGGATAAGTTGTTTCTGAGGGCAGTGAGCTG  
CCAGCTGCGGGATCCCAAGTATTGAACGAGGTAGAAGCATGAGCGGCACCATGATCAGCACCGCAACCAG  
CGCAATGATGGTTGAACGGCTCAAAAACACTGGCGCTGGCTGGCCGTATCCGCCAGCTGGATCTGCAATTT  
GCCAAGCTGGTGGCCGATCTGGGCGGCGAGCCCCGAGCTGGTGCTGGGGGCTGCGCTCACCTGCTTCGAGC  
TGGGGCGCGGCCATGTCTGCCTGCCCTAGAGATGTTGGCGAGTGGAGCTTTACGGCCGTTCCGGGCTGGA  
TCCACAGCAGAGCCGATCTGCTGGGGATCTGGCGGATCCTGCCGCTGGCCGCCCTGTTTGCAGAG  
AGTCCCCTGGTTGGTACCGAACAGGATGAGGGGCTCGCCCCGCGCTGGCCACTGCGGCTGTGGCACGGGC  
GGCTCTATCTCACCCGTTACCACGATTTTGAACCTGGGGGTGGCCCGCTATCTGCGCGCTTTGAGCGAGCG  
CGCCGAATGGCCGGAGATTGCTCCCGCCCTGTGCGGTTGTTTGGCCGCGACTACGGCCTCGTGTGGG  
GCGCTGCTCAAGGCCCGCCTCGCCCCGACTTTTTCGGCCCGCCATTTTATCGAGAAGTATCTCGATCTAG  
TGTTCCCGAACGAAGTGGACTGGCCCCGCATCGAAGGGCTGCTGGCCAGCGCGCAGGCGGCGAGCGACTT  
GAGCAAGCTGGATGCGCTGGTGGCCGAGGTGCTCTGCTGCAACGGCCAGAAGCTGGCGGGCGGCCACCGCG  
GCGGCGCGCCCCCTTTGCGGTCTCTCCGGCGGCCCCGGTACCGGTAAGACCACGACTGTGGCCAAACTGC  
TCGCCATTCTGGTGGAGACCGGCCTGCAAGCAGGCAAGGCCCGGCGATCCGGCTGGTGGCCCCACCGG  
CAAGGCGGCGGCGCGCCTTACCAGAGTATCGGCTCTGCCCTGCAGGCCCTGGATCTGCCCCCGAGTGG  
GTCGAAGCGATCCCCACCGAAGCGGGCACCCCTGCACCGGCTGCTCGGGTCAATCCGGGGCGCAGCCAGT  
TCCGCCACCACGCGGGCAACCCGCTGCACCTCGACTTCTGTTGGTGGATGAGGCCCTCCATGGTCCGACT  
GCCGATGATGGCGCGCCTGCTCGATGCGCTGCCGAGCCACGCCCGCTGATCCTGCTCGGCGCAAGGAT  
CAGCTCGCCTCGGTGGAGGCGGGGGCCGTGCTCGGCGATATCTGCAGCTTTTATCGAACAGGGCATCAGCC  
CGGCGCAGGCGGACTGGCTCTCCCGCCAGACTGGCTACCGCTGCAGGGCACGCCCCGCGGGGGCCCCGGT  
GCGCGACAGCCTCTGCTTGTGGCCAAGAGCTGGCGCTTTGATCAGCACTCCGGCATCGGCCAGCTGGCG  
CGCGCCTGCAACAGCGGCGATGCCGCGGCGGTGGAATCGGTCTGGGGCGCAGGATTCGCCGATATCAGCC  
TGCACCCCTGGGCCGGGAGGCCTACGATGCCCTGATTGCCAGGGGGTGGCCGTTTATGGCAGCTATCT  
GAAGGCGGCCCCGCGGGGGAGGCGCCCCGCGCGCTGTTCAAGGCATTC AACAGCTTCCAGATCCTCTGC  
GCCCTGCGTGACGGCCGTTCCGGGGTGTGGGGCTAAACGAGCGGCTCGAACTGGCCCTGTACGGGCTG  
GCCTGATTGACCGCGACGGCGACTGGTATGCCGCTCGCCCGTGGTGGTGGTGGTGGTGGTGGTGGTGGT  
CGGCCTCTATAACGGCGATATGGGGCTCTGCCCTGCCGATGAAACTGGGCGGCTCAAGGTGTGGTTTGG  
CAGCCGGACGGCACCTTGGGGGCCCTGTTGCCAGCCGCTGCCGCCACGAGACGGTCTACGCCATGA  
CCATCCACAAATCCCAGGGCTCGGAGTTTGCCCATACCGTACTGGTGGTGGTGGTGGTGGTGGTGGTGGT  
GCTGACCCGCGAGCTGGTCTATAACGGCATTACCCGCGCAAGGCGGCTCGATCTCTACTGCGATCGT  
GCCCTGCTGGCACAAGCGGTACGGAAAAAGACCGAGCGTTATTCGGATTGGCGGAGAGGTTGGGGGTGT  
GATTGATGGCGGCGGTAAAGGGATTTACCGCAGTTTCAATTACGTTTTAGTAACCTGAAGCCGAAATTAAT

AAATGAATAGGGGAATATAATATATGAAGTATGAGAAAACCTAAAAGCTCTTTGTCGAAGTCCTAAAC  
TGACAGAAGAACAAATTCAATTAACATTCAAGAAGCGGGATTTTACTGATGTTGAGGTGTCGAGGGATAG  
TTTAACTCGAGCTGGCTTTAATATTTAAAACCGATGAAGGGTTATTTTATGTAACAGAACGCCCTATATCA  
TATATGAACAAGCGATGGGGAAGGGTGACGTCCTCCAACAACGTATGTTGAGTTTATCTATACCTGTAC  
CATTATTTCTTGGAGAAGGGGATATTGTAAGTGATATAAGTCGTATAAAATAAATCAAATAACCCCTCATAA  
GTCGGCCAGTAAATGGTTGCATGAAAACCTTTACCCCAGAAAGTATTTGCAACATATTTCAATAAATATTTT  
TCTGTAAGTGACTCATTAATCGAGTATAAGACAATAACTTTGAGGCTATTTGAGGCCATCATATGGGAT  
TAGACCATATAGCGATAATGTCTCTTTTTCTGTTTTTGAGGCTGGATTAAGGAATGTTCAAGTTAGTAT  
TCTAAATCAAGGTGTAACAATGTAAGTGCTGTGGGGTTTAAAAAGGCTTTAAACAACATAATATTAAT  
CATGGTCGAAAGCAAATGTCTAAATATGACTGGCATCCAGGGGAGGGCTATAACAGTGAGGTTGAGATAG  
ATTTTTTAAACGCATGTTAACCCACAATGTGATGTAATAAATGCATTCAGAAATTTCTTTCTTGGTCTT  
ATACAAGCCAAGTCGGGCAGATGGGAAAATGAATGGTTTTAATCGACACCTAATTTATGCATCTTTTTAAAA  
AATGATTTTTAATGATCCATCCAACCTCCCTAGAAATAACTTTGGCACTAACACATTATGTTTTATTGAAA  
GTTTTGAAAAATGAAAAGGTTCTTTTTCTTGGCCGGGAATTGATAAAAGTCGATATGGACTTTGGTGGATA  
TTTACGTAAGTTAACAGATGTGGTTTTCATATCTCGCAGAAAAGTTACTAGACTCACTAACCCACATGTGCA  
TATTAATCGACAAATAACAAATTTATTTTCATCTTGATGTTGGAATTAGCGTATTTCCGGATGTTGGGCT  
TCGCAGGCTCAGCCACAACCTACCGATTGTGTAGGCTGTGGCTGAGCGTAGCGAAGCCCAACGTTTACCG  
CGTAATTTCTTTTTCTCCCTCATCCCGACCTTCTCCCGCAAGGGGAGAAGGGAGGTTTGGCCCC  
GTGGCTATATCTCGAATTTACACGCGATTGCCAACACCATATCCCGATGCTGCTTTATCCCTCTCCCT  
CTGGGAGAGGGCTAGGGTGAGGGGCGCAAGTTGGCACAATGCCAATTTTGGCCGCTTCGTGAAATCCGGT  
AGGGTGCAAAGAACGAAGTGAATTGCACCGCTGCTATTTATCTGCCACAAGGTGTCATGCGCTGCGCTTA  
TTACACCTGCATCCAACCCACACACGACAGGATGTCATTGCTTGAGACTTGAATTTAACACTATCGATC  
TGGATCGCGATTACGAACCTCTGTGTTACAGGCGCGCAGGGATGCCATTTTTTGCAGCTTTCATACCCATGA  
CTGCTTTGCCGACTTTATCGACGGTTATCGGGAGCGGATCCGCGAAAAGGCTGGGGCAAGCGCAATGGCAC  
TACCTCCATGTCTGGGCAGGTGAACAACGGGTGGGCCAGCTGGAGTTTCGCAGTTTTTCCGATGAGCCCC  
AGACCGGTTATGTGCAGCTGATTTATCTGTTCCCAAATATCGTGGCAGCGGTCTGGCTGCCGAGTTGCA  
GGCATATATCCCGCAGCAGTTGCTGGGGGCGGGTTGTAATGGGCCATTCTCTCCGTGAGTCGCACCAAT  
GTGCGGGGCTTGAATCATTACCGGCGCTGTGGCTGGGTATTTCTGCGCCCCAATCCGAAACATCGGGAGA  
CGGATTTTTTATCGACTGACTCTGGCCGAGTGACCTCTGTGGTGGCTCTGGGTATCCCCCTCATTTTATTC  
CCATCCCCCAAATGGCTGAATCGTGAGTTAAATCCGGTAAATGGGGCGCGCTTGAGCCACACTTATGGCC  
ACCCTGATTCAGCCTGTGCCGTGAGTGGCCGATAACCGGGGAAACGTGGTGCGGTGGGGTTCTGGCTGAC  
AGATCTGTTGCAATATGCCAAGGTAGCGCCTCACGACAACAGCGGATTTCCCGTGGTGCGCGGGGCGG  
AAGAACAAGGATAACTGCTATGGTGCAGGACAGTGACACGATCAGGATCTCGGATGTCAGCGAGGCCGTG  
GTGCATGGCATTCTGGAGGTGACCAGCGATGGCATCTGGGATTTGGCATGCCAATACCGGTTTTGTCTATC  
GCAACCCCGGCTGGTACCGGATGCTGGGTTACGAGCCTCACTCCCTCGGCAATACCGTCTTCACCTGGGA  
GAACGTGATCCACTCCGACGATCTGGCGGCGGTGATGGCGAAGTTCGATCTCTGCCTGAGCGGCAGCGCC  
CATGAGTATCGCGCCGAGTACCGTTGCCGCTGTGCGGATGGCAGTTACCTCTGGATTGAGGATTGCGGCC  
GCATCATTGAGCGCAATCCCAGCGGTCTGTGGCGCGGATGATCGGCGCCGCCAGCCGCTATCGGCTGGA  
GCGGGCGTTGAGCTGGAGTGCGAGCGGGCGCGCCGCTTCCATCAGCCGTTTACGGTGATCGCCATGGAT  
GTGGACAACCTTCAAGCAGATCAACGACAGCTATGGCCACAATGCAGGGGATCAGACCCCTGATCAACATAG  
TGGCGCTGGTGCGCCACCATATCCGCGAGATCGATCTGCTGGCCGCTGGGGTGGTGACGAGTTTATGGT  
GTTGCTGCCAACACCGGCCCGCAGGATGCGCTGGTGGTGGCGAGCAAGTTTCAGGCATTGATGGCGAGC  
GAGCCCATTTGCCCCCATGCGCCCGCTACCATGAGCTTCGGGTTGGCGGAGTATCAGCAGGATGAGCAGA  
AGGAGAGCCTGATGGTGCGCGCCGATCGGGCGCTCTATCAGGCCAAGCAGCTGGGTAAAGACCAGATCTG  
CTAACCGCGCAGGACGCGAAAGAGAGCAGTAAAAAGGGCCGAGGTTTGAACCTGCGGCCCTTTTGCAT  
TGTTACTGACGCGCGCAGCTTAGAAGTGGTAGCGCAGCCCCAGCTTGAAGGTATCCAGAGAGTAGTGCT  
CTTACCCAGGCTCAGGGCGTCAATTTGGCGCTCGTAACCGATACCGGCAGAGAAGTGGTCTGTAAGGC  
GTAGTCCAGACCCACTTCCAGATTGGGGTGACCTTGCTCTTGGTTGCGCTCTTGCTTACCTGATCGCTG  
AAACCGAGGAAGGTGGCGTTGCCGACAACCTCCAATTCGGTGCGGGTGTAGGCGATACCCGTTTTGGCAT  
AGGCGCTGAAGCCCCAGGCCAGCGCTGGCTCAGCTTGGCTGCCAGGCTGATGCTGCGGGTTTTCGATGGT  
GGTGTGCGCAAGCCGCTTGAATCGGGGAGGTACCCAGGTCAGCTGATCCATCTGTTGGGCGTGCAGG  
CCACCTTCAACCGCCAGCCAGGGTTTTGAAGCTGTAACCCACGATCAGGCTGCCGCCGTCGAGCTGGTCTG  
CGATCACTTTGGCGTCATAGGCGCTTTTGGCTGCACCATCGAGATCCATCTTGGAGGTAGTCAGATCCAG  
ACCTGCATAACCAGCCTTACGATGGGCGCCGCCATTCATGGCCAGAGCAAGCAGGGAGAATGCGGCAATT  
TTATTAACCTTGTTTCATGGATAAATAACCTTGTGTTGCGTGAACGCTGTGATTTATATTGCTCAATCC  
ATGAAGATTTTTATATTTCCGTCATTGCTCTGCTTTACAGAGGGGCGCAGTATAGTCAGCACATTTCT  
GAATAACAAGAGAGTGATTTCCCATTTCTAAATATGACTGGCTGTAAGCAGGGTCATTTTGTTTAAT  
AAATGGTGTATTAGAGTTTTAGCTTTATTGAGGTTTAAATAATTAACCTGGTGAGGCAAATGACAGGCTG  
CGAGTTCGATTTTATTCTATGTGATTGATTTGTATCAGCATTAAATTTTTTATTCGAGCGTGGCCGTGAT  
GAGTTGTCTAAAAATTGACATCTCAGATGTCACTGATTTGGCATCAGGTTCTTTTCGATGATTTTTTGAAC  
CCATCACAAGGTGAAACCGTGAGAAAAAATCTATCTTTTTGCTGTTTTTGTCTTTTTGGAGGTTTGG



GATTGTTCCCTATTGTGGCTTTTTGGTGGTCTTTTGGAGGCTGTTTATGCGTAGGCCATGTTGCCACCAGAT  
ACGCGGATGGGTTCTTGTGGGTGACTTTTCATTTCTCCCGGCAGCACTCGTTGGGGTGGCATGATGTGTG  
ATAAGCAGATATGGGGCGTGCGGTCTGATTAATTTTGTGTTGCTTATATATAACAAGCCATTTAAAAGATAG  
GTTTTTGGAGTTTTAAATAACTTTACTATATTCGTTTCTATATTTGGCGAAGCTTTCCAAGCAAGCCATT  
TAAATATATTGAATGGCAATGAAACGCTATTGATGATCGTTTAGGATACCTTGCCAGAGAGGTCTGATG  
GCTGGCGCATCGGTTGGCGGGCGGGTGGCCTGTGACACTTCCCCCTTGCCGGGGCCCTTGACCTGACCTGCG  
AATTCAGGGAAAAGAAAAGGGCGGTGCTATCAGCGCCGCCAATGCCAGGAAAAGAGAAAAAACCTTACGG  
TTTTAAAAGATAAAAATTTGGAAGCAAACAATCGATTTCTCAACCAGGAAGGGTCTTGAATTCGATACGTT  
TCGATTATGCGCGATGTTCTATGCAGCACTAGCAAAAATGTTTGCGGGTTGAAAGATATGCACTGTCTGGT  
GTCAGATTTTGCACCTCATCGTTCAACTGGTCTGTCTGATAAGCGTTGTAGGCGATTTTTTCTCTAGG  
CTGTTTTTTCGGTGTCAATATCTGAGCCTTGAAGGTAAAAACAGGTGAGAAGCTGACTCGGCATAACCAT  
GCAATGAAAGTGCATAACAAGGAAGAGTGGCATGACCTACAGCCAGACCCCTGGCCAACAATATTCTCGA  
CACCTGAAGAAGACCCTGACCGACAAGGGGATCCGCTATCAGACCCCTGGCAGAAGCCATGGGTGTCTCC  
ATCGCGACCGTGAAACGGATGATGAACAAGCCCTCCCTGCCGTTGATACTCTGCTGGAGATCTGCCATC  
TGGTGGGGCTCTCGTTGAGGAGTTGCTGGATCGCACTCAGGACGCCAGAGCCCGCCGCGCCGTCTTCAC  
TCAGGAGCAGGATGAGGCGTTTTACAACGAGCCGGGCTCTACGCTTTCTCGCCAATATCTTCTGGCGC  
GACAAGACGCTGATCGATCTGAAGCGGGAGTACGGCCTGACCGATGCCTCCTGTACTCTATCTGCGCA  
AGCTGGAGAAGCTTGGCATTTCAGCTTGGTATCGACAACAGTTACCCTTCTGATCAGCGAGCGGAT  
CAGCTTCGAGCAGCACAGCCGTTTTGCCCCGCCAGCAGGCGCGGCAGGCAATGTCGGTGTGGGGGAGTAT  
CTGGTGGAGAACATGCACAAGTCAACAACATATATGGCGCTCTGCCAGCTGCACCTCAACGAGGGGGAGG  
CGATGGCGCTGATCGACCGGATGAAGGAGTACTGGCATCAGGAGATCAAGCTCAACCGCCAGCCATCGG  
CCAGCAGGAGCACGCCAAGACCTACACCATGTGCTGCAACTGGCCGACTGCGGGTACCAAAGCTTCGAC  
GACATGATCCCCAATATCGACAACCTGATCCCGGGCGGATCCTGCGGGATCCGTCTCTGCTCGTGAATGA  
GAGTGGTTACTCTGCCAGTTGCATGGGTTGCGCTTTGGCGATGATGGGTTGCAGCGCCCGGGTATCGAGA  
CAGATACGAATGGCATCCGGCCGCCAGTGTTCGATATCGCAATCCACCAGAGCACCCCGCTCGTCTGATG  
TGACCCGCACCAGCCGTAGCACCCGCGCTCCCTCTGCCAGATTGAGGGCGCGGGCGATGGCGCCGCGCGC  
TGCCGAGGGGGTATCTCGAGACTCGCTCCACCCTGGCCTATGCCATAGCGCTGCTGATAGAGCTCGGTG  
AGGGAGCTGGGACCGCCGCGCTGGCGATATCGGGAAGCGGCTCGCCAGCAGGTGGTGGTGCATGGA  
GCACAGGACGGCCGTCGATCAGCCGCTGGCGGGGATCTCATAAAGTGGGGTGAAGGGTTCCAGCCCCAT  
CCAGCGGCACAGTTGCTGCTGGCAAGTTGCTGCCGTTGGGCCAGCACCCGGGTTTTGCGCGGTGCGCTGC  
TGCTCGCCAATCCACTGGTGAAGTGGGTGTGGATGGCGGGATCGTAGGTGAGGGCGGGGCGCGCCACAA  
ACCAGCCGCGCCGCTCTGCTCGGTAGATAAAGCCATCCGCTTCGAGGCTGGAGAGCGCTCCTTGATGGT  
GATGCGGGTGGTGGCGAAACGCTCGCTCAGGGCCGTTGCGCGGGCAGCTGCTGCCCGGCCCCCAATTGG  
CCGCTGCCGATATAGCGGCGCAGGGTCTGGCAAATCTGTTGCACTTGGAGGAGACGCGGCCATCGGCCA  
TGCTCTGTTGTTCACTCTCTGCTCGCTCAATCTCGGCTCGGTCACACTCTTGTCCCTGTTGCTTATTCA  
GAAGGCGGATGACTGGAGTAGTCCAGCCTCACTCGGTTTCAAGTTGTAAGTGTGTGGATGACAGCGCC  
ATGACAGGGTGAATTGTCATCAAACCTGCCATTAAGCGCCCCGCCACCGTCACAAATCCCTCTAGCATCC  
CTCTCGAACCTTAACTGACCTAGTCCAGAGGGATGGGATGATGAAAAGCGTGATCGCAAGTGCCTGGCC  
ATGGTGGCCATCAGCCAACCGTTGTTTGGCCACAAATAGCTATGCAGCCGAAAATATCGCGGATCTCGAAA  
AGGCCGCCCGTGGCGAAGGCCAGCTCCACAGCATCGGCATGCCCAGCAGCTGGGCAACTGGAAGGATAC  
CTGGCAGCAGCTGGGCAGCATCTACGGCATCAAGCATCAGGATACCGACATGAGCTCGGGCGCAGGAGATC  
GCCAAGTTCGCCCGCCGAGAAGGCCAATGCCACCGCCGATATCGGTGACGTGGGGCGGCGCTTCGGTCCGG  
TTGCGGTCAAGCAGGGTGTACCCAGCCCTACAAACCTCCACCTGGGCTGATATTTCCCAACTGGGCCAA  
GGACGCCGACGGTCACTGGATGCTGGCCTATACCGGCACCATCGCTTCTGATCAACAAGGATCTGGTC  
AAGGCCGCCCCACCAGCTGGCAGTCCCTGCTGGGTGGCGACTACAAGGTGACCTGGGTGATGTGGGCG  
TAGCCTCCCAGCCAAACAACGGTGTGCTGGCGGGCCCTATGCCACCGCGGCAGCGAGAAGAATCTGAA  
ACCTGCACTGGAGCTGTTGCGCCAGCTGGCCAAGCAGGGTCTGCTCTCTCCCTGAACGATCCCACCATCGCC  
AATATCGAGAAGGGCGAGGTGGAAGTGGGTGTGCTGTGGGACTTCAACGCCCTCAACTACCAGCAGCAG  
TCGACCCCAAGAAGTTTGGATGTGGTGATCCCGAGTGACGGTTCAGTCATCGCCGGTTACACCACCATCAT  
CAACAAGTGGGCCAAGAACCCCAACGCCGCCAAACTGGCCGTTGAATACATCTCTCCGATGCCGGTCAA  
ATCAACCTGGCCCGCGGCTATGCCCGCCGATCCGCAGCAACGTTGCGCTGCCGGATGACGTGAAGGCCA  
AGCTGTTGCCAGCCGAGCAGTATGCCAAGGCCAAGCCGGTGCAGGATCACGCCCTGGGAGCAGAGCTC  
CAAGGCCCTGCCCGCCAGTGGCAAGAAACCGTCATGATCAACATGCAGTAAGGGAATCCAGTGAACAC  
AAGGTGATAGTGGTACTTGTGGATGGCCTCTCTGCCGGGTAGCCCATGGGATGGGCTACCTCGCAGGCA  
TGGTGGAGGCGGAGCGCGCCTCTATACGACCCCTCAGCTGTGCTTGGCATCCCTCTCCCGGCTCTCTA  
CGAGTGCATCCTGACCGGTGTACCGCCGGTGGCGAGCGGCATCACCCACAACGGGGTGAATCGTCTCAGC  
CTGCATGACTCCATCTTCCATCTGGCCCCGCGCCGCGGGTAAACGCACCCGAGCGGGCGGCTACTACTGGG  
TGAGCGAGCTTTACAACAAGAGCCCTGGCTGGCGGGCCCGGATCGCTTTACCCACGATGAGCAGCTGCC  
TATCCAGCACGGCTGCTTCTACTGGGATGACAACCTACCCCGACAGCCATCTGCTGATGGATGGCGAGTGG  
CTGCGCAGCCAGTACGATCCCGATTTTCTGCTGATCCACCCGATGGGAGTGGACGATGCGGGCCACAAGT  
TTGGCCTCGATTCCCGCCAGTACCGCAATCAGGCACGCCGGATGGACAGCCTGCTGGCCGATCTGCTGCC

CCATTGGCTGGCGGAGGGGTATCAGGTGGTAGTCACCTCGGATCACGGCATGAACAACGACCTGAGCCAC  
GGCGGCACCCTGCCCGAAGAGCGCACCGTGCCGCTCTGGCTGTTTGGCGATGCCTTTATCGAACGCTGGC  
CGGATGGAGTGGTGATCGCCAGACCCAGCTCTGCGCCCTGATGGCCGATCTGCTGGGCATCCCCACGA  
CAAGCCGGCAGCGCCACCCTGCTCAAGGCGGCCCTTTATGCGCGAGGTGCACTGATGATGCCTGCCACCA  
CCGAGATTCTCGTGGATCAACCCGTGGCAACCAAGCGCAAGGTGCGCCGCCACTGGCTGCCCGCGCTGGT  
ATTGCTGCCCTTTATCCTGTTGATGATCCTGTTCCAGCTCGCCCCCATGGTGTGGGTGCTGGTGGGCAGC  
TTTCAGACCCCGGATGGCTGGGGCATCGACTACTACCGGGAGATTTTGAGCTCCCCCTTCTACCTGCAAT  
CGTTCGGCAACTCGTTGCGTATCGCCGGTATCGCCAGTCTGGCGGGGCTGGCTATCGGTACCCTCGGGGC  
AGCCCGCTGCGCCACAGCGGCGAGCGGGTCAAACGGCTGCTGCTGGCCTTTGTACCATGACTGGCAAC  
TTCAGCCGGGTGCCGCTGGCGTTTCGCTTTCATCATCATTTCTCGGCATCAACGGTGCAGTGACCCTGCTGC  
TGAATCCTGGGATTGATCGACGGCTTCAACCTCTACTCGGGCAGCGGCTTATCCTCATCTACACCTA  
CTTCCAGATCCCCTGCTCGCCCTGCTGCTTCTCTATCCGCTTCGATGCGCTGCAGGATGAGTGGCCGAG  
GCTGCGCGTTGCTGGGGGCGAGCAAGGGGCGAGTATGTGTGGCATGTGGCGCTGCCGGTGTGACGCCTG  
CCCTGCTCGGCACCCTGATCATCTGTTTGGCAACGCGGTGGGGGCTTATGCCCTCCGCTACGCCCTCAC  
CACCGGCAACTTCAATCTGGTGACCATCCGGGTGGCCAGTCTGGTCTCCGGCGACATCTTCTAGAGCCC  
AATATGGCGGCGGCGCTGGCGGTGATCCTGATGGTACTGCTGGGGGTAGTGACGGCCGCCAACCAGTGGC  
TGCTGAAAAAGAGCTATGTGAACAAGGGGCAATCCCATGCATGATTTGACGCCGCGCTGGCCCAAGTGGG  
TGCTGGGTGGGCTGGTTGCCACCCTGCTGCTACCCTGCTGGCCACCTTTCTCTACTCCATCTCCACCCG  
CTGGGGGGCGACCCTGCTGCCGGACGGCTTTACCCTCGACTGGTATCTCAAGCTGTGGGGCGATCCGCGT  
TTTCTGGCGGCGTTTGGCCGAGCCTCCTGGTCTGTTTCGCCACCCTGCTGCTGGGGACCCTGGTGTGCG  
TACCGACCCTGCTGGTGGTTGCCTACTACTTCCCAAAGCTGGATCCCTGGATGAACCTGTTGATCCTGCT  
CCCCTTCGCGGTGCCACCTGTGGTTTTCGTCACTGGGGCTGCTGCAGATCTACGCCGATGGTGTCTGCGG  
ATTATCGGCACGCCGTGGATCCTGATCGGCACCTGGTTACCCTGGTGTCTCCCTTTATGTACCGGGCAC  
TGGCCAACAGTTTGCAGGGTGTGCCGCTGAAAAGATCTGATGGATGCCGCCACCCTGCTGGGGGCAAGTAG  
TCGGCGCGCCTTCTGCTGGTGGTGTATCCCTGTCTGCGCAAGGGGCTGCTGGCGGCGCTGTTTCTCTCC  
CTCTCCTTCTGCTCGGCGAGTTTCGTGTTTGGCAACATGCTGGTGGGACCCGCTACGAGACCCTGCAGG  
TCTACCTCTACAACATGCGCGCCACCTCGGGCCACTTACCAGTGCCTGGTGTGAGCTACTTCTCTGCT  
GACCTGTCTCACTACTTGGCGGCAACAGATTTTCATCGTGTGATCCAAGATGTTTCATTTAGAAGTCAAT  
CAGTTGCATAAATCCTACGGCGATACGCCGGTGTTCGAGGGGATCGAATTCGGCATTCGCAAGGGGAGC  
TGGTGAACCTGCTCGGCCCTTCTGGCTGCGGCAAGTCCACCTTGTGCTCGGGGCGCTGGCCGGGCTCACCC  
GGTGGATGGCGGTGAGGTGCGGGTGGCCGGTGGAGAGATCACCTGGCAGGCGCCCCAGAAGCGGGGCATC  
GGCATGGTGTTCAGAGTTATGCGCTGTTCCCAACATGACGGTGTGGGACAACGTCGCCCTTCGGCCTCA  
AGATGAAAACCCAGCCGGGGCGGAGCTGGCGGCCAGCGTGCAGGAGGCATTTGGCGCTGGTGGAGCTGAC  
CGGTTTTGAGCGCCGCTATCCGGCCGAGCTCTCCGGCGGCCAGCGCCAGCGGGTGGCACTGGCCCGGGCG  
CTGGTGGTGCAGCCGCGGATCCTGCTGCTGGACGAGCCGCTCTCGGCGCTGGATGCCCGCATCCGCCGCA  
GCCTGCGCCAGCAGATCCGCGAGATCCAGCAGCGGCTCGAACTACCACCATCTTTGTGACCATGATCA  
GGAGGAGGCGCTCACCATGTCCGATCGGATCTTCTGATGAACAAGGGATCCATCGTCCAGAGCGGCAGC  
CCGGAGGAGATCTATAACCCGCCCGCCAGCGAGTTTGTGGCGGGTTTTATCGGCAACTACAACCTGCTCG  
GCGCAGAGCAGGGCAAGTTCGCTGTTTCGGCCCCGTTTTTCAGGGCAAGCTGGCGCTGCGGCGGGAGTCCAT  
TACCCTGCTGCCCGCAGGGGTGACCAGCTGCGAACCCAGCCTGCCCGGCATCATTCGTGAGCAACAGCTG  
CTTGGCAACGTGATCCGTTATCAGGTGGAGTGCAGGAGGAGGGCTGTTGACGGTGGACTGCCCTCAACCGCT  
CGGCTGGCGATCTGCTGGCCACCAGGAGTGCCTGACCCCTGGCGGTGGCCCGGGATCAACTCTGTGAGGT  
AGCATGACGCCTCGTTTTCATTTTCGTTGTTACCGCAAGGAGCCCTCATGGCACTGGCACTGTTTGTGATCTG  
GACGAGACCCTGATTGCGGGGATTCCGCCAGCCTCTGGCTGGAGTACATGGTGGCCGAGGAGCTGGCTC  
CTGCCAGCATGATCGCGGAGGAGCAGGCCATGATGTCCCTTACCATCAGGGCAAGATGGATATGCACCA  
GTACATGGCCTTACCCTGCAACCGCTGGCGGGCAAGACGCGCCAGTGGCTCGACTCGTCTTACCCGC  
TTTTGCCGAGCAGGTGCTGCGCGAGCGCCTCTACCCCGAGGGGTGGCGCGTATCGAATGGCATCGGGAGC  
GGGGCGACGATCTGGTGTCTTATCTCCGCTCCGGCGAGCATCTGGTGGCCCCCATGGCGAAGATGCTGGG  
GATGGATCACTGCGTCGCCATTTTGTCTGATGAGGAGGAGGGATGCTGACCGGCCAGACCCGCGGCACC  
CTCAGCTTTTCGCAAGGCAAGGTGGCCCGCATCAACCAGCTGTTTGCAGGAGGGACCATCTCTGGCAGG  
GGAGCTTTGGCTACAGCGATTCCACAACGATCTGCCGATGCTGCGGGCGGTGAGCCATCCCCATGCGGT  
CAATCCGGCCCCCGCTGCGCCAGCAAGCCGAGGAGCTGGGCTGGCCGGTGTGGGAGTGGCAGCGCTGA  
GTCGCGCGCCACACAGGCTTAACGTGTGACAAGAAGCACGAAAAACAAAGAGAGAGGCTGGAGCCTCTCT  
CTTTGTTTTTTCGGATAGCGTTGTGGTTGATGCTGGCCGCTGTGGCTACCCCTCGTTGGTTTTGTTGTCGG  
GGCTCGCCAAAGGCGGGCACTTCTCCTCTGCACTCTGGTGGAGGGGCTGGCGCAGCGGGAAGCAGATAC  
GGTTTTTCCCTCCCGCTTGGCTTGTAGACCCCTTGTGCGCCAGCTCCACCAGCTCTTTGGCCGAGAG  
CCCGGAGCGGCTGAAGGCCACCCCGCCGCTGATGGTGTGATGGTGGATCGGGTTCGCGCCACTCCAGCTGT  
TCCACCCCGAGCCGGAACGCTTCCAGCAGGGAGGGAAAGCATCGGCTGCTCTTCGCCGTAACGGAAGATCA  
GCACCAGCTCCTCGCCGCATAGCGGCAGAACAGCCCCACTCGTGGAAACAGATTCATGCCAGCTTACT  
CACCCGCTTGGACACCATCCCCGCTGATGGCCGTGGGTATCGTTGACCCGCTTGAATCATCAAGA  
TCGAACATCACACCCCGAAGGGGGCGCCACTGTTGAGCTGCTTCTGCAGGCACTCGTCAAGAAACGAC

GGTTGTAGAGTCCGGTGAGCTTGTCTGATGGGCTTGCAGGCGGATTTGGGCAAAGTCTGACTGGCGGC  
ATCCATCTCTTCATAGACCTTGGCCAGCTCCAGCATGCGGCGGCCGTTGTAGGCGATACCGCCGAGCGG  
CTGGCGCGGATCAGCAGGGTGTATCTCCCCAGCATCCGGCGGAAGTAGCGGGACCAGAGCAGGGCCAGCA  
GCAGATAGAGAATGCAGGCGACGGCAATCATCAACTGCACGTTGATGGAGACGCTGTCGATCACCTGCTG  
CATGCTGGCAGTCGGCTCGACGCTGAGCAGGATCCAGCGCTGCTCGGGGATGCGGTAGTAGGAGACCATC  
AGGTGCTGGCATCATCGAGGAAAAAGCCCTGCGGCTGTTGCATCCGGGCCAGCCAGTCGGGGTGGGCGA  
GGGGTTTGAATACCCGTTTCGCGATCCGGATGGGCCAGCACCAGCCCGTCATGGTTGAGCAGGATCTGATA  
GCCATTGCCCAGATGGTGACTCTGATCATGCCGACTGTTTAGCCAGCTGGCGAGGGGGGTGAGCTGGGTA  
TCCAGCGAGAGTACGCCAACCCTGCGGCTCAGGATCTTCAATCACCTAGCCAGCGCCATGGTGAGGG  
TGCCAAAGGTGTAGTCGTAATAAGGATCGGTCAGACAATCTGTCCGGATGGCTGGATGCCAGCAGATA  
CCAGGGCGGGTCTGGGATCGAACTTCTCGTCGGCCTGCCAGGATGGGTGGATCAGCATCTTTCGATGC  
TCGGTGCTACATAGACGTAATCGAGCTCCATCACCTTGTGATAGGCCCTGCCACTGTTGCAGGTAGCGCT  
CGCCGTTAAGGATCTCCGGGCCGCTGAAATCCCGATAATTTACCTGCTGATAAATGAGCGTAAACTGGCG  
TTTGAGGGTGCAGATAGGGTTTCGATCAGGGTATGGAAAATACTGGGTGTTGCGAGCAATCAGATATTGT  
TGCTGCTCGTGGCGCAGGGTGCCTCCATATGCAGGTAGTAGATGCTGCCGAGCAGCAACACAGGGATAA  
AGAGCAAGAGGAGGCCAGCCGATGCGGGTATCAAAGACCAAGTGTCTTGGGCTTGGCGGGGGACAT  
GAACAGATCCTTTTTGCTCTCGGGTGGCACCAGCATATATGATGCTGTGCGGCTCGTCTAAAGGCAGAAAA  
TGAGATGTTTTCCGATGCTGAACCACACTCTGCTCTCAATGATTCATTATGGCAGCATAGCGGTGCTAATC  
CTTGCCCTCTGTGTCGAGTATCTGATCTTTCGGCGCGGCTGAACATGCTGCGAGTGCGCCGCTGCTGC  
TGGCAGATGGGGTGGCGCGCTGGCGCTCTTCTCCATCTTTGCCACCGGGTGTCTGCTGGCCCTCGAGCA  
CGCCAGCTCGGTGGCAGAGATCTTTGCCCATCCTGCCACGGCTCAAGATGGGGTGTCTTCTGCTGATT  
GTTGGCTCCCTCGTTTTATCCAGCCGCTCTTCTATCGCTGGCGTCGGCCCTGCGTCTGGGCAAGGCGC  
CGATGATCTCCATCCAGCAGCACTTCCGGGTGGTGTGGATCCTGCGGGCAATCTGCTACTGATTGCCCT  
GTTGGCCGTGTTACCAAGCCCTCGCTGCTGTAACACTCGCGGTGCTCAAAAAGCAGTGCGATGCAGCGCG  
TTGAGAGCGAGAGCGAAGACAAAGAGTGGAGACAAGAGGATAGGGAGGCGGGTATCTTGGATCGGATAAC  
CCGTCACGCGCCGATTTAAGGAAGAATCGCCATGCGCTCCAATCTGATGTTGCTGATGGCTGCCACCATC  
TGGGGTATGGGCTTTGTGCGCCAGCGCTCGGGATGGATCACATGGGGCCCTATACTTTCAATGGCCCTGC  
GCTTTCTGTCTCGGCGCCCTCTCCCTGCTGCGCTGCTCTGTTGGCTCAAATCCCACAACCTGTTGCCAT  
TGGCGGCGACCATCGCAACTGCTGATCGGTGGTGTGCTGCGCGGGCTGGTGTGTTGTCGCGCCGATCC  
CTGCAGCAGGTGGGGCTGCTCTACACCACGGCCGCCAAGGCCGGTTTCATCACCGGCTCTACATCATT  
TGGTGGCGGTAAGTGGGCTACTGCTGCGCCACAAGAGCGGACTCAATACCTGGATCGGCGCCGTCATTGC  
GCTGGCCGGTCTCTATGTGTTGAGCGTCACCGACGAGTTCACCATCGGCTTTGGCGATCTGTTGCAGGTA  
GTCGGCGCCCTGTTCTGGGCTGTGCATCTGCTGCTGGTGGATCACTACTCCAACCGGGTGTCTCCCATCA  
AGCTCGCCGAGTGCAGTTCGATGCTGCGGCTGCTCAGCCTCGCCACCGCTTTTGTATTGAAACTCC  
GACTGTTAGCGGCGCTGTGGCCGGTGGCAGGCGCTGCTCTATGCCGGCTGGTGTGGTGGGTCGGT  
TATACCCTGCAGGTGGTGGGGCAGCGGGCGCTCATCCGGCCACGCCCATCATCCTCAGTCTGGAGA  
CCGTGTTTGGCGCCGTTGGGTGGCGTGTGCTGCTGGGGGAGACGCTGGACGAGCGGCTATCGCCGGTTG  
CGCCCTGATGTTGGCGGGAATGCTTATCTCTCAAATCCGGCTGCGCTGGTGGTGGAAAGTCGCGCCGAGAC  
AAGGTGCTGTGACCAAGTAAACCAGCGCTCGCAGCATAACAAAACGCCCCGACTGTGGGGCGTTTTGCA  
TGGTGGCTGTTTGGATCAGGGGCGCTGATCCAGCTCGCGCTCCAGCTCTACCGCCTTCTGACGGGCGGGA  
TGGGTATTGAGGCGCTGCCAATAGGCTTGCAGGTGCGGGAAGTGGGCCAGCTGACCACTTTGCGCCAGCA  
GATCCACCAGGAAGGAGTTCATGATGTGCGGCGCCGAGAGGCGATCCCCACCAGATAGTGGCGACTCGC  
CAGTACCTCATTGAGGTAGCCCAGCACCTTGGCACACTCCGCTTGGCGTAGTCCGGCAGGAAGCGCATC  
GGGCTGCCATCCTTGGCAGCAACATCTCGAGCAGCAGCGGAGGATGCCGAGCTCTCGGCAAAGTGGGA  
GCCACTGCAGATATTCGGGATACTCCGGGCTATCTGGTGGCGGTGCCAGCCGCTCGGCGGCTAGCGGGC  
GATCAGGTACTCGGTGATGGCGCCTGATTCGCCAGCAGCCGCGCTCGAACTCGATGACCGCGACTTG  
CCGAGGGGGTGGATGGCTTTTAGCTCGGGCGGTGCCAGAAAGGTGGTGGCATCGCGCTGATACGCCTTGA  
TCTCATAGGGCTGGCCAGCTCTTCGAGCAGCCAGATGATGCGCTGGGAGCGGGATTTGTTTCAGGTGGTG  
CAGGACTATCATAACGACCTCGATTCCGTGGCAGGATGGGGTATACGAGCGGACTAGGGGGGCGGTTTAC  
CGATGGCTAAAAAGAGCGGGCTGATGCCCGCTCCCTTGTGACTAACTCAGGCCCTCCAGCGCTGATCC  
AGATCCGCCAGTATGTCTCGATCGCTCGATCCCTACCGACAGCCGATCATCTCGGGTTTTACGCCAG  
CCTTGGCCTGCTCCTCGCTCAACTGGCGATGGGTGGTGGAGGCGGGGTGGCAGGCCAGCGACTTGGC  
ATCGCCGATGTTGACCAGCCGCTTGAAGATCTTGAGCGCATCGTAGAAGCGCACGCCCGCTCGTAGCCA  
TCCTTACAGACCGAAGAGAGGATGGCCGAGGGGCGACCGGCCATATACTTCTCCGCCAGTAGATAGTGG  
GGTGGCCCGGAGACCGGCGTAGCTGACCCAGGCCACTTGGGGTATGCTTGAGGTGATGGGCAACCCG  
CAGGGCGTTATCCACGTGGCGCTCCATGCGCAGGCTCAGGGTCTCCAGCCCTTGCAGCAGCAGGAAGGCG  
TTCATCGGCGCCAGCGCCGCGCGGTATTGCGCAGTGGCACGGTGGCTACCCGACCGATAAAGGCAGCGG  
GGCAAAGGCCTCGGTGTAGACTACCCCGTGGTATGAGGGCTCGGGTTGGTGGAGTTGTGGGAAGCGCTC  
GGCGTATCCGCCAGGGGAACCTTGGCCGAGTCGACGATGACGCCACCCAGCGAGTTGCCGTGGCCGCGC  
ACATATTTGGTCAAGCTGTGTACGACTATGTCAGCGCCGTGTTTCGATGGGCTTGCAAGTACCGGGGTG  
CGACCGTGTGTCGACGATAAGCGGCACGCCGCGGGCTGGGCTGCCTTGGCCAGCGCGCCAGATCGAC

GATGTTGCCCGCCGGGTTGCCGATGCTCTCGCAGTAGACCGCCTTGGTCTTGTTCATCGATCAGGGCGGGC  
ATGGCTTCGGCGCTGTTCATCCTTGGCAAAGCGCACCTCGACCCGAAACTCGGCAGCATGTGGGCGAACA  
GGGTGTAGGTGCCACCATAGAGCTGGGGCGTGGAGACAATGTTGTCACCGGCGGGGTCAGCGCCTGAAT  
GGCGTAGGTGATGGCGGCGGAACCTGCCGAGACCAACAGCGCGGGGATCCCCCTTCCAGCGCGGCCATC  
CGCTGCTCCAGCACATCGTTGGTGGGGTTCATGATGCGGGTGTAGATGTTGCCCGGCACCGCCAGATTGA  
ACAGATCCGCCCCGTGCTGGGGCGCTCTCGAACTCGTAGGCCACCGTCTGGTAGATGGGCACGGCGACCGC  
CTTGGTGGTGGGGTCGCTGGAAAAGCCGTGGTGCAGGGCCAGGGTCGCATCTTTCATCACACACTCCTTG  
TTGGATGTTGCTTGTTCGAGTTATAGATGGATAGACGTCCAATCTATCAGGCCCCGTGGCCGATGTAACA  
GCAAGATCCGGCAAAGCAATATCGCCCGCAGGGGATGCGCGTCTTGAGTGGCTGGCATGGCCCCTACTCA  
GAGACGACGGCGATACTCCTTGTTCATCGATCTGGTTCATATCCACTGCATCAGGCGGTTGAGCTGGCTC  
ATGGGATCTTCGATGAGCGACAGCGGGCGTGGCAGGATCCGCTTGAAGTAACGGCGCAAGGTCGCTGGA  
TCCGGTTCCGGTTTGAGGGGGTTGGCGTGGCTCATGATGGTCTCCTCTGCTGTGGTTCTCACGTTTCATCA  
GCAGTATTGAGCTAAAATGCGGAAGTAAAACTGATGACTTACAGCAACAGGATTTCCCTTTTTATGCCG  
ACCGGTCGCTCTACCAGCAATTTCAACGACTCGCCAGCTGCTTGGCAGCGACGAGCGGGAGATCAGCC  
TCGCCGAGGTGGCGGATCTGCTCTGCTGCACCCCGCGCAACGCCCGCTGCTGCTGCGGCGGATGCAGGA  
TCAGGGCTGGCTCAGCTGGTTCGGCGGAAGCGGGGCGGGTTCGGCGCTCCCGGCTCACCTGCTCGACAGT  
CAGGAGAGCCTGACCCGGCGCCGCTTGC GGATCTGCTCAGTCAGGGCCAGTGGCGCAGGCGGTAAGGC  
TGGCCGAAGATCGCCTCGATCTGCTCACTCCGCTGCTGATCGAACAGCTCGGTCAGGCCACCCGCGAGGG  
GCGCCAGATCCTGCGGGTGCCTACTACCGGCCGTTGCCGAGTTGCTGCCACCGGCCCGATGCGCCGC  
TCCGAAATTCACCTGAGCCGCCAGATCTTCAACGGCCTCACCCGGCGAAATGAGGAAAATGGGGAAATCG  
AAGGGGATCTGGCCACCCTGGGAGTGTGGGGTCTGCCACTGGCGTTTCTATCTGCGCCCGCGGT  
GCGTTTTTACCACGGTCGCGAGCTGGTGGTGGAGGATGTGATGGAGAGCCTGCTGGCCCTGCGGGATCGC  
CCGCTGTTTTTCCCATCTGGTTTCGGCTGGAGAGCCCTGGCCGCGCACGCTGGATCTCTATCTCGACAGTC  
CGGATCCCTGGCTGCCCCACCTGCTGGCGGAGCCGGTGGCGACCATTTTGGCACGGGAGCTCAAGGGGA  
GGCGGGCTTTGCCCTGCAACCTGTGGGCACTGGCCCTACCGGGTGGCCGCAACGATCCCCTGATCTT  
TGCCTTGGCGGCTTTGACGACTACTTCGGCCTGCGCGCCCTGCTCGACGAGATCGATATCTGGATGCTGC  
CTGAACATGGCGGAGCGGCTGGAGACCCACCTGCAGCTGGGGCGCGACAGCCCTGAGCTCGGCACCATGCG  
TGGCGAATCGGATCGGATCGGATCGGATCTTCTGCTGCAGGACGATCGCTCCGGATCTTGCAGGAT  
CCCGCCCTGCGCCAGTGGCTCGGCCAGCTGCTTCCGTTAGCTCTGATGGGGCGGGTCCGCCCCGAGT  
TGCAACGGGGCTGGACCAGCGCCCTGGGGCTGCTGCCCACTGGCGCGAAGCACTGCCCGCGCCCTTGCC  
CACACCGGCGCAGTTGCCGACGACCTTGGTGTCTGCTTCAACCAGCATCTGGAGTTCAACGAGTGC  
GCCAACGCCATGAGTAGCCTGCTGGCCGAACAGGGGATCAGGCTCGAGGTGCGCACCCCTCGATTACGGTC  
GCTGGGTGAGCGGCGAGGATGAGGATGTGGATCTCTGGCTCGGCACCCCTCAACCTCGAACATGCCGGCC  
CTTTGCCCCCTACGCTGGTTGCAGGGGACCCGTTGCTGCGCAAGGTGTGGAGCAGTCAGCATGAGTTG  
TGGCAGGGGTTGATGCAGTGGCGCGCCAGCGGTGAGGAGCCTGGCCCCGCGCCCTGCTGGCAACTGTGC  
AGCAGCAGAGCTGGTTTGTGCCGCTGTTTACCCTGGCTGGAGCTGGAGAGCCGGTTCGGCGTGCACGG  
GGTGCAGGATGACGGCGCTCGGCTGGTTTCGATTTTCGCAGCGCCTGGCTGCGGCCCGAGCCGCCCATCAG  
CCCGCAGAGGCGCCATAGTTTCATCCAATTTCTGTGCGGCCGATGGGGCGTCCGCGGCCGCTTGCCTGAA  
AGATCCGTAATCGGCCGCTGCTGCACAGTTTGTGTACCGCTCTGTGCCATGCTGTTTCAGGTTATGGA  
CAGCAGAGCAAATGAGGAAAACGATGAGCAATAATTCAGACAGTTCCGCGAGGAAAATGCCGGTTCATGCA  
CGGGGGAACCACTCCGTCGAGACGTCCAGAATGGAGTGGTGGCCGAAGAGCCTCAACCTCGACATTCCT  
CACCAACACGATACCAAGACCAATCCGCTGGGGGCGGTTTCAACTATCGGGAAGCCTTGAAGGGGCTCG  
ATATGGCGGCCCTCAAGCAGGATGTGACCGCCCTGATGACCGACAGTCAGGAGTGGTGGCCCCGCGACTG  
GGGCACTACGGCGGCCTGATGATCCGATGGCCTGGCACTCGGCCGGGACTTACCGCATCGCCGATGGC  
CGCGGGCGGGTGGCAGCGGCAACCAGCGTTTCGCCCCCTTAACTCCTGGCCGATAACGCCAACCTCG  
ACAAGGCCCGTCCCTGCTTTGGCCCATCAAGAAGAAGTACGGCAACAAGATCAGCTGGGCCGACCTGAT  
CATCTGCGGGGACCGTAGCTTATGAGTCCATGGGGCTCAAGACCTTCGGCTTCGCCCTTGGCCCGGAG  
GATATCTGGCACCCGAGAAAGGATATCTACTGGGGATCGGAGAAGGAATGGCTGGCGCCAGCGGCAAGC  
CGGGTGGTCGTTATTCCGGCGAGCGGGATCTGGAAAACCCGCTGGCGGCGGTGATGATGGGGCTTATCTA  
CGTCAACCCGGAAGGGGTGGATGGCCAGCCGATCCCTGAAAACCGCGCAGGATATGCGGGTCACCTTC  
GCCCGCATGGCGATGGATGATGAAGAGACAGTGGCACTGACCGCCGGTGGCCACACCGTCCGCAAGGCTC  
ACGGCAACGGCGATGCCAAACAGCTTGGGCCGAGCCTGAAGGGGCCAGCCTCGAGGAGCAGGGGCTCGG  
CTGGATCAATCACACAGCCGCGGCATCGGCCGCAACACAGTACCAGCGGCATCGAGGGGGCTGGACC  
ACTCACCCGACCAATGGGACAACGGCTACTTCGATCTGCTGTTCAAGTACGACTGGTGGTTGCAAAAAT  
CTCCGGCGGGGGCCCATCAGTGGGAACCGATCAATATCGCCGAAGAGGATATGCCAGTGGATGTGGAGGA  
CCCGTCGATCCGCTGCAAACCCATGATGACGGATGCCGACATGGCGCTCAAATTCGACCCCGAGTATCGC  
AAGATTGCCGAGCGCTTCCGCGATGATCCGGCGGCCCTTCTCCGACGCTTTGCCCGCGCCTGGTTCAAGC  
TGACCCACAGGGATATGGGGCCGAAGAGCCGCTATGTGCGGCCCTATGTGCCGACAGAAGATCTGATCTG  
GCAGGATCCGGTGCAGCCGGACGTGCCGATATGACGTGGCGGCGGTGAAGGCCAGGATTCGCCGCTGC  
GGCCTCTCCATCAGCGAGCGTGTGAGTACCCTGGGATAGCGCCCGTACCTTCCGTGGCTCCGACAAGC  
GGGGCGGTGCCAACGGCGCCCGCATCCGGCTGGCGCCGAGAAGGATTTGGCCGGCAATGAACCGGCCGA

GCTGGCGAAGGTGCTGGCGGTCTATGACAAGCTGGCGACCGAGTGTGGCGTCAGCGTCGCGGATCTCATC  
GTGCTGGGGGGCAACCTCGCCATCGAGCAGGCTGCCAGGCCCGGGGTGACGGTGAGCGTGCCGTTTTG  
CGCCGGGCCGGGGGGATGCCACTCAGGCTCAGACCGATGTGGCTCGTTCGAGGTGTTGGAACCGCTGGC  
CGACGGCTTCCGCAACTGGTTGAAGCAGGACTATGTGGTGACGGCGGAGGAGCTGCTGCTGGATCGCGCC  
CAGCTGATGGGGCTCACCGCCTGCGAGATGACGGCGCTGGTCGGCGGGATGCGGGTGCTCGGCATCAACC  
ACGGCGGTACCGGGCACGGGGTCTTTACCGATCGGGTCGGGGTGCTCAGCAACGACTTCTTCGTCAACCT  
GACCGACATGGGCTACCAGTGGCTGCCGAAAGCGAGCAATCTCTACGAGATCCGCGATCGCCGCAGCGGC  
GCGCTGAAGTGGACGGCCACCCGGGTGGATCTGGTGTTCGGCTCCAACCTCGGTGCTGCGCGCCTATGCCG  
AGGTCTATGCCCAGGATGACAACAAGGAGAAGTTTGTCTGTGACTTCATCACCGCCTGGAACAAGGTGAT  
GAATGCGGATCGCTTCGATCTGCTCGGCTAGTCCCCGAGCCGTTTGTTATCTGCACCAGCCCCGCACAG  
CCAAGATGTGCGGGGCTTTTTACTGCCCCGCTTTTCTGTGCAGCCCTACAATCCGCGCGCTGCGACACCC  
GCTGGCCGGTATCGCAGGGCCGCTGGCATCCCTGTGCTTGGGCCAGCAGTATCATGTAACATGCTGATCC  
GCTGGTGTATGCCCGCGGCCACCCATTGGCCACTGATGTCCAATCAACAGGACAAGGACAGAACAAGAG  
ACAAGGAGTCAACCCATGCTGGAAATGCAGATCCAACCCCCGCTTTCAGGAGACGGATGCCCTCGGCCATA  
TCAACAATACGGTGCCGGCGGTCTGGTTTGAATCGGCGCGGGATCCCCATATCCGGATCTTCTCCCCGA  
TCTGGATGTGCATAACTGGCATCTGATCATCGCGGGCTACACAGTGCAGTTCAAACGGGAGCTGTTCTAC  
GGCCAGCCGGTACCATCAAGACCGGCGTACGCCGATCGGCACCAGCTCATTTACGGTCTGGCAGGAGG  
CCTGGCAGGGCGGCAACTGGCCGTCACCGCCGAAACGACCTGATCCATTTTACTACCAGGCCCGCCA  
ATCCCTGCCCCCTGAGCGATGCTCACCGGGAAGGGCTGCGGGCTGGCTGACAGAGTTAACCACGGGCC  
GGATGGCCCATCACAGGAGTGTATGTACAACCTCAATGCGCAACACAGCGATCGCGCTGACCCTGGGATT  
CTGCTCCCTCCCTTCTATGGCCGCTTCTCTCGCCGAGCAGTTTACCCTGATGGAGAAGGGGGCCGAGAGC  
GCCCTCGATAACCGTCAATTCAGCCATGACGGCGTCGATATCAAGGCCCTGGATCGATGGCGCCCCCGTCA  
TCATCGCCGTGCCCATCATGAACGAGCTGGGCAAGCTGGAAGGGGAGAGCCGCTACTACTTCAAGGGCGG  
CAAGCTGTTCCGGGTCAAAGAGCCCGCAGCCAGTTCGCTTTCGACGCCAGCGGCAAGCTGACCCAATGG  
CTGGACGAGAAGGGTCAGCCCGCGAGTTCGTGAGCAAGATGAGCATGCAGCAGCGTCAGGAGTGGCTCA  
CCAAGCGGGCCCGCGAGCTGAGCAAGCTGTTTGTGGTGAGCGCGGCCGAGCAGAAGGCGGCCAAGGGGGG  
CGTCAAGCTGAAGGGGGCAGATCTCGCTCACTGGCTCTGCAACGGCAAACTGATGGATCTCGCCATGGC  
GACAAGGTGATCTTCGAGCAGGATAAGCTGAAGATTGGCGAGCAGGGGATCGAAGGGGAGGTTCCCTCGC  
GTCAGGAGAAGGGGCTGGCAGGAGCTGAGCCCTCAAGTGCAGAGTGCAGGGCACTCAGGTAACCCCTCAC  
CTGGCAGCCGCTGCCGGGGGCCAACAAGCCGCAATAAGCGCAATAGCAAGGGGGCCCATCACGGGCCCCC  
TTCTCATTCGGTGTGTTGCTCCCCAGCTTTCAGCCGGGTAAAGTGCCTCGACCCGGCGCCACTGTCCGGGC  
TCGAACCAGCGGGCCAGCAGCTCCTGTTGCTGTTTCGGCCCCGGCCCTCGTTCGGCAGTTGTCTGAGCTCGG  
CCAGAAAGCTGCTGAGCTGCTCCTCGAACCCCTTGCCGGTTCGTCTCAGCTGGCGCATCCGATCCACCGC  
TTCCGGTCCCCCGTCTCCAGCAGCAGAGCCTCCTGTTTGGCCGGGTCCATCTGTGCCAGCTCTTGCAAC  
TCCTCAAGCAGACGGCTGTTGGCCTCCGCTCGCGAAACCAGTCCGGTTGCTCCGCCAGCCAGAGATCCA  
GCTCGCTGGCCAGCTGCGACTTGTGCTGTCTCTTTCGCTTCGCCAGCGCCCTGCGGCGCAGGGTACAGCTG  
CTCCATCAGTCGATCCTCGGCAACAGCTGGGCTGCTCCGCGGGGTAAAGCTCTGCTGGCGCAGCTGC  
TCCCCTCGTCAAACAGGATCTGCAGGCTGGCGAGGGAGATCTCGGTGGGCACCGTCAGGCTGCTCTGGG  
CGGAGACAAAGGTGCGATAGCGCGCCTGCAGGGCATCGGCGGCCCTCCTGCTCGGGATCGTGCGGGTGGCT  
CTGTGCATGCATGCTGGCTTTCAGCGGGGGATGAGTCTGCCGTCCGTGGCGTGGGCGAGCAACACCCCG  
CCAAGCAGCAGGGTATGGCGCAGGGCACGACGAGCAGGGTGGCTATCTTCATAGTCCCAGCTCTTTGAG  
TCGGTTGGCATGCTGGCGATAGAGGGTGACCGGATCGGTCTCGAACAGATGGTGGATGCCGAAGGACTGG  
TTCACCTTCGTCCAGATGGTTCATCCGGTAGCCGGTGCCGATCACCTTGCCGAGGTGGCTGCTGCAGACCC  
CGACCAGTCCGTCAATTGGGCTCCTTGAAGAAGGCGCCGGTTCAGCGCCAGCGCCGGATCCACCGGATCCAG  
CAGATTGGTCAGGTTGCCGAGCCCGCTCCAGGAGAAGTAGTAGACGCCGTTGGTTCGCTGCATCGGCCCC  
TCGCGCAATAGCGGCTGGGCAGCCCCCTCCGGGTAGCGCTGGTTGAACTGGCTGGCCCCCTTGCTGGTGA  
GGGCATCGAGGGCGGCGACTGGATCTTTCGGCAGCTGGCTCCCGCCGAGAGCAGTGAATCATGCCGGA  
GAGGGCGTGGGCCGCGGCGGCGAGCCAGCTTCTCGGCGGCGCTGCCGGGGGCGGCATTGGCCCCGACCAGA  
TCGGCAATCTCTGAGCCGTAGTTGACCCCGCCGACGCTGGTGGCGGAGGCGACCAGCTCGGGGGCGACCG  
AAGCGACATAGCGGATGGTGGGCCGCCATGGGAGTGGCCGATCAGGTTGACCTTCTCGGCGCCGGTGGC  
GGCCAGCAGCAGTTCAATCTGGGCGAGCAACTGCTCCCCCGCTGCTCGGAGCTGGCGGTAGCAGATAACC  
TGAGCCACGTAGACCTTGGCGCCATCGCGGCTCAGGGCTTTCGGGAATGCCGTAGAAGTAATCGACCCCGA  
GCAGCTTGTGCAAGCCGAACAGGCCGTGCACCAGCACTATGGGGTAGCGGGTCTGGGTGTATCCGCTGGC  
GTGTGCCAGCATGGGCAGGGTGCAGAGCAGCACCAGAAGCCATCTCTTCATCATCAGCATCCTTGTGAT  
TCGTGAGGAACAGATTGTGTGGCGTACTCCATGTTTCGCCGGTGCAGTATGGTGGTGTGACGGGAGAG  
GCTGTGAGGGGGATCGCAACTCGGGATTCAAAGGGATTTCAGGGTGCGGGGCGGGGAAGCTGAGCTCCCCG  
CCCTGCGGCTTATTGCCACTCCACCAGGTGATACTGCTTCTTGGCCCCGGCGCAGCAGGTTAGCGACCA  
AACAGCCGATCATTGGCTCTCAGCTGATCATCTTGTCTTTCAGCACACCATTGAGGCTGATGGCGCCTGCCG  
CCAGCAGTTTCGCGGGCGATGCGCCTGGAGTTAGCCAGACCCGAGCTGACCAGCAGGCTGACCAGATCGGT  
CTCGCCGCTGACGGTGTGCTCGGCATGCCATCTTCGCCAGCTGGGCCAGATCGCTCTCGCCGAGGCGG  
GCCACATCGCCGCTAAACAGCAGCTCGCTGATGCGCTGCACCGCCGCCAGCGCCGCTTTCGGTGTACCA

GCTCGGTCAGCTCGTTTGCCAACACCTGCTGGGCTGCTTGCGCCCTGCCGCTTCGCGTCTTCCGCCTC  
CAGTGCATCAATCTCGCTCAGCGACATAAAGCTGTAGTAGCGCAGGAAGCGGTAGACATCCTCATCCGCG  
GTGCCGAGCCAGAACTGGTAGAAGGCCTAAGGGGAGGTGAGCGCCGATCGAGCCAGACCGCGCCCCCT  
CGGTCTTGCCGAACCTGGTGCCGCTGCCTTGGTGATAAGGGGCAGGGTCATGCCGTGCACCTGAGCCTG  
ATGGAGGCGACGGGTGAGATCCATGCCGCTGGTGATATTGCCCCACTGGTCATTGCCGCCAATCTGCAGG  
GTGCAGCCGAGCCGCTGGTGTAGCAAAATCGTAGGATTGCAGCAGAGCGTAGGAGAACTCGGTGA  
ACGAGATGCCCTGATCCGGACGGGCCAGCCGCTGGCGCACCGATTCCCAGCCAGCATGGCATTGACCGA  
GAAGTGCTTGCCGATATCCCGCAGAAAGTCGAGGGCGGACATCTGCCCATCCAGTCGCCATTGTTGACC  
AGTTGCGGGGCGACAGGCCCTCATCGGCGGGCAGCAGCGCCCTGATTTGGGCAGACAGGCTGGCGACCC  
AACCTGCACGGTATCGGCACCTGTTGAGGCTGCGCTCGGTCGCTTGAAGCTGGGATCGCCGATAAGGCC  
GGTTGCCCCACCCAGCAGCCACCGGGGTGGGCCCGCAGCTGGAATCGGCGCAGCATCAAGAGCGGC  
ACCAGATGACCGATATGCAGGCTGCCGGCGGTGGGGTCGAACCCGCAATAGACGGTGCAGCGGGGTGGCAA  
GATGATCGGCCAGGGCCGCCGGGTGCGAATTCTGGGCCACAAGGCCGCGCTCGGTGAGCTCATCGAGCAG  
GTGGGGGTTTTATCATGGGTGCTCCAACAGCAGGGGAAAAGTCGTCATCCTCGCTGTTCTGGCTGGTGGC  
GGATATGTCCCTGAGGGACAGTTTTGCCACTCTCGTGCTAGCATCCAGCCATAGTGGGGAGCTGCTCCC  
CGCCACCGGGAACCCACTCGCATGACTCAACAACCATGACCCAGCCATTCACCACAGATGCCCTGACCCG  
CAGCATGACCGAGGTGGTCGATGCCCTGCACAGCAGCGCCTTTGCGGCGGCGCTGGTGCAGGCTGATCCAG  
CAGCAGGTGGCGTTTTGATTGCGCCCTGCTGCTCGGGGTGGGGCAGCGCCCCGCTACCTCTACGACAACC  
TCAATCATCAGCGGGCTCTGCTCTTTGATCGCTACCTCACCAGCCACTTCAGTCAGGATCCCTTTATGCA  
GGCGCTGGAGCAGGGCTTGCCCTGCCGGCGCTTGACGCTGGCGCAGGTCTCCAAGGGCGGCTCGATCCC  
GAATATCGCTACCCTTCTATCAGGCCACCGGCTGGCAGGAGGAGTGGGGTGCATCCTGCCAGTGCGGG  
ACGGACTGACGCTGATGCTGTTTTCTGGGGCGCCTCGACAAGCGCAGTACTCTCAGCCGTGACGAGCTGGC  
GAGGCTGGAGCAGCTGTTCCCGCTGGTGCATTCGCTCTGTGCTCAGCAGTGGCGGCAGAGCCAGCCGCTG  
CTGGCCAGAGCACGGCGCTGCCAGATAGCGCCAGCCTCAAGAGCGCGGTGGAGCTGGCGATGGCGAGTG  
TCGGGGGGGATCTGCTCACCCGGCGCGAGCGGCAGGTGGCGGAGTTGCTGCTGCAGGGACTGGATAACGGA  
GGCGATTGCCGCAGCGCTCGGGATTGGCAGCGGCACGGTGAAGAATCACCGCAAGCATCTCTATGGCAAG  
CTGCGGCTCGGCTCGCGGGCGAGCTGTTCAATCTCTTTCTGAACCACCTCATTACGGCGCCGGTGGAGG  
CATCAGCGGCTCATCGGCGGGAGATAAAGAGAACCAGCCATAGGGCGGGCCGGAGTTACTCGATGATTCATC  
GGATGGTGGGAGTGGTTTTGGGCGAGGATACTGAGCAACTGGTAGCGCTTCATCAGCTGCTGTATTATC  
CCCCGTGCTGACCTTGTCCAGCGCCTGTTGCAGGGGGCAACCTGTTGCTGTTTTGCCCTCAGGTTGAAG  
GCGAAGCAGTTATCCTGCTCTTCAATAATCGCGACGGTGACAAAAATCCTCGCTGGGGAAAACCCAGCTCCT  
TGGCCTGATGGCGCAACATCACCTCGTTGCCCGCCACCAGATCGGTGCGTGCCATGATCAGCTGGCGCAC  
CACCTGCTCCATGCGCTCCACCGACATCATATTGCCCGGGCTGATCCCAGCGGTTGAGTAGCAACTGCTCC  
CCGACATCCGCTGCATCACGCCGATCTGCAGCTTGGCGAGATCCGCTTTGCTGGCCACTTTGGGGGCAT  
CCTGCTTACGGCCGACCAGCGCGACCCTGGAGTGGCTGATGGGGCAGACCAGAGGAAGTGGGGATCCCC  
TTCCTTGGTGTGTGCCGTGGTAAAGAGCACGGCCTCTTGTGTTGGGTCAGCAGATACCAGCCGCGGGCC  
CAGGGCAGAAAGTGGATAGGTTGTTCCGGCTCCCCATTTGCTGCCACATCAGGCGCAGCAACTCGACCG  
CCAACCCACAGGCTGACCATTTTTATCCTGGCCATTGAGTGGCATGTTCTGCTCCGAATAGTAGATAAG  
TGCCGGAGCAGGGAGCGGATAAACAGGGCGAGAGAAGCGAGAGCAGGGAGCAGACGACGCATGATGCAC  
TCCTTGTGCGGGTAGTTACCTAACAGTCTATGTGGCCTTTTTTCATAACGTCATGATCCGGTAGCGGGATA  
AAAAACAGGCCACCTTGGCGGTGGTCTGTGCGTTTTATTTGAGCAGGGCTTCCATCTCCGCCCTGCTGCTTGG  
CGCGCGCCTTGGCTTCCGCCGCTCTGGCGGCATCGGCGACGCTCTCTCCGGCCGTATGAGAGGCTGCACT  
GACAGCCTGTTTGGCTGGATCGGCAACGGCCTTGGTTGCCCTTTCGCTCACGGTAGCGGCGGCACTGCTG  
ACTGCTGTTTGGCCGGAGCGGCAACGGCCTTGGTGCCTCTTGTGTCACGGTTGCTGTAGCGCTGCTGA  
CGGTCTGTTTGGCCGGAGCGGCAACAGCCTTGGTGGCCTCTTGCCTCACGGTTCGAGCGGCGCTGCTGAC  
GGCCTGTTTGGCAGGAGCGGTAACGGCTTTGGTGCCTCTTGCCTGCGTTCGCTGCGGTCGAGTGGCGCTGACG  
GCTTGCTTAGCAGGAATGGCAACGGCTTTGGCCGCTTCTTGCCTGCGGTCGCGAGCGGCGCTGCTGACGG  
CTTGCTTGGCAGGAGCGGCAACGGCCTTGGTGGCTTCTTGGGTCGCGGTCGCGAGCGGCGCTGCTACCCGC  
TTGTTTGGCGGGTGCAGTACTGCGGTGGTTGCAGTGGGGTAAGATCGGTTGCGCTTTGGTTACCCGCT  
TGGGCGGCTGTCCGGTGGCTTGTCTGGCGGCTGCCCTGTGGCGTTGGCGGCTGCGCCGCTGATAGCCT  
GGCTGGCGCTGTTGGTCAGCGAGCCGGTGCAGCCGCGAGTCACTGTGCCAGCGCGCTGCCAAGGGAGAA  
GGGGGAGGCGCCACTCTGACTGGTCGCCGCCAGTCAAGGCATTTGGTAGTCGGGGTGGAGCTGGCTGGTG  
GGGGTCTGCCAGCCCTGCATGGCTGTTGGCCAGGTGGTGGCGTGGCCGAGATTTTCGCCAAAGGTCA  
GGGTGGTGGCATCCCTTTTTGAGCAATAACGACATCTGGTTGGTTTGGAGTTCCACACCATCCCCGC  
CTGCTTGGCGATATCCGGCACCGGCGCATACTCGGAGACCACATAGAAAAGCGGCCCTCCTGCTGTAAC  
TTGTGCGCAGTCTTGGCAACTGCATGGTGTGCTGCTAGTTGGGACCAAGGATGGCGGTCATCCGATCCT  
TAATCAGGGGTTGTTGCAACAGATTGACCTCGTTGGGTCAAAAGCCGACCAGCGGCTTGAGCAGGGCCCA  
CATCAGCTGGCTGGTGGGGCTCATCATCAGCAATGGGGCAACGCAGGCGGACAACATCAGGCTCAGGCAG  
GCCGCTGAAGCAACGGCATGATACGCATTTGGGATAATATCCAAATAACGATTTGATAAATAAGGTTATA  
TTTTGTGAGGACGTGACAAATTCACCGGAAGTTTGCAGCTGGCAGCGAGAGACTGCCCGCAGGCGCTGGC  
AGGCTACCATATTGGTTCCACAATGCCAGCAGGCAAGTATGATTGTCAGTCAAGTAAACCCCGGGCTGGT

CGACTCTTCGAGAATGCCTTCCATCGAAACAGGATCCCTCTCATGAAAAATGTACTGCTCTGCCTACTGG  
CCTCCCTCTGGCTCGCCCCCGCTCTGGCCGCGTCCAAAACCACTGTGGTGGGCGAGTCTGCCAGTCCCGA  
GCTGGTGTGGCCGCTGGGCTCATTGCCCCGAGCGGGTCTGCTGGTTTGCAGATCAGAAAATATCCGAAGGG  
GCCCCGATTCTGCAGGGAGATATCTGGCTGGAGTGCAGCCCGCAGAACGACCTTGAGAGCAATGGCGCGC  
TGGCCTGGCGCTCTCTGCGGTGGTGTGGCCTGCCACCCGTGGTGCGAAAGCTCAGAAGACGATTTCCGT  
GGGTGAGTGGGCTTTTCTTGATCCAGCTAAAGACATGGACGTGATCCCTGTCGCATAATGCAGCTCCTT  
TCTTCTCTGGCTGGAACCTAAGAAAATGGCTCGTTCGCTCTTCCAATGCACAACGTCGTCGCAGTAGCTGG  
TGGTACAAAACGCTTGTGGCAAGGGAGCGGGAAGAGCGTGAAGCGCGTTCCGTCCGGGATTGATGCAGCA  
TTGAAAAACGGAGCCTCGGGCTCCGTTTTGTATTTATCACCAGCTCGGCGGTGCTCTTCCAATGCACAGC  
CTAGTTGCCGTAACGGGTGGTACAAAACGCTTGTGTCAAGGGAGCAGGAAGAGCGCGAAGCGCTTCCGT  
CCGGGATTGATACAGCAGTGAAAAACAGAGCCTTGGGCTCTGTTTTTTATTTATCAAATACCGTCATGAC  
GAGAACGGGGGCCATCAGGCCCCCGTTTTATTTTGTAGAGTTGTCTGCTTGCAGCTTAGCGCTGCAAG  
GCGGCCAGTGCCAGTTCGACCCGCTTGGCATACTCGGGGTCGGCCTGCTCGAAGTGTTTTAGCTGGGTCCG  
CGACGATGGTGTATCCTCCACATTGATAAAGGGAGCGGGCCAGGTTGGCGGCGAGCCGTGAACGCTGCC  
CTCGTCCATGATGCGGAACAGGTTGCCCGGCTGGCTGTAGTAGTTCGCTGTCGTAAGTACGGAAGTCGTAG  
TGCAGGGCAGCCCTTCCAGACTCAGCGCCGTTCTGTGCTGCTCGCTCGGTTGCTGGGTACCGAAAACGGT  
TCGGCTGATAGTTGGGGCTGGCGCCGCCATTGCTGTCCGCCCGCATGGCACCGTCACGATGGGCGCCGTG  
GTGGAATGGGCAGCGCGGGGCGTTGACCGGCAGCAGGCCGTGGTTGACGCCGAGGCGATAGCGCTGGGTG  
TCGCCGTAGGAGAAGAGTCCGCCCTTGAACATGCGATCCGGCGAGAAGCCGATACCGGGCACCACGTTGG  
CCGGGGTAAAGGCGGCCTGCTCCACATGGGCGAAGTAGTTGTCCGGTTCTGGTTGAGCTCCAGCATGCC  
CACCGGGATCAGCGGGTAGTCGCTGTGCGGCCACACCTTGGTCAGGTCGAACGGGTGGATGTTGTAAGTC  
TGGGCGTCCGCCCTCCGGCATCACCTGCACATAGACCTTCCAGCGCGGGAAGTCCGCCCGCTCGATGGCAT  
TGAACAGATCCGCTGACTGGTCTCCCGATCCTGCCCGACGGCGGTGGCGGCCCTTTCATCGGTGTAGAA  
GCTGTGGCCCTGCTCGGTCTTGAAGTGGAACTTGACCCAGAAGCGCTCGTTGGCATCGTTGATAAAGCTG  
AAGGTGTGGCTGCCGTAGCCGTTTCATCTCCCGCAGGCTCTTGGGGATGCCCGCATCGTGAACAGTATGG  
TGACCTGATGCAGGGATTCCGGATGGCGTGACCAGAAGTCCAGGCGGCGGTTCGCGCTGCGCAGGTTGGT  
ACGCGGATCCCGCTTCTGGGTGTGGATGAAGTCAGGGAATTTACGCGGATCGCGGATGAAAAAGACCGGG  
GTGTTGTTGCCACCCAGATCCCAGTTGCCCTGCTCGGTATAGAATTGAGGGCGAAGCCGCGCATGTCGC  
GCTCGGCATCGGCGAGCCCTTCTCACCGCCACGCTGGAGGAGAAGCGCAGGAAAACAGGAGCTGCTGTGCC  
GATGGCGCTGAACAGATCGGCCTTGTGAACGCTCTGATGTGCTGGGTACCGTAAAGGTGCCGTAGGCG  
CCCGAGCCCTTAGCGTGAACCACCCGCTCGGGAATGCGCTCGCGGTGGAAGTGGGCGAGTTTCTCCATCA  
ACCAGATATCTTGCATCAATACGGGGCCGCGCGGGCCGGCGGTGAGGCTGTTGTTGTTGTCGACGACGGG  
GGCGCCGTTGGCGCTGTGCAGGGTCTTGTGAGTATGGCTTCTCTCCTTGTGATATGGGGTCAGCCTAC  
GGATCTGCGCCGTGCTCGGCAATGGGCCTTCTCTCGCCCTTGTATAGGCAAGACAAAATGGGTGCGGGTA  
GGGGATGTGGAACCGCGCCGATATTGCATGATGGTGGCTTCGAGAAGGAGCCTCATATGCAGATTACTA  
TCCGTGATGCCGAATCCGCCGATGCCCCGCTTGGCGGATCTCTATGCCATGCCAATGCCAGGCGGG  
CACCTTGAACACTACCTATCCGGCACTGGGTGTGTGGCAACAACGTTGGAGCAGAGTGGTGTGGTGGCG  
CTGGTCGCGGAGGTAGAGGGGCTGCTGGTTGGCCAGATCGCATGTCATGTGGAGTCTAATCCGAGACGCA  
AGCATGTGGCCGGGATTGGCATGGGGGTACGGGATGACTGGGCCGCAAGGGGGTTGGATCTGCCCTGAT  
GGCTGCGGCGCTTGTATCTGGCCGATAACTGGCTCAACCTGCACCCGATGAGCTGACCGTCTATACCGAC  
AATGAGGCCGACAGGCGCTTTATCGCAAGTTCGGTTTTACCAGAGGGGGCGAGCCCGTACTATGCCCT  
TCCGCCAGGGGCGTTATGTGGATGCGCTCTATATGGCCAGAGTGGCGGGGAGCGTCAGTCGTAACGGCA  
TGAGGCGGCCAGTCTTGGCGGCTCTCCAGCTATCACTTTCATCGGGTCTTTACCGCCGTACCCGGTGAA  
ACCCCGGCGGAGATGCAGCGCCGCTGCGGTTGGAGCGGGCTGCTCGCTCTCTGCTACAGTCCGCGACC  
CGATCACCGAGATTGCCCTTCTCGCCGCTTTTCCAGCTCACAGGCTTTGCCAAGGCTTTGCCAAGGCTTTCGCAAGCA  
GTTTGCCATGGCACCGGGGATGTTGCGCCGCCAGCCGTCACCTTGCAACTGAGCAAGAATGGACACGCG  
GCTGCCCGGGTCTCTGATTATGCTGAAGCCGTTCCAGTGAAAGGAGGCTACAGATGAAAACCGAACAGA  
TGGCTGCGCGCACTCTGGCCTATATCCGGGTACCCGGCCCTTACGGCATAGGCTATGAGCCGGTGTGTGA  
CCAGCTCTATCAATGGGCTGTGGGTTGGGCTTGGCCGAAGGGGAGTGGATCTTCACTACACGACAAC  
CCCGAAGTGACGGCTCCCCAGCAGTGGCGCACCAGATATTTGCGTCACCGTGGCGGCGGGGACCAAAGGCC  
GCGGCAATGTGGAGATCCAGCAGTGGCGGGCGCCGCTATGGCCAGTCACGTTTTACCCTGACCGACCC  
GGCCAGTACCCCGCACTCTGGCAGCAACATATCGGTGAGGTGGTAGCGGCCGTTTTCGAATTTGATGAT  
CGACCCTGTTTCGAGCTCTATCACAGCTTCGATCCGCTGACCAAGGTTGCGGATGTGAGCTTTTGTCTCA  
GCCTAAAGGGTTAGGGCACAACAAGACGTAAGGGATGGTACAGAGCATCGCGCAGAAATAGAGAGCCGG  
ACAGTGTCCGGCTCTTTTGCATCTGGCGGTTGGGTGGCGTTTTAGCGCTGGAACCCCTTCTGGGCGAACTT  
GGGACGTGCGTTTCATGATCTGCTCCACCTGTTCTGTCGCTCATCTTGCCACGCGACAGCCCCAGCACCTTG  
TAGGTGAGCAGCGGTGGGGCGGGCAGGGCGATCATCAGGGCGCGGATCTGGTTCTCGTCACTCTTATCCC  
GGGTGCGCTTGGCGTAGGCATAGGTGAGGACGCCGGCATCCATCAGGTTTTTACGGCGGGCTCGGTGAT  
CGGCAAGTTTTATGACGCTTTTACGCTGTAGCACGAACTCGCGCAGCACCGCTTTTCTGTTGAAGTCGAGG  
AAGCCGATCATCTGGGCCAGCTGGTCTGCTGACGGCGCGCTGCCACTTTCGCAAGCCCACTCCAGG

CGATCAGGAAGCCCTGACTGCAGAAGTAGGAGATGGCGATCAGCATGCCGACCCCCAGCCAGGCCGCATG  
ATCCGCAGCCCACTGGCTGACGGCCCCCTTTCATCAGCCCGGCCGAAACAGCAAAATGATGCTGCAGCAG  
AGCAACAACCAGACCATCAGCCAATTGAGGCGGTTTCAGTTGATAGAAATGTTGGATCCACCGTTTCATTG  
TTCATCCTTCCCAAACCTGTTGTGGATAGTGAACCTACCTACAGCAATCGGTGTGCCAACAGCGTAATGGCC  
CCTGGGAGGGGAGGCTGGCGATACATTTCCCTTACAACCTTATTGAATGAGTTGTCAGTAATTTGCCTTGTG  
AGGTGACGGTCGAGTTGGTAAAACGTCCCTCAGTCATTGGGGAGTAGCAACCCGCCCGTATTCGGGGCC  
GGGCCATGTCAACACTCTTGGATCCTCGCATCCATGGCATGGGCGGCATAGGCACTATCGCTCTGCAA  
GACCTTTGGCCTCGATATGCACGCCAGCCGGGCGAGCCATGTCGGGTCCATCGGTTATTCTGCTCGCCTG  
GCGGTATCTATTATGTTGATTACCCTGCTGTTATTTCTCGTCTCTGCGGTCACTATCTATCTTGCCTTGGC  
AATACTTCGTCAACGGCATCGAGTGGACCGGACCACTTCAAACCTCTCGCAAAGTGCCACTGGTTTCGCT  
GCTGGTGCCTGGGTACGGCCCTGCCCCGAATGCATCGTACCCCTGACCGCCCTGCTGATGGGCAACAG  
ACCGCCAGCAGGAGATCGGCATTGGCGCCGCCCTCGCGGGCCGCTGGTGTGCTGGCCACCATCGGCTATG  
GTGCGGTGGTCTCACTCTGCTGCTTTGCATGGGGCGTACCGAGCGGCCATCAATGGGAGGTACAGCG  
CGAGATTGGCCGGGATCAGCGCTGGTTTTATGGGGATCTTTTTTGGTGGCGACCATGCTGGGTCTGGTGGC  
TTTTACGGCAAGAGCTGGTTGGCGCCTCTGTTCTGTGCTGGTCTACCTCGTTTTATGTGAGGCGCGAGCTGA  
AACAAAGCGACAGCCATGAGGTCGAGCTGCCGGAGCCCTCAAGCTGGCTCCAAATGCCGGGATCCCACC  
CCTTGGCAAGGTGCTGCTGCAGACGCTGGCGGCGCTGGTAGTGGTGGCGCTGGCGGCGCAGCTGTTTTGTT  
CATCAGCTGGAGAGCATGGGCGAGCTGTTTTGGCCTCTCGCCGGTGTGGCGGCCCTGCTGCTGAGCCCGG  
TGGCGACCGAGATGCCGGAGTTGATGAACGTGCTGATCTGGGTGCGACAGGGTAAGAACCAGCTGGCACT  
GGCCAATATCTCCGGGGCCATGATGATCCAGGGCACTATCCCAAGGCGTTCTGTCTGCTCTTTACCCCC  
TGGCTGCTGGATGGCGCCATGATGGCCTCCTCGTTGGTTCAGCTACTGGCGGTAGGGTTGCTCTGGTGGG  
GCTTCAGAAAGGGAGTGATGACCGCAGAGCGGTTGGTACTGGCCGCGCTGCTCTATTTCCGGTCTTCTGCGG  
CTGGCTGCTGGTGGAGCTGAAAACGGGAAGCGCGGATATGAAAAAGCCCCCTTGGCAGGGGGCTTTGTTGTA  
TCGGTTAGGGCGGTGCTTACAGCGCGGCATCTCGGCCCTGCTGGGCTTCCAGCTTGGTCAGCTGGAGACG  
GTAATCTTCCAGCTTCTCGCGCTCTTTGGCGATGACCGCTTCCGGCGCCTTGGCAACGAAGGCTTCGTTG  
CCAAGCTTGCCTTCGATGCGGCCGCACTCGCCACCAGACGGGCAACCTCTTTGGCCAGACGGGCCAGTT  
CGGCGTCCCTTGTGATGAGACCGGCCATCGGGATCATCAGTTCGGTAGCACCGATCAGCTTCTTCACTGA  
CAGCGGGGCGGTTTTACCGTCCCGCAGTACCGGATGGATTCCAGACGGGCCAGCGATTGAGGAAGGGT  
TCGTTGTGACGCGCGCTGGGCATCCTTGGCATCGCATGGAGCAGCACGTTGAGGGGCGCAGCTCGGGG  
CCACGTTTCACTCGCGCGGATGTTGCGGATGCTGACGATGAACTCCTTACCCACTCCTGATCCGCCAT  
CGCGGCTTCTGTCACCTTGGCGGCGTCAACTCCGGGAAGGCCTGAATCATGATGGTGTGCGCGTGTACG  
CCAGCCAGCGGGGCGACCGATTTCCAGATGGTCTCGGTGATGAACGGGATGATCGGGTGCGCCAGACGCA  
GCAGGGTTTCCAGCACGGTACCAAGGTATGGCGGGCAGCGCGCTGCTCGGCCCTCGGAACCCCTGGTCAG  
CACCGGCTTGGTCAGCTCCAGATAACAGTACAGAACTGGTTCAGATAAAATTCGTACAGCACCCCTGCC  
GCGATGTGAAGCGGTAGGTATCGAGGGCGGTACGGAAGTACGGATGGCCACTTGCAGCTGGGACTGGA  
TCCAGCGATCCGCCAGGCTGAACTGCATCTCGCCGCGTGAAGCCGCAATCCTGATCTTCCGGTGTTCAT  
CAGCACATAGCGGGAGGCGTTCCACAGCTTGTGTCAGAAGTTGTTGTAGCCGTCCAGGCGCTTCATGTCC  
CAGTTGATGTACAGACCGGTAGAGGCCAGTGCAGCCAGCGTGAAGCGCAGGGCGTCCGGTACCGTGGGCAT  
CGATCCCTTCCGGGAACCTGCTTGGCGGTACGCTTGGCGATCTTCTCGGCCATCTGCGGCTGCATCATGTT  
GCCGGTGCCTTCTCCAGCAGGTCTTCCAGCGAGATGCCGTGATCATGTGAGGGGGTCCAGCACGTTG  
CCCTTGGACTTGGACATCTTCTGGCCCTCTTCTGTCACGGATAAAGCCAGTGTGATGACGGTCTTGAACG  
GGACTTGGCGCTGGCCGTTTTCTGCTCCTTGTGAAAGTGCATGGTTCATCATGATCATCCGGGCAATCCAGAA  
GAAGATGATGTGAAGCCGCTCATCAGCACGTGCGTTCGGTGGAAAGGCTTTCAGTGCCTCGGTATTTGTT  
GGCCAGCCAGAGTGGAGAAGGTCCACAGAGCGGAGCTGAACCAGGTGTGAGCACGCTTTCGTCCTGAC  
GCAGTACGGTTACGGCCGGATGCTGTGCTTGGCGCGCACTTCACTTTCGCTGCGGCCAACGTAGACGTT  
GCCGGCTGCTCATAACCATGCCGGATGCGGTGACCCACCAAGTTGACGGGAGACGCACCAGTCCCTGA  
ATGTGCGCATCCAGGAGAAGTACATGTTTTCTGATTGCTTCGGTACGAACTGGATACGGCCATCTTCCA  
CCGCTTTCGATGGCGGTCTTGGCCATCGGTGCCACGCGCACGTACCACTGGTCCGGTCCAGCATCGGCTCGAT  
GGGCACGCCACCGCATCGCCGTACGGCTGTTGCAGTATGTGATCCTTGTATCTCGTCCAGCAGACCCAGC  
TCTTCGAGCTTGGCCAGAATCGCTTTACGGGCGGCGAAAACGCTCCAGACCGGGCGAATTCGCTCGGCAGAG  
CTGCATCGTAGGCGGTGCTCGGGTTGCCGTTGGTATCGACCACTTCGGCTCGGCACGCACGTGGGCGTC  
CAGAGTGAAGATATTGATCATCGGCAGGCTGTGGCGCTTGCCACTTCGTTATCGTTGAAGTCGTGGGCC  
GGGGTGTCTTACGCAACCGGTGCCCTTCTCCATGTGCGCGTGTTCGTCGGCGACGATGGGGATCAGAC  
GGTTCACCAGCGGCAGCAGGATGTGCTGGCCGATCAGCGCCTTGTAGCGCGGTCTTCCGGGTTCACTGC  
CACGGCGGTATCGCCAGCATGGTCTCCGGACGGGTGGTGGCGACGATCAGGTAATCCTTGCCTTCAGCG  
GTCTTGGCGCCGTTGGCCAGTGGATAACGCAGGTGCCACATGTGGCCCTTGATCTCGCGGTTCTCCACTT  
CCAGATCGGAGATGGCGGTGTTGAGTTTCGGATCCCAGTTCACCAGACGCTTGGCGGGTACATCAGGCC  
ATCTTTCGTAAGACGAACGAACACTTCTTGCACGGCGGGCGAAAAGACCCCTCATCCATGGTGAAGCGCTCG  
CGCTCCCAATCCACGGAGTCCGCCAGACGACGCATCTGGCGGGTGTGGTGGCCACCGGACTCTTCCCTTCC  
ACTGCCAAATCTTGTGATGAAGGCATCGCGGCCATAATCGTGGCGAGTCTTGGCCCTTCTTGCAGCGAT  
CTTGGCGCTCAACCACCATCTGGGTGGCGATAACCGCGTGGTGGTACCTGCCACAGGGTGTCTTGG



CCCTGCATGCGGTTGTAGCGGATCAGGGTATCCATCAGGGTCTGCTGGAAGGCGTGACCCATGTGCAGGC  
TGCCGGTGACGTTTCGGCGGGGATCATGATGCAGAAGGAGTCTTTGCTGGTGTGCGCCGTGGGGCTTGAA  
GTAGCCCTGAGCTTCCCAGTGTCTGGTAGAGCGCCTGTTTCGATGGCGTTGTGATTAAAAGTCTTTTCCATG  
GTCTCGCCGTAATCTGGATGGATGGAGTCTGGTGTGATTTCGTCGTGGATCACAGGCGGCGCAGTCAGGG  
CTGCGCCGGATCCGGTTCGGCAAGGACGGGCTGATCCCTCATCTCGAGGGCATGGCCTGCCTGGCGATAG  
TGCTTGTAGCGCTCGCGGGCTTGTGCTTTTGTGTTTCGTCAGTGGGGACAAAATCTACCACTTGAGCGA  
AGTGTCTGCAAACAAAGGTGTCTGTTTGGCCAGATTGATGAGGCGGGCGTAGCGCCGCCGTGGCGGCTG  
GTGGCCGATCTCCACCGGCGCCTGACCGCTTTCGCCCTGCAGCTGGTGCGGCACGAAGCGCTCCGGCGGC  
AGTTGCCACAGCAGCTCGTCGAGGCGCTGAGCCTGAGCCTCATCGTCGCAGAACAGGTAGATATGGCCCC  
CTCCCCAGCTATCCGCTACGAGCTGGCAGGCGAGCCGTTTCGATGGCCGACGCCTGCGCGTCATCCTGTTT  
GCTCATCAGGTAAAAGTCACTTGGCTCATCAGTTGATCCCGTGTTCAGTACGAGTATTTGACCGCC  
TCATGAGGCTCGCGGGGTGTTTCTCCGCTCGCAACTCACTGATTCAACAATGAAACAAGGAAGAGGCGGG  
CCTCTTCTTGTGATTGAGGTAACGCCAACCCCGTTGATGCACGCATCAGACAGGTTGGGAGAGTTACT  
CTTTCTTTCGATATCCACGCCAGCCGGTTTTCAGCAGGAACTGGGTCAGCAGGGGCACCGGACGACCGGT  
GGAGCCTTTGTCCTTGCCACTCTTCCAGGCGGTCCCGGCGATATCCAGGTGGGCCAGTTGTACTTCTTG  
GTGAAGCGTGACAGGAAGGCGGCCGAGTAATGGTGCCGGCCGACGACCGCCGATGTTGGCCATGTCGG  
CAAACGGGCTGTGATCTGCTCCTGATACTCGTCGAACAGCGGCAGACGCCATGCGCGATCACCCGCCGT  
CTCGGAGGCGTTGAGCAGCTCGTGGGCCAGCGGTTGTGGTTGGCCAGCAGACCCGAGGTGTGGTGACCC  
AGCGCGATGACGCAGGCACCGGTCAGGGTCGCCACGTGATCACGTTTCCGGATCGAAGCGGTCCACAT  
AGGTCAGCGCATCACACAGCACCAGACGACCTTCCGCATCGGTGTTGAGCACTTCGATGGTCTGGCCGGA  
CATGGAGGTGAGGATGTCACCCGGGCGATAGGCGTTGCCACCCGGCATGTTCTCGCAGCCTGCCAGCACG  
CCGATGACGTTGATCGGCAGTTGCAGCTGGGCCAGCGCATGCATGGTACCGAGCACGGAGGCGGCGCCAC  
CCATGTCTGACTTTCATCTCGTCCATGCCGTTCGGCCGGTTTGTATGGAGATGCCCGCCGGAGTCAAAGGTGAG  
ACCCTTGCCGACCAGCACGATGGGCTTGGCATCCGGATGACCCCTGTATTCGATGATGGCCATCATGGCT  
TCGTTGTGCGGAGCCGCGGGCCACCGCCAGATAGGAGTTTCATGCCGAGTTTCGGCCATCTCCTGCTCGCCCA  
CCACCTTGGTGGTGTGATGTTGTGCTAGGCATCGGCCAGACGACGGGCTGGGAGGCCAGATAGGCCGGGTT  
GCAGACGTTGGGCGGCGATGTTTCGCCACGTGCGGACAGACCCGACACCCCTTGGCCACGGCCAGACCGTGA  
GCGATGGCTTTTTACCAATGGTCAGTTCCCGACGCGTCGGCAGGTTGAACACCAGCTTGGCAGCCGTA  
GACGTGGTTCGGCTTGTGTTGTTGAACTGATCAAAGCTGTAGAGGCCCGCCTTGGTGGTTTTCTACCGC  
CTGGCGACCTTCCAATAGGTATCCCGACCCCTTACGCTGCAGCTCGGTCAGGAAGCAGACCGCTTCCATG  
GAGCCGGTTTTCGTTGAGGTTGGTGTGATGGTCTTGTGATGATCTGCTTGTACTGGCGTTTCGTCGAGTTCCC  
GCTCCTTGCCGCATCCGACCAGCAGTACGCGCTCGCTGAGCACGCCCCGGTACTTGTATGCAGCAGCAGCAT  
TTGGCCTGGTTTTCCCTTCCAGGTTCGCCACGGCGCAGCAGCGAACTGATATAGCCATCGCTGATCTTGTCC  
AGTTGTTTCGGCAACCGGAGAGAGGCGACGAGGCTCAAATACGCCACTACGACGCAGGCGCTCCGTTGCT  
TCTCTGGACTGCCACTCTTTACTGAACTCCATGGAATCTCCTACATCTAAAGACAAAAGGCACCTTT  
TATTGAATAATGCGGTGCTTGTGGGGTATCAGAGGCGGAGCGAACAGCCACAGGCTCCGCAGTTCAAAC  
TGGTAAAATCCAATATACGGCCCTATTTTTTCAGGCATTCGACTAAAAACACAAGTTTACTTGGGAATGA  
CTGTGATCGTTTTTCGATATTTGTTTCAGGGAAACCTGAAAACCCAGCTGGCAGTGTATTTCGTATTGCT  
GCTTATCTTTGTGACGCAACAATTTATCAAGATCATCGGTGACGCCCGCGATGGCGAGGTGCCGACACGT  
CTGGTCTCCACCCTGCTGCTACTCAACTTGCCCAATATGGCGTTGTTGATGCTGCCATCAGTCTCTTTT  
TAGCCATTTTGTGTTGCCATGGTGCCTTTACGCCGAAAGCGAGATGACGGTGTGATGCGGTCGGCTT  
CAGCCACCGTTTTCGTGTGTCGACGCCATGTTGCTGGCCTTGTGACGGCGGTGGTTGCGGCGTTCAAC  
ACCGGCTGGATCGCCCCGAGGCCAAGGAGCGGAGTGCAGGTTGATCGACCAGTTCAAAGCCGATCCGG  
GTATCTCCTTCTGCAGCCTGGCCGCTTTATGGAGCTGCACAAGGGGCGTCTGGTTGCCATATCCAGGA  
TTTGAACGACAACGGCTCAAAACTGCAAAAGATCTTCGTGCTGCAGCGGGCGGAGGGGAACAGTCTCC  
TCGGTGGTGGTGGCGACCGAAGGGGTGGTGACGGTTCGATGAGAACGCTCTGCAGTGGCTGACCTGATGG  
ATGGTCCCGCTACGAGGGGAACCTTCTCCGGCAAGCAGTTCCAGATCTCCGATTTTCGCGAATATGGTCT  
GGTGTATCCGCCAGCAAGAGATGGAGCGTTTCCAACCGCAAGGCGGCGCCAAAGCCGACCATGGAAGTCTC  
GGTACCCAGGACAACGCCATGATGGCGGAATTGCAGTGGCGTATCTCGCTGCCCTCTCCATTCGGGTGC  
TGACCCTGCTGGTGGTACCGCTGGCGCGGGTCAACCCCGTACGGGGCGCTACGCCAAGCTGTTGCCGGC  
CATCATGCTCTATCTCTCCTACTTCTGCTGCTCAGCGCCCGCCGTTTCGGCCATCGACAGCGGTCCGGCTG  
CCCTACTGGCCGGGGATGTTCTGGTGGCGCTCGGTTACCTGCTGTTTATCGGCTGCCCTCAATCTGC  
AGGGCACAGCTGGTGAACGGGGTGAAGGGCGCTATTTCAACAGAAAATCAGCATGATGCTGCAACAT  
AGGAACCTTCTGCTGATGTTTGGCATTCTCGATAGATATATCGGTAGGGTCATCTTTATGTCGATCCTGCT  
GTGTGAAATCACGCTCGTTGGTCTGGCGGCGCTCATCAAGTATGTGGAGCAGCTCAAGTCGGTCCGGTGC  
GGCAACTACGACATGATCAACGCCCTCTACTATGTGCTGCTCTCCATGCCAAGGAGGCGGTACTGTTCT  
TCCCCTGCGCCGCTTGTGTTGGTGGCCTGATTGGTCTGGGTCAGCTGGCGACCAGCTCCGAGCTGGTGGT  
GATGCAGGCGGCGGGTTCGCTCCAAGATCAGTATCGTGTGATGGCGGCGCTCAAGACGGCGATCCCGCTGATG  
ATCATGGTGGGGCTGATGGGGGAATATGTGGCCCCCGCCGCAAGCGGATAGCTGATGACATCAAGGCGG  
GCGCGCTGTCCGAAGGTGCTGTCAGGTTTCCGCCTACGGGGTGTGGGCTCGCGATGGCAACAACCTTCGT  
CAATATCAACGGGGTGCAGCAACGATGGCGCCCTCACCGCATCACCTCTATCGCTTACCCCCGAGCGC

AAGCTGATCGACGTGGTGCAGGCGCAGGAGGGGGTGTTCGAGCGCCACCACTGGCTGCTCAAGCAGACCC  
AGGTTACCCGCTTCGACGATCCCGCGCAGATCCGCGAGCAGCATGACAAGATGGAGTGGAGCTCGGA  
GCTGACGCCCAACAGCTGGGGGTGGTGTAGTATCGACCCCGAGAACCCTCTCGGTCTCCGGTCTGCTCGAC  
TACATCGGCTATCTCGATGCCAACAAGCAGGATGCCGGTTCGCTACAAGCTGGAGATGTGGCGCAAATTGC  
TGTCACCACTCTCGGTGGTGGCGATGATCCTGCTGGCCTCCTCCTTCATCTTTGGCCCCGCTACGCTCGGT  
GAGCATGGGGGCGCGGATGCTGATGGGGATCATGACCGGCTTCGCCGTCTACGTGAGTGTGATCGGGTGT  
GGCCCCATCAGTCTGGTCTATGCGGTACCGCCATTCTGGCGGCTATCGCGCCCAGCTGCTGTTTGGCG  
GTATCTCCTTCTACATCCTCAGCCGCAAGCAGTAATCCGCACGAGGTTATGAGGAAATGCAAAGAGGGCA  
CCTGTTGGTGCCTCTTTTCGTTATTGCATTGATCCGGGATTACTTGTTCACAAATTCAGATTTGCCTGC  
TTGCTCAGCAGCATCACTTCGCACCTCGGCCAGATATCCTGAAACGCCCGGGCGCTGGCGGTTGAACA  
GGCACATCAGGTTGCCAGACCAAAAGCGGCAGTGGCGAGACGGATCAGCGCTGGGTAACGCGGATGTG  
GCTGCCATCCTCGTTCTGAATGCGCAGCCGCCAGGCGCGCATACCGACGCTTGGCCAGCGCGGTCCAG  
AACCAGGTGTAGAAACCACAGATGACGAAGGCGAGCCACAGGGTGTAGATCAGGCTCAGGTGGTGGCGGG  
TCAGCAACCAGACGGTATCTTCACCCGCGGTACGCTGGCCATGCCGGTGACCAGCAACAGCTTGGCGAC  
ACCCATGCCGATAAAGCCGGCGATGATCAGCAGCGAAGTCACCACCAGCGCATCATAGATCAGGGCGCCG  
AGGCGACGCGAGCAGACCCGCTGACGGGTATGGCTGAGTGGCGGGAGAGGGGGATTTTTGTTGGACTTTTT  
TAGGCTTGGCCATCGTTTTTATTCCATTAAGATGATGGCGGCATTCATGTAACTGGCCCTGCATCGGCA  
AGGCGTTGAATAAATGAACAAACGGGAGTGTTCATCGAAAAACACCTTGCATGGCATCGCGCCATTCGT  
ATAATCCCTCGCAGTTGCCCGGGTGGCGAAATCGGTAGACGCGAGCGGATTCAAAATCCGCCGATGAATAA  
TCGTGTCGGTTTCGAGTCCGACCCCGGCACCATTAGAATTCATGACTTAAGGCCATCCTAGCGGATGGC  
CTTTTTGTTTTCTGTGTCATGGTGGCGGCAAAATGGCGGCAGGTATTTAGATGATCGGCGTAAACCGATG  
CTCGATTCTTTCTTTCCAGTGACTCAGTTCATCTCAATTCCAAAGTGTGTCTACCCATTTTTTTTTAGCCT  
TCTGCTAGAATGCTCCCCGCTTGGAGCATCCAACCTGAGATTTTTTTCGTGACAGTAAAAGAGTGCCCCGA  
TCAGCCTGATTGGAAAAGCATGGAGTTGGAAAGACCTGAAGGGCTTGGGGTAGAGAAGAGGCTTCTGCT  
ATTGAGCAAGAGCCCGGCTGCTACTCAAGAAGATGCAGTTGCGGTGTTGGTAAGTAAGTTTGGTTTTG  
TCGGCAACGAAGCATCAGTGATGATGGCTACACCAGTCCGTGATATTCAGGTGTGTCGGGACTCTTTACC  
GCACATTTGTTGAGAAAAGGCCGCATGCCAGAGAACGTTACGTTAATCATGCTATCGCAACTCTGCAGAAT  
CCCTTTGAGGTTGGGAGGTTGCTTATGACGACGGAAGCTATCGGTATGCCTTTATAGGTACCTTTGAAG  
AACGAAACATGATGCTGGTTGTTGCCACAATTACACCAGATAAGATCTTGTGGAACCTCATGCAAAGTGA  
AGCAAAATCGATGAACAAGCATAGACATGGCAAGCTGGTGTATGCTCGTCAATAAATGAAAAGAGGCAACC  
TATGGTTGCCTCAATTTTTGAGCTTTTCATTCTGCTTGTACTTTGTACTCACCCAAGCTGGTGAGGAAAGGT  
CTCACCCCTACAATGCAGTTGGACATTCGGGGTTTCTCTATCGGTCATTGCCCAACTGGCCACCGACT  
TTGCGCTTTTCGAATACAACATTATTAATAAATGAGGAATGCGTCAAGAATTTGTAGGCGGTTTCCGCCTA  
GTTGGATGGGGCTTTTGGTTACAAATTTTCTACATTTGCATTTTCAGCGATAGATAGAAATGCTTCACTCG  
TGAAATTTATGGATCCTTGCCAAAACCGCCCGCAAGCCTTGCCGCATAAGGCTTAACAGTTTTTCCCTTG  
TGGTTCGACACAGATCCACCGTGCCGACTCAGATCCTCACGAAAAGTAACCGCAATCCGTTTTCCATCAAT  
TGCTTACGCTTTTCTCGCCGCTTGTGTGTGTGATCAAACCATCCAAAACGATCATCAAATGACGTTTTT  
GTGAAATTCGCAATTCACCCCAAGAACCAGCCACGGCGCGGGCTAGACGATAGATTTGCATTTTTTAT  
TTGTGCAAAAACGCCACATATTTAGCCCGAAGGTGGGGGGGAGGAGTGCGGATTCCTGAGCGGCGCG  
TTTTCTCCGTCGCCACTGGGCTGCAGGGCAGGGGGTGGCCACAAAAAAGCGACGCTGGTGCCTGCTGT  
TGTGTGCGGGGTGATAGTCGGCGGGTACTGGCCGGCGCTCCATCCCATCTTCTGGAATGCCCTGGCGGC  
AATAGCCAGCAGTTCGTGCTTGTGGCTGGGGGAGCATGGGGCGGGCGGGGGTCTCTACCGTCCAGCGG  
TGCTTCCCTGGTCTCTCCAGTGGTGGTCTGATCAGGATGGCAGCCCGGGTAACACTGACATGTTCCCGTA  
TCCACTTGAGGGAGGGCTTGCGGTAGCGTCGACGAGCGCCCGGTCTGACAGCACCTTGTACCCAGCGC  
ACGCAGACGCTGCGCTGGCTTCGGGTACAAGGGCTATCTGTTGGTTTGAATGGTCTTTCTTCTTGGCC  
TGTCTGACTTCCCTCGTTGTGCTGGCTTGGCGCGGCTGCCGTGAATGGCTGTGACATCCCCTGGTGGT  
TCTGGTTGGCGATCATCCCCGCAAAGCGGGAGTCAAAGTCGATGATGGCCGCATCCTCGGTACCACGAGA  
GCGCAGGCGCTTGGAGAGGCCCGTGAGCCGCTTGTGTTTTGCGTTTTGCTCTTGGTGGGGGCCACTTTGTA  
CCATCAGGTGCTTTGCCTGCACGGATGCGCTGGCGGTTTACCTTGGCCACTTCGCGGCCATCTGCTGGG  
TGATGCGCCGGCGTTTTCGCCGGCGGCAGAGAGGCTGCGTCCAGGCGCGCCAGAAGGTGGTGCATGGCGCC  
CTGATTAAGGTTCAAGTGTGATCATGTGCGCATCCCTATTCGATGATGGGGGAGAGCTGGTCCGGCAGTTG  
TTTTGGCTTGTGGCCATGTCCGGTCATCGCCCCGCTGTTACCAGGCACCGGGCCGCTGCCGTGGGTGTGG  
CTGGCCGTGGCAGCGGCCAGCTTCTCCACCAGTTCATCAGCTGCAGCAGCAGTCGGAAGATGTTACGC  
CCTCGGTCCCCATCCACGAACGGGGCGCCTCCAGGTGTTGCAGCTCGCCGGCAACTGCCCGGCGCAGTTG  
TCCCCTACCTCAACCAGATCCCCCGCCGTGGTCTGGCTCATGTTGCCAGACTTCCCAGGGTGAATCA  
TCGCCGGCCAGCAGCTCGATGGCACCGAGCGCCTCGATGAGCTTGAAGCCCGCCACCTCCTCGATGCTGT  
GCTGGGCTATCTGCAGCCGGTGTGGCCATGCTCTCCAGGTAATCATCACTCTGGTGGTGCATCTGCAG  
GGCGCGGTGCATGCAGGCGTGGTGGTGGCGGGAGAGATTGCCACGGTGTCCGGTGGCGCTGGCCACC  
TCGGCCCGTTGCTGCTGCAGCTGCTCGCCCGGGCGATGTCCGGCAGGGGCCAGCCACTGCCGAGCACGG  
TGCGGATAAAGGGCCGGTTCGGCCCGCCGAAGGCGAACCCTCAGTTCAACCAGTGTCCCTCGATGGGGAA  
TTGCATCAGCCCCTGCTCTGGCCCGCCAAACTGCACCGGCAGCGGTACCGCCGATAAAGCGGGGTGGCC

TGGTCCGGCTGGCCATCTTCGCCCAGCAGCTGTACGTCCACCGCATAGCGGGGGCGAAAGGGGTCAATTGA  
GCTGGCCAGCGGGCCGCGCTGTGCTGATGGCCTCAACCCGCCGAACTTGGGCAGGTGCATGTTGTGCGGC  
CAGCTCCGGGAACTCCCCCTCTATCTTTCGCGCCGTTCCGGCGTTTTTCACCGGTTTGCCAGGTGTTGCTGTG  
GTCAGGGTTCATCTGGTCGCCCTTAAGGGCGACCCGCATCACCCTGCGGTTGACGATAGCGCCTGGGC  
GCATGGTTCGGGATCGGGCGCCGTGGTCAGCGTGTTCGCCGCTTGATGGCTCGAAAACGCCGGATCCAGCGC  
TACGGCACGCTCAGGCCAGCGGCTATGGGCATGGCTGCCGACGAAGATGGTGCCATCGGGTTGTTGATGC  
CAAATGAAGTCGGGGACCGCGAAGGGCGGACCCGGCATGATCGAGCAGCTGATAGCCGGTACCGGCGCTGG  
TGAAGTTGGGGATAGGCCGGTTCGGTATAGTCAGCCCCATCAGGTAACAGGAAAAGTAAGGCTAGTCTGGTC  
AGTCAGCCAGGCCAGCAGGGCGGCGCAGGGTGGCATGTTGGAGGCTGACCGGAAAAGCGGCTGCCAGTATC  
CCCCAGCTCACGGCAAAGCAGTTTGTGGTGCCATTGGCGGCGGGTTGCACGTCATACACGTAACCGG  
TGAACCAGCGGTGCAACTGGTTGTTATAGCCGTTGCCAGGTCACCGGTCAGGGTCTGCCCTTCTCGGCCGGCC  
TTCGATGGTGAGAGCGGCACGGCCGCCGGCGTTGAGGTCACGACCACATATCATGGTCAGCCAGGTGGACA  
GGTTGACCCGCCAGGGTCAGGCGAGTGGACAGTTTACGCTAAAATATCTCTACCTTGCCATCAACCCA  
TTTAAGGCCTTGTTCAAAGTGGTTTCAAGTTTGTCTTGTTCGTTGTTGTTGTTGTTGTTGTTGTTGTTGTTG  
TTACTGGTCCCTTTTCCGACAGAGGCAGTCGTTTTTGGTAGGCGTTGTTCCCGCTTCTCGGGCACCAGT  
TGTGTTTCGCGCAGGGTGAAGTGCACCTTGCCACGCCAGCAGCCCCCTCTGCTCGCTGGCGGTGATGCGGCC  
GGCAAACCTTGGCCTGGCGCACCTTCACTGACTTGCCAAACAGCGAACCGACCCGGTAAATATGGCGCTGA  
CCGCCATCCCCCTTGGCGCTGGCCAGTTCAAACAGCCGGCTCAGCATCTGCTCATCTTGAACGGGATCA  
GGCCGGAGACATCGAGCTCCTTGGCCTTCTCGCCCTGCTCCGAGCTGCTGGTTGCGCTGGTCTGGCCGCT  
GTTGTCTTGTCTGAAACTGCATCGATGCGGAGACCCGCATCGACTTCATCACAATGGGCTCACCATCC  
AGGGTAAGCATGGCGGTTTCGGCTCATCGGGTAACTCCTGCCAGAAGGTGAGTGGGGAAGGGGAGAGCAG  
CAGGGCGCCGACCGTCATGCTCTGACTATGGTCTGGCGGGCTGCTCTGGCCCAGCTGGGCGGCCAGGCTG  
GCTGCATCCCCCTGGCCCTGCCAGTGCCAGAGGGTACCAGGAGAGTACGCCAGCCCTGGCCAGAGCCTCGG  
CGAGGGTGGCCAGGCGGTTCGGCACGGCGTTTCGCCAGCCCCCTGCAGCTTGGTGATCGGGGTCTGGCTGTC  
CCTGCAAAGGCTCTCCAGTTGGGCCAGCTCTGCCCCAGCGCCAGGCGGGCCGGGCGTAGCGGATCCCAA  
CTCAGAGGCTCGTCTGCTTTCCAGCGTGGCACCTTGGCGGCGGTGGGCTTGTCTATGGTGTCTGTTGTTGG  
CGGTGAGTCGGCGCAGGGTGGCGCACCACTCTGGCAGCGGCAGGATGGCGCAAAGCGGCGTCAAGGCATC  
GGCCAGCGCGCTCTCGTTGCTTGGCCGTGACCCAGGAGGGCGTGCAGCTGGCCAGTCCGTTAGCAGG  
GGATCGGCCCGCTCTGACGCTTGGCGGCAAGGGTGGCCAGCCGATTTGGGGGCGAGCGAGGCTGTATGGT  
TGCCCTGGTGCTGGCCACACCATGCTGATACGCGGTACGGTACGGCAGCGTCCGGTGACCAGTAGGGC  
GTCGAGCTCGCTGCGCAGCCCTGCCAGCGCGGCGGCGGTCTCGCTGAGCGGGTGGGGCCGGTACTGAGCC  
CGCCCCGCCAGCCCTTGCAGGCGGTTTACTGCGGCTGATTGCGCGCCCCGGGATCTGGCTTGTACCCCCGT  
TGGCCGCTCATGGATGGCGTCAGCCGATGCGGGCCATAACAGATGGCCCTGGTGCCATGTCATGCCCTCG  
GGCTCCTCGGTGGGCTCGGTTCGGCAGGATCGGCTCAGGGTTGACCCACTCTTTGCCGTCAAAGTTCGCGC  
CAGCGATCACCCAGTCAGGGCAGGGCACAAACTTGGCGGCCAGCTCAGCCACATGCACATCAGCCGGGGT  
GATGTTTAGGCCACCATCGTTCCAGACTTCCGTACGCGATCTTTAATCAGTCTTGCCTAGTAATTCATC  
CCAATACCTCCACAATCACGGCCCCCGGGCCCCCTCCGCCGATATTGGCCTGATGTGCAGCGTTGCTTGT  
ACCCTGGCCAACCTCGGCTATAGACAGAGAGATAGTTGCTGCCCGGATCGCCTGGAGCGTGAGATCCGCA  
TCCAGTGGCAGGTGCTGTGGGGTATCCCCAGTCCCCAGCCATCGTCTGACAGCAGGGGGCGAAGCCAT  
CGACCCAAGAGCCCCCACACCACCCGCATTCGGGGCGTTTCGCGTTGTCTAGCCCATTGCCACCGGGCGCC  
ACCGAGGCCGTAATGATGGCCTGAAGCGCCGCCACCACCGCCACCACAGAGGCCGCATCAAAGGCGTTA  
CCGCCAGCACCGCCAGCGTGATTGATGGTGCCACCGATGCCGGCTCCTCCAGCTCCGCCCTTACTGGCGA  
CCGCGGTGTTATCGGTGGCGGTCTTCCGCCGGTGGCGGAGAGCAGCGCGCCGAACGAGGTGGTGGCGCC  
GTCCTGATTAGGTTCGCGCCCGCCCCACGGTGTAGGTGAACGTTTGGCCAGGCACCACATCCAGCTCG  
ATTTTCGGCATAACCCGCGCTCCACCACCGCGCCAAAACCGTGTGTTGTTGTTGTTGTTGTTGTTGTTGTTG  
CACTGCCACCGCCACCCACCGGCGACCCGGATCTTGTCTCAACCGGTCGGGATAATGAGCTGGCGCGT  
GCCAGGGATGATGTCCAACACTTCAATGCGGTTTCTAAACCGCCAAAATCCAGTGTCTTGTTCGGCAGT  
CCTCCCAATGTGATCATGCTGCCCTCCACTGTCCGGCAATCTTCTCGAAAATAAACTCGCGACTGGCTTG  
GCGTAGTCTGATTTGACGGTCAGCCCCGGCGCTGGTGTGATCGTCCCCTGGTTAGCTGCACGATGCAG  
TCCCCTGCCGCATATCCACGCGGTGATCGACGATCACGCCGAGGCGGCTACCATCCGGCCATGCTCAT  
CCAGGGTCACGACGGCAGGTTTTCATAAATCTCAGGTGTGACGGGTATTTCCCGTTGGCGGGCAGCGAACT  
GTCGGCAGTGATCGCCGATGCACTGAACCCGGCGCGCAACCCATCGCTGATCGCGGTGTTGATGTAGTGC  
GTGAAATCAAACCTGCCATGTCTCCGGCGTATGGTCACATCCAGCGCGGCGCTGGCGGGGCGAATTTCA  
AGATAAAATTACGGATCAGGGTGTGCGCCCTGCTGGTAGGCATCCTTGGCCACCTTGACCGTATCAGGCAG  
ATAAGAGACTGCGACCTGGGTGCCATCGCTGGCTTCCAGCCCCATCCAGTTGAATGTAACGGCCCCACG  
GTCGGTTCCAGCAGCAGGGAATAGACCACCTTGTCCGGCGATATCGCGGGCGGCTCTGGTGACCGGCCCC  
GATATTTGATTTCCCCCGGTGCGGGATCCGGTTTCATCCGGATTCACCGGGTCGGTGTAGTTCAACCCCGG  
CTTGTAGGCCAGCACAACCTTGTGATGTGGGTGGCCACGTGCAGGGCGAGATTTCTGGGAGATGAGTGCC  
ATCCCCGATTCAGGATTTTCGGCCATTTAGCCTCCGTAGTTACATAGCTGGCAGAGAGCGGCTGGGCCG  
TATCACGCAATGCCCCAGACCGAACCAGGTCGACATCCGTTGATGCGGTGATGGTTTGTAGTGC  
GCCGAAAACCTCGGCGCAGCCAAAGAGCTGCTGGTTCGGTGAACCGGTTACGCCACGTCATAGCCAGC

AGGTGCGGCGGTACTGCTTACCAGCTCGTGGGCCAGCCGCTCCGTCAGTTGGTCGCTGTGCTCATCGAG  
CAACAGCAGGATGATGTCCCAATCCATGCCGTCGATGCGCTCCATCTGGGCGCGCAGGGTGATATCGAAC  
CGGCCAAAGATATCGACAAAGCCTGCGGTACCGCCCGCGTCTCTGGCGTTGATGAAGGCGAAC TTCACCC  
GTTTTGCGAAACAGGTGCGAGCGGTTGCGCCCTTGAAGCGCGTGATATCCCGCTCCAGGCGAGCAGTGCCAG  
CAGGGACTCGGAGCAGGTGAGCGGGTCTTGTGTCGCCAGCGGCTGTACCAGCCAGCCTCGCAGTCGGCGC  
CACAGGGCCATGATGCCCCCTGGCCAGGAAGGCAGGCTCCTGCACCCCGTCCGCGATGCTCTTGCCATCTT  
CCCACCACGGGGCGGTGCTATCCGGCAGCTGGGGCGCGGCGCTCAGATGGTCGATGCCGGTGGTTTTATT  
CATGGAGCGTCACCTCCAGCCCCGAGAGGCGTGGGATAGCGAGCCCCGAGAGGATATCCAGCTCGGTGAA  
GTGCAGGCTCTTGATCTCGGGGAATGCCTGATGCAGCTCACGGCCCAGCTGGCTTAAGGAGAAAACGGGAC  
TGCGGCCATGTGCGAGTACCGGTCGGATAGTCAGCCGACAGCCGGAACGCCGCATTGACCAGCTGCCATGA  
CCCCCGCAGACCAGGGCGGCCGCTGGGGCTCGCCAAGGTTATCGACTGGCCACAGCTCCAGATGCAAGCT  
GTGCTCGGTTTTCCGGTATCGCCATCACCTGCAGATCATCGCCGTGGCCGTGGTTGCGCTGGTTGGTACG  
TAGTCGTTAAGCTTGCTGATGAGGCTGGCCGGTGTGGTCCCCACTTCCAGCAGGATGTAGGCATTGGCGG  
TACCTGGCCCCGCGGGGGCGTCTGCTCGAAGAAGATATGATCGGCGCGAATACCCGCGACGCTGGCCAG  
CATCGAGCGATAGACGGCGTTCGATGTGATAGCGCCCCACTGCCGAGAACTGGTTCTTGATGCGCAGACCC  
AGCGCATCGTTGCTCTCGGCATCGGCGCCCGGGTGGTGTGATCCACTCCTTGTTCATCGTTGCGAGCCGAGA  
GGATGCCGGTACCGGTTCACTCAGCAGGTGGTAATAGCCGGGGCCAGATTCCAGGCCGCGCCCGCGAA  
CTCGGCCTCGCACACCACGCGGGCCACCGCTTACCAGCGGGGCTCACCACCGCTTGCAGTGGCTTGACC  
CGGTAGATGGTGCCGTTGATGCGCTCGGTGCTGACCCAGATATCGGCCGGATGGTGACCGCTTCGCTCG  
GATTGGCTTTGACGAAGTTGATTACCCCGCGGGTCTTCTGGTTCGCTTTGCGGGTCAAGTCCACATCCCA  
CGCCTTGAGGTCGAGATAGGTATCGGTGGCAGTGGCGGCAAAAGTGCTGGGCAACACATGGCCAGCCAGC  
AGGGTACGGACAAGCCAAAGCGCCGGGGTGTGATGACCACGCCGCGCACCCAGTCGCCAAAATGGGCTCATAT  
CGCTGTGCTTGGTGATAAGGGGAGCCGGCGGGCCACCACCTCCTTTTTAAGCTCGGGCTCCATGGCCTGCTC  
GGTGGTTCGGGATGCCGGTCTCGGCCAGCAGGGCCATAAAGTCCACGTTCCGGGCGCAGGTTTACAGGGTTA  
CCTCCAGATCGCCAAAGTCATACGTGCGGGCCGTACCAGAATGCGCTGCGGGTCTTCCACGAATGAG  
GATGGTGCCTGGCACCAGTCGCTCGTCTGTCGACCAGCAATCAATCTCGGTCATCACATCGCTGCGC  
AGGGTTGGGCTCGCTCGCCAATCAGCTTGCGGGCCAGCCCCGATTCCATGATGCGGTGCTTGATGTCCT  
GGCCGATGCTGTGCGGCTCTGGGTGGTGCGCGGCTGGCCGCGGCATCGAGCAGCCAGCCGCTTCCAC  
GACCAGCAGATCGATGTACTTGGGTTGCTCATTTGGTTCGTTATCCACATTTCTTGCTCCATCTCCCCAG  
GGGTGATCGGGTTGGCAAAGTGGTTGTGACCTCGCCGATGTGCATGGCCTTTGCGGGCTTCTGGTTGGT  
GGTGGTTCGCGCCGCGTTAGCCTGGATCAACTGTTGGCCAAGGCCCGGATGGCACCTTGCTCTGGTCC  
TGCTGGCGGTAGCTGGCCAAGGGGCTGTTACCACGGTGGCGGGCGGGGTGATATCCGTGGGGGAGGCCG  
CCCATTTGGGCAACACATCCACGTTCAAGGCGCCGGTGTGCAACTGGGTGCCAGGAACGATTTCGAGGC  
ATCGAGCGCGCTTGTGATGAGCGCGATCAGTGCCCGCCAGGGGTGAGTAGGGTGTGCAATACCCGCGCA  
AGGATGGCCCCCATCCGGCGCCGCGGTGCGCCACGTTGTGATCCCGACGCTGGCCTGGTTGGTTTTGTT  
CAAAGAAGCTGCCAAGCCAGGCGATCCCCTGACCAGCAGCCCCACGATGAGGGTGAAAAAATCCGCCAC  
GGGGGCCAGTGCTTGCAGCAGCGAGCGGGCCGAAGGTTCTCGGCCAGGCCGCAAGAAGGCGCCAGCAGT  
TCAAAGTCAGTCAGCACCGCGAAGGTGGCGCGCAGTTTCGTCCAGTAGATGATGGCCAGCGCCACGGCGG  
CGACCAGTGCCAGGATCGCCCCGATGATGATCACCGCCGGGTTCCAGACTCATCGCCAGGTTGACGGCGAA  
GATAACCGGGCGCAGGGCGGGCAGGGCCCTTCTTGAACAGAAGGATGGGGCCGGTGAGACCGCCGAAGGTC  
AGCGCCAGGCCAGGGTGGCCAGCTTGGCGACGCCGGCCAGCATCAGCCTGGCACCCGGTACGATGCTAA  
GGCCCGCAATGGCCAAGATGACGGCCCCACCACCTTGGTGAGGTTGGGAAAGAGCCGGGTCCAGCGCAG  
TACCAGGTACCGCCATCGGCAAAGGCGCCACCACCTTGTGATGGCGGGGAGCAGTCCCCAAAGGCG  
GCAGCTCGGATCGCGAACCAGGCGGATTTGACCCGTTGCCACTGGTCCACCATGGCCCCGGCCATCTGCT  
CGGCCTTGCCCATCGCGTGGGTGTTGGCCAGGGCATTGATACTGGTGGCCAGGCCCTGGGTGTTGCTCAT  
CAAGAGCTTGATCATCGAGACCGCCTCGTCTGAGCCAAACGCTTTTCAACTCGTCTGCTCGCGGCCACG  
GTGAGGGTGTACCATAGCGGGCCTTGAGCTTGTCCAGGATATCGAGCACCGGCAGCATGTTGCCGGCCG  
AGTCGGTGAACCTGAGCCGAGTGCTTTCTGGGCACTGCCGACGCCGGCCAGGAACGACTTGAACCTGGT  
ACCGCCTCGCCACCGCCCATGGTGGCCTGCAGGTGGCCGAGCACGGCGAACTGCTCATCCATCGAGATC  
CCGGCGGGTGGCGTTGGCGCAATGCCCTTGAAGGCGTTCGGTTCATGCCCTGGCCGGTGGTTTTAAACA  
TCTGCACCGCTTGCAGGCTTGGCGGACATCCTCCACCAGTTGGCCTTGCCCATCTTCTTGGCCTG  
TTGCTCGAAAATGCCATACATGGTGGCCATGTAGTTGGTGTGATGGTGGCGGTGTCGGCCTTGGTAGCCTTG  
GCCAGCACGCCAGAGGCACGGGCAAAGGAGGGCAGTTTCGTTGCCCTCCAGCCCCGCGATGGCGGATTGGA  
TATCGTAGGAGGCGCTGACAAACGCGCTGGCCGATTCGCCGTACTTGACGGAGAACATCAAGGCGGTGTC  
GGAGAGTTGCTTGAGGGTCTTTTCATGGACATCGAGCGAGGCCACTTCGGCCAGGGCCGCGTCCATTTCC  
AGAGCTGGCCTCAGTGCACTTGGATCGCCATGGTGCCGGCCAGCATGGCGGGCGCCACCGCCGGCGATAT  
TGGCAAAGCCGCTTTGCGCGGTCTCTTTACCCGGTTTCAGCTGGCTGTTGATGCCCTCAAGCGGCCGGGT  
AACGGCATCTATCAGGGCAATCCTCATGATCAGTTGTTTCGGTGCAGAAAGCCATGATTTATCCATTGAAG  
GCGGTGGCGATGCCCTCGGCGACGGCATGGGCGAGGCGTTGGGCGTGGTACTTGTCTAACAGAGGGCGC  
GAGCCAGGGTGTGAGCTCGTACCTTCATGGGGCAGGTAGTGGCGGCGCAGCGCCAGTACCTGTTCCAG  
TTGGTTGTGCTCGATGGCCTCGGCGCGCGGGTCAGTTTTTTACTTCGATATCCAGATCGGGGGCGTACT

GCTCGTTGACCTTGGCGGCGATCTGCAGGGCCGCGCCCGGGCGGGCCAGCAGGCCATCCAGCGCCTCTTT  
GCTGTGCGGCGTCGACGATGCGCTTGTAGGTAAGTACTGATGGGACGGCGCCACCTTGTGCGTTCATCGACAGGCCG  
TTGATGTAGCTGTTGTAGGCCACCATGGTGGGCACAAAACGGATGTCGGTGCCGGCGATGGTCAGGGTGA  
TAGGTGTGATCTTGTCTCATGGGGTGGTTTCTCTTGTTCATCAATCCAATGGTTCAGGGTGGTGTCTGGGTT  
TGGCAGCGGGCGCAGCGCCGTCTGCAGAGTGGGGATGAACCCGCACGGCCTCGCCGTAGGTGCTCCCCGTAA  
AGTCAGGTTCCGGGCGAGTGGGGCACCAGCCCCGGCGGTGGCAGGCGCTTGACCACCTTGGTTTGCACCAC  
CGTGGTGGGCTGGCTGGAGCAGGCGCAAAGCACCGCTAGGCAGAGGCTCGCGAGCACAGTCCGGACGGCC  
CGCCGGCGGGCGTGGCCAAGGCTTGTTCAGTTCATCGGCGGTCTTCTGTTCGTGTTGTCGAGCTCAGTC  
AGTGCCTCGTTCTGGTTGGCGAGCAGCAGACGCAACCCCTTTCCTGCATCAGCAGTTCCTTGGAAAGGCAG  
TCGCCTGTTGGGTGTTGACGGCCTGCAGAATGTTGATGGTGTGCTTGGCACTGGCCAGTTCCTTGGTGCC  
CTGCGTGTAGCTGCTTCGCCTTGGGTAAACAACAGGGTGCACAGTACCAACCCGATGATGGTCCGGCAGGAA  
CGGATGAGCGTGTCTCATGCCAGCACCCACCGAAGTTCGTTGAACTTGGCCAGCAGGTCGGCCAGTTTGTG  
CTCGCGCTGACCGTAGCCGGCCCCGGGCAGGCTGGCCAGATGTTGGCGCACTTGGCCACCGCCTGGGGG  
ATGCGGCCCTTGTAGCACATCGTCCAGCGCCTTGCCTCGCGGATCAGCTGGATGGCCAGGTGTCTTGGC  
ACGCGGGGCGCAAGTCCGGCAGGCCGAGCTGGTTCGCGGTAATGCGGCCAGTGTGGACAGATGCTGATA  
GCGGCGGGCGGGTGTGCTGCTCAGTGTCTTGTGACCTGCACCAGCACGTTCGGGTGGGTGCGGTAGTGC  
GTGAAGAACCCCGCGGATTGACCAGCTTGTGTAACCGTTCATCCCCAAGCCCTTGGTGCCTTCGGCAT  
AGGCGAGCAGGTCGAGAAAGGCGGCCACTTGTGGGTGGCAGTACTGCGCGGCATTGTTGTCTCCCTTCT  
TGTTGAACACGGTCTTGGCCCGCTCGCGGATGATGTCGATCCCAAGCAGTCCCACCATGCCACCAGCAA  
CGGGGTGGCTTCTGGGGGATCCCAAGCAGATGGGTACCGGTGGCGGCCGCCAGGTTGATGAGGCCGCAC  
AGCAGGGATTGATCAGGCGGGCGGCCCGCCCGCCGGCGTAGGTGATGCGCAGGAAGGCGATGGCCA  
GCGCCAGCAGTGCCCATAGACGGTGGGCCAGTTGTCCATCAACCAGGCCAGCAGGGCAGCACCAGTATGAT  
GGGGTCTTTGTTTGGCATAGGGTTCATGTCCGTGCTCTGATTAGCGACCCAGCCGCTCAAGGCGGGTCT  
TGCAGGGGACGCACAGGCGCACCCCGGGGATGTGGCGGGCGGCTTCTTCCGGGATGGGGTCTGCGCACTC  
TTCGCACTGGTGCAGGCTCTCCCCCTGGTAACGCCCTTGGCCACCTGGTTGGCCAGCTGAGCCGCCAGC  
ATGCGGGCGGCATGGTGTATTGGCGGGTTCGATCTCGTCCAAGGCGCGCCCTTAATCCATCAGGTGGCGG  
GTGTCTCCTTGGAGAGGTACGGCACGCCATCGAGGTGAACAAAGTTCGGGGAGGTGACGAAGCCCTTCA  
CCTTGTGTCACGGTCTTGTCTGCCCTTGGCCATCGAGCTCGAGCAGGTCGACGCGTTCAGTCTGACGCTC  
GTAGGCTTCCACCTTCTCCTCCTCGCGGGTATTGGCGTAGAACAGCACATCGTCCGCTCCATCCCCG  
CGCCAGCTGCCGGCCCGTTTGGCGGGCGGATCAGCAACTTGAAGTTCCTGGTGTGCGAGCTCGAATTCAC  
ACTCGGCGGGCAGACATCTCCATCCACATAGCCATCAGGAATGCCCCGGGTTTGGCGCCACCGCGCTGTTGTC  
GGTGATGGAGAGGCTGGCCTTTTTCGACGTGGACCATGGCCCCATCAGGGTGGTGTGCGAAGTTGATACCG  
GAAAAGCGTTTGGTTCACGGGTTAACCTCCCCGTGTTGAGGCTCAGATCGAGCAGGATGTTGACGGTGA  
TCCCCCTTGGGGCAGTCCACGGTGCACACCACCAAAACACCGAGACCAGGTTCTTGGCCGTCCACTGGAT  
ACGGATGTGCCATCCTGGGGGACGCGATGTACCAGGGAAACAGCTGGCCGTTGATGGTGGTCCGCTTG  
GCCATGGCGCGCAGGCTCTTGGCAAAGTAGGTGATGGCGGTGGCGGTAAGTCCCGGGGTGGAGTTGAACG  
AGCGATCCCCGATACGGGCGATGGCGCGCAGGCGCATCCGGCGCGCCACCTTGTAGGCAATGCGCAGGTT  
TTCGATCACCTGGTAGTCCCGCCCTCGGGCTCCAGGGTGCAGGCGTCCGGCCAGTAGGTACCGTCGAAA  
TCTGGGTACCACATCGGTACCGAGAACCAGGTTTGTCTCAGGGTCTGCAGGGTGGCCAGCGGCAGCGGGA  
TCCCCGTCTTGTCCACCGGCTTGTGGCCAGGCCAGGCCAGGGCGCCGGTCTTACCCGGCAGGGGCTGTC  
GGCGATGCTCACTGCCCGGTTGCACAGGCGCCCCGCATAGGCGCCGGCGAGGTTCCGGCCACAGCTGCGGT  
ACCAGAGACACCGAATCGGCTCGGATGCCATCTTGCAGGGCAGCCAGCGCCCCCTCGTACTCGTCCAGT  
CTTGACCCCCCTCGGCGGTGAGACGATGCCTGGCACGGCCAGCAGCATGAACTGCCAGCGCCCCATTT  
GGCGATGAGCTCCTGGTTGAGGGCGTGGGCGGGCTTGAATTTGCGCTCGTCCACGCTTGGCCAGTACC  
ACGACCCCTCAAACGACTGGGTTTTCTGGGCATCAGTACCAGCTCTTCCAGTCCATTTTCCAGTCCAGTTC  
GCACGTAGGCGCCGGCCTCCAGTCTGACCGGCGTGGCCATGGCGGCTGCAGGTTGGCTTTTCCAGTTC  
GCTGGCGGCATCACCAGCAGCTTGTGAAAGTGCCTCTGGGTGTGAGGGAGAGCAGCTTGGCCGGCTTG  
TTGGCGGGTGGCCGATGAACAGCAGGTGGCGTTCGACCTCCGTCACCGGCCCTGCATCTGGTTCAAGT  
TGTTGATCTGTACATAAGGCCACATGGCGCGGGCTCCTTAAGTCTCGGGGTTAGCGGTGAACGGGGTGGG  
CGCTGCCCGCCACCGACAGGGTGAATTCATCGGCCACCCACACTTCAAAGGGGGCCACGGTCCAGGCTTT  
ATCCAGCCAGCGGACTGCACCGTCCGGTCTTCCACGATGCGCAGGGGCTCGGGCAACTTCACTTCCAGA  
TCCAGGTCCGGCGCTGTGCTCGTCAATTGGCACACGTCATAGGTGGGATCGGGCAGGGCGAAGCGTTCCG  
GGAAAGGGTCTGTTTTCTGTATCCAGCTGGCGATCACCAGCAGGGTCTCGGTGCGGCATTTCCGAAA  
CGGCAGGTTTTCCAGGGAAAACACGGCGGTGATTTGAGCCAGGCCAAATCCATCCCGGTGACCCCATG  
TCCTTGGGTTCCAGGCTGATGGTGCCGCTTCCATCCAGCTGTGAGGGAACGGGCGCAGCGGGCTGGTA  
GCACGCGCTCAAGCTCACTGTGACGGGCTGACAGGAAATACCCCTGGGGATGCAGGGCCTCGTCCGTTTC  
GCTCATATCATCGAGACCCCGACCCGGTGTGTTCTTGTGCTGCGCACCAGCTGCTGGCTTTCCGGCCA  
GCAGTTGCTCACGCAGATCGGGGGCGGCTCGGCCATGTCTTTGCGGGCGTCCCGTTCGGTACCGTGGC  
GAACTCGGGCAGCAGCATGGCTTTGGCCCGGGCAAAGACGGCGGCCAAGTAAGTCTCGGTGAGCGGTTG  
TTGCCCGGGCGAGGCGGGGGCCGGGCACCTGACCCGCTCGGTGTAGCCCTGGGCTCGCAAGGTGGCCT  
GGTGACGGGTGAGCTGCAGGTTGATTTGCTGATGGCCGCCAGCAGGGCCGCACTGATGGCGTCCGCTGTC

CATGTCAGCGGGCAGGGCGCGCCGGCGCTCGAAGTCGCCACACACCACGTCAGGCCAAAAGCCGTCATTG  
GTGATGGTCTGCTCGCTGTAGCGGATGCTTTTTGCCTGAAATCATGTGCTGCCCTATCAATTGGGGCGCCC  
CTGAGGCCACGGGATTGAGCGCGGTGCGAGCGGTGAGCTGCAGGCTCATCCCCGCCGGGGCGCGGTGGCG  
TGGGAGTCGTTATTCCGGGTTGAGTGCTCGCAGGCGCATGGCGATCTTGTGGCGCAAGGTGCCGACCCCC  
ATCTTGCTGTGGGTCTTCTCGGCCAAAGCCAGCCAGTGGTTCGGCCTGCTCCAGGGCGGGCTTGTCTGCCA  
GCGCGCTGGGGCGAGGTACCCCCGCTCTTGTACGCAGCAGCAGGCAACCGGCCAGCTTGTACCATTGTCG  
GGTGGCCTGTTTCGTTGAGGCGCCAGTACCCCCGACCTTGTGCAACACCCGGGAGAACCAGGGCTCGACG  
CCATGGCCCAGCGCCGCTTGTTCCTCGGCCAGCCCAACACGGTGTTCGGCGGTGAAATGGGCCAGTCCG  
GCTTGATGTTGCCCGGGGTGCGCTGGTTCGCTCGATAGCCAGCAGCGCCAGCTGATGGCGGTTTTCCAG  
ATCGCCGATATCAAACGCCAGACGATCAGGCGTGAACACAGCGCTTCTGGTACACGGTGCCGAGCGCC  
GCCAGTCCAGTACTTGTCCACGTAGGGCGGATATTTGGGGAACAACCTCGTTCCGTTTCATCGCCACCT  
TGTCGCTCATCTGCCAGCGCCTTGAGCCGTGCCATGTCCTGTTCAGGGCAATCAGCTGCAGGTGCAA  
GCTGTTGGCCACAAGTCTGTGGCTTGCCTGGTGGCGGCTTGCCTCGCCCGCCCCAACTGGGCCTGGACC  
TGCTGCTTGTGACGCATGCCAGGTGAGAGGGCCATGGTTAGGCCTCCGGTTCGCTGTGCGCGTCAGTACC  
TGCCGGCGGGGCGGAGGGCGCGCCCCGACCGCCACGTTCGGCCTCTTCGTAGCTGCCAAAGGCTTCATAG  
TCGCCGATGGCATAGCCTTCTGACGCCAGTACTGGTTTTCAAAGCCCTTGGTGTGCTCGTTGTGGCGG  
CCTTGCCTTTCGGGTGTTGCGCTGGGTGTAGATGTGCAAGTTGGCCAGGGTGGTACCCACATCCCCTT  
CGCTGGGAAATAGGGCGGGATATAGGCCGGGCGGCCGCAATGGACTTGGCCAGCTGCTGGGCAGCGATC  
TGCTCGGTGGGCTTGGTGGCCTCGCTGTAGAGCTTGGCCTGGGCTGCGGCCACCAGGTCCGTACCACCA  
GCACCACCAGACGGGGATCGGTGCGATAGAGCGGGTTGATGGTGGCGTTGATGAGGTGAGAGGCCATTT  
ATCCAGGGTCTTGAAGTCGCCATGGCCGTCCGGGTGCAAAATAGATCTTGTGCGCCGGCGGGCGCTTTCACC  
ACCTGGCTGCCCTTGTTCACACTCACGCGCCAGCTGCTGCCAGCCCTTGTAAACGTCTTCACCCAGCGGGT  
ATTTGACCGGATCGGAGTCATCGGCGATGTGGGTACCGTTAAAGCCACCCGCGAGCATGTGAGGCCAAA  
GGTCTGGTTGGTGAAGTCGGACACCAGCTGCACGAACTGGCCTTCGTGGCCGGCGTTGGCCAGGTGCAC  
AGAGTGTCTCCAGTCCAGGCGCACGAGGAGTCGGTTTTCGGTGAGGCTGACTTGTTCGGTCCGACCCCAA  
TCTTGCAGCAAAAACGCCCTTCAACCTTGCGGCCGGTGTGCAGGGCACTGGCGCCGACCTGCACCACCTG  
GCCGTCAGTTGATCCACGTCCAGACAGGTGATGAGTTTCAAAAACCTCGGTGGACTCGAGGATGGCGCTG  
CGCAGCACGGTTTTCCATAGGGGCGCTGACCGAGAACTGCTTGGCCAACCGCTTCTCGGGTACGTTGAAG  
CCTTGGCCAGCAACCGCTTGTAGTATTGACTTCCAGGCTTCTCAGCCTGCGGGGTTTTGGTTTTGACTCACAGA  
GGGTTCTCAGCAAAACGGTTCGGGTGGGTGTGCTGCCCGCCAGGGCATCGGGGCGCTGGTCCGGAGCTTC  
TACCAGAAATTTTTTCGATCTTGGCGTTGAGGCCGGTTCAGCTGTTCCGCCAGGCCTTTCAGGGTCTGTTTCG  
AAAGCTGAAAACCTGCTCGGTGGTGACGGCAACCGGTGTGGGGTTCGGTTCACGGTGGCCGGCTCGGTGACGG  
CCGGTTGCTTGTCTGCCGTGACGCGCTGACTTTGGCGCCAAAAGGTTTCAATCTGGGTGCCAGCGCGGT  
GAACATCCCCGCCAGCTTGTTCATCTGTTCTTCGTTTCATGTCGGTACTGTCTCGGGTGGGGGCGGGTTC  
GGTACTCAGTGGGGAGCGCTGCGTTCGGGGCGCCGTGACCGCCAGGAAGTTGAACACTTTGTGCAGGA  
GTGAGACGCGGTTCGGGGTGGTTGTGCTCGTCCGAGGCAGCGAGAAGCCGGACAAGTCCAGCGGCTGGCT  
TGTCCCCACAGCCGGCAATGGGTGCTTGGCGGAAAACCTGAGCATGTTGGTGGCGGTGCTGGCGGGGATA  
TCCGTACGCCCACCGCAAACAGGTAGGTTTTGCCCCGACCGGTGAAGTTATCCAGCGGCTCAATGGAGC  
AGAACTTGTACTGGCCGCGCTGGTTCTGATAGATGAGGTTCGCGGGTTCGGGCAAGGATGGCGAACAGGGT  
GTGCTTGGCGTCCACCTTGTGACGCTTAAAGGGCTGCACGTAGCCCAGGTTCTCGCCCCATTTCTCATGG  
TTTGGCCAGAGCTGTGCGCAGTAGAAGGTGGGATCGTAGGTGTCGGCCATGTCCGGTATCCACTTGGCCG  
AGATCTCGCGCCATCCACGGACTGGCCCTCAGTGGCAATCACACCACCGCCGGTGGCGAGTGTGAGTC  
TATCGGTGTTGGCACGGCGGCCCTTGTGTGCAATTGGCGTCAGGTTATCGGGCAATGCCGGGGTAGC  
ACTCAGATGCGTTCGCGATTTCCGATAGAGGGGTTATCCGAAATCATCCGAATGAAGGCGGGGGAT  
GGGGGGAATTGGCTCAGTATCATGAGCCCCAGCTTTATGACTGGGGAGCCTCATGGCTATACAGAAGAG  
GTACGCAAAACCGCAAGCGGCTTTATCTGCGCCACTGGAGCGCACGGGAGATCAAGGAAGAGCTCGGCC  
TTGGCAGCGTGCCTGTTGACTTGTGGGCCGAGAAATACCGCTGGACGGAACTCCTTAGCGATGAGGC  
GTTGGAAGACCGATCACCCGGCGCTATCAGGCGCTGGCCGCCAAGCCGAAGAAGAACACGCGGACCTG  
GCCGAGATGGACAGGCTTATCAGTACCACGTTCGCCCTCAAGGCGGAGGCTGTCAAGCTGGCCGAGCGCG  
AGCAGGCCCTCAAGGCTCGTCCGAGGCGACTCCGTGAGTGGGCTGACGAGGTGGGCGAGCGTGAAGG  
GCGTCCGACGCGGGGAGAGCAAGCCGAAGAAAGCGGCAAGAACAAAACTGGGTCAATGACCTG  
GGCCCCGAAGACTTCGAGGGGTGGCTGGCCTCCCTGTTCCCGCACCAGCTGTACGTGCGGGAGGTCAAGA  
ACGACCCGGCTATCCCGCGCACCCGCAATATCCTCAAGTCCCGGCAGATTGGCATGACCTACTATTTTCG  
CGGCGAAGCGTTGGAGGATGCCATCTTACCGGTGGCAATCAGGTGTTCTGTCCGCCACCCGGGCCAG  
GCCGAGATCTTCCGCTCCTACATCATCAACATTGCCCGCAAGTTCTGGGGGTGGAGCTCAGCGGCAACC  
CCATTGTCTTTTCAACGGCGCGCAGCTGGTGTCTGCTCGACCAGCGCCAACAGTGCACAGGGTTACAC  
CGGCAACTTCTACGCCGATGAATACTTCTGGATCAAGAAGTTCAAGGCGGTACCCGATGTGGCCACCGGC  
ATGGGCTCACAATCCCAGTGGCGCAAGACCTTTTTTCTCCACCCCATCCAGCAAGGCCACGGGGGTTATA  
AGCTGTGGACCGGGGATGACTGGAAGGGCAAGGATCCGGCCCCGAGGCCATCGAGTTCCCGACCGATGC  
CGAACTGCGCGACGGTGGCCGGGTGTGCCCTGATCGGGTGTGGCGCTACATCCTTACCCTGGAAGATGCC  
GTATCCAAGGGGTTACGCTCATCGACATCGAGGCGCTGCGCGAAGAGACCGCCATCGAGGTGTTTTGATC

ACCTCTACATGTGCTCCTTCGTTGATGATGAAGCCTCGGTGTTCAAGTTCAGCACATGGAGCGGGCCCA  
GACCAGCATTAGCAACTGGAGCGACTACACCCGGGGACACCCGAGCCATTTGGTAAGCGCGAGGTGTGG  
CTGGGCTATGACCCGAGTCGTACCCGCGATAATGCCACCTGGTGGTGGTCGCCCCGCCGTTGTTCCCGG  
GCGAAAAGTTCGGGTGCTGGAGAAGCATTTCTGGCGCGGGATGAACTTTCGCTACCAGGCGGACGAGAT  
AGAGAAGATCGCCAAGAAGTTCCGGGTCACCTATCTGGGGATCGACGTCTCCGGGGTGGGCAGCGGGTTC  
TATGACCTGCTGCAGCCCGTGTCAAGTCAACCATCACCCCATTAACACAACTGGAGAGCAAGGCC  
GGCTGGTACTCAAGATGGTGGATGTGGTCGAGTCAGACCGCATCGAGTGGGATCAGGAAGACATCGAGAT  
CCCGCTGGCCTTCATGAGTATCAAGCGCAGCACTACCGGCGGCGGCCAGCTGACGTTCCGGGCCCTCGCGC  
AGCAGTGAGACCGGACACGCTGATGTGTTCTTTGCCATTGCTCATGCGGTAGACAACGAACCGCTCGACA  
CATCACGCCGCCGTAATAACCTCCACCTGGGCCATCAGTAAACGAGGAAAACATGAGCCGCAACAGCGCTTTC  
ACCCGCGGGCCGAGCGGCCACCCCAAGTACAACAGCAACCGGCCACGGTCAGCTTTTCCATTGCCGA  
ACCCATCGACCTACAGCCTGGATGACCGATTACACGACGCTGTTCTACAGCCCTGGGGCAGTATTAC  
ATGCCGCCAATCGACAGGCAGGGGCTGGCCAAAGTCGCCCGCCAATGCGCACCATGGGGCCATCCTGA  
TGGCGCGGCGCAACATGGTATCGGGCCGGTTTTATCAGCAGCGAGGGCGTGCCCAGGGAGGTGATCACC  
CCTTTGTGCATAACCTGCTCCAGTTCGGGGATGCAGCCCTGCTGAAATTGCGCAACGGGTTTTGGCCAGGTG  
GTGGGGCTCTATCCCTGTGAGCCTGTATCTGCGCCGCTGTCAGGATGGCAATTTCTGATGTTGCAGC  
GGGACGGCAGTTACAAACACTACCGAGCCGAGGACATCATCTGGCTGGCCCAATATGACCCGGTGAACA  
GGTTTTATGGTCAGCCTGACTACTTGGGTGGCTTGAGTCTGCCCTGCTCAACCAGGATGCAACCATGTTT  
CGGCGTAAATACTTCTCAACGGGGCGCACATGGGGTTCATCTTCTACGCCACTGACCCGAACATGGACG  
ATGACCAGGAAGCGGAAATGAAGGAGATGATCGCGAGCTCCAAGGGGTTGGGAACTTCCGTTGATGTT  
CGTCAATATCCCGGGCGGCAAGCCCGATGGCATCAAGCTGATCCCGGTGGGGGACATCGCGACCAAGGAC  
GAGTTTTCGGCCATCAAAGCGATCACCGCCAGGATGTGCTTACCGCACACCGGTTCCCGCCGCACTCG  
CCGGCATCATCCCGCCAACGGCAGCGGGGGCCTCGGAAAACCCAGAGCAGTACGACCGGACTTATGCCCG  
CAATGAGACGATCCCGATGTGTGAGCTTATCCAGGATGCAATCAATGGGGCCAACCTTCCGCGCCGGCTG  
CAGGTGGATTTCAATCGGTGCTGGAGGCGGTGTTACTGTATAGAGATCCAGCTTAGGGTATAATCGAG  
CGGTTTTTTATCGATGGTATCAGGGGGGGATTTATGCGGGTATTTTGTGCGGAATGTGGGGAAC TAGGGC  
GCATCACCAAGACCGCACCCTGAGTCGTGATACTCGGATCTGTAAGTGCACGGATGCAGAGTG  
CGGGCACAGCTGGGTGTCACAGGTGTCATACAGCAACCCACTGAGCCCATCGGGGCGAAGCAGCCAA  
CTGGCCTTGAGCCTTATCAACTCGCTTAGCCAAAGAGGGCGACAGGCCCTGCAGCGGGAAC TCAACCTGG  
GACAATGAAAAGGGGCGTATTAATGCGCCCTTTTGAACCTGTTATGTAGAGCTTAAGGGTACAAATGC  
CAGTTCCACGAGTTTTCTAGGTCTGTCTCTTGGCAAATTTGGTTACAGTTAGGATCTTTACTTAAAGGCTA  
TATTGAATGTGGCAAGAGTTGGTTGTGGAACATCTGGCGTGTATAGCGTGAAATAGTTATAACCAGAGCAA  
GAAATCCTTAGTGGTGAATTTGTAATATCCAAGGTCAATCATGCCTAGCCTGTCTTGCGAAGTATTTACC  
CACTGTTCTGCCCATATTCTTCCACGACGAGCAGTATATTAATATGGTCAAGTTTCATTGTATAACCTC  
ATTATGTAGTATCACTAATGTCTTAAACGAGACATAGGAGGGTGTGAGTGCGAACAAAATACTTTCTAAAA  
GATGATGTCATTAGTTTGCTACGCTATTAATTTCTGGATTATTTCTAATGGCAGGGTTGGTTTTATATAGGTA  
TAAGCTTGTATTGTCATATATCCCCATAGTTTATGTTGGTGTTTATAAATCTATGGGGATTTTTATAATG  
GATTATGTTGATTTATATTTCAACAGTCATTTGTCTTAATTTCTTCTGAGATAATCCACTTTGATGAAG  
CATTGTGAGGGTTGCTTTTTCTGTCAAATAAGCCCCCTTGTATTTTTTATCATACCATACATATTGGTT  
CCAATATGTATTTTTAAGATTGAAAATATTATTGCTTCCCTAGTATTTCAAATTCAGCTTGATTCGGAGAA  
TGCCAAAGTTTTATGCGTCCATTTTTTTTTATCGCTATAGCTGAAGAATAAATATGGATTATCTTTACTAC  
GCAAATAAATGATTTACCTCCATCATTTGGGACTCTTACGAGGCTTAAAGGTGTTTTTGTCTCCGTGAAC  
AATAGAATAGTTGTTTTCAATGCTGTCAACAGTTAGCTCTTGGTTGTTTGTCAATCTTTAATTTTTATG  
ATCTTACCTGTATCTCTATCAAGCTGCTTTTGTGTCATGATGCGTTAGGTAAGTACTAGCCAACTGTTAGACT  
TCCAGCGCCAGTTAAATGGGATGTTAAGGTAAGGGTCATTAGCATCAGCATAACCGGGTTCAGCTTCTAT  
ATTTGAAAAGACAGTATCGCCGACTATCATCCAGCACATCTACTAGTTCTTTCTGTGTTTTGGGTTTAATA  
GTCGCGCCGTATCTATTTTTCGCTGACAAAACAGACATACATTCTTTTTGCAAGTTGCTTTACCTGTGT  
CACCATCAACTTTTTACATATGTGTTGTACGGTTATTCTCATTGTGCATACCAGTGTTCATTTTCATCTTT  
ATCAAAAAGACATCCATTTGTCTATCAACACCTGAGCTTCATCGCGAGCATATTTTTACGTTTCGTTAATA  
TCAACGGACATTGTTCTCATAAATGCAGCCAAAGGTCTTTACTGGCTTCCATCGCAACCAAAGCAACGG  
GTTTCATATTGCTTGTCTTGTATCCTCCCAGCCAGTATCTGTCTTAGTCCCAGCTTCCAGATCACATC  
GCCAGATGTATAATCTAGAACAGCACCGTTTGTGAGTGGGCATGTTGTTTCAGCACCTTCCGTGCAAATATAA  
GCCTTAACTTGGCGAACCTTTTTATAAATATCACTTGGACTCCTTACTACATGCTCAGGACTAAAAGAAT  
CCTGGAAAAGGTGTACTGCTCGTCCAAATAGAAAATAGTTATAGTCGACATCGGTTTTTGGCAGAGCTACC  
ACCGCCATCCCATACGACAATACGTTTATTAGTTGCCATCGCGGCAATTGATAAAGTGAGTAATAAATCGT  
TCTTGTCTCTTTGGGCTGATTTAACTCCCCCTTGTGTCATTATCATCATATCGACGCATGAAATGGT  
CTTGTGTTGATATCTGCGGGTCTTGTGAGAAAACCGCATCGAAAACAGTCTGGCCCTGTTTTACTTATCAA  
ATTAGCAACATTCATCCCTCCGAGATCAACCCAGCGTTGACCCACAATAGCGGAGTAACTGCATCATA  
CTAGGAGCATAAAGACTATTGTCATTAGTGTGGCTCTTTATCTTGGCGACTTCATCATCAGCTGTGCTAA  
TATCGACATTTTTAGCCAAACCACTGGTCCAGGATTTGCGTGGATCATTTTGGTCAACACTGATTTTTATG  
CTCAGCATTCAACACTTCGAGCGCAGATGTTCTGGTTAACCATTTCATGGCCATTGGGGTTATACCTCCA

GC GCCCATTGGGTAAATGCGTGTACTTGTGTGGTGGCAAAAAAGATGCACAAAGACAAC TCTTTATAT  
TCATAAAGTCTTACCCCTAAAAAGTCTAGTTGTTTTTAATTAAGGTAGTATGTCAATAATCACCATGTT  
GTCATGGTGAAAAAAAACATATACTGATATTTAATTAGTCACAATGATTATTTTTAATGTTGAGTTTGT  
ACTATTCGGTGCTCTCGATTTCTAATCGAGATGTATCTACAATTACTGATTTTTTATTAACATTTTTCGTT  
TGAGTCTGTCTTTGTTCTGTTAGCTTTAAAAACAGCTAAAAACCAATAGTTTAGTCAACTACATTCTAGTT  
TTTTATGGTCTCAATTTAAATCGTGCTTCAAGGTGTCTAAAATAAATCAATTTGTGACTCATTTGTGGCTGT  
TTTGGTTGTGTTATTTGTTGTTTTTTTTGAAAAAACTAGTCTAATCAATCACTTTTTGTTTTTTTTTAG  
ATTTTTCTATTATTGTGAGTGGTTGTAACCTGGATTTGTTTATTTTCAATAAGTAGAGCTGAGTAAGCTA  
CTGTTAATGACTTTGGGTAATGTATTTTTTTGTTATCAGGCTGGTTCGTTTTGGATGGGAGGATTTTTAA  
GAAAGCCGTTAGGTTTCTCAGTCATGAGGTGCTTGTATTAAGTATTGTTAAGTATGAGCGACTATGAG  
TTACCAATCTGCTGGCGTATGAAATTTACATTCACAGTTCAGCTTAATCAGTTAGAGAGAAAGCCGTTACGAG  
TGGACATTTTAACTATATAGCTAAATCGGTATAGCTTAAGTTTATAGTTGTTTTCTGTGATAAACTTAA  
CGTATGTATTGAAGTAAAGGTATTTTTAAGTGTAGATGTTGGTTACGAGGTGCCCATAGAACATGGTGATTT  
GCTCTATATAAAATGTCTGGTGTATCTTCTTGTCTTAAAGACAAAAGTTTGTGCGCAACAATATGAAGCAG  
ACTATATAGCAACATTGGGTAATGTACCTATGGAGCTGTTATCTAAAATAGCCCGTTGTTCTGGGAAC TAT  
TAATATAGTTAGGTGGAAGTAGATATCAGCAATTGTTGACTTGTATTGAGGCTGATTTTACATCGAT  
TATCGTTAGATCAATAGGCATGTTTCCGTAGGTCATCAGCTGGCAGCCGAAAGAACTCGGCATTGCTGAT  
CGTCTCTTGCCGGTGCTCGACTGGTGGCAGTGGCCACGTCCGCAGATCGACGGTATCGCGCAGCCGGTCA  
AGCTGGACGTGGGCTGTCTCCGCGTCCCATCTCCCAAGGCCCTCCAGCAATACCAGTGCATCTTCGGCGC  
CGGCGGCTGTCTATGCTGGCCAGCCAAGCCGCTGTATCCCCGACTCGCCAGCAAGCACCGCACATCCTT  
GAGCTCCGTCTGGCGTTTTGCTCCCGGCTGTGGCTTCGGCTTCAATTTGATACGGTGATGGCTCGTTT  
GGTGATTCGAACGGATGCCGTTCCGGTCACTTTCAACTCACCATCCC GAATGCAAACAGACC GGTTCCCCG  
CTCTGACAATCAAGCCGCATCGGACCATTGCCACTTCTTCATCACATAGCCCCAAATGGAATAGATTTCAT  
ACCGCCCAACGGATCCTCTTTAGATCCTTCGAAAATCGTTCGCGTACAGTTGTTGCCAGAGCTCCAAGGGGG  
AAACCCCTTCGCTTCGCTCGGTACCCACTAACTCGCTTCGCTCGCCACAGACCAAAACCCGCTGCCTT  
GGGCTCGGTGGTACTCTGTGAACCACATTTACGCAGCACCCATTTCCCCACACGGGTCTGCTGGATGAG  
GCCGTACAGCGCCCGCACGCCCCACAAGCTTGGTTTTCGGTTTCGCGTACTGATTGGGTTAGGCCAAAAGCG  
GTGCGGTGGATACTCAAGGGGCGTTTATCGCGCCGCGCAGCAGGGGCGCCCATGGCTTGGGTGAAGTTCCT  
TCCAGTCCACCGCTCGGCATAGCCGCGACTCTTCCATGATGGGGCTGGCCAGTGGGGCCAGCAGTATG  
CCCCCTTGCCCTCTTGACAGCGGCCAGGTAGCCGGCGCAGCTCCCGCCAGATCCCGACCGGCGGCCCTTTC  
AATGGTTGGAAC TGCGCAGGCCCCAGAGCGAGGCCAGGCCCGCACTCGGCGGGCGCCTTCGGTTCGCGG  
CGGTCTCGGCTTCCAGATCGCCTTCGTCGCGGACCCGGTACCCGTCGATATTCTTGGCGATGTATTTGAC  
GATGTAGCCGACGGCGCCGCCCTTCTCCTTGTCCATTACCTTCCAGTCAAAGCGGGGCGTGATGTCGCTA  
TAGGGCTTTTTGCTGTCCGGGTGGCGTTTTCGTTCCAGGTCGCTTTGTCATGGCTCAGGGCATAGCGCT  
GCAAGATGCCGATCAGCCGGTGCTGATGCTCAGGTTTAAACCAGATCAGCAGGTGCCAGTGGGGTGTGCC  
GTCGTGGTGGGGTTTCGACCACCCGAAAGCCGAAATAGTCGATAGGGTCGGCCACCAGGAATTTCCCCCGC  
TTGGCCAGGTTGCGATCGAGGGCAGCACGGCAGCGCTTCCACAGCTCGCTGATGTAGTGTGTGAGTCCG  
GAGGGGATGAGCCGTGCTGCTTGGGGTCTCTTCTGTGCTGTCTGGTCCGCGGTTTGGGAGGCTCGTAC  
CGTCTTCCAGGGGTGGAAGCGGCTCGGGGCCGTCCAGGTGAAGAACAGGCCACATAACCCATTTTCGTCA  
GCCACATCAGAGAAGCCGCGCGCTCGAACAAATCAACTCATGGCGGCGGTTCTCCGGGTTGGCGATGGAGG  
CTTTTACC GCATCCTCCAGACTGATGATGATGTCGTCCTGGGCGTTATAGGCTTCCATGTCTTTGAGCCA  
AGCGGCGGCCATATGCTGACGCTCGATAAAGGCCCTGCAGGCCCTGGCTGGACACGTAGGCGGATACCCCC  
TTACGCACCTTGCCGAGCAGGATGGCGCAATGTTCTGTTGTATTGATCCAGATTTTTCGCGATGCGCCTGG  
CCCACACTTGGGGTCGAGCCAGCGGATAAGGTGGTGGGCGATGAAGTCGTCGCGGCTTTTCGGCCGTTCT  
GAACTTGGGCAGCGGGGCGACATGCCCCAAGCGGCCAGCGGTTGGCGGCACGCCTTCCACAAGCGGATC  
GCCGTTACCTGCTCGGCCGCCGAAATCGGTGATGGCGTTAAACAGCCGGGTGACCCGTTTCGGCGTAGTTGA  
CGGCCAGGCGCTCGCGACTATCTTTGGTGCAGCGCTTCGAGCGGTTTCGGGGATCACGTTCTGCACCTG  
ACGCAGGGTGGTGTGTCGGCTTGTATAGCCAGCGGTTGGCGTCATAGCAGATCGCCACGCCTTTGAGCACA  
TCCGGGGCGCGACGGGCGCAGTAACCCACGAACTCGGCGATCAGATCGTCCGGGCAACTGCACCCCTG  
GCCGCGCTTCTCACGCGGGATCGGCCGCTCCAGCAGGTCAAGCGCCAGTCCAAGGCATAGGCGCCAGG  
GATGCCGACAAAATAGCTCTTGTATGGCTCGACCCGGGTTATGATATCGCCGCGCGGAGCTCCCTGCGC  
CGAGCGGCGGGGAGGCGGGATGCGTCGAGTGGACAGAGCGAGACACGACGACAAGCCATGATGCGACGCG  
CCATGGCTTTGGTGGATGCTGCCAATTTCCAGGTAGCAGGTTGCCTGGGGGATATGGGTTTGGCGTCAA  
CAGCTCGGAGTGGTAGTCCCGCATTAGAAGGGCAGGGGCTCGTCACCGCATAGGTGGGCAAGATACCCT  
CTTGGTGGGCGACGGTGTCTAACACCTCGATACGGGCACGGCGCTCCTCTCTGCATTCGAACAGCAGGCG  
GCACAGGGCGTATTTGGGGTCTGGCAGGCGGGCTCTCGTAAAGTGAGGAGCTGGCGTTGGTACTGACGA  
AGGGTTGCCAGTTTTACCTTGGCGATGGCGGACAAGGTGGCTATGTCCGGCTCTACTTCCGCTTGCAGTG  
CTGAAAAGTCCGATGTGTTCTCGGTTCATCGGATCACCTCGCCAGTCCATGCAGAGGAGCGCACTCTTTC  
CACCAGTCCCGATTTTCGGTGGCAAGCGGAGTTTCCCCCTGGCCGAGTCCAGCCAGTAGATGGAGCGGA  
TCGCCCCAAGGGCGAGCACCTCAGCCGCATCAGTCCCATAGGTGGCGTTTCGAGGCGCCGATGTAATCGGC  
TCGGTAGCTCTGCCAGTGGAGCCATAGCCCGCTTTTCGGCTGGTCCGGCTCACC GGTTTCGGCGTATTCA



TTATCGCTGCTGTCATCATCCAGCAGCGGTTTTGGGCTGCTTGTGGCCACAAGCTGGATCTGAATGTGCT  
GCGGGCCAGACCATAACGCTGCCCAGGCACACCCGATTGTCATCAGCCCGGGCGGCAACATGTCGGCCAG  
CAACCCCTCGATGAGCTTTGGGGCCTGGCTGGCTATCTTGATTGCGTCACTCATAGCTACTTCCCTCAACG  
CTTTCTTACGGTCAGTTTTGTTGTACCCTTCGTGGGTTCATCAGCTGATAACCGCTGGCCCCACAGGGCCGA  
AACAGGCGGTATCGGTAGCCCACTGCAATGACATCCCCACACCCGGATTGCAGCCGGCGAGGGCGTTGAC  
AGGCCAGCACTACTGCCGCTTTTGCCTGTATCTGGGCCGGTATCCGGCCAATGCTCTTGAATCCTTCCAT  
GTGCATTGCTCCAGGGGCTGCCGAAGCAGCCCTTGTGGATTAGTTGGGATGGGCCGGGCGGACTTGAT  
CGGGTATGATCAGAGAGCCTTTTCATCAGCCATACGGCGTAATCAGACAGGCCAGGGGTATTGATGATGCG  
CAGCAGCAGGCCCGCCCAATCTCGCGATAGCCCAGCTCGTAGTTCTTGAGGGTGGCGGGCGGGATATCT  
AACTGCGCTGCAAATTTGGGACGACTCATTCCAGAAATTCGCGCAGTTGGCGCAGGCCGTTGGCGGGTAC  
TGGCATTGAGGGCAGTCATGGACGGCATTTCAGAGTTGTGAGGGTCATGGTTAGGCTCCTTGATGGGCA  
TTAAGGCGATTGATGTGACCAAACAGAGAAGCCAGACCAGGGCGTTGGCGCGCTGGCTCAGGATCGTCA  
GGTTCGTTTTCCGAGTAGCGGGCGGCATATGGGCCAGCAATACGGCTGTTCTGGATCTTGCAGTTGCGCAG  
CGCGCAGGGGATTGCTAGAGTTGCCATGTGCACTTCCCTTCCAGAGTGGTTGATAGAGAGCCCCGTTAG  
GTGTTTTGCGGCACCAGTGATCGGGGTTTTTTCTTGTCCGCAATTTGCGGTTTGTGGGTTGTTGACCAGTG  
TCATCAACAAGCCCTTGCTCTTCGCCAGCCGGTCGGCTGGTCTGTTACCTCTGGTTTTTCTTCTGGTGG  
TGCTATTAACCGGTTTCGCCATTCTTCGAGGCTGACCGCGCCGTGAAACAGGTGCTGGTACCCAAGGCGG  
CGCATGGCCAGACAAAGGGCCTCGCGGTCGCGCTCCCCAAGTGGGAATTCAGGCCTTGCCATCGAGATCG  
GTAATTCGGCTTCATTGCAGATGGCTTTGCGCTGTGGCTGATTGAGCTCGCCCCAATACTTCGCAACCCT  
GCAATTTGGCGTGGTAAAGCGCTTCACGCATTTCCGCCAGCGCTTCTCGGCTGCACTCGCTCGTAAATTC  
ATCTTTTCCCTCCTTCTCACATCGCCAGTGCCGCAAGGGGCGACACCACCTGAAATCGCTGTTTCGACGTC  
TTGATCAGCAGCGCCACTGAGCCCATGGCCGCTGCGGCGATGCTCATGAAAGAGCGGTGCTCGTTGCTGG  
TGATACGGCCGCGTTCTGTGAGCTCCAGGGTGCCTGGCCGATGCTCGCTATTTGCGAGTTGAGCTGGAT  
CACCTGGTGGGTGAGGATGGCGCCCGCTCGGCATCGGGGATGGCGACAGCAGTCAGGCCACACTCAAAC  
AGCAAGGCATCGAGTAGCGTTTTCGTCTTTGGTCACTGGTAAAGCGCGATCAAGTCGTCACCCGACAGCT  
TGTGTTTTCTGCTGCTGATTGAACTTGTTCGCGCAGCACATGGGCCGACATACCCATGCTGGCGGCCAACTT  
TTCTACGTTGCGATCCTTCACGAAACCGGCGCAGGCACTGCGGTAGTGGGGGTGTAGGTTTTCTGGTGGTA  
TTCGACACTCTGATTTCCCTCCAAAGGTCGTTATGGTTAAGCCGCCAGCCTGAACTGGACTGTGGGGAAA  
GCATGGCCATCTGATTTGGCGATAAATACATGCACTTTCACCATGACCAGTCAATGCTGCGGGCTTTTT  
CCAATACATCTAGCCGGCCGCTTTTTGACCCAGTGGCGCGGTATCGACAGAGACGCCGACCCACTCGGC  
AAATTTGGCGATGGGCATCAGCGGTGGAGTGTGAGGGGAGATCACGAGATTGATCGCGCTGACGGTCTGTC  
GGCGGAGCATGCGAAACGGCAGGGTTGATATGACGTGGTGGCATAGGGCAACCCCTTATTGCACGGTACGA  
GGTTGTGCGGGGAGGCTTTAGCTTGGCCGAGTCAGTGACTCGAGCTTGTAAAGCGTCTTTCTGGGA  
TAGTTTTCATCCCATTGGGAACTGCAGATCTCGTAATCCCAAGCGCATTTGCTGCTTTGCTCACACCACC  
GAAATACTCAAGGACATCACTTTTTTTTACAGAACCCCTCCAGCGTCAGAAATGCTTAACTTTGTCAAATC  
GCTTACCTTTCTGGATGGTAAGACCGCTTAAACATCGATCGCAAGCACTTTTGACATTGTTTTGTTTAGAG  
TGCTAAACATGAAAAGTGAACGCATCAAAGAACTAAGGAAGAAAACAAGGACTTACCCAGCAAAGCTGGG  
TGAACCTGTTGGGGCTAGCCGAGCATCGGTATCGCAATGGGAAAGTGGTGAACATTCGCCTAGTGGGGAT  
TACCTGATTGCACTAGCGAAAGCGTTTTGGGGTCTCCCTCATTGGCTTTCTACGGGCAAGGGGTGCGCTG  
AACTGTGCAATGTTGAACCAGCCGTGATCCCGCAAGGGAACCGAGTGCCGATTTCTGAGCTATGTTACAGGC  
TGGTCACTGGCGTGGGATGTGTGAACAGGCCACGAGCTTTGATGGCAATGTGGAGTATGTGTCTGCCAGC  
GTCGATATCGGCCCTTGTGGGTTTTGGTCTTTGGTTGCGTGGTAAATCTATGACCCCGTTTTTCAACGAAG  
GGGATCTGGTGTGCTTGACCCTGACGAACAGCCGCGCCCTGGTGAATATGTAGTGGCCAAAAACGGCGG  
CGAAGAAGCCACGTTCAAGAAGTACCGGCCGCGTGGCATTGATGAGAACGGGCAAGAAGTTTTTGTAGTTG  
GTCCCCCTTAATGATGATTACCCCAACATGCACTCGGATCGGCAGCATATCGAGATCATCGGAGTGATGG  
TCGAGCATCGAAGTTTCAGAAAACGATAAAGAGTGAATTTTTAACGTTCCCATAGCGACTTCACTGGCAA  
AGAGCGTTAGGCAGCCCCATTGATTGAGACTATTAACCTTCCCTCTCGGAGAAGCTTCTATGATGCCAAT  
GATTTTTGAACTGGCAATTAAGAAGCTGAAATTTAGTGAATTGCCTTTTTATAAGTCAATGTGGAGATAAAGA  
TAGGGCGTACTGCAAGTTCTTAGCTGATGCCACGTTGAAGTTGCTCTGTCTTTGCCATCATGTGGTGTCT  
TCTTGGTAGAAATTTGACGCTGACTTTTTGAAGGGGGCGGTGCAACTGCTTTACATTTCTAGAGCGCTGC  
GGTTTTTTTCCACTCACTACCGCAAGAACTGTTGTTACTCCCTACAGGCCACAGGCACAGGATGCATCAA  
TCGCATACGCAGGTGAGAGCGCTAACCTGCTCGAAATTCGGGCGGTTAGCCCAACGAATCCAGCGCCAA  
CAGGCCGATACCTAGCCAGTTGACTGATGCGTTAGGTACTTTAATCAAACCTGATTGCGATACATTCCTG  
TCAAACATTCAGACTGTCGTCAGTGAGTTTTGTAGCAATGTGTCTGAACATAGCCAGGTATCAATCCCTG  
GGTTTGTATACATGCATCACTATCCGGCGTCAGGGAACATATACATTTCTATCGCTGATCTGGGAGTCGG  
GCTGCTCAACAGCCTGCGTGAAGGTTTTGCAACTCCGGAATCACTGGGCTAAAGACCTGCCTGATCAGAAC  
CTGATTTTTAGAAATGTTTAAATGAGGGGCTGAGCCGCAAGCATGATGGGAGAGGAACTGGTCTGAACCGAG  
CCGCAAATATCGCGATCCAGTTTGTGGAAGACTCCATGTAAGGCTTGATCGACACGTCATCGACTTGTA  
TCCCAATGGCTCTCGATTTGAGGCTGCAGCCACAGCCACGGCGTTAATGAGTACTGATTGCTTTCTGGCG  
AAAGGGACACACATAACGCTCTGTTTTTCTCGGACAAAACCTGTAGTGTTCCTTGCATATCAACCTCAC  
TCTGATTCAATAAGTTTTATGAAACAGATAATCGCACGTATCAAACCTCATCGATTTTCATGGGCTTTGCTG

AGCCGAATGCTGATGGAACCAAGGATGGATGGGGAGTTACTGATGGTGAGGCCGTCGCGGCAGCACTCTC  
AAACTACATCTCTAATTCTCCGGAAGTGGATATCTATGATATCTCACTTGAAGGTGTCAGACGCATCGAT  
GCATCCTTCCCTCGTGAGGCGTTCATCATGCTCGCAGCAAAGTCCGTGGGTAAACGTGGCTTTTTTGTCA  
GTGACGTTGCTAATGCTGTCTTACTAGACAACATTTCGTGCTGGAGCTGATAAGTTGAGCTTTCCTTGCA  
TGCCTGCTGTGAGGACGTGTGGAGGTTTTGGGGCCGGAACCCGAAAAGAACCCAAAAAGAGCTGTACAGC  
TATGTTGTGAGCAAAGGGTGGGTGACCGCTCGGAGGTTGAGAGGTTATGCGACCTGAAAATCAACAATG  
CGAGCAACAAGCTAAAAGAGCTGGTTGATGAAGGTTTTTGTCTAGAAAAGAAGGCGTTGCTGAGACTGG  
GGGATTGAATTTTACTACTTCCCTATCTATGGGCAGGGTCAGCAGAAAACTGCTTCATAAAAATTTCTTG  
ATCGAGAAGATCCGCTGTGTTACTTTAGCCAATAAGGAGGTCTAGTTCGGCTCCTTGAAAAACAAAGGC  
CATTCAATTTTTTTAGTGAAGGCTTTTCAAAGGTAGGGTGTTCATTGTTTTTTGTGAATGCCATACGG  
CGAGCAATCGTCTTTATCAAGAGAATTGAAATTAATGTTAGCAAAAATCAAAGATGTACATGTATGTGCCT  
ATCTGAGGCGGCTAAAGGGCGTTTTGGAGTATGTGACTTCACATTGGCGTTCTTCGCGGGGAGTTAGTA  
ATGTTTTGTGTTCTAGAAAACAAAAAAGCCCAATGTGGGGACATTGAGCTCCTTTCTTAGACACACACCG  
TTGAAATTCGGACTGCGCCTGTTTTGTTTTTGCAAACTAACTATAGTCGCGAGTCCGATTTTTTGGCAACAA  
GTTTTAATGAGTCTCGGCTTGTCTTGGCCAGGTCTCAATTTACAAAAATGGCTTAGTCAGTAGCTTAGTCA  
GTAGCTTAGTCAGTAGCTTAGTCAGTAGCTTAGTCAGTAGCTTAGTCAGTAGCTTAGTCAGTAGCTTAGT  
CAGTAGCTTAGTCAGTAGCTTAGTCAGTAGCTTAGTCAGTAGCTTAGTCAGTAGCTTAGTCAGTAGCTTA  
GTCAGTAGCTTAGTCAGTAGCTTAGTCAGTAGCGATGACATGGAATAGTTTGAAGTCTTTGAGCATTAT  
TGGCAACTTAGTAACAGGTTACCACGCGATGACAGTTCGCAAACTTGATGACGGCAAGCCAAAACCTG  
GCTTGGCGAAGTTTTATCCTCAGGGGCGTGATGGCCCTCGTAAACGCAAGCGCCATGCCACTAAGGGCGAA  
GCCTTGGCGTGGGAAAAGCACATGTTAGCCCAACCTTGGCAACAGCCAGAGGCGGGGAATGTGGATGAGC  
GGCGGCTGGGCGATTTGGTGGCTCTTTGGTATGGCCGACATGGCCAGACCCTGACCGATGGCGACCGGGC  
CCGCGACAAGCTGAATTTGGCTGGCGGATGCGCTAGGCAATCCCATAGCCACTGAATTTACAGCCCAACAG  
TTTTGCGGCTATCGTGAGCGGCGACTTGGCCGGCAACTTTATGTGCTTGGTCAGCGCAAGCAGGTATCAC  
CGACCACTATCAACCGCAACTGCTCTACCTGCAGGCGGTGTTCAATGAACCTTGGCCGCTTGGGTGAGTG  
GACTCGTGGCAATCCGCTAGAGGTGCTGCGTCAATACAAGGTACAAGAGTCCGAGTTGGCATTCTTGAAC  
CAGGATGAGATTGAACGGTTGCTGGCTGCCTGTGCGGGACTGAAAGACTTGTGGTTGATCGTGATGCTAT  
GTCTCTCGACTTGGTCCCGCTGGTCCGAGATCGAAGAACTGACCCGCTCACAGGTTGGCATTGGCCGCT  
TACCTTCACTCGCACCAAGGGTAAGAAGAATCGCACCTACCAGTACCAGTGGCGGGTTGGTGTGGCCACTG  
CCCAAGCGAACCGGCCGACTGTTGCGGCGACTGCTACTCTGAGTTGAGAAAGCGATACGGCGTGCCGAGA  
TTGAATTTGCCGCTGGGCAGAGTACTCACGTTCTGCGCCATACGTTTGGGAGTCACTTTCATGATGGGTGG  
CGGCAACATCTTGGTGCTACAGAGGATCCTCGGCCATACCGATATCAAGATGACTATGCGTTACGCCCAC  
TTTTGCCCGGACCATCTTGAAGACGCTGTCAAATTAACCCGATCACTGCGCTGAAAAATGGCGGCAAAA  
TGGCGGCAGCGCTCACCAGCGCTCACCAGCGCTCACCAGCGCTCACCAGCGCTCACCAGCGCTCACCAGC  
GCTCACCAGCGACACCCAGTGAGCCTCGTTCATTCTATGTAACCCCTGAAAACACGGCAAGTCATTGA  
TTAAGAATGGCTTGGATGGTTTTCAAATCCGCCGTGAATAACCGTGTGCGTTGAGTCCGACCCCGGG  
CACCATATCACAGTTTTCATGCCGTATCACGGCAGACCTGAAACCCGCATAGCTTAAGGCTCTGCGGGTTT  
TTTTGTTATGTCTTGTGCTATCATTTGGTCTCATAGCATACCCCAAATACTGGGGGCTTTTCTGGGGGCTC  
AATGTTAAGCCCCCAGAATTTAGGCCCCCAACTGTGGGCCAACTGTTAACCTGCAAGGCTGCTAGCTCGA  
TGCTTCCGCCACAATCTGCAGTAACTTAGGCCCCCATCATTGGATATGGAGGCCCCAGATGCCTTTAGA  
TAACATCACAGTCAAGCAGGCTATATGGAGTGGCAAGCCGAGCGGCGACAAGCTAACGGATGAAAAGGGC  
ATGTTCTGCTGGTTAACAAGTCCGGCAAGTATTGGAACTCAAGTATCGTCATGCGGGAAAAGAGAAGA  
AGCTCGCCCTAGGTGTCTATCCCGATGTGTCCCTGAAAAGAAGCGGAGCTAAGCGGGATGATGCTCGCCG  
CCTGATCGCCGAAGGGTATGACCCGAGTCTTGTCCGTAAGCAAGAGAAGATCGCCAGTAGGCTTGGCAGT  
GAGAACAGCTTTGAGTACTGGCTCGGGAATGGCACCATAGCCAACTTGCCATTTGGAGCTCTGGTCACG  
CCACCCGAGTAATAGAGTCTGTTGGAGGCGGATGCCCTTCCCTGAGCTGGGATTAGTCCCTGTACAGAACT  
GACGCCCCCTATGATGCTGGATACCTTGCCTAAGGTGGAAAAGAGGGGGGCAACGGAGACAGCAGGACGG  
ATATTACAGCGGTTTTAGTGCCATCATGCGTTATGCCATCCAGACTGGGCGAGCCAGTACAATCCGGCCC  
AAGATCTTAAAGGGGCCCTAAAAGCCACCAAGCAGGAGCACAGACCGGCTTACCCAGAGTGGAGCTGCC  
TGAGTTTTTACCGCCGCTAGCAGTTGAACCACTGAACCCTGCGACCCGCTTGCCTTCCATTTGCTGATG  
CTGACCATGACCCGCCCCGGTGAGGTGCGCTTTGCCCGCTGGGCAGAGTTTGACCTGGATCGGGCGGAGT  
GGCGGATCCCTGCTGAGCGGATGAAGATGCGAGCCCCCATATCGTTCTCTCTCTCGTCAAGCGCTAGC  
CGTGCTTATGAGCTGCGCAACTTACAGGACATTGTGAACTGCTATTCCCGAGCGAGCGCAGCCTGACC  
AAGCCTATTAGCGAGAACACCCCTGAGCTATGCCATGGGGCGTATGGGCTATGCAGGCATTGCTACGCCGC  
ACGGGTTACAGGGCGCTGGCCTCCACCACCTTGAACGAGGAAGGGTTTGTATCTGATGTGATAGAGCGTCA  
GCTCGCACATGCAGAACGCAATAAGGTGCGGGCGGCTACCATCGTGCCGAGTACCTGGACGACCGCCGC  
AAGTTGCTGCAGTGGCTGGCAGATTTTTATGAATCCAGCAGGGTGGCAACGTGCGCCCAGTGAATCTTA  
CATCAGTGGACTAACAACTTGAAGGTGGCTCGATGACAACAACCTCAGAATAAGCGGAACATTTGAAA  
CAACTTGAATACTGTAGATTAGATAGGGCTGCAGAGTTGCTAGGTTGCGATGTTTTCAGATCTCATCCACT  
TTGGGGCTACTGAGAGAGTAGCAATATATTTATATTTAAAAGACAACCTACAGCTTTGGTTTTCTTTTCC  
AAAAATAACAGATTTCTTTTCTCAGCATCAAGACTTATGTGAGAAAGGAATATTTACATTTGACCTTAAT

ACATCCATGCGCCCTTTTGGCTTTGGAACAATAGAAAAGTGATGATGATGGGAATATTATTGGTTTTGAAT  
CTGAATCTGAGTTCAAAGCCGAGCTTTATGGACTTTGGCAGTTACCACCTTATATAGTGACTGACATTGA  
AAATGACATGCTTCCGGATATGGAATACCTTCTTATACGAGTGTCCGGCTGTAACCAGTGATGGTGATTTT  
GCATATGCTGACTTGAAAGAGTGGGGGTTCCGCCCCACAGTTCATGACTGTTATCTTAAGAATGTCGATC  
TAATTCGGATAGATGAATGCTTTACCAATAACGGTAACTAAACCTTTGCTAAGGATTAGTAAGTCAGC  
TAGCGAGCAAGAGGCACAATCTAGACCTCCGAAAAGAAAAGTAAACCTAATGGTGTTCAGAACGCCATGCA  
GTAAATCGTGAGATTATATTAGCTGCTGCGATCTATGCAAAAGATAACTTGGCCTGACGAAATGTGGTATCA  
CAGCGAAAGAGTGGGCGGCCACAATATTAATCATGAGCATGTATTTGTTTCAGTGAAACAAATAGTGGTAA  
AGCCATATTGGCAGACCAGCAGATAGAGCGGATATTAGGCGCTGCTATGAATTTCTGGTCGCCCTCACAA  
AGCAAATGATTATACGAATTTTCATGTTGGCTCGATTATACGTTGCTTAATGTAAGGGGGGGGTGATGTTT  
ACCTGATGTTAGGTAAGTTGAATGATGTTTACCTAATGTTAGGTCGATTATTTGATACATACCTTACATC  
AGGTAGGCCGATTAATGCTTACCTGATGTAAGGTATGGCCAACCTATCATCGATACGACCTCAACTTGTG  
TTTGAATACCCTTAACACGTTAAAACAATAAGGGAGTATTCAAGATATGTCGATGAACGAAGCCCATGCA  
ACTAACCAGCATATATTACCAATGGGAGGTTATATCAGAGCTAAAAGCATTAGCTCCTCTGCTGGGGATCT  
CCGTTGTTACCCTGTGGCGCTGGTCTGCCTCTGGCAAGATCCCTAAGCCTGTGAAGCTAAGTGAGCGAGT  
GACCGCATGGTGGATGGAAGATGTGCGCAACTGGATGAATACTCGTAATAATGGACAAGCAACATAGGGG  
CAGAGACTTTGAGTGTTCAATCTGCCGGCTGCATGGTCTCTTTTAAATGAGGTGCTGAAAGCAAGGCTA  
TAAGTTGAAACTGTAAAGAAGCCATGGCATTAGAAAAGGAGAAAATATCATGGCAATGAAGGTCTATCGAA  
TAAACGATGTTGTAGAAGGATGTGTGTTATCCAAAATAACCATATATCGACTAATGAACAATGGGCTGTT  
CCCGAAGTCAATCAAGTTGACTGGAAGGAGCTCTGTTGGATGGCGAAGATCAGATGTCGACCATTTGGTA  
TCAACAGTTGGTTCTGAAGCTGAGGCTAGATATGAATAGACTATCTATCCGCAGAGATCTTTGTAATCTC  
ATGGAATCGCCTGATGATACAATAATTGAGACTGAGAAAACGGATTACACATCTTCTTAAAACCTGGTAATG  
AAAAGCATCAACAAATAGCTTGGAAAGTTATGGTCTTGCTTAGAAGAGGACGGTCATGATTGTAACCTCTCT  
AGCATGCAAGCAGTGCCTAGAACTAAGAGAATGAAAAGTCATCGAGTCAGTATTACCTAAGGTTATTGGT  
AATAACTATCGGTTTGTCACTGTGATCCTTTATCATGATGTATTTGGCGAAGAGTGAGTTGCATACGCATA  
AACCGCAGAAGTTGAAAGAACAACCTCTATCGGGATCTCAAGAAAAGTAGGAATCACAAGTCCAGTATATGG  
AGCATTGGAAGTCGACTTAAATGAAGGAGAGCAAGTATGGCTACCACACTTTTCATCTTCTTGTGACGCA  
GATGAGGACAAGATGAAGTCGCTGAAGGCAAAAGCTTAAGCGTCGGCATAACATTGAATCATGGAATGATA  
AGATACCTAGACCTGTGAAAGTAGACCTGTACAGATGCTATCAGGCAAGTGAGTTATATATACAAAGTT  
TATGTGGCAAACGGTACTAGTTAATGGGTGTAAGGTAAGAGGAGAGCTTAACGTATATTGTGCAGCATT  
GCATACCTTGATTCAATGCCCATAGAGACCTTGCAAGTTTCAGTATGGTGTGCAAGGGGAAAGTAAGGAA  
TGACCATTTGGAGTGTCTACGCATATGTATAGTGTGTATATACTACAATATAATGACTTAAGGTAATAAC  
ACTACAGTGAGATGAAAGGTAAGGGGACGGTGAAAAGTAGTACTTACCTTACCTCTCGTATTTGGTTAAA  
TATATTGAGCTAGGAAGATAGTGAATAATGGCTTGCCAAGGACATTTGCAATTTACTGATGCGGCTCCAC  
GAGCACCTCAAAGACCTCGACAAAACAGGTCCACGAGTTGGAGGACACGATCGTACGCTGGCATCAAGACA  
GTGCCGCCAGTCAAAAATTTGGCAAGTTGCCAGGCATCGGGCCGCTCACCGCCAGTGCCTGATCGCTTCC  
ATCGGCGATGCGAAAACCTTCAAAAATGGCAGGCAGTTGGCCGCATGGCTGGGGTTAGTCCCTAGACAGC  
ATTCAGCGGTGGCAAGCAAACGTTGCAGGGGATCAGCAAGCGCAATGACAGTTATCTGCGGACATTTGTT  
AATTCCTTGGCGCTCGGGCCATGTTGCGGGTGGCAGAGCGTCTGTTGCAAGTGTAGCTGGCTGGCCGGGGTGA  
TAGGGCGGCGCAACGACAATATAGCGATAGCTGCGGTTGCACAAGCCAAACAGACGGCCCGAATCACCTG  
GGCGTTGCTGGCACACGACAGAGAGTTTCGATGCCTATTATGGCGTGGCAGCATCATGATGAAAAGTATCC  
TTATCAAGGAAACGGCACATGATGATCGCTCTTGTTCAGTAGGTGACAACCCGTGAATCATCAGCCAGAT  
TCGCACATAAAGAAAAATCCCAAGCAATTGAATTGCTTGGGATTTATCATTTGGCGGTGAGGGAGGGATT  
GAACCTCATTTTGCACATCAACCTCAAATATAACCATATTTTCAACTACTTATGATATATTTTTTACC  
TGTAAAACCTATGCGATTGTCTCATGACATTGCGGTGAGATTTGTAGCTTATTTTACTACAAAAGCTAG  
GGAAGTCAACATGATGGGACTACTGTGCGCACGCTTAAAATTTCTAATTTTAAATTCACAGCAACCGAAGG  
CAGTTGCTTCAAATAAAGAGTCAGGAAGTGCCATTCCCCCAGCTGTATCCCGTGAAACTCGCTGAATCGA  
CAATCTCAAGCGTTTTCGATTCTTGGTAGCACTTTCCGAACCAGCCTTCGTATACTATCGTTATAGTAAT  
CTTTCTCGTACTTTCCAAAAGCCTTGATCATTTAAACCGCTTGTGCGCAACGAACAGGATGTAATCGCC  
CCATTATGTAACACTGTTATTTGCTGTGATTTGAGAAGCAGGCAAGCCAACGTTTCTTGTTTTTCTTTTG  
TTGCATCTTTACCAAGAGCGTCTTCAAGAGTAGACTCATCAACATTGAGACGGATATTCCTTGCAGGAAT  
TGAGCCTGAGTTTAAAAGTACAAGATTATAGGCAATGCATTTCAAACCAGCCATTTTCGTTCTAACCGCA  
GCGGTACAGATCGGACGAAACTGCCTTCGCCAATAATAAATTTGACAGCGTCAGTGTATTACTGATACAG  
CTAGTGCAACAAGTGCATGACCGTATCAACGTTGTTCTTAAGTTTCGACTTCACAAAAAATGAATTCAT  
ACAGTTCTGCCTTGTAACACCCTAGCGTTTAAATTAAGATGTTAATTTTAACTTATACTATACCTAAAATA  
TAGCAAACCATACGACAGCCGATGTTGCGTCAATTTAGTTTAACTAATTTTGTATAGCCTTAAAGAATGCC  
ATCATCGAAGTAATAAAAACCTAAGACCACCCGTAAAAGACCTATATACCCATTGAGAGTGGGTGCCATAC  
TGAGTTTCTGTTTTGTTAATGTCAATAGGGCTCCCTATAGCAAGACGAACCATAGTAGATGTCATTCGGA  
GAGTAACCTCGCCTTGCTCAATTTGTTTCCATACCTTGGCGGGCCAGTCTTTATAAACGTCCTTTGGGTT  
ATCCATATGCCAATCTAAATTAATCTGGACAATCCATTTTTCATGTCATAGTTAATGTATACAATTTCA

TTCGTTGCTCTTTTTAAGAACACACGCGCCTGATTTTTTTTACCTATTCCATCAGGAATGGTAACATTAT  
AGACGGTTAACTCTTCAAGATTTTTAAGCAATGAAGCATCAGATACACTATCGACTTGATCAATGTGCAC  
AATTTTTCTGGTTGTGACCAGACTTTTTTCCAATAAGAGACTTGAAAGCAATGAATGCTTCCTCATT  
TCATCTGCAAACCTCTCATTACCTAGCGCCCCGGCTACATCGGCACTATTTGTGTAATTTATATCCGGTA  
TGCCTTCAACTCTGAGTGCAATAACATGTTGATTAATGCTGCTTGGACCAGGAACATTTTCATAACATAC  
AACTGTTGCTTTTTTACCTTCGATCATTTCTTTTTGGAACAAAATTTATTATAGTTTGCCACATTTGCTTTG  
TTATATCGATAGTAAAATGAGTAGCTATTTCTGATTTAACTACGAACGATTGCCCATCATAAGAGGACG  
CCTCAGTGCGGGTACACGGAGGTTCTATGGCGGTTTCTGGAGGGCTTACACAGCTACTGAGCACAGCCAT  
TGTCAGCAATATTA AAAACTTACCTCTCATTTCATCTACCTTATATTAATGTCGCGTGATGATATTAAG  
ACCTATTCCGAGTGATTGCAACCCCTCTGTTCTGACTTACAGCACAAAATAAACCTTCAATTTCAATAG  
CTTATGCAATGCTTTGTGCGAATAAAAGTAGCGTGATTGTCTCAGGTAATTGCTATGAGACTTATCGTAC  
TCTTATATAGAAAATTAATTAATGTCAACCCATAAATGTTGCAATCTTAACTATGTTGTAGTGCCAG  
GCGGCCCATTCGGGGTGTCTGGGGTTTTGCCAACAGACCAATGTACATTCATCAATCACTATGTTTT  
GATGTAAGCTTAGTCCAATCCAACAAGGGCTCACTTATATTCAGTCGTCTGGCAGACGGTATTCATATCG  
AACAGCTCATTATCTTTGACGACGTTAGACACAAGGTCTTAAAACTGACGTTAGAAAACAGGGTCTTAAA  
ATATAATGGATCTTTGCTAGGCCCTCTAGAGCCAGATGTACAGTTTTACGCTCCCTTGGCTGCTTTTTAA  
GCCGATGACTATCAACAACCTGGTAAAATACTACATGTCTTTGCTCAATCACAGGCTGTAAATTTAGGGG  
GTGACCCGATACAATAAGAAGCTACAGCATTACCACGCTTATCAAGACAGACTGTAGTGCTGAATGTTA  
GTGAAAAGTCAGAAAACCAACGCAGAGAAAATTATCAGTCTTACGTAATGGGCATCTGGCAGAAGGCTCAA  
CAACTTTTAACTCATTGTAGTAAAAGTGTCTGTTGGATAATACCCGATTCTTCGTCACATAACGTTTGTCT  
CTATAAATGAGTTAAAAGAAGGCCCGCAATGAATAAAGAAGCTCACTATCAAACCTACTAATCACGGCGGG  
TCTATTTGGGCTTGTGCGCGTTGCATCTACATTAATAAATATAGCACAAACAGAGACAACCTACTGTGCCT  
CCCAAATTAGATTACAGCAGAACAATGTTTACC CGCGTAAGTCAACAATTTGGCACAACATGAGCGACT  
TAGAGAAAAGGCTGGATTGGAGGAATGGTCATTTCTTCCGCGGGGCCGTTCCGATATTCAGGGGGATTTAA  
AATACTGGAGATGAAGGCAGCACGTAGCCTAGATGAAAATACAGTAGTGGCATGCGGGCGCTGCAACAT  
GGTGATAAGTTTGGCATATTCTCTGTATTATATGATCCAGCAACACTTTCACTTAACGGGCATGTCGTAT  
ATCGCATCCAAGACGATATTATGTCCGTACGGCACTCAGTGGAAACGGAAAAATGGCGGTTTACCAGAT  
GGACTCCGCTTTAATAATGGCTGACTGCAAGTATGTCGGACTCTTGTAAATAGATACTACATGATAGTAAA  
TACCCCGCGCAAAGCCGGGGGATTTACTTCTATTTCCGACTGACTAGAGCCCAAAACCCGGTTCTAG  
GTTGATTTATAAATCATTAGATTTAAATATTGACATTTATATTTTTTCGTTTTATCTAAATCTGCACCATAC  
ACAGGGCAAGAACATGAACGTTTTTGTTCAAATTGCTCCAGTTGTTGACCCCGAAGATCGTGGTGTGATC  
TTATGCTCTCTTTTTGAGGGCGTTGTTGCCCAAATCGATGCAGCTTGAATGGAACATAATTGAAAACCCA  
GTGATCTGATCACTACCATCCTCTTTAAGTCTGCATCATGGGCACGTCGCTTCACCCCATCACCACCTGG  
CCTCAATACAACAAGTCTTTGATTAACCGTGGTTCACTCACCTTCTGGGTTGATGCCGAGGCCATGAGCA  
ACTGGTTTTACCACGACCATCATGGGCGGGGGCCGACCCAGCTTTTACTGACCAGACCATCTGTAC  
CTTCTGATGCTCAAGGGGATTTTACGCTCAGCTGCGAGCCACTCAGGGGCTACTCGACTCCCTGTTT  
GAGCTGATGAACGTGCCGTTGTGCGCACCGGACTATAGCTGTGTCAGCAAGCGAGCACGCACGGCGACGG  
TGGCTTATCGACAGTCCCCAAAGGGACACATTACCGACTTGGTTATCGACTCAACCGGGTTGAAGGTGTT  
TGGTGAAGGCGAGTGGAAAGTCACGATAAAGGGGAATTCTATGCCAGCGGGTGATCTATAACGTGTCTCA  
TACCAAGGAGCTCATCATGGGGCCTTTTTGGGGGCCAAAGGTTGGGTTGAAAGAAAAATTCGGCTTAAA  
AATCAATTATTTTATCCATTAATTCGATAGAGACCCCGGCACCATCAAATTCATGACAAAAGGCCATCAG  
CAATGATGGCCTTTTGTTTTTTGGCGTTCCTGCGCATTTGGTGGTGTGCTGCTGAGCAGGCAGTACTTCCC  
GTTACCTCTTGGTATCCCTTCTCTTTTTCCGCTCTCCATTAATTTCTTTTCTTGATGTGGCCGCTGACGA  
CATCACCGCCAGCGGCTGTTTCTATTGCGGTTTTCTTTCAAACCTTGCTGCATCAGATCATGATTGCT  
GCGTTACCCAGCAGGGCAACAGCAGGGTGCCGAGGGTGCCAGCGAGTGTGAGCGCTATGATGGCTCTG  
GGTGTGCCCTGACGTTGGTCCACATAAACAGGCTGGTGAGGGCGAGCAGCAGCAGGGCCAGGGCGCGCA  
TATCGCCAAACAGCTGCCAGCCGAGCCGGTGCCCATACCGCGGTGCAGCCGGTTGAGGCTGGCGGCAAA  
GTTGGCCAGTTGCAGGTCGGTACGTACCAGCAAGGTGCCCTCAACATAGCTGGCGGCCACGCTCTGGCTG  
AGGGTAACGCCGCGCATCTCCCACTTGGCGGGCAGGGTGAGCGGGCCGTTCCGGGTGGGCAGGGTCTGGG  
CCGGGGTGATCATGGTTCCGCCGTCGGCAAAGGTATCGGGATAGCGCTGTTGCAGCAGGCTTTTACAGCTG  
CTCCGGGCTGGCAGCGGCGCCTCCAGCACTATCTCTTCACTCGATTTGTGCGGTGTGGGGGCCGGGGATG  
GGCAACACGGCACGGTGTTCAGCCAGAGGCCGGTGATGCCGTACATCAGCATCAGGGCGAGGGTAAAAA  
AACCGGCCAGGCATGGAGGCGGCGTACCAATTTGTTGTTGTGAAGGGAACTCTTCTGCGTTTTATCGT  
GGTTGCTTCATAAAAAACTGGCCAGCAAGGGCTGGCCAGTCCGGGTGGTTGTACAGAGATCAGAAACGG  
TAGGTACCGGTCAGGCTCAGCTGGCGGGGTGTGCCCGCATGATCTGGGTGGCACTGGTGGCGCTGACGA  
AGTACTCGTGGTCAGTCAGGTTCTCGGCGCTCAGCTCGGCTTCCCACTGCTGCCAGCGATAACCGGCGCG  
CGCATCGAAGCGGGCGTAACCGGGCAGTGTGGTGGTGTGGCGTTGTGCGCGAAGCGATCGCCACCAGCC  
GTTACGCCGGTTTTACCGAACAGCCCTGCTCGCCACTCTTGTAGCCGAGGTAGAACTGGCCATTTCTGGC  
GGGAGACGTTTCATCGGGCGCTTGCCTTCAGATCCGCATCCGCCCTTGACCTGCTCCGCATCTGAATGGC  
AAAGCCGCCACGCAGATAGATCTCGTCCGGTTCAGCTCGGCGGGCGCTCAGTTTCGACCCCTTCGGTACGC  
TGCAGGCCGGTGAGGATCACCTTGGTGGGATCCAGCGGATCCTTGGTGCCTTGTGTACATCTCCAGTC

GATAGAGGGAGAGAGTGGTCGCCAGCTTGCCGTTACGCCAGTCACTCTTACACCACCTTCGTAGAGGGC  
GGTGTGCTGGGGTTCCAGCCCGTTGTTCTTGTCAACCGGGGTGATGCCGATCAGCTCGCCGCCACTGGA  
GTGAAGGTCTTGCTGTAGGAGGTGTAGAAGGCGTGATCCTCGAGGGGATTCACACCAGACCGAGGCGCG  
GGCTCAGGCTGTTGACCGAGACGCTCTCCTCCTTGTGAGGTCGTAGCGGGCAGTGGTGACGGTGAAGTC  
GTCACGGCGCAGCCCGCAACCAGATGCCAGTCAACCAGGCTGAGCTGATCCTGCAGATAGAGGCCATTG  
CCGCGCACCTTGTGTTTGGCATCGCTGGAGAGCTTCATGGCGCCACTGTAAGTAGGCAGCGAGCCCGGAT  
CGTAGAGATTGCCAGACGGGATGGCGGTGGCATTCTGGTAGAGCTTGGGGGTGCGCTCCTGCCAGTTCCTG  
CTCGAAGCCAACCAGCAGGCGATGTTCCACCGGGCCGGTCTGGAACAGACCCCTCGGCCCTCGGTGTTGCTG  
ATCAGGTTCTTCGCTTTCAGATCCTGCTGCCAGCGGGAGCGGGTCACTTATCCCTTTGACGCTGGTGA  
CATAGGTGTTGTCAAACCTGGCTGTTCGAGGGTGGAGTAACCGAGCTGCTGGCGCAACTGCCATGATCGTT  
GATATCCCAGGAGAGCGGGAGCGGGTGGATTGCGCCACGTCATCTATGAAGTCGCGGGTGGTATCGCTG  
TAAACATACTCTCTCGGCACATCGGCCGGACGGCCATTGACCCCGGGAATGCCGCGATCTGGGGTGGCGT  
CATGTTTCGTTGCGCTCGTACTGCACCAGCCAGTTGAGGTTGTCGCTGATCTCCAGTTGGCGGAGGGGGC  
CAGCAGGGTGCCTTTGCTCTTACACCCTTGCAGGAGCTATCTTTGTCCTCTTGCGCCATATTGAGGCGC  
AGTTGCACCTGCTCACTCGCCTCGCCATTGAGGTCGGCGGCCAGTCGCTGACTGTCAAAGCTGCCGACCC  
GGGCGGTGACGCTGGACTCCTGCCCTTTTTGCGGCTTCTTGTGACCCGGTTGACGATGCCCCCGTGTCT  
GCCGCGGCCGTAGAGCACGGCAGCCGGGCCCTTGCAGCTTCCACCCGCTCGATGTTGCCGAGATCCCGG  
GTGTACTGCATGTGCTCGCGGAATCCGTCGAGATAGAAGTCGTTGCTGGCGCTGAAGCCGCGGATATTGA  
CCCCGTGCAAGCGGGTATCACCGCTGGCGTTGACCCCGGAATGCCGCTCAGAGCTTCACTCAGCGTAGG  
TTGGCCGAAGGCGGTGAGCTCGCTGACCTTGCAGCTGTGATGTTCTGGGGCACCAGCTTGGCTGGCGTA  
TTGGTACGGGTTGCGGTGGCAACTTCCCTGATGCTGGGATCGTTTGCCAACCAGTGTATGTTTTCATCGG  
CGGCCTGGGCAGTGAAGCCGGTGGCCAGCAGTCCAGCGAGACCAGCGTTCTGCGAAAGTGAGGGTGTCTG  
CATATTTCAATATTGACTCTTTGGATGTGACCTGACGGCTCGAACATATTGATTTAATTATAATTAGCCT  
GACCCGCTTAAGCGGGATGCCAATGATATTGATTTTTCATTTGCTGGCAAGGTGAAAAATGGAGGGGGCTT  
TGGGTGCGTGTGTGTGGTTCGGCAGAGCTCGGCTGAAAAAGCAGAGCCATTACAACAAACCAGGAGAACGA  
AGCGAGGGAAAAGGGCGTAGCGGAAGAAAAGGTGCGAAATGTGAAGCGATATCCGGCCCGATAGGACGG  
GCCGATATCGGACTCAGCGAGTGTCTCAGCAGTCCGCGGGTGGGGGGATAGTCGCCCAGGCGATAGA  
CCAGCAGAGACGATCCCAGCAGCAGCGGACCTTGGCGATCTCCACAGGATGGATGCGGCCCTGCGGCC  
AAACACGAAGAGCCAGACCACCAGCATCATGTGCAGGTCAGTAGATCCCAGCACTTTGGGGGCTGGCGC  
TCAAGCCAGCTGCCCTTGCCCAACTCGGGGTTGGCCAGCAGCAGGCCAAACAGGCCGATAGCCAGGGAA  
GGGAGCCGAGCAGGAAGTCGTGGCGGGTGGAGCGGCACTGCGGCGAAGTGTGTCAGCGCCAGGCTTACACA  
GCCATAGAGCGCTACGCCCGCCAGCAGCAGTTGCCAGCCGGTGCCTGCATCGGGCTGCCACTGACGCTGG  
CGCAGCAGGGCACCGAGCGCCACAAACAGTAGGGAGAAGAAGGGCCGTTACGGGTGAGAAGTGGCCACT  
CGGAGCCCAGCAGCGGCTTGGCATAGGAGCCCCCAGCAGAGCCAGCAGGTAGAGGCCAAGACCCAGCCA  
GAGGGCGAGTTCTGGTCTGCCAAGCCGATAGCAGAGTGCAGCAGGGCCACCGCCATCACCAGGGCTGGT  
AGAAACCAGAGGTGGATCATGCCGCCACCAGCCAGCCATTGAGGGGGTCCCGAGCTGGAATTGCCACT  
GCCCCGCGCAGGGAGGGCAGATAGCCTTGTGTCAGCGCAGCAAGCGGATTGAACGGCACTAGCAGGTAGAC  
CAGACTCCACACCAGCCAGAGCATCAGCAAGGGGCGGCAGTAGCGCCAGGCCACGGTCAGCGGCGCTTCG  
CGACTCAGCCTTGGCTGCAGAAAGTAACCAGCACAGAGGAAAAACAGCGGCACGGCAAAGCGGCATAACT  
GGTTGATGGTGGCGCTCAGCCAGAGCCAAGATCCACTTCCCCACAGGGCGGGATTGAAGGGATTGGCGAA  
GGGGGATACGTGAATGCTCATCACGGCCAGAATGGCCAGTACCCGCCCGCACTCGATACTGGAAATACGC  
ATGGTGGCTCGTTCGCTACAGGGGTTGTGACAGCAGCTAAAAATCTTGGCCGAAAACCTACAACCAATTGA  
ACGGGAGCGGGCTCCCGTTTTTTGGGCGCGCTCATGCAGATAAAAAAGCGAGGCGGGCGCCTCGCTTGG  
TTGGGGATCTCGAGCTTACTGGTGTGAGTGCAGATGCTGCTTGGTTGGCTGCCAGGGTGGTTCTGCCCGAG  
CTCTCCAGCAGGTTTTGATCCGCTTGGCGTGGCGACCCGATCGTTGGTGGTCTCGGCATTGAGCAGCA  
CCATGATCACCGGCTCACGATTGACCTTGGTGGCCAGCACCAGGCAGCGGGCCCGCTTCGCGGATATAGCC  
GGTCTTGGAGAGGGTGAACCTCCCATTTGCCCTTCGCGGATCAGCCGGTTGGAGTTGAGGTAGTGCAGCTGA  
CGCTTGTGGTGGCGCACATAACTCTGCTCGTTCGGTGGAGTACTGGCGGATCAGCGGATAGGAGGCCGCTG  
CGGCGGCGAGTTTGGCGAGATCCTGCGCGGTGGAGACATTGCGCGGGTTGAGCCCTGTGCTGTGCGCGTA  
GCGGGTATTCCACATCCCCAGCATGCGGGCTTTGGCGTTTCATCGCTCGACAAAGGCACGCTGGCCGCCG  
GGATAGTGGCGGGCCAGCGCCGAGGCGCGGTTTTTCAGAGGACATCAGGGCGATATGGAGCATTTCGG  
CGCGACTGAGCCTGGAACCTATGGCCAGGCGCGAGCCGGTTCCCTTGTATGCGGTCGATGTGCGCATTTGGT  
CACGGTGTAGCATTTCGTTGAGGCGCAGGTTGGCATCCAGCACCACCAGCGCCGTCATCAGCTTGGTGTAGT  
GAGGCGATGGGCATTACCCGGTTGCCGTTGCGCTCGGAGATCACCTCGCCGGTTCTGTGGTTGGCCACCA  
CGAAAGCGGCCGAGCTGAGGTTGGGCACATCCCGTCGCTCGAGAAAGCCGCTGCTGCTCTTGTGCTGGC  
GGAAAAGGGGTTGGCGTGGGCACTGTCCATAGTGGCCGGCAGCATTACTGCGCCAAGCAACAGGGGAAGG  
AGGGAACGCATCATGATCAGCTCTACCCGACGAAAATACAGGGATATCTCGCTAAGTTATATGTGCTG  
AACTGGCGCTTACAATCATTCTCACCTTGATATTGATAATTTACGGCGTTGAGCGCGCTCTGGCGGCCGA  
GGAGTGGTAAAAGAGGTTCCATGGAGTCTTTTTTTACATTTGAAACTATGGGCTGGTTCGTGATGGCGAG  
CGGAAGCCGGCGCTAAAAAATCGGGACCAGAACGGTCCCGATTGGCATGGAGCATTGCTTACCGTTTAC

TGGGCATCTTCTGCTTGATCTTGAAGCGCATGGCGATCACCACGAACAGCAGCGGGCCAATGATGGTCC  
AGACGCCGGTGGAGATATCGCCGGAGATAAAGGGGGCTACCACGTTAAAGACGTTGCCGAAGGCGACCAG  
GATCAGGCTGATGATGGTGGCCAGCAGTACCGAGCCCGCTCTTGAAGAAGATCAGGTCTTGCCACAGC  
GCCGGTTGTTGCGATAGCGATAACCAGGCGTAGATGAGGAACATGTAGGGCAGGGTTCATGCCACGTTGG  
TCATGGTGATGATCAGCTCATAGAGGGCGGGCCCTTCCGGGTTGATCAGGGTAAAGATGGACTTGGC  
GGCAATGAACAGACAGACCACCCAGGCTTGCACCTTGGAGGGCTTCAATGCCGCACACCATTCTCGTTCTCG  
CGTTGGAAACGCTCCGGCCAGAAGTAACTCGGGGTGCCGGTGATGAACTGGCGCAGCGGCGCGTAGGAGA  
GGGCGATAAAGGCACCCAGATAGCTCAGGAACATGCCAAGGCCAGCAAAGCGCATGAATACCTGTCCCAG  
CCACTCGCCACCAAGATGGCGCCCCAGCTCCAGCATGATGATGAAGAGGGCGGAGAGAGAGGTGATCCCC  
TCGGCCGGGAAGTCGCTCCAGCGCATGATGGAGCCGACCAGCCAGAAAGCCGATGATGTAGCAGACACGA  
TAAAGGCCCGGAGAGGAAGATGCCGCGCTTGAGGTCACGCTCGGGATCTTCCAGCTCGTCAGCCACCCC  
GGCCATCGCCTCGACCCCGCGTAGGCGAAGATGGCGAACACCATAAAGCCGAGGAAGGGGATGATGTCCG  
TTGAACCGCGCATTGGGAGAGGCTACCAGTGATGCTGGGTGAGGGGCTCTGCAGGGTCATGCCGCTCA  
CCGCGAAGGTGAAGACGCCACCCAGCAGCAACACGTTGAGCGCCACCACGGAGAGGGCGCCGATGGC  
CGCCACTTTGGCGAAGCGGGCGCTACCCAGGGTGATGAGCTTGGTGACGGTGGCAACCAGCGCGATGGCG  
ACCACTCCCAGAATAAAGGGGCCGAAGTCGACCCAGTGCCCAAGGTGACCGGGATGTCCGGGCCAAACA  
GCATGAAGGAGAGGGGCACCCACATGGAGAGCGCCTTGCCAAACATCCAGATGACGTAGGAGGGCAACCA  
CATGGTCAGACCGATAAAGGCGAATCGGGTCGAGACCGAGTGGCGCATCCAGGTAAAGATGCCGCCCGCC  
TCTTTGCGAAAGCCGGTGCCGAATTCGATCATCATCAAAATGAACGGGATGAAGAAAAACAGACCGCCAA  
TGACGAACATCGGAATGGCGGCATATCCCATTCGGTAAAAACCGATCCCGATATTAGTGACGCCAAATAC  
CGATGTTAATATCATCAATATAAAGGCGCCCAACTTCAGCTTTTTTGTGACATATTA AAAA ACTCCCTGA  
TGGTGCTGGATTTAAAATAATCAAAAATTAACCGGACGAAACCGGACCCATTAATAACGCGGTAGCGCCA  
TGCCATCTGCTGTGGCGGGCGGATCGGGCCATCTCTGACCGGGCTGGCTTACCCGTCAGGCGGTCAAT  
TAATGTATGGGCGGAGCGGCATGGTCTGTGCCATGCGCGGTATTGGTCAGCGTTGCCGAAAATTAAGTGT  
GAACGATTTTATCATTAAATGCTGCTGGGCAGGTAAGTTTCCGAATGAAGCTGTGGTTGAAATAAACAGA  
CCTGCAAGTTAATTGATACGTTGCGGATGTAAACATTTACGCCCGGGCCGACACTTATTTCCATTATTGG  
TATTCGGCATATTTGGCGGAGTGAATTACGCCATCTGTGATGATAAATCTGCACCAATGGCGACAGCGCT  
TATCTCCCAGCCGGTCAGCAGCAGCCCGCGGTGATAATGGCCGCGCCGTCAGCCGATGCGCCGCGA  
GCGGCTCTTTGAGCAGCCAGACCGAGCAGCATGGCAACAGCAGCACTGCTTTCGCGCAGAGCCGCGAC  
CACGCCAATGGGGGCTTGGGTGATGGCCAGATAACAATCCCATAGGCGAGCAGTGACATAGCCCTCCG  
GTGGCGCAACCAGTGATATTGACGGATCTGGCGCCATGCTTTCGCTTTCTGGTGGACGAGCAGCACCA  
GCAGCATCGCCAGCCCGGTGAGGCAAGAGCCAGAGGGTGTAGCGTACCGGTTACCCCTGCACGGGC  
GCCGGCACCATCCGAGAGGGTATAGGTGCGCGTGAACATGGCCGTGATCAGTCCCGCCGAACCGCTTG  
CTGTCAAGGCGCTGCTGCCACCTCGCCAGGCCATCAGCAAGACCCCATGATCAGCAGCAGACGCCGA  
CGATGCCGCGTAACCGGGGTAGTCCCCAGCAATAAGGCACTTAACACCATGGCGAGCAGCGGGGCACT  
GCCACGGGCCAGCGGATAGATCTGGCCAAAATCGCCCTGATTGTAGGCATGGCTGAGAAAACAGGCAGTAA  
CCGATATGGAGCAGGACTGAGAGGCCGAGCCAGGGCAGCTCGGCAGCAGAGGGAATCCCATGGGCAGCA  
GCGCCACGGCGGCGATAAGCCCTGAGAAGATCGCCACCAGTGATACCCCAACAGCCGCTTTCGCCAAT  
TTTGACCAGCGCATTCCAGCTGGCATGAAGCAGGGCGGCCAGCAGAACGGCAAAAAGACGGTGGTGCTC  
ATGGGAAGGGGCTCTCGGGCGATGGGGGTCAACAGCATAACCCGCCCGGAGCCTGATTGGCCGAGATCTTT  
ATCAAGGCTTCGGCTTTTCGGGGCTCGCCTCTGCGTGGTGGCGTTACCCAGTTGCCCAACACCAGTTT  
GGGATGGGGATCGGTCTGCAACGGAATATCTTGCAGCCCGGTTCCCTGCTGGTGGCGATGGATGATCCC  
GCGGCCATCTTGCCAGTGCCTCGTAGCTGCTGATGGTGGCAACGCTACAGCCGTGCTCGACGAACAGCT  
CGGCACTGCAGATGGTAGGGATGGCCGCTGCGTTGAGCGCATTCAGCAAACGGGGGGCGATGGAGAGCAG  
ATAGCTGTCTGCGGCCAGAAAGACGATGTGTTTTTGGCATCCTGTGTCAGCCGCTTTCAGTTCTGTTGTC  
AGCCCGCTGGGTGAGGGCCATTCGCCAGGTGACCATCTGCCACTGATAGCGTTTCGCTTCAATTGAGCA  
GCATATCGGCCACCAGCAGGGTGTCTGCTCACGGGGGTTGAAGGGTAGCAGCAGCCGTTTGGCGGTGGC  
CAGATGCTCGCTGGCGTTGGCCAGTTGCAGCGCCATCGGCACCATGTTGCTTACCCCGGCTACCATGCTG  
TTCTGGGCTTTGCTTCCGAGAGAATGTAGCCCCGACCGGATCGGAAAACACATTGAAAATCAGAGGCT  
TGCGGTTGGCCACCAGACTCTTGGTCATGGTGGTGGCGGTGGTGCCAAAAGTGTAGATGTAGTCGTATTC  
GGCCAGTTTTCGGCAGCATCTGCTGGCGCAGCATGGTTGCCAGCGCCGTACGATCCTGATCGGCGTTATAG  
GTGGTGATGGTGGCCTGATAGCCAAGGCGGGTCAGCTCTGCCGAAAAGCCGCTTCGGCTGCGGTTTTCAC  
CGCGCCACAGCACCATGGCGATAGAGAGGGCGTGAGCGGGAAGAGCCAGCAGCAACAGCAGGACGAAAGG  
CAGCATGACCATGATCATCTCTCCGGCGATAACATCTACTGTTGAGCCTAGGCCACTTTCTCCGGTCGTGA  
GCGACGCCAGCAAAAAGCGCGATGGCAAGCCATCGCGCTTTGGGGATCCGCAAAACCTCGATTAGAAGT  
CGTAGCGGGCAGCCAGCTGGAAGTCATCCTTGACGTTGAGCTTGCCGCTCTCCTTGCTGTCCAGATTGTT  
GATACGGTACTCGCCAATCACCCGAGGTTCTTGTGTAATTTGTAAGTGGGCACCCAGGGTGTAGTAATCC  
ACGTTGTCTTTCTTGATGCCAGCCTTGTCTGCTCTGTTTGTTCACAGCGCCATCAGACCAGGCGGT  
TCTCGAAGTTGTAGCCAGCGCGGCTTCCCAACCGGTGTGATCGGTGCCGGTCCGCGGAGGTCGCTGCC  
ATCGGCATAGCTCAGGGCGGCGTAGGCGGCCTTGTGTGCGAACTTGGCGGAGATCAGCCACAGCTTGGCA  
TCTTCTTACCGCTTTTGTGCGGATAACCGACGTTGTAAGCGGTACCCAGAGACAGGTTGAACGGGAAGG

TGTAGGCCACGGCAGCACCGTAGGGCGGCGTCGCTATCCTTGCTGGTGGTCTCTTCGGTGTACCACCCTC  
GAACTTGTAGCTGGTGTGCGAGCTGGAAGCCATTGAACAGGCCGGAGTATTTTCAGTACGGAACCGGCGCGG  
TTGGTGGCGAAGGTGTGCGGTCTTGGCGCCCAGCGCGTCTGTCGGTAGCCGTGCGAGAGGGAGACATCAG  
TCCAGTCGGCCAGGAAACCCGGGGCCCTTTCTGGCGACCGAAGGTACCGGTGCCCCAGTCAGCGCCGAC  
ACCGGCGAACGCCAGACGGGTGCGCAGGTTGTGCGGAGTTCTCGCTGATGGTCTTCTCGCTGTCAATTGATA  
TACATCTGTACTTTCGTATTGAGCCAGAGCCTTCAGGCCGCTCTGGATCTGGGTCTCGGCCCTGGCGCCGA  
AACGGACAAACTGGTTGGCACCCCTGCTTGTGCGCTGTATTTCGCTTTTCGGTTTGGCCGTGGCATCCAGTTC  
CTTCTTGTACCAAAGAAGTGGCCAGCGTAGATACGGCCATAGAGATCCAGCATGGAGGTGTCATTTTTG  
TACACTTCAACGGCTTGAGCCTGGAAGGCTGCGGTGAGAGCCAGTGCCACTACAGTCAGCTTTTTTCATCT  
TAATCCCTTGTGGTGTGCAAGCTTTTGTTTTGAACCGGGTTCATGCTAGGCAGCGGGGATGACAGCGG  
GGTGACAGTTGGATGAAGAGTCGATGGCAATTGGGTGCAATTGGATGAATTGGCTACATTCCTTGTCTGC  
AGCGGCTACTTTTGTGCGCAAAGGTTTGCCTTGTGGTGAATGCGGCCCTTTTCGAGCTCCATAGGTT  
GGATATGCGATGAGACGTGAACTGGCAATCGAGTTTTCCCGAGTGACGGAAGCGGCTGCACTGGCTGGCT  
ACAAGTGGCTCGGACGTGGTGACAAGAATATCGCTGATGGGGCGGCCGTAGCGGCCATGCGCCACATTCT  
CAACCAGATCGAGATCGATGGTGAAGATTGTGATCGGCGAAGGTGAAATTGATGAAGCGCCGATGCTCTAT  
ATCGGCGAGAAGGTTGGTACTGGACACGGCGACGCGGTGGATATCGCGGTCGACCCCATCGAGGGTACCC  
GCATGACCGCCATGGGTGAGCCAAACGCGCTGGCCGTGCTGGCGGTGGGCGACAAGGGTTCGTTCCCTGAA  
AGCGCCTGATATGTACATGGAAGAGCTGATCGTCGGGCCAAAGGCCAAAGGCGCCATCGACCTGGATCAG  
GCTCTCGAGCTGAACCTGAAGTCCGTGGCCAAGGCGCTGGGCAAGCCGCTCTCCCGTCTGACCGTCATTA  
CCCTGGCCAAGCCGCGTCATGACAAGGCAATCAAGGAGATGCAGGTTCTGGGCGTGGGGTGTTCGCCAT  
TCCTGATGGTGAAGTTGCCGCTCCATCCTCACCTGTCTGCCGACAGCGAAGTCGACATGCTGTATGGC  
ATCGGCGGCGCACCCGGAAGGGGTGATCTCCGCGGCGGTGATCCGCGCGCTGGATGGTGAATGACATGCAGGCC  
GTCTGGTGGCGGCCATCGCGTCAAGGGCGACAGTCCAGAAAGTGCCTGCGCTGGGCGAGCAGGAAATTGC  
CCGCTGCGAAGCGCTGGGCATCGATGTCAACAAGGTGCTCAAGCTGGAAGACATGGCGAAGAATGACAAC  
GTCATCTTCTCCGCCACCGGCATCACCAAGGGTATCTGCTGGATGGCATCACCCAGCGATGGCGTGAATG  
CGACCACCGAGACTCTGTTGATCCGTGGTAAATCCCGTACCATTTCGTCGATCAAGTCGATCCATTACCT  
GGAACGCAAAGACAGCGCTGGTACGTGACATCATCTGTGATGATGGCTCGCTGAACCGGCTGTGTCTGAA  
GCCCCGATGCCCGCTGCGGTGCGGCTTTTTGTGTGCGCCAGCTACGTTTGTGCGCCGCGCTTCGGCTATGG  
TGGCTCAGATCGTCCCAAAGGAGTGGAGTCTATGGAGTGTCTGAGCGGCTGCGCTGCTGTTGCATCGCC  
CCCAGTATCAGCAGTGCCATTCCCGGTATGCCAGATGGCAAACCGGCTGGCGTCCCTGTTATCCAGCTCG  
ATAGCGCCCTTGGCTGCAAGATCTTCCGTCAACCGGAGCGGCCAGCGGTGTGCGGCGGTTTTTCGCCCAT  
GATGGATGTGTGCGGCAGCCACCGTGCCGAGGCCATCTGGCTGATCGGCGAGCTGGAACGGCTCACCCACC  
TGACGAGGGCAGGGCGAAGAGATAAAAAAAGAGGCCGCATCATGCGGCCCTCTCGCGTTTCTGTTTGGCGG  
GGATCAGACTCCCGCTAGTTCCAGTGCCTGACGATAGTACTCGTTGGCCTTGTGGTGAAGCGGCGCTTG  
TCCATCAGCTGGCCGAGGGCGTGGTAGGCGGCGGCTCGGCGCCGCTCCACCTCCTGCTCCAGCAGCT  
TCTGGGCATCGTCCAGCTGACCTGCCAGCAGATAGAGCTGGGCCAGTGCGGTGTCCACCTCCGTTTGGCC  
CTGCTGCTTTTGCAGCAGCGTCAGCAGCGGCTGGTAGCTGTGAGTTTCAGCTTGGGCAGGCGAGCCAGC  
AGCTGTGGCATCGGCTGTTTGCAGCAGCGCTCCTGCCACAGGGTGGCGGCCCTCGCCATCGGCGCCAGCT  
GGCGCAGCAGATCGCCGTAGCAGGCCAGCAGTTCTGGCTCAAGGCGCAGTTTGCAGCGCAGATCCTGCCA  
TACCGCCTTGAGGGTCTCGAGGCTGCCGGCAGCCTGTTGCAGACGACCACACCAAGCCTGTTGCAGCAGA  
TCTTCTTCCCTGTTTTCGGGGTCAAGTTTGCACCTTGTGCGAGTCCCGGGATCAGGTCGCACAGGGCGCTCC  
AGTCCCTGACGGGCCAGATGTACCTGACGCAGCTGATCCAGCACCATGGGGTGGCGCGGGTTGAGGGCGTA  
GACTGACTCCAGCATCGCCAGCGCGGTATCGTACTGGCCCTGCTCGATCTGCAGCTGGGTCTGGGTGAGG  
GTGAGCGCCAGCTCGGCCTTGGGATTCTCCTCCTGCGCTTTTTGCAGGTAATTGATCCCGCGGGCGTCTGT  
CACCACGGGCTGTGCCGCTTGGCGGCGCTCAGGTAGTTGAGCAGCGGGGTGTGCTGTTGCTGGCCCC  
CTTGATCATCAGCTTTTTCAGCTGACTGTAGTCCCTTCGGCCATTGCCAGGGTGGCGGCGACGCTCTGT  
TGATTGGCCTTGCAGCGGCGGCGGAGCCGTACCAGCCGAGGGTCTTGCAGCGCAGGCGCAATACCCGAC  
CCAGCAGCCACTCGACGATCAGCAGGGCGCCGTAGAACAGCACGGCCAGGATCACCGCGCTGGTTACGGA  
AGATTTCGATGGTGAATTGCCAAGGGCAATCAGCACATAGCCCTTGTGTCGGGAGGCTTGCAGGGCCAAAG  
ATCAGCCCTGCGACCATCACGGCGACCAGAATGATTATACGGATCATGGTGGCCCTCCTCAGCTGCTGGCC  
AGAATGCGTTCAGGGCTTCCGGTACGACCTGCTCCAGCATGGCCTGGGTCTTGAACGGGCGGATAGT  
CGATCTGGATCTGCTCACCCCTTGAAGCTTGTGATCTCGCCCTGCATGTAACGGGTGGCGCTGTTGTGCGG  
GTCGAAATACTGGGTGAGCCAGCGCTGGGCCTTGTCCAGGCTGTCTTCGTAGAGCGCCTGCTGCTCGCGA  
TAGACGGAGAGCTGGCCCTGCAACAGCTTGGTTTTGAGTTTTTACGCAGGAAGATCTCCTGTTGCGGCG  
AGAGCAGCGCCTCGACCGCGCCATCGCGGCGACGGATGGTGACGAAGTTCTCGGTGAACCTGACCCAGTT  
CTTCTTCAGGTTGCTCTCCCACTCGTCCGGATTGGTGTGACCGCTGATCCGGCTCGGCTTTGGCTTCC  
GGCATGCTGACGGTGGAGAGGGGCGAGCAGCTCGATCTGGTCTGAGAGCGCGGCCAGCTTGAAGGTCAGCC  
CCTCGCGGTGATGCGCGGCATCCCTTGAAGCTTGGCGATATCCTCGGCCAGCGCCTTGCAGGATCGGCAT  
CAGGCTGGGGTGGTTGAGGGCTGCGATACGCTCGTCCGATTTGCCGAGCAGGGTGTGGCGGAGACGAGG  
TCATGTTCCAGCCAAAGTTTTGCGGCCCGCCATTCGAACCAGATACTCGGATTCCTGCCAGCATCCAGTCAT  
TGGGGCGCTTGTGCTTGAAGGCCAGTACCCGGTCTGCAGACCTGCATCTCCCTTGCAGCCGCTGCTG

GGTTTGATCCAGCGCGGCCAGCTGCTCGGCATCCTTGCTGCTGGTCTGGTCGATCTTGCTCAGGGCGCTC  
GCCAGTTGCTGCTTGAGCTGGGCCAGTTCAGCCTGCTGGGCAACGGCGTTCTTGTGGCCGTGCAGATAGA  
GACCGCCGGTCAGGCCAAGGGCCAGCAGGATGGCAACCCCTCCAGTACGGCACCGGAGCGGCTCTTGCT  
GCCATTGACCGCAGCGGTTCGGCTGGGGTTTTGACCTGGGATTCTTGTGTCTGTCAATCCATCTTCCTCA  
GTTCCAGTGCGGCCGTGAGGGCCTGGTTGGATGCACCTTGGGCAATCGTGATATGGATAAAGCCCCGGGA  
GTGGGCCATCTCGGCCACCGCGGGGTGGGGACCACCAGCAGGGCGGTCAAAAAGCCAGGGCCGCTGGTGG  
TCGGGAACCAGTTCCAGCAGCCGTTGCAGCAGTTCACCACTGGTAATGAGCAGGCTGTCCAGCCCTGCTG  
CCTGCCAGTGGTGGGTTAATGTATCCCCGTCTAGCTCGGGGTAGTGGCGCTCATAGGCCGCACAATAGTG  
CACCAGAGCACCGCGTGAGGCCAGTGTGCTCGCGATGAGATCCCGCCGCCATTGCCCCGAGGATCAGT  
ACCCGTTTTGCTGTACCTGTGACGGGCGGGCAGGGCGAGCAGCCCTTCGCTGCGCGGTCATCCGGGC  
AGCTTGCCGTGATCCCGATGGCCGCAAAACGCATCTGCGCTGGCTGACCCACCGCAAAGTACTCAATATG  
TGGCCAGGTCTGACCAGTTTTGCAACAGAAAATCGTGTGCAAAAATGAACGGCATGAATGCTACGGCGATA  
ACCGCGTCAGCACTGCGCAGCAGGTTCGGGCAGGAGAGGGAGTTCAGTCCCGCCACGTTTTCCAGCAGCG  
GGCAGCAGAGTGGTGCATGGCCGTGCTGGCGCAGCAACTGCACCAGCTCGGCCGGCTGAATGGCCGGACG  
CACCACCAGCGGGATCATGCGCGGTAGACCTCGGCCAGGATCTCGTCCGCCACCGGCCGGCCAGCAGGGCT  
GGGCCAGCTGCTCGCCAGGGCCTCACCATCGGCCAGCGGACCGCGGATCTCGTCCGGATGACGTAGGT  
GCCATCCGGGCTACCCACCAGACCGCGCAGCCATATCTGCTCGCCTTCGACCAGTGCGTAGGCTCCGATA  
GGCACCTGACATCCCCCTTGAGAGCGCGGTTTATGGCGCTTCGGTCAGCACCCGGGCGCGGGTCTCGG  
TGTGTTCCAGCGGCCAGCAGGGCGTGCAGTTCAACATCGTCCAGGCGGCATTCGATGCCGACGGCGCC  
CTGACCGTTGGCCGGCAGGCTCTGCTCCGGCTCGATAAAGCGGTGATGCGGTGCGCCATCTCCAATCGT  
TTCAGACCGGGCGGGCGAGGATGATGGCGTCTACTCACCGGCATCCAGCTTGGCGAGGCGAGTGTGA  
CGTTGCCACGCAGGTTCGCGGATCACCAGATCCGGGCGGGCGGGCGCGCAGCTGGCACTGGCGGGCAGGCT  
GGAGGTGCCGACCACGGCCCCCTTGTGGCAGTTCGGCAATGGCCTTGAAACGATTGGAGACGAAGGCATCG  
CGGGGATCTTCCCGCTCGCAGATGGTGTGACGGCCGAGCCCTCGGGGAACTCCACCGGCACATCTTTCA  
TGGAGTGAACGGCGATATCGGCCCGTCTTCCAGCATGGCGGTTCACAGCTCCTTGACGAACAATCCCTT  
GCCGCCACTTTGGCCAGCGGGTATCGAGGATCTTGTACCCTGAGTGTCTATGGGCACCAGTTTCGACC  
TGCAACTGCGGGTGCAGGGCTTCGAGCCGGTCTTTGACAAAAGTTGGCTGCCACAGGGCCAGGGGCTCT  
TGCGAGTGGCAATTTTCAGGGTTCCGGGCTGCCATATCAATCAGTTGTTTCAATTTTAGAAGGAAATCGAT  
ATTACCACCTTTGCCCGGGCTTTTCATGGCCGAGCCGCAAAAAGCGGGGCCAAGCTCAAAAATGCATGCT  
GAAAATGATTTTTCATTAAGCAAGTGGTGTGATTAATTCATTGAATGTATTGGAATTTAATGATTTCCCC  
TGATACTTGATGTGGTCATACCAGAAAATAATCTGACGTTTTAGCTGAAGGCTTGTTTACCACCGCTGTTTG  
CATTGTTAACATGATCACACTTTTTTGACGTATCCCCCTTTGGTGCCTCATTTTTCACTTAGGTGATAGGC  
AGGGCATTGCAGGAACACATCGATACGCTGGTTGCGCGTTATGACGACATTACCCGCTCAAGACGCAAC  
GGGCGTTAGGCCTCATGAGTCGCTATGGGCAGCAGGTATTCCAACTGCTGCCTGTCTATGCTGCACTTCAA  
TCATCCCCTGCTGCCCGGTTATGTCTCCGGTATGTCCCTCATGGCATCTGGAGCTTCAGCGCCACCGCC  
GAGCAGCAAGCCTTTATCGATGACCTCTGCCGCAACGCCAACTGTCAGAGCGGCTTGCCACCCATGATC  
GGGCCATTCAGGGGCTTTACTCCATGGGCAGCACCTCCTCCATCGGTCAATGCTGTCACTCCGATCTCGA  
TATCTGGGTCTGCCACGTGGCCGGTTTTGTGCGCAGGAGCGGCTCGATCTGCTGGAGCTGAAGTGCCAGCAA  
CTCTCCAAGTGGGCCGAACAGCGCGGGGTGATCTCAACTTCTTCTGATCCCGGAAGACAAGTTCCGCC  
AGACCAACGATGCCAGATGCAGGGGGAGAGCTGCGGCAGTGCCAGCACCTGCTGCTGCTCGACGAGTT  
CTACCGCAGTGCCATGCGTATCGCGGGCAAACGCTTGATCTGGTATCTGGTGCCACCGAGTGTGATGAT  
CACTACGATGCGTATGTGAACGAGCTGTTTCAGAGCGGCAAGCTCAAGCAGGAAGACTGGCTCGATCTCG  
GCAGTTTTGACCGTATTCCGGCCGAAGAGTATTTCCGGTTCGCTTGTGGCAGCTCTACAAGGGGATCGA  
CTCCCCCTACAAGGCGGTGCTCAAGTCGGTGTGATGGAAGCCTACTCCCACGAGTATCCCAACACCCGC  
CTGCTGTGATGATTGGTTCGCGACTGGTTCCAGCACAACGAGGGGATGCACTACCGGCTCGACAACACT  
GTCTGATGCTGGACAAGGTGACCAACTACCTCAAGTCCATCGGCGACATGGCGGACATGGCGCGGCTCGATCTGGTGC  
CCGCTGCTTCTACCTCAAGGTGTGCGACGGTCTCAGCCATCCCAAGGATGATCACTCCCCGAGTGGCGC  
CGCGAGCAGATGAGCCAGCTGGTCTCCTACTGGGGCTGGAGTCAGGACAAGCTCTATCAGCTCGATCATC  
GCCACGAGTGGAAGATCGAAGAGGTGAAGATCGCTCACGCCGAGCTGCTGGAAGCCCTGATGCAGAGCTA  
CCGCAACCTGATCCAGTTCGCTCGCCGCAACAACATCAGCGAGTCGATCAACCCGGAAGATATTGGCATT  
CTGTGCGGCAAACTCTACGCCGCTTCGAGAGCTGCCGGCAAGGTGCAGCGGGTGAACCTCAAGATCG  
CGCCGGATCTCAGCGAGCCGGATCTCAGCTTCGTGCAGGTGCCCCACGGTCGCTTAACCGCGCCGGCTG  
GTATCTCTACAAACATTGCTGGAGCCGGTGGACATCATTGGTGCAGCGCCGCTGGAGTTCAACGGTTAC  
ATCAGCAAGCTGGTCTCCTGGGCTACTTCAACGATCTGCTGACCCCCAGTCGCGGGTGCACCTGTTCA  
ATCAGGGCTCGGATCTGCACATCGACAATCTGCACCAGTTCGCGCGATCTCTCCGGCTGCTTCCCCGA  
GAAGTACCCGCTCGCTACCAACCTGGCCCTCAGTCGGCCGTGCGAGATACGCCAGCTCTCCATCTTCCTC  
AATCTGGAGATGGACCCGACCAGCCATTGGGTTCGGTTCAGGTGATCGAATTTGACGCCAACACCGTGGATG  
TCTTCTCGTTCCGGCCGAATCAGGAGTGTCTGGTTCGGTTCGGTGGATCTGGTCTATCGCAACTCCTGGAG  
CGAGATCCGCACCCTGCACTTCAGGGGGATGAAGCCGTGGTTCGATGCCCTCACCACCATCTCGGCAAG  
ATGCATCAGGATGCCGCCGCCCGAGATGATCGAGGTGTTCTGCTACAGCCAGCACTTCGTTCTCTGG  
TGGCTCCCCGCTTCAGACTTTGGTGGCGGAGTGTATCGACCTGCGCTTGCACGGACAAGCAACAGCT



GGTCAAGACCATGGCCCTTGGCCGCGAGAAGTACGGCATCTTCTTCGAGCGGCGGGGTGTCGGTGAAG  
AAGCTGGAAAACGCCATCGATTTTTACCGTACATCTCCCACAACAAGCTGGATCACCTGCCGCTGCGGC  
TCGACAAGACCCACAGCCAGCATCTGCCGAGCATCGTCGATGCCACGCCAGGAAGGATTGGTGCAGTT  
CTTCTTCGATAACCCGGGATGCGGGCACCAACATCTATATCCTCGATGAGGCGAACC GGTTGGAGATCTAC  
CAACACTTTGCCGGCAACAAGGATGAGCTGGTGGCGGGGTCAACCCTTCTACACCTCCAATCACGAGC  
GGTTCAGCGATGATGGGCAGTTCATCAACTTCAACCTGCCCCAGTACTACGAGATAGTACAAGTGAATGG  
CGAGCTGGATGTGATCCCCTATCGCAGTCAGGGGACTCTGCGCGAACAGGTGCCGCCCCGCTCGAGAAGTG  
GGCTGACCCGTCAGTTGGAATCGCAATAAAAAACGGCCTGCAGATGCAGGCCGTTTTTTTATTGCGGTTGC  
TCAGGCGCCGAGGCGAGCCAGCAGCCAGCTGCGAATGTCGCCAGCTGCGGGCGGCAGATCTCGTGACGC  
ATCGGGTACTCGTGCCACTCGGGGGCGAGTCCGGCGCTTTCAGCCGTTCTTGGCATCCCAACCGAGCG  
ACAGGCTCACACATCGTCATAGATGCCGTGCATGTAGCAGATGGGCTGGGTGCGAGCAGCCCTCGCTCAT  
CTCGCCGAGCAATTTGTCGGGGGCCAGATAGGTGGACATGCAGAGCAGGGCCCGCAGCTTGCCTGA  
TAGCGCAGCGCGGTGAAGGAGGCAATCACCCCGCCCTGAGAGAAGCCTGCCAGCACGATATGCTCGGGGG  
CAAACCCGTCGGCCACCAGCTGATCGAGCAATGCGGCAATCTGGTGGCTGATTACGGACATGGGACTC  
CACGGCCCCGTCGGCGGGATCCTCGAAGCTCCTGATGTGTAACAGCCGCGCATCTTGTAGCCCATGTTG  
ATGGTGATGGGGCGCTCGGGGGCATCCGGCAGCAGGTGACGCACCGGTAGCTCGGTGGGCAGATCCAGCG  
CATCCACCAGCGGGGCGAGACC GGCGCCGAATCACCCAGCCCGTGCAGCCAGATCACCCGATGACGGGC  
GCCCTGCGGGTGCAGGTGCATCATGGGAACACCACATCTTCGCCCGCTGGGCGGAGCAGGATTGGCTCA  
GCAGCGCCTTGAGCTCGTGGCCGAATCGGTTGTGATCCAGGTGTCACCCCGCAGTTCGAAGTGAAGCC  
GTTCTCGCGGGTGGCGACCCAAATCTGGTGCAGTGGCTCCTGCTTGTGATGATGACCTTGGTCTTGTTC  
TCGAAAGAGAGGGTCAATACGCCCGCGTTCGCTTCGCAGTCGATATCCGGATACCCCTCGTCGAGCGTGT  
CTTCCACATATTGGA AAAAGGCGTTCGGTTCAGGGCGTGATACTCGTGATCCTTCATCGGTTTTATCCTGTTG  
CTTTTAAACAATGTGAGTGCGATTATAGAGGGCCAAAAATTTTTTCGCAGCGAACCATTATGATCACCCAG  
TTCACCAAGTGTCTGCTTGTACTCTTCTGTCCCTCGGGTTGGCCGCGTGCGGTCTGAAAGGGCCGCTCT  
ATATGCCGCCCCCGAGCAGCCACAGAGCCAGAGTACACCCGAAGCAGCACCCGCTGCGACCTCCGAGGC  
TGCCACTGAGGCCGCGCCGACTAATGCCGACCCATCTAGGAAGGAACCGCCCCCTTGGATCACTTTA  
ACTACGACGCAGACGGCCAGCTTCAGGCCGAGCAAACCTCGTGC AACAGCTTGCCGAGCAGTACGGTAC  
CCCCCTTACGCTACTCCCGTCCGACCCCTCGAGCCCATGGCACGCCTTCGACAAGGCCGTCGGCAT  
ATTTCCCATCTGATCTGTATGCGGTGAAGGCCAACTCCAATCTGGCGCTGCTCAACCTGCTGGCCGCTC  
TAGGCTCGGGGTTTGACATCGTCTCCGGTGGCGAGCTGTGCGGGTACTGGCGGGTGGTGTATCCGGC  
CAAGGTGGTATTCTCAGGCGTGGCCAAGAGTGAAGCGGAGATGCGCCTCGCGCTGGATAAAGAGATCCTC  
TGCTTCAATCTGGAGTCGGAAGCCGAGCTGGAGCGCCTCAATCGGGTGGCGGGCAGCATGGGCAAGAAGG  
CTCGGCTCGGGTGCGGGTCAATCCGGATATCGATGCCGGTACTCACCCCTATATCTCCACCGGCCCTCAA  
GCAGAACAAGTTCGGCATTCCCATCGAGCTGGCGCCCGCATCTATCGCAAGGCGGCCGATGGCGAAC  
ATCGAGATCGTCGGGGTCGATTGCCATATCGGCTCGCAACTCACTGAATTGAATCCCTTTATGGAAGCGG  
CTGACAAGCTGCTGCGGCTGATCGACGGTCTGGCGGCGGAAGGGATTATATCCACCATCTGGACGTGGG  
CGGTGGCCTTGGGGTCAACTACGGTTCGAGCAGCCACCCATCCACCGAATATGCCGAAGCGCTCAAG  
CAGAAGCTGGCGGGCCGGGATCTGACCCTGCTGTTTCGAGCCGGGCGCGCCATCGTCGCCAATGCCGGTG  
TGCTGCTGACCCGGGTCGAGTACCTGAAGCCGGGCGAGACCCGCAACTTCGCGCTGATCGATGCTGGCAT  
GAACGACATGCTGCGCCCTCGCTCTACGGCGCCTGGATGAACATCATCGAGGTGGATAGTCGTGCCGGC  
CATGCTCCCGGCTCTATGACGTGGTGGGCCCGGTGTGCGAGACCGGTGACTTCTCGGCAAGGAGCGCA  
CCCTGGCGATTGCCGAGGGGTGCTGCTGGCGGTGCGTTCGGCCGGTGCCTACGGCTTTACCATGTATC  
CAACTACAACACCCGTCGCGCGCAGCCGAAGTGTGGTGGATGGTGGCAGGCGCACCTGATCCGCGAG  
CGTGAGCAGTTGGCCGATCTCTGGCGCGGTGAGCACCTGCTGCCCTGATGCAGTAGATAGAGATGACAGA  
ATTTTACAGCCCTGACAGCACAGGAGTGC GCGATGTGTACAGATTGTTCCAGGATGCATGGGGCTTTGGA  
CAACGACTTCATAGTGGTTGACGGTGAGTTTTTACAGCCCTAACAGCACAGGAATGCAGATGGGATAG  
ATTGTTCCAGGATGCATGGGGCTTTGGACAACGACTTCATGGCGCTTGACGACCCTTGGTTCGGTGAATT  
TTTACAGCCCTAACAGCACAGGAATGCACGATGTTGATAGATTTTTTCCAAGATGCATGGCTTGGGCAACG  
ACTTCATGGTGGTGGATGGCGTCAACCAGAAGGTATTTTTTCAGCAATGACGTCATCAAGAAGCTGGCAGA  
TCGCCACTTCGGGATCGGCTTTGACCAGCTGCTGCTGGTGGAGCCGCCCTATGACCCCTGAACTCGACTTT  
CACTATCGCATTTTTCAATGCCGATGGCAGCGAAGTGGAGCAGTGTGGCAACGGTGGCCGCTGTTTTGCC  
GTTTTCGTGCCTCAAGGGGCTGATCAACCGGGATCGCATCGCGGTGAGTACCGCCCGGGTTCGCATCGT  
GTTGCAGCTGGAGGGGGAGAATCAGGTACGGTCAACATGGGTGTTCCCAAGTTTGGAGCCGGGCAAGATC  
CCGTTCCGGGCCCAGAAGGCAGAGAAAACCTATCTGCTGCGGGCGCAGGAGCATAACCGTGTGTGGCG  
TGGTCTCCATGGGTAATCCCCACTGCGTCATCGAAGTGCCCTCGGTTCGCCGATGCGCCGGTCAAACGCT  
GGGTGCCATCATGGAGCGCCACGAGCGTTTTCCCGAGCGGGTCAACGTCGGTTTTCATGGAGATGGTCAAT  
GCCACCGAGATCAAGCTGCGTGTATTCGAGCGGGGCTGTGGCGAGACCCCTGGCCTGCGGCACCGGTGCCT  
GTGCGGCGGGGTGATTGGCATCAGTCAGGGCAAGCTCAAGGAGCGGGTACCAGTCTGCGGGCGG  
CAAGCTGACCATCGCCTGGAAGGGGCCGGGCCAGCCGGTCTATATGACAGGTCCCGCCGAGCATGTGTTT  
GACGGCCAGATAGAGGTTTAGCCGATAAAGGTTACGGTACGGGGGGCGCTGGCCCCCTTTGCCCATGATG  
TCGGGGCAGCGAGCCCCATTTCTCTGATGGATCAACCAATTTATGAGCGAACTCAAACGGCAGGAGCAAT

CGGTGGATGAAGCCACTGTGCTGGAGTACCTGGCCCGTTATCCCGAGTTTTTCCAACGCCATGCCGCCGT  
GCTGGACCCGGATCCGCATTCCCCATGAACGTAAAGGGTCGGTCTCGCTGGTCGAGCGTCAGCTGGAGCGT  
CAGCGCGAGCGGATCGAACAGCTGGAGCAGGAGATCACCGAATTGATGGGGATCGCCAGCGAGAACGAGC  
GGATCTTCCGGGTCTATGCCGATCTCTACGGCGAGCTGTACGGTTGCCAGACCCGTGTTTCGAGGTGAGTGC  
CGTGATGGGCAAGGCCCTTTGTCCAGCGGGCTGCGCCTGACCCGGCTGCGGCTCTGGCTCAATCCCAAGAAG  
TTTTGCCCTGAGCGGGCCCCGAGCAGCGTTTTTTGGCACAGGGCAAGCAGCTCGAATCCCTGCTGGGTGAGC  
GTTTGCCGGGGCAGGATTACTACTTTGGCCGCTGAGCCAGAGCGAGAAGCAGGGCGTGTGTTGGCCACGA  
TGTGCTGGTCAACTCGGTGGCCCTGATGCGGCTCGGCGATCTCGGTGTGCTGGCCTTCGCCAGCTCGGAT  
CCCCGGCACTTTACTCCCCACAACGACACCCTGCTGCTGGGCCAACTGGGGCGCCTGCTGCAACTGCGTC  
TGCCCCGAGTTGACTCATGGCTAGAACACCCGGCCAGGGCGCTCGCCAAAGCTCCCGTCGTCGCACCCGCAC  
TGCCCTGCGGCACCTGGCGGACGAGCTGGCGGCCCTTTATCGAATACCTGAGGGTCGAGCGTCAGCTCAGCCC  
TCATACTCGCAATAACTATCAAGCCCATCTGGAGGCGATGACCCGCCGAGCTGGTGGCCCTGGGGCTCACT  
GACTGGGGTTCGGCTCGAGGCGAGTCAGGTGCGCACTCTGGTGACCCGGATGCACAAGGGGGGACTTGCTC  
CTCGTTCCCTTTCCACCAAGGTCTCGGCCCTGCGCAGCTTTTTGCGACTGGCAGGTGCGGCAGGGGCGGCT  
GACCGCCAATCCGGCCCGCGGCATCGTCACCCCCAAAACAGGGGCGGCCGCTGCCGAAAAACCTCGATGTG  
GACGAGATGCACCAACTGCTCAACATCACCGACGAGCAGGATCCGCTGGCGGTGCGGGATCGCGCCATCA  
TGGAGTTGATGTACTCCTCAGGGCTGCGTCTGGCCGAGCTGGTGGGGATCAATCTGGTGGATCTGAAGCT  
CGACGACCGTCAGCTCAAGGTGACCGGCAAGGGCTCGCGGGAGCGGGTGTGCCATAGGCCGGATGGCG  
GTCGAGTGGCTGCAGAAATGGCTCAAGGTGCGCCCGCTACTGGCCGGGGATGAGAGCGAGGCGCTGTTTG  
TCTCCAGCCGCAAGCAGCGGCTGTGCGCCCGTTTCGGTGCAAGCCCGCTCGATGGCTGGGGCAACAAGCA  
AGCGCTCAACGCCACGTCCATCCCCACAAGCTGCGCCACAGCTTCGCCACCCATATGCTGGAGTCTTCC  
GGCGATCTCCGGGCGGTTTCAGGAGCTGCTGGGACATGCCGACCTCTCTACCACCCAGATCTATAACCACC  
TCGACTTCCAGCATCTGGCCAAGGTCTACGACAGCGCTCACCCAAGGGCCAAGCGTGACCCGGATGCACA  
GGACGATGAATAACGGGCCCTGAGCCCCGTTGCGAGAGGAGAGTCCATGCACTTCTATCGCCGCTGGCAGC  
CGGTTGCTGCCATCTCGTTTTGACCTCGATGACACCCTCTATGACAACGGCCCCGCCATCATGCGCGCCGA  
GCAGTGGATGCTGAGCCATCTGCGCAGCGAATATCTGGCCACCGCCATGCTCGACAAGCCGCGCTGGCTG  
GAGTTAAAACGCGCCGTGTTGCTGGCCAACCCGAGTTGCGCCACGATGTCAGCCTGGCGGTCAGCAGA  
CCATCCGTAACCGCTATGGCTCGAGGGGGGGATGGCCGACCAAGCCAGGCCAGCCGCGAGGCGGAGCGTGT  
TGCTCGGTTTCTGGCAGGCGCTCGAAGATCGAGGTGAGCGAGTCCACTCATCAGCTGCTGGCCAGACTA  
GCCGAACGCTACCCGTTAGTGGTCATCACCAACGGCAATCTGGATCTGGCGCAGGCAGGACTGGAACGCT  
ACTTCACACTGGTCTGCAAGGCGGGGGGGGCGCCAGGATGAAAACCGCGCCGGATATGTTTGAGCAGAC  
CCGCACTGCCCTCAAGCTGCCAGCGGGGCGGATCCTCCATGTGGGGGATCATCCCGAGACGGATGTGCTG  
GGTGCCCGCTTGACCGCTTTTCGCGCCGCTGGCTCAACGAGCGGCAGCAACCGTGGCAACAGTTGCAAC  
TGTTGCCGGACGTGGAGCTGACGGCATTGGAGGCGCTGGCCGAGTTGCTGCTCTGATGGCGCTGGCGGGT  
GGCCCGGCTCAGGCGGTAATGGCTGTCTCATCGAATAGCGATATATAGCAAGGGGTTACGCCCGCTATTTGC  
GGCAAACCAACCCGAGCAGGGTGTAGCGGTGCGCTGGTTGACGCGGCAGTAACTGATGCCGACGGGTAG  
CGGCTGCTGCAGGGTATGGCGCTGTTCTGATAGCGGCAGACCAGATAGAGCGGGCGCAGGCTGCTATCG  
AGCTGACTCCAGTAGTGGATCTCGTCTCTGTGCCATTATCCGGTTTGAGTTGTGCCAGCTCGGCAGGAT  
CTCCGTCGAACAGGGCCAGATTATCGAGCCGGTGGCTGAGGGTTTTGCTCCGGTTTGCCATCGTCAATTGCC  
GGTGAACGCCTGCCAGCCCTGCTGCGGGGTGAGCAGCTGTTGGCGAGTCTCTATGGTGGCGGGACAATCA  
AATTGCAGGCTGGCGGCAAGGGCCAGGGTTGTGAGTAACATGGCTGCGGTTCTCTCTTACGTCCTCAAT  
ACGATGTCATGCTACGTCACTTCCGCCGAACAGCTTCATCAGCTTATCAAGCAGATCAAGCTGTTGTGG  
TGGCTGTTTCATGGCTTCCGCTTCCCGCTCCAGCAGCGCTGCTGCTCCTGCTGGCGGTGCTCAGCACC  
CGATAGAGGGGCTCGACCAGCGCCTCGCGCTGCATCACCAACTCCTGAAACATTCCTGATTGATGCGAT  
AGGTTTCGACGGTGGCCACCGCCCGCACCGTGAAGGAGCTGGGTTGCGCGGTGAGCAGGCTCAGTTCCGCC  
AAAGAAGTCTCCCGGTTGAGCGGTACCAAGCTTCAGCTCTCGCCCTTCGACATTCAGCCACTCAGGCT  
TCCCCTTTGACCAGCACGAATAGCCAGCTGGAGACATCTCCCTGCTCCAGCATGATGTGCGCCGCTGACGA  
AGGGGGCGAACTTACCTGATCGGCCAGCTGGAGCAGCTCGCTCTCCTGCAACATGGCAAACAGCGGCAG  
CTTGCGCAGGGTATCGGTTTCGTTTCGGCAGTGTGGCGCTTGTGGCGGGCATCCAGATGCTGCTTCTCCTTG  
GCCATAAAGACGTTGAAGATCGGCGGGGTGAGGCGGCGATCGTTGCGGCGCAGGGCGGCATCGATCAGGC  
TGCGCACCATGGAGTCGGTTCGGATCGTCGCGAGCCAGGTTCGGTCAGCCAGTAGCGCACCCGATAGCGGGC  
GATGCCCCCTTCGACGTTTCATCAGCAGGAGTCCGGTTGCGGATGCTTGGCGACGCAGGGGAGCTTGGTC  
TCTCGCAGGGATTTCTCGATCAGCGCGATGATCTGGGTGCGCAGGGTATCCAGGGTCAGATCGAACCCAGA  
CCCAGCGCCGCCACTGCAAGGGTTCCGCCAGGCGGCGCCCGAGCACGGTGAAGCGCTGTTTGAGCAGGTG  
GCTGTTGGGGATGACCACAGTCTCCCAGTTGCGGGTCTCGATGGTGGTAGCACGCCAGTTGATCTCCACC  
ACCCGGCCCTGGGTGGTGTGCACTTGCAGCCAGTACCAGATGGCGATGGAGTTGTGAGCTGAATGGAGA  
CCCCGGCCAGCAGGTTGCCAAGGGTGTCTGTCATGGCGAAGGCGATGACAGCGGTGATGACCCGCCAGGT  
GGTGACTATCTCCCCGAGCGCCATGCCGGAGGCGTAGAGGCGAAAACAGACCCAGCCGATATAGCCGATG  
GTGATGACGATATCGGCGATGATCCGCGGGATCCGCACATGGCAGAGGGGGAGCAGAACTCGAACAGCA  
GGATCCCCCATATCTTGACCAGTATCAGGCCGGCCAGCAGGGTGGAGATCTCGATCAGCAATGATGGGG  
CAGCGGCAGTTTTGAACCAGCCCCCTTCCAGCTGGATCAGCAGGATCACACCAGCGTAATCATCACGAAA

CTGAGCTCGGAGAGCAGCTCCCGTTCGCTGTCCCGGACGGCGCCAGAAGTGGATCAGCATCAGGGAGAGGG  
TGAGCAGGGTCCAGAACGGGTGTTTCGCCAATCCAGATCAGCGTCGGTAGCGCGGTGAGGTTTTTCGCCAGC  
CATAGCAGCACCTTATTGTGGTTTTATTTCCAGCATAGCTGCTGCGGCGCGGGGAAATGGTGCCTTGGGG  
CGGCAATTTATTTATCCTGTGCAGAACCGGGCAAAGGAGTGCATTGAGTGAATTTTCAAAGAAAATCA  
TCTGTTTTGATGGCCCTGTTTTCCATTGGCTGGCTGCGACCTGCTGACCGAGAAGTATCGGGTTCGAATTCGG  
GGATGGCTCCTGGCGTGAAATAGCCATTACCCCTTCTCCAGCGAGGCGCGCTGGCGTGAGGGGTGTGCC  
ACCGGCGAGGTGCTGAGTGACATGAAGGTGCCCATCAAGCGGGGTGACACGGTCAATGGCCGCGAGCAGT  
TGCTGATCGGTGGCGAGAAGTTCGAGCTGGATGACAACAACCTCTACCGTAGCAACGGCATGGTGTGG  
CCATTTCGCTGACCATATCCAGCGCGGGCTCAAGGGGATGGATATCTGCCGTACCTGCGCCCCGAGCGG  
GGCGGACTGCCAAAGCTCAAGGCGCGCGGGTTTGGCGACTGAATCGATGAGGGATTAATCTGCTGCCATC  
AATGCACCTGCGTTGGCGGACGCATCGCCAAAGGCTTGAAGATCTTGATGGAGTGGGGGTTTTTCATTGG  
CCTTCCACTCCGTATGCCACTGCACTGCCAGCAAAAAGGGTGACAGTGCAGGGGCGCATGAAGTGCCTCGAT  
CAGCCCATCTTCTGCGTGGGCCAACGGCTCCAGACCCTTCCCCAACCGGTTGATGCCCTGCCATGCAGG  
GAGTTGACCTGAATCTGTTCTTCCCCCATCAGTTCGGCAAACCAGCTGCCGGGCGAGCTTTGATCTGAT  
GGCTCGGCCATACTGCTCGTCGACCGGATCGTCGGCATCCTCCCGGTGATCGTCATAACCCGGCTCGTT  
ATAGACCTTCTGATGGATGTCTCCCCCAGCGCCACGTTGATCTCTCGCATGCCGCGGAGATCCCGAGG  
ATCGGCAAACCACGGGCAAGCGCCCCCTTATGAGGGGCGAGATCGAACAGATCGCGATCCCTGTCTTGCT  
GTTTTTCTGGCGTGAGGTTCTCCTGGCCGTAGAGGGCCGATCGATGTTGGAACCGGCGCCGCTCAGATA  
GACCCCATCGGCGAGATCCAGATACTGCTCCAGATCGGTGGTGCAGCAGGTTGGCACCAGCAGCGGG  
ACGCAGCCGCTTATCTCCACCAGCGGCATGATGTATTTGTGGTTCATCACCTGATAGGCGTGGCCGTTGC  
GGGGCTGGGCGCCCATGGTCATCAGCACGACAGGTTTACGGGTGGCGGGAGGCTGGGGATTTGGCATAGG  
GCACCTTGATTATCCTTGGCGTTGAAGTCTCATCCTGCGCCTTGGGCAGGCCCTTGCAAACCGGCAGGGC  
AAGGGCATGCCTCAAGGCATGGTCATGGGATCCCGCGTCCGGCCGGGTGACAGAATCGTTGGTCAGCTTG  
GGCAGCGACGGCATGGATCCTCTCTTCACTGCTGCCAAGGCCGTTCAATATGTTAAACAAAATGATGCCAA  
ATTGTTAACGTGTCTGTTTTGGTCTGCTCTGAAGCGGCATTTAACGGGGCTGTTGAGATGGGCCGTTAT  
GGCTGGGGTAGCAAAATGGTGGATATATTAACCGCGCAGGGATGGCGGGGAGAGGGGAGAAGGCATCAAT  
AGAAGCACGCCTCCGCAAGGGGAGGCGTGTTCGGGGATCACAGCAGGTTTCGATCTCGCCGCGCAGAT  
ACTGGTACATCTTCGCTAGGCGACCGCGGCTTGTTCAGCTCCCGCTCCTTGTGGCGGATCGCATCAG  
CTGGGCGAGCTTTTGGCGATCCAGCTCGTGGAACTGGGACATCAGCTCGTTGAGGGCGGTGTCACCTTCG  
GTGATCAGGCGCTCGCGCCACTGCTCCAGCCGATGCAGGCGTGCATTACCGGTGGAGTGACGGTTCTTGA  
TGATGGAGAGCGCTTCGGCAATCGGCTCGATATCGCGGCTGCGCATCAGGCGGCGGATGAACTGCAGATG  
GCGACGGAAGGACTCATCCTTCTTCGGCTTGAGTTTGCAGCCAGCTCGACAGCTTCTGCAAGCTCTTCA  
TCCAACGGGATTTTTTCCAGCTCGCTGTGGCTGAGGGAGACGATCTCTTCCCCCATTTTCTGCAATGCTT  
CGGCATCGCGCTTGAAGTGGCTCTTGGTGGGGCCCCAGTCTTCGAACTCGTTGTCGCTTGTGATATTGACT  
CATCGGTCTCTTGAATCCTGTCAATCACGTTTGGCGGATATGTTACCAGCTTCTCCCGCTGGGCGCAGGG  
GTCTGATATGCTTACCCCTTCTCTTCTTTCATACAGATGTGAGTTATGGATCAGCAAGACCAAATCCG  
CCAGGATCAAGCCCATCTCGAGGCCGTGGTTGCCGAAGCCCTGGAGATAGCCAAAGGACTGGGCGCCTCG  
CTGGCCGAAGTCTCCATCAGCAAGCAGACCGGGTTGTCGGTGAACACCCGGGGTGTGAACTAGAAAGCA  
TTGAATTAATAAGGATGGCGCCCTCGGTATCGCCGCTATCGCGATGATTGCAAGGGATCTTCTCAGC  
CACCGATCTGAGCAAACCCGCCATTCGTGCCGCGGTTGAAGCGGCCATCGAGATTGCCCGCCACACCTCG  
GCCGATGATTGCGCCGGTCTGGCGGACGCCGAGCTGCTGGCTTGGGATGCCCCGACCTGCAACTGTGCC  
ACCAAATCGAACTGGATCCCCAGCGCGGGATCGAGCTGGCTATCGAGTGCGAACGGCTGGCGCTTGGTGC  
CGATGCCCGCATCAAGCACTCCGACGGCGCCGGTTTCTCCAGCCATCTAGGCATCAAGGCTATGGCAAC  
AGCCACGGCTTCGTCAAAGGTTATGCGGCGTGCAGCAACTCCCTGAGCTGTGTGCTGATCGGCGAGCAGG  
ATGGCGACATGCAACGGGATTACGGCTACTCCTCCAGCCGTACCTCGACGGGCTCTGGAGCCCGCAGCG  
CATTGCGGACGAAGCCGTTGAGCGTACCCTCCTCCGCTCGGCGCCCGCAAGATCTTACCCGTCATGCG  
CCTGTGCTGTTCCACCCGGACACAGCCTCCGGTCTGTGGGGCCATCTGGTGTGGCCATCAGCGGTGGCA  
ACCTCTATCGCAAGTGCAGCTTCTGCTCGACAAAATGGGCAAGCAGATCCTGCCCGAGTGGCTCACCAT  
TCAGGAGTTCCCCACCTGCTGGGCGGGCTTGCCAGTACCCCGTTTCGATGGCGAAGGGGTGCGTACCCGC  
GACATGGATATCATCCGTAACGGCGAGCTGATGAGCTGGCTGCTGACTTCTACTCCGCTCGCAAGCTGG  
GGCTGACTACTACGGGTGATGCCGGTGGCATCCATAACTGGCAGGTTCCAATACTGGCCAGGATTTTTCA  
GGGCATGCTTAAAGAGATGGGCACCGGTCTGCTGGTACCAGCTGATGGGGCAGGGGTCAATATCGTC  
AATGGCGACTACTCCCGCGGCGCTGCCGGTTTCTGGGTGAGAAATGGCGAAAATAGCCTATCCGGTCAAG  
AGATCACCATCGCCGGCAATCTGGCCGAGATGTTACGCCATATCGTGGCGGTGGGTGCTGACGAGGATGA  
GCGCTCCAGTCTCAAGACCGGCTCGGTGCTGGTAGAAAATATGAAGCTGGCGGGTCACTGATCCCGGTTT  
CAACTGAACCGAAACCATGAAAAAGGCCCTCGCCAACCGGAGGGGGCTTTTTATCGGCTAGCGATCA  
GGGGGCTATCAGCCCTTGGATGCGTTTCGATGCGGCCGCCAGACCCTGCAGCTTCTGCTCGATGTCTTCGT  
AGCCACGGTGCATGTGATAGATACGGTGCAGCATGGTGGAGCCTTCGGCTACGAAGCCGGCCAGTACCAG  
ACTGGCGGAGGCGCGCAGATCGGTGCCATTACCTGGGCACCCCTTGGAGCTGCTCGGTGTCACGGCAGATG  
GCTACGTTGCCCTGCAGTTTCGATGTCTGCACCCATCCGTACCAGCTCGGGAACGTGCATGAAGCGGTTCT  
CGAAGATGGTCTCGGTGACCATGCCGGTGCCTTTGGCGACGGCGTTGACACGGTGAACGTGTCCTGCAT

GTCGGTTCGGGAAGGCCGGGTAGGGGGCAGTCTTGATGGTGACCGCTTGAGGGTGCGGCCAGTCATGTCC  
AGGGTGATCCAGTCTTACCCCTTCTCAATCAGGGCGCCAGCCTCTTCCAGCTTGACCAGTACCAGCTTCCA  
GCAGGGTTCGGGTTCGGTCTTGCGGCAGGTGATCTTGCCGCCGTGACCGCTGCGCCCACCAGGAAGGTACC  
GGTTTCGATGCGGTTCAGGCTGCACGCTGTAGTTGCCGCCGTGACAGCGCTCGACACCGTCGATGGTCAGG  
GTGTTCGGTTCGGCGCCCTGGATCTTGGCACCCAGGGTATTGAGGAAGTTGGCCAGATCGACCCTTCCG  
GCTCGCGCGCGGGCTTTTCGATCACAGTGCGGCCATCAGCCAGGGTGGCGGCCATCATCAGGTTTTTCGGT  
ACCGGTTCACGGAGACCATATCCATCAGGATGTGGGCGCCTTTCAGGCGGCCATCGACACGAGCCTTGATG  
TAGCCATCTTCGATGGTGTGATCTTGGCGCCATCAGCTCCAGGCCGTGGACGTGCAGGTTGACCGGACGGG  
CACCGATGGCGCAGCCGCCGGGCAGGGAGACGTGAGCCGCGCCGAAACGGGCAGCCAGCGGGCCAGCGC  
CAGAATGGAGGCGCCGATGGTTTTCCACAGCTCGTAGGGAGCGACATGGTTGTTACCGCACCTGTCCAGC  
ACGGTGACGTTGCGGTTGACCTTGGTGGTGGCGCCAGCATCTCCAGCAGCTTGATGGTGGTGGCCACAT  
CTTTCAGGCGCGCACGTTGGAGAGGTGTACCTCTTCATCACAGAGCAGGGTTCGCGAACAGGATCGGCAG  
CGCGCGTTTTTGGCGCCGAGATGGTCACTTCGCCGTTGAGAGTACAACGACCATCGATTTTTGAATTTG  
TCCATTTTTACTTTCGTTACCAAATCAGGAGGGCAATAGGAATTTACGTTTCGCGTTTTCCACTCGGCGTTCGG  
TGAACGCCTTGATGGAGAGGGCGTGAATAGCGTTGCTGGCGATCTTGTCCATCAGCGGGGCATAGATGGC  
CTGCTGCTTCTTGACCCGGCTCATGCCGTCAAACATGTACCAGCGGCGATCAGCTTGGTAGTGACTACCG  
TCCCCTTTGACATGGACTTCGGACAATGGCAGAGCCTCAAGGAGTATCGCTTCAATTTACAGAGACTTGCA  
TTATGCGTCTCAGTTGTGAGCGGGGTTGACTGAAACAGCCCGGCCACCCGTTAGAGGTTGGCCAGGGTA  
TAGAAATCACTGGAGGCGCCACCAGTTGCGGTGTGGCGCCTCGCGCTAATACGGCTTTGGCCATTTGA  
CCAGCAGGGCCAGTCCGGCAGAGTCGAGGGTGGTGCAGCCCGGAGCTCAAGCTGGTCTGCTGCCACCA  
TTCGGCGCGGGCTTGCACAGGTCATTGACCTGTGGCGCCTGCAGCTCACCCTGAGAGTCATGGTTTTCA  
ACACCAGCGGCTTGGCGTTGTGTTTCGCGCAACTGGGCGATCACCGCATCGATGCCGTTCTGGCGGATCAA  
ACCGCCGAGCTCGCTCTGTTTGGCGGAGAGCAGGCTGATCCCCTCTGCCACCATGTGGAAGGCTTTCCAC  
TCGCCGGTCTTGTGTTCTTTCGCGCAGCTTGAACCTCGAGGAAGATGTCCGGCTTGCCGGCTCTTTACGC  
TGACGTTGACGGCGGTGATGTTGCCGCTGGGAGCTTTGCCCGCTCGACCTTGACGGTCTGCTTGTCAA  
ATGGGCCAGCGCATCGGCGTAGGAGCTCACCATGTACTCGGTGAACACCTCGACAAAGGCATTGCGCTGC  
GCTTCGGTAGTCTCTTAATCTGGTTGCCAAGCACCTTGTAGGCGGCGAAGCGGTTGTCCACATAGGGCA  
GCAGCTCTTCGCGGATGATCACCCTCAGGTGATCCGGATGCTTTTACCTGGGCTGATCGGCTTTCAG  
CGGGCAAAGGTCTGCTTGGCAGCCTGATCCACCGCGCTTGGGGTTCGGTGGCATCGACTCGCGGCTGG  
GCAGACAGGGAAAAGAGCATGCTGGTCAATCAGGCCAGCAGCAGGGCGATTTTTCTGAAATGATTACTC  
CTTCTTGTCTGATTTGCTGTGCGGAGGATTGGCTGTAGAGGAACTTGCCAATCAGATCTTCCAGTACG  
ATGGCGGATTTGGTGTCTTCAATCAGGTTCGCCATCCTTGAGCATCTCGGTGCCCATCTCCTCATCGCTGA  
AGCCGGGGCCAGACCGATGTACTGCTCGCCGAGCAGACCGGAGGTGAGGATGGAGAGGGAGCTGGTATC  
GGCGAACTCGCCAGCGCTCTTTGATCATCAGGGTACTTCGGGCACCTGGGTTTTTCGGGTCCAGTACG  
ATGTGCTGACCCGGCCTACCACCAGCCGCGCACCTTGACCGGCGAGCGCACTTTACGGCCCGGATAT  
TATCGAAATGCGCGGTAGGGTATAGGTTTCTCCTTCCGGTTTGAAGCTCAAACCGGCCACTTGCAGGGC  
CAGTGCCAGAATGGCACCGATGCCAGCCAGCATGAAGGTGCCGACCAGGAATTTACTTTGCTGAACTTC  
ATCTTTACCTTATCAAACATGACTGCAGTGAGTATAAAATCCAGGCGGAGCACGGCGAGGGATGAGTGG  
ACCACGGTTTCGGGTCTGGCCTGACTGATCCCAGGCGGAGGTCGGCTTGGCATCATAGCCGTTAAAGAGCG  
CAATCCAGGTGACCACCAGGGCGAAAATCAGGCTCTTGATGGCGCCCTGCATGATGCTTTCATGCCAGTC  
GACGGAGGCTGCATGGCAGACCAGAAGCCCCCTTCGTCCACGCCGAGCCAGTCCACGCCGACCAGCTTG  
CCGCCGAAGATGCCGATCAGGCTGAACATAAAGGCCAGCAGCGGCATGCTGATGACGCCAGCCAGAAGC  
GGGGGGCAACCACCCGGCGCAGCGGGTGCACCCGCATCATCTTAGGCTTGAAGTTGCTCGGTGGCCTT  
CATCAGGCCGATTTACGCGGTTCAGGGCCGAACCGGCACGGCCGGCAAACAGCAGCGCCGTGACCACAGGC  
CCCAGTCCCAGCAGGGAGAGGGAGACCAGCGGTCCAGGCTCTGCTCGGCGCCGAAATCCTTCAATA  
CGTTGTAACCCCTGCAGCGAGAGCACCATGCCGATGAACAGGCGGAGACCAGAATGATGGCCACCAGCTG  
TACGCCACCACATAACAATGCTGGATCAGCAGCGGGAAGTGCTTGCAGCGGCTCGGGTTTTGCCCGCCAGC  
GCATGGAACAACATGATGGTGGCGCGACCGACGGAGCTGATAAACCGCACTCCGACCCGCCAGCTTGC  
TTATTTGACTTATCAACATCAGAGATCCTGTAGCAGATCGCCTGCCGAAAATGAAACGGAACAGGACCA  
TCGGGCAATCCTTTGAGGAACTGCTCGACTTCGGGATTTGTGCTCCTCGCGCAGCTGGTCCGGCGTGGCGT  
GCGCCACCACCTTGCATTGGCGATGATGTAGGCGTAATCGGCGATGCTCAGCACCTCTTTACGTCGTG  
GGTGACGATGACGGAGGTGATAACCAGGGCATCGTTCAGCTCCTTGATCAGCTTGACCAGCACCGCCATG  
GTGATGGGGTCTGCCGACGAACGGTTCGTACATGATGAGGTTCGGGGTCAAGGGCGATGGCCCGAG  
CCAGCGCCCGGGCGGCCATGCCACCGGAGAGTTCGGAGGGCATCAGTTTCGCTGCGCCGCGCAAGCC  
CACCGCCTGCAGCTTCATCATGACGATGGTGTGGATCAGCTCCTCCGGCAGGCGGAGTGTCCCAGCAGC  
GGGAAGGCCACGTTGTGCTAGACCGTCATACCGGTAAACAGGGCGCCGCTCTGGAACAGCATGCTCATCC  
GTTTTGCGCACTTCATAGAGGCGGAACGGGAGAGGGTGGGGATATCTTCCCCGTCAAACAGAATGTGACC  
GGACTCCGGCTTGAGCTGGCCACCAGTCACTGCAGCAGGGTGGTTTTTACCAGTGCAGCTTGGGCCATG  
ACGGCGGTACCTTGCACGAGGAATGGTCAAGTTGATCCCGTCATACAACAGCCGATCTCCGTGACTGA  
AGGTGAGATCGGAGATGGTGTGATCAGGTCATTGTTCAAACAATGTCCATCCGGTGTAAATGAGGTGCGAA  
TTTTATGGGGTAGTCTAGGTCTAAGCAACAGCAAGGAACAATATTGAACAGGCTGCAAGCCATTTGCA

CGACAGTTTTCTGTAACAAAGTGCCTCATTGAGAGCGGGACTTGCCATCCGATTCGCTTATCCGGGCAGAC  
CTTTTTTATAATCCCGCAGCTAATTTTCGGCCCCGAGCTGTGTCTTTATGTCTGTAAAGCCTGAGAAAAGTG  
TCTGAACTGTTTCGATTTTCGTCGCAGTGCCCGCGCGGTGCTGGACACAGAAAAGCAAGCCATTGATGGAC  
TCTATCAGTATCTGAATGACGCCTTCGACAAGGCGTGCGAAAATGGTGTGCGCTGCGGTGGCAAGATAGT  
GGTCACCGGCATGGGCAAATCGGGCCATATCGGCAGCAAGATCGCCGCCACCCTCGCCAGCACCGGCACA  
CCGGCCTTCTTCCTTCATCCGGGAGAAAGCGAGTACGGCGATCTGGGGATGATCTCCAGCGCGGACCTTA  
TCATCGCCATCTCCAATCCGGCGAGAGTGACGAAAATCCTGGCCCTGCTGCCGGTACTCAAGCGCCGCGG  
CATTCCGCTCATCTGCATGACTGGCAATCCCGCTCCACCATGGCCAAAGAGGCCAATGTGCACCTGTGC  
ATCAAGGTGGAGAAAGAAGCCTGCCCGTTGGGTCTGGCACCCACTTCCAGTACCACTGCAACCCCTGGTGA  
TGGGTGATGCCCTGGCAGTGGCTCTGCTGGAAGCGCGCGGTTTTACCGCCGATGACTTCGCCCTCTCTCA  
CCCCGGCGGGGCGCTCGGCAAGCGTCTGTTGCTGCGGGTTGGCGACCTGATGCACAGTGACGATCTGTTG  
CCCCGGGTGGGGATAGATGCCACCATCAGCCAAGCGCTGCTGGAAGTGAGCCGCAAGGGGCTCGGTATGA  
CGGCGGTGGTTCGATGGCAATGGCCTGCTGGCCGGGCTCTTTACCGATGGCGACCTGCGCCGATTTCTTGA  
CCAGCAGATCGATATCCATCACACCCCCATCAGCCGTGTGATGACGGCCAACTGTGTTACCGTAGGTCCA  
GAGATGATGGCTGCAGAAGCCGTCAAGCTGATGGAAAACGAGAAAAATCAACGGATTACTGGTCTGGATG  
AAGAGAAACGCCCGCTCGGCGCCTTCAACATGCACGACCTGCTGAAAAGCCGGAGTAATTTGATGCAAAAC  
GTACCGACCCTCTATGGTCCGGTGACGCGCAGCCAGTTCGACAAGGCGGCGCAAATCCGCCTGCTGGTGT  
GCGATGTGGACGGGGTCTCTCCAACGGCCTCATCTACATGGGAAAACAACGGCGAAGAGCTGAAAACCTT  
CTGCACCCCGCATGGTGGGGCATGCGAGCATTGCTCAATGCCGGGATCGAGATCGCCATTATCACCGGG  
CGCAACTCCCGTATCGTCAGCGATCGGATGAAAAGCCTGGGGTGGCTCATGTGGTGCAGGGGGCTGATA  
AAAAGCTGCCTAACTTCGAAGCGCTGCTGGCCAAGCTGGGGCTGACTGCTGAACAGGCCGCTATATGGG  
CGATGACACCATCGATCTGCCGGTGTGATGGCCGCTTTCGGCCTGGGTATCGCGGTGGCCGATGCCCATCCG  
CTGGTGTGAGTCGTGCCGATATGGTGACCCGGCTTGGCGGTGGCATGGGCGCGGTGCGCGAGGTGTGTG  
ACCTCATTTTGCAGGCGCAGGGCCACGACGATTATCAGCCCGAGGCCCTCGGTATGAGCAGACAGACCCCTG  
TTGTTTGCCTGCTGTTTCTGGTTCGCGCTGGTTGCCCTGGCAGTTGGGCAAGGTGGAGCTGGTGCCTGAGA  
GCGCCGTCAAATCGAAAACATCAGCCGGATTTTGTGCGCAAAGATCTGGTGACCACCCGTTTTGATAT  
CAATGGCAAGCGCACCAGCGGCTGGAGTCGACCTACGCCGAGTATTATCAAATCCTCGAGCAGGCCACC  
TTCGACAAGCCGTTGGTCTACATGTATGACAATCAGGGTTCGCCCGAGTGGAAAGGTGACCCGCCAAAACCG  
GCGTGTCAACACCGGCGACAACGTCATCTCGGGCAAGGTGCATCTGGATGGTCTGCTACCCACCTC  
CTTTATCTCCACACTGGATACCCCTATCTGGAGCTGGATCTGGTGACACAGGATGTGCGCAGCAACCGG  
GAAGTGAACATTCTGGGTTCGGGATTTCCAGACCCAAGGGGTGGCCTCAAGGGCCATCTGGACCGCAAAT  
ATTTTGGAGTTACTGGATCAAGGCCATGCCATCTATTTCAATGAAAAACGCTAATCTGGCCCTCGCAGCCC  
TGTTGTTGTGTGGTGGGCTGACTGCCAAAGAGTCCGACTTTGCCGAGAAGGTCTACGTGCATGCCGTCAA  
ACAGGTGGCCGAGATGCAGGACAACCGCATCACCTTCGAAGAGGATGTGACCATCAATCAGGGCACCATC  
CGGATCAAGGCTGACAAGGTGGTAGTGACCCGCTCCGGCGAGAAAAGGGCGGAGGTGATGACTGCCTACG  
GCAAGCCCCGCCACCTTCTTCCAGATCCTGGATAACGGCAAGCCGGTCAATGCCACGGCAACACTATCCG  
CTACGAGCTGAAGAACCGGCTGGTGGACCATCACCGGCAACGGTCAAGCAGGAAGATAGTCAGGTC  
AATGGCGATCTGATCCGCTACGACATCGTCAAACAGAAGATGATCGCCGAGAGCAAAAGCCGAGCCAGC  
GGGTCAAACCGTGTTCCTGCCGGATCAGGTAGAGAATTTTCGACAAGCCCGCCGACCAGAAGCAGCAGGG  
AAAATAAGCCATGGCAGTGTAAAAGCAGTGGGCCTGCAGAAAGACTACAAGCGCCGCATGGTGGTGGT  
GACGTGACGCTTGAAGTGGGCACTGGCCAGATTGTGCGGCTGCTCGGCCCCAACGGGGCGGGCAAGACCA  
CTTCCTTCTACATGATCGTGGGGCTGGTGCAGCGGATGCCGGTCTCATCACCATCGACGATCAGGACAT  
CAGCCTGCAGCCATGCATGTGCGGGCGCGCAACGGCATCGGTTACCTGCCGAGGAGCCCTCCATCTTC  
CGTGCCTGTCCGATTTTCGACAACCTGATGGGAGTGATGCAGACCCGCAAAGGGTTGAGTCGCGAGGAGC  
GTGAGGACAAAGTTAGCAACTGCTGGAAGAGTTCATATACCCACATTCGCGACAACCTGGGTGAGAG  
CCTCTCCGGCGGTGAGCGCCGCTCGGGTCGAGATCGCCCGTGCCTGCGCTGGCGGCCGAGCCGCTTTTATCTG  
CTGGATGAACCCTTTGCAAGGGTTGACCCGATTTCTGTGATAGACATCAAGAAGATCATTCAGCATCTGA  
AAGATAGAGGCCTTGGCGTCTTGATTACCGACCACAACGTCAGAGAGACTCTGGACGTATGTGAGAAGGC  
CTATATCGTCAGCCACGGCAAGATGATTGCCGAAGGTGCACCGGCTGACATCCTTGCCGATGAGCAGGTC  
AAGCGCGTCTATTTGGGCGATCAATTCAGTCTATAGTAAGGGGGCATGCCCTCATTTCTTTGACGAGTG  
CCTCGCTGAACATAAGGATATCCCAGCTAGATGAAGCCGACATTACAGTTGCGTCTCGGTGAGTCCCTG  
ACCATGACGCCGAATTACAACAAGCGATTCTGCTGCTCCAGCTCTCCACTCTGGAACCTCAGCAGGAAA  
TTCAGCAAGCGCTCGAAAACAACCTCTGCTGGAGCAGGAAGAGAGCGAGGCGCAAGAGACTAGTCCGGA  
AGCGCCGGTGCATGCCAGCCAGCTGGACTCCAGCGATGCCATGGCTCAGGAGCAGATGCCGGACGAGTTG  
CCGGTGGATACCACCTGGGATGAGGTTTACTCTGCCGGCACGGCCAAAGTGCGGGCCCCATCCACGATG  
GGGAAGATAGCGTCTATCAGGGTGAAGTACCAGAAAACCTGCAGGATTATCTGCTGTGGCAGATGCGGCT  
CACACCTTTCAGCGATGTGGATGCCGCCATCGCGCTCGCCATCATCGATGCCATCGACGAATCCGGTTAT  
CTGACCGTTGCGCTGGAGGATATTGAGGCTGCCGTACCAGCGATGACGTAGAGGTGGAACCTCGATGAGG  
TCGAGGCGGTACTCAAGCGGGTGCAGCACTTCGATCCGGTCCGCATTTGCTGCACGTTCTGTGCAGGAGTG  
TTTGCTGATCCAGCTGGATCAGTATGACCCGACAGCCCTTGGCTCAACGAGGCCAAGGAGGTGATCCTC  
GAGCACATGGAGCTGCTCGGCAACCGGATACCAGCACCTCGCCGCAAGACAAAACCTCAAAGAGAGCG

ACCTCAAGGAGGTGCTGGATCTGATCCAGCTGCTGGAGCCGCTCCCGGTAACGGCATCATCCAGAGCGA  
CTCCCAGTACGTGATCCCCGACGTCTCCGTGGTCAAGAAGGGCAGCAAGTGGGTGGTCGAGCTCAATCCC  
GACTCCGCCCCCGCATCCGGGTCAACGAGACCTATGCCGCCATGGCACGTAACGCCCCGAGCAGCACAG  
ACACCCAGTTTATTCGCTCCCATTTGCAGGAAGCCAAGTGGTTCATCAAGAGCCTGGAAAAGTCGCAATGA  
CACCCCTGCTGAAAGTGGCCAGTTGCATTGTGCGAGCAGCAACAGGGCTTTTTTCGAGTATGGTGAAGAGGCG  
ATGAAGCCGATGGTGTCAATGACATCGCCGAAGCGGTGGAGATGCATGAGTCGACCATCTCCCGGGTGA  
CGACCCAGAAGTACATGCATACCCCTCGTGGTATCTTGAATTTGAAGTTTTTTTTTCTCCAGCCATGTGAA  
CACCGAAGGAGGAGAGAGTGTCTATCGACCGCAATTCGCGCGCTCATCAAGAAGCTGGTCACGGCAGAG  
AATCCTGCCAAGCCGTTAAGTGTATAGCAAGATCGCGGATTTGCTGGCCGAACAGGGTATTATGGTGGCGA  
GACGCACGATCGCTAAGTATCGCGAATCCTTGTATTTCCACCTTCCAATCAGCGCAAACGCCCTGGTTTA  
GGCAAACAAAAGGATGATGTTATGCAAATTAACCTGACCGGACACCATGTCGAGATCACCGAAGCTCTGC  
GTGATTATGTGAATAACAAATTTGCCAAACTCGAGCGTCACTTCGACCACATCAACAATGTTTACGTGGT  
GCTTAGCGTGGAAAAACTGAACCAGATAGCGGAAGCCAAATTCACGTCAGCGGTGGCGAAGTGTTCGCC  
AACTCTGAACATGCCGATATGTATGCTGCGATAGACACCTTGTCTGACAAGCTGGACAGGCAGATCATCA  
AGCACAAAGATAAGTTAAATAAAAAATAACCATGCAACTTGAACACATACTGAGTCGGGACTGCACCAAG  
AGTGCAGTCCCTTGTACCAGCAAGAAACCGCCCTCGAAATCATCAGCGAGCTGGCCGCCGAACGCCCTTG  
GCACCTCCCGTCAGGCGCTGTTTGAATGCTTGTGGCCCGCAAAAAATGGGTAGTACCGGGATCGGTGC  
CGGTATTGCGATCCCCACGGTCGATTGACGATGAATTTCCGCCAACCGCGATCCTGATGACCTTTGCC  
GACCCTATTCTTTTCGACTCCATCGATAATCAACCGGTTGACCTGCTGTTTGCCTTGTGGTGGCGAAA  
GCGAGTGAAGCAGCATCTCAAGACCCCTTCTCTGATGGCTTCCAAGCTGGGTGACAAGGCGGTTTGCCG  
CCAGTTGCGTCAGGCAACCAGCGACGAAGAGCTCTATCAGATCATGACCTCGGCCGTATAGCAGGCCAAG  
GATGAGACACCCGTTTTTGGCGTGAGGGAACAAGATGCAGTTAATCGTGGTAAAGTGGACGTTTCGGGCTCCG  
GTAAAACGGTAGCCCTGCGAGTGTGGAAGATCTGGGTTACTACTGTGTGGACAACCTGCCGGTCAATCT  
GTTGCCCCAGCTGATAGTTTTCGGTGGAGAGCCAGTACGACAAGCTGGCGGTGAGTATCGATGTGCGCAAC  
CTGCCGAGCGATCCGGAGAAACTGGAAAATCTGCTGGCTCAGGTGCGCAATGAGGGGCGGGTTGAGTTCT  
CCAGCTTTTTCTTCGACGCTGACAACGGCACCCCTGCTCAAGCGCTATGGCGAGAGCCGCCGCTTGCACCC  
CCTCTCACGCAACAAGCTGTGCTGGATGAGGCGATTTCGGGAGGAGACCCACCTGCTGGCGCCCATCTCC  
TCGACCCGCTGACCTGCGCATCGACACCACTACCTCAGCATTCACGACCTGAGCGAGCTCATCAAGATCC  
GGGTGCTTGGGAAGAAGAGAACGAGCTGGTGTTCGAGTCTTCGGCTTCAAGTACGCGATCC  
CAAGGATGCCGACTTCGTGTTTCGATGCCCGCTTCTGCCCAATCCGCACTGGATCCCCGAGCTCAAACCG  
TTTACC GGCAAGGATGAGCCGGTCGCCAACTACCTCTCGGCGCAGGCTGACGTGATGCTGTTTTACCCAGC  
AGATCGAGAACATGCTGGTGACCTGGTTGCCCCATCTGGAGCGCAACAATCGCAGCTACCTTACGGTCCG  
CATCGGTTGCACCGGCGGTGAGCACCGCTCGGTCTTTATTCAGAACCGGTGGCCAGTGCATTCGGTTTTG  
CTCGGCAAGAACGTGCAGATCCGCCACCGCACTCTCGACAAGAGTGCCCCCAATCCTGACGGACCAATA  
GGACGACCCGATGACTGTTTTCCGCTCGGTTGAAGTGA AAAACAAGCTGGGTATTCATGCCAGACCAGCC  
ATGATGCTGTTTCGAGCTGGTGCAGGGTTTCGATGCTCACGTGCTGCTGCGCAATGAAGATGGTGTGGAGG  
CCGATGCTGACAGTATCATCGGCCTGCTGATGCTGGATTTCGGCGCAAGGGCGGCAGGTGGAAGTGCAGGT  
TGAGGGGCCCCGAAGAGGTGAGGCTCTGGCCGCCGTGGTGGAGCTGTTACCTCCGGCTTCAATGAGGAG  
TAGTCACTCCTCGTTATATGTTATGAACCGGTGCGCGCCAGCGCTTTGAAGCTGGCAAATCCCCGACAAG  
CCAGCAGATTCCTGCTGGCTTTTTTCGTTTCATCAGTGCCAGAAAACAGGTCGTAGAGACCCATCGCCTCCTC  
GTAGTCAGCCTTGTGATGGCCAGCACGAAGATGAGCGTCGCTATTTCCCCGTTCCCCCAGTCAATCCCC  
TGCGGGGCCAGCACGGTGTAAACCAGAGTGCGGCGGCCAGCAGACCGAGGGAGTGGGGCAGGGCGATCC  
CTTCTCCCAACATGGTGGAGACGATCCGCTCCCGCTCCTGCAGTGAAGCTCTGAAGCCGCTTTCCACCAG  
ATGAAGTGGTCGGCATCGAAATATTTGTGAGCATGTAGGGGCGGGTGCAGTGCATCAGCACCAGCTTGC  
CAAGCTGCTCCAGCTGTTATTTGGGTGCGGAAGGGGGCAACGATACCACGGGGGCGTTTTTTTTCGTTTAC  
CTTGACGGTACTGATGACAAAGTCTGCGCGATCTGCCAGTCTTCGTAATCCCCGACCCGATTCAAGC  
GTGGTCAGCTGTAACCTGGGGATACTCCCGCTTGTATGCGTGCTTCCAGTACCCGGAAGGTGGCGTTGCCCG  
CATCGCAAAGCAATAGCGCCTGCGGGCGGGGTATAGCCGATATCGTAATGGCGCTCCAGCCCCGACCCC  
GATATGGATCACCAGATAGCCGATCTCGTGGTGGGTGAGTGGTGGTGGTGGTGGTGGTGGTGGTGGTGGT  
ATGGCCGACGCTGATGTCGTAGGCGAGGGGGTAGTACTGCTTGTGATGTGATCGGCCAGCGGGTTATGGT  
TGCCAATCTGGTATTTGACCCGTAGCAGCATGGCGCTGATATGGGTTTGCAGGTGGCCCCGAGCTGTTG  
GTCGCTCGCAGGTGTAAGGGTAGTGTGATGAATGTAGGTCAGCAGATGCTCCACCAGCTGTTTCGCTC  
TCGGCGGCCATCGCCGGGCTGAGCTGGGGAGTATCGGCAATCAGGCGCGCTGGATCTGGATGGCGAGAC  
CGGCATCTCGTCTCTACGGGGGGCGTCAGGGTTGGCAATACCGCATATATATCGCGAGATACTGCCAG  
CAGCGGCAGAGTCAGATCCTCGCTGGCGAAGTGGCGCAACTCGTGACCGGATGCCGTGACGCAGCAGGGCA  
ACGGCGCAGTAGATGGTGAAGTGTGTCAGGCTCTCGTCAGCGAGACGCAGCTGATGTCGGGCAAGCTGGG  
CATGGATGTGATTGCCACTACCTCCATCGTCTTGTGGGGCAGAGGTTGGGTAGCAGGGTTTGAACCTG  
GTTGTTGTGACGCAACTCCTGATAGAGCAGCTGGGTCAAGCAGGCACGGATCGCCGCTCCTCCCCCTGA  
ATGCGCATCCCCAGGCGGGGTTTTGCTCTCGACGCTGAGCCTGAAGTGGCTGAGCTGCTCACGGACTTCCG  
CCATATCCCCCTGCAGTGCCGCCCGGCTCAGATACCAAGTATCAGCCAGCTCATCGAGCTTGTATCCCCTG

CTCTGCCGTCAATAGCAGGATCTGCAGGTGCAGAACCCGCTCGCGGCTGGTGCCTGGCAGGCCGCTATCC  
TGACCCTGGGCGCCAGCAGAGCCTCGAACAGTCCCTGATTGTAGATTTTCAGCTGGTAGCCGCTGCCAC  
GCTGGTGGATCAGATGAGCGCCGTGCGTGGCAATCAGTTCGTTGAGGGTCGCCACATCGGTGCGCACCGT  
GCGGGTGGAGACATTGAGGCGGCGAGCCAGTTCCTCCTGTGGCAGTGGTTCGGCGTGGAGCTGGATCAGC  
AGTTGATGGAGCCTGGGGTGTGGCAGCTTGATCATAAGGGGTATGCAAGACTCCTGTTGCGAGATAAAGG  
GTCGATGTTAAACAAGTGGGTTCATCAACAAGCCAGGCACCGGTGAGTGAACCGGTGCCGTGACTGCC  
ATCAGGCCAACAGTCGTTTCACTATGGCCAGCAGAGTGCGAACATCCTCGGGGCGAGTGTGCCCCGCTCGC  
GTTGTGCGATGATGGAGCTGTAGACGTGCGGGATCACCTTCTCGACTCCGGCATCCAGCGCAATCCGCACT  
ATCTCCTCGAAGTTCCTCCAGATCGATGCCGCCGGTGGGCTCTAGCCAGAAGTTGTTGCGGGCACAAGCCT  
CGGCTACTGCCTGATACTCGTCGCGGCAGGCCAGCCCGCCATGGGGAAGAACTTGACCGAGCTGCCGCC  
CATGTCTTTGAGCAGGGCAATGGCGGTATCGATGGCCACTATGCCATCGGGCTGCCCGGCTGAGTGGGA  
CCGGTGGAGATCTTACCATGCCCGCATGCCGGTAGGGAGAGCAGCCCGTTGACCAGTGTCTCTGACT  
GGCCGAGCAGCGCCCGCTGGCACC AACCCGGTGAACACCTGGTTGACGTGCTGGGGCTGCAGTTGGCA  
GGCCAGTTCGGTACCATGGCGGATTGGCGGGATCGCCGGCGCCAGCCGATGGAGAGGGCGTTGTGCG  
ATCAGCTTGGCGTACTCCTTCATATCGGCAACTGCGGAGGGAAATATCCGGGTAGTTTTTGGAGAGCACAC  
CGACCAGCACGTGGCCTTCGGCTGCGTGTACACCTCGACGGCATTCCTCCTTGGATCCAGCCAGCACGTT  
GAGACAGACCCGATCACGGTAGTAGTTGGGGTAAGGGACATCAGCGATTCTCCTGAACGAGGTTGGCAA  
TGGCAGAGTGGATTTGGCCGAGCTGGGGCACGGTGCAGCTGCGCACATCGATCTCGATGTGCCCTCGTT  
GGCCTTGTAGCCGCGGCAGTAGATGGCAGGCGTGCCCTGTTGCAGACGGGTGACGACCTGCACTGTGGTC  
ATGCCGAGCTGCTGGTGGTCAAAGGCGATATCGGTGCGGGCAATGTCGCGTCTGCGCTGTCCACACCA  
CCTTGGCGGTGACGCCGGGCAGCTGGTTTAGGCGTTCGATGAAGGGGCTCATCTTGGCGACCATGGCGGC  
GCCGCTCTCTTTCTCTTTGGCCAGATAGCGCTCGATGGCGTGGGTGAGCCGAGGATCCCTCCTTGCCC  
ACTTTCATGGCGCGACCGATGCCATTGGCTTGCTGCTTGACCCACTCCACGTACTGACGCTTGCCAACCA  
CCAGCCCGCTGGTGGGCCCTTCAATGGCCTTGGCGCCGCTGTAGATGACCAGGTCCGCACCCCTGGTTGTA  
GTAGAGGGCGCAGATCCTCTTCGGCAGCCGCATCGACGATGAGCGGGAGCCCGTGGGTCTTGGCGACCTCG  
GCGGCCTCTGCCACCGACAGAATGCTCTTCTGCACGCAGTGGTGGGATTTGATGTAGAGGATGGCTGCTG  
TGTTGGCATTGATGGCAGCGGCCAGCTGGGAAGGGGAGCACTCGTTGGCGTAACCGGCTTCCACTACTTT  
GCCGCCACCCAGATTGACCATGGTACCCAGCCGGGCGCCGAAGTTGACGTTATGCCCTTGGGCAGCACG  
ATTTCACTCGGCACCTCATGGGGATGGGCATCGAGGTTCGAGGCGGTAGGGATCGCCGCTACTATCA  
TGGCGGCGACTGACTGGGCGATGCCGGCGCTGGCGCAGGAGACCACCACCGCATCTTCCACATCCAGCAA  
ACCAGCCAGATAGGCGCCGGTCTTGTGACCAGATCCTTGACCTCGAAGTAGTGGCCAGGCCAAAATTG  
ACCGCATCGACCACCTCCTGCTCGGGGGTGGAGACGCCGAGAATAGTCATGCGCCCGGAGGCGTTGATCA  
CCGGTTTGGAGCTGATATTTCTCATAAACAGAAAGGCATGGTGTGATTTCCCATAGTGAGTCAGAACCAGTT  
CGCCACCGACAGGGCGGCGAGAGGCTGCAGTTGTTGGTCACCGCTGCGGGACTGGGCTTCGGTATCCAT  
AAACAGGGTGGGCCGCTGGTGACCTCGAGCAGGGTCAGATCGGCATCGGCTCCACCTCGAGCCGCCCC  
TTGCCGAAAGGGCGCAGGGCATCAGCGGCCCTGATGGGTGACGAGGCGAGCACCTGTTCCAGCGTCATGC  
CGATGGCGAGAACTTCGACATCACGTGAGCCAGACTGTAGACCGCCCTTGTATGCGGTTCTTGCAGTA  
GATGTGCGAGCTGATGGTGCGGGGTAGGATCCCTGTGCGATAGCCAGCTCCGCCACCTCGAAGCTGAAG  
CTGGCGCCCGCTGGCCGATGTGAGCAAAAAGCCCCGTTTCATCGCCTCGCGCACCGCGACCCGCGAGCT  
CGCCAGCCGGAGTCAGGATGCGGTTTCGGTTTGCCGTTGAAGCAGTGGGTGAGCAGATCTCCATCCCCAG  
CAGGGCGACGATCTCGTCCAGATCCGGCGGTGTGTTACCCACGTGCACCATCAGCGGCAGCTGGTCTGTA  
GCCTGTTGAGGGCCTTGGCCATGCGCAGCGGTTGCAGGCCGTTCTCACCGACCACGCTACCGCTCATTC  
GCGCCTTATGCCAACGATAAAGTCGGGGTGGCGGCGAATGGCTGCCGAGGCGAGATCCATATCGAGGTC  
CCGGCTATCCGCCAGCTCGTTCTGGCGTAGCAGACCGATGCGGGAGATGTTGAGCAGGGCATGCACCCGG  
GTCTTGAACCCCGCAGCGATCTGCTGGAAGTCATCCACATCATCGGCTCCGGTGCTGCCGGCTCGATCA  
CGGTGGTGACGCCGACTCTACGCCCTACCTTGTCCGGTTCATCGTTATAGATCGGGGAGGCGGGGTAGCA  
GTGGGTGTGGCCGTCGATCCAGCCTGCGCTCACATGCACCCGCGCCGAGATCCAGGATCTGCCGCGCC  
GTTGCCATCTTCCGCGAGGGAGCCGATGGCGGGCATTTTTGCCCTCCCTGATGGCGATATCGACGAGCTGGC  
CATCTCCAGCCGCCCCGCTCTGATGATGATGTCATACATGCTGATAACCTCTGGCGAGCCGCCCTGCAG  
GGCGGCTGGTACTTACACAAGGGCGACCCGGGAAGAAGGTGCCAGCAGCATGGCTCCAGAAATGGCGCCA  
CCGGTGTGGGTTTGGCCACACGTAGAACAGCAGGGCACCCAGCAGGGAATGATACCGATGGGGATGG  
AAGCGCCCATGGCGGAGAGGATGATGAGGGGGCTGAGGAAGCGGCCAGAGCTGTTGCCAGCACCCATCAT  
CACGTCAGCACCGTAAGTGGAGTTGCTCTGGTTGATGGTGAACCTGCGCGCCAGAATGATGATGTAGCCG  
ATGGCCAGACCAATCCCATACCGGTTGCCAGCGAGGCGCGAAGTTCTCCACCGGATAGACGATGCCGG  
CCCCAGCAGCAGGGCTGGCACTCCGAGGCCAACCCCGGTTGATGGTCCCGCCGATATCCAGGATCCC  
CACCAGGGATCCCTCGATGATGCGGGCGAACAGGAAGCTGGCACCGAACGCGGCCACCGCGCCGTAGGCA  
CCCGTGTCCATTCCGGCTTTCAGCATGGCGACGAAGGCTACCTCGTTGAAGGCACCAACCCCGTACAGAT  
AGAACATGTGGGTACCGGCAAGACCCCGGCCGAGAGCAGGCCGACGAAGATGGGGAAGAACCAGTCCGGC  
ATACCAGAAGTTGTTTTTCAATTTCTCATCCATGGTGTGACCCCTTATTTGCCGCTCAGCAGGTTATGGA  
CGTTTTCCAGCCACAGGGGACGCCCATATGGAAGGATTCATCAGTTTCATGTGGAAGCCGCGGAAGAA  
GCCGCTCAGCACGAACAGCAGGACGATGGCTGCCATCATCACCTGGTGCATGGTTCCAGCCGCTCTCT

TCCACACCCTTGCCGATCAGGATGCCGAGCACCAGACCCGGTACCGCGTTACCCATGATGAGCTGTGCCA  
GACCGCCGAAGATGGTGGCCAGAAACCGGATTTCTTGCCCGCTTCGATGGCGGCCAGCCAGAAGATCAC  
CGGCATGACGGTGTGGACCAGCAGGTTGGCTGCCGGTACCAGCACCTTGACCGCAGTGACCTGCAATGCA  
GCAGGGACGGCTGCCGCCGTGCTGTTGAGGAAGGCAACCACGATGGCACCTATGATGCCGCCGGCGATGG  
CCATTTTTTTTCGGGTGCGTGCAGAGTGGTGGCGAGATCCCGATTTTTTGAACAGCAGTGCCGCCGTGGCCCA  
GTGCGGGATGATGCCGTGATCCACATCCTGGGTGAAAGGCGCCTGCCGCCACGGTCGAGGCCAGGCGTTG  
AAGAAGAAGCCCAGACCAAACGAGAAGTGGGAAGCGGGATCCCTTCGCAGGAGTTGAGTTCGCCCAGGG  
TGCGGAAGGCACCCATGCCCTGTACGGTCGGGGCGTGGAACATCCGCGCCGCGCCGGCCCCACCCCGAC  
GCCAACCAGGCCGCCAATGATGAGTGAATGATAAAAAATGATTAGAAACATCCAACGTATCCTTCTTGTG  
GGGTTGTGCCTGCCAGGCATCACACCTGGGTGAATGTACCTTGGCGACATCCAGACTGGTGACCTGAA  
CCTTGATCTCCAGCTGGACGCGGTATTTCGCGCGCTGGCGCGCAGGAAGAAGAAGAACAGTCTCCAC  
CCGGACCAACTCCTCGGCTTTGAGCACCTGTACATCGACCGGCTCAATGCGCAGCAGTACCTGCTGGTTG  
TCCTTGAGCAGTGTGGGTTGCACCTGGCTGAGGGCGGAGGCAAACGCTGCTGGCGGGTCTGCCCTTGC  
CGTTGACGATGACCTGGGTGGTGAAGTTCTCTTTTTCATCAGGCGCGTCCGTGCTTCTTGGCGAAGGCTTCG  
ACCAGCTTTTGGCCAGCTCTTCTTGTCCATGAAAACCGAAGCCAGCACCACACACCCCTTCGTTAATTG  
CGGTGACGCCCTCTTCAACAGAGCGCATGCCGTAGCGGCACTTGTAGCCGTATTTGGTCTGGGCGGTGAT  
CGCCCCGGCGCCCGCTGCCGAGAAGGAGATGCCGAGATCCGCTGCTCCTTGTTCATCACATCGCCG  
AGCTTCATGTACGCGCCATGCCAGGGATGATGATCACGTTGGCCCCGGCAGCTTCCGCGCCTGCACCCA  
CTTTCTGACCCTTGCCGAGACGATCTCCGATTACGAGTTTGTATGGCTGTCATATCGATTTCTCCTTGAGT  
TACGGGTTCTGCACCGAGCTGAGTTTCGTTTTCTTGGCGACTTCAAAATGGACGGACAAGAGGTGTGCCT  
CCTCATAAGCAAGCTGATCCAGCCAGCTGACGACCTGTTCGGCGAGACGCGAGTGAGAGGGGGGAGATCTC  
TTCAAACAGGCTGAGGTCAACCTCCGGCAGGGGCTCGCCGCTGTGGGAGCGCCACACCCATGGCTTTGACA  
TGGGAGGCCAGCATCTGCCGTTGCACCTCGTTGGGGATGATGCCCTGTTCGGCCAGCAGGGGATAAATGC  
GCGCGAGGATATGATCGGTCTGGCGCAGCAACTCCGGGCTGTTCGGGGTCAGGGTCTGGTCTGAGTCTC  
TGTTTGCAATGTCTGCTCTCAAGGCTGGCAGAAGGTATGGCGTTACCCTAAGCCTGCGCGTCAATGTGG  
AGGAGGCAGCGTTTTTCCGATTTCGAAGCGGAAATTCCTGATGAAATGGCCCCGAAATGATCGTTTGGATA  
CTAAAAGGTAAGGAGAGTGTCTTATTGAAGCTGGTTTTTTTGTGATCGGTAGCGCACAAATCGGGGGCGG  
GGCAGGGCAAGCGTTGCGGGAAACTGCGAGTCACTACGTTAAGAGACGTTGCCGAGGGCAGATAT  
GGAAAAGGGCGGTTTTCCCGCCCTTCTCATAAAAAGGAGTACGCTAGCTGAGCCGATGCGCGCTGAGCT  
GGCCGTTCTCTGCTGATAGCGCAGGTCTTCTCTATGAGTACCACCCTTCCAGCGGCTTGGCCGAGCGG  
AATACCGAGATGGTCAGCTTGGTGCCGGGGCGGCTCTCGACAATCTTGTCCATGGCGCTGCGTACGCCAC  
TGATGGCCTCTCCGTTGATCTTGAGCAGCACATCCCTCGCTGCAGGCCGCTTTGGCCGCCGGGCGGTT  
GGGATCCAGACTCTCCACCACCAGACCACGCAGGTGCGCGAGGTTTCATCATCCGCGCGACTATGGGGTTG  
ATCTCGACGCTGGAGATCCCAGGTAGCCGCGGATCACCCGGCGTTGGCGATCAGCTCATCCATGATCC  
GTTTTGGCCAGCCGTTAGGGGATGGCGAAGCTGATGCCGTAGCTCTCCTGATTGCCGTTGAGGTGATAGGT  
GGCGGTGTTGATAACCCACCAGATCGCCACGGCCGTTGACCAGCGGCCACCCGAGTTGCCCTCGTTGATG  
GCGGCATCGGTCTGCAGCAGATCCTGACGGCCATTGCTGTGAGTCCCATGCTGGAGAGGCCGGTACGGC  
CGGTGCGACTGATGATGCCCTGGGTGATGGTCTGGCCGACGTTGTAGGGGTTACCGATGGCGAGCACCAC  
ATCCCCCACTTCTGGCAGTGCCTCCGGATCCTGCGGGATCACCCGCAGGTTGCTGACTCGATATAGAGC  
ACGGCGAGGTGCGGTGAGCTGATCGGTACCGACCAGCTCGGCACTGAAGACCCGACCATCCTGCAACGCGA  
CGATGATCTGGTCGGCATCGGGCATGACGTGGTAGTTGGTCAGTACATAGCCGCGCTGGTTCATGATGAC  
GCCAGAACCCAGCCCTTGCGGGCGCAGTTCCCCCTGATTGCCCTGATTGGGGGCAAAGCTGCGGGTGTAG  
ATGTTGACGACGGCAGGGCCTGCCGATGGGCGGCATAGGAGAACTCAGTTACGGGCATTGGTGATGA  
TGCCGGGCAGTTGGGCACCACCGCGAAAATGGGGAAACAGCAGCAACAGCAGCGCCGCGACGGTCAATCC  
AAAACCGACAGACTTGCCCAAGTAACTGACTAAAGGGGGGATTTTCATGTCATTTCTCATCCGTACAGGCT  
GCGCGCAGAGAATAACACTATCGATGGATAAAAAATCACCCGCGTGAAGGCCGCGGGTGTATGGAGGGTT  
GGCGAACAACCTGAGCGTTAGCGGATCACCAGATAGAGCGAGGAGTCGCCGCGCTGGATGTTGAGCGCCA  
GCACGTGAGGCTTGTCTTGGAGCGCTTGGTCAGCTCGCCAGGGTGTGATGCGCAGGCGGTTGACCCC  
GATGATGATGTCACCTTCTGCAGGCCGGAAGCGGCTGCCGGAGAGCGAGGATCAATATCGGCCACCGCG  
ACACCGGAGACCGGGTGGTGGTGGTGTCTCAGCTTGGCCCTTCCAGTGCCGGATGCAGCGCGCTGGCGC  
GACTTTCGCTGTCTCGGCTGCTTACGGGTCATTTGGCAGTTTGTGACTTGCCATCGCGGATCAGCCC  
CAGTTTCGACCTGCTTCCAGCGCCCATGGTGGCAATCTTGGCGCGCAGTTCCGCCAAGGAGCGAACCGGT  
TTGCCATCGATGCTGACGATGATATCGCCGGCCTTGTGATGCCCGCTTGTGCGCCGCCAATCAGGCATGA  
CCTGATTGACGAAGGCACCATCCTTCTTGTGTAACCGAAGGTTTTTGGCGATGTCGGAGGTGAGCTCGGT  
GCCGGTAATACCCAGCTGGCCGCGACGCACTTACCCTACTTGACGATCTGCTCGGTGAGTCCCAGCACC  
ATGTTGGAAGGGATGGCAAAGCCGATGCCGATGTTGCCCGCTTCGGGCCCAGAATCGTGTGTTGATAC  
CGATCAGCTCGCCACGCAGGTTGAGCAGGGCACCCCGGAGTTACCGGAGTTGATGGCCGCATCGGTCTG  
GATGAAGTTCTCCAGATTCTCGATGTTGAGGCCGCTGCGACCCAGCGCACTGACAATACCGGAGGTGACG  
GTCTGGCCAGACCAAACGGGTTGCCGATGGCCAGCGCATAGTCACCTACCCGCGAGCTCGTCCGAGTCCG  
CGAACTTGATCTGTACCAGATCCTCGGCTTGTATTTGCAGCAGGGCGATGTCGGACTGCTTGTCTTACC  
GATCTTCTTGGCCGATACTCACGACCATCCTCAGGTTGACCTTGATCTCGTCCGCTCGTGCACCACG



TGGGCGTTGGTGATCACGTAACCCCTTCTTGGCATCGACGATGACACCGGAGCCGAGCGCCTGGAATGGCT  
GCTCGCTCACCTGTTTCATCGGGCATGTTGGGGCCGAAGAAGAACTTGAAGTGTCCGGCAGACGCTGACG  
GGTAATTTTTTTTGGCAGAAACCGAGATATTGACCACCGCCGGGTGACCTGTTTCGAGAACAGGCGCCAGG  
CTTGGCATCTCTGATTTGAACCTAACAGGGAAGGCAGTGCAGCCTGAGCAGGGGCGCAGACATGGCGA  
TACCGACACTGAGGGCTAGCACACTGAGCATGGAAAAGAGGTTTACGCATATGAAAAACAGCTCCCAGAAA  
AAGTTGCATTGCAATCGTCAAGGTGAGACCACGGGACTGGCCAATTAGTTCGCGGAGGAACTAGTTTGGT  
TGCTTGAGCAGTCCGGAAGAGGCGCCAGCATAGTCGCGAGGCGGAACGCCCGGCTCTTCTGCCACATTGG  
CAGGGGCTTCTTCTACCAATGATTTCGCGAACAGCGGTTCTTGCCTTGGCCAGGAATTTGCTCTGCTC  
GGCCATGTGGCGATAGAGGGTCTGATACTGCTCGGCCAGTTGCTCCATCAGGGCGGCACTGTCCGGCAGG  
TGGGTGTTGATCTGGCCCTGATAACTCTCGAGCTCCTTGTGGGCTTCTTTCAGTTCCCTGTTCCAGACGGC  
CAGCATCGCGGCTACGCACCGAAAAACGGCCGAGACGATACCGATAATCAAGGCCGCGACAGCCAGCAGC  
GATCCCAGTTAACAGACTCATAGATGCTCCTTGTACAGCTAAAAACAGAGTGGGTTTATGCGGTGCTCAT  
AACCGCCATGCCTTGATGGCACTATAACCGTGCCTGAGGCCGTGATACCAATTTTGTCTCGATTTCAGG  
GACTTGAGAGGGCGCTCAAGGATGACACCGCAGCAAAAAATACCAGCAGGATCTGCTGCGCCCCGGCTTTG  
TGGCCGACCCTGCGCAGGGGATGGCCATTAGCAGGCTGGAGCGACTGTATCAGGATTTGCTACGGCGCCC  
GACTCCGACCAGATCTCGAGGGCTGCTGGGTTGGCTGCAAAAAGCCAAAGCCGCGGAGCCTGTCTCGGT  
ATCTATATGTGGGGCGGAGTGGGCCGAGGCAAGACCTGGCTGATGGATACTTTTTTCGACAGCCTGCCTG  
GGACGCGCAAGATGCGCAGCCATTTCCACCGCTTCATGCACCGCATTACGATGAGCTGCAGGGGCTGAG  
CGGGCAATCCGATCCCCTCAAGCTGGTGGCCAGCAAGCTTGCAGTGAACAGACATCATCTGTTTCGAC  
GAATTTTTTGTCTCCGACATCACCGACGCCATGCTGCTGGGCACGCTGTTCCAGGAGCTGTTTGGTTCAG  
GTGTTGTGCTGGTCCGCACTTCAAATATTCCGCCGAGGATCTTTATCGTAACGGGCTGCAGCGAGCCCC  
TTTTTTGCTGCTATCGAGCTTATCGAGCGTCATTGCGAGGTAACCTGGAATGGCGGTATCGACTAT  
CGTCTGCGTACGCTGGAACAAGCCGAGATTTATCACTGCCCGCTGGATTTGCAGGCAAAAGCCAATCTTG  
ACCACTATTTTCAGCAATTAACCGGTGGGCACACGGCTTGCAGGGGACGTTTCGAGGTCAATCATCGTCA  
GCTGGCGTTCGCTCGGGATGGGGGAAGGGGTGCTCTATATGGAATTTGAGCAACTTTGCTGTACTCCCCG  
TCCCAGAACGACTATATCGAGCTGGCCAGACTGTTCCATAACCGTTCCTGCTGGCCAATGTTACGCAATGG  
GCACAGGCACAGATGACGACGCTCGCCGCTTCATTGCCATGGTGCATGAGTTCACGAACGGCAGCTCAA  
ACTCATCATCTCGCGCGGTTCCCATGACAGAACTCTACGGCGAAGGGCTGCTGAATTTCAAAATCCAA  
CGTGTCTTTTCGCGGCTTCAGGAAATGCAATCGCACTAACCCTGCCAGAGTGCACCTCCCTTAGTACAC  
AATACCGCGCCTGCCAGTCCGATGGGCATCTGCGGCAGGTAGGGCCGGGCGACATTTGCTGATTTTCATGG  
CAGTGAATTAGCAGGTGATATTTAAGGCAACTTCACTTATAATCGCTCGGCCACGTTACAGCTGTGCA  
TAAGACAGCAACTTTAAGCTTTACTTGTATTGCAAGGGGTACAGGTAGGCCATCGTTTGTGTTTGTG  
GGAGAGCCCCATAAGCAATTTGGTCTGTAACAGGTAATTTGGGTTTAACTTAATGAAAACTTTCGTTGCC  
AAGCCAGAAACCGTAAAACGTGACTGGTACATTTGTGGACGCAGAAAGGTAAAACCTCTGGGTGCTATCGCAA  
CCGAGATCGCTGCTCGTCTGCGTGGTAAGCACAAAGCTGAGTACACTCCGCACGTTGACACCGGTGATTA  
CATCATCGTTGTAAACGCTGAGAAGGTACACGTAACCGGTAAGAAAATTTACCGACAAAATGTACCAGCT  
CACTCCGGTTTTCCCGGGTGGTATCAAGTCAATCAGCTTCGACAAGCTGATTCAGCGTAAACCGGAAATGG  
TAATCGAAGCTGCCGTCAAAGGCATGCTGCCGAAAGGTCTCTGGGCGGTGCCATGTTCCGTAAACTGAA  
AGTTTACGCAGGCGCCGAGCATGCTCATGCTGCTCAGCAACCTCAAGTACTGGATATCTAATCGGGAAC  
GGCAACATGGCAGAAAATCAATACTACGGTACCGGCCGTCGCAAAAGCTCCACTGCTCGCGTATTTATCA  
AAGCGGGTAGCGGCAAGATCGTAATCAACCAGCGCTCCCTGGAGCAGTACTTCGGCCGTCCGACTGCCCG  
CATGGTAGTTTCGTCAGCCGCTGGAACCTGGTTGAGATGACCGAGAAAACCTGGACCTGTACATCACCGTTAAC  
GGTGGTGGCATCTCCGGTCAAGCTGGTGGCATCCGCCACGGTATCACTCGTGCTCTGATGCAGTACGACG  
AAACCCTGCGTTCGCAACTGCGTAAAGCTGGCTTTGTTACTCGTGATGCCGTAAGGTTGAGCGTAAGAA  
AGTTGGTGTGCACAAAGCTCGTAAGCGTCCGCAGTACTCCAAGCGTTAATTCGCTTTTGGTACTCACTCT  
TTCGAGTGTCAAAAAGCCTGGCAACCGCAGCCTTTTTTATTTGTTAATATTACCGACATCAATGCTAA  
CCACGCGTCAAAAAGACAAAAAATGTTTCTTTATTGTTTTTCATTGCTCACTGCTCTTTCTTGTCAAGT  
TGTTATCTTTTCTTTAAAATTTCCCTGTTTTCTGTGGCAATTTGTAATCCAGCTTCCGCGCTGTTGTC  
ACGGGAAAAATGGGGAACAGGGACACTATAAGAATGTGCGGAGTCCACATGGGAGAGTTTTTGGATGAGC  
AATGCGCCAGTTGATACCGGTGCGCCGAGATTTCTTACCTGGTCAACGGTTGCCGTTGGTGGGGTAGGAG  
CTGCGTTTTACCGCAGTGCCGTTTTATAAAGTCATGGAATCCGAGCGCAAGGCCAAAGCAGCCGGTGGCC  
GGTTGAAGTCGATATCAGCAAGTTGGAACCGGGTCAGCTCATCCGTGTCGAGTGGCGAGGCAAGCCTGTC  
TGGGTGGTGAAGCGCACAAACAGACGCTGGATGCCTTGGCCGCGCATGATGACAAGCTGCGGGATCCCT  
CATCTGAAGAGCCGACGACGCTGACTATGCCATAACGGGTACAGATCGATCAAGCCGAAATTTTTTGT  
CGCGGTGCGTATTTGCACCCACTTGGGGTGTTCACCTTCTATCTGCTGACAGCTTTGGCGAGCAGGTG  
CAGGGCGTTACGTCCGGCTTCTTCTGCCCGTCCCATGGCTCCAAGTTTCGACATGGCCGGCCGTGTGTTCC  
AGGGGGTGCCTGCACCGCTGAACCTGGTCATTCGCCCTATCAATTCATTAATGACACCACCATCCTGGT  
CGGTGCCGATGGCAAGGAGGCTGACCATGTTGAGTAAACTGATGGGCTGGATCGATTATCGATTCCCGC  
TCACGGCCATGTACAACGACCACATGGCCAAGTATCCGGCACCGAAGAACCTGAACTTCTGGTACTTCTT  
CGGCTCGCTGGCCATGCTGGTGTGGTAAACCAGATCATCACCGGTATCTGGTTGACCATGAACTACAAC  
CCCTCTGCGGAAGGTGCGTTTTGCTCCGTGGAGTACATCATGCGCGATGTGGAGTACGGCTGGCTGCTGC

GTTACATGCACTCAACCGGTGCGTCTGCATTCTTCATCGTGGTCTATATGCACATGTTCCGCGGCATGAT  
CTATGGCTCTTATCAGAAGCCTCGTGAGCTGCTGTGGATCTTCGGCATGCTGATCTTCCTGGTGTGATG  
GCGGAAGCCTTTATGGGCTACTTGGCTGCCTTGGGGTCAGATGTCATTCTGGGGTGCCAGGTCATCATCT  
CGCTGTTTTGGCGCCATTCCGGTCATCGGTGACGATCTGACCCTGTGGATCCGTGGTGACTACGTGATCTC  
CGGTGCGACCCCTTAATCGCTTCTTCGCGCTGCACGTCATCGCGTTGCCGCTGGTGTGGTGTGATGCTAGTT  
GCCATGCACATTCTGGCGCTGCACGAAGTGGGCTCCAACAACCCGGACGGTATCGACATCAAGAAACACA  
AGGACGAGAACGGCTGGCCGCTGGATGCGGTGGCGTTCCACCCTTATTTACCGTCAAGGACATGATCGG  
TGTGGCGGGCTTTCTGTTCTTCTTCTGCGCCATCATTTTCTTCAAGCCGGATATGTGGGGTTACTTCCTC  
GAGAAGCCGAACCTTTGAAGTGGCCAACGGCCTGAAGACTCCTGCTCACATCGCGCTGTGTGGTACTTCA  
CCCCCTTCTACGCGATTCTGCGTGCCTGACTGACAAGCTGCTTGGCGTCAATCATGATGGGCCCTCTCTAT  
TGTGGTGTGTTCCCTGCTGCCTGGCTGGATCGCTGCAAGGTGCGTTCTGTTTCGCTATCGCAGCAAGCTG  
CACAAGCTTAACATCGCCAGTTTCGTGGTCTGCTTTATCATCTTGGGGTGTGGTGTACTGCCGTCGA  
CGCCGACCCTGACGCTGGTTGCCAGATTTGTACCTTGGGTATTTTCGGTTTCTTCGTGCTGTTGTTCTT  
CTACAGCAAAAACGAATGCACCAAGCCGCTGCCGGAGAGGGTTACATTTAAATGAAAAAATAATATTTG  
CAGTGTGACCCTGCTGCCATCACTGGTGTGTTGCCAATGCTGGGGCCGTGCATCTGGACAAAGCCAATTA  
TGATCTGAGCGACAAGGCATCCCTGCAACGTGGAGCTGCCACCTTCATGAACATATTGTGCAGGCTGCCAC  
TCTACCCAGTATCAACGCTACAACCGGGTGTGCCGATCTGGAGATCCCCGAGGAGCTGATGAAGGAGA  
ACCTCATCTTACCAGCGCCAAAGTGGGTGATCTGATGAAGAGCGCCATGTCCGAGAAGGATGCCGCCAA  
GTGGTTTGGTGTCTCCCCCTCCGGATCTGACTCTGGTTGCCCGGTACGTGGTGCAGCTGGATTTACACC  
TATCTGCGTCTTTTTTACGTGGATCCGACTCGTCCGTTTGGGGTGAATAATGTGGTGTTCCTGCTGTGG  
GTATGCCTCATGTGTTGGAACCGTTGCAGGGAACCCCCGTGCCGAGTTCGTCACTCACACGGTGCATGG  
AGTCGAGACCCAGCAGGTTGTGACGATCAAATCTGACGGTAATGGTGAAATGGATGACGAAGAGTATGAT  
CAGACGGTACTGGATCTGGTAAACTTCTTGGTCTACTCGGCTGAACCGGTACAACAGGAGCGTGAACGCA  
TGGGCTTCTGGGTGCTTGGTTTTCATCGTGTGATCTTCTTCATCTTCACTGTGCTGTTGAAGAAGGAATCTG  
GCGCGACGTTCACTAAGCGACAGATAACGGTAATATAATGCACGGCAATGAAGACCAAGATGCTTCATT  
GCCGTTTCTGCTTTTTAATGACGGGAGGGTTCAATGGCTGTAGCTGCCAATAAGCGTTCGGTAATGACGC  
TGTTTTCCGGTGCCAACGATATGTTACGCCATCAGGTGCGTATTGTCTTGGCGGAGAAGGGTGTAGCGT  
GGATATCTGCCAGGTTGACTCCAGCAATCTGCCAGATGAGCTGGCCGAGCTGAACCCGTACAACCTGTGA  
CCGACCTTGGTTGATCGTGTGAGCTGGCGCTCAACCCATCGCGCATCATATGGAGTATCTGGATGAGCGCT  
TCCCGCATCCGCCCTGATGCCTGTTTACCCGGTTGCCCGGGTAACAGCCGTCTGATGATGCACCGCAT  
CGAGCTGGACTGGTACTCCCTGGCCGACAAGATCATGGCCGGTACCATGCTGAAGCGGCACGCAACGAA  
CTGCGTGACAACCTGCTGGCCATCGCGCCGATCTTCGGTGAAATGCCCTATTTTCATGAGCGAAGAGTTTCG  
GTCTGGTGGATTGCTACATGGCACCCTGCTGTGGCGTCTGCCGAGCCTTGGCATCGACCTGACCGGTGCG  
TGGTGCCAAAGAGCTGAAGGCCTACATGGTTCGTCTGTTTCGAGCGTGAGTCCCTCCAGGCTTCCCTGACC  
GAAGCCGAACCGAGATCCGTGCTGGCGTATGAGCATGGAACCGACAATGACACCGAGCCGCCCGTACTT  
GTTACGGGCGTCTTTGACTGGTTGCTGGACAACGATCTGACCCCTCATCTGGTGGTCAACGTCAACATT  
CCCCATGTGATGGTGGCAGTGCAGTTTGTCTCAGGACGGGCAAATGTACTGAATATCGCACCCCGAGCCG  
TGATGCAATTTACATGGATAACGAGGCTATCAGCTTCAGTGCCCGCTTGGCGGCGTCTCCAGCAGGTT  
TTACATCCCGATGGCGGCAGTGTGGCTATCCATGCCCGGGAGAACGGCGTGGGCACCATGTTCCCGCCC  
GAGCCGGGTTACGATATCTGGCTGGAGCAGGCTGAAGCGCCGGTGGAGCCTGAGCCGGAACCGCCGCGTC  
CAAGCGGTGCTCCGACCCTGAAGGTGATCAAAATAAAAAACGCAGCCGATTGGCTGCGTTTTTTTTATGTGC  
GGTGCAGCTTAGTTCTGGGCGAACTCGAAGGCCTTGATCACGCGCTTACGCGGGTGACATGGCGGGCGA  
TGTTGACTGCCTGCTCTCCCTCTTGGCGAGTACCAGACCAATCAGGAACACCTCGCCGTTCTCGGTGAC  
CACCTTGACCTTGGTGTGTGCAAGTTCTTGGTGCCGAACATATCGGCTTTCACCTTGGAGGTGATCCAG  
GAGTCAATTGCTGCGAGTGGTGAACCTGGCAGGTTGGCCGATGCGCAATTCGTTGTAGACGTGGCGAACCC  
CTTCGATGCGACTGACAATTTTGGCCGCTCAATCTTGTAAACGTCAGAAGGTGTCTGGCCGACCAGCAG  
GACGCGCCATTTGTTGCTGTAGACGCTGATCTTGGCTGCGCTGAGGGGTTTGTGTGTCGGCCAGCAGA  
TTGGCCGCTTTTACGCTCTATGGTCTGGTTCATCCCACTGCGCGCCAGGGTTTCGGCGATCGCCAGAGGCC  
TGGCAGTCCCTGCGGCGCCGCAACAACAGGGCTGCGCAGCCTTGCAGCAGCAGGGTGTAAACCAGCAG  
ACCGAGCAGGATAGTGTGCTTTTTTTCATGGTTTTCAATCTTCCCTGTTGCGGGAAAAGTGTCTGGTTCGATGAG  
ATCACACAGGCAGTGCAGGGTCAACAGGTTCACTTCCAGAATGCGAGGGCGACGGGCGGAGGGAACACGG  
ATCTCCACATCGTTCCGGCCGAGCAGACCAGCCATTTCCGCCACCGTCCCCCGCTCAGCACCCTATGG  
TCATGTACGGGAGAGGGCAGCCTCGGCGGCTTGTATCAGGCTGCGGCTGTGGCCGAGGTTGGTGTGATGAC  
CACCAGAATGTGCCAGGCTGGCCAGCGCGCGGATCTGCTTGGCGTAGACCTTTCAAAACCGTGTGATCG  
GTGGCGATGGCGCTGATGGTTCGCCATGTCTGGGGTCAGGGCCATGCCGGGAGGGAGGGGCGCTGGGTCT  
CGTAGCAGTTGACCAGTTCCGGAGATGAACAGTTGCGCCAGTGCAGGAGGACCGTTGCCGATGCCAG  
CACCTTGTGGCCATTGAGCAGGCAGATGGTGTATCATCTGGGCTGCAGTATGGATGGCATCCGGCAGCGCC  
TCGGCGGGCTATCTTGGTCTGGATGCTTTCCGGTGTAGTTCTCTTTGATGCGGTCAGTCATAGGGTCTCT  
CTTAAAATGCGTTCTGGATCCAGGCTGGCTGGTGCCTTCGAACGCAATCACATCGAATCGGCAGGCCGTG  
ATTGGCCTCGTTGATGGCATGTTGCTTCAAATAGTGGCGCGCTGCCAGCATGATCTTGTGCTGTTTGTGCTG  
CGGGTGACCAGCTGGCGGCCCCGCCATGGCTGCCGGTGGCCGGTAGCGCACCTCAACAAACACCAGGG

TCTGGCCCTGGTGCATGATGAGATCTATTTGCGCCACGACAGCGGTAGTTGCGAGCTACCGGTTGCAG  
GCCCCTAGCCTGCAACCAGCGTTTCAGCGACTTGTTCAAAGTGCTGTCCCTTGCTCGTTGGTGAGGGGAAC  
AGGCTCGGCAACTGCTGGCGCATCCGTTTCCATAGTTCCCTTCATTGGAGGGCTCCTCCAGCTGCTGAACG  
GCGTTTCTCGTCGACCAGTTTGCCTTCTGGTAAGTACCCAGCTCAGCATCCGCACGATATTACCCTGGG  
CATCCACGCTCAGCTGACCGCTCATGCCGGCTGCTGCATGCCACCCACCTTGCGCATCTGCTGCAGGTT  
CTCTGCCAGACTGACGGCATCGTAGCCCATGGCAAACAGGGCGAACAGGTCACCCCTGGGTCTGCGGCCAG  
AGCAGGGCGATCTGCTCGCGCTGTTTCTCGTAGCCGCCAGCAGCAGCGGCATATCGGGCATAATGCATGC  
CGTTGAGCTCGGAGGGACCTCGGTGGCGGGCTGTCTGAGCCACGGGAGCTGGTGTAGATGGGCAGGCT  
GCCCCATCGGATTGACCGAGACATCCACGTAGGGCTTGATCATCCGGGTTTCCAGGCTGTTGGCCACCACA  
TAAACGGGCATCGATGCTGCGTGGTGGCGCATCAGAGAGTTGCACTACCTCGCCAGCACGGGCGGTAGAGC  
GGCCGCTCAGGGCATTCTTGACCATCCCTGCAGTCTGTTGCGGGCACCGAAGGTGGCAACGACCGGCTT  
ATCCTGGCTCAGGGTGGCCAGCTCTGCTCGAACCCCTTAATACTGCTGTAACCGATCCGCCCTGAGCG  
GCGATCAGCAGCGGTTTGCGGTAACCCTGGGTGTAGAGGTACTGGGCTGCCGCGGCATCTGCGGCCG  
CAGAGAGGGAGAAGTAGTAGGTGGTGTGCTTGACGACCGGCTTGTCAGCTCGTTGAGTGCCAGCACCGG  
CACGGTCGGATTGGCCTTGAGCAGCTCCTCGACCCGATCTTTCAGCAGCGGGCCGATGATCATGTCAGCC  
CCTTCTGAATCGCCTGCTTGTAAAGGTGCGCGTGCAGTCTGCTGCGGTGTCGTAGAAGTTCAGGGTGA  
ATTGCCCTGATTTTCTTATAAGACATCAGCATAACCGTTACGGATGGCGGCCCTGCGGCTCCAGATT  
GCCGGAGAGGGGAGCAGCACAGCGATCTGTTGCACCGAGGTGCTGGCAGTGGCCGCCAGATCGCCCAAT  
CCTGCCGGCATATCCTTCTGGGCTGGATGGTTGGGGAAGTTCGCGCTTCCAGCCTGCCAGTTGGCGGGCA  
GCAGGTTTCGGCTGGGCGCCAAACTCGTTGACCAGTGCCGCCAGTTCGCAACCAGCCGTTGGTACATCAGG  
GGCCGAGCCTCTTCCAGCGCTTGCAGGGTGGAGGGGTCATGCTTTTGAGCAACGACCAGATCTGCTGA  
TGTTTGGTTCGCTGCTCGCTCTGATTGAGGTAGGGCTCCAGTGCATCAACGACTTGGCGGCACCAA  
TGTTATTGATGTGAGCTGTAGCACCACACGCTGGCGATACCAATCCTTCTGGGTATCGGCATCCAGCAC  
CACCTCGGGTTTGCCTTCCAGCAGGATCAGCGCCTGATTGGCGTGGCTTGCGCCAGCAACAGATGGGCT  
TGCAGCAGTTGCAACTGCGCCTTCTGAACGGGATCCTTGGCTGCTTCTGCAATTGCTGGAACAGTGGCG  
AGGCCGGTTTGGCCTGGCCAGCGCCAGATAGCTGCGTGGCCAGCATCTGCCAGGTAAAGGCCCTCGGC  
CGGCTTGGCCGGATCCACCTGCTCAAGATAACACTGGGCATCTTGGTTCAGATTGGAGAACGCAGAGGGC  
ATGCTTGAAGTGCCTGACGGTTGATTGGGCTCCGACAGCAGGCGGCGAGCAGTACTGCCGCGATATGA  
TGCCGAAGAGTTCGTGATACACTTAGCTGCTTGTAAACCCGTTCAAGTTCATTCCCCGACCAGTGTGAA  
GTTCCCCATAGTGTAAACGGGCCAATATGGCGACACAATTGTGCGGGCACTCGGAGATCCCATGAGTGAC  
ATCCCAACCCTGTATATAGTCCCCACTCCGATCGGTAATCTGGCGGACATCACCCAGCGTGCATTGGACA  
TTTTACGCAGTGTGATCTGGTGGCCGCCGAAGATACCCGTCATACCGGTATCCTGCTCAGCCACTACCA  
AATCTCGGTGCCGACCTTCCGCCCTGCACGATCACAACGAGCAGCAGAAGGCCGATGTACTGATCGGCCGG  
ATCAAAGAGGGCAAGAGTGTGCGCTGGTCTCCGATGCCGGCACTCCGCTCATCAGCGACCCCGGTTATC  
ACTTGGTACCCCGTGTGCTGAAGCCGGGGTCAAAGTGGTGGCGTGGCCGCTTGGCCGCCATTAC  
CGCCCTGAGCGCTGCCGGTCTGCCACTGATCGATTTGCCCTTGGAGGGCTTCTGCCCGCAAGAGCAAG  
GGACGTGACGATCGCCTGCAAGCCGTTATTGAAGACACCCGCTCGCTGGTGTCTACGAATCCCCGCGCC  
GTGTGCAGGATACAGTGAAGCGATTGCTCGCATTCTCGGCGAGCGTCAGGTGGTGGTGTGCCGTGAGCT  
GACCAAGACCTTCGAGTGCATCCACGGTCTGCCAGCCTCTGAAATGCTGACCTGGCTTGGTGGAGGATGAC  
AACCGCTGCCCGGGGAGATCGTGCTGGTGGTGGTGGCTCCAAAAGATGAAGAGGATCTGCCAGCCG  
AGGGCATCCGTAATCTGGGTCTGCTGGTGGTGGTGGTGGTGGTGGTGGTGGTGGTGGTGGTGGTGGTGGT  
GATCCACGGCGTGAAGAAGAATGCCCTCTATAAATACGGTCTCGAGCACTATTGAGCCGATGAAATAGGC  
TGGCAGACTGCTTTTTGACCTGTGCAATCCCCGAACCGGCGAGCATTCAGCCTGTAAACGGGGGCCAAA  
GCGCGATAAATGGCTGTAAACGGGAATTGCCGGTTTACCCCGTGCATATCGCAAGGCTATAATCCGCGCC  
TCGGAGTTGGCTGGGCAATCGCTGCTTCTGCTGTTGTGTCCCTCGGGACAGACGGGCGGAGGGGAGGAAAG  
TCCGGGCTTACAGGGCAGGGTGCAGGTAACGCTGGGGGGCGTGAGCCTACGACCAGTGCAACAGAGA  
GCAAACCGCCGATGGCCCGCAAGGGATCAGGTAAGGGTGAAGGGTGGCGTAAAGAGCGCACCCGCGACT  
GGCAACAGTTCTGTCGACGGTAAACTCCACCCGAAGCAAGACCAAATAGGCCCTATTGGCGCGGCCCGC  
GTTGGGGGCGGGTAGGTTGCTTGAGCCAGCGAGCGATTGCTGGCCTAGAGGAATGATTGCTACCCGGGGC  
AACCCGGTACAGAACCCGGCTTACAGGCCAACTCCGACCTATTTCAAATCAAGAGCTTAGCGGTAAAACG  
CTAGGCTCTTGTATATGTGGAACAACTGAGTAACAAAACGGGGAACATCCCTCACTATCTGACCCGCC  
GCAATGGCGTTTTTCTACGCTGCTTCCGCTGCCAACAGCACTGACCTACCGACCAAAGTATTGCTGCTG  
CTCTCTCCATAACCCGTGATGCTGGATTGGCTCGTTTGGCTGCTGGCAAAGTGGTTGCCAATCTTTCAGCAG  
ATCAAGGAAATGGCGCAGGTGAAGAGTGAAGAGGAGCAGTTAGAAGATCTTGTCCCTTCTATCCAGCGAT  
TGAATGAGCTGACCGCCCAAGATGAACAGAGCGTGGTCAAGGTGGTGGCTGATCTGAATGCCCTTTCGA  
GGATTTCCAGAAGAAGGACTGTATGCCGAGCAAGATGCCATAGATGACTTTATCGCGCCGATCTGAAA  
GAGAAGCTGACTCTTGGAAAGTATTGAGACGGAGGACGATGCCGAGCGCATCTTTGCGCAATCCCCGC  
TCTCTGGCCTTGATATCGCCGCTTCTGAGCGGGAAAGCTACAGGGATGAACTCCTTTACCTCAAAGCGCG  
GCTGGCGAAGTTACAGGGGATTCTGGCCTCTATGAGCTGATGCGTAACCAACTGGTGGAGCGGTATCTC  
ACCCCTGAACTGGTGGCGTATCGTGAATGCGAAGCCGCCAAGGAAGCCCAAGACAAGATGCTTGTGTTG  
TCGCCAGAGAAAGTATTGCTGGTGGGGTTAGTCGTGCTCCTGCCATGACCGAAACATCCCTGTTACTGTC

TGAATCGTATAAGAAATTTATCAAATTCAAAAAGAATCTAACGGGAAAAATGATTAAGGATTACGACCGT  
TATCTCGATTTTACGCTGGCGATGTTAGGGGATATTGAAACCCACAACGTCACCAAGCAAGCATTACGTG  
AATGCCTTGAGGTCTATCAGCAGATGCCGAAGGGGAATCACTCGCCCTATAATCGGCTGAGCATGGCTGA  
CAAGGTGGATTTGGCAAAAGCAGGAGAGATTGAAAAGGATCACTTGATAGCTGCCAAGACAGCAGGAGAG  
TTACTCAAATTTTATCAAAGTTTCTTTAGTGCTTTCTTAACGGATAAAGAGGATATTTTCACTACATCCC  
CCACAACCCGGATTGAAAAAGCCACCATCGGAAGATGTGAGCTGGGGGGCCTATACCAAGGCTCAGGGGCG  
CCAGATATACGAGTATTGGCTGGCACAACCTGATAGCCCCATGCGCTGGGTGTTTCTTCTGGTACTATTT  
ACGGGAATGCGCCGTAGCGAAATTTGCAATGTTTCTCGTGACTCATTAAAGCAGGATCAGGATTTCTGGCC  
GCTATTACCTGTGGATAACAAGAGGGTAAAACTGCTGCTGCCACCCGTCCGGTAACGATAGCGAAAGAGCT  
TGAGGCGCTGGGGTTTGTGCAATATCTACAGTCACTGGATGATACGCTCTATCCGGCGGAAAGGCTGAAC  
GACATTAACCGAGAGAGCAAACAAGTTTCGTCACTTTTCTCATGATCGGTGAGACAGAGGAAAAATGGCAAAG  
GGCGCTTGGTGTTCATAGTTTTTCGTCACTCCTTTGTTACGTTCAAGCAGGCACAAAAAAGTGGATTTCCA  
GCGTTTTGCAACGATTTCGTTGGTCATGAGGGTACAAGAAGTATCACTAAGCGTTACACACACGATCATATG  
ATCACAGATTATAGTGATATCGCAGATGGCGCATGGTGGGGATAATAGGGGGGCGGGAATTTACTGTAAAA  
CCGCTCTAAATAGAGCTGTATTGCATTTTATGGGGTAGGGTAATACCTACCCACACAGAACCACAACAAA  
ATCAAATTAGCGCGTATATTTTATTTTTTTTAGATGCATGGAAAACTCTGTGCGATATCTTGAATTTTT  
TAAGTTTATTAGTTAACCTCTGCAATTGAATCAGCAGAAAAACAACCTCACCCCATTTAAATATGCTCACCG  
GCCTTTTTCGTCTGTGGCTTTGCTGCATTCTAAATGTAGGTTTTTAATATTATCTATATCTATATCTATA  
TCTATATCTATATCTATATCTATATCTATATCTATATCTATATCTATTTTATACAAGAAAGTTAAGTTAAA  
TTAAATGTAAGGAATAACAATATAGGCACAGGAGGAATATGAAAAATATAGTTCAATACAACTAAATGA  
TATGGGAGAAGATGACAATCTTGATACTACAACCATAACTAAAAATGATCCATCAGATTGAGACATTATCG  
AATAAATACAGTAAGTTATTAGTGGTCAGGATAGATCTGCATGTGCCAGATGATGTGTGGTTAAATGATT  
CAAAATTGATAGGTAAGTTACTGAAAAACATAAGAAAAACAAAAATGTAAGATCACTTGTTCGGATACTT  
TTGGGTATTGGAACGAGAGAAAAAGAAAGGGGCATTATCATATGGTGTTCCTTTTGATGGTCAGCAG  
TGGCAAAGTCAGTGGGCCGCACAGACTATGATTGAGGGCTGTGGCAGCGAGTTGTCAGCGGGGGAACAA  
TACACCGCACCAAGGGGGCTGGCACTGGGATGCTATTGCGTAGCGATCAGCAGAAAAAGAGCGGATACCAT  
TTACGCCCTCTCTTATCTCTGCAAGAAACGAGGCAAGAAGCGTCTTAAAAAGGGGCAAAGGTTATACGGA  
TTCTCTCGTTTACCTAACTGCCAATAAAACCCCGCTCAAATAGCGGCCAAAAAGCCCTGCAATAGTCAT  
CACAACTTACCCTGTCCGGGGGATTTGGGTAGGGTTGGAGTTGAAAAATAGCGCGTTTTTAGTAGTTTTG  
TTTTAGCAAGAGGCTCCCTCTACCCACGTCCATTATTTTTAAAAATGGTGATGATATCATATTTTTTTATTGTC  
AGCACGCAATGTGATATTTAAATAAATGGCGAGTGCCTAGTAAAAAGTACATTTTTTTATTTTTTATCAAAT  
TTTTCTCTGCATTGGTATTTCCCGTTTTTAATGTTTACCTCTCTTAGGTTGAAAAGAAAAGTTGGTTCAT  
GACCAAGTAGAGATAGCTTTTCTGTCACTTCTTTAATCTCAATTAAGTGCATTTAAAAAATCTTCAATGGA  
AATATTTTTCTTTTCTTCCCTGCTCTATGCTTCGGATGTAGAAATCAAGTTCAGAAGATATTTGTGCCCTGC  
TTGTGAATTAGTTCTTCCAGTCACTCTTTTTTATTATGGATCTGAATATGTTTCAATTTTTATCCTTTGGG  
ATTGTAAGTCTGCGTTTTTATGTTTTTGTAAAGTTTATTTGGTGATGTGATGTGCCTTAATTATAAGG  
CTCTATAAACTTCAATTAGCCTTGACATACAGAATGTTGTTAGTGTATAGTTGTTTTATAGTTGCGCCGAA  
GTTTCAATTTTTGTATGGTTTTTTTCCACAGACTGGCATGAGTCAGGGCTGGAACCATCTATTTGAGATTGC  
ATATTCAATTTCAATGATTCCGCAATATCATTTAAATACTTATTTGTCAATCCTCGCTTATCCATCCAAG  
TGCCAACGTGCTCTAGTTCTTTTTGAGACGTCAAGCTCACAAACCAATAGCACGACCAAGAATGGTTGAGTA  
AGTTGTCACTTATCAATATCTTTTTCTTCCGGCGGAATATAAAATTTAATGAAAAATAAGAGCAGAAAAAA  
ATAAACAGTGCCTTCATAATTTACCCATTTATTAATTACAGAGTTTATAGCTACTTTAGCAATTTGTTGCT  
CGGTGCATTTATACATATCCTCAATCTTGCTATAAGACCATCCAGCAGACAAGGCCAATTTGAATCTTTT  
CGTGAAGTGCCGCATCTATCGGGCGGCCTTTATAGCGTCTTCTGCCTTGGCTTTGGCGATGCCCTGAGC  
CTGACGGCGGGCAGCGTCCGTATAGTCTTTGCGAGCAATGGCGGCGAGCATATCAGACATCATACTGTTTT  
AAGGCGTCCAGCATCCGGCTGGTGAACCTCATCCCTGTCTGTCATAAGCTGGTGGCTGGTGGGCAAATCCA  
GTGCCACGATCCGCACTCCTTTAGCCTTGATTATGGCTTTTCAGGCTTTCCAGTCTTACCCTTAAGGCG  
GCTGATACGGTCTACCTGTTCCACCAGCAGGCAATCCTCTTGCTGGGCTATATCTAGCAGCCTGAACAAC  
TCGGGACGTTTGGAGACTGGCCCTGATTCATTTTCAACAAACCATCCGGCAATCTGTTGCCCTTGGCTTT  
GGGCAAACCTCGATCAACTGTTCTTTTGGCGGGCTGGCGTCTTGTTCGTCGGTACTGGCTCGCAGGTATCC  
ATAGATCCGGTTACTCATAATGCCCTCTGGTTTCTTTATATGGTTTTCATAAATGTAGTTTTGTTTTGAGT  
GGTTTAGTAAATGAGAGGCCAGAGAAAAATCGAGATGAAAAACCAGTTTCTTTTAGGTATACCCAATGAAA  
CTAATGAAAACCTGTACGATATTTAGCTTTATATAGAGAACGCTAAGTGGGGGAGGTTATGAGTCCATT  
AGGTGGCTTTGACTGCCTTCTGAGTGGTTAAAAGGTTGTCAGATTAAAAGTCAAGCAGTTCTGTAAGTGT  
ACGAGCACTGATAACCAGAAGAGATGACCTGAGAGCTAAGTTGTGTAATAATATGTCACCCCGTATTTGA  
AGGGGTATAGATATATTTTATATAACCTATTGATTTTTAACTAAAAATCGCTGGGTTTTTGGAGATTGGGAT  
AGGGCGGCTTACAGGCCGACTCCGACCTCATTCCGCGTGAACCGTCACGCTAAAAATCCCGGTGCCTAACG  
GCACCGGGATTTTTATTATTACAGCCGAGATGCACCCGATGGCGGCATTCTGGAATTTGTAATAAAGTTC  
TCACCTTTTTTGGTCGATATACGTCCGGCTGGACTGTCTGTATCTATCACACTGCTGGCCTGATGAGCGAC  
CCTGTGGCAGTAAGGCGAGATGAAATGGTTAAGGTGGATTATTAATGTTATCAAGCAGCGCAATGCTCAC  
ACCTTCCCGGCTGCTTAGCGCAGAACGGGGCAGAACCCTGCCTCATTATGATCTGTTGGGTGTCGAGCGG

TTAAACCACGCCCGTTTGAAGCAGGTCAATGGCCAGTTGAGCACATTTTCCCTGCAAGCTGCGAGTTGTA  
TGGCCCAGCTGTTTAAATAGTGCAGGAGTGCAGACTGAATTATGGCGAGTTTCGCCTTTTCCGATCCGGCAGA  
GATAGATGACGCTCATATCTGGGTGCGAAGCGAGAAGTCCGCTTGAACCACAGCGCGCCGCTATTTCTCG  
ATCGCACCTCTGGTTCATCTATCATCTTTCGGGTCTCTTTTTTCGGCGGCACCTTGCAGCAAAAAGAGGAGC  
ATGTTTCAGTCTGGCAAAGGGTTGACCGATAACCGAACAGCGGCTGTTATTCGGGCTTTGCCAGTATCAGGT  
TGATATCTGGTGTGCTTGTCTGGGGTTGGGGGATCTGAAGTGGCAGTTGCATGTCGTGCCACGTGATTCC  
ATCGCCCACCGTCAGCTCTGGACCACGCAGGCAACCCTGCAGGCAGGTAATTGCACTCATCACTGGCAGA  
TGTGGTTGCTTCCCCCGAGGAGTCCATTTCTCAGGTCAGTCATTCCTGCCGGAAGGTCAGCTGGAACA  
GGCTCTGACTCATGTCCCGGTGCGTCTGCGGGTGGTGTATGGGCCAATTGTCCATGACGCTGGCGGATCCT  
GAGTGTCTCAAGTGGGTGATGTGCTGTCACTGGACCTGCCTGAGGTGGTGGCAGCATGATTGGCAGCC  
GTCCCTGCTTCAGTGGACGAATCGCAGAACACAAAGGCAGCCCTGGTCTATCAGGTTGCGACGGTTGTAGA  
GGAGTAAATTGAATCATGAGCGAGCACAATATGAATGATCCGCTGGATCTGGATGGATCAACTGT  
TTGGTGACGACATCAGTATGCCTAGCGCTGCAGACTACTTGGCCCCACCAGTAGCAGCAAAACAGCGGGA  
TCTCTCCTTCTTTTCGCCAGATCCCGGTCAAGGTGACGCTGGAAAGTGGCCAGTACCGAAGTGCCGCTCGGC  
GATTTGATGCGCGTCGAGGAGGGGGCTGTCAATTGAGCTGGACAAGCTGGCGGGTGAACCGCTGGATGTGC  
GGGTGAATGGCCGTCTGCTTGC AAGGGCGAAGTCGTGCTGCTGAATGGCAAATATGGTCTGCGCCTGGT  
CGATGTTATCGATAACCAACCTGCTGGGTGGCATGGACGACTGATGCGCTATCTGCTGCTGACGCTGCTGT  
TATTTTCGCTGCCTGGCTGGGGCGCGACATGACCCTGTTCTCGGTATCGCCAGGCGCTTCAGGGGGCGA  
GGACTACAACATCAAGTTGCAGATCCTCTTCTCATGACCCTGCTGGGTCTGCTCCCGACCTTGTACTG  
ATGATGACCAGTTTTACCCGGATCATCATCGTACTGGCCATATTTGAGACAGGCACTTGGCTTGCAGCAGA  
GCCCTCCCAACCGTGTGCTGATCGGCATCAGCCTCATCCTGACTGTGGTGATTATGCGTCCGGTCTGGAC  
GGACATGTATCAAAATGCATTTGTCCCTTATGACCAGAATGAAATAACCCGTTCAGAGGGGATCGCCAAG  
GCAGAAAAACCCCTGCGTAAATTCATGCTGGCCCAGACCCGTGAACCGGATCTGGAGCAGATGCTGCGCA  
TCTCTGGCGAACCAACTACGGTCGCCAAAAGAGGATGTGCTTTTCGGGGTGTGTTGCCCGCTTTGTATT  
GAGTGAGTTGAATACCGCATTTCAGATTGGCTTTATGCTGTTCAATTCCTTTCTGGTGATCGATTTGGTG  
GTCGCCAGCGTCTTGATGGCGATGGGGATGATGATGCTCTCCCCGCTGATCATCTCCTTACCCTCAAAC  
TGATGGTGTGTTGTGCTGGTTCGATGGCTGGTTCGATGACCGTCGGCACCTTGGCCGCCAGCTTTGGTGGGG  
AGGCTGATATGACCCCTGACGAGAGCGTTCGCCCTGGTGGTGGTGGCGCGTCAATCTGGTGGTGGTGGT  
CTCGGTGCTGATGTTACCGGGCCTGATCGTGAAGTTGGTGGTGGTGGTGGTGGTGGTGGTGGTGGTGGT  
CAGGAGCAGACGCTCAGTTTTCTTCCCCGTTTTATCGTGAAGTCTGATGACCCCTATCTTTACGGGTAAC  
GGCTGTTGTGCGCAGATAACCACCTTGTTCAGGATCTTTTTCTTAAAAATCCCCGGGTTTTATCGGATGAAT  
TCGCTGCTGTCCCTCAGTGTGCTGACCTGACCGCATGGTTGGGACAGTGGTGGTGGCCGTTTTATCCGGA  
TCGGTATGGCATTCTGGGTGATGCCGGTCTTTGGGGATACCCGGGTGCCTGCGCAAGTTCGCCCTGATGCT  
GGCGTTCATCATCAGCCTGCTGCTCGCCCCATGATGAAGGATATGCCGGTGTGCGATCCTTTCAGTGCC  
GGTGGCTGGTCCCTGGCGGTGGAGCAGCTGCTGTTTGGTGTGCTGTTTGGTCTGTGTGCTCCAGTTGCTCT  
ATATGGTGATGACCACTGCGGGCAGATCCTCTCCATGCAGATGGGGCTCGCGATGGCGGTGATGAATGA  
TCCGGTCAATGGGGATTCTGCACCCATCATCAGTCAGGTCATGATGGTGTGTTTTCGCGCTTGTCTTTCTG  
GGGCTGAATGGCCATCTGGTGGTACTGGATATTCTGGTGCAGAGCTGCGTAGCTGGCCGCCGGTTTCAT  
CTCTGGATCTGATCGATATGAAAGGTGTGATCGGCTTGTGTTGGTGGTCTATCGGTGCCGCCCTGTTGCT  
GACGTTGCCTGCCGTTGTGCGCCATGTTGATGGTTAACCTGACCTTCGGGGTGAACCGGACCGCCCT  
TCGCTCAATATCTTCTCTCTCGGTTTTCCCATGACCCTGTTGCTCGGGTGTGCTCACCATGGCGCTCTCCA  
TCAGTGGCGTGCCCTCCCGTTATCTGGATTTGGTTACCCATGTGCTTGAACAGCTGCGAGGCTTGACCCC  
GGCATGAGTCAGAACAGCGCACAGGACAAAACCGAAGAGGCTCCAGCCAGAAACGCCAGAAAGCGAGAG  
ATGAGGGGCAGATCGCTCGCTCAAAAGAGCTCAGTTCGCGGTTGCTGCTGCTTGGCGGGTTGGTGTGAT  
GCAGTGGATGGTGGCGGGGTTTTGGCCAGTTCCTTTCGCGAGTTGATGAAGCGTCCGCAGCGTTTTGACTGG  
CAAGGTGCCCCGTGACCCGAGATGATGATGATGATGATGATGATGATGATGATGATGATGATGATGATGAT  
TGCTGCCCTGTTTGGTTTTCTGGCCCTGATGCTGGTGTGCTGCTCAGCATAGTCCCGGGCGGTATGGCGTT  
GACCTGGA AAAAGCTGCTACCCAGTGGCGAGAAGATGAACCCCTTTGAAGGGGCTGGGGCGCATGTTCTCC  
AAGAACAGCCTGATGGAGTTGCTGAAGTCACTGCTCAAGGTGACGCTGATCGGCGGCACGCTGGCGTTGA  
TGTTAAATCATCAATGGCCTTCTTGTGATGATGAACCGGATGCCCCCTCAGGCGGGCTCGAGCAGGC  
GCTACGGATCCTCTCCAGGCATTTATTTTGTGTTGGGAGCGTTTTCAGATGCTGATTGCCGCTGGATGTG  
CCCTATCAGCGCTGGTTCGCTTAAACAAGCAGCTCAGGATGACCAAACAAGAGGTCAAGGATGAGCACAAGA  
ACAGCGAAGGGCGTCCCGAGATCAAGGCCAAAATCCGCCAGGTACAGGGAATGCTTGGCCGCGCGCTAT  
CGAGCAGCGGGTACCGCAGGCAGATGTGATTATCGTTAACCAGCCATTATGCGGTGGCCATAAAAATAT  
GATGCGGCTCGTGCCAATGCTCCTTTCTGATGATTGCCAAAGGGTTCGATAGCATGGCCGAGCGGATCCGTC  
AGGTGCGCAAAACAGCATGACAAGATGGTGTGAGCTTGCCTGAGTTGACGCGAGCCATCTATCACTCGAC  
CAGGGTGGATCAGGAAGTCCCCGAGGGCTGTACACGGCAGTTGCCATGTATTGAACCATGTATTGCGAG  
TTAAGGGCGTATGAGGCAGGCAAGGGGAGGAAAACCGACCCCTCTTGGCCCCGTTATATGTACCGCCGAGT  
TACGTCAACCTGAGAGGTAAGTTGTGAACTGGCGTGTATTACCCAATCTATACCGCAATTCCGCTGAT  
GTTATTGGCCATTCTGGCCATGATGATCCTGCCTCTGCCCGTTGGCTGCTTGTGCGCTCTTTACCTTC  
AACATCGTGTGGCGGTTCTGGTGTGCTGGTATCCGCTCTCGGCCGACACCCTCGATTTCTCGGTAT

TCCCAACCGTATTGCTGGTTGCCACCTTGATGCGGCTGTCGCTGAACGTGGCCTCTACCCGGGTGGTGT  
GCTGCATGGTCACGAGGGGCATGAAGCGGCCGTAAGGTCATCCAGGCATTCGGTGAAGTGGTGATCGGT  
GGCAACTATGTCGTCGGTCTGGTGGTCTTCGTGATCCTGATGATCATCAACTTTGTGGTGATCACCAAG  
GTGGCGAGCGGATTTCCGAAGTATCCGCCCGCTTCACGCTGGATGCTATGCCCGGCAAGCAGATGGCCAT  
CGATGCCGACTTGAATGCCGGCACCATGGATCAGCATCAGGCCAGGGCTCGCCGTGAGGAGATCGCACGA  
GAAGCAGACTTCTATGGTGAATGGATGGTGTTCCTCAAGTTTCGTTTCGTGGTGACGCGATAGCTGGCATGT  
TGGTGTGATCATCAACCTGGTGGGTGGGTGGCCATCGGTATCTTCCAGCATGCCCTGCCCCGTGCGGA  
GGCCTTCCAGCGCTATGACTGCTGACCATTGGTGTGTTGGTTCGCCAGATCCCGTCCCTGCTGATG  
TCGACTGCTGCGGCTATTATCGTGACCCGGGTGAGCGATGAGGGTGAGATGGCTGATCAAGTTGGTCAGC  
AGATCTGGCATCGCCTCGCGTTATCTATACTCTGCAACCATCATGCTGATCCTGGGTCTGGTGCCCCG  
GATGCCGATGCTCGCATTCTCAGTTTCGAGCTGTACTGGCCTGGACTGGGTGAGTGTGAGTGTGAGCAG  
GCCGTCAATGTGCCGATCTGGATGCAGCGCAAGAGCTGACTCGTCAAATGATTCAGCCTGAACAGCAGG  
CACTGGAGTGGCAGGATTTGCCGCCAGTCGATACGGTCGCCATCGAGCTTGGTTATCGTCTGGTGCCATT  
GGCTGAAACGGATAAAAGGGGCTGAACTGCTTGCACGAGTGCAGCGGGATCCGCAAAAACCTCTCCGAGCAG  
TACGGTTTTCTGCTCCCCGAGATACGGGTGCGCGACAATCTGCAGTTGCAGCCGGATCAGTACCGGATCA  
AGTTGTCCGGTGTGCGTTGGCGATGGGGAATGTGGATTGCCAGCGCTTGTGGCGATCAGCAGTGGTGA  
GACCTATGGCGCGCTAGATGGCGAGTTGACCCAGGACCCGGCCTACGGCATGAGTGCAGGCTGGATCTCC  
CCTGAGCAAAAGGCCAAGGCCCTTAATCTTGGTACTCGGTGGTAGATTCCGGCCACCGTGATTGCTACTC  
ACGCCAGCAAGCTGTTGCGTGAACAACCTTGATGACTGTTTGGTACGATGAAGTTGGCAAACTGGGCCA  
ATATCTCGCCAGTCAGTCCCCCGGTTGGCTGAAGAAGTGAATCTGGCGCTGACCCAGATGCAGCAATTG  
AGAGTGTTCGTCAATTGCTAAAGGAGCAGGTGAGTCTTACCGATATACGAACCGTTGCCACGACGCTGC  
TGGATGCGAGCGAGCTGACCAAAGACCTGTCTTGTGGCATCCGATGTGCGCTGTGCCCTTGAAGCGCCA  
GATTGTGCGGCAGGCCATTGGTAATCGCGATGTGCTGGCTACGTTTACACTGGATGATCGCCTTGAGCAG  
ACATTGCTGGCTGCAATGAATCAGTCACAACAGCAGGGGCAAAATCCAGCTGGACAGCTTCCCGGTGATC  
CGCAATTGCTGGCCCAATTGCAGCAAAAATATGCCGTTGGTGAAGGAGCAGTTGCAGCAGTTGGGACATGC  
CCCCGTATTGGTTGTTATGCCGCAACTGAGACCGCTTATGGCCCGTTATGCCCGGTCAATTTGCAAAAGGC  
CTCAAAGTGTCTTCTACAATGAGATACTGAAGAGCTACGGGTGGAGGTAATTTGGTACACTTGGTTAAT  
TACTGTTGGATAAAATCTCTGAGGGGAAGTGTTTTTTCGCTCCTGCTTGAATTGTCGTATGAATACTAT  
ATGATGTTGGCGAAAATTCAGCAGCAATGTGTGAAAGTAAATAACAAAAACAATTAATTTGTGTTGCC  
ACACGCTTAGCCCATCAGGCTGGGCGTGTATCACATTGTAAGGGCAAACTGAACTGAAAAGTCAGGACG  
CAAAGCCTCCGGTCTAACAGCAGGAAAAGCTAATGACAGCGGGGTTACCAAGGTGAGTTTGGATAACAATCC  
TGTTACCATCTAGATACAAAATCTCACTTTTTTAAGTGCGAATTTGTATTTCTCCTTTGTGTCTGATAATT  
CAGCTCTATTGATTGTTCTATCCACAATCACAGGTGTGCGACGCTATGTCTTCGGGATTACCAATAAAT  
ACAACAATCGGGTGTGTGGCGATAGCTTGGCTGGGCCCCATATATTTGATTTCAGCCGCTAATAGTTG  
CCGAAAATGAGGTTGAAAAAATCCTATCCAAGGAAGGAATCAGGGTATCAAGCGTTAATTTCTGTAAACA  
ATCAAAGGGCATTATTGCTGATGATGATGTCAATTTGATCTTGTCTCGATATGGATGCCATGACCGAGCTT  
GGGCCGCGTATTCTGCGTGAGTTTGAAGGACTTGATTGCATCATCATGGTCAATGAGCACCAGCCACCA  
TTGCTGCCGAGGCCATGTGTGCCGGGGCTGTTGACTATATTGTCAAACCTTCTGCCCCAGCAATTGCT  
CGATGCTGTCCGTGGTGTCTACGCCCTTCGTGACGGCGATCCCCAATCTTATCGCTGTGTGCGCCATGAGC  
CTGCAGGTCTTGCAACTGGCCCCGACGAGCAGCCAAAACCTCTGCCACCATTCTGATCGGTGGTGGATCAG  
GAACCGGTAAAGAACGGTTGGCCCCGTATATTACGAAAATGTCTGTGACAGCGGAAAAACCAATTTCTAGC  
GATTAATTTGTGACGAATTCCTGAGGCAATGCTTGAAGTCAATTTCTTTTGGCCACAATAAAGGTGCATTT  
ACCGGTGCTGTTTCTGCTCAGCCCGGCAAAATTTGAGTTGGCTCAGGGGGGGACCCTGTTGCTGGATGAAA  
TATCAGAGCTTCTTTGAACCTGCAGGCTAAATTAATACGGGTGCTGCAAGAAAAAGAAGTTGAGCGACT  
TGGCAGTAATCAAACGATTGCTCTTGTGATGTTGCAATCATTTGCCGCCAGCAATAAAGATCTGCGCAAAC  
GTTGCATGTGGGCAATTTTCGTGAAGACCTTTCTATCGTCTTGTGATGATTGCCAATGAATTTGGCCCGCAT  
TGCGTGAACGTCCTGAGGATATTATTCGCTGGCCAACCTACTTTATGAGCGTTATGCATCCCAACAGGG  
CTATCGCCTGAGTGAACGTGCCTGTGAGTTGTTGCTGTGATATGAATGGCCAGGAAATGTACGAGAGCTG  
GATAATGTCATTCAACGGTCATTAATCATGGCGCGTGGTTTGCATATACAGTCCGTCGATTTGATGTTGC  
CAAATTTGATTTCTTCCCGAAGAAAACAGTCGAGCAGACACGTGGCATGCTCCCGAGGGGTTAAGTGAAC  
CCGGCGGCATGCCGAGTTCCAATTTGTATTAGAGACCTTTCGCGCCGCTTTCGTGGCCATCGTACCCGCACA  
GCCGATGCACTGGGCATGACAACCCGGGCACTGCGCTACAAGCTTTCGCGCGATGCGTGAGCAAGGCATTG  
ATATTGAACAGCAGATTCAAGCAGAGGGATAAAGAGTGAAGATTCAGATGATGTCATCACAGGTGACGCT  
ACTGCAGCAGATGCAGGAGATGCAGCGTGTGCAAGCCAGACCCCTTCTATCGAATCCAATGATCTATCT  
GGAGCATCATTTACCGATGCCATGCGGGATGTGGTTCGGGCGCGTCAATGAACAGCAGAATGTGCGGTCAA  
AATTAATGGCATCCGTGATGCCGGGCGAGCGATGATCTGGTGGGCGCCATGGTGGCGAGTCAAAAAGC  
CGGCTTGAATTTTTTCAACCTTGCAGGTTTCGCAACAAGCTGATGACCGGTTTTGATGACATTTATGCGT  
ATGCCGCTCTGAGGTAACAGATGACTGAACTGGTAACGTTCTCCTCAGGGGGCAGCCCCGATTCGCTCAA  
AATCAGGCTACAAGAGGGATTACGCAACTGGCGTACCCTCTCCCGTGACAACAAATCGATCCTGACCATT  
GCTCTGCTGGCTGCCATTGTGGCCGTTACCATAGTCGTTATCCTGTGGACCTCCAGCAAAAACCTATGTGC  
CCCTGTATGGCAAACAGGAGCTATACGATACCGCCAACATCATGGAGATGCTGGAGAAAAGAGCAGGTACC

TTTCCGTCTGGAAAAGAGCACCGGTCAGGTA CTGGTTCTGAAAACCAGCTGGCTCATGTCCGGATGGCG  
CTTGCTGCACGAGGGGTGCGTGCAGCCATGCCGTCTGGTCTGGAAGGGCTGGACAACGTAACCGGATTGG  
GTACCAGCGAATTTATGGAAGGGGCGCGTTATCGTCATGCCCTGGAAGGGGAGCTGGCCCCGTACCATCAT  
AGCCCTCGATGCCGTGCGCAGTGGCCGCGTTTCATCTGGCTATTCCGAAACGCACGTTGTTTCGTGGGGCGC  
GATGAGGAGAAAACCCAGCGCATCGGTAATGCTCGATATGCAACCCGGGCCAATCCATCGAAGCGGGTCAGG  
TCGAGGCGATTGCCAACCTGGTAGCAGGTAGTATCTCCGGAATGAAGCCCCGGTGCCGTCACTGTGGTTGA  
TCAATCCGGCCAGTTGCTCAGCGCAGAGCTGGGGGACAAGGTCGGTTTTGGCAAGCAGAGCGTTCAACAG  
ATGGAGTATGTCCGCAAGCTGGAACAATACATTCGTTCAGCGTGCCAATGACATGCTCTATCCCATGCTGG  
GCAGCACCAATTTCAAGGTGCAGATTGCGGCAGACGTTAACTTCAACGCTGTCGAAGAGACCCAGCAGCA  
GCTCGATCCGCAAGGTGTGGTGACTCGCGATGCCAACAAGTCAGACAAGACCATCGATGCGTTGGCGATG  
GGGATCCCGGGTGCCTTATCCAACCCGCGCTGAAACCGCGGCAAAAAGATGAAAAGGCTGGTCTGACA  
AAGGCAATGCCAATACCGCGACACAACAAGAATGACACTCGTACCGAGCGTCAGGAAGTCAGCAAGCAGTA  
CGAAAACAGTCGCACCATAGTGCACACCCGTTACCAGCAGGGACGTCCTGGAACGAATTAACGTATCCATT  
CTGCTTAACCAGCAGATTGCTCCGAAAAGGTGGCTGGAGTGCCGAGCAATTGGAACAGATCCGTGAGATGG  
TAGAGCGTGCAGTCGGTTTTCGATGAGTCACGTGGCGATCAAAATAGTCTGCAGGCCCTTCGATTTCAATGG  
TGCAGTACAAGTAGCCGCTCCCGAATCCAGTTGGTGGGAGACCCCTTACTGGCAAGACTCCCTGCGTTAT  
CTGGTCGGCGGTTTTGCTTGGCCTGACACTGGTCTTCTTCGGTATTCGTCCGTTGGTGAACATCTGGTTC  
GTACCCAACAGCAGCCGGATATGGAATGGGTGAGACGGAAGAAGAGCTGGAGCCCACAGTCGGATTGTC  
CATGCGCAGGGATGACGATGATCCCCAGCTGACGTCGCTCTTTCAAATAGTCTGATCCGTACTGACAAC  
AAGATGGAGCCCCAGTTCTCGTCACTCGATATGGAGTCGTTGCCGGAACCTGGATCCGAGCTGGAGGTTTC  
AGCTCAAGCATTTGCAGTTGCTGGTTGAAAAGATACCGCCCCGGGTGGCGGAGGTTGTCAGAGCATGGGT  
GAGTGGCAATGAACAGCGTTAACTTGAATCAGAGTGCCGTCGATATCGATATCGACAACCTTGAGAAGGC  
CGCCATCTTGTGCTGAGCATGGGGACCGAATCTGCGGCCAAGGTGATGCAGAAGCTCTCCCGCGACGAG  
GTGCAGCGTTTTGATTTCCAAGATGGCCTCTCTCTTGGCGTCAGTTCGATGGAGGCAAAGTGGACGTTGC  
AGCAGTTCTTCAATCACTACCGTGAGCAGAGCGGAATTTGGCAGCGCTTCACGGGAGTATCTGGAACAGAC  
GCTCGATCTTGTCTGGGGCAACGACTCTCCCGTAGTCTGCTCGACAGTCTGTATGGCGATGTGATGAGC  
CAGGATATCCAGCGTCTGCAGTGGGTACCTGCCGATGTGCTTGCCCGTTTTCTTCCGCAACGAGCATCCCC  
AGATGCAGCTGTGCTGTGGCCTTCCCTGCCGCCAGACTGCGTCCGCGCTGCTTGATGCCTTGGCCCG  
CTCGGTGCATGACGATTTGCTGGTGGCGCTCGCCAGTCTCAGCAGTGTCAAGTGAACATGTGCTGGCGAA  
CTCAGGCTGACACTGGATCGCTGTCTCACCTACGTGGCGGATCAATCCGGTGCCAAAGGTAACGGGGTGC  
GGCAGGTAGCCGATATTCTCAACCGTTATCAGGGTGACAAGGAGCAGATGCTCTCCCTGTTGCGCAACA  
CGACGGTGACATGGCGCTTGAATTTGAGAAGAACATGTTTCGATTTTCATGGCGTTGCGCCGTGAGAGCGAC  
GACACCTTGAACCGTTGGTGCAGGAGCTGCCAGCGAATTTGCTGGCATTTGGCTCTCAAGAACACCGAAA  
CCAGCTTCCGCAAGGTGGTGTGGGTGCCATGCCAAGCGGATGGCTCAGGCGTTGGACGATCAGATCCA  
GAACCAGGGCAGTGTCTCTTTGCGCAAGGTGAGCAGGCAAGGGAAGAGGTCATGCAACTGGTCCGCGAG  
TTGGTGGAGCAGGGCGAGATCGAGTTCCAGCTGTTGCAAGAGCCACCGTCAGTTAACAGGAGGCATTCA  
TGAGTCACAATGTGCGCAAATTTGATGCCTGGGGCGACCCGCTGTATCGTTTTCCCTGCGCTCGGTCAGAG  
TGGGGAAGAGGCCCGGAGTCAGCAAGAACAGTTTTGAATTCGGCTATCAGCAGGGGCTGGAGCAAGGTCAT  
GACGAAGGTTATCAGGCCGGCTATCAGCAAGGGCTGACCAGCGGCCCTGCAGGAAGGCGAGAGTACCGGTT  
TGCAACAAGGGCAAACCCGCGGGTTTTGCTCAGGGCCTTTCCGAGGGGCGAGCCGCCCTTGAACAGGCAAT  
GGTGCCGTTTTGCCAAGCTGCAAGAGCAGTGGGAGTCACTGAGCCGGGCCCGGATGGCCGCGCAGAAAGAG  
CTGATTTGCCAGCTGGTGGCGCAGGTGGCCAAGCGGGTCATCATGGCCGAGTTACCCCTCAATCCGCAGC  
AGGTGATGAATCAGGTGAGCAGGCGCTGGCTACCTTGCCGAGTGAAGTCGGAAGAGCTGGTGATCTATCT  
CAATGAGGGAGATCGACAGCGACTCGCCGAGCAGGGGGTACTCGCTGCGAAGGGTGGCCATTGCAAGTT  
GATCGACACTTTGGGTAGGCGATGCCCGAATCGAAACGCGCGCTGCCGTCGTCGAGGTAAGCACCAGCT  
CCCGTCTGGCAACCTGCATCGAACAGCTCAACAGCTCGCTGGACGTACCGCAAGATGCATGAAGCCCTGC  
AGCAGGCACTGACCAGTGCCTGGATAAATCTGGATGAACTGCCCGCGTTTTGCTGTTTTGGACGGTTGGT  
GCGAGTGACCGGTTTTGACTCTGGAAGTAGTCGGCTGCCAACTTGTGATGGGGCAGCGTTGTCTGTGTCAGC  
ACGGCAAGTGGCGCCCCCTTGTGGCCGAGGTGGTGGTTTTAAACCGGGAGATCTCTTACCTGATGCCGC  
TGCAGCCGATGAGTGGCCTTTCGCGGGAGCTCAGGTGCAACCGATCGATGGAGAGGAAACCGTTCCGGCT  
TGGTCGTCATCTGCTGGGGCGGGTACTCGATGGCCTGCTGCAGCCCTCGACGGGCAGCCGTTACCCGAT  
GTTGGTGACAGTGTCCCCCTGTTTTGCTCTTCCCCCAATCCGCTATTGCGAACTCCGGTACGTGAACCGC  
TGGATGTGCGGTATCCGCGCCATCAATGGCCTGCTGACGGTTGGCAAGGGCCAGCGTTTTGGGGCTGTTCCG  
CGGCTCGGGGGTTCGCAAGAGTATGTTGCTGGGCATGATGACCCGCAATACCGCAGCCAGATTGTGGTG  
GTGGGACTGATTGGTGAGCGGGGCCGTGAAGTGC CGCAATTCATCGAACACAGTCTGGGGGCCGATGGTC  
TGGCTCGCGCCGTGGTCATTGCGGGCGCCAGCGGATCAATCTCCCTGATGCGGGTGCAGCGGCCAGCT  
ATGCCACCGGATTGCCGAGTATTTCCGTGAGCAGGGGCAGGATGTGCTGCTGCTGATGGATTCACTGACT  
CGCTATGCCAGGCACAGCGGGAAATTCGTTGGCTATCGGTGAACCCCCCGGACCCGGGGCTATCCGC  
CCTCGGTATTCAGCATGCTGACCCAGCTGGTGGAGCGAGCCGGTAACGGCACGCATCCGGATGGCAGTCT  
GAGTGCCTTACACCGTGTGGCGGAAGGGGATGACCAACAGGATCCGGTTGTGGATGCCGCTCGTGCC  
ATTCTTGATGGTCATATCGTGTGACCCGCGCTTGGCGGAAGAGGGACACTATCCGGCCATCGATATCG

GTGCCTCGGTTCAGTCGGGTTATGCCGCAAGTCGTACCTGCCGAATGGCAAAAGCTGGCGGTACCTTGCC  
CCAGCTGTGGGGACGCTATCAGCAGGTGCGTGAAGTCTGCCACTGGGTGGTTATCAACCCGGGGCCGAT  
CCGCAGATGGATGAAGCTGTTTCAGCGTTATCCGGGGATTGCCGCATTTCTGCAGCAAGGCTTGCATGAAG  
AGATGGCCTTTGAGCAGGTGATGGTTGGTCTCAAGCAGGTGCTGGGGCAGGGATAAGGATTCGTAATGCT  
GAAGTCTTATCTGGGGTTGCAACAGGAAGAGCTGGAAAATCTTGGCGCCGAGCGTTCGACGCTTGGCGGGAG  
CTGGCGTTGGCGGAAGAGCAGCGAGCACACAAAATTGCAGGAAGTGATCTCCTCGCTGCCACCCGGTTCCG  
ACAAGTTTACCCCTTTGCTATGGCAAAAACAAGCAACAGATGGATGGCCAGTTGCCCGCTTTGCTCTCCCA  
TCAGGTGCAGCAATCTGCGCTGGCCAGACTGGATCTGGAGCGCCACGAAGTGGAACCTTGCCGGCAGTTC  
GGGCGGGTCAAGGGACTGGAGCTATTGCTGGCAAGACGTGATGATGTTGCTCGCCAGCAGCAGGAGAGGC  
GGGCTCAACTGCAGCTGGATGAGCTGGCGAGTTTGGCTCACCTGACCCGCCAAGAGTAAAGCGGAAGGTT  
AATCCGTAATGCTGTCCGGTCCGCATACCTGACTCTTGTCCCAACAGTGAATGAATCGTCTCCATCTG  
GCCTGCCAGCAGGCGGCCATTGAGATCATTCTGGCGCAGACACTGGTGCAGCAGCTCTTCAAGCTGTTGC  
CATTGATTGGCTACCGTGGTGGCAGGGGAAGTGGCAGCTTGGCTATCAGGGTGGCCATCCCTTCTCAT  
CGGGTTTGAGGCCAATGTCTGCAACTGCTGGCAACGCAATTTTGCCTGTTGTGTCACCTTGGTTCATCAG  
CGCGGTCTGCTGCTCGTTATGGACTTGCAGGCCATCGACATCATGGCTTGCCAGCAGTGCATGCTGACGC  
AGCAACAGGGCGGTGAGTTCCGTATAGTGGCCGTAATCCTGCTGGATCCCAGAGGATCAATGCCTTGACGG  
TGGCCTTGGTATCCACGCTCATCGCGCATGCATATCCAGAATGGCTGACCCAGCGCATCCAGATCGATC  
TCCAGCTTGCCTTCACTGATGGCTTTGCGGATCTCGTTGACCTTGTCCATGTCGACGTCGGATGTGGTGG  
CCAGCTGGCTGCGGGCGTTGGCTACTGACTGCGCTGTGCTGCTGATCCGTGCTTCGGATGACTGTGCAGA  
CCTGGTTTTCCGGTTTGGTTCGTTACATCCGGTTTGGCGCCAGGCTGATTTTGAATATAGAGCGAGTCAGTA  
CGGGTAATTTTTCATAACATAAAATTCCTGATGGTCTGTTTATGACAAGCGACCCAAAGGCTTGTGCAACTTG  
AATCAAATTCGATCTTGGTTCAAAAACGGGTTTTCAACTTCCCTTATATCAGTCACCCATGCCTGTATCT  
GCTTGCCAGAGCTAAGATTTTTCACTCTGATCCCTTCGCTATTCGCCATTATCGAGGGCCTCCCTCT  
GGTTGTGGCGGAGAACTCACCTTTCCCTGCACGAATTAGTACCCCTTCCCTTGTGGACCGCCCAACTT  
TTTTGTAAAGTCCAGCTCACCGATGAGTTGCCACTTCTCAGATGCCGGTTGCTTTTATGGCCAGCAGGG  
AGTGATTACTCGGGGTGAACCCGCGCTGTATGCGGCTGACATCCAACCTTTTCTCCACCAGATCGCTGGC  
GCTGATGGCCTGACCTTTTGCATATCCCGTGCAGCAACCCAGACCCGGCAACAGTAGCCAGACCTTACC  
CTCCCGCGCACTGCCAGGCGGATCTGTGCTATCGATGAGATAGGGGCGTTCGTCGCCAGGGTGGCCGAT  
ACTGGCCACTGCTTGTAAACGAGAGTACTGTGAGGACAGGAGGAAGGTGCTCGGCGGAAGGGCAAG  
CCAGACCTTAAACTCCCTGAGGCTGCGGGCCATCCCTGCTGGGTGATGTAGTCAAGACTCTGGCGG  
GCATCTTGTTCGAAGCAACTGTTCAAGCATGGCGCTTTGACCTGCGGGGCACCGTGGCGCAATGCGCTCA  
GCAGTAGCCAGAGGATGCCGCTCCATTTCCACACGGGAAGTCGCACTTCCCTCATTTTTTCATCTGCTTGGC  
GCGGATGGTGCATGGTAACCGCTTGAACACTAGGTATCTTCATGGTTGGCATGAGTCTTGATAAGGGTAAC  
CCCGGTCTGAGTGAACGATAAAGGATGAAGCATGAGTATCTCATTTGACAGCGCCCTCGGCGTACACCCT  
TATGCCCTCGATGTGAGGGCTGAGCGGGCGCGGATTTTGGCGGGGAATCTGGCCAACGTGGATAACCCGG  
GCTATCTGGCTCGGGATGTGATTATAAGACGATTCTGGGCCGTGTGCGCAGCAAGTTGCTGCGGGTGA  
AGAGAGCCAGGCCATCAGCCAGGGCGCCATGCGTGCAGATATGCGTCAACCCCTCTATCGCATTCCTTAT  
CAGGTCTCCATGGATGGTAATACCGCTGAGTTGGGCGTGGAGCAGGGCAAGTTTGCCAACAATGCCACCG  
ATTTCCAGACCAGCCTCACCTTCTCAATATGAAAATACCGGTATCGCCAAGGCGATTGAGGGCCGTTA  
ACCATGTGCTTCAACAAGATTTATGACATTGCTGGCAGTGCCATGCGTGGCCAGACCGTGGCGGCTGGATA  
CCGTTGCTTCCAACCTTGGCCAACGTGGATAGCGCTGCCGCCAGTGAAGACGCCCGCTTTCGTTCCATCAA  
GCCGGTTTTTTTCCACTCTCTATCAGAAGATTCAGGATGCCGATGGCCTCGGGGCTGCGTCCGTGCAAGTG  
GCGGGTATCGTGCAGTCCGACCGTCAGGTCGAGAAACGGCTGGAGCCGACCAACCCGATGGCCGATCAGG  
ATGGTTTTGTCTACTACTCCAACGTCAACGTGGTGAAGAGATGGCTGACATGATGAGCGCTCTCGTGG  
TTTTGAAACCTCGGTGGAGGTGATCAACCGCATTAACAGCATGCAACAGGGGCTGTTGCGTCTTGGTTCAG  
GGAGTCTAAGTCATGAGTCTGCCACAGATCAGTAGCCTGGATACGGCGCGCGGTACAGTACAGACCAATA  
CCGATCCCAAGATCGCCAGCAATGGCAGCGGTGCTGCTCAGGAAACGCAAGCCAACCAAGCAATAGCGGGAT  
GCAGTTGCGTAACGAATTCCTGCAGATGATGGTGGCGCAGATCCAGAACCAGGATCCCACCAACCCGCTT  
GATGGTGGCCAGTACGTGGCTCAGCTTGCCAGTTTCCAGCATGGTTGAAGGGGTCGAAGGGCTGAAGAAGC  
TCCAGCTCCAGAGCAATACCAAGATGGATACCCAGCAGGTGTTAGAGAGTACCGCGTTGGTTCGACAAAGA  
GGTCATGGTGCCTAGCAAAAACCTCAAACAGCAGCAAGAGCACAAGATCCGCGGTCCAGATCGAGTTGCAA  
GGTGGCGGCAACAGGTGGATCTCAAGGTATATGACCAGCATGGCGTGCTAGTAGCGAGCAAGAGCTGGG  
GTGACAGCAAGGCGGGTGGGCTGGATTATGAATTGCCCTTCTTCTGTCGGGGAGTACCGCTTTGAGGT  
CAAGGCCTCGGCGGGCAAGACCCCTGGTGGGGGCCAAAATTTATGTGGCGAGCAAGGTGGAACGTGTTGCC  
TTGCCCGGTACGGGAGAAATCATGCTGCAGGTTGCCGTTGGGCGATGTCCCGCTCTTTCAGTGAATCC  
AGTTCCGGCAAATCAGCGTAATCAGAGAGGAGCGACACTGTGTCTTTCAGTATCGGATTGAGCGGCCTGGC  
CGCCGTAACCCAGGAATTGAGTATTATCAGTAACAACGTAGCCAATGCCAGTACCGCGGGCTTCAAATCC  
AGCCGCGCCGAATTTGCGGCAATTTACGGTGGTGGTCAGGCTGGCGGTGTCGAGATGAACAACGTCTCCC  
AGAATTTTTCAGCCGAATGGTGCATGACTCGTACCGGTGCGGGGCTGGACCTGGCGATTTCTGGCAGTGG  
TTTTTTTCGTGCTGAAAGATGGCAGCGGCCAGACGTCCTATACCCGTGCCGGTATGTTCCAGCGTGATAAT  
GCCAATTACTTGACCACTGCAGGCGGTACGCGGTTGCAAGGTTATACCACTGATGACGCGGGTAAGCTGC



AATCCGGTGTGGTTGGTGATATCCAGGTCAAGGCGGGCAGCCTGCCTGCCAAGCCATCCGACAAACTGGA  
GTTTGTGGCTAACCTGAAAGCCGATGCCAGTATCATCCCGCTGACCTAAGTTTGATCCAAACAAGTCG  
AATACCTTCAGCTATTACAGTCCAGCAAGTTTATGATTCGCTGGGAAGTGAACATACCGTTACCCAGT  
ATTTTGTGAAAAAAGGACCAATGCCTGGGATGTTCACTACAGCTTTAATGGAGCAGACGTGACGCCTTC  
TGGCGGTGCCAAAATGATTTTTGATCCCAATGGCAAGTTGGATACCCGGTGCTTCCAGCATCCCCCCTCC  
TTGGCCCTGAAGCCTGCGGGTGCCTCGCCGATTGAATTGCAATTGGACATGAGCCGAGTCAGCCAGTATG  
CCTCTGACTTTAATGCCACCCGCAACCAGTCGAATGGTTATACTGCTGGGGATTGACGGAGGTGCGTGT  
GGATGGGGACGGCGGTGTCTACGCCACCTTTACCAACGGTCAGCGCCTGTTGCAGGGGCAGGTCGTGATG  
GCGAACTTCACCAATCCCAATGGCCTGCTGCAGACCAATAATACCTCTTGGCAGCAATCTTTACAGTCAG  
GGCAGCCTGTACTGGGGGACCCGGGAACCGGCACCTTGGGCAAGCTGACCGCCGGGGCTTATGAGAGCTC  
CAACGTTGATCTGACCGGTGAACCTGGTAAGCCTGATGACTTCTCAGCGTAACTATCAGGCCAACGCCAAG  
ACCATCAGTTCGGCTGACAAGATGAGTCAGATCCTGTTCAACTCCTTCTAAGGTAATCCCGTGAAAAAGC  
TTATCTACACCGCCATGTCCGGGGCACAACATACCCTGATGGCTCAGCAGATCCGTGCAATAACCTGGC  
CAACGTCAACACCGCCGGCTTTTCGGGCTGATTTTTGAGCGGGTTTTCGGCTTATGCCCTGACTGGCGATGGT  
TACCAGAGTCGGGTGATGGCCAAGGAGAGATGGCGGGCACCAATTTCAAGGCTGGCCCTCTGATGCAGA  
CCGGTCGCAAGCTGGATGTGGCGATTCTGTGGCGAAGGCTTTCTTGGCGTACAGACTGAGGATGGCAAAGA  
GGCCTATACCCGTGCTGGTAACCTGGAAGCGGATGCTGACGGGCTGTTGACCCTCAATGGTCGGCCGGTA  
CTGGGGGAAGGTGGCGAGCTTGTGCTGCCCGCTTATCGTGACATCAGTTTCGGCAAGGATGGCACTCTGA  
GTATCACTCCTCCGGGGGGCGGGCGCCCGGCTCGATGTGGGGCGTCTGAACTGGTCAATCCAGAGCCAGC  
CGAATTGGTCAAAGGTCATGACGGTCTGTTCCGGATGCGTCAGGGAGAGGATGCAGAGGTCAGTGACCAG  
GTGGTGATGGCATCCGGTTTTCTGGAAGGGGCCAACGTCAATGCCGTGGATGAATTGGTGAGCAGCATGT  
CATTGACCCGCAACTTCGAACTGCAGGTCAAGTTGATGAAAGCAGCGGATGATCAGGCTCGTCAGGGAGC  
CAAATTGATTTCCGGTCAGGGTTGATTTTTGACGGCATCGGGCAGATACCCGATGCCCTTGCCACATCCAG  
TGGATGAGGCTTGATGAATAAGGTGGAATAACAATGCACGCAGCATTATGGGTGAGTAAACAGGTCTGT  
CGGCACAAGATGCCAAGATGTCCAGTATCTCCAACAACCTGGCTAACGTGAACACGGTCGGTTTTCAAGCG  
CGATCGAGTAGCGTTTTGAAGATCTTTTCTATCAGGTGCAGCGCCAGCCGGGTGCTCAGCAGGATCAGCAG  
AATCTGGCGCCTATCGGTATTCAGATGGGTAATGGTGTGCGGGTAGTGGGTACCCAGAAGGTCCTTACCT  
CCGGCCAAATCCAGAATACCAATCAGGAGCTGGATATGGCGGTGGTGGTGGTGGTGGTGGTGGTGGTGGT  
GCGCCCGATGGCGAGACGGCCTATACCCGCAATGGTCAATGGCATCGCAATGCCGAGGGGCCAATGGTT  
AACCGGGATGGTTTTGCCATGGTACCGCAGATCCAGATCCCCGATAACCGCTACCAAGATCTCCATTGGTA  
CGGATGGTACCGTCAGTGATCTTTGCCGGGTGAGCAAGAGAGTGTGAGCTGGGCGGTATCACCCCTGAC  
CAACTTCGCCAACCCGGCCGGTCTGGAAGCGCTCGGTGGCAACCTCTACCGTGCAACCCGGCGCGTCCGGT  
GAGCCGATTGAAGGTGTGCTGGTGGTGGAGGGCGATGGGGGCGTCAAGCAATTCGCGCTGGAGAGTTCCA  
ACGTGAACGTGGTTGAGGAGATGGTCGACATGATCAGACTCAGCGGGCTTACGAGATGAATGCCAAGGT  
GGTCTCTTCTGCCGACCAGATGCTCAAGTTTGTCACTCAGGCACTGTAATGATGAAGTCGATGCTGCGTT  
ATATCTGGTTGGTATTGTTGCTGGGCGGCTGTGCCACCTATGAGCTGCAGGCACCCGAGCCGGGTGACGA  
GAAATGGGCACCATCCCGTCCCAAGGTGACCGCGACTGCGCAGGGCGAAGATGGTGGCCTCTATCGGGGC  
AACTACATGATGACCCTGTTTCAGGATCGGCGTGCTTACCGTGTGGTGACATTCACCGTGGTGTGCGG  
AAGAGCGTACCCAGTCGAGCAAGAAAGCCAATACCAGCATGAGCAAAAACAGCAGCATGAATGTGCCGGC  
CCCCTCTATTGGCGGTAAACTGCGCCCCGACTGGGGGGCCGCCCTCAGTGCGGATCGGGATTTTTGATGGC  
GGAGCGACCTCCAGTCAGCAAAAATACCCTGGCAGGTTCCATTACCGTGACCGTAGCAGAAGTGATGCCCA  
ATGGTGTGCTGGGGATCCGCGGTGAAAAGTGGATCCGCCTCAATCAGGGGGATGAGTATATCCGCTTGGG  
CGGCATGGTGCGGGTTGAGGATATTGATCAGAGCAACCGTATCTCGTCCAGCGCATTCGGATGCCCGC  
ATCACCTATGCCGGTCTGGAGCCCTTGAGACAGTAACCAGATGGGGTGGCTGGGCCGCTTCTTTAGCT  
CGGCGTTTTGCGCCATTTTGGGAATCACATGAACAGATGGTTTATCGCCCTGCTGTGTCTCTGCTTGGCC  
TGGTTTGTAGTCAGGTCGCCGACCCGGCCAAACGAGCCTTGTGATATTGCCGATGTGCAGGGGTCAGAA  
CCAACCAGCTGGTGGGTTATGGTCTGGTGGTGGTGGTGGTGGTGGTGGTGGTGGTGGTGGTGGTGGTGGT  
TACCGGCCAATCCATGGCCAACATGCTCAAACAGTTTGGTGTGCAGTTACCGGACGATATCGATCCCAAG  
CTTAAGAACGTGGCAGCCGTTTTCGGTTTCCAGCCACGCTACCCGCTTGGCTGGCAAGGGGCAGTTGCTCG  
ATGTAACCGTGACTTCCATTGGTGATGCCAAGAGTCTGCGTGGCGGTTCTCTGCTGCTGACCCCCCTGCG  
TGGTATCGACGGTGAAGTCTATGCCGTGGCGCAGGGCAATCTGGTTGTCGCCGGGGTGAAGCGGAAGGG  
CAATCAGGTTTCATCGGTACGATTAACGTGCCGACAGCCGGGATTTATCCCAATGGCGGCACCATCGAGC  
GAGAGGTGGTCAGCAATTTTGGCGAAAAGCCGGAAGTGACCTCAATCTGCATCAACCTAACCTTCAAGAC  
GGCCCGCAATGTGGAGCGTGCCATCAATCATCAGCTGGGGCCGGTTGCCCGCGCGGTGAGTGCCGGGCGG  
GTTTCCAGGTTGCAGCCCCCAGAGACGAGAGTCAGCGCATCGCGTTTATGGCACTGTTGGAAGATATCAAGG  
TGGATCCGGGTGAGGAGCGGCCGAAGGTGGTCTTCAACAGTCGAACCGGTACTGTGGTGATGGGGCAGGG  
GGTCAAGGTCCACAAGGCTGCCGTTAGTCATGGCAGTCTGACGGTGACCATTGGCGAGAGTCAGACGGTC  
AGTCAGCCCAACGCTTTCTCCAATGGGCAAAACCAGACTACCCCCAACTCCAAGATCCAGGTCGATCGGG  
AACGTAACAACATGTTTGTCTGGCCGGATGGCACCTCTTTGGAGGTGATCGTCAAGGCTGTCAACTCACT  
CGGGGCAACCCCGATGATGTTATGGCCATCTTGAAGCGCTCAATGAGGCTGGTGCCCTTGGGGTGAG  
CTGGTGGTTATCTAAGGACTATCATGACAAGAATTAGCTCGGATCCCGTTTTTATCAGGATCTCAATGA

ATTGCAGCAAATCAAAAGCAACCCGGATCAGCGTGCCGCGCTGGATGCTGCAGCCGGTCAGTTTGAAGTC  
AGTTTTCTGCAAACCGTGCTCAAACATATGCGCTCGGCGACGGATGCCCTGCAGGATGAGGACGACAAGA  
TTATCAAGGGACAATCCCTCTATCGCGATATGTATGACAGCCAGTTGGCGATGAGCATGGTCAAACGTGG  
TGGCATCGGTCTGCGAGAGCAGATGGTCAACCAGCTGGCTCCGTCATTAAAGAAATCCGGACGGGGTGGTC  
GCTTCAGAGCAGCAGACCCTGGCTGCGTTTCAGCCAGCCTCTCAACTCGGTAAAAATGAAGAAGTTGACT  
GATGTCACTGCTCAATATCGGCGCCAGCGGACTAAAATGCAGCCCAGATTGCATTGAACCTGACCGCCCAG  
AATATCGCGAACGTCAATACCATCGGGTATAGCCGTGAGGAGCCATGATGGGCAGTCTGTCCGGTTTCG  
GGCGGTGGATAATGGTGCCGGTGTGAGGTGACAGGGGTACGCAGGGTAACGGATGACTATCTGGTAGC  
CCAACACTGGCGTAGCCGTGCGGCCACCGGTTCTCTTATGCCTTTCATCAGTACATCAATACGACAGAG  
CAGTTGCTGGGACAGTGAGTCGATGAATATCGCAAAAGGGCTCGACAGCTTTTTTGTCTCGCTCAGTGTG  
CGCTCGACAGTCCGGAAACACCGGCACAGCGCAGTCAAGTTGTCAGTTCAGCAGGGGCGCTCGCCAACCG  
TTTTACCCAGCTTGACGAGAGCATGGTCAACCAGGAAAAGCAGATCGATGATCAGCTGAACAGTACGGTT  
TCCCAAGTGAACAGTTACTTGAAGCAACTGGCTGAACTGAACATGCAGATTGGCGATCAGACAGCCAAGG  
CAGTTAATACCGCTGCACTGGAAGACAGTCGCGAACAGATTGTGCGTGAGTTGTCTGCCATATATGGAGGT  
GCGGGTCAATCGTCAAAGCGATGGCTCGTTTGCCTCAGTCTGCCGCAAGGACAGCCGTTGGTCTGGGA  
AGCAGCAGCAGTACCCTCGCGCTTTCGGGGCATAAACTCAGCCTCGCTTTCGGTGGGCAGACGTTTGAAG  
TTCCTAAATTGCACGGTGGTTTCGCTGGCGGGTGTGATGGATTATCGAACACAGTATTGCGGCCGACCAG  
AGAGGCGTTGAATCAGATAGCGGGCAAACCTCGCAAAGGATTTCAATGATAAACAGGCCGGTGGTGTGAC  
CTTCATGGAGTAACCGGAAACCGCTATTTCGCTTTTACGAAACAAAAGATATCCATGGTAACTACATCA  
ATGCGTTGGGAACATTGCGGGTGGCTGATGGTTTTACCAGGAGACGACCTTGCCTTTGCCAAGACCGGCGG  
CGGTAAGGGCGATAACCGCAACCTGCAGGAGTTGCTGACCATCAAAGATAGCCAGTACAACGCATACAGT  
GCGCTGCTGGGCAAGATGGCGGTGCAGAGTGGTCAGGCGAAAAGCGACCATGCAGGCCGATGCCAATATGG  
AAAAACAGATGGCGGCCAAGCTGAGCAGTGTGAGCGGTGTAATAACAGATGAAGAAAGGGTGAAGATCAT  
GGCGTATACCAAGGCTTATCAGGCCAATGCCAAGGTGATCAGTACCTCCGAAACAGCTCTTCAACTCCATT  
CTGAACATGTTCTGAGAGTCATAACCATGCGGATCAGTACCCATCAAATTCAGCTCAGCATGCTCGACAA  
CTTGACAGCATGGCTTCGGCGAGTATGCCCCCTCGATCGCCAGATCTCCACGCAAAAACGCATTTCTCAG  
CCCTCAGATGATCTGTTGGCAGTGTGACGTGCTGGGCTTCAGAAAAGCAGGTGGCGATGGCGCAGT  
ACCAGAGAATATCGCCAACGCAAGAGCCAGCTCTCCAGGGGGAGTTGCAGCTCGATACCATGACCAA  
CATGCTGATGCGGTTGCGTGTGAGTTGACCCAGCGCCCTAACCGGCTCCCTGTCTGAAGGGGATCGCAAA  
GCGGTTGCCAGTGAAGTCGCCATTATCAAGGATGGTCTGCTGGATTTGGTCAATGCCCGCAACGAGAGTG  
GCTCCAGCCTGTTTAGCGGCAGCAAGGTGGATGAGACCCTTTGGTGAAGGTGACTGACCCAAAAGAGCC  
TGACTTTGGAGGTTACCGCTACAAGGGTGTATCTGGTTTCGGGAGGTTCGGCATTGCCAAAGGTGTCAGG  
GTAGGGTTAAACAGACGGCCGATCAGCTTTTTTTGACGCTGACGATTTTTTCAAACGACTCGATAGCA  
TGGTGAAGGCAATTAATGACGCAGCACCTGACGCCATCGATCAGGCACGAGCCATGCTGGATCGCAGCCA  
AACGCTGCAAGATAATATCAGCCAGGCGGTGAGCAGATTGGAGCCGGATCAATCTGCTGGATCAGATT  
GATGAGAGCCATGCCGAGAAAGGTGTCTATAGCAAGGAAGTGAGCAACCAGATAGAGTCGCTGGACTATG  
CCGAGGCCGCGACCCGACAGGCCACGTCCTGATGGCATTACAGGTGCAGCAGCAAGCTTTTGGCAAGGT  
TAATGGTCTTAGCTTGTTCATTAATCATGCCGTAACGATCGAAGGAGTCATGATGCAGGTCCAGCAAACCC  
GTCTTGAAGCGTTGCAGAGGCGCAGGCAAAGCCCAAGCTGCAAGGCCGGCAGACTACGCAGGCTCATCC  
CCAGGTTGCCAACAAACAAGGCGAACGCCACCCCAATATTATCCGGATGGATAGATGGGCAATGATCGGT  
GTCGCTCAGCAGCGCATTGCCCATGCCCAGAGCGGCGAACAGGCGCTTAATCTGGTTTGGGGGGAATTGA  
AGCGGCTGGAACGCCAACTGGGTGAGCGGACCTGGCTACCAGTGACGTGACCAATCGCTTAAAAATACT  
GGAAGAGAAAGTCAACCAACCAAGAGGGCTTTGACGGACGAGCTCAAACCCAGACTTATCGCATCGGCT  
CAGGAACCTGCGTCCCCGCTTCAGTGCCGAGCATCTGGATCTGCTCAGTGCCAAAAATAGTACCGAGCGAC  
TGGTTTTCTCTTTTCCCAAAAGTAGTGGTGCAGTGAAGTAACACTTCCGGCCGGTGCAGGGATGGAGA  
GGTGGTTCGCAAGCTGGATCGGGCACTGCGCAAAAGACATATTCAGGCTCGGTTGAATGAACGGGCAAG  
CTGGAGTTGTCCGTGCGCCGAGCCCCCTGCGTCGCAAGCTGGATGAACCTGTGCTGGTGCAGTGGCGAGGAA  
TTCGTATTCCCGCGGGCAATCCTGTACCGGTACAATTCAAGCCGAGAGCGGGACGGTTGACTCAACTGTC  
TGACGGGATTGGCAAGGGGGAGCTGCGCCAAGAGCGGCAACATCTCCAAAAATGCTGGTTCGAGATTGAG  
CAGTCGGTGCAGAGCTGAAACAGTTTCGCCAAAAAGATGGTCAAGCAGCTCGATAAGGTGAAGGCTCGTA  
GCCAGCACCTGGAACAGGAAGATCTGCAACGGTTGCAGTCATCGCTCGCTCCCAATTGCAGCAGGGGGG  
ATTCAAGGGGGCGATGTCCGGTTTGTGGCACAAGCCAATGTCACCCGGCAAGGGGTTGTTGCGCTATTG  
ATGTGAGCAGAATAGTGAGTTCAACATTTGAAATTTTTGAAATAAAAAACGCTTCTATTTCCCGAAGGCG  
TTTTTTTTATCTATGCGCTTCTATCCCTTATTACGTAACAGTGCATAGAGTGCATATCGCTGTTCAATCC  
CGATGCGTTGAGGCTTTCGTGCAAGATGCGGGTAAAGTACAGGGAATGTAGTCTGCTGGCATGATAGCTG  
TAAAAGAGCGAGACGATGATGCTCTCATCAGGTTCTTCTCCTTCCCTGGGTCAATCAGGCAGAGATAGGCGC  
GCAGCAAGAAGAAATCAGCCACCAGCAGCAGATATGCCTCTGTGCGGTGAGCAGTCTTGTGCGGAAAGCC  
GTGGTGTAGACCCAGTAGAGAAGGTAGTTATCCAGCACATGTGGATGGTTAACGAGCCAAGGCTCCCAT  
TACTGTGCCATTGATGATAGAGGCTGGTCACTTTGTCTTTATCGCATTTCTCCCTCGAAATGGCGATAGA  
CCCGGTCCATGCATGCTTCCATGGTTTTGTAGCCGCGCTTTTTGCTCGATTGTTTCGCTGCGCAACAAAT  
GCTCATCGCTTTTAGCCCCACCAGTGAAGGTGCGCCAGGTACGGCAGTTGCTCAAAATGGGCGGTGAGC

CCGCCGGCATCCGAGATATCTGCCAGTTGATGGAGAAACTCTTCATGGGAGAGTTGGCTCGCATCCCGAT  
GGACCAGCATAACCGAGGATCCAGAGCCGCTGTTTCGACAGGCAAGTCTCGATTACAGATTAGATGTAGCGC  
CAATTGCTGTAACCTGGTTATGTGACGGAGGAAACGGGGCTGTGGTGTATGGCCCTTTTGTGTCCAGC  
GCTATCTCCATGGCGTGTGGATCCAGCAACACGCATCGTACAGCTTGTGGACACGAGAGCGTCAGGGTAT  
GGCGGATCTCTTGATCCTGGGGATAGGAGATGCGTGGATAGCTCTGGCAGGTATTGCTGAGTGCATCCGG  
GCCCCGTTTTTGGCTGAATAACACATAACCCGGCGTTATCGAGGAAGGGGCAGGCTCCTTGTCTATCCAGT  
CTGATCTCTCCCCACTGCGCATCACTCTTTCTGATTTTACGGATATGCGTGGCGGCCATTTTTTTAAGGA  
CGGCATCGGCATGGCCAAGATAGCTGCGCAGGCTCTTTTTATCGATAGTATGCTCCAGCCATGGCAGCA  
ATTGTCTTCAACAGCTCCCCAATACAGCTGAATTGTTGGTAGTAACGGGGTGTGATGGGTGACGGGC  
ATTTCTGCTCCTTTCTCGTAATGTAAGTTGGTATCGAGAAGATTTAGCAAAAATAAGTGCCAACCAAGTGGG  
TCTGGAGCAAAAAGAAAAGATGATGTATTGATTTAATTTTTCTGCGTTCAGGGTCTTTCTATTCTG  
TCGAGATAAATGTGGCCAATTGGCCGAGCTAACGAACGGAACGAAAAAATGGGTCTTTCTATTCTATAC  
CAACTTTGCTCTCTGACTACTCAGAACCAGATCAACTCCACCAACAAGATGCTGGGCCTGCCATGCAG  
CGCCTGGGTACCGGTCTGCGCATCAACTCCGCAGCAGATGATGCCGCTGGTCTGCAAATGGCGACTCGCC  
TGCAGGCACAATCCCGTGGCCAAGCTGTTGGTATGCGCAACTCACAAGACGCCATCTCCATGATGCAGAC  
CGCTGAAGGTGCCATGGACGAGATGACCAACATCACCTGCGCATGAAAGATCTTGTACCCAGTCTGCT  
AACGGCACCTCTTCTACCGAAGACCGCAAGGCCATGGATGACGAGTTCAAACAGCTGACTAAAGAGCTGG  
GTAACATTGTTGATAACACCCTTTCCGGTGGTCAAGCTGCTGAAGGGTGGTCTTTTGAATCTGACGT  
GATCTTCCAGATCGGCGCTTCCAAGGATGAAAACTGACCGTTGATGTAAAACTGCGATGAAGGAAGT  
ACTGGTACCACAGCAAGTAAAGGTATCGCTTCCAAGGATATTACTGATGGTATCGGTGATCAAACCAAG  
CAAAATGTGGCGATTAAAGGTGCTGCAGACCTGATCGACCAGATCGGTGCTGTCCGCTTTCCTTCGGTGC  
CAACATCAACCGCTGGAGCACACCGTCAACAACCTCTCCAACATGAAAGAGAACACCGATATGGCCAAC  
GGTGTATCATGGACGCTGACTTCGCAGCGGAAAACCAACATGACCAAGAACGAGATGCTGATGAACA  
CCGGCGTTAATATTCTTAGCAAGTCCAACGGCATGACCGGTATGGTTATGGGTCTGGTGCCTAATAGAT  
TATCTGGCTGCCCGGTGTGGGCAGCCTTTCTTTTTGTCCGTTGGAAAAGTGTCCGGCCGGTATTTTCCAA  
CAGGCATGCCTATTAGCTTAATAAGGATGATGTGATGCAGATAGATCCTGCCAGCATGGCGAAGCAAGTG  
GTTGCCATTTAGCGCAAGAACATGGACAAGCTGCTGAAAAAGCAGATGGACAATGTAAAGGGGCAGCAAA  
CGGCGTTTTAATACGCTCAATAGCAAGTTGTCTACGTTCCAACCATGCTGAAGGATTTGAATCAAGCATT  
CAATTTGCAGGCTCAGAAAGCCACCTCGCAAGAGGGGTAATGACGGTCAACGTAATGGTAAGGCC  
AGTTCCGGACAGTACAGCTTCCATGTGCGAGCAGTTGGCGCAAGCCCATCAAAATCGGGATGGCGTTTTGATA  
GTGAATCAGCGTTACTGCCCGCAAGTGGAGCCCTCTCGCTCACAGTCAAAGGCAAGGCGGTGGATATCGA  
TATGGCCAGCTTGCAGCCGGTTCGACCATCAAAGATCTGGTCAGTCATATCAATAACGTAAGGATAAC  
CCTGGCGTGAAGGCCTCTCTGGTACGTAAGTACGCGCAAGGTCAATATGGTGTAAACCAGCAAAGATACCG  
GGACTGAAAATGCGATTACGATGGTTTATTCTGGTGACGGCGCAAGTATGCTGGGCGTTGCCCTGGCAGG  
TAAAAAAGACATTACCAATGCCAGAATGCCAAGCTACAAATGGGCGGGAATAGTCCCCTGACCATTGAG  
TCTGCAAGCAATAAAATTTGAAAATGTGGTGGAGGGGTTGACCTTTCAGCTCACGAAAGCTCAAAAGTTGG  
GTGATGCACCGCTACAAGTTGTTGTAGATCAGGACAAAGAAGCGGTGACCGGCTCGTTGAAAAAGTTGCT  
CGACAGCTATAACGAGTTGCTCGATGACATTGGCAAGATGACCTCCAGTGACCCCAAATCTCCGGGGCT  
CTCTCTTCTGATAGTGGTGTGCGCACCTAAAAAGCTTGTGGGCAACAAGGTGCGCGATCTGCCAAATG  
GATTGTCACTAAGTAATCTCGGGATCAAAAACAGACAAGGCTGGTAAGCTTTCATTCACGAAACCGATTT  
TAACAAGGCGCTTGAGAAAGATCCCGAGTTGCTCGGCAAGGCATTGCTGGGGGATGATGGCCTGCTCAAG  
CGGATGAGCAACGGGCTTGATCCCTATACCAAGCGTGACGGGGTTTTTAAAGACTCGTAAAACAGGTCTGG  
AATCCAGTCAAAGCGTCTCAACGAACGGATGGAAGCGCTTATCGCAAGATGGATGCTGCATACAAGCG  
TTACCTAACCCAATTTAATACCATGAATCAGATGATGCAGAATATGGGGTCTCTCTAACCTGAGCTCAT  
AATCGCTGCATCAACTTTGGAAGTGTCTCATGTTTGAATCCAAAGATGGCTATGATGCCTATCGAT  
TTGCCCGCACTGAAGCAAAGCCGCGAGTCCGATCCATATCAGCTGGTACTGATGTTGATGGATGGTTT  
GCTTGACGAGATAGCCAGAGCAGAAGGGCATATCTTGGCCAAACAGTTTTGAGCGCAAAGGTTGGCCATC  
AACAAGTGTCTGCAGATCCTGGGTGGGCTGGACAGTGCCTTGATATGAATAAAGGGGGCGAGCTGGCGG  
TTAACCTGCATCGTCTTTATGACTACTGTGGTCAAGAACTGTTTCGAGACCAGCGTATCCAACAGTGTGGA  
GGGATTTGCCGAAGTGCGCAAAATTTGCAAGAGCTGAAAAGAGGGTTGGGAAGCCATGGCGCGTATCCT  
CGTTAATACGGAAGTAGTACTTCTTCCCTCTGTTCTTCTTCTCACGCCAACGTATTGAAATTTCTTGGT  
TATCGGTCTGGCCACTCTTTGCTTGTGGGCTGGTTCATCTTCTTTTTGGGGCTCGTCATGTCAGGTATT  
GCGCCCGTGTACGTGAGACCGAAGTGCAGACGCGCCAGCGCAGTTATTGGGGTTGGGTACGCTATTGC  
TGCAACAAGCGCAAGCTGGCCAGTGGGAAGCTGTCAGGCTAACCGATGGACGCTTCGCGCAATTTGTCTC  
TCAAGTTAGCCGGAATCCCCAAGTCTGGGCTGCGCTGCAACCAGCAAGAGATAAAGCCCGGGTGTGTAT  
CGACAAGCATTGCAGCTTTGCGAGCAGGAGACCTTGATTTCGTAAACAGGAGTGGCAGCAGCTTTCTTCGA  
TTCGTGAAGGCTTGACTGCTTACGGTGGATAGAGCAATGGGATTGATTCATTTAGCCGTTTTTGTATGCG  
GTGAATGCGCCGGATGTCACGGCTTGAACCGTTTGTCCGGCCAAGCCGGCAGTGAAGGGGAGTTATATC  
AACCGCTGGATGAGATTGTTGACCCTCTGGTTGCATTGCCCTTGCCCGAGTTGGTTGCCAGTGTGTTGC  
GGTAGACGAAACAGAGAGCGAACAATCAGGAGCGGAAGGCGACCCGACTGAACAGCTGCAAGCGTTTTACC  
AATGTGCCTCTCTTTTGTGAGAGTAAGTGTGCGCATCTTGTATGGTTTTCTGTGTAAGCCGTACTTTTT

CCCCGAGCTGAAGGTAGCACTGGTGGGCAGCAGGTGGTGGTGGATAACAAATTGCCGCCCTCTCTTCGTGC  
CTTGATGGGGAGTGCACCACGCTGCCCCGAGCAAGAGGTGATGCCGCGTCGTGAGACGGTTTTCTGCCGCT  
GCGGAACAGGGCGCTCTCTACCTTGCTTACCAAATCAAATGGGCAAACCGGTGTATTGCCCGGCCGCTTCA  
CCTTGCCGGTTATGGCTGCCGGTTTTGATGCTGGAAATGTGCCTGATACCGCAGTGGTAGAAAACAGGCT  
GCCAGATGCTCGCCAGCTGGCAGTTGGCCAACCTCGCTGCGACGCCGTTGCGACCTGCCGACTATCAGTGG  
GCCCCTGCCCGGTTGTGAGACAACCAGAGCCAGTGGGGGCAACAGTTGGTTAGCCTGCTTCAGGACAAGG  
TTGAGCTGCAAGTCAATCAACAGGTGAAACAGGCCACATCCGGCTGGATCCGCCAGAGCTCGGGCGATT  
GGAGTTGACCGTCAAGCTCGATGGTGACCGCTCAATGTCCAGTTGAATGTGACTAACCCGGCGGTGCGC  
GATGCAATGATCCAGTCGATGGAGCGCTTGCGCATGAGCCTGGCTCCCCATCATGCCGGCGGGCTTGAGG  
TCAATGTGGGGCAAGGCGGAGCAGGGGCAAGCAGGATCGGTGGCAACAGGAGAAGATCCTGGCTGGCCG  
CCGTCAGTGGTTGGATGAACAGAGTCCCAATGGGGACGATGCACGACTGGCTCAATACTGTTGCTGTA  
TTTTTAACACGTAATAACAGAGAGTGGTTTTACATTATGCGCGCTGTCATGAAGTGGTTGATGGTTGTCGT  
CATTGCCCTGTGTCTGCTGGTTTTGCTGGCATATGGTGCTGGTTGAAACGCGATGTGATTGAAGTCTGG  
CTCGGATTGGCAGAGCCAAAGCCAGAGCTGAGCAGCACTCCGCTGTTCAAGCCGATGGAGCGCTTCGTTA  
TCAGTCTGGAAGGGGGCGAACAGTCCCATATCTGGTGCTGGAGCTGGCACTGGTGACCTACAACCCGGA  
GCAGGTTGCCAAGTTGGATGAGCTGACTCCACTGATCCGCAATGCCATGGTGCAGTATTTTCAGCCACCGC  
TCCCATGATGACGTAAGGTTGAGCTGCAGAATATTTCCAAGCTGCAGGTCTCTTTGCGCGACAAGCTGG  
TCACTACGGTGCAGGGATATGGCTACAAGCCCTATCTGGACGAAGTGTGATCACCAAGGTACTGGTACA  
GTAATTACCATATGACTGATTCTGCTTGGGATTCTCAACAAGAGTTTGGCGATACGCCAACAATTCCCCG  
TACTGGTGAACAGGCCATTCTGACTCGCTATCTGCCCTGGTTAAGAGGGCTGCTTGTACCTGCGTAGC  
CAGGTGAGTGCCTGTTTTGATCAGGAGGATATGGAACAGGTAGGGATGATGGGATTGCTGGAGGCGTGGC  
GTCGTTATGGTAGTGAACCTGATGCCAGTTTTGAAAAGTTACGCCCTTCAAACGGATTCTGGTGGCCATGCT  
CGATGAGCTGCGGCGTCTGGACTGGCGGCCCTCGCCAGTTGCGACAGCAGGTACACGGCCATAATCAGGTG  
CAGCGTGAACGCAATCGTTTTGGGGCGCCCCCTCAGAGCAAGAACTTGCTGCTGCGCTCGACTGTT  
CGGTGGATGAGGTGCGTCAGTTGTCTACGCCAGCCAGGCTGAAGCGCTACAGAGTCTGGAAGAGTGGCT  
GGAGAATGGTGGCAAGGCGCCAACAACCGAGTCTGATGATGTCGATATGGCGATGACAATCAGCAAGGTG  
TTGGCCACTCTGGATAAACCGCAGCAGCTATTGCTTGCCTCTATTACCAGCAAGAGCTCAATATGAAAG  
AGATCGCGCTGGTCTGGATTAACCGAATCCCGGGTTTTGTCAGCTGCACAAGCAGTGTGTGCTTCAGCT  
AAAGCAGCGATTGGTCGACTCCATATAGTAGTCTCACCTTTACTGGTGACCTTCTTGTATCGTGGCGG  
GAACATTCATGCAAAAACAGATTGGCATCGGCGCTCATTTTTAGTATGCGTGCTGGGTGGTTTCATGATGGC  
CGGGGGGAACCTCGCCGCTTGTGGCAGCCAGCCGAGCTCATCATTATCATCGGCGCAGCGGTAGGCTCC  
ATGTTTTCTGGGCAACTCGAAAGAGGTGATGCACGAAATGTGGCGGCAGATCAAAATGTGCTTCAAGCCTC  
CTAATAACGAAGAGAGCGAGGTCTATCGTGAGCTGTTGACTCTGATGCATCAACTGCTGGAGGAGACAG  
CAACAAGGGGATGAAGGCGCTCGACGAGCATATTTGAAAATCCCAGCAGAGCTCGGTTTTCTTGATGTAC  
CCCCAGATCTCTGAAGATCCCAGTTGCTCGGTTTTATTATTGATAACCTGCGTTTTGTTGGGGATGGGCA  
AGATCACACCTCATGAGCTCGAAACCGTCTGGAGCAGGAGATCATGGCCATTGAAGAGGACATGCTCAA  
GCCTGCCCATGCTTTGCACAAGACCGGTGAGGCTGCCGGGCTTCGGCATTCTTGTGCTGCGGTGATGGGG  
ATCATCATCACCATGCAGCAATTGGACGGCCCCCTGAGTAACATTGGCGTTCATGTGCTGCCGCTCTGG  
TGGGAACCTTTATCGGGATTTTTCTCTGTTACTGCTTGGTGGAGCCTGTGAGTAAACGCAATGGAAGAGAT  
GGTCAGGCGTCGTATTAGCCTGTTGATGTGTATCAAGTCGATCCTGATTGCCAGTTGCGTGGCAAGACA  
CCGCTGCTGGCCGTCGATTAGGTCGCAAGATCCTGGAGCCTGAAGTCAAACCAAGCTTCTTGAAGTGG  
AAGATTGGGTTAACAACAGGGCAATGTAATGCGCAATCACGAGCAGATTATCGTCAAGCGCCAGCAGCGA  
CGTAATAGTTCCCTAAAGGAGGGGGCGCTGGAAGGTGGCATTTGCCGACTTACGTTAGCTATGATGG  
CTTTCTTTATGGTGTCTGGATCCTGGCGGTATCTAACCAGGAGGAGCGGGAAATTTGTTGCCAGCCGCTC  
GCGGGACTACAGCATCATGGACAGTGAAGTCCAACCGTTTTGACATACGCAATAGCCCCATCCTGTGATG  
TTGGGGGGGAATCCCTCGCTGATCGATGAAGTGAACCCCAAGTTCGATCAGCAGGGTCAAGTGCATGATG  
GGCATATGGATCGCCGTCAGAGCATTTTTTTCAGATGGGCCTAACGGCGGGTACGAAAATCTGCTGGTTGG  
AAAGCTCGAAGGTGAAGGCCAGATGCAGCAATTAGCTGGATTATCAATGATCTGGCTGAACAAATGCAA  
GCTAACAATAACCTCGAGATTAGATTGTTCCCAAGGATTGCGGATCCTGATCCGCGATGACGCTGATC  
GGGAAATGTATAGCCGTGGCAGTGCCCGTATCACTCCATTTTTTCGTCACCTGTTGATGGCATTGGCCCC  
TATTTTTCCAGCGTATCGAGAATCGGGTCATGATTTCTGGCCATACCACAGTACACCGTTTTGCGGGTGC  
AACTACACCAACTGGGAACTCTCGTCAGACCGGCCATGATGGCAAGGCGGGTATTGCTGGCGGGCGGCA  
TGCCGCTGATCGGGTCGCGCAGGTGGTCTCTATGGCTGATACCATGCTGGAAGATACCCGGAATCCGCA  
AAGCAGCCGTAATCGGCGCATTGAATTGCTGGTCAAGTCAACTCAGGCAGAAACCAATCTGGAGCAACTT  
TTCAGCTCACAAACACAAGCGGCAGCTAGTCATGCCAAGGAGATGATTTCTCATGGACAGCCCTGAAATC  
GAGTTTTCCGGTGCATACCTCGCACAATGATCCGCGCCGAAAGGTACCGCGCTGGTATCTGCATGATGGAT  
CAACGCCACTTGAGTCACAAAGTTGTGGTATTGCCGCACGGATGCTGATTTAGGTTGTGTTATTTGACAA  
AAGTATTGGCCGAGCCGTGATCAAGGATATCGGCCCGGGAGGCGTTGGCTTTCTTGCCCCGCTGCTCGCTTT  
ACGTTACCTGATACGGTGACCTTTCTCTGTCCCGCCAGATTGTTCTGGATTGTGCGCATCACGCATCGTC  
GGCCTATAGGTGAGCATCTTTGTTTCTATGGCGCTTGTGGTCAATCCGGAAGAAGTGCATTTGGGACC  
AATATTGAGCCAGTGGCGCCACTGCTTCATGGTGCCCAATCAGCGGCCGCTTCTGCTGAATCCCAAGAG

GGTCAGGCAAGCGTTCCAGCCTGATCTCGCCTCGACTCATATCAAGCCCCCTGGCAGCTTTCAGCAACAG  
GGGATCATGCAGACTGTCCAGTGAGACCGCTTTGACAATGGCGGTGCGCCCTTTCTTCCGGTTGGCTGTG  
GGGGCCTTGCCCTTGCTATAGACGATCGGGCAATTGGTTATCCCTTGC GCGACAGGGAGTTGCCAGGCCG  
GATTCCAGCGGCTGGCGTCATTCATTGATACGCCCTTTGCCTGAGCCCACGCGGGCAGTGAGCAGCCGTT  
CGGATGACGGAATATTTGCAAGTCATTGCCGCTGTGCCATGGCGGAAGTTGAAACTGATAGCTGTCAGCC  
ATATCAAGCAGTCTTGCCAGCGCAACAAAAGCGCGGACATAAAAAGCGTGTTTCAGTCGGAAGCTCCAGTT  
CCCATATATTACGTGTCCCGCTTTTAAAACCGCATTGAGTACCCGCCCTTCTCCTGCGTTGTAGGCGGC  
CAAAGCAAGCAGCCAGTCATTGCCAAAGAAGCGATACAGCCATGCCAAATAGGAAAGGGCAGCCTCTGTT  
GCCAATGGCAGTGAATAGCGTCCATCAAATTCGCTGGTGATGGGAATGGCAAATCGGGTGGCGGTATCTG  
ACATCAGTTGCCAAGGGCCTGCGGCGCCTGCAGCAGAGACCACATCCAATCGGTAACCTGCTTTCAGTAA  
AGGAACAAAGGCAAGCAAGGGCGGCAGTTTGGCTTCGTGAACCTGTTCCGCGACCCAGCGAATAACGGGC  
TGTGTCTCCGCAAGACGTTGTTGGAGATAAGGGCGCTGCTTCAACAGGAATGTTGCTGCTGGCTGACCA  
AGTCGACCCCTTTTCTTGGATCGGGATTGGGAAACCAGCTTGCCAGTGATAAATGTTGATAAGCATGGCA  
AGATGTTGATATCATTAAACATCCCCTCATTAGCAAAAAAACGAGCCGGGTGATGGGGCAATTGTTGAGC  
AAGGATCGCGCAATAATAAAAAACATGATATATCTCAACAGTTTTTTTGAATTTAAGGTCGTCTGATCATGT  
GTAATCCAGGACGTAGCAAGCATGATAACACGAGTAAAAAAGAGCCAAATTCGGGTAAAGCGATTGAGA  
AGTTTTTTGCTGTATCTGATACTCGCCAATTTTATTCTGATGGGCTTGTACATTGGTTACGCTCAAGAGCT  
GGCATTGTCACCAATATTCTGCTGACATCCCTGCTGATTATTTACAATCTGTTGCTTTGTCAGCTGGTG  
TCTCTGCGTGCTCGCCGTTGAAAGATGGTTACATCATCTATCCAGTGATATGTGTCAGTATTTTGTCT  
GTGCAGTGGTATTGTTCCGTTTTCATCATATCGCCAGATAGTGACCGCTCACCGACTTGTGCTTATTA  
TCACTTTCTGTTTTTTTTCAGCAATAACTCTTGGAAAATCAACCCACTCAATCTGCGGTATGCAATTGCTGC  
GTCAATATGTTCCCTCTGTCCCATCTCCTTGTGTTGAAAAGCCCCCTGCACGTCCTTAAACTTCAAGGTGG  
GGAAAAGTGGATCAAAGTGGTTTTTTAGAGGGGGCAATCTGCCTGCTCACTCACCTTCAGGGACTGCAATTT  
GTTGCGTGGCGCTCATGCCATCAGCCTGGACAGTAAAGGGCGACTGGCAATTCGGACCAAATTCGGTGAT  
TGGCTGCGCGACGAAAGCGACGGCCAGCTGGTCTGCACCATCGATATGCCCATCCCTGTCTGCTGCTTT  
ATCCCCTGAATGAATGGGAAGAGGTGAGCGCAAGCTCAAGACTCTCTCCAGCATGAATCCGCAAGAGCG  
CCGTTTTGCACGCTGTCTGCTGGGACATGCAACCGAATGCGAGCTGGATGGCAATGGCCGCTGCTGCTC  
AGTCAGGACTCGCAACCATGCGGGGCTGGACAAGAAAATCATGCTGGTGGGCCAGCTCAACAAAGTTT  
AGTTGTGGGATGAAGCCCGCTGGCAACAACAGGTCAATGACGACATCTTGGGTCTGCCCGGGGACGATTG  
GGCAAGCTCACACGACTACAGGATTTCTCTTTATAAATGACCCAAGCCGCTGAACACATACAGTGCTG  
CTGCACGAAGCCGTTGAAGGTCTGGCCATCAAGCCGGACGGTGTCTACGTCGACGGTACTTTTTGGCCGTG  
GTGGTCATTCTCGTCTGATCCTGCAGCACCTTGGCCCCAATGGCCGCTGATCGCCATCGACCGCGATCC  
CCAGGGCATCGCCGAAGCAGCAAGATCCAGGATCCCCGTTTCGAAAATCGTGCACGGCCCCCTTCTCCGGC  
ATCGCCTCCTATCTGGATGAGCGCGGTTTTGCTGGGCAAGGTGGATGGCTTCTGCTGGATCTGGGGGTCT  
CTTACCCCCAGCTGGATGATGCCGAGCGTGGCTTTCAGCTTTATGAAAGATGGTCCGCTCGATATGCGGAT  
GGACCCACCTCCGGTCAGAGCGCCGCGGAGTGGCTGGCCAAAGCCGATGTGGATGACATCGCCTGGGTG  
CTGAAGACCTTCGGTGAGGAGCGTTTTTGCCAAGAAGATCGCCCGTGCCATCGTGCACGACCGAGTGACCG  
AGCCTTATGTGCGTACCCGCCAACTGGCGGAGATGATTGCCCGGTTCAATCCGAGCAAGGAGAAGGGCAA  
GCATGCGGCAACCCGCAGTTTTCCAGGCCATTTCGCATCTATATCAACAGCGAGCTGGACGAGATCGAAACC  
GCGCTCAACGGAGCATTGGAAGTGTGGCACCACATGGCCGCTGTGTCGGTTATCAGCTTCCATTGCTGG  
AAGACCGCTTGGTGAAGCATTTCATCCGCAAGCACGAGAAGGGACCGGAAGTGCCTTACGGCATTCCTTT  
GACCGAGGCCAGCTGGCAGGCGGTGCGAAAATGAAAGTCGGTTCGGCAAGGCACTCAAGCCTTCTGAGCAT  
GAAGTATCTGAAAACAGCCGGTACGCAGCTCGGTGCTGCGGGTTGCCGAACGGCTGGCGGAGTAAGCGA  
TGAGCGAAGTGCCTGTTTCATCTGGCCAAGGAGATCGTTGCCGATCTCTGGCGGCACAAGCTGCAGATTTT  
TCTGTGCGTGCCTGCTGCTGCTGACTGCGTTTTGCCGTGATCCTGGTGACCAACATGACCCGGGGTCTGACG  
GCCAAGCAGAACGATCTGATGGCGGAAGAGGATCGCCTCAATATCGAATGGCGCCACCTGTTGCTGGAGC  
AGGGCACCTGGCTGAACACTCCCAGGTGGCGAGTCTGGCGATGGACAAGTTGCAGATGGGTCTGCTCCGCT  
GGTGACCACCGAGAAGGTAATTACCCAACCATGAAAACGCAAGGCTACAGCCAAAGCTGCCAAAGCGAATG  
TCAAAGCGCCATCGATCTATCCGTGGCGCTTTTCGCACGCTTGGCGGTGTTTATCGGCATCGCGTTTTGTGGG  
TCTGATCCTGCGTCTGGCCTGGATCCAGGTGATCAATCCGGATCGTCTGCGTCAAGGAGGGGGACATGCGC  
TCCCTGCGTACCACCTTACCAGGCGGTGCGCGGCATGATCACCGATCGCAACGGCGAGCAGCTGGCGG  
TTTTCGGTACCGGTGAGGCGGTCTGGGCTGATCCCAAGACAGTACATGAATCCGGTGGCCATCAATAATGA  
GCGAGCTTGGCTGGCACTTTCTGCCGTGCTCAAGCTCGACATCAATACCTCAAACACCGCATCGCCAAC  
CCCAGCAAGCGCTTCGTCTATCTGCAGCGTCAGGTTACTCCTGCGGTGGCGGAATATATCAAGGGGCTTA  
AGCTGGGTGGCGTCTACCTGCGCCCAGAAGCGCGCCGCTTCTATCCGACTGGCGAAATCAGTGCCCATCT  
GGTGGGGGTGACCAACATCGATGGCAGCGGTATTGAAGGGATTGAGCGCAGCTACAACGAGTGGCTGACG  
GCGACACCCGGCGAAATGCGGGTGCGCAAGGATCGTCAGGGCCGGGTGATCGAGCGGCTTGGCATCGTCA  
AAGAGGGCAAGAATGCCAACGATCTGCAGCTCAGTATCGATCAGCGGGTGCAGGCTCTGGCTACCCTGC  
TCTCAAGCGGGCAACCGACGAGAACAAGGCGACCTCCGGCTCCATGGTGATGCTGGATATCAAGACCGGT  
GAAGTGCTCGCCATGGTCAACACCCCTCCTATAACCCGAACAACCGCGGCCAGTATCAGAGCTTCCGGG  
TACGCAACCGGGTGGTGAAGTACTGATACCTACGAGCCGGGTTCGACCGTCAAGCCATTGATTTTTGCTCAGTGC

CTTGCAGGCAGGTGTCACCAGCTGGAAAGATTTTCATTCTGGTGGGCGCTCTTTATCGGTGCCAAGCAG  
ATCAAGGACGTCAGTATCCACAAGGCGACCAACCTCTACGATATCTGCGTTACTCCTCCAACATCGGTA  
TGTCGCGCATCGCGCTGCCGATGCCGGCGCAGGAGATGATCAATACCTCAGCATGTTTCGGTTTCGGTAT  
GGATAACCGGCAGCGGGCTGATGGGCGAGAGCAGCGGCATGCTGCCCCAGCGTCGTCGCTGGTCCGATATC  
GAGCGGGCGACCCCTCTCGTTTCGGTTATGGTCTGCGGGTCACCCCGCTGCAGCTGGCTTCCGCCTACGCCA  
CCCTGGCCAACAAGGGCAAGCGGGTGCCGCTCTCCATCGTCAAGGTGACTACGCCGCCAAGGGGGAGCA  
AGTTATTGATCACAACAACGCCGCTGCCATGTTGAGGGCGCTGGAGTATGTGGTCGACAACGCCATTCCA  
AAAGCCAAGATCCCAGGCTATCGGGTTGGCGGCAAGAGTGGTACCGCCAAGGTTCGCCGTCGCCGGTGGCT  
ATGGCAAGGATTACATGGCCTGGTTTTCGGGTTTCGCACCCGCCAGTATCCCCGTTTCGTCATGGTGGT  
GGTATCAACGAGCCAAAAGGCAGCGCCTATTATGGCGGCGCCGTGGCGACCCACCGTTTCAGAGGCC  
ATGGGCGGGGTGCTGCAGCTCTTCAATATTCGTCGCGATGTCGGTGGCGCCAGCGGTGCCACCAAACCTTG  
CCCGTACGGAGGCTTCTCTTGTCCCGCAGCTTGCATGATTAAGTACTGCGCCCTTCGGTATCCAGCGCCGG  
CGCTCACCTGACCGATATCCAGCTGGATAGTCGGCGGGTTGGCCCCGGCTCGCTCTTCGTTGCCATTCCG  
TGGTCATCAGATGGATGGCAGACGGTTTTATCGAACAGGCGGTGGCTCAGGGAGCGACCGCTGTTGTGTTT  
GAGGAGGGTGGTGAATTTATCCACCATCGACTCCGGTTCCCTGTATCGGGATCGGGGATCGCCCGCTC  
ACCTCTCTGCTCTTTCGGGCTATTTCTACGATCAGCCAGCCAAAAATTTGGATCTGGTCGGGATCACC  
CACCACGGCAAGAGCACTACAGCACTGCTGGTCGCCAAGTGGCGCACCTGCTGGGTGGCAAGGCGGGT  
GTGATGGGCACCATCGGCAATGGCCTGTTTGGCAATTTGATCGAAGCGGAAAAATACCACCGGCAGCGCC  
TGCAGGTGCAAGCCAATCTGGCTGCGCTGCAAGAACAGGGCGCGGATCTGGTGGCGATGGAGGTCTCCAG  
CCATGGTCTGGTGCAGCATCGTGTGCGCGACTGCCGTTTTCGGCTGCCGTTTTCACCAACCTGAGCCGG  
GATCACCTCGACTACCACGGCACCATGGAAGCCTATGGCGCGGCCAAAGAGCAGTTGCTGCAGCTGGTCCG  
ATGAGTCAAGTGCAGGATCAACCGTATGACGAATTTGGGTGCCAAGTGGATTGAGAAATACCCGGCAGC  
GGTGGCGTTTCAGCGTTAATGGCCCCGATTGAACACCATTCTGGCCGTCATTAACGGCGCAGCAGCTCGAT  
TTTACCAGCAAGGTTTTTCGCGCGCAGATTAACCTCCAGCTGGGGGAATGGTGTATTATCCGCCCCCTTGC  
TCGGGCGCTTCAACGTCAGCAATGTGCTGGCCGCGATGGGCGTATGCTGGTGCCTCGGTTACGACTTCCA  
CGAGCTCCTGGCAACAGCGCCTCAGTTGCAGCCGGTAACCGGTCGCATGGAGTGCTTTGGCGGTGGTGT  
ACGCCGCTGGCGGTGGTGCATTACGCCACACCCCGGACGCTCTGGAGAAGGCATTGCAGGCCCTGCGGG  
TGCATGCACAGGGGACGCTCTGGTGTCTGGTGGTGTGGTGGCGACCGCGATCGCGGCAAGCGCCCAT  
GATGGCCCGCATGGCCGAGCATGCGGATGCGCGTGCATCCTGACCGACGACAATCCCCGTACCGGAGGAG  
CCGCCCGGATCATGGCCGACATGGTGGCGGGTCTTCGCGATCTGCTGCGGTGCAGGTGGAGCACGACC  
GGGTCAAGGCGATTGTGCTGGCCATTGGTTCAGGCGAGTAAACAGGACATCATCCTGGTGGCCGGTAAGGG  
TCACGAGGATTATCAGATCATTGGAACCGACAAGCGGCACTACAGCGACCGGGAAACCGTCGCGGCGGCC  
TTGCACACATTATTGGAGTCATTCAAATGATGACCTCAGGCTTGGCGAGCTGGCGCAGGTACTCGATGC  
CCGTCTGATTGGTGACGATGGCGAGATCACCCTGCTCAGTACCGACACCCGCACTCTGGGCGCGGGTGGC  
CTGTTTCGTTGCCCTGCGCGGCGAGCGCTTCGATGCCACGATTTTTGCGAGCAGGCCGTTTCAGGCAGGG  
CCTCTGCCCTGCTGGTTCGAGCGGAACTGCCGCTGGCAATCACCAGCTGGTGGTAGCCGATACCCTCAA  
GGGGCTGGGCCGACTCGGCAAACTGGTGCCTGAGCGCATCAACCCGAAAGTGTGGCCATTACCGGCAGC  
TGCGGCAAGACCACGGTGAAGGAGATGGCAACCGCCATCTGCGCAACGAAGGGGAAGTGTGGCCACCG  
CTGGCAACTTCAACAACGAGGTGGGCGTCCGCTCACCTGCTGCGCCTCGAACCAGCAACACAAGTTTGC  
GGTGTGAGGCTGGGTGCCAACCATCCGGGCGAGATCGCCAGGACTACTTCACTGGCCAAACCCGATGCC  
GCCATCATCAACAATGTGGCGGCGGCCATCTGGAGGGCTTCGGCTCGCTGGAAGGGGTGTTTACGCCA  
AGAGCGAAATCTTTGACGGCTTGAGCGAGGGTGGCACCGCCATCGTCAATGCCGACAACGAATCTGGCC  
GAAGTGGCGGGAACCGGCATTAGTGCCTTCTCCATCGACGATCAGAGTCAGCCGTTCCACGCGCGT  
AACCTTGTGCTCAACGAGCAAGGCTGCGCCGAGTTTCGATGGTGAACCCGACGGGCGAGCTGAGCCTGA  
CTCTGGCGATCCCCGGTCCGCAACAGTGGCCAATGCGTTGGCTGCCGCCGCGGGTTGCTGGCCCTCGG  
CGCATCCCTCGACTCCGTCAGGCTGGGCTGGAACAGATGGCGCCGTCAGGGGCGCTTCTGCGCTCCAG  
CGCTGGGGCGGTCTGACTCTGGTGGATGATACTACAATGCCAGCGTGGAGTCCGTGCTGGCGGGCATCG  
ATGCCCTGACCGCCATGGGCGGCTTCAAGGTGCTGGTGTGTTGGTGTATGCGGGAACTGGGTGAGGAGTC  
TGCCGAGCAACACGCCCCGGTGGCCGTCATGCCCGGAGCGCGGTCTGGATGCCGTGCTGACAGTGGGG  
GAAGAGAGTCGCCACACCGCAGATGCCGCGGCTGGCCGACATTTGATAACAAGGCGTCTGTTTGAAG  
TGCTTGGCAGCAATGATAAATACACATCAGGAAATTTGATTTGGTCAAGGGGGCCCGTGGCTCCCGCAT  
GGAAGATATCGTCGAGATGGTCAAAGGCCATCAGGAGTCAGCCACATGCTAGTCTGGCTGGCTGAAGTGC  
TCACCCCGCACTTACCTTCTTCAACGCTTCTCCTACCTGACGTTTCGCGCCATCCTGTGATCATCAC  
CGGACTGGGGGTTGCCCTCTGGATGGGGCCACGCTGATCCGTGCGCTGCAGATCTGAAGTTTGGTTCAG  
GTGATCCGCAACGACGGTCCCGAGTCCCACCTCAGCAAGCGGGGACCCCGACCATGGGTGGCCTGATGA  
TCATTGCTGCGATTTTTCAGTCTGTGCTGCTCTGGTGGCGCTCGACAACCCCTATGTCTGGCTGGTGT  
GTTTGTGCTGGGTGCCTATGGTGCATCGGCTTTGCGGACGACTACCTCAAGGTGGTGGCGAAGAATACC  
GACGGCCTGATCGCACGCTGGAAGTATTTCTGGCAATCCGCGGTAGCGCTGGCGGTGGCGGTGTTCTCT  
ATGCGACTGCAACCCATGAGGGGCGAGCCAGCTGGTGGTGCCTTTCCTCAAGGATGTGATGCCGAGCT  
TGGCCTGATGTTTATCGTGTGACCTACTTTGTCATCGTGGTACCTCCAATGCCGTCAACCTGACCGAC  
GGTCTCGACGGCCTGGCTATCATGCCGACCGTATGGTGGCGGGGGCTTTGCCCTGATCGCTGGGCTA

CCGGTAACGTCAACTTTGCCAACTACCTGCACATTCCCTACGTGCCCTATACTCCGAGCTGGTGATCGT  
CTGTACCGCCATCGTCGGGGCGGGTCTGGGTTTCTCTGGTTCAACACCTATCCGGCGCAGGTCTTTATG  
GGGGACGTTGGTTCCCTGGCACTGGGCGGCGCGCTCGGCACCATCGCCGTGCTGGTCCGTGAGGATTC  
TGCTGGTGATCATGGGCGGCGTCTTCGTGATGGAGACCGTCTCGGTGATCCTGCAGGTGGGGTCATACAA  
ACTGCGCGGCGTGC GGATCTTCCGCATGGCGCCGATCCATCACCCTACGAGAAGAAGGGCTGGCCGGAG  
CCGCGCGTCATCGTGCCTTCTGGATTATCACCCTCGTGTGGTGTGCTGGGTCTTGCCACCCTGAAGG  
TGAGGTAAGGCCATGGTCATCATCATCGGATTTGGGCAAAAACCGGACTCTCCTGTGTCGATTACTTCTCG  
GCCGTGGCGTCACGCCACTGGTGATGGATAACCGCGCAACCCGCCCGCAAGGATCAACTGCCGCCTGA  
GGTTGAGCTCATTACGGGCTCGACGAGGCACTGCTCAAGCAGGCGCACATGATTGTGCGGAGCCCGGGT  
ATCGCGCTGGCGAGACCCCGAACTGAAAGCGGCTGCCGAGTGTGGTGTGCAGATCGTGGTGATATCGAGC  
TGTTTTGTGCGGAGACCCAGACCCCGGTCATCGCATCACCAGGCTCGAACGGCAAGAGCACCGTTACCAC  
CTTGGTGGGCGAGATGATTGCCGAAGCCGGTCTCAATGTGCGGCTGGGCGGCAATATCGGCACGCCTGCG  
CTGGAGCTGCTCAAGCAGCCGATGGATCTCTGCGTGTGGAGCTCTCCAGCTTCCAGCTGGAACCTACTC  
ACAGTTTTCGTGCTGCCGCTCCGTAGTGTGAACCTCTCAGAAGATCACATGGATCGTATCAGGGCAT  
GGCCGACTATCGCGCCGCAAGATGGAGATCCATCAGCATTCCAAAACATATTCTGGTCAATCGTGACGAT  
GCCCAGACCCTGCCGATGTGGGTGAGGTGTGGCAGAGCTTTGGTCTCGATTGCAATGGCTATGGCCGTT  
GCCTGCTGGATGGCCGCTACTGGTTGACCCTGCACGGCGAGCCGCTGCTGGCGGTGGACGAGATGAAGAT  
CGTGGTGCACACAATCAGGCTAACGCGCTGGCCGCATGGCGCTGTGCGATGCGGTGCGCATTTCCCGC  
GCTGCCCAGCTCACCCTGCTGCGCCGTTTTGAAGGCTTGCCCAACCGTGGCCGTTTTCGTACGGGAGGTGA  
ACGGGGTGCCTGGATCAACGACTCCAAAGCCACCAACGTGGGGGCCACGCTGGCTGCCGTTGCCGTTGT  
GCGCGAGTCGGTCAAGGGGCGCCTGCTGCTGCTGGCCGGTGGTCAAGGGCAAGGGGAGGATTTTGGCCCG  
ATACAGGCGCTGCTGGGTAACCAGATCGATCACATGTAAGTCTCGGTGAGGATGCCGAGGTGCTGCTGG  
CACTGGGCGAGCAGACCGAAACGGGTGGCCGACCTGGCCGCTGCGGTTGCCAAAGCGGCGGCCGATGCCAA  
GCCCGGTGACTGGGTGCTGCTGGCGCCAGCCTGTGCCAGCCTCGATCAGTTCAAGTCGTTTCGAGGTGCGC  
GGCGATCGTTTTACCGAGATGGTGCTGGCACTATGAACGCCCTTCGCGCAGCAGCAGGTTTTGTTCCAGCG  
CTGGTTGTTACCGGCGCGTCTGCGGCTCTACGATCGGCAGCTGGTACTGCTGGCGCTCTCCCTGATG  
GCGGTGCGGGTGGTCATCGTGGCCTCGGCGTCGATCCCCGAGGGGATTGCGCTGGGGGATGACCCCTTCA  
TGTTTTGTAAGCTCAGCCCTGTTTTCTGGTGATGGCGCTCGGTATCTCCTGGTTTTGTGTTGAGGTTGCC  
GATGGCGCATGGCAACAGCACAACGGCCCATGTTGCTGCTGGCGATCTTGATGCTGGTGGTGGTGTGCTG  
CTGGTGGGCGCAACGTCAACGGTGCCTGCGGTTGGTTCGCGCTCGGCCCTTCAATCTGCAGCCTGCCG  
AGTTTTGGCAAGCTGGCGCTGTTTTGTCTATCTGGCCGGCTATCTGGTGAGGCGCCAGAGCGAAGTGCCTGA  
AGCCTGGATCGGCTTCCCTGAAACCGCTGGCGGTGTTTTGGGGTGTGGCGGTCTTGCTGCTGTTGCAACCT  
GATCTGGGTTCTACCGTGGTGATGTTTCGTTACCTCGTTCGGCATGCTGTTTCTGGCCGGTGCCCGATTGG  
GACAGTTTTTTGACCCTGATCGGCGCGGGCCTCGGTTCCGGTGGTGATGCTGATCATCGTCGAGCCCTACCG  
GATGCGGCGGGTGACCTCCTTTATGGATCCTTGGGCCGATCCGTTCCGGCAGCGGCTACCAGTTGACCCAG  
TCGCTGATGGCGTTTTGGTTCGTGGCAGCTGGTTTTGGCGAAGGGCTTGCGCAACTCCATCCAGAAGATGGAGT  
ACCTGCCGGAAGCGCACACCGACTTCGTGTTTTGCGATCCTCGGTGAAGAGCTGGGTTACGTCGGGGTGT  
GGGCGCCCTGTTCTGATTTTTTGCCTGGCGGTCAAGGCGCTCAAGCTGGGGCATCGCGCGCTGGTGGCT  
GAGCGGCTCTATGACGGTTATCTGGCCATTGGCATCGGCATCTGGTTTCAGCTTCCAGACCTTCGTTAACG  
TCGGCGCGGCCAGCGGCATGATGCCGACCAAGGGCTTGACCCTGCCGCTGGTGAGTTACGGTGGTTCCAG  
TCTCATCATCATGTCCGGTGGCGGTGAGCATGTTGATTGCAATCGATTTTGGAGTTGCGTCAGGCGACAGCC  
CAGGCGCGCGTGC GGGAGGTTTTAGTGAGCAAGACTCTGTTGGTGATGGCAGGTGGTACCAGTGGGCATGT  
GTTCCCCGGTCTGGCCGTGGCCGATCGCCTGAAGGCCAGGGCTGGACTGTCCACTGGCTCGGCATGCC  
GACCGGATGGAGGCGGAGCTGGTGGCCGCCACGGTTATCCCATCTCCTTCATCGATATTGAGGAGTAC  
GTGGCAACGGCATCAAGCGACTGCTGGTAGCGCCCTATCGCATCGTCAAATCGATCCTGCAGGCGCGTCA  
GGTACTCAAGACCGTTCCCGCTGATGTGGTGTGCTCGGCATGGGCGGTTTTGCTTCCGGCCCGGGTGGCGT  
GCGGCTGGTTCTCCGGCATCCCGTTGCTGCTCCATGAGCAGAATGCCGCGAGCCGGCATGACCAACAAGC  
TGCTGGCCCGTATCGCCAGGCGGGTGTGATGGCATTTCGGGGGCTTCGCGCGGAGCCGTGCTACCGC  
CGTGGTGGGCAATCCGGTGCCTCCGAAGTGGTGCCTGCGGATCCGCAACTGCGCAGCGGAGATGAG  
CCGCTGCATCTGCTGATCGTGGGTGGCAGCCTGGGGCGCGGGTGTCAACGAGCAGGTACCTGCTGCGG  
TGGTGGCATCCGGCGTGGCCATTGAAGTGCCTACCAGTGTGGCAAGGGCAATGCTGAGGCCGCTCTCTGC  
TGCCTATGCCAGCACGGCATCAATGCCGAGGTGAGCGAATTTATCAAGGATATGGCCAGCGCCTACGCC  
TGGGCCGACCTGGTGGTCTGCCGTGCCGTTGCGTACTGTTTCCGAAGTGGCTGCTGCCGTTGTGGCCG  
CCATTTTTTGTGCCACTGCCCCATGCGGTGGATGATCACCAGACCCGTAACGCCCTGACCCTGGTGCACGG  
CGGAGCGGCGGAGTTTTCTGCCCCAGTCAGAGCTGAACACCGCCTCACTGGCGGCGCGCTGACCCTGGCTG  
GCTGGTTCGCGGGGAGACCCTGTTTTAACATGGCGAAAGCGGCTCGTCGCGTCCGATCACAGATGCGGCCG  
AGCGGGTGTGATGAGTGCAAACAGCTCGCAACCGGGTGCCTGGTAAAGATTGATGAGCAAGGTTGCA  
GCGGTGACACCGTGCAGCCTTGTACCTGTATGTATTGATGCCGCCGTACAGCCGCGCTTTGACGGCACAT  
GGCCTGCGGCAGACTAAAGAGACGATTATGACCAAGGTTGAACTGGCAAAAACCTGCGTACTGTGATCCCCG  
AAATGCGCCGCGTGCCTGCATCCACTTTATCGGCATCGGTGGTGGCGGATGGGCGGGATCGCCGAAGT  
GCTTGCCAACGAAGGTTATCAGGTAACGGGTTCTGATCTGGCTCGCAACGCCGTGACCGAGCGGTTGGCC

GGACTGGGCGCGCACATCTTCGTCGGCCACAGTGCCGAACACGTTGAGGGTGCCAGCGTGGTGGTGGTCT  
CTACCGCCATCAAGCAGGACAACCCGGAGCTGCTGGCCGCCGGAAGTGCAGGATCCCGGTCTGCGCCG  
CGCCGAGATGCTGGCCGAGCTGATGCGTTTTCCGCCACGGTATCGCCATTGCCGGTACCCACGGCAAACT  
ACCACCACCAGTCTGGTGGCGAGCATCTATGCCGAAGCCGACCGCGACCCGACCTTCGTCATCGGTGGCC  
TGCTCAACAGTGCCGGAACCAATGCCCGTCTGGGCAGCAGCCGCTACCTGATTGCCGAGGCGGATGAGAG  
CGACGCCTCTTTCTGCATCTGCAGCCGATGGTCTCTATCGTGACCAACATCGAAGCGGATCACATGGAT  
ACCTACGGCGGTGATTTCTCCAAGCTGAAGGCCACCTTCATCGAGTTTCTGCACAACCTGCCCTTCTACG  
GACTGGCGGTGGTCTGCATCGATGATCCGGTATCCGTGGCATGTTGCCCGAGATTGCCCGTCCGACCCT  
GACCTATGGTCTCTCTGATGATGCCGACGTGCAGGTGCTGGATTTTGTCCAGACCACCAACCACAGCTGC  
TTCCGTGTTCCGCCGCAAAGAGGGCCGGTGAAGTGCAGGTGACCTCAATTTGCCGGGTATTACAACGCAT  
TGAACGCGCAGCGCGATAGCTGTCGCGACAGAGGACGGTGTGAGCGATGAGGCCATCATCTCTGCTCT  
GGCCAAATTTGAAGGGGTTGGTCTGCTCCAGCAGTATGGCGAGTTTGAACCCGTCGCGCAAGGGC  
ATGCTGGTGGACGATTACGGTACCACCCGAGCGAAGTGAAGGTACCATCAACGCCCGCCGTCGCCGGT  
GGCCGAGAAGCGCCTGGTATGGTGTTCAGCCGACCGTTATACCCGACCCGCGACCTCTACGAGGA  
CTTCGCCGATGTGCTCTCCAAGGTAGATGTGCTGGTTATATTGGAGGTTTATGCTGCCGGTGGAGGCCG  
ATCCCGGGCGCTGATGGACGGGCACTGTGCCGCTCCATTCGCTCGCGTGGCAACCTGGAACCCATCTTCG  
TCGCCACACCGGATGACGTGCCAGCCGCTGCTGGCCGACCTGATCGGCGAGGGGATTTGGTGTGACTCA  
AGGCGCCGGGAACGTCGGGGCACTGGCCCGTCTCGGAGAGATGAAATGAGCATAGATAGCATGAAA  
TCTGGCGCCTGAGGGCCCAATGAGTATTTTACCGCCAAGCCGGGGCTATATAATGGCGAACCAGTCTG  
TCAAAGGCCGGTTTAGCGGTTACACGGGGATCGATCGGGTGGAGGCAAGGGCACAGGGGCGCACCAGG  
GTGGCTTCATCGCAGGGGTAGCGTTTTTCTGCTGGTATGATGGGGCTGTACCGGACGGCGCTGGATGT  
TAAAGGTTGGCTGACAGATGCCAACCGGTTGCCCATGAGCGAGCTGTTGCTGCAGGGGCAACACCAGTAT  
TTGCAAACCGAAGAGCTGCGGATGGCCGTGCTGGATGGCGCCGAGCTGCGCAACTTCTTCGAATTGGACG  
TCAAACGAATTGCAGGCAAGGCTCAATGCCTTGCCATGGGTGGCTCGGTCTCGGTACGAAAGAAGTGGCC  
GAACAAGATCAAGATCTACCTGACAGAACAGGACGTGGCGGCGCGCTGGAATGGCAACCGCTTCGTCAAC  
ACCATGGGCAAGGTATTAGTGCCTCGGATCGGGTCAAGACGCCGCTGTTGCAGCTGTGAGGGCCGGATG  
ACCAGGGCCGCAAGGTTGTTGAAAGAGAGTCCGGCAGTACGAGTGCCAACTGGCTGCCAAGGGATAACAAGTT  
GCTGGGGGTGAATCTGACCCCGCCATGCCTGGGAACTGACCTGGATGGCAATATCAAGCTGTTCTCTG  
GGACGCAATGACATTCGCTCCGGCTGCAGCGGTTATCGATGCTTCCCGGTTATCGAACCCTCGCGC  
AAGTCGCTACGTGGATCTTCGATACGACACCGGAATGGCAGTTGGCTGGAAGAAGAGCGAAGAGAAAGT  
GCATGACCAACACCGCAGATAGGAATTTGATTGTGCGGACTGGATATCGGCACAACCAAGGTGGCGGTTCT  
GGTGGGGAAGTATTGCCGGACGGTGAACGTCATCGGTATGGGCAGTCACGCTTCTCGCGGAATG  
GAGAAGGGCGGGTCAATGACCTCGACTCCGTGGTCAAGTCACTGCGCCGCGCGGTGGAAGAGGGCCGAGA  
TGATGGCAGATTGCCAGATCAGCTCGGTTTACCTCGGTTTGTCCGGCAAGCATATCGACTGCCGTAACGA  
GACCGGCATGGTGGCCATCTCCGATGAAGAGGTGACTCAGGAGGATGTGGACAACGTGATCCACACCGCC  
AAGTCGGTTTCGCTCTCCGACGAGCTGCGCGTGTGATGTGCTGCCTCAGGAGTTTGCATCGACTATC  
AGGAAGGGATCAAGAATCCGGTTGGCCTCTCCGGTGTGCGGATGGCAGCCAAGTTCACTTGATCACCTG  
CCACAACGACATGGCCCGCAACATTGAGAAATGCGTGGAGAAGGTTCGGCTTGCCTGTGGATCAACTGATC  
TTCTCCGCGCTGGCCTCCAGCTATGCCGTGTTGACCGAAGACGAGAAAAGAGCTGGGTGTCTGCGTGGTGG  
ACATCGGTGGCGGCACCATGGATATGTGCTGTTTTACCGGCGGTGCCCTGCGCCACACCAAGGTGATCCC  
GTACGCTGGCAGCACTGTGACCAGCGACATCGCCTACGCTTTGGCACGCCGCCGCTCGACGCGGAAGCG  
ATCAAGGTGCGCTACGGTTGCGCCCTCGGCCGTCTGGTCAGCAAGGAAGACAATATTGAAGTACCCAGTG  
TCGGTGGTTCGCGCGCGCAGCCTGCAACGGCAGACACTGGCTGAAGTGATTGAGCCCCGTTACACCGA  
GTTGCTCTCCATGGTGAATGATGAGCTGGTGCGGGTACAAAGCGAGTTGAAAGCGCAGGGGGTCAAGCAT  
CAGCTGGCAGCCGGTGTGGTCTTGACCGGCGGCGCTGCCAGATTGAAAGCATTTGTGGAGTGTGCAGAGC  
AGATCTTCCAGAGCCAGTCCGGTGGGAGAGCCCATGAACATACCTGGTTTGAAGTATTACGTGCAGGC  
ACCGGTGTACTCGACTGCGGTTCGGGTTGCTGCAATATGGCCGACCCATCAAGCCACAGGTAGCAACAAA  
GAATATGCCGCCAAGGCAAGCGTCCGTGGCCTGGTCAAACGGGTTAGCAACTGGCTGCGTGGCGAGTTCT  
AAGAATTTTGGTGTGAGTCAGGCAAAATAAGCGGAGAGACAACATGTTTGAATTTATGGATAGCCACACTGA  
CGAAGCCGTCATTAAGTGTGCGGTGAGGTGGCGGCGCGGTAACGCTGTGAGCAGCATGGTTCTGTCAA  
AATATTGAGGGTGTGAGTTCATTACCGTCAACACCGACGCCAGGCACTGCGTAACTCCAGCGCCAACA  
CTACCCTGCAGATCGGCGGTGGCATACCAAGGGTCTGGGGGCGCGCCAATCCGGAAGTGGGTCTGTA  
TGCGGCCATGGAAGATCGCGAAGCGCTGCGTGAAGTGTGACCGGTTCCGACATGGTGTTCATCGCCGCC  
GGTATGGGTGGTGGTACCGGTACCGGTGCTGCGCCGATCGTGGCCGAAGTGGCGCGGAGATGGGCATCC  
TGACCGTTGCTGTGGTGAACAGCCGTTCTCCTTTGAAGGGAAGAAGCGGATGGGCTTCGCCGCCACCG  
TATCGAAGAGCTCTCCAAGAAGCTCGACTCCCTGATCACCATCCCCAACGACAAGTTGCTGAAGGTGCTG  
GGTCCGCGGTATCTCCCTGCTGGATGCCTTCAAGGCGGCCAACGATGTAAGTGTGGCGCGGTACAGGGCA  
TTGCCGAGCTGATCACCCGTCCGGGTTTGTATCAACGTCGACTTCGCGGACGTGCGTACAGTGTGCTGA  
AATGGGTACCGCCATGATGGGTACCGGTTCCGCTCTGGTGTGACCGTGCCGAAGAAGCGGCGGAGAAA  
GCCATCTCCAGCCCGCTGCTGGAAGACGTGGATCTGGCCGGTGGCCGTGGCATCCTGGTCAACATCACCG  
CCGGTATGGACATGACCATCGAAGAGTTCGAAACCGTGGGTAAACCGGTCAAGGCCCTTCGCTTCGAGAA



CGCCACTGTAGTTGTGGGTACCGTAATCGATCCGGAAATGCACGACGAACTGCGTGTGACCGTGGTTGCT  
ACCGGTATCGGTGCCGAGCGCAAGCCGGACATCACTTTGGTCAAGAGCAGCCAGGTGCAAGAGCGCCCGG  
TGCGTCAGCCCGTGGTTAGCGACATGATGCAAGGCCCGCTGATGGACGAAGCCCCGCCAAGGTGGTCAA  
CGCTGAGCCGCAAGCTCGTTCGTGAACCGGATTACCTGGATATTCCGGCGTTCCCTGCGCAAGCAAGCTGAC  
TAAGCCTCTTATGGCTCTCGTTTGTGGTTGTTTCAAGGAATGTGCTAAGATGGCCTGCCAACGACCATCT  
GGTCCGGATTTTAAAGCTGTTTAGGGTACACCCATGATTAGACAAAAGAACCTTGAAAACGAGTGTACAGGC  
GACTGGTGTGGCCTGCATTCGGGCCGAAAGTCACTATGACGTTCCGTCCGGCGCCTGTGAACACAGGG  
ATCGTTTACTTGCCTACCGACCTGAATCCTGTGGTGGAGCTGCCAGCCAATGCCGATCAGGTGCGCGATA  
CCGTGCTCTGTACCGCTCTGGTCAACGAAGCCGGTGTCCGTGTCTTACCATTGAGCACCTCTCTGCCGC  
GCTGGCCGGGATGGGATCGACAACCTCTATGTTGAGGTGACGCCCCGAGATCCCGGTGATGGACGGC  
AGTGGCAGTCCCTTTATCTACCTGCTGCAGGAAGTCGGGATCCGTGAGCAGAATGCTGCCAAGCAGTTTG  
TGCGGATCAAGAAGAGCATCCGGGTTGAAGAGCGCGACAAGTGGGCGGAATTCACCCTATCGCAACGG  
CTTCAAGATGGATCTCGAGATAGATTTCCAGCATCCGGTCTTTGAAGGGCGCAATCAGCGTTGCGTACTG  
GATTTCTCCGGTGCCTCCTTCGTGAAAGAGATCAGCCGTGCCCGTACCTTCGGGTTTCATGCGTGATATCG  
AGTACCTGCGTTCCAGAACCTGGCGCTGGGCGGAAGCCTGGAAAACGCCGTGGTACTGGACGACTATCG  
GGTGCTGAACGAAGACGGTTTTCGTTATGAGGACGAGTTCGTCAAGCACAAGATGCTGGACGCGATCGGT  
GACCTCTATATGTGTAACCGCAGCATCATCGGTGAGTTCGTGCCTACAAGACCGGACATGCCCTGAACA  
ACAAGCTGCTGCGTGCCTTGCTGGCCGAGCAGGAGGCTTGGGAACTGGTGACCTTCGAGGGTGAGGGCGA  
CAAAGCGCCTATCGTTACTACGATAACGGTCTGGTCTTGGCCTGATAGCTGTGCAACGGAACGTCGGTC  
CTCTCTCCGCACCGACGTTCCGTCAATTTGTTTACTCCATCCTTTAATAACCGATTATCTCCCGGTTTTATT  
TCCCCTGACAGGCTCTTGGCCGCACCTGACCGAGCAGACTGATTTCTATGAGCATTACCCTGATCCTCCAC  
GGCAAGCAGCGACGCAAGTTGCACCTGCCCAAACAACGCTCTGGCCTGGGTGCGGCGTATTCTCTTCTCCC  
TGTTGGCCCTTGGTGGTGGTGGCTCTGGCAGAGCTGGCACCAGAAAATGGAGGGCGTGGAAAGTGGCGCT  
TGCCGTTGCCGAGCAACAGTCCGTTGACCAGAGTGGTGACGAAGCCCGTGAACAGTTGGCGATGCTGGCT  
GCTCAGGTGGGCACCATGCAGGGTCAGCTTGGCCGTCTCAATGCCCTCGGTGAACGATTGACCGAGCAGG  
CCGATCTCGATCCCAGCAGTTCATTTCAAAGAGCTGCCTCCGATGGGCGGCCCTTCTTATGATGAAGA  
GTTGGAAGTGAGCCTCAACGAGCTGCAGGCCTCGATGAAAACCTCAGCCAGCAGCTCAGCAGCCGCGAA  
GAGCAGCTGTCCGTTACTTGAATCTTTTCATCATGAATACCATATCACCGATGCCGGTTTTATTTCCGGCA  
CGCAGTCAAAGAGGAGTGGTGGTCTCGTCCGGTTTGGTGGACGGGTTCGATCCATTCAACGGGCG  
TGCCAAGATGCACAAAGGGGTTCGATTTCCGTGGCAAACCCGGAACCCCGATTCTGGCCACCGGGCCCGG  
ATTGTGAGCTGGGCGGCCGTCATCCGGAATTTGGCAATATGGTGGAGATTAATCACGGCAATGGCCTGG  
TCACCCGCTATGCCACAACCTCAAGTTGCTGGTTCGAGGTGGGCACTCTGGTTGATCAGGGTCAGAAGAT  
TGCCTTGATGGGACGCACCGGTTCGCGGACCGGGTCCACCTGCATTACGAAGTGTGAAAGATGGTCGT  
CAGGTCAACCCCGCACGCTTTCTCAGTGCCAGCCGGGTTAGGTTTTTTTTCTTCAGGTTCCAGTGACGGA  
ACGCTTTTATAACCAGAAATAGTTGGTACCCATGATTAGCACACTGCTTACCAAGATTATCGGCAGCCGG  
AACGACAGAACGCTCAAGGCTTTGCGCAAAATGTAAAACAGATCAATGCCATGGAGCCGCAGTTCGAGG  
CTCTCTCCGATGCCGAGTTGCAGGCCAAAACGGCCGAGTATCGTCAGCGTATCGAGCAGGGTGAGACCCT  
GGAGCAACTGCTGCCGGAAGCGTTTCGCGACCGTGCCTGAAGCCTCCAAGCGGGTGTGGCATGCGCCAC  
TTCGACGTGCAGCTGATCGGCGGCATGGTGTGAACTCCAACCGCATCGCGGAAATGAAAACCGGTGAAG  
GTAAGACTCTTACTGCGACTCTGCCAGCTTACCTGAACGCCCTGAGCGGCCGTGGCCTGCACGTGGTAAC  
GGTGAACGACTATTTGGCCAAGCGTGATGCGGAGGCGAACCGTCCGCTGTTCGCCCTTCTCGGCATGACC  
GTCGACTGCAACGTGCCCGGTATGGATGCGTCCAGAAAGCGTGACGCCCTACGCCCGGACATCACCTACG  
GTACCAACAACGAATTCGGTTTTGACTACCTGCGCGACAACATGGCGTTCTCGCCAGAGCAGCGGTACA  
GCGTCCGCTCAACTATGCGCTGGTGGATGAAGTTGACTCGGTGCTTATCGATGAAGCCCGACTCCGCTC  
ATCATCTCCGGTCCGGCCGAAGATAGCTCCGAGCTCTATATTCGCGTCAACAAGCTGATCCCGCTGCTGG  
TCAAGCAGGACAAGGAAGACACCGAAGAGTACCCGGCGAGTCACTACACGGTGGACGAGAAGAACC  
TCAGGCCCTGCTGACCGAAAACGGTCAGATCTTCGTGGAAGAGCTGCTCAAGAAAAGAGGGGCTGCTGGAC  
GAGAACGACTCCCTGTTCTCCGCTCCAACATCAGCCTGCTGCACCACGTCAATGCGGGTCTGCGCGCTC  
ACACCTTGTTGAAACGCAACGTCGACTACATCGTCCAGAAAAGACGAGATCGTCAATCGTTCGACGAGCAC  
CGGCCGTACCATGCCGGGTGCTGCTGGTCCGATGGTCTGCATCAGGCCGTTGAAGCGAAGGAAGGGGTG  
AAGATCCAGAACGAGAACCAGACGCTGGCATCCATCACCTTCCAGAACTACTTCCGCTCTTACAACAAGC  
TGGCGGGGATGACCGGTACTGCAGATAACGAAGCCTTTGAATTTGAGCAGATTTATGGCCTGGATACCGT  
TGTTATCCCGACCAACAAGCCAATGGTGCCTAAAAGACATGGGCGATCTGGTCTACCTGACCGCCAATGAG  
AAGTATGCCGCCATCATCGAAGATATCCGTGAGTGTGTGGCCAAGGGCCAGCCTGTACTGGTTGGTACTG  
TCTCTATCGAGAACTCCGAGCTGCTCTCCGGCATCCTGACCAAGGAGAAGATCCCGCACAAGGTGCTGAA  
CGCCAAGTTCCACGCCATGGAAGCGGAGATCGTTGCCAGGCAGGTGAGACTGGTGCCTGACCATCGCG  
ACCAACATGGCCGGTGGGGTACCGACATCGTGTGGGCGGCAACTGGCAGGCAGAGATTGCCAAGCTGG  
AGAACCCGACCGAGCAGATTCGCCGAGTGAAGGCCGCTGGCAGGTGCGTCACGATGCGGTGCTGGC  
CGCCGGTGGCCTGCACATTATCGGTACCGAGCGTCACGAATCCCGTTCGTATTGACAACAGCTGCGCGGC  
CGTTCCGGTGCAGGGTGAACCGGGCTCATCCCGTTTCTACCTCTCCATGGAAGATAACCTGATGCGGA  
TCTTCGCCCTCCGATCGCGTGACCGGCATGATGAAGAAGCTGGGCATGGAAGAGGGCGAAGCCATCGAGCA

TCCGTGGGTCACCAAGGGCATCGAAAACGCCAACGCAAGGTGGAAGGTCGCAACTTCGACATCCGCAAG  
AGTTTGCTGGAGTTTGATGACGTTGCCAACGACCAGCGCAAGGTGGTCTACGAGCAGCGCAACGAGCTGC  
TGGATACCAACGACATTTCCGAGACCATCCACGTTATCCGTGACGACGCTCTACGGCGCGGTGATCGACGA  
GTACATCCCGCCCCAGTCTCTGGAAGAGATGTGGGATGTGCCGGGTCTGGAAGCACGCCTGAAGGCCGAC  
TTCGCGCTGGATCTGCCGCTGCAGCAGTGGCTGGCGGAAGATGACAAGCTGTATGAAGAGAAGCTGCGCG  
AGCGCATTCTGGACGAAGCCACCAAGCTCTATGCCACAAAGGAAAGAGCTGGTCGGCAAAGAGGTGCTGCG  
CAACTTCGAGAAAGCGGTGATGCTACAACTCTGGATGGTCTGTGGAAGAGCATCTGGCCGCCATGGAT  
CACCTGCGTCAGGGCATCCATCTGCGCGGCTACGCCAGAAGAACCCCAAGCAGGAGTACAAGCGCGAAT  
CCTTCGATCTGTTACCCAGATGCTGGAACCCCTCAAGCGCGACGTGGTCAGCATCCTGAGCCGTGTTCA  
GGTGCAGGAGCGCGATGTGGAAGCGATGGAAGAGCAGCAGCGCCAGCAGGCGGAAGCCGTCCTCCCGTACC  
TATACCCACGCCGCTGCCGAGAGCCAGCTGGCCGATGAACAGGCGCAGGCGAAGAGGGCCACACCACCT  
TCGTACGCGACGAGCAGAAGGTCGGTCGCAACGATCCCTGCCCGTTCGGGTTCCGGCAAGAAGTACAAGCA  
CTGCCACGGTCAGTTGACCTGATCGACGCTATGCCATAACAGGCGGGCCAAGTGCCCGCCTTGTTATTGG  
TGGCAACAAGCGAACAGAGGTAATTGATGGAACAGAAAAACGGATCTGGGTGGCGGTTGGCGTCATCGA  
GAATGAACGGGGCGATATCTTCATCGCCAGACGCTCCTCCGATCGCCATCAGGGGGATCGCTGGGAGTTT  
CCCGGTGGCAAGGTTGAGTCCGGTGAGGATCTGCTCACC GCGCTGGATCGGGAGCTGTGGGAAGAGATCG  
GCATCCGGGTATTGGATTGTGCTCCCTTCATGGAACGCAACACGACTACCCGGAGAAGCAGGTATTGCT  
GGATATCTGGAAGGTGACTCGTTTTAGCGGTGAGCCGTTCCGCAAGAGGGGGCAGGAGTGCCGTGTTGGTG  
CCGGTGGCCGAGCTGAACAACACTACCCTTCCCGATGCCAATGGCCGATTGTAGCGCGGCTACAGGGTC  
TGCTGGCGTGAGCCGGTAGCAATCAACAAGCATGAAAAAGGGCCAATCGGCCCTTTTTTCATATTGCAGA  
GATGAGTGACCAAGGGCTTACAGCCACTGATCGCCCTCTTCCGGCTCCGGCAGCAGATCCGGGTTGATCT  
CCCCCGGGATCCGCTTCTTTCATCGGCCCATTCGCCGAGATCGATCAGCTGGCAGCGCTTGCTGCAGAA  
GGGGCGGAACGGACTCTGCGGGCCCCATTCCACTTCGCTCTGACAGGTCGGACACTTTACCTTGGTGACC  
ATAAGCCCTCCTTAGCAGCAGGCGAGCTGGAACGGCACGTCGCCAATCGGCTGTTCGCGGTGGGCAGAA  
AGCGCAGGGCGAAACGGTTCTTGTGGCCGCTCAGGGTCGGGTAGCAGAACAGATTGCCCGGCAGCTTGAT  
GCGGATCAGCTCGGCGCTTTCGGCGGTGTCCTGGAAGAAACCGTTGCTGGCAACCTGCTCACTGAAGCTG  
CCTGATTCGCGCCACAGGCGCAGCAGAGTGATGGCATTTCATCAGCAGATTGATATCGCTCAGCCAGC  
CCTGCATCTGCTGTTGACGGGTGATGGCCGGGTACCGAGCCAGTGTTGCAGCTGCGGCACATCGAAGGC  
ACACAGACCACCCGGGATGGAGAAGCGCTGGCGGATGGAGCCGAGCAGACGATCCTCTTTAGCGGGGCA  
CCCGGGCGTGGCGAGTTGAGCAGGTTGCGGGAGAGCTGGCTGCTCTCTTGCTGCATCAGTTTGATCTGCT  
CCAGATCGACATCGGGCAGGCTGGCCAGTGGCTCAGACGCTGGCCGAGACGTTCCAGATCCTTGATGAG  
GTCGGCTCGCAGGTCACCACGCTCCAGCAACTCCTGAAGATCGAACAGCCCCCTTGAAGAAGGCGATATGT  
GCCCAGGATTGTTCACTCTCCAGATTGTGCGGGATCTGGGAAAAACAGGACTCCAGACGAAGATAGGTCC  
GGCTTTTTTTCATTGAGGGGAAATCGTAAATCATGCCTAATCCTAGCCAGCCATAAACCGGCCTAGTGTA  
CTCACACTTGGCGGGCTTGTGAGAGGCAATTGCCAGATATGTCCTGTCAGCGCCAAAATCCGCGTTTTT  
AATCGCCATTTGCTGCCATTGTTGTTTTGATGACATCATCCGCCGAGCGAGACGCTCCGACCGGCTC  
GCCTGAGCGGGGATGATGGCCCGGGCCTGCTCGGCCGATACCCCATCCCGCGGCAGGTACGCTCAATCT  
GGGTGGCTTCGTCCACATCGATCACCACACCCGGTTGGCGAGGCGGTGAGTTTGTCTCCACCAGCAG  
TGGCACCAACAGCAGGCAAGGAGAAGTGGCCGCGGCACATTGGCGCAGCATTTTCGCTGCGAATCAGC  
GGGTGGAGCAGGGCATTGAGCCACTCCTTGGCCTGTGGATCGCTGAAGACCCGCTCGCGCAGGGCACGAC  
GGTGCAGTTGACCGCTCGGATCAATCACATTCCGGGCCAAAATGGTCCGGCGATGGCGGCAAGGGCCGGGT  
ACCCGGCTCGACCACTTCGCGGGCGATCACATCGGCATCCACCACCTCGATACCCAGCGCGGCAAACTGA  
TTGGCGATAGTGGTCTTGCCGCTGCCGATACCACTGTGATAGCAACTACATGCATGGGGCCCTCTTGCT  
CAAAGCAGGGTAGAGAGATAACAGCGGGTGATGGTATCGCCCCATAGCAGGGCGATCCAGCCCGGATGG  
CGAGGTAGGGGCCAAGGGGATGGGCTTGCCTGATGATGTTTTTGCAAGGCATCAGGCTGATACCGAT  
CACTGCGCCGACCGGGATGAGAGCAGCAGAATAATGGCAGCGCTGCCAACGAGCCAGGCGCCAGG  
GCTGCCAGCAGCTTGAAGTCGCCATAGCCCATCCCTCCTTGCCAGTCAGCAGCTTGAAGGCCAGTAGA  
GACTCCAGAGCACCAGATAGCCCGCCATTGCGCCAATTACGGCATCAGCCAGCGGCACGAAGCCACCTGC  
CAGGTTGAACAGCAGTCCGCCCCACAGCAGTGGCAGGGTGAGCTGGTCCGGCAGCAACATCTTGTCGAGA  
TCGATAAAGGTGAGGGCGACCAGCACCAGGTGAGCAGCAGAGCAGCCAGCGTGCCCCAGCCGGCGTTA  
TGACCATGGCAACGGCCACCAGAGCAGGGCGGTGAGCAGCTCCACCAGCGGATAGCGGGCCGAGATGGG  
GGCCTGACAGTCGCGGCAACGCCCTTTGAGCCAGAGCCAGCTCAGCAGCGGGATGTTCTCCAGCGCAGTG  
ATGGCGTGGCCACAGTGAGGGCATGCGGAGCGTGGCACCATCAGGTTGTAGCGATCTGCAACAGTGGCCT  
CCTCATCGGGGAAAAGTAGCCGCGATACTCGGTCTGCCACTCCCGCTCCAGCATGATGGGCAAACGGTG  
GATGACCACGTTGAGGAAGCTGCCGATCATCAGGGAGAAGAGAAAAACCAGCGAGAAGTAGAGCCAGGGC  
AAGCCGTGAGCCAGCTCGAGAAGAAGTGTACATAACCAACCGTCAGTCATTAAATGAGGGGGAGGGCATGG  
CGGTGGCGCCATGCCCTGATGAATCAGCCTACCACGTCGCCAAGCTTGAAGATGGGCAGGTACATGGCGA  
TAACCATGCCCGGACCAGCACCACCGAGCACCACCATGATGAGGGGTTCCAGCAGGCTGGTGAGGCCATC  
GACCAGATCATCCACTCCTGTTTGAAGATGGTGGCGACCTTGGAGAGCATATCATCGATGGCGCCGGAC  
TCCTCACCGATCATACCATCTGGATCACCATGTCCGGGAAGAGATCGACGGTGCAGATTGCAACGTTGA  
TCTGCATACCGGCCACCACCTCGTTGCGGATCGCCATGACCGGGTGCATAGACATAGTTGCCCGAGGC

CCCTGCTGCCGAAATCAGCGCATCCACCAGCGGGATACCGCGGAGAAGGTGGTCGACAAAAGTACGGGCA  
AAGCGGGCCATCGCCGCTTGTGCAGGATCATCCCGACCACCGGAATGGTGAGGACGAACCTGTCCGGTAT  
TGTCTTTCACCTTCTGGGAGGCCCGCCAGGCCCGACATAGAGGAAGATGCCAAGGGCGGTGCCACCAA  
GAAGACATAACCAGTTCTGCATGAAGCGGGAGATGCCGATAACAAACTGGGTGAACACCGGCAGCTCG  
GCACCGAAGCTCTTGAAGATATCCTCGAACTGCGGAATGACGAACAGCAGCAGGATAGAGGTGACCACGA  
TGGCGACCAGAATGACCATGGTGGGGTAGAACATCGCCTTCTTGATCTTCGACTTGAGCGCTTCCGACTT  
TTCCCGGTAAGTGGCGATACGGTTCGTAGATGGTCTCCAGTGCACCGGATTGCTCACCAGGCTTCCACCAGA  
TCGCAATAGAGATCATCAAAGTAGAGGGGATGGCGGCGCAGTGCCTCCGACATGGGGGTACCGGTCTCCA  
CATCGGCGGCAATCTGCCCCATCAGCTCGCGCATCGAGGCTTCTCATGGCTGCGGGCGATGATCTGCAG  
GCTCTGCACCAGCGGTACACCGCGGAGAGCATGGTAGTTATTTGGCGTGAGACGATGGCGATATCCATC  
GGTTTGATCTTGGCGCCCTTGGAGAAGAGCCCCCTGGGATTTCTTGCTACCTTGGTGACGTTGACATC  
CCTGCTTGCAGTTCGGTCTTGACGGTGTGTGATGCTGTGCGGCTGCAGCTCGCCGGAGACCTTCTGCC  
CTTGCGATTAACCCCGTGCCAGCGGAAGGCGAAGACTTTCTTGGGGGCATTGTTCTTTTTCTTGGGTT  
GCCATCTTTGCATCCTGCAATGGGGTTAGTTGTGCAGAGTCGGACTCTGCACGTCACCAACCTGGTCAAGG  
TGCCCGACTGGCTTGATGCCTGCGGGTACTGATAGGGTGGGTGTTACCTTCTTGGCGCCAGCCCGGTCA  
CTTTAATGCCTGATTATTCTGTCAATCGGGCTGTCACTATTCCGTGTTTCGTGAACGACGAATTCGCTCT  
GCCAACCACCGCGGGTTCGTTCCGCACACGGATCAGTTGGTGGTGACCCGGTTGACCTCGGCCAGACT  
GGTGACCCCGAGCCGAGCCTTCTCCAGTCCCGAGGTACGTAAGGTACGCATCCCCTCTTTCTGCGCGATA  
GCAGCGATTTGCAGGGAGTTGGCCCCCTGCATGATTAATTTGGCGATGTTTTCCGACATCAGCATGATTT  
CGTATATGCCGACCCGCCCCCTTGTAGCCGCCGAACACTCCTTGCAGCCAGCGTTTGAACAGTCGCAG  
TCCGGCTGCCAGCTGCTGCGGCGTAAAGCCAGCTCCAGCAGTTCGGCTTCCGGCACCACCTCCGGCGCT  
TTGCAGTGGTTCGACAGTTTACGGGCCAACCCTGGGCCATGATCAGGGTACCCGAGGAGGCGATGTTGA  
AGGCCGGAACCCCATGTTTCATCATCCGGGTACGGGTCTCGGCGGCGGAGTTGGTATGCAGGGTGGATAG  
CACCAGGTGGCCGGTCTGTGCCGCTTGATGGCGATTTCCGGCGGTTTCGAGATCGCGAATTTACCCACC  
ATCACACATCCGGGTCTTGCCGAAAAAGGAGCGCAGGGCACTGGCGAAGGTGAGCCCCGCTTGGGGT  
TGACCTGCACCTGGTTGACGCCGGCAGGTTGATCTCCACCGGATCTTCGGCGGTAGAGATAATTTACCTC  
GGTGGTGTGAGAATATTGAGCCGGTATAGAGCGAGACCGTCTTGCCGAGCCGGTGGGGCCGGTACCC  
AGGATCATCCCCTGTGGCTTGGAGAGGGCGCGCAGGTACTGCGCTTCTGCCGGTCAACAAAGCCGAGTT  
GCTCGATATTAAGCCGTGCCGCCGAGGAGTCGAGCAGCTGATAACAATCTTCTCCCCACATGGTGGG  
CAGGGTATTAACCCGCATATCCATCGACTTGTGCGCGACAGCTTCAGCTTGATGCGGCCATCCTGTGGC  
AGCCGCCGCTCGGCAATATCGAGCCGCGCCATGACCTTGAAGCGGGCGGAGAAGCGGTTGGAGAGGTTGA  
CCGGCGGCGTAGCGATTTTCATGCAGAATGCCGTGCATGCGAAAAGCGGACCCGATACTTGAACCTCATAGGG  
CTCGAAGTGCAGGTTCGAGGCCACCGCGCTTGATGGCGTCCATCAGGATCTTGTGATGTACTTGACGATG  
GGAGCATCGTCATCGGCGGTATTGACGCTTTCGTCCAGCCGACTGTTTTCGTCCGATAACCTCGAGATCCG  
AAATCTCGGATTCGTGCATATCCTCCATGCCGAGGGCGTCTTTTTCGTCTCCAGCAGCTTGCCGATGGC  
GGCGGTGAGCTTGTCTCCTCCACCAGCAGGGCTTCAGTATGAAGACCGAAGCTGAAGCCGAAGTCTCC  
AACGCCGAGACATTTGGTCCGATCCGACATGGCGATATAGAGGGTGTGGCCCTGGGTGTAGATGGGCAGGA  
CGTGGTGTCTCAATCAGCTTCTGATTGAGGTACTTCTGCGGGATCTCGGCCAAATCAAAGGCGGCAAG  
ATCCAGCAGAGGTACCCCATACTCCAGCTCGCAAAAATCGGCGAGCGCCTTGCTGTGCGAGGATCTCGTTC  
TCTATCAGAAATGTCACAAAGGGTTTTGCGCTGGGCTTGGCCTGGCTCAGATAGCGCTGGGAGTCTCTT  
CACTGATCAGTGAAGAGGGCGGCCAGGCTTAACGCCAGGCCGCTATTAGGGCTAGAGGTATGCTATAGCT  
TTAGCAGAGGCCACTCGTTTTGAGGCCCCAGATGCTGCCCATGTTACTTTGCCATCAGTTTCAACACTC  
GGTGTAAAGATATATGTCATGCCAGTACAAAAGTAGCTTCTTTACCGGTTGCGGTTATAGCGTTGGTTG  
TATCACTTACCTCAACACTTTTAACTCTCCTGTCCAGCTGTAAGATTGGAGGGTACACCATTGGACCC  
CGCATCACAGGTGCTTAGTGTCTCCGAGGCTGCACCTGTTGTTTGCACAAAATTTCAATTGCAGTTTTA  
TAAGTCCAGTAGCCGCTACTTTCAGTAAACTTAGCTTTTTTGGTGTAGGTCTGGTACGCCGGCAGTGTG  
CTACTGCCGCCAGAATGGCCACGATCGCGACCACGATCATCAGTTCAATAAGGGTAAAACCCGATTGTTT  
CTTCATTTTCGCTCTTCATGGAATAATCCTTTTTATCCTTGGTTTCTGGGAAGTGTGCGGTGGAATAATC  
CGCACGTCAGTATCTTATCCGAGCTGTGAGGGGTGGCAACAGAGATTGCTGCCTTTGTTAACTACTTTCA  
TGTCATTTACAAAAAATTTGATGCGAGTCATAAAAATAAGTGGCTTCTTATGACTCTTTGTTACGGGTGAA  
GGCGGGTCCGTCATCACACTCCTTTGCTGAGGGATTCTGCATAAAAGAAAAGGCGCCTATGGCGCCTTTTG  
CAAGTCTGTTTATCCGGTTAGGTTCGAGTATTTGCTCAGGCCGCGGGGTGAATCTCACTGCTGGATAAAGC  
GCATGGAGAGATCGAGCGCCCGTACATGCTTGGTTCAGCGCCCGACAGAGATAAAAATCGACACCGGTGGC  
GGCAAACTCGGCCAGAGTATCCAGCGTCACATTGCCGAAACTTCGAGCTTGGCGCGGCCCTGATTGATG  
GCGACCGCTTCCCGCATCATGGCAACATCGAAGTTGTCCAGCATCACGATATCGGCCCTTTGCCGCCAGCG  
CCTGCTCCAGTTCTGCCAGCGATTCCACTTCCACCTCCACCGGTTTGGCCGATTGAGATGACGAGCCTC  
ATTAATCGCCTCGGCAATGCCGCCGAGGCGAGGATGTGGTTTTCTTTGATGAGATAGGCGTTCGTAGAGA  
CCGATGCGGTGATTCTTGCCGCCGCCGAGGTGACTGCGTACTTCTGGGCGGTACGCAGCCCCGGTATGG  
TCTTGCGGGTGTGAGCAGGCGGCAGTCAGTGCCTTCCAGCTCTGCCACATAGCGGGCGGTGAGGGTGGC  
GACGCTGAGAGGGTCTGGACAAAGTTTCCAGCGATTGCGCTCGCCGGTTCAGCAGTAGGCGGGCAGGGCCA  
TGGAGGCGGAACAGCTCCTGATTGGGGGAGAGCACTTCCCATCCTGCACCAGCCACTCCACCTTCACTT

CGCCACCGAGCTGGGCCTTCAGTTGCAGGAAGACTTCATCCACCAGGGCTGGCCGCAGAATACTCCTGC  
TTCACGGGTGATGACCCGGGCGCTGGCCATCCGGTCGGCCGGATCAGCTGTGCGGTGATATCGGCGCTG  
GCGTCCGGTTGGTCCAGCGTGGTGAGGGCATTGCCAGATCTTCGAGTAGTGCGGCGCGCACGGCGCGGC  
TGACATCCTGTTGAAACATGCCTTATTCTGCAAGGGTCTGAGCAGCAGTTGCCGCTCCTTTTGAACCAG  
CTCCAGCCGACCGAGGGCGTTTCATGCCAACCAGCACTTCGTCACCGTCTGCCGCCGGATTGATAAAGATG  
GCCAGATCGTACAAGGTCAATGGCCCCATCGCCAGCGTTTCGATGGTGCCGTTGCCAACC CGGATCTGCC  
CTGCGGGCGGTATTGACCTGGCTGCTGCCATAAGCGGTGAGGCCGAGCCGCTCGGCAACCTGCTGCGGGAT  
GGTGATACGGGTGGCGCCGGTATCGAGCAGCAGTTGCACCGGCTGGCCGTTGATGGCACCCCTCCAGACGA  
TAGTGGCCGCTCTGGTCGGCCCCGAGCAGCAGCTCGCCGCTGGCCGTTGACGCTTGGTTGGTTGCGGGAGT  
GAAAATAGAGGGTCAGCAGGCCCCATCAAAGACAGCCAGGCCAGTAACCACATCCAGCGTGCCGTGTGCTG  
CATACCCCATCCATATCGAGCGGAAGATGACTCAGCCTAACATACCATTTCCTCGTTGATTCAGTGAGTTG  
GTGCTGGGTTGCCTATCAGGTATCTTCGTTTTCTCGCCATTTATCAGCCAACTCGAGTAGCCGATGACTC  
AACTTGCTTCGCAACCTTTTTTCTCTATCGATGCCGAGGCTGGTGCCAGCAGGCGCGCCGGTGCCTTC  
TCCCCATCACAACGAACGGGCGAGCCGGATGATATCTCCCTGCTGGTGGTTTCATGGCATCAGCCTGCCG  
CCGGGGGAGTTCCGTGGCCCCCTTTATCGACGATCTCTTTATGGGGAGACTCGACCCCGAGGCTCACCCCT  
ATTTTGCCGGTATCCATCAGTTGCGGGTCTCGGCACACTGCCTGATCCGCCGTGATGGCGAGCTGGTGCA  
GTATGTGCCGTTCCGGCGCGCGCCTGGCATGCAGGTGTCTCGAGCTGGCAGGGGAGGGAGGCATGCAAT  
GACTTCTCCATCGGCATCGAGCTGGAAGGGACTGACGAAAATCCCTATAACCGAGGCTCAATACCGGGCGC  
TGGTGGGGCTCACCCGAGCCATTTTCGGAGCGCTATCCGGCGATTACCCACGAAAAAATTTGTCGGCCATTG  
CGATATCGCGCCAGGGCGCAAGACGGATCCCGGAGCCAGTTTTCAGTGGGATTACTACCGGCAATTACTA  
AACAGCTAAAGTAAATATTCAAATTTAGTTTGGATTTTAAAAATCAATGGCTTGCCATCTGGCAGGCCAT  
TTTTGTCTCTGGTTGCGCAAATGTTATTTGTGAGCGAGGTCAAGAATATTTGGTCAGACCATTTTCTATGA  
GCTAAATCATGTTTTCCCTGCTTTACCTCTTAAGTGGTGGGGCTGATTCCTTGACTCAGATCATTTTTGA  
GTGGACTTTTTCAAAGGCCTCTGCTAATTTTCGCCCCATCCATAAAATTTGGTAATACCAATTTAACAAAG  
TAGCCTCATGCCCTATCGCAAGATTACGCAACCCAAGTTGGCCGACTCCATTTGTCGCCGAGCTGGAACAG  
ATGATTCTGGAAGGCAGCCTGCAGCCGGGCGAGAAATTCCTCCGAGCGGGAACCTGGCCATCCAGTTTC  
AGGTATCGCGCCCTCCCTGCGCGAAGCCATCCAGCGACTGGAAGCGCGCGGATTGCTTTATCGCCGTC  
GGGCGGGCGCACTTATGTCAGAAATGCCCTGAGCAAGGGGATCGCCGATCCTCTGTTGCAACTCTCAGT  
ACCCACCCGAAGCCAGTATGATCTGCTGGAGTTTCGCCACGCGTTGGAAGGCATCTGTGCCCTACTACG  
CGGCCTTTCGGGGAAACCGGTCTGATTTTCGAGCGCATTTCGTCAGGTGCAAACCACCATCGAAGAGGCGGG  
CCAGCTGGGCTCGCTGGTGGCCGAGTCGGCAGCCGTGACCCAGTTCTATCTGGCGGTGGCCGAGGCGTCC  
CACAACGTGGTGCTGCTGCACCTGCTGCGGGCCATGAGCCCGATGCTCGAACAGAACATTTCTGCAGAATA  
ACGAGATTTTGAATCGCCGCCCGGGAGTGGTAGCCAAGATACGTCGCCATCGCGCGAATCTGATCGAGGC  
TATTCTTTTCGGGGGCTCCGGAGCGGGCCAGAACAGCTTGTTCATGAGCATCTGGCCTTTATCGAGGACACC  
TTGTTGGATATGCAGAGGGAAGACAGCCGGATCCAGCGATCCATGCGTCGGATCCGTCAGCAGGAAAACCT  
AATCCCACAAGGCTCTATTGTGCAATGCTTGCGCCCTTCGCCGTGCAATGCCGTGCAATCACAACAACAT  
AGGAACCAGCCATGTCTGATATCCTGAAGAACGATGTGGACCCGATAGAAACGCTGGAGTGGCTTGCCCTC  
TCTGGAATCCCTGCTGCGTGAAGAGGGTCCGCAACGCGCTCAGTTTCATCCTTGAACAGTTGGCCGAGAAA  
GCCCCGCTAAGCGGTGTGGACGTGGCTGCCAAGGCAAAATCGCGATTACATCAACACCATCCCGTCCAGCG  
ATGAGCCGGACTACCCGGGTGACCTGGAGATGGAACGCCGCAATTCGCGCCATCATCCGCTGGAACGCCAT  
GATGATCGTGCTGCGCGCGTCCAAGAAAAGACCTGGACCTGGGTGGTACATGTCTTCCCTTCGCTTCTTCT  
GCGACCATCTATGATGTCTGCTTCAACCACTTCTTCCGTGCTCGCAACGAGAAGGATGGTGGCGATCTGG  
TTTACTTCCAGGGTCATATCTCCCCGGGCATCTATGCTCGCGCTTTGCTGAAGGTCGTCGACCGAAGA  
GCAGCTGGACAACCTCCGTCAGGAAGTGGACGGCAAGGGTATCCCTTCCTATCCGCACCCGAAACTGATG  
CCGGACTTCTGGCAGTTCCCGACCGTATCCATGGGTCTGGGCCCCATCGCCGCCATCTATCAGGCTCGCT  
TCCTGAAGTACCTGACCGACCGTGGTATCAAGGATTGCTCCGAGCAGACCGTTTACGCCTTCTGGGTGA  
CGGCGAGATGGACGAGCCGGAAGCCAAGGGTGCCTGACTGTTGCCGTGCGTGAAAAGCTCGACAACCTG  
GTGTTTGTGGTCAACTGCAACCTGCAGCGTCTGGATGGTCCGGTTGTGCGTAACGGCAAGGTTCATCAACG  
AGCTGGAAGGCCTGTTTGGTGGCGCCGGTTGGGATGTCACCAAGGTCATCTGGGGTTCGCAAGTGGGATGA  
GCTGCTGAAGAAAGACACTTCCGGCAAGCTGATCCAGCTGATGAACGAGACCGTGGACGGTGACTACCGAG  
ACCATGAAGTCCCGCGACGGTGGCTACATCCGCGAGCACTTCTTCAACCGTTATCCGGAAACTGCCGCGC  
TGGTCAAAGACATGACCGACGAGGAGATCTTCGCTCTGAACCGCGGTGGTACGATCCTCGCAAACCTGTT  
CGCTGCATTCAAACAAGGCGACCCAGACCAAGGGTAAGCCGACCGTTATTTCTGGCCAAGACCATCAAGGGT  
TACGGCATGGGTGAAGCGGCCGAAGGCAAGAACATCGCTCACCAGGTCAAGAAGATGGAGCTGGACTCCG  
TGCGTCACCTGCGTGACCGCTTCAACCTGCCGGTGGCCGACGAGCAGCTGGCCGATCTGCCCTTACCTGAA  
GATCGAAGCCGGTTCTGCCGAGCACAAATACCTGCACGACCGTCGCACTGCCCTGAAAGGCTATGTGCCG  
ACCCGTCTGCGTGAAAGCACCACCAAGCTGGAAAATCCCGGCGCTGGATGCCTTCGGTCCGCTGCTGGGTG  
AGCAGGCGCGGAAAATCTCCACCACCATGGCGTTTCGTGCGTTCCCTGAACGTGATGCTGAAAGACAAGTC  
CATCGGCAAGCGCATCGTTCCGATCCTCGCTGACGAAGCCGTACCTTCGGTATGGAAGGTCGTTCCGC  
CAGATCGGTATCTACAGCCCGCACGGTCAGCAGTACCCCCGCAAGACCGCGACATCGTCTCTACTACA  
AGGAAGACAAGCAGGGTCAGGTTCTGCAAGACGGTATCAACGAGCTGGGCGCCATGTCTCTGGCTGGC

TGCTGCGACCTCTTACAGCACCAACGACTGCCGATGATCCCGTTCTACATCTACTACTCCATGTTCCGGC  
TTCCAGCGGATCGGCGACATGGCGTGGGCAGCCGGTGACCAGCAAGCCGTGGCTTCCTGCTGGGTGCAA  
CCTCCGGTTCGTACTACCCTGAACGGCGAAGGTCTGCAGCACGAAGATGGTCACAGCCACATCCTGGCGAA  
CACCATCCCGAAGTGCATCTCTACGATCCGTCTACGCCATGAAGTGGCGGTGATCGTACAGGACGGC  
CTGCGCCGCATGTACGGTGTAGAACCCGGAGAACGTGTTCTACTACATCACCACCCTGAACGAGAACTACG  
CCATGCCGGCCATGCCGGAAGGCGCCGAGGAAGGCATCCGCAAGGGTATCTACAAGCTGGAATCCGTGCG  
CGGTGCCAAAGCGAAAGTTCAGCTGCTGGGTGTGGTTCATCTTGGGTACAGTGGCGCAAGGCTGCCAG  
ATCCTGGCCAGCGAGTACGGCATCGGTTCCGATGTGTTACAGCTCACCTCCTTCAACGAGCTGGCTCGTG  
ACGGTCAGGACGCGGATCGCTGGAACATGCTGCACCCGACCTCTGAGGCGCGTGTTCCTACATCGCTCA  
GGTACTGGGTTCGGAAGCCACCATCGCTGCGACTGACTACATGAAGTCCCTTCGCCGATCAGGTTCCGCGC  
TTCGTTCCGACCCGAGAACTACCCGCTGCTGGTACCGGTTACGCGCCGTTCGACAGCCGTCGCCAAC  
TGCGTTCGTCACCTTCAAGTGAACGAGTTCACGTGGTGTGCTGCTTTGACCGAAGTGGCCAAGCGCGG  
CGAGGTAGACAAGCAGGTTGTGGCCGACGCCATCGCCAAGTACGGCATCGATGCCGACAAGGTCAACCCG  
CTGTACCGGTAAGTGGATCAAGGGTTCGCGCCGTATGACGGCGCGACCCCGCCAGGATTTAAAACGGTTAA  
CGCGAGATGTGCGTGGCGGCATCAGCCAGTACCGCGGATCGACGCAAGAGGATAAAGCACAATGTCCAAA  
CAGATTATGGTGCCGATATCGCGCCGATGAAGTTGAAGTCACCGAGATCATGGTGGCCGTGGGTGATA  
AGGTCGAGCTGGACCAGTCCATCATCGCGGTAGAAGGCGACAAGGCTCCATGGAAGTTCGGGCCCGCTC  
CGCCGGTATCGTCAAAGAGGTCCTGATCAAGGTGGGCGACAAGGTTGCCACCGGTTCCCAGATCATGATC  
TTCGAAGCCGAAGGCGCTGCCGCCCTGCTGAAGTGGCTGCACCGGTTGCTGCTCCGCCGCCGCACCTG  
CCGCTGCCGTGCCGAAAGATGTGCACGTGCCGGACATCGGTGATGACGAAGTGGACGTGACTGAAATCAT  
GGTTGCCGTGGGCGACATGGTTGAAGCCGACCAATCCATCATCGCCGTGGAAGGTGACAAGGCTCCATG  
GAAGTGCCGGCTCCGTTTCGACAGGTCGCGTGGTTCGAGATCAAGGTTGCCGCTGGCGCCAAGGTCTCTACC  
GTTCTCTGGTGTATGTTTGAAGTGGCTGGCGCTGCTCCTGCTGCCGTTGCTGCTCCGGCTCAAGCTGC  
CGCGCCCGTGGCTGCTGCCCCGGTTGCCGCCGCTGCCAAAAGGTTCAACGTACCGGATATCGGTGGCGAC  
GAAGTGAAGTACCGAGATCATGGTTGCGGTGGGTGACAAGGTTGAAGCCGACCAAGTCCCTGATCGCCG  
TGGAAGGTGACAAGGCTCCATGGAAGTGCCTGCGCCGTTCCGCCGTGTGGTCAAAGAGATCAAGGTGAA  
GGCGGGTGACAAGGTTCCACCCGGTTCCTGATCATGGTATTCGAAGTGGCTGGCGCTGCTCCTGCCGCC  
GCGCCGGTTGCTCAAGCTGCCGCCCGGTCGCTGACGACCCCTGTTGCCGCTGCTCCGGCTCCGGTACGCC  
AGGCTGCTGCCGCTGCGACCGGATTCGTTGCGTGCACGACCCCTACGTGCACGCTCTCCGGCGGTACGCC  
TCTGGCGCGAGTTCCGGCTCAACCTGGCCAAGGTGAAAGCTTCCGGTTCGCAAGGTCGTATCGTCAAAA  
GAAGACGTGCAAGCCTACGTGAAGGATGCCATCAAGCGTGCCGAGTCCGCACCTGCCCTCTGCCGGCGTAG  
CCGGTGGCAACGGTCTGGGCGTACTGCCGTGGCCGAAAAGTAGACTTCAGCAAGTTCGGTGTATGGAAGA  
GGTTCGAGCTGACCCGCATCCAGAAGATCTCCGGTCCGAACCTGCACCGCAACTGGGTTCATGATCCCTCAT  
GTCACCCAGTTCGACGAAGCCGATAACCACTGAGCTGGAAGCGTTCGCAAAAGAGCAGAATGCGATGCTCG  
AGAAGCAGAAGGCAGACGTGAAGATCACCCGCTGGTGTTCATCCTGAAAGCCGCCCAAGGCACCTGGA  
AGCTCACCCACGCTTCTGCAGTTCCTGTCCGAAGATGGCAGCAAGCTGATCATGAAGAAGTACATCCAC  
ATCGGTGTGGCGGTAGATAACCCCAACGGTCTGGTGTGCGCCGTGGTGCAGATGTTAAACAAGAAGGGCA  
TCATGGAGCTGTCTCGCGATCTGGCCGAGATCTCCAAGAAGGCCCGTGCCGGCAAGCTGACCGCTGCCGA  
CATGCAGGGCGGTTGCTTACCATCTCCAGCCTGGGTGGCATCGGCCGTACCAGCTTTACCCCGATCGTC  
AACCGCGCCGGAAGTGGCCATCCTCGGTGTTTCCAAGTCCGAGATGAAGCCGAAAGTGAACGGTAAAGAGT  
TCGCGCCGCGCCTGATGCTGCCGCTGGCTCTGAGCTACGACCACCGCTGATCGATGGTGGCGATGGGGC  
TCGCTTCATCACCACCATGAACGGCGTGTGTCGACATTCGTCGACTGGTCCGTGAAGTGAAGGGCGG  
GCCCAGAGCCTGCCCTTTTACTTCTCATTTCATTAACATGATCGTAAACTTGCCCGTTTTTTTTACGG  
CTGCAGCCACCCGTTTCGGTATAAGACTGCGCTGTCCGGGGATATAAGAACGACAAAGAGGTTCATGATGA  
GTAAAGAAATCAAACCCAGGTCGTAGTACTGGGTGCTGGCCCTGCCGTTTATCCGCTGCTTTCCGTGC  
AGCCGATCTGGGTCTGGATACTATTATCGTGCAGCGTTACTCCACCCCTGGGTGGCGTCTGCCTGAACGTG  
GGTGCATCCCTCCAAGGCGCTGCTGCACGTTGCCAAAAGTATTGAAGAAGCCAAGGCGCTGGCCGAGC  
ACGGCATTGTCTTCGGTGCACCCGACGACATCGACAAGATCCGCTCTGTGGAAGAGAAGGTTATCAA  
CCAGCTGACCGGCGGTCTGGCTGGCATGGCCAAGATGCGTAAAGTTCAGGTTGTTAACGGCTTGGGTAAA  
TTTACCGGCCCGAACACCCTTGAAGTGAAGGTGCAGACGGCAAGACTACCGTGACCTTCGACAACGCCA  
TCATCGCGGCCGTTCCCGTCCGGTGAACCTGCCGTTTCATCCCCACGATGACCCGCGCGTATGGGACTC  
TACCGATGCGCTGGAGCTGAAAACCGTTCGCCGCAAACTGCTGGTTATCGGTGGCGGCATCATCGGTCTG  
GAGATGGGTACCGTTTACTCCTCTCTGGGTTCCGAGATCGACGTGGTGGAAATTTGCCGACCAGCTGGTTC  
CGGCTGCCGACAAAGACATCGTCAAGATCTACACCAAGCGCTCGCCAAGAAATTC AACATCATGCTGGA  
GACCAAGGTACCCGAGTTGAAGCGCGCAAGACGGCCTGTACGTCTCCTACGAAGGCAAACACGCCCCG  
GCCGAGCCGGTTCGTTACGACAACGTGCTGGTTGCCGTAGGCCGTGTCGCCGAACGGCAAGATGCTGGATG  
CCGAGAAGGCAGGCGTTGCCGTGACCGAGCGCGGTTTCATCGAGGTGGACAAGCAGCTGCGTACCAACGT  
GGCCACATCCACGCCATCGGTGACATCGTGGGTGACCCGATGCTGGCGCACAAAGGTGTTACGAAGGT  
CACGTTGCCGCCGAAGTATCGCTGGCAAGAAGCACTACTTCGACCCGAAAGTATCCCGTCCATCGCCT  
ACACCGAGCCAGAGATGGCATGGGTGGTCTGACCGAGAAGGAAGCCAAGCAACAAGGCTGAACCTCGA  
AGTCCGACCTTCCCGTGGGCTGCTTCCGGTTCGCGCCATTCGCTCCGACTGCTCCGACGGTATGACCAAG

CTGATCTTCGACAAGGAGAGCGGCCGTCATCGGTGGTGCCATCGTGGGTACCAACGGTGGTGAACGC  
TGGGTGAAATCGGTCTGGCCATCGAGATGGGTGCTGACGCCGAAGATATCGCGCTGACCATCCACGCTCA  
CCCGACTCTGCACGAGTCCGTGGGTCTGGCTGCCGAAGTCTTCGAAGGCTCCATCACCGACTGCCGAAC  
GCCAAGGCCAAGAAGAAAAAGTAATTTTTCTTCCCCGCTTGTCTAAAAAGCCGCTCGAATGAGCGGCTTTT  
TGTTTTCTCCTTGCTGCCCCGACTTCGACAAAGCCCAATATGCTAAAAGATAGGTTTTGGCACTGACGAGA  
GAGGCACGATGCTAGAAGCACCCATTCCACCCGATGAGGCATTGCGGTTGGAGACCCCTGCGGCGGCTCTC  
TTTGCTCGATTCCGAGGCTGAGGAGCGGTTTGATCGGCTGACCCGCATGGCCCGACGGGTGTTCAATGTC  
CCCATCGCGCTGGTAAGTCTGGTGGATGAAGATCGCCAGTGGTCAAATCCTGCATCGGTCTGGAGGTCC  
GTGAGACTGCCCGGGACATCTCGTTCTGTGGCCACGCCATCATGGGCAATGAGACCTTTATCGTGCCGGA  
TGCTTCGCAAGGATCCCCGCTTTGCCGACAATCCGTTGGTGGTGGGTGGGCCCGGCATCCGCTTCTATGCC  
GGACAGCCACTGCGGATCGCAACGGCTGCAAACCTTGGACACTCTGCATCATCGATACGGTCCGCGGG  
AATTGAGTGAGGAGGATGTGGGGCTGCTCAAGGATCTGGCTGCGATGGTGGTGGTGGGAGCTCGAAGCGGT  
GCAGCTGGCCACCATTGATGAGTTGACCCTGATCTCCAATCGGCCGCGGTTCTGATGCTGGCGGAGAAG  
AGCCTCTCGCTGGCCAGTCTGCTTGCAGATGCCACTGGCACTGCTCTATCTGGATCTCAATGGCTTCAAGG  
GGATCAATGATAGGTGGGGGCATGCAGAAGGGGATCGGGCCCTGATCGTCTTTGCCACTCTGCTCAAGCA  
GGCTTTTCTGTTGGCGCCGACGTGTTTGCCCGCATGGGCGGCGATGAGTTTGGCGTCTGTTGCCAATGTG  
ATGGAGGCGCAGGCGCAACTGGCCTATGAGCGTTTCAATGCCATGTTGGCCGAGCACAATCAGCACAGTG  
GTTGCGGTTATGCGCTGACCTGCAGCACCGGAATTATCTGCTATGACGGGCACGGCTGTGTCTCCCTGGC  
CGAGCTGCTCACCCGCGCGGATGAGCTGATGTATCAGCGCAAACGGGATGGCAAGGGCTGACTGCTATGC  
CGGATTAGCCGCCACAAAACAACAGAGAGCGCCACGGCGCTCTCTGTTGTTGATGGCTTAGATCAAGGT  
CAAGGCCAAGGTTCGGGTCAGAGCCGGAAGTTGCCAACCAGCTTGTCCAGCTGACCGGAGAGCTGCTGCA  
GGCTGCGGCTCGATTTCGGTCAGCTGGTGGGCGATATCGGCCGCTCCATGGTGAGCTGGTTGATATCTTC  
CACGTTGCGGTTGATCTCGCCGACCACACTCGACTGCTCCTCGGTGGCGGTGGCGACCTGGATGTTTCATG  
TCGTTGATCTGGGTGATGTGGGCGGTGATCTGGCCGAGGGCTGCGTTGGCCTCATCGGCCGAGGCTCACC  
CCTCCAGACTCTGGTTACGCCCTGTGCCATGGCGCTGACGGCGCGGGCACTCTGCTCCTGCAAGCGGTT  
GATCATCCCCTGGATCTCTGCGGTTCGAGGCGGCGGAGCGGTTGGCCAGATTGCGCACTTCATCTGCCACC  
ACGGCGAAACCGCGACCCTGTTACCGGCGGAGCGGCTCGATGGCGGCTTCAATGCCAGCAGGTTGG  
TCTGATCCCAGATACTGCGGATGGTTTCGAGGATGCTGCCGATGGAGTCGGTCTGGCTCGCCAGCAGCTC  
GATAAACCCCTGCCACTCTCAATCTCGCCGAGAGCTGACGATGCCGTGGCGCGCTGCGCTACCACCT  
ACTGCCCTGCATCGCCCTGGTTCGTTGGCTTGTCTGGCTACTTCGGCTGCCAGCGAAGCGTTACCGCGCA  
TCTCGCTCACCGTGGCCCCCATTTCGTGGATGGCGGTGGCCACCTGCACAGTGCGGTTCACGCTGGGCAGT  
ACAGTTGTGCTGGGTGAGCTGCGCCTTGTGGCCACCTCGTTGGCGGTGGCCGCGAGCTGGCGGGAGTTC  
TCCGCTACCTGCTCGATGGAGCCGTGGATCTTGGCGACGAAGTTGTTGAAGCCGGTGGCGACCTGACTCA  
GCTCGTACGCCCCTTCCACCTTGGAGCGTGGGTGAGATCACCATCGCCGCTGCCAGCTCCTTGAACAG  
GCGGGCCAACCTCGTTGAGCGGGCGGCTGACCGAGCCTGCCAACAGCATCCCCATCAGCCCCATGGCCAGC  
GCAATCACCAGCGAGATCATCAGGATCTCGTTGCGGGTCTGATCCAGCTCGGCATAGATCTCGGCTTCTG  
GCACCTGGGCCACCAGATAACCAGTCGAGCAGCGGGATATAGCTGCTGGCCAGTACCATGGGCTCGCCATT  
GACTTCGGCGTTGATGACGGCAAAGGGGCGTTTGGCCAGCAGGCTGCCGTTATCACCGCTGGCAATGTTG  
CCAAGTGTGTACGCTCGATGCGATTAGCCTCGGGGTGCAGCTTCACCTTGGCCGCTGCCATCGACCATAA  
AGACGATGCCGCTCTCTTCCAGCCGGAAGTTGGAGACCATGGTCAACCATGGTGTGCGAGGGATTTGGCAAA  
GCCCGCCAGCCCGCGCCCGTTGAGCTGCTGGAAGTTGACGAACAGCTTCACCTCGCCGTTGCTCTCGCGG  
AAGATGCTGAGGGTCATCTCCTTCTGGCTCTTGGTGTAGTCATAGAACCAGGCATCTTGGCTGGGGGTCA  
GGTTGCGCAGAAAGCCATCCTGGTTGTAGTAGGCGGCACTCTGACGATCGGCGAAGGAGGCGGTACCAG  
CCCGTACTGGTTGGCCACATCCTTGGAGCTGGTTGATGAGGATCGGCTCCTGCTCTTTGGGCATGCCCGA  
TCCACCCAGTCGAGGATGAAGCGGTCGGTGGCCAGTTGGCGTGGCGCTGGGCGATGCCGTGGAGATCCT  
GTTCAATCTCCTTGTGATCCGCTGGGTGAGTTGGGGAGCTCCTGTTGAAACATCCGTTTTCGATCAG  
TTGCTGGGCGGAGCGTTGGCTGAAGTAGCCTACCAGCAGGAGGAGACGACCAGGCGGAGGTTGACCGTG  
GCCAGTATTTTTCTGTTTAAAGAGTGAGGGTTGCCAGCATAAAGGTGCTCAAAAGGTTGAGATTGACGACGC  
TCATATTAGCGGCAGCGCGGCTACCCATGAGGCTTGCAGCCCTTTATTTGCGGATTACGTTTGGCGCTC  
ACAGGGGCGGCGGCGTGGCCCTTTCGCCATGCAGCACAGGCGGGATGCGGATTGACGGTTGCGCTAACTGC  
CGGGCCCTTATAGTAGAGGCCATCCTTGGTGACTGACCTCTGAATAATATGGAAAATATGATGCGCAG  
CTTAGGTGCGGGATGGACCCGCTGCTTTTTGGTGATGCTGGCGGCTGCCGCTGCTGGCTGTGGCGGCA  
CAGGGGGAGCGCCCGAAAATTGCGGTGGTGTCTCAGCGGCGGTGGCGCAAGGGATCGGCCCATATCGGCA  
TCCTCAAGATACTGGAGCAGAAACGGATTCCGGTCGACATCATAGTCGGCACCAGCATGGGCTCTTATGT  
GGCGGGGATGTATGCCATGGGGCTCAGTGCCGAGGAGGTGGAACGCACCCTTTGGCCATCGACTGGAAC  
AAGGGGTATCAGGACAAGTTGGCTGCGACGAGCTGTGCTGCGCAAAAAGCAGCAGAACGAGCAGTACC  
AACTGCGCACCGACATCGGGGTGAATGGCGACACCACCCAGCTGCCGGACGGTTTCTTCCAGGGCCAATC  
CATGGCCAGCCTGCTGCGGGGGGCCACCTCCAACCTGCCGGTGCAGGCGAGTTTCGATGATCTCCCCATT  
CCCTACCGCGCCATGGCGACCGACATGGAGACGGTCACCCCTTTGTGCTGGATCACGGCAGCCTTGCCA  
AGGCGATGCAGGCTCAATGTTCAATCCCGGCGCCCTCAAGCCGGTGGAGTGGGAGGGACACATCCTGGC  
GGACGGCGGACGCTCAACAACATGCCGGTGGATGTCGCCAAGGCGATGGGGCTGATGTGGTGATCGCG

GTGGATATCGGTGCCAAGCTGCGTACCCGGGAGTCCCTCAAGTCAGGGTTGGCGATGATCGACCAGCTCA  
CCACCTACATGACCCAGGTGGGTACCGACAAGCAGAAGGCGCTGATGGGGCCCAGGGATATACTGATCGC  
CCCCGAGTTTGGCGATATGGGGATCGCCGACTTTGCCCGGATGCCGAGGGGATCAAGATCGGTGAGACG  
GCGGCTGACAAGGTGTGCTGCAACTCGATAAACTGTGCTCACCAGGCGCAGTACAACGCCTATCGCA  
ACCAGAAGCTGAGCCGCCGTGCCGAGCGTAGCGGTGAGCCCGCTACTTCATCGACAAGGTGGAGATCAT  
CAACAAGTCGCGCCTCTCCGACGAGACGGTGCAGCCATGCTGAAAAGTGGCGCTGACAAGGTGCAGACC  
AACGAGAGTCTGGAAGCGGGCATTGCGCCGCTCTATGCCCTTGAGTCGTTTATCGCATCACCTACGAGG  
TGGAGGAGCGTGATGGTGAGAACGTGCTGCTGGTGGATGCCAGCGAGAAGAACTGGGGGCCGGGCTACCT  
CAACTTCCAGTTCGGTTTACCGATGACTTCGAGAACACCTCCAACCTACAACGTCGGCATGTCCTATACC  
CTCACCAACGTCACAGAGTGGGGTGCCGAGTGGCTGACCGAGGCGTCGCTGGGCACGGCCAAACATATCA  
AGACCGACTTCTATACCCCGCTCGAACCTCCAGACCTTCTATGGTGAGGCGAGTCTGGCCTATGACCA  
GACCCTGCGCCGCTGTTTTTCCCAATCCGGATCCCGAGACGGTTTCGATAAAGCTATCTCGACTCCGAA  
TACTCCTTCTCAGCGCGATCTGGCGGTGGGCTGGAACCGCCAGCCCTGGAGCCGGTTGTGATGGGGC  
TGGAGGGACAACCTGGGCACGATTGATGTGAAGAACTTCAAGGGGCTGGAGATGGATGCCACGGCGTGGGG  
CCCCTATGTCCGCTTTGAACACGACAATCTGGATAGCCGCTATTTCCCTATCAGGGGGTGAATGGGAT  
ATGAAACTGGGCCACTCCACGTCAGTGTGGATGGACTCGAGTCGGCAGATGGCCGAGTGAAGGCTGGA  
ATTATCAGCTCTCGATGATCAAGCCCTGGTCATGGGACAGGCACAGCCTCAACCTGATCCTCGAAGGGGG  
TGGCTCGGGCAGTGAAGAGGTGGTGCCTGCATATCAGGATCTGGGCGGGCTGTTCCGCCTCTCCGGT  
TTCCAACGCTACCAGCTGAGCGGTGCTACAGCCTGTTTGGTGGCTGCGTTACATCTATCGGGTGGCGG  
ACAACGACTTCGGTGCCTCAAGATGCCGCTCTATCTGGGTGGATCTCTGGAGCAGGGCGGGGTCTGGAA  
CAAGGGTGAGGATATCAGTCTGGAGAGCTCGTTTACCGCCGGTTCGCTTTATGTGCGGGTGGAGAGCTTC  
CTCGGCCCTGTGTTCTCGGCTACGGCATGGCGGAGGGGGCAATGACGCTCTTCTATCTGCAATTGGGCA  
GTACGTTTGAATAATGCTGAAAATGATGCCAATTTGTTAACTCTGGTTGAGGGCGTTCAATTAATTTTCAA  
AAAACACCAATCTGTTAATTGGTTACGATTTTGTGGTGAATAAGTAAACAGGGTTTGGATTTAATTAG  
TCGTTAAAACCTATATAGTGGGGAGCACCTACGGGGTGTCCCGCAAGGACGATCGCCGCGAGCGTGGGC  
GAACCCCAAAAAAGACCAAAGAGGAATTAGTCGTGCTTGAACATAACCGTAAACACGTCGCAGAACGTG  
CCGCCAGGGCGTGGTTGCCAAACCTCTGGATGCAGAGCAGGTGCGCCGCTGGTTGAGCTGCTCAAGAA  
CCCCCGCTGCGCAAGAAGACTTTCTGAAAGAGCTGTTGTCTCCCGTATTCCCCCGGTGTTGATGAA  
GCGGCTATGTCAAAGCCGTTTCTCACCCGCTGCCAAGGGCGAAGCCCACTCTCCCTGACTGACATG  
CCGCCAAGCTGTTGAGCTGCTGGGCACCATGCAGGGTGGTTACAACATTCAGCCGCTGATCGACCTGCT  
GGATCATGCCACTCTGTGCGCGCTTGCCGCCAAGGGCTCTCCACACCCCTGCTGATGTTTACTCCTTC  
CACGACGTGGAAGAGAAGGCCAAGGCGGGCAATGTCCACGCCAAAACAGGTGATGCAATCCTGGGCTGATG  
CCGAGTGGTTCTCTCCCGCCGAGCTGGCCGAGAAGATCACTGTCACCGTGTTCAGGTGACCGGCGA  
AACCAACACTGACGACCTCTCTCCGGCACCGGACGCTGGTCCCGCCGACATTCCGCTGCACGCGCTG  
GCGATGCTGAAAAACGCCGTCGCCGATTACCCCGACAAGGATGGCGCCGTCGGCCCCATCAAGACCA  
TCGATGCCCTGAAAGAGAAGGGCTTCCCGCTGGCCTACGTGGGTGACGTGGTTCGGTACC GGCTCTTCCC  
TAAATCCGCCACCAACTCGGTGCTCTGGTTCATGGGCGACGACATTCCGTTTCGTGCCGAACAAGCGAGCT  
GGCGGTGTCTGTCTGGGTGGCAAGATTGCCCTATCTTCTTCAACACCATGGAAGATGCCGCGCTCTGC  
CCATCGAAGTGGACGTCTCCAAGCTGGAATGGGCGATGTGATCGACATCTACCCCTATGCCGGCAAGAT  
CTGCAAACACGGCACCGAACAGGTGCTGGCACAGTTTGAAATTGAAAACCGACGTA CTGATCGACGAAGTA  
CGCGCCGGTGGCCGATTCCGCTGATCATCGGTGCGGGCTGACCGACAAGGCCCGCGAAGCGCTGGGT  
TGCCGTTCTCCACTGTATTCCGTCGCCCCGAGCCGGTGGCCGATAACCGGTAAAGGCTTACCTTGGCCCA  
GAAGATGGTGGGCAAGGCGTGCAGGCTGAAGGGCATTCGCCCCGGCACTTACTGCGAGCCCAAGATGACC  
ACGGTCCGCTCTCAGGACACCACGGGCCCCGATGACCCGCGACGAGCTGAAAGACCTGGCCTGTCTCGGCT  
TCTCCGCCGATCTGACCATGCAGTCTTCTGCCACACTGCCGCTATCCGAAGCCCATCGACGTACAGAC  
CCACCACACCTGACCGACTTCTATCATGAACCGCGGCTGTGAGCTTTCGCTCCGGGTGACGGCGTCTATC  
CACTCCTGGCTGAACCGCATGCTGCTGCCGATACCGTGGGTACCGGTGGTACTCCACACCCGTTTCC  
CCATCGGTATCTCCTTCCCGCGGGCTCCGGTCTGGTGGCCTTTCGCGCCGCCACCGGCTGATGCCGCT  
GGATATGCCGGAGTCCGTGCTGGTGCCTTCAAGGGCGAATTGCAACCGGGCATCACCTGCGTGTCTG  
GTTTATGCCATTCCCTACGCCCATCCAGAAAAGGGCTGCTGACCGTCGAGAAAAGCGGGCAAGAAGAACA  
TCTTCTCCGGCCGATCTCTGAGATCGAAGGTCTGCCGACCTTGAAGGTGGAGCAAGCCTTCGAGCTGGC  
AGATGCCAGCGCCGAGCGCTCCGCTGCCGTTGCACCATCAAGCTGGATAAAGAGCCGATCATCGAGTAT  
CTGAAGTCCAACATCGTGATGCTGAAATGGATGCTCTCCGAAGGTTACGGTGACCCGCGCACCATCACCC  
GTCGCATCAAGGGGATGGAAGAGTGGCTGGCCAACCCGACCTGATGGAAGCGGACAAGGATGCCGAGTA  
CGCCGAAATCATCGAGATCGATCTGGCCACCATCAAGGAACCGATCCTCTGTGCGCCGAACGATCCGGAC  
GATGCCCGTCTGCTGAGCGACGTGGCTGGCGACAAGATCGACGAAGTGTTCATCGGTTCCCTGCATGACCA  
ACATCGGTCACTTCCGTGCCGCCGGCAAACCTGCTCGAGAAGTATCAGGGCGAGCTGCCGACCCGCATGTG  
GATCGCGCCGCCACCAAGATGGACAAGGATCAGCTGACCGAAGAGGGCTACTACGGCATCTTTGGTTCG  
GTCGGTGGCCGATCGAGATCCCGGGCTGCTCCCTGTGCATGGGCAACCAGGCGGGGTAGCGGAAGGGG  
CCTCAGTGGTCTCCACCTCCACCCGTAACCTTCCGAACCGCTGGGTAAAGGTGCCAACGTCATCTGGC  
CTCTGCTGAGCTGGCCCGCTTGGCCCATCTCGGCAAGATCCCGACCGTGGCGGAGTACCTGCAATAC

GCCAAGGCGCTGGATGCCACTGCGGCAGATACTTACCGCTACCTTAACTTCAACGAGATCGCCTCCTACA  
CCAAGAAGGCCGATGCGGTGATCCTGCAGCAAGCCGTTTAAACGGAGTTCTTGC GCGATTTGCGCGATAAG  
AAGCTAATAATGCCGCGTATTTACGCGGCATTATTTATTTGTGTGTTATTCACCGTCTTTTTTGAAGATT  
GTTTGCACGATCCTTGCTAGAGAGATCCAACCACCTGTTTTGGTGGTTCGTTTTATAAACGCTTTGGGTTA  
TGTTGTTTCGGTTATGTGCGGTAATGATGAGGCATCGTTATCGAGGGAAAGTGGATATCTGTTCACTGGGT  
GCTTGCCTTGGCAGGCCTGACGAATTGCGGCGTGGTTCTTTATGTTTCTGTTCAGGATCGATCTCTCCCG  
AACCGGGTTACGCTTTCGGCGGTGCCTTGCTGGTCTTTACCCTGCCGCTGCTGGTGGGAGCTTGGCTCATC  
CACAGCAATTATGTGCAGGAGCTGAAAGCGGAATCCAGCGCTCGGCCACAAGGCCAGAACCCTGATGG  
AGTTCGATGCTGGATCATGCGGAGCAGGCCAATCGCTCCGTGCTGCCTCTGGTGAATGCTCCCTGTCCGGA  
CAACCTGCTGGTGTCTGCGCAAGAAGGTCGCCATCGAGCCCTTCTTGCCTTCGGTCAATCTGGTACGAAAC  
GGCATCATCAATTGCACCTCGCTGTTTTGGTGAGGCCAATGATGCCGATGACGGCTCCATCTACACCGGCC  
GCAAGCTGCTGCTGATGAGTGGCAACCGGGTGCGCCAAAATCACCCGCTGCTGGTAGTGCGCACCGAGCA  
GGGCAAGGATGCCGCTTGAGCGCCATCGACAGTACCCAGCTCAGCTTCATGCTCTCCATGAGCGGAAAA  
TCCAGTGCCTCTATCTGCAGGTGGGGTCTGCCTGGCTCAATGAGTCCGGCCGCTATCTGAGCGAGGCGC  
CCACCCTTCATCGCGGGATCAGCCAGGCCCTCACCTCATCCCATTATCCTTTACCATCCATGCCGGTCT  
ACTGGAAGTGCCTGTGGGCCGCGCGCATGTGGCGCTGTCGTGGCTGGCGGTTTTCTCGCTTTTGTCTGGC  
CTGGCTGGTGTGGTGGGTGCTGGGGCGGCCCGCTCGCCAACAGATGAGTTGCGACGAGCCCTGCCGGCC  
AGGGAGTTTTGTTCCCTATCTGCAGCCGCTGATTGCCAGCCACGACGGCAAGATGATGGGCGCCGAGGTGC  
TGATGCGCTGGGAACATGTCAATGAAGGGGTGATCCGGCCGATCTCTTTATTCGCAAGCGGAGGAGTC  
GGGACTGATCGTCCCATGACCACCCATATCATGAAGCAGGTGGCGACACGTTGAACCGCTCTCAGGAG  
CAGTTGCCCGATGGGTTTTATATCAGCTTCAACATCAGTGCCGCCCATTGCCACGATTTTGCCTGCTGG  
CCGAGTGCCGCGCCTTCTCGGCCACTTCTCCCGGCAAGGTGGTACTGGTGTGGAGCTGACCGAGCG  
GGAACTGTTGATGTGATGATCCCCAGACCCTCTCCCTGTTCCGGCAGCTGGACGAGATGGGGGTCAAACCTC  
GCCATCGACGACTTTGGTACCGGCCACTCCAGCCTGGCTTACCTGCAGCAGTTCCATGTGGATTACCTCA  
AGATCGACAAATCCTTTATTGCCCGCATCGGTACCGAGTGCCTCTCGGAACATATCGTGGATAACGTGAT  
CGATCTGGCGACCCGGCTCGGTCTGGCGCTGGTGGCGGAAGGGGTGGAGAGCGAGCGTCAGGCTGACTAC  
CTCAGGGCAAAGGGGTCGACTATCTGCAGGGATACCTGTTTTGCCCGCCCATGCCGCTGCGCCAGTTTT  
GCGAGGAGCTGCTGCGGAAAGAGGCACAAACCCGACAGATGGGGTGGGAGGCATCCCGAACCGGAC  
CTGATCTATCGGTGACAGACGGGCGGCCACCTCCCTCTGCGAGGGTAGGGGAGTGTCTCTCCCTATC  
CCCCCTCGAGTGCAGGGGCTTGTTTTTTCATGCCTTGC GGCTCGCTTTTCGGTAGAATCAGCGCTCATTTTT  
GACGTGAGTAAAAGATGAGGCGCGGTATGACGGTTTCAGTTCCAGGCATTTTACAGCATCAAGGCGATCGG  
TAATCGGGAGGTGCTGTTCAACTGGTTCGAGAACCAATCCCCCTCGGAGCGCTGGATCAGGTGTGGCGCCCG  
AAAAGCCGCGACGAGTTGCAAGCGCTGCTGCGGGAACACCCCGAGCGCAAGCTGCGCCTTATCGGCTCCG  
GCCTCTCTTTTGAACCCATCCACAGCGTCTATGCCGAGGGCAGTCAGGCGCTGCTGGTTGACTTGCACCA  
CCTGCGCGGTGAGTTGGCGCAAACCGCCGATACCGTGACATATCAGGCGGGGACGCCCCCTCGATACCGTT  
TATGCCGAGCTGATCGCCATGGAGCGGATGCTGCCCGCATCCCCGGCGTTATCGGCATTCAGACCCTGG  
GTGGCGCCCTCAGCACCGGCACCCACGCCAGGGGTTGCACCAGTCAACCCTCTGCGATGCGGTGGAGGC  
GATGACGGTGTGCTGGCCAGTGGCGACATCATCCGGGTGGATCGCACCGACCCGCGCTTCGGCGCCTTC  
GTGATGGGGATGGGGATGCTCGGCATCCTGCTCGACGTCACCCTGCGCACCGTGCCAAATCGCATTATGC  
GCTGCACCAAGTTTACCACCGATTACCCCTTCTGCTGGAGCACAACGAGCGGCTTAACCGCGAGCACGG  
CTTTGTGAAGAGCTGGTGGTTTTGCCTGGACCGGCGAGAGTACATCTGGCTGGTGGATCCCGCCTCCGAT  
GAGGAGGTGGCCCGCTATCGCGCCGGCGGACGAGCCGCTGCTGCTGGATGGCGATATCGACGCCCGCA  
TGAATGCCACCATTGATGCCACTTTGCAGAAGATGGCGAAAGACACCAAGGATGAGGCGCTGGCTGGCGA  
GCACTTCGAGACGGTGCGCCGCTTCAAGGATGCCTCCGATCTGGTGGGCAATGTCTACCAGATCCTCTGC  
AAGGGGATCCCGGCCCCCAGATCAACTGCGAGGTGGCGGTGCCGCTTCATCGCATGAACGAGGCACTGG  
AGACCCTGCAAGCGTGGCAGCAGGCCAACCCGGTGTGCTGCACTACCCCTTTATCCTGCTTGCACCCGG  
CCCCCTCCGAGGCTGGCTCAGTGCCGCTTATGGCCAGCCGGTCTGCTGGATCGGTTTTCTGGTCTATCTG  
GCGGCGGACGGCACCTTCGTCAACGGCTCCATGGAGCAGATGCGCGAGCTGCAGCAACTGCTGGTGGCGC  
TCGGCGGCAATCCCCACTTCGGCAAGCATCTGGCGATGGATCTCTACGACTTCCCGGCCCTGCTGCCGCG  
CTGGAACGACTTCGTGGCGTTGAAAGCCGAGCTCGATCCGCACGGCCGCTTTGAAAACCGCTGGCTCAGC  
GACCTGTTTTGCCAACCGGTAAGGATCTGACATGACCATATGCAAGATACCCGTATCCCCGTGACCCTGC  
TGACCGGCTTTCTCGGTAGCGGCAAGACCCTTGTCTCAACCACTGGGTCAAGCAGCCGGAGCTCGGCGA  
GTGTGCTGTGTTGATCAACGAGTTTCGGCTCGGTGGGGCTGGATCACCATCTGGTGCAGCAGGTGGATGAG  
CAGGTGATGCTGCTCGACTCCGGCTGCATCTGCTGCTCGGTGCAGGGCTCTCTGGTGGAGGCGCTGCAGG  
GGCTGTTTTATGAAGGCCATCCAGCGCAAGATCAAATCGTTCAAGCGGCTGATTTATCGAGACCACAGGTCT  
GGCCGATCCTGCTCCCGTCTTTTTACCCTGCGCGAAGAGGGCTTTATCGCTCAGCGTTATCGCTTCGAT  
GGCACCGTACCGTGGTGGATGCCGGCCATATCGAGCAGCAGTTGGCGGCTCAATATGAAGCGGTGAAAC  
AGGTGGCGCTGGCGGATCTGCTGGTGGTGGAGCAAAGGCGATCTGGTGGACGGCGAGCAGCTGGCGCGGGT  
CGAAGCCCAGCTGGCGGCCCTCAATCCGGCGGCCCGATCCAGCAGGTGACCAATGGTGAACGTGCGCCA  
GCTGTGCTGGAGAAGCTCGGCGCCTACAACGAAGCGGCTGGGCGCGATGTGCGCCAGCTGCTGGCTTGGC  
TGCGCACCGAATCCCCAAGCAGGGGCTGGCGTACCGATGCAGCCGAAGATGCAACCGTTCCCGCCCAA



GGTAGGCACAGCTGCGCCTACCCACTTCGAGCACGGCAACATCGAGAGTTTCTCCCTGCGTATCGGTGAG  
CCGCTCAAGCCCTCTCGCCTGCTGGCCGCCATCGATGCGGTGCAGGCCAATACGGCGATGCCCTGCTGC  
GCCTCAAGGGGATCTTGCAGCTGGAAGGGGAGAGCCAGCCGGTGGTATCCACGGCGTCCACGGCCAGCT  
CTATCCGCTGCAGGCATTGGGTGACTGGCCGGAGGGAAAGGCCAGTCCCGACTGGTGTATCGTGA  
AGTCAGGACAAGGCCGGTATCGAGCAGCTCTTTATGGCGACCTTAAAGGCCCGAGCCACTCTGGAAG  
AGCGGCTCAAAGCCATGCTGGGTGAGCCGACAACCTGATCTTGCAGCTTGCAGCTCTCCTGCACCGGGT  
AGGACGGCGACGGTTGAACAGCACGAACGCCACCGGCACAAAAGTAGAACGAGAGCAGGGTTGCCAGCGT  
GTGCCACCGGCGATGGCGATGGCAAAGGGTGGCCAGAAGCCGCCCGCCCCAGCAATAGCGGGATGAAGC  
CGCCACCGTGGTATGGTGGTTCGAGACGATGTGGCGGCTGCAACCGGCGACTAGGTACCGGATCTGCGG  
CAGATTGCCCTGTGTGCCAGCGGGTCTGCCTTCAGCTCAGCCAGAATGACGATGGCGGCGTTGATGGCC  
AGCCCCATCAGTCCCAGCAGGGCGATGATACCCTGTAACCCGAAGGGGTACCCCAGCAGCCATACCCACA  
GCAGCCCGAGCCCCGCGACTGGATCGCTACCAGGTGACGATGCCCGCCAGCCGGAACGAGTTGAAGCT  
GAGCACCAGCACGGCCACCAGCAGCACGGCCAGGCTGACATGGGCCATCAGATTGCCACCGATTCA  
TCCCGCTTGGCGGCTTCCCCGCCAAACTCCAGTCGATAGCCCGGTGGCAATGCCAGTGCCTTGGCGGCCA  
GCCTCTCTTTTACCTGCTCCAGCACGGTTTTCGCGCAGTACGCCGACCGCCAGATAGGCCCTCCAGCACATT  
GACCCGCTCACCATCCCGACGGCTGATCTCCCCCAGCTTGGCAGCAACTCGGGAGTGGCCAGTGCCTGC  
AAGGTGAGATTGGCAGCCCCCTTGTGGCCGGTGCCTGGTGGAGCAGTACGGCCACATTGAGCAGCGCATCCG  
GATCCTGACGCAAGGGCTCGGCCAGTGCACCCGAACCGGGATTGACTCGGTGCCTTCCAGCACAGTGC  
GCCAACCTGCCATCCAGTGCGCCCGCCAGCCGGGAGGCAACATCGGTGAGGCTCATGCCTGCCAGCCGG  
GCGGCCTCCTCATCGACCTGCAACCAGAGTTTGGGGCCCCCTGCCTGCAAGGTGGCGCGGGTCTGCACCA  
CGGCCGGGGTATTGGCGAGCAGACTGCGAAGCTCCTCTCCAGACGGTGCAGCTGTTCAAGGTCCGGGCC  
AAACAGCCGCAGCTCGACCGGGGCATTGAAAGGGCGGCCCTGTTCCAGCTTGCAGCACCAGGATCTGCGCT  
TCGGGAAATGTTGCATCGAGCCGCTGCTGCAGTTGTGGAATGAGCCGCTCGGCGGCATCGGCATCCTGCA  
GAGTGATCATCCCTGGGCGTAATCGGCCCGCCCCTGTTTTCTGGGCACCAGGTTGTAGTAGAAGCTGGG  
TGCGTTGTGCGCCACCACCAATCCTGACGAACCAGCTCGGGGAGGCTAGCCAGCTCGGCGGAGATCCCC  
AATGCCAGCTCGCGGGTGCAGCGCCAGGCTCGCCTGTGGAGAGAGGCTGGCCTCGATGTGGATCATGTCCC  
GGTCCGCAGCGGGGAAAGAAGTGTTCAGTGAAGCGGCCCGCCACCCAGAAACCGATCAGGGGCAGCAGACT  
GACCACAGCAGGAGTCCGCCAGGGGTGAGCAAGCGCCATGGCGATGCTCTGCTGGAAACGGGGCCTACC  
CGGGGCAGGTGCAAGCCACTCTGATACCAGCAGCCCTCCCTGATCACTGCCAATCCAGCAGGGCTGCGAGGC  
CAGCCACCAGGTTGTGGGCGATGAGGTAGGATCCAGCAGCGAGCAGATCACCGCCAGGCGATGCCGCC  
GACAAACTCGCCCGCGGGCCCGGCATCAGAATGATCGGCATAAAGCGAGCATGGTGGTGAAGGTGGAT  
CCCAGCAGTGGCAGCCAGAGGTGGCCGATGGCTTCCAGTGCAGCGGCAGCTCATGGCCATGCCGTGGCGGC  
GCTGATACTGCACCCGATCCGCCATGACGATGGCGTTGTCCACCATGATCCCGAGCGCCACCACCAGACC  
GGTGACCGACATCTGGTGAATGGGCAGATTGATCAGGTTTCATGCAGGCGAATGAGAACGCCACGGTAAGC  
GGCAGCGACAGGGCCACGATAATGGCGGCCCTTGACCCCCAAGGTCACCAGCAGCACGGCCACAATGATGA  
GGAAGCCCTGCACAATGTTGATGAGCAGGGTGTGAGCCGCTGATCGGTATAACGCTGCTGATCGAAGCT  
GGTGACGAGGCCGATATTATCCGGCAAGTCTGTTCAGCTGGGCCAGCATGGTGTGACCCGTGCCGAC  
CAGAGGTGATGCGGTGATCCTGTGCCATGCGCAGGCCGACCACCACGGCCCGTCCACATTGGCAAAGG  
CCAGCTGGCTCTCCGGCTGGTGCAGGGTACGTCTTACCTCGGCCAGATCGCCAAGGCGCAGGGTCTGGCC  
CTGCTCGCCGGTACGCAGCGGGATCTGGCGGATCCGCTCCAGGGTATCGAGGGCGCCGCGGATCTCTACC  
TGAAAGCGATTGTGGCTGCCCTGCAACTCCCCGGCGGCAACTTTGGCATCGGCACCGCTCAGCGCTGGG  
CAAGCTGTTCCGCACTCATGCCGCTGGCACTGAGGGCGAGGGGATCGAACCAGCACCCTGATCTCTCCTG  
CGGTGCCCGACCCGCTCGACGATTCGGTGCCTGGCAGCTGGCGAGCCCGCGTTCAGCTCGCCGCTG  
TAGCGGGCGAGGGGATCCAGCTGCGGCTGGCCCGCCCGCCGACACCACATTGACCAGCCGGGTGAAGG  
GGTAGCCCTTCTCGTCATCCAGCTTGGGGGCACTGGCCCGGCTGGCAGTCCGGCGCAAGATCTGCCAG  
CCGGTCACGGACTCTGGACCAGATGGGCTCGACATCGCTGACCTCATCCTTGAGTCCAGATTGATGATG  
GAGAGGCCGGGGCGAGAGCTCGACTCGATCAGCTTGGTCTCGCTCTGGGCCCGCAGCCGTTCTCGATGG  
GCTCGCTCACCAGCGCCTCCACCCGCTCGGCGCTGGCCCCGGGGAAGTGGGTAACCTACGCTGGCAAACG  
GCTGGTGAAGTGGGGATCTTCGGTTCTGGGAAGGGTCTGCAATGCCGCAAGGGCGGCGCTCAGCAGCAGC  
GCGACCGTCAACAGCAGCAGGCGGCCATTCTCGATAAACGGGCGGATCATGACTGTGGCTCCGGATGCGC  
CGCCTGATGATCCACGCTGGTGGTTCAGGGTACCTGCTGGCCGGCACCAGTTTATGCAGGCCATCGGTC  
ACCAGCTGTTCTGTCCGTTACAGGACCACTGATCCAGGCCGCTCGCCATCTTGTGCAGCAGGGTGA  
CGTCCCAGCTGACCACCGGGGTGGCGTTTCGTGCTTGGCAGATAGAGGGTCCAGCTGCCCGCAATCC  
CTGGGTGAGTGGGTGAGCGGTACCTCGTAGGCGCGGGTAGGCTCGCGGGTCTGATGCAGCAGGGTGTGAT  
AGTTGCCCTCTGCCAGTTGTTCCGCCCGCCCGGGTACGCTGGAAGCGGGCGGTGCGGGTGTGGGTCTGCC  
CGTCCACTTGTACCCCCAGATTAAGCAGGCGACCCCTCCAGTGATTGCGCACCGCTTTCAGGGGGTAGCG  
TTGGCCGACGATCAGGGTCTCGGCCTGTTTACCCGGCACGCCGATATCGGCCCTCCACTGGCCGCTGCGG  
GTCAGAGAGAAGAGAGGCTGGCCTGCGGCCACCACGGCCCCCAATGCCTGCTCGCGGTGACCACAATCC  
CGTTGAAGGGGGCGCGCAGCTGTGATTTCTCCTGTTTACCCGGTTGGCTTCGAGGGCGGCGGCCAGCTG  
GTTGGCGCTTGCCTCCAGCATGCGGACTTTGCCTGCTGTTTCATCCAGCGCTGACGGGAGCTGAAGTGC  
TGCTGGCGCAGGGCGGTGAGTCGATCGAGCGTCTGCCGGGCAAGGGTCAGTTCCGGCTCGTTCTGGGCAG

CCCCGGGCGGCCAGCTCTTTGGCTTCCACTGCCAGCAGGCGGGTGTCCAGTGTGGCGAGCAGTTCGCCGGC  
CGCGACCGGCTCTCCGCGTCCCTTGTGCAGAGTGGCGATCCGCCCTGCCAGCTCGAAGCCTATCTGGCTG  
TGCTCGGGGGCGATCACCCGGCCATTGAAGCGGTGCAGCACCGGGTAGTGATCGCTGGCTTGCAGCGGCT  
GGGCGATCACCCGGGTGAGGGCGGATGTTTTCTTCTGACTCTGTGACCGGGCTGCAGCCACTCAGTAACAG  
CGCCAGCAGGATTAAGCAAAGTGTGATGACATCATCCTCTGGTTGACATAACATCAAATCACACCGGTGA  
GTCTAGTTTTTCAAGACTAGACTGTCCAGTTTTGATTGTGGAGGAAAAATGAACATTTACCCCGTAGTCA  
GCAGAAGCGGGGTGCGATCCTCGATGCTGCCGGGCGGCTCTTCTGTCAGCACGGTCTGCATCTGGTCAGC  
ATGGACATGGTGGCCAGTGAAGCGGGCGTCTCCAAGCAGACGGTCTACAGCCATTTTGCCAAACAAGGAGT  
CGCTGTTTTGCCGAAGCGGTGGGCAGCAAGTGCCTCAGCAGCGAGCTGATGCCGGAGGTATTGTTGCGTGG  
CAACAATGTGCGGGGAGAGCCTGATTGCCTTTGGTCGCAGCTTTCGCAAGTTGATCCTGAGCGATGATGCC  
ATCAATATCTTTTCGACCTGCATCAGCTGCAACGATGCCAGCTGGCCACCCTTTTTTTCGAGGCGGGCC  
CGCTCTACGTGACCGAGATGCTGTCCAACCTGGCTGGAGCAGCAGAAGCAGCAAGGCCTGCTGTGCCATCA  
AGACAGCGAACAGGCCGCTTTGCAGCTGTTGCTGATGTGGCAGGGCAAGGAGCGAATGCTCCGTGAGCTG  
GGTCTGCCGTTGACCCAGAGCGCTGCCGAGCAGGATGCCTGGACCCTGAGTTGTGTGATCTCTTCCCTGA  
CCGCCGCGCTCCCCCGCAAAAAATAATGGAGGTGGCAATGAGCCACACAGTGACAGATGCCAGCGCAAG  
TGGCTGCCCTGCTGGCGGCGGTGGTTTTCTTTATGCAGGCGCTGGATGGCACCATTCTCAACACCGCCC  
TGCCAGCATGGCCGAGACCTTGGGAGAGAGCCCGCTGCAGATGCAGTCGGTGTATCATTGCCATACATGTT  
GACGGTGGCGTTGCTGATCCCGCTTCCGGCTGGCTGGCTGACAGATTCGGCACCCCGCCCATCTATCTG  
GCTGCCATCTCGCTCTTTACCCTCGGCTCGCTCGCTCGCCGCTCCAATTCGCTCTCCATGCTGGTGG  
CCGCCCGGGTGTTCAGGGGATTGGCGGTGCCTGCTGATGCCGGTGGGGCGGTTGGCGGTGCTGCGGGT  
CTATGACAAGCATGAGCTGCTGCGGGTGTGTCGTTGTCCACCATCCCTGGACTGCTCGGCCGTTGATG  
GGGCCGGCACTCGGTGGCTGGCTGGTGGAAAGTGGCGAGCTGGCATTGGGTGTTTTCTCATCAACCTGCCGG  
TGGGGCTGCTCGGCTTTATCGCCAGCTGGCACTTTATGCCGGAGCTGCCGCAGCAGACCGCTCGGTTCGA  
CTGGCAGGGATTGCTGATGTTTCCAGCTCGGCATGGTGTGGTGTGGTTCGGCTTGCAGGGGCTGGGGGAG  
CACAGCATCTCCACCGGTTGGGCGCTGTTTGCAGTATCTTCGGCTTGGCGGCGATGGCGAGCTACTGGC  
TCTATGCCGCCAATGCACAGCAGCCGCTCTTTAGCCTGAACCTGTTCAAGACCACCACCTTTGCCATCGG  
TATCTGGGGCAACCTGTTTTGCCCGCTCGGCAGCGGGCGCCATGCCCTTCTCACTCCGCTGTTTTCTGCAA  
CTGGGGCTCGGTTTTCTCTCCGAGCAAGCGGGGATGACCATGATCCCCACCGTATTGATCGGCCCATGCTGA  
CCAAGACGCTGGTGAACACCTTATTCCGAAGTGGCTATCGCCGCATTTCTGATCGGCAACACCCTGTT  
GCTGGGGGCGATGATCGCCAGCTTCTACTTTATCGACAACCAGCTCCCTACGGGGTCTTGCTGGGCTGG  
CTGGCGATCTTCGGCGCCATCAACTCGCTGCAGTTCTCCGCCATGAACACTCTCACGCTGCAAGATCTCA  
GCCCCACCCTGGCCAGCAGTGGCAACGGTCTGCTCTCGGTGGTGTGATGCAGCTCTCCATGAGTTTGGGGGT  
GGCGATTGCCGCCAGCCTGCTCGGGCTCTTCTCGGCGGGTACCTCAGCGGGCACCTTAGTGGCCGAGGGT  
CAGTGGCTGGCCGGGTTCCACCTTACCTACCTCTGTGTGGGCTGCTCTCTATGCTGGCGGCGCTCATCT  
TCGCCAGCTGGCGCGGATGGGGCTACGCCGTCGGGGCGGGCAGATAGCTGACCTCGCAGGGGAGCTGC  
GCCAACACTTCGGCCAGATGCTCGGTGCCAGCAGAAAGTCTGCTCCGGGTGGCCCGAGTCCAGGTGA  
AGGCGGTGTGGTTGAGCAGTTGCTGATCCACCAGTAGCGGAATATCGGCGCGGGGCTGGAAGGGGCACAC  
AGCCCCGGCAGGCAGCCGATCTCCGCTGCATCTCTTCGGCGGTGCAGATGGAGGGCTTGGCACCGAGT  
GCGGCCTTGACCGCCTTGTGTGTCGAGCCGTCGCTCCCTGTGGGTGAGCAGCAGGGCGAAGCGGCCATCCT  
TGAACCTTGAGAAACAGGGTCTTGTGAACTCCGCCTGCCAGCCGAGGCGGGCCTTGACCTTTTTCATCGGT  
GGCGTAGTCGAGGATGGGCTCGTGCTCATAGCGCTGGTGGGGCAGTTCCGGCCAGTAGCTGGCAGTTGAAA  
TGGTGAATGGTATCGAGTGGCATGGGGTTCTCCTGTAGTGGGCGCTATCCTGCCAGCCTCGCAGGGTCA  
GCCAATGACACTTTCTTATCCGTGATAAGCAACCTGTCCGTGCAACAACAAGGGCGCCGTGAGGCGC  
CCTTGTGGATCAGTGTGCTGCAATTCGCACGCTTCCAGTGAAGGGAAATGGGGCACAGCTGCTGGGAG  
GCCTTGTGATAGGCTTGCACAGCTCGCCATGGTGCGGCCATCGACGGGGTGGCGAGTTTGGGGGCCA  
GCTCGGCCAGCGGCCACAGCAGCAAGGCGTTGGTGAAGCTTACCCGCGCGGCAGCACCAGCGGGGTGTC  
GCAGACCAGATCGCCATAGAGCAGCAGGTGAGATCCAGGGTGCAGCGGGGCGAACTTCTTGGCATCAGGC  
TCGCGGCCGTTGGGCGAACTCCATGGCCCCGAGTCGCTGGCAGACGGTGGTGCAGCGGCAGATCGGTCTCGG  
CAGCCGCCACCAGGTTGTAGAAGGGGCGGCCGTTGAAGCCGACCCTTCGCTCTCGAATACCCGGGAGAC  
CCGCAGCTCGCCAAATTCGGCGTGCAGGGCATCGAGTCCGGCGCGGATATGGCGATCCCGCTCGATGTTG  
GAGCCGAGGCTGATATAGATGGTGGTTCATCAGTTGCTGCTCGCGGCAGGCGTGCATGACGCAGGAGCTC  
GACGCCGACCCCGCGGCAATTGGGCACGGCGCCCGCTTGGTGAAGGTCACCTTGACCCACTGTACCCGC  
TCGCTCGGCGAGCACCAGCATGGCAACCTGCTCGGCCATGGTCTCGACCAGCTCGACCACCTTGCCGCTGA  
CATGCTCGCAAATCTTGTGGAGAGGTGGCATAATCCAGTGCCAGATTGATGTCGTCGGTTGCTGCCGC  
GGGGCGGTTGTGCAACCCCATCTCGAGGTCAAACCGGAGCTTTTGGCGAATGCCCTTCTCCACTCATAT  
ACACCGATGGTGGTCAAACTTCGAGTCCGCGAATAAACACCTTGTCCATGACTGTACTTCTTCTTTACT  
CTTGATGGGCTGTGATGACAGCGCAGGGATGCTGGCCGGGCAACAGGCTTGGCGAGGCGCTCTGGGTGGG  
CATGGGCCCATGCCAGCGTATGTGGCCCCGATCATACCCCATTCATATCGTGGTAAAAACGACCAAGATG  
ACGGCCCTGACGATTTTGTGATTATTTGCTGGCCTACCTGGGTGGTTCACTATCCAGTGTGTGCTGGTCT  
CCCGCTGCACAGGTCTGCCGACCCCGGGATCATGGCTCCACAATCCGGGGGCAACCAATGTGCTGCC  
CCTCGGTGGCCGATGGCGGCGCTGGTGGTGTGCTGATGTGCTCAAGGGCACTGTGCCGCTCTAT

CTCGCCTGGTATCTGCAGATCAAACCCGTCTACCTCGGCTTTATCGGGGTCGCTGCCTGCCTCGGCCATA  
TGTACCCCATCTTCTTTTCATTTTCGTTGGTGGCAAAGGGGTGGCGACGGCGCTGGGGACCATGATGCCCAT  
CGGCTTTACCATGGGGGGCGCCGTGATTGGCACCTGGCTGCTGGTGTGCTGGTGAGCGGCTACTCCTCG  
CTGGCCTCCATCATTACCGTGTCTGCTGACGCCGCTCTTTACCTATCTGCTCAAACCCGAATATACCCTGC  
CAGTCTCCCTGCTCTCCTGCCTCATTCTGATCCGCCATCACGAGAACATCTCCCGCTGCTCAAGGGGGA  
GGAACCCAGAGTCTGGGGGGCAAAGGCACGGCCTGTGCCGAAGAAGTGGCAGAAAATGGACGATGTTGCCG  
CAAAAAGAGACGAACGAGACAAAAGTGAATTTCCCGTTGACCATCCGCCTTAAAAATCCGTTTAATAG  
CGCCACGCCCAGATAGCTCAGTCGGTAGAGCAGGGGATGAAAAATCCCGTGTCCGGCGGTTTCGATTCGG  
TCTCTGGGCACCAACTTTGGTGCCATGAAAGAAAAAATTTGTTTCATGCACAATGGTTTAAAGTGTGCCGG  
CTTAGCTCAGTAGGTAGAGCAACTGACTTGTAAATCAGTAGGTCACCAGTTCGATTCCGGTAGCCGGCACC  
ATTTGCCAGATAGCTCAGTCGGTAGAGCAGGGGATGAAAAATCCCGTGTCCGGCGGTTTCGATTCGGTCT  
CTGGGCACCAATTACAATTCCTCCTTAGTTTCAGTCGGTAGAACGGCGACTGTTAATCCGATGTCACCTG  
GTTCAAGTCCAGTAGGAGGAGCCAATTCAAAAAGCCCTTGTGCGAAGACAAGGGCTTTTTTCTATTTGGC  
GCAGCCATTTTTTAAACATAAAAAACAACCACACACGCACAGATGAACCCGAGGATAGATATGAAAAATCA  
TGTAAGTTATAGAGTCAAAGGGGGCGACTTGCCGCCATTGCAAACTGGATGGAACCCGCTGCTGGTGTGCTT  
ATTCTTGGCAGCCTGTTCCGTTACCTCGGCAGCCAGATGGGCCTCTCTGCCATGGTCAACACCCGTGTTCA  
ATACCGCCACCAGCTGCTGCTCAATACCGTGTCTTTTATCATGGGGATCACGGTGTCTCCGGTGCCTT  
GAGCCAGCTCTTGAGCGAGTTCCGGGTGATCCGCTGCTGGAGGTTCTGCTGGCCCTCTGATGAAGCCG  
GTGTTTTGCGCTGCCTGGCCGCACCGCGCTGGCGGCGCTGATGACCTTCTTCTCCGACAACCCGGCGGTGA  
TCAGCCTCGCCAAGGACAGCCGCTTTCGCAAAGGCTTCACCCCGTGGCAACTGGTGTGCTCACCAACTT  
CGGCACCGCCTTTGGCATGGGGCTGATCGTGGTCACCTTTATGGCCACCTGCAACTGCCGAGCGGTGAA  
TCCACCGCCAGCGCGGGCGCTGATCGGGTTGCTGGGTGCTCTGGTGGGCTCGGTGGTCTCCACCCGACTGA  
TGCAGCGGATGATCCGCCACTGGTGGGGGAAAGTCTGAAACGATGACGCTGTATCGTCCGACGGCCGCAA  
GGTAGGGGTGACCAAAGAGGGCGGCTCCCGGCTGGCTGCGGATCCTCAACTCTCTGCTCGATGGCGGCAA  
TCTGGCGTGGAGCTGGGGATGGCGGTGATCCCGGGGTGCTGATCATCAGTACCTTCGTGATGCTGCTCA  
CCTTCGGCCCCGGCGACAAGGGCTATACCGGCAAGCGTTTCAAGGGGTTGCCCTGCTGCCGGTGTGCG  
CGCAAAGGTGAGCTGGCTGTTTGACCTGCTGTTCCGCTTCCAGCAGCCGGAGCTGGTGCCTTTCCCGGCC  
ACCTCGCTTGGTGCCTGCGTCCGTCGCTGCTGCTGCTGCTGCTGCTGCTGCTGCTGCTGCTGCTGCTGCTG  
GTAACAGGTCGCGGTGTTTACCGCCATGGGGATGTTGCTGGAGTGGCTTTCTGAGCACCCACACCCGAT  
GCTCGATGCCCTCGGCTATCGCCACCTCACCTCCCGGCCATCGTTGCCACACCATCGGCGGCTGTGC  
GCCGGTGTGGCCGCTCACAGCTCTATCTACTGCTGGGCTGAGTCGGGTTTCAGACACGGAACAAAAAGA  
GGCTCTTCGGAGCCTCTTTTTGTTTCCCCCTGCCCGCCCTGCTCACGGGCGCACCAATCACCCCTGCTG  
CGTGATGCCCTGCACCTTCAACCAGAATCGCTCCTGACAGTGGTTGTGAAACAGCTTGTGCGGTGGAGTG  
ATGGGGATGGGACTGGCGATGACCCGATAGCTGATCCAGCACTCGGCACAAAGCTGCTGCGATGGCGCTT  
CGTCCTGTTCCGTTTGGTGGCGGATGACGACCCCATGGCAAACAGCTGGTGGTTATCTGGTGTGGAT  
CACAGTGGCGCTCTCATCATGCTCGCTATAGTGTACTCTCTTGGTGTGTGAGGGTGACGGGGCTCGCC  
TGTCGATGAATGGCCCTGATATAGCTGATTAGTTGATTCAATTGCCGATCTTGCCGTGATGGTTGGCCTGC  
ACTGGATGAGCTGTACAGGATGAAGAGGGCTAGCGTAACGTGCTGCCCTTGGTTGCGGCAATCGCCTCGGC  
TGCGCCGCAAGCAAATCTGAAAAGGGGAGAGCAATGGGAATCCCGCAAAACAAGGCCGAGCTGCTACTCG  
CGATCGATAACCAATTTTAGCAAGTTGTTCAAGGCGTTGCGAGCCGCTCCCGAGAGCCGGGTGCGGGAGCC  
GACCCTGGCAGGGCACAGCAAGGGAACCACCATGAGCGTGTCAATCTGCTGGCCTACCTTATCGGCTGG  
AACGAACTGCTGATCAAGTGGATCGAGCGGGATGCGGCAGGTCTGCCAGTGGATTTTCCCGAAACCGGTT  
TTAAGTGGAAACGAGTTGGGCGGGCTGGCCAAAAGTTCTATCGGGATTACGAGGGGCTCAGCTATCCGGC  
GTTGTTGCAGCGGTTGGCTGCCGCCAGAGGGCACATCATCGAACTGGTGGAGGCGCGCAGCGACCTGCAG  
CTGTATGGCTGCCTCTGTTATGAGAAGTGGACGCTCGGGCGGATGATCCAGTTCAATAGCGCCTCCCCCT  
ATCTCAACGCCAACGGGCGGCTGCCCAAGTGGCTAAAAGAGTTGGCGAGCAGGGTGTGAAAGGAAAGGGGG  
TCGCGGCCCCGGGTGGGCGGCAAAACGCTTTGCCACCATATTGCCACTACCGCCCGTGGCGGCGACCATTG  
GCCGCTGACACCCCTTTGCACTCGGCCATCTCCTGCGTGTGCTGCTTGAACAAATAGATCAGCCATTCAAG  
GGATTAGCCGATTCCGTTGCGTTTTATCGCCGTGCTGGCCCCGCTTATGCACATCTCTTGGCAACACCATC  
AAGGGTCGTTGTGCGGAGAGTTATCATGATCAGCAGCCTGCTTCCCTTGCCTCGATCGCCCTCAAGCT  
GGGCAGTCAGCTGCTCGGCAGCAGTGCCAAACCTGAGCCTGTGCAGCAAACAGTGCAGGAAGATCGCCTC  
GCCCCGACCGTCCAGAGTTTGTTCAGCGACTCGGCATCAAGGATGCCGATAGCGAACAGAACCCTCGG  
CCATCAACCACTTTATGGGGGAGCTGATGCAGACTCTGGGGCAGGAAAATAGCGGTGAGTCACTCCCAGC  
CGCCATCGATAGCGCCGCAACCAGCTGGCGAGTGGCACTCAGAGCACCCGCTCGATGCCCTGCAAAGC  
GAGCTCGATACCCTCAAGGATTCCTCGGTGCCAGCAATCTCAATCTCGATCAGCTGCTCGGTGCCTTTA  
AACAGACCCTGCCCAATGGCAAGGGGGAGGGGGCGGGCAAACTGCTCAATGCCAGTGTGTGAGTGAAGT  
TCATAAATGGGTTGTGAGCACAATGCAAATATCGGCCCGAAAATGAAACAGTTAATGACTACTTTTATTGA  
TCTGTGTGAGGTAATTTATTTGATTTGCTATTTTCATATAGAAAAATCCATTTGGCAATGTAGGATAATG  
TTATTAATCCGTGGTTAAATTTTCTAATCTGCATTAGGAGGAGGTGTGAAGGAAAACCTTAGGCTTTAC  
TAGGGTAATGATGGTATTGGGAGCTTGTACCATTTTTCGTATTAGCTGCCATTAAGGTTCAAAAATC  
ATTGATGATAAATATCTACTATTAGGGTGTTTAAGCTTTATTTATTTCTTAACCTGATATTGTATATTA

GAATTTTCATGTGCGATAAAAAATAATGATAAAAAGATCTTTTGTTCGTTAAGTCGGTAAGTGATAATAGAGA  
ACATTTACTTGTATTTATTTATTCGCTGTTTTAGTCCCATTGTATCAAGCTAATTTAGACTCCCCTCGTGAA  
ATATCTATGCTGTTAGTGGTTTTATCATTGTTGTTTTCCTTTTTTTACATCTTAACCTCCATTATATGA  
ATTTTCGTTTTTGCATTGTTTGGATATAAAAATATATTCCGTTGAAGTCGGGAGAAGACTTAAAGAAAATAGC  
TGTTTTAAGCAAGCGAGATCAAATTAATAGAAATCAAGCTCAACATTTTTTTGAGAAATTAGCAATACAGTT  
TACATTGATATTTGAGGCCGTATGATTTCAAAAATTTTCGATTTCAACAACATAGTAAAATATCGAATTCAGTT  
TTCGAGTTGAAGATGGAGAGAATGTTAGTTTTCAATCTGCACCTACAGATCGCGAAAATAAAAAATATCTCT  
CAGGCAAATGTTAGATGACACAGTGGCTGAATTTAACATCAATCAAGATGAGATACTGCCATATGAAGTG  
TCAGAAAAGTACGCAAGTAAAGAAAAATTACGTGCAAGTATTGTCGATCCTTTATATCAAGAGACCTTGT  
TGATAAGGGATGCTGAAGATGCTCAGATAAAATCTGAGGCAATAAATAATCCGGCATCAATCCCATTTTA  
TAGGGTTAAATACTATGATTTCTGAGGGACGAGTACTGTTGCTGTAAGAACAGCTTCGTATTTTTAAAGCG  
ATGCTAAAACAACGTTCAAGATTAGTTTCGTCTAGTCAATGATGCATTGGAATCATTTCAGATAGCATTTT  
TCAAATTTGGATTTTGGATTTTCGACTTTTTTATCATAGGCAATGATGCTATATTTCAAGGCCGGCAAATTT  
CGAATCAATTACAAATCTAGGTGATGAAAATTTTGAACATGCGGTTGCAAAAAGTAGAAGTTATATCTGAG  
GCCTTGGGGTTTTATTAATTTTGAACATATACAAGAGTTGGCAGGCCGTTCTAAACGTGTGGCACGATTAG  
TTGCCTCTGTTAGCTCAAGAGATGATTTAGCACAGATATCAGAACAATAATGTTTCGTACGCTATCTCAAAG  
AACTGGGGTTGGGTTGGTTGAGAGTGAAAATGGTCTGATGCCCTTTAGAAGGTAAAGAGCTTGATTTTCTT  
GAAATTTCTTGATAGAAGACGATATATCGTGGAATTAATTGATGGAAATCAGGAGGCTTATCGAGCCAAA  
GTAGACAAGCAATTAGGCGAGTTTAATTTATTCACATGATTAATTTTGTACTGATCTTCCATTTTATATGT  
TGATATCAATAGTGATGACTATGATTTGAAAGAACGGCAACCTGAGGTTGCCGTTTTGCTTTCTATTTTCG  
GGTGACGACTCCCGCAATTAACCCACCCGTTTTACCAGCCAAGCTTCGGCGGCAGTCAGGGCTGCCTCA  
ACCTGCTCGCGGGCGACGCCGCCCTTTGGCAACCCGCTTGGCCAGGGTCGCTTCCAGCTCCAGATTGGGGT  
AGACGTCGAACTCGATCACCGGGCTGAAGCGCTGGAACTCGCCGATGGAGAGCTCCTCCAGCGGTTTTACC  
CACGCTGATGGCAAAGACCACGGTTTTCGCCGACGATATGGTGCGCTTCACGGAACGGAATCCCCTTGGCC  
ACCAGATAGTCCGCCAGCTCGGTGGCGTTGGCGTAGCCGCCCTTGCGCCGCCGCCATGGTGCGCTCGCCGT  
TGACCTTCAGATCGATTAGCACCAGCGCCGCATATCGAGGCAGTCGTGCCAGGTGTCGAGGGCATCGAA  
CAGCCCCCTTTGTCTTCTGCTGCTTGTGTAGGCCAGCGGCAGCGCTTGAAGGCTCATCAGCATG  
CCCATCTGGGCGCCACTACCCGGCCGGTCTTGCOCGGATCAGCTCCAGCGCATCGGGGTTCTTCTTCT  
GCGGCATCAGCGACGAGCCGGAAGTGACCCGATCGGAGAGCTCGACAAGCCCGCTCGCCGGTGTGTGTA  
GAAGATAAGGTCTTCAGCAAAGCGCGACAGGTGGGTTCATGGAGAGGGACGCCACGTGCATCTCCACT  
ACGTGATCCCAGATCGGAGACCGAATCCAGACTGTTGCGGGTGGCGCCGGCAAAGCCCATATCGAGCGCCA  
AGGCTTCGCGGTTCGATGGCATAGGCGGTGCCTGCCAGCGCGCCGACCCGAGCGGGCTGGTGTGAGCCG  
CTTCAGCGCATCCTGCAGCCGGGAGTAATCCCCTCCAGCATCTCCACATAGGCCAGCGCCAGTGGGCG  
TAAGTGACCGGTGGGCCCCGCTGCAGGTGGGTGTAACCGGGCAGCACCCGCGCCTGATTGGCGCGAGCGG  
AGGCGACCAGCCCCCTGCTGCAGGGCGGTGATGGAGCCGAGCAGCAGCTCGCCCTGCGCCTTGCACCAGAG  
TTTTAGGTCGGTGGCGACCTGATCGTTGCGCGAGCGCCGGTGTGCAACTTCTTGCCCAAATCGCCGACG  
GCGGCAATCAGCTGGCTCTCGACCCAGGAATGGATATCTTCGGCGTCCGAATGGAGGATCTGCCGGGGAT  
CCTGCTGCACCAGGCGAGCAGCACCTCCATCGCCTGTTGCAGTTTGCCCTGCTCATCGCGGTCAATAC  
GCCCACCTTGACCAGCGCTTTGGCCCAGGCCATGGAGCCCTGAATATCCTGCTCCGCCAAGCGGTAATCG  
AACCGCAACGAATCGTTGAACTGCTTGAACCGGCTATCGGCTCCCTGACTGAAGCGTCCACCCCAAAGTG  
CCATACTGCTCTCCTTGAATGCGTTGTGCGGTAGGTGTTTACGCTTCCGCTACTCGCGCGGCCCTTGGCC  
TGCGCGCAGAAATCTTGCCCTGTATTTTCTGAATAACAGTGCGGTGGTGATGAGTGTGTTGCCGTTGA  
ACACGTCAAATCCAGCAACTGCGAATCGGTTCCCTCTCCCTCTGGGAGAGGGCTAGGGTGAGGGTAATTC  
CCCCCTATCCCCGCCCTTCTCCCAGAGGGGAGAAGGGAGAAAAATACGTCAGCATCATATTCACACAGC  
CCCTGTTATCTCACAGAAGCGCCGGGGCGCTGCCGCTCTTGTACACCCGCCGATGATGGGTGAGGGGGC  
TATGCTCTCTGCCTGTAGAAGAGGGGGCCATGCCCCCTCAACGGAATCAACGGGTTATCGCGCTTGCCTTA  
GCCGTGGGTGTGATCGCCACCGATGGCTTGATGCTGCTCCTTCATGGCGCGGATCCGGCTGGCCAGGGTG  
TAGAGACGGATAAAGCCTTTCGGCATGGCTCTGGTTCATACACTTCATCGCGCGCGAAGGTGGCGAAATCTT  
CGGAGTAGAGGCTGTTTCGGCGACTTCTTCTGCACCCGCGGTGACCTGACCCCTGTACATCTTCAGCACCAC  
TTCACCGTCCAGATCTTCGGCGATGGCGTTGGCCGAGGCGAGGAGCGCCTTGCACAGCGGAGTGAACCAG  
CGACCGTCATAGACCAGATGGGAGAACTCGGCACCCAGCTTCTCCCGCCAGGCGCGGGTTCGGGCGATCCA  
GTACCAGCTCTTCCAGCGCGCAGCGCGGCGACCATCACGGTACCGCCCGGGTTTTCGTAGCAGCCGCG  
GGACTTCATCCCCACCATCCGGTTTTTCGGTGTGTCGATGCGGCCACGCCGTGCTTGGCCGACGCTCG  
TTCAGGGTTCATCAGGATCTGGTGGGGCTGAGCGGCTGATCGTCAACGGCCACCCTTACCCTGCGCCA  
CGGTCAGCTTGACGTACTCCGGCTGATCCGGTGCCTGTTTCGGCCGTACGGTCCACTGCCAGACCCTTC  
GGACGGCTCGTTCCAGGTGCTCTCCAGCTCGCCACCCCTCGGTGGAGATGTGCCAGGCGTTGGCGTCGCGG  
CTGTAGATCTTCTTCAGGGTTCGCTTGCAGGGGATGTTGCGGGTCTCCAGATAGGAGAGCAGATCTTCCC  
GGGAGCGCATGTCCAGATCCGCCACGGGGCGATCACTTTTCAGCTGGGGCGCCAGCGCGGGACCCGCGC  
TTCGAAACGCACCTGATCGTTACCCTTTCGGGTGCAACCGTGGGAGATGGCATCGGCCCCCTCCGCCAGC  
GCCGCTTCCACCATCGCTTGGCGATCACCGGACGGGCCATGGAGGTGCCAGCAGATAGGTGCCCTCAT  
AGACGGCGCCGGTCTTCAGGGTTCGGGTAGACGTAATCTTTGACGAACTCTTCCCGCAGATCCTTGATGAT

GCACTTGGTGGCGCCGGAGGCGATGGCCTTCTGCTCGATCCCTTCCAGATCGTCGCGCTCCTGACCGACG  
TCGGCCACGAAGGCGATGATTTTCAGCGTCATAGTCTTTCAGCCAGGGAATGATGGCCGAGGTATCCA  
GTCCACCCGAGTAAGCCAGTACGATCTTGTGATTCCGCTCATGTTACTTCTCTCCGTGATGATTCGATG  
ATGATTTCAATAAAAAGGGTCGTGATTACAGGTTGAGTGCCGCGTFACTTGCCACCCAGAAGGGTCAGCAACA  
CGGCGTTTCTGGATATGCATCCGGTTTTTCGGCCTCGTCCATGATGAGGGAGGCGGGGCCATCCATCACCTG  
CGAGGTGATCTCCAGCTCCCAGTACGAGCCGGCTGGCAGTGCAGCACGTGCTGGATGCCGGTGCGGTTCGAGC  
AGGGCCTGGTTGATCTGGTAAGGCATAAAGAGGTCTTTGACCTGCTCCATCGGGGTGTTGTCGCCCCATGG  
AGACCCAGGTATCGGTGTAGGCCACGTGCAACCTTCGATATCCGCCACGTATCACTGATGTGGATGGT  
CGCCCCGACTTGGCCGCCAGTGCCTGCGCCTGCAGGAAAATCTGGGTATCCGGGCCATGGCCTTTTCGGG  
CAGATGAGGGTGACGTCCGGTGCAGGGTGGCCCCCAGCAGCAGCAGAGAGTGGCTGACGTTGTTGCCAT  
CACCGAGGTAGGCAAGCTTCACCTTCGACAGGTCTGCTAGTGTCTCGGCAATGGTCATAAAGTCGGCCAG  
CCCCTGACAGGGGTGGTAGAGGTTGCACAGGCTGTTCACTACCGGCACTGTGCCGTGCCCTGCCAGCTCG  
ACCAGGGTCTGGTATCGAACACCCGGGCGACGATGGCATCACACCAGCGGGACAGGTTGGCGGCGAAAT  
CCTTACCCGACTCCCGCTTGGCCAGCGCGCCGTTCTGCTGATCCAGATAGACGCTGTGGCCGCCAGCTT  
GGCGATGCCGATGTGCAAGGTGACCCGGGTGCGCAGGGAGGGCTTCTCGAACAGGGTGACCACACTCTTG  
CCCGCCAGCGCCTGGCTGTACTTCTTCGGGTGCGCCTTGACCCTTTGCCCAGCGCAATCAGTGCCCTCGA  
TCTGGGCTTTGTTTCAGATCACTGTCTTTCAGAAGATGTTGCATCGGATGTTCTTGTTCGGTGGAGATC  
AAATAGCTACCTGGGTGCCGACCGCGCCGCCAGCCAGCAGCTTGAGCAGCTGATCCGGGTAACGCCAGCT  
GGCGACACAGACCCGGCTTGGCCGAGGGTCTCTGCGGCGTGCAGGGCCGCTTCTACCTTGACCGCCATACCA  
TCGCGGATCACCCCTTTCTCCATCAGATCCAGTGCAGTGCAGCTTGTTCGAGCTGGGGCACCAGCTTGCCCT  
TGCCATCGAGGATGCCACTCACATCGGAGAGCATCACAGATCGGCGCCGAGCGCCTCGGCAATGGCGGT  
GGCCGCTGATCCGCGTTGACGTTTCATCAGTTGCCCTCGGCGGTGATGCCGATGGAGCTCACCACCGGC  
AGGAAGCCCTGACCTAGGATGCCTGCTACCAGCGCCGGGTTGCCCGGCTTGCACTCGCCGACTGCGCCGA  
GATCCGGGTGCGAGCTGGGTACCTGACAGAGGGCCGCATCCGCCAGGCAGAGCCCCACAGCCGGAATGCC  
GGTGGCGATCGCCTTGGCCATCATCTGCTTGTGTTGGTGTGCCCGCCAGCGCTCCGGCAATAAAGGGGATC  
TGCTCGAACGGGGTCAACCGCAAGCCGTTCTTCTTGGTGGAGGTGAGACCCAGCCCCCTTGAGCAGGTCAT  
CCACCAGACAGCCACCGCCGTGTACCAGCACCAGCGGACGGTGTGATCGTCGAGAAAGGTTTTGAGGGT  
GGCGAACAGGGCGGTGACGCGCTCGTCTCGATAAAGGGCGCCGCCAGCTTGATTACCAACCTTGTGT  
TTGTCCATGTTTCGAGATCCTTCTAAGTCTTAAATCAGGCGCGTGGCCGTTCAAATCCCAAATTTGATA  
TTTATGCACTGCATGGCTTGCAGGGCGGCGCCCTTGAGCAGGTTGTTCGATGGCGGAGACCACCAGCA  
TGTTGCCCTGCTGTTGCCAGGCGATATCACAGTAAGGGGTGTTTGGCACACCGCGAATAGAGGGCATCTG  
GCCGGTGGAGGCGACCAGCGGCTTGCCCTTCGTAAGCCTTGAGGAAGGCCTGATCCACCTGGGTGGGGGTG  
ACGCCGTCCGCCAGCTGCACATAGATGGTGGCCAGGATGCCGCGCACATAGTTGCCAAGGTGGGGCTGGA  
ACAGCACCTCCTTGCCGAGGTGGTGGCTGATCTCCGGCTGGTGTCTGTGATTGAAGGTGCCGTAGGGATT  
GAGGCTCACTTCGAGAAGCTGGTATTGATGGCGCCTTGCGCCCGGCGCCAGAGACCCCGGAGACTGCG  
TTGATGATGGGCTGCCAACCTTGGCAATCAGGCCATCCTGCTGCAGCGGCTTGAGGGCGCACAGCGATG  
CGGTCCGGGTAGCAACCCGGCACCGCAATCAGCTGGGCGCTGGCGATGGCATCGGCATTCCACTCCGCCAG  
GCCATAGGCGGCCTGATCCAGCCACTGTTTCGCTCTGGTGGGTGAAGCCATAGAAGCTGTCTGTAGAAGCC  
TGATCCTTGACCCGGAAGGCGCCGGAGAGATCGAACACCGGCAGCCCCCTTGCGGAGAACTTGGGTGCCA  
GCTCGGCGCTCACCTCGTGGGCGGTGGCCAGCAGCACCAGATCGGCCTGGGTGAGGATCCGGGTGATGCC  
GTCGTGCTCCAGCGGTAGCAGCGGCTGATCGAGGGCGCCGACCCACTGGGAATGCAGGGAAGAGAAGCGC  
TTGTGGGCATCCTGACTGCCGGCGGAGACATAGAGGGCCGAACAGTTGAGTTGTGGGTGGTTCTGTACCA  
GTGCGGCCAGTTCGGCTCCCGCGTAGCCACTGGCACCGACGATAACGGTGTAAAGCATGTTGAATATTC  
AAGTCAGAGTTCGAGATTCACAGCATGGCGCTGCAGTGCACAAGGGTGTTCGAGCGCCCCCTTTGCACCGT  
CTTGATAAAAACAAGTGCAGGAGGGGCAATTCAGGCGGGTGTGTGTCTGTCGTTATAGATCAGGTGACAGAA  
CATTAACTTTCCCTTACAACCTAGAAGCCTTTGTTGATGAGCCAGATATTCAGGTAATAATGTAGAATATT  
CATGCACTCACTTTGCATTTGTATTTTCTAACAGAAACATTCGGGGACGCAAGGAGGAGCTGATGGCCA  
ATCTGGATTTTTTTTTCACTTTATAAGAATATTATTGCGATTCCCTCTATCAGCAGCACGGATCCCAAGTG  
GGATCAGAGCAACGAGGCGGTGATCCGGCTGCTGGCCGACTGGTTCCGGTCAGCTCGGTTTTTCAGTGCGAG  
GTGACGGCGCTCCCCGACCTGCCGGGCAAGTTCAATCTGGTGGCTACGATCGGTCAGGGGGAGGGTGGTC  
TGCTGCTGGCAGGTACACAGATACTGTGCCGTTTCGATGAGGGGGGCTGGAGCAAGGATCCCTTCAAGGT  
GACGCAAGAGGGCAATCGCCTCTATGGTCTCGGCACTATCGACATGAAAGGCTTCTTCGCCCTTTATCGTC  
GAGGCACTGAAAGAGATTGACCTCACAAACTGACCAAGCCGCTGCGTATTCTCGCTACCGCCGATGAAG  
AGACCACCATGGCGGGGGCGGTGCCATCGCCGCCGCTGCCGAGCTGAAACCCGACTACGCCGTGATTGG  
CGAGCCGACCGGGCTGGTGCCTGTGGTGGCCCCACAAGGGGCATATGTTCGAGGCGATCCGCATTACCGGC  
AAGAGCGGCCACAGCTCGGATCCCGCCAATGGCGTCAACGCCATGGAGATCATGCACAAGGCGATGGGGC  
AGGTGCTGCGCTTGCAGCAGGATCTGAAAGATCGCTACGCCGACCACCGCTTTGCCGTGCCGACCGGCAC  
CCTGAACCTGGGTTACATTCAGGGCGGCGACAGCCCCGAACCGCATCTGTGGCTGCTGCCGAGCTGCATATC  
GACCTGCGACCCACTCCGAGGTGGGGCCGGATGAGTTGATGGGGATGCTCAAAGAGGGCGCTCTCTCCCA  
TCGAAATTCACCAACCCGGCTGCCTGCATCTGCAACATCTGCATGAACCCATTCCCGCCTACGCCGTGCCG  
CGACGACTCTGTGCTGGTGCAGCAAGCAGAGAAGGCGAGCGGCCGCGCCGAGTCCGGTCAACTACTGC

ACCGAGGCGCCGTTTATCCAGCAGCTTGGCTGCGAGACCATAGTGATGGGCCCCGGTCATATCACCAGG  
CGCACCAGCCGGATGAGTATCTCGACCTCTCCTTCGTCAAGCCGACCACCTCGGTGTTGCAACACCTGAT  
CAGACGTTTTTGCCTGTAGCTGCGGCGGTGAAAGGGCGTAAGAAGTAAAGTAAAGTTACATAACAAGCC  
GGTTGTGGAGTGGTGTATGGAAATACATGTTCTGAATCGGCCTGTATTTGACCTTGCAGCAGACAATCTGG  
GTAGATTGTCACCCTAAGATGACGGAGCATATGTTGTAATCGCACAACAATAAGTGAGGTCTGTCTAGCAC  
CCCGGATGGGTGTCAGGCACCAACAAGATAAGGATGTGGAATGAACGAAAAGTACGCCGCACTACGCGCC  
AACGTAGGTATGCTGGGTGAGCTGCTGGGTAATCCATCAAGGATCATCAGGGTCAGGCCTTTCTCGACA  
AGATCGAAACCATTGCGCAATTGGCCAAGTCTCCCGCAAGGGCAATGAATCAGACCGGGAACGTCTGCT  
CGATACCCTGCGCACCCCTGAGCGATGACGAACTGCTGCCGGTGGCCCGCCTTCAGCCAGTTCCCTCAAT  
CTGGCCAACGTGGCGGAACAGTTCCACACCATCTCCCGTCTGCGAAGAGCAGATCTGCACCCCGGACC  
CGCTGGAGCAGATGTTTCGACAAGCTAAAAGCCTCCAACTGTGCGAAGAGGCCATCATTCAGGCCGTGCG  
CGAGCTGGATATCGATCTGGTCTGACCCGCTACCCACCGAGGTGACCCGTGCGACCCCTGATCCACAAG  
CACGTGCAGCTCAACGACTGCCTCGAGGCGCTGGAGCTCTCCGACCTGCTGCCCGCGAGCGGGACAAGA  
TCCTCAATCGCATCGAACAGCTCATCAATCAGGCGTGGCACACCAACGAGATCCGCGAACAGCGCCCGAC  
TCCGGTTCGACGAGGCCAAGTGGGGCTTCGCTGTGGTGGAGAACAGCCTGTGGCCCGCCATTCGCCAATTC  
ATGCGCAATCTGGACGAGCGTCTGCAACACCATCTGGGTGTGCGGCTGCCGCTGGATGCCGCGCCGGTCA  
AGTTCACCTCCTGGATGGGCGGTGACCGTGACGGCAACCCCTTCGTTACCGCCAAGGTGACTGCCGAAGT  
GCTGGAGCTGGGCCGCTGGATGGCGGTGAGCCTGTTCTACAAAGACATCAAGGAGCTCACCTCCGAGCTC  
TCCATGTCCGACTGTACCGACGCGCTGCGTCTGCGTGGCGATCACCCGAGCCCTACCCTGCGCTGG  
TGCGCGAGCTGCGTGAAGCGCTGCGCGAAACCAAGGAGCACCTTACCGCCAAGGTGCAGGGTCAGGTGAG  
CGAGAGCCAGGATCTGGTCAAGACCACCGCCAGCTGCGCGAGCCGCTGGAGCTCTGCTACCACCTCTCTG  
CACGCTGCGGCATGGGCAACATCGCCGATGGCATGCTGCTGGATGTGCTGCGCAAGGTGCGCTGTTTCG  
GCATCCATTTGGTCAAGCTCGATATCCGTGAGGATGGCGAGCGTACGGGCTGGTCTTCTCCGAGCTGAC  
CCGCTATCTGGGTCTGGGTGACTACGCCGAGTGGAGCGAAGATGACAAGCAGGCCCTTCTGCTCAACGAA  
CTGAACTCCCGCCGCCCCGCTCATTCCCCACGACTGGGAGCCGAGCGCCGAGGTGCGCGAGACGCTGGATA  
CCTGTGAGGTGATCGCCGAGCAGACCCCGATGCGTTCGGTATCTACATCATCTCCATGGCCGGTGGCC  
TTCCGACGTGCTGTCGGTGAACCTGCTGCTCAAAGAGGCGGGCTGCAAGTTCCGCATGCCGGTCCGCCG  
CTGTTTGAACCCAGGATGACCTGATGGCAGGCAACCGCGCTGATGGAGCGTCTGCTCTGAGGTGGACG  
ATCGCGGTGACTACATTGAGGCTCGTACGTACGTGATGATCGGTTACTCCGACTCTGCCAAGGATGCGGGC  
GATGGCCGCTGGCTGGGCCAGTACGCCGCCATGGAATCCCTGGTGGGGCTGGCCGAAGCCAACAACATC  
CGCCTCACCCCTGTTCCATGGCCGTGGCGGTACCGTCCGTGCTGGTGGTGGCGCTGCCCATCAAGCCATCC  
TCTCCAGCCGCGGGATCCCTGCGCGGTGGTCTGCGTACCACCGAACAGGGGGAGATGATCCGCTTCAA  
GTTCCGCGCTGCCGAAAGTGGCGATCAAGAGCCTCGAGCTCTACACCAGCGCCGTGCTGGAAGGGAACCTG  
CTGCCACCGCCCAAGCCGAAAGAGTGTGGCGGAGGTGATGGAACAGCTGGCCGCGACTCCTGCGATC  
ACTACCGCAGTATCGTGCAGGTCATCCGACTTCGTTCCCTTACTTCCGTGCCGCCACCCCGGAGATGGA  
GCTCGGCAAGCTGCCGCTCGGCTCCCGTCTTCCAAGCGCAAGCCAACGGCGGCTCGAGAGCCTGCGC  
GCCATTCGCTGGATCTTCGCTGGACTCAGAACCCTGATGCTGCCGCGCTGGCTCGGTGCCACAAGG  
CGCTGCAACAGGCCATCGACGGCGCAAGCTGGCGGTGATGGAGGAAATGAGCGCCAGTGGCCCTTCTT  
CCGCACTCGCCTCGAAATGCTGGAGATGGTGTTCCTCAAGGCGGACGCTTGGCTCGCTGAGTACTACGAC  
ACCCGTCTGGTGCCGAGGAGCTGTGGGGCCTTGGCAAACAGCTGCGTCAGGAGCTCGCCGAATCCATCG  
AGGTGGTGTGAAACTGAGCCCGCGCGGGGATCTGCTGGAGGATCAGCCCTGGATCAAGGAGTCCATCAA  
GCTGCGCAACCCCTACACAGACCCGCTCAACGTGCTGCAGGCCGAGCTGCTCAACCGCTCCCGCAACCAC  
CCGGAGACCCTGCACCCCGAGCTGGACAAGGCGCTGATGGTCACCATCGCCGGTATTGCCGAGGTATGC  
GCAACACCGGTTGATAGCCAGCTCAATCCAGCAGGCTTCAGCGATATCCATCAAGCCAAAGGGCGCCGAC  
AAGGCGCCCTTTGTGTTTGTGTTTCGGAAGAATTTGGACAGATGGGAACCCCGTCTTGATGTGAGGCTGT  
ATTTTCGTAGGGTGAATAAGCGCAGCGCATTGCACCCTCGAAAATGTGTTTTGCATGGAGTTATCCTGC  
GTTTTATATATGGGCAAGTGGTGCAATTCACCTTCGTTTCATTCACCCCTACGGATGACGAGCGCAGATTGCTT  
CTCCGGCTTGATCCCTCGCCACGCGAGGCGCAGACTGTTTGGCCTTGTTTTTATGCGATTTCGATTCAAGG  
CAACCATCATGACTCCTGCCATCAACCTGCTGAAGAAGCTCAAAAATTCCCCAACAAGCTCTACCCCTACGA  
ATGCGAAGCCACGACGATTTCCGCAAGCATGCCGCGACCCAGCTCGGGCTGCCGGAGGCGCAGGTGTTT  
AAGACTCTGGTGCACCATCACGACAAGCAGGCGGTGGTGGCTATCGTTCCCTCATCCGGCATGTGCAGCC  
TGAAACAGCTGGCCAAGGCGACCGCCTCAAGAAGGTGGAGATGATGAAACCGCGGAGGCGGAGAAGCT  
GACCGGTTACAAGGTGGGTGGCATCAGCCCGCTGGCCAGAAGAACTGCTGCCACCCTGCTCGACGAA  
TCGGCGCTGCAGTTTACGAGATCCTGGTGGCGGCGCAAGCGCGCCTCTCGGTGCGGCTGGCGCCGC  
AGGATATGCTGACGCTGATGAAGTGGATCGCCGCTCCCATCGGCGAAGAGTAGTGCCGGGCACGGTGTGA  
ACCTGCCCTCCGGGCTGTGGCGGCCCCGATGTATCCTTGTGGCTCACTCCTGTTGGCTGATATAGTGG  
AGATGGAATAATTGCCGCAAGGATATGGCCTATGCGCGCATCTGCCCGCTCCCTGCTCTTTATCGCGTT  
GCTGCTGCCCGCCATCGGCGGTGCGACCCACGCTTTACGCTGCGAACCTGCTTTGAAAACAGTACTCC  
TACCCCTGGCTGCTGCAATCGGGGGAGGGGGTGTGCAATATCACCTCAAGGCGGTTGCTACCGCTCTTG  
ATGCCGAGATCGTGCTTACGCCGCTACCGTGAAGCGCTGCCCTCTCGGGTGGAGTGGCCAGATGGA  
TGCGGCCATCAAGATGAGCTACAGCGTGCAGCGGGCGACCACAGTGGGGTCTATCCCATGCGTGAGGGC

AAACCCGACCCTACCAAGCGGCTGCTGACCGAGAGTTACAGTCTCTACCAGCTCAAGGGGGTAAGAGCC  
AGTGGGATGGCACCACCCTCAGGGTCAATGGCATGGTGGCTGCCAGTCGGGATTTTCCATCGTCGACTT  
GTTGCAGGCTGCGGGAGCCGAGGTGGATGACTCCAGCCGTGACCCGCTGATCATTGAAAAAGCTGGTG  
ATGGATCGGGCGCAGGCGACCGCCATCCAGACCGAGGTGGCTGACAGTATCTGGCGGCAATCCCGCGT  
TGCAGACTCGCATCGAGCGGCTGTGCGCCGGTGGTGGGAGAAGCCCTACTATCTGGTCTTCTCTCACCG  
CTTCTATCAGGCCATCCCCGACAAAAGCCGACAGGTGTGGGATGCCATCGAGCAGGTGCGCGACTCTGCT  
GCCTATCAGCGTTATGCCACAGCGCTAAGAAGCACGCTCCGGTGGGGGAGTAGGCTGATGGATGCGACT  
GGCCGAAAAGGGGAGGAGAGCGTGGGGGGCAGGGCCGAGCGGCCACGCTCAGGGCTACACTGAAAGTAC  
CCCTTACGCCAAGGTGCGGTTTATGTACCCCTGCATCTGCTTGGCTGCCGCTCTGCTCTGCATGTTGTGCG  
CTGACCCGGACAGGCGGCCACCCGGTTTACCCATATCAGCCCGGAGAGCGAGCGTATCCGCGCACCACCT  
ATGATCGGGAGCTGCTGCGGCTCCGCTCGACAAGACCCGCGACCAAGTTTGGCGACTATCTGCTGGAGCC  
TGCGCCGCCATGACCAAGGCGCGAGCGGCTTAGCATGCAGCTCGACAGCTATCCCAACCTCTTTGTGTC  
ATGGACAGCTACAGCAGCACCCGCGAGGATCTGGGGCTCGCCTATGTCCGTTTTCCCATCCATCTGGGGA  
TCGTCAGCTACCGCATCTGTTTTGTGACCCCGCAGCAAAAAGCGGCTGTGAGCAAAGTGACCGACCTCAA  
GGGGCTGCGCCAGTTCACCTTCGGTACAGGGCAAGGGGTGGCTGGATGTGGATATCTGCGTTACGCCGGG  
ATGGAGGTGGTGAAGTGAGAGGGGTACGAAAAGCTGTTCAAGATGGTGGCGCGGGGCGCTTCGATCTCT  
TCTGCCGCGGGGTGAGCGAGCTGCGCAGCGAGCAGCTGACCCATAAGGAGATGACGGATCTGCTGGTCGA  
TGACGCGCTGTTGATCTACTACCCGCTGCCCGGGTTTTCTACACCCATCCCAACAATCGCGAGGCGTTG  
CAGCGGGTTCGAGCGAGGGTTGCAGCTGGCGTGGCAGGATGGCTCGCTACAGGCGCTGTGGCGCAAGAGCT  
TTGGCCCGGCCATCGCCTTTGCCAAGCTCTCCAGCGCCGACTGCTGCGACTGGATAACCCCTTCCCTCGA  
CGGGATCAGCTTCGATTACCGCCCTACTTCTACAATCCGCAAACCGATCGCTTCGGCGATTACTGAGGT  
GCCTGCCGCTGGCGGCAGAGGGCCAGCCAGGCTCGGGCGTGGCGGACAGATAGCGCTCGCTCGGCCAGA  
TCACCCCGAGTCGCCAGCTCAATTCGGGCTCCAGTGGCCGCGACACCAGACCATCCGGAGTCAGCCGGTT  
GCAGACCGGCTCCGGCAAGAAGGCGACCCCATGCGCTGCGTACCATGGCGGTGAGAAAATCCCCTGG  
CTGCTGCGCGCCGCCACCTGTGGCACAAAAGCCCGCTCCTGACACGCTGCTCCAACCGCTCGCTCAGAG  
TAAACGCTGGGTATAGAGCAGGAAGGGCTCCTCCTGCAGGGACTCCAGCCGCGAGCGGCGCATCGCCATG  
CCAGCGGGGTTGATCAGGCAGCACACCACCCGATCGGGTATTGATCCAGCTCCAGCGCGCTGAGGGCGCCC  
CCCTCTTTGGTTCGCGCAGCATGGTGGATGGCGAGATCCAGCTCCCGCTCCAGCACCGCTGTTGATGCGAC  
GGCTCGGTACTIONTCCACAGGGTTCAGCTCCACCTTGGGATAGCGGGTGGCGTAGGCGCGGATCAGATCCGC  
ATAGACGTGACCCACCATGGGGGAATGCCGAGGGTGGAGCGACCATGTTGCGAGGCTTGCAGATCCGCC  
AGTTCCGCTTCCAGCTGCTGCATCTCCGCCAATATGGTCTGGGCTCGGTTGAACAGCACCTGGCCGCTGT  
CGGTACAGGTTGAAGCGGCGCCCTTCCCGTTGAGCAGGGGTTGGCCAGCTCCTCTTCGATATTGCGGAT  
CATCTTGTGATGGTGGGCTGGGTGACGAAACAGCTTTTTCAGAGGCGCGGTGAAGCTTTTTTCCCGCACC  
AGTTTCGACAAAATAGCGCAGGGCGCAATATCCATGGACTCTCTCGACTCGTGTGGCGGGTACGGGATG  
AAGTATGCCTATGTGGCATGAATTTGATAATTTAATTCATTTCTGGCAGGTTTTGCTCAACTCTATACT  
GTGAGCCGGTTCACAGAAAGACGATGATCATGAAAGCCCTCTGCTTGGCTGGTTACAGACTCCCTTCCA  
GATTGTGTTGCTGGCAGCCATCTGGCTGCTGGCCGATACCGCGGTTGAAACCCTACATCTGCCGCTGCC  
GCCAACCTCACCGGCATGCTGTTGCTGCTGGCCTGCATCCTGCTCGGAGTGGTTAAGGCCGAGTGGTTCA  
GCGCGGGGGCTCGCTGGCTGCTGGCGGAGATGCTGCTTTTTCTTCGTGCCCGCCGTGGTTCGCGGTGGTCAA  
CTATCAGGATCTGCTGCTGCAGGAGGGGTGGCGCATCATGGTGGTGGTGGTGGTGGTGGTGGTGGTGGTGGT  
CTCGGCACCACGGCGCTGGTGGTGGACCGGGTTTTACCGCTCGAACTGAACTGGCCCGCCGGAGTCGCC  
GTCATGTCTGATAACCTGCTCGGGCTGATCTGTTTCGCCCTCACCTGCTCTTCTACTACGCCAGCAAAT  
GGTCTACGGCAAAAAGCGGATCCTGCCGCTGATGCCGCTGCTGCTGGCGCCGACCTGCTGGTGGCCGT  
GGTGTGCTGTTCCACATCCCTATCAGGACTACATGGCGGAATCCCACTGGCTGCTCTGGCTGCTGGGC  
CCGGCCACCGTCGCCTTCGCGGTGCCGGTCTACGAGAACCGCCAGCTCATTCGTCGCCACTGGCTGCTGCG  
TGTCCGTCGGAGTGGTCCGCTCGGTCATCATGGCGGTGGGGAGTACCGTGGTGGTGGTGGTGGTGGTGGT  
TCTCTCCGACATGCTGCAGCGCAGTCTGGCGATGCGCTCCATCACCACGCGCTTTCGCGGTGGAGGCGACC  
CGCGCCATCGGCGGTGAGAGCGATCTCACGGCGCTGTTTTGTGGTGGTGGTGGTGGTGGTGGTGGTGGTGGT  
TGGGGGAGAGCGTGGTACCGTGGTGGCCATTTCGAGTGGCTCGCCTCGGCAAGGGGGCGGGGTTTTGGTGGCT  
GGCCACGGCGCCGGCACTGCCAGGGCTTATCAGATGGGTAATGAGGAGGGAGTGGTCTCCAGCATGGTGG  
ATGATGATCGCCGGTATGGTACCCTGCTGCTGGCACCCCTGCTGGCCGGATGTTCTGGTAGGCCGGGC  
TTCCCTTTAGAAGGCTGCTCGTCTCGGCGCTACATTTCTAGTGAGCTGTATTTCCGGGATGAGCAGTATG  
ACCTTTTCATCGTCTCGCTTCCCTGCTTGGTGGTGGTGGTGGTGGTGGTGGTGGTGGTGGTGGTGGTGGT  
GCGACGTCATCACTCATATCAGCCCCGAGAGCGATCGGGACTTGGCTACCTCTATTTTCGCGATCTGTT  
GCAGCTGTGCTGGAGAAGACCCGCGACAGCTTCGGTACTACGAGCTGCGAACCAGCGCCCGCATGAAC  
CGTATCCGGATGCGACAGATTGTGAGACTCAGCAATACCCCAATCTGTTTGGCCGACAGTCTGCGTC  
CGGCCGCGGAGAGCGGAGCGCTGGATTACGTCCGTTTTCCGGTGGAGCTGGGCATCCTCGGTTATCGCAT  
CTGCTTTGTGAGTCCGCGAGCAGGCCGACGAGTGGCAAAGGTCAATACCCGAGCTGCAGCAATTT  
CTGCACGGGACAGGGCGTGGCTGGCAGGATGCGGAGATCCTGCGTATGGGGGATTCAGGTTGCAGGAGA  
TCGATGGTTACGAGCGGCTGTTCAAGCTGGTGGCGCGGGTGCATCGACCTCTTCTGCCGCGGGGCCAA  
CGAGCTCTTTATCGAGCAGGAGCAGCACAGTATCTGCCCGGCTCACCGTGGATCAGCGAGTGGCGCTA

CACTATCCCTTCCCTCCACCTCTTCTACACCCACAAGGATAATCAGGCCGCCATCCGCCGCTCTCGGTGC  
GCCTCAAGCTGGCGTGGCGGGATGGTTTCGCTGCAACAGCTCTGGCTGCGCCACTTCAAACCTTCCCTCGA  
TCAGGCGCAGCTCCCCAAACGCCTGTTGTTTCGAGTTGGCCAATCCGCGCCTTGATAAGGTGGACTTTGAT  
TATCGGGCCTACCACTACAACCCCGTTCGACGGGACGTTTCGGACCCGGGCTGCCTTGATCCTGATGGTGC  
GTTCCCGGATAAAGGGCCGTCTCTGCCGATGTGCTTAAGCATGCCAAAAAGGCATGTTTTTTTATTATTTA  
AATTCATTTTTTTGAAGGTTGGTTCGCTGCATATACTGGGGGTCGCTTACGGGTCAGGTTTGCCTCGC  
CGCTTCTGGCTTGTGCGAGTGAGCCTGAATCGTCTGCTGCGGCGTCTTGATGTTCTGCATGAAGGCGTC  
CATCACTGGGCCGGGAGCGATCCCGGCAGGTATTACAGCTGACGGAGCCTTGTTATGTTTAATCCCCACT  
CTTGTGCCCTGATTGTGCAAGGGGGCGCGATGCGCGGCATCTTGGCCAGCGGCGTGCATGCCTTCGT  
GGAAAGCCATCACTATCCGTTTCGATTTTCGTATGGGCGTCTCGGCCGTTGCCACTAATCTGGTCTCCTAT  
CTGAGCGAGCAGCCGCGCCAGTCACCACATCATCCAGAGCTGGCTTGCAGCTCCCGTTTTCTCGATC  
CCCTGCGTTTTTCGTCAAAGGGGGCGATCTGGTGGACATCGGCTGGCTATGGCAGGCCAGTCCCATCGCTT  
CCCGCTCGATCTCGAGACCTTCTGCGCCCGGACATTCCCTTCTACGCGGTGGCGACCAGTGTGGCGAGC  
GGCAAGGCCATCTATCTGCCGTTGCGGCCCCGACAACATGGATGAGGTGCTGACTGCCACCTGCGCTCTGC  
CGGTGGTGCAGCACGATAACCCCTGCGTTCGATGGTTCGCCCCATGGCCGATGGCGGCATCAGCGACTCCAT  
TCCGGTGCATCGAGGCTATCGGCGCGGGGCGCGGCGGATGACGGTGGTGTCTGAGCCCTGGGGATAT  
CGCAAGAAGCCGGCCCGTTTTCTGCTGGATGGTCAAAGCCTTGTGAAAACCCAGCCTGCGCTGGCGCAAG  
CCATGCTGGAACGGGATCGCGCCTACAACCGGGCACTCGATTTTCATTGCCAATCCCCCTGCTGATTGCGA  
CATCGAGGTGATCGCGCCACCGGCCGATTTTCATGGTCTCCCGTTTTTACCAGGACCCGGTCAAGCTGGAG  
TCCGGCTATCTGCAGGGTTACTGGCAGGGGGCGCCAGAGTCTGCTGCGGGCCCGTGGAGAGGCGCGAGCGG  
TGGCCTGACTGGTTTTGCCGGGTGCTGAATATAGAAAGGGGAACCTTGCCTTCCCTTTTTATCTTCCCTGA  
TCGGCAGCCGCTGGTTACAGCATCTGCTTGAGGCGATAGAGCAGGTCGAGGGCCTGACGGGGAGTGAGCT  
CGTCCGGGCGCAGCGCTTCCAGCTCTTCCACCACCGGATGAGGCTGCGGGGCGAGGGTACCAGGAGCCGG  
GCGGCTTTTACCAGGCGGCGACCGGGGTGGCGCTCTCCAGCTCATGCAGTTTGTGACGGGCTGCTGGATC  
ACCGATTTTCGGCACCCCGGCAACGCTGCCACTTGCAGACCGTAGGAGCGGCTGGCCGCCCTTCCCTGCA  
CCGCGTGCATAAAGGCAATGGTGTGCGCGTCTCCACCGCATCGAGGTGGACGTTGGCCAGCCCGCTCAT  
CAGCTCCCGCAGACGGGTCAGCTCGAAGTAGTGGGTGGCAAACAGGGTGTAGGCGCAATCTTGTCTCGCC  
AGTCTGCTCGGCACAGGCCACCGCCAGCAGGAGGCGCGTCTGATAGGTGCTGGTGGCGGCCAATCTGCCA  
TCAGCACAGACTCGCGGCGGTTGGCGTTGTTGAGGATATTGGCGGCTCTCGGTCATCTCCCACTAAAGGT  
GGAGCGGCCGAGGCGAGATCATCCGAGGCTCCGATCGGGTGAAGATGCGGTCGATGGGGCCGATGCGG  
GCGCTGTGCGCGGGCACGAAGGCGCCGATATGGGCCAGCAGCACGATCAGCGCGGTCTGGCGCATGTAGG  
TGGATTTACCGCCCATGTTGGGGCCTGTGATGATCAGCATCCCGCGCTCCCGCTCCAGCCGGATGGGGTT  
GGCGATAAAGGGATCTGTATCACCTGCTCAACCACCGGATGGCGGCCCGCTCGATGATGATCTGATCT  
TCGTCGATGAGGGTTCGGGCGACTATAGTTCGAGGGTCTCGGCCGCTCGGCCAGGTTGGCCAGCACGTCCA  
GCTCCGCCAGTGCGGCGGCGGAATCCTGCAGATCGCCGAGATGGGGCAGCAGGGCATCGAGCAGCTCTTC  
GTAGAGCCGTTTTCTCCAGCGCCAGCGCCTGGGACTGGGCGGTGAGTACCTTGTCTCTGACTTCTTTCAGC  
TCATCGATGATGTAGCGTTTCGTTGTTCTTTCGAGGGTCTGGCGCGGATGTAGTGGGCCGGCACCAGATGGC  
TGTTGGCGCGGCTCACCTCTATATAGAAGCCGTGCACCTTGTGTGAACCCACCTTGAGGGTGTGATGCC  
GGTCAGCAGTTTTTCCCGCTCTTCGATGCGTGCAGGCTGGCGGTGGCACCGTTGGCCAGGTTCCCGTAGC  
TCGTCAGCTCCTGATTGAAGCCGTCACGGATGACGCCACCATCGCGGATCAGCACCGGCGGCACTTCCA  
TCACCGCGCGCTCCAGCAGGTCGAGCAGCTCGGGGAAGGTGCTGGCCCGCTCGGCCAGTTGTTGCACCGC  
TTCGTGCTCGTTGTCCACCAGCAGGCGCTGCAACTCAGGTAACCTGGGCGAAGGCTGACGCAGGCGGGTG  
AGGTTCGCGCGGGCGGGCCGATCGCAGGGCGAGACGGGCCAGCACCCGCTCCACATCACCCACCTGACGCA  
GCAGGTTGCCCAACTCGTCGTAGAGGTTTTGCTCGATGAGCTCCTTGATGGTGTCTTGGCGACCTTTCAG  
GATCACCCGATCGCGGCTCGGCTGGTGGATCCAGCGCTTGCAGAGGCGGCTGCCATGGGGGTAGCGGTG  
CGATCCAGACCTCGGCCAGGTTATTTTCATAGCCACCGCCAGATTCTGGGTCAGTTCCAGATTGCGGC  
GGGTGGCGGCATCCATGATGACCGCGTGCATCCGGCTGCTCGAGGCGCACGTTGCGGATGTGGGGCAGGGC  
GGTGCCTGGGTGTCTTTCAGTACTGCATCAGGCAGCCTGCGGCGCACAGGGCGGTCTCGCTCTTGTGCG  
ACGCCAAAGCCCACCAGATCCTGGGTGCCGAACTGCTGGCAGAGCAGCTTGCAGCGGTTGCCAGCTCAA  
ACTCCACTCCGGGCGGCGACGAGGCGCGGCGACCCTCTATATGGTGCAGGAATTCGAACGATTCCGGG  
ATAGAGCAGCTCGGCCGATTGGTTCGCTGCAGCTCCGCCAGCAGGGTCTCTTCTTCTCGAACGTTG  
ATGAAGAAGCGGCGGAGCCGATGTCCATGGTGCATAGCCGAAGCGGCGGCCATCGTGATAGACGGCGG  
CGATCAGGTTGTCTGCGCTGCTGAGCAAAGCCTCGTCGGAGACGGTACCCGGGTTGATGATGCGAAT  
GACCTTGCCTCCACCGGCCCTTGTGTTGGTGGCGGGATCCCCACCTGTTTCGAGATGGCGGCGGATTTCG  
CCGAGCTGCACCAACTTGGCCAGATAACCTTCGATAGCGTGCATAGGGCACCCCGCCATCGGGATGGGGC  
TGCCCGCGACTGACCGCGCTTGGTTCAGGGAGATATCGAGCAGCTGGGAGGCTTGCGGGCATCGTCATA  
GAACAACCTCGTAGAAGTCGCCCATCCGGTAGAACAGCAGGATCTCCGGGTTCTCGGCCCTGAGGCCAAGG  
TACTGCTGCATCATAGGCGTGTGGGCGCTCAGATTGGCGCCGGGAGCGGAGCTTGTGGCGCCGCTGGCTT  
GGTGTGTTGCGGTCATGTTCTGTTCCAGAAGGGGCTCTGCGGGCCAGTGTCTGCGGTGATGAGCCTTGA  
GCTTGCATGGCGCCATTCTACACATAAGCGCCGCTACGGGGGAGCGGGTGTTCGGGCGCGGTTGTTCTGC  
ACTATTGAAGTGCATTGCACAGGTACGGCACCTCACATTGCGGCAGGCAAGGGCGGCTGCTGTGGTTGC



GGGCGGTGGTAGCGGGATCGCATAATGTGCCTCTTGAGCGGATCATAAGGAGTCGTGATGAAACTGGATG  
CAGAGATAGAGCACCTTGCCATCGAGCTGGGACGGGCCCTCGGTCAGCGGGGCTGGCTAGCGGGCACC  
CGAATCCTGCACCGGGCGGGGGTGGCTACGGCTATTACCGACATCGCGGGCAGCTCCGGCTGGTTCGAT  
CGCGGATTTGTACCTACACCAACGAGGCCAAGCAGCAGATGTTGGGGGTGAGCAGCGAGAGCCTTGAGC  
AGCACGGTGCCTGAGCGAAGCCGTGGTGTGGAGATGGCCCCGGCGCGCTGGCCACTCGTCGGCCTC  
CATCAGCGTTGCTATCAGTGGCATCGCCGGCCCCGGCGGCCACCAGGGCAAGCCGGTCCGGCACCGTC  
TGGTTGCGCTGGGCCGACCGCAACGGCCGTCAACCTCCCTGCTCGCCCGCTTCGACGGGGATCGCCGAC  
AGGTGCGCCAGCAGGCGGTGAGACAGGCCTTGTGGGTCTGTTGGCCCTGCTCAGATAAATTGGGCTTGA  
TACTGTATGAATAGACAGTATACTTAGCCCAACTTCACTTCTTACTCACGATTTCCAGCGGAGATTGGCA  
TGGATCAGAACAAACAGAGGCACTGGCCGGTGCCTGGGTGAGATTGAAAAGCAGTTCGGCAAGGTTTC  
CATCATGCGTCTGGGCGACAGCAAGACCATGGATATCGAAGCCATCTCTACCGGTTCCCTCTCGCTGGAC  
GTGGCGCTGGGGATCGGCGGTCTGCCGTGTGGCCGTATCGTCGAAATCTACGGCCCGGAATCTTCCGGTA  
AAACCACCCTCACCTGCAGGTGATCGCGGAAGCCCAGAAGAAAAGGCAAAACCTGTGCCTTCGTGATGC  
GGAACACGCTCTCGACCCTATCTACGCTGCCAAGCTGGGCGTCAACGTCGACGACCTGCTGATCTCCAG  
CCGGATACCGGCAACAGGCGCTGGAAATCTGCGACATGCTGGTTTCGCTCCAACGCCGTTGACGTCATCA  
TCGTCGACTCCGTGGCGGCTCTGACCCCGAAAAGCGGAAATCGAAGGGGAGATGGGTGACTCCCACGTTGG  
TCTGCAGGCCCGTCTGATGTCCAGGCACTGCGCAAGCTGACTGCCAACATCAAGAACGCCAACTGCCTG  
TGTATCTTCATCAACCAGATCCGGATGAAGATCGGCGTTATGTTTCGGTAGCCCGGAGACCACCACAGGTG  
GTAACGCGCTCAAGTTCTACGCCTCCGTGCGTCTGGATATCCGTCGTATCGGCGCCATCAAGGAAGGCGA  
CGAAGTGGTCCGTAACGAGACCCCGCTCAAAGTGGTCAAGAACAAGGTGGCCCCGCCCTTCAAGCAGGCT  
GAATTCAGATCTTCTACGGCGCCGCTATCTCCAAGAGGGCGAGCTGGTGGATCTCGGCGTCAAGCACA  
AGCTGATCGACAAGGCCGGCGCCTGGTACAGCTACAACGGCGAGAAGATCGGTCAGGGCAAGGCCAACGT  
GATGAAGCTGTTTCGCCGAGAACAAGGTGATGGCTGGTGAAGTGGAGGCTCGTCTGCGCGAGCTGCTGCTC  
TCCGGTGCCTGCCAGTGCAGCACAAGGCTGCACCGGTTGAGGCAGACGAGTTCGATGCCGAAAGCGAAC  
AAGAGTTTGAATAAGGAACAAGGAAGGCCGGGTTGATACCCGGCCTTGTATTTATGATGGTTGATGAA  
TCTGCTGACAAACCTGTGCAACTCACCTTTGAAGAACAACCTGGCTGCGGCCCGGGCTATGCCATGCGCA  
GTCTGGCCCGCCGAGAGTCCGAGTCCGAGCTGGCAACCGGCTGCGCCAGCAGGGCTTCAATGAAGA  
GGTATCGAGGCGGTTGGTTCGACTACTGCCCGGTTACAACCTGGGTCAATGACGAACGTTACGGCGGATG  
GCTGTACGGCCCGGTCGCCCAAGGGGCATGGCCCCATCAAGATCCGCTTCGATCTGCGCCGCAAGGGGC  
TCGACGATATGCAGATTGATGCCGCATTGATCAGCCGGAGCTGGACTGGTTCGAACGCGGCTTGCCTC  
GCTCGAACGGCGCGCCAGGGTGGCCGATCTGGCGGATTTCAAGCTGCGGATGAAGTGGCTCAAATATCTG  
CTGGGGCGCGCTTTTACCCAGGATCAGGCCCGTTATGCCATCTCGGCCCTGCAGGAGCGGGAAGTGTAAAC  
GCCACTGCGTGGCAAACGTCGTTTTACCTCTCCTTATGGCAGGTTTTTCCCTTCCCGTTACGTAGCTTGGC  
CGCACAATCCCGAAAAGCGGCCTTTTGTTCATCTCATCTCTCTTTATGCGCTGCTTTTTTGCCTCTCGA  
CAGTGA AAAAAGCCACTGTGGGCAGCGGCGCTCTTATCTGGCCGTTTTATGTGCGCTTTTTTCGCCCTGG  
CGGCCCTGTCCGTTTTACTTTTACCCCGCAGAAAACCTTACATTAATGCGGTTAAAAGTCCGTATTCGAATC  
AAGCAGGATTTTTCCATGTATATGTCCACGTCAGAGATTCGCGCTGCGTTTTCTCGAGTATTTCCGTTCCCA  
GGGGCACCAGGTTGTCTCCTCCAGCTCGCTGGTACCGCATAACGACCCGACCCTGTTGTTTTACCAACGCG  
GGTATGAACCAGTTCAAGGACGTGTTCCCTTGGCGCAGACAAGCGTGCCACAAATCGCGCGACGACTTCCC  
AGCGTTGCGTGCCTGCGGTTGGTAAGCACAACGATCTGGAAAACGTCGGCTATACCGCTCGTCACCACAC  
CTTCTTCGAAATGCTGGGCAACTTCAGCTTCGGTACTACTTCAAGCAGGATGCCATCAAGTTTGCATGG  
GGCTTCCTGACCGAGGTGCTGCAGCTGCCGAAAGATCGCCTGCTGGTGACCGTCTACGCGACTGATGATG  
AAGCTTTCGATATCTGGGAAAAGAGGTCCGTTGCCGCGGATCGCATCGTGCATCGGTGACAACAA  
GGGCGCGCCGATGCCTCCGACAACCTTCTGGGCGATGGGCGATACCGGTCCGTGCGGTCCCTGCACCGAG  
ATCTTCTATGACCACGGCGATCACATCTGGGCTGGCCGCCCCGGCTCACCGGAAGAGGATGGCGACCGTT  
TCATCGAGATCTGGAACGTGGTGTTCATGCAAGTTCAACCGTCAGGCTGACGGCACCATGGAGCCGCTGCC  
CCGTCCGTCCGTGGATAACCGGTATGGGTCTGGAGCGTATCTCCGCCATCATGCAGGGTGTCCACTCCAAC  
TACGAAATCGACATCTTCCAGGCGCTGATCAAGAAAAGCGGCCGAGATTGTGCGCACTACCGATCTGAGCA  
ACCAGTCCCTGCGCGTATCGCTGACCACATCCGCTCTTGGCGCTTCCCTGGTGGCAGATGGCGTATGCC  
GTCGAACGAAGGCCGTTGGCTATGTGCTGCGCCGATCATCCGCCGCGCCGTGCGTCACGGTCGCAAGCTG  
GGCGCTACCGATGTCTTCTTCTACAAACTGGCTGCCGAGCTGGCAGTGCAGATGAAGGATGTTGCTGCCG  
AGCTGATCGCCAGCTGCCGCTGGTCGAGCGTGTGCTGCGCATCGAAGAGGAGCAGTTTCGTCGCCACCCT  
GGATCGCGGTCTGCTGCTGCTGGAAGACGCTCTGGCCAACCTGGGCGATGCCAAGGTTATTCGGGGCGAA  
GTGGTGTTCAGCTCTATGACACTTACGGCTTCCCGGCCGACCTGACTGCTGACGTGGTGCAGGAGCGCG  
AGATCGGCATCGACGAAGAGGGCTTCAAGGCCGAGATGGAGAAGCAGCGTGTCTGTCGCAAGAGGCTC  
CAGCTTCGGCGTGAACATAACGAGATGCTCAAGCTCGACTTCGAGAGCCCCCTCACCGGTTACAAGACT  
CTGACCGAGCGCACTCGCGTTGTCCGTATCTACAAGGGTGTGGAAGAGGTGAGCAGTCTTATCGCCGGTG  
ACGAAGCGGTCATCGTGTGGAAGAGACCCCTTCTACGCCGAATCTGGCGGCCAGATTGGCGACAGCGG  
TACCCTGAAAGTAGACGACGGTATCTTTGCCGTGACCGACACCCTGAAAGCGGGCAAGGCGATCATCCAC  
AAGGGCTACATGGAGTTGGGCACTCTGGAGAAGGGCGCCGAAGTGAAGCCGTGGTTGACGCTGACCGTC  
GTCAGGCCATCGCCCTGAACCACTCCGTGACTCACCTGCTGCACGCAGCCCTGCGTCAGGCACTGGGCGA

GCATGTCACCCAGAAAGGTTCTCTGGTTGGGGCCGAGCGCATGCGTTTCGACTTCTCCACTTCGAGGGG  
CTGACCATGGCGACCATTTCGCCGGTTCGAGGAGCTGGTCAACAACCAGATCCGCGCCAACCATGAAATCA  
CCACCCAGCTGATGGATCTGGAAGCGGCCAAGTCCGCCGGTCCATGGCGCTGTTTGGTGAGAAATATGA  
AGACGACGTGCGCGTGGTGC GCATGGGGCGACTACTCCACCGAGCTGTGTGGCGGTACTCACGCCAAGCGC  
ACCGGTGATATCGGCTTCTTCAAGATCATCGCCGAGAGCGGTATCGCTGCTGGCGTGCGCCGTATCGAAG  
CGGTGACCGGCAAGGCCGCCATCGACTTCATGCATCAGGTTGGCGAGCAGATCGAAGAGGGCTGCTGCACT  
GGTGAAGGTTGACAGTTCTGCATCGCCGACAAGGTTCCGCAGATGCTGGACAAGGCCAAGATGATGGAG  
CGCGAGCTGGAGCAGCTTAAGGCCAAGCTGGCTGCTCAGGCTGGTAACGATCTGCTGGGTCAAGTGATCG  
AGATCAATGGTTCAGAAGGTGCTGGTTGCAGCGCTGGAAGGGGGCCGATCCGAAATCCTTGC CGGCATGCT  
GGACGAGCTGAAGAACCAGATGAAGTCCGGTGTGCTGCTGCTGGCCACCTGTGCCGATGGCAAGGTCAAC  
CTGATCGCCGGTGTCAACACAGCTGACCCGCAAGGTCAAGGCCGGTGGTGGTCAATCTGGTTGCC  
AGCAGGTGGGTGGCAAGGGCGGTGGCCGTCGCCGACATGGCACAGGCCGGGTGGTACCCAGCTGAGGCGGT  
GCCGGCAGCGCTGCAATCCGTTCACTCCTGGCTGGAAGAGCGCTGTAATCGGGCGAGGTGATCTGTGGC  
ACTCTATGTACAGAAGTACGGCGGCACCTCGGTGCGGCACACTGGAGCGGATCGAGGCGGTAGCTGAGCGG  
GTCGAGCAGACCCGCGCCAGGGACACGACGTGGTGGTGGTTGTCTCCGCCATGTCGGGCGAAACCAACC  
GGCTGCTGGGCATGGCCAGCAGCTGGATCCTTATGCCAACCGCGGGAGATGGATGTACTGGTCTCCAC  
CGGTGAGCAGGTACCATAGCGCTGCTGGCGATCGCGTTGAACAAACGTGGTTGTCTGCGGTCTCAATG  
ACCGGTGATCAGGTGCGGATTCATAACGATTCCGCCATGGCAAGGCGCGCATCACCCACATCGACACCG  
AGCTGGTTTCATGCCGAAGTGGCTGCGGGCAAGGTGGTGGTGTATCGCCGTTTCCAGGGCCGTGACGAGCA  
TAACGCCATCACGACGCTGGGCCGCGCGGTTCGGATACCACGGCAGTTGCCGTGGCGGCGGCCATCAAG  
GCCGATGAGTGCCAGATCTTTACCGATGTGGATGGTGTATACACCAGGATCCGCGCATCGAGCCCAAGG  
CGCGTCTGTCGACACCATCACCTTCGAGGAGATGCTGGAGATGGCCAGTCTCGGGCGCAAGGTGTTGCA  
GATCCGCTCGGTGGAGTTTGCGGGCAAGTACCGCGTCCCGCTGCGGGTGTGTCGAGCTTTATCGATGGA  
GAGGGAACCTTAATCACATATGGAGGTGATAGGATGGAAGCTCCCTGGTATCCGGGATCGCTTTTAACC  
GCAACGAGGCCAGCTTGACCAATTCTGGGCGTGCCGGACAGACCAACCGTTGCCGCGCAGATCCTGAATCC  
GATCAGTGACGCCAACATTGATGTGACATGATTGTGCAGAACACCTGGGAGATGGCACC GCCGACTTC  
ACCTTCACGGTGAATCGTGACGACTATCGCCGCGCCCGGGCACTGCTGGAGGAGACCGCCACCGAATTC  
GCGCCTCCTGCTGCAGCAAAAATGGCGAAAATGGCAAGTTTCCATTGTGCGGTGTCGGCATGTGGAACCA  
TCCCGGTGTTGCGCGCACCATGTTCAAGGTATTGGCGAGGAGGGGATCAACATGCAGTGTGATCTCGACC  
TCTGAAATCAAAATCTCTGTGGTGATTGACGAGAAGTATCTGGAGCTGGCGGTGCGAGCCCTGCACGCGG  
CTTTTCGGGTTGGATCAGGCACCGCAAGAGCAGCCCTTGGGCTAACAATCTCTGATTGATTTAGTTTCAAC  
CATTTACCATATCGGTATCTTTGTTAGATAATGTGCGATATCGATATAAAAAACAAAACAGGATACAGGAG  
CAAGCGAATGCTTATTTTACTCGTGTGTTGGGAAACCTGATGATTGGTGTGAGTGAAGTACTGTCACC  
GTACTGGGCGTTAAAGGCAACCAGGTCCGATCGGTGTGAACGCACCAGAAAGAGGTCTCCGTGCACCGCG  
AAGAGATCTACCAGCGCATCCAGGCCGAGAAAGTTCGGGGCAACCGGGCTTCTAAGCCACTTTCATGGC  
TGTGACAAGGCGACACCTCATGTGTGCCTTTTGTTTTTTCTCGGCCCTGAAATCGCCCTGCAGGGCGC  
GAAACTGCGGGATAAGTGCCGATATTGTTTGAATATTCCACGCTTTGACCAAATGCTGAGCGAACGCACT  
TTTTTCTCCAAAAAAGTGTGTTGACTAAAAATCCCTGTGAAGTATTATCAGCCCCGAAACGGAGAGGTGG  
CCGAGAGGCTGAAGGCGCTCCCTGCTAAGGGAGTATGCGGCTTATACCCGCATCGGGGGTTGCAATCCC  
CCCTTCTCCGCCATTTGCGCCCGTAGCTCAGCTGGATAGAGTACCTGGCTACGAACCAGGTGGTCAGAGG  
TTCGAATCCTCTCGGGCGCACCATTTAAAACGACACAACGATTTATGAGCGCCCGTAGCTCAGCTGGATA  
GAGTACCTGGCTACGAACCAGGTGGTCAGAGGTTGCAATCCTCTCGGGCGCACCATATTTAAAGCAGTAC  
CAAAAGTTTATGAGCGCCCGTAGCTCAGCTGGATAGAGTACCTGGCTACGAACCAGGTGGTCAGAGGTTT  
GAATCCTCTCGGGCGCACCATACAGACAGCCTCGACTTCGGTTCGGGCTGTTTTTTTATGGGCGACATTT  
ACCCCTGTGCTGTGGATCAGTGTTCGCTATGGCGGCCGGTACCCTCCTGCCTATCTGTCTGTTCTTGT  
CCTCTTTTATACCTCTTCTGTTATTGAGCCGCTTCTTCTGAACGTTACAAGCCTTTGCCTCATCTGCAA  
GCAGGCTGTATGCCTGCTGTTGCTGCGGGGACTGCGCGCAGCTCATCACTCAGGGTTTTGGCTATCAACA  
TCCTGCAAGGCCTGCATAGGCGTTCTGCGGGCAATAAAAAAGGATGCCGAGCATCCTTTTTGTGTCGAGA  
TATTGACTCAGCTTTTCAACCATTTGCGAATGCGGTTGGCATCGCCGATGGGGGTGCGTTTTGCCACCGA  
GTTGAGCAGCAGATGGCGAGCTCGCGGCTGTCCGGTTTGGCGCGCATCACCCAGACAGCGCCCCGCTTCG  
TCAGTGAAGCCGGTTTTTGGAGAGGCGCACGTCCCAATCCGGGTTTTTACCAGCGGGTTGGTGTGTTGA  
ACATCAGGCTGTAGGCGGGGGCGCTGAAGCGCATCTCCGGTTCATCTTGTGAGTGAAGTACGGATCAG  
CGGCTGGCGATAGGCGGGCGGCCAGCTTGCCAGATCCTGGGCGGTGGAGACGTTGCGGGTGGAGAGG  
CCGGTGGAGTCGTAGAAGTGGGTATTACGCATACCCAGCTGTCTGGCCTTGTGTTTTCATGGCTCGCACGA  
AGGCGCTGCGACCGCCCGGATAGTGACGCGCCAGTGCCGAGGCCATCCGTTTTTCGGAGGACATCAATGC  
CAGATGCAGGGCGTGC CGCGGGTCACTTGGTGCCATGCGGATGCGGGAGTGAGTGTGTTTGACCCGA  
TCCAGATCGTTCTTGTGACCGTAATGGTCTGGTTGAGATTCTGTTTGGCATCCAGCACCACCAGCGCTG  
TCATCAGCTTGGTGAGAGAGGGCGATGGGACGCACCTTGGTGGCATCTTCTGGTAGAGCGCTTGGCCGT  
TTTTACATCCACGACCAGGGCGCTGCTTGGAGCTACTTCCAGTTTGGCAGGGTTGGGTGCCGCGCTGACC  
GCAGGCAATCCCAGCATTCCCATCAACCCGACAACCAGCGCTGCTGCGCGAATCCGACACCACATAAAC  
CGACTCCATTCATCAAAAAAAGGCGCTAGATTCACTCATTTTTACCCCGCTTTACAAGGGCCGAGC

GGGACTATTTCTGCTATTTGCGCAAAATTGGCGATCAAAAAAGCCCTCTGGCGAGGGCTTTCAGGTCCGG  
CGTTGGGCGAGGGGTCAATCCCCGGGCTGCGCGGCCCTGCGTTTGTGATCCAGCGCCAGACCAGCGCCA  
CCATGCCACCCAGCAGCAGGGCCACCGGCAGATAGATGATGATGTTGAAGAACTGGGTCTGGTATTCGGC  
GGCCAGCTTGGTGTGGCTCAGGTAGTAGCCAAACCCGACCAGCGGGCAGATCCACATGATGGAGCTGATC  
AGATTGACGATGAGAAAAGCGCCCTGGGGTAGCTCGGTGGCACCCACGATATAGGGGTAGGCGGTGCGCA  
CGAAGGCGATATAGCGCGGGTGTATCAGGGTGTATGATCCCGTACTTGTCCAGCAGGTGGTAGACCTTCTG  
CTGGTGTGCTCTTCCACGTGGGACATCAGCCGATGGTAGAGCTGGGTGTGGCCAAGGAAGCGCCCTGC  
ATGTAACCGAGCCAGGTGCCGACAAAGGTGGCCATGATCAACAGCGGGATTACCCCGAGAGACAATACAT  
CCTGATAGATGAGCACGCCGGTGTAGGATCAGCAGGCTGTCACCGGGCAGAAAAGGCGGTAGGGATGAATCC  
GTTTTCCAGTACCAGAAACGTGAGAATCACACCACAGATCATGAAGCCATCTTGGGATCGGAAAAGTGTG  
TTCAGATCGTGATTCATAAAGGCGGTGAGCCAGTTGGTAAAACCTGCTCCATACTTGCAAACCTCCGCAGGTT  
AGCTGGGTTGATCGGTCAAGGGCATGGCGAGCACCTTGTTCGATGCGCAGGCCATCCATGTCAACAATTTTC  
CAGTTGCCACTGTTCCAGTGTACCAGGTCTCCGGTTTGTGGAACACGACCAAGGAGCAGCATGATAAGC  
CCTCCGAGGGTGTGATAGTGTATGTTTTTCTTCTTCTGGCAGACGAACCAGCTCCAGACAGTCTTCAACT  
CCGGCAGCGGGATCAGGCCATCGAGCAGCCAGCTGCCGTGGCGCGCCGGAAGGCCAGTTGTCTCGCC  
ATCCTCCTGCTGGAAATCCCCCGCCAGCGCCTCCAGCAGATCCTGCTGGGTGACCAGTCCCTGCAACTCG  
CCATATTCGTCCACCACCAGCGCCATCTGTTTCGTGTGGGTGCGGAAGTGGTTGAGCAGCTCGACGCCGT  
TGAGGGTCTCGGGCAGCAGGCTGCCCTCCTGGGTGAGGGCAGCCAGATCGATGGGCTCCCCCTTGATATA  
GGCGTGCAGCACCTTGTGACATTGATGATAACCCACCAATTTCTGACAGGTTGCCGTGCGAGACCGGAAAA  
TAGCTGTGGCGATACTCCACCAGCCGCTGCAGGTTGGTCTCCAGCGGCAGAGCCAGATCCAGATAGCGGA  
TATCGCTGCGCGGCACCATCAGGGAGGAGAGGCTGCGCTCGTCGAGACGGAAGACGTTGCGCAGCATGGT  
GTGTTTCATGATCCTCGATTACCCCGGCTTCCGATCCTTCCACCAGCATGGCGTGGATCTCTTCTCGGTG  
ACGTTGGCGCTGCCGTTCTGGTTGACCCGACAGCCGAGGCTGGCATTTGGTGGAGGGCCGACAGCAGCC  
AGACGAAGGGGCGGGTCAGGGTGGCGAGCCAGTGCATGGGACGGGCCACCAGACAGGCCGATGCGCTCGGC  
ATTGAGCTGGCCGAGCCGCTTGGGCACCAGCTCCCTACCACGATGGAGAGATAAGTAACCACCACCACC  
ACGATGATGGTGGCGATCAGGCCACTGCTCTTGGCCGGGAGTCCCCACTCCTGCAACCAGAGGGGAGAAGG  
GCTGGGCGACAGGATTCGCCGTAGATAACCGTTGAGCAGACCTATGCTGGTGTATGCCATATCTGGACGGC  
AGAGAGAAAATGGTAGGTTCTCGCCAGTTTGTAGGCGAGTGGCGGCGGAGCGGTTGCCCTCAGAGGCA  
AGCTTGCCGAGGCGAGCCTTGCCTGCGGTGACGATGGCGATTTCTGACATGGCGAAGACGCCATTAAGCA  
AAATCAATCCAGCAGGATCAATATTTCCATACAGCAACAGCACTCCTTGAGTGGATAAGATCGCTGGCA  
GTGTAATGAATTTGGCGGCGATGCGCTTGTGAAAAGCGGGTGTATCCGGCTCGCTAATTTGATGACAGCGCT  
TTGTGATGGCTGAAAAAGATGGCCGAAAAAGAGAGGGACGACCCCGCCAAACGGCGTAATGGGCGAGGCA  
GCATTGCAGGAGTGAAAAGGGCGGGAAGTCCCGCCCTTGTCTGTCACTTGTGTCAGGCAACCGTTGTGAGAA  
CTGCTGGAACCAGCGCTGGATCTGGGCCGATCCTTGTCTGGGTGAGGAGAGCATCAGCAGCACCCCGC  
GCTTTCTGCGGGTTGAGAGTGCAGGAGGCCACGAAGCCGTAAGTGGGCATCATCGATCTCGGCATCCAGAG  
TGGTGGCGCCGGTGGCACGCGGGCGGAGCGCACGACGCGGATGCCATCCTTGTCTCGCTTGGCCAGGGT  
GTCGAACAGGGTGTGGTAGAGGTTGCCGTTGCCACCCCGCGCTGACGATGCCGTGCAACTTGGCATCC  
ACCATCGCCTTGGCCGGCAAGTCCGGTGGCGTGGCGTAGCTGTAGACGATGCCAACTTGGCGCAGCTTGT  
CGAGCTTGTCTCACGTCAAATGGCGTTTTGCTGGTGTGCAGACGGGCCGGGCTGCGCTGATAGTCGATCTT  
GCCGTTGTGGATGTAACCCAGCGGGCCAAAAGTTGGGGGAAGCGAAGGTCTGCACCCCGGTGGTGTGGTCT  
TTGGTGACGTGCGGGGCATCCAGCACGGTGTGCTTTCATCGCCACCATCACGCCACGGCCCTTGGAGGCGG  
GGTCCGAGGGCGGTACCACGGCGTTGTAGAGGTTGAGCGGGCCATCGGCACCTCATGGCGGTGGAGGGGCG  
CATGGCGCCGACCAGCACACCAGGCTTGTGCTCTTGTGAGGTCAGATTGAGGAAGTAGGCGGTCTCTTCC  
ATGGTGTGCGGTGCCGTGGGTAATGACGATGCCATCCACGTATCCTTGGCCAGCAGCTCGTTGACCCGCT  
TGGCCAGCTTGTGACACACCTCGTCTGTTGCTGCTGGGAGCCGATCTTCAATAGCCACCTTGCCTGCCTGAG  
ATCGGCCACTTTCTTTCATCTCGGCGACGGCGGCGATCAGGGTTTCAATAGCCACCTTGCCTGCCTGAG  
TTGGACTGGGTAGCCGACTGGCCTGCTCCGGCAATGGTGGCGCCGGTTGCCAGAAATAGGACGTTGGGCA  
GCGCCATCGCCATGGGGGAGAGGGTACAGGCCAACGACGGCGGCGAGCAGGGTCTTGGCGATCGGTAGGGT  
CATGCTGCAAATCCTTATGGTTGGAATAATCGCAGCAAGTTTTGCCCGTTTAAATAACCTGGGTCTGTGATA  
AAACTACCAAAAAGACAGGTGAGTACAGATTTTTAACTGTTTTATACCTCTATGGAGATAATTTAACTC  
GCAGAGAAAACCTTGGCTTCGATCAGGGCGATCAGTTCTGCTTGTCTGCTCAGCTCGCTCTCGATAACGGCCT  
TGCTGCTGGCGAAATCGACGGTTGCGGTGGTGACCGTAGGCTGGGCCAGCAGCGCTTTTTGTCAGACTGGC  
GGCGCAGCCACCACAGGACATGCCGGAGACGGTGTGATGGTCATAAATGCTCTCCTCGGTTGATAT  
GGCACAAGGGTAAAGCTGTGCTCCTCCGGCAAGGTCAAGCCGTGAGTACATCAACCCAGATAGTTTCATCA  
GGATTGTTCCAGCCGGTGGATGGGTGACATGTGAGCCAAGGTTTATAGTGGCGATGAGGTTGGCAGTTT  
CCTCTGGCAGGGTCAGTACATCAGACCGAGGTAATTCATCAGAGTCGCCCGAGGCTGGTAGTGACCAGC  
GAGCCGAGGGTGGTGGTGGCGATGATGTTTCGTGCCAGCACGCTGTGCCCCCATGGCGCGGGTTCATCA  
CATAGCTGGCGGCGGAGTGGGGTAGCGCTGATGAGGAACAGAAATACCCAGCTCCAGATGGCTGAAGCC  
GAGCAGGGCAGCCCCAAGAGTGAACGCAGCCGGAATGAGGCAGAGCCGCATGATACTGGCCACCCGGCA  
ATGGCTGCGCCACCAGCGCAGGGCGTTGAGGCTGAGAGAGGCACCGGTGCAGAGCAGCGCCAGCGGCAACG  
TCATGTTGGCGAAGTAGCTGCCGGTGGTGTGAGCAGCAGTTGCGGCATCTTGATACCGAGCAGAGTAAACGG

CAGCGCCGCCACAATGGCGATGATCAACGGATTCTTGATGATGCCGAGCAGAATGGGGCGAATGCCGGTG  
GCACCGCCGAGACTGCGGGTGAGGGTGATCACCGCGAGAATGTTGTAGAGCACGGTCACCGCACCGACAT  
AGAAGGCAGCCGCCCCCAACCTTCGTGGCCGTAGGCGTTCTGCACATAGGCGAGCCCGATAATGGCGCT  
GTTGCCGCGAAAGCTCCCCTGCACGAAGATGCCGCGCAGCCGCTGCTCCCCGATAAAAACGCCAGCCAGC  
AGCTCCAGCACCAGATAGCTGATAACGGTGGCGAGCAGGCCATAGCCGATAAACCAGAGGCTCGGCATGG  
TGGCGAAGTTGGTACCCAGAATACTGAGAAAAGAGCAGAGCGGGCAGGGTGACTTGAAACACCAGTCGCGA  
GGCGGATTCGGTAAAGGGATCCGGCAGTAGCCCCAACCGCTTGAGCAAGATGCCGAGCAGCAGCACCACG  
CAGATGGGGCCTGTGATGGAGAGGGAGAAGAGCAGACTGGCCAGCAGATCCATGATGGGCATCCTGTGCT  
GTGCCACACACCCTGACGGCGGGGCAAAAAGGGCATCTAACGCCATGGGCTTGATTCACAGGGGTTA  
ATCACACAATGTGGGCAATCCACCGCTAGCCCTCCTGTGAGCCAATTCATGGACAAGAAAACGACCAT  
CCTCGATATCGCCAGACTGAGTGGCGTCGGCAAGTCATCGCCGAGCACGGCTTCGTGCCGAGCAAATCGG  
GTGAAGCAGGAGACCCTGCAGCGGGTGGAGCAGATCATCGCCGAGCACGGCTTCGTGCCGAGCAAATCGG  
CGCGGGCCATGCGTAGCCAGAGCCAGCAGGTGGTGGGGATCATCGTCTCGCGGCTCGACTCCAGCTCGGA  
GAATCAGGCGGTGCGCGGCATGCTGGAGACCCTCTACCAGCGCGGCTACGATGCCGTGCTGATGGAGAGC  
AAGTTCTCCCCGCAAGGTACAGGAGCATCTGGCGGTGCTGGAGCGGCGGGGGTGGATGGCATTATCC  
TGTTGCGCTTCAATAACTTGACTATGCCGCTATGGCGCCGCTGAAAGAGAAGCTGGTGTGGTGCCTCG  
TGAATATCCCGGTTTCTCCTCGGTCTGCTTCGACGACGCCGGTGCAGTGCACCATGCTGGCGCAGCTG  
GCAAGCCGTGGTGGCCGCGATATCGCCTATCTGGGGTGGATGCCTCGGATCTCACCACCGGCCAACGCC  
GCCTAGACGCCTATCTCGTTACTGCGCAGAGCAAGGGTGCACCCGCGCAGAGCCCTCGGCGATCTCAG  
CCTGCAGAGCGGCTACCGGCTGGCGGCCGAGCTGCTTACCCCTCCACCCAGGCGTGGTCTGCGCCAGC  
GACACCCTCGCCATTGGTGCGGCAAAATACCTGCAAGAACAAGGGCGTAGCGAGGTGCTGGTGACCGGCC  
TTGGCAACAACCCCATGCTCAGCTTCTCTCCCCAACGCCCTCAGTCTCGATCTTGTTTACAAAGGGGC  
GGGGGAGCAGGCGGCGCTCAGCTGCTCGGCCAGATTGAGCAGGAGCAACTCCCGCAGGTGACAATCGCC  
CCCTGTGCAACCCTGTGACCCCATCACTCCGGACTGAACAAAAAGTGCAGCTTTTTGTGATGCTGGCCAC  
GAATTGGGAACGTTCCCATTTGATCTGGCCAGATTGTGCGCATGCTAAATGGGAACGATAACAAAAACG  
CTCCGGCCGACAGACTGGCTCAAAAGGGCGATACAGACCACTATTCATGGCGTCACAGAGGGAAGACCC  
ATGTCCAAGATAACGCACAGCAGCTTGCCACCCTGATCGACAAGATCGGCGCAAGGAGAACAATCGCTA  
CCGTACGCCACTGACTGACCCGGTTGCGCTTCGCTCGTGAACGATCCGGCCAAGGCCGACAGCAAGCCAT  
CGAAACCATCCCGCGGTGAAGGGAAGCTTCAACAGGCGGTGAGTCCAGGTGGTGTGATCGGTAACGAG  
GTAGAGCAGTGGTACAAGGCGCTGACCGAACAGCTCGGCGTCAGCGGTGGCAGCAAGGAGACTGCCAAGC  
AGGCGGCTCGCCAGAACATGAACCCGCTGGAGCGGGGCATCTCCCATCTGGCGGAGATCTTCGTACCCT  
GCTGCCCGCCATCATCACCGCGGTCTGATCCTGGGCTTTCGCAACGTCATCGGCGACATCAAAATGTTT  
GATGATGGCACTCACACCCTCACCGAGATCAGCCAGTTCTGGGCTCAGGTACACGCCCTTCTCTGGCTGC  
TGGGCGAGGCGATTTTTCACTTCTGCGGTGCGTGTGTTGCTGGTCTGCAGTGAAGAAGATGGGCGGCTC  
CGAGATCCTCGGTATCGTGTGGGGTGACGCTGGTGTACCAGTGTGATGAACGCCTACGGCATTTGGT  
CAGCAGACTCCCAGGTTGGGACTTCGGCCTGTTGCTGATCCAGAAGGTGGGTTATCAGGCCAGGTCA  
TTCCGGCGCTGCTGGCGGGTGTATTCTCGCTGGGTGGAGACCAACCTCAAGCGGATCATTTCCGGCTTA  
CCTCTATCTGGTGTGTTGCGGTTTGTCTCGCTGCTGCTGGCAGTATCGTGGCTCACGCCCTTATCGGC  
CCGTTCCGGTGCCTGGATTGGTGTGGCGTGGTTCGCGGCCAAGGCTGCCATGACCGGCTCCTTTGCTC  
CCATCGGCGCTGCCCTGTTCCGTTTCTCTACGCACCGCTGGTTCATCACCGGCATTCACCACACCACAA  
CGCAGTGGATCTGCAGCTGATGCAGAGCATGGGTGGCACGCCAATCTGGCCGCTGATTGCCCTCTCCAAC  
ATCGCGCAGGCGTCTGCGGTGCTCGGCATCATTTCTGATTAGCCGCAAGGAGAACGAGCGGGAGATCTCGG  
TACCTGCTGCCATCTCCGCTACCTCGGGGTGACCGAACAGCGATGTACGGTATCAACCTCAAGTACAA  
GTTCCCCATGCTGTGCGCCATGGTGGGGTCCAGCCTTGCAGCCCTTATCTGCGGTTTCGCGGAGTGATG  
GCCAACGGCATCGGGTGGGTGGCTGCCGGCATCCTCTCCATCCAGCCGCAATACTGGGCGGTATTTG  
CCATCGCCATGCTGGTGCATCGTGGTGGCGGTGGTGTGACCTGCTGGTCTACAAGCGCCAGCAAGC  
CGCTGGCAAGTTGACCAAGCCAGCGCTGAACATAGTTATCAGGGCGACCGATGGGTGCGCCCTCTCCAT  
TTTTCTATTTCGAGACAAGAGAAAAGACCCATGAGCCAAAACACCTGGTGGCAGAGTGCCGTGATTTACCAGA  
TCTACCCCAAGAGCTTTCAGGATTCGCTGCCGTTGGCACCAGGTGATCTCAAGGGGATCATGGCCCGCT  
CGACTATCTCAAGACTCTGGGCGTTGACGCCCTTTGGCTGACCCCGGTCTACGTTTCCCCGAGGTGGAC  
AACGGCTACGACATTGCCACTACCTTGCCATCGACCCCGCTACGGCACCATGGATGATTTCCAGGCGC  
TGCTGGCCCGCCACGCGCGGACATCCGATCGTATGGATATAGTAGTGAACCACACCTCCACCGA  
GCACGCTGGTTCAAGTGGCGCTGGGGGATAAAAACAGCCCTTACCAGGACTACTACATCTGGCGGAT  
CCGGTGGATGGCGGCGTGGCCAAACTGGCAATCCAAGTTTGGTGGCAGCGCTGGGAGCTGGATCCCG  
CCACCGCCAGTACTACCTGCACCTGTTTGGCCGCGAGCAGGCGGATCTCAACTGGGAAAATCCTGCAGT  
GCGCGCCGAGGTCAAAAAGATCATCCACTTCTGGGCCAAGAAGGGGGTGGACGGTTTCCGGCTCGATGTC  
ATCAACCTTATCTCCAAGGATCAGACGTTCCCTAACGATGAGACTGGCGATGGCCGCGCTTCTACACCG  
ACGGGCCGCGCATCCACGAATTCCTGCAGGATGTGAGCCGCGACGTGTTTCGCTCCTGTGGCGCCATGAC  
GGTGGGGGAGATGTCTTACTTTCGCTGGAGCACTGCCAGCGCTATGGTGGCTCGATGGATCCGAGCTA  
TCCATGGTGTTCACCTCCACCACCTCAAGGTGGATTACCCCAACGGCGACAAGTGGACCAAGGCACCGT  
TCGATTTCTCGAACTCAAGCGCATCTTCAACCACTGGCAGAGCGGTATGCATGGCAAGGGGTGGTCCGGC

GCTGTTCTGGTGCAACCACGATCAGCCGCGCATCGTCTCCCGCTTCGGTGATGAGGGTGAGTACAGAGTG  
GTCGCTGCCAAGATGCTGGCCAGCACGCTGCACGGCCTGCAAGGCACCCCTTACATCTATCAGGGGGAGG  
AGATCGGCATGACCAACCCCGGCTATCAGCGCATCGATGACTATCAGGATGTGGAAAGTCGCAACATCTT  
CGCCATCAAGCAGGCGGAAGGGATGAGCGAGAGCGAGATCCTTGCCATCTCGGTGCCAAGTCCC CGC  
AACTCGCGTACCCCGATGCAGTGGAGCGCTGCGGCCAATGCAGGTTTCACCCAAGGAACGCCCTGGCTCA  
AGCCTGCCGCCAACTATTCCGAGATCAATGCCGAGGCGGGCTTGGCCGACCAGCACTCTGTGTTCTGGCA  
CTATCGGGATCTTATCGCTCTTCGCAAGGCGCACCCATCTTCACCCAAGGGGATTATCAGGAGTTGCTG  
ACCGGGCACCCGAGATCTGGGCTATGCCCGCCGCGCCAACGGTCAGACCCTGCTGGTGGTGAGCAACT  
TCTACGGCGAGCCGGTGGAGTTTGCTTGCCTGCCGAGCTGCAAAGCGGGCAAGGTCGGCTGCTGCTCGG  
CAACTACCCGGATAGCCCGGCCAACCGCAATCGGGTATGCTGCGCCCTTATGAATCCCTGATCTGGCTG  
ATGGAGTAGGTAATGGAGAAGGTGGTGCGCGGTACCGGATGGCAGAAAGATGGTGGCGGGGAAGCCCTATG  
ACGCGGCTGACCCTGAGCTGAAAGCGGCACGTGAGCGTGGCGCAGGCTCTATCACACCTTCAATACCAG  
CTGGCAGGAGAAACCGGCGCGGGATGCTTTGCTTCATGAACTGCTGGGCGGCCCTGGCCAAGCGTGTGCC  
ATCAATCCGCGTCTTCTTTCGCGACTATGGCGCCAATATCTTCGTCGGCGAGAACTTCTACGCCAACGTGG  
GCTGCACCATCCTCGACGTCTGCGAGGTGCACATCGGCGACAACGTGCTGCTGGCGCCCGGGGTGCAGAT  
CTACACCGCCGCTCATCCGGTGGCGGTGGCGCCGCGCATCAGGGGTGTAGAGTTCGGCAAGCCGGTGC  
ATCGGTACAACGTCTGGATTGGCGGCAGCGTCGTCTGCCCCGGCGTTACTATCGGTGACAACAGCG  
TCATCGGCGCAGGCTCGGTGGTGACCAAAGATGTGCCCGCCAACGTGGTGGCGGCTGGCAACCCCTGCAA  
GGTGCTTCGGGCGATGACGGCACAGGAGCTTGAAGGCGTCATCCAGCGGTGAATAGGGACCATGAATGCT  
ATTGCTATCTGATTGATAGAAAAGCGACTTTCAGATTGTTTTGCATTTCAGTCTTATGTTTCGGGGCCGCT  
TGGTCGATACTGTTGAGTGCAGGAGGAACCCCTATGGATATATCAAGTTCGCAAATGCGTCTTTGGTTC  
TGCTCTGATGACGGCCAGTCTGGCCAAGAAAACAGCAGACCCAAAGAGGGCGAAGCTGCGCTGAAGCTGCTG  
CAAAACGCAGCCCAATCAGCGCCGGTTCACCCGACATCGGCCAGTGCTTCTCTGGGAAGCAAGATCGATA  
TTCGCGTCTGACCCTAATGAAAAAGCCCCCATCTCGCGATGGGGGCTTTTTTATCTCTGCGATTGGCGC  
GAGCCTCTTTTCGCTCAGAGCGGGAAGGGGGCTGGCGCCTCGAAGGTCATCCGCTCGCCGCTGCGGGGGTG  
GCTGATGGTCAGACTGGCCGATGCAGATAAAGGTGCGGTGCCGCCGCCAGCGCATCCGGATGGGCGTAG  
AGGTTGTACCCAGGATCGGGTGGCCAGCTCCAGCATATGGACGCGCAGCTGATGCGAACGACCTGTGA  
TGGGGGTTAGTCTGATCAGGCTGTTGCCGTTCTCCACTTTCAGTTTTTCCACAGGGTCAGAGGCTGACG  
CCCCCTCTGCTGATCCACCTTCTGCTTCGGGCGGTTGGCCAGTTCGACGCAGAGCGGCAGGTCAACCTGC  
CCCGACTCTGCTTCCGGCTCGCCCCACACCCAGGCGAGGTAGTGCTTCTCGGTCTCCCGCTCGCGAAATT  
GTCGGCTCAGTTCCCGATGAGAGTTGGGATTGAGGGGAATGACAATGACGCCAGTGGTGGACATGTGCGAG  
GCGATGAGCTGCCGCCGCTTGGGGTGTGCTGTTTTACCCGATGCAGGACGCTGTCTTCATTTCTCGGGG  
CCGCGCCCGGGGACGCTTAGCAGGCCAGTGGGCTTGTGACCACCATGATGTCTTGTCTTGAACAGGA  
TATCGAGCCAGGGTTCCAGAGGCGGTGAGTATTCAAACATAAATGTCTCGCATCAGAAGGTGGGGGCAAG  
CCCCCATCAGTTATGGGTAACCACGACAAAGTGGCCTTGGGTATCCAGTTTGTAGCTGGTTCTGGCCGCTG  
TCGGTTCGGTACCTTGTGAGTTATGGGTGACCACGATAAAGCGGATGGCATCCAGCTTGTAGTTGGTCTGA  
TCGATCAGGTGGTGCAATTCTGCCTGCAGATTGCGCAGATAATCTAGTTTCGCTGTCTCGCACGTTCCGGT  
TGACCGCCTTGAGCGCTTCCAGACGATCCAGATCCTGCTGCAGGGTCTGCGCCATCTGGGTGCGGGCCTT  
GTCGACAATCCCGGCTTTTCAGCTCTTCGGCAATGGCTTGGCCCTTGCCAATCAGACCCTGGATCACCGGC  
TGGGATGCAGTACCCAGCTTGTGCGGAGGTGGCGATTGACCGGCGTCAGCTGGCGGTTGAAGGCATCGA  
ACGCCACTTTCTCACCCAGATTCTGGCCGTTCTTGTCCATCAGCAGACGGATCGGCGTCCGGCGCATGAA  
GCGGTAGAGCTGGGGATGGGCCGAGACTCGGCAACGAAGATCAGCTCAAGCAGGATGGAGCCGATGGGC  
AGCGCCTTGTCTTGTAGCAGTGCAGCCGAGGTGGCACCGATCTCGGAGCCAGGATCAGGTCGATACCGC  
CGCGCATCATGGGGTATCCCAGGAGAGCAGCGCCATGTCTATCCCGGACAGGGCTGTGTTGCGATCGAA  
GGTGTAGGTCATGCCGCTTTCGCGCAGGCCCCGGAAGCTGGAGACCAGCATGTGATCCCCGGGGTTCAGC  
ACCAGCGGTTCTCGCCACGGTTCCTGATTGACCCGATCTCGTTCGAACATCTTGAGAGCGAAGGAGA  
TCATAACAGTGTGTCATCTTCGGCGGCCAGCTTGTGCGACCAGCTGCTGGGCGGCGGCGCCACCGCTGGA  
GTGGATCTCCAGCAGGCGATCGCGACCCTGCTCCAGTCTGGCCTTGAGCGGCTCGTGCAGTTTCGCGGGT  
TTGACCAGCAGGGCATCGAGGGCCGCTGATCGCCGGTGTGGCGGCCAGCAGCTCGAACAGATCGTCAC  
GTACCGCTTCGAATACCGGGCGTGCAGTCCGGCAGGTCTGCTCGAACGCGTCCAGACCATCGTGATACCA  
GAGCTGCAGGGCGCGCTGGGCTGTCCCTTCAGATAGGGAACTGGATCTCGACGGTATTCTGCTGACCG  
ATACGATCCAGTCCGCCGATACGCTGCTCCAGCAGATCCGGGTTGAGGGGCAGATCGAACAGCACCAGAT  
GGCTGGCAAACCTGGAAGTTGCGACCCTCTGAACCGATCTCGGAGCAGAGCAGCACCTGGGCGCCACCCTC  
TTGCTGGGCGAAATAGGCGGAGGCCTTGTCCCCTCTAGGATCGACATCCCTTCGTGGAACACGGCACCA  
CGGATCCCTTCACGGGTACGCAGTGCCTCTTCTGCGCGATGGCGGTGCGCCGCTTCGGAGCAGATCACCA  
GCACCTTCTGCTGACGGGCTGAGAGCAGCAGCTCCAGCAACCATTGACACGGGGGTGAACTGGGTCCA  
GGTGGCGTTGTGCTTTCGAACGCTGGAAGATCTTCTCGGGGTAGAGGTAGCGCAGGGCGCGGGTCTGC  
AGATCGCCACCGTTGCCACCCATCATGCCATCACCTTGTAGCAGTCTTGTACTGCTCCGGCAGCGGCA  
TGGGGTAGACGTTGAGGTGACGCTCGGGGAAGCCCTGAATATTGGCGCGGCTGTTACGGAACAGCACCCG  
GCCGGTGCATGCTGATCCAGCAGCTTGGCGACCGCCTGCTGGCGTGCAGTGCATCGCTCAAGTCCAGC  
CCTTCCAGCTGGCTGGCGAGGATCTGTCTGGCTTCATCGCTCAGGGTCTCGCCATCCAGCAGCTCTTGTG

CGGCGTTGGCGACCTGACCATAGGCCTGCTCCTCGGCGAGGAAGCCTCGTAGTCGTAGAAAACGCTCGGG  
ATCGAGCAGGCGCAGACGGGCAAAGTGGCTCTGGTGGCCAGCTGATCCGGGGTCGCGGTGAGCAGCAGC  
ACGCCCCGGCACCTGTTTCGGCCAGCGCTTCCACCATCTCATAGGCACGGCTCGGCGCCTCTTCACTCCACT  
CCAGATGGTGGGCTTCGTGACAAACCAGCAGATCCCCTCGGCTTCCAGCACCTGCTCGAAGCGACGACG  
CTTCTTGGCGCAGGAAGTCGAGGCTGCAGATCACCAGCTGTTTCGGTCTCGAAGGGGTTCTCCGCATCGGCA  
AATGCCTCGATGCAGCGCTCCTCATCAAACAGGGAGAAAGTGCAGGTTGAAGCGGCGCAGCATTTTCGACCA  
GCCACTGATGCTGGAGCGTTTCGGGCAGCAGAATGAGCACGCGATGGGCGCGGCCGGAGAGCAGCTGCTG  
ATGAATGATCATGCCCCGCTTCGATGGTCTTGCCAGACCCACCTCATCGGCCAGCAGTACGCGCGGAGCG  
TAGCGGTGACCCACCTCGTGGGCGATATAGAGCTGGTGCGGGATCAGGCTGACCCGGCCACCGGCCAGAC  
CGCGAGTCGGGTTGCGACGACGCTGGTGTGTTGACCAGCGCTCGTAGCGCAGGGTGAAGCGGGACAT  
CCGATCGATCTGACCGCGCAACAGGCGATCCTGCGGCTTGTGAACTTGATAAAGTTGTTGAGAAAACACT  
TCCTTGAGGGCAACGGGCTCATCATTGTCTGGTGGCAGCACCTACATATATAAGCAGGCGCTCTTTCTCCT  
GCACTTCTTCGACCGTTCATGGTCCAGTCTTCGTGACTGGTGTGATCTGATCGCCACATTGAAGCTGACCCG  
GGTGACCGGCGCCTCTTCTTTGGCATAACATGCGGTTTTTCACCGGTAGCCGGAAAACAACAGGGTAACCATG  
CGTCCTTCAACAGCAACGACAGTCCCTAACCCAGATCCGTCTCTGTATCACTAATCCAACGCTGGCCAA  
GTGCAAAAGGCATTAACCTCTCCAAAGCCCAAGAGTGTGTGAATCGCAAAGGGGCGCTATGTTACCCGAA  
GGCGTGACCTCGATCACCATGCATATAGATGTAGAGAGACCAAAATCGCCACAACCTTGATCTGCTACCAT  
CGCCACGCCATCTAGAGGATAGCGAGCTCGCCAAACGGGTGTGTTATTGCAGGATAAATGCGCTTTTTTGG  
GTGATTAGTGAACGGTTGAACCAAAAATGCGAATTTAATTCGAAAACACCTTGCAAGCGTGATCCAGAT  
CCCTATAATGCGCCTCCATCGACAGGGCAAGCGGCAACGCAAAACAACCTCGTCGATAACCTCAAAAAGCC  
TTTGAAAATAAGGCTTGACTCGAGAAGGCGGTTGAGTAGAATTCCTACTCCCGCAGCAACACACTGTTGCG  
TCGCTCTTTAACAATTTGAATCAAGCAATCTGTGTGGGCACTCACAGCATCGAACATCAAACAATTTTT  
GATTTTCAATGTCTGGTGAAGTGACCAAGACGATTTCTTAGCAATAAGAGTCGAACAGTTTATTTTCAGC  
AATTCATTGAGCCGCTTTTCGAAGCAACCAAACTTAAATTTGAAGAGTTTGATCATGGCTCAGATTGAACG  
CTGGCGGCAGGCCTAACACATGCAAGTCGAGCGGCAGCGGGAAAAGTAGCTTGCTACTTTTTGCCGGCGAGC  
GGCGGACGGGTGAGTAATGCCTGGGGATCTGCCAGTCGAGGGGGATAACTACTGGAAACGGTAGCTAAT  
ACCGCATAACGCCCTACGGGGGAAAGCAGGGGACCTTCGGGCTTGCAGGATTGGATGAACCCAGGTGGGA  
TTAGCTAGTTGGTGAGTAAATGGCTCACCAAGCGAGCATCCCTAGCTGGTCTGAGAGGATGATGACGCA  
CACTGGAACCTGAGACACGGTCCAGACTCCTACGGGAGCAGCAGTGGGGAAATATTGCACAATGGGGGAAA  
CCCTGATGCAGCCATGCCGCGTGTGTGAAGAAGGCTTCGGGTTGTAAAGCACTTTTCAGCGAGGAGGAAA  
GGTTGGTAGCTAATAACTGCCAGCTGTGACGTTACTCGCAGAAGAAGCACCGGCTAACTCCGTGCCAGCA  
GCCGCGGTAATACGGAGGGTGAACGCTTAATCGGAATTACTGGGCGTAAAGCGCACGCAGGCGGTTGGGA  
TAAGTTAGATGTGAAAGCCCCGGGCTCAACCTGGGAATTCGATTTAAAACCTGTCGGGCTAGAGTCTTGTA  
GAGGGGGGTAGAATTCAGGTGTAGCGGTGAAATGCGTAGAGATCTGGAGGAATACCGGTGGCGAAGGCG  
GCCCCCTGGACAAAGACTGACGCTCAGGTGCGAAAGCGTGGGGAGCAAACAGGATTAGATAACCTGGTAG  
TCCACGCCGTAACGATGTGATTTGGAGGCTGTGTCTTGAGACGTGGCTTCCGGAGCTAACCGGTTAA  
ATCGACCGCCTGGGGAGTACGGCCGAAGGTTAAAACCTCAAATGAATTGACGGGGGCCGCACAAGCGGT  
GGAGCATGTGGTTTAATTCGATGCAACGCGAAGAACCTTACCTGGCCTTGACATGTCTGGAATCCTGTAG  
AGATACGGGAGTGCCTTCGGGAATCAGAACACAGGTGCTGCATGGCTGTCGTGAGCTCGTGTGCTGAGAT  
GTTGGGTTAAGTCCCGCAACGAGCGCAACCCCTGTCTTTGTTGCCAGCACGTAATGGTGGGAACTCAAG  
GGAGACTGCCGGTGATAAACCGGAGGAAGGTGGGGATGACGTCAAGTCATCATGGCCCTTACGGCCAGGG  
CTACACACGTGCTACAATGGCGGTACAGAGGGCTGCAAGCTAGCGATAGTGAGCGAATCCCAAAAAGCG  
CGTCGTAGTCCGGATCGGAGTCTGCAACTCGACTCCGTGAAGTCGGAATCGCTAGTAATCGCAAATCAGA  
ATGTTGCGGTGAATACGTTCCCGGGCCTTGACACACCGCCCGTACACCATGGGAGTGGGTTGCACCAG  
AAGTAGATAGCTTAACCTTCGGGAGGGCGTTTACCACGGTGTGATTCATGACTGGGGTGAAGTCGTAACA  
AGGTAACCTAGGGGAACCTGGGGTTGGATCACCTCCTTACCTTAAGATGTCGAAGTTGTTGAGTGTTC  
CACAGATTGCCTTGATTCAAAGTAGTTAGAGCAAAGACCTGATGCGAAAAGTGTGAGTGTATCTGGCTT  
CGGTGAGATGAGAGAAGCCCTATCATTGGGTTTTGGGATGTGAATAATGGCGCTCGGCCCTCGCAGGCTCG  
GCACTCGCCATTACCCAAAATCTGCACTGCTGACGCAGCGCAAAGATGATTTTGGGTCCCTTCGTCTAG  
AGGCCTAGGACACCGCCCTTTCACGGCGGTAACAGGGGTTGCAATCCCTAGGGGACGCCACTTCTCTTC  
TTGCTAACAAGAATGCAGAGTTAAGAAGTATTCTTAACTCTGTTTTCTTCGGCCTTGCGCCGTTGCAAA  
CATGCTCTTTAACAATCTGGAAGCTGATTTAAAAAGTAGTTCTCAAACATTTGTTACAAGTGCCTTTGGA  
AACTTCTTGGCGAAAACCAAATTTTATTTGGTCTTGTGTGACGACAACAAGCAAGCGTTGTTTCGACGA  
CACTTCTTGGGGTTGATGTTAAGTACTAAGCGTACATGGTGGATGCCTTGGCAGTCAGAGGCGATGA  
AGGACGTAATAACCTGCGATAAGCTGTGAGAAGTCGGTAAGAGACGCTATTACTCACAGATTTCCGAATG  
GGGAAACCCACCCGAGATAACTCGGGTATCTGTTACTGAATACATAGGTAACAGAGGCGAACCGGGAGAA  
CTGAAACATCTAAGTACCCCGAGGAAAAGAAAATCAACCAGATTCCTCAGTAGCGGCGAGCGAACGGGG  
ATTAGCCCTTAAGCATCTTGAAGTTAGTGAACGGTCTTGGAAAAGGCCGGCGATACAGGGTGTAGCCC  
CGTACACGAAAACGACCTTGATGTGAAATCGAGTAGGGCGGGACACGTGACATCCTGTCTGAATATGGGG  
GGACCATCCTCCAAGGCTAAATACTCCTGACTGACCGATAGTGAACCAGTACCGTGAGGGAAAGGCCGAAA  
AGAACCCTGTGAGGGGAGTGAATAGAACCTGAAACCGTGTACGTACAAGCAGTGGGAGCCCTTCGGGG

TGACTGCGTACCTTTTGTATAATGGGTCAGCGACTTACATTTTGTAGCGAGGTTAACCGTATAGGGGAGC  
CGTAGGGAAACCGAGTCTTAACCTGGGCGTCTAGTTGCAAGGTGTAGACCCGAAACCGGGTGATCTAGCCA  
TGGGCAGGTTGAAGGTTGAGTAACATCAACTGGAGGACCGAACCCACTAACGTTGCAAAGTTAGGGGATG  
ACCTGTGGCTGGGGGTGAAAGGCCAATCAAACCTCGGAGATAGCTGGTCTCCCCGAAAGCTATTTAGGTA  
GCGCCTCGGACGAATACTACTGGGGGTAGAGCACTGTTTGGGCTAGGGGGTCATCCCAGCTTACCAACCC  
CATGCAAACCTCCGAATACCAGTAAGTAATATCCGGGAGACACACGGCGGGTGCTAACGTCCGTCGTGAAG  
AGGGAAACAACCCAGACCCGCGGCTAAGGTCCCAAAGTTCTGGTTAAGTGGGAAACGATGTGGGAAGGCT  
CAGACAGCTAGGATGTTGGCTTAGAAGCAGCCATCATTTAAAGAAAAGCGTAATAGCTCACTAGTCGAGTC  
GGCCTGCGCGGAAGATGTAACGGGGCTCAAACCAGGCACCGAAGCCGCGGATTCACACTTATGTGTGAGT  
GGTAGGGGAGCGTTCTGTAACTCTGCGAAGGTGTATCGAGAGGTATGCTGGAGATATCAGAAGTCCGAAT  
GCTGACGTAAGTAAAGTAAGGAGGTTGAAAAGCCTCCTCGCCGGAAGACCAAGGGTTCTCTGTCACAGT  
TAATCGGGGCAGGGTGAAGTCGACCCCTAAGGCGAGGCCGAAAGGCGTAGTCGATGGGAAGCAGGTTAATA  
TTCCTGCACGACTTGTAAATTGCGATGGGGGGACGGAGAAGGCTAGGTGGGCCAGGCGACGGTTGTCTCG  
TGAAAGTGCCTAGGTGGTGTCTTAGGCAAATCCGGAGACACAACACTGAGACACGAGACGAACACACTA  
CGGTGTGGAAGCCATTGATGCCCTGCTTCCAGGAAAAAGCCTCTAAGCTTCAGATTACAAGTCATCGTACC  
CCAAACCGACACAGGTGGTGGGTAGAGAATACCAAGGCGCTTGAGAGAACCTCGGGTGAAGGAAC TAGGC  
AAAATAGAACCGTAACTTCGGGAGAAGGTTGCTCTTGACAGTGAAGTCCCTTGC GGATGGAGCAGTTGG  
GAGTCGCAGTGACCAGATGGCTGGGACTGTTTATCAAAAACACAGCACTCTGCAAACACGAAAGTGGACG  
TATAGGGTGTGACACCTGCCCGGTGCCGGAAGGTTAATTGATGGGGTTAGCGCAAGCGAAGCTCTTGATC  
GAAGCCCCGGTAAACGGCGGCCGTAACATAACGGTCCCTAAGGTAGCGAAATTCCTTGTGCGGTAAGTTC  
CGACCTGCACGAATGGTGAACCATGGCCATGCTGTCTCCACCCGAGACTCAGTGAATCGAATTCGCCG  
TGAAGATGCGGTGTACCCGCGGCTAGACGGAAAGACCCCGTGAACCTTTACTACAGCTTGGCACTGAACA  
TTGAACCTACATGTGTAGGATAGGTGGGAGGCTTTGAAAGGCGTGACGCCAGTTGCGCTGGAGCCGTCCTT  
GAAATACCACCTTGTATGTTTGTATGTTCTAACCGCAGGGCCCTGAATCGGGCTCGCGGACAGTGCCCTGGT  
GGGTAGTTTACTGGGGCGGTCTCCTCCCAAAGAGTAACGGAGGAGCACGAAGGTTGGCTAATCCTGGTC  
GGACATCAGGAGGTTAGTGAATGGCATAAGCCAGCTTAACTGCGAGACGGACAGGTCGAGCAGGTACGA  
AAGTAGGTCATAGTATCCGGTGGTCTGAATGGAAGGGCCATCGCTCAACGGATAAAAAGGTACTCCGGG  
GATAACAGGCTGATACCCGCAAGGTTTCAATCGACGGCGGTGTTTGGCACCTCGATGCTGGCTCATCA  
CATCCTGGGGTGAAGTCCGTCGTCGCAAGGTTATGGCTGTTCGCCATTTAAAGTGGTACGCGACGTTGGGTT  
AGAACGTCGTGAGACAGTTCCGTCCCTATCTGCCGTGGGCGTTGGATGATTGAAGGGAGTTGCTCCTAGT  
ACGAGAGGACCGGAGTGAACGAACCTCTGGTGTTCGGGTTGTACAGCCAGTGGCACTGCCCGGTAGCTAA  
GTTCCGAATCGATAACCGCTGAAAGCATCTAAGCGGGAAGCGAGCCCTGAGATGAGTCATCCCTGACCCC  
TTGAGGGTCTAAAGGGCCGTTGGAGACCACAACGTTGATAGGTGGGGTGTGTAAGCGCGGCGACGTGTT  
GAGCTAACCATACTAATTACCCGTGAGGCTTAAACATAACAACACCCAAGAAGTGTCTAAGGCTTGTAG  
CAAATACGAACGAATTACTTACGTCAGCTTCTCAGATTGAAGAATTTGCCTGGCGGCCATAGCGCCGTG  
GAACCACCTGATCCCATGCCGAACCTCAGAAGTGAACCGCGGTAGCGCCGATGGTAGTGTGGCATTCGCCA  
TGCGAGAGTAGGACACTGCCAGGCACCCAATTAACAGCGATGTGAAAAATCACATCACTGGCTGCGAGG  
ATGACACCTCACTGACGCGGCAACAATTTAGCGCAAGCTAACCGAATGCGGAGCGGTAGTTTCAAGTGGT  
TAGAATACCGCCTGTACAGCCGGGGTTCGCGGGTTCGAGTCCCGTCCGCTCCGCCACTAATTTGAAGGC  
CTTCCCAGATGGGAAGGCCTTTTTTGTATGGGCGTTTTTTACCCTGACCCCGATGGTTGCACAGGAACT  
AACACAAAACCTCGCTCTCACGACCCGGGCTTTTTGTATTTTTTAGCGTGTAAACAGCCAGTGTTAGCATTTA  
TCTGCAGGAAGAGAATAAAAACCTGTTATCTCCTCCATTTTTCTATCTATATCAAGCCCTTATCTGATGG  
ATTGCTGGCCATTTTAACTGGTTTACTTTTTGGCCAACTCTGTTTATGCGCGCGGATTAGGGTTGTATCT  
CGTTTATAACTCGGTAGAGTAAGGGCATCTTGAAGTTGCTGCCCCGCGCGAGTTTGCCGGTTCCAGG  
TGTAACCTTGCCAGTTTTTATCAACCTTAACTGAGTGGTATCGATATGGAACAAGTAAACAAGTCCACCT  
TCAGCGATGTACTGGAATATGTGCGTATGTCCCGTCGCCAGAACAACCTCAAGCGTGAATTTGCGGATAA  
CGAGAAGAAGATCCGTGACAATCAGAAGCGCGTGCTGCTGCTGACAACTGAGCGACTATATCAAGCCG  
GGCATGAGCATTGATGATGTGACGGCGATCATCGCCAACATGCGCGCCGACTATGAAGAGCGCGTGGATG  
ACCACATCATCAAGAACGCCGAGCTATCCAAAAGAGCGTAAAGAGCTGAGCACCAAAACCTGAAGGGCATGAG  
CTCTCAAAAATAAGCGTTAGCTTTTCGCTTTCAGAGACACCGGCCACTGGCCGGTGTTTTGTATCAGCTC  
GGATCTCTGCCACTCCTGCAACAATCGGCTCCCTTTTTAGAAATGCCCCTGTTACCATCACCACAAAGCG  
GTCAATAGTTTCAAGCCATTGACTTGAAGAGACTAAGCTTGAGTGAACACAATAAATTTGCGCAACCATG  
GTGGGGCTGATATGGGCGCATCAGAACAGACGGATTTGACACAAGTGGCATCTCAAGATTCATCTGTCCA  
GACCTCGGACGGGAACCCAAAGCGCAAGCGTCCCTGGTGGCGTTGGCTGTTCTGTTTTCTTTTTTA  
TTGTGCCTGGGGGCGGTGATCGCTCTGGTTGGCTATGAGATGAAAACCTCGAAGCTGCAATCTCAGGAGA  
TCTCCCCTATGCTGCCAAGCTCACCTATCAGGTCGAGCCTGGTCAGAGCAAGCAGATCGCCTTCCCTGA  
GGATGGCCCGTTGACAAGCGGCTCGGCTATGTGCAACTGCCGATGATGCAGGAGCGTTTGTCTCAGCGG  
GGTTATGAAGTCAGCAAGCAGGTGCATTTCTCCGACGCGCTCTATGACTACGCCAGTCGTGGCTTCTTCG  
TGCCCTATAACCGAGAAGGTGCAGGCTGGACTGACGCTGCACGATTGCCGCGCCGAGCCCTTCTATCAATT  
CAAGTATCCGACCCATCACTATCCAGATTTTACTCCATTCGCTCTTGTATCCAGTCGCTGCTGTTT  
ATCGAGAACCAGGACTTGTGAGCAACGAAGAGCCGTTGGCCAAACCGGCGGTGACTGGCCCCGTTTTG

CCAAGGCCGCGCTCTCTCAAGTGGGCAAGGCACTCGATATGCAGGATCAATCTGCCGGTGGCAGTACCCT  
GGCGACCCAGGTGGAGAAGTATCGCCACTCGCCGGATGGCCTGACCCTGTCGCCGACCGAGAAGATCCGT  
CAGATGGCCTCTGCCAGCGTGC GGCTTATCGTCTCGGGCCGAAACCCTCGAAGCGCGAAACTGGTGC  
CTTGGGCTACCTCAACTCGGTACCGCTCTCGGCTGCGCCGGGATATGGTGAAGTGCATGGTCTGGGAGA  
TGGTCTCTGGGTCTGGTTTGGTGCCAATGTTCGATGACGTGAACCGTCTGCTGGATCCCGCCCGCAATCAG  
AATGCGCCGCTGGCCGAACAGGGGCTCGCCCTGCGTTCAGGTTGTCTCTTTGATGATTGCGCACCCGCGTC  
CCTCTTACTATCTGGCTCAAGGGCGAGAGGCGCTGGCTACCCTGACCGACAGCTACCCTGCGCCTGTTTGT  
GCAGGAGGGGATGATCACGCCACCTCTGATGGAGGCGGCTCAAGGCCAAGATTACGTTCCGTGACTTC  
CTGCAGTCCCCGGCTATCACCCGGGTGAACAACAACAAGGGGTTGCAGGTTGCCGTA CTGCGCTGAGCC  
GTCAGCTCGGGGTCAGCTCTATGACCTCGACCGGATGGATCTGACGGCCGATACCAGCCTCAATATGCC  
GTTGAGACAAGAAATCTCCCGTTATCTGCAACAGCTGGCCGACCCGACGTTTGCCGCCCAGGTAGGACTG  
TTTGGTGAGCGCCTGCTCTCGCCGGAGAAGACCGCGATGTGCGCTACAGCTTACCCCTGTTTCGAGAAGT  
CGCCGGAAGGGTTCAAGGTGCGGGTGCAGACCGACAACACTGATCAGCCGTTTCGATATTAACGAAGGCTC  
CAAGCTGGAGTTGGGCTCAACCCGCAAGCTTCGGGTGCTGACTACCTATCTGGAGATCGTGGCCGAGCTG  
CACGACAACCTATGCCGGGATGCCGGTTGAGAATCTGCGTAAAATTGGCTGCCGCTCTCTCAGGACAACCTCA  
GCCGCTGGGCCATCTCCTATCTGATGACGGCTCAGGACAAGAGCCTGCCTGTAATGCTGGAAGCGGGCT  
GGATCGCAAATACTCCGCCAGCCCCAACGAAGGGTCTTTACCGGTGGCGGCATGCACACCTTCAACAAC  
TTCCGCCGCGAGGATAACAATCGTATTCCGACGTTGCGTGACTCTCTGCGTGAGTCGATTAACCTTGCCCT  
TTGTGCGGCTGATGCGCGATATCGTGCGCTACAGCCTCTACAAGGAGGGCAACCGTGCCAGTTGCTGAA  
GGATGACAAGGATCCCCGTCGTCAGGAGTATCTGGCCAAATTTGCCGACAAAGAGGGGCGAGACCTATCTG  
CTGCGCTTCTGGCGCAAATATCGCGGCAAGACTCCCCGAGGAGCAACTCGATACCTTCCCTCGACGGTCTCA  
AGCCGAGTGCAGTACGTTGCGGGCGGTTACCGCTACCTGATGCCGGAAGCCAGCGAAGCTGCATTTGC  
TGCCCTTCCCTGGCGGAGCGGTTGCCGCGGGAGAAGTTGAGCGCCAAGCGGGTCAATCAGCTCTATGTGAGC  
TATGGCCCCGGCAAGTATTTACTGCCGGATCAGGGCTACATCGCCCGGGTGCACCCGCTGGAGCTGTGGC  
TGCTGGCCTATCTCAAGGAGTTGACAAGGCGACCTTTGCCGACGCGGTGGCGGCCAGTCGTGACGAGCG  
GCAAGAGGTTTACAGCTGGCTGTTCAAGACCCGTCATCGCAGTGCCCGTGACAGCCGGATCCGCACCATG  
CTGGAAGTTGAAGCCTTCCCTCGATATCCATCAGCGCTGGGCCAAGCTCGGTTATCCGTTTGTATCATCTGG  
TGCCTTCGCTGAGCAGCCGCTTGGGTAGCTCCGGCGATCGTCCGGCTGCACTGGCCGAGTGGGGAT  
TATCCAGAATGGCGGTATCCGCTCGCCAACCTTGCATCGAGCACCTCTCGTTCCGCAAGGGGAGGCCCC  
TTCGAGACCGAGTTTGGCCGACGACACCGAGGGGAACCCGGGTGATGCCGGCAGAGGTGGCGGCAGCCC  
TGCGCAGTGCGCTCTCCAAAGTCGTTGAAGGGGGCACGGCAAGACGTATAGCCGGAGCCTTTACCCCTGCC  
GGATGGCACTGTGCTGCAGATGGGGGGCAAGACCGGGGACCGGGGATAACCCGATTGAAACCGTGGGTCTG  
TATGGCAACGTGACCAGCTCACTGGCGCGCAACCGCACCGGACTTTTCGCTCTTCTATCTGGGTGAGGATC  
ACTTCGGTACCCTGACCGCTATGTACCGGGTAGCCAGTCTGACAAGTTCCGTTTACCTCGGCGCTGCC  
GGTGCAGGTA CTCAAGGGGATGGCACCCCTGCTGACGCCTTACCTGCAACCGGGCTCCCATACCCAGTGT  
CTGTGCAACAGTGTGATGCGCACGAATTACCGCTCATCAGCAGATAACTAACCAGAGAAAAACGGGGAG  
GCTGACAGCCTCCCCGTTTTTATATCCTCATCGGACGACGCGGCTCGATTGCGATCAGGCGTTCAGTA  
CGAAGTGTGATCACCTGAGCCACGCCATCTTCATCGTTGCGGGCAGTGGTGTGCTGGGCGAGAGCCTT  
GATCTCGTTCGGTGGCATTGCCCATCGCAACCCGAGGCCTGCGTATTCGATCATGTGGCGATCGTTGCC  
GCATCCCCGACGCGAGATCACCTGATCGGCGGTGAGGCCAAGGTGCTCGGCCAGTGGCGCCACGCCTGTTT  
CCTTGTGCTCTGCTTGTTCATGAACTCGAGGAAGAAGGGGGCGCTCTGTACCACGGTATAGCGCTCATA  
GAGCTCTGCAGGCAGTCGCTCGATGGCGCGGGAGAGCTGGGGCGGCTCGTCGATCATCATCACCTTCATG  
ATCTGCTCGTTCGGCAGGCAGGGTGGCGAAGTCGATCAGATTGATCGGCATGCCGATCAGGCGGGATTTCG  
GCTCGGTGTAGGTGCTGACACGGGGACTGATCAGGCCACGGGTACCGAGAAACCGTGACGTTACCTC  
CAGCTCGTCAGCCAGTTTGGCGACGGCGCTGGCGTACTGCCGTCAGCAGCTGGCTGCGGATGATGCGC  
TGATCGGCCACCTGTTGACACAGGGCGCCGTTGTAGCAGATGACGTAGTCATGCTCTGTGGTGAGGCCGA  
GCTCTTCCAGATAGCGGCTCATCCCTTCCAGCGGGCGCCGAGGCCAGCACACGGTGACCCCTTTGGC  
GCGCGCGGCGCTGATGGCGGTGTTGGGTGCGGGGAGTAATCTGGCCCTGCGGGTTGAGCAGGGTGCCATCC  
ATATCCAATGCGATCAGCTTGTACATCTCTCACTACCTGAGTCTGGGTGGCCCGCCCGGTGGGGCCAAGG  
AAGTGGCGAGTGTAGCGAAAATCGGCGGCGGGATCACGGCCGGTTTCAGCGATGGGGCCGTGCCGGTTGAG  
CTATTTGTGTCCCTCGTAAGGGTTCATCTCGAGGGTTTCATCATGGATGGTCAGACGGGTAGGGCCTCGG  
GTGATGGTAACCTTGCCTTTGAAGCTGGCCATCTCGACCTCGATGCCGGAGTAGAGGTGTTGGGTGGCAA  
TGACCTCCATCTGAGCCATCAAGTTTTCGAGTTTCTCCTGTTGGCGGTGAGCTGCTCATCGAGCTGGGC  
CAGTTCCGGCCAGCTGATGGTCCCGGATCGGTTTGGAGCTTGCAGAGGTATCCGGATTGCGCTTGTGCGCC  
GGCAGTTGCAGCAACTTCATGACCAGCTCCTTGAATTTCTCCAGCTGGGCCTGACACGCCTGCTGGCGCA  
GCTTGAGCTGGTGTTCCTGCTCCTTGTGGGTGAAGTAGCCGCCGAGGATCTGCAGCCGGGTATGATTGGC  
GGCCTCTGCCCCAGGCTGGGAGCCATGATCAGGCGATTGGCAATGCTGGTGCCCCCAGCAGAGTGCCT  
TTGCGCATGTTGCTATCGCCACCTTGTATGCTTGTCCGCTGCGGGAGTAGCAGTGGCTGAGCTGGCTCT  
GGATCTGGATATCCCCCCCCGCTTCCAGCTGGGCATATTTGGGCGTAGCTGGCGTGGATCTCTCCTTGTGC  
ATTGAGCTGGCAAAGGTA CTCCCCCTGCTCGTTGCGGGCGCAATGATGCCGTGGCGTACCGTGTATGCAG  
CCCCCGCCTCGATCCAGCCCCCTTCGATAAAGCCGCGGATGACGATATCACCGCTGACCCTGATCTTCA



TGCCCGGGTTGACGTCGCCGCTGACGATTAAGCCCCCTTCAAAATCAATGTGGCCGTGGCGGGCATCAAC  
CTGTTTTGACACTGAGCACCTCGTCCACCTTCATGCCTGCTTTCTCTGACAGGGCAGGCCAGCCCAGCCG  
GCAATCAGCAGGTCGGGATCGTCCGGGGGAGATGAAGGTGCCCTCGCCAGCGCTCATCGGACTGTCTTTGC  
CATCTTTGGCGGGCAGGTCTCGACCGGTACAGGTAACCGGGTACCCCGACGGTGGCCGGATGACGGCC  
CATCAGCGGAGCGCCGGCCTTGACGGTGACGATGGAGCCGAGATCCCGCAGGTCGACCTTGCCATGCCCC  
AACTCCTGCGGTTTTGAGGATCCGTTTCGGCCGGGGTCTCCACCAGCCGCTCATAGCGAGTGTCTTGACCAT  
TGACGGCAGGCTGGCCGTTTTGCAATCACCAGCTTGAGCTGACTGCCGGGGCGGCCCTCTTGCCGACTG  
GATGGCAGCGGTGAGCAGTTGCTCACTTACCCCTGTTTGTATTCGCTGATGGCGATCGCCTCTTTGAGC  
TGTTCCAGCGTCACATACTTGCCCCCAGTCGGCAGTGATCTGGGCGATGGCGCTCATGCGATCCTTCT  
CCACTATTACGGCGAGTCGGGCATCCTGACGCTTGCCGACAGGGATGGGGTTGGCGGGGATGGGGGGCG  
AGGATTTGGTGAGCAGGTTAAGCAGGCTGATGGCCTGTTTGTATCCCTCGGGCAGCGGCTGATAGCGG  
CGACAGTTGGAAGCGAGCAGCAGAGCCTGCACATCCTGTTCGCTGACAGGTTTGGTGAGACCGGCGGCAA  
TCCCGAGGCAGACCAGTTCCATATCGCTTGATAGCAGCAACCACTCTTTGCTTAACACCGCATCTCCTTG  
CTGGATGAGAACGGAGCGATCGGCTCGCTCCTTTACTGTCAATTTAATCTCTCAATGATTAATAAAGCGAG  
TCGCCAACCTGAGAGTGGGCAGTATTAGATATTTCTCTGAATGGTCAATGAATTGAAGTCAAATCGG  
TGATGGCGGCCAGATAAATGTGGGCGCTGTTTGGAAACGGAGTGAAAAGACGGATCGCAGCGCCAGCGAC  
ATAGGGTTCGCTGGCAGGGGAATGGCGGTTCTTATCAGCTGCGCTGGGCTGTTCTGGCCAGGGTGAAGTAA  
TCGCCGAGCACCGGCTCACCCAGCATATGGCGGCGCAGCATGTGAGGGCGGCAAAGGCGAGGATCTTGC  
GGCGACTCTCCGGGTGGGGTGGCTGACCTTGACCGTCTGACCGATGTGCATGCCATCGGCGCTGAGCAG  
CAGTGGCACCCCTCTGCGCCCTCTCGCCCTATGGTCAGTTGCAGGCCCGCATCGGTTGTGCGCAGTTGT  
GCCAGCTCATCGGCCAGTTGCGTACTGAAGTTGGCCTCCAGCCGGGGATGGCCGTGACAAAGCGTCAGCA  
GGGCGCCGCCACTCTCCCCCTCCAGCAGAGCCAGCGGTTTTGCCTTGACAGCAGCGCGAGGATCTGTTGCGC  
CGGTTCCGTATCTCCGCTGCCAACCCAGCCAAGGTCGGATCGTATCCAGCAGTCGGCGCTCTGCACTCTCC  
ATGTCAGCGGTAAGTGGCGCCGTGGCCGATCAGTTTTCAGCTCGATAAGGGGCATGGAGGAGCGGTAACCCA  
GCTCGATGCTGGCTGGCCAGGGTTCGGCATCCAGCATATCGCTGAGCGCAGATTCCGAGATGCCGAAGGT  
GTAAGGCGCAGCAGCTCGGTATCGATCTGTGCCCGGCCAGCTGTTTGAAGCGCGGTAGAAATTTGCTCG  
CGTACCATCTGCTTGAATTCGAACGGCACGCTGGGGTGAAGAAGAGCTGACTCTGGCTATTTTCGCACCA  
CAAAGCCGACGGCGGTGCCAACCCGGTTGTGAGGATCTCGCTCCCCAGCGGCAACAGGCCTGTTTGGGA  
ATTGCTTTGTGCCATGGGGCGACCCAGGCTGGCGCTAGCGGCTTCGATGGTAGCGAGCAGTGGGGGAAG  
AGGGTGAGCGGTTGGTCAAAGCCCTCGGCTGCCGCTGAGCGGTGAGGTCGTCGGCAGTGGGCCGAGCC  
CGCCACACACCAGCACCACTCGGCGCGGCTGGCACTCTCTTGACAGCACCGTTTTTCAGGTGGCGAGGTT  
GTCCCCACCGTCAGACGACGGCGCACCTGCCATCCCTGTTCCAGCAGCAGAGCGCTGAGCCAGACCGAG  
TTGGTATCCACCACCAGACCCGTCATAATTCGCTCTCCGGTACTGATGATCTCGATACGCATAGCAGGCT  
CCTTGATTAAACGGGTGGCAACGGTTGGCCTCGGGCAACACAATCAGGCTTTGTTGTGCTCGAAGTAG  
TAGCTGATCCGGGTACCGGATTGAGGTAATCGAACACGGCGGGCGGCAGCCGTTTTGGGGTGGATCACCT  
TGGCGATCGACAGTTTCGGCTTGTGTCAGGTCGATGATGGCGGCTTCTGACGGGGAATGCGCGGATCGTA  
GACCAGCACCGAGGGGTAGAGCAGGCGGGAAGCGTTGACCGACATCACCCAGCCACCTGACCGTTGGAG  
AGTTGCACCACGCTGCCGGGGGGATATATCCCCATCAACCGGATCAGCATGCTGAGGTACTCCGGATTGA  
ACTGCGCCTTGCGCTGCTTGTAGAGGCCGCTCAGAGCCGAGTAGGGCACCTTGGCCTGCATGTGGCAGAG  
GTTATCGTACTCGTTGATCAGCGACACCATCTGGGTCAGCGGATCGAGCTGGCCACCCCTGAGCCCTTCC  
GGCCCGCTGCCATCGAGATATTCATGGTGTGAGGACAGATCCCTTAGCTTCCGACGGGAAATCCTTGG  
CCAGATTGAGCAGATCCAGCCCGTAGCGCGGGTGTGGCCATCAGGTTCTGCTCCGGCTTGGTCAGCGG  
CTCGGCTTTGCGCAGGATCTGGCTCGGGATCTTTCAGCTTGCCAATATCGTGGAACAGCGCCCCCATGCC  
ACCTGACCGATCTCGTCGGCCGTCATGCAGCACTCTTGGCCAGCAGCATGCTGAGCAGCTGACGTTGA  
GGGAGTGGAAAGTAGAGGTTGTTGCCATCCTCGCTGTCGGAGACCAGATGGAGCACCATCTCGTCCACCGA  
GAGCAGTTGCTCGGTCATGGCGTTGACCAGCTCCTGCGCCTCGCCGATGGCATTGAGGGGGCGGGACTGG  
ATTTTGCTCATCACGCTGCGCACCTGCGCCAGCGACTGCTGAAACTGTTTCTCGCACTGCTGCAGGTTGC  
GGCGATAGAGTTGCAACTGTTGATGCGGCGATCCTTCTCCTGCTGCATCTGGGCTGACGCTGGGCGGC  
GTCTGCGCTCTCTTGTGCTGAGGCTGTACCTGATTGAGAGGCTTGGGCGGAACGTCGCTCTTGTGCGGA  
ATAATGGTGACAGTTTTCAGGCCGAGACGGCGGATCAGCTCGATCTCTTCTTCACTTTTGATCTTGAAGC  
TGGAAAACAGGAACGGGTGTTGCGCCACCCAGTGGCAGGGATACATAGTTGCCGACTTGCAGTCGATC  
TACGGAAATCTTGATAACGGTCATTATCTTGAAGCAGGAGACACACTGAGCCGTATGCTAGTCAAAGGC  
GGGGGTGAATACAAAAGGTATCTGATGACAGGGCAGGTGCTTTATTTATAGGCTTCTGGATGTCCAGACAT  
ATTTACCGATGCAGTACAGGGAGTAAGCATGCCGATCAAGATCCCGGATCAGTTACCCGCCGCCGAAGTG  
CTGGGGCAGGAGAACATCTTCTGATGACGGAATCCCGGGCGTCAACCAGAACATCCGCCCGCTGCGGG  
TGCTCATCCTCAACCTGATGCCAAAGAAGATTGAGACCGAGATCCAGCTGATGCGGATGCTCTCCAACCT  
GCCGCTGCAGGTGGATGTGGATCTGCTGCGCATCGATGACAGGGAGTCAAAGAACACGCCGCGAGGCGCAT  
CTGGAGAACTTCTATCACGACTTCGAGCAGGTGCGTGGCAACAACACTACGACGGCATGATCATCACAGGGG  
CGCCGCTCGGGCTGGTGGAGTTGAGGAGGTTGCTACTGGCCGCGCATCGTTCGAGATCATCGAGTGGTC  
CCATCAGCATGTCACTCCACCCTGTTCTCTGCTGGGCGGTGCAGGCGGCGCTGAAAGCCTTGTATGGT  
ATGGAGAAGCAGACCCACGGCGAGAAGCTCTCCGGGGTTTACCGCCACCATCGCCTCGATGAGCAGGAGC

CGTTGCTGCGCGGTTTTGATGACGAGTTTTGTCGCGCCCCACTCCCGCTATGCGGCGTTTTGATGGCGATCT  
GATCCGTGCCAGACCGACTTGCAGATTTTTGCCGAGTCAGAAGAGCGGGGGTCTATCTGGCGGCGACC  
AAGGATTGTCGTAGGTGTTTTGTCACCGGGCACCCGGAGTACGATGCCCTGACGCTGGACGGGGAGTATC  
AGCGGGATCTGGCGGCGGGGCTCGACCCGGCCATTCCGGTCAACTACTACCCGAATAACGATCCGGGCAA  
GACCCCGCGCGCCAGCTGGCGCAGCCACGGTCATCTGCTGTTTTGCCAACTGGCTCAACTACTACGTTTTAT  
CAGCTCACCAGCTATCGGGTGGAAAGATATCGGCAAGGTCTTTACCTACGACCAGGGAGGCAAGTAGTCAG  
TCGCCCTGCGCCAGCCGCTCGGCCAGCTGGTCGAGCCATTGGCGGTGGCAGGCCAGGGTAAACGCCTTGG  
GTCTGTGGGCCTTGATGGCGGCCATCGCCTCTTGCTGTGGCTGGCCGAGGGTCATCAGCAGCGCGGGCGG  
GACCAGACCGGTACGACCGCTGCCCCCTTTCAGTGGATGACCAGATGTTTTGCCATCCCCAGCAGCTCG  
CGCAGCTGCGGCAGCGCCTGTTGCCAGGCCCGCTCGAAGTCGGTGTGCGGGGCCAGGTATCCTCGATGG  
GCAGATGGAACACGCGCATCCCTTCGTGTTTCGACTCTGGCCGAGCTGCGCCAGTTCGAGTCGGATTAA  
CTCGGCGCTTGTTCATCAGGGTCACCACTCCGTGGGCAGCCGCAACCGCAGTTGATCGAGCGCCAGGGTC  
AGCGGCACCTGCTGGGTGCCGGGGCAGGGGGTTCAGCAGCAGCTGACCGTCGACACGGGGAACCTCAAGGC  
TCCAGAAGGGGTGATACGGGTGCATGGCGGATCCTCGCGTGGTGGCCGAGGGCTGCGACCGGTGAATGG  
CGCAAGGATAGCGGGGGCAGGGGGGATGTCAATGGCCGTTGTGTTGCCCGGTTTACGGGCTGAGTCT  
AAAAAATTGAGCGGTTCAAGGAGTTAAGATGAGAAAACCTGGATCAACTGGATTTGGATATCCTGGCCAT  
CTGTTTTCGGGATGCGGGCATGACCAACAAGGATCTGGCCGCGCTGGTGGGCGTTGCCCCCTCCACCTGTC  
TGGAGCGGGTGCGAAGTTGCAGCAGGATGGCGTCTCAAGGGGGCGCACTGCGAAGTGGATTATCAGGC  
TCTCGGTGGCCACATTCAGGCCATGGTCTCCCTGCAGTTGGCCCGCCACAGCCGTCAGATCATCGATGCC  
TTCCGCGATGCCATTCTGGCGCTGCCCGAAGTGCAGTCTGTTCCACATGGGGGGCAAGGATGATTTTC  
TGGTGCACCTCTGTGTTTTCCGACACCGAGCACCTGCGCAACTTCGTCTTCGATCACTTCACCTCCCGCGA  
GGAGGTGGTGCACCTTGAAACCTCGCTGGTGTTCGAGCACAAGTTTCAGCCGCTCCCTGCCCTGCTTTCC  
CAGCCATAACGGCCAGTGGGCGGACGGTATGGATAGATGGAAAAAACCGCCAGCTGGCGGTTTTTTTCCAT  
TCTGCTATCGGCTGAATCAGCACAGTTGGCTCAATTGGCGGCGGTGCGTTCATCCTTGGCCGTCTGATAG  
AGACTCTTCTGATAGGCCATGCTGCCCCACAGGGCCAGACCAAGCGCATCCTCCTTCAAGGCGTCCGGCT  
GCGCTGCCGGGGTACGCTTCTCGCTGGCACCATCGTAGACATAGCCTTCTGCCGCCCGCTCCGGTTGCAG  
GATCACCACATCCTTGCCGCGCATCAGGGCGAAGTCTTGTGCTACTGCATGATGGCGCGCCCCGACCAG  
TCGGCGGCATGCGCGTCAGATCCTTGCCGAGCATGGGGTAGTCGGCACTGATCCCCATCAGGGAGACGA  
GGGTGCGGCCCATGTCGATCTGGCTGACGATGCGCGACTCCTTCTCGGCGCAATACCGTCCGCCACGAT  
AACCCCGGAATATGGAAGCGGGGAATGGGCACCAGACTGGCGCCACCGACCCCGGCTATCGTGGTCCGGC  
ATGACCAGAAACAGGGTATCCTTCCAGTATTCCGATTGTTTTAGCCTTCTTGAAGAACTCGCCGATGGCGT  
AATCCGCATACTTGGCCGCGTGTGTGCGGGTCTGCTTGGGCTGCTCGAAGAGTTCGATGCGGTTGTCCGG  
GAATTCGAACGGATCGTGGTTGCTGGAGCTGAACACCAGACTGAAGAAGGGTTTACCCCTCTTGTGCAGC  
GCTTTGAAGGTCTCGTCCGCCTTGGCCATCAGATCCTCGTCCGAAAGCTCCCAGGAGCCCTTGAACACCG  
TATTGTCGAAATCCTTCTGCTCGACGATGGTGGTGAAGCCATTGCCGAGGAAGAAGCTGCGCATGTTGTC  
GAAGTGACTCTCGCCGCCATAAATAAAGCTGGTGTGTAACCCGTTGTTTGAAGCAGATCCGCGATGGTG  
AAGAAGTTGGTCTGGCTCTTGCCAAGTTTGACCACCGACTGTGCCGGGGTTGGTGTGAAGCCGGTCAGTA  
CCGCCTCGATAACCGCGCACCGAGCGGGTGCCGGTGGCGTAGAGCTGCTCGAAGGCCAAACCTGCTGCGA  
CAGGGCATCGATGTTGGGGGTGAGCGGCAGGCCGCCGAGGGAGCCGACAAACTGGGCGCCCAGGCTCTCC  
TGCAGCAGGATCACCAGATTCTTCCGTTTTACCCTGGAAGCTCGCCTCGTTGAAGGTCTGGCTGGGCAGCA  
GATCGGAGTTGAAATCACTGGCCGGACGGCCACTCTCCTTGGCGATGACCTCGAGCACCTTCTGCTCCGT  
CATCTCGCCGTAAAACCTGGCCGGCATCCTCCTCGGCGCCCATCTGTTTATGATGGCAAAGAAGAGGGAGTAG  
GCGGAGTTGACGGTGAAGCGAGTTGACCAGCGGATCTTCGGCAAAGGCGACCATGGCCGGGTTTACGGGCG  
GGTGGCCGAGACTGGAGCGGGCACCGAGAAAACCTATGGCCAGAATGAGCAGGGCTAAGGCCGGACGCAG  
ATACCAGCGGGGGAAGCTGAGACCAGTACCAGACGGCCGCTCAGCCACCAACCGCCGGTACGACAGGGC  
CCACTGAAGATTAACGCCAGCAGCAGCTCGGCTTTCGCCCCGCCACAGCATGGCGAACACCTCTTTTCG  
GATAGATGAGGTACTCCACATAGAGCGGTTGGGGCGCACGCCATACTCGGTGACAAACGAGGGGGTGGGA  
GATCTCGAGGAACAGCATCAGCCAGAGTCCGATGGTTAGCCACACTCGCATCAGTTGCAGCCAGCCCCGG  
CCGATGGCATGGGGGCTGCCAGCAGCAGAGTGAAGCATGGCGGGGACACCCAGACCCAGCAGAGGGTCCG  
CAAAGTCGACCCGGATCCCTTGCAGCAGCATCTCCTGCCAGCCGGCCACGGCATCCACCCGTTCCAGTTG  
CCAGAGACCGAGGGCGATGCGGCTGAAAGAGAGAGAGAAAAAGCGGAGCGCGCAGAAGATGGCGAAGGGC  
CAAACGGGCGAGTGCCTGTTTTAGATCTGTCATTTTTGTCTCCTGAATGAGACTGTAAGCGCCTGTCCA  
CAGACGTTTTTTACTTGTGTGAGGTTATGACAGATCGAACTGGTTAAGGTTGCATTCAATTTTTGTTAAA  
AGCCGGAATTAACACATTTGTCATCTAAAAATGTGATGTCGCGCGCTTAATGAGCACAGCATAACCTGCT  
GGATAAAATGTGAGCCACAGCGGTATGGATGGGGGATGGGTGTTTATAATTGCCGCAATTTATCTCAAT  
CGGAGCCGAAGGGATGCCGGTCTTTATCGATGTCGAGTATGTGCCGGGATGGCGCCTGTTTCTGGTGTTA  
TCGGATGGCACCACGGGTGTGCTGGATCTGACCCCTGGCGAACCAGCCGCTGTTTGCAAAGCTGGAGA  
GCGAGCGTCACTGCGCCCGGGTCTTCATCAACCGTACCACCAGCTGGAGTGGCCCGTCCGATGTACCTT  
GTCAGCCCATGAGGTCTATACCTCATCTCTCCATTGATGAGCGGGAAAGCCTTCAGCTAATCCCCATTT  
TTTTGTGAGCCAACGCCAGATTCTGTTACTGGAATGTTTGCCGTTTGCTTTCTGAGCCAACCTGGGTA  
AAACCTGCGCAACATTTTTGCCAACTTGCTTTCGCTTCATCTGACAGAGGCTTGCCGTTTTCCGCGCCGAG

GCCTTTTTTTCGGCCAGATGGCAAACCTTTCCCTTACTGAAAGGTTTGGTTGGTTGAATGAAAATAACAA  
AACAAACAAATACATAAGGAAAATGTATGGCTTGTTCATATGCGCACACCCCTTGCCCTGCTGGTTGGTGG  
GCTCGCCTGTACGGCGCTGCCGGTCAGGAATCGGTTCAACAGCTGGATCCTATGGTGGTGGTGGCAACC  
CGCCCCGCTAGCACACTTGAAGTGACACAGGATCCCAAGAAGCCCGGTTCCCCCATGCCTGCTGCCGACG  
GCGCCGGTTATCTGAAGAATGTACCCGGCATGAGCATGGTGCACAAAGGGGGGCTCGGTGGCGACCCCTGT  
ACTGCGGGGGATGGGGATGTCCCGCTCAACGTGCAGATGGATGGCGGCATGCTGGCCGGTGGCTGTGGC  
GGCCGGATGGACCCGCCACGGCTATGTGTTCCCCCAATCCTTTGACCGGATCCGGGTGCTGAAGGGGC  
CGCAATCCCTCGAGCAGGGTGCACCCCTGGCGGAACCGTGTGTTGAAACGGGACAGACCCGAGTTTAC  
CGCACCGGGCCTCAAGGCCGATGCCTCGGCCCTCTATGGCAGTTTTGGCCGCGATGACCAGATGGTGGAT  
ATGACGGCGGGTTCGACCGATGGCTATCTGCGCGGTTCAGTTTACCCACTCCGACAGCGACGATTACCGCG  
ATGGTTCACGGTAACAAGGTGCGCTCTTCTATCGCCCGGCAATGCCCGTCCCGCTATGCGGATCGCACC  
GGGGGAGCACACCTGGCTGGAGCTCACCCGAGCGCAGCAATGCCCGTCCCGCTATGCGGATCGCACC  
ATGGATGGCCCCATGTTTGTATCGCGAATCCTTCGGGCTGAAGCTCAAGCAGGAGCAGATCACCCTACT  
GGCAGCGCAGCGAGCTGACCCTGTGGGACAACCTACATCGACCACATCATGGACAACCTTACAGCTGCGGCA  
AAACAGCGGCATGAAGATGCTCTCCAACCCGGATCGCCGCAACACCCGGCGGTGCTGGGCAACGACATC  
GCCTTGCCAGCAGACTGGCTGCTGACCGCCGGCTCGACAGCAACCCGGGATCAGCACCGCAGTCGGAGTG  
GGGTGACTATGCCACCAAGGATCGTCAGCGCACCCCTGCGTTTCGAGCAGCAGGGCGGCTTCGCCGAAC  
GGGTGCTCAGCAGGGGGCTCACAGCTACAAGGGCGGTTATCGTCAGGATAGGGTCGAGACCACCCGCTAT  
GGCGCCGGTGAACAGACCCCTCTACAGCGATAACCCGACCCGAGCGGGTTTGGCCGCTACGAGTATC  
AGTGGTTCGCCACGCCGGTCCAGCTATCTGGCCTGGGGGAGGAGCAGAGCTGCGCCGACTACTGGGAGCG  
CAGCAAGGACAGCACCCCGTTTACCCCTCAACCCGGAGCGCAGTCGCCAGTGGGATGCTGGGTGGCCCTG  
CGCAGTCGCGAGCTGGACCTGACCCTCTCCCTCTTTAGCGCCGATATCAAGGACTACCTGCTCTACAACA  
GCAAGTCGAACAAGGTGCGCAATATCGATGCCAGACCCGGGGTGGCGAGCTGGAGGGGGCGTGGCAGTT  
TGCCGAGCAGTGGCGTCTCGATGGTGGTTTTGGCGGTGGTCTATGGCGAAAACAGAGCGACAACAAACCG  
CTGGCCAGATGCCGCCGCTTGATGGCAAGCTGGCGCTGGGTGGCAGCCAAATGAGGGCGTGAACCTCA  
CTCTGCTGGGGCGCGCCGTGGCGGCGCAGGATCGGGTGGATGTGGGCTCCGGCACGGTCCGCCGTGAGGA  
TCAGGGCGAGACCCCGGGCTTCTTACCATGAACCTGAGCGGCGCCTGGCAGTTTGCCAAGGGGTGGCAA  
CTCTCGCCGGGTGAGACAACCTGTTTCGACACCTTCTACTACGAGCACCTCTCCAAGTCGTTACAGCCCA  
GTCAGGCGGGGTGGCTACGAGCAGAGCGGCGCATCCCCGAGCCGGTTCGTTCCCTACTGGCTCTCGGT  
CAACTACCGCTTTGCTCGGCCGGTGTGCTCTAACAGTTGAGTCAGATAACGTTTTTCAGTCACAGACAC  
CGCTGTGTGAGCATCGCTATCATGGTGAACAAAGGCGTATCAGACGCTGCTCTCACAGCGGGAACATA  
ACAATGAAACAGGGAACGTTACGCTATGGCGGCTGCTCGGGGCCGCCCTGTTACTTGGCGCTTGTGGCG  
GCAGCGGTAGTTAGGTGGGGAGAGCGCTCCCCCGTCTCAATCCGCCGGTCAACCACCCCTCTGTGCG  
CACGGCCAGTCGTGCTGCTATGGCGACGATCAACTCGCTGCAACCTGCGCATCTATCAGGTAATGGTG  
GAGTCGTTTTGTCGATGGTACGGCAGTGCCAACTACGGCGTGGCTATGGCCCTCCAGCACAAACGGCG  
ATCTGCAGGGGATCATCGACAGTCTCGACCACATCAAGAGTCTCAACGTCAACGCCATCTGGCTCACCC  
GGTGTTCGACTCCTGCGCGGGGCAAGGCGGTGATAACAAGCTCGATGCCACCGGCTACTTGCCTGCGAC  
TTTTTTTACCGTGGATCCCAACTTTGGCAGCAATGCCAAGCTCAAACAGCTGGTGGATGCAGCGCATCAGC  
GCGGCCTCTACGTCTTCTCGACGGGGTGTGGCCACGTCACAAGGTGGGGGTGAGCAAGCCCTCGCC  
AGAGGGGCGTCTGCCAGCCCTCACCGAGCGGGTGGCGGTTATCCCGGCCAGCTGGTGGATTACAGCAAG  
CCGGAGAGCCTCGCCTACTTCAAGGAGGTGGCCCGCTATTGGGTGAGCAGTACGGCATCGACGGCTGGC  
GCCTCGATCAGGCCTATCAGCTTGGGCTGGATGATTGGCGGCCATTCGACGAGGTTGGAGCAGGCCAG  
CGCAGCGCGCAAGGCCGCCGGTCAAGCAGTGGGGCACCCCTCGGCTACATGGTGGGCGAGGTGTGGAAGGG  
GCTGACGATATTGCGCTCAGGCTTATGGCAGCAGCGACAATCCGGCGCTCTCCTCGGCGTTGACTTCC  
CGTTGCGCTACGGCATCGTGCAGGCGCTGGCGGTGGAGGAGTCCGGCAAGGGCGGCCAGGGGGCCAGCGT  
GCTTGACGCCAGCTGGAACAAGGTGGAGAACTACCCGAATCATGCCATGCCGAACCTGATGCTGGGCAAC  
CACGATCTGGTGCCTTTCGGTGTGCTGGAGCGTGGCAACTTCAAGTCGACCGAGTACTGGCAGCGCC  
ACAAGGCAGCCTTACGCTTTATGGCGGCCCGCTCCGGCCCCATCACCTTCTACTATGGCGAGGAGTTTGG  
CGACGAGGTGCCGGCTTTGCCGCCAAAGTCCGGCGTACTGTGCGGCGCAGGGCTTGTGCGACGATCAT  
GTGGCCCGCAGCGATGGCAAGGTGCCCGCTGTACCAGGTTTTGTGCCAAGTAGCGAACAGGCCGAGCTGA  
AAGAGTGGCTGGCCAGCTACTGGCGATGCGTGCAGCGCACCCCGCTCTCTATCAGGGGGAGCGAGTCAA  
ACTGGTGGCCGAGGGCAGTCTCTATGGTGCATCAAGCAGACGGCGGGGGAGCAGATAGTCTACCTGCTC  
AACCTCTCCACCAGCGCTCAGCTACAACCTGCCAGCGGCAAGTTGCGCAGCGGCAGTGCCTGGTAG  
ACCTGCAAAGCGCGAGAGTCTGGCCATTGGCGGCAGCAGCGTAACGGTGGAGATACCGCCCTTGAGCGG  
GCGTTTTCTGCTGCAATAAGACAGCCGACGACGCTTTGATATGAGAGAGGGCCCTTCGCGGGGCC  
CTCTCTGTCAATTGTGGGCGACAAAGTCATGGCGGGTTATGCGGTGGTCTGGCCCCGGTTTTTCCAGCCGT  
GGCGGAAGGCGCGGGCCAGTCGCTCGTAGAGATCCTGCGCCTCCTTGTCTTCGATATCGCCGCGGATCCA  
GGGGTTGTGACTATCTCCAGCAGCACGAGTACCGCCCTTGGTGGCGCAATCGAGCCCGTAGAGGCCA  
TTGCCGAGCTGATGCACGGCACGGCGAGCGGTCTGCAGTACCCGCTCCGGCACCTCGTTAAGCGGCAGCG  
CCTCGATGCGGCTCATGTGAGGGGGTGTGCTGCGGCGGCAATGCGGTTGCCGTTCCGGCCGGTAGCG  
GCGACAGGCGAACAGCGGGGAGCCGTGAGAAAAGCCGATGCGCCAGTCAAACCTGGCGGGGATCCGGCTC

TGCACCAGCAGCAGGGCGGAGCGGCCCAACCCCTCGTCCAGCAGCCGTGCCAGCTGCTGCTCGTCGCTGG  
CCATGGCGAGATCGCGCCCCTGCGCCCCGTGCGGCACCTTCACCATCAGCGGCAGGCCGAGCCGCTGTAC  
CAGCTCGTCCACATGGTGGCGGCCGCGCGGGTACCACCATGGTGGCGGCATGGGCACGCCGCTGCGC  
ACCATCAGCTCGTAGAGATAGAGTTTGTGCTGCAGGCGAGGATGGCGCGGGAGCTGTGCATCACCGGCA  
TCTTCAGCTGTTTCGGCACGGTGGGCGAATTCGAAGGTGTAGTGGCCGACCGCGGTTTCGGCACGCAGCCA  
GAGGGTGTGAACTCCGGCAGCCGCTCGATGGCGGACGGTGGCAGGATCTCGGCCCGGATCCCCGTGTGG  
GCGGCAGCCCGGATAAAGCGCTCCAGCGCAACCCGTCCTGCTGGCACGGCCGTCATCTGGGTGACCA  
GAATGGCGAGCTGGTAGAGCGGCGCCGCTGCTCCTCGTACCAGTCCCACCAGTGCCTGAGCGTGGTG  
CAGCATCAACTCTTTCTCGCTTGGGCTCAGCTCCAGCGGCACAGGCTCTGCTGCTGGCGCACCGACCAG  
CCGTGGCGGCGCGCTTGGGGTCACTCCTGCAGCGGCAACTGGCTCAGGCCATAGTAGTAGCGCGCCA  
GCCCCGACGCTCGACTGTTTACACTGGCCGAAGATGGCAGTACCCTGATCCGATCCTCGCTGCTGCTG  
GGCAGCCACCCTGTGCCTTGCGCCACAGCTTGGCCGGTGGCTGCTGGGGTTGCAGTTCGGCTGATGGCT  
TGCAGACCCGGCAGACAGTGGTGGCCGCGAGCCTGGCCAGCAGCAGTAGTAGCTGCGCTAAGGT  
GTTCCAGATTGCGGCAGAGGTTGATGATGCGGGGTCGGCCCGGTTGGTTCGGCACGCCATGTTGCAGATA  
GGTTCGGGCGGTGACAGATAATCTGCATGGCAAGGCCAGTCCGCCAGCTCTTCGACGATGACATAGGTA  
CTCATATTTTCGGCTCCACAGATCAGACTGCCTGAACAGGCAGGATCCCAGTGGGCTTCGATGCACCGA  
CAAGCACGACAATGGCGCGAGGGGAAACAAGAGGTTACAGTGCCTAATATGACGCCCTGGTAACCTGTGA  
TACAAGTCGATTTTTGGTGTGAGGATAAATAACCGAACAAGGACTCCCCGTGTTGACCGTACGTGCGG  
CCCGAACCGATGATCTGGGCGCCATCGTTAATCTGGAACGCTACTGTTTTCCCCCTGAAGTCGCTTTGG  
CCGCAGCCGCTGGCACTATCTGCTGGCCACGCCAAGGGGCGCACCTGTTGCTGCTGGACGAGAAACAT  
CAGCTGATGGGCTATCTTTGCTGCTGGAGCACAGAGGCTGGGATCGGCTGGTCAATTCAGGCGCTTGCCA  
TCCGCTGGACGGTGCCTGCTGCTGGGTTGGGCCCGCCGCTGCTGGAGCAGGTGATCCGCGAGGGCAAGGC  
CGCTGGCTGGGGGGCGATTTCGCTCGAAGTGGCGGACGCCAACGAAGAGGCGCTGGCGCTCTATCAGGGA  
TTGGGATTTTGTCCCCGGCAGCGGCTGGCGGACTACTATGGTTCGCGACCAGCACGCCACCAGGCTGGTGC  
TGCCGCTGGTGGAGCAGAGGAGCGTGGAGCGGCGAGAGTGGCTCGCACTCAGGCGCGCAAGCCCTCTGC  
ACAGGCCAACTGATCATGTTGAACGAGCAGAATAGAGGAGCAGGATGAGCTGCGACAACCTGTCTTGCCAC  
CGCCATCAGGGCAAAGTGGGGCGCTGTCCGGTCTGCGCCGCGCAGACCTTTGCCATCGGCATGGTTCGGT  
TGGCTGGTCTGGTGGTGGTGGCGCCGACCTCGTCAACGCCCTCACCAGCCCTGCTGTTTGGCTGG  
GTGGCTCGGCCCTTGTGCTCCATCTGGCGGATTTGTCTGGCGCAAGGCGACCGGACTGAAATTGAG  
CGATGAATAAATCAGATTGGTTTCAACAACATAAATAACAATATCGGTTGAGATAATGGAGTTTTCAGATG  
ATAGCAATGGTAACGGGCGCCTCGTCCGGTTTTTGGTGAAGCCATCAGCCGCCAGCTGGTGCAGGCGGGCT  
ACAAGGTGATCGGTACCGGTGCGCCGCGGAGCGGCTGGCTGCGCTGGCTGACGAGCTGGGGGAGCAGTT  
CCTGCCGCTGGCGTTTCGACGTGACAGACAAGGCGGCCACCCGCGCCGATCGCCGGCTGCCAGCCGCC  
TGGAGCGAGGTGGATCTGCTGGTCAACAACGCCGGTCTGGCGCTGGGGCTGGAGCCGGCCACAAGGCGG  
ATCTGGAAGATTGGGAGCAGATGATCGCCACCAACATCAGCGGCTGACCCTGCTCACCCTGCTGCTGCT  
GCCGGGCATGGTGGCGGCAATCGCGGCCACGTATCAACATCGGCTCCATCGCCGGTACCTATCCCTAT  
CCGGGCGGCAACGTCTACGGCGCCACCAAGGCGTTTCGTGAAGCAGTTCAGCCTCAACCTGCGTGCCGATC  
TGGCGGGCACCGCCATCCGTGTACCAACGTGGAGCCGGGCTGTGTGGCGGCACCGAGTTCTCCAACGT  
GCGCTTCCACGGTGACGATGCCAAGGCGGCTCCGTCTATCAGGGGGTGGAGGCGATCCAGCCGGAAGAT  
ATCGCCAATACCGTGTCTGGGTGAGCCAGCAACCGGCCACGTCAACATCAATAGCATCGAAATCATGC  
CGGTGGCGCAGACCTTCGGCCCCGCTCAATATCAGCCGTCGCTGATCGCTGCATTTGGTTGAAACAAAGAGG  
CTCCCGTGGGAGCCTCTTTGCATTGGCGAGCCGATTACAGGCTCATGATCTTCTTGAACCTCCCGGCGA  
ATACTTCTTCTCGCTGCGCTTGGTCAGGTCCGTATCAGCTTGTAGCGCAGCGTTTTGGCCATCTGATAG  
GTCTGCTCCAACCTGGCCATAGGAGTAGTCGGCAGCCAGCCGATGGCGGTAGCCTTGTGCTGGCATAGG  
CCTGCTTACAGCTCTGGTTCGAGCACGGCGACCTCCTGTAGAGCTTGTGCTCTCCTTGTCCAGACGCC  
GCGCAGCAGCGGCAGTACTTGTCCGGATCGGCGATGGCCAGCGCAGTACGGCTGCGGAACCTGCCAGTAG  
GCGGAATCATCGGAGTAGCTGTGCTGCCGGTGGCAGTAGGAGGCGAGGGGTAGGATTCAGCGCGTTGTAGA  
TCGGCACCATCACAGATTTCGGCCAGCACGCCGTAACCTGCCAGATCAATCCCTGCAGCTCTTTGGGCAT  
CTCCTTGGCGAGCTGGATGACGTGGGATTCCAGCTGGCGATCGACGCGGATCGGCCGCTCCGCCCTTGCC  
GCCAGCAACGTGCCGTATAGGTGGCGCTCAGCACCTGGCCACGTCCGGCACGGCGATGGGGGAATCCG  
GCTTCATAAAGAGCGGATATTGCGCCTGCTGGGTGCTTGTGTTGTTGGGAGGCCGTCAGCATGTTCTGGCC  
GAGCCACTCCCGATCCACGTTGTAGGGGTGGCAATCACCCGAAACGCTTGGCGAAGTTGAAATCTTTC  
GGGTGCGGCTTATCCAGCAGTTTGTGCTTGGCGACGAACTCCAGCAGCTTGGGCGAGTGCAGCACATCGG  
TGCTGTGAGATTGACGCCGTGGATGCGCAGGCGTTGGCCACCATGGCGTAGCTGTCGTCGCGCACCCG  
CACCGCGATCCAGTGGTGGCTGGAGCCGATCTCCATCAGCCAGGCTTCGTTTACATCTGCCAGATAGAGG  
CTGTTGCCCTCACCGGCGCCATATTGCTCCACATAGCGGCCGAGCAGCTCGACCCCTCTTTGGCCGCT  
TGGCCTGCGGCAGGATCAGGGTTCGGGATGATGGCTTCAATCACTCCCTTCTCGATCAGCGGATCGGCTTT  
TTGGGCTTGTGCTTACCTCGGCACTGGTGGTGGCCGAGATGGCGACGTTGAACTCGTTGATGCCGCGC  
TCTTCATAAATATTTGCCTGCCGGGTGCTGGTGGTGGCATCCAGTCGTTGGATGGCGGAGTAGGCGAAAA  
ATGCCTTGGGCATCGGCACTTCCAGTCCGTTACCCAGTTTCCAGACTTTGCTCTCGTTCTGCTGCGCGG  
CCGGAAGGCGAGGACTTGTTCAGTTGTTGACGCCAAAACTCTGTTTCTGGCGATCATCACGCTGCCG

TCGGCGCTGGCCCCCTTGCCGACGATGAGGCCTGTACAGGCGTCGGCACTGGTGCCAAGCAGGGTGAGCA  
GGGTGGCGGAGAGAAGACTCAAGGTGTGTTTTTTCATAGGTGTACCCGAAGGGTTGCGGTGAGTGAGAGT  
CAGACGAGGGGATGAGGTGTGGGGAGGCTGCAACTCCGAAGTGGCAGCGGAGTGAGCACGACAGATTGGT  
CTGCCTGTTATTGGTTTTTTCGAACAGATCATCCATGACACGGCTGGCTGGTTGTGATGTGCACAAAATT  
GTATTTCCGAGTGGTTGTTTTGTTTTGTGATCGAACTGCGGTTCCCTGACTTTTTCTCTGGCGTCTGTGGTGTG  
CGGACGGCAAAAATGTGCCAAAACAGCGTGAACCGGCAGCAGATGAGTCATGATTCTGACGCCAGCCTTAC  
GTGGGGGGCGTGGTGAGATCCGCCATATCTTTGGATCTCGCACTATCTGACAAGTTGGCCGTGTAACCTGC  
TGTTTTAATTGATAATGATGGGGCCTGACGCCCATGTGACCGGATCAGCCTGTGCCCATTTGCCGAGAT  
GCGCACTGAATTGGAGCCCCATGGATATCAAACCTTACAGCCAGCAGCTTGCCAGAGCGCATCCAACA  
ACCCGGCCCTCGTACCCTCAACAGTGCCAGTACGCGCGGTGAGGGCGGTGGCTGGGAGGAGATGGTCAG  
CCTCTCCACCCAGCGCATGACCGGTACGCCAGCGGTGCTGACCTACGAACATCTGGCCAAAGAACAAC  
AAGCTGCCGCCGGCGCTGGATATGAGCTCCGACAAGGGGGCGTGGTACAGCAGCTGGTGGACAAGGCGC  
TTGGTTTTCGATCGCAAGAAGTTCAACGAGATCGAAGAGAAGCTCAAGACCATCGCCGATAACAAGAAGCT  
GACGCCGGAAGAGCGGGCGGAGCAGAGCAAGCCGCTCAACGAACAGCGAGAGGCGATGCTCAAGGAGGCG  
ATGGATCGCCTGACCGGCAAGAAGAGCTCATCCAAAAGATGAGGCCAAAAGTGCCTGATCCTGCCGCTGTT  
CTGAGATCTACCCGGTCCGCACCGATGGGCCAGTATCGACCGCCGATGGGCAAGCTTCTGCCACCTCTTT  
TGACCTCACCTCCCCACAGGCGACAATGTCCGCGCATTGAGCCAGTCGAGGAGTCCGCCGTGTACAACT  
TCCAATATGCCAATCCGACCCGCATCTGTTTCGGCGAGGGGCAGATCGCCAGCCTGCCCGAACTGATCCC  
GCCCCGAGCCGGTTGCTGGTGTCTACGGCGGTGGCAGCATCAAGCAGAACGGGGTGTATGAGCAGTTG  
ATCCGGGGCGCTGGAAGGGGTGACGTGGCAGGAGTTTTCCGGCATCGGCGCAATCCCAGATACGAGCTGT  
TGATGGAGGCGGTGGCGCAGGTGAAGCGCGAGCGCATCGACTTCCTGCTGGCGGTTGGTGGCGGCTCCGT  
GGTGGATGGCACCAAGTTTTGTTGCGGGCGGCCGCTGCTACGAGGGGGATGATCCCTGGGATATCTGCGGC  
AAGCAGGGCAATGTGCACAAGGCGCTGCCGATGGGCTGTGTGCTGACCCTGCCAGCCACCGGCTCCGAGA  
GCAATCCCACCTCGGTGGTGAGCCGGGGGATGTGAAGATCTCCTTCAGAAGCCCGCTGGTGCAGCCGCA  
ATTTGCGGTGCTCGACCCGACCACCACCTACAGCCTGCCGCCGCGCCAGACCCGGCAACGGGGTGGTGGAT  
GCCTTCGTCCATATCGCCGAGCAGTACCTCACCTTCCCGTGGGAGGCGAGGTACAGGATCGGCTGGCGG  
AAGTTTTGTGTCAGGTGCTGGTGGAGAACGGCCCCAAGGCGCTGGCGGAGCCGACCAACTATCAGGTGCG  
GGCAATCTGATGTGGCGGCCAGTCTGGCGCTCAACGGCTTATCGGTTGCGGAGTGCCGCAGGATTTGG  
GCCTCTCACGCCATCGGCCATCAGCTGACGGCGCTTACGGGCTGGATCATGGCCAGATCTGGCGGTTGG  
TGCTCCCTCACTGCTGCGTGAGCGGGCGAGTCAGAAGCAGGACAAAAGTGGCCAGTTTTGCCGAGCTGGT  
GTGGCATTTCGACCCGTGAGGACAAGGCTCTGCGCATCGAAGAGGCGATCATCCGTACCGAGCAGTTCTTC  
CAGAAGATGGGACTGGGCACCCGGCTGGCTGACTATGGCCTCAGCGAAAAGCTGCATTCGGCGGCTGTGCT  
CCAACCTCAAGCGGGTGGGACGCACCCGCTCGGTGAACAGCAGGATATCGACCCGGATCGGGTGGCAGC  
CATTCTCGCCCGCGCTATAAGCCGGCGCCGTTTTGTTTTCCCTGGCTGATTCATTTTCCCAATTAAGA  
GGGCCGATTGTGGCGGCCCTCTTGATGATGGGTAGCCGATCACTCGGTACGCGCCTTGAGATAACCGG  
CGTAATCCGGGATCTGCACGCTGAACGCCTGCCGCATATGGGGGCTGTCCATGATGAAGTCGGCGGTCCG  
CTCGTTGGTGGCAACCGGGATGTTCCACACCCGAGCCAGTCGCAGCAGCGCCTTACATCCGGGTCTGTC  
GGCACCGCATTGAGGGGATCCCAGAAGAAGATCAGTACGTGATCTTCCCTTCGGCAATCAGGGCGCCGA  
GCTGCTGGTGCACCCCATGGGGCCGGAGAAGAGGCAGGTGATGGGCAGTTGTGCCGTGTTGCCGAGCAT  
GGTGCCGGTGGTGGCCGTTGCATAGAGGTGGTGGAGCTTGAGCTCCTCCTTGCGGGCGCATCACCCAGTTC  
AGCAGAGGGGTCTTCATGTTGTGCTGAGCCACCAGTGCAACCCGTTTTGTGGGGCGCCATCTCGCGTGCAA  
TCTGTTCCATGGAAATCGTCCGTAGCATTGTTATTTGGAAGAGAGCCGTATCCTAATCGAAAGCGGCGCCC  
GTTACCTTGCCGGGCGCCGTAACCTGTGATCACTTCGACTGTTCAATCCACTGCTTGTCTTCTGCTCCAG  
CACCGAGATGGGCAGCATGCCGTATTCCAGCAGATGGTGGTGAATGCCTTGAGGTCAAAGCCTCCGCC  
AGTGCCTGCTCGGCGACTCCCGCATCCGGATCAGCGCCAGCTGGCCCCGCTTGTAGGAGGTTGCCTGAC  
CGGTGTAGGCCATGTAGCGCGGCACCTCGGAGCTGATGTCCCCCGCCCCAGCGCCGAGTTCTCCTTCAT  
GTAGTTGACAGCCTGATCGTGGCTCCAGCCATACCAGTGGATAACCGGTATCCACTACCAGCCGCATCGCC  
CTGAGCATCTCCTCGTTGAGGCGGCCAAAAGTATTGCAACTGGTTGTTGAAGGCGGATGATCCCTCGACCT  
TCACGTCTCCACCCCGGATCATAGAGTCCCGTCCCTGATATAGCCCCATGTCGTGATCCGCCAGGTA  
CTCGGTGTAGAGCGCCAGCCCTCCGCATAGGAGGTGTAGGAGGCGTTAGCCACGTACTGCGGGAAGTCG  
GGATCCTTGCGGCGCCAGCTCCTGGGCATGGTGTGTTGAAAGTGGTGACCCGGCGCCGCTCGTGGGCCA  
GCAGGGTGTGATGTTCCAGCTCTGCAGACCATAGGGGTAGTAGGTGTTGAGGAAGAACTGCCCCTTGCC  
GCCGGTCTGCGGGTTGCCGCTCTGATAACCAGGCCACTCCGCCGATGGCGCATCTTCATAGGAGACGGGC  
ACCACCTGGTAATCCAGCTTGGGAATGGTACGTTCCGCATCGAAGAAGTCCGGCAGCACCAGTGTGCTT  
TGCTCTTGAAGACGTTGTACTCCTGCAGTGCCCGCTCGTGTTCGGCCAGCGCCTGTGCTGTGGCCCGCT  
CAGGGTCGCCCCGGCTGCATTGTCCGGGTTGAGGCCGGCGGACCAGACCTCTAGCGGGTTCTGATAGAAG  
AAGGCCGGCTCGTTAGATAGCGGAAGAAGGCGTAGATCTGGCCGCTCTGCTTGGCTCTGGCTCACGCCGT  
CGCTGTACACTTGCCGACGGAATGGCATACTTGACCATGGCAGCGAAGATCCGCTCTACCTCGCTCAA  
TCCCAGCTCATGTACCTGCTCGGGTGTATATTGGTGGTGGTGTGCTTCTTCAGCAGCCAGCGATACCAG  
TCGCGCCCGTTGGTGTATGCCACAGAAAACCGTGTACACTCGCCACTACCCAAGCGCACTGCATAGGCGC  
CGCCATGCTGGTAATCCAGATAGTCGCGCAGCGCCAGATAGCGGGTGTGATGCTGTCCAACACGGCTTT

GTAGTTTGCTCGCAGTGTGGCATCGGCATCCCCGGCAACTGCTGCCAGCCGAGGTAGGAGCCGGCGATC  
GCCTCCCCATCCAGCTTGCTGTTGAGCTGGGCCAGCAGCCGGTCTACCAGCTCATCAGGCAAGGTGTTGC  
CCTGAACACTGGCCAGCTCGAACTGGTGTTTTACCTCGCAAGATAGACATCATAGGCCCTTGAGCCAGGT  
GAGGTGTTCTGATAACCAGGCCCTGCGGGGTCATTGTTGTCTTTGCTCGAGTTGCCATTGCAAGTGCCGGA  
GCTGTGTCTGTGCGGTGAGATCCCGTCGCCATGTGCCATCACCCGGTTCACCCGGTTCGGCCGAGCTGT  
GCTCGAAATAGTCGAAGTCACCGCTGACGGTACGAGCTGCTTTGCCGCTGGCAGGGGGTGCCTCCGACGTC  
ATCTGCCAGATCCACCACGCGGTTGCGGAAGTGATGGATCGGGATCTGGGATTGGGGTAAATCGTATCCT  
TCAAGATTGATCTGCAAGTCCCAGCGGATCATGTCTGTAAGACAGCCGATCCCGCTCACTTAGCACCGTGG  
GATCCAGAGCATTAGTCGTTGGAGCAGTGAAGTGTGAGTGTCTTTCGCTTGGCGATGCTGGTGGCAGT  
GATGGCAAAAACCGTAGGGGTCGAGCGACTGGCTCTCGCGCAGGGCCATCCATGGTTTGCATCAGGGAT  
GTTTTGGTGGCTGCGGGGCTGTCAGGTGCGTTCGAGTGTGTGTCATTGTCAGGCGGCAAGAGACAGGGCAA  
TGGCGCAGGCTAGCGCGAGCTTGTGGGTAGGAAGTGCATGATGTAGTCCCTTTCACATGTTGTTATTGTA  
TGCCCTGTGAGGGGCCCAATAGTGCAACTCCCAAGCGTCTGTTTTTGGCATCTGAATAGCAAAAATAC  
GCTTATTTTTTTCATGCTGATAAGTGGTGTGAAAAGCTATGCAGCCAGACATTAAAAAACCCGCTGAGCGG  
GTTTTTTAATCGTTTTTTTTCATGCCATAACTATTAGGATGAACCGTGGTGCAGTTGCGACTGCTGGTAGT  
TCTCCAGCCCAGTGCATCGATAAGGTCTAGCTGGGTCTCCAGCCAGTCCACGTGCTCCTCCTCATCCTC  
CAGGATCTCCTGGAACAGGTGCGGGCTGATGTAGTCTTGCACCGACTCGGCGTAGGCGATGGCTACCTTG  
AGGTGCGGGATGGCATCCATCTCCAGCGAGAGGTGCGAGCGCAACATCTCTTCGACGGTCTCACCGATAC  
GCAGCTTGCCAGATCCTGCAAATTTGGGCGACCCCTTCGAGAAACAGCACGCGCTTGACCAGCTCGTCGGC  
GTGTTTTTCATCTCATCGATAGACTCGTGATACTCCTTGTGCCGAGCGCCTTGAGGCCCCAGTTCATCGTAG  
ATGCGGGCGTGCAGGAAGTATTGGTTGATGGCAATCAGCTCATTTGCCAGCACCTTGTGAGGTGGGCAA  
TGATCTTGGGATCTCCTTTTCATCGACAGTGTCTCCTTGGTTCGTGCTGAGGCTTCTATCGTTAGAGCTTA  
GTCCAGAAAAATGACAACAAGAGGTCTGGCGAGCCAGCTCGCCTGAGAAAAGGGGTGACCCTGTTGGCGG  
GTCGCATCAGAAAAGAGGTGTGAGGATCAGGCCACTTCGTAGTAGAGCACGGGTGCTCCTGCTCCATCT  
TGTCGAGTTTCGGCGGCGATAATCTCCATGGTCATGCGCACGCATTTGCCACATTTGGGCGCCACCTCGAG  
CGACTGCTTGAGCTGGCGGAATTCGCTTTTACCTGACTGCACCGCTTTGCGGATCTGGGTATCTGTGATG  
CCGCGGCACAAACAGACGTACATGATGGTCACTCTTGTGGAATGAGATGAAATCTAAATGAGAATGGTT  
CGTAGTGCAAAATACCATTGGTAATAAGATCCCCCTGCTTGCACCTGTGCAACCCCTTGGGGACAAATGCTG  
GCAACCAGAGGAGATCACCATGCTCAAGAAACTGTTCAGCGCCCTGTTTCGGGGGCGAGCCGACAAAGCG  
CCGGAAGTCACTCTCACCGAATATGCCGGCTATCTCATCTATCCGGAGCCATGGCAGAGGTGGCCAGT  
ACCGACTGGCAGGGCGCATCACCAAAGAGCTGGATGGGGTGTGTCAGACTCACCGCTTTATCCGCTCCGA  
TCTGTTTTGCCAATCCGGCCGATGCCGAGCATTTTCATGGTGCAGAAGGCCACACCTTTATCGATCAGATG  
GGGGAGCGCATGTTTCGAGCCCCGAAACCGGCTGACAGCCAGGCTTCATGACGCGCCCTGAGCTCAACAG  
CCTGCGCAATGCGCTGGCCCCGCGCGGTGAGCGGCGCTGATCTGGCTGGAGGGGGAGGAGCCGAGTGC  
ATTGTCCGCGCCCAATCCCTGCTCGGCGAGACCGTCTTCTGGCTGGGTGCCGGGCCGAGTGTATGCCG  
CGCAACCCGCTGCCAAGGCGCTGCAGCGGCTCGGTGAGGAGTGCACACGCTGGTGTTCACGCTTCAG  
CGGCTTTACCCCGACGCTTCGGGGCGCTGGCGGGCACTCTATGCGCCGTTGGCTTGTGTTGCTGCTG  
ACGCCGCCAGAGTAGAGTGGCCTTCATGGCCGATCCTGACCGGATCCGGCTGGTGGCCAGCCGGAGA  
AGGCGGGCCGGGCGGTCACGGCTTTATCGCCGACTGGTGGCGTGTGCTGGCGGGGGATCCTGCCCTCTC  
GCTGGAGCCGCGGTTTTGCTCGCAGCCGTGGCAACCGCTTGGGCCCCGAGCAGCCATTGAGCTGCGATCAG  
GCGCGGGCACTGCCCGCCATCCACAAGGTGTTGCACGGTTCATCGCCCGGCGGCTGGTGTGAGTGGCG  
ACCGCGGTTCGTGGCAAGAGTGCCTGCTGGGCTGGCTGCCGCCGAGCTGCTGCGCCAGCAACCCCGGCT  
GAACATAGTGGTGCAGGCCCCCTCGCAGGCAACGGTAGCGACCTGTTTGGCCACGACGCTCGCGGGCTA  
GATACCACGCTGAACAGCTGACCGGACTGAGTACTGCTCGCCGATCGGCTGGTGCACGAGGCGATGA  
ATCCCGATCTGCTGCTGTTGGATGAAGCGGCTGCCATTCGACCCCGCTGCTTGGGCTATGCTGGCCCG  
CCACAGCCGATCGTGTGTTTGGCAACCCAGCAGGTTACGAGGGGACGGTTCGCGGTTTTTACCTGCGC  
TTCAAGCGGGTGTGCTCGATAGCCAGACCCCGAGTGGCAGGAGATCCACCTAGGTGAACCCATTGCTGGG  
GTGAGCGCGATCCGCTGGAGCCGCTGATTTTTCCGCTGCTCGGCCTCAATGCCGAAGTGGCAACTCCCTT  
GCCGCCGACAGCCGAGCTGGCGTCTGGTTCAGTTCAGGAGGCGCTGGCGAGCGACGAGGAGCTGCTCAAC  
CAGCTGTTTCGGCCTGCTGGTGTGCTCACTACCAGACTACGCCGAGCGATCTCAGATCCCTGCTGGAGA  
GCCCGGATCTCGACATCCATCTGCTGGAGCAGGATGAGAGCTGCTGGGTGTGGCGCTGGTGGCGGGGA  
AGGGGAGATAGAGCCGAACTGGCCGAGGAGATCTGGGCCGGTTCGCCCGCTCCGCGCGGCCATCTGCTG  
CCCCAGTGCCTGCTGGCCACGCTGGTTTTTAAACCGCGGGGGGGCGCAGCTACGCCGGGTGATGCGTA  
TCGCCATCCACCCCGAGCTGCACCGGCACGGACTGGGTTTCGCTGCTGCTTGGCAAGCTTGAGGAGACTA  
TCGTCAGATTGGCATCGACTACCTCGGCTCGGCCCTTTTCGGCCAGCGCCGACCTGCTCCCTTTCTGGCGC  
AAGGCAGGGCTGGAGGTGCTGCGCATCGGCCTGCAACGGGATGCCGCCGGCGGATGCCACGCAGCCCTGC  
TGCTCAAAGCGCTGAAACCCGAGCATGAGATCGAGTTGAATCAATGGCAGCAGCGTTTTCAATTCGCCAGCT  
GCCGACCTTGCTGGCGGGTGAAGTGAAGGATTGGATCCCGAGTTGGTATGGCAATGTTTGAAGGCAGC  
ACCGTACCCGCGGCTGAGCTTGGCGAGTTTCGAGCGTGTGAGGTTGAGTGTCTTGGCCGTCATCACAAGC  
CGTTTTGAACTGAGCCAGTGCAGCCTGCAGTTGTGGCTGGCGCGCAATCTGGATGTGCTGGCTTCGCTGAC  
TCCTGACGAGCGTTATCTGCTGATCGCTACCATCTGGCAATATGCCGATTTGGGAATGCTGGCCCGGAGG

TTGCAACTGGCAGGCAAGCCCGCCGTGATCAAGAGGTTGCGGGCGCTGCTGGCGGTCTCTTGAGTTCT  
CTACCACTCGATAGGTTTTGCCCTGCCAGTCGAGAAAGCTCAGCTCGCCATCCGGTTGCAGCCGGTTCATC  
AGGTTAATCAGATGGTCGGCTACCTGCTCGGGACTCTGCACATTTCTGGCGGTACATTGGCGTGAAACG  
GGCAAGAGAGTTGGGTATCCACTGTGCCGGGATGGAAGGCTAGCAATTTGACGCTGGGGCCCGCCGGG  
CAGCTCGATGGCGGCACACTTGAGCAGCATGTTGAGGGCGACCTTGGATGCGCGATAGCCATACCAGCCG  
CCCGCTCGGTTGTCACCAATGCTGCCGACCCGGGCGCTGAGAACGGCCAGAGTGCAAGGCTCGCGGCCAA  
ACAGCGGTAACAACCTGGCTGATCCAGCGCAGCGGCAGCAAGGCATTTGGTCTGGTAGACGCGGGTTCATGGC  
ATCCAGATTGATTGCTTCGAGTCGCTTCTCTGGCTGGATTTCCCCCTGATGCAGTATGCCATTGCAGATC  
ACCACCCTGTGCGGTCTCGGTGCCAACTCCGCGATGCGGGCCACCACTTCTGTCAATTTGCTCATCGCTGT  
AATCGCAACATAGCCAGTGCAGACCCGGCGATGAGAGGCCAGCAGGTGCGGGCTGGCGGTGATGGCAAT  
CACTGGCCCCGACACCCCGCCCAACCAGTGTGTCCAGGACGCGCCCGATACCGCCAAGCGCCAAATC  
ACGACTATGCCTTCACTCATCTCAGGCTCCTTGTGAGTACATGATGGATTTACCATCCGCCAATGTTGT  
CCTGATTGGCAGATACGATCCCGCCAGCCTACGGGATCAAGCGGTTAACGCTGCAATTTGCCGAGATCC  
GAGCCGTTGGGTGAATTCATTCCTATACTGAGGGAAAAACCGCAGCGGTCTGCTGCCCGCGCAACCAGAA  
TGAGAGTCACCATGATGTCCAAAGATGGGGAAGAGCGTAAATCTATCCTGACCGAAAGTGGCACCACGA  
GCTTGAGATCATCGAGTTTACCTCAAGAAGCAGCTACCGGACGGCCGTGAAAAAACCGCTTATTACGGG  
ATCAACGTCGCCAAGGTGCGCGAGGTGATCCGGGTGCCGGAGACCACAGATTACCCCAATGCCCAGCGTC  
ATATGGTGGGGTATTCTCCCTGCGGGATCGCCTCATCCCGCTGGTGGATCTGGCGGGTTGGCTCGGCAT  
CAAGACCAACCCTGACCCAGCCACAAGGTGGTGTGATCGTCACCGACTTCAACAAGATGGCCAACGGCTTC  
CTGATCGATAGCGTCAGCAGGATCCATCGGGTCTCCTGGGAGGATGTGGAGTCCCCAGCCAGTTTCTGG  
AAGCGGGGGAGAACGACTGCGTGGTGGCCGTGGTCAGGCGCGATGGCAACCTCATCATGATCCTCGATTT  
CGAGAAGATCATCGCCGATATCAACCCCGAGCTCAGCATGGAGAAGTACGACGTCACCCAGGATCGCAAA  
GTGCTTATCGACGATCGCATGATGGCGCTGCGACAGGGCAAAAACAATTTCTGGAGGTGGACGACTCGGCCT  
TTATCCGCAAGATGATCGAGACCACCTGCGCACCGCTGGCTACAACGTGATTACGGCCAAGGACGGGGG  
AGAGGGGCTGGAGATGATGACGGATTTGATCGTCTGGCCAGGAGGAGAGAATGCCGGTGACCGGCTTC  
GTCAATGCGGTGATCACCGATGTGGAGATGCCCGCATGGATGGCATGCACCTGCTCAAGCGGTGCGGG  
ACACCCCTCCTACAAGGAGATGCCCATCGTGTGTTCTCCTCCTGATGAGCGATGACAACCGCCAGAA  
AGCGCTGCAATTTGGGGCAACGATACCATACCAAGCCGAGATAGGGCGCATGGTGGGGATGATGGAT  
CAGCATGCTGCTGGGAATTTGCCCGCCTTCGCCCAACACATCTGACCTGCCATTAACCTGCCATTTGG  
CCGGTCAATTTCACTGACCGGTTGCCCTCAAGCGGCCACTCCTTGCCAGGGTGTGGCCGCGCTGTTTTAGC  
TGTTTTGCTGCGATTCCCGACGCCCCCTTGTCTCCCGGATATGATTGTAATGATAATTATTATCATTG  
TTGGTGTGAAGCATATGACAGCAACCTGGGTGAAGGGATGGGTGCGAGTCGACCGAAGGCGGCAGCAGCAT  
GAGTCACTGGAACAGCAGACCAGAGAGGGCAACCGGCTGTTTACTGCGGCGAGTATCATCAGGCGCTG  
GCTCATTATCAGCAGGCGCTCTGGCTGGCTCGTCAGCAATTTGGTGCAGTGGCATGACGCCGATGAGGCGG  
TGGCTGCGCTGGTTGTGGCTCACCAATCTGGCGGATCTGCTGGTGGCCATGACTCTGCCCGATCGCGC  
CGCCGACCTGCTCTGCTATGTGCACGACTGCCTGCTGGCGACCTGTCACTCCCCGCTTGCTCCTCTCGC  
CTGCGAGAGGCGGCTTTGCGCCATACCCGCACAACCCGTGCCGAGTTGCTGACGTTCTGTAAGCGCCACG  
GCAGCCACGCGGGATCATGCGTTGCTCGGTCACTGCCTGTGTGAGAGCGAGCCCTCATCCCGGCTCCA  
TTAATCCGAACAGAGGTCATCATGAGACATAACCTGCCAGCCCTGAACTATGCCCTACGACGCACTGGAAC  
CCCATATCGATGCTCTGACCATGGAGATCCACCATAGCCGTCATCACCAGACCTATATCAACAACCTCAA  
CGCCGCACTGGAAGGGGCGCCAGAGCTGGCTGCACTGCCGGTTGAGGATCTGCTGCGCCGCTTCGATACT  
CTGCCCGCCACCTTGAAGGGGCGGTACGCAACCATGGCGGCGGCCATGCCAACCCTCCCTGTTCTGGC  
TGGTGTGAGCCCGCAGGGGGGCGGTGAGCCGGGCGGTGAGCTGGCTCTTGCATCGAGCGGGAATTTGGG  
GGGATTCGATGTCTTCAAGCAGGCCTTCACTCAGGCGGCCCTGAGCCGTTTTGGCAGCGGCTGGCCCTGG  
CTGGTGGTGGACAAGGCGGGCAGATTGCAGGTGGAGAGCAGTCCAATCAGGATAGTCCCCTGATGCATG  
GCCATACCCCGATCCTGGGGCTGGATGTGTGGGAGCAGCCCTACTATCTCAAGTACCAGAACAAGCGTCC  
TGACTATATCTCTGCCTTCTATCAGGTGGTGGATTGGGCGCAAGTGGCCCGCCGTTATCAAGCGGCGGA  
GGCTGACTTGGTTCGCTGGGAATGGGTGTACAGGCTCACCGCCACAACCCGCGCTGCAATAACAAGACCCG  
CCAGTTGGCGGGTCTGTTTATGGCGTGGCAGTGTGACGCTGGCGGTGAAGGGGTCATCGGCAATG  
TGGGCAAGGCGGTGCTGGGCGTCTCGGCGGTGGTTTCTGCCGAGGGTGTGACGGGAGTGACCGGCTCAGT  
GGCTGCCGCTGCGGATAAAGCTGGAGTACTTGTTCAGTCTGGCCGAGGCAGACGAAGTTGCTGACTCG  
GTGGCAACCGCGCAGAGACTGCCGCTGGCTTGGCTCATCCACCGCCGTTTTGGGCTGTTTTGAGGCAGG  
GTTGCAGACTGCCGATGGTGTCTCAGTACTGGCAAGGCACAGGCAGGCCGATGGGGACCGGTGCCCGGAG  
GAACTTTGGGCCCCCTTGTCCAGTACATATAGGTCGAGCAGCCCATCAGGCGGGCAAAGACTTCCCAGCACC  
CGGGTGCAGATCCCCTGATAGGCGCTGGGATCCTCGGCATTAAGCCGACCGCATCGATACCAGAAATGGC  
GGCGATGAAGATGGCCCGCTCGTTATGAAAGCCCTGGGAGACCACGGTAAAGCGCTCCTGGCCGAACAC  
CTCTTTGGCGCGAACCCTGAGTCGAGGGTGCAGGAAATCCGGCGAAATCCATATAGATGGCGGAGGCGGGG  
ATACCCGCTTGGATCAGGGCGCGGCGCATCTGGCGCGGCTCGTTGTAAGTGCACGGTAGCGTTGTACCCGG  
AGACGATGATGAAGTCCACCTTGGCATTTGTTGAGAGCTCGGCCCGCCCTTGTGCGGTTATTTGAAGTA  
GTGGTTGGGGCCGCCACCGGAGAGATATTTGGAGGTACCAGCACCACCGCAACCCGTTGTAGGGCACC  
TTGTCCACCCGATCGTAGGTGTAGTGACGGGCATCCGAGACGATCCACTCGCTGTAGCCAGCAGCATGG

CAATCAGGGCCAGCAGCATAACGAGGCAGGCGAGGAGGATCTTGGCAAACCTTCTTCATGCGCGGTGCGGT  
CAGGGTCTGAAGTTGGGAGTGGCTATCGGCATTCTATTACAACCTCGGCCGCTGGCGTCAGGCTTGATAGC  
GGGCGGGCACTTCATTTCGGGCAGAGGTTGTTCGACAGAGGCAGGGGGAGCGGGAGGATAAAGCGAGGGG  
CTGCGGTGGCAGCCCTCTGTTAGGTGAAGGTCTATCAGTGGCGGAGTCATTGCCCTTGCAGGCGTCTG  
ACTCCTTGGTTGGCTTGCCACCATGGCAGTAGATCTCGGGCGAGCCACGCCGTGATAGGCGTTGCTGTGCTT  
GGCGATCAGCCGGTCCAGCTCCCTTTCGAAAGTCGCTCATCGCCTGCTGCCGATCCGGATTGCGCAGCGCC  
TGTGCCAGCGCCAGCCAGCTGGCGCCGCGACCCGGTATCGTTAAGGAAGCGGTGCACGGTATAGGACCAGG  
AGTAGACCATCTCGCCACCCTGGTCGTAGTCAAGGTGGAGGATAGCCGCCAGTGTCCGACGCTGGTTGGC  
GGGGCGGTTTGGCACGTTATCCAGACCCCGGGCAAAGCACTGGCCGTGGGCGATGTACTCTGCAATCCCT  
TCGGCCACCAGGTTGGTTCGGTTGAGTGGATAGTGGCCGAAGCTGCCGTAAGCGGCCATCCA  
GATAGTGAACGTAAGTCTGTTGGCGCAGGTTCCACACCTGGAAGGCAGGGCGTTTCCACTCCGCTCATAGGC  
GAAGAAGCGGGCCTGATTGCCGGGGCGAGCCGGATCCCCCTCGATATAGATGCCGCCATTTGTCGGTGGAT  
ACGCCAAACAGCGCGCTGCCGTAGCGGCCAGTCGGCGGAGGAGTTGAAGATCACCAGCTCCAGCGCCT  
CGTTGTGATCATCGGCCACCGGTTGCCAGCCTGTCTCCATCTGCTGGTGGAAAGCGCTGCTTTCATCACC  
CAGCTCGCGGCAGATCCCTTTCGGCCTGAGCCTGGGTGAGATCCTGAGCGCGCAGACGCAGGGTTGGCGAG  
CAGGTGTGCTCGAACGGCAGAATATCTTCCATGCGGATCGGGGTACAAAGCCCGGCGAACCTCCACTGA  
CACAGGCTTTCGCTGGTGCATCCGTGTAGGTGAGGTAGTAGTGGAGAGGGTCAGAGAGACCTCTTCCAG  
CATGGCAGCCGGATGTTGTCCACCCGGGATCAGCCCTGCTGGCGCATGATGGCGATGACATCGCGATCC  
AGCTGTTGGCGATAGGCAATCGCCTTATCCGGGCTGGTGTGATGGAGGTAGCGCATCATCTGGTAGAGGC  
GGCTGTGGGCATCGAGGATGTTGTTGAAGATAAACAGATCCCGTGAGCCATCGCGCTGTTTCCAGAGGGC  
CAGCTCGCTCAGGCCAGTTGCAGCAGGCTCTGGCGCAATGCAGCCTCCTGCTGCAGCACAGCTGCGCTG  
AAGTCAGCCTGCTGACCGTAAGAGGCGCTCTGATCGACCAGATTGAGCAGCTCGAACAGGCCATCGGCC  
AGGGTTTGTGGCCATTGATCTGCGCCGCATGTTGCACCCGCATAGCCGAGCGCCTGGTTGAGCTGGGCCAG  
CATGGGGGCGGCACTCTGGCGGAAAGCGGCTTGGCCAAGCTGTCCCTGCGCCGCTACGCTCCAGGCTTCC  
AGCACTGTGCCAGCCTGATCTTGCGGTTCGCGCCAGCAGCAGGGGGTGGTTGAGCAGATCAATCATT  
CCCCGGCCAGTGCAGGGCGGCCTGATCACTCTCTTGGCTACGCCGCCATGGTAGTTGTGGGCACGCAC  
ATAGTAGAGCAGCTTGTCCATTGCCGGATGGGTTCGGCTGGTTGGCCGCCAGCAGGGCACGCATGCCGCGC  
ACCACGCCATCAGTTTGGCGTCATCGTGGCCGTAATCTGCTGCCAGGCAGGGCTGTTCTGGCCGCTCA  
CGTCGGCCACCAGTTTGGCGGCATCGCTGTGAGCAGATCCACATCGGGTTGCTCTGGTTCGGAGCAGAG  
ACGACCCTTGGCGCGCGCCACTCCAGCTGCTCCTCCTTGGCTGGCCAGCACGATGGGGCGATTGAGCACC  
CGACTCTCCTGCCACTCTTGTCTCTGGCAGGGGCTGCCACTCGCCGCGCGGACCGGGTATTGGTAGC  
CGCTATCTTGAACGTTACCTGAACCTCGCTGCCAGCGGGGATCACCTGACGACAGATGCGATAGCGAAT  
GGTGTGCTCCCCTCCTTGCCTCCTGCGGCTCATCACACTCCTGCTGAGGCGTGAGCTGATCCAGCTGC  
CACTGATAGCGGCGCCAGACATGGATCTCGCTGACCTGAGCGGCAGCCTGACTGCCCTGCCACCGGCTGCA  
GGCGGAAGAAGATCTGCTCCAACCGGCCATCCCGCTCACTCGGGGCTCTTCAAGTACCTGCAACTGCCG  
CCAATCCTGCGGCTGATAGTGCCACTCCGACTCTGCGCAGCGGCTTGTGCGTTGAGTTTCGACGCGATCC  
AGCTCCCTTTGCTCTGACCCAGGATGATGGCTTGTGGCAGTGGCAGACGATCCTGCCGCTGGGCGGTGCG  
GCGTGGCCGCGCAGCTGCTCCAGCGACCCCTGCTTGGAGCCATAAACCAGGTCATAACTGCTGGCGGGAAT  
GAGCTTGGCCGCGGAATCCGATCTTACAGCGCACGAAGCGGATCTGCCAGCCCGCATCTACCTTGAGC  
TGCGGCTCGCCACACTGCTGTTTCGGCCAGTGGCGGAGATCGCTGCTCTGCCAGTCGAAGCGACGGTAGA  
CCCTGAGCTGTTGGTAAGGAGCATTGCTGCTGCGCGCCTTGGAGCTCGTAGGTGATCTCGGTGATGCGAGC  
GGCCAGTTGCCGGCTCGATTTCGCCAGTCAGCTGATACTGTGCCAGTCATTGGAGGAGTAGTTGGCTTGC  
GCCGAGGATGTGCCAAAAGTAGGGGGCCTGCCAGCAGCAGCCACCCGGTACCTGAACGGTTCAATTTTA  
TCCCTTTGTTCTTGTGTTGTGATTGTCTTGGAGTAATCGCAAGGCAATTTAAACAGTTCCAAAGGGATA  
TCAATTGCCAGTTAAAAATCAGATAAATCAATAAGATGGTGAATTTTGTGAGTCTGATCGAATATCGTGG  
GTTGGCGCCGCGCAGTGGAGACTCACATGTTCTTTTTTGTGTTTCAAAGAAGATCGGTAATAATGTGAGTCCG  
ATCTCATTAGCTTGTGCTGCCCCGAGTGGTCTGTTGTGCGGCAACCTTGCCAGCTGTTGGCGGGAGGGT  
TTGAGATTACCGCCAAGATCGGGCCAGGGGAGCCAGTGGTTCGGGCACCATAAAGCCGGGCAGGGTGTGTC  
GGATCCAGGCAGCCAGTTTCGGAGTTCGGGAACAGGTTTCGCCGTGCCAGCCGATAAAGGCGGGCGGGCGTTG  
CCCCACTCGTTCGCTCGGTACCGGCACCACCAGCGCCTGGGCGACAGCGGGATGATCTACCAGTTCGCTGC  
TCTATGGTTTCTGGCTGGATATTCTCCCCGCCGAGATAAAGAGGTTATCGAGCCGTCCTCTACCAGCA  
GTTCCCCTGCCGTAGTGAACCTCCCCTTGTGCGGGTATGAAACCAGCCCTCGTCATCGAGGGGCTGTTT  
CAGTTCCGCATCTCGGTAGTAACCGGCAAACAGGGTGGCGCCGCGCACGCAGATCTCCTGCTCCCGGATG  
CACACTTCCCCTCCCGGTAGCGGTTTGGCAACTACACCGGCATCGCCTGGGATAGCGGTGCAGACCTGGC  
TCCCCATCTCGGAGAGACCATAACTCACCTTGGGTTTCGAGCCCCATGGCGCAGAGGCGGCTCACCAGCGG  
CTGCGGGATGGCGGGCGCCACCAGCAGCAGCTCGCGCAGGCGGGTACGGGTGGGATCAAAGCCCTCTGCC  
AGCAGGCGCCAGAGTTGGGTAGGCACCAGAGACAAGTGAGTGATGGGTTGGCACTCCAGCCGCTCCTTGA  
GGGGGCGTTACGTTGATCCAGTACCAGAGTTCGACCCCGCCAGAAAGACCCGAAACAGGATGGCGTAGCC  
GCCACATGGAACAGCGGTAGGGAGAGCAGCCAGCCGAGGCTCATCGAGGGGTATGAGGGTGGCAGAG  
CCGCGCGCAGAGGCCAGGTGGTTGCAGAGCCGGTGCACCACCGCTTTCGGCGTGGCGCTGGAGCCCGAGG  
TGAGGATCATGTTATTGAGCTGGGTGATTCCAGCGGCCACGCTTCTCGCTGCTGGCAGTTTCGTGCGT



GAAGTCGAACTGCAAGGGCTGCCAGTTGCCCTGCCGGGATCTCCCCTGCCGACCAGAAGGCATCGGCATCG  
AGTTGTAACGCCAGCTCGCGCTGCTTTTTGAGAGGAAAGGCTGGATTGAGCGGGCAGAACACCACGCCGC  
TGCGCACGCAGGCCCACGCCAGCAGCACATCTTCCAGCGCACCACGCACCACCGCTGTCAGATGATCGCC  
ACGATGCACTCCGGCTTGTTCCAGCTGTTGGCACAGGCTGTTGAGGCGGGCATCGAGCTGGCGATAACTG  
AGGGGCGAGGCTGTGTGGATGGCAATGCGGTTTCGGGGCTGTGATTGCCCGGTGGCGTACCAGGGCAAGGCG  
TCTGTTCCGGATGAGCTGGAGGGGTCAATCACGGTAATACAGTTGCTCCAGTCGACTCAGATCCGGTTTTGC  
CATCTTCCCCCAGCAGGTTGCCATCCAGCGGGGGTATCCAGACCCGGCGCCTGTTCTGGCGCCCA  
TTCGCCAGCCAGATGAAAGAGCTGGTTCAGGCCAGATCCGATTCGAAGCAGGAGGAGATGATCACCTTG  
AGCCGCAGTTCGCGGGCGCGGGCGATCAGCGCTTCGCAGTTGGCGAGTGAACCGAGCAGGGTAGGCTTGA  
GCACCAGCGCGCGCAGTTGCGGGATCGGCTCCCAGCGCTTGCTTGTGCCAGCAGCTCGTCCAGCGCCAC  
CGGCATGCCGGTTCGGTTGGCGACAAGGCGATGTCGGCAAAGTCGCGCAGGGGCTTCCAGATACCTCG  
ATGCGATTCCGGTTCGAGATGGCCCGCAGAAGGTCATCGCTCCTCGCGAGTCCAGCCCTGGTTTTGCATCCA  
GCACCAGCTTGAGGGAGGGGAGGCGGTCGCACAGCAGGCGGATCAGCGCCAACTCGTACGCATCGGGTA  
GCGCGCCACCTTCAGCTTGGCCTTGGCGGGCGTGCAGTGCAGCCACTCTTTCCAGTTGCGCAGCAGCTCC  
TGGGGGAGCCTTGAATGAGGGGATAGGGCTCCGGCAGCGGGTTGCGCTGTTCCGGGCCATGTCCGGCGCG  
CGCAGTCGAGGCCAAATTGCACCGACGGCAGCAGCGGGTTCGGGGTGTCCGGCGGGCAAGGGCCGCCAG  
CGTGGCAAGGGCTTCTGCCTCTGCCTGTTGCAGACTCTCTTTCGAGAAGCCGGGCAGGGGGCAATTTCC  
CCCCAGCCGTCGTTGATGCGCACCAACAGCCCTCTCGCGCCACCTCCACCTTGCCGTGAAAGGTCAGTG  
GCTGGGTAAAAGGCAGTTGATAGCGATACAGGGCGAGTGTATCAGGGGGTCCGCTTGTATTTGGAGAAG  
TCGGGGCGACGCTTTTCGTTGAAGGCGTTGCGGCCTTCTGACCCTTTCGTCATGTAGAACAGCATGG  
TGGCATTGCCCGCCAGCTCCTGCAAGCCCGCTGACCATCACAGTCAGCGTTGAGGGCGGCTTTCAGGCA  
GCGCAGCGCCATCGGGCTGTTTTGCAGCATTTTCGCGGCACCAACGCACGGTTTCACGCTCCAGTTCGGCC  
AGCGGCACGACGGTGTTTACCAGACCCATGTGAGGGCTTGTGGGCATCGTACATGCGGCAGAGGAACC  
AGATTTTCGCGGGCTTTCTTCTGGCCGACGATGCGGGCCATGTAGGAAGCACCCCAACCGCCGTGCAAGGA  
GCCACTTTTCGGGCCGGTCTGGCCAAACTGGGCGTTGTGCGCGGGCAGTGGTCAGGTCACACATCATGTGC  
AGCACGTGGCCGCCACCGACTGCATAGCCGGCCACCATGGCAACCACCGGTTTCGGGCAGGTGCGGATGT  
CGCGCTGGAAGTCAGTACGTTGAGGTGGTGTAGTCCCTCGTCATCCCGGTATCCACCGTAGTCGCCACG  
GATCTTCTGGTTCGCGCGCGCGCAGAAGGCTTCTCGCCAAAACCGGTCAGGATGATAGTGGCGATTGGA  
TCGTCATAACGGGCATCGGCCAGCGCCTGCAGCATCTCTTTGACGGTGCGGGGGCGGAAGGCTTGGCGCA  
CCTGGGGACGGTTGATGGTGTCTTGGCAATGCCATCGTTGGACTTGTGATAGAGGATGTCTCGTAACC  
GGCGGAGCAATCTTGCATTCAACAGGTGCATACAGTTCAGCTTCCGTCATTGCTTCAATCATGACTCGT  
CTCTTCTTGTGGTTGACCCACTCCGCGAGGAGTCCGGCGAAGTTATCAGGCTGATGGGCGTGCAGATTA  
TGGCCGCCATCCAGCACCAAGTGGTTGATTTCTGCGATCCTGGTTCCGCCAGCTGGCAAGCCAGCTGATGGA  
ATTTGTGATCCCGCTTGCCTACTACCCAGGTGACCGGCAGCTGGTTCCGCCATGAGCCAGGGGGCGAGATC  
CGGCTGCTTGCAGGCGAAGTGGCGCGCAGCATGGTGGCGATGCCCTGACCGTCGTTGCCAAGGCGGGCGG  
GCGATCTGGCTGGCCCCGGGCCGCATCGTCAAGATCGGCAAACACCCCTTGCCGGTACCAGTCTGCCAGCA  
CGTCAGCCAGGGGCTCCTGCTCGAAGCGCTGCGCCACAGTTCATCGTGTGGATGCGGGCGGGCCGCTC  
ATTTGCTGGTAGCCCCGGGTGGCAGTTCTCCAGCAGCAGCCCCCGCAGCCCGGGCGGGTCCGCGCTGGCG  
TGATAGAGGGCCAGTCGCCCACCCAGCGAGTAACCTGCCAGCAGATAGCGTTCAATGTTGCGGGCTGGCCA  
GCTCGGTGACCAGCCACTGGTGGCTCTGCTCAAAGTCGCTGACGTTGAGATCGCGATGCTGACCGTGACC  
CGGCAGATCGAGGGCGATGCAGTGGATGGCGGGCAGCAGGTGCATCACCAGTTGCCAGTCGCCGCTATCC  
CCCAGCAGGCCGTGCAGCAGAACCAGCGGCATATTTGGCATCTTTATTCGCCACGGATGGCGGGCCCCCAGC  
GCCTTGAGATCATCGGCCACTTGTCTGCTCGGTACCCGGATCTCGATCAAGGTAACGCCATGTTGGAGGG  
CGGCGCGGTAATCGCGTTCGAACTCGGGCAGGGTGGTCCGGCGCCGATAGGCGAGGCCAAACATGGCGGC  
AGCATGTTCAAAGCTGAGGCCGTGGGGCAGCCGGTAGTAGCTCTCCAGCAGTTCCCTTCCGTTGGGCGACC  
GGCAACATACGAAAGATGCTGCCGCCATCGTTGTTGAGCAGGATCACCACCAGCGGTGCGCTGCGTTTTGC  
TGAGCAGGGCGAGGCTATTGAGATCGTGCAGGGCGCTGAGATCCCCAAGCAGCAGGGTGGTGGGCTCATC  
GCTGCCCGGTTTCGACCGATTGGGCAAACCCGTAGGCGGTGGCGATCAGGCCATCGATGCCGGAGGCGCCA  
CGGTTGGTCATCACCCGGCTCGGCCCTTGCCCGTTTCGCCGAGCATATCCATCAGTCGGGCTGGCATGC  
TGTTGCCGACAAACAGTTGGCCTTCGATCAGGCGGTTGAGGCGATGGCAGACCCCAAGCTCGGAGAAGTG  
CTCGCAGGCGGGCGGATCTGCTGGCTGGCGTGTGTTGCAGCTCGGCCAATGTGTGCCAAGGGGCCCCGG  
GTGGTGACCGGATGGGCCCGCAGCAAAGGCGCTGGCACTGCAGAGCAGCCGGTTGCGCAGCCGGTAGTCGG  
GATCGAGCCGCGCCGGTTGCGGATCCACCAGCCAGTAATCTTGCCATGAATGGTGTGTTGATGAACTGGCC  
GAGCCGCTTGGAGACAAGCCGCGGCCAAATTGCAGCAGCACCTCCGCGCGGCCAGCTCGGCGACGAAT  
TCAGGGTTCGTTGAGCGCCATATCCATGTGGATGAGGTTGCGGCTATCGAAGCGGATCTGGCTCTGCAGAT  
CTGCCAGCAACGGCCAGCCAAGTTGCTCTGCCAGTGCGGCGACCACCTGTGCCGTGTTCCGGGGTCAGTGAT  
CCTGCCGGCGACAATAATGCCGCGCTGTTGGCGAAAGGTTTCCCACTCCGCTGAGGTGGGCAGCTCGGC  
TCGTTTTGCTGCCACGGGCTCCACGGCTTGCGCGAGCCGAGCCAGTCAACGAGGGGGGCGAGATAGTCGG  
AGAAATCCTGATAGTGCTCGCCCGGTTAGAGGGGCTCGGGGTACATGCAGTTGAAGTGCACCACCCCGGG  
GGTGAGCGCCTGTTTGGCCAGCGCCTGATCCACCAGCTCAGTACAAACGCCCGGGAATGGTCCGGGGTG  
GGGCTCGGCAGGTTCTGCTGATAGACGGGGTAGCGGCCGAAGATCCCTGCTGGTGCATCGCTGATTGG

CGCCGTTGTCGATAAGCTCGTGAGGGCGATCGGGGAGAGAATAATCAGCGGTACGCCGGTGGAGCTGGGC  
CTCTGCCACGGCGGGCCAGAGGTTGGCCACCGCGGTGCCCGACGTCATGATCACCGCCACCGGCCGGTTG  
CTCCCTTGGCCAGCCGAGCGCCATAAAGCCGAGGCCGCGCTCGTCAAAGTGCAAGTGACGACGAAAGC  
CCTGATGGGCCGCGGCTGCCATGGTCAGCGGGCAGAGCGGGAGCCGGGGCCAGCGCGATGTCGCGCAC  
CCCGAGGCGAAAGAGCTCCTCCAGCAAGAGGGAGGACCAGACGTGGTTGAAGGTGGCGTGCAGGTTGGCA  
AACTCGGTGCAGGCAGACGCTTCGCTGGCAGGCTCTTTACGGGTGGACATAGGGGCTCTCGTAGCGTGAA  
AAGGGTGAATGACTATCCAGCAGGGAGAGCACATTTGGCGATCTTGTGTCGAGTTCGGCCACTCGGCG  
ACAGGCTCGGAACCGGGCACAATGCCGGCACCGGCAAACAGGGTGACGCTGCCCGGTTGAATACGGGCGC  
TGCGAATGGCGACCGAGAACTCGGACGTCTCCGACTCAGCATGCCGAGGCTCCGGCGTACCAGCCCCG  
ATCGTAGGGCTCGAACTCGCGGATAAAGCGAGCGCTGCCCTCGCGCGAGCGCCGCCACCGCCGGAGTC  
GGGTGGAGGGCGTCGAGCAACTGCCAGTCGAGACCCCGGGCTTGAGCTCGGCTTCGATATCGCACTTGA  
GGTGTGTCAGCAGCCGAGTTTGAAGAATGCGCGGCTCGGTCAGGGTGGCATCGTGGGTGAGTGGCGCCAG  
ACGGCTGAGTATGTCGGCGTGTACCAGCCGGTTCTCCAGCCGGTTCTTGTGTCGCGCCAGCAGCTCGGCG  
GCAAGTTGGGCATCGACCTCTTCATCGCCGGAGCGGGCAATGGTGCCCGCCAGCGCTCGGTAAAGAGGT  
GGCGATCTTCCCGCGGTAGAGCCGCTCGGGAGAAACAGGCGATAAAGGCTGCTCGGGGGAGAATTGAAA  
ACCGAAGTGAAGCAGTCTTGGCGTGGCGGGCCACTGGTTCGAGCATGGCCAGGGATTGATATCCGCA  
TCATGGTTCGACTGGTCAGCAGGCTCTCCCGCATAGCACCACTTGGGAGTGTGCGCTGAAAATCGG  
AGGCGGTGACGCGCTCCACCAGCGTCTGCCACTGGGCGGGCCGGGGCAATCCTGTCGCTGCCAGGGCTG  
CTTTTGCAGGACGGGCAGCGGGCTTCCGGGCGCAGGGCATCGAGGGCGGCTTCGGCCGCTGCAGTTTCG  
GCCTCGAGATTGTTTTTTCATCCAGCCATAGGTTGAGGCAGAGACTGACGCACTCGCCACGGCGCACAGCT  
CGATGCGGGGCGAGCACGAAACGGCAGGGGCCAAACCCTTGCCAGCCGGATTGGGCCGGATCGAACGCCAG  
TCCGCCATAGTAGCGAGGGCTGTGCTCATGATGCTGGTTGGCTGTGTTGCTGACACCTGCTTGATGGCG  
TGCGGTTCCGGTCAGTTCATGGATGGCGCCCAGCGCGACATACTCGGGACGAGCTTCTCCACGGGCTGCC  
AGTAGATGCGGGGATAGAGGGTTTTCGCGCCGAGCCAGCCAGAAAGGAGCGGATTCGATCGCCACTCG  
CAACCGTACGAAGCCGCTGACGTTGCTGTGACGCAGGGCGTCCAGTTGTTGCTTGATATGGGTCGAGCC  
AACATGGATTCTTGTCTGAGCCGGGTAGTAACGAGCGATCCGGTAGCTGGATGCCGTAGGTTTATGCCAA  
AGGGCGATGATTTCTATATATATCTGCCATTCGTCCATGTAAATCGCCCGGGGAGCTTCACTCTCC  
GGGGCAAGTATACCCAAATCCGGTTCGATAACCCCTAACACGATCAATATCCGATTGTTTGGCCATCAC  
AAAATGACAAATACCTTCTCTGTTTGGTTGCTGCGCGGCGCTTTCGGAACATTGCGCCCTGCTGCTCTT  
CCATCCTGCTGGGCTCGGGGCTGGCTGCCAGTCGTGGTGCCTTCGATGGCACCATCATGGCGCTCTCTCT  
GCTGACCGCCATCTTGTGTCAGATCCTCTCCAATCTGGCCAACGATTACGGCGATGCGGTCTCCGGCGCC  
GACAACGGCGAGCGGATCGGCCCGCAGCGGGCGGTGGTCTCCGGTCTTATCACCAAAAAGCAGATGTGCG  
TGGCGATGGGGCTGACTGCGCTGGCGGGTGGCCAGTGGCTGCTGCTGCTGGGCTGTGCCCTCGGCGG  
CCAGTGGCTGCAGATTTTGGCATTGTGGTGTGGGGGGGGCGCCATTGTCGCGGGCGGTGACCTACACC  
GTCGGCAAGACCCCTTACGGCTATCGCGGGTTTGGCGATATCTCGGTGTTCTCTTCTTTGGTCTGCTGG  
GGGTGCTCGGCTCCTACTACCTCTTACCAAGACGCTGGAGTGGATCTGCTATTGCCTGCCACCGCCTG  
TGGCCTGCTGGCGACCGCCGTGCTCAATATCAACAATGTGCGCGACATCGAGACCGACCGCCAGCGGC  
AAGATCACTCTGGCGGTGCGCCTTGGCCGCAACCGCGCCATCGCTTATCACTGGGTACTGTTGGGGGCGG  
CGTTGCTCGCAACCATCGCCTTTATCCTGATCCAGCCCGCCAGCTTCTGGCCGTGGATCTTCTTGCCCGC  
CATGAAGCCTCTCAGCGATGCGGCCAAGACCCTTCGCGAAAAGCTACGATGGCGAGGTGCTGACCGGTTCC  
CTCAAGAAGACCGCTATCAGCGGTTTCTGTTTCAAGCTGTTGCTCTCCATCGGGTTGGCGCTCTCCTGAC  
CGCTGGTGCAGCTCGCAAGGCGAACAATGAAAAGGGCTCCCGATATGGGAGCCCTTTTGGGTTTTGGC  
CGGTTTAGCTGGCGCGGCCACCCTGAGGGGGCGGGGGAGAAAATCAGGGTATCCAGCAGCCAGATGGC  
GACCATGGCGGGCGCCACCAGCGGGAAGGCTATCCCAGCAGGATCAGCAGGGCGATGGCGCCACGCATC  
GGCGGGAGTTTGGCGGGCAGCGGGTGGCGGAGACGGCCCTGCGGACGGCGGCACCACCAGATCCACA  
GACCGCTCACGGCGCTGGCCAGCACCATCAGCAGATAAGCAGCATGGCCAGCTGATGGGGCCAGCCGTA  
GAGCTTGCCCATGTGAGCATGACGCCGCTCTCCACCCTTGGCGACCGGGCCGTAATCCTGCCAGCGC  
ACATCGGCCAGCACCTTGCCGCTGTATTGATCGATATGCAGGGTGGCGTGGTGGTGGATCGTGGCAA  
ACAGGGCGATGGTGTAGACGCCGGTGTGCGCGACCGGCGGGGTGATGCTGTAACCCGGTTGGACTCCCCG  
CTCATGGGCGATCTCGACACCCGTTGACGCGCAATGCGCTGGCTTGGCATCACCACTCCCTCGTGTCTG  
CCGTGGTTCATGGCACCGTATCGTGCCCTCATCAACTGGCTGCGAGCTGGGCATGGGGGTGTTCTCCA  
CCGCCTAGGGAACCGTCTGCTCATGGCCTGATTAGGCTGCGAGCCAGCGGTGCCGATTTGGGTACCTC  
GTTCCACATAGCGGCGGGGAAGCGGTTCCAGACCGCGGCAAACTGATCGCCCCAGAAGCCGGTCCAGGTC  
ATGCCGCTCAGCAACAACAGCAGCAGGAAACCGGCGCCCCAGAAGCCGATAACAGCGTGCAGATCGCGCC  
ACCAGAGGCGGCCACGCTGGCTGACTCTGGGCCAGAGAATAACCGCCACGCCAGGCCCTTGGCGGGCCA  
CCAGAGATAGAGTCCGCTCAGCAGCAACACTATCCCCAGCCGGCAGCCAGCTCGATCAGCCTATCTCCG  
GTGGTGGCGAGCAGCAGGTGGCGTGCAGGGAGCGAGCCACCCTTGCAGATTCCACTTGTATCCATGG  
TGCCGAGCAGGGCACCGCTGGCGGGATCCATAAACAGGGTTCAGCTCCTGTTACCCCGATTGACGATGAA  
CTGAGCGCTCTGATCGGGTGGCAGAGGCGGAGGATTTACGCGAGGCTGGCATCGGGCATGGTTCATC  
GCCTTGGCCAGCAGCTGGTGGCACTCAGTGTGGTGGCGGGGGTGGCCTTCATCAGCTCTGGGTACA  
TCAGGTTGTCGAGCTGGGGTTTTGAACAGATAGACGATCCCGTTCAGTGCAGCAGGATCAGGAAAGGGC

GACAAAGAGACCGGCGTAGAAGTGCCAGCGCCAGATCCGTTGGTAATGACTCGAGTCCCTGTTTTTTCATT  
GCACATCCTTGTGAGGTGCCAAACCTTTTCGGTTGGTGGAATGTTTGTGGCGGCGCGGATAATAGCAGTA  
ACGTTTTCGTTAACTGCAATCACACATCTTGAGATCGGTTTCAGTGCGGGATGTCGGTAACATGAGGTGCCG  
ACGGTTTTGCTGGATAGGATGACCACGCTTTGGGGAAAGCCTGTTTGTGCTGGACTTTTCCTTATAAATT  
ATTACCTTGTGGTAACAATTTGCAGACGATTGTGGTAACGGAATGGGAGCAGTCATGCAGCCACATGGGC  
AATTTGACATGGAGCGCAGGGGCCAGATGCTGATCTGCCGCCGAGTGGCCCCCTCAATCTGGCAGGTGC  
CATGGCCTATGAGGCGCGCTTTTCGTCACGAACTGGCCGGTCTGATGGATGGCCCCCTGGGGAAATTGTCGAG  
GTCGCGACCGAGTTTGAAGCGGCGGGGCCGAGGTGCTGGCCCGTTTTCGTCGCCAGTTTGGCTGGTGTG  
CCGAGAGTGGCTGTCAAGTTTCTGGCTGTGGTTTTTCGTAGGGGGCTTCAAGCGCTATCTGGCGGATAACAT  
CTTCAAGGGATTGCCCTTTTCGGGCGGTACGTTACTTCGAGCAGGAGGCAGCGGCCATCCAGTGGCTGGGG  
GAGCAGCTCAACACAGCTCCCTGTGAACCTGCGAGCGCTTGACGACCCCGCTCCCCGCTGGACGGGTTT  
TACTCCAGCTTGATAAACCCTTGTCCCCTGCTCAACGCAGTCGGGTTTACCCATTTCGAATTCACGGC  
AGATCAGCGGTGCGACCTCGTAGATACGGCACATCATGGTGTGCGGTGAGGGCGGCGCACACCAGCCATC  
GTCCAGCCGGCGCATGACCGGTATCTCGCCATCCCGTTCCAGTACATAACGGTCCGGCACGCGGTATCG  
GTAAAGAGCATCACTTCGAGGCGGCAGCAGCAGGCTTCGCAGTTCTGGCAGTCCACATCGGTTTGGATTG  
CTTGGGTTCATGGTGCCTGTCTTGCAGCATGGCGGCATCGGAGATATGAAACAGGCGCCTGTCAGGCGCCT  
GTGGTCTGGCTAACGGCTTGCAAAGAACCCTTAGCCAGTTTTCGGGCGCGGTAGCTGCGACCCCTTGATCT  
TGCCTTCTGCAACCGCTTGAGGGCGGTGCTCGCCACGCTGCGCTTTCACGGCGACGTAGGAGTACTGCTC  
GGATATCTGGATCTTGCCACGTCGGCGCCGGCAATGCCGCTTTCACCGTTCAGGGCACCCAGAATGTCA  
CCGGCCCGCACCTTGGTCTTTCGACCTGCATCGATGGAGAGGTTACCATCTGCGGGGCGATCGGCTTGA  
TGTCGCGGCGGATGCTGTGAGATCACCCAGCGGCATCGGGGCTGCTGGTACTCTTCGATGAAGTTGAC  
GCGCTGGGCTTCGTTTCGGCTGATAGAGGCTCAGAGCCAGACCCTGCTGGCCAGCACGACCGGTACGGCCG  
ATGCGGTGCACGTGCACTTCCGGATCATAGGTTCAGTCTGATGACGGCGCCAGCTCCTTGATGT  
CGAGGCCGCGGGCCGCACATCGGTGGCCACCAGAATGGTGGCGCTGCCGTTGGCAAAGCGCACACCAGCAC  
CTGATCCCCTCCCCTGTTCCAGATCGCCATTCAGCGCCAGCGCCGAGAAGCCTTTGGCGGCCAAATGG  
TCGGCCACGTCGTTACAGGCTCGCTTGGTGTTCAGAACACCACGCAGGAGCTGGGCTGGTAGTGGCTCA  
GCAGTACAGGTGAGGGCGCTCGAGGCGCTGACCGGCAGGCACTTCGTAGAGCTTCTGTTTCGATGGCGCTACC  
CTCGTGCAGGGACTCCACGCTCACCTGACCCGATTCGCTGACGCGCCGCGGCTCATCTGGCGATCCCT  
TCCGGATAGGTGGCGGAAAGAGCAGGCTCTGACGCTGCTGGGGGCGATAGCTGATGACCCGTTGATAT  
CTTTCGCAAAGCCCATGTCCAGCATGCGATCCGCTTCATCCAGCACCCAGCGCTTTCGAGGCGGATAGCTC  
CAGCGTGCCTTGTCCAGATGCTTGTAGAATACGACCCGGGGTACCAGCGCGATGTGGGCACCAAAGCTC  
AGGGTGGCGGACTGAGGTGCGGTGCGGGTGCCGCCGACAGGGTACCAGCTTACGTTGGGCAGGGCGC  
GCGCCAGACGACGGATCTCCTGAGCCACCTGATCCGCCAGTTCGCGGGTCCGGCAGAGCACCCAGCGCCTG  
CACTTCGAGGCGGTTGACGTTGAGCTTGGCCAGCAGGCCGAGGCCGAAGGCGGCGGCTTTCGCCCTGCCG  
GTTTTTGCCTTGGCGATCAGGTCTTTGCCATCGAGCACCCAGGGGCAGGCTCTGGGCTGGATCGGGGTCA  
TCTGCAGGTAACCCAGGCTGGTGGAGGTTCTCTTCAGGGCGGGGAGAGATTGAGGCTGCTAAATTCGCT  
GTTGTTTCAAAAAGGACTCTATTTTCGGAGAAAACGGGGATGCGCGAGCGCTAAGGCCGCGCATCATACCA  
GAATGTGGCACCGGATGTGGCGGATTTTTGAACGGCTGGTTCAGAGGGGGCCATGAAAGTTTCATTGTTG  
CCAAACCGATCGCGGGCGAGCACTGACAATGTAATAAGGACTATTTTTCAAACACACATCTAATTTATTTA  
TCGCGGACAAACGTTTTTCTATTTTTAGTGTTTTAAATATAATGACTGGAAAAATATTCACAGAGTAGTTATT  
GCGCCATAGGGAATGTTGCGAAAATGCTGATGAAAATTTTTCAAAGAACATAAAAAACGGCGCCAACCTTA  
CTCAATATGATGTTTTTAAAGGAATTTATATTTTTCAATGTTGCGCGATTAATATCAGTTTCATTGCACAAT  
TAATTTAAAAACGTTTGTATTATCCTGCCTCCATAATATTCGCGGGATGTTGATGGCTATCTGATTTTT  
AAATGTGCAAATGTCTATGATGGCGCCGGTCAAAAATFACAATTTACTCAGGTGCTACAGGTATGGAATA  
CGTTCACCTTTGTGCTCGGACTGGTATGGTCTCTGCTCTCTCTGCTGGCTAACCGCCACAACCTGAAAA  
CAGATCAAGTGCCTTATATCGGCCAACTGCTGGTGGTTCGAACTGGCGCTGGCTGGTTTCATGCTGAAC  
CGGAAGTGGGTCTGGCGGTGGTGGGGGGCTTTGCCGCCGGCTTACCAAGTTGATGGAGTTTGCCAAACA  
GGGTACCGACTTCGTGTTTTGGTGGTCTGGTCAACGAAGGGGCTTCTCCTTCTCCTGATGGTGTGATG  
CCCATCGTCTTCATCTCCGTGCTGATCGGTATTCTGCAGTACATCCGCTGCTGCCGCTGGTGTGATCCGCG  
GTATCGGTACCGTGTGGCCAAGATCAACGGCATGGGCAAGCTGGAGTCTTTCAATGCCATCAGCTCGAT  
GATCGTCCGGCAGTCCGAGAACTTCATCGCCCTCAAGAACATCTGCCGCACCTGAACGAGAAGCAGATG  
TACACCCTGGCGGCGACTGCCATGTCTACCGTCTCCATGTCCATCGTCCGTGCTACATGCAGCTGATCG  
AGCCGCGCTACGTGGTTCGCCGCGCTGGTGTCAACATGTTTCAGTACCTTCGTGGTGTCTCTGCTGATCAA  
CCCCTACGAGCCGGATAACTCCGTGACCGACATCAAGGCCATTGCCGAAGGTGACGAGCACCCACACCCCG  
AAGAAAGAGAACTTCTTCGAGATGCTGGGCGAGTACATCATGGCCGTTTTCACCGTTGCCGTTATCGTGG  
GTGCCATGCTGGTGGGCTTTATCGCCCTGATCGCCCTCATCAACTACCTGTTTCGAGATGGCATTGGCGT  
GAACTTCCAGTTCGTTCATGGGCTACCTCTTCTACCCGATCGCCTGGATCCTGGGTATCCCGAGTGGTGAA  
GCGCTGCAAGCGGGCTCCATTATGGCGACCAAGCTGGTGGCAACGAGTTCGTGGCGATGATGGATCTGG  
GCAAGGTGGCTGCCGAGCTCTCTCCGCGCACCGTTGGCATCTCTCCATCTTCATGGTCTCCTTCGCCAA  
CTTCAGCTCCATTGGCATTATCGCCGGTGGCGTAAAAGCGCTGAACGAAGAGAAGGGCAACATGGTTTTCC  
CGCTTCGGTCTGAAGCTGGTCTACGGTTCACCTCTGGTTCAGCCTGCTCTCTGCTGTTATCGCTGGCATCA

TGATCTGATCCTCTAGTGGTTTCGACCACTGCTTGGGCCCTGACTTTGTCAGGGGCTTTTTTGTTCCTG  
GCTCACAGCCGCCAGCCGACCAACCAGCCGGCGACCAGCAGGGTGAGGGTGCAAAAAGCCGGTTTTTCGATGG  
CGCCGCCGCTGCGCAGCGGCCAGCCCGGCAGGCGGAAGCGGCGTTTGTATGGGCCAGAAGAGCGGAATGCC  
CGCCGGGGTGAGCCAATCCCCAAAAGGTGGCTGAGGTAGCCGACGATGAGTGCATCCTTGACCCCATG  
GGCAGGGTGTCCGGCGGCAGGCTCTGGTTTCAGCCCCAGATAGCGGGCGGCACCGCCAGCAGACTGTGGG  
TGAAGCCGCGATGGCCGAACAGCCGCGACAGAGGTTTCGAGATCCACGGCAGGCGCTGCCCCAGCACC  
TTTGGGGTGGTCGAGGTGGGCAACAGGGCGCTGGCCAGCGCGGCAGGGATGGTCTGCCACAGGCTGGCA  
TCGGCCAGTGCCGGAGTGAGCTGCAGTTTGTGGGCGATCAGGGTGCAGGTAACGGAGAAGAGCAGGTGCC  
CTTGGGCGGTTCATGATGATTACGGCGTGGACAAGATGGCGGCGCATCTTACCAGCTGACGGTTGTGGTC  
AGCTCTTATTTTAAAAATCAGGATGTTACGGCGAAAAAGCGCCCAAGCAGGGCGCTTTAGGGTCTCTTT  
ACAGCTTGCCTTTGACCAGCCACTTGTGCGAGGGCGTTGGCAAAAACGCTGTTTGTGCGGCGCATGAAGGG  
GGCCGGCCCGCGGTCTGCACGCCGGCTGAACCGAGCTCTTCCATAAAGTTGCGCATGCCGAGCCGCGCC  
TTGATGGTCTCGCGGTGTAGATCTCGCCGCGGGGATTGAGCGCCTCGCCACCGGCATCAATCACCAGG  
AGGCGAGGGGGATATCGCCGGTGTATCACCAGATCGCCGGGCTGAACCTGCTGGGCGATGACATGATCTGC  
CACATCGAATCCCTTCTCCACCTGCTGGGTTTTGATGAAGGGCGAGGGGGCACCCGCAATCCCTGATTG  
GCCACCAGGGTAGTGACGACCTGGGCGCGGTGGGCGGCGGTTAGAGGATCTCCTTGACCGGAATGGGGC  
AGGCATCGGCATCAACCCAGATGGGCATGGCATGATTTCTGTAGTAAAAGCGGATGGAAAACGAGAGCG  
GCCATGTTAACACAGGCTCCCTTCCCGCGCGGGGCTGAGTCCGCCAACCTTTGGTGTAAAGCTGGGG  
CCAGCACATGAAACGAGAAGGAGACGAGATGGATCGGGTGCCCGGTGAAGTATTTATGCCCTGACCCTG  
GATGGCAAGGGTGGCATGGCGCCGCTGATGGCGGGAAGCGAAGTCCCGGCGGCGCATCCCGGCTGGCTGC  
ATCTGGATTACGGCAATCCCGATTGCGCGCGCTGGCTGTTGCAGACACCTTGCTCAGCGAGGCGGCCAG  
GGAGTGCCTGCTCGGCCAGAGCAATCGTCCCAAGCTGGTGCGGATGGGGGAGACTGTGCTGCTGATCCTG  
CGCGGCATCAACCACAACAAGGATCACAGGCCCGAAGAGATGGTGGCGCTGCGCATCTTCATCACC  
ATCTCATCATCAGCAGCCGTCGTGCTCCGCTGCTCTCCGAGCAGGATGTGTTCAACCAGCTCAAGCTGGG  
GGGCGCGCCGATAACCCGGCCGACTGGCTGGTGGAGATCTGCGATGCCCTGACCGATCGGGCGGGGGAG  
TTTGTGCGAGGAGCTGCACGACAAGATCCTCGATCTGGAGGAGATGGTGTGCTGATGCGCGACATGCCCGCA  
ATGGCCGACTGGCGCTGATCCGCAAGCAGCTCATTATGATCCGCCGCTACCTCTCCCCCAGCGGGATCT  
GGTGGCGCGCTGGCCAACGAGAAGATCAGCTGGCTGGATGAGGATGACCGCCGTCGCTGCTGCATATC  
GCCGATCGGCTGCGGCGCTGGCTCGATGACCTCGATGCCGAGTGGCACGCAACCGCCGCTGCTGGCAGACG  
AGATCAACAATCTGATGGCGGAGGCGACCAACCGCCGCGCCTACCAGATGTCGGTGTGGCGCTGCTCTT  
TTTACCTGCCAGCTTCTGACCGGCTGTTTGGCATCAACCTCGGCGGTATCCCCGGGGCCGAGAATCCG  
ACCGCTTCTGGGTCTTCTGCGGATCCTTGGTGGCGCTGGCAAGCGGGCTGGCTATCTGGCTCAAACATC  
GGCGCTGGTGGTAAGGAGGCATAACCCATGTGGCAATCAATTGGCTGACCTGCTGCTGTTGCTGGGGC  
ATACCCTGATCCGGCGGCTTATTACAAGAGCCTGCTGGCGCTCGGTCAGAGCAGGCAAGGTGAGCGAGAA  
CCGGGTGCTCTACGTGGCCCATGTGTTCCACTTCTGCTCGGCTGCGCCACCCTGCTGGTGTGGCCGGG  
GTGTGGGGGCTCGACTTCTCCGACTGGTGGTGTCTCGCTCCTCCTTCTTTGCGGTATTGGGGGTCGCCA  
TGGTGGCCAGTGGTCGATCCTCTCCAACATCACCGCCAGCATACCATCTTCTTCGCTTCCCTACAA  
GATTGGCGACCGGATCCGCATCCTCGACAAGGATGATTCGGTCAACCGGCTCATCACCAGATCGGCCTC  
TTCTATGTGCGGGTGCCTGATGACAACGGCGATCTGGTCACTATCCGGCCAACCTGATCCTACAAAAGC  
CGGTGAGAAAGCTGGAGGGCAAGGTGGCGGAACCGCTGCAACCGGAGTAGAAAAGCAACCGGAATAACAAA  
AGGCTCCCTCGGGAGCCTTTTTACTGTGCGGTGGGTGGCGCTAGCGTTCGAAGAAGCGGTAGAGGTGCTC  
CACCTGAACCGGGCAGTCGGCCACCTGATGCAGATGTTGCGGGGCTGCTCGACGGTGCCGAAGCTGACC  
GGGACAGCCGAGGGTGTGCGTCAGCTCGTAGAGGGCGCCATCCTTGCTTGAATTCGATGAGCCAGCCG  
GAATGGCCACGTCGTGGAGTATTTGCGCCTCTTGCAAGATCTGTTGCTGATAGAGCTTACGAAGTTCACT  
GACTGTGATGATGCTCTCTGTGGGGAATATCCAGCTCCAGTCTATGCCTGCCCTTTATATGCGGCAACG  
GGATCATCCCCGAGGACCTCCCATGCCAGCGGATGCGGACAAAAGTCTCTGCATTGCCGCCCCGATCC  
GGATGGTGTGTCAGTGCCAGCTCCCGCCAGCGGCGGCGGATTATCTCTGACTCGTCCCCTCATTCAGCT  
CGAACAGGGCCAGCGCCTCGGCTTTGTGCCCTTCCCGTCCATAAGCGCGCCAGAAGCGGTTGAGCAGGGC  
CTCAACTTCGGCACGGTCGGTTTGCCAGAACACCTGCCAGTCGAGATAGTAGCTACGCAGATTTTCGCCA  
ACGGCAAAGCCGTGGTTGACCTCCTGGTTCCCGGCCAGCGGTTTCGAGCCGGATATCCAGGGTGTGATCA  
CCAGCCACCAACCTCTTATAAAGCTCGGCTTGCAACTGGTAGAGGGCGTTTCATGATCAGGAAGTTGAC  
CCGAAACAGCTGCAGTTGCTCGTCTGCGCCAGCCGGGGGATCGCCCCCTGCTGGCGCAGGGCGGCCATC  
AGTTTCATGCACCTTGTAGCTGCCCCCGCCTGTTGCAATAGCACCAGCAGAGGGGCGATCAGCGGATTAT  
GGTTGGCTTCGTTTCATTGCGCGCCCTGCTCCCTGGGTGGCTGCAGGGCGATCAGCAGCTACCCGCTGC  
GGGGTGACGGGGCCGGTAACGATCTGGGGCTTGCCTTGCATCCATGATGAAGAGCGGGATGGCGCCGG  
GATTGGCGGTCTGATACTGGGCCAGTCGAACGCTCGCTCAGGCGGGTCCCTTGATCTGGCCACCCCG  
GCTCAACAGGCCGCTCAGCCGGGCATAGTTGATGTGCGGGCCGAACAGGTTCTGGCGAGCGGAAAGGTG  
GCGCTCTCCCGGTTGGCTTGGCGTGTGCTGCTGCTGAGAGCGAGGGAGTAGACCTGCTCCTCGCCGTAGA  
GGTGGGCAAAGTGCAGCACCCCGAGTGCCTTGTGTTGGCGGTTGGGGGAGAGCGCCAGCACGGTACTGAT  
GCTGGTGTAGCGGCAGGTGCAGCTCGGCATGTTCCGACTGGGGGTTGCCGAAGTAGCAGGGGAGGTTGCTC  
ATCCGTGCCTGTTTGCAGAACTCCAGGCGGGATCGCAGAGCTGTACCGGCACCCCTGATCCGCCAGCG

CCTTGCCGATAGCCCGGCCACCGAGTTGGCCCTATGATGAGCCAGGTGTTGGGGGCGCTCTGGCGCAT  
CTTGAGCAGGCTGGCCAGCGGTGCCGAGGTGAGGCTCTGCAACACCACGGTGGAGATGATCACCCAAAT  
ACCAGCGGCACCAGCTTGTCCGATTGGGGATCTCGCCCTGATGCAGGCTGATGGCAAACGAGGCGCTGA  
CTGCCGCTGCGACTATGCCACGTGGGGCGATCCAGCTTAGCAGGGCGCGAGCTCGCCAGGAGAGATCCGA  
GCCCCAGGTGCGAGACCAGAATACAGAGCGGGCGGCCACGAACTGCACCACGCGAGCAGCGCCAGCACC  
ATGGGGCCGAGCTGCCAGAGCTGGGCCAGATCGAGGGCGCGCCGCCAGCAGGATAAACAGGCTGGATATAA  
GGATGACCGCGAGATCCTCCTTGAACGCCAGCACCTCCTCCAGGTCCAGCCCCCTCTGATTGGCGAGCCA  
GATGCCGAACACGGTACCCGCCAGCAGGCCGGACTCGTGGCTGAGCCAGTTGGAGAGACTGAAGGTGACC  
AGCACCAGCGCCAGCACGCCGAACTTGTGCAGGCTGACCGGTAGCCAGTCCCTTGCGAATGAGCAGGGTGG  
TGAGCCAGCCTGCCGCTACCCCGATCAGGGAACCGACCAGCACTGTCTTGCCAGCGCCAGCAGGGTATG  
GCTGATGAGATCCCCCTGACTGCCGAGGCGCACCCGCTCGAACACCAGCACCCGAAACAGGGCGCCGATG  
GGGTGATGACGATCCCCTCCCAGCGCAGGATGCGGTTCCACCTCCCAGGTCGGGGCGGAGCACGTTGAGCA  
TGGGGGCGATCACCGTCGGGCCCCGTTACCACCAGCACAGCCCGAGCATGGTGGCGACCCGCCAGTCCAG  
CCCCAGCAGGAAGTAACCGGCGCTGCCGATGACGGCGAAGCTGACCAGCATGCCGGTGGAGCAGAGATTG  
CGCACACCTTGCCGATCCCCTTGAGCTCGGCCAGATGGAGGGTCAGCGCCCCCTCGAACAGGATGATGG  
CCACCGACAGGGAGACCAGCGGAAACAGCAGATCCCCGAGCAGGGCATCGGGGTCGAGCAGGCCGCTGAC  
CGGACCCAGAGTCAGGCCGGTGAGCAGCAGAAACAGGATGGCGGGCACCCGCAGCGACCAGGCAAGCCAT  
TGGGCCAGTACGGAGACCAGGGCGATCCCGCCAGAGAGAGGGCAATCATGCAGACCTCGATTTCAGGCAG  
TGAGTATGGAGCTAGTGTAGTGGCTAAGTTGGTCAGATTGACACCTGAAGGAGCGTGCATCATGGCCGGG  
ATGGGGAGATGTGCGACAGTCGGCGTCATGGTGGCTGGCGGTGGTGTGCAGGGCGCCAGCCAGACGCCAA  
CCGTGGTGATGGGGTGGCCTCGGGGCCGGATTAGATGGGGCTCTCCTTGTGGAGCTCGCCGACACAGTCC  
GCCAGCGCCAGTACCAGTGCAGGAGCGCACCATCTGATCGAGCCGGTTGAGCTGCATCTGGTAGAAGGCC  
AATCCTCTTCCGCTGGCGGGGGGCTCCAGCTTCATCATGCCGCCCTGATTGACCCCGTGCAGGCGGTGCGAG  
CAGATCGCGGATCGGCTTGTGCTGAAGCGGTAATCCTTGGGGTCGCGCACCCAGAAAGTCGCGGATCTTG  
ATATAGGCTTCGATATCCTGATAGCGCTCGAGTGAGATGAGGCCGAGGGCGAAGATGAGCTTGAGGCGCA  
CCTCCAGCTGGCCGAGGGGGCCGCTCTGGTTGAGCAGGGGTCGATGGCGTATTTGACGGCATACTCCTC  
CTGACCGAAACCGCGCTCGCATCAGGGAGTCGACCGCTCTTCCAGGATGGTCACGGCTTCGAGAAAGAAG  
CCGCGGGGGCCATCCTGCTCGTTTCAGTCTGCTCCAGTACTCATCTTCTGTTGTGTGGTCATAGGTCAT  
TGGGTCCAGCTGACAGGGAGAGAGTGGGCTCTCTCCCGTTTCTATCATATGGGGCACATCCCCCTGCC  
ATTCAAGCGCTTGGCGCGCTATCAGTGGTGGCTGAATGCGCCGCAAGCAGGGTCAATTACAGGGTTTCGTA  
ACGGGCGACGATGGCGCGAACCCACCTCGCTCTCTTCATCCAGTCCGGTGACGCGGGCCAGCGCTTTGGCC  
GGGCAAGCTCCGCCAGCAGGGCTTGCAACTCCACTGCCTGCGGGTCATCGGCATTGCGATAGTGGAGCG  
CCGCGGGGATCCCCTCCTGCAACTGATCGCTCGGCAGGCCGTAATCCAGGGTGCCAGCAGCGGCTTCAC  
CAGTCGATCTCCCGCCGACGCTTGCAGCAGCGGTCAGCAGCCGACCCGGTCAATCTCGTCCACCAGATAG  
GGGTTGGCGAAGCGGGCCAGGATCTTCTCGATGTAGGCGGCGTGCAGGCGGGGTCGAAGCCGTAGCGTT  
TCACCAGTACGGCACCGCTCTCTTCCATGGCGCGGCTACCTTGCTGCGGATCACCAGTCTTCGATCGC  
CTCGCGCACTGTGTGGTAGCCCCGCAATTTGCCGAGATAGGCGGTGACGATGTGGCCGGTGTGAGGGTG  
AACAGCTTGCCTGCGACGAAGGCCATCAGGTTGTGGTGGGTTCCATGCCCGCCACCTGTGGCAGCTCCC  
CCTTGAAGTGGGTCTGGTCGACGATCCACTCGCTGAAGCTCTCGACCGTCACTTCCAGCGGGTCACTGTT  
GGCCGCCGCGGGCGGGCCAGGATGCGATCCACCGCCGAGTGCAGGAAGCCGATGCAGGATTCGAGCGTG  
GCATGATACGCGACCGGCAGGTAATGAGTACCTCCCGCTTGGAGTGGCTGGTGCCGCGCACCATGTTTT  
CGCAGGCGATGACATTGAGCGGTGTCAGGTTGCCAGCATCGAAACGGGCTTGCAGCCCCCTGGCCAGGGT  
GCTGGCAATCTTGTCCAGAATGTTGGGGCCACTGCCGTGGTGACCAGATCGGCGGTGATGATACGGGCG  
ATCACCTCGTGACCGGCGGAACTGACCGCCGCCACGTTGCGCACCCAGTCCAGTCTGATCCGCTCCCA  
CCACATGGACCTTGTACTCCGTCAGCGGTGGTTGAGCTGGTGCATCAGGGTGTGCTTACGTCGGCAAGGT  
GACCTGATGGCTGGCATCCGCCAGCACTTTGCCGATAAAGCCGCGACCGATGTTACCAGCACCAAAATGC  
AATGTTTTTCATGATATTAACCTCTTGAACCAAAGACGATGAAAGATGATTACGCGAGCTGTTCCGGCACCC  
AGCAGATCCAGGAAGCCCTGGGGATCCGTGGTGTGTCGGCCAGCCGGTTCGATGAGACCGGGTTCATCCAGTG  
CATTGGTACAGGCGGGTTATCACCTGCATGTGTTTCGTCGTTGCGGGCGGCGATGCCGATCACCAGCCGCGC  
TACCTCATCGGCAGCCTCGCCAAAGGCGACCCCGCCGGGTAATGGCAAATGACGATGCCGGTACGCTTC  
ACAAACTCCTTGGCGGCGATGGTGCCGTGGGGCACGGCGATGGATTGCGCCAGGTAAGTGGAGACCAGCT  
GTTACGCTCCAGCATGGCGTTGACATAGTCGGGCGCCACGTAACCGCGCTCTGCCAGCAGTCGGCTGC  
GGTCAGGATGGCGGCTCCTTGTGTCGGCTTTCAGTCCAGATGCACGTCATGACGGCTCAGGGTAAAG  
ACTTCGGCCGCTTGGGCTCGTAGCTGTGTCGTTGGCCGCCACCAGCAGTTGCGGGTGGCGACGTCAT  
CGTTGGCGGCGCGGCTCAGGCTCTGTACCAGCTCCTGATAGAGGCCGTTGTGAGGAAGTTGGTGAGCGA  
GATATGGTGGAGCTTGGCGCATGGCGACGGGCCCCGCTCGGTCAGATCCTTGTGGGTGATGACCCAGTCC  
ACCTGATCGTGCAGCTGATCGATGGCGCGGTTGGTGACGCTGATATCGAGCCCCGCGGCTGCACCCGCT  
TGCGCAGCATAACCGGCGCCATGGCGCTGGAGCCATGCCCGCATCACAGGCGACCACGATATTGCGCAC  
TGCCATCAGTTCCCGCCCGGCTTCTTGGCCGCTGCGGTTTCGGGCTTGGCGCCCTTCATGGCTTTCATC  
TTGCGAGTGGCTTACCAGGGGCATCGGCCCTCGTCCGCTTCCGGCTGCTGGGCGCGAACGAATACGGCGG  
CGACCAGGAAGGAGACCAGAGTGGCGCTGATGATGGAGAGGGCGACCCGATCAGGGAGGCTTTCGGCGT

CATCAACAACACGGCGAAGATGGAACCCGGTGAGGCAGGGGAGACCAGACCGGCGTTGAACAGGGTCAGG  
GTAAAGACCCCGGTCATGCCACCGGCATCACCGCCAGAATGAGGCGCGGGTTCATCAGCACATACGGGA  
AGTAGATCTCGTGGATGCCGCCGAAGAAGTGAATGATTGAGGCGCCAGCCGCGACTGCTTGGCCGCACC  
ACGACCGAACACCATGTAGGCCAGCAGCACACCCATGCCCGGGCCCGGGTTCGCTTCAATCAGGAAGAAG  
ATGGAGCTGCCGTGCTCGGTCGCTTGGATCCCCAGCGGCAGAGAAGATGCCGTGGTTGATGGCGTTGT  
TGAGGAACAGGATCTTGGCCGGCTCGACGAAGATGGAGGTGAGCGGCAGCATGTGGTTTTCCACCAGGAA  
GCCGACGCCACCGGCCAGCAGGCCGGAGAGCACCTTGACGAAGGGGCCAATCACAAAGAAGGCAAGGATG  
GCCAGCAGCATGCCGATAAGGCCGGCGGAGAAGTTGTTGACCAGCATCTCGAAGCCGCTCTTGACGCGAC  
CGTCCATCGCCTTGTGGAAGCGCTTATGGCCAGCCACCGAGCGGGCCGACCATCATGGCACCATAAAA  
CATCGGGATGTCCGTCACCATGACACCCATGGTGGTATGGCACCAGCCAGCCGCCACGATCACC  
CCCATCAGCTTGCCCGCGGTGTAGCCAATCAGCAGCGCAGGATAGGTGATCATGGGGCCGACCAGCT  
TGGCCAAGGTTTTATTGGGCAGCCAGCCGGTGGGGATAAAGAGGGCGGTAATAAAGCCCCAGGCGATAAA  
GGCGCCTATGTTGGGCATGACCATAATTGGACAGGAAGCGTCCAAAATTCGTATCTTGACTTTGGTATCC  
GGTGATAACATGTGCGGACCCCGTTTTAAGCCTGTTTTGATTAAAAAGTGGTAGTTCGGGATGGCCGGTTTT  
GCCGAACCTCCATCCCGGTCGTCTAAGCAACTTCAATCTACCAGCTTGCATCAAAATAGGCTGAAAACG  
GGGTGTCTTGTGATCCAGATCTCGGATACCCAGCGATAACCCCTCCATAATCAGTGACCCACATCACATT  
CCCATGCTGTAATTCGGCTACATTTGATCTTTTTCTGTTTTGATGGTCAATTTTTTGTGACTCAAATCAC  
TAAAGTTGTTTTGTGGCTCTCTTGGTGAATAGTGACTTTCGTACAAAATCAATTTTTTGTATTCGAATGG  
GACAAATCACTCAGTCACTCATCAGCGGGTAGTGACGATGGATCTATCGAAACACTCCATTGTTTACCAA  
TGAATCAATAAATTTGTAACCCGCTTTCAGTTTTTACGGTCGGCGATGAGGTCTCTTTTGTGCTGGCTG  
GTGGGAATGGGCGCCAACATGCAGGATGTTATCGAGCGGCAGATGTTCCGGGGCGCTTGTTCGCCGCGCAG  
GGCTGATAGCAGATAAAAAACAAACCGCCAGCAGGCGGTTTTGTGCGTTTTTACGAGCTATCCCTTGTGCGG  
GGCTGCGGTTTTAGTAGAAAACCGGCATCCCCGGGGGAGGGGCGGGTCTTGAAGCGGCGATGGAGCCACATG  
TACTGCTCCGGCGCCTTGCACAGCGCGGCTTCAATCTCGCGGTTGGCGCGGGCGGCATCAACCATTTTCAT  
CCCCGCTCGGGTAGTCCGGCAGCGCGCGCCGATATGCAGGGTGTAAACCTCGCTGGTGGCGATGTTGTA  
GCAGGGCAGGGTGACGGTGTCTTACCCGCGCCAGGGTGGCGGTGCCGGTGATGGTGGCCGCTGCTCT  
ACCGCGAAGTAGGGCAGAACACGCTGGCGTGGCTGCCGTAGTCTGATCCGGTGCATACCAGAGGGCGT  
CGCCGTTGCGCAGCGCCTTATCATCCCCCTTACATCCATCCGCTTACCAGATATTTGTTGGGAGGACA  
GCGCCCTGGTACTGGGCTACTCCAGCACCCTGGTGGTGGGGCGATAGACCCCGAGCCCGGGGCGC  
ACCAGCCCAGAACAGCGGGCGTTGAGTTCCAGCGTCAGGAAGTGGCAGGAGAGCAGCAGCATGCCCTGAC  
CTTTTTCCATGGCGCGATGACGTGCTCTTCCCTTCCACCTTCATCAGGTTGCGCATCCGCCAGTCTGG  
CCAGAACCAGGCGATCCCCACCTCGAACACGGCGCAGCCACGCTCTCGAAGTTTGCCTTGAGCAGTTTT  
TCCCGCTCATCCCGGTCAGCTCGGGCATCGCCAGCTCCAGATTGCGACGGGCAATCTTGACCCGGGACT  
TCAATATCCTGGCTGCGAGACGACCGAGCTGACGGCCAGCCACATCTGGCTACGCCACGGCAGCAGGGT  
CAGCAGCCAGAGCAGGCTAGGCCGAACAGCTGGCCAGTAACGGGGATGAAACAGGCGGGGCTCCAGG  
CGGGGAGCGTTGTGCTGGGCCATGGCTAATCTCTTGTTCGCAACACAATCGGGGATTTAGCCGAAAA  
GGGGGGGCGGGGGCGAATGGCTGTGTGCTGGTCAGAGGGGTAGCCTGCGTCCGTTAGCGTGACAGCGGC  
GGCAACCGCGGTGCGCTTTTTCTACACCGGACAAAAGAGTGTGATAAAAATCGCCCGCTGATTTTTTCAGGT  
TTTGAGAGTCGATACAGATGAAGATCACCTGCCCGATTTTGAAAAAGCCCGCGTCTGGTCTGTTGGCGA  
TGTCATGTTGGACCGTTACTGGCATGGCCCTACCGGTCGGATCTCCCCGAGGCGCCGGTGGCCGTGGTC  
AAGGTTGAACACATTGAGGAGCGTCCCGGTGGCGCGGCAACGTGGCCCTCAACTCCGCCGCCCTTGGCG  
CTCACGCTGTGCTGCTTGGCCTGACCGGTGAGGACGAGGCTGCCGATGCTTTGGCTGGCCAGATGGCTGG  
CGCAACCAGCAGCTGCTGCGTCTGGACTTTGAAGAGCCCTTCCACTCCGTCGATGCCACCTGCTGATGA  
GCAAGGTTGAGCAGGCGCTGCCAACAGCGACGTGATGATCTTTCCGACTATGGCAAGGGTGTCTCAA  
CGATGTGCCCGGTATGATCCAGCGCGCCCGTCCCGGTTATCCGCTGCTGGTGCATCCCAAGGGGACC  
GACTTCGAGAAGTATCGCGCGCTACCTTGGTGGTGGTGGTGGTGGTGGTGGTGGTGGTGGTGGTGGTGGT  
AGGTGAAGAGCGAAGAGGAGCTGGTCGCAAGGGGCTGGATCTGGTCAAGCGTTTTCGAGCTGGATGCCCT  
GCTGGTACCCGTTCCGAGAACGGCATGACCCTGATCCGCGAAGGTCAGCCGGAGCTGCATCTGCCGGCT  
CAGGCTCACGAAGTTTACGATGTGACCGGTGCCGGTGATAACCGTCACTCGACCCTCGCCACCTCGCTGG  
CTGCAGGCAAGAGCCTGGACGAAGCCTGTGCGCTGGCCAATACCGCAGCCGGTATCGTGGTCCGCAAGCT  
GGGTACCTCTACCGTGAGTCCGGTCGAGCTGGCCAACGCCCTCTATACCGAGCAGGAGACTGGTTTTTGGC  
GTGATGTCCGAAGCCCAGCTGAAAGTGGCGGTTGCTGCCGCTCGTCTGCGCGGCAGAGAAGGTGGTGTGATG  
CCAACGGTTGCTTCGACATCCTGCACGCCGGCCATGTCTCTATCTGGCCAACGCCGGAAGCTGGGGGA  
TCGCCTGATCGTGGCGGTCATAACCGACGAGTCGGTTCGCCGTTTGAAAGGGCCGGTTCGTCGGTCAAC  
CCGACCGAGCGCCGATGGCGGTGCTGGCTGCGCTGGGCGCGGTGGATGGGTAGTGCCGTTTTGGTGAAG  
ATACCCCGCAGCGCCTGATCGCCGAGATCCTGCCGGATCTGTTGGTCAAGGGCGGCGACTACAAGCCGGA  
AGATATCGCCGTTACGCCGAGGTGACCCGCAATGGCGGCAGGTGCGCGTCTCAACTTCGAGGATGGC  
TGTTCCACCACCGACATCATCAAGACGATCCGCGAGCGGGTAACGTTCTGCTGGCCCCGCAATCTGGC  
GGGGCTCGCTATCGCGGCTGCAAGCCGACAGAAATACGGATAACAAAAAGGCGACCTTGGCGTCCGCTT  
TTTCATGTCCGATAGCGGCTATCAGCCTTTGGCTTTTGGCTGGCAGGCATCAGACCTGGTTTTACTTCC

ACCAGGTCCTGCGCTTCCAGAATACCGGCAGCCTGTTTCAGGCTCAGGATATTGAGAATGTAGTTGTAAC  
GGGCTTCGGAGAGCTTCTGCTTGGCCTCGTACAGCTTGGCAGTGGAGTCCAGCACGTCGACGATGGTACG  
GGTACCCACTTCGTAACCGGCTTCGGTCGCCTTCAGGGCGCTGTCAGCGGAGACCACAGACTGGCTGTAG  
GCACGTACCGAGCCGATGCTGGCGTTACGTTGTTGTAGGAGGAGCGCACTGTGCTCTGCACCGAGCGGA  
AGTTCTTCTCCAGCAGTTCGCTGGCCGCCACGTAGTTGTAAGTGGAGCTGGTGGC  
GCCACCGCTGTAGATGGGCAGCTTGAAGGTGAGACCGATATTGGCCTGATTGTCATTGCCGCCCCGGAATG  
CTATCCAGCTTGAATCGGTATTGCTGGTTTGCAGTCCGGCACCCAGATCCAGAGTCCGGCTCATGGCCGG  
TCTTGGCCAGATCGATCTGCTCCTTGGAATGTCCTTGCTGATGCGGGCACTGTGCAGTTGCAGTTCTT  
GTCCAGCGCCAGCTCCAGCCATTTGTGCGAACCAGAGGCAGTCTTTTGGGGCTGAAGCGATCGGTGTTG  
AGGATGTCCAGGTTGCGGTGATCAACACCGGTGAGTCCGCGCAGGGTCTCGTAGCTGTTATCCAGAGTGT  
TCTCGGCAATTGATCTCGTCAGCCAGCCGCTGGTCGCGGGAGGCTTCGGCTTCATGGACGTCGGTGATGGC  
GGTCAGGCCCACTTCGAAACGCTGCTGGGTTTGTCCAGCTGACGCTTACCCTGACCTTGTGGCACGA  
ACGAACTCCAGGGTATCCATCGCCTTGAGCACATCAAAGTAGGCTTTGGCGGTGCGCACCATCAGTTCT  
GGATCTCGAGGTTGTAGGCGACATCTGACTGGGTGGCCTGCTTCTCGCTGATATCCAGATTGACCCAGTT  
ACTGCGACGATAGAGGGATTGCGACAGCGTCACTTACCCTTGGCGTTGGTATTGCTCTGGGTATCGTTC  
TTGTTTTGAGATAATTGAGCCCGCACCCAGATCGATCTGGGGCAGCAGAGGGGCACGGGATTCTGTTGA  
TCTTCTCGAAGGCCTGGTCGCGAACGGCTTTGGACTGCAGCAACTGCGGGTCTTTGATCTGGGCTTGCTG  
GTAGATGTCGAGCAGGTTTTCGGCATGGGCACCGCACTGACGCCAGCAACACCATGACTGACAAAAGT  
GTTCTTTTTCATAGATCGTTTTAACCTTATGTAGTAACCCAAACTGGTTGCTGGAGAGGCAAATATTGTCA  
CCGACCAAGCTTGATTGCAGCTTAATCACTCTACTATAAGCAAAATTAATGCTAAGAGTCTCAGGTCCG  
GTGACGGGAACGTCAAGAACCGGACGCAGTTTTCTCCCCGCGTGCCTAGCCAAATGGTCTGTGGCTGCTA  
AAATCCACCCCTCATTACCATGGCACGCCGAGTGAATGAACGTTCAATCATGTTCCCTCGGATTTTTATGGT  
CAAATGATACAAGTCAAGCTGACGGGAGCCCCGGATGTCGACGCAACCCCTTGGCCGAAGATCGGCATTA  
CGCCGCCGATGATGTGAAAATCATTGAAAAATCAGCTGGATATAACGGCTTCTTCAAGGTGAATGTCTAT  
CGTCTGCAGCATAGGTTATTTGCTGGCGGCTGGAATCAGCCCATCGTGCAGGAGCTGTTCCGAGCGGGTCT  
ATGCCGCCGCTTGCTTCCATACGATCCGGTACGCGACCAGATAGTGTGGTGGAGCAGTTCCGTATCGG  
CGCCATGGAGACCAACCCGACCCCTGGCTGCTGGAGCTGGTGGCCGGCATCATCGACGAAGGTGAGACC  
GCCGAGGCGGTGGTGCAGCGGAGCGGTGGAAGAGGCGGTTATCGAGGTTGCCCGCTCGAGCATGCCA  
TCAGCTATCTGGTGAGCCCGGGCGGACCCGAGTCCGAGGTTGTTGTGGGCGAGGTGGATGCCAG  
CAAGGCGAGCGGCTGCACGGTCTGGCGGATGAAGGCGAGGATATCCGGGTGACGTTGGTGGAGCCGAA  
CAGGCTACGCTGGCTCAAAGAGGGACGTATCGACAATGCGGCCTCGGTCAATGCCCTACAGTGGCTGG  
CCCTCAACCATGGCGAGCTGCGCGCCGCTGGCTGGCGGATCGCTGAGGTGGCGCTGACCCGCAACAGA  
GCAGGCGCTATGTGCTGATCTGATGTCCTTGACAGCTACCTGCGAGGTCAATTACATGGCGTTGATGAA  
ACTGCTGCCGCCAGATGGGGAAGTCCGGGCGAGCGCCGCTATCGGGTCCGCAACGATCTGCAGTTCCAG  
CTCACCATCATTGGCGAGAGTGCCTTACCAATCAGGTGATCCTGAGCCAGCACAAACCCGAATTGCCCG  
AATATTTACAAGCTCAGATAGAGATTCGTTTGTATCATGATGTGCGGATGGCGGAAGTGTGTGCAGCGCA  
ACAGATTTCCCGTTTGAACACGTTATGATTATCCCAATAAAAAGATGCACCAGCGGGACGAAAAGGAG  
CAGGTAAATCTGTTTCTGGCCGAATGGCTAAAATTTTGTCTCAGACATGGTACCAGCCCGATCAATATCT  
CCAGTTGAACAAATAAAAAGAAGCGTGATTTTTGGAACAGAGCTCCCCAGGCGCAGGACGGCAGTGTGC  
GCCTGTTGCAAAATACCGACACCCACCTCTTCCGCGAGTGCCGAAGGGCGGCTGTTGGCTGTGCGTACCGC  
AGAGAGTCTGGCCGCCGCTGCTGGAACAGGTGCAGGCCAATGAACACCCCTACGAGGTGATTTCTGGCGACC  
GGCGATCTGTGCGAGGATCACAGCCCGGAATCCTATCAGCGTTCGCTCCATGATGGCGCCCCGGGCC  
GCCCCATCTACTGGCTGCCGGGCAATCACGATGACAGCCCGCTGATGACCGAATATCTCCATGCCGCCGG  
GATCAGCGAATCAAACAGCTGGTGGGCGACCACTGGCAGGTGATCCTGCTCGACACCCAGGTGCGCGGC  
AAACCCACCGCATGATTGGCGATCACACAGCTGGCCGCCCTCGACCGCGCCCTGCGCCAATATCTGATC  
GCCACGCTCTTATCACCCTGCACCATCAGCCGTTGCCGTTGGCTGTGCTGGCTGGATCAACACAATCT  
CAAGAATGCCGATGACCTGTTCCGCGTACTGGCCCGTATCCGCGAGCAGAAGACCATCTGTTCCGGCCAC  
GTCCATCAGGAGTTTGACGAGGTGCACCCGCGGGTGCAGGCTGATTGCCAGTCCATCGACCTGCATCCAGT  
TCAAACCGCTCTCTGATGGCTTTGCGCTGGATGAATCCGGCCCGGGCTGGCGCTATCTCACCCCTCTATCC  
GGATGGGCGGGTGGCCAGCGAGGTGTGGCGCTGCCGGTGGGACAGTTTGTGCCCGACCCCAACGCCACC  
GGTTATTGAGGAGAGAATTCCATGAAGTCCGTTCTCCTTTATCTGCACGGTTTCAACTCCTCACCGGGCT  
CCGCCAAGGCGCAGCAGATGGCTGCCTGGGTGGCCGCCAATCGGCCGACATCGAGGTGATCATTCGGGC  
TCAGCCCAATACGCCGGCGGCGGCTTGGGCGGCTATCGAACAGACCATTGCCGATCTGCAGCGTCTGTTAT  
GGTAGTGAATTCAAGCTCGGCGCCGTTGGGTAGTTCCTTGGTGGCTTTATGGCGACCCGGGTGAGCGAGC  
TGTACGGCTGCCCGCCGCGCTGATCAATCCGGCGGTGCGCCCGCACGAGTGTCTGTGACTACCTTGG  
CCCCAGACCAATCCCTATACGGGTGAGCAGTATGTAAGTGTGCTGACATATGGATGAGCTGCGGGCA  
CTGGCGGTACCGGTGACGGCGCCGGAGGACTCTGGATCCTGCAACAGCAGGGGAGATGAGGTGCTCGACT  
ATCGCAAGGCGCTGGACGAATACCGCTTTGCCCGTCTCTCGCTGGAGTGCGGCGGGCACCACGCCCTTTGT  
GGCGTTCGAGCGCTACCCCGCCAGATTATCCGTTTCTCGGGTTATAGTCAGGTTTGGTCAATAAGGG  
CGGTCTCGCCCTGCTTGTCTTCTCCAGATCAACCTTTCGGTGCGGGGAGTTTGTCTACCCCGCCCTAG  
CAGTTAAGATTCCCTCAAACGTCATTCGCAAGGCCCTCCATGTCTACTCAATACAATGCGGATGCCAT

TGAGGTCTCAATGGCCTTGAGCCGGTGGCTGCGCGCCCGGCATGTATAACCGACACCACCCGGCCCAAT  
CACCTCGGCCAGGAGGTCATCGACAACAGCGTCGATGAAGCGCTGGCAGGTCACGCCCCGAGTCTGGAGG  
TGATCCTGCATGAAGACCAGTCCCTCGAAGTGATCGACGACGGCCGCGGCATGCCGGTGCATATCCACCC  
GGAAGAGGGGGTTCAGCGGGGTGGAGCTGATCCTCTGCAAGCTGCACGCGGGTGGCAAGTTCTCCAACAAG  
AACTACCAGTTCTCCGGCGGTCTACATGGGGTGGGTATTTTCGGTTCGTAACGCCCTCTCCGATCGGGTGC  
AGGTGACGGTGGCCGCGACGGTACGGTCTACGACATCGCCTTCGAGCGTGGCGAGAAGGTGCAGGAGCT  
GACCATCACCGGTACCTGCGGTTCGTCGCAACACCGGCACCCGAGTGCCTTCTGGCCGACGGCGAGCTAT  
TTCGATTTCGCCCCAAGTTCTCGGTACCAAGCTGGAGCACCTGCTCAAAGCCAAGGCTGTGCTCTGCCCGG  
GCCTCACCATCAAGTTCTCGACAAGAACACCGGCATCAAGCTGGAGTGGTGCTACGAAGATGGCCTCAA  
GGATTATCTGGTCGACGCGGTCAAGCAGTTACCTGCCTGCCGGAGCAGCCTTTTATCGGCTCGTTACAG  
TCCGAACAATCGGCGGTGGACTGGGCGCTCTGCTGCTGCCGGAAGGGGGCGAATGCCTCGCCGAATCCT  
ATGTGAACCTGATACCCACTGCGCAGGGCGGTACTCAGTCAACGGTCTGCGTCAAGGGTCTGCGTCAAGGGT  
CATGCGCGAGTTCTGCGAGTTCCGCAACCTGCTGCCGCGGGGGTCAAGCTGACCCCGGAAGATATCTGG  
GATCGCTGTGCCTACATCCTCTCCATCAAGATGCAGGATCCACAGTTTCGCGGGTTCAGACCAAGGAGCGCC  
TCTCCTCCCGCCAGAGCTCGGCGTTTGTCTCCGGCGTAGTGAAGGATGCCTTCAGCCTCTATCTGAACAG  
CAACACCGAGCTGGCAGAGCAGATCGCCGAGATCTGTATCTCCAGCGCCAGCGCCGGATGCGCGCCGCC  
AAGACGGTGGTGGCAAGAAGATAACCCAAGGCCCGGCGTCCAGGCAAGTTGACTGACTGTAACCTGCG  
CCGACCCCATGCAGGGGGAGCTGTTCTGGTGGAGGGTACTCCGCGGGCGGCAGCGCCAAGCAGGGCGG  
GGATCGCGAGTTTCAGGCCATCATGCCGCTGCGCGGCAAGATACTGAACACCTGGGAGGTGGAGGCTGGT  
CAGGTGCTCGCCTCACAGGAAGTGCACGATATCTCGGTGCCATCGGGCTCGACCCCGACTCCGAGGATC  
TCAGCGGCCTGCGCTACGGCAAGGTGTGCATCCTCGCGGATGCGGACTCGGACGGTCTGCACATCGCCAC  
CCTGCTCTGCGCCCTGTTTCGTGAAGCACTTCCGCACGCTGGTGGAGAAGGGCCACGTCTATGTGCGCCATG  
CCGCGCTCTATCGGATCGATATCGGTAAAGAGGTCTACTACGCCCTCGACGAGGACGAGAAGAACGGCG  
TGCTGCAGCGGGTGAAGCCGAGAAGAAGAAGGGCAAGGTGATGGTGAACCGATTCAGGGTTTGGGCGA  
AATGAACCCGAAACAGCTGCGGGAAACCACCATGGATCCCAACACTCGCCGCTTGGTGCAGCTCACCATG  
GAGCCGGCAGGAGAGAGTGAAGGGGATGCGGCTGACGAGACCCTGCAGCTGATGGACATGCTGCTGGCCA  
AGAAGCGGGGGGTGATCGCCGTGAATGGCTCGAAGAGAAGGGCAACCTCGCCATCATCTAAGCCGTGCG  
TCACCTGCCGACCCCGATTTTCAGGTGTGCCCTCTCGGGCGGCCATAGCAAGAGAAAAACATATGATG  
ATGCTATCGAGCTCAGTCTGGACGGGGTAGAGCGCCCAATGCGCACCTTTACCGAACAGGCTTACTT  
GAACTACTCCATGTACGTATCATGGATCGGGCCTTGGCCGATATCGGGCAGCGCCCTCAAACCGGTGCAG  
CGGCGCATCATCTACGCCATGAGCGAGCTGGGGTTGTCGGCGCTCTCCAAGCACAGAAGTCTGCCCGTA  
CTGTGGGTGACGTGCTGGGTAAGTACCACCCCCACGGCGACAGCGCCTGTTACGAAGCCATGGTGTGAT  
GGCCAGCCCTTCTCCTACCGCTACCCGCTGGTGGATGGTTCAGGGCAACTGGGGGGCGCCGGACGATCCC  
AAATCCTTCGCGCCATGCGTTATAACCGAGGCGGGCTGTGCGCTTCTCCGAGCTGCTGCTCTCCGAGC  
TGGGGCAAGGCACGGTGGAGTGGACGCCGAACCTTCGACGGCACCATGAAGGAGCCGGTGGTGTGCCCGC  
CCGCTGCGGCACATCCTGCTCAACGGGGTACCGGTATCGCGGTGGGCATGGCGACCGACATCCCGCCC  
CACAACGCGCGGGAAGTGGCCTACGCCTGTGCCGAGCTGCTCGACAACCCCAATGCGGGGCTCGATGTGT  
TGATGCAGCACATTCAGGGGGCCGGACTACCCGACCAACGCCGAGATCATCACCCCGCGGACGATATCCG  
CAAAATCTACGAGACCGGCAAGGGCTCCATCAAGCAGCGGGCGGTCTGGAGCGAGGAGGATGGCGATATC  
GTCATCACAGCGCTGCCCCATCAGGCCTCCGGCGCCAAGATCATGGAGCAGATCGCTGCCAGATGGTGG  
CGAAAAAGCTGCCGATGGTTACCGACCTGCGCGATGAATCGGACCACGAGAACCCGACCCGCTCTGGTGT  
CATCCCCGTTCCAACCGGGTGGATGTGGAGGGGCTGATGGCCACCTGTTTCGCCACCACGGATCTGGAG  
AAGAATACCGGGTCAACCTCAACATCCTTGGCTCGACAACCGGCCGAGGTGAAGTGCCTCAAGACCA  
TCCTCAGCGAGTGGATCCAGTTCCGCCGCGAGACAGTGCCTGCGCTGTCAGTTCCGCCCTCGACAAGGT  
GCTGGCTCGCCTGCACATCCTCGAAGGCTTGTGATCGCTACCTCAACATCGACGAGGTGATCGAGATC  
ATCCGACCCGAGGATGAGCCGGGCAAGGTGATGGTGGAGCGCTTCAACATTACCGAGACCCAGGCCGAAG  
CGATCCTCGAGCTGAAACTGCGCCATCTGGCCAAGCTCGAAGAGTTCAGCTGCGCGCCGAACAGAGCGA  
ACTGGCCGAAGAGCGCGACAAGCTGGAGCTGATCTTGGGCTCCGAGCGCCGCTCAACACCCCTGCTCAAG  
AAAGAGCTGCTGGCCGATGCCGAGAAGTACGGCGACGATCGACGCACCCCGCTGGTGGAGCGTGCCACCG  
CCGTGGCGCTGACCGAGAAAGAGCTGGTGGCCAGCGAACCGGTCACCGTCATCCTCTCCGACAAGGGGTG  
GGTGGCGCGCCGAAGGGCCACGACGTGGATGTGAGGGGCTTTCTACAAGGGCGGGGACAGCTATCTG  
GCCCACGCTGTGGCCGACGAACAGCAGGCGGTGTTCTCTCCAGTTCGGCCGAACCTTACGCCCTCG  
AATCTCACACCTTGCCATCGGCGCAAGTACGGGCGAACCGCTCACCGCCGCTTTGCGTGGGGGCTGG  
GGAAGAGGTGCGCCATCTGGTGTGGGCAACGAGGGCGAGCCGTATCTGATCGCCAGCGACGCCGTTAC  
GGCTTTGTCTGCACCTATGACGACCTGATCGGCAAGAACAAGAACGGCAAGGCGCTGCTCACCGTGGCGG  
AAGGGGGTTCAGGTGATGGCACCCCAAGATCGGCTCGCCAGAGACCGATCTCTGCATGGCCATCTCCAA  
CGAAGGGCGCATGCTGCTGTTCCCGCTCAACACCCCTGCCGGTACTCGGCAAGGGCAAGGGTATCAAGCTG  
ATCAGCATTCGGTTCGGCTCGGGTCAAGGCGCGGGAGGAGTTTGTGGTGTGGCCCGGCTCATCCCGCAGG  
GTCAGTCCGTCACCTGTTTTCGGGCAAGCGCAAGCTGACCTTGAACCGTCTGATCTCGACTACTACCG  
CGGCGAGCGCGGCGCTCGCGGCGCCAAGCTGCCCCGCGGTTTGCAGCGGGTTCGATCGCATCGAGATTGAA  
CCCCCGACTGGAACCGAACCGGTAGCTGGGGAAAAATCAGGAAGGGTAATTAATATAGAAGGGCGCGAAAG



CGCCCTTTCTATAACTGGGTTAATATGTTCCACCAGTACAGGAGCAAAGGGTTCAGCTTACCATCTTGTG  
GTTGATTTCAGTTCATTAATTAGTTCATTCAAGAGCTCTCTATCGTCCTCAATGGATAGCGAATCAGGGTT  
ACCATAGTCTTTCCAGATCAAGGTATTGACTAGCTGTTTTCGCTTCTCGATCAAACCCCTTGTGTTTTCT  
TCTGTATCACCAAGATTGAGTACTCGTATTGCCTCGCGAGCCCTATCAGTTACACCTTCAACACGTCCAC  
TGAGTTTGAACGGAATTCATTTTTACACTCAGACATAAAATGGGGTAAGTGGTAAGTGTGTGAGTCATG  
AGAGCTATCACACTGTTTTGGCGTTGTGCAGCTTGCCACTATGTTACTAAAGTCTAGTGAACGTTTCGGGA  
GCCAGTCTTCGAGCTACTACATGCTCATTGATCTTGATTGGCACCCTTATTGCTTGGCAACAAT  
ATGCACAGAGATAAAATTTGTTCTCTAGAGCAACTTTGACGAATATCCTGACGCTCTACATCAGACAAATC  
TTGATAGCGAGCCAGTGGGTTAGTTTTTTTTGAATGCTGTGAGTGATACAGGCTCTGGCCCCCTTGTAAAT  
TTTTTACAGCAATGCCTCTTTGCGTAATAACAGACGAGCCTTGTTAAATCCAAGTTGTCTGCCGGA  
AGCTCCGAGCAATTTATCAAAAAGTATATTGGCATCATCCAGTTTTTTGTCTGTAAGTACAGTACATAA  
AATCATTAGCTGTTTAGATATAGCTTCAATTCAGGACATAAGTATCCATTACATTGACTAGTAGACAGATT  
AGCGTCTTGGCCGACTGTGATGGTACTTGAATTACGTTTTCCGTTATCAAGAGAATAAACAAGAACATCT  
TTACAATCGCTAATCACCAGGGGAGAATGCGTAGTCAAAAATAAACTGACAATTAGGGAATGCTCTAGTTA  
GTCTAGAGATAATAGTGGCGCCCACTGGGGGTGTAATGCATATCTATTTTCGTCGATCAGTACAACACC  
ATCACCATGTAAAGGATTTTTCTAGGTTAGGGTTCATCATTGCTAGACGACGAGCAATATCTCCACCAGC  
GCCATTAAGATTTCTCACCTTGGGATAATTGTAACATTTGAGGGTTGACCCCTTTTATCTATGGACA  
TATGCAAGCGTGGCTTCCGACGAATTCGGATATTGCTGAATCCTGGCATAAATGATTTCGATTGCAGACCG  
AACTGCATTTCAGTTGAGGATCTTTAGTTTGTGAGTCTCAACGTGCTTCATAACATTCATCATTTTTGTGATT  
TGTGAGAACTCTTTAGTACAGGGCCTCAATATCAAAAATCTTTAATCTGATCTAGACGAGATGAAGCTGACT  
CTGCAATCTCCATCATATCATCTATTAGTTGAGTGTTTTTTGTGAGTAAAAGTCAAGAAAACATCTCCTTC  
TCTTTTCAATTTCAATATCTTCTCGCTCTCGAAACCATTCAAAAAATCTACGGAAATCTACCCCTTGATTT  
AAAGAGTTATCATATCCATCAAGTTGTTGGAATGTGTGCCCTCTCTTTAATTTTTTAGAGGAATATCCAATA  
CAATCCGTTTCGACAGGATAGAAGGCTATTAGAGGTAGACTAGCTGAGTCAATTTCTGCCAAACGCACCCG  
GTAATTATCCGCCAGCCTGCTGGCCTCATTAAAGTTGAGATTGCCGATTGCCCTTTCGCGCCCTTTCGAGTT  
TTGGTTAGTAACCAACTAAATTCAGTCCCTGATCTTGTAAAATAATCTCACTTGTAGTTGTAGGGGTAC  
CATTTAAAATGACTTCTTCTGGTAGCGGACTACCCTGCCCTTATCGCTACGAAGACGGGCGACAAACCA  
GCTTAAAGACTTCCAGTGCACCTCAGGATCGAGGTTTTTCTGCTCCATTATTTCCGATCAGAACGGTT  
ACATTTGATGTAACGTATCGGTGGGAGCAAAAATGATGTCTAGGGATTGAAAACGCCCCAGATTTTCAA  
GTTTTGAGTTGTCTGATTTCCATTCAATGTTCTGTTTTTAGTACATCATTGGCCTTACTTAACTGACC  
TTCTAGTCACTGTGCCAGTTAGGCCTTGTGGATTGATAGTGCAAGTAACTAATTAGTGACATATGGTCA  
GCTATTGTCTACGTCGTAGCTATTGGATTGGATTGGGTTGGTGTCAATCTAGCGTCTACAACGAACCTCA  
TAAACAGTTAAAACACTTTGTAGTGATATAGTTACAAGCTTTACGTATCCGTTACAGCCCTGCCCTCTCC  
AATAATTTAGCCGACGAGTTTTCTAGGGGGGCTCGGCTTCTGCAATGCCCTGGAGCTCTGGGACTCCCA  
CCTTTTTGACACGGATGCCGCTTCTTCCAAGAAAGTTGGGCCGTAGGTCTGATTAGCGAAGCGTAATCAG  
ACGTTTCGCGAAAACAGGTTGCCGTAATCTGCCGGTGTTCAGCTGATCTCTTCTCTATGTCCATCGCTA  
CCGGGATTGCGGTGCGGACGATTACGCTTCGCTAATCGACCCACGCTTTCCTGCTTGATTTAACGTTCT  
GCGTCTGGTGGTGGCTTCTGTTGTGATGTTTTGTTTCCCTCATTCGCGACCCCTTCTCCCTTATCTAT  
GGCAAAGAGTGGGAGAAGGGAGCAGAGATCGCAGCCATTGATAGTGACCGTGGTATGGCGTGATAGCTAA  
GGGTGACAGCTATGGCTACAGGTTGGCAGGCACTGGTTCCCTCTCCCTTGGGAGAGGGTTCAGGGTGAGG  
GGAGCCGACGATAGGGGTAAACACTATAGCAAGCGCAAGGTTGCCAACCTGAAAAGAACCATCCAACCCG  
CCAAAAGCGAGGGCCCCGCCATCCATGATGGCGGGGCCCTTTCATGATCAGCCGCGTTGCTGATTTAAC  
CGTTTCGCGCTGGCAGGGGCCACTGAAATGGTTGGCCGAACCCGATTAGACAGGAATGGCTGTCCCGCC  
GGTGGCGGGGTGATTTTCGAGGCGATCAGCTGGCGCAGGCGGGGCACCAGCAGCAGCAACACCAAGCCGC  
CCGCCAGCGAGCCCCAGCCGAGCATATTGAATACCGAGCTGTAACCCGGGTTGGTGGCGACCGGGGTGCT  
GCCGATACTTTGCGCATGCGCTGGGAGACATAGCCCGCAGCAGCAGGCAACGCCGTTACCATCATC  
CAGCAACCCATCAGCAGGCCCTTGCAGGCTGGCGGGGGCCAGCTTGCCAATCATGGCGTAACCGATGGGG  
AGATAAGCAGCTCGCCAAAGCTCTGCAGCACATAGCTGATGGCGATCCACTTGAAGGCGACCAGCCCGTC  
GGCCTCCGCCAGATGGATGCCGAGCGGCAGCACCAGCATGCCGAGCCCCATGCAGAACAGGGAGGCGGCA  
AATTGGGAGGGGATGTCGATATTCCACCCCTGCTCGCGCAGCCGCTTGAACAGCAGCGCCATCAGGGGGC  
CACCGATGACGATGACGAGGGTGTGATGTTCTGGATCCACTGGGGCGGACCCGACCCGACCCGAACACATT  
GAGGTTGATGTTGTCTCGGAGAAGAGCATCAGCCCCATGGGCGCCAGCTGGTAGAGCGACCAGAAGATA  
AGGGAGCCAAGGGCGAGGATCAGGTAGGCCACCATGCGGCTGCGCTCGGCGCGTCCGGATGGCGGGCGG  
TCATCACGCAGAGCAGCACCAGCACCACGGCGCCAAGATCAGCACGAAGCTGCCGCTGAAGCTGGCATG  
GGTCAGCAGCAGGCGCAGCGCCGGCACCAGCATGGCCAGAATGGCGATCCCGGCCAGCATGCGGCGGTAG  
AAGCTGCTCCCTTTGACATGGCGCAGCGGGGTGCTGATATCCGCCAGAATCGGCCAGCAGGCGAAGGTGG  
CGATGATGGCAATGATGTTGCCAGCGTTGCAAAACAGGAACAGGGTGGCGTAATCCTCGGTGAGCTGGAA  
GTAGCCCGCCACCGTAAAGCCGATAAAGAAGCCAGATTTCATCCCGCGTAGTTCCACAGGAAGGCGCTC  
TCGCGGGCGGTGATCATCCGGGGCGAAGCGCTGGGTGAGCATCATGTTGAGGCAGGTGACGTTGAGGCCG  
TGCCGGTAAGGAACATGGCGAGCCCCAGTAGAGGCCGGTGTATCCCATCTCGGCGATGAAGTAGCAGCC  
GATCACCTGCAGCACCATCCCATCACGAACAGGTTGCGGTTGCTGAGGTAGCGCCCGCGAGATAACCG

CCAAACAGGTGCAGGCCATAGTTGAAGGCCCGAAGACCCCATCATGGCGTTGGCCTGGGATTCCTGA  
AGCCGAGCCGCTTGGTGGCGTAGAGCACCAGCGTGGAGTAGAGCACGGCAAACCCAGAGTCGAGAAGGT  
CTGGATAAAGAACAGCGCCCCGGAGCCGGGGGAATGGTGGGGTGTGATTCGAAGCGCTCACGGTCTGT  
CTCCTGTGAGAGAAGAAAATCATAACTCGTCTGAGAGCGTACCGGTCTGCTGCCGGCTAGCCTTGTGCC  
CTTCCATGCTGGTCTGAAGGCCGGTCTGTCAATTTAGCGGCCAAGCGGTACAAATAGCCATACCTGAAATT  
TAATCCGGCGCGATTAATTGCTTTTTATTGATCTATTCCGGTTTTTTATGCGGTTTTGGCCGCTGGAATG  
CTGGCGCTGGCGGGGTGGTCATCAGAATGGTTGGGTTTGAATGGAGCCATTTTGGGCTGGGCTGATTTG  
ATAGTGAGATCGCCATCTCGCTTTTGGCTGCTCTTTCGCCATTCAGTCGGCATGTTGAGTATCAGCTTA  
TTTTATTGAGTTTCACTGTTTGAAGTGAATAAATATTGAAAATGAGGGCTTGCTCAGAACCTGATGGTGTGG  
GGAATTTTTGAGCGTTTCACTCGCAGGGGATAATATATATCTTGTGTAATAACGTGGTAAAGATTAGTT  
TCGATAGATAGGTGACTTAAGATAGTCTGATAATATATCAATCAGAGCATTTTGGGGCTGGGAGTCGTGA  
TGCTATCTTTTAGGAAAATATATTTCTTTGTCATGCTTTGAGTATTTTTCTCAGAGATAAAAATCTGATTA  
TGGTGAGAACAGCTCATAGTCCGGTGTGATAATAGAACCCTTCCGATAGGTCAATATAGACAATGGTCCCT  
TCCTCATCGACCATGGCATATGGCCATTTTCCGTTGGCTCCGTACATGGCCACATAGAGTGGGTTGAAAT  
AATCTTGAGTCTGCCAGCTGGGTATACGGGAGTCGAACATGATAGATTGGATATTTACCATCGTTACA  
TAACTCGACTCTCTTAATAATAACGCCTCGTTCAGTAATACCTGTCTGGTCGGATGTTGCCAATTTTCC  
AAATCTACATTTTTTACAATTATTGGCGACTTCTCGATAAAGGCGGGTATCTGACAGTAGCGGAGTATTGG  
CGCTGATAAGCATTAAAAGTGGCAGCAGCATAAAAAATCTGACCTGTATTATGACCGTTTTATTCAGCCCT  
GAATCAGGGGCGCAGTATAGCTGCGAACAAGGTTTGAATGAAGCCATCTGAACTGGTTGCATCCCATT  
GTTACGTCAATCGTGGGAGTTGATGAGGTAGATAGAACAACGCCCGCGGGCCGGGTGTTGGGTTATCCC  
ACATTGGGGGCAACAACAGAGGCGGCGAAGCGCGCCCTAGAAGTTGTGGTAGAGCGGCCAGCCAAGCAGC  
GGGTGCTTGAGACCGGCGCGCATCTCGATGTTGTCGAGCTTCTCCGGCGAGGCGTTCTCTTTTTGCAGCA  
GCTGGTACTGGCGCACAAAGCCGAGGGTGTGCAGCAGGTTCCGGCACAAAGCCCGGGCTCAGCTCCTGACG  
CAGGGCGGCGGCCATGTCCGGCGGCGAGCGCATTCAGCATCAGGGCGAGCTGGGCGGCGAGATAGTCGGTG  
TCATAACCAGCCCTCGTTCGAGCTCAATCTCCCGCGCCAGTTTGCCTTGAGATCCTGCTTCCACCTGAGCG  
GGGCGGCGCCACTGCCCTTGCCGAGAGGATGCGGTAGAGCAGCGCTTCGGCCAGCTTGTCCCTCATGGT  
GGGGTGGTTCGCTCTCGCAGGCGAAGAAGTGTGGTGCATGAGTTCCATCAGGCGGCTCTTGTGTGCTCG  
GTCAGCGCCTTCTCGTACTCCTGCCAACCTTGGCCACTTCCACGTCCGCGGGGCTCGAGATCTTGTCCA  
AGAGCCGCGCATCCACGTCAACGTAGAGGCTTGTGCCACTTCCACGTCCGCGGGGCTGACGTAATGAGCATCGA  
CCAGCCCTTCTGGAACGGCTTGATGGGGCTTCCGGCGCCTGCAGCAGCGCCAGCGCCTTGGCCGGATCC  
CGCGCCGAGAGCTCCTGCAGGCCGAGGCTCACACGCCGATGACGTCGTGGGCGGCTGCTCCAGCAGGT  
GCATCTTGTACTTGTGTAGTACTTGTGCGGCAATTTGAGGCTCATCAGCACCGCCTTGCCCTTGATGGC  
GGCCAGCTGTTGCTCGGTCAAACGTTCAATGTGTCGCGCCAAAGCGCAGCACCTGGGTCAGAAAGGGGCC  
TGTTTGGCATCGGAATGACTAACTGCATGAATGGGCTCCTTAATCCAGAAAGCTGAACATGTCGTCGAC  
GTCGCCGACTCGTCTTCCCTCGACCTTGTCTTCTCTTTGGCCTGCATCACCAGCTCGGCGGCAAACCTG  
TTGATGATGCCGTCCCAAGTGGAGTGTCTGTTGCGCAGCAGCGCTTGATGGCTTTCTCCACCTCGGGGG  
CCAGCTCGGAATGAGCATCAACAGGCTGCGCGGGTTCGTCAGCGCTAGTCTGGACATCCTCGCTCTG  
CTGGCGCTCGCTGTAGCGCAGGGACTCTTCGAGATCTTCTCTTCGGCGTGCAGCAGCTCGCGATAGCCT  
TCGTCTCTTCATAGCGATCGCCGCGATAGAACTCGATAAAGGGGATGGCGAGGTAGAAGAGACCGGCCG  
GATCTTCGGCCACGCACTCGAGGATCTCACGCTGCTTGGCTTCGCTATCCTGGGTGCGGATCAGGTAGTT  
GAGGAAATCGAAGGTGTGCTGTTGCAGCTCGTCCGGCTTGTCTTGATCGCCTCTTCCCAATAGAGCGGC  
TGCTGGTAGACGATGTCCGGATCCGCTCCGGGGTCATCAGCTCGGAGATGATGGAGGGGAAGGAGATAT  
CGTGCTGGCCGTTAATCTGGGTGAGGTAACGATATCAATGTTTTCAATCACTTCTGCCAGCTGGTCTGTC  
AGACATGGTCTTGGCGATCAGCTCGAACTTCTCGCTGGCTGCTTCGGCTCGATAACGGCCAGCTCTTTG  
ATCTCGATGGCGGTAATTTCTATCAGACTGTTGCTCATGCCTTGCCCAATTAGAAAACGGACTTCGTCGT  
ACATATCCTGATCGCCGTCGTCATCGCCATAGCGGTCAGTCCCGCCGTGGTAGTCGGCGTCGGCATCTTC  
CCCGTCTTCATCTTCTTCTGTCGCGCAGCTCATAGTCTCATCGCTGCGGTGGCTACCGCGCGGTAGCGGG  
TTGTGAGCAGGAACAGCACGGCGCAGGCTTCCATCAGCTGATCTTCGCTCTGGGCCCCGACCGCCTTGA  
CCAGCGGCAGGGCGGCGTTGTTGAAGCCGACGCTCACCTTGAACCTGTCAGGAGGGCTGCTCGCCGCT  
GGCGAGCCACTTGTTCAGTTCGACTTGGCCTTGGCCGGGAACTGCACCCGGCCATAGAGGGCCAGCGGC  
AGATACTCGGGCATAAACTCCAGCATGCTCATGTCCGGCAGCAGCAGGCTCTTCATCTGGTCCGGTGAAC  
GTTCCAGCCCCTTGGGGTCTGCTGATCCCGGTAGGATTCGATGTTTTGCTGGCATCGCTTTGCAGCGA  
CTTGAGCCGCGCCTGGTCCCATCTCTTTGCATAGTTGCTCTTTCTGCCTGCTGTTTCAGGGGTAGA  
GATCCCACATCTCCTGCATGGCGGAGGCGGGGTCGGTCAGATGACGTTGTTGAAATCCTTGATAAAGGC  
GGCCCGCTGTTTCGGATCGGACAGCACTTCATAGCCCTGCTTTACCTGGTGCAGCTTGTGAGGCTGCCTGC  
TCTTTCTCTTCTTCACTGGCCCCGTGCAGCTTGTGCGGGTGGTACTGGTTCGACAGCCGACGATAGGCTT  
TCTTGATGTGCTTTTTGCTGGCGTTGGACTTGGACGCCAGCACCAGAAAGTAGTTGTTTCATGGCAGATCC  
TGCATCACTGGCATCATAGGATTCACGCTGCGAGTGCCTGATGGTGGGGATTGGCAAACAGGCACGGCA  
AAAACCCGTCATTTTAAACGGAAACAGCCCGCAACCGGATGAGTTGGGCGATCAATTAACGGGCGAGATG  
AAGAGGTGTGAGTTGAGCGTCTATTGTTGCCAGTCCGGTCTGGCCAGTGAAGGGGCGAGCACGGGAAGGC  
GATGAAAAAATGGTCAGGGGCGAGTGTGGGGTGAAGTGGCGGCGCAGCGCAAATCGGGCTGCCCGCGCA

GGGGTTACTCCTCCCAGAAGGAGGCGGAGGTGTGGTAGATCATCTTCTTGCTCATCCCGCCATCGACCAC  
CAGATTGGCGCCGTTGATAAAGTCGTTCTGGGGATCCGCCAGAAAGAGGCAGGCGGGGTGATGTCGTGC  
GGGCGCCCGACCCGCGCTCGGGTGTGGCGGTGATCCGCCTCGGTCAGGGTGTGGTAATCCTCCGCC  
GGATCCAGCCCGACTGATGGCATTGACCGTGATGGGGTAGTTGGCCAGCGAGTTGACGAGGGACTGGGT  
GAGGGCGACCAGCGCCCCCTTGAGGGCACCATAGGCATCCCAACCCGGTTCGTTCTGCTGCCAGCGGGT  
GAGGCGATATTGATGATGCGGCCATAGGGCAACCCGCGGTTGGCCTGCACAAAGGCGCGGGCGCAGAGCA  
TGGCGCCGCGCACATTGACCGTCATCACCTGATCAAACCTGGGCTGCGCTCAGCTCCTCGAAGCGGGTGT  
GAACTTGCTGATGGCGCCGTTGTTGATCAGCAGATGGACGCCGCCATGCTGCGCGCGCACTTCGGCAAAG  
AGCCCCACGATAGCCTGCTCATCGCGCAAGTCGAGCGGGTAAAAAGTGGATCTCGGGATGGTCGAAAGCGT  
GAGGAGCCAGATCGGTGGCGATCACCTGATAACCCGCCCTCGGCCAGCCCGATACAGAGTTGGCGACCAAT  
CCCGCCAGCGCGCCGTTGATGAGGGCCGACACCTTGGGGTGGTTGGTTCAGCTCGTTTCATTGCGCCGCT  
TGCGTGCCCGCAGCACCTTGATGAGGGCCGACACCTCTGCTGGCCAAACCCCTTGCGCCACCCCTTCCTC  
AAACAGATCGGCGGCAAAACCGCGGAAGCGGCTGTGATCCCGGCATCGGTTGCGTGACCGCGAGGCGG  
CTGATGGCGGCGCTCCAGGTTTTTCAGGCTGGCGTAGGGGTGATCGAAATCACCGCTCGCCAGCGTCTTGC  
CAAGGTGGGCCACATCGCCACCGAGAATGGGCGAGAGCTCGCTGAACTGGGCGCACACCTTGGCCACCGG  
CAACCCCTTCGCGCTCGCAGATCAGCGCGCGTCCAGAGCACCGAGCAGACCGCCAGCAAAGTAGGCGGGC  
ACGGCACAACTTTCGCGCCGCGGCGGCGCCACCGCTCGGCCACATGGTCGAGGGTGGGGGCGAGCAGGC  
GCAGCACCGGCTCGGCCCCGCTAAAGGCGGCGCTGGCCCCGAGCAGATGATGCTGGCATCAGTGGTGCC  
GATCTGATCCGGGAAGCAGAGGATGGCGCCATCGAGATAACGGGCGCCGCGAGCGTGACTCCAGCTCTCC  
AGCGCTCTGGCCCCCTGTGGGCTGCCGGTGGAGAGTTGCACCAGCAGCTTGCCCGCCACCGCATCGCTCG  
CCTCGTCCAGCAACAGCTGGCTGACGGCGTAGTTATCGACGCAGACAAGGGTGATATCGCTTGCGGCAAT  
AGCCGCGCCAACCGAGGGGGCGAGATTTCGCGCCCAGCGCTTGCAGCGGGGCGCCCTTGGCGGCGCTGCGA  
TTCCAGACGGTGACCGGATGGCTCGCCTTGAGCAGGGTGGTGGCGAGGGCGGAGCCCATGGCTCCTAGGC  
CGATGACAGAGAGAGGGGCGCATGATGGCTCCTGGCTGTGTTGATAGACGCTGATATAGGGAATTGAGATG  
CCTTGTGGCAGGTAAGCCACTATATTTGCCAGTGTGCGCGTGAAAAATGGCTTTTATGACTGTCTGGTA  
TAGGAGAATTCTATGGATGTGCAACCCCTGCGTGCGTGTGTTGCTGCTTCGAGGAGCGCAACATCACGG  
CGGCGGCCACCCATCTTTTCATTACCCAGCCCACCTCTCCACCACCATCAAGACGCTGGAGGATGAGCT  
GGGGGTACCCCTGTTTGTGCGGCGAGGCGGAGGGGACTGAAGCTGCCACCCGCTCTATCCC  
CGGCGCAAGCGGCTTGATCGCCGACACCGACTCCCTCGCCCGAGTTTCGTGAAACCTCCCCCTGCCTTG  
AGCTGACGGTGGGGATTGAGGCAGACCTTGGCGATGGCGTGGTGGGGACGCTGGTGCAAGGGGCGCTCGC  
CCACGAGGAGATCCTGCTGACTCTGGAGGAGGGCTGCTGTGGCGATGTGCGGCTGGGGTGTGAATCCCTG  
CGCTGTGGTGACGAGCTCTTTATCCCCCTGCTGGAGGAGGAGTTTGTACTGGTGCTGCCGCCGATCACC  
CGCTGGCGGGCAAGGGGCGCTCACCCCGACAGCGTTGGCGGATGAACCTGGGTACCTGCCCGCGCCA  
CGACTCCCACCTGCGGCTGATCGCTATTCTCGGCAATCAGGCGCCGCTCTACCCACGGCGGGCGGGGTG  
CTGCGACTGGCGGCGACCATGGTGGCCGCCGGGGCGGGGATGCTTGGTTGCCCGTTGCTTTGTCCGC  
CCGGTTGTACGGTGCAGGCTGGCGGCTCTTCTTCAAGCGGCGGGTGGGGCTCTGCTATGCCCCGA  
TGCGTTGCGATCGGTGGCGGTGACCGCCCTGCTGGAGCAGGTGCGCGGGATGCAGCTCCCCGCTGATGT  
CGGCATAAAAAATGTGCGGCATAAAAAAGGGCCATCAAGTTGGGATGGCCCTGTTGCAGGCAACGAAGGTG  
CGTGGCTAGAGCGACGCCCACCAGAGCCGACGCTGCAAGCCCCACTTCGAGCTCCAGCCGGTGGTGGTGC  
TCGCAAGCGTCCCATCCTTGATAACGAGGAAAAGTCGGGGTGACCCCCACCTGCCACTGGGCTGCCAGCGC  
TCCCAGACTCGTCGTTGTGGGTGGGGAAGGTGAGCCCCCTTCTTGCTCATCCCATTTGGCTAACTGCTCCGAA  
TTGCCGGAGCGCAGCGCCACCGTCAGCACGTTTTTCCCCCTCTTGCCAGAGCTGCTGCACCGCCGGGGTGG  
TGAAACGGCAGACACCGCACCAGCTGGCCCAGTAGTAGACCAGCAGCGGATTCGCTGACTTAAGGTAGC  
GAGATCCGTGCTGCTGCCATCCTGCAGGGTGACGGGGGCGCTCATCGCCCCCTTGGCAGGGTCCGGCTG  
CGCCACAGATCGAGCAGGGTTCGAGATGACCAGCGCCATCAGCAGCAGCCAGAGCGCCTCCTTGCCCCAG  
GGCGCCAGCGGGGTTGAGGATAGGTGGTCAATCCCTTACCCCTGCTTGGCCAGTTTCGGCTGCACCAATG  
ATCCAGCTCCTCATAGGGGATGGCGCCCGGTACCAGCTGGTTGCCAATCAGGGTTCGTTGGTGTGCCCTGT  
ACCCCCAGAATGGTGGCGATGCGCAGGCTGTTGCGCAGCTCTTCGGTGCCTTGGCGGCGGTTTTGAGCG  
CGGTGTTGCCGGTGGCGGCCAGCGCTTGTGATGTCCGCTCGGTCAACATCCCCCTGCTTGTCTATCAG  
CTTGTGCTGACGGGTGAGGAAGCGGGCGGGATCCTGCTGCCACAGGGTCAGGCTGTATTGGGCGGCTTG  
GCGGAGGTTTTGCCCTTGAATGGCAGCAGCTTGTATCACCAGCCCAGATCGTCCGGATAGGCCCTTGGCA  
GTTTTGGTACAGCTGGGGATCGAACTGCTTGCAGTAGGGGCAGTTGTAGTCGGTGAACAGCACCAGCGTCAG  
CTTGGGGTCTTGGCGCCGAGGCGCGGGCTGGTGGCGCTGTTGAACAGCACATCCTTGTGCTTGTGATG  
AAGTTGCCAAGCTGCGCCTCCTGGGCTGCCCGCTTCTGTTTCTCCAGGATTCGGCTGCCTCGTCAGGA  
TCTTGGGGTGGCGATCAGGGTCTCGCGGATCAGCTCCTTGATACGCGCTCCTGCTCCGGGGTGAAGGG  
GGCAGCGTGCAGGACCGGAGCCAGCAGGGTTGCGGAAAGGGAGGCCAGCAGGGTTCAGGGCGTAAAAGTC  
GGTTTTCATGGTTGCTCCTTAAAATCGGGTGGTGGCAGCCTGAAGCAGGCCAGCCTTGTGCAATGTGGTCA  
GCAGATCGTCCTTGTGAGCAGGGGGGACAGCGTGACCCCCCTGCGGCAACTCCGGGGCCGTAAATCTGGTT  
GAAAGGGACGGCCGCGCGCCCCGCTTACGGAGGAAGGCGGGCATGGTGTGCTGGTTTGTCTCCAGTGC  
CCGCGCAGGGCCACCACATCGGGGGCCGAGAGGGCTGTTGTACCTCATCGCGCAGCAACACGTTGTATT  
TGTTGGCCTTGCAGGTAACGCACCAGTCGGCGGTGACATCGATAAAGACCCGCTTGTCTGGGCCAGCGC

ATCGGCGATGGCGCGTTTCGGAGAGCGGCTGCCAGACCACCTTGTCAACGCTGGCCGAGCCCTGCGCGCTA  
AAGGCGCCGCTCAGCAGCAGGGGACTGCCAATCAGGGCGGCGAGGGCGATCGCCAGCGTGAAGCCGCGCA  
TGCCGTAACGCCATATGATGCCAGCCAGCAGTGCCAGCAGCATGGCAACTATCAGCCAGCCGGTGGCATA  
GCTGCCGAGGTGGTTGTTCGAGCAGGCTGGTGAGCCAGAGGCTGGAGCCAGCATCATCAGGCCGAGCAGG  
ATGCGCAGATGGTTTCATCCAGCGCCCTGGTTTTCGGCAGCCAGAGGGCGAGTCTTGGCAGGGCCGCCACCA  
GCAGCCAGGGCAGGCTCATGCCAATCCCCAATGCCGTGAAAGATCAGCCAGAGCTGGCCGAGCGGTGCCGC  
CAGCGCAAAGGCCACCGCAGTGCCGAGAAAGGGTGGCGAGCAGGGGGTCCGCCAGCAGAGTGGCGAAGCTC  
CCCTGCAGGAAGTGACCGCCGAGGCGGTGCCGCGCTGGTGCGAGGGCGGGTGCTGAGGGCGCTGGGCA  
GGCGGATCTCGAACAGCCCCAACAGGTTGGCGCAAAACAGCAGGGTGACCAGCACCATCAAGCCGATAAA  
ACCGGCACTCTGGAAGTGGATGCCCCAGCCGACGGCACCTTGGTGCGCGTAGCAGGCTGCTCATGGCC  
GCCAGCACCAGAAAGGAGGCGATGATCCCAGGCTGGCGGCGAGGAACTGTTTGGCGCAGCCAGGCTCCCTGTT  
CACGCTTCTGATGTTGCAACACAGTTCACAGCTTGAGCGCCAGCACCCGGCAGCACGCAGGGCATCAGGTT  
GAGGATCAGGCCCGCAGCAGCGCTGCTCCCAGCAACCAGAGCTGCGAATGGCTCTGGTTGGGCAGTGCC  
AGTGGCGCGCCGATCGTCCCCTTGCCCTGCCACGCTGTTTCGCCGCTGGTGAGCAGCAGGCCGAGGGATT  
GGCCGCGCAGATCCGGCGCATCCCCCTGCCAACCATCGCTCACCGGCACCCGGGCGATCAGGGTGTGGCC  
CTCGACCTCAAGCGCCGGTTTTGCCAACTCGGCCCCCTCCAGAGCGTCGATAAAGAGCGCTGGTGATTGC  
CAGCCCTCTGCCGCTCGGCGCGCAGTTGCAGCTGGTTGTGCTGATAACCCAGCTCGACCCGGTTTTCGG  
CAGGCAATTGCTGGGGCAGGGTACTCATCGCTTTCGCCAGGCAAAATCGAAGTCGGCCGGGGCCCTGCC  
ATCCACCGCGAGGGTGAAGGGAAAGTCGGTCAGGATGCAGACATTGCTACAGGTGGAGAGGCGCAGAGTC  
CCCTTGAGCGGTTGCCCGCGGGGTAGTTGAGGCTAAGGGGGAAGTACAGTCCCCCTGATAACCTGGG  
TGCTGAGCCCGGCTACCTCGAAGTGGCGTGGCACCCGGCCAGCGCCACTGAAAGTCACCGACCGGCTCGTC  
CCACAGGATCTGGGGGGCAATGCCCCCTTCGCCCGGGCTGTGCCAGTAGGTTTTCCAGCCTGACTCCAGC  
TCGACATCGAGCAGGATGCGGGTCTGATCTGCCGTGCTGCGGTGCGCCTGCAGCCGTACCCGGGCGTGAT  
CATTCTGTGGGCTGGTGAGCCAGCCCGTGTGCTGGCCAATCCCATGGATTGCCACAGCAGACCCGCCAG  
TAGCAGGGCCGCCTTGAAGAGATTCGACATCTTTTTGGTCTCGCAAAAATGAGTGACAGCTAACGAAAG  
AACGCTGCCGAATCATTCCCGCCAGACGCAGAGGGTGAGGTGCAGACGCCGCTCGGGCGCGAGATGAC  
TCTGGGAGGGGGCAGTGGCGGTGTGTAGCGCAAAGGGGGGCCAGCAGGGCGATCAGCACGGCCACGGCA  
AAGAATAGCTGTTCCGACGACAGCAGGGTGGCGCGCTTAGCCACTTGCCGTTGAGCTGGCAGCTGGTGG  
GTTGCGGGCTGGCCGGTTTTGGCATCTCTTGATCCGTTGCCGAGCCTGGAACGGGCGAGTGCCTGACAGCT  
GAGGGCGTGATCGAGCAGGGCAAGCCGGGCCAGCGGCTGGGCCGCACAATTGAGCACCAGCAGGCAGACC  
AGCAGCAGGAGATGTTTTGCTACCCGTTGTTGCAACATCATGTTTCGCCCCGTCCATCAAGATGGGGCCAT  
CCTAACGACCAATGGCGGGTGGGGCAAGTCGGCGGCGTATTGATGAGCAGTACTGTGGGTGGCGCAACGG  
GGAGGGTGGTTCGTTTCTGTTTGGCGAACGCTTGTTCGCTAAAAAGGGGGATCAGTATACTGCGCCGAGTTA  
AAACTCGAGGTGTTTCGATGCTCAAAATTGCCCGTGTGCTGCTGCTTGGTCTGCTGCTCATTTTTCTGGTTC  
CTGTTTCGGCCTGCTGCTCTGTCTGGTTTCGTCCGCGCCATCCCAACAACGCTCTATGTCTTCGCCCGCATGT  
ATCACGCGGTCTGCCCGCTGATCGGACTGCGAGTCAAGGTGGCGGTGGCCGACGAGGTCAAATCGGTCGG  
CCCGGGCTTACGCTCTGCAACCACAGAGCAACTTCGACATCTTCACCGTGACCGGTGCGGTGCAGCCC  
GGTGTGGTGGCGGTGGGCAAGAAGAGCCTGCTCTGGCTGCCGCTGTTTCGGCCTTATCTTCTGGCTCTCCG  
GCAACGTGCTGATCGACCGCTCCAACCGCTCCCGTGCCATCGGCACCATAGGTGAGGTGGTGGATCGCAT  
CAAGAACC GCGGCACCTCCATCTGGATGTTCCCGGAAGGGACCCGCTCCCAGGGGGCTGGCCTGCTGCCG  
TTCAAGGGCGGGCGCTTTCCACACTGCGGTACAGGCTGAAGTCCCCGTGGTACCCATCGTCTGCTCCAGCT  
ACTTCGGTCAGGTGACCTCAATCGCTGGGACAACGGCGAAGTGCTGGTGGAAGTGATGGCGCCGGTCTG  
CAGCAAGGAGCATGGTGCCAGCGGCATTCGCGATCTCTCCGACACCTGCCGCGCCCGATGGAGGCCAAG  
CTGGCCGAAGTGGACAGCAAGCTGGGCCACAGCCACGCCGCTGACGGATAGCGCAGACGAATCGACAAG  
GGAGCCAGAGGCTCCCTTTTTTGTGGTAAAAATCACCACTGGTTGGCTATTCTCACCAACAATCCCTT  
CTTGAATTTCTCAGTAAATTTCCATCTATATGTAAAAACAATAATTTTTCTTGGCAGCGCTCTTGT  
ATGCAATGGGAAGAGATAGCCATCCCATCAACAAGGAGCCAGACCATGAGCGTATTTCAGCCGCTGACCG  
ACGTGATAAATGCCAACCTGCACAGCCTGCTCGACAAGAGTGAAGAGCCGGAGAAGATGCTGCGCCTGAT  
GATCGAAGAGATGGAGCTGGTGAGGTCAGATGCGTACCCAGGCCCGCCGCTGATTGCCGAACAGAAA  
CAGCTGGAGCGTACCAGCAGGGGTTGCAGGCGCAGATCCTGGAGTGGTTCGGCCAAGGCCGAGCTCGCCA  
TCCAGAAGGGACGTGAGGATCTGGCCCGCGCCCTCACCGAGAAGCTGGCGGAGGTCAAAAAATGTGA  
ACAGCTGGAGCAGGACAAGGCCCGGGTCCCGAGGTGCTGGCCAGCTTACCGCCGATAGCGAACGGCTG  
GCTGCCAAGCTGACCGAGGCGCGGAGAAAGCAGAACTGCTGACTCTGCGCGAGCAGACTGCCACAGCC  
GCATTCGTGCCCGCGCCAGGTGGACAACCAGCGCATGCATGAGCTGATGGCGGTTTTTACGGTTTTTCA  
GGGCCGGGTGCATCAGCTGGAAGCCCAGTTGGAGGCGGCCACCTTGGGGCAGAAATCCCTCGCTGGAGGCC  
CAGTTCCGCGAGCTGGAGCTCAATGACGAGATCGAGCGGAGCTGGCTCGCCTCAAAGGCCAGAAGGCCG  
AGGTGTAATCATGAGCCCTGGCCCAAGGATCTGGCGCATCGCAAGCTGACCGGGGTCTGCGCCGGTATT  
GCCAGGCGGTTGGGGGTCTCCAGAGTCACGGTTCGGGTGGTGGCACTGCTCGCCCTGATCCTGATGCCGC  
CGCTGGCACTGGCCGCTATCTGCTGGCGGTGCTGGTGATGCCGCCCCGTATGAAATTGAAGTGTGGCT  
GGATTGACCGAAGGGTTGATCAGCCGGCAGAGAAGGTAAGTATAAGGAGCAAGTTATGCTGGAATTTTTT  
ATATTGCTGGTGGTGTGCTGGTCATGGCTCTGACCGGTTTTACCTGGTAGCCATGTTGCTGGTGAGCG

GCCTGTTTCGTGCTGCTTGGGGCGCTGGGTGGCATGCTTGCTTTGATCATCAAGCTGGCTCCCTGGTTGCT  
GCTGGTGTGCTGGCGGTTTGGCTGGCTGATCAGCAACCGCAGCAAGCGTTCCAATACTTACCTCTAACCCGCC  
TGAGGTTGTGCAAGACGTTGTGTGATGCTCCCTGATTTCCCTTTCCGGCCACTCATAGAGTGGCCTTTT  
TTTGCTGTGCTCCTCAAGGCTGGGTGGCTGCGGGTAACCACTGGTGGCTCCAGTTCTGCCAGAGTACCG  
GGCTGTGGATCAGCTGCTCCTTGAAGGATTTCCGGCTGCTGCTTGAGGCGATATTCGATGCGCAGGGCCGC  
CCCCTTCTCGCCGACTTCTGTGGCCACGCGAGCGTCAGTGGCCCCTTGCCGCGTAGGGGCGGAGCGCCC  
TTGCCACTCTGGTGTGGCGCAGGCGGCGCAGCGGATCCGTGCTGATCCCGGTATAGAGCAGGCCGGTGG  
CGGTACGCACCATGTAGACAGACCAGCGGGAAGGGGCGGATGGTTGCGGCGCTGGAGTGGTGGTTCGCGGG  
TTCTCTCATTCAAATTCTCTGTGCCAAACTCAGAGGCAGCTCAAGGAGGTGCGATGAGAGTCTGGTTTTG  
GTTGTGTTACTGTTGTGCGTCCCAGCCCTGGGGGAGACGATCCGTCTCTACGATTACCATCAGCATCCG  
CCCTTCAAACCCGGAGTGGATGAAGGGCTGAGCCCCGAGCTGGTCAAGTATCTCAATGAAAAGCTGGGG  
GGTGAACCCAGAATCGAGCTTTGGCTGGTCAATCCGCGCCCGGCTGGCGCTGGAGATGGCTGATCCCGACT  
TTGACGGTCTGGTGGTCTGGGTCAATCCCGCTGGGTGGGGGATCCCCATCGCGAGCGCTATCTCTGGAC  
TTTTCCCGGTGATGCGCGACACCAACGAGCTGGTCTCGAACATTGACAAACCCGGTCACCTATCGCGGGCCA  
GACTCCCTCAAGGGGTTGGTGTGGCGGGGTGGAGGGCTACCGCTATCAGGGGATCGATGATGCCGCTG  
CAAGGGGAGAGCTGGTGCCTCAGGATGCCAAGAAGGTGAAGACCAATCTTGATCTGCTGGTGCGCCGCCG  
CATCGATGTGACGCTGGTCAGTGGTTCATCGCTGGGCTTTTTTCATCGACGCACAGCACTATCAGGGCAAG  
CTGTTTTATCTCGCCCTTCCCCAATCCAGCTATAACCGCCATATCTGCTACCCAAGTCTCGCCCCGAGC  
TACATGCCACCCTCAACGACATCGCCGAGCAGATGGACCGGGATCCCCGTGGCACAAGGTGCTGGAGTC  
CTATCGCGGTACGCCCTGAGGGCGGCGCTTGAGCCGATGCAGTGGCAACAGGCTCACCAGCAGACCTGCC  
CAGACAAAGGCGAAACCGACTGCCTTGATGGGGTCCGGCGCCTCACCAAACAGTAGATGGCGAGCAGGA  
AGGCGAGGCTGGGCTCGATATATTGCAGCAGCCCCACCGTGTCTATCCGGGTTCTCGCCACCGCATAGCA  
GAACAGCCCCACCGGCAGCAGAGTAGCGGGCGCACTGCCCATCAGCAGCAGCTTGTGAGCCAGATCTCCG  
TTCACGAATGCCCTTCCCCGTGCCATGCCAGCGTGCCGATGATGATCAGCGCGACGGGCAGTTGCACCA  
TGGCTTCCAGATAGAGGCTGGTGCCTGTCGTAGTGGATTTTCTTCTTGATAAGGCCATAGCAGGGCAA  
GTTGGCCCCCATGATGAGGGAGAACCAGGGGAGCTGGCCGTAGCAGAAGAGCATGTAGGCGAGACCCGCC  
AGCGCCAGGGCGACCCGACAGATGCTTTTTGCGGGGTGAGCCGCTCTTTTAGGAAGATGACGGCGAATACGA  
TATTGAACAGTGGGTCATAAAGAAGGCGAGGCTGGTGGTCAGCACTTGCCCCGTAGTGAGGCCACCAAGT  
GAACATGCACCAGTGTGACATGACGGGGCCCGCCAGCAGAATGAGGCCGAGCTGGCGCGGCTCGCTG  
CGCAGTTGTGCCAGGGTACCTTGTGGCCAAGCAGCAAAAACAGGGCCCCAGCAGCACACAGACCAGA  
GCACCCGGTGGGAGATCAGCTCCCACATGTTGACCTCGGGCATGAATTGATAATAGAGCGGCAGCATCCC  
CCACAGGATGAAGGAGAGGGTTCGCGGTGCCGGTACCTAGCCAGTTTTTTCATTATTATCCGTTTTATTAAT  
TAAACATCCATGGCGATAGTAGGGGGCGGCCCTGTTTCCACAAGAGGGAAAACAAGGAAATGCTGGTAC  
TATCAACGTCATGCAGCGAATCGATAAGTGTGTTGGGCAAATCAGGGCCTGCCGCTCTGTGCGAGGCTCAT  
CTGCCGCTGGGGCCTCGTCCGGTATCCGCGGGGCCGAGAGTGGCCGCTTGTGATCATCGGTCAGGCGC  
CCGGCACCCGGGTGCATGCCAGCGGTATCCCGTGGGATGACCCCTCCGGTGACCGGCTGCGTCAGTGGCT  
CGGGGTCGATAAGGCCACCTTTTACGACGAATCCCGCATCGCCATCATGCCGATGGGCTCTGCTATCCC  
GGCAGGGGAAAATCCGGCGATCTGCCGCCGCGCCAGAATGTGCGGCCACCTGGCAGCACAAGGTGCTGA  
TGCTGCTGCCAATATCGAGCTGACCCTGCTGATCGGCCAATATTCACAAGCCTACTATCTGCGGGGGGC  
AGCCAAGGGATCGCTCACCGAGACGGTGCAGCAGCTGGGCCGACTATGGCCCCGGCTGGTTGCCGTTGCCG  
CATCCCTCCCCGCGCAATACTCTCTGGCTCAGGAAGAATCCCTGGTTTCGAAGATGAGATCGTCCCCATC  
TACAGCAAAGGGTGCCTCCGCTTCTGGGGAGACCCTGAGTATTAGAGCGCTGGCTCGGCCAGCGGTTTGG  
GTTTGTGTCGGACCATGGCGATGAGCGGCAGGACGATGCAGATACAGCCCAGCAGCAGCGGCAGACCAGG  
CTGCTCGTCAAACAGCCACACCCCGATGGCCACCGCCATCAGCAGACCGGTGTACTCCGCCGAGGCGATC  
TTGCTCGCCTCCGCTTGCATAAGCCACCACGCAAAATCCCGCATAGACCATGATCAGCAGCCGAGGAGC  
CGAAAGCGGGCCACCACATCTGCCACTGCCAGTCCGCCCTTCCCATATGCCAGCGCCAGAATGAATGG  
CATGCTCAGCACGTTGGTGA AAAACAGGGTCTGGGCGATGGGCTGATTGAGCGGGATCCGCTTGATCAGC  
AGGTTGTTGAGCGCCATCGACAGCGCCACCCCGAGCGCCGCGCAGTGC GGCCAGTTCACTTCGGTTGGGC  
GCAGCACGATCAAAAACCCGATAAAATCCGATGACTGCGGTGAGCACCTTCTGGCGCGAGATCGCCTCTCC  
TGCCATCCACACTGCCAGCGCACCATCATCAGGGGAGCTGCATAGAAAAGGGCATTTGGCAGTGGCGAGC  
GGCAAGCGGGTGAGGGCCACCACCATCAGGCAGACGCCGACCCCAAATATGGGCCCGCAGCAGGTGCC  
ACTTGATGGCCACCGGTGGGTTGCGGCGCCATGACCAGAGCAGCCAGGGCATCAGCAGAATGGCGGCCGA  
GAGCTGGCGGAAAAGACAAACTGGAAGATGGGCTGATCCGGCTCCAGCACCTTGACCAGCGCATCGGAA  
AAAACCGCCACCATATTGCCAGCACCAGATAAAGGATGCCGATCCCTACTGCATTCATAACCACCTCCCA  
CTTCAGATGGGCGGAGGGTAGCGTGCCGGTTGATATCCAGTAAAATGATAAAAAATGACCACCTCATGAGA  
TATTTAGATAATGAAGCTTCTCTCTGCGTGCGGTGCAATATTTTCGAGGTGGTGGCCCCGGTGTCTCAGC  
TTCTCCCGCGCCGCTCTGGAACGTCAGCCAGAGTGC GGTCAGCCACCAGATCCGTCTGCTGGAGG  
ATTTTCTGGGTGAGCGCTTGTGCTGCGTCAAGGGCGGTTGCTCTCGTTGACACCCAGGGGGAGAGTTA  
TTTCGAGGGAATTGCTGCTGGGCTCAGCCAGATTTGCCAGAGCAGCGAACAGCTGCGTGGTGGTGGCGAG  
ATGCGAGTCCGGCTCGCGGTCTACAGCTCGTTGCGGTGAAATGGCTGATCCCGCGGTTGGCCGGATTGC  
GCCAACTCTACCCCGAGCTGGATTTGAGTCTGGAGATGGTGGCGGAAGACCCCGAGCTCTCCGATCCGGT

GGCGGACTGCTTTATCACAGTCTCACCCACGGGCGGGGCTACTGCCACGACCTTATCTATCAGGAGCGG  
CTCTTTCCGGTCTGCAGTCGCCGCCTGTTGCAGCAGATCAGCGGGGAGTGGCCTGAGGCCATCTGGCAGC  
TGCCGCTGCTTTCCGGTGCAGTCCATCTACAAGGTGCGGGGGAGGATTGGCAGCGCTGGGCCAAGGCGGG  
TGGGCTGGTGATTCCGGACGAGGCGCGGATGCACCACTTCAGCCATGTGCTGTTGGCGATGGAGGCGGCA  
GCCTGGGATCAGGGGGTGGCATTTCGTGAATGATTACATGCTGCGGCCCGATGATCCCCAGCTGGTGGCCT  
TGCCGGTACACCAGCTGGAGACGGGGGATGCCTTCTACTTCACCTGCAAGCGCTCGCGGGCTCATGAGCC  
TGCCATCAGCCGGTTGCGCCAGTGGCTGATGATGGAGACACGCCAGAGCATGCCGCTCTAGCCTGCACCG  
TTACGCTCTCTTGAACCTGGCTCAGCACAAACAGGCTGGTGGCACAGACGACGACCGAAGGCCAGCCGGG  
GTGTCTTGATAACCAGGAGAGGGTCAATCCACCAGCACGGCGAGACAGCCGATCAGCGCGGCAAAGCCCC  
CCATCTGCTCCGGCTCTGGCTGAAACGGCGGGCGGTGGCGGGGGATGATCAGCAGGAGGTGATGAT  
CAGTGCCTCCGACAAACTTCATCGCCACGGCAATCACCAGCCGATGAGCAGCATCAATACGCAGCGCAGC  
AAATCGACCCGGATCCCCTCTACCCGTGCCAGCTCTTCCGAGATGGTTCATGGAGAGCAGGGGATCCCACA  
GTCGCCACAGGGTGAGCAGTACTAGCGCGCCACCGCCGTAGATCCAGAGCAGATCCATCGGTTGTACCGA  
GAGCAGGTGCGCCGAACAGGTAGGCCATCAGATCCACCCGCACGTTATCCATAAAAACCTCAAGGTAACCAGA  
CCGAGGGACAGGGCACTGTGGGCCAGAATGCCGAGCAGGGTATCGGTTGGCCACCTGCTGGTTGCGACTCA  
TGATCACCAGCAGCATCGCCATGGCGAGGCAGCAGACCACCACCAGGGTGAGATCGACCTGCAGCAG  
GATGCCAGCGCGATGCCGAACAGGCAGGCATGGGAGAGGGTGTGCGCAAAAATAGGCCATCTTGCGCCAT  
ACCACGAAGCTACCGAGGGGACCGGCCAGCAGGGCGATGCCGAGACCGGCCGCGAGGGCGTATAACAGAA  
AGCTGTCCACTTGAATGTCTGTTGCTTGCCTATTTGCTGTGAGCGTTGTTGCGAGAGGGCAGGCGGAT  
GACGGGAGCCTGCGGTTTCATGATGATGGTGTTCGCCGTCGAGTGGTGTGATGGTGGGTATAGACCGCCAGC  
ACCTCCTGCTCCGGTGCAGCCGAACAGGCGGGCAAATTCGGGGTGGCGCGCCACGCTTTCGGCTCGCCAT  
GACAGCAGACGTGGCGATTGAGGCAGATCACCTCGTGGGTGCTGGCCATCACCAGATGCAGGTCTGTTGGGA  
TACCATCAGCACGGCGCAATTGAACTCGGCGGGGAGCTGACCGATGAGGGCGTAGAGCTCGATCTGGCCA  
GTGATGTCCACGCCTTGAACCGGCTCGTCCAGTACCAGCAGCTCGGGTTTGACCAGCAGGGCGCGAGCCA  
GCAGCACCCGCTGCATCTCACCGCCGAGAGTTTTTGCATCCGGTTTTCCAGCAATCCCTCTGCGCCAC  
CCGGGCCAGAGCTTCTCGATGGAGAGGGCGCTATTTTTGCCAGTTGCAGGAAGCGACGCCACCGTCCAGC  
GGCAAGGTGGGATCCAGATAGAGGGCGCTGCGGTACATAGCCGACTCTCAGATCGCGGCTGCGGGTGATCT  
TGCCTGAATCCGGCTGAGCAGGCCAGCAGCTGTGCTCAGGGTGTCTTGGCAGCCCCGTTGGGGCC  
GACGAGCGTGGTGTATTTGCCTTTATTGAGGGTAAAGGAGACCTTGTGCGAGCACAGAGCTCCATCAAAC  
GAGAGAGAGACCTCTTTCAGCTCTACCAGTTGGCTCATGACAACCTCCGGGGTTTACAGCCAGTGAGAGTT  
ATAATATAACAAAAGCGGCTGTTATATATACATACTCACCCCTGACGAGATTACCAATGAGAATT  
ATTGCGCTTTTCACTGCCCTGCTGGCGGTGAGTTTGCTGTTTCGTGCCATTGAGGTACTGACCACCATCA  
AGCCCTTGGCTTCATCGCTGCGGCGATCACTGACGGCGTGAGTGAGCCCAAGGTATTGTTGCCGACCGG  
CGCCTCTCCCCACGATTTCTCCCTGCGCCCGTCCGATATTCGCAGCATCAACAGTGTGGGCTGGTGGTG  
TGGGTTGGCCCCGAGCTGGAAGGGTTTATGGCCAAGCCGCTGGCCAATCATCCCCATGCTTTGGCCCTGA  
CTCAGGTTGAGGGAATGCCGCTGTTCAACTACCGGACTCAGGATAGTCATGACTCCCATGACCATGATGA  
TCACGATCATGCCGCCACGAGCACGGTAACCATGATCATGATGAAGGGCATGAGGGACATCATCAGAA  
GGGGTCGATCCCCATATCTGGCTTGGTCCGACGCAGGCCAAAGTGATTGCCAAGGCGATCGCAAGTGAAT  
TGGGCAAGCTGGATCCGGCCAATCAGGCTCGCTATGACGCCAACCTCGCGGCATTTGATACCAAGGTGGA  
TGCCAAAGACAAGGTGATTGCTGGTCAGATGAAGGCGGTGAATGAGAAGGGGTACTTTGTCTTCCACGAG  
GCGTATGGTTACTGGGAGCGCCACTACGGCATGAGTTCAAAGGTCACTTTACCGTGAGCCCTGAGCGTC  
GCCCGGGCGCCAAGACCCTGGTGGATATTCGCAAGGCACTGGAAGAGAAGCAGGGCGAGTTGCATTTATGC  
CGAGCCGCAATTCTCACCGGCTGTGATCGAATCGGTGGCACGCAATACCGGCGCCAAGGTGCTGTTGCTT  
GATGAGGTGGGTGAACAGGTACCGCTCGGCCCGGATGGTTATCCCCAATTCATGCAGCAACTGGCAGACG  
CATTTGCCCAATGTGCTGATCAGCGGGCTGAGTCTCTCATCCGGAGGGGCTATACTGACCTCCAGCATCT  
GACATGGAGTGTCCGGTATGAAATGGTTGTTGATCCCGGCTGTACTCTGGCGCTATGTTGCGCCAGCGT  
GCAGGCTTCGCGTCTTTCCGAATATATTGCCAGTCCGGATCTGCGGGCCAAGCTGCAGGAAGTGTATGGT  
GGCCGCGCCATTACAGCGGGCCGAGGCATTTTCTCGCCTGCTCACCCCCAGAGCGGGTACAACCGACCAGC  
AGAAGATCGAGCTGGTGAACAACACTACTTCAACAGTCTGACCTATAGCGAAGATCCCAAGCTGTGGGGAGA  
TGAGGATTACTGGGCCAATCCGCTGGAGTTCATCGGCGCCCGGGTGGGGATTGCGAGGATTACAGCATC  
TCCAAGTACTACACCCTGATGGAGCTGGGGTGGATGAGAAGAAGCTGCGACTGGCCTACGTCAAGGCGG  
TGCGTTACAACCAGTTCACATGGTGACGCTCTACTTCCGACACCCAAGGCTGACCCACTGGTGTCTCGA  
CAACATCAACAGCCGGATCCTGCCGGCAGCAAGCGTACCATCTCATTTCCGTTTACAGTTTTCGATGCC  
AAAAGCATCTGGATCATGAAGTCACGGCGGGAAGGGACGCTGGCGGGGAGTGGCGATCGGTTGGCGCAGT  
GGACATCGATGAAGACCCGTTTCTCCAGCGAGCAACTGCGCTCTCCCCGTCGTCAGTTATAGCTTGGCCG  
CCGCTTTCAGCTCCTCGAAATATTTAGCTGCGCCCGGATGCTGCTCAATACTCAGCACCGGGCCGGTTTT  
ATTGCGTGCCCGGTGAAACATATTTGGCGTAGCCATAAGTCTGCTCATTTGAACCTGGTCTGCTGGGTGAGC  
ATGGCCTTGGTACAGACGATAGACAGACTCTTCCGGCATGGTGGCATTGGTGACCAGGGTGGCGGCAATGG  
CAAAGGTGGGGTGCCTTCAGATTGCCGGGGTAGATGCGGGCGGGCACCTGACTACGTTGGTAATATTT  
GACCCCTTGGTGTAGCTGATCACGGGTGGCCCCATCGATGGGGAGGAAGCTGACTGCGCAACGTTTGGCG  
GTGTGAGCACAAATCCGGTTAGGGTGTCCATCACCAAGTGCAAATGCGTGCATCTGCTTGTGTCAGAGCG

CATCCGGCAGGTTGGCCATGCTTTTCAGATCGAGATCCTGCTCTTTCGCTCCCAAGATGTTGAACAGGGT  
CAGCGCCGTCTGGCGGGTTCAGGATTTCAACCCCATGTCGATGGGGGCGAGCTTGAGCTGTTCCAGT  
GAAGTGATATCGCCATCGGCACGGATCACTATGGTGAAGGGCTCGGCATGGGTGGCAAACAGGGCGCGCA  
GCTCAGGTTGCGGCTGGGTGGTAAAAGGGCCCAAGCCCTGGCTTGCTTGATAACAGCCAGTCTGACTGCAC  
CATGGCGTAGGAGGTCTCGCCACTCTTCAGCCGATTTCAGGTTTTCTATTGAACCCGATGAGCTCTGTAAT  
GTGCACGCAAGTTGCTCATCGACCTCATGGGCCAGACGGCAAAACTCTTTGGTTATCTGGTGATAAATCC  
CCTGCTCACCCCGGTGGTGATAGTGACGGTTTCAGCCATCAGGCCGGGTGGCCACAGCAGGGGCAACAG  
CATGGCGAGCTTCTTCATGATTGCGCCTCCTTGGCATAACCATCGATACCCAGGTCCGCAGTTTGTCTGA  
TGTCGCGACACTCTCCCGATTCTGCCAGCAGGGTATAACCCGGCGGCATGCATGGTTTGGGAGAGCAGATT  
CCAGTAGAGCCGGCGCATCGGTGAGCTGACAGCTGATAAAAAATGGGATTGAGCGGGTCAAGTTGATTGAAG  
GTATCCGCATTGAGGGGAATGGCGCTGAAGGCGAGCTCACACCCCTGTTTCTGCAACGCAGCCAATGTGG  
CTTGGCCGTGGGCGGAAAGGTGACCACATCCAGCCCAATCCAGTGTTTTGGCCGCGCCCTGGCTTAG  
CAGGGGGGCGATCTCGGACCATTGCGGGTATTGAGCAGGGAGAGGGGCGAGCAAGACCCCTTCTATATGA  
GAGTGCTGCCACTGTTGACGGGCGCTCTGGATGGTCGCGAGATCGCTGTCGGCTCCGAGGGGCTGGTTGG  
GCAAGAAACGCTGATAGAGCGCGATCTCCCTTGTGTGGAGACAAAATTTTGCAGTTGCCCGCCTCCGG  
CAGCGGGCTCACTCCTTGCAGCGGCTGTGGGGCGTCAGTGGCAGCTGTTTTCCAGCTGGGTGATCTTG  
AGTCGTTGTTGACGAGATCCCGTTTGCCTTCGAAACCAATTTGGTTGATGGAAAGTGCCACTTCTTTGA  
GGTCTTGAACACAGGGAGTGGGCAGGGTGTGTTGAACTGGTGTTCGGGAGACAGATCAGCTGCAGGTT  
GATCTGCTCCAGGGGCTGCAGCAGGCGTTGGCACACCAGGGAGATGATCAGGGTAAATACGACGAGGCC  
GCCAGCAGCGCCAGACCGGTGCGACTGATGGCATTCCACAGATGCTGATAGGCGTAGCCGCTATGCCCT  
CAAGGGTCAGAGTGCCAGCATGCGCCAGCCATCGGTCAACTCTTGCTCAATTTTACGGGGGGCATGCC  
GATAACCGAGGGAAGCCAGCCGGGGACATTTTTGCTGGGTAGAGTGGAAAGACCTTCTGAAACAGCAACTGG  
CCATCAGGATCGATCAGGGTGACCGAGCTGACGAAGCCGCCATCGAACATGGCATTGACGATGGTCTCGG  
CCAGCACATTGTCGTCATTAAGCAGGGTTCCCTTGCAGCACCAGCCCAGAGCGGTGATGGCGGTTTCCAG  
GTTGGCTGACATCTGGTCGAGGATGGATTGGCGGACCGTCGTGACTCCAGTGCAAACAGCAGCGCTGCA  
CCGATCAGGAACAGGACGACAATTATTCTGATTAACAGTTTTGTACGACATATCCACTCCATGGAAAA  
GTTATCGCAACATTTTCAGGTTTCTATTTCAGTAGCGAATCCGACCCGGTTCTTAAAAATAGGAAAAATGG  
TTAAACAAAGACGATCATTTCTGCCATCCGGCGGGTATGCATAAAAATGTGAGGTTTCATGCAGATTGTG  
ATGAAACTATTTGTAACATTTGTGTCCAACAAACAGTTTATACGTTTGTGTCACAACGACATCGCAAC  
TCACACTCTTTAGATCTAAATACAGGATAGCGGATGAAACGTTCTCCGTCCCTTGGTAGTAGCAGGCTGCCA  
ATTGGGAACACCGGTTCCCGCAAACACTTTTACGCCATGCTGATGCTGACGGCCATGACCCTGTCAGC  
AGTGGCATTATTGCCAGCTCCGGGTGACATCCTCGAGCGGCCGCTGCGTCTTGAGTTGCCCATTGATAACC  
GCAGGTACGGCAACCAACGAAAACAACACCGACTTTAACGAAATTTCCCGATCACGAACTGGTTGATCAGA  
GTGCGCCGGATGACGACATCCCGGTGACACCACCCCCAGTGGCAGGATTACCGGGTCCGCAACGGCGA  
AAACCTGACCGCCATTTTTAACAATCTCGGTCTCTCCACCACCACCTCTACAAGGTGCTGGACGCGGAC  
AACAAGAACTATCTGGCGCGCTCAAGCCGGGCCAGAATATCGAGCTGCTGATCGATCAGGACAACATCC  
TGCAGCAACTCAAATTCGCTGAACATCAAGCAGACGCTGGTGTGATGGCAGCAGCGACGATGCCTATAC  
CGCTCCATGATCAATGAGAAGGTGAGTGGCAACCCGACGCTTACAACGGCGTGATCAACGGCAGCTTC  
TATGTGAGTGGCCGAATGCGGGGATTCCGGCCAACCATATCCAGAAAATTTGCCAACCTGTTCCAGTGGC  
GAATGAATTTTCGCAAGGATCTGCAGAAGGGCGACAAGTTCAAAGTGTGGTACGCCAGGAGACGGTGGGA  
AGGCAAGAGCACTGGCAACAGCCAGTTGCTGGGTGTGGAAGTGACCAGCCAGGGCAAGACGGTGTCCGGCC  
TGGCTCTCCGATGACGGCAACTATTACGACGGTCAGGGCAACAGTCTGGAGCGCGGATTCGCGCGCTACC  
CGACCCACAGCCGCTATCGGATCAGCTCCAATTTCAACCCGGCCGCAAACATCCGGTAACCGGTATGGT  
GCGTCTCACGAGGGCACCGACTTCGCGGTACCGGTGGGCACGCCAGTGTGGCAGCCGGGATGGTGTCT  
GTCCAGAAGGCAACAGCCACCCGCTGGCGGGTACCTATATCGTCATCAAGCATGGCCGTACTCTCTCTA  
CCCGTTATCTGCACCTGAGCAAGCTGCTGGTCAAAACCGGTGAGCGAGTGAAGATGGGCGACAAGATCGG  
CCTCTCCGGCAACACAGGTCGCTCGACCGGTGCTCACCTGCACTACGAGCTGCGGATCAACAACCGCCCG  
GTCAATGCCATGACCGCAAGCTGCCGATGGCTGAACCCCTGAGCGGCAAGGAGCGTCTGTCAGTTCTTTG  
CCAAGGTGAAGAGCTACCGCAAGGAGCTGGCTGCGGGTTGATACCTGTTGTACAGCCTGAAATGAAAGG  
CCCCGCCAGATTGGCGGGCCTTTTTACATGCGCCGTGAGGGTCAATAACCCCTTGTGCAAGTTCGATCTTG  
CCATCCAGTGGCTGGCCATCGATAAAGCGGATGTAGTTGCGCACAAAGATCTGGGCCACATCATCCGGGA  
AGCTGTAGGCGCTGTTGTGGGGGTGACGATGAGGTTGGGTTGGCCCCACAATGGACTGTCCGGCGGGCAG  
CGGCTCCTGCTCGAACACATCCAGCACTGCCATCGCCAGCTTGGCCGTACGCAGTGCAGTGGGAGCAGATCG  
CCAGAGTGCACGGCGCTGCCACGACCGACGTTGAACAGGATGGCGCCCGTTTGCAGTGTTCGAAGCGGG  
CGGCATTGAACAGATGACGGGTATCGCGGGTGGCTGGCAGCACGCTGACGATGACATCGGCCTGCGCCAG  
CATCTTGTGAGCGCAGGCAGTTGATAAACCCTGATCAAACCCGGCCCGCTCCCGACCGCTGCGGCTGATA  
CCCAGCACCTTCATGCCAAAATGTTTGGCCGTGTGGGCGATATGCTGGCCAAATGCTGCCGGTCCCCAGGA  
TTAGCATGGTGCAGCCCTTGGAGCCCTGATAGGGGTGGCTTTGCCACAGTCGCTGTTTCTGCTGCTCCCG  
ATAAAGGGGGATTGGCGCATCAGGCTGAGCAGATGACCAAGACATACTCGCTCATCAGCGGGCCGAAG  
ATGCCGCGCACATTGGTGAGCTGATAATCACGGCGACTGTCAGGGTCGAGCAGCACATCGACTCCCGCAT  
AGGTGGACTGGAACAGCTCAGCTTGTGGCTTTGGGCAGCAGCGGTTGGCACGGGCCGGTTCCGGCCAT

CAGAATATGGGCTTCGCCGATCAGCCTCTCGGCATCGCTCTGGTTATCGGCTCGCAGAATGCGCAGATGG  
GGGAGATTGGCGGCCTTGAGCAGCCGTTTCGTAGTGAGCATTATCCTGGCTGAGCAAAAAGAAGGGTACGTT  
GGCTCATACTCTTGTTCCTTATCAGAATTTGCGGCGCAACAAGATGCCGCTCTCGACCCATCTTACCTGA  
CTTCATATCGCAACATAGCCGACCAGGGCGCTTTTTTCGTTTTTCGCCGCGCGCTCGTGGGCTACAATCTG  
CCCCACATTTTGC AAAGGATCCGACTCCAGTGT TTTGGTGACAAGTTTTATAAGCGACTGGCCGAGCTACA  
GCCTTGGAACAGACCGTCTACACCCTGGCGCTGGCAGAGCGCATGTACCCCAACTATGCCCTGTTCTGT  
CAGGCCTCCGGCTTTGGCAATGCTGGCGCTTTCCGGCATGCGCTGGATCAGATGTGGGTCTACCTCACC  
TCAAGGGATCCCGGGTCAATCTGGGTGCCATCTCGAAGAGTTCGAGTCTCACATTCGGATCCCCGCAA  
GTTTGAATCCTACGGTGCCTATCCCGCGCTGGATGCCTGTGTTGCGCTGGGCTGCGCCTATAACTCGGTG  
ATCTGCCGGGTTGGTGAAGAGGGCCAACGATGCCAGCCATGCGTCAGTCGGTACTGTGGCCGGTTTTATCG  
AGCTGCTGGAAGAGCGGGATCTGACCGAAGAGGAGCTCTACGAGCACGAGTACATGGAAGCCGAGCTGGA  
GTTCCAGGTCGAGCTGCTCAAGCGGGTTGCCATGAGCGCGACAGCGATCGTATTTCTGGCCATCAGAGTA  
TTCGCCTCTCAGGATGGCGTCTCCAATATCGGGATCAGCCTGGAAGAGTAATTTCTGCGGCCCTGATC  
GAAAAAAGCTCCCGTTCCGGGAGCTTTTTTTTATGCCTGAAAATTGTTTCAGCAGCTTATGCCTGCTCTTCGGT  
GAGGGGTCTGACGCTCAGCACCGGGGCTGCGTCGATTTTCGCTGCATTCATCATGGCGGAGATGCGTTGC  
AGGGAGGAGAGCAGCAGGGTCTGCTCCAGGTTTTCAAGGGATTGAAAGCGTTGGATAAAGCGCTCTTGTA  
GCGGGGTGCGGGCCTGAGCCAGCAGGGCACGGCTGCATCAGTCAGTGTGCGGTGAACCTTGCCTTGTG  
GGTATTGCTGCGAACGCGCTGCACCAGTTGGCGGCTCTCCAATCGGTCCATGATAGTGGTGGCGGTGGCC  
TGGCTCATGTTGGTGTGATCGGCCAGCTGGCGCATGGAGATCTGTCCCAACTCGTCGATCCCTTTGAGCA  
GCAAGAGTTGCGGGGAGGTGAGCCCGGCTTCTTTGATCAAGCGCCTGGAGTGCATGTCGATGGCACGAAT  
AATCTGGCGCAGGGCGACCAGCACTTCATCATGTTTTTCCATGGGGTGTGCGTCAATTGGAAGGCTATGGA  
GAGGCGCAAAATTTTCCGCTAATTCGTCAACAAGGTCAATATGGTTTTTTGTTGTAATAGTTTCTGCTCTA  
ACTAATTTTGTGTTAGGTTGACGGGCATTTTACCGAATTCACCCTGACATTTGAGGAGCGAAATGATGAA  
TGACGAGCTGGATATCAAGTCTCTGGTGGCCGAGTTACGTGTGGTCAGAGTGCCTATGAACTGCCGGAC  
ACCTCGGCTTTTGTGCGCTATCAGCCTGCCTATGATGAAGATCCCAACAACCTCAAGGTACACCCTATG  
ATGGTGAGTTACCCCTCTCTTGCAGTGAGACAGGTA CTTTCAACCTAAAGGAGTTGGTGAATGAATTGCG  
CTACGCCTATGTGTGGTGCACCTCTTTCTGACGAAAGTGCATGAACCTTCTATCTGACCGCCCTCGAT  
ACCCGCTGGCAGCTGGAGTTTATCGGTTGCTTCTTACGACTTCAACCGCTCTGGATCACCAGCCGTA  
TCTCCAATCTGGGCGTCCCATGGCCATCTTCTTCCGCAACGTACGCGCTGAATGGCCAGCCCTCGGT  
TTCGCTGGTGGATCACC CGAACAGGCAGCTGGCAAACCTGGTCTATCGCGCCATCGGCGGTGCCGGT  
CATGTGGGCGAAGACTTTTTTCAACAACGACTAAGGAGGCTGGATGCGAGCAAGCAAAGGGCTATTGAAAG  
GCCTCAACCCACCATGGCCATGACGGCCCTCACCCTGATCACCTGTTTTTGTGTTTGGCGTATTTGT  
TCCC GATAACCGCGCCGCTGGTTTTGTGCGGTGCCAAGGATCAGATTATGCGGGTTCAAGTGGTACTAC  
ATTCTGGTGGTGCCTGTTCTGTTCTTTCGCTGTCTACCTGATGTTTCAGCCGTTTTTGGCAGCATCCGGC  
TGGGTGACGACGACCAGGTACCGGAGTTTCGGTACTTTCGCTTGGTTCTCCATGCTCTTTAGCGCAGGCAT  
GGGTATCGGTCTGGTGTCTGGAGCATCGCCGAGCCGATGAACCATCTGCAGGGCAATCCGTTTATTACC  
GAAGGGATGACCCCGGAAGCGGCCAGATCGCCATGCGCCTCACCTTTTTTCCATTGGGGCCTGCACCCCT  
GGGCCATCTATGTGATCGTTGGCCTGTGCTGGCTTTTTTTCAGTTATCGCCGCAAGTTGCCGCTGGCGAT  
CCGCTCTGTGCTTTACCCCATCCTTGGCGAGCGGATTTACGGTTTTTTGGGGCCATGCGGCGCATGTGCTG  
GCGGTGTTCCGGCACCGTGTTCGGGGTGGCGACCTCCCTTGGTCTGGGGGTCTCCAGATGAATACCGGCC  
TCAACCAGATGTTCCGGTATGGACGTATCGCAGTCCAACCAGCTCTGGCTGATTGGCGGCATCAGCCTGAT  
CGCCACCCTCTCGGCGATCTCCGGGGTGGGCGCGGGGTGAAGATCCTCTCCGAGCTCAATATCTGGCTG  
AGCGTGTTCGTGCTCGCACTCTTCTGGTGTGTTGGGGCCGACCACCTATATCCTCAACGCCATGTGCAGA  
ACATCGGTGATTACCTGCAGAACATCGTCAAACCTGAGCTTCTGGACCAACACCGAGGCCAACGGCACTTC  
GGCCTGGCAGTCGAGCTGGACGGCGTTTTACTGGGGCTGGTGGATTGCCTGGGCGCCGTTTTGTGCGCATG  
TTTTATCGCCCCGATCTCCAAGGGGCGTACTATCCCGGAGTTTGTGCTCGGTGTGCTGCTGGTGCCTCGC  
TGCTCGGCATGTTCTGGCTCACCGTGT TTTGGCGGTACGGCGATGAATCTGGAGCTGTTCCGGTGGTGG  
CGTGGTGCCTGCGGTCAATCAGGATGTGACGCTGGCGCTCTACAAGACGGTCGAGCTGTTGCCTGGGAT  
ACCTTCCGCTGGATTGCCAAAGCTGTGCTGACCCTGCTCATCTGCACCTACTTCATCACCTCCAGTGACT  
CGGGCAGCTGGTCATCACACCCTGCTCTCCATCGGTGATCAGGAGCCGCGGTA CTGCACCGCGCCGT  
ATGGGGTCTGGGGCAGGGGCTGGTTGCCGCTATCCTGCTGGTTTTCCGGCGCCCTGGCAGCCTTGCAGGGC  
GCCAGCATCATAGCGGCGCTACCCTTCTCGGTGATCATGCTGGCGATGTGCTATTCGCTGATGCTGGGGC  
TCAAGCAGGAGAGCCAGCGCCAGTTTCGAGTATCGTCAGAACCTCAAGCGCCACGATGGCTCATCCCATAT  
GAGCCTGATGGAGCGAATTTGGTCCGGCATAACGGCACAGAAGAGGGCTGACTCCCTTCTTATGTAAAT  
CTGGATGCAAAACGGCCGCCCTGGCGATGCTCTCCTTGCAGGCTCATCATCAGGGCGGCCGCTGTTTAT  
GGGGCCGAGGTTACTCCTCGATAAAGGTCCACTCATCTTGTATGCGGCTGATGGCATCGGTGCGCTTTTT  
GGCGAGCTGTTCTTGTGATCTCTTCCCCTTTGAAACCGGCTGCCACTATCTCTTTACCCGGCACCGCCTGG  
GCGGCAGCCAGCGCTTCGGCCACATAGTCCGGCTCGGCGTAGACCCGCTCCTCGAAACCGGTACGGCCAT  
GGAAGTCGGCGCGACAGGCATCCAGCAACTGGGCAAAGCGCTCGGGGCGGCGCCAGGCATCCGCCCTTGT  
GAACACCTTGAGCAGGGTGGCGGGCTTGAGCTCAAAGGCGATATGGATGTGGGTGTGCAGATCGCTCACC  
AGCAGCGCCAGATCCCGGCACTCATTGGGTACCCGGAACCGCTCGCACAGAGCGGAATAAGCGGCAGCC



CTTTCTGGCCGTGACCGTGATGGCTTGGCCAGAACTCCTTGGGGTTACTCCCTTGCCAAGGTCGTGGCA  
GAGGGCGGCAAAGCGGACGGTCAATTCCGGGGAGATCCGGCACGCTGCTCCAGCACCATCAGGGTGTGG  
ATGCCGGTGTTCGATCTCCGGATGCCACTTGGCCGGGGCGGGACGCCAAACAGCGCATCAATCTCTGGGA  
ACAGCGCCTTCAGGGCGCCGCACTGGCGCAGCACCTCGATAAAGATCTGCGGGGTTCGGCCCCAGCAGCAC  
TTTTTCCAGCTCCTTCCAGACTCGCTCCGGCGTGAGGTGGGCCAGCTCGCCAGCGGCCGTATCTCGCTC  
ATCAGGGCGAGGGTCTCCGGCGCTATGGTGAAGCCCTGAGTGTGGAAGCGGGCGGCGAAGCGGGCGACCC  
GCAGGATGCGCAGCGGATCTTCCGCAAAGGCAGGGGAAACGTGGCGCAGCAGCCGTTTTTCCAAATCCTC  
GATGCCGCCGTAGGGATCGTGGAGCTGGCCCTGATCATCTTCCGGCGATGGCGTTGATGGTGAGATCCCGG  
CGCAGCAGATCCTGCTCGAGCGTCACATCGGGGGCGGCGTGGCAGACAAAACCGGTGTAGCCCTGACCCT  
GTTTGCCTTCGGTACGGGCGAGGGCATATTCCTGCTGGGTTTTGGGGTGAAGAAACAGGGAAAGTCGGC  
ACCGACCTGGGTAAAACCCAGCAGCGCATCTGCTCCACCGTGGCGCCGACCACCAGATGATCCCTGTCCG  
CCCTGCGGCAATCCAGCAGGCGATCCCGCACTGCGCCCCAACCCAGATAAGTCTGCAAACCGTCTCTCC  
CGTCATCAATTGTGGGGCCGAGTATATCGTCTTTGTTACCCTTTGCTGCCGTGAGCACCACCTGCCCGCA  
GCGCCAGTCAGCGCGGCTTTGACTTGGGCGTGACGAGGCCCTTACGCTGCCCGACCAGACAGCTGGCGCTG  
TGCAGCGGGATGACTTTCATGCCCCGCGCAGGCCAGATGAGCCGAAGGAGCCGACAGATTCCCTTATATC  
AACGACATGAGAACAACGTGAATCAATCAACCTTCGCAAGCCGGTTCTGGAGTGGTATGAGCTTCATGG  
CCGCAAAACCCCTGCCCTGGCAGCAGGAGAAGACTCCTTACCAGGCTGGGCTCGGAGATCATGCTGCAG  
CAGACCCAGGTCGCCACAGTCATCCCCTATTACCAGCGTTTTATGGCGCGCTTCCCCGATGTGATGGCAC  
TGGCCGATGCCCTGTGACGAGGTGCTGCACCACTGGACCGGGCTTGGCTACTACGCCCGGGCCCGCAA  
CCTGCACAAGGCGGCCCAGCAGATCCCGCATCATCACCATGGTCTCTTTCCCGAGCGTTTTGACGAGGTG  
ATGGCGCTGCCGGGGATTGGTCTTACCGCCGGGGCCGTGTGTGCTCTCTCTGGGTGAGCCCCACG  
CCATCCTTGATGGCAATGTGAAGCGGGTACTCACCCGCTGGCTGGCGCTGCCGGGTGGCCCCGGCCAAAA  
ACAGGTGGAGAACGAGCTGTGGGAGATCGCCATCCGGCTGACTCCCAAACTGGGGCGTGGCGCAATACAAT  
CAGGCGATGATGGATATCGGGGCGACGATCTGCACCCGACGCAAGCCTGCCTGTGATCGCTGCCGGTGC  
GGGCGGATTGCCAGGGGCTGTGCAAGGCAAGCCACTGTCTATCCCAACAGCAAGCCCAAGAAGAGTAT  
TCCGGCCCCGCGATGGCGTCATGTTGTTGATCCGCCATGGTGACGAGTTATTGCTGGAGAAGCGGCCGCCA  
CAGGGGATCTGGGGCGGGCTCTACTGCTTCCCGCAGGTGGCTTCGCTGGCGGAGGTGGATGGTCTGCTGG  
CATCCCTCGGCTGAGCCATCAGGTTATCGTGAACCTGGCCGGTTTTTCGCCATACCTTCAGCCACTTCCA  
TCTCGATATTACAGCGCTGCTGATTGACATTGATGAGCGCAGCCGCTGCGGCTCATGGAAGCAGATAAC  
CGACTCTGGTATAAECTTACGCCATCCTGCCGAGGTGGGGCTGGCGGCGCCACGGCCCTGTGCTCGCCT  
ATCCAGAGTTACAACCATAGAGGTCAACATGAGCCGTAAGTATTTTTGCCAACGCTGAAAAAAGAGGGC  
CCGGTCTGGATTTCCAACCTCTATCCCGGTGAGCTCGGCAAGCGGATTTTTGACAACATCAGCAAGGAAG  
CCTGGGCGGAGTGGCAGAAGAAGCAGGTGATGCTGATCAACGAGAAAAAGCTCAACATGATGAATCTTGA  
GCATCGCCAACTGCTGAAAAAGAGATGGTCAGCTACCTGTTTATGATGCAGGTGAAGTGCAGATCGAAGGT  
TACACCCCGCCTGCCAGTAAGCTCTCCGGCTGTTGTACGTGTGAACAGGTGCGGGAATGGCGCCACACT  
GGCGTGACCGCTCCTGAAGTCGACGCAAATGAATGATGGCAGCTCTGCTGCCCGTTTTGAGGAGCCTATG  
GGCCGAATTTTTTGGCTGCTGTGCACCCTGCTGTTTCTCTCTGCTGCTCATCTTCCCCAAGCCAGCG  
GGAGTGAGGATGACGATCTGGTCAACGGCAAGGACATCCGCGTTTTTGAACACATGATCAGCGCGCTCTC  
CCATAACGTGAACGAGATATGGGGGCGGGAGGCGCTGTTTTGCGGGCAAGTTTTGACTACGTCAAATACAG  
GATCAGTACAAGAGCCGGGCCACATCGACTTCTCCAGCGGCCACATCATGGTGGAGACGGTCTCGGGCA  
TCGATCCCCGCGCTCACCTGCGTCCGCGCATCATCGAGACTCTGCTGACCCCGGACGATCCGGCCGAAGT  
GGATCTTTACTCCGACCGGAAATTCGACCGGTGGCGAGCCCTTCTCTACGGTCAGGTGCTGGACAAC  
CAGCGCCAGCCAATCCGCGCCTCCTGGCGCGCCGAGCGTTATGCCGATTACCTGCTCAACACGGCGATGA  
AGAAGCGCACTCTGGGTATTCGACCATCTTCTTCGTGATATTCATATGGTGGCCAACCATGAAGATCG  
ACGGGGCTACAAGTATCGGGGATCATCCGGGAAGCGTTCGCGCAAATACGGCGTGGCCGAGAGCCTGATC  
TATGCGGTGATCAAGACCGAGAGCAGCTTCAACCCCTATGCAGTGAAGCATGCCAACGCTTATGGCCTGA  
TGCAGGTGATCCCGCTACCGCCGCTGTCGACGTCTATGTGCGGGTCAAGGGCAAGAACGGTCCAGCCGAC  
CCGGGAGGAGCTGTTCAACCCGGCCTACAACATCGATGTTGGTACCCTATCTGCACCTGTTGCAGACC  
GTCTATCTGGCGGATATCGAGGACCCGCGCTCCCGTCCGCTATGCGGTGATCTCCGCTATAACGGTGGCG  
CTGGCGGGGTGCTCAATACCTTCTCCAGCGATCGCAAGGCGGCGCCGGCCGGATCAACAGGCTCTCCCC  
CGAGGCGGTCTATCAGGTGTTGACGGAGCAACATCCCAAAGAGGAGGCGCGCCGTTACCTCTACAAGGTC  
AATCAGGCCGAGAAGGGCTTCAAGAGAGCCTTTTCCAGTCCGGCCGGTTAAGCGGTGATGCTGGGTGAAC  
CATGCAAAAGGGCGCTTGATATCAAGCGCCCTTTTAAAGTCTGGCCAGTTCGTCGTTGAAGTGGCCTTAT  
TTGGCGATAAAGCCGCCCTTGGTCTGCGGAGCCGCGCCACTTTCTCCAGGGTTTTACTTCCACTTCGG  
TCTTGTTCAGCTGTGGTCCACTTACCACGGATGCGGATCTGATCATCTGGGCCACTTCGGTGCACG  
CCACACATCCTGATCCACTTCGACCTCCACTTACCCTGGCATCGCGGAACAGATAGTTCTCGCCGCC  
AGGTGCTTGACAGTTTTCCCTTCCAGGGTGGCCCAGCTGTTCATCGGCCAGATCTTTTCAAGTTGAGCAACGG  
AAACCTTGTCTGCTCTTGGCGGCGGTTATAGGCCGCCATGGCAAAAGAGGAGACAGACATCAGGGTCAA  
CAGTCCGATTACGCTTGCCTTGCCTTGTTCATTTTCACTCCTGTCGTTGGTATGAGGGCATTTGTGCCG  
GGGGGGCGTGAACAAGCGTGAAGAAATAGGCTGGTGTGATTTGTCTGTTTTGTGAGCGCAAGCGATTT  
CATCGGTGGCGGAACATGTGTGATTTTCACTGAACTGTAATCTGTGCTTACCAGAAGTCAGTGGCA

GCAGACTCTTCCCATGCCTGTGCGCCACTCGAGGAGAAGTCCGCAGGTCTCACCTGCTTAATCGAAGAGCA  
TAACAATATGAAAAAATGGCTTGTGTTTATTGGGGTTAATGGCATTGACCGCGCAAGCGGCAGAGGGA  
CGCCAACCTTTTTACGGGTGCGTATGTTTGGTGACAGCCTCTCCGACACCGGCAAGATGTACAAAAAGA  
TGCGGGGGTATCTCCCCTCCAGCCCACCCTACTTCAACGGACGCTTCAGCAACGGCCCCGGTGTGGCTGGA  
GCCGTTGGGTGACGAGCGTTTTTCCCGGTCTGGTCTGGCCAACGAGGCGGAAGGCGGTGCAACCGCGGTG  
GCCTATAACCATCTGGGGGCCCTGAATGGCTGGCTCGGTTTCTGGTCCCTGGGATCCCAAATATCAGGTGA  
TCAACAACCTCGATTACGAGATCGATCAGTTCTGAAAAAGGACAAGTTCCGTCCCGATGATCTGGTGGT  
GATCTGGGTGCGGTGCCAACGACTATCTGGCCTATGGCTGGAACACCGAGCGGGATGCGGATCGGGTGTATC  
GATACCATCCGGCTGGCATCCAACCGGTTGGTGTCAACGGTGCAGCAGATCCTGCTGCTCAACATCC  
CGGATCTGGGGCAGACCCCCGTAGCCCCGAGCATGAAGGTGGTGGAGAAGGTGCGCCATGTGGCCAGCTA  
CCACAACCCAGAAGTTGCAGAACCTCACTCGCAGCTGGCTCCCCTTGGCATCGTGAAGTGTGCAAGGT  
GACAAGCAGTTTGACGAGATGATGCGCGATCCCCAGCAGTTTGGTCTGAGTGACACAGAACACGCTTGCT  
ACGGTGGCGGCTATACGTGGAAGCCATTCTCCGGCAGCGCCGCCGAGGTGGCTGCGACCCCGGCTTTGAG  
TGTCTCCGAAAGAGTGGCTATTGCGGGTAACCCGATCCTGGCGCAGGCGGTGGTGGAGCGGGCAGGCAAAA  
GGGCGAGCAGCGACTCTCAACTGCGATGAGCATATGTTCTGGGATCAGGTGCATCCGACCAAGACGGTGC  
ACAAGGTATTGAGCCAGCGTGTGCTGACTTTATCGATCAGCACTACGAGTTTGTTCGTCACCTGATATCG  
CTTCCGGCCAGCATGTTGCTGGCCTTTTCCCTCTCTCGGTCCCCATCTGTGCGTCTTTTTGCGTCACATC  
CAGTTCAAATAACAAACGTTTTGTTGCTGTTTTTGTAACTGGTTCGTTAGAGTGTTTTTTGTAAATTGA  
TATCAGTGACTTGAAAATAGGCTAACGTTGATATGCTGCGATCGTTTTTGGGTGGTGCACCTATAAGAC  
GAGGTGATATCAATCAACCTCCTCCTACATAAAGTTGCAGAGGCTCAAACATGAAAAATCATTGATTAC  
CTTGCTGGTTACCGGCTTGCTGGCGGCCAATGCCAGGCTGCCGGTCAAGACAACACCTGGTATGGCGGT  
GCCAAACTGGGTTGGTCCAACCTTCTACGGCATTGATGAAAACAATGCCCTGACCCTTGGCAATGAGACCA  
ACGATGCCTTGGGTGCAGGCGTGTGTTGGCGGTTATCAGATCAACAAGAATCTGGGGTTGGAGCTGGGTTA  
CGACTATCTGGGCAATTACAAATACGATGCCACTACGGCGGCAGGCGCTTTCAGTGATGAAGTAAAAGCA  
CAGCTGGCTCAACTGACCCTGAAACTGGGCTTCCCGGTTACCGATAATCTGGATCTGTATGGCCGTGTCG  
GTGGCGGTTATGGCTGGGCTGATACCAAGAGCGATGTCTACAAAGATGACAGCCGCTTTGTCATGGTCCG  
TGCACCTGGGTGCGGAGTATGCATTCAACCTCGACTGGGCTGCTCGCCTGGAGTATCAGTACACCACCCCG  
TATGGCAGCTCGTGTATACCCGTTTGAGAAATGGATAATGGCCTGCTCTCGCTGGCAGCGGTTTATCGCT  
TTGGTCAGGTTGCCCTGTGGCGCCCCGCTCCGGTCCGGAACCTGCTCCTGCACCTGTGATGTTTGAAGAA  
GCAGTTCACCCTGAGCTCCGATGTGCTGTTTACTTCAACAAGGCGACCCTCAAGCCAGAGGCCAGTCAG  
GCACTGGATAGCCTCTATAGCCAGATTGAAGAGGCGCGACCCAAGGATGGCGTGGCAACCGTAATTGGTTC  
ACACCGACCGTATCGGTTCCGATGCCTACAACCAGAAGCTCTCCGAGCAGCGTGCCCAGACCGTTGCCAA  
CTATCTGGTTGGTAAAGGGATTCTGCCGCCAAGATCAATGTGGAAGGGCGTGGTAAATCCTCACCAGGTT  
ACCGGCGACAGCTGCGTCAGCAAGTCCAAGCGTGAGCTGATCGTCTGCCTGGCTCCGGATCGCCGTGTTG  
ATGTGAAAGTGAAGGTGTCAGCGAGGTGCCGGAGTAATCCTTCACACTGAGCTGATCTTCACTGGGGCT  
GGAATGAACAGCCCCCTGTCCGAGCAAGAGAGACCAAAAAGCCAGTCAGTTGATCTGACTGGCTTTTTTACA  
TTGGCATTGCGGTGCGGCAGGGGACTAAATCAGGAAGGGAGCGGCATCACCCGTTGCGCCCCAGCTCCT  
TGGCCTTGTAGAGCAGCTTGTGCGTACGTTTCGACCAGACAGTCTGCGCTCTCCTGACCCTTGAACCTGCC  
CACGCCAAACGAGGCTGTGATGTGGTTCGATGCGGCGGCCTGATTTGCGATCCAGAATCGACATCCGCTCG  
ATGGCGCGGCGCATGCTCTCCGCCATCTGTCTGGCCAACGCCAGCGAGCGATGGGGGACCAGCATAGCGA  
ACTCCTCCCCACCCAGCCGATAGGCGGTGACCCCTCCTTGCAGGCATCGCGCAGCCGTTTGTGTAAGGC  
GCGCAGTACCTGATCGCCGAGCAGGTGACCGTACTCGTCTGTTGAAGTCTTGAAGCGATCGATATCGGCG  
AGGATCAGCGAGAAGGGGTGCTGGCTGCGGATCAACCCCTCCAGCTCCAGATCGAAGGCGCGGCGGTTGA  
GCAGGTTGGTGAGGGCATCCTCGTTGGCCAGCTTGCAGCTCTCGTTGAGCGCCGCCGAGCTCTTTGAT  
CTCTTTCTCCGCATTGCTGAGCTGGTTGCGAAAAGTGCATGGTGGACATGCGCACATCCCGGACTCGCGC  
ACCAGTCCCAGGATCCCCATGGTGTCTTCCAGCTGAAGCCCTCGTCATCAATGCGGCTGAGCTTGT  
CAAAACTCTTGTGAGCATCTCCTGAAACATGCCGGTATCGGAGATGGCGTCCGTCATGGAGTGGCCGAG  
CTCGTTGGCCATGGCGGCAAGGCTCAGTTTTCATCGCCTCCATCTGCTTCTCGTCTGAGCGGCCAGATA  
TGGTGATAGAGTCGCTCGCAGGTGGTGGAGCAGCAGGTTCCCTGCATTTTACTGCTGATCAATCGCCT  
GGTTGAGCTCGGGCATGCTGGCCGAGACATAGTTGTACCACAGGTGGTAATTGTCCGGGCTCGTGGGGAT  
CTGGTACTTGATCATCAAGGGAACCGCTGTTTGAAGATAGGCGGCGGATTTGGGCAAATGTGTCTTACTC  
ATGAGTTCTGTGTCTCATCATGCCAGCGAACTGAAGATAGTATGACAGAGAGATTGGCCAAAAGGCAGCC  
GATGGATGCCATTCGCCCCCCCCCTCCGATATAATGGCACCGTTACCACCTACCCTAAGGCCTGCTTATGT  
CTCAAAAAGATCCTTTCTCGAACGCGAGGCGGAAAAATACGATAAACCCTACCGCAGTCGCGAGTTGAT  
CCTGGAACCTCATCAAGGGCCATGAAAAGCCCATGTCCCCTGAAGAGTTGGCCAAGTCTCAAGCTGAAA  
GATGAAGAGCCGTTGGAAGCCTTGCCTGCTGCTGCGCGCCATGGAGCGTGATGGACAACCTGGTATTCA  
CTCGCAACCAATGTTATGCCCTGCCGGATCGCCTGAATCTGGTCAAAGGTTATGTAATCGGCCACAAGGA  
TGGCTTCGGTTTTTCTGCGTCCGGAAGGTGGTGGTCCGGATCTGTATCTGAACAACCGAGAGATGCAACGC  
CTGATGCATGGCGATTACGTGCTGGTGAACCGACCGAGATTGACCGCAAGGGTCGTCAGGAAGCGCGTC  
TGGTGCCTGCTCAAGTCCCCTGAGGCAGACATTGTGCGCCGTTACTTTCGTCGAGAAATGGCGTTGGTTT  
CGTGGTGCAGGATGACAGCCGATCGGCCAGGACATCATATCCCGAAGGGGAGAACAAGGGGGCTCGC

CAGAGCCAGGTCGTGGTTCGTGCGCATCAACCAGCGGCCACTGCCCGTTCAACGCGGTCGGTACCGTGC  
TGGAGGTGCTGGGTGAAAACATGGCGCCCGGCATGGAGATCGAAATCGCCCTGCGTACCCACGGCATTCC  
GCACACCTGGCCGGAAGAGGTGACCAAGAGGTTGCCGGTCTCGGTGAGCAGGTGCCGGAGAAAGCCAAA  
GAGGGCCGCATCGACCTGCGCGCCCTGCCGCTGGTGACCATCGACGGGGAAAGATGCCCGCGACTTCGATG  
ACGCCGTCTTCTGTGAAGCCAAACGCGGTGGTGGCTGGCGTCTGTGGGTGGCCATTGCTGACGTCTCCGC  
TTACGTGAAGCCCGGCACGGCGCTGGATGCCGAAAGCGTATCAGCGCGGCAACTCCGTCTACTTCCCCGAG  
TTCGTGGTGGCCATGCTGCCGGAGGTGCTCTCAACGGCTCTGCTCGCTCAACCCGCGAGGTTGACCGTC  
TCTGCATGGTGTGCGAGATGACCATCTCCGCCGCTGGCCGCATGTCCGGCTACAAGTTCTACGAAGCGGT  
AATGAACTCTCACGCCCGTCTGACCTACACCAAGGTTGCCGCGATCCTCGATGGCGATCCCAAGCTGCGC  
CAGCAGTATGATCCGCTGGTGGGCCACATCGAAGAGTGAACAACCTCTATAAGGCGCTCAAGCATGCC  
GTCATCAGCGTGGTGGTGGAGTTTCGAGAGCGAGGAGACCCGCTTCATCTTCAACGCCAGCGCAAGAT  
CGACCGCATCGTGCCACTGGTGCACAACGATGCCACAAGATCATCGAAGAGTGCATGATCCAGGCGAAC  
GTGGCTGCTGCCCGTTATATCGAGAAGAACGAAGCCGCCCGCTGTTCGGGTGCACGACCGTCCGGGCG  
AAGAGCGTCTGACCGGTTTTCCGCGATTTTTCTGGCCGAACTGGGTCTGGAGCTCAAGGGCGGTCTCGAGCC  
CGAGCCGAAAGACTTTGCCGAGCTGGCCGCAAGTTGAGGGGCGCCCGATGCGGAGCTGCTCTCCACC  
ATGCTGCTGCGCTCCATGCGTCAGGCCATCTATCAGGCTGACAACATCGGTCACCTCGGTCTGGCGTTGA  
AGTCCTACGCGCACTTACCTCGCCAATCCGTGCTATCCCGACCTGATCCTGCACCGGGCGATCAAGTA  
TCAGACCGCAAGGAGCAACAGGGCAACCTGCGCCACAAGTGGAACCCGAGCGGTGGTTATCACTACCAG  
CTGGAAGAAGTGACCCGATGGGCGAGCACTGCTCCATGACCGAGCGCCGTGCCGACGATGCCACTCGCG  
ATGTGGCCGACTGGCTCAAGTGCGAGTACATGCTGGATCAGCTGGGTGACGAGTTTGACGGCGTTATCGC  
CAGCGTACCCGGCTTTGGCTTCTTTGTCCGTTGGCTGAGATCCATATCGATGGTCTGGTGCACGTCAGC  
ACCCTCACCAACGACTACTACCAGTTTGATCCCTGCACATGCAGCTGATTTGGCGAGAATTCCGCCGTC  
GCTACCGTCTGGGCGACAAGGTGCGGGTCAAGGTGATGGGCGTGAACCTGGACGATCGCAAGATTGATTT  
CGTGATGGTGAAGAGCCGCTCAAGGCCACCGGCAAGAAGCCAAAAGAGATGGCGCGCAAGCAGGCCGAG  
ATCAAGAAAGAGAAGGCCAAGAGCGCCAGCGCCACGAAAAACGTAAAAGAGGGCAAGGATCACGGCAAAT  
CCGACAAGGGTGGCCGTGCCAAACCGAGCAACAGACGACCGAGCAAAAAGGCTCGCGATAAGGTGAAGGC  
CAAGGGGTGAGCCCTCGGCCATGGCTTGGGTCCGACGACCCGGGTGAGGTCGTAAGGGGCTGATGGCC  
CCGGGTTACCTTCGCCAGCCCGGGTTATCACTGCAAAAAGCCTGCGACTTTGAGATGAAAAATCCGAA  
CCCGGTTACCGAGGTTCCGGATTTTTATGCTCAGCGAAAAGGGGAGGGGCTTAGATTCTGGGCGGGGCTC  
AGCCAAGATTTCGTGCATATGGCTAGGCTGTGTTCTTAAAGTGATGAATATATAATCTCTTATCTTCTCAA  
TAGCTTAAGATACTATGCAGTGTCCCGTTCGTTACCAGTTAACCCTTGCACAATGGGGCTTATCGAGCCCC  
TTTTTTCGATACCAGCGCATAAGCGGACGCCCTACTCGTGAGCCACGCCAAGTGCCTTGATGGCATTCTCTG  
GATACTTACACCCGGTGCACCTTGGCGAGATCTGCTGGAACGTTTCGGCCCATGGCGCTCGGTCTACAAC  
ACCTTTTCGACGTTGGCTGAGTACAGGTATATCGATGCCATCCTTGCTGCGCTGCAACTGCATCTCAATG  
AAGAAGGGCTTATCGACTTTGACCTGTGGTGCATTGATGTAGTGGTCAACTAAATCCGGACACTTGGTTA  
GGCCGATCCTCGGCTTTTGTGGCGGTATCCCGTCATTGTGGTGTGATGTGGACGCCGCCAGTTGTAGTAAT  
CCATCAGGTAATAACTGATATCCCGCTTTGCCCTCCCGCAGCTTATGTATCCCATAGCCGGAACCCACTC  
CGTTTTAAGACTTCTGAACAATCGCTCCATCGGGGCATTATCCAGCAGTTGCCACGCCGACTCATGCTC  
TGGGTTCATGCGATAGCGCCACAGTCGTTGCCGAAATGCCCTACTGCCATATTGGCTGCCCTGGTACAGGT  
GAAACAGCACACCAGATGGGCAACCACGCTGCTGATAGGCCATCTCCAGTGCTTTGATTGCCAATTCTGC  
ATCAGGTTTATCAGACATCGCCAGCCACGACCCGCCGAGTGTGCAGGTCAAGCACCGCTGCCAGGTAA  
TGCCAACGGCCACCAGCCAGACGTAGGTGATATCGCCACACCACACTGATTTGGGTTGCTGGACATCAA  
ATTTCGCGGGCCAGCAGATTGGGGATATCCGGTCGCTCAGACTGGGCGACCTGATAACGATGAGCGCCCGG  
CTGTTTGGATAACCAGCCCGGCTTCCCTTCATCAGGTTACGTACTTTGAATCGACCAATCTGATACCCCAAC  
TCCCGCATCATCGACATCAAGGCGCGGCTGCCTGCAGAGCTCCTGCTCTCTTTGAACAACCGGCGCAACT  
CACTGCGTTGCTGTATCCGCTCACGGTTAATCGCCCGTCTGCGGGCCAGATAGTCGTAAGCAGGATGT  
TGGAACATCGAAAGCGCAGCAGACCAAGGTGATGGGGGCTTGCTCCCTTAATCGGTCTATCAGCGGTAC  
GTGTGAACTCGTCCGCCATCAAGAGAGCAGTAGCCTAATGGGATGGTCTGCTCCACCCACCCCGCTATGC  
TGTAGCCAGCATCAAGGAGGCTCATCATGACTCAAGCGCAGATTTACATTTACGGGATCGATTTAGGCAA  
AAATTGGTTTTACCTGGTGGCGATGGATCGCATGGGGCATGTATTGACCAAGCAAAAGCTCACGCGTTCA  
CAACTGAAACAGTTCAATTAGCACGACCCACCCTGTCCGGTTCGCTTCGAGGCATGCTCTGGTTCCGAAT  
ACTGGGGGCGCCTGTTTCAACAGGCGGGGTTGCAACCCAAGATTATCCCTGCCCAATTTGTGAAGCCCTA  
CCTCAAATCAAACAAGAATGACTTCAACGATGCTACCGCCATTGCCGAGGCTGGTAGCAGAGGTACTATG  
CGCTGTGTCCCGTTGAAATCTCATGAGCAACTGGCATTGCAAGCGACTCATCGCTCCGTCAGCGTTTCA  
TCGTCGAACGTACCGCCACTGTCAATCAGATGCGAGCGTTGCTGCTGGAATATGGGCTCACCGTGCCAGT  
CGGCAGAAAAGTCTTCGAGCGCTCTCTGCCGACGATCCTTGAAGATGCCGAGAATGGCTTGCCGACTTT  
ATCCGCGCCCTGGTATTACGCTGAGAAAACGGTGGCAACAGCTGGATATTAGATTGATGACATGAGCC  
TCATGCTCGGACAAGCCTCAAGCGCATCAGGTTTTGTGCCAAAAAATCAGTACCGTCCCGGCGATTGGACC  
GATTGTCTCAACCGGTTGATTGCCGCGATTGGCAATGGCTCACAAATCAAGAAAGCCCGCGACCTGTCA  
GCTTGGTTGGGGCTGGTCCCCAGGCAATACTCAACGGGCGGCAAAATCTTCGCTCGGCGGGATCAGTAAGC  
GTGGCAATAGCTATTTAAGGCAAAATGGTTATTCAAGGCGCCAAAGCGCTAAAAATTCACATGAAGCGTGA

CAAATCATCGTTAGGCCAATGGGTGCTAGGCTGGAGGCTGGCCATCACCATCATGTGGTTCCTTATCGCC  
TTGGCCAACAAGATAATGCGAATTTGCTGGAAAGTACTGACATCCGGCAGGGATTACCAACCCTATCCCA  
ACGCAAGCGCAGCCGTTTAAACAGATATAACTCATACCCGTTTTGCGAGCCAAAAACAGATGACAGAAGC  
GTTACCCACGACGTTGACGCTGGCTAAAAAAGCAGTCTCTCATGACTGGTAGCTTTATTAGGACGAT  
GACGTGCGGATCCCATCAAGGCCAGAGCCGGAAAAACGGCTCACAGACAGGCCGGATAACATTGACGCAAAC  
GACTTCTGGAAATCAGTTCAAGCTTGCAGATAAGGAGCAGACCATAACATTTTTTAGAATGTCCTTTTCAC  
GTTTCGAGCCGGTTGATACGGGCTTCCAGCTCCTGAATTTTTGCTGCTCCGGAGTCAGTGCTTTGCCGAT  
TGGGGTTGTGCCAGTTCGTTTCGGATTGCAGTTGCTGAACCCAGCGGCGAAGTACGGTTTTACCCGACATCC  
AGTGAACGGCTGGCTTCAGGGACAGAATATCCCTGGTCGAGCACCAGGGATGCGGCTTCGAGTTTGAATT  
CGGCAGTAAATGAGCGACCTAATCTTGTCAATTGAACACCTCAGGTCATGGTGGCGACTGTACCACCTAAA  
ATGGTGTCCGAGATGATTAGACCCTACATGACCCGCTCCAATGTCAGGGCATCAAAAGATGCTGTCGGAG  
CGCCTAAAAAAGCACTCCGGTAAATCAAGCTCTTGGTCGCTCTCGTGGTGGTTTTGGCAGCAAAAATTCAC  
TTGGTCACTGATGGTAATGGTTTTACCCTGGGGTTCTGCCTTTTCGATGGGGCAATCAGCAGAAATCAGAT  
ATGCGATAAGTGCGTTGGTCATGGCAAGGATCCCAGCTTCATCAGGCCTTTATCGCACTCGGCCAACTTA  
TCTTGGCCGAGATAAGGCCTATAGCAGCAGGGCTCTGCGGGCTGAACTCCTGCGTAGAAAAGATAAAAGTG  
GTTATCCCGCAACGCAGCGACCAGCAACGGCACCATAAGGGACGTCCTGAGTTAGACAAAGCTCGTT  
ATCGTAGGAGAAATGTGGTCGAACGGTGCTTCGGATGGCTGAAGAAGTTTTCGCCGATCCTCAACGCGGTA  
TGAAAAGCTGACGGGAAGTTTTGCTGCTTTTATCAAGCTGGCTTTCTGCCTTCGTTACTTACGGGAACTA  
TTGGTGGACAGAAAACCAGCATTGAGAACACAGCCGAGGGACATAATCTTGCCTATTGCCAATGTA  
TTGGCCGCTATGAGGCGCTCAGAGAGGTGGGTGTCTATTTCTGTAATAATTTTTAAATAACATCCTCT  
AGGCTTACTCTTTTAAAAACATCCAACCTTCTCCACGAGTAGCATTAAATATTTCAATTCTCTCACCT  
CTAAGTGAGACTTAAGCAACATGAATTTGTTTTGTTATATTTTTCAATTTCTTGGTTCTGCCCATATGTCACC  
AGCTTTTTCGATAATTTTCATGAAAATGATTTTGTCTCCCTCACTAATCTTATATAGATTATCTTTGGTT  
TTTGGGGGGAACCTTATAGTTATGATCAAAACCAGAAAGAAAACTCTTTTTGCGCCAATAAATACTGCTA  
GCTGAACCATGTCATACACAACACTTTTCGCTTTAAAAAAGCCAAACAATAGGATTTTCTTCAAAGCCAC  
TTCATCAAAAGGCACATTGCTTTTATTTGTGTTGTAGTATGTGATATCACGATTAACCGTGTATATCTT  
AAACAGTCCGACAGGGGCATAAACATTTTTCAATGAGTATTTTTAAAAATCATGCAGGTACTCAAATATAT  
CTAGAGGATCCTCTACCAGATAATGTTCTGGTCGCAAGTGGTCTCATCAAAACATAGAAAATATTTTAT  
ACATGCAATTTGTAGTTTTCCACGATTTAGTTCGAAGTACAGAGACTTTCAGGCTAGGGCAATACCAATT  
ATAAAAAACATCTTTATTTGCTAAGTGCTGTTCTTCCATTTTTTTCAACGAACATTTTCATTGATAGCTTC  
TATATATCTTACTTTTTATAAAAAATATTTAAACTCGCCCTCGATAACAAGCTTGTCAATGCAGCCTTGAA  
ATTATTTATTTTTAAAGAGATTGAAACCTTCTTCTTTGCTATAAAAAACAACTCTCCACCTAAAAAAAAC  
ACCATAGTCACTTGGCAATGACTCAACTTAGGATAAAATTCATCTTTGTAGTTTGGGCTATACAGATATA  
CATGTGAACCTACTGGTAGGTTATCATATTTGATTATGTTCCCCCTCTTTAAAGTCATCAGCATAACC  
ATCTATCTTACATCCTTGCCCTTGCAACTCTATATACAAAAATGTGCAATGTCATTATATGGTGGGATG  
TATACTCTGCCTGAACTCATTGCCCTCCTCAATAATTTATAATGCGCTTAGTTTTTTCGCGCCACCATTG  
GTACTGTGTGAAAAAAGTGTACACGGTCAGTCTTGGAAAGCGTCGCCTAATCACGCCTACGTGAACATAT  
CAGGAATGAAAATGATGCTCTACTTGTACAGATCTAGTTATCACCTGACACCGGCTCAAACCGGTGTCT  
TGTTTACGCTACTTTAGTGCGCACTTCTTTCGCTATCAATTTTCAGACCCTTTTTGAAACATGCTGTAAGGG  
GTCTGCCCTCCATCATCCTGCCCTGATGTGGCCGCTGGGTGTTGTAGTGCTCCAGGTAGCTATCCAGGT  
CTGTCTGCATCTGCTCTACCGACTCATACTAGATCGTCTCCCTTGATACGGAAAGTGTTCATCCAGCAA  
GGTTCGATGCAGCCGCTCGATAAAGCCGTTGCTCTGCGGCTGCGCACCTTGGGGGTTCCGGTGTCAATC  
CCCTCCAGTTACAGGAACAGCTCGTAGGGATGGTGGTCAGGGCGCCACAGAACTCGCGCCCGTTATCCG  
ACAGGATGGTATAGACCCGTCCTCGTGGGTTTCAAAGAATGGCAGCACCGTTTTCGTTAAGCACATGGAC  
TGAGGTGATGGGCAGTTTGTGGTGTAGAGCCGCCCCAGGCGTGGCGGCTATAGCAGTCCAGCACGGTT  
TGCAGATACACCTTACCAGCCCTTGCAGCGCCGCGCAAGAAGGTGTCGACCGCCACCAGTTCCCGGT  
GTAGTGGACCTCAATCTGACGTTTCGCGAAACTCGGGGCTGAAGCGCTCTAACAGGCGAATTTGCTCGTCA  
TTGAGCTCAATGGTCTGCTCCCGTTGGATTTTTCTCAAGGCGCAACAAGCGGTGCTGTTTTGGAGAGCAAGT  
CGTGACGTTGCCACACGCCACACACGCCCGGCACTGACGTTGATACCTTGCAGAGGCAGTTCTTGCGC  
AACCCGAGCGGGCCGTGAGTAGGCTGGTGGAGGAATAATCGAGGATGGCTGCTCAATCTCGGGCGCA  
ACCCGTTTTGAGGAGCCCTTTACAGCCGGGCAATTTGTGAGCAATCCCTCGGCGCCATAGGCTGGTAA  
TTACGGCGAATTTTCGTAGAATGCTGACGGCTGTAGCCGATGAGCTTGCAGGCTTTGCTGACATTATTGA  
GTTCTTTGGCAAGCTCTAGCAGGCTGAGTTTGCAGCTGCTACTTTCTCGTTGGTGGTCATACGGTGACT  
CCGGATAACACGGTAGGGTACCCTTTTGTATCCGGTTTGAAGCCGATGACCACTCCCTTTTGTGGGC  
AACTGTGAGGTGAATACCATCTCCATACAAATAAATAAGGTATTGGATTCTCTGTCAATTCGCCGATGGG  
GGAGAGCGGGTGTGGGCTGAGCAGTTTTCTCCTCCCTAGATGCCGGTCTCTGTTGATGATGCGCCATC  
ATTTAGCGACCGGTGACGACGCCACCATCATGGCGGTGAGGCTGCCGGCACGGCCATTTTTCTTCGGGGC  
GCATTTATGCGACCCGACCTACGGATCTTGAACATGAGTACTGAACTGATCTACGGCATTACGCTGTAT  
CCGCGCTGCTGGAGCGCACTCCCGAGCGCTTCATCGAAGTGTGGGCCCTCAAGGGGCGGGATGACGACCG  
GCTGCAACCCCTGCTGGCCGAGCTGGAGTCCCTCGGTCTCAAGGTGCGAGCGTGAACCGCAAGACCCCT  
GATGACAAAGCGGAAGGCAACAATCACCAGGGCATCATGGCCGGGTGAAAGAGGCGCGGAAGCTGGCCG

AGCACGATCTGGCCAGCCTGCTGGACGAGCTGGCGGCACAACAGAACCAGCCCTTCTGCTGGTGGTGGG  
TGGCGTGACCGATCCGCACAATCTCGGCGCCTGCCTGCGCAGCGCCGATGCTGCCGGGGCTCATGCGGTC  
ATCGTGCCGCGGGACAAGGCCACGGGTCTCACCCGATCGTGCGCAAGGTTGCCTGTGGCGCGGCCGAAG  
TGGTGCCGCTCATTAGGTCACCAACCTGGCCCGCACCTGCGCGAATTGCAAGGAGCGCGGCGTCTGGAT  
TGTCGGCACCGCTGGCGAGGCCGATCACGACCTCTATCAGGCCAAACTGACCGGCCGATGGCGCTGGTG  
ATGGGTGCCGAAGGTAAAGGTATGCGTGCCTGACCCGCGAACATTGCGACGAGCTGGTGAGCATCCCGA  
TGGAAAGGGGGCGGTATCCAGCCTCAACGTCTCGGTGGCAACCGGCGTTTGCCTGTTTGAAGCCGTGCGTCA  
GCGTCGCGGTTAATCATGCTGACTGACAGACCCCCCTTCGATTGGGCGCAGGTCGCAGATAGAGAGGAGG  
CCGCGCGCCTCCTCTCTTTTGGCCCGCCGCTGACCCCTCAGCCGAAAAGCTGCCTCTGGCATGCCGGCGA  
CAGCCCGGATCTGCTGGTCAGGGTGGAGCAGGGGCTGCTGCGGGCCAAGCTGGTGCTGGAGGATGGCCGC  
GAGTACATCAAGGAGTTCTACTGGGAAGGGGACGAGTTTCTCGACTTCCATCACCTGCTCAGTGGCGAGC  
CGGCCCGCTACAGCGTGGAGGCGCTGGAGTCTTGCCGCTGCGAGCTGTTCAAGTCTGGCCGACCTGCGCCA  
GCTGCCCGGTTGGCCGCGCTGGTATCAGCACCTGCTGGAGGTGCGAGCTGCGCATCAAGGAGGAGAAGGAG  
CAGTTGCTGCTGACCGGCAGCCCGCAGGCGCGCTATCAGCACTTTCTCGACAGCTTTCCCGCACTCGATG  
CCAGAGTGCCGGATCACCAGATCGCCGCTATCTCGGCATTACTCCCATCAGCCTGAGCCGCATTCGCAA  
GCGGTTGAGAGCGCTGAACAAGGAATAGTGTGCGCGAGGCGCCATGAGGGGCTGTGTTGCCACCAGATTT  
CAGACCTTTCATAGAGCCCGTCTCGGCATTACGCCAGCCAGTCAGTCTGAGCCGATTCACAAACGGCTG  
AAAGAACTTAACAAAGATTAATGCAGGGCGCTGGCGCCACGATTATGCTGGCAGGCCGAACGTGATAAGGA  
GTTGCCGATGAACTGGATCCTGAAACCTGGTCTGAACTGACCACTGACGAGTTGTATGAGTTGCTGGCG  
CTGCGGGCCGAGGTGTTGCTGGTGGAGCAGACCTGCCCTTTCAGGATCTGGACGGGCTCGATCGCCGCG  
AAGGGGTCTGGCACCTGCTCGGTTATCAGGGCGAGCTGCTGGCCGCTATGCGCGGATCATGGCGCCCGG  
CATCGGCGACGAGAGCGGGCGCCGCCATCGGCCGGGTGGTGACCTCACCCAAGGCGCGTGGCGGTGGTCTT  
GGTCATAAGCTGATCGGCGAGGCGGTCAAGGCGTGCGAGGCGCGCTGGCCGACCCACAGCATCTGGCTGG  
GGGCGCAGGCTCATCTGCAAGGCTTCTATGGCCAACACGGTTTTGTGGCGGAAGGGGAAGGCTATCTCGA  
AGATGATATCCCCATATGGGGATGCGCAGAGTGGTGGCATAACCACCTCGTCAGAGTGATTGAGAAATGCA  
GAAGGGCCATCCCGCGGGATGGCCCTTCTCTATCGCCAGGCGATCACTTCTTCTTTTCTTCTTGGCG  
GACTTCTTCTTGTGACCGGCTTTTTCTTCTTACCAGTACCCGCGCTTCCCTGTGTTTCCGGCGCAGCT  
CGTCGATACCCCGGCGTTGAGGCGCTCCTCGGTGACGCTTTCGATCTTGGCGACCATCGCCATGTCGCTG  
GGCTTCCACCAGGCTGATGGCACAGCCAGCTTGCAGCGCGCCGTTACGGCCGATCCCGTGGAGCTAG  
ACATCGGCGCCGTAGGGCATGTGCTAGTTGATGACATGGCTGACGTTTCGGCAGGTCGATGCCGCGGGCGG  
CAACGTCGGTGGCGATCAGGAAGGGCACTTCCCTTTCGTGGAACCTGCGGATCGACTCGATACGCTTGCT  
CTGCTCCATCTCGCCACGGATCCAGGCGCAGGAGATACCTGCCGCTGCGAGCTGGCCGGAGAGCTCCGCC  
AGACGCTCGCGAGTCTTGACGAAGATAATGGCTTCTGGGTTCGGATCTTTCAGGATATGGGTGAGCA  
GCGCCAGCTTGTGGGCGGCGTATCAGCCAGATGGATCCACTGGGTGATGGGGCGACGTTTCGCTGCGGGG  
CGGCTCGGCGTGACGCTCCACCGGATCCTTGAAGATCTCGTTGGCGAACTTCTCAAGGCCGGCCCCCTCC  
AGGGTGGCGGAGAAGAGCATGGTGTGCTTGCGGTAGCGCGCTTTCACGATGCGGTTACATCCTTGA  
TAAAGCCCATGTCCAGCATGCGATCCGCTTTCATCCAGCACCAGCACTTCGATGTCGTGGCTCTCGAACTC  
CTCTTTCTCGATGTACTIONGAGCAGACGGCCCGGGTGGCCACGACGATGTCGGTGGTCTTGGTCAGGGCA  
GGCAGTTGCTCTTTCATGGCTGACGCCCGGATGATGGTCTCGATGCTGAGGTTGGTGTGAGCCGCCAGCG  
CCTTGGCGTGGGCGGTACCTGCGAGCGCCAGCTCGCGGGTCCGGGTCAGGATCAGCATGCGGCAGGGGCC  
CGGCTTGGCGCGCGGAAGTCCAGCAGGTGCTGGAGTGCCGGCAGCAGGAAGGAGGAGTCTTGGCCGTA  
CCGGTCCGAGCGGATGCCAGAATATCGCGGCCGTCCAGGGCTGGCTCCAGCACCATCTGCTGGATGGTGG  
TGGGGCGGGTGAATCCCATCTCGGCCAAGGCCCGGTTGAGGGCTGGGTGCAGGTCGAAATCATCAAAGGA  
CTGGCTCATGGCAATACTCGGTCATTAAGGAAACGGCAGATTATAGGCGATTATCTCGTCCGCTCCTATT  
GGTGAGTGTGCTTAGCCGCTATAATCGCCACCATTTTTGTCAGATGACGGGGGCCAGATGGGACGTAGT  
CGCGGATTTACCTTCAAACAGTTCCATATCAATCAGATCGCTGCGCCATGAAGGTTGGCACCGATGGCA  
TTTTGCTCGGTGCTGGGCGCCGGTTCGAACAGGCGGACGAGTCTCGATATCGGCACCGGCGAGCGCCCT  
GATCGCCCTGATGCTGGCCCAACGCAGCAGATCTGACTGCCGCTTGTGTCGGTTCGAGCTGGATATTAAT  
GCGGCCAGTCAGGCGCGGGAGAATGCGGCTGCCTCTCCCTGGGCCGATCGGGTGACCATCATAGAGAGTG  
CCATTCAGGATTATCAGGCTGCCCTTACGATCTTGTGCTCTCCAACCCCTCCTTATTTCTGTCGAGGCCA  
GTCATTTAGCGATCCGGCGCGGGCGTTGGCCCGCCATACCGGTGCCCTCGACAGCCCCGATTACTGGCG  
GCCTGCGATCGTTTTGCTGAGCCCGAACGGGCAGGTGGCGCTGGTGTGCCGACGGCGATGGCCGATGAAA  
TTTTATGCATTTCCGGCAATTATGATCTGCATGGCATTGTTATACAGCTGTTATCACCAGAGAGGGTAA  
AGAGGCAAATCGTGTTTTATTGCTACTTGGCAGAGGATTAACAGGTGTGAGAGGGGTGAAATTTGTGATC  
CATTCTGCTGACGGGGCTATTCCGACAGATATATCCAACCTGACCAACCCCTTCTATTTGAAGATGTAAA  
TTTTGCTTGAACATTTTTTTTACGCCATTATGCTGGTTCAGATCGAGCGCCCGTCCCTGACCAGCTAA  
AACCCTGGTTGCGATGAAAAAACATGCGGGGCTCTTTTTTTTATACCCCTGAACACACCCGGTCAGCGA  
CCGATAAAAACTATAACAAGCAATAATTTACAAGACAGACGAGGTTGAACTTGACGAAATCACTCACATT  
GTCCGATGTACTIONGAGGTTTATGACCTTTCGCTTCTACTTGGGCGCCGGTAAACATCATTTTTCCCA  
CCGTTGGCCGGTTACATGGCTGGTGGAGCACCTCTCCCTGGCGATGTTTGGCTTCCCTGGTCACTGCCGTG  
GCCTGCCTCTGGTGACCATTCTGGCCGTGGCGAAAAGCCGTTAACGTTGGGCTGGCATGACCAAGCTGCT

GCCTGCCGGTGTGCGGACTGCGCTGGCCGTTGCCATCTATATCATCATCGGCCCGGCTTTTGGCCGCGCC  
CGTACCGGTCTGGTTGCTATGAAATGGGCCTCAAGCCATTCATCGGTGACATGGGGCAGGCGGGTCTGG  
CGGCCTATACCGTGATCTTCTTTGGTGTGGCCATTCTGGTCTCCATGAACCAGGGCAAGCTGATGGACGC  
CATCGGCAAATACCTGACTCCGGTACTGATGCTGCTGCTGACTCTGGCGATCGGTGTATTCTGTAGCA  
CCGCAAGGCTCCATGCCTGATGCGTCCGGTACTACCAGAACAGCCCTTCGTGAAAGGGATCCTGGAAG  
GCTACAACACCATGGACACCCTGGCGTCCCTGATGTTTTGGCGCCCTGATCGTCGACCTGCTGCGCCAGAA  
AGGCATCAACGATTACAAGAGCCAGTTCAAGTATCTGGCCATTGCCGGCTCATCTCTGCCGTTGGTCTG  
AGCGTGGTGTACGTATCCCTGTTCCAGCTGGGCAACACTGCGGCCGGTGTGGCGACCGATGTCAGCAACG  
GTGGCGCTATCGTCAACGCCTACGTACTGAGCCTGTTTGGTCAAGCCGGTCAAGTTCATTTCTGGCGGCCAT  
CATCATCTGGCTTGTCTTTACCCTGCGCGTGGGCCTGATCTCTGCTGTTCCGATTTCTTCCACAATCTG  
ACCGCATGGCTTACAAGAAGCTGGTGGTGTGCTGGTGTATCTGTGCCGTGGTAGCCAACGTGGGCC  
TGAGCCAGTTGATCAGCCTCTCCATTCCGGTCTGGTGGCCATCTATCCGGTTGCCGTGGCGCTGGTGTCT  
GGTACCTTCCCTGAAGGGTACTTTCGGCCGTCGCCGTTGGTGTTCGGTGGCGTGTGATGGTGGCCCTC  
CTGTTCCGGTTGCCTGGATGGTCTGGGTGCTGCCGGTATGAAGATGGATGCGTTTTGCCCTTCTTGGCGCTGT  
TCGACAAGGGCCTCGCCTGGCTGATGCCGACCCTGCTGGCCTGCGTAGTTGGCGTGATGGTGGCTCCGAC  
CGAGATGGCTGCCGAAGCTGCCTGATCACACCCGATCTGATATTGCCAAGAGCCTGCCCGTGCAGGCTC  
TTTTGTTTTCTGTGAGCCTAGCTTCTCGCCTCGCTTTGCTGCCGTAATTGTCACGTACGCAGATAGCAT  
CTGAGCAGCCGATCTTGGCGCTATAACCAGTTCCCCCTTCTACAACCCCTTCTCACTTCCCATAGGGCA  
CGTGGCAGACCTGTTTTATGGAGCGCCGAGTTGTTCCGGTATTAATTCCGCAGCGGTAAATGTTTTCAAGA  
TATTAATTGGTGATTGAGATCGAACTCCTCTTCTTTATGCTAAAGATGGTGGCCTCATCCGGTCTGCGG  
GCCGTGTGGGGTGGAGAGTATTGTTACCGGTTATCTGCCAGGCAGTGGGTGCAATCAATAACAAGCTGAT  
AAGGCAGATGAGGTTGAGTTTACGAAATCATTGAAGTTGTCGACGATTTCCGGATTGGGGTTTTATGACG  
TTTTGCCCTTCTATCTGGGGGCGAGCAATATCATTTTTTCCGCCGCTGGCAGGTTTTATGGCTGGTGGATC  
TGCTGGCCGCATGTGCGGCTTTTTGCTGACGGCAGTGGGCTTGCCGCTGATCACCCCTGATTGCGGTGGC  
CAAGGGGAGTTCCGGGGGGCGGCGGAGTGGCTGGACCGGAATGACCCGCTATCTGCCCGCCGGGGCGGCG  
ACGGCGCTGGCCATCGCCATCTATATCATCATGCGGCCCGCTTTGCCATTCCCCGACCCGCTCGGTGCG  
CCTACGAGATGGGGCTCAAGCCCTGGCTTGGCGATACCGGTCATGGGGACTGCTGATCTACACCCCTGAG  
TTTTCTTTGGCTGGTATCCTGGTGGCGCTCGATCGGGCAAGCTCCTTGATGCGGTGCGGCAAGTATCTG  
ACCCAGCCCTGATGGCGATGCTGCTTATTCTGGCGCTCGGGTCTTTATGACGCGCGAGGACCATGCTG  
CTGATGCCAGCGGTGAGTACATAGATGACCCCTGACCAAAGGAATGCTGGAGGGGTACAACACCATGGA  
TACCCTGGCCTCCCTGATGTTTTGGCGCCCTGATCATAGGTCTGCTGCGTCAGAAGGGGATCGAGGATTAT  
CGCAGTCAGTTCAAATATCTGACCATTGCAGGCTTGATCTCGGCGGTTGGGTTGTCGGCGGTGTATGTCT  
CGCTCTTTAGCTGGGCAACAGTGCCTGGTGGGTTGGCGAGCGATATCAGCAATGGTGGGGCCATCGTCAA  
TGCCTACGTCCTGAGTCTGTTTTGGTCAACCGGGCCAGTTTTATTTGCTGCCATCATCACCCCTGGCCTGT  
TTTACCAGTGGGTCGGCCTGCTCTGTGCCGTTGCCACTACTTCCATGGCCTGACAGGTTGGGCTTATC  
GCAACTGGGTGATGCTGCTGGGGGCGCTCTGTGACTGGTGGCCAATGTTGGGTTGAGCGAGCTGATCGG  
CCTCTCCATCCCGGTGCTGGTGGCCATCTATCCGGTGGCCATCGCGCTGGTGTGGTGGTGGTGGCTCG  
GGATGGTTTTGCCAGCCACGGCTGGTGTTCGCGGTGTGCTGACGGTCCGTTTTCTGTTTTGGTTGCCCTCG  
ATGGGCTGGGGGCTGCCGGGATGGCGATGGACGGCTTTGCCTTCCCTGCCGCTGTTTCGACAAGGGACTTGC  
CTGGCTGCTACCGACTCTGCTGGCCTGCATCGTCGGCATCCTGGTGGCAGGCGGTAAGCTGGCTGCC  
GAAGCAGCTTGATTCAGAAACAACGAGATAGCAAAGAGGCCAGCAGCTGCTGGCCTCTTCTGTTTTCTGCC  
GGATCCGTTACCGGATCAGATTTGCGGGCTTTCCGGCTTGGGTTGCCATCCAGACCATAACAGTGGGTT  
TCTACCCGTCGGCATGCCACTCGAAGGTGCCCAAGGCTGCTTGGCTTCCAGCGGGGAAGTTGATGA  
GCACCCGGTTATCTTCGTACTTGTAGAGGGAGGTGCTGATCTGAATGTCCGACAGGATCAACAGCAGGGC  
CCAGCAGATGAAAATCCATTTCAATGCTTTCCACATAGGGTACTCGAAGCAAATTTTCGATAGTGGCGCG  
ACCGAAATCCGATTGAAACGGCATCATGATCTTGGTGGCCATCGGCACGGTGGGTAATGGTGTGGTTGGG  
CCGGAGACGATGATGGGGGTCGCCATGTCAAACCTCGTAGCCCTTCTCGCCAGCATCCGCTTTGCACCCG  
CGGTACCATGTTGGTGAATTTACCGACCATGTCCGGTACCTCTTCGTTGATGTTGGCGGGAGCTTCCCC  
CAGCATGCGGCGCATGATCTCCAGCGCCAGCCCTTCTCGAAGCTGATGGAGAGGGAGCCACGGGTCTGC  
GGGCGACCATGCCAATCAGGCTGAGACGTCGCCGCGCGCCAGCTCATCCATCTTGGCTTTTGGTTTTGC  
CCGGTTTTGAGTTCCAGCTGTGCCATGGTTCGAGAGCACATTTGAGCAGGGATAGCAGGAACGGATTTACAAA  
ATCAGCCTTCATGATGACTTCTACAGTGGGCGTACAACGGGCACATTTGCCATGTGCCCTCTATCGTCTT  
ATTGGTAATAGTAAAACCATGCAAGTGGGCCTGCTCGGAAAACGCGCTATCGATCGCCGATCGTGAAGC  
TCGACCACATCCCCGACTCGTCGAGATCAACAACCTGCATCGGGTGGAGCTGATCGAAGTGGCAGCAGA  
AGATAAACGCGTTGAGAGATTCCACCTTGTGAGCAAAGCCCTGTTTCGAGCAAAAAATCGAGTGCCCGATA  
GACGGTTGGCGGCTTGGCATTGGCTTCGGTTTTGTTGAGCTGGGCAACAAATCATAGGCGCTGATGGCG  
TTGCCGTGTGCCGCCAGCAGGCGAAATACCTGACGTCGGGTGGGGTGAAGCGGATCCCTCGCTGTATAC  
AGAGTGCCTCGGCTCGTTGTAAGGTTGGTCTTGATTCATGATCGCGCAGATACCCCTTCTATTAGCCGG  
ATACTATCACAGGGCCTCGCATGGCGCGGCGACAAAATTCATTTTCTGGGGCTGCTTCACGTTGTGATAA  
AATCCGCCCCCTTCTTTAGCCAACCCGGATGATTTTTATGAGGCGCAGCGTTTTTCCATCGCCCCCATG  
CTGGACTGGACTGATCGGCATTGCCGTTACTTTCATCGGCTGATGAGCCGCCAGACCTTGCTTTATACCG

AAATGGTGACCACCGGCGCCATCATCCACGGCAAGGGGATTATCTGGGTTACAGCGAGCAGGAGCACCC  
CATCTCCCTGCAACTGGGTGGCAGCAATCCGGCCGATCTGGCGCGTGTGCCAAGCTGGCCGAGGAGCGC  
GGCTATGACGAGGTGAACATCAACGTCGGTTGCCCTCCGATCGGGTGCAGAATGGCCGCTTTGGCGCCT  
GCCTGATGGGGGAACCGGCGCTGGTGGCAGACTGCGTCAAGGCGATGCCGATGTGGTGCATATTCGGT  
GACGGTGAAGACCCGTATCGGTATCGACGATCAGGACTCTTACGAGTTTTTGCAGGCCTTTATCGAACAG  
GTGCGCGATGCCGGTTGCGACACCTTTATCGTCCATGCCCCGAAGGCGTGGCTGAGTGGCCTGAGCCCCA  
AGGAGAACCGCGAGATCCCGCCGCTCGATTATCCCCGCGTCTATCGGGTCAAGCAGGATTACCCGGATCT  
CACCATCGCCCTCAACGGTGGTGTACCTCCATGGAGCAGACTCTCGAGCACCTGCAACACGTCGATGGC  
GTCATGATGGGGCGTGAAGCCTATCAGAACCCCTACATCTGGCGCAGGTGGACAATCTGGTGTTCGGCC  
AGAACAACCGCGTCCGAGCCGCCACGAAGTGGTGGGATGATGCTGCCCTATATCGAGCAGGAGCTGGC  
CAAGGGCAACTACCTCTCCACATGACCCGCCACATGCTGGGATTGTTCCAGAATATGCAGGGGGCCCGC  
GCCTGGCGCCGTCACCTGAGTGAGAACGCCCTGCAAGCCGGGGCGGATATTCAGGTGGTGTGGATGCCA  
TGGCCAAGGTGCCGGAGTTTTGCCGCCAGCGAGACGGCCGAATAAGCCAGTTGTGCCAAGGCAAGAGCAGC  
CAAAAAGCGCGTCAGTTGACGCGCTTTTTTATTACTGTCGCTTCAATATCTGAACTGGTTGATCAGCCGC  
GAGAGATCCTGCAGCCGCTTACCAGCAGGGTGTGCCATCGAGGGCTGCCGCTGTTGTTCGGCGGTGT  
GGCTGGCCAGCTGGTGGATCTGGTGTACCCCTTCATCGAGGGTGCCTGTGACGTCGGCCTGCTGACTTAC  
CGCCTGGGCGATCTCGTCTCTGGTGGGTTACCTGCCCCAGCATCCGGTTGATCTGGGTGAGCACGTCG  
GCGGTGGTGGCCGCGTGTGCTGGCAACGCACCGAAGTCTGTGCCCTTGTGTCATCCCGTCCGACAGCT  
GTCGTGTAGTCTGTTGCAGCGCCTGGATCATCTCGTGGATCTCGCTGGTGCAGGCACGGGTCTTCTGAGT  
CAGCGCCCTCACTTCATCCGCCACCACGGCAAAAACCGCGCCCTGTTCCGCCAGCACGGGCGGCCTCGATG  
GCTGCATTGAGGGCGAGCAAGTTGGTCTGGTGGCGGATTTGGCTGATCACCTCCAGAATGCCGCTGATCT  
TCTGGCTGTGCTGGTGGAGCTGGGCCAGCACGGCATGGTTGGCATCCAGCTCCTGATGGAGTTGGTTGAC  
GGCGGAGCGGGTGGTGCCTAATGCTTGCAGCCCCCTCGTCGGAGACCTGCTGTACCTCTATGACCAGATTG  
CTCGCCTCATGGGCACTGTGGGCCACATCCCGAATGGAGTGGCTCAGTTCGGTGATGGCGGTTCGCCAGCT  
GCTCGCTGTGGGCGCGCTGCTGCTGCAGGTGGGTATCGATGGTCTGGATATTTGCCCGGTTCATCTTCGGC  
TGCCTGCAGGATCTGCTGGTTGGTGTTCGGCGCTGCGCCGACCACAGCCTTGAGCTCGGCCTGCTTCATC  
CGCAGGGCCAGTTTCGACCGGCCCAAGGTGTGCGCCGTCGGGTGTAGAGCACCTGACAGAGCGGGTTTC  
CCTTGTCTTGATCGGCAAGGGTGGCAGATGAGCCAGCCGCTGTTGCAATCGCCAGCCGCTGGATGCCCTG  
TGCCAACAGCAACAAGCGGTGGCAGCAGCCATAACAGGTTGCCGTTGGCAAAGTTAGCAAGGGTGGTG  
AGCAAGGCAGAAGCGGAGAGCCAGAGGGTCACTGACCCGGTTCAAAGTGAAAGCGGCTCAGCCAGGGAA  
GCGCCTTGCCGCTGCGCAACAGGCCATAGAGCTGCTCGGCCAGGCCACATCGCTGGCGGCGGGTTTTGGT  
GCGCACCGACTGGAACCTGCAGCATCTCCTTCTGCGCATTGAGGATCGGGGTGACGTAAGCGTTTACCCAA  
TAGAACTGACCGCTTTTGGCGCGGTTCTTGACCAGCCCCATCCAGCTTTTGCCTGTGCGAGCCGCTGCC  
ACATGTTCGGCGAAGGCCGCTTTGGGCATGTTCGGGTGTGCGACCAGATTGTGGGGTACTCCTTCCATTTT  
GGTGCACCATATCCGGCCACATCACAGAAGTGTGGTGGCATAGGTAATATGACTGGCGGGATCCGTG  
GTCGAGATGAGTGCATGTTGTTCGGGGAAGTGTATCTCCCCCTCCTGATGGAGTTTGGTTCATGTGTCGTT  
CCTGAAAAGCCAAATAACTGATAAATATATTTTTTATTGTGCTTCTCAGTTAATCATTCTAAGGCTCTT  
CAGTGACCCGAACCTTGGCTTGGGTCAATTAATCAACACAATGAATTGATGAAGTAAGGGTCACTGGCCG  
GTGTGAAATCGTGAACCTTCGCCGCTTCTCGGTTTTAAAGCGCGGATCGCTATCTTTGTAGCTACGCACCAG  
CTCCATCGTTTTTGCAAAAGCTGGTCTGCTTGTGCTACTCCTGACGAGCCAACTCGATGGCCCGTTTCGGCC  
CGGCGCCGCTCCATCTTGTGCACTTTCGATCGCTGAACTGTTGCTGCTGGTGCAGCATCCAGCCGACAA  
ACTCTTGTGGCATTGGGATTTCGCTATTGGCTGCGCAGGCAGGGTCCACAACAACGAGAGCAGTATCAA  
ATAACGCATGTCTGACTGGGTATTGAAGATTAATTGAACAGAAGGGGCGGCATTTTAGGCTGGAATCGT  
GGTGTGAACAGTATCAATAGCGAGGCCACGCGGGCCTCGCATCGTTCGTGGCCGGTGTGAGTGTTCGACG  
AAGTACAGCTGGCGGCTGTAGGCCACATCTTCGGGTGTTGATGGGGTAGCCCTTGAGCCATGGCCTTGA  
TGAGGCGGGCATTGGTGTACTGGTAGATGGGGCGATGGGGGCTTGATCCAGCAGGATCGCCTCCGCTC  
GCCAAACAGCTTGCTGCGGCTGGCGGCATCCTGAGTGTGGCCGCTTGCAGCAGCTGGTTCATAACGG  
GCATTGGCAAAGCCAGCCATATTGCCGCTGTGACGAGAGCCCCACAGGCCAAGGAACGCTGAAGGGTTCGT  
TGTAATCAGCGACCCAGGAGGAGCGGATCACCTCGAACTGACCGCTCTGGCGGCTGTGAGATAGGTTTTT  
CCACTCCTGATTGGTCACTCGACCTCGGCGCCAGCTTTTGGCTTCCACATGCTGGCAATCGCCAGTGCC  
ATCTTCTTGTGAATTTCCGCGGTGTTGTAGAGCAGGGTCACTTGAAGCGCTTGTCCGGGCGGTAACCGG  
CCTCCTTGAAGCAGGGCCTTGGCCTTGTGTCAGCGCTGGCTGGCTGCTGGTGGAGAGCAGGTTGGCGGC  
CGGGGTAAAGCTGGCGGTTCATCCGGAGTGAAGTGAATAAGCCGTTTTCTCGCCAGTACCGAGCACTTTG  
TCGGCGATCAGGGCGCGGTGATGGTGTAGGAGAGCGCCTTGCACACCCGCACATCGTTCAGTGGTGCCT  
GACGGGTATTGAAAGCGTAGTAGTACCGAGCTGATCCGGGGTGTAGACCTCATTCCGGATCTGCTG  
CTTCAGCTTCTGTAAGTGTCTCCTTGGGGAAGGATTCTGTGATATGCAGGTTCGCCCGCCAGATAGCGGTTG  
GTGGCCGCGCTCTCCTGATTGATAGGCATGAAGATCACCTTGGTCAATACGGTATGGGCCCCGATCCCAGT  
AATATGGGTTGGGGGTGAGCTCCAGCTTCTCGTTGACCACCCGGTTGTTTCAGCACAAAGGCACCGTTGCC  
CACCAGTTTCCGGGGTGGGTCCACAGGTTGCCGTAAGTGTGCTGATGCTGGCTTGTGAGCGGGCGACAGG  
CTGGGGTGGCTCAGCAGGTTAGGAAGTAGGGCACCGGCTGGGAGAGGGTACCAGCAGGGTGTGGTTCAT  
CGAGGGCCTTGACCCCCAGCTCGCTGGCAGGCAATTTGCCAGCGACTATCTCGTCCACCTTGTCCGAAACG

GGCCAGCTGGGCGAACCAGGCGAAGGTGGCCGCTCTTTCGGGTCGACCAGCTTGCGCCAGCCGTAGACG  
AAGTCGCCCGGCCCTTGACCCGGATCGCCGTTGGACCAGCGCGCATCCGGGCGCAGATGGAAGGTAAAGAACT  
GGTTGCCCTTGTCTCCCAGCTGGCCGCCACCCCGGCAACCGGTTTGCATCCGGCCCCGTTGGGTCAGCAG  
CCCCTCGAACAGATCCCGCAACACCTGCAACTCCGGCAGGCCGACCAGCTTGAGCGGGCTCAGGCTCGCA  
GGTTCATCCTTGAGGTGGCGAACGACAATCTGCTCGGGCGGAGTTGTGTTCGGGCGGGAATATCGGCAG  
CCTGGACAGCAGCACAGCCCAGCAGGGCCAGCAAGGGGCTCCATCCTTTCATGGGTCGGATCCTTCAAAT  
AGTGTGAAGCGGGGAGAAAACCTCGGCAGAAAATATCGCCGACAGATGGGAAATCATGATATCCCCTTGTG  
CTGGTCTGACCGCCAGCATTGACTCTCACTCCCAATCGGGGTAGAAGAGCGTTCTCGGCGTCTGTGCAG  
TTCAATGTGGTGAGGAGTGTCAAACGATGAAAGCATGGTTATTGCTGGCTGTGTGCTGAGCCAGGGTGC  
CTGGCGGTTGGCCCCGTGCCAGAGCGACACGGCGGTGGGCAACTGGTGCAGATCGGCATCGATGCCTTG  
CACCCGACCCAGGGGGCGCTCGGCCAGATCCAGGTCGATGAGACCCAGGCCACATTTGGCGGGCATGAGCG  
CAAAGCAGCTCGACAAGTTGATGAAAAAGAAAGAGATCCCCGTTGTTGATTGCGCCGGATGGCAGCTACTG  
GCTGGTGGACAGGCACCATCTCACCAAGGCGTTGTGGCAGCAGGGCGTCAAGGATGCCCGGGTCAAGGTG  
ATTGGCCGCTGCAGGATAAGGCCAACTTCTGGAGCCAGATGCAGAACAACCACTGGGCTGGCTCAAGG  
ATGAGAAGGGGCAACCGCTGACCCCGGAGCAGTTGCCGACCAGCATCGACAAGCTGCCGATTACCCCTA  
TCGCACCCCTCGCCGACTGCTGCAGAATCGGGCTACTTTTCGCAAGGATAAACAGGTCATTTTCGTGCAG  
TTTGCCTGGGCCAGCTGGCTCGGCAAGCAGATGCAGTGGGTGCCGTTGGACAGCGCCAATCTGGCGGGCC  
GGCTGCAACAGGCCAAACGGCTCGCTCGGCAGCGACGCCAATGATCTACCCGGTTATCCCGGCAAGCA  
GTGCAGCCTCAACCAGTCCAAAAGCGCGCAATGAGTGGATGTGCGATGACGGCATCCAGAGGATGCCGGA  
GATAACAGAGGGCGACCCTGGGGTCGCCCTTATGCTGTGACTACTGGTTAGCGGTGGTCACTCATGGCG  
CTCCGCCAGCGGGCAGCCGCTGTTCAAGCAGGGCGACGTCACCTTGTGGATCAGCGGTAGCAGATCG  
TTGACCTGTTGATCCGGCCAATCCCAACAGGCGAGGGCCTGTAGCCGGGCAATCTCCTCCTCGCCAAAGC  
GCATCCGCACCACCTGGCCGGGGTGCCCGCCACCATGGCATAGGGCGGCACATCCTGATTGACCAGCGA  
ACGGGCGGGCGATGATGGCGCCGTGCGCGATGGTGACCGGGCATGATCATCGCCTCCATGCCGATCCAG  
ACATCGTTACCGATGCGGGTATCGCCAGCGGGCGGTAGCTGCGCTGGAGCGCAGCCAGATCGGCGAAGC  
GATAGGTGCTGATGAAGGCGGTGTTGTGGGTGTGGTTGCCGCCATGATGATCTTTACCCAGCGGCAAT  
TTGCACATAGTCGCCGATGAGAGCCGGTCGATATGCCAGAGCGGCTCCAGCCGGTGTCCGGGCTGCCG  
CTGAAGGGATCGCCATGAGATGAGCAGCCACCTCTTGAAGGGGCCATCCAGCCCGAATAGT  
AGCTGTGCTGCCCTTTAGGCAGATATTTGGGTTGGTCACCGTCAGGTGCAGGTATTCGACCTGCGACCA  
GTGTTGGCAGGTGTTTCATGCTGGTACTCCTTTGCTGAATGGATCGGATGGGTTGCGTTGCGTTGAGCGCA  
GCTAATAGATCCAGACCAGCATGCGGGGCACGAGAGCAGGGAGCAGCCAGCATCTGCGGGAGGCGAGG  
TCGCATTGTGGTGTGCTCCAAAAGAAGAGGGAAGGGCGCGATCATAAGGTCGGGCGCCGGGTTTGCCAAGA  
TTGCGCAGAGATCCTGACTAACCTCTGGTTGATATTTATTTCTCAATTAGCCATGATAACACTCCCACC  
ATGACGGACTCGGGAGAGCGAAATGACACCGCAAAGTTGGCAACGATAACATGCTGGAGGCGGAGCGTGCC  
TGGCAGGCCGTTTCGCTGGGGCGGCGATCTGCTTTTATCAGCAGGCGCTGGGGGATGTTTACGAGATGA  
CCCAGGTGAGTTGACCGAGCTGGCCACCATGCGAGTGCACCTGTCACCGGTGGCCGACTTCTGGCG  
GGCGATGGATGAGCCGACTTACGAGCTGCGCTACCTGAAACTTGCTCCGAGCTGGTCACTGCGCTGGTG  
CCGCAGTGCCCAATCGGGAGTGTGAGGCGCTGATCAGCGAGCTGGGTTGCTGTGTCGCGGTGCCCTGCTCG  
CCTTTCTCAAGCGCCACCCCAATCCGGAAATTGCCCGGCTGATCCAGCTGCAGGACAAGGTGCAGGGCTG  
CGAGCTGATCGGTCGGTTTCGTCTCAACTGAGCGGATGTGGGCGCGGCTCAGCCCCGCGGTTTGAGTTTC  
TGGGCGATGCGCTGCTGCGCCTCTTCCCCTTGCAAGTGCCTGGGCGAAGGCGCGCGCTCCAGATCGATGA  
CAAAGTGCACCGCCTGCTTAAGCTCCTGTTTTCAGCAGCGCCTTGCTCTTTTGCAGCGCTCTGGGCGGTTT  
GGCCGCCAGCTTCTGCCCTGCTCGCGGGCAAAGGAGAGCAATCCATCGGCCGCCACCACCTTGTGGCG  
AGCCCGAGTGCAGCGCCTCCTCGGCATCAATCGCTCGGCCAGCAGCAACAGCTCGGCTGCCCTGAGGT  
GCCCCACAGACGCGGCAGCAGAGGCTGGAGGCAAACCTCCGGCACCAGTCCAGCTCGACAAAAGGGGAG  
CTGCAAGCGGGCGTTATCCCCAGATAGACCAGATCGCAGTGCAGCAGAATGGTGGTACCAGTCCACC  
GCCGGGCTGCAACGCGCGGCAGCACAGGTTTGGGGAAGTCGGCCAGGGTGTGGAGGAGCTGCAGTATGG  
GATCGTGGGCTCCAGCGAGCTCTTGCCATAAAGTCGGCCAGATCATTGCCCGCGGTAAAGCAATCTTG  
CTGCCCTGCAACAGCAGGACATGCACCTCCTCATCGGCTGCCGCTCTCGCAGCGCTGCCACCAGTTGC  
TTATAGAGCTCGGTATTGAGAGCGTTGCGCTTGTGCGGGCGGTTGAGGGTCAGGGTGAGCAAGCCATCCT  
GCTGCTCGGCAATGAGAATGGGGGCCATGTCTAAATCCTTGTATTGAAAGGTGCAAAAAAGGTTGCTGC  
TGGGGTAACCTTGGCGCGGTTTAAACAACATCATAAAGGATTTCAACCATGTTTAAACGTGCGTTTTATT  
CTCTGCTGGTTCTGGGTATGACGGCGCCTGCACTGGCCAAGGTCGAGGCTGTGACGGCTATGTGCGCCT  
GTTGCCCGCGGGCTCCCCAACACTGCCGCTTATGGTGTGAAGAATGACGCCGACCAGCCGGTCAAG  
CTGGTGGCGGGCGGCTTCTGCTGTGGCGGGGCGTGCCGAGCTGCACACTCACCTGCACGAAAATGGCGTGA  
TGAAGATGCGTCAGGTCGAGAATATCGAGATCCCGGCCAAGGGCGAAGCGGTGCTCAAGCCGGGCGAGCT  
GCACATCATGTTGTTTCAGGTTGGGCACGCTCTCCGAGCAGACCCCTTTCCCGCTCACCTCACCATGGAT  
GATGGTCAGAAGCTGGATCTGTCACTGCCGGTGAAGCCGATTGAGCCGATGGCAGAGATGAAGCATATGA  
AGCACTGACATTTGTGCTGTTTTGTTTCAAGATTGACGCTGGGTATTTTGGCTGCACCGAGTAAAATAGTG  
CTCTTTTCCATGTATGCAAGAGGAAGTGACGTAATGAAAAAGACGCTGATTGCCGGTTTTGTGCTGGCTC  
TGTGCAGCCAGAGTGCCATGGCCGCTGACGACTGGCGTTTTGCCCGGGTGGCGACGATGGGCCGCCAA



GGGCAGTGGTCAGGCTTATGGCACCAGTGTCTGATGGCAGCTATGACGACAGCTACAACCTGGAACGGCTAT  
CTGCAACTGGAACACGGCATCATCTTCTGCCGAACGCCAAGTTTGAAGTCTCCGATTTTCAGCACCTCCG  
GCGGCAACTTCAAGAACGATCTGACTGCCTACGATCTGAGCCTCTACTACCGTCTGTTCAACAACGATCT  
GTTCAAGATCGATCTGGGTATGACCGGCCGTCCTACGATGGCGAGCAGGTCCTACTCCGGTCGCAAGGGT  
TATGACGAAGATAACCTGATGGCCTATGCCGGCAGCGAAGTGAAGATCCCAGGGCACCGGCATCGCCTTCT  
TCGGCGATCTGCGTACTCACGATGCGGACAACCTATGACTACCGTCTGGGTGGTTCTTACAAGTTCTCCTC  
CATGCCGATCAAGCTGCGTGCCTGGCTGGCGTGAAGCCAAGGTCGACTTCGCCAATATCGACCAGTCTGTC  
GATGGCTGGTTCATGGGCGGCGAATTCACCTTCTAATCTGACCGTCGACTGACGGCGAGGAGCAATCATG  
GGCCACATCATAGTGACAGGTGCCGGTCTGGTCTCGGCCGGGCGCTGACCATAGGTCTGGTTGAGCGGG  
GCTATCAGGTCTCCATGATGGGGCGCCGTTATCAGCGACTGCAGGAGCAGGAGCAACTGCTCGGCAGCGC  
GGTGATCGGCATCGCTGCCGATCTGGCGCACCATGAAGAGGTCGACGTCGCTTCGCTGCAGCGGTGGAG  
TGGGGCGGGCAGCCGACATGGTGTACTGCGCCGCGGGTGGGCGAGTTTGGCCCGGTGGTGTCTACA  
CCGCCGAGCAGATCCGCCGGTGGTGGAGAGCAATCTCATCTCCACCATTCTGGTGGCTCAGCAGACGGT  
GCGGCTTATTGGTGAGAAAGGCGGAGTGTGGCCAATGTGCTCTCCTCCGCCGCTCAGGTGGGCAAGGCT  
AACGAGAGCCTCTACTGCGCCTCCAAATGGGGGATGCGCGGCTTCTCGAATCCTTGCAGCGCCGAGCTGA  
AAGGCTCGCCACTGCGGCTGGTCAACCTCTATCCGAGCGGGATCCGCAGCGAATTCGGGACAACCTCGGA  
TCACGTGGACCCGAGTGGCTTCATGACCCCGGAAGATGCGGCGGCTATATGCTCGACGCGCTGGAAGCC  
AGAAGCAGCTGCCACGTGACCGATCTCTTATCGGTGCAATCCCTGAGGCAACCCCTTATCAGGTTGCC  
GTCGTCAGCACACGGAAACAAAAAGCGCGCCAAATGGCGCGCTTTTTTATATCGGGAAGAGGGCGGGATT  
AACGGCCCAGCTTGGCCTTGAGCATGGCGATGATGTCGCTGATGGCCACTTCTGCTTCTCGCCGGTGGC  
GCGGCACCTGTACTCCACCACGCCGTTGTCCAGACCGCGATCGCCGATGACGATGGCGTGGCGGATGCC  
AGCAGCTCCATGTGGGCAACATCACGCCCGGGCGCTCTTTACGGTCGTGGAACAGCACGTCCACACCAG  
CGGCTTTCAGCTCGGCGTAGAACTGTTGTGCTGCTCGGCCACCGGTTCCGGACTTGTGCATGTTTATCGG  
CACGATGGCCACTTCGAACGGAGCGATGGCGTCCGGCCAGATGATGCCGTAATGGTTCGTTGTTCTGCTCG  
ATGGCAGCGGCAACCAGACGGGAAACCCGATAACCGTAGCAACCCATCTCCATGGTGACGGATTTGCCAG  
CTTTCGTTTACGACGCTCGCCTTCATCGCTTCGGAGTACTTGGTACCAGCTGGAAGATGTGGCCACTTC  
AATACCGCGCTTGAGCAGCAGCTTGCCTGGCCGACGGGCTCGGGTCGCCTTCTACCACGTTGCGCAGG  
TCGGCAACTTCGTAAGAAGCAGATGTCGCGATCCCAGTTGGCACCGGTCAGGTGGAAGCCGCTCGTTCG  
CGCCGACAGCAAGTCCGCCAGATGGGCGGCGCTGCGATCGACGATGATGCGACCGCAAAGCCAGCCG  
GCCGATGGAACCTGCATCGCAACCGGCGGCGAGCTTTAATCTGTTGTCGTCGTTGGCGAAGGTCAGCGGTTG  
GCCACGCCAGCCAGCTTCTCGGCCCTTGATTTTCGTTTACGCTCGTGATCGCCACGCGAGTACCAGCGCGATGA  
CGGCTGTTTTGCGGTGTTTATCTTCTCTGCCAGTACCAGCAGGGTCTTGGCGATGGCGGTGGTGGCCAC  
GTTTACGGAAGGCGGCCACTTCGTCGATGGTGTGGACGTTTCGGGGTGGCAACCTTGGTTCAGGGCTGCGGTG  
GCGGCAGCGCGCTCACCCAGCCGGCGCCAGCGCTTCGGCCATCTCGATGTTGGCTGCGTAATCTGATGTGT  
CGGAGAAGGCGATCAAGTCTTACCAGCTCTCGCCAGCACTTGGAAATTCGTGGGAACCGGTACCCCGAT  
GGAGCCGGTATCTGCCTGCACCCGACGGAAGTTTACAGCCATGCGGGTGAACGCTTTCAGTAGGCGGCA  
TGCATCTTCTCGTAGGTATCGACCAGAGACTCTTGTGATGTTGGAAGGAGTAGGCATCCTTATCAGGA  
ATTCACGGCCACGCATCACGCCGAAACGGGGGCGCACTTCGTCGCGGAACCTGGTCTGGATCTGGTAGAG  
GTTGAGCGGCAGCTGCTTGTAGCTGTTTCACTTCGTAACGTACCAGCGCAGTGATCACCTTCTCGTGGGT  
GGGCCACGACGAAGGGACGGTGTGACGGTGGTTCAGACGGCACAGCTCGGGACCGTAGTCAATCCAGC  
GGCCGGACTCCTGCCACAGCTCGGCGGGTGTACCACCGGCATGGAGACTTCGACGGCACCAGCATGTT  
CATCTCTTCGCGAACAATGTTCTCGATTTTCTTTCAGTACCAGCAGCCGGTGGCAACCAGGCATACATG  
CCGGAGGCCAGTTTACGGATCATCCCGGCGCGCAGCATCAGCTGGTGGCTGACAACCTCAGCGTCCGAGG  
GGTTTTCTTTCAGAGTGGAAAGCAGATATTGGCTGGTACGCATCGCGGTAGACCTTAGCTAGAACGGGCG  
CGGGGCCAGGATAATTTCAAGGGCGGAATTTTAAACAGGCTGGGCGTTGCGGCCAAGGGCTAAATTTGC  
CGCAACCCGAAAGGTGGCCACGCCGCGCAGATGGTCAGGGCAATGACCAATGCAACAAGCAGCCTTTTTTA  
TGCCTGCAATTTGGCCGGATCTCCGCTAAACTCTGCCACCTTTTCTCGATGGGCATGGCTTGCCTCGCTT  
CATCACCCCATTTTTTAGTACTTTTTGGAGCCGCTCATGCCGTTAGTGGGACATCAACACCAGATCGAGA  
TCCTGGAACCTGACCGACAAAGGAGATGGCAAAGGACGCTGTTTCGATCGCCCCCTGTTTGTGCAAGGTCT  
GCTGCCCGGTGAGCAGGCGCTGGTGGAGCTGACCGAGGTCAAGCCGAACTATCTGCACGGCAAGGTTGCC  
GAGCTGCTCCAACCTTCTGCAGATCGGGTTCGGATTTCTGCCCAACACCGAGTGGCGGTGGCTGTCAGG  
TGGCCCCGCTGGCCTATCCGGCCAGCTCAAGCTCAAGCAGGCACTGGTGCAGAGCGCACTGGAGCAGGC  
TGGGCTGGGTGATACTCCGGTCAAGGATATCCTTGGCATGGAGAGCCGTTTCGCTATCGCAACAAGGCG  
CAATATGCGGTGCGTGGCTGTGACGCCGGTGGCGAGATCGGTTTTTATCGCAAGCACTCCACGATCTCA  
TCACCGCCGATGACTGTGCGGTGCAGGATCCGCTGCACGTGGAGCTCAACGCCCGGGTGGCGCAACTGGAT  
GCGCGCGCACGACATCGCCGCTATGACGAAGTAAACCACAGCGGCTGTGTGCGTAACCTGATGACCCGC  
AAGGGCTTCAAGAGCGGCGAAGTATGGTGGTGTGGTCACTTTGGGTGAGGTGCTGCCGTTTCAAGCCG  
AACTGTTGGCAGCTCTGAGCGATCTGCCGGTCAACAACCTTGGTGCAGAACATCAACGATGAGCGCACCAA  
CCGATTTCTGGGCGCGACCAACCGGGGGCTGCTCGGCGAAGGGGTGATCCGCGACAAGATCCACGAACCTC  
GAGTTGAGATCTCGCCGCTCTCCTTCTTCCAGAACAACCCGACCCAGACCGATGTGCTTACTCCAGCG  
CCCTCGAGTATGCCGAGCTGACCGGTAACGAGACAGTGTTCGACATCTATTGCGGTATCGGCACCATCTC

CCTGTTCTTGGCTGGCAAGGCCGCCAAGGTCGTCGGGATCGAGTCGGTGGAGAGCGCCATCAGCGATGCC  
CGCCGCAACGCCGCCCTCAACGGCATCGAGCACACCGAATTCACGTTGGCAAGGCCGAGCAGCTGATGC  
CCGAGCTGCACGCCAGGGCGTGACAGCTGACGTGGTGGTAATGGATCCGCCCCGAAAGGCTGTGACAA  
GGCGGTGCTGCAGACCCTGGTCGCTATGGCGCCCCGCCGTCTGGTCTATGTCTCCTGCAACCCGACAGCC  
CTGGCCCCGACCTTGCCCTGGCTGGTCAAACAGGGCTTCGTGCTGGACGAAGTGCAGCCGGTTCGATATGT  
TCCCCGACTCCATGCATGTGGAAGCGGTTGCCCGCTGAGCCTGCCAGCCAAGGCATAAGTCGCCCCCGA  
CTCTTGGCCATAAAAAACGACGCCAGCTGGCGTCGTTTTTTTATCTCTGCAATCGGGCGGATGGGCGATT  
AGCTGGCGCTCTGGCGCACCTCGGCGGGCATCTGGTTCGAGCAGCTGTTGCCAGCCCTGACCCAGCTCGTT  
CACCAGCGCTTATAGCCATCGGCCGGCGCACCCGCTCCTGACGGAAGGGGGCATCGCGCAGCACGGTG  
CCATCTTCCCGCAGCAGGCCGCCAGCGCCGCTCAGCACGGCGCGCCGTCATGACGGCCCTGAAAGCGCT  
CCACCAGAATGGTCAGCACCGGCCCTTGTGGCGCCATCCTGCCGTACCACCCAGCCCGGCGAGGCGGGT  
GGAGAGGCCATTGAGGGTGAAGCTGGTTGAGCTGATCGTCCAGCGCACCCGGCCAGCCTGGTACTCGGTG  
AAGTGCAGCTCTTGCCCTTCCAGCTGATAGACCAGGCTGATCCGGTTCGAGCTGGCTGGCCAGCGCCACCG  
GGCGCAGCACCAGCTGGTGTTCGGTTGGGCGGGGCCGTCACGGGCTGCTGGCTGTCCGGCATCGAGCGA  
GTAGTAGTGCAGGCTTGGCTGGCTGCTGCAACCCGCCAGCAGGCCAGCAGGGCCAGCGTCAGGATCTCT  
TTTTTCATTGTTTGCCTCGCTTGGGCTCAGGGTCCGATGGATGCGCGCATCGAAGATCAGCGAGCTGGG  
CTGCTCGTTGAGGGAGTGCACCAGCGGCTGCAGTTTCGCGCATCAACTGATTGAGGGTCTGCACCGACTGA  
CGCAGGTCTGATTGGTCTGCGACTGGGCATCATAGGCTGCAGGGTCTCCTGCAACTGCTTGAGGCTCT  
CGTTGAGCGAGGCGGGCAGCTGCTGGGTGGAATCCTTGGCTGTGAGCTTGTTCAGGTTGGCGCTGACTGC  
ACTGATGTTCTTCAGGGTGCATCCAGGGTGGTGAAGTACCCGTTGACCTTGGCCAGGGTGGTTGCCATA  
TCCATGTGCACAAACTTGTGCGAGGATGAGGTTACCTTGCCTCGATCTGATCCAGCCCGCCGGCACGG  
TGGGGAAGACCTGATAACCGGCCAGCTTGGCCTGCTCGAAACGTGGCGCGTCCGGATAGAAGTTGAGGTC  
GATGATCTTGGCCCGGTCAGCAGGCTCGAGGCTTGGAGGCTGGCACGCAACCCCTCCTTGAACCTGCTTG  
CCGAACAGGGCACGCCATTGATCCTTCTCCGCTTGGCATAGCGGTGGGAGAGGGCGTGCACCTCGATGC  
GGGCCAGCACCAGGATCTGGCGGCTCTTGAAGATCTGCACGCCCTTGTCTCGATGAGGTAGGGGGCGGA  
GATGACGGTACCGACCCGAATGCCCGGATACTGCACCGCCGCGCCCGGGTGCAGGCCACCCACGTTGTCA  
TCGAACAGGAAGACGTAGTCGATGAACTGATCCAGACTACCGGCCAGCACGCTCGCCTCATCCTGGAACA  
GGGTGAACCCCTTCCATCTGTTTGAACCGGCTCGCCAGGCGCCAAACCGGGTGGCAGACCCATGGTATGAT  
GCCATCGATCAGGCTCTCCAGCGAATCCATCTACCTTACCTTCCCTCGCTGCTCATGGAGACCTCGAAG  
CCCGGGTTCATCCAGAAGCGGGAGTTGCTGCTCACCAGAATGTCATAGGGGGCGTGGATGAAGATTTGAT  
ACTGCATCTCGCTCTTTTTCCGGCAGGAACTTCGCTCTTCCACCTGACCTATGGTGAAGCCCTGATAGTT  
GATGGGGGAGCCTTCTCCAAGCGCGGGTGTTCGCGACTGCTGAGGGTGAAGCGCAGCCCTTGGCATCG  
AGGGAGGCGAGCGGGGTTTGTGCGAGCATGGCGTATTCGTCCCGCGCCGACCTTTCTTGGCGGGGGCGA  
GCTCGATATAGGCGCCGAGAGCAGGGTGTTCAGACCCGATAACCCCTTACGGCCACTCTGGGCTTGC  
CACCCAGAACTGGCTGTCACCGCGCAGCATGCCGGAGGCGGCATTTGGTCAGCCGTCCTTTTACGACCCGA  
TGGCTGTAGTCATCGCTCAGCTCGACGGCCTCGATGCGGCCGACGTCCACTTCGCGGGAGCGGATCACCG  
TCTTGGCAGCAGCTATGCCCTCGGCAGTGGCGACTGTGAGGGTGAACCTGGGGCCCTGGGAGTACCAGTG  
CTGGAACAGCATCCAGAGACCGATGAACAGCGCCAGCAGGGGCACCATCCAGATTGCGGGCGCAGAGCTC  
AGAAAGTCAGAGCCCGGTTTTCCACCTTTTTTTTACGCTCACTCACGTTTCGGCTTCTCCTTGTGTAAATCC  
CAGATCAGGCGGGAGTCGAAACTCATGGCGGGCACCATGGTGATCAGCACCACACCTGCAAATGCGACGG  
CCGCAGGGCCGGGATAGATGGTCATCAGATTGTGCGAGCCGGATCAGGCCCCGCAAGATGGCCACCACGAA  
GACGTCGATCATCGACCAGCGTCCGACAAATTCGGTCATGCGATAGAGTTTGGAGCTTGGCCAGGGGGGAG  
GTGACATTGCCGCGCTGCACCATATAGCAAAGCCAGAATAGCGCCAGTATTTTACCAGCGGCACCACCA  
CGCTGGCGAAAAAGATCACCGCAGCTATGGGGTATGAGCCATGGCCAGAGCAGCACCACACCGCCGAG  
GATGGTGGAGGGGCTGTTCATCACCAGAAACACCGTATCCATGATGGGATAGACGTTGGCCGGAATGTAG  
AGAATGGCGGAGGTAACAGCAGCGCCAGGTACGGTTACAGGCGCCCGGCTTGGCGGCATGCAGCTTGC  
CGCCGAGCGGGAGCAGCTGTGGTTACCCACCTCGCTCAGGGCGCCACAGATATGGCAGCCACCAGACC  
GGACTCCAGCGCGCCCGCTTCCGGGTCGATCTCCCGCGCCTCGGTTCGGGCCGAAACAGCCGCTGCCACAGC  
CACATCTGATCCAGCGAGGAGATCATCTTGTGATGAGCAGCACCGTATAGCCGACGAAAGCCCAGAATGACA  
GCCCCATCTTGTGTCGGCCATCCCCATCAGCTTGAACAGCGAGATGAGCACGCCCACCAGAAAGACATC  
CACCATCAGCCAGGGTTTTGATCCGGCAGAGCAGACGGCCGAGGGAGCGCAGGGCATTGCTGTGCAGATCT  
TTATCGACCCGCCACAGCACCAGCATGATGGATCCCATATAAACCAGTGGCAGGCCGATCAGGGTCAGGC  
TCAGTACCGCGCCGAGAAACAGATAGCCCTCATCCACAGGGTGGTGTGCTCTGCAGAAAAGTCATCTC  
CTGGCCACCCCTTTGGCCGAGAAGGACATAAAGGTAAGGCATTGGCGAGCACGAACATGATGAGTGCC  
GCGAACCCGATAGGAGATCGGCCGCAACTCCTGCTGTGGCAGGTGGCGACTCAGTGTGTGTCCGCAACGGG  
GGCAGCAGCTGGCCTGTCCACCTCGAGCGGTGTGGCCGGTATCAGCAGGTCACACTCTTTCGAGGCAGT  
GGCATCATGGACATAGGTGGTGTGGTGTGGTGTGAAAACCGGATGCAAGATAAAAACCCAGATAAGGCC  
GTGGTAGAGCCAGAGCTGGCGATTATCGCAGTTGTGCTGGTCAGCGACCAGCCCCGGAGGCCGCTATTG  
CTGGCGGGAGTGAGAATGACTTTGACAAGCCAGTGGCCATTTAGCATAATCAAACGCCACTTTTTTTCCG  
CGGGACAATAATTTATGACAACTGAATCCCCAGCTACTCCACGATTGAGCAAGCCTTCTCCCTCGGGAA  
TGGGCAAGATTCTGCCCTCAACTGGTTGCGCAAGAACCAGTGTGAGGTCGCTATTTTTCTGGTGGAGCGGC

ATCAAGCTGGAAGGCACCATCAGCGGGTTCGACCAGTACAGCGTGCTGCTGACCGATGCTCATGGTAACC  
AGCAGCTGGTCTACAAGGCCAAGATCTCCACCATCGCCATGCACACCGGCCGTCCGCAGGTGAATATCCA  
GCGTGCTCGCAAGCCACGTGTCTCCATGGCGCCGCGCCCCACGGTGCGCCGGTTCGATATGACGACAAT  
CAGGGCGGCGGCAACAACGAGTAATCGTCTGCCCCGCACTCCCCGTGACGCGCCCTGCGTACGCGGCTG  
ACGGAGCCTGCTCTCATTTTTTCATTCATGTCCCGTATGAGAGCCGGTTCGGTTATCGCCCCCTTGACGGG  
CGATATTTTTTCCGCACTACGCCGTATGCGGACCGGTTGACCCTCTTTGACCATGCAGGTCTGCATAC  
CCGCCGCTTCTCCGGCCTGTACCCCGATAACCGGTATCTTCAAACACTAGACAGCCTGATGGCTCGACCCC  
CAGCTTGCTGACGACCAGCAGGAAGGTGTCCGGATTGGGCTTGTGCAGTTCACATCGTCTGCGGTGACC  
ACCACGGAGAAGTAGCGATCCAGCCCCGTGTTGCGCAGCACCGCTTCGGCATTGACGCGGGGCGAGCCGG  
TGCCGATCCCCATCGGGATGACGCCATGATAGCGCTCGACCAGCGCCTGCATGGCCGAAAGACGGTCCG  
CTTGTGCAGGTTGGCCACATAGTGGCGGTCTTGCAGCGGTTGACTTCGAGCGGATCGAGGGGGATCTGC  
TGCTCCTGTGCGACCTGCAGGGCTATCTTGCGGCTCGCCATGCCACCCAGTTCATAGAACCAGTTCGGCGT  
CGAAGTGAAAGCCAAACTCGCGGGCGGTATGTTCCCAAGCGGCGAGGTGCAGCGGCATGGAGTCGACCAG  
GGTGCCATCAAGGTCAAAGACCAGGCCTTGGAAATCCGGAAGCGTCATGGTGCGGGTTCAGTCTCTGAAAA  
AAGGGAACCCATTCTAGCCAGTGGCTCCCCGCTCGCCATCACCTAGCTGGTGAGAAACGCTTGCCCCCA  
CATTTGTGACTGAAAATAGACGGGGGTGAGCTGGGCCGGATCGAGTTGATATTTGGGGGCAAGCTGTTC  
AGCAGGGCCCAGTTGCCCTGTTTATAGGTGCTGACCAGCTGAAACAGATGAAAGAGTGGCCCTTCGTGCA  
GTTTCGATGGCGCGCTGCACGCTCTTGGGCAGGTGGGCCATCAGCGGCTCCGACAGCAGGGAGCCATCGAG  
CACCAGTCTTACCAGAAAGGCCAGCTGGCCTCCGCTTTACCAGGGCGGTGAGGGCAATCAACTCGCAG  
AAGCGGCCCGCGGGCGATGGCCATGCGGGTGCAGGCCTCCGGCATGTGCTGGCTCACCCGGGCCAGACCGT  
TGATCAACACGAACCTGCGGATCTCCTGCTCCCCAGATAGGAGAGGGCGCGGGGTACCGAGGTGATGGG  
GGCGGCATGATCGAAGCCGGGGGCGTTGACGTAGGTGAGCAGCAGGCCGGGCAGCCAGGCATCCTGCTCC  
AGCAGGGCGGGCTACCTGGGCGAAGGAGAACTCCTCGTGGCAGATGAGCTGAAGGATCTGCTGCACCAGCG  
CCATATCGGGCTGGTTGGCCCGCTGATTAACCAGCTCCGGACGGGCGAGAAAAGCCGCCGGAAGAAGTC  
GACCCCGGCCCTCCCGCAGCGGGAGAAAATCCGCCAGGTTTCGATGTTACAGCCATCCGCTTGTGTTCC  
GTAGGCTGGCAGATCCCCTCTTCCCCATCCAGTACACCAGCAGGCGGCTGGCGCCGAGCCAGCGCGGAT  
CCCCGTTGGCGCCATGCACCGCCAGTCTGCGCCGGCTGTGCGCCACTGCTCCAGCACCGGGAACGAGTT  
GGGTTGGCGTTCACTGGAGCTTCAACCAGCGGGATCGCGTCTGATCCAGCAGTAGTGGAGCTGTTCA  
TCTAGCTGTTCGTGGGTGAAGGGCACCATGATTGACGCCCTTGCGCCAGCAGGGCGGCAATGTTGCGCTA  
GTGAAGGCCATTGCGCCGGTGAAGTGCAGTGCATGATGTCGATGCCGTAGGGCCACCAGAGCCAGGCGACGATT  
GAAGATGGGGTAGCGACGCAACAGCATGGGATCACCGATAGGCCAGAGTGCAGGGCCCTCCCTTGTGACTT  
GGCGTGGTAGAGCGCCTGGTTCAGCCTGTTTCGGTTCAGGGTTCGCCATGCTCCGTCCTGGGAGGGAACCAGA  
TAGCTAAAGCCTATGCTAACCGTAATGAAATCAGCAACCCGCGAGGCGGGATGGGGCATTTTCAAGCGGG  
CAAGACCATCGTGGATCCGTCGGCCAGCTGTTTCGGCTCACCGGTTGCGGGGCGCAGAGCAAAATGAC  
GAACTCCTCCCCGCGTAACGGGCGACCAGATTGGTGCAGCGTCGCTCTGCATCCCGCAGCACATGGGCC  
ACCTGTTGCAGGCAGAGATCCCCCTTTGCATGGCCGAAGTGGTCTGTTGATGGCTTGAACCTGTCGACGT  
CGATCATCAATACCGCCAGCAGGTTCTGGGTGCGTCGTGCCACTCCCCTCCGCTGCATGGTGTGATGTC  
CCACTGGCGCCGGTTGGCGATGCCGGTGAAGGGATCTTCCAGCGACAGCAGGGAGAGGCGGTGATTGGCC  
TCCTCCAGCGCACGGTTGGTCTCGGCCAGTTGCATGGTTCGCTCGGCGACCCGGGCCCTCCAGCTGGCGGT  
TGAGGGTTTTCCAGCTGCTCCTGAGTACGTTGACGGATCAGCAGTTGTGACAGGATAGCTGCGTACTGTTT  
GAAGATCTCGCTCTGATAGGCTTTGAGCGGCCGGTACCAGAGCAGGTTGTGCGGCGGCGATCCAGCCGATG  
GGGGTGGTGCCATCCCATAGCGATAACCATGGCGTTCAGCCACGGCCCACCTGCTGCTTCTCGTAGTAGA  
GGGGGGTATCTTCCATCACAGTACGTAGTCTTGCCTGAGCGCCTCTTGACCGTGGGGTATCCGG  
AATGGGGCTGATGAAGTTGTGTTTATCCATCAGCTCGCCGTCCTCGCTGGTGCCCCAGGTGCCGCGCATG  
GTCTTGCCATCGGGTTCGATCAGGAAGATGGCGACCCGATCGAATTGCAGCTCCTTGCAGGCGCAGCA  
CGGCATCTCGCAGCAGATCGTTCTCGCTGCGACTGCGGGAGAGGTTGACGCTGACCATGTGCAGCGCCTG  
CAACATGGTGAGGAAGGAGCCTTGCAGTGCCTGACTCTGTACCAGATCGGTCTGGGTATGGAGCCGCTGG  
TCTCGCTCCTGATTGACCTGGCTGGAGAGCAGGTGATTGCTGAGCTCGGCTGTCAGATAGTGGATAAGGA  
GCTGGATGCCCTGACGCTGGTGGGAGGAGAGGCGATCGATGCCGCGGCGGGTCTCCAGATAGATGACCCC  
TTCCAGCTTTCATGTGACGCTTTAGAGGGAAAACAGGCGCGTAACCTGAGGCTGGGCGGGCTCCACATTTTCG  
CCGGGATCCGGCGGTGCTTGGAGCTGCTCGATCACAGTGTTCCTTCTCCATCGCCTTGTGATCAGGT  
GGTGGGGCAGGGTCAGTTGACCGAGATGGGCGAGATCAAGCGTGGTCAGCCCGTGCATCGAGCTGAAAAC  
GTAGAGCTGCGGTTCCGGGGCTTTAGCCAGAGGTAGAGGCGTTCGGCATCGGTCTTTTACGGATGGTG  
GCGAGGCTCACTTCGCATAACTGAGCAAAGTTGGTGAAGTGTTCGGGTCCCATTCCTGCATACCAATAT  
CCCTTGGATTGTACCCAAGCGAGTATAGACATATTTCTCCTTGATTAATATGTCAGAAAGGAGAGACAGC  
GCACATAACGGTTGCTTTTCCAGCCCTGCTGGTGGAGACATTCAGTGCCTTTTCTGCCAATCGTGGATAGAA  
CTGTGTGCCATAACGGTATATATGGCAGCTTGTAGGGCGGGATGCCGGGCAAAAAGAGCCCGCACGATG  
GCGGGCTCTCGGCAGATCAGATGATTCTGCGTGGCTTATTCCGCCCTTGGGGGCGAGCCTCAGCGGGCGTTT  
CACTGCTATCGGCTGGCGCACTCTCGGCCGCGGGGCTTCCGGTGCAGGGCCCGGCAACCTCCACCGC  
CGGCTTGGCGATAAGGGAGCGGGTCTCTTCCACCGCTTCGGTTCAGCTTCACCTCGATGATCTGGCCGAGC  
TCATAAACCCTTCCGTCTTGTCCAGATAGACGCGGCCATTGTCACAGTTGCACTCCAGTTCGATCCTTGT

TGTCGAGGATGTGACGGGCAGGCAGGAAGACCACTGCTCCGTTTTCTGCAGACGCAGCTTGAGACCGGC  
ACGCATCACGTCGATGATCTCGGCCTTGAACACCTGATCGGTGCCAGCGGCTGCTTTCAGGTAACGGACA  
TAGAGCCAGTCGCCGATGTGCGCTCCACCATGCGGTGCAGGCGGCGGCAGGCGGTGAGGTGCTCGGTGA  
GCTCGGTGCTCGGGCGCTCACCCGGGGTCTTGCCGGCGATGACCCTTTGAGCAGACGATGGTTGACCAT  
ATCGCCGTATTTACGGATCGGGGAGGTCCAGGTGGCGTAGGCATCCAGACCCAGGCCGTAGTGGGCGCCC  
GGCTCGGAGGACATCAGCGCATAGCTCTGGAAACGGCGGATCTTGCCATCCAGCCAGCGGGTGTGAGGT  
TGTCGATCCAGCGACGCAGGGCGCAGAAGCCGGAGAGGCTGGCGATCTCGTCGCGCTCGAACGGGGCTTC  
GGCACTCTTACGAGGTGATGGCACCGTCGAGAGACTCTTCGTCAAAGCCGGTGTGAACGTTGAAGATG  
CCGTAACCGACGCTCTTGCCAGCACGCGACCGGGCGCAGATGTTGGCGGCATCATCGACTCTTCCACCA  
TGCGGTTGGCGATGCGGCGGGCTCGACGTGGATGGCCAGCACTTCGCCATTCTCGCCAGCTCGAAGTC  
GTAGTCGGGACGATCCGGGAATACCAGCGATGCTCGGTGCGCCACGCGATGCGTGTCTCGGTCATCGCC  
TTCATCAGCGGCAGCTGGGCCAGTACGCCTGCGTCGATAGACAGCTCTTTGCCATGCTCGGCCAGTCGG  
AGACGTCGTCATAGTTGAGACGGGCGTGGGAGCAGATGCGGGCGGCGAAGAACTCGGTCTCCTCCAGTAG  
CAGACCATCTTTCGGCGATGAGCAGACGGGCGCACAGAGTGTTCGCTCCTCGCCCTCTTTCAGGGAGCAG  
AGCTCGTCGGAGAGGGTGCAGCGGATCATCGGCACGTTGCGGCCCGGCATGTAGACGGTAAAGGCGCGCT  
GGGCGGCTCTTTGTCCAGCTCGCTCCCTTCGGCCACATAGGCGGTGCGGTCAGCGATGGCGACCAGCAG  
CTCCAGCCGTTATCCAGCTTGGTGTGTCAGCGCATCGTCCATATCCTTGGTTTTGGCACCGTCGATG  
GTGAAGAAGGGCACCTTGGTCAGATCGCGACGGGGCAGCTCTTCTCTTCGATCACCTTCCACTCCGGCA  
AATCAGCCGGCTCGACCTGGGCCAGATTGTGGCGCGCCAGCACCCACCAGGGCACATTGTGATCTTC  
CTGGGCGGCGATCTTCTGGATGATCTCGGCAGAGAAGTTGCCGTGACCAGCGCATGGCGCTTGAGGGTA  
GCCACCACCAGTCACCTTCTTGAACCTCTTCTCATCCAGACCCTTCTTGACGCGGGCCTTGATGGCAT  
CCTTGATCAGCGGATGGTCGGCCACCACGTTGAGGCGGTGCGGGAACATCTTGACCCGGGCCACGAAGCG  
GGTGACGGACTGCTCCAGCAGGGTATCCGGCTCGGCCACTTCTTCTCTTTTTTCGGTGCGGATCAGGGCG  
GTCACCCGGTCACCGTGCATCACCTTCTTTCATGTAGGGAGGCGGCACGAAATAGCTGGTCTTCTCATCGA  
CTTCCAGAAAGCCGAAGCCCCGATCGGAGGCGGGATAACACCCTCTTCTTTCGGGATGTTTTTCGGGAT  
TTGTTGCTTGAGCTGGGCCAGCAGCGGATTGTCTTGAACATAAGTGAGGAACCTGAAGTGAACCCCTGG  
GTGGAGACCTGATGAAGGATCGCCAGCACTATACGTTTTTAGCCCTGCAAAGCCAAGGTGAATGGCCTG  
CTCAGCGTGGTTTTCAACTGCGATCTGGCATGGTCGATAAGGCGTTGGGAGAGCTGCTTGTGAACCCCTTT  
TTCCAGTACCCAGCGGTGCCAGTAGAGGCGTCCGTCAGAACGTGGTCGGGACTGAGGTTGAGCCTTGAC  
CCGCCAGCCAGCTGGCCTCTTATCTGCAATTCGGGAATGAGACAGTAGGCCAACCCCTGCTCGGCCATGG  
CGACGAAGGCCTCTGACGAGTGGACCGTATGGCAGGGATAACCCGCCGGCTCCAGCCCGAAGCGTTCTCT  
CATAAAGCTCACATGCATGTATCGGTTGATCGAACGCCACCGCCGGTGCCCTGGCCAGCGCCTCACGG  
GTCAGGCCGCGAGGGAAGTGGCGGCAACAAAGGCGGGGCTGGCGGTAAGCTGATAGTTTCATCTCACCGA  
GCTCATCGACGCAGCAACCCGCCAGCGGTTGGGGATGCAGGCTGACTGCGCCAAAGGCCTGACCCCTCGCG  
GACCTTGTGAGGGTGCAGCTCTCGTCATCGACCAGCAGGTTGAGTTCGATGGGGTGTGTTTTCAACAAG  
GGGGCAATGGCGGGCAAAAACCAGGTGGCCAGGCTGTGCGGCTTGACGGCGATGCTGATCCGGATTGGCC  
CCTGCGGCTCATCGGGAGTCAGCTCCCCCGCCAGTTCGAGCTCAAGCTGATGTACTTGCCGATAGTGGGC  
CAGCAGTTTTCTGGCCGAGTGGCGTGGCCTGCAGCGGCTGGCTGCGAATGAGCAGCGGCTCGGCAAACGT  
TGCTCCAACCTGCTTGATCCGCTGGGAGATGGCCGACTGGGTGATATGGAGCGACTTGCCCGCCGATCGA  
AGTTCTGCTCCTGCAGTACCGCATCCAGTGCCCGCAGCAGTTTTGTAATCCAGCTCTTTCATCTTCTCCCC  
CTTCCGTTGCCCAAGGGCTGACTCTACGTCACTCGGCAGGGGACAACAATGGGCGGTGGAAGGGGCGTTG  
CGCTGTGATATCTGACAGTGGTGGTCTGTCTTGTAAAGGAAGGCATACTGCTAGAGACCCGAGGGGGCAGC  
CCTGCGGGGTATAGCGATACAGCGATACGTTTATCCCGGGCCTGTTTTCCCGGATTTTTTATATCTGG  
GCCGCTAACTCATGCGAGCGATAGGTGGCAGTTTGTAGTGTCCGATGAGCGGCTGCGAGACCCCTGCG  
CGAAGCGCTCATCCAGATGGAAGCGGATGCCAACGCCCTTACC GCCCCAGATCGACCCTGACGATG  
ACCAGCCGCTCGATGGGCAGGCCAAGTCGGCGGAAGATGCGCTCCACTGGCAGGCTGACGACGGCGACC  
AACTCCCGGATCCCGTGGGCATGGGCGAAGGCATAGACCTCGCGGAAGATGACACAAGTGAAGTTCGCTGA  
CGCCATTGCTCATGCGCGGTGCGCGCTGGGCATCGATAGCCAGACGGGTGAGTTCCAGACATCGGGGGT  
GCGTGGCGCGCTTTTACC GGCAAGGGCGGTGGGGAAGATGGTGGGCAGCATATAGGCATCGGCACAGTTG  
AGTAGACGAATACAGCCACACAGCCCTTGTTCGTCTCGATCAGAACCCAATGGGTGCTGCGGTGTCGA  
AGCTGTACGCTCCAGGCCCGATGAGACTCGACATCCAGCCTAGCCGGTCCGAAAAGACGCGATTTTCG  
AAAGCGATAGAGTTCATTCTCCACCTCGTTTCGTGGATGTTCTCTCAATTTTTCTTTAAAAACCAACATT  
ATGGACCCTCTATCTTGCTATTTCGCCGTTATAATCACATGTCTGGCCAAGGGGGCTTTTCATATGAACAGA  
GACCAACTGCTTGAGTACCTCGAACATTTCACTTCGGTGCAGACGGCAATCGTCTGGCCGAACCTGATCG  
GTCGCTTTACGCTCGGGATGGGCTATGACTACTATCGCTTCGCCCTTATCATCCCGATGTGATGCAAAG  
GCCAAGGTGGTGTGTTCAACCAGTGGCCGATTCTGGGTGCAGGCTATACC GAAAACAACATGCTT  
GCGTGCATCCGGTGTATCCGGCTGGCACGCAAGCAGACGCTGCCCATTTACTGGAACCGCCTCGATGAGC  
GGGCCAGTTTTTTGCAAGAGGGAACCATGGACGTTATGGGGTTGGCAGCCGAGTTCGGGTTGCGTAACGG  
CATCTCATTCCCTCTGCACGGTGCAGCCGGGAGAACGGTATCCTCTCCTTCATCACTTCCGAACGGGCC  
TCGAGCGATCTGTTGCTGGAGTCTCGCCGATCCTCTCCTGGATGGCCAATTACATCTTCGAGGCGGCCA  
TTCGGGTGGTGCCTTTCAGCATGATGACTGTGCGGGTAAAGACCCCTTGACCGAGCGGAGACCGAGTG

CCTGTTCTGGGCCAGCGAAGGAAAGACCTCTAGCGAGATCGCCTGCATCCTCGGGATCACGGAGCGCAGC  
GTCAATTACCATCTCAATCAGGTCACCCGCAAAACGGGCTCCATGAACCGCTATCAGGCCATTGCCAAAG  
GGGTTAGTACGGGGCTGTTGCTACCCAATCTGGAGCAAGTCGTGTTACCAACTTCCCCAGATTGCTGCA  
GTAGGCTGAGCCTGCAGGCGCAACAGATTCTCCTGCCGCACTCTGAGGGTCACAATTGTCAGATCCGGTA  
ATTGACAAGGGCTGGAACAGCGGGCGGGTATGCCGTTTTTTTTATTAGCAAAATGAATCAATCAGTAAATCAA  
TGAATTTCTAAGAAGGAACCACCATCGATATAGTGCCGCTCATTCATCATTTTCGAACGGTACTCTCCATA  
ATGCTCGCAACGACACTGCAAGGCTTACCATCGGTCTGGCCATGATTATCCCCATCGGGCGCCAGAATG  
CCTTTGTGCTGAGCCGGGGCATCCATCGCAATCACCATCTGCTGACGGCCACGCTCTGCAGTTTTCTGCGA  
TCTCACCTGATTGCTATCGGCGTATTTGGCGGGGCAATGTGCTGGCCGCCAGCCCCCTCGGCATGGCG  
CTGCTACCTGGGGTGGTGTGCTGTTTCTCGGCTGGTTTGGTGGCCGTTCCTGCTCAGTGCCTGGCGCG  
GTAAAGGGGAGGACTTGGCCGATTCTGCTCAGCAGATGGGGGCCAAAAGCGTGCTGGCGATGACGCTGGG  
AGTTACGCTGCTCAATCCTCAGCTCTATCTCGATACCTGATGCTGCTTGGCTCCCTTGGCAGTCAGGTG  
AGCGAGTCCTTTCGCTCCGGCCTTTGCTGCGGGGGCCATGCTGGCCTCGTTGGTGTGGTTCTACTCGCTGG  
CGCTGGGTGCTGCGGCACTGGCGCCCTGGCTGGCCCCGAGCCGGGTGCAGCAGGGGATCGACCTGCTGGT  
TGGCATCATCATGCTGAGCCTGGCTATTCAACTGGCCATAGGACGTTGAGGAAGTTAAGGCGGCAGGAAT  
GAGCGACCGGTAACAAAAGATGCCACTCACATGAGTGGCATCTTTGCTATTGGAGGGGCTCAGACTCTG  
AACTGGGAGAGCAGGCGCTGCTGCAGCAGGCTGGCCTGATGGAGCGAGGAGGCGAGCTGCAGACACTCCT  
GCGCCTCCTGTTCCGCGGTTCTGGCTTGCAGACTGATACCGGAGACCTTGTGAGAGGAGTGGCTCAGGGT  
GTGTGACAGTTGCCCGGTAGCCACGGCCACCTGCTGCACCATGTGCGCCAGTTGGTCGATGGCGCCTTCT  
ACCTTGAACAGGATCTGTTTGGTGTCTCGGAGTCTGATGCGGACTCCACCGTCTTGGAGTTGCGCT  
GCATCATCAGATAGGCGGTCTCGGTCTGCTGCTGGATGCTGCTGATCACCTGGCTTATCTCGGCGCTTGA  
TGTGCGCGTGCGATTGGCCAGGGTGCACCTCGTCCGCAACCACCGCAAAGCCACGCCCCATCTCCCC  
GCGCGGGCCGCTTCGATGGCCGCATTGAGGGCAAGCAGGTTGGTCTGCTCCGAGATAACCGCTGATGGTGG  
AGATGATCTGGCCAATCTGACCCGCTGCTCCTTGGAGGAGTTGATGGCGATGGCACATTCGCTCACCTC  
CTGTACCACCCGCTGCATGCCCGCGCTGGCGGAGGCGACATACTGGCTGCTCTCGGTGGTCAGCTGGCGC  
ACCTCATTGGCATTGTGGGCCGCCATGCTGCAGTTGTCCGAGATAACCGGTGGCGACTTGCACCATCTGTT  
CACTGTCGTGGTGCAGGGCCAGCGCATGTTCCGGCTGCTGGCGGCTGCTCTGGCTGATTGCCCTCACCCG  
GTTGACCGAGGTGTGACAGTGTTCGCTGATGTGCTGGTGTGTCCATGGTGGAGCTGATCATCTTCTGCG  
AATTTTTCGATGAAACGATCCACGCTGTTGGCCAGCAGCCCTATCTCGTCATCCCGTGCAGGTTGATGC  
GGGCGTTGAGATCTCCCTCGCCGGCGGCATATCCTGCATTGCTTTGTCACCTTGCAGCAGCGGGTAC  
CAGCTTGCGGGTGAGCCAGAAGCCGAGAGGGTGACCATGATCAGGCTCAGCAACAGGCCACCCAGCAGC  
AGGGTTGCGATCTGGCTGATGATGCCGTTGAGCTGGGCCACCTGATCCTCGACGGTGGCATCGCCGCTCT  
CCTCGATGGCAACCAGCTGTTGTGCGAGCTCATCGGCACTGACCTCATAGACGGACTGCTGGGCTGATA  
GCTGCCGAGCGCATCGATCCACTGTCCATCAGCTGCTGATGCCGGCCAAACAGGGCGGATACTCTGCC  
GACAGTGTCTTGCCGGCAAATTCGCCGTTCCCTCGATATCGAACAGCCCGGTGCCGAGCATGCTGTGCA  
TTGCTTCGTGGTAGAACTCGGTGCTTCTTTCAGCTCGGCTTGATCGCCTCTGTGACTCCTTGTCTGCG  
CATCTTCTCCAGAGCATAGAGCTGGCGCAAAAAGCCTATGTTGGATTCCATCCCCCGTTCGGCCGCTTCC  
CAGCGAGTGGAGAGGCGCTGTTCCAGCTGATGGTCTGGTTCGGGGGATTGGGTGAGCGCCTCGACCGCGC  
CGTCCCGATCACCTCCAGCTGGGTGCGAGAGGCGAGCCATCAGATCGGCGTGTGATGCAGGGCCTGATC  
CACCTCGGTATAGGCGTGATAGAGCGCCAGCAGCTTCTCTTGTGTTGATAGTCCCTGCTTGTGCTGT  
TCCATGGTGGCAAGGGCTGCACCATCAATGAGCAGCCCCTGGCTGACCCGGGCCAGCGGTCATCGGTGCG  
CCGCCTTGGCAGCATCGAGTTCCGGCGGATTGAGCGGGTTCGTTTTCATCTTCTGAATCTGTAGCTG  
TTGGTTGCCAGCTCTATGGAGCCCTCCATGGCACCGTTCGGCGGCTGCCAGGCGGCGCCAGGACATAG  
GAGAGCAGATTGGCTAGCCGCTGGCTGCCATAACAGCCAACGACCCCATGCCAGCGTACAGCCGAGCA  
ATATGGCAAGACCCAGATTGGAGGTGGTAACAATTTTCATGTGATGGCCTTCCTTGGTATCGACATTGGC  
ACCAGTTTCGGTTCGACGCGGTTAGTGTAGTGGTTTATCCCCCGCTCGGGGGCGGTGCGGCGCTGAA  
ACATCCCGTGCAGTGGCTGCACCCGATCAAGCATGGTGGAAAATTGGATAAAAAGCCTCTCTGACCATGC  
GGGTGTTGCTGCCCTATGCTGGATACTTATCCAGTTATTCTTTATGCTATGAGCCAATTTACGAATAGTT  
GTATTGGTGGAGAGAGCCGTGATTGGTGCCTTGGAGGCAATTGTCATTGAAAAGCAGCCCCCGAGGT  
CCTGCTGGAAGTGGGCGGGTGGCTATGAGGTACAGATGCCGATGAGCTGCTTCTATGATTGCGCGGAG  
ATCGGCAAGGAAGCGACCATCCATACTACTTCTGTTGCGGGAAGATGCCAGCTGCTCTATGGTTTTTA  
ACCACAAACAGGAGCGGGCGCTGTTCCGCGAGCTGATCAAGACCAACGGAGTCCGCCCAAGCTGGCGCT  
GGCGATTCTTTCGGCATGACAGCTACCCAGTTTGTGCTGAGTGTGCAACGTGAAGAGATAAGCTCTTTG  
GTCAAACCTGCCGGGAGTCGGCAAGAAGACCCGCGAGCGCTGGTGGTGGAGATGAAGGATCGCCTCAAGG  
GCTGGGTGAGTACGACCTCTTCTCCCCGCCATGGTACCTTGCCAGCCAGTGAAGCCGAATTGCGGGC  
ACCTGATGTGACCGAAGAGGCGGCCAGTGCCTGGTGGCCCTCGGTTACAAGCCGAGCAGGCGAGTCA  
ATTGTCAGCAAGATCGCCAAAGAGGGGATGTCGGTGGAAAGATATCATCCGTGAATCCCTGCGTAGCCTGG  
TATGAGGTAGTTGATGATTGAAGCAGACCGCTCATCTCGGCCAGTCCGCCCCGTGAGGATGACATTATT  
GACCGGGCTATCCGCCCAAGAAGCTGGCTGACTACACCGGTGAGGATACCGTCTGCGAACAGATGGAGA  
TCTTTATCGAAGCGGCCCGTCAAGCGGTTGAAGCGCTCGATCACCTGTTGATCTTCGGCCCGCGGGTCT  
GGGCAAGACTACCCTCGCCAACATCGTCGCAACGAGATGGGGTCAATATCAAGACCACCTCCGGCCCCG

GTGCTGGAGAAAGCGGGGATCTGGCGGCGCTGCTCACCAACCTCGAACCGAACGATGTGCTGTTTCATCG  
ACGAGATCCATCGCCTCAGCCCTGTGGTGGAGGAGGTGCTCTATCCGGCGATGGAGGATTACCAGCTCGA  
CATCATGATCGGGGAGGGACCCGCAGCTCGCTCCATCAAGCTGGATCTGCCTCCCTTCACCCGTGATTGGC  
GCCACCACTCGGGCAGGTTCACTGACCAGCCCCGCTGCGGGATCGCTTCGGTATCGTCCAGCGGCTGGAGT  
TCTACAACGTCAAGGATCTGACCGATATCGTCTCCCGCAGCGCCCGTTGTCTGGGGCTCGACATGACGGA  
AGATGGTGCCATTGAGGTGCGCCGTGCTCTCGCGGCACGCCCGGATTGCTAACCCGTTTGTAAAGGCGG  
GTGCGCGACTTTGCCAGGTGAAATCCGATGGCCGGATCGACGGCCCCATTGCTGCTCGCGCCATGGACA  
TGCTGGATGTCGATAATGAAGGCTTCGACTTCATGGACCGCAAGTTATTGTTGGCTGTGATAGACAAGTT  
TATGGGGGGCCCCGTGGGTCTCGATAATCTGGCCGCCGATCGGGGAAGAGAAAAGATACTATCGAAGAT  
GTGCTGGAGCCTTATCTGATCCAGCAAGGTATCTGCAACGTACACCCAGAGGACGGATTGCGACACAC  
GAGCTACGCTCATTTTCGGTCTTCAGCGACCAGATGAGAAGTAAAAACAGTCTGTTTGAACATGAAACCGC  
CGTCAAAGGCGGTTTTTTTATTATCCGGGCAAAAAAAGCCACGGCGGATGCGGTGGGCAAGACAATTC  
AGGATGGATGTTACAGACAGTGAAGTGCCTGCGACACAGACCGGAAAATAAACAGGTGAGCCGTGCGGA  
GCTCTCAGAGTGGTTTCAAGTTGATAGAGCTGAACAAAAGAAAAGCTTGTAGTAACGGATGGTTTTAGCAAC  
AAACTTTTTTCATCTTCGATTCCAATAGACAGGTTCAAATTTGATCGTCAATACGTACCCGTGAACCCGGAT  
TAACCGCCTGTATCCAAGGGTATGCCCTCACTGCGAGGCGCATTTGATAGGAGTTCGAATCGACCCCGGCA  
AACAAGAAAATTCGACTCTCAAATTAGTTTTATCTAATGCTTTTATTGATGAAATTTGGTTCGCATGAGT  
ATGCATTTTTCGAAATTTTAAATTTAGTTTTTGAATTCAGATTTGCCTGACTCGGATAACATGGAAAAAGGC  
GCGTCATTCACGCTTTTCAAATTAACCGAGTGGCGGGATGTTAAATTTCTTAAATTTGATTTAAATCAATG  
TTTTACGCTTTTATCGTGTTTTTGTGATCTGGCTCGCGTCAATAATCGTGAATAGATTAAAAATGCCTTTC  
AAAGCCATGTATGGCGGGTCTTTTACATTGATTTCAATCAAATAAAGGTGATATAAAAAACCCGGTTCATC  
ATGGGCGAGAATAAATTTAGGCTGATTGTTTTTGAATTTGTTAAACATTTAGCTTTATTTGTGTTCTCGTAT  
TGCCTTGTGTTAATGCCAGTGGTTACTGAACCGGTTTTTGTGTTGACACGTCCCAATAAGGCTCATTCGA  
TAACCTCCAACGGAAGCTTTGTGCTTAAAACTTAAAAATAGCCGTGCCAATAATCGGTGAGGAAACATCAT  
GATTGCTGAGCATGTGGTAGACCTATCGCGGTTCCAGTTTCGCTGCGACGGCCCTTTATCACTTTTTGTTT  
GTACCCCTGACGCTGGGAATGGCCTTTCTCCTGGCGATCATGGAATCCGTCTATGTGATGACCAACAACA  
CCATCTACCCGGGACATGACCAAATTTGGGGTAAAGTTGTTTGGTATCAACTTTGCCCTGGGGGTACCAC  
AGGTGTCGCCATGGAGTTCCAGTTCCGGACGAACTGGGCTTACTACTCCCATTATGTGCGCGATATCTTC  
GGGGCCCCGCTGGCTATCGAAGGGCTGATGGCCTTCTTCTGGAGTCCACCTTCGTCGGTATGTTCTTCT  
TTGGTTGGGATCGTCTGAGCAAGCATCAGCATCTGGCTGCCACCTGGTTGATGGCGCTGGGTACCAACCT  
CTCCGCCCTCTGGATCCTGGTCGCCAACGGCTGGATGCAGAACCCGGTTCGGTGCAGGTTCAACTTCGAA  
TCCATGCGGATGGAGATGATGAGCTTCGCTGACGTGGTGTCAACCCGGTTGCTCAGGTCAAGTTCGTCC  
ACACGGTGGCGGCTGGTTATACCTGTGGCGCCATGTTTGTGCTGGGTATCTCCTCCTACTACCTGCTGAA  
GAATCGTATGTGGCGTTCGCCCGTGCCTTCGCCATTTGCCGCTGCGTTCGGTATGGCTTCCATCGTG  
TCCGTGCTGATCCTCGGTGACGAATCCGGTTACGAGACCGGTGAAGTGCAGAAAGGTGAAACTGGCCGCTA  
TCGAAGCTGAGTGGGAAACTGAACCTGCTCCGGCCGCTTTACCCTGTTTCGGTATTCGAATCAGGAAGA  
GATGCGCACCGACTACGCCATCAAGATCCCCTATGCGCTGGGCATTTATCGCGACCCGTTCTCTGGACGGT  
CAGGTAACCGGTCTGAAGGATCTGAAGAGCGAGCACGAACCTGCGGTCGGTAACGGTATGACCGCTTACG  
ACCTGCTGACCAAGCTGCAATCCGGTGCAGGCTGACGAGACCCCGGCTCGCTTCGACGAAGTGAAGCA  
GGATCTGGGCTACGGTCTGCTGCTCAAGCGCTACACCAGCAACGTGACCGATGCTACCGACGAGCAGATC  
AAGGCCGCCGTGGATGACTCCATCCCGCAGGTTCTGCCGCTGTTCTTCGCCCTTCGCATCATGGTTGCCG  
TTGGCATGCTAATGCTGGTGTGATTGGTATGGCCTTCTATGACAGTGCCCGCCACCAGATCGGCAAGCG  
CAAGTGGCTGCTCAAGGGTCTGCTGTGGGGTATCCCGCTGCCGTGGATCGCGATCGAAGCTGGCTGGTTT  
GTGGCTGAATATGGTCGCCAACCCCTGGACCATTGCAGAGGTGTTGCCGACTTCCCTCTCTGCATCCAAT  
TGCCTGCAGCCGAGATTTGGTTCTCTCTGATCGGTATCTGCCTGTTCTATACCGTACTTCTGGTTATCGA  
GATGTACCTGATGTTCAAGTATGCCCGTCTTGGCCCCAGCAGCCTGAAGACTGGCAAGTATCACTTTTGAA  
CAGATCAAGGCATAAAGGAGAGCGACCATGTTTGTATTACGAAACTCTGCGTGTCACTCTGGTGGGCTCTGGT  
CGGCGTACTGCTGATCGGTTTTTGCATCACTGACGGCTTCGACATGGGGGTAGGCGCACTGCTCCCGTTC  
GTCGGCAAGAAAGATGTGAGCGCCGCTGATGCTCAACACCATGGGGCCGCACTGGGAAGGTAACCAGG  
TGTGGCTGGTCACTGCCGGTGGCGCCTTGTTCGCCGCTGGCCGATGGTGTATGCCGCGACCTTCTCCGG  
CTTCTACATCGCCATGATCCTGACCTTGTGCGCTGTTCTTGCCTCCGGTCCGGTTTCAAGTACCGCTCC  
CTGCGTGTGATGCAAAATGGCGCAGCAACTGGGACTGGGCTTGTTCGCCGGTAGCGCAGTACCGCCCA  
TCGTCTTTGGTGTGGCCTTTGGCAACCTGCTGCAAGGCGTTCGGTTCGAGTTTAAACAGTTTCATGATGTT  
GACCTATCACGGCAACTTCTTCGGCCTGCTTAAACCGTTCGGCATTTCTGGCTGGTCTGGTGGAGCCTGTT  
ATGCTGCTCACCCAGGGCGCAACCTGGTTGATGATGAAGACCGACGGTGAAGTGTGGCGCGTTCCCGCA  
CTGCCGCCATGATCTGCTCACTGCTGACCCTGGTGTGTTTGTGCTGCCGAGGTTGGTGGGTAAGCGGTAT  
GGAAGGGTATGTCATCGTCAAGGCTGCTGCGACTGACGCGGTATCCAACCCGATGAACAAGGAAGTTGTC  
CTGCAGGCTGGTGCCTGGATGAACAACCTACACCCCTTATCCGTGGATGGTGGCCGCCCTGTACTGGGTC  
TGGCCATGAGCCTGCTGACTGCGCTGTTTGGCCGATGAACATCGGCTGGCTGGCGTTTACCAGCTCCTC  
GTTGGCGATTGCCGGGGTTCATCCTCACTGCCGGTTTTCTCCATGTTCCCGTTTCGTGATGCCCTCAAGCCTT  
GAGCCGTCACTGAGCCTGACCATGTGGGATGCTACCGCCTCTTCAACACCTTGCAAGGTGATGACAGTGG

CTGCAGCGATCTTCGTACCGATTGTGCTGGGTTACACCATCTGGACTTACATCAAGATGTTTGGCCGGGT  
AACCAACAAGCACATCGAAGATAACCAACAATCTCTCTATTAAGAGGTGCGCTGACAATGTGGTATTTCA  
CCTGGATCCTGGGACTGTTGCTGGCCTGTGCATTTGGCATCATCAATGCGCTGTGGCTGGAACACACCGA  
GAACATGGATCGTCAGATCGATGAAAACAAGTGATCGACTCGCCAGGCTGGCCGCTCCACTGGAGCGGCA  
GCCGTGGCAGGGGTTGATGTTACTCGCGCGGCCCTTGTGGCCGTCGCTATTTTACAGGCCCCCAATCTG  
ATCGCGGCAACACCAGCGAGCATGGTCTCTGGCTTGTCTCCCTGGCTGATGTGGGCCGTCTGTTGTGGCG  
TACTTAACGGGCTTGGCTTTTCATCTGAAAAGCTTGGCCGGACGTGTGCTGTTCAACCCCTGGCTCGCCTG  
GCCAGTTTGTGTATGGCCTCTGGCTGACACATTCATATTTCTTTTCATAAAAAACGGGGGGAGGCAGG  
ATTTCCCTGTCTCCCCCTGCTTCTTTCTATTTCAGCCCTGCGCTATGATAGCCCCCATCTGACTGTCTGA  
ATGGATCACAGATTTGTTATGGGGGAAGTCTTTGAGTTTCCGGTGCCTGTCTACTACGAAGACACCGACGC  
CGGGGGCATCGTTACAACGCCAATTATCTCAAGTTTATGGAACGTGTCTGCACCGAATTTCTTCGTGCC  
AAAGGGGTCGAACAGGACGTCTGGCTGCAGGAGGATATGCCCTTCGTGGTGGAGCCGAACTGAGATCGATT  
TCCGCTCGGCGGCCGTTTAAATGAACATTTGAATGTATTAACGCAAGTGATTGAAGTGAACGCGCATC  
CCTGCGCTTTTTCGCAACAGATCCTGGCGGCTGATGGACGACTGATTACCCAGGCCATGGTACAGATAGCC  
TGTGTACAGTCATTTCGAAATGAAACCTGTAGCTATACCTGAAAAAATCAAGGGAGTGTGTTAAGTGCAC  
GCTGAAATTTTCGTTTATTGGCCTGTTTTGGCAAGCCAGCCTGTTGGTAAAACTGGTCATGATGACCCGTA  
TGAGCATGTCTATTGTCTCGTGGGCGCTGATTATCCAGCGTTCAAAGGCGATCAAGGCGGCAATCTCGC  
ATCGGAACAGTTCGAAGATCGCTTCTGGTCAGGGGTCGATCTCAATCGCCTCTATCAGGAGTCCCTCTTCC  
CGCCGCGATGATATCGAAGGCATGGAAGATATCTTCTACTCCGGCTTCAAGGAGTATGCCCGCTTGTCTCA  
AGGCCGGTGGCCGTTGGTCAGGATGCGGTGATGGATGGTACCTACCGCGCCATGCGCGTCTCCCTCTCCCG  
CGCGGTGGATGATCTGGAATCCAATCTGCCGGTGTGGCGACCATCGGCTCCATCAGCCCTATATCGGT  
CTGTTCCGGTACCGTATGGGGGATCATGAACGCCTTTATCGCCCTGGGTGAGGTGCAGCAGGCTACCTTGC  
AGATGGTGGCACCGGGTATCGCGGAAGCGCTGATCGCCACCGCCATGGGTCTGTTTGGCCGCTATCCCGGC  
GGTTATCTTCTACAACCGCTTCTCCAACAAGGTGCGAGCGGCTGGAGAACGCCCTACGCCAACTTCATGGAC  
GAGTTCACCACCATTTCTGAACCGTCAAATTCACAGCAGCAGGGTGATCAGTAATGCAAACCTATCAGCG  
GATCCGGCGCAAGAAGGTGGCCGAGATCAACGTGGTTCCTATATCGACGTCATGCTGGTGTGCTTATC  
ATCTTTATGGCGGTACGCGCGGTGATCACGCAAGGGGTCAAGGTGGATCTGCCACAGGCTGAGTCCGAGC  
AGTTGCCGGAAGATGCAAGCCGCCCTTCACTCGTCAGCGTCAATACCGAAGGCGAGTATGTCATCAAGGC  
TGGTGGACCGCATGATGAGCCGGTGCCAAGCGCAGCCAGAGGCGATGCAGCAATACATCACCAGAAAA  
GCCATGGGCTATCTGGCGATCAACCAGAATGCCCCCGTGGTGGTTCGCGGGTGACAAGGCCGTGCGCTACG  
AAGAGGTGATCCTGTTGATGGTGGCCCTCAAGAAAGCGGGTGTGCCCTCAGGTTGGCCTGATGACAGATCC  
GGTGAACATAACGGAGATGGATGTGAAGCGTGGTATTTCCGGTTATCTCATCGCGTCGTTTCTGCTGCACC  
TGATCATCGGCATCATCTGTTTGTGCGGCTCGATTTTCAGCAAAACCGAAACGACCCGAATCGAAGGGGCA  
GATCGTCAATGCCGTCATGCTCGATGAGAACTTCTCAACGAACAGGCCAAGCAGATCCAGCAGCAGAAA  
TCTCAGCCCAAGCCTCAAAAGGTAGAGAAAAGAGAAGGATAAGGAAGACACGGATCTCGCCAAGCGCGAGC  
TGGCTCAGAAACAGGAGCAGCTTCGCATCGCCGAGACCAAGCGCAAGCAGGCCGAAGAGGCGACTCGCAA  
GGCCGAGGCCGAGAAGCAGAAGAAGGTTGCCGAGCAGAAGCAGGCGGAAGAGAAGGCCAAAAAGCCGAG  
GAAGCCCGCAAGCTGGAAGAACAGAAGGCCAAGAAGGCCGAAGCCGAGCGTAAAGCGGCGGAAGCCGAGA  
GCAAGGCGTTGGCGTTGAAGAAGAAAAAGGAACAAGAGAAGAAAGAGGCCGAAGAGAAAGCCAAGGCGGC  
AGAAGCCAAGGCCAAGAAAGCGGAAGCTGACAAGAAGGCCAAAAGCCGAAGCCGAGAAGAAAGCCAAGGCA  
GAAGCAGAGAAAAAGCCAAAGCCGAGGCCGAGAAGAGGCCAAGGAAGAGGCTGAGAAAAAGGCAAAAG  
CTGACGCAGAGAAGAAAGCCAAGGCCGAGGCCGAAAAAGCAGGCCAAGATCGCGGCTGAGCGCAAGCGTAA  
AGCCGCGAGCAGGCCAAGCTGCAAAAAGAGATGGAAGAGATGATGCAGCAGCAGCTGTCCGGCTGAGGCC  
AATGCCCCGAGTCAGGCGGCATCGGCAGCAGCCCAGGGCGAAGTCGACAAATATGCGGCGCTCATCAAGG  
CCACCGTTGAGCGGTATATGATTTTGGATCCCACCATGCGGGGCAAAACATGTACTATCGGCTACGTCT  
TGCGAGCAGTGGCTTTGTCATATCGGTAGATAACGGCCAGGTTGACCCGCGGCTGTGCTGTTCCGGTAA  
GCAGCTGTTCTGAAAGCCAATCAACTGCCTGTGCCCAAGGATCCTGCGGCATTCGAGATGTTGAAGGAAT  
TTAACCTGAAGTTAGAACCGAGTATCTAAGCGTGATAAAAACGAGGTTGCTTGCCCTCCGGTTGGCAACCTC  
TCGCCGAGAAAGGAATTTAACCTCTCATCTATATTGGAACCGAGTATTTAAGCCATGATCAGAAAAGTAT  
TTTTTGGCTTTGGTTGGCTGTTTGTGCTGGGCCAGAGTGCCAGGCGGCCCTGGACATCGTCATCACC GG  
CGGTATTGATAGCGCACGCCCTATCGCCGTCGCCCTTCAAGTGGGAAGGCAACGGGCAGTTGCCGCGAG  
GACATCGCGGAAGTGGTCTCCAACGACCTGATGCGTAGCGGCAAGTTCAAGCCGCTGGCCCGTGGCCAGA  
TGCCGCAAACCCGAGCAGCAGCAGCAGATCAACTTCGCTCCCTGGGCCCTCCAAGGGGTTGAAGCCGT  
GGTGGTGGGTTCCATTTCCGCGAGTCGGTGCAGGCACCTACAAGGTCAACTTCGAGCTGGTTCGATGTGCTG  
AAAGGCCAGCTGGCCAAGGCGCAAGGTGGCGAGAGCAACGGTTACATCCTGGATAGCCGATGGCGACCA  
TCCCGGGTGCCAGATGCGCCAGTTTGGCCACCGTATCTCCGACATCGTCTATGAGCGTCTGACTGGCGA  
GCGCGGTGCCCTTCTGACCCGCTGGCTTATGTCTCCGTCCAGCAGGGTACCCAGTTCCCGTACCAGCTG  
CGCATTTCTGACTACGACGGTTACAACGAGAAGACCCTGCTGCGCTCCCGCGAGCCCTTGATGTCTCCGG  
CCTGGTTCGCCGATGGCAGCAAGCTGGCTTACGTGAGCTTCGAGAACCAGAAGTCCGAAATCTACGTGCA  
GGATATCTACACCAGCAGCGCAGCCTGATCACCAGTTTCCGCGGTATCAACGGGGCGCCGGAGTGGTCT  
CCGGATGGTTCGTCGCTGGCTATCGTTCTCTCAAAGATGGTTCACCGAACCTCTATGTGGTTGATGTCC

CTAGCAAGCAGCTGACCCGCGTCACAACCAGCCGTGTTATCGACACCGAACCCCTCCTGGATGCCGGATGG  
GCAAAATTTGTTGTTACCTCTGAACGTGGTGGCAAACCCAGATTTATAGCGTAAATTTGGCGACTGGT  
ATGACTCGCCGGATGACTTGGGAAGGTGAATCCAACCAGGGTGCATCCATCACTCCTGATGGCAAAATCA  
TGGTGATGGTGACCCGTGTTTCAGGGACAGTATCGTATTGCCCGTCAGGACATGGAAAACAATGCCCTGTT  
GGTCCTTACCCAGAGCGCTCTGGATGAGTCGCCAAGTGTGGCTCCCAATGGCAGCATGATCATTTATGCC  
ACCATCTATCAGGGTTCGTAAGAGTCTCGCGTTGGTGTGCGACTGATGGTTCGCTTCAAGGCTGTGCTTCCGA  
CCAGTAGCGGTGAAATTCGTGCACCAGCTTGGTGCCTTCTTGAATTGATAAAAAATCCAATGTTTTTTT  
GTTTTGTTATAAAGGTTTAAGGAAATAGCATGCAACTCAATAAACTGCTCAAGGGTTTGGCCATCGCACT  
GCCACTGTTACACCTGGCCGCTTGTAGTCTTCTTCTGATTCCGACGCTGCTGGCGCTGAATCAGGTATG  
ACCGACGGCATGGGCGGTGTACAAAACCGCGGCCAACGGCATGTTGTCCCCGGAAGAGCAGATGCGTC  
AGAAGTTGAAGCACTGCAGCGTGCACAGCTGATCTACTTCCCGTTCGACGGTTACGATATCCAGGGTCA  
GTACGCTGATCTGCTGGATGCCACGCCAGTACCTGCGCGAGCGCCCGAGCGTTAAAGTCTGATCGAA  
GGTCACGCCGATGAGCGCGTACTCCGGAGTACAACATCGCCCTGGGCGAGCGTCTGCCAAGGCTGTTG  
CCAAGTATCTGCAAACCTGGGTGTGCAGGCCGAGCAGCTCTCCATCGTCAGCTATGGCGAAGAGAAGCC  
GCTGGACATGTCCACACCGAGGATGCCTTTGCCAAAAACCGCCGCGCGTCTGGTTTACTAAGGTTTA  
AACCGAACGAAGTTCGTTTATATGCAAGCGCCATTTTCGATGGCCGTTTTATTTGCACATAACGCCAAGG  
TTTTGATCCGAATGAAATCTGCATATGCGAGCGACGATGGCGCTGGCCGTTTTATCTGTACTAAACGCTAA  
GGTTTTGATCCGAATGAAATCTGTGTACAAGCAAGCTGTGTTGCGCTGGCCGTATTGGTTGCTCTGAATG  
CGCAAGCTGCGGCTCCTGTGACGATCTGGGCGGTGACTCGGGTGGTGGCGTTGCTTGTAGTGGAACAA  
CGGCGCCATCGTGGCCACCGGTAGCCTGGAAGATCGGGTTGCCCTGCTGGAGCGCACCCCTCAATGCCCGT  
CTGCGACTGCAAGCTGAATTGCAGCAGCAGGTGCGACTCCCTGCAAGGGGAGGTTTCCGAGCTGCGTGGTC  
AGCTGGAGCAGCAGACCTACCAGATGGAACAGTCGCAAGAGCGCCAGCGTCAGCTCTACCAGGAGCTCGA  
CAAGGTTGCCAGCAGCCAGCAAGCTGCTCCAGCCGCCCCGGCCCCCTATTGCTGCCACACCGGCTGCTGCC  
GCCAATTACTCAACCAATCAGGATGAGAACCAGGCCTACGACGCAGCGGTCAACATGGTGTCAAAGAGA  
AGAACTACGACAAAGCCATTCCGGCTTTCCAGGGCTTTATCAAGCAGTACCCCAATTCAGGCTATGTTCC  
CAATGCACACTACTGGCTCGGCCAGTTGCTGTTCAACAAGGGTGACAGAGCCGGTGCCTCGGCCAGTTTT  
TCGACCGTGGCCAACAAATACAGCAAATCCCCAAGCGAGCCGATGCGCTGCTGAAGTTGGGTATGCTGG  
CGCAACTGGATGGCAAGAAGCGGAAGCCAAATCCTTCTATGAGCAGGTGATCAAGGGCTATCCCAACAC  
CTCGCCGGCCAGTTGGCCAAACAGAGTCTGACCAAGCTGTAACATTGCTGTATGTCACTGTTTTCTGTAA  
CGCTACTGTAAAAACAGCCTGCATTTGTACGCACAGTGAGCAAACGGATTTAAATTTACGAATTTTCTGTT  
GCACCGGAAATTTAAATCCGTAATATAGGCCGCCGTCAGAGCCGAAGCAGTAATGCAGTCGGAACCTGGTC  
GTGGTGAGGGTTCGTTAGCTCAGTCGGTAGAGCAGTTGACTTTTTAATCAATTTGGTCGCTGGTTTCAATCCA  
GCACGACCCACCATTTTTCTCCACTCGGTGGAGACAGAATTTCCAGGTTCGTTTAGCTCAGCTGGGAGAGCA  
CCTCCCTTACAAGGAGGGGGTCACTGGTTTCGATCCAGTAACGACCACCAGTTTTGTAAAAAATGATTTA  
GATGGGTTCGTTAGCTCAGTCGGTAGAGCAGTTGACTTTTTAATCAATTTGGTCGCTGGTTTCAATCCAGCAC  
GACCCACCATCATTTCAGAATCCCAGGTTCGTTAGCTCAGCTGGGAGAGCACCACCTTACAAGGAGGGG  
GTCACTGGTTCGATCCCAGAAACGACCACCAGTTTTGTAGAAAAAATGATTTAGTTGGGTTCGTTAGCTCAG  
TCGGTAGAGCAGTTGACTTTTTAATCAATTTGGTCACTGGTTTCGAATCCAGCACGACCACCACCATTTAG  
AATCCCAGGTTCGTTTAGCTCAGCTGGGAGTGCACCTCCCTTACAAGGAGGGGGTCACTGGTTTCGATCCCA  
GAAACGACCACCAGTTTTGTAGAAAAAATGATTTAGTTGGGTTCGTTAGCTCAGTCGGTAGAGCAGTTGACT  
TTTTAATCAATTTGGTCACTGGTTTCGAATCCAGCACGACCACCACCATTTTCAAGATCCCAGGTTCGTTTAGC  
TCAGCTGGGAGTGCACCTCCCTTACAAGGAGGGGGTCACTGGTTTCGATCCCAGAAACGACCACCAGTTT  
TAGAAAAAATGATTTAGATGGGTTCGTTAGCTCAGTCGGTAGAGCAGTTGACTTTTTAATCAATTTGGTCGCT  
GGTTTCAATCCAGCACGACCACCACCATTTTCAAGAATCCTAGGTTCGTTTAGCTCAGCTGGGAGAGCACC  
TCCCTTACAAGGAGGGGGTCACTGGTTTCGATCCCAGTAACGACCACCATATTCGCAAGCAAGGCTGAGAT  
ATCAGCTGCGGTTGCAGAGAAAAGTCCCCACTCAGATGGGGATTTTTTTTTGCCCCGCAATTCAGTACTCCAG  
CTTCTTCTGTTGCCGTTGTGGCGAGCCGAACGCCACCTCTTATAGTGCCACTCTGCCACTCTGCCACTCT  
GCCACTCTGCCACTCTGCCACTCTGTCAATTTTCGCACATCCTCTACTCTGCTCTGCCGAGATTGCCCGACT  
GCACTCCTGTCCATCGTGATGCTGCTTATATGAACGCTGTAATAAAGTAAACGCCAGCAATAAAAAGGG  
CAGGCCAAAGCCTGCCCGCAAAGATGCGCAAGGTGTTACATGATCCCGCGGATCAGGATCCCGCTGATCA  
GCAGCGGCCACCACGCGCCAGCACCAGAGCAGCGCCAGACGCAGGGCGGGTGACAGGCCCGCAGGCCAA  
TATGGCATCACCAATTTGCCAGCCAAGCAGCAGGGTCAGTATCAGACCAAACAGCGGCATCATCAGGTTG  
GAGGTTCAGATAGTCGAGCAACTCGAAGATGGTCTTGCCAAACAGGGTCAGATCGCTCCATGGGCCGAACG  
ACAGGCTCACCGAATGCCGGAGACCATGATAAGCAGGGTCAACACCCGGCAGGCACCACGGCGCGACCA  
GCCCCACTCCTCGGTGGTGAAGCGCACCAGATGCTCCAGCATGGAGATGGAGGAGGAGAGCGCGGCGAC  
AGCAGCAACAGGAAGAAGACCACCCCGACCCCTGACCGAGCGGCAGATGACTGAACACGGCTGGCATGG  
TCATAAAGGTGAGTCTGGGCCCGGGTGGGATCGATGCCGGTGGAGGCCAGCGCCGGGAAGATCATCAA  
GCCCGCCAGCACCGAGATAAGGCTTGCCAGTGTGACCACCCAGACCCCGGAGCGCAGCACCCCTTCGCTA  
TTGGGCAGGTAGGCGCCATAGGTAGTGTGTACCCGAGCCCGATGGAGAGGGAGAAGAAGGCCAGCCCCA  
GTGCGTCCAGCACGCTCTGGCCGGTACGATGGAGAAGTCCGGCAGCAGCAGCTGGCGTACACCCGCCAT  
GGAGCCCGCATGGAGAGACCGACCCACCAGCAGCAGCATCATGATGAAGAGCGGGGCATCATCCAG



CGCAGCGCCCCGCTCCACCCCTTTCTGAATACCCCCCTGCACGAACCACCAGGTCAGGCCCCGGAAGATCA  
GATGGGTGACGACCCGGCCACCAGGGGTTGCTGACATAGCCGTTGAACAGGGCGGTGAGGGCGCTCCCCCTC  
GCTCAGGTTGAGCTTGCCAGCCATCGCCAGCGCGGCGTAACCCACGGTCCAGCCACCAGCCAGCTGTAG  
AAGCTGTAGATAAAGAAGCCGAGGCGATCCCCATATACCCCATCCAGCGCCAGTTTCGGCCCCACCAGTT  
TGCGAAAAGCGCCGAGCACCCCCGCGCTGGCTATGGCTGCCGAGCAGGGTTTCGCCGACCTGTACCGCTAC  
CCCCAGGGTGAAGCTGAACAACAGAAAACACCAGCAGAAAAGGCGCCACCGCCATTGGTGGCGGTACATAG  
GGAACTTCCAGATGGCACCAAGGCCAATCGCTGTGCTGCTGCCGCCAGCACATGACCGAGACGGGAAG  
ACCACTGAACCTGGCTCATACAACCTCCGGGTAACACGACATCGAAGCAATACTCCTGAGTAGCAATAAAA  
CGACAGACCATAAAAAAGGCCGCTGAGGCGACCTTTGCAATGAACATTCAGAAAACTGTGCGTACAAG  
GTCACCTCTCTTGCAGCTAAAAAATCGACAAAACAGCAGGATGGCAGACATGAGGTGACAACCTGA  
CTAATGAATGAGGAAACAGCCTAAACCATGGAAAAGAATAATTGACACATAAAAATCAAAAATTTTTATGT  
GTGCCGCTGTACCACCTCTGGCTATACGTACAACCTCAGTGGGGGAAAACCTCGCCGGCCGTATCTTTTC  
TACCTTGTGGCTATTTACTGGGCGATAATCGACGTAGCTTCTTCTGGAAC TAGTGACCGCTACATGGCGC  
TGACGGGAACAACGATGAGACAGGATGTCTGATGAGATGGATGGTGTGCTGCCCTGGTTACTGATCAGCCTG  
AGTGTGTGGCGCAGTCCGGATTAACCTGCTGAGTCACGACTTACCCCCCTTACCGAATACCGCGATG  
GCAAGCTCGATGGTTTTGCCATTCTGTTTATTGATGAGGTGCAGGAGGAGCTTGGCACCCGCTATCCGGT  
GCGGATTTACCCGCTCAAGCGGGCGCTGGCGTTGGCACGGGTCGAGCCCGCTATGGACTGTTCTGTGGTA  
CAGCGGCTCCCTGAGCGGGAGTCCCATTTCAAATGGGTGGCCCGCTCTTTATCAATCGGGTCTTTATCT  
ATCAGGCGCCGGATAGTCGCCACCCGCTGACCTCGCTGGCGCAGCTGCGAGATCTGCCAGAGTGGGGGT  
AGTGTGGGTAATGCCGATGACGTGCCGCTGACCCATGAGGGCTACACCAATCTGGTGGCTACAAGACA  
GTCGGGGAGGCGATAGAGCGGCTGATGCTGGGCAAGATCGATGCCCTGCCGATGGCGGAGCTGGTGTAGG  
AGGCCACCCTCGACAAGATGGGGTTATCCCGGCGCAGCATCGTCAGCAGTGGCGTGTGCTCCATCAGGC  
CGGTCTCTATATCGTCTTCTCCAAGGGAACGGATGATGCCGAGATCACCCGCTGGCAGCATGCCCTGGAG  
GCCGTGAGAGCCGCCAGGGGCGGGCCGATGAGCCCACCCGCGAAGAGTAACCGTCACACCAGACCCGCGA  
ATCAAGATCCCGCCGATCAGCAAGGGGGCAATCCAGCGCCAGCAGTTTCATCAGCAGGTGATGCCAGTGGC  
TGGCAATCCCCTGCGGCAGCGCCTTGGCTCCAGCTTCCAACCCAGCAGCAGCGTCAGCATCAGGCCGAA  
CAGCGGCATCATCAGGTTGGAGGTGACAAAGTCCAGCAGCTCGAAGATGGTTTTGCCAAAACAGGGTTGCC  
TGTTGACGCGGCCAAAACAGCAGGCTGACCCGAAACACCCGTAACCATGACGAATCCAGTGTAGGCGCTGC  
AGGCCGTGCGGCGTACCAGCCAGCCAGGCTCTCGCACAGGAAGCACTGCAATGCTCCAGCAGGAGATGGC  
CGAGGAGAGCGCCGCAAAGACCAGCAGGGCGAAGAAGATCACCTCAAGCACCTGACCGAATGGCAGCAGC  
TGAAACACCGCCGGCATGGTTCATGAAGGTGAGACCGGGGCCGGAGGCGGGTTCGATACCGGTGAGGCCA  
GCACCGGAAAATCATCAGCCCCGCCAGTACTGCCACCATGCTGGCCAGCAGCACCACCCAGAGGCTGGA  
GCGACCAACCCCTTCGCTGGTGGCAGATAGGCGCCGATGGTGGTGTGAATGCCAGACCGATGGAGAGG  
GAGAAGAAGGCCAGCCCCATGGCATCGAGCACGCCGGACATCCCAGCTTGTGAAGTGGGGCATCAGGA  
AGTGACGTACTCCCGCCATCGCATTGGGCAGGGTGGAGCCAAAGGCGACCAGCATCAGGATCATCAGGAA  
CAGGGCGGGCATCATCCAGCGCAGGGTACGTTCCACTCCTTTCTGGATCCCGCTTGTACCACCATCCAG  
GTGAGGGCTGCAACAGCAGGTGAGTGGAGATTGGCCAGACGTCGCCGCTGACATAGTCATTGAAGCGGG  
CGGTGAGGGCTGCTGCATCACCATGGTTGAGATCGCCGGAGATGGCCATGCCGTTATAACCCAGGGTCCA  
GCCGCCACCACGCTGTAGAAGCAGTAGATGAGCAGGGTAGAGATCACCCCATTACCCCAACCCATCGC  
CACTGTTTTGCCGAGCAGCTCGGAGAAGGCTCCGACCACCCCGCGGCGACTCATGCTGCCGAGCAGGGTTT  
CTCCCATCAGTACCGCCACCCCAAGGTGAAGCTGAAGAGCAGAAAAGACCAGCAGGAAGGCGCCGCCGCC  
GTTGACGGCGGTGACATAGGGGAATTTCCAGATTTGCCCGGATACCGACCGCGGAACCCGCTGCGGCGAGG  
ATGTAGCCGAGTCGGGATGACCATTTGGGACTGCTTCATAAGAACTCCAATCGAGCGCCCTTGGCAAGGG  
CAGAATGGCGCTCATGTTACGGAGGTACGGCGCAATCACTACGACGGTTATCAGGTTTAAATGCGATTT  
TTTTGGCAGGATTTGCTAATTTAATTCTATTTTTTGGCCAATCCTGCCAACAAAATAAAAACCGGAGCGAGA  
TTGCTCCGGTTTTGGTCTCTGACAACTGCTCGTGGTGGACTAGATCACCCGAGCTCCCGCAGCCGCTCC  
ATCAGGTAGCTGTGGGCGGTATGGCGCTCGGAGAGCACCACCTCGGGCCGCGGATGGAGGAACAGCGGCA  
GCGAGATGCGTGACTTGTGTCGCACTGCCACCGGTGGGTTGATGACCGGTGGGTGGTGGAGGGATAGTA  
GCCGCGAGAGGCTCCTGCAGCATGTGCGCCGATATTGATGATGAGGGTGGCAAAGTCAACACGGCACATCC  
ATCCATTGCCGTCGGAACCCCTTACCTGCAGCCCTGGCTCGTTGGCGGCGGGCAGAAATGGTGAGCAGGT  
TGATATCCTCGTGGGCGGCGGCGGATGGCGCCGGTTCTCGGTGCCATCGAACGGCGGGTAGTGCAG  
CACCCGAGCAGGGTCTTCTGGCTCTCTTCGATCATCGAGGAGAGGGGGCAGCTGTAGTGAGCGGCGATA  
TCGGCCGGGGTGTACTGCTCGACCCAGCCAGCAGCTCGGCGCCAGACCGTTGGCGAGGCGGTAGTACT  
CCATCGCCTGCTCCTTCAGTTCTTCCGGCATCTGGCCCCAGGGGTAGATGTGGAAGTACTCCTTGATGTC  
TTTTCTGGCTATGGCCCTTGGCCACCTCGGAGACCCAGCGCGGGAAGTAGCCATCCTGGGTCTCGCGGTTG  
AACAGGAAATCCTGCTTCTGCTCGCTCATGAAGAAGCGATAACCAGTTGTCGTAGATGGACTGCACCAGCT  
CTTTTCGGGATGGGGTGGTTGGTTCAGCACGCCAAAAGCCGGTGGTTTCGCAGGGATTCCGGTGAAGCGTTGGGC  
CGCATCGGGTGGAGCGGTAATCGACGGTCCAGGACTTTTCATTGTTTTTGTGTCGCGCCAGTTAAAAGATGGC  
GCAGTTTACCTTGCACCTGATAACAAGGAAAAGCGGGTTGGCTGCCCCGCTGGCACGGCGTTGAATAGTG  
ACAAAACATCAAATAAACCGCGCCAGACCCGACGGGAGCACATCCCTTGTATGGCCTTTTATCCTCTC  
TAGAATGCCGGTCACTATCTTTTCCGGAGTCTGTTTCATGTCCCCAAAATCCTGTTGCTGACCTGCCCG

TATTGCTGGCGGGATGCAGTGCCCTGTCAGAAGATGAGTGCCGCACCATGAGCTGGTACAACCTGGGTTA  
TCAGGATGGATCGGAAGGCCAAAACCCGTCAGGCGACCCGCGATTACGTTTCGTCTTGCAGCGAATATGGC  
CTCAAAGTGGATGAAGCCGAGTGGAAACGGGGCTACGACAAGGGGCTGGAGCTCTACTGCATTCGCCGAGC  
TGGCTTACAGCAAGGGCAAGGAGGGGCAGGCCATCTGCGGGGATGCCCAATGATGCCAGCTTCCTCAA  
GCAGTATCAGCGTGGCTACGAAGAGTACAACTGGCTGCCCGCTGCGGGAGATCAGCGACGAGCTGGAG  
CGTACCGAGAGGGATATCGATACGCTGGAGCGCAGCATCCGCAACGAAACCAACACGGAACAGCGTGA  
ATTACCGCGCCAAGCGCGATCGGGCCATTTCGCCACTACGAATCCCTGCGCCGGGAGTACAATCGTCTGCG  
CTATCCGGATCGGGTATCCAGTTCTCCTTCGGCGGTTAATCCCTCTCTTCATGGCCAGCCCGCGTGTG  
GCCATGTTGCATCCTGTACGCTCAGGGCAGAACCAGCGCTGCAGCGCCAGTGCATACCATCTTCGTTG  
TGGTCGGCCGTCAGCCGATGGGCATGGCTCTGGATCTGCGGGGCCGATTGCCATGGCCACCGCCAGCC  
CCACCTGCTCGAACATGCTGATGTCTGTTGTTGTGTCGCGGAGCCAGCCACCTGCTCCATCGCAATCCC  
TTCGCTGGCTGCCACTGGGCCAGCCGTTGCCCTTGTCTGCAACCGGGCTGTACCAGCTCCACCGCATAG  
GGGGCCGCCAGTGCAGGGTAAAGGGCATCTGCTCGACTACCTCGCCATAAAGGTGTGCAGGCGTGCCG  
GATCCTGATTGAACAGCTCCAGCTTCCAGACCGGGTTATCGAGCCAGCCTGCCAGCTCCTCGACCGGGTG  
GAGGGCGATCTTGAGGTGGTCCGGCTGATTGGCCGACAGTGGCGGATGCGGGTGACATGCTCTTCACAG  
CCGATGTAGCCGATCCCTCGCTCAGGTGGAACAGGGCGCCCATCTGCTGCGCCTCGACCGCGGCCAGCA  
GCTCGGTAAGCGGGCAGCCGCCAGCGGGTGCCTGATGATCCGGTTCTGCACCGGATCATAGAGATA  
GGCGCCATTGCTGCAGATGAGGGGGGTATCGAGGGCCAGCTCGTGGTGAAGGGGGCGTGCCGTCATGTAG  
TGGCGCCCCGTGACCAGCAGCACCTTGATGCCGTGGGCGCGGGCTGCGCCAGGGCTGCCCGGGTGGCCG  
ACGAGATCTTGTGATCCCGGGTCCAGCAGGGTGCCATCCATATCGAGCGCGATGGCCTTGTACTCACTCAT  
AGCTCCTCCAGCATCGAACAAATCTGCAAGAGCCTTACCCTCCAGACCCGGCGCCCCGATGCAAGTCT  
TGCCCGCGGCCGAAGCGCCGAACTGTGATCCCTTCGTGGCTCAGGTGCAGCTGGCCAGCTGTTGACGACG  
GTCGGCACGGCGGCCAGCAGATAGAAAACCGCGGCACTGGCAAGGGAGCAGAGGGTGGCGAGATAGAAG  
GGCCACTCGGTACCGGCCAGCAGCACCAGACTGCCGAGCAGCACCGCCAGGATCTCGCTGCCACGGCGA  
GGGCGCGGTAGAGCCCCATCGCCTGCCCTGCTGCTCCGGGTGACTGCGGTTGGAGATCGCCACCGAGGT  
GGCCAGCTCCCCAGGCTCATGCCGATGCCAGCCGGAACGAAGGTAAGCGCCAGTCCCCACCAGTGCACG  
GGCAGGATAAAGAGCAGCATGCCGCTCGCCATCACCAGATGGCCGACAATGCCGAGGGAGCTGCCGCGCC  
AGTGACGGGGGATCGGGGAGCCAAAGCCAGGAGCCGCCATCATGGGCAGGCTCACCAGCACCGCCCTG  
CGCAGCTGGGCGGGATCCAGGACAGCCAGCTCCACAGCAGATATTGAAGTAGGTGAAATAGAGCTGC  
ACGGCGCCATAGCTGATCAGGGTGTGAGTGCAGAGTAGGGCAGCAGGGCGGTTGCAGCAACAGCTGGCGGC  
TGGAGAGTGTGCGGGCCTGAAGGGTGGCCGCCACCGCGGACGATAGGGGATCAGCCAGAGCACCAGCAG  
CAGGTTGAGCAGGGTCATTCCCTACCGCCAGCCAGGCGGCCAGACTGTAATCCCCCGAGATCACCCGGGCG  
TAGCCCCCGATCATCGCCCCACGACCAGCCAGATTCATGCCGATGTTGATCCAGGCGAAGCTGCGCG  
CCTTGTGCTCCTTGCCGGCGAGATCCGCCCATCGCTGCACGATGGCGATGTTGCCGTTGCACAACCC  
CTCCACAATCCGGCTGAGCAGCAACAGGGGGAGGGAGCGCCAGGCGATACCGAGTGCCATCAGGGCATAG  
CCTGCCAGTACCCCCGCCAGCGAGAGCAACAGCAGTGGCTTGCGGCCATAGCGGTCCGAGAGGGCAGCGA  
GCCAGGGACTGCCACCAGCTGGAACAGCGGGTAGAGCCCCATGATGACTCCAGCCACACCTTGCGGCT  
CCAGTCCGAGGCTTCCGGCGTCCAGCATCCCCTGCGCCGGATCCAGCAGCAAAGGTGCCAACACCGGGGAG  
GGAAGACTGAAGCCTGCAACTGCCAGCGTGACCGTCATGACCAGCACCCAGAGGGGATTTTTTGTGCTCGT  
GTTTTCTCCATGCTGCACCCATTAAGTAAAGTTATTAGTTTTATTTATGCTGGTTCATAGACGGGATTAAGT  
AAAGTGAATTGTTGATTTAATAAAGGGGGCTCCCCATAATGGGGTCATGAACGCAAGCACCAGCAAGATC  
CTGTTTCTGCTCAAGAGCCATGGCCCCAGAGCGCCCGCGCTGGGGGAGCAGTTGCAGATGACCTCCA  
TGGGCGCCCGCCAGCACCTGCTCACGCTCGAGCAGGAGGGGTGGGTACATTCAGCGACGAGGCGCGCGG  
GCGCGGTGCTCCCGTGCAGGCTGTGGCAGCTCACCAGCAGGCTGGCAGCGCTTCCCCGATAGCCATAGC  
GACCTGACCGTGAACATGATCGACAATGTGCGCGAGCTGTTTGGCGAGGAGGGGATGGAACGGCTGATCC  
AGCAGCGAGAGCAGAGATGTTGACGCGCTATCAGGAGCGCTGGGGTCCCATGGCCTTTCTGGCCGGCT  
GGCGGCGCTCAGGGAGCTGCGTACTCGCGAGGGCTACATGGCGGAGATCCTCCGCGAAGAGGATGGTAGC  
TGGCTGCTGTGGGAGAGCCACTGCCCCATCTGTGCGGGCGCGCACCTGCCGCGGTTTCTGTGCGAGCG  
AACTGACGCTGTTTCGCCAACTGCTGGCGCCGGCGACGGTGGAGCGGGAGCAATATCTGCTGGAGGGGGC  
ACACCGCTGCCTCTATCGCATCACGCCGCCCGCTTCTGATTTTCGTCAAACGCCCAAAAACAACAAAGCA  
GGCGCCGGGATGCCTGCTTTGTTGCTTCGGGGAGGGGGTTCCTCTCGTTCCAGCCCGTCTGTTTCCCGATA  
AGGTAAGACGGCTGATGGGGCTCTTGACCCGGTAAGGTCTTACCAGCAAAACCCGGTCCAGGTATCTGC  
TTTGCCACCGGAAGATGTAACCATAGTATCCTTCCCGTGCCTGGTGGTGGTTCGAAAGTAACCACTTATT  
TCGATTTGTTTTTGAATACTTACCCTTAATCTAGGAAAAGTGGATTAGTCAATTGCAACGAGGAAGGGTA  
AATGCTGAAACTTGATCGCATAGACAGACATATTCTCGAGCTGATGCAGGAGAAATGGCCGCATCAGCAAT  
CTGGAACTGGCCGAGCTGGTCCGGCTCTCGCCGTCGCCCTGCTCCCGCGGGTCAAGGCGCTGGAGGATG  
CCGGTCTCATCGACACCCACGTTACTCTGCTCAACGCCCGCCAGCTTGGCCTCACCTCACCGCCTACAT  
TCACATTTCCATGGACAGACATACGCCGGAGCGGTTTCGAGAATTTTCGATCGCGCCATCAGCGAACTGCC  
GAAGTGTGGAGTGTGATCTCATCACCGGTAATGATGCCGACTACCAGCTCAAGGTGGTGGTGCAGCGACA  
TGGAGCACTACCAGCACTTCTGCTGGACAAGCTGACCCATATTCGGGGGTGACCGGTGTGCGCTCCAG  
CTTCGTGCTGCGCCGATCAAGCACAAGACGGCGCTGCCGCTCAACCATCTGGGTTGAGCCCGCGCAAAC

CGCTTATAGAAACAGAAAGAGGGGGCCAGTGGCCTCCTCTTTTGGCTATTGCTCTTGGTTATTGCGTCTG  
GGTTATCGGGTCTGGATTAGCTGTGCGGGTACGGGGGCGACTGCCGTGGTCAGACGCTGACCTGGCTGAT  
GTCTTCCACCTGCAGCAGCCAGCCGCTCTGCTCCTGCTGCGGTTGCGCCGTAACCTGCAGCCGCTCGCCG  
GTCGGCACCCACTGCCCTCGGGCAGGGAGACCAGCAGGCTCTCGCTGCCGTTGTCGAATAGCCAGCGAT  
CTTCGCCAAGCGATTCAATCAGATAACCTTCCATCTCCACTCTGGACTCGGCTTGCCAGGATGGCGCAAC  
GGAATCACGGCTCTCGATGAAATCCCCCTGAAACACAAAACTGGCTAGCCCCACAGAATGGAGAGCCCCG  
ACGATGGATGTTTGCATCTTGTCTCTCTCTTTTGGAACTGTAGGGCCAGTATGGGAACAGAAAACCTGAG  
CGCACCATGAACAAGGTGGCAAAGTGTGGCGAGATCGCGAAAAAATCCGGTCAATTGGCCGGCAGAGTC  
ATTTTATGGTGTCTGGATCACACTATTTGGCGGCTTCTTCTGCCATCCGTTTCCAGCTCTTGGCTTATTCGT  
CCACATGGCTACCCCGCAGTATGATCCCCACAGATCCCCCTGTCACCACGGCGCGAACCCGGGTGCCATCT  
TTGCAAATGGCCTGCCAGGCGTCCGCATCATCGATGGCGAGCGAGTTGGGGGGCGGCGTGGTTTGGCAA  
CTGTGAGCAGCAGGGCGCACAGGGGGAGCAATTTTTTCATGGCGGACTCCTCGGGTAAATGGGGGACTGA  
GAGGATGGGGATGGCCTCTCCATCCGGGCTTCACTCCCCAGCATCAGTGATAACCGTTTCCAGGGGCAAGG  
GGATGGGTACCCGACAGGCGCAGGTGCCGTGCAGCCGAGGCTTGCCCTGTGCCCTCCTTGGGCCTAAGGT  
GGGGCAGTTTTACTGCCTGATTGAAGGATCGTTTTTTCATGTCCACTCTCTATCCCCGCGTCGGGGTCCGGC  
TCATCCTGACCAACGCCCAAGGCCAGGTGCTGCTTGGCAAACGCAAAGGGAGCCATGCCCCCTACTGGTC  
GATCCCGGGTGGTCATCTGGAGTTGGGGGAGAGCTTCGAGTCGGCGGCGATCCGCGAGGTGGCCGAGGAG  
ACGGGACTTGAGATCCATGGGCCCGAGGTGGTGGCGGTGACCAACAATCTGGAGACCTGGCGCGAGAGCG  
GGTTGCACTATATCTCGGTGACGCTGCACGCTAAGGCCGATGGTGAGCCGCAACTGCTGGAGCCGGAGAA  
GTGCGAAGGCTGGGTCTGGTGCATCCGTGCGCGTTGCCCGAGCCCCATTTTCGACGCCAGCCGTCAGTCC  
ATCGCTTGCTGGCTGGCGGGACGCTGCTATCTGCCGGGTGATATGCCCATGGTGTGCGCCGAATCAGCCT  
GATTGTCAAAAACGATCATCGCGCTGTCAATAATATCCCCCTCTCCATCGGGAGAAGAAGGATGAGGGAGA  
AGAGCGTGGGGCAGGTATTTATTCAGTTTTTATGGCTGGGATGCATAAGTTTTGGCGGCCAGCCGCTCA  
TATCGGCTATTTCCAGCGCACCTTCGTCCAGCGGCTCGGCTGGCTGACACAGGTCGAATTTGCCCGCTTG  
CTGGCGCTGTGCCAACTGCTGCCGGGGCCCGCTCCAGCCAGCTGGGTTTCGCCATCCGGTCTCATCGCG  
CCGGTCTGGGCGGGGCGCTCTCTGCTTTTGTGGCTTACGCTTCCCTCATTTCTTCTGCTACTGGCGTC  
TGCATCGGTATCGGTGAGCTGGGCAGCAATTTGTGGCTTGATGCGGCGCTGCACGGCCTCAAGCTGCTG  
GCGCTCATCGTGTGGCGCATGCGGTGCTCAGGTGAGTGTGCTGAGTTCGTGCCACGGGAATGACCCAAG  
GGATTATGGTGGCGACCCGCTGCCGCACTCTGGTGGCAGCCCGGCTGCTGACTCAACTTGTGATGCTGGC  
GGGAGCGGCGCTGATCTGCGCCCGCAGCCAGTGGCGGGGCGGGTAGTCGCCAGCCTCCACCGATTGCCCT  
TCTGCCGCCAGCAGTCAGCCTCATTGGCCGACCCTACTGCTGTTTGGCATCCTTTTTATCGGCCTGCCGC  
TGCTCGGTAGTCCGCTTGGCCAGCTGGCTGCCGACTTCTATCGCGCCGGTAGTCTGGTGTGGCGGTGG  
CCATGTGGTGTGGCGCTACTGCAAGAGAGCGTGGGCCACACTCTCAACGAGCAGCAGTTTCTGACCGGT  
TACAGCCTGGCTCAGTTGGTGGCGGGCCCATGTTTACCCTCGCCACCTATCTTGGTGCCAGTTGCAGC  
CCGAGATGCCGATGATCGGGGCCCTGTTGGCGACCCTGGCGCTCTTTGCGCCCGGCTTCTGCTGCTCTG  
GGCGGTGGGCCCTGCTGGCAACAGTGGCTGGCCCGGCCCGTCTGGCGGGGGCCGTACCAGGAATCAAC  
GCCGCCGTGGTGGGCTTGTGCTGGCGGCCCTCTATCAGCCGGTGTGGCAGAACGCGGTGCTGGCGCCGA  
CCGATCTGGCGCTGGCTGCCATCGGCTTTTATCTGCTGCGGGTGGTGAAGCTGCCGATACCAGCCATCGC  
TGCCCTGTTGGTGTGCTGCTATCCTGCTGGCGTGAAGCCGGTGAAATCCCGATAAAAACGGCGCCTCC  
GTGATGGAGGCGCCGTTTTTATTGCAATGGGTGAGCCGTTTACAGCTCGGGATCGAAAATCCAGACTCAGG  
CTGTTGACGCAGTAGCGCTGGCCTGTCTCGGTCCGTCCGGTGGGGAAGACGTGACCGAGGTGAGAGCCGC  
ACTGGCGGCAGGTGATTTCCACCCTCTTTCATGCCGTGGCTGTTGTCTCGGTGACTCCACCGTCCCCTC  
GATGGCCTTGTGCAACGAGGGCCAGCCGAGCCGGAATCAAATTTGGCTCCTGAGTGAACAGCACGCTC  
TTGCAGCAGACACAGAGGTAGTCGCCGCTCTTGCATTGTGGAGCAGGGCGCCGCTGTAGGGGCGCTCTG  
TGCCCTTCTCCCAGCAGACGCTGAAACTGCTCGGCGGTGAGTTTGTGCTGCGCCACTGTTCCGGATTGTTACT  
GCTCATACCGACTCCTTGGCCATCCATAACCGGAGCCAGCATAGCGGCTCCGTAAAGCTGACTCCAGCATG  
CCTCTTATGCTTTGCTGTATCTGTGATCGAGGTGGCAACCATCTCCTCACCAGGATGAGGGAGAATTTT  
CTGCTGCGGTGGCTGGGCATCCTCCGCGTGTGGCCAGCGCCACCCGCTCCAGCAGTTTGGAGGAGTGG  
GCCCGGCCGACCGCCACCTGCCGTTTGTGATGTCATCGGGCAGGAAGGGCAGCCCATCGTTAGTGGCGGTG  
CGATGGTCTGGATCCACTCCAGCCCTTCCCCGGCGGGGGCAGGCGGAACGGATATCGTAGTCCGCTGGC  
GTTGAACAGCACGTACCAGCGCTCGCCGACACAGTTGATCATGCCGATATCCATGGCGAACGCCGTGCCCC  
ATGGGGGCGTGCCAATCCTGATCGGTGAGCTGGTGGCCGTCCGGGTGATACCAGTTGACCTGATGGCAGC  
TGGACGGTGCGCCATTCCAGCTGTGCTGCTCAGCTGCAGGTGGAGAAGACGCAGGACTCTGCCCGCAG  
CGCCATCATCTGCTGGGTGAAGGCGAACAGCCGCTCATCTCCGGCCGCACTGCCAGTTGACCCAGCTG  
ATCTGGTTGTCTGGCAGTAGGCGTTGTTGTTGCCAAGCTGGCTGCGGCCCATCTCGTCCCGGCGAGGA  
AGTGGGGAGTGCCTTGGGAGAGCAGCAGGGTGGCAATCAGATTGCGCTTCTGCTGCTGGCGCAAGCTGTT  
GACCCGCGGATCCAGGGTCCGGCCCTTCTACCCCGTGGTTATAGGAGAGGTTGTTGCCGTGGCCATCGCGA  
TTGCTCTACCGTTGGCCTGATTGTGGCGCTGGTTGTAGGAGACCAGATCCTCCAGGGTGAAACCGTCTG  
GATAGCAGAGGTAGTTGACGCTGGTGTGGGGGGAGCGCCAGTTCTTCCGGGAAGATATCCCGCGAGCCTAC  
CAGGCGGGTGGCGAAGTCCCCATCTTGCCCGCATACCCGCGCCAGAAGGCGCGCACCGTATCGCGGTAG  
CGGTCATTGATCTCCTGCCACTGGCTCGGGAACCTGACCCAGCCGGTAGCCGAAGGGCCATATGTCCAGG

GTTCGGCGATGAGCTTGACCTGTGACAGCACAGGGTCGGCCATCACTGCCTTGAAGAAGGCGCCCATGGG  
CTCGAACTCCCCCGCTTCCCGCGCCAGTGTACCAGCCAGATCGAAACGGAAGCCATCCACCTGCATCTCG  
GTGACCCAGTAGCGCAGAGCATCGAGCACCAGCCGAGGGTGTGGGGTGATCCAGATTGACGCTGTTGC  
CACAGCCGGTCACGTTGGCGTGACGGGTGTAGTCCGGGCCGTGGGGGCCCGCTTCAAAGGCGTAGTAACC  
GGCGTTGTCAAACCCCTTGAACGAGAGGGTGGGGCCGTGGAAGCCCGAGGCGGCAGTGTGGTTGTAGACC  
ACATCCAGGATCACCTCGAGCCCGGCCCGGTGCAGCTCGCGCACCATGGTCTTGAACCTCGGTACCCGCT  
CGTCTGCCCTGGTGCTGTAACGCGGCTCCGGGGCGAAGAAGGCGATGGGGTTGTAGCCCCAGTAGTTGGT  
GAGTCCCAGCTGCTCCAGTCCGGTTCGACATGAAGGCGGCCACCGGCATCAGCTGCACCGAGGTGATG  
CCGAGGCTCTTCATATGTTTCGATGACCAGCGGGTACTGATGCCAAGGTAGGTGCCCTGCAGCGCTTTGG  
GGATCCCCGGGTGCTGCTTGGTAAAGCCCTTGACGTGGGTCTCGTAGATAATGGTGCAGGCGCCGACTGAT  
CCCCGGTTTGCCAAACCCCTTGCCAGTCAAACCGGTCACTCCACTACCACCGACTTGGCAATCATCCCCGGCA  
CTGTACCCTGATAGAGGGCTTCATCCCAGTAGTGGGACGACTGAGCGCCTTGGCGTAGGGGTCAATCA  
GCAGTTTTTTCGGATCGAACAGCATCCCCCTCTGCGGGGTGCCATAGACCCGATAGCCGTAGCGCTGACC  
GGCCTTTACACCGCGCACGTAGCCAAAGCGATACTGGCCACGGCGGCCGGGCAACTCCAGCCGCATCAGC  
TCCTGCTCCTGCTCGTACAGGCAGATCTCCACCTTGTCCGACTGGGGGGCCAGACGCAGAAGTGGC  
AACCGTTCTCGTCAAGGCGGGCCCCAGCGGGTGGCCACCCCTTTTTCCATTACAAGCATCAAGACTCC  
TGTTTTGATAAACAAGGTGCCAGCGGGCGCAAGTCCAGCACCATGCTGTGTGCCATCCCCCTGCCAGGGGG  
TCGGCTCGGCAGCGAACACCAGACCTACATCATAGTTACTACCCAGTAATACTCGCTGTCCGTGTTGAG  
CACCACCCGATAATTGCCCGCAGCTGGGACGCCGATCCGATATTCGAGACGGGGCACCGGGGTGAAGTTG  
CAAGCGACCACAATAGCCTGCTTGCCCTCTTTGTCCGCCCGCAGCCAGGCAAAGATGCTGTTGTCCGCAT  
CGTTGTGATCCAGCCAGCGGAAGCCGGTCTGCTCATAATCGGCCGTGATACAAGGCAGACTCATGACGGTA  
GAGGTGGTTGAGATCGTGGATCAGCCGCTGCTGACCGGCATGCTTGGGATATTGCAGCAGATGCCACGGC  
AGCTGGGCATCGTGGTTCCACTCGTTGCTCTGGGCGATCTCGGTGCCCATGAAATTGAGCTTCTTGCCCCG  
GGTGGGCGTACATGAAGCCCATATAGGCCCGCAGGTTGGCGGCTTGCTGCCACTCGTCGCCCCGGCATCTT  
GTAGAGCATGGAGTGTGTCGCTGACCACCTCGTCTGTTGGAGAGCGACAGGATGAAGTTCTCGTCATAG  
TGGTAAACCATGGAGAAGGTGATGTCGTTGTGGTGGTAGCGGCGGTGGATCGGCTCTTTCTGCATATAGG  
TGAGGCTGTGCTGCATCCAGCCCATATTTCCACTTGAAGCCAAAGCCGAGGCCGCCGAGGAAGGTGGGGCG  
GGAGACACCCGCAAAGCGGTGGACTCTTCGGCTATGGTCAATGGCGTGGGGATACTTGCCGTAGACCTCC  
TCGTTGGTCCACTTCAAGAGGTGATCGCCTCGTAGTTGTGGTTGCCGCCATCGACGTTCCGTTACCCACT  
CACCGGCGTTGCGGGAGTAGTCCAGATAGAGCATGGAGGCGACCGCATCCACCCCGAGGCCGTCGATGTG  
GAACTTGTGAGCCAGAACAGGGCGCTCGCCACCAGGAAGTGGCGCACTGTGTGCGCGGCCGAAGTCTGAG  
ATGTAGGAGTTCCAGTCCGGGTGCCAGCCACGGCGCGGATCTTCATATTCGTAGAGCGGGGTGCCATCGA  
AGCGGGCCAGCCCGTGGGCATCGGACGGGAAGTGGGCGGGCACCCAGTCCAGAATGATGCCGATGCCGGC  
CTGGTGGCACTGGTTCGACGAAGTATTTGAAATCATCTGCGGTGCCGTAGCGGCTGGTGGGGGAGAATG  
CCCACAGGCTGGTAGCCCCAGGAGCCGCTGAAGGGGTGCTCGGAGACCGGCAGCAGCTCGATGTGGGTGT  
ACTCCATCTCCTTGACGTAGGCGACCAGCTCCACTGCCAGCTCGCGCCAGCTCAGGCTGTGCCGTTGGG  
GTGGCGTTTCCAGGAGCCGACGTGCAGCTCATAGATGGAGAGCGGTTGCTCGGCTTTGTGCTTGTGCTGG  
CTGGCAATCCACTCGGCATCCTGCCACTGGTACTGGGCGTGGTTCATAGACCACGGAGGCCAACGACGGAT  
ACTGCTCACTGTAGAAACCTACAGGGTGCCTTGTGGGGCAATCGGTTGCCCATGGGATCCTTGAGCTC  
GAACTTGTAGCGATCCCCGGCCTTGAGGGCCGGCACAAACAGCACCCAGTGACCGCAGAGGCTGCGCTGC  
ATCGGGTGGCGGGCGCCATCCCAGAAGTTGAAATCGCCGATCAGGCTCACTGCGGTGGCGCTCGGCGCAT  
AGACCGCAAACGCACCCCTTCAACCTGCTGGCCAAGATGCTCCACGGTGCAGCAGTGGGCGCCAAGGGT  
GTGGTAGAGGTTTTCCGGCTGGGCGGTGAGTTCGGCCAGGCTGCCAGGCGGCATCCTGAAACTGATAG  
GGGTCGATGACCTCGGTGGTGGCATCTTGGTAGCTGGCGATCAGCTGATAGGGGAAGGAGTTTTTTCGGCG  
GGGTGAAAACAGTTTTCAAAAAGACCCGATTCATCGGTGGGCGCCAGGTTGGCAACGACTTTGCCCGACTT  
GAGATCCTTGACGCGGACTTCGAGGGCATCAGGCAACCAGGCGGTGAGTTTGAAGCCGGGCCCATCCGGA  
TTGGCCTGCAGGCCTAAGTGAGAGAAGGGATCGGAACAGCGGGCAGCAACCAAACGTTCAACGAGCATCG  
AGATTTCTTTTCATGACAGAGCATCCACTCCGGCCGAAGCCGGAGTGGATTTAGGTGAGAGCGCTGTGGG  
AGACAGCGTCTCAACGACTGGCCTCATCACGGGCTTGGCTCATCTTGCCAGCCAGTGCCCTTGAGTGCCCTC  
ATTTGGCAAAAATATCTTCCAGATCAGCGGAAAAGCTTGGCGGCCAGTTGGGGTATTCGTAACCTGGTGCC  
GGTACGTTGACCGGCTTGTCCATCTCCAGCCAGTCTTCCAGCTGGGTAAGTGAACAGGGCGCAGCTGCCG  
GGGACATGTGGATCTGCAGACCGTGGTTGAGTTCGGTGTTCATGCCGACCAGTTCACGTCATGACTGAT  
GTTGTGACAGATGACCTTGTGGGCATGCAGGCTGTGAGGATCCGCTGTTTGGCCTGGTACGATCAGCA  
TACAGAGTCTTCAATACATCTTCATCCGGATACAGACCCAGTTGACGGCCGAGCTCCAGGTCATCGCAGT  
GCCAGAAGCCCTTGAGGGTCCGCATGTCGTGGGTGGTTCAGGGCCGACATCGCCTGCTCGGTGTAGTGC  
CGGAGAGATAAAGCCGCCATCTTCCCTGGAGCGCTCGAAGAAGAATACCTTGTAGGAGTGGACGCCGTTT  
TCTTTTCAGAGTACGTCGATCCCCCTCCGGCACGGTGGCCAGATCCTCGCCGATCAGCAGGCACTGATTGC  
GGTGGGATTCGAGGGCCAGAATGCCAGCAGATCGTTGACCGGATAGTAGATGTAGGCGCCCTTGGCGGC  
GGACGCTCCGGGCGGTACCCACCACAGGCGCAGCAAGGCCATCACGTGGTTCGATGCCGAGTGCGCCGAG  
GAGCGCATGTTGGCACGGAACAAGTCCACCATCGGCTGGTAGGCCGCTTCAAACAGCTTGTTCGGGTTCA  
TCGGGGCAGGCCCCAGTTCTGACCGAGCGGGCCGAGGATATCGGGCGGCCACCGACCGAGGCTTTCCG

GCAGTAGAGATCTTGGTTGGCCAGATCTCGGTGGAGCCTTCGGAGACGCCACTGCCAGATCCCGGTAG  
ATACCCATCACCATGCCGGCAGCCTTGGCACGGGCATCGGCTTGCGCCAGCTGCTCGTCAGCCAGGA  
GCAGATAGAGGTAGAAGTTGACATCTTGCGGGTGCGCGCCATCCAGGCGGCAACGGCAGGATTGTGGTA  
ATCGCGCAGCTCCTGCGGCCATACCGGCCAGCCCCAGGCATTTTCGCCCTTGGCATAGAAGTGGGCC  
AGGGCATCAAATGCTGCCTGCTGTTGAGGCTGTGCGCCACCGGCCGACGAAGGCATCAAAGGCGGCC  
GACGCTCGGGCTCAGGCTGGCTTCATCGAACACCTGACGCAGCATGCCGAGTTTGGTCTGGATCACGCC  
GGTGTAAATCGACGTTCTCTTTGGCGCGCAGATCGGCCAGATGTTGCTGGAAGGCAGGACTTGCCACTTCC  
GCTTTCAGGGCAGCGCTTTGCTGGAATTCGGGCACCGCTTCCACATTGATATAGGCCACGTTGAGCCAGC  
GACGGGAAGAGGGGCTGTAGGGACTGGCGCTCTCCGGATTGGCCGGATAGAGGGCGTGGATGGGGTTGAG  
GCCGACGAAGTGGGACCCCGAGGCGGCTTTCTCGACCAGCTGGCCAGATCGCTGAAATCACCAGATA  
CCCCAGTTGTGGCGGCTGCGCAGGCGTAGAGCTGCACGCTCGGACCCATACCTTGGCGCCATCGGCAA  
TCGGCGCCTGTTTGTAGCAGGCTTGGGGGCGACGATGAGGCGCATGGTGGCCAGTGGTTGCTCATTGCC  
CTCTTCCAGCAACACCAGCTGGTGATAACCCAGCTCCGGGGCCATATCCAGAGTGACACGATAGGCCCTGG  
CACTCCATCTCTTCAAATTCGGCCACGCCGACCAGCTCACCCTCGATGGGGGTGAATTGACCGGACAGCA  
CCGCACCCTGCTCCTGCTGGAGCTGCCAGGTGAGGGCGTCTGTTGACGAATTCGATGGGGAGGCGAACCTC  
AAGGGTAACGGCGTCGCCGGTGCGAACCACCATCACAGGATCCAGCGCCCGCAGCCAGTGTGGCGATGC  
TCCTCTTCCAGCTGCTGCACCAGTGGCGCTCGTCATCGACGCGGTAGCCATGGCGCCAGCATGGCGG  
CCTTGCTCTCTTCGGATACCTGGGCGGGTGGCCCCAGGCATCGACGTACTCGCTGGCGATACCTTTTGC  
GGCAACCAGCTGTTCAATCAGGGTGGTCATAGTTTGAAGATTCCCGCTGTGGATTCTATCTATACTATTT  
TGTTTTGATTTTTATGGGGTGGTACTTGAACAGTGGCTCTTTGGCCATGCTAAACCGCGCACATTTTTACA  
TATCTCTGTGAATGGTTGTGTGACCGAGTAGGCACTATTGTTGATATCTGCGCGATGCCACGATCTGGCA  
CTTTTTTTCGTCAAACGTTGGTAATCAGTTACATAAAACAGAAAATTAATTTTACAGTTTTTTCATGATATAG  
CGCAATTTTCAGACAGAATGTTGGTTGACTCACCGGAGAGTTCTAGTAAATTTACAAGCGGAATTTTCTTT  
GACTACTGAACAGTTAGGTAATAAATGACTATCAAAGTAGGTATTAACGGTTTTTGGCCGTATCGGTC  
GTTTTCGTATTCGGTCTGGCTTGGCAGCGTGCAGACATCGAAGTTGTTGGTATCAACGACCTGATCGATGT  
TGACTACATGGCTTACATGCTGAAGTACGATTCAACTCACGGTCGTTTCAACGGTACCCTGAAGTTAAA  
GACGGCAACCTGGTTGTAAACGGCAAAACCGTACGTGTTACCCTGAGCGTGACCCGGCAACCTGAAGT  
GGGGCGAAATCGGTTGACGTTGTTGCTGAAGCTACCGGTCGTTCTCTGACCGACGAGACTGCTCGTAA  
GCACATCGCTGCGGTTGACCAAGAAAGTTGTTCTGACTGGCCCGTCCAAAGACGCCACCCGATGTTCTGTA  
ATGGGTGTTAACGACTCTACCTACGCTGGCCAGGACATCGTTTCCAACGCTTCTTGCACCCTAACTGCC  
TGGCCCCGATCGCCAAGGTTCTGAACGATACCTTCGGTATCGAGTCTGGCCTGATGACCACCGTTTACCGC  
TACCCTGCTACCCAGAAGACCGTTGATGGTCCGTCTGCCAAAAGACTGGCGCGGTGGCCGCGGTGCGGCT  
CAGAACATCATCCCGTCTCTACCGGTGCTGCCAAAAGCTGTTGGCGTAGTTATTCGGGAACGAAAGGCC  
TGCTGACCGGTATGGCTTTCCGTGTTCCGACTCCGGACGTGTTCTGTTGTTGACCTGACCGTTAACCTGAA  
GAAAGCTGCCACCTACGCAGAAATCTGCGAAGCGATGAAAGCTGCTTCCGAAGGCGCTATGAAAGGCGTT  
CTGGGCTACACCGAAGACGAAGTTGTATCTACCGACTTCTGGGTGAGCGTCAGACCTCCGTATTCGACG  
CCAAGGCTGGTATCCAGCTGAACGACAAAATTCGTTAAAGTTGTATCCTGGTACGACAACGAAATGGGCTA  
CTCCAGCAAAGTTCTGGACCTGATCGCTCACATCTCCAAGTAATTTGGGATGCGCAATCGCGTAGCTTGA  
AAAAGGCGGCCATTGGCCGCCTTTTTGTTTTTCGGTTTTCCCTGATGACAGGAGTCTACATGCAATCCAT  
TCGTCCCCTGACAGCCAATTGCAAGCTTGCCAAACAATGCGGCCGGTCTGCCGGTTCTCACCATCAACAAC  
GACTATGCCAAGGCAGAAATCAGCCTGTTTTGGCGCCATGTGCTGAGCTATCAGCGTCATGGCGAGCCAG  
CCTCCATCTGGTTGAGCGACAAGGCGGTGCTGGATGGCAGCAAGCCTGTTTCGGGTGGTATCCCGATCTG  
CTGGCCCTGGTTTGGCCCGGCGCCCGCCGCTCGGTAGCGGCAAGCCCTCCACGGTTTTTGGCCGACC  
ACCCTCTGGATGCTGGACGGAGTCTCCGATCACGCTGATGGCACGCTTGTTCATCTCTCCCTGCGCGATA  
GCGATGCGACCCGTCGCCCTGTGGGATCACGCCTTCGAGCTGGAGCTGGATGTACTGGTTGGCAAAGAGCT  
CTCGCTGGTGTGACCACTCGCAACACAGGTGCTCAGTCGCTGACTTATAGCGGTGCGCTGCACACCTAT  
TTGCAGATCAGCGCACCGGAGGCGGTAAGCGTCAACGGCCTGGGTGAGCCCTATGCCGCAAGCTGACCG  
GGCAGGATGCCAAGCAGCAGGGGGCATTGACCCTGAGTGGGCCGCTGGATCGGGTCTACTGGCAGCCAGA  
GGCGCTGGTGAGCGTGCAGGATGGTGAGCGGAGACCCGGGTTGTCAGTGGCAACCACGACAGCATGGTG  
GTCTGGACCCCTGGCTGGAAGGGGCTACCGCCATGGCCGACATGAGCGATGACGGCTATCTCACCATGC  
TCTGTGTGCAAGCGCCATCGCCGGCGAGGCGGGTGTGACCGTCGCGCCGGATGAAGAGCACAGCCTCTC  
CACCGTAATCATCTGAGTTGGATGAGGTTAGATAAAATAAAGAGGGCTCCCGGGGAGCCCTCTTTGCAT  
CTCGTGACGGCGCAATCAGGCGTTGCCCTGGGCTTGTGAGCTTGTGAGTTTCGGCGGCGAAGTTGAGCATCCG  
ATCGAGGGGGATCAAGGCTTTGACCCGACAGATCTTCGTGACATGGATCTCGTGGCGTTCGGCACCATCG  
GTGAGGGCCTCCTTGATCGCCACCAGACCGTTCATTGCCATCCAGGGGCAATGGGCGCAACTGCGGCAGG  
TAGCGCCATCGCCACCGGTGCGGTGCTTCCACCATCTCTTTCTCCGGACAGGCTGCTGCATCTTGTAGAA  
GATGCCCCGATCGGTGCGCACGATCAGCTTCTGCTGGGGCAGCTCCTTGGCCGCCTTGTATCAGCTGACTG  
GTGGAGCCACCGCATCGGCCAGCTCGATCACCGAGGCGGGGGATTCCGGATGAACCAGCACGGCGGCGT  
CAGGATTCTGCTCTTTCTGCTCGCGCAGGGCGGGGCTTGAACCTGCTCGTGGACGATGCAGTGGCCTTG  
CCAGCGCAGCATCTGCGCCCCGTTTTCTTCTCGATATAGGCTCCAGATGGCGATCCGGGCCCCAGATG  
ATCTTGTGACCCAGACTGTGAGGTTGTCGACGATCTCGAGTGCATGCTGGAGGTCACCACCCAGTCCAG

CCCCGCGCTTTGACCGCAGCTGAGGTATTGGCATAGACCACCACGGTATGGTCGGGATTGGCATCGCAGAA  
GGCGGAGAAGTCTCGATGGGACAACCCAGATCGAGGGAGCATTCGGCCTCCAGAGTCGGCATCAGCACC  
CGCTTGTGAGGGCTCAGGATCTTGGAGGTTTCCCCCATGAAGCGCACCCCGGCGACAATCAGGGTTTGGC  
CCTCGTGATCGCGGCCAAAACGGGCCATCTCCAGCGAGTCACCGACGAAACCACCGGTGGCTTCGGCCAG  
CGCCTGGATCTCGGGATCCGTGTAGTAGTGGGCAACCAGTACCGCTTTGCGCTCCTTGAGCAACGCCTTG  
ATTTCTGTGGTCAAGGTGCTTCTCTGCTCGGCACTCAGGGGAAGAGGTTTGGCCGAAAGGGGTAGTCCA  
TCGCGACTACCGGCGGGACACTGCTCAGTGCATTGCTCATTGCGACTGTTCCATCAACGCTCGGGAAGGC  
AAAAATTATAACCAGAAGCCTGCCACAAACCCATCAACAAATCGGGTGAAGCGCAAGTGGGCGAATATAC  
TCAAGTAATTCGTTGTTATTCTGCCATAAGGAGTTGTTCGCATGAAGCAACGTTCCCTCAAGTTCAAGTTG  
TTGTGCCTTACCATGGGGCTGTTTCTGCTGACCGGGCTGGCCATGACCCTGTTGCAATCGGCCTCTTTCA  
GCTCCCTTCGCAACATGGTGTATGACCCAGACCAGCATGCATGGAAGAGGAGGTTCTCCCGCAGCCTGCA  
GTATCAGGCAGAGCGCTATGCCATCCAGATTGCCCTCGTGTATGCAGAACTCCTATCAGATCCCCCTGACC  
GTGACCGCCAGATTGAAGCCGGGATGGCCAAGCCGGAAGTGGGTTGTCGCGGCCCAAGTGGAGTCTC  
TGCTCGGCAGCAGCCTGCAGCAGGCGAGCGGGATCAGCTCCATTTATGCCAGTTTGAACCGGATGGCTA  
TGATGGTGAGGATGGCAACTGGCTGGGCGGGGCCAGCCACTCGGTGGCAGGCAAGGGGAGTCTGGAGGTC  
TATTTACCAAGGATCAGGGAGGGCCGTCGCTCAGCAAGCGGTGGACGCCGCCAGCGAGGCCAAGT  
TTGATACCTCCCTCAACGAGTTCGGCATTTCGAACAGCGAGTGGTATCTCTGTGGTTCGCGATACCCGCCA  
GCCCTGCCTGATGGAGCCCTACCTCTACGAAATCAGCCGGGCAACAAGATGCTGATGACTAGTCTGACG  
GTGCCCCGTGCTGCGTGACGGCAAGTTTGTGCGGCTGGCCGGGTGGATATGAACCTGCCATCTTCCAGC  
AACTGGCTGAAAACCTTGGAAGAGCCTCTATGACAACAAGGCGGATGTGACTCTGGTCAGCAAGATGGG  
GCTGATTGTGGGTAGCAACCCTATGCCGACAAGCTGGGTTCGCTCAAGGAGGTGGGGCTGACCCTG  
CCTGACGGTCAGCCGGTCAGCAGCGACAGTGAATTCATTCTTCATCAGCCCATCCGGGTTGAGGCAGCCA  
ATACCCAGTGGTGGTTGATGATCAAGGTGCCCAAGGCGCTGGCGCTGAGCAAGGCGCACGCCATCAGCAA  
TGAAGTGGGTGCCCTGCTGGTGGATGCCAGCGGCAGCAGATCATCGCCATGGGCGGGATTACCCTGTTG  
GTGCTGGGGCTGCTGGTCTGGTTTATCCAGACCATCACAGCGCCACTTCTCTTATCAGCCGCCATGTGG  
GCCATCTCTCCAGCAACGAGGGGGACCTGACCAGCAGATGGAGATCGACACCCATCAGGAGCTGATCGA  
TCTGGGGTCCCAGCTCAATGCCTTCTCGGCAAGCTGCGGGGCATGGTGCAAATGAGCAAGGGGATCGGT  
CAGAGGTTCTACCAGAGGCGGGGAGATGAAACATACCAGGCGACACCATGCGCAACAGTCTGGCAGCAGC  
AGAATCTGGAGCTGGAGAGCGTGGTGAGCGCAATGCACAGATGAGTACCACGGCAGTCACTGTGGCAGG  
TTATGCCGAGCAGGCAGCGCAGGAGTCCGAAGCGGCGACCCACCACATCAATAACCGCCAGCAGACCCTC  
AGCAATGCCCCGAACGAGATCCATACTCTGGTTCGGCGATATGCATGAGGCGGATAAAGCGGTGGCGCTGG  
TGGCCAGCGCAGCACCAATATCAGCCGGATCCTCGATGTGATCCGCGCCATTGCCGAGCAGACCAACTT  
GCTGGCCCTCAACGCTGCCATCGAAGCGGCGGGCGGGTGGATGGGCGCGGCTTTGCGGTGGTGGCG  
GACGAGGTGCGGGCGCTGGCGACCAAGACCCGTGAATCGACCGACGAGATTGGCCAGCTGATTGGCAGCC  
TGCAGACCGAGGTGAGCAGCAGCCAGCGTCTGATGAATACCGGCATCGAGCGCTCCACCACCACGGTGC  
GGGTACCGAGCAGGCGTTTCGAGGCGCTCAATCGGGTGGTGGCCAGATCCAGCAGATCCACGACCACATC  
AGTCAGGTAGCCACCGCCGCGAGCAGAGTGCGGTGGAGCGATACCATCAACCAGAACCTGATGCGGA  
TCGGCGATACCGCAACGTGATTGGGCAGGAGGCCAGCTCCAGCCATCAACTGAGCGAGGCGCTGGAGCA  
AGCGGCCACGGCGCTCGCCAGTCAGCTCGATCGGCTGCGTACCTGAGTGGCAGCCAGAGAGACAAAAGCC  
CGCGAGCGATCGCGGGCTTTTTTATGACTTGTATGGCAGAGTTGCGTCAAGTTGCGGGGTTCAACCAGCAGG  
ATGTGGGAGTCGGCCCCACTACCCTGACCTTGTGCTGCTGGCAGCGACTCGTCGCAGCGCACCCGTCC  
AGACCGTATCGTCCAGATGCACCCGACTGGTGCCTTGGGCGACATCATCCAGCAGGGTCAGCTCGCGGCC  
CATATAGCTCTGCATCCGCTCGTTGATGGTGTGCGGCATCCTGACCCGAGTTGTACGCTGGTGTGC  
CAGCGCCACCAGACCCAGGTGGTGGCAGGGATTGCACCGCAAACAGCAGCAACTGCGCTGCCAGCCAA  
AGTGCCAGATCAGCAGCAGGCCCCACTTCCAGAGCGCGATGCCGTTCCAGAGCAAAAAGCCACCAG  
GCCGAGCACCTCGATGGCCAGCAGAATGAAGCCGAGCCAGCCAGTGGCAGTGGGTCAGCCCCCTAAC  
AGGGCTGTACTGACTTGTGCTGCCCTTGCATCTTTGTTGAACAGCTCGGCCATGCCAGCCACCGAGCCAAT  
CAGGCTGCCCCCCTCCAGCGGCATCATGATGATCTTGTGTTGGGGCCTTCACCGATGCGGGCCAGTGCC  
TCGGTGTACTTCTGAGCCACGAAGTAGTTGATGGCCTGCAGGTCTCCTTCCGCAATCGCTGGGAGACCA  
TATGAGTCGCCTTGGCTTCCGCTCGGCTGCCCGCTCCCGCGCTTCGGCGGCGAGGAAGGCGGCTGACG  
CTCGCTTCCGCTTTGAGGATCTGGGACTGCTTCTCCCTTCCGCTTTCAGGATCTTGGACTGGCGCACC  
CCTTCGGCTTCCAGTACCTCGGCCCGTTTCTGGCGCTCGGCTTTCATCTGGGCGTTTCATCGCTTCGACCA  
GCGCCAGCGGCGGGCGCACATCTTTAATCTCGATGCGGGTCACTTGTATGCCCCAGGGGGCGGTGGCGGC  
ATCCATGGTGGCAGCAGCTTCTCGTTGATGGTGTGCGCTGGGAGAGCATCTCGTCCAGCTCCATGGCG  
CCGAGCACGGTCCGCATATTGGTTCATGGTGGAGATTGCGGATGGCGCTGGTGGAGATCGTTGACCTCGTAAC  
CCGCTTTGCGGGCATCCACCACCTGCACAAAGCTGATGGCGTCGATGGTGACGTTGGCGTTATCGCGGGA  
GATCACCTCTTGTGCCGGGATGTCCAGCACCTGCTCCATCATGATGATCTTGTGGCCGACCCGATCCAGC  
TAGGGGATCAGCAGGTTGAGACCCGGGGTCAAGGTGCGGGTGTAGCGGCCGAAGCGCTCCACCCTCAGT  
TGTAGCCCTGAGGCAGATCTTGTATGCCCGGCTCAGGGTGGCGAGCACAGGAACACGAAAATCCCTAG  
CACAATCAATGATTCATTCATTTAGCTCCTTATGAAACACAGTCCCTAGCCTATGGTCTGGCGTCAG  
GTACCACAAGTGAATTCGTACGCCTTTGCCATGAATCGGCTTTGCTAATTACCAAAACGCATTAAGG

ATTTTTTATTATTTTGGAGGATAAGCTGCCCTGCCTATAGTCGCCCCATATTAGTCGTGTTCCGAGGGAT  
GGGCCGAAATGGATTATTTACCTATGTTTGCCAAGTTGGAAGGCCGCCCGGTACTGCTGGTGGGTGGGGG  
CGAGGTTGCCCTGCGCAAGGCGCGCCTGCTGCTGGCAGCCGGTGCCCGGTGACCTTGGTCTCCCCGGAG  
CTTGAACCGGAATTTGCGGAATTCACCGGTGCTTTACCCATCTGGCCGAGCGCTTACTCCGGCCCATC  
TGGCAGGCCAGATTTTGGTGGTGGCGGGCACCACAACCTCGAAGTCAACGCCCTCGTTTATCAAAGTGC  
CAACCAGCTGGGTCTGTTTCGTCAACGTGGTGGATGACCCTAAACGCTCCAGCTTTATCTTCCCCCTCGATC  
ATTGATCGCTCGCCGCTGATGGTGGCGGTCTCCAGCGGGCGCAACGCGCCGGTGCTGGTGGCCCTGCTGC  
GCGAACGGCTGGAGAGCCTGCTGCCGCGCCATCTTGGCGGGCTGACCGAGCTCTCCGGTCCGGTCCGTGA  
CAAGGCCAAGCGGGTGTCTCTCTCGATTTCCGATCGTCTGCTGCTTCTGGGAGCGCGCTTTGCCCTCAAC  
ACCCTCGCCAGCTGATTGAAAAAGAGGATTGGCAAGGGGCGGAGCAGTGGCTGAGTGATGGCCTCGACC  
AGGCGAAAAGCGAAGTGGGCGAGGTGGTCTTGGTGGGGCGGGCCCCGGTGATCCCCGGCTCTTGACCCT  
CAAGGCGCTGCAACAGATTCAACAGGCTGAAGTAGTGTATACGACCAGCTGGTCTCGCTGAGATCCCTC  
GATCTGGTGGCCGCGATGCCACTTTGGTGTGGTGGCAAGAAGGCGGGCGCCACAGCTGCCGACAGG  
AGGAGACCAATCGCCTGCTGGTGGAAATACGCCAAGGCGGGCAACCGGGTGGTGGCGGTGAAAGGGGGCGA  
TCCCTTTATGTTTGGCCGGGGTGGCGAGGAGCTGGAAGTGTGGCCGATGAAGGCATCCCCTTCTCGGTG  
GTGCCCGGCATCACGGCCGCTGCCGGTGCCACCCTATGCCGGCATTCGCTCACTCACCGTGATTACG  
CCCAGAGCGCCGCTTTTATCACTGGCCACTGCCAAAAAGAGGGCAGGGAGCCGACTGGCAGCAGCTCGC  
CGCCACCAGTCAGACCCTGGTCATCTACATGGGGCTGATGCGCTCCGAGCATATCCAGCAGCAGCTGGTG  
GTTTCATGGCCGAAGCCAAGCCACCCCCATGCCATCATCGAGCGCGCACCACATCCCGCCAGCGGGTGT  
TGACCGGCACGCTGGCCGACTTGGCCGAGCTGGCCAAACAGGCGGTGAGCCCGTCTGTTATCGTCATCGG  
CGAAGTGGTTGCCCTGCGCGATCGGCTGGCCTGGTGTGGAGAAAAAGCGGGGAAAAGAGCGGCCAGCAG  
CAGCGCGCTAACCCGGATCTCGATGGCTGCGACCTCAAGCTGGTGCAGCTGGCCTGACCCGGAAAAAGAT  
ATTTGATGCGGCTGCCAGCGCGGCCGCGCACTGAGCCACCCAGCGCCCCGAGCAGGCGCATAAGCAATGA  
CCCGAGGACCAACATGGACCGTGAAAAGATTGACGCACTTGCAAGCAGCTGGAAGCCGAGAGCATCCATATC  
ATCCGCGAGGTGGCTGCCGAATTTGAAAACCCGGTGATGATGTAATCCATCGGCAAGGACTCCTCCGTCA  
TGCTGCACCTGGCCCGCAAGGCCTTCTATCCGGGCAAGATCCCCTTCCCTTGTCCACGTCGACACCGA  
CTGGAAGTTCAAGGAGATGATCAAGTTCCGCGCAGAGACCGCCAAAAAGTACGGGCTGGATCTCATCGTC  
CACAAGAACCCGGAAGGGCTCGCCATGGGCATCAACCCCTTGTCCACGGCAGCGGCAAGCACCAGCA  
TCATGAAGACCCGAGGCGCTCAAGCAGGCGCTCAACAAATATGGCTTCGATGCCGCTTCCGCGGTTGCCG  
TCGCGACGAGGAGAAGTCCCGCGCCAAGGAGCGGGTCTACTCCTTCCGTGACAAGTCCCACCGCTGGGAT  
CCGAAGAACCAGCGCCCGGAGCTGTGGCGGGTCTACAACAGCCAGGTCAACAAGGGGGAGAGCATCCGGG  
TGTTCCCGCTCTCCAAGTGGACCGAGCTGGATATCTGGCAATACATCTATCTCGAGAACATCGACATAGT  
GCCGCTCTACTTCGCGCTTACCGTCCGGTGGTGGAGCGCAACGGCATCAAGATCATGGTGGATGACGAG  
CGCATGCCGCTGACCGCCGAGGATGAGGTAAAGCAGGAGCTGGTGCCTTCCGACCCCTCGGCTGCTATC  
CGCTCACCGGGGCCATCGAATCCGATGCCACCACCTTGCCGAAAATTATTGAAGAGATGCTGCTCACCAC  
CTCGAGCGAGCGGCAAGGGCGGCTGATTGACCAGATCAGGCCGGTCCATGGAGCAGAAGAAGCGTCAG  
GGATATTTCTAAGGAGTCGTAGTATGAACAGCCATATTGAGACCGCCATCACCGAACAGGGCATCGAAG  
CCTACCTGCACGCCAGCAGCACAAGAGTCTGCTGCGCTTCTCACCTGCGGCAGCGTGGATGACGGCAA  
GAGCACCTTATCGGTGCGCTGCTGCACGACTCCCAGCAGATTTATGAAGATCAGCTCAAAGCGCTGGAG  
TCCGACAGCCAGAAGCTTGGCACCCCGGCGAGAAAGCTGGATTTGGCACTGCTGGTAGACGGCCTGCAAG  
CGGAGCGCGAGCAGGGCATCACCATCGACGTGGCCTACCGCTATTTCTCCACCGCCAAGCGCAAATTCAT  
CATTTCCGATACCCCGGGCCATGAGCAGTACACCCGCAACATGGCCACCGGCGCCTCCACCTGCGATCTG  
GCCATCATTCTGATCGATGCCCGCAAAGGGGTGCTGGATCAGACCCGCGCCACAGCTTTATTGCGAGCC  
TGCTCGGCATCAAGCAGTTTCGTGGTGGCGGTCAACAAGATGGATCTGGTGGAGTTCAGTCAGGAGGTGTT  
CGAGCGCATCAGTGCCGATTACCGCGAGTTCGCCAAGAAGCTCAGCGTCGACACCATCCATATCGTGCCG  
GTCTCGGCGCTGGACGGTGACAACGTGGTCAATCCAAGCGACAAGCTGGCCTGGTACGAAGGTGAAACCC  
TGCTGGCGCTGCTGGAATCCCGCCGAGGTAGAGCGGAGCTGGAGCGTCATCCGGTGCCTGCGCGGTGCA  
GTATGTGAACCGCCCCAACCTCGATTTTTCGCGGCTTTCGCGGGGACGCTCGCTTCCGGCATCCTGCGGGT  
GGCGACCGCTTGGCGGTGCTGCCGTGGGCAAAAGAGAGCACAGTCAACCGCATCGTCCACTTCGACGGTG  
ATCTGGAGTACGCCCTGCCGGGTGAGGCCATCACCGTACCTTCGCCGACGAGATCGACATCAGCCGCGG  
CGACCTGCTGGTGGATGCTGCCAAGCGGCGCAAGTGAACAGAAATGTGCTGGCCCATATCGTCTGGATG  
GGGGAGGAGTCCCTGCAACCGGGCCGGGTCTACGACGTCAAACCTGGCGACCAAGAAGAGTCCGGTCCAGG  
TGGAGGCTATCCGCCATCGCATCGAGATCAACAAGCTGGACGAGTTGGACGCGAGTGAACCTAAGCTAAA  
CGAGATCGGCCTGTGCGAGCTGAGCCTCACCGACCCGGTGGCGTTCGACCCGTATCAGGAGATCCGCGAT  
ACCGGCAGCTTTATCTGATTGACCGGCTGACCAATGTACCGTCCGGCGGGCATGATAGTGGAGGGCT  
TGGCCGCCAAAGCGGTAAAAGGGCACTACAGCCAGTTGAAAATCGAGCTCAACGCCCTGGTGGCGAAGCA  
CTTCCCGCACTGGCAAGCCCTTGGCATCGGTAACGACACAAGCAAGGAGTAAGCCCATGACCTGGCAACA  
ATTCCTGGTGTGGGTCTGCTGGCTGCTCTCGTGGCCCTGCTGATCCAGGGCAAACCTCCGCCGGCGCTG  
CTCTTCTCGGGCGCCGTGCTCATCACCTACCTGAGCGGGCTGGCGGATATCAATGCCGTGGTGGCGGGCT  
ACACCAACAGTGTCTGTTGACGCTGGTGTGTTGCTGCTGGTGTGCTGGCGGTGGAGAAGACCCGCAT  
CATGAGCTGGTTCGCCAATCTGGTGGGCACGGGTTTCATTAACAAGGTGCTGGTGAAGGTGTGGTTCTCC

ACCGCCTTCTGTGCGGCCCTTCGTCAACAACACTGCCGTGGTGGCCTCCATGCTGGGAGCGGTCAAACGCA  
ACCCCAACCATGCGCCGTGCGGGCTGCTGCTGCCCATGTGCTTCGCGGCCACCTTTGGCGGCGTGCTGAC  
CCTGATCGGCACCTCCACCAACCTGATCGTCAACAGCTTCCTCATCAAGATGGGGGCGCCGCCGCTCGGC  
ATGTTTCGACTTCTTTATGGTGGGAGCGGGCACCCTGCTGACCGGTCTGGTGGCCGTGCTGCTGTTTGCC  
GTCACCTGCCGGAGCAGGATACCGAGATGAGCCGGAATCCGGCTACTTTCTCGAAGCCAAGGTGGGCGC  
CGGTTGCGCGCTGGCGGGGCGCAGCGTCAAGGAGAACGGCCTGCGCAGCCTGAAAAGCCTCTATCTGGCG  
GAAATCATTGCGGGCGATCAGGTGATCTGCCCGGTGACGCCGAACATGAACTGCACGAAGGGGACGTGC  
TGCTCTTTTGCGGGCATGTGGAGAGCGTCCGGCTATTGCAGGAGATGAAGGGGCTGGATCTCTACGGCCA  
GCACCGCCTCAACGGCCAGCATCTGGTGGAGGTGATCGTCAGCCACAGCTCGCGGCTGGTGGGTGAGACC  
ATCAAGGATGCCGAATTTTCGTACCCACTTCGATCGCGGTGGTGTGCTGGCGGTGCGCCGCGGCCGAAACCCAGC  
TCACCGGCGCCCTCGGCCAGATTGAAGTGCACGCCGGTGATACCTGCTGCTGGCCCCGCCCCAGTT  
TGCCCGCAACAATCGCTGGGGCGGGAGTTTGTGGTGGTGGAGCGGGCTGGAAGCCTCCACCCGCTCTCGAT  
GGCAAGCGCAGCGCCCGCTGGTGTGCTGGGTTTTCTCGGGGTGCTGGCACTGTCGGTGTGTTGATCTGGTGC  
CGCTGTTCAAGGGGCTGCTGTTGATGCTGGTGGCGCTGCTGCTCACCCGCATTTCTGACCCCTGGACGAGAT  
CCGCCGCCGCTTTCCGCTGGATATCTGGCTGGTGGTGGGTGGGGCGCTGGCCATCGCCGATCAGCTGGAA  
AAGAGCGGGCTGGCCAAGCTTATCGCCGACTGGCTGATGGGGGAGTTCAACGGTGGCAGCCCCATCATCG  
CCTTTATCGGTATCTATGTGTTTACGCTGGTGTGCTGACCGAGCTGATGAGCAACAACGCAGCGGCCGCGCT  
GGCCTTCCCCATGGGTTACCAGCTGGCGCTCAGCATGGATGTCTCGACCATGCCGTTTATTTCTGGCGGTG  
CTGTTGCGGGGCGAGCTCCAGCTTTATCCTGCCCTACGGCTATCAGACCAACCTGATGGTCTATGCCGCGG  
GCAACTACAAGATGCCGGACTACCTCAAGCTGGCCCTGCCGCTCTCGCTGGCCTATAGCCTCGGGGTGAT  
TGTGATGGTGGCCCTGCTGTTTTCCGTTTTAAGGCGTGAGCGCCAATCAAGGCGTGTGGATGAGTAATGC  
CATGGCATCAGCACGTTGTGCGGCGGATAGTCCGAGGCGGCTCCCCGTGGTGGCGGACAGTTTAAAGTTTTG  
AGGCGTGAGCGCCAAGCAAGGAGTGTGGATGAGCAATATCGTGTGGCACAACATGCCGTGGACAACA  
GAGCCGGGCGGAGCTTAAAGGGCAAAAACCGCTGGTGTGCTGGTTTACCGGGCTGTGGGGGCGGGCAAA  
TCCACCCCTGGCGGGGGCGCTGGAGCAGGCGCTGGCGGCACAAGGCAAGCACACCTATCTGCTGGATGGGG  
ACAATGTGCGCCACGGCCTCTGCGGGCATCTTGGTTCGATGATGCGGCCCGTCAGGAGAATATCCGCCG  
GGTGGCGGAGGTGGCGAAACTGATGGTGGATTCGGGGCTTATCGTGCTTACCCTTTTATCTCGCCGTTT  
CGTGCCGAGCGGGCGTGGTGGCGAGCCTCTGGGTGAAGGTGAGTTTGTGAGGTGTTTGTGAGGTGTTT  
CGCTCGCCGCTCTGTGAAGAGCGCGACCCCAAGGGGCTCTACAAGAAGGCTAGGGCAGGGGAAATTACGAA  
TTTTTACCGGTATCGACTCCGCTACGAGGCACCGGAGCAGCCGAAATTCATCTGTAATGCCGTTAA  
TCGGTGAAGTGCTGGTGGATGAGCTGCTGACCGCCCTGCGGCAGGGGAACTACCTGTAGCTGGATCGGA  
AGAACCTATAACAAGCGCCCGGCGCCCTTAAAGCTGGCCACCACAGGCGCTTATGGGTAGGCGGCCACCA  
CTATAAGCAAAAGCAGGGAAATTTTCGGGAAACCCATAAATTTGGCTTATAGCGGTGCCGATGAACCTTG  
AGCAGCTCCAAGGCTGCCGATATCAATCCCGCAAGGGGAGCTCGCGATTTTTTGTCTTATGTCGTTGCGGG  
ATTATTCGCGATTGTCCGAATACGCTTCGCTATCCGAACCTACGGGCTGTACACTTAGTTAGTTCTATTT  
TTTTGCCTCAATTTTGGTAACAATACTATAGAATAATAAATTCCTTCATGCTTACATCCCATACTCT  
AATAAATGTTCAATGTACTTTTTCAATTTGGTTTTGCACCGGAAATAGATGCAAGCTCGTTGCCAATATCTG  
TAAATGGAAATGCACCTTAGTAGTATTCCATTACCTTCGTCAGGCTCCGAACTAGTGAGGTATTTTTTATT  
AAAATAGTCTAGCGTAATAATGGTTTTCATCATTATCATCGGCTCCGTACCAGATACTGCTATTGTTAAGA  
AGACCAATGCTTTTTGAGATGCAGCTCTACATTAGTCGTTAATCCGTGTGCTCTAATAAATTCATAAATAA  
TGTGAGAGAAATTAGGTAATAGGTTGGCACCATCTTCAGACTTGAATGAAAACCTCACATAATAGTGTA  
CATATGAGCTTCTTCTGAAGTAAGTGATTTGACTGTTTTGAAGTGTCTTGGCTTAAATGTACCAGGATTA  
GCCACTTCTCCGGCAAGCAATTTTGGCCATATTTGTTGCATTTGAATGTTGCCAATATCTTGACAGAGTT  
CAAAAAAATTTACTATCCAGTCTTCATCAACTGGATTGGTATCAACAGTGTGTTGGTAGCTCATTTGATGC  
TCCTCTAACTATAAGATCAATATTTATTTGACGCTATTTTCTCGATGCCCTAAGCGCTCCATAGCCCCGT  
AAGGATATTTTATCAGTCTCGCATTTTGGCTTCGGTTAGAATTTTATCATCACCTTCGCGTCTGCTCTTGC  
TACGAATTTTTTTAGTGGGCTCATATATTAATCCAATGCCCTTTTGAAGTGAAGTCAATTTTGTAA  
AGGTTCTGAAATTCCTTTTATATCAACCAACGAAAACCCAGTGTACTCATAATTTATTTCTGTATAGAT  
GATGAGGAATTTGTGTGAGACGTAGTGGTGAATTAATGGATGGGGGGGTATTATTTAGTCTTCAATATAA  
TGTATCTCGCATATTTGGGCTAAAAGTTATAGGTTAGTGCTGAACGAAGTGAAGTCCAACGTTTACC  
AACGATCTGCCAATTTGTTTTACCGAACGACCCAAATCCACATTTATTTGCTCTGGTTGAGGTGATCAT  
GCTCATCTGTTGGGCTTCTCTACGCTCTGCGCAACCTGCAAAAACACGCTACCGCCCCGAAATTTAG  
CCTCCAGCTTGTACCTGCGATTTGGCACTGGCTGACTCATGGTTGACTCCTGCGAGAGGTTGCCAAGC  
GGCTATGTTACCGAACGGGGCTGGGGTGAAGAGTGAAGCGGGCGGTTTTCTGAGCAAGATCAATAAAT  
AATAAATAACGGACGGTGAATAAACCAGCAGCACCAGCAGCAGCTATCCGCGCAGAGTGAGAT  
TGGAAGGGGAAAGCGGGAGTGTGCCAGCTTGTGACAGACATTAATAAACCACATGGACCCAAGGGCC  
ATGTGGTTTTTCTGCGGTGATTGCTTGTCTTTATCTGGCTTGGCGTACCGGCACGGCGCGGGTGGCGGCC  
ACTTCGTAGCGGCTTTGGCTTGCCGGAGCGCCCTTCTGGAAGTGGCGTACCAGCCGGTTCGAGATCGCTTA  
ACTGGTTTACCAGCTGGGTGATGCCGTGCACGGCGTGTGGCTGCCGACGCTGGAGTCATCGGCCAGGGT  
CTTGATGCTGAGCACGTTGCGGTTGATCTCGCGGGTGCAGTGAAGTGTCTCTGCACCGCCTGGGCAATC  
TGGCCGCTGCCGGAGGCGACCTGCTGCAGCATATTTGTTGATCTGCTGGAGAATGGTGGCGGTCGCCGAGG



CTTTCTGCTGGCAGCTTTTCGGAGAGTTGGCAGCCCTTCTCCATCGCCTGTTCTGCATCCCCGGCGCTGGT  
TTGCAGTTCGGTGATCATCTTCTGGATCTCGCTGGTTCGAGGATTGGGTCTTGATGGCGAGGGTTCGGGATC  
TCGTCAGCCACTACCGAGAAACCCCGACCCGCTTCGCCAGCCCGGGCCGCTTCGATGGCGGCATTGAGGG  
CCAGCAGGTTGGTCTGGTTGGCGATGTTGTTGATCACATCGAGGATGCCGTCGATATCGCGGCAGTGGCC  
GACCAGCGCACTGATCACGCTCTTGGAGGTGGTCAGCTCGCTGTTTCATGCCCCGCCACGGCCGCCACGGTT  
TCGGCCACGCTACTGTTGCCGCTCTTGAACAGCACGGCCGTTTCATCCAGCAGGCTGGAGGAGTCACTCG  
AGCTTTGTGACACCTCGCGAATGGATTCCGACATCTCGGTACGGCAGTGGCTACCTGATTGGTTTCGGC  
CTGCTGCTGTTGCAGGTTGTCCGGTATGGATTTCGGCGTTGCGCAGATCCCCCTCGGCGGCCCTGCAGGATC  
TTGCTGCAAGTCTGCTGGGTGCGGGCCAGCACGGCGTTGAACTCGGCCGATTTCATCAGCATCGAGAGTT  
CGATGGCGGGCGATGTTGTCCACCTTGTGGTGTAGAGCAGCTGCATCAGAGGGTTGTCAAAGCGGCTGGC  
GGCCATCTTGTGAGCTTGGCGAGGCGGGGAGAGGCATTTCAGGGTGTGGCCGCTATCGCCAGCGGC  
AGGGCGACCAGCGCCAGTTGCCAGTTTCATGTCGTGGTTGTAGCCAGCGCAAACATGGCGAGCAGGCTCA  
GCAGCAGGCAGAGGTTGATGGTCAGGGTATGGGAGAAGGTGGGCAACTTGAGCGCCAGCGGCAGCTTGT  
GTTGCGAAGGTTCGGCATAGACCTTCTCGGCTCGCTGTTTTCATCTCCTCGCTCGGGGCGGTGCGCACCCGAC  
TGATACTCCACCACCCGGCCGCTGGCATCCTTTCATGGGGGTGACAAAAGGCGCTGACCCAGTAGTGATCGC  
CACTCTTGCAGCGGTTCTTACCAGCCCCATCCAGCTCTTGCCTTCGCGGATATGGTTCCACAGATCGGC  
AAAGGCCTGTTTTCGGCATGTCCAGGATGACGTACCAGATTGTGGTGTTCCTCCACTAGCTCGTTCGAGCTGG  
AAGCCTGCTATCTCGCAGAACTCATCGTTGGCGTAGGTGATGCGGCTCTCCAGATCCGTTGGTGGAGATCA  
GGCTCTGGTGGTCTGGATAGAGACGTTCTCTTTGGGTACCAGTTGATTGATTCTCATGGCCTTACTCCC  
GAGCTGTGATGGTTAGATTTTTCATCTACATCAAGACATCTGCAAGGGGTGGGCCAGCTGGCAAAAGCTAA  
TGACTGATGTGTTATTAGTGCCGTTTTTGGCAGGAAAAGAACGTTGCTGTTTGCAATATGCAATGGAGCAG  
ACGGGGTGTGCCTTTTCGGCATCTGCAATTTGCAACCTATTCTGGTCAAGCCCCATGAGCTGTGAGCCAGA  
AGCTTGATGCGAAGGAGCCACGAACCGACGGGGCATCCGCTGCCCGCCAGAGATCAGGGGAGAGGGTTCG  
GGAGCGGGTGAGGAGGGGGCGCTGACGAGCTGCATCACTTCAATCTGGATACCTGCACCAGCACGGTTTT  
TCAGATCCTGCAGGTACTCCTCCAGCGGCGACTCTTGCAGCAGCTGGGCGAGCTCGTTGCCACCGGGGT  
GAGCCGGTAGTAGAGCAGGGTATGTTGTTCTGCTTGCAGTGCAGCCGCCAGCGCTGGTTGCCGAACCTCC  
AGCTCGACCCCATCGGCGGGCAGCGGGCCGACTCCAGCTCAGCGCGGTGCAGCAGCCCCAGCTCAAACA  
GTTGCAGCAGGGCGTTGTAGGGCAGTCGGTATTTGCCAAGGCCAAGGCGGTTGCCTTGGCGGGGCTCAG  
CAAACCTGGCCCCCTTGTGCAGCCCCAGCAGCAACCTCGTCTCGTGCCTGCGGTTGTAGTGGCAGGTCAGT  
GAACAGATGCGCTGGAACAGCTGGGCCTCGCGCTGGGTTCATCTCTTTGAGGGTGGCTAGCGCCCAATGG  
AGAAGCGGCCCCGGCGTGGCGACTTCCAGCGCGAAGATCCGCCCCACAGCTGCTGCATCGGCACCATGCT  
GATATCTTCCGCCAGTTGCAGGAAGCGGGTTCAGCCAGTTCGCTGTCCATCTCGCCGCCAGCTGCCGTCTCT  
TCGCAGTGGCGGGAGGCCATCACCATGATGGCTTCCAGATTGCGCTGACGGGCGGGCTGATCCGCCAGAT  
GGCGAAAGGTGGCGCGCTGTTGCAAGGTGCTGTCCGTTGCGGGTGAGCATGCCGTCGATGCCGCGACT  
GCGGGCCAGACGCAGGGTCTGCTCCTGGCTGCTCAGGATCGAACTCTCTTTTTTCGGGGGGGGGAGGTCT  
GCCATGCTGACTCCATTTCGCACAGGTTCTGGAGCTGAATGTTACTCCAACCGGGATGCCAAGATAACAAA  
GCGGCCTCCGTGGAGGCCGCTTTTTTTGCAACGGGAGAATTACTCCTCGTAGACACTCACCTCGACCCT  
TCCATCGAATAGGAGGCGGTGGCCATCTCGTGGCTGGAGCTGACAGTGCGCATCTTGCCCTTACCAGG  
TGGCATCCACAGATCATCCACCAGCGCACCCCTTGGGGTAGCTCACATAGATCACCTGATTGGTGGGGGG  
CGGCGGCACATGGATGCAGGCGCCGAAGTAGGGCACCAGCAGGAAGGCGGTGATCTTCTTGGCATCCCCCT  
TCCAGTGGCACCACGAAGCCTGGAATGCGCACATCCTGGTTGTCCAGCTTCTTGTTTACCCCGCCACC  
GTTGCGGCACCGACATGGGATCTTTCGTGATTGACCTGGGGCGGTGGCAGCAGTTTTTCCCTTCCGGGAT  
GAGCACATCCAGTCGATGGTCTTGTAGTCGGCGGCCAAGGCGGGCAGCACCAGCAGGCTGGCGAGCAGC  
GCCACAATTTTCCACTTCATCATCTGTCTTCTGTTTCTATTTTGGGCGTCTCGCTAGACCGGAATGCTC  
ATGCCATCGCTCAGGCTGTAGCGGTAAGCGCGGGCGGCAGGGAGCAGGCCATCACCATGCCTGCCAGCC  
ACACTACCCAGCAACTGCCACTCGTAGGTGCTCGGTAGCCCCAGACTCAGTTGCAGGCCATAGTGGCT  
GAGCAGCCAGGGCGAGGCAAGCCCCCTGCCCCAGATAGAGCACGGCGACCCCGAGAGCGATGCCGACCGTG  
GTCAGCGCCATGGCCTCCAGCGCCAGCAGCAGGAACAGGTGGGCAGGGCCCGCACCGAGGGATCGCAAGA  
TGGCGAGCTCCCGGCGCCGCTCGTTAAGCCCCGCCAGCAGGGTAGTCAGCATGCCGATAAGGCCCGCGAC  
TACCACGAAACCGGCGATGACCGAGAGGGCGGTTTCCGCCACGCTCATCAGGCTCCACAGCTCCTGCAGG  
GCGGCCCCCGGCAGGATCGCCATCAGCGGCTCTTGGGATAGGTGTTGACGCTGCGTTGCAGCTGAAACG  
CCAGGATCCGGTTGCTCAAGCCACCATAAAGGCGGTGATGGTTTTTCGGGGTGAGATCCTGAGCCAGCGC  
CTGCTCCGGCGTACGTTCTTGTGTGGCGGCCGTTGCCAACCAGATGGATCGCCTCTATCCCCGCC  
AGCGGCACATGGATGGTGCATCGATGGGCGTACCAGTTCGGTGCAGAAATACCACCACCTTGAACGGCA  
GATTGTGCTGCTGGCTGAACGAGGTGTTGCCAGCGCCGTTGGGCGATGACGATGGATTGGTTCGAGGTGATA  
GCCGAGCTTCTCGGCCACCTGGGCGCCCAGCACAGCTTTAAACGGCGTGTGCAATGGCCGCCCTTCCCGC  
AGTTGCAGCGACTGTTGCTGACCGTACTTCAGGTGGGTGAAGTAGTCGCCATTTGGTGGCGAGCACTCGAA  
ATCCCTTGTGGGAGTACCAAGGGAAAGCGGGATGGTCCAGGCGACGCCCGGTTTCTGCTTGATGGCCTG  
ATAGGAGTCCACCCACGTTGTTGGTGGGGTTGCCGATGTGAAACACCGAGTAGAGCAGCAGGTTAACC  
TGGCCGGAGCGGGCGCCGACGATGAGATCGGTCCCCGAGACGGTGTGGAGAAGCTTTCACGGGCCCTGGG  
TGCGCACCCGCTCCACCCGAGCAACAGGGTACGCTGATGGCAACGGCCAGCAGGGTGGCCCCGGGT

GAGGCGGGGGCCAGAGACTTTGCAGGGCGAGCTTTAGCATGATGCCCTCCGGTTGAGCTGTTGCAGGT  
TTTCGACCCGCGGGAACAGGGGTTTCGAGATAAGGGTCGTGGCTGACGAAGATCAGGGTCGAGCCCTGCTT  
GTCACACTCCTCGAACAACAGCTTGATAAAGGCGGCCCGTTGTCGGTGTGAGTGCAGAGGTGGGCTCG  
TCGGCGATCACCAGCGGTGGAGAGCCGATCAGCGCCCGTGCAGCGGCAACCCGTTGCTGCTGGCCAATGC  
TGAGAGCATGGACGGGGCGATGCAGCGCCTCGTCCGGCAGTTGCAGCTCCGCCAGCAGACGGCGCGCCTC  
CTGCTCCGGACTCCCTTGCAGGGCGGGCCGTTTGGCGGGCGAAAAGGTGAGGGCAGCGGTACGTTGTCC  
TGCACCGAGAGAAAGGGCAGCAGATTGAACTGCTGGAAGATATAACCCAGATTGGCCGCCCCGGAAGTGGT  
CACGGGCACGGCCAGAGAGCCGGGCCAACGGTTGGCCAGCACCTCCAGGGTGCCGTGGTTGGCGGTCTG  
GATCCCCGGCCAGCAACCCGAGCAGGGTGCAGTTGCCAGAACCCGACGGGCCCTTGATAAAGACCCGCTCA  
CCCTCGCGGATGGTGAGGGCGGGCAGATCGAGTACAGCGTCGCCATCTGGCCAGGCAAAGCCAGATCGC  
GGATCTCAACCACGGCTTTTTCATGGCGTTACCAGCTCAGCTTGTGGCGGACGGGGACAGCTCGCTAG  
CGGTCTGGCCAGTGGGCAGGATCCCCTGCACGCTCAGCTTCTCAAGGCTCGGATAGACGCTGAACAGGGT  
CGCCTCAAGACCGGTGAGTTGGCTGGTGTAGCGCAGGTGTAGGTGTACATGGCGCCCATATCGGCGTGA  
CCCGCTTCGTGATGATCATGGTGGTCTTCATGTTTGTGCTGGCAGCCTTGTGATGGTTCATGGTTCATGGT  
CATGGTCGTGATCATGCTCTTCTTTGGCTGCTTGCAGCTCCTGCTGGGTGAGTTTGCAGCCAGCGGCCGG  
GTCGAAGCGGAACAGGGTGTGAGGCTGCTGGAGGCGGGCGACCGCTTTGGCATAATTGCGCCTTCTCTTCA  
TCGCTCTTGGCGGCGTGTCTGAAGCCACCAGATCGGCTGCGGGTGCCTGCAGTTCGATCATCAACTGGT  
CGCCATCGACCACCAGATTGAGGTGGCCGTGGCCATGCTCGTGGGCGCCGTGGCTGTGGCTCTCGTGTTC  
GTCGTGATTTGCGTGTACGCCAAAGGCCGAGCGGCCAGCAACAGAGTAACTGCTTTCATCTTTAATCCT  
TCTTTCAAACAATAAGTGAATTAACAAGGGATAGATAAAAAACAGAGCGGGCGGCGCACGGATGGC  
ATAGCTGTGAAGCGTGGCGGTATCCGCCGAGCGTGTATGGTTGCAACTACGGGCAGAACAGAGGTGCAA  
CCGGGGAAACAATAGGGGGTAGCCGTGATGACCTGTTTTGCCATCCAGATGGAGGGCGCAAACCAGACAGT  
GATGGTCGTGCTGGCCGGCAGGGCGGATTCAAAAGTGGTGCCGGGCAAGGGCAGGCTGCAGCCATAACCA  
GCCAGCAGCAAGATCCAGATTTTCAGCTTGATACGACCCATAGACCCCTTATGGAAAGGGCGCCATCAGC  
GCCCTTCTCTCTGACTTAGAGATGGGACTTGATGAGCCCATCACGGTAGCAATGTTGTTGGCATCGAG  
CTGGCCATCTTTGGCAAACAGCACCTTGCCCTCTTATCCAGCAGAATGATCGCCGAGCTTTCCGGCGTC  
AGATCCCAGGCGTTGCGCGCCATGCCCTTGGCATCCAGCACCATGGCGGACCAGGGGAACCTTTCTTTC  
TGTCTCGGACTGCTCTTTCACGAAGCCGAGGTGCCAGATGGCGTCAATTGCTGTTGATGACGGTAAAC  
GGTCTGGTACTTGTCTTTCGCGAGCTTGGCGGCTTATTCGCTCGATCATCGGGGCGTTTCAGCTCCTTG  
GCACTGGAGCGACCGGCAATATGCTGGATCAGGAACACCTTGCCGGTGAGCGAGGTGCTCTGCCACGGCT  
GGTAGCCGATATCCTTGGCGTTCAGTACCAGCTCACCCCTTGTCACTGATATTGACCAGCGGCACCGGGTT  
GCCATCCTTGAAGTTGTGAGCAAAGACCAGAGATGGCAGCAGCGCCAAAGTAAGTACGAGATGTTTCATC  
CTGATGACACTCCATTTGTTATGTTATAACGAGTTTCGGATTGAGGGAATGGGCGAGCTTCATCCTAAGC  
TGATCGGATCTGTTAAAAAGTGTAAATAAGATCGCAATTCAGAAGCGTCGGCGCCCCGCCAGTCAGGT  
GGTTGGCTGGCAAGGGCGGCTAGGATGGCATGACATCGATAAAAAATCAATGAATTGGCTGCTGGTCTGAG  
CTGTCTGCGTCAGTAGAGCGACTCGCTGATGAGGGGGATCTTGGCCATGGTCATCTGCTGGCCAGCAGG  
GACGAGCCGGTCAACAGCACATGGCGCTGATTGTTGATCACCACCACATCACGGGTACGCCACTGTCTG  
CCGTAATGGCCAGCCAGGCAGGGGAGACGCTGCCGATGCTGATATCCGGATAGATGATGCTGAGCACATA  
TTGCGGCGCCAGCTCTGCCAGCAGGCTGGCCATCAACAGCGCCTTCTCGTCCGTGTGCGCCTTGTATCC  
TGAGTGCCTGCAGCGGCGGTGCGAAGTGTATCCAGCTGCTCCGGCTGGGTGGGGATGGCGTTCAGCCACT  
CCTGCAGCAGGCTGACGCTGGTGGCGAGATCCTTGGCCGCAAATGCTGCGCCAGTGGCTTGAGGTGCC  
TTTGAAGTGGTAGAAGAGCTGGGAGTAATCGGGTCGCACGCAAGGCAGTTTGGGATTGGCCGGATGGACG  
CAGGGTATCACCTCATCTGGTAGAAGGCATCCTCCTGATACTGCTGGTAGGCTTGCAGAACAGCAGCG  
ACTCCATGCTGTGCTCCCGCAGGGTGAAGGCCTGCTCCAGATTGCGAAATTTGGTAGCGGTCTCGGGGCT  
GCTCTGATTGATCAGGTTGATGCTGTTGTAGAGCCGCGGGCTGATGTAGGCGTAAAGGGTCTCCAGCGGA  
TTGGTGAGAGAGGCCCTTTCAGCAGGCTCATCTCGTGGCGACTGGCGGCCATCACCTGATCGTGGTGGTCA  
GCTGGAAGTGCTTGCCTGGCCATCGGTGGATTGCCACTGCCAGCTCATGTTGATTTGCTGCGTGGCTGTGCT  
TGTGGCGCCAAGGGTGGTGTGAGAGTGGGCTGAGCAACAGCGCGGGGGTTCAGCTTCATGGTGGTGTCTT  
CCTGCCGTGGACGATAATTAACAACACTAGGTGAGCCGGCACTACTTTGGTGTGATGTTTCGTTTTGTGATCTG  
GATAACAGATTGATGTGACTTTTAATTTAATTGTGAAATTAAGTCACTCTGGAGGGGTTATGAAGCCTTG  
GATCATAGTGTGTTTTGGGCTGCTCAGCCTGCAAGCCATGGCGGGTCAGGTGATCGTCAACAAGGGGATG  
TCCGTTGCGGATAACCTTTGCCCTGCGGATCAGCTGGCGCGCAACACGAATGGCAGGAGTGGCTGCGCT  
ACCAACAGGCCATCAAATGGCTGGAGGTGTTGCCGGTCAACTGCGAGCTGATGAGCCAGCCGGGCGGCGG  
CTATCGCTGTGGCGGTGATTACTATCGGCCCTTACCAGAAAGATGGTGTGAAATATAACATTCAGGGCAAT  
CCTGCCGAAGATGCGGCCGATCAGCTGCCGCAAATACCAATAAAAAAGGCGCCATAAGGCGCCTTTTTTTA  
CAAGCGAAGTGACGCTTACTTGGCAGCGTAACGCTCGGCAGAGGTCTTGATCTCGGCTTCGGCAGCGGCC  
TTGTGCGCCCCAACCTTCCACCTTGACCCATTTGCCCGCTTCCAGCTCTTTGTAGCGCTCGAAGAAGTGT  
GGATCTGGGCTTTCAGCAGTTCCGGCAGATCGTTACATCCTGGATGTGGTCTGACTGCTTGGTTCAGCTT  
GGAGTGTGGTACTGCAACGATCTTGGCATCTTCGCCAGATTCGTGGTTCATCTTCAGCACGCCAACGGG  
CGGCAGCGAATGACGGAACCGGCCAGCAGCGGGTAGGGGTCGGAACCAGTACGTCGACGGGGTACCAT  
CCAGAGAGAGGGTTCGCTTACGATAGCCGTAGTTGCACGGATAGAACATCGGGGTAGACATGAAGCGATC

GACGAAAATAGCACCGCTGTCTTGTGCGACTTCGTATTTGATCGGGTCGGCATTCTGCGGGATTTTCGATG  
ATGACATAGATATCGTCCGGCAGGCTCTTGCCAGCCGGTACCAGGTTTCAGGCTCATGATATTTCCCTTCGT  
TGTTAGTATCAGGTTTGCAGGCCGATATTATAGCGATGTGATGTTAAATGACCATATTTTCAGCGGATATC  
GCTAACGAAGAAGGGGGATGTTTCCGCTTTGCGGGCCTTTGATGTGTGCGGAATGCAACAAAACGGCTGT  
TTTGATGCCCTGCCGCTGACCTTGGTCAACCGGCAGGGCATGTGGAGTTGCGAGCAAAGGGGTGAGAGCGA  
GTAGGGGAGTCTCGACTCATTGACCAGTCGTGACAGGGGCTGTTACGACATGAGGGTCAAAGTGGGTGCCG  
GAGCGGGACTGGATATACTCCATGGTCTGCGTCAGCGTCCAGGGCTCCTTGTAGGGGCGCTTGCTGAGCA  
GGGCATCGAATACATCTACTACCGCCACAATCCGCGCCGACAGCGGGATCTGCTGGCCAGCCAGCTGCTG  
CGGGTAGCCCTTGCCATCGAAGTGCTCATGGTGGCCCCGGGCGATCTCTGCCCCAGCGAGAGGTAGCTG  
GTTCCCTCCACCATTTCAACCGCCTTGTGACGATATTTGGCGCCGATGCCGGCATGCTGCTCCATGATGG  
CCCCTCTTCCGGGTGCAACGGCCGGGCTTGTGACGATATGATCCGGGGTGGCCACCTTGCCACATC  
GTGCAGGATGGAGGCCATGCCGATCATCTCGACAACTCCGGGGTTAGCTGCTCGGGATAGGCTGCCATC  
TGCTTCAATTCGCCCACGATGGCATCCGAGAGTTTCTGCACCCGCAAGACATGCTCGCCGGTATCGGAGT  
CGCGAAACTCTGCCAGCGCCGCCAGCGCCACCACGGTGGCCTCCTGCGCGCGCAGCAACTGGTTGTAGAG  
ATAAAGGTTGTGCTAGGCCGCCGAGATGCGCTGACAGAAAGACATCCAGCAGATCGCACTCGAGGGGATCG  
AGAGGCTGGGTGCGGGTAAAACCTCAGCACGAACTCGCGACCATTCTGGGCGGCGATATAGAGGGAGTCTT  
GTGGATGTTCAAAGCGGTTGACGCGCGCCGAGTGCCTTCATGACCGAGTCATTGAGGGTGGGAAAGTC  
GGTGATCTTGCCATCATCCAGCAGAGTCTCGTAGTCGCCGGTGGCGGCGAGGATCTCCAGCCCCGTGTTCC  
CCGGGACGGCGCTCGGCGCAGATAGCCCCCTTCGGTGCCACATCGAGAATGGCGCTGATCTGTTTCAGCA  
CGCCGGAGGCAAACCTCCTTGAGTGAATGAAGATGGTAGAGATCGCCCGCTCCTTCCAGAAATTTGCGGAG  
CCCCTGACGGCTCTTGTGATGGCACTGAGGGTTTCGTATGAACGCAGGGATGCGATGACAGTGGTGTAG  
AGCTTTTGTACCGTCACTCGGTCTTGGTCTTGTAGTCATTGATGTGTAATCGAGGATCACCCGCTGCT  
CGGGTGCTTGCCGGGCTGGCCGGTACGCAGCACGATCCGCACCAGCGAGTTGTGCATTTTCGTTGCGGAT  
CCGGTGCACCAGCCGACAGCCTGCGTCTTCTGTCTCCATCACCACATCGAGCAGGATCAGCGCAATCCTG  
GGATTGGCCTCCAGCATAACGGCCAGCTTCGGCGCCGCTGTAGGCATTGAGCAGCTCCAGCGGACGGGATT  
TGTAAGTGAATGTTGGAGAGGGCCAGGCGGGTGGCATGATGGATATCCGGCTCATCATCCAGATCAGCAC  
TTGCCATGGGTTGAGTGCCTTGGGGACCACGACCTCCTCATCATCGAGTTCGATGATGTCGTCGTCAGC  
AAGATATCGTCTTGTCTTGGGCACTGCTCATATCGGTTACGCTCCGGCGCTCAATGAGTATGTGAACA  
GTATGCACGATCACATCCGCTCGGATCATCAGGATAAGTAGATATCGTGAGCTGGTCCGCTCTTTATC  
GCTACTCGAAAGGTTCCAGATACCCCTGGATCGACTTCTTCAACCAGGCCAACACCTTGCCGTATAGGC  
GTTTTCCGCCAGATAGACCCATAATCTCGCCACTGCAGGCTGAACTTGTGTTTTAGTGTGTCAGCAGGGAG  
CCTTGTGCGAGCTGGCTCTGGATCAGCGGCGAGGGGAGCACCCGCCAGCCAGTCCGTCCAGCACCCGCAT  
TGCGCATCAACTCGAAGCTGGAGAGACCGATATGCTGGCCTCCACAGGTAGCAGGCTTTTTTACCAGAAA  
TTCATCTACATACGAGAGGGTAACTGGGTGTGATCGGTCAGATCCTGTTGTTTTGACCCGCTTCAGTCCG  
GCCAGCGGATGGCTGGGCGCCACCACCATCAGGGTGCGGATCGGGTTGAGCACGTCGATATTGAGGCCGC  
TGCGCTCCTGATCTTCCGTAATAAGGCCAAAAGCGGCATCGACGAATCCCTCTTCCACCAGCGCCGGCAG  
TTCGGGTGGGGAGGCGAGCACCCAGCGAGATACTGGTCCGGGAAACTGGCTGTGCAAGGCGGTCAACATC  
TCGCGCCATACCGGTTCCGGGAATCGCGTCATCGCGGGCGACCCGTAGCGCTACTTCGGCCCCGAGGCGT  
AATGTTTTGCACTTCTGCTGCAGGCTGTTGGCTGCCTGCAGCAGGCGAGTGAATCATCAAGCACCAGCTC  
GCCTATTTTCGGTCAAGCGACTCTGATTGGCACCTCGTTCAAAAAGTTTCGACGCCAAGCTCAACTTCCAGC  
GCCGCGATGGCGGTGCTGACGGCGCTGCGGCTTTTTGCCAGGGCGACGGGCGGTGTTGGCAATAGAGCCGC  
TATTGGCTGACTCTACAAAGAGTTCTATCTGATATAGCTTCATGTTTTACAGGCCATGGCAGAGTTTTTC  
ACCATCACCTTAGCGTGCCAAACCAAGGCAAGGCAACCTGTGGCGTCGGAATAATCGACGCTGAGCGAT  
TGTCGCGAGTTGCTTCTCCCCGTTTACCATCTCTCCGTCGAAGCAACAAAGGCATCTTATATGTTATTA  
AGTCGTATGTTTTCTGGCCCGGCTGTTTTTGACCGGCGCCATCGTGACCGAGGTCGCCGGTACCTCCAGCA  
TGGCCATGATCCCCGAGCAGGGGCTGGCTGGATGAATTACATCCCGATGTGGCTGTTGATCGGTTTTCTC  
GTACTGGTTGCTGGCGAAAGCCGCCAAAACAATCTCCATTGGTATTGCGTTTTGCGCTTTGGGAGGGGCTC  
GGGATCACCTGATCACCATAGTGTGCGTTCATGTTCCCTTGGTTACGATGTGACCGTTTCAGGAGCTGATTG  
GCCTGGCTCTCGCGATAGTGGGGATTGTTATGGTACCATGGGGGAGACCCATGATGAGCCCGCAGACAA  
GTCAGTAGAAGCGGAGGCCACAGCATGAGCCCGTTTTGTGATTGATTTGGGTGCCGCACTGATCGATATCG  
GTGCCAACATGGCCATCAACCGCTCCAAGGGTTTTCTGTTACAAGGGGTGGGGATTCTTGGGGATCATGCT  
GGTACTCGGCGCCTTTACCCTGCTCTCGGAAGCGGTAAGTGGCGGCCAGATTGACCTGGCTGTTGCCCTAC  
GCCACCTGGGGGGCTATCGGTATCGTCCGTACGGCGCTGGGCGGTTTTGCTCTTCTTCCGTGAGCGGCTCA  
AGCCCATCGGCTGGGCTGGCATGATGGTGTGATGGCGCTGGCTGTGCTTATGCTGACTACCGCCTGATAATC  
TGAAGCAATAACAAAAGCCGCCCGGTAGCAACCGGGCGCTTTTTGTTTTGGCTGATTGCTTGGTTCGATGCA  
GGCTCAGCGCGGCGCTTCGTAGAGCTCCAGCGGCAGGCCGTCCGGGGTCCGGCAAGAAGGTAAAGCGCTTG  
CCGGTCAGCTCGTCCACCCGCACCGGTTCTACCTCGACCCGATGGGCCAGCAGGTGGGCGATGACCCGGT  
CAAGGTCGCTGACCCGAAAGGCGAGATGGCGCAGGCCGACGCTCGGGGCGGGAGGGGCGCTTGGGAGG  
CGAGGGGAAGCTGAACAGCTCCAGCTGGCTGCCGTCCGGCAGGGCCAGATCCAGTTTCCACGACTGGCGC  
GCTTCGCGCAGGGTCTCGGCGATGATGGGCAGCCCCAGCACCTCGTGGTAGAAGTGGCGCGAGCGTGGGT  
AATCGCTGGCGATGATAGCCACATGGTGGATGGCGTCAAACAGCGGAAAGGTCATGGTGTTCCTTGTCA

GCAGCATAGTGAACGGGCAGCCTGCGCTGCCCGTGTGCTTATCTAGTTGAAGAAACCGCCGAACCAGTC  
ATCCAGCGCACTGCGCGGCGATGCACTGCTGGCGCAACCGGCTGGGGAGCCCATGGTGGAGGCTTTGGCC  
GGCACCTGCAGGCTGCCCGGGCAGTCGCTGGCGACGCGGGTGCCGCTGGCGCGGGAGAAGTTGGCCCAGG  
TGACCCCTTCCGGCATCTTACGCCCCAGACTGTTGACGCCGCGCTGGCTCATGTAGCCGCTAAAGAGCTG  
CAGTGCCCCGCTGGCACCAGTCAAGCCCCGCCGGGGTGTGTGCTGCGGACCGACCCAGATACTGACCAGC  
TCGTTGTTGTCCATCCCGGCAAACCAGGAGTCGCGCAGCTCGTTAGTAGTACCTGTCTTGGCCGCCATGG  
TGGCGCCCGGGAACCTTGGCACTGAGCGCGCGGGCTGTGCCCTGACTCACCGTCTTGGTCATGGCGAACAG  
GGTCAGCCAGCTTGCTTGCTGGTCGGTGACCCGCTTGGCGGTCTGATCATGCTGATAGAGCAGGCTGCCA  
TCCCCGTTGACTACGGCGGAATGGCAGACAGCGGCTGGGTAGCCCTGATTGGCGATGGGCAGATAACA  
TCTGGTTACCTCCAGCGGGGAGAGGGCCACCGCCCCAGCACCGGATAGGGCTGGATCTCCTG  
CTGGACTCCAGCTTGTGACGGGTGTGACCACTTTTCCAGCCCCACCTGCAGACCCAGATTGACTGTC  
GGCAGCTTGAGTGAGCTGGCCAGCGCATCCATCAGCGCACGCTCTGGCGGAACCTGCGATCGTAGTTTT  
GCGGCGTCCAGACCTGACCATCCTGACCGCAATGCGGATCGGCTGATCTTTGAGTGGGGTTCGCGAGCGT  
CAGGCCGTTGGAGAGACCGGTGAGGTAGACCGCCGTTTACCAGCGAGCCGATCTGGCGGGCGGCATCC  
AGCGCCCGGTTGAACCCGGCGTAGCGGGGATCGCGGCCACCCACCAGCGCGACCACTTCGCCCTTATGCC  
AGTCGGAGACCACCATGGCCGCTTCCAGCTTTTTCTTGCCGCGCAGTTTCTCGATATCGGCGAGGCCCGA  
TTCGACCGCCCGCTCGGCCGCTGCTGGCGATGGGGTTCGAGACTGGTGAAGATCTTCAGGCCAGACTGC  
TTGAGCAGTTTCGGCACCGAAGCGGCTCTGGATCTCTCGCTTGAAGATCTTAAAGGCCGGGGTTCGCAC  
CATAGCTCATCTGGCCACGGGCGATGATGCCGAGGGGTGGCGGCTGGCCAGCTCATATTCGCCCTGGGT  
CAGGCTGCCGTGATCCATCAGCAGCTTCCAGCACCAGATCGCGCGGGTCTTGGCCCGCTCCGGGAAGCGC  
CAGGGATCGTAATAGGAGGGGCTTTACCAGACCGACAGCAGGGCCACCTGATCGATATCCAGCTCGT  
TGACCGGAATGCCGAAGTAGAAGTAGGAGGCGAGGCCGAAACCATAGACCCCTTGCAGAGAAGTTCTGCC  
CAGATAGACCTCGTTGAGGTAGGACTCCAGGATCTCGTCCCTTGTGTAGCGATAGTCGATCAGCACCGCC  
ATATAGGCTTCTGTCAGTTTTCCGCCACAGGCTGCGCTCACGGGTTCAGGAAGAAGTTTTGGCCAGCTGCT  
GGGTTCAGGGTACTGCCCCCTGCACGGTTCGACCCGCGATCAGGTTGGCGAACATGGCGCGCATGATGGC  
CACTGGCGAGACGCCCATGCTGGTAGAAGTCGCGATCTCGGTGGTTCAGCAGGGTTCACCAGCAGGCTG  
TCGGGTACTTCGGCGATACGCACCAGCAGGCGATCTTCCGATCTTCGGTATTGAGGCGATCGAGCAGCA  
CAGGGTCCATCTGGGCGTAACCGAGCTGGCGCTGGTTCTCCAGCGACTGGATCCCCCTCAAGCGCGGGCC  
GTTGAAGGTGAGGCGCAGGCCGCGGGCTCCATCGGCCCATCATAGAACTCGAACCGGCGAATAAGC  
TCGATGCGGTTGCCGTTGATGGTGTATTACCCGCGGTGTGAGGCTGGCGCACCTGCTTGTAGCTCAGCA  
TGTTGAGCTTCGCGCAGCATCTGGTCCCGCAGAGGCGCTGGCTGGGGTAGAGCTCCAGCGGGCGGCTGTA  
GACCATCACCGGCAGCTGCCACTTCTCGCCATCGAAGCGCTCGCGCACCTTGGTATCGAGGTAGATGCCA  
AACACCACCATAAAGGCCGCTACCACCAGGGAGAGCTTGAAGCCAAGCCAGAACAGCTTGGCCAGATGG  
TGCGTTTTGGGCGCTGCCTTCTTGGGGCACGCTTGCCTGCTTGGGTGCCATAAATCCTCTTTGCTTTCC  
TTTCTACTTGTATGTGCAATTCGCGAACGTCCGAGCGGGATTAACCCGTCGAACCTAGATGCCATCTT  
CTTCTTGGTGACCCTGGTTCGGCATCGCTTCCAGCGGGTTATCCGGCCAGTAGTGGCGGGGATAGCGCCCC  
TTCATCTCTTTCTTACCTGCTCGTAAGAGCCAGCCAGAAGGCGGCCAGATCGGCGGTGATCTGCAGCG  
GTCGCTGGGCGGGGAGAGCAGCTCCACCACCAGCGGTACCCGGCCATCGGCCACGCAGGGGGTTCGAGCC  
TTGCCCGAACATCTCCTGAATGCGCACCGGGATTACCGGTGCCTGCCCCGGCTGATAGCGGATCCGCACC  
CGGCTGCCGGTGGGCGCCGCAAAGTGGCTCGGCAGCGCCTCGTCCAGCCGTTTGGGCAACGGCCAGGGCA  
GGGATTGGCGCAGGATGTGCGCCAGGTTGAGCTTTTTCAACTGCTCCAGCCGGGTCATGCCGCTCACCGC  
TGGCAGCAGCCACTGTTCTAGGTTCGGCCAGCAGGCTGTGCTCATCCATGGCTGGCCACTCCTCATCAGGC  
AGCCACTCACGGGCGCAGCGCAGACGGGCCAGCAGCCCTTCGCTGCTCTCGTCCAGGGCAGCACATGCA  
GCCCCCTTGGCGGAATGCCTTGCAGCAGGACGCGCCCTTCTGCTCGTCAGAGAGTTCCGTCAGCGGTG  
CTGGCTCAGCACCAGCTCGCCGATCACCTGCTGGCGTTCGGCACGCACCCGCTCTTCCCGTTTCATCCCAG  
TCGAACCACTGCCGTTGCTCACCAGTTCCGGCAGCAGGCGCACCAGCTCGTCCAGATCGACCTGTTCCGG  
CGATAAAAATGCGGCTGCCGCGATCGTTCTGCCCATCTCGATGGCGATCAGCGCCCCCTGTCCCTGACA  
GGGATGACCTTCTACCAGATCGCAGCTCACCCACCAGTGTGATAGCGACTGCCACTACGCAGTTTTG  
CCGATGCGATCCGGCCAGGCGAGGGCACAGAGTAGCCCCAGCCACTGACCCTGCGCATTTGGCAGGGCGCA  
CGCCAAGCCGCTCAAACCAGCGGGCCGCCCTTACGCAGGGCACTTTGACGGCGGTGGAACAGCACAGA  
GAGGCGCTCCGATCCTCGCAGATCTTCTTCTGCAACGCCACCAGATAAGCGGCATCGGCGACAATCCCT  
GTCAGACCCTCGACTCCAGCTCGCGGGCTCGCAGCAGCATGCGGGCGAGGCGAGGGTGGGTACCGAAGG  
CGGCCATGGCGCGGCCAGCGGCAGTGTGTTGCTCACCTCCGGCTTCATGGCGCCAAGAGCCACCAG  
CAGCCGCTGGGCGCTGTCCACCGCAGCGGCGGGGGCATGTCCAGCAGCGGCAGATCTTCCACCTTTGCC  
CCCCACTGGGCGGCGTCCAGCAGCAGGCCGGTTCAGCTCCTGAGTGAGAATATCTGGCGGGCTCTGCTCGG  
CGAGCCGCTCCTGCACCTCGCTGCTCCAGAGCCGGTAGCAGACCGCGGGGCGAGACGGCCAGCGCGGCC  
TGCCCGCTGGGTGGCGGAGGATTTGGCTATCTGGCGAGTCTCCAGTCCGGGTGACGCCGCTTTTTCAGATCA  
AAGGAGGCCCGTTCGTTCCAGCCGCTATCGATCACCCACGAAATCCCCCTCGATGGTGGGGAGGTTCTCCG  
CCACATTTGGTGGTGAGCACCAGCTTACGGCGGCCCGCAGGCGCCGGTTCGATGGCCGCTGCTGGGCCG  
CATATCGAGGCGGCCGTAGAGGGGAGAGGGGTACGTCGTCGACAGTTTGTCTGCCAACCATTTGCCG  
AGTCGCTCGATCTCACCTGTCCCGGCAGAAAGACCAGCAGGCTGCCATCTTGTCTGGCCAGCGCTTCGA

GTACCACGGCGCCGACCTGCGGCTCCAGCCACTGCTGGCGATTGGCGGGGCGGTAGTGGTAATCGATCGG  
GAAACCGCGCCCCCTCGGAGCGAACCACAGGGGCATCCGGCAACAAGGTCTCGAGTGCCATGCCATCCAGG  
GTTGCGGACATAATCAAGAGCTTGAGGTCATCGCGCAGCCCTTGCTGGCTCTCGATGGCGAAGGCCAGCG  
CGGTATCTGCGTGCAGACTGCGTTTCGTGGAACATCGAAGATGACCAGCGAGACGTCAGTCAGCTCAGG  
GTCTTGTGTCACATCCGGGTGACGACCCCTTCGGTGACGATCTCGAGCCGGGTGCTGAGCTGGTGC GG  
CTCTCACCGCGTACCCGACAGGCCGATGCGCTCGCCCACCTTCTCCCCAGCTGGCGCGCCAGAAAAGTAG  
CGATATTGCGCGCCGCGAGGGCGCCGTGGCTCCAGCATGATGATGCGGCCGGGCAGCCGGTCTGACGCAC  
CAGCTCCAGCGGCAGCAGGGTCGATTTGCCCGCGCCGGGTGGCGCCTGCAGGATCACGCTGGTGTGGCTG  
TCGAGGGGCGGCAAAGAGTTTCGGGCAATACCGAAACGATGGGGAGCTGGGACAAAAGCGATGAGCACCTTCT  
GTAGCAACCGGTAACCGGCGCCTATTCTGCCACAGCCACCCGTGCCACCGTGAGTGGATGTGCGCAGAT  
GGTCACTCGGGCGGGAGGCTGGCGAGACATGGCCGGATGGCTGCCATAGAATGGGCCCATCCAATGAGCG  
TGAAAAGGCATTATCACCACATGGCCAACCTTCTTTGCCCTGCCCGTCAAGGAGCTGCCCCCGAGC  
TCATCGCCTGGCGCGATCAGCTGCCCTGGCCCGGTGAGCCGGTGCCGCAAGCCAACCTCCACCTGACCC  
GGCATTCTGGGTGAGGCGGACGAGTTGACCACCCGCCGCTGATCGCCGCGGTAGAGCGCCAGCACTGT  
CCGCGCTCTCCATCAGGCTGGATGAGACCGGCTGGTTCAGCCGGGCCAAGGCTGCCGATGGCCCGA  
AGGAGTGGCCCAACGAGCTGACCGTGCTGGCGAAGGCGCTGCGCCGCCACGGCGAGAAGTTGCGCCTGG  
CAATGGCGAGCAGGGTTATCGCCCCATGTACCCTGTGCGCAAGGCGGGTGAGGCTCCGGCCATCCTG  
CCTGCCCAAATTTCTGCTGCAGGCCGATGAGTTCTGCCTCTATCAATCCATCTCGACTCCGGACGGGG  
TGGCTACGAGCCGCTTGCTGCTGGCCGCTGCGCGCCGGTAAAAGAAGACGCACGGAGGGCTAACCC  
GTGATCTTTGATCCCCCCTGCAATCGGGCCAGCTGGTGGCCGCTACAAGCGCTTTCTGACCGATGTGC  
AACTCGATAACGGCGAGGTCATCACTATCCACTGCGCCAATACCGGTGCCATGACCGGTTGTGCCGATCC  
GGGCACCCGGGTCTGGTACTCCACCTCCGATAACCCCAAGCGCAAGCTACCCAACAGCTGGGAGATCGCC  
GAGAGCCCGGGCGGGCCACTTTATCTGCGTCAACACGGCGCGCGCCAACCAGATTGCCCGGGAGCTGATCG  
AGCAGGAGGCCATTGCTCCGCTGGCGGGATACAGCCGGTTGCGCACCGAGGTGAAGTATGGCGAAGAGAA  
CAGTCGCATCGATCTGTTGCTGGAAGATGACGAGAAGGGCAATTTGTTACATCGAGGTAAAATCGGTACC  
CTGCTCGACGAACGTGAACATCCGGGTATGGGCTACTTCCCCGATGCGGTCACCGCCCGTGGTGCCAAGC  
ACTTGCGCGAGTTGATGGCGATGAAAGCGGCGGGCCACAGGGCCGTGCTGCTCTTTATGGTGTGCACTC  
CGGAATAAGCCGGATGCGCCCTGCAACCCATATAGATCCGCACTATAGTCTGCTAATGAGCAGGCAATC  
GCGGCGGGGGTTGAAATTTTATGCTATCGGCCCATGTTGGGGTGCAAGGCATGGTGGCTCAAGGGTTTG  
TCCCGTTTTGAATCAGGTCACCTGTTACCCGAGGGGAGTGCATAAAATATTGGAGTGGGTAACATTATTGGT  
ACGGCTCGTTTTGCTTACCCGTTACCCCTTCTGCTATAGATGTGCGCCCTCAATTTATGGATGGCACGGGTAG  
AGTGCTGAATTAGGAGACAGGGCATGCCAACAGGCGAAAAACAGGAAATCTCTGGGCCCCCTGGCCATTGC  
GGGTGTGCGCCTTACCAGGAAAAGCCGGGTGAGGAGTACATGAATGACCAACAAAAGGCGCATTTTCGC  
AAGATCCTGGGTGCTGGCGCAACCAACTGATGCAGGAAGTTGATCGTACCGTCGACCATATGAAAGACG  
AGGCTGCCAACTTCCCGATCCCGTGGATCGTGCCGCGCAAGAAGAAGAGTTCGCTCTTGAAGTGCCTAC  
CCGCGACCGTGAACGCAAGCTGATCAAGAAGATCGAGAAGACCTTGACGCTGCTTGAAGACGATGATTT  
GGTTACTGCGAACACTGCGGTATCGAGATCGGTATCCGTGCTGGAAGCCCGTCCGACTGCCGACCTCT  
GTGTCGATTGCAAGACGCTGGCCGAGATCAAGGAAAAACAGATGGCCGGTTGATCCCAGCCCTCTGGTAT  
ATGAAAAGGGGAGCTCGCGGGCTCCCTTTTTTATTGAGCTTTTGGCGGTGCGACCCCGAATGCAGCCTC  
AATGAATCGCTTACCCGAATAGTCATGCCAGTGAATTTCCCATCCTCACCCCTTGCGCGCCCCCTATGTGC  
GCCGCTTTGCTCCCTCACCCCTCAGGCCCGCTTCACTTCGGTTCGCTGATCGCCGCCCCCGGCAGCTTTTT  
GCAGGCCAGAGCGCAGCAGGGACGTTGGTTGGTACGCATCGAGGATATCGATCCGCGCGAGAGATGGCG  
GGGGCTGCGGCCCTGATCCGCAAGACCTTGAGGCATATGGCCTCGAGTGGGATGGGGAGGTGATGTTCC  
AGAGCGCGGCCACCGCCGTTATGACGAGATCATCGACCAGCTCTATCGGGCGGGGATCTCTACTGGTG  
CCGTGCAACCCGGGAGAAATCATGGCCGCGGGCGGTCTCTACAGCGGCCACTGCCGACCCCTGGGCTT  
GCGGCTGAAGTTGCGCCCGCCGCTGCGCCAGCACCATCCGGTCTACCCTTCGACGATCGTTTGCAGG  
GCCATATCGCGGTCCCTGCGCGCTCGCCGAGGAGATTTCATTATCCGCGCGCGGACGGCTCTACGC  
CTACAACCTGGCGGTGGTGGTGGATGATATGGACAGCGGCATCACCGAGATAGTGCGCGGCGCCGATCTG  
CTGGAGCCACGGTGCGCCAGATTGCCCTTACCAGACCCTAGGGGCACCGGTGCCGACTGGGTGCACC  
TGCCGCTGGCGGTGCTGGCAGATGGCAACAAGCTCTCCAAGCAGAACCATGCGCCTGCGCTGGCGCTTGA  
TGAGGTGCGCCCGCACTGTGGCAGGCGCTGCACTTCTCGGCCAGTGCCCGCCGCCCCGAGCTGATGGCG  
AGCCGGATCGACGAGATCATCCGGTGGGGTATCGCCAACCTGGCAGCTAGAACGGGTGCCAGCAAGCGAGA  
AGATCCCGCTCGCGGATTGCTGAGTCGACCAGGTGATTTTTGTTGATTGAGCGTAAATGCGCGTGTG  
ATTGTGATTTTACC GGATGATCCGTTTTCAAACGGGATCAATTGTCAGCACGGTTTTTTCATTTGGTCAAG  
TGTGAGCTATGTGCAGATTGAGCGCTATTTTCGCTGGCAGACGGTTTCATGCGGGATCAATTGTCAGCAC  
GGTTTTTTCATTTGGTTAGGCGTGAGCTATGCGCAGGTAGACCCTATTTTTTGGCCCGGTTTGTATCAA  
TGAGCTGAAGTAGCCACATGGTTTTTTCATTTGTGCAAGCGTGAGCTATGATAGGCCGCTATTTTTTGGCC  
TCCCGTCAATTTAGAAGTCATGAAGAGGTGTACCATTTTTTCCCAGATCGCAAACCTTTTGGCCGAAGGTG  
CTCGGCAAGGAAGACGGCGAGCAGTCCGTGGAATCCCCATTCAGCCCGTGTGCGCGGTCAACGTCGTA  
CCTTAAGCCGTGATCAGCACCCCTATTTTCGCGCAAAGAGATCAGCGAGAATGCACTCAAGGTGCTCTATCG  
CCTGAACAAGGGCGGCTACGAAGCCTACCTGGTGGCGGGGAGTCCGGGATCTGCTGCTCGGGAAGACG

CCCAAGGATTTTCGACATCGCAACCGATGCGACGCCGGAGCAGATCAAGGAGCTGTTTCAGCAACTGCCGCC  
TGATTGGCCGTCGTTTTCCGCCTAGCCACATTGTCTTTGGTCGTGACGTGATCGAAGTGCCACCTTCCG  
GGGTACCACCATCAGGTCAATACCAGCAAACATGTGTCCGCCAGTCTGATGAAGGCATGCTGCTGCGC  
GACAACGTCTACGGCACCATCGAAGAGGATGCCGAGCGCCGCGACTTTACAGTCAACGCCCTCTACTACA  
GCGCCAAAGATTTACCCCTGCACGATTTTCGAAGGGGGTCTGGAAGATCTGGCCGAGCGCAAGCTTGAGCT  
GATCGGCGATCCCGAGACCCGTTATCGTGAAGATCCGGTGCGGATGCTGCGCGCCGTGCGCTTTGCCGCC  
AAGCTGGATATGACCATCAGCCCGGTACCGCCGCCCCCATCAAGGAGCTGGCGCCACTGCTGCAAGACA  
TCCC GGCTGCCCGCCTGTTTTGAGGAGACCCTCAAGCTGTTCTGGCTGGCGACGGTCTGGCGACCTACAA  
ACTGCTGCGCGAGTATGGTCTGTTCCAGCAGCTCTTCCCGCAAGTGGCTGCGCTGTTTTACCCCGCACGGC  
AACTCGCCCTACGAGCAGTATTATCGAGCAGGCACTGATCGATAACCGATAACCCGGTTTCGTGAAGATAAGC  
GCGTCACTCCCGCCTTCCCTCTACGCCACCTTGCTGTGGGGCTGCGTTCGAGGCCCGTGGTGGGTGCTGGA  
GAACGAGAGCGGCCCTGCCCTGGTATGACGCCCTTCATGCTGGCGATCAACGAGGTGCTGGACAATCAGGTG  
CGGATCATCGCCGTTCCCGCCGTTTTACCACAGATGTCCGCGACATCTGGGCACTGCAACAGCGTCTGA  
CCCGTTCGTGAGGGCAAGCACCCCGAGCGGCCATGGAGCATCCCAAGTTCGCGCGGGCGTTGACTTCCCT  
GTTGCTGCGCAACCCGGTTCGAGCGTGGTCTCGGCGAGCTGGCCAGCTGGTGGGAGCGCTATGTTGCCCTCC  
AATCCGGATGTGCGCCCGCAACTGCAGCGTGAAGCGACCCGTCGCCCGCCAGCGGTGAGCGCGGGCAGG  
CTCGCAGCCACGATGGCGAGAAGCGCAGCAGCAACAGCCGTAACCGCCGTCGCCCCGTCGCCCGCAAACC  
GAAAGTGGCCGAGTGACAACAGACGTGATGACCGAGGTCTTCATCGCCATTGGTTCCAACCTGTCTGATC  
CGCTGGGTTCAGACTCGTCGCGCCGTTGCCGCGTTGGCAAGGTTGCCGGAATCTGTGCTGGTGGAGGCCTC  
GTCGTTTTTACAGCAGCCGCCCATGGGGCCTGCTGACCAACCGGATTACGTCAATGCCGTGGCCCGGCTC  
AATACCCGGCTCGCGCCCTTTCGCTGCTGGATCAATTACAAAAATCGAGCTGGAACAGGGACGTGTGC  
GCAAAGATGAGCGGTGGGGGCCGAGAATCTGGATCTCGATCTGCTGCTCTATGGGGATCAGGTGATCAA  
CCATGAGCGTCTGATCGTACCCCACTACGGCATGAAGGAGCGGGAGTTCGTGCTGCTGCCCTTGGCCGAA  
ATTGCGCCTGCTCTGGTGCTGCCCTGCGGCACCCCGCTCGCCGACTGGTTGCCCGCTGCCCGCACAAATG  
ATTTGGCCATCATTGCCCGCGTGCAGACGTACAGGAGCCTCTATGAGCAAGATCACCACCGCCAGCCTG  
CTGAAGATGAAGCAGGAAGGTCAAAAGTTACCCGCCATCACCGCCTATGATGCCACCTTTGCCAAGCTGT  
TCGACGACGAGGGGGCCACGTGCTGCTTATCGGCGATTGCTGGGCATGGTGTGCAAGGGGGTTCAGGA  
TACCCTGGCGGTCAACATGGATGAGATGGTCTATCACACCCGCTGTGTGGCGCGCGGTGCCAGCAAGGCA  
CTGGTGGTTCGCGATATGCCGTTTCATGAGCTACGCCACCCCGAGCAGACTTACCAGAACGCGCCGCCCGC  
TGATGGCGCCGGTGGCCGATGGTGAAGATGGAAGGGGGCGACTGGCTGTGTGACTCCATCCGCCACCT  
TACCCGCAACGGGGTGCCGGTGTGTGGTCACTCGGCCCTCACTCCGCAATCCGTTTCATGTCTTTGGTGGC  
TTCAAGGTGCAGGGGCGCGATGAGTTTCAGGCACAGGAGATCTACCGTCAGGCCCTCGAACTGCAAGCGG  
CCGGTATCCAGCTGCTGGTGCTCGAGTGTGTGCCACTGCGCTGGCCGAGCGCATCACCAGGGCGCTTCG  
CATCCCGGTGATCGGCATTGGTGGCCGCCCGCGACCGGTCAGATTTTGGTGATGCACGATGCCCTTT  
GGCGTTACCTCCGGCTATGTGCCAAAGTTACCAAGAACTTCTGGCCGAGACCGGCGATGTGCGTGCCG  
CCATCCGCCTCTATGTGCAGCAGGTGAGCGAGGGGAGCTTCCCGGCCCGGAGCACTGCTTCAACTGATC  
CTAGCTGTTGCATGATGGGGCTGCGGCCCGCTCTCTGCTTGTGACCTTGCACAGTTAATCCGTATAG  
CTAATCCGTATCTTATTGATTATCTAAAGGTGAACTGCTGATAGCCATGTTTCGTGCCCATCCCGCCCG  
AGCGCTATCTGTGGATGCAACCCGTCCTCTTTTTGATTTATCGGAAGGTGAACTGCTGATGTTGGTTCGT  
AAATAATCCCGTCGTTCTGCGTGAGCAGATAAGCCAATGGCGCCGTGAAGGGCGTGCCATCGCATTCGTG  
CCCACCATGGGCAATCTGCATCAGGGCCACCTGACGCTGGTGAAGGAGGCGCACAGCCACGCCGAGAAGG  
TGGTGGTCAGCATCTTCGTCAACCCGATGCAGTTCGATAAGGCCGAGGATCTTGCCAACTATCCGCGCAC  
TCTGGAGCAGGATTGCGCTGCGCTGGCAGCGGCCGGTGTGATATGGTGTTCACCCGACCCCGGAGATC  
ATGTATCCGCAGGGGCTGGCCAGCCAGACCTTCGTGAGGTGCCGGTCTCTCCAATCTGCTGGAGGGGG  
CGCTGCGCCCGGGTCACTTCCGTGGTGTGAGTACCGTTCGCGCTTATTCGCAAGATGGTGGCCGACATGGCG  
ATGCCCATCGAGATCGTTCGGCGTGGCCAGCCGTCGTCGCGAAGACGGGCTGGCACTCTCTTCCCGCAACG  
GCTACCTGACTGCGGCCGAGCGTGCCATTGCCCCGAGCTGGCGCGCACCATGAACTGGATCGCCGAGCA  
GATCGAAGCGGGTGACCACCACCTGCCCTCCTTGGTGGCGCAGGCCAGCCAGCGTCTCGACAACGCCGGT  
TTTTCGTACCGATGCCATCGACATCGTTCGATGCCGCCACCTCGAATCCGCCACTGACGAGAGCGCACAGC  
TGGTGTATCCTGATGGCCGCTTATCTTGGCAAGGCCCGCTTATCGACAATCAAGTGGTTCACGCTGCAGCA  
AGCCTGAGCCCGCCACAACCAGGAGGACCCATGTCCAAGAAAGTTTACTGCATTGCCCAATTCCTGCC  
AAACCCGGTTCAGGAGCAGGCCCTGTTTCAGGTGCTGCAGGCGCTCGAACCACACCCCTGCGTGAGGATG  
GTTGCTGCAATATCGGGTAACCCGCCACATCGCGAGCCCGTTTGGCGAGGGGAAAGTTTTCCATCGT  
GTTCAACGAGATTTGGCAAGATATGGCCTCTTTCGAGGCGCACTGCCAGCGCGCGGAGATCAAGGCTTTC  
TTCGAGCGTTACTGTCTGGCGGAAGATGGTTTTGGCCGCGAAGTGAATGTCTGCGTCTATAGCGACGAAC  
CCGAACAGTACGACGCCCCCGTAAAGAAGTAATTTCCCCGATTGCCAGCGGACGCCCTTCCGGGGCGTCCG  
CTGCTTTTTTACGCCTGCACTCTCCTGCATCCCGCGTTTTTGTCTGCGGCCCTGCCCGCATCCCCCTTC  
GTTTTCAATCCACTTTCGGCCTGATGGCCGCTACAGGTATTCATGATGTTTGTCTGATTGCATCGCTTGT  
TTTTCTGTCTGCTCTGTTTTGCTCTCACCCGGTTGCCACAGGATTGCCGCTCTCGCGCAAGGTGCTTGGC  
GGTCTGCTGTTTTGGCGCCCTGTTCCGGCTGGCTCTGCAACTGGGCTGGGGCGCCGATGATGCCGGCGTCC

AGCAGACTCTGGAGTGGATCAATATCGTCGGCGGTGGCTATGTCAGCCTGCTCAAGGTGGTGGATGATGCC  
GCTGGTGTTCACCTCCATCCTCTCCGCCATCAACAAGCTGGAGCAGGCCAGTCCCTCGGCAAGATCAGC  
GCCGTGCTGATCGGCTCCATGCTGACCCCTAGTGATGATCGCCGTTGTTGGGGATGACGGTGACCCATC  
TGAGTGGTCTCACTGCCGAGGGGCTGCTGAGCCACGGTAGCGACACGGCAGCCCTGCAACAGAGCATGAG  
CTCCATCGACAGTGCCAGACCTTGCCTGCCTTGGCTGCTCTCGCTGGTGCCCAACTTTGCCGCGCAT  
ATGGCGGGTAGCCGCGGCTTTTCGGTGGATCGGCGAGGTGATCTTTACCGTGGTGGCCGGGGTTGCCCTGC  
TGCAGTTGAAGGCGGAGCATCCGCAGGCAGGGGCTCGCGCCGCGCTGGCCATCGACACCCGCAACTGTG  
GGTGGTGAAGATGGTGGGGTGGTGGTATTGCGCTCACCCCTATGGCGTGGTGGCACTGATCGCCCGGGTG  
GTGGCTCACTATCCCTGAGCGAGATCCTCAGCCTGCTCGGCTTTATTCTGGTCTGCTACGTCCGCATTC  
TGGCGATGTTTGGCGTACACATGGTGGTGGTGGTGGTGGTGGTGGTGGTGGTGGTGGTGGTGGTGGTGGT  
AGTGTGGGGCGTGGTGGTGGTGGTGGTGGTGGTGGTGGTGGTGGTGGTGGTGGTGGTGGTGGTGGTGGT  
ACCCAGCAGCGTCTTGGTGGTGGTGGTGGTGGTGGTGGTGGTGGTGGTGGTGGTGGTGGTGGTGGTGGT  
AGAACGGCTGTGCCGGCATCTATCCGGCCATGATGGTGGCGATGATTGCCCCCATGCTCGGTATCAACCC  
GTTTGGATCCCTGTTTCTGCTGACTCTGCTGCCGGTGGTGGTGGTGGTGGTGGTGGTGGTGGTGGTGGT  
GGCGGTGGCGGCACCTTCCGCGGCTGATCGTGGTGGTGGTGGTGGTGGTGGTGGTGGTGGTGGTGGTGGT  
TAATGATCGCCATTGAGCCGCTGGTGGACATGGGCGTACCCTCTCAACGTCAACGGCTCCATCATGGC  
GGCCATGATACCAAGCGGTTGGTGGGCAAACTGCAGCTGGCCGAGACGCAGGTGCTGGAGCAGCAGGCC  
GCCAGCTAACCCAGCGTTCCCATGTCTAGTCTGAAATAGGTTTACACATTTTCAACTAGCATTTTCTC  
TACTCAGAACCCCTATGTACCGCATCGGGGTTCTGTATTTCAACGCATGATGCGGCCGCTCCTCGTTG  
TAAATATCCACCGCTTACAGCACCATTTCCCGGCTTGCATCAAATCTGCGGGCTTTGCAACAATAACT  
CTCCTTTCAAATCCCGTTACCCGCTCCGCCAACGCATCTGGTAACAGTCATACCCATCCGTCATCGA  
GCATTTACCCCGTACCGTTCATGTAGTGGTGGTGGTGGTGGTGGTGGTGGTGGTGGTGGTGGTGGTGGT  
TGATGGATGAGTTCACCGCCGCCACGCGGTTGGTTCAGTGGTGGTGGTGGTGGTGGTGGTGGTGGTGGTGG  
CGTGCATCCCTTCGTGCACGTGATGGCCACTATCTTGGTGGTGGTGGTGGTGGTGGTGGTGGTGGTGGTGG  
CAGCGGCCCGCTCCTGGCTGGCAGATAGGTGATATCAGCGACCCAGACCTGCTCCGGTGGTGGTGGTGGTGG  
ACCTGCTCTGGCCCCGCTTGGCAAGTTGGGATGACGGTAGAAAACGGTGGAAACTGTGGGTGGTCTTGT  
GATACGCCCCGCTTAGGCTGCACCAAGCGGTGGTGGTGGTGGTGGTGGTGGTGGTGGTGGTGGTGGTGGT  
CTTGGACCCGCTTCCCTGACCCCTGACCCCTGACCCCTGACCCCTGACCCCTGACCCCTGACCCCTGACCC  
AGTCGAACCTGACGCAGCAAGCGCACCCAGCTGAGCCCTTGTGCATGGCGTTCGTGGCGGCGCCGATGGC  
GCTTGTAGTAAGCTGCCGGCTTATCCCCAGAAAACAGGCAAGGTTAGTCTCTCGACTTGGCGCTGCGAGA  
GGACTTGGCGGGTGGTGGTGGTGGTGGTGGTGGTGGTGGTGGTGGTGGTGGTGGTGGTGGTGGTGGTGGT  
AAGAAGTGGGCTTCTGACTCATCAGCTCCAGCTGTTGGTGGTGGTGGTGGTGGTGGTGGTGGTGGTGGTGG  
GGTGGTGGTGGTGGTGGTGGTGGTGGTGGTGGTGGTGGTGGTGGTGGTGGTGGTGGTGGTGGTGGTGGT  
ACCATGTTTACGCAACCATAACCAGAACGGTGGAGCGGCCCTGAATGCCATAACGCACCTGAGCCTGTTTG  
TAGGTGAGCTCGCCTTTTTCAATCTTCTCGACCAGTGACAGTTTAAAAGTCAGCGAGTAACCGTGGTGGT  
TCCGTTTTACACCTTGTCCCATCGGGTCTCCATTTATTGGAGGGAAAAGGTGTAACCATATTCAGGACG  
GGACACCAATATGAAAGAAGCCCGCAGTTGCGGGCTCTTTATGTCGACAGTGTGCTTGTGAGCAGAC  
GCAGTTATTCGGCAGAGACGGGGGAACCGGCGCCTTTCCAGGCGAAGATGCCACCTGGCACCCGATAGAC  
CTGTTGATAGCCCTGAGTCACCGCCCAGGCGGCAGCGTGTGGTGGTGGTGGTGGTGGTGGTGGTGGTGGT  
TAGATCACCACAGGGCGGGACTTGTCTTACCCAACAGCGCCTGGAAGTGGTGGTGGTGGTGGTGGTGGTGG  
CGACAATCTCGCTCCAGTTGTACCCGGCCTTGGCCTCCTTACGAAAGACAAAAGTTCTTGGCGCCCGGGAT  
GTGCTCTTTCTTGTAGGAGTCTCATAGGGCATGGTGGTGGTGGTGGTGGTGGTGGTGGTGGTGGTGGTGG  
CGGGTTTTAGCTCGGCCACGGTACGAGCTGATAGCCCCCTGCTGCGCCTCCTGTGCCAGCTGCACAG  
CCGATTGCTCAAGCTTACCTCCTGCTCGAATTGGTGGTGGTGGTGGTGGTGGTGGTGGTGGTGGTGGTGG  
GATCAGCGAGGGCCACAGAGTGGGGATCGCAATGTCATCATGTCACTACTCCTTTGGAACGGGAAAAAC  
GGGGCGGGAAGTTCCGACAGGGCGCCCGCAAGCGTACGAGCAGATCCCGCACAATGGCCTCCGGC  
AGCGAGCTGAGATCAGCCCTGCCAGACAGCCGCAAGAGATGTCGAGCCCGATGGCAACGCCATAGCCCA  
ACACCGGAATAAACAGGGCGAGCAGCCGATCACCAGCCAGAGTCCCCAGCGCCGGTTGGCGATGACCGC  
AAGCCCTGCGCAGAGCTCAAGGGCAATCAGCCCCAGGCGGCGAACGGGATTAGCGGCGGCGAGATCAGG  
CCAAAGGCGCGATCTGCTCGATGAACAGGGCGGGGAGACCAGCTTGAACCCGGCGGAGGCGAGGAAGA  
ATCCTCCCAGAGCCAGATTGGCCAGCATGCGCAACAATGCAGGCATGTTCTACCTCTTTATAGAGAGGGA  
TGAATTCTAACAATCCCATTGAGCCGCAATGACTAAACCCATGCCAAACAAGATAAATCTCGATTTTG  
CGAGACAGTGACCAGAATGGGGCGCTAGACCCTGATGGTGGCGGTTGTGGAGGCGGGATGCTGTGGCTG  
TGTCGATTGCTCCCTGCTGCTGGTGGGTGAGCAGTTGGCAGCCAGCTCGATGGCCCGCTCGAGCAGT  
AGCAGCAGGCTGTGACCGCTCAGGTGATCGAGCCACTCGCGGGCCAGATCAGGGTCTCTCCTTGTTCGG  
TCTGATCCAGCAGAAACTGGCTCGTCCCAAGGTGGTGGTGGTGGTGGTGGTGGTGGTGGTGGTGGTGGTGG  
CGGTAGCAGCAGATAGATCACCAGATGGCCCTCATCCTTGGCAGCGTACGACCCAGTTCTGTCGTTGATG  
GCGAGGGTGGTGGTGGTGGTGGTGGTGGTGGTGGTGGTGGTGGTGGTGGTGGTGGTGGTGGTGGTGGTGG  
GAGCGTGATACATGGCCAAACCTCGGGCAGGGAGAGAGTGACACCCATGCGGGTGGTGGTGGTGGTGGTGG  
ATCACTTGTGCTCATTTTTTTAGCGTTTTTGGTGGCGGGTGGGTTGATTGTGCCGAAATTTGTGAGCTGA  
CAGACATCTTTTACGGGTGAGTCCGAATCCTAAAAAAGCGGGACCATCGCTGACAGGGTGACAAGGGGGG

CGGGCGTACGCTGAGGATCCCCCTCTCTCATCAACGCAGGTTTCTTGTTCATGAAAATTGCCTCCCCGGATA  
TCGATGTAAGCCGTCATCAGCAGACAACCCCTGATGCGACACCTCTGCTACTGCTCGCCTTGGCAACGC  
CAGACTACGGCTGCTGGATGCCGGTAACCGGGAGTTCGAGAGGGGGATCCGCCCGGTTATTGGCCATCGG  
CAGAGCCCCGAACTCAAGGCGGTCAAGCAGGCAGTGCGGCACTATCAGGCCAGCCAACGCCTTACTGG  
CAGGGCTGGCGAAGATTGAACAGGCGCTGCAGTTCTGGATCGACTCGGGCAAGAACCCTCTCGTCAGCA  
GGATCCTGTGTTGCAAAAACCTGGTTCGATGACATTGCTGTCCGCCGTCAGGCGTTGGCGCAGGGTGGCAAG  
CCTCCCTCATTTCAGCTGGCGTGGGTCTGCAACGAGCAGGGGAGGGTCAATCAGCCATCGAGAGTAACC  
AGCAGATCCGCCAGTGGTGCAGCGAGTTGGCTCGCTGCAACAGGAGGGGGCCAACGACTTGTTCAGCG  
GGAGCTGCAAGGAGGGCTCGATCTGATGTTCCGGGTGAGTGAGGGGATGATGGCGCGGCGCTGGAGCGG  
GCGCCGACCCGTGAAGAGGTCGCTACAAGTCACGAGTGGCAGCTGTTTTGCGGGACCTTGCCTCAGGCTC  
TGCCCCGACTGGGTGAGCTCAAGCCCCAAGCCACTGCCGAGGAGAATGGTCGCGATATCCTGCTTACCCA  
CAGTCAGTTGCTGGAGCTCGGCCACCTCAAGGAGTTCTGGATCTCAGCATTGAGCAGGAGTGGAGCAAG  
CAGGGGGAGATTGGCTGCTCAGGACCGAGCTGCTGACCGCGCTGGTGGATGGACTGGATGAGCCCTGGC  
TTGAGCGCGAGGGCGCAGGAGAAGGCGCTCTGGCAGGGAGAGGGCCGCATCAGGAAAGTACTATCAGAGTGG  
TGTCCGGGCCGAGCTCAAGAGCCCTCTCTGCTGCCAGCAAGGAGCTGAAACCGGGTGGAGCCCGTGGAGC  
CACAAGGCCTTTGGCGGGCTCGGGCTGGTCACTGCGCTGGTGGAGGCTTTCCGCAAGATCGAGA  
TTGGCAAGTGGGAGGGGCGTCCGCGATACCCGGTAGGAGAGTTTGCAGGCAAGGTGGCTCTGACCCAGGA  
GAACAAGGCGAGTGCCAAGGCCGAGCTGGTGAATTGGCAAGGCGGAGGGCTCATTGGTGTTCATCCGGTG  
AACAAGATCGTCAATGATACCGACGGATCGCGCTACACCCGGGGCCCATGACCTTAGTCTGCTGCGCA  
TCGGGGCCAGTGCAGGCTGGTGGAGCAGGCTGGGGCTGTCGGTTGAGGGGAGCTGGACTATCGGCAACCT  
GCTTAACGCCAAGCTGGCAGGCTCTGCCGAGGTGGTCCGCAATGCCAAGCTGGAGGCCGGTGTGCGGCT  
ATCATGACCCCAATGGGCCGGTGGTTCAGCGTGAATGCCAACGCCTCGGCTTTTGTGGTATGAAAGCTG  
AGGGGAGTGGCCAGCTCAATCTGCTCAAGAGCCAGTATGCGGATGCCTATAGCCTTTCGGCCAAGGTACG  
CGCCTCCGCCAATCTGGGTGTGGTGCATCGGCCGGTGCCACCGCGGCTTTCGGGGCCACAGGGAGCCAAG  
TTCCATACCACCTTTGGCGTGAACCTGGGGGTGGGGTCCGATGTCGGTTGGGAGGGCGGAGTCAACGCCA  
TGGCCACCAAGGCTTATGCACTGGAGCTGGCCGCTCGTGCAGTAAGCAACTTTGATCAGCGCAAAGGGGA  
GCAGCTAGATGGACTGGCGATGGCTGCAGGGAATGAAAACCGTCTCTTCGAACTGGCCAGCGGGTTCGAT  
AACCCGATTTGCTACTCTCGCCACCCAGTTGGAGGAACTGCAGCTGGCGGCCAGCGAAAACCGGATCCGGA  
TGCAGGAGAGCCTGATCGATCCCGAGCTCGCTGGTGCAGCCCGCCATGGCGCAGGCTATCGACGATGC  
CTTCCGTCAGGAGCGGGTTCGATGAGCAGGGGGCGCTACGGTTCCCGAGCGGGCTGCCAGCGCAACGAG  
AAGCTTGAGCTCACCGCCCGTTGCTCAAGGATCACGCCATCCGGGTCTAAGTCATCCCGAGGCTGGCAG  
GACAATGAAAACGGGCACCGCGAGGTGCCCGTTTTGGCAATCAGTGGCGCAGTCCGGTACCTCGGGAGAT  
AAGCCACCAGGCGATACCGTAGAGGGCCACGATAAAGCCGATGATGATGAGGTAGGCGGTGCCGAGCGGC  
ACATCGGAGATGCCGAGGAAGCCGTAACGGAACCGGTTACCATGTAGATGATGGGGTTACCTGGGAGA  
CACTCTGCCAGAAGGGGGCAGCAGGCTGATGGAGTAGAACACCCCGCCAGATAGGTGAGCGGTGTCAG  
CACGAAGGTGGGGATGATGCTGATGTCGTCGAAGGTCTTGGCAAACACCGGTTGATAAGGCCACCCAGC  
GAGAAGAGAATCGCGGTGAGCAGCACGGTGAAGCAGACGCTGAACAGGTGGTGGATCTGCAGCGGCACGA  
AGAACAGCGACACCAGGGTGACGATAAAGGCCGACACAGAGGCCGCGCGCTACGCCACCGCCACGTAACC  
GGCGATGATGACGTAGTTGGGCACCGCGCGACCAGCATCTCCTCGATATTGCGCTGGAACCTTGGCGCTG  
AAGAAGGAGGAGGCGACGTTGGAGTAGGAGTTGGTGAATCACCGACATCATGATGAGGCCGGGCACGATGA  
ACTCCATGTAGGTGAAACCGCCATGTCACCGATGCGCGAACCAGTTCAGGTTGCCGAAGATGACGAAGTA  
GAGGCTCATGGTGAATGGCCGGTGGCACCAGGGTCTGGATCCAGATCCGGGTAAAGCGGCTCACCTCCTTG  
GCCAGAATGCTCTTGAAGGCGATGTAGTAGATGGCCAGATTCATGCTTTTTCTCCCTCTTCGACCAGATT  
GACGAACAGCTCTTCCAGCCGGTTGGCTTTGTTTCGATGCTCACGACCTGCACCTGCTGGTTTCGACAAC  
TGCTCGAAGACTGTTGAGTGAATGACTGGCTCTTGTGAGATCAACTTCCAGGGTGCCTTCATCCGGCATGC  
GGCCGTTGAACCTGTTACCTCAGGTACGGCAGAACCCTGGCGCAAGGTCGAGCAGGAAGGTCCTCGCGACC  
CAGCTTGCCAGCAGATTCTTCATGCTGGTGTCTCGATCAGACGACCTTGTGATGATGCCGATGTTG  
CGGCAGAGCATCTCGCCCTCTTCCAGATAGTGGGTGGTGGAGAATAATAGTGACGCCCTGCTCGTTGAGAT  
CCTTGAGGAAGGTCCACATGGAGCGGCGGATCTCGATATCGACCCCGCGGTCGGTTCATCGAGGATCAG  
CAGTTTGGGTTCGTGCATCAGGGCGCGGGCGATCATCAGACGGCGCTTCATGCCGCTGAGAGGGTGGCG  
GCAGGCATGTCGCGCTTCTCCACAGATCGAGCTGGCGCAGGTAATCTCGGCGCGGATCTTGGCTTCCG  
CCTTGGGCACGCCGTAGAAACCGCCCTGATGGGTGACAATCTGGATCACCTTCTCGAACTGGCTGAAGTT  
GAACTCCTGCGGCACCACTCCGAGCTGGGCCTTGGCCAGTTCGAGATCGCTGTCGATGTCGTAGCCAAAC  
ACCTTACCTTCCCGCGCTTTTTGTTACCAGCGAGCTGATGACGCCGATAGTGGTGGATTTGCCCGCGC  
CGTTCCGGCCCTAGCAGGGCGAAGAAATCCCCCTGCCTGACGGTAAGATCGATGCCTTTAAGGGCTTCGAC  
GCCCCCTGATAGGTCTTTTTCAGGCCGCTGATTTCCAGTGCCTTCATGCAACCTCTGTGATGGTTGAA  
TCCGGCTCGATACAGAAAAGGCGGCCAAGGCCGCTGCACAGAGTAAAGGGCGCAAGGCCGCTTACCCCG  
TGATATTCTGAACCTTGCTTACTCTGGGGTACCCTTTGCCGATAAACGGCAGGTTGCCGTAATCTCTG  
GGCGTAGTCGATGCCGAGCCGACCACGAATTCGTCCGGAATGGCGAAGCCAATCCAGTCGACCGGCACC  
TGCATTCGCGGCGGGAGGGTTTGTCCAGCAGGGTGCAGATGGCTAGGGATTTCCGGCTCGCGCAGGGAGA  
GGATCTCGCGCACCTTGTGAGGGTGAACCGGTGTCGATGATGCTTCCACGATCACCACATCCTTGCC



CTTGATGTCATCGTCCAGGTCTTTGAGGATGCGGACGTCACGGGTGCTGTGCATGCCGGAGCCGTAGCTG  
GAGGCGGTTCATGAAGTCCAGGGTGATGGGCAGCTGGCACTGGCGGCAGAGGTCGGCCAGGAAGATGCAGG  
AACCGCGCAGCAGCGCAATCATCACGACTTCGTCAGAACCCTGATAGCGGGCGGTGATCTCTTACCCAA  
TTTGGCGATCCGGGCGGCTACTTCAGCCTCGGAGATCATCACCTCGACGGTGTGTTTCATCACTTACTCC  
CATAAGGCCAAAGGGGATTTGGCCGTTTCATGAATATCAAAACCGATAATTTCTACCACTCATGTTGAAGGG  
TGCTAGAGATACGTGGTGCTTTTATCGGCTTATTTTAATTGATAGAGTTAGCAGGCACTCAGGCATGATT  
AGTTAAAATACTATAAACACCATAATCAATAACTATTAGATGATAAAAACTATGGAACCACGCGCAGAAA  
TAAGACGTCGTACCCGGCTGTGCGCGGAAGCTCGTCGCTCCCAATTGATGGAATGTGCCATCGAGGTGTT  
CTCCCGTCGCGGCATTGGCCGTGCAGGTACGCGGAGATAGCCGAACAGGCCAAGGTCTCTGTGGCTACC  
GTCTTCAACTATTTCAACACCCCGGAGGAGTTGGTAGATGAGGTGCTGGCCGAGATCGAACGCTTTGTGA  
ACCAGATGCTGTACAGGCATACGGTGACCGGCTCCATTTTCGACAAGATCCAGCGTCATGTACGCCCT  
CTCTGTGATGCGCGCTACGATCAACCGGATTATGCCGTTATCTGGCTGGAGTGGAGTGCATCGGTTCCGG  
GAAGAGGTATGGCCCCGCTATACCCGGCTGCTCGATCAGTGCCTTGAGCTGATCGCCAGCGAGCTGCAAA  
CCGCCATGGATGCAGGGGAGATCACCAGCGTGTGTCAGCACAAGATCTGGCCCGCTCTCTGACCGGTTTT  
TGGCTATGTGATGATGCAGATGATCAATCAACCTCAGCGCCCGGTGCGCCAAGAGGTGACTGATTTCTTG  
TTCAAGTACGTGACGGCGCAATTCAGGCTCGCTAACACTGCTTAACGAAAAACGGCGTCACTCATTGA  
GTGGCGCCGTTTTTTTTATGGCCGATATGGCGGTCACTCAATGGTGGCCATAGCCCCAGCGGTGGGTCA  
ACTCATGCTCGACACCCAGATGATCGAGGATGCGGGCGACCATAAAGTCCACCAGATCCTCGATGCTTTT  
CGGCTCATGATAGAAACCGGGGGCTGCGGGCATGATGGTCACCCGAGCCGTGCCAGTTTCAGCATGTTT  
TCCAGATGGATCGCCGAGAAGGGGGTTTTCGCGGGCACCAGGATCAGTTGGCCGCGCTCCTTGATACCA  
CATCCGCTGCCCCGCTCCAGCAGGTTGTCCGAGGTGCCGTTGGCAATGGCCGAGACAGTGCCTATTGAGCA  
GGGGCAGACCACCATCTGTTTTGGGCGCGGCCGAACCCGGAGGCCACCCGGCGAGAACCCTCCTCCTTGCCG  
CAGGCGACAATCTGCCCTCCTTGGCGCCATATTGGCGACAAAAGATAGGCAGAGAGCTCTTTCGGCGAGC  
TGGGCCAATCCTGTTGCTGCTCGGTCTTGAGCACTACTCTCGCCGCCGATGAGGCGAGCAGATAGACCCG  
ATAGTCCGCTGCACCAGACACTGGAGCAGGCGCAGGGCGTAGGGGGCGCCGGAGGCGCCGGTCCAGCGCC  
AGGGTGATCGCTTTGTTTCATAGTTCGCCGTGGTAATCCTTGAGGCGGGCGATCAGCTTGTATGAATGCC  
ACCGAAGCCGCGGTTGCTCATGATCAGAATATGGTCGCCATCGCGGCTCTCGGCCACCAGCCGGTTGATC  
AGGGTCTCCAGGTGCTTGAATACCTTGGCCGACGGGTCATATGGGCCGTCACCTCGCCAGCATCCAGC  
CGATGTTGGGCGGCTGGAAGAAGAACAACCTCGCGGCCATCGAAGCAGCCAGCCAGCTCCTCCTTGTG  
AACCCCGAGCTTCATGGTGTGGAGCGTGGCTCCAGCACCGCCAGAATACGGGCTTCTCCTACCTTGGCG  
CGCAGGCCGCGGAGGGTGGTCTCGATGGCGGTGGGGTGGTGGGCAAAGTCGTCATAGACGCTGATGCCGG  
CCACCTCGCCCTTGAGCTCCATCCGCCGCTTGGGGGACTTGAAGTGGCAGAGGGCTGCGATGCCATGCTC  
CACCATCACGCCAGCATGACGTGCGGCAGCGATGGCCATCAGACCGTTGTTGACGTTGTGCTCGCCGATG  
CACTCCCAGTGCACCTCGCCCTGTTTTTACCATCCAGCCACACCTCGAAGGCGGAGCCGTCATCGGCCA  
GCTTGACCGCTTTTCACTTGGCGTCATCCTGACCCACCAGCTCCATTTGCTCCAGCAGCCCATCTTGCG  
CACGGCGGTGAGGTTGTCATCGGCTTTCGGGAACAGCACCCGGCCGTTGCTCGGCACGGTGCGCATCAGG  
TGGTGGAACTGGCGCTGGATCGCGGCAGATCCGGGAAGATGTCCGCTGGTTCGAAGTCCAGGTTGTTCA  
TCACCAGGGTGCAGCGGGTGGTAGTGGACGAACCTTGGAGCGTTTGTTCGAAGAAGGCGCAGTCATACTCGTC  
CGCTTCGATGACAAAGAAGGGGGCAGAGCCGAGACGGGCGGAAAACCCGGGAAGTTGCCCGGCACGCCGCC  
ATCAGGAATCCGGGCTCCAGCTTGGCGTACTCCAGCACCCAGGCCAGCATGCTGGCGGTGGTGGTCTTGC  
CATGGGTGCCGGCAGCGCCAGTACCCAGCGATCCTGCAGCACGTGTTCCAGCAGCCACTGGGGGCGGGA  
GATGTAGGGTAGATTGCGGTCCAGCACATATCAACACAGGGGTTGCCCGGCTCATGGCGTTGCCAATC  
ACCACCAGATCCGGCGCCGATCGAGTTGGGAGGGGTTCATAGCCTTCGGTTCAGTTTCATGCCCCTGTTGCT  
CGAGCTGGGTGCTCATGGGGGATAGACATTTGGCATCCGAACCGGTACCCGGTAACCAAGCTGTTTTGC  
CAACACCCGACAGACCACCCATAAAGGTGCCGAGATCCCGAGAATGTGAATATGCATACCGCTTCTTTTC  
GCAGTAAAGGGAAGTGGCATTCTAGGGGGTGTTCGGTGGTGGCACAAGCCGACTCATGGTGGAGAGAC  
CCACAGATGCAGCACTGGAGGCAGAAATCTTGGCGCTGTTGGGATATGCGAGATTGGAATGGGTGGAAAG  
GCTTTATTTGAGACTTGATATTGTGTGCACTTTCTTACAATTTCTTCCGTTTTTGTGACGCACGCTACAGT  
TTTACGATATTGCCCTTTTCAAAGGAGAGTCCCATGGGCAAGTTCTGCTTTGCTATCTGGTCCGGTGG  
TCTGGTGGCCATCAGTTGGGCTGCGCTGCCCGCTCACGGTCCCTGGGATCAGTGGGACCTCGCGATTTTT  
CATAACCGTCAACGGCTGGCTCGCCAGTCCGCTCTGTGGGCCGATCTGGTGGCCATCACCATAACCGCC  
TGTTTCGATCTGGCGGTGCTGGCCTGTATGGGGCTGATCCTGGCCGCTGCTTCTTCCGCCGGGATTTGGC  
GGGTCGTCGCCAGCTGGTGGCAATGGGCATAGTATGTTGCTGAGCGCACTGGTATCAACCAGCTTGGT  
CACCGATTGCCGGTGGAGCGACCCAGCCGACCTGATGGTGGCCGATGCGCTGCGGGTGACCCAGATCA  
GCGCTATTCCGACCAAGGACTCTTCCGGTGACAGCTTCCCCGGCGATCACGCCCTGTTCCCTGATGATCTT  
CGCCGGCTACGCCTTTCGATATCTGCCGCGCTGGGCGGGAGTACCGCATTGCTGATGGTGGCCGATCTTT  
TCCGCGCCGCGCATTCTGGCTGGCGCCCACTGGTTTTACCAGCTCTACGTCCGGCGCGTGGGGCTGGCGA  
CCCTCTGTCTGCCCTGGCTGCTGTTGACCCCGCTGGCGGATCGGCTGATAGACCCGATTTGCCCCCGATT  
GGCCCGTGTGCCGCTGCTGCGCAGTACAGCCCACTGATTGAACGTCGCAAAAATAAACGCCCCGACATGA  
AAATGTCCGGGCGTTTTGTTATCCACCCGCGAGAGATCAGCCTTATAGCCGTTCCGGTTGTTGCTTTGC  
CAGCGCCAGGTATCGACCATCATCTGCTCCAGACCGCGCTCTGCTTGGCAGCCAGCTCGGCACGGGCCA

CGTTCGGCTCTGCCAGCACTCGGCGATGTCGCCCGGGCGACGGGGTTTGATCTGGTAGGGAATGGGTCC  
GCCGCTGGCCGCTTCAAACGCCTTGACCATCTCCAGTACCGAATAGCCCTGACCTGTGCCAGGTTGTAG  
GTGAAGACGCCGGTGTCACTCTTGATGCGTGCCAGTGTCTTTCAGGTGACCGATGGCGAGATCCACCACAT  
GGATGTAGTTCGCGCACGCCGGTGCATCCGGGGTTCGGGTAGTCGTTGCCAAATACCCCAAGCTCCTTGAG  
CTTGCCCTACACCCACCTGGCTGATATAGGGCAGCAGGTTGTTGGGGATGCCGTTGGGATCTTACCAATC  
AGGCCGCTCTCGTGGGCGCCGACCGGGTTGAAGTAACGCAGCAGTACGATAGCCAGCGGGGATCGGATT  
TGGCGAGATCACGGAGGATCTCCTCCACCATCAGCTTGGAGCGGCCATAGGGGTTGGTGGCGCTGGTGGG  
GAAATCTTCCCGCAGCGGCACCGAGGCGGGATCGCCATAGACGGTGGCCGAGGAGCTGAATACCAGCCGG  
AAAACGCCGGCCTTGGCCATCTCTTCGCACAGCACCAGAGTGCCGCTGATGTTGTTCTGGTAGTAGGTGA  
GCGGGATCTGGCTGCATCCCCGACCGCCTTGAGACCGGGAAGTGGATGACCGATTGCATCTGGTGGTT  
GGCGAACAGCTGCTGCAGGCAGGCTCTGTCCAGCATCCCTTCGACGAAGGTGACCCGCTTGCCTGGT  
ATCTGCTCGACCCGCTTGAGTGACTCCGGTGAGGAGTTGGAGAGGTTGTCGAGTACCACGACCTGCCTGCC  
CCGCGCCGAGCAGCTCAACCAGGGTGTGGGAGCCGATATAGCCGGCGCCCTGTGACCAGTATTGTCAT  
TTTTTATCCCGTGTCTGGTGAAGTGGGGCAGAGTCTAGCGTCCCTGTCTACTTGGGAAAAGGTTGGGA  
TACCGATGACGCCTTACCACGCCTCAATAATCGAGACTGATATCCCTTTCGCGGTGCAGGAGCAGGCC  
AGAGCAACGCCGCTCTCCAGATCTGAGCACTCAAGGTCATCACGCTCTGGCGCTCGATGTCACCTGTGG  
TGGTGAACGACAGCTGCCACATAACCGCGCGGCAAGCGGCTATCATGGTTTTGCCCGCTGCTTCCAG  
CGCCGCCAGCAGAGTCTGACCCGGCAGGATTTTACCTTTTTGCGCTCTTTTTCAGGGTCAGCCAGAAG  
TGGCCGCTGGTGGTCTGGTGGTCTACAGGAGGAAGACCAAAGGACTCCTGATGCAGCTGCTCCGGCG  
GCAATCCCAGCTCTGCCAGCATGGTGTGCTGACCGCCGATATAGGGGGCCGGGCCGAGAGATAGACATG  
GCGTTTCGCGCAGATCTGGGGCCAGTTCGGCCAGCATGGCGGGGTGAGTCGGCCACCAGGGATGAGCC  
TTCGGCGCCTCTTCCAGTATCAGGGCATGGAGCACGCTGAATGAGCCGAGCCAGAGTAGCCAACCTCGT  
CTGCGAAGATCACATCTGCTGGCGAGCGGGCGCTATGGATAAAGCGGATATCGGCATCCGGCCGTTTGGC  
CAGCTCGTCCCGCAACATGGCCACATGGGGGTGATGCCGGAACCGGCGCTCAAGAGCAGTGGTCTGTCG  
CAGGGCAAGGCGGTGAGGTTGAAGTCGCCAAAGGGACCATCCACCCGATCTCGTCGCCCACTTGCAGGG  
TCTGGTGTGATGGCGAGAGACCCGTCCACATCCTTGATGGTGACCTGCCAGCATGCATCCTGCGGGCT  
GGAGGAGAGGATATAGGCGCGGCACTCCGGCAGGCCATCGATCTCGGTGTGCAGGGTGCATGTCGCA  
GCCAGTACGGGATGGAGGCTGCCGGAAGCGGCGCCAGCTGCCAGCTCACTACGTCGTGGGTTGTTCTGTT  
GGCGCCAATGCAGGTGAGCGTGAGAGAGGTCATCAAGGCTCCTTAGGTTTGAAGCTTGAACAAAAC  
GTCTGGTGAAGAAAGCCGATCCAGAAAAAGGCGAGCCGGGCGGCTCGCCAAACGCTTACAACATGAAGT  
GCCGATCAGGCCGCCAGGATCTCGGCCAGGTCAGCCTCGGCCGTTGGTGGTCCCTTTCAAGCCAACTGCT  
CCTCCAGCACCTTGAGCAGAGCCGGGGTGGAGAAAGCGGGGGCGGTCGGGCGGTACGAATGTCCTTCCAC  
CCCGAGGGAGAGCAGGGTGGAGCAGAATGACGATGGCTTTTTGCTCGAACAGGAGAGCACCAGCGTCAGC  
GGCAGATCGTTGACCCCGCACTCGAACGCTCGGAGAGTGCCAGCGCCAACTGGATGGCGGAGTAGGCAT  
CGTTGCACTGACCCACGTCCAGCAGACGCGGAATGCCGCCGATGTCGCCAAAGTCGAGCTTGTGAACTT  
GTATTTGCCACAGCCCAGCGTGAGCAGCAGGCTGTGCGCGGCGCCGCTTGGCAAACCTGGTGAAGTAG  
GCGCGCTCGGCCCTTGTGCGCGTCACAGCCACCCACTAGGAAGAAGTGGCTGATCTCCCGGCCCTTACCT  
TCTCGATCACCGTGGGTGCTGCCTGCATCAGTGCCTTGGCGGCAAGCCGATGGTGTGAAAGTGCCTCGAG  
CTCGGTGTGCTTGAAGCCTTCCAGCGCTTGGGCCCTTGGCGATCACGGCCGAGAAATCATCCCCCTCCAGA  
TGGGTGACGCCCGGCCAGCCGACGATGGAGCGGGTGAAGATGCGATCCGAGTAGTTGCCACATTCGGGT  
CGATGATGCAGTTGGAGGTCATCACTACGGCGCCCGGGAAGTTGGCAAACCTTCTGCTGGTTCTGCCA  
GGCGGAGCCGTAGTTACCCACCAGATGGGGTACTGCTTGAAGAAGGGATAGGCTAGCGCAGGCAGCATC  
TCACCATGGGTGTAGACGTTGATGCCGTTCCCTTGGTCTGCTCCAGAATGAGCTTGAGATCCATCATGT  
CGTGGCCGAGACAGAAATGCACCTGCCGAGATGGGGTTACGCGTACCTGGGTGGGTTCCGGATGGCC  
GAAGGAGCTGGTTTACCAGAGATCCAGCATCTCCATGATTTTGAAGTTGAGCTGACCGATCTCCATGGCA  
CAGCTGAACAGCCGACCAATTTGCTCGGCTGCTGAGCCAGCTCATGATGCGGTGGAATTCGGCGG  
CCACCTCGTCACTCTGCTGATCCAGCACCCGGGCGTGTCCATATAGGCGGCGGCGCCCTTGGAGCCGTA  
AAGACAGAGCAGACGCAGCCCCATGATGTCTTTCGTTCACTTTCGCTCTTGGCCCGATTGGGGGCGGCTGGT  
GCGGCATGGGCAAGTTGTTCCAGCAGTTCGGCACCGGGTTCGAAGTAAGCGGACTGTGGCAAATCGTTGA  
CCTGCACCGCCATGGCGGTGAGACGATCGGCCAACTGCTGGCGATAGGCGAGGGCTGATTGACGTAGGC  
CACGATGCGATTTCGAGTCGAAGTTGACGTTGGTGAGGGTGGCGAAGAAGGCCCTTGGGCACGAAAGCATCG  
ATCTCGCGATCCATGATGCCCTGCTCGCGGGCGGCCAGCGCCAGGCGCTGAGCCCTGCAGGGTGTAGA  
TCAGCACATCCTGCAGATCCGAGGTTTCCGCCGCTTTCGCCACATACTTGTGCGTAGGCACAGCCGTT  
GCCTGCCGGGGTACGAATTGTCTGTTACATTGCACACAAAACATCATGCCTCTCCTAATTGGACATTTT  
AGTTGTCTGTTTTGTGGTGAATCTATTCTCTCGCGAAAAACTTAATAGGCATTCAATTTGCCAATTAAG  
ATTCCCTTGATGCAGATCAAAAAACAAAAAAGCCGCCAAACAGGGCGGCAAGCGGGTGGATAAAAGGAG  
AGACAACTCAGGTTTGAACAGAACATAACAATCAGACGGATTGGGCCGTTGGTCTGGTTCAGGAGCTTCCG  
GCCCGGTACTTACTCAAGCAATCATACGTACGCTGTAGTCAGCTTGGTTCACTATCAGGCCAGATAAGCG  
CGCAGCATCCAGACCAGTTTTTCTGCTGCTGCACATAGTCGGAGAGGATGGAGGCAGTGCCCTTATCAC  
CGGCTTCGGCGGCCGCTGACCCAGAATACGGCGCTGGGCGACCAGCAGTTCGCGGAAGCTATCCAGCAAGGA  
TTCGACACAGGCGCGGCCATCGTGCAGCCCTTTTTGCTCCGGATGGCAGAGGCTTTCAGGTATTCAC TG

AAGCTGTGCATTGGCACGCCATCCAAGGTCAGGATCCGCTCGGCCAGCGCATCGACTTTCAGCAGCAGGT  
CGTTGTAAATCTCTTCAAATTTTCAGGTGCAGTTTCGAAGAAGTGGTTGCCACGGATATTCAGTGGAAGCC  
GCGCACGTTTCATGTAGAGGATCTGGTAGCTGGCCAGCAATTTGTTCAACTCGGCTGCCAGGGCTTGTGAT  
TGAGCAGTATCAAGACCAATCGGGCTTTTCATCATTCACCTCCAGATTTGGAATCGGTTTTAAATCTC  
TTTTCGGAACGCAGTCAGAATAACGCCCTTGCAAAATGCAGAGACAATTGCTTGTGCCTAACGTGTTTGATAG  
CTAAAGGCTATCAAACAGTACGCAACAACAGGGGCAATGGATGAGGATTAGGGGAAGTATTTTTCCAGCA  
GCGCCATCAGGATGGCCTGGCACTCGCTGTCCGGTTCGCTATCGACCTTGCTGGCGCGAAAGTGGAGCTG  
AAAGGCGCCCATGACGGCGCGGCTCTGCTCATCCACTGGCCGCTCCGGGGCAGGCCATAGCCATAGAGG  
GCCAGCTGCTGCTGCCACATGGCCGCATCCAGTCGGGCAAAGGGCTGGCCAGTAACTCGGCCACCCGAT  
CTTCATCGGGCCAGGCGCCGACTCCGTACGTACAGATATAGCTGGCGCCAGGGGAAGTGGAGCCGGGATC  
CTGCTTGGCTCGGGGGCGATATCGCTGTGGCCAGCAGCTGGGTTCGTTGGAATCTGGTAGCTGGCGACC  
AGTCCCGGCTGAGGGCGCCGACGGCAGCTATCTGCTGCGGGTATAGGGTTGCCAGCGGGGCATCGG  
GGCCAGCGGCTCATCTTCCGCTGGATAGCCGAGGTTGACGATCTCGATGCCAAGGGAGCTGGCATTGAG  
CCCGGCATATTTGGTGCCAACGGCTGCGTCCGGCATGCCAGGCGCGCGCTGTCGGTACCAGCTGATAG  
ACGGTGAGCGGTGTCTCGCGTTGTGCGGGGGATCAGGTAGTGGGCGCTCACCTTGTGCTCCGGCTCGG  
TCAGCAGGCGCAGGGAGTTGGCATCATCTTCGTCCGTGTAGTGGAGGATCAGAAAGGCTATCCGCTCGTT  
CTGGTTGGCGCTCTGATAGCGGGTAGATAGCTGGTACTCGGACGGTGTGCAGGCGCCAGCAGCAGAACC  
AGTGGCAGAAAGAAGAGGGGAAGAAGACAGCGCCAGCGCCATCCCCCTGCTGCAGCCAGGTTGCTGAGCG  
TGGGAGGAGTGAAGTGGCACATGTGCAAGGCCCGGTCTGGTCAAGTGCAGCGGCTGGTTAGCCGCGGT  
ATTTGGCCGTGAGACCGATCAGGAAGTTGCGCAGGATCTGATCCCCGCAATCCTGATAGTGTGTTGATC  
CTTGGAGCGGAACAGGGCACTGAGCTCGGACTTGGAGAGGTTGAAGTCGGCGAGCTTGGGGTGGCCGAGC  
ATGTCTCTTCTTGAAGTTGAGACCGATGCGCAGCTTGGCGAGGATCATGTTGTTGTTGATCCGGTTCCG  
GGATCACCTGGGCCGGTGCATCTTCGCGCGCGCCGCGGGCGGCGATGATGAAACCGTCGAGGAACTGGCT  
CAGGGCCGAGTCGGGACAGGCAACATAGCCTGCCTTGTCTTTCACCTTCCGCCGCCCTTTTCATCAAC  
CAGCTGTGCAGTTGGGCGTGAGTGACCGTCAGGTTACCCTTGGCAAACATCTCGACCATCTGGTCTGTTG  
TGATGGTGAGGGCGTAGCGCAGACGGCGCAGAATATCGTTGTTGGTTCATGCTGACTCCTGTGTAACGGC  
GCAACTTTACCATCTGGCGGGCCCTCGCGTCAGAAAAAGCGGGGGCCGGTACAGTTTCAGGTCAAGCTCATC  
AAGCCTTGGCCAGATAGCGGGGCGCCCTCCTGCGCGCACCAGTTCCAGCGCATCTTGCAGCTCCAGCAGCTC  
GGGTTCCAGCTCGCTGACCGGGCAGCCGCTCAGCAGCTGTTGTTCAAGCTGGGAGAGCAGCCGTTGCGAGC  
CCCGGCACCCCGAATAGGCACAGCCACCGTTGAGGCGATGGAGCTGGGCGAGCACCTCGCTATCTTCAA  
TTTTCGCCCCCAGTGCCTATCCAGCACCGGCTCGACCTCGTCAAAACTGGCCAGCAGCATGGTCAGCAT  
CTCTCTGGCGAGATGCTCTTTCCCCGCGCCTGTGCGACCCGCCAGTGCCAGTCGATCTGTTGGGCACCA  
TTATTCTGGTGACGGCGATGGGCAAAGTCCGGTGTGAGCTGGGCCAGCATGCTCTCGTCGATGGGCTTGG  
CCAGATAGTCCATCCCTGGCGGATCAGCCGCTCTCGCTCTCCGGGAATGGCGTGGGCGGTCACCGC  
CACGATCGGGGTGGTGGTGTGAGGGACTGGTTGCGGATCGCCTGGGTGGCGCTGATGCCATCCATGATC  
GGCATCTGGATATCCATGAAGATGATGTGCAACGGTTGGCTCTGGGCTGTTTGACCGCCTCCTTGCCGT  
TTTTGCACACCACCCTGACTCACCATCTCCTTGAAGCATGGCGCGATCAGCTTGGAGTTGGCGGCGTT  
GTCATCCACCGCCAGCACCTTGATTGGCTGCAACTGGCGCGGCGCAGGCTGGGCGGGCAGCTTCTGGCGG  
CTCGATTCCGGCGAGAGCAGGGCGTGCAGCAGCTTGGGTTGGTTGACCGGTTTGGAGAGGCAGTGTGGG  
CGCCATGGGCCAGCATCGCTTCATAGAGCGCCGGCTCGTGGCTGCTGAGCAGCACTATGGTGTCTGCTG  
CTGGCCGTTTTCAGTTTGTGCGAGACGGCCGAGCACTTGGTGCAGGTTGCTGCTGCCGATGATC  
ACCATCTCCTGCTCGCTCATCTCGGGCCAGGGATCATCGCTGGTTCAGTGGGTGCACATCGAGGTGCCACT  
CCGCCAGCAGGGCGAGCAGGGAGTCTTGCGCGAAGGGATCCGGTTCAGCAGCCAGAGCCGTTTGGCCAG  
GATCCGATCCAGCGGAGTTGATCGGTCTGGGGCAGGGGTGAGACCTCCACATCCAGACTGAACGAGAAG  
ATGGAGCCCTTGGCGAGCTCCGATTCAAAGCGGATCTGGCCGCCATCTGCTGCACCAGCTTCTGGGTGA  
TGACGAGGCCCAAACCCGTGCCGCCATAACGGCGGGAGATGGAGGAGTCGGCCTGATTGAAGCCCTGGAA  
CAGCTGATGTTGCTGCTCTTGGGAGATGCCGATGCCGGTATCGCGGATCTGGACGTTGAGCCTCACCTTG  
TGGTTGCCACTGCCGCTGCTCGATATGGACATCCACGTTGCCCTGCTCGGTGAACTTGATAGCGTTGC  
CGGTGAGGTTGGTACGACCTGTTGCAGACGCATGGGGTCCGGGTGAGGTAGTCCGGCACATCGGCATC  
CACCCGAGGGAGAGCTCCAGTTGTTTGTGCTGGGCGCTGGGGCCGAGCAGGTGCATGGTCTCGTTGAGG  
GTATCGCGCAGGCTGAACGGGATATGTTCAAAGTGCAGCTTGGCCGCTTCCAGCTTAGAGAAGTCGAGGA  
TGTCGTTGATGATGCCAAGCAGGTTGCGCGCCGATTTCTCGATGGTCTGCATGTAGTCGGTCTGGCTCGG  
GGTCAAGGCTGGTTTTTCAGCAGCTGGCGGGTAAAACCGATGACCCGTTGAGCGGGGTACGCAATTCGTGG  
GACATGTTGGCCAGAACTCCGACTTGAACCGCGCCGCTCCTGCGCCGCTTCTTGGCCATGTGAGTT  
CGACGTTCTGGATCTCGATCTGCTCCAGGGTTTCGCGCAGGTCAGAGGTGGCCTGATCGATATCTGCTG  
CATCTCTTCTGATATTCGGAGAGCGCCTTGGCCATGGCGTTGATGCCGTTTTTTCAGCATATCCAGCTCG  
CCGGTGAGCTGGCCGCTGACCCGGGTATCGAGCCGCCCTCCCTGATCTTGTGCACCGCCTGCACCATGT  
TGGTGTGAGGTTGGGTACGCTCTTGACCAGACGGAAAGCCAAACAGGGTACTGAAGGCGACTCCGATGAG  
CACCATGATCACCGCAAAGAAGGTGTGCGGGTATTCAGCAACATGGCCCTGTCGGTCCGATCTGCATC  
GAGATGTAGCCGATCATCGGCGGCTCTACATCGCTTGGCAGCGGGAAAGCCATCCAGACTGGTTTTAGCCT  
GGATCGGGGTGCGCAAAATGATGTGCTCTCCCTGAAATGTACGCTGGTCAAATCGGGAATAGGCTCACC

ATCGGGCAGCCTGAGCCGGGTGAAATCCCGGTGGTAGTTCGAGGTGACGAACAGCTGGTTGTCCCTGGGTG  
AAAACCCGCGATGGACTTGATGAAGGGGGAGTTCCTTGCGATGGGTGAGGCAATCAGCCGCTTGAGGGATT  
CGCGACTGTGCTGGGTGATCCCGTATTACTGGCGATTGCCAGCGTTCGATGATGTTGATCCCTGATC  
AATGAGGTTGTTTTCCAGTTGCTGGTAGCGGTGGAAAGTGAAGTAACCGGCCATCAGGCCACCGATGATC  
AGGGTCGGCAGGATGGTGAAGGCGAGAACCGGTGCTCTCAGGCCATATTTGGTCATACGAACAGGCCACC  
AGTGAACAGGGTTGGCGATAGGGTTGATGGCAATACACGGGCTCTGTGGCCGTATTTGGTCACTACTATTA  
TTCTTGTGGGACAATACCCGGCAGCAGATTCCACAATCATGACATAGCCACCTATAGGCACCAAGTTTTTA  
TGGCCCAGTTTTTCAAGCCCCAAAAGAAGTCCACCCAGCTCCAACGCATTGAATTTACGATAGACACCCT  
CGATCACCCTGCGTCGGTATCGGTGCGCATCAGGGCAAGGCGATCTTCGTGCAAGGGGCACTGCCCGGC  
GAGACCGTCAAGGCACGCATCACCGAAGAGAAAAACAGTATGGTCACGCCGCTTGCAACAGGTGGTGA  
CCCCGGCGGCCAATCGTATCGCTCCCTTTTGCAGCCATTATCGCGAGTGCAGGCGGTTGCAGTGCACGCA  
CATGTCGGTTGCCGATCAGCAAGCCGCCAAGGCGCCGACTGGTCAGCCTGTTTCGAGCGGTTGGGCAAC  
ATCAAGGCGCCGGCGCTGGAGCCGGTACTGACCGGTGAAGATCGTGCTACCGCCGGTCTGTGCTGCTGG  
CCATCAAATTTGACAAGAACGGTGCCTGCACCCGGGTGGTTCGCCCGCCGCAACAGCAACGATCTGGT  
GGAGATCGACGGTTGCCCTGTGCTGGCTGAGCCGCTCTCTGCGTTGATTGCCCGCTGCGTGAATGCCTC  
AATCGCCTCAAGAGCCAGCGGAGCTGGCCATGCGGAGCTAATCCAGGCCGAGCAGGGGATCATGATGC  
TGCTGCGTCACACCGGCCGCTCCAATGAGGCGGATCGCGCCCTGCTGGTGGAGTTTGCAAAAGCGCAGGG  
GATCGACCTCTATCTGCAGGCGGCGGATGATCGCATCGAAGCGTGCAGCAACAATTTTCCCCATCCTAC  
TCGCTGGATGGCCTGTCTCTTGCATTTGCTCCCGGTGATTTTCATTCAGGTCAACGGCCCCATCAACCAGA  
GCATGGTTGAGCAGGCGCTGACATGGCTCGGGGCGAGCAAGGATGACAAGGTGCTCGATCTCTTCTGCGG  
CATCGGCAACTTCACCCTGCCGCTGGCCCGTCAAGGCTCGCGAAGTGGTGGTGTGCAAGGTGAACGGCC  
ATGGTGCAGCGGGCCGAAGAGAACGCCCGTTCGCAACGGCATCAGCAATGCCCGTTTCTACAAAGCCGACC  
TGAGCGATGACATCGTCCGCATGTCTGGGCGCGTGAAGGGTTTTCATCTGGTGTGCTGGATCCGGCTCG  
CCCCGGCGCGCTGGAAGTGATGGGACACGTCGTGAAACTTTCACCCAAGCGGGTGGTCTACGCTCCTCTGT  
AACCCGGTCACCCTGGCGCGGGACAGTCAGGTGCTGGTGAAGGGGGTTACCCTGCTGGTGCCTCGGCA  
TGCTCGACATGTTCCCTCACACCGGTTCATCTGGAGTCCATGGCGCTGTTTGAACGGGAGTAAATGACTCA  
TCAGTACGGCGATCGGATATGTAATCTGGCATGTCTGCGTCTGTTTTCAGCTGGTGTGGTATATGAAGTA  
ATCCTGCTCATCAGTACGGCGATCGGATATGTAATCCGGCATATCTGCGTCTGGTCTGTTTTCAGCTGGT  
GTGTATATGAAGTAATCCTGCTCATCAGTACGGCGATCGAGATATGTAATCTGGCGTGTCTGCGGCTGTT  
TGAGCTGATGTGATTGGGGTAATCTAGACCCCTCGTTCGTCGGCAGGGCTGTTGGCGCGCTTATTGTCT  
TTCTGGACAATATGCCTTGAAGAAGTGCCTGGATATCCCCATTTGAGGCAATCTCATGAGGGGAGAAAGT  
GACAGCTTTCGGCCGATAAATTTAAAGGATTGATAACCATGGTTGCGGTTTCGCGATATTCATTTGAAAGAC  
AACTTCACCCTGGAAGAGTGGGTGAGCTCGCTCTCCTTTCAGTGCAGTGAAGAGGATCAGCTGCGAACC  
TCTACCAGTATTGTCTGACGCTCGGTGACGAGGCGTGCACGCAAGCTGCTGGTGCAGCGGCATCGAAAT  
GGTGGGCATCCTGCAGATGCTCAGCATGGATATCGGTACCCTCAAAGCGGCCATCATCTACCCCTTCGTC  
GAAGCCGGTCTCATCAGCCAGGAGCGGATGGACGAGGACTTCGGCTCCAAGATCGCAAGCTGGTGGAAAG  
GGGTGCTGGAGATGGAAGCCATCCGCTCCCTGCAGACCCCTCCATCGCAGCGAAACCTCGCCGGAGCAGGT  
CGACAACGTGCGTGCATGTTGCTCGCCATGGTTCGAGGATGTGCGCGCCGTGGTGTCAAGCTGGCGGAG  
CGGATCGCCTGCCTGCGGGAAGCGAAGACGGCAGATGAAGAGACCCGGGTGCTGATGGCCCAGGAGATCA  
CCAACATCTATGCACCGCTCGCCAACCGTCTGGGCATCGGCCAGCTCAAGTGGGAGCTGGAAGATCTCGC  
CTTCCGTTACCTGCATCCGGATACCTACAAACAGATCGCCAAGCAGCTCGACGAGAAGCGGCTCGACCCG  
GAGCGCTACATCCGCGAGTTTGTGCAATCCCTGCGTAATGGCCTGAAAGAGGGCGGGAGTTGACGCCGAGG  
TGTACGGTTCGGCCGAAACACATCTACAGCATCTGGCGCAAGATGCAGAAGAAGCACCTCGAATTCACCGA  
GTTGTTTCGACGTGCGCGCGGTGCGGGTAGTGACCAAGCGGTTGCAGGATGCTATGCGGCGCTCGGTATC  
GTGCACACCCAGTTCACACCATTCCTCGCGAGTTTTCAGACTATGTGCGCAACCCCAACCCAAACGGCT  
ACCAATCGATCCACACCCGTAGTGGTGGGGCCGAGGGCAAGACGTCGAGATCCAGATCCGTACCCGACCA  
GATGCATCAGGATGCCGAGCTAGGCGTTCGCGGCGCACTGGCGCTACAAGGAAGGGGCACAGGCTGGCGGC  
AAGGCCAACACCTTCGAAGACAAGATCGAGTGGCTGCGCAAGCTGCTCGCCTGGCAGGAAGATCTCTCCG  
AGAGCGGCTCCCTGCTCGAAGATCTGCGCAGTCAGGTGTTTCGAGGACAGAGTCTACGCTTTCACCCCGAA  
AGGGGATGTCATCGACCTGCCGGCAGGCGCCACCCCGCTCGATTTTGCCTATCACGTCCACAGCATGATC  
GGCCACCGCTGCATCGGCGCCAAGATTGATGGCCGATCGTGCCGTTTCACCTACGCGCTGCAGACCGGCG  
ATCAGGTGGAGGTGATCACCCAGAAAGAGCCTAACCCGAGCCGCGACTGGATGAACCCCAACGCCGGCTT  
CCTGCGCTCCAGCCGGGCGCGGGCCAAGGTGGCGACCTGGTTTCAGAAAACGGATCGGGACAAGAATATC  
GTGGCCGGTTCGCGAGCTGTTTCGAGAAGGAGCTGGATCGCCACAACCTCAGCATGTCCAAGATCGACAAGG  
GCAACATGCTGCGCCGCTTCAATCTGGAGAGCACCGACGATCTGCTGGCCGTTATCGGCAGTGGCGATAT  
CCGCATCAACCAGGTGCTCAACTATCTCGACACCTGTTACAACAAGCCGACGGCGGAAGAGGAAGATCGC  
CGCCTGCTGGAGAAGCTGGAGCAGAAGGCCAATGCGCCGATGCGCCACAAGCCCAAGACCACATAGTGG  
TGGAAAGGGTTCGGCAACTTGATGACCCATATTTGCCCGCTGCTGCCAGCCTATTCGGGGGACTCCATTCA  
GGGCTTTATTACCATGGGGCGTGGCGTTTCGATCCACCCGGGAAGATTGCGAGCAGTTGAAAGAGCTTTC  
CGTTCGAACCCGGAGCGGCTGATCGATGCGGTGTGGGGGAGAACTACTCCGGCGGCTACGGCTCACCA  
TCCGGATCATCTCCAACGATCGCTCCGGCCTGCTGCGCGATATCACGACCGTGTGGCCAACGAGAAGAT

CAATGTGATGGGGGTGCGCTCGCGCTCCAACGTGCGGAGCAGACCGCGGAGATCGACATGGAGCTGGAG  
ATTTACAACATCAATGCCTTCAACCGGGCGCTGGCCAAGCTCAGTCAGCTTAACGACGTGATCAGCGCA  
AGCGGCTTTGATAGCGAACCGACCGGCCAGTGGCCGGTCTGCATTTACGACCTTTTTGAACGAATCG  
AAAGTGAATATCCCATGTCCAACGTTACGATCTGCCTCAACTGCTCGACATAATGGCTCGCCTGCGCGA  
TCCGCAAAACGGCTGTCCCTGGGATCTGAAAACAGGACTTCCAGACCATAGTGCCGCACACCCTGGAAGAG  
GCCTACGAGGTGGCCGATGCCATCGAGACCGAGGATTGGCAGGGGCTGAAAGGGGAGCTGGGTGACCTGC  
TGTTTCAGGTGGTGTTTTACGCCAGCTGGGTAAGAGCGGGGCTTGTTCGACTTCGCCGATATCGTCGA  
CACGGTGAGTGAAAAGCTTATTCGTGCTCACCCACGTTTTTTCCGATGCAGACCTTGTAAACGAGCAG  
GCAGTAAAAGCGAACTGGGAGGCGGAAAAAGCCAAGGAGCGCGCTGCCCTCGACAAAAGAGAGCGTGTGG  
ACGATATCCCGCAGGCGCTGCCCTGACCTCGCGCCGCCAAAATTCAGAAAACGCTGCGCCACCCTGCGG  
TTTTGACTGGAAGACGTTGGGCGCTGTGGTGGACAAGATCCACGAGGAGATCGACGAGGTGATGGAAGAG  
GCATTGATGGCCGATGTGGACGAGGCGGGGTGAGCGACGAGCTCGGCGACCTGTTGTTTTGCCACCGTCA  
ATCTGGTGCCTCATCTGGGCAAGGATCCGGAGCAGGTGCTGCGAGGCGCCAACGCCAAGTTCGAACGTCG  
TTTTCGTCAGGTTGAGCAGATAATCGCCGAGAAGGCTTGAAAAAGACCGATTGCACCCTCGAAAAGCTC  
GATGCCGCTTGGGATAAGGCGAAGGAAAACCGAGCAAAAGTTGATTTGGCGCAAGATGGGGGGCGGTGAGC  
CTGATAGATTTTTGCTCATTGTTTGGGAGAGGGGTTTTTGGTATACTGTTTCCCGTCCCTGCCTCATCCC  
CGAAGCACCCCTAAAATTCCCTAAACTTCTTTCAGGTTTACGATGACGACCAATAATTTTTTGTACT  
GGTGGCGTTGTTTCATCCCTCGGCAAAGGCATTGCCGAGCTTCTCTGGCAGCCATTCTGGAAGCCCGTG  
GTCTGGATGTGACCATCATGAAACTGGACCCGTACATCAACGTGGATCCGGGCACCATGAGCCCGACCA  
GCATGGTGAAGTGTTCGTAACCGAGGACGGGGCCGAAACCGATCTGGATTTGGGCCACTACGAGCGTTTC  
ATCCGCACCAAGATGACCCGTCGCAACAACCTTACCACCGCCGATCTACGCCGACGTACTGCGTAAAG  
AGCGTGCCTGGTGACTATCTGGGCGCCACCATTAGGTTATCCCGCACATCACCACGCCATCAAAGAGCG  
GGTGATTGCCGGTGCCGAAGGCCATCAGGTTGCCATCGTCGAAGTGGGCGGTACCCTAGGTGACATCGAG  
TCCCTGCCGTTCCCTCGAAGCCATTCTGTCAGCTGGCTGCCGAAAGTGGGCCGCAACAACGCCATGTTTCATGC  
ACCTGACGCTGGTTCCCTACCTGGCTGCTGCCGGTGAAGTGAAGACCAAGCCGACCCAGCACTCCGTTAA  
AGAGCTGCTCTCCATCGGTATCCAGCCGGATGTGCTGATCTGCCGCTCCGACCGTGCCATTCGGGCCAAC  
GAGCGCGCAAGATCGCCCTGTTCTGCAACGCTGCCGAGCGCGCCGTCATCTCCATGAAAAGACGTCGACT  
CCATGCAACAGATCCCGCCTGCTCAAGTCCCAGAATCTGGACTCCTACTTCACCGAGCGTTTCGGCTC  
GGAGTCAAAAGAAGCCGATTGTCGAGTGGGCAAGTTATTTACGAAGAGGCCAACCCGACTGGGTGAA  
GTGACCATCGGTATGGTCGGCAAGTACGTCTCCCTGCCGAGCCCTACAAGTCCGTCAACGAGGCGCTCA  
AGCACGGTGGTCTCAAGACCCGTCCTCCGTCACATCAAGTACATCGACTCTCAGGATATCGAGACTCG  
TGGCGCCGAGCTGCTGGAAGGTCTGGACCGGATCCTGGTGCCGGGTGGCTTCGGTGAGCGCGGTGTGGAA  
GGCAAGATTCTGGCTGCCAGTATGCCCGCGAGAACAAGATCCCTACCTGGGTATCTGCCTCGGCATGC  
AGGTTGCTATGATCGAATTTGCTCGCAACGTAGCGGGTATGGAAGGGGCTCACTCCTCCGAATTCAGAA  
AGATTGCGGATACCGGTCGTCGGCTCATCACCGAGTGGGTGGATGAAGAAGGTAATGTCGAGACCCGT  
ACCGAGAAGTCTGATTTGGGCGGTACCATGCGTCTGGGTTCACGCTCTGCCACCTGGTCAAGATTCCA  
AAGTGCCTCAGATGTACGGCAGCCCGACCAATTTACGAGCGTCACCGTCACCGTTACGAAGTAAACAACA  
GCTGCTGCCGAGATTGAAGCGGCAGGTCTGAAAGTACCAGGTTCTCTCCGCCACAAGAAGTTGGTGGAA  
ATCATCGAGATCCCGGATCACCCCTGGTTTCGTGGCCGCGCAGTTCCACCCGGAGTTCACCTCTACTCCTC  
GTGATGGCCACGCTCTGTTTCGCCGGTTTTTGTGAAGGCGGCAGGCGAGTATCAGAAGCGTAATTTGAAGTA  
ATTTGAAAATAAATGCGGTTGGGGCACTGTGCCACAGCCGCTTTTTTTGGCATAATTTTTGTTGTTTTTTTA  
CGAAACCTGAGGAAATACACATGTCCAAGATCGTTAAAAGTGCATCGGTCGTGAAATCATCGACTCCCGTGG  
TAACCCGACCGTTGAGGCCGAAGTTCACCTGGAAGGTGGTTTTGTTGGTATGGCAGCCGCTCCGTCGGC  
GCGTCCACCGGTTCCCGCGAAGCGCTGGAACCTGCGTGACGGCGACAAGAGCCGTTTCTGGGTAAAGGCG  
TGCTGAAAGCCATCGAAGCCGTAACCGCCGATCGACAAGCTCTGCTGGGTAAAGATGCCAAGGACCA  
GGCCACCGTTGACCAGATCATGATCGACCTCGACGTTACCGAGAACAATCCAAGTTCGGCGCCAACGCC  
ATCCTGGCTGTTTTCCCTGGCTAACGCCAAAGCTGCCGCTGCTGCCAAAGGCATGCCGCTGTACGCCACA  
TCGCCGAGCTGAACGGCACCCCGGGTGTTTACTCCATGCCGCTGCCGATGATGAACATCATCAACGGTGG  
TGAGCACGCCGACAACAACGTCGACATCCAGGAGTTCATGATCCAGCCGGTTGGCGCCAAGACCCTGAAA  
GAAGCCGTTTCGATGGGCGCAGAAGTGTTCACAACCTGGCCAAAAGTGCAGTGAAGTCCAAGGGCTACAACA  
CTGCAGTTGGTGACGAAGGTGGTTTTGCTCCGAACTGAAATCCAACGCCGAAAGCGCTGGAAGTTATCGC  
TGAAGCCGTTGCCGCTGCCGTTACAAACTGGGCACCGACATCACCTGGCTATGGACTGCGCTGCTTCC  
GAGTTCTACGACGCAGAGAAGAAAGAGTACAACCTGAAAGGCGAAGTCTGCTTCCACCTCCAACGGTT  
TCTCCGACTTCCCTGGCTGACCTGACCACCAAGTTCGCGATCGTCTCCATCGAAGATGGCCTGGACGAATC  
TGACTGGGAAGGTTTTGCTTACCAGACTGCTGAACTGGGCAAGAAAATCCAGATCGTTGGTGACGACCTG  
TTCGTAACCAACCAAGATCCTGAAGCGCGGTATCGACAACGGCATCGCCAACCTCCATCCTGATCAAGT  
TCAACCAGATCGGTTCCCTGACCGAAAATCTGGCTGCCATCAAGATGGCCAAAAGACGCTGGCTACACTGC  
CGTCATCTCCACCGCTCCGGTGGAGACCGAAGACGCGACCATCGCCGACCTGGCTGTTGGTACCCTGCT  
GGCCAGATCAAGACCGGTTCCATGAGCCGTTCTGACCGTGTTCGCAAGTACAACCAGCTGATCCGTTATCG  
AAGAAGCTCTGGGTGCCAAAGCTCCTTTCCGCGGTCTGAAAGAGTTAAAAACCAGGCTTAATTTGCTGG  
TTTTGCCAGCCTCGGCTGGAATGAAAAAAAACCGGAACCAAGGTTCCGGTTTTTTTTATGCCCTGTTGTT

CAAGCCAGCGTTGCAGATGCTGCACAAACAGCGGGGCTGCTCGATGGGGTAGAGGTGCCCTACGTGCGG  
CACCTGCAAGCGATCGCAGGCGGGAATGGCGTTGCCAATAGCCTCACAGACCAGCGCAAACAGCGCTCTG  
GTATCTGCGCCCTGCACGATGCAGGTGGGCATGTTGAGCATGGCAAGGCGCCCGGGTGACCAATCTGGTC  
GCTCGCTCTGGCTCAACTGCTTGGGCAGGCTATCGGCTTCTGCCAACTGTGCCCTGCTGCCACTTGAGCGG  
TTGTGCAGCAAAATAGCCTGCATGACCACCCGAACCATCGATCAGGGTCGCCACGGCCTCTTGACGCAAG  
CCTTCCGCAACCTGGCCAAACACGGGGCCAAACATGGCTCCGGCATCGGCCATAAAGGCAGCGATCCCCT  
GTTTCATCGAGGGCTCCAGGGCAGCCTGGCTCCACCAAATAGAGGCTTATGAATTGCTCCGGAGCCATCAG  
GGCAGCGGTGAGGGCAACATCCGCCCCGATGACCAGCCCGCCAGATGCACTGGCCCGCACGGCAATTGT  
TCCAGCAGGGCAAGCAGATCACTGGCGTGGGTCTCCAGACCAAAGGCCCGTTTTTGGCCGCTCGCCAA  
AGTGGCGCAGGGTGGGAGCGTAGACGGTGTAGTAGAGCTGAGAGCTGCTCGATATGTTTCAGCAGAGGGT  
ATGGTTGGCCAGCGCCATGGATCAGCAACAGTGGCTCGCCGAACCGCCCTGCAGGAGGGCTGCGGG  
CTGTTCATTGACGATAAAGGTGTGAGTCTGTGATTGCATATCAACGCCCTCCCGGCGTGTATAAGAGCAG  
AGGAGTATATGACAAGCGCCCCGTAGTCGGTAAGTGGGCGCATTGAGGCTGGCGCTAGCCACTATAAGAA  
AAAGTTGGGTCAATTATCAGAAAACCAATAAATCCAGTTTATAGTGGCACCAGCAGCCTTGGGGTGAACC  
CAAATGGTCGATATCAACCCCGCAAGGGGATCTTCCGATTCTTGGTGATGTATTGGCGGGGATATTCGAG  
ATTGTCCGAATAGGCTGCGCTATTCGAACCTACGAGCTTGAGTAAATGCTAGATTTTCGTTCTGAGAAAA  
CCACATGTATATGTTGTTGTCTTTAAATCTTTCAACACTTTAAGCGCTTCAAAGCATCCAGTCTAGCC  
ATTTCAACTGGATCATAGACTTGTATCCATCATCTTCTTCTGAAGAGAACCATCTTTCAGCCCCACTT  
TTGCATGAACATATGGATTTCTTATTCTCCTAAGTGAATCAAGTTTTTTATGTAGGTGAGGTGTGACAAT  
TGATTGATCTTTAGCTGCGTCGATAATTTCTTAAATGATGATTGAGCAAGTTCATCTTGGCCATCATA  
ACAAAGCGTCCAGACAAACTGTGTTCTATAAAAGCTTGAGATAGTAGAACTACTGCCATAAAATTACCAG  
AGACATAACTATTTGCTACCTCGTGTAGTGCTAGTAATGATTGATACCCCCCTCAAGAAGCTGATCGCC  
TTGAGGACCAAATAATGTGTTAAGCTCTCTCAATCGCCCCAGCCTATCTTCTCTCGAGTCTTTTTTCATCT  
TGTA AAAACTGCTGTGTAACAGAGTTTAAAAACTTCTCTAAAATTCATCACGCATACCTTGAGTTAATATC  
AAATTTAGTGGTGGTAAATACCAATAATTAATTTCTGGAATCAAACCGAAAATAGACAAGATTCCTTAGGCT  
ATTCCAATTTTTTGGATGATTATAATTTTTACGATAGATATTACCAACTAAGGTGTGACTAGAGGGAAAT  
TTGGATGTCTAGGTTTTCTCTGATGTTCAATAGGACTGCAAACGCTACGTGTTGGCAAATCTATAATTA  
TTTTCTCAATTGCCAGTCTTATTGCTTAAATTAACTACACCTTGAGAGCTACCAAGGTGAGGGCAATTTA  
AGGAAACGTGTGCCGTAATATGTATGGAGATGGTATTACCTGACAGTTGCCACAAAAGGGGAGTGGTC  
ATACGGCTTCAAACCGGATAACAAAACGGTACCCCTACCGTGTATCCGGAGTCAACCGTATGACCACAA  
CGAGAAAGTAGCACGTGCAAACTCAGCCTGCTAGAGCTTGCCAAAAGAGCTCAATAATGTCAGCAAAGCC  
TGCAAGCTCATCGGCTACAGTCGTGAGCAGTTCTACGAAAATTCGCCGTAATTACCAGACCTATGGCGCCG  
AGGGATTGCTCGACAAATGCCCCGGCTGTAAGGGGGCTCATCCCAATCGGGTCGCTCCCGAGATTGAGCA  
GGCCATACTCGATTACTCCCTCACCAGACCAACTCATGGCCCGCTGCGGGTCGCCCAAGAACTGGCTCTG  
CAAGGCATCAATGTCAGTGCCGGCGGGCTGCGTGGCGTGTGGCAACGTCATGACTTGCTCTCAAACACG  
ACCGCTTGTGCGCCTCGAGAAAACCCACCGGGAGCAGACCATTGAGCTCAATGACGAGCAAATTCGCCCT  
GTTAGAGCGCTTCAGCCCCGAGTTTCGCGAACGCCAGATTGAGGTTCACTACACCGGGGAACGGTGGCG  
GTCGACACCTTCTTCGTCGGCGCGCTCAAGGGGGTCGGTAAGGTGTATCTGCAAACCGTGTGGACTGCT  
ATAGCCGCCACGCTGGGGGGCGGCTCTACACCAGCAAACCTGCCCATCACTCGGTCCATGTGCTTAAACGA  
AACGGTGTGCCATTCTTTGAAACCCACGAGGCACGGGTCTATACCATCCTGTCCGATAACGGGCGCGAG  
TTCTGTGGGCGCCCTGACCACCATCCCTACGAGCTGTTCTGCAACTGGAGGGGATTGAGCACCGAACCA  
CCAAGGTGCGCAGGCCGACAGCAACGGCTTTATCGAACGGCTGCATCGAACCTTGCTGGATGAGCACTT  
CCGTATCAAGGGGGGACGACCTGGTATGAGTCGGTAGAGCAGATGCAGACAGACCTGGATAGCTACCTG  
GAGCACTACAACACCCAGCGGCCTCATCAAGGCAGGATGATGGAGGGTCAAACCCCTACACCATGTTCA  
AGATGGGTCTGAAATTGATACCGAAGGAAGTGCACACTAAAGTAGCGTAAACAAGACACCGGTTTGAGGC  
CGGTGTCAGGTGATAACTAGATCTGTACATTTTGCCAAATGCATATTCAGAAGTATGATCTCTCCTTA  
ATTTTAGTTCTTCGTAAGCTTTATCTAATACAGTTGCTACATCGACCAAACCGAATAATATTTCTTACT  
CTCGGGGCTGATATTTAGTTTCAAAGCGGAGCTATATCTTTAGAACTACCTAAGATTCCAATCCATTCA  
CTGATTTTTTTCGTAATGAATTGAACGCATTGTTAGCTTCAACAGCATTTCGTTCTAACTCTGATAACA  
TTTTTACCAAACCTCAAGTTATTACTTATATCTATAATTCGCATTAAGGCGTGAGTGACACAATGCTAAA  
CATTCTGCAATCCACTTTAAATAAACGGTCATTAATAATTCACCTCACTAATGATTACTATTAAGTTCGT  
TACTATTTGTAATTAATGATGGCTGAACCGCAGAATATTTCTAGAAGTTTTTCTGCTTAATGTCGTAT  
GTCCATTTTTAGTTCAAGACTAAAGTATTAGAGACAAGCTACGAGCAAATGTAGTTTTAATCTTATATA  
TCATCATCATTAAAAGAGCTCTCAATTAGAGTAGATTTTTTATTATTTTCGTATGTTGGACTAAAAATAGT  
AGGTTGGTGTGAACGAAGCGAAGCCCAACTTTACCAGGAGAAGTATCTGAAATTTTTTTCAATCGACCC  
GATCAATGTTTATCCCGCTCTGGTTGACGTGATAATGCTCATCTGTGGGCTTCATTAAGCTTTACGCCA  
ACCGACACAAACCACGCTACCGCCCCGAAATTTAGCTTCCAGTCTGCTGCGGTTCCACCAACGGGATGGG  
GTTGGCATGGCTCATGGGAGACTCCGACGAGGCAATTTGTTGCCAAATGGCAATATTAACCATGGCGCTGT  
GGAGAGAAAGCTCAATATTGAGGATTTCTGTGCAAGATCAATAAATTAATCAAATGTCACCTACGATTGA  
TGACGCGCCGAGATAGCGTGAACAACCATCTTGAGCTATCACCATAGAATATTCATGGACATATCTGGC  
TTGAACCAGCATAAAACTCTTTGTTATTGTCCGCATCCCCGCTGAAATAGCTTATTTATCTATAAATCA

ACAAGATAGCATTATGCGGTGGCGTCGCGGGGGCATCTGCTATCGGGAAGGAGAGTTATGAAGTCGCAGT  
TCAAAGTGGCGCTGGCCATGTTGGCCCTGTTTCGTCGTCCAAGGCTGCACAGCCCCGGATTTCATCCACCAA  
GCGCAATGTACCCGGCCCCGGTGCTGACGGTGCATTACGAAAAGTCCCCCCTGATCCCCGTCACCTATCGCT  
GGTGAGCAGTACCAGTTTTTGTCTGATACCGGGGCCAGTATCACCTTTATCGATCGCCGTCTGGCCAGCC  
GCTTCAAGACGCTGACCTTAAGCGAATTGCCAGGGCCTATCAGGCTGATTTTGCCACTGTGAACAGTGT  
TTCGAGCCAACCTGGGCAGCGAGCAGCTTGGCTTTGTTGAGCCGCAGCCCTTCTCGGTGGGGTTCGGTCACC  
ATTGATGACAGCGATCTGTGGGCAACCGTTGATTTTCGATCTTTTCTCCAGTCTCTCGGCAGCCGTATCG  
ATGGCATCCTCGGGATCGACACCATCCGCCGTTTCAACTGGATGTTTGATCGCGACAAGCATCAACTCAC  
GGCTTCACTGACGGCACCGTTCGGCAGCCACGTTTCGAGCGTGTATCGGCTATGAAGACAGCTACAACCGC  
TCCCCGGCAGTGTATCTGACCCACGGTGAGAGCAGCGTGCATGTATCTGGATACCGGGCCGATCAGA  
GCTATGCCGACCATGCCTTATCGACTTTATGGCCAGCCAGAAGCGATCTCTGGCGAAGATGCCACGCG  
ACGCAAAGGGGTGGATGCCAGCGGTATGGTGGAGGGCGTGACCATATCCTCACCGCCTGCACCTTGTAT  
GAGCGCCAGCTCGGTGAGCTACGCGTGTTCGAAAAACAGCAATGAGCAGTATGGTCTTGGGCTGGATTTTG  
TTAACCGCTTCAATCGCTTTGCGATCATGCCCGGGCGGATGATGTTCTGCTACGACGCCGACAGCCTGGC  
GCGCAAAGTGGCCAGTCTTGCAGCAATATCGGGGTGCGTTTTGATGGCGAGCATCTGCAGGTCTACTAC  
AGCGACGAACGGGATCTTGGCCCTATGGTCTGGCAACGGCGACATTTCTGGAGCAGATCAACGGGGTGG  
CTTATCGCCCCCTCGAGATCGACAAGGTGCGTGAAGTCTCAGCACCAGCAAGCCGGGGTTCGCTCAAGTT  
GCGGATTGTGCGGGAAGGAAAACCGCTGGATATCGCCATCTAGTCAAGGTGGGGCGGCAAGATGAGCCGC  
CCCTATGAGCCTCAGCCCTTGGTTCGGATTTTCCATGCAGGTGAGGGTGGCTGGCCGTAACGCTCCAGCG  
TGGCGTTCGTCGCCCTTGGTGAAGAAGGTAAGGTTTTGCCCTTCATAACGGGGCGCCGCTGGCGCTGGGGG  
TTCATAGGCGAGCACTTGTTCGCTGCTTGTTCGCCCTCGCTCAGATTGATCACCGCGGGCGGAGCTTGGCA  
TCGTTATAGAAGTAGGTAGAGAGCATGACGCTCTTGGCCACTTGTAGTTGACCGGTGCCGGCACCATCA  
GCTGGCCGCCGCTGATCTGCAGTTCGGTTCGCGAGCAGGTAGTTATCCTCCACACACTGGCGCAGATC  
CTGCCCTTCCAGCAGTTCGTTGCGACCTTTCGATCCAGCCGCGCTGCATGGCACGCTCGGTCTTGCAGTGT  
TCGGGAGAGAGCGCTGCAATCGCTTTGGGGTAGAGGGCCGCCAGTTCGTTATCAAGGGCGGCCAGTCCGG  
CATCCTTGCAGATCAGGGTTTCGACCCGACCCGGAGGCTTTGGTGCAGTCAAAGGAGGGAGTTGCCGGCGT  
GGCAGCAGAGGGGCAACACAGCAGGGTGGCAAGCAAGGTCTTGTTCATCGATAGATTCCAGCAATGAGGA  
GGGCATATCTGCCTACTACAGCACACTCTACAGGGCAATGCAGCAGGGGAGCTGAGCGCATCTGCACAG  
TGAATGGCTGCAAAGCGGAAAAACCCGACACTCCTGGCCGAATGTTCGGGCTTTTGTGCGCCGCTGATAAA  
GGGTAGGCGGGTTGCCCGTTGATCAGGCCAGCGCCAGTTGCTGACTGCGGGCGCGCCACAGCCGCTCGT  
GGAAGAAGAACACCACGGTATTGATGGCCGGTTCGATCATCGCCATCACACCACCGGTGAGCAGCTCGCC  
GCTCAGCAGGAAGGCCACCCGAAAGGCCACCGAGAAAGTGGACCACCGCGAAGCTGCTGGTCTTGGCCTGC  
AGGCTGTGATTTGGTTTGGCTTGTGCCAGCAAGGTCATGAAAAGTAGAAAGCGACCGTGTGACGGCGG  
GCTCGATCAGGGCGATCAGGCTGGCGGTGAGCAGCTCACCGGTGAGCAGGTAGGCCACGGTAAAGGCAAC  
ACCGAAGTGCAGAATGGCAAAGCTGATGGTCTTTTTCATGATGGCGGCTCCCTCTGTTGATGATGAGAGT  
ATCCGCCGAAATGAGATCAAATGAAAATATTCTCATCTATTGCCAGAATAGAGAGAACCTATCAAAGGG  
CGAGTGGCCGGTTCGCGTTTCAGCGGTTGCCAATCGCAACCAAGGCGATAAAGTACAGGTTCTTTCACACTTG  
CCCATGAAAAAGGATCTTTCATGAATATCAATGCCACTCTGCTTGGCCAGTTCATTGCGTTCGCTGATGGT  
CATCGTTCGGCCTCATCGCCTGGCGACTGGCGCGCCGCAAGAGCGAGCATCCGGCGCTGATCACCCCTTATC  
TGCTCCCTGCTCTGTCTGTTTCCGCCCTTTGGCCTGTTGGCCCTGTTGCTGGTTGCGCTGAAACAGGATC  
TGCCACCCGCTCATAGGGCGCGCAGGTTTCAGGCTGCCGCACACACCGGCCGACCAATAGCAAAGCCC  
CGTGATGGGGCTTTTTCGTTTGAAGTTCGGTTCGAGCAGAAAGCTTGGACACCCATCTTTTGGGTTTCGGGCT  
ATTCTACGCTTGTCTCAAAAAGGTGGGTGTCCAGATTTGCCACTAGGCAAGAACTATATTTATCAAGTA  
AACAATTAAGCAGTTGTTCGCAAATATAAATGACCATTCGAGCAGGCTGCTAAAGCGTCTAATTTATCCAG  
TACTTAGCAACTTTGTTCATCGAAATATCCTTGTCTTCAGATATGTAATAGCCAAATGAAAACAAAGCAT  
TAAGAAGTACAGCTGTAATATAAAAATATTGTAGAAAATTTGATGTAATGACTAGCCGAGATCAACTCAGC  
TTTATCAACAACAGCTAGAACGAACGCAAAGCTCGCTCCCGTGAAGTTCGGATAAATGATTTTGCCTAAT  
GCCATTTTAGCCTCTGTTTTATAACGCCCTTGTCTCAGCGCAATTTAAAGTGGCACGTTTTTTCGAATGCA  
AAACAAGTGCAGCTTTAAATTTGTCGATGGAGCTATTTGTTAGGCTCATGTTTTTGTAAATCACTTAAT  
ATCCAGTCGAATTTTCAAATCCTGGAAAAATAGTTTCTCTGGGTTTGTTCGTTTTTTCATTTTCATATTCGT  
CAAATAATATCTTGGCCCAATCATCCATAACAAAGGCGTGTGGCCGCTGTTGAAGATGCATATATAA  
ATATGGGAGTTTTTTACTAAAATAGATTTTTTGTGATTCGGTACTAATTGATAACTAGCTATTTATGCAA  
TCACGGTAATCCCAAATAAAAATACTCAACCATATCCTTTACTACTTTGTACGAAAAAGTAAGAGATCTTT  
CTAATTTATTATTCTTAAGATATTTCAACATGCCGATCATACCAATATGGTAGATATTCGGTTTTCTTTAG  
TAGCAAATAGCGCGACAAGAGCGTAAAAAATTCGTAGTGTGAATAAGCATGTACTGAATACTTGTGAG  
CAGAATTCGTTATCGCCTTTTTCGCTTACACATTAACCAATGGACCGAGAGAGTTATACGACATAATTG  
ACTTTTTCTATTGCACTTTCAATTTTCAGGCCACCTTTTTTTCGCGTATATAGGTCATTTCTGAATAGAGCAAG  
ACCGCTTTTCTGAAAAATCTGAATCTTTTGTTCAGGATCAGTGAGGACGTTTTTATTATTCTTACTAAACCTT  
CCTTCTCTTTGATTTATTTTCGACACTAGACCAATAAACATGCTTATTACTTAAATCTACGACTATAAGAA  
AAACAGGTAAGGAGCCCTATCCAATAGTTAATAGTTGATTTTTTATTCGCTATAAGTGAAAAAATCCC  
TTGTCATTAATTTGACTGAGTTAGCGCTCTTCACTTGTAAACGCGACTAAGTCACCAGTAACTTTTCCAT

TCTTTCCTACTAATTCCACATATAGGTCAACTCCGTAATCCCTTTCAGTTAATTCTCTTACTATCCATTC  
CTTTGGCAATACAGATGATAAGGCACTAAAAGAAATGCTTTCGGATATATGTGTGTCGATTCTTTGTGGG  
TATTCATGACTTATAAGAGCCTAACAGTGATTAGATGGAAGGCGTATTAATCCGTTAGCAGAGCATTC  
CATATAACTCCGTAACATTTTCACTGCCGCCAAGTAAAAAATCATTAAATCATAATGTTACAAACTTGT  
TCTCGTGCTGAGCGTATTTCGCTTGACTTCTCTTTTTGCGCCATCGTTACTACTGTGTGAAAAATCAGTG  
CTCAGCGCAATCTTGGAAAGTGCCGCCAAAAGCACGCCTGCGTGAGCGGGTCAGAAAATAAAATGGGGCCG  
TCACTATGTTGACTGGGTAGTCTGTTGGCAAGGTTTCGCTTATCCATTCATCTGGCATGGCTACCGCCCT  
GAATTTAGCCTCCAGTCTGCTGCGTTTAAACCAATGGGGTGTGGCTGGCATGGCTCATGGGGTGACTCCG  
ACGAGGCTCGTGTGGCAATTGGCTATAGTACCGGCCCTTGGCCAAGGGAAAAGGGCGATGCGGGGATTT  
TCTGAGCCAGATCAAGCAATTAATAAATCGCGACCGGTTGGCGCTGCGAGTGAAAGTGCAGCCACTGTG  
TTGCTGGATAAAAAGTGTGGCGGGTAAAGTGTCCGTTGGTGGGTAAGCGCTGGCAGGTAAAAACAAGAAG  
CCCCGGAACGGGCCCTTCTCTTTGGCGGCATAGCCACTATGAACGGCTGGGCTGATCGTCTGCTGCGCGG  
TTAACCGGGCGCCGGAGCGAGCTGGTGGCGGCCTACTCTTCGACCTGTTGAGCCACTCGACCTTGTATT  
GGGCGCCGGCGCCCTGTGCCAGCTTGGCGCACAGCGGTTTTGAGGAAGGCTTCAATCTGCTCGTCCAGCAT  
CCAGGGCGGACTGATGATCAGCATCCCTGAGCCGTTTATGCCCCAGTCGGCAGTCTGGCCGGCCACTTCC  
AGCTCGGCCACCAGGACGTTACCGAAGTTCTCGCGCTTGTATGGCGCGCAGCATGTGCGGGGATTTGTCCG  
CCTCTTGGCCGAGGATCGGATACCAGAGGGCGTAGATGCCGGTGGCCAGCGTTTCTGCGCCTTTTTTCAG  
GGTGTGACCCACGGCGAAGTAATCTTCTTGTAGCTCATAAGGCGGGTGCATCAGCACCAGCCCGGGCGC  
GGGGTGGTGGCAGCAGGGCGATCAGCCCCCGAAGCCGTCACGGTGGTGCACGGCGACGCGAGGGTCTGT  
AACCCATGTTGGCAGCAGGTTCTCGACCTCGTTGTGTGTCAGTCCATCAGCGCCAGCTTGTCTGCTC  
GCGGGTGGAGCGACGGGAGAGCTCCGGCGAGCCGGGGTAGTAGTGCAGTCACTGTTCTGGTTCATCTCC  
TCGATGACGCCGAGATAGGGGGCCATGGCAGACCACTGGGCCCCGCTCGTCCCACAGGCGGCCGATGCCAT  
CGGCATACTCGGCCCTTCTTCTGGGACCAGTCGCCCGCAGGTCGTAGAGACCGCCACCGGCATGGGTGTC  
CAGCACTATGAAGGGTTTTCTCTTCTTGTAGGGACTCGATGATCAGGGCCTGAACGGCGTGTTCAGC  
ACGTCGGCATGGTTGCCGGCGTGAAAGGCGTGGCGGTAGCTCAGCATATTAGATCTCTGAGGGGGCCCTG  
CTGGGCACCCAGTAACGATAGATAGTTCAATAAATTTGCGGCTGTTGCCGCGAAACAGAGAGAGGCTGCGC  
AGGGTCTGCAACAGGACGCCCTGTTGCAGCCGCTCCAGTCCAGTCTGTTGGCCAGCATCGACTGATACT  
GCAGTCTGTCAGAGTCCGCTTGGCGCTCTGGCGCAGGGCGGCCACGGGGTCCAGCCGCTCGGTCTG  
CACCAGCCCGGTTGCAGGTCGGTGGATCGACCCAGTCCGAGTTGATCGAGCCGTTGCAGCAGCAGC  
GCCAGATTGACGTTGCCCCCAGCTCCTGGACGGTGGCCAACTCTGGCTGCGCTACCATAGACTTTTGC  
CGCTCCAGTGCCAGAAGCCGATCGGGCTGGCAATTCGTGGACTGCGACCCGCTCGTGGCCATCAGCTG  
TTCGTACGCAAAGAAGGCTTGGCTCCATGGTTTCCAGCTCTTCGGAGAGGCTCATCCACTCCAGCTCAAC  
TTCTTCCAGCTGCTCCTTGGAGGGGCCCTGGGATTTGAGCAGCTCGGAGAGCTTGGTTTTAGCGCCCTCT  
TCGTAGATGGCGGGTTCAGCCAGTTGGCTCTCGATGTGCCAAGCTTGCTTGCAGCTTCTCCATGCTCG  
CTTTCAGCTTTTTCCAGCTTCTGGCGCAGGGGACGGGTTTGGTGGCGAACTCCGCCCTCGCGCCGCTTCTG  
ATCCTTGGCGGCCACTGCCGAGTTGGCAGAGACGGGGCCATCCGCCGTTTGGCGTTGGCTCTTTCTCC  
TGCTCGCCGAGCCACTTGTGGTAGTCTGTCAGATCGCCGTCGAACGGCTCGACCCGGCCACCGTGCACCA  
GATAGAAGTCATCTGTGGTGGTACGCAGCAGGTGACGGTCTGGGAGACCACTACCATGGCCCCTTCCAA  
GCCTTGCAGCGCCATGGTGGAGGGCGTGGCGCATCTCCAGGTCCAGGTGGTGGTTCGTTTCATCCAGCAGC  
AGGAGGTTTCGGCTTTTTGCCAAGTGATCAGCGCCAGCACCAGCCGCGCTTTTTTCGCCACCGGAGAAGGGGG  
CCACCTTGTGAGCGCCTTGTACCCGTGAAAACCGAAGCTGCCAGATAGTTGCGCAGCTCCTGCTCGGT  
CTTGTCCGGCGCGAGGGCGGGCCAGATGATCGAGCGGGGAATCATCGAGACGCAGGGTCTCCAGCTGATGC  
TGGGCGAAGTAGCCGATGCTCACCCCGCGCTCACTTCGAGCTTGGCGGAGAGCGGGGTTGGAGCCCG  
ACAGCATCTTGATAAAGGTGGACTTACCGGCGCCGTTGCGACCGAGCAGACCGATGCGCGAACC CGGTAC  
CAGATTGAGTTTTGATCTTCTCGAGGATCACCTTGTGCGGTAACCGGCAGAGAGTTTCTCCATGGCGATC  
AGCGGGGTCCGCAGGGCCGAGGGCTCGCGAAACTCGAAGCTGAATTCAGAGTGGCGTGGGCGGGCAGGA  
TCTTCTCCATCCGCTCCATCGCTTTCAGGCGGCTCTGGGCTGACGGGCCCTGGAGGCCCTTGTAGCGGAA  
GCGGTCCACATACGCTGATGTGGGACATTTCCCGCTGCTGCTTCTCGTACATCGACTGCTGCTGGGCC  
AAATGTTTCGGCGCGCTGCAGTTTGAAGTTCGGAGTAGCCCGGGTGTATTTCGTTGAGCTTGGCGTTCTCGA  
TATGGATGATGCGGCTGATGACCGAATCGAGGAAATCGCGGTCGTGAGAGATGAGCACCAGCGTGCCTG  
ATAGCCCTTGGCCACTTCTCTAGCCAGATCACCGCATCAAGATCCAGGTGGTTGGTTCGTTTCATCGAGC  
AGCAGCAGATCGGAGGGGAGAGCAGCGCCTGGGCGAGGTTTCAGGCGCATGCGCCAGCCACCGGAGAAGC  
TGCGCACCGGCGAGCCGAGTTGCTCGTCTGAAACCGAGGCGTGCACAGTTTCGGCGGCGCGGGCGCG  
AATGCTGTAGGCGCCGATGGTATCGAGGCGACCGTGCAGTCTGGCCACCAGCAGCCATTGTATCTCTGC  
TCGGCTTGGCGCAGCTGGGCTTCCAGCGAGCGGAACCTCTTGTGCGGTCGATCACATACTCGAGCGCGG  
AGCAGTCCAGCGCCGAGTCTCCTGCGCGACGCTGCGATCTGCCAGCCAGCGGGCAGGCTGAAGGTGCC  
GCTGTGATGGCCAGCTCGCCCCGTACCAGTGCAAAAAAGGTGGACTTGGCCACAGCCGTTTTTGGCCACC  
AGACCCACTTTGTGGCCGGGGTGAATGGTGGCGGAGGCGTTGTCCAGCAGCTTGGCGCCGCGCGGATCA  
GTTTCGATTTGACTGGCAACTATCATGGGTGGGATCTGCTTGTCTAAAAATGGAGGAGAAAAACTGGCGCGG  
ATCTTACGTGAAATGACGCTGATTTGCACTGTAGCGAAGGGCTGGCCACTGGCTGGCACTGCAAAAAAT  
GCCATAACAGAGAAACCAGTTTTGGTTACGGGAGGTTAGCATGCATATCAGGGATATTATGACGACCCGGG



TCGCCACCGTTTTCAATGGATGATCGACTCCGAGTCATCAGGGATATCTTCGAGCAGGCACACTTTTCGTCA  
CCTGCTGGTGGTGGAAAGAGGAGGAGCTGGTGGGGTTCATCTCGGATCGGGATCTGTTCCGCGCCATCAGC  
CCCTATCTCGACTCCGAAGCCGAGATGAGCCGCGATAACCGAAACCCCAACAAGCGGGCCCACCAGATCA  
TGAGTCGTGACTCGTACCATCGCTCCCCATCTCACCGTGCAGCGACGGCGTCAAGCTGATGCTGGAGAA  
GGGGGTCTCCTGCCTGCCGGTGGTGGAGAATGGCGCCCTGGTCCGCATCATCAGCTGGAAAGATTTTCTC  
AAGGCGGGCTGGAGAGTGACGCGCTGGTGGTGGTGGTGGTGGTGGTGGTGGTGGTGGTGGTGGTGGTGGT  
TAGAGAGAGGGGAGCCAAGGCTCCCTCTCTCTATATTGGCTTTGCCGACAATGCCGGTTTGCACGCCGC  
CAGCATCATCACGGCTCGGGTGTCTTGCAGACAAGACAGGAGGGGGCCGCTGCCGGAGAGGTGCCGGTGAA  
GATGAGTGGGATCTCCTGCAGGGTGCCTGGTACTGCTGGGCATGTTGATCGAGAAACGCGGGGGTGTG  
CTTGAGACGCCGCTCCAGGGTATCAACCAGCAGCGCCACCCTGGGGGCGGCCATACCCGCTGGCCAACAG  
TGTTGCAGCAGCTCCAGCAGTTGCCAGGCATCGCCGCGCAGAGCGGGGAACCTCCAGCAGCTGTAAGC  
CCGCTTGCAGGGCAGTCTGATACTGGCTGGCCTGCATCGCCTTGTGGCGCAGCTGGCGCAGTTCGCTCAG  
CCGCTGCTCTCTCGCCGTGAGGCGCTGGCCCAACTCGGCCACCAGATGGTGGAAACAGCTGGCGGGTGAGC  
GGGTGGGGCGCCACCCTGACGCGGTATTGGGTGAGCTGGGTGAGGTAGCGCTGGGCGTGGTGGGGCAAAC  
CGCAGAACTGGCTGACCGCAAAGCCGAGCAGCAGGGTGGGTGGTGGTGGTGGTGGTGGTGGTGGTGGTGGT  
GTGGGCAATCAGGATCAGCGCTCGTGAAGCGGTAATCCAGCCCAGCATCAACGCCGTCAGCAACTCA  
TATTCGTGGGGTTGAGATGGACGGTGCCTTGGAGGTGCTCCACTCCTGTTGCAGGGAGCGGATCCGGT  
TGCTGGAGGGGGCGTGCCACAACACCGCCAGACTGGCATTGAGCATGAAACTGTCGATGGCGAGCCGGAC  
GCGCTGTTGCTGAAGTGGCGCAGGGTCAAGCTGTTGGCTGCTCCAGCACCTTCTCCTCATCTTGCAGC  
ACCAGCCCAGCAACATCGCCAGCTGATGCCAGCGCGGCTGATGGGGGCGGATCTGCAGCAGCTCTCCCA  
TGGTCTCCCAGGCCGCCAGCCAGTAATGCGGATGCAGCTGGCTGGCGAGTTGCAGCTCAAGCCGGGTGGC  
CATCGAGATGCTGGCTTGATGGCGCTGCAAGTCGGTCTGGGCGCTTTGCAATTTGCCGAGCCCCAGCATG  
GCGTAGAAGAGCCCCGGCCCTTGGCCAGCTCGCCTGATATTGCTTGGCACAGAGGGGCATAGTGTGGGCGG  
CAGTGATCCGCTCGGCTGATTGCAGCAGCAGATAGCCCTTGGAGCCGATCCAGCCAGGGGGTCCAGCGAGCG  
ATTCTCCCCTTGAACAGCAGGTCTTACAGAGGGCGGTAGCCAGTTGCCACTCCCGCAGCAGAATGGGG  
GCGGCCAGCGTGCAGGGTCAAGTTGCTTAACTTACCAGCTGGCCGAGCACCGCGGTGAGCTGCTGGGTCA  
TGAAGGGGAGGGGAGATAGAGGGGAAAAGTAGAGATCCGAGGGGAGAACTCCTGCTCGCTTTGATCGGC  
ATCGAGCAGCAGCAATCGCAACCCGGGTTGCAGCAGCCGAGATAGTGCCTTTCGTGCAGCAGCCGGCCT  
CCGTCGAAGATCCTGCTGCTTGTCTGCTGACAGATGATGGCGTGAAGGCGTGTGTTGCAGCAGGGGCCA  
GCAGGCCACTGCGCTCGTGGTGGTGGTGGTGGTGGTGGTGGTGGTGGTGGTGGTGGTGGTGGTGGTGGT  
CAGTTCGGGGTGGTGGTGGTGGTGGTGGTGGTGGTGGTGGTGGTGGTGGTGGTGGTGGTGGTGGTGGT  
CCTGTGAGCAAACCATTAGGTTGATTATGGTAGACCCAAAGAGGAACATAGGCACAGCACTCGCTGAGTGA  
AAAGCTGACAATAGCCAGCAGGGTGTGGAGGGGCGCACTATGGGGTGTATTTCATCGGTTATGCCACC  
TCTCAGGGTGGCAACCTGTTATTGCCAGGGCGGGCCTGCGTCCGAAAGGGGCAGTCGCTCTGGCGGATC  
AGCCCGCACCCCTTGCCTGTTCCCCAGCCAGCTTAAATCCAGCTTGCCGAGGCGGGCCAGATGGCGCA  
GCTCGAACTCGTAGCGCTGGCAGAGGTTGTCTGAGGCAGGCTCGCCATCCCGCTGGCAGTCGGTATTG  
ATAGCGAAGGAGTGGCCCATCTTCCAGCTTGTGTCACCGGACCAGCCCTCTGGGGTGGGCTGTGGC  
GCCCCGAGTGCAGCGCGCAAACCTGAGCGGCGCATCGATCGCCTTTTGTAGTGCAGGCCATTTCATCGCCG  
CCAGCTCCTCTTCCAGCCGTTGCAACTCTCCTTCCAGTCCATTGAGCGCGGGCCCCAGCTGCTGGTGGGT  
CGTTGACGAGGCGCAGCCACCCAGCAACAGGGTGGCAAGCAGCAGGGCGGGCTCTGATGGGGGGCACGGCA  
TCTCCTTGGCAATGACGATGAAGCGTGAAGGTGAGGTGGCTGGCCCTGACTATAGCAGGGGATGCTGG  
GGGGCGTCCCCTGCAGCAGTTGCGCCAGACGGGCCAGCCCTCGCCGACCCGGGGCGTCGGTGGCGGGTTG  
GCTCAGGCTCAGGCGCACCCCTGCGGAGCGGCAAACTGACCGGCGGCGAAGTGTTCGGCTCGCCACG  
CCAACGTCAAGGGCATCGCGGCGAGCGGCAAACTGCTGGCTGCGCCAGGGTTCAGGCAGCGGTAGCCAGG  
CGTGCATGCTGCCAGGCTGCCAGCGGGCGGCGAGGCAGGTTGGCGCAGCAGTTCGCCACGGCGTTTGG  
GATCTCTCGCTGCTGCTGACCCAGCGGCATGATCTGGCGTACTGACCATTTTGCAGGCGAGCTCGATC  
AGCAGCGGGCTCACCATCCAGCTCGACAGCCGCATGGTCTGGGCGAAGGCGCTGCGCAGGGCAGGGGGCG  
TCAGCACGAAGCCCACCCGACAGCCGTCGACAGGCGATCTTGGCCAGACTGCCCAGATAGATGACCCGCTC  
CGGCGCCAGATTGACCAGAGGGATCACAGGTTGCTGGGGCAGCAGGCCGTTGACGTCATCCTCGATGATC  
AGCAGATCGTGGCGACGGGCGATGGCGACGATGGCTCCCGCCGCGCCAGACTCATGATGGCGGTGGTGG  
GGTTTTGCAGGGTGGCGTGAGGTAGAGCAGCTTGGCCCGGGGTCGCGCAGGCGGGCTCCAGCGCCTC  
GGGACGAGCCCTCCTCGTCCATCGCGAGCCCCACCACCTGATTCTTCAGCTGGCGAGCGTTACCCAGC  
ATGCCGGGGTAGCTCAGCCCTCGCACAGGATGGTCTCCCCACGCAGCCGGTCCGACGAGCGCCAGCA  
TGATGCCGTGCTGGGCGCCGTGGCTGAACAGCAGGCGATCCTCACTGCAGGCCACCCCTTGTCCGCCAG  
CCAGTTGACGAACCTGCTGGCGCTGATCCGGTCTCCCGCTCTTTGTATAGCCGAGCAGGGCGTTGAGA  
TCCCCGTCCGCCACTTCTCCAGCATGGGGCGAATGATGGCCGCCGATCCAGCTGCACCGGCAGGTTCT  
GCCACAGCTCGATGCGGTGCCCTCCTCCTGGCGGATCACCCACTCATTTGGCGGGATCCGTGTTTCGCTCC  
CTTGACCCAGGTGCCGTGGCCACCCGGGCGGCCAGCAGGCCGCGCCGCTCCGCTCGCTGTAGGCGCGG  
GTGACGGTGGCGACGGTGGACCCAGACGATCCGCCAGGGAGCGGTGGGTAGGCAATCGGGTCTGCGGTG  
GCAGCTCGCCATTGCGATCCCCTGTTGATCGCTTTGACCAGCTTGGAGTAGAGGGGGCCATCGAAGGC  
TGCAAGGTGGGTGTCCAGATTGTCATGGTGAACAATAAATCCATTGATCAAAATTTGTTGTCATATAGC

GTGAATTTCAACCTGATAACAACCAAATAGCACACATTGTATCGATAACAATGTGGCAAGCAAGGAGTCAC  
AATATGACGATGGAGTGGTATGTCACCCTGTTTCGGTTTTGCCGTAACCTGCGGTACGCCGGGGCCCA  
ACAACCTGATGCTGACGGCCTCCGGCGCCAACCTTCGGGGTTCGCTCGCACCTGCCACATCTGCTCGGGGT  
CGGATTGGGGCAGCCGGTGTGCAACTGGTGTGGCGCTGGGGCTCTATCCGCTGTTTCGAGCGCTGGCCC  
TTGCTGCGGCTCGGTTTTGCAGATCTTCGGTAGCCTCTATCTGCTCTGGCTGGCGTGGCGTATCGCGGTGG  
CCGGGGCGCCGGGGGATCCGGCCCCGAGGGCCCGTCCGCTGACCATGCTGGAGGGGCTGGGCTTTCAGTT  
CCTCAATCCCAAGGCGTGGATGATGGGGATCTCCGCCATCAGTCTGTTTCAGCCTGCCCCGGCGCCAGTTAC  
TGGTCGAGTCAGCTGGCAGTGTGGTTCATGTTTTCGCTGGTGGCCCTGCCGGTCTGCTTTTGTCTGGGTAC  
TGTTTCGGCCATCAGCTGAGCAACTGGATCAGCTCGGATCGGGGCTGGCGGCGGCTCAACGGCTCCCTCGG  
TCTGCTGACGGCGCTCTGCGTGGTGTGCTCTGGTATTGAGCCGTGCTGCGCTGATGGGGGAGGTGGCCG  
AGAAAGAGGCATTTCTGACTTGTGCTCGCCACGGGGTGGCTCTGCATATTAGAAGGCTTTCCCCATAACGGG  
CGCGTTGCATCGACAAGAGGTTGAGATGGATCTGAACCTGGTACTGCCCCGGCGGGGTTTTGCCTTGGTT  
ACCTGCGGCACGCCGGGGCCCAACAATATGTTGCTCACCAGCGCCGGGGCGGCGCAGGGTTTTTCGCCGCA  
CGATTCCCCTGCTGGTGGGGGTAGTGGGGGGGATCAATCTGATGATCCTCGCTACCAGCGCTGGGGCTTGG  
TGTGGTGTTCGAGAAGGTGCCGCTGCTGCACGATGGCCTCAAGCTTATCGGTTCCGGCTATCTGCTCTGG  
CTGGCGTGAAGGTGGCGACCGCCAGCGCCCGGCCGAGGGTAACCGGCCGCTTATTTCCCGCTCATCAGG  
GGGCCATGCTGCAACTGCTCAATCCCAAGGCATGGATGATGGCGCTCTCCGCCATCAGCGTTTTACCCT  
GGCGGGGAGGCTTACTGGCCCTCCGCGCTCTGGGTGTTGGTGACCTTCTTTATTACCAGCCCTCTATAACC  
GGGGCGTTCTGGGTGCTTTTTGGTGGCCAGGTGCGGCAAAATCATTCGCACCGCCGGGGCTGGCGGCGTT  
TCAATCTTGGCATGGGGCTGGCGACGGCCCGCTGTGTCGGGATGATCTGGATTTAGTCCGGGGTTGACCC  
GGGCCTTTACCAGCTGTCTTGTGGCCCTGCGGGGACTTTTTATCTCGCCCCCGTACCTTGCCCTGCAAG  
GTGGCGTGGTTCTGCCCTCCCTTGGGATGAAAGGAGTTTCATATGAAATGTATCGGTTCTGCTGGGTGGCAT  
GAGCTGGGAGTCCACCGTCACTTACTATCAGGCGCTCAATCGCGGGGTGCGGGCGCAGCTTGGCGGTTTTG  
CACTCGGCGCGGGTGTGCTCAATAGCGTGCAGTTTTCGGGATTCGAGCGGTTGCAGCATGCCGGTGACT  
GGCCCCGCTACCAGCCCGCTGCTGGCGGCGGAGGCGCGCAAGTTGCAGGATGGCGGCGCCGATTTCTTGT  
GATCGGCACCAACACCATGCACAAGGTGGCCCCGAGATTTGAGGCGGCCATCGATATCCCGCTGCTCCAT  
ATCGCCGATGCCACCGCGCCAAATTCAGGCGGACGGGATAACCCGGGTGCGCCTGCTCGGCACCCGCT  
TCACCATGGAGCAGGATTTTTACAAGGGGCGCTTGCAGGAGCGCTTCGGGTTGGCGGTGCTGGTACCCGA  
TGAGGCCGGGGCGGAGCGGTACACAGGATCATATGACGAGCTCTGTCTGGGGGAGATCCGCGAATCG  
TCGCGGGCCGAGTATCTGGCCATTATCGAGGAACCTGGCGGCCGCGGGTGCCGAGGCGGTGATCCTCGGCT  
GTACCGAGATTGCCCTGCTGGTGGGGGATGCCCGGGCGGTGGTGCCGCTCTACGACACCACTGCCATCCA  
TGCCGAAGCGGCGGTGCGCTGGCACTGGCAGTTGATTAATAAACTGGTCAGATCTCACTATTCATGCTT  
GTCTCATAACCCCTTGCATAAAAAGCGTGTAAAATTCGCGCCTGAATTTTCCCGGGCAACGCGGGTTGGC  
TGCGGTTTTCTAGCATGCAAGGCTGACATTTGTGACTGAAGTAGATAGATTCGCGGATATTCGCCCTACC  
GCGATGAAGAAGTGCCGCGAGCCATCGAACGGCTGATCCAGGATGATGAATTTATCGGCGCCATCGCCAA  
GTATCGTTTTCGGTTCCCTGATGAGCTGGCTGGGTGGGCCATCCGCCGATGATCCGCTGTTCTTGCGC  
CGCAAATGGTCAAAGTGACCACTGTGCATCAGGTCCAGATGGGGGTTACCTGGTACATGTCCCGCATGA  
TCGCCACCTCCACCAAGGGGGTACCTTCTCCGGGATCGAGCATCTGAAGAAAGAGCAGGGCTATCTGTT  
TGTCTCCAACCACAGAGACATCGCCATGGATCCGGCCTTCGTCAACTGGGGGCTGCACACCCACGTTTT  
GATACCGTGCGCATTGCCATCGGTGACAACCTGCTGCGAAAACCTGCGCTACCAGCTGATGAAGCTCA  
ACAAGAGCTTTATCGTCAAACGCTCGGCCAAGGGGCCGCGGGAGATGATGAAGGCGCTCGGCGAGCTGTC  
TGCCTATATTGGCAACTCGGTTACGAAGGTCACTCCATCTGGATCGCCAGAAGGAAGGGCGCGCCAAG  
AATGGCGATGACAAGACAGATCCCGCCATCCTCAAGATGTTCTACGTCGACGGCAAGAAGCAGAATATCG  
ACTTCGTCGACTACATGCGCAGCCTCAATATCGTGCCGGTCAGCATCAGCTACGAGCTGGACCCGACCGA  
CAAGGCGAAGGCGCGGAGCTCTACGAGAAGTCGGTCAACGGCAGCTATGAGAAGGGCGAGTTTCGAGGAT  
ATCGAGAGTATCGTCGGGTATCGTCGGCATGAAGGGGCGGTACATGTCTCCTTCGGCGCGCCGATCA  
CCGAGGGCTTCAGCGATCCGGACGAACCTGGCCGCGCTGATCGACAAGGCGATCTGGAGCAGCTACCACCT  
CTTCCCCAGCAACTATCTGGCGGCCGATGTTTTCCGGCAAGGCCAATACCATCGAACAGGCGGCCTTCCCTG  
ACCCGTCAGTCAGAGGTGCCGGAAGAGCACAAGGCGATCTGGCGAGCCATGTACGCCAAACCGGTGGAAA  
ACGCCAAAAAGGCTTGAATGAAACCGGTTGTTAAACGGTTTTGCGAAAAAAACGGGGCGCTGATGCGCCCC  
TTTTTTCGCTCTGGTCAAAGTCGAGGGGAAAGGGTGGTGAATAATATGGTTTTACGCTGGTACGATCACTA  
TGAAAATGGGATTATGTCTCTTGGCAAGGTGCTGACGAGTGTGTAACAGTGCCCATATAGCTGAACATGA  
GCAAAAGCTCTAAACCGGTTTTGCACGGATTGCAGACGGCATTATGAAAGGACCTGTCACAGGTCCTTTTT  
CATTGGCTGGCAAAGATGCCGCCAGATATACTAACAGGAAACAGACGCCATGATCACCAGGTAGCCTGA  
ACACCCTGCAGCGGACGCCGCTGCCCGCCCCGCTGGCCCGCATTATGGCTGAGGTGGTGAAGAGCGTGGC  
GCACTGGGGTGCAGCTCCGCTCGGCAAGACCGAGATCGATGGCTCAATCTGTTCTGTCTGGTGGAGCGAA  
GATCTGACCGAGCCAGCCGCGGATCGCCGTGGCGAATTCATCAGCAGTATCTCGATATCCAGTTGCTGC  
TGCGCGGTGAAGAGTGGATAGGTGTGGGCCCCACGACTACGTGAGCGACGGCGCCGACCATCCCCATCC  
CGACCTCTGGTTTTGTGATGACGAGCAGACCAGCTACCTGGCGCTGCAACCGGGCGATTTCCGCCATCTTC  
TGGCCGGGGCAGCTGCACCGCCGCTCTGTACCTTCAACCAGCCCGCAAGGTGAAGAAGCTGGTGGTCA  
AGGTACACAAGGATCTGCTGGCTATCGCCTGAGCATTCCATTTAGGCGAGCCCTGCGCAGCTGATGCGT

TGAGACTCGCAAGCATTGAAACCAGTGATACGCACCACAAGTTGCGATGACTCTTTCAAGAGCAAGAATT  
GAAAAATTGGACGCACCCTCCTGCGACCATAAGCCCCCGCAGGGGAATCCCATCCTCTTTTGGATGACA  
CGACACTGTGCGCATAAAGCCGAAGCACAGGAAGATGTAGAAAATGAGCAAGTTGGTATTGATCCTTAAC  
TGCGGTAGCTCTTCCCTGAAATTTGCCGTAATGGACGCCGAAACAGGTGAGGACATGCTGTCCGGCCTGG  
CCGAATGCTTCAATCTGGATGATGCACGTATCAAATGGAACTCCACGGGGTCAAGGGCGAAGCCATGCT  
GGGAGCGGGTGCCTGCTCACCAGGAGGCCCTCGACCATATCGTGGGTACATCCTGCCGCAGGATCCGACT  
CTTGCCGAGCAACTGGTGGCCATCGGTACCGAATCGTACACGGTGGCGAGCAGTTCTCCCGCTCCGTGC  
GCATTGATGACGGCGTGATCGCCGGTATCGAAGCCGCCATTCGTTCCGCCCGCTGCACAACCCGGCGCA  
CCTCATCGGTATTTCGCGCCGCGCTGAAAGTGTTCGCCAGCTGTCCGAGAAGAACGTGGCCGTCTTCGAC  
ACCGCCTTCCACCAGACCCTGCCGCAAGAGGCCACCTCTATGCGCTGCCGACAAGCTCTACCAGCAAC  
ACGGCATCCGTCGTTACGGTGGCCACGGTACTTCTCACCGTACATCGCGGAAGAAGCCGCGAAAGAGCT  
GGGCAAGCCGTTGAATGAGCTGAACATCATCAACTGCCACCTGGGTAACGGTGCCTCTGTCTGCGCCATC  
AAGAACGGCGAATCCGTAGACACCTCCATGGGTCTGACTCCGCTGGAAGGTCTGGCGATGGGAACCCGCT  
CCGGTGATATCGATCCGGCCGTGGTCTTCTTCATGCATGACCAGCTCGGTTACAGCGTTGAGCAGATCAA  
CCACACCCTGACCCGTGAGTCCGGTCTGCTGGGGCTGACCGAAGCGAGCAGCGACTGCCGCTACGTCACC  
ACCAACTACGCCACCGACGCCGGTGCCAAGCGTGCCTGGATGTCTTCACCTACCGTGTGGCCAAGTATG  
TCGGCGCCTATGCCGCTGCGATGGACGGTCTGCTGGACGCCGTGGTCTTCACCGCGGTATCGGTGAGAA  
CGCCGCCATGGTGCAGGATGGTGTGAACCGTCTGGCCCTGTTCCGGCTTCAAGGTGGACAAAGAGGCC  
AACAACGCCGAGTACTGGGTGGCGAAGGTGCGATCACCACCGCCGACAGCCGTTGCGCCATGGTGTATCC  
CGACCAACGAAGAGCTGGTTCATCGCCCGGATGCCCTGAGCCTGGTCTGCTAAGTCAGCCTCGCTTTGAA  
ACAACGCCCGCCTGTGCCGGGCGTGTGCAATTTCTGGCGTTCACCGATTTGACATGGGGGAGGGGCGCGG  
TACCCTGACCACCACTGTTTTTGCAGCCAGCGGGCTGCCCGGTTCCGGGAGAGAGCAATGAAAGAGGCGTT  
TTTTAACTGGTTGTTCGGGCTTGGGGTGGATGTGACCAGCCTGATGGCGCTGGTGATCGCGCTGGGCTTT  
ATCGTCATCACCTCGTTGCTGCTGCACATGGCGCTGCACCGAGTGTGCTGGTCCGGCTGGTGGGGATCC  
TCGGCAAGGCCAAGCAGGTATGGCTGCCGCCCAGTTGCAACAGCGCCTCTTCAACCGGCTCGCCTTTGT  
GCTGCAGGGGGCCGTGCTGCTCGGTACGGCGGAGATCTGGCTGCCCGCCAATCGGATAGCCTCAAGCTT  
ATCGAGATGGTGGCCAGCTCTGGATTTTGTGCTGTTCCTGCTGCTGGCCTTCTTTGCTCTGCTCGACTGCC  
TTTTATCGGTGAGCCCTTACACCCGCTCTTGGTCGGGATTTGCCCTGCGCGGCATCTTCCAGGGGCAAA  
GCTGGTAGGCAGCATTCTGGTGGGCATCCTGATGATCGCCCTGCTGCTCGGCAAGTCCCGCTGTTCCTG  
TTCAGCGGTCTGGGTGCCATGACCGCGGTGCTGATGCTGGTATTCAAGGACCCCATCCTCGGGCTGGTGG  
CGGGGATCCAGCTCTCCGCCAACCGGATGCTGAGCGTCCGTGACTGGCTGCAGATGGACAAGTACGGCGC  
CGATGGCGAAGTGACCGATATCGGCCCTCACCACGGTCAAGGTGTGCAACTGGGACAAGACCATCACCACC  
ATTTCCACCTATGCCCTGATCTCCGACTCTTTCAAGAACTGGCAGGGGATGACCGAGTCCGGCGGGCCGCC  
GCATCAAGCGCAGCGTCAATATCGACATGACCAGTGTGCGCTTTCTGACGGCCGATGAGCAGTTGCAGCT  
CAAGCAGGCGCAGCTGCTGGCACCTATCTCAGTCGCAAGGAGCAGGAGCTGAGCGCTTACAACCAGCAG  
CTGAGCGATGCCCTGAGCTGCCCCATCAACGGTCTGTCACCTCACCACCTCGGCACCCTGCGCGCCTATC  
TGGATGCCTACCTGCGCGCCACCCCGGCATTCGCAAGGACATGACCCTGATGGTGCAGCAGCTGGCACC  
CACGTCAGACGGTCTGCCGCTGGAAATTTACTGCTTCACCGCGACGACCGCATGGGCCGATTACGAAGGG  
ATCCAGGCCGATATTTGCGACCATATCTTCGCCATCATTGAGCAATTTCACTGCGGTTGCATCAATCTC  
CTACAGGTTACGACATGCGTACCTGGCAACGGGGATAAACAGGGAAAACCGGACGGGTCCGGGGACGCGGAA  
AAAACCGCATATTAATCATCGACCCGTGCCCACTTGTGAGTTGAAAATTTGCCGTGCAGAGGAGAAAAATG  
ACGGCCTTCTCTTCGCGCCCCTGATCCCCTCTTGATCAGCTGCCAGCCAGAGACGTCACCTCAAGTCAT  
CATCATGGGAAAGTTATGAAGCTCCTTCGCAATAGTGTGGCAACACTCTGCTACAGCCTGCTGCTGACCG  
CTGCGCCGGTTTTTCGCTGTTGAATATGCTCTGCCTGCGGCCAACAGCCGTCTGGTAGGGGAAAAATCTGGA  
ATACGTGGTTCCGGCCGAAGAGAACGGCCAGCCGCTGGAGGCCATTGCGGCCAAATTCAGCTGGGGCTC  
ACCAACATGACCGAAGCCAACCCCGATCGGATCCCCCTGCTGGTACAGACCGGCGAGAAGCTGGTGTATCC  
CCCAGCAACTGATCCTGCCGGATGCACCCCGTGAAGGGATCGTGTGCTGAACTGGCCGAGATGCGGCTCTA  
CTACTACCCCAAGGGTAAAAAAGTGGTGGAAAGTGTGCCCATCGGCATCGGCCAGCTCGGCACCGATAACC  
CCGAAAAACTGGGTGACCAGCGTGCAGCGCAAGAAAAGCGGGCCCCGACCTGGACCCCGACCGCAAGATGC  
ATGCCAATATGCCGCCCCTGGCGAGAGCCTGCCTGCGGTATGGCCGGCCGGCCCGGACAATCCCATGGG  
TCTGTTTGCCTCTACATCGGCAAGATGTACGCCATCCACGGTACCAATGCCAACTTCGGTATCGGCCTG  
CGGGTGAGCCACGGCTGTGTGCGCCTGCGCAACGATGACATCGCCTATCTGTTCAAGCAGGTACCGGTGC  
GTAATCGCGTCCAGTTCGTCAACCAGCCGATCAAGGCCCTCTCTCGAGCCCAACGGTGCCTGCTATCTGGA  
AGTGCATCAGCCGCTGTGCGCAGCGAAGAGGAGTTCAACTCCAAGCTGCCGGCACCGCTGCCGATGACT  
CCGGCGGTGACCCGCTTCAATTGCCACGCCGACAGCGACTCCCAACTGGTGAAGCAGGCGCTGGAGCAGC  
GCAACGGCATGCCGATGGCGATCAACCGCTAAGGGCAAATCCCCGTACGACAAAGGGCGAACAGCATGC  
TGTTCCGCCCTTTGTGTTTCTGCTGTGCTGACTCAGCTTCGCGAGCAGATTTGCCTGCAGCTCGCTGCCGAG  
CTGATCGAGCAGCTGATAGCGCGCCTTGTAGCTGGCCCCGCTTGGGGGAGGGGATCTCCTCCAGCGTCTTG  
CGGGGCACTTCCAGCGGCAGGCTCATCCAGAGTTCACTTGCACGCAGCCCTGATGCTCCTGCCACAAGC  
CGTCAGGTCGAACCTGACCCGATCGGCAGTGCCTTTGCTGCTCTGATAGACGTGGCTTTGGGTGCGGAT  
CCCCAGCAGGCTTTTGCACGCCAACCCCGGGCCAGCTCGGCGGCCATATAGACCAGCAGGGACATGGGG

CGCAGCCCCGCCACGCCTTGGTGACCAGCTTGATCTCCTCGCTCTGCCCTTGCCGCCCTGCAGCGAAC  
AGATCTCGAGGGTTCGGGTCGGGCGGGGCGCAGATTGAGGGCCATGTAATATAGCGCCGCGTCACCCAG  
CTTGAGGGTTCAGGCTCATCTCCCCCTCTTTGCCCATGTGGGTTTGGTAATCCAGTTGCAGGGTGAAGGGG  
GCCGTACAGCTTGTGCTCTGCCACTGGGCCAGCAGCAGGCCGCGCCGCTGTAGATTGCCAGTTGTTGCC  
CCTTGGGCAGCTGACGTGCCAATTGCTGGTAGTGGCCGCTGATAAGCCCCGGCTCGCAGGCGCTTGCAGGAG  
CCCCTTGTGGCGATAGGGGTGGATCGGCTTTTCCAGAAATATCGGGGAAGCGGCTGATCGCCTGCGCCAGC  
AGCGGTTGCTCCTGCTGCTGGCGATAGAGGGCGCGGGCGCCGGGATTGAGCCAGAGACGCCCCACATACT  
TGGCCCGTTCGGATGAGATGACCCGACTCCTCCACCGGATGAAGGCGGCGGGCGAGGGTGCAGGTGTGA  
CAGATGAGATGACATGGTGGCGACCTCTGACTGGTGAATGAGACAGGGCGGGGAGTGTAGGAGCGGGGC  
GCTGGCTTGTAAAAAATGGATAGTAACAAAAATGTAAAAACATAACGCTCAGTAGCGGCTGGCGCTGCGAG  
ATGACCGTACGGCCACGGCAGGAAATCTGGCGCCATCCTCTTGATGCGGCAGATGATTTGATGCGGCAAA  
GGTTTTTATTGTGTTTTATGTTTTGTTAAAGTGGTTGAGCTGGCGCGAACGGCTGATTAAGCTAGGCCGG  
TTTTTTAGGGATGAGCCCGTACCAGAGCGGGCAGAAAAATGACACAAAACGGAGTTTTGTCATGACAGTTA  
GCACACCCATGTTAATCACCTTCTGGTGTATATCCTCGGGATGGTGTGATCGGCTTTCGTGCGCTATCG  
CGCCACCCGCAACTTTGATGACTACATTCTGGGCGGCCCGGATGGGGAGCTGGGTACAGCTCTCTCT  
GCCGGCGCCTCCGACATGAGCGGCTGGCTGCTGATGGGGCTGCCCGCGCCGCTTTCGTGAGTGGCATCT  
CCGAGAGCTGGATCGCCATCGGTCTGGTTCATCGGTGCTACCTCAACTGGCGCTGGGTAGCGGGTTCGCT  
GCGGGTACATAACGAGAAGAACCGCAACGCCCTGACCTGCCGACTATTTACCTATCGCTTTGAAGAT  
CACAGCAAGGTGCTGCGCATTCTCTGCGCTGGTGTATCCTGCTGTTCTTACCATCTATTGCGCCTCCG  
GCGTGGTGGCCGGTGGCCGCTGTTTCGAGAGCACCTTCGGCATGGATTACAACACCGCCCTCTGGGTCCG  
TGCCGCCGCGACTATCACCTACACTTCTTCGGCGGCTTCTTCGGGTGAGCTGGACCGACACTGTGCAG  
GCGACCCCTGATGATCTTCGCCCTGATCCTGACCCCGGCTTTCGTGATCATCGCCGTGGCGGGGTGGACA  
GCGCCATGATCGAGGTGGCCGCAAGAGCGCTACCAACCTCGACATGTTCAAGAATCTGGATGTGATCGC  
CATTGTCTCGCTGATGGCCTGGGGCCTTGGCTACTTCGGCCAACCACACATTTCTGGCCCGTTTCATGGCG  
GCGGACTCCCACCACTCCATGGCCAATGCCCGCGAATCAGCATGACCTGGATGGTGTTCGTCTGGCTG  
GCGCGGTGGCCATCGGCTTCTTCGGGCTGGCCTACTTCGCCCGCTTCCCGAAGTGGCGGCTGGAGTGAC  
CGGCAACCCGGAGCGGGCTTTTATCGAGCTCTCAAGATCCTGTTCAACCCCTGGATCGCCGGGGTGTCT  
CTCTACCCGCACTTCGGCGGTTGATGAGCATTAAGTGCAGCTGTTGGTCTGCTCCAGCGCCATCA  
CAGAGGATCTCTACAAGCCCTTCTGCGCAAGAACCGCTCCAGCGTGGTGTGGTGGGGCGCCCT  
GATGGTGTGCTGATCGCGGTGATTGCCATCGCCGTCGCCATGAATCCGGAAAACCGGGTGTGGGGCTG  
GTGAGCTACGCTGGGCCGGTTTTCGGTGCCGCTTTGGTCCCGTGGTGTGCTCTCTGTGCTCTGGCCGC  
GAATGACCCGCAACGGCGCGCTGGCCGGCATGCTGGTGGTGGCCATCACCGTTCATCGTCTGGAAGCAGTT  
CGGCTGGCTGGGGCTGTATGAGATCATTCCGGGCTTCTGTTGCGCACTGCTGGCCATCGTGGTGGGCAGT  
CTGCTGGGCGAAGCGCCCTCAAAAGCGATGCTGGAGCGTTTCCGCGATGCCGAGGAGGTACAACACTC  
CGGCCGAGAGCGCGGGAGAGCCAGTCTGGTGAACCTGATCCCCCTTACCCTTTCTGATTGAGAGCCCCG  
CCCCCGGACAAGGAGCGCCCTGGTTGGCCATCCTTGACCCGTTTGGCGGGGCTTTGTGCTATCTGATTC  
ACTCTTGGGCACTTTTTTATGTTTCGGCCGGTGGCTCCCGGGTGTGCTTCTTTTGTCTTGGCACCGAA  
TATGGGACACTAGGCCGCTGAAGGAGACCTAGTGCATGCGGCTATTCACCCCTGATCCTGATCCTCCTGC  
TGGGGGGACTGCAATATGACCTCTGGCTGGGGAAGAACGGGCTATCCGATTATCAGAACCCTGTGAGGGC  
CATCTCGCAGCAACAGCGGGACAACCAGACTCTCAAGGATCGTAACGACCTCATTTACCAGGAGATAGAT  
GATCTCACCTCTGGCCTCGAGGCCATCGAGGAGTTGTGCGCAACGATCTGGGTTACATCAAGCAGGGGG  
AGACCTTCTACCGGATCATCCCCAAAGAGAAAAGACAAAAGAGACAGCGCCGGACGATGAGCCCTACGATGA  
CTGATGCCAGCCGAGTATCCGGCCTGACGGCGATCGTCCCTGCCCGGATCGGCAGCCGGATGGGGGC  
CGATTGCCCAAGCAGTACCTGCAACTGGCGGGTAAAACCATTTCTCGAACATACCCTGGAGCGGCTGCTC  
TCCCACCCGGCCATCGCCAGGTGATCGTGGCGCTGGCGCCCATGATCGCTGGTTCGAGGCCCTGCCCG  
TGGCGCCGACCCCGCATTGTGCGGGTGCATGGAGCGCCGAGCGCGCTTTTCCGTCTCAATGGCCT  
CCATGTGGCGCAAGGGGAGTGGGTGCTGGTGCACGATGCGGCCCCGTCCTGTCTGACTCACGGCGATCTC  
GATGCGCTGATTGCCGCGCCATGAACTGCGGCGGTGCCATTCTCGGCAGTCGGGTGCGCGATACCATGA  
AACGCTCCGATGGGGAGGGCAATATCATCGCCACCGTCGAGCGCGAGCAGCTCTGGCATGCCCTGACGCC  
GCAGATGTTCCCGACCCGTGCCCTGAAACGGGCGCTCGAAGAGGGGTTGCTGCTGGGCGCCACCATCACC  
GACGAGGCTCCGCCATGGAGCGGGCCGGATTTCGCGGTGCGGATGGTGGAGGGGCGCGCCGACAATATCA  
AAGTGACCCGCGCAAGACTTGTGCTGGCGGGCTGTTTTTAAGCCAGCAGGCATAAGCCCCCTCAGTC  
AGTACAGACCGTTTCAGAGCAGAGTGTCTCGAACAAAACAGGCCCGAACAAAGGAGTTAGCATGCTCCGATT  
GGAGATGGTGTGGACGTACACAAAATTGATGGGGTTGGTTTTCAGCATGTTGGGAGGTTGCCGCTGATGAT  
TCGCATTGGTTCATGGTTTTTATGTTCCATAAAATTTGGTGGTGTGGCCCTGCATGCTGGGTGGCGTGCCG  
GTTCCCTACGAGCAGGGGCTGGTTGCTCACTCCGACGGCGATGTGGTGTGACGCGGTAAGCGATGCC  
TGCTGGGGGCTATCGGTGCCGGTGCATCGGCTCGCCACTTCCCCGATACCCTGCCGAGTTCAAGGGGAT  
CGACAGTGCATTCTGCTGCGTGTGCTTTGCCCGGGTACAGAAGGCGGGTTATGCCATCGGCAACCTG  
GATGTGACCATCATCGCTCAGGCCCCCAAAATGGCCCCCATATCGACGCCATGTGCGCCGTGCTGGCCG  
CCGATCTGCAATGTGATTTGAACCGGGTGAACGTCAAGGCGACCACCACCGAACAGCTTGGGTTTACGGG  
GCGCAAGGAAGGGATCGCCACCGAAGCCGTCGTCTACTGGTGAACAATAATGCTGGAACAACCTGCCT

ATCTGCACGGGGCGCCACCGCCCGGGTATCCTCAAGGCCGAGGCCGCCACTTCGTGGTCAATGAAGA  
TCTCGGCTTCGAGCCCTGCGGGGAAGGGGAGCATATCTTCGTCCGTGTGCGCAAACCGGCGAGAACC  
GCCTGGGTGGCGGGTCTGCTGGCCGATGCGGCCGGGTCAATCGCAATGCGGTGACCTGGGCGGGCTGA  
AAGATCGCCACGCGGTGACCGAGCAGTGGTTCGGCATTCACTGCCGGGCAAGGCCGAGCCGACTTGT  
GGTCATCGAGAGCGACAGCATCCAGATCCTGCAAGCCAGGCGTCACAACCGCAAATTCGGGGTTCGGCTAC  
CTCAAGGGCAACCACTTCACCCTGCGGCTCACCAGGCTGGAACAGGCCGACGGGGTGGAAAGCGCGCTGC  
AGGCCATCGCCACTCAGGGCGTGCCTAATTACTATGGTGTGAGCAGCGTTTTGGCCGCGATGGCAACAACCT  
GGAAGCGGCCAAGGCGATGTTTTGCCGGCAAGCGGATCAAGGATCGCAACAAGCGTTCCTCTACCTCTCT  
GCCGCCCCGAGCATGCTGTTCAACGCCATTGTGAGCGCCCGTATCGAGCAGGGGCTGGCTCATCAGCTGC  
TGGCCGGTATTGCGTGTCTCAAGGGCAGCCACTCCATCTTCAGCGAAGAGAGCGTGACCCCCGAGCT  
GGAAGCGCGTCTTGCCCTCTGCGACGTGCAGCTCACCGCCCCAGTGGGGCCGTGGCCGTCTGGCCAGT  
CAGGGCGCCGCTGCCGAGTTCGAACAGGGCGTGTGCCCCCTTACAGCGATTGGTGTGACGGGCTGGAGA  
AAGCCGGGCTGGATCAGGACAGGCCCCCCCTGCTGCTCAAGCCGGAGCAGATGAGCTGGCAGCTGGACGG  
CGAGGCGCTGACCCTCTCCTTCTTCTGCGGGCGGGCGGTTTTGCCACCAGCGTGGTGGCGAGTTAATG  
CAGGCCGAAGAGGCCGATCACGGTTTTAGGAATCAGACCGATGCGAATTTCTGGTCAGTAATGATGATGGT  
GTGCATGCCGAGGGGATTCGTGCCCTCAGCGAGGCGCTGCGCGCTGCCGCGAGGTCATTGTGGTGGCGC  
CGGATCGCAACCGCAGCGGCGGAGTCACTCCCTGACGCTGGAAGTACCCTGCGGGTTACCCGCATCGC  
AGAAAACGGCTTTAATGGGTGCGAGAGCTATGCGGTGAAGGGGACGCCACCAGCTGCGTGCATCTGGCG  
GTCAACGAGCTGGTGCCTCTGAACCCGACATGGTGGTGGCCGGCATCAACCACGGTGCCAACCTGGGGG  
ATGATGTCTACTCGGGCACGGTGCAGCGGCCACCAGGGGCGCCATCTTGGCTACCCCTCCATCGC  
CATCTCGCTGGTAGGCAAGACCCACTTCGCCACGGCGGCCACTATGCCGGCCCTGCTGGTGAAGGGTTG  
ATGAAGCACCCCTGCCTGCCGATCAGATCCTCAACGTCAACGTGCCGGACTTGCCCCCTCGAGCAGATCA  
AGGGGATCAAGACCACCCGCTTGGCAATCGCCACCGGGCGGAGTCGGTGATCTGCACCAGGATCCCCG  
TGGCCAGCCCATCTACTGGATCGGCCCCCGGTAGCCAGCAGGATGCCGGTGACGGTACCATTGTTGCT  
GCCATCGAGCAGGGCTATGTCTCGATTACCCCTGACCATCGATATGACTGCCTATGACAGTCTCGCCG  
GTCTGGGGGCTGGTTAGATCTGCAGGGATGAGGGTGGTGTGATAGTACAGCGCCTGTTAAATCAGCTCA  
TTGCCCAGGATATTTCGCGATTTTTCGCGTGTGGCGACCATCGCGAAAGTGCCGCGCCAGCTGTTTGTGGA  
CGAGGCCATGGCGCACAGGCGTGGGACAACCGCCCTGCCATTGGCCACGGCCAGCACCATTTCCGAG  
CCCTATATGGTGGCGCAATGACCGAGTTGCTGATGCAAAAACAATCCGGCCCATGTGCTGGAGATTGGCA  
CTGGCTCGGGCTACCAGACGGCGATCCTCGCCCATCTGGTGGAGCATGTGTATACCCTTGAGCGGATCAA  
GTCGCTGCAGTTCCAGGCCCGCGCCGACTGCGCCAGCTCGATCTGCACAATGTCTCGGCCAAGCACGGC  
AACGGCTGGCTGGGGTGGCCCAACAAGGGGCTTATGATGCCATTCTGGTGACGGCCGCGGCGAGCGAGA  
TCCCCGACGGCGCTCACCGATCAGCTGGCCGAAGGGGGTTCGACTGGTGTGCCCCGTGGGTGACAGCCAGCA  
GACCCTGCAACTGATCGAACGATCCGGATCCAGCTGACCAGCCGATTTCTGGAGCCGGTACGTTTTGTT  
CCCCTGATTGACGGAGATGTTGAGTGAAGTTGTTTTCCGTTTGTACGTACTGGTGATGCAGTGGGCTCG  
CCACAAGCATGCCCCCTGGTATCTCTCCATCACCGCTTTCATCGAGTCGGTATTCTGGCCGATCCCGGTG  
GACGTGATGCTGGCACCGATGGCGCTCGCTAAGCCCCACAAGGCGTGGCACTACGCCACGCTGGCTACCG  
TCTTCTCTGTGCTGGGCGCCCTGTTTGGCTATGCCCTTGGCTATGCCCTGTGGGATCCGGTCTGTGCTGCC  
ACTGGTGGAGTCTGTGGGCTATCAGGACAAGATCGAGATTGCTCGCAACTGGTTTGGAGCAGTGGGGGATC  
TGGGTCATTTTTCAATGCCAGCTTACCCCTATCCCTACAAGGTGTTTACCCTGACGGCAGGGTTGTTGC  
AAATGGCTCTGCTGCCCTTCATCATCACCTCCCTCATCGGTGCTGGCATGCGCTTTTTCTGGTTGCGGG  
CCTGATGCGCTGGGGTGGCGAGAAGATGGAACGCAAACTGATGCACTACGTAGATGTGCTCGGTTGGCTC  
TGTATTGGTCTGGCCGTGGTGGCTATTTCTGGTTTAGTCGTTAAGGATCCATTATGCGTTCGCGTATTT  
GGCAAGGAAGCAGTGTGCGTGGTGTGTCATGGCTGCTGCTGCTCCTCCAGTAAAAATGCAGCTCC  
GGTAGATGGTGTGATGAGGGGAGTTTGTCTCGACCATTCGGCTCGCCAAAGCGGTGCCAGGTCAGC  
GCCCCATTTCAGGGCGGTAGCTATGTGGTGAAGCGGGGCGATACCCCTACTCCATCGCTTCAACTCCG  
GCAACGACGTACCCTCGTTGGCCAGCCTCAACAACATTAGCCCCCTACAACATCTATCCGGGGCAGCG  
ACTGCGACTCGATGGTTCCAGCGCCAGCATGAGCAGCAGCCGAGTGCCGGTACCTATGAGGTGCGCCGC  
GGCGATAACCCTGAGCAGCATCGGCCGCCAGTTCGGCATGACGCCGAGGCGCTGGCCAGAGCAACAATC  
TGAGCGCCCCCTATGCGCTGCAACCGGGTCAAGGTGCTCAATGTCCAGACTGCTGGCGGGGTTTCGACCCA  
GATGGTGGCTGCGACTCGTCCGGCAACCGTGCACCCGGTGGCCGTGAGTCGTCGAGCAGCGGTCCGCGT  
CCGTTGGCCGAGCTGAGTGGATCTGGTCAGACCACCGCTTCATCTCTCAGAAAATCCGTTGCTCCGGCAG  
CACCGAAGGAATACGCTCAGGTCAAAGAACAACCAAACTCCAGTCGAGACTTGTGTTGGCACTG  
GCCCCGAAAAGGCCGGATTGTGCGAGGGGTTCTCTGTTGCAAGACAGGGTAACAAGGGGATCGACATAGCC  
GGCCAGAAGGGGCAACCCGCTACGCCGCCAGCAGCGGTAAAGTGGTATACGCTGGCAGTGTCTTAAGGG  
GGTACGGCAAGCTGATTATCCTCAAGCATGATGATGACTATCTCTCCGCTTACGCACACAACGACGAGTT  
GCGGGTGAAGGAAGGGGACAGCGTCAAGGGGGGCTCGGTCAATTGCCAACATGGGTAGCACGGACGCGCCG  
GATGTGCGATTGCATTTTCAGATCCGGTACAGAGGCAAGTCGATCAATCCGATGAGCTATTTGCCAAAGC  
GTTAACCCAGAGAGACCGTCTTACTCTGGTAACGTCAAGGAGACACACCATGAGCCAAGAACAACCTGGT  
AATGCAGGATGCAGAGTTAGAGTTTACGCTGAACCCGAATCTCATGAAGTAGAAGAGTTGCAGGAGGTA  
GCCGCCGAGGGCGGACGAGACTATCTCCGATGAGTTGCTGGCACCCGAACTGAACAAGGTGATGGATGCCA

CGCAACTCTATCTGGGGGAGATAGGTTTCTCCCCGCTGCTCACTGCCGAAGAGGAAGTCTACTACGCCCC  
TCGTGCCTTGCGCGGTGACAAAGCCGCCCCGAAGCGCATGATCGAGTCCAACCTGCGACTGGTGGTGA  
ATCGCCCGTTCGTTACAACAACCGCGGCCCTGGTGTCTGGATCTCATCGAAGAGGGCAACCTCGGTCTTA  
TCCGCGCGGTTCGAGAAGTTTTGACCCCGAGCGCGGCTTCCGTTTTTCTACCTATGCCACCTGGTGGATCCG  
CCAGACCATCGAGCGGGCCATCATGAACCAGACCCGCACTATCCGTCTGCCCATTCATGTGGTCAAAGAG  
TTAAACGTTTTACCTGCGCACCGCGCGGAACTCTCTCACCGTCTCGATCATGAACCGACCGCCGAGGATA  
TCGCCTTGCGCTGGATCGTTCCGTGGACGACGTGAACCGCATGCTCAAACCTCAACGAGAAGATCACCTC  
GGTGGATACCCCCATCGGTGGCGATCGCGACAAGGCATTGCTGGATGTGCTCTCCGACGAGCGCGGCATG  
GGGCTGAGCTGGAGTACAGGAAGATGATATGCGCAGCAGCATGTCCACTGGCTGGAGGAGCTCAATC  
CCAAGCAGCGGAAGTGTGGCCCGTCTGTTCCGTCTGTGGGTACGAGCCCGCCACCTTGAGGATGT  
GGGAGCCGAGATTGGCCTGACCCCGAGCGGGTACGTCAGATCCAGTTCGAGGGGCTCGCCCTCTGCGG  
GAGATCCTGCTGAGCCAGGGGCTCTCCATCGAGGCGCTATTTCTGTAACCAATTAAGTCCGCAACCACTGAT  
CAGCGCATCAGCCAAATAGTACGAGGGGAGCAACAGCTCCCTCGTTTTTTTATGCTGTGCTCTGGCGA  
TGGCTTCGTGGTTATACCAGCTCAGCCAGCATGGTGTGCGGCTAGGGCACCAGTGCTTCTCCCTTCTTCA  
CCTTGGTGAGGTAGTCCGGGTTGGCGATAAGCGGACGACCGATGGCCACCAGATCGAAGCGGTTGGCCTC  
GATGGCCGAGCGGCGCGCTCGGCGTCTAGTTGCCACCCCGACAGATTGCCCTTGTAGTGGGCACGC  
AGATAGTTCGAGGGCGCGGCCATCCAGATAATCGAAGGTGAGGTTGTCATCGAAGATGCCGAGGTGGATAT  
AGGCCAGCGGGCGATCGTTTCAGCTTGCCAGCAGGTAGTTCGAACACGGCGCATCTTCCGGGCTGCCCGC  
CAGATGGACATAGGCACCCGGGGAGAGGGCAATACCAACCCGATCACCGCCGATGCGGGCGCTGATGGCA  
TCGACCACTTCCAGCGGAAGCGGCTCATCTTTTCCGGGCTGCCACCGTAGTTGTCGGTTCGCGAGGTTGG  
TGGAGTGGTGCAGGAACCTGGTTCGATCAGGTAGCCGTTGGCACCGTGGATCTTACCCCGTCAAAGCCCGC  
TTCGATGGCGTTGGCACCGGCAGTCGCGTAATCCTGTACCAGCTGGGCGATTTCCGCCTCGGTTCAGGGCG  
CGCGGCACCTGATAGGTTCAGCTCGCGCATGCGGGGCACAGTGCCCTCGTTCGCGCCACGGCAGAGGGGGCCA  
ACACTTCAGCCTGATGGAAGAAGGGGTGGGAGAGGGCAGCCGACGTGCCACAGTTGGGCGAAGATCTTGCC  
GCCTTTGGCGTGTACGGCGCTGGTCACTCTCTTCAGCCATCGATCTGCGCCTGGGTGAAGAGGCCCGGG  
GTATTGGGGTAGCCCTGCGCGTTCGGGGCGGATGATGACGGCTCGGAAACAATCAGGCCGATGTCGGCGC  
GGCGGCCGTAATAGGCAGCCATCTGCTCGGTTCGGCACAGACCTGGGCTGCCATGCAGCGGGTTCAGCGG  
GGCATCATGAAACGGTTGGCCAGGGTTCAGAGTGTTCATTGAGTTCGATACGGCTGAAACAGGGTATTCATG  
ATAGGTTGCTCCTGAACGGGTTATTCTTGAACGTGCATTCGAAGACGTTTTTTGCGTTCGGGCGCAAGCTTTT  
TTTGAATGCGCGTTCAAGAAGGTTGGCCCGAGCGGGCGGCTGGGGTAAACTTGCCGCCCTTTCCAGCCAC  
TCTTTATCGGCGGGCCCTGTTGCCCTTGCCGGTGAACCATTTCCACGGGAGGAACCATGCGGATAGCC  
GAGTTTGATCGGGACGAGGTACTGCGAAATGCCATGGAAGCGTTTCGCGCCAAGGGATATGCCAAGACCA  
CCATGCAGGAGCTGGTGGCTGCCACCGGCTGCACCCGGGCGCATCTACGGCGCTTTGGTAACAAGCG  
AGGCCTGCTGCTGGCGGCGGTGGATCATTATGTTCAGGGCAAACGCACCTGCGCCGCTCCCTGCTCGAC  
AACCCGAGCCCGCTGGCGGGCCTTGCGGCTATCTCGACCGGATTGTGGGGGAGGCGCTCTGCGGCTCCT  
GTCTGGTGACCCGCACCATGATGGAGCTGAGCGAGCAGGATGAGGAGCTGACCCAGCGGGTCAAGGGGAT  
CTATGGCGAGCTGGAGCAGGATCTGGCCGAGTTGCTGACACAGGCGCAGGCCAAGGGTTCAGCTGGCCCCG  
GATAGCAATATCCACACCCTCACCGCCCTGCTGCTGATCAACTTGCAAGGGCTGGTACCTTTGCCCAGT  
GCCGCCCGGATCGCCCCCTGCTCGACGACGTAGTCGCCAGCTGATGCGGGCCCTGCGGGCGTAACGCGC  
GCCCGGAAACAACCATTTGCTCCTGCGGGAGCCATGGTTGTTTTCCGGGGATGCCACACGCGCCGGGTTGTT  
TGCTCCCTTCTCCCTTGCGGGAGAAGGGTTGGGGATGAGGGGGAGGGCTCTGCTCAGCGCAATGAGAGC  
CAAATATGGGCCAGTACGACCTCCATCCGACTCAGCACATCGTTATTCACACTCGTATCACCCGAAATC  
CCTGCTGATTGAGATAGGCTGTCCGAGCCTCGTCATGCATCTGGTTCGTTGTGCTCCATGTTGCGAACC  
ATCCACTTCGATGACCAATCCCTGTTCAAGGCAGATGAAATCCACCACATAGGGGCCGATGGGCATTTGG  
CGGCGAAATTTACGCCCCGCCAGACGGCGACTGCGCAGCTGTTGCCACAGTTTCTGCTCTGCCAGCGTGG  
CATCCCGTCTCAGTCGCTTGGCAAAGAGGTTACTCTCCATAAAATGTCCCCACTCTGTATGCCTTATAG  
ATATAGCCAGCTTCCCATCTGTTTACCAGGTTGGATATTGCATTCCTCACTCTAGCCCTCTCCCGGAGGG  
AGAGGGAACAGATCGAGTTGTTGTTCGGGATTTGGTTGATCAGCACTGTGTCTATTGCCTTATTCGAGCTG  
GGGAAGCTGGATTGGGTGATAGCAGATGGCGATAACTTTTCGAATGTATTGGGAATCGCCTGGCTGGCAG  
ACTGGCTGAATGGTTGTCAGCGATGCTGCAAGTGGTAGCGTAACTGCTCCCTTCTCCCTTGCGGGAGAA  
GGGCTGGGGATGAGGGGGAGGGAGCCGCCCTCACCTAACCTCTCCAGAGGGAGAGGGAATGATCG  
AGGTTCCGTTTGGGCATCATGGTTCGCCAACAAGCTCCTTCATCAAATCCTTGAGCCACACCAGTGCCGG  
TTGTTGCGTATGCACCGATGGGGTATGCCAGACGCTGCGGCTTACCTCGGCCCCACCAGCTCTTTCATC  
AAATCTTTTCAGCCACACCAGTGCGGGTTGCTGGGCATGCACGGGTTGCCAGACGCAGTTGAGGTGGTAGT  
CGGGCACGTTTTTCGGGCAGCGGCAGGCTTTTTCAGCGCCAGTGGGTGGCGAGCAGCTCGGCCACCATGCT  
GGGCAGCACCAAGAGGTGATCGCTCTGGCTGACGATGGCGGCGGCGACATATAACTCTGGCTGTTGACC  
GAGATGGTTCGGCTAAAGCCCTGACTCTTCAGATAGCGGTTCGAGGCTCGCCTCCGAGGTGCCAAGGGGCG  
AGTGGAAACACATGGGGCATGGCGATAAGCTGCTGCAGGGTGTGCGCTCCTGCCACTGGGAGGGGTATC  
CTCGGCGCCGGCGGGGGCCGATTTGGCAATCGGCAGATCGGCGCGCACCCAGCCCGCCAGCGGTTCCGGT  
AGCCAGGTCTCCTTGCCGAGATAACCCGGCACCTGCATGTACTCGTCAAACCCAGCACCCAGATCGATCT  
CGCCGCTCGCCAGCTCGGCTTCGGGCAGGGTGTGCGCAGAATGCGGATCTCGATGGTGACCCCTGGCGC

CAGCCGTCTGAGCCGCTGAATAAGCGGGCGGGATCAGCACGCACTCCACGTAATCTGTGGTGCAGAGCAGC  
AAGCGCCGCTTCGACTGGCTCGGCTCGAACTCTTCTTCTCGGTGAGCTGCTGCTCCAGCAGCCGCGAGCG  
CCTGCTGCACCCCGAGGTGCAACCGCTGGGCGCGGGGTTCGGCAGCATCCCCTGCGGGGTGCGCACCAG  
CAGCGGGTTCGCCGAGAAAGGTGCGCAGCCGGTTAAGGGAGTGGCTCATGGCGGGCTGGCTGATAAAGAGC  
GCTTCGGCGGGCGGAGTGACGCTGCCCTGCGTCATCAGGGCGTCAAAAAGCGAGCAGATTGAGGTGCA  
GCTGGTGCAGTTTCATGGGGGGGATTATTCGCCGTGTTTATGGGACAATCCATCCTATTTCATTTGATGGA  
TGGGGGCGCAACGTCTTAATCTGCGACCCACTCTTATTTTCCCGGGTTCCCGCGCCGCATCTGGCGTAAA  
CGGGGGCCTCAATCCATGCAAGGAGCCTTGGGATGAGCATCAAGACCATTAACTCCACGCCGGCCGCCGA  
CGGCTTACCATGCCCCGCCGAGTGGGCGCACCAGCAGGCCGTCTGGATGATCTGGCCGTTTCGCCCGGAC  
AACTGGCGCGTAGCCGGTTCGCTTCGCGCAAGAGACCTTCGCCAAGGTGGCCGATGCCATCGTGGCGCGA  
CTCCGGTCTTTATGGGGGTACCGGCCAGTTTATGGAGCAGGCTCGCGCCATCATGCCCGCCATGTGAC  
CCTGGTTCGAAATGAACAGCGATGACTGCTGGGCTCGCGATACCGGCCACCATCGTCACCAACGCTGCC  
GGCAGTGCCGTGGGGTGGATTGGGGCTTCAACGCCCTGGGGCGGCCACAAGGGCGGTCTCTACTACCCGT  
GGAATCAGGATGAAGAGGTGCGCAGCCAGATGCTGGCCAGCACGGCATGGCTCGCTACGATGCGCCGCT  
GATTCTGGAAGGGGGCTCCATCCACGTGATGGCGAAGGCACCTGCCTGACCACCGCCGAGTGCCTGCTC  
AACGAAAACCGCAACCCGCACCTGACCAAAGAGCAGATCGAAGCGCACTTGCAGGACTATCTGGGCGTCA  
CCAGCTTTATCTGGCTGGACGAAGGCGTCTACATGGACGAAACCAGCGCCACATCGACAACATGTGCTG  
CTTCGTGCGTCCGGGTGAAGTGGCCCTGCACTGGACTGACGACCATAACGATCCCCAGTACGCCCGCTCC  
GTGGCCGCCCTCAAGGTGCTGGAAGCGGCAGTCGATGCCAAGGGTCGCAAGTCAAAGTGTGGAAGCTGC  
CCCAGCCGGGCCCCGCTGTTATGCACCGAAGAGGAGTCTGCCGGCTCGAGAGCGGTACCGGTGTACCGCG  
CGAGGCAGAAGGCCGTCTGGCCGGTTCTACGTGAACTTCTCATCACCACGATCGCATCGTCTATCCG  
CTGCTGGATGCCGCCACCGATGGCGAAGCCCAGCGCATTCTGGAAGAGATCTTCCCGGATCACACCCTGG  
TCGGCGTGCCGGCCCGGAGATCCTGCTGGGCGGTGGCAATATTCACTGCATTACTCAGCAGATCCCTTC  
AGGTGAGTAAGCTGGTCGAAAAGTGTAGAAAATTCAAAACCCACGCCGTGGGGTTTTCTCTCTTGATGGT  
GTGATGGTTCGCCGGCGCTGATGCGGCGATCATCATGACAAAACAGTCACCCTTTTACAGGAGATCAAAATG  
ATCGAAGTGACCGAGGTTTTCCATTGCCGAGCTGCGTGC CGCTCGAATCAGGCCGCCACCACAGCGGTGC  
AACTGGTCAAGCCATCTGCCCCGGATCGAAGCCATAACCGCCCCGAGACTGCCACCAAACCTCAACGC  
CGTGGTGGTCCCAATCCCAGATGCGCTGAAAGAGGCCAGGCTTCCGATGCTCGCCCGCCCGTGGCGAG  
ACCTTGAGCCCGCTCGACGGCATCCCCACAGCCCAAGACAGCTATCTGGTCAAAGGGCTGACTGCCG  
CCTCCGGCAGCCCGCTTTCAAGGATCTGGTGGCCACGCTGATGCCTTTACCGTAGAACGCCCTGCGCGC  
CGCCGGTGCCATCTGCCTTGGCAAAAACCAATATGCCGCCGATGGCCAATGGCGGCATGCAGCGCGGCGTC  
TATGGCCGTGCCGAGAGCCCCATAACCGCCGACTACCTGACCAGCCGCTTTGCCCTCCGGCTCCTCCAACG  
GCGCCGGTACCGCCACCGCCGACGCTTCTCCGCCTTTGGTCTGGCCGAAGAGACCTGGTCGAGCGGCCG  
TGGCCCTGCCTCCAACAACGGTCTGTGTGCCTACACCCGTCCTCGTGGCGTCATCTCGGTGCGTGGCAAC  
TGGCCGCTGACTCCGACCATGGATGTGGTGGTGCCTATGCCCGCACCATGAACGACCTCTTGGAAAGTGC  
TCGATGTAGTGGTCGCCGACGATGCCGATAACCGTGGCGATCTGTGGCGTATGCAGCCTTGGGTGCAGCT  
GCCCAAGGCTTCCGAGGTGCGTCCGGCTTCTATCTGGAACCTGGCAGCCAAGGCCGATGCCCTCAAGGGC  
AAGCGCCTCGGCGTGC CGCGCATGTTTATCAACAAGGATGAACTAGTCGGCACCAGCGAAAAACCCGGCA  
TCGGCGGCCCGACCGGTGAGCGCATCCATAACCGCGAGACCGTGATCGCCCTCTGGGAAGAGGCCCGTCA  
GGCGCTGGAAGCCGCTGGCGCCGAAGTCATCGAAGTGGACTTCCCGCTGGTCTCCAACCTGCGAAGGTGAC  
CGACCCGGCGCGCCGACCGTGTCAATCGCGGCATCGTGAGCCCGGAGTTTCTCAATGACGAGCTGTGGG  
AGCTCTCCGGCTGGGCGTTTCGACGACTTCTTGC CGCCAACGGCGATCCCAAGCTTAAGCAATTGGCCGA  
TGTCGATGGGCCGAAGATCTTCCCCACGATCCGGGCACCTTCCGAACCGCGAGGGCGATCTGGCGGCG  
GGCATGGACGAGTACGTCAATATGGCCAAGCGCGGCTGAAATCCTGGGACGAGATCCCCACAGTGC CGG  
ACGGCCTGCGTGGTCTGGAGAAGACCCGCAAGCTGGATCTGGAGGACTGGATGGACGGGCTCAAGCTCGA  
CGCCGTGCTGTTCCCGACCGTCGCCGACGTCGCCCGGCTGATGCGGATGTGAATCCGGCCTCCGCCGAT  
ATCGCCTGGAGCAACGGCATCTGGGTTGGCAACGGCAACCTCGCCATTCGCCACCTCGGCGTACCGACCG  
TCACCGTCCCCATGGGGGTGATGGCCGATATCGGTATGCCGGTGGGCTGACCTTCGCCGGTTCGCGCCTA  
TGACGACAACAACCTGCTGCGCTTCGCTCGGCTTTGAAATCCACCGGCAGCAAGCGTATGGTGGCGCCA  
CGCAGCGCCCGTGGTTTGGATCGCTACAGCTGGCCTTGTGTTAGATCAGGCACAAAGAGAGAGGGGAGG  
CATCATGCCTCCCTCTTTTTTTCGTCATGTTCTGGCTTTGGCCATCACACCCGGATGTTCTGGCCCCGA  
CCCATTTTCGTTCTTGTACAGGCGGGGTCTGCTCATCTTGGGACAAGCTGGCTCCCACCTCGTGGGCCCT  
TCTCCAGCAGATCTGCGAGGCTCTCCCTGATCTGCTGCGGACGATAGTTCCCAACCGGAGTTGGGAGAA  
AAACGATACCCGCTCGGTGCCCGGATAGATGCCGACCCGTAAGCATGGCGCAAGGGGGCGAGGGCATGC  
TCGCCAAAGCGCAGGAACAATTCGCGAGACAGGCGCTCGGGAAGATCGCTCGCCGTGGTACCGAGAGCA  
CCAGCGCCATTTTCGTCGGGCTGAGCCACGATATTGACCACAAAGGGGGCGCTCGCTTCCCTCTGCTGCTCG  
CTGGATCTCGAACGTGCGAGACCGCTTTTCATCGAAGGCCAGCGGCTCGGCCGACAGCTCGGCCACGATT  
TTCTGATAGATATCCAACACAACACTCCAGTCCGGTTGCCCGGTCTGCTTTCGAAGGGGGCAGGGCAAGATC  
ATAAAGAGACGGCCCGCCACCGAGCGGGCTGGGCCGTTCATCCATATTCATGGCAAGGGTTACACCTTGAT  
ATTGAGTGTCTCGGCCCTCTTCCAGCTCGAACATCCGGACATCGCTCACCAGATTGTCTGTTAAAGCGCACG  
CTTTTCTTCATCTTGGCGGCGACGTTCTCCCGTCCGATGAGCCAGTGCCTCTTCGACCAGCGGTGAGG

TCTTGTGGCGGGTGTTCCTCGGTCAGGGCGTCCAGTTCGGCGGTGGCTCTTTGCTCAAACAGCTG  
GACGAAGCTGCGATTGAACTCGGCATTGACCTTGGCGTTGAACGCCCTCCGATTCATGGCCCAGGGTATTC  
AACGCCGAAGTGAAGTGCCTCACCCGAGAGTACTCGTGCAGGGCGAACGTCGCTCGATCACCCGACTGC  
TCAGCATGCTGAAGATGGCATCTTTACCGTTGATAAAGCTGGAGAAGTGTGCTGCACAAAGCTCAGGGA  
GTCCTTATCCAGCGTCTCCAGACCCGAGGCGCTTCTTGTGGCATCTGTGATATCGGCCATGGTCGCCGTT  
TTGGGGTGCCTACCCGGCTTCAGATATTGGGCCTCGTTCTTGAACCTCGCTGACGGGGTGGTTAAAGGCTT  
GCTGCACAATCTTCTTGGCTTGGCCAAGTTCGGTCAGCTGCCGCTGCACCTCGGACTGTATTTGAGTGGC  
CCGGGTGGTGAGCGCACTCTCCCCCTTGGTGGCAGCGCGGCTAAAGAAAATCGACCACCGCATTTTTTGATG  
CGGCCAGCGTGTCTAAATGGGCCAGGTCCCGTTGTACGGAGACATCCCCACTCTTGCCGATATGAATGG  
TGTACTCCTTGCCTTACCAGATGAAGGGCAAGCTTCTGATTGCTGCCGGGATTGACGTTGGCGAGCTG  
CAGGCTGTCGATAGCCTTCAACATCACCGGGTAGTCCATGAATAGCCATGACCTTGGTTCCTTATCTC  
ACTAACAAGCGATACATCTGGCTTGCATCATACCCGTCAGTGAACGCGCTTTATTAGCCATGGTTGCA  
CTATTTTAGTTTTGGGGTGGTCTGCGCCGAGGCTCCTGTGATGGATACAAGCTGCTGCGCTTCGCCCTTG  
GCCTTCGAGTCCACCGGCAGCAAGCGTATGGTGGCCACGCACGCCGCCGCTTGGGGTGAATATTCGGGA  
TTGGTTCGGTGATAAATAAAAACAAAACCGCTCATGTAATATGGGCGGTTTATATTTTAGTGGAGGACTTA  
TTGTTTTCTTTGTAATAATATCGCTGAAATTTAAAAAATCAGAGATAATGAGCCACAATCTCACGGCTA  
ACATTTTAATCGGTATGGGATTTTTTCTTAAACCATGTGGATGGTTGATAGATAAAAGTAAACATCC  
AGCTTAACCATATTGCAGCATCGTAATCTGTCTTTTGTCTGTCAATTATGATGCCCTATTCCAAAGTTGTT  
GGCTATATTAATATGTCTTTTTTTCATCTTTCGTTGTAAGATGCTCTTGTAACTGAGGTCTTAAATATTC  
AAAACATCGGCTAGGTCTCGTACTGCCTGACGCTGTATCAATGCTTGCGCCATGTCTACGAAAACCTAG  
TTGTAGCCGCATTTATTCTATTTATTATGTTTTTGTCTGGGATGGAATTTCTGCAGAGAATATCGCCTC  
GAAGCCCTTCTCAGGTATATGAAGCACCTCTCCACTATCTGCTAGTTCAAACCTTCACTCTATAGTGGCCA  
AGCACAGTATTTATTTTTTCTTTAAATTCATCTGACCATCTTCTTTACTAAATTTTTTCCCAATGCATCC  
CACATTCACCCCATGAATGCATTACTCCATCAATTGGTTTTGAAACCTTTTGGTAGAGGTATTCATGAT  
ATCTAGAAGATCGTCTCACTATATGATTTGCAATATAACTCAATTTGGCCATAAATACTTTTTTCTGACT  
GACAATAGAATGTCTAGTTCGACATCCTTATATTCCTGTTATCGGACCAGCATCGACACAGTTAAACC  
CAAAGCCCTCATCGAAGTAACTTCCGACATAAATTTGATTGAAAACCTTAACAAAATAGCTCAACGACATC  
CTGTAGTTCAAGACATTTGAGATTTGGATTGACTCCAATCTTTGAGAGTAGAAAACATGAGACATATCA  
CGCACCTAGATAAATTAATATTTGAGTCATTATAAAGCTGTCTCATGATTTATCTGAAGCTCATATTAGGCGCG  
TAGGTTTCAATAGCGAAGCGTATTCGGACGATCGCGAAAGGGTGTAGCCGAGAGGCTTGGAGTCCAAG  
ATTTTTCTGTCACTTGTCTGACTTGTATGTGCAGCGGTAAACGGACGATTACGCTGCGCTAATCGACTC  
TACATTATGGGGCTTATTGTTACCTCCCCCTCATCCCCAGCCCTTCTCCCAGCAAGGGGAGAAGGGAGCAA  
ATATGCTCCGCTGATTGTGCTTTACGTACGAGGTGTGGGTGGGGTATGAGGGGTTTGGAAATGGCACGA  
ACGATCCCCCTCTCCCTCGGGAGAGGGTATGGGTGAGGGGCAGCTATCAGTGTGTCGGTTTGGTTTTGAGC  
CTTTACCTCTCTCCACTCTGCGTATCGCCAATCGCCATCTTTGTGCTGGTTCGCAGTCGATCTCCCCCTG  
ATTTTTTTCTGAATTTCCCCAGACTTCACCTTCTCTTACACAACCTCATTTTTCCCTCACAAATCCCC  
GTATCTTCTGCCACTGCTTAAAGGCCCGGCTTGCCACAGGGGTGGCGAGGGGGCGGTTGGTTCGAGGG  
AGCAAGATGATGAAAGGTTGGATGAAGTGCACATTGGCCGGGGCCGTGGTGTGATGGCGAGTTTCTGGG  
GTGGCAGCGTGCGGGCGGCTGGGATCGAACTCAAGCAGGTGAGTGGCCCTGTCTATGTGGTGGAGGACAA  
CTACTACGTCAAAGAGAAGTTCGATGGTCTATTTTCGGGGCCAAAGGGGTGACGGTGGTGGGGGGCAGCTGG  
ACGCCGATACCCCGCGGAGCTGCACAAGCTGATCAAACGGGTGAGCAGCAAGCCGGTGTGGAGGTGA  
TCAACACCAACTACCACACCGACCCGGGCGGGCGGTAACGCCTACTGGAAGTCCATCGGGGCCAAGGTGGT  
GGCGACGCGCCAGACCCGGGATCTGATGAAGAGCGACTGGGCCGAGATTGTGCGCTTTACCCGCAAGGGG  
CTGCCGAGTATCCGGATCTGCCGCTGGTGTGCTGCCAACGTGGTGCACGATGGTGACTTACGCTGCAAG  
AGGGCAAGGTGCGCGCTTTCTACGCGGGCCCGGCCATACGCCGACGGCATTTTTTGTCTACTTCCCCGA  
CGAGCAGGTGCTCTATGGCAACTGCATCCTCAAGGAGAAGCTGGGCAACCTGAGCTTTGCCAATGTGAAG  
GCCTATCCGACAGACCATCGAGCGACTGAAAGCGATGAAAGTTGCCGATCAAGACGGTGTATCGGCGGTACG  
ACTCACCGCTGCACGGGCCCCGAGCTGATTGATCACTATGAAGAGCTGATCAAGACGGCGCCGACGTCATA  
ACGGCTGCGCGACAGACTGGCAGTAAGCCGTGCCATCGCTGCAATCAGCAGCCATAACGGCACACCACAA  
AACGCCCGCTTTAGGAAATAAGCGGGGGTTTTGCTGTTGCGGCTTTTCTGCGGCCACTTATTGCGGGCG  
TTGGCACTGCGAGATTAAGGCTGTTCAAGGGAGGGAGGCTTTTATAAGATGGCCCTCTCTCTTTTTCCCTG  
AAAGTTATCCATTTTCTGTTATGCAATACGCCTCTCTCGCGCCCTCAAGCAGGCTTTTATCACCGGGATG  
TGGCCCTCGCTGGTTCAGCATCGTTATCGGCTTCGCTTCAAGGTGTGGCTGGCGCAGTGGGTGCGCAAGG  
GGGAGCTGGCGCTGTTCAACAGCGTGGTGGATTTGATCTCCCTCTCTTTTATCCTGATGACAGTTTTTTCG  
CTCCTCCATGGTGGTGGTACTCCCAGACAAAACGATCGGGACATCATCAATATCTTTCGCTACTTC  
CTCATCGGCATCGTGTGCTCACCTGGGGGGCGGTGATCCCCATATCAAGCACGGGCTCCATATCCGGG  
TGGAGTATCTGCAACTGGTGGGGGTTCATCTTCGGGCTGGGGCTCAAGGTCTACTTCAACCAATCTGGTGGC  
CATGTATCGGATGTATCAGCTCTCCAACCGGGTCACTGGCTGGAGCCGCTGGCCAACGGTCTGCTGTTTT  
ATGGCCTGCTATTTTCGGGCTGGGGATGGATGCGCTTGCCTCGATCTTCTACGGGCTGACCTTCTCGTTCG  
TCGCCATCGCCGTTTATATGATGTTTTGCGCCGCCGGGCCATCGCCACCAAGCCGCTGGCCAAGGTGGC  
GCTCGGCCCCGAGATGGTGGAGCTATGTGAAGAAGAGCTTTACCGCATCCCTGGAGGCGGGGGCCAGCATT



CTGATGATTTACATCACAGTGCTGCTCACCATCCGTCACCTTCAGCATCGACGAGCTGGGGGATTTTCAGG  
TGGTGGTTCGCCCCATCTTCACCTATATGACCACCTTGTTGTCTTCCCCATCTACCGCTTTGTGCTGCC  
GGAGCTGGCGGTCAATCTGCGCAATGGCGATCACCGCCAGATAAGGCTGATCCGGCGCTGGATCTTCCGT  
CTCTCCGCCATCGTCAGTCTGGCGTTCCTTTGGCTTGATGCTGCTGGCGGGCAAGCCGCTGGTTTTGTCTGT  
TCTTCCCCGCGACTACGTGGGTGCTGTGCCGGTGTCTTCCACTTCTCCATCTTCTTCATTTTTATGAT  
GCTTAACGGCTATCAGCTCGCCTATATCAAGGCTCACGGCCACTTTACCCAGAGCCTGCTGATCCGGCTG  
GCTGGCATAAGTGGCGCTGGTTCGCCCTACTATCTGGTGGCCGAGTTCACCGCCAACGTGGTGGCGATTA  
TCGTGGCGCTGGGGCTTGCTATATGGTGATGTTTATCCTCTCGACCTGGCAGAGCGGCAGATCTTGCG  
ATCCCTGCCACTGGTGTGGCGACCCGCTAGGGTGTACTCGCCAAGAGCTGGCCCTGTGAGATAACAA  
AAAACGCCCCGAGGACTTATACCTAAACAAGCATAGTTCAGCGGCATATTGACCGAGGCCCTTTTCAG  
TACTGCATTTCTGTCATTTTTGTGATGTATGTAAGAATACATCCTAATACATCATAACTCTCAAGCGCCG  
ACGGTCTGTTGGCGCTTTTTTATGCCGAATCTCCTAACACCCCTACGAATTGCCCAAGCAAAAACCAACAT  
CGAATATTGTGCGACCGCGCTCGTTAACGATTTACCATGGCTGCCCTTCTTCAAACCTCGATCTTCGAG  
ATAGTCTGCCGACACGGCCTTCTGTAATGCCTCACGCTCAGAGGGGGTTCAGTTGCGCAGATAAATCAACC  
ACAGCCACTGGTGCACCAGTCGTAGACGTGATTGTTGCCCCAGCGGACGCCGGTCCACAACCCTTGTG  
TATGAGCTTTGAGGGTATTGAGCTGCGCCTTGGCTTGTACGCTCGGTGACGATGGCTGCATGATAGA  
ACGAATGGCCGGATCCTCGATGCGCATCAGGTAGTCGTGGCTGGCTAGCGTCTTGGTAGGCTTGGGGGTT  
GCCGGACCTGCGTAAGCCGCCAAAGCCTCGATGAGCGCTTTGTAGTCGGCGGATTGGGCATTGTAGAGTG  
CTCGGCCCTTCATGATGCCATCGGCTTCAGCCAGACGGCCAATAGTTGGTACAGAGAAGTCTCGTGACTC  
TGCCTCATACTGCTTTTCGACAAAGTTCGTGCATTTCTAGTGAGGTTGTTTCGACGTTAGAGCGCTCAGCC  
TTAGCAAGCAGTGACGCCAACACGGTGTGAGGGTGAATATCCGTTGTAATACTCATGATCTATCCCATTT  
CAAGGTCGAGTGTCCGGACGGGAACGAGGCGGTGTGACAGAGTGCCGGCAACTGCGCGGCAAGGTCGAGA  
TCTAGGTAGGCACTGAGGCGTTCACCTGCATCCATTAGGCGGATGACTTCACGTTGGCCGAGCGCCGGGT  
TCAGTGGGTTTCATCTGCTGTGCTAGGTAGCGCATAAAGGCGTTACCGGCAAGCAGTTGTTCTGTTCACT  
CAGCAGCATGAACACTGGCGGCAACTTGTGCGGGTAGAGGACGGCATCCAACAACCTGGCTGCGTCGAAAC  
ACCGCCTTGCCCGGCTCCAAGTCTGGATAGATCTCGACGCTCTCGCAGACACCGGCCAGTTGTAGAAGCT  
CCGACTCGGTTTTCTCAAAGACCGCCTGCACATCGCATAACGTGCCAGCCGCTACCAACTGTGTGCTGTC  
GCCAGTGTGTTGTTGCAATTCGAGCTTTGCAGCGTTCGATGAGTCGCCAACAGGCTACCAAACTCTTGGCT  
GCGTCACTAAAGCGTTTCATAGCGCTCTCCCAAAGCCGCTCAGCTTGCTGTAAGCATCTAGCCGGTGA  
ATGGCTTGCCAGTTGCTTCTGCATCGGCTTTGTCTTTTTTCAGGCTTGAGATCGTGTCTCGGGTAAG  
ACAGGTATTACGCGCCTCGTCAAAGTGGTAGGCCAGCGTATTGAAGTGGCCTGCCAGAGCTGGCAGGTGC  
TGCGGCGCAGTCACAAACCAGCGACAGCGTACACAATTGCCGCTGCCACCTGGAACAGGAGCAAACCTGG  
GGCGTGATGTCACTCCAATATTTGGCCCTCCGTTATAGCAGCCGCCACTGCGCCGTTGTCTTCTCTTC  
GCTGGTGTGCCACCCACTAGGCATAGGCCGTTGGTGCATCAGCATCCAGCCACGGGGTTACGTGCTGCC  
GGATGCTGCGGAATAGCTGCACTCAGAGACGGCACACTGTTGCAGATCGCTTGTTCAGGAGCACCTCAT  
GTTCACTGTCGAGCAGAAAGGCTGGATGCTCTCTTCTTGTGCTGCCGCAACCCTCCACCGCACCGAG  
CAATACATCGCGGATGTGCGTGCSCCCCGGCTTGGTGTAGTACAGTGTCAATTAATAGGCGACTGTGCCCG  
ACGAGTTTTTGCAGGATAGGGAACGGCACCTGCCCTTCCAGCGCAACCGCGGTGATGAGGAAACCGCGCA  
GACTATGCAGGGGAAAGAGGGTTGTTATTCTGTTGTTCTGCTCCTCTGGCAGAGGAAGAAAGCGAATTGG  
CGTGCCGTTGTGATGAGTCTCCCCCGACCTGCGAGCCGCCATTCCAGCGCTTCCAGCAGGGCAAACCAG  
CTGGAAAACATAGTTCTATCCGAAAGTGGGAAATAACGTTTCATCCTCGCTGACCTCTGGCAACCGGAGCA  
GGAAACACGCGTCTGGATAGCTTGCAGTTCGACTTCGCTCTTCGCTATAATGTGACGTCATCCAGTGC  
AGACCAAGGTGTGCGCCGCGAGATAGGGTGTATTTTTCTTGCCAAATGCGCAGTTTTTCCAGCCAGTAA  
AACACATCCTGATGTACCGGGCCGCGCAGAGGACACGGCAGGGCGTACCCTTTCTCGGGGCTGATTTGG  
CGATATCGGCGGTTTTATTGGTGTGATGTAGAACACCGTCGAGACCGCTCGCCATCAGCCAGCGCGGT  
GCTACGGCGAAACACACCTTGTTCAGTGGCCGCGCTCGCTGCCTTGTGCGAGTGGCTCGGGCTCAAC  
TCCCAAGCGCCGCTGCTGCGTAGCGCAAGTATCCGCTTCTCCCGAGTCGAGCATGCGGACCTGAAAAGTGC  
GCAGTGGCAAGATGAGCTTTACCAACAACGCCACCCAGCGCACCGGGCTCCACATTTCCAAGCGTGTTC  
ATTGGCTATTGGGCGTTCACGCCACACACAATCCGGATCGTTCCGGTCAATCTGCTCTTCGGTTACCTCG  
AACCAGTGGGGGCGCCGCGGCTCGTTGCCCAATCTCTGCCCCATCGCACTTTGCGCCCAACACAGT  
TTTTGAAAGTGAGGTCCAGCTGCCAACATCTGGCGCAGTTCATCAATGTAGCCATAGGGTAGTGGTGAATG  
TACGCTCTCGTCACGCTTAGGCAAGCCGCTGTGGACATCTGAGGCACGGGGTTACAAAAGGCTGGAGAA  
ATGACGGGTTGACCATCATCGCCGGGCGCGCTGAAATCACGCAGCAGAAACAAAGTGCAGGAAGGCGTAA  
TGCAGTTGTTGTATCTGATGCCCTTCTCCGAATTCGGGCAGACTGTCTGATAAAAAGTCTGGCAGAACTGT  
GGTACGCGTCAAAGCACTGTGCGGTCAAGCGGTAGGCCCTGCCGATGAGGTAACGCTCGAAGAATGAC  
GATAGAGATTCCAGTCTCGCATCAACCCCGGCTGTTCCCTTTGAGCCACTCCACTGCTAGGACTCTCC  
AGGGTTCGAGTTGAGGATACTCCCAGCGACCCAGCCGAGGGATGTGTCCGTGGCGCGTTTTTACACCTAC  
CTTTCTTGGCACAGGGTGCCTAGATGCAATGGCTACGGTGTGTTTTCTTCTTATCGGGCATGGAAAATCT  
CAGTCGTTAAGTTCAGCGTCTGGTAGCAACAGGCTCTGCATGGCGGCAGTTTCCACCTTCGCAACCCGTA  
ACCGCTGCGCAGCGGCTTCCAGTACAGCCAAGGCTCGCGGGTAGAAGCTCGGTGTAGACATCTTGGCT  
CTCAAGCGATGCGTGGTGCATGAATCGCCGGATAAGGGACTTGTGATACCCGCTTTTTGTAGTCGACGA

CCGTATGCGTGTGCGGTGACCATGTGGCGTGTGCCAATTTTTTGTCTACTGTGAGACCGATGCGCTCGC  
AGGCGGCTGCGTGGGCTTTGTTGTACTGAGTTAGCGTATACATGGCACCGATAGGCTCACGTGCGAGGTT  
GATGAAAGCAAAGGGGTGATTACGTTTATTGTGCGCCACTTGCTTTAAGTAGCGATACCAGCAGTGCAAG  
AACCCTCGCCGTACTCCGGTTGAAACCAGTAAGCCTGCTTGTAATAAGCCCCATCGTGCGTACCGCCTT  
TCCAGCCAGCATGTGCGGCGGTCCAAGAGGGCAGTGCGGGGGACAAGGCCAAACTGCTGGGAGAGGTATTC  
AGCTCTATTACCCTTGCGGGGTGCTCCTCGTGCCTCACGCCAATCCCTAGGCGCAGCCCCATGGCTTGGGA  
TGGTGAATGCGCACTAGGGCCTGATTTGGGTTGGCAGGGTCAGGTAACACATCCTGAATATAGAGGTGGA  
AAGGCTCCGACTCTCGGAAGCCTGCACCGTGCAGCAGCAAGGTGATAAGCATGCCCCGATAATCCTGACG  
TCCGGCAGGGCAGAACCCTTAACCAGAAGCTCTTGAAGCGCTCTTCTGGAAAAGCTGGCGGCTCGCCA  
CGCTCAACCTTGGGTAGGCGCTGTCTCTGATACGATGTCCGGTCTGGGTTGGTGAGGCATTGGCTGCC  
AAGTATGTCCCAAGAATGCTTTACTGCGCCGATACTGGTAAGCGATTTTCATCGGTCTGCCGGTCAAGGC  
TCCACTGGCGTAGCGCGGATTGACCTGTGCCAATGCAGGGCGCATTTTCGCTAACCAATCGAAGAAGTCG  
GAGAGGTGGGTAATGATGTGAGAGGCATCTTGTGGCGAACCGGTGCCAACAAAGCCAAGTGGGTCAA  
GTCCAGTCTCACGGTCAAAGGTGCCTGTGTAGAGCCGCTGGGCAAAGTTCTGGAAACAAATGATAGGTATT  
GCGTTTACGAGGGTTGGTCTGGAAATACTCAAGAAAACATCCGGACAGAGCGGGTCACCTTCAACATCCAA  
GTGAGGCTGCGGTGATGGCTGCGATGGAGGCAGTAGTCAAGCAATGGTTCAGCACCCCTGCTGGGGTCA  
GCAAAGCAGGGAGCTCCGTGTAGACACCCGTGGCATCGGCATAAACACGGGCTTTGACTGTTACGAACAT  
TCCATCACCTATCTACCCAAGTAACGTAATCAAGTGGTTCAGCTGTAAAAACAGATGACGAGCCACATT  
AGACGCTTATTGGACAACAACGTACATACTCTTCTCAAACCTCAGTACTTTGGCATCTTTCAGTTCAAGC  
GACTCGGTTTTTACAGATAACCTGCTGTTACGGTTCCTACTGTTACAGAGGGTTGAGGTCCAATGGAGTG  
AAGACGTACGCTAAGGCCGAGCCCCGTGCAGCACGGTAGCAAAGATAGCCATCCATACGGCTCCCTTTAG  
AATAAGCACGGCGGTAAACAGTGCCGCTATATGTCACGACTTTATTTATTTTCTTCCATGTTGTTGGGTT  
GAGTTTTTATTTTACTTTTTAATCCATCTAAACAATCAATAAAATATGAAAAGTAAAGCGCAGCAAATGAAAC  
CACCGAGCCGAAATAAAGAAAAGTAAACCATGTGCTAAACGCCACTGACCAAGCGGCTATACTCAGTGCCA  
ATTAAATCAAATTCAAACCATACTTTATATTGACCAGTACGAGAATCAATATAATGCTCATGATTATAA  
AATGCATTATAAAGGGGGCTGCAACCCCTACTGTTTTAAGGATTTTTTTAATCATTGCTGCTACCTAATG  
AACCACCAAATGTTCTGGGGAAACGCCGCTTGAACCTGCTACCTGCAACACCAAAACTATTGCCAGAGGA  
ACCAAGGGTTTTCTCAATAGGCCCTGCACCTTTCTACTGGGGATGAGCCCTCACCGTTTGGTGTAGGCTGC  
CTTCATGGGCTGAAGTCACTTCAACCACAAGCATGTGAGAGCTGAGGCCCCGTTGTGAAAGGTTGGCGTTCG  
AGCGATGATGGTATGACGAAATCCTCTGTATACGTGTTTTCTTAGAGGCCCATTTGGCAGTGAAGGCACTTG  
TCCCTGCCAGCTTCAATGCATCAACAGAAAGTCTGTTGTGCAGTTACTACCAGTTAGATCGTATTTATTTAT  
CACCTGCCAGTTTTCTTTTATTTTATTTTTTCTGGCTGGGTGGAACCTGGAAAGCCATTTTTTTTTGGAAG  
ATTGCCAACGTCAAACCTTCATCTACATCCATGATTTTAAATGCTCTCGCACTCATGCTGTATAGCTCGT  
GCTGATAATACTCACGAGCTTTGGCAAAGCTATATTGAATAAGCACACCATCACCTACAGGGGATATAGG  
ATTACCATCAAATCGACCGTAGGTGTATACGTGCATACTCCATTCCTTGTGGACTGAAACAAAGGCATGT  
CCGGTTCCCTTTGTTTCAGTCCACAGAAATACACCGTTTGCTAAAAATATCGCTGGGCTTTTCGCAAACCTT  
TATTCTCTATCCAATCCCCCTTGTCTTTTCAATGGGGGTGATGCTGCCGCGATCATCTGATCGAAAGTT  
TGAAGTCTTCTCGCTTTCCCATTCGCTTTCTCCCCAGCGCTGCCATCCACCATTCCACCCTGTCCACTT  
CTACTCGGCTCCACATTTCTCCACAGCCTTGCTTCTCAAAAAAGCATTTGTGCCATAGGCTCTCAGCGAA  
TCCGTACCTTTTTCGTTCTATTGGACTTCAAACCTCTTGCATTGAATCCACATAACATGACTATTTATGGG  
ATAGCTTCATTAGCTAACAGAAAAAGAAAAGCCCCATAAAGAGGGGCATTCAAATAGAAATTCCAACCGAA  
AAGCCTTTACGATGTATCTTAGTTGGGGGGAATAACGTGCGGGCGTTTTTTTTATTGGCGGTGCTGGGCG  
GCTTAGCGTTTTGCCCTTGCCACCCTTGTGCCAGCGAGGGCTGCTTTCTGGCGCGCTGCTTCTGGGCGG  
CCTTGTCTGTTGCGGCGCGGCTCGGGCTCAAAGCGGGTGAGATCGGGCTCAAAGCCCGAAACCACTGCTG  
GGCAAGCGGGTGTGAGACACCGCTTCCACCTTCTCCAGCAGCGGCGCATCTTCCGGGCTGAACAGGGTA  
ATGGCAGGCCCTTGTGTCGCGCACGGCGGTGCGCCGATACGTTGGACGTAATCCTCGGCCACAAACG  
GGAATTCGAGGTTAATCACATAGTTGAGATCGCTGATATCGAGGCGCGGGCTGCCACGTGGTGGCGAC  
CAGTGCCTGCAGGGTGCCGGCGGAAACTCCAGCAGCACTTTTTCTCGCGCGCTCTGCGACAGATCGCCG  
TGGAAGGCGAGGGCATTGATGCCCGCTTTGCCAAGCTGCTGGGCCAGCTTGTGACCCCCCTGTCGGGTGC  
GGCTGAAGATAAGTGCCGGTGGCCACCCTTTCACTTTCAGCATGTGTTGACCCAGCGCCAGCTTGCATC  
GCTGTCCACCGTGTAGACCCGTTGTTCCACCTCGGCCGCGTGGTGTGTCGCGGTGCCACTTCAATCAGC  
TCGGGGTTCGCGCAGCAGCACCCTGCAGAGGGCAAACAGGTTGTGCTCGCAGGTGGCGGAGAAGAGCAGGG  
TCTGGCGATCCACCGGGATCTGTTTGTGAGCAGCGCCTTGTGCTCGTCCATAAAGCCATGTGAGCATGCG  
ATCGGCCTCGTCAAACACCAGATGGCGGAGGCTATCCAGGCTCAATGCCCTGACGCAAATGGTTCGAGC  
AGACGGCCCGGGTGGCTATCAGGATATCCACCCCGCTTGAAGCGCTTACCTGAGCCGCGATACTCA  
CCCCGCCGTACACCAGCGTGTGGTGTGAGACCGGAGCCCTGGCCGTAGCGCGCCACACTTTTCGGCGACCTG  
CACCGCCAGCTCGCGGGTCCGGCACCAGCACCAGCGCGCGGATCGGGCGGGGCTCTGCTTGTGGCTGTTGT  
AGCAACTGCTCTAGCAGCGGCAGCACAAAGGCGGGCTTTGCCGGTGCCGGTCTGGGCACCCGCCATCA  
GGTCCC GCCCTGCCAGAATGACGGGGATGGCATGCGCTGAATGGGGGTGGTGGCGCATAGCCCAGTTC  
GCTCAGGGTCTGCTGCAAGCGGGGGGAGAGGGCCAGTTTCGGCAAAAAGAGGCAATGGACATAGGGGCACCA  
GTCGGAGTTATCGCGGCTGCGGCCACGATGCAGTGTGATCGTGCCCGCATGGTAACAGAAGCTGGG

GGAGCGGCAGAAGGCGGCTATGCCTCTGCGTCGTCCGGCAACGGCCGGATCAGCCGGATCCTTTTTGCCCT  
CGTAGCAGGCGATGTTGTGCTTGCCGTGCTGTTTACGTGGTAGAGCAGCTCGTCGGCGAGATGCACCGC  
CTCGGTGACGGTGAGGTAGTCACGAATGCGGATCACCCCGCGGAGAAGGTGATGGGGGTGGGCAGCTCG  
GGGATCCCCAATGGTCGATCCAGCAGGCGGCCAGCGGAGTGGATCATCATCTCGTCATCCTCCATCCCC  
TGAACAGCACGATAAACTCCTCGCCGCCCAACGGATGGCGCTGTCCACCTTGC GGATATTGCTTCTGAG  
GTGGCCGGCAAAGGCGACCAGTGCAGATCCCCGACGCCATGGCCATAGGTGTGCTTGATCGACTTGAAG  
TTGTGATATCCAGGATCATCAGGTAGTCGTGCTCATGGAGCAGACTCTGGCAGAGCACATCCCTGCGTG  
GCAGCCGGGTCAAGTGGTCGGTGTGCGCCAGGGTGCAGCCGCAGGTAGATCTGCTTCCAGGCCACCAT  
GCCCAGCAACAGCACGATGAGATAGACCTTGAAGGCCGCACTTTGCAGGGCCAGCTTACGAAATCGAAC  
CAGTGTAGGACCACCTCAGATAGAGATCATCCCCGCCTTGGTGCGCATAAAGGGTTTGGCTCAGGCAGA  
GATGCTTGGGGCGGCAGGGCTCGGC GGCTTCAAACGATATGTTGGTGC GGTCGGGTTGATGGTGTGCGAA  
GGGTGCGCAGCACATCGTTAAATGCTTTCATCGACGGCGATATCGATACCGAGCAGCCCGTATTTGTAACCG  
CCGCGCCCCGATTGATGAATGAAGGGGAAGTACATCACTATGGTGTGCGCATGCTGAAGCTGTGATCT  
CGATATCGGAGACAAAGGCTTTCATCAGTGTGCACAAAGGGCGGCCGGCGCAAAGCTGGCGCAACCGAA  
GTAGTGATAACCAGGCGGGCAGTGTTCATCAGATCCACCTTGCATCGGCCAGTCTGGCGGGCAGCACATTG  
TTGTGCGCCACCATGCCGATCAGCCGGTAGTCATTCCAGATGGTGTAGATATTGATCACCTCCGAATAAG  
AGAGGGCATAGCGGAAGGTGTTTAGGATATTGGCTGCCGGTATTGCAGCGGAATATCGGCAAAGCGGTA  
TTTGCTTTTGGAGTCATACCCGTAGAGATAGTCGCTGCCGACGCTATTCGGGGGCGGTGGCTGATCGAGC  
AGATGGTGTGTGCCAGATAGCTGGTGTGTTCTCCACCTTGCAGGATCTTGGCTCGCTGGTAGAAGACCT  
CGAACACGTTCTTCTGTCTGGCGGTGATGAGATCCATGTCGTGCTGGATAGTGAGATAGGTGTAGTAGAA  
GACAATGCCCAACCCGGTCAGGGCGAGCAGGGCCAATCCGGTCACTTTGACGATGAACTGGCGAGCAAAC  
GCCGGTGGCCAGCGCAAGGCTGGGGGATTACCTGAAAATAAGGTCATAGGTGTCTGGGTGCAGTACCGAT  
AGGGGCGCGGGCGCCATACGGGCAAAGTATACGCGAAGGAAAATCCCGACAGGATCCACCGACAAACCTTG  
CCAGAAGCTGAAGCCCTCACCCTTATTTATCCCTACTCCACAATCAGCACGCTCTCGCTGGCCAGATGG  
TGCAGCCACTCCCTGACGATCAGCAGCACGGCGGCAAAGTGTCTGTCGCGGGGCGAGCAAGCTGGCGGCGA  
GGGGATCCCCCTCCGCCATGGCGGCCAGCTGGCCAAAGGCTTGTCCACCAGATCCCGGTCGAGCTGGTT  
GTCCCCCAGCACTTCGGCCAGTGTGGTTGACTGCGCAGGGTCAGCTGCAAGCCGGGCGGGATCTGCGGG  
GCGATGCGCATCAGCTCATCTCCACCACCATGATGGCCCGCTCCAGTTCGAGCGGGGTGGGCGCGCTG  
GGCGAAACGGTCCGGGCTGGATGGCGTGGGTGCCAAAGGCGAGCGGGTAGTGTGACGGGGCGCCATCTGG  
CTGGCTCAGCCAGAGCTGACTGCTCTGTTTACCAATCTCCAGCAGCAGGGTCACTATCTCCGGTACGGGT  
TGTGTTCATGGTGTGAGCTCCTGTATTGTAACGTTTTTCCCGTTCTGCCTTTGATACCCCCGCTGTGCGC  
ATTTGGCGAGACAATTTCTGCGAGTCGTCCCTCACTTGGTTGCAAACCCCTTGCAAAAAAATCCATTGG  
TGGAGGTCTGGATGTCTAAATGGCTATCGCCGTTTTCGTTATCCTCAGATGATTCAGGAGTTCAGATATGG  
ATATTGCAACCGCTCCCCGCGCCATCGCGCTCGCCCTCATGCTGGCAAGCGGCATCGCCGTCGCCAATGA  
AGCGCTGGTGTATCCAGACCGATTTTGGCCTCAAAGATGGCGCCGTGTCGGCCATGAAGGGGGTTGCCCTC  
GGGGTGGATCGCACCCCTGCCGCTCTATGACCTGACCCACGAGATCCCGGCTTACAACATCTGGGAAGCCT  
CCTACCGCCTCTACCAGACCCCTGCAGTATTGGCCAAAGGCGACCGTCTTTGTCAGCGTGGTGGATCCCGG  
TGTCGGCACCCGAGCGCAAATCAGTAGTGTCAAGACCAGGAGCGGCCACTACATCGTGACCCCGGACAAC  
GGCACCCCTGACTCTGGTGGCCGAGCACTTCGGCATCGAGGCGGTGCGCCAGATCGACGAGAACTCAACC  
GCCTCAAGGGTTCCGAGAAGTCTTACACCTTCCATGGCCGCGATGTGTACGCCTATACCGGCGCACGGCT  
CGCCTCCGGCGCCATCAGCTATGAGCAGGTGCGCCCGCTGCTGCCCGCCGAAGTGGTGAAGATCCCTTAT  
CAGCCTGCGGTGCGCGAGAAGGATGGCACCCCTCAAGGGCACCATCCCGATCCTCGATGTGCAGTACGGCA  
ACGTCTGGACCAATATCGACGATGCCCTGCTGACCAAGGCGGGGATCAACAAGGGGGATAACGCCTGCAT  
CAAGATCCGCGAAGGGGATGTGGTCAAATATGACGGCAAGGCGCCGTACGTCAGCAGCTTCGGTGACGTG  
CCGGAAGGTGACCGCTGGTCTACCTCAACAGCCTGCTGCAGGTGTCGGTGGCGCTGAACATGGACAGCT  
TCGCGCCCAAGCATCAGGTGCAATCCGGTGCCAATGCGATATCAGCCTGAAGAAGTGTCTCTGAAGATT  
GTCGGGCTTTTCGACAAGCGGGTTTTGAAGCAAGAGAGGGCAGCCAAAGAGGCTGCCCTCTCTCATTGGGTG  
GTAAGGCGTTGCTGATAAGGAGTTGTTGTCAAAAAAGCATATTAATTGAATGCAATTGATAATGATTGGTA  
TTTTGATTGGATAATCGCGCACTTGTCTGACCACCCAACCATAACCGAATGAAAACCAGCCTTTTACTGCTC  
AGCCTGCTGGCTCTGACCGCATGCAATGACAATCACAGCAATACGTCTGTGACCCCCCTCACCCGATGTGA  
CCCCACCGCTCGTCAAGCCGACCGAACCGCCATCACGCCGCAATAGTACCGCCGGAAACTCATAACCCG  
GGTGCCTCTGACCATTTAGGTCAATGTGGCCGATCGGCTGGGGGCGGGGGCACAGCTCGAGGTGAGACAG  
GTTGCCATCGGGATCCGCGTGCAGCAGGCCATCGAACCGGACCAACCTGTCAGCATCACCTTGCCAGCAG  
GTCTGCAACTGGATCAGCCGCTGGAGCTGCTCGGTAGCGACGAAGGCTATCTGCTGCGCGCGGTATCGGT  
GCGGGTGGCGGATCTCTCAGCCGGGATCACGCTGGCGCGCCGCAACAGCGTGCCGCGGCTGGGGTTGAAC  
GAGGAGGAGACGGCGATCTTCTGCTGGCGGATCAGAGCGGAGATGGCTCTCTCAGTCAGGCCGAGTGGG  
GCAGGGCAGAGGAGATCCGCCTGCAACAACAGGCGGCTCTTCAGGATTATGCAGCCTTCTGCTGGCCCA  
GCGCCAGCCGGGTGCCGTGCTGCACTATGCCGACAGCTGGCAGATGCTGCTGGCCCTGCGCGATGACAAG  
CAGGCGCGCAGCTGGTATCAGCGCAGCAACAGCGCCAGATCCAGTCCGCCCCGACCCAGCTCTATCCCG  
CCAATCCGAGCCAGCCGGACGAGCCGGAGACAGCGGATCTGCTGCGTCTCGATGAGCAGGGGCTGCTGGT  
GGTGCCTGGCCCTGGCAGTGCCTGCACGATGTGCGCACGGTCAGTGGGGTCAAGGGCAGCCAGTACTGG

CTTTATGGCAGTAACACCAGTGC GTTGAAGATTGCCAGCCAGCCACA ACTGGCTGCGGGGCTGACCGCTT  
GCGGCCGACGACTGGCGCCTGCCGACCC TACCGAGTTGGAACGGCTGCTGAGCAGTGACAAGTCGGC  
ATGGCGCTATCCCAATACCTTTGCTGTTGGCCTGCCCGCCAGATCTGGCTGCAGGATGGTGC GGGTCAA  
CCCCGTCTCTATCAACTGGCAACCCGAACCTGGCTGGATGAGGGAGAGGGGAGTCTGCTCTGGTATGCGC  
TGGCACCTATCCGGTGC GTTCCCTCCGTGGTGC GCGACAGCAGCAAGCCGGACATGGCGGCCCTGCGCGC  
CCAGTACAGCGGTTTCATCGGCCCAATGGCCTGCCGCCCGGGTGGATGAAGGGGTGGAATGGCAGGAGCTG  
GGGCCGCTGCCGGCGGTTCCCTTCCC GGCCGACAACCCCTATAGCCGGGCCAAGGTGGTGC TGGGTGAGC  
AGCTCTTTTTTCGACAAGCAGCTCTCCAAGGGGGCGGGACATCAGCTGTGCCAGTTGCCACGATCCGCAAAA  
GGGGTGGAGCGACGGCCTGAGCGTCTCGGTTCGGTTCATCTGGGTGAGAAGGGCAATCGCAACGCCCCCTCC  
ATCCTCAACAGCGCCTTACAGCTCGACCCAGTTCTGGGACGGGCGGGTCGCCACGCTGGAGGAGCAGTCGC  
TTCACCCGATCCAGAATCCCATCGAAATGGCGCTTGGTTCATGACGAACTGCTGGCTCGCTTGCAGGCCAG  
CCCCGACTATCAGGCTGCTTTTGGCACTGCTTTGGCGATCAGGGGATCACGCTGGAGCGGATCGCCAAG  
GCGATCGCCACCTTCGAGCGCACCATCATCAGCCGCGACAGCGATTTTGAGCGCTTCGCCAAAGGGGATA  
GTCAGGCGCTCAGTGACAAGGCGCTGTGGGGGATGCACCTCTACCGCACCGATGGCCGCTGCATGAACTG  
CCACTCCGGCCCCGCTGCTGAGTCAGCACGGGTTTCGAGAGTGTGGGGCTCACCTATTACGGTCGTGGCAAG  
CTGGAAGATCGCGGGCGCTTCTTCGAGACCCGCAACAAGGCAGATATCGGTCGCTTCAAGACCCCCAGCT  
TGCGGGACGTGCGCTTTACCGGCCCTATATGCACAACGGCATCTTCCCGATCTGGCCAGCGTATCGG  
CGGCTCGGTGCAGGGGGTGGTAGCCATGTACAAC TTTGGCGTGACCAAGTGGAGCGGCGGGGTCGGTTTTC  
CCGACCGGTGCGGATCAATATGATCCCTTCTTCCCCAAAGCCTCCGATCACCTTCATGCTCTTGGCCTCA  
GCAACGACGAGCTCGATGCTATTGGCGAGTTT TTTGCGCAGTGCCTCGCGCCGAGCCACGCCGACTCCGGC  
CACGGTTGCCGAGCTGGGGGTGAGTCAGACGGATGACCCGGCTCCGGTGGGAGCGGTGATCACCGGCTTG  
GCGGTGCTGCCTGTCCAGCCTCAGCTGGAAATGGGGCGCTCACTCAATCTGCAACTGCAGTGGCAACTGA  
GCGATGGATCTCTCGGCCCGCTCGATGGGCCTGTTGAGTGGCGCAGCGAACAGCCGGAGTTTCGCCACCGT  
GAGTCCACAGGGCGAGGTGCGCGGTGTGGCGGTGGTACGGCACGACTGGTGGCGACCACGGCTCGTCAC  
ACGCTGACCGTGACGGTGCAGGTGGTGGATGCCAGCCGATTTTGCCCGGGGCTGTCGTCAACCCGAGC  
TGGTGGCGGGCAAGCTTGCCTTTGTCTGCCAGCTGACCAGGGACGAGGCGGATCGTCTGTCCATCTCCTA  
TGACGGTGTGAGCAGTGACAGCGATGGTGACTACAATCCCTTCCCGCTGGAGTATGTGACCATGGGTGAG  
GCGCGGGCGCGGATTACTGCCAGCAGCTGGTGGCAGCGGTCATGATGACTGGCGTCTGCCGACCCGGG  
CCGAGCTGGAGGCGCTTTTGGCCGCTACAACAAGGATGGCGCGACGGATCAGTTGCTTTCAGCAGCGGG  
GTGGCCGCTCTACAACCGCTACTGGAGTAGCGATGCGACTGCCAATGACGATGGTGTGAGTTGCCGCTGCTC  
GACCTGAGCACTGGTGATCCGCTGTGGGATCTGGCGGATGAGGCCCATGCCGCCACCTGCGTCAAGGGCCA  
TCTAGCCTTCATAGATAGTCAGATGATAAACGGGCGCCTCGGGCGCCGTTTTGTCTCTGGTAATAAAGA  
AAGGGATCAGA ACTCGTTGGAGAGCGCCTTGTACCCTTTGACCAGATCGATATTGGTGTGAGCCACGTCC  
TCGGAGA ACTCGCGGCATCCACCGAAACCCGCGGGATATGGGTGAGATCGTCTGCTGGTTGATGCGGG  
TGGTGGAGGGGACGTAGA ACTCCGGCGGCAGATCGCAGCCATCGATCACCGAGTTGTGACGCACCACGGC  
GCCATCGCCGATATGGCAGTTGAACAGCACGCTGTTGAAGCCGATAAAGACCCGGTTCCCAC TTCGCAT  
GGCCCGTGGACGATGGAGCGGTGGGCGATGGAGGTGTA CTGCGGATGGTGACGGCGGCGCCGATTTGG  
AGTGGATCACACGCCATCCTGAATATTGGAATTGGCGCCGATGACGATGGGTTCCATCTCGCCGTTGGC  
ATCCACTTCGTGCGCGCGGATCACCGCATAGGGGCCGACAAAGACATTCCTCTTTGATGATCACCTTGCCG  
CAGATGATGGCGGTCTTGTGCATATAGGCGGATTCGTGCGATGACAGGCAGATGGCCGGAGGGATTCTTGC  
GGATCATGTTACATCCTGTGGTTGCCAAGAGGGATTATCTGGTGGTGGACGAGGAGCCTACCGGTCCGGTC  
AGCTTACCCCTGCTCGCCCTCTGGTGA AACCCCTGACTGGTCTGACCCCTGTGCTATGCCGTTTCGGCAT  
GGCTGTTTTCCCGCCGCAAGATATGGGAGCATGGCTGT CATCCCAGTCGCGTTAGGTGGACATATAAAG  
ATGAAGAAGATGATTGCCCTGTTGGCGGGTGGTTTGTGCTCTCCTCGGCCGTGACGGCCAAAGGGGAGG  
CGGGGAGCTTTGACTATTACGCCATGGCGCTTTCTGGTGC CCCGAGCATTGCGCCGTCAAACCGGCCGA  
TCGGGACCACTGTTCCCGCAAGCTGGGCTTTGTGCTGATGGTCTTTGGCCCCAGTACGATCGCGGTTAC  
CCCAGTAACTGCACCCGCAACGGCTCAATCCCGATATGGAGAGCGAGTTTGCCGATCTTTACCCCGACC  
GTTTTCTCTATCGCCATGAGTGGGAGAAGCACGGTACCTGCTCCGGCCTGAGCCAGCAGGCCTTCCATCA  
GCTGGCGAGCGATTTGCGCCAGAAGGTGAAGATCCCGGCGGCCTATCAATCCCCGGAAGAGCCGCTGCGC  
AAAACCAGCTTCCAGCTCAAGGCCGATCTGGCGAGCGCCAACCGTGGCTGGCTCCCGACAACATCACGG  
TGGCTTGTGCCGATGGTGGCCGCTTCTGCGGGAGATCTATATCTGCGTCAATAAAGAGGGGACGGATGC  
GGTCACCTGCTCCGCCGAGATGCAAAAAGCGGAGCGTGCCTCTGCGGTGACCCGATTTCTGCTGCGC  
AGCGTGCCTTAAGCCTCCACTCTCTTCATCGGGCCCTTGC GGCTTGATGTGTAACCACAGCTATCGGAA  
AGGAGTCTGACAGATGGATGGCAACAACCGGTTTGGCCGACAGAGCGGGCCCTGCTGCTTGGGGTAAAA  
GGGGTGGGGCCGACCGTTATCGGGAGGCTCGAACAGCTTGGATACCATACCTGGCGGGATTGGCCGAGG  
CCGACACCACCCATATCGTCCAGCTGGTGGCCAGCATGCTGGGCTCGACCTGTTGGCAGAACAGCCCGCA  
GGCGCGCAGTGCCATCAATGGCGCTATTGCGCTGGCCCCGCGCCCATCTGGCGACGGATGCTACAAAGGGG  
GTGAATGGATGAGCCTCTTTACCGAGTTGGGAATGCGTTATCCCATAATCCAGGCGCCGATGGCCGGTGT  
GCAGGGCAGCGAGCTGGCGCTGGCCGTGACCGGGGCGGGTGGCTTGGGTTCTTTGCCCTGCCGCCATGCTC  
ACACCAGCAGAGCTGCGCCGCGAACTGGAGCATCTTTCCCAAAGCGGCCTTGGGCCATTTAACATCAACT  
TCTTTTGCATCAGCAACGGGAGCCGGATCCCGTTGCGCTGGCCCGCTGGCAGCAGCCCTTGTCCCTA

CTATGCCGAGTTCGGTGTAAAGCCCTCAGCCGTTACGACGGTGCCAGGTCGAGCCCCCTTCAATGAGGAG  
CATGCTGCCATGGTGGCCGAGTTCAGACCGGCGGTGGTCAGCTTTCACCTCGGCCTGCCCGCTCCCGAGC  
TGCTTGCCCGGGTGAAGCGGCGGGGGTTAGGGTCTTTGCCAGCGCCACCACGGTGGCAGAGGCCGTATG  
GCTCGCTCACCACGGCGCCGACCCATCATCGCCAGGGATTGGAGGCGGGTGGTCATCGCGGCCATTTCT  
CTCTCTGATGATCTCGCCCTGCAGCAGGGCACCTTGACCTTGCTGGCACAGATCCTCGCGGCGACTGATC  
TGCCGGTGATTGCCGCGGGCGGTATCGTCGATGGCAAGGGGATCGCCAACCGCGCTGGCAATGGGGGCGAG  
CGCCGTGCAGATGGGCACTGCTTTTCTCTGCTGCCATGAAGCGACCACCTCGGCGCTGCATCGCGCCGCC  
ATCCATTACCAGAGGGCCAGCAGACGGCACTGACCAATTTGTTTCAAGTGGCCGCCCGGCGCGGGGTATCG  
TCAACCGTCTGATGCGTGAGCTGGGCCCGCTCTCGGATCTTGCCCTCACTTCCCTATGCCAGTGGCGC  
ACTGGCACCGCTGCGTGTGCTGCCGCCGAGAAGGCGGGGGCAGTGGCTTCTCTCCGCTGTTGGGCTGGGCAG  
GATGTATCGGGCTGCCGGGATCTTCCCGCTGGCGAGCTGATGGCGTGTGGGTCAAAGGCTGGATTGG  
GATAAGCACTGCTATATACGCCCTCTTTATATAGAAGCGCCGTTGGTGCAGTGCCTCGGACGCGACGGTG  
CTGCGATGATGGATGAGTGTCTTGTCCCTTGTGAGGCGCTTATCCGGAGACAAAACCCCGCACTTACCC  
ACTCCTGTGGATAAGTCTGTATAAAGGCTGTGTGTTGATATGAATAACTAATAAATTGCACTTTTTTTGCA  
ATTTTTATTGCGATAAAGCCTTGCCAATGTGAGCTGGATCTCTATAATGCGCCTCCATCGACAGGGCAAGC  
GGCAACGCAAACAACCTCGTCGGTAACCTCGAAAAGCCCTTGAAAATAAGGCTTGACTCGAGAAGGCGGT  
TGAGTAGAATTCCACTCCCGCAGCAACACACTGTTGCGTCGCTCTTTAACAAATTTGAATCAAGCAATCTG  
TGTGGGCACTCACAGCATCGAGCATCAAAAACAATTTTTGATTTTCAATGTCTGGTGAAGTGACCAAGAC  
GATTTCTTAGCAATAAGAAGTGAACAGTTTATTTTCAAGCAATTCATTGAGCCGTTTTTCGAAGCAACCA  
ACTTAAATTTGAAGAGTTTGTATCATGGCTCAGATTGAACGCTGGCGGCAGGCTAACACATGCAAGTCGAG  
CGGCAGCGGGAAAGTAGCTTGTACTTTTTGCCGGCGAGCGGCGGACGGGTGAGTAATGCCTGGGGATCTG  
CCCAGTCGAGGGGGATAACTACTGGAAACGGTAGCTAATACCGCATAACGCCCTACGGGGGAAAGCAGGGG  
ACCTTCCGGCCTTGCGCGATTGGATGAACCCAGGTGGGATTAGCTAGTTGGTGAGGTAATGGCTCACCAA  
GGCGACGATCCCTAGCTGGTCTGAGAGGATGATCAGCCACACTGGAACGAGACACGGTCCAGACTCCTA  
CGGGAGGCAGCAGTGGGGAATATTGCACAATGGGGGAAACCTGATGCAGCCATGCCGCGTGTGTGAAGA  
AGGCCTTCCGGTGTAAAGCACTTTTCCAGCGAGGAGGAAAGGTTGGTAGCTAATAACTGCCAGCTGTGACG  
TTACTCGCAGAAGAAGCACCAGGCTAACTCCGTGCCAGCAGCCGCGTAATACGGAGGGTGCAAGCGTTAA  
TCGGAATTAAGTGGGCTAAAGCGCACGACGCGGCTGGATAAGTTAGATGTGAAAGCCCCGGGCTCAACC  
TGGGAATTTGCAATTTAAACTGTCCCGCTAGAGCTTGTAGAGGGGGGTAGAATTCAGGTGTAGCGTGA  
AATGCGTAGAGATCTGGAGGAATACCGGTGGCGAAGGCGCCCTTGACAAAAGACTGACGCTCAGGTGC  
GAAAGCGTGGGGAGCAAACAGGATTAGATAACCTGGTAGTCCACGCCGTAACGATGTGATTTGGAGGC  
TGTGTCTTTGAGACGTGGCTTCCGGAGCTAACCGGTTAAATCGACCGCCTGGGGAGTACGGCCGAAGGT  
TAAAACCTCAAATGAATTGACGGGGCCCGCACAAAGCGGTGGAGCATGTGGTTTAAATTCGATGCAACGCGA  
AGAACCTTACCTGGCCTTGACATGTCTGGAATCCTGTAGAGATACGGGAGTGCTTCCGGGAATCAGAACA  
CAGGTGCTGCATGGCTGTGCTCAGCTCGTGTGCTGAGATGTTGGGTTAAGTCCCGCAACGAGCGCAACCC  
CTGTCTTTTGTGTCAGCAGCTAATGGTGGAACTCAAGGGAGACTGCCGCTGATAAACCGGAGGAAGGT  
GGGGATGACGTCAAGTCATCATGGCCCTTACGGCCAGGGCTACACACGTGCTACAATGGCGCGTACAGAG  
GGCTGCAAGCTAGCGATAGTGAGCGAATCCCAAAAAGCGCGTCTGTAGTCCGGATCGGAGTCTGCAACTCG  
ACTCCGTGAAGTCGGAATCGCTAGTAATCGCAAAATCAGAATGTTGCCGTTGAATACGTTCCCGGGCCTTGT  
ACACACCGCCCGTCACACCATGGGAGTGGGTTGCACCAGAAGTAGATAGCTTAACTTCCGGGAGGGCGTT  
TACCACGGTGTGATTTCATGACTGGGGTGAAGTCGTAACAAGGTAACCTTAGGGGAACCTGGGGTTGGATC  
ACCTCCTTACCTAAGATGTGCAAGTTGTTGAGTGTTCACACAGATTGCCCTTGATTCAAAGTAGTTAGAG  
CAAAGACCTGATGCGAAAGTGTGAGTGTCTATCTGGCTTCGGTCAGATGAGAGAAGCCCTATCATTTGGGT  
TTTGGGATGTGAATAATGGCGCTCGGCCTCGCAGGCTCGGCACTCGCCATTACCCAAAATCTGCACGTGCT  
GACGAGCGCAAAAGATGATTTTGGGTCCCCTCTGTCTAGAGGCTTAGGACACCGCCCTTTCACGGCGGTA  
ACAGGGGTTCAATCCCCTAGGGGACGCCACTCTCTTCTTGTAAACAAGATGCAGAGTTAAGAACCTGA  
TTCTTAACTCTGTTTTCTTCCGGCCTTGGCCGTTGCAAAACATGCTCTTTAAACAATCTGGAAAAGCTGATTT  
AAAAAGTAGTTCTCAAACATTTGTTACAAGTGTCTTTGGAACTTCTTGGCGAAAACCAAATTTTTATTTGG  
TCCTTGTGTGACGACAACAAGCAAGCGTTGTTTCGACGACACTTCTTGGGGTTGTATGGTTAAGTGACTA  
AGCGTACATGGTGGATGCCTTGGCAGTCAGAGGCGATGAAGGACGTAACCTGCGATAAGCTGTGAGA  
AGTCCGTAAGAGACGCTATTACTCACAGATTTCCGAATGGGGAAACCCACCCGAGATAACTCGGGTATCT  
GTTACTGAATACATAGGTAACAGAGGCGAACCGGGAGAAGTGAACATCTAAGTACCCCGAGGAAAAGAA  
ATCAACCGAGATTCCCTCAGTAGCGGCGAGCGAACCGGGATTAGCCCTTAAAGCATCTTGGAAAGTTAGTGG  
AACGGTCTTGAAAGGCCGGCGATACAGGGTGTATAGCCCGTACACGAAAACGACCTTGATGTGAAATCG  
AGTAGGGCGGGACACGTGACATCCTGTCTGAATATGGGGGACCATCCTCCAAGGCTAAATACTCCTGAC  
TGACCGATAGTGAACAGTACCGTGTAGGGGAAAGGCGAAAAGAACCCTGTGAGGGGAGTGAATAGAACC  
TGAAACCGTGTACGTACAAGCAGTGGGAGCCCTTCCGGGTGACTGCGTACCTTTTGTATAATGGGTGAGC  
GACTTACATTTTGTAGCGAGGTTAACCCTATAGGGGAGCCGTAGGGGAAACCGAGTCTTAACTGGGCGTCT  
AGTTGCAAGGTGTAGACCCGAAACCGGGTGTACTAGCCATGGGCAGGTTGAAGGTTGAGTAACATCAACT  
GGAGGACCGAACCCTAAGCTTGCAAAAGTTAGGGGATGACCTGTGGCTGGGGGTGAAAGGCCAATCAA  
CTCGGAGATAGCTGGTTCTCCCCGAAAGCTATTTAGGTAGCGCTCGGACGAATACTACTGGGGGTAGAG

CACTGTTTGGGCTAGGGGGTCATCCCGACTTACCAACCCCATGCAAACCTCCGAATACCAGTAAGTAATAT  
CCGGGAGACACACGGCGGGTGTAACTCCGTCGTGAAGAGGGAAACAACCCAGACCGCCGGCTAAGGTC  
CCAAAGTTCTGGTTAAGTGGGAAACGATGTGGGAAGGCTCAGACAGCTAGGATGTTGGCTTAGAAGCAGC  
CATCATTTAAAGAAAGCGTAATAGCTCACTAGTCGAGTCGGCCTGCGCGGAAGATGTAACGGGGCTCAAA  
CCAGGCACCGAAGCCGCGGATTACACTTATGTGTGAGTGGTAGGGGAGCGTTCTGTAAGTCTGCGAAGG  
TGTATCGAGAGGTATGCTGGAGATATCAGAAGTGCGAATGCTGACGTAAGTAACGATAAAGGGGGTAAAA  
AGCCTCCTCGCCGAAGACCAAGGGTTCTGTCCAACGTTAATCGGGGCAGGGTGAGTCGACCCCTAAGG  
CGAGGCCGAAAGGCGTAGTCGATGGGAAGCAGGTTAATATTCCTGCACGACTTGTAAATTGCGATGGGGGG  
ACGGAGAAGGCTAGGTGGGCCAGGCGACGGTTGTCTGGTAAAAGTGCCTAGGTGGTGTTCCTAGGCCAAA  
TCCGGAGACACAACACTGAGACACGAGACGAACACACTACCGTGTGGAAGCCATTGATGCCCTGCTTCCA  
GGAAAAGCCTCTAAGCTTCAGATTACAAGTCATCGTACCCCAAACCGACACAGGTGGTGGGTAGAGAA  
ACCAAGGCGCTTGAGAGAACTCGGGTGAAGGAACCTAGGCAAAAATAGAACCCTAACTTCGGGAGAAGGTTT  
GCTCTTGACAGTGAAGTCCCTTGCGGATGGAGCAGTTGGGAGTCGCACTGACCAGATGGCTGGGACTGTT  
TATCAAAAACACAGCACTCTGCAAAACACGAAAAGTGGACGTATAGGGTGTGACACCTGCCCGGTGCCGGAA  
GGTTAATTGATGGGGTTAGCGCAAGCGAAGCTCTTGATCGAAGCCCCGGTAAACGGCGGGCCGTAACATA  
ACGGTCTTAAGGTAGCGAAATTCCTTGTGCGGGTAAAGTTCGACCTGCACGAATGGTGTAAACCATGGCCAT  
GCTGTCTCCACCCGAGACTCAGTGAATCGAATTCGCCGTGAAGATGCGGTGTACCCGCGGCTAGACGGA  
AAGACCCCGTGAACCTTTACTACAGCTTGGCACTGAACATTGAACCTACATGTGTAGGATAGGTGGGAGG  
CTTTGAAGGCGTGACGCCAGTTGCGCTGGAGCCGTCCTTGAATACCACCTTGTATGTTTGTATGTTCTA  
ACGCAGGGCCCTGAATCGGGCTCGCGGACAGTGCCTGGTGGGTAGTTTACTGGGGCGGTCTCCTCCCAA  
AGAGTAACGGAGGAGCACGAAGGTTGGCTAATCCTGGTTCGGACATCAGGAGGTTAGTGCAATGGCATAAG  
CCAGCTTAACTGCGAGACGGACAGGTCGAGCAGGTACGAAAAGTAGGTCATAGTGATCCGGTGGTTCTGAA  
TGGAAAGGGCCATCGCTCAACGGATAAAAAGTACTCCGGGGATAACAGGCTGATACCGCCCAAGAGTTCAT  
ATCGACGGCGGTGTTTGGCACCTCGATGTGCGGCTCATCACATCCTGGGGCTGAAGTCGGTCCCAAGGGTA  
TGGCTGTTTCGCCATTTAAAGTGGTACGCGAGCTGGGTTTCAAGCGTCGTGAGACAGTTCCGGTCCCTATCT  
GCCGTGGGCGTTGGATGATTGAAGGGAGTTGCTCCTAGTACGAGAGGACCGGAGTGAACGAACCTCTGGT  
GTTCCGGTGTGTCACGCCAGTGGCACTGCCCGGTAGCTAAGTTCGGAATCGATAACCGCTGAAAGCATCTA  
AGCGGGAAGCGAGCCCTGAGATGAGTCATCCCTGACCCCTTGAGGGTCTTAAAGGGCCGTTGGGAGACCA  
AACGTTGATAGGTGGGGTGTGTAAGCGCGGCGACGTGTTGAGCTAACCCATACTAATTACCCTGAGGCT  
TAACCATAACAACCCCAAGAAGTGTCTAAGGCTTGTAGCAAAATACGAACGAATTACTTACGTCAGCTTT  
CTCAGATTGAAGAATTTGCTTGGCGGCCATAGCGCCGTGGAACACCTGATCCCATGCCGAACCTCAGAAG  
TGAAACCGGTTAGCGCCGATGGTAGTGTGGCATTGCGCCATGCGAGAGTAGGACACTGCCAGGCACTCAAT  
ACAAGAAACCCCGCTCATCGAGCGGGGTTTTTTTATTGCTGCAATTCAGTAAGTCGCCGATAATTGCC  
TGTTTTATTCTCCTCTCCCTTCCAATTCCTAGTCTTCCCCGTCGGTTTTTACTCATAAAAAACAGCCATGGC  
AGCGTAAAATAGCGCTTTATTTTCGTCGGAGATAGCCATGTTTTGTCCAAAATGTGGTGGTCAAACCCCTG  
CAGAGCGTCAGCCCCAAAGAGTTTTGCTGTGGCTGCGGTTTTTCATTTTTTCCAGAAATGTGGCGACGGCTG  
TGATGGTGGCGCTTTGCTGGCAGGACGAGGTGCTGGTTGCGGTGCGTGCCCGCAATCCGGGCAAGGGGTT  
ACTGGATCTGCCAGGCGGATTTGTGATCCCGCGAGTCGCTGGAGGCGGCTCTGGTGGCGGAGTTGCAG  
GAGGAGTTGGGGCTCGATGTTAGCGTTCAACCTTTTTATCTATCTTGGTTCATACCCCAATATCTATCCCT  
ACGACAGTATCACCTACCACACCTGTGACACCTGTGACACCTTCTTCGCCATCAGGCTGAATGAAAAACC  
GGTCATCCAGCCAGCTGATGATGTGGCTGCCTGTGAGTGGCTGAAGATCCCGGATGTCCCCTTGCCCCGC  
TTTTGCTTTTCGAGTCGACGCGCACCCGATGGCGCGGTTGCAGCAATCCCTTTGCAAGCCTGATCCCTGC  
TGATGACGATGGGGATTGGCAGCGACCATGCCTGTCTCATCCTTGTCCGCTTTTGTCCCGCAGACGCCAT  
TCGTGACAGGTTGAGTGGTATAGTCTGCAGTGGATCCGGATTCAAGGAGCATATCGTGAAGAAGATAGTT  
CTCATTTGCTCGGCATCGCCGTGGCGGCCCTTGTGGCCATAGTACGCTGATAAGCCTTATCGACCCCA  
ATCAATTCAGCCCAACTGGCTGAACAGGTGCGCAAGAGCACGGGCCGGGAAGTGGTATGGCGGGGGA  
GATTGACTGGCGTTTTCTGGCCGAGTCTCGGCCTCTGCTGGAGAAGGTGGCTCTGCGCAATCCGGCGGT  
TTTTGCCGAGCCGGATCTGGTTTCGTTTTCGAACAGGGCGAGGCCCTCGGTGGCCCTGTTGCCGCTGCTCTCAC  
ATCGTCTGGAGATTGGCAAGGTGACCCTGAGTGGCGCCATCTCTTTATCCAGACCAAGGCGGATGGCAG  
CTCCAATCTGAGCGGACTGATCAAAGATGCCACTGCTGATGCAAGCGAACCAGGTCGTCGCCGCAACCCCT  
GCGCCAACCGCTGATAGCAAGCCCTGGCAGATCAGCTTGCAGGGTGTGCGCTCTCCAGGCCAGTGGCG  
TGGTACAGGATGATCGCCGCGCACCTCGCTGCGACTGGATCGCTCGATCTCGATATGGGGCTGCTGGC  
CACTGGTCACTGGGTACCCGTGACGCTGGCCGCCAAGGGGAGTGCCGACAAGCTCGCTTTTCGATGTTAAA  
GGGCAGACCCAGATCAAGCTGGCGCAGGAGGTGATGGCCAGTGAAGTGAAGACTTGAGCCTCAGTGGCA  
GCCTGAGTACCCGTCCTGCGACTCGACAGTTTCTCCATCAAGGGAGACCGACTGGCCTTGGGTGAGTG  
GAGCAACCTCACGTTGGCGCTGAAGGGGACCAAGGGTGAAGGGCAGCAAGCTTCATTGGCTGGCTCGCTG  
GAAGGAACACTCAAGGGACGGCTCGATAAAGAGATGAAGCTGGCCGAGCTCTCCGATGTGCTGCTGACGG  
CTGCGCTGGAAGGTGATGCGCTGCCGCGCCCGCAGATGAAGCTGAAACTGGCCGGGTTTGGCCGTGCCGA  
GCTCGACAAGGAGTTGATTACCCTGAGCAAGCTGGTGTGAGTGTGATGAGGCGCTGCTGAGTGGTGTG  
GGAACCGTGCAGCTTGGCGCTGTTCCCGCAATCAGCTTCGATCTCAAGGGGAGAAGCTGGATCTCGACA  
AATGGCTCGCCAAATCGGTACCGACACACCTGCGCAGGCGAAAAGAGGACAAACCGGCGACCGGTGTTGC

CAACACCGCTGCAAGTGACAATAAAGCGGTACCCGGCAAGAGCGAAGCCCTCTCCGCGGTTGAACCGGAT  
CTGGGCGCGCTCAAAGAGGTGGATCTGGATGGTTCGTTGCAACTTGGCAGCCTGCGCCTGAAAGGGCTGG  
ATCTCGGTGCTGTGCATCTGCAGGTGGCTCTGGCAAAAGGGCTGATGACGCTCAAACAGTTCAGCGCGAC  
CGTGGCTGACGGTCAGGTAAGCGCGAAAGGGGTAFCGACGCACGCGAGCAGCCCGCCACCTACAAGGTG  
CACAAGCAGGTGGCCGGAGTGAATATTGCCCCCTTGTTCAGACTCTGGCTCAGAGTGATCTGCTGGAGG  
GCAAGGGCGATCTCGATGTGCAGGTGCAGGGACGCGGTCTCTCTGCGTTGGCACTGCGCAACCGAATGCA  
GGGCAAGGTGACCTTGAAGCTGAGCGACGGCGCCCTGCATGGCATCAACCTGCCGGAGATGATCCGCGAG  
GCGCGGGCCACCCTACCCGGCAAGGGGGGTGAGCAGGTGAAGGAGGCGCGCAAGACCGACTTCAGCGCCC  
TCACCGCCAGCTTCCAGATTGCCGACGGCATCGCCCGTAGCAACGACATCCAGCTCTTTGCCCCCGCCTT  
GCGGGTCAAGGGCGAGGGGGCAGACGGCGCTGGTGGCGGAGAGCTCGACTTCCTGTTCCCTACCTCCATT  
GTCGAGAGCAGCAAGGGGCAGGGGGCAAGGATGTGGATGAGCTCAAAGAGATCACCATTCCGGTTCGGGA  
TCGGCGGTCACTGGCAAGCCCCAGCTACCAGCTCGATGTGAAGGCGCTGCTTAGCAACAACAAGCTGCT  
GGAGGATAAAGGCGCGCAAGGAGGCCGAACGCGGCCTCAAGAAGCTGCTGGGTGACAAGGCCGAGAACGAG  
GCCGTCAAAGGGGTGGCCGACCAGCTGCTCAAGGGGCTGTTCAAATAGATGACGGTTCATATGGGCTGGC  
GGGAGCCGCGCAATGCCGTTAGCGGTTGACCGGATGTGACGCGCATTGAAAAATGGCGCTGACATTCCTT  
TATGGCGCAGTGACCTGCTGTGCCTTGATCCGGAGTCTCTCGAGTTGAACCCATGCGCCTGATCCTGCT  
GCTCTGCTCCCTGATCTGCTACGGCATGGCGTATCCCGTGGTGGCCGGCCGCTGGCTGATCGCCTGGCG  
GGCGAGCTGGCCAGGACGGCTCCCGAACAGGCGCTGCCTCTTGACGAGGGGCAGCGGCTCGATCGTCGCC  
TGATCGCTCCCGACTCCCTTCATCCTGCCTGGCAGCGCTATCCGCTGCGTCAACTGCAGGCCACCTATCG  
CTATCAGCAGGAGTGCGGGACAGAGAATGAGTTGCCCGCCGAGTGGCTGCCGCTACTGCAGGCGCTTGT  
GGCCAAGGGGCTGTACCCTCGACCCGCTGGTTCGCCGCTCACCCGTTTATCCGCTGGGTGGCTCCAGCG  
CTGCGCGCTGGCTGGCTGGTTCATCCGGTGGCCGGGCTCGATGCTCTGCTCCATGTGCGGGAGCGGCGTGA  
TCAGCTGGGGCTGCTTGGCGAGCTCGGGCATGACAACCTCGATGCCCTGCTGCGGGGTGAGCGCTGGCTG  
CTGCAATCGGGTCAGCTCTGGTACTTGGCGATGGGCGAGTGGCAGCCGCTGGCCGAGCGGCTTGGTGTGA  
CGCTGGATCGCCGTACCGATGGTCCCTGTGAGGAGCGAGTGGGAGCGATTTGCTTCAATGCTCTCCCCAC  
GCTTGGCTGGCAGTGGCTGGCGCTGGCCAGCTCGTTTGGTTTTATCCTGTTGCTGGGGTGGGCCAGCTGG  
CAGCGCTGGCGCCTGCTGCGGAGCGGCGTGTGCGATTGCAGATGCTGACCCACGAGCTGCGCACTCCCA  
TCATGGCACTCTCCGGCATAGCAGGAGCTGCGCCACGATTTGACCCGGCTGCCCCCTTCCGCCCAACA  
GAGCGTGGGGCAACTGCTGGGCGAGTGTGCCCCGCTGCACTGAGCTGAGGCGAGGCCAGTCCCACTATCTG  
GCGGCAGAGACTCTCGAGGATGAGCGGGTGGCGGTGAGTCTCACTGAGTGGCTCACCCCTGGCTTGCAGC  
GGCATGACGCCATCTTCTGCCTTGAGCGGGAGATGACTCTGGCGCTCCCCCTTCTACTGGCTCGATCTCGC  
CCTCGACAACCTGCTGCGCAACGCCAGCCAGCATGGCCGCGCGCCGGTTCGAGTCAGTGTCTGCTGGCAG  
GCGGGGCGTTTTGCTCCTCGCGGTGAGCGATGGCGGCGAGCTGCCGGGTTACCGGCTCGCCACCCCTGCTG  
GCCGCGGTGCTCGTGCCGAGGGTTTTGGGGCTGGGGCTTGCATCGTGCGCCATCTGCTGCGCCGCTTTGG  
CGGGTGCCTCGCCCTATCCGGCCCCGCCCCTACCTTACCCTGACACTGCCCTGCCAATCTGGAGCGAC  
ACCGAATCATGAAGACCATCCTGCTTGTGGAAGACGAGGCGCTGCTGGCGGAGAACCTGCAACGCTATCT  
GACCCGCGAGGGGTATCGTTGCCTCTGGTGCAGACCCCTGGCAGCCGAGAGCAGTGGCTGGCGGCG  
GATCTGGTGTGCTCGATCGCACCATGCCGGAGGGGGATGCCCTCGACTGGCTGCCCCAGTGGCTGGCCC  
GCAAGGCGCTGCCGGTGTGCTGCTCACTGCAAGGGTGGAGGTGAGCGATCGGGTGGCCGGGCTCGATGC  
GGGGGCGCGGACTACCTGACCAAGCCCTTCTCCACGACGAGCTGCTGGCCCGGATCCGGGCCAGTTG  
CGTCAGCTGGGGGATGGCACTCAGGTGGTGGGCGGCTTGCAGCTTCATCCCGCCGGATGCAGGCGAGTT  
GGCAGGATGCGGAGGTGAGCTTACCCCTACCGAGTTTGCCTGCTCACCCCTGCTGGTGGCAATGGCGGG  
TCGGGTGCTGAGCCGGGAGGAGATCCTCAATCGGGTGTGGGGCTATCAGGCGTTTCCCTCCACCCGACG  
GTCGATAACCATATTTGCAACTGCGTCAAAGCTGCCCGGGCTGGCTATCGAGACGGTGCAGCGGTATCG  
CTTCTGAATGCAAGCAGCGTGTGGCAACAGAGGGGCTGGCCACCGATCGCGCCGACCCGAGCAACCGG  
CTACCCTGGCGCTGTTGCAAGGGGATAACCGGCACGCTGGCAATCTTTGAGCAGGCGATGGCCCGCCCT  
CAACAGCGAAGCCGAGCGCCGTAGCTGGCAGGGGATGCTGGCCGCGCTGAGTGGCCAGCACTGCGGCAAG  
GATTTCCCGCTGACCTTGCTGATGGGGTGGCGAGCTGCGCCTTGAGCTGATCCAGCGCGATGCGCCGC  
TGCTGCGGGACTATCGGGTGCAGTTGACCGGGGAGGGGCCATCACCCCGCGGAACCTATCGATTCCGC  
TGGCCGTGACCGACTGGCAGGTGCCAGTGGGAGGCGGAAGAGAATCCGGAGTCAGGGTTGTGCGGGCC  
GATCTGCCGACGCTTTACCTGCCGACTCTATCAGCTGCGGCTGACGGTGGCGGGCAAGGAGTGGCAGG  
TGGCGTTGCCGCTGCCTGCGGTGCAGGATCTGACTGGCTCTCCGCTCGCCACAGGCGGTAGCCAATCC  
CCCCGCCAATCCCGCTTTGTGCACTCCGCTCTGGCTGAGCAGACTGTGCTGGCCCGCCGCAATACTCC  
CTGCTCTGGTGGCACCGGATTGCGACTGATGAGCCGGTGAAGTGGCAACCGCTACGCCCAGAGTTGGC  
GTACCCTCTCGCTGGTGCAAACCAGCCAGCGCGGCCAGCTGGTGTGAGCTGAGTACAGTACAGGCTGG  
GCCGGTGGACTAATGGTGTGATGGTCAAGGTACCCGCAATCCTGACATTGGCCTGACAATCGCAGGC  
GGCAATCTGCTGAAATGGCGATTCCCGTGTGTTATCAGGAATCACCGACCATGACTCTTCTTACCGAAT  
TAGCGAGCCGGATCCGCTCGCTGCTGCTGTTGATGCCGCTGCTCTCCCTGCTGCCGAGGCGCTGACCC  
GGCAACGATCAGTGGCGTATCGAGCTGGATCCCGCCACCCCTGGCGGCCGAGGCTGTGCTGCCATCGGGC  
CAGCATCTTGCCATCTTCCCCCGGCCCGCGCCAGCCGGTACCGCTCTGCAGCAGGAGGGGGAGCGTG

CCAGCTGGCTGACCCGTGCCGATGGCGAGGTGCGTGCCTCTGCCCGTCTCGAGGGCAACCGTCTGATCCT  
CAGCTTGAGTCGTGCGAGTGTGGCGAGCTGGTGTGGCCGCGGGTGCCGGCAGGGGCGCAGGCGTGATA  
CTGCCGATCCACGAGGGTTTTTCGCATCCCGGTTGATCATCCCAAGTGGCGCAAGGCGTGGCGCAGGAGT  
ATCAGGGGATCAACACAACCGAAAAATCTCACCTGCCGCTGGTTCGGGCTGGATCACGGCGATCAGCAGCT  
GGCGATCCTCTTTGCCAACCCCTTCAACAACCGGCTCACCTTTGCCCCAAGCAAGATGGCATTGCCCTG  
ACGGCGACCCATAGCGTCAATCGCCTCAATCTGACCGACCCCTATGAGGTGGCGGTGTGCGTGCAACCGG  
GCAACGACTGGCTGGCGGCGGCCAAGGCCTATCGCAGCTGGCTGCAGGAGCGGGGCGAGCTGGTCTCGCT  
CGAGAGCAAGCTGGCGGCAGTACCGGATGGCAAGCGGCTGATTGGTGCCTCTCACCTCTATCTCTGGGGC  
GAGCGACTGCTGGTGCCTCAGGATGTGAAGAGTTGGCCCGCTGCGCCGCTGATCCCCGCCGACTGGC  
TCAAGGGGAGAGTAAGAGTGCCTGCAAGCGCCGATCTTGAGCGCAACCGCTATCTGCAAAAATCTGGT  
GCTGACCGGAGTTGAGCAGGCGCTGGCCATCGCCATCCGGGTCAGCAACCGGCCGATTTGCGTGCCTGG  
CGCACGCTGGCGGCCACGCAACTGGGCTCTGCGCTCAACGAGCCGAGAGTTGGGGCGATGGCAGTTCGG  
CCAAGATGATCGCCGCTCTCAAGCAGGCTGGACTACCCAGACTCTGGCTGGGTCTGCCCCAGTGGACCGC  
CGGTTTTGCTGCGCCAGAGGGGATTGAACTTGCCAAAACAGGCGGGCTATCTCATCGCCCCTTACGACTCT  
TACGATAACCGCGCTGCCGGAGGGGAATCGCCAACAGAGCTGGCTCACCGCCAGATGGGGCAGGATATCT  
ACCTGCGCTGCGGCATCATGCAGGAGAACGGCCGGCGCAAGAGCGGCTTTCAAAAATAGCGGCGTCTACAC  
CAATCAGGCCTGTGTGCGCCCGGTGATGGAGCAGCGAGTGCCAAAATTCAGCAGGCGAGCCACTACAAC  
AGCTGGTTCTCGATGTGGCGGCGACCGCATGGTGTTTGACGACTTCGACCCGGCCAAGCCGACCCTC  
AGGCGCAGGATGCGCAAAACCGGATGGCCGGGATGACGTGGATAGCCAAGAGTCAGGGGGGGCTGGTGA  
CTCCGAGGAGAGCGGGGCGGTTGCCAACCGCACCGCGGCTTTGCCCCACTGCCCCAGACCAGCGGCTTT  
GGCTGGCAGGATCCCGATATGCGCCGCAACAAGCGCTCTCCCTACTATCTGGGGGCTGGTATCCCGACT  
ATCAGCCTGCATTTTTCTTTTCGCCAGAGCCACCTAAAACCTGAGTATCAGGGGCTCTACTTCGATCCGGC  
GCTGCGGTTGCCGCTGTTCCAGAGTGTCTTTCACGACAGCATAGTGACCACCCACCACTGGACGATGGAC  
AGCCTCAAATTCAGGGAGAGTGTGTCAGGTCACCGAACTGTTGCGCAGCTCTACAACGTGCCGCCCCCTAC  
TCAACCTCAGTCTGGATAGCGCCAGTGCAGCGCATTCCTACCTCAAGGGGCTCGATGCCCTTCTTCCGCCC  
GCTGCATGAGCGGCTCTACAACCGCCCTCACCGGTTTTGCTGGCTCGACAAAACGAGGAGTGGTGCAG  
CAGAGCGAGTTTCCGATGGCACCAGATTGGTGGCAACTTCGGCCAGCCACTGAGCAGGCAAGGATCA  
AACTGGCCGCTCAAAGCGTGTGCTGGCGCTGTTGCCCCGATGGCAGCCAGCAGCAGTTTGTCTCGCAACCT  
TGGCGTCCGCTAATCTGGCGTCTGGCTTTTATTTTTCATCAGATGATGCTGTGGCAGAACTTTTCTCATGTAT  
AGATGAACGTTCTGCAAAAATAAACGAGAGGCGAGTTCTGATGATTGAGAGTGAAGTGAATTAGAGAGTAAA  
CCATCCGGCGTGGCCGCTGGTCTGGCAGATCTATGGCGAGAGTTTTTCCCCGCTACGAGCAGCGCCAGTCA  
CAGCATCAGCCCCAGAAGATGCGGGATCCTCGCTATCACTGCCAAAATCTTTTATCAGGACGGCCTGCTGC  
TCGGTTTTATCTTCTGGTGGGCGTGCAGGAGCAGATCTATATCGAACATCTGGCCATCAATCCGGCGCT  
GCGCGGCCGCAACTACGGCAGCCGCTGCTGGCCGAATTTGCGAGCGGGCAGGCAAAACCGTCATTTCTC  
GAGATCGATCCGCCAGAGGATGAGATTGCCATTCGCCGCTGCGCTTCTATCAGGGGCTGGGCTTTTGTCT  
TCAACGACTATGCCCATCTCCACCCACCTATCATCCTGATTATCAAGGACATACGCTGCGGGTGTAAAG  
CTATCCGGGGCTCCTTGAGGAAGAGGCTATCAGCGTTTCAACAGCATGCTGGTGGAGACGGTATGGAG  
CACGGCTGAGCAACCGTAAGGATGCTGATTTGCCGATAAGAGAGGGGCCGACTGAAGCAATTCAGGCGG  
GCCCTTTTTTTCATTGCCGCTGGCGGGAATTACTCCCCAGCAGCTTGTGCCAGACGGCGAGCACATGGCTG  
CGTTTCGTTTTGTCAGCTGATCGCTCACCTTGGCGGAGATCTCCGAGAGGTTGAGGCGATGGCCGAGGT  
TGCGGATCTCCAGATAGGCTGCTTTCAGCCCTCCGCTGCTCCAGGGTCAGCACCCCGCCATGACGCA  
CTCATCGAAGATGCGCACGTTATCAGACCAGCGGGTGAGGGCGTCCGGTTCACTGCAGGCGTGGGCCAGC  
ACCAGATACTGGGCGATAAACTCGATATCTACCATGCCCGGGTGACTGCTTGAAGTCAACTCGCCGG  
CACCCGCTTTCAGCAGGTGATCCCGCATCTTGTGGCGCATCTCGCGCACCTCGCGGGCCAGAGTCCGGCAG  
CTCCCGCTCCCTGGCCAGCACATCGCGGCGGATGCGGGCAAACTCGCAACAATGGCATCATCGCCATAG  
ATAGGGCGGGCCCGCAGCAGCAGGCTGATGCTCCAGGTCACGCTCCAGCCTCGTTTTGCTGATACTGCTCATAG  
CCGAGAGGGACGACACCAGCAGGCGGAGTGCAGGAGGGGCGTAGCCGCATGTCGATCTCGTAGAGGAT  
GCCGGACGGGGTGCAGGCTGTAACAGGTGCAGGATCCGCTGGGCGAGACGCAGGTAGAACTGGCGGCTG  
TCGATGGGCTTGCAGGCTGTTGTTAGTGTGGGGTGCAGGAAACACCAGATCGAGATCCG  
AGCCGTAGCCGAGTTTCGATGCCACCCAGCTTGCATAGGCCACCACCGCAAAGCCGCGCTGGCCACTGGT  
TGCCACCTCGGGCGGCACCCGTAACGCTCGCTCATCTGGGCCACGCTGATTGACCACCTCCTCGGTG  
ATCGCCTCCGCTAGCCAGGTGAGGTGGTGCCTCACCTTCATCAGCGGCAGGGCGCCGGCGATGTCGGCCG  
CCACGATGCGCAGCAGCTGTACCTGCTTGAACGTCAGGCGAGGCTCCATCTGCTGCTCCACGCTCCTTTC  
GGGGATGCGCAGCAGGAACTGGCGCAGTTGGGGCTTGTACTGATCGAGCGGGTGGGGTATAGAGGTGC  
TGGGGATCGAGCAGCTCATCCAGCAGGATGGGGTAGCGGGCCAGCTGTTTCGCTCACCAGATGGCTGGCGT  
CACACAGCCGACACCAGCTGGCGCAGGGCGCCCGGGTTTTCCGCCAGCAGTTGCAGATAGGCGCTGCGGGT  
GAAGATGCGAGTCAGCAGCTCGCACACCCGCTCGAACAGGCGGGCAGGTTGCTCGCTGGCCACCACCAGC  
CGCAGCAGCTCCGGCATCAGCCAGTCTAGCGCGATGCGCCCTGCGGCCCTACCTGGCGGCGCTTGTACT  
CCTCCTTGAAGCGCAGCAGCGCGGCGCAGAGCGGAGCGGGCTCGACTACCCCTTGAGCAGTCAGCAATTT  
TTCCAGCTCGGGCGCTCGAGCTCGGTGCGCCACAGATCGAGCCAGAGCTGCTCCAGATGGGCGGGGGCC  
TCTTTCTTCCCCACCACGGCGGCAACTCCTGATGGACGGCGGCCATCTCTCATCGAGATGAGTCA



TGAAGGCAGCCCAGTCGGTAAAGCCGAGGGCGGGCAGCAGCCGCTGGCGATCCCGCTCCTCGGTGGGCAG  
GGTCTGGGTCTGCTGATCGCCGATCTCCTGCAATATGTTCTCGACCCGGCGCAGGAAGCGATAGGCCTCC  
AGCAGGGCGATCGCAATGGGCAGATTTCGAGGGCGCCGCATTTGGGCGATGGCGGCCAGCGCTTCGGGCAGGT  
GGCGCACCCGCGAGCGCAGGTTTCGCGCCCCGCCGGAATAAGCTGCAGCGCTGGGCGATAAACTCCACCTC  
GCGAATGCCGCCAGCCCCAGCTTGATGTTGCCCTCCAGTCCCTTGCGGGCGCACCTCGGCGGGCATATC  
GCCTTCATCTGGCGCAGGCCGTCGATGACGCCGAAGTCGATATAGCGGGGAAACACGAAGGGGGCGCAGCA  
TCTCGGCCAGTTCAACCGCGTGCTCGCATTTGGGGGCCAGTACCCGCGCTTGACCATGGCGTAGCGCTC  
CCAGTTGCGGGCCGTGGTGCTGGTAGTAATCCTCCATGGCAGCGAAGGAGATGGCCAGTGGCCCCGCATCG  
CCAAAGGGGGCGTAAGCGCATATCGACCCGGAACACCTGACCATCCTGGGTGGGTGGTGGAGGGCGTTGA  
TGATGCGCTGACCGAGCTTGATAAAGAAGTCTGTTGGGCGAGCTCGCGCCGCCCGCCAGCTGTGTAACC  
GTTCTCGGGGAAGGTGAAGATAAGGTGATATCCGAGGAGAAGTTGAGCTCGCCACCCGCGAGCTTGCCC  
ATGCCGAGAATGAGCAGCGGCTGCGGGTTGCCGTTGCCATCCATCGGGGTGCCAGCTCGCCGCACCTGTT  
TGGCGTAGAGCCAGTCGCGGGCCGCGCAGATGAGCGCATCCGCCAGCTGGTGAGGTGGATAAAGCTCTC  
TTCTACTGCTGCGTGGCCAGCAGCTCGCGCCAGGCATCACCAGCATGCGGCTGCGGGCGAACTGGCGC  
AGGATGCGCTTGAGCGCTCTTCATCACTCACCTCGGCAGCAGGGAGGTGAGGTCACCTGTTAGGCGG  
GCCAGCGTTGACCCGCTCCAGATCCCCGAGGTGAGCAGCTCGGTCAGCAACTCCGGCTGTTTGAAGAG  
AGAGTCGGTGACAAAATCGGAGAGACCGAGCAGGGTCAGCAGGGTTTGGCGCACCCGGCTCGGGCTGATTG  
CCATAGTCGGGGCCAGTTTCAGTCAGCCGTTGCCACTGGCGCTGGGCCAGCTCCTGCAGCAGGGGGGAGA  
AGGCGGAGAAAGAGGGAGAGTGCTGGGCCACGGTTGCCGTCCTTGTGGTTAACGAAACTGCCGATAAAA  
AGCTGGCTGCCAATCTAGCACTGTGAGGCCCGCGTACAGCGCAGGGACGAGAAGCATGATCCGGCGG  
GAATTATCAGCAGCCAGTCATTCAGGTGCGCTGGTAAATGGCGGGATCGTAGATCTCCATCAGGCTGCC  
GGGTTGGCCGGTGGGGCAAAGCCGAAACTGGCGTAGAGGCCGTGGGCATCCGAGGTGGCGAGGGAGAGGC  
GGCGCAACCCCTGCAACTCGGGATGGTGCACAATGGCGGCCACCAGCGCTTGTGTAACCGCGGGCCGCG  
ATACTCAGGCAGCACGAAGACATCGGCCAGATAGCCAAAGGTAGCCTTGTGCGGTGATGACCCGGGCAAAG  
GCAACCTGCTGACCATCGACATAGCCGCAACGCAGAGGGAGTGGTTGATGGCCCGCACACAGTGCTGT  
GGGGAATACCGCGACACCAATAGGCCTCTTCGAGAGAAAACGGTGGATCAGCGGCAGATCGAGCTGCC  
CTTGTGCTCACTGATCTCGATGGGTGAGTGCGTGTGCTCTGCTGCATGTTGGCTCCTTGCCGTGGGTCA  
GAAATGAGAAAGGGCCCTCGCGGGGCTTCCAGTCTAACCGGATTGGAGCGGGAAAGTCAGGCGAGCTTG  
AAGGATGGATCTGGCCATCCAGTTCCTGGCTGTGCTGCCAGTACCAGGCTCCCTGCAGTCTCGC  
GCAGCACACCACGGAGCCTTCGGCGATCTGCTTGACCTGCCAGATTGCCCGCATCTCTTCGGCGAC  
CGAGCTCTGTTGCTCGGAGGCGGGCGGATGTGGCGGTTTCATGTGCGCGACCCCTGTACCCGCTGCACT  
ATGGTGGCGAGCTGGGTACCGGCTTGGGTACCTGTTCCACCCCTTGTGCGCCTGCTGTACGCTTTGGG  
CCATCAGCTCACCAGCCTGATGGGCATTTGCCCTGCAGCTGTTGATCATCTTCTGGATCTCGACGGTGGC  
GGCCTGAGCCCGGTTGGCCAGTTTCAGCACTTCGGAGGCCACCACGGCAAAGCCGCGACCAGCTTCACCG  
GCGCGAGCCGCTCGATTGCAGCGTTCAGGGCCAGCAGGTTGGTCTGCTCCGAGATGCCGGAATGGTGT  
CGACCACAGAGCCAATGCGCTCGACCCCTGCTCCACCTCGTTGACCAGGTGGCTGAGCGTTGGATGTT  
GCCGGAGAGGGTGTCTATGGTGCTGACGGTGTGCGCGACGCGAGCGGCTCCCTCTTCCGCCAGCTGGCTG  
GTTTTCGGCGGTGGCGTGAGAGGCCTGATCCGCATGGGCGGCCACTTCGCGAATGGCGCCACCATCTGGC  
TCATGGCGCTGGCCAGCTGTTGATCTGGGTGAACTCTTCGTTGATCGCTTCGTTGGCCTCTTCCATGCA  
AAGGGTCACCTGGGAGGCGATGTGCTTGAGCTCCTTGCAGGCGGGCGCGCTGGTTGCCAAACACCTCTTTG  
AGGTTCTCCTGCGAGTGGGAGACGGCCTTGGCGATGTCACCGAATTCGTCACGAGATTTGAGCAGTACCT  
TGTGGCTGAGGTCCCGCTTGGCGAAGCGCTCCAGCAGGCCACCAGATAATGCACCTGCTTGACCATCAG  
GCGGGAGCCGGTGGAGCAGCAGGATCACGAACAGCAACCCCATGATGGCGGTCTCCATCAGGCCAGTCCAG  
AGCAGGCGATTGGAGATCGCATCCGCCTTGGCGGGATCGAGCCCTTCGCTGAGCAGGGTCGCTTCCAGAT  
TGTTGGCGCTCAAACAGAGTTTTGTGCTAGTAGCAGGAGGGTACTGAACACCATCAGCAGCACCACCTTTGGG  
TACCAACCGGATGTTGCTCATTCTTTCTCCAGCAGGTTTCAGCTGCATTGTCATTCTCCTTTTAAAGCC  
GTTTTTTCCTTTGCCCTCAGGACTATCGGCATTATCTTCTCTTTTATTAATTTGCACTGTGCTTAAAGTT  
GGAAAATGTATGCGACATCACTTAACTCATCTGCGGGCGATGGATCTGCTGATGGCATTCTGTCGATTA  
TCTCGGTTGTGCTGGTGACGGCCCCGCTGGTGGGGCCATGAGAGCCTGACACCACAGACCCCTGCAGCTCTT  
CTATGACCTCGACAGTCTGATCTGCTACTTCTTCTCGCGCACTTTGCTTATGGCTGGATCCGGGCCCTCC  
GATCGCAAGGCCTATTTCAAGGCCAACTGGATCTATCTGCCGGGTAGCCTGCCGATGGCGGAGCAGTTGC  
GCTGGGCGCGGTTGATCCAGCTGTGGCGGGTCTATCAGCTGTTCAAGGAGCACCCGGATCTCTGGGCCAT  
GTTCCGTCGCGAGCGCAACGAGACCACCTCTCCGGTATCCTGTTTCTGTTCTTTTTGCTGCTGGGGGTG  
GGCTCCGGCGTCATGTACTGGATTGAGTCAGGCCAGCCGGCAGCCAGATTGAGACACCCTATGACGCGT  
TCTGGTGGACGCTGGTGACCCCTCTCGACAGTGGGTTACGGGGATCTGGTGCCCAAGACAGAGGAGGGGCG  
GTTTTGTCGCCAGCCTGCTGATCCTGTTCCGGGTCGGTCTGTTCCGGTGCATCAGCGGTTTTTATGGCCAGC  
CTGTTTTTTCAGCCCAACAAGGGGGATGGCGAGACTGACAAGTGGCGTCATCACTACAACAACAACAAG  
AGGAGCTGCTGCGGGAGATCCGCGCCCTGCGCAGCGAGGTGCAGGAGCTGAAAAACAAGTGAAGCCGAG  
ACGGGCAAGTTGCGAGGTGACTCGCAACTCTGCGCGTATATCCCGGGGAGGTGCTTTTTCTTTGCTTG  
TCCTTTAACCTGCTGGCGGCTTAACTTCAACCTCTTGTCCAAACCTGAAAAAGAGAATCGATCGACCAT  
GCGCGCCCTTCTCGGGATTTTATGATCTGCTTGTGTGCCAACAGGCACTGGCCGATACCCGTTATGTTTCA

GACAACATCTTTACCTATATCCACAATGGCCCCGGGTACCCAGTACCGGATCCTTGGCAGCGTCAAGGCTG  
GTGAACCGCTGGAGGTAAAGGCGGTGAACAGCGAGGCCGGTTTACCCAGGTGGTGGACGGTCTGGCCG  
CGAGGGGTGGATCAAGAACAGCGAACTGCAGAGCCAGATCAGCCTGCGCGAGCGTCTGCCCCAGGTGGAA  
AAAGAGCGCGATGAGCTTAAAGATCGCCTGCAGAACCTCAACGGTGACAACGAGAAAACGTTACCGAGA  
AGGATGGTCAGATCGCTGCCAGAGCAAGGAGATCGCCGCCCTCAAGGCTCAGCTGGTCAGTCAGGGTGA  
GGAGATGAGCAATCTCAAAGAGCAGAATGATGCCCTGACCCAGAGCTACGACAACCAGGAGCACGACATG  
CAGATGGACTGGTTTATCCGTGGTGGTGCCATGGTGGGGGCCGGTATCCTGCTCGGCATCCTGCTGCCGA  
TGCTGCCCCGTCGTCGCAGCCGCGGGATCGCTGGATGAACTGACAGCATCTGGCTGAATGAATTGCTGA  
GAAGGGTCGCCGTGGCGGCCCTTCTTTTTTGGGGCGCATTTGGGCGGAATGCGTGACTGCTTTGCGATAGA  
GAGGCGGTGGCAGATCGTATACAAAATGAAGTCAGATGACCCACGCTTGTGCTGGCGTATTAGCTTCAA  
AGGGAATTCATGGGGGAATGAGCGATCTTTGTTAAACATTTGGCAACAAAATTCATTTATATAGGGTGCA  
ACATTGTATACATTATCGGCGTTTCGGCGGTGCGTCCGCCCTTTGTTCGATATCAGCCCTAGGGCGTACAGG  
AAGACCCCATATGTTCAAAGCTACTCAAGTGCTTGGCGCTGACTATATCCCCCGCATCTGGCCGCCCTG  
CGCGAAGCCATCACCCAGAACTACGTGGTGGATGAAAAATGCCATCTGGCCGAACTGTGGCCATGTTGC  
CGGGGATGGCGCCTCGCTGGAGCAGGTGACCCAGCGTGGCCGTACCCGTGGTGACCAAGGTGCGCAAGGA  
GAGCGGCTCCGGTGACGGTATCGACGCCCTTCTGCAGGAGTACAGCCTCGATACCCAGGAGGGGATCATC  
CTGATGTGTCTGGCCGAGGCGCTGCTGCGCATTTCCGATGCCGAGACCGCGATGCCCTGATCAAGGACA  
AGCTCTCCGGCGCAACTGGTCTCCATTTCCGCAAGAGCGACTCCACTCTGGTCAACGCCCTCCACCTG  
GGGGCTGATGCTGACCCGCAAGATCATCAAGCTCGACAAGAAGCTCGACGGCAACCCGGCAACCTGCTG  
GGGCGCATGGTCAACAAGCTGGGGGAGCCGGTGGTGCCTCTGCCATGTATGCCGCCATGAAGATCATGG  
GCAAGCAGTTGCTGCTGGGGCGTGACATGAAAGAGGCGCTCAAGGCGAGCCGCAAATCCCGCGAGCTGGG  
CTACACCCACACCTACGACATGCTGGGGCAATCGGCGCTGACCATGCAGGATGCCGACAAGTATCTGACC  
GATTATCGCAACGCCATCGAGGCTGTCCGGCAACGAGCGGATCAGCGACGGCGGGCCCGCCCCCTCCATCT  
CCATCAAGCTGTCCGGCGCTCCATCCGCGCTATGACGTGGCCAACCCGCGAGCGGGTGTCCGGCGAGATGTG  
CGAGCGGCTGGTGGGGCTGGTGCGGCTGGCCCGGACAAGGATGTGGCCATCAGCATCGATGCCGAGGAG  
ATGGACCGCCTCGAGCTGTGCTGGATCTGTTGAGCAGCTTTATCGCTCCGACGCCAACCCTGGTTGGG  
GCAAACTCGGCATGGTGGTGCAGGCCTACTCCAAGCGCGCCCTGCCGTTACTCTGCTGGCTCACCGCAT  
GGCCCGCAGCAGGGTGACCTCATTCCGGTTCGCTTGGTAAAAGGCGCTTACTGGGACGCAACTGAAA  
TATCCCCAGCAGGCGGGCTGCCCGCTACCCGCTTTTACCCGCAAGGCGGGTACCAGATCTCTCTACC  
TCGCTGCGCCCGCTACCTGCTGAGCGAGCCGACTCGGGCTTTATCGCTCCCCAGTTCCGCCACCCACAA  
CGCCAATACCGTGGTCAGCATTCTGGAGATGGCTGGCGATCGCCAGTTTGAATTCCAGCGCCTGCACGGT  
ATGGGGGAGGAGCTGCACAACGCCGTGCTGAACGACAATCCCCGGCTGCACTGCCGCATCTATGCGCCGG  
TCGGCGCCACAAGGATCTGCTGCCCTATCTGGTGCGCCGCTGCTGGAGAACGGGGCAACACTTCCCTT  
CGTTCACAAGCTGGTGGATCCCAATACCCCGGTGGACTCGCTGGCCGAGCACCCGCTGCGCACCCCTCAAG  
CGCTACTCCGGCTTTGCCAACGACCGCATTTCCCAACCGGTGAACCTGTTACAGCAGCCGCAAGAACTCCA  
GCGGCGTTAATATGAACATCCTCTCCATCCAGCGCCCTTCTTTCGCCCGCTTGAAGAGCTGGAGAGCAA  
GCAGTGGCTGGCGGGCCCCATCGTCGATGGCGAGACCCCAAGCGCAGCGAAGCCCGCACCGTGTGAGC  
CCGCAAGGATGTGAGCCTCACCGTCCGCAAGATCCACTGGGCCGAGCAGCAGGCGGTGGAGCAGGCCTTGG  
CATCCGCCACGCTGCCTTCCCGCGTTGGCGTGACACCCCGGTAAGCGAGCGTGTGCCGCGCTGGAGAA  
GCTGGCGGATCTGCTGGAAGCGAACCGCGAGCAGTTTGTCTCCCTCTGTACCCGCGAGGCGGGCAAGCTG  
CTGCAAGATGGCATCGACGAGGTGCGTGAAGCGGTGGATTTCTGCCGCTACTACGCGGTGCAGGCGCGCA  
GCCTGATGGGGCAGGCGACCCCTGCTGCCCGTTACACCGGCGAGCAGAACGAGCTGTTCTGCAGGGGCG  
CGGGGTGTTTGTCTGCATCAGCCCGTGGAACTTCCCGTTGGCGATTTTCTCGGCCAAATCGCTGCCGGC  
CTGGCCACCGGCAACACTGTTATCGCTAAACCGGCGGAGCAGACCGCCTTATCGCCATCTGGCGGTGA  
CGCTGGCCCATCAGCTGGTATTCCGGGCGACGTGCTGCAACTGCTGCCCGTAAACGGTGTACTCCGTC  
CGCCAAGCTGACGGCGGATCCGCGCATCGCGCGCTCTGCTTACCCGCTCCACCGAGACCGCCAGCAGC  
ATCAACATGACCCTGGCCAGCGGATGGCGCCATCCTGCCACTCATCGCCGAGACCGGCGCCAGAACG  
CCATGATTGTTGATTCCACCGCCCTGCCGAGCAGGTGGTGCAGCAGTGGTGGAGCGCCGCTTCCAGAG  
CGCCGGTCAGCGCTGCTCGGCCCTGCCGGTGTCTACTCTGACAGGAGGAGATTGCCGAGCGGGTGTGGAG  
ATCTCACCGGCGCCATGCAGGAGCTCAAAGTGGGCAACCCGGCCGAGCACAACACCGACGTGGCCCGG  
TGATCGATGCCGATGCCAAGACCGGTCTCGATGCTCACCTCGCTACATGATCCCGCGTGTCTCGCCTGAT  
TGCCAGGCGCCGATGCCCGCGGACCATGGAGGGACTTCTGTCAGCCGACCGCGCTGGAGATTGGC  
TCCATCCGCGAGCTGGTGAAGGAGCAGTTCCGGTCCATCTGCACGTGGTGCCTACGCCACCCGGGATC  
TGGACAAGGTGATCAGCGACATCAACGGCACCGGCTATGGCTGACGCTGGGGATCCACAGCCGCAACGA  
ATCCACGCTGAAGAGCTGGCGAGCCGATCAACGTCCGCAACGCTACATCAACCGCAACCAGATCGGC  
GCCATGGTCCGGGTGCAGCCGTTCCGGCGGTGAGGGCTCTCCGGCACCGGCCCAAGGCGGGTGGCCCC  
ACTATCTCGGGCGGTTTGTACCGGAGAAGACCCGCAACACTGCAAGTGGGCGGCAACGCCTC  
CCTGTTGGCGATGGGCGATGCCGATCCGCGTGCATAGAGGCCGGATACGGGATAACAGCGGG  
CCGCCTTCGGGCGGCTCTTTGTTGGTATGCTCCTTGTCTCGCCAGTTTGGCCCCGGCGGGGAGAAGA  
TCGGAGACGATTTTGTGTGGCGGCGGGTGTGAGTGGCGCTTGCAGTCGTAAGATGGGGCCATTCG  
CGCTATTTTGGCCCTGCTGCAGCCTGCTGTGACCGTGGCGTGTGTTAATCTGACTTAACGAGAGTGTTA

TCCGATGTCATTAACCTGAACAAGCCCCGCTGGTTTGTGCTGGCGGGTGACCATCAAATCCTGCTCGATGAG  
GCGGGTCAGGTGCCGAGCGGCGTGAAGGCGTGCCCGCCGACGCGTGGCCGGTGGCCGTTTCGAGCGTT  
TTGATGAGTGGCAGGGGCTGCCCTGCTATCTGCTCGATCTGGGGGTGAGGCCGACACGAGCGCCATGAG  
CCCGTTGCGCCAGCTGATGGTGGCGGGAGACGAAGAGGGCTTTCGTCTCGCAGGTCGTGCCCTGGCAGCTC  
GTTACCTTCCGCCGCACCCACCGTTTTCTGCGGGGAGTGCGGCGCCCCCATGACCCCGAAGGCGGGGGAGT  
GGGCGCAGGTGTGCCACCTCGGCCACACGGCCTATCCGCGTATCTCCCCCTGCATTATCGTGGCGGTGCG  
CAAGGGGCCGAGATCCTCTTGGCGGCCATCGCCGTCATATCAGGCGGACGATCCAATGTATAACCGTG  
CTGGCCGGCTTTGTGGAGGCGGGGAGAATCTCGAGCAGTGCCTGGCGGGGAGGTGTTTCGAGGAGAGCG  
GCATCCGGGTGCGCAATGTGCGCTATGTGGCGAGCCAGCCAGGCCCTTCCCCACAGCCTGATGATGGG  
CTTTACCGCCGACTACGAGAGCGGCGAGATCCTGGTGCAGGATGACGAACTGGTCGCTGCCGATTTCTTT  
GCCGCGACCGGCTGCCGCTTTGCCGCTCAGGCAACCTATAGCCCGCGGCTGATCGAGTTGTCACTGG  
CTGGCGAGGGGTAACGCGCTTATCTTTTCGCCAACCTTTTTCGACTTCATTTTAAAAACGGGGCGCTCT  
GGTTTGCGCCCTTACATCTTTGCAACCGATCACCCATTTGCCACGTTTGGGCAGTCCGCTTGACTGG  
GCAAAGTGGTATTATGACCGCCATTTTATGCGTGATACGAACTCAGGAACTGGGATGAAAGAGCTGAAGA  
ACGATCGATACCTGCGCGCCCTGCTGCGTCAAGGCGACTCGCGCCAGGCGGGGATTTTCATGTCTCTGTGCCGAAT  
TGGCCGTTATCTGCCGAATAACAAGGCGACTCGCGCCAGGCGGGGATTTTCATGTCTCTGTGCCGAAT  
GCCGAGCTAGCCTGTGAAGTCAACCTGCAGCCGCTGCGTGCCTTACCGCTCGATGCCGCCATCCTCTTCT  
CCGACATCCTCACCGTGCCCGATGCCATGGGGCTGGGTCTCTACTTCGAGCAGGGTGAAGGCCCGCGCTT  
CGAGCGCCCGATCACCTCCATGGCCGACGTGCAGGCGCTACCCATTCGCGATCCGGAAGACGAGCTGGGC  
TATGTGATGAACGCGGTGCGCACCATCCGCCGTGAGCTGAAGGGCGAAGTGCCTGATCGGCTTCTCCG  
GCAGCCCTGGACCCTGGCCACCTACATGGTGGAGGGGGGACGCTCCAAGGCGTTCACCAAGATCAAGCA  
GATGATGTACGCGGAGCCGCAGACTCTGCACCTGCTGCTCGACAAGCTGGCCGACAGCGTGATTGCTTAC  
CTCAACGCCCAGATCAAGGCGGGTGCAGCAGGCTGTCATGGTGTTCGACACCTGGGGCGGGCTGCTCACCC  
CGCGGATTACCGCGATTTCTCCCTGCAGTACATGCACAAGATTGTCGATGGCCTGATCCGCGAGCACGA  
CGGTGCGCCGCTGCCGGTCAACCTGTTTACCAAGAACGGCGGTGAGTGGTGGAGCAGATCGCCGCCACC  
GGTTGCGATGCGCTGGGTCTGGACTGGACCACCGACATCGCCGATGCCAAGCGCCGGGTCCGTGACAAG  
TTGCGCTGCAGGGCAACATGGATCCCTCCATGCTCTACGCCACTCCGGCTTGCATCCGTGAAGAGGTGCG  
CTCCATTTCTGGCCGTTTCGGTCAAGGCGACTGCTTCAACCTCGGCCACGTTATCCATCAGGAT  
GTGAATCCGGAAACATCGCGGTGTGTTTCGTAACGCGGTGCAGGACTCTCCGCCAGTATCACGGCCGCT  
AAGGCCGGGTGAGAGAAGAAGAGTTTGTGTTGATATCCGGGGCCGAAGGCCCGTTTTTACATTAATAA  
TGGTGTGCGACACGAGAGCGTGGCGCCAGTGTAGGAGGCAAGATGAGCAGCAAGTCACTGGATTGGGGT  
ATCGATCTTGGCGGTACCAAGTGTGAATGCGTGGTGTGGATGGCGACGAGGTGCTGCTGCGCCACCGCA  
TCCCCACCGAGCGGGCGGGCGGTATGAGCACATGATCGGCCAGATCGCCAAGCTGGTAGCTGAGTGC  
CGAGAAGATTGGTCAACGCCCGACCGTCACTCGGCATGGGCACGCCGGGGGCGGGGATCCGCAGACCGGC  
CTGATGAAGAAGTGAACACCACCGAGCTCAACGGCAAGCCGTTCAAGGAGGATCTGGAGCGCAAGCTGG  
GCGTGGCGGTGCTGATCGCCAACGACGCCAACTGCTTCGCGCTGGCAGAAACCCATCTCGGTGCAGTGG  
CCAGCACCATCCCGATGCGAAAGTGGTGTTCGGCATCATCATGGGCACCGGGTTCGGTCCGGCATCGTC  
ATCAACGGCCAGATCCTCAACGGCCACCACGGCATCGCCGGTGAAGTGGGGCCACAATGTGCTCTCCCCG  
ATGGCCCCGAGTGTACTGCGGCAAGCGTGGCTGCGTGCAGACCCTGATCAGTGGTCCGGCGCTGGAGGC  
CTGGTACGAGGCCAAGGCCAAGCGCCGCTCTCGCTCGCCAAAATCGCGGCTGCCACCGCCACGATCAC  
ATCGCCAAGCTCACCATCGACCGGCTGCATCTGCTGTTGGTCAAGGCGTTGGCCAACGTGGTCAACATTC  
TCGACCCGGATGTGATCGTCACTCGCGCGGGGTGGGCAATGTGCAGAGCCTTTACAGCGCCGGACGGCA  
GACAATTTTGCCTTCTCTTAATCCCCGCTTCGCAACCCCCATTAATGCTCCTGCCCTGGTGCAGT  
GCCGGGTATTCGGGGCCGACTGCTGGCCCGGGTGAATTCAGGAGGCCCTGCTGTGCTAGCCGGGGC  
TCCCGGGCGGGGCTGCGCCGCCCTGTTGCTGGTTCAGGAAACGGATTTCTCGATGATCAAGATTGCCAT  
CAATGGTTACGGGCGGATCGGTGCAACGTTGCGAGCCCTTATGAAAGCGGGCGCACAAGACCATC  
AAGATCGTCCCATCAACGAGCTGGCGGGCCCCGAGGCCATGGTGCACCTGACCCGTTACGATACCAGTC  
ACGGTGCCTTCCACCATCCGGTGCAACTGGCGGGTAACAGCATGCTGGTGGGGGAGGATCTCATCTCTCT  
GTTTGGCGAGCGGGATCCGTCAAAGCTGCCGTGGCGGGCGTTGGGGGTGGATGTGGTGTGCTGATTCACC  
GGGGTATTCCGGTCCCGGGCCGATGCCAAGCTGCATCTGGCTGCGGGGGCGGGCAAGGTGCTCTTCTCCC  
ACCGGGCGGATGCCGATGTGGATGCCACCGTGGTCTACGGGTCAACCATCATAACCTCACCGGAGCGGA  
GCGGATCGTCTCCAACGCTCCTGTACCACCAACTGCGTGGTGGCGGTGATTGAAACATTGCATCGAGAA  
TTCGAGATAAATTGTGGTACTATTACGACAATTCATTCGGCCATGCATGATCAGCAAGTCATCGATGCCT  
ACCACAGTGACTTGCGCCGAACCCGCGCTGCCAGTCACTCATTCGCGTGGACACCAAGCTGGCAAA  
GGGGCTGGAGCGTATCCTGCCCCACTTCGCCGCAAGTTTGGAGCGATCGCGGTGCGGGTGGCGACCATC  
AATGTAACAGCGATGGATCTCAGTATTACTGTTTCGTAATAAAGTGCAGTTACTGACGTAATCAAGCCC  
TGCAACGGGCATCCAGAGGTACATTACACGGTATTCTGGATTACACGGAAGAACCCTCTGGTCTCCGTAGA  
CTTCAATCATGATGCACACTCCTGCATCATTGATGGTACCCAGACCCGGGTGAGCGATGCCAACCTCGTC  
AAGATGTTGATGTGGTGCATAACGAATGGGGCTTCGCAAAACCGCATGCTGGATACCACCGGGCCATGA  
TGGCCGAGGCTGAGCCTGCCCCGGGCGAAAGGTTACTGTTTTAACAATTACCTGGAAAATATAGAGGAC  
TGAATATGTCTGTTATCAAGATGACTGACCTGGATCTGGCGGGTAAACGCGTTCGATCCGTGCTGACCT

GAACGTACCGGTAAAAGACGGCAAGGTCACCTCCGATGCACGTATCGTTGCGACTCTGCCGACCATCAAG  
CTGGCTCTGGAAAAGGGCGCCAAGCTGATGATCACCTCCCACCTGGGTCGTCCGACCGAGGGTGAATACA  
ACGAAGAATTCTCCCTGGCTCCGGTTGTCAACTATCTGAAAGACGCTCTGTCTGCCCGTTTCGCCTGGC  
CAAGGATTACCTGGATGGCGTAGAAGTCGCAGCCGGTGAGCTGGTTGTACTGGAAAACCTGCCGTTCAAC  
AAAGGCGAGAAGAAGAACACCGAAGAGCTGGCCAAAAAATACGCCGCCCTGTGTGACGTCTTTGTAATGG  
ATGCGTTCCGGTACTGCTCACCGCGCCGAAGGTTCCACCTACGGTGTGGCTCAGTTCGCTCCGGTTCGCTT  
TGCCGGTCCGCTGCTGGCGGGTGAAGTGAAGCGCTGGGCAAAAGCCATGCTGAAGCCCGAGCGCCGATG  
GTTGCCATCGTTGGCGGTTCCAAGGTTCCACCAAGCTGACCGTTCTGGAATCCCTCTCCAAAATCGCTG  
ACCAGCTGGTTGTGGTGGTGGCATCGCCAACACCTTCATCGCTGCTGCCGGTACAAACGTCGGCAAGTC  
CCTGTGCGAGACGACCTGATCGACACCGCCAAGAACTGGCTGCCGAGACCAACATTCCTGTGACCACC  
GACGTGGTTGTAGGTGCCGATTCCTCCGAGTCTACTCCGGCGACCATCAAGTCCGTCTCTGACGTGACCG  
ACGGCGACATGATCTTCGACATCGGCCCGGATTCGCCAAGGCCCTGGCTGACATCATCATGAACGCCAA  
GACCATCCTGTGGAACGGTCCGGTTGGCGTGTTCGAGTTCGACCAGTTCGCCGAAGGCACCAAGGTTATC  
GCTGAAGCCATCGCAGCTTCTCCGGCCTTCTCCATCGCTGGCGGTGGTGACACCCTGGCTGCTATCGACA  
AGTTCGGCATCGCTGACAAAAGTCTCCTACATCTCCACTGGCGCGCGCCTTCTAGAGTTCGTAGAAGG  
CAAGGTTACTGCCGGCTGTTGCGATTCTGGAACAGCGCTAAAAGCCTAATTGACCCGGAACGGGGGGCAA  
AAGCCTCCCGTTTTCGTTTATCATGTGCCCGCTGTGCCGGTTCATGATGAACCCCCATTTTTTATTAACG  
GCATACGAGACAGGACGATTAACATGTCTAAGAAAATTTTCGACTTCGTAAAACCCGGCGTGATCACTG  
GTGATGACGTTTACAAAAGTGTTCGCCATCGCTAAAAGAGAACGGCTTCGCTCTGCCGGCCGTAAACTGCGT  
TGGTACCGACTCAGTGAACGCAGTACTGGAAGCTGCCGCCAAGGTTAAAGCGCCGTTATCGTTTACGTTT  
TCCAACGGTGGTGGCTGTTTACCAGCGGTAAGGGTCTGAAGCTGGAAGGTCAGAAAGCTGCCATCCTGG  
GTGCCATCTCTGGTGGCAAGCACGTTTACGCTGTTGCCGAAGCTTACGGCGTGCCGGTAATCCTGCACAC  
CGACCACGCTGCCAAGAAGCTGCTGCCGTGGATCGACGGTCTGCTGGAAGCGGGCGAGAAGCACTTTGCT  
GAAACCGGCAAGCCGCTGTTCTCCTCCCACATGCTGGATCTGTCCGAAGAGTCTCTGGAAGAGAACATCG  
ACATCTGCTGCGAGTACCTGACCCGCATGGCCAAGATGAACATGACTCTGGAGCTGGAACGGGTTGCAC  
CGGTGGCGAAGAAGACGGCGTCGACAACAGCCACATGGATCAGTCCGCTCTGTACACCCAGCCGGAAGAT  
GTTGCTTACGCTTACGAGCGTCTGTCTAAGATCAGCCCGCGTTCACCATCGCTGCCTCCTTCGGTAACG  
TACACGGTGTATACAAGCCGGTAAACGTCAGCTGACCCCGTCCATCCTGGACGCTTCCAGAAAGTACGT  
TTCCGAGAAGTTCGATTTCCGGCCAAGTCTCTGACTTCGTATTCACCGGTGGTTACAGTTCCACTCTG  
GAAGAGATCCCGAGTCCATCTCCTACGGCGTAGTGAAGATGAACATCGACACCCAGCCAGTGGGCAA  
CCTGGGAAGGTTCTGCTGAACTTCTACAAGAAGAAGCAAGCTTACCTGCAAGGCCAGCTGGGCAACCCGGA  
AGGGCCGACAAGCCGAACAAGAAGTACTACGATCCGCGCGTATGGCTGCGTGAAGGTCAGACTTCCATG  
ATCGCTCGTCTGGAGAAAGCATTCTCCGACCTGAACGCCATCGACGTAAGTTCGTTTACAGCACCTT  
GATTGTATGAAAAGGCGCCCTTCGGGGCGCCTTTTGCATTTCTGTGATCCGCACAGGTTGGTGAGTGGAG  
GAGGAACTGGGTATTATCGAAACAACCTTTGCTTATTTTATTAACAATTTGCAACCAAGGCAGGATGCTG  
AGTATGCAGGCAGGAAAGCACAACGGATATCAGGAGCAGTGCCTCCTACTACGCGCCACCCGCAACG  
ACTCGCAACAGTGGCCGAGCTGGAGGGGGAGCACAAGGCTGACGTCTGCATCATCGGCGGCGGCTTTAC  
CGGTCTCAATACCGCCATCAATCTGGCTGATGCCGGTTACAAGGTCGCCTTGCTGGAGGCCAACCGTATC  
GGCTGGGGGGCTTCCGGGGCGCAACGGCGCCAGCTTATTTCGCGGTATCGGCCATGACACCAGCCAGTTCC  
CCCGCTGGATTGGTGAGGATGGGGTGCAGGAGCTGGATCTGATGGGGCTGGAGGGCGGTGCAGCTGGTGGC  
CGAGCAGGTCGAGCGCTTCAATATCGAGTGCAGTCTCACCTGGGGCTACTGCGACCTCGCGACCCGTCAG  
CGTCATCTGGCTGGCTTCGAGGAGGATCTCGACCATCTGGCGAGCCTCGGCTATGAGCACGAGCTAAAGT  
TGGTCCCGCGTGAAGATATCCATAGCGTGGTGGGATCGGATCGCTATATCGGCGGCCATCGACATGGG  
CTCCGGCCATCTCCATCCCTCAATCTGGCGCTCGGCGAGGCACGCGCCGCCAGTCTCGGGGTTTCC  
CTGTTTGAACACTCCAGAGTGAACCATATCGATTACGGCAAGCAGGTGGAGGTGACCACGGCTCATGGGC  
GGGTACCCCGGATTATCTGGTATCGGCTGCAACGCCTATCTCAACGACCTCAATCCAGAGCTGGGAGG  
GCGGGTGTACCTGCCGCTCCTATATCCTCGCCACCGAGGTGCTCGATCGCCGCTTGCAGCCAGGATTG  
CTGCCGAAAACATGGCGGTGTGCGATCAGAATGTGGCGCTCGACTACTACCGCCTCTCTGCCGATGGCC  
GCCTGCTGTTTGGCGGCGCCTGCAACTATTAGGGCGAGACCCGAAGGATATCAAGGCCTTTATGTTGCC  
CAAGATGCTGCGAGTCTTCCCCGAGCTGGCTGGCACTGCCATCGAGTTTTCAGTGGGGCGGCATGATCGGG  
ATCGGCGCCAACCGCTGCCGAGATTGGCCGCTTGAAGGAATACCCAAACGTCCTTACGCCCAGGCCCT  
ATTCGGGTACGGTCTCAACGCCACCCATATGGCGGGCAAGCTGGTGGCCGAGGCGATCCGCGGCGAGAG  
CCGGGGTTTCGATCTCTTTGCCAGCGTGCCCCATATCACCTTCCCCGGCGGCACGGCGCTGCGCTCCCCG  
CTGTTGGCACTGGGTATGCTGTGGCACCGTATGAAGGATATCTTCTGACCCCATTTGTCAGCCTGTGCAG  
TGATGGCTGAACTAAGCCCCCTTGCCAGCCCTGTTTATAGCGGTTGGCACTATCGTTCCGCCTGATAG  
ACAAAAGATGCATTGCGCTAATTTTCGTCCGATTGGCGCTATCTTTTAGGTGTGAGAGCGGTTATCTGC  
CAAGGAACAAGGATTTGTGAGATTGCCGGAATAGTTGCCGAGAAAAGGGCCGAGGATGGGGGTGAGGAGGG  
CCAAGATGGAGATAAATGTGGTTCGCTCAGGCGGGCTCAGCCCGCTGGCGCAACGGCAGGGTTCTCCCGC  
TGTGCGAGGCACAGGAGCGGGCTGCAACTTACCATCAACGGGCAGTGCAGCCTGGTGGCGACCTTGGC  
GCTGTGCTGGATGAGCTGGGGCTGTACCGCAAGGGGATAGCAGCGCGGTGGCACTGTTTCAATCAGGG  
ATTCGCTGGAAGCGTTCATCAACACCATGATGGGCTCCCTGCAACAGCAGCAGGAGCAACAGTTGGCATT

GCAGCAACAACAGCGGCAAGAGCAGGAACAGCGCAAACCTCGCCATCGCCGACAGCAGCGAAAACCCGCTC  
AAGCGGGATCTGGAGCGCCTGCTGGAGACGCTGGAACAATAGGGCGGACAGGGAAAAGAGAGCGAGCAAG  
GAGTCGAGCTTGAAGCGGTGAACCCCTTGCAGAGCCAGCTGACCAAGCTGCTGGAGAGCAGTCTGCGGC  
AGAGAGCGGGGTCAACCTCAAGAAGGTGTTGTGAGGGTTGGCTAGCAAGCTGCCGAACGAACCTGCCGAG  
CGAAAAGGGTATCGGGTCGATACCCAGGTTTGGAGCTGGTTGGCAACGGCAGCCCCGCCGTTGCAGAGCAT  
AAGGGGCGGAAAAGCGCTTTATTGGGCCGGTTTACGCCAGCCGCCACCCCTGTTGTCCTTCATCATCCACA  
CCTCGGCCTCTTGTGGTAGCACCTGGCCCGCTCGAACTCGCCATATTTTCGCTCGAGCTCCATCAGCCC  
CATCTCCTGCTGGAAGGGGCCAACCCGGTCGTAGACCAGGTCCTCGTCGTGCAACACCTGCAACTGATCG  
AGCCCCCTGCTTGAAGTGGAGCTGGTAACTCACCTTGACCAGATAGACCCCCCTCCATCCGCTCCTCCTTGC  
CGAGGATGGTGAAGTTCGCTGATATCGAACAGGTTGGCGTCTGTCTCGGCCAGTAGCTTGGCCGGTACCTG  
CTGGCGGATATCCTCTTACCAGGGCCCTGCCTGCAGCAGCATAAAGCCAGAGGGCTAGCAGGGGGATGAAC  
CACTTTTTTCATCAAAAACCTCCGGACAAGTGCAAAACGAGAGGGGGGATTTGTGCCACGCGAATGCGCGCGG  
CAAACCTCGGCTCACGGTTCCAGTGAACGTTCCAGCAGCATGGCCCTCGGCCCGATAACCAGCCAGCTCGC  
GGCGATAGCACTCGGTGAAGCCTCTGCGCAGCCAGAAGGATAGAGCACTCTCATTACTGGCAATCACTGA  
CAGGCGAAGCCGGGTAGCCCCCATGAGCTTGCCAGCGTGCAGGCGTGAAGATAGAGCGACTGACCACGG  
CCACTCCCTTGCCAGGGTTCCCCCACCAGTAACAGACCCAGATAGGCGGTGTCTGGATTGGGGTAGCCGC  
GCAGCAGATCAATGACAGCGGTGAGTTCTCCCTGCTCCAGCGGCCGATGAGATGTTTGTGCGGAGAGAGG  
CAGGCCGGATGGCAGGCGACAAGTTCTCTTCTCTCTGCTGTGCAGAGAGAGGGTCAATTGCTCACCGCC  
GCCTGATAGGAGGGGGCCTGCTCGAACAGCCGCTGCAAGGCAGGTGCATCGCTTGTCTGCAGCCGACGCA  
ACTCAGTGTGCATCACTTACCATCTCGAGATGTTTGGCAAAGGGGATAGGCCCCATAAAACCGGTGACCC  
GCTGGCCTGTGAGCTCCTTGCCCTCGCGGTGGAAGAAGATGAGGGTCCGGCAGGCCAGCACATTGAGTTT  
GTTGAGCAGCTCCACATCGGCATCGTCTGTTGGCGGTGACATCCGCTGCAGCAGCACCATCTGGCCAAAG  
CGCTCGCGCACGGTTGGGTCACTGAAGGTCTTGTGCTCGAACTCCTTGCAAGGCGACGCACCAGTCCGGCGT  
AGAGGTGAGCAGCACCAGGCTTGCCGCGGGCGGGCCAGCTGCACCTTGAGATCATCCAGCGTCTTGAT  
GCGGATAAACTGCGGCGCCGTTTACTGGCATCCGCCGTGGCGGCAGCAGGGGGGGCGGTTGCAGCAGA  
TCCTTGCCACTACCACGGCGCTGATCATCGCCAGCAACAGCACGAAGCCGCGCACGCTTTTGGCCACCG  
AGTGGGGTGGTGTGGTTGTGGTGTATAGATAGCCGCACAGCAGCAGCCCCAGCCGAGCCAGGCGAG  
AGTGGCAATCTGATCGCTCCAGAGCCGTGACAGCAGGATCGGCACCCAGCAGCAGCAAAAACAAAC  
AGTCTGTTGATCACATCCATCCAGGCGCCCGCTTGGCGAGCAGCTTGCCACCTGAGGTGCCCCAGCAGCA  
GCAACGGCAGCCCCATCCCCAGTGAAGCGCATAGAGCGCCGCCCGCCGAGCCAGAGATCGCCGCTCTG  
GGCTACGTAGATCAGCGCCCCCGAGAGCGGTGCCGTGGTGCAGGGGGAGCAGACCAGCCCGGAGATCATC  
CCCATGATGGCGACCCCGACTACCGAGCCGCCCTGCTGGCGGTTGGAGAGGCCGGAGAGCCGGGTTTGCA  
AACTGCTCGGCAGTTGAGGGTGTAGAGCCGAACATGGAGAGGGCCAGCAGCACGAACATCACCGATAG  
ACCGATCAGCACATAGGGGTGTTGCAGCGCCGCTGGAATTTTACGCCCTGCCGAGGCCACTACCAGCCCC  
AGCAGGGTGTAGGTACCAGCCATCCCCTGCACATAGACCATGGAGAGCAGGAAGGCGGACCCGGTGGAGA  
GGCGATGACCGGCGCCGGCGATGATGCCGGTCAAGATTGGGTACATGGGGAAGACGCAGGGGGTGAAGGC  
GAGCCCCAGCCCCAGTGCAGAAGAAGGCGACGATGCTGAGCCAGAACCCTGATTGCCGAGGGCAGCGGCC  
AGCTGATCCTGCTGGCTAACCGGTGCGACGCTTTGTGCCGTTTTCAGCAGTGGACGCTGTGGTTGCCGTGA  
CCAGCGGGGCCACATCGATCAGCTTGTGCGGTGCGCGGGTAGCAGAGGCCGTCGGTACAGCCCTGATAGCG  
CACCCGAGGGTGGCATTTCCTCCACCTCCTTTAGCGGCACCCGATGCTCACCTGCTGGTAGTAGACC  
CGGGTCTTGCCGAAGAAGTCATCCTCGTGTGCTCGGTGCCCTTCCGGCAGGGTCCGGTCCGTTGAGGT  
TGTTCCCTTGAAGCGCAGGCTGTGGCGATAGAGGTAGTAGTCGTCGGCGATGTGGAGGGTCCAGCAGCAG  
CTGATCGCCACGCTGTTTCGCTCTCGATCTGAAAGGCCTCATCGACCTGCAAAAATTTGGGTTTGGCATT  
GCTTCAATGCCCAGCGAGCTGAGCAGATCGGCGCCGCTGGCGTGGGCAGGGGAGCTGCCACCCGCTGTCA  
TCAACAGGGCAGCAGAGCAGCAACAGGGGAGAGCAAGCGGGTGAACGTCATGAGGTCTCCCCATTGAGC  
CAGTCGAGATAGCCAGGTAGTCCGGCACTTACCAGCAGGCCAGCAGCTCGGGCACCTCATAGGGGTGAT  
GGGTTTGAATGCATGCCTGCAGCTCGGCAAGCGCGACTGGCGGGATTTGATGATGAGTGGATCTCGGT  
GGCGCGCTCCACCTTGCCCTTGCCAACGATAGACGGAGGTGACGCCCGGCAGTTGATTGATGCAGGCGGCC  
AACCGCTGGTTTACGAGCTGTTTCGAGAGAAGGTCCGGCACTGGTTTGTGATCGGGCAGGTGCAGAGCACC  
CAATGGCGTGGTCATAAAGCGGATCTTACCTCGTTGGGGTAAACCGGGCAGGCGCCCTTGCCGTCTCA  
TCCCTGTCTGCGGATGAAGGTGAAAAAGCGCCTGAAAATCAGCGGCTACTATACCCAGAGCCGCTTCA  
AATAGCATCTGTAGCCATTTGTGAGCCAGCGCCAAAAATTTGTGGGGGGCATGAGATAGACGCTGTGATG  
GGGACAGGGCAGAATGAGCGGGCTTGTCCCAATTGACGTAAGGAAATGTATGACCAACAGAATGAGCA  
GCAGAGAAACCGCATGTTGAGCCTGCTGCGCGAAGGTGAGCGCCGATGTTGGTTCAATTGGCCGGGCTG  
CTGCGCACGACCCCGATGAAATCAATGCCGAGCTGGAGAAAAGAGGAGCTGATGGCCACCTGGAGCAGC  
CCATTACAGTGGAGTATCTCAACGGCGTGGTGCAGCACCATCTGTTGAGCGCAAACACAAGGGAGATAT  
GGCGGTTGCCAGCAGATCCTGAGCGATTATCAGAGCGAGCTGGAAGCGCTGCAGGCGCTCAGGCCAG  
CCTGAAGATGCTGCCGCTGCCGACGAGAGCGGGCAAGAGCTCAAAGCCAGGCTTGAGCGACGGGCAGGC  
CTGAATCCTTACCTCTGAATCAGCCGGCCTGCCAGCGCTGACCCCTCTTGCGGCTCCATCATGTCTGCCA  
TGATGGGGCCGTGTGTTTTCTTTTGTGTCCTTCACTTCTCGGTTTCAATCCAACGGATTCTGTCCTTAG  
CTCGCCTCTTGCGGCATGCCGTGCGGCACTTCCGGGGGATGGGGAACACCTTGTATAGCCCCAGTTGT

AGACGAAGGCATAGATCAGATAGAAGACGACGAAGCCCAGATCCAGCACCAGCGCCTCCAGCAGGCTGAC  
GCTCAGCCACCAGGACATGACCCGGCAGCGCAGCATCAGCAGACCGCCCTCAAAGCCGAAGGTATGCAGC  
ACCCGTTGCCACAAGGTCTTGTGGGTATGGCCCTGATATTTGAGCAGCAGCTTGTGACCCCGATGTTGT  
AGATGTAGTTCCAGACGGTGGCCAGCACCAGAGAAGAACAGTGCCAGCGGGCCATATGGTTGAGCCCTAC  
CCCCGTAACCCAGCTGGCCAGCGGGGGCGGAATCAGCAGGCCAATGAATTCAAAGCCAATGGCATGGCGC  
AGGCGATCGTTACGGGTACGCATAAGTCACTCTCTCAATCAGGTTTCATTCACGGATTGCTGGTTAATCTA  
TAGATCTTTAGCGATAGATTCATGTTGGTATCCATCGCTAAAAATAGATGGATGAGAGAGCTTGCCGGAGG  
GCCATAAGATGACGCCATCACTGGAACAACCTGAGGATCTTGTGGCGGCCCGGAAACCGGCTCGTTTTTC  
CGCTGCCCGCCGCAAGCTGGGCAAGGCGCAGTCGGTGGTGAGCAGCGCCATCGCCAATCTGGAGATCGAT  
CTGGCGCTCACCTGTTTTGACCCGACGGCCGCTATCCGCAGCTGACGGAGGCGGGGGCCCGCATGGTGC  
AGGAGGCGGGGATCCTGCTGGCCAGAGTGAACGGTTGCAGTCCATTGCGGGGAGCTGGCGGGCGGGGT  
GGAGACTCGGCTCACTCTGGCCATCGATGATGACTCTCACCTCCCCTGCTCGGCACCTGTTGGAGGAG  
TTCGCCACTCGCTACCCGACCGTGGAGCTGGAGTTGCTCTTCCCGCTGATGGAGCTGGAGTTGCTCTTCC  
CGCTGATGGAGGATGTGACCGAGATGCTGGTGACCGGCCGGGCCAGCTCGGCATCAGCTATCAGAAGGT  
TCATCCCCAGCGGGAGATTGTGCGCCATTGCTGGGGGAGGTGACCATGCCGCTGGTGGTGTACCCGGAT  
CATCCATTGGCCCGCAAGCAGCCGCTGCGGGAGGTGATCTGCAGGGGGCACGCCAGCTGATGGTGACCG  
GCCGACGGGAAGGGAGCGAGCGCCAGCGGTTTTGCATCTCGGCTCAGGTGTGGTGGTTCGAGGGGATCT  
CGGGGTGCTGGAGCTGGTCAAGCGGGGCTTGGCTGGTCCGCCATTCCGGAATTTCTGCTGCATCAACCG  
CTGAAGCGGGGCGAAGTGGTGGTGTGCTGAAGCCAGACTTTATCGCCAGCCACGCGCTGGCGCTGGAGTTGC  
AGTGGCATCGCGCCCGCCGCTGGGGCAGGCGGGGCGCTGGCTGAAGGAGGCACTGCTGGCGCGGGTGC  
TCGCTAGCCGACCTTACTCGGTCAGGGCGTAAGGCAGGGGTTGCAGGGTGAGGCGGGAGCCTTCGTCCTG  
CTTGAGGCGGAATTTGGGCGTCAGCCTCGGTATCTTTCCGGCAGTACGGCGGTGAGCCACGCCTGCCCGGC  
TGTTGCCAGGCGTTGAGCACCATGCCGCTGCGGCGCCAGTTGTCACCCAGTTGCAGTTCCAGGGTATCGC  
CGCTGGCGACCGGCTCACCGGTAGTCCCCGCCAGCAGGAACAGGGCGCGGTTGTTGGCGCCGCGATACTT  
GGCGCGGGCCACCGTCTCCTGCCCCATGTAGCAGCCCTTGTGAAGCTGATACCGTCCAGCGCCTGCAGG  
TTGAGCATCTGCGGGATGAACTCCCCCTGATGCACCGCTTCCATGTGTGGCAGGCCCGCCTTGATCTCGA  
GCCCCACCCAGAGTGACTCGTCACCTTGCGGCAGGGCGTGGCTTGCTGATTGCTCACCAGCAGCCAGCG  
ATCTTGTTTCGATCTTACCGCCATGCCCGCCGTGATGAGACCGCTCTGCTCAAGGCCAAACTTGGTGGCG  
ATCTCAGCCATCGCTGCCCGTACCGGCATCCCCGGTGGCGTGGCGTTGCTCGGCGGCAACTTCCACCTGG  
AGAAGACGGCAAATTTCTTACGCTCCGGCAGTTGGCGCTCCAGTACAGAGGGGCTGGTACGTAGCAGCAG  
ACTGTGCTCGAGGCAGAGCAGGCGGAAATTTGCTCCACAGCTTGGCCCTTGGGATCACAGTGGCCACCCGGG  
GTCTGTTGCCCGGTTGACAGGGCGTTGACATCACAGGTGACCTGACCTTGCAGATATTTGACGCGATCCT  
GGCCGCTGATACGGGTGATGGCCAGCTTGGTACAGGGAGAAGCGGGTCCGGCTCGGCAGGAAAAACAGGTGG  
TTGCAGGCTCACGATGGTATTCCAGAGAGAAAGTATGTGAGCTGCATGGTAAAGACGTAACATAATGTTTG  
TCAGCCGGAATAATCCAGCTGGTACCATCCCCCGTCTTTGTAAGGAGAGTGCCATGTTGAGCCAGTTGA  
AAAATCCCGCCTGAAGTGGGCTGCCGTCGCGGTATGCTCGAGCTGGATGTGATCTTTATGCCCTTTTTTC  
GAACACGAGTTTCGACTCCCTGAGCGAAGCCGATCAGCAGACCTTTATCCGCTGCTGGCGAGCGACGATC  
CGGATCTGTTCAAATGGTGCATGGGTGATGGTGTCCCTGCCGATCCCGCATTTGCCGCCATGATCCCGAT  
GATCCTGGAGCGCAATCAGGCGCGCCACGACCGCCGGGGGTAATACCGTGGAGCGGGTGCATGACGGT  
TCACCCCTCCCGCCATCAGCAATGTTTGGTGGTGGCCCTCTTTTTGTTGCTGCTCTGGTTCGGTGGCTGGC  
CTGATTGCCGGTTGGCAGTGGGCACTGTTGCTGCCCGTCTGGTTGGTGTGCTCTGGCTGAGCTGGCGTG  
CGCTCGCCGCGCCCCCGTTCCAGCTCGTCTGGGATGGCCAGTGGCTACAGTGGCAAGGTCGTGCTATCA  
GCTAGACAAGAAAAGCCGATCTGCCCCGTGTGCTCAGGCTGGCGCTTTGTCCCGATCCGCAAGAGGGT  
GGAGCCGTGTGCCACGGCAACTGTGGCTCTTCTCCGATGCCCTTCCCCCGAACATTACCGCTGCTGG  
CGCGAGCCATCCACTTTCTGCCGTCCCGGCGCTGACGCCTGCTTTCCGTGATGACCATGCGCTGATTTAT  
CGGATAAAGTGTGCCATGTGGCTGGCGACACTTTTTTGTGGCTGAAAAGCGGTTGAAAACAAGTGAC  
CCCGCCGGGGCGGGTCACTGATTGCTTTAACGTTTTGCGGGAAGGGGGATTAATCCCGCTCCGGGGTCA  
GCACGGTCCGTTTTGGAGTCCGGCAGCATATCCGGATGATCCAGGTTGTAGTGCAGGCGCGGGACTCCTT  
GCGCTGCAGGGCGCAGTTGACGATAAGCTCGGCCACCTGCAGCAGGTTGCGCAGCTCCAGCAGGTTGTTG  
GAGACGCGGAAGTTGGCGTAGTACTCCTGCACCTCCTGCTTGGAGCAGGTCGATGCGGGCGCTTGGCGCGGG  
CCAGGCGTTTTGTTGGTACGACTATCCCCACGTAGTCCACATCATCAACCGCAGCTCGTGCCAGTTGTG  
CTGGATCACCACCAGTTGCTCAGAATCTTCCACCTTGTCTCGTCCACACCGGCAGGCGCGGGCGGCTCC  
ACGCTCATCGGCAGCTTGGCCAGAATGTCGGCCCCCGCTGATGGGCATAGACCACGCACTCCAGCAGGG  
AGTTGGATGCCATGCGGTTGGCGCCGTGCAGACCGGTGTAGGTCACTTCACCTATGGCGTAGAGGCCGGG  
GATATCGGTCTGGCCGTTGTTGTGATCATCACGCCCCACAGGTGTAGTGGGCGGCCGGCACGATGGGC  
ATCGGCTCCTTGGTGTGTCGATGCCGACCGCGAGGCGAGCTCATAAATGGTCCGGGAAGTGTGTTGATGA  
TGAAATCGGCCGTTTTGTGGCTGATATCCAGATACATGCAATCCGCCCCGAGCCGCTTCATCTCGTGGTC  
GATGGCGCGGGGCGACAATATCCCGTGGCGCCAGCTCGGCCCGCTCGTCAAATCCGGCATAAAGCGGCTG  
CCGTCCGGGGCGGCGCAGATAGGCCCCCTCGCCACGCAGCGCTTCGGTCAGCAGGAAGTTGGGGTGTCCG  
GGTGAACAGGCTGGTGGGGTGGAACTGGTTGAACTCCAGGTTTCGTAACCGGCAGCCGGCCCGCCATGC  
CATGGCGATGCCATCGCCAGAGCTCACATCCGGGTTGGAGGTGTACTGGTAGACCTTGGAGGCACCACCG

GTGGCCAGTGCCACGAAACGGGGCGGGATCACCTCGACCTGCTCGGCGTTGCGGTTCCAGACGTAGGCC  
CCAGCACCTTGTTGCCCGCAGGTTGAGCTTGCGGGTGGTGTATGAGGTCGACCGGTTGAAGCGCTCCAT  
CAGCTGGATATTGGGGTGGGCACGAACCTGATCGATCAGGGTCAGTTGCACCGCCTTGCCGGTGGCATCG  
GCCGCGTGAAGATGCGGCGATGGCTGTGGCCCCCTTCCCGGGTGAAGTGGTACTGGGATTACCATCGG  
CGTTCTCCTCCTGATCGAAGGGGACCCCTTGCTGAATGAGCCACTGGATGGACTCGCGGGCGTGGCGAGC  
GGTGAATTCGACCACTGCCGGGTACACAAACCCGGCGCCCCGCTTGAGCGTGTGCTCACGTGGGATTTCG  
ATGCTGTGGTTCGTCGAAAACGGCAGCGATGCCTCCTTGCGCATAGAAAAGTGGCCCCCTTCACTGATGG  
GCCCCCTTGCTCAGAACCAGGACTTTGGCGTGGTCTGCCAATCGCAACGCGAGGGACAAACCAGCGGCACC  
GCTGCCAATGATCAGTACATCGCAAAGGTATTCAACACTTGCTTTCATAAGTATCATTGGCCCTGGATTAA  
GAACCTGGCACCATTGGTAGCCAAAGCAGGGCGAGGATGCAGCCTGCATCACATTTTTTTCAATTGAAGCG  
AACTTCTCTGATTCTCCCTGTCTGAACTTGTGCGCTTAGGAAGGGCCGAAAAGAAAAAGATAACCTG  
ATGGGGGTTTTACGGCTCTGATGAGCGACCAGAATCTACTGGACGAACAGCTGGTTGAACGGGTCCAGCG  
CGGCGATAAAGCAGCTTTCAACCTGTTGGTAAAAAATAACCAGCATAAGGTGGTCAACCTGGTTGCCAGG  
TATGTCAACAATCCCGGTGATGTGCCGATGTGGCGCAAGAGGCCTTTATAAAAAGCCTACCGTGCATTGC  
CGACATTCCGTGGCGAAAAGTGTCTTTTACACCTGGTTGTACCGAATTGCCGTGAACACGGCGAAGAATTA  
TCTCACCTCCCTGGGGCGCAGGCCGCCAGCAGTGTGTGGAGGCTGACGAAGCGGAGTCTTATGGTGGT  
GGTGAAGCCTTGCAAGAGGTCTCAACCCCCGAAAACCTGGCGCTGACTGACGAGATCAAACGCACCGTGT  
TTTTAGCCATAGAGGCATTGCCGGAAGACCTGAGGACAGCTATCACCTTCGCGAACTGGAAGGGCTGAG  
CTACGAAGAGATTGCCGAAATCATGGATTGCCAGTGGGTACGGTCAGATCCCGTATCTTCCGGGCGAGG  
GAAGCAATCGATAAAAAGCTGCAACCTCTGATCGAGAATTAAGTGGGAAAGACGGGTTAAGCTTATGGCA  
AATAAAGAGCAAATCTCTGCCCTGATGGATGGTGACCTGAGTGACGCGAGAGGTACTGAACGAGCTGGAGA  
TGGACTCCGACTTGCAAGATACCTGGGGTGGTTACCACCTGATCGGCGATGCCATGCGGGGTGACCTGCC  
GGTCAATCTGCAACTGGATCTCAGTGACAGCATCATGGCTGCGCTGGAGGATGAGCCCACCATACTGGCA  
CCCAAGCCGGTGCAGACGGCTCCCGTGTGCAACCTGCCGTTGCACCGGTCAAGACAGATTCTAATGTGG  
TTCCGTTGTTCCGCCGTGTGGTCAAGCAGCTGGGTCAATATGCCATTGCGGCATCCGTGGCCGCTGCCGT  
TATCTTCGGGGTGCAGCAGTATCAGGGACAGGATGGCGTTCGGGCCAATCCGGTGTCAATACCATTCCA  
ATCGGTGGCAGTCCGGCACCTGTGAGTGTTCACTATCCGCAACAGGATGGCGCCCGTGCCTGAGCAAG  
GGCTGACCCAGACAGCAGATGCAGGAGCAGCGGGAGCGGATCAACGCCTTCTGCGTGACCCACCGATTCA  
GCAGCCTGTGTGCAAGACAGACAGCTCCAACGAATTAAGTGGGAAAGACGGGTTAAGCTTATGGCA  
AGCCGATTTTTGCTGGCCTCTCTCCTGCTAATTAGTGCCAAGGCCTCGGCGACGATAAGTCCGGCCGAGG  
CCTTGTGTGAGCAGATGCAGAGTGCCGTGCAGCAACAGAATTTTCGAGTTGTCCATGGTCAAGGCCCGTCA  
GGGGCGTCTTGAACCGATCCGGATCAGCCATGCCGTATCAACGGCAAGGAAGTGGCCCACCTCAGTTAC  
CTTGACGGCAAGGGATCGAGTATCTCCAGCGCCAGAACGAATACACCTTCTTTGAAAACAGCCACGATC  
CCTACACCCTGAAGGATGCCCGCTTCCCCGGCATCTGGTGCACCCTGGTGAAGATGCCGCTGGCGCAGGT  
GCTGGAGAGCTATGATCCAGTGTGCGCCGGTGCAGCCGGTGCAGCGGTGGTGGCGCAGGTAGTGAGG  
CTGGTGCCTAAAGAGGCCGACAAATATGGTTTCGTGCTCTGGATTGATGAGCAGAGCCACTTACTGTTGC  
GGATCGACATGGTGCAGCGGGAAGGCAATCTGGTGGAGCAGGTAAGTCCGTTGTCGAGCTGGATCTGCAGAG  
CAAACCGGCCCCCTGGCTGGTGAAGCTGGCCAACAGCAAGCAGCCTCCGGCGCTGGCGCTGGAGGATGCC  
TATCCGGCGCCGCAACAGCAGTTGAACTGGCAGATCACCTGGCTGCCCGATGGCTTCAAGGTGCTGTCCG  
AAGATCGGCACCAGCTGGTGACCACCAGTATGCCGGTGGATTACATGATGCTCTCCGATGGGCTGGTGGGA  
TCTCTCGGTCTATGTCTCCCGGGTTCGATCCCAAGCAGGCGGTGCGCCAGCAGCTGATCCGCCAGGGAGCG  
ACCTCGCTGGTGAGCTACGTCAACGAGGTGGGGGTGCAGATCACCGTGGTCCGGCGAGGTGCCGCGAAA  
CCGCCAAGCGCATCGCCGAGTCCGTCCAGCCGCTGGCCGCAACGAAGCAGTGCAGTAACGGGGGATGCC  
GGGTTTTGCCCGCTTGGCGAGCGTGGCGAGTCTGGTTCAGATCCTCTGATTGTGTGAACCCGAGGTGTT  
GCCGTGAATGAGATGAGTGAAGAGCTGGCGACCGTGGTGGCCATTGAGGGTGACCATGCCTGGGTGGAGT  
GCGAGCGTCCGCTCCGCTGTAGTGGTTGTGTCAGCAGCAGTCCAACCTGCGGTACCGGCACCGTGGCCAAGG  
GTTTTCCCTGAAAGCTCCCGCTTGGCGGTGAGGCTGACCGCGAGGTGCGGGTTGGCCAGCAAGTAAGG  
CTCGGTATCCCGCAGGAGAGTCTGCTGCGCGGGGCTGCGCTGGTCTATGTGCTGCCGCTTTTTCTGTCTGT  
TGGCCGGCGCCTTGCTGGGGCAGCTTTGGCTGGCGCCGCTGCTCTCGGGCGGGGAGGGGATTACCATTCT  
CTGCTGCCTGCTGGGGGGCGTGGGCTTTTTACTGGTTCGTTACTTTTTCCAACCGCCTGGATCAGGGG  
CGTTACGGCCCGCAGATGCTCGGCGTGGTCTGCTCCCTGTCCGCATCTCCCTGACCGAACAGGCGCTATT  
TCACTGGCGCTGGCGACTAAAGAATGGCCGTGAGCCGGTTATCCAGTAAAATCGCGCCTCCATAACTGA  
CCTTAACATAATTTTGAAGTACTCTTGGTCTGATGAAAACATTCGTAACTTTTCGATTATTGCGCACATCG  
ACCACGGTAAATCGACCTGTGCGACCGTCTGATCCAGACTTGCAGTGGCTTGTCCGACCGCGAGATGCA  
GGCTCAGGTGCTTGACTCCATGGATCTGGAGCGCGAGCGCGCATTACCATCAAAGCACAGAGTGTGACC  
CTGAACACCAGGCACAAGACGGTAACACCTACCAGCTGAACTTTATCGACACCCCGGGCCAGTGGATT  
TCTCCTACGAGGTCTCCCGCTCTTTGGCGGCTGTGAAGGGGGCGCTGCTGGTGGTGGATGCCGGCCAGGG  
GGTTGAGGCACAGACTCTGGCCAACCTGCTATACCGCCATGGAAAATGGATTGGAAGTGGTGCAGGCTGCTG  
AACAAGATTGACCTGCCAGCCGAGAGCCCGAGCGGGTTGCCGAGGAGATCGAAGACATCGTCCGTATCG  
ACGCGGTGATGCGGTGCGCTGCTCCGCAAGACCGGCTGGGTGTTGATCTGGTGTGGAAGAGATCGT  
CGCCAAGATCCCGGCACCGGAAGGTGACCCGGATGCCCCACTGCAGGCGCTGATCATCGACTCCTGGTTC

GACTCCTATCTGGGCGTTGTCTCTCTGGTGCGGATCAAGAACGGTTCCTGAAGAAGAACGACAAGATCA  
AAGTGATGAGCACCGGTCAGGTGTGGGGTGTGATCGTATCGGTATCTTCACGCCCAAGCAGGTGGATAC  
CCAGGGGCTGGGGGGCGGCGAGGTAGGTTGGGTTGTCTGCGGCATCAAGGACATCCACGGCGCGCCGGTG  
GGCGATAACCTGACTCAGGCCAAGAACGGTGCCGATAAGGCGCTGGCTGGCTTCAAGAAGGTGAAGCCG  
AGGTTTATGCCGGTCTGTTCCCCATCTCCAGCGATGACTACGAGTCGTTCCGTGACGCCCTCGACAAGCT  
CTCCCTGAACGATGCCTCCCTGTTCTTGAACCAGAGAGCTCCACGGCGCTGGGCTTCGGCTTCCGTTGT  
GGCTTCCTCGGCATGCTGCACATGGAGATCATTAGGAGCGTCTGGAGCGTGAATACGATCTGGATCTGA  
TCACCACGGCGCCGACCGTAGTGTACGAGATCGAGCTGACCGACGGCTCCACCATCCATATCGACAGCCC  
GGCCAGAGTACCCGCCATCACCAGCATCAAGGAGATGCGCGAGCCGATCGCCGAGTGTATATCCTGCTG  
CCGACGGATACATGGGCAACGTGATCACCCTCTGTATCGAGAAGCGTGGCGTGCAGACCAACATGGTCT  
ACCACGGCAAGCAGGTGGCGCTGACCTATGAAATCCCGATGGCGGAAGTGGTGTCTCGACTTCTCGACCG  
TCTGAAATCCACCAGTCGCGGTTACGCCCTCGCTGGATTACGGCTTCAAGCGTTTCGAAACCTCCGACATG  
GTCCGTCTGGACATCATGATCAACGGTGAGCGGGTGCATGCTTTGGCCATCATCACCCACAAGGACAACG  
CCCAGTATCGCGGTCGTACGGTGGTGGAGAAGATGCGCGAGCTGATCCCGCGCCAGATGTTTCGATATCGC  
GATTACAGGCGCCATCGGCAACCAGATCATCGCTCGCAGCACCGTCAAGGCTCTGCGTAAAGACGTAACC  
GCCAAGTGTACGGTGGTACGTGAGTCGTAAGAAGAACTGCTGAACAAGCAGAAAGAAGTAAGAAGC  
GGATGAAGTCCCTCGGCCGTGTGACGTGCCGAGGAAGCCTTCTCGCGATTCTCCACGTCCGAAAGGA  
TTAATAGATGGCAAGCACGTTTTTCCCTGATCCTGGTGGTGGTCTGCGCGATCACCGGTGTTATCTGGTGT  
CTGGACAAGATGATTTGGTCCAAGCAGCGCGCCGCCAAGATTGCCGTGGCTCGTGGCCATGGCGGTGCC  
ACCTGGATGAGAAGACCCTGGCCAAGGTCGCCCCGTGCCGGTCTGGATTGAACAGACCGCCGGGGTCTT  
CCCGGTATCACCTTTGTGCTGATCCTGCGTTCGTTCAATTTTGAACCGTTCAGATCCCGTACAGGTTCC  
ATGATGCCCACCCTGCTGGTGGGCGACTTCATCCTGGTGGAAAAATTTGCCTATGGTCTGCGGGACCCGG  
TGACCAACACCAAGTTCCTCGAGACTGGCGAGCCCAAGCGTGGCGACGTGGTGGTGTTCAGTATCCCT  
TGAACCGCGCGTTGACTACATCAAGCGGGTGGTGGCATGCCGGGTGATCGGGTCACTATCGCAACAAG  
GAGCTGATGATCCGGCCCAAGTGCGAAGAGCAGGAAGGGAAAAACGTGCCCGGGCTTCAAGAAGCTCGACG  
TCAAGTTTGAACAAAGAGGCGAATTTACCCAGATGGGGATCCCCCTTGACCGCTATACCGAGCAGTTGGG  
TGATGTCTCCCACGAGACCCTGCGCAATCCGCTGATGCCCGACATGGTTGGCCGTTACTATCGCCAGCCC  
GGCACCATACCCGACGAGTGGTGGTACCGGAAGGCCAATTTCTGTGATGGGCGACAACCGCGACAACA  
GCACCAGACCCGATTTGTTGGGCTTTGTGCCCCGAGCAGAACTGTTGTCGCAAGGCGGTCCGCTATCTGGAT  
AAGTTTTGAATTCGAGCGCAAGAAGGCTCCCTGCTGCCAAGTTGGGTACCGACAGGTGTGCGCTTCAAC  
CGCATTGGCGGAATCAAGTAAATGAATATCAAGATGAACAGACTGCAGTCCCGTCTCGGGCATGTCTTTG  
CGGATCTGGAAGTCTGACCCGCGCGTACTCACCGCAGCGCCGGTTCCCGTCACAATGAGCGACTGGA  
ATTTCTGGGTGACTCCATTTTGTGCTGGTGGTGGTGGTGGTGGTGGTGGTGGTGGTGGTGGTGGTGGT  
GAAGGGGATCTCAGCCGATGCGCGCCACCCTGGTGGCGGAGAACCCCTGGCCGAACGGGCGGGGAGT  
TTGACCTTGGTGGTACCTGATCCTCGGTCCCGGCAACTCAAGAGCGCGGTTTTTCGCCGGAATCCAT  
TCTGGCCGACACGGTGCAGGCGGTGATCGGTGCCGTCTATCTGGATACCAATCTTGAGACGGTGGCGACA  
CTGCTGCTGAGCTGGTATGCCAGCCGCTGGAAGAGATCAAGCCGGGCATCGAGCAGAAAGATCCCAAGA  
CCCGTCTGCAAGAAATTTTGCAGGGAAAGCCGCAAATCCCTGCCGACCTACACCGTGACCAACGTCAAGGG  
CGAGGCACACAACCAGGAGTTCACTGTCCAGTGTGACGTGGAAGGTCTGGATGGTCCCTCGTGGGGT  
GGCACCAGCCGTCGCAAGGCCGAACAGGCCGCGGGCGCAGCAAGCATTGGAAAAACTGTATGACAGATAC  
CACCTACTGCGGCTTTGTGCGCCATCGTGGGCCGCCGAATGTGGGCAAGTCCACCCGTCAACAAGCTG  
CTTGGCCAGAAGGTGAGCATTACCTCGAAGAAGCCCCAGACCACCCGTACCCGATTTTGGGGATCGACA  
CCGAGGATAACTACCAGACCATCTATGTAGATACCCCGGTCTGCACATTTGAAGAGAAACGGGCCATCAA  
CCGCCTGATGAACCGTGCAGCCACCAAGTTCGCTGGGTGATGTGGCCATGGTGGTGTTCATGGTGCAGG  
ACCCACTGGACCAAAAGACGACGAGATGGTGTGGGCAAGCTGCGCAATCTCAAGTGCCCTGTGGTGTGG  
CGGTCAACAAGATTGACAACGTCAAAGAGAAAGAAGATCTGCTGCCCCACCTCGAGTGGTGGGACAACA  
GATGAACTTCGCCCATATTCTGCCATCAGTGCCGAAAAGGGCACCACCGTGGAGAAGATCCGCGAGTGG  
GCCAAGGATCTGCTGCCGAAAACGTCCACTTCTTCCCGGAAGATTACGTGACCGACCGCTCCTCCCGCT  
TTATGGCCTCCGAAATCATCCGCGAGAAGCTGATGCGCTTACCAGGTGAGGAGCTGCCCTACTCGGTGAC  
GGTGGAGATCGAGCGCTTCAAGGTGGAAGAGAAGCGCTCTATCACATCCACGGCTGATCCTGGTGCAG  
CGCGATGGCCAGAAGAAGATGGTATCGGTAACAAGGGCGAGAAGATCAAGACCATCGGCACCGAAGCGC  
GCCTCGATATGGAGCGTCTGTTCCAGAACAAGGTGCACCTCGAGCTGTGGGTCAAGGTCAAGTCGGGCTG  
GGCTGATGATGAGCGCGCCCTGCGCAGCCTCGGGTATGGCGACGACTGATTGCTGACTCCGGCTTTTCGTC  
ATCCACAGTCGGCCCTATCGGGAGACCAGCCAGCTGGTGCAGGCTTTCACCCAGGATAGTGGCCGATTTA  
CTCTGGTGGCTCGCGGTTCTCGCGGGCCACGCTCCCCCTTAAAGGGGTGCTGCAACCTTTACCTGCT  
CACCATCGCCTGGCGCGGCAAGGGCGATCTCAAGAACCTCACCCAGGTGGAATGCCCGGATCACTCCCTG  
CGTCTCGGCGGGATCGTCTCTTCTACGGCCTCTATCTCAACGAGCTGGTCTACTACCTGCTGGAAGCGC  
ACACCCCGTTCCAGAAGTATTCGATGCCTATGCCCGTGCATCATGGCGCTGGCCGATGGCGAGACGCC  
GGAGCTGCCGCTGCGCCGCTTCAGATTCTGCTGTTGCAGGCGCTCGGCTATGCGGTGGATTTTCGAATAC  
ACGGCGGACGACGAGTCGCCCATCGAGCCGACCTGCTCTATGGCTTCGAGCGTGAATTTGGGCTTTGTTG  
CTTGGAGCGGGCGCCGATCCCCGTACCCTGTTCTCGGTGCCACCTGCTCGCTTTGCCGAGGGACG



TTTCGATACCCCTCCCTTGCTGCAGGGCGGCCAAACGTTTCAGCCGATTGGCGTTGCAACCCTATCTGGGC  
AAGCGCCAGCTAAAGAGCCGGGAGCTGTTTTTAAACGCAAAGCCAGCATCCAAGGCTGACACAGATTAC  
AGACATACGGATATTGGCGCGGTGTGATTTCGCTGACCGCGCAGTCAACAGATGAAGCCTTCAAGGAGTT  
CTCAATGAGTGAAATCTATCTGGGTGTGAACATCGACCATATCGCCACCTGCGCAACGCCCGTGGCACC  
CAGTATCCGGATCCGGTACAGGCCGCGTTTCGTGACCGAGCAGGCCGGGGCCGATGGCATTACCGTGCATC  
TGCGTGAAGATCGCCGCCACATCACCGACCGTGATGTGGAGATCCTGCGCCAGACTATCCAGACCAGAAT  
GAACCTGGAGATGGCGGTGACCGAAGAGATGATCGGCATCGCCTGCCGCATCAAGCCCCACTTCGTCTGT  
CTGGTGCCGGAGAAGCGCACCGAGGTGACCACCGAGGGCGGTCTGGACGTGGCCGGTCAGCTGGACAAGG  
TGACTGACGCCGTTGCCCGCCTCTCTGCTGTGGGTGCCAGGTATCCCTCTTTATCGACGCCGATCCCAT  
CCAGATCGATGCCGCTGCCGAGAGTGGCGCCCCCTTTATAGAGATCCATACCGGCCGTTACGCCGATGCC  
ACCACCGATGCCGAGCGCAACCGGAGTTCAAGCGTATCGCCGCCGCGCCTCCTATGCTGCTGGCAAGG  
GGCTCAAGGTCAATGCCGGCCACGGCCTGCACCTACCACAACGTCGAAGGCCATCGCCGCCATCCCCGAGCT  
CTATGAGCTCAACATCGGCCACGCCATCATCGGCCGCGCCGCTTCGATGGTCTGGCCAAGGCCGTGAGC  
GATATGCGCCTGCTGATGCAGGAAGCCCGTCAGGGGATTTGATCCGCTGGATAGGTGAGCGGCCTGAGAC  
CGGCCGCTAGAAATAACAAGGGACGCCACGGCGTCTTTGTTGTTTTTAGGTCTATTAATGCGGGGCTAA  
TGAGTTGGCGGCACCCGCGCAGTAATAACCAGCACAATCGGCTATAAGCAGTTGATGTCAAAGGGTTA  
CACTGGTTGACCCTGTGAGCTGGACGAGAATGTTATGGATCATCCCTTGTACCACCCGATATCACCGAA  
CTTGAACCTGTGCCCCGCGCGGGAGCGCCATCATGGCCATCTACAGCCAGCCCTTCGCGGTGGAGT  
ACAAGAGCGACGAGAGCCCGCTGACCGCTGCCGACAAGGGGGCTCATGAGGTGATCGTTCAGGGGTTGGC  
ACAGCTGACTCCGGATATTTCCGTAAGTGTCTGAGGAGTCGGGGACCGAGGTGATGGCGGCGCGCCACGGC  
TGGTCCCGCTACTGGCTGGTGGATCCCTCGATGGCACCAGGAGTTTGTCTCCCGCAACGGCGAGTTCA  
CCGTCAATATCGCGCTGATTGAAGAGGGGGCACCGCGCTGGGGGCTGGTCTATGCCCTGTGCTGGACAA  
GCTCTGGTATGGCGGTAAGGGCGCGGGTTCCCTGGCGCATCGCCGATGGCAAGCGCGAGCCTATCCAGACC  
CGGCCTCATCGTGAAGGGCAGGGCTGGCGAGTGGTGGGCAGTCGCAACCCTGTCGCAGGAGACCCTCG  
ATTTCTTGGCTCCTTTTGGCGAGATCGAGCTGGTATCGATGGGCAGTTCGCTCAAGTTCGCATCATTGC  
CGAGGGGGGCGCCGAGCTCTATCCGCGCCTCGCACCTACCTGCGAGTGGGATACCGGCCGTCACAGGGC  
GTGCTGGAGGGGGCGGGTGGCAGCGTCACCTGCTCGATGGCTCACCCATTGCCACAACAAGCCCGATA  
TCCTCATCCCTGGTTTGTGCGCAAGGCATAAAGCAGATATCGGGATGCAAAAAGGCAGGACTGGAATGA  
ACTTCCAGTCCCTGCTTTTTTTTATTTTCGCTATTCGCTTTGCGGTGAGAAGACCTTTTTTGAACGGCTGATG  
GTCACCTTTGGCATAGACGCCAGCTGCCACATAGGGATCGGCATCGGCCAGGCTTTGGCGTCAGCTTGGC  
AGGCAAACCTCGGCGATGACGGTGTGCGCGTAAAGCCTGCATCGGCTGGATCCTCGGCATCGATTGCCGG  
GTTGGGGCCGGCGGTGAGCAGCCGACCTTCATCCTGCAGGGCTTGCAGGCGAGCCAGATGGGCAGGGCGA  
ACTTGCTTGGCAGTGGCAGGCTATCGGGGACATCTTCGGAGTAGATGAGATAACCACATGAGACAATCCT  
TTTTCTGATGAGGGTTACTTTTTTGGGTTGCTTTTTTGTGTTGGGACAACCTGCTCGGCAGGGATGTGGCGATA  
GAGATAGACGCCGCTCAGCAGGGTAAAGACCAGCGTCATCCCCAGCAGACCGAACACCTTGAAGTTGACC  
CACATCTCTTGGCGCAGGTTGAACGCCACGTAGAGGTTGAGCAGGCCACAGACGGTAAAGAAGCCGACCC  
AGCCGAGATTGACTGTGTCCAGACCTTATCGGGTGTTCGAGCTCCTTGGCCAACATCTGTTTGTATCAG  
ATTCTTGGCAAAGCCGTAGCGGCTGATAAGCAGACCCAGTGCGAACAGCACGTTGATGACAGTCACTTTC  
CACTTGATGAAGGTGTATCGTGGAAAGACGGTGAGGCCGCCGAAGAACCAACCAGCAGGAAGGTAA  
AGAGCTGCATCTTCTCGACCTTGCAGATAGCGGATCCAGCTATAGGCGAGCTGCAGACCGGTGACCCTAC  
CAGTGCACCAGTGGCCATGTAGATGTCTGTAATAAGACCGCTCATTTTTACGCCGTTCCGCGCTGTGCGCAAACAGTTG  
ACGTGCAATGGAGATCCCCAGTCGCTGCTGATCGGCCAGCAGGTGCGGATATGGCGCTCTTCAATCAGG  
GGATTGAGCAGCACGGCACGCAGGGTAAGCGGCTGGGCACCGTAGCGCACCACGGCCCGCTGGGTGC  
GGGAGACAAAGCTGTGCCCTCGCCCGCTGGGCTTTTTGCAAGTGCACGTTGAAGTCTGTTGATCTGTGC  
ATTGGCCGCTTCATCCAGCACCTTGCCTGCAAGGTGGGGTGAATGCAGCGGTAGGAGAGCAGGTTTCATT  
ACCGGAGCAAACATCAGCTCGAAGGCCGGATTTCTGGTAATAAGCTCGGCCATCAATCTGGCCCGGTCGT  
AGTTGGCTTCGATAAGCTCGGCATAGCCTTGTGTTGCCGAACAGCTGGAAGGCCGGCTCCAGATAGAGGGC  
GTTGGCCGGGCGGGTGCCCTCCAGCGTAAAGCGCCCTGATCAAACGAGGTGGCTCGGATGGCGTAGGGG  
GCCTCCCGCTTGACCGCCATCATCAGGTCCGGCTGGCGGCAGAGCAGCATGCCGGTACCAGCGGCACCA  
GCAGCTGTTTTGTGGCCATCCAGAGTGACGGTATCGGCCGCTCGATCCCGGCCAGCAGGCCCTTGATAGCG  
GGGAGAGAAGAGGGTGGGGCCACCCAGCGGCATCCACGTGGAAGTGGATCTGCTCGCGCTCGGCGATG  
GCGGCCAGTTCGGCGAGCGGATCGATGGAGCCAAAGTCGGTGTGCTGCCCGCCACGCCAGCAGCGCCAGTA  
CTTTCAATTTCTGCTCTTTGCACTGGATCAGCGCCTGCTCCAGCGCAGCCAGACTGAGCCGTTCTGTTC  
GTCAGTCTCAAGGCGCCAGACGCTGCGAGCGCCAGTCCCAGCAGATCCATCCCTTGTGCAAGGAGTAG  
TGCATCAGGCGGGAGCCCAGAATGACGGCGCCCCGATAGCCCTGTTTCATAGAGGGCGAATAGGTTGTGCGC  
CACAGGCGCGGTTGCGGGCCAACCACAGTGCCGTGACGTTGGCGATGGTGCCCGCGCTGGTCATGACGCC  
GAGGGCTGCATCCTTGGCATGCATCTGCTCGCCGTAGAAGGCATCATCCCTGCCATAGATGAGGCGGTGC  
AGCTTGGCCAGCACCTCCCGCTCGAGAAAGCTGAGCAGACGGGAGGACTCCATCTTCATCGGATTCGTT  
TCAGCATCACCAGCAGGCGGACAGCTCGGCAGTATAGGCCGGCAGTGGTGCCGTCATGTGGCCATGTA

CGGTGGCGAGGTGAGATGCGAGGCACCGGGCACCAGAGTAGCCAGCCGCGCCAGATACTCCTCGATAGGT  
TGGCCGACTGCAGGCATGCGGGATTGATCGAGCTGGTGGGTGAACAGGTCGCGCTGATAGGGAGCCTGAC  
TGTCGTCGGAGTGGTGAAGCTCTCCAGCAAGGTGTTTCATCGCCTCGCCAAAGGCGGGATCCGCTTGTGC  
AAACAGCTCAGTCAACTTCATCAGGTTCTCCAGACCAGGTCACCGGGGTAGGCGTCTATGCCGCTTGTCT  
CGGGCATCGGCGGCAGAGCATAACCAAAGGGGGCGGGTGCAGCCACCCCATTTTTTAAGCGAACACT  
TGTACTCCGAAATGGCGCTGGGTAGAGTGAGCCACAGTTATTGTGGAGTCGATGTTATGAGTGGTGTGAT  
GGATTACTCCCCCGGGAGGAGCTGGCAAACCGGCTGAGTCACGGTGCGGGATTTGTTGCTGGGGATTGTC  
GGGCTGGTGTCTGTTGCTCATCAAGGGATGGGGCAGGGGACGCAGGCGCTGGTGAGTTACAGCCTTTATG  
GCGGCAGTCTGGTGTCTCTATCTGGCCTCGACCCTCTATCACAGCATGGGGTCAGGGCGGGCCAGACG  
CTGGTGCAAGGTGTTTGATCACTGCGCCATCTATCTGCTGATTGCCGGCACCTATACCCCTTTCCTGCTG  
GTGGCGCTCGATACCGCTGCGGAAGGGGTTGATGGTGGTGGTGGTGGTGGTGGTGGTGGTGGTGGTGGT  
TGTTCAAGCTGGTGTGTTTATCAATCGCTTCAAGAAGTTGTCGCTCTTTACCTACCTGATGCTGGGCTGGCT  
GTCGCTGGTGGTTCATCTATCAGCTCTACATCCATCTGGCCGGTGAGGGGCTGCTGCTGCTCGGGCTTGGC  
GGCCTTATCTACAGCCTCGGGGTCTCTTCTATGTGGCCAAGCAGATCCCCTATAACCATGCCATCTGGC  
ATCTCTTTGTGCTGGGTGGCAGCGTTTGTCACTTTATGGCCATTTACGGCTACGTCGCCAAGCTCTTGC  
AACTAGCCCTTAATTGGTATTTTTAGCGCGTAAAAGGATAAAATTCGTGCGGTATCACACAGTTGGCATCA  
GCGTTTTGCTGACAAGCTAGGGCCAGTTCAATTCGCAAAGGATGCACGAAATGAGTGAAATCGCGCTTTCC  
ATCAGCATGTTGTCGCTGGTGGCAGTGTAGGACTCTGGCTGGGAAACTGGCGAGTCTATGGCGTTGGCT  
TGGGAATAGGGGGGGTGTCTTTCGGCGGCATCACAGTAGGTCACTTTGCAGGCGCCTCCGATCTCGCGCT  
GGATGCACAAACGCTTCACTTTATTCAAGAATTTGGCCTGATCCTGTTTGTCTATACCATCGGCATCCAG  
GTCGGGCCGGGTTTCTTCTCGTCAATTGCGCAGTTCGGGTCTCAAACCAACGCCCTTGGCCGCTTGTCTGG  
TCATCCTTGGCTGCGTGGTGGCCGCTGGCTTGCATCAATTTTTTCGATGTGCCGTTGCCGCTCATTCTGGG  
GGTCTTCTCCGGTGCCGTCACCAATACGCCATCTCTCGGTGCGGGCCAGCAGATCCTGGCCGAGCTGGGC  
GCCGCGCCCGGTTTACCGGTTTGGTGGGGATGGGCTATGCGGTTGCCATCCGTTTGGTATCTGTGGCA  
TTTTGCTCACCATGTGGTTGGTCAGGGTCTTCTTTTCGATCAAGATCGACGATGAAGCCGCCAGTTTCGA  
GCTACAAACCGGTAAAACCAAGGAGAGCTTGCAGACCATCAACATCGCGGTGCGCAACCCCAATATGCAC  
GGCCTGATGCTGAGCGAGATCCCGAGTCTCGACGAGTCTGATGTCATCTGTTACGGCTCAAACGGGGCG  
ACGCTGATGTTGCCACGGCCGAATCCCGTATCGAATGAGTGGTGACTTGCTGCATCTGGTGGTGGTGGC  
CCACGCGCTGCACAAGGTGTTGCTGGTGTGGGGGAGGAGGTGGAGACCTCGCTCTCGACCCGCGGCACC  
GATCTGCGCGTCGAGCGGGTAGTGGTGACCAACGAGCAAGTTCTTGGCAAGAAGATCCGCGACCTGGATA  
TCAAACAGCGCTATGACGTGGTGTCTCCCGTCTCAACCGGGCTGGTATCGAGCTGGTGCCGACCAGCCA  
GACCAGCCTGCAGTTTGGTGACATCCTCAACCTGGTTGGCCGCTCTCGACGCCATCGAAGCTGTACCAAT  
GTGGTGGCAACGTCAGCAAAAGCTGCAACAGGTGCAGATGTTGCCGGTATTTATCGGGATTGGCCTTG  
GCGTATTGCTCGGCTCCATCCCCTTCTATCTGCCCGGTTTCCCGGCCCCCTCAAACCTGGGTCTGGCGGG  
GGGGCCGCTGGTGGTGGCGCTGATCCTGTGCGGATTGGCAGCATCGGCAAGCTCTACTGGTTCATGCC  
CCCAGTGCCAACCTAGCGCTGCGGGAGATCGGGATCGTGTCTGTTCTGGCGGTGGTGGCTTCAAGTCCG  
GTGCCGGCTTTGTCGATACCCTGATCAACGGTGTGCCCCGGCTGGATGCTCTACGGCATGGCGATCAC  
CCTGATCCCCTGCTGGTGGTGGTGGTGGTGGTGGTGGTGGTGGTGGTGGTGGTGGTGGTGGTGGTGGT  
GGTTTGGTGGCCGGCTCTATGACTGATCCTCCCCTGGCTTTGCCAACGCCATGCACCCGACCAGTG  
GCGCCAGTGCCTCTCATAACCCACTGTCTACCCGCTGGTGTGTTCTGCGGATCATCTCGCCACAGCT  
GCTGGCTATCATCCTCTGGGCGGGTGTATAGGGTTAATCTTGACGGGAGCATGCTTTGTGATGCTCTCGT  
CATCATTCTGTAAATTATTGATAATTTTTGGTTTTTACTATTTATCACAACTAGTCTTACACACTTCTGTC  
TGGCTGAACAGTTACGCTCAAATTTCCCTATCCTTTGCAATTTTCGAGCTGGTTATTTTTGCCATGTGT  
ATGCACAGTAAGATGTGGCTTGTGCAATCAAATCAGGATTCAGGAGAGAATGATTACCAATGCCGTT  
ACCTTGAACAGGGCGTAACCGTAACCCAACTAAAGGACAAATTTATCTGGTTGCCGAAGATGGCAGCC  
GGAAGCTGTTGGCTGAAGGTGATGTGCTGCTGCGGAAAGGGCGGTGATCATGTCGCCGGATGGCGCAGTTT  
CATGGGGGGCGGACAGTCGTTCACTGTGCAACCGGCCAACGAACAGAGTGAGCCTGCCGAAGAGGGGAT  
GCCCCCAGTTGGCGCAAAACGGTGTGTCAGGTAACCTGATGATATCAGTGCTCTGCAACAGGCCATTT  
TGGGGGGCGCGGACCCGACCCAGGCTTTGAAGCCTCTGCCGAGGCGGTGCGCCTGCTGCCGGTGGTGG  
CGGTATTGGTGGTGTGCGCGGTGCCAGTGGCAACGGCGGTTTGTGTCACCATCGACCGTACCGGTTCCGAA  
ACCATCGCTGAGGCCACCTTCGATAACCACTACAACGCCAATGGTGAGCCCGCGCTTGGTGTGCTGGCG  
AAGATGAGGTATTTGACCTTACACCCCAACCATCTCCGTTGTTGCGCCAGATAACACCAATGACACCAC  
TCCGACCCTGACCGGAACAACGGATGCTCCCGTTGGCAGCACCGTAACCTTGTGGTACCAGTGCACAAAC  
GGTAATCAACAAACCTGACCGGATCGTCACACCCACTGGCACCTTACCGTGGATGTGGTTACCCCT  
TGGCCGAAGGCTCTTATACCGTTACCGCCACAGTGACAGATCCTGCGGGTAAATCCGGAAGTGGGACTGA  
TTCAGGGAGTGTGGATGTAACAGCTCCAGTGATCACCGTCGAAGCACCGGACAAACAGCACCGATGACACA  
CCAATATCACAGGTAACAGACGCTTCCCAGGCAGCACAGTAACCATCTTCATCACCGACAGCAATG  
GGGATAATCAAACCCCTGACCACCATAGTTAATAACGATGGTCTTACACGGTTGATGTACCAATCCATT  
ACCTGAAGGTGGTTATACTGCAGATGCCAGCGTCACAGATCCTGCCGAAACATAGGTACCGACAGAGAC  
AATGGTGTGTTGTTTACCCTGAAGTCAGCCTTAGCGCCAATCAAATTTGATGTCAGCGAAGGAGGCATAG  
CAAGCTTTAATGTAAGCTTGGATCAGATTGCGACAGAAGATGTTACCGTTAGTTTACGCTATTCAGGCAC

AGCCGCTGATGGCAGTGACTTTGTCCGGTGTGGTCAGTGTGGTTATCCCCGCCGGTCAAAC TAGTGTGACC  
TTCAATATAAGTACAATTGATGATGCTTTTTACGAAGGTTCCGAAGACTTCAATATCAGCATCAGTGGCG  
TGAGTGGTGGCAATGCCACCATTGGCCCCGAATAGCAGTGCCAATACCAATATTTATTGACGACGGCACC  
TCCGGGTCCGAACCCGGATGATGATCGCCCATCGGTCTCTATCACC AATGCAGGGACTCTCAACGAAGGC  
AGCACTGCGCTGTTACACCGTGAAC TTGTCTGCGGGCGGCCACAGCCACCACGGTCAAAC TGACCCTCA  
ATACCGGGGATACCGAAGCCGGTGACATCGGCACATTGGAATACTTTGATGGCACC AACTGGGTCCGGTGT  
CCCGGCCGATGGTATTGTGACGCTCGCGGGCGGCTCGACCGCGTTGCAACTGCGTGTCCAGACGAATGAT  
GACAGCGTCTATGAAGGGGCAGAAAGCTTCAGCGTCACCGTGACTGGGCAAACCCGGCACCACAGGCACCG  
CTACCGGCAGTGCCAGCATTGTGCGACGATGGCACC GGTCGGGTCCGAACCCGGATGATGATCGCCCAAC  
GGTCTCTATACCAATGCAGGGACTCTCAACGAAGGCAGCAGTGCCTGTTTACCGTGAAC TTGTCTGCG  
GCGGCCGCCACAGCCACCACCGTCAAAC TGACCCTCAATACCGGGGATACCGAAGCCGGTGACATCGGCA  
CATTGGAATACTTTGATGGCACC AACTGGGTCCGGTGTCCCGGCCGATGGTATTGTGACGCTCGCGGGG  
CTCGACCGCTTGAAC TGCGTGTCCAGACGAATGATGACAGCGTCTATGAAGGGGCAGAAAGCTTCAGC  
GTCACCGTGACTGGGCAAACCCGGCACCACAGGCACCGCTACCGGCAGTGCCAGCATTGTGCGACGATGGCA  
CCGGTCCGGGTCCGAACCCGGATGATGATCGCCCAACGGTCTCTATCACC AATGCAGGGACTCTCAACGA  
AGGCAGCAGTGCCTGTTACACCGTGAAC TTGTCTGCGGGCGGCCACAGCCACCACGGTCAAAC TGACC  
CTCAATACCGGGGATACCGAAGCCGGTGACATCGGCACATTGGAATACTTTGATGGCACC AACTGGGTCC  
GTGTCCCGGCCGATGGTATTGTGACGCTCGCGGGGCTCGACCGCGTTGCAACTGCGTGTCCAGACGAA  
TGATGACAGCGTCTATGAAGGGGCAGAAAGCTTCAGCGTCACCGTGACTGGGCAAACCCGGCACCACAGGC  
ACCGCTACCGGCAGTGCCAGCATTGTGCGACGATGGCACC GGTCGGGTCCGAACCCGGATGATGATCGCC  
CAACGGTCTCTATCACC AATGCAGGGACTCTCAACGAAGGCAGCAGTGCCTGTTTACCGTGAAC TTGT  
TGCGGGCGGCCGCCACAGCCACCACGGTCAAAC TGACCCTCAATACCGGGGATACCGAAGCCGGTGACATC  
GGCACATTGGAATACTTTGATGGCACC AACTGGGTCCGGTGTCCCGGCCGATGGTATTGTGACGCTCGCGG  
CGGGCTCGACCGCTTGAAC TGCGTGTCCAGACGAATGATGACAGCGTCTATGAAGGGGCAGAAAGCTT  
CAGCGTCACCGTGACTGGGCAAACCCGGCACCACAGGCACCGCTACCGGCAGTGCCAGCATTGTGCGACGAT  
GGCACCGGTCCGGGTCCGAACCCGGATGATGATCGCCCAACGGTCTCTATCACC AATGCAGGGACTCTCA  
ACGAAGGCAGCAGTGCCTGTTTACACCGTGAAC TTGTCTGCGGGCGGCCACAGCCACCACGGTCAAAC  
GACCCTCAATACCGGGGATACCGAAGCCGGTGACATCGGCACATTGGAATACTTTGATGGCACC AACTGG  
GTCGGTGTCCCGGCCGATGGTATTGTGACGCTCGCGGGGCTCGACCGCGTTGCAACTGCGTGTCCAGAC  
CGAATGATGACAGCGTCTATGAAGGGGCAGAAAGCTTCAGCGTCACCGTGACTGGGCAAACCCGGCACCAC  
AGGCACCGCTACCGGCAGTGCCAGCATTGTGCGACGATGGCACC GGTCGGGTCCGAACCCGGATGATGAT  
CGCCCAACGGTCTCTATCACC AATGCAGGGACTCTCAACGAAGGCAGCAGTGCCTGTTTACCGTGAAC  
TGTCTGCGGGCGGCCGCCACAGCCACCACGGTCAAAC TGACCCTCAATACCGGGGATACCGAAGCCGGTGA  
CATCGGCACATTGGAATACTTTGATGGCACC AACTGGGTCCGGTGTCCCGGCCGATGGTATTGTGACGCTC  
GCGGGCGGGCTCGACCGCTTGAAC TGCGTGTCCAGACGAATGATGACAGCGTCTATGAAGGGGCAGAAA  
GCTTCAGCGTCACCGTGACTGGGCAAACCCGGCACCACAGGCACCGCTACCGGCAGTGCCAGCATTGTGCGA  
CGATGGCACCGGTCCGGGTCCGAACCCGGATGATGATCGCCCAACGGTCTCTATCACC AATGCAGGGACT  
CTCAACGAAGGCAGCAGTGCCTGTTTACACCGTGAAC TTGTCTGCGGGCGGCCGCCACAGCCACCACGGTCA  
AACTGACCCTCAATACCGGGGATACCGAAGCCGGTGACATCGGCACATTGGAATACTTTGATGGCACC AA  
CTGGGTCCGGTGTCCCGGCCGATGGTATTGTGACGCTCGCGGGGCTCGACCGCGTTGCAACTGCGTGTCT  
CAGACGAATGATGACAGCGTCTATGAAGGGGCAGAAAGCTTCAGCGTCACCGTGACTGGGCAAACCCGGCA  
CCACAGGCACCGCTACCGGCAGTGCCAGCATTGTGCGACGATGGCACC GGTCGGGTCCGAACCCGGATGA  
TGATCGCCCAACGGTCTCTATCACC AATGCAGGGACTCTCAACGAAGGCAGCAGTGCCTGTTTACCGTG  
AACTTGTCTGCGGGCGGCCGCCACAGCCACCACGGTCAAAC TGACCCTCAATACCGGGGATACCGAAGCCG  
GTGACATCGGCACATTGGAATACTTTGATGGCACC AACTGGGTCCGGTGTCCCGGCCGATGGTATTGTGAC  
CCTCGCGGGCGGGCTCGACCGCTTGAAC TGCGTGTCCAGACGAATGATGACAGCGTCTATGAAGGGGCA  
GAAAGCTTCAGCGTCACCGTGACTGGGCAAACCCGGCACCACAGGCACCGCTACCGGCAGTGCCAGCATTG  
TCGACGATGGCACCGGTCCGGGTCCGAACCCGGATGATGATCGCCCAACGGTCTCTATCACC AATGCAGG  
GACTCTCAACGAAGGCAGCAGTGCCTGTTTACACCGTGAAC TTGTCTGCGGGCGGCCGCCACAGCCACCACG  
GTCAAAC TGACCCTCAATACCGGGGATACCGAAGCCGGTGACATCGGCACATTGGAATACTTTGATGGCA  
CCAAC TGGGTCCGGTGTCCCGGCCGATGGTATTGTGACGCTCGCGGGGCTCGACCGCGTTGCAACTGCG  
TGTCCAGACGAATGATGACAGCGTCTATGAAGGGGCAGAAAGCTTCAGCGTCACCGTGACTGGGCAAAC  
GGCACACAGGCACCGCTACCGGCAGTGCCAGCATTGTGCGACGATGGCACC GGTCGGGTCCGAACCCGG  
ATGATGATCGCCCAACGGTCTCTATCACC AATGCAGGGACTCTCAACGAAGGCAGCAGTGCCTGTTTAC  
CGTGAAC TTGTCTGCGGGCGGCCGCCACAGCCACCACGGTCAAAC TGACCCTCAATACCGGGGATACCGAA  
GCCGGTGACATCGGCACATTGGAATACTTTGATGGCACC AACTGGGTCCGGTGTCCCGGCCGATGGTATTG  
TCAGCCTCGCGGGCGGGCTCGACCGCTTGAAC TGCGTGTCCAGACGAATGATGACAGCGTCTATGAAGG  
GGCAGAAAGCTTCAGCGTCACCGTGACTGGGCAAACCCGGCACCACAGGCACCGCTACCGGCAATGCCACC  
ATTGTGACGACGGCACCGGTCCGGGTCCGAACCCGGATGATGATCGCCCATCGGTCTCTATCACC AATG  
CGGGGGCTCTCAACGAAGGCAGCACTGCCTGTTTACACCGTGAAC TTGTCTGCGGGCGGCCGACACAGCCAC  
CACGGTCAAAC TGACCCTCAATGCCGGGGATACCGAAGCCGGTGACATCGGTACATTGGAATACTTTGAT

GGCACCAACTGGGTGCGCGTCCCTGCCGATGGTATTGTCAGCCTCGCGGCGGGCAGACCGCGTTGCAAC  
TGCGTGTCCAGACCAATGATGACAGCGTCTATGAAGGGGCAGAAAGCTTCAGCGTCACCGTGACTGGTCA  
AACCGGCACCACAGGCACCGCTACCGGCAATGCCACCATTGTCGACGACGGCACCGGTCCGGGTCCGAAC  
CCGGATGATGATCGCCATCGGTCTCTATCACCAATGCAGGGACTCTCAACGAAGGCAGCACTGCGCTGT  
TCACCGTGAACCTTGTCTGCGGCGGGCCGACACAGCCACCACGGTCAAACCTGACCCCTCAATGCCGGGGATAC  
CGAAGCCGGTGACATCGGTACATTTGGAATACTTTGATGGCACCACCTGGGTGCGCGTCCCTGCCGATGGT  
ATTGTCAGCCTCGCGGCGGGCAGACCGCGTTGCAACTGCGTGTCCAGACCAATGATGACAGCGTCTATG  
AAGGGGCAGAAAGCTTCAGCGTCACCGTGACTGGTCAAACCGGCACCACAGGCACCGCTACCGGCAATGC  
CACCATTGTCGACGACGGCACCGGTCCGGGTCCGAACCCGGATGATGATCGCCATCGGTCTCTATCACC  
AATGCAGGGACTCTCAACGAAGGCAGCACTGGCGTGTTCACCGTGAACCTGTCTGCGGCGGGCAGACAG  
CCACCACGGTCAAACCTGACCCCTCAATGCCGGGATACCGAAGCCGGTGACATCGGTACGCTGGAATACTT  
TGATGGCACCACCTGGGTGCGCGTCCCTGCCGATGGTATTGTCAGCCTCGCGGCGGGCAGACCGCGTTG  
CAACTGCGTGTCCAGACCAATGATGACAGCGTCTATGAAGGGGCAGAAAGCTTCAGCGTCACCGTGACTG  
GTCAAACCGGCACCACAGGCACCGCTACCGGCAATGCCACCATTGTCGACGACGGCACCGGTCCGGGTCC  
GAACCCGGATGATGATCGCCATCGGTCTCTATCACCAATGCAGGGACTCTCAACGAAGGCAGCACTGCG  
CTGTTACCGTGAACCTTGTCTGCGGCGGGCCGACACAGCCACCACGGTCAAACCTGACCCCTCAATGCCGGG  
ATACCGAAGCCGGTGACATCGGTACGCTGGAATACTTTGATGGCACCACCTGGGTGCGCGTCCCTGCCGA  
TGGTATTGTCAGCCTCGCGGCGGGCAGACCGCGTTGCAACTGCGTGTCCAGACCAATGATGACAGCGTC  
TATGAAGGGGCAGAAAGCTTCAGCGTCACCGTGACTGGTCAAACCGGCACCACAGGCACCGCTACCGGCA  
ATGCCACCATTGTCGACGACGGCACCGGTCCGGGTCCGAACCCGGATGATGATCGCCATCGGTCTCTAT  
CACCAATGCAGGGACTCTCAACGAAGGCAGCACTGCGCTGTTACCGTGAACCTGTCTGCGGCGGGCCGAC  
ACAGCCACCACGGTCAAACCTGACCCCTCAATGCCGGGGATACCGAAGCCGGTGACATCGGTACGCTGGAAT  
ACTTTGATGGCACCACCTGGGTGCGCGTCCCTGCCGATGGTATTGTCAGCCTCGCGGCGGGCAGACCGCG  
GTTGCAACTGCGTGTCCAGACCAATGATGACAGCGTCTATGAAGGGGCAGAAAGCTTCAGCGTCACCGTG  
ACTGGTCAAACCGGCACCACAGGCACCGCTACCGGCAATGCCACCATTGTCGACGACGGCACCGGTCCGG  
GTCCGAACCCGGATGATGATCGCCATCGGTCTCTATCACCAATGCAGGGACTCTCAACGAAGGCAGCAC  
TGCGTGTTCACCGTGAACCTTGTCTGCGGCGGGCCGACACAGCCACCACGGTCAAACCTGACCCCTCAATGCC  
GGGATACCGAAGCCGGTGACATCGGTACGCTGGAATACTTTGATGGCACCACCTGGGTGCGCGTCCCTG  
CCGATGGTATTGTCAGCCTCGCGGCGGGCAGACCGCGTTGCAACTGCGTGTCCAGACCAATGATGACAG  
CGTCTATGAAGGGGCAGAAAGCTTCAGCGTCACCGTGACTGGTCAAACCGGCACCACAGGCACCGCTACC  
GGCAATGCCACCATTGTCGATATTAATAATCTCCCGACTACTAATGATTTAGAGGTAATTGGTACTGAAG  
ATGATGCAAGCATAAGTATCCCCCCTCTCGGGCTCAGATACCGACGGCACGTTAGCCAGCTTTGTAAT  
TGATACTTTGCCACTTAATGGCACCTTGTACCTCAATGGCGTTGCCGTACGGTCCGGTCAGAGCATCTTG  
GTTGCCGATGCTGCTAGCCTGACCTTTACGCCAAATGCCAACTGGAATGGTGACACCAGCTTTACCTACC  
ATGCAGTAGATAACAATGATTTGCTGACTCAACTCCAGTACAGTCAACATCACAGTGACCCCATCTAA  
TGACGGAGTTTCTTTAGGCGGACTCAATGCCCAAGGTGGTGAGTTAACTGTTACAGAGGTAACCTTTCA  
ACGGGCTCTGCCCTAATGGCAATGCGCTGACTCAGACTGGTAACTTTAGCTTTACCTCTGTAGATGGTT  
TATCTTCTGTACAATTCGCGGACAAACCTTTAATTTGACAGCGTTACTTGCCTAAGCACCAATATGGT  
GAGCATTACAACCCCTTATGGTGTTTTACCCTTACGGGGTCACTGGTGATGCAAACGGTGGCTCTATT  
AGCTATAGCTATAGGCTAAAGGACAATGTCGATAATGACTCTGCGGATGGGGCTACTAATACTAGCTATT  
TTGATAGCTTTGCTGTAACCGTTGTGGATACGGATGGCAGCCAAGCCAATGGTAGCCTTGATGTGAAAT  
TGTTGATGATGTCCCTAATGCCAACAATGACAGTGGCAGTGTGATGTGATTTGATAGATAGCTTTATAGTC  
TCTGGCGTGGAGGCAAATGGACGTCATGGACAAATGGCACAAGCGTAACCAGATTCGATGGTAACAGTA  
ATCCTAATGGTGGTGGCACTGACAATGATGATGGTTTAGATCAGATCAGATGGGGGAATCCAACGAATAC  
CTATAAATCTGGTTATGGTTTTATCGATAACGACAGTGCATTAATGGTCACTTTGCCCTAAACCAAGAG  
ATTTATTTGGGCACGTTTACCCTATAACTCCCAATATCTTCTGGTGGCGCTATCACTAAAGCAACTA  
TGGATGTTACTTTCTCGGTGACTGATGCCTATGGGGTAGTTACACCAGTAACTCTCAACGTCAACTTTGA  
CCATAATGAAACACCGAACGACAACAACGATCCTGAAGCATCAAAAAGATATCATTAAAGTCGGCAATACC  
AATGTAACCTTTGAACATCAGGGGCAAGTTTATACGCTGCAAGTAATAGGCTTTAGAGTTCCTGGTACTA  
ACCAAGTTGTTACTGAAATTAGAACGGCTGAAATGCGGCAAGCAGTTATGAACTAGTTGTACGTATAGT  
TGCTGGTAATGGCTATGAGTTACCCTCTACTGAGGGTAACGTGTTAGACAATGACATCATCGGTGCTGAT  
AACGATCTCACGGTAATTGGTGCTGCTGTGGGTAACCAACAGGGTCCGGTACCTCTAGCAACGTAGGAT  
CTATTATCAATGGCCAATACGGTACGTTAATAATATACGCTGGTGGTAGTTATACATACACAGTAACAGC  
CAATGCCTCTGCGATTCCGGCCAATGCAACGGAAACCTTTACCTATACTATGCAAGATGCTGATGGTGT  
AAATCCAGCGCATTGCTCACCATTAATGTAATGCCGTTAATGTTAATGCAAGTAAAGCGGTTCAAGATC  
AAGGTATTGGTTCCGAAGATACTGCTGTAATTGGCAATGTGCTCAATAACGATGGCAATAAAAAATACATC  
AGTCACACATTTTACAGTAGCGAACGATAACCACTCAGCATACTGCAGGCAGTAAAAATAATTTGGCAGAG  
GGTGAACCTAACCTCAATGCTGATGGTAGCTACACCTTTAAGCCCGCAGATGATTTGGAATGGCCAGGTT  
CAGTCGTACCTACACCACGAATACTGGGGCAACAAGCACACTAACCATAGTGGTAACCGCTGTTGATGA  
TCCAACGGTGACTGAATCAGATAGCAACACCGTTGCCGAGGATACTCAAGCGGAAGGTAACGTACTGAAA  
AATGATACGGATGCGGATAGCACATTATCCGTGACCAGCTTCCAAGTGAATAATGAGATCTATACCGCTG

GCAGTACTTGGTATCAATTGCCGGAAGGTAAGCTGCAATTAAAGGCCAATGGTGAATACAGCTTCGAGCC  
AAAAGAGCATTGGAGTGGTTCATTACCTGAAATCACCTACCCACTGATACTGGGGCTACAAGTACCTTG  
AATATCACTGTTCAAGCAGTAGCAGATGCCCTAATCTGACAATCAATGGTTACACCTCCGTTGCGGCTA  
TTAACTTTGAAGATGCCAAGATTACAGGTGATTGGAGTGGTGTAAAGGCAGATGACATTAAGGGCCTAAA  
TACCATAGGTACTTGGCATAACCAGTAATAGAGGCGGGAAAAGTTGAAATTTGGTTATGAAAGTGTCTACGTC  
TCTGGTGGTTCCAATAGTAATAAAAGTCATGGAAAATTGAGTTTAAACAATGGTGATAAAAACCTTGTATACCG  
ATATCCAAGCGGATGCTGGTCGATTTTACGAACTCGGATTTGATATTGCGGCGCGCTCAGGTAGCGTAAG  
CACCTCTGGACTGACTATTAACCTGATCCCGCTAGATACTCAAGGCAACCCACTAAATGCTCAAGCTATT  
ACGCTATATGACTTCGATCCCCTAATGCGAATTGGTTAAGAGATCAAAAAGATTACCTTACCCATTGGCC  
AATCAGGTAATAATCGTTTGCAGTTTGAAGGTGATAATGGGGATTCTTATGGGGCCTTGCTGGATAAATTT  
AGCATTAAAGTGGTCGACAATATGGGGTATCGCGGTGAGTTTATTAACCTCAGCAATATATCGTCATCA  
CTTAAAGATACTGATACATCAGAAACGTTGAACCTTAAATTGCAGGGCTTGCCAGAAGCGCTGTGCTGA  
AAGATGGTTTTGGCAACCTGGCGACGGTTGGCGCAGATGGCACTGTGGATATTACCAACTGGGATAAATC  
CAGCCTGCAGATTAAGTCGCCAACCATGGCAACTTCACCATCACAGTTGTAGCTACGGCGACAGAAGCC  
AGTAATCAAGATACTGCGCAAAGCACTGCTGATTTCCAAGTTACCGTTCTGCATAAGAATAATGTTGTGCG  
GTGGTCAGAGTGTAGATTCAATTCATGATGACCGATTGGAGTGGTGATACAGCCAGTTTGGCGTTAATTT  
AGGAGGATACGGCAGTGTGCTTTCATCATCCAAGACTCAATATTTTGTAAAGACACCGAGCTACTAATTT  
AATGCAGGCGATAGTAATGATTACATCGACCTTGGTGTTCACCTGCTAACAATATCGTGAACACTGGTA  
GTTTCGTTGCCAATGTTAATAACCCCTGTGGTACTCAAGATGAGTTACTTAGCAGCCAATTTTACTGACTCA  
GGATGTTATTACCAACACCGTAGGTACTCTTAAGGAAGATGCGCGGCAGCCACTGCAACCCAAAACAGAC  
ACAGTCAATTTGGGGTCTGGCGACGACATAGTCAACGGTGGCGAAGGTAGCCAGGTCGTTTCATGGCGGCA  
GTGGCAATGACCAACTGATTGGTGGTGAAGGTATTGATGGTTTTACGTGGTGGTTTTGGGTGACGACATTCT  
GATTGGTGGTCTTGGCAATGATGTCTGCGTGGTGTGAAAGTGCAGATATCTTTGTCTGGAACAAAGGG  
GATACGGTATCCGGCTCTCAGACCACGGATTACATCATGGACTTCAACAAGGGGTCAGACACCAACAACC  
TTTCGGAAGGTGACAAGCTGGACTTGAGTGATTTGCTTGATTTCTTACAATCAGAATGAGCTGACTTCTTT  
ACTCTCTGTTAGTCAGGGCGACGATGGTGTGCATCTATTTATCAGAGAAGACAGTAGTTCTACCTCACCA  
ACTCAAGATGTTGTTGATGAATCATACTTCGATAGCTTGACTGGGGTTTTCTGATACTACGACCACACT  
AGGTTCTCGAGTACATGTTGAACAACATACTGGTGTATCGACAAAACCTCATGGCTAACAGAAAATACAGT  
AGAAAAACAAAAGCGCAGAGTAATCTCCCGTTTTTTTTATCTTTGCAGGGGAAGAGAAATCAGTTGCCGA  
GGGTGGCGAACAGGCTCTGCTCCAGGGTGGCGGGGACACAGACCGGCTTGATGGACGGGGCCGGTAC  
GCGCTCGCCTGAGGATTCAACGAAGAACAGCTCGGTGTTGCCCTTGACGTTGACGGTGGCCACGCTGCTG  
TTGCCGCTCTGGGTGATGATCAAGTTGATCTGCAGGTTCCGGTTGCCAGTGCAACTTTGGAACCCATGG  
TGCCGAGTCCAGCCACTCCAGTCCGTCCGCTGACTGATTGACGTTGGCGGTCATCAGGCCGGAGCCACG  
CTGGCTGTTTTCGATGGTGAAGCCGTGATCGGTGAACCACTTCTCGGCACGAGCCACACCAGATCCACC  
GGGATCGCCATCTCCTGAGTGTGTTGGTTGCCTTGGCAATTGGCGGGTGTAGCGATACTCCTCACCGC  
CGTTATTGTGCCAGCACAACCAACCAGCAGCAGCGCAATGCGCTCCCATAATCTTTTTTCTGTTGTT  
TCTCTCGTCCATATCACCAGCCATTGGCCAACCGCGCCTATTTATCGCCGAGCGACAATCTCTGTCAG  
CAACCATCCAGCGTTTCGATGTTATGGGGAGGTGCTCGGGGTGCTTTACAAAATTGGTTTGTCTATCATAGA  
TTTTGCTCGAAATTCCTCCATAAGCACCCCTGTGACCAACATGCTCACCCCGGATCTGCTGCAGCAGATCA  
TCGACCAATTGCCAATGAGTATCTTCTGTGCGAGATAGTCATGGGCGTTACCTGTTTCGCCAATCGTGAGTT  
CGCCCGTGAAGCCAAGCTGGAGTGCCTGCCGAGGTAGTCGGCAAGACAGATGCAGATATGCCCTGGGGC  
GATCTCTTTCGAGTGAAGATGAGCAGCTGCTTGTGAGGCGTGGCGATGCTGTATCAGCAGCTCCATT  
GCAACCGGGGCGGAATACCTGCTGGATGGAGGTGCACAAGGTGCCCTTTTACACCCCGCAGGGAGAGGC  
GTGTGCAGTGTGTTGGCGTGGTTAACGAGATTGCCAGCGCAAGAGCCTGGAACAGACGGTCAAAAAGCAG  
CAGTTGTTGCAGCGTTTTCTGCTCGATGCCATTCCTGACCTGATCCGTTTCGATGATCACAACGGGGTGT  
TGCTGGAGTGCNAATCAGCGTTTTCTCGACTTTATCGGCCAAGGGGCGGATGAGGTGCTGGTGCAGCAGT  
ACCGTTCCGGCTGGCGGCCCGCAGGGGATGGGCCACGGCGAGTGTGCTGCTGGATGCCAGCGGGCAG  
GGGCGACACATGGAGATCACCCGGGTCGATGTCCCCGATGGTGCAGGTCACCTCCCTCGGGATCCTGACGC  
TGGGGCGTGACATCACCGCCTGCGCACCACTCAGGCGCAGTTGCAGCAGGAGCAGCACTACGACAGTCT  
GACCGGACTGCTCAAACCTCTCCCGTTCTTGCAGACCAGCCGCTCTTGGGGGACGAGTGCACATTG  
GTGCTGGTTCGATCTGCACCAATTTTCTGAAATCAACGATCGCTTCCGGATCCGGATTGCCGACCGCTGC  
TCAGCCAGGTGGCCAAGCGGTTGCAGCAGTTGGTACCGCCGCTTCCCTGCTCTGTGCGGGTCTGCTGCCGA  
TGACTTCAGCCTGCTGCTGCCAGATTTCAACGAGCCATTGCAGGGGTGGAGCCAGCATCTGCAGCAGCAG  
TTGATGGAGCACTATCAGGTGGAAGATCACCGGATCCAGATCCCGGTGTTTTCTGGGGCTGGCCAGGGGC  
GGGCAAGCGATGCCGAGCGGTTGCTCAGTCATGCCGAGGCTGCGCTGGCGCAGGGCAAACGGCAGCAGCA  
GTACTGCACCCTGTTTTCGATCCCGAGCTGCATGCCCGGCTCAAGCGGCTCAGCTGATCGCTGCCAGTTG  
CCGCTCGCTATCAAGTCCGCCAGCTGGTTGCCGCTATCAGCCATTATCTGTACCCGCACTCACCGGC  
TGCACGGCGCCGAGCTGCTCTGTGCTGGCCCCATCCTGAGCTTGGGATGATCTCCCCGACGAATTCAT  
TCCGTTGGCGGAAGAGATGGGGATCATCGGCCAACTTGGCCAGCTGATGCTGGAGCAGGGGTGTGCCAG  
CTGGCGCAGTGGCAAACCTGCGCAGCCGGATATGGTGTCTCCATCAACCTCTCGCCGCTGCAGTTCCGCTG  
ATCCGGCGCTCTGTGAACGTGTCTCTGCCTGCATCGCTGCCATGGTCTCAAGGCCAGTCAACTGGAGCT

GGAGATCACCGAAGGGGTGTTGATGGAGAACGCCGACGAGATTGAGACCAACCTCGACAACCTGATTGCC  
GCCGGTTTTTCAGCTGGCCATCGACGACTTTGGTACCGGTTACTGTTCACTGGCCTATCTGCCGCGTTTTGC  
AGGTGGCGACCCTCAAGCTGGATCGCAGCTTCACTCAGGGCTGGCCAGCAATAGCGCGACCACCGCTAT  
CGTGCGCTCGGTTCATCGGGCTGGGTTCATGAGCTGGGGATCCGGATCACCGCCGAAGGGGTGGAAACACCC  
GAGCAGCAGTTGTGGCTGACTGAGGCGGGGTGTGATCGGTTACAGGGCTATCTGTTTCACTCGCCCCCTGC  
AGCCGGCGGAGTTTTGCTGCCAGCTATCTGGTGTGAGAGATCGTCAGAAACAACAAGGCCACCGCAAGGTG  
GCCTTGTGTTTTACGATGGAGGCAGGATCAATCCTGGAAGTAGGTGCCCCAGCCATCGTAATCCACCCC  
ATATTTTTCCAGGATGGGCAGCATCTTGGCGATATCGGCGACGATCGCTTCGACATTCAGCTTGCACCTCG  
ATGGTGGCATCGAAGCAGAAGATGGTGGCGCCGTTCATCCAGCTCCATCTCTTCGGCATCGGTCACTTCAA  
AACCGGCTTGAACAGGTCAACCGCTGCTTTTTCCAGACGGTCGAAATCCTGGCAGGCGAAGTGGTGCCTC  
GATGTCGTAATCCGCATCGGGATTGCTGCCATCGGCACGAGTTCGTTGACGATCTCGGTGGTTCATCA  
CGCCACTCTTGCATATTCAGACTCATGTTGCCCTCCAGGCGGTATCATTCGGGCAAAGCATACTCGCAGAG  
TGGATTTCGGCTCAATGCGGCGGACCCACTGAACCTCGAATTTCCATCATATTCGGCGCAGCCTGCAGGGTG  
TTCAGAGGCCTGCAAGTACGGCAAACAGGACTGAAATGGATAATAAATGGCCGCTTCGTTTCGGTTGTTGA  
GCGAACGCGCTTTTTTATCGTGCCATCATGGTTGACACTCTGCGCTGGAAAAGGGTTTTAATGCGCGCCGTTG  
CCCAGATAGCTCAGTCGGTAGAGCAGGGGATTGAAAATCCCCATGACAGTTTTCAATACCACAGCTCTGGA  
CAGCACACCCTACAAGGCTTCGCTTTCAATGCGAGGCCTTTTTGTATGCGTATCTGGTCAATCTCTGGC  
AAGGTTTTGCCACTATACCCTGATTGAAGATCTACATATGCTGGTTTTGACTTCACAAGCATCATTATCCA  
CACCGCCCCCTATCGCGGCACTGACCCCATGGTTCAGTGCCTTCGTCTTCTTTCAGGTCTTTTTATCAT  
TTATTTGAGTCGATAGATAAGATAACATGAAGACATGTGGTTTACCTGGAGCATATCATGTCATAAAT  
GTGAGATTCTCATCTCTTGATGAATCAGAACTGAGTCAATTTATTACGCCGATATCATCAGATAACGCAT  
CTTTTTTTGACAACATAGATAGTCGCCATGACAAAATACCTTCCAGCAATTAATTACTTTGCTGACTTAGT  
AAATCAATCAAGAACATCTGCAGAGCTCCTTCATCTAATAAGAAAACCTCAGCTTCCAGCCAATCTTAGG  
ATGAGTCTACTAAAATTTTGAAGGCTCATATGTGAGCACTGCGACACAGAAGCTACAAAAGAAAATTA  
AAACTCCAACAGAATTTTTTGTACAGCTTATGGAAATCATTTCCAACCTATCGAATACGTTAAGAGTAG  
ATTAATTCATTAACACCCAGCATGCAGTCAATATTAATCTGTATTACTTGGTGAGTATGATAATAGAGGT  
AAGTCAGGCTATGGACTGACAGAGCGCTTCTTTGATTGGTTCCAGTTAAAGTTTTGGTCATGAATTTACAA  
TCGATGGCCCTATGGCGCAGGAAGATATAACAATACTAATCCTCCCTGATTTTTCATGAGAATA  
TCCATGTGATTTTATAATCAGAAAAGGTCAAAGAAATTTGCGCGGTTGGTTTTGCAAGGTATGACAGTACA  
CGTGGGGGAGCGCAGTCTGACGATCGTACGGGTGGTAATAGTGATAAAGTTACCAAAGCTATCGAGTACA  
GCGATAGAACTGGGAAAAAATTCAGCTGATATTCCTATCCGATGGACCAGGTCTTCTACATAATGATAC  
CTTGTGTTGAGTCAAGAAAATTTGGATGTACTGTGGAATGACAATGTCAGAGTAACAACATTGAAGTTGTCT  
GAATATATTATAACGAAAGATTGGTTACTTTTATAAAAACCATGGCCATCGAATTCATTTATCATGAATTC  
GATGGCCAAACGTTACAACCTATAGTAGCTCTTTAATCAAACCTAGGTGATATTTTCATCATCCACAATCAAT  
TCAATCATGTCACCCTATTTGTCATTTTTTATATAGCTGTCATTTTTGTTTTTCAGGGGATACATAATCAC  
CCATCTTTTTTCAATCCATGTTTAAATCGAGAGATGGTGGCCTTTACACCCTCCATGGACTGATCAATTC  
TATGAATTTCCCTATCTAATTCACAAGCTGCCTGCATGGTAGTTCCAGAACCACAGAATGGATCTAAAACA  
ATATCTCCCTTTTCACTGGATGCGCTCACTATGAGTTTTCAACATGTCATGTTTTTTTTCTGTTGGATAAC  
CGGTTATAAGCTTACTCTGATGATGTGCATCTCTGTACTCATCCCAATAATCTGTGACAGGAATGTTTTT  
ATTTTTCAGATAGATATACCTTCCGACGCGGGTTGCCATTTTTTTGACCAATGGATATGACCCTTTTCGATCC  
AGTTCATCCAGTTTTGATGGCTCTAGCTGCCAGTGTTTTTCTGGTGGGGGAAGCATTCCACGCCATTCCTT  
TTCCAGTTTACCATTCTGATTCCAGGAGCATGAACAGGCACAAGCTTATACCGACCATCAGCATCAGA  
CTTAGTATATTCTTTATTCACCCATTCTCAGATGCTACTTTGCCTGGAGCACTGAAGTATGTGACTGAA  
GTTTTTCCATAAAAACAATATATAGTCGTTAAGGTTTTGATATGTTTTCTTGTGAGTTTTTTGAACCTAC  
ATTTTTCTTCTTACAATTAAGTTTTTTGAAATTTCTTCTCCAAAACCTCATCCATAATAATTTTCAAATG  
AAAGAGTCTTTGATGGCCGATGTGGATATACACACTCCCGTCTTTAGATAACAACCTCCCTCATCAAAAATA  
AGACGACGCTCATCATTTCTATCCATGGGGCAAGGCTAAATTTGCTTTTATATGAATGCTGAAGACTTC  
TAGAGTGAAAATCTAGTCCAGTATCATATGGTGGGTCTGTATATATGAGCTTAATTTTTACCAGTGTAAAT  
CCGCAAAAAGAAATTCATGGCGTAATAGTTATCAGCCCAGAAAAGAGAGTTAGTTGGTGCCCCACAATCG  
CTTAGGTCTTTTTCTGCTATTTGCCAAAACAAAGCGGTGCATAGTACTTGCAATTAATTTCTTCGGTAGATG  
CCTTCCCTTCATATGAAAGCTCCACTTTTTGAAGAGCGCTCAGGCAAAGGGCACTCATTCCTAACCACTGA  
AACTTCCGATGCAAGAATAGCCTCATCAGACACCGTCTCTAACTTGTTAATACCAGTTGCCATGATTACC  
CCTCAGATTATCTTTCCAATTATAAATCAAAAACCACTTTAATCACAACAGAAAATAAATTTAAGATGGA  
AGATAAAGAGAATTTCTCAGCTTTTTTAAATAAGAACGTGAAAAAGCACTAGCAGCTTATGGCTACTAAG  
CCACACATTACAATCAAAATATCAAAGTATTACTGAAGAATATCCAACAAGCTTCAAGAAAGATGCAAT  
AATAGAATACTTTAACATCAAAATAAATGTGTGCTGTGGTAAAAATGAGAGCCCTGCAAGAGGTAATATTA  
AAAATCACATACTCTCCTTAAGGGAGTAACTCAACTCCCACCAGGAGTGCCATAACGAAGTTTTTTATAAA  
TCCAAAATAAATCCCTTTAAACAAAAAACACTTTCAATACAACCTCACATTTGGTATGTAAATTACAGTCC  
TGTATAGACGATACATCTAATGGTTAAAAAGTGTATTTAATCATAAATACATGCGCCGTGTTAGATATATT  
AACATAGCAGACCAAGAGTAAAAATTTACGGCCAACACTTCTTGATTTAAAAATGCTAAAATATAACG  
TAAGAAAGCTATTGCCGTAGTGAGTGGGATTATGGCCGTGCCGACGCAACGGCGGAAAGCTAATAACACA

TTTCCATTTATCAATTATAGATGGTAATATAACCATCTATTCTTGGGCATTTTATAGAGAGCTGATTATGT  
ATGTTAAAAGGGTTCATTTTTTACTTCGATATAGCGACAAGCTTGCAAGTGGTCCGACACTCTTGCAGA  
GCACAGAGCGATAATAGAAAGTAATGGTTGCGTTTGGTTAGGGAAGTTTGGTATTGGAATGAGCTCTCGT  
TTCGCTGAACTAGCGATTAATCAGATTAGAATGAAGCAGCCTTGTCTTGTATCTTATGCATGGTTCAA  
AATTAACGGCCAAATCAAACATAATTGATATAGCGACAGCAGGCACAAATCGAGGGGAAATACCAAGTCG  
AGAGCCCAACCTGACTCCATTTTATTATAGAAGTAGAAAAGTGCTCAGTCTGGTTCAAACTTGATACGATG  
GATGACATTAATAATGAAGAGATTAAGAAGTTATGGTTATACAACAATCCAGCATCACATCCTAGCCTTG  
TTGGCATGAGAGGCTTAATTTATCTGACACCGGATAACAGCAAAACAGAAATTAATGTAAAGGGGGATCT  
TAAGCCGAGTATTTATACAGAGGGTTTTTTTGGATTGAAAAAGAAATAAAGTAAAGCAGAGCCTAAATCAC  
CATTAAAGTTATAGCAAATACATGCTCGTGATTAATCATGGCAGCTCTGCCTATTTAATAGCTGATATGGA  
GTCGCGCTGGACCTCTACTACCTCACAGTTACATTAACAAACATACTCTTGAGACCAAAAACATTATTA  
ATCAGAGATGATAATCTACCATATTTCTCCGATAGATACTTGACTCCAAGCGCATGGTCATTACACTGATG  
TGAGTTCATTACACTTATATAAGTGTATCACACAGTTATTCTAACACATATAAAATTAATCACTAAAAAG  
CCATGCTTATTAAGTGCATGTCAAACACCGAATACTCTATCGATTTAGATATATATAAAATCCTTTGATAT  
CCAATAGCCATTTCCGGTATTTAAATTCAAAGGAGAAACATCCATGTCTGAACTTTCATTATTTCGATGCCA  
TTGGCGAAGGCAAAAACGCGACTCAGGATTATCTGGATAACCTGTGCGGGGCACCTGCTGCGCCATCATCA  
ACTGGTCAAAGCCATCCGCATCCACGGTCTGTTATGTACCGGAATCCTTGCCAATGCCCGGTCTGCCGGTA  
TTGGTTGCCATCTTCAGTCACACCAATACCTACACCTTGACCAACTGCCCTCTACTCAGATAGGGCAGT  
TGGTGTGTCAATTGCTCGCTTCTCCGGTCAGGCCACCCATGACCTGGACAACGGCATCTTTGAAGAGGT  
GTGGGACATAGGTGACAGCAGCTTACCACGGACAGCGCCGAGCAGGCTGTCTACTGGTTGCCGTTACCG  
GAGCGCTGGATCGCTCTGGAGGGCACACAAGTGGCGCTGCACGATAAAGACCATCCGGTGTCAAGTTGC  
TCAACGTCACCGCCCGGAACGCGGGTCCGGTCTGGATATCTGTGATGGCGTGGTCAGTTTGGCGCTAGA  
GTCAGAGTGGGATGGGGAGTGGGCCGCATGACCGAGATCAACCGCTCCTCGCTACTCGCCAAGCTCAAAC  
ACATCAAGGGCATGAAGCTGCTGGTTGAGCAGGCCGTCTTGCTCTACCTGTTGATGGCCGACGAGCAGAC  
GCCTGTGTGGGTCAAGACCATCGTGGTCAGCGCACTCGCTATTTGCTCTGTCCGGTCGATGCCGTACCG  
GACTTTATCCCCGGCGTCGGCTCACCGATGACCTGGGGGTTCATCAGCGGTGCCATTGCCCTGTTAGGCA  
GTCATATCCATCAAGGTTCATCGCAGCAAAGCGGCTGACTTCTTCAAGTAATCCCTTCAGAAGGAATTTCA  
TCATGGCTAAAGCCACACCACCGCCAGCCTCGCTGCTCCGGTCTGGACTGTTATTAATGCTGTAAGG  
CCCGAAGATCAGCGCACGGCCAGTGGTTTGTGCTACTCAGATGTGGGCAAGAACGATGAAGGTCGTTAC  
GCCCTTCGCATTACCGCAACGACACGGGCGGCTGTTTACGAAGCACTGGTTATCGCTCGATGACATCC  
TGGCACTGCTGGACATCCTCAAGGATGCGCCATTCAAATCGGTGGCGCTCAGGGCGCTGTTTGTTCGAGG  
CAGTGCCAATAACCACGGTTTCTCGCCGCATCCTGCGGGCTGAAAAGTTACTGGTCGCGCCGAGCCC  
AACTCACCGTTCACCGGGTCCGGTCTCTCTCTCAGCGACTGGTCAGCACAGTTGGATGAACCGGCAATA  
TGGATAAACAGGCTCGCAAGGGAAAAGCCAAGGGGCAGAAGGGCCAAGATGACACGACCGATGGGATAAC  
AATCGAGGAAGGCAATGAGCCCCGTTTTCTTGAACAGCCAACGACCAGGCCGTTTTGTCAGACAAGATG  
GATGAGGCCGGGGCCGAAACGGGATCCGAGACCGGCAGGAGGTAGCCGGGCAGGAGACCAGCCATGAG  
CAATCGTGACATAGCACTGAACTGGCAGGGGCTCCCCCTGCCGTTTTACCCCGGCTCGCCATATGCCTG  
ACCGACCTGCTGAACAGGCACCATCCACATGGTCACAAGCCGAGCTGTCACGATGAACTTTCGTGATC  
CGGGTTATGGCCCGAAAGTGGTGGCTTTCATCCGGTGGAAAATCCGCTGCAACGCCGAGGAAATCTATG  
GTCCTTGGTCTATATGACGGACTTTTCTTATGTCGGCATGGGTGACTATGCCGAATTTGGCCAAGGAGGTG  
GATTTTACTTCTCAAGCCAGGAAGGGCTGGTTGCTTATGCGCATGTGATGCCGTTGTCTGAGCTGGGTG  
AGTTCATGAATTATGGGAGGCCAATTTCTCACCTACCTGTGCTGGGTGTCTACGCGATCAGGGTAGC  
CACTGAATGATCCCTCCCTGTTAATGCGCAAATTTACGGGTTACGGGATTGGCGTCGAATTACGCAGT  
ATCTCCAAGGGAAAACCGCGCCCCGTTTTCCCCCGTTCTGTCGGGGCGGGCACGGGGCTCGCCGTGAATG  
TGCGGGGCAACCCGACCTCTTCAATTAACCTACCCATTAATTTCCGCAAATTTTCGCGGGGTTACGGGGTTGA  
GATGGAAAAGCCCAATCACTCAAAGAGAAAAACCCAGCCCCGTTTTCCCCCGTTCTGTCGGGGCGGACACG  
GGGCACGGGGGATTTTTACGGGATCGGACCGGGTCCGCGACCGGGGCGGCCATTTGCTCACTCACCTTTC  
CCACGTTGTTCATCGTGCCGGGCCAGTCAGGCCAAGGCGCGATGAGCAACGACCATTTTAATCGCCAAGCC  
AGAGACGGGGATTAGACCTCCTTTCCACTGTGAAGGGGCTATGCCGTGTAGAACACAGCTCACATGTTG  
AGGAGCGAACAATGAACGAAACACCCACCCGCTTTAAATTTACCAACCGGAGAAATGCCGAACCTGCCCCC  
TAACCCAGATGACGCCCCGAGTACCGAAGCGGAGTATTCGATACCGAAGTGACCGGTCTGCGCTGTCTG  
GTGGGCAAAGGGGAAGGCCGTCGCAAGTTTCTACTGCGTTATCAGATACACGGGCGCAAACGGGCCATTG  
CCCTCGGGCACTATCCCGGTTGGATGTCAGCGCGGCTCGAAAGCTGGCGCTCGACTACAAACGCAAGAT  
CGCCGAAGGCGTTGATCCGCAACAGGCCAAGGAGGACAAGCGCAACCAGAAGACCTGAGCAATTTGTTT  
CAGGAGGACTATCTCCCTATCTGCAATCGAGAAATCGCAGTTGGAAGACGACGAACATCGCTTCCGTA  
ATCACCTACGGCCAATATTTGGCAATCTGATACCGGAAGAGATCACCGTTACCCGCATCCAGAACATGCA  
ACAGATGCTGCTCAAGCGCTCACCCCGGCCACCTGCAATCGAGTCTTGGCATTTGCTCAAGGCCATCATG  
ACCTGGGCAGCCGTGCCGGACTGATCAAAGAGAATCCCGCCGCCCTTGTGTGCTTACTGCGAGAGAACA  
ATCGACGGAACGCTACTTACCCCGGATGAAATACGCCGCTGTTCCGGGCTGCTGACCAGCATGAGAG  
TTTCTATACCGGTGAGTACGTCAAGATGTTGCTGCTCACCGGCTTGCGCCGGGCGAGCTGGCAAGGGCC  
AAATGGCAGCACTACAACAAGGAGGACAAGACCTTATACATTTCCACACCAAGAACGGCCATAGCCGTG

TGTTGCACCTGAACCATATGGCGGTGGAGCTGTTGAACTACTTACCGGTGACAGAGGGAAATCCCTATCT  
GTTTCCAGGCAAGCGGCAAGGGCAGCCATTGCAGAATCCCACCAAGGGTTTTTCAGCGGATGCTGGCGCGA  
GCCGGTATAGATAAAGGAGGGGGTTTTGCTTGCACACCTGTCGTCATTTCGGTCGCGGCGCTGATTGTCTCCA  
ACGGCGGCACCCTGTTTGATGTGCAATCCCAGTTAGGGCACCAGGAGCAGCCAGACATCGCTGCGTTATGC  
TCACCTGCATAACACTCGGATGCAGCAGACCAGCCAGAAAAATAGCCAACTGCATCCATGATGCCCTGACC  
AGTTCTGTACCATCCAAGCCGCTGCCACTTCCCGAAGAGGTTCGAGTGGGTTTCAGGCCAGCTAGGAGCATC  
GGTATCTCACGGCAAAGTGAGATACCGATCCTTGAATTAACCCGCACTTTGAGTGCCTTTTGCCGCTATC  
CCTGATAAACGGGATCAACCGGCTTGTACCTCATATTATCAGTCTGAGTGACTCCTTATCACTCACATG  
ATTTCATACAGGTATAATCTGGCAGTTAGCGACTGTACCAAATATTAGGCTCCTTGGCCCTGCAATTTCCCA  
TAGCAAATCATTCAAATATTCTGAGTCCGGCTTGTGTGCAGGATCGAATGAACTTGTTCGTTGCAAAAA  
TATTTCTATCTTTTCTTTAATAAAAATCGTTTATCACGGGAACCTTGTAACTCAGCAGACACAGTGGCCGATG  
CCTTTTTTCTAGAAAGCAACGTTAGAACCTTCTTTAACTCAGCAGACACAGTGAATCCTGCGATG  
CTCCTCAAATTTTCATGGGAGGTGGGCTATTTTTAGCCTCGACCCACATACATGCAAGTAATGGCCGCAAG  
ACATAAAAAATACTTCTTGATTTTTACCTGCTCACTCTGCAAAATACTCACGGTTATTACCTGTGCGCATGT  
GAAGATAATGATAAATGGATGAGACAGGGGAAAAATACTTGTCTGCTGCTTGGCGCAACAAGTTAGTTGC  
ATTTGTTTTCTTCCCTGTAACAATTTGGTGAAGCTAGCCATTCGAAAAACACGGGATTGGACTTATTTAGC  
AAAAACAACGCCTTTCTAATATCCAGCCTGAATAATCATCTACTCCAACAATCGGTAGTTCAATGACAT  
CGCGCTTTGGCAAAATATTGAAATACCAGCTTGGTTTATGTCGATACAGAAATCGAACATCGTAATCACT  
ATCTATAGACTCAAAACCCCAAGCCCTAGAACCAGATTCAATAGCGAATAATATTTCTACATCATATTCA  
CTTTCAATGTGAGACAGTTTTTTAATAATATCCTTCTGATTTCCGGAACAATAGCGCTCATCTACAAAC  
CTCGATTCTTTTTAATTCAATCATCTTAGATAAATTTGTATTAACTACATTTTTGTGAGTTTGACTG  
TGAATAGTCACCAAAAGCCAAAGTTCAGTACATACTTAGATCCCCGATACTGATATCACGGTTTTAGCCTC  
CCAAGGAGCAGTTTTAGCCCGTCTCCTCAAAAAACAGCCACAGCCTGCCCTGACCGGCCCTTCTGGCCTG  
CTTAACCGCTTCTCGCCGGTTGATAACAAAACCCCTCACCTGATGACAAAAGCCCATCGTCGATGATGGG  
TTTTGCGAAAAACTGCCTGCCAGTCAATTCGTACGCGGTGTCGCGGCCCTGTTTGGATAATCCGCGACAC  
GGTTATTTCCCTTTTGTGATGGTATGCACGAACACGACAAGATTGCTCAGCGCCTCGGTATGCTCCTCAC  
CCGCCTGTACAGCGGTGAGAAGCTGCACCTGAGTGAATTCGGTGCAGAAATACAACGTCACCGTGCCGACC  
CTGCAACGGGATTTCAATCAACGCCTCAGTTATTTACCGATAGAACAACCCGAGCCAGCAACTACTGGCTGG  
ATCCTGAGTTTCTCAATCACAAAGAACGACAAAACCTGCGAAAGCTGGCCGAACAGTTGGCCTACCCGA  
CCTGTTCCCCACGCCAGTGAACATCGTCTGGGTCAACTACTGGACAGAGGGCAACCCAGTATCTTCGCC  
ATCAAGGGGTTTCGATGGTCAATCAGCCGACTTACTAATCCACCAGATACCGGTATTAGAGCAGGCACTGA  
CCCAGCATCTGCAATGCTGGCTCATCACTAAAAGACCAGCGCAAGCAGCTGTTTAGCCCTATCAGCTCGT  
CAACTACAAGGGCACCTGGCACTTGGTCCGTGTCAGCGAGGGGAGGTTGCAAGCCTATCCGCTGAGCTCC  
ATCGCGCTGGTTGAGCTATCGCAACAGACCTTCAACCGTGACGCGTACATTCAACGACAGATCGATACCG  
ACCCGACGCTCTGGCGCTCCGGCATGATCGAGGTGCTCCTCAAGGCCAGTGCCGCCATTGCCGTCAACTT  
TCAGCATCGCCCGTTGCTGCCCGAGCAAGAGATTGTCAAACCCCTGGATGACGGTGCCTGTTATTGAGC  
AGTCCGCTACTCGATGCCAATCAGATTCTGCCCGTCTGCAAACTTTGGATGCCGGAACCTACCGTGATCT  
CGCCCGGCTTTATCCATGAGCAGATCGTCCGTGATTTACGCCATTTATTGACCCGTGATGAGTCAGGCTTC  
ACCCTGATTCATTTGTGACAAAGATCCCAGTTTATACATCTGGCGACAGCGCCTGACATGCCACGACACC  
ACCTGTGCGCCGCTGTTCTGCATTGTGCTCAACCATCAAGCAGTAGCAATCCAAGGAGTGATGCATGAGTA  
AAATGATCCAGATGAAAGAGTCCACCGCAAAGCGCGAGGTTGAAGCAGGAATACGGCCTGACCGAAACGGA  
TGGCCAGGCTTTCTGGGATCGGGTGAACCGGTGATCGGTGAATCCCGAGAGGAAGTCGATAATGAAGAC  
CGCGTTCTGCCGATATGAAGTATATCGATAACGTCAACGCGTACATGTTAGTTGGTCAATTAGTTGACT  
CCTGTGAGCGATATCTGCCACGAAACGCTCGTAACGACAAAAGCGGCCAGTTCTACTGGCCTTTTTTTTTT  
GGACCGTTTCGACAGCACCGGCTGAGATCACACCAGTGAAGCAATACCGGGGTAATGCCCGCATGGCGAGGC  
ATCCGATACGCGGTTTAGCGACCCAATGAGCCGTTTTTGGTGCAGCCGCTCCAAACCTCCGCAACAAGA  
TCATCCTGGCCTTCTCGGCCTGCTAAAACGTTTTCTCCCTTGGTGCCTGCTGCTTTTGCCACCGGATCCCAT  
AAAGCAAAGGGGCCAGTTCGCACTGGCCCCCTTTTCAATTTTTTTAGAAATTTTTTCGACTTCCACCGATATCT  
CTGACATGTCTGGTGAAGATTCAACCATCACGCACCCCGTCTCGCTCGTCGCGCGGGGTTGAAACTCGG  
AGCGGGGAGCCAGGGGCCGTTGATGAACCCGTAAGTGAAGGTTGGACGAGGCTCTCAGTCCGTTTCATCA  
AATAGCGGGCTTCTAAATTGAAATACCTTGTTCACCGAGAATACGTAATAATTACCAGGAAGGCTGTCTA  
TTACGATCTCTTTGACATATCGTCCGTGAGCATAGTGCATATGTACCCGTTTTTCAGGAAGCCACTTCAT  
GACCAGCTTCCGCTTGTGTCAACAGTTTTCTGAAGCTGGGTCATTTTCGACATAAAGCTTTCCGTCTTCC  
GTGAATCCTAATAGCTCCCGCACTTCCATGGATGGCTTGCCTTTGTGGATCTTTCTTCGTTGCTCGGAGA  
GCGTATCCAATAACCGATAAGCCTCTCTGGTGACATCATCCATGATGCCTTCCATCGACATGAGCCACCG  
TCGGAAGCATAACAAAACGCAATTATCTGCATACGCCACATCAAACGGCAGAAATACCTAGCTCAACGGCC  
AATCGCCCCGCTGCCATGACGTTTGGCAAGCAACCAGCACCACGAGCAGCAAGAGGGCGGAGGGTTTTCTA  
ATCCCGAGCGACTCATCAGCCACTCTTGGCACTCTTACGCTTAGCAGCAAAGATAACCGCTAAATCAGC  
AGGGGTATCGATGTCTGGCATATTCAACAGCGCCTGAATATATGCAGGCATCGCCGTACCGTAGTACTGA  
GAGGTTGCAGCTTTAAGGCCATTACCCGGCAACGAGTCAGCTCAAGGCTCTCACCCGCCAGCGCGACAT  
CCTCCGCCATCATCTCAATATCCAGCAGTCTGACGAATATCCCCCTTTAGTGGCCGCTTGTCCGCTC



TAGCAGTTCCTTGAAGGACTCCTCCCCGAAGAGGGAGCACAAACATTCGATGCCAATGGGCTCCTATTA  
CCCGTGGCCTTCAAATGGCAAGCACTCTCGACTGTCCACCCGTACCGAATAGGCAAACCTGAAGCGGAT  
CGTTACTAGACAATGAGCCCAGTTCATCCAAACAAATGCCAATGCCAGTTCGTTGTTGAAACATGCCCTT  
GAACCCAGCAGCTGTTCCGTCCCCTCACAATCGCCGTTGCGGGGCCCGCACTTGGGTGAGATGCCACG  
CCTGACACACTCTGCCCACTTGTAAAAGCGTCGTTTTGCCCACAAGAGCTTGCACCATTGAAGTGA  
TCATGGTCCCTGTATTTGATAACTTCATGAATACATTGGATAGATTTGCCATGATTGCAACGAGCATGGT  
TGGTGACTCTTTGACAGACAACGCAATGTTCTTTTGCCAATCCTGCAGCGTTCCTTTTCGAGTGGATAGCG  
TCATGCTCACCAGGCGCGGACAGCAGCTCGTGCTGAGGACCACTATAGCCGTTTTGTAAATTGACCGAC  
CTACCCAGACATAGCAGGGATGTTTCGCTAACAAACCCCGCTTGCAGATGCTGATGGACCACGCTGATATC  
TTGGACTACTGATGCTGGCGGACATGTATGACAGCAGCCCTCCTCTCGTGACCTGGGCATTCAATCCCC  
GCACGGTATAGCGCAGCCCTCACTGTTTTGTAGTCTGAAATCACCTATCGAATAATAGGTCGATGCGCT  
GGCATTGCTTCCGCTCATCCAGATACATGAAACGAACACCCTGATCTCTGTACTGTGCTGAGTGGAGTAT  
CGATAACCGGCAGCAATGGCTTACCAGATATCGTTTTTGGCTTGCCATGATCGCTAGCTAATTTCCCCAC  
GGGGACATCGCAAACCCACCAGGAATAAGCCTCGAATAAACCGGTTTTTTTCATCTCCGGCTCAGATCTGG  
AAAGCACCAAGCCATCTGGGTACACACAGTCCCATCAGAGGCAATCGAGCAACGCCCTCGTTGTACAA  
CCTGTATTCTGCTAAATATCGATCCAGCATAAGAAGTTCATGACGAACGAAAAGCTCATATTGAGTCTCA  
TTGTTCGGGGTGTGGCTGACAACATTTCGTGCTGTTTCGGACAATGGGCTCACAGCATCGGGGACAATATCCG  
CTCGATGAGCATCACCATGGTGTGCATCAAGGTTTCGTTTCTCCACCAGTAACGGCAGCGAGTCAGGAGC  
GACTGCAGGGTGCATTCTGGCGCTGATGCCTCCTGATCCGAGTCCGTTACCAGTCTGTGCGCGGTACA  
CCCTGACTTGCCATCCTATCAAGAGATGCTTGAGTCCCTGGACGACGGGCAAAAAGCCTCGGGGGTTAT  
CACTACTAGATCTGGGTCTACGCATAATTCTTTATGGGGGAGTCTCCTCCCCAATCTCCAAAAATTGTT  
AACAGGTGATGCGTGGGAGGTCCCACAAGGTGTGTAATTCGTTGACGGCCTTGACCAGCGTGGTGTGCTG  
GAGGCGTGCATATCGCTCAGTCATTTTCGGCGAGCTATGGCCTAGGACTTTTTGCAGTACATCCAGCGAG  
CAACCTTGGTTTTAACAGCGATGTAGCGACGGTATGGCGGGCGTCATGCATGCGCACTCCTGATAGTCCGC  
AATCATTGCAGACCCGGTACCAATACCGCCGAGGTTTCGGAAATCTGAGAGACACTATCCTGGCCCTAAA  
GAGCAGACCGGTTGTGCCATGGCGCTGGAATTTGAGTTGAATCAACTCCAGCGCGAAATGATTAAGTGGT  
ATGAGCCTTTCTCGACCAGACTTACTGGTGGGCAAAATACGCAATCTTTTCGATTGAGATTACAATCTTGAA  
GCTGTAGCTCGTTCGCTCACCAGCCTGCACCCTGTTGCAAAACAGGAACAGCAGAAGCCTAGCTTTTTTTC  
ATCGTCGATGTCTTTCATCAAACGATGGACACCTTATTCACCACCTCATCAGGCAACCCCTTGGGTGGC  
AAAACAGCTTCATGCTTTGCGGAATACCTGCTGCTGGCGAGGACTTGAGAATGCCACGTTCTACAGCGA  
AGGACATGATGGCCTTTACCTGTGCCAAGTAGCGGTTCCGCGTGGCGACAGAGCACGTTTTTATTTGATTC  
TGTAAGAAAATCCTCGATGTGAAAACGGGTTACTCTGTTTAAATGGCTTAAAGCCCTAGAGCTGCCACGATC  
GGCTTTACCCGAGACTCGATGGTTTTATATGATCTATGAGTTGCTCGTACTGAGGGCAGGTATTTATCAT  
GTATAAACTGTTCTACTGACAAGCTCGAAAGGTAGGCTTGATGAAATCCCGCTGGATCTAGTACAAACTC  
CGCTTTTAGCTTTCTTGTGTTTACGATCTCTTTAACGCTGACTTCGTCCGTGCTCGCAATTTTTTAAC  
CGATAACGGACTTTATTTTTGGTGAAACTAAGACAACCAACCTTGCAGCAGTGGCATAAGTAATCCAGC  
TAAGGGAACGCTCGTATTTATCTTTGCTTTACGCTGCTTTGAACTGCACTCCTCCAACCTGGTACTATC  
TACAGTTGGAGCTACAGCCTGTTTCGGGCATCGCACCTCCTATCATCTAGAGCCCCACCCTGGTACTCA  
TGACAAGAATGTTGGGCGAAGAAAAACCGAAATGGAAGACCAGCTCCAGAGCGTAACCATCCGATAATGC  
CTTATAAAAACAGACTACCCTGCACATGGTATGTTTTATGCGTGGTGTTTTTCTCTTGTAGCAGTTGAAT  
CGAAATCAGTTTTTGGCCCCCTCTAAAGAACCAGAAAAAAGAAACTCAATAGAGTCTGATTTTGTGGCAG  
AAAAATATTTTTATTTTTTTGTTCCCCCGCCGCACTGTACGATTTTCGAGCTAAAACACTGCATTGAG  
CACAAGTATTTACTTCCCCCTACAGCTCTTGTGTAGGGGGTTATCACTCTTCTCAAACGCAGATACGG  
AAGTTGAGCGACCGGAGGTCCTTCGGTATCGACGCACCAACCCCTGTCTGGTCAATTTCTGGTAACTTTG  
CAGCGCACAAAAAACATGCAGGTTAGTTCATCCGTTTTTTGACAAAAAATGGGCTCACTTGTGGAGGCT  
CGGGATGGGTGAGAGAGCGAAAAGGTAATCTATAAAGGGAAAAAACCTCGATAGCAGAACCTGCCGACA  
ACCGGATCCTGGTGTGGAGTCAGGGGCTCCTTGCACACTATCTCGCCACTTAGTTCACCCCTATGCAAAAA  
CATGCCAGAAAGTGGGGCTACAAGGTTGACACCCAGTCGAGAAAAGGTTTTAATGCGCGCCGTTGCCAG  
ATAGCTCAGTCGGTAGAGCAGGGGATTGAAAAATCCCGTGTGCGCGGTTTCGATTCCGTCTCTGGGCACCA  
CAATTCCTCCTTAGTTCAGTCGGTAGAACGGCGGACTGTTAATCCGTATGTCACTGGTTCAGTCCAGTA  
GGAGGAGCCAAATTCGAAAAGCCCGCTCAATCGAGCGGGCTTTTTTCATTTTTTAGTTGCTGTTGCATGCTG  
CCAAAAAGAGCGTTGCGCCACAGGTGGCACTGAACAGCAGCATTCGGTCTGCAGCATGCTGCCAGGGCA  
TGGCTTCTTCTCTTTTTTCTGGCCCTGATCCACTTCGGTTTTCATCACATTCCTTATCTATTTTTGTCCG  
CCTGAATGGCTGCCTCTGTGCAGGCGAGCCATCTTTGTTGAATGGCGCCATGGCGTCAATCTCCCCCG  
CAAAACAATTAATTCAGCACCGTGAAGAGCGGCTTGTCTGGTGTGTTTCGACCTTTAAGCCATTGTTA  
ACATTTTTGAAAACCGGAGTGACCCTGTGGCTGGGCGAGGATATGATGGGGTCAATAATGTTCCCATCCT  
GACGGAGAGATCCCAGATGAACAGCCCTTGAGCTATGTAAGGACGGCATTCATTGCGAGCCGCACTTT  
TTTACCCTTCCCCTCGATCATGATGAGCCGGATGGTGCAGCATTACCCTGTTTGGCCGACCCCTCTGTC  
GTAAAGACAAGCTCGATGAGAAGTTGCCCTGGCTGCTGTTCTGCAAGGTGGGCGGGGATTCGGGGCGCC  
GCGCCCGACGGCTAACAGTGGTTGGCTCAAGCGGGCGTTCGAGGAGTTCAGAGTGTGCTGCTGGATCAG  
CGTGGCACCGGGATGTGAGCCCCATCCACGGGCATAGTCTGGCCAAAATGACCCCGGCTGAGCAGGCGG

AGTATCTCGGCCATTTTCGCGCCGACAGCATAGTGCAAGATGCCGAGTTTATCCGGCTGGAGCTCAGTCC  
CAAGCATCGCTGGAGCCTGCTGGGGCAAAGCTTTGGTGGTTTTTGTGCTTGACCTATCTCTCGCTCTTC  
CCCGATAGCCTGCGGGAGGTTTTATATCACCGGCGGCATCGCGCCGATTGGCCGCAGCGCCGAGGAGGTTT  
ACCGCGCCACCTATCAGCGGGTGGCTGACAAGAACCAGCCTTCTTCGCCCGCTTCCCTCCACGCTCAGGG  
GATTGCCAACCAGGTTGGCCAACCATCTGCACCAGCACGATGTGCGGCTGCCCAACGGCCAGCGCCTGACG  
GTGGAGCAGTTCCAGCAGCAAGGGCTGGATCTCGGGCTACGGGTGCTTTTCGAGGAGCTTTATTACCTGC  
TGGAAGAGGCCTTTATCGGGACAAGCTGAGCCCCGGCTTTCTCTATCAGGTGCAGAGCATGCAGCCATT  
CAATACCAACCAGCTGTTTGCATTCTGCACGAGGCTATCTACGCCAAGGGGAGGCGACTCGCTGGGCG  
GCAGATCGGATCAGAGGGGAGTTTCTGCGGTGAACTGGGCGCCCGCAAGGATTTCCGCTTACCAGGCG  
AGATGGTTTTACCCTGGTTGTTTCGAGCAGTTCCGCGAGTTGCTGCCCTGAAAGAGGCGGCTCATCTGCT  
GGCCAACAAGGCGGACTGGGGGGCGCTCTATGACCCGCGCCAGCTGGCCCGCAACCAGGTGCCGGTAGCC  
TGCGCCGTCTATGCCGAGGATATGTATGTGGAGTTTGACTACAGTTCGCGAAACTCTGCGTGGCCTTGCCA  
ACAGTTCGCGCCTGGATCACCAATGAATATGAGCACAACGGTTTTCGTGCCGATGGTGAAGCGATTCTTGA  
TCGTCTGATCGCGTTGAATCGCGACCGTTAATGGCCGTTATCGGCAACCATCGCGGGAGCCCGGACTCCC  
GCGATGGTAGTGATGGATGGTTGTTATGAAAGCGTGACTCCCTGAACTTGACCCGTATTTCGCCAGACGA  
TGAGTGGATAGCCGGCTGATTAATTTCCCCCTCTTCACTGTTTCTGTGATCCCTCACCATATACTTGC  
CAAACGACTCTGTATTGAGCCGCGGTCAAATCGATTGACCAACCCTGCTCGTTACCATTAGAAAGTCGC  
TCTGATGTTCTGTATCCCAGTATCAGATATGCCATCTCTGCATGCCCGCTATCCGGGGGAGGGGATGG  
TCGTGCTTTTCAATCAAGATAAGGATGTATGATGAGAAAGTCTCTGTTGGCCTGCTCCCTGCTGCTGTGC  
CCAGCCGTGTTTGTGTCACCCCCATTGGGAATATAGCGGCGAGGCGGGGCCCCGCCCCTGGGCCAAAC  
TGACCCCGGAGTTTGGTCAAGTGTGCGGGCAGCAATCAGTCCCGGTTGACCTGAACGGGCTGGTTGATGC  
CAAGCTGGCCCCGCTGGCACTCCACTATCAGGCGGGTGGCAACACAGTGGTCAACAACGGTCAACCGTG  
CAGGTCCGTTATGCCCCGGGCGACCTTGCAACTCGATGGCACCACGTTTGAACCTCAAGCAGTTTCACT  
TCCACGCCCCGAGCGAAAACCTCATCGAGGGTAAATCCTATCCGCTGGAAGGGCATCTGGTACACGTCAG  
TGGCAAGGGGAGAGATCGCGGTAGTGGCGGTGATGTTTCGAGGCGGGCAAGGCGAATTCGGCACTGGCGGCA  
GCCTGGAGCGCGTTACCTGCCAAGGTGGGCGAGATCCAGGCCCTCAAGACGCCGCTCGTTGCGGAGCAAC  
TGCTGCCCGAGAACCCTGACTACTATCGCTTTAGCGGTTCCCTTACTACGCTCCCTGTTCCGAAGGAGT  
GCGCTGGCTGGTATGATGAAGCAGCCGGTTGAGGTGAGTCAAGTCCAGTCCAGTCCAGTCCAGTCCAGT  
CACCACCCCAACAACCGGCGCGGTGCAGCCCCAATGGGCGCGTGGTACTGCAATAACACAGCGTTGCAA  
TAGCGCTGCAGATAGCAAAAAACAACAAGAGGGCCGCGAGGCCCTCTTTTACATAGCAGGTATCGGCGAG  
CGATCAGAGGCTGGCGGCGATGCGGGCGCCGAGGGCCGCGTTGTTTCACTACCAGCTGGATGTTGGCGGCG  
AGCGAGTTGCCGCCAGTCACTCGCAGACGCGGGCCAGCAGGAAGGGGGTTGACGCTTTGCCCTTGATCC  
CCTGCTCGTCCGCTTCATGGAGCGCCCGGGCAATAGCTGCGTTCGATATCGGCTTTCGGCATGGCGTGTGC  
GGTCCGGATGGGATTGGCCACCAGGCGCCCGCCGCGAGTCCAGCTCCCACTTGAGGCGCAGCGCCTCG  
GCGATGGCTGCCGACTCTCCAGTTCGATAATCAACCTTGAAGCCGCTCTCGCGGGTGTAGAAGGCGGGCA  
ACTCTTCGGTCTGATAGCCGATCACCGGCACCCCTTGTGTCTCCAGATACTCCAGTGTGAGCCGATATC  
GAGGATCGATTTGGCGCCGCGACAGACTACTGCTACTGGCGTTTGTGCCAGTCCCTGCAGATCGGCCGAG  
ATATCGAAGGTCTCCTGCGCGCCGCGATGTACCCCGCCGATACCACCGGTGGCAAAGACCCGGATCCCCG  
CCATGGCGGCGATGATCATGGTGGAGGCGACCGTGGTGGCCCCATCCCTTGCAGCGCCAGCACGAACGG  
AATGTGCGGGCGGCTGCACTTGGTCACTGCTGGCCAGCCCGGCCAGCGCTTCCAGCGCACCGGCATCG  
AGACCCACTTTGAGGCGGCGCTCGAGGATGGCGATGGTTCGCCGGAATGGCGCCGTTATCGCGCACTACCT  
GCTCCACCTGACGGGCGCTCTCCACGTTCTGCGGATAGGGCATGCCATGGGAGATGATGGTGGATTTCGAG  
GGCAACGACCGGTTTGGCAGCAGCCAGCGCGGCAGCCACTTCCGGTTGGATATCGAGGTAAGCGTTTCAG  
ATGAGTACTCCTCCAGTATGCGGTCAACGGCGGTCTTGTCTCAGACCCGAAAAACGGTATCGGAACAAT  
GACGGTGTAGTGCAGCGCAGCCCAAGGCAAAAGCGGGTGGTTTGGGCAATGTGAGCTGTTGCAGCCAGGCG  
TGGGCGAGGCCAGCCATAAAGGCATCCCCGCGGTTGACGTTGAGTACCAGGACTGCCAGCACCGGCA  
GGTGGCCCTGCTGCTCGCCATCGCTGTAGAAGATCCCCTGTTTACCCAGACTGAGGAACAGTCCGTTGAC  
CCCCGCGCGGTGGAACCAGGCGGCCACCATGGGCCAGGTTTTCGGGCCCGGCGATGGTTCATGCCGCACAGC  
TGCTCGGCTTCGCTGCGATTGGGTTTGGAGGTGTGGATCTTGCCAAGCCAGGGGCGGATCTTCTCCACCT  
TGGCCACCAGAAACGGTATCGACAAAAGATGGCGTGCTCACCTTGGCGCTCGAACAGCCAGTTCGAGGGTATG  
GATGGCCAGATTGGTATCGAGCACCCAGAGCCGGGCACCGCCGAGAAAAGCCTGCGAGGGGGGGCAGGCGG  
GCAGGGGTGAGCTGCTCTATGATGGCCATGTCATTGATGGCGCAGCTCATTTCCGCTGCCATCATGCA  
GGCTGAGATAGCAGGAGGTGGTGTGACCATCGAGCACAGAGTCTGGCGCACATCGACGCCGGCCCGCTG  
GCTCACTTCCAATAGATGGTACCATACTGGTTCGTTACCGACAGCAGTCAAGCAGTCCGGTATCGCTGCCG  
AGCCGCGCCAGATTCTCGGCGATATTGCGGCCAACACCACCGGCCGAGGTGCGCACCTTGGCCGGGTTGG  
AGTCCCGGAGCAGCAGGTTGTCGTGGCTGGTGGCGCAAATATCCATATTTGGCACCGCCGATACCACCAC  
GTAGGGACCTCTCGCAGTACATAACCCCTGCCTTGCACATACCCCTGCCGGATCAGGCTTGGATGTGG  
CTGGCCAGCGCAGAGCGGCTGATGCCGAGGCGATCGGCCAGCTCCTGCTGGGCAATCATGGGATCCTGAC  
GCAGCAGGGCGAGGATCTCTTGTTCACGCTCAGTCATAGACAAAATCCATTTTACAAACGTTTGTCTATT  
ATTGCTGGGAAACGTTTGTGGCTATCAGCTTGTACAAGATTTGTGCGCTTGCAGCAAAAAATCGACAT  
TCAAAGCTGGGTTAGCAAGCGGTTTAGCCGGGGAGGGGACTTTTAAACGGGTCCGTGGCCCTGCAACGGCT

TATAATGGCCGCCGCAAGATGAGGAGAGATGATGAAAAAGAGTGCATTCTGCTGCGTGGGGCTGGTCAAT  
CCCAAGTCTCCGAAAATGTCCGGCTCAGTGATGCGGGCTGCGGGTTGTTACGGGGTGGATGAGGTCTACT  
ACACCGGCAACCGCTTCGAGTTGGCGCGCCGCTTTGCCACCGATAACCAAGCAGATGGTGGAGAAGATCCC  
GCTGCTCGGGGTGGATGATCTGATGGCGTTTGTCCCGCAGGGATGCGTGCCCGTGGTGGTGCATCTGATC  
GATGGCGCTACGCCGCTCCCCGACTATGTCCATCCGGAACCGCTTTTTTATATCTTCGGGGCCGGAGGATG  
GCACGCTCGATCCCCGCTCTATGGCGCGGTGAAAAGATGTGGTATTATGTGCCGACCCGGGGTTGCATGAA  
TCTGGCCGCTCGGTCAATGTAATCCTCTATGACCGCTTGGCGAAGGGATTCCGGCAACCCGTGAGTTGTG  
GCGTGGCTACGGTGACTIONAAACCACAATGAAAAGGTGTTGCTCATGGACAGGTTGCTGGCGGTGGCCGCT  
GTTGACGGGGCTGCAGCATCCTTCTCTTTCCCTATGGAGGGATCAGTTTTTCGCCGACCTTGACCGCTGC  
TCCTCGAGAAAAGTCGCGGTAGTAGTCATAGAGGTGATAACGGCGATATATCTCGCCAGCGTCCCGCGAC  
GGATCAGATTCACCATCTCCTGATCCCCACAGCTGCAGTACCGGTGCGCCCTGCTCGGTATCGGCAAAAAT  
GGGGTAAGTCGGTATCCAGCGTAAAATGGTGCGGTACATATTTGGCCGTGGTCTCATCGCGGAAATGGAGC  
ACGCCAGCGGTGAGGTAATAGCGATAGCGCCCTTGCCAATCAGCTGCAGGGCCATCTCATGACTGTGCA  
TCTCGTGCCACTGCATGGTGATCGGAAAGATATTTATCCAGCACCCATCCTCGCCGCCAGAGTACGGTCTC  
TCCCTCCAGGCTGCGCTCTCCCCGCCATTGTGGCTGCCACTGCTTGAGCGTGAAGACGGTACATCATCG  
GCGGAGGCTGGCTGACGGGGCTGTTTGACCCCTTGATCTCGTCCAGATAGACACTCATCGCCATATCCC  
CCTCTTGCTGGCTACCATGGCGACGGCGCGTTTGTAGGGCACGATATGGGGCACGATCTGGTAGCCGTG  
GGGTTGGTAGATGGTTCGCACCAGGTGAGATAGATAACCGTGGCCATCCGGTTGGCAGAAACCGGGCCAG  
CCATCGCAATAGACGTGAATATCGGCTGTGCGAGCGTTGGCGATCGCACACAGAGAGCAAAGCAGCAAAC  
AACCGATGCGCAGCATGGTACGATTATCCTCGCAGGGGTGAGGAGAGCACGTATCACCTGATTTATACC  
ATGCATTGATCGCGCGGGCGGAGAAAACATCTCGCATCTCCATTTTGCACAGGGTCGAGGGTTATTTG  
CGGTTCGGATCGTTATGATCGAGTAAAGATTC AATAGCACCCCAATCAGTAGAGGAGACTGCATTATGCCA  
TCGATCAAGACTCTGCTCTGTCCAGTCGATTTTTTCCCAATGTCTCGCGCGGTACTCGACTATGCCGTTT  
TCATGGCACAGAGCCATCAGGCCCAGCTCAAGCTGATCCACGTGGTTGATCAACTGCACGGTTTTTGACAG  
TTACAAGCTCCTTCATATGACGGCCATCGAGATCACTCACGAGATGGAGCGTCAGGCCAGAACCAGCTC  
AAAGAGCTGGTTGCCACCCTGCCGATCCCGCCACCTTTGATATTCGCTTTGGCCGCGCCCGCATGAAA  
TTGTCACTCAGGCCAAGGAGGATGAGGTTGAGCTGATCGTGATGGGCAGCCACGGTCGCTCCGGTATCAG  
CCATCTGCTGGTAGGCAGTGTCCCGAGTCTGTGGTGCCTCATGCACCTGTCCGGTATGCTGGTGTGCGC  
CAATAACCGCCACGTTTAGAGTGAAGAAGCGTAAACAAACAGGCCAGCGATCGCTGGCTTGCGTTTTCT  
GGTGTGTGCCCCGTAGCCGTGAGCGTAGATGACACTCCCTCCCTTGATGGTATCTATGATGGCCCTGGC  
CTGCTCTTTGGGCAGGGCGGGGCAACCCAGCTGCGGCCAGCTTGTATATTTGCGCAGATGGGTGCGG  
CTGGCATAGGCGGCCCATGTACTACGATGGCCCGCTTGCGGGCATTGCTGTTCTTGCCGGGGCTGAGCC  
CGTCCAGCCGAGGGAGTAGCCATGTTTGCCAGATAGGTTTCTGCGGTGCGATAGACGCCAAGAGAACT  
TTGGCGGGAGTTGAGCTGGTTGAAAAGTGTTTTGGCGCCAGTTACCTGAGTTGCGGCCATGGCTGACC  
CAGGTGTGATAAAGCAGCTTGTGGCGCTTCATATCGATGACAAACAGTCTGCGCTGGGTGGATGGCTTGC  
TGTAATCGATGATGGTGAAGAATGGGTTTGGCTTGTGGCGCACAGTTTGATAACTGTTGAGTGCCTGACG  
AAAGGTCTGTTTATCCAGCTTGCCGGCCAGACCCAGTTGACGATAGAGGCTCTGATCCCAGCTGGCATCT  
GCCGTGCTGCTCCAGATGAGCGATATCAACAGCAGTGACAACAACAGCCACTCGCGTTGCCAGTCTATGT  
TCCCCGCGCTTGTCTCATCCGTGAATATCTCCTTGTCACTCCCTGTCAACGACGCGGATATTGCCATCA  
ATCCGCTCGATAGTTATATGCAAGGTGCTGAAAAGGCGCAATAAAAAAACCGGCCGAGAGCGGCCGGAA  
GTAATTCAAAACAGTAGACATTGGTATCACAGGGTATAACTGACTTCCAATTACTTAGAAGTTGTACTGCA  
GGGCAACCGCGACTACGTCATCGGTGTTCTTGCCAGAGAGTTGGTGGACTTGCCATCTACGGAGTCCAG  
CAGGTTACGCTTGTAAATCAACGTAGGCGTTGAAGTTCTCGGTGAAGTTGTACCAGGCACCGATAGATACG  
TACTCTGTGTAGGTATCATCGATACCGCGAGCGGAGTCTTTCACGTCAGTGCGCAGGTAGGCCAGAGAAG  
GCTTGAACCTTGCCGATGGTGTACTGGGCAACGGCTTCGTAGCCATCCATCTTCTCGGCGTAGCCGTTGTT  
GACGAACAGGTGGTCTTACCCTGGGAGTAGGTTGCAGCCAGGTAGAGGTCGCCAGTTGCATATTTGGCG  
CCGAAGCCCATCAGCTTAGCATCCTTGTGCGCCACCGAAGGCGCGTAGCGAGCTTGCTCGTCACTGTTGC  
CAGCCTGGTTATAGGCAGCACCCAGGCTCAGGCCATATCGAAAATCGTAGTTGGCAGATACTGCGAAGCC  
TTCAGCAGAACCTTTGCTATTCAGCTTTGCGCGTTGTAGGTGTTGCCGTTGAAAAGATTGAGTGATTGCA  
CTGCGACCGCGGTTTTTGCGGATCGTTGTTACCGGTGAACTGGGCACCCAGAGTCAGACCCGTAGAGTGT  
AGATGTACTGGGCCAGACCGTTGGTACGGCCGGTACCGAATACTTCAGTATCTTTGCCAGGCCGTCACC  
GCCCCACTCAGGCAGGATGTCGGTATAGTTGTTGACGGCTTGGTGAACAGACCATCCTGACGACCATAG  
CTGAAGGCGCCGAAACGGTCGTGCTTGTGATGCCGCATAGGCATAACGCAGCTCGTCTGTCAGAACCGG  
AAGTCGGCAGGTTGTACTCGGCAAAGCCGAACGCCTTCATCTCGGGAGCAATCTTGGTCTCGCCAGCAAC  
GTGCAGACGGAAGTAGCTCTGGTACCTTCGGAACCGTTGTCGTGAGTACCGTAGTAAGCACCTTGTGCA  
CGGCCGCCGATTTCCAGCTTGGTATCGTTCTGGTTGTAAACGGTAGCGGCATGGGCGCCGCTCGCCAGCA  
GCAGGCTGGAGATGGCAATAGTCAGTGCAGACTTCTTCATATGCGTTATTCTCTGATGTAAACACTTCC  
GAACTTGTGTGCGGTTCTGTGAAAATCGGAAAATGGTCCGATAGCCACACGGTAGGCGTCCCAACCTTGACT  
GGGCTGAATCCATCGTTGTTTAAATTGAGGTGACGAGGTGCTTATAAAGACTGGGTGTGACGGTTTTTGA  
CAAGATAAAAAGAGATTAAATTC AATGAATATTTTCTAGTGGCTTTTTTGCATCAAGGCTGTTCTGAG  
CAACAAGGTAGATGGCTCAAGTTGTGAGCTATATCACACAGGGGAGAATGGGGCGGGAAAAACGGGGGGG

GGGGAGCCTTGCAAGGCTCCCCCAGTGATCAGAAGGGCTTTTGCCACAGGGTCAGCAGCAGATCCTGTT  
CCAGTTCATTTCGGACCCTGTTGAGCGAAAGCGTGACGCTGCTCACCGGTTGCCCAGCAAGACGGCT  
GGTCTCCAGAATAAAGCTGCGCATGGCCTGATCCATGGTGAGGCTGAACTGGCAGCGCTGTTGAGCCATC  
GGATTGAGGCCGCCGAGGGTTGGCCAGCTGAGAGGGTGTTCATGCTCACCGGATTGAGGCTGACCCGCA  
ATTGCCACTGATGACGGGGACCCGGCTGCAGATAGAGCAGATAGCCACCGGGGGCCAGCCAGCTGACCAG  
CTGTTTCACTTGTGACCTTGTGATCGTTGACCAGCAGCACCTGAGCAGAGCCCCGGTTGCAACGGCGCGCA  
GCGGGATCGGCAATGACAACTGGCCGTCCGGCTGCGCTTTTTTGGCGGCAAAGATGGTGTCTTGGCGA  
TATCAACCCCAGCAAACCTGCCAGCCGGGCAGCCGCTCTGCCAGCGCGCGGCAGTAGTAGCCCTTACCAGCA  
CCCAAGATGGATCAGCTCTTGTGGGGCAAGGGGAGCGAGCAGGCCGGCCATGGCCTCAACCAGCGGCAGT  
TGGTGGCCAGCTTCCAGGAAATGGTGTCTTGGCGCGCATCAGGGCGCGGCTGTGCTGTCTTTGGGGTTTT  
TCTTGGCCGGGATGAGATCCAGATAACCTTCCGGTGCCGATCGAAGTGATGCTTGTGTGCTAATAGCG  
CCCCGGGAGGCTTTCATGAAGATGGAGCGGACTGCGCGCAGCGGGGACATTGAAGGTGCATAGTAACCTCTC  
TGGGCGAATGCCGGAACAGTGAAGGGCGTTCGGGATTATAGGGGAGAGGATCAAAAAAGGCTGCCGTAGC  
AGCCTTTTTTATCCCAAGGCCTCAGTCAGGCCTGCGGACGGGTTCATCAGCGAGTGCCAAATACCACAATG  
GTCTTGGCGTGAGCAGAGATGAGCTCCTGCTCTTCCAGCATCTTCCAGGATGCGGCCACGGTTTCCAGAG  
AGCAGCCGACGATCTGGCCGATCTCCTGACGGGTGATCTTGTATCTGCATGCCATCCGGGTGGGTTCATGGC  
ATCCGGCTGTTTTGGCCAGGTTGAGCAGGGTCTGGGCGATCCGGCCGGTCACATCCAGGAAGGCGAGGTTA  
CCCCTTTTCTGGCTGGTGTGTTGCAGGCGCTTGGCCATCTGGCCAGAGAGACGCATCAGAATGTCCGGGT  
TGACCTGGATCAGCTGGCGGAACTTCTTGTAGGAGATCTCTGCCACTTCGCAAGAGCCTTTCGCGCGAAC  
CCAGGCGGAGCGCTCGGGGTTCTCGTTCCTCGAACATCCCATCTCGCCAGGAAATCGCCCTGGTTC  
AGATAGGAAAGGATCATCTCTTTGCCCTCATCGTCTTGATCAAGACGGCCACAGTGCCTTGACGATGT  
AGTAGAGGGTCTCCGCTTTTTTACCCTGCATGGATCAGGGTGTCTTGGCGGGATACTTATGAATGTGGCA  
GTGCGACAAGAACCATTCCAGGGTGGGATCGCTTTGCGGTTTGGCAATGACCATGAGAATTCCTCTGTAG  
TGTCTTTTTTATGGACTTGTGCGTCCGGGCAAGCTGCCAATCTTGCCATTCCTTGTATTGGTTCGAGTAGG  
ATAAGAGCCTTTGCCTGTGCTGACAAGGCTTTGCGGGCTTTTGACAGAGCCCTTTGAGTAATGCCTGCTG  
CGCCGCTTCGGCCATTCTAGGGAAGATAGAGGCCGGAGATGTTGATTTTTGATCTATTTCCATCCCAACTC  
CCCCTGTTTCGGCAGAGATAAGCGACTGGGTTATGCTAGGGATCCATCATCATGATTAACAGGAGAGAGTG  
CGAGATGAAAGCAAGGTGAGCTGGGTGGAAGGGATGAAGTTTGTGGGTGAGAGTGAATCCGGTTCACAAG  
GTGATCTGGATGGTGGCAACCCCGGTGAGGGGGCCAGCCGATGGAGATGATCCTGTGGCGGTGGGTG  
GCTGCAGCTCCATTGATGTGGTCTCCATCCTCGAAAAAGCGCGCCAGTCCGGTACCAGCATGCCATGTCGA  
TGTCAGTGGCGAACGGGTGATAGCGTGCCCCGGTTTTTCGAGAAGATTAATCTGCACTTTCGTGGTGACG  
GGCAAGGGATTGGCAGAGAAAACAGGTGGCCAGAGCGGTGATCTGTGATGGAAAAATACTGTTCTGTTTT  
CCCTGATGTTGAAAAAGCGGTACAAATTACCATAGTTATCAAAATGTTGAAGCTTGATAACGATAGTT  
TCGTTGGTACCCTGGCATAAGGCAGTTACGTAAGGCCACTGCACAAGGCCATGACATAAAGCCATTACAT  
AAGGAAAGTGCAATGAAAAAATTGATCGCTCTGCTTCCCCTTTTGGGCTGGCGGCGTGCAGCAGCCCGC  
AACCTACCCAGTATCAATACAGCCAATACCAGTGTGGCGAAGAGATGCTGGCCGTTACCTATGATGCTCA  
GGCCGACATGGTGCAGTTCCTTATGCGGGGTTTATCACAAGCTGGCGCGTGTGGAGTCAGAGTCTGGC  
GCCAAATATTCTGACGGCCTGACCACCTTCTGGAATCAGGAGAAAACAAGCTCTTCTCACCCAGAAAGGGG  
TCACACTGCTGACCTGTACGCTTAAATAAGTGACCACAGATAGCTGAAGGTGTGCAGCTTTGTGCCGGG  
TCTGGCCTAGGCCGGATTGGGTCAATAGGTTGAGACCACAAAAAACAGCTTGCCGGGAAGCAAGCCGTTT  
TTCTATCCATCCGTTATCACTAAACAAGCGCTAGTTGGTGGGGACGCGATTGAGCAGCTCGGCCGCGAGC  
TGCTGGCTGAGTGCCTGACGCTGGCTGTCTGCAATGCTCACATCGCTGGTTCAGCTGGATGATGCTGCTCC  
AGACCGCTTTTCTGGGTTTTGCGATCGAGCAGCAGATGGCCAGCGACCCCTTTGCGCTGGTTGGCCGAGGC  
ATATAACCCCGGTGTCATGCCAAGGCGCGGAAAAATCTCGCCGTCATCATATCCTTGCCGCCGCGAGC  
CCGATGGCGACCCACAGATCCGCTCGTTCGAGCGGTGCGCTTTGCCATCCCTTGCCATTGAGCTCCCGGC  
TTACCGCTGCTGCATTGGCTCAAGCCATCCTTCCGCCAACTCACCGGCAAATGATACTGCTCGGCGAG  
GGCGTAGCGCGGGGTTGCACCATAGGTCCAGTTGCCCATCGGGCGAACCAGCATGGTCCCGACTCCAGC  
GTGGGGGCCGCCGGCCGCTGCTGCAACCGCCAAGCAGGGCGAGCAGTGCCACAGAGAGATAAGCAAGCC  
GCATCGTGAACCTCTTTGAATCAGGTTATTTTTGCCGGTTTTGATCAATTGCTGGATGAGCGGGCGCAGGA  
TCAGCTCCATCGCGAAGCCCATCTTGCCACCCGGCACCACTATGGTGTTCATCCGCGACATGAATGAGCC  
ATCGATCATCGACAGCAGGTAGGGGAAATCCACCTGCTTGTATACCGCGAAACCGGATCACCAGCATACTC  
TCGTCCAGACTCGGGATCACCTTGGCGCTGAAGGGGTTGGAGGTATCCACCGTCCGTTACTCGCTGGAAGT  
TGATATGGGTGCGCGAGAAGTGCAGGGGTGATGAAGTTGATGTAGTCATCCATGGAGCGCACGATGGAGTC  
GGTACCCGCTCGCGGGAATGCCCTCGCTCCGAGGTATCGCGGATCAGCTTCTGGATCCACTCCAGGTTG  
ACGATGGGCACTACGCCTATCAGAAAATCCACGTGGCGCGCCACATTTGTATCCTCGGTGACCACCCGC  
CGTGCAGCCCTTCATAAAACAGCAGATCGGTATTGCTGGGCGAGATGCTGCCAGGGGGTGAAGGTACCGGG  
CATCTGGTTGAAGGGCACTGCCTCGTCAAAGCTGTGCAGGTAGCGGGGATACTGGCCATTACCATCCTGC  
CCATAGCCCTGAAAAAAGCTCTCCAGCAGCCCCGAAGTCATTGGCCTCAGGGCCAAAAATAGCTGATATGAC  
GCCCTGTTTCGCGCGCCTTGGCGATCGCTACATCCATTTCCGGTCCGGTGTAGCGGTGAAAACTGTCACC  
TTCCACCACCGCCGCGGTATATCCAGTTGATGGAACATGGAGCGAAAGGCGTTGGTGGAGGTGGAGGTG  
CCGGCACCGGACGAACCGGTAACAGCAATAATGGGGTGTCTGGCCGACATGGGATTCTCTCTTCCCTGGG

AATTCCGTTATAAGGTCCCGATTGCGGTTGGGTCAAGACTGCTCGATGAAGCGGTCTTTCATCACGATAT  
TCACCGATTCATGCAGCTCGCTATAGACGATGACAGCTTTGCCTTGCTGTAATTGTTCTCTCACTGCATC  
GACTTTGACGCCAAGCGGTACATCCTGCTCTCCATATTCTGTTCCCTTCCCTGCAACACAAAGTGTTCGATC  
AGGTTGGTCAGGGTGTGCGCGTCCAGTTCCTTGCCAGGGAATGATCATTTAAAGGTCTCACAGCAAAAGAG  
GTGATCGTCAGGCTATTGTTGTGTTGAATCCTGCGAATGCAATCACTTTTTTACCTTTTTACC GGAGTCTG  
AGAGATGTTGTCTGAAGCGCAGCGCAGCGCGCCGTTAACCTGACTGAGCATCTGGACAGCGCACGTCTGA  
GAGGCGATTGCCCGAGGCATGGTGTGGTTCCTGGTGTGTTGAACTGGCTGGTGGTGTGTTTCTTTTCGATAC  
GCTATGAGGTTTACAGCCAGGTGCGGCTCGCCAGTGATGACAGCTTGCCCTGGCGCTTTCAGAGTGAGCT  
GGCGCTGGTCATGGTGGTGTATTGCTGCTACCCGTTGTCAGCCTGTTTTGTGACCATCTGCAGGATCGC  
CTCTGGTTACGGATGGCTGCACCTGGTGACGGTGTATGGGGCGGACTCTGGACGCTGCATATCTATAACGA  
TTGGTCAGGTGGAGCTGCGGGGAGGGGTCAGTATGCCAACGGGATCATGCGGGTCAACCTGCTGGCTGC  
GCTCATTGCGTTTTTATCCCGATCGCAAGGTTTTTATGGCTATCTCTTGGGCCCGATGACGTTGGGTGTG  
GGGTTGGAGCTCTTTTTACGCGTCGATTTTTCCCGAGATCTACCTGCTTGGCGTGTGTTTGGCGTGATTG  
CGCTGGAGGTGCGCCGCCGCATGCTGCACCGCTGGTTTTGAGTTGGCGATCATGCGGGAGCATGAAAATCT  
GACGCTGCTGCGCAAACCTTGATCAGCTCGCCAAGCAAGATCCTCTGACCGGTGTCGCCAACCGGCGGCAT  
TTCAATATCGAGCTGGATCGCGCTTAGCCATAGCCAGGAGAGCGGCGCTCCGCTATCGATCATCTTGA  
TCGATGTGGACTATTTCAAGCGCTTCAACGACCACTATGGCCATCAGGTGGGGGATATGTGTCTCAAGGA  
GGTGGCACAAGCGCTCAACCATGCGGTACGCACGCCATCTGATCTGGTTGCCGCTATGGCGGGGAAGAG  
TTTGTGCTGCTGCTGCCAATACCGACCGTCAGGCGGCGGCCAGCGTGGCGCAGCGGCTGCAAGATGGCT  
TGGCCAGCCTGCAGCTGGAGCATCTGGCGTCCGATGTTGCCCTTGGGTGACGGTGAGTCAGGGGATTGC  
CAGCAATGTGTCCGGCGAAGGGGAGAGCCAGTTGCTGGAGCGGGCGATCAGGCGCTCTATCGGGCCAAG  
GAGTCGGGACGCAATCAGTTCGTGTTGAGAGTGACTCTGTTCCGCAATCCAGCGACTGATCCGCTCAT  
CCAGCCAAAACCGCGGCCGCCAGGGCGTGGCGTGCAGAAAAGCCGACATGGCCGCCACGCTGGTTCAACTC  
ATAGCGCACCGTGGGCGAGAGTTGCTCCGGCCGGGGAATGACCGCTGTGACATAAAGGGATCGTCGGCG  
GCGTGCAGGATCAGAGTAGGGATGGGGATCTGAGCCAGCAGCGGTAGCCCCGAGCAGCTCTGGTAGTAGT  
GGCTGGCGCTGTGAAAGCCGTGCAGCGGCGCGGTAACCAGCTCGTCAAAAATCGCGCAGGGTGGCAATCTG  
CTCCACTTGTGAGGTTGCCAGCGTTCACCTCGCTTCTGCTGCTGGCTGATCTTGTGAGCAGGTGTCAG  
CGCATGGTGCAGCAGATAGTTCTGATAGACCTTCGAGAAAACCTGATTGACCCGCTCGGCGCAGCTTG  
CCAGTTGCAGCGGGCCGAGACCACCACCCGCTTTCAATGCCGAGGACAGCCCCGCGCCAGCAGATT  
GACCAGCATATTGCCACCCAGTGAAGGCCGATGGCGATCAGCGGTTTGGCCGGAAGCGCTGGCTCAGC  
TCGGAATCAGCTCCTGCGCATCACCGATGGCGCCGGAGTGATAGGCCTGCAGGTGGCGATTGGGCTCGC  
CGCTGCAACCGCGAAAAGTGCATCAGCACGGCTCTCTGCCCTCTTGCTGCAGGTGGGCGAACAAATCCCTT  
GGCATAGTGGGAGTGAATGCTTCCCTCCAGCCGTGAAAACACCACCAGTGGCCGTTTCAAGGCAG  
ACCTCCCCGCTCCAGGCGAGGTGACAAAAGTCCCATCCTGCAGTTCAAAACCGCTCCGCCACAAAACGGG  
CAGGGGTGCGGCGCAGCCATTTGGCAATATGGTCTGCAGATGAGGATTGCGTGCCACCAGGGGGCGTG  
GAAGTGGCTCTCGGTGAGCATGGGGTCAGTCGGTCTGGGTGGAAGATAAGGAGGACGGGAGGTGTGTTCC  
TCCCCCAGTCAATTGGCTTATTTTACGAGGCGATCGTGATGTTTCGGCGCCGCGCAGCATGGCCTGGATCA  
GCTCATTGGCTTCGAACTTGGTTCAGCGCCTCATGGGCTCCACCTGATGGGCCCGCTCCACACTGATCTC  
GCTGGAGAGGGAGGTGTGCAGGATGATGTAGGCCCCCGCCAGTTTGGCTGTCGCTCTGCACCTTCAAGGCC  
AGCTCGTAGCCATCGAGCCCGGGCATCTCGATATCGCTCACCAAGATGTCGATCGGGGTCTTCTGGCTCG  
CCCGCTGTCATCAGGGTCAGTGCATCCTTGCCATTGGTGCAGACCTCATAGGGGATATTGATGTAGTC  
GAGGGCGGCCATCAGCTGACGGCGAGCGACCGAGGAGTTCATCGACCAGCAGGATCCGCATCGGCTTGATC  
CGCTCCCGCTGCACATCGGTGAGCACCGGATAGAGGTGGTCTGGATCATCCGGATAGACCCGGGAGAGGA  
TCAGCTCCACATCCAGCAGCTGGATCAGCTGGTCAATTGACCCGGTTCACGCCGTTACGAACACATTTGTG  
ACCGAGAGAGGCGGGGGCGATTTCGATATCGCGCCAGTTGCACTCGGTGATCTTGTGATGCCCCGTACC  
AGAAAGCCACAGGGTGCGGCGGAGTCGGTAATGATGATGAAGCAGTGGGGCATCTCTCTTGTGCTGA  
TGGGGCGATAGCCACCGCCATCGCCATGTGATCACCAGGAAATGGTGGAGCCGCGCATATTGGCAGCCCC  
CAACACGGTGGGTGCGAGTGGGGCATTGCCGTGAGCTGGGTGTAGGGCACTATCTCTTACCTTGAGG  
GTACCGATGGCAAAGGATTGTTTGGCTGAAAAGGTGAAAACAGCAACATGCCCTGGGATTGATTGGCTTTGC  
TCGTGATGGCAGATGTCTGTTGGTGCAAAACGTTGGCAGTCACTTACGGCTCTAGCATAAAGGATTACG  
GGGGGAATGGCCCTTCTTGTAAACGACCATCTGGCAAAAAACTGGACTCATTCAGCCAATTTAGTTCCG  
GCATTCACACCTGCGTCCGGTTATTGATCACCATCTCGCAACGCCCACTGCTGGCAGGCCGCTTGCA  
ATGCGGCCTCATCGGCATAACCCTGCTTGTGCCACCTGCGCGGTTTGGTGGCCCTTGGCAATCT  
GAGCGCCTGCAGCAGTTGCCACTGTTGTTGCAATCACTCCCTTCCACCGGCGCATCGGCTTGTGTTGCC  
CACTGTTGCAGAGACTCCGGTTGGCCATTGGCCAGCGCTTGGCAGCAGGCTTGCAGCTCACCGTGACCT  
GCTGGCTGATGGCACACTGTTGAGCTCATCCAGGATCACCTGCAGTCGCTGACCGTAGGCCCTTGCCA  
CTCTTTTGGACGTTGCCACAGAGCCAGCGAGTCGAGCAGGGCATCGAGCAGGGGCGTGGCCTGCAGCCAG  
CCAGCCTGCTGCGGCTGAGCCACGCGCAAAGAGACATTCAGCTGATCGTACTACAACCGCTGAGGGGGC  
TGAAGGCCGCGAGGGCATCGGCGCAGAGCCAGAAGCTGCTGCCTGCCGGCAGCAACAGATCATGTTGGCC  
CAGTCTCAGCAGCGCGGCCCGGGTATCCGCAACAGCTGCCCGACCGGAGTTGTTTTGCGGTTGCCG  
GCGTGCAGGCCCTGGCAGGAAAAAATGGTGATACTCGATGGCGTGCATGTAACCACTGATATGAT

GCTGCCTGGAGGTAACAAATATGGAAACCAGACGTAAAAAACGCTTCATTGCCGGTGTCTGTCTGCCCGG  
GTGCGGCAAGTTGGACAACATGATGCTGTATCTGGAGCATGGAGTCGAGAAGGTGACCTGCGTCGCCTGT  
GGCGATACCCAGGTACAAACGCCTGCTGAGGTCGACAAGCAGACTCGCGAGGCGGAAGAGGTGATCGGGG  
TGTTTCGCCCCCTGATAAGGGAACGGCGGGTGGAAATGCGGGTCTCTCGCTGACGCTGTTGCCGTTTTTTT  
CGTCACTCCGTGGCGCCGCACGGCATATGCGCGGCCCGCTTTTTAGGGTATTCTGAGCCCGTTTTTTTTCT  
ATCCGCAGGATCCTGACATGAAAGTAGCTCCTCTGAGCGTGGTTACGCTGGAATACACAGTCACCGACGA  
GCACGGTGAAGTCATCGACAGCACTGTGCGCAAAGAGCCGCTGGTCTATCTGCACGGCACCCGTTACCTG  
GTCTCAGGCCTGGAAGCCGAGCTGGAAGGTCGCGCGGTAGGTGAAGCCTTCGAAGTGACTCTGGCACCGA  
GCCAGGCCTACGGCGAATATGACGAGACACTGGTACAAGAAGTACCGGGCGAGCTGTTGACGGCATGGA  
AGTCTCCGAAGGGGATACTTTTGTGGCTGAAACCAGCATGGCCACCGTCCGGTGACCGTGGTTGAAGTG  
TCCGAAGAGTTCGTCGAAGTGGATGGCAACCATCCGCTGCGAGGCGTAACTCTGGGTTCAAGGTCGAGA  
TCAAGGACGTGCGTGTGCCACTGCCGAAGAGCTGGCTCACGGCCACGTTACGGTGCCGTTGCGG  
CCACGATCACGGTCATGACCACGATCACGGCGGCTGCTGTGGCGGTCATGGTCACGACCACGATGAGGAG  
CACGGCCAGGGCGGTTGCTGCGGTGGCGCTGGCCACGGTCACGATCATGGCCACGACCACGGTGACGACC  
ATGGTCACGGCGGCTGCTGCGGTGGCGGCGGTTGTGGTGGCAAGGGCCATCACCACTGATCACGGCCACG  
CCGATGATAAAAAACCCGCGATAATCGCGGGTTTTTTTATTGGCTGACAGTGATGCCGAACCATGTTGCC  
GACCAGAGATAGTGCCGATCAGTAGTGCGGCGGCGGGTCTCTTCGGCCATGCTGGCAATCTGGCTGGG  
TTGTACGCTTTGAGTTTGTGATCAGCAGCTGGATCTGGTATTTGAGCCGATCGAGTTCACGGCCCTGG  
GTGGTTACCTCGTCATTGAGCTGCTCTATGGTGTACTCCGCATAGGCGAGACGGGTTTCCAGGGTTTTCGA  
TGCGATCGTTAAGTTGCTGACTCATGGGCTTCGGGTCCTTACTTGATTGTCCAGATTTGCGCCAGACCA  
CTGGAGCTGGCACTGACAAGGTGGCTATTGTGCGCAAAAGCGACCGGTAGACCCTGCGCTGGGCGGTT  
TCACCTTGGGTTGCGGCGAGACGCGCCAGCTCTGCAGCAGGGCACCATCGCTCACTTGCCACAGGGAGAG  
CTGACGGGAAGGGGCGCCAGTGATGAGCCACTTGCCATCGTTGGCAAAGCGGGCGCTGGTGTAGACCTCG  
AAGCGGTGATCATATTGCAGCTGACTCACCTCCTTGCCGGTTTTTCAGATCCCAGATGCTGGCCCGGCTGC  
TGTCGGCGGTGAAGGCGTAGCGGCCGCTCGGCTCCAGTCTGGCCATGATCACCCGGCCACCATGGTTGAA  
CCGCCAGATCACCTGCCCGCTACGGGTATCCACAGATAGGCGCTGTAGTCGTTGCCGCCGTCAGGGCG  
TAGCGACCGTTGGCGGAGAGATCCACCGTATTGACCTGTTGCGGTGTGCCCGAGAACTGCAGGGCACGGC  
CGTTTCGGGTTGCGAGCCACTGAGTTTGGCACTTTCGGCCCGATCAGCACATAACGACCCTCGGCAGA  
GAGCGCGATGTCCCTCAGCCTGGATTCCGAAGTGTAGTAGTCCCTTGTGATTGCCCGCTGTTGAGCCGC  
CAGGTAGCAAAGGTGTCTGGGGTAGCGGTGACGGCATGGCTGTTGCCCTTCGGAAAAGCGGGTAATGAATA  
CCAGATCTTCCGAGAGTCGGATTGCTTCCAGCGCCAGCGTTGACGGTTCTGTTCCAGATCCCAGACGAT  
GATGCCCTGGCTGATGCTGGAGACGATGGCCTGCTTGGCCATCACTGGATAGATCTGCGGTGAGCAGACCC  
GTGCTGGCGAGGGTTATTTGCTGGTTGGGTTGGGAGCTCTGCTCGCAACCGGTGAGCATTAACAGAGGC  
TCACCAGATAAATGGCACTTTTTATCATTTTTGTATGTCTCACGCTTTTTGTTACCTGCGATCACGGCGTTA  
GTATAAGGCGCTTATCACGATAAACCTCTCATTTCACGATGGAACCGAGAGCGGTATTTGGAGTTTGGAG  
AAACTGATGAACAAATTTCTGAAGGTGTCCCTGTTGGCGGCGGCCGTTGCCGTGCGTCTGACTGCTTGCC  
AAAAAGACGAGAAGCCTGCTGCGGCCAATACCGCCGAAGTGAAGGCAGAAGCCAGCAAGCCGGCAGAGGC  
GACCAAGGCCGAAGCAAGAGCTTTGAAGAGCAATCTGGCTACGCAATTGGCCTCTCCATGGGTGCTTAC  
ATCGCCAATACCCTGGAGCGTCAGCAGGAAGTGGGCATCAAAGTGGACAACGCCGTTGATCCTGAAAGGGG  
TGACTGACGGTCTGGGCAAAGAAGCAAGATGACTGATGAAGAGATCCAGAAGGTAAGTGCAGGATTACGA  
CGCAAGATCAACGAGCTGACCAAGGCCAAGGCCGAGAAAAGACGCCGTTGAGAACTGGAAGAAGGGCGAA  
GAGTTCTGGCTGCCAACGCCAAGAAAAGAGGGTGTGAAGAGCACTGAATCCGGCCGTCAGTACGTGGTGC  
AGAAGATGGGCACTGGCGCAAGCCGAAATCTACCGATATCGTCAAGGTGCACTACACCGGTACCCGAC  
CGACGGCACCAAGTTCGACAGCTCCGTCGATCGCGGCGAGCCGGTACCTTCCCGCTCAACCAGGTTATC  
CCGGGTTGGACCGAAGGTGTTGAGTGTGCTGATGCGGCTGGCTCCAAGTTCAAGTTCTTCTGCGCTCCAAGC  
TGGCCTATGGCGAGCAGGCTGGCTGGCTCCATCCCGGCCAAGCCGCTGCTGGTGTGTTGACGTTGAGCTGCT  
GGCTATCGAGAAGCCGACTGCTGACGACGCCAAGAAGTAATCCCTTCTTGTAGTTAAAAACGGCTCCCTTA  
AGGAGCCGTTTTTACTTGTGTATTCCCTGCAATCGCGGGATAACAGAGCTGTCTTGGCGTTGGGTTTGGC  
CGGAAAATAAGGCAAAATAGATCGCAGAATCAAATACAAGGATGAGTCCAGTGGCTGAAAATAAATCGC  
GTGCTCTGCTGGTGAAGATAACCGTAGTCTGGCGGTGGTCTATGAACAGTACCTGCGCCAGGAGGGGTA  
TGAGGTGGTGTGGCCGACTGTGGTCAGCAAGCGTTGGCGCAGTTGCTGGCAAGTCTCCCCCGTGGTG  
CTGCTGGATCTGGAGCTGCCGATATGTCCGGTATGGATATTTCTGCAAATGATCACCGAACAGCAGTTGC  
CCTGCTCTGTGGTGGTGTATCACCGCCACGGCTCGGTGGATGTGGCGGTGGAGGCGATGCGCCTCGGTGC  
CTTCGATTTTCTGACCAAGCCGTTTACAGCAAGCGCTCTGCGCCACCGTTCGCAATGCCTTGAAACAT  
CAGCAGTTGAGCTCGCTGGTTGCCCACTATCGGGAGAAGTTCGAGCGCAGCTCCTTCTTCGGTTTTTATCG  
GCGCCTCCATGTGATGACAGGCGGTCTATCGCATCATCGAGAGCGCGGCGCCAGCAAGGCTACCGTCTT  
TATCACTGGCGAGAGCGGCACCGGCAAAGAGGTGTGTGCCGAAGCGATTACCAAGTGCAGTCCCCGCAGC  
GAACAGCCCTTTATTGCCCTCAACTGCGCCGCCATCCCCATGATTTGATGGAGAGCGAGATCTTCGGTC  
ATGTGAAGGGCTCTTTTACTGGCGCCAGGGGGATCGCAAAGGGGCGGCCAGTCTGGCCGATGGCGGTAC  
CCTGTTTCTGACGAGATCTGCGAGATGGACCTGGATCTGCAGAGCAAGTTGCTGCGCTTTATCCAGACC  
GGCACAGTGCAGCGGGTCGGCAGCGGCAAGCTCGAGACGGTGGATGTCCGCTTTATCTGCGCCACCAACC

GGGATCCGCTGGTGGAGGTGAAAGCGGGCCGTTTTTCGCGAGGATCTCTACTATCGGCTCCACGTCATTCC  
CCTCACCCCTGCCACCGCTGCGGGAGCGGGGCGAGGATATCCTGCTGCTGGCGGTACCCTGTTGCAGAGC  
TACGCCAAGGAGGAGAGCAAACGCTTCAAGGATTTTGATGTCGAGGCGGCGGAGTGTGCTCGACTACC  
CCTGGCCTGGCAACGTACGCGAGCTGCAAAACGTGGTGCACAATATGTGGTGTCAACGACAAGGAGCT  
GGTGAGCCCGGATATTCTGCCGCCACCGCTCAATGGGGTTCGTCCCCAGCTGCCGGCTGCGATTGCGGCA  
GCGGTGGCATCGGCTCCGACCGCCACCGGGGTGGCCAACGGGCAATTCGTCCGCTCTGGCTGGTGGAAA  
AAGAGGTGATCGAACAGGCCATCGCCAGCTGTGACGGCAATATTCCTAAGGCGGCGGCACTGCTCGAGAT  
CAGCCCCCTCCACATTTACCGTAAAAAGCAGGGGTGGGAGGAGTCCAATCGGGCCTGAACCATCTTGCCA  
GCAGCAAGGGCGGCTAGCGTGCCGCCCTTTCTATTTTGGGGATCAGAGTTTGGCGAGGCGCTTGAGGCGG  
GCCAGTCGCTCCCCCTCGTTGGCGCTGAACACGGGTCTTGCACAACAGAAACCAGGCGGGGAGAAGT  
ATTCCGCGGCCAGCGGATCGTCCAGTACCAAGGCATTTCTCCCCAGTCTCTCGAACAGATAACCATCCTC  
AGGTTTCGCGAGCCTCGGCCATATCGGCCCTTGAGCTTGCAGCTCTGCCAGCGCCTGTGGTGTGCTGACCC  
TGGGCCCGGGTACGGCGAGCCAGACTCCAGCGGGCGATAAAACGCTTGGCCGGCTGGTTATGTTGCAGAT  
GCCAGGCCAGGCACTTCTGTTGCTGGATTTTTCGCTCCTCGAAGCGGCTCAGTTCGAACAGGGTCCAGCC  
CTGATTGTTGTAAAGGGGGGCGAGCCAGCCGCGCACCTTCTCGTCACTGCTGCGTTCCGCCAGCTCCATC  
GCCAGTTGATGCCAGCGGCTCTGCTCTTCCAGCGGTGCGGCGATGGCGATCATGTGGGCGGCGTGCATGG  
CAAGATAGGTCTCCTTCTCCTTGGACCCCATTTGCCAGGCTTGTTCAAACAGTGGTTTGGCACTGGCTTT  
GTCGCCCCGCGAGTTAAAGGTGCGGCCTCGCTCCAGCAGGGCCCGGATCCGTGCTTTGGGGTTTTATCG  
GTGAGGCGAGGTTCTATCTCGTCGAGCAGCTGATGGGCTTCGGCAAACGGCGCTGCAGCGAATGGGTGC  
GGGCAATTTGGGTGAGCAACTCCAGTTTCGAGTTGCAGGTCGGCGGCGGCGCGCTTCGGGAAGAAGGTT  
ATGAAAACGCAGGGCGCTGGCGGCGGGATCCTGATAATCCACAGCGCCATGAAATCGGGCGGATTGTCC  
ATCTGGCCTCCTTGCTGGTTATCCTGTACCAAGATGCCTGCAGGCCATTTGTTGTACAAGGGGCGCCCG  
TCACAGAGCGCCCTTGAGTCATGTTAACGGCTGTGGCCAGTTGCTCAGTAGACCATAGCCAAGCTCATC  
AGCATCAGACCGAGGGCGGCAAAGGCCCCCTCCTTGATGGCGAGCCGTGGCACCAGCGCCTTGGGCAGGG  
CCGGAAACAGGCTCAGGGCAAAGCCAAGGCCCGGCATCAACCAGTGGAAATGCCGGATCGCGCAGGGCGGG  
ATCGGCGGCTCCATTGATGATGATCAGCAAAAATAAATAGGGTGAAGGCCGGCAGGATAAACCAGCGTACC  
CCACCGCGGAGACCGCCCGCAGCGGCGAAATGCGATAGAGCAGCATGGTCAACAAGGAACAGAACAAAAG  
GGGCGCAGCATAGAGCGGAGCGGGGTTCAATAACATCTTTCTGAAAACCTGATCGTCAAAAACAGGGAG  
TCCGGTGCAAGAGGCGCGGGATTTAATCATACTTCGCAAGTAAATCACCAGCAGCTCGGGTCCGGGCTGTG  
AAGAGGATCCCGGATAAAGGTTTGTAGCGCTCTTAATGCAACCAGAACCAGGCTGCTGCAAAATCCAG  
CCAGCTCAGCACCAGCAAGATCCAGGGCAGGGGATGCTGATGGCTTACTTCAACCAGTTCCAGCTGATCG  
TCTTGTCTTCGATTTGGGGCGCGCCCTGTGGCTGCCTGGCTTTGGCTGCAATTTTTTCTGGCGGCTCG  
CTTCGCGGGCCCGCGCCTTCATCTGTTTCTTGTATTCTGTCGATGCCCTTCTGGATCCCTTGTGCGATAAG  
TTGGGTCTGTTTCTTGGTCTGCCCCGCTTCTGGTTGGCACGGGCAATTTTCATCGCCTCCTGCTGGGTC  
TCGGGGGAAATCTTGTGTACTTGGCCATCAAATCATCTCCTCGGGCATGGCTGGCTGGGGAGTATGCCA  
TAAAGGCGCGTCCGGGTGGCGCCTCCTTGGTGCGGGAGGGGAGCAAGTGAAGTACTGCTCAACAAAAAC  
TGATAAATCAGCAGGAAGCCGGATGTTGGGCCGAAGATACAATTAGCAGAAATTTGTGAGTCATCGATGA  
AAAACGGTTCATCTGTTGTTTGTATATTGGCGCCCGACCCGCTGGACAGGGTTGATAAAATAACAAAACAA  
TCAAGGTGATATGAAATGAATAAATACTTTATCAAAGGCGGCGTGGCACTGGCCGTGCTTGTGCACTG  
ACTGGCTGTAATACCTCGACCAATGACACCGTTGCACCCTGCACCAGAAAATGTCTGCAAACTGACCATAC  
TGCACACCAACGATACCCATGGCCGTTTCTGGCACAACGCTGAAAATGAGTATGGTATGGCTGCCAGAA  
GACTCTGGTCGAGCAGCTGCGTGCCGATGCCAAGGCTGCTGGCAGTGAAGTACTGGTTCTTTCCGGTGGT  
GATGTGAATACCGGAGTGCCGGAGTCCGATCTGCAGGATGCCGAGCCTGACTTTCATGGCGATGAACAACA  
TTCGCTACGATGCCATGGCAGTGGGCAACCATGAATTCGACAACCCCTCAGCGTGTGAGAGAAGCAGCG  
CAAGTGGGCGGAGTTCCCATGCTCTCGGCAACATCTACGACAAGGCCAGTGGCAAACTACTTTGAC  
CCCTACAAGGTGTTCAAGTTGGAGAGCGGTCTCAAGTTCGCGTACTGGGTCTGACCACCGAGGATACCG  
CCCAGCTGGTGGATCCCAACAACGTGCAAACCTGGAGTTCCGCGATCCGACCAGCGAGGCGGCAAACT  
GGGCCAGCAGATCCGCAAGCAACAAGGAGGCCAATCTGGTCTTCGCCATCACTCACATGGGCCATTACGAG  
AATGGTCAGCACGGCAGCAATGCGCCGGGCGATGTAGAGATGGCTCGTGCCTGCGGCGAGGACTCTGG  
ATGCCATCATTGGTGGCCACTCCCAGAATCCGGTCTGTATGGAGCCGGGTACCACCAACAAGTACGCCAA  
TTTTAAACCGGGTGATAACTGCCAACCAGGACGCAAAACGGCACCTGGATCATGCAGGCCACAGAGTGG  
GGCAAGTATGTGGGCCGTTGCCAGTTTGGTACCAGAATGGCAAGTTGACCTGACCAGCTATGACCTGA  
TCCCCGTCAACCTGATCAAGCGCAACGCCAAGGGCGAGGCGATCGATGCCAACGGCACCTGACCAAGGA  
TCCAGCCAAGATGCAGTTCGTACAGGACGAGATACCAAGGATCCCGAGCTGTATAACACCCTGCTGGGT  
TATCAGGAGAAAGGTGAGCAAGAGTTGAATGTGCTCATTGGCTCGGCAGATGGCTTGTGGTGGTGGTATC  
GCAACTCGGTTTCGCAACAAGCAGACCAACCTGGGTGCCTCATCACCCTGCGACCAGCAGCAAGCTGGG  
TGTCGACTTTGGTATCGTCAACTCAGGCGGTGTGCGCGACAGCATCCCCGGCCGGTGATATCACCTACCGC  
AGCGTGCTGCTGGTGCACCCGTTTGGCAACACGGTCAACAAGGCTGTGATGAAGGGGAGCGATCTGGCGA  
CCTATCTGGGCCAGGTGGCAAGCAAGACTCGCAATACCGGTGGTTATGCCAGTTTGGCGGTATCAACAT  
GGCGGTAGATTGCCAGGCCAAGAGCGTCAATATCACCAGTATCGGTGGCAAGGCGTTTGTATCCGGCAGCA  
ACTTACAGCTTCGCGATCCCGAGCTTCAGCGCCTCCGGTGGTGCAGGCTATCCGAAGATCGATACCATCA

ATGCCGGTTTTGGTCGATGCTGCCGTGCTGAAGGAGTACATCGAGATCAAGAAGACCATCAACGTGGCCGA  
TTATCAGCCAGGCAATGAGGTGAGCTACCTGAACTCAGCCTCTACCGAAGGGTGTAAATTGATTCGTCAGC  
GGGGCGCATCGCCCCAGATATGATCCCAAAAGGCAGCCGGTGGCTGCCTTTTGTGCTTGTGGATGGC  
GGTTACAACCTCTTCAATCATCAATGACGATAGCCATCGCCTGTATGAGGTCAGGTGAGGGGATGAAATGA  
AAAGAGGCGGCCCGTGGGCCGCCTCTTGGCTAGTGACAATCTGAACCTTACAGCTGCTCGATACCGACGA  
TATGCCAGGGGGCATTGTTCTTGGCCAGATCGCGCTCGAGGTGCCACACCTCTTTGATATCTTCTTCGAC  
CTGCTCCTGACGGTCCATGTAGCGGCCGCTGAAGCGCACGCTCACCTGAGCCCAGTCGCTGCCGTAGTTCG  
GCGCGTACCAGCTGGGTATCGACGTACATCACTTCCGTATGCTGGTCGCCAGTCAGTTCGGCGCGTTCCGG  
CTTTGAGCTGCTCGAACAGCTCGGGGCTGACGTACTCGCGCACTTTTTCCAGATCGTTCCTTGTTCACAC  
CTCTTGCAGGGTGCATAGTGTATCGCGGGCACCAGCCAGGAAGCCGTTTCAATGTCAAAGCCCGCGGCAGG  
CGGAACGGCACATCGCTGTCGGCAAAGCCGGTGGCTTGTGGTGCCTGTTGTGGCTGTGGCGTGCAGACCTTGC  
GGCAGCGGATTGCGGTGGCTGATAGCCCGCATAGGCTGCCCTGTTGTGGCTGTGGCGTGCAGACCTTGC  
CTTGCAGAGGTACGGATCAGGAAGACGGCACCCAGCGCCAGCAGGGCGATCAGCAGGAAGTCCATTCCCT  
TGCAGACCTTCAAAGGCACCGCTGCCAGCAGGTAGGCAAACAGGCCGCCAGCCAGCAGGCCCGCCAGCA  
GGCCACCCATCATGCCGCTCTTTTTCGGCGGAGTCTGGGCATTCAAGTGTCCGATTCTTGTGTGCGACCGG  
TTTGGCCGAGGCTGGGCCGGCGCAGTTTTGTAACTTTTACCAAAGGATTTGCCCGCCGCAAATTTCTTG  
GCTTCGGCGTGAGGTGCCCGCAGGCAATGGCCAGGATCACGGCAAACAGGGTCAGCATCTTTTTCATTT  
TGACTCTTTTTACTCTCGTCTGTGGGTGGGGCATGCTCCGCTTTGGCAAGCTCAGCAAGGCGCATGGCAG  
GCTGCCTGTCCCTAATTGTGTGCGAGCTTGTATTCAATATCACCTCTGGCATGAATTATTCATGAAC  
GAGGTAGCCGCGATGCGGCGTCAAACAAGAGGAGTAAACCGGATGAAAAGTAGAAGATTGAGTCGCAAGG  
AGCGCAAATGCGAAGCAAATCAAATGGTCAAGGTAGAGCAGACTCTGGTTTGGCCCTTTATGATGGT  
ATGAGCCGCCAGATAGGGCTCGCCGTAGTTGGCTTTCTTTTTGTAATAATCCCGTCCCTTCCCGCTGCGG  
TTTTTATGTGTATGGCAGAGCAAGTGACGGCGAAAAAGACGCCAAGACACAACAGCTGAAAGTTCCCTCC  
CCACTCTTTTGGAGCCGAACAGTCCGTAAGTGGCGGCCCTGATGCTGGATAACGATGCCCTGGGATCGGGTT  
GCCGAACGGGTGATCGATCAGGATTTCTACAGCCGTCCGCACCGGTTGATCTTCCAGGCCATGACCCGCC  
TCTCCAACGCGGGCAACCCCATCGACCTCATCACCTGCAGGAGGAGCTGGAGCGCTCCGAACAGCTGGA  
AGAGGCGGGCGGCTTCGCCTATCTGGTGGAGATCGCCAAGAACACCCCGAGTGTGCCAACATCAACGCC  
TACGCGGAAATCGTGCCTGAGCGGGCGGTGGTGCGGGAGATGATCTCGGTCGCCAACGAGATGTTCAAG  
CGGGCTATGAGCCACAGGGCCGAACCTCCGGCATGTGATCTGGATCTTGCCGAGAGCAAGGATTTCAAGAT  
TGCCGAGCAGCGCACAGCGCCAACGAGGGGCCCCAGCCCTGAAGCTCATCTCGAGCAGACCGTGCAG  
AAGATTGAAGAGCTGTTCAAGACCCCCACAACGGGGTGACCGGGGTATCGAGCGGTTACAACGATCTGG  
ACAAGATGACCGCCGGTTTGCAGCGCTCGGACTTGATCATCGTGGCGGCCCGTCCCTCCATGGGCAAGAC  
CACCTTTGCCATGAACCTGTGCGAGCATGCGGCCCTCACTGCCGACAAGCCGGTGCATATCTTCTCGCTG  
GAGATGCCCTCGGAGCAGATCATCATGCGTATGCTCGCCTCGGTGGGGCGCATCGATCAGACCAAGGTGC  
GTACCGGTGAGCTCGACGACGAGGATTGGGCGCGCTCTCCTCCACCATGGGATTGCTGCTGGAGAAGGG  
CAAATGTATATCGATGACGCTCCGGCCTCACTCCGACCGATGTGCGCTCCCGTGCCCGTCCGGTGGCA  
CGCGAGCATGGTGGCCTATCCATGATCATGGTGGACTACCTGCAGTTGATGCGGGTGCCGGCGCTCTCTG  
ACAACCGTACCCTGGAGATCGGCGAGATATCCCGCTCCCTCAAGGCCTTGGCGAAAGAGCTGCAGTGCC  
GGTGGTGGCGCTATCCAGTTGAACCGAAGCCTGGAACAGCGGGCCGACAAGCGCCCGGTCAACTCGGAT  
CTTTCGTGAATCGGGCTCCATCGAGCAGGATGCGGATTTGATCATGTTTATCTATCGTGATGAGGTTTTATC  
ACGATGATAGCCCGGACAAGGGGATTGCCGAGATCATTATCGGCAAGCAGCGTAACGGCCCTATCGGCCG  
GGTGCGCCTCACCTTCCAGGGTCAGTTCTCCCGGTTGACAACTACGCCGGTCCGGCGGTTTACGACGAT  
TATTGATAAGTAACAATCATGGCAATCCTGTAGTCAGGATTGCCACCACCGCTCTGACCCGCTTGCATT  
TATTGAGAGGCAGCCAGCCAGAGCCTGTTTTCCCGGTTGACAAATATGCCGGTCCGGCCTTTCGACGAC  
ATAAGTGAGTGGCGGCTTTCGGCCCGATGAGGGGGAGACCATTTGTGCCCTCGTAAGGGAAAACCATGAA  
AGCGGCTACTGCCCAAATCAATACTGCGGCCCTTGCGCCACAACCTCGCCGTGGTCAAGCGCCACGCCCC  
GCTTGCAAGATCATCGCTGTGGTCAAGGCCAACGCCTATGGTCACGGACTGCTGCCGGTCCGCCGACCC  
TGGTGGATGCGGATGCCTATGCGGTGGCCCCGAATCGAAGAGGCGCTGATGCTGCGCTCCTGCGCCGTGGT  
CAAACCCATCGTGCTGCTGGAGGGCTTCTTCTGCGGACGATCTGCCGGTGTGGCGGCCAACAACTG  
CAGACGGCGGTTACACCTGGGAGCAGCTCGAAGCGCTGGAGCAGGTCGAGCTGCCAGCACCCGTGGTGG  
CCTGGCTCAAGCTCGACACCGGCATGCACCGCCTCGGAGTGCCTGCCGACGAGATGCCGCTTTTATCGA  
GCGACTCGGCAAGTGAAGAACGTGGTGCAGCCGTTCAACATCATGACCCACTTCAGCCGCTCCGATGAG  
CTGGTGCAGCCCACTACCCGCGAGCAGATCGATTTGTTGACCAAGTTGACCGCACCGCTGGCGGGCGAAC  
GGCCATGGCCAACTCGCGGGCATTTTGGCCTGGCCAGACTCCCACTGCGACTGGGTTCCGCCCGGTGT  
AATCCTCTATGGCGTGTGCCCTTCCCAACACGGTAGCGGCCGATTATGACCTGCAGCCGGTGTATGACC  
TTGAAAACCCAGCTGATTGCGGTGCGGGATCACAAGGCGGGCGAGCCGGTGGGCTACGGCGCAAACCTGGG  
TGTCAGAGCGGATACCCGGCTCGGGGTGATCGCCATCGGCTACGGTGACGGCTATCCACGCATGGCCCC  
CAATGGCACTTCCGTGCTGATCAACGGCCGCATCGTGCCGCTGGTGGGGCGTGTCTCCATGGATATGAGC  
ACGGTAGATCTTGGGCCCGGCGCAACCGACAAGGCCGGTGACGAGGCGGTAAGTGGGGCGAGGGGCTGC  
CGGTGGAGCGGGTGGCCGACGAGATTGGCACCATCCCTACGAGCTCATACCAAGCTCACCTCCCGCT  
CTTTATGGAGTACGTCTGATGTGGCAGCAGTGCTGCTGACGTTGAAGCCCCGCTCGCGGGCTTTTATC



TGGTGA CTGACGAGCTGGTGGCCAAGCTGCCGATGCTGGCGGATTACCGGGTCGGCATGGCCCACCTGCT  
GCTGCAACATACTCCGCCTCGCTCACCTCAACGAGAATTACGATCCGAGCGTGCAGCAGGATATGGAG  
GCCCATCTGCACCGGCTGGCGCCGAAGGATGCCCCCTACTATCGCCACACCTACGAGGGGCCGACGATA  
TGCCCGCCACATCAAATCCTCCCTGCTCGGGGTGAGCCTGCAGCTGCCAGTTCGTGATGGTCAGCTGGC  
GCTCGGTACCTGGCAGGGGATCTGGCTTGGCGAGCATCGCGTCGATGGCTGCGCCCCGAAGGTGCTGGTG  
ACCCTGCAGGGTGAATAATCAGGCTGCAACCAGCTGAAAAAATGGATAAAAAAGAGGGATGGCGCCGAGCC  
ATCCCTATTTTATTTCTGCGGTTTTATGAGCTATCCGCTTGGCGGTGGAGCTCAGCGCACCTTGAACGGC  
GTCAGCTCGGCCAGCGGGCTCGCGTCCATAAAAGGCTTGGCGCTCCTGACCGTGTGTTGAAGATCTTGAAGT  
CCTGTCTCGCGGGCGCTCCAGTACTCCAGACGCTCGCTGCCGTTTTCTCCGGTGATTTGCAGCAGACTCGC  
TTCGCGCAGGGCCACCACATATTCCGCTCGGGTTGATGGCGCAGAACTCGGCCAGACGCTCGTCGCGGGTC  
TCGCCCCATGTGGCCGCTGATACTGGCGTCCAGATAGTGGCGGTTGATCTGCAGCGGGAACAGGCCCAGCG  
CGGGCAGCACGGCGGCGTTGCAGACCCGGCATGTCGTTGGTGGTGGTGGTGGTGGTGGTGGTGGTGGTGGT  
ACCGGCGCTCCAGCCACATAGGGGACGCCCCGCTCACGCACGGCGCGCTGGATCGGCACGATCAGGCCA  
TTTTTCATGCAGCAGCTGATTCAGGCGCCAGGTGTTGCCGCCACTGATAAAGATGGCGTCCGCGCTGATTGA  
CGGCCGCGACCGGATCATCGAAGTGAATGCTGATGGTCTCGATCCCGAGGCTCTCGGTAAGTTGCTT  
GGCACGGGCATCCCAGTCCGTCGCGATCACCGCATAGGGGATGAGCAGAAATGCGCTTGACCTGTTTGCGA  
GCCAGCAGGCTTTGAACCCGATCTCGGGCCAGCCGAGCAGACCCGAAATTCGTTGGCTTTACCGTTGC  
TAAGCAGAAGCAGTTCATCAAATCGTTCCTCAAAGAGTGAAGCGGAGGAGGGAGGGCCACCGGATCCG  
CCGTGCGGGCCGATGGCAAGAGGAGGCATGCTACCACCATTTGGCGCGCGGTTCTGTGATCGCGAGGCC  
ATTCAACGGCCATGGAGGAGTTATGGATGTATAACTCAATGCCAAGTGGTGGATTAATAAGCAGCGCTCC  
GCTCGCTGCCATCGCCAATAAAGACCCCGCCGACGCGGGTTCATGGCAGAGTTAGTCGAGTTTGAAGATC  
GACCCACACCATGCGGTGATCCGAGCTGACCCCTTTGGCGATGCCGAGTTTCGCATCATAGACCAGGTGA  
TAACCGGCCTCGAAGCTGGCTGGCCAGAAGACGCCGCTCTTGACCGGTTGAGGTTGGCGGAGGGGATGA  
CGTGATCCAGCTGCAGCACGCTGGAGTTGGTATCCGTTCCGGGTTGGGGCAGTGAGGTTGCGTTTGCAG  
GTCAGCCCCCTTTGCTGACACACTCCGGACCCCTTCGCTGACCGGGATCAGGGTGCATTTGGTATGGCC  
TGATTCATCAGGGCGTTGTCCAGTAGTGCCTGAATGGCGCTCAGGTCGCGCTCGCCGTTTGGCGATCGG  
CGTTGAGATCGCTCGCATAACGAACCTTGGCGTTTTTGGCCAGCCACCCTTGGTGCCCTTGTACATCGGT  
CATGTAGCTGAGACCTTTGACGTAGCTGCTTCCAGAAGGCGATCTCGGCACGTTGTGCTTGCAGTGTGA  
CGCGCCGCTTGGCAAAGATTGGCGGGTCCGGTGGGAGATCAGGAAGTGAATCACCTTCCCCCTTCT  
CGGTCTTGATCCGTACCGGCACATCGGCGTGGTTCTTGGAGGAGAGCGGGTACTGCTGCCAGGCTGCGTC  
TGAATAACAGGCATCGCCACACTGGCGGCTGGCCGGGATCTTGACCTTGGGATTTGTTGCAGTTCATCGATG  
ATGGGGTTCTGCTCGCCCGCATATCCTTCCACTTGAAGTTCTGGAAGGTGCGGATCTGCTTGGTGTGCA  
TGGGGTATTTGGACATCACCGCAAAGGCGTACTGGCCGTGGTAGTTGCCAAAGCCCCAGGCATCGTCGGG  
GCCGCTGTTGACCTTGCCATCCAGATTGAGGTCATAACCGCTCATCAGGCCGTTGTTGGTGGCGAAGTTA  
TGCATCACCGGATAGCTGATGGCGGTCACCTCGGCATGCTGGGCGTGGGCCAGATAGTTGTCGTTGAAGG  
CTTTTCAGATCGGCGGTTGCTCTCGCCTTTGCCGTGTTGTCGAACTCGTTGAGCAGAAACACATCCGGACG  
GGTGCCTGGATGATCTCCGCCAGTTGCGGATCTGCTGCACGTTCTTGGCTTTGGTTTCCGTTGGCGCCG  
CTCAGGCTCCCTTCGGTGAGGCGGGCCAGCAGGGCATCCTGCTCGGTGCGGGTCAAGGCCAGCTCACCGG  
TCAGCATAACGGCGGCAGTGCGGTCAAAGAGAGGTTGAAGGTGGCAAACGAACCATGGGATCAGCTGC  
CTTTGAGTCGTTGTGCTGTTGTCAGCCAGCCAGCATCCCGAGGGAGATGGCGGCAGCCAGTAGGGTCTTG  
TTGATATTCTTCAATTGAATTAATCCGTAGCATCAATGAGTTATGCCTTCTGTGAGGCGGCGCCATTATA  
AATAGACGGCGATGCTGCGGGGATTTTGCTGAGCAAAGTGTGAGGATATTCACACCACATAGCTGGCGA  
TGATGAATGTTAGCAGGGCGATATGGGGTGTGAAAAACCGGTTTATACGCTGCAGTTTCCGGGATGAATG  
GCGCATTTCTGCGGTTACCGCACTCTGAATTTGTACACCACCATCGGCAGGCCGTTTCTGGATGGTG  
GATCACCTGTGCCGATAGTCATAGAGACGGGCGATGAGCTCAGGGGTGAGCACCTCGGCAGGCGTGGCA  
TCAGCCATCAGCTTGCCCGCTCCAGCATCACCAGCCGATCGGCATAGCGCGCCGAGATTGAGGTCGT  
GCAGCACCACCAGCACTGCAGTATTGCGGCTTGCCAGGGCGCGCCATGGTGGTGGTGGTGGTGGTGGTGGT  
TTTTAGATCCAGCGCCGAGGTGGGTTGCTGAGCAGCAGCAAGCGGGGTTGCTCGGCTTGTGCGGTCGGG  
GAAGGGGCTGCCAGATCTGCGCCAGTACCCGGGCAAACCTGTACCCGCTGCCGCTCGCCGCCGAGAGCC  
CCGGATAGAGCCGCTTGGCCAGATGCTCGACCCCGGCATGGGTGATGGCCCGCCGCTATCTCGTCACG  
CCGCGCCGCGGTTACTGTGGGGCAAGCGCCCATGGCGACCACTTCTCGCAGAGAAAGGGGAAGTTG  
AGGGAGGAGCTTTGCGGCAATAACCCGAGCCGGTGGGCAAGCTGGCTGCTGTCCACTGCTGGCGATCCG  
CGCCAAACAGGGTGAAGGACCTCATATTCAGCTCGCCGTCAGGCATTTGAGCAGCGAGCTCTTGCC  
CGCCCCGTTGGGGCCGAGCAGCGCGGTGAGGGTGCCGCTCTCGAGACTAAGATCGAGCCATCCAGGATC  
TGGCGCTGGCCACGGCGCAGGCTGAGTCGTGTGACGCTCAACAGGGGGGAGGAGAGTGAAGATGAGAGTG  
GTTGCATAACAGTCCGTATCACAGGGCGCGGGCCCTTTTACCAGCAGCCAGATGAAAAAGGGAGCGCCG  
AGCAGGGCGGTGATGATGCCACCGGCAGCTCGGCCGGGGCCAGCAGGGTGGTGGCAGCATGTGCGCCG  
CCAGCAGCAGGGCGGCGCCGAGCAGAGCCGAGAGCGGCAGCAACCTGACGTGGTTGGGGCTGCCAGCAG  
GCGCACCAGATGGGGCACTACCAGCCGACGAAGCCGATCATCCCCGATACCGCCACCGCCACCCCGACG  
CCCGCTGCGGTGAGCAGAATCAGGCGACGTTTGAAGGATTCACATTTGACCCCGATGACGGGCTCTC  
CTTACCCAGCAGCAGGGCGTTGAGGGGATGGCATCGCGCATAAAGAGCCACAGCAGGGCCCGCAGGGT

GAGCAGGGCCAGCGCCACATCGGCCGGTTTTGCCTGCTGCCAGCGTTCATCTGCCACAGGCTCAGGTTG  
CGCAGCATCTGATCGTCCGCCAGATAGGTGAGCAGGCCGATCACCGCGCCGAGAGCGCCGTGATGGCGA  
CCCCGGCCAGCAGCATGACGGTACCGGAGGTGCCGCCCTCACGGGTGCCGAGCAGATAGACCAGGGTGGT  
GGTGAGCGCGCCCGGAGAAAGGCGAGCAGCGGCAGCAGACCAACCCCGATGGTGGCTTGCAGCTGCTGG  
CCGAGGGGGGTCAGCAGCACGATGGCGAGCGCGGCACCGAGCGCCGACCGCCGGAGACACCTATGATGC  
CGGGGTACGCCAGGGGGTTGCGAAAACAGTCCCTGCATCACGGCGCCACAGAGCCCGAGGATCCCCCCCAC  
TGCGATGCAGAGCAGGGTACCGGGTAGGCGAATTTCTGCACGATCAGCAGTTTGTGCGACTCAATCCCCG  
CTCTCCTGCCCGCAAACAGCGCCCGCAGACTCTCGCCAGGGTGAAGGTCATGGGGCCGGTTGCCAGAG  
AACCGAGCAGCAACAGTGCAGTGCAGCGCCGTGGTAAAGGCCAGCAGCCAGGAGAGGGGTAACCGCATCAT  
GACCCCTGCTTGATCCACTGGGCGATCTGGTTCGCTGTTGCAGGGAGTTGAGGCTCAGGCCCCCTTGCA  
GGCGCTGGCCGTCGATGGCGTGAATGGCGTTACGCTTGCCAGCCGGGTGGCGGCCAGGGCGGGCACTTC  
GGCCAGCACCTTGCCCGGATCGGCATATTGCTGCCAGTACAGACCGCTGACCAGTACCAGATCGGGCTGC  
ATCTCGATGAGGGATTCTGCGGATACCGCTTGTAGTTGCGCAACTCGGCGACCGGATTGATGCCGCCCG  
CCAGCGAGATCAGCGCGTTGGCAGTGGTGTCCCCCGGCGATGCTGGTGGGTGGCCCTTGTGCAGCAG  
CAGGAAGGCGACCTTGAGCGGTTTGTCTGTTGGCTTGCGCCGCCAGCTGAGCGGCTGGGCTGGATC  
TCTGCCTTACGGCGATCGCCAGCGGCTTGTGCGCCAGCAGGCTGGAGAGGGTGTGATACGCTGGTTGA  
GGTTGGCGAGAGTGGCGCGGTATCCAGCACCTCCACCTTGACCCCGCACGGCGCAGTTGATCCAGGGT  
CGGGGCCGGGCCATCTCGTGCCTGCCACCAGTCCGGTGGGGGAGAGGCTCAGGATCCCTTCGGCGGCC  
AGCGCCCGGTGATAACCCACCTTGGGCAACCCCTTTGGCAAGGGACTGCTGACATCGGTGGCGATCAGGC  
TCGATTCACCGCCAAGGGTCAGAATGAGTCTGTGGTGGCGGGGCCGATACTGACGATACGCTCTTTCTG  
TCCGTGCGCGGCAACGGCAGAGAAGGGGGGCGAGTGAAGTGCAGAGCAGGGTGTGGCGAGGGCAAGACGA  
CGGCCCATGCTAACCTCCGAAGGGGTGAATGAAACGGGTGTGCCGCCGAGAAATCAAGGCTTTGGAAAA  
AATGCACTGATAATGATAGCAATTATCAATTGCATTGGTTTCGGTGCTTTATTAGAGTAGCCGCCATGAT  
AAACAGCGGGACAACATGGTCCCGCAAAGGGAGAAAAACATGAGCATTCACAAACGCATTCACGCGCTGCT  
GGAGCAGGATCCCGGCGCTCATCCGTCCACCTGGCGGCCAGCTCGCCATCAGCGAATGGGAGGTGGTT  
CGCCATCTGCCCGCCGAGCTGGTGACCCTGCTGCCCGCCGATCGCGCACAAAGGTCTGCTGGAAGATCTGG  
CCGACTGGGGCCCGGTGACCACCATCGTCAATCAGAAGGTTCCATCTTCGAGGTAAAAGCCCCCTTCCC  
GAAAGGCAAGGACGCACCGGTTACTACAACCTGATGGGCGCGACGGTGAGCTGCATGGTCACTCAAG  
CTCGACAACGTGGCGGGGATGCGCTGGTCAAGCTGTTTTCATGGGCAAGGAGGGGCACTCCCTCCAGT  
TCTTCGGTCACTCCGGCCGCTGCATTTTCAAGGTCTATCTGGGTGCGGACGAGAAACGCCAGCTGCTTGC  
CGATCAGGTACCCGTTTTTATGGCGCTGCGCCACAACCTCTCAAGAGGAAGTCAAAGCATGAGTGAACGTC  
AGGAGCGTCTGCAGAACCCTGCAACCCGAGATCCCGGAGTTTCGCGACAGCTGCCGCACCCCTGCAGCT  
CGCCACCGTAGATGGCGAAGGCAATCCCAACGCCAGCTATGCCCGTTCGTTGCTGCAGGAAGATGGCTAC  
TATGTGCTGATCTCCGAGATCGCTCGCCACGCCCGCAACCTGCAACAGGTGCCGCGAGTATCCCTGATGC  
TGATCGAGGATGAGAGCGGTGCCCGGAGCTGTTTGGCCGCAAGCGCTGACCTTCGATGCGGTGGCTGA  
AGTGGTGGCCCGTGACGACGCCCGCTGGAGCAAGGCGGTGGCGGCGCTGGAGGGCGTTTTTGGCGAGATC  
ATCAAGGGTCTCTCCAACCTCAAGGATTTCAAACCTGTTCCGCTCAAGCCGAGCAGGGGCTGTTGCTCA  
AGGGCTTCGGCCAGGCGTTCCGCGTCTCCGGTACGAGCTGGTGGATTTCGTCCATCTGGTGGAAAGGGCA  
CAAGCGCATCGACAACGGTGCCGAGCTCACCAGCCCCGGCCGATGCGCCGGTCTGACGATCCCTGTGACC  
ACGACAGCCGTCATAACAAAACGGGCAGCCACTGGGCTGCCCGTTTTTTATTCGGTTATCTCATCCGGCCT  
GTTCAATCCTGCCAGCTGGCCTTGTGGGAAAAGCGCGACGATCGGCGTCAAGTGGCTGTTTCGTTGCACT  
CTCCCCGCACCTTCCAGGAGGTCTGGCTCAGTACGATGTATCCCTGGCGGCAATACTGCTTGGTTCGCCAG  
GGTCTCGGTACGAGGTTCTCCTGTAACGCCTCTCGCTGTTCCAGCAGCCGCTGGCTCTGGGCGCCGAG  
AGACCGCGCGCAAGGTTTTGTTGGGCGAGGCTTCAAAGTGAACGCTTGTTCCTCCTCGTTGATGT  
GGTTCAGAAACAGGGGGTCCGGCCCGTCATACTTCTGTCCGGCAAGCTGGAGCAGGCCGACAGCAGGGG  
AACAAATCAACAACAGGGTGGCAGACAACAGGCGCACGACAGACTCCAGTGAGAAACAGGCGAGGCTCGC  
AGATTAGCACGGCTGCAGGGCGGGTGTACTGCCAGCAGCTCGTCCGGTGGTGGAGCAGGGTACATTGCGC  
CCCTCCGGCAGGCTGAGGTGGCGCCACATCCAGTGTGCTCGGTGATCTGGGCGCGCTCAGGTGGG  
GGCGATCGGCGGTGGTGTGACCATCGCTCAATACCAGCACCTCGTACCCATGGGAGGCGGCACTACGCAC  
CGTGGTGTGACGCAAAAATCGGTGGCGCAGCCACAGAGAATGAGTCGATCGACCGGCTGCTCGGCCAGC  
AGGAAGGCAAGCTCGGTATCGAGAAAGCTGTACAGGCCGTTTTTGCACACCCGGCTATCTCCTTTGGCCG  
GTTGCAGCGCACTGTGCAACTGCCAACCCGGTGTGCCCGTTCAGTTCGGTACCGGGGGGCGAGTCATG  
CTGGATATAGATGACCCGTCCCTGTTGCTGCTGACATGGGCCGAGCCCGATTGATATTGGCCAGCACC  
TGCTCCTGGCGGTAACGGGGCTCGTTGAACAAGCCTTGTGTCACATCGATGATCAGTAACACATCCATAT  
TTTACCCCGCGTTTTCTTGAAGATTAGGGTTGCAGCCACTGGCTGCAGTACGACTGCGGGATTGATGCA  
GCGCGCCCATATCTTGTTCATCTCGTCACTGTTTTGCCAGCGCTTAGGCGAGCGGCATGATGGTTACCTG  
CACATCGGCTGCGGGATCTGCAACAGAGGTCTCATCTGTACGGGGGACGACCAGCGCTACCTTGAGGGCC  
GGATTGCGGCTGGCGATGCGACTGGCGAGCCCAAGCCCCCCTCGACGTGGAAATTCGCCGGCGATATGCA  
TGATCTGCTGGCCCGGGTGTGGCGAGATAATCCACCATGCTCTCGGCCATGGTGTGATCCCAACTGGT  
CTGGGCGGCGAAGCGGCGGGCGTGTGCTGTCGGCATCGCCATGGTGCATGGAAGCCATAAATTTCTGGCGA  
TAGGGGTATCCCCAGCGTCAAGTTGGCGGGCCAGCTGGCTGCGACGCGACGCGGGCAGTTTGTGAGCC

ACTCAGCCCCCTCTGACCGACACAGCTCACCAGCGGTTTGGGGCGTTGGCGGCGATCACCGGCATCTG  
GTGAGCCTTGGCAAACCTCCACCAGCGGGCGGTAGTCGCTCGGATAGTTGGGCCAGGCGTTGCCTTCGCGG  
ATCAAGGCCGCTTACCAATCTGGTTCGCCAGATAGGCATCCAGCGTCTTCTGATCGGCGCGGCTGAACT  
GCTCCATGGAGAGGGCCAATGACCGCCCCGTGCCGCTGGCCAGCAGTGTGGAGCCCCGTCAGCAGGCGCGA  
TTGCAACAGATGCACGGCGGGATGGCTGTGCAGCTCGCCCACCAGAATGATGTCGGCGTCGGCAATGCGC  
GCGATCGCCTGCTCCAGCGTCAGGTCTGCGTCTCCCTCTCCCTCGCTGCTTAGCTGGTAGTCATAGAGCG  
TCTGCAACTGTGATGACTGGGTTCGGTGGGGTGGGCGACAGGCTGCCAGTAGCAGCGGCAGGGCGAG  
CAGGGGAAGTCGTCTAATCATGGGATCTCACGGCTGATATGCCCGGATGCCGGCGCATCTCGGGGGGCTA  
ATAGAGAATAAGGGCAACACAGGGCGACAGTGTAAAACCAATTTGGTTCAAAACAAATGAGAATGATTTT  
GTTTTCTGTGATCTTTGTTCGGGAGCCGGGTAATATGCGGTCTGTTTGATAATAGTTCTCAATAAGGATT  
CGCTGTGACCCATCATAACGCACCTCTCTGTTGCCCTCGCCGTGGCAGCCGCTCTCTTCCCAGGTC  
TTTTGCTGCCACCCAGAAGGCGGATGAAGTCGTGGTTCAGCGGCTCACGGATGGAGCAAAAACTGGAAG  
ATGTCTCCGGCCCCATCTCGGTGATCACCGCCAAGCAGATTGAAGAGCAGGTCGTACCAACGTTGCCGA  
CCTGTTCCGCTACGAACCCGGTGTGACCGTGTCTCGGCGGTCAGGGTGTGCGCAGACCTTTATCATCCGC  
GGCATGGGGGAAAACCGGGTCAAGGTGGTGCAGCGGTCGCGCCAGAACGATGCCACAGCAAGGGCG  
GTGTTGGCCAGAGCTACTTTGATACCGATATGATCAAGCAGGTAGAAGTGGCCAAGGGGCCCCGCTTCTGC  
CGCTACGGCTCCGATGCGCTGGGTGGCGTGAATGCCATCACCACCAAGGATGCCAGCGACTTCTCAAG  
GGCAAGGATAGTTATCTGGATGTGACCAGCGGTTATGCCTCAAGCAGCCACCAGAAGATGGCGGGCTTTA  
CCGGCGCTTTCGCGACTGGTGAAGTGGAGAACCTGCTGCGCTACACCTGGCGCGATGGCGGTGTGACCCA  
GAATTTGACTCCACCAAAAACGACTTCGATATCGGTACCCACGCCCTGCTGCTCAAGAGCAAGTGAAC  
CTCTCCGATGAGCAGTTCTCAAGCTGACCGTTGACTACCTAACCGATGGCGAGGAGCCGGATGCGGTCA  
AGCTCAACAAGGTCGGTACCGGCACCTGCCCGTGTCTTTGATCAGCCATCACCAGCAAGCAGACCGACAA  
CCTCTCAGTGGTGTGGATCACGGCATCGCGCTGAATCAAGGCTGGGCCGATCGGATGGATAGCAAGGTC  
TATTTGCTCGCACCAAGCAGACGCTGGATCAGTACGCCTCATCCAAGTATCCGGTCAGCCCCGGCAACC  
CCTATGTGACCAAAAACCTCGCTGGATCACAACGTGTTGATCAGAAAGCATCGGCGCCAGCTGCAGTT  
CCACAAGGCGGTTCGCAACCACCGCCTGGCTTGGGGGGCTGAATACGAGCACACCGACAACGAACGTACC  
CGTTACAAGGGGCGCAGACTCCCAGTATTTGTCGGCTACAACGAGCTGAGTTTCCCGGCTACCACCA  
GCGAGCCAGGCGCCCTTGGCCCTTTGACGAGATCAAGTTTGGCGAGCGCTGGGTACTGACCCCGGTC  
CCGTTATGACTACTACCGGATGACCCCGGACACGATCCGGCTACACAGGCGACAAGTGCACAAGTTC  
TCCGAAGGGGAGTTGTACCCAAGCTGGGTCTGGTGTTCGAAGGCCACGAGGCGGCCAACCTGTTCCGCC  
AGTACAGCCACGGTTTTCAAGGCCCCCATGTATGACAGCGCCTTCTCCACCCTGAACCATCAGGCGTACGG  
CTATCGCATCGAGCCCAACCCGAACCTCAATCCGGAGAGCAGCGACGGCATCGATCTTGGCGTGCCTGGC  
AGCAGCAACGGCTTACGCTATGAAGTAGCCAGCTTCTACAACAAGTTTGAAGACTTCATCGAGATGGTGG  
AAGTGGGTAAAGAGGGGCGCACCGCCGTCTACCAGTACCAGAACCTGAGCAAGGCGACCACCAAGGGGT  
CGAAGCCAAGGCGGATTACTGGCTCAACGACATCGTCAATGTCTGGGGCAACCTCGCTACATCGAAGGC  
AAGGATGGGGATGGCAACTACATCAACAGCCTGAGCCCCTGAATGGTCCGTCGGTGTGCGTCTGGAAC  
AGTCCCAATGGAACCTCAACACCGCGCTGCGCTTTGCTGACGACATGGACAAAGTCCGTAAGACAGCAA  
AGGCAACGATTACGTGAAGAGCGCCGGTGGGGTGTGGTAGATATGTACGCCAGTTC AACCCGATGACC  
GACCTGCAGCTCAACGTTCGGGTCTTCAACCTGTTTGAACAAGGAGTACACCAGCTACGAGCGCATCGCCG  
GTCGTGATGCAGGTTCCGACAACAGCCTGATGACCGAACCGGGTTCGCAACCTGAGTGCACGGGTCAAATA  
CGTATTCTAAAAAGACAACACACGCAGTGTCTCGGGCTGTTGCCCGCACCGGATCCCCGCCCTGACAGG  
CGGGGATTTTTTATACATGTAGCCAGGTGTGAGGTGACCCGCTCACACCATGTTATTCATTGGCTTCGCC  
TTTTTCTTTGTGTTGGCGAGATATTATGCTATTTGATTCATGTTAATGACATTTAGTAATCTTTACAA  
TGGGTGTGCCTAGCTTTTGACTTCGACATCGAATTTTTCTCGACACCGCCGACGCTCTTGAGCTGATT  
ACCCGCTTCAATGAGGCTCTGACGAGCAGACCATAGTGGCCCTGCTGCGTACCCTTAGCCAGCAGATGG  
GTTTTGACCACTCCGGCTGGGATTCATCTTTCCAGTTCGATTTCAGCGACCTGACGTGAGGATTTTCAA  
CGGCTGTCTGCGGAATGGGTACAGACCTATGACAAAAAGCGTTTCTTTACGGTAGATCCCGTTGTACGC  
AAAGGGATGAGCCAGAGTACCCCTATCTCTGGGCCAACCTGATCACCAGTGTGCGCTCAACAAGATA  
TGGCGGGGCTTGAGGTGATGTTGCAGGCCCATGAGATGGGATTTGTGCGACGGGATCACGATTCCCTGGCA  
CGGGCCGAATGGCCATGTTGGCTTGTGTCATTGATCACACGCACTACACGAACTGAGCATCAGTGGCTG  
ACGGCTACTCCCTTTTTAAGCTGGCTGGCGGTGCATGTCTTCGAGGCTGTGGCCCGTGTGTTGCTTGGCCG  
TGAAGCTTCTCAGGAAGAAGTACCCCTACGGGAGCTGGAGGTGTGCCAGTGGGCTGCCGAAGGCAAGCA  
AGTTAGTGATATTGCCAGATCCTGGGGATCAAGCCAAGAAGTACCTTTTCTATCTCGAGCGAATCGCA  
GAGAAGCTGGGGGCGAGCTGCAAAAATCAGGCAATATCCTGGGCGCTGATGCAGGGGTTGTCAGACTAA  
ACATTGATACGGCACAGATCGAAAATGTGGATGATAACAGTGCATAATGCTTCTAACGCAAAAATGTTGC  
TCATTACGTAGATGAAATTAATAAAAATGTGAGTTTTGCCAGTGGGTGTGATGATATTGCGCAAGTTATT  
GCATCTATGCGCGTAGAGAGAGAACAGATGTAAGGTAATTTGACTGATAAATAAAGAATAAAAAAGTGGCA  
TGGTTCGCTGCTAAAGGTTGGTTCGAGTGTATCTCGTTTAAACCAATCTATTTAGGAGCATACTCATGCCAA  
CTCCATGTTATATCAGCATCGAAGGTA AAAACCCAGGGCAATATCACCAGGTCGCTTACCCTCCGATTC  
CGTCCGCAACATCTTCGTACAAGGCCACGAAGACGAGATGCTGGTACAAGAGTTCCAGCACGTCGTACC  
GTCCCGACCGACCCGAATCCGGTCAGCCTGCCGGTCAGCGTGTCCACAAGCCGTTCAAGTTACCGTTG

CGCTGAACAAGGCTGTGCCGCTGATGTACAACGCACTGGCTTCCGGTGAGATGCTGCCGAAAGTGACCCT  
GAAGTGGTACCGCACCTCCGTTGAGGGCAAGCAGGAGCACTTCTTCTTACCCTGCTGACCGATGCCACC  
ATCGTTGACATCGACTGCCAGATGCCCCACTGCCAGGACCCGGCAAAGTCTGACTTCACCCAGCTTATCC  
AGGTCTCCATGGCTTACC GCAAGATTGACTGGGAGCACACCGTTGCCGGTACTTCTGGCGCGGACGACTG  
GCGCGCGCCCATCGAGGCGTAAGCCTTGCTTCCGTACTTTGGTATTCTTGTAAAGTAGTTATGTGTCTTT  
GAGCCGGTTGTTCAACCGGCTTCTTGTACTGTGCATTTTCTCCAGCCTGGCCAATGGGTTGGCTGGAGCT  
TTTCTGTTTTGCCATCCCCCTGCCGGGTTTGTATGCCCTGCCGGTGAGTGCGGAGGGATGGCAAAGCACT  
AAAGGGTGTCTGTGATGCAGACCCGAACCGCTCGTAACCTGTTAACCCCTTATCTCTGGTGGCCCTTG  
CGGCACCGGAGAGGCGGTAGCGTGGCTGCGCGGTGAGGGCGTGTATGGGCGCGAGAGTTGGCAAGGGCTC  
AGGCATGCTTGGCCGTGACAAGAGGGGAAAGCCATGGCTAATCAAACCGGATTGCAATTTACCCTCAAG  
GTGGGGCGTTGCCGAGAGCACCTTTGTGGTGGCCAGTTTTCAGCTGGATGAGGGGCTGAACCGGCCGT  
TCAACCTGCAGCTGGAGTTGGCCAGCAGCCAGCCGATGTCGACTTTGGCGCCGTGCTGGACCAGCCATG  
CGAGCTGATGGTGTGGTACAACGGCGAGCTGCAGCGCCGGTCTGCCGGGTTGTGAGCGAGTTTGCCAA  
GGGGACAGCGGCTTTTCCGCTACCCGTTACAGCCTGCAAGTCAAACCGGCCCTGTGGCGACTGGGCCTGC  
GCCAGAACTCCCGCATTTTTTTCAGGCGCAAAAAGCCGATGAAAATCCTCAGTATCCTGCTGCAAGAGCACGG  
CATCACCGACTACGCTTTTCCCTGAAAAACGAACACGCCACGCGGGAATACTGCGTGCAGTACC GCGAG  
ACCGACCTCGATTTTCAATGAACCGCCTTGCTGCCGAAGAGGGGCTGTTCTACTTCCACGAGTTTGAAGCAG  
GCAAACACCGCATTGTGTTTTGCCGATGACGCGGCAGCACTGACTGCTGGCCCCGAGCTCTTCTTCAACCT  
CGGCAACCGCTCGCTGGAACAAGGCCCTTACGTGCGCCAGTTCCACTACC GCGAAGCGGTGCGACCAAGC  
GATGTAGAGCTGAAAGATTACAGCTTCAAGACCCCGCCATATGGCTCTCCACAAAAAGCAGGGGGCTG  
AGCTCGACCATCAACGGGACACCTACCAGCATTTTGACTATCCGGGTCGCTACAAGCAGGACCCGAGCGG  
CAAGGCGTTTTGCCAGCATCGGCTCGATGCGTTGCGTAACGATGCGGTGGCGGGCAGTGGCAAATCCAAC  
AGCGCAGCGCTCTTGCCGGGTCAGCATTTTTTTCATTGACCGAACATCCGAACGCCAGCCTCAACACCGAGT  
GGCAAATCGTTTCATATCCGCCACACCGGTGAGCAACCCCAAGCCTTGGAAGAAGAGGGCGGCAGCGGCC  
GACCGTCTACCACAACGAATTTGGCGTGGTGAAGGCGAGTACCACCTGGCGCGCTCGCATCGGCAGCCCC  
GAGGCCCCCACAAGCCGATGGTGGATGGCCCCGAAATCGCCATCGTGGTGGCCCCGAGGGGGAGGAGA  
TTTACTGCGACGAGCATGCGCAGGGTGAAGCTGCAGTTCCCGTGGGACCCTACGGCAGCTCCAACGACCA  
GAGCTCTGTGGGTGCGGGTGAGTCAGGGCTGAGGCGGTTGCCAGTACGGCATGATGGCCATCCCGCGC  
ATCGGCCATGAAGTTATCGTCTCGTTTTCTGGAAGTAAACCCGACCAGCCCATCGTACGGGTGCGACCT  
ACCACGCCACCAACCGGCCACCTTACGACTTACC GGCAACAAGACCCGACCCGCTGCTACGCACCGAAAC  
TCACAAGGGCGAGGGCTTTAACGAGCTGCGTTTTTGAAGACCAGGCGGGGCGAGGAAGAGATTTATATCCAC  
GGTCAGAAAGACCTGAACGTGCTGATAGAGAACGATGCGGCGTGGCACATCAAGCATGACGAGCATCGTG  
ACATCGACAACGAGCGGGTGACCCGATCAGAAAAGTGCCGGGCAAGGATGGCGCTCCGCCAGCCTTGG  
TAATGACCACCTGACAGTTGAAGGTGAAAAACGCGACCACATCAAGGCGGACTATTACTGACGGTGGAT  
ACCTCCCTGCACCAGAACTGGGTCAATCCCTGTTGGTGGAAAGCGGGCGAAGAGGTGCATATCAAGGTGG  
GTGACAAGCTGGTGTGGAGGCCGGCTCAGAGATCACCTCAAGGGGGGAGGCAGCTTTGTGAAAGTTGA  
CCCGAGCGGCATCAAGCTGGTGGGCCCCGCCATCAAACCTCAATGCCGCGGCAGCCAGGAGCTGGCTCT  
GGCTGGGCTGGTCAAGCTCCCGTTACTCCCAAAGGGGTTGAGGTGGTCAAAGCCCCGGAATTTGGTTGAAC  
TGGTCAAGGCGATTGCCACCGAGAAGGCTATGGAGGCGTTGCTCAAGGCGCTGGAGCCCCGATAGCGATTA  
TCAGCCCTCTGCTTGATGTTGACGAATAACTTAGGATTGAATGACAAAAGATGAAAATCGTCTATCCCAT  
GCAACTGGCGGGTGAAAATGGCTCCGGCGAGATTGCATCCCTCGATGAATTTATCAAGAAGATCAATGGT  
CTCAAGAGCGGTACCTTCCCGATAGGCCGCAACCGTATCTGGCACGGTGGTATCCACTTCAGTAAAAGCG  
GAGGCTGGCACCCGAGCGGCGCAGTGCGCGGATTGCTGACGGGGAGATTGTGGCTACC GACTGGCGAC  
TAAACCAGCCAAGGCGACCCGTAGCTCCGAAAAGGGCAAACAGAGGGAAAAGATTGACTTGTATACCTCC  
CCTTCGTTTTGTCTGTTGATCGTACGCTACGAAAGCCGGTGAGCAGAGCAAGAATCAGCTGACCTTCTACA  
GCCTCTACATGCACATCGCCTGTGAGAACAGCTACAACAGTCCCGAGGCTGCGCGAGTAAACGGTCAAGGG  
GACAGGTGTGTCCACCTATGAACCGGTGGCGCAGGGAGACCCCTAAAGCTGACACGCGGACTGTCGGGT  
AGTAGTCTGTGTATGCCAAAACAGGTGCTGAGGTGAGGTTGCTCCAGCAAACCCCGAGCAACCTGCTCA  
ACCACAGGGATGAAGCCCACAATTTTCTGGTGCCTACGTCGATGAACCGAACAGCCCCGTTCTATAT  
CGCACAGAGCCAGTTACAGCATGAATATCCGCAAAAAGCCGACGTGGATGACCCCAACGAAAGGCAAACCG  
GCCCGCCACAAGGTCCCGAGTAATACATGGTTACGTA AAACTGCTGACACCACAGTGGGTAGCATGGGGC  
TGCCTGCTGGCAGTGAGGTGGTGGTATCCACTGAGCCACCACAGATGGTGAACCTCAATGGCGGCACGAC  
TGAGTTTTCGTAAGTACAGGTTTTTCAAGGTGGCAGCGGCACTGTCAAAGACAGTGCCAATCAGGTGATG  
ACCAATGCCAGCAAAGGTGCCGTTGGCTGGCTGGCAAAAAGCAAGATGGGGGCGGACTGACCGCAGAAC  
CGAGTATCCCTGTGCAATTCAAAGACGATGCGGTCGTTGACCGCAGCGCAAATCCGATACC GGTGCAGGC  
CGGAGAGATCATCGGTCATTGGGGTGAGCATGAGCTAGTAACTGCCGGTGACAGCGGTTTTCGAGAAAAGAC  
GCAGATAGCAAAGCCGTGCACTTTGAGGTGTTTTGTGGCAGAGAGCGACAAAACAGGCGCTTGAAGATTGCA  
TCAATAACAAGGCGGAGTAACCGGTGGCCAAGGCTACCTGCTGGTAAAGAAAAGAGGTCACTACCTATCG  
TCTCACCGAGCATAGCAAGCATGGTTTTTTCAGAGGTTGCCAATTTTGGGCCGCTGGTCTTACC GTTGGCG  
GTGAAAGAGTCTGATATTGTCACTCACGGTGCCAACAACCTTTGTGAAGGTACGTGAGCGGACTGCTGCCG  
ACGGGGAGTTGGCTGGCGAGTTCGATTGCAGGGCGGTGATGTCGAAGTCATCAGTCAGCACGACTGGCA

CAAGCTGGGCGTCAAGCTGGTTCGATGGCAGCAGCGATGACGATGGATTTTTGGACAAGGCTGATACCGAG  
AGTGAAGAGCCCGCAGCAGAAAGAGGCGAGCAAATTTTTTAGTACCCTCTATGACAAGCTGGTGACAGACG  
GAGACAACGATGGCACCCCTGAGCGGCAATGACATCAAGCCGCGCTGGCCGATGAGGAGTTGGCGGGCAA  
GTTGCGCATGTTGTTTATCAAGCACAAAAGCGAATGGGTAAAGCCAGGCCAAGAGTGGCCGCGCTTAAAA  
CAGGAGTTGGCTAAGCAGCCAAAGCTCTATGAATATGCCATGCAGGTACACAACAATATGGCGTGGATGG  
AAGATGCCAGTAAGATATTGGGTGATACCAATCCTTGGTTTATTCATCCGGCAGGGATGATAGAATTGGT  
TAGAAATCAGCATGGCTTTAATATTGATCGCCAGTACTTTTTGAAAAATATAAAGATTTTTTACCCTCTA  
AGTGAGAGCCAAAGAAGAAATATATCATTGATGTTTGTATGCAATCGAACAGTATTATTCTGATAATGTGC  
ACTCTTGCAATGAACGAAAAGTTGCATATATGTTAGCCACTGCAAAGTTAGAACTGGTGATACTTTTTGC  
TCCAATATCAGAGGTTGGGGGAAGGAATTTTTGAAGGTATGTATGATTATTTCCCTTGCTAAAAATGAA  
GATAGAAAAAAGTGGCAGTCGCGCTTGGCAATATTCAGCTTGGCGATGGCGTCAAATTTTCATGGCCGTG  
GTTTTGTTTCAGCTAACAGGTCGCTCCAATTATGATAAAGCCGTAACCTATTAGGTGTTGATTGTCTGAA  
TTCTCCAGAATTGGCCAAAGACCAAGTTATTGCAGGTAAAATTTATGTGTTGGGGTATGAAAAACGGAATT  
TTTTACCGGTAGAAAAGTTAGATCAATATTTTTTTCAGCTAGTAAAAGCAGACTATTATAATGCTCGTAAAAATA  
TAAATGGGTAGATAGGGCGCAAGATATAGCGGATTATGCTAAGAAATATATCCTCATGTATTTTAAATTC  
AAGGTAAACACATGTTTTATTACGAATTATGTTATGTTTATGTGCATTTTGGGCCCTCAGTCTCAGTTTT  
TGCTTACCTAGCTTTGATTGTGGAAGGCAGAGTCATCAATAGAGAAGATGATATGCTCTGATAAGGTT  
TTGTGAGAATTAGACAGCTCTCTATCCACTCAATATAAATATGTGCTGAAGACCAACCCTAGCTCGGCGT  
CTTCAATAAAGGATGAACAAAGGACGTGGTTGCGTGAAAGGAAAAAATGCACCGATAACAGCTGCTTGAT  
TTCAATGTATGAAAAACGAATTAATTTTTTTCATGACAAGGGAAATGCTAAGTTAAATGTTGTGTTGTCA  
CCACCAAACGTTATTGTAACATTGAGTGGCCAACGCTCTGTTATTAAAGATGTAGCACCACAGGGAGGAA  
CAACATTCTCAACTTTAATTGATGGTGAGAATAAATTTTTCTGTATGCACAGAGTATCTTGCATCTGCAAT  
AAAGAGAGTTGAGTGAATGTTTTTAAAAGGATTGGTGAAAAAATATTTTTGGGCTTTACATAGTGAAGCT  
AAAAGAGACTATGATTCATTTTTCAGCTATTTTTCATGAAATTTGGACGACATGTCATACAATGAAGAAGA  
AATATAACGTCGCAAAAAAATAGATGGCTATCAATGTCTTTATAAAAAATAGTAGTTCAACAACCAATGT  
GATTGAAATTGATCGAAATGGCGTGTAGTAAAAAATCCAAGTTGAGTCTTTCTAACGAAGATTTTTTAT  
AGCAATCTTGACAGATTTCACTTGATTATTTATGATGCATCTTGTAAATTAATAATGCATTTTCAATATTT  
GAACGTTACGGTGAGTTGTTAACTTTTTCAGTGATTTGGATGATGTCGAAAAATAAAAAAAGTACATC  
ACCTAATACCTTGATGTGGGTAATTGTTAATTTTCAAGGTAAGTTAAAGAAGAGTCTCTGACAGAGAC  
TCCTCTTGCTTCAATATGAAACTTAGTTCAAAAAAAGCAGTTTTCTCTATGTTTTTATGACAGTTCAGAT  
TAAATTTTACAATCAAGCTCTGGAGCCTTGTAGGTGCGGGAAATATCTGATTTTTTTTTTGTGGGTGGAGT  
TAATGTCATCTTTGCTTTTTTATATTTTTGTTGTGCTTTTTCTTGTGCTGCACAATCAGAGGCTTCCATTCA  
GGGTGATGAGGGGAAACTATTTTTCGTAGACAAGGTTGATGATAACCATCGGCGACGATGTTATCGCGGTA  
TTTTTTGATAACAATAAGAGTGGGAGGTATTTTGTGATTACCTTCTTATTTGCTTCTAAGGGGGAA  
TACAGGATTCCTTCTACTTAAATACTGATAACTTAACGAGTAAATATTTTTGTTGTTTCAAGGATCACA  
AGACTCAGACACAGGAATGAATTGGTCTAATTTTAAATGTCATTTGTTTTTCTTATCTCAATGGTAAG  
TTGATTAAGATGAAAAGTTAACGTCATATTTTGGCTCTGGTGAAACATTGTAACCCTAACGGCGCTA  
ATAGTATAACCTATTCCTTTCCATATTATAAAAAAGGAAAGGATTTTACAAGCAGTGTCTAAGCCTGAATT  
TGATGCATGGATGAAAGGGCAAGATGTAAAATTAATAAAGGAAAGGTTATTTTTTCTGAACCAC  
TGCCAATTAACAGAGCTAAGTCTTATCTTGTGCAAGGTGATGTTGTCTGAGGAAAAACATGAGTCAAG  
TTGGGATTATGTCGGCTATAAATCAACTAAAGGACGAGAATATTTCTGGCTGGATGCCCTGTTCTTTAACT  
GGAAGCTGTTAGATGATATGTGAAGTAGGTTTGTATTAATTTGCAACTAATTAGGCTTGTGTATAACTTTCC  
AAGTGGAAGTTATTTTTGACAAGGGAAGATAGGGACATTTATTTTTTGGAGTGTACAGGCATAGTTATCA  
CCTGACACCGGCTTAACGCCGGTGTTTTTTATCGCTACAATACAAATAGTTTTTGGTGCAGGATAGCTCG  
AAGATTTGTTGTATCCAGATGATTTTTCGTGTGAGGATGGATTTAAATTTGAATCCGAGATGCAGATCC  
TGGTGATGAGAAAAGTATTAGGGGACAAAAAAGAAACCCCATGGGCGGGTGAAGGATTGCAACACT  
AACCAGGAGGAGGTGTTACCAAGTAGACCCCACTCTTCGGTAATAGTTCAATTTTTATTGAAGTTTTTTC  
GTTTTTTGCGCGGGTTTTCCATCGGGATCTGCGGCGGAGGATGGGTTATCATTCTGCTCCCGTCACTCCGG  
TTGCAGAGGATCTATGCCCGGTTTTCTGTTAGCGCTCTTTTTCGGCGCCTTCTATTTTTGCTCTACGGT  
GCTTACTTGCCGTTCTGGTCTGCTGCTGAGGGGGTGGGCGTCAGCGCCGAGATGATTGGTCTCCTGC  
TGGGAGCGGGATGGCGATCCGCTTTGCCGGCAACCTGATGGTGATGGGGCAGATCAAGGGGGCGGGCCA  
TCTGCTGCCGGTTACCCGGTTGCTCTCCCTGCTCAGTCTGCTGGCGTTTTCTCGGCTTCTATCTCAGTCAT  
AACCTCTGGTGGCTGGTGGGCTTGACCCTGCTGGCGAACTTTATCTATCCGACCCTGATGCCGGTGGGGG  
AGGCGCTGGCGACCCGATGGTGGTGCAGGCGCACCTCGATTACGGCAAGGTGCGGCTGTGCGGCTCCTT  
TGCCTTTATCGTTCGCTTACCCTGGTGGGGCGCTGGTGGGCAACTTCGGTAGTGACTGGATTTTGCAC  
ACCATGGTGGCGGGGCTGGTGTGATGCTGCTGCTCAGCTGGCTGCCGCTCTATCCGGCGCCACAGGATA  
GTCAGGGCGAGCGCGCCAAGGCGTCTTGTGTCGCAACCCTGCGCAGCGCGCCGGTGGCTCGCTTCTGCT  
GCTGACCGCTCTGCTGCAGGGGAGCCACGCCGCTATTACGGTTTCAGCGCCATCTACTGGAAGGCACAA  
GGGTATAGCGGCACCATCATCGGCTATCTCTGGGCGCTCGGGGTAGTGGCGGAGATCTGCATGTTCCGCC  
CCGACAAGCGTTTTCTTGCAGCGCTTTGGCGCCAGAGTCTCTTTATCGCCGGTGCCATCGGTTGTGTGGT  
CGGTTGGGTATTGCTGGGGGCTCGACCGAGTTGTGGGTACTGGTGTGGGGCAGTTGCTCCACTCGGTC

ACCTTTGGCATGAGTCATCTCGGGGCTGTGCGTTTCATGACTCGCCAGCTGCCCCGCCGAGCAGTTGATCC  
CGACTCAGGCGCTCTATGCGGCCCTTGGCCCTCGGCATGACGGTGGCGGCCCTGATGGCAGTTTGGCGGCT  
GCTGTTTCGAGCCTCTCGGCGGGCGGCATCTTCTTCTGATGGTGTGTTGGTCTTGGCCGCTTCTTCCCTG  
CGGCTGCGCCCTTTGCGCCGTCTGCGCAGGAGAGGGCTCCGGCCTGATATTTGTCTATTTGAATCATCA  
CCTAACAAAAGGGAGAGCCACGGCTCTCCCTTTTTTCGTTACTGCGGTTTGTGGCGTACTGCTGCTCGCC  
AAGATAGAGGGCGGCTGAGACGGCGCCAGGTATCCGAGCCGATGGTGCCGGCAAGCAGCTCATTGGATGCA  
GCATCAAAGCGGCCATCCGGCAGCCAGCCAGTTGGGGCAGCAGTTGCGCCATCGTACAGTCATTGTGCT  
GCAGTCCCGCTCCAGCGCTTCCAGAAGGGCGCTCCCTTGACGTAAAAGAGCGGGTAGTAGGAGTGATC  
GCCCCGCCAGCACCTCGCGAGCTGCCCCGATAGAGGGCGCTCTCGCTATGAGGTAGCAGTTTGGCCGCTCG  
GCCAGCTCGTTGACCCCGTGACCTGATGACGCCGAAAGCGGCGCAGCGCCTTGATGGCGAGGTACTCGG  
CGAGGCTCTCGTTGACCCAGGTGGGCTGTGGAGCAGTACGGCGAGCGCTCAGGATATGTACCCGCTCGTG  
GGCCGAGGTGCGCAGCAGGCGCAAGGGGGCCTGTGCGCTCGGTTTGCCAGCCTCGTGGGGTAGTTGGCA  
ACAAACACCTGATCTCCGGCGGGCGCCGCCGAGAGAGCGGGTTGCCACATCCCGCCCCAGCCACACCAGTT  
GCCATGGGTGAGTGGGCGGATCCACATCAAGCTGGAAGGCCAGATAGTCGATGATCTCATTGAGTTGCTG  
CTGCAAGGCCGGCAGATCGAGCTGATTGGCGGTCTCGTTCATGGCTCAGCACCAGCCGCGGATCCGGCTTG  
GTGACGGGCACTGTGTCCAGACAAACGGCAGGATCAGCGGGGTTGGTTGACATCCGGCAGCGGTTGGC  
AGCTGCCATCCGGCAGACAAACTTTTCTTGGCGACTCCCCATCTGGCGCACAAAGTTACCCCACTCGGT  
CAATAGCCACTGGTCAGGGGCAAACAGAAGCGACTGTTGGGCCGAGGCATCTGCACCCTGTGCCGGAGCG  
GGTGTGAGCGTGATCTGCCAGCCGATCTCTTGAAGAGAAGGGCTGGTTGAGGGCAACCGGCTGGTTGT  
CTGCAAGGCAGATCAGCGCGGGGAAACCGGCGCGCACTGCCCGCAACTGGCGGGCGGGGAGCAGGGT  
AAAAGGGGGCTTGCCTGATGGTGGAGCGCACTTGACAGCAGTTGGCGCTGGCGCACTGCTCGATAAGG  
TAGCGGGGGCCGTTTCGCGTCATTGCCAGCGCAGGCCACAGCGGCAGCAGCCACAGGGCAAACAGGGTGA  
TATGACGACTCATAAGAGGGTTAGCGCTCCTGCTCGTAGCCCAGCAGATCGCCGGGGTGGCATTGAGTT  
CACGGCAGATGGCCTCCAGGGTGGAGAAGCGCACCGCCTTGGCGTGGCCATCTTGAGGATCGAGAGGTT  
GGCCTCGGTGATGTGATGCGCTGGGCCAGCTCGCGGGCGGTCATTTTACGCTCGGCCAGCAGGGCATCG  
AGTCGGATGATAATGGGCATACGTTTCTCACACCGTCAGTTGCTGTTTCATCGGCCAGCAGTTTGGCCTCG  
CGCATGACCAGTGCCAGCGCCAGTACGATCAGTCCCGCCAGCAGTACCCGAAATCTGAGGTACTCAGCG  
CTATGGTACCAGTACTTCCGGCCCTCTCATGGTGGAGCAGTACCCGATCCAGCAAGGGGGTCAAGATCAATC  
GACCAGGAAGGTGTACAGAGCAGCAGTCCGATCTCCGATAGCGGGCGGATCTGCTCGAAGTGAAGGC  
AGACCGGCGCGGTAGCCGCGAAACAGCTGACGCGAGTTGCCAGAGCATCATATAAAGACCAGATCCGGCA  
ACAGCTGCACCAGGGTGGCGAGCAGCCGGGTGGAGAAGTGAAGGGGATAGTCGGCAGGATGGATGCCGGG  
GCGGCTCAAGATGGTGTGAGCTTCTCCTGCAGAAAAATCGGCGCCACCAGGGGGTCCACACCTCCAGC  
AAGGTGATCAAAGGGGTAGCCAGCAGTGCCAGCAGCAGCAGCCATTCGATCAGCATGCTCGAGCGTTCGA  
GTTTTGTTGGAGATCATCTCATTCTACTGTGATGGTTTTATCTGAAAGGTAAGTTTATCGTTTTATCAA  
TATCCACATCGGCAATGTTTTATTGTTTTGCGATATACAGTCAAGATAAAACTTATTGAAAAACGATGATT  
TTAATCTGTCCGAAGGGGATGACTTTTGGCTGCAGCCTCTCTAGACTGGCGAGTTGTATACAAAAACCTC  
AACATGGATAAAGGAGTTATCGATGCACCAGGGATGGCTGCTGATCGGATTGTCGCTCACCTATCTGGGGC  
TGCTGTTTTCTGATCGCCTTCGTGGCAGACAAGCACAAACGGCACCGTCTCAAGGGGCAACCGCTGTTCTA  
CAGCCTGTGCTGGCAGTCTACTGCACCTCCTGGACCTTCTTCGGCACCGTGGGGCAGGCGAGTGAATCC  
CCCTGGTGCAGGGTGGCCATCTACCTTGGCCCCATGCTGGTCTTCTTTTTGGCTGGCGGCTGCTGGCCC  
GCCTTATTCTGGTGGCCAAGCGGAGCACATCACCTCCATCGCCGACTTTATCGCCGCTCGTTACGGCAA  
ATCCCAGCGGCTCGCCATGGTGATCGCCCTCATCGCCATCATGGGGATCCTCCCTTATCTGGTGTGTCAG  
CTCAAAGCCATCGTACCCGGGCTGGATCTGCTGATGGTCAACAGCGGCGGCATCAGCCGACCAGCAATA  
CCAGCGAGTTGGCGCTCGGGGTTACTCTGCTGCTGGCGCTGTTTCAGCATCCTGTTCCGTACCCGCCATCT  
CGATGCCACCGAGCACCACAGGGGGATGGTGGTGGCCATCGCTTTCAGATCGGTGGTCAAATGCTGGCC  
TTTATCGCGGTGGGGGCTTCCGCCCTCTGGCTGATCTTGAGCAAACCCGGCGAAGTCAAGCAGGAGGTGA  
CCCGCGACTTCTTTGCGCAGGTGGTGGCGGTGAGCCCCGGCAACCTGCTGGAGCTTGCCATCTACACGGT  
GCTGGCTATGTGCGCCGTCATCTGCCTGCCCGCCAGTTTTTCATGTGACTGTGGTGGAGAACAATCAGGGG  
CAGGATCTGCACTGGGCGCGCTGGATCTTCCCGCTCTACCTGTTTGTGATGGGGCTCTTCATCTGGCCGC  
TGGCACTGGCGGGCAAACAGTGGGTGGGTGCCGATATGGCCTCTGATACCTATGTGATTAGTCTGCCGAT  
GGCCCTCGGGTTTATGATGGCATGGCGATGCTGGCGTTTCTCGGCGGCACCTCGGCGGCCACCGGCATGGTG  
ATCGTCTGCACCATCGCGCTGGCGATCATGGTGGAGCAACGATCTGGTGTGCTGCCGGTGTGCTGCGCCGCT  
TCTGGCGGCAGGGGCGGACGAGCGGCTGGTGGCGCTGCTGTTGCAGGTGCGCCGTGGCGCCATCCTGCT  
GATCTTGTGCGGCGCTGGGGGCTCTACCTATGGCTCGGCGATCTCACCAGCTTGTGCGGCATCGGTTAC  
CTCTCCTTTGGCGCGGTGGCCCAGTTTGCGCCGGCCCTGCTGCTCGGCCCTACTGGCGTACAGGCAATC  
GCAAGGGGGTATATCTTGGGTTGAGCCTCGGGGTGAGCCTCTGGTTCGTCACCTGCTGGTGGAGAGCGG  
GCTGCTGGCGGGCTCGCCCTTGGCCGAGCTGCTGGCGCCGCCGGACTGGCCTGCGTTTTGCGGAGCTGAGT  
CTCGGGGCTTGGTGCATCTTCTGAGCCTGCTCTTCAACCTGCTCGGCTATGTGGCCGGTTCTTGTCTAT  
CGCGCCCTGCGGTGAGCGAGCGGCTGCAGGCGGCCAACTTTGTGCGCAAGCCGAGCCGCGATACCGCCGC  
CCTCTATCAGGCGCGGGTCTCGGTCAAGGAGCTGGAGATGCTGGCGGCCCGCTTTGTGCGCTCAAGCCGG  
GTCAAACGCGCCTTTGGTTCGTTTTGCGCGGTGAGCGGGGCGGCACCTTGTCCCGAGATGCAGGCCCTCGG

CCGAGCTGATTGCCACACCGAGCGGCTGCTGGCGGGGTGTTTGGGACCTCCTCGGCGGGTGGTGC  
CGCCTCGGCCCTGCAGGGGCGCAACATGCAGCTCGAGGAGATCGCCACCATAGTCGATGAGGCCTCCGAC  
GTGTTTCGCTTCAACCGCGGCTGCTGCAGGGGCGATCGAGCATATCGGGCAGGGGATCTCGGTGGTGG  
ACAGGGAGCTTCGGCTGGTGGCCTGGAACCGCCGCTACATCGAGCTGTCCACTATCCGCCCGGGCTTAT  
TCAGGCTGGGCGTCTATTGAGGAGATCATCCGCTACAACGCCAGCAGGGACTCTGTGGCCCCGGTGTAT  
ATCGAGGATCACGTGGCGCGGCGGGTTCCTTTATGAAAGCGCGGCAGCGCCCATATCTCGGCGCGGGAGC  
GCCCGGACGGGCGGGTGTATCGAGATGCAGGGTAACCCCATGCCCGCGGTGGTTTCGTTCATGACCTTTAC  
CGACATCACGCCGTTTCGCGATGCGGAGCGGGTGTGCGCGAAGCGAACGAACATCTGGAGGCACGGGTG  
GCCGAGCGCACCCGTGAGCTCTCCGAACCAACCGCAACTATGCTGGTGAACCAGCAGGTGGAGCGGG  
CCAATCAATCCAAAAGCCGTTTTCTGGCGGCGGTAGCCATGATCTGACCCAGCCTCTCAATGCCGCCAA  
GCTGTTTACCTCCCTGCTGGAGATGTTGCCGATGCTGCGGAGCAGTCCCGCATGCCCCGCATATC  
GATGATGCGCTGGGGGCGACCGAGGATCTCATCACCAGATCTGCTCGATATCTCGCGGCTCGAAGCGGGCA  
AGTTCAAGGCCAAGAAGCTCGATTTTGCCTGCGGGATCTGCTCGACAACCTCAAGGCGGAGTTTGGCGT  
GCTGGCCCAGGCGGGGGGATCCACTTCTCGGTGGTGGAGAGCAAGCACGCGGTGCACAGCGATGTGCGG  
CTGCTGCGCCGGTGTGCAGAACTTCTCACCAATGCGTTTCGCTACAACCCGGGCGGCGGGTGTGC  
TTGGTTGCCGCCGATGGGGATAAGATCCGCATCGAGGTATGGGACAACGGCCCCGGCATCCCGCAGGA  
CAAGCAGGAGGCGATCTTCGACGAGTTCTCCCGTCTCGATCACTCCCGTACCGCCAAGGAGCAGGGGCTG  
GGTCTGGGGCTTGCCATCGCCCGTGGCATCTCGCAGGTGCTCGGTTCATCAGCTCACATTGCAGAGCTGGC  
CGGGCAAGGGATCGGTCTTTGCGGTGACCCCTCAATCTGGCGACCCGGCGGTACGGCCCATCAGCTGGC  
GGCGCCGGTGGTGCCTGACAGCCAGCTGGAAGGTGTAGCCGTGCTCTGCATCGACAACGAGCGGGACATT  
CTGACCGCCATGAGCACCTGCTTGGCCGTGGGGCTGCGAGGTGCGCTGCGCCGTGATCTGGCCGAAG  
CCGAGGTGCTGGTGACAGACGGGTTTTGTGCCGCTGCTGGTGTCTCTGACTACCACCTCGACGACGGCAA  
GACCGGGTTGGAGGCGCTCGCTGCCCTGCAACGGGTGTGTGGCGACGAGCTGGGGGGCATCATCAGT  
GCCGATCGCAAGAGCGAGTTGCAGGCGCAGATCCGCGAGCGGGGTATGGCTACATCAGCAAACCGGTCA  
AACCGCTCAAATTCGCGGCCCTGATGAACAGCCTGCTGCTGCGCTAGCCGCATCCGGAGCGGCAAGCCGT  
GAACCGGCTCACAAAACCGCGCAATGATCCTCTGGCCCGTGGTTCATGGATGAATGCCGAAAACAGAGATT  
TATTGGCGAAGATCTCTTTCATCTTCCAGCGCAATCGCCGCCAGTTACAGTATTGGCTTGGCACTGTCTGTT  
CAACGCCGACAGTGGCAGACCCGATGCTCATAGTTCGGGATGCGATTTTTTGCATCGCAAATGA  
AGTAACCGAAGGGCAAACCGATCGCAAGGTGCTGACGACGCAAGCTTCCGGTCCAGGGATGAGCCGACTTG  
AGATAGCGGGGCCACCACAGTTGTTGTGCACCTTTGCCAAGAGGCGCACTGCCGTGAGCGTTACCTGT  
CAGGGCGTAGCCCTTTTCGTTGCCAACATAACGAAATAGGGAAATATAAAAAATGCTAAGTCCAAAGCCT  
ACCATGCTGGCCCTTGCGGTGGTCTGTGCTGCGCCTCGTCCGCTTATGCTGCGGCGCCCGGCAAGCCGA  
CCATCGGATGGGGCCCCACCAAGTTTTCCATCGTTGAAAGTCGATCAGGCGGCTACTGCCACAACAATCT  
GGTCAAGGTAAAGGATGCCGCCGATGTGGAGGTGAACTGGAACCTCTGGAGCGGCGATCTGGGCCAGAGT  
GCCAAGGTGCTGCTCAATGGTCAAGGAGGTGTGGTCCGGCCCTCGGCCGCGGCGGGCAGCGCAAATTC  
AGGTGAAGAAAGGGGGCGCTACCAGATGCAGGTGGCGCTGTGCAACGCCGATGGCTGTACCCTCTCTGA  
TGCCAAGGAGATCGTGGTTGCCGATACCGACGGCAGCCATCTGGCGCCACTTAAGGCGCCGCTGCAGGAG  
AACAAACAGCCCTACGCCAACAAAGTCCGGCAAGGTGGTGGGGACTTACTATGTGGAGTGGGGGGTCTATG  
GCCGCAAGTTTACGGTGGACAAGATCCCGGCCCAGAACCTGACCCATATCCTCTATGGTTTACCCCCAT  
CTGCGGCGGGGATGGCCTCAACGACAGCCTCAAGGAGATCGAAGGGAGCTTCCAGGCGTGCACGGGGCG  
TGTGCCGCGGGGCGGACTTCAAGGTGGCGATGCACGATCCATGGGCCGCCATCCAGATGCCGCAAGGCA  
ACCTCACCGCCCATGACGAGCCCTACAAGGGCAACTTTGGTGCCTGATGGCGCTCAAGCAGGCCTATCC  
GAACCTCAAGATCCTCCCCTCGGTGCGCGGTGGACCCCTCTCCGACCCCTTCTATTTCTCGGTGACAAA  
ACCAAGCGCGATGTGTTTGTGCGCTCGGTGAAAGAGTTCCTGCAGACCTGGAAGTCTTCGACGGTGTGG  
ATATCGACTGGGAGTACCCGGGCGGACAAGGCTCCAACCCGAAACTGGGCAGCCGAGTGTGGTGGCCAC  
TTATGTGGCCCTGATGAAGGAGCTGCGTGCCATGCTCGAGAGCTGGAGGCCGAGACCCGTCGCCAGTAT  
GAGCTCACCTCGGCCATTGGTGCGGGGGGCGACAAGATCCAGGATGTGGACTACAAGGCGGCCAGCCCT  
ACATGGACCACATCTTTCATGATGACCTACGACTACAACGGCGCCTGGAGCAACACCGAGCTGGGTACCA  
GACCAACCTCTATCCGGCAAGCTGGGATCCCGCTACCAAGTACACCACCGACAAGGCGGTGAATCTGCTG  
CTGGCGCAGGGGGTTGAACCGGGCAAGCTGGTGGTGGGGCCCGCATGTATGGCCGTGGCTGGACCGGGG  
TGAGCGGTTATCAGGGCAACAACCCCTTACCAGGCAAGGCGACCGGCAAGGTGAAAGGCTCCAGGGAGGA  
CGGGGTGGTGGATTACCGGACATCGTCAACAACCGGATGGGGGCTGGCTGGGAGAAGAGCTATGACGAG  
GTGGCCGAGGCGCCCTATCTGTTCAAGGCGGCGACCGGCGACCTCATCACCTATGACAACGAGCGCTCGG  
TCAAGGCCAAGGGGAGTATGTGCTGGCCAACAAGCTCGGTGGCCTCTTCTCTTGGGAGATCGACGCCGA  
CAACGGCGACATCCTCAATGCCATGCACGAGGGGTGGGCCACGGCGAGGGGACGACTCCACCAGCCAAC  
AAGCCGCCGCTGGCCAACCGGGCAGTGACCTCAAGGTGACCGGCCCTACCGAGGTGACGCTGGATGGTT  
CGGCCTCCCACGATCCGGAAAACAGCGCGCTCAGCTACAGCTGGAAGCAGATCTCCGGCCCCGAGGCTGC  
CCTGCTTGATGCCACTCAGGCCAAGGCCCGTGTGTACTCGATGCCGTGTCCGCCGACATCAATCTGGTG  
TTCGAGCTGACGGTGACCGATGACCAGCAGTTGAGTGCCAAGGATCAGGTTGTTGTACCAACAGGGCGC  
CGCAGGCCAATCTGGCGCCTGTGGTGAAGTGTACCTGCCACGGCCTCTGTGGAGGCGGGCAAGCAGGTGAC  
CATCAAGGCGACCGCCTCCGATCCGAACGGTGTGCTGACTTATCTGTGGAGCGTGCCGGCAGGCATC

ACCGCAACGGGTTCAGAACAGCGCCACTCTGGTGGGCACCGCCCCGAGCGTGATCAGCGACACCGGCTATG  
ACCTGAGCGTCACTGTCTCCGACGGTGGGCTGGATGCCAGTGCGGTAACCCGTCTGACGGTCAAACCGGC  
CAGCAGCGGGCGGTGGTTGCACGGCGACCGATCCGGATGCGGCCAACTGGCCAGTCTGGAAAGCGGCCAGC  
ACCTATAACAGCGGGCGACAAGGTGAGCCACAACCAGCTGGTATGGCAGGCCAAGTACTGGACCCAGGGCA  
ACGAGCCTAGCCGCACTGCGGATCAGTGGTTGCTGGTGAGCAAGGTGCAACTGGGTGGGATGCCAATGT  
GGCCTACAACGGTGGCGAGCTCACCACCCATAACGGCCGTCAGTGGAAAGCGCAGTACTGGACCAAGGGC  
AATGAGCCCGGCAAACACGACGTCTGGCAGGATGTGGGAGCCGCCAGCTGTAATAAGCATTGAATGGTG  
GCGGGGCATGCCGTATGCCCGTTTTTTCTCCCGCTTCGCCACATTCCTGGCGGGTCTGCCAATCGGTT  
TCCCCACCCAGCTTCTCTTTGTGCCTGCAAAGCAGCCCTTCGGGGCTAGTGATTAATGCTCTCCCCGAT  
AGCTGGCATCTGTGCCGACGTTGCTCTTTGTGGTGCCGCTTGTGTTGGTACATGTCGGCATCGGCTCTG  
GCAAACGCAAGTCAAGTCCGCCGATAGGGGGCCATCCCCATGCTGCACGAGATAGTGGGGGAGGCGC  
TGGCCAGCATGGCCGTCAGCCTGGCCATCGTCTGTTCAGCTCGGTTCGTTGTCAGAGTGGTGAGCAGCAC  
AAACTCATCCCCGCCGAAGCGGGCGGCAATCATTCCCTGACCGAAGTGTGGCGTATGCCATCTGCGATA  
AGGCGCAGGGCCTGATCACCTGCCAAATGGCCACTGCTGTCATTGAGCTGCTTGAGATTATCCATGTCGA  
TCAGCAGCAGGGTGCCTTCCGGCTGCCCTGCAGAGCGAGTTCGAATTGCTGGCGATTGGCGAGCCCGGT  
CAGCTGGTTCGGTATTGGCCAGCTGATAGATGCGGCGGGACTGCTGATAGATGGTGTGGCGTGGCGAATA  
TCCCCGCGCCAGGATCGCCATCAGGTGGCTGTCGTAGCGGGTAAAAGCATTACGTTTGTGCTGTCCATAT  
TGATCATGCCGTAGAGCTGACCATCGATATGGATCGGGTTCGCCAGCGTGGCCTGGATGGGCAGGTTCGGT  
GCAGTTGACCAGCAGATCTCTGTCTGTTCCGACAGGGGCATGGTGGCATTATCTTCGACAGGTTCGTTG  
ATCAGCAAGGTTTTGTTGCATCGTCCCTGAGTCAGCTTGTACTGAAAGGTGTGCTCCAGCGGCAGATTGA  
TCCGCGCGCAGTTTACCATAATCCATGCCGATGGCGGCTTCATATCTCAACATGCCGTGTGCCCGGCAGCAG  
CTTGATCAGGCAGCCCATCTCGGCTCCCGGGATCAACATCACGGCTCGTCTGAGCAGATCCTCCAGAAAG  
GCCTCTTCGGTCTGGTATTGCGCCGAGTTGCGGGCCAGCTCGGCGGTGGTTTTCGTTGATCTTGAGCGCCT  
CACTCAGATGCTGCCACTGGCGGTGCAGATGGTAGCGGTAGTGGCGATAGAGCCAGAAGGTGCAGATAAG  
GTAGCTCTGGACTAGCAAGGTGCTGGCAAGCGGGCCCTTTGCCAGCCATTGAGGCTGTTGATAAGCCAG  
ATCATCCCCGCCAGTGGCAAGGCATAAATCGTCAAACGAACAAAATTTGTCGTATCTGGATAACCGGGTGC  
GTGAGGGCAGTTTCGCTGGGCATGAAGACACCTGCTGGCCATGCAAAGCGGGCATTATAAATTCATTAGTT  
GCGATACAGATGGTCTTTTGTGCGATATTGTTCTTACTCATTGATTTTTCTCAATTTGGTGTGTCAG  
ATCAAAAAAATAGTGTGAGGTATCTGGTTGGAGTGATGAGATTAGTCTGCATATCCGGCTGTTTTTTTA  
AACATTAATTTCTTGAAAGTAGGTAATTGTGCGGGTTGGTAACCGGTGGGCTGGCAATGGTCCGATTTGC  
TTACTTATCAGAATTACCCTACAGTCAATCGGCGATTATTTATCGCCAGAAATAACGTTGTGACAAGGGC  
AAATCGATTGAAAAGTTCGGGACGCAAAGCTTCCGGTCTAAGGGTCAAGACGACCTAAGATAGCGGGGCCA  
CCACAGTAGAATGCAGGCTGCCTTTGCCAAGGGGTGGCCGTTTTTTGTGTCACCTGTCGTGTTGCGTTGCC  
CTTTTCGTTTTTCCATAACGAAAACGAAAAGGAAAGCAATATGCTAAGTCCAAAACCTACACTGCTGGCCA  
TGATGGTTCGGCACCTGCTCGCCTCCTCCGCCGCTTATGCGGCAGCTCCCGGCAAACCCGCCATCGGTTG  
GGGCCCCACCAAGTTTTGCCATCGTCGAAGTCAGCCAGTCCCGCAGCCGTTATAACGAGCTGGTCAAGGTG  
AAGGATGGCGCCGATGTGACCGTCACCTGGAATCTCTGGAACGGCGATATCGGCCAGAGTGCCAAGGTGC  
TGCTGGATGGCAAGGAGGTGTGGTCCGGTCCCTCTTCCGCCGCTGGCACAGCCACCTTCAAGGTGCACAA  
GGGGGGCCGCTATCAGATGCAGGTTCGCGCTGTGCAACGGCGATGGCTGTACCCTGTCTGATGCCAAGGAG  
ATCGTGGTTCGCCGATACCGATGGCAGCCACCTTTCGCCGCTCAAGCCTGCCTTGCAAGGAGAATAACAAAC  
CCTATGTCAACAAGTCCGGCAAGGTGGTTCGGTACCTACTATGTGGAGTGGGGGGTCTATGATCGCAACTT  
CACCGTGGACAAGCTGCCGGCCAAAACCTGACCATATCCTCTATGGCTTCACCCCGATCTGTGGCGGT  
GATGGCCTCAACGACAGCCTCAAAGAGATTGCCGGCAGCTTCAGGCGCTGCAACGTGCCGTGTGCCGGGC  
GCAAGGATTTCCAGGTTCGCCATTACGATCCCTGGGCCGCGCTGCAAAAAGGGCAGGGGTCACTGGTCCG  
CTGGGATGAGCCCTACAAGGGCAACTTCGGCAATCTGATGGCCCTCAAGCAGGCCTATCCGGACCTGAAG  
ATCCTCCCCTCAGTCGGTGGCTGGACCCTCTCCGACCCCTTCTTCTTCATGCATGACAAGGCCAAGCGTG  
ACGTGTTTCGTCGCTCGGTCAAAGAGTTCTGTCAGACCTGGAAGTTCTTCGACGGTGTGATATCGACTA  
TGAGTTCCCGGGCGGCACGGTGCCAACCCCAATCTGGGGGACAAGACCAAAGATGGTGAACCTATGTG  
CTGATCATGAAGGATCTGCGCGCCATGCTCGACGAGCTGGAGGCCGAGACCGGTTCGCACCTATCAGCTCA  
CCTCCGCCATCGGTGCCGGTTACGACAAGATTGAGGATGTGGATTACAAGGCTGCCAGCAGTACATGGA  
CCACCTCTTCGTGATGAGCTACGACTACAACGGTGCCTGGAGCAATACCTCCCTGGGTTCATCAGGCCAAC  
CTCTATCAGGCCACCAACGGCTCGGCCAACAAGCGCTACAACACTGATGCAGCGGTACAGCAACTGCTGG  
CGCAAGGGGTGCACTCCGAGAAGCTGGTGTGCGTCCGCGCCTACGGTTCGCGGTGGAAAGGGGTGAG  
CGGATATCAGGGCAACGATCCCTTCACTGGCACCGCCACCGGCAAGATCAAGGGCACCTGGGAAGATGGC  
GTGCTGGATTATCGCCACATCGTCAACAGCCATATGGGCGCAGGCTGGGAGTACAACCTACGACGAGACTG  
CCGAAGCGGCCACCCTGTTCAAGCCCTCCACCGGCGAGCTGATCACCTATGACGACGAGCGCTCGGTCAA  
GGCGAAAGGCCAATACGTGCTGGCCAACAAGCTGGGCGGGCTCTTCTCCTGGGAGATCGATGCCGACAAC  
GGTGACATCCTCAACGCCATGCATGAAGGTCTCGGCCACGGCGAAGGGGTCACTCCGCCAGCCAACAAGC  
CGCCGGTTCGCAACGCGGGCAGCGATGTGGCGGTGACCGGCCCGGCTACCTTACGCTGGATGGCTCAGC  
CTCCACGATCCGGAAAAGGCTCTCTGACCTACAGCTGGAAGCAGGTTTTCCGGTCCGCAAGCCGTGCTG  
GGTGATAACCACGAGGCCAAGGTGCGGGTGCATGTGAATGCCGTGAGCGCAGATACCGCGCTGGTGTTCG



AGCTGACGGTGACCGATGACCATCAACTGACCGCCAAGGATCAGGTAGTGGTGACCAACAAGGCGCCGCA  
ACCCAACCTACCACCAGTGGTCACTCTGCCCCGCCAGCGTCAAGGTGGAAGAGGGCAAGCAAGTTACCATC  
ACCGCCAAGGCATCCGACCCCAACGACGACGAGCTGATCTATCAATGGCAAGTGCCTGCCGGTATCACGG  
CGACCGGCCAGAGCAGCGCCACCCTGGTGGTCAACGGCCCCGGCGGTGGATACCGAAAACCGCTTATGACCT  
CTCCGTGACCGTCTCCGATGGCGCACTCGATGCCAACGCGGCCACCCGTCTCACCGTACGCAATCAAC  
GAAGGTGGTGAGGGTGGCTCTTGCAACACCACAGATCCGGAAAGCAGCCAACGTTCCCGCATGGCAGGCCA  
GCAAGGTCTACAACGGCGGTGACAAGGTGAGCCATAACCAGCTGGTATGGCGTGCCAAGTACTGGACTCA  
GGGTAATGAGCCGAGCCGCGCCGCGATCAGTGGGCGCTGGTGGTGGTGGTGGTGGTGGTGGTGGTGGTGGT  
GCCGTTGCCTACAACGGCGGGGATCTCACCAACCACAACGGCCGTCAGTGGAAAGGCCAAGTGGTGGACTC  
AAGGCAATGAGCCGGGCAAGCAGATGTCTGGCTGGATATCGGGGAGCAAGCTGTAACCTGAGGCCCTCCT  
CACCGATGAAGGGGCATGGCGACATGCCCTCATTCGCCAATAGCAATATGAACGAGAACCAGCAATGAC  
CACAATGTGACCCGAATCGCTGCCCTCATTCAGCAACCCCTGGCGGCTGGCCCCCTGTCTGCCGCCACC  
TCGCCCCGTGATATTCAATGACACGACACCGCAAAGCGATCTGACCGGCAGTCTGGCTGCCAGCGTGCAAG  
TTTGGCCAGAGCCAGATCCTGCCGTCTCATCCCAAGGAGGGGGATCGCCAACCCATCCTGACCAGCCTGC  
GCAAGAGCCTGCTGCTGGTGAACCACTCCAGGCCGACGGGGTGAACCCCATGACGGTGGAGGCCCGTGA  
CGGCAGCGCAAGCTGCTGGCACCCTGACCTTGTGCGCGCCATCGGCGCTGCCAGAGACTGTCTACCAC  
CTCGCGGGGGCTCCAGAAGGGGGAGTGAGTTTTCATCCCTGAGAGCGGCACCCTGCCGTATCAGCAGCA  
GTGCTGATTTGGCCAACTGAGCGACAAGAGCGGCGCTTCTCAAGGATCGGCTGACCGGGCGTGGCT  
GGTGGAGATCCAGACCGCGGACGGCCGCTGGGTTCCGGATATTTACCTGCCCGTGAACCGGAGCTGGAG  
GGCAAGATGGTGGGGTCCGCTCCAGCGCCGGTTATAACTCGACGGCTTCTATGGCGAGCGACAGGTGA  
CCGTCTCCCGTGGCCAGACCCTGCAGTTCAAGTTTGGCAATGGGCGAGTGGTCCGCGAGGGGGAGCTGGA  
GAACAACCGAATCACCTATGCAGCGGATACCTGGAGCGGCGAGCTGCCTGCCGAGTGGATCCAGCCCGGA  
CTGAACCTCTCCGTTTCGTGAGGGCAATCTCAGTGGTGGACTGCGTGACATCAAGGTGGCGCCCCCGGGC  
AGCTGCTGCTGCACACCATCGACATCGGCATGCTTACCCCGCCACGGGATCGCTTTGCTTTTGGCAATGA  
CAAGGAGGCACATCGCAATACTTCCAGACCATTCCGGCCAGCCGGTTGATTTGTCAGTCACTATGCACCG  
CTCTCCCTGCCTGAGGTGATGCTGCCAATGGCACCTTGTGACCGATTTTGAACCGAGCGAAGGGGGCT  
GGCATGGCCAGCACCATGCGCCAGCGCATCGGCAAAGAGCTTATCTCCACGGCATCGACAATGCCAACA  
CGGCATCAACAGCAGTCCCGGTGAAGGGGAGGGAAGCCATCCCTTTGTGGCGGCCAGCTGACGGCGCAC  
AACAGTCCGCGCAAGTATGCCAATGGAGTTAGGTTAGGTTAGGTTAGGTTAGGTTAGGTTAGGTTAGGTT  
TGGATGATTCGCTGGGCAACGAGTTTACGCCACGAGGTGGGCCATAAATTCGGCTTGGCCACTATGTGGA  
TGGTTTTCCGCGGCTCGGTTTCATCGCAGTGGCGATCAGCTCAACTCCAGCTGGGGCTGGGACAGTGACAAA  
CACCGTTTTTCATCCCCAACTTCTCGCCGACCCACACCAATGAGGATGCCTGTCTGGATGGCCAGTGCCAGC  
CACCGTTTCGATGGCCGCAAGTTTGGCCACGATGCGATGGCGGGCGGCCCTCTCTCCGGCGCCAACCG  
TTTTACCCTCTATACCCCAATTTCGGCCGCATCATCCAGCGCTTCTGGAGAGCAAGGCGGTGTTTCGAT  
GCCAACTCGGCCACCGGCTTTAGCAAGTGAACAGTGCAGCGCCAGGATGGAGCCCTATCAGCACACAA  
TCGAGGGGATCGAGAAGGTGATGCCCCATGGATGCCCTGAGCGAGGCAGGACTGAGTGCCCTGCTGGC  
GGATTACGGCTTGGTCAAGGTCGCCATGTGGGATGGTGCCTGGACCCGTGATATCCGGGTGCCGATTGCC  
TCTGCGGACAACCGTGGGCGCAGTCTGACCATCGATCAGGGGCGGTTACAACAGTCGCCTCTTTATCA  
ACGGCAAGGAAATTTGTGGTGAACCGGGGCTTCAAGAAGAGCTTACCTCGGATGGCCAGAGCTGGGTGGA  
GGTCTCCCCCATCGATACCAAGGTTGCGCGCAAGCCGAGCAGTTCCGGCGTGCCGGTGAACCCCTGGT  
GGCTATTACGATCCGCAAGGAGCCTTGGCGAGCTACATCTATCCGGCTCTGCACGGCGCCTACGGCTTCA  
CCTATCCGGATGACAGCAACACCCTGTCCGGCAATGACTGCCAGTTGCAGGTGGAGACCCGCGATGGTCT  
GCAGCGCTTACGGCTGGCCAATCACAGAGCGGCCAGCAGCGTCATGAACAAGTTCCACATCAACCTGCCC  
ACCGCCAGCGAGCCCGGCCGCGCCACCATCCAGTGGCGTGGCCAGACACTGGTACAGCAGAGCTTGTGTC  
CACCGCAGCAGATCCTCTCCTTTACCGTCAACGGGCGGCCGCTGGAGCAGGGCGTGGTGGAAAACAGCC  
TCCGGTGGTGACCGTCCGCGCAGCTTGGCGGCATCGGCGGTGAGTGGCTGACCATCACTGCCGAGCGG  
AGGGATCCCGAGGGCGATGCGCTGAGCTACCGCTGGCACTTCCCGCGGGCTGGCAGGGCGAAGGCGAGA  
CCAGTGCAAACCTGCGTTTGTGCTGCCGCGGCGAGTCAACCACGAGCAACATGAGCTGAGTGTGAGCGT  
CTCGGACGGGGTACATCAGAGCGAAGGGCGCGTCTGTGCTGACGCTGGCGCCCGTGGTCCGACGGCTCTTGC  
AACACCACCGATCCGGAAGCGGCGAATGTTCCCGCATGGCAGGCCAGCAAGGTCTACAACGGTGGCGACA  
AGGTGAGCCACAACCAGCTGGTATGGCGTGCCAAGTACTGGACTCAGGGCAATGAACCGAGCCGCGCCGC  
CGATCAGTGGGCGCTGGCGAGTCAAGTTGAGCTGAGCTGGATCGCGACCGTTGCCTACAACGGCGGGGAG  
CTGACCAACCACAACGGCCGTCAGTGGCAGGCCAAGTGGTGGACTCAAGGCAACGAGCCGGGCAAGCAGC  
ATGTCTGGCTGGATGTGCGGGCGGCAAGTTGCCCTAGGTTGAGTCCATGATGAAGATGGCGGAGCCTGT  
TCAGGCGGGCTCCGCTTTTGGCCAAAACCATAGAGAGCAACAATAATGAAAAAAAAACCGCATCACCT  
TCTGCTTCCCGCATGATGCTGAGCGGCCACCTGTGGGCGGCCGAGGCATACGACATCAACAAATCCTAC  
CCGGGCGGCGAGCCAGGTCAATTACAACGGCCAGGTTTTTCGAGGCCAAGTGGTGGGTCAACCCGGGTGAGA  
CTCCCGCATGGCGGCCGCAATGAGTGGGATACCCCGTGGAAAGCTTGTGCGGGAAGGGGAAGTGACCCC  
GCCGGACACCGGTGGCGATGACAAGCCCAATCCGCCAACGCTACCCCGCCGGATGGCAGCACCACCC  
GTCTATATGAGCCAGGCCGAGCTGGATGCCAAAGAGAAGGCGCTGACCGACTTCCCGCGATGGAAGCGG  
TCAAGGCCTCCATCGCTACCCGGGACAATCTGGTAGTCGAGGCGGTGCAGCCGGTCTGCGGACAACCC

GGGCAACGTCAAGCGGGTTCGAAAGCCTGCTGAGCGAGAGCCAGTTCAACTACCTCTTCCCGCTACGCGCC  
CCCGAGTACACCTATCGTGGCCTGTTGCAGGTGGCGGCCAAGTTCCCGGCCCTGTGCAGCGATTACAGCG  
ACGGCCCGCATGCTGACGCCATCTGCCGCAAGACTCTGGCGACCATGTTTCGCTCACTTCGCTCAAGAGAC  
CGGCGGCCATGAAAACCTGGCGCCCGGAAGCCGAGTGGCGTACGGCGCTGGTCTACGTGCGCGAGATGGGA  
TGGAATGAGACCATGCGCGGGCGGTTACAACGCCGAGTGCAGCCCCGATGTGTGGCAGGGTTCAGCAGTGGC  
CGTGCGGCACCTTCGATAATGGCGAGTTCAAGAGCTACTTTGGCCGCGGCCAAGCAACTCTCTTACAA  
CTACAACCTACGGCCCTTTTCCGAGGCGATGTTCCGGCACTGTGCGCACCCCTGCTCGACCGCCCCGATCTG  
GTGGCCGACACCTGGCTGAACCTCGCCAGTGGCGTGTCTTCTATACCTATCCGCAGCCGCCAAGCCCT  
CCATGCTCCATGTCATCGATGGCACCTGGCAGCCAAACGAGCAGCAGACAAACAGAACGGTCTGGTGCCTGG  
CTTCCGGGGTACCACCCAGATCATCAACGGCGGGTGGAGTGCAGTGGTCCGGTTCGAGCATGCCAGTCC  
CAGAACCGCATCAACTACTACCCGAGTTTGGCAACTACCTCGGAGTGGCGGTGCCATCCGACGAAGTGC  
TGGGTTGCAAGAACATGAAGGTGTTTGACGACAATGGCGCCGTTGCCCTTGCCCATCTATTGGGAGCAGGA  
CTGGAGCTATGTGGCAGAGAACCCCAACGGCGGCAAGAGTTACTCGTGCAAGCTGGTGGGCTACCAGACC  
CGTTTCAGCGCCTTCAAGGCAGGGGATTACAGCCGCTGCGTTCAGCACTTCTATCCGGAGGTGGTGTATCG  
AGGATAACGGCGGTGGCACCAACCTGCCACCGGTGGCCAATATCACCGCCCCGGCGCAGGCCGAAGGTGG  
CAGCAAGGTGACCCCTTTCGGCCAGCACTCCAGCGATCCGGAAGGCAAGCCACTCTCTTATGCCCTGGACT  
ATCCCGGCTGGAGCCTCTGCCCCGGTACTGGATCAGGTAACGCTGGAGTTGACCCTGCCAAGCCGGCCA  
GCGATACCAAACCTGGAGATCAAACCTGACGGTGACCGATGAAGGGAGCTTGAGCCGTAGCGCCACCCATAG  
CCTGCTGGTGAAGGGGAGGAGGGGGGGCGTAACGCCGCTGACTATCCGGCTATAAAGAGGGGACTCCC  
TACAAGGCGGGCGAGCGGGTTCAGCAATAGCGGTGCCAGCTACGAGTGCAAACCGCATCCCTACACCGGCT  
GGTGTGCCGGTGCCTGCGCCTGAGCCGGGCAAGGGCACGGCCTGGGCGCATGCCCTGGATCAAGCT  
CTGAGCCGTTTCAGGGTTACAAGGCTTGCCGATTAGCCAGCGCACTATCCAGCGCAATGACAATCCGGAG  
CAATAAAAGATGGGGCCTGCGGGCCCCATTCTTGTGTTGGTGGAGTTCAGGTTTGGCCGTGGAACATCTGG  
CCCGGACAGGACAGCGCCTCGAGAGGGCTGTGTGATGATGTGTGTTTTTTTTTATTACATTTTCCGTG  
AAAGGCTTTCAGCAATTTTTCGCGTAGCGGAAGTAGTATTCACGGGTGGAGGGGGCATAGGCATCTTTC  
TCTACAACGCCGTTCTTGGTGGTTGCACCGCGCAGGTGGAACAGGACTGCCAGATTCTCAAACATGGTTTT  
ACCTCATCGCTCTGTCAATTTATGGTTATGGTGTGTGACCTGGGTACGGTTTTGATCCTATGGTCATTTGT  
GAGCCAGATCAACTTTCTGTGTTGTAATTTACAAAAATCATGGAAAGGGTTTTCAAATGCAATGCCCTT  
TATGGAAAGGCTTTCCCGAGGTGACGGGGGAGCAAGCTGATTACCAGCCAGCATAGAGAGTCTGAGAGCG  
GGAGCGTTGCACGGGGAAGAGGCTTGTCTGACGGCCTCTCCTGTATAGGTGCTTGAGCCGATTTGTGAC  
ATAAAACAGAGAGATAGCACGCGTCTTGCTGGTAAAAACAGCGAACTGCTGCAATTTTGAATAAACGAAT  
CAGTCGTGGTTATTTTTAGGGTTGACAGCAAAAGCGGGTATGCCTATCATGCGCCTCCGTTGCCGGAGATA  
ACTTCGTACAGCGCCGAGGTGAGTTGGGGTTATAGCTCAGCTGGGAGAGCGCTTGCATGGCATGCAAGAGG  
TCCGCGGTTTCGATCCCGCGTAGCTCCACCAAATTTCTCCTCGAACAATCTGGAATCAAAGGGGTTATAGCT  
CAGCTGGGAGAGCGCTTGCATGGCATGCAAGAGGTCCGCGGTTTCGATCCCGCGTAGCTCCACCAGGTTCC  
TGATTGGCATGAAGTACCCAGGGCAGTGCAGGTGTGTATCACCAAGCCGACCTTTGTGGGGTTATAGCTC  
AGCTGGGAGAGCGCTTGCATGGCATGCAAGAGGTCCGCGGTTTCGATCCCGCGTAGCTCCACCATTATTTA  
GGATGAATGGCCGCCAGAACCATTCAATTCAGTACCGAATTTGGGGTTATAGCTCAGCTGGGAGAGCGCTT  
GCATGGCATGCAAGAGGTCCGCGGTTTCGATCCCGCGTAGCTCCACCAAATTCAGAGTGACTGCCGGTCAT  
TCACACAAATCGGGGTTATAGCTCAGCTGGGAGAGCGCTTGCATGGCATGCAAGAGGTCCGCGGTTTCGAT  
CCCGCGTAGCTCCACCAAATTTCTTGTACAAGAAGCAAAAAGGCCACCCGATCGCGGTGGCCTTTTTGTT  
TTCTCCATCATTTATTTTCTCCATACGTCCGCGCCTTTCAATTTGTAATCCAATGACCTGAATGAAAAAG  
CCCGCGAGAGTGCAGGGCTTTGCTTGCATATTCAAATGCGCCTGTGGTTAACGGCGACGTCGCCAGGCC  
AGTGGCAACAGGGCCAGCAGGCCGAGTCCAGTGCACCACCGCCTGAGGAGGTGTCGGTTTTGGTGGCAT  
CGCTCTCCAGTCTCAGATCGACGATGATGGGGTTCATGGTTCGAGGCACTGAAGGGGTTGTGACAGCTT  
CAGGGAGCCGGTGTACTGCTGCGCAGCCGGGTTGGCGAGGGCATAGTCCAGGGTGCCAGCTCCCGCTCGT  
ACACCAGCCACCTTGCTGGCCAGCGCCGGGTTGGCGAGGGCATAGTCCAGGGTGCCAGCTCCCGCTCGT  
AGCTGTAGGAGATGGCTTTCTCCTTGTGAAATTTGACGTTGAGATCGATCAGGCCGTAGCTGCGAGTAC  
TTCGCGACCGAGCTGTTTCATAGGACTGCTCACCGATAAAGGTGTGAGAGGCCGATACGATCTTCCGCTCG  
CTGGTGGCCGGGTTGTAGTCGGTACGACCCGGATCGGATCTTCTTGGCGTAGGAGTTGAAGTCCGCCA  
CCAGCAGCACCTGGCCCGCAGTTTGTGACCGCCTCACCCAGCACCTTGGCGGCAGAGACCCGGAACCTC  
GGTGCACCTTGCCCTGCAGGTCCGCGGTTCTGTCTTGCATCGCCATTTTCGTAGCAGCCTGACCCCTTG  
GATTTGAGATGGTTGACCACCAGCGTCAGCGGCTCCTTGTCTTGGCGAGGGTGAAGGTCTGAACCAGCG  
AGTCCGCGTACCCGGCTGTCTTGGCCACACCACAGTGGTGTAGCGCTGCTCCGGCAGCTTGTATGACGCT  
GGCATCTCCGCTGGGGGTGAGCAGGGCAGGACGGTAGAGCATCGCCACCATGATAGCGTCACCGCCGAAG  
AACTTGCCATCGGTAAGGGCAGTGACCGGCAGACGCACATAGGCGTAGTGTTCGTCGCATCCTTCTGCT  
GTTTCGTTGAGGCGGGGCACCAGATTGTGGAGGGCCGAGTTATCCTCGAAGCCGTTGTTCTCCATCTCCAT  
CAGGCCAAGCAGATCGGCATCCATTGCGGTGATGGCATTGACGATCTTGGTGCCTGCTTCTCGAACTCG  
GGTTGGCTCTTGGCACCCCGGTTGCAACCTTTGGCGTTGTCCGCATCCGCTGATCCTTGCACAGGATAT  
TGAGTGCGCCGCCAATGCTGGAGTGGCTGGTGAAGTAGTTGAGCACGTTGAAGCTGCCGATCCGCAGATC  
GCTGCCAGCGAGGCGAGCCGGCGCGTCTTGACGATCCTTTCAGGGCTGCGCAGCAGGGCCGGCAGTTC

AGGGTGACATCGCTCGGTACCACCAGACGGAAGGCATCCTTGTGTAGACGATCACTCCCTCCAATCCAT  
TTAGCTGATCACCAATGCGCAGATATCCCTGATCGGCATCCCAGCTTGGGAACCAGGGCAGTACGCCATC  
CGGTGCTTTGTAATCAGACTCAACTACCAGACGGTTGCTGCCATTTTTGGTGGCCAGCGCAGCGTCC  
GCACTGTTGGCAACATGAAGTTGGGTGCGTTTTGATCAGCGGGGTGTTGTGGGCCAACTCTACGTTGTTGC  
GATAGACCTTGTAGTCGAAGCCGTAGTTGCGGGTCAGGTGCAGGTCACTGCTGCTGTCGAGACGTACCCG  
CATCCCTTCGTGGCGATTGAGTGCCTGCGCCAGCGTCTCCCTTCATTGACCTGCAGTACGCTGGTCCGGC  
ACATTCAGCCCTTGTGCGGTGACTTGCAGGCGGGCTTGTGTTGATTCGAAGGTGGGCTTGGAGCTGGGTGC  
CGCCGTAATACTCCTCGACCTTGGCTTCGAGGCAGAGTTCAGACCCCGTTTTGATGTCCTTTATATTTGGT  
CGCGAAGTCCTTGTGTTTCAGATAGACAAAGATGCCATCAGAGGTGGCCGGATTGCCATCGCCCACCGGG  
TCGGTCAGATAGAACCCTTGGTCAGGCTTTGGCCCAGCGTCGTACGATACCGCGAAGTTGAAGGTGC  
CCGGGCTGATTTTGGCGGTACAGTTACCGTTCTTGTGCGTACCGTCTGGGTAGCCAGCGCTGGCGGA  
GCCTGTACCCTGAATGGTCGGGATGGGGGTGAGTTGACCCGGATCGGACGGGCAGACAAATGCCGCATGG  
GCGCCTGAGGATGCAAGTGCCAGCCCCACGGCCAGCGACAGCAGGGTACGAGTACCTTTCATAGGTGTTT  
CTTTTTTATTTTTTGGCAGTGATTCCATAGCCTTGGCTCGTTGACCAAGGGCGCGCATTGTCACATTTCTG  
GCATGTCATACCAGTGAGCCAACGCACATTAATGAATCTGGGAAGGTGCGGGAAAGCGTTTTTATGATC  
CCAATAACGATATGATTTTTTTTTGATAATTCAATCAATTTTAACCTGTGATCATGACGCTTTCGTGGCA  
GGGGATAATTCTCTTTGAGAATAAAGATTGAGGGGATCTTGTGCGCTTCTATACTGGGTTCGTTCTCTCA  
CGGAACCCAGGTAAAGGGCAAACCGGCAGTGATGCCGGGGCGCAATGCTTCCGGTCTCGATCGTGGATCC  
AGATAGCGGGGTTTTCCCTGGGTGAGGGGTGGTTTTTGTGGCAGGTCCATTGCCAGTTGTCTGCGCCCATC  
ATGCAGGTTGCGATTGTTCTTTGCCTTGGTGACCAAGCCAAGACAAAACAAGGAAGATAACAATATGCAA  
CAGCTCTTCAGACCCAGCAGGCTTGCATGCTGGTCGCCCTTGGCGCTGCGCCCGCTGGGCTCAGGCCG  
CTTATCCCCGCTATAAATCCGGTACTGCCTACAAGGCTGGCGATATCGTCAGCAACGTGGTGCCTCTA  
TGAATGCAAAGAATTTCCCTATTCAGGCTGGTGCGGGGCATCCCCCTATCACTATGAGCCGGGGGTAGGT  
GTAGTCTGGGCAGATGCCTGGAAGCCCTATGGTGGCGAGGTGCCCCCTCTGCACTCGGCGTAGCCGTCA  
GCTCGCCAGCTGCCGGTTCAGCTTCAACGAAGGAGCCAGCGTGGCGCTGGCAGTGACCTGAGTGGCCC  
GGTAACGGCGTGGCCAAGGTGGAATATCTTGTGACGGCAAGCTGGTGCACGGCGAGCGCTCGCCC  
TGGAGTGCAGCTGGAGCGCCCGCCGGAGTGGGGCCCCATACCCTCAAGGCTCGCGCGCTGGATAAAGATG  
GCAAGGTGCTGAGTGAGCGGATTTCGAGCTTCAACGTCGCGCCGCTGGTGGCGCCAGAGCGCCCAAGGT  
GAGCAATTAGCAGCCCGCCAGCGGCCCAAAGTCAAGCTGGGTGCGAGTGTGGCGGTGAGTGGCAACGTC  
ACCGATGCCAACAACGATGTGGCCAAAGTCGAGCTCTATGTGCGACGGCAAGAGGTGGGCGAAGATACCA  
CTGCCCCCTGGCAGGTGAACTGGACGCCGGATGCCAAAGGGAGTGCCGCCCTCAAGCTGGTGGCCACTGA  
CAAGACCAATCTGAGCGGCGAGTGGCGGGCGGTGACCGTCAATGTGCGAGGAGGCCGCGCTGCCGCCACC  
GGTGGCAACCTCTCTTGTGACATTCGCCAGATCTATCGTCCGGATGGTTACGAGTGATGGGGGATGACC  
ATGCCCGTGGGTTATCGGCTACTTACCTCCTGGCGCACCGGCAAGAACGGCTGCCCGCTATCTGGT  
GAGCGATATTCCATGGAACAAGATCACCCACATCAACTATGCCTTCGCGGCGGTGGATGAGCAGAGCCAC  
ACCATCAAGGTGGACGATGCAGCCACCAAGATGACCTGGGATGGCGTGCCGGGTGCCGAGATGGATCCTG  
AATTCGCTACAAGGGCCACTTCAACCTGCTGTGCAAGTACAAGAAGCAGTATCCGGACGTGAAGACCCT  
CATCTCGGTGCGGGGCTGGGCCGATACCCGCGTTTTCTACTGCTCACTACCAAGGTTGACTGCTCGGTC  
AATACTGCAGGTATCAACACCCTGGCTGACTCGGCGGTGAGCTTTATCCGCCAGTACGTTTTGACGGGG  
TCGATATCGACTACGAATACCCACCTCGATGAAGGATGCCGGCAATCCCAACGACTTCCCGCTCTCCAA  
CCAGTGCCGGGCCAAGCTGTTTTGCCAACTACGAGGTGCTGATGAAGACCTTGCGGGCGCGGCTCGATAAC  
GCCGGTAACGAAGATGGCCGCAAGTACATGCTGACCATCGCTCACCGGCATCGGCCATCTGCTGCGCG  
GGATGGAGAATTCAGGTACCCAGTACCTCGACTACGTCAACCTGATGACCTATGACTTCCACGGTGC  
CTGGAACCACTTTGTGCGTCAACAACGCGGCCCTGTTGACAACAATGCCGACCCGAGCTCTCCACTGG  
GGCGTCTATAACCCAGACCCAGTTTTGGCGGTATCGGTTACCTCAACGCGGCTGGTCTGCCACTACTTCC  
GCGGTGCGCTGGCGGCTGGCAAGATCAACGTTGGCGTGGCTTACCTTACACCCGCGGTTGGCAGGGGTTAG  
CGGTGGCAGTCATGGGCTGGGTGGCAAAGCAGCCCTGCCGAGCCAGAACGAGTGGCAGCCGGGCACAGGT  
GGCAGCACCATTCGCTGCGGCAACGGGGCGGTGGCATCGACAACATCTGGCATGATCTCGACAAGAACG  
GCAAAGAGATCGGCGGTGGCGCGGTGCCATGTGGCATGCCAAAAAACCCTGGAGCATGCAGCCAGCCTCGG  
CATCACCATTTGCCAAGTTATGGCACTGCCTGGGGTCTGGATCCCAACAATCCGGCTCACGTGATGCAG  
GGCAAGTATGTGCGTTACTACGATGACAAGGCCTACGCGCCCTGGCTGTGGAATGAAGAGAAGAAGGTGT  
TCCTCTCAACCGAAGATGAAGAGTCCATGGGCCACAAGCTGGACTACATCATCAAGCGCGGTCTGGGTGG  
CGTGATGTTCTGGGAGATGGCGGGTACTACGCTTCGATCCGGCCAAGAACGAGTACGGCATGGGCAGC  
ACCCTGACTACTCTGGCTTACGAGAAGTTTTGCCAAGGCAACTCCGTACAACACCAAGCAAAACGATCTGG  
CCGCGCCGAGTGCCAGCTCGATATCCAGCTCAGCCTTCCGGCTTCAAGGAAGGGGACTCCAACATATCC  
GATCAACCCGAAACTCAAGCTGGTCAACAAGTCGACCCAGACCATTCGGGGCGGCGCGCATCGAGTTT  
CTGGTGGCCACCTCCACCTCTGATACCATCACGGATCAGAGTGGCATGGGGTTGAAAGTGGTGGAGAGCG  
GTGGTAACGACAACCTCGGAAGGCATTGCCAACGAGAAGGACTTCCACAAGGTGCGCCATGAACCTGCCGGG  
CTGGCAGACTCTGGCTCCAGGGGCCGAGATTGAAGTCGCCATGACCTACTACCTGCCCCGCGCTGGCGTG  
CCGAGCGGTATGCGCATCATCAGCGGCAGCCAGACCATTTGGTCTCAAGGCCGAGTTCCCGACCTGCCGG  
AGGCCGTGCTGGGTTCCGGTGGCGGCGAGAATCCGGGCACCAGCTGCAGCAGCCAGAACGTCAATCCGGC

GGCCTACAAGGCCTATCCGAGCTGGCCGCAGGGGGATCATGCCAATGGCGGCGATCGCATTACCCATAAC  
AAGGTAGTGTGGCAAGCAAACCTGGTGGACCAGCAGCGAGCCCAAGGCAACCGATGGTAGCTGGAAGTCTG  
TCTGTAGCTATTGATTTTTAAATCAATGAGATAAGTGAGGCTTCGGCCTCACTTTTTTTGTCTGGTTGGT  
CGCTCTGGTTGAAAATGCGCCTGCCTTTCTGGCGGGCAGCCTCTATAATAGAGTCGATTAATAATCAGA  
TGGATATCAGCGTATGGCGAGTATATTGGATTCCGTTGATCAACGAACTCAACTGGTGGGTGAAAACCGC  
CTCGAGTTGTTGATGTTTTCGTCTCGGCACCCGTCAGATGTTTCGCCATCAACGTCTTCAAGGTACGGGAAG  
TGGTCAAGTTGCCCCATCTGAGCAAGATGCCGGGCTCCCATCACAAATATCAGCGGGGTGGCCAATATCCG  
CGGCACCTCGATTCCGGTGATCAACCTGCGCAGCGCCATCGGTATGCGCCCCATGCCCATCGACAGTGAA  
TCCAACCTCATCATCACCGAGTACAACCGTACCATTCAAGGCTTTCTGGTGGGGCAGGTGGCCAACATCG  
TCAACATGACCTGGAAGGATATCCTGCCGCCACCGCGCTCTGCCGGCGTGCCAACCTACCCTACCGCCAT  
CACCCGATTCCTGAAGATGGAGTGGATCAGATCGTCGAGATCATCGATGTGGAGAAGGTGCTGGCGGAG  
ATCATCACCTATGACATCCGCATCTCCGAGGAGTCTGGATCGGGAGATCCTGCCCGAGATGCATGGCC  
GCAAAGTGCTGATCGTCGATGACTCCAGCACCGCCCGCAATCTGGTGCGCGAGACCCTGGGCCAGCTTGG  
GCTTGAGGTGATCGAGTGTGAGGATGGTTTTGCAGGCGCTGACCCTGCTCAAGGGGTGGTGCATGCTGGC  
AAGAAGGTGACCGACGAGATCCTGCTGATGATCACCGATGCCGAAATGCCGGAGATGGACGGCTACCGCC  
TGACCCACGAGGTGCGCAGCGATCCGCGTATGTCCGATCTCTTTATCACCCCTCAACACCTCCCTGAGCGG  
CAACTTCAACGAAGCCATGGTCAAGAAGGTTGGGTGCGACCGTTTTATCTCAAATTCAGCCCGATTTG  
CTGGTCCGCGTGCCAGGAGCGGCTGCGTCAGGTGCTGAAAAGCTGAGAAGCTGCCTGCCGTTATGCT  
AAATCAATAACAACACATCCCGCTTCGGCGGGATGTGTTGTTATTGGGGATTGGCGATGGATTGGTTGAA  
TCAAGGTGCCACGCAGAGATCGTCGACCATTCAAACATCCAAGTTTGGCGGGATATTTTGTATGGGAT  
ATTGGCGATAGACGGCGGGCTTATTGGCTGAGCAGCGGCTCCATAAAGCGGGCAACCTTATCGCGGATTT  
GGGGCTGGGCCCGCGGGGTGGGATGAATACCATCGTTTCATCATAAGTTCAGGGCGCAGCGCAATATCATC  
CATAAAGAAGGGCAGCAGGGGCAGATCGTTAGCCTGGGCCAACTCGGGAAAGAACTGCTCGAACTGGCGC  
AGATAGCGGGCACCGTAGTTGCGGGGCAGCTGGATTTGGGTCAACACCACACGGGTCTGCTGCTCCTTGG  
CGAGCGCGATCATGCTGGCCAGATTCTGGCGGGTAATGGTCGGTGCGAAGCCGCGCAGGCCGTCGTTGCC  
TCCCAGTTCGATCAGCAGCCAGTCCGGCTTGTGCTCCTTCAGCAGAGCGGGCAGACGGGCCAGCGCTCCT  
TGGGTCGTTTTACCCTGATGCTGGCATTGAGCAGGGTGTGTTTTGCCCCCTCCTCCTGCCATTTCTGGT  
TGAGCAGGCGGGCCAGCTCTGCTCAACCTGCATCTGATAGCCGGCGCTCAGGCTATCTCCAGTACCAG  
CAGGGTCTGGGCCAGCTGAGCCGAGCAGAGCAGGCTGCCGAGGCAACGAACAGGCAACAGAAATACGCACC  
ATCAATTCAACTCCCGCTATGGATTGTCATCAAGGGATTGGAACAAAGGATACAGAGCATGAGTTCAACC  
CCCATTATTGTGCTCAAGGGCCTCGGCAAATCGGTTTCGCTCGGCCAGGAAAGCCTCACCATCCTTGAAG  
GGATCGATCTGCAAGTCAATAGCGGCAGACGGTGGCTCTGGTCGGTGCCCTCCGGCTCCGGCAAGTCCAC  
CCTGCTGGGATTGCTGGCCGGGCTCGATCTGCCGAGTCAGGGGGAGATCGAGATCCTCGGCAAATCCTTG  
GGCGAGCTGGATGAGGAGGGGCGGGCCCGGTTGCGCGCCGAACAGATCGGCTTTGTGTTCCAGTCTGTTCC  
TGCTGCTCCCGACCATGACGGCGCTGGAGAATGTGATGCTGCCCGCGAGTTGCGCGGCGAGCGGGATTG  
CGAGCCAAGAGCCCCTGAACTGCTGGCGGCGGTGGGCTTGGCGAGCGGTTGCACCATCTGCCGCCACGG  
CTTTCCGGCGGTGAGCAGCAGCGGGTGGCCATTGCTCGCGCTTTATGACCCGTCCAGCCTGCTGCTGG  
CAGACGAGCCGACCGGCAACCTCGACAGCAAGACCGGCGAGAAGGTGATCGAGCTGCTGTTTGAACCTCAA  
TCGCAAGCACGGCACACGCTGGTGGTGGTAACCCATGACCATCAGCTGGCCGAACGCTGCCAGCGGCAA  
GTGGTCATGACGGCGGGTTCGGCTGGAGCGCGAGGTGCCCATGATGTGGTGTAAACGGGGTGAGCTGCGGG  
TCAGGTGGGAGATGCAAGGGATGATGCTGTGGCGATTGGGATGGCGACTGCTGCGCCGGGAAGGTTTCTG  
CGGCGAGCTGCGCTGGTTTTGTGCTGGCGCTGGCCCTGAGCGTGGCGTGCCTTTGAGTGTGTCATTGGTA  
GCGGATCGGCTCGATGCCGACTCAAGGCGTGGGCCGCGACTTTATCGGGGCGGATCGGGTGTGCGCA  
CTGCCGCTGCTCTGCCGATGGTTGGCTGGAACGAGCTAAACAGGATGGCTTGGCGGTGCAGACCACCGT  
CAGCTTCAACAGCATGCTGTTTTACGGTATGCGTTGCAGCTTGCTTCCATTCGGGCGGTGCCCGATGGT  
TTTTCCCTTATATGGCAAACCTCACTCTGGAACCTGCCCGTGGCCCTGCTCCCGGCGAGATCTGGCTCCTCG  
CCCGGTGATGCAGCTGCTCAAGGCCAAAACGGGGGATGAACTGGAGGTAGGCAATACGGTGTCAAGGT  
GGCAGGCCTGCTTGGCGAGGAGCCGGATCAGGGCTTCAGCCCCCTTCTGCTGGCGCCGCGGGGCGCTGATC  
CACAGTGCCGATATCGAGGCGACCGGCGCCCTGCTTCCCGGCGAGCCGCCAGCAGTGGCGCTATCTGTTCA  
AGGGGCCGCGGGAATCGCTGGCCCGTTACGAGCAATGGTTGTTGCCGCAATTGCAAGCCGGACAGAAGTG  
GATCAAACCGGATGACAGCGAATCCCAAGTGGGTGCTCGCTGGCCAAATGCCGAGCGTTTTCTTCCGGCTT  
GCCTCGCTAAGCGGGGTGTTGCTGGGGGCGTTGGCGATGGGGATTGCGGTGCGCCACTTTGCCGAGCGCC  
AGACCAATATGGTGGCGCTGCTCAAAAACCTGGGGGCATCCCGTGCCTCGCTCTGGCAACTGATGGGAAC  
CCTGCTGCTGTGCTGACGCTGATCGGTGCGCTGCTGGGTCTGGTAGCGGGCACCGTCATGCAGTGGATC  
ACCTTGCAACTGCTGGGGGACCTGCTGCCGCCGGATCTGCCGCCCCCTCCTGGCGTCCCTTTGCCCTAG  
GCGTGGCGGTGGCGCTCTTTATCACTCTGCTTCTCGCTTTTGTGCTTTCTTGGCGGTGCTGAAAGTGCC  
GCCGCTGCGGGTATTGCGCCGGGAGCTGGAGGCGGGTATTCCCCCTGGCTGGCCCTGCCGGTCCGGCCTG  
TTCGGGCTGTTTTGCGCTGGTCTGGGGCTTTACCGCCGATGTGCGGCTGGCGCTGGGTCTGGTGGGTGGCA  
TGGGCTTGGTATGGGGCTGTTGGCCCTGCTGGCAGCCCTGATGTTGCGGCTGGGGGCAAGAGTGAGCGG  
GCCTCATGCCTTGGCGCTGGCTCTGGCCACCTGTGCGCGAGCACAGCAGCGGCTGTTTTCAGCTGGCG  
GGCTTTGCGCTGGCATTGATGCTCTTTGGCTTGTCTGGGCGGCCCGGGTCGATCTGCTGGATGAGTTTT

CGGCCCGTCTTCCCCTCGATGCGCCCAACCGTTTTCTGGTCAATGTGGCCGAGAACGAGCGGGAGGGGAT  
CCTGAGCGAACTGGCGGCAGCCGGGGCCACCCTTCCGATTTCTATCCCATGGTGCCTGGCAGGCTGACC  
CATATCGCCGGTGGAGCGGTGGGCGAGGGGGCCAGCAGTGGCCGCGAGGGGGTTCGATCGGGAGCTCAACT  
TCACTACCACGGTAACCTGCCAATCGACAACAAGCTGGTGGCCGGGAAGTGGCTTGCCGGACCCGGCGA  
GGTGTCCGGTGGATAGCGAGCTGGCCAAGCGGCTCGATATCAAGCTGGGGGACATGCTCGCCTTTACCATC  
GAGGGGCGCAGCTTTGGCGCCAGGGTCAACCAGTCTGCGCAGCATCAAGTGGGACAATATGCGGCCCAACT  
TCTACATGATCTTCTCCGAGGATCTGTTGGCACCCCTTCTCCGAACCTGGCTTGGCAGCTACCGGCTGCC  
CGAGGCGGGGCGCTCTGCCGAGGTGGAGTTGATCCGCCGTCACCCCACGGTGAGCCTTATCGATGTGGAT  
GACCTGATTGCGCGGCTTACTCAGGTATCGGAGCAGGTGAGCCGGGCGCTGGCGCTGATGCTGGGGCTGG  
TGACAGTGGCCGCACTGCTGGTGTCTGACCCAGACCCAGGCCAGCATGGCCCAGCGTCGGCGAGAAT  
GCTGCTTATGCGCACCCCTGGGTGCCAGCAGAGAAGTGTGAAAAAGATGCTGCGTTGGGAGCTGGTGGCC  
AGTGGTGCCTGGCGGGGCTCTGTGCCGCCATGGTGGTGGAGCTCTGCTCTTTTGGCCTGCAGTGGTGGT  
GGTTCGAGGGGCTGTGGCAGTTCCACTGGGCCATCTGGCTCGCCCTGCCGACGCTGGGGGCGCTGCTGGT  
GACGCTGGCGGGGACAGGAATGCAACGTGAGCTGCTGGCTGGCACCCCTGAGCGATCGGTTGCGGGGCTG  
GGTCAGGGACTGTTGTAATCCCGACAGCGCGAGCCGATGCACACAAGGTGCAATAGCGCAGCCACAATAA  
ACAAGCAGCCCGCCATTGGCCGGGCTTCTTGTATGTGAGGTGCTGACGAGCGGACGCCGCGAGCGGGT  
GTGAGTTAGCGGGGCTCGCGCAGCAGATTGGTGGAGGCACTCGGCAGCTCGGGATAGCTGAAGTGAANAAC  
CGGCCTGTTGACGCCGTGCTGGTATCACCTTTTGTCCGGTCAACGAGCAGATCGGCCGCTTACCACATCAC  
CAGTTGCAGCAGGGGGGCGGGCACGAAAAAGAGGTGCGGGCGGTGCAACGTGGTGGCAAGGGTCTGGCTG  
AACTCCCGGTTGCTGACCGGATGGGGTGCAGTCCGCTTGAAGATGCCGTTGCATTCTTCTGCTCCAGCA  
GGAAGAGCATGGCGCGCACCAGATCCTGCACATGGATCCAGCTCATTATCTGGCTGCCTGACCCCATAGG  
GCCGCCGAGCCCGAGTCGGTAGGGAGGGAGCATTTTTGGGCAGGGCGCCGCCATCCATGCCAAGCACCAGC  
CCGATCCGCACGATACAGACTCGGGTTTGGCGGCTCTGGGCTTCCCTGCGCCAGGGTCTCCCACTGCTGGC  
AGAGCTGGTGGGTAAACTCGTCTTGGGAGAGCGGCACTGCTCGTCGAGGGTTTCGGTGCCTGTCTGCC  
ATACCAGCCGATGGCGGAGGCGTTGATCAGCACCTTGGGCGGCGTGGATAGCTTATGAGATCTACC  
AGTTGCTCGGTGAGTAGCCAGCGGCTATCGCAGAGCAGCTGTTTGCAGGACTCGCTCCAGCGTCCGGCGG  
CGATAGGTTACCCGGCAGATTGATTACCGATCCACGTCAATGAGGTCATCAAGCCGGTCGAGGTTATC  
CAATACCCCTGATATCGTGCCGAGAGGAGTAAGCGCGGCTCCCTGCCTGCTCAATACCAGACTCCG  
TGATTGACCTTGAATGGGCAACCAGCTTGCAGCGGATGAAAGCCGTTCCCTCCGTTAATAAGAACCTTCA  
TCGCTGCACGCTCCTGCTGCCGTTTGTCTACTCTAATGGCGTCTGCTCCTGCAACAAGTGGACGAGCT  
TGGCATGTGTTGTTCACTAGACTGGTTTTAACTCTATCTTTTTTCTTACCAGATATTGTTCAACAATAGTT  
TGAATTGATTGATTTTTGTTGGGTGGAGATTTGTTGATCAATCGCTATTATGGCGACCCTTTTTCGCTGT  
CCACCGAGGCTGTCACCCATCATCCGAGCATCAAAGAGGCCGCCATGCCATTTTCGTCGTTTGAACCTCG  
CCAGCTTTACTCGAGGATTCTGTTGGCGCTGCTGATGGGGGGCGGGATCCTGCTGCTGGGGGTTGTTGCC  
GTTATCTGGCAGACGGTGACGGAGATAGAGCGTATGCCGATTCACGGTTGCAGCATGCCCGGATGATGT  
TTGATCGCTCCATCGGCCATGCCCGGAGGCGGCCATCAATGTGGAGGGGATGCTAGGTCACCTCGTGAA  
GGAGGCGGCACAACCTGCTGCGCGAACAGGTGGCCACTGTGCCGATGTCCGTTCCGCCAATCTGGCTGTC  
GGCAGCCACATCTACTGCACCTCGCTCTATGGTGACTACGATGGCCCCCTCAATCCTGACAGTTATGTGG  
ATGGCAGGCTGCAACTGCTGCCAGGCAATGAGGTCAACCCGATCGCCCCCTGATCGTGCTGCGTCATGA  
AACGGACAAGGGGAGTGTGCTGATCGGTGTAGATGGCTACTACCTGCGCAATACCCCTGGAGATCTCCAGC  
AAGAATCCCGATGGCTCTCGTGGTGGGGCAGAGGGCTCTGTTGGATCAGGTCAGGTCGGGGCGGGCGC  
CCTCTCCGACAGAAGAAGGTTATATTGCCCTCGCTTCGGCCGATTTCCCTATCAGGTCGTCACCCGGGT  
CACGGTGCATGACTACTGGAGCCACGCATGGCGCTACTCCAGATATACCTTGTTCCTCTCTCCGTTGCTG  
GCGCTGCTGATTGGATTCCGCACCTTCAGGCTGATGGGGCGTAGCAGCTCGCCAGCGGAAGAGCTCAAGC  
GGCGTGTGAGTGCAGGAGGAGTTTATCCCTATCTGCAGCCGTTGGTCTCCGTTGAGGATGAGCAGTGGCG  
TGGTGTGAGGTGCTGATGCGCTGGCAGCATCCCAAGCAGGGGATGATCTCGCCGGATCGCTTTATCCG  
CTGGCGGAAGATAGCGGGTTGATCGTGCCCATGACCAGCCTGTTGATGGCGCAGGTGCGGATCACTTCT  
CCCCTTATGCCCCGAAGTTGCCGGCAAGTTCCATTTTTTGTCTTCAATATCAGCGCCAAGCACTTTCAGGA  
CCTTGACCTGTTGGCTGACTGCAAGGCGTTTCTTGACGCATTTAAAGACAATCCCGTTGATTTGGGGCTG  
GAGCTGACCGAGCGTGAACCTGCTGGTGGCTGATGAGACAACCCTCAGATGTTTGGCGAACTGCGCAAAC  
TGGGCGTCTTATCTCTATCGATGACTTTGGCACCGGTCACTCCAGTCTCACCTATCTGCAACAGTTTCA  
GGTGCATGCACTCAAGATTGACCGGAGCTTTGTGGAGATGATCGGCACGGATGCACTCTCCAGCCATATC  
GTTGAAAACGTGATTGATCTGGCGAAGCGACTTGAATTGATCCTGATCGCGAGGGGGTTCGAGAAGCAGT  
CGCAGGCGGACTACCTGCGGGCTAGGCACGTTGACTATCTGCAAGGGTATCGTTACAGCCGCCCATTC  
GATGAAGCAGTTTTTGAAGACCCTGTTTGGCTGAACGGTTGAATGGGGAGCATAAAAAACCAGCGATCGC  
TCGCTGGTTTTTTGTTAATACGGTTTTGGCTTGGGCGTTCAGAGCATGCCCTGGAGGGGCGGGGCCAAGCG  
TTTTGACCCCTCCTCGATGGTGCCTTCATCGACGCGAGGAGAAGCTCAGGCGCAGGGTGTCTTGTATCTCG  
GGGCGCACGTAGAAGGGGGCGCCGGGTACGAAAAGCCACCTTCTCCTTGATCGCCTCGTCAAACAGCGCCA  
TGGCACTGATGTGGGCTGGCAGGGTCAAGCAGAGGAACATGCCCCCTTCGGGCTGGTGTAGCTGACGCC  
GGGCGGGCAGTGACGGGCCAGCGCGGCTCCATGGCGGCGGCTGGCGGCCATAGACCTCCTTGATCTTC  
TCCAAGTGAGCGTGCAGGGAGTTGTCCGTGAGGAAGCGGTGCAGCACCTGCTGGCTGAAAGCATTTGCTGT

GCAGATCGGTTCGCTTGGCGATGGTCACCTTCTTGGCAGCCAGTCCGGCATCACCATCCAGCCCAG  
ACGGAAGGCGGGCACCACGGTTTTGGAAAACGAGCCGAGCAGCAGGTATTGTTTTGGCGCCAGCTTGGCA  
ATCGGGGGGAGATGCTCCCTTCGAAGCGCAGCTCGCCGTAGGGATCATCTTCCACCATCAACAGCTCGT  
GGCGCACCAGTCGCTCGGCCAGTGCCTCGCGGTTAGCAGCGCTGTAGGAGACACCCTCGGGTTCTGGAA  
GTTGGGCACGCCGTAGAGCAGCTTGGCATTGGACCCGCTTGCCAGCAGCGCATCCAGCGCCGCCAGATCC  
AGACCCTCTTCTTCAAGGGTGTATCGGCTTGAAGGTGGGCTGGTAGACAGAAAAAGCCTGAATGGCGCCAA  
GGTAACCCGGCTCTTCGATGATGAGATCCTGACCCTCGTCGATCAGCACCTTGGCCAGCAGATCCAGCGC  
CTGCTGGGAGCCGCTGGTGTATGAGGATGTTGTCCGGATTGACCTGCATGCCGTGGCGGGCCAGATAGCGG  
TCGGCAATATACTGGCGCAGCGGGGCGAAGCCTTCGGTCGCCGCATATTGCAGGGCGGCAGCCCCCTGTT  
CGCGCAGCACATCTGACAGCCCTGATCGATCGCCTTGACCGGAAACAGGTGGGGATTGGGCAGGCCACC  
GGCGAAGGAGATGATCTCCGGATTGGCGGCAACTTTCAGGATTTCACGGATAAAGGAAGTTCAACCTTC  
TCGAAGCGCTGGGCAAAAAACCGCTGCATAGACAATTCTCTCGGCATGTGGGCGGTCCATTCGACC  
GCCAGGTTATCCGTTTTGTATCAGATTTTCAGAAATGAGGCAATGATTGTACAAAAATCGCCAAAAAGGG  
CTGGAACGACTTTACTGCGGATTATATTGGACGGTTAGTCGGTGTGGTGTATGCCAGTGAGGGAGCTGGGG  
AGCAGCTGGCTGGAATATTTGTTGCGCGAAACACTTGCCTTGGGCTATCTTGGGATAAATTCGCTCCC  
CTGTTTTTCGCGGGTCGATGAAATGACGAACCGGAGCGGTCCCGCTCGGGATCGAACACAAGATGTATTA  
CCCAGATTGATGAAATAACGAGACCATTATGCCTGTGACCCAAGATGTATTTAACGAAGACGGCAAGTTC  
ATGCGCAAGATCCGACGCTTTGTCCGTGCGAAGGCCGCTGACCAAAGGGCAGGAGAAGGCCCTGGAAG  
AGCTCTGGCCGGTCATGGGCATCGATTTTCGAGCCAAAGCAGCTCGATCTGGTTCGACTGTTTGGCCGCGA  
GGCACCTGTGGTGTGAGATCGGTTTTGGCATGGGCGCCTCTCTGGTGGAGATGGCCAAGAATGCCCC  
GAGAAGAACTTCATCGGCATTGAAGTGCCTCCCGGGCGTGGGCGCCTGTCTGGGTACCGCTCAGGAAG  
CGGGCGTCACCAATCTGAAAGTGATTTGCCACGATGCGGTGGAAGTGTGGAGCACATGATCCCGAACGG  
TTCACTCTCCTGCCTGCAGCTCTTCTTCCCGGATCCCTGGCACAAGAGCCGTACCACAAGCGCCGCATC  
GTACAGCCTGCGTTTTGCCAGGATATTTCGTGAGAAAGCTGGCCATCGGTGGCGTGTCCACATGGCGACCG  
ACTGGGAAAACATGCCGAGCACATGCTGGAAGTGATGAGCGCCGCGAGGGTTACGAGAACACCTCTGC  
CACCGGCAACTGGGTGCCTCGTCCGGACTGGCGTCCGCTGACCAAATTTGAACAACGTGGCCACCGTCTC  
GGCCACGGGTTTTGGGATCTGATTTTTCAAGCGTGTGAGCTAAGCTGGCACGTCAACACACCTAGCGTATC  
AACTAACTTGGAGGATCATGAGCAATCGTAGCCCGCCGAGCGCAAGAACTGCGCGTGCATGAAAT  
CCAGGAAATGGGTTTCGACATCAGTTTTCAACTTCCCGGTCCGCAAGAGACCATCGATGCGGTA  
GTCGATGCGATGATCGATGAGGTTGTTGAACCCCGTAAACTGGCTTTTTGCCGGCTCCGGTCCCTGGCCT  
GGGAAGGGATGATCTGCACCCAGCAACTGGGCAAGTGTACCGAAGAAGACCGCGCTGCCGTCAAATCCTG  
GCTGGAAGGCAAGGGGATGGAAGCCGTGGTTCGTTACCGAGCTGTTTCGACCTCTGGTACGGTGAACCGGCC  
TGATAACAAGGCTGCCGCATCTGGCGCCTTGTGTTGGGTAACCTGAAAAATCCTGCCGCTGGCGGGATTTTT  
GTCAGTGGGGATGGGATCTCCACCGCTGTTTTAGTCATGGAATCGCTTATTGCTTATGGTGTGTCATCC  
GAATTACTGGCCAGCATCCTTGAAGAGGTGCGCCGTTGCTGGGACAAGGCAAGGTGGCCGACTACATTC  
CGGCACTGGCTCAGGTACCGGCCGATCGGCTGGGTATCGCAGTCTGTACCGTCGAGGGGGAGTTGTTTAC  
CGCCGGTGACGCTTTTGAACCCCTTCTCCATCCAGAGTATCTCCAAGGCCCTGAGCCTGACCCTGGCACTC  
ACTCTCTATCAGGAGGAGGAGATCTGGGCCCCGTGTTGGCAAGGAGCCCTCCGGCCAGCCCTTCAACTCGC  
TGGTGCAGCTCGAGTTCGAGCAGGGGATCCCCCGCAACCCCTTTATCAATGCCGGGGCGCTGGTGGTGTAG  
CGATCTGCTGGAGACCCGCTCACTGCGCCCCGTGAGCGTACCCTTGGCTGGTGGCGCCGCTTTCCGGC  
AATCCGGCCATCATGGCGGATCAGGTTCGTCGCCCGCTCCGAATATCAGCACTCTGCCCGCAACGCCGCCA  
TCGCCTATCTGATGAAGGCCTATGGCAACTTCGAAAACGAAGTGACAAAGGTGCTGCAAAGCTACTTCAA  
TGCCTGTGCCATCCGCATGAGCTGCGTCGATCTGGCGCGGGCATTCATTTATCTGGCCAACCGTGGTGTG  
CCACTGGGCGAGAGCGTACCCTGCTGCCCCCGCCACCACCAAGCAGGTCAACGCCCTGCTCGCCACCT  
CGGTTCTCTATGATGAGGCGGGCGATTTTTGCCTATCGGGTTCGGCATGCCGGGCAAAATCGGGGTCGGCGG  
CGGATCATCGCCCTGATCCCGGGCGAGCTGCGTCTGTGTCTGTTGTCGCCCCGAGCTCAACAAAGCCGGT  
AACTCGCTGGCGGGCACGGCGGCTGGAGCTGCTGGCCGAGCGGCTGGGTTCGCTCCATTTTTTAAACCTT  
GTTCACTATGAATCGAGAAATCACCATGAAACGACATCTTCGCTTCTGCAGGCCGCGCTGGCGACCTTA  
CTGCTCTGGTGTGCCCTGCCCGCGTGGCAGGGGAGTTGCCACCCTCTCGCTGGCCGATGCCAAGGCCA  
AACAGGCTGTATCCTGGATAACCGCGCCAGCTACTTCTATCAGGGGTGGCCGATGGAAGGGGAGAAGCA  
GGGCGGTTCATGTGGCGGGTGCCGAGAACCCTCTCTGCCGAGTGAAATACAGCGATGAAGAGTGGCCAAAG  
GCGCTCGAGATCAAGGGGCTGAAAGCAGATCGTCCGGTTGCCCTTACGGTGCCTCCCGCAAGTGGCCG  
AGGTGGCCCGTCTGCTGCGCAAGCAGGGGATCAAGCAGCTGTTTCGAGTTGCAAGGGTGGCAAGCCGCACC  
GCGCGAGTCTGTTGGCACGCTGGCAGCAGCTGGTCTATCCGCGCTGGTTGGCGGATCTGCAAGAGGGCAAG  
CCGGTCCCGCAGCGCCCAAGGGTACTGGAAGTTGTTTGAAGTGGATTGGGGTTACCCAAGGCCCTACC  
TCATCAGCCACATCCCGGGGGCCGGTTATATCGATACCAACAGCCTCGAAGAGGAGCCGCTGTGGAACAA  
GGTCTCTGACGAAGCGCTCAAGAAGCTGCTGCTGGATAACGGCATCCGTCACGACACCACCGTTATCCTC  
TATGGTTCGCAACACCATGGCGGCTGCCCGTGGCGGCACCTGATGATGTATGCGGGGGTGGAAAGATGTGC  
GCCTGCTGGACGGTGGTCTGGATGCCTGGTTTTATCCAGCACCTGCGCACCGAAACCGGCTGCCCAACAA  
ATATGAGCCGGTGAAGGAGTTTGGCGTGGCCATTCCCGCTCACCCCGAGTACTACACCACGCTAAGTCAG  
CGGAAAGAGCTGCTCAAGAAGCCCGATAGCGCGCTGGTTCAGTGTGCGTACCTGGGACGAGTTTGTCCGCA

ACACCTCAGGTTACAGCTACATCAAGCCGAAGGGCGATATCCCGGGGGCCAAATGGGGTCATGGTGGCGT  
CGATGCCAACAGCATGAGCGACTTCCACAACCCGGACGGCACCATGAAGCCGGCCCGGAGATCCTCGCC  
ATGTGGGACCAGTGAACATCGAGCCAACCCAGCAGCGCGCTTCTACTGCGGTACCGGCTGGCGCGCCT  
CCGAGGCCTTCTTCTACGCTGGCTGATGGACTGGAAACAGATCAGCGTCTACGACGGTGGTTGGTACGA  
GTGGAGTTCGGATCCCAAGAACCCGACCGTCAACGGTGAGCGTCAGCCTGCCAAGTCTTGATTACGTGCT  
TGCGCTGAAAAGAAGAGGGCCGGACAGAGATGTCCGGCCTTTTTTCATTGCGCTCGCCACCCGGCCAGATAA  
CTAGGCTAAGTGCCTGATTATTGACGGCGATCCCCTTTGCTCATCCCGCCATCCCCTGCGGTGCTATTG  
AACTAGGCTTCAAGAAACATCCTCGTGGTGAGGATGATCGCAGAAGAGGCCGCAATGAAAAAATGATGA  
TGATCCTAGTGTGCGCCCTGGGGCTGGTGGCATGCAGCTCCCAATACATCATGAGCACCAGGATGGCAA  
GATGATCACCACAGAGAGCAAACCCAAAGCTGGACGAGACCCGGCATGTATCGCTATTACGATCATGAA  
GGGCGCGAGGTAATGATCAAGAAAAGATGACGTGACCCAAATCATGGAGCGCTAAGCGCTCTCTGGCCGCA  
AGGGCCGCTATCTGCGGCTCTTCTCTTTTTGCCGAAAAGTCGCGCTGTTTTCTCTGTTTTATCCCCGCACA  
TTCGAGCAAATTCAGCCGTGATACAGCTTCCGTTATGGTTTAAACCTTATCATCACACTCCATTTTTTTA  
TTGGAGGTGTTATGTCCTTGATGTCTATCTGGAATTTCCCGTTTTTCTGCACGCAGCTTGCTGGGTGGTGC  
CTTGCTGGTGGTGGCGTCAGCCAGCCATGCCGGTGACGATCAGTTCACGCTGAGGCGGACTATTTTGCTG  
GGAGCCGGTGATCATGGTGCACAATTCCTTTGGTGGTTTGGCGTCAGACCAAATATATCAAGGTGAAGG  
CGGAGCGTGATTTGACCCTGGATCGGGTGGTGGTACCTATGGTGGTATCGTACCAAGACCATTCCGTTT  
CGATCGGGAAATGAGCAGTGATAAAGAGACCGAGTGGAAATCACTGGGCTCGCGCCGTTGTGTAAAAAA  
ATCGAAGTGTACGGTAATTCAGAGCGCAGCAAAGCGGGCGTAAAAGTATTCGGCCGCAAATAATTGATGC  
GGTTTTTCTGCGCAAACAGATGAGTTGAAAATAATGGCGAGCCGTGGCTCGCCATTATTTTTTATGGTGC  
GGTTCGCTATTTTTTTCGGCCGAAATGGTTTGTATGACGGTTTCATCGCACTCGAGATACGGCCCTTCCATC  
AAATCGATGCAGTAGGGGATGGCGGGGAAGACTGCATCCAGACATTCGCGGATTGATTTGGGCTTGCCCG  
GCAGATTGACGATCAGGGTATCGTTCGCGCAGTCCGGCAGTCTGGCGCGACAGAATGGCAGTCGGCACAAA  
CTTGAGGGATTTCGGCCCGCATCAGCTCGCCAAAGCCCGGCATCATGCGATCACACACCCGCTCGGTGCGT  
TCCGGCGTGACATCCCCTTTGGCCGGACCGGTGCCGCTGTGGTGCAGATGAGACAACACTGCTCCTCAT  
CCGCCAGCCGGATCAGGGTGCCTTCAATCTGCTCCTGCTCATCGGGATCACCTGATAGACAGGTTCCCA  
CTCCGAGGTGATAGGCGTTTCAAGGGTGTGATGATGGCCTTGGCGGAGAGGTTTCATAGATGCCCGCG  
CTGGCGAGGTCGCTGACGGTGACGATACCGATATTTGCTTGTCTCATGGTCTGCTCTTGAATGTCCGATA  
AAAGTGGCAATTAATAAATAACATAATCAGTGAGATATGCTTAAACCGTCAGGAGATGACGCGGGTCCGTTGAG  
GGAAGAATAAAGTGTGCAATGAAGCAAATAAAGGCCACCCGATTTTTTATTTGCAATAAAAAACAGAAAA  
TCACAACCTAAAATGTATAAGTGTTTTTATCTCGCCTGAATTAAAAAACAATCGCTTGTTCCAAACACAAT  
TAAAATAGATAGACACCCTCGTAGTGACCATTGTCCGGTTTAGTCGCCAGTGGATGGATTGAACCCTTTT  
TAGCCGCGTGCATATACAGATTTATATGGCTGGGACGTGATGGTGTGGTACCGCAGTGTGTGGCAGCA  
ATAGTCGCCAAGGAGGGCATAATGGAGTTGCCTGATTTTGACACCCTGAAGGAGTTGGCTGCGAGTGAGCC  
CTCCCGGCTGGATGCGATTCTGGAGCAGCAGATCGACCAGTTGATGGCCCGAGCGAGCCCGATCAGCAG  
CGCCGCTCTGCGCGGGTTGCAGTTCAAGATTGATGGTGCAGCGCTTGGCGAAAAACAATCTTGATAGCT  
GTATCCGGATTACCAACATGATGCGGGAATCTTTTTATTTGATGCGCAGCGAAATGAGCCAGTTCAGAGA  
AGAGGGGGACCCTCCGCTGAAAGCGATGGCAGTGGTAAAATAATCCGCTTGGCGGACTATCGACGTGCG  
AAATAATCTGCAATAACCCCTTGAATGATATTTAGCCAAATCGGTGAGATCATGATAAAGGGAATTGC  
TGGCGACCTGATTGTTATGGTTTTTAATGTTAGTCGTAATGTATTTGTGATGTAATTTCTTTTCTCCTTC  
TTGTAATAACTAATTAGTCAGGTTGTGATAGGGGTGGATGAATAACAGTAAAAGTTAGGCTAATATGGCC  
GAAATTTTTTATTGCTACGACTCGAAGGGATTATGAGAAGTATCACACCAAGACGGGTGTTGTGCGGGGAG  
CAACAGACAGAGATCACCCGATTATCGTCAAGGTGGGTGAGATGTTGGCCAGTTCGGGGCGGAGAGCC  
GGATCATCGAGCAGACCAGGTGCGGCTGGGGATGGCGCTGGGGCTGGAGAGTGTGAGATGGCCATCTC  
TTCAGTGCATCTGCTCACCAGTCTCTATCAGGGGGTTGCGTCAACACTACCCGCGGGTGCAGGAA  
CACGGCATAAATATGCAAGTGGTGTGCGAGATCCAGCGGATCTGCATCATGGCGGAAAAAGAGCTGATCG  
GTGCCCGTGAAGTGCAGCAGCGCTCGAAGCCATCGTCCCTTCCACTATCACCCCTGGCTGGTGGTCCC  
CATGGTGGGGCTCTCCTGTGGTGCCTTTAGCCTGCTGTTTGGCGGTGACTGGCCCATCTTCTGGTGACC  
TGCTTCTCGTCTGCCGTGGCGATGCGGGTGCGCCAACTGATGGCCCGCCATCACCATAGCCCGCTCATCA  
ACTTTGCCGCCACCGGCTTTATTGCCACCTTGCTCTCCTCCAGCGCCACCTTTTTTAACTGGGGTGACCA  
GCCTTATCTCGCCATGGCGGCCAGCGTGTGCTGCTGGTGCCGGCTTTCCGCTGATCAATGCGGTCTCC  
GACATGGTGAAGGGCTACTTCAACATGGGCTTGGCCCGCTGGGGGACTGCGACCCTGCTGACCATCAGCG  
CCGCCATAGGTATCATTTTTGGCCATGTGCGTACGGGGATCTGGGGGTGAAAAGTATGATGGATTTGCTC  
TGGCTACTGGCCAAGGATGCCTTCTGGTCTCCATCCCAGCGGTGGGGTTTGGCATGCTGTTCAACGTGC  
CACCACGGATGCTGAAGTATTGCGCCATGGGCGGCGCGCTGGCCACAGCCTGCGTACCTTGTGATCCA  
CTACGGTATGCCCATCGAGTGGGCGACGCTGGCGGGCGGACACGGTCCGGCTTGTCTGCGTCTACTGG  
TCGCGCCGTCTGCTGGCACCCGCTCCGGTGTTCAGCGTTGCCCTCCATCATTCGGATGATCCCGGGCAGTT  
ATGCCTTCAAGACCATGATTGCGGTGGTAGAGCTCAACATCAACGGCGTGACCATGGAGTTGATCCAGAG  
TGCGGTGGAGAACGGCCTCAAGGCGCTCTTTATCGTCCGGTGCCTCAGTTTCGGTTTGGCGATCCCCCTC  
CTGGTGTGTACCGTAATCGCCCCATAATCTGACAGACGGTGAGAGGCCCATGAAGATTTCCATGATTG  
CCGCCATGGCCACGACAGGGTGTATCGGCAAGGACAACCAGATGCCCTGGCATCTGCTGCCGATCTGGC

TCACTTCAAGCGTGTACCCCTCGGTAACCGGTATTGATGGGGCGCAAACCTTCGAATCCATCGGTCTG  
CCGCTACCCGGACGGCGCAATCTGGTGATCAGCCGCAATCCCGCTATCAGGCCGAGGGCATTGAGGTAG  
TGGGCTCCGTCGAGGCGGGCTGGCTCTGTTGGCAGGCAGCTCGGTGGAGGAGTTGATGGTGATCGGTGG  
TGGTCATCTCTATGCCGAGATGTTGCCGAGCGGGATTGCCTCTATCTGACGCCAAATCGATCTGGCGGTG  
GAGGGGGATACCCGTTTTCCCGCTTTTTGACGATGGCCACTGGCAACCGGTTGATTGCGAGAGCCACCCTG  
CCGATGAAAAGAACCCGCACCCCTATAGCTTCGAGACCTGGCAGCGCCGCTGACGGACGAATGCTAATGG  
GCAAAGAACAACAAGGGCATCTTCGGATGCCCTTGTGTTGCGGTTGCTTTTTCAAGACGGGATTAGATGC  
CTGAGCCGTCGTTCTCGCCATTTTCTCGTGCAAACCGCACTCGCGCTTGAGGCCGAAGAAGCGGGTCTG  
CTCCTCGCTCATGCCCGGCTCCCACTTGGCGGTGGTGTGGACATCGCCACCAGAGATAACCCCTGCTCC  
CACAGCGGTTGGTAGGGAGGTCGAACTCCTTGAAGTAGTAGAAGACATCCTTGTGCTCCAGTCGATCA  
CCGGCAGAACTTGAACCGCCGCTGGATGCCCAGCACCGGCAGCTTGCCACGGCTGCCGACTGCTCC  
CCGGCGCAGGCCGAGAACCAGGTCTGGGCCCCAGTCCAGCAGCGAGGGCGCGGTCCATCGGCTCCACCTTG  
TTGAGCTGGTTGTAGCGGGTGTATCCCTCTACCCCTGCTCCACAAGAGACCAAATCGAGCTCCTGCC  
AGGCAGGGCTGAGTTTCGGCCGATAGATCTTCAGGTTGAGCGCGAGGCGCTCGGTGAGCTCGTCGATGAA  
ACGGTAGGTCTCGGGGAAGAGATAACCGGTATCGGTGAGCACTACCGGCACGTGCGCCCGCTCGCGGCTC  
ACCAGATGGAGCATCAGTGCCGCTGAATGCCGAAGCTGGATGAGAGCACATGCTCCCCCGGCAGATTGG  
CCAGGGCCAGCGCACCCGCTCGGGGGCGCTCATGGTATCCAGCTCCCGGTTGAGGGGCGGAGTGCCCTC  
GACTTGCTCTTACGGCCGAGGGCCAGCAGTGCTGCAGGTCAAGGCGGCCATCTTCAGTGACATTAAGC  
GGCATATTAAGCGGCATAGAAGTCCCTCGCAGAGTCGATAACGGGGCAATTACCCCAACCCGGATCAGC  
AAGTCGCCAAAGCATTGCGCCTGATTGCGCTCGGTGGCCAGCGCCGATCAACGCGTCGAGTTCGGCCA  
AAATCTGCGGTTGCGGTGATGTTCTCCTGATAGAGGCGCGGAATGCGGGTACCCTCCAGGTTGCCCCAG  
ATGCAGGTTGTAGCGGGCCGGCGCCTTGCCACCAGACCCACTTCCGCCAGCATGGCGCGGGCCGAGCCG  
TTGGGGCAGCCGGTGACCCGGAAGATGATGGCGTCATCCGCCAGCCATGTTTGGCCAGCAGCCCTTCGA  
TGTCGGTGACAAAGGCGGGCAGCATGCGCTCGGCCTCGGCCATCGCCAGCGGGCAGGTGGGCAGGGCCAC  
GCAGGCCATGGATTGCTTGCCTGCTCGCTCACGCTTCATCCAGCAGGCCGTAAGGCGCGCCAGCCCT  
TCGATGCGGGCCTTCTCGTTGGCAGGTACGCCCAGATGATCAGGTTCTGGTTGGCGGTGAGGCCAAAAT  
CCCCCTGATGCACCTTGGCGATCTCCAGCATGCCGCTTTCAGGGGCTTGCCCGGAAGTCCAGCAGGGC  
GCCGTTCTCGATGAACAGGGTCAAGTGAATGCTTCCGCTGATCCCTCGACCCCAACCGCATGCCCCA  
CGGCTGGTGAACATCATAGGGGCGAACCAGCCCGCACTGATGCGCGCGCGGTCTCCACCTCGGCCCTTGA  
ACGCTTCGACGCCGACTCGCTCGAGGGTGTACTTGGTCTTGGCGTCTTGCGGTTGACCCGTTGCCCCA  
GTCGCGCTGGGTGCTGACCACGGCGGGCCGACCTCCAGCACGTGGGAGAGCGGAATAAAGCCAAAATCG  
CTCACCTTGCGCGGATAGGTGCTGGTGTGCGCGTGGGTGATGGCCAGACCCCGCCACCAGCACGTTGA  
AGCCACCAGTTTGCCACCTTCGGCAATGGCCACGAAGTTGAGATCGTTGGCGTGGATGTCCACGTGCTT  
GTGGGGCGGGATCACGACCGTAGTCTTGAATTTGCGCGGCAGGTAGTTGGAGCCAGGATCGGCTCCTCG  
TCCTGCCCCAGTTTTTACCATCCAGCCAGATCTCCAGTAGGCGCGGGTCTTGGGCAGCAGGTGCTCGG  
AGATCTTCTTGGCCACTCGTAGGCCTCCTGATGCAGTTTCGGACTCCACCGGTTGCTGGTGCAGAGCAC  
GTTGCGGTTACGTCGCGGGCGGTGGCGATGGAGTCGATAACCGGTGCTGTTGAGGGTCTGGTGCATCAGC  
TTGATGTGCGCTTCAATACCCCGTGAAGTGAAGGTCGACGGGTGGTCAGGCGGATGCTGCCGTAGA  
GGCTGTGCTCTTCGGCGAACTTGTGATGATCTGCCACTGGGCCGGGGTATGATCCCACCAGGCAGGGC  
GGCACGCAGCATGACGTTGTGACGTGGCTCCAGCTTCTGAGCGGGCGGCTCCGGGGCGGATGTGCGGGTCA  
TCCTGCTGGTACATGCCGTGAAAGCGGATCAGCTGGAAGTTGTCGCCGTTAAAGCCCGCGGTGAGCGGGT  
CCTGCAGATCTTGTCTATGGTGCCGCGCAGGAAGTTGCTCTCGCGCTTGAGGGCTCGTTGTGCGGCCAG  
CGGCCCTTCGACCGGTCCCGCTTTTGGGTGAGAAAGAGGTTGTTTGTCTCATCAATAGACATCCCTTTGAT  
AACGTTTGGCACGACGCAATTCGCTCAAATACTCTTCTGCTTCTCACGGCTCTTGTGGCCGTGTTTCGGC  
AATCACATCCAGCAGGGCCTCCTGCACATCCTTGGCCATCTTGTGCGCTCGCCACACACATAGAAGTGA  
GCGCCTGCTTCCAGCTAGGTAGACTCAAGCCCTGCCCGCAGGCGGTCTGACATAGATCTTGT  
TGGCCTGATCCCGGCTGAAGGCCAGGGAGATCTTCGACAGCAGCCCGATTTACATAACGCTGCCACTC  
CACCTGATAGAGGAAATCCTGGGTAAAGTGGGGGTTGCCGAAGAAGAGCCAGTTCTTGCCTTCCGCGCCC  
TGAGCTTCCCGCTCCTGCATAAAGGCGCGGAACGGGGCGATGCCGGTGCCCGGGCCACCATGATGACGG  
GGGTGTTAGGGTTTTGCGGCAGGCGGAAGTTGTGCTTGTGCTCCACAAAACCCCGCACCTCGCCATCCTC  
AATCAGCCGATCCGCCAGATAGGAGGAGGCGGCACCAGAGCGCACTGTGCCATCTTCTGTGGGTAGCGC  
ACCACGCCGACGGTCAGGTGTACCTCCTCTTCAACCTCGCTCTGGGCAGAGGCGATGGAGTAGAGGCGCG  
GGGTGAGGGGGCGCAGCAGGCTGACCAGCTGCTCGGTGCTGAGGGCGGTGCGGAAGCGTTTCAGCACATC  
CACCACCTGAGCGGAGGCGACCAGTGCATTGATCTGGGCTTGTGCGCCAGCCAGATCTTTGAGCGCTGCG  
TTCTCCGATATGTGACGAGCCCTGTGATAAAGCCCGCGTGCAGCCGGGTGAGTTTCAAGTACTGGTCA  
GTGCGGTGTGCAAGCTGCCGTGGGCTGTGGCTTCATCACCAGAGAGGCGGTCAGGGCGAGCACTTCCCC  
CACCAGGTGCGCGTCATTGTGCAACCAGACGCCGAGGGCATCACCCGGTTGATAGGTGAGGCCGGAGTGC  
GCCAGATTGATCTCGATATGGCGGATATCCTTGGTGAATCGCGGCCGGTGATCTTCTGATTGACCGACA  
GGCGGGCAGGGAAGGGTTCTCCTTGTGTTGTTGTTGTTGTTGTTGTTGTTGTTGTTGTTGTTGTTGTTG  
GCTGCTGCTGGCCGCTCCGGTAGAGAGGGTTCGCGGTGATGGCATTGAGCGCTGTTCCGCCACGCTTG  
CGGCATCCTGATAATCCACATCGAGGCTGGCGAGCTCATAAACCCTCGGCCCTGCGCTGGCGAGGA



AGTTGTCAAATCTTTGCCGGTCTGGCAGAAAAATTCGTAGGAGCTGTCACCCAGCCCCAGCACCCGGAA  
CCTGAGGCCGTCCAGCTTGCCAATCTTGCCTTTTTTAAGCTGCTCGAACAGATCGACGGCGCTCTCCGGC  
GGTTCACCCCTCCCCGTAAGTGCTCACTACCACCAGCAGATGGCTCTCTTTCTTGAGCTGCTTGGGTTTGT  
AGTCGGCCATCGACGCAAGGGTGACGGGGAGGCCACGTGCCTCGGCCTGCGCCTTGATGGCAGTGGCGAC  
ACCTTTGGCGTTGCCGGTCTGGGAGCCGTAGAGAATGGTCAGGCTGCCGCTGGGAGCCGCGACTTCTGCC  
CCTGCCGGTCGCAACGGGCTGGACGCCCGCTGGGAGAGGCCGTAGAGATAACCGCTCACCCAGGCCAGTT  
GCTGGGTATTGAGGGTCGAGAGTACCTGACCCAGCTGACGTTGTTGCTCGTCAGAGAGGGGGGAGAGGTT  
GAATGGGGAATCCTTCAATTGCATCACACGCGTCTTCCATGGTCTGATTTTTGGCCAGATTAAGGGCGT  
GTTGGATAACAACAAGAATAAAAAATTTCTTCTTATCTATTAATGCATTAAGGGGCAGAGGTACGCC  
TGTTCCCGCAGCAAAAAGAGGGGGCGTGGTATAAAGAGCGTTAAATGAGAGCCACTTGATAACACAGGAAGT  
GTCATGTGCAATATCCGATTGTTTCATGTCAATGCGGTCAGTCAGCAGCCCTTGGTGGCAATCCCGCGG  
TGGTCGTATTGGGAGCAGCCCTGCCTGATGCCAGCCAGTTGGCGATGGCGGCCGAGTTCAATCTCTCCGA  
GACGGCCTTTCTGGTGCAACTTGGCAGGGCCCATTACCAGTTACGCTGGTTCACGCCGAAAGTCGAGGTT  
GATCTCTGCGGTTCATGGCACCTTGGCGGCTGCTCATGTGTTGTTGGCAGACAGGAGCGGTAGCTGCACACG  
AGACTATCCGCTTCGAGACCCGTAGTGGTGAGCTGCTGGCCCCGGCGGGAGGGGAGTGGATTTGGCTCGA  
TTTTCCGCGTATCGCGTTGACGCCACTGACGCTGGATCCCGCCTATGCTGCCCGCTTGGTTGCCAGCCA  
CGACAGACCTTGGCGGTGCGGGCCAAGTTCTTGTGAGCTGGCAAGTGAAGAGGAGTCCGCGCTATTT  
CGCCTGATTTCCATGCCCTGCGCGCCCTGCCGGGACGGGGCTGATAGTCACTGCTCCGTCGAGCCGGGC  
AGATGATGATTTCTGCTCTCCCGCTATTTTGGCCCTTGGGTTGGCGTGGATGAGGATCCGGTCACCGGCTCC  
AACCACAGTGCTCTCATGCCCTTCTGGGCTGAACGGCTCGGCAGGCAGCAGTTGCGGGCCCGTCAGGTTT  
CATCCAGAGGGGGTGAGCTCAGGCTGGAGCTGCGGGGTGAGCGAGTATTGATGGCGGGTCAGGGGTTGAC  
CCTGTGGCAGGGGGAGTGGTTGCTGCCCTCGCCAAATAACACGTTACGTGACACATGCCAATAAAAAACG  
CCCCGCAGTTGCCGGGGCGTTTTTATTGGCTATCACGCTTGGGGTTGACCCAAGGGATTTAGCTGACTTCT  
GTGGGCCTTACTTCTGCGGACGCAGGGCCGGGAACAGAATGACGTCACGGATGGTGTGGCTGTTGGTGAA  
CAGCATGACCAGACGGTCGATACCGATAACCTGACCGGCAGTCGGCGGCAGGCCGTGTTCCAGTGCGGTG  
ACGAAGTCGGCGTCGTAGAACATGGCTTCGTGTCGCCAGCTTCTTCTGATCAACCTGATCCTGGAAGC  
GCTTGGCCTGGTCTTCTGCATCGTTTCAGCTCGGAGAAGCCGTTGGCCAGCTCGCGGCCACCGATGAAGAA  
TTCGAAGCGGTCGGTTACGTCGGGTTACGTCGTTGCGACGAGCCAGCGGAGAAACGGCAGCCGGGATAC  
TCAGTGATAAAGGTCGGTTGACAGCAGCATGTGCTCCACGCTCTCTTGAAGATCGCGGTGATCAGCTGGC  
CCAGCTCCCAACCTTTCATCAGCTCGATGTGCAGACGCTTGGCAACGGCCTTGGCGCTCTCGAGGGTAGC  
CAGATCATCCAGGGTCACATCCGGATTGAACTTCAGGATGGACTCGACCATGGTGAGGCGCTGGAACGGC  
TGACCGAAATCGATGGTCAGGCCCTCTTCGCCCTCTTTGGCGTAACGGATCTTGGTGTGCGCCAGAATGT  
CCTGCGCCAGGGTACGCAGCAGCTCTTCGGTCAGGTCCATCAGATCGATGTAGTCGGCGTAGGCCATGTA  
GAACTCGATCATGGTGAACCTCGGGTTGTGACGAACCGAGATACCTTCGTTACGGAAGTTGCGGTTGATC  
TCGTAGACACGCTCGAAGCCACCGACCACAGACGCTTCAGATAGAGCTCCGGAGCGATACGCAGGTACA  
TGTCGATGTCCAGCGCATTGTGGTGAGTGACGAACGGACGCGCGGAGGCACCACCCGGGATGACTTGCAT  
CATCGGGGTTTCCACTTCCATGAAGCGCTTTTCGTTGAAGAACTTGCAGTACCGGCAACCACCTGGGTG  
CGGATCATGAAGGTCTTGCAGACTCTTCGTTGGCGATCAGATCCAGGTAGCGCTGGCGGCAGCGAGCTT  
CCTGGTCGGTCAGGCCTTTGTGCTTCTCGGGCAGCGGACGCAGTGCCTTGGTCAGCAGGCGGATATCGGA  
AACGTGAACGGAGAGCTCACCGGTCTGGGTCTTGAACAGGGTACCTTCGACACCCACGATGTGCGCCAGA  
TCCCCTTCTTGAACCTGCTCGTTGTAGAAACCTTCCGGCAGGTGCTCACGGGTGACGTAGACCTGGATCT  
TGCCGGCCATGTCCTGCAGGGTGGCGAAAGAAGCCTTGCCATGATCCGGCGGGTCATGATGCGACCGGC  
AATCTTACCCGTTTACCCAGGCTCGTCAGCTCCTCGGCGCTTTTGTGTCGTAACCTTGCCTGCAGATCG  
CCAGAGAGGCTGTGCGACCGAAAGTCGTTGGGGAAAGGATTACCCTGGGCGCGCAGGGCGCCAGCTTGG  
AACGACGCTCGGTTCATCTCGTTGTTGAGTTCGAGAGTTCGACTTCCGGAGTATGGTTTGTTCAGA  
CATGGTGATTCCCTGCTTGTTCAGACCTGATTTTCAGGCTGGCTTCGATAAACTTGTCCAAGTACCCGTC  
GAGCACCGATTGGGTATTACGGGTTTCGACGCCGGTGCAGCAGATCCTTGATACGGGAGTCATCCAGCACA  
TAGGAACGGATCTGGCTGCCCAACCGATATCAGACTTGGTCTCTTCCAGGGCTTGTCTCAGCGTTCT  
GCTTCTGAATTTCCAGCTCGTAGAGCTTGGCTTTTCAGCTGCTTCATACACTGGTCTTTGTTTTTGTGCTG  
GGAACGGTCGTTCTGGCACTGTACCACGACACCGGTGCGAACGTTGGGTAATACGCACCGCGGATTCGGTT  
CGGTTAACGTCGTCGACCACCGGCACCGGAGGCGGGTAGACGTCGATCCGCAGATCCGCCGGGTTGATCT  
CGATATCGATATCGTCGTCGATCTCGGGGTAGACGAACACAGAACAGAAGGAGGTGTGACGGCGGCCACC  
GGAATCGAACGGAGACTTGCGAACAGGCGGTGTACGCCAGTTTCGGTACGCAGCCAGCCGAACGCATAT  
TCGCCGGTGAACCTGATGGTGGCGGATTTAATGCCGGCCAGTCGCCTTCGGAGCATTAATCAGCTCGG  
GCTTGTAGCCGTGGGCATCGCCCCAGCGCAGGTACATGCGCAGTACCATGTTGGCCCAATCCTGTGCTTC  
GGTACCACCGGAGCCGGACTGGATGTGATATAGCAGTCGGAGCCGTCGTGCTGGCCGGAGAACATGCGG  
CGGAACTCGAGATCCACCAGCTTGGCTTCCAGCTGTTCCGATTCGGCGATGGCTTCGTTGAAGGTCTCTT  
CGTCTTCCCTTCCACGGCCAGGCTCACCCAGCATCTCGACGTCATCCACGCCCTGGGTGAGGTTGTCGAT  
GGTGCCGACACGTTTTCCAGCGCTACGCGCTCTTTGCCAGCGCTGTGCGCGCTCGGGTTTCATCCAT  
ACGTCCGGCTGTTCCAGCTCGGCGTTGACCTCTTCTAGACGCTCTTCTTGGCGTCATAGTCAAAGGTAC  
CCCCTAAGAAGCTCGGTCCGCTCAGACAGCTCCTAAGTTTATTTAATACGGGATTAACCTCGAACATCG

TGAAAACCTCTCAGGGTCGATGTGATTTAAAAACGGGATATTCTAGCCAATTGTGGAAGGAATAAACAGGG  
TTGCCTTGGCTTGTGCGGCTCATGCCGTCAATTTCTGGTGCACTTTTCTCCACCTCGGTAGAAAAATATCG  
CCCCGAGACCCATTTTCAGGTTTCAGTTTTGGCCATTTCGGGTCGTAATGACTACGTGTAGTGTGTGCAA  
TTTAGGGAAAAACCCGCTCCTCACCTCAATAAGAAGAACACATGATGAAAAACCTGTCACCTCAAGCAGAA  
GATACTGTTGTGTCAGTGGTGATCGCCCTTTTCGTTGGTGATTTTTGTTGCTCTCCTGGCAGAGCTATAGCAGC  
CAGAAGTCCCTGTTGCTGCAAGGCAGCCAGGAGCAGTTGCAACGGCTGGGTACCCAGCAGGCCGAGCGTG  
TCAGCGACTGGCTCGCCGCCCGTTCGCGACGTGATCCAGGCGCTCGGCAACAAGGCCGGTGCCGACCCCT  
CAATGCCTTGCAACAGGCACAAGTTTTAGGCCGTTTCCAGCTCACCTATTTTCGGTGAGAGCAGCGGCAAG  
ATGAATGACTCCGATCCCTCCATCAACCGCGATGGCTACGACCCGCGCTCCCGTGGCTGGTATCAGGAGG  
CGATGAGCAAAGGTGGTCTGATTGTACCAAACCTATCTCGATGTGGCTTACAACATCATGGTGGTCA  
TCTGGCCACAGCCGGTTTTCTGGCGGGGTTGTCCGTTGACCTCCTCCATCGCCTCGTGGTGAAGACGTG  
ACCAAGATGCAGCTGCCTGCCGAGGTTTTGCGCATCATGATGCACAAGGATGGCACCATCATCGCCTACA  
AGGATGCCGCCAAGGCATGAAACCGGCCAGCGAGATCGACAACGATCTGACCAACGCGCTGATCGAGCA  
GAGCAAGTCGAGCAAGGAGCTGGTGCCAGCTTATTTTTGACAACGAAGGTCGAGACAAGCTGCTGTGGGCG  
GCCGATATCCCCGACACGGATTGGGAGCTGGTGCTGGTGCTGGACAAGGCCGCGCTGGAAGCGCCACTCT  
CCTCCCTGCTGATGACCCAGCTGGGGATGGCGCTGCTGGTGCTGGTGGGTAGCATCCTCGCTATCTCCTG  
GCTGGTCAGCATGCTGCTTGGCCCGCTCACCAAGGCTCTCCAGGCACTGGCCCGCATTGCCGATGGTAAC  
GGTGATCTGACCCAGCGCATCAAGATCGACGCCAACGACGAAGTGGGCCAACTGGCCAACAGCTTCAACC  
GTTTTCGTCGGCAGCCAGCATCAGCTGATCGGTAATATCCGTCAGCTGGCCAACGAGTTGAACGCCGATGC  
CGAGCGCAGTCTGGTGACCAACCAGGCCGCGGTGGACGAGCTGCAGCGTCAGCAGCAGGAGGTGACCATG  
GTCGCCACTGCGGTACCCGAGATGGCGAGCGCCACCATGGAGATCGCCGGCAACGCCGAGAACCAGCCG  
CCGCTGCCCAGCAATCTGCCAGAGCAGTGAGCAGGGCAAGATGCTGGTCAACAAGACCCGCCAGTCCAT  
CAATGGTCTGGCCGAAGAGGTAGGGCAGGGCAGCCGAGGTGATCGGGCAGCTGAGCCGCCACGCGCAGGGC  
ATCACCAGCATCCTCTCCACCATTAGGGGATTGCCGAGCAGACCAACCTGCTGGCACTGAACGCAGCCA  
TCGAAGCGGCCCGTGCCTGGTGAGCAGGGTCTGGTTTTGCGGTGGTTCGCTGACGAGGTGCGTGTGCTGTC  
ACGTCGTACCCAGGACTCCACCCAGCAGATCCAGTCCACCATCGAGACCTGCAACAGACCACCCGCCG  
GCGGTGAGCCTGATGCAGACCAGTCAGGGGCTGGCGGACAACAGCGTGCAGGATGCCGATCAGGCAGTGC  
GCGCACTGGAAGAGATCACCAGGCCATCTCCCTCATCTCCGACATGGCGGGTCAGATGCCACTGCCG  
CGAGGAGCAGACCCAGGTGACCGGCCAGATCACCAGAACACCAGCCATCAAGGATGTGAGTGACGAG  
ATCACCGCCGCCCATGCGCGATCTGGATCAGGCCACAGCCTCAAAGGGCGTGTGCTGACCTGAACC  
AGCAGGTGTGACCTTTATCCTGTAAGGTGCAACTCACGGCTGTTCCGGCTGAGATAAACAAGCCCCGC  
CCTCTGTGAGTGCAGGGGCTTTTTGTTGTTTCGGAGGAGTGCAGGGATGTGGGGACTTCGGGTTTTCTGAGT  
TGCTCGCGGGTCATCCTGGTGCCGGATACGTGCCCTGCGTCAGCTGGCGAGTAGAGAACAAACAAAGAG  
CCCACCGAAAAGTGGGCTCTGATCATATACGTCTGACGAAAAGGGAATTACAGGAATGGCATCGCCATAA  
ACAGCTTGATCACCATGGCGTTGATGATGTCGATAAAGAAGGCCCCACCATGGGTACTACCAGAAACGC  
TAGGTGGGAGGGACCGAAGCGCTGGGTGATGGCTGCATGTTGGCAATCGCGGTGGGGTGGCCCCAAG  
CCAAAGCCGAGTGACCTGCCGCCAGTACGGCCGCATCGTAATTTTTGCCCATCACCCGGAAGGTGACGA  
AGATGGCGTAGAGCGCCATCGCCACTGTCTGGGCGGCCAGCAGGATGAAGATGGGCAGTGTAGGCTGGC  
CAGATCCCACAGTTTTCAGGCTCATCAGTGCCATGGCGAGGAACAGCGACAGGCTGACGTTGCCAGCAGG  
GAGACTTCTCGATCGCTCACCTCATGCCAGTTCAGCAGGGTTCAGGACGTTGCGCAGCAGCACGCCGACAA  
ACAGCACGCAGACAAAGATCGGCAGCTCGAAGGCAGCCCTTTGAGGGAAGCAGAGAGCAGTTTCGCCGCC  
CTTAAGGCTGATGGCGATCAGCGCCAGCGTCTCGATAACGCTGAAAAGTGGTGAGGGGGCGCTCCATGTG  
GGCATTTCGAAGCCCTGAGGGGCTCATCCTGATTGTGCTCCTCACCGGGCACCTGCACTTTCTTACCA  
GATAGCGAGCCACCGGGCCGCAATCAGGCCGCCAGCACCAGACCGAAGGTGGCACAGGCGATGGCGAG  
TTCGGGCGGGGATTGCACCCCGTATTTCTCGGAGAAGGTGGCACTCCAGGCCGACCGGTGCCGTGGCCG  
CCGGAGAGAGTGATGGAGCCGGCCAGCAGCCCCATGTGGGATCCAGACCGAGCAGGTTGCCAGACCGA  
CACCCAGACTGTTCTGCACCAGCAGCAGCCCGGTGACCACCATCAGGAAGGTAACCACCGCCTTGCCGCC  
GCGTTTTAGGCTGGCGAGATCGGCGGAAAAGACCGATGGAGGCGAAGAAGGCCAGCATCAGCGGGGTTTTGC  
AGACTGGTATCAAATTGCAGCTCCATCTGCAGGGTGGAGCGCAGCAGTAGCAGTACCAGCGCGACCACCA  
GGCCGCCGGTACCAGTTTGGGGATGTTGAAGGTACGCAGCAGCCCGACTCGGGTAACCAACACCCGGCC  
AAGCAGCAATAACCAGAGTGGCGGCAGCAGCGTTGCGTAGGAATCAAGTTGTAACATTACGTACTCCCAT  
GTTGATTGGCTGTGCTTTTCATAGCAAAAGACTTACAGATTCAGCCGGATGAAAACAGTGTGGCTTATG  
TGCCAGCAAAGAAGGGGAAACATCTCCCCGCCAGGAAAGATGGGGCTTGTGCGGGCCTGAAATGCTCA  
GGCATCCAGATGAGATTTTAGTAAAATCCGGCGGATGTAGCAAAAAGCATCGTTTAAATCCATCTTTGT  
CGTATTAATGCTCGTTTTAGTGGTTTTATTGTGACATTTAACACTATGTGGGTAGAGGGCAGAAAAGCCGA  
AAAGGGAGCATGGAACGGCTGTCAATTTGGGGGCCAGTCTCTATAATTCGCCGGTTTTCCGCTGCACGCAG  
AGGCGCTGGCGGGCGTTGACATTGTGGTTTACCCCGACATGGTTTTCATGTTTTGGCGGTGTTTACTTTCATC  
AAGAGGAGAGGGTGTGAAGAAGTCTATCTACATTGCCTACACAGGCGGCACCATTGGGATGCAGCGTTCC  
GATCACGGCTACGTGCCGATGGCGGGCTTTATGGAAGACTGTCTGGCGGGATGCCCGAGTTCCACCGCC  
CCGAGATGCCGGATTACCATATCCACGAATATGCGCCCTCATCGACTCCTCCGACATGACCCCGGCGGA  
TTGGCAGCGTATCGCCGAGGATATTGCGGACAACACGAGAAATACGATGGCTTCGTGATCCTGCATGGC

ACCGACACCATGTCGTTACCGCTTCGGCGCTCTCTTTCATGCTGGAAGATCTGCACAAGCCGGTCATTA  
TCACCGGCTCCCAGATCCCATTGGCCGAGCTGCGCTCCGACGGTCAGCAGAACCTGCTCAACGCCCTCTA  
TATCGCGGCCAACTACCCGATCCACGAAGTGACGCTGTTCTTCAACAACCAGCTCTATCGCGGCAACCGC  
AGCAAGAAGGTGCACGCCGATGGTTTTCCACGCCTTCGATTCCCCCAACTATCCACCGCTGCTCAATGCCG  
GGATCGCCATCTCGCTGGAAGCGGGTGAGTTGGGCGTGCCCTCCGCGCGGGCCGCTGGTGCTGCACGACAT  
CACCCCCAGCCCATCGGCGTGGTGACCCCTCTATCCGGGTATCTCCAGTGAGGTGATCGCCAATATCCTG  
CAACAGCCGGTGAAGGCGCTGATCCTGCTGTCGTTTCGGGGTCGGCAATGCGCCGAGAACCCGGCCATGC  
TGGCGCTGCTCTCCGAGGCATCGGCCCGGGCGTCATCATCGTCAACCTGAGCCAGTGCCCTGCACGGCAA  
GGTCAACATGGGTGGCTATGCCACCGCAATGCCCTGTGCGGGGCCGGGTGATCTCGGGCTTTGACATG  
ACCGCCGAAGCGGCGCTACCAAGCTCCACTTCTGCTGAGCCAGGACTTGCCCTCCCACCGCATTCGCG  
AGCTGATGCAGCAGTCCCTGCGCGGGGAGCTGACTCCCTAAGCGATGCGGCCCTCACCCCTACCTCTCC  
CGGCGGGAGAGGGGATAGATCGAGGTGCTGTTGGCCACGAGGCTTGCCATGAAGAGCGTTGGCAGGTGGC  
CCGTTCACTGTTTCGAGGTGCGAGCCTGCTCCCTTCTCCCCCTAGCGGGAGAAGGTTGGGGATGAGGGG  
GATGAGTCATCCTGCATAGATAGGAAAAGAGGGGAGCCATAATGGCTCCCCCTCTTGTGCTGTGGCCGCGC  
GAGCGGCTGCCGAGTCAGGTTCAATGGTTAAGGTGATCCGCACTATCTCTTCTCGTCGCGATACTGA  
CGCTTGAGCTCGCTCTTGTCTTTCATCACGATCTCGCCGTCACGACCTATGTTTCATGTGCTCGGGGTTGT  
CGAGATGCATCGCTGCCAGGCCATCACGGCTTGCAAGGAGGTGGCCTTCTGCTCGTCGGTGAGGGGCTT  
GCCATCGGGCCACTTGCCAGCTCGACTGCGGTTTTGAGCCGCTCATAACCTCTTCGGGCATCTGCCTG  
ATAGCTTGTA AAAACTCACCTGTTGAAACGACATTTGGCCTCTCTTGA ACTATTGAGCCATAAACAGC  
GGGGTCTGATGGGCCATGCAGGTAGACCCCATCGGTCTATGCCGTTAGATCTTGGCGGACTACGCCAGCC  
ATCTGCTCCATCACCTCACTACCTGACA ACTGTACCCGA ACTCGTTGTCATACCATACGTAGAGCACAC  
AGTGATCCCCCTTCGGCGATGGTTCGCTGGGAGTCGACGATGCCCCGATAACGGGAACCTACCATGTGGGA  
GGAGACCAGCTCGGTA TAGCGCTGAAGTCGATCTGGCGATGGAGGGCCGAGCTTAGCGCCATCTGCTGC  
AGATAGGCGTTGAGGCTCTCCCGATCGGTGGCCTGCTCCAGCGACAGATTGATAATCGCCAGCGAGACGT  
TGGGGGTCGGCACCCGGATGGCGTTGCCGTCAGCTTGCCCTTGAGCTCGGGCAGCGCCTTGGCCACCGC  
CTTGGCGGGCGCCGTTGCTGGTCATACCATATTGAGGGCGGCGCTGCGACCGGGCGCTCGCCTTTGTGG  
TAGTTGTCGATGAGGTTCTGATCGTTGGTGTAGGATGGACCGTCTCCACGTGGCCGTGGCGGATGCCGA  
ACCGCTCTGCATCACCTTGAGCACCGGGGTGATGGCGTTGGTGGTACAGGAGGCGGGAGATGATCC  
GTCACCCGGGCTATCACCTCATGGTTGACCCCGAACACCGTCTTTTCATCTCCCCCTTGGCCGGGGCG  
GTCAGTAGCACCTTGGCGGCACCGCGCCTTTAGGTTGCTCGGAGAGGCTGCTTCGTCACGCCAGACGC  
CGGTGTTGTCGACGATCAGCGCATCGTGAATGCCGTAGGCGGTGTAGTCGATGTCGGCCGGGCTATTGGC  
GTAGATCACCTGAATGAAGGTGCCGTTGGCGATGATGGCGCTGCGCTCCACATCCACCTCGATGGAGCCG  
TTGAAGGGGCGTGC ACTGAGTCGCGGCGCAGCAGGCTGGCGGCTTCTCCAGATCTCCGTCGCGACCAC  
CGCGTACCACGATGGCGCGCAGGCGCAGCGGATTGGCAGCGCCGTTACGCTCGATCAGCAGGCGGGCCAG  
CAGGCGGGCATAACGGCCAAAGCCGTAGAGCACACGTCGGTCCGCTGCGGCATCTGGCTGCGGCCAAGG  
GCCGGTGCCAGTCGCGCTTGAGATAATCCTCGATCCCCGCTCATCTGATGATCCTGCCAGTAGCCGA  
CTGCCAGCTTGCCAAGGTCTACCTCGGCGGCGGTGGGTTTTGAGGGCAACGATGGCCTGAAGCAGGGGGAA  
GCTTTGCTGGATGGGGAGGGGAGCGCCCTGGTGGCGGCGGACGACCCGTTGGGCTTGGAGATATCGATG  
GTGGAGGCGTTTTGCGAGCGGGCGGCCGTAGAGGGTGATCTCGACCCCTTGTGTCGGTAGAGGCGACCAA  
TCAAGGGCTGCATGGCTTCGGCGAGCTCCTGGCTCTCCTGCCACGCTTGCAAGTAGTGCTCGTGGGTCAT  
TGACCAGATCCTTTATTTACGTTGTTGGTGTAATAAGAAAATTCGTCGAATGCAGATCAGTGTAGGGGT  
GTATATTTGCTTATATTCTGCAATCGCGGCCCTTATATGGCGCGCGCATTTGTAATGGATATGTAACCG  
GTTTGCTAGCCGAGGTGGCCCGTAAAGGCGCCAGTTGTTACCAACCCGCTTACCAACAAGATGTGAAC  
CATGGCCAATTTCCCCCTGCGACAGACCTTCATCATGCTTTCAGTCGGCTTGGCGTGGCTGGCTGCAAT  
GACGATCGGATCCACAATATCTGCAGCAACCATGCCGAGCTCTGTCAGGATCTGGTGGACGATGGCTGGT  
GTCGCTACGAGCGTACCGATGTGATCCGACCCGCTTCTATCTCAAGGAGGAGGGAACGGATCGGCGCAA  
GTACGAGCTGATGCGCAACCTTGAGCGCTATCTTAAGTGTGCCGAGCGCTTACCAACATCGAGTATAAG  
AATGCCCGCGAGCAGAAGAGTCCACGGGTGGAGGGAATGCTGGCGGCCGGGGATCAGTTGGCCAGCTCG  
ATGGCGGACCCGCAATTCACAAGATCCCTACCTGCTGCTCTGGCACTGGACCAACAACACCAACGAGTT  
GGCTCGTCAGCAGTTTATGGCGCTGGAAGGCACCAAGGCGCTGGATGAACCCGAGCTGCAACTGGCGCTC  
GGCGGTATCTACCCAAGAGTGACCCGAAAAGGCCATTGCCACCTGCAGCACGGGCTCTCCCTCTATC  
AGGAGGGGGACAAGGTGAACAGCCGATGTTACCTCCCTCAGTACCTCTATATGGGCCAGAAACAGTA  
TGGGTTGGCCTATCTGTGGGGCAAGGTGAGCGAGTCGTTTCAGGATAGCCCCGAGTCTCAGCCAAGCGT  
TTTGGCATCTACCACACCCTGAGCAAGACAGAGCAGGATGGTTACGATGTGCGGGCTGCCGAGATTGTGCG  
AGCAGCTCAAGCATGGCAACTACCGGCCCTGATGCAGTGATGACGACGTTTTCTCCGGCCAGCTGCTGGC  
CCAATCCGTTTCGATCTCTCTTTTCGTTTCATGGCGAGGTACGTACCGATGGCCGTACTCTGGAGCGCCTCAC  
GGTGC GCGCCGTTGGTGCCCCGTGGCGACGAGTTGCTGCTGGTTCACTCCCGGGTCAACGGCGATCTGATG  
TTCCCCGGGGGCGGCATTGAAGCGGGGGAGAGCCACCATGTGGCGCTCGCTCGCGAGCTGCTGGAGGAGT  
GTGGTGCCGA ACTGCGGGAAGTGGGTGGCCTGCTTGGCGAGACCCGTGAATATCGCGCCGCCCCGCGAGCC  
GGGGTTT GATGCCTACTGCATCCGCTCGCTCTACTACTTGTGCCGATTTGGCGATCAGCTGGTGGCCCCG  
CAGCCACAGCCCTACGAGATCCGCCTTGCTTCTGTCGCCGCTGGTTTTGCCCTCGACGAGGCGCTGCAGA

CCAACAAGACCCAGCTGGCGGGGCCCTGTCCCAGTGGACGGCGGGGAGACCCGGGTGCTGGCCCAGCT  
GCAACGCTGGCATCAGCAGGGGATCTTCGACAACGATTGTTGAACACATCAAACGGAAACGGTCAGTGAT  
ACCAACAAAAAGAGCGCCAATAGGCGCTCTTTTTTATTTCGAGGGAGGAAGTTATTTGACCTCTGTCATT  
TACATCGCTTCGTTGTA CTCTCGTAGCTAATGTCAGCCGTTAGAGCAACGCTCTTCTGTACCAGCCCATC  
AATCTGGCAGCTGATGCCATTACCTATAATGTTATTTTGTATTGGATTGACATAGATGCCGGTGCGCAA  
GATCCCCGAAAAATTACCGCAATGTCACAGGGGTGGCCTCTCATCGCAAGTCCACTGGACGGGCTATGTTT  
GAGTCTACCTCGAGCGTGATTTCTTACACTGCTGGAGTTTCGATCCAGCAGTCGAGAGCTTTGAAGTGC  
AGCCTGTTACCGTTCATTGGCTTGATGAATCGGATAAGGAACGCATCTATACCCAGATGTATTGGCTTA  
CTTCCACAGCCCTCATCATCCAACCTACCTCTACGAAGTCAAATATCGTAGTGAAC TCAAAGAAC TTTGG  
CCGGAGTTGAAGCCCAAGTTCAGAGCTGCCTTGCGGTTTGCCCGTAGCAAAGGATGGCGGTTTAAAGCTCA  
TCACTGAAACAGAAGTGCCTGAAGTCAGACTGAAGAATGCGAAATTCCTGCTTCTTTTAAAGAAAGG  
GCCTGTAGCAGAAGTTGATATGGATATTCTGGACGATGCGATCCAGACGCTGAACCAATCAACACCTAAA  
GACCTTCTGGCCACGTATATCAGGATGAATGGAACAGAGCGGCTTTACTGCC TACGCTCTGGTACCTGA  
TAGGAACCCGTCAGATCGCTACCGATCTCGATCAACCTCTCACCATGTCGAGTACCATTTGGAGGTTGAA  
CGCATGAGTCATCAACAATTGGTCTTTCAGCCCGGTAAGCGGGTCAGCTACCAGGGACGCTTATTCGGGA  
TCGTTCAACTGCTGTCTCTGCAATTGGCTGAGTTGATTGCCGAAAGATAACCACGAAATCATTAATGCCAG  
TATTACGGAAC TACAGGCTCCAGAGGCTGAAGTCATTAACGACCTGATTTGACACTGATTGATGACAAA  
GCTTGGGAAACTGCTCGCAGCCGATGAGTATCATCAAGCCGCTGCTCAATCTGTCATCCAGAACCAGAG  
AACAGGTGGCAGCCACGGCCAGAAACATTCGGTTTCAACCAACACTCTGTACGGTTGGATCAAGACCTA  
CGAGAGCTCCGGCGTACTATCATCGCTGCTACCCAAAACCCGCGGGACAAAGGAACGACCAAAC TGTG  
TCTGAGGTTGAAGAGATCATCAGAGAATCAATGGCGACAGACTTCTGACGTTGCAGAAAAAGTCTGTTT  
AGAAGCTTTGCGATGAAATCATCAAGCGTTGTATGGGGGCAGGACTAGAGCCACCGCACGACAACCCAT  
ACGCAACCGTGTAAAGGCTCTCTCGCCTGAGATAGTCGTCAGTCAACGGGAAGGCCGAAAAAAGCAGAC  
CTGTCAATTAAGCCACACCAAGGTTCTTTTCCAGGTGCGGATTGGCCGCTATCTGTTGTACAGATTGATC  
ACACCAAGCTCGACATCATTCTGGTAGATGATCACTACAGGCAACCGATAGGTCGCCCC TGGATCACACT  
GGCGTTCGATGTGTACAGCCGATGGTGT CAGGTTTCTATGTGTCTGTTGATCCGCCCAGTGCTTTATCT  
ACAGGCCGTGTGCCTGGCTCATTCAATTCTGCCAAAAGACAAAATGGTTGGCTCAGAACGGCATAAAAAAGTG  
AGTGGCCAGTGTGGGACTTCCGACCCTATTCAGTTGATAATGCGAAGGAGTTTCGAGGTGAAATGGCT  
CCAGAAAGCTTGCAATGAATACAACATCAACATTCAGTTGAGTGGCGCCCGTAGGCCGACCGAATTTTGGTGTCT  
CACGTTGAACGTGCTCTCGGGACGTTTTTCAAAGAAATCCATAACCTGCTGGCACTACCTTCTCCAACA  
CATATTCCAGAGGCGACTACAAATCGGAGAAGCATGCAGCGCTGACCTTATCGGAGTTTGAACCTTGGCT  
GTCTATATACATTGCTGATGTTTACCACCAGAAAAATTCATTCAGCTTTGGGGGCTGCACCTATTGATGTT  
TATAAAAAAGGAATTCTGGGTGATGAGCAGCAGCCGGGATGTGGCTGCCGCTAAGATAACGGATGAAG  
ACAGACTGCGATTGGACTTCATGCCATTTGAGCTCAGAACCATT CAGGACTATGGAGTGGTTGTAGAGGA  
AATTCATTACTACCACGATGTACTGCGGCACTGGATAAACGCCCCAGACCCAAAAGATAGCAAGCGGAAA  
CGCAAATTCACCTTCAGGTGCGATCCTAGAGACATCAGTGTGATCTGGTTTTTTGATCCTGAAATCCAGA  
CCTACTACCCGATCCCTTATCGGGATACTTCTCACCCCGGATCAGTATCTGGGAACTACGGGAAGCCAA  
GAACAAGGTTACCTCAGACAAACGCCGTCATCTTAGTGAGCGCAGTATTTTCGATGCCTATGACCGTATG  
CGTGAGATAGAGGCCGACGCAATGGCCAAAAGCAAGGCTGCGCGTCGAGCTAACCAGCGGCGAGCTCATC  
ATCAACAGATTGAAAAGCCGTTGATTACTACACTATCAGATAAGAGCCCTGTAATAGAACGCTCAGTGAT  
AAGTGAACCAACTACGACTATACCGGATATTATGCCATTTGATGAAATGGATGACTTATCATGATTGCGT  
ATAACCATTTAAACGATT CAGCGGTTGAGACATTTGTGTTTACCGGACGCAGATAGAATTC TCAAATAACG  
ATCAGAGCGATGGATCGGTTATCCAAAAGCAAAACAGATCCTCGCCAAACTGGAAGACCTGCTGATTTAC  
CCCAGAACTAACCGGATGCCAAACCTGCTGATTGTAGGTGATACCAATAATGGCAAAACAATGTTGGTAC  
AGCGCTTCAA AAAACTTACATCCTGCAATCGACAACCCATCCGGAGAAGGTATTCAGGCTCCAGTCCTTTT  
GGTTCAGGCTCCACCAGTACCGGATGAAGGACGATTTTATAACGCTATCCTTGAAATGCTTTTTTGGCCCA  
TATCGCCCCAGTGAACGTGTAGACAAGAAGCAGTTTCAGGCGCTCAAAT TACTCCGTTATGTTGGTCTAA  
AAGTACTGATTATCGATGAAGTT CACCATATTTTTGGCGGGTAATATGAATCGCCAGAAGGCATTTCTTGAA  
CGTCATAAAAATATCTGGGTAACGAACTTCAAATCAGTATCATTGGTGTGCGGTACCAAAGATGCTTTTCGG  
GCCTTGCAAAC TATCCTCAGCTTTCAAACCGGTTTGAACCGGTCACTTTACCTCGATGGGAAATGGATC  
ATGACTTTTCAGAGGTTAGTGGCAAGTTTTTGAACGGATGCTTCTCTAAAACAAGCTTCAAATCTCGCTCA  
GCAGGACATGGCATCCAGCTTGTATGCCATGTCGGAAGGCTATATCGGTGAACTGTCACGCTTGCTATCG  
GAAGCTAGCGTACTGGCAATTAATTCAGGAACTGAGACAAATTCAGCAAAAAATCTCCAGCAAGTAGATT  
GGACTCCTCCATCTAAGCGTAAACGTCAGTTGGAAGGTATGCGCTGATGTTGTGCGGGACTCTTTGGCCC  
GCACATCCCCATCCATTGCCAGGAGAATCATTGTCTGCTTATCGTTTCGCACAGCCCACGCAAATGGAT  
TGAAGGTGCAGACATCTGTGATCAGGCCTTTGGCAAAGAATTT CAGGCTGGAACCGGGACATAGATAG  
GAATGCGCCTGACTGGCTACTGAATATCATGAGCGGGAAAAGCGGGAAACCCCAATCAAGCAGATCAGAAAT  
ACCACTTTTCAGGCTTTATGAGAAGCGGTTATTCCCGATTTTACACATGGCTAGTCACTTCGCTGGGTCA  
TGCCAATCAAGCATCGTCATCGTCTTAATACTGGTTATGCTATCCAATATTTGTCCACAGTGCCTAGCAGA  
GGATGAAACTCCCTATTTTCAGGCTTGCTGGCGTTTGGCACTCTATACTTTCTGCCAAAGCATAGGGTT  
ATGATGGCTGATCGATGCCTCCATTGCGGCGCTCCAGTAGCTTTCACCGGATTGAGTTAGGTAAGCCGC

AGCGGTCAGATGTTGATACGCTGGATTGCTGCTGGCAGTGTGACGAAAACTGAGCAGCATAACCACACA  
GCCTGTCAATTATCACACCAACGCTTGTGGACAGGCGGTGGACCCGTATTCTGCAATCCATTGACCGACAA  
TTTTATCCAGCAGGAGCATTGAACTACAGGAATCTGGCCCTGCTCCATCAGATTTGTGCGCTGATGGGCT  
CAAAAAATATGGCTACCAGCTTATACAATACGTTAGCAAGAAAAGGCTATACCCCTTTAATAAAAAGTATC  
GGTACTGTCACTTGGCTTTTGGAGCAGAGGTGAGTGAAGAACGGCATTATTTTCTACAGTTCGCATTTTGG  
CTTACCACACATAAAAAAGAAAAATAAAAGTGGCGATCAAAAGAGAGAAATTATTCGGATTAACGTCTTGTATC  
GAGATTCTGATAATCATCTTAAGAAAATACGTCACGATAGAGTTACTGACTTTTCGTATTGGGTAGGAACT  
CTCTCTGACCCAGTCAGAGTGAAATGTTTGGGACCATATGAATATCACCCCTTTTCTCGGAGTAAAAC  
CAATGGCAGCACCGTGTGCTAGGCTGATGAAGGAAGGGGAAACCCGTCACATACAAGCATGTCACACCT  
ATAAACCTTATCTTGTTCGCCCTTTTACTGATGAGAACGAGTGGTACTATATGCTTCCAATGACGGGCT  
ATCATCGGTAGAGTTCGAGAGGCAATACCTATCTCAACAGCAAGTCTAGGAATCTCAAGGCTATCCAGAA  
AGTTTTGGATGTCAACGGACGAAGATAGCGAAGATGTTGGTATTGCTACTCATTGGAGGAGAGTATGCCA  
GACTTAGATGTTTTGATTATTCAAGATCTAGAAGTGCGCACAAGACGCTTCCCTTGATACGATAGGCGGTT  
ACGAAGGTTTTGAGTTTTCTGTGACGAGGTGGGTGAGCTGCTGTATTCAAGGTTACGAGGAAGGGTAGATT  
GAGTGCCTTCAAGGCATTTAAACCCGAGTTTTTCTCTGGTTCTTACGGCGATGCAGAAAGGCACCGCTTG  
GAGGTGCAAAGGCGTTTTAATTGGTCATAGATGTGAATCGTTAATCCAGACATATCATATTGCAGAAGCGG  
AAGGAACCGCGTTCATTGAAATGGAGTTTATCGAATGGCCGCAATTGACAAAATGTCTAGATAAAGTCC  
CGATGAAGCGATAGTAACACTTATCTCCAACCTGTTGATGCTGTGCGGTTCCCTCGATTCCTTGAAAATT  
GTTTCATCGAGATATCAAGCCTGACAACATTCACGCTCACCCGACTTCAACATTTAAAATTACTTGATC  
TTGGGGTTGTCCGTGAATTTGATTCTGTGGATTCAAGTGTGCGTGTGCTGACCGATAATGGCAATCAACG  
ACCGTTTTTGGCAACAGCTCAATACAGCTCTCCGGATTATCTTTTTCGTCTGGATGAGCCGACCAGCAAA  
CTATGGCGCGGGTTGAACATATACCAAGTCGGTGCTGTATTGCATGACTTAATTA AAAAAGAGCCTCTTT  
TTAAGCACGAAATGTGCGTTGGTAAATAGGTGGCTTGTGCGAAAGGCGGTTCTTACAAAGCAACCCTCATT  
TGAGGATTCAGTCTCAAATCGCCTTCTTGCCTAAAAGCACTTGATCACGTTGCTTAGTTAAGGATCTA  
GACACACGAATAGCTCTAGTTGGTTGGGAGGATTTTCAACTTGAAGGTGCAGTAGACTCAGTCAGAGCTT  
TGCGTGGCAGGCTTGCAAAAGGAAATATTGCTGCTAGGAGAAGATCTAACGAGTCCGTAGATGCACGGAA  
CAATTTGAACGTAAGTGAACCTTATGAAGCGATTTCTTGACCAAGTCCGTGCAGAGCTCATTATATCTGC  
GGAAGGCAGCTCCCCTTAACAATGATCTACCTGTCACCTGTTGAGTCAACGGAGGTAAGTATGAGTTAA  
CTGTTGATCAACAGCTATCGATTAGTTGTACATGGATTCAACTGGCAAGAGGGCCTATATCAGAGTAG  
TGCTAACTTATTGATCGGTGTACAAAATAATCTCTTCTGTGCTAGTAGGAGGCTATGCCCTGCAGTTTTATAC  
CAAGTTGCAAGTGTGTAGGAATTCGAAGAACGGAAGGTGAGGCTATAACTCAAACAGTTGATAAGTTAG  
CTAGCCTGATATCTATTGCACTAGATAAAAATCGAAGTTACAGATAATCCTGCTAGCTTGCATGGCTTGAA  
TATTCAGGTTCCCAAAAAGTTGAAATGTGATAATAGAGGATAGAAGAATGATGAATAAAAAGTTGGTGGC  
GTTCAAAAACGAACTAGATGATGATCAGAAAGCATTATTCAGTTGCCTGCCCAAGGTCGTTATTTCTTT  
AATTGGGCCGCCAGGATCAGGGA AAAACAAATTTACTGCTTTTACGAGCGCAGTTCATTGCTGGGACAGGT  
GAAAAAACGTAAGTATAATACATATACCAAAGCATTGGCTGACTTTATACGTACTGGAATTGGGGCAA  
CTGGCTTAATATCTCCTGATCAAGTCAGAACGTATCACTCATGGGCATTTTCTCATATTTCTGAAAATCT  
TGGCCAGCGTGTACTCCCTCGTGAAACAGATTTTCGATGATTCTGCTAGAGATGAGGTTGTTGCTCTTGT  
CGTGAGGCTAATTCAAAGTTACCTAGCAAAAATTTATTTAGTGCAATTTTTTGTGGACGAGGCCAAGATC  
TAAGTGCAGATGAGCTTGATGCTCTCTTGTGTTTTGAGTGATAAAGTAGCTATTTGCGGTGATGAACATCA  
AGGTATCTATCGGAGAAATGGATTATCTATTATTGACAAGCTTAAATTTGCAACCTCACTCGCTGAAACGA  
CACTTCCGTATTGGCCAAAGAATAGCAAGAGTTGCGGATAGGTTGATCCCACCAGAACGTCAAGAAGATA  
GTCTTGAGGCAATGTCAAACACTACGATTTAAAATCTCAGGGCGAATCGAGCGCAAATTTATACTCATGTGA  
GACAAGGGATGAGCAATTTATCCTAATGCTCGAAAAATAAAAAATCAACTTGATGCATTCAAGGATGAG  
GGGATTTGGGATTTTCTGTGAAAAAGAGAGTCGCTAGAGGATCTTCGGTCTCGCTTCAATGATACTGATC  
TTGCAGAGCAAGTTTGTGTACATGGTATCGATGAAGATGCTAGCTTCTCTGGTAAATACATGATTGATGT  
GCTGACAATGCATGCAGCCAAAGGAACCGAATTCCTGCGGTTTCTCTTTTGGGATTGAAGAATTGGCA  
AGATATCCTCTCAATCGTTTCTCGTCTTGCCATATACCGCAATCACGCGAGCCAAAGACGGCTCTCAATGCAT  
TCCGAACAGGGAGCACAAGTAACGGTATAGAGAATGCATTTGCTGAACCCCGTCATATGGAATTAGACGA  
CCTTTTCCCTGGTGACAAGACATGAAAAAATATGAAATTTATTTGGACTTTAGTCGATAGAGAGGATCTGC  
TCGATGTTTTTCTTGGTGAGCATGAGCCACTCTTTCACAGCGAAATATTTCCAGAATCAGGTTTATATGG  
ATCTAAACTTGCCATTGGATATAAAAAATACGCAACACCAACCAGCATTGTATGTCCTTCACTAATAGTG  
ATTCCAGACAGCTCGGCTACAGAGACACTATCTTGGCTTCGCACATTTCTAACGATGTTTCAACCCCTTA  
GCCAATATGGAAGGGTTCTACTTCTTAGTGAATGGCATCAATATGATGCACTGCGTGATGTCCTAGATTT  
TTCTGAGCCAAGATCCTATCGTTGGGCATCTATGATTGTTGGTGAAGCATTATGCCAGATAGAAGGTGAA  
GCTAATTTACACAATCTTCTTTATCGCGCTTTGCTGGTTGTTTCACTACTCCAATTTGCGAGAGCCGCCA  
TTATCTGGGGGCACAAAGATGTGACTACTGCTTGTGCGGATAGGTTACGACTACTGAAAACCTGATCACCG  
GTTTGCACGTCGATCAGTCAGTGTGGAACAATTACATCCAATTTGGTCAATCGCGAACTCTAACATCTAT  
AGCAACCTATCCCATAACGAGGCTGTTGATATAGTGATGGAAATTCACGAACTTACTTCAGATCTAGAA  
ACCAAGATAATAGTAATATTTGCTCATCAATTTCTGACGAAAGAAATTCACGGACTAAATAGTGACTCAGT  
GGAAGAGCGTGTAAACAGCTTCAATAAACTCAGTTTCGCACATTTTATATAGTGCTCAATCAAGTATTGGA

ACGACACAATCAGCCATGATTGACGTTGTCCTTGCTGCAGCTGCTTTTTTGGTTGGGAGAAGTACGTAC  
ATGTTTTCTTGTACAGCGTATACAGAAAGTTGCACCAACAGCCGAGCATGGTTTTGGTGAATAGCTGC  
GCTGGCTGGTCCGCGTTTTATGGGATAAAGCTTGGCTCAGGTTAGCAAAGGGGCAGAACGATTGCTACGC  
CCAGAGTTCAGTTGGCTAGATGTTCTAATGCTGATATCTGTTGGGGAGAATTTATATGGCTTGCTCGAA  
CTTTTTGATAAATCTGATATATTTCTGGATTTGCCAAAAATGCTTTCTCGAACATTAECTATAGAAGTTGT  
TCCTGGATCTACATGCCAGTTTCGTATTGGTAATGGAECTGCAGAAATAGAATCAAAGCCTACACAAAT  
CCATCAGACCGTGAACGTGAECTCTCTGATATTGTTGGTCAATTTCTTGCTCTCGCTAAGTACGTTGAAA  
ATAAAGTTGAGCGTTCTTCTTTGAGTTCACACGTGCAGTCACTGTCTTTAGAATCTAAAGGGAATTC  
TGATGTGAATAAGAATCAACGAACGAAGAAACCAAGAAAAAACTCTATAGAAAAATAATTTAGTAGCGTG  
TAGATAGAACACTGACGATGTCGTTTAAATGAAGGAGAGCAAAGCTCTCCTTCATTTATTTTAATCATTT  
TTGGTAAGAGTTAGTTTTATTAGGCGGCGTATAGACGTTTTTGTACGGTCTCTGAGAATGAGCGATGATC  
AGTCCAAGTATGTCTAAGGCTGATGATCTCAATGCCAGAACTTTTAGTATGAATATTTTGCCATACACCT  
TTAGCCATCGAACACTGAAAAATTATATTGTAAGCTCTTCATCACTTAGCTTTTTTCAGCCCTGATGAAA  
TCAAAGAACTGTGTAATTTTACCCTCTCTCATTTTCAAATTTCTATTAGATTAAAAAACATCCATCAAA  
ATATAAATCTGCAATTATGACACCACGCTTTGTTTTGGTTGATGAGTCCAAATATGCCCATTGCCGCGGT  
TTATGAGGTTTGGTTAGTGGCATATTCTCCAAAGCAGGATTAECTTGGTGAATGCTGGCAGATATATGAT  
TATACCTATTGAGTTTATGTATGGCAGCAATTAAGGTGTCAAACTAGCTTTAGCACCTTTCTTCCGTGA  
AAACTAGGTGAAATATTAGCTTTTTGAATATTCTTTCTTCAAGACCATAGCCACCAAGTCCAGTCCCG  
AGTGCTTCTACAGCAAAGTCTTGTAAGATGATCCTGCGCTACGTTACTCACATTTCAATTTTTTGGTT  
TATCTGGTTTTTCGCCATTTAATATCCCAAATCGATCGCTTGAAGTGCAAGTATCACATTTGACAGGCT  
TTTTATTTGTGTCTGTTCCACTTTGCAAAGGTGGATCTTCAGCAGTTTTGGTATTAGTTCCTTTTTGGCGT  
GAGTATGGTTTTTTTTCTTCTTCGGGGCGATCTGTATCACTTTCTGCTCCGGTGCCATCATTATCTCTGA  
TGACGGTTAATGTACTGTACGGAAATGGAGCAGAGCAACGTTCTAAGGACAATATTAGGCAACGCCATGG  
GGAGTCATCTGATTGTTGAATCCACTTAACCTTGCTTCTAAATTTGTTTTACCGGTAATGGAAAATTA  
GATTCATATGCAAGAATTTATGGTTAATCGTATTTTAAAGTACAGTATCATGAATCTTGCAATATGATA  
AGAATGCCTCTTTAGAGTGGAGAATTTCTGGCAATTAACCCTTCTTCATCAGAGATATGATCTCTCAA  
ACCAAGAAAAACCTATCATCTTCGGCTCGATAATAAGTTCGACTGACGTTTATTATCGAATCTGGATTA  
TGTTGTAATGATCCAGAGAAAATAGCGTGAGCCAAATTCGTAGAAAATGCATAGTAAAACTGCAATTT  
CCATCTAGCTGGGATGAGGAGCAAATGGATCGCAATTCGGTTCATATGGCTATCAATTTACTTCCGGCACC  
AGCTTTACCAATACGATATGACTTATATGGAATTATATTCTTCCGTTTTCTTGTGTGGCGTAATA  
ATTCTAGTTGTCTGTGGCGAAATATCAGATTTTTGATGATTTTCATATTTGCCTGCTAGGATTTCTGAC  
AAAGACCGTCTCGCCATATGGATCCTGTGGAACCAATGGCAATTTGTTCAATACCAATATTGATAACTTT  
TTGCTGTTCTACATCAGTTTGGTTAACTGATGCGCGCTGTCTCCGGGGATCCCAGATGGGTTACCGAAG  
AAAGGGCTAATTACTACTTGAAGAGCGGCTCAGTAGTTATGTCCGGATTAGGGTGCACAGCTCCTTTCC  
AATCAACTCGCCAGAATTTCCCATCCATGGGAAATTTCTTTGATCTGGGGTATCCTTGTATTGCCATTC  
TGAGCCTCGTAGTACAAAACATCAGTGTAGTCTATTTACTGATGTAGAGTACTATTTAGCCTTGTAA  
CCACAACCTCTTCGCCCTTGGCTTGCAGATCAGCATGGTAGGAGGAGCGAACGAAAGACCACAGGCGGC  
GTGAGTAAAGCCAGCTCCATGGCGACATCTTTCAGCTCGTCAAACCTGCGGGCGGCACGTAGCGCTTG  
ACCGGCAGGTGGTGGCGGCTCGGCTGCAGATACTGACCCAGGGTCAGCATATTGACGCCGTGAGCGCGCA  
GATCCTTGAGTACCTCGACGATCTCTTCGTTGGTCTCGCCAAGGCCATCATCAGACCGGATTTGGTCCG  
CACGTGGGGGTGCATCTCCTTGATGCGGCGCAGCAGCTCCAGCGACCACTTGTAGTCCGGCACCCGGGCGG  
GCGACGCGATACATGCGCGGCGCAGTTTCCAGGTTGTGGTTGAAGACGTCCGGCGGGGTTTCGCGGAACA  
CCTCCAGCGCCTGCTCCATCCGGCCACGAAATCCGGGGTCAAGATCTCGATGCGGGTCTGCGGGCTGTG  
CTCGCGGATCTCGCGGATGCAGTCCGGCGAAGTGTGCGGACCCTGCGCGAGATCGTCCGGTCCACC  
GAGGTGATCACCACATACTTGAGTTTCTCTTGTATGGTTCAGCGCCAGCTTCTTCGGCTCTTCCGGAT  
CGAGTCCAGCGGGCGGCGGCTGGGCCACGTCCGAGAAGGGCAGCGCGGGTGCAGATGGCGCCATGAT  
CATGAAGGTGGCGGTGCCGTGGTTGAAGCACTCCGCCAGGTTGGGGCAGGAGGCTTCTCACAGACCGAG  
TGCAGCTTGTCTTTCGCAAGGTGCTCTTGATGTGTTTCGATCTTCTGGCTGGAGGGAGGCAGCTTGATCC  
GCATCCAGTCCGGCTTTCGAAGGAGTTCTTTCGTTGGGATCCGGCATGAATTTACCGGGATCAGGGCCAT  
CTTGTGCCATCGCGCAGCTTACGCCCGGCTCCATACGAACGGGTTTGTCTCATGATTTACTCTCGGTGT  
TTGTTATTGTTTGTAGCCAATCAGGCGAGCCAGCTCGGCCACCAGAATGGATTGCGCCTCGGCCACGCT  
CTGCGGGCCGCCAGGGCGCTGGTCTGGGTGATGCCATGCCCGCATAGCCGCACGGATTGATGTGCAGG  
AAGGGGGTTCATGTCCATGTTGATGTTGAGGGCCAGCCCGTGAACGAGACCCCTTTCGGATGCGCAGAC  
CCAGCGAGGCCAGTTTTGCTCCATGCCAAGGTCAATTTTTACATAGACCCCGGGGCATCGGCCTTGGC  
ATAAGCCTGGATATCGCTTTTTGGCGAGGGTATTGATGATGGCTGTCTCCAGCGCGTCCAGCTCGCGA  
ACCGAGAATTTGAGCGGCGGACATCCACCAGTACGTAGAGCACCAGCTGGCCCGGGCGTGTAGGTTCA  
CCTGACCGCCGATCGCTCTGCACCACCGGGATATTGCCCGGATTGAGCAGGTGTTCCGGCTTTCGGCGC  
CTGGCCCTGGGTGTAGACGGGATCGTGTCTGACACCACCCAGAACTCGTCCGGGGTGTGCTGGTGGGTTG  
TCGGTGAAGGCTTTTCATGGCGTCCCATACCGGCTGGTAGGGGCGGCGACCCAGCTGCCGACAATCAGGC  
TGGACTGGGCGGGGATCTGGGATGACATGGCGTCTTCGCGGCGTGTGCGGCCAAAAACAGTCCGCCCGC  
AGAACGGGGCGAGAGAGAAATTACAGTACGATTTTACCAGCTCGATCTTGCCAAGGGCGTGGTACATCG

CTTCGATGTGCTCCTTGCTCTGGGCGGTACGGTCACGCGGACCGAGTGGTAGTTGCCCTTGGAGCTGGG  
CTGGACTGTGCGGCTGTAGGTGCCGGGGCGTGTCTGCTGCAGCACTTCAACCACCATTTCCGGCAGTGCC  
GGGTGCGCAACGCCGAGTACCTTGAACGGGAATTTGCAGGGAAACTCCAGCAGTTCATCAAACCTTGGTAT  
TCATTTACTCACCTTTTTCGTCATCACCGGGATGACTTCATCTTGGATGGCTAGTGGCCGATGGCCCGTG  
GAGGCCGCCATTTCAAGTCTATATGGGCACGGCTCATAACTATATGGGCGCTGCCCGGACCGGGATCAAG  
GCCAGGATCGGTGAGACAAGGATGGAAGTGTCTGCTTTTTTACCACAAATCAGGGTAAGGCGGAACCTGCAG  
TTTACAGGGTTATTCACTGCCTTTGCCGGTCACAGACAGCAGCGGCCCTGTTGGCGCCGCTGTTTGGTG  
AGGATTGTGCGTTGGATTACTTGAACCAGCTGGTGACCAGCAGTACCAGATAGTCCCACAGACGGCTCAT  
CAAGCCACCTTCCCTGCACCTCTTCCAGGGCAACCAGCGGCACCTGCTTGATCTCTTTGTGCGCCCTGTTTC  
AGGAACACCGGTACCCGACGCGCTGCCCTTGGCCAGCGCGCTTTCAGCTCGCTGTCGAGCTGGAATCAG  
CCTTCAGGTTGTTACCCTGACCCGCGGTGACCAGCAGCAGGAGACATCTTTGTCGACGCCAGTTTCACTTC  
CGGTTTGTGCGCCATCCAGATCTTCTGGGTGACCAGCTCGGTGCCCTGTACGCGGGTTCAGGCTCTGG  
AAGAAGCGGAAGCCGTAGGTGAGCAGTTTTTTGCTCTCGGCGCGCGGGAGGCTTCGCTGCTGGCGCCCA  
GTACCACGGCGATCAGGCGCATGCCTTCGTTGTTGGTGGCAGAGGAGACCAGGTTATAGCCGACCTGGCT  
GACGTGGCCGGTCTTGATGCCATCCACTTGCAGGGATTGATCCCACAGCAGGCGGTTGCGGTTGTGCTGG  
GTGATGCCGTTGAACACGAAGGATTTCTGGGAGTAGATCTTGTACTCTCCGGCAGGTCGCGGATCAGCG  
CCTGACCCAGACGGCCATGTGCTGAGCGGTAAGTGTAGTACCTTCCGCATCCAGACCGTGCAGGTTTCAT  
GAAGTGGCTGTCATTCATGCCGAGCTTGGCGGCCAGCTGTTTCATCAGGCTGGCGAAGGAGTCCGTTGCTG  
CCCGCCAGGAATTCGGCCATGGCGACGCAGGCGTCAATTGCCGACTGGATGATGATGCCCTTGTGAGAT  
CATCGACGGAGACCTGCTTGCACCTCGATAAACATCTTGGAGGAGTCGGAGTAGTTCTTGGACCAGGC  
GTTCTGGCTGATGGTCACCATGTGCGGTGCGCTTGATATTCCCTTCAGCAGCTCCTGGCCGATGATGTAG  
GAGGTCATCATCTTGGTCAGACTGGCGGGCGGCAGACGCTCTTCGGCGTTCTGCTCGGCCAGCACCTGAC  
CGGAGTAGTAGTCGATCAGAAATATGGGCCTTGGCGGAGATCTCCGGCGCGCGGGGAACCACCATGGGCAT  
GGCATTTCGGGGTCCGCACCGGCGTATTGGCCTGGGCGGTTACGCTGATCAGTGAGGCCAGAAGAACTGAA  
CGGGCAAATTTGGACATCTTGAAATTCCTGCGAGCCAGATGGGGATAAAATGCGGGCCTAACATAACCAG  
ATGCGCCCCGAGGTTATAGCCCCGAGATGGCGATCAGAACTGGTTTTTTATCCATCACTCACTGTATCAC  
GCCATAAAACGACGTGATGACAGTGAGTAAGCGGTTAGTACATCCGCGGTAAGGGGGCGATCAGGGC  
ACGATAAAGCCCTGTTCCAGCCCGCTGACGTACTTTTCCAGCACACTTGCCCTGCTGGTCCGCGGGCA  
CCGGGCAAATCAGACCCCGAAAATGGCGCCATGGGCATCGATCCGTTAGGGCAGCGCTAACGCTGGGT  
CATCACCTTGCCCATCGCCTCGGCCCGATCCCGGGAGCCGCTGGCCAGTACCTGGATCATCTTGCCATCC  
CCACTGCTGGCAGGCGCTGCGGCCCTTGGCGGGAGCTGGCTTGACAGGTGCCGCTTTGGCGGGCTTGACGG  
GAGCGGGTTCCGCGAGCGGGAGTGGCCATCGCCAGCGCCGTCGGTTTACCCAGAAAACCATCTTGCGACAG  
CGTGTGGAGGCCGAGCCGGAGTGGTTGGAGTCAATTCGATGGGCTTCATCGGCTCCATGATCACCATC  
TGATCCGGGGTGTGCTGATCAGCTCCAACCGTACTCGGGCTCACCGCTGTCGACCATCTCCAGCTGCT  
TGGCCGCTGCGTAGGAGAGGTCGATCAGGCGCGGGCTGTTGAACGGGCCGCGATCGTTGACCCGCACAAT  
GGTCTCCAGCCCCTGTCCAGATTGGTAACCCGCACATAGCTAGGGATGGGCAGGTTGCGGTGGGCGGGC  
CTGAACAGCTTGTGCTGTCAGCACATCGCCGTTGGCGGCTTCTTGCCGCTCCAGATCCGGCGACAACCAGC  
TGGCGGTGCCCTCTTCGCTGTAGTGTGTTGATGTGCGCCACACCTCGTGCTTCTGCTTGCCGATCCAGTA  
GTCCCGGTTGCCGCTGGCACTCAGGGACTCGGGGCGCGGAATGGCGCCAGTGGCTTGCGGGATCTCGATA  
ACGGGTGGCTTGCTGACCGGTGCTTGGCGCTCGACGGGGGCGCTCTGTTCCGGCTGGCTGCTACAGGCGG  
CCAGCAACAAGCTCAGGCTGAGCGGGAGGAGTTTGTGACGAAGATGCATACGCTTCCGTAATGGCTTGGC  
TAAGTTGATACACCGCCATCGCATAGAGTGGGCTGCGATTGTAACGGGTGATCACATAAAAGTTATGCCG  
TGCGACCCAGTATTCGGTCCATCGGCTTGGGCAAACGCCAGCAACTTGACCGGCGTCTGTGGGGCCAGC  
GGCGTGGCGAGCTCAATCCCTGCCCGCCAGTCTGACCACTGTTGTGTTAACTCGGGCTCAGGCTGA  
GTAGAGGTTTCGACTGCCATCAACCCGATCTGGGCGGTTCCACCACGATTCGCCCCAGCGCCACTGGTG  
GCTGGGCAAAATAGTTGGCCACGCTGCCGATGGCATCGACCGGTTGGCAAACAGTCCCGCTTGCCATCC  
CCGTCAAAGTCGACGGCATAAGTGGCGATAGCTGGAGGGTATGAACTGCCCCATCCCCATGGCGCCGCGAT  
AGGAGCCCTTGAGGGCAGTTCGAGTTGCCACCCTTCCCTCTTTGGCCAGCACACCAGCTGGGCAAACCTCCTT  
GGCAAAGAAGTCGCTGCGCTCCGGGTAGTGGAAACCCAGGGTGTAGAGGCTATCGAGCACCGGATGACGG  
CCCATCTGGCGACCGTAGAAGGTTTCTACCCCTATGATGGCCACGATGAGCGAGGCGGGCACCCGATAGG  
TCTGCTCCGCGCGGGCCAGTGTCTCGGCATGTTGCTGCCAGAACTGCTGGCCGTCACGGATGCGATCCGG  
GGTAACAAACAGCGGCCGAGTGCAGAGGCTTGGCTCCCACGGCTTGTGATGGTGTGCGAGCACC  
TCCTGCCGTAACCTGGGCGCGGGCGACCGCGCCTGCAGCTCCGCCAGCGGCACCTGCTGCTGGTCCGCGA  
GCAGGGCCAACCGATCCGGCGACACGGCGCGGTCGCCATCGTGGTGGCGAGGGAGAGCAGCAATCCAAC  
CCGTCTCATCAGGCGAGCAGTCTTCTATGAGTCTGGATGGACATCAGTATGCCAAAGCCGGCCATCAGGG  
TCACCATGGAGGTGCCGCCATAACTCACCAGCGGCAGGGGACCCCTACCACCGGCAAGATGCCGCTCAC  
CATGCCCATGTTGACGAACACATAGACGAAGAAGGTGAGAGTGTAGGACCGCCAGCAGTCCGCTCGAAG  
CTGTTCTGGGCTGCATCGAGATAAACAGGCAACGGCTGATGACGTAGAGGTAGAGCACCAGCAGCAGGG  
CAACCCCTACCAGACCGAACTCTTCGCTGAATACCGCGAAGATAAAGTCGGTATGCCGTTCTGGTAAAAA  
CTCCAGCTGGGACTGGGTCCCTTGCAGCCACCCCTTGCCAAAGACGCGCCGGAGCCGATAGCAATCTTG  
GACTGGATGATGTGGTAGCCTCGGCCGAGCGGGTCTTCTCCGGTTCGAGCAGCATCAGCACCCGCTGGC

GCTGGTAGTCGTGCATCAGGAAGAACCAGAGCACCAGGCATAAAGGCCAGCATCAGCAGGACCGCCAAGCC  
GATCAGCCACCAGCTGAGCCCCGCCAGGAAGATGACGAAGAAGCCGAGGCGGCCACCAGAATGGAGGTG  
CCAAGGTCAAGGCTGGGCGGCATCAGCAGGGTGGGCAGCAGCACCATGATGAGGGCGATCACCACATGGC  
TGAACCTGGGGGGCAGCGAGTGGCGACTGAGCCAGGCGGCCACCATGATGGGCATGGAGAGCTTCATCAC  
CTCGGAGGGCTGGAACCTTCATAAAGCCCAGATCGAGCCAGCGCTGGGCCCCCTTGCCGATGTGGCCGAAC  
ACGTCCACCGCAATCAGCATCAGCACCACCACGGCGAACAGCGGCACCAGCAGCGGGCGTAGAGGGAGG  
GGGGCAGCTGGGCCAGGCCGATCATCAGGGCAAAGGCGAGACCGCCGCGCACCAGCTGGCGCACGATAGA  
GTCCATATCCTGACCTGAGGCGGAGTAGAGCACCACCATGGAGAGGGTCATCACGGCCAGCAGACCGAGC  
AGCAGGGGCAAGTCGATATGCAGCTTGTACCAGATGCTCTGCTGGCGGGCAGAAATTACTCATTGGGGGCG  
ACCTCACTCGGTTGGGACCGCTTTTCCGGTGCCGGTGGCAGTTGCGGATCAGGGGGCAGACAGATAGGCAT  
CCAGCATTTGGCGTGCAATGGGCGATGCAGCTGCAGCCAGCCACCTCCGATGGAGTTTTCCAGTACCAG  
AGCTACCACCGCTTTGGGTGCCTCGAAGGGGGCATAAGCAACGAACAAAGCGTTATCGCGATGCTCCGCC  
TTGACCGTCTTGATGTTGTAACCTGATTTTCCCTTCAAACCGACTACCTGGGCTGTGCCGATTTGCCAC  
CTGAGGAGTAAGGCGCCTTTGGCAAACGAGTGACGGCCACTGCCTTCACTGCCATGGTTGACTCGCCACAT  
CCCATCCTGCGCCACTTTCCAGAAGCTGTGCTTCTTGAGCTTGAGGGCGATATTGGGGTTGATGGGGGCA  
TCGACCACCCCGCCTTGAGGCGGTGCTCTTGAGCAGGTGCGGGGTCACATCGTGACCGTTCTGGGTCA  
GGATGCTGATCGCTTTGGCCAGTTGGAGCGGGTGGCGCTCCAGTAGCCCTGACCGATAACCGACAGAGAT  
GGTGTACCCCTGATAACCAGGGCTGGCGCAAACGGGCCATCTTCCAGTCACGGGACGGCATGACACCCTTG  
GTCTCTTATAAAGATCGACCCCGGTGTAAGTACTGACCGAAGCCAAACTTGGTCATGTAGCTGTGGATCTTGT  
CGATGCCGACTCGATAGGCGAGATCGTAGAAGTAGGTATCTGCCGAGACCTCGATGGCGCGATAGACGTC  
GAGCCAGCCATGACCCAGCGGCGCCAGTCGCGAAACTTCTTGGTGGTACCGGGAATGGAGAAGCTCGGG  
CCGCCGAAATAGCGGTAGCCCGGGGTGATGGCCCCCTCGTTGAGACCCATGATGGACATCATGGGCTTGA  
CGGTGGAGGCAGGGGCATAAATGCCCTGAGTGGTGGCGTTACCAGCGGCCGCGCCGGATCGTTGAGGAG  
CGCCGAGTAGTTGGCGCTGGAGATGCCGGTACGAACAGGTTGGGGTCGTAGCTGGGGCTCGACTCCAGG  
GCCAGGATGGCGCCGGTTTTTCGGGTCCATCATCAGATGGCTCCGCGCTGGCCAGCCAGCAGTTGCTGGG  
CCTTGAGCTGCATCCGGACGTCGATATTGAGGTAGATATCCTTGCCCGGAATAGGTGGCTGGAACCTTGA  
GGTGCGGACAATCCGGCCGCGGTTGTTACCTCGACCTCCTGATAGCCCGCCACACCGTGCAGCTCATCC  
TCGTAATACTTCTCAACCCCTGCTTGCAGATATCCTTGGTGGCCGCTAGTTGGCGAGTTTTTCTTCCCT  
TCTCGAAGCTCCACCTCACGGGTGTGATCTTGCCACATAGCCCAAAGCATGGGTGAGGGTGTCTCACC  
AAACGGGTAGTAGCGTTTTGAGGTAGGCCTCGATGCTGGCCCCGGGTAGTTGTGCTGGTTGACCGAGAAG  
AGGGCCACCTGATATTGCGGTGACGTTCTCGTAGAGGGCGACCGGCTTGAAGCGGCGCTGGCGCTTCACTT  
CGGCGAGGAACCTTCTCCTTGGTGCCTCTGGCAGACCCAGCAGGGTGTATCAGCTGGTCGGCGGTTTTTTTC  
GAGATCTTTGGTCTCTTCCGGCACAATTTCCAGACTGTAGACCGGGCGGTTTTCCGCCAGCAGCACGCCG  
TTGGCGTCATAGATGAGGCCCGTGGTGGCGCCACCGGTACCACGCGGATACGGTTGGAGTTGGAGCGAG  
TCTGGTAGGTGTGCTAGGACTCGACCTGCAGATAATAGAGATTGCCAGCAGCACCAGCATCAGCACGAC  
GATACCGATGTAGGCTACCAGGGTGCGCCGGAAGAACAGATTGCCCTCGGCACTGTGATCGCGCATTTCCG  
ATGCGTTGTTTTCAGCATGCCTTTACCTCAAGACCCCTGGGGGCAATAAGAGCAGGAACGATTTGTTTAC  
TCTCTGTGATAGGGGTGAATATGAGAGGTGAGACTCCAGAGACGCATGGTCACTCTCTATGATACGGAT  
GATTGGTGGTGTGCTCCAGGCCGATAGAGGCTCTCTGCCACCAGCACCCGCAACCAGCGGATGGGGCAG  
GGTGAGCGGTGACAGTGACCAGCTCTGTTTACGCGGACGCTTGCACCTCGGGGGACAAACCTTCCGGCCCCG  
CCTACCAGCAGTGCGACATCGCGGCCATCGAGTTTCCACGCTCCAGCTGGGTAGCCAGCTGCTCCGTGG  
TCCAGGGCTTGCCCGGAATGTGAGGGTGCAGATGCGCGAGCGCCCCGAGCCGCCAGCATAGCTTCCCC  
TTCCTTCTGCAGGATGCGGGGAATGTGCGCATTTTTTGGCCGTTTGCTGCGCAATCTCGACGAGTTCA  
AACGGCATGTCTTTGGGGAAGCGGCGACGATACTTTCGAAGCCATGCTCTACCCAGGCGGGCATCTTGG  
TGCCACCGCAACTCAACTGGATCTTATGGTGGTACACTTGTGCTCTTATTGCGTATTCATTTGAGCGG  
CACCCTCCACAGCTTTTCCAGTTGGTAGAAGTACAGATGTTTATCTGCATCAGATGCAGATCACCGA  
GCCATATCTACCAGCACCCATTACCGCTCAGTTGCCCTTCCACGCTCAGCAGATCCAGACCCGCGTGG  
CGGGCCTCGCTGGCCAGATGGTGGGCAATGGCGCTGACGTGACGACTGGAGTTGCCGGAACAGATGATCA  
TGGTGTGAGTAATGCTGGATTTGCCGCGTACATCGAGGGTGTGATGTCGCGGCCCTTTCATGTCATCGAT  
CTTGTGATGATAAAGGCATGCAATCTTGGCCTTGCAATGAGTCTCTCCTGTATTCCGGCGCGCAGCGT  
TTGCGTCAGGGCGGCGGATTATATCATGGTCACTCCCGTTTCCATCGGGTGGGGCGGGATTACGACAGG  
GGCTAGCGGCGGTTGGCGCGGTAGAGCCCTGTTGATCAATATAGTGCGCAACCGACTCGGGCAAGAGGT  
AGCGGGTGTCTTGTCCCGCATCCAGCAAGGCTCGAGTCGGGTGGCTGACAGTTCGATGGGCTGGTTGTC  
CGCCAGCCAGATATGACCGGCCAGACGCTGATGCAGCGGTTGGCATCTGTGGTGTGATGGTGCGCCAGC  
AGCTGCGCCACCTCGGCCGGATAATCCGGTTGCCAGCCCGGCGTACGCTCACCACCAGATGGGCATGGT  
CGAGCAGCTCCTGCCAGCGGTGCCAGCTTGGCAGGCTCAGCAGTGAATCCATCCCCATCAGAAAACAGAG  
CGGCGTATCGGGCAGTTCATGACGCAGCTCGATGAGGGTATCGATGGTGTAAAGAGGGCTTGTCCCGTCTC  
AGTCCCGCTCATCCACCACAAAGTGGTGGTTCTCTGCCGCCCGAGTTTGACCATGGCAAGGCGCTGTT  
CGCTCGAGCAGAACGGATTGGCGCGGTGGGGCGGGATATGGTTCGGGATCAGCCGCATCTCGGCTAACCC  
GAGGGCATCGCGCGCTCGATGGCCGGGCGCAGATGGCCGATATGGATAGGATCGAACGTGCCCCCAGC  
AGGCCAATGGGCGCCTTACGACCGGGCTGTTCTCCATCACCAGCGGCAGCGGGGTGCCATCAGAAAGCC



GAGGGCAATGGTCTGCAGCATCAGCCAGGCCTGCTCGCTATCGAAGCGGCGCTGGGCATCGTCCAGCTGG  
GCCATCAGTTGCCACAGTTGCTGCAACTTGGCAAACGGCAGTCGGGTGAGCGCTTGTGGAATGAGCTGCT  
GGCGGCTCTGCCAGATGCGCAGGCGGCTGAAGTGCTCACCAGCGGCTGGCCGTTGCGCATCGCCAACGA  
CAGCTCGGTGAGCTGCTCCAGCTCGCGGCGAGAGGGTCCAGGCCAGCATCCCCGGCTCGGTGCCCTTCGGCC  
CGCAGGGCGGCCAGAATGCGCTGGGCCCGGTTACCTTGCCTCCAGCAGGGTATCGACCAGCTGGAACG  
GGGTGAAGTGGGCGTGGCGGATAATGGTCTCTTGCAGATAGGTGACGCTGATGGGCTGGGGTGGCGAGAG  
CAGGGTCAGCTTCTCGATCTCTGGCTGGCGGCCAGCAGGTTGCCCTCGTAGGAGTGGCACATGAAGTTG  
ATGGCATCCGGCAGCGCCTTGAGGGCGAAACCGCGCAAAACGGGCGCTCATCCAGCGGGGAAGAACTTGG  
GCTCCGGATGGTTGACCGGCACATAGGTGCCAATCTGGTAGAGCTTGTGGAACCAGGCTGATTTTCATCTG  
GGTCTGGTTGAGACGACCCGCACTCAGCACCAGCAGCAGGTCGGGATGAAGCTGCTTGCCAAATTTGCTG  
ATGCGGGCAGCGAGATCCTTGTCCACCTTGGCGGGCAGCTCCAGCTCGATGATCTGGCGGGCGGAGAAGA  
GGCTCATGGCCTGACAGGCATCGTAGACCTGATTCCAGTCCAGCCCTGTTCCACCAGAAAGGTGTGGCG  
CTCATCGAAACCCTGCTTGCGGGCGACCTGACGGATGGCATCGATGGCCTCCAGTCGACAGCAGGGGCTCG  
TCGCCAAAAACGAGATAGCAGGGCCGAAGCCCTGCTTTGAGGTGGTCACCAAATTTGTTCCGGGTAGATCC  
GCATCAGAAGCTGACCTGACTCAACTGCCGGATCACCTGATTGGCCGCTGCTCCTGCATTTGCGGGTTG  
AGCTGCTCCTGCTCACGGGAGGAGGCGAGCGCTGCATCCGGCTTGTGAGGAAGCTGCGGTTGAAGTTGA  
TGGGGAAGACCTGAGTCGGTTTTGCCCGTACCAGATGGTGAAGTGGGTACCAAAGCTCAGCACATATTC  
GGTGTCCGTCCCCAGCGGTTGACCGAGGCAACCTGACTGGTGTGCTACGCCGCCAGAGTGAGCACC  
GGAATGCCCTCCTTGTGCGCCAGGGTCACGCCAGAGGCTTCAGACGGGTAGTAACCATCCGGTAGAAGT  
CGCTCTTGTGTCGCCCACGACCTTCATGGTCATCAGCTCGCTCGGAATGCCGTTGCCGCGCATGTGAAA  
GCCGCGACCTTGACAGCAGCAGACCAGCCAGCAGCGGTGGCCATCCAGCGGGTGAAGATGGTGCCTATAGAA  
AATCCTCTTTGCATTAAGGGAAAGCGGCGGGCGCAGGGCCCGCCTTATCATCCGTTTGCTGTTACAGAT  
TGGCAATGATCAGTTGGTAACCAATCAGTTGGCAGCCAATTAGTTAGCGACAATATTGAGCAGCTTGCCA  
GGTACATAGATCACCTTGCACAGGTCAGACCGTCCGGTGAAGTCTGCACGGAAAGCATCGGCCATCGCCA  
GCTTCTCGACGTCGGCTTGGCTGATCTCGGCCGGCACGGTCAGTTTGC CGCGCATCTTGCCGTTGATCTG  
CACCACCACAGCTTCTCGGTCTCGACCATGGCCGCTTCATCGGCCACCGGCCAGGCTGCGTGATCTATG  
TCGTGCGCCCTTGCCAGCATCTTCCACAGCTCGAAGCCGATGTGCGGGGTGATGGGGTAGAGCATAACAA  
CGACAGCTTCCAGCGCTTCTCGATCAGGGCGGGTCCCTGCTCGTCTGTTGCCGAGCTTGGCCAGATTTGTT  
CATCAGCTCCATGATGCGCGCGATGGCGGTGTTGAAGCTTGACGGCGACCCACGTCATCGCTCACCTTG  
GCGATGGTCTTGTGAGTTACGGCGTACCCTTCTGCTCGTTGGTGAGAGCAGCCACATCCAGCGCGG  
CAACGGCGCCACCGAAACGTGTTGAAAGGTGACGCGCCACAGGCGACGAGGAAGCGCTGGGCACCCTC  
TACGCCGGAGTCGGACCACTCCAGGGTCATCTCGGCCGGAGAGGCGAACATCATGAACAGACGGACGGTA  
TCGGCGCCGTAACGCTCGACCATCAGCTGCGGGTCGATGCCGTTGTTCTTGGACTTGGACATCTTGGTCA  
TGCCGGAGTGAGCACTTTCGCGCCTTCTGTTATCGATGGCCTTGGTGATGCGACCCCTTCTCGTCACGCTC  
TACCTTGACGTCGGTGGGCTGACCCAGACGTTGCCGCCCTTCTCGTCTTTGTAGTAGAAGGCGTCGGCC  
AGCACCATGCCCTGGCAGAGCAGGCGCTTGAACGGCTCGTCTGCTGTTGACCAGACCCGCGTCACGCAGCA  
GCTTGTGGAAGAAGCGGGCGTAGAGCAGGTGCATACAGGCGTCTCGATACCGCCGATGTACTGATCCAC  
CGGCAGCCAGTGGTTGGCAGCAGCCGGATCCAGCATGCCCTTGTCTGATGTCGGGGAGCAGTAGCGCGTG  
TAGTACCAGGAGGACTCCATAAAGGTGTGAAAGGTATCGGTCTCGCGGAACGCTTCCGTGACCCTTGTAA  
TGGTCTTGGCCCACTCGGCATCAGCTTTGATCGGGCTCTGGATAACCATCCATCACCACATCTTCCGGCAG  
CAGCACCGGCAGTTGGTCTTCCGGCGTCGGCACCACTGTGCCGTCAGCCAAGGTCAGCATCGGGATGGGG  
GCACCCAGTAACGCTGACGAGAGACACCCAGTCACGCAGACGGTAGTTGACGGTGGCGCTTGCCTTTGC  
CCAGCCCTTCCAGCTTGTGCGGATGGCATCGAAGGCGCCCTGGAAGTCGAGACCGTCAAACCTGCCAGA  
GTTGAACAGCACGCCCTTCTCGGTGTAAGCGGCGTCTGCTCACGTCGACGTCGCCATCAACCTGCTTGATC  
ACCGCCTTGTGTCGAGGCCATATTTGGTGGCGAACTCGAAGTCACGCTGATCGTGGGCTGGAACCGCCA  
TCACGGCGCCGGTCCGTAGTTTATCAGCACGAAGTTGGCGACCCAGACTGGTACCTTGGCGCCATCCAG  
CGGGTGAATGGCATAGAGCCGGTGGCCATGCCCTTCTTCTCCATGGTGGCCAGTTCAGCTTCCGGCTACC  
TTGGTGTCTTGCACCTTTCGATGAAGGCGGCCAGCTCAGGATTGTTTTGGGCTGCCGTCAGCGCCAGCG  
GGTGACCGGCAGCGATAACCGACATAGGTGACGCCCATGAAGGTGTCCGGACGGGTGGTGTAGACCTCCAG  
CTGCTCAGCCTGACCTCGATAGCGAAGCTGATGTTGACCCCTTCCGGAGCGGCCAATCCAGTTGCGCTGC  
ATGGTCTTGACCATCTCCGGCAACCTTCCAGATTGTGATGTCGCTGAGCAGCTCTTCCGGCTAGTCGG  
TGATCTTGATGAACCACTGGGGATCTCTTTCTGCTCCACCGGGGTGTCACAGCGCCAGCAGCAGTTGTC  
GACCACCTGCTCGTTGGCCAGTACGGTCATGTCGTTCCGGCACCACTTACGGAGGAGGCTTTTTTTGTAG  
ACCAGACCCCTTCTCGTAGAGCTTGGTGAAGAACCACTGCTCCAGCGGTAGTAATCCGGTTTTGCAGGTGG  
CGACTTCACGATCCAGTCATAACCCAGACCCAGCATCTTCAGCTGGTCTTTCATGTATTTCGATGTTTTTC  
GTAGGTCCAGGGCGCCGGTGCGGTATTGTTTTTGTGATCGCGGCGTTCGGGCCGGCAGACCGAATGCATCC  
CAACCTATGGGTTGACGACGTTCTTGCATTGAGGCGTTGATAACGGGAGATCACATCACCTATGGTGT  
AGTTACGAACGTGCCCCATGTGTAGTCGACCAGACGGATAGGGGAACATGGACAGGCAGTAGAACTTCTC  
CTTGTCTACCTTCTCCACGGCCTTGAAGGTTTTCTTGGCATCCAGTGCTTTTGCACCTGCTGGTTCGATT  
GATTTGGGGAACGTATTGCTCTTGCATTGGTGCATCCGGATCTGTGAAATGAATAGATAAATCAGCTGGG  
AAATCGCAATAGAATAACCATATCCTGCGGCGGCAACAACCGCCAGCGTCCCTTGGGCCTTAAAGCCGGGC

CAGATCAGGGTTTAGTAGAGGAGTTAGAGCCATGGACAAACGTCAAAAAGGGTACGAAGCCTTCATTGCC  
GAGCTGCAAAAACAGTGGCAAGAGACTGAAGAGTTCCAGGAGGAGCGCCTCAACCGGATGATTGCCAAGG  
TTCAGGCCTATCTGGAGGCGGCCAGCGACCTGACCCAGGACGAACTGGCGCTCATCGCCGAGTACGTGAA  
GCGGGATCTGGGCAACTATGACGAGGGGGCGCCATGACGATAGTGCAGGTTGGAAGAGTCCGCCTTTATG  
CTGGCCCTGAAAAACACCGCCTGGTCTGGCTGGCGGATGTGACCGACCGCGCCAGGTTGAGTGGCGCG  
AGCTGGCCGACGAGCTGGAGCACAAGGGCGTCTATGAGGCGGGTACTGGGTAGGGCTCGGGGTATGGT  
GTGCGACAGTGTGGCTGGCGCCATACCGTGTGCATCCCCAGCAGCTCGATACTTGGCCCCAATGCGGC  
TGCGCCGAGTATCATCGCGAGCCGCTCTCGCCCTGAGTCATGCCATCAAGGCGGACGAGATAACGAGCAA  
AAAGGCGCCATCAGGCGCCTTTTTCTTGCTTGCAAGTTTCGTGCGGGCGTTTACTTGCCTGCGACGGAGA  
GGCCACCAAAACGGATAAAGCGGGGAGTAGAAGCCCTTGCCGTGTTGTGGTGCAGGGTATCGCCGACCGC  
TTCCAGCTCGCCAGCAGGCGGTAGAAGTTGCCCTGCTACCGTGTATGCCGCGCACCAGGTCAGGGCAACT  
CCATCGCGGCAGAGGAAGCCCGACCGCCAAAGGAGAAGTACCGCTCACCGCATCGGCACCGGAGTGCA  
GGCCATCCAGCTTGACCAGCTCCAGATAGTCGCCGCTTTGCACCTCCGCTTCCCTATGGGGGCCGCGCC  
AAACACCAGATGGCGAGCGGTACATCGAGGGCGCTGCGGGCACCAGCGAGCGGGCCGAACCGTTGCTGGCG  
ACTCCAAAGTGGCGGGCGGTGGCGCTGTTGTGGAGCAGGGTTTTAGCTCCCCCTTCGCCAATCAGCAGCA  
GATCCGAGCTGGCAGCTCCCTCGCCATCAAACGCCTTGATGTTTCATGCCGCCCGGCATATAGACCCCTGCT  
CTCCAGAGTAAGCCAGCGCGACGCTACGCTCTGGCCGACCTTGTGCGCCAGGGTTGATCCCCCTGCTGG  
GCCCCCTTGGCCGACAGCACACCCTGAAAGCAGCCAAACAGGCTGGCGAAGCAGTTGGTGTAAAGATGA  
CGCTGTAGTGACCGCTCGGCACAGCTTACCGGGCAGCAGACCATCGGCGATGGCGTAGATCTGCTCGAT  
CAGGGCCTGACTGTCCAGCTCGTGAAGCGGGCGCCATACTGCCCTGCGAGTGCATCGACTGGCGGCCA  
TCCCCGTTCCACCAGCGCCGAGGTGTAGCAGCCGACGCTGAACTCGCCGTGCTGGCAGAGGGTGCCTGAC  
TGTTGGCGAGCCAGAGCTGGCTCTCCCCCTTCGAAGAAGCTGTTGTAGGGGGCGCCGCTCACATCGGGCAT  
GGCCAGCATGTGAGATTCCAGACGCAGGGCCAGAGCGATCTTCTCCTCAACCGGCGTGGTATCGGGCTGG  
TTGATCTCGGCGCAATCTGTGGTGATCCGGCTATTGGCCACCAGATGCGCTGATCTGCATCCACCTTGG  
CAAAGTGGCTGGCATCGAGCGCATCTGCAGCATGGCATCCAGCGCCAGCTCATCGAGGGATTCCGAGTA  
GGCGATGCCGACTCGGCCCTCTTTTATCAGGCGAATACCGAGTTGCTGGCTGCTGGTGACCTTGTATTCA  
CCTAGCTCGCCCTTGTCTGCCTTGAGGGAGAAGGCCTTCTCCTGATTGGCGATGATGTCTGCCTCGGCGC  
CGAGGTCGGCCACCTTTCAGCAGGCGGGTGAGCAGTTGGTTTCATGTCAAGTTGGCTCATCGCGCTTC  
CCTCCCACCAGGATTTGTCCACTTTACGCGCCGCTGGCCACCAGGTTGGGGACCGCCAGAGCAG  
AGCCGCACATAACCGCGCCAGCGCCAGATTGCGGCCACCATGGAGATCTCTTTACGCACCTGCGGGCC  
GGTGCCGATCAGGGTGGCCGACTTGAGCGGTTTTGGTGATCTTGCCGTGCTTGTGAGGTATGCCTCCTGC  
ACATTGAAGTTGAACTCGCCGGTGCCGGGCTGTAAGTGCGCCGCCCCCCATCTTCTTGGCGTAGATGCCAT  
GTTGACGGTGGCCAGCATATCGTTCGAGGCTGTGGTTGCCCGGCTCGATATAGGTGTTGCGCATGCGCGA  
GGTGGGGGCGTACTTGTAGGATTTCGCGCCGCGCCGAGCCGGTGCCTGCGTAGCCTGTTTTGAGGGCACCC  
ATTCTGTCCACCAGAAAACCGGTCAGTACGCCGCTCTTGTGATGAGCTGGGTATGCTGGGTGCGCCATCCCC  
CGTCATCGACGTTGATGGAGCCCCAGGCGTTGCTCTGCAAGCCTTCATCCACCGCATTGACCACCGGATT  
GGCGATAAGCTGGCCCATCTTGTGCTGGAACACCGAGGCTTCTTGGCTACCGAGGTGGTCTCCAGCAGG  
TGGCCGACGCTCGTGGAAAGATGACGCCGCAAAGCCATTCTCCATGATGACCGGCAGGGTGGCGCTCG  
GGCAGGGAGCCGCGCCAGTTTTACCAGTGCCTGACGGGTGGCGGTGAGGGCCAGCTCGCGCGGATCGAT  
GCGATCGGCATGCTCCACCCCATCAGGGCGCCGGGGGCTCGTAACCAACGCTCTGCTCGCTACCTTCC  
ATGGCGATGGTCTGGGCCATGATGCGGTTGTAGTGGCGGCGATCGGCCACTTGCACCTCTTCGCTGTTGA  
AGATCTCCACCTCCTGCTCCAGCCAGCACGTTGCCGGAGAACTGGCTCACCTTACTGCTCTCGGCACG  
GGCCACCGCATCCATGGCGTGCAGATAGGCGATCTTCTGCTCCAGCAGCTTGTCTACCGACAAGGGCAGG  
GCCACCGGGTTGCGATCGCTCAGGCGGGTGAAGCGAAGGCGGTGGCGGTACCACGGGGTCGCGGCGGT  
CTTTGGCCGCCAGCAGGGTACGATGCGCAGCAGCTCGTTCGCGGCTGGCTTGGTTGGTGTAGCCGTAGAG  
CACCTTGTGGCCGTAACAGAGGCGCACGCCGATGCCGAAATCGAGGCCACCGCTGATGTTCTCTATCTGG  
CTGGAGAGCAGGCTGAGCTGGCTGCGGCGCTTGCCTCGACAAACAGCTCGGCAGAAATCGGCACCCAGCG  
CCAGCGCGTATCGAGCACGTCACGGGCAATGGCGGGGGCCAACAGGGAGAATGGTGTATAGAATATCC  
TTTTCTGGTCTGTCCGTTTTGCTTCCGACATCCGGCTCTGATTGTTATGGGATGTCGAGTCCATTGTTGCA  
GACCAGCAGAAAAAGTGCCTATAGCGTCATGCGATGATACCGATTGAGAAAAATCGGTGCGATAACTGCG  
CCCGGGCGCCAGGGCCAGGCGCTCAGGGTCTTTTTGCCAAACGTTGGGAAAGATCAGAGCAGGGCGTGG  
TTTTGCTCAGGATCTGCTCGACCCACTGCTCGATGCGCGGATCGGTCTGGTCATATTGGTTGGCATCATC  
GAGGGCCAGCCCGACGAAGTACGGCCATCGTTCGATCAGTGCCTTGGAGGCATCGAATTCGTACCCTTCG  
TTGGGGCAGTAGCCACCAGCTTACCCCTTTTTGGCACCAGCTGATCGTGCAGCATGCCGAGGGCGTCCCT  
GGAACCATTCGCCATAACCGAGCTGATCGCCGAGGCCAAACAGGGCCACGATGCGTCCCTCCAGATGGAG  
ATCGGCGATATCTTCCAGCGGGACTCCAGTCTCCTGCAGTTCGCCAAAATCCAGGTGGAGATGCCG  
AGGATCAGGATCTCGTAATCCTCCATCCGGCGCAGGGAGACATCCTTGATATTGTGAATATCCACCAGCT  
CGGGGCCGATGAGGGCGCGGATCTTCTCGGCTGCCATCTCGGTGTAGCAGGTGGTGGAAACCGTAAAACAG  
ACCAATCTTCATCGCTCTTCTCTCTGTTGGCGCTTTCTCGCTTGGCTTTTGGCGGTTCTCGCATGCTCGT  
GTGGGCTGCGCCATGTTGGCAATACGATGGGTAACGTAAGGGGAGGGCGCCAGTCTAGCAGATTGCCATT  
CGACCTTACCGCCCGCAAGGGGTGTGGCAAAAGTGCCTTATCTTTCCAATGAAAGTGCCTTGTCTTTT

CAAGGAGTTGGCGGTTACAATGGGCCATCGATCCCCTGATTGCAGCGCACCATGAGCAAGCCTGACCCA  
CATCCCCTGATTGAACCCCTTCTCGACGCCCTCTGGCTGGAGCGGGATTGTCTGACAACACGGTCAGCT  
CCTATCGCAGCGATCTGGAGAAGTTCTCCCTCTGGCTCGACGAGCAGGGGAGCTCGCTGCTGCTGGCGGG  
GATGGACGAGATCCAGCACTACCTCGCCTGGCGGGTCGATCATCAGTTTGGCGGTAGCAGTACGGCCCGC  
TTCCTGTGGCCCTGCGCCGCTTTTACCAGTATCTCAACC CGGAGAAGCTGCGCCGCGACGATCCGACCG  
TGCTGCTGGAGGGGCCAAGCTGCCGAAAAAACTCCCCTCCGATTTAAGCGAAAACGGAGGTGGAGGCACT  
CTTGAGTGGCGCCGCTGGTGGATGACCCGCTGGAGTTGCGGGACAAGGCAATGCTGGAGCTGCTCTACGCC  
ACCGGCTTGGCGGTTTCCGAGCTGGTGGGGCTCACTGCCGAGCATGTTAGTTTGGCTCAGGGCTTGGTGC  
GCGTAGTGGGCAAGGGCAACAAGGAGCGGTTGGTGGCGATGGGCGAGGAGGCGATGCACTGGCTGGAGCG  
TTACTACCGGGAGGCCCGCACCCCTGCTGCTGGGGGACCAGCTCGGATGTGGTGTTCCTTCCAAGCAG  
GCCCGTATGATGACCCCGACCCCTTCTGGCACCCGATCAAGCTTTACGCGCAGCGGGGATTAACG  
GCGAGCTCTCCCTCACACCTTGGCCACGCCCTTGGCCACCATCTGCTCAACCACGGCGCCGACCTGCG  
AGTGGTACAGATGCTGCTGGGCCATGCGGATCTCTCCACCACCAGATCTACACCATGTGGCCAACGAG  
CGACTCAAGGCGCTGCACGGTGGAGCACCACCCCGCGCTTAAGCCTGTTGCAGGCGATTTTTGCCCCGCTT  
GTTTAGCCTGATACAGGGCTGCATCGGCGCGGGCCATCACACTGTCTGGGGCATCATTCAGGGATTGGC  
AATGCCACCGCTAAAGGAGACGCTTAAGCCCTTTTACGCCAATCCTGTTGCCCATGCTGATACGCCAC  
TGCTCCATCAACTTCTGCGGTTGGCAATATCAGTCTGTTCAAAAAATAGCGACCAGCTTCCCCCCCCAA  
AGCGGCACAGGGTTGCCTGTTCCCTCCAGCAATGGCTACCAAGCTGGGCAGTGCCTTTCAAACGGCCTC  
ACCGATGGGATGACCATAGGTATCATTTATTTTTTTGAAGTTATCAATGTCGATGATCGCCAATATATA  
TTGGTTATTTTCTTTATGTAGAGTGGCGAGCACCTCTTCCAAATGACGGCGGTTGTACACGCCGTTAAT  
GCATCACGCAGCGATTTTTCTGTTTGGCCTGCATTTTGTCTGAAATCATCACTATTTTCATCTCCAGCT  
CCTCTATAACCAGCCAGCTTGGGGATAATAATTTGTTGCCCTGGAGGGGTGATACGCAATTGTCTAACAAC  
TTGTACTAATGTGCTGATGGTATGCTCCAGACGTTGCCCTGAAAAAATGGCAACCAGTGTGAATATCGAT  
AGTGACAATATCAGAGTGATAAATATGGTAGGCAATATTTACCAATCAGAAATATCGCTCTTGAATGGAA  
ATACAGTAATAACCAGCCATGATGGGTTGTTGTGAAGGGCGTGATATGAAATGAGATCACCATTTTCACT  
CATTAAAGGTACCATTCTGCCTTTCAATTCGAAATCCATGGTTGGTCAACTCGACTGCCGTTTTCTGA  
GGGTGCTGTGAGCCACAATCATCTTGTGCTCGGTCAAAGAGCATATATACAACATTGTTACTACTCT  
CCAGAATCCGCCCTATACGTGCTGAAAAATACCTTCAAGTTCAGGTCGATGCCAATCAGCCAAAGAAATC  
CCCCTGGTTATTGAAAAAGCAGCATGGGAAAGGGTGACGACCAGCGGCTTTTTTCAATCGCTCAATGTAAGGG  
GAACTCCAGATATTGATGCCGGGATGGTTCGATGGCATTGGCATAACCATGGGCGTTCCGATTCTTTGAACT  
CAATCGGGGTAGGATGAAGAGAGAAATGATATGCTTGTATCTTGAAGCATGTAGTACAGGTTTTTTAT  
TGGGCCATCAGGGTAAAGAAGGTATTGCCAAATGTCGCGATAACGTTGTTTTAATTCCGGGGGAAGATCT  
CCATTATTCTCAGTAATGTCGGCAATGATGATATTTATTTGCCTCTCAACCGAAGAGAGTGAGTTATCCC  
ATTGCTGCGCAGTACTATCGTTAAAAAATCTGGCGGTGCTTAGCAAGGTGTTTTTCTGCATAACAGAAAA  
AAGGTACGCACTACCAATGTGGTCAAAAACAAGTGGCAGCGCAAGCAGCAAAAAGAAAACGGAGAATAAAG  
CTGTGATTGGAGTTTGCAGCATTGGAGGTTTGCATAGTACGACGCCTATATAACTTTACGCCATCTAAC  
CATAGCCCATGGGCATCGTGACACACATACACTAGTCTGGGGAGTCGGCTTAACGCTCCTGTTGAGAT  
TTCAGCAGATCACGGATCTCGGTGAGCAGCTCCTGATCCTTGGTTCGGGCTGCCGGGGCGGCGGCTTCCCT  
CTTCTGCTTTTTTCTTGGAGGTTGTTGATGGCTTTTCACTCCATGAAGATGGCAAAAGAGATGATCAGAAA  
GTCGATGATGGTCTGGATGAACTTGGCCATAGGCGATAACTACGGCGGGTGTGACCTTCTGCGGCCCTC  
AGGGTGACCGCAAGGTCGCTGAAGTCCACGCCCGCCAGGATCAGGCCGATGGGCGGCATGATCACGTCAC  
CGACAAAAGAGGAGACAATTTTGGCGAAGGCGGCACCAATGATGATACCGACCGCCATATCGATGACGTT  
GCCGCGGGCGGCAAAGGCTTTGAACTCTTGAATCAGACTCATTTATTTCTCCGAAATTAACAAGATAGC  
GCGTTGATTACCCTTGCCAAAGGGCGAACTCTTGTGAGAAAAACAGAGGCTAAGCCGCTTGTTCCTGT  
CGTCTGACTAGCTTGCGGGCGTTATGAGTCTTGGCAATCGGGGGAGCCATTTTTTTGGTACAAAAATG  
ATATTAATTTTTTGGTAAGTAGCTGGTTGAATGATGAGCTGTGCTGCTGTAGTTTGCTGGGTCGATTCAT  
TCATAACCAGTGAGTAAACAAGTGAAGTATTTACTACTGGGAATGATGCTTTTGTGCACATTTGCTGCCA  
GAGCGGGGATGGATAACCAAGCCTTGAACAGACCATCACGGCCCGCTGGGGGTCCCCGTCTATCTGGT  
TGAACCGACCCCAATCGCGGGGTTGTATATGCTGGGCACCTCACAGGGGGTGTCTACAGCGATGCCAAA  
GGGGATTATGTGGTGCAGGGGGTCATGCTGGATATGACCCGCGACATGAAGAACCAGCCATCTCGGGTA  
TGCGCGAGCAGCGCCGACTTGGTTTGGCGCAGGTGGCTCATGCCCCATCGTGTCAAGGCTCGGGATGA  
GCGTACCCGGGTTGCGCTGTTTCTCGGCGAGCAGGACGCAAAAGCGCCGTCAGCTCTCCGGCACCTTGCAA  
CACCTGCAGGCATCCGGGGTGGAGCTGGCACTCTATCCGGTATGATCAGCCGAACGGGCCCGGACT  
GGTGCAGCGATCCCCTGCTGCAAAATGATCCGTTAAAAGCCTATTTGCCTCAAACGGCATGTAGTGAGAC  
CCTTATCCAAAATATTGGCCTGAGCCAATGGTTGGGGTCAAGGTAAGTGGCGGCTGGGTCTCCTCCGAC  
GGGGATCTGGTGCAGGGGATCAGAGCCCCGAACAGCTGCTCAAGATACTGGATCATATTGATGTCCCTG  
CAAATCCGTGCTGCTCCGCGAGTTGATGATTTCCATCTGCCTGCCACCCTGCATCCCCGCTTCGCCAAA  
TCTTCGCCAGCCGTGGCGTAGAGGATCCCGCCCTGCTGGAGCGCAGCGCCAGCCAGCTGTTGCCGCCCA  
GCGCCTCTATGGGATGGAGCAGGCTGTGCCGCTGCTGGCGGATGCCCTGACTGCCAGAAAACGGCTACTG  
ATTGTGGCGGATTTGACTGCGATGGCGCCACCAGCTCTGCCCTGTGCGTGTGGCCCTGCGCGCCATGG  
GGGGCGCCATATCGATTTTTCTGGTGCCCAATCGCTTCGAGTTTGGCTACGGTCTCACCCCCGAAATGT

CGAGCTGGCGGTGGCCCGTGGCGCCGAGTTCCTGATCACGGTGGATAACGGCATCTCCAGCATCGCCGGG  
GTGGCGGCTGCCAAGGCGGCCGGCATGCAGGTAAGTACCAGATCACCATTTGCCGGGTGAGGAGCTGC  
CTGACGCCGATGCCATCGTCAACCCGAACCAGCGCGGTTGCGATTTCCCTCCAAGTCCCTGGCCGGGGT  
GGGGGTAGCCTTCTACCTGATGGCGGCCCTCAACACCCATCTGCGTCAGCTCGGCTGGTTTGAACGGCAA  
GGGTTGCGCGCGCCCAATGTGGCGGATTACCTCGATCTGGTGGCCCTCGGCACGGTTCGCCGACGTGGTGG  
CGCTCGATGGCAACAACCGCATTTCTGGTCCATCAGGGCTTGCAGCGGATCCGGGGCCGGGCGCTGTCGCCC  
CGGCATTCAGGCGCTGGTGGATGTGTGCGGGCCGCGATGGTTCGCTCACCGCCGCCGACCTCGGTTTT  
GCACTGGGGCCACGCCTCAATGCGGTGGGCCGTCTCGATGACATGTCCCTCGGGGTCGCCCTGTCTGCTCT  
GCGATGATCTCAATCTGGCGCGCCAGCTTGCAGGCGGAGATGGACAGCCTCAATCAGGAGCGCAAGGAGAT  
CGAGCAGGGGATGCAGCAGGAGGCCCTCGCCACCTTGAGCAGATCCGGTTTTCGCGATGGCGAGGTGCCG  
TCGGGCATAGTGTGCACCCGACCGAGTGGCATCAGGGGGTGGTGGGGCTGGTGGCCTCCAAGGTGAAGG  
AGAAGTACTACCGCCCTGTCATCGCGTTTTGCCGAGAGCAGCGAGACCGAGCTCAAGGGCTCCGCGCCGCTC  
CATCCCTGGCGTGCACCTGCGCGATGCGCTGGAAGTCTCGATACCCGCCACCCGGGCTGATGGGCAAG  
TTTTGGTGGCCATGCTATGGCGCGGGGTTGACCTCCCCAAGGCCAACATTGAGGCGTTCGGTTCGGGCCCT  
TTGAGGCGGTTCATCAGCGAGCTGGTGACCCGGAGCTCTTGACCGGGGTGCTGCTCACCAGTGGCGAGTT  
GTTGCCGGATGAGCTCAATATCGAGCTGGCGGAGCTGATTCGCGCTCCGGCCCCGGGGTTCAGGCCCTC  
CCCGAGCCGCTGTTTCGACGGCGAGTTCGTGCTGGTGCAGCAGCGGCTGGTGGGGGAGAAGCACCTCAAAA  
TGATGCTGACAACCGATTCTGGTACGCGGTGGATGCCATCGCTTTTGGCGTCGATCTCAAGCGCTGGCC  
CGATGCCTCGGTCAAGCGGGTGCAGGCTTGTCTACCGCTTGTATGTAACGAGTGGCGCGGCAACCGCAGT  
GTGCAACTGCTGGTGGAGCATCTGGAGGTGGCCGGTCTCTGAGCCGTTAGCATCGCTGCTCTATCGCTGC  
TTTATCCCAGATAGCGCTGACAACGGCCACCTCGGGTGGTTCGTTTTTGTGGCGGATCTCTGGAAAAGG  
GCGTTGACCTGTCTATAGCTTTACAGTTTAAAGCTCGTCTCTATCGGGTCACTGAGGGCCCGCACCGTGA  
GTGATTGCCATGAAAATATCCGAAGTGGCCCGCCGCTGCGGCCCTCGCCCGCTCCACCTGCTCTATTACG  
AGAAGCTGGGGGTGATTGCCGGCACCCGGGCGCCAACGGCTATCGCCACTATGACGAGGGGGATCTGCA  
GCGACTGCAGATGGTGCAGGCCCTGAAGGCAGGTGGTCTCAGCCTAAAGCAGTGCCTCGCCTGTCTGGCT  
GGCGAGATAGATCAGGCGGCATTGCAGGCCCGGGTCAAGGAGCTGGATGAGGAGCTGGCGCGGATGCAGC  
GCGCCCGGGATCTGTTGGCGGATCTGGCAGGGCTGCGCCCGCGCTCCGGTGAAGAAATCAAGGCCGAGCA  
GCTGCAACTGCAGCGCGAGGCCACCGGAGCCTACTTCTGTTGGTGTATGAAACAGGGTTTTAGCGAGAAA  
GATCGCTACCCTGCAATGGTTGAGCAAAGACATGAATGAACATGAGCGTTACATCAAAGACTTTTATCC  
AGCTGCTGGATGGCATGAGTTACTGGGGCCGGGGGATCGCGCCTTCAACCAGCAGCAGTTTTGCCGCTT  
GCCCATCCGGCCGCGCCGGATCCTCGACATGGGCTGCGGGCGCGGTGCCTCGACCATGGCGCTGGCTCAG  
GTGACCGATGCCACTATCGTAGCCATCGATCTGGAAGAAGAGGCGCTGGCCCGCGTGGCGCACTCCGCCC  
GTGCAGCGGGCTTTGAGCATGTCTCCACCTCTGCGCCAACATGGCGGCACTGCCGGACGATCTGGCCCC  
GGCCGACCTCATTGCGCAGAGGGGAGCGCTTACGTGATGGGGTTGCCAATGCGCTGAAGGCGTGGCGT  
CCGCTGCTCGCGAACCCGAGGCTTGCATCGTGTCTAGTATGCGGTCTGGCTGACCGATAACCCGCCCC  
AGGAGGCGTTGGCATTCTGGCAGCAGGATTACCCGCCATGCAGACGCTGGCGGGCCTGCTTGAGACGGT  
ACAAGCGGCAGGCTACCGCTGCCTGTACACACCCCCATTGCCGATGAGTGCCTGGAACAATTATCTGGAC  
CCCATCGAGGTCAATCTGTTGCGCTATCGAGACGAGCTGGGGGAGAGTGCCTGCTGGCAGGACTTGAGCC  
GGGAAGTAGCCATCCACCGCCAATATCTGGGCAGTTACGGCTATGTGATCTGCTGCCTGCAGGCGATGTG  
AAGAGGATGGCTATTGCCATTGAGGGTGAAGCCAGTATCGGACGGGGGAGCAGATGCTCCCCATTTGTT  
TTAGTTTTTAAATGCCAAGTTTCAAGTGAATAATTGAGTGTTTAGTGTGATTTGCATGATTAGGTGAATATC  
AAAATCCAATAAAGCGATGGCTTGTGATATATTTATCTCGCATTCCTGTCTATCCCTGAAGGAGCTCGAT  
CCTTGCCCTCTTGCCAGTGCCTTACCCCAAGCCGCATACAGCACGGTGCATGGCCCTTTGCCATCGCCTG  
CATTCTGTGGCTCGCTGCTTTTTGCCGAGCTGGGCTGAGCGCCGTTTTGCGAGGGGCCATCTGCCGGGGC  
ACGGCGGGGATGGCAGTGCAGACCCGATCAACCAGCGTCTGGTGCACACGGTTCGGCTGCTGCCGGGCA  
ACCAGTGGCGCCACGGGTCGAGCAGGGGCGCGGTTGGCGAAGGAGCGGGAAGGCCATCTATCAGAT  
GCTGCTGGCCTGGTTCCAGTACGACATCCTCGGCCTGCTCTGTGGCCTGCTGTTCTTTGTGCCGCTGATC  
TATGTGAGACAAGCTTGTGGCCACGTTGGCTATCTGCATAAACGGCAACTCTGCGGCCACCATTTGCAAT  
TTCGCTTCTGTACGGCGACTAGCTCACCTGCTGGCGGACGCTCATCCACATTTTACACAGGCTTTTAA  
CGCTCCCGATTGACTGACGGGGCAGGCTGACACCTGCTGCCTGCGCTCTATCGTCCGGTGTGCGTCCGC  
GCTTTCTGTTGTTTCGTCCATGCTGCTGGCCATCGGCCAGAGGACAGCTTTCTCTTTGCGCAAACACCTG  
GTGAGCACACCTATGGACTACTACCTCAACCTGTTTATTTACTCAATATTTGTCGAAAACCTCGCCCTGG  
CCTTCTTTCTGGGGATGTGTACTTTTTCTGGCCGCTCTCGAAGAACATCAACACCGCCTTTGGCCTTGGCAT  
GACAATCCTGGTGGTGTGATGGTATCGCCATTTCCCTCAACAACCTGATTTACCGCCATATCTTGCGGGCA  
GGCAGTACCTTTTTCGGTGAATTCGATCTGGGATTTCTCGATTACATCATCTACATCGGGGTGTTGGCGG  
CGCTGGTGCAGGTGATGGAGATGGTGTGCTGACAAGTTTCGTTCCGGCGCTCTATCAGGCACCTCGGCATCTA  
TCTGCCGCTGTTGACGGTGCACCTGCGCCATCTTCGGCGGGGTGATGTTTATGGCGCAGCGGGATTACGAT  
TTTTGTGAGTCACTGGTCTACAGCGCAGGCTCCGGGCTTGGCTGGCTGCTGGCCATTGTCGCCATGGCCG  
GACTGCGCCAGAAGCTGAAGTACGCCGATGTCCCGAGGGGCTGCGGGGCATCGGTATCACCTTTATCGT  
GGCAGGGCTGATGTCCCTCGGCTTTATGTCTTCTCCGGCATATCGCTATGAGGGGATGACAAAAAACGA  
GGCGCCTGCGGGCGCCTCGTTGTTTATCAGGGATTGCGGATGGCCATTACAGCTCGCGGGCCAGGGGTG

AGCCTTGGGGCGCAGCGCCAGCGCCAGACCCAGCAGCAGCACGGTCAGACCGTAGAGGGGCCAGCTGCCA  
AAGCGCATGTAGGGGTCTCGCCGTGGGCGGGACGACTTCGCTGCGCAGCAGCCCGCTTCAAACCTGCG  
GGATCTGGCTGATGATGCTGCCATCGATCTCGGTACAGATAGTGATACCGGTGTTGGTGTCCCGCAGCAG  
CGGACGAGCCAGCTCCAGCGCGGCATCCGGGCGATCTCCATATGTTGCCAAGGGCCGATGCTGGTGCCG  
AACCAGGCGTCGTTGGAGACGGTCAGCAGGAAGTCGGTATCGGTATTGACGTTGCGGGCGCACCTCTTCCG  
GGAAGATGATCTCGTAGCAGATGGCGGGCGGCAAACTTGAGCCCTTGGCGATCAGGTTTGGCTGCACTTC  
GTCACCCCGGCTAAAGGAGGACATCGGCAGGTTGAAGAAGGGGGCGATGGGGCGCAACAGATCTTCAAAT  
GGCACGAACTCGCCGATGGGCAGCAGGTGGTACTTGTGTAGCGGTTGGAGTGGTTGTAGTAGTAGGACT  
CCTTGCCATCCGCATCCTGCACCCCATGCCGAGCACGGTATTGTAGAAGCGCTGTTGCTGCTCGTCGTA  
GTGAATAATCCCCCGCAGCAGGCGGATCATTCACTTTCATCGCCTTGTCCAGATTCTCCAGATAGGGG  
CCCATCGCCTTCTCGATAGCCGGAATCGCCGACTCGCCAGATGATGATGTCGGCATCCTGATTCCTCGC  
GGCTCAAGTCTGATAGGTGCGTACCGTGGGGGCCAGCGCCTCCGGATCCCACCTTGAGGGACTGGGCGAT  
ATTGCCCTGCACCAGTGCCACCTTGACCGGCTCGCCACGGGTGACCCAGTTGAGCTGCATCAGACCGTGA  
GCACCTGCCACCAGCAGGGCAGGCACCACCAGCCAGAGCGGGGAGCGGGACTTCCACACCAGCCAGATAG  
CGGAGGCGGACAGCAACAGGGCGAGGGTGTATGCCCTGCACCCGAGAAATGGGAGCAAATCCCTTGAGGGG  
GCCGTCGATCTGGCTGTAACCAAACAGAGCCAGGGGAAAACCGGTCATCACCCAGCCGCGCAGCCAGTCA  
GCCACTAACACAGGGCCGGGAAGGCGAGCAGCCAGCGGCTCCAGTGACGGCCGCAAAGAAGCGGGCGA  
AGGCCAGCAGGCGAGCGTCGGGTATAGGGCCAGATAGGCGGAGAGCCGGCCAGCAGCACGAAGGCGAC  
CGGTAGCGGGATGCCACCAAACCTCGGTATGCTGACGTGGATCCACCACAGCCCGGCAAAAAGAGTCCC  
ATGGCGTAGCCAAAACCGCGCCAGGCGGCTGTTTCGGCGTGGCTTTGTCCAGCAGGGCGTAGAGGCCGA  
GCAGGGAGGGGATCACCAGCGGCCAGTAGCCGAAGGGGGAGAAGGCCAGCACGGCGATGGCACCAGAGGC  
CAATGCACTGAGGCTTAACAGAATTTTGGAAAGTAACAGGGGATAATCTCACGGGCGATGGTGCTCGTCTT  
GGTGTGCAACTGGGGTTCGAATGGCCGGTATCTTAACCTGTAAGCGGGGCAACGGCGGAGCCTCGATGCCGG  
TGGCAGAGAGCACAACGCCCCGAGGTTCGGGGCGTGTTCACACATCGAGCGGATCTGCCATTGCGGGCT  
CGGATTGCGCCCGCGCGTGGTGTTCGGGGATCTTCACTGCAACTGCTGCAGACGGCGCCGGTTCGGCATG  
CATCACCTTGAACAGGTAGCCGTCCAGCTCGATCTCCTCGCCCTTCTTGGGCGAGGTGGCTGAAGGCGTGC  
ATTACCAAGACCCTACCCTATCCACCTCTTCACTCGCTGAATTTGGTGCCGAAGAAGTCGTTGAAATCCT  
CGATCTCGGTACGGCAGTGGAGAAGACCCGCTTGTGAGGCGGCGGATTTCTGTCGGGTTTCCATCCTC  
GATGTCGTCAAACTCGTGTGATCTCGCCAAACAGTCCAGTATGTCCTTCGATGGTACCAGACCT  
GAGACGCCACCAAATTCGTGACACAGATGGCCATGTGGTAGCGCTCTTACGGAACCTTTCGAGCAGAC  
GGTCAACCCGTTTTGCTTTCCGGCAGCATCACCGTGGGGCGCAAGATTTTCTCGAGCTGCAGCGGCTCGCT  
GGCGTGATGGCCGCAAACCCGAAGGGGAGCAGATCCTTGGCGAGCAGTATGCCCTCCACATGATCCTTG  
TCCTCGTTGATCACCGGAAGCGGGAGTGACCGGACTCGATGATCACCGGCAGGATCGCATCCACCGGTT  
GGGACTTCTCGATGGTACCATCTGGGAGCGGGGATCATGATATCGCGCACGGAAGATCGGGCATCTC  
CAGCACCCCTCGATCATGTCTTGGTGTCTGATCGATGAGGTCGCGCTCTTCGGCATCGGCTATCAGC  
TCTACCAAATCATTGCGGTCTTTTGGCTCGCCCTGGAAGAGTTGGCTGAGTTTGTGAGCCAGGTTTTCT  
TCGGCGAGCCGGTACTAGGGTATCGTGGTCAATTTCTCTCTTGGTTACTCGTATGAACACACTTGA  
TAGTTTCGGGTTATATAAGGATGGTCACTGCTGTTTCAAGACGATGACCATCCGGTTCTTTACTCTTCGT  
CGTTTCAGATAAGGATCGGCAAAACCGAGCTCCTGCATGATGTCGCGCTCAAGCGCTTCCATCTCTTCGGC  
TTCTCATCTCGATATGGTCATAACCTAGCAGATGCAGACTGCCGTGCACAACCATGTGTGCCAGTGG  
GCCATGAGGGGCTTGCCCTGCTCCTCGGCTCGCGCTTACCACCTGACGGCAGATCACCCAGATCGCCGA  
GCAGCGGCAGCTCCAGACCGGGTGGCGCCTCGAACCGGAAGGAGAGCACGTTGGTGGGTTTGTCTTGGC  
GCGATAGGTGAGGTTGAGTTCGTTGCTCTCCGCTCGTCGACGATGCGCACCGTCACTTCTGCCCTCTGC  
TGAAGCCGAGAATGGTGCCGTCGAGCCAGCCTTGAACCTGGGCTTCGGTGGGCGAGCCGTCAGTGCTGG  
CACTGGCCAACCTGCAGATCTAGGGTTACGCTCATTGCTCACTCTCTTGTGTCGCTTTGTTTGGCCGGCC  
ACCTTCTCGGCGGCTGTTTGGCGTCAACCGCTCATAGGCTGCACGATGCGGGCCACCACCGGGTGGC  
GCACCACGTCTTTGGACTCGAAGAAGTTGAACGACAGACCATCGACCCCTGGCAGCACTTCCAGCGCGTG  
GCGCAGGCCGGATTTGGCGTTGCGCGGCAGGTCTACCTGGGTGATGTCACCGGTGACCACTGCCTTGGAG  
TTGAAGCCGATGCGGGTCAAGAACATCTTCACTGCTCGGTGGTGGTGTCTGGGCTCATCGAGAATGA  
TAAAGGCGTATTGAGGGTCTTCCGCGCATATAGGCGAGCGGCGCCACCTCGATGATGTTGCGCTCCAT  
CAGCTTCTCGACCCGCTCAAAGCCAGCATCTCGAACAGGGCGTCGTAGAGTGGGCGCAGGTAAGGATCC  
ACCTTCTGGGAGAGATCCCTGGCAGGAAGCCAGCTTCTCACCCGCTTCCACCGCCGACGAGTCAGCA  
GAATGCGGCGAATTTCTGACGCTCCAGCGCATCCACCGCCGACGACCGCCAGATAGGCTTGTGCCGGT  
ACCGGCCGGGCTATGCCGAAGCAGATATCGTGGCGCAGATATTGGCAATGTACTGGGCTGATTTGGG  
CTGCGTGGCTTATGATGAGACCGCGCTTGGTCTTGACCGTCACTCCTTGGCATAGGGGATGCTCGGCGCCG  
GTTGCTCATCCTGCTCCAGCACCCGCGACTCCTGAATGGCCAGATGGACCATGTCGGGAGTGATGTCGGT  
CACCTTGCCACCCCTTGGGGGCTGGGTTTCCACATAGAGGTGCTTGGAGTACGGGCGGCGGCATCCAGC  
TGGGCGGGTTTGGCCACCAACTGGAAGTGGCTGTACGGTAGCTGATCTCGACGCCGAGGCGGCGCTCCA  
GCTGCTTATGATGTTGTCATCGAAGGGGCGCACAGGCTGGCAAGGCGCTGGTGTGTCGGGCGGGCTCCAGATG  
CAGATTCAGGGTTCGAGATGTGTCGGCTCAAAATATCCTCGTCTCAAGGCGCTCCCCATCCGCGGGCGAA  
TGGGAGGAGGGGATTAATGGGGAGTGAAGGCGGCAACGCCAGCTCGTCCGGTACGTTATCCGGGCGAC

GGGCCAGGATTTTCGCTCGGGGCGGTGGCGATCCGCAGGTTTCATCTCGCTCTCGCCGCGGATGAAC TTGCC  
GCGCAGGGAGTTGGGACGCACCTCGGTGATTTCCACGTGCGCAAAGCCCGCATCAGGGTGTGCAGGCC T  
TCGAAGTTGACCACCCGGTTGTTCTCGGTGCGGCCACACAGCTGCATCGGGTCGAGCTTGGAGGGCCCTT  
CCACCAGGATGCGCTGGGTGGTGGCCAGCATGGCAGGCCAATCTGCATCGCCTGGTTGTTGATGACGTG  
CTGCAGGCGGGCCAGACGGGCTTTCTTCACTTCCATGTGACATCGTCTGGCATGTGCGGCGGCCGGGGTG  
CCCGGGCGCGGACTGAAGATGAAGCTGAAGCTCATGTGCAAAACCCACATCCTCGATCAACTTCATGGTTG  
CTTCAAAGTCTTCGTCCGTCTCGTTCCGGGAAGCCAACGATGAAGTCGGAGCTGATGGTGTATGTCGGGACG  
GGCGGCACGCAGGCGACGGATCTTGGATTTGTACTCCAGGATGGTGTGCGGGCGCTTCATCATGGTCAGA  
ATACGGTCCGAGCCGCTCTGCACCCGGCAGGTGCAGGAAGCTGACCACTCCGGAGTGTCTTTGTAGACTT  
CGATGATGTCGTCCGTGAACTCGATCGGGTGGTGGTGGTGTAGCGAATGCGATCGATACCGTCCGATGGC  
GGCCACAGACGCAGCAACTCGGCGAAGGTGCAGATGCCGCCATCAAAGTTCGGACCCGATAGGCGTTG  
ACGTTCTGGCCGAGCAGGTTCACTTCGCGCACGCCCTGCTGGGCGAGCTGGGCGATTTTCGTAGAGCACGT  
CGTCCAGCGGTGCGCTCACCTCTTACC GCGGGTGTAGGGCACCACGCAGTAAGTACAGTATTTGGAGCA  
GCCTTCCATGATGGAGACGAACGCGGTAGCCCCCTTCGGCGCGCGGTTCCGGCAGGCTGTGCAATTTTTTCG  
ATCTCGGGGAAGGCGATATCAACCTGGGCACCATGGCCCTCTTGC ACTTCCCTTGATCATGGCGGGCAGGC  
GATGCAGGGTCTGCGGGCCGAACACGATATCCACATAGGGAGCGCGCTGGCGGATGGCATCACCCCTCCTG  
AGAGGCAACGCAGCCACCCACGCCGATCACCAGACCGGGCTTGTGGCCTTGAGCTTTTTCCAGCGTCCC  
AGCTGGTGGAAACACCTTCTCCTGCGCCTTTTCGCGGATGGAGCAGGTATTCAGCAGCAAGACATCTGCCT  
CTTCCGGCTCTTCGGTAAGGGTGTAGCCATTACTGGCATCCAACAGGTCGGCCATTTTGGACGAGTCATA  
CTCGTTTCATCTGGCAACCCAGGTTTTAATGTGAAGTTTCTTGTCTATTGCTTCTCTTGACTTGTTTTGA  
AATCGGCATGGTCAAAGGACCGCGCATTTTACTCCGCAATCTGGATACTGCC TAGCTAATATCCAGCTGG  
CAATGGTGTCTACCCGATACCTGTTGCCATCAAGCTCAATAAGCTTTCTCCTTGATTTGACGCAGCAATT  
CCCCGTTTTGTCTCACTGTTTATCAGTCGCCCTTTCGCTATCATGCAGCCATCCGGTTCACGTCCGGGCGC  
TGTCGCCGAGCGCACCCCTTTCAGGAATAAATGTATGGAAACAGTGTGATATCGCCATCGTCCGGCGCCGGCA  
TGGTGGGCGCCGCCACCGCTGTCTGCTGGCGGCTCAGGGCTCTCGGTGCGGGTCATCGAGACCCAACT  
GCCGGAGCATTACGCGCCGGAGCAGCCGCTGGATCTGCGGGTCTCCGCCATCAGTCAGGCTTCGGTGGCG  
CTGCTGGAGCAAGCTGGTGCCTGGCACCATCTGCAGCAGATGCGGCTCTGCCCTATCGCCGGCTGGAGA  
CCTGGGAGCTGGACGGTTTTTGCACCCGCTTCAATGCCCGCATCTCGGTCTGCCCCAGCTCGGCTACAT  
CATCGAAAACCGGCTGGTGCAGCTCGCCCTGCTCAAACGGATGGAGGATTTCCCCACCATCCAGACCAC  
ACCCCGGCGGGTACCAGCCTGCGCCAGAGTGCAGATGACGCTGTGCTGACTCTGGACGACGGCACTG  
AGCTGGCGGCCCGCTGGGTGCTGGCTTTCGATGGTGTGCTGAATCCACACCCGCAAGCTGGCGGGTATCGG  
CGTATCGCGCTTCGAGTACC GCCAGCACTGCATGCTGATCAATATCGACACCGGCTTTGCGCAGGAAGAT  
ATCACCTGGCAGCAGTTACCCCGAGCGGCCCGCGCCTTCTTCCACTACCAGGCCAGCACGGCTCTC  
TGGCGTGGTATGACAGCCCGCCCGTATCCGGGCGCTGGCGGCCATGAGCAACGAAGGGCTTGC CGCGGA  
AGTGCGCCGCCACTTCCCAAGCCGGCTCGGCGGATTTACCGTCAACGGCAAGGGGAGTTTCCCGCTGGTG  
CGTCGCCACGCCAACGACTATCACGTCGGTTCGGTGGTGTGCTTGGCGATGCTGCCACACCATCAACC  
CGCTGGCTGGGCGAGGGGTCAACCTCGGCTTCAAGGATGTGGCTGCTGGGCTGATCTGCTGCAAGGAGC  
TGGCGCCGACTGGCATCAGCTGGCGTTGGCCGAGCGTTACGAGCGACGCCGTGCCCCGACAACCTGCTG  
ATGCAGTCGGGAATGGATCTCTTCTACGGGGTATTACGCAACGAGATTTGGCCCGCTCAAGCTGGCCCGCA  
ATCTTGCTCTCAATCTGGCGGACAAGGCGGGCCCGCTCAAGGAGATGGCGCTGCGCTATGCACTGGGGCT  
GGTTTGACAGGTAGAAACCAGGTAACACGGGCTGAATTCGCGAAGGAGCAAAGGTGATGAACAAGGCACT  
GTTGGTGTATCGATTTTATCAACGATATTGCCATCCCGACGGGCGCATTTGCCGCTCCGCAGCCACAGTG  
GTGGAGCAGGATGCCATTGCGCATGCCAATCAGGCGCTGGCCATGCCCGCGCCACGGCTGGCTGGTGG  
TGCTGATCAAGGTGGGCTTTGACGGCGGCTATCAGCTGCAACCCAAAGGTTCCCCATGTTTGGTCCGCG  
TCACCAGCAGGGTGCCTCTCTTTGGCTGACAGCGGCACCGACTTTCATCCTGATCTGGATGTGCAGCCC  
GGCGATCTGGTGTGACCAAGCCCAGGGTCAGTCCCTTCTATGGCTCGGCGCTGGAGCCTGCGCGGGG  
CCAATCACATCGACCACCTTTATCTGTGCGGGGTGAGCACAGCTGGGCCATTCAGGCGGCAACGCGGGA  
TGGTACAGATCGCGACTACACCATCACCATTCTGGAGGATGCCTGCGCCGCGCAGATGCCACCGAGCAT  
CACACCTCGCTGCGGATGCTGGGTGCGATCGCCGAGATCATCAAGGTGTCCCAGCTGGCTTGATCCTTAA  
CGCAGGCTGCGCCCGATCACCGTTTTGAGATTGACTCAGCGGCTCCCTGTGCGGGCCGCTGCGCTTTTGGG  
CAACATGATTGTGCGGCAAGATAGTGCTCACATGGATAACAACAAGGATGGACAGATGCGTTATCAGGGA  
CGGATCGCGAGCTGGAACGAGGCGCGCGGCTTTGGATTTATTACGCGGAGCAAAATGGCGCCGAGCAGG  
CAATCAATGGATCACGCAGTGCAGGGCTGTTTGTGCATGTTACGGCGCTGCAATCAGATGGCCGGGTGCC  
CGAGCCGGGGGAGCGTGTACCTATCTGATCGGCAGTGGCCAGGATGGCAAACCAAGGGCTTACAGGTC  
TTTTTCCCCGATCGCCCGCTCACGTTGGCGGATGCCGTGCCGTGCGCCGATCATCAGCGGCGCCATCGT  
TTCGGGCGGCAAGTCAGCCGCCACGACCCACTTCTACCAGAGAGCGGAGTAACCCCTATCGACGTCGCAA  
GAGCAGCTGGAGTGGCAAATGATCCCTCTGCTGGTGTGCTCGGCCCTCTTTTCCATCTATTCCCGTTTTC  
TCGGCCGAGTCGATGGCGCCATTGCCGGTCTCATCTTTCAATCAGGAAGAGATCAGCACCTCGGTGAGCA  
CGCTACAGACAACGACCTTTATTCGTGAGTGTGATGGTTCGGCAGCATGCTCCCAGATGACCTCCTGCGA  
GGAGGCAACCTGGTTTTTACAAAACCTGCCCTGGTACCAAGATGGATGGGGAAGGAGATGGCATCCCCGT  
GAAAATCAGTGGTGTGGTCATTAATGTGACTTATCAGAGACATATGCTCATGATGTGCTCTTGTATCC

GGAACAGGGAAACTGGCCTGAAACCTTGCCGGATAGTGTTCGATGGTGAAATTTGGTCTCAGTTGGCTAA  
GTGGGAATGGGGTGCTTTACTCTATCTGCTGACTTAATTGTTAATAGATGGCGGTATGCCACTTTTGCCA  
CAGGATGGCCATCATGGTGGATGATATACAGAGGCCCGGAAGTCACTTCTCCGAGCGGGCTCATTATCTG  
GCTGCGCTGCTGGATTGCTGGAAGACCAGATATCGGTGATAGACCGGGATGGAGTGATCCATTACACCA  
ATCTCGCCTGGGAGCTGTTTTGGTGAACAAAATGGCATGCCCAAGGGATATAACTGGCTCGGAGTCAATTA  
CATGGGGGCTTGTGACGATGAAGCCGAGCCCTCGGGATTGGCTGCCGTGGAGGGGATCCTCCGGGTTATC  
CGTCATCAGCAGGAGAAGTTCTATCTGGAATACCCCTGCCACAGCCCCGACACCCAGCGCTGGTTTTATGA  
TGCGAGTAGCGCCGGTACCCGGGCTTGATGCCGAGTATTTTTCCATCGCCATATCAATATCACCGAGCG  
CAAGCTGCTGGAGCTGGAAGTTGCCAGCCTCTCCCAACATGATCCCCTGACCGGACTGGCCAATCGACGG  
CTGTTCAACAGCTTTTTGCATAACGAGTGGCGGCGAGCATGCGGGAACATAACCCGCTCTCCCTCATCA  
TGCTGGATCTGGATAACTTCAAGGCGTGCAATGACCATCTTGGTCATCAGATGGGGGATGGCTCCCTCCA  
GCTGGTGGGCCATCTTCTGCAATCCTTCTGCCAGCTCCGGCGGATCTGCCCTGCCGTTTTGGTGGTGAC  
GAATTTGCCCTGATCCTCGGCAATACCGACCAAAATACGGCCAGCGGATTGGAGAGGAGATCCGCCAGG  
CCATCAACGATCTCGACATCGTGGTGGCAAATAATATTACGCTTAGCGCCAGCATTTGGCATTGCCACCTA  
CACGGCAGAGCAACCGCTGGAGGGAGAAGGGGCGTTGCTGGCCGCGCCGATGCGGCGCTTTATTGCGCC  
AAGGGGGCGGGTAAAAACCGTAGTCACTGCGCCAGCTGTTGAGCCGATTTGCCGCTTTTGTCTGCATGC  
GCCCCCTTGATGGGGGCGCACTGTTTTTTGGCTGGTACGATGTTAGCTACCAGCAAGGGTTGGTTTTAG  
CGCTCGGGTGTGGCCGACACAGGCAGGGGATGGCTGGCGATCACCTGCCTGACGAAGTGATCCCGGATGG  
GGTCCGCAAGTCCGGATTCCATACCATGCTGACCTCCACTCGGAGCTGGGACCAGAGAGAGGATAGAG  
GGTGACATCGGGCCCTGCGATAAAGCTGACGCTGCGCGCAGGATGGCATTGCCGATGCCGCGCGGACC  
AGCGCCACCAGCGTCTGGATATCCTCGGCCTCCTGGACCATGCCGGTCCAGCCGATTGGCGCCGAGGAAAC  
CGGCGATCTGCTGGCTGAGCCCCGGGGCAGCGGTGGCCCACCATCTGCAACAGGGGTTGACTGGTCAAGTGC  
CTGCTGGACGTCGAATGCGGCCGGGTCTGGTTCGGTTCATTCGTGTCGGCACCGCCAGCACCAGCCGGTCCG  
ATCAGCAGTCTGTGCTCCTGTAACGGGGCATCTGAGGTCTGCGCATAAAGCCAAGCTGCAACTGGCCGG  
AGAGCAGCTGTTCTGCTGGATGGCGGAGGGCATACTCTGCAGATGGACCATCACGTCGGTGACCTGCTG  
TTTGAAGCGGGCCACCAGCGCAGGGGCCAGTGCGAAACTCGACAGACCAGCAAGCAATCTTGAGCCGACC  
GCTACCCCGCTCGCCACAGCCAGCGCATGGCTTTGAACTCCCGACCGTGCTCGACCAGCGCACTCGCCT  
GAGTGAGCAGCTGGGCGCCGAGCGCCGTCAGCTCGGACCGTGGCGACCCCGCTTGAACAGGGGTGACGCC  
CAGCGCTGCTCCAGCCCCGATCTGCTTGGTGAAGGCGGGTGGGTGATAAAGAGGGCGGTGGCCGCT  
TCCCGGTAGTTGGCGGTGTCGGCCAGCGTCAAAACGCTGACAGTTGCCCTCAAGTCAATTTTCAATCCAA  
TTGGTTATCAAAAGTGGCGATTTATTGATTATAAATATCTAATCGCCTTGTTCATAGGCTCGGCAAGG  
GGGAATCGCCCTCCTCTGAACCGGAACAAGGAGCCATATCATGTCTACCCAACGCTATCTTTTTTTAAT  
CAAGGGCAGCTGGTGTGCTGGCTCAGCCATTGGTGGCCCCGGAGACGGGGGAGCTGCTCGCCAGCCTGTTG  
CAACAGGGGTTTTGTGGTGGCCCCCTTGAAGTGTGGGCTGGCAGTGCCGAGCAGGCGCTCGCTTGTATG  
AGCGTGCCACCCAGCAGCAGGCCTTTGCCGATGCGCTCTCTGGCTCTCTGCCAAGCTGGCCGGGGTGTCT  
TGTATGAGTGCCTGTATGAATGCCTGTATGAGTGTGTCATGAACACGATCACCTGTCCGATACCGCC  
TGCTGCTCGATATGGATGGCACCCCTGGTCTGCTCGACCGGTGATGTGGAGAAGGTGTGGCGGCTCTGGTG  
CCAGTATCATCAGCTTGCCCCAGAGCCGGTACTGGCTATGTGCCACGGTATGCGCTCACGTGAGGTGATC  
CGGGCGCTGGCCCCGAGCTGGATGTGGAGCGGGAGGCAGCGCCCTCGACGATCTGGAGATGGAACATA  
CCGGTGGCGACGCCATCTTTGGGGCTGGCGAGTTGCTGCGCCGCTTGCCGCCAGAGCGTTGGGCCATCGT  
GACCTCCGCCAGTGAGCGGGTTGCCCGCCATCGCCTGAGTTGTGCCGGTTTGCCGCTGCCCCACGTACTG  
GTGGGGGCCGAAGCAGTGATCAATGGCAAACCCGATCCCGAACCTATCTGCTGGGGGCTGAACGGCTTG  
GCGTGTGCGCCGATTGTTGTCTGGTGTTCGAGGATGCCCGGCGGATATCGAGAGCGCCCTGCGTGCAGG  
TTGCACCGTGGTGCAGGTAGGGGGCGATGCGCCGCTCAATCCGGCGGTGGTGGCGGTGATCCGCGACTGG  
CGCGAGGTGAAGGTGGAGATTGGAGAGACATCCCTGCTGGTGACGCTGCCCGCTGAGCGGTAGAGCGTA  
TTACGACCGCAGATTGCGGTATGAACCATGCCATCAACACTGTATGCCGCAATAAAAAACGCCCCGAGA  
TGCGGGGGCGTTTTGCTTTCTCAACGGTTATTTGAAAACGCGGAAACGGGTGGCATCGTCGATAAAGGTT  
TTGTACCCGGCCGGTTGCTTGATACTGCCAAAGGGCATCTGGGCACGCAGCAGCCAGCTGGCGGGCAGGT  
TCCACTCCTTGCGTACCGCCTCGTCGATCAGCGGGTTGTAGTGTGTCAGGGAGGCACCGACTTTCTCCTG  
CGCCAGCGTTGTCCAGACCGCAAACCTGGGCGATGCCGGTGGCATGTTCCGACCAGATGGGGAAGTTGTCT  
GCGTAGAGGGCGAATTTTTGCTGCAGATCCTTGATGACGTGCGTGTCTTCGAAGAACAGCACGGTACCAA  
AGCCTGCGCGAAAGCTGCCATCTACCTTGGCCTCACTCTGGGCGTAGGCCCTCCGGCGGCACAATCTTTTT  
CAGCTCGGCTTTGACGATATCCACAGCTTGTGGTGTGTTGGCGCCAAACAGGATGACGGCACGGGAGCTC  
TGGGAGTTGAAGGAGGAGGGGCTGTGCCTGATGGCATCCTGGATTAGGGTCGTCAGCTGCTCCGGCGTAT  
GGGACACCTGGTTGCCAGGGCATAAGATGGTACGACGTGCTTTGATCTGTTTCGATAAAGCGACAGCTCAT  
AACATCTCCTTGTCTGCTTGGCGTTGCAGCCGGTATGGACGGTTTGTCCAGCGCCTGCCGAATCAGGT  
ATAGACTATAACACCCGCGATGCAGAGCGGGGTTAACCAGGGGTAAGTACCGTTTTTCTGTGCTGATGAT  
ATTGTTTTGCGAACCTTGACGTTTTCGTTAGTGTGGAAAGTGTCAATTAAGGGGCGCGAAAGTGATATTA  
TCAATGATTCACTCTCCTTTCTCTCCACAATCCCCGATGTTTTCTTGGTTCGGATGTGATGTGAGCCG  
TTCGTATCTCAATAAAGCTACTATGTGTTGGTCCCCCTCTCGGCATTTGATTGGTTTTGATGATCCTGATA  
GTGACGATCATCATGGCTATTGCCAGCTATCTGAGGGATATCGACATGACGGTATCCGGCTTCGGCCACA

TGGCATCCTCCGTTGAAGCGTCCCTGATCCACGAGATGGTGAAGGTCAATGAGCGGCAACTGGCAGTGCT  
GGAGGCCTCGCTTGACAAGGAGAAGATCGCTCGCGGGGGCTGGCCGATTCCCCATCTGGGCCATTGCG  
CACAAGATCAAACCAGGCAACCACTACATCTACTTTTACAACCTGAACGCGGATCGTATCGACAGCTACC  
CGGACTGGCTACCGCCCCCAGTTATCAGGCGGGCTGCGACCTGGTATCAGGTGACCACCATGCCGGG  
CGACGAGCTCGTCTGGTTTGGCCCCCTATCCTGAATACAATACCAATGAACTGATACTCAGCCTGATTA  
CGGGTGCGGGACGATCAGGGGCAACTGCTGGGGCTGCTGATGGTTCGACATGTCATTCGACTCGCTGCAGC  
AGGGCTACAGCGGACGGTTGGCAGCAATCAGGCCGCACTCTATCTTACCTTGCGGGACAGCGGCCAGCT  
GGTGGTGGGACAGCAATATGGATCTGCTGGCAGATTACCCCATCGAGCAGCATCAGGGCCAGCAGTGGCTC  
GGTCTGGATGTGTTGTGTCTGTTACTTTTCTGAAGCGCGAGCTGGCGGACATTGGCTGGGATCTCAATA  
TCTATCTGCCCGCCGCTGCTGTTTCGCAACAGCCCTCTATGAGGCGCTGCAGATGGTGGTTTTGCCATTGAT  
CTCCCTATTTGCCATCTGGTGTTCAGCTGAGTCTGCTGGTGCAGATCTTCCGCCAGGAGCAGGCCGCTG  
GTGTCGGGTTCACTGACCGGTATCGTGCACGCAATCTGGAGAGTTCTCCCCCATCACCAAGGCCAATACCT  
GGTTTGTGCGACGACGCTGAACGAGATCGATCAGGTCAGGGCCAGCTTCCCAAGGGGAGGATGCGCT  
GTTGCGGGACCTCTGACCGGTATCATGAACCGGCGAGCCTTCGAGCAGCACAAAGAGCGCGCTGGAGCTG  
AGGGGGGAGCGCTTCTGGCTGTTGCTGTTTGTATATTGATCACTTCAAAGGACTCAATGACCGTCGGGGTC  
ATGCCTTCGGCGATCAGGTGCTGTGTCGGGTGGCCAATTGCCCTTGTGATGTGCTGGGGGTGAGCACGGT  
TTACCGGATTGGTGGCGATGAGTTTGCCGCTCTGCTGCAACAGCCGCGAGGATGAGTTGGCGGAGAAGCTC  
AATTGTCTGCTTGACGTGGTGCACATCAACAGTGGCGTGAGCACAAAGGGCAGGTCACCTTGAGTATCG  
GCGGCGCCTGCCATTCACCCGTCGCCGACCCCATCTTCGAGCGTGCTGATGCAGCCCTTTATCGTAGCAA  
GGAGGCTGGCCGGGACTGCTGGCATCTGGCGGATGAGGCTGCTGACTGACAGCTTTTGTCCAGCGCGGC  
GGGTCTGTGCCGGGACACGACAACCAGATTGTGGGGCGCCAGCCGTAATAGTGTGGCTTTTTGGTGATT  
TTAATCTTTAAATTCAATCGCTTGATTTTACTCTTCCATTTTTTGGCAGTAGCCGTGCGGCCATTGACTGT  
CGCATCCCTCATTTTCTGCTGGCTGGCGAACCCCGTGGCGCTTTGTATAGTGGCGCTGAATATTAATCAGG  
TTTGACAGGAGTACCCATGGAGATGAATTTCGCGTGCTCTTCGCGCACTGGCACTGCTGGGCGCCTTGCTG  
GCTGGCAGCACGACTGTGCACGCTCCGAGACCTCAATACCATTTTTGGGTGGCGGCGCAGGTGGTGTGG  
CGGGCACCATGATCGGCAAGGAGCTGGGGGGAGATAACCGGTGCGCTGGTAGGTGCGGCCATTGGCGGCGC  
AGCCGGTGGTGCGGGACGGCCAACAAGGGCAACAAGAATGAAGCGGCCCTTGGCGGCGCGTGGGGGCGC  
CTGGGCGGTGCCCCATCGGCAAGAGTGTCCGTTGATACCGGTGATACCGGTGATGATGCGGCGCGGGTGGCG  
GGGCGAGCGGTTTCGGCCATCGGTGCCAAGACGGCGGATGGCCACAAGAGTCAGGATCGCTATTACGATGA  
TGACCACCATCACAAGCACCACAAAAAGCACAAAGAAGCACAAAAAACACAGATGGCATGACGACGATTGA  
TCGCCATCTGTGCTGAGTGGTGGGGATGAAACAACGGGGCCAGTGGGCCCGTTTTGTCATGTTTGTCTCAG  
ACCAGCCGGTGTGACGGCGACCGGCGGCAAGGCGTTGATGTTGTGTCGATCAGCTGATCGGCGAGACGCT  
GCATCGACTCTTCGCTGGCCAGGCCACATGAGGGGTGAGAATGAAGTGGGGGTATTGCAGCGCCTTCAT  
CAAGGGATGGTGGGGGGCGGGGTTTCGACGCTTGCACATCGAAAACGGCGCCACCAGGGCGGCCGTTG  
GCCAGCGCTTGCAGCAGCGCCTCCTCATCCACCAGTCCGCCACGGCCGACGTTGATCAGCAGGGCGCCCCG  
GTTTTCATCAGATCCAGCTCCCGCTCGCCAATGAGGTTGCGGGTGTAGGGGGTGAAGGGGCGAGTGCAGGCT  
GATCACATCCGAGCTTTGCAGCAACTCGTCGAGGGGCAAGCGATCCTCGTCTGACTGGCGCCGACCTGG  
CTCTGGGCGTAACGCACTGTCTATCCCATCCCTTTGGCCCCGCTCGCCGAGCGCCTGTCCGAGCGTCCCTT  
TGCCGATGATGCCAAGCTGCTTGCCTGTCAGATCCATGATGTTGTGGTTCGAAGAAGCAGAAGTGGCCGCT  
CTGTTGCCAGCGCCCTCCAGCAGCGACTGGCGCCAGCAGAAGAGGTTGCGCGACAGGGCCAGCATCAGC  
GCCATGGCGTGTCCGGCACCGAGGGGCGGAGTAGTTGCGGATATTGCACACCCCGACGTTGGCGGCGC  
GGCACGCTCCAGATCCACGTTGTGCTGCTGCCGGTGGCGGCGAGCGCGATGAGTTGAGCTCTGGCAGCTG  
GGCCAGTTCGGCGGCGCCGATCCGTACCTTGTGATGATAGCGATGCTGGCATCTTTGAGCCGTTCCACC  
ACCTGTTCCGGGGTAGTACTTTGGATAGCTCTGCCAGTGGTGGGGGAAGTCGGGGTATGCAGGGTATGC  
CCGATCCAGGGTATCGCTGTGAGAAACACAATCTGCTGCATGGACCTTCTGCCATTGTTTCAAGTTCCG  
AGAGGCCATGATGCCAAAGAGGATGCGGTGAGGGCCAGCCTGCCGCTGTGTCATGGCGGGGCTTTATCCG  
GCAGATGTGAGCTGGCGCGCGCTTTATTGCGCCACGGTGGCGGCGAGGTTTAGAGCCAGCCAGATGGTTG  
AGCCAGCCCTGAATGCGGGTGGGGCTCTCCTCCAGCTCCATCAGGGCGTAGGGGCGATAGTTGAGCTTGT  
TGCTGCGCCGGCTCTCGCTTCTGCGGGCCTCGGCGGCCAGCAGTGGCCAGCGACCGCCATCCTCCTGATA  
GAGATCCAGGGTGGGGATGGCCGCTGAGCCACCTGTTTGGCCAGGATCTGATTGCTCTGCTGATTGGGG  
AAGAAGCCATCGAGCAGCACCAGCGCTCGGGGGCGGGCAACTGTTGCTGGCGATGAGGTTGGCAGTCC  
AGGGCGGCGCCGTAACCTTGCGCCAGGATCAGCTTGAAGCCCCCTCCTGCAGCTTGGCATCCGCCAGCTT  
GCTGATCCGCTCGGCAAAATTGCTTGCAAAATCATCGCTGTTTTTTCGTTTTTTTTTCGGCGGCTGGGTCC  
AGTTCGGTCTGTTGGGGGGAGGGCAGCAGCAGCAGGGTATCAAAGCCCAGTCGGCCGAGGGCGCGAGTCA  
GTTGCCAGAGCTGGCCGCTGTGCTGCCAGTCGGGCAGTAAATGGCGAGCCCAGATAGTTTTTCACTGTC  
GTGTTTTGGCAAACAGCACCGTCTGTTTGTGATCTGGGTAGCATCGGGCAACCTTTCCAGTCTGCTCGCT  
TGCCAGTGGTTCGAGGGGCATAGGTTTCGGCAACGGGGGGCGCAACCTCGCTCGCCTCTGCCCCATGGCCAG  
CCAGCAAGGTCAATAACAGCAGTGATAAGGATAATCTGGCCATAGTGTGCTCCCCCGTTATCTGGGTTA  
GCGGCGGCTGCGGGATTTTCTGAAGGCGGGCGGTGTGATGGCAACCCGGAGGCAATAAAAAAGCGAGCCG  
TTGGCTCGCTTTTTTGTAAATCAATTCAAAGCGGTCAATTAGTTGACGCGACGCTTGAATTCACCGGTGCG  
GGTATCGATTTTCGATCTTGTACCGATCTCTACGAAAGCGGCAACAGCCAGCTCGTAGGTAGTGCCTTTC



AGACGGGCAGGCTTGGTCACTTTACCGGAGGTGTCGCCACGGGCTGCCGGTTCGGTGTACTCAACTTCGC  
GCACGATGGTGGTCCGCGAGTTCTACGGAGATGGCTTTCTCGTTGTAGAAAAGTCACTTCACACAGATCTTC  
CATGCCGTCTACCAGGTAGTTTACGACAGTACCCAGGTTGCTTTCTCTACGTCTGTTGTTGTTACTCG  
GTGTCCATAAAGACATACAGGGGATCGGAGAAGTAGGAGTAGGTGCACTCTTTACGTTCCAGCTGAACAA  
CGTCCAGCTTGTCTGTCGGCCTTGAAGACGGTCTCGGTAGCGCTGCCGTTTCCAGCAGGCCCTTCAGCTTCAT  
TTTGACCACGGCGGAGTTACGGCCGGATTTGTTGAATTCAGCCTTCTGAACCACCATCGGCTCGGTGCCG  
ATCATGACTACGTTACCAGCGCGGATTTCTGTGCGGTTTTCATGTAAAAAATTCCTGTTCTGTGAAACGG  
ACGGATAAAAACTGCCAGATTATATACGGCTTTCTAAAAAATTCACCAACCGTGTGACGAGATCCCCATC  
CCGGAGCAACTTCTGTGACCAGCTTCGCCCATGTTGCTGCCAAATGGCGCTATATCGGGGCCATTGGGCC  
CAAAGTTCGCCGCAATCTTCGCCACGGTTGAGAGCCAGATTGAACCGGCGCAGCCATTGGCCGCACTCGG  
CGGGTAGATCTGATAAGTAGTGGTCAAGGAAGTCTCCAGCTTGACCAGATGGGCTTCTCTCTCTGTTG  
GTAGATGTGCCAGAGGAAAGGACGAGCCGCCACTGGGCCGTACGAAGGAGTCTCCCCACGCACCAGA  
TTGAGATCGCAGTTCCACAGCAGACGATCGTAACCGCCTGATCGGTCATCGGCAGCAGCTTGATGGTGA  
GGTTGCCCGCGTGGAGCAGATCCCCCGCTTGTGCGGTGGTGTGGCATCTGCCAGACCGGCACCGGTGAG  
CACATCGTTGAGAGAGCGCCCCAGCGGCAGCAGGGTGACGGGCGTGGCGCTCTGGCACCAGCTCTCG  
ACCAGACTCTTACGCGCATCGCTCTCGTAGGTAAGAGGGCTGACCCGCGAGCTCGTTCTCTGTTTTGGCG  
GCAAACCGAGGCTGGCCAGTAGGCGGTAAGTCCCGCATCATCTGCTGCCACTGCTCCCGTTCGGTGAT  
GAGGTGCTGCTCGCACAAAAGGCCCGCGGTTTTAGCGGTAAAGCCCGGGAAGAAGAAGTATTTGTTGAGG  
CTCTGGTTGCCAACTCGCTGTGGCGAGGCGAGGCAGTGACAATCCTCGACCCAGCTCTCCGCCGAGAGGT  
ACTCCAGATTGATCCAGCAGGGGGGCTTGGGTTGGCTCGCCATCAGTTCTATGAAGGGGGTGGGCAGTTC  
GCAGGCAAAGGCTTCGATCACCACCCTGGCCGGTGTGATGCTCGCTCGGCAGGGACTCATGCCAGTGTGG  
ATATAGATGCCATCGACCCACTGGCCATCTTGCGCCGGGTCGAGCCCCGGACAGATGCGGGCGAAAATTG  
CCAGATCGTCCACCCAGAGCCGCACCTGAACCTCATTGCCATGTGCCGCAATATTTCCCTCCCGTTTTAG  
CTGGCGGGCAAGTCCGCGAGGTGACCCGATGTACCCGAAGTTGTGACGACGCAACAGAAGATGTCCAG  
TCAAACGGGGGCAAGGGAGTTGTATGGCTCAGGATCCCGGATGCAAAAAAACCAGTGGCAGGGTAGCA  
CACCGGTTGACTGGCTTCTAACCGTCAGCGTGTGACGGCGGTCTGTGGCAGGTTACTCCTTGGCGTAGAC  
GTTGTTCTCTTGTGCGGATACCCGGATAAAGGTGGTGCCTTGGTGAGCTCTTTCAGCTGGCTGGCACC  
ACGTAGGTACAGGTGGAGCGCACCCGCCGAATGTCGCGCACTGCGTTCTCGACCCGGCCGCGTAGG  
GCAGCAGTACGGTTTTACCCTCGGAGGCACGGTACTCGCGACGCGCCCGCGCTGTGTCCATGGCGCT  
GGAGGAGCTCATGCCGTAGAAGTTTATGAAGGGTTCGCCGCTACATCGACGATCTCGCCACCGCACTCC  
TCGTGGGCTGCCAACATGCCGCCAGCATGACGAAGTCGGCGCCCGCCGCAATGCTTTGGCGACGTCGC  
CCGGGCAGGTGCAGCCCGCTCACCGACGATCTGGCCGCCGAGGCGGTGGGCCGCATCGGCACACTCGAT  
GATGGCGGAGAGCTGCGGGTAACCGACACCGGTTTACGCGAGTGGTGCAGACGGAGCCCGGGCCGATG  
CCGACCTTGACGATGTGCGCGCCGAGAGGATCAGCTCTTTCGACCATCTCGCCGGTACCACGTTGCCCG  
CCAGAATGACGTGGTTGGGGCAGGCTTACGAATTTTGCACGAACTCGACGAAGTGTTCGGAGTAGCC  
GTTGGCCACGTCGACACAGATGAAACGCAGCGCTTCGGACATGGCGAGGATCTGGCGGGTCTTGGCGAAA  
TCTTCAGCCGAGGTGCCGGTGGAGACCATCACATGGCCAGCAGCGCCGGTTCGGTCTCGTTGACGAAAG  
CTTGCCACTGCTCAAGGCTGTAGTGTGTTGTGACCGGGTTCATCATCTCGAAACCGGCCAGCGTGCCTGC  
CATGGCGAAGCTGCCGACGGTATCCATGTTGGCGGGGATAACGGGTACGCCCTTGCCATTGGGTCTGAGTG  
TGTTTGAAGGTGAACTGACGGGTGAGGCTTACTTGGGAACGGCTCTTGAGAGTAGAGCGCTTGGGGCGGA  
ACAGGACATCCTTGAACCGAGCTTCAAGTCTTCTTCGATACGCATTACAAAATCCTTATTGAGCCTTGT  
TGAAAGTCACTTTTGCAGTGGCAAATTTTCGGCAGGCGCAAAAAAACCAGTGGTTTTTCAGGCCCTCCGGT  
TTACAACAGTGTAGGCAAAAATCCCTTACAGAACTGATAATTTGTAAATCCTTGTGGTAGCCTTTG  
GCGTCACAACCTGAGGTTAACACCAGCTTTCATCCAGCACCGTTCGGTGCCTTGTCTCTCTTCGATATTC  
CCGCCCGCTTGGGCCCGCGTGCGCCACTCTTGTGCTCTCTCTCTCTGACCCGCCAGATATTATCAAGT  
AGCTGAAATAAATCGGATTGACCCACAATGGACTGTGGTAGATCTGGGCGCAGGATTGACAAGGCTGGG  
TCGTAAAAATGGGCAAGATGATGGTGGGGATCACCTGATGCTGGCACTGTGTGGCAGTGCCTGGCTGAG  
ACCCCGACAGCTATGGCTGGATCGAGAAGGGGCTTATTTTTGCCATACCGCGTGGCGGTGAAGATGAAGC  
TCGACACTGGGGCGCTCACCTCTTCCCTCGATGCACGCTCCATCACAGATTCAAACGGGATGGCAAGCC  
CTGGGTGCGCTTTCATGCTGGTGGTACCAGTGCAGCAGCGGCAAGCTAGTCAAACAGCAGTTCGAGCGG  
CGGGTCGAGCGCAGCGTTACGGTGCAGCGGGCGGGCGGCATGGAGCAGCGGCAACGGTACCATGTCCA  
TCTGTCTGGGGGACAAGGTGTATGAGGAGTGGTTCACCTGCGGGATCGCAGCAAGATGATCTATCCGGT  
GCTGCTGGGCCGACGCTGCTGCGGAGCTGGGCCCGGTGGACTCCAGTCAACCTTTACCCTACAGCCC  
GCCTGCCGTTAGGGGCAATTTCCGGCGTGAATCTAAAAAACCGGTTTTCACAGCTAAATCCCCGCCCTCT  
ACCAGAGGTAGCATCTCCACCATAACCTGAAGCGTGCAGCTCGTTCCGCAAGGGCTTGGAGCGTGGG  
GTGCATCATAGTGAAACCTATCAACAAATAGTATCTGAATGGCTATTGCTCGCGGGCGAACAGCAGGGC  
GTAGCCTTGAGTCTGGGCAGCGATGGCCACTGCCGTGTGCCATTCGGTCTGGATAGCGAGTGCCTGGTGC  
AAGTGCCCGATAACGATGAGCTGCAGGCATGCTACCTCTATCTCCCTTGTACGCTCTGCCTGACGAGGC  
GGTCAGTCAGTTGCAGCTGACCCGCTCGGCCCTTGGAGTGAACATGTTTGGTTTACCACGGGGGGAAGC  
CAGATCAGTCTGGACAGTCGAGCAACCATCTGGTGTGACCTTTCTCTCTTATCGAAATGCTCGATA  
AAACTCTGTTTATGCAGACCCTGGGCGAATTTCTTGATCTCGGCGTCACTTGCAGACGCAATTCAGGC

GTTGAACGCCCGGCAGGAGACAGCTGCCATTCCCTCCCGTTATCTGGCGTCATGATCCCGTGTGATGG  
ATCGTCATTGGTATTAATCAGGAGTAGAAGATGTCTATTCAAAGCATTGGACAACCCAGCGTGCTAGCG  
CTGTAGCCTCTCATGAGCATGGCGATGTGCAATCCTCATCGCGCCAGCACTCGGTTTCATACAATCTGGC  
CTCTCACTATAACCAGTCTCGGCTTCGGCTCCCGGGTTCAGCCCGCAAGGTCCTGAATACCTCGCTCAAG  
TGTTGACCCCTCAGTGCCCCGGCTCGCAAGATTGGCATCGCCATCCAGGGCGGCCATGATTCCCATGCC  
AGAGTGCCAAGGGCAAAGCCCGTACTGGACGGGCGCCATCATCAAAGGGCTGGCCAATATCACCGGTGG  
TGTCAGCAGCGTGGCCAGCGGTGCGGTGACGGCTGGGGTGGCCGGGGTGAAAAACCTTGGCGAGTCAGCG  
GCGCGTCTGGTGGCTTCTCCTCTCTGGGGTGGCGGGTAGCGTGATGAAGGGGGCCCTCCCATCTGCCGC  
TCGGTATGTGAGAGCGGTTGCAACAAGGCTCACAGCAGGCCTTGAGTGCCGCAAGGGGATCATCAAACC  
GGCCTTCGTGGCGAAGGCGCAGCAGGAACCGCTGACTGCCAGGGGGCGAGAGCGGTGATGGATCGGGCC  
CAGTGGCTCGGGTCAGCTGCTCCAGCAGTTATCGGGAGATGCCGGCAGGCTACAGTCAGCCACGCTGG  
CAGATATTCCCCCTTCGATATTGGCCCGCGTGAAGATGGTTCCGGTGGCACCGGGAGTGCCCTGACACT  
TCATGTACCCCCGGCAAGAACGAGAATGACCCTTTATCCTGACAGGTGATGCTTGGTCTGCGCTCAAG  
GTCGCCGTTTTACAAGCGTGGCGATAACCATGGTGTCTCGTTTTGTGGGCACTCAGCCTGCCAAACGCCCG  
GCACCCTGAAGAGCGATGCTGGCGCGGCCCTTGGCATCAAGGACAGCGGTTTTCAAGATGCCGACCGGCT  
GGTCAAGGCCTTTGCCAGCAGTATGGCGGCAAGGTCGAGGTGCTGGGCCACTCTCTGGGGGGCGGTCTG  
GCGCAGTATGCCGGCATCAAGCATGGACTCAAGGTTACGGCGTTCAACAGCATGGGACTGCATGTCGGGT  
TGCGGGATCGCCTCGCTCACAAGCTGGACGATGCCAATGTCACCCACGTCAACACCAGCGGGGATCCGCT  
GAGCCAGAAGGTGGAGCACGGTGTGTTCCGGCTGGATGCCCTTCCAGGTGGGCAAGCGTTATGTGATT  
GAACACTCTGGCGGGCATCGCATGGAGGCGGTGACGGCAGGTTGGATGCGCTGCTTGCCTGATCTACGG  
GTGATGGCGCCGCAACAAGTCGTGTAGCGTCAGCGTGCGAACTATCCATGAACAACGCCCTCCCTCGGGAG  
GCGTTGTCATTTTTCGGATCAGGGCTGGGAGTGGGTGTGGGTGCGGTAGCCAGACGCTCACCTCCAGCCCC  
CTTCCGGTTCGGTTGTGGACATCGAGATCGGCGCCGTGCAGTTGGGCGATGCGCGAGACGATGGCCATGCC  
AAGGCCGACGCCATCCCCCTGCTGGGGATTGACCCGAAAGAACGTTTCATACAGCCGGGGCAAGGCCTG  
GCGGGAATGCCGGGGCCGTTGTCACTCACATCCACCCTCACCCGGTTGCCCTCTCGCTGAACCCGCACCC  
TGATCTCGCCCTCTGGCTGGGTGTAGCGCAACGCATTTGTCGATCAGGTTGCTGAACAGCAGCTCGAGCAG  
GGTGGCCTGCCCCATACCAACTGCGGCAATTACACTCCAGCGACAGCTGCTGATCTTTCTTGAGCGCG  
ATGGGAGCCAGCTCGCCAGGGTGCCTTGACAGCAGGTGGCCTATCTCCAGCTCGGTCAATACGACCCCT  
GCTGGTTGTGATACGGGCTGGGTGAGCAGTTGCGGATCGCCGATCGCTGCGGTCGAGGGCCGCGAG  
CATCTTGTGACAGGATTGCTGGCGGCTCACTTCATCTTCGGCCGCAAGGGCATTTTTACTGTGGATCCGC  
AGCACCGCCAGCGGGGTGCGCAGCTCGTGGCCCGCTCGTTGGTGAAGTGCCTTCTCCCGCTCTATGGTCT  
CCGCCAGCGCCTGCATTAGCCGGTTGATCTCGTTGGTGAGGGGGGTCAGCTCCTGAGCACTTATCTTGAG  
GCTGAGCGGGCTCAGGTTGGCGGGGTGACGTTGCTGATGGCCTGGGCCAGCTGACGCAAGGGGGCCAGC  
CCGCGTGTGATGAGCCACCAGAGCAGGGCCAGCAGGAAGGGCAGGGTGATCAGCAGCGGCAGCATGGTGA  
GGGTGGCCATCTTGCTGGCCAGTTCGCTGCGCTCGTCTCCGCTCGGCCACCACCAGCCAGGTCTGCTC  
CTGCTGGTTGTAGAGAGTGAAGGTGCGCCACTGGTGATTATCTTTTTTCGACCGTGTCAAAGCCGATAGCC  
AGGGTGACCAGCGGCTGATCCGGGGCGCTGGGGGCGCGCAGCAGCAAGCCGCCTTTTTCATCGAGCAGCT  
GGAAGTAGAGATTGCGTTGCAACTCGTGGCCGTAGGGGGTGATCTCCCGATCCTCGCCGCTCAGGTTGAG  
GCTGGGGTCTTTTTGCCACTCATCGGGATTTTTGCGCCTCCCACTCCTGATAGACGGTGCCGTTGGCGGGC  
AGTTGCCCTGCTGGGCCATGTAGCGAGCCAGCAGCTGGTTGGTGATGCGGGCCGACTGTGCGAGGGCGGG  
CATCAAACAGCTCCTCCATTTTCGTGGCTCGCCTCCATGTAACCGATAAAGGCGCTGATGGTGAGACTCAG  
GCTCACAGCGCTCAGGATACCGGTGAGCAGAAAGCGGCGAATGGAGCGCGGGCGTTTCATCGTGCGGGTG  
TCCGGCTTGGCTGTTTCGAGCTGGGGAATGATGTAGCCGACCCCCGAATATTGCGGATGAGGTGCTGTA  
GAACTTCTTGCAGATGGTGGATATGCACCTTACCAGGTTGCTCTCGGCGCCTTCATCCCAACCGTAG  
AGGCTCTGTTGCAGCTGATCCTTGTCAACACCCGGCCGCTCTGGCTGATCAGCTCCTGCAGCAACTTGT  
ATTCATGGGGAGTGAGTTTGACCGCCTCCCCCTGATAGGTGACCTGCTGGGATTCGGGATAGATGAGGAT  
GTCGCCATACTCCAGTACCGCCTGAGCCTGCCCTTGCTGCGGCGAACGAGGGCGCGCAGGGCGGGCGTTG  
AGCTCCTGCAGGGCGAAGGGCTTGACCATGTAGTCGTCGGAGCCGGCATCGAGGGCCGACCACCCGATCGT  
CCAGCGCATCGCGGGCGGTGAGGATCAGCACAGGCAGTTGGTGTCTTTCACGCCGCAACTTGCGCAGCAG  
GCTGAGGCCATCGATGTGGGCGAGTTGAGATCGAGGATCAGGGCGGCGAATTCGTCGCTCTTGAGGGCT  
GCCAGAGCGGGCAAACCCCTGTTGCAGCCAGTCCACCCTGTAGCCGCTATGGCGCAGTGCATCCTGCATGC  
CATCCCCAGCATCACATCATCTTCCACCAGCAGGATCCGCATTTCTTTCTCCCTGTTTTGTTGGGTGTGG  
CGATCTGGCTCAGCGCCAGGGCGTGCCGTGGCATAAAACAACCCCTGCCACCAGTATGCAAGCTGGTGGGC  
AGAGTTTAAATAGTTCTTTGATCCATCAGGGTTTTATAGCTTGGCCAGCCGATCGCGGATCTCCATTCTG  
CGCCCTTCGTGACCCACTTCGCGGCCCGGGCGGGCCGGGGCGCCAGCGCTTGTGAGATAGGTTTTGG  
CCTCGGCTTTGCGACCCCTGATCCAGCAGGAAGTCACCGTAGAAGAAGTTGGGATCGATGCCATCCGGATT  
GATGGCCAGCGCCTGCTTGAGCAGCTGCTCTGCCTTTTTCGTCATCGCCAAAGCCGACCGGCCAGCCGGGC  
ACCTGATAGTAGAGGGAGCCTAGGCTGGTATAGGCGGAGCCATCCAGCACCTTTGGATCCTGTTTGAGTG  
CCAGCTCCAGCTTGGCTTTGGCCTCTTTACCAGCCCCAGCGCTCCAGCCCCGCTTGGCGCCAGCCCA  
GGTGTCTTTGACGATGGCAGACCAGATCAGCAGATCGGCGCGAAAAGGCTCCTTGGCGCTGGCCGCTTCG  
GCCTGGGTGCTCAGGGTTTTGAGGCAGCTCTCTTTCGCTTCCGGTCTGTTGATACTGGCAGACGGCCC

ACTGTTGCTGGATGGGGACGAGGGCATCATTGCGGCCATGACTGAGGTGGATCCCAGCAGGATGGCGAT  
GGCACAAGAGGTACCGATTGACGGAAAAAATTCATATTAATGCTCCTTCTTGGTTCGGGATCGGGCGGGA  
CAAGTCTGGTTGTGGCGCACTTTTGGCGCCAGCATCAGCCGTCCCTGGCTGAAGATGACGGGCATAACGT  
TTGATGATTGGCAGCTGTCTGGCCAGCGCCTTGTGCGACGATGCCAGGCAGCAGGGCATTGAGCCGCACGA  
ACAGTTTTTCCGGCCAGCCGAGCCAGCTGCGGGCGGGTTTTCGTTGCACAGGGCGATGACCGCCTCTTCGGC  
CACCTCCTGCGGGCTGTGGTCTGGGTGCCGAGCGCCGATTCATCTCGTAAGCGGCCCTCAGAATTGAGC  
TTGGTTCGGGTGGCGCGGGGTGCAAAGTGCAGCACCTTGATGCCGCTGCCCTCCAGCTCCCGTCCCAGCG  
CTTCGCTAAAGCCGCGCAGGGCAAATTTGCTGGCGCAGTAGACGCTGTAACCGGGGTAGCCGATGCTGCC  
CAGGCTCGAGCCCATGTTTCATGATGATCCCCGGCTTGCATGTTGGCAGCAGGGCACGGGTGAGCTGG  
ATGGGCGCCTTGATATTGAGCAGCAGCTGGCGCTCCACCTGCTCGAAGCTCTGATCTTCCAGCCAGGCAA  
ACTGGTTGCAGCCAGCGTTGTTGATCAGGATGTCGATCCCGTCTCCAGCGCAGGGTGTGCAACAGCTT  
GGCCCGCTCCTGCGCAGAGCCGAGGTGCGCGCAGCACCCTGATGGCGCTCGGGATGAGGCAGTGACTTG  
CACAGCCGCTCCAGTGCCGGGCCGCGACGTCCGTGCGCAGCAGGTTGCCCCCTGGGCGGCCAGCTCCT  
GCGCCAGCTCCTCACCTATGCCACCGCTGGCGCCGGTGAGCAGCACGAGTTTCCCTTCAAGGTTTCATGTT  
GTGGGTTCCCTTTTTGCTGTCTGCTGCCGACTTACGGCGTGGCGGTGAGGTTGTAGAGCATCTCGCCGTA  
GAGGCGATAGACCACCTTGGTGGAGTGGATGATGGCGGCTGATCCGCCGGGCTCTCGACCTTATCCATC  
AAGGATTCAAAGAATTTGAGGTGCTCCTGATCCAGAGCGCCGTGGGAGCTCAGGTAATCATCGCCTGCG  
GTGGCAGGCCGAGTCCCTTTTTTCAGCTGGTGGCGCAGGTGAGGGCGATGGCGACGCTGGTGCCTTCCAG  
TACCTGCACCATGCCGAAGAAGCCCATGGGGTTGCCGCTGGATCTGGTTCATAGAGGAAGGCGACCATC  
AGCTCGATGGGCAGCCCGGGCTGGCCGTGGCGCACCCTCTCGGCATCACCGCCACAGGCGCGGATATCGC  
TTAAGATCCACTCCTGATGGCCATACTCCTCGTCGATGATTCGGCAATGGCGCCGCGCACCCACTCGTA  
CTCCTGACCCAGCTTGCCGCCGGTTGCCATCAGCAGCGGAAGTGTGGCGCACGTGGTAGTAAGCCTGC  
GCCAGAAAGGCGAGATAGGTGTACGGCTGATATCGCCACGGCGGCAGGCTTCGATGATGGGGGCGTTGA  
ACAGATGCTCACGCTCCTGGGCCGTGGCTTGTTCAGAGTCTGATAGAAGCTCATTACGATTCTCCTGTA  
AGGCATTGGCTGATTTGCCGGGAAAAGTGTGGTAAATCTCGTTGCGACGGGGGCGCCCGTTGGCGGTCA  
GCAGGCCGGGATGCTGGTTCGAGTGCCACCGCAACCAGTGGTGCAGCCGGGCATAATCGGGCAGCCGCTG  
GTTTCAGACCCGGCGATCTGGCGTGGCAGATCCGCTCTTTGCCCGGCAGGGGCTGGATCAGGCCACGTTG  
GCAGGCTGACCATCGCCAAAACACGATGCGGGCGATGGCGGGGCAGAGCTGGGCTCGGCTTCCAGCC  
ACTCTGGGGAGAAGTTGCGGCCAAAGGCGGTGATCTGGCAATCTTCTTTCGCGCCCGTGATATGGAGGTA  
GCCCTCATCATCCAGATGACCCAGATCGCCTGTGGCAATCTGTTTCGGGAGTCGGTTCTGTTGCTGCCGAGA  
TAGCCCAGCATGGCACTGCCGCTCACCATAAATTTCCGCCGTCGCTGGCGATGGTGTGACAGTGGGGCA  
GGGGGCGGCCGACGCTGCCGGGCTTGTGAGCATCCTGGCTGTTGAGCGCCACCACGGAGCCGCACTCCGA  
GAGGCCATAACCTTCGTATAACCGCAGGCCGAGCTGGCGGGCATGTTTGTATCAGGTCGGGTGCTACTTTG  
CCGCCACCGACGGCAATAAAGCGCAGGCTCTTGAGCTGCTGGGCCAGCGTCGGGGTGTGGTGCAGAGCG  
CCAGCAGCAGGCGCAGCAGTTCCGGGACCAGCACCAGACTGTGGGTCGACCAGCGCAACAGGGCCTCCCC  
CAGCATGGCTGGATTGAGCGAACTGGATCCGGTGAACCGAGCTCTCCGAGGACGGAATGCGGCTGCAG  
GCGCCGGTTCAGCAGCGGCACATAAAGGCCGGTGTGTTCTCAAGCAGGTTGGCCAGCGGCAGCAGGGTCA  
GGTGTTTTTCCACCTTGGCTGGCGCGACCCGCTCGGCCAGCGCATGGCTCACCGCCATCATCTGGCTCAG  
GGACAGGCAGACGCCCTTGGGCTGGCCCCGTGGTGCCGGAGGTGTAGGTGATCTTGGCTGTGCCCTTGGGC  
AGCGCCGGTGCATTGGTTCGGTGTATGGCGCCAGAGTGGCAGCTCGCCTGTGATCAGCGAGAGCGGCTCGG  
CGGCATGCCACCCCTGATGATGTGGGCCACCAGCGCATCGGCACCGCTGCTATCCAGCAACCAGGCCGTG  
CTGGGCTTGAAGTGAAGAAGTGGGGCACCGGTATGACCACGATCCCGGCTTTGGTGCAGGCGAGATCCAGC  
AGCGCCAGGGCAGGCCGTTGTCCAGTTGCAGCGCCAGACGGCTGATGTCGAGCTGTTGCAGCTGGCTGG  
CCAGACGCTGGATCTGTTGCCACAGGGTCTGGTAATCGAGACGCTGCAGGCTGCTCAGCAGCGCAGGGGA  
TTGCGGATTCTCGTGGGCATGTTTGGCGATGGCGTGAACAGGCTCATTGGGCGCACCTTTTTTGTATGGG  
TCTGGTTATCACTGCTCTTGGTCTCGTCAAACAGGTTGGCATGGGGGCCAGCAGATTGAGCAGCAG  
GCTGCGCTGGGCCAGCACCTCGCGCCCCCTGATTGATGTCGCCACCATCACCTTGGGTTGGCAGCGGTAG  
TACTCACCCAGGCATCGGGCTCGGCCCCACCTGATGGGCTGGGCGGGGGCCAGTTCCACCGGATTGA  
GTTGCAGGCGGGCAAAGCTGTTGCGCAGCTTGGCCGTGCCGGTAAAAGACCACGTAGTCGAGGGCGTTTTTC  
ACACAGCAGACGACACAGGGCCGAAAACATCAGGCGGGCATTGCCCGGTTTCGCTGCAGGCCAGATTGCC  
ACTTCGATAATGCGGTTGCGTGCCGAGAGACCCGAGGCGGGTGTGATGGCGGCCCTCGATGGGTTGCT  
CCAGATACTGTTCCAGATAGAGAGGCCCTCACTGGCATGATGAGACCACAGGCGCCGACCAGCGTCCC  
ATCCGCCCGATAGAGCCCCAGCAGGCAGGGGAGAAAATGGGGATGCGGGCGTTGAACTCGAGGGTGTAG  
GCTGCCTGGATATAGCTTTGCAGCGCCATGACCTGCTGCGGGACTTGGCTAGCAGCAATCGGTAGGGGG  
CCTGGATCTCGATGGTTCATGGGTGACTCCTTCTCTTGCATGTTTGTAGAGTAAAAGGGCAAACCTAAGA  
AACCTTAAGGAGCAAAAAAAGTTGTCAGCGAGGCAGCGGGCAGGCAATCTGCGCCGCTGTTATCCAACA  
GGAAGCCCCCAAGAGGAACCGCCATGTCATCCACCGTCAGCTGCCCCCTGTGTGCCAGCCATCGCAGTTA  
TCCCCTGCTGGTGGCGGGCAAGCGCTACCATCGCTGCCTCGCGTGGCAGCTGGTCTGGCTGGATGAGGCG  
GATCATCTGGATGAGGCGGGGAGAGGCGGTCTATGACGGTTCAGACAACCAGGTTGATGATCCCCGTT  
ATCGCACCTTTCTGATGCGGGCATTGGCGAGGTAAGTGCAGTGGGTTGCCAACCCCTGCCTGCGGCCCTCGA  
TTTTGGCTGCGGTCTGGCCCTGCGCTGGTGGCGATGGGGCGTGGGCGGGTTACGACATGGTTGGATAT

GACAAGTTCTATGCCGACTTTCCCGAGTTGCTGACGCGTCAGTATGACTTCATCACCAGTACCGAGGTGA  
TCGAGCACATTGCCGAACCGCGTGCCGTGCTTGACCGGTTGTGGCCTGTCTCAGGCCCGCGGCATGCT  
GGTGCTGCAGACCCAGCGGGTGCTCGGTGACGAGCGGTTCAAGAACTGGCGTTACCGCCACGATCCTACC  
CATATCGTCTTCTTCTCCGAGGCGTCGTTTCAGGTGTTGGCCGCCAGCTGGCAGGCCGAACCTCAGCTTCC  
CCCACGCCGATGTGGCGGTATTGCAGAAAGGCACGCCCTGAGGCGTGCCTTCGTCTGTTACTCGGCTGTT  
TCTTGCTCGGCTCTCGGTTACTCCTTGTAGCCCTTGTCCTGCCACTGGTAGTACATCAGGGCAGATTTGA  
CGCCAATTGACTTGAACGGCTCTGGCGGCAGCCACATCGGCAGACTCTGCTCCGCGTGGTTGAACCAGGG  
GTGCTCCTTGCTTGATAGAGGCTGGCCACGATGTGCACAAACAGGAAGGAGAGGTTGATGCCGTGGCCG  
TTGTAGCCGAGGGCGTAGTAGATGTTCTTGATGCCCATTACCCCCACCGCTTCGGTGTGTGCGCCG  
TCATGCCGAGCACCCCGTCCCACACCTGCTCAAATTTGATCCCTTGAGGGCCGGATAGAGGTCACAAG  
CTCGGTCATCATCTCGCTGACCCCGTTAAGATCGCCCTTGATGTTGAGGCCGTCATTTGAAGCGGTAC  
TCGGCATTGCCGCCACCGATGACGATACGGTTATCCGGGTTCAATACCAGATGGAACAGGATGTTGCGGG  
TGTCGTAGTAGGGCACCCGACTCTGCCACTGGATGGCGGCCAGCTGCTTTTTGCTGAGCTGCTCGGTGAC  
GGCGCTCTGGGCGTGTACCGGAAAGACCCGCCGCTGAAGTAGCCAAGTTTTGAGGTATAGCCGTTGGTC  
GCCAGACTATGCTGTGCGCGGTACCTTGTACTTGTCGGCTACATTCAGCTCGATCTGCTTGCCCTCCT  
TGATACCAGCACCCGGCTCTGCTCGTAGATGGTAACGCCGACTGCTCCACCGCCTTGCGCAGGGCATT  
GACCAGTTTCATGGCGTGTACCTGACCGCATTGGGGTGTAGACCGCCCCACGTAGCGGTGGTGGCC  
AGTTTTCTTTCGGTGGTATCGGCGTTCAGTACTGCAGCGGGATGCCGAGGCGATTGGCGGTTTTTCACAT  
AGTCGCGGTACTCGGCATATCCTCCTCATCGAGGATCGCTCCACATAGCCATTGAGCTTGAGGTGGC  
CTCGACGCCGGTTGAGGCCACCAGCGCTGCAGCTTGCGCATGCTGGCGACGGTGAAGTCGTAGTGGCGC  
TTGCTCGCTTCCCCCTCTTCGTAGAGATCCATCACCTCGGAGCCCGCAGCACCATGCCGCCATTGGCGC  
CCGAGGCGCCGCTGCCACCTGCTTGGCTTCGTAGATGGCGATCTTGAGCGACGGGTTAGCCTTGGCCAG  
ATGCCAGGCACTGGAGAGGCCGCTGTAGCCGCCACCTATGATGGCGATATCCACCTTCATGTCTTGCGCC  
AGCGGGGCACTCTCCTCTGCCGGTTTTCTCCTTGAACCAGTAGCTGGTGTGGGCTCAAAGTCGCTCATCT  
TGGGGCCCGCAGGCGCGAGGAAAAACAGCTGATGCACATGGTCAACGCTCGTTGGTAAAGGGGGTTCGG  
ATTCATCTTCTACTCCGGTTACAGATACAAAATGTCAAATCAGTTCATCGGGTTGGGCGGTGTGACCCG  
GCGGCCTATGTCTCGACCGCGGCCAGCTGATCGGCAAGACCAGGCCCTCATCCAGGCTGGTGACAAAG  
TTCCAGAGGTAGGTACATCAGCAGATAGACATGGCCTGCCGAGACCTGGGGCTGGGCCATCAGCATGGTGA  
TGGCCAGGAGAAACAGCAGGAGGCGCTGATCCCGATCGCCAGAAAAGCGAGTGCCTCCCGATCCGAAAT  
TCGGATTTCGAGCCAGGCCAGCGCGCGGTAGTGGCGGGCGAGGCTGGTTGACTGGGCATGGGTGACCAGT  
TTGACCTCGTGTTCAGCCGATCGTTGAGCCGCTCGTGCAGCAGCTGGTTCTTGCGCGAAAAGCCGGGCA  
GCAGCAGGCCGAACAGCAGCAATATCCCCATGCAGGCGATGCCGACCCAGAACTCGATCACCATCAGCAT  
CACGGCTGCCCGACGATGGAGATCAGGCTGGTGGCCAGGATCGGGATATGTTTCTCGAAGAAGTCGACA  
AACTCCCGCGCCAGGGTGACCCGCGCCACTATGGTAGATTGCCCTCCTGCTGCTGGCGTGTGTTCAGGA  
TCACCGGCACCGCCAGTGCCGCATAGATATGGGTAAAGGCGCGGGTGTGACCGCCCGGCGCAGGGCACC  
GATGAGCCAGAACAGCAGGACGATGAGGGCGTAGCTTGAAGCCTGCCACCACTGGCCCTTGACGATGGCG  
TCGATGGCAAAGCCGGCGAACAGGGGATAGACCACCAGCAGGATGTTTTCGAGGGCCACCAGCGAGAAGG  
TGCCCGCCAGCTTGAGGGGATTGGCCCGTGAATCGCCCCAGCGAACGACCGGCCGAGTGTGGCAACGG  
CGTGGCCTGCTCGTGCACACTGGCTGCCGAAGTGGTTGGTGTGTGTCATGGGTTATCTCCTAAGATGTGCG  
AAACGCTTAGTTTTGAGCGACTGCTCAAAGTTTTGTTTTGAGCGACTGCTCAAAGTCAAGCAGATCGATTGAT  
ATCGCAGGAGGTGAGATGGCCCCGCCATCAGCAGAAACAGCGCAAAGAGATGATCATCGAGGCCGTATTGG  
CCCTGTTTTCGAGAAAAGGGGATGGCGGCATCGTCAACCCGTGATATTGCCGAGCGCACCGGCTCGGCGCG  
CAGTCACGTCTACCACTACTTCAAGGATTGGAAGGAGCTCTGCCTCTGCGCCGTGGAGCGTTTTACCTAT  
CAGGAGATCGCCGAGCAGCGGAAGTGGCTGTTGCCGCTGCCGGCCCGCAAGCGTTGCCGCTCTTTGTGTC  
GGGACAACCTGCCGACCAGTCAGGATGCCTCCTGGGCCATCTACCTCGATGCCTGGAACGAGTCACTGCG  
CGACCTGTGTTTTGCCGAGAGCTACCCGAAAATCATTTGCGGTGGCGGAGGTGCTAGAGCTGATCCTG  
CAAAAGGGGATCGACAGCGCGGAGTTTGCAGCGGGTATGCCCGGCGACTGGCGCGTCAGATCACCTCCC  
TCATCAACGGCTATGCCGATGACCTGATTCTGGAGCCGACCCCCGAGACGGTAGAGGCCACTTATCAAGA  
GATCATGCTGGTGGTCAATCAGCTGGTCTTGCCCCGGCCATTATAACGGCGCAGGTACACAAGGGGG  
GAGGCGTGCCAGCGTGGTGCCTCCCCGGTGTGTTGGCCATCCGCCGGGCGTGCGATGGCCAGATAACA  
GGGAGCGGTTGTTGATGTGATTACCATTTGTCACTGCAAGATGCCCGTCACTGCAACTGGCGGCGCA  
GGGGCTGCTTGCTCCCGTGCCTGCAAGGCGACCCCGCCGATCTGTTGGCCACCATTCGCCGATGGCG  
CTGCTGCAGATCGATAACCATCTCGGTGGTGGCACGCAGCCCTATCTGGTGTCTTTAGCCGCTTGGCC  
AGTACGAACCGCGCTGGCTGGAGCAGTTGCTGGCCGACGGCGAAAGCTTCAATACTGGGCCATGAGGC  
CTGCTTTGTGCCCGCGAGGATTACCGGCTGCTGCGCCACCGGATGCTCGACCCCGCCGATGGGCTGG  
AAGTTTTTCGGCAACTGGCTCGCCACCCATCAGCAGGAGATTGGCCAGCTTATCGAGCGCATTCGCCAGC  
ACGGCCCGGTGCGGGCTGCTGACTTTGAACGCACAACCGGCAAGGGGAATGGCTGGTGGGACTGGAAC  
GGAGAAGCGCCATCTGGAGGTATTGTTTACCAGCGGTGAGCTGATGGTACGGGAGCGGCGCAACTTTCAA  
CGAGTCTATGACCTGGCCGAGCGGGTTATCCCCGAGTGGAGCGACCAGCGGGATCTGCCGAGCGTCGAGC  
AGGCGCAGCGGGATATGGTGCAGCGCCAGCTGCCGGGCGCTGGGGCTGGTCAAAACCGGCTGGGTGGCGGA  
CTACTACCGGCTGCGGCGCGGCAAAATATGACGCCCTGCTCCATCAACTGGCGGACGAGGGGGAGCTGTTG

CCGGTACGAGTGGAGGGGTGGCAGCACGGCGCTTTTGTGCACGCCTCGCTGGCCGATGAGCTGGTGAAG  
CCAAGGAGGGCCGTCTCAAGGCAACCCATAACCACCGTCTTGTGCGCCGTTTCGATCCGCTGGTGTGGGATCG  
CAAACGGGGCCAGTGAAGTGTCAACTTCGACTATCGCATCGAGTGTATACACCGGCCCAAGCGCCAG  
TATGGCTACTTTCGTGTTGCCCTTGCTGCATCGTGGCAAGCTGGTGGGCAGGATGGATGCCAAGGCCATC  
GCCAGCAGGGGATCTTCGAGATCAAGAGCCTCTATCTGGAAGCCGGGTGAGAGTGACCCGCACGCTTGC  
ACAGGATCTGGCGAAAGCCCTGCAAAAGCTGGCTGACTGGCACCAGACGCCGCAGCTTCGTTATGGTGCC  
ATTCCGGCCAATTTGCTGGCGTTGTGGCATGAAAAGCGCCCTGCAAAAGTGAGCTCTATCCCTTCTGGGCT  
AAGCTGCAAGAGGGATAAACAGTCCGGGAGCGGGAGATGACACGAGTGGCAACATGGTGGGCAGGATTTGG  
TGATGGCCATCTTGTCCCCCGCTATGGGGGCAAGAGCCGCCAGTGAAGATCTGTCTGGGGGAGGGCAA  
CGAGTGGGCCCCCTTACCTACTGGGAGCGCAAGGACGGGGTGGCCGATACCAGCCGCTGACCGGTTCCG  
GCCACGACGCTGGTGCATCGATGCAATTGCAACAGAGCGGGCTCCCGCACCAGATCCGCTATCTGCCCTGGG  
CGCGGGTGCAGCAGGAGCTGGCGGATTATCACCAGAAGCGGCTCTGTGCGAGCTGACCTGGGATGCCAGCTA  
CAAGCCGGAGCGGGCCGAGTTTGCCTTCTACAGCGTTCCTCTATTACACCCATCTCGTTTTCTTCTAT  
CTCAAGCGCCGCTACCCCGAACCAGCCGGATCTGCAGACGGTCAATCGCTCCCGGGTGTGCGGGGTGATTG  
GCTACAACACACCCCTACGGGCTTGGCGAGGACACGCCGGGTCAAGCAGTTGCAGCAGGCGCTCGA  
TATGCTGGAGCGGGATCGCTGCGACTTCTGCGGAGCGAAATCGAACCTCTGGTGGCTGGCATCAGCCTT  
GGCATCTACCGCAGCGAGAGCGGGTGTCAATCTCGCCCTGCCAGCCGCAAGGGATTCTATCTGCTGG  
TGAGCAAGGGCTCCCCCGCGGTACCAGCTGGTGAACATCTCAATCAGTCGCTGGTGGCATTTTCAGGA  
AGGGGGGCATACGGATGAGGTGATGCGCCGCTTCTTGCACCGATGGAGTAATAGCGAAGGGTTGCTGTC  
ATTCAGGGGGAGCAGATAAACAGAGGGCCAGCCGGTGCAAACCGGCTGGCCCTTTTTTACGTGAGAGCTT  
GTCAGGCTGCCAGACGGGTGAGTACCTTACCAGCAGCTCGATGCGCGGGGCAATGCTGACCAGATCCAG  
ATACTCCTCGTCACTGTGGAAACCTGCACCGATAGGGCCCAGACCATCCAGAGTGGGGATACCGAGGGCG  
GCGGTACAGTTGGCATCAGAGCCGCCCCCACCTCTTGCCAGCTGATCGGCAGTCCAGTTTCGGCGCCAC  
ACTCTTCCACCAGCTGCATCAGCGCCTGAGTACCCTCTGACGGCACCATGGCCGGTTTGTGGGCTTCGCG  
GGTCAGCTGGATGGTGACCCGTCAGATGGGGCCGCTCGGCCATGGTCAGCAGATGATCGTTGATCTGG  
TGGTACTCCTGATTGTCCAGAAGCGGACGTCTACCACGGCGCAGGCATGGGCCGGCACTATGTTGGCGC  
CATTGCCCCCTCGACAATGCCGATGTTGAGGGTGGTGCCGCTATCGAAGTTGGTCAAGGGCGTTGATGGC  
CAGGATCCCGTGGCCAGCTCGGTGATGGCGCTGCGCCCTTCTGCGGTTCTGTTGCCCGCTGGGCTGCC  
TTGCCGGTGAAGTCGATGCGATAACGGGCCATCCCTTGCAGCGCTTGACCAGCGAGCCATGGGCTCGGG  
CCGCTTTCGGCCACCAGCACCTGTTTCGCTGTTTGGCCACCAGCTGCCAGCCAGTCGTTGGAGTGCAGGGA  
GCCGATCTCCTCGTCCGGTTTCATGCAGACGCAGATGCTCAGGCGATCGCGCACCTCGCGGGGAGTTCA  
CGCAGGGCATAGACGATGTTGAGCAGGCCGGATTTTCATGTGCGGAGACACCGGGGCGGTAAGCGCGCTCAC  
CATCGATGCTCATCGGGCGGGCAGCGCGGTACCAGGGGGAAAGACGGTATCCATATGGCCGATCAGCAT  
TACATCGATCTGCGCCGATCAGGCTGGTTGCGGATCTCCAGCCCCACCCGGCGGCGCCGAGTCGACC  
CGCTTGATCTGCCAGCCGCCATCGTCTCATATTTGGCGGCCATCAGGTCCGCCACTGCCGCAATGCCCC  
GCTGGTGCAGGGATCCGCAATCCAGATTGATCAGCGGGCCAGTTCGGTCCAGGTATGATCCAGAGAAAA  
AGTCAATTGTTTGTCCACTATCAGGTTCCGGTTCAGAGAAGGATGTTTCATCACCAGCATGGCGCCGAAGGC  
GTTGAGTACCAGATGGCGACCATGATGGGGATGTAACGCCCTTCGGTTCGGATGCAGCCGAGGATGCGG  
CCCATGTACTGTACCTGGGAGCCCATCAGGTAGATGGCTGGCGCCAGAATGGCGATGTGGGTGCCGTTGA  
GGATGCCCTGATCGAACAGGGTGTGACCACACCGACTGCGCCCCCATCGACATCCAGGCGCCGATCAG  
CACGGCTGCCGCTCACCGGGCAACCCGAAGATGGCCATGACAGGGGAGAAAGATGGCGCCCATGGCATCC  
AGCGCGCCGGTGTCTGCAGCGCCTTGTGATGATGACGAAGGCCATCAGTACGTTGGGTACGGTGGAGGTGG  
TGGCGATGACCCAGCCCTTCTTGGCCCTTCGACGAAGATATCGGTGACGATGGGTTTCTTGTGTTGGC  
CTGGCTCATTTGGCTTGTCTCCTGAGTGTGAGGGTCTGCTGGGTGTTGTTATCGGTCTGCTTGCCTTCGC  
TCATATTTGAGGTAGACCCGGAACAGGTTGGCCCCGACAAATTTGAAGGCGAACATCACGATGACTGCCAG  
ACCGATGGAGGAGCTGACCGCCGGGCTGCCATCCGCCAGCGTCAGGGTGAACAGCAGCGCGCCGAGGAG  
AAGAAGTTGACGATGGTGGCACCAGCGGAGAAGTGAACATGGTGAACACGTCGGTTTTACGTTTTGGTGA  
TGAGCCCTTCATCCTTGTAGCTGGCGGGTTCATGGCGGCACCGGCATCGGTAATCTGCAGGGAGGCAATAAG  
GGCGAGGCCGGTGTGTCGGGGATCCCCATCAGCGGACGCAGCAGCGGGGTCAGCAACTTGCGGGCGCT  
TCCAGCGCGCCGTAGTGTCCAGCACATTGATCATACCGAGGGCAAACATCACGGTGGGGATCAGGGTCA  
GGGCAAACAGAAAGCCGCTCTCGCGCCCGTTGCCCTCCCTTCCACGCATGTCCGGTTCATGGCGGTCTTGT  
GCCGTCACCATTTCTCGCTGACGCTCTGGACCATGGTACCAGAACGAACCGTTTCAGCGTGGTGAATCGAAT  
ACCCCGTACCACTCGCCGGATTGCAGCAGTCCGGAGAAGAAGACCACGGCGAAGGCCAGTGCAGGTAAC  
TGCCTATGCTCACCGAGCGTGTGTTTGTCTGTCTATTAGCTAGCTCCATATGAATAATTAATTAATCTGAAT  
AATTATAATTGATGTGGATGTCACTAAATTGATGGTGGTCAAAATGGTTTGTCTACAAATGACGAATGTAT  
TGGGGTTATGTGACTGTGATCGCCATATGATTGGACGATAATCTGGTTTTTATCGAATTTGTTGAGTGAA  
TAAAAAGCAGGGGCGGGATAGCGGGGCAATAAAAAACCGGGCACGAGGCCCGGTTTTGGTCAATCAGTCAG  
ATGTGATTACTGGAGTACCAGCACCATCAGCAGGCCGACGGTAATGGCAGATACCAGGAAGGCAAAGCCA  
TAGAACACATAGTGGTGCAGTTTGGTGGTGTGGATCCCCAGATCGTGCAGACCGTGGTAGATACGGTGC  
TGCCGTGCCAGACTGGCAGGGCGATGATCACCAGCAGGATGCAGGCACCCACCAAGAGCTGGCGAACGC  
GTGCACGGGTTCATAGCTCATGGTTTTCCAGTCCATGATGCCATGGGCACCAGCAGACCGGTGATGAGG

ACAATGACCGGCAGCAGCATGGCAACGACCATGCCACCCGCACCAAACAGACCCCAGTAAATTGGTTTCGT  
CAGAACGTCTCATTGTTTTCTCCTCAGGCCACGATGATCAGGACAAGCAGGGACACCACCGCCAGCGCCA  
CATACTGGGGCAGAACGATCGGCTTCTCCGGTACCAGGTCTTACCACGGAAGATACGCATGGCTTTCGG  
CGCCAGGGCGAACCAGGTTTTGGCATGGAACAGGCACGCCCGCAGAGCCGACGACATGGAACAGGATAGCG  
ATCGGGCTTTGCAGGGATTCCAGCCAGCCGTTGAACGCTTCTTGACCCGTAACCAGGCGCATCAGGCCCC  
ACATCAGCACAACGGCGTAGATGGAGACGAAGATACTGGTGCCTTACGGATCATGTAACCGGTGTAGAA  
GGCGTTCTCAGCCACCAGTCTTCTTTCATTTTCGCGGACGTAAGGTTTACGTTTGCATCAGTGTGTTC  
ATGGTCTCAATCCTGCTCTCAATCTGGCTTGAACATGGCGATCATGTAGTCCCTGGCGCTTTCGACCTTG  
CCAAGCTGGATGGCCGCCCGCGGATCGACGCCCTTCGGGCACACTTCGGAGCAGTAGCCACGAAGGTAC  
AGCCCCAGACGCCTTCGTCTGGCTGATGATGCGCATACGCTCTTTGGCACCAGCATCACGGTTGTCGAC  
GTTGTAGCGATAGGCCAGAGCCAGTGGCCCGGACCGGTGAACCTTCTTGTGATGCCGTACTCGGGGCAG  
GCTGCGTAGCAGAGACCAGTGTGATGCACTGGGAGAAGTCTTGTATTGCGCCATCTGGGCCGGAGTCT  
GGATGTACTCGCCATCACACAGGCTGCGCGGCTCGCTCGGGATGATGTACGGCTTGATGCTCTCCAGCTT  
CTCGATGAAGTCGGACATGTGACACCAGATCGCGCTCGATCGGGAAAGTTGTTGAGCGGCTCGACGGTC  
ATCTTGCCCGCAGGTAGTCGCGCAGGAACGCCTTGCAACCCAGCTTGGGCACACCGTTGACCATCATGC  
CGCAAGAGCCGACAGATCGCCATCCGGCAGGACCAGCGGAAGCTCAGGGTAGAGTCCAGGTGATCCTTGAT  
GTACTGCAGGGCGTCCAGCAGAGACATCTCTCTGGTATGGCACCTGGAAGGTTTGCATCCAGGGCTCG  
TTATCCTGTTCCGGACGGTAGCGCAGGATCTCAATTTCAATCATCTCAGCCATTCTTCTTAGCCTCGTCT  
TGTTTCTCACCCCTCGGAGCCGTACACGCGTTTTGCCGGCTGGGACTTAGTGATCTTCACATCGGAGTAAT  
CGATGGAGGGCGTTTTGCCATTTTTGTAGAACGAGAGCGTGTGCTTGAGGAAGTTCACGTCATCGCGCTC  
TTCGTAACCATCCAGACGCTGGTGGGAACCGCGGGACTCTTACGATTGATAGCGGAGTGCGCCATGGCT  
TCAGCCACGTCCAGCATGTAACCCAGTTCGATGGCGTACAGCAGATCGGTGTTGAAGACAGAGGACTTGT  
CGTTGATCTTGACCTTTTTGTAACGGGCTTTCAGCTCGTTGATCTTGTGATGGTGCCCTGCATCAGCTC  
TTCGGTACGGTAGATACCGACACCGGCTTCCATGGACATGCCAGCTCGTTGCGGATATCGGGCCGGTTTT  
TCGGTACCGTCTACATCCATCAGGGAGAGGTGCTGCTTGATGAGCGCTCGGCCCTGGCGGCCAGCGCTT  
CGGTGTTGCCATGCTTCTGAGTCTTGCAAATTCACCTGCCTGCTCACCGCCAGCTTGGCGAATACCAC  
GATCTCGGACAGGGAGTTGGAACCCAGACGGTTGGCACCGTGCAGACCGACGGAGGCACATTCGCCCGCG  
GCGTAGAGGGCCGAGACGGGTGGCACACTGTTGTCAGTCTCGATACCACCCATGGTGTAGTGGGCAG  
TCGGACGTACCGGGATAGGCTCTTTGGCCGGATTCACGTTGACGTAGGCTTGGCCAGTTCAGCAGATGAA  
CGGCAGACGCTCTTTCAGGTAAGTCTCGCCAAGGTGACGAGGTCGAGGTGAACCACATCGCCCATCGGG  
CCCTGAATGACGCGGCCTTTCTGCTGCTCTTGCCAGAATGCTTGGGAAACGCGGTGCGCGCGACCCAGCT  
CCATGTATTTGCTCTTCGGCTGGCCAATCGGGGTTTTCCGGGCCCAAGCCGTAGTCTTGCAGGTAGCGGTA  
GCCATCCTTGTTC AACAGGACGCCACCCTCACCACGGCAACCTTCGGTTCATCAGGATGCCGGTGGCCGGC  
AGACCGGTGGGTGATACTGGACGAACTCCATATCACGCAGCGGTACGCCGTGACGGTAGGCCAGTGCCA  
TGCCGTGCGCGGTGACGATGCCACCGTTGGTGTGTAGCGATAGACACGGCCAGCACCGCCGGTTGCCAC  
GATCACGGATTTGGCCTGGATGAAGCGGGTGATAACGTTCTGGATGTCGAAGGTCAGTACGCCCTGGACA  
CGGCCGTGCTCCACGATCAGATCAAGGCAGAAATGCTCGTGAAGCGCTTGATGCTCGGGTATTTGACGG  
AGGTCTGGAACAGGGTGTGCAGAATATGGAAACCGGACTTGTCTGCGGCGAACCAGGTACGGGGAACCTT  
CATGCCACCAAACGGACGCACGTTGGCTTTACCATCCGGCTTGC GGCTCCAGGGGCAACCCAGTGCTCC  
AGCTGGATCATCTCTTTGGTTGCGTTGTTGACGAAGTATTCCTACTACGTCTGCTCGCACAGCCAGTCC  
CACCGGAGACGGTGTGCTTGAAGTGGTTTTTCGAGGGAGTCGTCATCACGGACGACACCGGGCGCGCCGCC  
TTCGGCAGCAACCGTGTGGCTGCGCATCGGGTAAACCTTGGAAAATCAGGGCGATGTCCAGGTCTGGCTGT  
GATTCGGCTATAGCGATAGCGGCGCGTAAGCCGGTACCGCCAGCACCGATGATGGCCACATCGGCTTGA  
TAATATCCACATCTGCCTCCTTAGGGATAGATTTGCTGGGCACGATTTTGTCTATGAAAAAATTCAGG  
CTTGATGCAAGTCAAACGCTAGGTTTTATTCCCTTTTTATTGGTTATTTTTCTATAAAAAACCCAAATC  
CCTGGATGAAAATGTCGTTATTATCGTCATTTTTTGGTGTACTGAGCAGTTGAACACCTAGCTACGAGT  
ACTTTAACTTCTGGATTGTACGTAGTTTTCTTTCAATAAAAATGCGAATCACCTCTCTTTTTAGGTACTCG  
CGAAAAAATTTTTAAGTTTTTTTATTGCAATTTTTTAAATGAGAATTATTGGCATTCAATTTGTTCCGATAGA  
AATAGGTAATCCGAAATGCTACGGTGACCACGGCGGTGATCTGATAATCCCAGACGAATTACAAGGGTTT  
CAAGGCGGGGATTTGGCGGTAATGTGAGATTA CTCACTGAAAAATTAAGCGCTATTTAGAAAAATAAAA  
GGGGCCTGTAAAGCCCCTTTTGCTCATGCTCAAATGCGGAACATGCCGACCTGATTGCTCAGTTCACCCG  
AAATATTTTTAAGTTGTTTCAGAGAGATGGCGTGAGCTGTCTGCATCCACTGCCAGTTTCGTCAGACATC  
TTTTACTGCCTGAATGTTGCGGCTTACCTCGTGGTGACGGCCCGCTGCTCTTACGCCGCTGGAGATC  
TGGGTCGCCATGTCCGAGATCTGGTTGATCGAGGTGGTGTGATCTGCTCCAGCGCTGGGTGGCGTTGTTGG  
CGTCATCCACGCTGTTCTGGGCCAGCAGCTGGCCTTCGTGCATGGTGTGACCGCCCCCTGGGTATTGCG  
TTGCAGGGTTTTGCATCATATTGCGGATCTCGACGGTGGAGCTGTGGGTACGCTGTGACAGGACCGGCACC  
TCGTCCGGTACTACCGCAAAGCCGCGACCCCTGCTCACCGGCACGTGCCGCCCTCGATGGCGGCGTTGAGTG  
CCAGCAGGTTGGTCTGCTCGGGCATGCCCTGAATGGTGGAGAGGATGGTGTGATCTCCTGAGCGTTTTTT  
CTCCAGTTCTGAATGATGTTGGAGGCTGTTCCACCTGGGTGGCCAGATCGGTGATGGAGCGCTGGTTG  
CGGGCGATCACCTGCTTGCATGCTCGCAGCTGCTGGAGGAGCTGCGGGCCGCTTCGGCGGTCTGCTCGG  
CGTTGCTGGCGACCTCGACTGCGGTGGCTGACATCTCGTGTACCAGTGGCGATCTGGGAGATCTCGTT

TTGCTGGCGTGCCAGCCCCCTGATTGGCCTTCTCCGCCATGCTGTGAGAGGACTTGGCCTGCTGGTTGAGC  
TGGCCGGAGGAGTTGGAGATATCCTGCACCATCACATGGATCCGCTCGATGAAGGTGTTGACGTGTTTGG  
CAACCGCGCCACCTCATCTCACGTTCAATCTTGATCCGGCGGGTCAGATCGCCGTTGCCACGGGAGAG  
ATCGGCAATCGCTTCGCCCAGGGTTTTTCAGAGGGGCCAGCGAGCTGTGATGGCGACATAGGAGAAGCCT  
GCCACGATCAGTATGGTGATAAGCCCCCTGAATGAGGGAGGAGGTAACCATGCGGGCTACCGACTGGTAGG  
CGATCTCTTCATCCACCATCATGCCGTAATACCAGTTGGTATTGGGAATGGCATTAAAGTCTGATAGACCTC  
TTTCTTGCCGCTGATCACCAGCTCGTTGATCATGCCGTCATGGGCGACCTGATGATGATAGGCGGCAGTC  
AGCTCCGGTGCCAGAGCGGTAGCGGATTTAGGCTCAGGGAGGCATCGGGGTGCGCGATGATGGTGCCAT  
TGCTGTCCACCAGCATGGCGTAGGTGCCCTCGGTGGTGACCGCCAGAATGTCCGAGATCAGTGAGCTGAT  
GGAGACGTACCCGGCGATGACCCCCCTGGGTATTGCCACGCTGGAACGGCTCGGCAATGGTGACAATCAGC  
TGGCCGGTGGAGATGTCCGCATAAAGGGGAGGTGATGGTCATCTTGCCAGCAGCCATTGCGCTTTGTACC  
AGGGGCGTTGACGGGGGTATAACCGGCGGGCAAGTCGGTTGGTTTGTCTGGATCATTTTGGCTCTGC  
GGTACCGGCATAGACCAGGTGGAAGCCACCGGCATTTCATGGACTGGGCCAGATGACTGATGGGCTCATCT  
TCTTTGGCGAATGCTTCTTTGGTGGTGCTGACCATGCTGATCCGGGCGTCGACCCAGCGGGAGATCCCCCT  
TGACGTTGGCCATGGAGCTTTCGTCGATGATGTTCCAGACCAGTCGCTGGGTCTCGCTGCGCAGTTGCGA  
GGTGTGTACCAGACCTGCAGGCCGGTATCACCAGAATGATGACCCCGATAGCCAGAACAAGCTTGTTT  
TTAATGGATAAGTTCATAGTTACATCCTTGATGAGCGTCAGTCTGAAGTGTGTGGCATCTGATTATTGTT  
ATAGCCTTGTACTATCGGCCGTAGTCGAACCTTTTTTTACCCCGGTCAACAAATTAAGTTAGTGCCATA  
ATGGGGGCTTATCCATACGCGTATCGTCCCATCATGGTGAGATAAAGCGATCCGGTCGATTGGTGAAGAT  
TCCATCGACCCCATGCTAGAGAGCGTTTCATAATCTTCTGGATAATCAACGGTATAAACCAGAACCTTG  
AGCCCCCGGCGATGTGCATCATCGACCAGCGCGGCTCGATGAAATCAACATCGCAATTGATGGACCAGG  
CCCCCAGCTCGTCGGCAACCTGCGCCAGGTTGAGCGGCAGGTTGGCGGTGACGGGACCGAGCCGGATATC  
GGGCCGCAAGGCGGCAAAATCGGGCCAGCTCCGGGTGATGGAAGGAGGAGACCACCCACTGCCCGGGAGTA  
AAGCCAAGCTCGGCCTCTGCCCGTCCGGGTGAGGGCAGCCACCGCATCGGCGGTATGAGTCCCCCTGAGCT  
CGATATGCAGCTCGCAGCGTCCGGCGATGATCTCCATCACCTGCCACAGGGTCGGGATCACCTCTCCCTC  
ACCGGCATCGAGCTGCTCCAGATAGGAGCGGGATTGTTCCGGTCAGCACCCCTTGCCGTTGGTGCAGCGC  
TCCAGCCCGCGGTGCTGGAAGACCCACAACCTGCCATCGGCCGCTGCACGTCGATCTCGATGGCTGATG  
CTCCAGCTCCAGCGCTTTGGCCATCGCCTTTAGGGTGTCTCTTGCGGCCAGACCCTGGCCAGCAGGTTG  
GGCAATAATCTGCATGTTTTGCTCCTTTTACCTCGCGGATCAGCCGCGGCTCAGGTGAATGTCGATCTGT  
TGATGGGGCAGGGTAAGTCCCTGCTGCTGCATCTTCTCCAGCACCAGCGAGTGAACCTCGTGAAGTATGG  
GCATCCGGTGATCCATGTTGTTGACGTAGAGGCGGATCTCGTAGATCAGTGCCGAGTCCGGTGAATTGAT  
CAGGAAGACCTCGGGCGTCCGGCTCTCCAACACCAGGGTCGATGCCTGGATGGACTCTTCCAGAATGCGC  
TGCACCAGTTTCGGATCCCGGGTCCGGGATCCGGATCCGCAGTTTGACCCGGGTGATGGCATCGGAGA  
GCGACCAGTTGATGAACTGCTCGGTGATGAAAGCCTTGTGTTGGGCACGATGATCTCCTTGCATCCCAATC  
CACGATAGTCGTCGCCCGGTCTTGATCTTGGTGACGGTGCCGGTGAGATCGCGGATGGTGACGGTGTCA  
CCGAGCCGGATCGGCTTCTCAAACAGGATGATGAGGCCGAGACAAAGTTGGCGAAGATCTCCTGCAGAC  
CGAAACCCAGCCCCACCGAGAGGGCGGCGACCAGCCACTGGGTCTTCGACCAGTCGATGCCGAGCATGGA  
GAAGCCGGTGAGGGCACCGATCAGGATCACCAGATACTTGCTGGTGGTCCGTGAGGGCAAAGCCGGTACCC  
GGGGAGAGGCTGAGGTGTTGACAGAGGGTCAGCTCCATCAGCCCCGGCAGGTTGCGGGCAGTCACCACGG  
TCAGAATGAAGACGAAGGCGGTGAGCATCAGATCCTGCAAGGTGATGGCCGAGAGCTGCTCGATGCCGCC  
AATCTTGCTGCTCACCTGCCACACCTCGATATTGCTGAGGAAACTGAAGGCGGAGTTGAGATCCGACCAT  
TGCACCACCACAGCATGGTGAAGCCAGCATCAGCAGGGTGCGCACCAGTCCCAGCGACTGGGCGCTGA  
TGGTATCGAGATCCAGCTCAGTCTCTTCCACCAGTCCGGGGTCTCGGAGCTGAGCTCGTATGCCCTC  
TTCCCGCCCGCTGGGCCAGGATCTCGGCCGCTTGCTCTTGGCGGCTCGAAGGCGAGGCGGCGGCGC  
TGGATCAGCATCCAGCGTCTGGCCAGATAGTAGACCAGCAGGCAACCCAGCCCCATCAGCAGGCTCAGCT  
CCAGCTGGCGCAGCAGGGTTCGCGAGGTATAGAAGTAGCCAAACAGGGCGCCAATCACCAGCAGCAGCGG  
CGCCAGCATCAGGCTGTTCCAGATGAAGTGGTGTAGCAGATGGGGCTTGGTCAATGTCGGTCTGGCCCCAG  
GTGAGCGGCAATCGCTCCCGGTTGAGGCGGGCAAAAAAGAGCAGCAGCCAGAGTGCACCGATCATGAAGG  
CCATCCGGCCGAGGGAGTCGTAGAAGGCGTCTCCTGATAGCTGTTGGCCATCCCCTGACAAAAGAACT  
CGGGATCAGCACCAGCAGCAGGGTGCAAAACCTGCCCCATACCTTTTGCACCTGTTCCCGGGGCGAGCGG  
AAGTGGTGGATCAAAATCCCCGCTCCAGCGTCAGGTGGCGGGCCATCACCAGTGCCAGCAGCAGAAACC  
AGATCTCGCCAAGGCGCGTGTACCGCCACCGCAAACGGGTATTGCCAGGCCCTTCGAGCAGGCCGCG  
CACCATCAGTACCATGGCGGGCAAGGGGAGGGCGGCAAGCAGGGAGCGCAGCAGCAAGCGGCTGGTGAGG  
CTGAATTTGCTCTGGGTACCTTGCCGATCCGCGGCGCAATATGGTCGCAATAGAGGTTTCCAGATGACGGG  
CCAGCTTGAACCAGCTCCAGGCCAGCACCAGCAGACCAATACCGGCCAGCGTGAGACTCAGCGGGCTGTT  
CTCGGCGATGGCGTAGGGCAGTTGCAGCCAGTTATCCGGGTTGAAGGCCAGGGTCAGCGCGGCGGGAATA  
CCGAGCATCACCTGTGGGGTAAAGGGGCGCACATCCGGCATCCAGAACAGGTGGCTGGCGCTTATTTGCG  
GGATCTCGTCGATCTTGCTGTTTTGACGGCTGTAGAGCAGTTTGGAGCGGGTCTGCTCCTGAATGAGGGT  
GTCTGAGGCGTGGTTGAGCCGGGTGAGCAGTTGGCGCCGGGCTTGGAGCAGGTTGTCGAGCACCCTTGC  
TGCGGCCGATCCAGCGTCACCTCCTCTTCGGCCATCAGCTTGTGCGCAGCTGGCGGGTATCCTTGAGCC  
CATCCTGCTCGCTCTCGTACTGGTACTTGGCCATGCGGGCGCTGACGATGGCGGACTCCAGCTTGTGCGAG

GGGAAACTGGGGAGGCAGGTTCGGAGAGTTTGTCTGCGCAGGTTCTCGCCATAGGCATTACTGATCTGCAGC  
CACTCCAGCTGTTTCGCGTACCGAGTTGACCAGCTCATTAGTTCAAACAGATTCTTGTGCGACGCTGCGCT  
GCTCGTCTGCACCCGCTCAATCTGATCTTCCAGTGTGCCGAGCTGGATGGAGAGCGCCTGATTCTGCTG  
TTGCTGCTCCAGCAGCAGCGGCATGTCCGGTGGTGAGCTGTTTTGCGCAGCCGCTCGCTCTCCTCCAGCGCC  
TGCTCGGTCTTCTCCCGCCGAGCTGGTTCTGTTGGGTGAGCAGGCTGGCTTGCCACTCATCTCTGCTCGG  
CGATGGCCAGATTGAGCTCCTGCAGCTTTCAGCTTGGCCGAGATCGTTGCGCTGCTGGGCCGAGAGCTGCTC  
CAGCTCCAGCATCTGGATCCGGTTCGGAGAGGCTCTGCTCCTTCACTTGGTTCAGCAGCAGTTGGGCCCTCC  
TGCTGGCGATCCGATTGCTGCTGAAGCTCAGTCCAGCTGGCTGCGGGTTCAGTTGCAGCTGTTTGC  
GCAGATCGTCCACCCGAGGTGATACTCCTGCCCCTGCTCTCCAGCTGGTTGAGGCTGTCCATCACCCC  
CTGCCGCTCCTTGCAGGTTGAGCTGGCGGTTGCTGCTCAAGCCTATGGCCTGGCGCAGCGCCCTCCTCC  
TTGAGGCTCGCCAGCGCCGGCCGAGCAGCGGGCTGATAGTTGTGTCAGGCTCTCCTTGGAGCGCGCCGACT  
CCTTGGGGTAATCGATGAGGATCTGCTGATAGGCTTTGCTCTGCTCCTCCGTTAGCGCTCGGCCTCTCTGGC  
AAATTGCAGCGCCTGCTGGTAGCTCTCCCGCAGCTTCTGGTTTTCCGGGGTATCGCTCTTGGGCACGCTC  
TGCAACAGGGATTTCGGCCTGGGCAATGGCATCGTCCGGCGCGCACGGCTGGCGGCAACAAGATAAGGGAGA  
GCAGCAAGAGGGTGAGCAGGCGTTGCAACATGAGGCTCGTTTTCCGTTTCAGAAAGAGGTGGCCCTAGCCTAA  
AACAGGGCAGGGAGGCGGGTAAAGCAGTCTATATTAATGATTCAACACAAAATAACAGGAAGTCTGCTGCT  
GCCGTTTTGCTATGATCCCGCCGCTTTCTCTCCACCGAGTCAATATGTCAGCTGTTGATCTGGGCACA  
GCCCCGCTATCTCGCCTTTTTCTGGCGTTACGTAACCCCGACCGTGGCGGCCATGCTGATCACCGGCATCT  
ATGTCACCATCGATGGCATCTTCGTTGGCCATGTGCTGGGTGAGGATGGCATGGCCGGTCTGATGCTGGC  
TTATCCCATCTGCGCCGCTGCTCTATGCGGTGGGGGCGCTGATCGGCATGGGGGCTCGTCTGCTGGTCTCC  
TTCCATCTGGGGCAGGGCAACCCGACCAAGCCCGCCATATCGTCCGGCAATGCGCTGGTATGGTGTGTC  
TGGCCTCGGCACTGCTCAGTTTTATCGGGATCCGCTATGGCGAGCCATGCTGGCCTGGATGGGGGCGGA  
GGGGGAGATCTTACCCGCGGGCTCTCCTACCTGCAGGCTACGCCAGGCTGGGGCTCTTTGCGGTGCTG  
TCGATGGCGTTTCAGCTCGCTGCTGCACAACGATGGCCGCCCCGGATTTGTCACCCCTCATCATGGTAGTCG  
GGGGGCTGCTCAACGTGCTGCTGCTGACTATCTGCTGATGGTGGTGTTCGTTTCGACTGGCCGGGGTGGC  
GACGGCCACTATGCTTTCCCAAGCGGTGACGGCCCTCGCCTGCTGTGGCACTTCTTACACCCGCGCAGC  
CAGTGCAGGATAAGTTGGGACACCTTGCGCCCGATCTGCGGCTGATGGGCGAAACGGTGCGCCCTCGGGG  
TCTCCAGTTTTCTGATGTACCTCTATCTCTCGGTAGTCTGCGCTGCACAACAAGGCGTTGCTGGTGTGTT  
TGGCACTTCGCTGATGTGGCGCCCTACGGGCTGATCAGTTACACCCAGGCTTCTTCTATCTGCTGGTGTGTT  
GAGGGGATCGCCATGGGTATCCAGCCATCGCCAGCTTTAACCAGGGCGCCGGTCACTGGCGCGGGTGC  
TGCGGATCCGCAATCTGGCACTCGGAGTGACGTTGGGGATCGCCCTGTGCGCCATGTTCCCGCTTTATCT  
GTGGCCGAGGCGCGGTCTATCTGTTTGCAGCGACAACGCCACCTTGTGCGCGGTGGCGAGCCTCGGG  
ATCTGGCTCTACTTCTGGGGCTGCCGATGGAGGGCTTGTGCTGGTGGGGGCCACCTACTTCCAGGCCA  
TCAACCGGGCCCGCATCGCTTCCCTGCTCACCGGTGGCAAGCTGGTGTGATCGGCGGTTTTCTTGTGGGG  
ATTCTCGACCCTGTGGGGCTGCCCGGGTCTGGCTTGCAATGCCAACGTGCAGCTCATTGCTGGTGTG  
GTGATGTGGCGGGCGATGCATCGGGAGTCCGGCGCCACGCGCTGGCCGATAGGTAATCAGGTTCCGACG  
TGCAGATAGCAGACAGGCAGCCATGGGCTGCCTGTTTTGTTAGAGGATGTTTTGTTAACGGGCTCTGCCG  
ATTCAGGGCTTGAAGGCGCCGATAAAGATGGCGGGATCGACCCGGGTGTCGTTGAGGCTGACGTTCCAGT  
GCATATGGGGCCGGTAGCGCGCCGGTTCGAACCGACTCGCCCGACGATGCTGCCACGCGGCAGGCTCTG  
ACCGAGCTTACATCGATCTTTGACATGTGGCAGAACATGCTGATGAGCCCCGACCGTGGTTCGACAAAG  
ACGGTATTGCCATTGAAGAAGTAGTTGCCGATCAGGATCACCTTGCCGGCGGGCGGGGACTTGATCGGAG  
TGCCGGCGCCACTGCGAAGTTCGAGGCGGAGTGGGGATTGCGCTCCTCGCCATTGAAGAAAACGACGCAG  
GCCAAACGGGCTGGATAGGGGGCCGTTGACCGCTTGTGCAACATCAGGTTGCTCGGCTGGTTGGGGCTG  
AAGGTCTGGTAAGCCCGAGTCTGCTCCGCCAGCTCGCGGTTGATGCGGGTCAATCCTCGGCGAGTGGAT  
TGACCTGACGGCTGTTCTTGGCTTGTGCTGCTCGCGGTAGTGTCTTAGGGGTCACGGTGAAGCCAAG  
CGTGCGGCCATCACGGTGGTCAGCAGCTGGCCCTCAAGCGGTTTTTTGAGAGAGATGCCGACGATGGCG  
ATCCACTGGCCATCTTCTGACAGCAGTACGGGCTTGCCTGATAATGGGCTTGTGGCGCCGTTGGATG  
CCTTGCACAAGGGGCACGACGGCCACGCCGCTGGTACCGGATGGTTGAGCAGGCGACTGATAAAAACCCTC  
GGCCAGGGCTGACTGGCTGGCCAGTAAACAACAACAGACAACACAACACTCTCATGACGATAACCACTCGAT  
GTTAAAACGCCCGGGATAGCGGGATGACAACCCCTGTCCGGCATTCGCCGATCACTAAAGGGTGTACAC  
GACACGTTGGCCACGACAGGTGCGGTTGGAGGAGGGGACAGATTGTGCTCGTTATAGTCGGTGCAGCCA  
GAGGCGGGGCTGGCTGACGCCCTTTTTGTGCATAGCTGCGTCAGGTTTTATGTCGTTGGTTCGGGTTGCTT  
CGCCATTGAGTCGCCCCCGCCCTAGCTCTAGAATCTGCTTCCGGCACTGATGCCACCGACATTCGAGGA  
GACGATATGAACGATTACCCCTTTTGCACCACTCCGGCCGGTACACGACAGGTCGTGGCTGGCTCT  
GGGTTTCGACGCGGGTTCGATATCTTCAACAAGGGGATGGGGATCAGCGTAGCCATGGTGTGCTGGTCTGGTT  
TATGGTGGGCATGCTGCTGGAGCAACTGCCGGCGGGCGCCCTTATCTCCAGCTGCTCTACATGGTGTGG  
GGCGCGGGTTGGGTGGCGGTCGCCGCTCGGGGTTATCGGGGGAGCCGCTGCAGTTTGGCGATCTCTTCG  
CCGGTTTTTCGCCACAAGTTGACCCCGCTGATGCTAGGCGGCTGCTGGTGTGCTGCTGTTTAGCCTGGT  
GGGCTCGTCTGCTCGGCTGCTCTCCATGTGGGGGCTGCTCCCGCTGCTGACGCAGGGTCCCGAGAGC  
ATGGTGGTCTCAGCCAGCCAGTTGCAACAGCTGCTGCTGGTGTGCTGGTGGGGATGCTGCTCATCATTC  
CCGTGCTGATGGGGTACCTTTGCTCCGGCGCTGATCTACCACCACAATATCGGCATCATCCAGGCGGT



ACGGCTGAGCTTCTTCGGCTGCTGGCGCAATATTTTTCCCTTCTTCTGGTGGGGGCTGCTCTCAGCCATT  
TTGTTGCTGTTTTGGCGCTGTGCTGTTGCTGGTAGGTCTGCTGGTGGTGATCCCGGCGCTCAACTACTCCA  
TCTATGTGGCTTATCGGGATATTTTTCTGGACGAGAGTGCCGAGCCGGAAGCGCCGCATTTCAGAACCATT  
CGGATTTGAAGCCTGATCAAGGGATCAGAGCGAAGAAGGGGCCCGCAGTGGCCCTTCGTTATGTTTGGG  
TGTGCGGAATGCTTACTCCTGCCAGATGGGATCCGCCGCCATGCCGGCCAGCAGAAAATCGAGGAAGCTG  
CGCAGCAGTGGCGACATCTGCTTGGGGTGGCATAACCCCCGTAGACGCCGAGCCGCTTGGGTTGCCAGT  
CGGCCAGCAGGGGACACAGTTCCCCGCGCTCCAGATAGGGTGTGCCGAGTAGCGGGGCTGCAGGCTGAT  
CCCCGCACCTTCCAGCGTTGCTTCCAGCAGCAGGTTGGAAATATGGCGCTCAGGTTACCGCTGACCCGC  
ACTGACTCGGGACCGTCCGGTCCATTGAACTCCCACAGGCTCTTGCCAAAGTAGGTGTAGGTGAGGCAGT  
TGTGACAGCCTAAATCCTGCACCTTGTGTGGCATTGCGATGACGGGCCAGATAGGCCGGGCTGGCACAGAC  
TACCGAGTGGCAGGTGCCGAGACGGCCAGCCAGATTGGGGTTCGAGGTCGTTGGTGCAGCACCGCC  
AGATCGATCCGCTCCTCTACCAGATTGACGGTCTGTCTGAGCAGCAGAATGTCGATGGCCGTCGCCGGGT  
ATTGCGCCAGATAGTCGTTGGCAGCCCCGACCAGCAAGGCTTCTGACAGGGAGTAGCTGCTGGTGATCCG  
CAGTTGTCCCTTGGGGGCGTCATCTCCCTTCCAGCGCATCTGCTCCATCTCTTCGCCGAGCGCCAGCATG  
GCGCGGGCCCCGTTAGCGCCTCCTCTCCTGGCCCGGTGAGACTCAGACGACGGGTGGTGGGTGCAGCA  
GGCGGGCGCCATCCAGCTCTCCAGCTCGGCCAGATAGCGCGACACCATGGCGCGGACATATCCAGTTT  
CTCTCCGGCGCCGCTCAGGCTCCCTTGTTCGACTACGCTGACAAAAGACCCGCAAGGCGGTGAGTCGATCC  
ATGTACGGCTCTCTATATGTTTCGATATGTGCAACAGTGATGCGCTTTTTATGCTGTATTTGCACCTTAAG  
TGATCCAATACACTGTGTCCATCAAATGAACCCCCGAATACTTAATGAGGAATAGATGATGAACAACACC  
CTGATCCGCAACCTGACTCTGGCGACCACCTGCTGAGTGGCGCCGTAAGTGGCCGCCCTTGGAGCGTGA  
CCGTCTACAACCCTGGCGAGAAGGCGATCTTCCCGGTCTCCTCCTCACTGGTGACCGGTGACAAAGAGGC  
CATCCTGATCGATGCCAGTTTCGACGTGCAAAATGGTCAGGCGCTGGTCGACATGATCAAGCAGAGCGGC  
AAGAAGCTGACCACTGTCTATATCAGTGCCGGTGACCCCGACTTCTACTTCGGTCTGGAGCCTGTCTATGG  
CTGCGTTCCCGGATGTCAAAGTGCTGGCCGACCAGCACGTGGTTGACCATATCAACCAGACCAAGGATGC  
CAAGCTGAGCTACTGGAGCCCGATCCTCGGCAAGGGGGCACCGAAGAGCTTGACCGTGCCGCAAGTGATG  
ACCGCAAGCCACCTGACGCTGGATGGCGAGAAGATTGAAATCAAAGAGATGAATACCCCGAATGCCATACC  
TCTGGGCCCCCTTCCATCAAGACTGCTTTTGGTGGTGTGCCGGTTTACCACGGGGTGCATGTCTGGATGGC  
CGACGCCAGACCAAGCGCGCCCGCAGTAACCTGGTCCAAAGCGCTGGATAACCTGCTGGCCCTGAAACCC  
GAGCGTGTGGTACCGGGCCACTTCTTGGGCACTGCTCCTCAAGGCACTGCCGCTGTGAGCTTTTACCCGCTG  
ACTATGTAGAGCGTTTTGAAACAGGAGCTGGCCAAGGCGAAAAACTCCGGTGAGCTGATTGAGGCTCTGAA  
GAAGGCCTATCCGGCACTGCCGGTTGACGATGGTCTGGCCATCGGTGCCAAGGTCAATACCGGCGAGATG  
AAGTGGTAAGCCACTGAGCCTGCTTTCCCTGTGTTTTTTTTTACCAGGGCCTAAGGGCCCCGTTTTTTTTATCCG  
AGATCGAAATGAGAATGAAGATGAGCGAACAACAACCACCTCCATTATGTCTATGACCCGCTCTGTGG  
CTGGTGCTACGGTGCCGCCCCCTGTTGCAGGCGGCAGCCACCATGGCCGGACTCAAGATCGAGCTGCAT  
GCGGGCGGTCTCTGGCTGGGTAGTCGCCGTGAGCCGATGGGCGAGGCATTGCGTGATTATGTGCGCCCC  
ATGATCAGCGGATCGAAGCGCTGACTGGCCAGCATTTTGGCGAACGCTACTTTAACGAACCTGCTGCTGCG  
CGAAGGGTGTCTGCTGGACTCCGAGCCCGGATCCGTGCGGTTTTGGCCGTCACGACATTGGGGGGCGAT  
GGGCTGACTATGTTGCACCGGATCCAGCAATCCCCTATCGGGACGGTATCTGGATTGGTGAACCTGCGT  
TTCTCGCCACGCTGGCGGCAGAGCAGGGGATTGCAGCCGAGGAATTCACCAAGCTTATCTGCAGGCCCC  
CTTGCTGCAACATCTGGCAGATAGCCAGGGCTGGATGAAAACGGCTGGGCGGTGAGGTTATCCTACTTTG  
GGTATAGAGCGAGGGGGAAAACCTCGAAAAGGATAGAGGTCAACCAGTATCTGGGGGAGCCGGAGTTGCTGA  
TCCCACGACTGTTGCGGGCAATAGAGTAAACAGTTAATAGTCTGCGGTAGTTAAAGTGGCCCTCTCTGCG  
TGTCGATAGCGATATATGGTGTCTATGCAAACTACAAAAGCACAGCTCTACGGCTATGCTCAATTACAAA  
AACATGAACACATAGCTCCTATCAAAAACCGACATTAACGATGACACGCAGTTAAGGATGAATCTATGCT  
CCAGAATATGTCCATAGGCCAGAAGTTGAGTACTGGCTTTGCGGTGCTGGCACTTTGCGTATGCCTGCTT  
GCCGGTATGGCGTCTCACGACTGTCTGATCTCAATCAACAAAACACTGTATTGGCAGAGAACCCTTATCC  
CTTCTGTTGCTATGCAAGTCAGATGCATATTGCACTGCTTGATGCTCGGCGTTTTCCAATTATCTATGGT  
GATCGCGATGGGCTACAACGACAGTGCGGATATTGAACGAACCCAAAGGTGTGATGGATTCAAAGGCA  
CGTTTTGAGCAGGCTGCGGCTAATTACGGCGGATTGGCTTTTTAATGCTGCTGATGAAGAGCAAACCTTTA  
ACGCGTTGAAGACTGCCGAAAATGCCTTTTTTACAGCGCATGACCCGCTATATCAGGCGGTGAAACAGAG  
TAGTGACAAGACAAGAGAGATTTTTGCAAGGGAATCTCAGAACCAGCTGGAGCAGGCAACAAAATTAACG  
ATGGATTTGCGTGAGATAAATGAGCGTATTGGCAAGGAGATGGATGCCAAGGTGAAGAGGCATACACCA  
GCTCCAAATTCCTCAGTATCTTACTGGCGCAGCAGCTCTCATTTTCGTGGTGTGATTGCATGGTATTT  
GAGTCAGCAAATCAAACGACCCGTTAATCGCTTGTGGAACCTGTTGGTAGCGTCGCGGCTGGTGAATTTG  
ACTCATCGGGTGGAGTTGAATGCGTTTTAATCAGGATGAATTAGGACAACCTGGCGAAAGGCTTTGCGCAGA  
TGCAAGAAAACCTTGCAGAACTGGTTGGGGAGGTATCCGGTCTGTGTGACAGATGAGCTCTGCGGTAGA  
AGAGATCAGTGCCGTAGCAAGGCAGTCAGCCAACAATATGAATGCTCAGCAACATGAGCTGAACCAGCTG  
GCGACGGCGATGAACGAGATGCAGGCTACGGTGCAGGAGGTTTCTCGCAACACCAGTGATGCGGCCAGTG  
CTGCCACCTCGGCCAGTGAGACGGCCGAACTTGGTGCAGCAACGGTGAATGACTCCATTCAACGTATTGA  
ACGGGTGCGCGGTGCCATCGAGAGTACCGCGGTGGTGTATCCGCCAAGTGGCGATGACAGTCGCAATATC  
GGCATGGTGTGAGGATGATCCGCGGCATTGCCGAACAGACCAACCTGCTGGCATTGAACGCCGCCATTG

AAGCGGCCCGTGCCGGTGAGCAGGGACGGGGGTTTGCGGTGGTGGCCGATGAGGTGCGTACTCTGGCCAA  
GCGCACTCAGGACTCCACCTCCCAGATCAATACCATCATTGCCGAGTTGCAGCAGCGTGCCGAACAGGCG  
GGCAGTACCATGCAACAGAGTCAGGAGCTGATGAACACCACGGTTGCTACCAGCGCGGGAAGCGGGCGAGT  
CTATCTCCCAGATCAGTGGCTCGGTGAGCAGCATCTCCACATGAATATCCAGATTGCAACGGCCACCGA  
AGAGCAGGGGGCGGTGAGCGAGGAGCTCAACCGCAACGTGGTCAATATCAGCCATGCTTCCGAAGAGGTG  
GCCGCCGGTGCCACCCAGATGGCTCAGGCGTGCAACGAGCTGAACCATCTGGCTACCCAACTGCAAGATA  
TGGTGGCCCGTTTTCAGGGTGAATCCCTCGGTGAGTCAAAACAGCCCGATTACCACAAGGTGATCGGGCTT  
TTTCTGTTTTGGAAGGGCAGCCGGAGAGGTTACCCGCGAGCTGATGACTTGTCCAGCCGGACGATATTGT  
GCATGCTGATGGCCATTTTCCAGGCAGGACTCTTGCTGTATGAATCTTCGCGATCTCGAATATCTGGTG  
GCGTGGATGAGGAAAAACATTTTCGCAAAGCCGCTGAACGCTGCTTTGTGAGTCAACCCACCTGAGCG  
GCCAGTGCAGCAAGCTGGAGGATGAACCTCGGGCTATTCTGATCGAACGTACCTCGCGCAAGGTGCTGTT  
TACACCGGCTGGCGATGCCATGGCCATCAGGCGCGTCCGGTGTCAAGGAGGTGCGCGAGCTCAAGAGC  
ATCGGTGAGCACTTCTCCGAGCCGATGTCCGGGAGATCCATATCGGTTTTATTCGACCGTGGGCCCT  
ACCTGTTGCCCGTATTATCCAGACCCTGCGTGAGCGTTTTTCCCAGCTGGAGTTCTACCTCTATGAGGA  
GCAGACCCAAACCTGCTCAAGCGGTTGGAAGAGGGGGAGCTGGATTGCGTCATTTGGCCGAGATGCCG  
GGGATGGAGGGGTTTTGGTTCAATCCAGCTCTATCATGAGCCGATGTGGTTGGCGGTGCCTTGCCATCACC  
CCGAAGCACAGGCCAGGCAGGTGCCACTCGGCAATCTCAAGGGCAAGAAAATTGCTGATGCTGGCCGATGG  
CCACTGTTTTGCGGGATCAGGCGATGGGATTCTGTTTCGCTGGCGGGATTGGTGAGGATCAACGCTTCAAG  
GGAAGTAGTCTCGAGACCCTGCGCAACATGGTGGCCCGGTTAGCGGCATGACCCTGGTGCCAAAGCTGG  
CCGTACCTGCCGATCATGATGAAGGCGGGGTCAGTTATCGTCCCGTGGTTGACCCTGTGCCGGGGCGTAC  
CATCTCGCTGCTCTATCGCCATTACTCGGTGCGTCCGCCCTGCTTCAATGAGCTGGCGGCCCTGGATCGCC  
ACGCTGATGAGCAAGCAGCTGGCGTAATAAAAAACCGGCAGCCAAAGGCTGCCGGTTTTGCTTCTGCCGCG  
ATAACGACTTAGAAGATATCGTCCGGTAGAGACAGGCCCTTCTACATCGGGGTTGTCACCGCCGTAGACCT  
GATTGCCATCCGAGCTCGGTGCTGCGTAGCGGGTCCGGTCCCTTCCCTGAAGTATTCGTCCGGTTCC  
GCCACTGGTTGCCAGCAGGCCGGTTTTGCTATCAATCTTACCCTCATGATCCCCTCGGGAACCGGCATC  
TTGTGCTCCGGCAGCTTTTTGAGGGCGACTTTCATGAAGTCGATCCAGATAGGCTGCGCGGCCGCCAC  
CAAACCTCGGCAGGCCAAGGCCACGCTGGTGGTTGTCAAAACCGATCCAGGAGGTGGCAACGATGTCCGG  
GGTATAGCCCGGAACAGGCATCCCGCGATTCGTTGGTACCGTTTTTACCAGGAGATGTGCTGACGCT  
TTCAGGTGCGCGGGTGCACGCCAGCCGATACCAGCCGCTTGCACCCAGATGGTGTGCTGACGGG  
TGTCGGTGATCAGGAACGCACTCTGGGCACTGATGGTATGCGGGGCGATGGTTGGCGCGAGAGGGTCTG  
CGTGCCATCTTGTGCGGCTCCATCAACAGTTGGCTGCGGCAGTGTGCTCTGCTCGGGTGCAGCCTGCTGT  
TCGCAGGTGGTGCAAGCAATAGCAGGGTTGGCCTGATAGAGGGTGTCTCAAGACTGTCCGGTCACTTTGT  
CGATGAAGTATGGGGTACCAGGAAGCCACCGTTGGCCAGAACCAGTAACCACGTACCCTTCGAGGGG  
GGTGAATTCGGCAGCGCCAGCGCCAGCAGCTCATGGGGAGAGATGAAGTCGCGGGGGGAAGCCAAAGCGG  
GTTAAACCGTCGATATAGGTATCCAGACCAGTGGCGCGCATCAGTCGAACTGACATCACGTTCTTGGACT  
TGGCCAGTCCCAGACGCAGCGGAGTGGGACCATCATAAACCGCCGGGAGTTCTTGGGCTGCCACATGGG  
CCCTTTTGACGGATCCCAGTGGTTGATCGGCGCATCGTTGATGAGCGACGCCAGGGTATAGCCGTGCTCC  
AGCGCGGTGCGATAGAGGAAAGGCTTGATATTTGAACCGATCTGGCGACGCGCCTGATCGACCCGGTTGA  
ATTTGGATAGTTGGAAGCTGAAGCCGCCAACCACTGCTTCCAGCGCGCCATTTTTTCGGGTTTCATGGCAAC  
CAGCGCGGCGTTGACGTCCGGGATTTGGGCCAGCAGCAACTCTTCGCCCTCTTCCCGCACCCAGATCTGG  
GCGCCGACTTTTACGACATCGCGCGCCGATTTTCGGGGCATAGCTCTGACGGTTCGTCGGTAATAAAGGAGC  
GGGCCATTTAATACCGTTCCAGCCGAGCTCTGCTTCTTGCATTTTTTTCAGTACCAGCGTGGCGCTGCG  
ATCACCAGCTTGGTACGACCCGCCCATCAGTGGATCATAAGTGGGCTGCTTGGCAAGGTGAGCGACG  
ATCTGCTCGTAATCCCAGGCTGTCTCGCCAGCCTTCCACAACGTAGCCGTGCGGCCACGATAGCCGTGAC  
GCATGTATAGGCAAAGACGCCATCCAGCAGCGCCTGTCTTGCAGCCGCTGACGTTCCGCGCAGAGACGGT  
AGTGTAGACGTGCAGGCCCATGGTATAAGCATCTTACCAGAACTGCTCGACCATCTTGGCGCACCATTT  
TCCCCAAATAGGGGGCGTGCAGGGTCACTTCGGCGCCGTGAAAACGGGGCTTGATCGGCATCTTGGACG  
CTTTCGTCAAACCTGGGCTGGGTGATCTTGGCGGTTTTCCAGCATCCGGCCCCAGCACCCAGTTGCGGCGAGC  
AAAGGCGCGCTCGGGGGAGCGGATGGGGTTGAGCATGGAGGGGGCTTTCGGCAGACCTGCAATGATGGCG  
ATCTCGTCCAGTCCCAGATCCTTGACCTCTTTACCAAAGTAAACCTGTGCCGACGACCCGATCCCAGAGG  
AGCGATAACCGAGGGGGATCTTGTGAGGTAGAGTTCGAGGATCTCGTCTTTTGGAGAGATTCTGCTCGAT  
CCGCCAGGCCAGGAAGACCTCCTTGATCTTGGCGATGATGGTCTTCTCATTGCTCAGGAAGAAGTTGCGG  
GCAACCTGCTGGGTGATGGTACTGGCACCTGACGGCATGGCCGAGACAGCCAGACGGATGCAGCTC  
GAATGATACCAATCGGGTCAATGCCCCGGTGTCTATAGAAACGTGCATCTTCGGTCCGACGATACGGC  
GATCATGGGTTGCGGAATTTTCGTCAGACGCAGCGGAATGCGACGAATTTCCGCATATTTGGGCGATCAAC  
TCCCCATCCCAGGCTGTAAACCCGCATCGGGGTTGCCAGCTTACGCTCACGCAAGTGCAGTGCAGTGCAGG  
GTTGGGGTTTTGATATAGAAGTAGATACCGATGAGGCTGGCAACACCCAGCACAGCACCCAGCATCATGAC  
AATAAACAGGCGAACGAGCCATTTTCAGCATGGAAGAACTACCAATCGTCTTAAAAATTAGCCAACGGGCGC  
AGAGTATAGCCCTTTTGCATCGGGAATTCGAGGTTTTCTGTGGCGAGCCACCCACCTCAAAAAGGATG  
CGAGAGGTTAGCACTACAGGGAGCAATTACCAAGGAGGGCCACTTGCCATGAAGAAAGCGAGATGGGTCA  
CTTTTCGACATAAACTTTATGACATTGATAGTTAGAGCATTTAGGATGAGTGAAGCACTCCTCTGAGCGG

GTGTCCTACACTCTGTTTCAGGAATAAAACCAAATAACGCATGGATGTGTATATGTTTTGGGCTTTTTTAACA  
AGGGATCCCTCCTCCTCCTGTTGGGCATTGATTTTCGGCAGCCAGACCATCAAGGCCGTTACCCTCAGTGG  
CCGACCCGGCAAGCTTCATCTCGAATCGGTCGCCGATATTGCCACCCCGAAAGGGACGCTGGTTGACTAT  
CAATTGCAGGATATCGAGCGCTCAGTCAATCTCTCAAGACCCCTCAAGCGCTGATCCCAGCTCACAGTG  
ACTATGCCGCCACTGCGGTGACAGGTTCCAACGTGATAACCAAGGTGATCCAGATTGATGCCCGCTTCAG  
TGACAAGGAGCTGGAGAATCAGGTGCAGCTGGAGGCCGAGCAGATCATTCCCTTCCCCCTCGATGAAGTG  
AGTCTCGATTTTGGAGTACTGAGCACCAACAACAGTGAAGATCGTCAGGATGTGCTGCTGAGCGCAGCCC  
GCACCGAGAGTGTCAACGGCCGGGTGAGCGCCCTTGCCGAAGCCGGTATTACCGTCAAGGTGGTGGATGT  
GGGCGCCACGCGCTGGGCCGTGCTGTGGTGGCCTGTCTGCCGAATTGCAGGAGAGTGAGCGACCCGATC  
GGGTGATAAGATATCGGTGCCAGTGCATGACCTTTGCGGCGCTGGTCAAGGGAGAGGTGATCTACTCCC  
GCTTGCAAAACTTCGGCGCGGATCAATACAGCCAGGCGCTCTCTCTTTTATGGCATGACGCTCGATGA  
GGCAGAGCAGGCTAAAACCAAAGGTACCTTGCCAGTTGACCATGAGCTGGATGTGCTGATGCCCCACATC  
AACTCGCTGCTGCAGCAAGTGCGGCGCAATATCCAGCTGTTTTGCAGTTTATCCGGTTATCGTGACATCG  
CAAAACTGGTGTGACGGGGGAGGCAGTCTGCTACCCGGTTTTGTTGGTACAGGTAAGAAGAGGTCAA  
TTGCGAGGTGTTGCACCCGGATCTGTTTCGCCCTGTTTGGCAAACCGAAAGGGGAGGCCGAGCTGGTACAT  
GGTGCTAAATATATGACGGCATTTCGGGTTGGCTCTGAGGAGTTTTCACACCATGTCAAATATAAACCTTCT  
ACCCTGGCGTGAAGCCCGGGCCAGCGCCAAAAGAAACAGTTTCGGGGCCTTGTGGGGATTTTTGTGCTG  
GCCACGGTCGCACTGGGATTTTTTGCCTACTGGCTGGTTGATCGCCAGATCGTCGCCCAGCAGCAGCGCA  
ACCAGCGGCTGGTTCAGGAGATGACTATTCTGGATGCCAACTGGGGGAGATCCGTCTGCTCAAAGAGCG  
TCGCAAGGAGCTGATCGATCGGATGCAGCTCATCGAGCAGTTGCAGATGCGCCGCAATGTGCCCGTTCGC  
CTCTTTAATCAACTGCCTTCACTGGTGCCTAACCGGGTTTACCTCAACACCCCTTCGATGCAGAACAATA  
TTATTGATGTTAATGGCAAGACCGAAGCCTATGGGCGGGTGGCCAGCATGATGCGGCGGATTGATGGTTC  
CGGTTGGTTGGGCCAGGCAAAGATAAGCACTATTTTTGCGGCTGATGTTGCGCCAGTGTCAATTGAGCCAG  
TTTTCCATGATGTTCTGATCGCCAACAATGCTGCAGCTGCAGGGAATGTGGCCAAGGAGCAACAATGAA  
CCTTCAGCAACTCAACGAGTTGGATATCAATGACATAGCAAGCTGGCCAAAATGGGCAAAGGGGTCTTC  
ATCTTTTTCTGCTGCGTGTGACCGGGCGGCGCCATCTACTACTACGTGATTGCCAACTCACTGACCAGTT  
TGACTCAGGAAGCGGGAAAGAGACCGAACTGAAAGCCAGTTTGAAGCAAGGCGATGCTGGCTGCCAA  
CCTGGGGGCATAAAGCGCAAAATGGTTTCAGTCTGAGCAACTGGTTGATACCCAGCTCAAGCATGTTGCC  
AATACCCATGAGGTGCGCGCTGCTGGACGATATCAGCTTTATTGCTACCGACAACGGCTTGAATTTGA  
ACCGGATCAACTGGGAACCCGAGGTAAAGCACGAGTTTTTCAACCGAGCTACCAATGCGTATCGAGGTAGT  
GGGCACTTACCATGAAATTTGGCAAGTTCACCGCTGACATGGCCCGCTTGCCCGTATCGTCACTCTTGAC  
TCCTTCACTCTGGGTGAGAGCAAGGATGAAGGGGAGTTGATTTTCGATGTCGATGCTGGCCAAGACCTACA  
AGTACAACGGTAAAACAGTGGAGCCGAAACAATGAGACGCATCTGCTGGTTATTGCTGCCCCCTTGCTG  
GCGGCTGTGGTGGTTCAGGAGGACATGGATAGCTATGTCGCCAGACCAAAGCAAGGCCACCCATACCTA  
TCGAGCCCTTGCCCGAGCTGAAGCCTTTTGCCCTATGCACTACCAGCAACGCGAGTTGCGCAGCCCCCTT  
CATGGTTCCCCAGCCTGAGGCGACGGTCGGAAGTACAAGCACTATCAAGTCCCAGCCGATTGTGCTCAG  
ACCCTGATGGATCGTGAGAAAGAGGTGCTGGAAAATTATTGCTGGCTAGTCTGTCGATGCATGGTTCTT  
TGGGTAAGGCGGGTCAGTTGTGGGCCCTTGATCAGCACCCCGGATGGCAAATCGATGCGGGTCGGGCTCAA  
CCAGTATATGGGGCTTGATCAGGGGCGGGTCATCAAGATCACAGACACTACAGTGGATTTGCTGGAACC  
ATTCCGGACGGGAAGGGGTGCTGGGTAACAAGAGAAAACCCAGTTGGCGATGGCCAATGTGCAAGAAAAAC  
AATAATCAGGGACGAACAGCAATGAGAAACAACAATAGAGAGTGTATCCAAAGTGGCTTTGCTGTTTTGCG  
CCAGCGCCCTCAGTCAGGCGTGGGCGAGTGGCAACCCCTGCAGGAGATCAAGGTCAATCCGCTGCTTGCCGA  
TCAATTGCTGGTAGAGCTCAGTTTCAGTGAACCTGTACAGGCTTTACCGATCGTCTCTTACCAACCC  
AATCAGCTGTTGTTGCATGTTCCCGGTGCGGTAGGGGCGCTGAAAGTGAACCCGCTGCCGATCCAGCGCC  
TGGGGGTAGATAAATATCAAGTTGAGGGTAAGGGCGCAGGCTTGATATCAAGATCGCACTCGATCAGCT  
GGCCCCATCAGGTTCAGCAACAGGGGAACAATACTGGTGTATTGGGCGAGGGGGCTCTTCCGGG  
CTCATCAATGGTTCAGAGCGCGCTGATTGCACCCGCAACCTCGGCTACTCTGTGCCAGCGCCCTTGCGGA  
TGGTGGCCACACCCTCTCCTTTCGGCACTGCTCAATCCTCAGGTCGTCGCCCGGTGATGCCTGTTGCGCC  
CGTGACTACGCCGTAGCAACACAGCCTGCCAGCAAGCCGGTGTCAACAACATCAAAAGCAGTGGGGGT  
GGCGCTATTTCAACTCGGTTACCGGTGTGGATTTTCGTCGTTGGCAAGGATGGTCAGGGGGAGTTTCTGG  
TCACGCTGGATAACAGCTCGGCCGCGTCGATGTGAGCAGCCGAGGCCAGACCGTACTGGCCAAGTTTCA  
TGGCACTCGTGTACCGGATGGCTTGTCTAATCTGATCAACGTGCAGGATTTTGAACGCCCGTCTCTCAG  
GTTGAAGTCTCCCGCAGGGCAGTGATACCTGTTTGAAGTGTGATCAATGGTCAGTTTGAATTACCCTT  
ACGATCAGGCGGACAAGCTCTTCAATTATCGAGGTAAGAAAGCGGACGACGGCCACGGCATCCAAGCAGTA  
TCAGGGCAAACCCATCTCATTGAACCTTTCAGGATATTCAGTCCGTACCGTATTGCAGCTTATTGCCGAT  
TTCAACAACCTTAACTTGGTAACCACAGATTTCGGTATCAGGCAATATTACCTGCGTCTGGATGGGGTGC  
CGTGGGAGCAGGCGCTCGACATTATTTTGAAGGTGCGGGGTCTGGATAAGCGGCTGGATAACAACATCTT  
GCTGGTAGCGCTGCAGAAGAGATCGCAACACGCGAGAAGCAACAGCTGGAGAGCCGAAATCAGGTTGCC  
GATTTGGCTCCGCTCTATAACCGAGTATCTGCAGATAAACTATGCCAAGCCCTCGGAAGTGGCTGCCCTGC  
TCTCTTCCGAAAGTACCAAGTTGCTGTACCCCGTGGTGCAGTGGACGAGCGAACAACAGTGTCT  
GGTGGTCAAGGATACCGCCGATGTCATCAGCAGCATCAAACGGATGCTCGATATCTCGATATTCGGTCT

AAGCAGGTGGTGATCGAGGCGGGATGGTGACCATTGACGACGGCTTTGATGAATCGCTCGGGGTGCGGT  
GGGGAGTGACCAAAAACGATGGTCATGGCAACAGTACGTCCGGTTCCATCGAGGGGAATGATGGCTCTGG  
TAACAGCAATGGTGGCTCGGCGATCAACCCCTCGGCCATCAGCAGACGATCGGCTCAACGTCAACTTGCCG  
GTGACCAATGCGGCCGGTACTTTGGCCTTCCAGGTTGCCCGTCTGGCTGATGGCACCTTGCTGGATCTCG  
AGTTGTGCGGCGTTGGAAAAAGAGAGCAAGGCCGAGATTATCGCCAGTCCGCGGGTGACCACTGCGAACCA  
GAAACCGGCATTGATCGAGCAGGGTACCGAGATCCCCTATGTGGAGTCCCTCTCCAGTGGCGCTACCTCG  
GTTACCTTCAAGAAGGCGGTATTGAGCCTGAAGGTGACCCCGCAGATCACCCCTGACAATCGGGTGATTC  
TCGACCTGACCGTGACCCAGGATACCAAGGGTGAAACGGTACCGACCGGTACCGGTGATGCGGTTTTCCAT  
CAACGCCAGTCCATCACCCTCAGGTGCTGGTGAACAATGGCGAGACCCCTGGTGTGGGCGGCATTTAT  
CAGCAGACCATCAAGAGCGATGTAACCAAGGTGCCGCTGCTGGGTGACATTCGGGATTGGGGGCCCTTGT  
TCCGCAAGACCACAGCAGGAGAACAAAAGCGGGAATTGCTCATTTTCGTGACGCCCAAGATAGTCACCGA  
CGCCTTCTGAATGCTTTACATGTGAGGGTAAAACACATATAACCTTACGCCCAATGAGGTGGGGCGTA  
AGGGCTGCGGTTGCCAGTCCCGATATCTATTGAGATAATCCCCTCCTGATCCATCGCAAGATAAGGTTT  
ATAGGTACCCCGATCCAGTATTCATCGGGGTGCTACAGTTTGTAAATTAATAACGAAAAGACATGGCTGAG  
AAACGCAATATTTTTCTGATAGGTCCCATGGGTGCGGGCAAGAGCACCATAGGTAGACATCTGGCAGAAC  
AACTGCATATGGAGTTTTTTCGACTCAGATCATGAGATTGAGCGCCGAGTGGTGTGATATCGGCTGGGT  
GTTTCGATGTTGAAGGCGAAGAAGGTTTTCCGGATTTCGGAAGAGAAGGTGATCGGCGAATTGTCAGAGCAG  
CAGGGTATCGTGCTGGCGACGGGTGGCGGTGCCATCAAGAGTTCGCGAAAACCCGCAACAAGTTGTCTGCTC  
GCGGCATCGTGGTCTACCTCGAAACCACTATCGAAAAGCAGCTGGCGCGCACACAGCGAGACAAACGCCG  
CCCTCTGCTACAGACCGAAGAACCAGGACGCGAAGTGTGGAACGTCTGGCACAAGAGCGCAATGCCCTG  
TATGAAGAGGTTGCCGACTTTGTTGTGCATACCGATGACCAGAGCGCAAAAATCGTTGCCAATCAAATG  
TAAAGCTGATCGGTATGTAATGTAGAGGACGTCCATGGAACGGTTGAAGGTGCAACTGGGTGAACGCAGC  
TATCCCATCGAGATAGCTGCCGGGTTGTTGCAGCGCCCTGAGGCGCTGGTATCGACCATCAAGGGCAAGC  
GGGTGATGATAGTGACCAACACGGTCTGTTGCTCCGCTTTATCTTGAACGGGTAACCGCTCTGCTGTGCGG  
TTTTTCAGGTTGAACACCTGATCCTGCCTGACGGTGAAGGCATACAAGAACCCTGGCGACCTTTGAGCAGATC  
ATGTCTGCTCTGCTTGAACCAACCATGGGCGGATACGACACTGATCGCTCTGGGGGGCGGCGTGATCG  
GGGATCTGGTGGGCTTTGCGGCAGCAAGCTATCAACGTGGCATTCCTTTTATCCAGATCCCGACCCTCT  
GCTCTCTCAGTTGACTCCTCTGTCGGCGGTAACACCGGTCACACCACCCCTCGGCAAGAACATGATT  
GGGGCTTTTTTATCAGCCCTCAACAAGTTGTTATCGATAACCGAATGTCTGAGTACCTTGCCAGCCGCAAT  
TTGCCGAGGGATGGCCGAGGTGATCAAGTACGGCATCATTTGGGATGCTGATTTCTTCAGCTGGCTGGA  
GCAGAACATGGTGCCTGCAACAGCTGGAACCTGCCGCGCTGGCCTACGCCATCAAACGCTGCTGCGAG  
ATCAAAGCCGATGTGGTGGTCCAGGATGAGACCGAGCACGGCGTCCGTGCGCTGCTCAATCTGGGCCATA  
CCTTTGGTTCATGCCATCGAGGCCGAGCAGGGGTATGGCAACTGGCTGCACGGTGAAGCGGTATCCGCTGG  
CACCATGTTGGCAGCCTGACTGCGCAGGCCCGTGGCGATATGAGCGAAGCGGACGTTGCGCGAGTGC  
GCTCTGCTGCTGGCCGCAATTTGCCATTTCATGCGCTGCCGAGATGGATTTGCCCGCTTTATTCGCC  
ATATGCGCCGTGACAAGAAGGTGCTGGAAGGCAAGCTGCGTCTGGTGTGCGGTTGGTATCGGCCATGC  
GCAGGTGGTGGGGATGTGTCCGATGCCGAGTTGCTGGCGGTGATCGAGTCTGGTCTGACGAATAAACT  
GCTAAAACCTCCTTCCAGCGGCAGCTGGTTGACCGCTGCTGCATCTGATTGAATTC AATCACCCCTTC  
ATTTTTCTCTCCGGTAAACCCGGTTGTGGTTCGCGGTACCCTGTGCGAATCCCTGCTCGGCGTGTGCGCG  
AAAAAGTGCGGGTGGTAAGCCTGATTGGTACACCTGCCATGAAGATGGTGGATGTGCGCCAGCTGTTGCT  
GCCACAGGTGGTAGCGCGCCCGCTCTTCAATCCACAGGATGCGCTGGCGGAGAGCTTCTTTCGCATGCTG  
GAGGGGAGCAAGCCAGCCACCCTGTTGCTACTGATAGAGCGGGCCGACCAGTTGCCAGCCGAACGCTGG  
GAGAGTTGTGGGCGATCATCCGTCATAACGATAACCTGGCGGCGCCCATCAGCTGGCCATTATTTGCTC  
GGGAGTGACGTCTGGTGTGCTACCAACCGCCGAGCTCAAAGGGCGTGCCATGCCAGCCCTTGAGCTG  
GAAGTGGCCCTTGGACCCCTCCCGAGCAGCGCATCTTCTGTATGAAAAAGCCAAAGAGCTCAAGATCC  
CGGCGACCCCTTGGCCAAAGCCGAAGTGGAGGAGATCCTGAAAACGGCGAACGGACATCCGTCACCAT  
CATGCAGTTACTGGAGGATATCATGACCGACAGAAGGCCCAAGAAGCGTCAGGCGGAGTTGCCTGTCAAG  
AAGATTGCCACCGCTATCGCGCTGGTTCGCTGGCGGCTGCTGGCGCTGAGCTACCTGCTGCCTGCGCTGT  
TTGACAATGAAAGCAAACCGGCACTGCAGGATCCGGCGCAAAAACACGGCATTGCCGATCCCGGTAGCGGG  
AGGGCATCCCCTCACCGCTGGCGGTTGAAATACAGATTCCGCTGCACAAGGCGCGCAAAAACAGCGCTGCA  
GCCAGTAATCCCAATGGGGTTGTGAAAGATTGGCAGCCGAGGCGAAAAGTGTGCCCCAAATCGGTGGAGA  
GCGAAACTGTGACCACCGAATCAACCAATTACGAAGGGCGTGGGTGGTATCTCTGACGAGGTGCTGCA  
AAAGCTGATGACCGAACCAAGGTGAGCGGCGCACTGCCTACTGACGTGGTGGACGAGCTGACCGGCAAG  
AACCCGAGTGGCACAGCCCCAGTGGTGCAGTCGCAACCACAGCACCAGCCAGCACTAGCAAGGTACAGA  
ACCCGGTGACAACCGCAACGCTACGGCCACCACAAAACCGCCAGCAACGAGCCGGTTGCCGCGCCAGC  
ACCAAGGTGGCCCTGACACCGGTGCGCCACCTTGAACAAGAAGCCGCGTAACCACTACAGCGTTACAGCTG  
ATGGGGGCGAGCAACACCAAGGCGGTGGATCAGTTTTGTGCGCCGAGCATGGTCTGGCGGGCAAGGTATGGG  
TCTATCAGACCAAATTCGGTGGTAGCCCCCTGGTATGTGGTGTGCAAGGGGATTATGCCGGTCTGACCCA  
GGCCAAGAGTGCCATTCGCAAGCTTCCGCCAGCTTTGCTGAAAGGTGACCCCTGGCCCAAGTCTGTTGCA  
CAGGTACAAAAGAGCTGAAGCAATAGCCTTGATAACCGGATAAGGGGGTAGAATCGTCCCCCTTTTTGGG  
TCTTGCCTTCTTACACACCGGATTTCCATGAAAAAACACGCGCTTTTTTAAAAATGGGCCGGGGAAAAAT

ACTCCCTGGTTGAAGAGATTGCCGAGCGCCTGCCGGCCGGGCGTGTGTTGCTGGAGCCCTTCGTCGGGGG  
CGGGTCTGTGTTTCTCAACACCGACTACGACGCGTATGTGCTCAACGACATCAATCCGGATCTGATCTGC  
CTGTACAACCACCTCAAGCTGACGCCGGACAGTTTCATTGCCGAGGCGCGCAAGCTGTTTGTGGCAGAGC  
ACAACCACAAGGCGGCCTATTACCGGCTGCGTACCCAGTTCAATCAGACCCGAGACCACCTTCGAGCGGGC  
ACTCTTGTTTCTGTTTCTCAACCGTCACGGTTTCAACGGACTGTGCCGCTACAACAAGAAGGGCGGCTTC  
AATGTGCCGTTCCGGTTCTACAAGAAAACCTATTTCCCGGAAAAAGAGCTGTGGGCCCTTTCGCCAAAAGG  
CGCAGAAGGGGACCTTTATCTGCGAGAGCTACGCCGATGCCATCAAGCGTGCCGAAGAGGATTGGGTTAT  
CTACTGTGATCCACCCTATGCGCCGCTCTCCACTACGGCGAGCTTCACCACCTATGCCCTCCGGTGGGTTT  
ACCCTGGATGATCAGGCGATCCTGGCGGATTTGGCCCGCCACACAGCGGCTCACAAAGGGGTGCCGGTGC  
TGATCAGCAACCACGATATCGAGCTGACTCGTGAGCTTTATCGCGGTGCCCGCTCGACGAAATCCTGGT  
CAAGCGCACCATCAGTCGCAACGGCGGCACCCGCAACAGGTGGCCGAGTTGCTGGCGTCTATCCCCC  
GGAATCGAACCTGAGCAGGGCTACTATCCCAGCGACAGTGAACACTGCCACTGGCGTAAACAGACCATGC  
GGCGCCCAAGGGCGCCGTTTTTTATGGGCGAGTCCGCGCCCGTGCCGATGCCCAAAAACCCGGGTGGCTG  
GGGGAGGGGAGGCGATTGCCCCATTTACCCCGCATTCGAGTTCGTTTTCGCCCGCCTTTTACGTTAAAATT  
GCGCCGTTTTTTCTCCCTGGCTGCCAATGGATGATGCTGATGAAAAGACTTTCTGATTGCCCCCTCGATCC  
TCTCTGCCGATTTTTCGCCGCTGGGTGACGATGTAGCCAAGGTAAGTGGCTGCCGGTGCCGACGTGGTTCA  
CTTCGACGTGATGGACAACCCTATGTCCCAACCTGACCATTGGCCCATGGTTTTGTCAGGCGCTGCGT  
GACTACGGTATCGAGGCCCCCATCGACGTGCACCTGATGGTCAAGCCGGTGGATCGCATCATTCCCGATT  
TTGCCAAGGGCGGGTGTCTCCCTTATCACCTTCCATCCGGAGGCGTCTGACCACGTGACCGTTCTCTGGG  
CCTGATCAAGGAGATGGGCTGCCAGGCGGGTCTGGTGTCAATCCGGCCACCTCGCTCTCCTGCCTCGAG  
TATGTGATGGACAAGCTGGACGTGATCCTGCTGATGTCGGTCAACCCGGGCTTCGGTGGTCAAGGCTTCA  
TCCCCGGTACCCTCGACAAGCTGCGTCAGGTACGTGCGCTGATCGACGAGAGTGGCCGCGATATCCGTCT  
CGAGATCGATGGTGGGGTGAAGGTCGACAACATTCGCGAGATCGCCGAAGCGGGTGCCGACATGTTTTGTC  
GCCGGCTCTGCCATTTTTCAGCCAGCCTGACTACAAGGCGGTGATCGACAAGATGCGTGCCGAGCTGGCTC  
ATGTCACACGCTGAGCGCGCATTTGATTTGGTGTGTTTCGATCTGGACGGCACCCCTCATTGACAGTGC  
CACAGCTGGCGCTGGCGGTCAATCTTACTCTGGCTGATCTGGGTCTGGAACAAGCTGATGAAGTGGTTAT  
CCGTACCTGGTTCGGCAATGGTGGCGACAAGCTGATCCAGCGGGCGCTCGCCTATCGCGAGGCCGATCCC  
GAGCTGTTTTGCCAAGGCCAGACCGATCTTTTCCAGCATACAACGCTTGCCTGCTGCAAGGGCTGGCGA  
TGTATGAAGGGGTGGCGCAGAGTCTGCGCCCTGTCGCAAGCCCTGGGCTACAAGCAGGCGATCGTACCAA  
CAAGCCGAGCGACTTTGTGCCCCCTATTCTCGATGCCCTTGGCATCAGCGATTGTTTTCGAACTCTGGCTT  
GGCGGCAACTGCGTGCCGGTCAAGAAGCCGAGCCCGGAGCCCTTGTGTCACGCTGCCAGGAGTTGGGGG  
TGAGCCCGGCTCGCACCCCTGATGGTGGGCGACTCCGAAAAATGACGTGCTGGCGGCGAAGGCGGCTGGTAT  
GAAGGTGGTGGGTCTCACCTACGGCTACAACCTATGGCCGCCCATCGCCGACTCCCATCCAGACTGGGTA  
TTCGAGCAGTTTGGCCAGCTCGATGCACTTTTGGTCTAATAGCGCAGCTGGGCTGGCTGAATAACAAGGA  
TTAATACTCTCATGACTAAACCAATCGTATTGAGCGGAGCGCAACCCTCCGGTCAACTGACCATCGGCAA  
CTACATGGGGGCCCTGCGTCAAGTGGGTCAACATGCAGGATGAGTTCGACTGCCTCTACTGCATCGTGCAT  
CTGCACGCCATCACCACTCGCCAGGACCCGGCTGCCCTGCGCAAGGCTTGTCTGGATGCGGCCGCCCTCT  
ATCTGGCGGTTCGGTATCGATCCCAAGAAGAGCACCGTCTTCATCCAGTCTCACGTGCCGCGACGCGCGA  
GCTGGGCTGGATCCTCAACTGCTACACCCAGATGGGTGAGCTGTGCGCGATGACCCAGTTCAAGGACAAG  
TCCGCCCGTTTTTCGAGAACAACGTCAACGTGCGCCTGTTTCGGTTATCCGGTGTGATGGCGGCGGACATCC  
TGCTCTATCAGGCCAATCAGGTGCCGGTTCGGCAACGACCAGAAGCAGCATCTGGAGCTGACCCGCGACAT  
CTGCACCCGTTTTCAACAACCTCTATGGTGCAGTGTTCACCATGCCGGAGCCCTTTATTTCCGACCGAAGGG  
GCACGGGTGATGAGCCTGCAGGATCCGACCAAGAAGATGTCCAAGTCGGATGACAACGAAGCCAACCTTCA  
TCGGCCTGCTGGAAGATCCCAAGCAGATCGTCAAGAAGATCAAGCGTGCGGTGACCGATTCCGACGAGCC  
GGCGGTGGTGCCTTTTCGACCCGAAAAACAAACCGGGAGTTTCCAACCTGCTGACCTGATGTCCGGGGTG  
ACCGGTGCGTCCATCCCCGAGCTGGAGCAGCACTTCGAAGGCAAGATGTACGCTCACCTCAAGACCGAAA  
CCGCCGAAGCCGTGGTTGCGCTGCTGGAACCGATCCAGGCCCGTTTTCCACGAGTTGCGTCAAGGATGAGGC  
CCATCTGATCGCGATTCTGGCAGAAGGCGCACAAAAGGCGCGGAAAGAGCTGAAAAAACCTGACCAGC  
GTATATGATGTAGTCGGCTTCGTTCTCTCGAGCCTGACATACTGGGAAGGTGTAGTAGAAGAGAGCTGGGT  
ATTTGCCTGGCTTTCTTTATTTTCTGCCCGCTATTTTGTTTAATTTCTTTATTTCAACCTGGGTAATAT  
CCCCAAGAGAAAGCATGCCTGTTCAACCAACTATTTCTGCTGAAGAGCTGAGTGACAAAGGTCACTGGCT  
ACGTAATTTTCGCAAGGCGAAAAACCTCAATACCCTGCAGTTGATGGTCTCCAATGCCATCGACAAGCAC  
CATAAAACCCCTGCCGTTGCTGCCGCCATCTATCTGGCCGAGTGTGACGCTGACGGGAAATGGAACAGG  
GTCGTTATCTCGATCGTTAATTTCTCCGCTGTTGGTTATCTCATGCTGTTGTTGATCGATAACTACGACTC  
TTTTACCTGGAACCTTGGTGAATATTTTCGGCGCCCTGGGACAAGAGTTGTGGTCAAGCGCAATGATGAA  
CTGACGCTTGATGCCATAGCGCAGCTCTCTCCCCGTTTTTCTGGTGTGATCTCTCCCGTCCCTGTACGCCCA  
ATGAGGCGGGGATCTCTCTCGATGCCATCAGCCACTTTGCTGGCAAGCTGCCCATTTCTCGGCGTCTGTCT  
CGGTCATCAGTCGTTGGCGCAGGCCTTCGGCGCCCGGTAATACGTGCCCGTCAAGGTAATGCACGGCAAA  
ACCTCGCTTATCCGCCATCGCAATGAGGGGGTGTTCAGGGGGCTCAACAACCCGCTGCCGGTGACCCGCT  
ACCACTCCTTGGTGGTGGAGCGCGACACGCTGCCCGACTGCTTCGAGGTCACCGCTGGAGCGAGCATGC  
CGATGGCTCGTTTTGACGAGATCATGGGGCTGCGCCACAAGACGCTCCCTGTGAGGGTGTTCAGTTCCAT

CCGGAGAGCATT TTTGAGCGAGCAGGGCCATCAGTTGCTGGCCAACTTTCTGGCGGTTTCATAAAAAGTTG  
TGATCGCCTTCTCAAATTCGAGAGAAGGCCAAAAAAATTTCCCTGACACTTTATTCACCCCCTCTCCTGC  
CCAAATTATCTCTTGGCAAGCCCCCTGAGTCGTTATGCAATGCGGTTGCCTAAAAATCTCAAGAGCAATC  
GAACATTGTTCTTATAGGCCGTCTTGTTACAGACTTTTTACTTTATTTCTGTGATAATCCCGTCACGTT  
TACACGGATTTAACTTTTTGGGCGGTGGATTATTCTGTGCGCGAATCGAAGGAGAGCTATATGTGAGAGTT  
GTTGGCAGTGACACGTGAAGTGT TTTGATGAAGTGATGGTTCCCAACTATGCACCCGCCAAGATCATCCCCG  
GTGCGTGGTGAAGGGTCACGTGTCTGGGATCAGGAAGGGCGCGAGTATGTCGACTTCGCCCGGTGGCATCG  
CCGTCAACGGTTTTGGGTCACTGT CATCCAAGCTGGTCGAGGCCCTGAAAACCCAGGGCGAGAAGCTGTG  
GCACCTCTCCAACGT CATGACCAACGAGCCGGCCCTGCGTCTGGCCAAGAAGCTGGTCGCCGCCACCTTC  
GCCGACAAGGTCTACTTTCTGCAACTCCGGCGCCGAAGCAAACGAGGCTGCCCTCAAGCTGGCAGCCGCT  
ACGCCATCGAGAAGTTTGGCGAGCAGAAGACCCAGATCATCGCCTTCAATCAGGGCTTCCACGGTCTGTAC  
CTTCTTTACCCTCAGCGTCGGTGGCCAGGCTGCCTACTCAGATGGCTTCGGTCCCAAGCCCGGTGACATT  
ACCCATGTTCCCTACAACGATCTGGCGGCGCTGGCCGAGGTGATCTCCGACAACACCTGCGCCGTGGTGA  
TGGAGCCGTTGCAAGGGGAGGGGGGCATCATTCTGCTTACCAGAGTTTGGCAAAGGGGTGCGCGAGCT  
GTGCGACAAAACAATGCCTTGCTGGTGTATGACGAAGTGAGTCAGGGGTGCGCCGGACCGGTGATCTC  
TATGCCTATATGGGTCTGGGCGTCACGCCGGACATCCTCACCAGCGCCAAGGCGCTGGGGGGCGGTTTTCC  
CCATCGGCGCCATGCTGACAACCAACGAAATCGCCTCTTACCTGAAAGTGGGCACTCACGGCTCTACCTA  
TGGCGGCAACCCGCTGGCCTGTGCGGTGCGCGAGGCGGTGATCGATGTGATCAATACTCCGGAGGTGCTG  
GCTGGCATCAAACAGCGCGAACAGCTGTTCCGCGATGGCCTTGAAGCCATCAATGCCAAATACCCTGCT  
TTAGCGAGATCCGCGGCAAGGGGCTGTTGCTGGGCGCTGCTCTGAGCGATGCCTACAAGGGACGCTCCCG  
CGACTTCTGCTGGCCTCCATCGATCAGGGGCTGATGGCACTGGTGGCTGGTACCAACGTGGTTCTGTTTT  
GCCCTTCACTGGTGATCCCGGAAGCGGACATCAAGGAAGGGTTGGCCCGCTTCGAAAAGGCGGTTGCC  
AGGTGGTTAACGCTGATTCCAAATTTAGAGTGGGGAGCTCTCCCGGAGGAGCCGGGACCCACCTGTGCG  
TCAATGAAAGGGAGTTGTCAATTTATGTTGGTTATCCGTCCCATCGAGCAAAAAGATTTTGGCCGGGCTCAA  
GACCTGCGCCATCGAGTCCGGCACCGGCATGACCTCGTTGCCCGTCAACGATGAGCTGCTGCAGCGCAAG  
ATCGATGCCTCTACCCAGACTTTTTCCGACAAGCCCGCCGCAAGGGGGACTGCCTTTACTTCTTCGTGG  
CCGAGGATCTGGAGACCCGGCGAGATGGTGGGCACTGTGCCATCGATGCTGCGGTTGGCCTCTCCAGCC  
GTTTTACAACCTACCATCGGCAAGGTGGTGGTCACTCTTCCCCAAGCTCGGCATCTACAACGATCTGAA  
ACCCTGACCCTCTCCAACGACTACCCGGCAACTCCGACTCTGACCCCTGTTCTTGGCGAATGTGCC  
GCGAGGGGCTCAACGCGCCGCTTGCTCTCCAAGCACCCTTTCTGTTTATGGCCGAGCACCCGAGCTGTT  
TGACGAGACCGTCTTTCGCGGAGATGCGCGGCGTCTCCGATGCCAACGGTCCACAGCCCCCTTCTACGAGTGG  
CTGCAAACCCATTTCTTCTCGATGGATTTTCCACCGTCGACTATCTGACCGGCATCGGCAAGAAGCGCT  
TTATCGCCGAAGTATGCCAAAGTACCCCATCTACGTCAATTTGCTGAGCAAAAGAGGCGCGGGCCGTTAT  
CGGCCAGACCCACGAGAAGACCCGCGCCATCAAGATGCTGCAGGACGAGGGCTTCGTGAACCGTGGC  
TACGTGATATTTTTCGATGCGGGCCCCACCGTCGAGTGCAGCTGAAGAATATCCGCAGCGTGCGCCGCA  
GCAAGAACTGCGGGTGTGGTGGGCGAGCCCATCGGTGGCAAGACCCACCTTATCTGCAACAGCCATTT  
CGAGCATTACCGCGCTGCTACGGCAATATCCGGTTCGATCTCGACAAGCATGAAGCCATCATTTCCGCC  
AAGATGGCGGCGGCACTCAAGGTGCAGGATGGCGACATGGTGCGGGTGGTTGACCTCGACTGAGGCAAAC  
AGGACAAGCAAACCGATTATCAGACAGGCAGCCGAGGCTGCCAGCGACAGGGAGTGAATGGATGAG  
CCAGTTAGTGCAATTTATCGACGGTCAGTGGCTTGGCGGTGAAGGCAAGCCGTTTCGAGTCAAAGGATCCG  
GCCAAGAACGAGGTGATCTGGCAGGGGGCTGCCGCCAGCACGGCGCAGGTGGATACAGCCGTCAAGGCCG  
CCCGTGCCTGCTTCTACTGCGGCGGACATGAGCCTTGAAGATCGTCTGGCCATAGTGCCTGCTTATGC  
CGACCTGCTCGGTGAGCAGAAAGAGGCGCTGGCCCTGACTATCGCCCGGAAACAGGCAAACCGCTGTGG  
GAGACCCGTACCGAAGTGGCCGCCATGCAGGGCAAGATTGCCATCTCCATCCGTGCGCACGACGAGCGTA  
CCGGCACCGTTGAAAATGCCATGCCGGGCGCAAGGCGTTTGTCCGTCACAAGCCCCACGGTGTGGTGGC  
GGTGTTCGGCCCCCTACAACCTTCCCGGGCCATCTGCCCAACGGCCATATAGTCCCGCGCTGATTTGGG  
AACGCCGTGGTGTTCAAACCTTCCGAGCTGACCCCATGGTGGCCGAAGCCATGGTCAAGGTGTGGCAGG  
AGGCCGGATTGCCAAAGGGGGTGTCAATCTGGTGAAGGAGAGGTCGAGACTGGCAAGGCGCTGGCGGG  
CAATCCCGACATCGACGGCTCTTCTTTACTGGTTCTTCCCGCACCGGTCAATTTCTCCATCAGCAGTTT  
GCCGGTCAGCCGGGCAAAATTTGGCCCTCGAGATGGGCGGCAACAACCCGCTGATCGTGAAAGATGTGA  
GCGACATCGACGGCGCCGTCCATGCCATCGTCCAGTCGGCATTTATCACCTCGGGTCAACGTTGCACCTG  
TTCCCGCGCTGTTTTGTGCGAGCGCGGTGAGCGGGGCGATGCCCTGGTCAATCGACTGATCGAGGTGGTC  
AGCCAGATCAAGGTGCGCCTCTATGACGCGCCGAGCAGCCGTTTATGGGCTCGATGATAAGCGAGAAGG  
CAGCACAGGGCATGGTCGAGGCGCAAGCCAACCTGCAGCGCTCGGTGGCGAGAGCTGCTTACCCTCAA  
GCACCTGGAAGCGGGCACAGGCTTTGTCTCCCCGGGTATTATCGACGTGACCTCAGTCAGCGAGCTGCC  
GACGAAGAGTACTTCGGCCCCGTGCTGCAACTCATTGCTATGACGATTTCCGATGCTGCCATCGATCAGG  
GCAACGCCACCCGCTACGGTCTCTCGGCCGGTCTGCTGGGGGACAAGGAGGCGGACTGGCACCATTTCTT  
CAAGCGGATCCGCGCCGGTATCGTCAACTGGAACAAGCCCATCACCGGTGCCCTCCAGTGCCGCGCCGTTT  
GGTGGCATCGGCGCTTCCGGCAACCACAGGGCAAGCGCCTACTACGCCGAGACTATTGTGCGTATCCGG  
TTGCCTCTGTGCAAGACAGCAAAGCCGCTATGCCGGATCAGCTGTCTCCTGGTTTACGTTTTAAGAGCA  
AACGGGGATGCCAATGCAGCAGAGATGGCTCAACGCCGCGGACTACTGTGTCATATCCCCGGTTGCCCTC

GTTGAAGACAGCAAAGCCGCCATGCCGGATCAACTGTCGCCCCGGCCTGCGCTTCTGATAACGACATGGGG  
CATCCAGCGGTGCCCCCATCTGTACCCGCAATCAAAGGAAAGAGAGATGCAAAGGATATCGACACCCTG  
TTCAGCCATCTGTGGGACAACACTACATCAAGGTGACCCCGAGCGCCCTCAAGGTGCACACCCTGCTGGGTG  
GCGGCGAGCCCATCGTCAACGATCACGTGGCGTTCGTACCTACAACCTGCCAAGCTGGGGCTGGAGAA  
GCTGGCCGCCCACTTCTGGCGCTCGGTTACGAGCAGAAGGGCGAGTACGTTTTCAAGGCCAAGAAGCTC  
TATGCCAAGCACTTCGAGCATCAGGATCCGGACGCTCCCAAGGTGTTTCATCAGCGAGCTGAAGGTGGAAG  
AACTCTCCCCAGCGGCGCAGGCCATCATCCACAAGCTGGCGGATCAGGTGCCCGATCATCTGACCCGATAC  
CCCCGCATTTCTCTACACCGGTGCCCCCTGGCAGGTCTCCTATGCCGATTATCAGACTCTGCTGGCGGAG  
AGCGAGTACGCGGCCTGGATGGCAGCCTGGGGCTATCGTGCCAACCACTTCACGGTCAATATCAACAAGT  
TGAAGGACTTCGATACCATCCATCAGGTCAATGCGGCGCTCAAGGCGCGGGGTTTCGTCCTCAACAGTGT  
GGGTGGCGAGGTGAAAGGGGACCCCGAGGTGATGCTGGAGCAATCCTCCACCATGGCCGACAAAGCAGAG  
GTGCCGTTACGCGATGGGGTGCGTACCATCCCGAGCTGCTTCTACGAGTTTGCCCTGCGTATCCGCAGG  
CCGATGGTGTGCTCTATCCGGGCTTCGTGCGAGGCTCGGCGGACAAGATCTTCGAATCGACGAATGCCAT  
GTAACGGGAGCCACCCTGTTTCAGTCGCAACGCTCCTTTGTGGAGGCGTTTTGTTTGGCGCAGAGTGAC  
GGTATCGGGTGTGTCTGAGGCTGCGTGTGGAGGGGATTTGGACGGCGCCTAATCGGTAAATGTTTGTG  
ATAAAAATGTGAACGAGATCACTTGAGACGACACAGATTGACGCTGGCGGTGGAGCAAAAAGGAGTAGAA  
TGGCGCTTTATTTTTGCGGGCCAATCGATGCCTAACTATCACTTTTTCAAGCAGGGTCAGGCGCTTACC  
TATCTAGATGCCAATGCGCCAGCTATAGCGATGAGCGTCGTCAACTGGTCGAACAGGGATTTGCCGCCA  
TCGCCGCCCCACCTTTGAGATACCCCGGCCGAAGCTCTTGAGCTGCTTCGCACTCATCAGGCCTACA  
GGATGAGGCGCAGGCCAACGCCCTTTGTCTGACGGTTGCCGCTATTCCGGCTGCGATCGCAACTCTGTCC  
GGGCACTGACGCTGCCGCTATGCTCACGTGAATAAAAAAATGGTGCCACTGTCATGACACCATTTTATCG  
GTCTGTCTGCTTGCCCTGAGTACTTTACCGCTGGTGCAGGTCACCTTCGATAACCAGCACGGTATCCATC  
CCCGCCGCTTGCCAGCCTCAAGCCCGATCCGGGTATCTTCAAAACACCAGACAGTTGGCCGGATTAGCGC  
CGAGCAGCTCGGCCACCCGTA AAAAGGTGTGGGGTGCAGTTTGTGGTTGGTGACATCATCGGCGCTCAC  
CACCACAGAGATGTAGGCATCGAGCCCGGTGCTTTTTCAGGATGGAGTCCGCCCTGATTGCGCGGTGAGCCG  
GTGCCAATCCCCATCTTACCTTGCCGTGATAGTGCCCTGACCAGCTCCACATCTTGGGAAAGACGCTGA  
CCTTGTTCGATATGTTCCATATAGAGGGCAATCTTGCAGCGGTAAAAGCCTCGACATCCACCGTCAGCCC  
CTGCTGCTCGGCAGCATGGCGATGATCTTGCGGTGGGAATGCCGCCATACTGATAGAGTACATCCCCG  
TCGAGGGGGATGCCGAATTCGCGCAGGTAAGCTCCCAAGCATCCAGATGAAGGGGGATGGAATCCACCA  
AAGTGCCATCCATATCGAAAATCAGGGCATCGTAGTGATCAAACCCGTA CTGCTCACGCTCGCTCATGGG  
GGCTCCTCGAATCAAATAGAGCAGGCTAGCAGAAAACGGTGCAGCTTTTTGTGGGATCGGCCTCATGGTTGG  
GCAGATTGTGGCCGCGTTTTTTCTATCTCTTGCTGATTTGTGAGACAATAATCCGTTTCATTGCCGGATA  
CTTTGGCATATCTGATCAGCGAGTCCGCTTATGACCTCGAAAATATCCCCAAAACCATCTTCTCCAGTG  
TGGCGCTGGTGTATCGCGCTCGGTTCACTGGA AAAAGAGCATAGTCACCACCCCGCTGCCATGATTGGCGC  
CGAGCTGCATGCCGGTGCCGCCCTCACCTGGGTGGTACCGCCTACCTGCTGGCGGTACCGCCGTGCTG  
CCCCCTACGGCAAGCTGAGCGATCTCTTTGGCCGGGTGCGGATGCTCAATATCGGCATCGGCCTGTTTC  
TGGCGGGCTCGGTGGCCTGCGCGCTCTCCAGGATCTGCCGACCTTGCTGGCAGCGCGGGTGTGCAAGG  
GCTGGGGGGCGCCGTGGACGGCAGCGATGGCGCCCCCTTCGACTGCATCTCGACAACCCGGGGGGC  
CCCCACAGGTTCTTGCCCCGTTCGCTCGACCAGGCCGACGACTGCTCAGCCATGGCCGAGCTGGGGGTG  
ATGGGGTAGATGGCGATGACTTCGCTGGTGCGGTACGCCACCGAGGGCGACTGCGTTATTCCCGTCTGTGG  
TGATCATGTGTTTTTCCACTTTGCTATGCCAGTTTGAAGGCCGATAGTTGCATCGGCAATGGATAGGTGCG  
TGGCATAAGTAAGAGGGGCAATGAGAGCGTATCAAACGGGATAAATAATCAATTAATAAGTCAGTAATAGT  
GGTTAATTTAATCCCGCCGCTGGGGGCATGATTTTCTGCTGACAGCCGATGGATGGCGATTGACGGGCC  
ATTGGCATGGCCCGTCAGCACGGGGTTAACCTGATCCACTTGCAGCCAGATGGCGCACTGATAAGGGGC  
GAAGAGCTGCAGCGGTTGCTGCTGGGTTATTGGCCAGCAGCAACCGCATCTCATCTGCCACCTGTGCAAG  
TGGGGCATCGCAAGGGGTTGCGCGTGAGATTGGCGAGCAGCAGCGAGGTTGTGCCGCTCTCCGCTCGCCG  
GATCCTGCCAGTGGCGCGATAGCTGATACGCTCGGGATCATCCCCATCCAACAGCTCGAAAATTGCCGTG  
GCCAACGACAGGGTGAACCTTGCGCAGGGCGATGAGCTGGCGATAGCAGTGAACGGCGAGTGGGGCGG  
GCCAGCTGCTCGGCGGCATTTATCTCGAGATGATTGGCGTTGAGGGCGATCCAGGGCGTGGCCGTGCTGA  
ATCCGGCGTGGGGGCCGGCTCCCACTGCATCGGGGTGCGGGCGTTGTGCGGGCGATGGCATCGAGCCG  
CCGACTCAGCTCGGAAGGAGCCAGCCCTGAGTGGCTGGCGCAGTAGTTGATGGCTCCACATCGCGCAGC  
TCGTCCGGCTGCCAGTGGCGGTTGGTCATGGCGAGCTCCTCCCCCTGATAGATGAAGGGAGTGCCTGCA  
TCAGGTGCAGCACCATGGCCACAGCCTGGCGCTGGTTTCCCGCCACTCAGGCCTGTCATCGCCAAAGCG  
GGAGACGGCGGAGGCAGGTCGTGGTTGCCGAGAAAACAGGCTGTTCCAGCCAGTCCGTGCAGCCCTTGC  
TGGTGGCGGGCCATGGCTCGCTTGAAGGCGAGGGGATCAAAGCGGGATGACCCTTGTCACTGCCAGCC  
CCAGATGCTCGAAGTTGAACACCATGCTGAACTCGCTGCCATCCGTA CTGGAGTAGCGCTGCATATGGGC  
TAGATCGGCTCCCCAGGTCTCCCCACCGTAATGATCCCCCTTGCCGCCGAAGCTGGCGGCATTTGAGCTCG  
CGGATATAGTCGTGCAGGTGCGGGCGTTGCTCATGGCCAGTCCGGTCCCACTCTTTGCTCACCATATCGA  
TCACATCGAAGCGAAACCCCTTGATCCCTTTGCCAGCCGAAAGTTGATCACCTCTGCCATTTCCGGCAGC  
CACCGCCGGGTTGTCCAGTCCAGGTGCGCCTGACTGGGATCGAAGTTGTGCAGGTAGTAGCGATCAAGC  
GCTGGCACATACTGCCAGCCGCTGCCGCCAAAAATCGAGGTGATTTGGGTGAGCGTCAACGAAGGCTTGGT

CGCGAAACACGTAATAGCCCTGATAGTGGGGATCCCCGGCCAGTGCCTGCATAAACCACTCATGCTCGGT  
GGAGGTGTGGTTGGCGACGATATCCATCATGATGCCGATGCCGTGAGCGTCTGCTTCGGCTATCAGCTGC  
TCCATCTCGGTTCAGGGTGCCGAAGGCAGGGTCGATGGCACGGTAGTTTCGCCACGTCATAGCCGTTGTCCC  
GCTTGGGGGAGCGATAGATGGGGGTGAGCCAGAGCATATCGACCCCGAGGGTGGCCAGATAGTCGAGGCC  
CTGACGGATGCCGTTGATATCGCCCATGCCGTCGCCATCGCTGTCTTGAAAACCTCATGGGGTAGATCTGG  
TAGATGACACAGCTATCGAGGTCGATATCGGGCGTGTGGAGGGGATGCCGGTTCATCAGCGTGGCCGGTT  
GGGGAGGAGTTATTTCTATCTTACGCAGATGCGCGGGCCCTCGACAGGGCAGGGGAAGCCTTGAAAAGGG  
TTCCATTATTGGCTGATTGCCAAAAGTGCGGGAAGGGTCACAAAAGGTGCCATCCCGGGCCACGGCTGTGG  
TCGGGATGACACGGCACTTAGCGCTGATGCACCGCAGCGATACAGGCTATTGAGCAGCCTTGGCCGTGCTC  
GGCGTTTTGTTCTGCTGGCGTTCGCGCTGCGCTCCAGCTCCTTGCCGAGGAAGTAGTTTCAGGAAGGTG  
CGGATCACCCGATGATGGCGAGGCGGATCAGCTCCTCCTTGCTCGGTGCGACCGTGGTGGCCAGGATAT  
CGGCGGCCAGCTGGAACCTCAGCGCCAGAATAAGCCAGCTGCCAAAAGCAGAGGCGAATGCGCGGAAAGCC  
GGGCTGGTGTATCCCGCACCCGTCGCCAGCCAGAGAGTTTTAAAGAGGCCAATGACCACACAGGCGATG  
GAGATGATCTCCAGCAGCAGCTGGAACAGCTCGACCCCGTGCATCATCCCCCTCTTTCAGGCTTGCTATCT  
CAAACACTCGGGTACCTCCCTGATTCAAAAAGAGGACACTATTAACACATCGCTCGGCAAAGGCCAAAT  
GAAGCCACTTAAGGCTTGTGGGGGAAATGAGCTGATGATCTAACGTTGGGCTCCACTTGACCACTTTTGG  
TATGCACAGCACAAATCCTTGCTCTTTCATGTAGTTAAAAGGTGAAGAGGCATTTTCATGACGCAGATGCA  
GAACCCAGCCATTGGCATTGATCTGGGGACAACCAACAGCGCGATCGCAGTATGGCGTGAGGGCCAGGCT  
CAACTCATAACCAATGCCCATGGCGAGGATCTGACGCGCTCGATTGTCAGCATTTGGTGAGGACAACACCC  
TGCTGGTGGGTCAGGCTGCTGCTACCCGCTGCTAACGGACCCCTGCCAATACAGCGTCTCACTTCAAGCG  
TTTTCTGGGCAGTGAGCGCGTTATCGACTGGGCAAGGAGCAGTACACACCGACCGAGCTCTGTGCATTG  
GTTCTGGGGAGCCTGAAGTCGGATGCCGAGGCGTGGCTCGGCCACCCTGTGCGCGAGGTGGTTATCTCGG  
TGCCAGCCTACTTTGGCGATCAGCAGCGCAAGCAGGTGCGACTGGCGGCAGAGTTGGCCGGGCTTGATGC  
GGTGCGCCTTATCAACGAGCCGACGGCCGCCATGGCTTACAGCCTGCATGAGCAGCACAGCCGGCGT  
TTTTCTGGTGTGTTGATTTGGGGGGCGGTACCTTCGATGTGACCGTGGTGGAGTATCAGGATGGCATCATGG  
AGGTGCGTGCCTCGGCGGGAGACAATCGGCTAGGTGGCGAGGACTTTACCCAAGATTTAGTCGATGCGGT  
GCTTAGCAGGCTCGATACCGATCGCGGTGAACTGACGCTCTCCAACTCGGGCAAGTGTATCTGGCCGTC  
GAGCCGGGCAAAACGTCATCGCAGTGGTAGCGGCTTGATGTCGAGCTTGGTGCAGGATGGAGCCGGAGT  
TCGGTTTTCTCCGAAAGCAGCTGGCCGAGAGCTGGCCGATACCCCTACCCGTTGCGCTAAACCTCTGAG  
TCAGGCGCTCTCCGATGCGCGCCTTCGGCCGAGGAGGTGGATGAGCTGATCTTTGTGCGGTGGAGCGAGC  
CGCCAGAGCGAGGTGCAACAAATGGCGGTGCGTCTGCTTGGTTCGCTTTGGCCGCCACGAGCTGGATCCGG  
ATCGGGTGGTCCCATGGGAGCTGCTATCCAGGCTGCCTGCCGTTTGGCTGACAGTGCAGGTTGAAGAACT  
CATCATGACCGACGTTTGTCTTTACGCTGGGCATCGCCGTCAGCCAGGGTGACCAGCACGGCATCTTT  
AGTCCCATCCTCGAGCGCAATACAGTTGTACCAGCTTACGAGTGGAGCGTTATCGCAGTGGCCACGAAC  
AGCAGAGTGTGTGCATCAGCATCTATCAGGGGAGCGCTTCTGGGTGCGCGACAACCTGCATGTGGA  
CGATCTCGAGATCCCGTTGCCGACCGGCAAGGGCATTACAGGAAGTGGATGTGCGTTTCAGTTATGACATC  
AACGGCATGCTGGAGGTTGACGTTACCCTGGTGAATTCGGGTGAGCAGTTCAGAAAGGTAATAGACAGAA  
GTCCGGCTGGCGTGACCGAAGAGGGCAAGCAGCAGAGTCGAGAGCGTCTGGCCCGTCTCAAGCAACATCC  
GCGCGATGCGTTGCCCAATCTGACCCTGAGCGAGCGATTACAGCAACTCTATGAAGAGAGCATCGGTGAC  
GAGCGGCGTCAGATAGAGCAGTGGCTGCTGCAATTTGAACGGGTCTGGCTGGCCAGGACCCGCAGCTGA  
TCCGCTCATTTTCGAGAAGAGATGAACGCTCTGCTCAAGCAGTTGCACTAGTCGAGAATGTGCTCAGCGA  
CATCCGGCCCTGTTTGTAGAATCCCTGGGCCAGCCACGGCGCAGTGCGCCCGGCCCTTAGCTGACTGCTC  
ATGACTAGGTGGCCGAGCCACAGGGGGACCGCCAGCCAGGCGCTATTGATGTAGAAGGCGATGGCTAGCC  
AGATCAGACTCCAGACCAGATAGTTTCGACTGGTGCAGGACGCTGTCTGGGCCCGGAGATATGCCACAT  
CAGATAGAGGTTCCATGAACAGCATCGCTGCCATATCCAGACCAGGGAATAATATCCACCAGTGTGGAT  
GAGCCGGAGGCGAGGACTTCGCGTAGGGATGGTTCCAGTGAAAACGCGAAGTAGGGCAGGATGGCGGACA  
GTATGCTGACGAACATCAGCTGTGAACCGCTTTGTAGCCTGAAAACGCTTTTTGGCGTGTGCCCTGTCATG  
TTCAAGTTGGGCGTTGAGCTTGTCTCCAGATAGCTCTGTACCAGAGATCGCACCTCCTGCTGGGCTGGC  
GTGAGGCCATCCGGTTGCTTGTAAAGCGGGTCTAGTTGACGGGCTGAAAAGCCATTTCTGCCAAAATCAT  
GAGCCAGCATGGCCAGGGCATAACAAACGGGATAGACAAAATGGCTGCCGCTTCGTTGGGGCGGTGTTT  
CTCAAGTTCTTCCAGCGTGGTGTATTTGTCAGGGTCTGTTGACAGGTAAGCGTAAATTAGTGACTCTTCC  
GCATAGGGATAGACTTCCAATGCTAATCCCTGTGCCGAGTTCGAGTTCGAGTTCGCGCAGTGGCG  
TCAAAAATATAGCCATAGGACTCATTGCTTGCCCTGTGGCTGAGCAACAGGTTCCACAGCACTATGGTGA  
GGCCAGATCCGGTTCGTTATCCAGTCGTCGATCAGGGCTGCCAGTGCAGGTTAGTTTCGTTCAAGCGGGCTC  
GTTTCGAGAAGCGCCTCGTCGCTGACATCAGAGCGTTTAAAGAAGTTCGCTGGTTGCGCAGTTCAGCGA  
CAGCACGTACTGCTGCGGCCAGCGGGCGAGGCGTCCATGATGGCAGCTTGGTATAGGGTGGGCTGGGCA  
CAAAGACGCAGGAGGGTGGAGAGCGGTGTGTCTCTGACTGGTTGGCAGTGAGCCCACCGACTGGCGAA  
TGGCGTCGAGATGCTGTTTCGGCGTCCAGGGTCTGGCATAAGTAGAACTGCGCCCAGCGAAAACAGCCGG  
CCAGCTTTCGCCATGCCAGGCATCAGCGAGCGCCGATCGCTGTAGAAGCGTTGATGAGAGAGACGGGCG  
CCCAAATGCATCCCCAGCATCATCCGCTCATCCATCCTTCATTGCTGGCGCGCTGGGCGATTGCTTTGA  
ACCAGGTGTCAGGCAGCAGCGGATAGCGGCGCAGGCAATCGAGCCACTGCTCCGGCGTAGCGCAGGCAAT



CTGCTCGGCACTGGGGGGCGGATACTCAACCAGTCATCGTTGCCATAGCGGGCAAGCAGTGTATCAAGC  
AGGGGCAGTGTGCTGGCCGCTCGGCCAGTTTTCGGCGGAGCGTGGCGTTGCAGCAGGTGTGCGAGGTACCGCC  
AGCCGCCCTCGGCCCTCGGCCAGCTCGGGCTGTGTGAGTCCGCTTCCAGTGCCTGCCAGGTGCCGTATTC  
GCTGTGCCACCATAGGCGGGCCAGGGCACCACGTGTGCCGGGTAGCGCGTCCAGCGCCAGGGCGGTGAGC  
GGCATATTGTCAAACCCAGCATCTGGTTCGTGCAGCCACTCTTCCACCGGGTCCGGTTGCTGCCAGGGCA  
GCATCAGCCACTGGGGTTCCCAATAAGCGCTGCGCGAGGTGGGCCACTTCTGGGGCGGTGGCGAATGCCTG  
CAGCCAGCGGGACAGATCCTGATCGCTGTCTAGATGCCACTGGATAAGGTGATTGGCGAGCAGCGCCCTCG  
TATTCGCGCTCTTCCAGTGCCTCGGCGACCTGCATCACCAGCTGTTCTTCCCGCAGCGCAGGCTGGCGT  
CGGAGAGCAGGTGCCAGTCATCTTCACTGAGGTGATCCTGCTCCAGCAGAGCAAGTGTGAGCGCAAGACG  
GTGGGTGGGATCACCGTCAGTACCGGCGGCATGGAGCGCGCAACTGCAGCCGGAGCAGATCCGGGTGG  
TCACCGCAGATGGGGAGGGCTGAATGATAGATGAGCCCTAACACGCTGTTGCGATCACCTGCCTCGAGCG  
ATAGCAGCAGTGGCTGATAGAAGGCCAACACGCGCGTTCAGCGGCATGGTCCAGGGTGGCAAGCCACTC  
CAGAGGGGCTGCCAGCGCGCCTGACGCCACCAGTCGAGAAAATCCCCCTCTTTTGCATGTGCGCGGTA  
AGACGCAGTAGTGACGCCCAGTCGAGCGCTTGCCAGAGACGCTCGATCACCAGGTGCTGGCAACCATTGCC  
ATTGGAAGATGTGTTGAGCACTTCGTCCGACAGCCGGCTCTGCTGAACCAGCGAAAGTGACTGCAGTGA  
TGTCTGCCACTTATCCATTTCGGTCATTACAAATCGCCGGCTGGCATCGCCAAGCAGTTCAGCAGAGCG  
GTCAGTTCAGCGCGCTCGGCCGACGAACCAGCTCGGTCTGTGGCTCAGAGTCATCACTCATGGCTGGAC  
GCGGCTGGCTGGCTCTTATAAGCCTCGCGCAGCAGGCGGAAGCCTTCGGGATCGTCTTCCGGGTGGCA  
GTCACGCAATTTGATATGATAGGCGCGCTTGATGGCGGCCAGATCGTTGGTCTCTTGAAGACCGAGACGT  
TGCCAGATATCCATGTTTTATTCTGCGGATCGCTGTTGAAGAGGTCAATGAGGCTTTGGGGTGTCTTA  
TGTCGGGTAGGGGGACCTCGTACCAGCTTTGTCCGTGGATTGGGTCTCCTTATCCCTGAGCGCATCGGC  
CAGCATGGTCCATATCCCTTGCAATCCAGCCGTGTAGCAGAGCCTGGGCGGGTGTATCCGGCTCCCC  
TCTTCATGACTGAATTTCCCATAGGCAGCGGCCGGCATAACCAGGCATGAGTGTACTGTTCCCAAGAGCCAT  
AACGTCCGGCGGGCTTGATGGGCTAGGTGGTGTGGATAAAGCCGAACTCCTCCTCGCTGACCCAGCCAAA  
GCGAAGTCCCTCCCGGGTGAAGTACGAGGCGCGCCCATAGTCCCATGCCTGCACACCATGGGGGCCGATA  
TAGGGGGCGGTACGAGCCACAAAATCGAGAGAGGCGCGGTGACGCGGCGAGGTTACGCGCTCTCGCATGG  
TTTGCCATTTGGCTCGGTTGCAGGCAGTGAAGGCGGTGACTCCTCAAGCATGAGATGCCCGTGACAGT  
GCCAAAGGCCAGTTGACGAACCTGCCGGTGCAAGTGCAGGCGATTCTCGATGCCCAATCCTCTCGAGT  
GTATCCGGCTCTTTCGAGCCCTCTCGCAGGAGTGAAGTTCAGGTTATTTCCCGCCACTCGGTCTGGAAGG  
CGATCTGTGGGGAGGTTAAAGTCAGCCACCATCGTTTCGTGTGGGGCAAGATTGGTACTATCTAACATGGG  
GCTCACCAAGGGTGCATTTGAGTCAGCTGGCAACTATAAAGGCGTGCGAAAATGGATGCAATTTGATCCTC  
TGTTACTGGTTGCGCAACCAGTCGGAGAGTTGTTCAATGAGCTGACGCGCCGCGGGGGTACTCCGGCCA  
GTTGGGAGAAGCCGTGTATAACACCAGTTGCCGCTGACAGGTAGCTGTGACTCCGGCTTGACAGCAGTTT  
GCGATAGAGGGCTTCCCTTCATCGCGCAGCGGATCATATTCGCGCTTACGATATGGGTCCGGTGGTAAT  
CCTGACAGGTCCGAATAGTGGAGCGGGCTGGCTTCGGGATGAGTGGCGGGTAGCTCGCCAGATAGGCGT  
GAAAACCGCTTAACAGCATGTGCGGGGTGATGAGGTAGTCATCCCTAGCTGCCGATAGCTGTCACCTGTC  
GCCCCGAGCATCGAGCATCGGATAGATGAGCAGTTGGGCGGCAGGCAAGGGGGCGCTCGCTCCTTGAGT  
CGCAAGGTGGTGTATCAGGGCTAGGTGGCCGCCGCGACTGTGCCCCGAAGGGCAATCCTTGCCGGATCCC  
CATGCCATTTCTCCACATTGGCCATGATGGCGAGCGTGGCTGCCAGTGCATCGTTCATGTGCTGCAGGATA  
GGTGTGTTTCAGGGGCAAGGCGGGTATGTACCGGAACACCAGTGCCTTCGGCGCGATTGCACAGCATCCGC  
ATCTGGCGGTTCGTGGGTGTCGAACTCGCCGCTGACAAAAACAGCCGCCATGAAAGTAGATCAGGGCCGGAC  
GGCTTGCGCTTGAGGTTGGTGTGTTGATAGAGGCGAACGGAATAATGGCCATTTTGCCACTCTTCGAC  
AGCGCCAACCTCTTCCCGTTCACCACCAATATGGCTGAAGCAAGATAGCCTTACGCGCGCTCCTGCCAG  
CTCAGGCTGCTTGCCTTGGGGCGGCTGCTGCAATGAACTCTGCCACCATGGCTGCAATGGCCGGTTCAA  
GTTGTGTATCCATAACGCACCAATAACTGTATATAAAAAACAGTTATTTTTCGCTTTTAGCCAAAAGAGCGC  
AACCGGCGTTAGCTGAGGCAGTCCACAAAATCAGGCTTCAAGCAGCTGGAATTCAATCACATAGAGCGGT  
GGCAGATCGGGGTAGATGTCGCGGATCACATCTTTAAGCTCGGGGAGGGTCATGTTCTCCTGACGGGCAT  
GCTCGTCAATTCAGTTCATCGAAGGCCACTGCGTTGACGGAGATCACCTCGATGGTGCCGAAGGGCTGGTG  
CTCCGGGTTGGTGAACAGGGCCAGCCGCTGGCCGGGCTGCCAGTTGGCCTCGCTCTCGTTCGCGGATGGTG  
ATGGTTTTGCGGCCCGCTGAATATCGGCGACGAAGCGGCTGAAGAAGGTGAATTCGGGATAGGGATGGG  
CAGACATGGTACTCCTGACAGGGTGAATCGAAATGAGGTGAATGGAAATCAAAGATCGAGATAGGCGCG  
CAGCCTGGCCAGATCGGCGATAACAGGGCCGCTCGCTGCTGTGCGGACTATGCCCTGCTCGACCAGCTCC  
TTGAGGGCGCGCGGTTAGACCCGCTCGGTGGTGGCGAAGCGTGTGCTGCTGCTGGGCCCGCTTGCGGATC  
CCAGCATCGGAGTGCCTGCGCTCACGCCATAGCTCATAGGCGATGTTGTAGGCGATGGGGTGGAGCAG  
CCGGCTGGTGGTGTATCTCCAGGGTATCGAGATAGTGCCTGGCAAGCGCGCGGCAAGAACAGGGTCCAGC  
TCGGGTTTCGGCCAGCAGCCGCTGGGCCAGCTTGTGCGGCGAGATGACCCGGGGCTCCAGCTCGGTCTCGG  
CCACCACGTTCCACTGCACCGGGGTGGCGCTGAAGAAGTCCATTTTCGCCGAAGATCTGGCTGTGACACTC  
AATTTTCGCCAAGCTGGAAGCGGCGGCCAGAGTGTACCGTGTGTTGAGGGAGACCCGGCCATGTTTCGACC  
AGATAGAGCTGCTCGCTCTGCTCCCCCTGCCGCATGATCAATTCGCCCCGGCAGGTAACGGCGCAGAAACA  
GGGTGCAGGCGTTCGAGCGCCGCGGCAAGCGGGGTTCAAGCTGCTGGAGTTTCGGCGTGAAACGGCCGAG  
GGGGTAGGGCTGTTGCTGCATGACTTGCTGTGCGACCCGATGACGAGGGCCATGAGGCTAGCAAGAGTG

CGGGCCGGATAACCAGCCCCGACGGTAGCGGATGTGCCGAGTTAACGGTTTGTGCTTTATTGCACCAGAG  
CGTGGAGGGGGCGGCGGATGGCTTGCTGCTCACCGGCCATCATCGCCTGTTTCGGCGCTGGCGTAATCCGC  
CACCCCTTGTTGCACATCCTGCTCGAACAGCACCACGTTGCAGAGCACGGCGGCGACCCGCACCTTGCGC  
AGGCGACCCACCGTCAGCAGGGAGGCGGTCTCCATATCGGCGCCGAGCACGCCACGGGCATGCCAGTAGC  
GGCACACCTCCTGCTCGTCATCCCCGATAGAAGCTGTCTGTTGGGAGCGCACCCAGCCCGTGCCAATGAGGTTG  
GCCGCTGGCCGCCACCTGATTGAGCAGGGCCGCTTGCAGCCAGATATCGGCGCAGGCGGGGTACTCGGCG  
GGCAGATAGGCCTGAGAGGCCCCCTCATTTGCGTACCCTCCTTCCACCACGATAAGGTCGCCGAGCCCGA  
TGTCGTGCTGCAGGGCACCGGCGGAGCCGACCCGAATAAGCGAGCGGGCACCGGCTTGCACCAGCTCCTC  
CAGCGCTATGATGGCCGACGCGCCGCGATGCCGGTGTGCAAACCGTGATGGGCAGCCCTGATAGCGG  
CCGTTGATGAGGCGAAACTCCCGGTTTTGCCCCAGCACTTCACTGTTCGAGCTGGCTGGCGATGCGAT  
CGACCCGGGCGGTCGCCGACAGTACCACCCGCTCGGCAATCTGGTCGGGGCGGCATGGAGATGGGG  
TAATAGTGTTCATGGCTTACAGACCTTGTGGCTGGCGCTTCGCGGCAATCACCCAGAGGCGAGTGCCGTTG  
GCGGCGATAAACAGCAGGATCAGGTATTCCAGCGACATGGCGTAAACGCCCTGCGCGGCATAGACACCGA  
TGCTGATGATGTTGATGACGACCCAGAGGATCCAGTTCTCCACGTATTTGCGGGTCATCAGGATCTGGGC  
GACGACCGAGAGCACCGTCATGCTGGCATCCCAGAACGGGAAGGCATCAGGGGAGGGCTCGGGGGTGGCA  
AGGTTGGCACCAACAGGTTGAGCAGGGAGACCGAGGTGCGTGCAGGGTGGCGAAGACCGGGTGCATAT  
AGCGGGTCAGCAGAGCGATGGCCAGCACGCTCACCACAGCAGTGACGATAAGCTTGGATCTGCTGAGCCA  
GCGGATCTGCAGGGTATCCCCCTGATCGTTGGCCGGTGGGTCCAGGCGTACCAGCCGTAGACGTTGGCG  
CAGAAGAAGAACAGCTGCAGCAGCAACAGCCCGTAGAGCTGGATCTGGAAGAAGATGATGGCAAACAGGC  
TGACGTTGATCAGACCAACAGGTAGTTGATGGTCTTCTCCTGACTGGCGAACCAGATACAGGCCAGACC  
AAACAGGGTGCCGATGGCTTCAATCCATGACATGGCATAGCCGCCACCCAGCGGTATGGTCACTAGGGTG  
TTATTGATGCTGAACAGCTCGAATATGCTCATTCTTCTGATCCTTGGGCATGAGGGTTAGTATGCGAGGGC  
GCCATTTTAAAGGGGTGAGGGGGAGGAGGGGGCAGGACTTTTGTCCGCCCGGGCTTGGCCCATATCAAAGA  
AATCGTCGCTGCTGCCCGGTTATTCCAGCAGTGATGGGTTATGGGGCCCCGGCGGGCCGGACTTTATTGA  
TATGTAGCAAGATGATAGCGCCGTGGCTGTGGTCTGATAGAGTCCACTCTCCGGGAGGAGAATCACGTGA  
TAAAAGGAGGTTGTATTGAATCCGAGCTTGTCTGGGTGCTCTGTCTGCTGGCTGGCGCCATCTATCTCT  
TTATGACCAACAAGGTGCGGATGGACGTTGGCTTGCCTGTTGATCATTATCCTCTTTGTGCTGAGCGGCAC  
CCTCACCCCTGCCGAGGCGCTGGCGGGCTTTAGCAGTCCCAACGTCATTCTGATAGCAGCCCTGTTTGTG  
GTCGGGGAGGGGTTGGTGGCGCACCCGATCGCTTATCAGGATGGGGGATGCGTTGGTGAAGGTGGCGGGCA  
GCAGCGAGACCAAGCTGCTGGTGTGCTGATGGTGGCGGTGGCGAGTCTGGGAGCTGTGATGAGCAGCAC  
CGGGGTGGTGGCCATCTTTATCCCGGTGGTGTGAGTGTGGCGAACCGGATGGGGATCCCGGCCGGTTCGC  
CTGATGATGCCCTCGGTTTTGCGGGGTGATCAGCGGCATGATGACGCTGGTGGCCACGCCCCCAACA  
TGGTGGTCAACAGCGAGCTGATGCGCCACGGCATAACATGGTTTCGGGTTCTTCGATTTACCCCCATGGG  
CGTGCTGATCCTGGGGCTGGGCATCCTCTACATGCTGCTGGTGCCTGGCTCCTTGGTGGGTGAAGGGGAA  
GAGGGCAAGGGCAAGCAGACCGGGCGCCGTACCCTGCGGATCTGATCCGAGACTACCGATTGGCCGGTC  
GGGCCCGTCTGCTGGCGCTGCGGCCGACTCCCCGCTGATTGGCCATACCCTGGATGAGCTGCAACTACG  
CGCCCGTTATGGTGGCCACGTCATCGGGGTGGAGCGCTGGCGCAAGTTCGCGGGGTGATGGTGGCGGTG  
TCGGGGATCAGTGAGTTCAGGCGAAGGATGTGCTGCTGATCGACATGTCAGACCCCGAGGTGGATGTGC  
GGGCGTTTTGACCCGAGGCGCGGCTTGAACCCATGATCCTGCGCGGGGAGTATTTCTCCGATCAGGCGCG  
GGAGGTGGGGATGGCCGAGGTGTGCTGATCCCTGAGTCCAAGCTGCTGGGTAAAAGCGTGCCTGAGGTG  
ACCTTCCGCTCCAGCTATGGCCTGAGCGTGGTGGGGCTGCGCCGCGATGGTGAGGCACTGGCAGGCAAGC  
TGGTGGATGAGCCGCTGCAGATGGGCGACACCCTGCTGGTGGTAGGGAACTGGAGCCACATCAGACAGTT  
GCAGACCCATAGCCGCGACTTTCTGCTGATGGGGCTGCCCGCCGAAGTGGACGAGATGGCCCCGCCCCG  
AGTCAGGCGATCCATGCCCTCTTCTGTCTTGGAGTATGATCCTGCTGATGGTGACCGATCCGGTGCCCA  
ACGTGATTTGCCGCTGATCGCCTGTCTGCTGATGGGCAAGTTTCGCTGCATCGATATGGAGAGTGCCTA  
CAAGTCGATCCACTGGCCGACCCTGATCCTCATCGTCGCGATGCTCCCCCTCGCGCTGGCGTGCAAAAA  
ACCGGCGGGGTGGATCTGATCGTCCGTGGCTGATCAATGCGGTGGGGGAGATGGGGCCGCGGGTCTATG  
TGGCCAGCCTGTTTGCCTCTGCGCCGTGATCGGGCTCTTTATCTCCAACACCGCGACAGCTGTGCTGAT  
GGCGCCATTGCACTGGGCACAGCCAGCAGATGGGTGTCTCGCCCTATCCGTTTGCCATGACCATTGCC  
ATCGCCGCTCGGCCGTTTTATGACCCGGTCTCGTCACCGGTGAATACCCTGGTACTGGGGCCGGGCA  
ACTACAAGTTTGCCGATTTTATCCGATCGGGGTGCCATTCACCCTGTTGGTGGTGGTGTGAGCGTGGT  
AGCGATCCCCTGGTTCTTCCCGTTCTGATAACCGGGATGATGAATGTGTGCACCAGCGGCCGCGGGCCG  
CTTTTTTATGTCTGGGAGACAAGAGTGGCAAGGCGTGTCTCGGAATCAGTGAAGAGTATGTGGACGGGAA  
TTAACGTGGAGATGGGTTGATAGAGGAGCGAGAGAAAAACTGGGGAGAGGCAAAATTCAGATACAAAAA  
ACCAGCGTGAGCTGGTCTGTTTTGGTACTGCTATTAATGGTGGCGAAGGAGAGACTCGAACTCTCACGCC  
AGGGCGCCAGAACCTAAATCTGGTGGCTTACCAATTTCCGCAATTTAATGGTGGCTATGA  
CGGGATTGCAACCTGTGACCCCCGCATTATGAGTGGCGATGCTCTAACCAACTGAGCTACATAGCCGTTTG  
TTATCGACCACTGATGTGGAAGAGAACAGAAAAATGGCTGGGGTACTAGGATTCGACGCTAGGGATGGCG  
AGATCAAAACCCGCTGCTTTACCGCTTGGCGATACCCCAACAGTATTAATGGTGGCTATGACGGGATTCG  
AACCTGTGACCCCCGCATTATGAGTGGCGATGCTCTAACCAACTGAGCTACATAGCCGTTTGTATCGACC  
ACTGATGTGGAAGAGAACAGAAAAATGGCTGGGGTACTAGGATTCGAACCTAGGGATGGCGAGATCAAAA

CCCCGCTGCCTTACCGCTTGGCGATACCCCAACAGAAATAATGGTGGCTATGACGGGATTCGAACCTGTGA  
CCCCCGCATTATGAGTGCATGCTCTAACCAACTGAGCTACATAGCCGTTTGTATCAACCACTGATGTG  
GAAGAGAACAGAAAATGGCTGGGGTACTAGGATTCGAACCTAGGGATGGCGAGATCAAAACCCGCTGCCT  
TACCGCTTGGCGATACCCCAACAGTGTCTCTCAACAGTCATGAGACTGGCAAAGAACTTTTAAAAAATGGC  
TGGGGTACTAGGATTCGAACCTAGGGATGGCGAGATCAAAACCCGCTGCCTTACCGCTTGGCGATACCC  
AACAGCGCTCCTCAACAGTGCAGGACTGGCAAAGAACTTTTAAAAAATGGCTGGGGTACTAGGATTCGAA  
CCTAGGGATGGCGAGATCAAAACCCGCTGCCTTACCGCTTGGCGATACCCCAACTAGAGATGGTGGCTAT  
GACGGGATTCGAACCTGTGACCCCGCATTATGAGTGCATGCTCTAACCAACTGAGCTACATAGCCAAC  
CTTGCTTCCGGTGTGTCGTTACCTCGTACCGTGCAGGGCCGAATTATGCGTATCTGGCTCTGGGGCGTCA  
ACCCTTTTTTTTGCCAGAAAACGCAATTTGAGTGCCTTTGACCAGTTATTGGTCTCTGTTGCGCAAAAGC  
CCAACAATCTGGTTTTTTTTAAGACATTTGCCATGATTTGCCGGGCAATGACAGATAAAAAACAGGCCAGC  
AAATGCTGGCCTGTATGGGATTAGACGTTGAACAGGAAATTCATGATATCGCCATCTTTGACGATGTAA  
TCTTTCCCTTTCAGCGCGCATCTTGCCCGCTTCTTGGCGCCTTGCTCACCCCTGTAGTTGATAAAGTCTT  
CAAAGGCGATGGTTTTGGGCGCAATAAAGCCTTTTTTCAAAGTCAGTGTGGATCTTGCTGCGCTTGGCGG  
GGCGGTGGCACCGACCGGAATAGTCCAGGCGCGCACCTCTTTACACCGGCGGTGAAGTAGGTCTGCAGG  
TTGAGCAGCTGGTAGCCGAGCGGATAACACGGTTTACGGCCCGGCTCTTCGATACCAAGGTCAGCCATGA  
ACTCGGCGCGATCTTCGTCGTCAGTTTCGGCGATGTCCGCTTCGATGGCGCAGCAGACCACGACCACGAC  
CGCGTTCTCGGCGGCGAGCATTTACGCACCTTGTCCAGATAGGGGTTGTTCTCGAAGCCATCTTCCGCC  
ACGTTGGCGATATACATGGTGGGTTTCAGGGTCAGGAAGTTGAGGTGGCTCACGGCGGCCAGCTCTTCTT  
TATCCAGCTTCATGCCGCGGATCATCTGACCGTTTTCCAGCGGACCTTGATCTTCTCCAGCACTTCCAC  
TTCCAGCATGGCATCCTTGTGCGCCGCTTTGGCACGCTTGGACTGGCGGTGAATGGCGCGCTCGCAGGCG  
TCCAGATCCGACAGGGCCAGCTCGGTGTTGATCACTTCGATATCGTACGCGGGAGAGACCTTGCCGGCAA  
CGTGAATGATGTTCTCGTCTGCAAGCAGCGCACTACGTGGCCGATCGCTTCGGTTTTCACGGATGTTGGC  
CAGGAACTGGTTACCCAGACCTTACCCTTGGAGGCACCGGCAACCAGACCGGCGATGTCGACGAATTC  
ATGGTGGTTCGGCACAACCGCGCTGCGGATTGATGATGGCAGCCAGCTGATCGAGACGGGGATCCGGCATCG  
GCACCACACCGGTGTTTCGGCTCGATGGTGCAGAACGGGAAGTTGGCGGCTTCGATACCGGCCCTTGGTCAG  
CGCGTTGAACAGGTTGGATTTGCCTACATTTGGCAGGCCACGATACCGCATTTAAAACCCATGGATTGT  
TACCTTACTTGGATGCTGTTGGGGTTCGCCCCGAGGCGGCCATGTCATGCTTGTTCGTTGGTTCGTTGC  
TCATGTACCGGCACAATGCCGTACGGGTCAAACCGACCTAACCTTTTTCAGCCTGAAGCTGTGTCAGG  
CGATTTCATGGCCTTGGTTCATATCTTGTGTTGAACAGGATGTGGTGGCACGCGAGGGATTTCGTCAGCGCG  
CGTTCGATCAGGTTCTGTTCACTGCCGGGGGCTTGGTTCAGGACGAAGCCAGCCACCTGCTCTTTGCTGCC  
GGGATGGCCGATCCCGAGACGCAGCCGGAAGAAGTTATTGTTGTTGCCCATCTTGGCGATGATGTCCTTG  
AGGCCGTTATGGCCACCGTGACCACCACCTGCTTGAACCTTGGCAATGCCGCGGCGAGTCCAGCTCAT  
CATGGGCAACCAGTATCGCTTCCGGTTCAATCTGATAAAAAACGCGCCAGTGCAGGCCACCGCCTTGCCAGA  
GAGGTTTCATATAGGTGTTTCGGGATGAGCAACCGCACATCTGCCCTCGACCAGGATGCGGGCAGTATGG  
CCGAAGAACTTGGGTTCTTACGCAGGCTGACATTTGTGCCAGCGGGCCAGTTGCTCCACATACCAGGCGC  
CCGCGTTGTGGCGGGTCTTGGCATATTTCCGGGCCGGGTTGCCAGTCCGACGATCAGTTTGATTTGCT  
TGTCACGCTTGATGCTTCACTCGCAGCTGCCGTGGGCACACTACCCAGGGCAATAGGACGCAATATTCT  
AGCCGCGAGTGGCGATCACTCAACCAATGCGCATGTTATGGCGGGATTTGCAGCAATTATTGCGGCCAAT  
GGGTGGCTAACTGTGGGCAAACGGGCTCTTGCAGAGGGCCGTTTTCAGTTTACCGATGGATTGTGCCCG  
GTTGACTACCGTCTGTTATTTGGTACGCAGCAGGGTGACGGTCTCTTTCATCCAGTGCAGGTCAGGGTGGGAC  
GGGCATCGCGCACATACTCCACGAAAGAGGCTGCATCGGTGCCGCAATCCACGCGCTGGCTTTGCAATC  
GAGGGCCTGGCCCGGGCATAGACGGCGCTCAACAGTTTACCCTTTTGTGCCACCTTACGACCCGGGAAG  
GCGGTACGCTTGCATTGACGCTGGCGATATCGACCCGCTCGCTCTGGTGGCGCTGGGCATTTGGCCAGTG  
CCTGCCAGCCATCGTTACCCTTGGCGCTGTAGGCGTTTCATCACCCCGATAGCGCTGGCTATCCACAG  
ATCTGCCACTCGCCGCTTGGCGCTTTCGCTGCAATTTGGGTCAGGGTGGCCGCTTTGCTCGCTCGGTC  
TCCTGGAAGGTGTAACGCAGGTGGCCGCCATAGGGGAACCTTGCCGGCATGGGCGCTGGCGGGCAGGGTGG  
CTGTGATGGTCTCGGTTCAGCAGGGCGCGCACCTCGGCGCCAGTCAGGGTCAGCACCGAGAGCTGGTTCTT  
GAACGGCAGCAGGGTGAGGGCACTATCCCCCTCGCGCCACTCGCCGGCAGGCAGGTCGGCGCGCACGCCG  
CCCACCGCAACCAGAGAAAAATCGACCGGGCCCGGTCAGGGCTTGCATGCTGGGGTATTTGCCAGT  
AGAACTCCCCCTTCGGCAACCAGCGGCTACATCTGAGCCGTGGCTGTGCTGCGCTGCGGTTGTGCGCGGGGCG  
ACGGGCATTTTTCAGCTGCTCGGGATGGTGGCGATCACCGGGCCGTAGGCTTTCTCCAGCGCCGGTTTG  
TAGTGGCTGTGATGATGCCGCGCAGGCGCGGATCTTTCATCCAGGTGACCAGATTGGGCTGGTTGTGCA  
CAAACCTGGCTTGCCTCTTTGCTACGGGCGTCTGTCGAGCGCTTGTGCTGCGCGCCGATCGGCGAAGAAGTC  
GCGGCTGGCCAGCAGGCTGTTGTGGCCCTGGCAGTCGGTACCTGACCTAGGCTGTCAAAGGTCACCTGT  
GCCAGACCGATGGCCTGGGCGTAGGAACCTGCCTGCACCACGAGGTTTTGCGCATGCCATCCGGATTGG  
TCACCAGCTTGGCGTAATCGCCGGTCTTGGCCAGCCGATATTGCGAAAAATCGCCGAGCAGGCTGTGGGA  
GTGGCCGCGACGATGGCATCGAGACCGTTTACCTTGGCGGCCAGCGCCAGATCCCGCTCGTTGCCGATG  
TGGGTACAGCGCCACGATCTGGTGGATCCCTTGGCTTGCAGCATGTCGACCGTGGCCTGAGCCGAGGCGA  
CCTCCTTGCCAAAGCGCAGCTTGGCGAGCTTGGGGGCGATATTGCCCATGCTTCCAGTACCAGACCGAT  
GACGGCGACACAGCTGTTTTGCCTTGGCGCAGGTTGTGAGATCGTTGACCGGGCTCTTCTGGTTGCCGTC

AAGGCGTAGACCACGAAGGGCTTGAGGTTGTCAGCCTTGCTGAGGGCCGGATCGGCCTTGGTGTGCGAGGT  
TGGCGGCCAGCACCCGGGAAGTTGACCCCCCTCGATGAAGCGGGCCAGCTTCTGGTTATCCAGATCGAACTC  
GTGGTTGCCAGCGCCATGGCATCGAGGCCGAAGTGGCTCAGCAACTCGGCGTTGGCCATCCCCCTCGTTG  
AGCTTGAAGTAGCCGCTGCCCTGCCAGGCATCGCCGCCGTGCAGCAGCAGCAAGGGCTGGTTCTTGGCCA  
GCGCATCGGCCTGATAGGCTTTTCGCCATGGTCAGCAGCCGCGGGTAGCCGCCAAAGCGGGTATAGAGGGT  
GTCCGTCTCCCCCTGCGGGGCAAAGATCTGCCCTTTGATCTCGGCATTGACCGGATCAAACCTGGGAGTGG  
GTGTCGTTTCATGTGAGCCAGGGTCAGCACGAAGGGCGGGTTCCTTTGACGGGCTGACAGGCCAACAGGG  
CGGAGGTGAGGGTCGCGAGCAGGAGGGGACGCAAGCAATTCATGGGTAAATCCTTAAGCCTGCCGGGGG  
AGGGTTCGTACCAGATAGCAGAAAGTTGGAAAGAGAAGGTCCAGAAAGACGAAAACCGCCTGATGGCGGTT  
TTCGTTATTGCTGAATCTATCAATGCTCAAACATGGCAGAGATGGACTCTTCGTTGCTGATGCGACGAA  
GGCCTCGGCCAGTACAGTTGACAGCGTCAGTCTGACCTTGGCGACCGCTTTCATCTCCGAGTGGAGC  
GGGATGGAGTCGGTGTATGATCAGTTTCATCGATCAGGAGTTCTTGATGTTCTCGACGGCGGAACCGGAGA  
AGACCGGGTGGGTAGCGTAGGCCAATACACGCTTGGCACCGCGCTCTTTCAGGGCCTTTCGCGCTTTGCA  
CAGGGTGGCGCCGGTGTGATCATGTTCATCAACGATGATGCAGTCGCGGCCGGCAACATCACCGATCAGG  
TGCATGACCTGGGAGACGTTTCGGGCGGGGACGGCGCTTGTGATGATGGCGATGTCGGTGTTCATCCAGCA  
GCTTGGCGATGGCGCGGGCACGCACGACGCCACCGATGTCCGGGGAGACAACGACAGGAGACTCGAGGTT  
CTTGGACTTCATGTCTTCCAGCAGCACCGGGCTACCGAACACGTTGTCTACCGAACGTCGAAGAAACCT  
TGAATTTGCTCGGCATGCAGGTCAACGGTCAGCACGCGATCCACACCGACGCTGGAGAGGAAGTCAGCGA  
CAACCTTGGCGGTGATGGGTACACGGGCGGAGCGGACGCGCGGTCCTGACGGGCATAACCAAAGTAGGG  
GATAACGGCAGTGTATCGGCCAGCTGAAGCACGACGACGATCCACCATGACGATCAATTCATCAAA  
TTGTCGTTGGTCGGGGCACAGGTGGATTGAATGATGAAGATATCGCCACCACGTACATTCCTCATGATCT  
GTACGCTGATCTCGCCGTCGCTAAAGCGACCTACGGCAGCATTGCCGAGTTTGATAAACAGGCGATCTGC  
GATCTTCTGGGCTAGTTCCGGCGTTGCGTTACCAGCAAAACAGCTTCATGTCAGGCACGGTTTGAACCTC  
GGGGTTGCATCCAGTATGTGGGGGAGTCTGAAATCAGACCCTATCGTTTGGGGCAAACGATTTATCAAG  
ATAACGTACAAGGTGTCTGCTGCCAATGAATGTGATGATAACCGGTAACCCGAATCCGTGGCCGAGTGCA  
AAACCGGCCACGTTAATCATCATCAATACCGTTCCGTTAAATTTGGCTGGGGTACTAGGATTCGAACCTAG  
GAATGGCGAGATCAAAACCCGCTGCCTTACCCTTGGCGATACCCCAATCATTTGAACTGTTGCAATGTG  
GAGAAGAGAGGTGATATGTTCTCGCCCTTGGCGACAAACCCATCAAGTCCCTTCGGCACGCGAGCCAA  
CTTCCCAGCAGTACTTCTGCTTCAAATTTGAGCAAAAGCAGCGAGGTCCTGTGCCCGTCAATTCGACGG  
CGCGTATTCTAGCAACCAGCCGAGCGCATTGGCAACCTCGGGGTGGCGCTTTTTTACCAGTGATTCGCAA  
TCGTTTTTCCACTCGCCTTCCAGCAAGTTGTCCAGCGCCATTTTTCGGCGTGGCTCTCGGCAGGTCCGGAT  
CCTGGAATACGGCCCGGTCGCCACATGGCAATCGGGCTTGGAGCATCAGATACCAGGCATCGGGCAGTTC  
GACCGGTTGCAGCCGCTCGCCACTCCTTCGGCAAAGGCCGCTTGGCACGAACAAACACCGGCACATCG  
GCCCCAGCTGGACGCCGAGCGCAGCCAGTTCATCTTCACTCAAACCTGCTTGGCAGAGGTGGTTAAGCG  
CCACCAGCGTGGTCGCTGCATCGGATGAACCGCCCAATACCGCCCCCATGGGCAGCACTTTCTCCAG  
CCGGATATGGGCCCCCTTGGGGCTCGGCAGGGTGTGTTGCAGCAGGCGCGCCCGGATAATCAGATTC  
TGCTCATCCGGCACCCCGGAATGGCCGGGCTCAGGGTGTGAGAGTGTGCTATTCGGTATCACTTCAAAC  
CGAGCCAGTGCCTGTGGTTGAGGAAGATAAATAGGGTCTGCAGCTCGTGATAGCCATCGGGACGACGGCC  
ATTGACGTGTAGAAACAGGTTGAGTTTGGCCGGTGGCCGCCAGCGTGTGGAAGCCATTAACGTGCAAGAG  
TCCATTGGTTGATCTGAAGCTTGGAGCGGCTGTTCTGGCCGGTTCATGGTCAGCTGGTGGCCAGGCGGTA  
GCCATCCTGATCCCATAATCGCCATAGACGATCTGCCACTGGCCGTCGCGCACGCTGGCCAGACTGCTG  
TCGGGGTTGAGTTCAAACCTTGCCTGACCTGGCAGCCCTTGGTCCACTCTGGCAATCCCGCAACCGGAA  
TATTCCAGCCGGTCAGTTGATAGATGAGCGCTTCGGCATCCTGGCTCTGGTGGCGATTGCCGTCGCTGTC  
GAGCAGGGTGTCTCTCCCTTGTGCGGGAGAGCTCCAGAATGCTGGTGGCAATCAGGCTGGTGGAGTTG  
AGGCGATAATCCTCCCCATCCTGCTGCCAGTTGAGGCGGGCACTGCCCTTTTGTGGGGGGTGTATGAG  
CCATCTTGGCAGAGAGCTGCCAATGGGTGAGTCTGAGACGGGCGCCGCTCCTGGTTCCAGTTACCTG  
GTCACGCTGGGGCTGGATGGTGGCACAACCGGCCAGCAACAGCAGGCGAGGTGAGGGTAAAAATACGTAGC  
AGCAAGAGACGGCTCCAGAGAGAGGAATTTGCCACAGTATACGGGGCGCCGTATTGCTTTTTAAAGACTT  
ACCCTTTCTCGTACAATTTGGCAGCCTTTGCACCCAGCGTATGAAATGATCGCCGCCACTCATGAGTTTG  
CTTGGCCTCGGAATCAACCACAACACCGCCAGTGTGCGCTTGGCGGAACGGGTGCGCTTTGGCCCGGACT  
GCATCGATCGCGCCTTGCCTGAGCTGGTGGCAACCCGGTGTGAGCGAGGCGGTGATCGTCTCCACCTG  
CAACCGGACCGAACTCTATTGCAATCTGGAGGAGCAGCGGCAGGAACAAGTGTGCGCTGGCTGCAACAG  
TTCCACGGGCTGGACCGGGCGAACTGGTCACTGCCATCTATCAGCATCACGATGAAGAGGCGGTGCGCC  
ACCTGATGCGGGTGGCGTGGGGCTCGACTCGCTGGTGTGCGGGGAGCCGAGATCCTGGGGCAGATCAA  
GCAATCCTACGCCATGCCAGCAGGCGGAGTGGTGAAGGGGGCGCTGGAGCGGTTGTTCCAGAAATCC  
TTCTCGGTGGCGAAAAGAGTGCCTACCGATACCGAGATTGGCGCCAGTGCCTGTGCGGTGGCCTTTGCCG  
CCGTGAGCCTGGGTGCGCGGATCTTCTCCGATCTCTCCAGACCAAGGTATTGCTGGTGGGGGCGGGGGA  
GACCATCGAACTGGTGGCCCGTTCATCTGCGCGAGCAGAACGTCACCAAGATGATGGTGGCGAACCGCACC  
CTGCAGCGTGGCCAGACCTGGCAGCCGAATTCGGTGGCCAGGTGATGACGCTCGAAGAGATCCCCGACT  
ATCTGCACGAAGCGGATATTGTCATCAGCTCGACCGGAGCCGCTGCCCATCATCGGCAAGGGGATGGT  
GGAGCGCGCTGAAGGCCCGCGCTTCAAACCCATGTTTCTGGTGGATATTGCCGTGCCGCGCACATC

GAAGCCGAAGTCGATGAGCTCTCCGATGCCTATCTCTACACGGTGGATGATTTGCAGGGGATCATCGAGC  
AGAACCTCGAAACCCGTAAACGGGCTGCCGCACAGGCGGAAGTGATCGTGCAGGAAGAGCGCAGAGTT  
TATGGGCTGGTATCGCGGCCAGAGCTCGGTCGACCTCATTTCGCGATTATCGCCATCAGTCCCAGCAAGTG  
GCTGATGAAGAGTTGCAACGGGCCCTGCTGGCATTGGCGCAGGGCGAGAGTGCCGAACAGGCGCTCAAGG  
CGATGGCCCATCGCCTCACCAACAAATTGATCCACGCGCCGACCCAGGCGTTGCGCCAGGCTGCCTCCCA  
GGGGGATCAGAGTGAGCTCTCCCGCTTGCGGCAGGCGCTGGGGTTGTACACAAGAGCCATAATTTTCGGGC  
AACCTGCCGGTTGTCCCGTCTCCATTGAGAATGCAAGAGTTATGAATCCGTCACCTGATCAGAAAGCTGG  
AAGGCCTCATCGAGCGCCACGAAGAAGTACAGGCCATGCTCGGCAGCCGGATGTGGTCTCGGATCAGGA  
TCGCTACCGCGCCCTGACCCGCAATATGCCAGCTGGAAGATATCGTTACGCCTTCCAGCGTTACCGT  
CAGGCGCAGGATGATCTTGAGACCACCCAGATGATGCTGGAGGAGGATGATGCCACCTGCGCGAGATGG  
CGCAGGAGGAGCTGCCCTGGCCAAGGCCAATCTGGAGGCACCTGGAGCAGGAGCTGCAACTGATGTTGCT  
GCCCAAGGATCCCAAGGATGACAATAACTGCTATCTGGAGATCCGCGCCGTTGCCGTTGGCGACGAAGCG  
GCCATCTTTGCCGGTGACTTGTTCGCATGTATTACGGTTTTCGCGAGCGTCAGGGTGGCGCGTCTCCA  
TCGTCAGCTGCAATGACGGTGAGTACGGTGGCTACAAGGAGGTGATCGCCAAGATCGACGGCGAGCGCGT  
CTATGGCCGCTCAAGTTTGAATCCGGTGGTACCCGGGTACAGCGGGTCCCGGAGACCGAATCTCAGGGC  
CGGGTGCACACCTCCGCTGTACCGTTCGCGTGTTCGCGAAGTCCCGAAGCCGAGCAGATCGAGATCA  
ACCCTTCCGATCTGAAGATCGACACCTTCCGCGCTCCGGTCCGGCGGTCAGCACGTCAACAAGACCGA  
CTCGGCCATTTCGATCACCCACCTGCCGACCGGTCTGGTGGTGGAGTGCCAGGACGAGCGCTCCCAGCAC  
AAGAACCGCGCCAAGGCGATGTCCGGTCTCTCCGCCGCTGCAAGCGGCCGAGGATGAGCGCCACCGCG  
CCGCCGAGCAGAGCACCCGCCAATCTGGTGGGCTCCGGCGATCGCTCCGAGCGCATCCGTACCTACAA  
CTACCCGCAGGGCCGCTCTCCGAGCACCGCATCAACCTGACCTCTATCGCTCTCCGAAATTTTGAA  
GGGGATCTGGACTGCGTTATCACGCCGCTGGTGCAGGAGTATCAGGCCGACCAGCTCGCCTCGCTGGCCG  
AGAGCAATTGATGCAAATGCAGAACCGGCAAGCTCGCATTCAGACGTGCCGTGATTAAGGTGGGACGGTAC  
TGATGCAGATCCAGCAGGCTCGTGCCATATCATGACCGTACTGGCTGAGGGGGAGTCCCCTCGCGCCGA  
TGCCGATGTGCTGCTCTGTCAATTTGCTTGACTGCCGGCGCAGCTATCTGATGACCTGGCCCGAGCGCGAA  
CTGGATGCCGCCAGCAGGCCACCCTGCAGACGTGGCTGGCCGTCGTCTCAACGGCGAGCCCATCGCCC  
ATCTCGTTGGCGAGCGGGAGTTCTGGTTCGCTGCCGCTGAAAGTGAGCCCGGCGACCCTGATCCCGCGCCC  
TGATACCGAGGTGCTGGTGGAGCAGGCGCTGGCAGAAGATCCCGCAAGGGCCCTGCGCCGTGTGGATCTC  
GGCACCCGCACCGGCCCATCGCGCTGGCGCTCAAGTCCGAGCGGCCGAGGTTCGATGTGGGGCGGTGG  
ATCGGATGGCCGATGCCGCGCTCTGGCCCCGAGAACAGCGCCGCACTGGGGTTACCCATCGAGGTGGC  
CGACGGCAGCTGGTTTCGAGCCCCCTTGGCGAGCCGGATCACGACGAAACGCCACGATTTGCGGTGATTGTC  
TCCAATCCCCCTATATTGATGGCGCCGATCCCCATCTCGAGCAGGGTGACGTGCGCTTTGAACCCCGCT  
CGGGCTGGTTGCCGATGACCCGGGCTGGCCGATATCCGCCACATCGTGGCCCATGCTCCCGCTTATCT  
GTTGCTTGACGGCTGGTTGCTGCTGGAGCATGGCTGGGATCAGGGGAAGGCGGTGCGTCAGTTGCTGCGC  
GATGGCGGTTACCGCGAGGTAGCCACTGTGCGGATTAACGGGATAACGACAGGGTGACGCTGGGCCCTCT  
GCCCCGCTGCGCTGACGGTTCCCTCACTGTTACACGGCGGGTTGCCGTGTCGCCCCCATGCAAGGATTGAAT  
ATGGTTTTTTGTGCTCAAACACCTGCACCTCGCCCTGATTGCCGGGGCCGTGCTGATGTTTATGCTCCGCT  
TCTACTGGGTACAGACCGCCACTGGCCGAGCCTATAGCGCGCCGGTGTGATGAAGGTCAGCGGCTGGCTCAA  
CGGTCTGGTGGTCTCTCCGGCGTATTGCTCTGCATGGTGGTATTTCTGGCGGGATGGCGCTGCGGCTGG  
CCCTGGCTCAGCGAGAAGCTGATGGCCATTCTGGTGGTGGTATTTCTGGCGGGATGGCGCTGCGGCTGG  
CCAAAAGCAATCTGGTGGCTGGTGTCTTTCTGGGGGCGCTCGGCTGGATCTACTTTTATTGCCAAGTT  
GGCAGTGCTCAAACAGACGAGTGTGTTTCGGCTAAGGCATGAAGAGAATGTTACACATAGACGAATGGACC  
GATTTTGAAGCCACGACATCACCGAGCTGGCGTTGTCAGTCAGTGACGAAATTTATGGCTCGGTCGAGG  
AGGGGATCCCGGAGTTGAACCTGCTGGACGAGTGGCTGGACGAGCAGATCGAAGAGGGCACCTGCGACGA  
GGTGCGCCAGCAGTTGCTGCAAGGCTTCTACCACAGCCTCGGTTTTTTCATGGCGATTGGCAGGATTATTT  
TCTGCCAACAATTGCGATCTCAATCAGGTGCTGGTTCAGCGCAAGGGGATCCCGGTCAGCCTCGGCATTC  
TCATCATTCAGCTGGGGCGCAAGCTCGGGCTCGATGTAGAGGGGATCTGCTTCCCCGGCCACTTCCCTGGT  
GAGCTTTGCCGGTGGCGAGGGGGAGGTCTATGTGATCCCTTTTACCGGCGATGAGCTGAGCCTGGCCCCG  
ATCGAGCTGCTGCTGCGCGGCGGCTTGGGGGACTTGGCGACCCTGACCCCCGACTACCTGCAACCCCTCCG  
GCCAGTGGGAGATCATCGAACGGCTGCTCAACGTGAGCAAGGGTGCCTGCTGCGGGAAGACCGCATGCC  
CGAGGCGCTGCGTTGCAGCGAGCTGTTGCTGCGGATGAAGCCCGGCGATCCGCTGGAGACGCGGGATCGC  
GGCTTTATCTACGAGCAGCTCGACTGCCCGGCCAGGCCGCCGACGATTTTGAATATTTTATTGAACAAT  
GCCCCGACGATCCGGTTCGCCGATGTGCTGAAAGTGCAGCTGGCCGCGCTGGATCTGAGCCCCAAGCCCT  
CCATTAAGGGCGGCTTGAACATAAACAAGAATAATCAAGGCCGCTGCGTCCGGTCGCAACGGAGTAACT  
TGGCTTCAGGCCCTTTTATTAAGGATGTCTTGGAGTTGAAACAGAAGAATAATCAAGGCCGCTGCGTCCGG  
TCGCAACAGAGTAACCTAGGCTTCAGGCCCTTTTATTAAGGATGTCTTAGATGGAACAGAAGAATAATCAAG  
ATCAACCAGATCGACGTTGCCAACGACAAACCGTTTCGTGCTGTTGGTGGCATGAACGTGTTGGAATCCC  
GCGACATGGCGATGGCGGTGTGCGAGAAGTACGTGGAAGTGACCAGCAAGCTGGGCATCCCGTTTGTCTT  
CAAGGCGAGCTGGGACAAGGCCAACCGCTCCTCCATCCACTCCTACCGCGGTCCGGGCTTGAAGAGGGG  
ATGAAGATTTTCCAGGAGCTGAAAGCGACCTTCGGCATGCCGGTTCATCTCCGATCTGCACGAACCCCATC  
AGGCCAAGCCTGTGCGCGAGGTGGTGGACGTTATCCAGCTGCCCGCTTTCCTGGCGGCCAGACTGATCT

GGTGAAGCCATGGCCCGCACCGGCAACGTTATCAACATCAAGAAGCCACAGTTCCTGAGCCCAAGCCAG  
ATGAAGAACATCACCGACAAGTTCGAGGAGTGC GGCAACGACCAGCTGATCCTGTGCGAACGCGGTGCCA  
ACTTCGGCTACGACAACCTGGTGGTGGACATGCTGGCCCTGGGCGTGATGAAGAAGAGCACTGGTGGCTA  
TCCGGTGATCTTTGACGTGACCCACTCCCTGCAGTGCCGTGATCCGCTGGGTGCCGCCTCCGGTGGTCGT  
CGCGAACAGGTGACCGAGCTGGCGCGCGCCGGCATGGCGGTTCGGTCTGGCCGGTCTCTTTATCGAATCCC  
ACCCGGATCCGAAAATTGCTCGCTGCGATGGCCCCGAGTGCCTTGCCGTGGAGAAGCTGGAAGGCTTCCT  
CAAACAGATGAAGGCCATCGATGACCTGATCAAGGGCTTCGAACCCCTCGATACTTCGGCCTGATCCCGA  
CGCTGTCTATGCCTGATAAAAAATGCCCCGAATGCGGGGCATTTTTATATCTGCCATATTTAGTTGAAGAC  
TCAAATTAATCTGCGAGCAAACAATTATTGGTTGTCGTGGTGTAAATGGTGTAAATTTTGTGTGTGATT  
AATGTCTCTTAATTTTTTTTTATTACATGTAAGTGGTACCCTAGTAATGCAGAAACAGCATGGATCGG  
GTGAGGTACGCGAGATATCTCGTCCGGCTATCTGCATGTTTATTGCTGCCATAACAATGTGCAATTAAT  
AACAGGACGTTAATAATGCGAAAGAACTATTTAGCAGCCCTATTTTCAGGTATTGCTCGGATTACCC  
TCGGGGTATTTCTGGGGCATGTCTATCCGGAACCTGGGCGCCGATATGAAGCCCCCTCGGTGATGGCTTCGT  
CAAATTGATCAAGATGATCATCGCCCCGTTATTTTTCTGTACCGTGGTTACCGGCATTGCCGGGATGGAG  
AGCATGAAGGCGGTTCGGCAAGACCGGCGCCATTGCTCTGCTCTACTTCGAGGTAGTCAGCACCATCGCCT  
TGATCATCGGGCTGTGCGTGGTCAACCTGTTACAACCGGGTGCCGGCATGAACGTCGATCCGGCAGCGCT  
GGATGCCAGCGCCATCTCCGCTATGCGGAGCAGGCCAAGTCCAGGGCATTATCGCCTTTTTGCTGGAT  
ATTATTCCGGGCAGTGTGATCGGTGCCTTTGCCAGCGGTAATATCTTGCAGGTGTTACTGTTTGGCGTAC  
TGTTCCGGCTTCTCCCTGCATCATATCGGTGAAAAGGGACAGGTTATTTTCGGCGTCATCGACAGTTTCTC  
CAAAGTCATATTTGGCATTATCAATATGATAATGAGACTGGCGCCGTCGGTGCATTCGGGGCAATGGCA  
TTTACCATCGGCAAATATGGAGTAGGTTCACTGGTACAGCTGGGCCAGCTTATTGCCTGCTTCTATCTCA  
CCTGCCTCTTCTTTATCTTCATTGTGCTGGGCAGCATCGCTAAAAGCCTCAGGTTTTAGCATCCTGCCTT  
CATCTCCTACATTCGTGAGGAGTTGCTGATCGTGCTGGGGACCTCCTCTCCGAGTCGGTACTGCCGCGG  
ATGCTGGACAAGATGGAGAGGCTGGGTGGCAGAAAATCGGTGGTGGGGCTGGTCATTCGGACCGGGTACT  
CCTTTAACCTGGATGGCACCTCCATCTATCTGACCATGGCGGCGATTTTTATCGCCAGGCTACCAATAC  
GCCGCTGGATCTGTTCCAACAGATCACCTGCTGGTGGTACTGCTGATCTCCTCGAAAGGGGCGGCGGGG  
GTAACTGGTAGTGGCTTTATCGTGCTGGCGGCGACTATTTTCGGCGGTTGGCCATCTGCCACTGGCTGGTT  
TGGCGTGATCCTGGGGATCGACCGTTTTATGTCGGAAGCGCGGGCGTTGACCAACCTGATCGGTAAACGG  
GGTTGCCACCGTGGTGGTTCGCCAAATACTGCAAGCAGCTGAGCAGAGAAGAGAAATGGATGCTGCTCGGC  
GGCAAGGTCGGGCAACTGGAAGCGGACAGGGCGTAAGCGCTGTTTTCCCCAGCACGGCTGCGTTGGCTGG  
TGCGGGGGCAATAAAAAAACGGCCAATCGGCCGTTTTTTTTGTGCTGATAACCGCAAGTATCAGCTCTTCAC  
TGCAGGGCGCTGATTACAGGCTCTGGGTGAAAAGTACGGGTAACCACGTCACGCTGCTGTTCCGGGGTCAG  
GGCGTTGAAACGCACTGCGTAGCCAGATAACCGATGGTCAGCTGCGGGTACTTCTCCGGGTTTTTCGATA  
GCATCTTCCAGAGTTTTCGCGACGCAGCACGTTGACGTTACGGTGTGGCCACCTTCAACAGCAGGCTCAG  
CCTGAACCGGCAGTTTCGCGGTATTGAACTGACCCAGGTCAGCCAGTTGCACCTTCTTGATCGGCAGCGAA  
AGCATCGCCTTTGACGCAGATGCAGCGAGCTTGTGCTTCTTTCGTCAGCAGCCAGAAAGAGTTTACGC  
AGAGCGGTATTGGCGGCTGGGTGATTTGAATGCCTTTGATCATGGTATGACTCCTCAATGGGAACGCGA  
ATCCAACGTGAAGGAAATTACCCTGATGTATTTAAGCTACCGTCGATGGCGATGACTTAAAGGGCCCTTG  
CCTTACACCTTTTTCTTTGATGGGGTCATATATAACCAGGTGGTAATATTACCAAAATTTGATCTAGATCAA  
GAAAATCCGACAAGGCACCATTTCAATGGGATTAATTTCTTGAGTTGAATCAAAAATAGGTCATTTTTTCT  
GATTTTGTAAAGATATCCAAATTTATGCATCTTTTATCTCGTTAATCTAGTAATTTAACTACATCTTTTGTG  
CTTTTTTCTGAGGTTAATTGAGAGGTTGGCTACACTCAGCAAAAAAAGCGAGGAGAGTGCCGGGTGAATA  
ATGGGTGGCGAAAGTGGGCATGGCTGGCCCTGTTTTGTGCTGGGCAAGCAGTGTTCGGGTGCCGGCCGA  
GACGGTGCCTATTGCTGTGGGCGAGTGGCCACCTTATATCAGTGAGGCGCTGCCAATCAGGGCTTTCTC  
TGTGAGGTGGTGCGCCAGGCTTTGCCGAAGAGGGGCTCGATGTCAGCTTTCACTTCTATTCCTGGGCCG  
AGGCTTACCAGTACTCTGGAGGGGCGCTATGTGGTCAACATGCCCTGGTTTCGCTCCCGTGAGCGGGGA  
GCAGCTTTTCTATCTCTCCGCTCGCTCGGCCATTTCAACACTCGCCTGATGACGCTGACCGGTACGCC  
GCGGTCAATCTGGGTGAGCTGAAAACAGAGCCGGTTCGGGGTGACCCGTGGCTACTTCTATGGCGATGGTT  
TTGCCGCCCGTCAAGCCGGGCTCACCTCGAGTGGTCAGATTCTGATGAGGAGAGCATGGGCAAGCTGCT  
TGACGGGCGGATCCACTATCTGGTGTGATGAGCAGGTGGCACAGACTCTGTTCCAGCAGGCGCTCGTT  
CGTCATCCCCAATCGCTGTCACTGACCGGTGCCGCCGACCCCATCTGGTCGCAACCGGGATACCTGCTGA  
TGCGCAAGGCTGACCTGAGGCGCGCGTCTGATGCTGCTGTTCAATACCGGGCTGCGCAAGCTGGAGCG  
CTCGGGGCGCCTCGCCAGGCTCTGAAAAGCGTGAGCCAGGTTGCGTCTTTCGGGCTGGCCCCATCCT  
GAGCCCTTCGCCGATCAAGTGAGGAGGCGGGGTGCTGACCTGGAGTGTGATGTTGGCTCTGAGAAAG  
AGCAGGACTATTTCAAGAGTACGCTGGCAACCGTCAGAGCCGAGCGGGAAGCGGGCAAGGTGATCTACCC  
GCCAGTACCGATGTGTTCAATGCCTTCAAGCTGACCGAGCTGGATCAGGTCAAGGTGGTGTCTGGGG  
CAGGACCCCTACCACGGCCCCAATCAGGCGCACGGGCTCTGCTTCTCCGTTCTGCCGGCGTGCCTACGC  
CCCCCTCACTGGTCAACATCTATAAAGAGATGCAGCGTGACCTGCCAGATTTTCGTCACACCCAATCACGG  
CTTTCTCGAATCCTGGGCCAAACAAGGTGTCTTGTGCTCAACACTGTGCTGACGGTGCAGGCGGGTACG  
GCCATTCCCATGCCATCTGGGATGGGAGACCTTTACCGATCGGGTCATCGAGCAGATCAATGCCAGTT  
GTCAGGGTGTGGTGTCTGCTGTGGGGTGCCACGCCAGAAGAAGGGACGTTTCATCGACCGCCAGCG

CCACTATGTGCTGACCGCGCCGCACCCGAGCCCACTATCTGCCACCGCGGTTTCATCGGTTGCGGCCAC  
TTTAGCGAGACCAATCGCTTGCTGGAACAACAGGACAAGAGTCCGATAGAGTGGAAATCTGTCTGCATCC  
CACTTGATTGAGTGCAAAGTTTCGGGCGACAAATGACCGTATACTCAGGGACATAAGATTTATTCAGAGCC  
AAGGAGTGCCCATGTTATCCAGTCTGCACAAGGACCATCTCAACATCGCCCGACTTTTGGAGCTGCTCAA  
GCACAAGCTGGCAGCCATCCGTGCCGAAGAGCCCATCAGCTATTTTTCTGGTGCGCGATGTATCGACTAC  
CTGCGGGAGGTCTCTGACAAGTACCACCATCCCAAGGAAGACCTCATCTATGACTACTACCTGAAATATC  
GGGTGGTGGAGGGTGGAGTGCCTAACCCTGCAGGAGGAGCACGTCAGCTGCTGGAGGCGGGGCCGA  
TCTCAAGGAGATGGTGGAGATGATCCTGATGGATGCGGTGATCCCCCTCGATCAGTTCACCTACCAAGCTG  
GAGCGCTTCGTGGAGCTGCAAGAGGCACACATGAACTATGAAGAGGGGGTGATCTTCCCCCATCTGCGTG  
ACTCCCTGACCCGAGGATGACTGGCGTCATCTGGAGCAAACTGGCAGAACCAGCCATTGGCGACCCCTT  
GTTCCGGGGCTGAGGTGAGCCAGCACTTTCAGGCACTGGCCAAACGCCTCTCTTTGCCGCTCAGACCCGC  
TAAGACGAGCCCGAACCCCTCAGCGCGGCGGGTATTGTGTGAGTGCAACTTGAGTGAAAACAGAAAGCCCT  
CCATTTCGAGGCGCTTTTGCATGGTGGAGCAAGCTTACGCTGTGGTTTCAGGAAGTTGCGATAGAGCATA  
TAGAGGTGGGCCGAGCTCCAGCTGAAGTTGCTGGCCCCCTGCATGGCGCCGGTCTCCGGATTGTAGTTTT  
CGCGGATGGGGCCGCTGCCCCGAAGCCCTCTGCGTTGTTGAAACAGCTTGTGACCAGAGCCTCGGCATC  
GCTGCGGTAGCCGTAGTTTTTCGAGCCCTTACCCCCGAAGTAGAACTGATCGAGCCATACCCGGCCGCGC  
CAGTAGATATTGGGGTCGTAGGCCGGGTGGTTCAGCGCGGCTGTGCCAGCGGGATCTTTGTGTTGAACT  
CCTGGGCGTTGAGCATCACCTCGCGCACCCGTGCCGCTTCTCCTTGTGCGCGACTTCTGCCAGAGCGG  
GCTCCACCCTTCCGGGCCACGGCCGCGGGCTGTGAGCAATTTGCCGACGCAGCCGTTGCCGTCAGCAACA  
TCCCCCTGAGCAATCTGGCGATCGTAATAGAAGCCTGATGCCCTCATCGAACATGCAGCTGTTGATGTAAC  
CAGCCAGCTGGGTGCGCCATCGCGGTAGCGGCTCGCGTCCGGCTTGTCAAGCAGGTGCGCCATGTC  
TGCCAGAATGCGTTTTCTCCTTGGCCAGGAAGGCGTTGAGCTCCACTGACTCCTGATCGATGGAGAAGCCG  
ATCAAAATCGCCATTGTCTGATGGTTTTCAAAGAAGGCGACGTTCCAGTCCGTGACGTGCCCTGGCCAAAT  
CTCCGCCATAGGTCTTGTCCGCATAGCGTTGCAGCTGGCCCGGTTTCGATAAAGCCGAAGCGGGCGGGCTT  
GTCCATGCCTGACTCCCAACCGGCACCGTGTGGCACCAGATATCCATGTCGCTGTACCCGCCACGTTT  
AACACCTGTTGATAGAGCGGCATACCCGGCGAGGCATACCAGCCATCCCCCTCACTGGTACAGCTGGAGA  
GATCCAGCCCCGGCGGAATAACCGTTGGAGTACTGCATTTGAAGGTGATATTGCCGTACTIONGTCGTTGTG  
CTCCACATCTGTTGTTGGCCCATATTTCGATGATGCGGTTGCGGTTGTTGTCCCGCGCGCGGTACCACCG  
TCGTGGTAGGCTGACGTTGGGATACATCTCGGCCATAAAGCCCTTGTCTTGGTGGCGCTGTAGATTT  
CCCAGATGGCCAGGCGGAGAGGGCGGCTTGGTGTGCGGCTCGTTCCAGTTGCCGCTATCGCCACCGCG  
ATCCGCCAGCTTGTGTGAGAAGACGGCGTGCATCACCATGCCCGCATCCTGTGGTTCGCACCCGGATCATCC  
GGCTGTACCTGATAGTCATACATGGCGCGCACGTTGTTCTTGGCTACCTCCGGGTTGAAGTGTGCCATGG  
CATAGGCGTGCTTCCAGCTATCCCAGGCCAGACCCGTCGAACCAGCGTGCGGTATTGGAGGGGGTTAC  
CCCCGTCGTGGAGGATGGCGCCAGCCGGGAGCGCCAGTTGCCGTTGAGGGTCTCCATCGCCTTGACGGCG  
ATGCGACGCTCCGACTCGGGATCCCCTGATTGGAGAGACCGTTGGCAAGGTAGCCCTCCCAGCGGGCGGA  
TGGAGTCGGCAAAATAGCTGGCCGGGTGCGCCAGCAGGGCCTGACGGCTCTGCTGATGGCTGCTGGCGTC  
ATCTGCGGAGTGGAGATAGCTCTGCAGGGTGTAGATATCCTCGTCCCCTTGGCGGCCAGAGTAATGCTG  
GCGTCACTTTGATAGCCCAGTGTCTTCTGGTGCAGGGTGGTGCGGCTTGGCAGGGTGCGGTGCATGCGAT  
AGCGGGCGCTGCCGCTCTGCATGATGTTCCAGGTGCTGCGCAGTTTGCCGAACGGAAATTCGATTCCTTT  
GTCGCTCTCGCTGATGGTGCAGTCCAGCCTGGATATTTGCTGGCAATCGTATCCTTGGCATCCCATTGA  
TTGAGCAACTCGCCCTGCCAGTTGAGGTTGAGGGTGCATCGGTCTGATTGATTAGTCGGGTGC  
GGATAAGGGCGGTGCGGGCATCGCCATAACGCAGCTCCAGCTCCAGCGTAAAGGGCTCGAACCTCGAAGCG  
TTGCACCAGCGCACCCGGAATGGCGTACACCTCCTGCTTGCGGGCGCTGGTGAGCGGGAACGGGCGGGCG  
CTTGCATCGCTCAGGGTGCAGCTTGTCCAGCTCGCTGGCAAAGAAGAGGCTGTACTCCTCGGAGATGACCA  
TGGGAGCCGGTAAAGCCCCCACTCCTTGTGCTGCGCAGGAGCAGGAAACCCTGCCATGCCCCAGATC  
GAGCAGCGGGTGTATTTGAGGTTGGAGTAGCTGTCAAAGTGCAGGAAATGGGTGCGTCTCTGTCTGGTTATCGT  
TCGATAACGTCCTTGTACTGGATGGCCTGCTCCGGTTTGGCGACTGTGCTGCTCTCTGTCTGGTTATCGT  
TGCAGGCGGTGACCCGAACAGGGCGGTGCCGAGGGCTACCGAGAGTAAAGTTTTTACGAAACATTTCTCG  
CTCCAATTCCGTTTATGTAGGTTAAAAGGAAGATTTTTTACGCTTTTTTTTTTAGTGAAAAGGTGTTCCGGTA  
GCCATTGTATGGCAAGGGGAAAGGGAGCGTTGGCGCGAGATCACACTCTGAAAGAGGCGGCAATGTGAGCG  
GGATCACCGAGTTACATCAGGTTACATAGAATGGTATTTAAGTAATATTTTACTTTTTCGTTGCTCGCCAA  
TCTGGCAGGGCAGGTGTGCAGGTATTGGTGGGGCGTCAGGCCGAACCTGTTTGAAGCGGGCGGCAAG  
CGACTGGGGGAGTCATAACCGCAGGCGAGGGCGACCTCCAGCGGGTCCAGCCCTGTTGCAACAGGTTGA  
GGGCGTGGCTCATGCGTACCTGAGCCAGCAACTGGCGAAAGCTGCGACCTTCGGCGGCCAGCTTGCGCAC  
CATGGAGGCGCGGCTCATGGAGAAGTGGGGGGCCACCGCTCCAGGGTGTGGTTCGATTCCGGGTTCCACC  
GCCAGGTAGCGTGCAGCCGCTCTGCGAGGGTTCATGGTGTGGCGGGAAAAAGTAACCCGAGGGCGTTGG  
CGGCCCGCAGCTCGGCATAGAAGCCGCGCAGCAGTTCGGCCTGGGTGCGCTTCGCTCAGTCCCCGTTCCGGC  
CATGGTGTGATGAGTTCAAAGCAGAAGGCGAGCCCCGGGGTGCCTTGCAGGCGAGGTTCTCCAGATCG  
GCGTGGGAAGGGGCTGACTCGGCCAGCCATTCTGGTGGCGGGGAGTGAGCAGCGTGTGGCGTGGGAGC  
GAAACTTGCCCTGCTCCGGCTGATTGACGAAGGTGAGCTGGTGGCTGCCGGATCAGCAGCCACCGCTC  
CCTGTCAAACGACAGACGTCGCTCGCGCCACCACAGTTGCTTGTCTCCCTGGGTGACCCAGATGAGGGTC

GGGGCGTAGATGAGCACCCGGTGTAGGGGCTGCTGGCGGATCCCGAGATAGTGGCTCTGTTGCAGCAGGG  
AAGTGCTCATCCGGTTGGCTCCTAGGGGGTGACGAAGGTGGCGGTCAGGGTGGCTTTGCCGAGCGCCATG  
CTGTTGAGCATGTAGCCTACCATAGCCGGTGGGGTATCAGCCTTCACCTCGAGATCATGGGGCAGGGCCC  
AGGCGGTGAAGTGTAGCGGTGCATGCCGTGACCAGCGGGCGGGCAGGGGCCCGCTAACCCCTGGTTGCC  
AAAGTCGGTGCAGGATCTCCAATCCCTGCTTGAGCTTGCCGGAGGCATTGCTGGCCAGTTCGCTCTGGGTG  
GCAGGCAGGTTAACCACCAGCCAGTGCCACCAACCGCTGCCGGTAGGGGCATCGGGGTTCATAGGCGGTGA  
TGGCAACACTCTTGGTGCCTGCCGGCAGATCCTGCCAGCTAAGTTGGGGCGAGTGGTTGTCGCCGCTGCA  
GCCAAAGCCGTTGAAGCTGAAGTGTGTTGTCATCAGCTGGCCTTCGTGAATATCTGTGCTCTTCAGGGTC  
ATGGCAAAGGCTGGCATGGCCGTGAGGCAGAGCAGTGGCAACAGGGCACTCTGTTTGAGCAATTTTCATCG  
GGTGACTCCTCGTGTGGTAACGGGTTCACTTTAGCGAGAGCAGGGCAGAATAATATGCAGAACGGCTCA  
ATGTGAGCTCGAATGGTGAATTAATTGACCTTTTGGTGGTTTATGGCAAGAAGTTAAACGGCAGCCAT  
AAAAAAACCGGCATCAGGGATGCCGGTTTTTGTGTTGACGATGAGAAGTGCGGCTTAGCGCAGGATCATC  
TCGTACAGGCCCGGGCCGACGGAACCATCGGAACCGGTACGCCGAGCAGCTCTTCGATACGCAGCACGT  
ACTGCTGGGCAGCGCGGCAGCTCTTCGAAAGTGCGGCAACCGGTGATGCTCTTCGCTCCAGCTTTCCAT  
CTGCTCGTAAACCGGCTTCAGGGCAGCGGTTTGCGGCCAAATGGGTTCTCGGTGTGGGCACCTTCGTAG  
GCCACGCAGATCTTCAGATCCGGCAGACCGGTGAGGCAGTCCAGCTTGGTCAGAGCCACTTCGGTGGCGG  
CTTGACGCTCGACACCGTTCTTGGTGGCGACGGCGTCAAGTAACCGACATCACGGGGACGGCCAGTGGT  
AGCGCCGAACCTATTGGTGTGCTTTCGGAACCTCGTCTGGTTCTCCATGGCGGTCAGCAGGGTCCCGGTA  
CCGACAGAGGAGCTGAATGCCTTGCCACAGCGATGACCGCTCCGGGCGCAGACCCGGCAGACCCGCCAC  
CGATACCGGGCTAGGCGCCGGATACGTGGGAGGAAGTGACCCAGGGTATTCGCCGTAGATCAGGTCAGC  
GCCAGCGCCAGCTGGGCTTCGAACAGCAGGGTCTTGCCCTTCGCTGCAGCGCTTTGAGCGGCATGCTG  
ACGTTGCAGACTGCGTCGATCCAGGGTGCAGAGACTTCCAGCAGCCAGTCCGGCCATCTCTTGGGCAGTCT  
GGGTGAATTCGAAAGAGGGATAGATAGCCTTCATCTGCGGCAGTTCACAGTCCAGCATGAACTGGATGCG  
CTCGACCAGCACGTCCGGCTGTTTTAGCCAGCCAACAGGATCGCTTTTTTCATGACGCGATCGCCGTAG  
GCAGGGGCGATGCCCTGACGGGTGGAGCCATAGGCGCCGTCAACCAGACGTTGCTCTTCCAGGGTATCTT  
CCAGTGCCTGCAGCGGCAGGCACAGGGTTGCGCGGTGAGAGATGGCCAGCTTCGGAGTCAAGCTGGAGGC  
TTTGACTTCTCTGAGCTCGACGGTCAAGTTCTCGGGCTGATCACCATGCCCGGGCCGAGGACAACCAGG  
CAATCCGGGTTGAATACGCCACTCGGAACCTGGTGCAGCTTGAAGGTGCCAAGGTGCTTAAACCCAGGTT  
GGCCAGCGTTGTTGCCGCCCTGGAAGCGAATGCTGGCGCCAGCTTGACCTGCCAGATAATCCACAGTATGCG  
GCCTTTGCCTTCATCACCCAGTTAGCACCTACGACTACGATAGACGACATGACTCTTTCTCCTAAGACG  
TTAGGCGTCCATCCTAGGAGCCTGATGCGGATTAGAAAAATTAATTAATCTTTATAAATCTGATAAGAGAA  
CCATATAAATATGGCCAATTAAGCGGCAAAACCGTCCGATTTTTGCCTGGCAAGCCCCGCACATTGCGGGTT  
GAGGGACTCTTATGCTGGATATTCATTGGTTGCAAACTTTGTCACTCTGGCCCCGATTGCAACATTTTGG  
CCAGACCGCCACCGAATGCACATGACCCAACCAATGTCAGCCTGCATATCAAGCGGCTGGAGCAGGCG  
ACTCGGGTGCAGGCTGATCGAGCGCAGCCGTTTCGCTGACTCAGGCGGGGAGCGGCTGCTGCAAAGCG  
CCGAGCGCACCATTTGCCGAGTTGCAGCTCTGCCAGTCCGATCTCAATGCCCTCAACCAGCTGAGTCAGGG  
GACGCTGGCCATCGCCGCCAGCGACATCATCTCCCGCTGCTGCTGATCCAGCCGTTCCAGCGCTTCAAG  
CGGGAGTTCCCGGCATCGACCTTACTTTGTTCAACACCCTTCGGATCAGGCTGCCGAGCTGGTCAAGG  
CGGGCAAGGCGGATCTGGGTTTTGTCATGGCGCAAAAGCGCAGCGAGCCGCTCTTCTATACCGAGCTGCA  
ACAGGTGACCTGGTGCAGGCTGGGGCACGGCCTTGCCCGCTGGCAGGCGCGGGCGGTGGCGGGAGAGAGC  
GATCCCCTCGACGAGCCGACCCTGATCCTGCTCGGTACAGCACCCCGCACCCGGGCGCTGATCGACCCGT  
CCCTGCCGTTGCTGGCCTTGCCCCCTGCCGCATCATGGAGGTGGGCAGCGTGGACGCCCAGCTCGATTG  
GGCCGAGGCGGGCTTTGGTGTGCCATCGTGCCGATTTCTCCCTGCATCCGCGCCTCAACCTCACCGCG  
CCGGTCAACAGCCTCGCGCACTTTCCCGGTACCAGTCTGGGCTACGTGGTGCCTGAGAATCAGGTGTTAT  
CGCGGGCCATCAAGCAGTTGCTGCACTGGGTTGAGGAGGAGATCCAGAAGCCCAACCCCTATCTGACCCG  
GGTGATGGAGCCGTAGCGATACGGCAAGGTGAGCAGGTCAATCGACTTCGCCACTATCGAGCGCATATCA  
ACAATCAGGGCAGCCGAGGCTGCCCTGATGCATTTGTGGGCGCTTACCGCTCAGGGTTGCGGGCGGTGG  
CTGCGCTGGTGGATGGGGAGGGCAGTGTATCGGTTTTATCCTGCTGCGAGGTTTCGCCAGTCAACCGCCT  
GCTGGCAGGCTGGATTGCCTGCTCTTGCGGCGCAGTGGCCGAGAGTCGCTTTGCGGGCACTGAGTCGAA  
ACGGCAGCCGATGGTGTGCTGGCGCAGTTGACGCTGCGGCAGAAAGGAGCCATGCTCTCACCCCTCGGTGGTTG  
GCGTAGCAGTGAGCTCGGAGGTGACCTCAAGTGCCTCTTCGGCAAGGGATTAACCTCTGTGGCTTCTGT  
TGCCACTGCGGCACTGCTGGTGGCGGTGCGGTGAGAGGGCGCAGTCCGCTTCGGGCTGGCGGCACTCACCTGC  
TCTGTGCTGGGCACCGCCTCCGAGGCCGATGGCGCTGGTGTAGCGGCTCCGGCGTCAGCTGTTCCGCGG  
TTAACTGCTCGGGGGTCAAGTGGCAAGGGGGCTGGCGGTTGATCCGACATCCAGCATGGAGGGGCAGCTC  
GGTTTGCCTGCAACTGCTCGGGCGTACCTTGCTCAGGGCAGGATGCAGCCGACTGAACTGTTTGACC  
CGGGCCAGCAGGGTATCGCGCACGGTACGGACGATGGGGTCCGGCAGGCTGGCCAGCGCCACCAGTTCCG  
CACTCATCCCATATTGTTGATGGCGGTGGTCTGTCCCGATAGAGGTTGGCGGGGATGCGGGTGCAGCTG  
GTAGTAGGGGTGTTGTTTGGAGCAGCGTGTGATTTGCTCCCTTCGATGGGGATGAGGCGCACCTTGCAG  
CGGCTGATCAGATCGCCGACTGCCAGACTGGGGTACCAGGCAACCAAAACCGGGCATCCAGCGAGCCAT  
CGCACAGCCCTTCCAGCGGTTGCTGTCCGATTTGAGCTGATAGGCAGCAAACTGCCCGGGTTGCCATCC  
CATGGCCGCCATCAGGGCCTGGCTGGTGTGCTCACCGGCGCCCTTGTTCGGGGATAGACCCGCTTC



CCTTCGATATCTGCCAGGGTGGTGATGCCGCTATTGGGGGCAGCCAGCAGGGTCAGCGACTCCTGATAGA  
GGCGAAACAGGCTGCGCAGCTCATTGTTGGCCCCCTGCCGCTGAAGGGGCCGGTGCCGTGCAGGGCGTG  
GTGCAACACATCGGACTGCACCAGCGCCAGCTGTACGTCCCCCTTGTCGAGTGCCTTGAGGTTGGCCATC  
GAGCCACGGGTGCTCTGCACGGTGCAGCTGTCCCCATGCAGGGCATGGCCGGCATTGAGCACCCGGCAGA  
TGGCGCCACCCGGTGGGTAGTAGACCCCGTTGAGCGGGCCCGTTCCGATAGTCAGCGCCTGGCTGCCAAA  
GGGGAGCAGCGCAGAGAGTGCACAGAGGGGGAGCAGAAAGGTGATGCAAGATCCGTAGAGACATAATTGAC  
CGTTGACTGAGTTGACCGCTGGCTGATGACACAGGGAAAAAGGGATGGGGCTTGCCCATCCCGTTGCTGG  
CTGATCAGGGCTTGTGTGGTTGAGGATTGCCCGCTCCATCCGCGCCAGCGCGTCCGGTCAGCCGTGCCCT  
GGTGCAGCCGAAGTTGAGCCGCACGAACTGACCGTCGCCAAACTGGGCGCCGGGGGAGAGACCAACGCCG  
GCCTGCTCGAAGAAGCGATGGGATCGGCAAGGCCAAGGGCGCTCACATCGATCCAGGCCAGATACGTGC  
CCTGATGACTGGCCAGCTTGACGCCGGGCCAGCGGTAACCGCTTGCTGGATCAGGGCCAGATTGGCTGT  
CAGATAGTCGAGTTGCTCGGTGAGCCACTGTTCCGCCCCCTCATAGGCCGCTTCGGCGCGCAGCAAAGCCC  
AGCAGGTTGACGTGCGCGCTGATGCCGCGCATCGCCTGCTGTAGCCTGAAGCGCAGACGGGGGTTGGGGA  
TAATGGCGAAGGAGCAGCAGAGACCGGCATATTGAAAAGTCTTGCTCGGGGCCATCATCACCGCAGCGG  
CTCGGCTGCTTGTGCACTGATGGCGCCGTAGGGAATGTGGCGGGCGTTTTTATCCAGCAGCAGATCGCAG  
TGGATTTTCATCGGAGCAGATCACCAGATTGTGGCGCGGGCGATGGCATCGATGGCCAGCAGCTCGTCAC  
GGGTGAAGATGGTGCCGCCCGGGTGTGGGGGTTGCAGAGCAGCAGCAGATCTGCGGCGGGGGCCTGACG  
CTCCAGCTCTGCCAGATCCAGCACCCAGCGACCCGCTCTTCAACCATCGGCACGGTGAGCAGGGGACGA  
TCATTGAAGCCCCGGCGCTGCAGGAAGGGGTAGTAGACCGCTTGGGGCGATGATACCGCAGCCATGCT  
GGCTCCACGCCTTGACAGCAAGGTTGAGCCCCGGCACCGCGGGCAGGAACACCAGCCATTCGGGCTC  
GATGGCCCAGCCATAGCGGGTGCCTATCCGTTTCGATAATAAGTTCGATCAGGCGCGGGCAGGGGCGTGAA  
TAGCCGAAAATGCCGTGGGGCAGCCGTTTTGGTCAACGCCTCTATCACGGACGGGGGGGAGACAAAGTCGG  
TATCGGCAACCCACATGGGCAGCACATCCTGACCCTTGTAATTGTCCTTTCAGGGCTCATGGTGCCACT  
GCGGTCTACTTCCCTGATCAAAAATCAAAACATGCGAACTCCTTGTGCTGGCAGGATGGGCTTTCACTCTACG  
GGGTGCGGGCCTCCCTCGCAAGGGCGCACACCCGCTTATGCCATCCTTGAGCCCGCTCTTGATAGTGACAT  
AAGATAGGCGCCGAATTTTCATACGGCTGCCGCCCGTTAGCCCGTATCGTCCCTCCAATCAGTGGTAACC  
CTATGAGCTTGTGATAGCGGGCTCAAACGCCTGACCCGCTCTCTTTTCATTTCTTGCCGTGACCTT  
TATGACCCGGCTGCGAGTGGCAGGTGCCTACCTTAACTTAACTGTTTCTGTTCTGGCCGAGGAGCAAGGTG  
CGCCCCTTTCTGGTTCGGGCTCTTCTATACCATCAATGCGGTTGGTGGGCATTCTGGTCAAGCAATGGCTGG  
GCCACCGCTCCGACAACAAGGGGGATCGCAAGCGACTGATCCTGCGCTGCTGCTTTTGCCGGGGTAGCGCT  
CTCCCTGCTGTTTGCTGGAACCGCAACTACTGGCTGCTGGCGAGTCTGGGGGTGATGCTGGCGGCGCTG  
GCGGCCACTGCCAGCCCCAGTTGTTGCTCTGGCGCGGGAGTATTCTGACAGCCGCAACCGGCGGGCGG  
ACATGTTTCAGCTCGGTGATGCGGGCTCAGTTTTGCTGGCCTGGGTCATAGGTCCGCCCATCGCCTTCGC  
GCTGGCCATCGGCTACGGTTTTGAGCTGATGTACCTGGCCTCGGCACTGGCCTATCTGCTCTGTGCGCTG  
GTGGTGTGGCGCTGGCTCCCCTCTCTGCCGCTGCCAAGCTGGCTGAAGAGAGCGAGCGGGTCAGCAGCT  
GGCGGGATCCGGCGGTGCGGGCGCTCTTTATCGCCTCCACCTGATGTGGACCTGCAACAGCATGTACCT  
CATCAATATGCCGCTCTACATCACCCGGGAGCTCGGGATGGATGAGAAGCTTGCCGGCATCCTGATGGGC  
ACGGCGGGCGGCTTGAGATCCCTTCATGCTGCTGGCGGGTTACTACACGGCGCGCTTTGGCAAGCGCC  
CCATGATGTTGCTGGCGGTGCTGGCTGGCGCGGCTTTTTACACAGGTCTGGTGACCTCACCGACCAATA  
CGCCCTGATCGCCTTGACAGCTGTTCAACGCCATCTTCATCGGTATCGTGGCGGGGATCGGCATGTCCTAC  
TTTCAGGATCTGATGCCGGGGGCGAGCCGGGGTGGCGACTACCCTGTTTGCCAACAGCATCCGCACCCGGCT  
CCATCATGGCTGGGGCCATCGCTGGTGTGGTGGCGGAGGTGTGGAGTTCCACGGGGTCTTTATGGTGGC  
GTTGGGATTGGCACTGGTAGCACTGGCCGCCAGCTGGCGGGTGCCAACGCTGACTGGGGACTGGCTGT  
TATTTGTCGTGCTGGGGCTGGGCGTGCGGGAGCGGCGCTGATTCGCCCTGATATTCGTTGCGCAGGCAGC  
GCAGCAGCAGCTCGGTGCGGGGCCCCGAGAGATTGGGGGAGAGGGTCAGCAGATAGGTGTAGAGGTGGCG  
CTCGTTGCCGCTTCTAGATCCAGCTGTATGAGTGACCTTCCGCCAGCTCCCGCTTACCAGATGGCGC  
GGCAGCCAGGCATAGCCGAGGCCGAGGCGCAGCATGGCGAGCACTTCGTGGTAGTGGGTGCGCTTCCAGC  
CGGTGTATCCGCATCGTTCCAGTCCACCGAGCGGTGAATGGGGGGATGCAGGCTGATCTGGTTGTGACT  
GGTCAGCACATCGCTGCGGATGGCCCCCTCCTCTTGCGCCAGAGGATGGCTGGCGGCGCAGAGGGGCGAGC  
AGGCACACCTCGTCCAGCAGCAGACCCGTGCGATCGCCGGGCGAGGTGCTCGGAGAGCATCAGATCCCCCG  
GTTGCAAGGCGTTGAAGTGGCAGTGAATGCGTTCGTGAGGTTGACCCGGCAACCCCGGCTGCGGGGATA  
GAAGCTGGCCAGCGCCGATAGAGGCGATCCCTTGGTTGCAGCGCCGAGACATAGAGGTTGATCTGCGGC  
TCCCATTGCCGCTCCAGGTTGTTGGCCAGATTTTCCAGCTCCTCCACCTGTTGGCTCAACTGACGGGGCC  
GCTTGAGGAAGATCTCGCCCCCGGCGCTCAGCACCGCTTGCGGCCGCGCACCTCCAACAAGGGCACCCC  
CAGACTCTGCTGCAACTTTGCAACCGCATGATTGAGGGAGGACTGGCTCTTGTTCAGCGCTCGGCCGCC  
TGGGCGTAGCCGCCGAGTCGACCACCGCTGAAAGATCCGCCATTGCTCAAACGTGCTCTTGGGACGAA  
ACATAGTTCAACCTGATTGGAGATAGGATGGTCAGTGGTTCGAACAGGGAGCCTGTGCCCCCTATTCAAT  
TTAACCCCTGCCGCACAACACTCTGGGTATTTTATTGATTTATTTGGGCTGGGCCACGCAACTTGTTTAT  
TTTGGCTGAGCCACAAAGGTCTGGCCGGTTTTTGCACGGCTATCCGACCCCATCAGGTAGAGGTAGAGCG  
GCATCAGATCGGCTGGAGTCTTGAGGTTTCATGGGATCTTCTGCCGGGAAGGCGCTGGCGCGCATCTTGGT  
ACGGGTACCGCCCGGGTTTTAGGGTATTGACCCGCACACCGGTGTTCTCAAGCTCGTCCGCCAGCACTTC

ATCATCCCCTCGATGGCAAATTTGGAGATGGCATAGGTGCCCCAGTAGGCGCGCCCCTTGGCGTCCCACGC  
TGGAGGAGGTGTAGACGATGGAGGCATCGCCCTGCGCCTTGGCTGTCTGGCGCAGCAGCGGCAGCAGCGC  
CTGGGTTCAGCAGGAATTTGATTTGACGTTGACCTGCATCACCTCGTCCCCTCTTCTCTGAAATATGT  
TCAAACGGAGAGAGGGTTCCAAGCAGACCGGCGTTGAACAGCACGCCGTCGAGGCGGCCAAACTGCTGGG  
CGAAGGTTTTCGGCCATGCCGCGGTAGTGGGCGGCGGTGGCCCCCTTTCAGATCCACCGGCACGATGGCGGG  
CAGCGGATAACCGGCCGCTTCAATCTGGTCATACACGGCTTCGAGTTTGGCGCTGGTGCGGCCGAGCAAG  
ATCACGGTGGCACCGTGAGCGGCGTAGGTGAGGGCGGCTTCGCGGCCGATCCCGTCGCGGCCACCTGTGA  
CCAGAATGACTTTATCCTTGAGCAGATCGCGGGGTGCTGATAATCGAGCATGACAACTCCTGTAAACAA  
ATTCCGGCCATAAGTGCATGGCAATCGGCGCCAAGTGTACTGATCCGCGCGCCTGTTTGACCAGCCAGCG  
GCAAGAAAAATGTGAAGAAAAATAGAGAGGTTGTGATGCTCGGGTTGGTTTTTCCGGGCTCTGGCTGCGAT  
TTTTTTCGCGCATTACCAAACCTCCCTAGAATGTGACGAAAAACCGATCCATTTCTGGAGTCCATCGTGACA  
TTTTCTGACCGAATATGGCCTGTTTTCTGGCCAAGACAGTACCCTTCTGCTGGCCATCGCGGCCATCATCC  
TGATGATTGTGAGCACTCGCCAGCCGAAAGCGCGCAAGGGGGAGCTAGTGGTGACCGATCTCTCGAGCGA  
GCTGGAGCAGGGGCAATTTGCGCTCAAGAGCGCGCTCGCCAGCAAGACCGAGCGCAAGGTGCTGGAAAAG  
CAGCAGAAAAGAGGAGCAGAAAAAGCGCGCCAAGGCGGGGGATGAGCGCAGTCGCCCTGTTTGTGCTCGATT  
TCAACGGCAGCATGGATGCCAAAGAGGTGGCTCTCTGCGCGAAGAGGTGAGCGCGGTGATTGGCGTCGC  
CCAGCCCGGCAGCAGGTAAGTACTGCTGCGGCTCGAATCCGGTGGCGGCGTGGTGCATGGCTACGGCTTGGCC  
GCTTCTCAGTTGACGCGGTTGCGCGATCGTGACATCAAGCTCACCGTGGCGATTGACAAGGTGGCGGCGA  
GTGGTGGCTACATGATGGCCTGTGTGGCAGACAAGATCCTGGCTGCCCCCTTGGCCATCGTCGGCTCCAT  
CGGGGTGATCGCCAGATGCCGAACCTTCAACAAGTTGTGAAAAAGCATGACATCGAGTTCGAGATGCAC  
ACCGCCGGGCAGTACAAGCGCACTATCACCATGTTTCGGCGAGAACGACGATCTGGGGCGCGAGAAGTTTC  
GCGAGGAGCTGGCGGCGATCCACGAGCGCTTCAAGGCCCTTTGTGGCCGAACACCGCCCGCAACTTGATAT  
CGATCAGGTACGACCGGTGAACACTGGCTGGCGAGTCAGGCCAAGGGGCTGGGGCTGGTGGATACCCTC  
TGCACCAGTGATGACTATCTGCTGGCGCAGGCCAGCCACCACAAGGTGATCGGCATCAGCTATCGCAAGC  
CAAAAAGCCTGACCCAGAAGCTGGGGCAGCAGGGCGCGCAGGCGCTCGAGGCAGGACTTGGGCGGCTGTG  
GCAGCAGAGCCCCTGGCGCTAAGCCTGGCCCTCTGGCGTTAGCCAGAGGGAAATCCCGGATAAAAAAGGC  
CAGTCGATGCCCATCGGCTGGCCTTTTTGCATCCGGTTGCACCTTGTGCGGTGAGCGAGGGTTGTTTCTAT  
TGAGACCCCTGTTTACAACCTGAATGCTTTCCCGCTTTATGACAGGATCTTGTGGTAAGAGCTGCGGGCA  
TGGAGCAAAGCGATGTCATGGAGCACCTTCAAGCAATTTACCCCGCTGGTCTGGATCGTTCATTTGGGCA  
CCTTTATGGTGCCTACCAGCTACTACATGGTGTGGCCCTTCTCTCCATTCGCTTATCGGGAGTATGA  
CCTTTTCGGCCACCTTCATCGGCCTGTTGCTGGGGGGCTCAATGGCCCTCTCTACCCCTGGTACGCTTTTAC  
GGCGGCTGGCTCTCTGATCGCTTCGGGCGGCGCAGCATACTGCTGGCCGGTTGTCTGGTGGCGATGATCT  
GTTTTCGGCTGCTCGGTTTTTTCGCACGAGGTGTTCTGGCTCGGAGTCGGGGTGTGGGCGAGCGGCTCTC  
GTCGGGGCTCATCGATGCCCTGGCAAGGCGCTGATGGCCGACAGTCTGGCCTCGGCCAAAGCGCGGGAG  
CTGGCACTGCACCTGCGCTATTTTTCTGCTCAACCTGGGGGCGCGCTGGGGCCGCTGCTCGGGGTGACCC  
TCGGGATCAACGCCCAGCAGGAGACCTTCTGTTTCTGGTGGTGAGCTATCTGCTGCTGGCGCTGGCCTT  
TGGCTGGGGATTTTCGCGGGGCTGGCAGCACAGGCAAGCCGGGACTGCCGGGCCGGACTGCGGGATGCC  
ATCAAGGTGTTGCTGGCGGATCGCGCCTTCTGCTGCTGGTGATGGCCAATCTCCTGATGGTGTGGTCT  
ACTCCCAGTTTCACTCGCCGCTGGTGCAGTACCTGACCCGGGCTGGCATGCCGAGGTGGCCGAGCTGAT  
TGCCCTGCTGGTGGCGACCAATGCCCTCACCGTGGTGTGCTGCAATTTCCGCTGCTGCGATTGTTGTGCG  
CGCTGGCCGGTGGGGTACGGCTTCATATCGGTATGGCGCTCTTCTGGCGGCCAGCTGCTCTTCGCGT  
TGGGGGACCCGATGGTGGCAGCCACTGGTTTTGGCGCGTGTGCTGCTCAGCATCGGCGAGACCATTCT  
GTTCCCCCTGCTCAACGTGCTGATCGACCAGATGGCCCCGCTCATCTCAAGGGGAGCTATTTTGGTGCC  
AGCGCGCTGGCCGGGTTGGGAGGGGCGCAGGTGCCCTGCTGGGAGGCTGGATCCTCGAGCAGTGGAGCG  
GTCAGTTGCTCTATGTGCTGATGGCGCTGCTTTGTGTGGCGATTTTTGCGCTTTACGAGTGGGGCGCCAG  
AGTACAGCGTCCCCTGTGGCCACGCTGTGGTTGAGCGGAGCTGACCCGGTTAATGCGGGGATCTGTGA  
TGCTGAATGTTTCACTGCGTGTCTACCCGGCGTCTTCTCTTTGAGCGCCTTCTGGCTGCGTACATCCTCTC  
GTCGGCGAGCCGGATCAGGTTTTAGCCCGTCTGCTGCTAGTGTCCGGCCCCGCTGCTGCACTATGCCGATACTG  
AGGGTGAGATCGCCAGCTGTTCTTACGGTGTGACCAATCGTTTGGATAGATATCCCGCGCCTGAC  
TCTCGTTGAGTTGGGCGAGATCAGGCAGAACTCATCTCCGCCATAACGAAAGCAGCTGTCTTCGGCGCG  
AAAGACCTGACGGATGAGTTGCCGACGATGCGCAGGATCTCGTCTCCGCGCTGGTGACCTTCGGTATCG  
TTGATTTGCTTGAAGTTGTGATATCGAGATAGGCGATGGCCATGGGTTTCGGCACGGCGCTGACAGGTGC  
GCAGGCTCAGCAGCAACAGCTCCTTGGGTGGCGAACGTTGAGCAATCCGGTTAGAGCATCGGTGCGGTT  
CAGCTCCTCCAGTTGCTTGGTACGCTCGCGTACTTTCTGCTCCAGACTCTTGGCATAGTTCTCCGACTTC  
TCTCTGGAGGACTCTATTTCCGACACCAGACTGCGAATGTAGTTTTCGAAGACCAGAGTGTGTCGAACA  
GAAAGAGTTTTGTCCAGGGCGGCCAGCATGACGAGGCGCTCCGGTTCATCGCGGATCTGCTCGAACATATC  
CTCGATCAGCAGAGCTTTGAGGGTGTGATGGCGGCCAGATAGAGCTTGGGTTTCGACCCCGATCCGCTTG  
TGAACCAGCCGATCCGAAGCCGGTGTGACGTAATGGCCGCTGAAGAGATCGAGCA  
CATAGCGCCGTTGTGCGGTGCGCAACCGTATGAGGGTATCGGCATCCCCGATCAACAGGGCGATTTCCGGT  
GATGGCCGCTGCTGCTGGTAGAAGCGATCCACCAGGGCGTGCATCCGTGGTTCATCTTGTGCAATAA  
CTTGCCAGCCGCGCCACATCCTGTTTATTGAGCAGCAATAACTCCTTGCATGGGCAATTTCAAAGTCGG

TGATCCTCATCTGCTCAAGCAGGGTCTGTTCCGGTCGGATTTCATCGTCGTCCTCGGTTTATTACTGGGCGT  
TACGCTGTCCGTGAGGTGGGACAAACAAGCAGGTGTGGCAATTGATAGTGTAGTCAGTGAGGCTGGGGCG  
CGCGCAATGCCCCCGCTGGCGGGGGCTATGGAGGGTCAGGTGAAGGCTAAAGGGGCAAGAGATCCGGAG  
GGGAGATCAGAAGGTGAGCACCTTGTGCGGCAGCCAGGGTCCACTGGGCCAGCATCGGCAGGGTGCCGACC  
TCAATGCCCTCGATCAGCGGCAGGGCGGTAATGCCACGGGCATCGGTGCAGGTCTTGCACAGGCGAATGG  
TGACGCCTTGCGCCAGCAGGATCTCCAGCATCTGGCGCAGGTTGTATCCCTCGGGCCGGTGTCTGACCGGC  
CAGTGCTGCACTTACCGCATCGGACATCAGGAACAGCTTGAGGCTGGCACCACCCTGTTCGTTGAGGGCG  
ATAGCGAGGCGTAGGGCGTTGAACAGGGATTCACTGCCGTAGGGGGCACCGTTGGCAATGACCACAATTT  
GTTGATTACATAACAGACTCCCGATTGGAAAAGAGCGCCATTGTAGAACCAACAGGGTGCCAATTGCGTGAT  
GTTGCACAACCTCTGTGCGACCTTTTTCCCGCTTGTCTGACCCTGCTGCCGATCGAGGTTTTTATGGTCA  
GCTCGCAAAACAAGACCGGATGAATCGAGATGTGAAAGTATTGGGAGCCGGCTTGTCTATTGGCCGGT  
CAGGCCTTTGGTAGTGAGGCGGTTCGGTTGCAAGGCCCGTCTGCAGGCCGTCAACGACCAGCTGGTGTGTTG  
CCAAAGCACACAACAATGCCGGGCAGATTGCCGGGCTGGAACAGGCAGCGCGCAATATCAAGGCCAACTG  
TACTGATGAAGGTCTGCTCAAGGAGCAGAAAAGAGCGGGTTAACAAACTGCGCGGCGAGGTGGAGGAGCGC  
CTGCTCGAGCTGCAGGAGGCGAGAGTCAGTGGCAAACCGGAGAAAGATTGCCAAGCGGCAGGCCAGGCTGG  
AGGAGTCCCAGACCCGGATGCTGGAGGCCAGCGTGAGCTGGACAACTGATCCGGCTGGTCGGCAAGTG  
ATGGCCAGCCGCTGCACGCAGGATCAAAAAAGGCCGATTGCTCGGCCTTTTTTTTCGTTTTACGGTCTGTG  
CATCAGCTACTGCCTGTGCATCCGCACAAATTTTTCCATCAACTGATCTTCGGTCTCCACATGAGCGGGA  
TCCCAGATGATGCAGTCGATAGGGCAGACACTGATGCAGGTCCGGCTTCTCATAGTGACCGACGCACCTCGG  
TGCAGCGACTGGGGTCGATCTCGTAGATCTCCTCACCCAGGCTGATGGCCTGGTTGGGGCACTCGGGATC  
GCACATGTACAGTTGATGCACTTGTGCGGTGATGAGCAGCGCCATCTCAGGCCGCCGTGTGCGGGTTGCCG  
GGTATCCTGGCTGTGCGCCAGATTGCGCAGCAAAATGCCGTAGTTTACATCCAGATCTTTCCGGGACTGGC  
ACATAGACCACGTGACCGTTGCCCGGCGCGGTATCGATAAGCTCGCCCTTGGCGGTTTTCCATCTGCTCCA  
GATTGAAACGGACGTTGCCCTGCGGGGTATCAGCTCCAGATTGTTGCCACCAGGAACTTGTCTTTCAC  
CTCGACCTCGACCATGTCACCTTTGCGACCGGTGATCTCGCCGACAACTGTTGGGTGTCGGAGACGGAG  
TAGCCGTAGTCGTAGTTCTGGTATTTCGCTGTGGTGTGACGGCGCAGGAAGCCCTCGGTGTAGCCGCGGT  
GGGCAGATTTTTCGAGGGTGCCCATCAGACTCGGGTCAACCGGACGACCCGCCACCGCATCGTCGATGGC  
CTTGCGCTAAACCTGCGCGGTACGGGCGCAGTAATAGAAAGACTTGGTGCCTCCTTCGATTTTTCAGGGAG  
TGAACGCCCACTTGGTCAGTCGCTCGACTGCTCGACGGCGCGAGATCCTTGGAGTTTCATGATGTAGG  
TGCCGTGCTCGTCTCGAACCGCTCATGTACTCGCCGGGCGGTGGACTCTTCCAGCAGAACCAGCGC  
ATCGGTGCGTTTTGCCAAGGCCAGGGTGTGTGCCGACGCACTGCGATGGGCTCCTGACGGTGGACGATC  
TGGCCCACGTCACTTCTTTACCCTCGTGCACCTTGTACTCCAGCGGCAGGAGTTGGTGCAGGTGCCCT  
GGTTGGGGTACGCTTGTGATGTAGCCGGAGAGCAGACAGCGGCCGGAGTAGGCCATGCACAGCGCCCC  
GTGAACGAACACTTCCAGCTCCATCTCCGGTACCTGCATGCGGATCTCTTCGATCTCGTCCAGTGACAGC  
TCACGGGAGAGGATGGCGGAGTCAGGCCATCTGATGCCAGAACTTACCCTGGCCAGTTGACTGCGT  
TGGCCTGCACCGACAGATGAATGGGCATATCAGGGAAGGCTTACGCATCATCATGATAAGACCGGGGTC  
GGACATGATCAGCGCATCGGGCTTTCATCTCCACCACCGGACGCATGTCGCGGATAAAGGTCTTGAGCTTG  
GAGTTGTGGGGCTGGATGTTGGCCACCACATAGAAGTCTTGGCCAGTGATGGGCTTCGTTGATGCCCA  
GTTGCAGGTTTTCGTGATCGAATTCGTTGTTGCGTACCCGAGGCTGTAGCGGGGCTGACCGGCATAGAC  
GGCATCGGCGCCATAGGCGTAGGCGTAACGCATGTTCTTGAGGGAACCTGCGGGGGAGAGCAATTTCTGGT  
TTAAACATGGCGGACTCTTTATATCTGATTGCAAATCAGGACGATGCCACCTGATGGCATCGTAGTGGTT  
GAGTTGCGGTGCAAGAAGCTCTCAGAGAAGAGGCTCAATGCAACGCGACCCGATGACGGCATAATCCGGGC  
CTATCTACAGAAGATGCGCCGATATTCCGGGTGCGAGATTGTACTCGCCCCACGTATCATGCAATTT  
GGTAGGAATATCATGCAATGGAATAACAGTTTTTGGGTAATCTGTGGTGGTGGGTTAGCGATAGTTGTT  
GATGTTCAATTATCCATTGCGAGTTGAAAATCGGGAAACTGTTTCGCTCATAAAAATTACGGGGCTGTGGC  
CAATTGCCTGCGCTGGCCAGCCATTTCCAAATCCAGTCTTGGCGAGCCCGCTTGAAGCGTTGATAGGCAAC  
GCCCTGATGAATGGTCAGAAAAGAGGGTCTGTTGGGAGTCCAGCTTGTGCTGTAGCGCACCATCAGATCA  
CCCTGATAGTCGTTGCTGATTCTGACTTTGAGCGCCTGCAGTGTGACACCGGTGGCGTGACCATGCTCGT  
CCCAGACTTCAAACATGATGTGAACACTCTGATGTGATGATGCCACGATGAGCAAGATGGGATGCAATTT  
GCAACTGTGAGATCTGACAAGGTGCGAAAATGTGATGAGAATGGCAGAAAAGCGAAAACCCGGCGGAGG  
CCGGGTTTTCTTGAATGATGGTGGAGGGAGAAGGATTCGAACCTTCGAAGGCAGAGCCGTGAGATTTACA  
GTCTGATCCCTTTGGCCGCTCGGGAACCCCTCCACGGGGGCAAAGCAAATTTGATTTACGCCACTGCAATC  
AGGGAATGGTGGAGGGAGAAGGATTCGAACCTTCGAAGGCAGAGCCGTGAGATTTACAGTCTGATCCCT  
TTGGCCGCTCGGGAACCCCTCCACGGGGTATTTCTGATTGTCACTACTTTTGCACCTGAAATGGTGGAGG  
GAGAAGGATTCGAACCTTCGAAGGCAGAGCCGTGAGATTTACAGTCTGATCCCTTTGGCCGCTCGGGAAC  
CCCTCCCCAAGTGCAGGCGCATACTATCAGATCCAGAGGCTTTGTGAACCCCTTGTGATGAAGCATCTGGC  
AGTAAAAAATGACTGTTTCGTCGATTTTTTGGATACATCCAGCTCAAAATTCAGCTTATCAGCAAGTTGTG  
CGCTGCTTTTTCTGCACAAAACAGCATCCGTGCAAGTTGGCGATCGCGCTGAAGAGAAGGGAAATAGCAGA  
AGACCGCCAGCGTGGCGGTCTTCTCGGGCATCACATCTAGCGCTGGAAACGGGTAGACCGAACCAGTTT  
CAGGATCTGGGTGAGCTCGTCCAGTGCCTGCGGGACTCCTGCACCAGTGCCGGATCCCGCAGGTCATCG  
AGGGTCAGGCGGTGCTGGTAGTGACGATCGACCCAGCCATCGAGGCGGGCAAACCTGGCTGTGCTTGATAA

GGCAGGCCGGATTGACCGCAGCGAGTTCCTGATCGTTCATGGCAACCCGCAGTCGCAGGCAGGCCGGGCC  
GCCACCATTACGCATGCTCTGTTTTACATCCATATAGTGGACCGCCTTGATCGGAGTCTCCTGCGTCAGC  
AGCTTGCCAAGATAGGCCGACACCGCCGGATTATCGCGCACTCGGTGGGGGCGATAATGGCCATCTCGC  
CACTCGGCAGGGTGAGGATCTGGGTGTTGAACAGGTAGGATTTACCGCATCCAGCACGGATACCTCGGC  
GGTTGGCACTTCGATAAAGTGCAAATTCCTCGCCAACTTGCCGCTGATCTCGGTACGTACCGCTTCG  
GTGTTGAGGAACGCTTGCTGGTGGAAAGAAGAGCACGTTCTGGTTGCCACCGCGATCACGTCGTTATGGA  
ATACCCCTGATCGATCACCTCCGGGTTTTGCTGAATAAACACCACGCTCTCCTCGCCAAGGCCATGCAG  
GCGGGCGATGGCCTGGCTTGCTTCCAGAGTCTGGCGGGCCGGGTAGCGCTTCGGCGCCGGGCGGGAGTAG  
TCAAAGGCGCTGCGGCCATAGACAAACAGCTCGACCCCCGCTCACCATAGGCGCGACAGAGGCCGGTAT  
GGTTGGCCCGCCCTCGTCGCGGAAGTGTCTATTCCGGCAGATGGAGGTGGTGGCTGAAGTGCCGATC  
ATTGTTGAACACGGCAGCAGGATACGGCCCCGTGACGTGCGGCTCCAGGGAGCGGTGAAACTTGTTGGTC  
AGGTTGGCGGGGGTGAAGTGAATGCGGCCATCCTGGGTATCGGCACTGGGAGAGACGTTGGCGCGCTTGG  
CGGTCCACATGCTGGAGGCCGAATAGCAGGCAGCCAGTACGGCAGGAGCCTGCTTGGCGGCCTGCTCCAG  
CACCCGGGCATCGTTGCCGGTGAAGCCGAGGCGGCGCAGGGTGGCGAGATCGGGACGCTCTTGTGGCGCC  
AGTACCCCTGGGTCAAGCTCGGTGAGCGCTTTCATCTTGCAGCCCTGTTTGGCGGCCTCTT  
TCGGATTGGAAGCCTCCTGGGCATTGCTCTGGGAGGCAACGTTGCCGTAGGAGAGGCCGGCAGTATG  
AGTCCGGCCGACAGACCGTCGAAATTGACCTCGAAGTGTCTTATTGAGTACATCCTTTCGATTTTTATG  
ATGGGTAGCGGTTCTTCCGCGCGCAATGCGTGGGGTTGGGCCATTATAAAGAGATTTTTATGTTTTTGT  
AACAAGCCGGTAACCAGGAGACGTTTTTATGTCGTTTTCAGATATAAAAAGAGGGCGGTATGGCAGAAAA  
TTGAAAAGCGGTTGCGTCCGGCCTGTTGCCTTCGATTAATAAATAAAGAAGCAATAAAGAAGCCGTG  
TGTTTCGGGCTGGTCAGGCAAATTTGCTCACAAGATTGCTTTTTTCGCGCCAAATCTTTATACAGCCCA  
CAAACCCGCACACCAACCCCGTTCGGGTGCAATGAGGATAATAGTTACAGCATGGGCAAATCACTGGTCAT  
AGTGGAGTCTCCGGCCAAGGCCAAGACGATCAACAAATATCTGGGCAAGGACTACGTGGTGAATCCAGC  
GTTGGTCATGTTTCGCGATCTGCCACCCAGCGGCAGCGCCAGCACCGAGCCCAAGAAACCTGTCAATTCGC  
GCATCAAGTTGAGTGAATCCGAGAAGGCTGCCAAGGATCGCAAGGCCCTGTTTGGCCGGATGGGTATCAA  
TCCGACCGCTGGCTGGCAGGCTAACTACCAGATTTTGCCTGGCAAGGAGAAGGTGGTCAGCGAGTTGCAA  
AGTCTGGCCGAGAAAGCCGACACCATCTATCTCGCAACCGACTTGGATAGAGAAGGAGAGGCCATCGCCT  
GGCAGCTCGCGAGATCATCGGTGGCGAGCAGCCGCTACAAGCGCGTGGTGTCAACGAGATCACCAA  
GAGCGCCATCAAGAGGCGTTTTGCCAGCCCTCCGAACTCAATATTGACCCGCTCAATGCGCCAGCGCC  
CGTCTTTTTCTCGACCGCTGGTGGGTTACATGGTCTCCCCGCTGCTGTGGAAAAAGTGGCTCGCGGTC  
TCTCCGCGGTCGGGTACAGTCCGTTGCGGTGCGTCTCATCGTCGATAAAGAGCGCGAAATCAAGGCGTT  
CGTTCCGGTCGAGTTCTGGGATCTCAATGCCGACCTGCTGACCGCCGACAAGAGCGATCTGCGGATGGAA  
GTGGTCAGCCGAATGGGGCTGACTTCAAGCCGGTGACCCAGGCCGAGACCTTTGCCGCTGTGCGAGCCC  
TGGAAGGGGTCGACTACAAGGTGGTGAACCGGGAAGACAAGCCGACCGGCTCCAAACCGTCCGCGCCGTT  
TATCACATCTACCCTGCAGCAGGCGGCTCTACCCGCTGAGCTTCGGGGTCAAGAAGACCATGATGATG  
GCCCAGCGTCTCTATGAAGCGGGTTACATCACCTATATGCGTACCGACTCCACCAACCTCAGCAAAGAGG  
CGGTTGAGGCGGTGCGTGAATATATCGGCGAGCAGTATGGCGCGCCTATCTGCCAGCCGAGCCGAATCT  
GTATGGCGCAAGGCCAATGCCAGGAAGCGCACGAAGCGATCCGTCCCTCCAACGTACAGGTGACAGCC  
GAGATGCTGGAAGGGATGGAGCCGGATGCCATGCGTCTGTACGATCTCATCTGGCGTCAGTTCGTTGCCCT  
GCCAGATGACCCCGGCTCAGTACGACTCCTCCACCCTGACTGTCAAGGCGGGTGAGTTCGAGCTCAAGGC  
CCGTGGCCGTACCCTGCGCTTCGCCGGTTGGACCAAGGCGCTGCCGCCGATGGGTTCGCAAGGGTGAAGAT  
AGTCAGCTGCCGGCGGTGACCGTGGGCGAGGTGCTGAAGCTGATCAAGCTGGATCCGCGCCAGCACTTCA  
CCAAGCCGCTGCCCGTTTACCGAAGCTGCGCTGGTGCAGGCTGGAAAAACGCGGCATCGGCCGCTCC  
GTCTACCTACGCCTCCATCATATCCACCATCGTCGATCGCGGTTATGTGCGGGTCGAGAGCCCGCTTTC  
TTCGCCGAGAAGATGGGTGAGATCGTCACCGATCGTCTGGTGGAGAACTTCGTTGAGCTGATGAACTACG  
AGTTACCCGCAAGATGGAAGACAAGCTCGATGGCATCGCCGAAGGGAGCCTTGAGTGGAAAGAAGTGCCT  
GGATGCCTTCTACGCCGAGTTTACCCAGGAGCTGGAGAAGGCCGACAAGGCCGCCGAAGAGGGCGGCATG  
CGTGCCAACCAGATGGTGATGACCGACATCGACTGCCCGGATTGCGGCCGCAAGATGGGCATTCGTAAGT  
CCACCACCGGTGTTTTCTTGGCTGCTCCGGCTATGCCCTGCCGCCGAAAGAGCGCTGCAAGAAGACCAT  
CAACCTGGTCTCTGCCGACGAGTTTGTCTCCGCCACTGACGGCGAAGAGGCGGAAACCGAAGCGCTGCGC  
GCCAAGCACCGCTGCGGTGTCTGTGGTACAGCGATGGATGCCCTACATCATCGACGACAGCCGAAGCTGC  
ACGTCTGTGGTCGCAACCCGGATTGCGATGGCTACGAGATCGAGAAGGGCCAGTTCAAGCTCAAGGGCTA  
CGAAGGGCCGAGCATCGAGTGCAGCCGTTGCGGCAGCGAGATGCAGCTCAAGAACGGCCGTTTTCGGCAAG  
TACATGGGCTGCACCAACGAGACCTGCAAGAACACCCGCAAGATCCTGAAAAACGGCGACATCGCGCCGC  
CGAAGGAGGATCCGGTGCCTGCTGCCGGAGCTCAAGTGCACCCAGTCCGATGCACACTTCGTGCTGCGTGA  
CGGTGCTGCCGGTCTGTTCTGGCGGCCAGCAACTTCCCCAAATCCCGCGAGACCCGCGCGCCGCTGGTG  
GAAGAGCTCAAGCGCTTCAAGGATCGCATCTCTGCCAAACACAAGTATCTGGCCGGTGCCCCGCTCACCG  
ATCCGGACGGCAACCCCGCCATCGTACGCTTTCAGTGCGAAGACCAAGGAGCAGTACGTGATGAGCGAGGT  
CAACGGCAAGGCGACCGGTTGGACCGCTCATTACGACAACGGTACCTGGCAAGAGAGTTTGCCAAAGGCT  
AAAAAAGCCTGATGAAAAGAGGCCCGACAAGGGGCTCTTTGCTTATGGATAGCGGTATACTGAGACAG  
CTGCAAGGAGTGCAGCTGTGCTCAATCGCGAAGTAGACAAGGAGGTTGAGATGGAGATTAACGAGATCCG

GCCAGGCATGAGCTGCATGACCCGTGAAGGGGCGGCCTATGTGCTGGAGGTTGACCGGCAGAGCCTGCTG  
GTGCTGCTGCAGCGCGGGATGAGACCATAACCGGTGCAGGTGCGCAGCGACGAGATCCTGGCGCCGCTGG  
AGTGACCCGGCTGTGCTCCCCCTCAAACGGCAGTAGAAAAAGCAGCTCGGCCAGATCGGGCTGCCATTGC  
CACTGCTTCATTCTGACCCGCCACCAGTACCACGACCCCTTCTTGTGTCAGGCGTCCCGTCTGTTCCGG  
CAAAGCTTGGCGATCCTTTCCGGTAACGAGATGGTGCCTCCGCGCTCAGCACCCGATGCCACGGCAGTAC  
CTTGTGCGGTTTCCCGCAGCACCTTGCCCACCAGTCTTGCCCGTCCGGGCAACCCGGCCAGATCGGCCACC  
TGACCATAGCTGACCACCCGGCCTGCCGGGATCAGGGCGATGATCGCTTCGATACGGGCAGCTTTGTTCA  
ATGGGACAGGACTTGATTCAATGCTCATAAACCCGATTCGTCAAAAAACAACAGAAGCGCCATTGTGGCGC  
TTCTGTGTCATGGGGCTGGCAATGATTAGCCGAAGGTCTGGCTAAGCCCTTCAGTTGCTTGGCCCGTTCC  
AGCAGAGCCTGACTGGAGTGCATCCAGCATCTTCTGACTGTTGGCGTGGGAGTACTCGGAGATCT  
GGTGGATGCTGCGGCTGATCTCCTCCACGACCGCTGTTGTTGCTCTGCAGCGGTGGCGATCTGGGTGGA  
GTGTTCCGGTGACCAGCTCTATCTCTGCCAGCACGTTATGGAGGCTGCTGGCGCCCTGGCGGGTTCATCTCG  
GCACATGCGCGGGTCTGTTGCAGGTTCTCCTGCATCATCCCTTCCAGCGTCCAGCGTGTGCTGGATCT  
GCTTGATGCTGCCCTGGATCTGCTCGGTCGCTTGTGGGTGCGGGTCGATAGAGTACGCACCTCGTCAGC  
CACCACCGCAAACACGGCCCTGCTCCCCGGCGGAGCGGCTTCGATGGCAGCGTTGAGGGCCAGCAGG  
TTAGTCTGCTCGGCGATGCCCTGGATCTCGCCATCACACTGCCAATCCGTTCCGGATTTCGCTGGCGAGCT  
CTACCGCCGAGTTGAACGCCAGCTCTGCCTGTTTGGCGAGCTGTTTCGATCTGTTGCTCGGCTCGGTTTAA  
CTGCTGGTTGGTTTGTTCACAACGATTGCGAGCTTCGTTGACCTGATCGTTGGAGTCTTGAATGTTGCGG  
GCGATCTCGTGAGCTGTGTTGGCCATTTGAGTCATAGCCGTAGCCATCTGCTGGGTCTGGGCATCTTGTCT  
CGTTGATATCGAGACAGGCCTGATGAGAGGCTGCTTCAGATTGATGGCCAGGATTTGCAGAGGTGCCGT  
GGCATCGTTGATCCGCCCAACACGGTTCGGATGCGGGCTTCGACGATCTTGATATGAAAATCGGCAATG  
GCGCCGGGGTTATCACCGGAGTAGACCAGCCGGGTCAGACTGTCATATTCACGGCCAGTTGCTGCAGAT  
AGTGGGGCAGGGCAAAGAGCTCGCGCCAGTAGGCTCCGCCAATAAGCAACAGGGGCAGCAGCATCAGCAG  
GACGGTCATAGCCCCTTGGCTGGCGAAGGCCAGCCATCAGGCCGAGCAGCAGCAGGGTAATGGCCGGA  
GTGCGCACTCTGGCAAGAGAGGGAAGGTTGCTGCTGTTGCCGCGCTCGGCCCTGAGCAGGGCTTGGTAGG  
TCTGAGCGGCGATGCGCTTGAATTGGGGCTCGGGCTTCAGCGTACCGACTGGTAGCCGCTGATCCTGTT  
GCCTTCATAGATGGGGTACATAGGCATCTACCCAGTAGTAACGGCCATCCTTGCAGCGGTTTTTTTACC  
AGACCCGACAGGTTTTGCCTCTTTGAGGCGGGCCAGAGATCGGCGAAGGCGGCTTGGGCATCTCGG  
GGTGGCGTACCAGATTGTGTTGTGACCGACCGCTCGTCAGCGCTATAGCCGGCGATGTTGCAAAAAGC  
CGGATTGGCATAAGTGATCACCCCGCGCAGGTCAGTGGTGGAGACCAGTTGTACGTCGGCAGGAACTCC  
ACTTCGCTATCCAGGGTATGGACATCTCTGCGGGCCATAGGAATACGCTCCGATGTTCTTGTGATAATG  
TTGTGCTTGTATTGTGGCAGATCTGGAGGTGGCCCGAGGCTCGCGCCAGTAGGAGGCAGACCAGCTTCA  
TTGGGGGCTGAATTTTGCATAAATGGCGGATGAATGGTAGGGGGAAGTTGATGTTTTGTGGCTAATCG  
TAAAAAAGGCGGCCGATTGGCCGCCAAAGTAGAGACAACATTACCTCTGTGGCATCCGGTAGCGCACCTG  
CAACTGATCGAGGATCTGCAGCTGACCCGGCAGGCGGGCGGCGAAGTGCTCCAGCCCTTGTGGGCGAGA  
TCGCTCCAGGCCACCTCGGCCGTGGCCAGCATAACCGGGAACAACATGTAGTCGAGACGATCACGGCTGG  
TGATCAATTCTGACCACAAGGGGCTCAGCACCCCGAGGATGTTATCGTTGGCATGGAAATCGGCTGGGGC  
AGGGTCACACGAGTAGATCTGCTCCAGATTGAGGGTACCCGCCAGTAGAGGCGGGTTTCATGAATATCG  
GCGCTCCAGGCCAGATCCAGATAGAGGAAGTGGGCGGGCGCCATCACCCCGGATAACCGGCTGTGGCAG  
CATCCAGCCCCGCTGAAAGCTGGTCCAGGCACAGATGGCCGCTTTGCGGCTCACCTTGTGCGCCATGCAG  
GATCTCCTCCAGCCGATCATCTGTTGCTTTGGCGGCCAGATAGCGCTGGCAGTGGCGCAGCAGATGG  
CCCTGCAGCTCGCGGAGTGGCGTAGCCCTGTTCCGGTCATCAGCTGTTGGCTGGCGGGGCTGTGCGTCC  
AGACCCCGGTGGCACCTCGTCACCCCATGTGGATCTGGGGGCGGGGAAGAGTTTCGCACACCTCGTC  
CAGCACTGCCTCCAGGAAGCGGTAGGTGCCGGCAGGGCGGGGTTGAGCACGTTGTCATCGAAATGCTGG  
ACCGAGCGGTAGCGGGAGTGCATCGGCCGTTTCGATCAGCAGCTCGGGCAGCGCTTGCATGGCGGCTGGC  
AGTGGCCCGGAATGTCGATCTCGGGAATGACGGTGCATGCCGAGCTCACCGGCATAGCTCACCGGCTT  
CACCTCGCTCTGGGTGTAGTAGCCGCCATAGGGTTCGGCGCCCGCTGAGCTGGGGGCGGATCGCCAGA  
TTATGGCCGCGCCAGGCACCCACGTCGGTCAGCTCCGGGAAGGCTTTTATCTCGAGTCGCCACCCCTCGT  
CATCGGTCAGATGCCAGTGGAAAGCGGTTGAACTTGTAGAGGCTCATCAGTTTGGAGCAGGCGCTTGTGGT  
GGCCGGAGTGTGGAAGTGGCGGGCGCAGTCGAGAAAAATGCCGCGAAAAGCCAAAGCGCGGGGCATCCTCC  
AGCGTGACGCAGGGCAGGCTCTCCCATGTTGCAGATAACACTGGGCCAGAGTGACCAGCCCATGACGCC  
AGCCCGTTTTGCTCGGCGGCGCAATTACCACCTCCTGCGGCGTGCATGGTGAGTTGGTAGGCTTCGGGGG  
CAGTTTGGCCTCGGTGAGCCGATTTTCAGCGTCTGATCCTGCTCCAGCGCCAGCGACGTCAGCTCGTTA  
AAGTGGGCCAGCAATTTCCGCACATCGCGGGGGGCGCTGACATGAGCCGCTCGGCCAGCCGGAAGTTCC  
CCTCCAGCAGCACCTGATGGGCCGTTGTGGCACTATAACCGGCTGGGGTTCGACATCCGGCAGGTGGG  
GCGGGTTACCGGCGAGTTCTCCAGTCCGAGATCCTGCGCCGCCAGCGTCACCGGTAGCAGCTGGGCACCC  
GTGGTGCCTCCGGCAGGCTGAGAAAAGCCCTGCGGCATGTCGGAGAGCTTCTTGATGGGGGTCTGGC  
GGCAGCAAAAAGCGCAGCTCGCAGCTGCCAGTTTTTTGGGACAATCACCTTGTAGCTGCCGCTCTGGCGCTC  
CAGCTCCCCCTTGAAGGAGTGGGGTGCATATGGCGAGCCAGACAGAAGTGCAAGTTTCCACCGGGTA  
TCCGGCATGCGGGAGAGGGTGAAGGTGAACCAGACATCCTCGCTGTCACGTCGGGCGACCTGGGTGTGGA  
TCAGGGGTGTAGACATGAAAATCCTCTGATTGGGCAACAGGATGGCGCCATCGAGCGCATCTGCCTGG

GGGGGATCAGGTTGAGCTGGCCGAGACGGGGAGCGAGGCGGGTGCCAATCCCCCAGCAGGGCGATCT  
GTCCGGCTCCGAGCTGGGTCAATCCCTCCAGCAGGATCCGCAGCTGTTTCGCAGGTTTCGTCCAGCAGCTG  
ATTGGCGAGCTCGTCGCCATCGCTGGCTGCATCGAATACCCAGGGGGCAAAGTGGCCATAGTCCGCCGGA  
ATGGCGCGGGCGGCCAGCAAACCACTCGGCTTGATCCCGCTTGAAGCGATCCATCAGGCGGATGGCGA  
GGGTGCTGGGGGGCAGAATGCCGTCGTGGCAGAGCAGGGATTGCTGGATGGCGCGCAGCCCCAACCAGGC  
GCCGCTGCCTATGTCTGAAATGGGGAAGCCGCGGGCCGGAACAGGTGCGGATCTGCCCCCTCTGATAGACC  
AGCCCCACCGAGCCGGTACCGGCGATCAGAATGGCCCCCTCACGGCCGCCAAAGGCGCCGAGGCAGGCAC  
CGAAGGCATCGGAGGTGAGCCTGACGCTGGCAAAGGGGAAGGGCATCTCGAGCAGGGCGTGATAGCAGTC  
GGCCAGCTCGGCGGAGGCGAGCGCCAGCCCTACCCCCATCTGCTGTTTCGCTCTCGATAGCGATCCCCGGC  
GCAAGGCGGGCGCTGGCGATGGCGGCCAGCACATTGGCGTGGGCATGGGGATGCCAGTCCAGATTGG  
AGCCGGCCGCGGCCCTCTCCGAGCAGCTTGCCCGCCGATCCCGAATGCGGGCGGGGTGTGGGTGCC  
CCCCGCATCGACGCCGACCCAGAACTCAATCATGGTGACCACCCCTGCTCATTCGGATCACTCAGGGCGCT  
CTGCCAGCTGATAGCCAGGGTAAACCAGGCGCGTGGGGGATCCACTGCTCGCCCCAGCGCCAGTTCTGA  
TCCAGCCGATCCTTGTACTCCTCCGGAATAAAAGCCACGTCGTTTTTCGTTCATCGAATCCGGCGGTGATGC  
CGTTGCAGATCCCCCCTGCGCATTGGGATACCCGGCGGTATAGGCGGGGTGTTGATGCCGTGACCGGC  
CAGCATGCAGGCGTTGAAGGGGTTCTGCCCAGGATCCAGTCGAGCTGGCGTGGCCGTAAGTGAGCAGC  
GGCTGGCTCTGGCGGGGAAGTGGCGGGCGCCAGCAAAGGCCATGGTCGCCAGAGATGCGAGGCGGGCGT  
TCTCCCCCTGCCACCAGTAACCGGATTCTGTTGTGGGGCATAAAGAAGCTGACGCGCGGGCGTTTCATC  
CACCCCTTTGACATATTGGCGGGCGAGGGAGAAGGGTTGCCCGCGGGCGCAGAGCGCCAGCTCGGGC  
GCCAGCGCCTGCTCCACCACGGTTTGTACCCTAGCCTTGTATTCTGATCCGGCTCTACGCCAGATATT  
CCAGCAGCGCCAGCACCGGCAGGCCTGCCTCAGCGCGTGGTAGTAGGGGCGCGAGCCATCCTCGTTGGC  
CGACCAGTAGTGACCCAGCTCAGGATGGGAGCGCTGGCGGGCACAGAGCTTGCTGGCGCGAGCTCTCGCC  
TCATTCAGCCACTCGGCGCCGAAGGTGCGGGTCAGCTCCACCCTGCCAGCAGGGCGCAGTAGTCTCGTA  
TGATGTTCTCGACCCCGTCATCCAGATAGGAGAGGTTGTGTTACCGCAGATGCAGGTAGCCGCTTTGGC  
GGCCTCGGCGTAGCGGCTGGCATCGAAGTCGCCGCTGACGCTCTCGCGGGCAGCGGGCCAGCGCGGGC  
ATGGCCATGCCGCCCCCTGGCGGAAACCCGCTTGCCAGTTGGCGGACTTGAGCCCCCTGCTGAGTGGCAT  
AGGCGCACAGCTCGCGCTGGGCGAGGGTCTTGTCTCACTTGTGCAACAGGGTCATGTAGAAGAAGCCCGA  
CTCATCCGATCCGGCGAGGAAATCGGCGCGCTGCAGCGCCTCGTCATTGAGCCGCTTGACAGAGTTG  
ACCCCGTTCGATATCGCGCGCGGGCCAGCAGTTCCCGCACTTGAGCAGAGCCACACCACCTAGGGGG  
TCTGCTGGGGGTTGAGGTAGTTGGCGTAGGATAGGTGGCTCAGGTACTTGCTCATGTGCGCCGCTGGC  
GAACCAGCCGCGTGCACATCTTTGTGCTGGTGGTGGCAGGCGGGCGCTGCGGTGCGCCCCGATCG  
AAGGTGCCGCTGGCGCGCTGCCCTTGAAGTAGTGGATGACATCGGAGAGACAGCGGTGGCCAGCAGAT  
CCTGGCCGATGGCAAAGCGGGTGGAGCGGACTATGCCTTGGGCAGTGATCGCCTCCAGCCGATAGTGGCC  
GGGCTCCTTGAAGGCGGAGAAGTGGCGCGCCAGTAAGCGCGCCCTGCCAGCTGGGACGCTGCCAGCC  
GGTTGCAGCGGAGTTTCAAACAGGATCTGGCCATCATCAAGGCGTTGCAGCTGACATAGCCGCCGAGAT  
CAGGGGCGGTGAGGTTTGAACAGGGCGACCTTGTGTCCGTCGCACTCGTAGCCACCTGATTGATCAA  
GAGTTCCATCAAGGTATTACTCCTGTGGTTACCAGCCGGGCGGTGAGGCACATCACGGGGCTGTGGCCGC  
CCCGTATCGAGGCATGGCCGGACTGTGCTGTCCGGCCGGTCTAAGGCTCACCATCACTCGTAGAGGTAGC  
AGCGCACGAAGTGGTTGTGCGCAAGCTTGGTGATGGGGGGCAGCGCCTCCTTGCAGCGGGGCATCGCCTG  
ATTGCAGCGCCCCGCAAAGGGGGCAACCGCAGGACTCCGGTGTCCAGAGCGGGATCTCCCCCTTGGCGCCT  
CCCTCCAGCTCGGCGTGGATGCTCTTCTCCGGGTGGGGCACCAGGATGAGCAGCTGGGTGTAGGGGT  
GCTGCGGGTGATGCAGGATCTCGTCCACCTCGCCCCACTCCACCATGTGACCCACATACATGACCGCCAG  
ATCTTCCGCCACATAGCGGGCGGTGGCGATGTCGTGGGTGATGTAGAGCATGGAGACACCGAGCTCGTTC  
TTCATCTGCTCCATCAGGTTGAGGATGCCGATGCGAATGGAGACGTCGAGCATGGAGGTGGGCTCGTCCG  
CCAGCACCCTCCGCTCCACCAGGATTGCGGGCGATGTTGACCCGCTGGCGCTGGCCGCCGGAGAG  
CTGGTGCGGATACTTGGCCCGCTTGCCTTGGCGGGGTGAGCCCCACCTTCTCCAGCAGGGCGTAGACC  
ATGTGCGGGCAGCTCTTTTTTGTGATCACCTTGCTGTGACAGCAGCAGGGGGCGGGCGATGTGGTGATAGA  
TGGTGTGGGTGCGGTTGAGCGAACCAGGATCTTGGCACACCATCTGCACGCTCTGGCGATAGTCCAG  
CAGGGCGGTGCCCTTGTGAACTCCTCCAGATCGTGGCCGCGATAGAGAATGCGCCCCGCACTGAGCTTG  
TACATCTTGGCGATGATCTTGGCGATGGTGGTCTTGGCCGAGCCGACTCCCCGACCACCGCCAGGGCGC  
GGCCCCGGTGCAGGTTGAAGGTGATGTCGAGAGTGGCCGATCTTGGCACTCTTGTGATGGCATTGGAGTT  
GATGGGAAAGTCTTGTAGAGGTGCTGGACTTCGATGATGGGTGCATCGGTTTTTGGCGATTTGCATGACA  
GACATCCTTAACAGCCAGCGGCTTGTCCAGATAGATCACGGAATCTTGTGTCAGTCCCTGCTCCTCATA  
GAGGTGGCAGGCGGTCTGTTGTCCGGGGCGGATCTCGGCAATCTGGTGTACTCCTGACGGCAGCGATCG  
TGCACCTTGGCCGAGCGGGCCTGAAAGCGGCAGCCGACCGGCACCTGCAGCAGGTTGAGCGGGGTGCCCG  
GGATCCCTTCCAGCACCTTCTTGGCCCCGTGCAGGGGCGGGAAGGAGTTGCCGAGCCCTCTGGTATAGGG  
GTGCAGCGGTGCGGTGAGGATCGCCTTGGAAAGGGGCGACCTCCACCAGTTCACCGGCATACATGATGCCG  
ATGCGATCGCAGAACTCCACCATCAAGGAGAGGTCGTGGGTGATGAACAGAAATGGAGAAGTTGAACTTCT  
CTTTTCAAGGCATAGACCTTCTGAGGATCTCCCGCTGCACCACCATCGAGTGCCGTGGTTGGCTCATC  
CATGATGAGCAGCTCGGGGTTGAGCGCCATGGCGATGGCGATCACCAGCGCTGACGCATGCCGCCGGAG  
AACTGGTGGGGTAGTCTTGGCCGCTCGGGTGGATATCGACGATGGTGGCAGCTCTTGGGCGCACT

TGATCGCCTCGTAACGGGTCATGCCGGGGTTGTGGGCCAGCAGCACGTGCGAGAACTGCTCCTCCATCCG  
CAGCACAGGGTTCAGGGCGTTCATGGCGGACTGGAACACCACCGACACCTGTTGCCAGCGATAGGAGCGC  
AGCCGCTCGTTCGTTGTAATGGAGGATGTTCTCCCCCTTGAACAGGATCTCGCCACCGCTGATGTAGGCGG  
GCGGCTTGTGCAGCCGGGCCACCGAGAAGGCGACGGTGGATTGCGCGAGCCCCACTCACCGGCGAGACC  
GAAGATCTCGCCCTGTCTGATATCGAAGCTCACCGAGTTGACGGCGCGCACGTCGCCATTTTCGGTGATG  
TAGTCGACGCAAAGATTGCGTACTGACAGCAGGGGATGCTTGTTCATGCTGTCTTCTCCTGTGCGGCAGA  
GAGTGGTGTTCGACCCGGGTGGCAAGTTTCTTCCAGCGGTGCGAGCCCTTGTGGGAGCGCAGCTGCGGG  
TTGGCAATCTCGTCGATGGCGAAGTTGAGCAGGGCCAGACCGGCACCCAGGGTGGCGATGGCGAAGCAGG  
GGGCCAGGATCTCCCACCAGGCGCCGACCAGAATGGCGCTGGAGGTCTGGGCGTTGTAGAGCATGATGCC  
CCAGTCCACCACAGTCCGGTTCGCCAAGCCCCAGGAATCCAGAGTCGCTTCGGTGACGATGGCGTAGATG  
ATGGAGCCGATAAAGCTCACCCCGATGATGGAGATGAGGTTGGGCGAGGATCTCCACCAGAATGATGCGCC  
AGGCCGGCTCGCCAGCACTTCGGCGGCAATGACGAACCTCTTCTCGCGCAGCGCCAGGGTCTGGGCGCG  
GATGACCCGCGCGCCATAGGCCACAGAGGTCAACCTATTATCACGGCAATTACCGCCGGTGACGCTCC  
CCGATAAAGCTCGCCAGCACCAGTAGCAAGGGGAGGTTGGGGATCACCCAGCACCACGTTTCATCAGGAAGG  
TGAGGCATTTCATCCACCAGACCCGGAAGTAACCGGCAGTGTGCCGATGGCGACGGCCAGGGTGCAGAC  
CAGCAGGCCAGCACTGAAGCCCACCATCAGTGAGATACGGGCGCCGTTGGTGAACGGGCCCAGATATCG  
TGGCCCATGCGGGTTGAACCCATCACGAACCTCGGCACTGGGCGGCTGGTGCAGGGCAGCCACCCGTTTGG  
TCGGCTCGTTGCTGGCCAGAATGGGGGCAAAGAGGGCCATCAGTACGAAGGCAACCACGATGGCGAGGCC  
ACAGGCAGCCTTCTTGTTCGCCAGCAGGATTTTGAAGTGGTGGCATAACGCATCTTATTTGCCTCCTGT  
ACGCAGACGGGGATCCAGGAAGACGTAGAGCACGTGCGCCAGGAAGTTGAAGCTGAGCATGGTGTATGGTC  
ATGATGAGCAGCTGCCCTGAATGAGCGGGTAGTCGCGGGCCAGAATGCCCTGATAGAGGGTCAAGCCCA  
GACCGGGATAGTTGAAGATCACCTCGGTGATGAGGGAGCCACCGATGACGAAGCCGAGCGCCATGGAGAG  
GGCGGTGACGCTGGGCAGAATGGCGTTGCGGGCGCCGTAGTTGAAGATCACCCGGTTGCTGGAGAGCCCC  
TTGGCCTTGGCCATGGTGATGTAATCCTCGCCAGCAGGTTGATCATGTTGTTGCGCATGGTGATAAGAA  
AGCCCCCACCTGTACCACGGCCAGGGTTCAGCACCGGCATGATGGCGTGGGTTCATGATGCTCTTGATGTG  
CTCCCAGCCCCAGTTCAGCCTTGATCTCCGGGCTGTAGGCGTAGCCGATGGGCAGCCACTCGAGGCTGACC  
CCGAACAGGAACAGGGCGAGCAGGGAGACCACCACCGGCGGAATGGCTGCATCACCCAGGGTGGAGCGGG  
AGAGAATGCTTCCATCCGGCCCGCAGATACCCAGGCGCAAAGATGCCGACGATGGAACCCAGGGAGAA  
GCTCAGGATGGTGGAGTTCCGACCCAGAAACAGGGTCCAGCCGATGGCACGGCCAGCAGCAGTCAAGACC  
TGCTGCGGGTAGAAACGCACCGAGGTGCCGAGATCCAGGTGAAGACACTCTTACATAGGTGAGAAACT  
GGGTGCCGATGGGGCCGTCGACGAAGCCGAAGGTGGCTTTGAGGGCTTCCAGGGCGGCGGGTTCCATCAT  
GGCGCCAGCGCGGGCAAACATCACGGAGACAGGATCCCCTGGCATGGCACGGGGTAACAGGAAGTTGATG  
GTGGCGGCTACCAGAAAGGCAACCAGATAGAAGGAAAAGCGTCTCAGTATGAATCCCATGATAGTACCTT  
TACTGCAAGTCTGCCCCGCGTCCGGTATAGCTACCCCAACCCCGGCAAAGTCCGGGCAAGAAGGGGATTA  
ACGGGGAAGATGGCCCCCGCAGGGGGCCGGGATTTGTTAGCTGTTTGGCTTGAGGGACAACACGTGCAG  
CAGACGCTCAGGGGTGTCCGGGTGGAGCTGAGGTTTGGCTACCGGGTTATCAGCACTGAACCAGCCGTTG  
AAGCGCTTGGTGCTGTACTCGTACCAGGTCCGGTGTGTTGAAGACCGGAATGATGGTCTGGTTGGCACAA  
CACGATCCTGGATGGCGAACATGATCTCCTTCTGCTTGGCCGCATCGGCGGTCTGGGTGAAGTCATCGAT  
CAGCTTGTGAGCTCGGGATCCTTGTAAACGAGGCGCGGCGAAGCGGTTGCCACGGTCGCCCATGTTGCGG  
GAGTGAACCGCAGTCTCGAAGTACTTGTGCGGGTTGGCACCGGCAAAGTAACCTGACAGGGCGACATCGA  
AGTACCAGGATGATCAGGTTCTCGGTCCAGACGGTTCGCTTCCGGGGTGGCGGTCTTGGCGTTCAGGCCAG  
TGCCTGCAGCCCTTCTACACCAATCTGAACTGTGTTGACCCAGTCCGGTCCAGCCGTTCCGGTACCAGTACC  
TTGAACTCGATCTTTTTGCAGCTCGGGGTGTGAGGAACTTGTGCGCGTCAAACTCCTTGTAGCCTGCCT  
CTTTCAGCAGGGCCTTGGCTCCTTCCAGATCGAACTTGTGTACTTGGCGTACTTCTTGTCCACTTCCGG  
GTTGTTCCAGGAGTCAAAGGCTTTGCCAAGACCTGACGGGTACTCGTTGACGGTGGGGTAGCCGTAGCCC  
CGCATATCCACCATCGACTGGCGGTCCATCGCCATGGAGAAGGCGCGGCGGAAGTTGATGTCGTTGAAG  
CTTCGTTATTGCCCGGTTCTTGGTCTGGAAGTTGACGTTGAACGCCACGGTACCAGGAGCCGGAACCA  
GTATTTGTTGTTCTTCCGATCGTTGCCGACGTAGAGGCGCTCGATATCCGGCACGAAGGAGCCGAACCAG  
TCGATGTCACCTTTCATGACAGCAGCCAGCACCTGGTTCGTTGGTGGCCATCTGCGGCATACGCAGACAGT  
CGATGGCGAGGTTGGCGTTATCCCAGTAGTGGGGTTGCGGCACTGGGTATAGAGCTGGGCGGAGAAGTT  
GTCCACTTCGGTGAAGGGGCCAGTACCAACCGCTTGTGCTTGGTGAAGGCAACCGGATCTTTCACCGAT  
TTCCACTGATGCTCCGGCACTATGGGTACCAGCACCAGATCGTTCACCACGTTGGTGTGACCTCGGTCA  
GGTTCGAATTTGACCTTGTGGGGGCCAGCTTCTCGACGCTCTTGATCTGGGTCCAGATTGAGCGCTCATC  
CAGCGCCTTGTGGCCTTGACCAGATTGAAGGAGAAGATGATGTCATCGGCATCAAAGGCTTCGCCGTCA  
GACCACTTCACGCCGTACGCAGATCGAAGGTGACGGATTTCAGGTCATCGTGAACGCATAGTTGGTGG  
CCAGACGATAGACGGGTTTCCCCCTTGCATATCGTTGAAGATCACCGCGGTTTCATAGATGAAGTGACG  
GGTGGTGTGCAGCAAGCCCGCTTGCAGGAAGGGGTTGAAGTTCTTGACCCAGGCGGTTTCTGCTGTGCG  
ACCATGGTTCAGCACGGTTTTGTTTTCTGCGGCCATGGCGTTACCAGGCGGCACCGGCAAGCATCATGGTTC  
CCAGCATTACAGCGGTAGAGATTTTGGATACTTTGGCAAGCATATGTTTTCTTTCTTATTTTTTGGCAT  
TCCCAGGGTTTCGCTTGTGTTGTGTGAGCACCAGTTTCGCATGCTGATGAAATCGGCCCTCTGTGTTGG  
TCAGGTGTCTAACCTTTGTGCTTCTGTTTTTCAACGCCCTAAGCAAACCAGAAATTAACAGGAAAACAACA

ACTATTGATTTTCGTTGTTTTTCGTAAAAATTGACGGTGTACGTCAATCTCGTCAAAATCGATTTTTTATAT  
GTTTAAAAATCATTGCTTTTGCCTTATTTGCTCTCGCGTAGAAAAGTGGCTGTGAAAATGGCGTATATGACAA  
ATTTGTGAATTGGATCTGCTCTCGGTTTTCGGGGTTGTGCGGGGCTTTGTTTTGCATAAAAAAGAAACCAGA  
TTGCCAATTGTGATCCGGCGCCCGTTTAGGGCGTCTGTGCACGGCTTGCCTGGCGAGCTGACGCAGGG  
TCTGGGCGCTGTGCTGCAACTGCTGGCGCTGGTGGTCATTGAGCGGACAGTGGCCAGCACATACTCGGT  
GGTGGCCACGACCGTCTTCCAGCGTGGCGACTTGGGGAGGGTGTCCAGACTCAGGTATTTGTGCGAGGGTG  
CGGGTCTGCGGGCTGGATCTGTCCATATAGACCCGCCACAGCTTGTCTTCTCTGCCAGCACAAATTTGC  
CCTTGCCGGTCCCCTGCTGCCAGGCATCCAGGGTGTGCTGATGGTCTCTACCAGCGCACGGCGCAGCGG  
CTCGTCATCTGTGGCGAATGAGGTCTGCGGCCAACGAACGGAACTCGCCACCCAGGCGGCTCAGCTCG  
CCCAGCAGCTGTTTCATCTTCGATGATGGCTTGCCTGCGAGAGGTTCTTGAGGGCGTTCTCCAGGCCATTA  
CCCGGTTCTCATCTGACGCAGCTCGGTACTCAGAGTGAGGGCGAAAGCGCCTGTCTCCGAGCGCAT  
GGGCAGGGCACGGGCGTTGAGCACATCTTTTTGCCCGGCCACCAGAACTCCAGATTGTGTTCCCGCTCG  
CTGGCAAGGTGCGGGCCACTGCTGTTGCAGCGGGTGGCGAGCCACTCATTGAGGGGTGCCCTCCATGG  
CTTCCGGCTCCTGCCCCAGCAGGCGTGCATCACCCGGGAGGCAAACAGCACTGTGCCCTGCTCGTCGAT  
AAAGATCATGGGGTTCGGCCCTTTCGCGGAGCAGGGCCAGCAGCCGCTGCTGATCCTGATGCAGCCGCTCC  
TGCAGGGTGTAGGCGATGTTTCGATCTCCTGCTTCAATAGCCGGTCTCTACAAGCGAGGCGCGTCCGGCCT  
TGGCTTCCAGCAGTGCCTTGACCCGGGCAAACAGCTCTTCTTGCAGAAAGGGTTTGACCAGATAGTCGTT  
GGCACCGGCCCGAAGCCCTCCTCGATATCCTTGGGCTGGTTGAGGGCGGTGAGCAGCAGCACCGGCAGC  
ATATCTTTTCGGGTGCTGCTCGCGCAGGTGACGGCAGACGTCAAACCCGAGAGGGTTCGGCATCATTACAT  
CGAGCAGGATGAGGTCCACCGGCTCCTCGGCCAGCTTGGTCAGCGCATCGTGGCCGTGCTGCTGGGCAG  
AATGCGGTAGCCGAGGGCTGCAGCAGATGGCGCAGGATGTGCAGGTTGATGGGCTCGTCATCCACCACC  
AGAATGAGCGGGCGCATCCTCGGGGGGAGGGGGCAGATCGTCTGCCAGTCCGGCAGGATCAGCGGTT  
GCTGGCGCACAGCTGATGCTCGATCTGGCGGCTGTGCGAGAGTCAGATTGGCCGCTTTGCCGGTGGCAAG  
GGGCAGGGTAAAGGCGAAGGTAGAGCCAACGCTCGGTTTCGCTCTCGACAAAACAGCTCGCCCCCATCAGG  
TGCACCAGCTGGCGAGTGTGGAGAGGCCAAGGCCGGTCCCTGCTTACCTCCGGGCTCATCTGCA  
CCAGCGGCTCGAAGATATGTTCCAGATGGTTCGGGGCAATGCCGATGCCGGTGTCCGGTGACCTTGATGCG  
CAGGAAGTTGTTCTCGACGATGGCACTGAGCACACCTTGCCCTGCGGCGTACTTGTGATGGCGTTGCC  
ACCAGTTGTAGAGCAGCTGTTTCGAGCCGCTGCTCGTGGCCAGCACCGGCGGCAGTTCCGGCCGGGCTGA  
TATCTACCAGGTTGAGGGTTTTGGCCTGCACCATGCTGGCAAAGATCCAGCACAGCCAGCCGATAACCCC  
TTTTGATGAGACGGGCTGGGAGTGGATCTCCAGCTGGCCGTAGCGCATCTGATGGTAGTCCAGCAGATCA  
TCCACCAGACGGGCAAGCCGTCGGCGCTCTTGATGATGAGGCCGAGCTGCTTTTTGCTGCCCTTCGGTCA  
AATCCTGCTGACTGGCGAGCATCGACTCGGCCATCCCCTTGATACCGTGAATGGGGGTGCGCAGCTCGTG  
GGAGGTGTTGGCCAGCAGTTCATCCTTGAGCTTGTCCGCTGCTGCAGGCTGAGGTTCTGCTTGTGGGTC  
AGCTTGACCTGCTGTTGCAGCTCCTGGGTCTGCTGTTTCGATCAGTTCGATCTTGTCCCTTACCAGCGCT  
GCATATGGCGAAACGCTCGGCCAGCCGGTGCATATCATCGCCGGTGCCTCGATGGCGATGGGGTGATC  
CAGCGCGCCGTCGGCCACCTGCTCGGCTGCTTCGGTTCAGGATCGCAGCGGCCCGTGTGAGTGGGAT  
AGCCAGCGGGAGAAGAGGATCAGCAGCAGCACCGAACCCGCGCCAGCACGATGACCAGCGTCTCCAGCT  
GGCGGATCGGGGCATAGGCTTCCCGGGTGGAGATCTCGGCGATAAAGGCCACTCGGTGTGAATACCTT  
CACCTGGGTGTAGGCGGCCAGCACCTCGTCATCCTGATAGGAGTGGAACAGCCCGACCCCTGCTCACCG  
GAGAGAGTCTTGGTGTGAGCGGCGTTTTGCAGCGGCCGGAAGTTGGGGCTGAAGCTGTTCTCGACGCTGA  
ACTCCGGCGCCAGCCAGGCATCGGCGCGCATCCGCTTGTGAGGGCCGATCAGGATGGTCTCGCCGGTCTC  
GCCAGCCCTCCCCTCGCCATGATCTGGTTGAGCTTGTCCGGCTGCAGCTCGAAAATCACCACACCG  
CGACATAGTCGATTTGCATCACGGGGGCCCGCATGTAGGCGACCACCTGCCCGGTGAGCTCGTTGCGGC  
CAAAATCGGTGAATTCGAAGATCTGCTGCGGCTTCTGGCCGCATCAAGGCGTCTTTGATCTTGGCGAA  
GGTCTGGCCCAAGCCACTGCCCTGATAAGGTCCGGAGAGCAGATTGGTGGCAAAGTTAGGGTGTCTGGTG  
ACCGAATAGACCACATCACCGTTGAGGTCCACCAGAAAGATGTCGCTGTAGTTGGACTTGCACCATGT  
CGGCATAGCCGCGATGAAAGCGCTGGTGCACCCGGCCATACATCTCGTCCGGCGAGGATAAGTGCCTTAT  
GGAGGGTTCGATCTCCACCTGACTGTCCGGTTTTGCGCAGTTGATCCCAGGAGCCGGGCAGATAGCGGGCC  
TGGGCACGGCTGCGGGCCTCCTGCGGTGTGGTGGCCAACTTCTCGAAGGCGCCGGTAAAGCCATAGAAAC  
GGCCGATACTGTTGCCGGCAAAATCCTGCTGGGAGAAAGTTGATGATCTGCTCTTTGAGGTTGTTGAAGTA  
ATCCTCGAGCTGACTCTTCTTGATATTACGGACGGAGACCAGATGGTTGGAGGTTCTGGGTGGTGTGATCC  
TTGCCGTGGCTGTATAGGAAGAAGAGGGTGTGACCAAAAAGGGCACCATGCCAACATGAAAAAGCCA  
GCATTAACCTGCGGCTGAGCCCACGAAGCGTGAAGATCCATTTTCATCTTGTGATTTTCAATTGAGAATCC  
GGTTATTAAGCCGCTCAAGTCTCGAACGAAAGCGTAATCATTTCAACGACTTTATCCCAAATTCGCTTGG  
TGGGTACAGCTGGCTGGAGAAAAATGCAGCAAGGCGTTTTAAACCTGAGCAAACAGTCTGCATCAAGGC  
TTAAATTCGAAAAAGGGGTTGTGCTGGCGCTCGTGGTACGTATAATGCGCCTCGTTGTGAGGCAACTGG  
CACGAAAGCAGTAACGCGGGAATAGCTCAGTTGGTAGAGCACGACCTTGCCAAGGTTCGGGGTTCGCGAGTT  
CGAGTCTCGTTTTCCCGCTCCAATTTTCCATCACACCAACGATGGAATTCATTTTCAAGACGACCAGTCTT  
GTCAGCATGGCGGTTAGCAAAGCGGTTATGCAGCGGATGCAAAATCCGTTTAGTCCGGTTCGACTCCGG  
AACGTGCCTCCATCTTCTGTCTTTTCCCTGATTCATCACTATTCGAGCTGTGAAGCTTGGTGTGATC  
CTTGCTGTACCAGTAACCTGTTTCGAGCCAGCCTGTTTCCACTCCCGCTCGAGATAGTGGCTCACATCCGC



CATGTTTTGCCCCGATATTGAAACTGCACCTCGGCACTGTGCTGGTTGAGATCCGCAATCCGTTGCTTC  
AGTGTGCCGCATTGCCACAGGCTGACGGTGGGCACGCCCGTTTCGCCCAGCACGATGGCATCTTCCC  
TCAGTTGCCACTCCTCCAGTTGTGCCCGTGTGAGGGCAACCATCAGCACCAGCAGTGGCCTTCAGGCAG  
TTTCATGCGTGTCTCCCTACTGCATGTTTTTCCCCTGATAACTGTGGCAAAGCGCACGATTTTCGCAAGT  
TTGTTAACTGTTGGTTAATGACGTAACCCGTTTTTCAGTATTTCCCCTTTTTTACCATTTTTTTATAAAAA  
AATGCGTTGTGATGTAGTAATCCTACATGGGTTGGGGTAATCTTTGCTCAGTGGTCTTACCAGTAAGGAG  
TTACATCATGTTTCATCCCTTTTCCCCTGACTCAGATTATTCTGCGTCGCATTTATGTATTGCTGGTGGGC  
ATTCTGGCTTTCCCCGTGATGCTGTTTCGCAGCGATCGTGCCCGCTTCTACAGCTATCTGCACCCGGATCT  
GGAATAAAACCAGCACCAAACCCGGTGTGGCTCAAAATGAGCGAGCGTGGCGAGCGGATCTTCTACTAAAC  
CCCATTCCGACCATGTGCAAAAAGAGACAGCCAAAGCTGTCTCTTTTTTTATCTGCTTGGCGCAACTCCT  
GGCTCCCCAACCACTCAGATTGTTTATTTCTGTTTCTTTAAAGTTGCATCCAGCCCTGCTGTTGGCG  
GGGCTTTTTTATGTCTGACGCATCTCTTTGATGGAAGCTGTGAAGAAGATTAACGGGATGAAAGCACCA  
TATGGCACTTTCCTCGTTCATTAATAGGTGGTTCGTCGAGAAAATTTCAATGATGAAATAGCTGTTAAAA  
TCAATTGATTGAGTGTCTGTCTTTGGATTTTTTAACTCTTTTTTGTGTTTTTTTTGAAAGGGAATATCCC  
TTGGCGGTTCTATTGCAGGTACCCGGTTGCGACAAAATCGGGGATATCAGCAACATCCAACGACATCAAAA  
GGAACATGAACATGAATGTTAAAAAAGCACTGCTATCGCCTCCGCCATGACCCGGTCTGCTGGCGCTGGG  
CGCCCAATTTATCGCGCACCAAGAGCAGCTCCTGCGCCGTTACTGCCAAGGAAGATGCTCAGGGTGTATG  
AGCAAAAATGACTGTGCGACCAAGAGCAGCTCCTGCGCCGTTACTGCCAAGGAAGATGCTCAGGGTGTATG  
CCTTTGTGGTGTATGCCCAAAGGGCTGTGCGAGAAGCTGGTTCGGCGGTTTCGCTGCAACCAAGTAAGAGAC  
ATCGGGCAGGGGATGGCCAACGGGCGCCCTGCATCTTCTGTTGGCGAAAAGCGAGTCTTGCAGTGA  
ACCCTTTGATTGGCATCGGATTACGCACTCCCCATTACGATGAGATCCGGCAAACCTGCGCGCAGTCCG  
TTGGCTGGAGGTGCACAGTGAATAACTTTCGAACGGCACAGCCAGGGTTTTTCAGGTGCTTGCCGAAC  
GCGCAGCACTACCCCGTCACTTTCACGGCGTTGGCATGTCCCTCGGTTCTGCGGACCCGCTCGATCCGC  
ACCATCTGCAGCAGTTGTGCACTGGTAGCGGGATCAAACCCGGTACGGATCTCCGAACATCTCAGCTG  
GGGACAGCATTGGCGGGCGCTATTTCAACGATCTGCTGCGGGTGCCTATACCCGCGCTCCCTGCGCAAC  
ATGAGCGACAAGATCCAGCAGGTACAACAGACCCTGGGTTCGGCGATGCTGATTGAAAATCCCTCCTCCT  
ATCTGCAACTGCCCGGGAGATGAGCGAGTGGAAATTTCTAGCCGAGCTGCAGCAGCGCAGCGAGTGGCG  
CATCTGCTCGACCTCAACAATCTCTATGTAGTGCCTCAATCAGGTTTCTCTTGCAGTGAATGATGATCTG  
GCGCGCATCGATCTCGCCACCGTCCGGGAGATCCACTTGGCCGTTATACCGAGAAGCAGCTGCCGGAAG  
GCTCTCTCTATATCGACACCCACAGCGCCCTGTGGTGGAGCCGGTCTGGGAACCTATCGCCAGATCTG  
CCGCAAGCAGGCCATTCCACCCCTGATTGAGTGGGATCTCGAGATCCCGCCGCTGCGGGTCTTGTGCGCA  
GAGGCGGCGCAGGCTGGTGCATTTCTGGATGAGGCGTGCGCCATGAGTGCACCACGGGAGGTAGCCCATG  
GCTGAACTGGCACAGCTGCAACAGCGCTTTGCCGATGGTCTGCTGGGGCGCCTGACGCCATTTCCCCTC  
ACATCAGCTCCCGGCTCTTTTCTGCCGAATCTGTGCTGCAGGTCTATCGCAACCACTTCATCCTGAGCCT  
TGGCGAGGTGCTGGCGAGCAGTTATCCCCTGCAAGGCCATGGTTCGGAGATGACTTTTTTGCAGCGGGC  
GCCCCGTGGCTTCGTATTGGCCGAGCCGCTCAGGGAAGGGAGCGTCAATGCACTATGGCGCCGATTTGGCC  
AATGGTTGGCCCCGTTGCCGACCACTACCGGACTGCCCTGGCTGGAGGCGCTGGCGCAGTTGCAATGGCA  
GCTTGAGCGTGCAGTCTGCTGCCGCTGGAATCCCCTGCTGCGCAGCTGAGCGTCTGGCCGATTTATCG  
CCGCAACAATGGGAGCGGCTGCGGCTATTACCAGCCACGGATCTGCTGCTGGTTGCCAGTGATTATCCGG  
TGCTGGCCCTGTGGCAGATAGCGCTGCACGGTGGTGAAGCGGTGGAGGTGCTTGATGCCCCGCTGCTGGTT  
GGCATTGAAGAAACAGCCGATTGCCGGTTGCCCCCTTGCCCTGACGGCGGGTGGTGGCGGTTGTTG  
CAGGGTTGCCCTCGCCGGTACGGCGCTGGTGCAGCTGCTGGCGGCCGACCTGCGGCCAGTGAACATCTCA  
CTCGCCTGATAACCCTGGTCTGCTGGTGGATATGGAGGTAATGCCATGATGGCAAACAAGTGGCTGGCA  
CTGGCCAGCTCGAGTGGTGAATTTGCCCGCTGGAGCAGCGCTGGTGTGCTGTTGCTGGCGGGCTGTGGG  
TCGCCCTGGTTTTTTTCACTTACAGCTGGCTCAAGCTGACTGCGTGGGATTCACCCCTCTATCTGTTTGA  
ATCCGAGTACTCAGGTGCCCTGCTGCCCTGGTGTGGCTGCCATCTGGGTACGGCAGCCAGCTGCTG  
TTGCCGCTCTTCTGCTGGCGGGGCTTTTTACTCGCCCGCCCTTGTGCTGTTTGGCTTCAATATCA  
TGGCGGTGATCTCTACCCGACCCCTTGGGCGGGTGGCTTTTTACGATCACCAGTTGTGGGGCTGGATGCT  
GCTGATCCTTATCATCTGGGGCGGGTGTGCTGAGCCTGGATCACTGGCTGACACGTCGCAGCCATTGA  
TTTTATCAGTGATTTCCCAATGACAAAAGAGCGCCACAAGGCGCTCTTTGTCAATAATGACGGCCGGCGAAA  
TTTTCCATGAGAGAAAAGGAGCAGCAATGATCATTCGTCAGGCAAGGGCCGAGATATCCCACACTGG  
TGGCGCTGCGCATGGAGCTGTTTTGTGAGGTGGTGGTGGTGGTGGTGGTGGTGGTGGTGGTGGTGGTGG  
GCAGGCCACCCTTACTATTTTCCCGGGCGATGAGTGAAGAGAGTGTATCTTCTGGCTGGCTGAGGCC  
GATACGCAGGAGGGCGGCAACAGATCGTGGCGGCAGGGACGCTGGCATTATTTGAACGGCCGCCCTATC  
CCGGCAATCTGGCGGGAGTGGAGGGGTATCTGCTCAACATGTATACGCGCCACAATGGCGCCAGCAGGG  
GATCGCCACGGCGCTGCTCGATGCCATAACGGCTTTGCCAGAGCGCTCAGCTGGGCAAGGTGTGGCTC  
CATGCCAGCGAGCAGGGGCACCCCTCTCTATGAGCGGATCGGCTTTGTGCCAATCCGGCTATCTGGAGT  
GGCAACCGGGGTTGAATAAGGGTTGCAGCTCTGCATGAGTGGCGTTTGGTCCGGTGAATTTGATTTACAG  
CAATAAATATGGCGTCAAGTGGGATCGCGGGAAAGCCGCAACTATGCTGATGGAGCACGCCACCATTAT  
CTTATTGATCCACTGCGTGGTTTGGCCATGGTGGGTGCCAGTCTGGAGGATACGTTTCGATGTTCAATAG  
CAAACGAAAGCCGAGTTGCAGCAGTGCAGGATCAACTTCTGGAACAGCAGGGATTTTTTGGACGAGTG

CACGGCAGCGTGGCGACCATCACCTTTACGCCGATGGCACTGTGCTGGCCGCAATGATCTCTTTCTCA  
ACGTGGTAGGCTTCAGTGCGCCCGAGGTTATCGGTCAGCATCACCGTATCTTCTGCGACAAGCTCTATGC  
CCAGAGCAGCGACTATCAGCAGTTTTGGGCGGATCTGAAGCAGGGGCGCTCCCGTACAGGGGTGTTCCAG  
CGCTTCAACAAACGGGGCGAGGCGATCTGGCTGGAAGCGACCTATTTCCGGTCAAGTTGCGGGGCGTGG  
TGACCAAGGTGATCAAGATCGCGGCCGATATTACCGAGCATCACCTGCAGCTGCTGAGCCAGCAGGCGGT  
GGTGGCGGGCGCTGGATCGGTGCTGGCGGTTCACCCCCGGCGGGGAGGTGATTGCTGCGAAT  
GGCAATTTCTCCATACCATGGGCTACACCCTGGCGCAGGTGCAGGGCAAGCACCACCGCATCTTCTGTG  
ATGACCACTTCTATCAGGAAAATCCCCACTTCTGGGAAGAGCTTGGGCGCGCCAGTTCAAATCTGGCCT  
CTTCTGCCGCCAGAATAGCCATGGCAGCAAGGTGTGGCTGGAGGCGACCTACAACCCGATCCTGGATGAC  
AACCGCCGGGTGGTGAAGGTGATCAAGTTTCGTAGCGACATCACCGAGCGGATCAATAAGAGCGATGCGG  
TGCGCGAAGCGGCCATGCTGGCCACGATGCGGCCCGGGAGACCCTGAACTGCGCCGAGCGGCGCGGG  
TTTGCTCTCCTCGGTAGTCGATAACCTCCAGCCTGATTGCCAGCCAGCTGACTCACAGCATCGCCGATCAAA  
AATCAGCTCAACGAGCAGTCGCGCAGTATCGAGGCGATCGTCTCCACCATCAGCAGCATCGCCGATCAAA  
CCAATCTGCTGGCCCTTAACGCAGCCATTGAGGCGGCGCGGGCGGGGATCAGGGGCGTGGTTTTGCGGT  
GGTGGCCGACGAGGTTGCGCCAGCTGGCGGCCCGTACGTCTCTCTTACCAGCAGATCGCCAAGGTGGTA  
CAGAACAACCGGGAGCTGACCGCCAGGGTACCTCCGAGATGTCTGAAGTCGCCAGCAGCGCCGAGCTTG  
GCAAGCAGCAGGTGGGCGAGGTGAATGAGGTGATGAGCGACATCCGCCGGGAGGCGAACACGTCTCCAG  
CACCGTCTCTGATCTGGCCATCTGAACCCCTGACTTCTGTCTATGCCGGGGCATTGACTTATATTTGAG  
CAGTCAGTGCCCCAATCTGAACCCCTCCTGTATCGTCCCGCATTGTGAATTGTCTCTTGGCCCTT  
GATTAGGCTTGGCCGCTCATTTATTTTTCAGAGCAGGAACAGAACAAGATGGCATTACAACAGAAGGGGCGG  
GCGGCCGCGTTGCTGATGATGGTTCGCGAGCATGGGTCTGGGCGGCTGTATGGGGCAGATGGGGCTTCCG  
GCATGGTCACCAAGGGCAACCTGAGCGTGGTGGATAACCGCTACGGCCGGGCGGTTGTCTTTATGCTGCT  
TTCCCTGTCTACGGTCTGGCCGCGACCGCTGACCTGTTTCAATACCATCGAGTTCTGGTCTGGC  
AAGAACCCCATCACCGGCAAATCCCCGGCAGTGGTGGACATGAAGGCCAATCCGGTGTCAAGGTGAACC  
AGCATCTGGATCCGGCCCTCAAGACGGTGCCTTGGCCATGCTGCCACAAGGGGTGCGCGAGGTGGAGCT  
CAGTACCCGGACGAGCATAACCGCCAGATGGAGGTGCACTATCTGGATGGCCGCCGAGCATGATGCGT  
GGCGAGAAGCGTGGCGAATGATGGATATCTACTTTCGATGGCCGCTTTGTATCTACCCTGAGCCGCGCCG  
AGCTGGAAGAGCGGGCAGTACAGGGCAAGGCTGCTGCCTAAATCAACTGAATCCAGATCGATCCAGCTT  
CAGATGGGGTATACCTAATCTGCTGGCAAATGCCATGATGTCTAAGGGAGTAGACTATGACGGTGAAT  
GGATTGCGATTGGCGGAGTTGATTGGTTCCCTCAGTCATGCGCTCGATATGACTGAGGGCAACCAAGAG  
GACACTGCATTTCGCTGCTGCTGGATAGGTTCCCGTCTGGGGGAGCGGCTGGGACTGGACGCCCGGCTGCG  
CCATGATCTCTACTACACGCTCCTGCTTAAGGATCTTGGGTGCAGCAGCAATGCCGCCCGCATCTGCGAG  
CTATATCTCACCGACGATCTTCACTTCAAACGCGATTTCAAACCTGGTGGATGGCTCCCTCTCCGAGGTAG  
TCAATTTTGTGCTGGGCCACACCGGCTTGCAGGCGGATCTGCTGGGACGTTTTTCGACGCTGTTTCATAT  
CTTTTCGCAACGGTGACCAGATTGCCAACGAAGTATCCAGACCCGCTGCCATCGGGGGGCGGATATTGCT  
CGCCAGCTGCGTTTTAGTGACGAGGTGGCCGATGGCATTCTCTCCCTTGATGAACACTGGAATGGCAAAG  
GTCGGCCCCCTGCAACTGGCTGGCGAGGCGATCCCGCTCTTCTCCCGCATTGCCCTGCTCTGCCAAGTGGT  
GGATGTGTTCCACGCGGCCCGCGGCCCTGATGCAGCGCTCAAGGAGCTGCGCGAGCGCAGCGGCAGTTGG  
TTTTGACCCGGCGCTGGTTTCGCGAATTTGAAGCTCTGGCGGACGATGATTTCTGGCAAGGACTGGCCGATC  
CCCGACTGACCGAGTGGGTGCTGGTCCACCCGGCCGGACAGGGCGAAGTAGCGCTGGATGAGGATTATCT  
GGACGAAATCGCGGGCGGCTTTCGGGCAGGTGGTGGACTCCAAAAGTCCCTACACCGCGGGTACAGCGGC  
AGGGTTGCGCTCTATACCGACATTTCTTGCCACCCAGATGGGGTTGTCCGAGTCGCGTCGACGCTGGCTCA  
ACTCGATGCGCAGGAGTGGGCGGCGGTGCAGATGCATGCCGCTATAACCGAGGAGATCCTGAGCCGTATA  
GGCGCCTTCGAGGAGCTGGCGCAAGTGGCGGGCGCCACCATGAGCGGCTCGATGGCAAGGGCTACCCCA  
AGGGGCTGAAAGGGGACGAGATTACCCCTTGAGACGCGCATCATCACACAGCCGACATCTCGATGCCAT  
CACCGCCAAGCGCCCTATCGCGGCGCCATCCAGTCCCGCAGGCGCTGGAGATGATGGCGGAGAATCTG  
GGCACTGCGATAGACCCCGACTGTTTTGCGCCCTGCAGGCGGGTATTCAGGATTTCTCCCTCTACCTCA  
CCACCGAGCAGCCGCTGGCCAATGCCAGTTAGAGTTGCTGATCAACGGCCCAAGCGGCCAGTCAGACAGC  
AAAACGCCCGCAACTGCGGGGCGTTTTGCATTGGGTCTAGTCCGGCTGCTTGCATGGGGCGGGTGGAG  
GATCAGTCCCAGCAGGCGGCGCAGGTGGGTGAGCTGTTTCGGTTCAGTGGACGTTGAGCCAGAGGTAGCCA  
TTGATGGCGGCTCGGTATTGGGGGGAGCGATACTGGGTGCTACCTCGTGCAGGCGGGCGATGGCGG  
CATCTGCGCCGCGACCATCGCCGTTTTGCATCATCAGGGCAAGCTGGTTGATCGCTCCTCGGTGGCCAG  
ATGGCAGGTTTTGCAGCGCAGCCGTGCTCTGCATCAGGAAGTGGCTCTCCCGATCGTTCCAGTAGGTGTTG  
GCCAGCATCTCAAGAGTGCAGAGGGTGTTCGCGATGGTGCCTGCACCGCATCAAACAGGGCGACGCTGT  
GGCGTGTCTCCTTGGCCGAGGGGCCAGCAGGGCCCCGAGTTTGGCGGTTTTGGGCCAGCAGTTGGGAGAG  
ATTGTGCTTGGAGCGCGGGCGCTCCAGCACATTGGGGGAGAGGTGGGTGTGATAGAGCCGCCCGACTGC  
TGCAAGATCTGGTGAACCTGCAGGCGCCAGTGGCTGTAGGCCCGCTGGGGATAGATGCTGCAAAAGAGCA  
GTGCCAGCAGGGAGCCAGCACCACGTACCGCTGCGCCAGAGGGCGGTATGGATATCCCCCGGCTGGGC  
TCCCATGGTGACCCGAGGGTGTGATGCCGATCAGCAGTCCACATAGGGGCGCTTGGCGAGCGCCAGATAG  
CCGCACAGGAACATGATGCAGCCGACACAGATCAGGGTGCAGGCGAGGAGTAGGTCTCAAGATAGAGTG

CCACCACCCCGCAGCTTGCGCCGAAGATGGTGCCACCACCCGCTGCAGGGCACGGGAGAGCACATTGCC  
CCAAAACGAGATGGGGCCCATCACCACCACCAGCGTGATCAGCGGCCAGTACTCTCCGGCAGTTGCAGC  
TGGCGGGTGTAGCAGAAAGGTGAGCATAAAGGCGAGCGCAATGCGCAGGCCATGGACGATGCGATAGTGGC  
CGTAGACCAGCAGATCGAGTCGGGATAGGGGGGCATCAAGACGCACGGTCTGCCCTCCTGTCAGGTGGGG  
ACGGGGCGCCGTGCATCCGGCCAACGCCCCGTCGGGATTACAGGCCAGTCGTCCCTGCAGGGGGTGGATCC  
AGACCCGCTCGCCAACGGCGATCCCGGGTTGATCCGGTACGATTTCAATCAGGCAGTTGGCATCGGCCAT  
GGAGCTGAGAATGCCGGAGCCCTGTGGCCCTGTGGTGCACCCGCAGCTGGCCGTTACGGTCTGATGA  
AAGATGCCCGCGCAGAACTCGGTGCGCCCCGGGCGGCTCTTCATCTTCTCGTCCGCCAGTGCCGAGAGGC  
GCAGCGGTGCCACCGCTTGCTTGAAGCGGGCGATGGCGGGCTCGACAACTGCAGCACGCAGATCAT  
CGCCGCTACCCGGATTACCCGGCAGGCCGAAGAAGGGGTCTGCCCAGCTTGCCAAAGGCGAGCGGGCGG  
CCCGGGCGCATCTGGATGCCCCGAAATCGATCTGGCCGAGCTCCGCCAGCACCAGCTTGATAAAGTCGG  
CATTGCCACCAGACTCCGCCGAGCTCAGCACCAGATCTGCGCTGGCGGGCGCTGCCAGCTGCTG  
GCGCAGAATGGTCTTGTTCATCGGGAATGATGCCAAGGTCCATCACCCTCGCAACCGGCGGCGCGGATAAGG  
GCCATCAGGGTGAAGCGATTGCTGTGCAAGATATGGCCGGGGCGAGCTGCTCGCCGGCGCCTGCACCT  
CGTCGCCGGTACTGAAACAGCGCCACTTTTTCAGCGGGGTGCGCACGCAGAGCGATGCCGACCGAGTGATGC  
CGCCAGCCCCAGCTGGGGGGCACCAAGCCAGGTACCGGCCGGGATGGCGACCGCACCTTTGGCGAGATCT  
TCGCCGGCGAGGGCGCACATTCTGCCCTGCGCGGATCGGTGCGGTGACCGTGACCCACTTACCTTCAATCT  
GCGTCTCTTCTCGCATCACCACGGTATCCACCCAGGGGGCAGCGGGGCACCGGTCATGATCTGCACCGC  
CTGACCGGCCTGCACCGGTTTCATGGCGCTGCTGGCCTGCCAGCACTTCCCCACCAGTTGCCAGCGGCCG  
GCGGCGAGATCGTCGCTACGAAGGCCAATGCCATCCATCGCCGAGTTGGCGTGGGGCGGCACATTGATGG  
GGCTTATCAGATCGGCGGCCAGCACGGCGCCGTGGCACTGGGCCAGCGGTTTTTCGGAGCAGGCCGTGCT  
CGGGGTGAGGGCCGCCAGAATGGCATTGCGGGCCGCTTCGACCGAGCGAAAGCCCTTGCCCGCCTCCGGC  
TCCTTGCTCTGGCAGCCGTCAAGCCAGCGGCAGACGAAGTCGGCAATGGCCGCCAGATCGTTGATATCGA  
GGCAGGGCAGGCTTGTCTGCTGTTGTTTCGCCACTCTGTTGGGGCTGATCGCTGGCCAGCGCGATGATGTC  
CCGGTCTTCGGGGAAGAGCAGCGGCTTGCCAATCTCGGCGCGGTGCAGCTCGATTTTCGGGAAGTGTTCG  
TGCTTAAACCCCTCGACCAAGAGCAGATCGAGCTCTGTCTGATCGAAGCTGGCCAGCAGCTGGCGAAAGT  
CCGCTTCGGCCAACCTCGGTCTCGCCGTGCGTGTGTTTTCAGTAATGCGAGCATGACGACGGCGGGAGGCAAC  
CATCATCTGCTGGGCGCCTGCTTGCAGGCGATAGCTGTCTTTGCCCGGCTGGTCGATATCAAAGTCG  
TGGTGGGCGTGTCTGAGCACCACCCGATGCGCAGGCGATCCACCAGCAGGGGGATCAACTCCAGCA  
AGGTGGTCTTGCCGGTGCCGCTCCAGGCGGCGAAGCCGAGCAGGGGAAGAGTGGGGCCCGGGGTTCATGAG  
GTGACTCCTTGTGGGGTTCGATAGCCGGAGCAAGCAGAAGGGCCCTCGTAGGCGGGCAGCTCGGCAGGGC  
TATTGAGATTGATAAAGGCATCCGGCTGATCGGCAAAAGCTCACCACCGCCATATGGTGGCGGGCAAACCA  
GATATCGATTTTTCGCTCTCCCTCTGCCAGCGCAGCGGTGAGGGAGGGGAGCAGGGATTTGTGCAGCAGG  
GCGACCACGGGTTGCAGCCAGTCGCCGTGTTGGGCCACTACCAGCTCGGTATCCGGGGTCAGGGCGGCGC  
GAAAGCGGCTCATCAGATCCAGCGGCAGGGCGGGCCATCGCAGGGGACAAACAGCACCAGTCGTGACG  
GGCGGCAGCAAGACCTGCCAGCATGCCCGCCAGCGGGCCGAGATAGTCGTTGTTGTCATCGCTGATGACC  
GGGGCCAGCGCTTGATAGCGGGCCTGACTGCGGTTGGCGTTGATCAGCACCTCATCCACCTGGGGGCGCA  
GGCGCGCAAAACATGGTTCGATAAGAGGGCGTCCCGCCAGTGCTACCCATCCCTTGTCTTCGCCCCCAT  
CCGGGTGGCGCGGCTCCTGCCAGGATCACTGCTGATACGGCAACGGGATCAGAGTGGCTGTGCTTTTTT  
GAAGTCATGTGCTCGATGATTTTTTAAAGGGGTGCTCTCTTGCAGCTGGCCACGGGCGAGGGTCCATTGC  
CGCTCGCACAGGGAGGTCAATGCGTGTGCTCTGGTGGCTGATGACGACCAGGCCGCTGCCATGTTCCCGCA  
GATCTTGCGCCAATGCGGCCATCAGGGCAACCGAATGTGTGTCCAGATTGGCGGTGGGCTCATCCATCAG  
CAGAAAGGCCGGTTCAGCGCCAGGCTCGAGCCATCGCCAGCCGTTGCCGTTCCGCCACCTGACAAAATG  
CTGATGTGCTCCCGCGCCAGCCCTCCAGCTCGACCCGGCGCAGCGCTCGAACACCCGGATCTCGCTGC  
CTAGCTGTTTATCGAGCGCCAGGCCACGTTGTGCTGACTGTGCGATCGAACAGATAGGGGGTCTGGTG  
CAGATAGGTGACCCGGCCTGGCCCCAGATCCCGCTTGAGCAGCCGTTGAGCCGCTGTTGCCAGCGCCCC  
GGCAGATTGGTGTGACCGCGGGTGGGTGCCAGCAGCCCCGCCAGGATTTTGAGCAGAGTGGTCTTGCCCA  
CCCCGTTGGCTCCATGCAGCCAGATGGCATCCCCGGTGGCATGGCGAGCCGGTCAATCTCGAACAGCTG  
GCGCTCGCCAAAGCGCATCGTCAGCTGGTGGGCGGTGAGGGCCATGGGGTACTCCTGTTGATACACAGTG  
GGGGCATGGTCAGTTCTTCAGATAGCTGTGGCCGCGACAGGCCGTGAGCAGCAGGTTGAGCAAGAGGGCG  
AGGGTGAGCAGCACTATGCCAGCGCCACCCCTGGGTGAAGGCCCTTTCTGGGTTTCCAGCGCGATGG  
CGGTGGGGATATTGCGGGTAAAGTGCAGGATATTGCCCCCCACCATCATGGAGCAGCCCACCTCGGTGAC  
GATACGGCTGAAGGCGCCGATGATGGCGGCCAGCAGGCCAAAGCGGCACTCGTGCATCAGGCCGATCAGC  
GCCTTGGGCCAGGAGACGCCAGCGTCAGGGCGGTCTCCAGGCGCGCCGGTCACTCTGGACAAACGCCG  
CGTGAGCCATGGTGGCGATCACCAGAAAGGCGATCAGCATCTGCCCTACCACCATAGCTGTGGGTAAA  
GAGCAGCTTCCAGTCGCCAAAGGGGCCGGCCCCGCGACAGCAGCATATAGAGCAAGAGGCCAATCACCACG  
GTCGGCACCGATTGCAGGGTATTGATGCAGGAGAGCCAGAGCCAGCGGCCGGGCGAGCGGCAGATAGGCCA  
GCGCAAAGCCCAGCAGCAAGGCGGGCAGCAGCACCAACAGCAGGGCGATGCAGGAGACGGAGAAGGAGAC  
CCCCACCACCTGCCACAGTTCCGGTGTCAACACTGAACAGCAGGGCGAGGGCCCAATGTCTGTCTGATC  
AATGTGGGCATCAGACCTCTCTCTCATCGTGCAGGGCGAGGGCCGTCAATACGGTCTGTTTCGATCAAGGT  
CGGCATCAGGCGCCTCCCTCAGCGAACCGGGGGAGGGCCATCAAGGTTCATCGCAGGGGTGAGGGTTGCCA

TTATTTCCCGTTGGCATCCGCCACAAACAGCGCTTGACCGGCTACCTTGAAGTCGCCGATCAACTTCTGG  
CCATGCTCGGAGACCAGCCAGTTCTTCAGGGTGC GCGCCCCTTCGGTGTGAGGTCGGGTTGCGCTTGG  
GGTTGACCAGGATCACCTGATAGGGATTGAACAGGCGCTTGTACCCCTCCAGCAGCACGGCGAGATCCAG  
CTTGCTCTGGTAGGCGAGCCAGGTGCCGCGGTGCGTCAAGGTGTAGGCACCAAGCTCCGAGGCCATGGTC  
AGGGTCGGGCCCATCCCCTGGCCGATGGATTTGTAACCGGCAAACTCGGGTTTGACGTCAGCCGCCTGCC  
ACAGGGTCTTCTCTTTGATGTGGGTGCCGGACTCGTCAACC GCGGGAGATAAAAGGTCGGCCCTGCTCCTT  
GATGGCCTGCAGCCCCTTGGCCGCGTGTGCAATTTGGCCAGACCCGCGGGTTCGTTGGCCGGGCGACG  
ATAACGAAGTCGTTGTACATCAGGTGCACCGGCTCGATGCCAAAGCCTGCGTCGACAAACTTCTTCTCGG  
CAGAGGGGGCGTGGGTATCACCAGATCCGCATCGCCATTTCTCGCCATCTTCAGGCTCTGGCCGGTACC  
GGCCGCCATTACCTGCACCCGATAACCGGTCTCCTTGGTGA ACTGGGGCAGCAGCCAGCCAGCAGACCCG  
GACTGCTCGGTACTGTTGGTGGTGGCGAGGCGGATCGGCGCTTTTGTGGCATTAGTATCCGCTTCGGCGT  
GGGCCGACCCGGCGATCAGCAGGCTGGTGGCGAGGGAGGGCAAAACGTTTGAGGCTGGTTTTTATCGT  
CATCGTGATGCAACTTTTTTCAGGGTGGCTGAGGAGAGGGCAAGAGTAAGCAAGCAGGGTGCCAAACTGTT  
CCTTTGCCGGTGCATTACCGTTTTGCCGTTTTAAAAACAGAAGCTTATTAGAAATCAATTAGGTGAGCTTGT  
TATCGCTTTTTAATAATTGGTGTGGTGTCTTTGATACGGTAAGGACAAAATGTCCCACTAAGGTTCCGGT  
TATCGGGACATTCACCGACCGTACGTGCATCCGAGGTA CTTTTTCCATGACACTCCCTCCAGCCGCTG  
GTCTGCCCTCTCCCTGCTTATCGTTGACGATGAGCCCGCATGCGCAGCTTTCTGGCCAAGGCGCTGGCC  
AAGCGTTTTTGCCAGATTGAGACTGCCGCCAGCGTGAGAGAGGGCGAAAGCCCTGCGCTGCCGCCTTCACT  
TCGACCTTATCATCGCCGACATCCGGCTGCCGGGGCGCTCCGGCATCGAGTGGCACGAGGCCATAGACCC  
GGCCACTCGCCGACGACATCATCTTCATGACCGGTTTTGGCGATATGGAGACTGCCCTCAAGGCGCTG  
CGCCTCGGCGCCAGCGACTTTATCCTCAAGCCCTTCAACCTCGATCAGATGGTGCAGGCGGTGGACAGAG  
TCATCGAGCGCCGGCAGATGGAGCGGGAGA AACTGCTGCTGCCCGGGAGGTGAGCAAGCTGTTCCCACC  
CACCTGATTGGCGACAGTGCCAAGACCCGCGAGCTCAAGACGCTCATCGCCAGAGTGGCGCCCTCCAAT  
GCAGCCGTATTGGTGGAGGGGGAGTCCGGCACCGGCAAGGAGCTGGTGGCCCCGCGCCCTGCATCAACTCT  
CTGGCCGGATGGGAGCCTTTGTGCCCTCAACTGCGCTCCATCGCGCCGGAGCTGCTGGAAAGCGAGCT  
GTTCCGGCCACGTGCAGGGTGCCTTTACCGGCGCCCGCAAGGGGCGTGACGGCCTGTTCCGGGTCGCCCAT  
CAGGGACAACTGTTTCTCGACGAGATCGGCGAGATGCCGCTCGCCATGCAGGCCATTTGCTACGGGCGC  
TGGAGCAGAAGGCTCCGCCCCGCTCGGTGCCGAGCGCAATTTGGCGGTGGATGTGCGCATGCTCGCCG  
CACC AACCGCAACCTCAAGGCCGAGGTGGAGCGGGCGCTTTTCGCGAAGATCTTCTATCGCTATCGCTCAAC  
GTGGTGGCGCTGCCGGTGC CCCCCTGCCGGAACGGATCGACGATATTC CCGCGTGGTTACCACTTTTA  
CCCCGCCAGCTCACCGCCGAGATGGGGATGGGCTCCTTGAGCTGGACCCACGAGGATGTGGTGGCGATGCA  
GGCCTACCCCTGGCCCCGCAACGTGCCGGAGCTGCGCAACCTCATCGAGCGCTGCCGCTGCTGGGCAAG  
CCCCCGGGGATTACTGGCAGAGCAGCAAGCCCGCCGAACAGGGGGCGAGCGAGGAGGGTTATCCGTTGG  
CATGGCCGCTGGCGGAGGTGGAGAAGGCCACATCTGCAAGTGGTGGCGAGCCATGATGGCAACAAGTC  
GGCCGCCTCCCGGTGCTCGGGGTGGCGCGCAAGACGCTGGATCGCAAATTC AAGGAGTGGGCCATCGAA  
TGAGGAAGGCTGATCGGATGGGGTGGCGATGAAACTGACCCTGCTCTCCCGCTGCATGCGCGCCCTGTTG  
CCCCGTTGCGTTCGCACCAAAGTGC GCTGGCGCCTGCTGCTGCTTACTTCGGTGGCCATCATGCTCACCC  
TGGTGGGCATGATTGCGCTCACCCCTACTGGACCTCACCTACAGCTGGCAGA AACTGCTCACACCGGT  
GCGCAGCGATCTCGGGGTGGCCCATCACGCCATCACGGTGCAGCAGCAGCGCCAGACCCAGCATCTCGAG  
CATCTGCGCGATGCCTGGGCTTTTTAGCTGCGGCTGCGGGAAATCGCCGGATCAGCTGCATGACTGGGTGA  
TGCCGCTGGCGGCCAACTATGGTCTCGATTTTCTACGCTTGC GCCGTGGCCCCGAGCTGGATCAGCTGAC  
GGCGCAGGAGCGCGCCGCCCTCACGGCCGACGCAGCGTCA GCCACTTTGTGGTCTGGTCGAGCAGGAG  
ATGCTCGCCCTCTCCCCGCAACTGGCCAAGCGGGCCGTGCTGTGGCAGCGGGATGGCACTAGGGTGGTGG  
AGAACAGGGGGCTGATCAGCCTCTCACTGACGCCGTTGATGGGCCGCGACGGCTCCCTTTGGGCCGTGCT  
GGAGGGGGGGCAGCTTGTCAACGGCAGCACCCGGCTGGTGGATGAGCTCAAGGTGCAGGTGTTTTGCCAAA  
AACACCCCTGCCGGATGGCAGTGTCCGCACCGTCA CCGTGTTCGACGATCTCGGGTGAGCACC AACG  
TACCGGTGAGCAGCAGCCGTCAGGTGGGCCGGGCGGTGGGCACCCGGGTCGCTGCCAGTGC CGGAACA  
GGTGCTGGGGCGGGGGAGATGTGGGTTGACCGCGCCTTCGTTCCACGATGCCTGGTATGTATCTGGCTAC  
GAGCCGCTGCTGGGAGCCAGGGGCGAGCGGATCGGCATGCTCTATGTGGGCTTTCTCGAGTGGCCATTA  
TCCGCACCTACCTACCAATCTGGTGGAGCTGGGCTCCGGCGTAGTGCTGCTGTTGCTGCTCTCCGGCCT  
GCTGGTCTATCGCGCGCGCGGGATCTCTTCTCCCCATCGAGCGGATGCACAAGGTGGTGC GGCAGGTG  
CAGGCCGGGGAGTCCGCTCGCATCGGCCGCTGGCCCTGACCCTGACCACGAGCTGGCCCAGCTCGGTC  
GCCAGTTGACGCCATGCTGGACAGGCAGGAGGCGCATCAGCAGCAGATGGCCCGCAGCGCCGACGAGCT  
GGAGCAGAAGGTGGCCGAGCGTACCCAAAGCCTCGAGCTCAAGACTGCCGAGCTGGAAGATCATATCCAT  
ATGCTGACCGAGGCGCGCCAGCAGTTGCTCATCAGCGAGAAGCTGGCGGCCCTTGCGGAGCTCTCTGCCG  
GTGTGGCCCATGAGATCAACAACCCGCTAGCGGTGATCCTCGGCAATGTGGAGTTGATGAAGCTGGAGCT  
GGGGGAGGCGGCCGAGCCGGTCA GCGAGGAGCTGGCGCTGGTGTGCCCCAGATCGAGCGCATTCGTTGCC  
ATCACCCGCGACCTGCTGCAATACTCTCGCCCTGGCGATTACGAGACGGCGCCTGTGTGGCAGCACCTCA  
ACCCCATCATAGAGGAGAGCCTGACCCTGGTGC GCTCCGCCCTGCGTCAGCAGCAGGTGGAGCTGGTGGC  
CGATCTCAAGGCCAGCAGCCCATCGAGGCGGATCGCCAGCAGCTGTTGCAGGTGCTGATAAACCTTCTG  
GTCAACGCCAGCCACGCGCTGGGGGAGCAGGGGGAGATCCGGGTGAGAGCCCGACTGGGTGATGAAC

TGGGTCAGCTGCGCGGGGCAGAAGTGC GGGTGATCGATAACGGCAGCGGCATCGAGGCGGCCATTATCGA  
CAAGATCTTCGATCCCTTTTTTACCACCCGCGCCACCGGCACCGGGCTGGGGCTGGCCCTGAGCCACCGC  
ATCATCAGCCGCTGGGGCGGGCAGCTGTTGGTGGACTCCACCCCGGGGCAGGGGAGCTGCTTTACCGTAC  
GGTTGCGCAGCCATGCCCTGCTGCCCAGCGGCAGCGAGCCCGCGAAACTGGAAGGGTGGCGCATCGCCCT  
CAATGCCGAGGGGCGTGAGACAAGCGATTGATGCTGTTATAAAAAAGGCCCGTGATAAAAAACAGCCCGTCA  
ACATGGTTGGCGGGCTGTTTTGTCTTTGGGTGAGTGGTTCTTTACTGCGGGCTCCACACCAGCTTGCCGC  
TTTGGGTGAGGTCATAGCCGCCGAGGCGGGCCGCCAGCTCGCGTCCCTCGGGGGATTGCGAGCCAGCCGAT  
CAGCTGTTGCAGCAGGGTGC GAAAGAAGACCCCTGCGGCATCACCAGATCGAAGCACTCCTGCGACAAG  
GGCATAAAGCCGAGGCCAAACTCGGTGGCGGTACTCTGGGCGCCGGGCCGACATCCGCATCGCCGCGGC  
TGATGGCGGCAGCCAGTTCCTCCGCTCGCTATTGACCTCGAGGGTGC GCTCCAGCCGGGTGAGCCAGTCCCT  
CTGGGTTTGCAGCCACTCCTGCAGGGCGCGCTGGCTGCCAGCCCTCCTGACGCATGGCCAGCGCCAG  
TCGAGCGCCTCTTTTCGCTCCTTTGGGTTGCAGCCCTTGCCGAGCACCAGCCCTGCACCCGCTGAATC  
CATGAACGATCACCCATTGCCGGTGGCCCTGATACTGCTGCACCAGCGCCGGGTGGCGCAGGTGCGCCTC  
CTCGGCCTGCCCCAGTGATGGCGCAGAGATCCACATGGCCGCGGGCCAGCATCGCCAGCCCTGACGG  
GTACCGCACGGGGTGTAGCCACCAGTGCCTGGGTGCCGAGCTGCTGTGCCAGCCGGTGTGGCGTAGT  
GGAGTAGTACATCGTCGGAGCCCGCCAGCAGCAGCCGGTCTTCATCACCCCTCGTGGCAACTGCCGAG  
CAGCCAGCGATCGAGCAGGGAGCGGGGAAACAGCCACTTGCCGGTGCCTTGGTGGCGGGGATGCGCGCC  
TCGTTGGCGAGCTGGTAGACCTTCTTCTCGTTGAGATCGAGGTATTCCGCCACCTGCTTCACGTTCATAA  
ACTCATTTCATGGCTTAGTCTGCATCCCGCGACCGGCCGACTGGGCGCCAGCACCGGCGGCTTCTCGTC  
CAGCACCATATGGTCGTGACCGCTGAATACCTCGAAATGACGCCCTTGCGCGGGCAATCATGGTGATA  
CCGAGCTGGCGGGCCAGATCCAGTCCCATCTGGGTGACCCGGAGCGCGACAGCAGCACCAGCAATGCCCA  
TCTGTGCCACCTTGATCACCATCTCCGAGGTGAGCCGCCCCGTGGTGTAGAAGATCTTGTGCTGGCCAGC  
CTCGCCGCGCATCCAGAGCTCGCCCGCCAGGGTATCCACCGCATTTGTGGCGCCCCACATCCTCGACAAAG  
GAGAGGATTTGCTACCGCGACAGATGGCGCAGCCATGCACGGCACCCGCCATCTTGTAGGTTTTGTTAT  
GGGCCGACAGCGCTTTGAGCAGGGCGTAGAGGGTGTCTGTTAAGCTCGGGCGCCGCAAAACCACCC  
TTCGAGCTTCTTCATCACGCTGCCATACATGGTGCCCTGACCGCAGCCGAGGTGACCGTCTTCTTCTCC  
AGCGACTTGTGAGATCGGCTGCCTGCTGGCTGCTCACCAGCGCGGCCCTCGCTCTCCAGTCGACAA  
TCACCCGACTCGATGGCTGCAATATCCTCGATAAAACCTGATTTTTTCAGATAAACCAGCACCAGCCCTC  
GGGGCGGGCCCCAGCGCTCAGGGTCACTACTCCTTCCAGTTGAGGTAGACAGTCACTGAGCCGCTCA  
CAGGCGATTTGGCGGGTGTTCATTGTGCCCTGCTCATCCATCACCTCGACGGCCATGGTGTAGCTGGGCGG  
CGGCATTGCTTTTTGATAAAGGTGCGGTGTCATGGGCCCTCGCGACCCGTTGCCGGGATCTAAGGGGAGGG  
ATACAGCAAGTTTTGTTCCAGATTAATGAGACGGACCAAATGTCAGAGTGATGGTACGCAAAGCATAATT  
ATGTTGTCTTAATAAAAGCGAGCAGGCTCCCATTTCTGACAAAAGAAATAAGTAGCCATACTTTTCTTTGAA  
AACACAGATGGTTAGACTTATGAAAACTAATTTTTAGGTGTGAAAATTAGCATTAAATGGATATGCTG  
TTGTAGTTTTTTTTGCTCTCGACGCTAATATTCTGGATTAAGTATGAACGAAGAAATGAGAACCTTATGT  
AATGCGTTGGATAGCCTCGGTGAGGCTGTGCAGAATGGATGGAGCGATAATCGAACACTCAATGAGGCTT  
TTGGGTGGCATCATCCGGTCTTAGATAGAAAGGAATTAGCTTATTTACCCATATCTCTTGCCGATAAAAT  
TAGACGTGTAAAGTTAGAACTGATGATGAAAAATTCCTCCAAATAATCGATGGCATTCTTGAAAACTT  
GAGAGATTAATAATCTTATACATTGCCATATTTTTATAATGGCAATGGACATCAAGCAATTCCTGCCTATA  
TCGACACTTTAAATTTGATATCCAGTGTGTTGAGCCTTATATATCATGGGTTGTATCCAATGATCCAAA  
TTCAATGCCACCAGCCATATCGCGTCTTTAAAAGGGTTGCAAGCCAAAATTCAGCAAATGATGTGCGAC  
CAAGATAGGCTATATAAAACAAATTAATAATTAACGAAGCAACGGAAAGCAGCAGAGTCAATACCATCAG  
ACCTGGAAGACTTGAAAGCTGCGAGAAAAAAGGTTGAATCCATAGGACAAGATGTTTTGAAGACATCTTC  
AAAAGTTTCTATGGCCAAAGAAGAGGTTGAAGGACTTTTAAATTTAATCACAGAAAAATAAATTAACATCT  
GACCAGCTAGTAAGTAATTGTGAGGATGCATATCGCATTACAACCAGCAAAGGACTGGCTGGGGCGTTTG  
ACCAGCGAGCTAAACAACCTAGCCAAGTCAATGTGGGTATGGGTTTTTGGTCTGCTATGTGCATTAGGCGC  
AGCATGGTATGTAGGTGCTCAGCGTATTGAAATTTCTCACAAGTTCATTATCTACTCCAGACCCCAAATGG  
GGTATGGTATCGATGCATTTTATGCTGGCTGTGGTTAGCCTTGGGGCACCACTCTGGTTTTGCTTGGTTGT  
CAACAAAACAAATAGGTGAGAGATTTAAGCTTGCAGAGGATTATGGCTTTAAAGCTTCTGTGCGAAAAGC  
TTATGAGGGTTATCGAAAAGAAGCTTCAAGAATTGATCAAAAACTAGAGGCTCGCTTATTTGAGTCTGCC  
TTAACAAGGGTTGAAGAGGCTCCATTACGACTTGTGTAAGGTACATCACATGGTACTCCATGGCATGAGC  
TTGCTGAATCAAGTGGCTTTAGAGAAGCATTAAAAAATATACCTGAGTTTCGAGATAAGGTTTTTTTCTGTT  
AGCGCAATCAATGGTTGATAAACCAGCAAGTCAAGGATGAGAGTAACGCTGCATAAAATATTG  
GCCATCCGATATAACGTATGTTGGATAAAATTTGAGGTTGGTGTGACGAAGTGAAGCCCAACGTTTAC  
CGCGACACCTTATCAAGGCAATAATCGGATAAATCAGCGTTATTCGATTATTGCCATTCCTCGATCAGAT  
ACACAGGCTGATTGGTTTTACTCCGCATGTTGGGCTTCGCTGCGCTCTGCGCCAACCTACGCCCCGCGCCA  
ACCCATACTCCTCATGACGGGCCAACCCGCATTAAGCCTCCATCCACCACCAAACCTGCCTTGGCCCCA  
CTCTTGCTATGTCTTATCCCATTTGATGGCCGTGGTGCCTGAACTCCTGCTCTGATCCGCCCCGAACG  
GGGTGAATCACGGGGGAGGGTGGCCCGGCAGAGACCTTCTGATGGGAGCCGTGACAGTGC AAGAGACAAC  
CAAACCCCTCTCCCCGAGCGCTGGCTGCAACTGGAGTTAAAGGCCATCGACAGTCAAGTTGGCCGCTGG  
CAGAGCCCGCGTTTTGAGATTGCGGCGCTCCACCCCGCGAGCCGAGGCGGCCAGCGCTTGGCCCTTA

CCCTGTTTTCGCGATGAGCGGGGGATTATCGCTTCAATTTGAGCTCCGGCTCGCCCCGCTCTTTGTGAC  
CGGAAGCCGCGTGGACAATGGCTTTGTGGCCGATGGCTGACCTTGAGCCAGACTGTGGCCGCCGCTAT  
ATGGATGGCGAGCGGCAGGTGCTCTCCTGCCCGCTGCCGAGGCGTGCAAGCCTGGGTGGAGGCCTTTA  
TCGGTGCACACGGCGAGCTGCTGGAGGCCCGTGCAGGGCAAGAGGGCAAGGGACGGGCGCAGGATCA  
GCTGGGAGTGCATACGGTAGATCAAGCCAGCTGTGGCGCCGTTAAAGCCACCGGCCCGATGGCCGCGAG  
CGTGGCAGTGACAGCGGAAATCGCGCCCATGAGTGAGTTTCTCAAGCGCTGGTGCCTCGCAAGAGTGAG  
GCGCGCAAGCATCAGGCATTGCAGCCACGGGAAGAGGTTATCCCCGAGGCATTTGCCGCCCTATCGAAG  
GCAGTGGCGAAGGTGAAACACCAGATAAATCGCTGGATAGCCCCGTAGTCAGCACTGACAAGGGGAGCTG  
TGAATCTCTTGCCGTTGAGGGGACCGAGAGTGGCGAGGCGCTGCTGAAAAACAGCCCATCCGGGCAAGGCC  
AAGCTCCCCGACAAGGAGGCGCTGCGGGCCATGTTTCGCACCCATAAGCCAGACGGGCTCGACGACTACA  
CCCAGGATTTACAGCCAGCCGAATTGCTGCGCGCAGCCCTGACCGCCGGGCTGCGCAACTGGTGGTGGGA  
TCAGGTGATCGCCCCGAGAGCGAATCGGCCAATCCGGCCAGCGGATCCGCTGAACCGTGGTGCCTGGC  
AGCGCACCTGCCCGGACGAGCTGGCTGATAACCATTCTCAAACCCACACCGATGATCGGGACATTTTGG  
TTTTCTCTGGTGGACAAAATGTCCCAACCAAAGGTGAGGGAAATGGAACCCCTCAGGATCCTGACTCCCTGT  
CAGTCACTTTTTTCCCGGGGAGTTGGCTCGCCTCTTGCTCTCTCGGCTTACCAACAAGCGCCCATCCCA  
TGAGGTGGCGCGCAGGAGTGTATGTGAGCACTGAACAAACATTGCCAAATCTGGCCCCAAATCTGGCC  
CCAAATCTAGCCCGGAGGCGGGGGCGGCCGAGCATAACGCGCGCTCGCGCTATGCCCTGCAGCATA  
CGGTCAAGACCGACAACCTGATCCCGCCACTATCTCTTACCAGAGTCAGGGGCGCCTGCTGCTGGTCCG  
CCCCGAAGATCGCATTGCGCGCGCCGAGCCTGCTGCTGCGGGGTGAAGCCACCCTGCTGGTGCATC  
GAAGCGGTCCGTGATGCCGAGGCGGCCGATCTCGAAGCCATTTTCGATGCCACCGCATCCCTCGCGGCC  
TGACCCTGCGCGAACCAGCCTGACAGGGTATCTGGGGCAGTTCACGCTCACCGGCCATCAATGGGCAGGG  
TGAGCGGGTTAATCTGGCGGCGCTCTGCTTCCCAACAAGGCTTTCCACAACAAGCGGCTGCTGTGAGT  
GAACAGCCACGCGAACCAGCGCTTTGACCTGGTGGCCGATCTGGGCGCGCCCCGCTCTTTGCGCTGGAGC  
GCCGCGCGGTTCGGTTATCTGCATCTCTTTGATGACCAAGGGCTGGCCGAACAGCTTGCCGAGCTCTGTG  
GCTGACCGGTATCTTCGACAAGCCGCGCTATTTTCGCTGGACCCCGAGGCTGCGCCTTTACCGCCCCG  
GGCGTGCCCGGTTGCAGCCGCTGTCTCGATGTCTGCCGACCGATGCCCTCAAGCCATCAATGGTTCGCA  
TCCAGATCGATCCCCATCTCTGTGAGGGCTTTGGTAGCTGCGCCTCTGCTGCCCCGACCGGGCGATTGC  
CTATCATCAGCCCGATGCCAACACCAGCGGCGACTACCTGCTGCGATTGCTCAAGCATTATCGGGAGGCG  
GGCGGCGAAGCCCGCCAGCTGTTGATCGCCGTTGAAAGCGAGCGCGAATGGGTGGAAACGGAACCC  
GCCTGCCCGCAACTGGCTGCCGCTGGGTGGAGGAGAGCGCGAGTTTGGGTATCGAGAGCTGGTTCGC  
CGCCCTTGCTATGGCGCCAGCGCGGTGCGCATCGCGCTGGGCGACGATGCCCCGCAAGCGTCCGTGTG  
CTGGTTGAGCGGGAACCTGGCGAGCGCCGCGCTGCTGCTGGCGGGCGCCGCTTGTGTCGAATCGTATCG  
CCCTGTTTTAACGGCGATGCCGAAATGGATGAGTCTCTTTACGCGCAGCCAGCCGTTGCCCTGTTGGATAA  
GCCGCTGAAAGGAGACAAACGGGAAAACCTGTTTGCCTCTCGATGCCCTCTGGCAGGCCAACGAAGGG  
AGCCGCGAGCCGCTGGCGGTGCCTCACGGCGCCCCATACGGCAGCGTGGAACCTCAAAGAAGCAGACTGCA  
CCCTCTGCATGGGCTGCGTGGCGGTTTGGCCGAGCCGCGCCCTGCATGCGGTGGGGCACACGCCCGCCCT  
CAACTTTATCGAGCAGGATTGCATCCAGTGCGGCATGTGCGAAAAGGCGTGCCCCGAGCAGGCCATTGTG  
CTGGTGCCCCGCTGCAACCCGTGCCCGAGGCGCGCCGCTCCGTGCAGAGCTCAAGGCCGAAGAGGCGG  
CCTGCTGCATTCGCTGCTCCAAGCCGTTCCGCGCCCGCTCGATGATCCGCCGCATCCAGCAAAAACCTGGC  
CGGTCACTCCCACTTCCAGAACGAGGCCCGCCAGCGGTTGCTGATGTGCGAGGACTGTGGGTCAGGAT  
GTGTTTGGCGGCTGGCGGCGGATCCCGTCTCCAGCTCAAGGTATGAGGGGCCAGTGATGAGTGAACAA  
CATAACGAAAAGGCTGGCGAAGTACCATGACCGAAGTGAACAGAGTAGCGCCGATCTACGCCCTGC  
TGGCAAGCCTCTGGCGCGCCGCCCCCGTGGCGAACAGCTCGCTGGCTGCAAGGGTTGCAGGTTATGCC  
GGGCCCTTTGCCAGAGGGCTGGGGCTGGTGCAGCTGGCAGCCAGTAGCCACCACGAAAACGAGCTTGC  
GAGGAGTATCAGGATCTCTTTATCGGGCTGGGGCGCGGGGAGATTGTGCCGTTTGCCTCCTGGTATCTCA  
CCGGCTCTTTGATGGAGCTGCCGCTGGCGGTGCTGCGCGCAGACCTCCAGTCCCTCGGCTTCGAGCGCCA  
GAGCGGAGTGTGCGAGCCGGAAGATCATCTGGCCGCCCTCTGTGAGGTGATGGCGGTACTGATTGGCGAG  
CAGCACCCGAGCGCAACCGCTTCTATGAGCGCCACCTTGCCCCCTGGGTACTCGCTGCTGCCGCGATC  
AGCAACAGGCGAAAGGGGGCAGCTTCTACCGGGCGGTGGCGCCCTTGCCGAAGATTTCTTCAAGCTGGA  
AAACGAATTGCGCCTGCCGTTTGGCGCTGCGTGGTGGCGGGCTGAACGGCCCTATCTGCGCATAACAAG  
AGCTGCGCATAACAAAACGAGCAGACGAGATATCCATTTGACGCGAAGCTGGCGCACAGGCGCCAGCAA  
GAACAACAACAGAGGTACAAGAATGAGCGATGAACAGCTGAAAGACCCGTCGCCCGCAATCTGATCAA  
GGGAGTTGGCGTGGTGCACACCATAGGCGTGTGCGGGTGCACCGGCCGGTGGTGGGCAAAGAGGTG  
CTGACCCACGACACCGAGCCTGACAAGGGCTATCGGGAGACCCCCATGTTACGACTTTTATCGCACCC  
TGCGCGGCACCGACTGAGCCGATCAGTGAAGGAGAATCATGAAACTGACAAAACGTGCCGAGCTGCC  
CAGGCGGGCGAGCAGGGCAATGAGGCCATTGCGGGTCAAGGGCTGACCCGTGCGCGCTTTATGGTCAACT  
CCGGTCTGGTGGCCGGTGGCGCCGTTGGCTGGCCCCGGCCATGATGCAGCGGGCCGAGGC  
CAAAACCGTGGCGGCCGGGGTGGCGGTGAGGTTGAAGCGCACCATCTGTTCCCACTGCTCGGTGGGCTGC  
GGCGTCTATGCCGAGGTGCAGAACGGCGTCTGGACCGGTGAGGAGCCGGCCTTTGATCACCCCTTCAACC  
TTGGCGGCCATTGCGCAAGGGGGCTGCCCTGCGCGAGCACGGCCACGGTGAAGCGTCCCTCAAGTACCC  
GATGAAGCTGGTGGGTGGCAAGTGGCAGCGCATCAGCTGGGATCAGGCCATCGAAGAGGTGGGCAACGAG

GTGCTGCGCCTGCGCAAGGAGTCCGGCCCCGACAGCGTCTACTGGCTCGGCTCCGCCAAGCACTCCAACG  
AGCAGGCTTATCTGTTTCGCAAGATGGCCTCCCTGTGGGGCACCAACAACGTGGATCACCAGGCGCGGAT  
CTGCCACTCCACCACGGTGGCTGGCGTCGCCAACACCTGGGGCTACGGCGCCATGACCAACAGCCTGAAC  
GACATGCACAACAGCAAGTCGATCATGTTTATCGGCTCCAACCCGGCGGAGGCCACCCGGTTCGCCATGC  
AGCACATCCTGCTGGCGAAAGAGCGTAACGGCTGCAAGATCCTGGTGGTCGACCCGCGTCGCACCCGTAC  
CGCCGCCAAGGCGGACATGTACCTCTCCCTGCGTCCGGGCACCGACGTCGCCTTTATCTGGGGCATGCTC  
TGGCACATCTTCAAGAACGGCTGGGAAGACAAAGAGTTTCATCCGCACCCGCGTCTACGGCATGGACGAGG  
TGCAAAAAGAGGTGGCGCGCTGGACCCCGGCTGAAGTGGAGCGGGTAACCGGCCCAACGAACAGCAGGT  
CTATGGCGCTGCCAAGCTGCTGGCCGACAACCGCCCCGGCTGCGTGGTCTGGTGCATGGGCGGTACCCAG  
CACACCACCGGCAACAACAACACCCCGCTTACTGCATCTCGAACTGGCCCTCGGCAACGTGGGCAAGA  
GCGGGCGGGCACCAACATCTTCCGTGGTCACGACAACGTGCAGGGGGCCACCGACTTTGGCGTACCTC  
CGACTCCCTGCCCGCTACTACGGCCTGGAAGAGGGCTCCTGGAAGCACTGGGCCCCGGTGTGGGATGTC  
GATTACGAGTGGATCAAGGCACGCTTCGACAACAAGGCCTACAACGGCAAGCTGCCGATGAACAACAACG  
GCATTCCGGTCTCCCGCTGGGTGGACGGGGTGTGGAGAACGCCGATCTCATCGAGCAGGGCTCCAATAT  
CCGCGCCATGTTCTACTGGGGCCATGCGGTCAACTCCCAGACTCGCGGCCCGAGATGAAGAAGGCGATG  
CAAAAGCTCGACATGATGGTGATTGTCGACCCGTACCCACCGTCCGCTCGGTGATGAACGATCGCACCG  
ACGGCGTCTACCTGCTGCCGGCCACCACCAGTTCGAGACCTATGGTTCGCTACTGCCACCAACCGCTC  
CATGCAGTGGCGGACAAGGTGATTGAGCCCTGTTTCAATCCAAGGTCGACCACGAGATCATGTATCTG  
CTAAGCAAAAAGCTTGGCTTTGCCGACCAGCTGTTCAAGCACATCAAGGTAGAGAACAACCAGCCGCTCT  
TGGAAGACATCACCCGCGAGTACAACCGCGCATGTGGAGCGTGGGCTACACCGGCCAGAGCCCGGAGCG  
GCTCAAGGCGCACAGCAGAAGTGGCACACCTTCCACAAGACCAACCTCAAGGCCGAGGGTGGCCCGGTC  
AGTGGCGAAGTGTACGGTCTGCCCTGGCCCTGCTGGGGTACCCCTGAGATGAAGCACCCCGGCAGCCACA  
TCCTCTACGACACCAGCATTCGGGTGTCCGAAGGGGGCGGCGGTTTCCGCGCCCGCTTCGGTATCGAGTA  
TCAGGGCGTCTCGCTGCTCGCCGAAGACTCCTGGCCGAAGGGGAGCGAGGTGGAAGACGGTTATCCCAG  
ATCACTGCCGACCTGATGAAGCAGCTCGGCTGGTGGGATGAGCTGACCGAGGCCGAGAAGAAAGAGGCCG  
AGGGCAAGAAGTGAAGACCGATCTCTCCGGCGGTATCCAGCGGGTCGCCATCAAGCATGGCTTCGTGCC  
CTACGGCAACGCCAAGGCGCGCTGCGTAGTGTGGACCTTCCCGGATCAGGTGCCAAGCACCGCGAGCCG  
CTCTACACCCCGCGGGATCTGCTGGCCGACTGACCCACTGGCCTGATTCGAAGAGCCCTGTGGCGCC  
TGCCGACCCAGTACGCCTCGGTGCAGGAGAAGTACGCAAGGAGTTCCCGATCATCTCACCTCCCGG  
CCGTCTGGTGGAGTACGAGGGGGCGGCGACGAGACCCGCTCCAACCTTGGCTGGTGAATTGCAGCAG  
GAGATGTTTCGTGAGATGAACCCGGCGGATGCCAACGATGTCCGGCTGCGCGACGGTCAGGATGTGTGGG  
TCGAGGGGGCCGAAGGGGGCCGGGTCAAGGTGAAGGCGCTGGTGACCCCGGGGTCAAGCCGGGGCTCGC  
CTTTATGCCGTTCCACTTCGGCGGCCACTTCGAGGGCAAGGATCTGCGATCCAAATATCCGGAAGGGTCT  
GACCCCTATGTGCTGGGGGAGTCGGTCAACATAGTACCACCTATGGTTATGACCCGGTCACCCAGATGC  
AGGAGACCAAGGTACCCTGTGCCGTTTTTCGAAAAGTAGGAGCCTGATCCCATGGCCAGAATGAAATTC  
TGTGTGACACCAAGCGCTGCATCGAGTGCAACGGCTGTGTGACGGCGTGCAAGAACGAGAACGACGATGC  
CCTGGAGTGGGGCATCCAGCGCCGTCGGGTGGTGACCCCAACGACGGCTGCCGGGGGAGACCTCCATC  
TCGGTGCCTGCATGCACTGCACCGACGCCCCCTGCATGGCGGTTCGCCCGCCGACTGCTTCTATCACA  
CCGACGACGGCATAAGTGTGCACAACAAGGATCTCTGTATCGGTTGCGGCTACTGCCTGTTTGCCTGCC  
GTTCCGGGGCGCCCCAGTTCCCGAAGACCGCTGCCTTTGGCGATCGGGGCAAGATGGACAAGTGCACCTTC  
TGCGCCGGTGGCCCCGAAGAGGATCACAGCGAAGCGGAGCGCCAGAAGTACGGCGCAACCGCATTCGCC  
AGGGCAAGCTGCCCATGTGTGCCGAGCTCTGCTCCACCAAGGCGCTGCTGGCAGGGGATGCGCAGGTGAT  
CTCCGATATCTTCCGCGAGCGGGTTGCCATCGTGGTGCCAAGGATGCGGCTTGGGGTAATGGCGATGAG  
TTGTTCCACGATGCCAGCAAGCTGAACAAGCAGGGAGGGGGCGCATGAAAACCTGGCTAATGGCCCTGTT  
TGCTGCCCTGCTGCTGTTGAGTACCGCAAGTTTCGCCGATGCCGAGAAAAGAGGCGGTTCGGCTTTGCCGGC  
GCCGATTATTTGGCGGGCGGTGAAGGATGGCCAGGAGGGGGTACCCTTCCCGCTCGCCGGAGACGGAG  
TGCTTATCTCGGTGCCGGGCCAGCTCTGGTTTCGAGGTGAAGACCAAGTGGGTGTCGCCGCTCGGTGCTAT  
CGCCATCTTTGGATCCTTGGCCATGTGTGGCCTGATGTACCTGGTGGTGGGGCAGACCAAGCTCTCCAAA  
CCACGCACCGGGCGCAAGCTCAAGCGCTGGAGCAGGCTGGATCGGGCGCTGCACTGGACCACGGCGGCCA  
TGTTTCTGACCTCTCCGGGTGGGGCTGGCCATCATCTACGGCAAGTACTTCATCAAGCCGGTGGTGGAG  
CCTCGGGGTGTGGGAGAACTGGATCTGGTTTGCCAAGGTGTTCCACAACACTACGTGGGGCCGCTGTTCTTC  
CTCTGTCTGATGGGGGTGCTCATCAAGTGGTTCGCCACAACATCGTCAACATGGTTGATGTGCAGTGGT  
TCATGAAGTTTGGTGGCATGCTCGGCAAGCACAAGGGCAGTACCCCTCGGCGGGCTTCTCCAACGGCGG  
CGAGAAGGCGATCTTCTGGCTGCTGATCTGGTTTGGCGCATTTGTGGTGGCGACCGGGCTGTTCTTGTGAT  
TTCCCATCTTCCGCCAGCTGCGCCGCCAGATGGAGTGGGCCAGCTTCATCCATATCGTAGGCGCCTTGA  
TCCTTATCTGCGTTTTTATCTTCCATATCTACATGGGTCTGTTCAGCTGGAAGGGGGCGTGGAGGGGAT  
GGTGACCGGGCAGGTGGACGAGACCTGGGCCAAGGAGCACCACGACCTCTGGTATGAAGAGGTGAAGCAC  
ACCCTCGATGAGCCCAAGGCGGGCAAAATCAAGCTGATGGTTCGACAAAAGAGTAAAGAGAAGGGGGCGTGTG  
GCGCCCCCTTTTGGTGGCGGGTGCATGGTGGTGGCAAAATGATTTGAGCGATGCCGCAACGGCGATGGTTT  
TTTGGGCCACCTTGAGCAACAGTAAACAGGGGTTCATTCACACAAGGGATGACAAAATGATGAGAAAAGCA  
TGGCTGGCAGCGGTATGTGCATCTGCGCTCTTCGGTGGTATTGCGGGCGTGGCGCAGGCGCTGACGGGA

TCAAGACCCAGCAGGTGCAGTTCAAGAAGGGGGAGTCAGGGGCAACCATCAACGGCACCATTCAAGGTAG  
CCAGACCCTCGATTACAAGCTGACGGCCAACAAGGGCCAGAGCATGGTGGTGATCCTGACC GGCAAGCCC  
TACTTCAATATTCTGCCGCCAGGCAGCAAGGGGGAGGCGATGTTTATCGGCTCTACGGAAGGGAACAAC  
TTGAGGCGACCCTGCCCGCAAGGGCACTTATAACCATTTCGGGTCTACCAGATGGGGGCGGCCGAGAGCAG  
CAAGGCCAAGACGCCGTTCAAGCTTGAGGTGGGCATCAGCGGCTAATGCCAGCAGCTGACAAGCATCATG  
GCGGTGGCGGCCACAAAGGGCCGCCACCCTGTTTTATCCTCTCTGTTTTTGGCTCGCCAAGGTCAATAT  
TCCCCCGGGAAAGCTGTTTGAAGTAGCGCTTATAACGCCCGCTGGCGATGGCCTGCTGCAACTGCTGAT  
TGAAGTGCATCCCGCAGTTTGGCCGAATCCGGCATTTCGCGGGGAACATCACGAAGCTGTGCTTGGCGCAG  
AAAAGGGGTCTGACTGTGGGTGATGAGTGCCGCGCTGGCGGGTTCGAGCTGGCTCTGCAGCTCGGCCTGC  
CCGACTCGCAGCTCTTGGCGATAGAGGTGATCCGTCGCGCAGCAGCTTGGCGAAATTCGTTTTACGT  
CGGTGACTTTCTGTTGGGTTACCTTGGCATCGGCAACCATCTTGTCCAGCTCGGGCCCGTAGCTGTAGGC  
GATATCGCCCCCAACCGCATGCCGATGATCTGCTCAAGCGCTCGGCCTGCAGCTGGCGATTTGAGG  
GAGAAGAAGACAAACTGCTCCTGCAGCACCCTTCGCTAAACAGAAAATCCTGCTCCCGCTCCGGTTTTGT  
GCATCCAGACTGCGGTGGCGTCTGATAGAGCTGGCTGTTGGCCGCCAGCGAATAGACCCGGCCCCAGGGGGC  
GAAGTGGAACTTACCTCATAGCCCGCTCCTTGAACAGATCGCTGATAAGGTGGGCCACGGGACCGTAC  
TGTTTTGACTGCTCGGAGACGAAAGGGGGCCATTACCCACGATGATGTTGAGCACCCGACCCGGTGGCG  
CGAGAGCCGACTGGCTGGTCAGAAACAACCACAGAGCAAGCAGCGGGATCAGGCGCATGGCAGGAAGAAG  
GGGGCGCAGGCTGGCAGAGGCGAGGGCATCAGGTCCTCCGGCTGTGATGCGGTGAAAGGGGCTGGGTT  
GCCCCGAATGCTAACATGAGTCTCATTCCCTTGGCGTGATATTTGTCTCGCCGGGGCCCGCAGACGCCTA  
TTTTGGCCGCGAGGATGCCCCAAGCTCACAAAACCGATCGAGTAAACGTCATATGATTGATTTTATTATG  
AGTCTTGCTCTCCTGCCGAACGGCAATTTACGTAATCAAGAGAATGACTATGGCTACCGGACAATAT  
CTGCTGTGGAAAGATGCACAGGGACAGGATTTTCGCCCCGTTGCACTGACCGGCACTGATCTGCTTAAACA  
ATCGATACCTCAACAAGGGCACGGCTTACCCGAACAGGAGCGGGCCGATTTTGATCTCGATGGTTTTGCT  
GCCGCTCAGGTGCAAACCTTTTGAAGCCAGCTCGAGCGAGTGTATGAGGGGTTCAAAGCGCTTGCAGC  
GATATCGAGAAGTACCAGAACCTGCGTGCCCTGCAGGATCGCAACGAGACTCTCTTCTATGCCCTGTTGT  
CACGCCATGTGGAGGAGATGACTCCCTACATCTATACCCCGACCGTGGGCAAGGCGTGCCAGGAGTTTCA  
CCACCGCTTCCAGAACC CGCGCGGCTCTACATCACCCGGACAACGTGGATGACATGGGCAGTCAGGCC  
CGTCACTTCGATGCCAAATCGATCCGATCATAGTCGTCACCGACAGCCAGGGCATTCTGGGGGATGCGG  
ACCAGGTTGTTGGCGGATGGGCATCCCCATCGCAAGCTGGCGCTCTATAACCCTGGGGCCCGGTTATCA  
CCCCGCTGCTGCATGCCATCGCGCTGGATGTGGGCACCGACAACCAGAACTGCTCGATGACCCCATG  
TATCTGGGCCCGCCGCACAAGCGTATTTCGCGGCAAGGAGTATGAAGAGTTCATCGACAAGTTTCTGTCAGG  
GGGTCAAGCGCCACTTCCCCAACGCTGTGCTGCAGTGGGAAGACTTCAGCAAATCCAATGCCTTCAACAA  
TCTGGCCCGCTACCAGCAGTCAATTGCCGTCATTCAACGATGATATTCAGGGCACCGGTGCCGTGGTGTG  
GCCGGTATTATCGGCGCGGTCAAGGTCAAGGGGGAGACCTGGGCCAGCAGAATTATCTGGTCTATGGCG  
CTGGCTCCGGCGGGGTTGGTGTGCGGGATCAGATCTGCGCGGGGATGATCCGCGAGGGGATGGATCCGCA  
GGCGGCCCGCGATCGCATCTACATTCTGGATACCCAAGGGCTGGTGTGCGACAACCGGGACGGGCTCGAC  
GAGTACAAGCGTCGCTACGCCAAACCGGGGTTGCTGCTGGCGGGCTGGGATACCGAGGTGCCCGGCAAGG  
CCAATCTGGCCGATGTGCTGCGTCAATGTCGCCATTACCGTGTGCTGGGTACCAGTGGCTCGGGCGGTGC  
CTTCCAGGAAGAACACATCCAGCTGATGCTGCAGCATTGCGAGCGCCCCATGGTGTTCCTCCGCTCTCCAAC  
CCGACCGCCAACCTGTGAAGCGCTGCCGGAAGATATCTACCGTTGGAGCAATGGCAAAGCCATCGTTGCAA  
CCGGTAGTCCGTTCAAGGATGTGAGCTACGAGGGGACAGGAGTTCCGGGTTGGGCAGGGCAACAACGCTTT  
TATCTTCCCCGGTGTAGGTCTGGCGGCCATCGTCAGCCAGATCCGCGAGATCACACCCGATGTATTTACT  
ACTGCCGCCTTTGCGTTGGCCGAGTGGTGTGAGTGGGATCTGGCGAAAGGGCCGTGTATCCCCGCA  
TTCGCGAGCTGCGCAGCATCTCGGTGCATGTGGCCACCGCCGTGCTCAAGGATATCGTGCGCCGAGATCC  
CTCCCACCCGCTGATCGGTGAGGATCTGCAGCAGCATATCTCAACCACATGTGGGAGCCGGTTTACCTG  
CCCTATCGTCGGGTATAACCGGATTTACCCGCGGATAACGGGTCGTTAAAGATGACAAGGGGGTAGC  
GCTGCTACCCCTTTTCGTTTACCCCGTGGCATTCACTAAGTTTCGCAATGGCCGCCAGCGCCCTTGCTGAT  
TGCGGCAGGCGGTATCCTGCCACTGCTGGCTCGCCTTGCCGATATAGAGTTGCTCGCGATAGTCGCGACA  
CCTTCCCCGCTGGTATGGCGGAAGGTGCGTAGCGGGGTGACGCTACCCGAGTGACGGTTAGCCGGATTG  
AACCAGGTGAGGCTTTGCCCTTTGGTGGCGGTTTCCAGCGCTTGGCAAGGGCTGATTGGCCAGTTGAA  
CATCTGCCTTATCCATTTGATGGTAAAGCGGCGGAGTGTGACCGTGGCGCAGCCAGCGAGGCGGAGCAG  
GAGGAGTGGTAACAGATATCGCATTATGGTTGCCCTGTTGGCGAAAACCGTTGTTGAGCAGCGCCCGCT  
CCTGCTCATCGGTAAGCACTTGTGGCGATCGTCGACCGTGCATCACCCCTGAGCTTGTGCGGTTGGCATCGACG  
ATCGACAGCATCCACGCCGTTGTATCGACCGTGCCTGACCTCTGAGCTTGTGCCATTGGCATCGATGGCATCTA  
CACCGTTGTATCAACGCCATTGCCAAATCCGCGGCCACCCCATGGCGTTCTCCCCCTGCATGTTTTTC  
TCCACCAGCATGCCGTTACCTCCACCATGCTGCTCTCCGCCGGCATGCTCGCCTTGGCCGCCACTGTCA  
TCGCTGCCCCCATCGCTGTGCTGCCACCGCCGCTGTGCTGCCCTCCGCCGCTGTTGCTGCCACCACCGC  
TGTTGCTGCCACCACCGCTGTTGCTGCCACCACCGCTGTTGCTGCCCTCCGCCGCTGTTGCTGCCCTCCGCC  
GCTGTTGCTGCCCCCATCGCTGCCACCACCGCTGTGCTGCCACCACCGCTGTGCTGCCACCACCGCGCTG  
TCGCTGCCACCACCGCTGTGCTGCCACCACCGCTGTGCTGCCACCACCGCTGTGCTGCCACCACCGCGC





CCA ACTGCGCCAGCAGTTGATCACTACCGTCTGGCAGATCCTGGTGCTCGATCTCTGCATCATCGCCCTG  
TTGATGGTGCTGATTCATCGCAATGTGCTCAGGCCGCTTCATCAGATGAATCAGGCCGGTGTTCGATCTGG  
CCAAAGGAGAGGGGGATCTGACCCGGCGTCTGAAGATCAGCCGTCAGGATGAGATGGGCGCGCTGGCCAC  
CAACATCAACCACCTTTATTGCTAAGTTGCAGGAGATGGTGGCGGAGATCAACGAGTTCTCTGCCGGTGTG  
TTGCAAACCGCTGAACTCTGTGACTCCCTCTCGGCAGATACTCGGGTAGGCAGTGACGCCAGCAATCCG  
AGCTGGATCAGGTCGCTACCGCCATTACCGAAATGAGTCAGGCAGTGCAGGAAGTTGCTGGTAACGCGGT  
GAAAACCTCTGGCGCTACCGATGAGGCCAACCTCTATGTGGAGCAGGGTTACAATCTGGCGGGCCATGCC  
AATGAGGCCATCCATCAACTGGTGGGGGAGGTGGAGCGAGTCGCCACCCTGATGCGCACCCCTTTTCGACCG  
AGAGCAGCAGCATTGGCACCATCATCGAAGTGATCAACGGCATTGCCGAGCAGACCAATTTGCTTGCCCT  
CAACCGCGGCTCGAGGCGCGCGGGCGGGTGATCAGGGGCGCGGTTTTGCGGTGGTGGCGGATGAGGTA  
CGCACCTTGTGCGGGCTACTCGCCAGTCGACGAGGATCAGTGCAGATCAAAACGTTGCAGCAAG  
CGACCCAGAATGTGCGGGCCGAATGCAACAGAGTCAGGAGAAGGCATCCCGCGCCGAATCGAGGCGGC  
AGATGTGCAGATATCGGTGGAGAAAATTAATAATCAGGTCAGCCTGATCCGCGAGATGAACATGTATATC  
GCCCAGGCATCGGAAGAACAACACTCGGTGGCAGAGGCGGTAAGCCATAGCGTCAACCGGATTGCGACGC  
TCAACAGCGAGAGTGCAGCCAGAGTGGCAAAGGTTGCCGAGGCCAGCAGCGATCTGCGGCAGTTGTGCGC  
CCAGCTTGACACCCTGCTCAAGCAGTTTTCGGGTCTAGTCACTTAACTTCGCCCCGTTGGATCATCCTGCG  
GGGCAGGCCGTTCCCATTAATTTGAGGCGTGGCAGATGTCGTGAGGGGCAAGGGGCCCTTGTCCAGCAG  
AGCTTTTTCGTATGCCTATGTCACTGTTGAGCTGAGATTGGCATGACCGTGATAGGCGAACTCGCAACA  
TCATGTTCTGCCGATATGCTGTCCGACAGCGCTGGACGCATATTTTCATTTTCCCGCTCATGCCTGCC  
TGCATCTATTGTGCCGCTGATCCCGACCCCTTTAGAATTTTCGTTTAATTACAGCGAGTCTTGAGCCGCCAT  
CTGGCTTTATCAGGTGTGGAATCCCATCTTCTTCATGATGAATGCAAATAACAGGTGGTTGGTATGACGG  
GGGTTGCGCCAGGCAATAACATATCAGCCTATCACTTCGGTGATTATGTCTTTGATGTCAAAGGCGAGA  
GTTGATCTTCTGTGCCGACAAGGACAACCTTGCAAAGCGCCCGGGTGGTGGCTTGTTCATCGGCAGAGAGC  
CTCATTTTTCAGTTATCTGCTCGATCACCATGACGAGGTGTGCGACAAGGATCTGTTGCTAGAAAATCGGCT  
GGTTGGGTGCGCCCATCAGCCCCAACTCACTGAACGTGGCCATCGCCAATATTCGTGCGCCACTTCACCTC  
ATCCCCCAGACGTTGGATATCAGAAGTACCCGAAAAAAGGGTACTCCCTGCATCTTAACTGCAAGATG  
AAGAGCTATTACGGCAAGGCACCTGCCAACAGAGAGTGAGCCCTTGCCCGAGCCGATGAGCGAGCCACGC  
CTGACGCGGCTGCGCAGCACCTCGACATCACCAAGCTCCGACCACGAGGTCATCAAAGGCTGCTGCTGC  
TCCCCGTTCTTTTGGTGAGCGCGCCAAACTTGCCCTTCTCAGCGGTATCGGGCGGCCAATGTGGCAAGG  
GGCCTGATATACGTCAATCTGCTACTGGTTGTGCTGGTGGCGTTTTGTCGCCAGCTATCTCCATTTTCGAGT  
GGCTCCATGTGCACTGCACCGACTCGCCGACCGCGTGTGTTTGGCAGATGGAGGCACGGAGCGACGTGCC  
ACCAGTCAAACCGGCATCGCTGGTGTCTGCTCTGGCCACCAGGTTTCGCGTGCTTTCTATAAAGAGCTC  
GAAAAACGTTGTAAGGGATCTCTGATGAAACGAACGCTGAAAAATACCTTGCTGCTGTTGCCACTGCTT  
GTCGTGCTGCTGTTTGTGGTGGGATGTTTATCAACAGTCTGGGCTGCCATTACGACCTGAAAATGTCCG  
CCAATGGAGTCAACTATCACGGGTGTGCCGCTGGGGCAAAATCACCGTGATCGAAGAGGAGGAGGCGAC  
CAGGGAGAAGTGGCGGGTGGAGCGGTTTTCAACTGACCTTCTTCAACCAGCTTGTTTACCTCATCGACAAT  
CGTACCCAACCTGCACGAATCGGGTAACGATGACTCCTATCTCAATGAGTACAACCTGATCCAGTCGCAAT  
ATGCGCTGGTCAACTATGCCTGGGTGCCGCTGACTGAAAACAAGGTGGCGATCTTCCAGCGGATCCGGT  
GCACGAGGTTGTGATTGCCAGCGAGATGGCTGGTTCGATCTCTACCGCTGGTCTTCCCCCGGCACCG  
CTGGTGCTGTTAGCCGCAAAGCGCAGGTGCCGGGCGTCCCGCTAGTTTCTAAGCAACTTGTACCAAGG  
GCCGGTGATATCGCAGTGGCCTGTCTCATCACTGTTTTTGGCAGCCAGCCGATGGTAGAAGGCTACTGCC  
GCCGTGTTGCGGGTCGCAACCTTGAGCGAGCCGTGCGGCGAATCAGCAAGGCCCGCTCCAGCAGGGCGC  
GCCCTATCCCCTGACCGTGCCAGTCGCTTGACACATAGAGGTGATGGACGAAGTGATCGGGCTGCCAGAT  
GGCGATAAAGCCGAGATATTGCCCCCTGTTGCGGTACCCACACCTGTTACCTTTGGTCTGTTCCCTCG  
AAATCCTCGAGTTGGAACCGGGCAGGATCGACCCAGTGAAGGTGTGGCGGCGGCTCTTTAAAAACAGCC  
GGCCAGTTGGGGAATGTCGTGTTCTTCCATGAGCCGGATCATGATGTCTCCCGGATCAAGCCAATGTT  
CAATCAGGCCGAGCATAGAGGCAGGTTAATTGATGCAAATGACAAGGGTGTGATTAAGCACTGTCCATT  
GTATTTGCCATGGGGCTATACTGCCGGAGTCCCTTGTATGGATGGCTTGAGGATCGCTGATTTATGGACA  
ATAAACTGATTGAAGGCAACATTTTTGTTCCGGCGCACATAGACGATGTCTGGCACGCTGGACTACCGA  
AAGCGGTCTGCGCAGTTTTTCTGGCTCCCGAATGTTTGTATGGTGGCCGAACCGAATGGTCCCTTCGAGGTC  
TACTTCAGGCCTGATGCCCGCTGGGTGAACGTGGCAGCGAAGGGTGGCGGGTCATGGCCGTATGCCCT  
ATGACCTGCTCAGTTTTCAGCTGGAATTTCCCGCCAGCCTACCCATATCCGCCAGCAAAGACCCAGGT  
TTGCCTGCGCTTTGTGCCGAAGGGCAGGGCACTCGCTCTACTTCTCAGAGCGGTTGGGCCAATGAT  
CCGGATTGGGATCAGGGTTATGCCTATTTTCCGGGAAGAGTGGCTGGAGACCAGCCTGCCACGGTTGCAGT  
ATCGTTTTTACCCACGGCCCATCGACTGGAACAATCCCCCGACAAGGCGCAGCTGAAGGCGTTGGCCCA  
GTAATCCCGGATATTCAGACATAAAAAAACCGGCCAAAAGGCCGTTGAAACAGTTTCAGGCTTGTGAGG  
TGACAAACGTATCCAGCGGATGAGAGTGCCTTTCCACTCCTTGTGAAGCACAACTCTTGGTTACGTGC  
GGCTACTTTTATGCCATTACACTGAATCGAGGCTGAACCATGGATGATCCCGCCTCGTTCCCTCTTCAA  
TCAGATAGTGATCCCATCGACTGGCGCAAGTAAGCGCCCGCACCGAGCAGCCCGGGCCCTTCATGGGTG  
ATCAGAAACACCGGGATCTCCTTGGAGTAGGACTTGAAGCGCCCTTGTCTTCAAAGGCGACCCGAAAC  
CGGAACCGGTAAAGAACTCCTGGAAGCGGGTACTATGCCACCTGCGATATAGACGCCGCAAAGGTACC

CATATTGAGGGCCAGGTTGCCGGCAAAGCGGCCCATCAGCACGCAGAACAGGCTCAAGGTGCGACGGCAA  
TCGAGGCACTCACCCGCCAGCGCACGTTCCGGTGATGTCTTTGGGGGCGAATGGCTCAGGCTCACGGCCAT  
CGGATTTACCAGCCCCGCGATAGAGATTGACCAGACCCGGGCCGAGAGGAAACGCTCTGCCGAGACATG  
GCCCAATTCGCCTCGCATTACTTGCAGCACCGCATCTTCTCTCGCTGTTGGCAGCAAAATCCACATGA  
CCACCTTACCAGGCTCAGCCACTGCTCACCCGCCTTGACCAGATGGGCGACCCCAAGGCCGGTGC  
CCGCACCATAGATGGCGATGGGCTTGCCCGCTACCGGCGCGGCCGCCAGCTGGATGCGATCCGATTC  
AGCCAATACCGGCACAGCCATCGAGACCCGAGTAAAGTCGTTGATCACTTGCAGGCGTGCCAGCCCCGAGA  
TTGCTCTGCATCTCGCTGATGGAGAACTCCAGCTGTGGTTGGTCATGGCGACCCAGTACCCTTGATGG  
GGCAGGCGATGGCGATGCAGGCTTACGCCACCTGAACCTTGTGTTCCTCCAGATAGAGGCGTACCACGGC  
TTCAAGGCTGGGATGGGCGAGACCTGAGTAGGCTTTGCTGAGAGATAGTACCCTGGCCAGCTCACAC  
AGGGCCAGACCGCATTTGGTGGCGGACATCGCCGACCCAGCGCATGGGTATGCTGCATAACAACTCCTT  
CGTTACAGGATGGGGACGACTCTGATGTCCCGAGATTATTGTGGATTATGACGGCCCATTTCTATCCGAG  
CTCAGGCTTGCTCACCCGCCGATCGATACAAACGTGCACCTGCTCACAGTGTGTTGCTTTGCAACATT  
TGTAAGCGCTTTTCATGGCTAGGTGACGTTTTTGTAAACGAAAAGTACGAAAATAATTAGAGATGAGTCATACT  
TTGTATGGCAGGCGTTAGTTGCGATAACCGCTTGTCTTGTATAGTCTTAGCTTGAATGGAACTTGCTT  
AGCCGTAGATTGAGTGCAAAGACACTGAAGCTAAATTACAAAAACGCTGGTGGTGTATGAATACCCT  
TGATAAAATTACGAACAACCTTGAAAGTTTTCAGTAAATCAGAACGCAAGGTTGCCGAGGTGATCCTGGCG  
TCTCCCCAGACCGCCATCCACTCCAGCATCGCCGCTCTGGCCAAGATGGCCGATGTCAGTGAACCGACCG  
TCAACCGCTTTTGGCGCGTCTCGATAACCAAGGCTTCTCTGATTTCAAACCTCCATCTGGCCCAGAGCCT  
GGCCAATGGCACCCCTTACGTAAATCGTCATGTGGAAGCGGAAGATGGGCCCGATACCTACACCGCCAAG  
ATTTTCGAATCCACCATGGCCTGTCTGGATGCCGCCAAAAACAGCTGGGATATCTCCGCTATCAACCGCT  
GTGTGATATCTTGACCCAGTCCAAGAAGATCAGCTTCTTCGGCCTTGGCGCCTCCTCCGCGTTGCCCG  
CGATGCCCAGAACAATTTCTTTCGCTTCAACATTCGGGTAGTGAGCTTTGACGATATCGTCATGATGCGC  
ATGAGCTGCATCAACAGCAGCGAAGGGGATGTGGTGGTGTGATTTCCACACCGGCGCCACCAAGGCGT  
TGGTCGAGATCGCCGCGTGGCTCGCGAGAACGACGCCACCGTGATCGGCATGACCGCCAAGGACTCCCC  
GCTGGCCCCGAGTGAATCTGGTGTCTCCATGGATGTGCCGGAAGATACCGATGTCTATATGCCGATG  
GCATCCCGCATCGCCAGCTGGCGCTGGTGGATGTGCTGGCGACCGGTTTTACCCTGCGCCGGGGGATGA  
AATTTCCGCAAAATCTGAAGAAAGTAAAGAGGGATGCGCGAATCCCGCTTCGAAACCCCGCATCTTTC  
CTGACCCGTCGGGGCTCAGGCCCCCGACTGTCTATGCCACCCCGCTTGGTGTAGTATTGTAATTTAATA  
ACAAAAACTACCCAGATGGTTTTGCAAACGGGTGCATCGACCCATGGGCTTGATGGGGCAGAATCTCAAGT  
CATATCAACTTCATATTGGAGTCTTTTCATGCCTAGACGTACAAAAGATTGTAACCACACTCGGTCCGGCTA  
CCGACCGCAAGGGATCCTCGAAGGGATCATCCGCGCCGGGGCCGACATGGTGCGGATGAACTTCTCTCA  
CGGCACTGCTGAAGACCATATCCTGCGCGCAATCAGGTGCGTGACATTGCTGCCAAGCTCGGTGCTCAC  
GTCGCCATCATGGGTGATCTGCAAGGCCGAAAATCCGTGTTTCCACTTTCAAGGATGGCAAAATCTATC  
TGGCCATCGGTGACAAGTTTCACTTCTCGACGCGCGCTCGGCAAGGGTGAAGGTTGCCAGGAGCAGGTCCG  
TATCGACTACAAGAGCCTGCCAGACGATGTGGTACAGGGCGACATCCTGCTGCTGGACGATGGCCGTGTG  
CAGCTGAAGGTGAGCAGGTTGAAGGCATGCGCATTACACCACGGTGACCGTGGCCGGGCCGCTCTCCA  
ACAACAAGGGCATCAACAAGAAAGGGGGCGGTCTCTCCGCTCCGGCCCTGACCGAGAAAGACAAAGAAGA  
CATCAAGACCGCTGCCCGCATGAATGTGGACTATCTGGCTGTCTCCTTCCCGCGCTGTGGCGATGACCTG  
CGTTACGCCCCGAGCTGGCCCCGGAAGCCGGTTCCAATGCCAAGATCGTGGCCAAGGTTGAGCGCGCCG  
AAACCGTGCACACCGATGAGGCGATGGAAGACATCATCCTCGGTTCGGATGCCGTGATGGTTGCCCGTGG  
CGATCTGGGTGTGAGATCGGTGACCCCGAGCTGGTTGGCGTACAGAAGAAGCTGATCCGCCACTCCCGT  
CGTCTGAACCGTGTGGTGTGATCACCGGACTCAGATGATGGAGTCGATGATCAATGCGCCTCTGCCGACTC  
GTGCAGAGGTGATGGACGTGGCCAACGCCGTGCTGGATGGTACCATGCGGTGATGCTCTCTGCCGAGAC  
TGCTGCCGCTCAGTTCCCCATCGAGACCGTGACCTCCATGGCGAGCGTCTGTGTGCGGTGCCGAGAAGCAC  
CCGAGCCTGAACGTCTCCAACCACCGCATGAGCTACACTTCACTTCCGTGGAAGAAGCTGTAGCCATGT  
CCACCATGTATGCGGCCAACCCACTGGAAGGGGTGAAGGCGATCGTGGCACTGACCGGAGTCCGCGCACCA  
GCCGCTGCTGATGTCCCGTATCAGTTCTGGTCTGCCGATCTTCCGCTATGTCTCCCCACAACAAGACCCTG  
TCCTGGACCAATCTCTACCGTGGCGTCAACCCGGTGTGTTTGGCGGTGACGAGACCAACCCGGTCTACG  
AAGTGTGCCGCGACGCGTGGCCGTGCTCAAGGAGAAGGGGCTGCTGCAGAGCGGGCAGATGGTGTGCT  
GACTCACGGTGAACAAGATGGAACCGTGGGTAGTACCAACACTGCAAGGTGATGATGGTCAATAAGCC  
CGTCCGTTTTTACTGTGCTTAAACAAGGCTGCTCCTCTTTGATGAGCAGCTTTTTTGTAAACCGCAGTCGG  
GCTGTGGCGGTATAAACAGGACTCAATGATTGCTTAAACCGGATTTCCCTTCCGATAATGCCGGAGTGATT  
TTCAGCGGGTAGCCTGTTGTAGGTGATCGTCTCAGGTAACCCAGACACTCGACAATACGGGAGTGAAAAA  
ATGAACAAGCGTAACCTGGTTGCTGGCCTTGTCACTGAGTCTGGCCTTCTCACCTGTTATGCCGACTGGG  
CCAAGCTCAAGGCCGAGCGTCCGATCTGGGAGCGGCAGTGAGCGAGACCAGCAAGGAGGTGTGGCAGGA  
TGTCAGCGATTTCTCCAAGAAGAGCTGGGCTTCCATCTCTGCATGGGGTGAAGAGGCGTTCAATACCGCC  
GGGGTCTGGACCGACAAGAGCATCGCGACCGGCAAGGAGTGGCTGAAGGCAGCCGACAAGGAGCTCAACG  
AGATGCTCAACCCCAAGACCGCGAAAGAGGGCGAGGATCGCGATCAATACCATGGCCGACACTGCGCTGAT  
CCGGTTGTTCAACGAGCAGCCATCAGCCAAGTTGTTGTTTGAACAAGGCTTATGGTTATGCCGTTTTCGAT  
TCGCGCAAGTTCTCCTGATGCTGCATAACCAATCAGGGGGCCGGGTGGCAGTCAATCGAAAACCGGCA

AGCACACCTATATGAAGATGTTTGGTGCGGGTCTGGCGGCCGGGATTGGCGGCAAGTTCTATCAGCAGGT  
GATCCTGTTTTGAAGACAAGGCCAGATTTCGATGCCTTCGTGACCCAGGGGTGGGAAGCTACCTCCGAAGTG  
GGTGTGGTGGCCGGCAAGGAGAGCGCCGAGCTGACCCGCAAATACAACGGCGGCATGGCCATCTACCAGA  
TTGGCGAGAAGGGCTTGCTGCTCGATGCCAATATCTCCGGCTCCAAGTACTGGATTGACAAGGACTTGAC  
TGAAACGAGCCGCTAATCCCCGCGTTATCGGTTGCTCGCTGCACGCCATGCGCTTGTCGTGATCTCGCCA  
ACAGGCCCCGAGTGCAGGGCTGTTTGTCTCTCGGTGTCAGTGGGCTGAATAGACCTGCTTGCCCTTGAA  
CATGGTCCAGAGCACCTTGGTCTCCTTGAGCTCTTCGCTTGCTACCTGTTCCAGATTGCGATCCAGCAAG  
ATCAGGTGAGCACTCTTGCCCGCTGATGGAGCCAATCTCTTTCTCCCGTCCAATTACCTTGCGGGCGT  
TGAGGGTATAGGCCTGCAAGATGGCCTGACGGCTGATCTGCTCGCTGGCGGGGGCAGCAAGCCAAGCTC  
ACCTTGGCGGGTGCATCGCGGTATACATGGCGAGGAAAGGGTTAGGGCTGGAGACCGCCAGTCACTGGCA  
CCGGCGATAAATGGCGCCGCTTTGCAGCAAGCTGCTGCCGATAGAGGCGGGCTAGCAGTCCGGGGGCA  
CTTTTCTTCAAGCAGCAGGGTGGTCGCCACATTTTTACC GGCCACAAGAGTTGCATCGATGCGGGCCAC  
ATTGAGCGGTTTTGAAACGGGCAATGCTGGCCGGGCTACCACCTCCAGATGGGTGATGCTGTGCAGCAGG  
CGGTGATCCTGATTGTGGGCCCCGGGCATAGGCATGGCCTCGAGGGATTACGGACGGCCCCGATCGCCGA  
TGGCATGAAAGTGAGTGATAAGTTGATGGGCATCCGCGGTGCGGATCAGCTCGTTGAAACGCTGTTTGT  
CAGATCGTCTTGCCGCTGTAACCGGGACGGTTGAGGTAGGGCTCGCTCAACTTGCGGGTCTGGGATGGA  
TACTCGATGACACCATCTTGAGGATCTTTATCCCCACCAGTTTAACTCCGGGGCATCTTGAAACTGCT  
GTTGCAGCGCCAATACGTCATCAATGATGGCGGGTGGGATGTATCCCCACCAGTGCAGTGCAGGATAC  
ATGTCCGGTACGCTTTCTTCCCGGGAGAGCATGCTGTACGCGGCAGCAGGCCGTTATCTCGGCATCC  
GGCTCGGCCTGAAAGATGGGGGCGAGGGGGCAATGTTGCTGATAGGGTCCATCCAGGCGGTAATGCCCA  
CCTGATTGAGTTGTTTGGCGGCAGTCATGATGGCACTGGCAATCGTCTCGTCTGCTGACGGGGGGCAGCGC  
CTTGAGGATGGCATCCAGCCGCTTCTGAGGCAAGCCATTGAGCTTGCCGGATGGGGTGAGGCCAAAA  
TTGCCTTTTCAGCGGAGCATAACGACCGTCAAGGGTGTGCGTATCAATGCCAGCCTTGCGCAGCATGGCCT  
GATTGGCCCAACCGGTGTGGGCATCCGAACCGGCCAGCACTACGGGTATTTGCCGGTATTGCCGGCCATT  
GAACACCTGATCGAGCAGGGGAAGCTGATGCCAGTAGTCGAGGGAGACATTGCTGTATAGCTCTACATCG  
CCCAGTGTGAGCGGGGATCATCCTTGTGCGGGTCAAAAATGCTGCACCTGCTCAACCTCACTCATGG  
CATCGGTAAGTTAACCGTCATCCCCTGAAAACCGGCAAAATGCCGCATGAACATGGCTGTGATGAGCCC  
CGGATCAGGTACTTTCTTTTCAGATCAAGGCGCTTGGCATGTTGCTTAGGCGGGCGTACCTCTGTA  
TAGCTGCGACTGCCACAATCTTTTTACCTCAATGCCAGCCGCTTCCGGGTGAGGGTTGCGCCGATCAC  
CACTGTAGATGGTCCGCCAAAGATCAGCGTCTGGCTGTGACTGGGCATTGGCGGCAGCGGGAAGCGT  
CACCATCAGGCTGGCGAGAAACAGCGTTTTGATATTTCATGGGCATGACTCCGTCGCTTCCGGTGCCTGAA  
GCACCGAAGTGGGTAAATGGAATGAGGTATCGGCTTATCGGTTGATCAGCGGGATACAGATATCAAACA  
CGTAATGCTCCCGGTGCGGGTCCGTGCCTGCGTGGTATTGCTCGTAACACGGGGGATCGTCCGAGTTCAG  
CCCTTGCCCACTACCCAGCGAAACGCGTTTTCCAGCAAGCGACCAGTTGATCGCCGCGAGCGATAAAC  
TGACAAACCGCATAGGGGCCCCGCGCGATGGTCTGGGTGGTTAACTGGCGCCAGCGGGGATCTCTGGCC  
CCAGCTCGATGCAGACGTGATACGGCAACGGGTCTCATCGGTGATATCGGGGATATCCCAATAGAGACT  
CAGGGTACCCGCGGTGTTATCGCCTCGTCTGAGGCGAACAGCGCGAGCAAAATCCCGATGAGCTTGCTCG  
CAGGTCTCTTTGCCATAGGGGCCCCAGGCGGCGCATGTACGCCACGCGCTTAGCGGGCATCTGCCTGACGT  
TTGCCCCCTGCAACAGACCCGGGTGTTCCGGTGACCGGGTGCATGACCAGGCCATCATAGGTGTCAAAGGG  
AAGGGGATCGTTTTCAATCTTGCTTTTTCCAGTTTTTCCCCCTGCTGCTGGCGGTATTCCGAAGGACTCATG  
GCGAAGTGCAGGCGAAAGGCCTTGGCGAAATTTCTGCGAGCTGGAGAAACCCGGCGGGCAGTGCAGGGGTGG  
TGATGTGCTCTGGGGGAGGCGAGCAAGCGACGGGCAGCGCGCTCCATACGCGAGGCGCCGGGTATATCC  
GGCAATGGTCTCGCCGACCATCGTCTTGAATAACGGTGGAAAGTGGAAAGTGGAGATGGCTGCCGCTGCT  
GCGACCTCATCCAGGCCCCGATTGTGATCCAGATGGTGGCTGATGTAGTCCATCGCCTTGAACACGGGTT  
TGCGATAATCCAGCGGACTCCTTGCCAGCCAGCAAAAGTGGGCTCAGAGTCGATTTAATCAGAGCC  
ACCTGCCGTTGTGCAACCCGTCCTGCTGCTGGCCACTCATCTCGTCCGTTTTTTAACGCATTGGCA  
CTTAATTGCTTGTGTCATGCCAGCGTCAATGATTTGCTCTGGGGATGGAAAATGGAATTAAGTGAAGCA  
GCCTGATGCAAGAGATGCAGGCGCTCAAGATCGAAGCAGGCGCAACGCCGCTGGCACAACCCGGTCTGCA  
GGTAACCTCCGACTTTGGTCACTGCTGCAACAGGCGCTTGGCAACGTCAACGAACTGCAAGGCGCCGCC  
AATGACCTGCGTACCCGTTTTGATATGGGTGACAAGTGGTGGATCTGGCCGAGGTGATGATCGCGGGCC  
AAAAATCGTCCATCGCCTTTGAAGCCACGGTACAGGTGCGCAACAAGATGGTTCGATGCCATACAAGCCAT  
CATGAACATGCCGGTATAAGTGATTACTGAACATCATGAACATGTCAGCAATAAGGACATAAATCGTGGC  
TACTGACCAAAACGGCGATCTGCTGATAAACGATGAGGGCACCGCCGCTCGATGAAAATGAGCAGAAG  
AGTTCGGCGCTGGGCTTCTGTCCAACACCGATGTGCTGCGGCAAAATCACCTGATCCTGGGGCTTGCCA  
TCTGTCTGGCCATTGCGGTGTTTATCCTGCTGTGGGGCAAGGAGCCGACATGCGTCCCCCTCGGCACCTA  
CACCACCCAGGAGCTGGTGAAGACTCTCGATTTCTCGATCAGCAGAAGATCCCCTACGAGGTGGATGGC  
AAGGGCGTGTGGTCAACGCCGAAAGCTACCCCACTATCCAGCTGGCCCTGACCCGTGCCGGTCTTGCCA  
ATGCCACCGATAGCAGCATCGGTGGTGAAGATATCTGCTGAAAAGATTCCAGTTTCCGGCGTCAGTCAGCG  
AATGGAGAGCGAACGTCTGAAGCTGAGCCGCGAGCGCCAGCTGGCGAGCGCCATCGAGCAGTTCCAGAAT  
GTGGCCAAGGCCAGGTGCTGCTGGCTATCCC GAAAGACAACGTGTTTGGCCGCAACGAAACGCAACCTA  
GTGCCACCGTAGTGCTCAACCTGAAAGGGGCGGCGCTGGGGCAGGGGAGGTGGACTCCATCGTTCGATAT

GGTGGCCTCCGCCGTACATGGCCTTGAGCCGACCCGCGTCACCGTCACCGACCAGAATGGCCGCTGCTC  
AACTCCGGCTCGCAAGACCCGATCTCGGCCAGACTCGCAAAGAGTTTGCCATGCAGCAGAAGCAGGAGC  
TGGAGTACAAACAAAAAATTGACGCCATCCTGATCCCGGTGCTGGGGGCCGACAAC TATACGGCGGAAGT  
GGATCTCTCCCTCGACTTCTCCCAGCAGGAGCAGACCCGCAAGACTTACAACCCGGACCTGCCTGCAGTG  
CGCTCCGAGATGACCATGGAAGAGAACAGCGCCAGCGGCAGCAACGGTGGTGTGCCGGCGCCCTCTCCA  
ACCAGCCCCCTGCCGCTCCAATATTTCCCGAGGAGGCGACCCGGTGGTGATGGTGCCAGCGCTGCTGCTTC  
GGGCCGTTCCCGCAAAGAGGCGACCCGCAATTTTCGAGCTGGATAACCACCGTCAGCCATACCCGTCGCCAA  
ATGGGTGGCATTGCGCCGATGACTGTTTTCGGTTGCCGTGGATTACAAAAGCGGTGCCGGTGCCGACGGGG  
CCGTGACTCGTGAGGCGCGCACCCAGGCAGAACTCGATACATTCGCGCCGTTTGTGAGCGGTGGCCTTGG  
CTTTGATGTGACCCGTTGGTGATACCCTTGAGGTGGTCGCGATTCCGTTCAATCGCCAGAGCTGGATAACC  
GTGGCCGAGGTGCCGCTCTACGATCAGCCCTGGTTCTGGCGTGGCGTGGCGATTGCCCGCTCGGTACTGG  
TGATCATCGTCTTGATCGTCACCGTGGTTCCGCCCCATGCTCAAGCGACTGCTCTACCCGGATGCCAAACC  
GGAAGGGGAAGTGGATTTTCGACAACCACACCGTACTGGGTGGCGACGACGAGTTGAGTCTGCTGTAGCA  
CAAGTCGAGAACGATCAGGTATTTGGTGTCCGCGATGGCCAGCTGAAACTGCCGGATCTGCACCGTGATG  
AAGACTTGCTCAAGGCGGTACGTGCGCTGGTGGCGAACGAGCCGGATCTGGCCGCTCAGGTCATTAAGA  
ATGGGTAACGAACAAAGATGCCTGAAGAAAAGAAGAGTCAAGTCACCGGCAATGACATAACCGACAGTCA  
GCGCCAGATCCTCGACCAGATGTGCGGAATGGAGATGGCTGCGGTGTTGATGCTGAGCCTCAATGAAGAG  
GATGCCGCCAGATCTTCCGTCATCTCGAGCCAAAGCAGGTGCAGCGGCTCGGTATGTCGATGGCCTCCA  
TGTCCGACTTCAGTCACGATCGGGTGGCGGCGGTGCACCGTCAATTCATCGACGATATCCAGAAGTACAC  
CAACATCGGTATCGGCAGCGAAGACTTCGTGCGCAAGGCGTTGGTGGCGGCCCTTGGCGAGGACAAGGCG  
AGCAATCTGGTGGATCAGATCATTCTCGGTTCCGGCGCCCGTGGCCTCGATTTCGTCGAAGTGGATGGATG  
CCCGTCAGGTGGCCAGCATCATCCAGAACGAACACCCCGCAGATCCAGACTATCGTGCTCTCCTATCTGGA  
GCCGGAGCAATCCGCCGAGATCCTGAGCCAGTTCCCGGAGCAGGTGCGCCTCGATCTGGTGTGCGTATC  
GCCAACCTTGAAGAGGTACAACCGGCGGCACTGCAAGAGTTGAACGACATCATGGAGAAACAGTTTGCCG  
GTGCGGCCGGTGCCCAAGCAGCCAAGATGGGCGGCTGAAGGCAGCCGCCAACATCATGAACTATCTGGA  
TACCAATATCGAAGGCCAGCTGATGGACTCCATCCGCGAGTCGGACGAAGAGATGAGCCAGCAGATCCAG  
GATTTGATGTTTCGTGTTTCGAAAACCTCATCGATGTGGACGATCGCGGCATCCAGACCATGCTGCGGGAAG  
TGCCGGGGGATCTGCTGCAACGCGCCCTCAAGGACTCCGACGATCAGATGCGCGAGAAGACTCTTCAAGAA  
CATGTCCAACCGGGCGGAAATGCTGGCGAGCATCTGGAGGCCATGGGGCCGATGGGGCCGATCCCGAA  
GTGGAAGCGGCCAGAAAGAGATCCTCTCCATCGCCCGTTCGTCGTCGGCGGATGCCGGCGAGATCATGCTGG  
GCGCCGGTGGCGGCGAGGAGTTCTCTAAGCCATGGCCATAAACAGAACCGCGATGCCAAGCCCGCATC  
AGGCAGTGGTGAGGAGCCGCGCAAAGCATGAACAACAAACTGCGTGGGTATGTGCGCCCCGAGGGTGATG  
ATGCCCGGGTTGAGACCTGGGGCTGGCCGAGATGGAGGTGAGGTTAGAGGCGGGAGCGCTACCAATGC  
TCTTGGCCTGGCCCTGACTGGTATCAGCAGGAAGAGGAGGTGGTGGAGCCGGAGCCCGAACAGGAGCCG  
ACCCCCAGCATCACCGCCGAAGAGCTTGAAGCGATCCGTCAGGCCGCTGGGAAGAGGGGATGGCTGAGG  
GGCGGAGTCCGGTTATGCCAAGGGAATGGAAGAGGGCAAGCTGGAAGGATTGCAACAGGGTCAATCTGC  
CGGTCTCGAACAGGGGCGCGAGGAGGGGCTGGCTATGGGCCGAGCTGGTGGAGCAGGAGATCGCCAC  
TGGCAGGGGCTCGCCGCGCGCCTTGCCAATCCGCTTAACGAGCTGGATCAGGCGGTGGAGCAGCAGTTGG  
TCTCGCTGGTGTGCAACTGGCCCCGCGCGCTGATTTCGTCACGAAGCGGAGACCTCCCCCGCATTTCTGCT  
GGAGGCGCTTAAAGAGGGGCTGGCCTTGCTGCCTGCCGCCGAACAGGGGGTGACTCTGATGTTGCATCCC  
GACGATATCGCGGAATCGAGCAGGCATTTGGCGCCGAAGAGTGCGCCAAGCGCCACTGGCGATTGCAGA  
GCGATCCCACCTTTCCCCCGGCGATCTGCAACTGGCGACCGAGCTCTCCAGCATCGATCTGACCCCTC  
CGGGCGCATCGATCAGTTGCTGCGTAACTTCTTGCAGGACAATGCGTCGCAGAAACCGGCTTCGCAGGAC  
TCACGCCATAACCGATGCCGGACGTTGCCGTCCGGCTGCACTTTTTAGCTCTCAGGAGGCCAGATGAGC  
GGCTCGTACTGAACCGGTTGCAAGGGTACAAGGTACGCGACAGCGCCCCAAACCGCCGCTCGCCGGTA  
AATTGACCCGGTGGTGGGCTGACCCCTCGAAGCCATCGGCTGCCGCGCCGATCGGTGCCCTCTGCCG  
CATCGATAACCCTTGATGGGTGCTGGAGGCTGAAGTGGTTCGGTTTTTCTGGCGATCGCCTCTATCTGATG  
CCGAGCGAGCAGCTCAAGGGGGTATCCCCGGTGCCGGGTGGTGGCCATCACCGAAGAGCACGGCATT  
CGGTTGGTATGAACCTGCTTGGTGGGTCATCGACGGCATCGGCCAGCCACTCGATGGCCTCGGCCCAT  
TCTCTCCTCCAGACCGTGCAGTTTGCCAGCACCGCATCAACCCGCTTTCTCGCCGCCCGATCCATCAG  
CCGATGGACGTGGGGGTACGCGCCATCAACGCCGTGCTGACGGTAGGGCAGGGCCAGCGGATGGGGCTGT  
TTGCCGGTTCCGGTGTGCGTAAATCGGTGCTGCTTGGCATGATGACTCGCGGCTCGGTGGCAGATGTGGT  
GGTGGTCCGCCTCATCGGTGAACGGGGCCGAGAAGTGAAGAGTTTATTGAAGACATTTCTGGGAGAGGAG  
GGCCGTGCCCGCTCCGTGGTGGTAGCGGCTCCCGCCGACGCTCGCCGCTGATGCGGCTAAAGGGGTGTG  
AAACGGCGCTGGCCATCGCCGAGTATTTCCGCGATCAGGGGCTCAACGTGCTGCTTTTTGATGGATTGCT  
GACCCGTTATGCCAGGCCAGCGTGAGATCGCGCTGGCGGTGGGCGAGCCGCCAGCGACCAAGGGTTAT  
CCGCCCTCGGTATTTGCCAAATTACCGGCGCTGGTGGAGCGTGGGGTAACGGCAGTGACGGCCAGGGCT  
CCATCACGGCATTCTTACCGTACTGACCGAGGGGGATGACCTGCAAGATCCCATTTGCCGATGCGGCGCG  
GGCGATCCTTGATGGCCACATAGTGTGTGCGCGAATTTGGTGTGCGGGGCACTATCCAGCCATCGAT  
ATCGAAAATCCATTAGTCGGGTGATGCCATGGTACCTCGCCGGAACATATGGATTTGGCGCGTACCC  
TCAAGCAGTTCTACTCCCTTTATCAGCAGAACCGTGACCTCATCACCATCGGTGCTTACAGCCAGGGTTC

CGATCCGCGCATCGACCGTGCCATCATTCAAAAACCCATCTGGATCAGTTCTTGCAGCAGGGGATGCGC  
GAGGTCAATTCACACTACGATGATGGCCTGCAAGCCTTGCAGATGGTGGCGATGCCATTGATGCGCTGATGAT  
GGTCCGTAACAGAGAGGTCGACTATGAGTAAAGGGTTGGTATTGTTGGCCGATCGGCTGGTGGAGGCGGA  
GCAGCAGTGTGCGCTGGCGCTGGTGAAGGCGCAGCAGGATCTCAAGCTGTTCATGGATCAGCAAAATGCC  
CTCAACCAGTACCGCCAGATCTATCACCAGCAGTGGACCGATCGCGGCCCTGCAGGGGATTTACCCCCAGC  
AAAACACCCAGTATCACGCTTTATCAACAAGCTCGAACAGGCAGCGACCCAGCAGTACGAAGGGGTGTT  
GCAGGTGCGTCAGGCGCTGGAACAGCGCCGTGAAGAGTGGCTGGCGGCCAGCAGCGGCGCAAGGCGGTA  
GAGCTGTTGCTGGAGAAGCAGGCGAGTCGCGAGCAGCAGAAAAGCCCTGCGTCAGGAGCAGAAGATGCTGG  
ATGAGTACGCCATGTTGCGACGCTTTCATCAATCTGGCCTGTAACCTGCTTTGATCTGGACATTGTCCGC  
GGCCATCTCTTTGGGGGCCACCAGAATTCAGGGATCCCATCATGATGCAGACACTGTTGACACAAACGCC  
TTCGGCTCCGGCCAACGGGTTGGACAAAAGCGCTCTGAGCGGTTCCGTCGAGAGCAAAAAGTATCGATGGG  
GGAACCTGGCAGCGACAGCAAGGGGGATTTGCCACCCTGATGTCCAAAGCCCGAACAGCGAACAGGGCG  
CCGCCGAGGCCACTCAGGGCGGTAACCATGTCCGATCAGCCAAAATCTTTGGCGACCGAGAGCGCTCTCC  
CAAAGAGGAGACCGCAAGGAGCAGGATCCTGACGCCGACAACAAGGTGGAGGAGTCCCTGCCACCGAC  
TTTTCTGCTGCGCCTGCAAGACTCCCTCAAGCTCGATACCTCGCTAGTGACTCCCCAGCTGACGGTAGCAG  
CCCAACAGAGCACCCTGTGGTAGACGGCAATCCGTTGCCGCAAGAGGGTGAGCTGGAGGGGATTGCGCT  
TGATGAAAGCGAGCAGACTCCTGCCGCTGCCAGGATTGCCAACAGCTTGCAGGTCAGACCGGGACGCAG  
TCGCCGCTGGCGACGACCGCAACTCGACTCTTGATAACCCTATCCTCCTCAGCGGCGGAGTGGTGG  
CGAAGGGCGATGCTCTGCTGCCGTTCTCTCCTCTGAAGGTGAAGATGCCGCCACTACTGCGGATGGGCA  
GGCCGGGGAGAAAGCCTCTGCCAAGGGCGAAAACCTCGGGGTAGATGGCAAGCAGACCAAGCCCTCACG  
GGGGCAGAGCGGATGGCCAGCTGGCCAAGGTGCTGCCGGTCGATGAGTCGGCAAGCACCGCCAAATCCG  
CGGAGTCACTCGCTGCAAAAAGAGGCTGGCGACAGCAAAATCCGATCTCGCCGCTAGCAATGCTTTGACTAA  
CAAGGGGCAGGCAACGCAAGCCGCGACTCAGGGGGCCGCCCTCAAGGCCTTCAATGAGGGGGCTCAAGCAG  
CCTGAGGGGGGTGCTGCAACCACTTACGAGCTGCGGATGGAAGTGGGGTAGCTGGCAAGGGGGCAGAAA  
AGGGGGCCCGGAGGGTAGCCAGCAGCCAGCCACCGCCGTAATCAAGGTTCCGGCGCCGTGAGGACGGC  
GCAGAGTGCCTGGAGAAAGTGCCTCAGCTCAGAGCAGCGTAACGACAAAATGCGACGACTCCGACCGATAAC  
GCTGCCGCCCCCGTGTGTTGGTGGCGCCGAGCGGTGTTGGCACAGGCGCAATCTCAGGGGGCCGAAAGCGC  
CGCTGCTCGACTATTTTCCGGCATCAAACAGATGGAAGTGCAGGGCACCGACGAGGTACGAAAAGCGGT  
TTCGCTTGAGGTAAAAACCGAAGCCGGTGGAGGTGGAGAGAGCCCTGTTGCGACGACATCTAGCAGTGGAG  
AGCAGCCCCGAGCCAGACCGTTACGATGCGCCAGAACAGCCAGACTCAGCCACAGGTAGCCGATAGCCGGG  
CGCCCCCGCTGAGACGACGTTGCGCCGTGAGTCGCAGAATTTACCCCATTTGAAACTGGCCAGTCAGGA  
AGCACCTGCCGAATTGCAACCAGAAGGTCAATGTGATGCTGGCCGAAAAACTGCAGCAGGCGGAAATTCAG  
CTCGACCCCTCGGCCCTTGGCAAGATGAAAATCCAGATCCAGATGGGAGCCGACAGCCAGGCCAACGTCC  
ATTTTGTGGTGAACATGGACAGACCCGCGAGATGCTGGAGCAGGCGATGCCCCGGCTGCGTGACATGCT  
GGCAGGGCAGGGGATCCAGCTTGGTCAGACGCAGGTGCAGCAGCAGTCGCAACAACAGCAGCAACAGGGC  
CAGCCCACCTTTAACGGGCAGGGGCAGCAAGGTGAGAGTAGTGGTCAGCCGCGGTCGGTAACGGGCTGG  
TTGAAGGGGAACTCACCACTTCCACCCCCAGTTTGTGGTGGAAATCGACAAACGTTCCGGAAATGATTT  
CTATGCTTGATGCAATCCCGAGTAAGTTTATGATATCGAACAAGTTTGAGACTAGGGGGGACAAGGGATG  
GCTGACGATAACGAGTTGACGCTAAAAGACCCGGCTGCCGGCAAGAAAAAGAGCTGATCATTATCATTG  
CCCTGGCGGTAATTTTGTGGGCGGTGGTGGTGGTGGCGCCTTCTGATGCTCTCCGGCTCCGATAAACC  
GCCGCTGAAGCGGCGGAAGGTGCCGAGGCCACACCCAAGGAGGAAGCGCCTAAACCTTCCCTCTATGTC  
GGTATGCCGCGCCCTTTGTCTTCAACGTCGCAGGTGCCAGCGGGATCGACTGGTGCAGATCAAGATCC  
AGCTGATGGTGCAGGCTACTGCCGACGAGACGCTGGCCAAACAGAATATCCCCCTGATTGAAGGCACTTT  
GCTGCCGGTATTCAGTGCAGCCAGTGCCTGAACAGCTGATGACCTTTGAAGGCAAGGAGAAGCTGCGCAAG  
GATTCACCTGGAAGAGTGCCTGCGGTGCTCAAGGACCTGGTCTCTTCCCCGTTATCGAACAAGTGCTGT  
TTACCGGCTTTGTAATGCAGTAGGTGAAGCGTGAGCGATCTGTTAAGTCAGGACGAAATGATGCCCTCT  
TGCACGGTGTGATGATGTCGAAGAGGAAGAGATAGGCGGCGCTGGAGACCCCGGCTAGCCAGTTTGA  
CTTCTCCTCCAGGACCGCATCGTCCGTGGTGCATGCCGACGCTGGAGCTGGTGAATGAACGTTTTCGCC  
CGCCATATGCCGATCAGCCTGTTCAACATGATGCGTCTGACCGCCGAGGCTCCATCAACGGCGTGCAGA  
TGCTCAAGTTTGGCGAGTATGTTACATACCCTGTTTGTGCCGACCAGTCTCAACATGGTGCCTTCCGCC  
GCTCAAGGGGACGGCACTCATCACCATGGAGGCTCGACTGGTCTTCATCCTGGTAGAGAACTTCTTCGGT  
GGTGTGCGGCTTATCACGCAAGATTGAAGGGCGCGAGTTTACGCCGACCGAGCGGCGATTATCCAGA  
TGCTGCTCAAACCTGGTGTGTTGAGGATTACAAGGATGCCTGGGCGCCGGTGTGACGTTGGGTTTCAGTA  
TCTCGACTCCGAAGTGAACCCGGCAATGGCCAACATCGTCAGCCGACCGAGGTGATCGTGGTCAGCTCG  
TTCCACATCGAGCTCGATGGTGGCGGCGGCGACTTCCACGTGGCGATGCCTTATTCATGCTGGAACCGA  
TTCGCGAGCTGCTGGATGCCGGTGTGCAGAGTGACAAGGGGGATACCGACGTACGTTGGAGCAAGGCGCT  
GCGTGACGAGATCATGGGCGTCAAGGTGGAGCTGCGGGCCAAGCTGCTGGAGACCGAACTCACTTTGCGT  
GAACTGATGGAGCTGCGACCCGGCGATATCATTCCGGTTCGATATGCCGGAAAAATCTGCTGGTTTTTGTGCG  
AGGACTTGCCCACTTTCCACGCCAAGATGGGCCGTACCAAGGATAATGTGGCGCTCAAGATCACCGACAA  
ACTCAAACGTCCGGAAGGGGTCAAGACGGAGATGCATCTGGTGAACCGGGGCGGGTACGAATGATGGC  
GAGGCCGAGCTGGAAGAGCTCGAGCGCAGTATCGAAGATCAACAGCGATAATTGACGGTTTTATTACGGTA

AACGGTCACGAAGTAGCATAAGGAAACAAGATGAGCGGAACTGAGGAAGAGGATCTGATGGCTGATGCCT  
GGGCTGCGGCTCTGGAGGAGCAGGTGACGGCGGAAGCCAAGCCAGCCCCGCTGGAAGAGTTGAAAGATGA  
TGCCCCCATCAGTGCCGAGGAGCGTCGCAAGCTCGACACCATTCTCGATATTCGGTCACTATCGCCATG  
GAGGTGGGCCGAGCCAGATCAGCATCCGCAACCTGTTGCAGCTGAACCAGGGCTCGGTGGTGGAGCTGG  
ATCGGGTTGCAGGCGAGCCGCTGGACGTATTGGTCAACGGTACCCTGATCGCTCACGGCGAGGTGGTGGT  
GGTGAACGACAAGTTCCGGTATCCGCTGACTGACGTCATCAGCCAGATTGAACGGATCAAGAAGCTCAAA  
TGATGCGCCTCCTGTTGTTATTGCTGCCTGTTCCGGCTTTGCCGAGACAGCGGCATCTGCCAACGTGCC  
TAGTCTGAGCTCCTGGTTGCTCTCCAGTCTGATGGTGATTGGTCTCATTCTGGTGTGGGGCTTTCTGCTC  
AAGAAGAGAAGCTGGCGACCGCCATGGGGGGCGCCAGATGCGGGTCATCGCTCGTTGCCGGTGGGTT  
ACAAAGAGAAGCTGCTGGTGGTCAAGGTGGGCGAACGCAACTACTGGTCCGGTAAACCCGAGCAGGT  
CAACTTTCTCTACCGCTGGAGGAGCCGCTGGATGAAAAACAGCCGCGAGGCGTTTTCCAGCAGCTGGC  
AAATTGATGGGCAAGCATGAAAAAAGCTAACGGCTTATGGCTGAAAAACGGGGCTGCTGGTCAAGCTGCTG  
ATACCACTGTTTTGCTCCTGGCCTGCGCTGGCACAGGACGCCATGTCGGCGGTGACCGTCAAGACCATGG  
GGGATGGCTCTCAGGAGTACAGCCTGACCCTGCAAGTGGTGGCGCTGATGACCGCGCTCTCCTTCTGGC  
GGCCATGGTGATCATGATGACCTCGTTTACCCGCATCATTGTGGTGTGGGTATCTTGGCTCAGGCGATA  
GGTCTGCAACAGAGTCCCTCCAACCAGGTGTTGATCGGCATCGCCCTGTTTATGTCCTTCTTATCATGT  
CGCCGGTGTGGATCGCATCAATGATGAGGCGTTCAGCCCTATCTGGCCGAGACCATTCAAGCAAAGGA  
GGCGCTGGAGCGGGCCGAGTTGCCATCCACCAGTTCATGCTGGCCAGACCCGGATAAAGGATCTCAAC  
ACCTTTATGGAGATCGCAACGTGCAGGTGGAGAAACCTGCCGATGTGCCGTTGCGGGTGTGATCCCGG  
CCTTTGTCACCAGCGAGCTGAAAACCGCTTTCAGATTGGTTTTATGCTGTTCTTACCCTTCTGGTCA  
CGATCTGGTGGTCCGAGTATTCTGATGGCGATGGGGATGATGATGCTCTCGCCGATGATCGTCTCGCTG  
CCCTTCAAGCTGATGCTGTTTGTGATGGTGGATGGCTGGAACCTCATTCTGGGGTCACTGGCCAACAGTT  
TCGGACTGGGTGCCGGTTAGCCGGTGCAGCGCAAGGAGCCCGAACATGAGTCTGAAACCTTTGTGCGAG  
TCTTTGCGGAGGCGCTCTGGCTGGTCAATATCATGGTCAAGCGCCGTGATCCTGCCAGCCTCGCTATCGG  
GCTGGTGGTAGCCATTTTTAGGCGGCCACCTCCATCAACGAACAGACCCGAGCTTTCTGCCCGCTC  
ATCGTGACACTGTTTGCCTGGGTGCTGGTGTCACTGGGGTCTGCAGAGTCTGATGGACTTCTTTGTAC  
TGATGGTCAATCAAATCCCCGAGGTGGTGGGATGACCTACACAACCGCTCTGATCATGGAGTGGTTGTCT  
TCCATCCTCTGGCCGCTGGCGGGGTGAGCAGCTGCTGATGGTGGTGGTGGTGGTGGTGGTGGTGGTGGT  
CTCCTGCGCGGGTACGAGTGGGGCTGGCTTCTGCTATCACCTTTCTGATTGCCCGTTGCTTCCGAAAAT  
GCCCCCTATCGAACTCTTCTCTGTCGGCAGCTTTCTGGTATTGGGCCAGCAACTGCTGATCGGTATTGCC  
CTCGGCCTGATGACTCAGTTTTCTAATGGAGAGCTTCGTGATGGCCGGTCAAGTTCATCGCCATGCAGACCA  
GCCTGGGTTTTGCCACCCTGGTGGACCCGATGAATGGCCAGTCCGCACCCGTGGTGGGTGAGTTTTATCT  
GATGCTGGCGACCCTGGTGTCTTGGCGCTGGATGGCCATCTGGTGGTGGTGGTGGTGGTGGTGGTGGT  
TTTTGAAACCTTGCCGGTGTGCGACAGCGGACTTACCTTGGCCGCATCCGTACCCTGATCGGTTTTCTCG  
GGGTGATGATCAGGCCTCACTGGTGGTGGTGGTGGTGGTGGTGGTGGTGGTGGTGGTGGTGGTGGTGGT  
CTTTGGCGTCAAGCCGGGCGGCGCCGAGCTCAACATTTTCAGTATCGGTTTTGCGGTGAGCATGATG  
TCGGGTCTGCTGATCCTCTGGCTCACTATCGGCGGTTTTCTCGGTCACTTCGACATCATGTTGGGAGCGGG  
TGCAGGAGGTGAGTGCAGCTGATCAACACCCAGTCTTCGGAGGCGCTCATGGCTGATACCGACCAGG  
AACGTACCGAACAACCCACGGGCAAACGACTGCAACAGGCCCGTAAAAAGGGCAGATTGCACGTTCAAA  
AGAGTTGGGGACCGCCAGCGTTCTGCTCTCGGCGGTCTTTGGCCTGTTGATGCTCAAGGGCTCGCTGGCG  
ACCGCCATGGTCAAGGTTGTACCATGGGCTTTACTCTGGACAGGGAGCAGGCTTTTCGATCCCAATACCA  
TGATCGCCATGCTGCCGGCGCTGCTGGGGAACTGGTGGTTCGGCTGGGACTCTTGTGTTGACTGGTGGC  
GATTGCCGCTTTTATCGGCAACACCCTGATGGGGGGATGAACTTCTCCACTGAAGCCATGATGCCAAG  
ATGAGCAAGCTGAGTCCACTCAGCGGCATCAAGCGAATGTTCCGGGTGCAGTCACTGATTGAGCTGGTCA  
AATCCACTCGCAAGGTGGTGGTTCATACCCCTGTTTGCCTGGTGGATGTTATCCAGCCAGTTCAATCACCT  
GCTCAACCTCTCCATGGAGGGTTTTCCCGCGGTATTATCGATGCGCTGGAGTTGTTTCTCTGGATGTTG  
ATCATCCTCTGCTGCGCCCTGCTTCCCATCGTTGCCATCGACGTGCCGTTCCAGCAGTGAACCCATGTC  
GTCAGCTCAAGATGACCAAGCAGGAGGTCAAGGACGAGTTCAAGGACAGCGAAGGCAAGCCGAGGTAAA  
GGGCAAGATCCGCCAGTTGCAGATGCAGATGGCGATGCGTCAAGTATGATGGGGGATGTACCAAGGCTGAT  
GTGGTGGTACCAACCCGACCCACTACTCGGTAGCGCTCAAGTATGATGCGGGCAAACCCGGTGGCGCGC  
CCAAGGTGCTGGCAAGGGCACAGATGAAATTGCAATGAAGATCAGGGAGATCGCCAGAGAGTACGAGAT  
CCCCATCATGCCGTACCAGCCTTGACCCGGGCTATTTACCCTCAACCGAGCTGGGCCACGAGATCCCC  
GAAGGGTTGTTTGGCGGTTGCCAGGTGCTCGCTATGCTTCCAGCTCAAGAAATTCGCCCGTGGTTC  
AGGGGCGCCGTCCCCAGCCGCTGGCTAAAGATCTGCCTATTCGACCGAATATCGGAAATGACAAAGTTC  
TGACGTAGTCAAAATAAATCCATTGCATTTCAATTTCTTGTATTGTTGGCTTGTGTTGCTTTAATCTG  
GCACCAGCAGGTTGAAATTGAGAAGCGCGATGGAATTCAAGGCAGTATTGGGCCAGTTCAAAGAGTACCG  
GGGAGTATTGGGCAAAGGCCTTGGTACCCCTCTACTGGTATTGGCCGCGCTCGGCATGGTGGTGGTACCC  
ATCCCGCCGCTGATGCTGGACGTGCTCTTCTCCTTTAACATTGCGCTCTCCATCGTGGTGTGCTGGTAT  
CCGTCTATAACCCGCCGCCCTCGAATTTGCTGCCTTCCCGACCGTACTGCTGCTCGCTACCTTGTGCTGCG  
GTTGGCGTTGAACGTTGCCTCGACCCGGGTGGTGTGCTGGAAGGTCATAATGGCAGTGCAGCGCCGGC  
CATGTGATCGAGGCGTTCCGTAACGTGGTGGTGGTGGTGGTGGTGGTGGTGGTGGTGGTGGTGGTGGTGGT

TCCTGATGATCATCAACTTTGTGGTGATCACCAAGGGTGCCGGGCGGATCGCGGAAGTGAGTGCCCGTTT  
TACCCTTGATGCGATGCCGGCAAACAGATGGCCATCGATGCCGATTTGAACGCCGGTCTCATCAATCAG  
GAAGAGGCGAAGAAGCGTCGTCAGGATGTAACCCAGGAAGCTGACTTCTACGGCTCCATGGATGGTGCTT  
CCAAGTTTGTCAAAGGGGATGCCATTGCGGGCATCATGATCCTCTTTATCAACATCATCGGCGGCTTCAT  
CATCGGGATGATGCAGCACCAGCTGACCTTTCAGCGAATCTGCCGAGATCTATAACCTGTTGGCCATCGGT  
GACGGTCTGGTGGCGCAGATCCCTCCCTGCTGCTTCCATCGCCGCCGCCATCATAGTGACCCGTCAGA  
ATACCGATCAGGACATGGGAAGTGGGTCAGCTGTTTGAACAATCCCAAAGCCCTGATCATCTC  
CGCCGGTATTCTGCTGATGATGGGACTGGTGGCGGGGATGCCGCATTTCCCTTCTGAGTCTGGGGGCT  
CTTGCCGCCGCTGGCGCCTGGTGGTTGCTGCGCCGAGAGAACTGGCGGCCCAAAGCGGCCAAGGGTG  
AGCTGCTGCCTGCCACTGCCGAACAACCCATGAGCAGAAAGAGCTGAGCTGGGACGATGTGATGCCGGT  
GGACATCATCGGGCTGGAAGTGGGTTATCAGTGTGATCCCGCTGGTGGATCGCAATCAGGGTGGCGAATG  
CTCAACCGGATCAAAGGGGTGCGCAAGAACTCTCGCAAGAGCTGGGCTTTCTGGTCCCGGCCGCTCCACA  
TTCGCGACAACCTGGATCTGGCGCCAAACCAATACCGCATCACCTTGATGGGGTCCAGTACCGGCGAGGC  
CAATGTCTACCATGATAAGGAGATGGCCATCAATCCGGGGCAGGTGTTCCGGCCAGATCCAGGGGATAGCC  
ACCCGGGATCCCGCCTTCGGACTGGAAGCGGTCTGGGTTGCCAAGGAGATGGTCTCTCAGGCACAGACGC  
TGGGGTATACGGTGGTAGATAACCGGACCGTGGTGGCTACCCATCTGAGCCAGATCCTGACCAACCATGC  
AGCTCTGTTGCTGGGTGATGACGAGGTACAACAGCTGCTCGACATGATTGGCAAACATCAGAGCAAGCTG  
GTCGAAGGTCTAGTGCCGGAAGTATGATCAGCATGGGTAACCTTGTGAAGGTATTGCAGAATTTGCTCAATG  
AAGGCGTGCCAATCCGCGATATGCGCACTATCCTGCAGACCTGGTGAATACGCGCCGCGCAGTCCGGA  
TCCGGAAGTGCTCACGGCCGCTTGCCGGATTGCCCTGCGTCCCTGATTGTGCAGGAGATTGCAGGCCCC  
GATCCCGAGCTGCCGGTATTACCTTGGCGCCGGAATTGGAACGTATATTGCATCAATCCCTGCAGGCAG  
GTGGCGGTGATGGTGGCGGTATTGAACCGGGTCTGGCAGAGCGGATGCAGCGTTCGCTGGTGGAAAGCCAC  
TCAACGACAAGAATTGGAAGGCCAACCGGCCGTGCTTCTGACATCAGGGATCTTGCGCAATACCCTGGCG  
AAATTTGTCAAGAATGCCATTCCTGGATTGCGCGTCTGTCTTATCAGGAAGTGCCCGACGACAAGCAGA  
TCCGCATCGTCAGTGCGGTAGGGCAGAACTAGTTAGCGGAGACGACGGGTGAAGATTAAGCGGTTTTTTG  
CCAAGGATATGCGAACGGCTCTGGCCGAGGTCAAGGAGACTCTCGGGCCTGACGCCGTCATCATGTCCAA  
CAAGAAGGTACCCGGAGGGGTAGAGATAGTCGCCGCGATCGATTATCAATCCAGGTCCCGGGGCCAAA  
GATCGCCGGTTCCCGCTCAGCTGAACGATGAGAGCTCAATATTTCTGCTGCTGCACGGCAGTATGATCC  
GCCCGAGCCGTCGCCGGCAAGGAGCAGAACAATATGCGGATACCTTGGCCGCTTGTGTCGGCGC  
CCAGCAGAAGCTCAAGCCGGCAATGGGGCGCCAATGGGTAAATACCAATCCGCGCGTCTGGCCGCTGCC  
AATGCAGCGCCAGAACATTGGCAGAGCAGGGCAGTGGGGCGCAGCCCCGAACCGGCCAATCCCAAGG  
CCCGGGTTGCCTCCGGCCAGCGCGCCCTCAACCTGCCAGCGGGATCAGGAGATGGAAGGGATGCGCAA  
GGAGATGGCCAGCATCCGCAAACCTGCTGGAGCATCAGATATCCGGGCTGATGTGGCAAGAGGTGGAGCGC  
CGCGAGCCGATGCGGGCCCTGCTGATCAAGGAGCTCAAGAAGCTGGGCTTTGACGATGCGTTTTGCCGATC  
AACTGGCGGGACTGATCCCCGAAGATATGTCCATCCATCAGGCGATGGCCAGTTGGCCGAAGTGTGAC  
GGCCAGCTCAAGATCAGTGAGGACGAGATCATGCGTCAGGGCGCGCGGTTGCACTGCTTGGCCCGACC  
GGGGTGGGCAAAACCACTACCATCGCCAAGCTGGCTGCTCGTTTTGCCATGAAGTATGGCGCCGAGCAGG  
TGGCGCTGATCACCACTGACAACCTACCGGATTGGTGGCCATGAACAGCTGCAGACCTATGGCCGCATCAT  
GGGTTGCCCGGTACGTGAGGTGCGTGATGCTGAAGAGCTGGCCAATGCCCTTTATCAGTTCCGCCACCGT  
CGACTGGTACTTATCGATACGGCCGGGGTGGGTGAGCGGGATATCCGCCTGACCGAGCAGCTCGATACCC  
TGGTCAAGAATGCCAAGGTGCGGATCCGCGATTATCTGGTGTGTCGGCAACGTCCAGCGTCCGGGTGAT  
GCAGGAGGCGGTTGACCATTTCCGGCGTATTCATTAAGCGGCTGCATACTTACCAAATTTGGATGAAAGT  
CTGAATCTGGGCGAAGTGATTAACGTGTGTATCCAGAATTCATTTGCCATCAGCTATATCACTGACGGAC  
AAAGGGTTCCGGAAGATATTGAGGTTGCAATGCGGCGCAGCTCGTCGGGGCTGCCATGGGCTCGCTGGA  
GCGAGAAACAGAGGAGCCCTATTTCTGGGGCGCAGGCTTTGGCGAGGCCGAAGATTCGGAGTTTTTATGAG  
TAACATGTATATGGATCAGGCGAGTGGTCTGCGCAAAATTCGCTCAAAACAATCGAGTAAAAGTAATCGCC  
GTTTTCCGGTGGTAAAGGTGGCGTGGGCAAGACCAACGTGACCTGAACGTGGCCGGAGCCATGGCCGCC  
AAGGCAAGCGGGTATGGTGGTGGATGCCGACCTGGGTCTGGCCAACGTCGATGTCATGCTGGGGCTGCG  
GGTTCATCGCAATCTCTCATGTCTGGCGGGTGAATGCACCATCGACGATATCATCGTTGAAGGCCCT  
TACGGCATGATGATCGTGCTGCGACCTCGGGCACCCAGTCCATGGTGCAGCTTTCTCCGGTGCAGCATG  
CCGAGCTTATCCGCGCCTTACGCGAGATGAAGACCCAGGTGACATCCTGCTGGTGGATACGGCTGCGGG  
GATCTCCGACATGGTGGTGGAGCTTACCCGCGCAGCTCAAGACATCATGGTGGTGGTCTGCGATGAGCCG  
ACCTCCATCACCGATGCCTACGCCCTCATCAAGATCCTCTCCAAGGATCACGGCGTGTTCGTTTTCAAGG  
TGGTGGCCAATATGGTGGCAGTCTGCGCGAAGGGCAGGAGCTTTTGGCAAACCTGACCCGGGTACGGA  
TCGTTTTCTCGACACCTCCCTGGAGCTGGTGGCTGTGTACCCTATGACACCAATCTGCGTGGCCCGCTG  
CGCAAGCAGAAGCTGATTGTGCGAGGCGTTTTCCAAGTCACCGCCGCACTGGCGTTCCGGGCCCTTGCCA  
ACAAGGCGGGGAGCTGGCCGGTTCCCAACCAGCCGGGCGGCCATCTGGAGTTTTTCTGGAAAATTTGTT  
GCAGAAACCGGCCATAACACAGGAAGGTTCCCGTGAATAAAAGCCCAAGCGTACTTGGCTCATCAGGATTC  
CTACGTGCTGGTGGAGCGTCATGCTCCCTGGTCAAGCGAATTGCCAGCATTTGTTGGCTCGCTGCCC  
AGCAGTGTCTTGCTGGATGACCTGATCCAGGCAGGTATGATTGGGCTGCTTGAAGCCTCCCGCAACTTTG  
ACGGTAGCAAGGGGGCCAGCTTCGAGACGTATGCCGGGATCCGCATCCGAGGCGCCATGCTGGATGAGAT



TCGGCGTGGTACTGGGTGCCCCGTTTCAGTGCATCGCAACAGCAGGGCTATTGCAGAAGCGATCGAGAAT  
GTCGAGCAGACACACGGGCGTGACGCGGAGATACCGAGGTTGCTGCCGAGATGGGGGTCTCTATCGCTG  
ATTACCATGCGATGCTGCAAGACGTCTCCTGCGGCAAAATTATCGGCATCGAAGATTTGGGGGTCAGCGA  
GGATGTGATCGGCAACCCCGATGACGCCCTTCAGGCTCGGGATTGATGAATTGGCTGCCGAGCGATTT  
CAGATTC AATTATCCGAGCAAATTTGGTTCGTCTACCAGAGAGAGAAGCTTTGGTTCTCTCTTTACTACG  
ATGAAGAGCTGAATTTGCGTGAAATTTGGCGAGGTTTTGAAATGTCAGCGAGTCGCGTGTGAGCCAGATCCA  
CAGTCAGGCAATGCACAGATTGCGTGTCTGTTGAGAGATTGGCATCTATAAGTGTGTTGTACTGGCTACA  
CTGAGATGAACTCTAAGGCATAATCCGCACGACACAACCCGTTTTTAGCATCATGTAAGTGAGCCACTC  
TGGTGGCTATTTAGGAGGGAATTTTGACAAGAACATGAAAAATCCTCATTGTTGACGATTTTTCAACGAT  
GCGCCGATTATCAAGAACTTGCTGCGGACTTGGGATTCAACAATACCCATGAGGCGGATGACGGCAAT  
ACAGCGCTGCCGATGCTGAAAAATGGTGATTTTCAGTTTGTAGTTACCGACTGGAACATGCCTGGCATGC  
AAGGTATTGACCTGCTTAAAGCCATCCGTGTCTGATGAGAAGCTCAAGCATCTGCCGTTACTGATGGTAA  
CGCTGAAGCAAAGCGTGAGCAGATCATTGAAGCCGCCAAGCTGGTGTAAACGTTACATCGTCAAGCCC  
TTCACCGCAGCAACGCTCAAAGAAAACTCGATAAAATCTTCGAACGAATTTGGCTAAGGAGCTGCTGGGA  
TGATGGCCAAAACGAGAGCAATGATTTGCTGCGACCAGGCAAGGATGCTTGTGCTCATCTAGAGCAAGG  
CGAATTTGAGCTGGCCGATGAACTGCTTGC CGAAGTATGTGCCCAACGCAGCCGATCTGTTTAAAAA  
GTAGGTCAGCTGACCCGACAACCTGCATGATTAACCTCAAGAAATTTGCTCGATCCCCGATTTCCCGATT  
TGGTACTCATGATATTCCCAGTGTCTCGGAAACGCTTGAGCTACGTTATCGATATGACCGACAAAGCGGC  
CAATCGCACAATGGATGCGGTGGAAGCCAGTTTGCCGATAGCGGATCGCTGAATGACAATATCCAGCTG  
GTGATGCCGAACCTGGAATGCCCTGATGTCTCGTGACATGAGTGTGGGGCAGTTCAAATCCTTATGTCACC  
AACTTGATGATTTTATTAAGGCTTCAGAGTCTGATGCCGATAAATACCGCAACTGCTGACAGAAATCCT  
GATGGCACAAGATTTTCAGGATTTGACAGGTCAGATGATCCGCAAGGTCATCAAGCTTGTTCAGGAAGTT  
GAAACAAAATTAATAGAAATGCTGACCATGTTGGTGAGGCTTCTGCTGAGCATTCAACTCGTAGTATTC  
CTGTCAACGGGATTGAAGCAGAGGGCCCTATCATGAACCCCGAGGCTCGTGCCGATGTGGTCAATGGTCA  
GGATGATGTGGACGATCTGCTGTCTAGCTTGGGATTTCTAATGGAGTGACGCATGGCCCTCGAAGTTGATG  
AAGACATACTGCAAGACTTTCTGGTGAAGCATCCGAAATATTTGGAACAGTTGTCTGAACAACCTGGTCA  
CTTGGAAGAACGGCCCGATGACAAGAACCTGTTGAATGCCATCTTTCGCGGTTTCCATACCGTGAAAGGG  
GGGCAAGTTTTCTGCTGCTCGGTGAACTGGTGTGATGATGACCGGTGCGGAAAACGTTTCGATATCT  
TGCGTAATGGCAAGCGAACCCGTTACTGCGGAGCTGATGATGTAATCCTGCAAGCGCTGGATGCCATCAA  
TGTCATGTTTCGCCAGGTTCAAATTCGCGAAGCACCAGCCCTGCGTCAAGTGAATTTGCTGCATGACCTC  
CATGAATTTGTGAAGCCAGAAGGGGAAGAGCAACTGCGCACTGCTACCAGTGCGGCTGCGGCTGTAGAAT  
CTGAACCTGCAGCACCGGTAGTTGTTGAAGAAGTTGCTCCTGAAAGTTGTTGAACCCGCAGCCATCAGCAG  
CGAGCCTGCTCCTGTCAATGGCAGCGGCTCGATCGATGAAATTTCTGCAGACGAATTCGAGCGTCTGCTG  
GACGAGCTCCACGGCGTGGGTGGGGCTCCGACCAAGACGGCTGCAGCAGCCCAATAGCGGGTGGCTCTG  
GCGATATCACTGATGATGAGTTTGGGCTTCTGCTGGATCAGCTCCATGGTCAGGACAGCACATGGGGGC  
GCCAGAGGTAATCCTCTGAAGTCCGTGCAAAAAGAGGTGGACGAGCTTATCGACGATGATGAGTTTGAA  
CGTCTGCTTGATGAATTCATGGTCTGTTGTTCAAGGGCTCAGAGTACTATGGCACCTGCCGCACCTGCCG  
CACCTGCCGCACCTGCCGCACCTGCCGCACCTGCCGCACCTGCCGCACCTGCCGCACCTGCCGCACCTGCC  
ACCGGCCACTCCTGTTGCCAAACCAGCACCGGCAGCCCCCGCAAAACCCGCTGAAGCAGCCAAGGCACCA  
GCGCCTGCCGCCAAGGCTGCGCCTGCGCCAGCAGAAAATAGTGCCGTGCAAAGCGATACGACGGTGGGGG  
TGGATACCAAGACCCTCGATGTCATCATGAACATGGTAGGTGAGTTGGTACTGGTTCGTAACCGGCTGGT  
GAGCTTGGGTATTGCCAGTAATGATGAAGAGATGTCAAAGGCGGTTGCCAATCTGGATGTGGTAAACGGCT  
GACCTGCAAGGTGCGGTGATGAAAACCCGCATGCAGCCAATCAAGAAGGTATTTGGTTCGTTCCCGCGCG  
TGGTACGTGATCTGGCCAGAACCCTCAAGAAAGAGATTGAGCTGGTGTGATGGTGGGCGAAGAGACAGATCT  
GGATAAAAACCTGGTAGAGGCGCTCGCCGATCCTCTGGTTACCTCGTTTCGCAACTCCTGCGATCACGGG  
GTCGAAATGCCGATGTGCGGGAGAAAGCGGGCAAGCCGCGGCAAGGACTATTACCCTTAGCGCCTCCC  
AACAAGGTGACCATATTCTGCTTTGCATCGAGGATGATGGGGCAGGGATGGATCCTGAGAACTCAAGTC  
CATCGCAATCAGTCGCGGTGTTCTGGATGCAGATACTGCCGCTCGCATGAGCGACAACGATGCCTATAAC  
CTGATTTTTGCTCCGGGCTTTTCAACCAAGGCCGAGATCTCCGATATCTCTGGCCGTGGTGTGCGAATGG  
ATGTGGTTAAAACCAGCATTGTGACGCTCAATGGGTGCGGTGCACATCGATTCCACTTGGGGGAAAGGTAC  
CCGTCTCGAAATCAAGGTTCCGTTGACGCTAGCCATTTTGCCGACGCTGATGGTGGAAAGTGGGTGAGCAG  
ACCTTCGCACTTCCCCTTGGTTGTGTGAACGAGATTTTCCATCTGGATCTGAAAAAGGCCAACATGGTTG  
ATGGCCAGCTCACCATCATTGTGCGCGAGAAGGCATACCGCTCTTCTATCTGCATAAATGGTTGATTTCG  
TGGCGCCAACAAGCGTTCACGTCAGGATACCGGACATGTGGTGTGATCGTGCAGATTGGCACTCAGCAAATC  
GGGTTTGTGGTAGACAGTCTGATTGGTCAGGAAGAGGTGGTGTGATCAAGCCACTCGATAACCTGCTGCAAG  
GCACCCCTGGCATGGCCGGGGCGACCATTACCAGTGTGGTGGAAATGCTCTTATTTTGGATGTGCCGAG  
TCTGCTCAAAGCATATGCGCGTAGACATTAATAGCTCAGGCCAAGGAGTTAGAAAAACAACATGGCAG  
TCAAGGTATTAGTTGTGACGATTTCGAGCTTCTTTGCGCGTGGGTGAGCGAGATCATCAATCAGGATCC  
CATGCTGACGGTATTGATACGGCCAGAATGGACGTGAAGCGGTGGACAAGGCGATGTCGCTGCGCCCT  
GATGTGATCACCATGGACATCGAAATGCCCGTGTGATGGATGGCATAAGTGGGTGCGGGAGATCATGGCCA  
AGTGCCCAACCCCAATTCTGATGTTCTCCTCCCTGACCCATGAAGGGGCCAAGGCTACGCTGGATGCGCT

GGACGCCGGTGCCTGGACTTCTTGCCCAAGAAGTTTGAGGACATTGCCAGAGACAAAGATGAAGCGGTC  
AGACTGTTGCAACAGCGGGTGAAGGAGATCTCCCAGCGCTTCTGATGACATCCGCTGCTCGTCCCA  
AAGCACCTGAACCGGTTGCTCGTGTTCCTCTGGGCAGCACAGCGCCAGATCTTCAGATCGTCAGCCTGA  
CCTGCAACGCACTGTGCCAAGTGCCTCATTCAAGCGCAGTGGCAAGAGTTATCAGTTGGTGGCGATCGGT  
ACTTCTACCGGTGGACCTGTTGCTTTGCAAAATGTGCTGACCAAGTTGCCGGGGGATTTTCCCCATCCCA  
TCCTGCTTATCCAGCATATGCCAGCCACTTTTACCGCCGCGTTTGTGCCCCGTCTCAACGGGTTATGTCA  
GATTGGCGTCAAGGAAGCGGAAGATGGCGATGTGCTTAAACCTGGGCATGCCACCTTGCCTCCCGTGGT  
AAGCAGATGCTGTTGGAAGGTCGTGGTGCAGGGGCCCCGATTCGCATCGTGGATGGCAACGACAAGGTAA  
ATTACAAGCCTTGTGTGGACATCACCTTTGCCTCTGCGGCCAAAACCTATGCCGACAAGGTATTGGCGAT  
TGTGCTGACCCGGTATGGGGGCTGATGGCCGTGATGGTGCAGACTGCTGAAAAGCAGGGATCAACCATC  
TGGGCTCAGGATGAGGCTTCTGCTGGTATATGGTATGCCCAAGCAGTAGCCAAAGCGGGGATTGCCA  
GCGAATCACTCCCTCTGGACAAGGTGGCCAGCGTATTCTGGTTGAGTTGGGGCGCTAATCATGGGCTTG  
CTAGGTCTGCTCCTGGCATTGGGGGCTATTGCCATTGCCAACTGTGGCATGGCGGCTCCCTGTTGACGC  
TGGTAGACGGCCCCGCTTTTTTGTATCGTGTGGTGGTACCCTTGGTGCAGTTACCTTGCAGACTCCAGC  
CAAGTACATCCTGCTGGCGTTGCGCCAGCTGTTATGGATTTTTTACCCCTCCCCACCAAGATCTTGCAGC  
CAGGCCGAACGATTGCAGTCATGGCCGTCTTTGCGCGCCAGCAAGGGCTGCTTGGCCCTGAAAATCAGG  
CCGAGCAGGAGGAAGACAACCTTTACCCGTCAAGGGCTCGGCATGATTGTCGATGGGGTCTCCACAGAGGA  
TATCCGTATGCTGCTGGAAGCCGATATCGATATCGAGCAGGAGCGCAATGAACATGCCGCCAGGGTATTT  
GAAGCCATGGGGGGTACAGTCCGACCATCGGGATCATCGGTGCCGTGCTGGCCCTGATCCAGGCCATGT  
TTCATCTCGAAGACCCGTGAGCACTGGGGGCGGGGATCGCAGTGGCATTGTGGCAACCATCTATGGAGT  
GGGGTTTGCAACCTCATCTACCTGCCTATCGCCAACCGGCTACGTGCATTTCACTATCACTACGCACTC  
TTTTAGGAGATGACCCTGGAAGGGCTGCTGGCTATCGCCCATGGTGAAAACGGCTTGCAGGTTGAACGCC  
GGCTCAGGGCCTATTTGAAAAGGAGAGTAGCCATGCGCAAGCGCTATCGGTTGCAGTTGCAGGGTTCGCGAG  
CATCTTGACCGCTGGCTGGTCTCCTATGCCGATTATATGACGCTGATCTTTGCATTTGTTCTGTTGCTCT  
ACTCTGTTGCGCTGGTGAACAAGGACAAGTATCGCGCGGTGATTGATGGTATGAGCCAGGCGTTCAAGTGT  
CATGCAGTCTGGCGCAATGGCTTGTGTTGAAGGGCAGGGTAATTCCTGCTGGATAACCCGGTATCTGCC  
TCTCCATCGTTGCTGGAAGCCAGCATCCCTCTCTCTCACTTGCTCCTATTTCTGGTGTGCCAGTGC  
TGCAAGATGGGCGGACACTTGCAAAAACCTGATGTCAGTGCAGTGCAGCAGAGCATGGGCTCGTGGTGGTGC  
CGGTATCGTCAAACCTGACGCAAGATGAGAATTGGCTGACGGTGAACCTCAGTTCCGGCTGTTGTTTGGC  
AGCGGCAGTGCCTTTTTGGGACCAAACGCTGCACCGGTCAATTAATACTCTTCAAGTATTCTAAAACCGG  
TCGATAACTATGTAAGGGTTCGGGGTTATACCGATAACCAACAGATAAAATAATGAAATTTATCGTTCTAA  
CTGGGCGCTTTCTGCTGCTCGGGCCGAAGCGGTAATCAATGGTTTGATTGCAGATGGGATCGCCCCCTCAG  
CGTCTGGCGTTTCAGGCATATGGCGAGTTTTTCCCCCTTTGCTGACAACGGCAGCGAGCGGGCAGACTGC  
AGAATCGCAAGGTTGTGGTGCATATCTCAAATTTGCCTGGGTGCCCGGCACCTGTGGTTGCAACACC  
GACGGTAGTTGCTGAACCGGTTCTGCTGTACAGCAGGCGGTGGATGCAGGAGAGATAAAGGTGATCACC  
TTGCCCGGTGGTGGCATAACGATAACAACAAGGCAGGATTGATACAGTGAATGTTTGGACGGTTGCCAAC  
CAGAAAGGTGGTGTGGGTAACCACACAGTGGTCTCGCTTGCGGGGATCCTGGCCAGCGTGGCCAGC  
GGGTGCTGTTGATTGATACCGACCCCATGCTTCGCTGACTGCATATCTTGATTTTGATTGATCGCCT  
GGATGGAACCTCTATGAGTTGTTTCAAGCTGTCAAACCGACAGCCGAGCTTGTCAATAAACTGACGCTC  
AAGACCAAGTTGCAAAATATCAACTTACTGCCAGCATCTATTACTTTGGCGACCCTTGATCGGGTATGG  
GCAATCGTGAGGGGATGGGACTGGTACTGAAGCGGGCACTGCTGCGCATTGAGGATCAATATGATTACGT  
GCTGATCGATTGCCCGCAGTGTGGGAGTGTGATGGTCAACGCGCTGGCTGCCCTGCGATCGCATCTG  
GTGCCTGTCCAGACCGAATTTCTGGCCCTCAAGGGGTGGAGCGGATGATGAAAACATTCGAGATCATGC  
AGCGTTCCAAGCGTGACAAGTTTCGCTATAACCGTGTATCCGACCATGTTTCGACAAGCGCACCCGTGCTTC  
TTTGTGACCTTGAATCGATCAAGGATCAATATGGGGATTTCGGTGTGGAACCGGTTGATCCCTATTGAT  
ACCAAGTTTCGGGATGCAAGCTTGTGCTGATATCCCCCGTCTATCTATTCTCCCGGGAGTGTGGAACT  
ATGCATATGAAACGCTGCTCAACCATCTTGATGCCCTTGAGCGGCAACGGGTTCAATGAGGTGACGGCATG  
AGAGATAACATTCAAGTACGGGCGATGGATGACTATTTCCACTCCCTGCTGCTCGATGAGCCACTGGTGC  
TGGATGAAGTGAAGAGGTTCAATCTGCCCTGTTTTACAGTTGCAACGTCAGCCTCAAAGCGTCCCCGA  
GGTAGTCGCCGACCATACCTCGAAAAGCGATCCACGGCTTGGCCAGCTCGGTGAGCTATTGGCTCAGGTG  
GGACAAGTCCAGTTCGAAAATGATGCCTTACCCAGGAGATAAACTCACCGCACCTCTGGAGATTGTGG  
CGGAGGAGTCACTGTTGCCGGTGGAGCCTGAGTGGCCTGCGGAGGTGCTGCTCCCCGAGGTTGCGGAGCC  
CCATACTACTATCTGACCGAGACAGCGCTGGAGGTTGCTCCGGTAGAGGCCAGTGAACCGGTTGCTTGG  
GAAAATATCGATAACCGGTAAGAGTTTTCAGGCCCTTTCTTTGAAGTCGCGGGCGTGACGTTTGGCGTGC  
CGTTGACCGAGCTGGGTGGTATTATCATGAGTGGGCGAGATCACCTCCCTGTTTGGCCAGCCTGGCTGGTA  
CAAGGGGATCATGACCTCCCGCGAGCAGAAGATGAATGTGGTTCGATACTGCCAGTGGGTTCATGCCGGT  
CAGCATCTCGAGATGGATGATTACAAGTATTTGATTATGCTTGGTGAATCGCCGTGGGGATTAGCCTGCC  
ATCATCTCAAAGGGACTGAATTTGTACACCGTGAACAGTGAATGGCGCCATCAGGAGGGCAAGCGCCC  
CTGGTTGGCGGGCATGGTCAAAGAAAAAATGTGTGCCCTGTTACACGTCCGTGAACTGCTCCTGTTGCTG  
GAGCGTGGGGTTAACATAGACGGTTCGCTGATAACTTCTGCAATCGAGCTGTTTTATTGCTAGTTTTAGCA  
GTAGACGTTTTTCATAAAAGGAATAAAAACATGACAGAAAAGCGCAATATTGCACAGAATCTGGCCGAAGA

TGAAGTGTCTGCAATGGGTAACCTTCCAACCTGGAAAACGAAACCTACGGCATCAATGTGATGCAGGTTTCAG  
GAGGTGTTGCGCTACACCGAAATTGCACCGGTGCCGGGTGCGCCTGAGTACGTACTGGGGATCATCAACC  
TGCGTGGCAATGTGGTGAAGTGTGCATCGATACCCGTTCCCGTTTCGGTCTGCCTTCCGGTGATGTGAGTGA  
AAACTCCCGGATCGTGATCATCGAGGCCGAGAAGCAGGTGATCGGCATCATGGTCGACAGTGTGGCGGAA  
GTGGTTTATCTGCGCTCTTCCGAGATCGATGCGGCACCTGCGGTTCGGTACTGAAGAGAGCGCCAAGTTTA  
TTCAGGGGGTGGCAACCGCGATGGGCAACTGCTGATCCTGGTTGACTTGAACAAGCTGCTCTCCGATGA  
AGAGTGGGAAGATATCGGTTCCCTCTGATAAGTAAGGTGATGTTTTGATTATCGAGATGGTTGCCTTGGG  
GGTGTCCCTGATTGCCTTGGCGTTTGCCTCTTATATCTGGTTCAAGAGCAAGCGCAGCAAGCAGGAGTCC  
GAGGACAGTGTGGCAACCCCTGCAAGGTGAGTTGGAAAAGCTTGCAGCAAGCAGATGATGGAACCTCCATACCG  
GCGCCATTGGCATGGGGCAGCGTCTGCAGTCGGTGGAAAGGGCGATGCAGCAGGTCAATGAGCGCCAGCA  
AGAGCTGACCATGGGATCGGATCCCGAAGCAGGCTCTACAGCCGAGCGCCAGATGGTTGAACCTGGGCGCC  
GATCTTGATGAAGTCAATGAGTGAAGTGCAGTGCAGTTCGCAAGGCAAGGCGAGGCGGAGCTCTTGATATCGTTGCGAA  
AAGGTGCGTCTTGATGATTGAGGAAGGCAATTGCCTTCCGAAATTTATGGCGTGCAGCCGCTTGTCCCC  
CAACTGCGTTGAGCAGGCGGTTTCTACCGTATTTTTCTTTGTGATCCCGGTGCGCCAGTCAAGTTCAATTGTT  
GCATCTTTGAAAAGACGTATTCCAATACTGTGTTAAGATGTAGACCCTTCATTTTTCTCTGAAAAAATCC  
CCATGCTGCTTCAAGTTAAACAATCTGAGCTGCGTGCAGGAAAGATCGCACTCTGTTTGAACACCTCTCTTT  
CTCTGTTGCGCCCGGATCTGGTGCAAATTGAAGGACCCAACGGGGTTCGGCAAGACCAGTTTGTGCGG  
TTGTTGACCGGGCTGTGCGAGCCATTTGCCGGTGGGTTGTGCTGGAATGGGGAGAATATTCGTCACCTGTC  
GCGATGAGTATCATGCCAATCTGCTCTATCTCGGCCATCAGCCCGGTGTCAAAGCGGCGCTGACCCCTTT  
TGAAAACCTGAAGTTCTACCAGCAGTTACATCACCCGAGCAAAACAGAGACTGACTTGTGGCAGATATTG  
GCCCCGGTTGGGCTGGCCGATTTGAAGAGAACCAGCCGGGCAACTCTCTGCCGCGCAGCAACGCCGGG  
TAGCTCTGGCCAGACTCTGGCTGTGACAGAAACCGGCACCTCTGGATCCTCGATGAGCCCTTTACCGCCAT  
CGACAAGCAGGGGGTCAAGGTGCTCGAGCAGCTTTTTCTGGCCACGCTGAGCGGGGGCGGCATGGTGATC  
CTCACCCATCAGGATCTGACCCTGATGCAGGGACGGCTGAAAGACTATCTCGTTGATCCCCCTTCGCCCT  
CGACATTGCAGGAGTAACGCCATGTTGCGCGCTGTTATGCACCTTATTCACCGTGAACGCTGATGGCTC  
TGCGCCAGCGTTCGATATTCTCAACCCGCTCTGGTTTTCTCATCGTCATCACCCCTGTTTCCGTTAGG  
GATTGGCCCCGAGCCAAACTGCTGGCCCGTATTGCCCGGGGATCATCTGGGTAGCGGCGCTATTGGCG  
GCCATGCTGCTCGTGGAGCAGCTGTTTCGCGCAGCACTTTGCCGATGGCGCGCTGGAGCAGATGATGCTGA  
TGCCGACCCTGAGCTGAGCTGGCGCTGGCGCAAGGTGCTGCTCACTGGCTGCTGACCGGATGCGCCGCT  
GCTGCTGATCTCTCCCTTGTGCGGATTTGTGTCGCTGGATATGAACACCTATCTGGCTGTGCTGCGG  
ACGCTGGCACTTGGCACTCTGTATTGAGTCTGCTCGGCGCGGTTCGGGGTTCGCGTTGACGGTGGGATTGC  
GCAAAGGTGGGGTATTGCTCAGTCTGCTGATCCTGCCGCTCTATATTCCGGTACTGATTTTTTGCCACCTC  
AGCCATCGATGCCGCGGGGATGAGCTTGCCTATGGCGGGCAGCTTGCATTTCTGGCCGCCATGTTGGTG  
GGGGCTTTGACACTGACGCCGCTGGCTGTGTCGGCGCGTTCGGGGTTCAGCCTCAACTGATGGCCGTGAG  
CTGAACCGGATTTGGCTCCGAACGGAGTCTTTTTGCAAAAAATAATGTTGCGATGGATCAAGGAGAGTGC  
CGCTTATTGCTTTCCGGGATTTGATGCTGCCCTGCGGTGCGTATGGTAGCCCTCGCCAAACGATTAATA  
ACAAAAGGTTTTGTGAGCTATGTGAAATGGTTGCACCTTATGCCAAACCGGAGCGTGCCTATCAGCT  
GGCAGGCACGCTGTTGCCCTGGTTTGCGGTGAATTAGTCTGCTCTCGTTTGTGATCGGTACTGTCTGGGGC  
CTCGCGTTTGTCTCCGGCAGATTACCAGCAGGGAGATTGCTTCCGGATCATCTATATCCACGTGCCTTCCG  
CCATTCTCTCCATGGGGGCTACTCCACCATGGCGGTGGCCGCTTTATCGGCCCTGGTGTGGCAACTGCG  
GATGGCGGATATGACGGTTGCAGCCATTGCGCCGGTTCGGCGCCGATTTACCTTTATTGCCCTCTTTACC  
GGTGCCGCTGGGGCAAGCCGATGTGGGGAACCTTGGTGGGTGTTGGGATGCGCGGCTCACCTCTGAGCTGA  
TCCTGCTGTTTCTCTACCTCGGTGTGATAGCCCTCTACAACGCCCTTCAGCGACAAGGTGGTTCGCTGGCCG  
TGCGGCCGCGATTCTGGCACTGGTTGGGGTGTGATCAACCTGCCATTTATCTACTACTCGGTGGAGTGGTGG  
AACACCTGCTCAGGGGGCCACCATCACCAAATTTGACAAAACCTCCATTTACCCGAGATGCTCTGGC  
CGCTGCTGATCATGATCCTGGGGTTTGCCACGTTTCTCGGGGCCCTGACCCTGATGCGTTTTTCGCAATGA  
ACTCCTGATGCGGGAGTGGCATCGCCCTGGGTCAAAGAGATTGCAGAGCAGGAGAAGTAAGCATGCACT  
TTGCCTCTTTTCAAGTATTTTATGGCGATGGGCGGTTACGCCTTCTATGTCTGGCTCTCTTTTGGCCTGAC  
GCTGGTGTGCTGGTTCGGCATCATCATTTCTACCCGATGAAAACCCGCGAGCTGCTCGCCGAGTTGTGC  
AGCAAGCAGGCGGTGAGGCCCGTGCAGGCGGCCAGCAGATGGAGAACCCCTATGAACCCGAGACG  
CAAAAACGCCTCACCATCATTCTTGCCATCACCTGGGTCTGGCGACCGTCAGCGGGCTGGTGTCTTAC  
GCCCTCAGTCAGAATATCGACCTCTTCTACACCCGAGCGAGCTGGTGGAGGGGAAGGGGCCGACAAGA  
TCAAGCCGGAAGAGGGGAGCGCCTGCGCATCGGTGGATTGGTCTGTCGGGGTTCGGTGCAGCGGGATCC  
CCAGAGCCTCAAGGTTGCCTTCAAGCTGGTGGATAACGGCGGTGATCTGGTGAAGTTCGAGTTTACGGC  
ATCCTGCCGGATCTGTTCCGTGAAGGGCAGGGGATTGTTGCCAGGGCACCTCAAGGATGCCACGACCG  
TAGAGGCGTTGAGGTGCTGGCCAAGCAGATGAGAACTACATGCCGCGGAAGTGGCCGATGCCACTAA  
CGGCATGCACTTCAAGCCGGAGTATACCGAGGCGAGTTGAAGGGAGCCAAGCAGTATCCCTGTGGTGT  
TTGCCTTTTCCGCTTTGCCTGCCGTGCGTGGTTCGGCTGTTGTCACCGTTCAATTGAAAGGAATGCCCTC  
ATGATCCCGGAATTAGGTGAGTTTGCCTGATCCTGGCCTTTGCCACCGCCCTGCTGCTGGGGAGCTACC  
CACTACTGGGCGCTAGTTGGGGCGTCTTGGCATGATGTCGGCGGCCCGTCCGCTCGCCTATGCCAGTT  
CTTGCTGCTGCTGCTGCTTTTTCTCTGCCTGACCTGGGCTTTATCGATAACGACTTACCGTGCAGTAC

GTGGCCACTAACTCCAATAGCCTGCTGCCGCTCGCCTATCGCATCTCGGCGGTGTGGGGGGCCACGAAG  
GTTCCCTGCTGCTGTGGGTACTGACCCTGGGTGGCTGGACTGCGGCGGTGGCCATGTTTACGTCGCCGTCT  
GCCGCTCGATGCTGTGCGCGGGTACTCGGCGTGGTCTGATCTCGGTCGGCTTACCCGCTTCGTTG  
CTGTTACCTCCGATCCCTTACCCCGCACCTTGCCCTATTTTCCGGTCGATGGCCGTGACCTCAATCCGC  
TGCTGCAGGATCCGGGTCTTATCTTCCATCCGCCGATGCTCTACATGGGTTATGTAGGCTTCTCGGTGGC  
ATTTGCCTTCGCCATAGCCTCATTTGATGACCGGTGCTCTCGATGCAACCTGGGCCCCGCTGGTTCGCGCCCC  
TGGACCATGGCTGCCTGGGTATTTCTGACCCTAGGCATAGTGTCTCGGCTCCTGGTGGGCCACTACGAGC  
TCGGCTGGGGCGGTTGGTGGTCTGGGATCCGGTAGAAAACGCCCTCGTTTATGCCTTGGCTGGCGGGTAC  
CGCTCTGCTGCACTCGCTGGCGGTGAGCGAGAAGCGCGCCACTTCAAGGCGTGGACCGTGTGCTGGCC  
CTCTCCGCCTTCTCGTTGAGCCTGCTGGGTACCTTCTGTTGCTCGGCTCCGGCGTGGTGTGCGTCCATG  
CGTTTGCCTCCGATCCGACCCCGGCCCTGTTTATTCTCGGCTTCTGCTGGCGGTGATCGGTTTCACTCT  
GCTGTGTTTTGCCTTCAAAGGCTCGCAGGTGAAGAGCCACGGCAAACACGAGCTGTGGAGCCGCGAGACC  
CTGCTGCTTTGCAACAACATCATGCTGGTGGCGGGTCTGCTGACCCTGCTGCTCGGTACCTTGCTGCCGC  
TGGTGCACAAGGAGCTGGGGCTGGGGAGCATCTCTATCGGTACCCCTTCTTCAACCACATCTACAGCTG  
GCTGATCATCCCATTTGCCCTGCTGCTGGGGGTTGGCCCGCTGTTTCGCTGGCGTCTCAGGAGCTGGGG  
GAACTCAAAGCAAGGTGGTGTGACTGGTGTGAGTCTGGCCGACGCTTGTGTTGCCGCTGCTCT  
TTGCCGAAACCTTCAAGCCGTGGGCGGCGGTAGGGATTGGTCTGGGCGCTGGATCATCGTACCAGCGT  
GCAGGAGACCTGGGTGCGTGTACCCACAAGCACAGCTTTCAGTTCGGTGTGCGCAAGCTTGGCAACAGC  
CACTGGGCCATGATTCTTGGCCATGTGGGGCTGGCAGTCAAGCATATAGGTATCGCCTGCACCCAGAAGT  
ACAGCATCGAAAAGGATCTGCGAATGCAGGCGGGTATCGAGTCACTTTCGCGATTACGAGTTCGTCTT  
TGCCGGGATCAAAGAGAAGAACGGCCCCAACTACGATGGTTTCAAGGGCGTGTGGAAGTGCACAAGAAT  
GGCAAGCAGGTGCGCCTGCTCAAGCCCGAGAAGCGGATGTACAAGGTGAGCCGGATGCCGATGACCGAAG  
CGGCCATCGATGCCGATACCCCGCATCTCTATGCGGCGCTGGGGGAACAGCTCGACAACGGCGCCTG  
GGCGGTGCGGATCTACTACAAGCCGTTTCGTGCGCTGGATCTGGTTCGGCGGCGTCTTTATGGCAATTGGT  
GGTGTGCTGGCGATGCTGGACAAGCGTTACCGTTTCGGCCGTGCTGAGGAGGAGGCCAAGGCATGAACAA  
AAAGACTTGGTTGTTTTTAATCCCCTTATCGTCTTTTTGCTGGGGCGGTGTTCTGTTCAAAGGGCTC  
TACTCCGATCCCAACCAAGCTTGAAGTCCGTGATGGTGGGTAAAGAGGTGCCGGTGTCACTCTGCAGGACA  
TTTACGATCTGAAAAGCAGCAGCATCGCAGTATCTGACTGGTTCGCCCCATGCTGTCAACGATCTGGGC  
TACCTGGTGGCCACCTGCTATGGCGAGCACCTACCTCAAACAGCTGGCAGGGCAGGCATTTCCATC  
ATCGGCATGAACTACAAGGATGAGCGTGACAAGGCGATCAAATGGCTGGCGGAGCTGGGCAACCCCTATC  
AGGTCAACCTCTATGATCCGGACGGCATGCTGGGGCTGGATCTCGGGGTATATGGCGCACCCGAGACCTT  
CTTTATCGACAGCAAGGGGATCATCCGGTATCGCCATGTGGGGGATATCAACCCCGAGAAGTGGGCGTGC  
ACCCTCAAACCCATCTTTGATGCCATGAAGTGAAGGGAGTCTGATGAGAGTATTTATTGCTTCCCTGCT  
GCTGTTGCTGGGATGGGTGGTGCAAGCGCCCGCATGGCCGCTATCGATGCTACACCTTCGACAACGAC  
AATCAGGAGCAGGTCTTCCGTGAACTGACCAAGGAGCTGCGTTGCCCAAGTGTGAGAACCAGGATATCG  
CCGACTCCAATGCTGGGCTGGCCAAGGACTTGCAGCACAAGACCTACCAGATGGTGCAGGAGGTAAGGA  
TAAAGAGGAGATCGTGGATTACATGGTGGCCCCGTACGGCAACTTTATCCTCTATAACCCGCCCTGATG  
GCCTCCACCCTGATCCTCTGGCTCGGCCCGCTGCTGGTGTGATCCTGATCGGTGGCGCCGTGGTGTGATG  
GCAGCCGCCGGCCACCTGCGGTGAAAAAACAACCTGGATAACGCTTGGAGCGAGGAGGAGCAGCGCCGACT  
GGCCGAGCTGCTCAAAGAGGAAGAGAAAACAATGACCGCTTTTTGGATAGTTATTGCGGGCTTGCTGGTGC  
TGGTGTGCTGGCGCTCGTGTGCGGCTGTGGCGTGGTGAAGGCAAACAGAGCATCAGTTCGCTCGGCGCT  
CAACAAACAGCTCTATCGCCAGCGGTTGCTGGAGATTGGCGAAGAGCGGAGCAGGGTGTCTGGCTGAG  
GAGTCCGACTCGCTGGTGCAGCTGCAACGAAGCCTCTTGGATGATATCCCCGATGTGGAGCAGACTGCCC  
GCAGTGGCAAGAGTCTGATCTGGATCCCGGGTGTACTGGTGTGTTGGTGGTGTGAGTCTGGGGCTCTACTA  
CAAGTTGGGCTCCTGGCAAGAGGTTAGTCTGCTGGCAAGATGCCAGCAGCCGTCTTGGCGAGCTGAGCAAC  
CGTATTTCTGGTGAACCGCATGCCCAGGTGACCCGAGCAGGATCTGCTGGATTTACGCTGGCAGCTGCGTA  
CCCGCCTCAAGGATGAACCGAACGACTACCGCGGCTGGCTGCTGCTGGGACGTTTGGCGTGGATGGCAA  
TGATCCTGAAATGGCCAGCGAGGCGCTGGAGCGGGCCTACACGCTGGCTCCCCAGAAATCGCTGGTGGCG  
GTACCCTACGCGCAGGCGCTGATGATGACGGGGGATGAGGCGCAAGCGGATGCCCTGTTGCAGGCTGCTA  
TCGCGCAGGATCCGGACAATATCGAGGCGGTTCCGTCTATGCCTTTATGGCGCTGCAAAAAGAGGACTT  
CCAGACCGCGCTGTCTCGCTGGCAGGCGATGTTGCCACTGATGGAGAAAGGTACCCCCGTTACGTGATG  
GTCGAGCGCTCCATGGAGTATGCCCGCGCGAGCTCAAGCAGCGCGCATCGAGGTGACGAATTCAGGCG  
CAGCCAAAGCGGGCGCAGTTGAGGGACAACCGCTGGCGGTGAAGGAGGGGGAATTTCCCATCCACGTAC  
GTTGGCGGGCGGGCATTGAGATGCCGGAAGATGCCCATCTCTTCTGCTTTTGTGTTGGTGGCCAACGGGCCG  
CCCATGCCCATCGCTGTGAAGCGTATCGCAGGGCCAACCCGTCAGTTACCTGTCACTCGGGGATGGCG  
ATGCCATGATGGAAGGCAGCAAGCTGGCGGCCATCCGGAGCTGCAGTTCAAGGCGCGTCTCTCGCGCGG  
TGGCAATGTGATGAACAAGGAAGGAGCCTTCGAAGGGGTATCCGTGCCGGTCAAGACGGCCGAGATCCCT  
GCTGCTCCGATTGACATCCGCATCGATCACGCCCTCTAATATGCCTTTGGATAACCCGGCTCCTGGATAG  
GAGCCGGGTTATCTATACTTCTGATAAATCAAAAATAAACGTCAGGACAATCATATGTATCTTCGTTTCA  
GGGCCATACTGGCAGCCCTCTTGTGGCTGGCTGTGCCGGTGGCCCACCAAGCCTGGCCAGAGAGTCT  
GGATCTCAATCCCGCATGAATAATCCGGGTGCCACCAGTACGGCGGCCGATCCCCGCGATCCCTTCCAG

GGGGCCAACCGGGCCATGTGGGCGGTCAACTATGATGTGCTGGAACCCATATGTGGCACGTCCTGTGGTAC  
ATGCCTATGCCCCGTACATTCCGGTCCGGGTGAAGGATGGCATTGCCAACCTTTGTTGCCAACCTTTGATGA  
GCCAAGCAGCATGGTGAACCATCTGATCACCGGTGATTTGAAGGGGGCGGGCACCAACCTGGGGCGCTTT  
ACCCTCAACACCACGGTCCGGTCTGCTGGGTATCTTCGATGTGGCCAAACATGCCGGCCTCGAGCGTAACA  
AGCTGGAAATGGACACAGTGCTGGGCAGGGCCGATATCGGTAATGGTGCCACATCATGGTGCCTGTTTTA  
CGGCCCGACTACCACCCGGGAGCTGGTTGGCGATGCGATTGACAGCTTCTACTTCCCCATATGCCCTGTTA  
ACCTTCCCGATGAAGGTTGCACATTGGGCAGTGGATGGCTTGGGCACACGTGCCAAGCTGATCGATCAGG  
AGCGGATCATCGACAACCTCCCTCGATCCTTATGCGCTGACCAAGGACTTCTACCTGCAATATAACCAGGG  
CAAGGTGACGGGCAAGCAGACCGAGCTGAAAGCGTCTCAGCAAGAGCAGGCTGACGATGCCAATCTGGAT  
GAATACATGGAGCAGCTGGACCAGTAAGCGGGTCAATCCCGATATGTAAGAGGCGCCTGCGGGCGCTTAT  
TCATTTTCGACAGCATATCGAGATAAAAAACGCCCCGAGTGCAGGAGCCAGAAGGTTTCCATGTACTTCGGAC  
GCAGGTTGCGGAAGTCGATGTAGTAGGCGTCTCCACAGGTCAACGGTCAAGCGGTCAGCAGCGGGTGGTACCGGC  
TTCAGTCAGCGGGCAGCCAGCGTTGGAGGTGTTGACGATAGCCAGAGAGCCGTCAGCTTTCTTACCAGC  
CAAGTCCAGCTGGAACCGAAGTTGCCGATGGCAGATTTGGTGAAGGCATCTTTGAACTCGGCGAAGGAGC  
CGAATGCCTTGTGATGGCTCAGCCAGGGCGCCAGTCCGCTCGCCACCGCCATTCGGGGAGAGGCAGTG  
CCAGTAGAAGGTGTGGTTCCAGATCTGGGCGGCGTGTGTAAGATGCCGCCGTTGGAGGTCTTGATGATC  
TCTTCCAGAGACTTGCCTTCAAACCTCGGTACCCGGCACCAGATTGTTTCAGGTTGACCACGTAGGTGTTGT  
GGTGCTTGGCGTGGTGATATTCCAGAGTTTCTGGGAGATGTGCGGTTCCAGAGCGTTGATTGCATAGGG  
CAGAGCGGGAAGTTCGAATGCCATTTTCTACTCTCCATTGGCTGGACCGTGCAGAGGCGACGGTTGCAAG  
ACATTGCGTACTCTTTTCTATATGTGAAAAGAGTTGTTTTTAAAATGATGGGGCTGGGTAGCCCAAAGCC  
AAGGGATTGTAGCAGTATCAAAGATGGCCTAACAACTCTTGATTGGCGCCATGATCGCGATCAATCCTGT  
GTGGGTTCTTTGCACAATTCCAGCCGGGTCAACCCCTTTGTGAGTTTGTGCTCGGGCAAGATTGCAGTAGA  
ATGGCCGCCGAAATCGCTCTAGTGAGGCACCTATGGAACTATTGAAAAGATTAAGCAGCAGCTGGCTGA  
CAACCCCATCATCATCTACATGAAGGGTCCCCAAGCTACCCAGCTGTGGCTTCTCTGCCAGGCCCTCC  
CAGGCTCTGATGTCTGCGGCGAGCCGTTTGCCTACGTTGATATCTGCAAAAATCCGGATATCCGCGCCG  
AATTGCCAAAATTCGCAACTGGCCGACCTTCCCCAACTGTGGGTTGAGGGTGAGCTGATCGGTGGCTG  
TGACATCATGATCGAGATGTTCCAGGCTGGCGAGTGTGACGCTCTGATCAAAGAGACTGCTGCCAAGTAC  
AAGAAAGATGATGCTGACGCCAGTAATCGGTTCTGTGTGTCGAGAGGGAGCCTTATAGGCTCCCTTTT  
TTATTGTCCCGTTCTGGCAGGAAAGCAACTGATTGCCGGTTGCAAAAAGCAACGCAATTGCCCTGAAAA  
ATCTAATCTTTACGGCTTTGTTTTTGGAGTTGTTAATTATATTGTTTTGCCAATATCTGATTACTTTTTTTTA  
ATCCATTTGGATTCAAGTGTGCTGCCATCACATTTTTTTGATAAATTTACCAGTAACGCAGTCTCTTTGTA  
GATTTTTTTGTGTTTATGCTCACATTAATTGCAAGTGATAGAACCCTAGTATCGCTTCGCCCTGTGAAATA  
AAACCCTACAAATTAATAAATAAAAAAGAGATTTGCGATGAAGATGTATAGCAATCTGCCCATTTGGTCTTC  
ATGATATTACTGAAGCCAAAAAAGACTGACCAATCATATATAAAGACCAGCAACTACCCCTAACTA  
CATCAGCGAACGTTGCCATGGCGAGGTTTATCTCAAGCTTGAACAATGCAACGTACAGGCTCTTTTTAAA  
ATTCGTGGTGCCTTCAACAACTCAGTTCATTAAGTCTGGAAGACCGACAAAAAGGAGTTGTGCGCTGCT  
CGGCGGGCAATCATGCCCAAGGTGTATCACTCTCCAGTGTATGCTGGGAATTGATGCCAAGGTGGTCAT  
GCCTTGCTGTGCCCCCAAATCAAAAATTGCTGCAACCAGTGACTATTCAGCCAAAGTGATCCTCCATGGA  
AATAGCTTCAATGACACCATTGCCAAAGTCAGCGAAATCGTGGAGATGGAAGGCCGCGTATTTATCCCCC  
CCTTCGACGATGCAAAAGTGATTGCCGGCCAGGGCACCATTTGGCCTGGAAATTAATCGAAGATTTGTATGA  
TGTCGATAACATCATAGTGCCGATCGGTGGCGGTGGTTGATTGCCGGTGTGTCATGGCAGGCTCTTTCTATG  
CCGGTACCATGACCAATCACAGAACCAGCAGCAGCTGGCCGATGGCTGTGATGTGGCAAGACCCGGTTC  
ACTGACCTTCGAAATCGTCAAACAATTGGTGGATGATATTGACTGGTCAACCAGGATGATATTCTGCAT  
AGCATGGTTGACCTTATTCAGCGCAACAAGGTGATTACCGAAGGGGCGGGAGCTTGGCCTCGGCAGCGC  
TGCTCAGTGGCAAGCTGAAACATTATGTGCAAGGTAAAAAGACCGTCAGCATTAATTCGGGGGGCAATAT  
TGATCTGACCCGGATCGCCGAAATTAATCGAACAGAACAAATATTCGTCAATTTAGCCTGTAAGGAATGCAG  
TCATGATATTAGACAGTGTGTCACCCGGCAGTAAAGAGAATACGCGTGCATGGCGTAAATCGGATACCCAC  
ATGGGGATTAGGTCTGTTCCGGTACTGCTATCGGGGCGGGGCTCTGTTCTTTCCAAATCCGGGCGGATAT  
GGTGGCCTGATCCCAATATTAATCATGCTGGTGTGCTTACCCCATTCGATTTTATTGCCACAGGGCGT  
TGGCCAGATTATTTCTTTCTGGCAGTAATCCATCGGCAAAATATTACCGAGACCGTTGAAGAACATTTTGG  
CAAGATGGGTGGAGTGGTAATTACCTTCTCTATTTCTTTGCCATCTGCCACTGCTGTGGATATATGGT  
GTGACGATCACCAATACCTTTATGGCATTTTGGGAGCATCAACTACAGTTGGTTCGGCTTAATCGAGGTG  
TGTTGCACTGGCATTGTTGATGTTGATGGCATTCTGATCTACTTCGGTAAAGATCTGATGGTCAAGGT  
GATGAGCTATCTGGTCTTTCCCTTTATTGCCAGTCTGGTTCGTTATCTCTCTCTCCCTCGTCCCGTACTGG  
AACAGTGCCGTCTTTGATCAGGTCAATCTGAGCGAGATATCGATGTTTGGTCACGATGGTATTTCTGGTTA  
CCGTCTGGTTGGGGATCTCCATCATGGTCTTCTCCTTCAAACCTTCTCGCCGATTGCTCCTCTTTTCAATGT  
CTCCAAACGAGAAGAGTATGAGCAGGAGTTCGGGCGTGATTTTACCGAGAAGCGCTGCTCGAAGATTAATC  
TCCGGTGCCAGCATGCTGATGGTGGCCGTGGTGTGTTCTTTGCCCTCAGCTGCCTCTTTACCCGTGCAT  
CGCAAAATATGGCGGAAGCCAAAGCCAGAACATTCGGGTGCTCTCCTATCTGGCCAATCACTTCTCCTC

AATGACGGGCAGCAAGTCTGCGTTTGCCACCACTTTGGAGTATGCGGGCTCCATCATTGCGCTGGTTGCC  
ATCTTCAAATCCTTCTTTGGCCACTATCTGGGGACGCTGGAAGGTTGAACGGCCTTATCCTCCGCTTTG  
GCTACCAGGGGCGACAAGAGCAAGGTTTCCAGTAAAAAACTCAATATGGTCAGTATGTTGTTTCATCATGGG  
TTCGACCTGGCTGGTCGCTTATGTGAACCCCAACATCCTCGACCTGATTGAGGCAATGGGGGCGCCAATC  
ATCGCTTCCCTGCTCTGTCTGCTGCCGATGTATGCGGTGAGCAAGACACCGGCACTTGCAAAAATATAAAG  
GTCAGGCCAGCAACCTGTTTGTCAACCATCATCGGTGTGCTGACCATCCTGAATATAGTTTCCAAGCTGTT  
CTGAAAACCTTTTCTGCAAGTCATCAACCATTCAGGCCCCCTGGCGGGGCTGGATGGTGCAGTCAGAC  
ATGAGCAATAACCGTTCTTCGTTGGCCACAATTATGTGGGCCCTGGGTAAGGCTTGCCGTTTTTTTACT  
TTCTGTTTAGGGCGAAATGCCCTGACTGCAGTGAATCGACTATTAATCTCGAGGCGATGTAATGAAGT  
TTGATTGTTGGTTCTGGTTATCAATTGTGGCTTTCGTCGGTCAAATTCGCTACTGGATAGTCAATC  
CTGTGAGGTGGTGATATCCGGTATGGCTGATGGTATTGATATAGCCATCCCAATTGCAAGTGGGTAAA  
GAGCCCGCAATGTCATTACCTGAAAATAACCACACCTGTGCATTGGCTGCCATCGCGCGGAATTGAAAA  
AACGGGAGCTGCTGGATGCCATTGCACTGGTTGGTCATCGAATTGCTCATGGTGGTAGTGAATTTAGTGA  
AGCCGTGATCATTGATGAACATGTATTGGCCAAAATCAAGCAGGTGTCACCCCTGGCACCCCTGCACAAT  
CACGCCAATTTAAGCGGCGTGATGGCCGCCCGCCAGCTATTTCCCAACCGGCCACAAAAGCGGTATTTG  
ATACCGGTTTTACCAGACCCTGAAGCCGGAAGCCTATATCTATGGGCTGCCCTACCAATATCTGCAGGA  
TTACGGCGTGCGCCGCTATGGCTTCCATGGCACCTCCCATCGCTATGTCGCCGAGCAGGCTTGCATTTT  
ATGGGGCTGGATGAGCTGCATGCTGGTCTGGTCACTGCCCATCTGGGCAATGGCGCCTCTATTTGCGCGG  
TGCAGGATGGCAAGAGCGTCGATACCTCGATGGGGATGACGCCGCTGGAGGGGCTGATCATGGGCAGCCG  
CAGCGGCGATATCGATTTTGGCGCGCTGGCCTATATCGCCAGCAAGACCGGGCAATCCATCGAGGATATT  
GATCGGGTATTGAACAAGCAGTCCGGCCTGCTGGGTATTTGGGGCTCTCCTCGGATATGCGGGTATTGG  
AAGCTGCCTATCACGAAGGACATCCCGGGGCGAAATTGGCCATTCACGCCCTTTGCCCATCGTATTGCCCG  
CCATATCGGTGGTCATGCCACCTCATTGCTCCGACTGGATGCCGTTATTTTACCAGGCGGTATTGGCGAA  
AACTCGGCCTTTATCAGAAAGCTGGTATGCGAACGACTTCAGGTATTTGGCGTAGCGATCAGCGAGCCGT  
TTAACAGCGTCCCAATAGTGAGGGCTGCCGGTAATTTTCGGCGGCAGAAATCCATGGTACTGGCGGCGGT  
TATTTCCACCAATGAAGAGAAAATGATCGCGCTGGATGCCATTCGTCGTTGGGGCTTAAGGTTTCGTCAGGCC  
GAGTGCCTCTGACATCTTCCACTGTAGTGTGATGAGTAGTGAATGAGGTTTATTTGATGAAAGTTGATAT  
GCAATTTGGATCAGGATAAAATTCGCTCAGGATGGCAAGGTTTGGCGGTGAAAATGGAAGCAGCAGATC  
AACGTTCCGTGATTTTATCCAGCAGAATACACCCCTATGAAGGTGACGAACAGTTTTTTAGCAGATGCCA  
CCGAAGCGACCACCTTTATGGAACAAGGTGATGGAGGGGATCCGCATCGAGAATGCCACCCACGCGCC  
CGTTGATTTTTGATACCAATATTGCCACCACAATCACCGCCACGGGCGGGTTATATCGAGCAGGGGCTG  
GAAAAAATCGTTGGCCTGCAAAACGACAAGCCCTTAAAAAGAGCACTGCATCCATTTGGCGGCGTAAATA  
TGATCCGCAGCTCTTTTGAAGCATATGGCCGGGAGATGGATCCCGAATTTGAATATACCTTCAGCGAATT  
GCGCAAAACCCATAACCAGGGAGTGTTCGACGTCTACTCTCCGAGATGTTGCGCTGCCGAAAATCAGGA  
ATTTTACCAGGTTTTGCCGGATGGTTACGGCCGTGGTTCGATTTATCGGAGATTATCGTCGGGTGCGCTCT  
ATGGCATAGATTATCTAATCCGTGAGCGGGAGCTGCAGTTTGGCGATCTGCAACCGGCGCTTGAGCGGGG  
AGAGCAGCTGGAGCAGGTGATCCGCCAGCGGAGGAGCTGGCCGAGCACAAGCGGGCACTGGTGCAGATC  
AAGCAGATGGCGGCCAACTACGGCTTTGACATCTCCGGGCCAGCACGACGCGCAGCAGGCGGTGCAGT  
GGCTCTACTTTGCTATCTGGCTGCGGTGAAGTCGCAAAAATGGCGGGGCCATGTCCCTCGGTGCTACTGC  
CACCTTCTCGACATCTATATCGAGCGGGATCTTAAGGCGGGGCTTATCAGCGAGCAGGATGCCAGGAG  
CTGGTTGATCACTTCATCATGAAGATCCGCATGGTACGTTTCTTGCCTACCCCGAGTTTGACACCCCTCT  
TCTCCGGCGACCCCATTTGGGCCACCGAGGTGATTTGGTGGCATGGGGCTGGATGGTTCGCACCCCTGGTGC  
CAAGAGCTCCTTCCGCTACCTCCACACCTCAAGACCATGGGGCCGGCGCCCGAGCCCAACCTCACCATC  
CTCTGGGCGGAAGGACTGCCCGGGCCTTCAAGACCTATGCGGCCCGCTCTCCATCGATACCTCATCCC  
TGCAGTATGAGAACGATGACCTGATGCGCACCGACTTCGAGAGCGATGACTACGCCATCGCCTGCTGCGT  
GAGCCCATGGTGTATCGGCAAGCAGATGCAGTTCTTCCGTTGCCGCGCCAACCTGGCCAAGACCCCTGCTC  
TATTGCATCAACGGTGGCGTGGACGAGAAGCTGAAGATCCAGGTTGGCCCGAAAAGTGGCGCCCATCATGG  
ACGAGGTGCTGGATTACGAGACCGTCATGGCCAGCCTCGACAGCTTTATGGATTGGCTGGCGGTGCAGTA  
CATCAGTGCCTCAACCTTATTCACTACATGCACGACAAGTACAGCTATGAGGCTTCCCTGATGGCGCTG  
CACGATCGCGACGTCTATCGCACCATGGCCTGCGGCATTGCCGGTCTGTCGGTGGCGGTCGATTTTGTGATTGA  
CGGCCATCAAGTACGCTCGGGTCAAGCCGGTGCAGGATGCTGACGGGCTGGCGGTCGATTTTGTGATTGA  
GGGGGAGTATCCCCAGTACGGCAACAACGACGAGCGGGCCGACTCCATCGCCTGCGATCTGGTTCGAGCGC  
TTCATGAAGAAGATCCAGGCGCTGCCGACCTACCGCAATGCGGTGCCGACCCAGTCGATCCTGACCATCA  
CCTCCAACGTGGTCTATGGCCAGAAGACCGGCAACACCCCGGATGGCCGCCGCGCCGGTGGCCCGTTTGC  
GCCGGGGGCAACCCGATGCACGGTCCGGATCGCAAGGGGGCGGTGCTTTCGCTCGCCTCGGTGGCCAAG  
CTGCCGTTCAAATATGCCAAGGACGGGATCTCCTACACCTTCTCCATCGTGCAGGGGGCGCTCGGCAAGG  
AGCCGGCAATCGCGAGAACAATCTGGTGGGGCTGATGGATGGCTACTTCCATCATGAGCGGGATGTAGA  
AGGGGGCCAGCACCTCAACGTCAACGTGATGAACCGCGAGATGCTGCTGGATGCCATCGAGAATCCGGAC  
AAGTATCCCAGCCTGACCATCCGGGTCTCCGGTATGCGGTGCGCTTCAACGCCCTGACCCGCGAGCAGC  
AGGACGTCTCTCCAGAACCTTACCAACATGATGTAACCTCTGATGCCGGGGTGGAGGTTTTGCTCCG  
GGCCTACTTTTTGTTTGTGTCAGCACGAGGAAGTAACAGATGCGACAGGTTATCACTACCAAAGCGGCGCA

GGCGCCATCGGCCCTATGTGCAGGCCACCCGGATTGGCAACATCCTCTATACCTCCGGCCAGATCCCGC  
TGGACCCGGTGTAGCGGCGACATTGCGGAGGGTATCGAAGCACAAACCTGCGCTCCCTGCAAAACGTCAA  
GGCGATTGTGCAGGCGGCAGGCGGTGAGGTGCGCAATATCTTCAAGACCACGGTGTGTTGTCTCGGATTTG  
AACGACTTTGCAGCGGTAAACCCGGTCTACAACGACTTCTTCACCGAGCACGATGCCATGTATCCGGCGC  
GCTCCTGCGTAGAAGTGGCCCGCTGCCGAAGGATGTGAAGATCGAGATAGAGGGGATGCTGTGTTGGA  
GTCCTGACGCGGCGATCCCGGCCAATAAAAAAGAGCGGCAACCCGAGGGCTGCCGCTCTTTTTCATCGAA  
CCCGCGTGTGCAGATAAGGGCGCAAGGAGTGGGGCATTCTGGATCAGGCGATCCGCTCGATGCGCGCCAG  
ATAGAAACCGTCGAAACCCGTAGCCGCCGACTCACGGTGTGATCACCAAGCAGGCGGAAGTTTTTCGTTG  
GCGGCGAGGAACCTGTCCACCTGTTGGCGGTTCTCCTCGGGCAGGATGGAGCAGGTAGCGTAAACCAGCA  
TGCCGCCACCTTACCATTGGCTGTAGCGCTGCAGGATCTCTTCCTGCAGGGCGACCAGCACCCGGCAG  
ACGCTCGGCGGTATCGCGCCACTTGGCATCCGGATTGCGCTTGAGCAGCCAAAGGCCGAGCAGGGGACG  
TCCAGCAGCAGGCGATCCGCGCTCTCTTTGAGGCGCTTGACGGTCTTGCTGTTGGTGATGACCCGGGTCT  
CCACGTTGTGGGCGCCGGCGCGGCCACGCTGCTTGAGGTTCTCCAGCTTCCACTCTTCCACATCCAT  
CGCCAGCAGGCGGCCTTTGCCTTTTCATCATGGCGGCCAGATGCAGGGTCTTGCCACCGGCACCGGCGCAG  
GCGTCGATCACCCGCATGCCGGGCGGACCTCGAGTGCGGCAGCAATGTGCTGGGAACCGGCATCCTGTT  
GCTCGAACCAGCCGTGCGCAAAGGCGTTGGTGCGAAACAGGGCGGCATCGGAAGTGACTTCCAGAGCGCT  
CTCAACCCCTGCTACCGGCACAGTGTGACCTGCTCTTTGGCCAGAGCGGCTTGCAGCTCCTCGCGGGTG  
CACTTGAGGGTGTGACCCGAGGTAGCGCTTGGGCATGGCGGTCAGGGCGGCACGCTCGGCAGGCCAGG  
CTTACCCAGCTGCTCGCTACCCAGTTTCTCCAGCCAGCTCGGGCAACCATCCATCAATACCGGGTCTT  
CTTCGCTCGGTGAGACGGCGGCGGAATGCCTCTTCATTGAAGCGATCCAGGGTCGGGTGGTTGGGCTGG  
GCAATTTTGTGGAAGGCATGCCAGCTGTGCAGCAGCGGCCAGACATCTTTTCGGCTGACGCACCTGAA  
TTCCGGTGAGGAAACAATAGAGGCTGAGACGGCGCAGCAGGTCGCCGGTGACCAGGGCAATCCTTGCCTG  
TTCTTGCGGTTTGTAGTTTCGATGCTGAGAAAGTGACGGGCATAAGCGCGGTCGAGGGTAAGACCCGTGACCG  
AGCACATCGTCAACAATGGCAACGACCAGATCCCCGAAACGGGGCAACAGTGGGGATTTGAGCATGAGAT  
TAACCTTGCCAGATAAAGATGAACCGCACCTTTGTGAAGAGGAGCAGTTCTAAAAATTGACAAATCCGCG  
CAATGATAGGGGTTAGACGGGGTGGCGCAACACTCCCATGGGTGAGTGGCTGAAACAGTGGCGCCGGG  
CTTTTTGATTTCGGCGGGATAATGATGCCGGTAATGGTTCAAAAAAGTGCATGACTACAAGGATGACAAAG  
ATGCATGTGAGCAGTAAGTGTTCGTTGGCCTGTTGGTGGCCAGTTTGTGGGGTCAACCCAGCTGATGG  
CCAGCAGTGGAGTACGTTAGCCGCCAGCAGCGCATCGGAGCAAGGTTATGAGGTGCGGGCCAAATCAGTT  
TCGGGTGGCCAAGGTGCCGCTCGACTATTTTGCCGGGCTGCAAGCCGGGGCGTGTGAGCTGACCCTGCCG  
TTGCCCGATGGGGGGGAGGTACCTTTGCTCTGGAAGCCTACGACTTGCTGCCTGCAGATCTCGTCGCCA  
AGTATCCGAGATCCGCACCTTCAAGGGTCACAACCCGGCGCATCCGATAGAGACGGGGCGCTTCGATCT  
GGGGCCGCAAGGTTTCCACGCCATGTTTCAGCCATCAGGGCAGGATGGTGTGTTGTCGATCCGCTGCGCAAT  
GCCGAAGGCTACGCCATCTATTACCAGCAGGATGCCCATAGTCGATTGGAAGAGGCGGCAGATGAGGTGA  
TAGGGCCCAAGCTCAGCAAACCTGGTGCGCAAGGTGCAAGTGGATGGCAATGTTGCAAGCGCTACGTCAT  
TGCCATTTTCGGCGACAGGAGAATTTACACAATACCACGGTGGCTCCAAAGCGCTTACCATGGCGGCGATT  
GCGACCTTGCTCAACCGCGTCAATCAGGTCTATCAACGGGATGTGGGCGCCGAATTCGTGCTGGCCAGTG  
GCAATGACAACCTGATCTTTACCGATCCGGCCAGCGACTTGTGTTGCCAATGATAATTCGGATGCGCAGAC  
CAATATCGGGGTACAGGCTTATTACTTTACCAATATGCAGCTCGGTAATTTTGATATCGGCCATGTCCCTG  
AATACCAATGGCGGCGGTCTGGCCGGATTGGCAGTGCTCTGCACCAATCAGAAGTCTGGTGGGATGTCCGG  
GTTACCCACACCCGGTTGGAGATGCCTTCTTCGTTGACTATGTGGCTCATGAAATTTGGCCACCAGTTTGG  
TGCTGATCATACTTCAACGGCACTACCGGGAGTTGCGGTGCTGGTACCCGGGTTGCGAGTCAAGCCTAT  
GAGCCTGGTAGTGGCAGCTCCATCATGGCCTATGCCGGTATTTGTGGTGTGAGAAATCCAGACTCACA  
GCGACCCCTATTTTCATAGCAAGTCCATCGAGCAGATGCGTGCACACATGGCGACCGTATCGACTTGTGG  
AACCACACTCGCGTTGAGCAATAATGCCCCGAGGCGAGCTGCTGGGGGGGACTATGTGATCCCTGCCAAT  
ACGGCCTTTATGTTAAAAGGGGCTGGTGGAGATCTGGATAATGATTCTCTGCTCTACAACCTGGGAGCAGA  
TCGATCTGGGTACTGAATCGAGCAGTGCCGCCACCATGATTGACGATGGCTCCCGGCCGCTGTTTCGTTT  
TGTCTCTCCACGGCATCGCCGGAGCGGATCCTGCCGAGTTTGGCCATCCCTGCTCTCCGGCACGCTTGCC  
AAAGGAGAGGCTGGCCGACTACCAACCCGGGATCTCAATTTTCAGACTGACGGTGGCTGATGGTCAGGGTG  
GCGTTGCCAGTGATGACATGAAAGTGCAAGTATCAATACCGGTGCGGCATTTTCGCATCACCAACCCGTT  
TTACGGGGTACTCTACTCCGGGGGCGAGTCAGGCAGTGGCATGGGATGTGGCGGGCACAACCTTGCCG  
CCGATCAGTTGCAGCAAGGTGGATATCTCGGTGACCCAGGATGAGGGCGTAAGCTGGACAATGCTCGCCG  
CCGGACAACCCAATAACGGCGCAGCAACGGTAACGTTGCCGATCTCACCAGCAGCGTCAGGCTGAA  
AGTGGCATGCAGCGACAATATCTTCTTTGCCATCAGTCCCCTCAAATTTGCCCTCTGGTGAAGGTGGCTCG  
ACTTCAGGTGGTGGTGGCGGGGCGCTCGGATTGTGGACGCTGGCTCTGGCGCTGCTCGGCTGGCAACGGA  
GGCGTACATGAAGGTAGTCCCTCTGTTGCTGCTTGTGCATGCTCGGCGGTTGTGAGGCCGATGCCAGCACG  
CTGGAACAGGAGCTGAGTGCAAACCTCGCCAGACAGGATTACCGCCTGATAGTGATAGCCGGGCGGGGAG  
AGTTTGGCCCCGGTATTGCAGCCGAGCAGCAGGCAGAGGCCAAGGCGCGCTGTGGAAAGCGTTATCTGGA  
TGGATTGGGCGATGTGATAAGGCCCGGTGAGCAAGAGATACATAACCAAGTTGAGTGCTTACGCCAGCGAG  
TATAACCAGCGTATGGTGATTCAATGCCCAATAGCATCGGGCGCTGGCAAGCAGTAATACCAACGAAC  
CAATCCAAATGGAGGGGATATTCATCCCCCTATCTATCCGTGAAGGCGCCAATGGCGCCTTCACTTTTTTC

CGTTGTTGAATGGGGCCAGCCTGTATTGCTTGAGATGGGGAGCGGGGTATAGCACGATTTTTTCAGCGTG  
ACAGAAGTTTTGTGCGAATTTTTCTTTTCTGTCTGTACGCAGATTGTCAATTGAGGCTGCGCCATACTTG  
TTGTCACCAAGGTAGGGCATGGAGGCTCTATGAAGCACGGCATTGCGGTGATTATCACCAGTTTGTCTGT  
TCAGGTTGCAGCAGAACCCAGTGGACCTTCATGGATGAGAACTTGCCAAGGGGAGGGTCTATGATGTG  
CGAGCTGAAAAGGTGAGAGTGGTGGTTTCTGACAAGCCTTTTTGAACCCGGGCATCTCGCCAGTGTATTGA  
CCTTGCCATTGCCGGATGGCACTACGGTGCAGTTTGTATGTTTATCCCAATGCCTTGCTCCCGGAGCCTTT  
GGCCAGCGCTACCCTTCTATCAATACTTACAGTGGGAAGGCTATCGATCGGGCGGGGATAACAGGCCGA  
TTTGATGTACCATAACATGGTTTTTACGGTATGTTTACCCATCAGGGGCGTACCTTTTTATGTGATCCGC  
TTCAGGACGGTTTTCTTATGCCGTTTATGAACAGCAAGATGCCTGGCGGCGACAGGATGTGGATCAGGT  
GATTGATCCTCATGGTATCGAGCGTGAAGCGTGTGCTGGTTCGATGGCAATTTGCGCAAGCGCTACACC  
ATCGCCATCTCGGCGACTGGGAATATACCCAGTATCACGGTGGTACCAAGTTGCAGCACTCTCGGCCA  
TTGCAACACTGCTTAATCGGGTCAATGAAGTCTATCGCCGTGATGTGGGGCCGAGTTTTCAGCTTGCAGC  
TGATACGGATAATGTGATTTTTACCGATCCTGCGACGGATCCTTTACCAACTCGACCCAGGATATCGCA  
ATCAACCAGACCCAACAGGGGTGTTGCTAAATCCTTCTTTTTGATCTGGGCCATCTGCTGGCGACATCAG  
GCGGCGGGGTGGCGACCCTGAGATCTTTATGCAACCCTTTAGCCGTTACGGGGCATGACCGGAGGCTC  
ACAGCCTATCGGCGATGCATTCTTTATTGATTATGTGGCTCACGAATTGGGGCACCAGCTGGGGGAGAG  
CACTCCTTCAATGGCATGGCCGACAGTTGTGCCACGGGTCGCAAGGCTAGCTCAGCTGGGAACCGGGCA  
GTGGCTCGACCATCATGGCCTATGCCGGATCTGTGGTGAAGGAGAATCTGCAGGTTAACAGCACACCTTT  
CTTTACAGCAAGTCGATCGAGCAGATGCGGGCTCTGATGGCCTCTCTGCCCTCCTGCGGCACCAGCTG  
GCGCTTGCCAATAACGCGCCGGTTGTGGATGCGGGCGCGATAGGGTATCCCTGCCAATACGCTTTTCA  
CTCTTGTGCGGTAGTGCCTGGATCTGGATGGCCATCCCTCAGTTACACCTGGGAGCAGGTTGATCTTGG  
CAATGCATCCTACAGCGTGGCAACCATGGTGGATGATGGTACCCGCCCGCTGTTTCGCTTTGTTTACCA  
ACATCGGATCCCCATAGAACATTGCCCGCCATGAGCTCTCTGATATCGGGTGTCTTGGCCAAAGGAGAGG  
CGTGGCCTGCGACCAATCGCAATCTCCAGTTCCGCTTACCGTACGTGATGGTCAGGGGGCGGTGAGCAG  
TGATGAAATGGTGGTTTCAAGTATCAATACCGGCGGGCATTTGCCATCACAGCTCCGCAGATCGGCGCC  
ATGATGGCGGGTAGCACTCAGCTAGTGACATGGAATGTTGCCGGGACCGATCAGCCTCCTATCAATTGTC  
CCAGCTGGATTTGCGACTGACACAGAATGGTGGTCTACTTGGACTACGCTGGCAAGCGGGCTTGCCAA  
TAACGGTTGCGGCGAGTGGTGGTGCCTGCATGTTGACCAGTTTCGCCAGGCTGAAGCTGGCAACTGCAC  
AATAATATTTTTTCTCTATCAATGGGATAAGAGTTGATCCGCTTCCACTACGGAAAGTGCACACTGCA  
TTACCGACAACAATGCGGGTGGTGGCGGTGGTGCAGTGAATCTTATCGTGATCCTCTGATGGGAGGGGC  
AGCCGGATGGCGCAGGTATTACTGTTAGCCGTCATTTTGTCTTTCTATATATCTGCGCAGCGCCTGTTG  
TGGCCGCATCACTGACCGAGGCAATAGATGAAAAGTCTTGTGCTCAGGATTATCGGCTCATCGTGCCTGG  
CGGGCGCGGGTATGGCTCCGGGGGTTGTGGAGTCATTGCAAGCAGAAGCGAGAACCCTGGTGGGAGTC  
CGTTATCTGAAAGGGTTCCGGTATGTGATTGAGATGGGTAAGGCGTCGGAGTTTGAGCAGCGGATTGACT  
ATGCCACCCGATATAACCGACAGATGCTGGAATAATGCATGCCGGAGGCGATTTCAAGGCCGTAGTGGCT  
GTTCAACAACGGCGTGAATCGGCATGATTGGAGTTATAACTCTAATATTTCAAACATAGTGATAGCCT  
CAGGGGAATGATTTCGATGACTCACATATGAGCCTCCATATAATTTTTTTGGAGTTTTAACTCTATTA  
GAACTGCTGAAAATGCTAACAAAATGAGCTGTTTATAAACTTTAACTCACTAACCTTATGATTTTAAATG  
AAATAAAATTCATTTAATTTAATTTGAAAAAGTTGAATTGTGACTTGTGTACGTTATTTCTCGCCGGCTG  
TTCAGTCAGGTGATTAATAATGATGAAGTTCACAATAAATGCAATCTCAGTTGTCAATCGCAATGTCAGCC  
AATATCGCGCTGGCATCCCCATGGCATATGATCGAAAAACGCAGCAAGCAGGCCGATGAACCTGTAAGGG  
CTCGGCATACAATATCTTTGAGGTAGAGCCGGATTTTTTAGAAAACTGCGCTTGGGCCAAACCGTGTAT  
TACGCTACCATTGCCTGATGGCAAGATGGTGAATATGAGTTGGAAGCCTATTCGTTATGCGCCCTGCG  
CTGGCAGCGAAATACCCAGATATCATGACCTATAAAGGACATGAAGTGGGCACCCCGATTAACCGGTC  
GTTTTGATATTTCTCCGCGTGGTTTTAACGGCATGTTTATGCATGCCGGAGAGCAGATATTTGTCGATAT  
TCAGCGTAATGGTACCTACGCTGTCTATTACAAAAAAGATGCACATTCATGAATGGCAAGAATATCAAG  
GAGATCATGAAAAATCCGAGCTGAAAAAAAAGTTAGCATACAAAACCTGAAGCGGCTCGTAACGAGGCTA  
GCTATAGCAAGCCAGAGCTTACCCAGTACAGCATTGCATTTCTCTACTACTGGTTTCAATATACCAGGTTCTT  
TGGTGGCCAAGCCCAAGCATTGGCGTCACTGACAACCTTGACTAACCGTTTAAACGAGGTATATGAAAGG  
GACTTGGGCGTTCGTTTTGTATTGGCAGATGGGAATGACAATATTTATATTCGAAAACTCTGTTGACGACC  
CTTTTGTGAACGGTAAATATCCAAAATTTAAAAACATCAGCACTATAAATGCTGTGGTTTACAGAGAGAA  
GCTGAATAGTAATGACCTTGGCTATTTTCGATATTTGGTTCATGTAGTAACGCAATCGGAAAAAGATGAGGGG  
GATGCACAGCTAGGGTCATTGTGTGATAAGGTAGACTCATATGCATCATATAGGTCTAACCGGCTACAG  
GAAACAAAAATCCTGTTGGAGATGCATTTTTTATTGACTTTGTGGCGCATGAGATTGGCCATCAATTTGG  
TGCCGACCATAACCTATAACGCTAATAAGGGGAGAGAGTCTCCATGGCATGGGAGCCAGGTAGTGGT  
AGCTCCATCATGGCTTATGCGGGACTGATGGGGGAGCAAAACGTACAGCTCAACAGCGATGCCTATTTTC  
ATAGCAAGTCGATTGATATGATGCGCAAGCATATCAACAACCGTGAAGCTCAAGCAAGAAGAGTGAGAT  
CCTATTTGTTGGTGCGCCATTAGTGTCTTCTCTATTTTTTCTCGCGTTGTGGCACTGCTATCCCAAAC  
CAAAATGGTGATAATCAGGCGCCAGAAATACCGATGTGCCAGCAGAACATGTGATCCCCAAAGGGGTGG  
CATTTAGTCTGAGTGGCAAGGGTAATGATATTGACGGCGATACCTTACCTATACCTGGGAGCAGGTCGA  
TCTGGGGGATGCAACGACGAGTGGCGATCAATTGAGTTCAGGTCGCCTTGCAACCGGCCCTGTATCGT



TACACCGCGCCGACCACTTCCCCGGTTCGTCACTTTCCTTCGCTGGCTACCCAGTTGAAAGGGGAAGCTG  
AGAAAGGTGATGTCTGGGTCAATGTGCCGCGCACCCCTTAACTTCCGTCTGGTCGCCCGTGATGGCAAAGG  
CGGTGGTGCCTATGGTGTAGACCTCGGTTCGAGGTGGTCGATACAGGCGCACAAACCTTCAAGATTGAACCG  
GCATCTGACCAGCGTATGCTGGTTGGTAGCCCCGACCACAGTGAATTGGCAAGTAGCTGGCACGGACCGTC  
ATCCTGTCAACTGTTCAGCGGGTCGATATCAGTTATAGCAACGATGAAGGCAAGAGCTGGCAGCCGCTGGT  
CAATGGCGTGAACAACAATGGCGCCCATGAGGTGACCATTCCGGCCAATGCTGGCAGCGCTGTTTCGCCTC  
AAGCTGGCCTGTAGCGACAATATCTTCTATGCCATTACGCCAAAACTGGCGACCAAGAGCAGTGATACAC  
CGGCTCCCCAGCCTGAAAGCAATGGCGGGCGGGTGGCGGGCGGTTTCGACCGGCTGTTTCGTGCTGCTGGG  
CCTTGGTATCGCTGCGTTGCTGCGTCGTGAGATCATGAGCTACTAAACCAGATAACCCAAGGGTGAG  
ATTACCCATCTTTGGTAAATTGATGAACCAAGCGAAGAGCGCTTAGCCTCTTCGCTTTTTTTGTATGGTT  
TACAAGGTCGCTTTATCGAGCGCACAAATGCCTGCGTCACTCTCTTGATGGTCGTGGAACCATTTATTTAT  
TGAAGGAAAATCAAGATGATGGATGTTGCTGATCTGCGCCGTGAGTATACCCGTGGCGGGCTGCACCCGGG  
CCGATCTGCCGGCCGAGCCGCTGGCGCTGTTTCGAGAAGTGGTTGGCACAGGCTTGTGAGGCCAAACTGAC  
CGATCCCACCGCCATGGTGGTGGCGACGGTGGATGCCGAAGGTCAGCCCTGGCAGCGTACCCTGCTGCTC  
AAGCACTACGACGCCAGGGGATGGTCTTTTACACCAACATGGGCAGCCGTAAGGCGCAGCAGCTGGAAG  
GCAATCCCCGATCAGTCTGCTCTTCCCCTGGCACACGCTGGACAGACAGGTTTCATGTGACCGGTCGGGT  
GGAGAAGATGAGCACCTTCGAGGTGATGAAGTATTTCCACAGCCGTCCAAGGATAGCCAGATCGCTGCC  
TGGGTCTCCAAACAGTCGACCCGCATCTCGCCCCGGCGTGTGGAGGCCAAGTTCCCTCGAGCTCAAGC  
AGAAGTTCCGCAATGGCGAAGTGCCGCTGCCGAGCTTCTGGGGCGGATTCGGGTGGTGTGATCGAGACGGT  
GGAGTTCTGGCAGGGGGGCGAGCACCGGCTGCACGACCGCTTCTACTACACCCGCGACGGGGATGGCTGG  
CATATCGAGCGTCTGGCTCCCTGAGCGCGCTATTCAAATCTGTTTTCAAGGAGTGTGTATGCGTCTGT  
ATGGTGATCTGCGTTCCGGCAACTGTTACAAGGTGTGGCTGCTGGCCCCGCTGGCTGGAGCTGCCCTTGA  
GTGGGTAGAGGTGGATATTCAGGCGGGGGATACCCGTACCCCCGCATTTCTGGCCATGAACCCCAACGGC  
AAGATCCCGGTGCTGGAGATTGGCCAGGGCGATACGCTGTCCGAAATCCAACGCCATCCTCTTCTATCTGG  
CGCAGGGCTCGTCTTTGTGGCAACCGATCCGCGCCAGCAGGCCGAGGTGCTCAAATGGATGTTCTTTGA  
GCAGTACAGCCATGAGCCCTACATCGCGGTGGCCCCGCTTTATCGTTCACTATCTCGGCCGACCCGAGTCG  
CAGGAGGCGCGGCTCGACGGTCTGAAAGCCGGTGGCGAGAAGGCGCTGGCGGTAATGGAGCAGCAGCTGA  
AACAGAGCCCCCTACCTGTTCGGTGTGCGCTACCATCGCCGATATCGCCCTTTATGCCTACACCCAGTA  
GGCAGAGGAGGGGATCTTCTCCCTGCAGGGGTGCCCCGCTATCCGCGAGCTGGATCGCCGCTATCGAAGCA  
CACCCCGTACCTGACGCTGCCAGCGTCTGTGAGGCCCGCTGATGGAACGCTGATCGAGGCCAGTCT  
GTGGCAACCGCAGTGGGCTGCGCTGTTGCTGCACTGGCAGCAGCAAGGTCATCGCTGGCAGCTGCTGCTC  
GGCAAAGAGGCGGCGGCCCTCGATCAAACCGATGCTCCCTGGGCGAGCAGCCACCTGACGGGGTGC  
TCTGCCCGGGGACCCTGCTGGCTGCTGCTGATGGGGATCTGCTGACGGATTTTCATGTTGATCCAG  
CCGCCAGATCCTGATCAGCGCTTACTTCCCTATTGACCCTCGCCAGGGAGCAGGGACTGCTCACCCCTT  
GGCCCTGTGGGGCTGATCTGCCGCTCACCCCGAGGCCGATTTGGGCGCCGTGCTCAATCGCCTGCTGG  
CGCGCCGCGTGACGGTGGCGACCCCTGGCTGAGGGGAGTGCCTATCAGGTGTGCTATTGCGACCACTGCA  
GGCCCGGATGAGTGCAGATAGTGCCTATTGCAGCGACGAGGCGCTGGCCCGCTATACCCTCAATATT  
CCTCACCCCTATCCGCCGAGGGGGCCCGGACTGGCTGGCCCTCAGCTGGCGCAAGGCGGCGCTTGGGC  
TTGGCTGGAGCTGGGCCATCACCTTGCCAGAGGAGCAAGGTGCGGCGCTGCTTGGGGTGTCTCCCTGCA  
CTGGAATGGCGAGATCGCCTGGTGGGTGGGCGTGCCTGGCAAAATCGCGGTTTGGCGACCCGGGCGGCC  
AGCTTGGTCAAGGGGTTTCGATTTGACCAACTTAAACTGCCTGCGCTGACGGCTCGCCATATGCCAGACA  
ATTTAGCCTCCGGCCGGGTGATGGCAAAAGTGGGCATGCACTATCGCGGGCGGCGCCATGTCAGCGGTGCG  
CCAGCCATGTGAGGTGAGCTACTGGCGGCTGGATCGCGAACCCCTCCTTACCCAATCCCTTGGCCGAGGAA  
ATTTCCCGCTCGCTGGCAGATGAGCGGATCGCCGTGGTGTGCTGCGCGATCCTGTAACGTTGGATCGGC  
AGAGTACTAACGGCAAGCTGGCCATCTCGCTCTTTGTGGATGAGAGGGGCGCGGGGAGGAGTCTGTTTT  
TCTGCGTTGCCCGGATCTTTGAGCGGTTGCTGGCGCAGCACTGTTATCCCGTCGATCTGCTGGAGCAG  
GCCGAACCGGAGCAGTTGTCCCATCTTGGCGGCGTCTTGGCTGAAAGAGAGGGATGAACAGGGGTTGGCGT  
GGTTGCTGCAACTGTCCGCGCTGCAGCGTCAAGGGCCCCGATCTGCTCAGCCGCGAGGAGCGCGTATCACG  
GCTCCACTGGTTCAACCAATTGATGGCGCAGGCGCTGGGCGGCAACGGTAACTCTTTGCGAGATACGCTAT  
CAGCAGTTACGGCTGCTGGTGGAGCTGCCGGAGCTGGTCGATGAGCTGGATGGCTGTTGGCATCAAACGC  
CCGAACTGACCTTTGATCGGTTGGCGCGGAGGCTCCCGCCCTCTGGCTGGCCTACCCGAGGCGATGAA  
CAGGGTCAACCCGGCGACGCTAACCGCCCTTGCAGCAGCAGTTTGGCGCTCGTTTTCTGAGTGCACCCCTC  
CCATTTTTGGACAAAGGTAATCAGAATGACCAGCCGTTGTGTGGAATAATGCCCGCTCTGCTGTACGAGG  
AGTAATACCTGATGTTGAGAAGTGCAGCGCCCCGGTGACATGCTGCCGCTCTATGAGCTGCTGAGTGCCGC  
CTTCGGTTCGATACCGATGAGGCCGAACCTGGTCAACCCCTGCGTGAATGTGGCGCAGCCGTGGTGACCATG  
GTCGAAGAGGAAGAGTACGAGTTCATGGGGCACCTGATGCTAAGCCCGATCACCATTAAACGGCATGGAAG  
GGCCCTGGCTCGGTCTGGCGCCGGTTCGCGGTTTCATCCCGACTGGCAAGGCCAGGGGATTTGGCTCGGATCT  
TATCCGTGAAGGGCTTGTATACGGCGCTCGAGATGGACTGGAAAGGGGTGGTTGTACTCGGGGATCCGGCC  
TATTACAGCCGTTTTCGGTTTCCGCCCGGCCAGCGAGTTTGGCCTGCACTGCATCTATGAGGTACCTGCCG  
ACTGCTTTATGGCGATGGAGCTGCAGGAGCGCGGTTTTTTCGGGTGTGCAGGGTGGGTGCTCTATCACCC  
CCTGTTTTGATGAACTCCCCGACGAGCTGCCGGACGCGCAGGCAGAAGTGTCCATTTATAGCGAGACGTC

GCAGCGACAAGCCATAGCGAAAAAGCCCTCATTGAGGGCTTTTTTCATCTTGTATTGATCCCTGCCGGGCT  
TATTCGAGCAAATTGGCTCAGGCAATGATGTGCGAGCTGGGTGCCCTTGGCATTATCTTCGCCACCATGT  
CACCCATCTGCTGGGCGAGCGGGCTCTGCTGGAATTGCATATAGTCGTGAGATTCTGCTGGCGCTGGTA  
GCGAGTCGCGAGCCTGATACATATCAGCCGTGCTCGGGCCCCGACTTGCTGTGCTCTCCTGACCGCTGGCC  
TCCAGGTAGCGCTCCACCACGGCTTTATCTTGGCTGGTTAGCCGTATAAGAGACCGCCATGGCTCTGCGAG  
CCGTTGCTCTCTCTTGGCTCTGTGCTTGCATCTTCTTGGTCAGTGCCTCGTTACGGGTCTGACT  
GACCTGCTCGGGTGTGACAGCGGGAGAGGGATATTTGCCGTAATCGGGCAGCGGCATGGGCCGGGAG  
GTGATTTGCATGGTGGCGCTTCTCTTGTGAACAGGGACGGACGCATGATACCCATCCATTTTAGTTCAAT  
AAATCACCACCTGTGCGTTCATCAAGAGTGGGTTCAGCTTCGCGCATCGATTGTTAATTGAACCGCCTCT  
GAGTGACAAAAAGGCGCCATAAGGCGCCTTTTTATCTTCGGTTACTGCCGGATCAGTTGAAGAACCAG  
TACCCGCGGTTGACCAGTCGGGTGACAGTTGCAGGAAACCGGCCTGATCGGCCAGTCCACCATGTGCG  
CCTGAGTGATGATGTCCTTGTGCGCACAGCAGGAAATGGCTGCCGCATCTTCGCTCTGCGAGGTCCAGGC  
TTCGCCGTGATATAGCACTGCTGGCTTTCGCCGCTGAACCAGACGGTGCAGACCCGGCACCTTGATG  
GCAGGTTGCCCTGGGTGACGAGTGGCTACCTCCTCGGCGCTGTAGTCCGGCTCGACCGGATTGACGT  
CCAGATCGTGCTTGGCCTCGGAGATCATGGTGCCGAACCACTCCTTGAACAGGGTCTCGTCATCGAGGGC  
CTGTTGCATCAGCTCGCGCAGACGGTGCAGCTCGTGGGGCTGGATCTCGCCGTGACGGGCACGGGGCTTG  
AGATCGGCATCGCCGTAACGCTCGGTACGCACCTCGTTGTGATCAGATGATCGGCAAAGGAGGAGATAA  
GCGCCTTGGCATCCGGCGCGCGGAAGCCACCAGAAAGTTCATGGAGGGCTCGATGGCGTAGCCTTCGTG  
GGGAATCCGGGTGGAATGTAGAGGATGTCACCCGGCTCCATGATGACGTCGATGATCGCCTCGAACGGC  
TCGCAGTGGAGCAGTGCGGCGTGGGCGGCGAACTCGTTGAGCGGCTTGGCATCGCCGACTCGCCAGTGGC  
GTTTGGCCAGACCCTGGGTGATAAACACATCGTAATTGTGATGATGGGGGCGCACCCCGCATGGGGGT  
GGAGAAGCTCACCATCACATCGTCAAAGCGCCAGCCGGGATGAACTGGAACGGCACGGCCAGCTCGTTC  
ACCTCGGGAGCCAGTGGTTGCAAGCCTGTACCAGAATGGTCCAGTTCTCTTCGCCCAGATGGTTCGTAGG  
ATTCGAAGGGGCGGTGAGCGGCATCCCACTTGGCGTCGAAACGGGTGACGAGGCGGGACTCGACCACCTC  
TTCCATGGCCAGACCCGCCAGCTCATCCGGGTGATGGGATCCTGAAAAGTCCCTGAAGCCACCCTTGATA  
AGGATCGGGCGCTTCTGCCAGTAGTGCTCGAGGAAGTGAGCGATATCCAGATTGAGTTCGTACATGCTGT  
TTCTCGTGTCTCGAAAGAGGTTTTTGCCTAAGGCAGGCTTGGGAAAAGCCACTCGGGATCCTGCCGTGGC  
AGGAAAATAACAGGGGCCCTGTGGCATATCGTGACAGGGGCCCTTCGTCACTGCCGTTGGCTTACTT  
CAGCAGATCGACCAGCCTGGGCGTCCCGCATGTAGTTGGCCGGGTCAGCTTCTTCAGCTCAACCTTG  
ACCGCTTCCGGCAGCGCCAGGGTGTGATAAAGGTACGCATCCCTTCAGCATCGACGCGCGCACCCAGGG  
TCAGCTCCTTGAGCTTCTCGTAGGGCTTCTCGATAACCGTAGCGGCGCATCACGGTCTGGATCGGCTCGGC  
CAGCACTTCCAGTTGGCATCCAGATCGGCGGCCATGGCGGCGTCGTTGGCTTCCAGCTTGGAGATGCC  
TTGAGGGTTCGCTGATAGGCAATCAGGGAGTAACCCACCGCCACACCCAGGTTGCGCAGTACGGTTCGAGT  
CGGTGAGATCACGCTGCCAGCGGGAGATGGGCAGCTTGTCTGCCAGATGCTGGAACACGGCGTTGGCCAG  
ACCCAGATTCCCTTCGGAGTTCTCGAAGTGCATGGGGTTGACTTTGTGCGGCATGGTGGAGGAGCCAATT  
TCGCCGGCGATGGTGCCTGCTTGAAGTGACCCAGGGAGATGTAACCCACACATCGCGTTCGAAGTCGA  
TCAGGATGGTGTGAAAGCGGGCCATGGCGTCAACAGCTCGGCGATATAGTCGTGCGGCTCGATCTGGGT  
GGTGTAGGGGTTCCAGGTGAGGCCGAGGGAGGTACAAACTCCTCGGAGAACTGGTGCCAGTCCACATCC  
GGGTAGGCGCTGAGGTGGGCGTTGTAGTTGCCGACTGCGCCGTTGATCTTGGCCAGGATCTCGATGGCCA  
TGATCTGCTTGAACGGCGCTCCAGACGGTAGGCGACGTTGGCCATCTCCTTGGCCATGGTGTGCGGGGT  
CGCCGGCTGGCCGTGGGTGCGGGAGAGCAGCGGCATGTACGATACTCGTGAGCCAGGCGCTTGGACTCG  
CTGATCAGCTTTTCGCAATAAGGCTTGTGACCTCTTCGCGAGCGGTTTTTCAGCATCAGACCGTGGGAGT  
TGTTGTTGATGTCTTCCGAGGTACAGGCGAAGTGGATGAACTCGCTGACAGCCGCCAGCTCCGGGTTTAC  
TTCGACTTCTCTTTGAGGAAGTACTCCACCGCTTTCACATCATGGTTGGTGGTGCCTCGATCTGTTTG  
ATACGGGCGGCGTCACTCTCGTTGAAGTTGCTGACGATGCCGTGAGCAGGGCGTTGGCGGCCGACTCA  
GGGCTGGGACTTCCGGGATCCCGCGTGGCTGGCAGTTTCTGCAACCAGCGAACCTCGACTTCAACGCG  
AAAACGCGAGCAGGCCGAATTCGGAGAAGATAGGGCGCAGGGCATCGGCCTTGTGCGCCATAACGACCGTCA  
ATCGGGGAAAACAGCAGTCAGCGCGGACAGCTCCATGGGGTGAACCTCGATGATTTGTGTGGGGGATCCG  
TATCCACTCGCACGTGGGGCTGAGTCGTATCAAGGCGGATGTGCGGCTATTTACCCTGATGTCGACCTC  
GCTTGGCCGACGCGAGCCGATGATTAGTAACGTTTGGCCAGCTCCACCATCTTCTTGGCAGCGAAGATG  
ATCTGGGTGCGGCTGCCACCGAGCTGACGCCACAGCAGCAGGCACGAATGCCTGCCAGCAGCAGGGCGC  
GCACCTTGTGCTGCACCAGCGGCTGCTGCAGGAACAGCGGGGTACCCGCCACCTGGATACGCGGCCGAT  
GGGGCTGATAAGATCGCTGTAGATGCTGCCATGTTGGCCAAAATCTGCTCGTCGAGCAGATCGAAGTGC  
TGTTGCTGGCGGCAATCTGGCTGATCCGCTCACCCAGCATATTGAGAATGTCTTGGCTTGGCCAGCT  
TGCGCTCTAGCGCAATCAGGCTCACACGTAAGCGGGTACGCTCGGCATTTCTTGGCTGCCGTGCGCACC  
CAGCTGCTCGACCAGCGCACGGTAGCCGTGCGGAATGGCCAGATGGGTGTTGTTGAACACCTCGAGCGGC  
TGGCTCGGGTTGGTACCAGAATGCTGGAGAGGCTCTCGCGCAGGGCGGCCTCGTCACAGCTGCCGTCTC  
GGGCCACCTTCTGCACCAGATACGCGGCTTGGCAGATGCCGGCAAAGGCCATTTGTTCTGTCTTGAATTT  
ATCGCTCACGTCGCTGCCTTCTGTAAAGGATTCAAACCGGATGGCTGAAACGTTGTTTCGATGATGCCG  
CGCCAGACACACTTCCCCGTGCTAGAAGACGGCGGACTGGCCCGGGTACCAGCAGCTGTTTCTCGTC  
GAAGATGACCCGGATGGTCTCGTCGTGATGGGCTGGATCAGGCAGGGAATATCCTGCTGACGGTAGCGG

GTCTTGACGGTGCAGCGACGCGGCTCGCGAATGGGAGTGCATCCACCCAGTGCAGCTGGCTGGCGATGA  
GGCCGTCGGAGTAGAGGCGGGGATGTTTCGCCCTGCGCCACCACCAGCACGTTGCGCTCGACCTCTTTGTC  
GACCACATAACCAGGCTCTTCGGTGGCATCTTTGCGACCACCGATAACCGAGCCCTTGCCTGGCCCAGG  
GTGTGATACATCAGACCCTGATGCTCGCCGATCACCTTGCCATCCACGGTCTCGATTTTACCGGGCTGGG  
CGGGCAGGAACCTTGCCAGGAAGTCTTTGAACTTGCGCTCGCCGATAAAGCAGATAACCGGTGGAGTCTTT  
CTTCTTGGCGGTGATGAGATCCAGCTGATCGGGGATGCGGGCGCACCTCCGGCTTCTCCAGATCGCCAACC  
GGGAACAGGCTCTGACCCACTTGCTTTTCGCTCAGGGTATAGAGGAAGTAGCTCTGATCCTTGTGGTAT  
CGAGACCGCGCAGCAGGCGCGGGCGGCTGTGCTGTCTGTCACGGCGCACATAGTGGCCGGTGGCGATGTA  
GGTGGCGCCCAGCTCTTCGGCGGCAAATTCGAGGAACGCTTGAACCTTGATCTCCTTGTGCAAAGGATA  
TCGGGGTTTGGCGTGGCGGACGCTTGTACTCTTCGAGGAAGTGTCTGAACACATTGTCCAGTACTCGG  
CCGCGAAGTTGATAGTGTGGAGTTTCATCCCCAGCTTGTCTGCGAGACGGCTTGGCATCAGCCAAATCCTG  
GGCGGCAGAGCAGTACTCGTCCGTGTCTTCTTCCAGTCTTTCATGAACAAGCTTCGACCTGATAG  
CCCTGCTGCTGGAGCAGGTAGGCCGAGACGGAAGAATCCACGCCCGGACATGCCGACGATCACCTTGA  
TTTGGCTGTTGTCTGTCAATTAGTCGAAGTTACCAGTTTCGTTTTAAACGGGGCGTATTCTACCAGAGTTTTG  
CGCCCCGGTACATATCCATGCCGAGTTCCTATCAGGAGCCTGATAGCAGGAAATCGTTTTTCTGTTG  
TTGGCCTTTGTACCCGAAAAGAGTGTCAAATGGCTCAGATAAAGGCTTGAGGGCCGAGAGCGGCAGC  
CGTGTCCCCGCCAGATAATCCTGAATGCACTGCCATAACAGGGGGCTGCGCAGGGCCGGTTTTGCATTCAG  
CTATTTCTTCCAGAGTGAAGCAGTGGCAAGCCAGCACATCGCCGTCAGGATCCTCTGGATGGTGTGACC  
GGGCGCTTTTTCAAGGTGCAAGATGATGGCTGTGCGCACATAGGTGGCTCGCTGTGCGCCGGTTTTGTAG  
AGATAGGTACCAAGCCAGGCGGTGCGCGTGGCGGTGAGCCCGTCTCCTCTTTGAGCTCGCGGCAGGCGG  
CGGTGAGCAGATCTTACCGGCTCCACATGGCCGGCGGGTGGTTAAGCGGCGTGGCCTTTTTATCTC  
CTCTTCCACCACCAGAAAGCGGCCCTGCCACTGCACCAGGGCGGCGACCGTCAGGGCGCGCTCCATGCGG  
GCGTGGCTGGTGGTTCGAGTGTCTGCCTGATTGCTCATCATGACTCCTTGTGCTTGTATGGGGATTGCC  
CGCTCGGGCGGGTTCGCTGCCGTTCCCTCGCCGCTGCGGGGTTTGCCCGGGTTCGGGTTCTGGCTGCT  
CGCTCGGTTGGGTGAGTGTGCGGGGGCGTTCGTCCCGTCTCGGCTGGCTGGGCCGCGCTGGTGCCTCCC  
CTGCCGTTTTGGCCGGTTTTGGCGGTATGAGCGCTGAACGGGATGAGGAGGGACGCGGGCGGCTGTGGA  
GCTCGGCACCAGCTCGGGGGCGGGCAGGCTGCGGCTCTCGCCGGGGCCAGACCATCCAGGGTCCAGTGC  
CCGATGGCTGACGAATAAGCGCAGGGTGGGTCGGGATATGGGCGGTTCATCCGCCACCTGCCCGGT  
TGCGTCCCTGATGATCTTGCATCCAGCAGCTGGTGGGATCTCCTTGCCTTCGCGGATCGCGGAT  
GCGCGGCCACACCGCAGTTTCATCCATGATGCGCGCCCCGGCGGGCAGGGTTCATGCCGTATTGAGCTCC  
ACACCGGCGCGCAGGGCGGCCAGTTGCTCCTCGCTCGGAATAACCTTCCACCTGCACCCAGTAGGTCTTGG  
GGGTCTTCTCCCCGGCTGGGTGAGGCGCGCTGCAGCTTGCCATCGTTGGTGAGCAGCAGCAGCCCCCTC  
GCTATCGCGGTCAAGCCGACCTGCGGCGTAGATGCCGGCTCGCTGATGTAATCCTTGAGGGTCTCGCGG  
CCCCCTCGTCCGTGAACTGGCAGAGCACCATGTAGGGCTTGTTCAGCAGGAGCAATTTGCGATCCGCTG  
GGGCCAGCTCCGTTTTGCGGGGGATGCATGGCGAGGTGCGGCTGGTTTTGCGCGCGTGCAGGGGGCGTT  
ATCGCGCGGCGAACGGCTGACAGAGAGACGGGGCGGGGAGATTTTCATCGGATACACACTTCAGACAGAC  
GATGGCAGCGAGTGTACCACAGGGTGTGAGGGCAGGATGAATGGCTGGCGTTACAGCAAGCAGTGCCCA  
GAGCCAATTCGCTAGCTCAGCAGGCTCTCGATGACGATAGCTGACGGGCGGGGGCCAGCCCGCCAAC  
AGCAGGGCGTGGCTGACCACATCGTCGATCATCGCTGCGCCAGTCCGGTGAGGGGGCGCAGGGTCTCCC  
GTCCGCTACCAACCGGCACCGCCAGCAGAATAATGGTCTGCACCGGCCGATTTGAGAGCCCCACTCGAT  
GGGCTCCTTGAGCTAAGCAGGGTTCAGCGCTGGCTGGCTGATCCCTTCGCTCAATACATGAGGCATGGCA  
AGGCCGGGGCGGATGATGGTGGCCGAGACCTGCTCGCGCCGCTTACCAGCAGCGGTTCAGTGTGGCGCGGT  
CGGTGATCAGCTCGGCGGGCAGCAGATCGATCAGATGCTCGAGCGCTTCGGCTTTGGCCAGCGGTTCCGG  
GCTGTGGGCCAGCTGGCGCAAGGCAAAATGGTAGTCCGGCAGCGGTTGGCCAGTGCACACTCCGCCAGC  
GCGGCGGTGCGCGGGCGCACACAGCGGTTGACCCAGCTCCCCGACCAGCAGGTGAAAGCCATGTGGGCCA  
GTTCCGGCATCGCACCTTCAATTTGCAACTGGCAGAGATCGCCGGGCTGGGTGGCGAGGTTCAACAGGGA  
GAGCTGGTTGCTGGCGGCAACGGTCTGACGCCGGTAAGGTGGCGCAGCGGATGGTGGATTTGAACATC  
CCCCGACCGGTTCAACTGCTTGGCCTGGGTGATGCTCAACCCCTGCTGGCAGTAGAAGGTGATCTCGC  
GGGTGAGCATCAGGCCGGATCGGCAGGGCCTTGGTACGGCGTTGGCATCCAGCAACACAGTTTCCAGT  
CTCACTTGGATGGATGGTGCAGCCGAGGAAGCGCTCTTCTGCTCAATCTCGATATCGGAGGCAATCAACA  
CCAGGTGCGCGCTGGCAATATCGCGGGCGGTGAGCATGTTCTCCATGCCATGGCGCCCTGAGTCTCGAC  
CTTGATCTTGGTCCCAGCCAGTGGCGGCTTTTTGCAAGGCATCGGCAGCCATATAGGTATGGGCAATA  
CCGGTCCGGCAAGCGGTGACGGCGACGATCTTCACTGCTCTCTGTGATGCTGACAAGGGGGAGCAAAAA  
GATAGCTCCAGCGGGGGGCTTTTACCAAAAAGTCCATATGAAAAGTGGGATCTTGATGGGGATATGCCCGT  
CCCTTGAACGGCAGTGCAGGCTGATATGGGCCAGCTGGGAGTGGGGTTGCCCAAACAACAAGGGCCACC  
CCTGTGGGTGGCCCTGAACAATCTGCGTCTGTTGTTATGGCTATCAGGCGGTCTGGGCAGCCAGCTCGGC  
GGCTTTTCAAGTTCGCGCTTGTGCGGCGGATCTTTCGCTCTTCGGCAATCGCCACGCAGGCCATCAGCACC  
AGACAGGGCGGCTGCTGCCATGTCCAACGCGGCGAAGGTGCCGGTCCAGCCGGTCCAGGCCAAGATGGGGG  
TACCATCGGGGATCATGCCAGACCCAGCTTGGCGAAGCTGTCAACCAATCAGATAAGCGAAGGTGCCCTT  
GACGCCATCGGCCACGCTGATGCCCTGCTTGGGTACGAAGCCACGGCGGCCACGCCGATCAGCAGTTGC  
GGGCCGAACACCAGGAAGCCAGGGTGAACAGGGAGCCAGGAACATGAACTGGGTGGTGGCGTGTGGT

AGAGACCCAGAGTCGCGATGATGAGCGCCAGTGCCACACAGGCAACCAGACCACGACGGCCGTTGGCCAG  
ATCGGAGAGGTAGCCCCACATCAGGGTGCCGACCAGAGCGCCACTTCGAAGAAGGTAAGCCCTGAATA  
GCGACGTCTTTGGAGAAGCCGAGCTCCTGGTGGGCATAGACGGTGGACCACTGGTCGATACCGATACGCA  
CCACGTAGAGGAAGATGTTGGCAAAGCAGAGCAGCCAGATCACCTTGTTCAGCAGCACGTACTTCACAAA  
GATCTGCCACTTGGTCAGCTTCTGCTCCTCGGTGGCGATATCCTCTTCGCTCGCCACTTCGTCAAACAGC  
TCTTCCACCTTGCCAAGGCCGTTAGGCTTCCGGCGAATCGCTACCAAAGCGCAGGCCGATAAAGCCGACGA  
TCAGCGCAATGATGGAGGGGAAGATGAACATGCCGAGCACGTGGCCATCAAACAGGTAGTTGGCACCGBA  
CAGTGCCACACCCGGCCGACCCGGCACCCGCCACATTTGTGGGAGAGGTTCCACATGCCCAGATAGGTGCCG  
CGCTTGTTCGCGGGGAGTCCATTTGGTGATGGTGGAGTAGCTGCAGGAGCCGCCACAGCTCTGAAAGAAAC  
CGCTCAGGGCGTAGAAGAAGATCATGAAGTAGAGGCTGAAACCGGTGCCGCCATGCTGGCACTGAAGCC  
CAGCATGCACAGAGCGGAGAGGATCAGCATCAGTGGCAGGAACCTGCTTGGTGTCTTGGCCATCGGCATAG  
TAGGAGACGATGGTCTTGCTACCCCGTAGGTGATGGAGAAGCCAAGGCCGATCATGCCAAGCTCGGTCA  
TGGAGAGACCGTACTCCTGGATCATGTCAATTTGCGCAATGTTGAAGTCTTTCGCGATCAGATACATGGT  
CAAATAGCCAATAAATAACAACCAGATAAAGATTGCATAAACGGCTTGAACCAGAGCTTGCGCCGGGCTTCG  
ACCCGACAGGTCGAGGGTGGGGACCCGGACCTGTTGGAGCAATTTCAACATCTTCGTTTCATCTCTGCGAG  
ATAGACGGTATTTCCGCCCGCCCCCTCATTTGTAGATAGGTTGTTTCGAGGTCACGCCACGGAAGGGGGAA  
CGGAACGTTCGGGGCTGTCAGCCGTTGCTGCGCTCGACGCTCCATCCATATAAACCCGGGCCCCGGCACGGG  
ATGACGGGGCGCATTGCCCATCGCGGTGCGGGTACGACATCAGGTGGGGTGACTCTAATAAGAGGGGGCA  
AAAAATGGCTTGAGAGCCATCCCTAGTGGAGCTAGGAAATTTTCTAGTTTTTTCGCTTTTCGCGGACAAA  
GCGTGAGAAACATCACACCGCTGACGCCGGATTGCTGCCATTTTCAGCCAGTTTGGCGCTCTGTGTGAGTG  
CTGGGCTGGGCTGGGCTGGGCTGGTGGGATGGATAGGCCAGAAGGGAGCCAGGGAAAGGCAAGGTGAGAG  
GTGAAGGGAGAAACGAGGAAGAGTGCTTATCGACCACTATTTCTCGGGGGCGATTTTGGGAAATACGGC  
TTGCCAGCCATCCCAAAAAACAAGAGGCCATCCCGTGGGGTGGCCTCTTTTATGGTCTAGGAGCCTCGAT  
GGTGAGGGGGGGGACTCAGGCCGCTTGGCCAGAGTTACCTCATCACTCTTTTTCGACCCGACGTTTTTTC  
AGGGCAACCCGACACCGCCGTTGACGATGGCACCAGATCATGCAGAGCAGGGCCAGCAGCGGCTTGT  
TGACCCGACCCAGCAGGGCCACGATGGGGCCACCGTGGGCGACGCTGTTGGTGATGCCCAGCAGGAAGGC  
CATCACGGCGCGGTGATGCTGCCAGCACGTTGGCCGGAATGACGGCCAGCGGGTACGGGCGGGCAAC  
GGAATCGCACCTTCGGAGATACCCACCCAGCCATGGCACCAGCGGCTTTACCCGCTTCGATCTCGGACT  
CGTCGAAGATGCCGAGCTTGCGACCCGAGCAGCCGATGCCAGCAGATGCCAAGGGGGGCGACCCGGGATGGC  
GCAGGCCATGGCACCATAAACTGGGTCTGACCGGAGGCGATCATGCCGACGGAGAAGAGGAAGGCCACC  
TTGTTGACCGGGCCACCCATATCAAAAACCAGCCATACCACCCAGCACGATACCCAGCAGCACCAGACTGC  
CACCGCTCATGGAGAGCAGCATGGCGTTGAGGGCCAGTCATCATGTTCGGCAATCGGGGCGCCGATGATGAA  
GATGAATAACCGCAGCGATAAAGAGCGACCCGACGATGGGGGCGATCAGGATCGGCACCAGCGGTTGCACC  
ATCTTGTGGTACTGACGAGTGGCAATCCAGCGCACAGATAAACCAGCAACAGGCCCGCGATGATGGCAC  
CGATAAAGCCGGTACCGCGCTCAGCGCCGTAGAAGCTGCCGTTGTTGGCGATCCAGCCCGCGATAAAGCC  
CGGTGCCAGTGGCCGACGATCACCGATGGCATAAGGCGATATAGCCCGCAGAATGGGGATCATCAGGGTA  
AAGGCGGCCACCGCGACGTTGAGGATCTGGTTCACATGCTCCCTTCCGGGATCTGCATGCCGCTCGGGG  
TCGGGTTGCCGCGATGGCCAGTGACAGGGCGATAAGCAAACCACCGTCCACCAGAACGGGATCATGTG  
CGATACGCCGTTTCATCAGGTAGCGATAGAGGTCCGAGCTGCCGCCGCTGGCGCGCTTCTCTTACCTTTT  
TTATCTTCTTTGCCAGCCACGTAGGCGGGGGCTTTTCAGGGCCTGCTCGATCAGACCTTTGCCATCCTTGA  
TGGGGGCTTTCACGCCGCTTGTATGAGCGGCTTGGCGTTGAAGCGGACCATGTCCACCTGCTTGTGCGCA  
GGCCACCACGATGGCGGCGGCGCGGGCGATCTCGTCCGCGGTTCGGGCTGTTCTTTCAGCGCCGATGGAGCCG  
TTGGTCTCCACCTTACCTCATAAACCAGCTCGCGAGCGGCGCGCTCCAGCGACTCGGCCCGCCAGATAGG  
TGTGGGCGATAACCGGCCGACAGCCGGTACACCGATGATCAGCCCCCTGTTGGCCGAGGCGCGGACG  
CGCTTCTCTTTCTTGGCCAACAGCAGTGCACGCGCATCGGCCGGGTTTTGGCTGCCAGCAGGGCATCG  
ATAAAGCCCTTCAATCAGCTTGGCGGAGAGCTCGGCCAGCACCTCGATATGATGGTTGGCCGCCACCGG  
CCGGGGAGGCAATCATGAAGAACAGCTTGGACGGCTTGGCATCTTCGGCGCCGTAGTCGATGCCGTTGCG  
GCTGATGCCGATGGCCACCGCCGGGGTGGTACCAGCCGACTCTTGGCGTGGGGCAGGGCAACACCCTCT  
TCAAAGCCGGTGTGTTCCAGCTCTTACGGGCCACAGATCCTTGCAGAACTGCTGCTCGTCCGCTGACCT  
TGCCTTGCAGCAGCAGGCGGGCCATCTCGGTGAAGACCTCTTCTTACGTGTCGCTTTCAAATCGAG  
ATTGATCAGATGTTTATTGATCAAGGTGGTTATCATGGCGCTCTCCCCGCTCCGTTGCCGGAGCCTGTTG  
GCATGCCGCCCTTGCAGGCTGGCATGCAGACAAAATTGACCCGACTATTATCACGCCGGGGCAGAGGTCA  
CCCTATCGGACAAATGTGCGAATAACTGGATTTTTGTGCGCCATCACCTTGAGTGTGACCCTGATCGCAA  
AGCTGAACAGCTGCTGAAATGGGGGCGGATTGAATCGCTCATATTTTATTGATGATTAATAAATCAATTGG  
TTGTGTTTTGTTTCGTTGGTTCAGCTCCTTGGCCGTAAGGTGAGTTTTTACTCAGTGGATGGGAGCGCTCTTT  
CTATAAATTTGTGAGGTGAAAGACGGCGGGGATGTGAGCCAACGCACAGAAATGGCCCCGCTGGCGGG  
ACGCGAGGGGGCGGACGCGAGGGGAGGCGTGAGCAGAAACAAGCTGGAGAAATGGGTTGCACCATCGATGCCA  
GACAGCCCACCGCAACGGGCAAGAAACCCACAGCCATAGGCGCACCGTAGGGTGCATGAACAAAGTGA  
ATTGCACCGCCTGTTTGGGACAGGGAGTGTGGTAGCAAGAGAGGGGATGGCTGAAAAGAGAGAAGATGGCC  
AGTTCACGTTAGCCAACTGGCCACTCGCTTAGCGGTGAGTGGCCAGTACTTCAGCATGAACACCTGAACA  
TATTTATCTGTTCTAAATGTAGCGGAGTTTCAATATACGGTTATTTAAGCTGATATCAAATGAACCTTCGG

TTACAGATATGGCTTTACCTGGCTTCGAGTTTCTACCATCTGGTTTTACAGCAATTTGATCCCCCTCTTT  
TAATCGACACCATTTCATTCCAGCTACCATTTACTAACTTATCATAATGAATGAAATAATCTTGGCTTAGT  
TCATCAGTCGTAAACATAAAGGTATTAGGGCCAGAGTTGCCGCCCTTTTGGTATGTTTTTTATTTTTGTTT  
TTATTAATGTTAGCTCTGTGATGTCTGTTCATTTCCATTTGAAAAATATGCCGGTTGGGCTGTTTT  
GGTATCTCTATTAATAAATGGATTGCCAGAAATATCTAGTTTTGATAGTTTTTTCAATAGTTTTGTGCGG  
GAGTCTTGCTCGGAAAAGCTTGGCTGCTCAGTAGTGTATTGAGATGTTTTGCTATAAAATGCTAGCGCCT  
CATTAGCAAAGGATTTATTCTCTTGGTATTCTTTCTCACTAAGCAGTAAGCGACTTCATTGAATATGTT  
CTTGGCTTGTACGCAAGCGCTTTTTATATAGCCATCATTTGGTAAATATGTCATCCAATATCCTTATTGAG  
CTGGAAAGACATTTTATCGTTCCCTTGGATGTCTGTGTTGACTATATTTTCTGACTTTCTTTTCCATGCGC  
TAGCTCTATATGCGCCGAGCATTCTCTGAAATGTTTTGACTTATTCCAGTTTTTAGTTTTATCTAGAAT  
TACATCATGCTTCAATCCATACAATAGTATAGCATATAACCACCTATTAACATGATAGGCAAATGAGAG  
TCATCATCTTTTACATCACCCCATCCATCATCAATTAACCTTTCATATATTTTTTCTGCTGCATCATAGT  
CACTCTGAGTATGATGTAACATCGCTAAGAAAAGCTTGGCTATTAGGGTTTTTATCTATTTCATAGTA  
CTTTTTATAATGCAATATTGCATCATCTTGGAGCTTTAAGGGCAGATAGAATTTCTTGCATATGCTCTTTGA  
TATGATGCATCGCTTTTATATATATGCTCGACTTCTTTAAATTTTTTATATAGAGGGATTAGTTTTTCAT  
TCTTTATTTTTGAACCTCTTATTGTTGAGTTATTGAACTCAGTAAGAAGAAATTTTTAAGCTTTCATTAGT  
TTCAGTTGGGATGTAGTCCCAGTGATAACCAAGCTAGCTTTTACTTTCTGGATATTGTCAATTTGTCTA  
GCCAGCACTTTACGTTTGGCTTATTTTAGCTTGTATATCGCTGCGAATTGAAATGTTTTCTAGCATTTGGTTA  
GTAAAAGCTCTCGAATAGAACCCTTAGACTAAAAGTTCTTTATCCTCATCAATGATTTCTATTTATTA  
GCTTGTATTTGATAGCTCAGCAATTTCAATAGCTAATTTCTTCTTTAGAAAAGGCTTAAAAGATCACATAAA  
TCAAGCCTGGTGCTTTTATCGTCAACAAATAGAGCCTCTAGAATTTTTATGATGTTTCAGAAATGTTCT  
CAATTAATTTGTTATAGGAGAAGCTTGAATTTCTTTATTTGCTACTTCAATGGATTTTGGAAATTTCTTT  
GCCAGACAAGAATAAATCCACAGTCAATCTGATAGCTAGTGGATTACAATGGCAGCTATTTGCTATTTTT  
TCATAGATAGCATTATCTTGGGCTTTACCACCTCGTCTTGTGAGTAAAGTCTGGCCATCAATGCCGCAG  
ACTTATCTTGGAGTGGGTTTTAAAGAGGTAATGCTAGCATTTGATATGTAATTCGACTTGTAAACAAGCAC  
TCGCCAGCTTGCAGGAAGAGAGTAGTTAAACTCCTCAAAATCTTCTGGAGAATCTACAAGTAGGGTTTTCT  
AAATTATCAATGAAAAGTAATATTTTTTCATTTTATATTTATTCATGAAAAGAGTCAAATGATGGAATAT  
CTTCAATCAATATGCAGCTTCTTCTAATGCTAGTTGATCTTTAATTTCTGCGATTGTTTTCTACAGCATC  
AAGTTTTTTTACTCCTTCTGCTGTAGTCGCTCAGTCTCAATGAAATAAAAACACAAAGCAGCACCCAA  
GTTTTTGTCTCAGGGATAGACATTTGTTCAATTTATCAAGTCAAGAGCTAACCGTGTTTTACCAAGTCCGC  
CAGGTGCGACTAAAGCCAATGTATTTACTCTAGGATTTTTTGGAGTACTTTAACAGTAATTCAGCTTCTTT  
CTGGCGCCCAACAAGCCCTGTAATTTGGCTGGGATATTTATTTGGAATATTTCCAAATG  
ACTCTTTCTAACCATTCTCGGGGGGGTCTGTAATGTCTCCATTTTCTGCAGATATGAGAGCTCTTTTGA  
CTTCATCCATAACCTAAGACATCAATCAATGGATCAGATGATATTTGATGCGACCTTATACCAATATGTATC  
AATAAATTTCTGTTTGGATGTGATATTATATTTCTTATTTTATAAAACATCATATATTACGAATAGTTCT  
TTGAGTTTTGCTTATATATTTATGGCTAGTTGTATCTTTTGTATGTGCGAATTTATTTGAAATAACTCAT  
CGAGGTATGTGCTTCAATTACATCTGTTATCGAGTCAATATTAATACACCTATTTCTAGAAAGCTCTCT  
ACTTGAATATCCTGAATTAATTTATCGGATATATTGTCTACCGTGAGCTCTCTAGACACGACATAATTT  
CCAAGTGCCATTTCTAGCTCATGGAGAACCATTGCAGTTTTTTCTTCTATTTACCTCAGGGTTCATAATAT  
CCTCAAAGATTTCTTTAAAAGGTTTTTCAAGTGGAGCATATTAATCTTGATTGATAAAATCAAGAACTGCA  
GATGAGTAAAAACCTGCCAGAGATCAATAAAGTTGTCAATTAGGTGGTCTTTGTTTGAACAGTTGGTGGGG  
TTTACGCCTCAATACTCCAGAACTTCTCCCCGACCGCTCGCAAAATAGATGTTTTACATGGGTGGCCT  
GATAGGCGAGGGTCTGACCGAAGACCGCATTGGTCAGGCTGCTGGAGCGAAAGGCTTGCAGAAAGTTTT  
GCGCGGATCCTTGGGCATGATGTCTGGCTGTGATCGCGGGCGACCAGCACCATATGGCGGGTACGC  
TCGCGCATTTGTTACAGCGGTGGATTTAGTTCGCGGATTTCTGGTCTGCGGGTGGCTCATAAAATGGGC  
TCGTTAAGTGAAGCGAGCGCCCATCATATTCTCTCCACTTGGCTTCAATCTCTCTTCCAGCGCAGT  
GAGCAGGCTCACATTTTGCCTGTCTGCGGGCTTGCAGCCAGCTCAGGCGGATGCCCCGTTTTCTGCGATT  
TGCTGGTGAGCGGTGATGATATGGCGGGTGGGGCGAGCTCGGGCGCCAGCCAGTTTCCAGGCGACTCCCCG  
CTTCTGCGGTTTTGCTGGTGGAGCGGTGATGATATGGCGGGTGGGGTGGAGCTCGGGCTTGTCCAGCCAGCTC  
AGGCCGATGCCCCTTTTTGCGCTTTGCTGGTGGAGCGGTGATGATATGGCGGGTGGGACGAGCTCGGGCG  
CCCAGCCAGTTTCCAGCTGATTCTCGCTTCTGCAGATTGGGGGTGATGATATGGCGGGTGGGGGCGAGCTC  
GGGTTGTTGCATCCGGGTGAGCAGGCGCCTTGCCGCTGACGGCCGATTTGCGGGGCGGTGAGCTGACA  
AAGGTGAGGGCGGGGAGGTGAGTTTGGCTTCCGCCACATCGTCAAAACCGAGCAGGGCCACCTGCTGGC  
CGATGTAGTTGTCTTGGCCACGGTGCAGGCGCTCGCTCGACGCCATAGATGGCGCCGAGCGCCACCTC  
GGGGTAGTGGCAGAGCACGGCGGTACCTTGGGGTGGTGGTGCAGCAGCTGGGGCATGGTGTGCGGCAGCG  
CTGCGCTGGGTGCGCTCGCACTCCAGTACCCACTCCGGTTTTGAAGGGCAGGCCATATTGCAGCAGGCTGG  
CACAGTAGCCCGGATCCGCTCGGGCGGGGTGAGGGAGTGGGCCCGCCGCGACATAGGCGATATGGCG  
GTGCCCTGCTCGATAAAGGTAGGTGGTGGCCTGCTTGGCGGGTGGGTGTTGTGCGGGGCCGATAAAGTCC  
ACGTCATCGCGATAGTAGGAGCGGGCGGCACACACCACCGGCAGCTCGGAATCGAGCAGGGTCTCCAGGG  
TTTTGGCCGCGCGCCGCGCACCGGATTGAAGATGATGCCCGCCACCCCTTGCCGTGACAGGGAGTGGAT  
GCTCTGCTGCTGCCCTCCGGGCTGTGGCCGACTGGGTGAGAAACAGCAGATAGCCCTGCTGCTCCAGC

ACCTCGCTCACCCCGGCGGTACCTCGGTATAGAAGGGGTCGGTGATGTCGCGCAGGATCAGCCCCACCA  
GATTGGACTGCTGGCTGCGCAGGTTGGCGGCGGCGCTGTTGGGCACATAGTCGAGCTCTTTTATCGCCTG  
CTGCACCCGCTCGGCGGTGGCCGGCGAGATGCGCCCCCTTGCCGTTGAGCACCATGGAGACGGTGGTGACC  
GACACTCCCGCCCGCTGGGCGACATCGGTGATCTTGGTGGCTTTGGCAGAGAGGGATTGGGCGACATAG  
GGCGAACGGACGATGGCATGTTGAGAGCGAGGCCCCAGCATACTGCTTGGGTTGCCAAGTAAAACGTTA  
CATCACCATCTGACCGATCCGGCTCACAAATTTGGATCCTCCTGCCAGCCAGCCCCCTTATTCTGTGATC  
CTGTGCGCACTTGTAAATTGATAAAACGTTTATCATCCAGCAAAAACCTGATGCTGACCCGCGCCTTTTG  
CTTCGAGATTGCTTCGAGATTGCCTCGAGATTGCCTCGAGCGGGGAGGGCAGCCGAGATATTGTTGTT  
TATTCACAAGGAGCCGTTTCATGGCCAAGCCTCAAGCCAAATCCACCATCTGGGAGTTCCTGCAGAGCCT  
CGGCAAGACCTTTATGTTGCCGCTCGCCCTGCTGGCCTTCTCGGGCATCCTGCTCGGTGTCGGCAGCTCG  
CTCACCAGCGATGCGGTCAAGCAGAGCATGCCCTTCTCGACAATACCGTGTGCAACTGCTGTTCCCTCT  
GGATGACCAAGGTGGGGCTGGTGGCCTTATCTACCTGCCAGTATGTTTGCCTGAGCCATTCGCTCGG  
GCTGGCGCGAGAAGAGAAGGGGGTTCGCGCCCTTTGCCGTTTCGTCGGCTATGCGGCGCTCAACCTCTCC  
ATCAACTTCTACCTGACCGTGGCCAACGTCATTGGTGATGCGGCTGCGGAGAAGGCCCTACGGGGTAAAAT  
CGATCCTCGGCATCAGCTCCATCGACACCGGGATTCTGGGGGCCATCATCGTCGGCGTGATCGTCGCGAA  
GCTCCACGCCCGTTTCTACACCTACAAGATAACCGATGCGCTCGCCTTCTTCGGCGGTGCCCGCTTCGTG  
CCCATCATCACCGCGCTGGTGTGGTGTGGTGGTCTGGTCTGCGGTTCTGCTGGCCCTGGTTTGTGCTG  
CCGGTATCAACGGCATCGGGGCGCTTATCTCCACGCCGTTCCCTTCGGCCCCCTTCTGTTCCGGTACCGG  
TGAGCGTCTGCTGCTGCCGCTCGGCCGTCACACATTTCTGGTGGCGCTGATCCGCTTTACCGAAGCGGGC  
GGCACCCAGCTGGTATGCGGTACGAGGTGAGCGGCGCCCTCAATATCTTCTACGCCGAGCTCTCCTGCG  
CTGACACTTCCGGCTTCTCGGTCTCTGCCACCTCCTTCTCTCAGGGCAAGATGCCTGCCTTCCTCGG  
CGGCTTGGCCGGCGCGGCGCTCGCCATGTATCACTGCGCTCGCCCGAAAAATCGCGGCAAGATCAAGGGC  
CTGCTGGTTTTCCGGCGTGGTGGCCTGCGTCATCGGCGGTATCGCAGAGCCGCTCGAGTTCCTGTTCCCTGT  
TCGTGGCGCCGGTGTCTACGTTATTACGCCATCCTGACGGGTCTGGGCTTTATGACCATGGGGCTGCT  
CGGCGTCACCATCGGCAACACTGACGGTAACCTCATCGATTTTCTGGTGTTCGGCGTGCTGCAAGGCACC  
GCCACCAAGTGGTATCTGGTGCCGGTTCGCGGCGGCCATCTGGTTGCCATCTACTACAGCGTGTCCGCT  
TCGCCATCGTCGCTTTAACCTGAAGACCCCGGGCCGCAAAATCGAGACCAGCGAGACTGCCAGCCCGC  
AGGCAAGAAGGCGCGCAACAGCGGTTACAACCGTGAATATCCTCAACGCCCTGGGCGGCGCCGATAAC  
ATTCTGGCGCTCGATAACTGCATCACCCGCTGCGGATGTCGGTGCAGGACATGAGCGGCGGTCGATGACA  
AGGTATTGAAGGCAACCGCGCCATCGGGGTGATCAAGCTCGACGAGCAACCTGCAGGTAGTGATCGG  
CCCCGAGGTACATCTGGTGA AAAACCAGCTGCAGAGCCTGATGGGGCCTGAACCGGCCAATAAGAACC  
AACGGGGGGCGCAAGCCCCCTTGTTTGCTCTCCCAATATGTCTCCTGTTTATGGAGGGAGAACTTCA  
TGCACGATATTTATGACTTCGACCATGTGGTCGACCGCCACGGCACCTACTGTACCCAGTGGGACTATGT  
GGCCGACCGTTTTGGCCATGCCGATCTGCTCCCTTTACCATCTCCGACATGGATTTTCGAGACCGCCCC  
TGCATTCGCCAGACCCTGGCAACCGGCTCGCACACGGGTATTTGGCTACAGCCGCTGGAATCACGACG  
ACTTCAAGGGGGCGGTGAGCGACTGGTTTGTCTACCGCTACGGGGCGAGCCTCGACCCCGAGACGCTGGT  
CTACGGCCCCCTCGGTATCTATGTGATTGCCAGCTGGTGAGCCTCTGGTTCGGCGCCGGGGGAGGGGGT  
CTGGTGCATACCCCGCCTACGATGCCTTCGGCAATATGCTGGCAGCCAACGACAGGGTGTGCTGCCCT  
GCCCCGTTAAAAAGAGGAGGGGAGTTACCAGATCGACTGGCAATGTTTCGAGCAGCAAGCGGCTCGCC  
CGATTGCCGGATTTTGTGCTTTGCGAGCCCCACAACCCACCAGGGCGGGTCTGGACGCGGGATGAACTC  
GGCCGGATGGCCGCTATCTGCCAGCGCCACGGGTCAAGGTGATCTCGGACGACATCCATATGGATGTGA  
GCTTTGCCCGCTACCTGCCGTGGAGCGAGGTGGCACCAGGACGATCACTGGGCGCTGGTGGAGCTCGGGCTC  
CAAATCCTTCAATATTTCCCGCCCTTGGCGGCGCCTATGCCTTTATTGCCAACGCCGAGGCGGAGCCGCC  
TATCTGCAGCGGCTCAAGGCGGCCATGGCCTATCATCACCGCCATTTCTCGGGGTGTGGCCATATCA  
GCGCCTATCGGGATGGCGGTGTCTGGCTCGATGCCCTGAAACGCTATCTGCACGGCAACCTCGCCATGT  
GGCGGCGCGGCTCAACCGCCTTTCCCCGCCATCGACTATCGGGTGCAGGGAACCTATCTCCTCGG  
ATTGACCTGAGCGGCTTGGCATCGACTCCACTGAACGGATGGATGCGCTGCAAACCTTGTGGTGGAGA  
AATACCGGGTTCGCCATCATGCGCGGCGACACCTACGGCCCCGAAGGCACAGGCTATATCCGCTCAACGT  
CGGCTGCCCGGCTCAAAGGTAGACCAAGGGCTCGACGCCCTGATCGGCGCACTGGGGGAGGCGGTGTAA  
GGGATATCCTGGACTAGCGATTGAGCAAGAAGACGACCTCCCCCGGTAGTGGGGGGAGGTTGCAAGCTT  
TGCCTGCCACGAGGGTTCCCACTCGCCCTGCTGCACCAGACCAACCTTGAATGGAATGGTGGAGCTGCATC  
ATGGCGGGTAGATAGGAGCTGTAACCCGGTACCGTATGTTTTCCCTGATAGGTCTGGATCACTATCTCAT  
CGACCGGAAGGCTGTTGAGCTGCGCCACATCCCCGCTTTGGCCAGTCGAGCAGGCCGTTACGCTGAG  
TTTGCACCTCTGCTGGCAACACTTGTGCAACTGCCGCAAGAGGTGGCGTAACGATCCAGTTGGCGGGTG  
GCTGCATCAAAGTCGATCTGAATACCCGTTACTTTGGCTCCGGCCTTGCGCCACTCCTGATACAGCTTGA  
CCAGCAACTTCTTGTGATCGGCAGAGAGCGGCAGCGTATTCACTCTCACGACAAGCCAGAGTTGTTCCGGT  
CTGAAGTGGCGTTGGAGCACGCCCCAGTTTGTATAAAACGGGGGCCGGATGGCCTGTTTCCAGGATCTCCCC  
TGATGCAAATAGAGGGTTGTTGCCCTGTGCCAGGACTGGCTGATGCCGGGTGGCAGACCAGAGCCAGAATG  
CGTGATAGCTGCTGGCATCGACCTTGCCTTAAAGTGGCGCAGCAAGTGTGATAACAGAAATTAGCAGGCT  
AGGCACGAGGGGTTGCTGCATGGTTTACCAGTAGTATTTGAGTGATTTAGCCCATACCGAGTTGCCATAA  
CGTTGCTTGGAGCGTGTGAACCAGGCTTGCCGATGCTCTTGGGGAGCTCCTGATCGTCACACCCGTTGT

AGCCTGATGGTGCCTAGCAGTTGATGGCTCTATAAAGGGCATAGCTCTTGTCTTCGGGCTCGGCTTTAGG  
GTTGGCCATGACGGCCTGATATAGCTTTAGCCTGCTTGGTGCCTGGTACTCAGGTTTTGACAACCC  
CAAACCATCTCTTTTCCCTTGCCACAAATTGATCGCGGATCCTTGTGCGCAGATATTCACCCAGGCAGT  
TGAGTGCCTGTCCGTCTCCGGGGTGTTCAGCAGTGTGCCGAGAGTGGAGGCCAAATCACGGCAGTAATA  
GCCCTGCGGTGTGCCTTACCTCCCCACTTGAATGCTGACAAGAGCACATCTCTGTTGGGTACCGGTTGC  
CATGGTTTCATCCTTGGGTGGGGTAGCCTCCTTGTAGTCCGGCCGGAATAAGTGTACAGTCTTTTCCAGGAACG  
TTGCGTAATCCTCTGCAATCAGGTCTCTACCAGCAAGGTATGCAGGGCGATTTGTCTTTCCAAGGCGCT  
TGTGGCCTGCCGAGCCTGCTGACGAAGCAAGTCCGGATCTGCCGACTGTTTTAACACGACGGTGCCTATT  
CGCAACTGAGTGACAGGGCTCTCTTTGTTGAAAATGGCCGAGTATTGCCGGTACGTACCCACTGATCTG  
CCAGCATGTTCTCCACGAATGCCTGTTGGGCTTGAGTGAGAGGTGCCGCTACGAGCGTCATCAGGGCTTG  
CTCTGCCTGGTCAAACGCCCTTCACTTCTGCTGTCGCCAGATGCGCAGCAACTGGCGGCTAAACGCCAGG  
GTTGATGCGTTTTGTCTTCTGTTTTGGGCAACAGCGCCAGTACAGCATCAAACGTTGGTTCTGCAGCA  
ATCGATAAGCTTGACAGATAGGTAGCCTCTTCCGTTTTACCCGCTCTTGCAGCTGTTGGATGGCCTCATC  
GATCTGCTCGTCACTCCAGTTGCGTTTTCTGGTCATAGCCAGTTCTGAGGCCACGCAAGTGCATTGATAAAC  
AGCAGCTCAGGCTGAGTTTTATCCTCGTAGGCGAGTTTCAATTCGATAAGCATCTGCGCTCAGCAAAGAGA  
GATCTATTTGTTAACCAGCGCCTCAAGTTCGGCAGGGAGTGGTCAGCGGCTATCGCTTCGCTATAGTT  
ATCGCGCAATGAAGCCTGGTCAACCGCCATCCAGTTGATGCGTCTGAACATCCCCTTGGTCGAGTTGACG  
TAACGGCCTTGCGGATAGGCCGCCAGATACGACAGCCCCTGTGTCATGGCCTGTTTCAGCGCCTCTTTAT  
CACTCTTGGTGAAATCCGTATCACCATACTCGCTCTGCGCATCTTTCACCGCTGCATTAAGGTGTGTTTCG  
CATCACCATATAGTTTCGCGGTTTTCGGCAACCCACTGCGCTTTTGCCCTTGACAGGCCATAAAGCCGGTC  
AATGCCTCGGAGAAATGACCTTGGTAGAAGTGGCGGGCCGCATCCAGATAAGCCTGCCACTCCCTGGCAG  
ACTCGCTCATTGTGACGTGCGAAGACTGGGGGCTATCTTCCCTGTTGACCAAGGAGCTGTAAGCGGGTTTT  
GAGCAGAAGCGTGCCTCGGTAGGTGACAGGTCACTCTGCTCAAGGGCATCGAGAAATTGACTGACAGAT  
TGCAGCGAGTTGGAAATGGCTCGGCCGTAAGGGGCATCCCGACCAGCATAGTGTCCAGCAAAGTCGGGA  
GCGAGGCGTCATGGGCGGTGAGCTGGCTAACAGCTGTTTACGTAGTTCCGGGACTTCCAACCTCGTCGGG  
AAGTGGCAGGCGTTGCAGAGAGAAGAGCTCCATATCGCGTTCGTTGGCCGGATCGGCCGGAAGCATAAAG  
GGAAGGGAGAGTTCGCTGCTTGTGAGCCAGCAGCATCAGCAAGTTGCTCTTGGTGTGATTTTTCGGAAAGGA  
AAAGCGGATAAGCAGGCAATGGACAGTCTGTGACGCAAAAACACTGCACCCGCTTGGTGCAGATGAGGCAAC  
CGAAGGAAAAGCAGCAAGCGTGAAGTCCAGTCCGCAACCAAGTATTTCAAGATCTTCATAAGAGGCGGTATC  
CACTATCTGCCGAGTGACAACCTCTTGAATCAGGACCAAGAAAGCCTGAAGCACAATTGGCTGGCAATAGT  
ACGCAAGTGGGTTGCAATCGACAACCTTTTCAAGTGGTTTTATGATGGGCGTTCAAGCAGATAACAGAATGCT  
GATGGCCTTACGTTGTAAGGCTGCAATAAAAAACGGGGCCATCAGTGTGATGGCCCCGTTCTGGTTGCGCTG  
TTTTCCCTTATGAGCAGACGCCGATATTCAGGCGCAATAGTTCGTCGGGATACCGCAATTCTGGCGTGAC  
ACGGCTGGTTTCGATTGCGGGCTCGCTGAGCTCGGTAGCTGCTAGTGCAGTGCCTTGGGTGAGGGCTTCAG  
CCTGATGCAGCATGCGGCTGACCATATCGGTGAGGATCCACATCCAGCTTGTCCAGCCACTCGCGACA  
CCAGAGCAGGGTGTCTTGTCTGCTGCTCTACTGAGTTGCAGCACAGGCCAGTCCGCCATGGCAGCGAGG  
GAGGGGGTCTGGATATCCCCAGCGGGATAAACAGGGTACCAGTTGATCCCGCTCTCGAATATGAAGGC  
TGAAGGGGCCAGCCTGCAGATCCAGCCCCTCTTCGTCAGGCACTCCTGCGGCAGGGTTAGCTGGCAAAC  
GAGGGTTGATAGCATGGCATGGAACATCATTAATCCTCCCGATGGGTGTTATCAAAGACCGACTCTGTGG  
GCGGCCACAGGTTGGCGATAGGGGGGGCGGGCAGGGGTACCAGCCAGTGGCGCCCCATGGTGGCGGGCCCA  
GGGGTGCAGTACCTTGGCGTGTGGCCCCAGCTTTCCGGCTTGGTGAGTTCACTCCCCTCGGCGCGGCCA  
ATCACTACAAAGCAGTGGGTCTGGGCGTGACCTTGTGCACCACGATGGGCCAGCACTTCGATCCGCTGGT  
CACTGTTGTGGCGCAGCAGTTCCGGCCGCCGAATAGGCCAGGGTCGAGCAGCAACCGGCCCTTGGCGTC  
ATCCACCGCCTTGGCGATGTTTTCCATGGTGCGAAGGAGAGTGGCTGCTTGTCTTGGTTATCTGGATG  
GCGGCCATATTGGCGCGGTTGTTGGCGCGCTGGTTGGCTGCCAGGCGCTGGGGATCCTGCCCGAAGGCGT  
TGAGTTTGCCGATGATCTTCTGATAGCTCGGGTGTGGGCTGGACAAAGTCTGGGCGTCCGTTGCAGGC  
GTAGCTGCCAGTTTTTCCAGTCCGGCCATGCTCTTTTGCAGCAGGGCCTGGGTGCCACCCGCACTACT  
TTCGGTTTCATGTGCGGGGCTGCTCTGGTGATGGCACCTGTTCTGCCAGGGCCTGCTTCAAGTTCAAGTCA  
GACGAGCGCCGCTGCTGCCACCTCTTTGGGGTGGTGTGCTCCAGTGTGGATTGCATCCTGCACCCG  
CTGCGCTTTGCCGCTATCGGGGGCGCTTTGCAACTGGCGCAGGGCGCTGATGACTTGTGAGATCGCTG  
CTCTGGAAGTGGCCGATGCCGCGCTTACAGGATGTTTGAACAGCTTGTACCCTTGGCCAGCAGCGGGC  
TGGCCTCTGTCTGTAGGGGGGATGCTGGGCGGTTGAGGTGAATGTGTCCACCGATTGCTGGTAAGGCCAT  
GATGTGATTTCCGACAGGGTTGACGATAAGGGGATGATACCAGCCGTGACGGCGCTATATCAGGGCG  
CGGTCGGGGATTTGTGAGTTTTCCGCGTGTGTGCTGTTTGTTCGCGCATGTGGGCAGCGTGTGCCCTA  
CCACTGTGGCCCTTCGCTCTGGCGCCACTGCTCCAGCCAGCGAGAACCCTCGGCGGTGCGCTCAATCTGG  
TCGGCGGGAATGTAGTTGTTGAGTTGGGCATCGCGATAGAGGGCACGGGCCAGTGGAAATGCGTTGCAGCA  
CAGGGATCCCTTCTCTTCGGCAATCTTGCACCTGTAGCGCCTGGGCATCGGTGAATTTGAGGGTAC  
CACGGCAGCGGGGTTTTCTCCCCGCTCGTAGCGGATACCGATAGCGATATGGGTGGGGTTGGCGACGATG  
ACCGAGGAGCGCTTACAGTCCGGCGCATGTTGCTGCACTGCAATTCCTGATGGAACTGGCGGGCGCTTGC  
TCTTGATCTCCGGGCTCCCTCCATCTCCTTGTACTCCCGCTTCACTTCGTCCTTGTCTCATCTTGAGCTG  
CTTGATGTGCTGGTAGTGTTCGAAGGCGTAGTCAGCGATGGCGATCACCACAAAGCCCATGGCGCAGACC

GCCATCAGCTGGCCCAGCATGCCCCCAGCACCGGGGTGATGCAGCTCATGCCGCAGCCGGGCAACTGGA  
GCATCGCCTGCAGATTGCCCTTTATGGTGACCCACACCAAGAGGCTCAGGAGACTCACCTTGAGCAGGGA  
TTTGACGAAGTCCATCAGGCTCTTGATGGAGAAGATCTTCTTGCCCCCTCCACCGGATTGATCTTTTTG  
ATATCGGGCTTGATGGACTCGCCACTCAGCAGTAAACCGTACTGGGCGAAGTGGGAGGCGAGCACCACCA  
GCGCCGACACCGCTAGGATCGGGATGCAGAGATAGGCCATCTCCTGCATCAGGTTCTCCACCACATGGTT  
GAGCGCCTGGGTAAAGGGGAGGTTGATGTGGGATTCCGGGATCATCATCAGCTTGCCCAGATGTTGAGG  
TAGTAGTCGGACATCGCCATCAGCATGCCACCAGACTGAGGATGATGGCGGTGGAGACCACCTCCTTGC  
TCTTGACCACCTGCCCTTCTGGCGGGCATCCCGCAACTTTTTGGGGTGGGTTGTTTCGGTCTTCTCGCC  
GCTCATCGCGCCTCCAGAATGGGGATCAGCAGTTGCAGCGGATCCATCACCGCCAGCACCTGTTGATAGG  
CGTGGTCCATCATCAGCTTGATATAGATGACCAGCAGCAGGCTGGCGACGGCGCTTTTTATCGGCATCGC  
CAGCACAAGACGTTGAGGGAGGGGGCGAAGCGCTGATCAGCGCCAGCCGAATTCGGCTAGAAAACATG  
GCGATCAAGAGCGGCGCCGCCAGCAAAGCGCAGAGCAGCAACATATGGCTGAACCTGGCTGTAGAAAAAGT  
TGACCCACTGTTTCGTCGATGGTGGGGAAGAGTGCGCCACCGCCAGCTGATGTAGCTCTGGAACAGGGC  
GGCCAGCAGGGCGAGAAAAGGCACCGCTGGCAAAGAGAGGGTGCATCAGGGTCTGGGTGAGCAGCAGGGCG  
GTGGGACTGGTCTGGCTGCCGAGACTCGGGTTGAACAGGGACCCCATGGCGGCACCGCGCTGGTTGTGCA  
TCAGAAACCCGCTCGACTCGATGGCCAGAAGGGGATGGCGGCGACAAAGCCGATCAGCAGGGCCGAGCAG  
CACCTCCTTGGCGATCAGCATGGCCAGCGCCATGCCGTCGATCTGATCCGGCAAGGTGTCGGCGACTGTG  
GGGTAGGCGTAGAGCGCCAGCGAGCAGACCACCGCTTGCAGGATCATCGCCCCTCCAGCATCTGTTTGC  
TCAGCACCGGCAGCATCACGAAGCAGCTGATAAAACCGCGCAGCAGCAGGGTATAGGCCAGCATCTGGGC  
CTGCAGGCTCTCCAGCGTCATTGGATCTGCAGTACCTTGAACAACACCATATCGGCAAAGCTGTAGAGCT  
CGTTACCCAGCCAGGCGGTGGTGGCAAACAGGGTGCATCACCACGGCGATCAGCTTGGCGACAAAGCCAG  
GGTCTGCTCCTGGATCTGGGTCAACGCTGCAGCAAAGAGACCAGGGTGGCCACAGCGCCGCCACCAGC  
ACAGGTGGCATCGAGAGGATCAGCACCAGCCAGAGCGCCTGGCTGGTGAAGTGAAGGATATCGGCGTGAC  
TCATGCTAGCCTCCGTAACCTGATGACCAGCCCGTGGGTGAGGCGGGCCAGCCATCGAGCAGCACAAACA  
GCAGCAGCTTGAAGGGCAGCGAGATGGTCATGGGGGAAACCATCATCATCCCATCGCCAGCAAGATGTT  
GGAGATGATGAGGTCGATGGCGATAAAGGGCAGGTAGATGAGAAAACCCGATCTCGAAGGCGCGACTCAGC  
TCGCTCACGGTAAAGGGCGGCAGCAGGATCAGCAGGCTGTCCGGCTCCAGCCGGTCCGCATATTTGCTGG  
GCCAGAGCTGCTTGGTGTCTGATAAAGAAGGCGTGTCTCCGTGGTTTTATCTGCTTTTTCAAAAAAGT  
GCGGTAGGGGCTTACCCCTCATCGAGGAACCTCTCTACCGATTTCGATTTCGGCATTCAGCCTCGTTTC  
TGGCGCAGGTAATCCTGGGTGGCAAAGCCTACCGCGCCATCACATAAATGCTGAGGATGATCGCCAGCC  
CGTACATCGCCATGTTGGGGGGATCTGCTGCACCCGAGGGCGTTGCGCAGCAGCGAGAAGACCACCGC  
CAGCTTGACGAAGGAGGTGGCCATCACGGCGATAAAGGGGAGCAGGGCCAGCAGCGCCAGCCCCACGATA  
AGGTTTTAGCTCGTCTGGCAACTGGATCATGACTGTGACTCGTTGTCGAGGCGTTCGACCCGTACACCCAG  
GCGCCCCTGGATCTCCACCAGTCGGCCACTCCAGCGAATGGCCGTTGCTGATGATGCGCACTTCGCCA  
TCGAGGGGCGTGCCAAGATCGATCAGGGCGCCCGTTGCAGGCTGGTGAGGGTGTGCCAGTCCAGCGTCT  
GGCGGCCACTTCGAAGCTCACCTGGATCGGCAGTTGATCCAGTTTGGTCCGGCCGAAGGGTTCAGCGGA  
GGCAGCATTATGCATGGCAGTCAGTTCAGATGTTGTTGATGGGGTTGGCAGTAGGCAAAGGGGCGACCC  
TCCACGCAGATCAGCAGTTGCTGACCGAGTTGTGGATTGGGTGGCGGCAGCAGCACATCGCCGATAGCGA  
GGGTGGCGAGCTCATCCATGGTCAGCCCCATCTCGCCCCACTGCAGGGAGAGGGTGAAGGGGCGAGCGCAA  
CCGCTGCTGCCGTGGCCGTGGTGGCAACTTGTCTAGCAAGGGCTCGGGCTGCGACAGCCACAGAGCGAGA  
CTGGCCCCTTCCCGTTGCAACAGCAGTTGCAGGGCTGGCTCATCGGTCTGAACGTTACTCTCCTGTGGG  
TCAGCGCCGAGCAGGTGATGCCACCGAGGGGTTGTCCAGCCGTTTCGATCAGTGCCAGTTGCAGCTGCTC  
GGGACAGGCTGAACAGCGCCGCTGTTGTAGATCCGGCGGAGCCAGTACGCCAGCTCTGCGCCGTGGCAC  
AACAGCGGCAAAGAGAGCCCCCTGCCACTGCAGTTGCAGCCGGTATCGAGTGTGCGAGGTGGCAAACCGA  
TGGCGAGGGCCAGCTCGCCGCCACTCCAGCCAAAGTGTGGCGGTATTTGGCTCAGGGTCTGCTGTAAAGT  
CAGCTCCGCCAGCGAGGCGGAGGTGAGGGCAATCGGTGTCATCGCTCGGCATCCCACTCTCGTAGATGG  
ATCGTTTTATGGCGTGAGCCCTGCTCACTGTCCGGCTGGCCGAAGAGATCGAGGGCGAGGGGCGGCGG  
ATAGAGGCGCTGCAGGCGGTGACCCAGATCGCTGCGCCCCGATTGAGCAGCAGTTGCCCTTCGCTGGTC  
GCTTGGATCTCGATCTGCAACTCGCCACCCTGATGGGCGATACGAATGGAGAGATCGCCAGCTGTGGCA  
ATGTGAGGCGCAGAAGCGGCGGACGCTCCGGGCGGCCAGCTCCTGATAGATATCCACCGCCAGTCGCTC  
CAGCAGCTGACCCAGTTCCCGATTACTTTTCGGCAGGTGCCAGCCGTGCGAGCTGCAGATCCCTGGGGTT  
TTCACCTGTGGGGGATCGGTTGACCACTGGCTTCGGGTATCTCGTCTGTTTCAGAGTGAGCGATTGAAGT  
CAGTGTGCTGTTGGATACCTTTTTGTTTCGGCGAATTCGAAGACTTGGGCAAGAGAGGCTTACCTTGTG  
AAGGGTGGCTTGATCTGAGCTCAGCGGCAGCGCCATAACCGCTGCGATCCCGATTGTTTGTAGATCATGT  
TGTCGCGAGCCACTCTTTTTGCTCGGGGTGGTGAATGGCTCTTTCATCAAAGAGGGTATCGCTGACA  
GAGCGCTCTTGGTGGCCAACTCCAGCTCCCTCGAGGAGGGGGCGAGGGGCGGTTGATTCAACATTGA  
TGAAGGCACTGAACAGGCGTTTTCCGGGGCGGGTAGCGCCACATCTCTGGTTCCGCCCTCGTGCACGTTG  
TCTTGTGCATCCCGCACTTGTGCGATCTTTTTGCTCTCGATTTCTTCTGGTACGTTCCGGTACCTCCG  
GGAAGGTGGATAAACCGGATGCCTTTCTTGTGATGAGCTGTTGTGCTGTAAATGCTTTGGCTGGCTGTG  
AGAAGCAGCAATATCAGACTGCCGGACAGCATCGGCTGCCTGTTTTTTTTGCTGCTGCGTCTGTAATAGT  
TGCTGAGGCCGAGGCTCCTGGGTCTTGTCTGGCCATTCGTCTGTGCTTGTGCGTTGCCTTTTGTCTCCG



AATCAAGCCTCATCGCCTGCTCGAAACGCTGCTGTTGCGACCGATTGGCCTCAGCCATCTGGGTATCACC  
CCGGGCTGTACTGTGCCCTGTATCGGGAGGATTTCGGTTCATGACTCGTTACATCCTGATCTGCTGGCGG  
AACTCTTCTGTTTCTGCTCTTCGTTGTAGTCACGCAGGGCTTGCTGTGAGGCCTGCTCCTGACGGTGT  
GTTTCGGCAAATTTCTGTTGCTGCTGGCGATCGAGCTGCTCCGCTGACAGATGGCAAATAGCCGCTCCTC  
TTCGGCAAGGCGCCACTGGCGATAGTCGAGACTCTCCTGCTCCGCTTCGCGTTGGCGAACGCGGGCGAGT  
TGCACCCGAGCCTGCTGGGCGGCGAGCTGCTGCTCGGCCCGATCCAGCCGCAGGTCTTTTATTCGTTGCA  
GGCGGCCAATCATCGGGTCAGCGCCTCCAGAGTCGAGAGGGCTTCGGCGAGTGAGCTGGGTTCATGAGTG  
CCTTGCCTGAGCCACTGGCGAATAGTCTCGATGCGGGCGATCGCCTCGTCGGCTACTTTGTCTGCCCTT  
TCTGGTATTTCGCCGATCTGCAGCAACAGCTCCACCTCTTCATATTCGCCAGCCAGCTGCGCAGTCGACC  
TGCCTGAGCCTGATGCTCGGGCTCGATGATCTGGTTCATCACC CGCTGGCGGAGCGCAGCATCGATG  
GCCGGATAGTGGTTGGCCCGCCAGTTTGC GCGACAGTATGATGTGGCCATCGAGGATCGAGCGAGTCT  
CGTCAGCAACCGGCTCTGTTCATGTTCATCCCCCTCTACCAGCAGGTATAGAGGGCAGTGTGGATCCCTT  
GTCTGACTGACCGGCCCGCTCCATCAGGCGGGGCAGGGCGGCAAACACCGACGGCGGATAGCCCCGTCGG  
GTTGGCGGTTTCGCCAGCGGCCAGACCAATCTCCCCTGGGACAGGGCAAACCGGTTGACGGAGTCCATCA  
ACAGCAGCACCCGCTTGCCTGATCGCGGAAATACTCGGCATGGAGGTGGCGACAAAGCCCGCTTGGC  
CCGCTCCATGGCAGGGCGATCCGAAGTAGCCACCACCAGCACCGCTTTTGTAGCCCCCTTCCCCCAGA  
TCCGCTTCGATAAATTCGCGCACCTCACGGCCCCGTTACCAGATCAGCGCCAGCACGGTGACATCTACCT  
CGGCGCTGCGAATAAGCGACGCCAGCAGGGTGTCTTTCGCCACCTGCGGCCGGAAGATCCCCATCCG  
TTGCCCTCACCGCAGGTGAGCAGGCCGTCGATGGCGGAATACCGAGCGAAATGGGCTCGGCATGCGC  
TTGCGGCTCATGGGGGCCGGCGCATCCCAGATAGACCGGATACCAGGCATCGGGCTCCGGCAGATGGCCAC  
CGCCAAAGGGGTTACCGAGGCCATCGAGCACCTGACCGAGCAGATGATCGCCGACCCCGACCTGATGCAT  
GGCACCGGTCGGGCTCACCTCGGTGTTGGAGGAGATGCCGAACATCTCGCCAAGGGGGGTGAGCAGCGCT  
TGATGCTGGGCAAAGCCGATCACCTCCGCTGCAGGGAGAGGGTGTGTCCGGGTTGCGCAGATGGCAGA  
GCTCGCCGATCCGCACCCCGGGGACGACTGCCTTGCAGGGGTGCCGGTACCTGGGTGACCCGGCCACG  
GATCTGGATCAGGCGGCACTCGTCGATGGCGTGACGAAGCTGGTTGGGGATGTGGTCGAGGGAGAGGGTC  
ATAACAATCTGCGCCATTGAAACTGGTGGCCACTATAGGGGATGGGGGGCTACGGGGATTTTCAGCGCGAG  
TCGGAACTTTTTAGAAAACCGTTGGGGGGCGGGCTAAAAATTCACGGCCGATTTTGGCATAGGGAGGTGAG  
GGCATTTTTTATAATGCCATCCTCGTCAATCCATTCGTCACGGGAGTTTCCATGGCCATATCCACGAGCA  
ACCCATTTCCCTGCCCAGCCCGGAGCTGCGCGGACGAGGTTCGCATCCCCGTAGTACCCCTGCA  
GGGTGGGCAATTTACGGGGGAGCGGGTCTGTCTGGCCAGTGCCGCCAGTCGCTGGCCGATGCCGCCGAA  
GAGCTTACCTTTGTCTTTTCCGAGCGCGCTGAGCTTTTCGCTCGCCAAGCGCAAGCTGAGTGACAGCCATG  
CCCGCATCAGCGAGATCGAGGCGCTGGTGGGGGATTACCTCGACAAAGTGCCGGAGCTCGAACGCCAGCA  
GAAGATCAAGGAGATGGTGCAGCCACTCGGCAGCGGTTCGGCTGGCCAAATCTCTCCAGTTGCTGGCCTAC  
CTCGAGAGCTATTTCGGGGGAAGTGAGCGAGCAGTTTCAGAGCGCTCTGCCAGGCGCGCAAGGCCCTCGCCG  
GACGACCGGAGATGCAGGGCACCTGGCGTTGGTGGAGCAGGCGCTGGCCAAGCTGGCGGACGAGCAGGG  
CAGTGCCATCGTGTGGGGGCGCGCATTACCGCCCCGCGCCGAAGCGGCCAAAGCGGGCGTGGGAGCC  
GAGCAGGATCTACGGGATCTCTATCGCGATGCGGTGCAGGACTACCGTGCCCTTTCTGCCGCTGGCGCG  
ATATTCACAGCCGCTTTGGCAACGGTGCCTGGAGAAGGTGACCGGCTTCATGATGAAGGCCCTGAGCGC  
CGATCTCGACAGCCAGCAGCGTTGGCTCGATCCGGTCAAGCTGGAGCGGGTGATGAGCGACATGCACAAG  
CTGCGGCTGCTCAATACTCTCTCGGGCGAAGTGGACGAGCTGTGGCAACGGGTCAAGGAGGGCTCGGCC  
ATGGCATAACGGGCTTCTGATCTGATGGGCGATCTGATCGCCCTGGTGGAGAAAACGCTGGGCCAGCGTGC  
GGGATGTGGAGCAGGTTCGGTGTGGCTCTTGCAGCTGTTCAGTGAGGAGGAGCAGCGCCAGAACCCTGTTG  
CAGTGTGTGAGGGGGCGCTCGATAACGCCATCGAGCGGGAAGAGGATGAGTTGTCTGGAGAGTCTGCAT  
GAACTGGATTGAACCCCTGCTGGTGCAGTTTTCAGGATCTGGGCATCACCATAGGGGATAACCCCAT  
TCGCTGATCCAGCTTGAACCTGGAGCAGAGCGGCACTGCAACTGGAGCGCCATCAGGGGCAACTGACCC  
TCTGGTTGGCCCGCGCCGTGCCCTGGCATCAGAGTGGCGAGGCGATCCGCGCGCCATGACCTTGACTGC  
CGCGGCGCAAGGGCCGGCACTGCCGGTGCAGCGGCTGGTTGGGGGAGGGTCAGCTTATCCTTTTTCGTC  
ACTCTCGATGAGCGGGCCGTGACTCTGCCCCAGCTCCATCAGGCAGTGACCACCTGACACGGCTGCAGC  
GAGAGGTGCTGGCGTCATGAGCCGGATCACTGCCGCGCATATCGGGATCGAGCAGCTCAGCGCCATCTCC  
CTTGACGATCAGGAGCGCAGCCTGCCGGGGCTTATGCCCTGTTGCCCGATGGCCAGTCCATCGAACCC  
ATATCAGCCGCTCTACCCCGAGCGGCTGGCGGATCGGGCGCTGCTCGATTTCCGCACTCCGGATCGCGG  
CTTTACGATTTGTTGCGGCCGTTGATTTCAATCAGGCGATGCAGGGGCTGCGCAGTGTGCTGGCAGAG  
GGGCAGAGCCCAGAATTGCGAGCGGCCCGCGCTGCTCGAACAGATGCACACCATGAACAACCTGATGC  
AGATGACCCCTTCATCTGCTGCACAAGGTATGACCATGGTGTCTTACGTACAGCAGCAGGATGCGCTGCTG  
CTCACCGGCTGGTTGCAACTGCAATATGGCCACCCCGACAAGGCGTGGCTGCTGCTGGCCGCCCTGCTGC  
AGATCCACCCCGACCATCAGGGAGGGCGACGGACCTGCTGGTGGCCCTGCTCAAACAGGGGGGAGGGGGA  
GGCTGCGCTGGCCCATGTGATCAGCTGATGCAGCAAGGGGAGGGCCGACGGCCCCGCTTGGCTCTGCCG  
AGCCGAGCCTGCCAGTTGGCAGGGCGGCTGGATGAAGCCCGTTTTCCTATCAACAATACCTCGAACTGG  
AAGAGCAGAATGAATCAACGCTCCCTGAGCTGCTGCGCCGATAGGCGAGCGCAAGGACATCATGCTGG  
CGATCCTGCTGCTGGCCATCGTCTTTATGATGGTCTTTCGCCCTGCCGCCGGTGGCCCTCGATATTTGAT

TGCCATCAACATGACCATCTCGGTGGTGTGTTGATGATGGCGGTTTATATCAATTGCGCCGCTGCAGTTC  
TCCGCTTTCCGGCGGTGCTGCTCATCACCACCTGTTCCGGCTTGCTTGTGCGGTGAGTACTACCCGGA  
TGATCCTGCTGCAGGCCGATGCGGGGCAGATCGTCTACACCTTCGGCAACTTCGTGGTGGGGGGCAATCT  
GGTGGTGGGGATCGTCATCTTCCCTCATCATCACCATCGTCCAGTTTCTGGTGATACCAAGGGCTCGGAG  
CGGGTCGCCGAGGTGAGTGCCCCGCTTTTCCCTCGATGCCATGCCGGCAAGCAGATGAGTATCGATGGTG  
ACATGCGCGCCGGGGTGTGACGCTGCACGAGGCACGGGATGCCCGCGGTGTCATCGAGAAGGAGAGCCA  
GATGTTCCGGCTCCATGGATGGCGCCATGAAGTTTGTGAAAAGGGGACGCCATCGCGGGCCATCATCATC  
TTCGTCAACATCCTCGGCGGTGTACCATTTGGGGTGACCCAGAAGGGGTTATCCGCGCCGATGCGCTGC  
AGCTCTACTCCATCCTGACGGTGGGTGATGGCATGGTCTCCAGGTGCCGGCGCTGCTGATCGCCATCAC  
CGCGGGCATTATCGTACCCGGGTCTCCTCCGAAGAGTCTTCCGATCTGGGTACCGATATCGCGCCGAG  
GTGGTGGCCAGCCAAAGCCGCTGCTGATCGGCCGCTGCTGCTGCTGGTGTGTTTGGATTGATCCCGGGCT  
TCCCGATGATCACCTTCTTTGCGCTGGCGGCCATCGTACGGCGGGCGGTTACTTTATCGGCTTGCCTCA  
GCGCAAGGCGCAGAGCAGCAACAGTCAGGATCTTCCGTGCCGTGCTGGCGCAGGGGGCGGGAGCCCCGCC  
GCCCCGAGCAAGCCAAAACCGGGCAGCAAGCCTCGGGGCAAGCTGGGGGAGAAGGAGGAGTTCGCCATGA  
CTGTGCCGCTTCTGATCGATGTGGATGCCGCTTTCAGGCGGAGCTGGAGGCGATTGCCCTCAACGACGA  
ACTGGTGGGGTGCAGCGCCCTCTATCTCGATCTCGGGGTGCCCTTTCGGGGCATTACCTGCGTTTTC  
AACGAGGGAATGGGGCCTGGCGAATACCTGATCCAGCTGCAGGAGGTGCCGGTCCCGCGGTCTGCTGC  
GACCGGGCCACCAGCTGGTTCAGGAGAGTGCCTCCAGCTCGATCTGCTGGGGATCCCCACGAAGAGGG  
GGCGCCGTTACTGCCGGGACAACCGACCTTGTGGGTGCTAATGAACATCAGGATCGGCTGGAGAAGTCA  
CGGCTGGCCAGCCTCACACCGATCAGGTGGTGCCTGGCATCTATCCCATGTGCTGCGGGAATATGCCG  
AGGACTTTATCGGCATTACAGGAGACCCGCTACCTGCTGGAGCAGATGGAGGGGAGTTATGGCGAGCTGGT  
GAAGGAGGCGCAACGCATCATTCCGCTGCAGCGAATGACCGAAAATTTTGCAGCGGTGGTGGGGGAGGAT  
ATCTCCATCCGCAACATGCGCGCCATCCTAGAGGCGATGGTGGAGTGGGGCCAGAAAGAGAAGGATGTGG  
TGCAGCTCACCGAGTACATCCGTAGCAGCCTCAAGCGCTACATCTGCTACAAGTACGCCAACGGCAACAA  
CATCTTGCCTGCCTATCTGCTCGATCAGCAGGTGGAGGAGCAGATCCGTGGCGGCATTCCGACAGCCAGC  
GCGGGCAGTTACTTGGCGCTCGATCCACCATTACCCAGAGCTTCTCGATCAGGTGCCCATACCGTCCG  
GTGATCTGGCCAGATGCAGAACAAACCGGTGCTCATCGTCTCCATGGATATCCGCCGCTATGTGCCGAA  
GCTGATCGAGGGGATTACCATGCCCTGCCGGTGCATCTCCTATCAGGAGCTGACCCAGCAGATCAATATC  
CAGCCCCCTCGGGAGGTTGCTGCTGAGGGGGACCCGTTAACCTCTGACCCCTGATCCCCCTGGTGC  
AGCCAGGGGTGTGGCGGTGGTACCTCACCATCTGGGGGCAACCCCATCCAGCTCGGCCACGCTTTCTGC  
TATCGCCAAATTTATCTCGCCTGGCGCTTTGATCCTGCGACCCGACGGGTCTGGATCCTGCTGGTGC  
GAGAGGGGGAGCGGGCCGACTGGCCAATCCCTTTGACGCCCTTTATCTGCTGGCCGAAGCCACTCTGGC  
TGTACTCGGGCCGGCCATTACCTCTACGGCAACGTGATGCTTTTCGTGGCAGTAGCCTGAGCAGTGAG  
CGGCTCGGCCGCTTCTACCTGTGCTGGACGGGAGCTAGTGAACCCGAGCCCGGTGGTTCATGCTGGCGG  
CCGAGCAGGTCTGTTCCCTGCGAGATATGCGAAAACGACAAAAGCACGGCCTTGCCTGACAGGCATGTCC  
AAAAGGGCCTCATAGAATAGGAGCCAAGATGAAACAACCGCTTTTGCAGCCATAGCGAGACCATTTTCG  
CAGGCAGAGCAGGCGATTGCCGATAGCGATCATCGCAACGCTCTGTTGCAAGAGATGCTGGCTGGCCTCG  
CTCTCTCGGATCAGACCTGTGAGCTGCTATTTCGATGCGCCGACCGAGCAAGTGGCCGTGGCCGAGCAGGA  
GTTGCTGGCTGAGATCCAGCGCAGACAGGCGTTACTGCCGGCACAGCCGGGAGAGGGCCGAAGAGTCCG  
CGTCCCCTATGATGCGCGGACTGATGATTTAAGGAGTCGTAATGAGCACTATCCCTGACTACAACACCA  
ACCCGGGCGGCTTTGTGCGGTGGCTTGTGAGGGCAAGCGCTGGACGCATTGCCGGGCCATAAAAACCCCAA  
GTTGACCGAAGTGGTCGAGCTGCTCAAGGGCAAGATCACCATCAGTGTGACCCGTCACCGGGGTTGGGCGA  
AAGGAGCAGCTGGAGAAGTTGCTGGCTGCCTATCTGACGGATCCCGCTCGATCAACGGGGGTTGGGCGA  
TGGGCCAGTTCAAGGGAGGTCAAGATGCGGCCATTGCCGCATCAAGGGGATGATCGAGCGGGGAGAAAA  
ACAAACCCCGCCAGTACCCACTGGACCATCCCTGAATTTATGCTGCTCTCCCTCAGTGCCTGACCATG  
GATCGCATCGATGACGATCTCATCACAACCTTTACCGGGTGTGATGATGTTTCAGGACAATCAACGTAAAG  
GGCTGCGGGATGAGCTGACAGAGATGAACGCTGAGCTGAAGATCTACGGGGTGTCCAGTCCGAGATCAA  
CAAGGTGCTCTCTGCGGCGTCCAGCCAGACCTTCAACACCAATTTCAATCTGCTGGATTACAAGCTCTAT  
GGCTATGAGTCTCTGGCCAAATTTATGGAAGGGGGCGAGTTCAAGCTGTTGTCAAAAAATGTTTAGCGATA  
AGCAGGTGAAAAAGCACAGCAAGATTTACCAATGCTAAAAATGAGCTGGAAAAAGTAATGTCGACCAG  
CCTAAACCCCAAAATCCAGGCGGAAGCTAAGATCGATTATGAGCGTAAAAAAGCCAATTTTGAAGATC  
GTAGCCACGCAGGTATCACAGTTAAAACGTTCTCGAAAAGTGTCAAAAAGAGAGCGGCGGATGAAAA  
ATATCGAAGCCAGCTACAGCTATGACAAGGACAACAACAAGCTTGGCAACTTCTCCACCAGTGTGAGCGA  
CCGTTCTCGCCCGCTCAACGATCAGGTGAGTAAAAGACTACCCGCTCAACGACGTCAGCTCGCGCTAC  
AACGCCGCATCGAGGCACTCAACCGCTTTATCCAGAAATACGACAGCATCATGCGCGACATCTTGGCG  
CAATTTGAGGAGAGATCATGACAGCCGACACCACCTGACCCCGAATATGAAGCAGAGCTGGAGGCCTT  
TATAGCTGACGGTGGTACCCTGGCCATGCTGCAGGATATCTCTGGCGACACCTTGGAGCAGCTCTATGCC  
CTGGCCTTTGGCCAGTATCAGGCCGGCAAGTGGGAAGATGCTCACAAAAATATCCAGGCTCTTTGCATGC  
TGGATCACTACGAGCCACGCTATTTCCCTCGGGCTGGGTGCCTGCCGCCAGGCGATGGGAGCGTTTGAAC  
GGCAGTTACAGGTTACAGCTTTGGCGCCATGCTCGACTTAAAAGATCCTCGTTTCCGTTTCATGCAGCC  
GAGTGCCGGCTGCAACAAGGTGATTTGAACGGGGCTGAGAGTGGCTTCCACTCGGCCGACTGCTGGCGG

ACACAGATCCCCGGCAGGCAGACTTGGCGGCAAGCGCCAAGGTCATGTTGGAAGCCATCGCAATCAGAAG  
GGATCTGCAAGATGAACCCGATCAGTAATGAAAGACAGTTTCCCCACTGGGAAACACAGGTGATATCGC  
GGGCCTCATGCCGTTACTCAACCTCACAGTAAAACACGGCTCGATGCCGCAACGGTGCCAGTTACCGGT  
CAAGCTCGCAAGTCAGGGGTTTTGCTGAACGCACCTTTGGTGGTAAGCAATAGCCAGGTCAGTGCACAGC  
AGCTTGGTGACATTGGCAAATTTGGTGACCTCGGTGAACGAGAATCCCCGCTTGATTTTGCCGCACGTCAC  
CGGGTTGGTGACCGCAGCCTTTACCTCGCCCGAAGCGTTTCGAGATTGAGCTGGGCAAACCTCACCAGCGAT  
CTGGAGAAGACCCAGACCAAGCTGAAGCTTGATGATCTCCGGCAAGCTCGTACGTTGAATGAGAAGAAGA  
TCGGCGAGAACGAGGCAAAGATTAAGAGGCAGAAGAGAGTGTCTCAGGAGGCCAAGAAGGCCGGTGTCTT  
TAGCAAAGTTTTTGGTTGGCTCAGTGCCATTGCCTCGTTGGTGATCGGCGCCATCATGGTGGCAACCGGG  
ATTGGTGTCTGTCCGCGGCGCCCTGATGATCGCTTCCGGTGTGGCCGGAGTGGTCAATTCGGCCGTGCAGC  
AGGCTGCAGCGGATGCCCTTATCTCCAAGGAAGTAATGGAGAACTGGGGCCAGCCCTGATGGGGATAGA  
GATTGCGTTTTGCAGTGATGTCCGCCGTTGTCAAGCTTAGGCCCGTTGGTTGGTTCGCGCGATAATGAGTCTT  
GCCAGCAAAAATGGGTGGTAAGATCGCAGATGCCGCCGCTAAGATTGCTGCCAAAGCGGGTGAATGACTG  
CCAAAGCGGGTGAATGGCTGCCAAGTTTTGGTGTCAAAGCGACCGTTCGAGGCGGTGAAGCTAACAGGCCA  
GACAGCAAAAATCGCAACTGTGGCCACTCAGACCACTGATATAAATTATTGATGTGAGCAGTGGCGCGGCT  
AAATCGGCCAGTCTGCGAAAGAGTCCGAGTCTCTGTATGCTCAGGCTGATCTTGCCATGAGCAAAAGTG  
AGATGACCGAACTGCAAGGGGTATCGACAAGCTCAAGGAGGCGATAGCCAGATGATCGAGGCGTTCCA  
GCAGACTATGGAGATGATCTTCCAGTTGATCAATGCCAAGGGCGACATGATGAACAACCTGGCCCCGAGA  
CCGGCCGCTATCTAAGGAGTATCGACCATGATTAACAGTGATTATACAAATGACGTGACCCGTACCACCG  
CGATGACCTCGGTAGATTTGGATGGGTCTCGCCAAGTTCGCAGTCCGCCACTGCTCATGAGGCTGCCGC  
TTCGACCCGCCCCGAAGGGTTAGAGAACAAGAGTGTTCGCCCGCTGCCACGCCCTCAATCCCTTTCAAT  
ACCAAAGGGGTGACCCAGATGGTTGCACAGTTGGACAGTGCATGGAGATTATGTCCTTGCTGTTCAAGC  
TGGCCCCGTGAGGCCCGGAAGAGGGGGTACAGGTTTCGGGATATCGAAAAAAGCTGGTTCATCAGCCACCA  
GCAGGCGCAAGTGAAGAAAATGCGCTATGGTGCCAAGCTGATGCTCGTTCATGGCGGTTGTCTCCGGGGTG  
ATGGCTGGGTTATCTGCTGTTGCTGGCGGGTTAGCTTAGCACAAAAGTGCTAAGACCATTAAGCAGCAAA  
AATCTCTTGACGTCAAGATTGCCGGTTCGAGAGGCTTACTGATGCCAAGGTTGACAGCTTGAACTCGCG  
AGGCCAGCAGTTGACCGTGTGAGGCGGGCAAGGTTTGGAAACAGGATCAAGTTGCAGACAGTAATGCG  
AGCCGGTTGTTGGACAAGAAATTTGCTCGTAAATCCGAGCGAACACAGGTATTTAATACCGTACTCCAAG  
CTGTGGGGGCAACAGTTAACGCTGCGATACAGGAGTTCAGGCGGAAAGTCAGGCTGAAGTCAAGGAATA  
CGAGGTTGAGGCGACCATCAGCCAGACCGAGAAGCGAAGGCCGAGGACAATATGTCTTCAATGCTAAC  
TTTTATGAAAGAGTTGCTGCAATTGATGCAGCAGTATTTCCAGAGTCAGAATCAGGCTTTGAAAGCGGCAT  
TCGGCGTTGCATAAACGCCATGGTAATCAAGGCGCTCATTCGAGCGCTTTTTTGTTTTTCCGGCCATTTTT  
TCTTAAAGTACCGTCTTGGAGTGATATCCCGGATGGCGGTGGCTGGCTAACATGATTTCTCTCTGCTG  
GAGGAAATCATGGATGTAACGTGATCATCAATCGACTGCTCGTGAATTTGCCACCAATATGGTTTTGC  
CATCCCTAGCTCTGAATCAGGAGGGGATTGCGGCGCTCTGTTTTGACGAGCAGTTGCAACTCAGCCTGAT  
CTTAGTATCTGAGCGGGCTCAGCTGGTGTGACGGTTGACGTAGCCGAATGCATCAGGTGGGCGAGGGG  
ATTTTTCGTCAAGTTAGCCAGCTTCAATCGTCACTGGTATCAGTTCAATCTTCACTTCGGTTTTGATGAAG  
AGAGTCTGACGGTGAACCTCTATCGCCAGATGGCGGCAAGCCGGTTGACTCTGGCGTACCTTGAAGAGAG  
TCTCGCCAGCATGCTGGAGCATGCCGAGTTCTGGCAGGAGTTGCTGCAACACGGTACTCGGGAGGCTGGC  
AGCGGCGATCAGGTGATGGGAGTGCGGGTATAACCATGAAGATTCAGGAATCACAGGCGCGCTGGCCCT  
GCATGGGGTAGAGGCGGGCAAGGTAGGGGCATTTGCAGGCAGAACTGTGAGTGGCCGGTCCAGCCAATGCG  
AGTCAGGTTCCCCTGTCCGCACTGCTGCGACGCTCTATTACCCTCAATCAGGTCCAGGAGCTGGCGCTGC  
AGCGACTGCAGCAGGGTGAGCACACACCGCTGAGTGAACGGCGGATCCGGGTGTTATGAGAGGCTGCAG  
TTGCTGATGTTGTCCGCCATGCTGACCGGTTGTGTACCACCCCGAGCTGAAGCCATCGCAACAGCAAC  
TCAAGGGTGAGGTGCAATTTCCCGCAAGCCTTGCCACGTCCGGCGACAGTGGAGGTGGTGGTGCTCAGCGT  
GATCGGGGGCGTCCGTTGCAAGTGGCTGCCACCCGTTATGAGGTGAATATGCTGCCATTGCTGTTTGAT  
CTGCGTTTTGACCCCTCTGCAACTGGCGGAAGGGGAGATCTATCTGCGTGCCCGTTTACGATTTATGGATG  
GCACTGCGGTACAGGCTATGAGTCAACAAAACGTTTTTTAAGATTTTTTAATGACAAAAAATGGTTATTCA  
ATTGCAGCCAAAAGCTTGTATCCACAATGTGAGTGTGATTGTTGTTTAAATAAAAAGCCTCAAATCAAT  
CGTTTTATTAATTTGTGAGTTAAGATTGAAGGTTTCTTTTTGTAACGAAGTATGTTTTTTTTGTAAACACAC  
CATTAAAGTATGAGTCGTTGTAAGTATAAGTGTGTTAGTCTAATTTTTAGGCTGGTTTTTCTGCTTG  
TGACTGTTGTAGGATCCCCCTCATTTCAATGGTGTAAATTTTTGAATTCACCAGCGAATGACTTGATT  
ACAAAATAATAAATAAAAATAACAGCAATAATAAAGCACCCGAGAGCGACCCGCTTCCGGAGGTGTTACT  
GGTACTACACGCAGATTCAGGAAAATAAAAACATGAAAGGCATTAACCACAGAGAAGGGCGATATGGCC  
CTGCTCCAGTGGCGCATGTCTGCTTTTTAACGTTATCGAACATCCGCAAGAGGGAATTTATATTTCTCTGG  
AAGGATCGATGAAGTGGCAGGACTGTACCGATACCTATGAATTATCCCCAACGAACCTTCTGTTCTGCGG  
CCGTGGCAACTACGCGGTCTGTACCGATGACGGCCCCCTGCCGCTGCTTTGGTTACCTCTGTCAAACCTCC  
TTTTTACAAGGCTTCTTGCAACGTTTTCGGTTCACTATTGAGTGAAGTCCCCCGGCTGGAGGGGATGGCC  
CTACGCTGTTGCCGTTTCACTCATCCCCCTTGCTGACCCAATGTATTCAGGGGCTGCGCGGGTTGACCGA  
ACATGAACATCCCCCGCACTGGCTCAATTACGCACCGAAGAGTTGCTGTTTTCTGCTCGCGTTTTGGCGAA  
CAGGGGCTCAACTGATGTCTATTTTTGCGCCAGCTGAGCAATCGCCAGGTCGAGCGGTTGCAACAGTTTA

TGGAAAAGCACTATCTGATGGAGTGGAAGCTCAGCGAATTCGCCAAAGAGTTCGGTATGGGATTGACCAC  
TTTCAAGGAGCTGTTTTGGCTCGATATATGGTGTTCCTCCACGCGCTGGATCAGTGAAAGGCGGATCCTC  
TTCGCTCATCAGTTATTACTCAATAGTGAAATGAGCATCGTCGATATTGCGATGGAGGCCGTTTTCTCCA  
GCCAATCCTATTTTACCCAGAGTTATCGTCGTCGTTTTGGCTGTACGCCAAGCCGTGCCCGACACGGCAC  
AGATTAACGCCGGACTAAAATAATCTGACGTTTTTTTTATAAGCCGCGGAGCGAGGCAATGGATAGAATAGC  
CAGCATATCGAAACATCATTCATTATTGCCCCGAGCAAGATGAGCAAGGCATAGCATGAGTCAGCAAGA  
TCACCATTACCTAACCAGGGCCTGTTTTGCAGGTCGTCGGGTTACCGTTGTCCAGCCAGATAACCTGAGT  
CGGGATCGTCTGGTCGGCCAGCTGTCCGTGCTCCGTATCAGGATGCCGGCGTGATCACTTCGCAGCAGA  
TGGCCCTGTTGCAACGACTGTTGCCAAGAACCAGCTGGAGAGCCTGTTGGGCTCCATCTGGTTTTGAGCG  
CCGTCTCGATGCCCGCTGGCCGTCTCGCGTGAGGAGCTGCAACAGATCTTGCCTGTCGGCAGGAGTGAG  
CGTTGTGACTGGATGCAACAGCTGGGGGATCGCATCAATCTGGCGGATCGTCCCTTGCTGGCAGCTGGG  
TGCTCTATCCCTTGACCCGCTGGTGGGTTACGCGTCTTGAACCACTTACGGCGCCTGGCTTAAACGAACT  
GGAGCAGTTGCAGGTGATGCGCCGCCAGCTCAATGCCAGGCCGTGTTCTGGCAGACCCTGGTTCGATGTA  
CCGGCGGATCTGGAGAGCCGGATCACCGATCAGCTTGAGCAGTTGAACCTGCGCGAGCAGGAGCTCACCC  
GGCTGCAGACTGATTGTGAGACACGTCTCCAGCTGGCCTGGCCTGCATGGTATGCACAAACGAGCAAGGA  
GGGAGACCCGGTTACCTGATGCCGGTGCCGTTGAGCTCGGCACATTTCTGGCATGCCCTGCAGGCTCTG  
CCCCATCAGGACGAGGCAGCCCTAACCTGCATGAGTGGCTGGCCGGCCGGGCATTGCCCTGGGTGAGG  
ATCACTTCTACTGGCAGCCTCCTGCGCCCTAGATAGCCGAGGAACTATGCAAACGCTACTGAATCGATT  
GGCCGCAAACCTTGGCCAAGGGCCTTTTTATTGCCGACGCACAGGAAAGTACCATCTGCGGATCGATGGT  
TATCCCCTCTTTCTGACCCCCAGAAACGGTGGATTGCTGCTGAGTACCCCGCTTGTAAAGCAGTCAGAGGA  
ATGATGCTGAGGCCCATGATCCGGCGCTGCTAAAGCGTCTGTTGCAACAGGTGGTGGCTGGGGCGTCA  
TGCCCCCATGCCCTGGTGTGGATGATCTTGGCAATTTGACGCTGGAGGCGCGGCTCTCGCTGGAGTGG  
CTCGACGAGGCGCTGCTGGCGGAGCGCTGAGCCAGCACATCGCCCTGCTGGAGCGGTTGGAACCCCAAT  
TGACCGAGGCGCCTTGGCCCCCAATGGAGACAGATGATATGGCACCCCTTGTAGTGTGCAACCCCTGCTG  
CGTCCCCTGTTGTGGATCTGCCTCGCCGTGATGGCGTGGCAGCGTCCCGCCATGGCACAGGAGCTGGACT  
GGGTGCCCATGCCTTACAGCTATGTGGCTGAAGGGGAGAGTCTGCGCGACGTGCTGGTCAACTTCGGTGC  
CAACTACGAGCTCTCGGTGGTGGTTAGCGACAAGGTCAACGATCAGGTCAACGGTCAGTTTGGCATGAC  
GAGCCGCTCGCTTTTTGACAGCTCTCCTCCCTCTACAACCTGGTCTGGTACTACGACGGCAATGTGC  
TCTACGCTTTCAAGAACAGCGAAGTGCAGTCCCCTCTCATCAATCTGGAGCAGACTGGGCAGCAGAACT  
CAAGCAGGCGCTGCAGCGAGCCGGGATCTGGGAGCCCGCTTTGGTTGGCGCCCCGATGCGGATAACCGG  
TTGGTCTATGTCTCCGGCCCCCGCCGTTACCTTGAGCTGATCGAGCAGACCGCGCTGGCACTGGAGCAAC  
AATCCCAGCTGCGCAGCGAGAAGACCGGGCCGCTGGCCATCGAGATCTTCCCCCTCAAGTACGCCCTCGGC  
GACTGACCGCTCCATCCAGTACCGTGATACCGATGTGGCGGCGCCCGGTGTGGCGACCATTCTGGCCAAG  
CTGCTGAGCGATGCTGGCGTGCAGATGGTCAACGGCGAGGGTAGCAAGGCAGCGACGGCCACCTCCGGTC  
AGGCCATCGTGCAGGCTGATCCTTCCCTCAATGCGGTGATCGTGCAGGATGCTCCGGAGCGGATGGCGAT  
GTACGGCAAGCTGATCGCCGCGCTCGACAAACCGGCGGCCCGCATTGAGGTGGCGCTCTCCATTATTGAC  
ATCAATGCCGAGGATCTCTCCAGCTGGGGGTGGATTGGCGAGTGGGGATCCGCACCGGTTCCAACCAGC  
AGGTGATTATCAAGACCACCGGCGATCGCAAAGGAATGAAGGGGGGGCCGCGTCCGGCAGTTTGGTGGTA  
TTCGAAAGGACTCGACTATCTGCTGGCCCGGTCAACTTGCTGGAAAACGAAGGCAATGCCAGGTGGTC  
TCCCGTCCGACCTTGTGACCCAGGAGAATACCCAGGCGGTGATCGACCACAGCGAGACTTATTACGTGA  
AGATCAGCGGCGAGCGGGTGGCCGAGCTGCAGGGGATCACCTACGGCACCATGTTGCGGATGACCCCTCG  
GGTGTATCCAGATGGGTGACAGACCCGAGATCAGCCTGAGCCTCCACATCGAGGATGGCAACCAGAAACCC  
AACAGTGGCGGGGCGGATGGCATTCCACCATCAGTCGCACCGTGGTTCGATACCATCGCCCGGTCGGCC  
ACGGCCAGAGCCTGCTGATTGGCGGTATCTACCGGACGAGATGAGCGAGAATCTGAGCAAGGTGCCCTT  
CCTTTGTTGACATCCCTTATCTGGGGGCGCTGTTCCGTAGCAAGGACACCCAGACCCGCTCGCTCGGTGCGG  
CTCTTTATCATTGAGCCTCGTCTGATTGATGACGGTATTGCCACTATCTGGCCCTCGGCAATGGTTCAGG  
ATCTGCGAGCCGGGCTGCTCGGGGCTGATGAGATCTCCAATCAGAGTCTCTCCCTGGCAAGGTGCTGGG  
AGGCGCGCAATGCCAGCCGCTGGCTGCAGCCGCTGACGTGCAGCAACTGCTGCGTCCAGGGGGGCAAGAGC  
TCGTCTCTCACTCAGTGCCGGATGGGCAATGAGCTGGGGTGGCGTCTGGTTCGAAATGAACAAGGATCAAA  
AATGTACACCGGCCCGCAGCTGGTGCCTGCAGGCGGGCAATGAGGGCGCGACCCGATGAGCTGGAAGTGC  
CGCGTATATCGCGGGCTCAACCGCGGGGTAGAAGTTCTCTGCCAGAGGGGCGTCTGGTCATCGGTTCCG  
ATCCCCTCAAGGCTGATCTGGTGTGGTGGATGAGGGGATGGCCCCGAGCATCTGGTACTGCTGGTGAA  
TGGGGAAGGGATCACCTGCAAGCCTGGGCGGACGGTATTACCCGACTCAGGACGGTGTGCCCTGACC  
GCGGGAGAGACGCTCAGGGCGGGGACCGACTGGAGGCAGGCCCGCTGCTCTGGAGCTTCTGTGACAACA  
GTCGTTTCGCTACCCGAACAGCTTGAGGCTCTGGCGCGGTTGGTTGCTCCTTCTCGTGCGCCGCGGCGGCG  
GACAGCGGGCGCCGATGTCTGGATGGGGGCCCTCTGCTGAGTCTGGTGGTCCCGTGGTCTTGTGCTC  
GGCACGGGCTGGTGGCATGGCGCCGACGAGAACGAATCCGCCCGCAGTGAGCAGGCATTGAAGCGCTTTC  
TGGCCGCACAAACTACCGTCAGGTGGTGTGAAACAGCAGTATCCCGAGCTGTGGCAACTCTCGGGTTA  
CGTCGATGAGAACAGCGCGCGTCTTGCCCTTGCAGCAGTACCTCGACAGCAAGGGTTTCAGCTACCGGCTG  
GAGCTGCGCACCATGGAAGATTTGCGGCAGGGTGCCGGCTTATCTTGCAGAAGCTGGGTTATGAACAGC  
TGCAGATCCGCAATGGCAAGGAGCCCGGCTGGCTCAGGCTCAGCGGTGAAATTCAGGGGCGGATGGCAA

GTGGAGCACTATTGAATCTCTGCTCAAGCAGGAGGTGCCCGTCTGCTGGGGTGGAAAATCAGGTACAG  
ATTGCCGGGGCTTATCGCAAGCGCCTCGATGCCTTGCTACAGGAGCAGGGGCTGGCTGGTGCATTGCGGG  
TGCGTGAGGCGGGTGGGCGACTCGAACTCTCCGGCCAGCTGGATGAGCGCCAACCTGGCCAGTTTCAGCA  
GGTCAACCAGCAGTTTTCGCCGGGAGTTTTGGTACACACCCGACGCTGGAGCTGATCAATCAGACCAGAACC  
CCGCGTCAGGATGAGCTGGAGTTTCGATGTGCGCAGCGTCTCGTTTGGCCGGGTGCCCTTATGTGGTACTGG  
CGGACAACCAGCGCTATCCGGTTCGGGGGAGCAACCTCCAGCGGCGTGCGGGTGCTGGCCATTGCCCCGA  
TGCGGTGGTGGTGGAGCAAGGGTAAGCAGCAATACATCGTTAAATTAAGGAGCCGAGCGGCATGATGAC  
CAGTTTGGAAAGCGCGACTGTCCGGCGCTGATCCCGCTTTGCCCGTGAGCTGCATGAGCAGCTTGTTCAG  
GCGCAGGGTGACGTGAAACGGCAACTGCTGCGCGGGGAACCCCGCAACAGTATCGGGAGTGGCAACAAC  
AGGCCGACGCCATCGAGGCGGGGCTCACGATCATTTGGCAAGATAAAGGAGCACAACCATGGCTGATTACT  
TTAAGTATGCGGACGGTACTACTAACACCCCTCGATCAGGTGGCATCGAACCTCTCCGGGCGAGCCAAATGA  
CGCAATACCGAGGTCAACAAGGCCATTGAGGCGATGAAAACCAATCCGGATAACCCGGCGCTGTTGGCC  
GAGCTGCAGCACAAGATCAACAATAATGGTTCGGTGTACTACAACATCAACTCCACCGTACTCGGGCCATGA  
AAGACCTGATGCAGGGTATTTTTGCAGAAGATTTGATGATGAACCCCTCAACTCAAACGACAGCTGGCCGAG  
CTTGCGCTGGCTGGTACCGGCCACCATTGCCATCAGGAGGCGGCTACTATTGCCGACTGGCTGGCTGGTG  
CGCCGAGATGACCGAGTGTGTAACGCTCATTCGCTCTCCTCCCTGATGAACCGGGGGATTACCAGGC  
CGCTTTGCAGCTTGGTGGCGAGCACTGCACATCGGATATCGAGCCCTGGCTGGCCCTGTGCGAGTGGCGG  
CTTGGTCAGCAGGAGGCGCTGGCTGCACGGTTGCTGCGACTGGAGCAGAGCGGTCAGCCAACCTTGAAC  
AGTTTGGCCCGGCCTGCGTGAGCAGATGGCCTCATGAAAATTGAAGGCAGCGATCAGCTGGGGGGAGAG  
CAGCCGCTGCGTCAGCCCCCCCCCGCCGAATCCATGGCTCAACGCCAGTTCGAGCGACTGCTGGCCAAGA  
CTCCCGAGCCGGATCTGTTTGAACGCTGGCAACAGGGGGCCCCCTTGAGGGTTTGTGGCCAGTGTGGA  
GCCCCCGCCAAGCGTGAAGTCTGCTGGCAGATCTACCAACAGGGCGACAAATCGGCGCCGGAGATTGGC  
AAGCAACTGTTTTGTCCCGGCTCACTGACAAGTTGATCGCGCGTTTTGGCGAGCGTCAGTCGCCGGTGGTGG  
ATGCCATTGATCTGCCGGAGTTGCCGGCCACCATTGCCGGAGTTTTGATCCCTTGGCATCGCGGCGGGAGAA  
GGTGTGCTGAACTTGTGAGCGAGCTCAGGGACGGGCGAGGGCGCTGTGCCTGCGGGACATCAATTTCTC  
GATGCACTGGCCCGCGCGAGCTGATGACCCTGATCCCGCTCAACGGCATGGTAGACAATCTGATGCGCA  
ATTCGCACAACCTTGTCTGGAGGCGTGTGAAAATTACACAGTCTGCCAGGCGGTGGTACCAGCCCTG  
GATGAGTTGAAAGCGGTGGATCTCTCCTCGCCCATATCGCCAGTTTTGAACAGGCGATGGGAGGTACAT  
CCCAGGGGATGGGGGCTCCCTGCTCGGGGAGCTGGGGGAGTTGAAGCAGCAGTTTTGTGCGAGGCCAAACA  
GAACCTGCAAGCCGAGCTGGCCACCCGGGGGATGATCCCAACAGCTGATGCAGATGCAGTGGTTCGCTG  
ATGCGGATCACCATGCAGGAGGAGCTGATTGCCAAGACAGTGGGCAAGATGAGCCAGAACGTAGAAAACC  
TGTTGAAGACCCAGTGAGGTAGTGTGAAGAGATCGATGCTGATGGGGGTGCTTGGCGCCTCGTTGCTGCT  
CAGTGGCTGCAAAGTGGAGCTCTATACCGGGGCTCACTCAGAAAAGAGGGCAACGAGATGCTGGCGTTGCTG  
CAGACCGAGGGGATCGCCTCGGACAAGCAGCCGGACAAGGATGGCCGCATCAAGCTGCTGGTGGAGGAGT  
CTGACGTGGCGCAGGCCATCGAGACCCTCAAACGCAAGGGCTATCCAAAAGAGAGCTTCTCCACTCTGCA  
GGATGTGTTTTCCAAGGATGGCCTCATCTCCTCGCCACCAGGAGCGGGCTCGCCTCACCTATGCCAAG  
GCGCAGGAGATCTCCAATACTCTGTGCGAAATAGACGGCGTGTGTTGGTCTGTTCCATGTGGTGTGCTG  
CGGAGGGCAATGAGGGGATCAGCAAGAAACCTCTCCCGCATCGGCCTCGGTCTTTATCAAACATGCGGC  
GGATATCCAGCTCGATACTTACATTCCGCGAGATCAAACAGCTGGTCAACAATAGTATCGAGGGGCTCGCC  
TACGACCGGATCAGCGTGGTGTGGTGCCTCGGCGGATGTGCGCCAGAGCCCGCTGATGCCGCGCAATA  
CCTCGCTCTTCTCCATTGAAGTGGAGCAACCTGGCGCAATACATGTGGCACCGGAGCCGGAGTCGCGGATGACGGTGC  
GTTTGACCCCTATCAGCTGCGCTTTTGCCCGCCAATTACCTCCATGAGGCGCACCTGCCCTCATCCTG  
GGCGCAGGTGCCGAACTCTTGCCAGAGTGGCGGACGCTGCCAGCCAGTAACGGCGCCTTGTCTGAGGCG  
CTGGCATTTGGAAATTGGCTACGAGATGCCCGCGCCTCTGGGGGATTGGCGCTCTTTCCCCAAAGCGAAC  
TGGTGTGTTGTTGCGCCGCTGCGGGGCGGTGCTGCACGGAGAGGCGATCCGCCACTGCTTGTGCTGGCAC  
AACGCTGCGCCAGATCATCGCCCTGCTGGGGGAGGAGGGGCACAGAGCCGTACTCTCCAGTTCGACTTG  
TTGATCGGCCCTTGGCTGCGGGTTGGCAGCAGCCTCTGCCCGCTCAGCTCGATGAGGGGGTGTGGAAG  
AGGCGGGCTTGCAGTTCTGGCTGGCGGCTGCAGGGGAAGGCTACCCCGACTGGGCTCGCCGCTCACCCCT  
GCGACTTCCCCTAGCGCCACCTGGGCCATCATGGCCTTTGGCGGCTGACCAGCTGCCACTGGCCCGGGCG  
CTTTGTCTCAAGATTGCCAAACAGGTAACCCCCCAATGCTGCCATTTGTTGAAATAAAGAGTAACCATCT  
GCAACTGGCGCAAGCCAGCGTATTTTTCGTAGCCAGGATTACCTCTCCTACCTGAGCGCACAGGAGTTG  
GTAGAGGCCGCTCGGGCCAGGCGGCCGATATCGTGGCCGAGGCCCGCGCCGCTATGAAGAGCAGAAAA  
GCCTTGGCTGGCAAGCCGGGATTGACGAGGCTCGGCGCAACAGGCAGTGTGATCCACCAGACCAGTT  
GCAGTGCCAGGGTACTATCGCACCGTGGAGCAGCAGATGAGCGAGGTGGTGTGCAGGCGGTGCGCAAG  
ATCCTGCACGATTACGATCAGGTGGCGCTCACCTCAAGGTGGTGCGGGAGGCGCTCTCGCTGGTGGCA  
ACCAGAAGCAGGTGACGATACGGGTTTCATCCCAGCAGGTGCAGGCGGTGCGCGACCAGATTGCCCGGGT  
GCACAAGGATTTCCCCGAAATCGGCTATCTCGAGATCTCCGCCGATGCCCCCTCGATCAGGGGGGCTGC  
ATTCTCGAGACCGAGGTGGGGATCATCGACGCCAGCCTCGATGGTCAGCTGGAGGCGCTCTCCCTCGCCA  
TGAGCTCGATGCTGAAAAGCGCGGTGAACAGCGAGCAGGTGCAGGCGGTGCGCGACCAGATTGCCCGGG  
TGCACAAGGATTTCCCCGAAATCGGCTATCTCGAGATCTCCGCCGATGCCCCCTCGATCAGGGGGGCTG

CATTCTCGAGACCGAGGTGGGGATCATCGACGCCAGCCTCGATGGTCAGCTGGAGGCGCTCTCCCTCGCC  
ATGAGCTCGATGCTGGAAAAGCGCGGTGAACAGCAGGCTCGACTAGCCGGGGCGAGTGTGCTGTTGAAT  
AAGGCGGCTGAATATATGGCCGGCTACGTGAGAGAACATTTATCTGACAAGTCCCCTGGTTTTTATTTA  
GCGATACCTATCTGTGCACCCTACTCATCCATGGCGCCCGCGCCGTGCTGCGGGTGGTGAAGAGCAAGGC  
ACAACACGCAGGTAGTTGGCTGGAGGGGGTTCATGGCGCGGCGCAATCATAATGTGGCGTCGATAGCACAG  
GCCAACAAGACGGCCCCGTATCGTCTGGACTCTACTAGCCAATGATCGAGAATTTGATGCGCAATACGGCA  
CAGGTACAATCCTGGCGGCGTAATGACAAGAGATATAGCAGAAGTAGAAAAAGAACCACCGATTGCACAG  
GCAATCATGACGTGATGGCGAGACAGGTGAGACCGTACTGGCAAAACCCGAGGTGTTCAAAGCACTTTC  
GAGAGCGACAAACTGATAGAGGCGCCAGTCAGCGAATTCATCAGGGACAGAGGCAGTAGCCTCGATCAC  
AGATCCGGATCTATGACTGCAATCTCAACCTAATCACCGCCATCGATTGAAGACTTGGCAAACCTGGGGC  
GACCATCTATGAATACCCCTGGCCTACCTGTGAGAAAGCCCGAGTGTAGAGGTCACTTGGGGCTGGGGA  
AGTCATGACTTGCTGGTTGATTTGGGCAACAACGCCCCAGACAACCTCTCGAAGACCAAGTAATTTATAAA  
AAATTGCGTCCATACTTAATATCTTGGCATTCTCTCACCTTTATAAATCCTTTTCACATAAATGATGACCA  
TCATAAAAAACACTAAGGAAGAACAACATGGATATTTATCAAGAAAAGTATCAGCTTTTTTAGGTAACGGCGC  
AGACTTTGATGAAAACGGATTGTTTCAATGTGAGTTGTACCAGGATAAGAATAACCATGATGACGCACCTT  
TTTTTAATAATATTTAAAAATGAAACAACCATTAACCTACACATGTCTCTCACCAGTCCAGTGGAGTTAC  
CAACCCCTCTTCCAGAAACGATTGCCATTGCGATCGGTGAACATGCATTGGAACCTTTCCGCGGTGGTTT  
TGGTATCGGTCTAATGCCTGATAGTCGAAGATTAACGATCTACAAGTTATATCTCTCTCAAACAAACCT  
CGTGATTATGTGCAGAACACCTTTTCCAGCAGCTGTTAGAAAAGTGGAGCAATGGCACAATTTTTATTGAGA  
AAGCGGATAGCGCGGAGACAATCCAGAAAAATATCTGCTGGGATCTTTATTTAACTTCTACTTCATCT  
CTTATTTAAAAACACAAGGTGAATATATGTCTATTATTCAAATCAATAGCCAACACCGAGGTAATTTAGAC  
CTCGCAGATATTTAAAAACATCAAAAAGCAAAAACAAAAGAAGGCGATATAGTTAAATTTGGTTCTGTATTG  
GTAAAGAGTACCGCGTAACTAAAAATAGTAATGGTGATGTTACTCTAAAAACAAAAAGAAAATCGCAGCTT  
TTTTAATCGCTTCTTTGGTAAAACCGATGCTTCAAAAAACAGTGATTTAAAGCTGAATCAGATGAATCAG  
CAACTACATAAAAAAGAAGGCAGCGGCAACGTTAAGGTCTTAACTTTGACATACAACCAAGCAAACCCAAA  
AGATGCCGGAAGACACAAAGAACTACTTCCAGAGCCTGATTCAAAAAGGCGACTATGATGTGGTCTTGT  
TGCGGAACAAGAATCTAAATTTGCTCGCAATGATCTTGAGCTAGATGGCATGAACCTTCTGAGTCAAAA  
AAAATGAAAGTTATGACAAAAGGTCTTGGTGAAGTATTAGTTACACTTCAATGTCTATTTTTGCAAAAG  
ATGGCGTCGATATTAAGTCAATAAGAGAGTCTAAATACCGTCAACGCTCAGGTTCTCGGTGGTCAAAAAC  
TTTTCATGGGTATCACTGGTAACAAGGGGGGTGTA AAAACAGCTTTGAGATCAATGATCAAGCCTTAACC  
GTCATTTCTGCACACTTGGACTCTAAACAAGAAGTCAAACCGCAATTCGAAGGTAACAAGTTAATGGAAG  
GGATCAATCCGAAAAGAAGAGGTTCTGATCACTGGTGACCTAAATGAGCGTGAAAAACGTATCGCTGAAGG  
TTCTGAAGTCATGTACGATCCTGTGGCACACGATGATACGCACCTAGCCAAGCATGGTTTTAAGTTCAAT  
CAACTTAATAGCCACACCTACATGCAACTTGATAAGCACACCGGTAACATTAACAGAAAAGAAGTTCGGC  
ACCGCCCTGACTTCCGTGAGCTCGATAATACAGGCTTAACCAACAAAACAGGCAACTTACAAAACCATGA  
AACCAGTGTATCACTGAAGGGTTTGAAGAATATCAGCGACCATAAGCCAGTACAGTCTACTTTTTGAAGTC  
AGAAGCTTTTTCTCAAAGCTGATTGAAAACGCACAAAACACATACAGCAGCAAACCTCAA AAAATGAAGCTG  
CATACTTAAATCCTGGTACTGATCCGGCAAAAAGCGACGTTTGATGATGTGACCTTTGCTAACCAAGCTCG  
TCTTGGTCTAGAAAAGTTGAGTAGCGATGAACAAGCATTGTGTA AAAAGAGAACTTCGCTAGATTTATCATC  
GGTAAAGAAGCAATCTTTAGCCAGCTAACAAAATGGCTTTTATGGAAGAAATGGGGAGCTTTCACATTGCTA  
ACCTGGCCACTGATCAACTACAAGCTCAACAAAATTCGATTGAGCGAGAAAATACGAACAGCTTAGCGATAA  
AGTAAATGCTCAATTTAACAGCAGTTTCGTTGCCAATATTTAAGTGCAAGAGAGACTCAACCAGAGCACT  
TATTTGTGAATGTAGTGATCAACTAAATCCAGACATTTGGTTAGGCTCAGTCTTGCCCTTTGCTGGCGGTA  
TTCCATCATTGTGTTGATGTGAACACTACCAGTTGTAGTTATCCATAAGGTAGTAACCTGATATCCCGTTT  
CGCTTTTCCAGCAGGCTCTCTTTGCATTAGTTTATCTAACTGCGAAAACCTGATTGTGATTCAGGATTACCTG  
CTCATTATTTGTATGACTCTTATTGATTGTTATATATTTGAAAAATTA AAAATCACTCATAAAGATATTTCT  
AATGCCATTTGTCAATGGATAGGAATGGCATCACTCAATAGCGACATTA AAACCTATGAAAAAAAATTTATTT  
ACGCCACTACGCTAATGACTCTACTCTCCAGTGAAGTGGCTTATGCGAACAGTGAAAGCTACTTTACAGAG  
GGGGACACAGGAGGTCAACGTCCAAGGATTAGTCGATTTTGTGATGAAGATAGCTACTCTGTGGATCTT  
AGTGCAAAAATATGGCTATTTTATAAAGGATAA ACTGGGAACTTGGTACAAAATATCACCACAGACTTAAGCA  
AAAGCTACAAGTCTGGTGGCCTTGGTATATTTACTGAGTACTATTTCAACCAATAGTACCAAATTTGTCCC  
TTATGTTGGCCTCACACAGAATTGATTCACGCTACAATAATGATGACGAATTC AATAGTGATGATAAT  
AGTTCATACACAAAATTCATCTAGAATTACA ACTGTAAGTATCAAAGCAGCGTTGGGCATGAAGTATTTCA  
TTAGCTCTAACGTAGCCATTTCTGCTGAAGTGA ACTACAACACAGCTACAGATAACAAGGCAAAGGACTC  
TTTTACTAAATTTATAATTTGGTACTAGCTTTTACTTCTAAGCATGTAGCTCATTATCCCATTGCGCCTTA  
ATGACTGTATGGAGGCATGCGGCAGTGCCCCATTACTGGGCCAATAAAT TGCAAGGGCTGGGGCATGCCG  
TCAAGCTGATGGCGCCTCAGTTTCGTTAAGCCC GATGAAAAGACCAACAAGAACGATGCTGCGGATGCCGAA  
GCTATTTGTGAAGCTGTGACTCGGCCACCATGCGGTTTCGTGCCGATAAAGAGCAGCGAACAATTTGGCCA  
TCCTAGCCTTGATCGTGCTTGACAAGGCTTCATCAAGGCCAGGACAGCTCAAGCCAACCGATCCGGGG  
CCTGTTAGCAGAATACGGGTTTCATCCTTCTCAAGTCATCATCCACATAGGCAAACACGTTCCCGAACTG  
CTGGAGGACAGTGA AAAACGGCTTGCCAGAAAACGTTTCGCCATGGCGTTGTTGCCAAAATCAGTTGTAAC

CGCGAGCTTCCCCAGCCCAAGCCAGCACTTTGCCATCGACTCGGAGATGAGCTCGGTCTTGCCTTCCCTTG  
AGACACGTCAGGAGGTACGTATTCATTCCGCCGAGTCAGGTTGCCACTTGTAGAAGGTGGCCGAGCTGAT  
GCCATGCTCGTGGCAGTGCCAAGGGGGTGGCTTGATGATAGCGATGATCTGGGGATCGCTAAAAGGTGAT  
GTTTTTATGAAGAACCTCCTGCATTTACAGTTCGGGAAAATTTTATTTATGAGCACCTCAATTTTTTCGAG  
GGGATTACCCCTCTCATCAAGGATCTCTGTGAAAATCCGGAACTTCAATGTAATGACAAATTAATAATT  
AACTAATGATTGGTTGATCTAGTATGGAGCTCAAAAAGTTAATGAGGTATAGTTCTCAACTGCACATCGT  
CGCCTAAATCGATGTAATTGGATAGGGTTAGCTGAGGCCTCGGTGATCTGAACAACTGCACCCCTCTTCAA  
GTCTGCATCATGGGCAGTGAGGCAGCAGCCAGCTTTGCAGTGACAAAGCCATTGCAGCAGCCCTGATATT  
CTAGAGGATTTTCAAACCTCAGCCTGCGGGCTACTCAGAAAATTACATAGCTGCGCAAGAAAATGGAAAATAG  
AAAACCAAGAAATGAGGTTGTGTGCTGATAATATCCAAGAAAGAGCTAGCTTACAGGAAGAAATATATCGGGA  
TACCAACCCGTTTCGCTGGCAGAAACGGCGATGATTTGGTTTCAAGCTACGGCGGATGAGGAAAATCACT  
TGCGTATTACAATGGTAAGCGGGGAGAAGCCATGCGTATATAAGCGCCATAAGTAAATTAATACCCTTGG  
TTGCCAGTCAGAAAGCCCCGAGTGTAGCGACTATCTGGGAATGGGAACACCATGACTCGTTAGCTGATTT  
GAGTAAGAACGCTATTCAACACACTTCTTAGAGATAAAATAATGTCGAGTAACTTTTTATTTTTTAGACTT  
GGCGCGGGTTTGGCTGCAATATTTATGGTGTGTACTCATGTAGTGAGTATTAACACAAAGACTCAAAT  
GCAGAACATTCTATATTTGGAAAGGTTATAACATTACTAGGTGAAGCCCCGCTGCCCCAGTATTCATGG  
TTGTCATGGGGATTCTATACGCATATAAGAAAGAGCATCAATTTACGCACGATATAAAGCGCTCATTTTC  
ATTGTTTGCTAAAGGGTACTACCTTAATTTATTACGATTAGCAGTCCCCTTTACCCTCTTCTTATTTTTAT  
ATGCCATTTGATATAAGTGAGCCGGATGATAAATTGACAACTTTGCCGATGATATCATCTCGAATTTAC  
TTGTGGTTGATATCCTACAAGCCGAGGCCATCATATTTGATAATGGCGATAGTCAATAAATTACAAC  
TAATGATGTTTGATAACGCTTCTGATACTATTGGTTTTGGTGTACTCCCCTTTTATATGGGGCCTTGG  
ACCTATGTTCCATTTTTGGGGAAGGTTACTCGAACCATTATGGGGTATTAATGGGGAAATGGTTTCATTCC  
CTCTATTTCCCATGGGTCTATCCATTGATTGGCATGATCCTTGGTAGAAGATATAGTAATCCACTTAC  
ACTAACAACACAGGTAATGGGGTATCAATTTGGTTTTGGTGTATGTTTATCCTTTATTGGTATGCTCATT  
TCTCAAACATAATTTCAATTTCACTTTGGTGTACTGGGAAACCGGCCCTGGTGGACTAGTATTATACA  
TTGGATTTATTATGCAATGGCTTGCACTCATGTTCTTCATATCTCCATACATCCATAAAGGCTTTTTTAA  
TGTCATTGGTTTTATAAGCACACACATACCAATTTCTATATTTGTACAGTGGGTCCCTATTTTCAGCGAG  
ATTTGCTGATTAATCAGTATAAACTAGATATAATCGAGTCACTTGTAGCTATTATCATAAATAATCGTAA  
TGTCATTTTTAATTTGCAAGAAATTACAGAAAACAATAAATAAATAATATAGTAGGAGAAAACCTTATGAAAA  
TATTTATGTATATACTAGGTTTTGGTTTTATCTGGTGGTGTCTTTGCAAAGGATAATCGAGATGGGATTGC  
CCATTTCGATAATATCACTTAATCAAAAAGATCATAAACTTCGATAACTCATTGAACTTAGATAACTCCATT  
CGAGAGCAAGGCGTCGATTTTCTATACGATAGCTTATCTCTTGGCAATGAAGTTTTTATCGACAAGGCCT  
CCATCGGATCTCCATCATTGTTGATTGGATCACTACATCACGTAAAAACAGCCGGTGATAACCCCTGGAC  
ACGCTATCGCTCCACAATGATCAAAGGTGAGAGCAGTTATGTTTTAGAAGGTAAATTCGGTGATACGCTT  
TACCTTGGCATTCAAGTTTATACATTACGTGATGGAAGAAACGTGGCTCTTCCAGAAAAAATGTTTTCAA  
CAGATAACATCAAAGTTGGGGATAATGGAACCTTCCGTATCGAGATCGGTCTACAGCTGCAGAAAATGG  
GATCACAACCTGATGCCAATGACTACATGCTAATTGTTTCGTGAGTATTATGCTAATGGCGCCGTTAGAAAA  
AATGCGCCAGCCGAGTTGATGATCAAACAACTGATGGTGATTTGACACTCCATTTCATTGCTTCATCAT  
CAGAACGAATTACACGAGCCAGTGCCTTTTTGACTAGTTTTGGTTGAAAGCTCACTTGACCTCACATCCCA  
AATGAGTAAAAGCAAAAATACAAGTGCAGATGTAACCCTAGACCTGACCTCGTTCAAGCACTCTTTCCC  
ACCCTGATAATCGCTATGATGGTTTTCTACATTCAACTTGAAAAATGACAAAAGCAATTAAGCTGACTGGTA  
AAATACCTGCCAATTTAAAGTATGCATCTATCACATATTACAACCCCTACTATGCTACTGTTGATTATGA  
TAAGAATAAGACTTACATCACTAAAGATGAATTAGAATTGAATGCAGATGGCAGCTACGAAGTCTATATA  
ACTAAGTTTGACATCAAAGACAAAAAGAATCTTATTACCCTCAAGGATATAATGAAGGCGTTATATCGG  
TACGATACCTTGAAAAAGAAGAAATGAATTTGAAACCAAGGTTATTGATGTAATGATATACCAAACAA  
AGATATTAAGAAGGATGAACGTAATGGTGGTGGCGGTTACGATACCTGCTGAGCTGTTAATTTTAGTGCT  
GTATATATGGCAAGGAAGAGCTTGGTAAGTTGATGTCAAGTATAAAGCCACCGTGTATCGGTGGCTTTAT  
GCCACCTCAATGCTGACAGGTATATGGGATTTCTGTTGTAAAAGTTGATTACCTTTTTCTACGGACACA  
GCATCATAATCTTCCGCAAAACCATCGTCAGCTTTCCCTTCATTCTTTCCCTTCGAATTCATATAAACTT  
CAGGATACAAGTACCCAGCTCAGTTCTAATTTTTCTCTATTTCTGCTCGACATCTTTCATAATTTGAGG  
ATGCGGAGAATATAACCAAAAATCTGTTCTGTCTCCACAAGGGGTAAAGGCGCTCACTTCAAAGCCTTCT  
GAATAGACACCTCGCCAAACATTTGGCTCTGTGACCAAACTTGAGCAGCTGTAGCAAGTAAAGAAATAA  
TAATTGACAAAAACAAAGTTCTCATTGATGACTCCCATTGAATTTAGGTTTGTAAATTTAAGTCTATAACA  
TGTTCCCTGTGCTATGGTAATCCTCCATTTTTAGGGCATTCAAAAAGTAGAGTTCATGCTGCCTGTGCCA  
GGCGCAGTTTTCGGCATGTAGCCATCCAGCGCCATATTGGGGCGCTCATGGTTATAAACCACCTGCCAGTT  
CGTGGCAAACCTCCTGTAGGTCATTCAGTGACTCAAACAAGTAATGGCCAGCCAGTCTAGTGCACCCGTG  
CGGTTAAACCGTTTCGATGTAGGCATTCTGCTGCGGATTTCCCTGGCTGGATATAGCCCAGGGTTATCCCCT  
CCTGTTTTCGCCATCGCTTGAGCTCCTCGCAGATATATTCCGGGCCGTTATCACACCCGGATCATCCCCGG  
CTTGCCACGCCACTCTATCACTTGGCCCAGGGCTCGCTTGACCCACGAGGCTGGCAATGAAAAATCAACC  
TCTATGCACAGCGCCTCGCGATTAAGTCATCGCTCACATTAACAGTCGCACCCGACCCGCCATCACTGA  
GCTGGTCATGCATAAAATCCATCGATCAGCACTGATTGGGCTTGTGCGGCACGGCCAGTCCGTCGGCTT

TTCACGCACCAGTCGCTTCTTGGGTTTGATCCGCATGTTCAAGCTCCCGATAAAATCCGGTAGACC  
CGCTTATGGTTCCAGCCAAACCCCTTTGACATTGCGTAGGTAGAGGAAGCAGAGGCCAAAGCCCCAGTTCC  
GTTGGGTGCTGGTGATGCGCCGCAACCAATCAGCAATCTCCTAGTTTTTCATCGGCAAGCACGGGTTGATA  
GCGATAACAGCCTTCACTGACCTTGAAGAGGTTGCAGGCCTGCCGGACAGAAATGGCGAAGTGCCTACG  
GCCTTGGTAGCCATCTCCTTGCGGGCAGATGGCGTTACCACTTTTTTGGCTATGGCCTCGGAGATGATCTC  
GGCCTTGGAGCGCTCCTCGGCATACATTTTTCTTGGAGCGACGATTCTCCTCTCCAGCTCTTTGAGACGA  
GCCATGAGGGAGGCATCCATGCCACCGAATTTGGAGCGCCATTTGTAGAAGGTGGCGAAGCTGATGCCAT  
GCTCACGGCACAGCTCAGGGACGGGCGAACCAGACTCAGCTTGTCTGAGAATGGCGATGATTTGGGCATC  
GCTAAAGTGTGATGTTTTCATATAGAACCTCCTGCGTTCAAGATACGAGAAAAATTTACTTATGAGCACC  
CCAGTTTTTTCGGGGGATTACCCGACATAGGCCACTGCTCATCAAGTTCACAGATAAGCGCCACGTCAT  
CGAACACCACCTTTTTGGAGCTTACTTGCCTTGGGGTGAGTTTTTTTAGGGCGCGTATGACGGTGTGATG  
CCAATCTTGAGGACGCGAGCAGTATCACGAACACCTGAGCCGTTGAACGCCATATTTGCGGCTTCATAG  
GTGTAGGTGAGCTGAAACACGTGCGGACAGACGGGGCAACGATAGCGAACATGGCCAGCAGGGGTATTAC  
CATGGCGATATACGTGGTTCAGAGTTGCAACGAGGACAGTGAACGGGGATGGATGCCATGAAACTACGAGT  
CTCAAAGACACCCATCATAACCCGCTCAACCGATCGGAGGCATCACCCCTTTGTTATAGAAAACATATCAA  
TGCTGGTGTGAGGTATCTGATTTTTACAGACAGTCCCGATTGTTACGATGAGACAATCGGGGGTATTGA  
ATGAAATCGAGAGAACACTATTCACCAGAGTTTCGGGCAGAGGCGGTTGACTGGTATTGGAGCAAGGCC  
TTAGCCAAGCTGAAGCCGCCAGAAGGTTGGGTATTGCCAAAGGCACACTGAGCAACTGGGTGGCCGCTGC  
CAAAGGAGGAAAGGATAACATCGGCCATTCCCGGTGCGGTTCTGTGCGCCGAGCTGGAGGTTGAAGTGGCC  
CGGCTACGCAAAGCTCTCGCACAAGCCAACATGGAGCGCGACATCATAAAAAATGTATGGTCTGCTCCTT  
ATCTGCAAGCTTGAAGTGAATTTCCAGAAGTCGTTTGCCTCAATGTATCCGGCCTGTCTGTGAGCCGTTTT  
CCGGCTCTGGCCTTGATGGGATCCGCACGTCATCGTCCATAAAAGCTACCAGTCATGAGAGACTGCTTT  
TTTAGCCAGGCTGCAACGTCGTGGGGTGAACGCTTCTGTTCATCTGTTTTTGGCTCGCAAACCGGGTATG  
AGTTATATCTGTTAAACGGCTGCGCTTGCCTTGGGATAGGGTTGGTAATCCCTGCCGGATGTCAGTACTT  
TCCAGCAAATTCGATTATCTTGTGGCCAAGGCAGTAAAGAACCATGATGGTGTGAGCCAGCCTCCAG  
CCTAGCGACCCATTCGCTAACGATGATTTGTACGCTTCATGTGAATTTTTAGCGCTTTGGCGCCTTGA  
ATAACCATTTGCCTTAAATAGCTATTGCCACGCTTACTGATCCCGCCGAGCGAAGATTTGCCGCCGCTTG  
AGTATTGCTGGGACCAGCCCAACCAAGCTGACAGGTGCGGGGCTTTCTTGAATGTGAGCCATTTCC  
AATCGCGCAATCAACGCGGTTGAGACAATCGGTCGAATCGCGGGGACGTAAGTATTTTTGGCACAAA  
CCTGATGCGCTTGAGGCTTGTCCGAGCATGAGGCTCATGTTCATCAATCTGAATATCCAGCTGTTGCCACC  
GTTTTCTCAGGCGTAATAACAGGGCGCGGATAAAGTCAGGCAAGCCATTCTCGGCATCTTCAAGGATCGT  
CGGCAGAGAGCGCTCGAAGACTTTTTCTGCCGACTGGCACGGTGAGCCCATATTCAGCAGCAACGCTCGC  
ATCTGATTGACAGTGGCGGTACGTTTCGACGATGAAACGCTGACGGACGCGATGAGTCGCTTGCAATGCCA  
GTTGCTCATGAGATTTCAACGGGACACAGCGCATAGTACCTCTGCTACCAGCCTCGGCAATGGCGGTAGC  
ATCGTTGAAGTCATTCTTGTGTTGATTTGAGGTAGGGCTTCAAAAATGGGCAGGGATAATCTTGGGTTCCG  
AACCCCGCCTGTTGAAACAGGCGCCCCCAGTATTGCGAACCAGGACATGCCTCGAAGGCGACCCGACAGG  
GTGGGGTTCGCTAATGAACTGTTTTCAGTTGTGAACGCGTGAGCTTTTTGCTTGGTCAATACATGCCCCAT  
GCGATCCATCGCCACCAGGTGAAACCAATTTTTGCTTAAATCGATCCCGTAAATGTAAATCTGCGCTTGA  
GTCATGATGAGCCTCCTTGATGCTGGCTACAGCATAGCGGGGTGGGTGGAGCAGACCATCCCATTAGGCC  
GCCGCGTACTTTGCTCAAGAGTCACTGCCAAGTACGCGTGGATAGCCAACCAGCAGGACCGCTATCCCAT  
TTCCGTTATCTGTGCTGTGCTGGAGGTCTCTCGTGCGGGCTTCTACCACTGGCGCCAGCGTCCACCGTCA  
CAGCGCCAACAAGAAGATGAACGACTCAAGGTCGCCATTCGGGCTGCTCACAACAAGACGCGCCAGACCT  
ATGGCGCAGCGGTTTACAAGCTGAGTTGGCCGCCGAAGGATTTTACGCCGGACGGGACCGGATTTGGCG  
ATTTGCCCGCTGAAATGGGGTTGTCTTGCAAAACAAAAGCGCAAATTCAGGCGACAACCCATTTCTGCTCAT  
TCCCTGCCTGTGGCGGAGAATCTCCTTGGTCAGGTTTTCGCGCCGACGAAGCCCAACGAAGTCTGGACCG  
GTGATATCACCTATATCGCCACCAGCAAGGCTGGCTTTATCTGGCTGGTCTCAAGGATGTGTTTACCTG  
TGAGATAGTGGGTTATGCGATGGGGGAGCGAATGACCACCGGGTTGGTCAGTCAGGCGTGTTCGGGCT  
GTGCAGCAGAAGAGGCCACCCGTTGGGCTTATTTCATCACACAGACCGGGGCAGTCAGTACTGTGCCAAGG  
CTTATCGGGCTCTCCAGGTACAATTTGGCATGCAGGCTCCATGTCACGCAAGGGGAACTGCTTCGACAA  
TGCCCCGATAGAAAGCTTCTGGGGTCTCTTAAAAATGAACTGGTTCAACCACCATAGATTCAAGACGAGA  
GCGGAGGCCAAGGCAGCGATTACAGGAATACATAGAGATTTTTTACAACCGCCAACGTCGGCATTACAGAC  
TTGGCAATGTCAGCCCGCGGAGTTTAAACAAGAGGTATTGGAGAACGGCTCAGGCTGCTTGATCCGGGAC  
TGTCCGATCTTGTGAGGACCTCACGTTTCAAAAATGGCGCTCCAAAATTCGGTGGCATGGATGCCTCCC  
TCATGGCTCGTCTCAAAGAGCTGGGAGAGGAGAATCGTGCCTCAGACCTCACGTTTTTAGCAGGATGCTA  
TTAACTTTCTTGAATAACAAAAGAATAAGATGAAAACGGCTATTTTTCCGTTTTTCATCTTATTCAGTCGG  
CAAATCACCACCAACCAAAATTCAGCCCATGCATCCATCATCGACCGTCCGCTGGTCTAGCAAATCGGTGCGG  
TGGTACGCAGCTTCTACCTTGTTTTTGAACTGTGTGAGCCAATGCTCGTTCAGCAAGATCCCGTGCATAAC  
CCTGCTCGCTACACCAGTCTCGAAAAGCTGGAACGAAAACCATGTGCCGTTGCCAGACGGCCAGGAGTAGA  
GCTTGGCGCCTTTACTCGTCGAAAAATGTTGTTAGTACCATATCTGATAGAGGAACTTGATCGCGTGGGA  
GAAGGGAAGACCAATTCATCATGCAACCCCTGCAATCCCATCAGGATCTCGATGGCTCGAAGAGATAACG  
GGACCGCATGCATTTGTTTTGCCTTCATTGCTCCGCTGGCAAAGTCCAGATCTTTGCTTCCAGATCGAC



CTCTGACCATTTTCATTGCCCTGACTTCACCTGAACGGCAAGCCGTCAGGATCAAGAACTCCAGCATTAAG  
CGAGTAACATCGTAACGTTGTGTTGTCCCTCAGATGCTGCTGAACAAAGGCTGGAATGTCAGCCAGGGCA  
TGGCAGGTTGATGTTCCGGTACGAACGGCTTTACTGGGTTGTAGTGGGAGTAAGTGATTTACCACATCGAC  
CGGGTTTGCTTGGCAGTGACCGTGCGCCAGCCCCAAGCCATTACCGCATGCAGCCGTTGTTTCACACGG  
CTGGCAGTTTTCAGGGATCTCCAACCAGATCGGCATTAAGACTTCAGCGATCTGTGCAGGAGTGATAGCGG  
AGATTGAGTACTGGCCAATCATGGGGAATGCATACTGCTCGAGCGTCGAGATCCACTGTTTGCCGTGTTT  
AGGATTTTTCCATCCAGGCAACAGTTTGGAGTGAACCTTCTCGAGCCGCAGCCTCAAAGTTGGGATAGAG  
GGTTTGCTCTCTCAGCACGTTTGGAGTTCGAGTGGGTCAAGGCCATTGGCGAGTTGCTCTCGCATCTTCT  
GTCCTTGCTTGGTGGCATCGGCTATGGATATCTCTGGGTAAAGAACCAAGCCCCGCATTTCTGCGTTTGCC  
GGTCACTGGGCTGACATAGCGAAGCACCCAGTTGCCACGACCTTTCGCTGTTGACGGATGAAGTGAAGG  
CCTGTTACGCCCGCCATGTGCAATTGCTTTGTCAACCCGCTTGAGATTACGTGCTTTGGTATCGGTAAGAA  
GTGCCATAGGGAAGATTCCCTTGAGAATGTGGCATGCCATGGACTATGCCATCCATTGTGCCATTTAGTGC  
GGGATAGAGTCATTTTTAGTCGGACGCTGTTGGACGATCTTTTAAGTAAGGCATTGATTGTAATTGGATA  
TGTAGGATGTGACTGGTTTTGGCTGGACTTGATTGAGGCGGTCTCCCTCACCGCCAACCTTGCAAAGCCCT  
GATGGAAACATCGGGGCTTTTTGCTATCCGCGTTTTTTCGAGCGCTGTGGGCAAGCCGATGGCGATGGGC  
GGCGGGCTCGGGTATAGTCTGCGCCAATGGCGTTATCCTGTTTTGCTGACCCGTCGTGGCCCTAGTGGT  
GGCGAGGGGCAGGCCCGTGAAGGAGTGTATGAAGTTCAGTCCCTGCTCGATGAGATGATGAAAGCCC  
TGCAGGTATTGCCTGGGGTGGGGCCCAAGTCTGCTCAGCGGATGGCCTTTACCTGCTCGAGCGTGAGCG  
CAGCGGCGGTTTTGCGGTTGGCCAGTTGCTCTCTCGCGCCCTGACCGAGATTGGCCACTGCAGCCACTGT  
CGCACCTTTACCGAGAACGATCGCTGCGATATCTGCGCCAATCCAAGCGGGAAGAGAATGGCCTGCTCT  
GCGTGGTGGAGAGCCCGCGGACGTGGCGGCCATCGAGCAGACTGGTCAGTTTTCCGGTCGTTACTTTGT  
GCTGATGGGCCATCTGTGCGCGCTGGACGGCATAGGCCCGGAGGAGCTGGGGCTCGATATTCTCGAGCGC  
CGTCTGAAGGAAGAGCACATCAGCGAGCTGATCCTCGCCACCAATCCCACCATTGAAGGGGATGCCACCG  
CCTGGTATATCGCCGATATGGCCCCGACCGCCGGGGTAGAGGTGAGCCGCATCGCCACGGGGTGCCGGT  
AGGGGGCGAGCTGGAGCTGGTGGATGGCACCACGCTCTCCACTCCCTGATGGGTGCGCAGCGCCTCAAG  
TAAGGGGCGGGTGGCGGCAAGTCGCGAAAAACTGAACATAAAATCGGCGGTTACACGTCAACAGGGGGCG  
AATGAGCAGGATTGCACATTCGCCCCCTTGATATTTGGATCGCTGTCCCATCTAGGTTGGGCATATGTT  
CAACCCGATGTTTCTGAGGATTGGTCCATGACCCAAAGTGTTCATGCCGAAACCCACGGCTTTTCAGACTG  
AAGTCAAACAACCTGCTGAGCCTGATGGCTCACACCACTACTCCAACAAGAAGTATTCCTCGCGAGCT  
GATCTCCAACGCCTCCGATGCGGCGGACAAGCTGCGCTTCAAGGCGCTTTCCGATGCCTCTTTGTTTCGAA  
AACGACGGCCAGTTGCGTGTGCGTCTGGTGGTGGACAAAGAGAAGCGTACCCTGACCATCTCTGATAACG  
GGATCGGTATGACCCGTGATCAGGTGATTGAGCACCTGGGTACCATCGCCAAGTCCGGCACCGCAGAATT  
CTTCAAAAACCTCTCCGGCGATCAGGGTAAGGATTCCCAACTGATCGGTCAGTTCGGGGTTCGGTTTCTAC  
TCCGCTTTTATCGTGGCCGACAAGGTGACCGTGGTCTCCCGTGC CGCGGTACTGCTCCGGAGCTGGGCG  
TACAGTGGGAATCGGAAGGGGAAGGCTCCTTACCCTGCTGATGTGACCAAAGAGGGTTCGCGGTACCGA  
TGTCATCCTGCACCTGCGTGCCGAAGAGGACGAGTTCCTCGATGACTGGCGTCTGCGCTCCGTGGTGGGC  
AAATATTTCCGATCACATCAGCGTGCCTGTAGAGATGTACAAAGAGGGCACCCCGGATCGCGAAGAGGATG  
GTGAGACCATCGTCGGCACCCCGGGCGAGTGGGAGCAGGTCAACCGCGCCACGGCACTGTGGACCCGCAA  
CCCGAAAGATATCAAGGACGAGGAGTATCAGGAGTCTACAAGCACGTCGCCACGACTTTGAAGATCCG  
CTGCTGTGGGGTCAACAACCGGGTGAAGGGGCGCAAGAGTACACCAGCCTGCTCTACGTACCGGCCCGCG  
CACCGTTGACCTCTACAACCGCGAGCAGAAGCACGGTCTGAAGCTCTATGTGCAGCGGCTTTCATCAT  
GGACGATGCCGAGCAGTTTATGCCGACCTACCTGCGCTTCGTCAAAGGGGTGCTGGACTCCAACGATCTG  
CCGCTCAAAGTCAAGCGTGAATCCTGCAGGACAACAAGGTGACCGCTCCCTGCGCAAGGCTTGTCCA  
AGCGCGTGTGACCATGCTCTCAAAGCTGGCGAAAGACGATGCCGAGAAGTACGCCAAGTTCTGAAAAGA  
GTTTCGGCAACGTGCTCAAAGAGGGGCGCGGCGAGGATTACGCCAACC CGAAGAGATCGCCAAACTGTTG  
CGTTTTGCCAGCACCGCGGGCGAGGGCGAAGCCAGACCGTCTCTCTCGAGGATTACGTGGGCGCGCATGA  
AGGAAGGTCAGCAGAAGATTTACTACATCACCCTGACTCCTATGCCGCTGCCAAAAACAGCCCGCACCT  
CGAGATCTTCCGCAAGAAGGGTGTGAAAGTGTGCTGATGTGGGAGCGCGTGGACGAGTGGCTGATGAGC  
CACCTGACCGAGTTCGACGGCAAGCAGCTTATCTCCGTCAACCGTGGCGAACTGGATCTCGGCGATCTGG  
AAGACGAAGCCTCCAAGCAGGCGCAGGAAGAGGCCGAGAAGGCCAACGCCGGTCTGGTTGAGCGGGTCAA  
GAAGAGCCTGGGCGATGCAGTGAAGAGGTGCGTGTCAACCACCGTCTGACCGACTCCCCCTCTTGTATC  
GTCACCGACGCTACGGTATGAGCACCCAGATGATCAAGCTGATGCGCGCGGCCGCGCCAGCCGGTACCGG  
AGCAGAAGTACATTTCTGGAGCTCAACCTGACCATGCGCTGGTGAAGAACTCGACACCATTGAAGACGA  
GGCACTGTTCCGGTGAAGTGGGTCACCTGCTGCATGAACAGGCCAGCTGGCCGAGCAGGGCGGGCTGAAC  
GATCCGGCGAGCTTCGTCTCCCGCATCAACCGCTGTTGCTGCAAGCTAAGCAGCAACGCCGTAACAG  
AAAGCCCACTGCATGCAGTGGGCTTTTTTGGATCCCGCTGTGTGAGCTCGGCGAAACACAGCGGTGAGGGA  
GGTGGCCAGCGCCTCTCTATTTGCGGTATTCGTTGTTGTAGTTCTGGATGAGACGGCGAGTCACCTCATG  
CTGGGGATCGGCAAAACACCTTGAGAGTCTTGCCGCGCTCCACCACCCGACCTTCGTGCATCACCAGCACC  
TCGTGCTGATATGGCTGACGATACCCAAATCGTTGGCTACCAGCACATAGCTCAGCCCCATGGTCTCCT  
GCATCTCCAGCAGCAGATTGATGATCTGGGAGCGTACCAGATATCCAGGGTGGAGAGCGCCTCATCGGC  
CACCACTATCTTGGGGTTGAGGATCAGCGCCCCGCGCCAGCGCCACCCGCTGCTGCTGACCGGAGGAGAGC

ATCTGCGGATAGAACAGGGCGTGATCCGGCAGCATCCCCACCATACGCAGGGTCTGCACCACCTTCTCGC  
GGCGCTCCTCCTCGGTTCATCTCGGTGTTGAGACGCAGCGGGTCTCCAGGATCTGGCCGACCCGGATCTT  
GCGGTTTCAGCGAGGTGTTGGGATCCTGAAAAATCATCCGCAGCAGTTTGCAGCGAGTCTGGTAATCGCCA  
TGCACCATCAGCTGGCCGTCGATGGCGATGTCGCCGCTGGTGGGTTTCGATCATGCCAGCCAGAATGCGGG  
CGAGGGTACTCTTGCCGGAGCCAGCTTCCGCCGACGATGGCAAGGGTCTGGCCCACTTCAAGATCGAACGA  
GAGGGGCTTGATCGCCTCCACCCGCTGACGACGGAATAGACCAGGTGCGGTTCTGGTAGGTTTTGCTAAGG  
CCTCTGACCTGCAACAGGGATGGCTCGATCACAAGCGGGGCTCCTTCATGGGGGCATTAACGGTTCATCAT  
TTTTTTGGCTCCTCCATGTTTCAGCGGGAAGTGACAGCTGAACTGATGGCCCTTGATCTTGTTCATCAACG  
GAGTTTGCACGCACTGCTTCTGGGCATAGGGGCAGCGCGGCCCCAGACGGCAGCCGATGGGCAGGTGTTG  
CAGCGGCGGGATGACCCCGGGCAGGGTCTCAGGGCGGACTTGTGGCGCACCAGCTTGTCAAAGTCGGGG  
ATCGATTTGAGCAGGCATCGGTATAGGGGTGATGCGGGGTCTCGAGGATCTGCTCCCGGGTGCCTACCT  
CCACCATCTGGCCGAGTACATCAGTTGATGGTATCGGTTCAGGTTGGCGATGGCGCGATATCGTTACT  
GATGATCAGGATGGTGGTATTGCCAGCTTATTTCATCTTGTCCAGCAGTCGCAGGATCTGGGAGTGGGTG  
GTGGACTCCATGGCGCTGGTGGGCTCGTTCGGCTACCAGCAGACGCGGCTGGTTGGCAATGGCCATGGCGA  
TCATCACCTTCTGGCACATGCCATCCGACAGCTCGTGGGGATAGGCGCGCATCACCTTGCGGTGTATCCTT  
GACGCTACCCGGTGCAGCAGGGCGATGGCCTTCTTCTTTCGCGCCACTGGAAGCGCTGCCAGAATTGTCCC  
TCGAACGAATCGGTTCGGGATCGCCTCTTCCAGCTGGGTGCCGATCTCCTCGGAGGGGTCGAGACAGCTGA  
TGGGGTCTTGAAGATCATGGCGATCTCGCAGCCATGATGCGACGGCGCTCCTTGGGAGCCATGGTCAG  
CAGATCCATGTGCTTGAAGCGCATCCGGTTCGGCAGTACCGTCCAGTTGTCTTCTCGATGCCGACGATC  
ACCTTGGCGATCAGACTTTTACCGGAGCCGGATTCACCCACTAGACCAGCGGATCTCCCCCTCGGTGAGGG  
TCAGGCTCACCTTGTCCACCCGCTTGACCTTGCCCTTGGCGGTGTGTGATCTCGATGGTGGAGATTGCGAAT  
GTCGAGCAGCGGCATCAGTCATTCCCCTCTTTGAGTGCTTTCACGAATGCCTTACCAACTAAATTGGTCA  
CCAGCACGCTGAACAGGATGGCGATGCCGGCAGGGTGACGGTCCAGGGGGCGAGATAGATGAGGTGCGT  
CGAATCGGCCAGCATGGTGGCCCACTCAGGTTGGGGAGATTGGGCGCCGAGGGCCGAGAAAACCGACCGCC  
GAGATATCGAGAATGGCTGCCGACAAGGTGCGGGTGGTCTGGGCCACCAGGGTTTCGACAATGTTGGGCA  
AAATAGCCAGCCGCATGATCCGGAAGGGGGGCGAGCCATCGAGGCGGCTGGCGGTGATGTACTCCTTCTG  
CATCTCGGCATGTACTGCGTTGTAGGTGGCCCCGATAAAAAGGCGGGATCAACGCCAGGGTAATGGCTATC  
AGGGTATTGCCAAAACCCGGCCCCATGATGGCGACCATGATGATGGCCATCAGCAGGGAGGGGATGGAGA  
GCAGGGTATCGAGCAGGTGGTGCAGTACGCTCGACTTGAGCCCCCTTGTCTCATGCGCCGAGGATGCCGAT  
GGCGGAACCCACCACCATGGCGATCACTACCACGACCAGCGCATAAACCAGAAAGTGAGGCGCGCCCCCTACC  
ACCAGCCGGGAGAGCATGTGCGCCCCAGATCGTTCGGTGGCGAGGAAGTAGTCGATGTTGCCGGTTCGCGG  
CCCATGAGGGGGCGAGCAGCAGCTTGTTCGGTGTGCTGTTTCATCGATGCCGTAGGGGACGACCAGCGGCC  
CACCAGCGTATGAGCAGCAACAGCAAAAAGCACCATAGCCCCGCCATTGCCAACGGATTGCGGCTGTAG  
GAGGGCCACGTCTGCTCAAGGGGGGAGAGGATCTTGGAGCTCGGGATAGATGTTTCGATTTATCTTGCATAG  
GATACCTGGCTCCTGGTACGCCATGAGCGGTTCAATCTTGTTTGGCATACTACTCTTTCGCGCCGTGCC  
GGATAGATAAGGGTGGTACGCAACTCGGTGCTGACGCTGGTTCAGGATCACGAACTGGCGACCACCAGGG  
TTGCGCCGCGAATGGCGGCGTAATCCTGCAGGGCGATACTGCTGATGAGCCAGCGGCCGATCCCGTGCCA  
CTCAAACACCACCTCGGTGATCATGGCGGAGGTGAGCAGCTACCCAGTTGCAGACCCAGCAGCGGCAGT  
ACCGGCGGCGAGGGCGTTCTTTCAGGCCATGGCGCCAGACGATCTGCGCCTTGGAAAGGCCCCCGGCTCGCCG  
CCGCCTTGATGTAGTTCTGCTTCATCACGTCGATGAGGGAACTGCGCACATGGCGGATCACCTCGGTAGT  
GGGACACCACCGCCAGTACCAGTGACGGGAGAAATGAGGTGGCGCAGGGCATCGTGCAGCGCAGCTTGCCGC  
CAGGGCTCGTTGCTGAGCAGCACATCGATCACCGGATGCCCGTGTGGGGGGCACGTCGTAGAGCAGGC  
TGATCTGTCCGGAGGCTGGCAACCAGCCGAGATCCAGCGAAAAGAGCATTACCACAAGCAGCGCCAGCCA  
GAACACCGGCACCGCATAGCCGATAAGACCGGCAGTCATGATGGAGAGATCCAGCGTCTTGGCCCTGTGAC  
AGGGCCCGCCAGGGTGCCGAGAGGGATCCCCACCAGCAGCGAGATGGCGAACGCTGCCAGACAGAGGATCA  
GGGTCGCCGGGAAGTAGTGACGGATCTCGTCCAGCACCAGCGGAGCCCGGAGACGCTGGAGAGCCCCAGGTC  
GCCTGCGAAAATGCGGCGCAGGAAGTCCGGGATAGCCGCTCCAGAAAGCTGAGCTGATTGCCGATCAGCCGA  
TAGTCCAGCAGGTAGGCGACAAAAGGTGAGCGCCAGCAGAGTGATAAGCAGCAGGTTGATGCGGCGCAAGG  
TGTATAGAAGCATGCTTACTCCCTGTGAGCCTGGTTGAAGGAGGTGCCGCCAAAAGGGCATCAGCGTCAGT  
CCCTCGATGTGCTGCGGCTGACCTGGGTACGCAAGGCGTGCGCCAGCGGGATCAGCGGCAGCTGTTTCGT  
TAAGCAGGGTCTGGGCATAGTAGTGTGCGCAGCCGGAACGAGAGCTGGGGCGTGGTGACCGCATCATC  
CAGCAACTGATCGAAGGCCGGGCTGCACCAGCGGCTGTAGTTGTTGCCGCGCTCCACTGCCGAGCAGCTC  
AGCAGCTGGCGGAAGAAGTTGTCCGGATCGGCGTTATCGGCAATCCAGCCGAGAGCAGGCTGTGCTACT  
GCCCCCTTGGTGGAGCGGCCTTCGATCACCGGCCACTCCCGTTGCACGATCTTGGAGCTTGGATCCCGACCTT  
GGCCAGATCGCTGCGGATCAGCTGGGCGGCTTTCGACCGCATCCGGGTTGTAGGGGCGGGCGTCTGGCTGT  
ACCAGCACCTGCATCTCGAACCCCTTCTCCAGTCCCCTCCTTGGAGCAGCTGGCGCGCCCCGTTTCAGGT  
CGGGTTTTGCGCTCGGGCAGGCTGGGGTTGTACCCCCACGAGAGGGTCCGGCAACAGGGCTGTTGGCGGGCAG  
GCCGGTATCGAAAATAGACCCTGCAACAGGTTGTGATGTTGATGGCGCTGGCAATGGCCTGACGCACC  
TTGACGTTGTTGAACGGCGGCTTTCGGGTATTGAGGGCCAAAAGGCGACGTTTCATCCCCGACTGGACCG  
AGAGGCTCAGCGCCGATTTTGTCTGATCACCGAGAGCTGGCTGGCGGAAGGGGTGCTCATCACGTCCGA  
CTCGCCGGACAGCAGCTTGGCCAGCCGTTTGGCGGATTTGGGGGTAATGTCGTAGACCAGCTGTTCAATC

TTGGCATCGCCGCCCAATAGCCGGGATGGCGCAGATAGCGGATGAACTCGTTGTGGCGATACTCCTTGA  
AGCTGAACGGCCCGGTGCCGATGGGGCGGCTATCCAGCAGGGCTGGCGTGCCCGCTGCAACATCTGCTC  
GGCGTATTCGGCGGAGAGGATCACCGCATAGTCGCTGGCCAGGGTGGCGAGGAAGGAGGCGTTCGGCTGG  
TTCAGCTCGAATACCACCGTCTGCGGCCCTTCTTGCTCACCCGCTTGATCAGCAGATCTTGCCCCAGGC  
TGTAAGAAGTAGGGGTAATCGCCGCCGGAGACATTGTGGTAGGGGTGCTGCTCGTCAAGCTGGCGGGCATA  
GGTGAAGACCACGTCATCGGCATTGAAAAGTGCGGGTGGGCTTGAACCAGGGGGTATGGTGAACCGTCACC  
CCCTTGCGCAGGGTCAGGGTATAGGTGAGGCCATCTCGCTGACATGCCAGTTGGTGGCGAGCGCCGGCT  
CCAGCGCCAGGGTGTGGGGTTCACCTCCAGCAGGCGGTCTAGAGCGGACGGGCACTGGCATCCAGTGT  
CACCCCGGAGTTGGAACATGGGGATTGAAGGAGAGGGGGGACCCCTCAGCACAATAGATGAGTCCGGTT  
TTGGAGGCCTCGGGTTGCTTCTGGCAGCCGGTGACCAGCACCAGCAGACTCAGCAGCAAGGGTGTGAGCA  
TTCTCATTGTTGAACCATGTTCTTATAGGGGTTTGTACGCACGTTTGTATACAAATGTGCCAGCGCGAA  
GGCTGGCGTGTGCTGGCGTCGGCATCAACCCGACTCCTTCACTCTTGTCTGCATCGTTATCGCCATCC  
AGCAGCTGATATTTGCGTAGCATGCCACGGAACCTGGTGATAGCTTAAGGCCAGCAGTTGAGCGGCTTTCG  
GCTGATTATACTGGGATTGCTGCATCGCTTGTCTGAGTAAATTAATCTCGTACTCCGCCACCGCCTGCTT  
GAGATCGAGCGGCAAGGGCAGGGGGGATGCAGATTGTACCTCGCTTCGGGCTCTTGCGCAGGTTGCGTG  
ACCTGTGGTGCACAGGGGGAATCAAACGGGTTGAGCACCAGGGTCGAGAGCGGCAGCTGGGGATTGCCCT  
GACGATAGATGCTGCGCTCCACCACGTTCTTACGCTCCCGCACGTTGCCCGCCAGTGGTAATCCAGCAG  
CAGCTGGGTTGCCTTGCGCGAGAAACCGCAAACAGCGGATAGCCAGCTCCCGCCTCATGCTGTGGGCG  
AAGTGTTCGCCAGCATCAGGATATCTTCCCGCCGCTCCCGCAAGGGGGGAGGGTGATCACATCAAACG  
CGAGTCGGTCGAGCAGATCGTGGCGAAACTGCCCTTGTGCGCCAGCGCAGGGAGATCCTCGTTGGTGGC  
GCAGACCAGCCGCACATCCACCTTGAGGGGGCTTGCCCCACCCACTCGCTCGAACTCGCCATACTCGATG  
ACCCGCAGCAGCTTCTCCTGCACCCGGGCGCTGGTGGTGGCCAGCTCGTCGAGGAACAGAGTGCCGCCAT  
CGGCCCGCTCGAAGCGGCCCTGATGGCGCTTGCCCGCGCCGGTAAACGATCCCGCTTCGTGGCCGAACAG  
CTCGGTTTCCAGCAGGCTCTCGCTCAGGGTGGCGCAGTTGATGGTGACAAAGCTTTGATCCCAGCGCGCC  
GAGAGATAATGTAGGCGGTGGGCGATCAGCTCCTTGCCCGTCCCCGCTCACCGATGATCAGCACGGGTT  
TGCGCAGTGGGGCGAGCCGTGAGGCCTGCTCAATGATCTCGAGAAATGCGTTGGATTCCCCCAGCAGGCT  
TTCCGTGGCCGTGGTCATAGTGATCCCTGTCAAGTGTAAAAGCTGGTCAATCTTACAAAAGTTGGTGAT  
TTTAATCAGTCACTTGCAGGATCTTGCATCCGGCTATTTGCAATCCGGCTATTTGCCCCATATAAATCAACA  
TTTAAATTTGTTCCAGATTGGCACACAAGTTGCCATTGTCAATGGAGAAACAACGCCATGCCAATAACAGG  
AATCATGAGTATTTTTTCCCGTCTGGCCGACATCAATTTCAACCTGACCGGCCCTGCTCGACAAGGCA  
GAAGATCCCCAGAAGATGGTGCCTGATCATCCAGGAGATGGAGGACGAGCTGGTCAAGGAGCGCTCCA  
ATCTGGCCCGCTTCTCGCCAGCCAGAAAGAGATTGGTTCGTCAGGTCGCCCCGTCATCAGGAGCGGGTTCGA  
CGAGTGGCAAGCCAAGGCCGAGCTGGCCCTGACCAAAGGGCGTGAAGATCTGGCCCGCGCCGCCCTTATC  
GAGAAGAAGAAACAGACCGAGTTGTGAGAGACCTTACC CGGAGCAGCAGGCGGTCGATAGCGGCATCG  
AGAAGCTGGGTGAAGAGATCCGTCAGCTCGAAGCCAAGCTGGAAGATGCCCGCGCCGTCAAAAGGCGAT  
GGCCATTCGCACCGAAGCGGCCAGCAGCCGTCTCAATGTGCAGAGCCAGGTAGCCCGTGGCGAGAGCCAG  
GCGGTGGTGTAGCAAGTTTGTAGCGGATGGAGCGTCGCATCGACGAAATGGAAGCGCGCGCCGATCTGGGTC  
AGTCCGACAAGGCGCTGGCGCAACAGTTTGCCGAGCTGGAAGTGGACGATCAGATAAGTCGTGAGCTGGA  
AGCCATGCGCCAGAAGCTGGGCCAGGGCGACAGCAAAAGCGAAGGCAAACAGGGGGAGTAACAGATGGAA  
GATCTGCTGGGCGTATTGATGGTTCCCATGGTGGTCTTTCATGGTGGTGGTAGCCCCATCTGGCTGGTGC  
TGCACTATCGTGCCAAGGGGCGGATTGGCGCCGGTCTTGTGATAGCGAGCGGGAACAGCTGCAAGGGCT  
GCTGGCTCGCACCGAGAAGATGCAGGAGCGAGTGGGCGCGCTGGAATCAATCTGGATGCAGAAGTACCC  
GGTTGGAGGAACAAGGTATGAGCAGTGTGAGTCGTGAAGGGCGTAACCTCTATCGCGATCCCCAGCGTGG  
CAAGATAGCCGGGATCTGTGCCGGTTTGGCTGAGTATTTGCGGGTGGAGACCTGGATCGTGCAGGCTGCTC  
GCCATCAGTGGCCTTATCTTCCCGGTTTTCATTACCTTCAACCGCTATATCGCCGCTGGTTCTTGTCTCG  
ACAAAAGCCGGTACCCTCTATTCGCAAGAGGATGCCGACTTTGCCGAGGTGCGGATGAAAGTGCAGCAG  
CTGGCAGGCGGGGATCACCCCTCATCAGGCGCTGGGCGCATCGCGCAGGAACTTGACGCGCTGGAGCCC  
AGAGTTTCAGCGGATCGAGAAGCTGGTGACCTCCAGGGAGTTTACCCTGCAGCGGGAATTTTCGCAAGCTGT  
AGTGCTTGTCAAGCACTCAATGTGATGGCGGCGCTCCCGTGATGCGCCACCATCGACACCAGCTATC  
CAGATGCAACCACCAAGGGAGAACGGGTCAAGCCTTGATACTCAATAAACTGGAACAGAAGTTGACTCGC  
CTGCAGAGCAAGGCGAACGACGTGGTGAACCGGGTGCGGGATCGCCATATCCGGCTGGCGGTGACCGGCC  
TCTCTCGCAGCGGCAAAACCGCCTTATCACGGCGCTGGTCAACCAGCTGGAACACGCGGCCATCGATGG  
CCGTTTGGCGTTGTGGGATGCCCTGCGTCAGGGGCGCATCCTCGGCGCCCGCGGGTGGCGCAGCTCAAT  
GCCCACATCCCCACCTTTGCCTACGAGCGTGGCCTCGACTCCCTGTTTGGCGATCCACCGCCCTGGCCCG  
AGCCACCCCGGTTGTGGCCGAGGTGCGTCTCGAAATTCGCTATCGCACCCGTCATCCCCGCGCAAGCA  
TCTGGGGGAGATCTCCACCTCTACGTGGATCTGGTGGACTACCCCGGGGAGTGGCTGCTCGACTTGCCG  
CTCCTTGAGATGAGCTACGAGCAGTGGAGCGAACAGGTGCGCGAGCAGCTTCGTGCGCCAGAGCTGCAGG  
CACTTGCCGCCAGCTGGCTGACACCCGGGTGGCAGGTGATCAGCGCTTCGAAGAGCGGCCGGTGGCTGA  
GCTTGCCGAGCGCTACACCGCTATCTGCACGCTTGCAAAACAGGAGCTGGGATTGCACCTTATTCACCC  
GGCCGTTTTCGTGTTGCCGGGGGAGTATGCCGGTGCCCCATGCTGCAATTTGTCCCCTGGGTGTGGGAGA  
TGCCCTGTGGCGAGCCCGCCGATGGCACTCTTACGCCACTCTCAGGCAGCGCTTCGAGCAGTACAAAACA

GCATCTGGTGCAGGGTTTTTATGAGCAGCACTTTGCCGGTTTTGATCGCCAGATCGTGTGGTGGATTGC  
CTGCAGCCCCCAACGCCGGGGCGCCAGCTTTGGCGACATGCAGCAGGCCATCGCCCGCATCATGGAGA  
GCTTTGCTTACGGCAAGAGCAACTGGTGGCGGGGACTCTTCTCGCCCCGTATCGACAAGCTGCTGTTTTGT  
GGCGAGCAAGGCCGATCACGTACACCTGAACAACATGCGCCCATGGTCTCACTGCTGCAGCATCTGGTA  
CGCAGCGGTGCGGGTCAGGCCCGTTTTGAGGGGATCACCACCGAGTGTCTGGCGCTCGCCGCCATCAAGG  
CGACGGAAGTTGGCAAGGGGGTGGCCAATGGCCGCGAGTTCCCCGCCATCCGTGGCACCAGCCTGAGCGG  
TGAGCCGCTGCTGCTGTTCCCCGGAGAGGTGCCGCCCATATTCACCCGCGCAGTGGTGGAAACAATCAG  
GGCTTTGATTTTTAGGCGTTTTGCCCCATGCCATGAGCCCCATCAGGCGCTGCCCATATCCGGCTCG  
ATGCGGGCGCTGGAGTTTTCTGCTCGGGGATCACCTCGAATAACGGTGTGCGGTCTTGGCACCTGAGCCGAA  
GGCTGCGCACAGGAGAACAATGCGATGAACGATCAGATAAAAGAGCGGCCACCGTTGCAGGGCAAGGTGA  
TTCTTGAGCCTGCCCTGACGGTGGCCAGTGCAGCAGTACCAGAGGTGGAGAGCGCCCTCGTCATCAAACCGCGC  
GAGCTTCGAGCGCCTCGACGAGCTGGACGAGTTCACCGAGGTGGAGAGCGCCCTCGTCATCAAACCGCGC  
CGCCGCCATCGGCTACTGGCGTGGGGGCTGGGGGCGGTGGTCTGCTCTCGTTGGGCCAGTATGGCGCCT  
TTCTTTACGATCAATTCTCACCACCCCGCTCTGGGGCAGCGCCTGGCTGGCGGCCCTCGGCGCTGGTTCGC  
TGCGGGGACCGCCAGCGTGGTGGGGCGCAGTGGCTGCGGCTGCGCACCTCAAGCGGGCTCAGGATGTG  
CGCTCGCGAGCAGAAGATCTGCTTGTCTATCAGGGAGTGGGCGAGGGGCAGGCCTTTTGCGAAGGGTTGG  
CGGTCAAAGTGGCGACAAAGGGCGCAGGGGTATCAAACCTGGCTGGCCAGCTCGATGAGAGCCACAG  
CGATCGGGAGGTGCTGACCCTCTACAGCCAGCTGGTACTCGGCGAGCGTGACAAGCTGGCCAGGCGCGG  
GTGGCCAAATGGTGGGGGAGGCCCGCTGTTCTGGTGGCGCTCAGCCGCTCGCCACCCTCGACATGATGC  
TGATGTTGTGGCGCAACCTGCGGATGATCGAGGATATCGCCGATGTCTATGCCATCGAACTTGGCTACTG  
GAGCCGCATACGCCTCATCCGTGAGGTGTTTCGCAACATGCTCTACGCCGGTGCCACCGAGCTGGTGACC  
GAGGTGGGGATGGACTTGGCTGGGGCGCGAGTTTTGCCGCCAAGCTCTCTGCTCGCGCGGGCGCAAGGGGTGG  
GGGCCGGTCTGCTCACCGCCCGCTTGGCCTGCGCACCATAGAGGCGTGCCGTCCGCTGCCCTGGTGTGC  
GGACGAGAAACCGAAACTCGGCGAGCTGCGCAAGCGGCTGATCGGCCAGCTGGCGGGGTATCTCAATCAG  
CCTTGATGGCTGCTGGAGATTAATAGCGGTTGTCACAATTTATTTACAACCTGTTTCAGGCAGCCGACTCA  
TGGGTGCGGCTGCTTTTTTTGTTGCCATTTGTTACAGTGAAACCGTGATGAAACGGCAAGGCGCCTGATG  
TGGCGCCAGAGGATGGAACCGCTATGGCAACCTTCTACACCGCCACCAGCCGGATGCTGACGGGGTAT  
CCACTACAGACAACGAGACCGCACCGCACCTGGCAGATCTGATCGAACGCCAGTTCGCTGCCCTCGATGAC  
AAGGGGTGTGACGAGATCTGGCCGCTCTCGACAGACTGGGATTTGCCCGTGATCGCATCCCCCAGCTGG  
CCGAGATCAACTCCGTCTTGCAGCCTGCGACCGGCTGGTGGTGGCGGGCGGTGCCCTGCGCTTATCTCGTT  
CGATCGCTTCTTCGCCCTGCTAGCCAACCGCCAGTTTTCCGGTAGCGACCTTTATCCGGCGCCGGGACGAG  
CTCGACTACCTGCAAGAGCCGGATGTCTTTACGAGATCTTCGGCCACTGCGCCATGCTGACCAATCCGG  
CCTTTGCCACTTCACCCAACTCTACGGTCACTTGGGGCAGCAGGCGAGCAAGGAGCAGCGAGTTTTTCT  
GGCGCGGCTCTACTGGTTACCGTGGAGTTTGGCCTCTTGGCTACACCTGACGGGCTGCGTATCTACGGT  
GGCGGCATTATCTCCTCCATCGGCGAGACCGCCTATGCCCTCTCCGGCCAGCCGCTGCTGCAACCTTTTCG  
ATCTGTTGACCGTGCTGCGCACTCCCTATCGTATCGACATCATGCAGCCACCTATTTTGTGCTGCCGAG  
TCTCGATCATCTCTACCAGCTGACCGGTGAGGAGATCATGGTGTCTTGGCGGAGGCCAGTCCGGTTGGC  
CTCTATCCGCCACGTTTTTGAGGTTGCCGCTGGCAAACAGGCGAGCTGACCAAAGCAAACAACCTATTT  
CATTGTCAATTAATTTTTTCAATTAATTAAGCAGGAGTAACCCATGTCCGAACTGGCCAGCCAGCAGTGTGA  
AGCGTGTGCGCCGATGCCCCCAAGGTGAGCGATGAGGAGCTGCGCGAGCTGATGCAGCTTATTTCCCGAC  
TGGCAGCCGTTGGTGGAGGAGGGGGCGCTGCAACTGCGGCGGGAATTTACGTTTCGCAACTTCAAGGAGG  
CGCTGGCGTTTTACCAACCGCCTGGGGGAGCTGGCGGAAGCGGAGTTCATCATCCGGGCCATCCTGACCGA  
GTGGGGGAAGGTGACCGTCACTGGTGGACCCACAAGATCGGCGGATTACACCGCAACGACTTCATCATG  
GCTGCGCGTACAGACCAATTGCCAGATAATCTGAGAACAGGTTGAGGCGGAGTATCCCCCTTCTGTCAT  
TTCTGACCGAATGGGGGAAGGTGACCGTCACTGGTGGACGCACAAGATTGGCGGCTTGACCCGCAACGA  
CTTCATCATGGCGGCGCACCGATCAGTTGCTCCGCTAATCGCACCCACACCAGCGTCACTCGGTTGAC  
CCGGGCTGCTGCGAAAGCGGGGCGGGCCCGCATTTTTATGGGCTGGCGCTCGCACTGGGGGATCGAG  
ACTGTATTATCCGCTCATTATAGAGTTAGCTAGGAAGTGTGTCCCGAATGCGTCTTGAAGTCACTGTG  
AAGACCGCCTGGGCTGACCCGGGAATGCTCGACCGCCTGGTGGAGCACAATATCGATCTGCGCGGCAT  
CGAAATCGATACCTCAGGCATCATCTATCTCAACTTTCCCGAGCTGGAGTTCAGTGATTTTCAGCATTTG  
ATGCCGGAGATCCGCCGATTCCCGGCTTACGACGTCAAGACCATCCCCTACATGCCCTCCGAGCGAG  
AGCATCACGAGATCGAGGCGCTGCTCAAGGCGCTGCCGGATCTGGTCTTCTCCCTCGACAGCAAGGGTAA  
GGTGACCCAGGCCAACCAGTCCGCCCTCACCACCTCGGCTTGCCAGTGGAGGAGTGCAGCGGCTGGCG  
CTCGGTTGCTGGTCAAGGGTTTTCTCCTTACCCGCTGGCTGGAGGCGAGCGAGATCAAGCCGAGACCT  
GCAAGCTCAGTTTCAATGGCGAAGAGTATCTGGCGGATCTGATGCCGCTGTTCTGTTGGCAGAAGCCCGCGG  
CAAGCAGGCGCTGGCCGCTGCCGTGGTGGTGTCAAATCTGCCCGTCCGGTCCGGCTGCATTTTCAGCGCG  
CTTCATGCGGTGGAAGTGGGGGGCTTCGAGCATCTGCAGGCCGAGAGTCCCAAGATGAAAGAGGTGCTGT  
CGCAAGCGCGCAAACTGGCGATGCAGGACGCGCCGCTGCTGATCGTCCGGCGAGACCGGCACCGGCAAGGA  
GCTGCTGGCCCGCGCCTGTACGGGGCCAGCCTGCGCTCCAGCCACCCCTTTATGGCCCTCAACTGCGCC  
GCCATGCCCGATAACGTGGCCGAGAGCGAGCTGTTTGGTTATGCCCCGCGGCCCTTTGGCAACAACCCG  
AGGGCAAGCGCGGCTACTGGAGCTGGCAAGCGGCGGCACCTGATGCTGGACGAGATTGGCGACATGTC

TCCCCATCTGCAGACCAAGTTTTTTCGGGGTGTTCAGGATGGGGTGTTCGCCGGGTTGGTGACGAGCAG  
GAGGTGAAGGTCAACGTGCGTTTTTCATCTGCACCACCCAAAAACAGTTGCTGGATCTGGTGACGAAGGAA  
CCTTCCGCGAGGATCTCTACTATCGCCTCAACGTGCTCAGTCTGGCGCTGCCCCCTGCGCGAGCGCAA  
GGCGGACATCATGGTGCTGGCCAGCAGTTTTGTCTCCCGCTTTGCCAGCGAATTGCAGCGACCCCGTCCG  
CGTTTTACCCGCAACATGGCCGACTACCTGACCCTACCCTGGCCGGGCAACGTGCGCCAGCTGCGCA  
ACTGTCTTACCCTGACCTGCTGGAAGGGGATGAGCTGGGGCCCGAGCAGATCGACCTGCCGGT  
GGCGGCCGATACCATGCCCTGATCGACGAGTGGTTTGGGGGAATCTCGACGATGCGGTGAAGCGCTTC  
GAGAGCCAGCTGCTGGCTCGGCTCTATCCTGCCTTCCCGTGCACCCGTCAGCTGGCCAAACGCCCTGGGCG  
TGTCGCATACCGCTATCGCCAACAAGCTGCGGGAATACGGCATCAGCAAGAAGTGATTTCTGCCTTGCTG  
CCTGCCACCAGAGAGCCCGTTACCAGACGGGCTCTCCGTTTTCTTTACACGAACTCTGTAGTTGATGGCG  
GGGTGAGACTTGTGAGCCAGTGTGACCCAACTACTACTGTTGTTTACTCTTTTCCCCCGTTTTAACTGCCCG  
AGCAGCGGTATTGTCAAGGCGACCACCTCCCGATCATGCTGTTACTCTTTTCCCCCGTTTTAACTGCCCG  
TCTGGCGCTCCTGTTGGTTGCGTTTTGGCCTGCTGTTGCCCCACGCGCTGGCGGAAACGGCCGCGAGAGC  
CGGGCGACGGCGGTGAGGGAGCTGGTGTGATATCATGAGTTACACCCGCTGGCCACCGAGCCTGCGG  
TGCTGCGCATGTGTGTTGGCGGCGCGACCGAATATGCCGGCGCCCTCTTTACCATCGATCGTCAGGCCAA  
TGGCCGTACCGTGCAGGTCCATCGTTACGAGGCGAGCGATCCGGCCATCAGCGATCACGCGATGTGCTC  
TATCTGGGAGTGCTCGACGAGCCGACCCGATTGCGCTGTTTGGCCGCTGTCAGGGACACCCAGTGCTCA  
GCATCAGCGAATAACAACCAGACTGTTCCACCAGCTCGGTGTTTCTGCCTGCAGACCTCGCCGGACAGCGT  
GCGGGTGCGGTTTTAAAGTGAACCTCGATGCTCTGGCCCTGAGCGGAGTGCGGGTGCATCCCGCCGTGCTC  
AAGCTGGCCCATGCCGACAAGGGGGTCCCATGAGACGACAGGTGAGCGCGGCTCCCCGCCGTCTGACCCT  
GCGTCAGAGCCTGGGGCGAACCATCTGGTGGCCGCCATCACAGCCGTCAGCGTGGCGGGACTCTTTTTT  
ACACTGGTGGCCCTGCTGGTAGTGCGTTTTTACGCCGACCACAATCTGGAGCTGGTAGCCCGCGCCATCA  
GCTACAGCGCCGAGGCGGGCGGTGGTGTTCACGATGAGGAGGCGGGGAGCGAGGCGCTCAGTGGCATCGT  
TGCCAAGGAAGAGGTGGCCCAAGCCACTATCGTGCTGACCAATGGCCAGCTGCTCGCCAGTTGGGAGCGC  
CCCAGAAGCAACCCGCTGGTGACGCTCGAAGACTATCTGGCCAACTGCTGATGCCGGGGCCTGTCAAAC  
TCCCCATGCTGCGGGGTGGTGAGCAGATCGCCACCATCGAGCTGCGCGGCCACGGTGAATATCTGTTGCT  
GTTTTTGTCTCGCGCTGCTGGTGATGGTAGTTTGCCTGATGCTGAGCGCCATGGTGGCACTCTATGTG  
GCCAGCCGATGCGAGTCTCCATCACCGCACCCGCTGCGCAAACCTGGCACTTGTGCGCCACTGGGTACGTC  
GACAACCGACCCTGGGGATGCGGGCGCCACCCGCGCATATCGTCGAGATTAACGAGCTGGGGGATGACTT  
CAACTCCCTGCTGGATGAGCTGCAAGCCTGGCAGGCCACGAGCCCGGAAAAATGCCAGCCTGCTCCAT  
CAGGCTACCCACGATGCCCTCACCCGACTGCCAATCGCGCCCTGTTTGAAGCGCGGCTCGCGCAGGCCA  
TCTCCCTCGGCGAGCAAGAGGGGTTTTGCGCTGCTCTATCTCGACTGCGATCGCTTCAAGCAAATTAATGA  
CACGCTGGGGACAACGCCGGTGACGATGTGCTGATCGCGCTCTCAAGACGGGTGCAACATCAGTTGCGT  
CCGGATGATCTGGTGTTCGCTCGGTGGTGACGAGTTTGCCTGCTGTTGGCCACTCCAGCGACAGC  
ATGAGGTGGAAGAGGTGATTGGCCGATCCAGCAGGCGATGAGCGAACCAGTGGCGCTGCGTGACGGTGC  
TCAGCTGGTGGCCGAGGTGAGTGTGCGCTTTGCCGCTATCAGGCGGGCATGAGTGCCAGCGTGTGTGT  
GATCAGGCTGATGCAGCCATGTATCTGGCGAAACGGGCGCGCCGACGAAACAGCAAACCATCGCCTGAC  
TGGCAAGAATAACAACATAAAACAAGGAGCAAACCATGAAGATCACCCACCTGTTGAAAGTGACCCTGCTG  
GGGTTGATGTTGTGCTGCTGGCCGGTTGCCAGAGCGCGCCCAAGGGGTTGACCCCGAGCAAATCGCCG  
TGCTCAAGGAGCAGGGCTTTTATCTGACCGATGAGGGGTGGACGCTGGATCTAGCCAACCGGGTGTGTT  
TGCCAACAACGTGGGGGCGCTCAATCCCCAGACTCGCCAATCCGTTGAAAAACTGGGTAAAAACTGCTT  
GGCGTAGGGTTGGACAAGGCGCGGGTGGATGGCCACACCGACAATACCGGCGAGAGCAGCTACAACCAGC  
AGCTCTCCCTGAAGCGGGCCAGTCCGTGGCCGATGTGCTGGTCTCGGTGCGCATGAAGCCAGCCAATCT  
GGAGATCCATGGCCGTGGCGAGACCATGCCCTGGCAGATAACAAGACCAGAGAGGGCCGGGCCCAAC  
CGCCGGGTTGCCATCGTCATCAGCGATCAATAACCTTTTATCGTTTTCGTTACCATAAAAAAAGAGCGC  
CTGATCGGCGCTCTTTTTGATCGCGACAGCTGGGGTCCGAGGGCATGTGCTGCAAGGTTACTGCGCGC  
TATTTTGGCCGTTATTGTGCTGATGGCTGCGCAGGCGGATGTTGATCATCTCCACCACCGAGGAGAAGGC  
CATGGCGAAGTAGATGTAGCCCTTCGGAATGTGTAGGTCCATCCCCCTCCGCCATCAGGGCGAAACCAACA  
AGGGTGAGGAAGGAGAGGGCCAGCATCTTGATGGTGGGGTGGGCATCGACAAAATCACCGATGGATTTGG  
CGGCAACATCATGATGAGGACGGCGATCATGATGGCCAGCACCATCACCGGCACGTGATCGGCCATGCC  
GACCGCGGTGATCACCGAGTCGAGGCTGAACACGATATCGAGGATGGCGATCTGGATCAGGGTGTGATA  
AAGCCCAGGGCCGCTTTGCTGACGCTCTCCGGCTCAGCCGCCCTTCCAGGGTGACGTGGATCTCGTGGG  
CACTCTTGCCGATGAGGAACAGGCCCCCAGCAGCAGGATCAGGTGCGGCGCGAGATGGCTTACCCAG  
CACGGTGAAGAGCGGATCGGTGAGGCGCATCACCCAGGCCAGCGAGAGCAGCAGGATCCGGGTACCC  
ATGGCGAGCCCAGACCCAGAATACGCGCTTTTTGACGCTGCGCTCCGGCAGGCGACCTACCAGGATGG  
AGATAAAGATGATGTTGTGATGCCAGCAGATCTCGAGCAGGTAAGGGTGGCGAGTGCAGCCAGGC  
AGAGGGATCAAGAACCATTCCAGCATGATTGAACCTTGGTTGAAAAATGAAGCAGCGCATTTCTAGCAG  
GGGCGCCACTGCTTGTCCAGAGGGGGGAAAAAGATAAAAAATGGTGGCCATCGCAAGGGAGGCTGGCATGT  
TTCGATTAGGGTTTATTATTAATCCGGTTCGCCGGGATTTGGCGGTGACGTTGGGGTCAAGGGCAGTGACGG  
TGTGGTTGCCGAGGCGCTGGCCGAGGCGCTGTGCCAAAGCGCAGGAGCGGGCGCGCAAGCTCTGTTG  
CCACTGTGCGAGCTGAATGTCCCGTTCGAACTGCTGACGGTGGCGGGAGAGATGGGGGAGACGGTAGCCC

GATCTCTGGGATTGCCCTGTGGGTCATCTATCAACCGGTCGGGGAGAGTACCTCGGCCGATGATACCCG  
CCACGCCGCCGGGCTGATGCGCGAAGCCGGGGTCGATCTGCTGCTATTTGCCGGTGGTATGGCACGGCG  
CGGGATATCTGCGCCGCGGTGGGGGAGTCTTGCCATGTGCTCGGCATTCCCCTGGGTGCAAGATCCACT  
CCGGCGTCTACGGGGTGACGCCCCGCCAGCGGGCGGGTGGTGGCGCGGATGATCGCAGGGGAACCTGCT  
CAGCCTGATCGATGCCGAGGTGCGCGACATCGACGAGGAGGCGTTTCGCGCGGGCAAGGTGCGGGCCCGC  
CACTACGGCCAGCTGAAGGTGCCCGGCGATCTGCGTTACGTACAGGCGGTCAAGCAGGGGGGAAAGGAGT  
CCGAAGAGCTGGTGTGGCGGATCTCGCCGCCGGGGTGGTGGAGCAGATGGAGCCCGATAACCTCTATCT  
GATGGGCTCCGGCAGCACGGTGGCAGCCTGTATGGCAGAGCTCGGTCTGGAAAATACTTTGCTCGGTGTG  
GATCTGGTGGAAAATGGCCGACTTATCGGGCAGGATCTCAGCGCCGCCGAGATCCTGACCCGGATCCGCG  
GCCGTCGCTGCCGACTGATCATTACCTGATAGGCGGACAGGGACATCTGTTCCGGCGCGAAATCAGCA  
ATTGAGTCTGAGGTGATTCGGTGTGTCCGGCTGGAGAATATCCAGGTGCTGGCAACCAAAGCAGCTT  
GCCGCCCTTGGCGGCAGGCCGCTGCTGGTGGACACCGATGATCCCGAATTAACCCGGGCGTTGCGTGGTT  
ATCTGCGAATAACCACGGGATACAAGGATCAGGTCATCTACCCGGTGGCCAACCCGGAATAGGACGCCAG  
GGACGCTGCTGGCCTGGCGCCAGAGAGCTGCAATCAACCGGATTGCGGTTCCATACCCCCGAATTTTTTG  
CCGCAAATGAGGCTGCGTTACATGACGATTTACGATTTTGGAGCACAAGTTGTTGGGACTGATCGACAGCA  
TGTTTGGTACCGCGACCGACGATGAGCTGTTTGGCGGGGGTTACCTGCGAGGTCATATCTCATTGGCCGT  
TGCCCGGGCCGAGCTGGAAGGCAAGACCCTGGTGGCGGACGTCAAGAGCTATGTGCTGCGCAGCCTCAAC  
GAGGCGATCTTGCAAGGTGAGCTTTCTGAAGAGGATGAAAAACTGGTGCAGGCGATGTGGAGTCGTTTGC  
AACAAGACGCAGAAGCTTGATCGGATACACAATTCAAACTGAAGTTTGGAGTTTATCTTCCCCTGAAGTT  
AGTGAAGGTTAATAATAAGTTTTCGCTTTTGTTCAGGGATTAACCTATGGCCTCCTCCTCAGCATTG  
CCAATAAAGTCCGCTCGAGATGCTCTATCACTGGGAGCGGCAGTGTCTGATCGAACCTACCTGCGTCA  
AACCATCAACCGGAATATGTGATTTACCTGGGGTGAAGTGGCCGATGAAGCGCGGGCGGATGGTGACG  
GCCTTGGCTCACCTCGGTCTGGTGGCCGGTGCAGAGGTGGCGCTGCTCTCCAAGAACTGCGCCAGTGGT  
TTATCGCCGATCTGGCGATGCAGATGGGGCAGTATGTGAGCGTGCCCATCTACCCGACTGCCAACGTGCA  
TACCATCGAATATGTGCTGCGCCACAGCGAGGCCAAGGCGATCTTCGTCGGCAAGCTGGATGACTGGAAG  
AGTCAGGAGGCTGGCGTCCCCGCCGATCTGCTGCGCATCGCCTTCCCCTATGACACCATGCCGGCCAGCC  
ACCAGTGGGACGATCTGCTGGAGGCGCATGAGCCGATCCCTGACAGCCCGGTGCAGGCCCTGACTCCCT  
GCTGAGTCTGCTACACCTCCGGCAGTACCCGCAAGCCGAAAGGGGCCATGCTGAGCTCGAGCTGAGCTAC  
GCCTGGTCTGTCGAGAAGCTGGTGGAGCGGTGAGCCTGAGCCAGGCCGATAGGGGGCTTCTCCTACCTGC  
CGCTGGCCACATTACCGAGCGGGTCTACATCTACGGCGGAAGTCTCTATGGCGGCGCTACCATCGCGTT  
CCCCGAATCCCTCGACACCTTTATCGAAGATGTCAAACGCTGCCGTCCCACCGTCTTTATCTCGGTGCCA  
CGGCTGTGGGCCATGTTCCGCATCAAGATCCACGAGAAGCTGCCCCAGAACAACTGGAGTTGCTGCTCA  
AGATCCCGCTTATCTCCGGCCTTATCAAACGCAAGCTGCAAAAAGGGTTGGGACTGGATCAGGCCCGGGT  
ACTCGGCTGCGGCTCCGCGCCTGTCTCCCCTGCGCTGCTTGAGTGGTATCTGAGCATCGGCCTCAAGGTG  
ACTGAAGCTTGGGGCATGACCGAGAACCACGCTACTCCACCATCAACTACCCGTTCCGTGCCGACAAGA  
TCGGCACCGTCCGCAAGGCGGGGATCGGAGTGACCATCAAGATCTCCGACGAGGGGGAGATCCTCTGCCG  
CTGCGAAGGGATGATGCTGGGTTACTACAAGGATCCCGAGCACAGCGCCGAGGCCATCGATGCCGAGGGG  
TGGCTCCACACCGGCGATATGGGCAAGCTGGACAAGGAGGGTTATCTCACCATCACCGGCCGGATGAAGG  
ATGTGTTCAAGACCGCCAAGGGCAAGTATGTGGCGCCGGTACCCATCGAGGGACTGCTGGGGCAGGAGCC  
CATTATCGAACAGCTCTGCGTGATTGGTTACGGCATGCCCGACGCCATTTGCGCTGGTGCAACTGGCCGAG  
AGCGCCATGAAGGGCAATCGGGAGGAGGTCAACGCCAGACTGGAAGCGGCGGGGTACGGGTCAACGATC  
AGCTGGAATCTCATGCCAAAATTCGCGGCATTTCTGGTGGTGAAGACTCCCTGGAATATCGAAAACGGCGT  
GCTGACCCCCACCATGAAGATCAAGCGTCACCTGCTGGAGCAAAAGTACGCCAGGTCCGGGATCGCTGG  
CCCTCATCCCAGGTGGTGGTGTGGGAGGAGTAAATCCCCTCTTTCCATAGCGCAACAAACAACAGGCC  
CTTGATGGGCCGTTGTTGTGTTTGGGACATATCACTCGCCACTGTTTATCGGCGAGTAAAAGCGCGTCC  
GGTTAGATCTGCGCCAGCGCGGCCAGATCGGCGATCAGATCGTCCGCATCTTCCACCCCGATGCTGA  
AGCGGATGAGGTGCTCGTTGACCCCGGCGGCGAGGCGGCTCGCCTCGTCCATGGCGGCGTGGGTGGTCT  
GGCCGGATGGCAAGTGAGGCTCTCGAGATCCCCCAGACTCACCGCTGCACGAACAGCTGCAGGTTATCG  
AGCAGGGTGGCGCAGCGCTCAAACCCGCTTCAAGTTCAATACTCACCATGCCGCCAAAGCCGCTGGCGA  
AGGCGCCGAGGGCATCGTGGCCCGGATGGTTGGCAAGCCCCGGGTAGATCACCTTCTTCACTGCCGGGTG  
GGCGGCCAGAACTCGGCCACTTTCTGGCATTGTGCAGGTGGGCATCCATCCGCAGCGGCAGGGTCTTG  
ACCCCGCGCTGCAGCAGGTAGGCCTCCTGCGGGCCGATGGGGGAGCCGATATGTTTGGGGCCACGGTGC  
GGATCGACTTCATCAGGGCGTGGGAGCCCGCCACCACCCCGCGATGATGTGCGCGTGGCCACCAGATA  
CTTGGTACCGCTGTGCATCACACATCGACCCGAGCTCCAGCGGACGCAGCAGGTAGGGGGTGGAGGAG  
GTGTTGTCACACACAGTATGGCACCCACCTTGGCGGCTGCTTCCACCACCAGCCGCGGATCCACCACCT  
TGAGGGTGGGGTTGGTCAGGGTTTTCGAACAGTACCACCTTGGTGGCGGGGCGGATGTTGGCCAGCAGATC  
CCGATCGCTCTCGTAGGCGGTGACTTTTATGCCGGCGCGGCTGAAGGTCTGCTTGAGGAAGGCATCGGTG  
CCGCCGTAGAGCGGGCCGATATAGGCCACCTCATCGCCGCTGTCGGCCAGGGCATAATGATGGCGCTCA  
CCGCCGATGCCGCTCGCCACCACAGCGCTTTCATCGGCACCTTCAAGCGCCGCCAGTTTCTGCTCCAG  
CTCGGCAGTGGTGGGGTTGCCAAAGCGGCTGTAGATAAAGCCGGGGGCTTGACCTGCAAAGCGCTCCTTG  
CCCCCTGGGCGTTGAAGTAGCTGAAGGTGCTGCTCTGGTAGAGCGGGTGGTGGGGCACCGGCTCTGTG

GGTCGATCCGCTGGCCGCTGTGTACGCTCATGGTCTTGAATTTTCATCGTGTGCTCCGTGATGGCCAGGC  
TCTGGCCATGACTTGTGTTTTGTTGTTTCGTTGCTTGTGTTTTTGTGTCAGCGCGGGTATGTGCATGCGGCTTG  
TGGCTTATGCATATAACCCGCTGCGCATCTCTGCGCTGTTTTCAGGCCGTATCGCTTCGCTCTTTGTGCGC  
GGTAGGCGAGCGGGTCCCCATAGTGGCGGGCCGCCACATCCGGGTGGGAGCGCAGCCGCCCTTGAGTA  
CGTTTTTCCCAACCTGATAGAAGAGCGGGTGGTTCGGGTCCTCTCCGGCCCTTGCGCCTGCGCTGCCAG  
CTCTGGGGAGAGGCTGAGCAGCGGCACGGTGGCATCGAGCCGCGCCGCATAAAGAAGGCGCAGGAGAGG  
CGCGAGACGCCGGGCGGGGACTCACCACCCGATGCAGGGTTCGCTTTGAGATAGCCGTTGGAGGCCAGCT  
CCAGCAGCTCGCCGATATTGACCACCAGCGCTCCCGCAGGGGCGGTGCGGAGATCCAGCCGTCGGCCGT  
CTCGACCTCAAGCCAGAGTGATTGTCTTGCATCACCAGCGTCAGGTAGCCGGGATCCTTGTGGGCGCCG  
ACCCCTTACTGCTGCCACCCGCTCTTGCCTCGGGTAGTGAATCAGCTTCATGTGTTGGTAGGGGCGCC  
CGCGAATAATTGCTCGTCAAACACGTTGGCCGGTTCGCTCCAGCACCTCGGCGAAGGCAGCGAGGGTGA  
GGTGATATTGCTCAGCCGCTCCTGCCACGCGCAGATGGGCTTTCATCTCTGGCAAGGCGCCGCCAT  
TGTTTGGGGCCGATCAGCCGCTGCCAGGGTTCACGGATCAGGGCCGAGGCAAGGCTTGCGCCTCATTCA  
TGATATCGAACTGCTCCCGCAGATCCGGCCGCGCTCGGGTTCAGCTCGGCACCGACCCGGTTGTAGCCGCG  
AAAGTGGGGGCTGTTGACCATCTGCACAGCCAACTTCACCTGCTCCGGCAGAGCAAAGAAGCGCTCTGCC  
AGCGCCAGGGTCTTAGCATCTCAACCTTGGCTCAAGCCGTGGCCGACCAGATAGAAAAAGCCACATCGC  
GGGCGGCCGCGGCCAGCCTGGCCAACATAGGGCGACGCACCTCGGGTGCCCCGTTGAGGGCAGCCAGATC  
GATGATCGGCAGTGGTGAATGTTCCATGTGCACCTCCTCACTCTTTCGTTATCTCTAGCGCCATCTCCTC  
TGCTGCCTCTGGTGCGGGCGAGTCTGATGAGCGGCAAACGGGATGGCGCGACAGTGTGGCGGTATGCGCA  
GCGGTGTGGCGCCATCTGGAATGAAGGGGATGCTACTGTTTCGGTGTATAAGACGGAACAACAAATTAT  
TCTTAGTTATATACAAAATTCGAAATGGAATTCGGTATGTAATGGGGTGGCTGCTTTTTGCGCAGCCATT  
AAGGGCGGAATGGGAAATGATGGGAAGGAGAGTGATAACCAGAGGCAAGCTGCCACGGTAAAAATGACC  
AAAACAGAAAATGGCCAAAACAGAAGGGAGGCGGATGCCTCCCTTCTGGTTGAGCGGTTTTTTCACCTTAC  
CGAAAGCACAGGCAAGTGACCGCGCATCTGGCCTTAACCGGTTGCAGGCTCTCAGTAAGCCAGGGTAAA  
GCGCTGGCGCAGGTGAGCCGGTTTTTCCGCTCGTTTCAGCACGCCATCGGCCAGATCACCGGCGGTGATC  
CCGGCAGGCTGTTCCGCACTAAAGAGCACCTGATCGCCACCAATCCGATAGCCGCCCGCTTCTCGCCCC  
GTTTCGAGAAACACCGGGGAGAGACGAAGCGCCAGTCGAGGGTGGTTTTACGACGCAGGGCGGTGAGACC  
GTCGCGGGCCGCCAGTGTCTCCCTGTTTCCACTCAGCCGGAACTCAGGGGTATCCACCAGTTGCACGCG  
GGGCAACCTCCAGACTGCCGGCCACTACTACCAGCAGCAGCTGTTGGCCGCTTGGCTGCTGCGCA  
CGATCGCGTTGGCGCCCTTGGGTAAGTGGTTCGTTAGATATCCGGTGTGGTCCAGCCCGGGTGTAGGCGCT  
GATCACCAGATCGTGCCTTGGAGCACCTCGGCCAATGCCTGCGGGTTTTGGGCATCCACCGCCACGGCG  
GTGACCTGCGGATGGGCGGCCACCTTGTGACATCGCGGACGATGGCGGTGACGTGATGGCCGCGGCTGA  
TGGCCTCGTTAGGATGGCTGAACCGACAAAACCGCTGGCACCAGATCAGGGCAATTTTCATGGGGAACCTC  
TCCTTCACTGTTGGAATGGGGCTATCCTACGCCCATTTATGATTTAATAATCACCTCAAAAATGCATT  
CACTTATAAGCTGGATTTAATAATGGAACAGCTCAGACGTTACGCCATCTTCGCCCGCGTGGTGGAAAGCG  
GGCAGCATGACAGGGGCGGCCAAAATCCCTTGGCATGACCCCTCCGCCGTCAGTCAGCATATCAGTCAGC  
TGGAGAGCCTGCTCGGACTGCCCTGCTCCATCGCTCCACTCGCCGCTTTAGTCTGACCGAGGCGGGAGA  
GGTGGTGTGGCAAGGGTGCCGGGCGTTGCAGCAGACTCTGAGCGAGACCGAGCTGCGCCTCTCGGAGGTG  
CGCGACGCCCTGCTCGGGGAAGTGCGGATCACCGCCCGGTGGGGATGGCGGGCAACCGTTGGCACTGG  
CCCTCTCGCCGCTGCTGCAGGCCACCCCTGCCTTACCATCCAGATCATCGCCGACGACGAGAAGCGGGA  
TCTGATTGCCGAGCGGATCGACGTGGCGCTGCGGGTTCGGCACCTTGCCCTGACTCGACCCCTGGTGGCCCGT  
AAACTGGGGCAAACCCGAATGCTGCTCTGCGCCGCTCCCGCTATCTGGCGCGCAAGGGGACGCCGCGCA  
GCCCGGAGGCGCTGCTGGATCATGACTGGCTGGCCGCCGATATGCTGAGCGGCGGGCTGACCTTCTTCGA  
CGAGAAGGGGCGAGGGGACAGGGTCAAGCCCAAGCCGCGGGTGGTCTGCAACAACGTGCTGCCGCTGCGC  
CAGTTACCCCTGGCGGGGCGAGGGGTGTGCTGCAGCCGAGGGGAGATCGCCGAAGATCTCGCCCTCGG  
GCCGCTGCTGGAACCTGCTGCCGGCTTTCGGGTGCCACCCATGGAGATCCACGCCATTACCCCGCAGCG  
GGAGATCCCGGAGAAGGTGCGCCGGGTGATCGCCGCCCTGCGCAGCCACTTCGCCGAACCGGTGGGGGCC  
GCGGCGACACGTCCGTAGCCGGGGCAAGGAAGAAGGCCGTTCCGGTTGGCCGGAGCAAACAAAGAGCAAA  
CAAGGATCAAACAAAGAGGGCAGCCCGGGCTGCCCTCTGTGATGCAAGGCCGGTGAACAGGCCCG  
GCCTCACTTTCATGTAGAGACCGCGTTGATGGCCAGGGTCTCGCCGGTGTATAGGCACCCGCCCTCGCTG  
GCAAGAAACACCACAGCGCGGCGATCTCTCGGGCTTGGCCAGTCGGCGCATGGGGATGTCGGCCTTGA  
TGCTGTCCAGGATGTGCGGTGCGGATCGCCTCCACCATGGGGTGGCGGTGTAGCCGGGGGCGATGGCGTT  
GACCGTCACTCCGAAGCGGGCCCTTCCGCCGACGCGCTTGGTGAAGCCAGCATGCCCGCTTGGCG  
GCCGAGTAGTTGACCTGGCCGAACCTGCCCTTCTGGCCATTGACCGAGGAGATGTTGATGATGCGGGCAT  
CGCGCTGCTCGCACATGGCGTCAAACAGCGGCTGGGTACGTTGTAGAGGCTGCACAGGTTGGTGTGGAT  
CACCTCGAACCCTGCTCCGGGGTCAATTCGCTTGAAGGCCCGTCCCGGGTGTGCGGGCATTTGTTGACC  
AGCACATCCACCCGCCCTTCATCTGCGAATCGGCCAGAGTGTGCGGGCACATGGCGGTGTCGGCCA  
CGTCCAGCGCCAGCAGCCGCACCTGATCCGGCCGAAAACCTGCTCCCCGTACCAGTCGTGCGCCGCTGC  
CCCGTTGGCGCTGGAGTGGGTGGCGATGATGCGATAACCCCTGGGCCAGCAAGGCGGTGGTGTGGCGGAT  
CCGATGCCGCCACGGGCTCCGGTGTCAAGGCAACTTCTTTCATCTTGGCTCTCCCTGCGTAAAAGATTC  
GAACGAGGACTTTATGGGCTTTTTGAGGTAATTGATATATTTGTTTTCAAACAATCTGACAGGCAAACGC

GTCAC TTTTGTGACAGTCTGCCAAGCTGGCTTGACGCGCTGGCCTAAGGGGCTGGCAAGGCCCTGGGCAA  
GGGGACCGGGGTGAGCGCAGCGGCCAGCGCTTGCCGCCAAGGTCGCGGCCATGTTTAATGGGGCCCTTGC  
GCGTAGCGCCTTGCCGACAGCCCAGATCCGATCTCGTCATGACCATCTTGTCCACCATTCCGGGCGCCGT  
GCCCCAGCCGATAGCCAGCTGACCCGCATCGAGCGGGTGTCTGACTACATCCACGCCAACCTGGATCAG  
CCGCTGGCGCTGGCCGAGCTGGCGGAGCAGAGCTGCTGGTTCGCGCTGGCAGCTGCAGCGGGTGTTCCTCC  
ATGAGACGGGGCTGACGGTGGCCACTATGTGCGGAGCTCAAGCTGAGCCAGGCGGCAGAGGCGCTGCT  
CTCTGGCCGCCAGCGGGTGTGGATCTGGCGCTCTGTTACGGTFTTGGCTCAGAGGTGAGCTTCAGCCGC  
GCCTTCAAGCAGCAGTTTCGGCTGCTCGCCGCTGGCCTATCGCAAGCGGGGTTTTCGGCTGGGGCTGCGTA  
CCCCCTGGTGGGGCTACCCTGCCGAGCCCATGCCTGCCAGGCTGGTACAGGTGCGGATCGAGAGCCT  
GCCGGGCTTTATCTGCACGGAGTGAAGGGGCAGATCCGCGGGCTGTTTGGCCCGCTCCCGACTTTTAC  
CAGAGGTTGCCCGCCATCTGGCGTGCCTGCGCACGGCGGGGTTTTCGCCACCGGGCAGGAGCGGGTGG  
GGGTGGTGGATGTTTCTGGCGCCGCGAGTCTCCCTACTGGGCGGGCTGCGTGATGGAGGAGGGGGC  
CAGCTTGCCTGCCGGTCTGGCGCATCTCCTGGTGCCGGCCAGACCTACGCGGTGCTAAGCCACGTGGGC  
CCGGTCAGCCAGCTGGGGCAGACCCTCAACTGGTTTTATCCTGCACTGGCTGCCGAGCTCCGGCTATCGCG  
GGCTGGACGGCTTCGAGCTGGAGCGTTACGCCCCGATTTTACGGCAACCAGCCGGATGCCCGCATGGA  
GTATTGGTTGCCCGTGCCTCTCTGAGAGGGCTATTCCCTTGCCCGGAGGATGCCGGGCACTGCTATC  
TCTCTTTCCCTTATTTGCTGCGCCAGGCTTTGCTATCCATTCGACATCGCTGCGTTGCTGCCGTGAGTT  
GAGGTTGCCGGATGGGGCCAAACTGGCCGATTTTCTCTCTTTTTCAGCACCAACATGCCCCAAATTTGTTA  
ATTCAAGGGCAAAATGACCCAATAAAATGCAAATGAGATTTGTTACTATTCATTCATTCGATTCGAGGAT  
CAGATGTACGCCACTCACCCCTTTGACCCTGGTGC CGCGACTATCTCCGCCCTGTTGGCTGGCCCTG  
TGCAGGCAGCTGCTGCCGAGCGCCGACACAGACCCGGGTCGACGAGACCTGACCCTGCTCGCGGAGAC  
CTATCGCAACACCGCGACCAAGACCCGGCTCGACCCCTGGAGACGCCCCAGGCCATTTTCGGTGGTGGAG  
GGTGACACCCTGGAACAGCGCGCGCTCAGCTCGGTGAGCGAGGCGCTGCGCTACGTGCCCGGCGTCAACA  
CCGAGCTGCCGGGGCGGGGCGGTCAACCGGCTGGATCTGTTCAACATCCGCGGCTTTGACAAC TACCAGAA  
CTTCTACGACGGCCTGCTGCTGCAGTACAACGACTGGAACCTGCAGCCCCAGATCGATCCGGTGGCTATC  
GAGCAGCTGGAAGTGTTC AAGGGGGCCACCTCCGTGCTCTACGGCAGCATGCCCCCGGCGGCATGGTCA  
ACCTCATCGCAAAGCGCCCCAGCGGGAGAGCAGGCACAGCGTACAGCTGGCGAGCGGGACGGGCACCCT  
CAAGGAGTGCACCTCGACAGACCCGGTGCCTCAGACGATCAGTTTGCCTATCGGCTGTTGGGGCTGGCC  
CGCCAGAAAGAGGGCCAGCGGCTGACCTCAGAGGAGGCGCTACGTGCTGGCGCCCTCTCTGACTGGC  
AGTTGAGTGACCGCACTCTGCTGAACCTCAACCTCTATTACCAGAAAGACCCGCAAGCCGGCATCTACAC  
CACGGTACCGGCCAGCGGCTCGGTCAAATCCAACCCGCTGGGCCAGCTGGGCAGCGATACCTTCCCTTGGC  
GATGAAAACCTGGAACCACTACAGCCGGGAGGTGACCCTGCTCGGCTACAAGCTGAGCCACGACTTCAACG  
CCAACCTGGCAGCTGCTGCAAAACGCCGCTACATGGATGCCTCGGCCAACAGCAGAACACCTACAATGC  
GGCGCTGGCGGCCGATAAACCGCACCCCTGGCCCGCAACGCTACCTGACCGATGAAGAGTCCCGCGGCTTT  
GTCATCGACAACCAGCTGGCGGGCAAGGTGCAGACTGGCAAGGCCAGCACAACTGCTGCTGGGGGTGG  
ATTACCAGTATCTGGATGCGCGCATTCTCTACCGGATACTCTCGACTACTCTGCCCCGCCATCGACAT  
CTTCAACCCGAACCACCAGCAGATAGTGCCGGCAGACCTGGCCTTCAACTATCAGGACAACC GAACCATC  
CGCCAGTATCAGAGCGCCTCTACCTGCAGGATCAGGTGCGCCTCGATCGGTTGGTGGCCATCGGCGGGC  
CCCGCTACGACCGCTACCGGATGGACACCAGCCGACCCCTCTATCAGGGGGCGGGCAGCAACACCCT  
GGCCAGATTGATCAGGACAACCTCTCGCTGCGCCTCGGTGCCCTCTACGAGCTGGATCACGGCCTCTCG  
CCCTATGTGAGCTATGCCGAGAGTTTCGAGCCGGTGGCGGGGGCGGACAAGCAAGGCCAGGCGTTCAAAC  
CGGCCACCGGCCGGCAGTGGGAGGGGGGGCTCAAGTTCCCTCTCCGAGGACATGAGCAAAACCGCCACACT  
CTCGGCGTTCCACATACCAAGCAAAATGCCCTGGTGCAGGATCCGGACAATGTCTACGGACCCAAGTTG  
CAGACCGCGGAGATGGTCTCCAAGGGGGTGCAGCTGGAGGGGGCGACTCGATCTCACCAGCCGCTGGGATC  
TGGCGCTGAGCTATAACCGCTCAGGAGATGGAGATCACCCGCGACACTACCAGCCTGCAGGGCAAGACTCC  
GGTCTGGGTGCCCAAGCAAAATGGCTTCGCTGTGGAGGAACTACCTGCCGGCCGGCCGCTGGAAGGAGTG  
CGCCTGGGGGCCGGTCTGCGCTATGTGGGGGAGGCCAGCTTGATGCCGCCAACACCGATACGGTGGCGG  
ATTACCTGCTGATGGACATGGCTGCCTCCTACGATCTGGCCCAACTCAGCCAGCGCCTGCAAGGGGTGGA  
GGTGTCACTCAGTGCCAGCAATCTGTTCAACAAGACCTACTACTCTGCTACGACCAGAACAACCTGCTGG  
TTCGGCGCAGAGCGCAGCGTGGAGGCGGACTCAAATACGTATTCTGACCCTGCGTCCCGGGCCGCGCCC  
GGGACTCTCACACCCCATGAGCGGCGCCGGCGTCTGTCGCCGAGCCCGGGGGCGGGCGGAGCCGGAT  
CTGCAGGCGCTGGCGGATCACGGCGCCCTGTTGCGGGCCGCGCCGGGCTTATCCCTTCCCTCAAGGGGC  
GGCTGGTGGCTGCCGGCAGGCTGCGGCGCTGTTGACGGCGACCAAGCAGGCCACGTCGGCCGAGGTGGC  
GGCCGCGCTGCACGAGTATTGGCGGCTGGCCCATCCGAGGCGGGTCCCCTACTGGCTCACCCGCAGT  
TGGGGCATGCTCTGCTGGCAATCCATCTATCTGGCCATGGTGGCCGTCTATCGGCTGCGGGCCGTGCCGG  
CGCTGGAGAGGCTGGGCCAGGGCTATCAGGATGGGCTGGTATCGGGCTTTACCTGCCGGCCGAGCCAT  
GATCAAGGGGGAGCTGGAACCTTGATCAAGACGGCGGGCGAGCGACTGCAGGCCCATTTGGCAGGCGCTG  
TTCGAGCGCTCGGGCAGGTGCAGCGGCTGCGGCCGGGCTTCGTGCGTCCGCTCTTGGCGGACGATCTGC  
TGGCGGGCGCTGGTGGGGTACCGGCGTCTTTTACGAGATAAGCCACGCCGAGGTGGCGGGCCATGCACC  
GCACTGGCTTGCCGCTGCGGCTGCCGGCCGAGCACCTGACGGGCTGGCAGCTGGCGCCCTGGCCGCCA  
CGGGCCGGCTTGGTAGGTTATGTGCGCCAGCGCTGCTGCTGCACTACAAGCGCCGATGGTGGAGCTCT



GCGCCAACTGCCCGCGGGCGGGGGGGCGGCGAGCTGTGAAGAGGGTGCTTGAATAGCGAAGCCCTGCGT  
GATGACAAGCCGCTTAAGGCGGCTTTTTACTGAGCTTTTAGGTCGCCCATCTTGCTGCGAATGCGCTCG  
AACAGGCTCTGCAGGCAGGCTTGATCCCCGATCGGCGCCCCGACCGCGCCATACATATGGCGACGAATAC  
CGCTGCCGAGGGGACGGGCGCAGAGCATCCCCTGTCTGACAAACTCGTCGCTGGCCCAGCGCGGAAGGC  
GGCGACGCCGAGTCCTGCGGGCGGCCATTTGCAGCATCACCGAGGTGTTGTCCACCGGCTTGCAGCGAGCG  
GGCTCCACCCCGGGGGTTGCAAAAAGCGGCTGAAGATATCCATGCGGCTGCGCTCCACCGGATAGACCA  
GCAGCACCTCCGGCCCCAGATCGCCCCGGCTCGATGCGGCTCTGGTGGCAGAGGGGATGATCCGGCGCCAT  
CACCAGAGTCAGATCGAAGGCAAACAGCGGCTCGAAGTGGAGATCGCCGCGGGCCTGCACGTCCGAGGTG  
AGCAGCAGATCGAGCTGGCCGCCTAGCAGGGCATTGATGGCATCAAAGCCCGGCACTGACTCCACCTCCA  
GATCCACCCCACTCCACTGGCGGGCAAAATCTGGCAATAGCGGCAACAGCCACTGGATGCAGCTGTGGCA  
ATCGAGCGCCAGATGCAGCTGCCCCGATCGCCGCTCTGCAAGGCCTGCAACTGCTTCTCGGTCTGGGGC  
AGGGCGGGCAGTACCTGACGGGCGAGGGCGAGCAGCTGGCTGCCGGCTGCGGTGAGCACCAGCGGGCGGC  
TTTTGCGCAGGTAGAGCTCCAGATTGAGGCGGGTCTCCAGCTCTTTGAGCTGGTGGGAGAGGGCGGACTG  
GGTGAGGTTGAGGGTCAGCGCCGACCGGCCAGCGAGCCCTGCTCGGCCAGCGCGGTCAATATTTTCAAG  
TGCTTGATCTCTATCCCTGCATTGCTTGGCACTGCCATAAGATGGCTCCTTGTGAGATTGCGTATGGCGC  
TGAGGTTGCGGTGCGCGGTGGCCTGTTGCGCTTCTTACTCCGGTACCTCTTGCACCTGTAAAAATCGGC  
CTCTGTATCCTCGCGGTGAACCTGACTGGCGGTGAGTTGAGGATTATTTGAGAGCCACTTGAAGAGGATT  
CAATAGCCAGCGTCACCTTATTTTGTCAATTTGGATGTGTAAACATCTGGATGGCTAAATCATCCAGTTT  
CCCATCAGATGAATGAGCATAAGGAAATGAACCTATGACACGAGCACACCCCTGGGCTTCCCCCGTATC  
GGCGCAAGCGCGAGCTGAAATTTGCCCTCGAATCCTACTGGCGTGGCGAGACCACTCAGGCCGAACCTCG  
TTGTGCTGGGCAAGACGCTGCGTGAGCGCCACTGGCAGGCCAGCACGGCGCGGGGTCAATCTGCTGCC  
GGTGGGCGACTTCGCTGGTACGATCAGGTGCTCGGCACCAGCCTGCTGGTAGATGCAGTGCCTGCCCGC  
CACCGCCATGGCGAGACCGATCTCGACACCCTGTTCCGGGTGCGCCGCGGGCGTGGCGCGACCGGCCCGG  
CGGCGGGCGGCCGCGGAGATGACCAATGGTTCAACACCAACTACCACTATCTGGTGCCGGAATTCAGCCG  
TGACCAGCGCTTCAAGCTGGGCTGGAGCCAGCTGTTTACGAGGTTGAAGAGGCCAAAGCGCTGGGGCTG  
CCGGTCAAGGCGGTGCTGCTGGGACCGGTCTCTTATCTGTGGCTTGGCAAGGAGAAAAGAGAGCGGCTTCT  
CGCGCTTGAACCTGCTCGATCGCCTGCTCATCGTCTATCAGGAGATCCTGGCCAAGTTGGCCGCCAAAG  
GGTGGAGTGGGTACAGATCGATGAACCTGCGCTGACGCTGGACCTGCCGACGAGTGGCGGCTGGCTTAT  
CTCAACGCCTACGAGCGCCTTGCAGGCCCCCTGCAAGCTGCTCCTCACCACCTATTTTCGGCTCGGTGGCC  
ATCAGCGCAGCATCATCACCAGCCTCAAGGTAGATGGCCTGCATCTGGATCTGGTGGCCGCCCGGAGCA  
GCTGGAGACCCTGGTGCCGCATCTGCCCCCGCAGTGGGTGATCTCAGCCGGGGTATCAACGGCCGCAAC  
GTCTGGCGTGCCAATCTGGCCAAGCTGGCGCCGACTCTGAAGGCACTGAAAGCCAAACTCGGCGAGCGGC  
TCTGGGTGGCCTCATCCTGCTCATTGCTGCACAGCCGGTGGATTTGACCCCTGGAGCAGGAGCTGGATCC  
CCAGACCCGAGCTGGTTGCGCTTTCGCTTGCAAAATGTTTTCGAGTTGGGGCTGCTCAGAGAGTATCTG  
GATGGGGGCGAGCTCGACAAAATCACCGCTACAGCCAGCCCATCGTGGATCGGGAGTCCGACAGCCGGG  
TGCACAAAAAAGCGGTGCAGTACGGCTCGCCAGCCTACCAACAGCGATTTTGATCGCCACAGCCCTA  
TCCGGTTCAGGGCAGAGCTGCAGCGCTCGGATCTCAAGCTGCCGTTGCTGCCACCACCACCATCGGCTCC  
TTCCCGCAGACCTCGCAGATCCGGGTATTGCGGCAGGATTGGCGCGCCGTCGCATCGATGACAGTGCCT  
ACGAGGCGGGCATTAAAGGCGGAGATCCGCGATGCCATCGCGCGTCAGGAGGCCATCGGGCTGGACGTGCT  
GGTACATGGTGAGGCCGAGCGCAACGACATGGTGGAGTATTTTCGGTGAACGCTGGATGGCTTTGCCATC  
ACCCGCTTCGGCTGGGTACAGAGCTATGGCTCACGCTGCGTCAAGCCGCGGTGATCACCCGCGATATCG  
ACCGCCCTACCCCTATGACGCTCGAATGGACCCGATTTGCCAGAGCCTGACCGACAAGCCGGTCAAGGG  
GATGCTGACTGGCCCTGTGACCATCCTCTGCTGGTCTTCCCGGGGAAGATGTGAGCCGCGAGCAATCA  
GCCCTGCAAAATCGGGCTGGCCATTCGCGACGAGGTGGCTGACTTGAAGCCGCGGATCAAGATCATCC  
AGATCGACGAACCGGCTCGCGAAGGTTTGGCCCTGCGCAAGCAGGATCATCAGGCCTATCTCGACTG  
GGCGGTGCGAGCCTTCCGTCTGAGCGCAAGCCGGTGGCGGACAGCACCAGATCCACACTACATGTGT  
TACAGCGACTTCAACCTCATCATCGAGGCGGTGGCGGCGCTGGATGCGGATGTGATCACCATCGAGACCA  
GCCGAGCCAGATGCAGCTGCTCGAAGCGTTTGAACGCTTCAACTACCCCAACGAGATTGGCCCGGGTGT  
CTACGACATCCACTCGCCGAACGTGCCAAGCCAGAGCTGGATTGAGGGGTTGCTGCGCAAGGCGGCCAAA  
CAGATCCCGGCCGAGCGGCTCTGGGTCAACCCGATTTGCGGCTCAAAAACCCGCGGCTGGGAAGAGACTG  
AGGCCGCCCTCAAGGTGATGGTGCATGCCACCAGGGCGCTGCGGGCCGAGCTGGCGTAACCGGCAAGCCG  
TGACCGCCATCGATAAGGTGGCGTGTGACAAAACGAACGAGAGAGGGGAAGCCATTGCTTCTCTCTCTC  
TTTTTTTCGTTGGCCACTTTTCCACTGGATCCTGAACCTTGGCGAGCCGCTTTGCACTAGGCTCAGAGT  
TGGCAGAAGTGGATGGAGTCGCGGCCATGAGAGTCAGTCTGGGGAGCGCAATCCTGTGGGGATTGCTGAT  
GTGTGAGAGTGCATGGGCAGCGCCAGCGGCCGAGTTGAAGATGGTCTACTTTGACGACTTTGCCCCATAT  
TCGTGGCGTGACGAACAGGGCAGGATGCGCGGGCTGATGATCGACGTGATGGATCGGGTGGCTGCGCAGA  
TGGGGCTGCGGGTGCACCACGAAGGCTATCCGTGGCAACGGGCGCAAAAACCTGGTGGGATGGCGCAGGC  
CGATGGCTTCGTGACCATCGCAACCCGGGAGCGGCGCAGCTATAACCTGATTGTGGAAGAGCCGGTTACC  
ACCACAGTGCTAACCATTTTTTACCAGCGTGGCCATCCCCGAATGGCGGAGTTTCAGCGAGCCAGCCGCT  
TGAGCGACTTCAAAATCGCTTACCTTTCTGACTATTTTCGGTAATGGCTGGGGCAAGGAGAACCCTGGCGGG  
CTTACCCTTCATCACACCATCAATGTTGATAATGTCTTCAAAATGCTGGCGGCGGGTGGGGGGACCTG

ATGGTGACCGACCCACTGGTGGCACGTTTCAAACCTCAACCAGCTGGGTCTCTCCGGGCAGGTGGTCGAGG  
TGCCGCTGCAGCTTGCCTCTACCCCGTTCAATCTCTGCATCGGCAAGCACTCCCGCTTCAATACCCGGAT  
AACCGAGTTCAACCGAGCCCTGCAACGGTTGCGACAAAGCGGCGAGTTGGCGCGTATCGTCGAACGCTAT  
CGTTGATGCGAGGCCCATCTGCGGTTTGCCAACGGCGTGTCTATCTTGGCGTCATATCGGCGATGGTT  
GTCCAGAAGGCATCGATCAAGGGCCCCCTTGCTGTGGGGCGGACGGATAAGGCCAATGGTCCAGCAGGCTT  
CCCCATCTCTAAGGGGCAGGGTGTAGTACATCCGGGTGCTCTATGGTGGTGGAGGAGGGGACCAGAGTCCA  
GGCGATCTCGGCTGCCGCGGTGGCAACACCGGCGGCGAAGTCGTTGACGTA CTGGATATCTCGAAAACGC  
AGCCCGCTCTGGGCCAGATAGTTTATCAGGTGATCGTAAAAACGACGGCGCCTTGTCCCGACGCAGGATCG  
CCAGCGGCTTGTCAACCAGATCCGCCAACCCCTCACATCGCGGTAGCTGGCGGGCAGCACGGCGACAAA  
GTGGGCTTCGACCACCGGCGAGGGCGTGCCACCTTGGGGGCGGGCAGGCGGCAAAAACCGAGATCCAGC  
TTGCCCTCACTCAGCGCCAGCAACTGGTGGTGGTGGAGAGATCGTTGAGCTCTATGGTCACTTGGCGCC  
GCTCGGCGCGAAAGCGGGCGATGGCGGGCGGACCAGGATCTTGGTGGCTACGCCAAAGCCGATGCGCAG  
GGTGGCGACATTGCCCGCCAGCACGTGCGGGGCGGTGCGCGAGAGTTGCTCGCTCTGGATGACCACAGCG  
CGGGCATCCTCATAACAGCGCCCTGCCAGTCCGGTGAGGCGAGTGGTACTGGCGTTGCGCTCGAACAGCT  
CGCCGCCAGCTCCTCCTCCAGCCGCTGATCTGTTTGGTCTCAGGGCCGACTGGGTAAACATGCTGGCGCAC  
CGCCGCTGGCCGAAGTGCAGCACCTCCCCAGAGTGACGAAGGCTTTCAGATCCCGTAGCTCCATCAGG  
GCTCCTTTTATTCTGTTGGGAATGTTGAGTGGTCAAATTTGTCATTGGACGGAAATTTTAGAAGTGATGG  
ATGCTTATGCCAATTCATTTTCGGATGCCCGACAGGGGGCGCGGAGTTATCAGAGATGGCTGACACCATC  
AGCGCAGAAGGAGCAACACCAGATGCATCACCACAAGTTCAACGACTTCCCGAGCGATTTTCTGTGGGGC  
GCAGCCTCCGCGCCTATCAGGTGGAGGGAGGCTGGAATGCCGATGGCAAGGGGCCCTCGGTGTGGGATC  
TCTTACCAAGCTGCCGGGCAAGACCTTTGAGGGGAGCAACGGCGATGTGGCGGTGGATCACTACCACCG  
CATGGAAGAGGACGTGGCGCTGATGGCCGAGATGGGGCTCAAGGCTTACCCTTCTCGGTGAGCTGGCCG  
CGCATCTATCCCACCGGTCCGGGGGAGGTGAACGAGGCGGGTCTGGCCTTCTACGAGAAGCTGATCGACA  
CCCTCTTGGCCCACCGATCGAGCCGGTACTGACCCTTTATCACTGGGATCTGCCGCGAGGCGCTGCAGGA  
TGAGTACGGCGGTTGGGAAGACCGACGCATTATCGAGGATTTTCGAGCGCTACTGCGTGACCCCTATCAG  
CGCTTTGCCGGCAAGGTGAAGTACTGGGTGTGCTTAACGAGCAGAACTACAACCTGACTAACGCCATC  
AGCTCGGACCCCATCCGCCCGCTGTGCAGGATCGCAAGCGCTTCTTTGCCGCAACCATATCGCGTTTTCT  
GGCCAACGCCCCGGTGTATCAAGCGTTTTCCGCAAGATGTGCCAAATGGCCTCATCGGCCCGAGTTTGGC  
TACTCTCTGCTATCCGCGCTCGTGCATCCGAAAGATATGCTGGCCTATGAGAACCCCGAGGAGTTTCA  
ACAACCTCTGGTGGCTGGATGCCTACTGCTTTGGCCGCTATCCGCGAGGCGGCGCTCGCTTACTTGCAGGA  
AAACGGCGAGGCGCCGGAGATCCTGCCGGGCGATATGGAGTTGCTGCGAGAGGGGACGCCGACTACATC  
GGCGTCAACTACTACTACACCCTGACCTACACCGATAATCCCTTGGACGGTCAGACCCCTGCAGCGGATCA  
ACACCACCGGCAAGAAGGGTACTACGCCATCGAGCGGCATCCCCGGCTCTACAAGACAGCGCCCAATCC  
GCACCTTGAGACCAGCAACTGGGACTGGCCATCGACCCGACCGGGATGCGCATCGCGCTGCGTGCCTC  
TCTTCCCGTTATGGTCTGCCGCTGATGATCACCAGAAACGGTCTTGGCGAGTTTCGACAAGCTGGAGGCGG  
GCGACAAGGTGAACGATGTGTACCGCATCGATTACCTGCGCAGCCACGTCAAGCGTGCCAGGAGGCGAT  
GCAGGATGGGGTGAATTGCTCGGCTACTGCGCCTGGTCTGTTACCGACATCCTGAGCTGGCTCAATGGC  
TACCAGAAGCGTTACGGCTTCGTCTATGTGGAGCGTGACGAGCAGGGGGGCTCCCTTCGCCGGATCAAGA  
AGGCGAGCTTCCACTGGTACAGCCAGGTGATTGCGAGCCAGGGCAAGCAGCTCTGACGATGTATCGCGTC  
GCGTAACCAGCGGGCCCGGGCAATCCCCGGGCCCGCGCTGTTTTTGGCGGGGGAGAGGGGGCAAGCCGGT  
TTCTCACCGTGCGACTCATCCCTGTTTGGTGTATTTTTGTCCTGCCAAAAGCCGCCGACCCCTGCTATTATC  
TGCGGCCGAACATGAGCCAATAAAAAATCAGGATATCGTGATGACTGACCACACTTTTATTTCCCGGCAAGG  
ACGCGGCGCTGGAAGACTCCATCGAACGCTTCCAGACCAAGCTGCAAGCCTTGGGCTTTGATATTGAAGA  
GGCCTCCTGGCTCAACCCCGTGCCGAACGCTTGGTGGTGCATATTCGCGACAAAGAGTGCGCCCTCTGC  
TTTACCAACCGCAAGGGTGCAGCAAGAAGGCGGCCCTCGCGTCTGCCCTTGGCGAATATTTTCGAGCGTC  
TCTCCACCAACTACTTCTTCGCCGACTTCTATCTGGGCGAGCAGGTCGCCAACGGCGATTTCTGTTACTA  
CCCGAACGAGAAGTGGTTCCCATCGAGGGTGACAGTTCCCGCGCGGCTGCTGCTCGACAGCTTCACTCGC  
AAGTTCTACAACCCGGACGGTGAAGTGACCGCCGACATGCTGGTGGATCTGCAGTCAAACAACGAAGAGC  
GCGGTATCGTCCGCTGCCGTTTCGAGCGTCAGTCCGATCACGAGACCGTCTACATCCCGATGAACATCAT  
CGGCAACCTCTATGTCTCCAACGGCATGAGCGCTGGCAACACCAAGACCGAAGCGCGCACCCAGGCGCTC  
TCCGAGGTGTTTCGAGCGCCACGTGAAGAACAAGATCATCGCCGAGGCCATCAGCTTGGCGCTGATCCCGG  
ACGAGGTGATTGCCCGTTATCCGGGGATTGCCGCTCCATCGCGGCGCTCGAAGCGGAAGGCTTCCCAT  
TTACAGCTTCGATGCCTCTCTGGGTGGCCGTTATCCGGTCACTGCGTGGTGTCTCAACCCGAGCAAC  
GGCACCTGCTTTGCCTCCTTCGGCGCCCACCCACGCTTCAAGTGGCCTTCGAGCGGACCGTCAACGAGC  
TGCTGCAGGGCCGCGGTCTCAAGGATCTCGACGATTTCTGTCGCGCCGTCATTCGATAACGAGCAGGTGGC  
GGATCACACAACCTCGAGACTCACTTCATCGACTCCTCGGGCCTTATCAGCTGGGACCTGTTCAAGCAG  
GATGCGGACTTTCGAGTTTGGCGATTGGGACTTCCGTGGCACCTCGCAGGAGGAGTTCGACCACCTGATCG  
GCATCTTCCATGAGCTGGAGCAGCCGGTCTATATCGCCGACTACGAGCATCTGGGTGTTTACGCTTCCG  
CATTCTGGTGGCCGGCATGTCCGACATCTATCCGGCCGAAGATCTGCTGCTGGCCAACAACAACATGGGC  
GCCAACCTGCGCGAAGTGATCCTGGCGCTGCCATCACTGGATTTGGGATGCCGAGCAGTACATGGCGTTGT  
TTGATCAACTGGATGAAGAGGGGCACGACGAGCGCACCCGTGTACGCGAGCTGCTGGGCATCGCCGCTGC

CAAGGGTACCGCGCTGCACACCCTGCGCGTTGGCGAGCTGAAAGCCATGCTGGCGCTGGCCGCCGGTGAG  
CTGGAGACCGCACTGGATCTCATCGACTGGACCATGGAGTTCAACCAGTCGGTGTTTACTGCCGAGCGTG  
CCAGCTACTACCGCGCCCTGCGTGCCTGCGTGCAGTTGTTCCCTCGACGAGGAGCGCGACCCCGAGCAGTA  
TCGCGCCGTCTTCACTCGCATGTATGGTGAAGAGACGCTGGCACAGGCATGGGCCAACGCCAGTGCCGAA  
GCACGCTTCCACGGGCTGGAGGCGGCCGATCTGTGCTCTCCAGTTCCCGCTGCACCAGAAGCTGCTGG  
CGGCCTACGAGAAGCTGCAGAAGGCCAAGCGAGCCCCATCACTGGGCGTGATTTGTTGCTGTAAAGGAAGGG  
GCCGAGTGGCCCTTCTGTTTATCGTGCAGGCAAGGCACGGGATAGTTATTTCAAAGATGAAATAAAAAACA  
AAAAATACCCCTAAGGGGGTTGATGGCAGGGCAGGGGATGTGCTGTGATCCGCAAAGATATCTTGCCAA  
TGCCACATTTCCATGATCGAAAATAAATCTTTAAAAATCATTCATTAAAAATGTGATATTTCTGTTTCA  
GCTGATACCTGGTGTAAAGTGGCGTAGCCATCGCACTAAAAATATTTGTAGTAAAAATTACATTCGCACCT  
GATAAACTTGATCAATGTCAATTTTGGCTATTTGGCCCTTTGTTATGATTTCAACAGGCCAAAACATTCAG  
GTAGAAAATAATTGAAAGCTGAATCTCCATTCGATTGTCTCAAGCCCGAAGCCATCGCTGCACCTGGCTGA  
AGACATCACCTATGCCAAGGCTACCAAGCCGGCATAACAAGGTCATTCCACTGGCCATCACCGCAGGCGCT  
TTCATCGCCATCGCATTTATCTTCTACATCACAGTGACGACCGGAACCGGCTCCATGCCTTGGGGTATGG  
CCAAGTTGGTTGGCGGTCTCTGCTTCTCTCGGACTTATTTCTGTGTGCTGCTCGGTGCCGAGTTGTT  
CACCTCCACCACCCTGACACTGGTGGCAAGGCTGCCAATCGCATCAGCTGGGCTCAGCTGCTCAAGAAT  
TGGGGTCTGGTCTACTTCGGTAACCTGATTGGCGGTCTGCTGATGGTGGCGCTGATCATCGTTTCTGCCG  
AGTACACGGCAGCAGATGGTCAGTGGGGCTTAACGCCCTCAAAGTGGCCCAACACAAAATTCACCACAC  
CTTCTTTGAAGCGGTGGCGCTGGGTATCCTCTGTAACCTGATGGTATGCTTGTGCTGCCTGGATGGCCTTT  
GGTGGCCGCGAGCGGACTGACAAGGTAGTGGTTATGCTGCTGCCGTTGCCATGTTGCTTGCATCAGGTT  
TCGAGCACAGCATCGCAAACATGTTTATGATTCCGGTTGGTATCGCTATCCACAGCGTGGCTAGTCCGGA  
ATTTTGGCAGGCCATCGGCCAGGATCCGGCAACCTTTGCTGACCTGACCGTATCCAACCTTCGTCTACAC  
AACCTCATCCCCGTGACCATCGGCAATATCATCGGTGGTGGCGTGATGGTTGGTCTGACTTACTGGTTTA  
TCTTCCGTCGTCATCATTAAAGGATGATTGCGGGATACTACATCAATACCGTGTGAGGTAATGAAAAATGG  
CAGAACTTAACGAACAGTTCCAAAAAGCATGGGAAGGCTTCGCGGCCGGTGAATGGCAGACCTCTGTCAA  
CACCCGTGACTTCATCCAGAAGAACTACACCCGATGAAGGTGACGAGTCTTCTGGCTGGCGCGACC  
GAAGCGACCACCAAGCTGTGGGACAAGGTATGGAAGGGATCAAAAATCGAGAACCGCACTCATGCGCCGG  
TTGATTTTGATACTGACTGCCCTCCACCATTACCGCACACGATGCCGTTTATATCGATCAGAGCTGGA  
GCAGATCGTTGGTCTGCAGACTGACAAGCCGCTGAAGCGCCCATCATCGCCAACGGCGGTATCAAGATG  
GTTAAAACCTTCTTGCAGAGTGTACGGTCTCAACTGGACCCGATGGTTGAGAAGATCTTACCGAATACC  
GCAAGACTCACAACCAGGGCGTGTGTTGACGTTTACACCAAAGACATCCTGAACTGCCGCAAGTCTGGTGT  
TATCACCGGTCTGCCGGATGCCTACGGCCGTGGCCGTATCATCGGTGACTACCGTCTGTGCTGTGAC  
GGTGTGACTTCCCTGATGGCCGACAACTGGCCAGTTCAAGTCCCTGCAAGCTGACCTGGAAAACGGCG  
TCAACCTGGAAGCCACCATCCGTCTGCGCGAAGAGATCTCCGAGCAGCACCGTGCCTGGCACAGATGAA  
GGTGTGCTGCCAAGTACGGTTGCGATATCTCCGTACCGCCAAAGAACGCCAAAGAACCCGTACAGTGG  
ACCTACTTCGCTACCTGGCGGCAGTCAAGTCCAGAACGGTGCAGCTATGTCTTCGGTCTGACCTCCA  
GCTTCCCTGGATATCTACATCGAGCGTGACCTGCAGAAAGCCCTGATCACCGAGCAAGAAGCCCAGGAGCT  
GATGGACCACATGGTCAAGCTGCGTATGGTTGCTTCCCTGCGTACTCCGGAATACGATTCACTGTTT  
TCCGGCGACCCGATGTGGGCGACCGAGACCCTGGCTGGTATGGGCGTTGACGACCGTACTCTGGTACCA  
AGAACAGCTTCCGTATGCTGAACACCCTGTACACCATGGGCCCCGTCCCCTGAGCCGAACCTGACCATCCT  
GTGGTCCGAGAAGCTGCCGGTCCGTTTCAAGAAGTACTGTGCCAAGGTATCCATCGAGACCTCTTCCGTT  
CAGTACGAGAACGACGATCTGATGCGTCCGGATTTCAACAACGATGACTACGCCATCGCTTGTGTGTAT  
CCCCGATGATCGTTGGTAAGCAGATGCAGTTCTTCCGGTCTGCTGCCAACCTGGCCAAAACCATGCTGTA  
TGCAATCAACGGTGGTATGGACGAGAAGCTCAAGATCCAGGTCCGTTCCGAAAACCGAGATGGTCAAGTCC  
GAGTACCTCGACTACAACGATGTAATGGATCGTCTGGACCACTTCATGGATTGGCTGGCCAAAGCAATACG  
TTGCTGCGCTGAACATCATCCACTACATGCACGACAAGTACAGCTACGAAGCCCTCTGATGGCGCTGCA  
CGACCGTGACGTATATCGCACCATGGCGTGTGGTATCGCTGGTCTGTCCGTAGCGGCTGACTCCCTGTCT  
GCCATCAAGTACGCCAAGGTCAAGCCGATTCGTGACGAAGATGGCGTTGCCATCGACTTCGAAATCGAAG  
GCGAATACCCGAGTTCGGTAACAACGACGCTCGCGTGCATGATATCGCCTGTGACCTGGTTGAGCGCTT  
CATGAAGAAGATTGAGAAGCTGAATACCTACCGTGGTGTGCTGTTGCTACCCAGTCTGTTCTGACCATCACC  
TCCAACGTGGTATATGGCAAGAAGACCGGTAACACTCCTGATGGTCTGCGCTGGTGGCGCTTCCGGCC  
CGGGTGCCAAACCGATGCACGGTCTGACAGAAAGGGTGGCGTTGCGTCCCTGACTTCCGTTGCCAAGCT  
GCCGTTGCTTATGCTAAAGATGGTATCTCCTATACCTTCTCTATCGTGCAGAAATGCACTGGGTAAAGAT  
ATGGAAGCTCAGAAAGCCAACCTGGCTGGCCTGATGGACGGTTACTTCCACCACGAAGCCAACGTAGAGG  
GTGGTACGACCTGAACGTGAACGTGATGAACCGTGAATGCTGCTGGACGCCATGGAAGAACCCGGAGAA  
ATATCCGAGTTGACCATCCGCGTATCCGGTTATCCGTTTCGCTTCAACTCTTTGACCAAAGAGCAACAG  
CAAGACGTATCACCCGTACCTTTACTGCTTCTCTGTAATCGAGACGTAGTGAGCAAAAACCGGCGCCAA  
GGCGCCGGTTTTTTTTATGCGTGCATTCAGGGGGAGTAATCATCCCCCTGTGAATCGCCCCCAGTTCCATC  
GCAACCACAACAGTTGTTACTGGGTATTTGAAGAGGATTAAGGGGAGGGGCTCACCCAGGATTGACCTGGG  
CTCCGTTTGTAAATGCGATTATGCTTTATTCGCGCTTAAGGGGATAGGCGGTTGCTTTGCCGGCCATAGC  
ATCAGTGTGCTATGGCTCGTGAACAGCTGATCAGGTTTAAGGGGTGAGCAGAGACGCCATCGCGGGTA



TCTATCGTCTGCTGGCCAACCCGGACTATGACATGCATCCGCGGTGTTTATCTTCGGCTCCAAAGC  
GGCGCCCGTTACAAGCTGGCCAAAGACATCATCTATGCCATCAACAAGCTGGCGGATCGGGTCAATAAC  
GATGCTCGTATCCAGGGCAAGCTGAAAGTGGTGTTCATGCCGAACATATCGCGTGAGTCTGGCCGAGAAGC  
TGATCCCGGCAGCAGATGTCTCCGAGCAGATCTCCACTGCAGGTTATGAAGCATCCGGTACCGGCAACAT  
GAAGATGGCACTCAACGGTGCAATCACCATCGGGACGCTGGATGGAGCCAACATCGAGATCGCTGAAGAG  
GCGGGTGGCGAAAACCTGTGCCATCTTCGGTCTGAACGTGGACGAAGTGAAGTCGCTGAAGGCGCGCGGTT  
ACAACCCGTACGACTTCTACTATGCCAACTCCGAGCTCAAAGCCGTGCTGGACTGGTTTGATACCGACTA  
CTTACGCCCGGTGCTCCGGGTGAGCTGGCCTCCATCAAGCGCTCCTTGCTGGAAGGGGGAGACCCTTAC  
CTGACCCTGGCGGACTTCCAGTCTACTCGGATGCACACAAGCTGATCGATACTTGGTATCGGGATCCTG  
CACTGTGGGCGAAGAAGGCCATCATCAACTCGGCCACCATGGGTAAGTTCAACTCAGACCGTTCCATCCA  
GGACTATGTGGATCGGATCTGGGATCTGAAGCCTGCAACATCGGCTAATCGGATTCATAAATGAGAAAA  
CCCCCGCAATGCGGGGGTTTTTTGTTTTATTGGGGGGAGGTGGATCAGAGGATATCGCCAAACGAAGTAGGCC  
AGCAGGGCGAGCAACACGGTAAAGACCACGTTTCAGAGCCATAACCGCTTTCATCATCTCCCTCTGGCGGA  
TGTGGCCACTGGCAAAGACGATGGCATTGGGCGGCGTGGCGACTGGCAGCATAAAGGCACAGGAGGCACC  
GATAGCGATCAACACCGACATCACCACAGGTGATACACCCAGCGCTCGGCGACACCGGCAAACAGGGGA  
ACCAACAGTGCGGCGGTGGCGGTGTTGGAGACCAGCTCGGTCAGGAACACCACGAAGGCGGCCAGCATAA  
GCAACACAACAAAAATGTTGGCGTGGAGAGTACGGCCGACAGATGGCTGGCCAGGAATGCGCTGGTACC  
AGTGGCCTTGAGAATGGCGCTCAGGGTCAGACCGCCGCAAACAGCATCAGCACGCCCCAGTCGGTGTTC  
TGTTGACGTCATCCCAGCTGGCGACACGGCTGACCAGATGGCCACGATGGCGCCATGGCAATCAGGG  
TGTCGAGTTGCGGAATACCGCAAAGGCGTTGGAGATGGGTTGTGATCCGATCCAGAGCACAACGGTGGT  
CAGGAAGATTGCCAGCGTCACTTTACGCTCGCGGGTCCAGTTGATGGTGACATCCTGGATCTCGACGCGG  
TGGCTGAGACGCGGGCGGGTACCAGATAGAGCAGGGCAATGCCGCAGGGCATCAGGATCAGCACAACCTG  
GAACACCGAATTTTCATCCAGTCAGTGAAGCCAATCCCCATCTGGGCGGCTGCGATGGCGTTGGGTGGGCT  
ACCCACCAGGGTGGCGATGCCGCCGATACTGGCGCTGTAGGCGATCCCCAGCAATACGAAGACGAAGGTG  
GCGCGCTCTTTTTGCTATCGAGGCGTGCCAGCATAACCGATCGCCAGTGGCAGCATCATGGCGGTGGTAG  
CGGTGTTGCTGATCCACATCGACATGGCGGCTGTGATGGTAAAGAGCAGGATGACGCCCCAACCCAGATG  
ACCATTGGCCAGGTGCATACCTTGCTGCCATCAGGGTATCCAGTCCCTGTTTTGAGAGGGCTGCCGCG  
AGGGCGAAACCGCCAAAAGAGGAACAGGATCGGGTTGGCAAATCGGTGAGGGATTTGCTCATGTCAA  
ACACCCGAGCAGCGTCCAGCAAGGGCACCAGCGCGGTGATGGTGACGTGCATGCTTCGGTTCGGTTCAG  
CCAGAGGATGGCGATAAAGACCAGAATGCCAGCCCCCTTGTGACCATGGGGTCAAACGGGAGCCAGGGC  
AGCATGGCGCAAAGTAGCAAGACATCCAGGATGACGATCCCTGATTTGATGTCCAGCCAGCGAGATGGAG  
CAGAGGGTACAGCTGATGTGTGCATAATGTTCTCTCGGTTAATTTATGGTTGTTTTTGTGTTGCCAAGAT  
TACATCCATTCACTTGTGTTGAAACAGACTCACATGTTGAAAAATCAGCCTCTACTCACATACTCATTGATA  
AAAATGAGGAAATGAACACATAAAATAAAACATGTGCGAAATATAAATCAAACATCCATGAACTGTTCCAG  
CCATTGCTTGAACATGCTCTTGGGCAAGGAGCCATTTATCTGGTTCACCAGTTTGCCTGTTGGAAGACC  
ATCAGGGTGGGGATGCTGCGAATGGCGTAACGGGCGGCAATGGTGTCTGTTGCTCGGTATCGACTTTGG  
CAAAGCGCATCCGTGGTTCGAGTTCATGGGCAACCTCATGAAATACCGGAGCAAACCTGCTGGCAGGGGCC  
GCACCAGCTGGCCCAGAAATCGACCACGACTGGGATGTCTGAGTTGATCAGGGTATCGAAGTTATCCGCA  
TTCCCGAGGCAAGGGGTCTGGCTGAACAGGAGGGCTTTGCAGCGCCCGCATTTGGCAGATGTATCGATAT  
GGGTAACGGGCAGGCGGTTTCTGGTAAAGCAGTGGCTACAATAAGTAGTGATAAATGACATAATTGGTTC  
CTTCTAAATCAGCTCTGGCCGGGGATATGATGAAAAGCCAGAATGAAGCAATCGCGAAACAATAGCGAAA  
TATCAGAGCAATAACGGTAACACAGTGCCCAGCGGGAGTGGATAATCCCCCATGGTTTCAATTGCCGTGACC  
GGATAATTCAGCGACCACCAGATGAGAGTGCAGACGGGATGAATAAAGGATCACGGAAAAACCGTGTGT  
GCCAGGGCTGATTGTTGCCCTGCTGCTTGCCTTTTCGGGCTACTGCTGGCAGTCGCTCAGTCAGCAGCAG  
CAGGCCCACAACCTGAACGAAGCGGCCGAGGTGGTGTGTAACAGGATCAACGACGATACCCCTCTATCTGC  
TTGGGCGGGAGCAGGCCAATGACAGCAATGTCCAGACGCGCTGAACCAAGTTATCCATCACCTTGACGG  
TTTTGTACGGGAAGTCAGAAGCGATCCCGAGCTGGTGCAAGACGACCTTTCCAGGCTCTGCTTGATGAC  
ATGGACAACATCTGATGGCGCTGGCCAGGCTTCATGCCATTGAGATGGCTATCGAGTACCTCAATGCGC  
CCCTGCAGGCCAGATTA AAAAGGTGCGGGGGATAAGCCCCGTGACACAGTGTCTCCATCGCGACCTGGA  
GGAGTTGGCGCAACTGAGCAACTATCTGCAGCGCAGTTGGGACAAAACGTGAACAGACTACGCTGGATCAG  
CTGCAACAGCAGTTGCAATCCCGTTATGGCAACTTGCCGGAGATCGCGACCCAGATCCGCTGAGCAAGG  
AGATGAGCCAGCAGGTGATGGCCTATCACACCTTGCGTTACCAGCTCATCGACATGCATGTGATCGAGAG  
TTTGGTGCCTGGAAACTCGACAAGCTGGAGCGCGCCTCCTCTTTGATGAATCGCTTTTATCTGATGGTG  
CTGTGCGGAGCTTTGATCTGCTTTGCGCTGGTGGCCTTACCCTGTGGCGCCGTAACCAGAAGCTGAGCG  
AACTGTGCGGCCAGACCGGCTTGTGCCCCAGGCCAAAAGCGATTTTCTGGCCAACATGAGCCACGAGAT  
CCGCACCCCATGAATGCCATCATAGGTTTTAGCTCGCTGGCACTGCAGACTGAACTGGATCAACAACAG  
CGGGACTATCTGGGCAAGATCAAATCCTCATCCGATAACCTGCTGCTGCTGATCAACGACATCCTTGATT  
TGACCAAGGTGGAGTCCGGCAAGCTGACGTTGGAGGAGATCGACTTCGATCTCAGCGAGCAGCTCGATT  
GCTGGCGGGCATGTTTGCCGATCTGGCGGAGCGCAAGCACGTGGAGGTGGTTATTCGCAAGTCAACGGAG  
GTACCGGTCTTCTTGCGTGGAGATCCCTGCGATTGGGGCAAGTACTGGTCAATCTGGTGAACAACGCCA  
TCAAGTTTACCGAACCGGTGAAGTGAAGTCTGCATCGAGCTGGCCAATCTCACCAATGCGGATCCG

CTTCAGTGTGCGGATAACCGCATCGGCATTGCCGAAGAGAAGCAGACCCAACTGTTTCAGGCGTTTACC  
CAGCTGGAGGCGGGCAATACCCGCAAATATGGCGGCTCGGGTCTTGGGCTCAATATCTCCCAGCGGCTGG  
TGGAGCTGATGGGGGGGCGGATCACCGTAGAGAGCAAGCCTGGCGTCTCTGTTCAAGTTCGATAT  
CCCGATGGCGCAGGCGGTCTACGGCGTGGCTGGACGGAAGGTCTTCTCGAAAACCAGCCGCTGGTGATG  
GTGATGGATGACAACGAACTGGTGCTGGATCTGGCCCGGGACATTCTGACTCGGGCGGGAGTGCAGTGC  
TGCCGGTTAACTCCCTTTCCCGCGCCCGTACAGCTGCTCCGTGAAGAGGGACCGAATCTGCGGTTGGCGAT  
CCTCGACTGGCGCATGGGTGAGGAGGATGGGCTCGATCTGGCGTGGAGATGTATCAGCACAGCCAGTGG  
CGGCGGATCCCCATCCTGATGATCAGCGCCTGGGCCAGAGAGGGGCTGCACGCCAGGATGGACAGCATGG  
GGCTGACCCATTTTCTGCCAAAACCGATGACCGAAAATGCCCTGCTGGCCAAGGTGGACGAACTGCTCAA  
CGGCAGCTCTTACGAGCTCAACCTGCGCAAGGCCGAGGCACAGGGGGATCAGCAACACTTCAAATCCCTG  
TTGCAGGGTACCCGAGTGTCTGTTGGCGGAAGACAACCGGGTCAATCAGCAGCTCATCAGTAACTGC  
GGCGCGTCGATCGCGGTAGTGTGTGTGGTCAGCAATGGTCTGGGAGGCGGTGGAGCGGGTGCAGGAGCAGCC  
TTTTGACGTGATCCTGATGGATTTGCAGATGCCAGTGTGGACGGACTCGATGCCACCCGCCAGATCCGC  
AAGATGGTCGACAAACACGATGTGCCCATCATTGCCCTCACCGCCAGCGCCATGCCCGGTGACAAGGAGC  
GTTGCTGGGGTGGGGATGAATGGCTATGTACCAAGCCGGTGGAGCAAGCTGGATCTCTACAACAACCT  
GCTGCAGTGGGTAAAGCCGCAAGGGGTGGAGCAGGCGGGGATCATGGAGGTGAAACCGCCGGATATGATC  
GGGATCCTCGATCTGCAGGATGCACTCAAGCGGCTGGAGCAGGACAAGGAGGCGTTGCAGATCCTGTTCA  
AGCTGTTTATGTGCGAGCACAAGGACGATCTGTGGGAGATCCGCTCCGCTCTGCGCCGTCAGCAACCCGA  
GGTGGCCAGCAAGCTGCTGCACACCCTCAAGGGGGTGTGGCCAATATCTCGGCGGCCCGTCTGCAATTG  
GTGGCTGGCGAGCTGGAGTGGCGCCTGCGGCAAAAACGAGGTGCTAAGCGAGACGGATCTGGAGCAGTTGC  
AACAGGTCTTTAGCCAGACCCGGGAAGAGGTGTCACACTTCTGTGACCGGTGAGCAGCATGAAAATTC  
GTATAATCCCTATTTCATCAGGGGATGATCGCATGTGCAGTGAATTAATAAGTAATTTATCTCAACCATC  
CCGGTTCGGGATATGATGAGCTTTTCGTTTCAATCGCCTCCAGCCGGAGGCGATTGTTTTTCATTTCTTCTAT  
TTCTGCGTGGCTTCTCTGATGGCCGCTCCTTGGAGCGGTACGGGCAGAGAGCGCTAAAGGTTGGTGGTG  
TGAGCGTATTTCTACGATTGAGCTGGTTTTTCAAGGAGCAGTGGCCCCGTTATCTGGCTGCCATCTCCCT  
GCTGCTGATGGTGGCCCTGTTGACCGTATTCCGCCAAAAGTGGTGGGCTGGGTGGTGGATGGCATCACC  
AGGGGTGGTCTCGACAATGGCACCCCTGATGCGTATCTGGCGGGGCTGTTTGGTCTGGGTGTGCTGATTT  
ATCTGTGCTGCGTACGTTCTGGCGGGTATGCTGTTTGGTGCCTCTTACCCTCTGGCTATGTGTTGCAAA  
TCGCTGTTTACGATTTTACCCGGATGACCCCGATTTTTATCAGCGCCACCCTACTGCGATTTGATG  
GCCCATGCCACCAATGACATTCAGGCTGTGGAGATGACCCCGATTTTATCAGCGCCACCCTACTGCGATTTGATG  
CCATCATGGTTCGGGGTATTGGTGTCTCCATCATGTGCAGCCAGTACTCCTGGCAGTTGACGCTGGTCTC  
CTTGCTGCCGCTGCCGGTATGGCCTATTTTCATGAACCCTTCGGCACCCAGATCTACACCCAGTTCAAG  
GCGGCGCAAGGGCCTTCTCCAGGCTCAACAACAAGACCCAGGAGGCCCTTCCGGCGTGGGGTGTGGA  
AATCCTATGCGGTTGAATCGCTGGAAGATGAAGGCTTTGCCGAGCTGACCAAACAGGCGGGGGAGCGCAA  
TATGGCTGTGGCCCGCATCGATGCCAAGTTCGATCCGGTATCTATCTCTGTATCGGTTGCTCCTACTTC  
CTCGCGGTGGCGGGGGCAGTGTGCTGGTGTGCTGCGCATGAGTTGACCTGGGTGAGCTACCAGCTTCA  
CCATGTACCTCGGCCAGCTGATCTGGCCGATGTTGCCATCGCTGGCTGTTCAACATCATCGAGCGGGG  
TAGCGCCGCTACTCCCGTATCGAAAGCCTGCTGGGGGAGCGCAGCGATATCGAAGAGCCCGCCAGCCG  
GCCGCGTTTACCTCTGCCTTTTCTTTGCAGATCAAAGGGGTGAGTTATCAACTTGAGCAGCGCACCCCTGC  
TTGCGGATATCGACGTTACCCTCAAGCAAGGGGGGATGCTCGGGGTGGTGGGGCGCACCGGGGCGAGGCAA  
GAGCTCCCTGCTCAAGCTGTTGATGCGCCTTGCCAATCCGACCCACGGTTCGATTTGTCATGGGTGGCGTT  
CCGATTGACCAGCTGCCGCTCGCCACACTGCGCAGCCAGTTTGCCTATGTGCCGAGGAGCCATTCCTGT  
TTTCCACCACTATCGCCGCAATATTGCCCTCGGCAAAACCGATGCGAGCCGTGAGGAGGTCGAACGGGT  
GGCGCGCATTGCCTGTGTCCACGATGATATTGTGCGTTTCCCAAGGGCTATGAGACCGAGGTGGGGGAG  
AAAGGGGTGACCTCTCCGGCGGCCAGAAACAGCGGCTGGCCATTGCCCGCGCCCTGCTGCTGGATGCGC  
CCATTTCTGGTATCGATGATGCGCTCTCGGCGGTGGATTTTCCACACCCAGCAGCAAAATTCGATGCCCT  
CAAGGCCCATCGTCGCACCTGATCCTGGTTCAGCCATCGCATGACGGCGGTGGAGCAGGCGCAGGATC  
CTGGTGTGGAGCAGGGAACCGTTAGCGAACGGGGTTCATCACGGTGCCCTGATGGCGCACAAATGGCTGGT  
ATGCAGATATGGTGCCTTATCAGCGTCTCGAAGAAGCGGTGGAGGAGAGCCTGTGAATCCGACCATTAAA  
CGACTGCTCGCCTACTGCGCCAGTATCCTCGTTGGCTGATCCAGGCGGGGATTTGCCCTGCTGCTTGCGA  
CCGGCGCCGAAGTGGCCGGGCGCTGCTGATCAAGCTCTTTATCGATGACTATCTGGCGCCTCGCAATAT  
CGTGCTGCCACCATAGCCCTGATTGCAGCGGGCTATCTGGGTTTGCAGGTGCTGTGCGGCGGGGTTTC  
TATCTGCAATCCCTGCGCTTTAACCCTGATCGCTCAGGCGGTGGTGCAAAACCTGCGCGAGCAGGTATTTG  
CTACCGCCATCCGTTTGGCGGGCGCTACTTTGACAAGCATCGTCCGGCTCGCTGATTTCCCGCATCAC  
CAACGACACCGAGGCGATCATGAACCTCTATGTGCAGGTGATCGGCTTGCTGGTGCAAAAGGTGGTGTCT  
TTGTGCGGCATCCTCATCTCCATGGCGCTGCTGGATCTGCGGCTGATGCTGGTCTGCTCCCTGTTGCTGC  
CCGCCGTGGGCGGGGTGATGTGGCTCTACCAGAAAACCTGAGTGTGCCGGTGGTGGAGCGACCCGCGAGCCT  
GCTCTCCGACATCAACAGCCGCTCAACGAGTCTGCTGCAGGGGATGCCGGTATCCAGGCGATGGTGCAG  
GAGCGCCACTTTGCCAACGCCTTTGCCGAGGTGAATCAGCAGCACTGGTTCGGCACGGATCAAGAGCCTCA  
AGATCAACGGCATTGCTGCGTCCGCTCATCGATCTTCTACATGATGGTGTGATCGGCTGTTGGC  
GCTGTTTGGCCACGAGGACTGAGCAGCACTGGTGCATTCAGGTGGGTGTGCTCTACGCATTTATCAGC

TATCTGGGCCGGATGATCGAGCCGCTCATCGAGATGACCAACCAGCTTAACCAGCTGCAGCAGGCGATGG  
TGGCGGGGGAGCGGGTCTTTGCCCTGCTCGATGAAACCCGCGAGAGCACCAGGGCGAGCTGCGCCCGCT  
GGAAGGGCGGGTCAGTTTTCGAGCGGGTGAGCTTCTCCTACGATGGTGAGCAGCAGGTGCTGCGGGAGGTC  
AGTTTTGCCGCAAACCGGGCCAGATGCTGGCGCTGGTGGGCCATAACGGCAGCGGCAAGTCCACCATCA  
TCAGCTTGCTGATGGGCTTCTATCCGCTGGTTACAGGGGCAGATCCGCTTCGATGATCACGCCTGGATAC  
CCTGTGCTGGCGGGCGGTGCGCCGAGCATCGGGTTGGTGACGAAGATCCCTTTATCTTCGTGCGCACT  
CTGGCGGAAAACCTGCGTCTCGGTGCGGGCCGGAATAGACGAAAACGAGGCTCTGGCAGGCGTTGAGCGAGG  
TGCAGTTGGCCGAGTTTGTGCGCAGCTTGCCACAGGGGATCAACACCTTGATGGAGGAGGGGGCAAGAA  
CCTCTCTGCCGGCCAGCGGCAACTGCTCTCCTTTGCCCGCGCGCTGGTGGGGGATCCGCGTATCCTCATT  
CTGGATGAAGCGACGGCCAGCGTGGACTCCAGACCGAGCTGGCGCTGTCGCAGGCGATCTGCGCCGCG  
GTCGTGGCCGACACCACCATGCCATCGCCACCCGCTCTGACCATCGTCGATGCGGACGAGATCCTGCT  
ACTCTCCCGCGGTGAGGTGAGCGAGCGGGGTACCCATGGTGAGTTGATGGCCCTCGGCGGTCACTATGCC  
CAGCTGTTTCGAGATGCAGAGTCAGGGGGCTGGCTGGAAGAGAAGCGCGCTGATCGGCACATTTGCTGT  
AACAGCGACATGAGCGAAAAGAGGGGAATCGGTGCGGTTCCCTCTGTTTTTTTTGGGTTGGGCAAAAGGTGCG  
TAACCGTGATCCCTGTGCTTGTGCAATGGCGCAGATGCAGGCAACATGTTGTTTACATTAACCTCATCGGA  
TCAGTTCTCATATGGATTTGCAACGCTTCAAAGCCAATCTGGCGCTCCGGCTGTTTGGCTGGCGCTATAT  
TCCCGTCATCGGGTTTTGTGCCCGATCATCGAAGAGATGAACGCCAAGGCGCTGCGCATTCGCATTTCC  
CTTGGCTGGCGTACCCGCAACCATCTGGGCAGCATGTATTTTGGCGCGCTGGCGACCGGGCGCCGATCTGG  
TAGGTGGTCTGCTGGTGTGAGAAAGGGGGCGCAGCGGCGCAAGAAGGTGCACTTCGCCTTCAAGGATGT  
GCAGGGGGAGTTTTTGAACGACCGGAGGGGGATGTGCAGTTGACTGCGCAGCGGGGGAGGAGATCGAT  
GCCATGATCGACGAATCGCTGGCAAGCGGTGAGCGCATCAATCGCCCCATCCGAGTGGTAGCCACCTGCC  
CGTCATTGAACGGGGATGAGGCGATGGCGCGTTTTTGTGCTGACCCTGTCGATCAAGGCCAGCTAGTGGGT  
TGCCGGAGAGTGGCTCCCCAAGACGGGATTAGCCAATCTCCGGGCTGACGCCCTCTTTACCACGACCTT  
CATGCCGTTGAAGTTGACCACCTGTTTCGGCCACGATCTTGACGCGCTTTCGGGTCTCGACCTGACCGTCC  
ACCTCGACAGCCCTTCGGCAACGAGGGCTTTGGCGGCGCCGCAATCGGCCACCCCTGATGTTTGA  
TAAGGTACACAAGGCAACGAAGGGGTGACCTTCGAGCAGAAAACGTCTCCATGGGAAATCCTCTAGATGG  
ATGAATGCCCGATACAGCAGGGCGACTATTTTAGGCAGTTGCTCAGGCAAGAAAGGAAGAGGGACTAC  
TCGCTGCGCAAAAAGTGGCCGATTTCTTGTGAGCTGGCGCTTTCGCAAGTCTGATGGAGAGGTGAGAGGG  
CCACCCGTCAGTATCGTGACGCACCTCGTCCCTGCTGGTGTGCCACACTCTCCCTGACTGTTTAGGAT  
CGGGCCACTCTCAATGGCCCAAGGAACTTTCCATGACACTCTCCCGCTGCTGCTGGCATGCAGCGCCCT  
TACTCTGTGCGGTGTGCGCGCAGGCCAGTACTCCGGTGCAGGTCTCGCTGCCCGGGGTCAATTTGCCCGCG  
TCCCATCAGGTGGAAGGGGGCGCGCCTCGCTGCTTACGGTCCGGTCCGGTCCGGTCCGGTGAAGGGCATTGATC  
TGCCGATCTTCGCCCTCTCCGATGTGGATCAGTTACAGCGGCTGCAGCTCGGGGTATTCTGGGTGCTGG  
TCGGGTGCGCCACCAGTTTGGCGGGTGCATCAACGCCATCAACTGGCACGAAGGGCAGGATACCGGC  
GTCAATCTGGGGCTGGTCAACTTGACCAATAACGTACAGGGGCTTAACTGGGGGGCGGTCAATATCGCCA  
AGGGCAATACGCTGGCCAACGTGCGCTTCGTCAACTATGCCGAGCGTACCACCTTCCAGATTGGCTTTAT  
CAATGCGACCAAGCACCTCGATGGCTTGAGATCGGGCTGGCCAACATGCGCCAACGGCGTGTTCGCC  
ATTCTGCCACTGGTGAACCTCCAGAAATCGTTCTGACCAAGGCGGTTTCGCTTTGCGTTAAAGGCCCTCTGC  
TGATTACCCTGTGCCTCTTGCAACTTGTTCAGGGCAACAGAGGTAATTGATGACGGCAGGGCAGATGAG  
TGCAATCGGGATCGGCTGGGATGTGCGTGGCTGGCAGGGCAGTGCCAGGCGGTGGCCGTGGTGGGCTGG  
CAGGCCGGTTCCAACCGCCTGCACTGGCTCGGGGTGTGCGCGCTGTTTCGCTGAGCTCGCGGGTGGCGC  
CAGATCTGGCCGCTCTGCTGCGTCCCGCCCTGCAAAACGAGCTGACCCTGATGCAGGTAGAAGCCTGCC  
GCAACTGGCGCTCGGTATCGATGCGCCGCTCGCTTTCCCGCGCTTTCGGGATCTGCTCAACGGCCAG  
CCACACAGCTGCGCCGTGCCCCGAGCGGGAGATAGACAACCCCTACGCTATCGGACTGCGAGCGCTGGC  
TGTATCAGCAGTACGGCAAAAAGCCGCTGTGCGCCACCTTCGACCGGCTCGGCAACAACGCCACCCCTGGC  
GCTCTCCATGCTGCCGAGCTCTGATCTGCAACTGGTGCCGACAGTTGCCCGAAGGCCAGTCTGCTGCC  
GTGCTGGAGGTCTATCCGGCATTGGCCAAAAGTGGGCGGCAAGGCCCGCCCGGCACGGCCGAGCTGGCAG  
CGCTGCTGCTGCGGATGTGCTGGTGCACACCGATCGCTATGATGCGGCGCTCTGCGCCCTGATGGCGCT  
GCAATATGCCGCTGGTGGCAAGGTGACGGTATTGCTGAGCTGATTTTCGCCACCCAGTGACATGCCGTGT  
GATGAGGGATGGTCTATCACTTTACCCGTCATGGCGTTGAGCACAACGGCATGTGATGGACGGTGCAGC  
GGCGCATCATGGCGCCGCTCATCTGTGATGCGGGCCAAATGGCGCAAAAAACCTGTCTTTAGTCAGGA  
AATTGCCTGTTTCATCCCGGCCAAGGTGGCGCATCGTTATCTTCATCCGATATATTGCCACCTTGTGTA  
TCCTTTGCTGTGGTATTCCCAGTAAATCCGTTCTCTTATTCAGTCCCACGTGGTCTTTGGTTGTGCCG  
GCAACAGCGCGGGCGCTTTCCCCATGCGTGCCTCGGCATGGATGTATGGCCATCAACACGGTGCAGTT  
TTCCAACCACACCAATATGCCAGGGGTGGCAGGGAATGGCGATGCCGCGGGTCAATATCAGTGTGCTG  
GTGAAAGGATTGGGCAATATCGAGGTGTTGAGCCAGTGTGACCGCTGCTGAGCGGCTACCTTGGTTCCG  
CCGAGCAGGGGGACGAGATCCTGACCGTGGTCAACGCCGTCGCAAGGCGGCCAACCCCGATGCCATCTACTT  
CTGCGACCCCGTGGTACCCGGAGAAGGGGTGTATCGTTCGCTCCCGGCGTACCCGTTTTCTGACC  
GAGCAGGCGTTGCCGGTGGCCGACATGATGGCCCCAACCTGCTGGAGCTGGAGACCCCTGTGATACCC  
ATCTGGCTGATCTGGATCAGACCCGCGCGGCTGCCATCAGCTGCTGGCCGCGGCGTCAAGCTGGTGT  
GGTCAAGCATCTCGGTGCTGCGGCGCAGGACTCCAGCCGCTTCGAGATGCTGCTGGCAACCGCCGAAGG

GATTACCTGATTGCCCGTCCGCTCTATGACTTTGCCCGCCAGCCGGTGGGGGTGGGCGATCTTATCAGCG  
CCCTGATGCTGGCGAATTTGCTGGCCGGTCACGATGCGGTGACGCGTTTCGAGCGCACCAACGCCTCGGT  
GGATGCGGTGCTGCAGGAGACCTGGCCGCCAGCAGGCTTACGAGCTGCAACTCATCGCCGCGCAAGATGCC  
TTCGCCCTGCCAGAGGTTGCAGTGCAGCGGGTGAAGTCCCTGAGTCAACGCGGACTTTTCGTCTATCCC  
GACAAGGGGGTGGGATGCAGATTAAGGCTTGCCCATGGGCAAGCCTTTTTACTGTTTGCACGTGTTTA  
GTGCGGCAAGCAATCAGATGCGGGGATGGCGGAGGGCGATAACGCTCAGCCATGGCATTGGCCGCTACCAC  
GGCGGGCTAGACATCCTGTTCACTCACTGTTCATCGGCATGTTGCCCATGGTATCGAGGGGATCGCAGGCC  
AGCTGCGCCACCTTGCGCCACTCGCTTTCATCAAAGTGGGTGAGCCCCAGTTCCTTGCAGTGTTCATGGGCA  
GGCCTGCACAGTCGATGATGCGAAACACCTCATCAAGTTCATGTTGCGGGGCGCGCTCAAGCACAAAGTTG  
GGTCAGCAGGCCGAAGACCACCTTCTCGCCATGCTGGGCACGATGGAGCTCCGCGATCAGTGACATGCCG  
TTGTTGACGGCATGAGCTGGCCAGTCCACCGCTTCGGCGCCGACCCCGCTGAGGTAGATGGTGGCCT  
CGATAACCTGCTCCAGCGCCGGAGTCGAGACATGGTGGCGTATCGCATCCATGGCCAGTCGATGTTCTC  
ACCAAGCAGCTCGTAACAGAGCTGTGCCAGACCAAGCCAGTGCCTGAAGGGCGCTTGCCGACCAGATTG  
AGTCCGTCTGACCGATAGCAGGCGCGCCTCGAAATAGGTGGCCAGGGCATCGCCAACGCCTGCGGAAA  
AGAAGCGGGGAGGGGCGGCGCAATGATGGCCGTGTGAGCCAGCACACGTCGGGATTTTTCGCGCAGGAA  
CAGATAGCGCTCAAATTTCCCGCTTGGTTGTAGATCACCGCCAGCGCCGTACAGGGGGCATCCGTGGAG  
GCAATCGTCGGAACAGTACAACCGGACGGCGCAGATAGAAGGCCACGGCCTTGCGCAGCTCCAGCGTCT  
TGCCGCGCCGATCCCACAATCACGTTGCGACCATATTGCTCTGCAAGGTGGGTGAGGCGGTGGATCTC  
CTGTTCCGTTGCATTCATAGCGAAACTTGTGCGACCTCCCTGAGGCTGCCTGCAGAAGCCCCGCCAAA  
GCTTCTTCCCGTACCCGCTCCAGAATGAACTCATCGCTGATGAGTAACGCATAGTCACCAAAATCTTTAA  
CGTGCTCATGGAGTTGCGGGAGAAGGTGTTGACCGATGATGAACTTTTTGGGGGAGGTAAGTGTACGGGG  
CAAAGTGGGCATCCATTATTCTCAAGGCAGTGAACAACATAGATTTGATTATCAAATGGGTCTCTCACG  
ATACGCCTGATGAGGCAATAGATGAAGAAGAAAAGGGGGCGTTTTAATCATTAATTAATCTTTCTGTTT  
GTTTGGTTGTATTTTGGGGCGAGCAATTTGGCGGTGTTGAGGCATACAGGCGCAATGGCTCTATCGTGGCA  
ATCCGTCGCAAGCCATACTGCTGCAACAAAACAGTCACGCTGGAAACAAGCAGGGCCGCTTGGTGGCGCC  
TGCTGTATTTGGATAAGGGATAGGGGATGGTCAGAGCGGTTTGTAGAAGATGACGGTCCGAGCAAGAGAG  
CCATCTGAGTTGCGTGCACCTTTGGTAGTTTGTGCGCTATTAACCTCCACAATGTCCATCTGACATCCTT  
GTCGTTGCGCTGTTATGTTGCTGGCTACCACCGCTGTTTCATATCAGGTGGGGACTTATGCTCGCCGGA  
GTACGGTTTGTGAGCGGATCAGCCCCCTGCTCAACCGCAGGTAACAGCAGGCGGGAGAGAGAGAGAG  
CTCATCGAGGTGAGAGCTGTGAGCCAGCGTAGCTCGGCAATTTCTGCGGAGGCGATCGGGGTGCCGCTT  
GTTTCGCCGGTGTAAACAGCGCAGTCTCACCTCGACTCCTGCCGGTTTGCCATCGGCCTGAGCGCTGAACT  
CGCAGACAAAATGCAGGGTATCGGGTTGCGAGGTTGACAGCCAGCTCCTCTTCAATCTCGTGGATCAGCGC  
CGCCTCGTGCCTCTCGCCCGTTCCCGCTTGGCCGCCGGGATGTAATAGATGTCTTGGCGTGGGAGCGG  
GCGCAGAGCAGTTGCTGATCTTTAAAGGTGAGCCAGGCGAGTTTGTGATCATTGAGTTGCATCCTCTGC  
TTGTGTGGTGTGATTTGTCTGCATGTACCGGTATACAGGGCGCGGTAGGAGCGAGGCTCCTGCGCATTG  
GGAGAAAGTCCCAACTGATCTGCCAGCGGAGCAGTTGCTGGCGAAACGCCGGGAGGCGTTCTCTGTCAT  
CGGTTCATGATGGCGAGCTCGGCAAAATCCCCGATCTCGCCAGATGATCCAGGGTGACGTGAAACGGGCC  
AAGGAAGTAGATGCTGCGCCTTTTGGTGATCACGAGTATCTGCCGGTAGTTTCATGGTCAAGAGCATGCTG  
ACGGCCTTGTCCGCATCATTGATAGTGACCGCCTCGCAGCGATCCTTCTCGGGCCCCCTTGACGATCCAGA  
GCTGGATGCCGGAGGGCTGCATGGTGCAGGATAGCCAGACTTTTGCCAGCCTGGGCAAGGGCATCATCCGG  
GGTGTGCAAGTAGCGATCCTGCTCCAGATTATCCTCCAGCATGATCTCCGGATTGAGGGCGAGCAGTGCC  
TTGAGGAAGGCGAGGCGATCCGTGAGCTGATATTTGAACTCGACTTCGAAGCGGGCCCTGAAAGTGCAGCT  
GTGACATCAAGAAGATCCCTCTGTGAGCCTGTGTGGCAGGCAGCCTAACAAAGATGAAGTTGAGTCCCAA  
GGAGAAAGAGAGGATAGGCCGGAACGCAGTGTTCAGCGCGGTGACCGCGTAGCTGAATGAGTGCAGCA  
ATGGCTGGTTCGCCCACAGACTTTTCGACCCTAAAAAAGCGGACTGGCGCACATCACGACAGGGCCGGACT  
GGGCGAAGGCGGGGCTTGTGGTTAATCTTGGCACTTTAGCGGTAGTAGGCGACGACCTGCTACCTT  
GCGTTGGCAAGATGCAGGTGAGCAAGATGCAGATAGCAGCAGAGAGCAAGTTTATCGGACTCGGGGTGCG  
GGGTAATTTGCGCGGTGATCTGGAGCAGGCGGGTGAAGCGTCGGACTTCGTAGCGGTAGTCTGCGCGAC  
ACCACGGCGCCCAAGGCGCTGTTTCCCTTTTTCTGTCGGGCCATCCGGGTGAGCTCGGGGTATTTCCCGT  
TGAGCGACAAGGCGATCTTCTGCGGAAGCGGCGGTGAGCGGTGACGAGAAGGTGCAGATCGAGCCGGA  
AGTAGCCCTCTGGTGCAGCTGGAGTATGCCGGAAGCAGGTGGTGGCGATCCATCCCCGCGCCTTTGGT  
GCCTATAACGACTGCTCCATCCGTGTCCTCAACGCCAAGAAAGATCAGCGAGAAAAAGAACTGGGGCGAAG  
AGAGCAAGGGGTTGGCGGACAAGCTGCTGCCGCTTTCGGTTTTTCTGCGGCTGCGAGCTCGATGACTA  
TCGCATCGCCTGCTATCTGGAGCGGGATGGTAAGCTGCACGCTTACGGGGTAGACAGCGCCGCCATCGAC  
TACAGTACTTCCACGGCAAGCTGCTCGACTGGGCCATCGACAAGTTCAATCATCAGCAGGATGAGGGGC  
CGGCGGAGCATATTCAGGACTGCTGGCGCAGGCGGGACATCCTCCCCATGCGCTCATCAGTATCGGTGC  
CACCCGCTATAACCCGTTTGGCGAGACCCACTTCTCAAACCGGGCGACACCTCCTGCGTGGTGGTCTAT  
CCGGGCGAGCGTTATAGCGAAGCGGATATTCGCGAGGCGATCCGCGAGCCGCAACTTTGGCGCTGATATGT  
CGGTGCTGCTGCAAGCGGTGAGGCGCGCTAATCACCGTTGCCAGCGGGAAGGTGCTCTTCCCGCTGGT  
TATCATATCGAGTCATTTTCATGACGATTGTTCCGGTATCCCGGGCCGATTATCCGGCCCTGATCGACCTG  
TGGGAGGCCTCTGTTCCGGCGACCCACCACTTCTGCCGAGGCCGAGATCCTCGCGCTTAAACCGCTTA



TTCTGGAGCACTACTTCGATGCGGTGACACTGCGCAGTGCCCGCACAGAAGAGGGGCACATTACGGGTTT  
TAGCGGAGTGTACGAGGGCAAGCTGGAGATGCTGTTTGTGGCTCCCGAGGCGCGCGGTAGTGGCGTGGGG  
CGTTTGGCTGGTGGCCCATGCCATCACGCAGGGCGGCGCAGCAGGTTGACGTCAACGAGCAGAACGAAC  
AGGCGGTGGGCTTCTATCTGAAGATGGGATTACCGTGACGGGTCGTTCCGCCGTGGATGGTCAGGGCAA  
GCCCTATCCGCTGCTACATATGGCGCTGGCGCCGACCTGATCGTGCCTGATGAGGCACAGTACCCATAAA  
CCAACGGGGGATGGCATCAGCCATCCCCCGTTTTTTTTGATCGTGTGTTACTTGTGGCGACCTTGTTC  
ACTACCTTGATCAGCTGATAGCGCAGGGAGGGGGCATCGGCCGGCACATCGGTGAGCTGCTCTTTGCTGA  
CTGTGAGCTGATAACCGGTAGCCCGGCTCGAACTGGAAGCCTTCAATATTTCTGGTAGAACAGCGTCCAGGG  
CTGCTGCTCTTACTGCGAACCTGCATGCACTGCATCGGGCCAACCTCCGACGCAATCGACCAGCTGGCTG  
TTGATATAGAGGGTCTCCCCCTGTGACGGGGCGGGGGCGCTCTGGCAGGCGGTGAGCAGCAAGGCTGGCG  
TGATAAACAGTGGTTTTCAATAATGGACTCCTTAACGCGAAAGGGGGCATTAGAGCGGCAAAACAAAAGCGG  
GTCAATGACCGCCTTTGTAACAAACCATATCAGCGCAGTGGTTAGCGCTGCTCTAGCGAGTGAACCTCGC  
GCAGCGGGTGACCCAGTAGAGCTGGCGTGGGCGACCAATCTTGCTGTCCGGGTCTGAGTGGAACTCGTT  
CCAGTGGGCAATCCAGCCAATGGTGCGGGAGATGGCGAAGATCACGGTGAACATGCTCATCGGGATGCCG  
ATCGCCTTCATGATGATGCCGGAGTAGAAGTCCACGTTCCGGGTAGAGTTTCTTCTCGACGAAGTAGGGGT  
CGGAGAGCGCAATACGCTCCAGCTCCATGGCCACGTCCAGCAGTGGATCCTTGATCTGCAGCTCGGTGAG  
TACTTCGTGGCAGGTTTTCGCGCATCACAGTGGCACGAGGGTCTGGTTTTTTGTAGACACGGTGACCGAAG  
CCCATCAGACGGAACGGATCATTCTTGTCTTGGCCTTGGCGATGTACTCGGGGATGCGATCCACCGAGC  
CGATCTCTTCCAGCATGCGCAGGCAGGCTTCGTTGGCACCACCGTGGGCCGTTCCCCACAGGGAGGCGAT  
CCCCGCGGGGATACAGGCGAACGGGTTGGCACCAGGAGATCCAGCCAGACGAACGGTGGAGGTGGAGGCG  
TTCTGCTCGTGATCCGCATGGAGGGTAAAGATACGATCCATGGCAGCTTCAACGATGGGGTTGACCTTGT  
ACTCTTCGGTTCGGCACGCCAAACATCATGTGCAGGAAGTTACCGGCATAGGAGAGGGCGTTACGCGGCTG  
CATGAACGGCTGGCCGATGGAGTACTTGTAAACACATAGCGGCCAGAGTCGGCATCTTGGAGAGCAGACGG  
AAGGCACAGATCTCGCGATGCTGCTCGTTATTGATGTGAGGGGCATCGTGATAGAAGGCGGAGAGGGCGC  
TGACTACACCGCACATGATGGCCATGGGGTGGGAGTCGCGACGGAAGCCGCGGAAGAAGAAGGCGATCTG  
CTCGTGACCATGGTGTGGCGGGTGACCAGGCGTTCGAATTCGGCATATTGCGCCTTGGTTCGGCGCTTCG  
CCGTACAGCAGGATATAGCAGACTTCCAGATAGGTGGCTTGGGTGGCCAACCTGGGCGATGGGGTAACCAC  
GGTGCAGCAAGACACCTTATCCCCGTCAATGTAGGTAATGGCAGATTTGCAAGAACCAGTCCGCATAAAA  
ACCGGGGTCAAAGGTGAAATACCCCTGTGATCCCAATTTTCTGACATCGATGACATCCCGGGCCGATGGTG  
CCGGAGAGGATCGGCAGTTTCGACCGGATCTTTTCCGGGCGAGGTGAGGGTGGCTATCTTATCAGCCATAG  
CACGTCTCCTTTGCTCTTTATAATTTGGTTCCAGTCTACTCTATTACGACTTTTATGACGCTGGCAAAG  
GTTGTTACCCATAACCGAAGTGGCTGGAGCGCCTTATTTGAAAACAGAGTTCCTTATCAATGTCAATTTTGC  
TGGAACCCCATTAATGGCATTAAATGAAATGTTAAATTAATAATGCGATCGAGTTTGGCGTTTTGTGTTTT  
CTTTGTAGCTAATTGATTGTCTTCGGTTAAGGCCCGGATATACTGCGCCACGTGGGTGATGGCTGCGGG  
TGTTTTGAAACGCTTTGGCAAAGCCTGATGTGAAACCGAAAACCTCGCTTTTTGGCTTTTTTTCAGAGTGT  
GGTAACAAAAACCAACAATCACCATTCGGTGCCCTCAAGTGTGAGTTAAAAACAATAACTAACGTGCTCA  
ATGGAGCTGAGTGGGCAAGCGTGAAAAACAACAGAGACCGGTCAACCTCGACCTACAGACGATCAGCTT  
TCCTGTCACTGCCATTGCATCCATCCTGCACCGTGTTCAGGGGTCAATTACCTTTGTTGCACCTGGGCATC  
TTGCTGTGGATGCTTGGTACTTCACTCGCCTCTCCCGAAGGGTTTGAACCGTGGTTGCCATCATGGACA  
ACTTCTGGTCAAACCTCGTGCTGTGGGGGATCCTGACTGCGCTGGCATAACCACATTTGTGGGCGGCTTGGC  
TCATCTGGTCATGGATATGGGCTATTGGGAAGAGCTGGAATCCGGCAATCAGAGCGCCCGCGTGGCCTTT  
GTGATCACCGCGATCCTGGCTGTATTGGCGGGAGTGCTTGTATGGTAACCAATTTCTGCAACCTTCGGGCG  
CAGCGGCGTTACGATTACATCCTGATCCGCGCCACCGCCCTCATCATGACCTGTTATGTCTCTATCTG  
GTGGGCTTTGTGCGGTTCAACGACATCACCTACGAGGTGTGGGCAAGGCTTCTTCGCCAAAACATTCACCA  
AGGTATTCACCTGTTGACCTGCTGCGTACTGATCCACGCTGATTTGCCCTGGTCTGTGGCAGGTGCTGAC  
TGACTATATCAAGCCGTAGGGCTGCGCGGGGCGCTGCAATTTGCCCTGGTCTGTGGTGTGTTTTGTCTAT  
CTGATGACGGGTTTTGCTGCTGTGGGGTGTGTAAGGTGACTATTCCAACTCGTGAATTTGATGCGGTG  
GTGATTGGTGCCGGTGGTGCAGGATGCGCGCCGCGCTGCAGATTGCCAGTCCGGCAAGAGCTGCGCTC  
TGTTGTCCAAGGTTTTTCCAACCGTTCCTCACACTGTCTCCGCCAGGGCGGGATCACGGTTGCGCTGGG  
CAATGCCACGATGACAACCTGGCAGTGGCATATGTATGACACGGTAAAAGGTTCCGATTACATCGGTGAT  
CAGGAAGCCATTGAGTACATGTGCAAAAACCGGTTCCGAGGCTATCTATGAGCTGGAGAACATGGGGCTGC  
CCTTCTCCCGTTTTGATAACGGGTCTGTCTACCAGCGTCCGTTTTGGTGGTCACTCCAAGAATTTCCGGTGG  
CGAGCAGGCTGCCCCTACTGCCGCTGCGGCCGACCGTACCAGTACGCGCTGCTGCACACCTTTACCAA  
CAAAACGTCAAGAACAAGACCACCGTCTTCTCCGAGTGGTATGCGCTGGATCTGGTGA AAAAACCAGGATG  
GCCACGTGGTGGGTTGTACCGCCATCGATATGGAGAGCGGTGAAGTGGTCTACTTCAAGGCAAAGGCCAC  
CGTGCTGGCCACCGCGGTGCCGGTCTGATCTACCAGTCCACCACCAACGCCACATCAACACAGGTGAC  
GGTGTGCGGCATGGCGCTGCGTGCCGGCGTCCGGTGCAGGACATGGAGATGTGGCAGTTCCACCCGACCG  
GCATCGCCGGGGCCGGGTGCTGGTAACTGAAGGCTGCCGTGGTGAAGGCGGCTATCTGCTCAATAAAGA  
TGGCGAGCGCTTCATGGAGCGTTACGCCCCGAACGCCAAGGACTTGGCCGGTTCGCGACGTGGTGGCCCGC  
TCCATCATGATCGAGATCCGTGAAGGCCGTGGCTGCGACGGTCCCTGGGGCCCGCACATCAAGCTGAAGC  
TGGATCACCTCGGCAAAGAGGTGCTGGAATCCCGTCTGCCGGGATCTGCGAGCTCTCTCGCACCTTCG

CCACGTGGATCCGGTCAAAGAGCCGATCCCGATCATTCCGACCTGCCACTACATGATGGGCGGCGTGCCG  
ACCAACGTGAATGGCCAGTGCCTGACTCAGGACAAGAACGGCAACGATGTACCGGTGGTCGGTCTGTTTTG  
CGGTGGGCGAGATTGCCTGCGTCTCCGTACACGGCGCCAACCGTCTGGGTGGCAACTCCCTGCTGGATCT  
GGTGGTCTTCCGCCGCGCTGCCGGCATGCATCTGGTCAACACTCTGGGCGAGATGGAGCACGGCCGCGAT  
GCTTCCGAGTCGGATCTGGATGCCGCGTTGGCCCCGCTTCAACCGCTGGGAAAATTGCCGTGACGGGGAAG  
ACCCGGTGCAGATCCGCAAAGACCTGCAGCGCTGCATGCAGAACAACCTTCTCCGTATTTCCGGAAGGTGC  
GGCGATGGCAGAAGGGTTGGCCGAGCTCAAGCTTATCCGCGAGCGCCTCAAGTCAGCCCCGCTGGATGAC  
ACCTCCAAAGAGTTCAACACCCAGCGCATCGAGTGCCTGGAGCTGGACAACCTGATGGAGACGGCGTTTTG  
CCACGGCGGTTGCCGCCAACTTCCGTACCGAGAGTGCAGGCTGCTCACTGCCGCTTTGACTTCCCGGATCG  
CGACGATGAGAAGTGGCTGTGCCACAGCCTCATATCCGGACACCGAGTCCATGACCCGTCGCGCTGTC  
AACATGTCAACCAAGACCCGTCGAGGCGTTCCCGCCCAAGTCCCGACTTACTGATTGCGGAGCCAGCCCT  
ATGAACGTACATTCTCTGTCTACAGATAACAATCCGGATGTTGATAACGTCCCCCATATGAAGGAATATC  
GTCTTGATATTTCCGAAGGTTCCGACATGATGGTGTCTCGACGCACTGATCCAGTTGAAAGAGCTGGATCC  
CACGCTCGCCTTCCGCCGCTCTTGCCGCAAGGGGTCTGTGGATCAGATGGTCTCAACATGAATGGCAAG  
AACGGTCTTGCTGTATCACCCCGCTCTCCGACCTGCTGAAGAAGGGCAATAACGTCGTTATCCGCCCTT  
TGCCCGGCTGCCGGTGTATCCGTGATCTGGTGTATCGACATGACCCAGTTCTACACCCAGTGGGAGAAGGT  
CAAACCCCTTCCATCAATGATGACAAGTTGCCGCCGGTGCCTGAGCACCTGCAATCCCCCGAAGAGCGC  
GCCAAGCTTGACGGCTGTACGAGTGCATTCTCTGTGCTGCTGCTCCACTTCGTGCCCTCCTTCTGGT  
GGAATCCCGACAAGTTCATCGGTCCGGCCGGGCTGCTCGCCGCTACCCTGGTGGTGGTGCAGCCGCGA  
TACCGCGACACCAGCAACGACTGGGGAATCTGGACGACGCAATTCAGCGTGTTCGCTGCCATGGCATCATG  
AACTGCGTGAACGTCTGTCCGAAAGGCTTGAACCCGACCAAGCGGATGGCCAGATCAAGTCGATGTTGC  
TCAATCGGGCTGTTTAGTATCAGGGCCGGCCTGGTGTGCTGGCTGACCTCTGGATAGCCATCCCACCCGTG  
GCAGGATGGCTATTTGACCCCTACAAGCTGCGCAGCAGTAACAAGAAGTACAAGGGATAGAAATGCATAA  
CGGCGTGTATGAAGGCTGGTTGGAGTCATCTCACCTGGCTGGTGCGAATGCAAGCTATATCGAGGATTTG  
TACGAATCCTTCCGGAAAATCCTGACTCCGTGTCCGACGAGTGGCGCAGCCTGTTTAGCGAGCTGCCCC  
AGGTCAATGGCCATGCGGTTGAACAACCCCACTCCAGGTCCGCGATTATTTCCGTCGCTGGCCAAGGA  
TCCCTCTCGTACAGTGCCTCCGCTCTGTATCCGCAAGTGGATGCCAAGCAGGTGCGGGTATTGCAGCTG  
ATCAACGCCTTCCGTTCCGTTGCTCACCAGAATGCCAATCTGGACCCGCTGGGCTGTGGCAGCTGAAA  
CCGTTGCGCACTGGATGGCTCGGTTCCACAACCTGCAAGGCGCAGACATGGAGGCCACTTCAATGTGGG  
CTCCTACGCCATCGGTGCGGAGACCATGGTGTCTCCGACCTCTACGCCCTCGCTGAAGAAGACCTATTGC  
GGCTCCATCGGCGCGACTACATGCACCTCACCTCCACGGAAGAGAAGCGCTGGCTGCAACAGCGTCTCG  
AATCCATTGAGGGGAAGGGGAGCTACACCCCTCGAAGAGAAGACCCGTTTCCCTCGAGAGCCTGACTGCCGC  
CGAAGGGCTGGAGAAATATCTGGGCGCAAGTTCGGGGAGCCAAAGCGCTTCTCGCTGGAAGGTGGCGAC  
GCCATGATCCCCATGCTCAAGGAGTTGATCCGTGCGCCGGTGCAGGAGGCTGCAAAGAGGCCGTTATCG  
GTATGGCCACCAGCGGTGCTCTCAACGTGCTGATCAACGTACTGGGCAAGCGCGCTCAGGATCTGTTCGA  
CGAGTTTGCCGGCAAGCATGGCGAATCCTGGGGTACCGGTGATGTGAAGTACCACATGGGCTTCTCCTCC  
GACTTCGCCACCCCGGGTGGCAACGTCCATCTGGCGCTCGCCTTCAACCCCTCCCACCTCGAGATCGTCA  
ACCCTGTGGTGCATCGGCTCGGTCCGTGCCCGTATGGATCGTCGCGGTGACAAGGATGGCTCCAGCGTGT  
GCCCATCACCATTCACGGTGCCTCGGCCATGGCCGGTGCAGGGCGTGGTGGCCGAGACCTTCAACATGTCC  
CAGACCCGCGCCTATGGTGTGCGGCGGGACGGTGCGCATCGTCATCAACAACCAGGTTGGTTTTACCACCT  
CCTATATTCGTGACCTGCGTTTACCGAATATTGCACCCGACATCGCCAAGGCGGTGCAGGCGCCGGTGT  
GCAGTCAACGGGGATGATCCGGAAGCCGTGGTGTGTTGACCCAGATTCGACTGGATTACCGCAACACC  
TTCAAACGCGACGTGGTGTGATCGAGCTGGTCTGCTACCGTCTGTCACGGTCAACAAGCGGACGAGCCGA  
GCGCAACCCAGCCGCTGATGTACCAGAAGATCAAGCAGCACCCGACCCCGCGCAAGATCTACGCCGATCA  
GCTGGTGGCCGAGGGGAGCCTCGCTCAGGACGGGCGACCGAACTGGTCAACGAGTATCGCGAAGCGCTG  
GATCGCGGCGAGCGGGTGAACAAGGAGTGGCGGCCGATGGAGCTGCACTCCGTCGACTGGACACCCATC  
TTGGCCACGACTGGAACATGGCCTATGAGAGTGGCCGTGCCAATGGATCACCTCAAGAGCCTCGGCGAGCG  
GGTGAGCCAGTATCCGGCGACCCACGTGCTGCAGCGTCAGGTCGAGAAGATTTACGAAGACCGCCGCTCTG  
ATGGCCGCTGGCGAGAAGCTGGTGGATTGGGGCTTTGCCGAGACCCCTGGCCTACGCCACTCTGGTGGACA  
AGGGGTCCCGCATCCGCTTTACCGGTGAAGACTCCGGCCGTGGCACCTTCTTCCACCGCCACGCCGTGCT  
GCACAGCCAGACCGATGCCAGCACCTATAACCCGCTGTGCAACCTGCACGACGAGCAAGGCCGTTTCGAG  
GTGTATGACTCTGTGCTGACCGAGAACGCGGACTGGCCTTTGAATATGGCTACGCTAGCGCCGAGCCGG  
CTGGCCTCACCATCTGGGAAGCCAGTTCGGCGATTTCCGCAACTGTGCCAGGTAGTGGTGGATCAGTT  
CCTCTCCTCCGGTGCAGAGAAGTGGGGCCGGATGTGCGGCTGACCATGTTGCTGCCGCACGGTTACGAG  
GGGCAGGGCCCGGAGCACTCCTCCGCTCGTCTGGAGCGTTATCTGCAGATGTGCGCTCAGCACAACATGC  
AGGTGTGCGTGCCTCTACCCCGGCGCAGGTGTTCCATATGCTGCGTCTCAGGTGGTACGCCCGATGCC  
CCGTCCGCTCATCGTCATGACGCCAAATCCCTGCTGCGCCATCCGCTGGCGGTGAGCAAGCTTGAAGAG  
CTGGCTGAAGGTAATTTCCAGAACGCCATCGGCGAGATCGATGCGCTGGATCCGAAAGCGGTCAAGCGGG  
TGGTGTCTGCTCCGGCAAGGTCTACTACGACCTGCTCGATGCCCGTCGCAAGGCCGAGCAGCAAGATGT  
GGCACTGGTGCGAATTGAGCAGCTTACCCCTTCCCGAAGAGGAAGTGCAGCGCCATTTCTGGCCGATTAC  
AGCCACGTCAACGACTTTGTTTTGGTGTGAGGAAGAGCCGCAACCAGGGCGCCTGGTACTGCACCCGTC

ACCACTACGATGGCGTGCTGCCAGCCGGAGCCACCCTGCGTTATGCCGGTCGCCCCGCGTCAGCCTCACC  
GGCCGTCGGTTACATGTCTGTCCACGCCAAGCAGCAAAAAGCCTTGGTGAAGATGCCCTTACCCTGTAA  
AGCCTCTGGCATAGAAGTAAAAAGGAAGTATTGGATGACTATCGAAATCAAGGTACCGGATCTGCCGGA  
ATCAGTGGCCGATGCCACTATCGCCACCTGGCACAACAAAACCGGGCGATCTGGTCGCCCCGTGACGAAGTG  
CTGGTCGACATCGAGACCCGACAAGGTGGTGTGCTGGAAGTGCCGGCACCAGCCGCTGTGCTGGGGGATA  
TTCTGCAAGGGGAAGGGGGCGACTGTGTTGTCCCGTCAACTGATTGCCATCCTCACCGCCGCCCGGTGGC  
CGGTGAAGAGACCAAGAGAAACCCGCTGAAGCAGTGGCCGATGATGGTGCCGATGGCTTGAGCCCCTCG  
GTGCGCCGCTGATTGGTGAACGATATCGACGTGACCAAGCTGACCGGTACCGGCAAGGGTGGTCGCA  
TCACCAAGGATGATGTGGAAGCCTTCATCAAGGCCAAGAGCCAGCCTGCGGCAGCCGACCCGGTCGCAAC  
TACAGCCCCGGCAGCCAAGGTTGCCCCGCTGGGTGGTGCACCGACAAGCGGGTACCGATGACCCGCTG  
CGCAAGCGCATTGCCGAGCCTGTCTGGAAGCGAAAAACACCACCGCCATGCTGACCACCTTCAACGAGG  
TCAACATGGAGCCCATCATGGATCTGCGCAAGCAGTACCGCGAGATCTTCGAGAAGAAGCACGGCATCAA  
GCTCGGCTTTATGTCTTCTACGTGAAGGCGGTAGTGGAGTCCCTCAAGCGCTATCCGGAAGTGAACGG  
GCGCTCGATGGTGTGACGTGGTTTACCACAACACTACTTCGACGTGACCATCGCCGTCTCAACCCCCCGTG  
GTCTGGTGACCCGGTGTGCGCGACTGCGACAACATGAGCCTGGCGGACATCGAGAAGGCCATCAAGGA  
TCTGGCGGGCAAGGGCCGTGACGGCAAGCTGACCGTGGATGAACTGACTGGCGGCAACTTCACCATCACC  
AACGGTGGCGTGTTCGGCTCCCTGATGTCCACCCGATCATCAACCCGCCCCAGAGCGCCATTCTGGGCA  
TGCACAAGATCCAGGATCGCCCGATGGCCGTTGACGGTAAAGTCGAGATCCTGCCGATGATGTATCTGGC  
GCTCTCCTACGATCACCGTCTCATCGACGGACCGGAATCGGTAGGCTTCTGGTCTCCGTCAAGGAGCTC  
TTGGAAGACCCGACCCGCTGTGTTGCTGGATGTCTAAGCCTGTGGCTCCCGGGCAAGGGGTTTGCGCCCG  
AGCCGGATGTGCTGCTGGACGTTTGTAGTAATACCCGAGCGATTGAAAGATAACGAGGGGCCGCCAGGCC  
CCCATTACAGGGGATTGAGAAAACACCAGCCCCGGACGGAAATACCTACAACACGGATAGAGCATCTATG  
AATCTGCATGAATATCAGGCAAAAACAGCTGTTTGCCGAGTATGGCCTGCCGGTCTCCGAAGGTTATGCCT  
GTGCTACCCCAACAAGAAGCGGCCGAAGCGGGCCGACAAGATTGGCGGCAATACCTGGGTCGTCAAATGCCA  
GGTACACGCCGGTGGCCGCGGTAAAGCGGGCGGGTGAAGTGGCCAAGAGCAAGGATGAGATCCGTGCT  
TTTGCCAGAACTGGCTTGGCAAAAATCTGGTGAACCTACCAGACAGACGCCAACGGCCAGCCGGTCACCA  
AGATCTGGTGGAAATCTTGACCCGACATCGCCAAAGAGCTTACCTGGGCGCCGTGGTTGACCGTGGTTT  
GCGCCCGTGGTCTTTCGACCTCGACTGAAGTGGCTGGATATCGAGAAGATCGCCCAAGAAACCCCC  
CATCTGATCCACAAGGCGCCATTGATCCGTTGGTGGTCCGAGGCCATATCAGGCCCGCAACTGGCCCT  
TCAAACCTGGGTCTGGTCGCGCATCAGATCAAACAGTTTACCAAGATCTTCATGGGTCTGGGCCAGATGTT  
CCTGGATTGCGATTTGCGCTGCTGGAGATCAACCCGCTGGTGTATCACCGCGCAGGGCAACCTGCACTGC  
CTGGATGGCAAGATCAATATCGATGCCAACGCACTGTATCGTCAACCCAAGCTGCGCGAGATGCACGACC  
CGTCACAAGATGATCCCCGGAAGCGCACGCTGCCAGTGGGAGCTGAACTATGTGGCCCTCGATGGCAA  
CATCGGCTGCATGGTCAACGGCGCGGGTCTGGCCATGGGCACCATGGACATCGTCAACCTGCACGGCGGC  
AAACCGGCCAACTTCTTACGTCGCGCGGGCGCCACCAAGGAGCGCGTAACCGAGGCGTTCAAGATCA  
TCCTCTCCGACAGCAACGTCAAAGCGGTGCTGGTCAACATCTTCGGCGGCATCGTGCCTGCGACATGAT  
CGCGGAAGGCATCATCGGTGCGGTCAAGGAAGTGGGGTCAAGGTGCCGTCGTGGTCCGTCTGGAAGGC  
AACAACGCCGAGCTGGGTGGTATCAAGCTGGCCGAGAGCGGCCCTCAACATCATTGCGGCCAAGAGTCTGA  
CCGATGCCGCGCAGCAAGTGTCAAAGCAGCGGAGGCCAACTGATGAGCGTACTGATCAACAAGGACACC  
CGAGTCATCTGCCAGGGCTTTACCAGCGGTGAGGGTACTTTCCACTCCGAGCAGGCGCTCTCCTACGGCA  
CCCAGCTGGTAGGCGGGCTCTCCCCGGGCAAGGGCGGCACCACCCATCTGGGCTGCCGGTGTTCACAC  
CGTCCGTGACCGGTGCAAGCGACCGGGCCACCGCCTCCGTCACTATGTGCCAGCGCCGTTTTGCAAG  
GATGCCATCCTGGAAGCGATCGACGCGGGTATCAAGCTGATTGTACCATCACCGAAGGCATCCCGACGC  
TGGATATGCTGGACGTCAAAGTGAAGCTGCAAGAGACCGGTGTGCGGATGATCGCCCCAACTGCCCGGG  
TGTGATCACCCCGGGTGAAGTGAAGCTGCAAGAGACCGGTGTGCGGATGATCGCCCCAACTGCCCGGG  
ATTGTCTCCCGCTCCGGCACCTGACCTACGAAGCGGTCAAGCAGACCCTGACGAGGGCTTTGGCCAGT  
CCACCTGCGTCCGTATCGGTGGCGACCCCATCCCGGGCTCCAACCTTTATCGACATTTCTGGAGATGTTCCA  
GAACGACCCGACAGCCGAAGCGATCGTGATGATCGGCGAGATCGGCGGCAACGCCGAGGAAGACGCGGCC  
GCCTATATCAAGGCCACGTCACCAAGCCGGTCTGATCTTATATCGCCGGAGTTACTGCCCTCCCGGCA  
AGCGGATGGGCCACGCTGGCGCCATCATCTCCGGTGGCAAGGGTACTGCCGCGGAGAAGTTTGGCGGCT  
GGAAGATGCTGGCGTGAACACCGTCCGCTCCCTGGCCGATATCGGCAAGGCCCTGCGCGAAGTCACCGGC  
TGGAATTTCCAGTTAGCCGTTATCTCTAATAAAAAATGCCGCCGATGGGCGGCTTTTTATTGGCATGGT  
TCGTAATTTATCAGGCATAACCAGAATACGCTTCTCTATTTAACTACAGTTCTAAAAATTGATTTAAAT  
CAAGCGCCAATGCAATGTGAATGTATTAATATGAATTTTAAACCTGATGAAAAGGAAGGTGCACCGTG  
CCATACGATTTAACAAGAAAGATTGGTTGTTGGCTTGTCTTCTAGCGGTTGTTTGACCTTGAGGAGTCAG  
ATAATATATTCAGGACAGAAGGTGAAGAGTCTTATAGAGAATATCAGAGGGAAATGCAAGATGAACCATT  
GGGCAGAGGTGTTGCATTTCCATTTATTCGTGCTTTACTTAAAGTTAAATACATTTGTGCCCAAGATCCT  
TTGGTAGAAGTAATATTGCTTTACGAAATGATTCTGATACTGGGCTCCGAGTTATGAACTCAATTGAAC  
ATTATGGCCTAGGTATTACGAGAGCTGTATTTCTACAAGGTAAGTCGCCTTATGTCTATATCCCTGCGTT  
TGATATCGAATTGTTTTTATCAGCCAATTATCAAGATGTTTCGACAAGCAGTTCTTGCTGGATACCCTGCA  
GGTCAAATTTCTGAGTGGTGTATATCAAAGATGATACTGAAGACCTAGAGCTTCGAATAGCTTTTCGACTTTG

ATGGCGTTATTGCAGATGATGAAGCAGAGGGCGTCTATAAAAAGTTCAGGGCAGTTAGCTGATTTTCACCTC  
TCATGAGTCTGAGCTAGTTGATGTCCACATAACCCAGGTCCACTGAAGAATTTTCTGCAGCGGATTTCCG  
GACATACAAAACTTGAGGCTGACAAGAAAAAGAGGATTCAGTTATTTACCGATGCTTAAGGTATCAA  
TTGTGACAGCAAGAAATGCACCTTCTCATAAACGAGTCATTAATACTATGCGCTCTTGGGGTATTTCTGT  
AAATGAGGCATTTTTTATGGGAGGGGTGGAAAAGTCAAAAAGTATTGAATATATTAAGGCCGCACATATTT  
TTTGATGATCAAAAAGTTACATTTACAATCGTTCGTCTATTTTACCATCGGTACATATTCGGTTTGGCGTCCG  
CAAATAAAGATTTGGTACTTTAATAAAGTGATCTTACTCGAATAGAAAACGAATATTCGGATGATCGGGGC  
GTTAGTGTGTGCTGTGCTTACCTGTGGCCAGAGTCGAATAGCCCAAGATTGTTATGCTGCTGCAACCAC  
GTTGGCTAACCAGTGTCTCGCTGGTAAATCAGTTCCTGCCGCTTTTTGGGCAACCAGAATGCGGGTTAACC  
CAAGGCCATTGACACTTGCAGGCTTTCTTCTATCAGTTCCTGGCTACCACGCCGACCATAAAAAATG  
CCGACCAGGGGTCGGCATTTTTCAAGAAAATAGGGTGTGGGGCAAAAACAGTATGGGAAAATGGTTGCCCTCT  
ATGACCGGGCTATTTATCCGCTTTCGCCCGCTCCTTGCGCCGGATGGCGTTGCGCACCGCCATGGCCCCAGCC  
AGCGAAACGGCTCGGGCGGAAAATAGCCACGCGGGCCGCTGACCAGCGCGCAGTCACGCCACGGCTTGTCT  
CTCCTCCCGCACTTTCATCGCGCACAAAAGTTGCCAGGATCTGGCCGCCGATCCAGCTTTGCGCCACCCCG  
TTGCCGGAGTAGCCGAGGCCATAGACGATATTGGGCTGCCCTCGCCAGTGGCCGAAGAAGGGGAGGCCAT  
CTACCGAGCGGTTCGAGGGCGCCGACCAGCTGGCGGCGATGGGCACCTCTTTGAGCGCCGAAAAGAAGCG  
TCGCAGGGTTCGGGTGAGAGGGGCAAGATAACGGCTAGGGGCATCGAACTCGGCCAGATGGCGGTTGGCA  
AAGGCGAAGGTGTTGCCCCCTTGCACAGCATCAGCCGCCCTTGCGGGGTGGAGCGGTAGTAATGCACAA  
AGGTGCGGCCATCCACCACGCTGCGACCGTGCAGCAAGCTGCTGGGCAGCCAGTGCATCCGGCACGGGGTC  
GGTTATCACCATATCGGAGGAGACCAGCACTATACTGCGGGCAAACTCGCGAAAAGTGTGCACCATGGCG  
CTGTTGAGGGCCAGCACCTTTCGGGGCACGCACCTCGCCCTGTGACGTTTGCACCCGTGCAGGCTGGC  
CCGCCTCAAGGGCTGCATGGGGGAGTGCTCATAGACCTCGACCCCGAGTTCCCGCGCCACCCGCAGCAG  
ACCACGCACCAAGAGCGCCGGTTGCACCGAGCCCGCGTGGAGGCTGTAGAGCCCTCCAGATGAACGTGG  
GAACCGCTCTGGCTCGCCAGTTACCCCTCCGCAATCGCCTGCCACTGGTTAAGATCGGCTCGCTGTAGCT  
CCCGCAATACCGGCTCCATCAGGCCGCGCTGGGCCTCGCTGGTGGCGGTGTAGCAGGTGCCCTCGACCT  
CAGCTCCGCTTTCATGCTGTGCGTTTCGAGAAGCGGGCGATCTCGTGTACCGCCTGCTCGGATCTTTGT  
ACCAGCCAGGCTGCTGCTGCTCGCCAAAGAGCGCTTTAACGTCAAGTATTTGGCCGACCAGGTGAGCA  
GACAGCCCGGTTTCGCCCCGAGGACCCGCTGCCAGCCGATCTTTCTCCAGCACTATGACGTGCAGGTTG  
GGGCTCGGCTGTTTAAAGCGGATGGCGCTCCACAGCCGGTAAAGCCGCCACCGCATGCAGACATCG  
GCCTCGTGGTTGCCGACTAGGGGCGTGGGCGGTGCGGGTTGTTTCGGCGGCGAGCGCTTCGGCCAGCCAGA  
AGGGGAGAGTGGACATGATGACTCCTCGATAAAGTTATGGGTGGCGCCAGCGCTGGGTGCGATCCAGCAG  
GGCGCGGCTCAAAAAGAGCTGGAGCAGCTTGACGGTGGCGGCGGCCAGCAGGATCAGGGTGGCCATGGCG  
GCGGCCGCGGCGGTATCGCCGGAATCCTCCATGTTACAGCACGGCGATGGAGGCGAGCACGCTGTGCTCG  
AATAGAGGAAGATCACCGCCGAGGTGGTGGTTCATGGCGTTGACGAACAGATAGATAAAGATCTCCAGCAG  
TGCGGGCAGGGAGGCGGGCAGGGTGA CTGCCAGAACGCCCTTCCAGAGCGGAATGCGCAATGAGATGGCC  
ACCAGCTCCAGCTCCTTGGGCAGCTGCTTGAGGCTGGTCAAGCGCTCATATGGCCACCGTGTAGTAGT  
GGATGACGCAGGAGAGCACCATCAGCGGCAGAGTGCCATAGAGAGTGCCAAAGAGCGGATGCCCGTTGAA  
AAAGAAGATGTAACCGAGCCCCAGCACCATACCGGGTACCGCCAGCGACAGCATGGCGAGTAGATGCAGC  
AGCTGGCGCAGCGGCGGAAGTGGCGCCCTTCTCCTGTGCCAGGCCAGCACCATCACCAGCATGGTAC  
CGATAAGCGCGGTATAGAGGCCAAGTTGCAAGGTGTTGGTAAAGGGCTGCCAACCCTAGACGCTGTTGCT  
GTCAAAGGCGTAGTGATCCAGCGTCAGCTCGAGGTTGTAGGGCCAGA ACTGCACCAGGGAGCCGTA AACG  
GCCATCCCCACCAGCGCCAGAAACAGCAGGGCCAGAGCGTGCACCAGCCGAGCGCCAGCAGATCCCGCA  
GCCGATGGGGTTTGGGCTGATAGGGCACCGCTTGGTGTGCTGCTCTGCTCCTGCATCTTGTGTCGCACTCT  
GTGCTCCAGGGCAAAGCTCAAGAGCGCCGGCAGCAGAGGGTGAAGCTGGCAACGGCGCCAGCGAGAAG  
TTCTGCATCCCGACTCACCTGCCGCTAGATATCGGTGGCCAGCACGCTGTACTGGCCGCAATCACCTTGG  
CCACCCGAAAGTTCGAGATGGTGAAGGTAAAGACGGCGATGGCGGCGCTCAAAAAGACCGTAGCGAGCGGT  
GGGCAGGGTGACGGTGACAAAAGGTGCGCCAGCCGCTGCTGCCAGCACCCGGGAGGCTTCATAGAGGCGG  
GCATCGCTCTGACCGAGCGCAGTGATAAGGATCATCAGGGCGTGGGGGAAGCACCAGAAGCCCAGACCAA  
TGACGATGCCGATAGGACCGTAGATGCTCTCGCCCGGAGCAGCCCTTGGCGATCCCTGATTGCCAAA  
CCAGTAGACCAGACTGATGGCGGGCAGCAGGGAGGGCATCAACAGCGGAATAAGGCCAATGAGGCGAAAC  
AGGCTCTTGGCCGCGATGCAGGTGCGTGTGAGGGCATAGGCGTAGCCAAAGGCGATGGTACCACCAGCG  
CGGTGATCAGCACCCCGAGCCAGAGGGTGTTCCTATGGTGCGCCCTAGATGAGGGGAGTCAAGTAGGC  
GCTGAAGTTGGCAAGGCCTATCCAGAGGCCGTTCTCATCTGCAGGCTTTTTTGGCAACATGGTGAAGCAGC  
GGCAGCAGCAGACCCGCGGTGAGCAGAGCGATGCCGAGCACCAGCAGGATCAGTTGCAGCAGCTGATCCC  
GGCTCCAGCCGCGACAGAGCCGCTGCCAGCGAGAGTCTTGGCGGGCTGTGCTGGCGGCAACAGGGAGGA  
GGTTCGCAAGGGGGCTGTGATGGGCGATCTCCTTCAAAACAGCTGCATCGCACCGGGCGGGCCAGTGCAGCG  
AGCAGCGCATGCCGCTGCGCCAGCCTCCTTGTTCGTGGCGGGGCAACTCGTGGGTGCGGGCGCTCCACCAG  
AATTTGCTGTGGGCCAGATAGGTGTGCGCGGTGCAGATCAGTTCGCTGGGCGGCGCCGAGAAAACCTCACC  
TGATCGATGGTTGCTTCAACGCCATGTTGCCAAAGGTGCGGCTCGTTTCGGCGCGCTTAGCGTATTGCCCT  
CGGGGCGGATCGCCACCTGCAATTTGCTGCCGGCAGCGGCTGGTTGGCAAGTGTGACGGTTGTTTCGTT

GAGGCGCACCTGATTGGGGCTCAGCACCAGGGTCTCGAGGAAGTTCATGGTACCGACAAAAGCTTGCCACG  
AAACGGCTGGCAGGCTGGTGGTAGATCTCCTGCGGGGTGCCACCTGTACGATGCGGCCGCCCTCCATCA  
CCACGATGCGGTCGGCCATGGTCAGCGCCTCTTCCTGATCGTGGGTACCATGATGGTGGTATGCCAAG  
GCGCTGCTGCAGGGCGCGGATCTCGCTACGAAGATGGGTGCGTACCAGTGCAATCCAGCGCGCTGAGCGGC  
TCGTCCAGCAGCAGCAGGCCCGGGGGAGAGGGCCAAGCCCCGGGCCAGCGCCACCCGCTGCTGCTGGCCGC  
CGGAGATCTGGCTCGGGTATTTGTGGGACTGGGCAGTGAGATCCACCAGCCCCAGCCAGTATCGACCCG  
CTCCTTGATGAGATCCCGCGCCAGCCCTGATTCTCAAGGCCGAAGGCGATGTTCTGGGCCACCCGTCAGG  
TTGGGGAAGAGAGCATAGGACTGAAACACGATGCCAAAATCGCGCTCCTGGGGCGGCAGGCGGGAGATAT  
TGCGCCCTCCTTGCCAGATCTCGCCGCTGTCTGGCAGATCCAGCCCCGGCGATGGCTCTGAGCAGGGTAGT  
TTTGGCCGAGCCGGAGGGGCCGAGAAAGCAGATAAACTCCCCGGCTCAATGGTCAGAGAGATCCCCCTG  
AGGGCCTGAAAAGCACCAGACTGCTTGTGAGATGTTGAATGTCCAGATAGGGCTGGGTCATGGTTCGAC  
TCGCTACTGACTTGGTATATACCAGTTTTCGGGTAAAGTGTGACGGTCAGGTGATCGGGGGATGACAGCT  
TGATGACAGTCAAATGACATCGGGTCGCCAGCAAGTACTGGGCACTGTGCGAATGGACTAAGCATCGCT  
AATTGAAGGCAATGAAACTCGGGAAGTTAAAACCAAAAAGCGAAGGCCAACAGCTGTTGGCCTTCGACT  
GGCAGTTTATTGGCAGCGGTGTGTCTGGCGTGAACAAAACCGCCGCCCTTACGCTTACTGTTTGGCTTCG  
GTCTTGCCGTCGAAGCTGGCGCTCCACTGGCCAGGATGGCGTTACGCTCGCGGGCTGCCAGCTAAAGT  
CGTTGTCGATCATCTGGCCTTTGATATCCGCCGATAGCCCGCTCTCGGTTGGGCCACATCGGGGATGGC  
AACCACGGCGAACGATTTGTTGTAGAGGGCGTTGGCCTGTTCCGTTGGCGGCAAAGTCGAGCAGCTGTTTG  
GCGGCTTCCAGCTGGGGGGTGCCTTGATGATGGCGGCAGCTTCCATATCCCAGCCCAGCCCTCTTTTCG  
GGAATACCACCTCGATGGGGGCTCCCTTGGCCTTGAGGCTGGTGGCCGGGAAGTCGAAGGAGATACCGAT  
CACCGTCTCGCCGCTGGCGGCCAGCTTGCAGGGGGCTGAACCCGAGTGGGTGTAACGGTCGATGTTCTGG  
TGCAGGCCGTTTATAAATTGCCAGCCCTGCTTCTCACCCATGGTTTTGTAGCCAGCCAGCGACGCTCAGGT  
AACCGGTGCCGGAGGAGCTGGGGTTGGGCATGATCACCTTGCCCTTGTAGATGGGCTTGGTGGAGTTCGGC  
CTAGCTGGTGGGGGCCGGGATCCCCTGTTTCTCCGCTCTACCTTGTGTAAGCAGATGGCGCTGAAGAAG  
GCGTCCAGACCGATCCAGTGCAGCTCGGCCTTGTGTGCGAAAAGCGGCTGTGAGCTTCTCCAGTCTTT  
TCGGTGCATAGGCATTGAGCATCTGCTGCTGATCGAGCTGCATCAGGCTGGTGGCGGCCAGTCCCCACAC  
CACATCCGCCTTGGGCTGCGCTTTTTCTGCCAGCAAGCGGGCGGTGACCACGCCGGTGGAGTCACGCCAC  
CACTTGGATGTTGATGTCGGGATGCTGGCGTTCGAATGCGGTTTTTCAGCTCGTTGAGCTGCTCCGGTTCGA  
AGGGGCTGTAGACGGTGCAGCTCGGTCGCGGCCAGTCCGGGGCGGTGATGGCAGCCAGCAGCGCGGGCGGC  
CAGCAGATGGGTTCCCTGTTTTCATCTCTTCTCCAGTTAAATTGGTTTTGGTATAAACCAGATTGGTCGAG  
AGAGAGGCTAGGGGATCTTTATGACGTGACCGTGACAGCCCCGTGACGTTTTTGGCCTTCTGATTTGTCC  
GTGACTAATCCTGGGTATCCACCTCGATCTCCAGACTGTGCTGGCGCCAGTACTCCAGATCGAAATCGAG  
CACCCGGCCGTGCTGATCGAAGTTGAGTCGCTCGAGGCGCAGGGCGGGCAGACCCGGCAGTGGCCCCCAGC  
GCCTTGGCCACTTCGTCCGGCAGAGCGGTGGGGAAGAAGCGCACCTGCATGCGGGCGTAGTGAAGATCGT  
AATGGGCTGATAGATCTCGGTGAGGCTGCCGTTGAGATCCAGCTCCAGCAGGCCGGGCACCCGCTCGGG  
CAGGCAGTGGTTCTCGCAGTAGCAGATGGCGCGCCCGTTGGCGTAGCGCAACCCTTTTAGCAGAAACAGG  
CTGTGCAACGGCTTGGAGCTGCAGTTGCGCCATCAACCGGGCGGTACCCTGACGGCTTTTCTCCAGTA  
GTTTTGGTGCAGCGCTCACCCCTTGTCTCCGCACTATCTGGTGAAGTTGGAGGTGCGTCTGGGGTTCAA  
GCGAAAGCGTGGCGGGGTTACGAACCAGCCGCGGGGATCCTCCCAGATAGATAAGGCCGTTTCGCCTCCAGC  
TGAACCAGTGCCTCGCAATGGTAACTCGGGTGGTGCCATAGAGTTCCCCCAGCAGCCGCTCGGAGGGGA  
GCTTGTGCTTGGGGGCCAGACCCCCCGCCAGGATCTGGTTGGCGAGGGCATCCTTGATCTGCAGATATTG  
GGGTTTGTCTATGAAAATCCCTGGTTTTTGAATAAGTTGGGCAATGGGCTGGGCACAGGGCAGGTCATCT  
GCCCGGTGCTTACACGGCAACATCAACATGCGTTGGTAGATAACCAGCAGCGCCCTGCTGTTACGGCTTC  
CTAGATTATCGCGATCCCGCGCTGAAAATGAATTTTTTGTGACGTAGCGCCACCCCTTTGACCTTGG  
CGGGGCAGTTACCCACAATGCGCTCATTCTGGTATATACCAAAAAGGAGCGAAGTCATGACCCATATTC  
TGCGGGCCCCCGCCGCTGATTACCTGCTGCTGACCCCGGGCCCCCTCTCGACCACTGCCACGGTGCAGC  
GCCGCCATGCTGCAAGACAGCTGTACCTGGGATACGGACTACAACCAGGGGGTGGTGGAGCCCATCCGCC  
GCGAGCTGGTGCCTCGCCACAGGCCCTGAATATCAAAGTACTACAGCGCCGCTGCTGCTGCAGGGGAG  
TGGCAGCTATGTGGTGGAGAGCGTGTGGGCTCGGCGATAAGCGCCGACGAGTGTCTGCTGATCATCAAC  
AACGGTGCCTACGGAGCCCGCATGGGGGAGATGGCCGCTGTCTTGGCCTGCGCCACCACGAGCTGGATT  
GCGGCGAGACCAACCGCCCCGAACCCGCGCCATCGAGGCGATGCTGGCGCGCCACCCCGAGATCACCCA  
TCTGGCCATGGTGCCTGCGAGACCACCACCGCATGCTCAATCCCCTTGGAGGAGTGGCTGAGCTCTGC  
CAGCGCCGCGCATCCGTCTGATCGTCGATGCCATGAGCAGCTTTGGCGGTATCCCATCGACATGGGGC  
GCCTTGGCATCGAGTTTCTTATCAGCTCGGCCAACAAGTGCATTCAGGGGGTACCAGGGCTTTGGCTTCGT  
CATCGCCCGCCGCTGCGCTGGCGGCCCTGCGCCGGTCTGCGCCGCTCTGTCTCCCTCGACCTGCATGCC  
CAGTGGCAGACCATGGAGCAGCAGGGGGCAAGTGGCGCTTTACCTCGCCACCCATACCCTGCTCGCCT  
TTGCCAGGCCCTGCGCGAGCTGGACGAAGAGGGGGCATTGAAGCCCCGCATCAGCGCTACGGCGAGAA  
TCAGCGCACCCCTGGTGGCGGGGATGGCTGCCCTCGGCTTTGCGCCACTGCTGCCAGAACAGTGGCAATCT  
CCCATCATCACCGCCTTCTACTCTCCGGCCACCCTGACTACCGCTTCGCGGATTTCTACCAGCGGCTCA  
AGGGCGAGGGCTTTGTCTATATCCGGGCAAGGTCTCCAGGCCGATGCTTCCGTATCGGCAATATCGG  
CGATGTGACCCCTGAGCGGGTGCGGGATCTGCTCGCCGATGGCCAGCGCTGCTACTGGCAAGGGGAC

GTGCGATGACCAGCATGCTGGCTCAGGGTCGTGATCTGCGTGGCCGCGATTTGCATGACCATAAGCTGCA  
CGGCAGCGGCCGTGCCGACAGCGAAGGGGATATCAACCTCGGCGAGGGCGGGCGCGCTGGTGGGCGGGC  
CAGAGCGAAGATGTACAGGCCGGATTGGCGGAGGATAGCCGCTACTTTCTCCATCAGGCACTCTCCACCC  
CCTGTCTGGATCTGATTGAGGGGGCGCAGGGGAGCTGGTTGACCAGTGATCGGGCGCGCTTACCTCGA  
TTTTTACGGCAACAGCGTTTCATCAGCTGGGTACGGTCACTCCAGGGTGGTGGCCGCGGTTTCAGCAGCAA  
CTCGCCGATCTGCCGTTTCGCGCCCCGCGCTACACCCATCAGGTTGCCATCGACTGCGCCCCGACCCCTGG  
CCGAGCTGGCCCCCGGCGATCTCAACCGGGTGCTGTTTGGCCCCGGCGGCAGCGAGGTGGTGGGGATTGC  
CCTGAAGCTTGCCCGTTTCATCACTGGCAACAGCAAGGTGGTGTCCCTCTGGGATGCCTTTCACGGCGCC  
TCCCTCGATGCCATCTCGGTGCGCGGGCAGGGCCTGTTTTGCGCCGGTATGGGCCCGCTGATGGCCGGGG  
TGGAGCGCATCCCCGCCCCCACCCTTATCGCGGTGTCTGGTATCGCGGGGAGGGGGATGACCTGCACATA  
CGCCGATTATCTGGAGTACGTCAATCGAGAAGGAGGGAGGTGTGCGCGCCTTTATCGCCGAGCCGATCCGC  
AACACCGACGTGCAGGTGCCCTCGAAGGCCACTGGCAGCGGGTGCGGGAGATCTGCGATCGCCACAAGG  
TGCTGCTGATCGTCGACGAGATCCCCAATGCCCTGGGCCGACCCGGCCACTGGTTTCAGCTTTGAAGAGTT  
CGGCATCGAGCCTGACATCATCTGTCTGGGCAAGGGGCTGGGGGGCGGGGTGGTGCCGTTTTCGCGCGCTC  
ATCACCCGCGACAGGTTCAATCAGGCGGCAGCTATTTCACTCGGTCACTACACCCACGAGAAGAGCCCTA  
TCGGCTGCGCGGGCGGCGCTCGCCACCATCAGTACCATCCGTGAAGAGGGGTTGCTGGCAAAAGCGCAGGA  
GGATGGCCGTTTTTATGGCGGCAGAGCTCGCGGCGCTTGCCGAGCGTCATCCGCTGATCGGGCAGGTGCGC  
GGCATCGGTTTTGCTCTGGGCGCTCGATCTGGTGGTGCATCATCAGAGTCGCATCCGCAATAGCCAGGCCG  
CCGAGCGGCTGCTCTACCGCTGTCTGGAGCTGGGGCTCAGCTTCAAGGTCTCCAAGGGAACGTCAATCCA  
GCTCTCGCCACCGCTCAATATCGCCCCGCGCCGATCTGGTGGTGCATCACCATTCTCGATCGCGCCCTC  
GGCGAGATCGCACTTTACCCGAAACAGGAACATCACCATGACTGAGTTGCAGACTGCCATCCACCCGACC  
ACCGACGTGGAGGCGCTGATCCTCGACTGGGCCGGCACTGTGCTCGATTTTCGGCTCCTTCGCCCCACCT  
CCATCTTCGTCGAGGCCTTCGCCCCGCGCTATGACTTCCCCGTTACTCTGGACGAAGCACGCCAGCCAT  
GGGCCTTGGAAGTGGGATCATATTCGCCGCGCTGGGCTGTCTGCCTTCGGTGGATGCGCGCTGGCAGGCC  
CGCTTTAGCCACCCCATGAGCCACGCCGAGGTGGACCACATTTATCACACCTTTATGCCGCTGCAGATTG  
CCGCCGTGACCCGCTTTGCCGCCCCATCCCCGGTGTGCTGCCGGTGTGATGCTCTGCGGGTTCAGGG  
GATGAAAATCGGCTCCTGTCTCCGGTTATCCCCGTCCGGTATGGAGGCGCTGGTACCTGCTGCGGCCGAT  
CATGGCTATCGGCCGCGCTCACTGGGTGGCCACCCAGCATCTCAAGGCAGGTGGTTCGCCCCGGTCCCTGGA  
TGGGCTGGCCAACGTGATTGAGCTGGGAGTAAGCGCGTGCATCGTGCATCAAGTGGATGACCGCCGT  
GCCGGGTATCAGTGAAGGGTTGAACCGCGGCATGTGGACGGTGGGATTGTCGGTTTCCGGCAACGAATTT  
GGTGCCACTTGGAAGAGTTTGCCGCCATGAGCGAGGCGGAGATCGCCGCCCGGCGCGCACCCGGCTGAGG  
CCAAACTGCGGGCGGCGGGGGCACACTATGTGATTGATAACCTTGGCCGACATCGCCCCGGTTATCGCCGA  
TATCAACCGCCGTCTGGCCGCTGGCGAGCGCCGTAGGCCATCTGCTTGGGCTAACAAAAGCGCTTGGCT  
GGCTTTAGATGCAACACGCCCCATCCGGGGGCGTGTTCATCTATAGGGGGAAGTTGTGCGCGGTGAGC  
GGATATCGACCCGCATCAGGGGAGAGGGGGCGTGTGACAAAAGTGGTGCAGATATGGTTCGTAGAGTGC  
CTTCTGGCCGGGGAAACTCACAGCGCCTTGGCTCGGCCAGGGAACACCAGCGATAGTCTGTGTGCTCG  
TCGTTGAGGATCACCGCTGATTAGCCGGGCAATAGACCACAAAAGACCGGCACTACCTCTATCGTATTCA  
GGCTTGCCCTCGTAAAATGCTCCAGATACTGGCCGTTGTAGAGTTCGGTGCACCTGATCCCCGTCTCTTC  
GCCAAACTCCCGAATAATGGTCTGCCAGCCGGTTTACCCGCTCCACCGTGCCCGCCACATGGCACCAG  
AAGCCTCCCTTGACCCGCTTCATCACCAGCAATCTGGTTTTCGCCATCGACAGTGGTAAGGGCAACGCCAG  
AGACGGCCTTGACGCGAATGGGGATCATGATCTTCTCTCCGGATTTGGGCTCTGTGATAGCCACGAACAG  
TGTGAAGGCGTGTAAATTGAAATATGCCTCGGCGGGTAGGCCATGACCTCTATTTTCATTTCAGGCCGCTT  
TTGGCCAGATAGTTGGCCACCAGATTGAACCCACCCAGTAACCGGCATATTTGGGAAATGGCCGGTTAT  
CACGGCAGTAGAAAAAGTCTAAAAAGTTGAACTGCTTGTGATAGATGGGGTGCATCTCTGCCAGGAG  
CGATTGCCAGTCATGGTGTGATGAGACTCCTTGAACAGCGAGGGGAGAGTGCACCATGAACTCTGCTCA  
AAGTAGCAGGCCAGCCCTTCAAAAATCAGGTTTTTCGGCCAGTGTCTGCTTCCACCTTGTCTCTTTTT  
GCACGATATGGTGGACTTCGTGGGCCAGCACGGCAGGCAATTCGGTGTGATCACCTTTTTGATATCAGG  
CCGTTCCAGATCAAGCTGGAGTTCTATTTCGATAACATGTTGATGGCCAGCCACCGATACCCGAGTCCGGGA  
GCATCCCCCTCGGCAAAAGGGCTGAAGGTGACATCCAGTTGGGAGAGATCGAACAAGGCATTCAATTTGT  
TCGCCGCTCGGCAAGACGTGCCTAATGGTGTGATCGAGCCATCGAATTTGCCCGAGTGGTTTAAACAG  
GGTGAGTTGCATCCAGACATCCTTGTCTATTGAAAGAGAGTGTGAACCACTTGCCTGGTTCGCGGGCGCCA  
TATCACACGATTACCCTTCTTCAATCAAGGGGTTACCCGCCATTTATGCTTGCCTGCTGGATCGCCCTCG  
ATCAGCGCGGCCCGGTTGATGCGAGGGCGCTCGCCATCGAGCAGTTGCTGCCACAGGGCAATGGCCCCGAC  
TGTAGCGACCATGCAGGAAGTATCGGAGGCGAGCAGCATCAGGGCGCTCACTTCCCCCGCTCCTGCTT  
GAGGGCGTTTCTCCAGCAGGCGGGTTGCCCTCGGGAGTCACTGCTGGCCCGCTGATAGTAGAGCACGGTG  
GCTTGGGCGGCTTGGTGCAGCGCTTGGCGCCCCCTCCAGCAGAGCGAGACGCTGGTAGGCGAGCAGGG  
CGTTGTCAATTCGCCCCGATAGAGATAGAGCTGGCCGAGCGCCGCCAGCTGTGAGATCGGCGGGGTT  
GCGCTGAAGTTTTCTGATGCAGACTCCCCAGCTCCTTGTCTTGCAGATCCCCGCGGGCTCAATCCCCGCCAGC  
GGATCGGGACGGGATGCATAATCCTGCCATGCCTGATAGCGGCCGCTGCTGAGATACACAGCGGCAACGG  
CCGCGATGGCCAGGAGGCCAAGCAGCAACAAGGCCTGCCCGTGCAGGTTATTGCGGCCGTGATTGTGATG  
CTGGCTGGCCAGTTGCGCGCGCAGGGCCAGCTCAGCCGCCGGATGGTGTGGCCAGGCGGGCGGCGCTC

AGCTCCCTGTAGAGTGGCTGGTCTGGGGAGAGGCCCGCTTGTTCCTCCACGCATGATCAACAGATTTCAGTT  
CGCTGCGCGGGTTCGGCCGCGGGTTGAGGGGGAGCCTCAACGATGGCCTTAACGACAGGGATGGGTTGCGC  
CATTGTGCGCGTGTAGGCGGGCAAACAGGGTCAACAGCGCCAGCCCCAACAGCAGCAGGGGACCGCCCCAC  
AGCAGCGCCGTGCTGCTCTTGAAGGGGGATCGTAGCGGACGAAATCGCCGAAGCGCTCTGTTCATGCGGG  
CAATCACCTGCTCATCAGACTGCCCTCGTCCACCCAGCGGTAGACCTCGAGCCGAGATCCCCAGCGAT  
GGGGGAGTTGGACTCTACCAGATTCTGGTTCCTGGCACTGAGGGCAGCGCAGGGCGCGGGCCAGCTCTTGC  
GCCCCGATTTTGCAGCTCGGGGTGGCGAAATTTGGTAGGTATCGACCCCGCTGGAAATATGCAGTGGCACTCA  
GCGATATGCCGAGGGCCAGCAGGGTGCAGGCAAGAGAACGGCACATCATGGCTGTGTCTCCCGAGCTGAT  
GTCGCAATAGATGGCGCAATAGATGGCGCAATCGCGGGTGCCGTTGTGGCGGCCCTTATCTGCGCATCAG  
CTCGCCCTTGTTCGAGCAGGGGGGCAAACCTGGCGTAGCCAGATCTCGTTGGTGTAGCTCGCCGGTATGGCG  
GGCAAGTAGGGCGCCATCGGCATCAAAGAGATAGGTCTCCGGCGTGCCTGAGACGCCGAGCTCCAGTGGC  
AGTCGGCCGTTCGGGGTTCGGCCAGCAGCGCGATAGGGGTTGCCCGCTCGATGAGCCAGGCGCGGGCGG  
CGTCCCCCTTGTCCCGGTAGTTGAGGCCATAGAGGGGCACGGCGCTGGCCAGCTCACCCAGCAGCGGATG  
CTCGGGCGGGCAGTTGGCGCACCAGCTGGCCCAGACGTTAAGCACAAAAGGGCTCCCCCTTGAGGCTGGCG  
GTCTGGATCGGACTCCCGTCCAGCAGATTGTCTGCTCTGCCACGCAGGCAGAGTACGGCCGACCGTCTCGCT  
CATCCTGGCTATAGGGATTGTTGCCAAGGCCGAGCCAGAGCAGGATGCCGAGGCTCAGGGTAAGGAGCAG  
TGGAAGAAAGAGGGCGCAGGCGGGATCTCATAACGCTCCTGTTCGAGCCGGGGATGGGAGGGCGCAACCA  
CAACGGGGCGGGAGGCAAGCAAGGGGAGACGGGCGAGCAGGCGCAGGGTGCCGCCCGCCATCATCAACAG  
GCCGCCGAACCAGATCCAGCGTACCAGCGGCTTGTAGTGCAGCCGCATGGCATAGGCATCTGGCCCCATC  
TTCTCACCCAGCACCACGTAGAGATCGCCGAGCATTCCCCACGCGATGCCCGGCTCGTTTCATGTTTCATGG  
TGCGCACGCTGTAGTGGCGCCGCTCCGGCGTACGCCGCGCCACATCTTTACCATTCTTGCGCACGCTAAG  
CGTGATCCGCTCGGGCGGTATAGTTGGGGCCGATCACCGGCTCGCGCCCCCTCATAACGAAACTCGAACCGG  
CCGAGCTGGTAGGGCTGGTTGGCACTTAGCACTGTGCTCCCTCCTGACTGTGGTGGCTCACTTGGGGCAA  
TGCCGAGGGCGCACACCGCCACCCCAAGGTGGGCCAGCAAGCTGCCAAAACCGATTGAGGGTGAACCTCGCG  
CAGCGACGTGGTGTGAAGAGCGGGAGCAGCAGGCTGGCCACCAGCCAGAGGCTCACCATATTGGCGAGA  
AGGCCAATCCAGCTAGCGGAAACCGATCCCTGTTCCAGATAGGCAAGGCTAATGAGCCCGCCGCAAGCA  
GGCCAAACAGCGCGGCAACAGCGCGTGTAGTTCGGGAATGTGCCGAAGCTGCTGCCAGCGCAGGGCGGG  
CAGCTGGGTCATCGCCCATCAGGCAGAGGGCCAGCGGCATGAAGATGGTATTGAAAATAGGGGGCACC  
ACCGAGAGCAACCCAGATGGAGCGACTGGCAGCACCATTGGGGTAGAAGGTGCCGAGCAGCAGCTGGCGC  
AGGCCACGCAGAGCAGCAGGATGGCGGGCCGAGCAGCCCCCTCTTTTGACAGCAAGCCAAAGCGGGCATA  
GGGGGCGCAATGTCCGCTCGCAGGGCAAACAGGGTGTAGGGCGCAGGTCAATAGCAAACCGAGCAGCAGC  
AAGAGGGTGTAGGCCCGGGCTGGGGTCCAGCGCAAAGGGCTGTACCGAGGTGAGCACCCCGGAGCGCACCA  
CAAAGGTGCCGAGCAGGCTCAAGGCGAAGGTGAAGATGGAGAGCAACAGCACAGCGTGACCATAGGCGCC  
GCGCTTCTCGCAGACAATCAGAGCGTGCAGCAGAGCGGTGCCGAGCAGCCAGGGCAATAGGGAGGCGTTT  
TCCACCGGATCCCAGAACCACAGCCGCCAGCCGAGCTCGTAATAGGCCACCAGGAACCCAGCAGCA  
TACCGGCGGTGAGAAAGACCCAGGAGCCGAGCGCCAGGGGCGACTCCAGTGGGCCACGGCGCCATCCAG  
TCTACCCGAATGGAGCGCAGCCATGGCGAAGGCGAAGTTGACGGCAAAGCCGACGTAGCCGAGATAGAGC  
AGGGGCGGGTGGATGATGAGGCCGATGTCTTCAGCATGGGGTTGAGATCTCGCCCCCTCCAGTGGCCCCG  
GGAATTGGCGGTCAAACGGGCTGGAGAAGATCAGGGTATAGAGGCCGAACAGCCCCGACGATCAGCCCCAT  
GATGGCCAAGACCCGGGTTGTGATCAGCGGATCGACCCGCTGGGAGCAAAGAGCCACCAGGGCTCCCCAC  
AGCCCCAGCGCAAAGACGAAGAACAGCATGGAGCCCTCGTGGCCGCCCCACAGGGCCGCGAGCTTGAAGC  
CAAGCGGCAGGGCGCTGTTGGCGTGTGGGCCACATAGCTGACGGTGAATCATCCAGGGCAAAGCAGCT  
GGCGAGCAGCAGCAGGGCGGCCAACAGCAGGATGGCATTGATCAGCGCCAGTGGCTTGGCGCAGCGCAGC  
AGAGTTGGGGAGGGCAGCCGTGATCCCAGCCAAGGCAGTGTGCCCTGCAGCAAGGAGAGTGGCCGCCCA  
GCAACAGTGAGAGATAGCCGAGCTCCGCCAGCACATAAACCCTCCGGTTCAATCTTTGATCTCATTCATGTC  
ATGCCACACACGCCCGCTCGTCTCCCTTTGGGGGAACACATTGCCAAGCAACGGGTGTGGCATCACCAGA  
AATTTATTGGGCCAGCAACAAACCAGCGCCAGTCACCCGAAGGTGGCTGGCGCTGGTGTATCATACCGTTA  
TACGACTGTCTATCTGGCCGGCATAAAGCACGAAGTAGCGCAGCAGCAGGATCCCCACCAGGGTTCAGGCTG  
CAGACCAGTACCAGATAGCCGTTTTTGGCCCGCAGCGGCGCGGGGGCCAGCAGGGCCAGCAACTGGGGCA  
GCAGCATGCCGATGCCACCACCCCAAGCCAGAACACCTGAGCCAGAAAGCCGCTGCCGATGGCGGCCCA  
CATGGCTGCCTCCTTCTGGCCGCCACCGAAGTAGAGGCCGTTAAAGAAAGCAGACCAGCAGCAACACCTCC  
ACCGCCAGCACCGGCCGCTCGAAGCGGTGGACAAAGCTCACCCCTGGCTATGATGGTTCTCCTTGAACA  
GGGTGACCGCCAGCAAGATGGTGGAGGCGATGCCGGAGCTGACGCCGAGATGAGGAACAGCACCGGCAG  
CACCGGGTTGTTCAACAGCGGATAGGTCTTGTAGCGCCGACAACAGAAAGCCGGTGTAGGCCCCCAAGAGC  
ACGGCAAGCAGCAGCAACAGCGGCCAGCAGCCGCTCGATGCGGGCAAGCCAAATGATCAGATCATCCA  
CAAAGGCGAACTTCTCTTGCAGCAGGTGACGACGCAATGTCTCAATCTCGGAGCGAAACACCACCGCCAG  
CCAGGCGAACAGCACCGCCATGTAGACCTGAAACAGCATGACCCCCATCGACATCACAGAGTGAACCTGG  
TAGTGGAACATCAGCTTCCAGAAGGTCCAGGGGCGGGCCAGGTGGAAAGATGAGGATCAGTAACCCAGCA  
CCACGCTCACCGGCGCCAGAATGGCGGTTCGCTTGTATGATGCCGCTCTCGCTGCCGGCCCCCTTGGCGCG  
CAACAGCACCGAGAGGGTGGTGGCCCCGGCGGAGATGCCGAGCAGAAAGAGATAGATGGCGATCGGCCAG  
TCCCAGACGAGGGAAGGGAAGTGAATGCCTCTTGCATGGTCATGACTTTATCTCCCCCTTGGGCACGCG

GTACATCTTGGGCGAGGTGCCGAGTGCCCTGCTTGTAGCGATAGGTGGTCTCCTTCACCAGCCGTTGGGGC  
ATGGGGCTGTCCGGGTATCCAGATTGCCGAACACCAGCGCTTGGTGGGGCAAGACTCGACACAGGCGG  
GCTCCTTGCCCGCCGCTAGGTTGGTCTTGCGGCAAAAGTCGCACTTGTCCGCCACCCGGGTGACCGGGTT  
GATAAAGCGCACCTGATAGGGGCGAGGCGGCCAGACAATACATGCAGCCGACGCGAGAGATCCGCGTCGACA  
TCGACGATGCCATCCTCCTTGC GGATATGGGAGGCGCCGGTGGGGCAGACATGCACGCAGGGGGCGTTGT  
CGCAGTGCTGGCAGGACTTGC GAAAAGAGCGGTA CTGCGGCTCGGGAAATTCACCGATGGGACCTGAACG  
GATGATCTCGAGGCGCGAGACCCCTTCCGGCACTTTGTTCACTTCCCGGCAGGAATCCATAACAAGCGGTG  
CAGCCGATGCAGGCCGTCTCGTCTGGATCATGCCATAGCGTATCCCGTCGATGGTCTGGCTGTGGGCGA  
GAGGGGTGGCAAGGGCGCGATTTCGACCCCGTCATCATGATAAGGGCCCCCGCGCCATGCCCCCATAAAA  
GTCACGGCGAGAGCAGCTCATGATGCCTCCTTGC CGGTAGCCGGTTTGGACTGCTCCTGCCGGCCTTGC  
TGGCCTCATGCTGCTTGTGTGGCAGTCGACGCAGAGCTTGATGCGGGATTTTTCCGGGATCCCCACCAT  
GGGCTCCTTGGCCGGATGCAACTGGTGACAGCTGGTGACAGGTGAGCTTGGTGGCGTGCACGTCTGGGCC  
CAGAGCGCCTCGCGCAGTGGTTTTGGGCTCGTGGCAGCTCATGCAGACTCCATTCTGCTCGCTGATGGGAT  
AAAGCTTGATGCTCTCTTTATCCTTCAGGCTGTGGCTGAAGCGCATCACATCCTTGACCCCTTCCCTGTG  
CTGGGGGAGGGCTGGCCGTGGCAGTTGGTGCAGGTCAACGGTTTGGAGTTGTTGGGATTGGTCGCTGA  
CCATGCTTGCCGTGCATCCCCTCGCTCTGCTCCTTGTGACAGTCGGTACAGGCCTTGTGGGATTGCGTA  
AAAATTCCACCTCATGTGTAGCTGGAACAGGGGCGAAACCGATTTCGGCCGCTGACCCTGCAGGCTGGT  
GAGCAGCATGGCTGCCATCAGCATCAGTCGTA AAAAATCCATCGTTAAATCACCCATAGGAAGCCTCCAT  
CCGCTGCGGGCCCGACTTGGGGCCGGACCCGCAGGCGCCGTTACTGTGCCAGCCGTCGGCCGCTTTGGC  
CTCGGCATCCCAGGCGGGGACCGTGGTCTTGAGGAACTGGGCCTTGTGCTGTTGAACTGCTTCATATCC  
ATGCCAAGGGCCGCTTGC GCTTTCTCCTTGGTGGAGATGTCGGGGATGGCGATTTCTGTTGGCTGATCCCCT  
TGCTGGCCAACAGGCGCGCCAGTTTTGGTGC GGCGCTCAGCGGCTTTATCCAGCGCGCCACCAAGTACCTT  
GAGGGCCACTTCCGGGGCGTGCATCTGCACCCCGTGGGAGGCGATGGCGTAGTCCCAGCGCCACTGGGCG  
TGACGGATGTCTGCAGAAATATCCTTCATCTCTGCCTCGGTGGCGCCGGCATCCCAGGCCGCTTGGCTT  
CAAAGTGGGCGTGTACCAGCTGCTTTTCGACCTTCAGCTTGGTTTCGATCACCGCCTCTTTGCGCTGCTT  
GACGATCCCTTGACGATCTCCTTGTCTGGGTGTGGCAGTTGCGGCAGGTCTGCTCGAAGCGATCGAAG  
GGTTTACCACCTTGTGATCGGTGTAGACCTTGCCTGCTCGTCTGTCACCTTGGGCATGTGGCAGTCGA  
CACAGGCGACGTTGTTCTGCGCGTGAATGCCCGCGCCAGGTCTCGTACTCGGGATGCTGGGCTTTTCAG  
CATAGGGGTCTTGGAGAGGGCATGGGTCCAGTCGGCAAGCCGATTTTCATCGTAATAGGCCATCCATTCG  
TCCACAGTGGTGCCCTTGTCCCAGGGGAATTTGACCGCCTTGGTGGGGCCGCTGAAGTAATACTCCACGT  
GGCACTGGCCGCACACCTGGGACTGCTGATCAAAGCGCCCTGCTCCTTGAACGGCTTGGCGATGGCGGT  
CATGGCCCGATCGGCATAGGGACGGGAGAGGTGCAGGGCAGGTTTACCCTCCTTGAACCTCCTTCGAGGCG  
GTGTCTGGCAGTCGGCGCAGCCGATGGTGTGACTACTTCCGGCCACCTTTGGCCACATCCCCTTGA  
AGTAGCCATCTTCGCTTTTTTCTGTCGATGACGCGGGCCACATCCGGGCTTTGCAGCTCCAGCAGGCCAT  
CGGCAGGGGGCCATCTTCGGCGGTCTTGGGGGCGCCGGTGCAGAGGTTTCGCGCACATCGGTGAGCGCA  
TAGAAGTGGCCGCGCGGCTTGTGTAAATCCTTGGCGAAGGGGTAACCGCCACAGCACCACCATGTTGG  
GATCTTCCGCCAGCGCGTGGTGCCTCCTTGCCTTTCGCTGGTGGCTTGCAGCTGGTGAACGATCGGC  
GTGATCCTTGGCGAACAGCTCGCTGCGCGCCTCTATCTTGCCATTGGTGGTTGCGTCATCAGCCAGTGCC  
CAGCCGCTGGTGCCAAGGCTGGTAGTCAGCAGCAGGGTGGCGAGGCCAGTTTGATATGCCTGTGTTGTG  
AACCCACGTTTTATCACTCCCAGATAAAATGTTTTGGTCTCGTCTGACCCGTTCCATCCTTGGTGTGGATCTT  
CCCCCGTCCGGGCGGGTGGGCAGACATTTCGCTTGC GGGTGAATAAAAACCGCGCAATATATGATTGCTCG  
AGGGTTACCCTAACAAATAGGTAATTTAATGATGATTTATCGGAGGGAGAGTTGTGCCAGATCAATTGG  
TGCACAGGATTGATCGCTGAAATGAGATCTGGATTAAATTTTATGGAACTCAACTTCTTGTAACTGCA  
GAGCATTAGATGGCAGGCGTTTGTATCGATACAGTTACGTA CTGGCAATTTTGCAGCTGAGCTGGATTGC  
TGCCCTATTGTTACAGATTCTGGCAATGACTTATGCTGATAATTGACTGAATATGCAAAATCTCGGTGT  
CGTAGCTGTGAGCTTTTCGACCTTCGGATTATGATCCATTTAATTGAAGCTGCAGTGGATTTATCGTCAAACG  
ACAGAAATGGTCACATGGATTCTGATAGACCTGTTAATAAAGGTGATGCGATTGGGGTCAATCCAAATCTC  
ATTTTCATTTAAAAAGGCTGTTAGATGCACAATCTTGTAAAGTTATGGTCATTTTATGGCAATCATTGTGCG  
AAAATAGCGAAAAAACCACTTAGTCTGGTGC GGTTATGATTATTGAACAGACAAGTACCCGTAGGTA CT  
GATGTTGGTGGTTAAGGTTTTGCTGGAGGTTGATGGCAGAGTTGCAAAATGAAAAGTCCACGGTATCA  
CCCAACTCGAGGGCTCCGTGTTTGTATCAGTGCAGATGGATCTGTCATGCGAGCAAAGGTGGGGATGGC  
GCTGCAGCCGGGGATCGCTGCAATCCGTTCAAGGGAGCAATTTTCAGCTAGCCGAGCCGGGCGATGAT  
CCTGCTGGCGTGCAAGAAACGGCTGCCAAACCTGAGCCGTCACGCCTGCTGCTGATGGGAACCGGCCG  
ATCCGGA ACTGGCCTCATTGCAAGAGGCGATCCGTCAGGGTATTGACCCGACCGAATTTGTTCCAGGAGAC  
CGCCGCGGTAACGCAGCCGCTGCGGGCAATATCGGTGGTGTAGCCGTTCCAGCTCGGGTGGATTTGTG  
GTGGTCGATCGTACCAATGACGCCACCCTGGCCGAGGCGGGTTTTGATACCGACCATACGGTGAACCTG  
TGGGCGATGAGCTGCTGTTTTCCGAAGAGCGCGATTTCTTTGCCGCCATCATCATCACCGAGCCCCAAC  
CAGCGACAACATTATCAACGCCGATGAAGCGGCTGGCGTCATCATTCGTGGTGTGATGGATGATGTGGAG  
GTAGGCCAGCCAGTCACTGTGACCCTTATCGATCAGACGGGAAATTCACTGACGGTGACGACAGTGGTGC  
TGCCCGGCTGGTGTGGGAAGCCAATTTTGGCGATGTGACCGGCAAGCTGGTGGATGGCCGCTTGCAGAT  
TGTGGCCAATACCCAGGATCAGGCGGGCAACAACGCCAGCGATACCGGACAGACTCTGCTCGATACCATC



ACCACCATTACCCTCGATCTCGCCGATGAGAGCGACACCGGCGCCAGCCAGATCGATGATCTGACCCGGC  
ACAATACCCCGCTGCTGCAAGGGAAGGGGGAGCCCGGCGCCACCGTAACCCTGAGCCTTGGCGGCAGCGT  
GCTCACCGTCTGACGGTGGATGCCGCCGGTAACTGGCAATATCAGTTGCCGCAAACCTGGCCGATGGC  
CAGTACCAGTTTTAGGTCAATTCCGTGGATATTGCCGGCAACCGCGCCAGCGATACCCTCGTTATCAATG  
TCGATACTCAGGCATCTATCGACATCGATGATCTCGATAACCACTGCCCTGTTTGGCAACAGCAGCGCCAC  
CCTGAGCGGGCCACCAGCAATGTGGAGGCGGGTCAGAGTGTCAATCACTCTGGTCGACAGCAATGGC  
CAGCCGCTGTTGACCACCTCGGCACAGGTCCGGGGCCGATGGCCGCTGGCAGGTATCAGGTCTTGATCTCT  
CCGGTATCAATCAATCCTTTGAAGTGCCTGCCAGAGTACCGATCTGGCGGGCAACAGCGCCAGCGATGG  
GGCGCCGCTGATCGGTGAGAGCGAAACCCCTGACGCTCTCCGAAGCCGGATTGGCCGATGGCCCGATCACC  
GCGACCCGGCAGTCTAAATACCCGCTGCCGGCCAGGATGGCAATCTGCAAGTCCAGTTCGCCGCCAGCAGA  
GTGCTTTTGAAGGGCTGGGGCTCGTCAGCCATGGCGCGCCTCTTGGCTATACCATCAACGGTCAGACCC  
GACCGCCAGTGCCTGGTGGGGCGACTATCTTACCCCTGACCTCAACAATGACGGCAGCTACCGCATCGTCT  
TGGAGTCAAAGCCTGGATCACGGTCAGGACGCGTTGCGCCTGCCGTTCAACCTCGAATATCGCGACAGCG  
ACGGCGATCTGGTGAAGGCGCCGCTGGTGTATCAATCTGGTGGACAGCAATCCGCCCATCTTCGAGATCCC  
GGCCATTCTCTGACCGAAGATGCCTTTACCAACGGTGCCTGGTGGCGAGAGCAGCTTTGTGGTCT  
AAACACACCGCCGATCCTCTGCTGGTGGATTCTGTTGGTGTTCAGCAATCAGAGCAGCACCCTGACTACCC  
TCAACGGCTCGGGTCTTGCCAGCGATGGTCATCCGCTGACCTTTGAATTTGACGATGATCGCACCCTGGT  
GGGTTACTACCTGGATGGCAGTGGCCAACGGGTGGAGGTGCTGCGTGCCGAATTGAATGCGCAGCAGCAG  
GGCAGCGATCTGGCTGGGCGGGTGGTGGTCACCCCTACCGGCCGCTCGATCATCAGGGCAGCGACACGC  
TTTCCCTCGATTTGACAGGTGAGCGCCAACGAGATAGATGGGGACAGCACCAGCGCCAACCTGACGTTGAC  
TGTCAATGATGGCAGTGTATCCCGCATTGGACATCGACAAGGGGGTCCCTGCAAGAGGGGGGCAACCAG  
AGCATCGATGGTCAGCTGCCGGTGCAGTGGGGAGCGATCGTCTGGTCTCCCTCAACTTTGAGGCGAGCC  
AGCCGGCTTTGGCGGGGCTCACCAGCCAGGGCAAGGCGACGAGTTACGAGGTTAAAGACAACCAGCTGAT  
CGTCAAGGATTGGCAGGGCAAAGCAATCCTCACCGTTACCATTGGTCTGGATGGCAAAATACAACGCTCTCC  
CTGACCGGGGTGTTTACGAACCGGAAGCGACCAACAGCCTCAACCTTGACCTGAAGGTACAGGGCTCAG  
ATTTTGACGGCGACAAGAGCAATCTCGGCATCCTCAATATCACCATTACCAGCGGTGCCCTTGCCGAGGT  
TAATCCTGTCTCCCTCAGCTCACCGAAGATAGCAACTGGCAGCAGGGCCAGACCCTTGACGGTGTATCTG  
ACTCTCACAGCGGGCAGCAGCTCCGCTGGCCAGCATCACTTTGATGCTAATCAGCCGGGCTGCAAGGGT  
TCACCTCAGGGCAAGCAGGCGGTGACCATCAGGTAGCTGACCATCTTATCGAGGGGGCACCCTCAGATGG  
CAAGCTGGTGTGTTGAACTGACCCTCGGCAACGATGGCAAAATACAGCTTTACCTCCATCAACCGCTGGAT  
CAGGGCAGTGCCGACAGCCTGCTCAAGGCGGGCTTTACCCCTGCTCGACAGCGATGGTGAACAAGTCTCCT  
CCACCATTACTGTGGCGGTGGGTGATGGTGCCAATCCGATCATCTCCGCCGTGACCGGCACCACCATCAC  
CGAGATGGCGCAAGGGGAGACGGCTGCCGTGACGACCATGAGTTTCTCGGTGCGCGCACGGCAGCGATGCC  
CTTGACCCTAACTCTCTTGGTTTTGATATCGCCGCTATCCAGAGCACCCTGACCGGACTGACCAGCCAGC  
GTAACCCGGTCACTTTGCGCGTTGATCCCGCAACCGGCCAGCTGGTCCGAACCGCCGGTGGCCAGGTGGT  
GCTGCGCGCCGAGCTGAGCCTGGTGCATAACAACGGTAACTGGAGCGTCACCGCCAAGGTACCCTGAGC  
GGCGAGCTGGATCACAAGGGGAGTGAATCCCTCAACCTGCCCTTGCCGTCACTCTGGCTGACAAGGATG  
GCGATCGCATCGGTACCACGCTGCCGCTCACCATCGTGGATGGCAAGGCACCAGCTTTATTTCCGGGTGC  
TGGATGAGGGGAACCTCACCGGCAGCAACAGCCTGAGCCAAACCGGCCACTTCGATGTGCAAGCCGGGT  
GGATCGGGTGGTTCGAGGTGGCCTTTGCCGATGGCAGCCAGCAACCGGCCGCTCACAGCCCTCGGCCAGCCC  
GTCAAAATACGAGCTGGTTGATGGGGACCCCGCCATCCCCGGTAGCCAGCTGATCAAGGGTTATGTGATGG  
TGGATGGCCAGCGGGTTCGAGGTGTTTCAGAGTCAAGCTGATTTGGCAGCCTCGATCAGGCTGGCAAGAACGG  
GTTTGACTATCAGGTACCCCTCTATCAGGGGCTTCATCAGGGCGGCAACGCCGTGACCGAGCTGCCATC  
AAGGTGATCGTCAACGATTACGACAAGGCGGGCGGTAACAACGACAGCACCAGCGGCACCCTCAATATCC  
AGATTGGGGGAAGGGGAGAAACCAACCCCTGACCCTGACCGATGTAACCTCAATGAAGGGCGCTTCGATGG  
CACCAACTCGGCCGTTGATGACCAGCAGAGCGGCAAGATCACCATCAAGGCTGACTCGGATCCGGTG  
ACCGATGTGCGACTGACCCTCTCCGGTCAGGTGATGGATGCCAGCGGCAAGCCATCACCATAACGGCG  
AAACCCCTGACCTGGAAGCGGTTGGCACCAGTGGTCACACCTTCCAGGCGGTGACCAGCGGTGGTCTGGT  
AGTGATGACGGTCTCCATCCCTCCGTCCCCGCCAGTATCGCCGCCATACCAGCGCCGAAATTGGTTAT  
CAGGTAACGGTGCATAACCAACCTGGATCACGGGGCAGACAACAAGCTGGAACCTGAATCTGCCGGTCAAG  
TCACCGACAGCGATGGCAGCAAAAATCAGGGAACCGCCACTGTCACGGTACTGATGGCATCAACCCGAT  
CATATCCGCCATTGAACCGGTTCCGGTTCAGGAGTCTGATCTCGATGCAGTGAACGGTCAAGCATCCGGGG  
ACCACACCTGCAGGGAGTGGAGAAACCGATAGTGGCAAGGTGACCATCACAGCCGGTTCGGATCCGGTTG  
CCTCCCTTGAGCTGGATGTGGCTGCATTCATCAGGCCAATCACCTCACATCGGGTGGCAAAGCGGTTAC  
GCTGGCTGCACACAGCACCAGCTGGTATCTGGCTACGGCCAGGGGGGCAAACCCGTTTTTCTGGGTCCAC  
CTCGATGTTAACGGCAGTTACAGCGTCCATCTGGTTGGCCAGCTTGATCACGGTGTACAGGGCAAGGATG  
AGTTGACCATCGAAGTCCGCTGTTTGTACCCGATCATGATGGCGATCGTAGTCCGAACGTAAGCGTGAG  
CGTGACGGTACAAGATGACATGCCTATCGGCACCTGTGCTGGCTCATACCCTGAGCGAGGGGAGCAGTACC  
GTGACCGGGCAGTCTGCTGCCTACTGCCAATGAAGGTGCGGATGGTGCCCGTGTGAGTTCGATTACCATCA  
ATGGCCAGACGTACGCCATCAATGGCTCTTTGATACAAGATGTGATGAGCCCCGATGGCAAGCAGGTGAT  
GGGAACCCCTGACCATCTCTGCCGACGGCTCCTACTCCTTCAATCCTGCGGCCGGTTTTCAATCACGATGCA

AGTCAGCTCAGTCAGGTGGTGACAGCCCATCTGGTCGATGGCGATGGCGATCGTGCAGACAGCACACTGA  
CTCTCAATCTGCAGGATGAAGCGGTGCGCTTTACCGTTAGCGCAGCCATTGGTAACGAAGATCAGGGGTC  
GCAAGACCCGAGGCTGGGTATCCCTATCAACATGCAGCTCGATATTGGCGATTTTCGATCGCGGTGAGCAT  
GTGGATCAGTTGCTTATCCAGGCGCCTGCCAATGCCCATGGCACCTTCTATTACAACGGCGTTGCCCTCA  
CCACCACGGCTGATGGCAAGTGGTTTTATCGTGCCGCCAGCGGCCATGGTGACCAGTGATAATGTTCACTA  
CACCCTCAGGGGGTGACCTTTGTGCCTTCAAGCAACTGGTCGAGCTGGAGCAATGGCGGTGAGCCGCTG  
CACTTCCAGGTGCAACTGCAGGTGGTGTACCCGAAGGGGGCGGCACCTGCGGCTGTAACGGGGCGATCTGG  
CTGTGACAGTGCAGCGGCGTGGCCGACAAGCCGATGTGGGACACAGCCAACACCCTCGCCACTATGACAC  
CAATGAAGACAGCACGGGTATCAAGCTGGACGTCAAGGCGAGCCTGACTGACACCGACAGCTCCGAGACG  
TTGACCTATCAGATCAAGCTGGAAGCGGGCAAGGGAACCTGATGCTCAACGGAGTCGAGCTCAAGCCAA  
ATAGCAGTGGCATCTACACCGTTTTCCGCGCGCAACATCAACAAGGTGACTGTTGTTCCGGGCAAGGATTT  
CAGTGGTGACATCAAGCTGTGCGGTGACGCCGATCAGCAGCAGAGAAGAACCCTGATCGCTCAGGGTCAGGGT  
ACGGCGCAGGGAGACAAAATTGATCTGGTGATCAATGTCAATCCGGTGGCCGATGACGCCAAGCTCACCG  
TGCGTGACATTCAGGGCAAGGAAGACACCCTGCTCGATCTGGGCAGCAAGATCGCCCTTGCTCATCTGGG  
TGACAACTCGATGGCTCCGAGCAGATGTTTGTCCGCATCAGTGGTCTGCCTGACGGTGAACCTTGTG  
CTGGGTGGTTCCGCGTTGCACAGAACATAGCCGGTTACTATGAGGTTCTTTTATCGGATTTGGCGAAC  
TCAAGCTGCAACCGCCGAAAAACAGCAACGTGATTTTCGATCTGACCATCAAGGGGTGGTGAAGACAC  
GGCGATATTGACCGATGCGAACGGCCAGACCATAACCGTGGTGAACGAAAAAGAGACAGTCTCCCAGACC  
CTTCATGTGGATCTGGTGGGGGTGGTGGATCAGCCCCATTTTCGAGCTTGGCAATACCGTCTGGGAGGCCG  
AAGGGACAGGCTATGCCACCACAGTGGGTGAGGATGGACGGGCACCGCTCAACTTTACCCTCACCTCGGG  
CGAGTGGGTGATACCCCGCATGACACTTCCGAGAGCCTCAACGTGGTGTGCAAGGGTGCAGGGAAAGGT  
GCCCCGGTCTTTGATGCCAATGGCAAAGAGCTGACTCTTACCTTTGCCGGACTCGACGCCCATGGCAAGC  
CGACCTATCAGGTGATGCTCCGATTTTGGCAACCTGCTTATTCAGCCGCCCCATAACAGCACGGCGGA  
TTTGAACCTGATCGCAAGGTGGTGGTGACCGAGAACGATGGCGACCACAAGAGCTTCGAGGTGCCGCTG  
CATATCAAGGTGGAACCCGAGATTGACGCCACCGACTACAGCAAGACCAGCCATGGCCTGGAAGATCAGT  
TCACCGTGTGGACTGGCATCCGACCCTTACTGACGGCGCCGAGAAAAGTCACGGCGCTGAGTCTCTCCGG  
GGTGGAGGATGGCTACCAGATCTGGCTGCGAGTGGCGGTGTGAGAGCCAGCTGACCGTGGTCACTGGC  
AAGGTCAACCTGACTGCTGCCAGCTCGACAGCCTGTCAACGGTGGGCAACTGCTGGTGAAGGCGCCGG  
AGGATAGCGATCGGGATACCCTATCCAGAGCCATGTTACCGTGACCCAGCATGATGTGGATTCGGGCGC  
GGTGGCCGAGAAGGTGATCGATGGCAATCTGCATGTGATATCCAGGCCGTTGGTGGAGCCGATGGCGTG  
CTGACCCAGAGCGGTGGAGCTCTCGTGGTGACAGTGGGGCTGATATAGACCTGACTGGACGCTTCTATCT  
TTACCGACCTCGATCCCTCGAGCGTGGAGGAGATCGACTATCTGGTGATCAACCTGCCGGTGTGAAACGG  
TGGTGCAGGCGATCAGTTCGTGGTGGTTGGCGGTATCAACAACGGTAACGGCAGCTGGATCGTGCCGGCG  
GGCAATCTCGGTAGCTTCAAGCTGCATGCGCCGACGGTTTTGTGCGCAAGGTTCAACCGATCCGCATCG  
ATGCCATGGTGCATGACCGGGGTGATGATGGCGATGCCAGTGCCACGTCAAAGTGAGCCTGGAACCCAG  
TGCCGAATTTGAGAACAAGCCAGTGACGCCAAGACACCGGCGGCGACTGTCGATATCGACGACAACGCC  
GTGCTGGTGGGCAAGGAGGATATCCGGGTTGATTTTGGTCAAGGCTCAAAGGCTTATCCATATCGGGC  
CCGCCGATCAGGCGAGCGACGAGGTGACCATTGTCTCAAGGGGTTGCCAGCAGGTGTCACCATCAGCGG  
CGCCGAGTACAACATCTCGACCGGTGAGTACGTCAATCAAGGTGCCGCCGCTCACTGGCGGGCCTGGAAGGG  
TTGACCCCTCGGCTTGCCACAGGACTTTGCCGGTTCGCTCAATATCGAGGTGAAGGTGGTGAATACCGATA  
CCGCCAGTGGCGATATCAAGGTGACAGCAGCACGGTTAGGGTTCGATGTGGCCCCCGTGGTTCGATGTGAA  
TGGTGGTTCGTGGCGAGCATCCGGAACGACTGACCGTGCAGGACACCAACCAGGATGGACAGCCGGAC  
AATCTGGAAGATAGCAAGATCCACCTCGATCTCTCGGTGAAACTGGCCGATATCAGCCCCCTCATCGCGG  
GCGGCGGTCTCGAAACCGTTGAGCGGGTCAACATCACGGTGGATGCCAAATATGGTTACTTCCCTCGATGG  
CAGCGGCAAGCCGGTCAACATTCTGGTGTGAGTGCATATGGCGGCACTTAAGGATTTAGTGTGTTGTGCC  
AAAGAGCATTTCAGCGGTGAGTACCCTCGACATCAAGGTGATATCGTGCATACCGCGTGGTTCGGCG  
GTCAGCTGGTACCAGCAGCGGAGTTGGAGCGGGCAGGTCCGGCTTTGAGGTGAGACCGGTCAACGATCC  
GGCCAGCTCTCGGTGCATAGCGTCAACGGGAGCGAGGATGGCACGGTCAACCTTGCCGGATTTGGCGCA  
ACCCTTATCGACAATGATGGCTCGGAGCAGATCGTCCGCTGCAGATCAAGGGGGTACCAGGATGGCTTCA  
CCCTGTGCGCTCCGGCGGTCAACAATGGCGGCGGCTTGGCAGATCCCGGTGGGGACCGATTTCTCCAA  
GCTGACCCTGATCCCGCAGCTGATTTACGCGCACCGTGGAGCTGTCGCTGAGCGCCTTTACCCTAGAC  
AAGGGGCTCACCATTCGCTCGAAACAGTGGCAGCTTTACCGTAACCGTCAATTCGGTGGGGGATGCC  
TTATCGCCGACATTCAGGGCCAGGCGAGCGGTACCGAAGGGGATGTGATCACGCTGGATCTGGGGCTGGA  
GACCCGGGATAACCAACCAACCGGCGGCAATGCGGGTAAATGTGCATGAGAATAAACCGGAGCAGGTGCGG  
GTCACCATCGAAGGGGTGCTGACGGTGGCGAGATCCGATTCGCAAAATGGCGTGGCGGGGACGGTGTGTTG  
ATCTGGGTGGCGGTGCTGCGAGGTACCACCGAGGGCGGCAAGCTGGGTGCAGTCGAGCTGGTGACCAA  
TGATGCCAACGGTGCATGGATCTCAAGATCACCGCTCAGAGCCTCGACAACGGCGCCCTTGGCCCCGAG  
GTCAATGGCACCATCCATGTGGATGTAAGCCCGGTCAACGATGCGCCAATCAACGTATTGCCAACGACCC  
CTCAGGTGCGCAGGAAGATCAGCCTTTTGTGATCCACGGTTTGCAGGTGAAAGATGTGGATGCGGGCAA  
CAGCCCCATCAAGATCACCTGTGCGTGGAAACATGGCACCTGACGCTGCCTGCTGGCAGCGGCGTGACG  
GTAGTCCGCAACGGCACCGGTTCCGCTGGTGTGACCGGCACGCTGGCCGATCTCAATGCCCTGCTCTCTG

GTGGGGTCACCTATCAGGGCAACAGTGATTTCTACGGCAATGGCGCCCTGACCATGGTCACCAACGATCA  
GGGGAACACGGGTAGTGGCGGGGCACTCAGCGATAACCGATGTGCTGCCATCGAGGTGCAGCCGGTCAAC  
GATGCGCCGGTCAATCAGCTGCCTGGCAGCATGACGGTCAAAGAGGATGGCTCTCTGTGCTCTCTGGCG  
TCAGCGTGAAGGATGTGGATGCAGGCAGTGCGCCTGTCTCCATGGTGCTGAGGGTCGAGCATGGTGTGCT  
GACCTTGCTGGGTGCAACCGGTGCCGTGATGGTGCAGGGGGCGGGTACCAGCGAGATCACCTGGTGGGG  
TCGCTGGCTGATCTCAACCAGTTGCTGGCAAGCAACCTGCACTATGAACCGGCCAAAGATTTCTGGGGAG  
AGGATACCCTTACCCTCACTACCTCCGATCAGGGCAACACTGGTGCGGGTGGCCCGCTGAGCGACACCGA  
TCAGGTGACCATCACTGTCACTCCCGAGCCGGATATGCCGGGTCTGACGGTGGATCAGCATGCGTTCCAT  
GCCTTGACAGGGGGCCGTTATCCCCCTTGGCATCAATGCCAGCGTGGTCAATCCGGCCACCGGTGAACCTCT  
CCATCCGCATCAGCGCCCTGGATGGGGCACAAGTGCAGGATGAGCATGGTCAAGTGTGCGGTATGCCGA  
TAGCAATGGCGACTGGTTGATCCCGGGCCGATCAGCTCGGTTCCGCTCTACTTCAGCGGTTTTTGGTGACGGT  
GACCATGTGCTGGGGATCAGTGCCGAGTCGAGTCTCGCGCGCTCAACCGTCAGCACGCCCTTGAGACCA  
TCACGGTGCACGGCCAGAGTGGTCATGAGCTGGTTCGGTTCGGATCAGGGGGATTGGCTGTTTTGGCTCCTC  
AGGCGATGACCGTCTGCTGGGGGGCCATGGCAACGACATTTCTCACCGCGGGGGCTGGCAGCGATCTCTTC  
GTCTGGCAGCACGGGGATGAGGGGAGTCAAGGGCAGCCCGCCATCGATAACCATCACCGACTTCCATCCGG  
AACAGGGGGACAAGATCGATCTGGCTGATATGCTGCAAGGGGGTCACTGGCAATGGTGTGATGATCTGCT  
CAAGCATCTCTCAGCCTCGGTGACCACGGGGAGCAATGGCCTGAGCGATGTGAATCTCTCGGTGGCGCCA  
GCCGGGGATGGTCATGTGACCCAGCAGATCACCTGAAGGATGTGGACCTGACCAGCTGGAATCTCACCA  
GCACCTCGTCCCACGATATCCTGCAGAGCATGCTGGAAGATCAACATAGCCTGATCATCCAGCACCCCTG  
ATAGCGTGCCTGAAGCGTAAAAAGAAGAGCCGGCAATTCGGCGCTCTTTGTTTTATCTCTGCGTGGATTG  
TTTTTATGCGACCGCAAGGGCCGGGGGGATTGAGCCAGCGCCTGGGGCAGCAGGTGGATCGGATGTTCA  
CAGCGGAAGCTGGTGTCTATTTTCGATCTGCCATTTGCAGGTCTCGCAATCGGTGATCACCGATCGGGGG  
AGAGGCGGTTGATTTGATCAAAACAGCCCCCTCACCGATGGTCTGGCTGGTCTGATAGTTCTCCGACTTGAA  
GCCGTAGGTGCCGGCGATGCCCGAGCACTGGGACTCCAGCACCGTCCACTTGACTCCGGGAATGGCGCGC  
AGCAATTCGAGGGTGTAGATGACGCCCCCATCTTCTCCATGTGGCAGGGGGTGTGGTAGGCGATGTGCA  
GATTGAGCGGTTTCATCGCCGGTTTGTGTCCTTGTAGAACTCGTTCACAGGAAGCGGGTACCAGCGA  
GATGCGATCCCGCACCTTGTGGTTGTCTGCTCCAGCAGGTGGGGGTATTCATCGCGCAGGGTAAAGCCG  
CAGGTGGAGAGGTAGCCAGCAGCGGCATCTCGTCCCCAGCAGGAATTTCTCCATCTGCTGATGTTGA  
AGGCCGCTGCTGCTTGGCCTTGTCCATGAAGCCTTGGCAATGAGCGGCACGCCGACACTTTTTCCCG  
CTCCAGCAGCTGGACGCCGATGTTTCATGGCGTTGAGCACCTGTACCAGCTCCTTGCCGAGCTCGGGTGG  
TTGTAGTTGACGTAGCAGCCGTGGAAGTAGGCGATTTGGCGCTCGAAGCGGGCCTGACTCGCTTTCTGCT  
TCTTGTACCAACCGCGGAAGGTGCCCTGGGAGTATTTGGGCAGATCGCGGTGGGAGGAGACTCCCAGCGC  
CTTGTCCAGCACCATTTTTCAATTGGCTTGAGGCCGGTGGTGAAGTTGACCACCGCGGCCATCAGGGTAGAC  
ATGCTGCCCATGAGATCGGTGTGGGAGAGCACGAATCGCGGATCCCCGGTTTGAAGCCGCTGTACTTGT  
CTTTGGCCTTGGCGATGATATCGCCGATGCGCACCCCGCTTGGGCAGGCCACTTCGCAGCGCTTGCAGTT  
GGTGCAGTGTCTTGAAGGCGCTGTCAAAGAGCTCCGGCTCTTGATCCGCAGCCGCTCGCCATCCGGGCC  
GCCTGTTTTGGGGCCGGGTAGGCGGGGTTGGCCTTGGCCACCGGACAGTAGGCGGTACAGACGGTGCATT  
TGATGCACTGATCGAAAGTTTGGTTGGCGTGTATCCAGTAGCATGTCAGTTCTCCTCCCGCGATGATGAA  
GACACGGGATATGGGACGTAGTAATCATTGGGCCCGCGCCAGAATATGGCCGGCAGCCTGCCAGCCGGTG  
GCAACCGCAACACCGGAGCCGGAACCTTACGAATTTGGGTGCTAATGGGCCAAGACACTGCCTGCGCCAT  
AGAGGTTGGTGTAGCGGCTTGCCGCCACGCAGCACTCTGAGCTTGTGCTCGGTCTTGACCCCGAAGCCTAT  
GAAGGGGTGGTGTGATCGAACAGGCGGCGACCGGCCAGGCATCGCGCTCCTCCAGACTCAACACATCGGCA  
TCGAAGATGGGTTTCGCAATGCCACGCAGACGGGACTCCAGCCCAGCGCTGAAGAAGCTGCCGGAGGCAA  
GCACGAAGTTGTCTGCCTCGAACAGCTGATCATCGCCATTTCTGGGTATGTACGCCGACCACCGGTACC  
TTCTGTAACGGGCGCCAGCACCCGCTCGCTGGTGAAGGTTGCCGCAAGGGCCATAAAGCGGCGCTTG  
AGCGCTCCTGCATCCGCATACCTATCAGAGACGGCGCATGGTGGCCACCTCCTTGATGGTGCAGCCGG  
TGCGCTGTTCCAGCTCCGCCAGACCGGGCCAACCGCCAGCCAGCGACAGGCAGGCGGGCAGCAGATATG  
GCGGCAGCCGGGTACGCCGCTCTCCTGCACCATGCGGCTGATCTCGCGTGCCAGATCGGCCACCAGATGA  
TGCTTGTACACAGGCGCGGATGTGCGGCTGAGCGAAACTCGTGGGGATTGCGGCTGAATTCGCCAGCT  
GGGGCAGGCGGATTTGCCGGTTCAGAATGCGGCAGTGGGCAAAAGCGCGGATGGGTGCGCCAGATTGGCCGC  
CGCCAGTGCCGGATGAAAGTTCGCGAAAGCCTTCGAGGGTAGCCAGCAGTAGCACGTCCGGGATCGGTGCA  
TCGGTGACGCAGGCGCAAGTATCGGGGAGAGCCAGGTACGCTTGAGGGTGCAGATGGGGGTGAGGCGCT  
GGTGATTGGTGTGATGGCGCACAGCGGCAGCCCTGCTCAGCACAGTGGCGCTGCAGATCGGCCAGACT  
TGCCTCGATATTTTGCATCCCCACCTTGTGTAGGGGTGATCCGGATGGGCTGCCATAAAGCTGGCAGG  
GCTGCGCGGGGATCCCCCTCGCTTTTCGAGCAGATCGACCGAGCCGAGGAGAAGTGCAGGGCAGCTTGGC  
CGGAGGCCATCAGCAGGGTCTTCTGTCTGCTCCACCAGCCGAGAGCAGCCGAGAGGCCCGCCATGCC  
ACCGCCGATAACGATATTGTCAAACCTTCATGACGGCTCTCCTTGTGAGTGGTCTCGCTGGTTGGGTGCGG  
TGGGGTATCGGCAACCAGCTGCGGGCTGCTCCATTTCCCCAGGCCAAACAGCCCTTCGTAGATCCAGTAG  
GTGAACTCGGCCTCGCGCAGGGCATCGCCCCACAGAACGGGGCGGGTCCCTTGTAAACGCTCCTCAAGGA  
ACTGACGCAGCATGACACAGGCCTGACGACCGTCCGCTTGCCTACTCCTGCATCAGACCGGCGGGCGG  
ATAGGCGCAGAGCTCCCCCTGACAGGGTCCCATGCCGAGGCGGGTGCGGCGGCGAGGTTCATGAGTTG

TCCACATCCAGCTCGCGCAGGGCGTATTTCGATTTGCCCCGGTGACCATTTGCGACTCGCAGATCAGGG  
CGTTGGCCCTTGGGATTGTACGGAAGAAGGCAATGACCCGCTCGCCGTGGCGGTACTGGGCCGACCCTTC  
GACCCGGCACCGAGAGGCCGGGAGCGGAGACCTTTTCCGGATCCCCTGAGCCGGGCAGGCTCAGCTCGGCG  
GTCTGGCAGGGTTTTGCTGTTACCGAGCTTCTTGGCCAGCAGATCGGTGGCCCATTCGGCCATCAGGCGGT  
AGGTCATCAGCTTGCCGCCGGTGATGGTGTGTAAGCCCTTGAGGCCATCGCGCTCGGCGTGATCCAGCAG  
CACGATACCGCGGCTGATGTTGCGGCCGGTGTCGTCACCGTCCACCGCCACCAGCGGGCGTACCCCGGCG  
TAGGCGCGCAGCAGACGGGTGCGGGCCATGATGGGGGCGAGCTTGATCCCCTCGCGCAGCAACACTTCGA  
CCTCTTCGGGTTTCGACGGTGAGCTGGTCAATCTTGTGTAAATCGATGCGACTCGAGGTGGTACCGATGAG  
GGAGATGGTATCGCCTGGCACCAGAATGTCCGCATCCGCCGGTTTTCGGGGCGCGGTTGAGCACCAGCTGG  
TTGATGCGGTAATCCATGATGAGCAGGGAGCCCTTGCCCGGAACATGCGGATGCCGAGATCGGCGTATT  
CGCAAATTTGCTGGCCCCAGATGCCGGCGGCGTTGATCACCTCTGACACTCCACCTCGAATGCTTCGCC  
GGTACGGGTGTTGATCGCCTTGACCCCGTGTACCCGATCCCTGGCTGCGCAGCAGCCCCAGCACCTTGCTG  
TGGGTGAAGATGTGCGCGCCGTGCTCTTTGGCGTCCAGCACGTTGGCAGCGCGAGGCGGAACGGATCGA  
CCGTGCCATCCGGCACATGGATGGCGCCGATCATCGCCGGGTTGGCGTTGGGCTCCATACGCAAGGCTTC  
GCGCGGATCGAGCTGGCGGGTTTCGATACCGGCCAGGGCACAGGCATCCATAAAAAGTGGTTTGGAAATTG  
ATGTCATCTTCCGGCAGGGTGAGGAAGAGGGCCCGCGTGTCTTCGACACAGTGGCTGGCAATCCGCTTGA  
GGATGCGGTTTTCTGGATGCATTCGCGGGCGGACTCCTGATCCGTCACCGCGTAGCGGGCACCAGGAGTG  
GAGCAGGCCGTGGTTGCGGCCGGTGGTGCCAGCGGCATATCATCGCGCTCGAGCAGGATGCAGTCGATG  
CCGCGCAGTGCGAATCGCGCATGATGCCGGCCCTGTGGCACCGCCCTATGATGACGACTTGTGTAG  
TTATTCTTTTCATTGTTGCCCGTCTCATCTCTTCCAGATGAGGCCAGTGTGGCCTACTTCTGAGTGGAAA  
TGTTTGATATGGGCCAAATTTGTGCTCGCAAACGCTCATTTGCTCGCGCGTTAATGAGCATTATGTGACA  
TTTTGTCACGCTTGTATACATCGGTTTTGTGGGCTGGTGGCGAATAACAGGCACAAAAAAGGGCATCGGA  
TGCCCTTGTCACTGTTTTCGAGAGTCTGGTGGGTGTGTGATGCGTCAGCCGCGCACTTCTTGTGCTTTT  
TGCCGCTGCCACAGGGGCGAGGATCGTTGCGTCTTGCCTTGAGGGGGGCTGGATCCTGCTCTCCCTCGGT  
GTAGACCCAGCGCCCTGATAACGCACGAAGCGAGAACGCTCATGGAGGCAGTGACGCTCATCTCTTCC  
AGAAACCAGGCTTTGAACTCCACCATCCCGGTTTCATCCTCCGGGCCGCCCTGGCTGGCGATGATCTCGA  
GACCATCCCAGCGGGTGTGATGCGTGAAAGCTCTTCGGCGGTGAGACCGCAAGGTGGGCCGGGTGCCA  
GCTATGGACCAGACTCCCCAGACCGAGCACAAAAGCACTGTAGCGCGAGCGCATCAGTCTCCGGG  
GTGTGAGCCAGTGCACCCTGTGACGTGAGCCACAAAGCAATTCGAGAGAAAGGGTTGAGCCGCAAGGAC  
AAAGATTGATGATTTTTCAGTCTTGGCCGATTTGTTTAAAGGAATTGTAACGAAAGCTGGGCTCGCCCTG  
CCAGCACCTATACTGATGAGTAAGCAAGGAATTTCCAATAAAAAACAGCTGCAAGGATGTGAAAGATGACGC  
TAAAGCAGAAAAATCCTGTTACTGGGTGCAGTCCCCGTAAGTTGATGGCCCTGGTGGTTAATCTCAGTAA  
CTACATGGTCTCCAAGAGCGATCTGGAGTCTGATCTGGTGGTGGCGAGGGAAAAATGCCATCAAGGAGCGT  
AAAGCGCTGCTCAGCAGTTACATCATGATGGCCAAAACCGCCGTCGATGCCGTGTATTCCCTGCCGGATT  
CACCGGAAAATCGTCAAAGGTCAAAGAGTTGCTCAGGCCGCTGCGTTACAGTAGTGACGGCTACTTCTT  
TGTCTATGACTTCGAGGGCAACACCATACTGCTGCCGGTGCCTACCGAGCTGGAGGGGAAAAACCGCTGG  
AACGACAAGGATGCCAAGGGCAAATTTGCTGATCCAGGAGATCCTTAAATCGGCCCGTCCAGGGGGATGGTT  
TTACCGAATACTGGACGGCCAAGCCCTCCATCGGTGCGGATGCTCCAAACTGGCCTTACTCTGGTGTCT  
GGACAAATACAGTGGGCCATTGGCACCGGTTTTTATATCGATGATATCGATAACGAGCTGGCAGCCCTC  
CGGGCAGAGCGCGAGAGCAACATGCATGCTTTCGTTGAGAGCAGTGTGCTGGTGATCCTGTTGATCCTCG  
GTATCACTCTGGCGGCGACCGTCAATTGTGGGCAACCGGGTCAACCAAGCCGCTGGCGGATGCGGTGCTGGC  
ATTGAACGATATCGCCAACGGTGACGGGGATCTGACCCAGCGCTCAAGGTGCAAAAGCCAGGACGAGATT  
GGCCAACCTGGCCAGCGCTTTCAACCGCTTTGTGAGCGGATCCAGTCGGTGGTAAGTCAGGTGGGCGAGA  
CCAGCAACCACCTCTTTAGCGCGGTGACAAAGTTGCACCATTTGAGCGAGCACTATGACCATCAGATGCA  
GGGTACAGTTCGCGAGACCGATCAGGTGGTACAGCGGTGACCGAAATGAGCTCCACAGCGCAGGAGGTG  
GCGGCCAGTGCCTCCAATGCCGCGACGGCAACCAGCGATGCGGCCCGTGAATCGGACGCCGCCCGGGG  
TGGTGAGCGGGGCTATCAACAGTATCAACCGGCTAGTGGGGAGGTGCATACCGCTCCGGCGTTATCGA  
GCAATTGGCACAAGAGACCGCCAAGATTGGCTCCGTGGTGGAGGTCATTCGCGGCATTGCCGAGCAGACC  
AACCTGCTGGCGCTGAACGCTGCCATCGAGGCGGCCCGCGCCGGTGAGCAGGGACGCGGCTTTGCGGTGG  
TAGCGGACGAAGTGCCTTCGCTGGCCGGCCGTACCCAGCAGAGCACCAAAGAGATCAACGAGATGCTGCA  
ACGTCTGCAGGGCGGCGTGAAGCAGGCGGTGGAGGTGATGCAGGCGAGCGAGGATCGCAGCCAGGAGACA  
GTGCAGGAGGCGAGCCATATCGCCAGCTCCCTCGACAGCATGGTGTGATGGCGGTGATACCATCAACGACA  
TGAACATCCAGATCGCCACCGCCCGGAGGAGCAGCAGCGGTCTCCGAGGAGATCAACAAGAACCCTGGT  
GGCCATTACAGCAGATTGTGACGAGCTGACCAGCGCGGCGGTGGAATCCAACAGCACCACCCGTGATCTG  
GCGAGTACCGGTGACAAATTTGCGCATACTGGTGTGCAATTCGTTACTGATCTTGAATGGTCCGTGAC  
GGCCACCACAAGATGCGGCCCTGACCCCGGTTACAGCCGCACTTTATTTGGGGATTGACCAATAATGTGT  
GAAAATTGCCAGCCTCTTTTTTTTTCAGCCTTTGCCCCATACCCTATGAATGAGATCGTGAAAGGTAGTATC  
GACTTGATCCGCCAGCTCAACTACGGCCTGGTTTTATGCCAGCCTGGAAGAGCACAAAGGAGTTGTGCGCA  
CCGATCTCTCCCGCTTACTGGTCTCTCTCCCGCCAGCATTACCAAGATCACCCGAGAGCTGCTCGACAG  
CGGGCTGGTGGTCACTGTGGTGAAGCTCGGTGGGGCGTGGCCGTCGCCAGACCTTGTGCGCATTAAC  
GAGCGCCGCTTCCAGTTTTCTCTCCATGCGGTTGGGGCGTGGTTATGTAGACATGGCGCTGTTGACTTCA

CCGGTCGTTTCGCTGGCGGCCATCGCCACATTTTTACCGAGGCCGAGCGTGGCGAACTGCTGGATAGCCT  
GGTTCACGCCATTTCGAGCTTCTTGCCGAAAAAGGCCCTCAACCTTGCCTGCATTGCCCTTTGTCTGCCG  
GGACAGGTAGAGCGCCACTCCGGCATGGTCAAACACTTCCCTTCTACGATCTGCGCAACTGGCCGCTGG  
GGCCGACTTTGACAGGAGCCCTTTGCTGTGCCGGTGGTGGAGCGGCGACCTGCGCACCTGGATCCAGGC  
AGAGCGCGAGTGGGGAGCCGCCAAGAATTGCGCTGATGCGGTGCTGGTGTTCGTTTACAACGACATCGGG  
GTCGGCATGGTGGTCAATGGCCAGCTTATCGAGAGCGAGAATGCGCTGCTTGGCGATCTCAGCCATTTGC  
AGCTCGAACCCATATGGCCAGCGCTGCTACTGCGGGCGCTTTGGCTGCGCCTGCACGCTAGTGACCAATCA  
GGCGCTGGAGGCGCAATACCGGGATCTGCGCGAGCGGATGCAGGAGCACGACCTGCCCCGAGAGCGTCACC  
ATTCGCGAGCTGTGCGAGCTGGCGCTGGCGGGCAACAGCCTCTGTCAGGACATTTCCATCAGGCGGCGG  
GGCCCTTGTGCGGGTCTCTCCAACCTCATCTGTCTGCTCAATCCGGGCAAGCTGCTGCTGGGGGGGGA  
AATCACCCGTGCCGATCGCTCTTCCCCATGTTGCATCAGTCGCTGGCGAGCCAGTTGCCGGCCGAA  
TATCTGGTGGCGTGCAGATTGAATCCACCCTTCTACGAAGATCCCACCAAGCCACCTCGGTGCAGG  
TGCACAAGGCGCTGCGCGACGGCAGCCTGTTGCTGGAGCTGCTGCGCACCTGTCAGGAGTCTGAGCACT  
TTTTGCGGGGCGTGGGAATTGGCGAAAAGGGGCAAGTGAATGCTGTTCCATCGCCGCGCAACTGGGTACAAT  
CCAGCCCTTTGTGGCGGGCCGCTGGCGCCCGCTTGTGATGATCTCCCTCTGTTTGTGACGCAAGATGAAG  
CCTGTTCTGATCACGCCGTCACCGCTGCGGGCTGGCGCAAGAGTATTTCTACCCGACCGTTTCTCG  
CCCGTGGTGGCACCCCTGGCTCGTTGTCCCGCTGCCAGCTGCGCGAGGATTGGTGTGCCCTGCGAGTGGCG  
CCCCGAGCTCAAAGCGGAGGCGGGCTTTTGCCTGCTGATGTACGACAGCGAGCCGATGAAGCCCTCCAAC  
ACCGGCCGCTCATCGCCGATGTGTTGCCGGATAGCACCTGGGCCTTTCTCTGGTGCAGCACCGAGCCCC  
ATCCCGAGCTGCTGGCCCTGCTGGCCGATCCTGCCTGGCAACCCATATGTGTTTTTCCCCTGCGAAAA  
GGAGCCGGCCCGTTGACCGGCGAGGTGACGCTGGCGCCGGGCAAGAAGCCGCTCTTTATCCTGCTCGAC  
GGCACCTGGCCCCGAGGCGCGCAAGATGTTCAACAAGAGCCCTATCTCGACGGTTTTTCCGGTGTGGCCA  
TCAAACCGGATGTGCTCTCCACCTACGGCATGCGGGTGCCTAACCTGCGACGAGCACCTTGCACCGCCGA  
AGTGGCGGCTGCGTGCTGGAAGTAGCTGGGGAGCTCAAGGCGGGGAGGCACTGCAGCACTGGTTCAAC  
TTGTTTACGAGCCGCTACATGGCCGGGCGGGTCAAGCGTTTCCCCTGCGGATGAAGAGCATCTCTGTG  
AGGCGCTGGCATCCATCAAGGAAGCGAACGTCGTTTACCAGGCTTGCTAACGGGCCCTCTGAGCTCAAAT  
CAATGAAAATCGGAATCAATTGGCTGCCACTGTTTCGTTAGATTCATGGTCACTGGTCTGCTAGGATAG  
CGAACAGCTGTGACGCCCCCGCACAAACGTCGTTTGGTGTCTTCCGTTGCTCGACCTTGGGGCAAC  
CCACTCTCGTGGAGTCTATGGATGGAATTGGAATGTTTACCCTGTTTGGCCCTGTTTGGTGTGGCCCTTG  
TCGCCGGCTTTATCGATGCCATCGCTGGCGGGCGGGTCTGCTGACGGTACCTGCTCTGCTGGCCACCGG  
CATGCCCCCGCGCTGGTGTCTTGGCACCAACAAGCTGCAGAGCAGTTTTGGCTCCTTCTCCGCCACCTGG  
TTCTATGCCCCGAAGGGGCTGCTGGAGTGGGCCATGATCTGGCCTGCGGTGATCTGCACTTTTATCGGTG  
CGGCTATCGGCACGCTGGCGGTGCAGACCATAGACGCCCATTTCTCGAGCGCTGCTCCCTTTCTGCT  
GATGGCCTTTGCCTGCTACTTCTACTTCTCGCCGCGGGTAAGCGATGCCGAGAGCTCCCGCCGCTGACT  
CCCATGCTGTTTTGCGCTGCTGGTGGGGGGCGGTGTCGGCTTTTATGACGGCTTCTTCCGGCCGGGGACAG  
GTTTCGTTTTTTGCCATCGGTTTTGTTGGCGCTGGCGGGCTTTGGCATGGCGCGGCCACCGCCATAACAA  
GCTGCTCAACTTCACCTCGAATATCGCCTCCCTGCTGTTCTTTGCGCTCGGTGGCAAGGTGGTGTGGAGT  
GTTGGTTTTTTGCATGGCGCTGGGGCAGTTTTATCGCGCCCCGTTTTGGCTCCAAAATGGTGTGAAAAAAG  
GGGTGAAGCTGATCAAGCCGCTGCTGGTGAACGCTCTCCTTGTGATGTCTGCCAAGCTGGTGTGGAGCCA  
GTATCCGGAGCTGTTTTGCCTGGATCTGATGTGCGCCTTGTCTTGGCCATCGCAATTGTTAACGGGGCCCT  
TGGGCCCGGTTGTCAATATCTGGTGTTTTACACGGCTAGTGCGGCGTGTGATGCAGTGGCGAAAAGTGTG  
GTGCAGGGCGCTCACCAGCCTGGCGATCCGCTCTCGCTTTAGGCTGTTTGGCCGGTAGACCAGATGTAGG  
GGGCGGCCAGTCCGGGAGTGGGCGCGCCATCTCCCCCTGTTTCCGCCACCAGCCCCAGCAGGCCAGCGG  
GGAGCAGCACAGGGCAATACCTGCCTTGGCGAGTTCGATGAGCGCCAGATAGGAGTGCAGCTCCATGGT  
GGGCTCCAGCCCCAAATCAGCCAGCGGTTTCGCGCAGGTAGCGGTTGGAGGGGTTCTCCAGATCCATGGTG  
AGGATCTTGGCCTGCTTTCTGTGTTGGCTGGTGGCAGGCTCGGCTGCGCCTCGCCACCAGATAGAAGG  
GCTCCTCAAGCAACAGATAGGCGCCGAGGCCATGGCCGGGCGGAGCCGACCGGCGCAGATGCCGAGCAG  
GGCATCACCGCTGCGCACCCGCGCCAGAATGACCGGCGTGTGGTGGGTAGAGAGGGCAAGGTGGGGATCG  
CGCTCCAGATAGTGCAGCATAAAGTGGGCGAGATAAACCAGGAGGTTTCCGGAGCAGGCGATGGGGA  
GGGACTCTGATCCGCCAGATCCTGGCTATCGGCCAGCACTCCTTTTCTCTGCCAGACTCGGGGCCAC  
TCGCTCAAGCAGCTCCTTTGCCTGCGGGGTGAGCCGGATCTGGCGCCCTCCGGCTCGATCAGCTTCTTG  
CCAAGGCGCTGCTCCAGCTGGGCAATTGCTTGTCTACCGCCGACTGGCTGATATAGAGGCGACTGGCCA  
CCTTGGCCATGGTCCCTTCACTCGCCAGCAGGCTCAGCGTCTCCAGCCCTTCCAGTAACATCTCGCCCC  
TTGTTTTATCGCCATCAGGATCGTCACAGATTGAGCGCTACCTTAGGGGCTGACTGGTTCAGGAGCAAGGG  
TCGTTTTGCTGCTTGGCCGGTCAATGCGCCATTCGCTCAAGGGCGGCGCAAGATCACCAGATTGCCGA  
TCAGGCTCACCACCACCCCGGCCACCGAGACCGCTGCCAGACAAAAGCCTTCGTAGAAGGTGGAGAGGGT  
AAGCGCCACCAGAGGAAAGAGCACGGTGGCGTAGGAGGCTTGTGGCACCGATGCGCCCCACCAGGGTC  
AGGTAGGCGGTAAAGGCGATCACCGAGCCAAAACAGGGCGAGGTAGACCATGGCCGCCAGATAGTAGCCAT  
CGGTCCGCCACCAGTTGCTGCCGAGCAATGTGACCCAGCCAGCAACAGCACCCAGCCGTAACCAT  
GCCCCAGGGCACAGTTGAGTACGTGATAGCCGTGGCGCTGGCCTCGGGCCGAGACCAGATTGCCAGC  
GAAAAGCAGAGGGTGGCCCGCAGGCGAGCAGCAGCCCTTCCAGCCGTTTGCACCAATTGCGCATCTG

CCAGCACCGGCCAGAACAGCAGCAGGGGTGCCAAAGAGCCCCAGCAAGGAGCCTTGCAGCCAGCGCAGAGT  
GGGGCGCTTGTTCGAAACAGCCAGAGGTTGAGGCCGTTGAAGATGCTGGCACTGGCAAAGATCACCGCC  
GACATGCCGCTCGGGATATAGCGTGTGGCGTGGTAGAAGCAGAGGAAGTTGGTGGAAAAGAGCAGGGCAC  
CGAGCAGTGCGGCGTAACGCTGGCCGTGCCAGGGGAGGCGCGGAAAAGCGGCCGCTGGCGGTGAGCAGGGC  
AAACAGTGCCACCGCCGCTAGCAGGAAGCGATAGAGCACCGACACCTCGATGGGAATGGGGCCAAGTTGC  
CAGGCGATAGCAATCCAGGTGCTGCCCCAGATAAGCACGGTGGCAAGATAGAGCATCAGATTCATCACAG  
TTCCGGTGAGTCAGGGAGAGATGACCCACTATGGGGCGAGCCCTGATGGCTGGATTGCACCATCTTGCGG  
TTTTTCATCGTCACGCGCTGTCATCTGCGGGCGCGGTTCGGTAAGATGGATGGCAGCGGCATAACATGTAC  
ACCGGAACAGGCGGCAGGGGCGAATGAAAACAGCAGGGGTATTTGATGCACTGGTCAGCACCGGGCGCCCG  
GCTGGAGGACCCCTGCTGGCTCGAACCCGGGCTTGGCGTCGCCAGTTGGCGCAACTGCTATGACCAGACC  
CGTATACACAAGCCAGCCACCACCCCTGAGCGTCAATCTGCAAGGAGGCGAGCAGACCAGCGACTCG  
ATGGGCCGGGTGGCCACGGTGGCACAGGCAAGGTGTGCATCATGCCGGATCACCACAGATCCGAGTGGTT  
GGTGCGCGAAGAGTTTTGCTTCTTTTCATCTCTACTTCACCCCGCTCACCTCTCCCGTATCGCCGAGGAG  
GTGTGTGACAAGGAGGGGCGCCACCTGCAACTGGTGGACAAGACCTTTATCGACGATCCGCAGGCGGCTT  
CGCTGGTGCAGCGCCAGTTGATGCAACTGCAGTGGCAGCACGGGGTTCGATCGGCTGGCGCTTTCCACGG  
CGCCAGGATGTTGATCCTCCACGCCTACTGCCACCACACCGAGGAGGCTCCCGGCTGCGCGCTCTACGC  
GGCGGGCTGGCGCCCGTGGTGTCAAGCGGGTGCAGGAATATCTGCAGGCCATCTGGCCGATTCCGGTCA  
CGCTGGCAGAGCTGGCCCAGCAGGCGGGACTGAGCGAGTACCCTTCGCCCGCATGTTCCGCCAGAGTCT  
CGGCTGCCCCGCCACCGCTATCTGCTGGGGCTGCGGCTCAAACGGGCCAAGCAGCTGTTGGCTGGCCCC  
GAGCCGCTGGCCAGTATCGCCAGTCAGTGTGGCTTCTCTTCCAGGCCATTTCCGCAATCGTTTTTCGCG  
AGGCGTTTTGGTTTTGACGCCGGGGCAGTGGCGGGCACAATTGTCATCTTCCCGTCACAGATAACCCTGAGA  
CTTTGGGCAAAAGAGGTGTACTCTTACCCTTATCCATTGAAAAGGAATGCCCATTTGAATTTATCGCAAAC  
GTCAAATCCGTACCCGTATCTCTGGTTCAGCCACTGGAATGCCCCGCAAGATCGCACCGCTGTTGTTAC  
CCCTCCCGAACCTGCAGTGCCTCACAGTTCACGTTGAAAAAGCCCCGCTGCGATAGGATTTTTCCGGTA  
ACTTTGCCACTATTGCCCATCACAAATGATGTGGACATGGCTGGATGTTTCTGGAACGTATTGAAGTCAA  
AGGTTTTTCGCGGTATAAATCGCCTGTGCTCGGCTGGGCTGGATCAGACCACAGTGTGATTGGCGAGAATACC  
TGGGGCAAATCAAGCTGCTGCGCGCCCTCTGGTGTGTTGCTGGGGCAGGATGCCGAGCCCTATCAGTTCA  
CCGCCGAGGATTTTTACCAACCCGGAAGATCCCGAACTGGCCCCGGCGGCCACTTGCAACTGGTGTCTCAC  
CTTTCAGTGAGCACAGACCCAGATGTGTGTCAGCAGTCCCGCTCGGCTGGCCGCTTTTGGCCCTCTGCGGTG  
CTGCACAAGGACAAATTCACCGCATTCACTATCGCGCCAGCGCCGAGCTGCAGGCGGATGGCTCTGTGC  
TCACCATTACGATTTTTCTCGACGGGGTAGGCAAGAGCCTGCCCATCGCCAATACCCACGAGCTTGTCTG  
CATGCTCATCACCATGAACCCGGTGTTCGGCTGCGGGACGCCCGTACCGCTCGCAACGGGGTGGAGACA  
TTGCAGTGGGGAGATCTCTCCGAACATCGCCTGAGCGAGCTGGCGGACAAGCTGATCGACGAACCCACG  
GGATCGGCGAGCCGAGCTCAAAGAGGCGTTCAGGCGGTGCGCCAGCTGATGGATCACTACTTCAACGC  
CCTGGCCCCCATCAAGAACAAGCCGCGCAGTCAGCGTGACATCATCAATCGCCCCATGACATTGCGCAAT  
CCGGGCAACCTGCATAACCTGCTGCGCCGCGCGATAACCGTGCCTGCAGCTGGCGATGGCGGGGATGG  
CGGCTACCTTGTGTCAGGCGCGTGGCAACCCGCGAGCTGGAGGAGGGGGCTCGCCCCATCATGATCCTGGA  
GGATCCTGAGAGCCGGCTGCACCCGACCATGCTGGCGCTGGCGTGGGGGGTGTGGAACAACCTGCCGGGT  
CAGAAGCTGCTCACCACCAACTCGGGGGACTTGTCTCTTCCCTGCCGCTCAATCAGGTGCGGCGGCTGG  
TGCGCCGTGAGCAGGATATCCTCTGTACCAGCTGGGGGGGAGCGTTACAGCAGCGACGATCTGCGCAA  
GATCGCCTTCCACGTGCGGATCAACCGCCCCATGTGCTGTTTGGCCGCTGCTGGCTGCTGGTGGAGGGG  
GAGACCGAGATCTGGCTGCTCTCCGAGTTGGCGCAGATCTGCGGTTACAGTCTGCGGGCCGAAGGGGTGC  
GGATCATCGAGTTTGGCCAGTGCGGCCAGTCGCCGCTCATCAAGGTGGCGGAGATTTTGGCATCGAGTG  
GCACCTGCTGACCGATGGCGACGAGGCGGGGCTCAAGTATGCCACCTCGGCCCGGGCCAGCTCAAGGGA  
GAGCGGGAACGGGACCGACTGACCCAGCTCCCTGCCGAGACATTGAGCACTACCTTATACAACGGTT  
TTGAAGCTGTGTTTTGCGCGTGGGCGGGAGTGGGTGGCGCGCCATGTGGAGCGCCAGTCACATCATCAA  
CAAGGCATCCATCACCAGCAAGCCGGGAATGGCGCTGGCGGTGGTGGAGAGGCGGAGCGGCTCGGC  
GCCGAGCATATTCCGCCGGTGTATCCGCCAGATGTTTGGCCGGTGGTGGCGCTGGCCCGTGGTCAAGGGCT  
AACGCCACCACCGCATCCCGTCACTATGGATATGGCTGCCAGCAGGGCGCCCCCTCAAGGTGGGCTCTGCT  
GGCGGCAAATGGCCCCGATTGTTTGGCCACGATTGTTTGTGCGGATTGGGGATAGCCGCGGTTTTGGGT  
ATACTCGCCCCCTCTCTGGCGCCCCGGTGGCGCACCTCGAATCTTTACTGCTGGAGGCGTCTGTTCGTTCC  
AACTCCCTTTTTGGCTCTTTCCCTCACCGATTGATGGCGCTTGGCGCCCTGATCGCCCTCGGTATCGT  
GCTGTGGCGCGGTGATATCTGTCTGCGCCAGCGCTCGCGCATCAGTCAGCAGCTCTTCTCCATCTGGGTC  
ATTACCGCGCTCTCCCTGATGCTGGCGGTGCGAGGCAAGGCGGCCAGTTGGCTCATCTGGAGTGGTGGGG  
CCGCACTGGTGTGCTCGGAGTGGGCTTGTCACTGGCCCAATCACGGCTGGAGGAAAGCGTTTCACTCCCTC  
GACACTGCTCTGGCTACCGCGGTTGCCGCTCGCTGTCTATGGCATCGGGCTGCTGCAACTGCAGGGCTGG  
GTGAGCGGTCTGCTGCAGATGGCGATGCTGGGGGCGGCCTTTGCCACCTGATGCTGCTGCGGGCCCGTC  
ATCGTCTCAAGGCATTTCAACACCTGTTGCCGCTGGCCGGTCTGGTGGGAGCGATGGCCAGCCTTGTGTTG  
GCTGGCAGTGTGGTGGGCTGGCAAGGGGGTGGAGCCAATCTCGATGCCCTGATCCCGGCGGTGGTGACC  
CAGGCAGCGCTGCTGGTGGCCTCTCTGCTGCTCTGGTTCAGCCCCTCTATTTGCAGCGTGATACCGCGC  
CAGTGGTGGTCTTACCTCCCTGTGTGGCCTGCTGATCGCCAGATTGCCGCTACCAGCGTGTGCACCA

GCTGATCTGACACTGGCGCTGAAAAGAGAAAAGCCCCGAGCCTTGGCTCGGGGCTTTTGCATATCTGGTTT  
GCTGGAATCGCAGCAATCCATTAGCAGCAATCAAGCAGCATCTATCGATCAATAGAAAATCGTCGGCCCCG  
CAGATAAAGAGGGCAACTGCTGCGCGGCTGGGCGAGATATTCGCGGGTCAGTCCCTCCAGCGGCATGCCGA  
AGGTGCAGATATCTTTCGCGCGAGGGGAGGGCGGTATCGAGGATCCGCCGCCAGTAGCCGCCACCCCTT  
GGGGGGGCTCGGTAGGTTAAAGGTGAGGGGTTCACAGTAGGCGTTGAACAGCACATAGAGCGCCAGCTTG  
GTTTTGCTCGACAGCGCTGACATGGCGATGGCGTGGGAGTGGGGGCTGAAATCCGGTTGCCCGGCTTGA  
CCCCGTGCCAGCAGATCTCGCTGTGGCGCAGGATCTCGGTGAGCGACAGCGGCATGCTCTCCTGCTCCGG  
GCGCTGGAACAGGTGTTTTGCGGTAAGTGGATCAGCTCCTTCATAAAGCGGAACATCTCCTGACTGCGGGTA  
TTGGGACAGCCAGTTCATCCAGCAGGTGGCATTGTCTGACAGTAGCCGTTGTTGTTGCCCGCTGGGTGC  
GCAGCAGCTCATCCCCATCAGCAGCATGGGGAGCCCACCGAGAGCAGGGTCGCCACCATCATGTTTTT  
GGCTGGCGCATCCGAGGGCGTTGATCTGGGGATCTTCGGTTACCCCTTCATGGCCGTGGTTCAGCTG  
AAGTTGTGATCGCAACCGTCACGGTTCTCCTCCCCGTTGGCCTCGTTGTGTTTTGCTGTTGTAAGTGGCC  
AGTCCCACAGGGTAAACCCGTCGTGACAGGTGACGAAGTTGATGCTTTTTCTCGGGATCGGCCTGGTGATA  
GTGGTAGATGTGCGGGGCTGCCGAGAGCCGCTCGACAAAAGCGGTGACGCTGTTGTATCCCGCGCAG  
AAGCGGCGCACATCATCCCGAACTGGCCGTTCCACTCACGCCAGCGGGCGCCGGCCAGTGACCCACCT  
GATAGAGCCCCCGCGTCCAGGCTTCGGCAATCAGCTTGATGTCGGCGATGTTGGGGTGGTATCTAT  
GGTGCAGCAAGGTAGGCGCATTGGCCTGCGGCTGACCCGATTCATCCCGCAGAGAAATGGCGGCCAGATCA  
AACCGAAAGCCATCGACGTGCATCTCCTGACGCCAGAAAGTGGAGGCTGTCCATGATCATCCGCAGCACCA  
CCGGATGGGCGCCGTTGAAGGTGTTGCCGAGCCGAATAGTTGGTGTCTTCTGGTTGTTGTCGAGGAT  
GTAGTAGGCCTCGTTGTGTCGATGCCGCGAAACGAGAAGGTGGGGCCATCATCACCCCTTCGGCGGTGTGG  
TTGTAACCCACGTCCAGGATCACCTCGATATTGGCCTTGTGCAGCGCCTTGACCATGTGCGAAATTCGG  
TCAGCGGATCATCGCCGAGGCGTATTGGGCGTGGGGGGCGAAAAAGGACATGGGGCTATAACCCAGTA  
GTTGGAGAGTCTTTGGGCGCATCCTGAGGATCGAACTGGAACACCCGGCAGCAGCTCGACGGCGGTGACG  
CCGAGAGATTGCAGATAGGGGATCTTCTCAATCAGCCCCGAGATAGGTGCCACGCAGCGCCGGATCGACCC  
CGGAGCTCGGGGACTTGGTAAAGCCCCCAGATGCAGCTCGTAGATCACCGAGCGGGAGAGGGAGTGAGC  
GGGCAGTTTGTCTCCTTCCAGTCGTAGTGGCGAGTATCGACCACCTTGTTCCTTGGCGCAACAAGCCAGA  
TTGTGCTGCTGACCGGGCGCCGCCCATCGATCGTAATTGGCGCAAGCTCGATGCTGCGGCCGTAAGGGT  
CGAGCAACACTTCTCGCATCGAAGCGGGTGGCCCATATGGGCGCCACGGGCCCTGAATGAGCATAGGC  
GTAACGTTGCCCGAGAGATCCCCCAGATCCACATGGATATGCCAGTAGTAGGCGGTGCGCGTTAGGCGCGGG  
GAGAGGGTGTACCTCGGGGTCGCATCGTCTGCGCTTGCGAAGAGCAGCAGTTTCGACCCGGCTGGCGA  
GGCGTGCCAGATCGCAAAGTTGACGCCGTGACTGTGCGGGCTAGCCCCAACTGACGGCAGTGACCGGC  
GGAGATGCGCATATTCTACCTACCCAAAATGAGGAGTGTTCACCTTATTGAGTGATGCGGGATGCCTG  
GCAAGGACTCGATTGCCTGAAAAAACAGCATGATGCTGCTAATGACCGCACTATTTGTCCGATTAATCTA  
CGAATAAACTTTTTTTGAGATATTTACTTGCAATCTGTGCGCTGGCGCCTATTATTGGCGACCTCAGACG  
CGGGGTGGAGCAGCCCGGTAGCTCGTGGGCTCATAACCCGAAGGTCGTCAGTTCAAATCTGGCCCCCGC  
AACCATCTGAGATCCTGACCACTCAAACCGGTGTAACCGGTTGGTGGGAAAGGAGAAAATCGAACTGGCTA  
CTGCTCGGCCACTTCGAGAAAAAATTCGACCGGGGTGGAGCAGCTCGGTAGCTCGTGGGCTCATAAC  
CCGAAGGTCGTGCGTTCAAATCCGGCCCCCGCAACCAACTCTTTCGTCAGCTTGCATTTGTGTAACAGC  
CGAAGGCAGACAAACGCCATCAAGCTACTGCTCGGCTTGGAGGTCGCAATTCGGACGCGGGGTGGAGCAG  
CTCGGTAGCTCGTGGGCTCATAACCCGAAGGTCGTCGGTTCAAATCCGGCCCCCGCAACCAACTCTTTC  
GTCAGCTTGCATTTGTGTAACAGTGAAGGCAGACAAACGCCATCAAGCTACTGCTCGGCTTGGGGTG  
ACAATTCGGACGCGGGGTGGAGCAGCTCGGTAGCTCGTGGGCTCATAACCCGAAGGTCGTCGGTTCAA  
TCCGGCCCCCGCAACCAACTTTCTGTACGTTCCCTTCTGCAATGCCAGTCATTGAACAATCCTTCTTGA  
TGCTCGTACCATCTGGTGATTGCTGCTATTTTTGACGCTTTTTCAAGACAAAATGGTCGTATCAACC  
ATTTGTTGGGTATCATCAGGTATCTTTCATGGATGAGGCACGCGCCTGTGATCACTCCCTTCACTATC  
TTCTCCTGCTATTGAAAGCCGGGATGCCACGCTGGCCGAAGCCCTTGCCCAAGGGTGGCGTTGCAACT  
GCTGCTGATCGCCGAAGAGCAGAAGGAGTCTTGTCTTTCGCTCCCCGCCCTTGGCGGTCTCCAGACCCAG  
CTTGGCGTGGGGAAAAAAGCGCCCTTTACCCTGATGCACGGCAATACCCTGTTGCAGGTGATGTTTGTGA  
CCGGCAGTGTGACGCGGGATCACCGCCTCTATAAACAGATCAGAGGCTGGATTGCTCCTCTTTCTGGGCT  
CAATGTGGAGCGCCTCGGGCTGCATCTGGAAGGTTTTTCCCCCTCCGAGCGAGTCATGCTGGCCGAAGTG  
ATGTTGTGCGCCCTGCTTGGCGCAATATTTGCTTGGCCACCAGCAAGCGCCGAGCGAAATCAGCTGGA  
GCTATCAGCAGATCAAGGTTTACCCTCAGTGGTGTGACTTGGCGCGCCTCTACAGCGAAGCGGGGGG  
CAACGGGCTGGCTCGCCATCTGGCGGTGTTGCCTGCCTCCGAGCTGACGGCCGAGCTATCGCGAGTTT  
GTCAGCAAGCTGGCGCAAGATGAGGGGTGGCAGTGCCATCACTATGATCAGGCACAGCTGGCCGAGTTGG  
GGGCGGGGGCGTTTTCTGGCCGTTGCTCGTGGCTCGGAAGACAATCAGGGGGCCATGGTCAAGCTCAGCTA  
CTATCCACCAAGCCGGTGCGCCGATTGCGTTGGTGGGCAAGGGGATCTGCCACGACTCTGGCGGTTAC  
AACCTCAAGGTCTCCGGCAGCATGTATGGCATGCATCTGGACATGGGGGGCAGCGCGGTGGCGCTTGGGG  
CCCTCTACGCCATCAGCCGAGCTCAGCTACCCTACGAGGTACACTGCTGGCTGGCCATTGCCGAGAATCA  
TATCGGCCCTCACGCTATCGTCTGGCGAGGTGGTACTGCCATCAATGGCACCTCCATCGAGGTGGTC  
GATACCGATGCCGAAGGGCGAATGGTACTGGCCGATAACCTGGCGATGGCGGTGCAGGATACTCCTGATC  
TGCTGCTCGATTACGCAACCCCTGACCGGGGCTGCAACGGGCGCTGGGTAGCCGCTACAGCGGCTCTT

TACCAATCGCAGCGAATGGATTACATCGCTGGTCAATCTGGGTCAGCGCAGCGGTGAACGAGTCTGGCCC  
TTCCCGCTTGATGACGATTATGACGACAACATCGAAAGCGAGTGGGCCGATCTGTTGCAGTGTGCGCCGG  
GAAGTTCGCCGGATCACATTGATGCGGCCCGTTTCCCTCGCCACTTCGTGCCCGAGCAGACCCCTGGCT  
GCACTTCGACCTGAGCGGTTTTTCGCAACAAGGGGGGCAATGGGGTGGTCTCCAGCGAAGTGACCGGCTTC  
GGCGTGCCTCAGCTGGATCTGCTGGCCAGCCGCTTGGCAGAGTCGGTCGCCAAGCCTCTGAACAAT  
CTGAATGATAACAAGGAGTTCTGTGAAAACAACCAAGCTATGACTGGGTGCTGTTGATTTGGATGAAACC  
CTGCTCGATTTTCCGGTGCCTCTGCGCTGACGCACACCCTGCAGATCTATGGCGTACAGGCTGATGACG  
CCAGCATGGCGCAGTATCACGCCCTCAACTACGGGCTCTGGCAGCAGTACAACGACGGCGAGATCGATGC  
AACGGCGTTGCAGCAGACCCGCTTCTCCCTCTTTGCCAGCAGGTTGCCGCCGATCCCATGGCGATGAAC  
AACACCTTTCTGGAGCAAATCATTGCCCTTAGCATGCCTCTCGAAGGGGTGGTCGAGACCCCTGCAGCAGC  
TGCGCAGCAAGGTGCGGATGGGGATTATCACCAATGGTTTCAGCGTGCCTCAGCGGGGGCGGCTCGGCAA  
ACTGGGCTGGAGCGAGTGGTTTCGAGCCGCTGGTGATCTCCGACGAGATCCGGGTGACCAAGCCGGCGCCA  
GCTATTTTCCAGCACACCCTCTCCCTGATGGGGCAGCCGGATCTGCGCGGGTGTGATGGTGGGGGATA  
ATCCGAAAACCGATATTGCCGGGGCGGCGGCAGGGGCTGGCGACCTGCTGGTACAACCCGGCGCGGCA  
AGCGGGCAGTGCATGCCACCCACGAAATCCACCCTTCGCCACCTTGCCGACATTGTGCTGGGACGC  
TGATAGCCAGGGTTAACCCATCACGTTATCGGTGACCAAAACGTCTGGCAAGTTGCAACCAGGGTTGTT  
TGAGACAGGATTGGGTTTGTCTGAGACAGTAAGGGGAGCTGATGCTCCCTTACTTAATGAGTGTTTTCC  
TGTGAATGCAGGGATCTGAACTGATAGCGATCAGAGATCTGCTGATAGTCGGGACTCTGTTTCAATTGAT  
CGATAGCCTGATTGATCCGCTGCAGTTGCGCCTCTGTGGTGTCTCTTTGCTCAGCATCAGGTGAACCGG  
CGTGACTTCGATACGCAGCAGGGTATGCAGCTGATCCTGCGCTTCATCCTTATCCTGCCACCCCTGCAGT  
CCGTGGGGATCCAGAATAAACCCCTGGATCCGACCCCTTGCAACATCTTCAGCAGCTGATCCAGCCGCA  
GGCGCATCTGCAGACGGGGCTGCAGCTCGGGCCTTGCCATCAACTGGCGGAAGGTAGTGCCGTAATCAAA  
GCCCTTGAGCACCCCGATATGGAAGTTGGGGGTGTTGATCAACTGCTCGAGGGTGGTATCCCGCGCCAG  
CGTTCGGCATCTTGCCGGCGGATGATGATGGCCGTCTCCTCTTCCCGATAGGGGTGGCTGAAGCGGGCAT  
ATTGCTGCCGCTCGGCGGTGATATTGGCTGACATGGTCAGCTGAACCGTGCCGAATTTTCAGCTCGTGCAG  
CACGCGAGCCAGGGCATTTCATGAATTTGGCCTGATAACCGGCTCGTAGGAAGATGGCGTTAAGCAGC  
TCCACATAAGTCCACGGAGCTGTTGTTGTTTATTGCGATAACTGAAGGGCTGCCAGTCGACCCAGCCCA  
CGACCAATGACTCTTGTGCCGTAGCCTGGCAACACAAACCATAACAACAAGAGTCTGTACACAACGCA  
TACCCTCGAACAGGCTGATACGGTTGAGTATTGGACAGGAACGACGGAGTAACCAGTGTGAGGGGTGAG  
TGGATGCACAGAGGTGCATCCCTCACAGTTTCGTGGGCGTGGAAATCCCTTGCGATAGCGGGCTTCGAGCG  
CGGGCAGCGTTGCAGAGTCGGATCCTGTTCCAGCTGTTTCGATGGAAAGCGGCTCTTCACAATCGGAGCAG  
AGGCCATAGAGGCCGAGATCCATCTGGCAGAGTGCCGCATCGATCCGCTTGAGGCGGGCCACGCTCTGCT  
CAACCTTCGGCAGATCCAGCCGGCTGGTCAGTTCCACCAGTTGATCCTGCTCGCAGTGACCGACCTGTTT  
GGCCACTCGTCACGGCGCAGGCTTTGAGCTGACCGATCAGCGTTTCTCGTACTTGGGCCAGTCTGAC  
AGCAGGCGATTACGCCAGACAGTCAACTGTGCTTGGCTCATTTACACACATTATCCCCACAGGACAGA  
CGACAGATTTGGGGCAGTATAGGGATCCGATAACTCTATCAAGATGATATGCGTCAAGTTAAACGTGGTT  
AGCCGTGGCTTTTGGCTGCTTGCAGCAGGGCATCGCGGATGGGAGCCGTCTCTTTGATCACC CGGATCTC  
CTGAAACAGCAGGTCCGCTTCGGGATATTCCCGCTTGAGATAGCTGAACCACTGTTTGTGATGCGACTGGGG  
TAGTAGTCGGCTTTTTTCGCTGGCCAGATCCTGCTCGGTATAGCTCACCATCAACTGCAGCACCTCGGCC  
AGCTCATGTGCGGGCAGCCGGTTTTTCATCACGTTGGCCAGATTGGGCAGGGAGATGGCGCCGCGCCCGAC  
CATCAGGGCATCGCAACCCGAGACCCTGGCACAGGGCAGGGGCATCTTTATGATCCCAAATCTCGCCGTTG  
GCGGTGACGGGGATGGGCAGGGCGCGGCAATGGCGTCCACATACTCCAGTGAGCGGGGGCCTTGTACC  
CTTTCGCGCTTGGTGCGGGCATGAACGGCCAGCTCGTTGGCGCCCCCTGGAGGACCGCCTGAGCGTTCTC  
CAGATAGAGATCCTTGTATCGTAACCGAGGCGAATTTTGGCGCTCACCGGCAGATGGGCGGGCACTGCC  
TCGCGACCCGCTTGCAGTATGCGGTAGATGGTCTCGGGCTCTTTGAGCAGCACCGCACCGCCCTTGCTCT  
TGTTGACCGTAGGGGCGGGACAGCCAAAGTTGAGATCGACGCGGGGGAGCCAGCTCGATGGCGCGCAC  
GGCGTTCTCGGCCAGCCACTCGGGGTGTTGCCCCAGCAGTTGTACCCGACCGGGGTGCCTGCGCGGGTT  
TTGCCATCTTGCAGCAGTTTCAGGGCAGAGGCGGTAGAACACCTTGGCGGGTAGCAGCTGATCGACGACCC  
GGATAAACTCGCTCACGCAGAGATCGTAATCATTGACGGAGGTGAGTACCTCCCGCATCAGGTGATCCAG  
TACCCCTGCATGGGGCCAAAATAACGCGCATAACGGCTTTCGACGAGAGTGGGGAGAAAAAGAGCGC  
AGATTGTAGTGGGGTTGCGGCCCGCTGTGACACCCGCTCAAACCTCTGTTAGGCTAGAGGGAGATAAATC  
ACGCAAGGAGAAGGAATGAAGCGTTGGTGTCTGATGGCGCTCGGGTGGCTGGCATTGTCACCGGTATTG  
TGGGCATTGTGCTGCCGCTCTTGGCGACTACCCCTTCATGTTGCTGGCTGCCGCCCTGTTTGGCCGCTC  
GTCGCCCCGTTTTTCATCGCTGGCTGTTGACCCATCCCTGGTTTGGCCCGCCATCGTGGATTGGCAACAG  
TATCGCGGCATTCGTGCTCAGGCCAGACGGCGGCCATTATCTTCATTTTGTCTACCTTTTCGGTGTGCG  
TGGCGGTGGTGCCTGCTGTGGGTCAAGGGGTGCTGGTTATCATAATGGTGATCCTGCTCACCTGGTT  
AATGCGTCTGCCGGTGTGGAGCCAGTTGCAATGGTGAAGTGAAGTCCCTAAGCTATTGCAGCAATAATG  
CTATGGAGTGGCCCTGTCAATTTTTGCGTGACAGGCTTTTTTATTTCCCGCAGAAGGGAATTGAGAAAAAT  
GGCCACCCCTGGGTCAAAAAATAAGCGGTCAACACATGAATCCGGAAACCTGAAATTTATCGAAGCAA  
GCATCAAGACCATTCGACTATCCGAAGCCGGGCATCTGTTCGTGACATCACCAGCCTGATCGAGAA  
TGCCGAGGCCTTCAAGGCCACCATCGATCTGCTGGCCAATCATTATCGTGATCAAGGGATCACAAGATT



GTTGGCACCGAAGCTCGCGGCTTCATCTTTGGCGCGCCGGTTGCCTATGCCATGGGGCTGGGCTTCGTAC  
CGGTCCGCAAGCCGGGCAAGCTGCCGCGCGAAGTGATCGAGGAGTCTATGCCCTCGAGTACGGCACTGA  
CACCTGCAACTGCACACCGATGCCATCGTGCCCGGTGACAAGGTGCTGGTCTGGACGATCTGCTGGCG  
ACCGGTGGTACCGTTGATGCGACCGTCAAGCTGATCCGCCGTGCCGGTGGTGAAGTTGCCGATGCGGCC  
TCATCATCTCCCTGCCGTCTCTGGGTGGCGATGCCCCCTGACTGCTGCTGGCATCAAGGTAGTCTCACT  
GGTTCGAGCTGGCCGGCGAGTAATGCCTCTTCGGCCCCGATCCTCTGCATCGGGCTGCATTGAACCGGTGC  
CCTTGGCGGCATCGGTTTAAAAATCAAGCGATCCCTCCCGCACTGACCGATAGCCGATAACAGCCAGCCCC  
CCATTTGTGTTAGCATCCGGCCTCAATGCCCTGTCTTCCTGCATGATGGATTTATGAGCTATCAGGTTT  
TGGCGCGTAAATGGCGCCCCATACGTTTGAACAAGTGGTAGGCCAGCAACATGTGCTGACCGCCTTGAC  
CAACGCCCTGGATCAGGGACGGCTGCATCACGCTATCTGCTGAGCGGTACCCGCGGGGTCCGCAAGACC  
ACCATCGCCCCGATTCTGGCCAAAGAGCCTCAACTGCGAGCAGGGGATCAGCAGCCACCCATGCGGCGTCT  
GTGATACCTGCCGCGAGATCGATCAGGGCAACTTGTGCGACCTGCTGGAGATTGACGCGCGTCCCGCAC  
CAAGGTGGAAGATAACCGCGAGCTGCTCGACAACGTGCAGTACCGTCCGGCCCCGCGGCCGTTCAAGGT  
TACCTCATCGATGAAGTGCACATGTTGTGCGGCCACAGCTTCAACGCGTTGCTGAAAACCCCTGGAAGAGC  
CGCCCCCTATGTGAAGTTTCTGCTGGCCACCACGGATCCGCAGAAAGTTGCCCATTACCATTCTCTCGCG  
CTGCCTGCAGTTTTCATCTGAAGAGTCTGGATCAGACCAGATCGCCAAGCAGCTCGAATGGGTGCTGGAT  
CAGGAGGGGACGCCCTTTGAACCGCGTGCCTGCTGGCCCTGGCCAAAAGCCGCTGACGGCAGTATGCGCG  
ATGCCCTGAGCCTGACCGATCAGGCGCTGGCCACGGCAATGGCAGCGTGCCTCGACAGCGTGCCTGGC  
GATGCTGGGCACGCTCGAGCACCGCCATCTGCACCAGCTGCTGGAAGCCATTTTTCGCGCAAGATGCCCC  
GCGACTATGGCCAAGATCACCGAGATCGCCACCCTGGGCCCCGATTTTGTATCAGCTCCACGCCGAGCTGG  
AAGGTTTGTCTCCATCGCATCGCCATGGCGCAACTGCTGCCTGCCAGTGTGCAGGAGCAGGGGGCGGATGC  
TGATTCCCTGCTGCAACTGGCCAAGGCGATGAGCCCAGAAGAGGTGCAGCTCTGCTACCAGATCGTGCTG  
GGTGGCCGTAAAGATCTGCCCTGGGCCCCCGATGGCCGCACCGCGCTGGAGATGACCTGCCTGCGGATGC  
TCGCCTTCTCCCAAGGCGTATGCCCTGCATCCGGCCAGCCTCACTGCGCTGCCCCGTCAATGACGAG  
CAATACCACTCCGGTAGCCTCCTTGC CGGAAAAGCCCCGCGCTGAATCGGCCACACTGGCACCGATC  
AGCGGCGCCGTGCCCGCGTTAATGTCTCCCCGCTGCATGACGGATGACATTTGGCAACCCCGCTGACA  
GAGAGGAGGAGGCGCAAGCCGCGGAGCTGTTTACGCCAGCAGGATGAGCTGCTGCGCAAGCCGACGGCAT  
GGGGTATCAACCCGAGCCCGGTTACCCCATGTGCGACCGCGATGTGTCTGCGCACTCAGCCGAACAATCC  
GCTGATGTGATGATCGAGCACCTTCCGACGGCATGACTATTTCCCGTAGCGAGCCGCTGACCCGCC  
CCTTCGAGCCCGCGCTCGAAGCGACAGCTACGCTGTTGCCGCTGCTGAACCGGTATCAGGGGTATCGAG  
CATGCAAAGCCTGCTTGGCAAGCGAAAACATGTTGCGCAGCCGCCAGCGTGGTCAGGATGCCCGGCGGGC  
CCCGCGCCGCGCGCGGTGCCGTTGCGCCACCTCGTCTGTGCGCCCCGCTACTGCACCGGCCGCTCACCC  
AACAGCCAGCTCCGGTCGGCCAACCGGCCGGGCGAGGGGATGGCGACGATGGGACACTATGATGAGTTGCC  
ACCGGTGGATCTCTATGGCGACGGTTACGAGTGCAGGGTGAACAACGGGGATTACGAAGAGTACCTCAAT  
CAGGGCTTTGCCGAGCAGACTCCGGTATGAGCCACGCCCCGTCACGGCACCGGCCAGCCAACCGATC  
TGCCCCCTGGGATCTCGACGGGCAGCCGAGCTATCGACCTGGCGAGCGCAGCACTGCGGCGCCTGCGGT  
GACGCCCCGCCAGCGACCCAGCCACCCGTTGCAAGCACGGCAGTGGCTGCTGCCCTTGTGACGCAGGAT  
GAGCCCCTCAGCCAGTATGGAGACCATCGACTGGGATGAGCTCGAGAGCGACAGCGAGCCGCAAGAGG  
GGGAGGTGACTCGCCTTATCCCTCCTCGCTACTCAATAGTTGCCGCGACCTTGGGCGGAGTTGATCGC  
CCACACTCAGGTGGGTGGTTCGGCTGCGCCAGTTGGCCATCAACTCGGTGATGACGCGGGAAGGGGACAAG  
GTACTGCTAACCCCTCAAGCCTGAACAGCGCCATCTGGTGGAGCGACAAGGCGCGCGCGGATCTGGCCGAGA  
TCATCGGGCCGGCGCTGGGTCAACCGGTGCAGGTTCGAGGTGACGCTCGGTGTGGTACCTGATAAGGAGAC  
CCCCCTCGAGATCGAGCACCGCCTCTATCTCGGGGTGCGCGAGCAGGTGACCCGGGATCTGGAGCAGGAT  
CCCAACGTGCAGTTTTTATGTTTACGCGGTTTGGTGCCTGCTCCATCACGAGAGCATCGAGCCCCCAACC  
GCTAAATCCCGTGGCCGGGAGCTCGCTTCCGGTTGAAAAGCAGTTTGGCTGTCCCCATCTAGGACAGACA  
AGCCCACAGCCCGCGCTGGATGCCGGATTTCAAGACGAGAGACGACATATGTTTGGTAAAGTTGGAATG  
GGAAACCTGATGAAACAGGCCCAACAGATGCAAGAGCGTATGCAGAAAGCGCAGGAGCAGCTGGCTCAGA  
TGGAAGTGACCGGTGAAGCCGGTGCAGGCATGGTCAAGGTCAACATGACCGGTAGCCACAGCGTCCGTGCG  
TATCGAGATCGACCCCTCCCTGATGGAAGATGACAAGGAGCTGCTGGAAGATCTGGTTGCTGCCGCTTGC  
AACGATGCCGTGCGCCGTGTGGAAGAGCAGAAACAAGGCCAAGATGGGCGAGCTGACCGGTGGCATGCAAC  
TGCCGCCAGGTTTTAAGATGCCGTTCTAAGGCGACTCTCCCCGCGCATTTCTTGTCCCTTGTGCTGGCC  
ATTCGGGTACCGCAAGGGGGACGGCCGAGAGACCCAAAGACGCAGCGTTATTGCTCAGGCGATACGCTG  
CGTTTTTTTATGGGCGCCATGCTGGCGCGGGCGGGCTCTAACTATCCCTTCTGGGAGAGGTTGCCACAGC  
GAAGGCCGATTACGCCATGAAACGCAGCAGCCTTGTAAAGGCGCGCTATTTGTGATACCCGCTATCGG  
ATATCCCGGTTTTGGCGTGGCCGGGCTGGATCGGCATAATGGCGGCTTGGCGTATCGAGGAGATTGTATGA  
AATATATCGGAGCCACGTGAGTGCAGCCGGCGGGGTGGAGAATAACATCGCCCGCGCCAGGCCATCGG  
GGCCAACGCGTTTTGCCCTCTTTACCAAGAATCAACGTGAGTGGCAGGCCGCCCTTGTGCGGATGCCACC  
ATCCGCGCCTTCAAGGCGGCCTGTGACAAGGCCGGTTTTCTGCCGGAGCAGATCCTGCCCCACGACAGCT  
ATCTCATCAATCTGGGCCACCCGGATCCCGATGGTCTGGCCAAAATCCCGCGATGCGTTTCTCGACGAGAT  
GAAGCGCTGCGAGCAGCTGGGGCTTGTCTATCTGAACTTCCACCCCGGTAGCCATCTCAAGCAGATCCCA  
GAGGCGGCCAGCCTCAAGCTGGTGGAGGAGTCCATCAACTGGGCGTTGGAGCGCAGTGAAGGGGTGACGG

CGGTGATCGAGAACACCGCCGGGCAGGGGACCAACCTCGGCTGGTCGTTTCGAGCACCTCGCCACCATCAT  
CGAGGGGGTGGAGGACAAGAGCCGGGTCCGGATCTGTTTCGATACCTGCCACGCCTTTGCCGCCGGCTAC  
GATCTGCGCACTGCAGAGAGCTGCGCTGCTGTCTTTGCCGAGTTCGATCGCACGGTGGGTTTTTCATTATC  
TCAAGGGGATGCATATCAACGGCGCCAAGTGCACCTTCGGTAGCCGGTTCGATCGCCACCACAGCTTGCC  
GGAGGGCAATCTGGGAGAGGCGGTATTCCACCACATCATGAATGATGATCGTTTCGATCGCATTCCGCTG  
ATCCTCGAGACCATAGACGAGTCTATCTGGGGCGAGGAGATCAGCTGGTTGCGCAGTCTGGCGAAGTGAT  
ACTCAGAAGCGAATCAAAGAGAGGGGAGCCGTGGCTCCCTCTCTGCTTTTTCCGTTATTGGCGAGCGGGCC  
TGCCAGCGGCGCTCCGAGCGGGCGTTACTCTGGGCGGCTCACCTCGGCATCCTTCACCTGAGCCCCGGCAG  
AAGTGGATAAAGTGGCGCAGGGAGGTGGAGTGGTACTTCTGCTTGTGCCAGATAAGGGAGAGCTGGCGCG  
GGAAGCGACGGGAGAGGGGCGAGGCGATCAGCCGCCATCTGCCAGGCGATCCGAGGCTGCCAGCCGGGA  
GATAAAGGAGATGCCAAGCCCTTCTCCACCCGACATCACCCTCCAGGGTGTGAGTTCAAGCCCT  
GGTTGCCAGCGGGGAGCTCGGGCTGGATCTGCTGGATAAACTGCTCGCGGCTGCCCGATTGCGCTTAC  
GCAATACCCAGGTCTCGCCCCCAGTCCGGGAGAGGGAGAGCTCCTTCTTGTGGCAAGCGGGTGACCGGG  
TGGGGCCACCACCAGCATCTCGTCTGCAGCCAGGGTTCGGCGAGCAGGTCGGGGTGGTGGTTCTCCCC  
TCGATCAGTGCCATATCCAGCTCGAAGTTGGCCAGCGCATGGCAGAGCAGGTGAGTGTGTTGATGGTCA  
CCTTGGGGGGGAGCCCCAACTCCTGTTTGTGCTGGCGAGCAGGTTGGGGAGCAGGTAGTTGCCGATGGT  
CTGGCTGGCACCAAGGCGCAGCTGGCCGCTCGGCTCGGCATCGGGGCTGAACAGGTTCTCGATATCCTGC  
ATCCGGGTGAGCAGCTCTTCGGCGGCCGGTTGCAGCAGGCGTCCCTCGTTGTTGAGCTGCAATCTGGGGT  
GAATACGGTCAAACAGCGGGGTGGAGAGCTGGCGCTCCAGCTCCTGCAGCGACTGGGAGACAGCCCCCTT  
GCTCAGGCAGAGCTCGTTGGCGCAAGGCCAAGGTTTCCATAACGGGCAATGGTGGCGAACACTTTCAGC  
TGCTGCAGGGTCAAGTTTCATCGTGTGTTGGTTTTCTGAATGATTGATTTAATTCATTTAGATATCGTAAA  
CGATAAGGGACCATTATCCTATCGCCATAGTCATCAATAGAAAGGTGTCATCATGATCGCAAGAACCCTG  
AAATCACTGGCTGCCGCCCAACCCCCATGGCGGGTCTGGCGCTGGGCATCGCCAGCCTTGTTGGTGGT  
GGGAAAATGCCGGTCACTTCGATGGCCGGATGCAACTGCTGGGCGCTGCCATTGCGGGCGTGTGCTGGT  
GATCCTGACCTTCAAGTTTCTGCTTACCCCCGCTGCTGTTGCAGGATCTCGCTCACCCCGTGGTGGGC  
AGTGTGGTTCCGACCTATGCCATGGGCACCATGGTGGTCTCCAAAGCGCTCGGTATGATTGCGCCGCAAG  
CGGGTAGAGCCCTCTGGCTGTTTCCCGTGGCGGTTACCTGCTGTTCTTCCAGGCTTATCTGGCATCG  
CGCCAAAGAATTTGAAATCCACCACATGGTGGCCGAGCTGGTTGCTGCGCCAGTGGGGATCATCTGGCT  
GACGTGCGCTTCCCGGGTGGTCAAGTTTCCCCGCTGGCCAAACGGTCTGCTCTGGTTCCGGATCATCTGCT  
ACGGCCTGATGCTGCCGCTGATGCTCTATCGCCTGATCTTCAGCCATGAAGTCCGGATGCCGCCAAACC  
GACCATCGCCATTCTGGCGGCTCCTGCCAGCCTCTCTCTGGCCGGTTACCTGACCGTCAAGTCAAGAGCCG  
TCACTGCTGCTGGTGGCCGCTGCTGTTGGGGATTGCCATCCTGATGACCGGCATCATCTATCTGGCCTTCA  
TCAAAGTCTGCGTCTGCCCTTCTCGCCGGGTTATGCCGCTTACCTTCCCGCTGGTGTGATCGGTGCTAC  
CGCCCTGTTCAAAGTGGCCCATCTGGTTGAAGGGTTTGCAGCAAGGGAGTCACTACGTCGAGCAGATCAGA  
CTGCTGGCCCACTTCGAGCTTGGGGTGGCTACCGTCATCGTCCGGTATGTGGCACTGCGTTACCTGATGT  
TTTTTCTGCCGAGCGTAATACCGAAATGAATAACGGCATGGCCCGCCAGGGTGTCAACGTTAAATCTT  
GAAGAAGATGTGACATCGGGAAATGGATAAGCAGTGCCTCCGAGAGCGACGGGATAAACGACCAGTCAT  
ACGATGGATGGACAAAGATCCTCCACCCTGGTTGTGTAACGAGCAAAATGCCCGCAGTGGCGGGCATT  
TTTTATGGTTTTTTGATGTGGCGCCCGTGGCGGGCTATTTGCCATGGATTTAACTGGTATTACCTGTGAG  
GACGACTACAATGCAGCACCCTTTTTCTGCTCGACCCCAATACATGTCGTCCCAAGATCCCGTATTTGAC  
TCCTCTTTTGAAGCCCGTTTTCTGCATCCCCGCTACTGGTTTCAAGTGGCTGGCGCTCGGGCTGCTGATGT  
TGCTCGCCTTTGTGCCGGTGGGATTGCGCGACCGTTTGGCCGAAGCCTTGGCTCCGCTGGTGTTCGTAT  
CTCGAAAAACAGATTTATATCGCCAGAACCAATCTGGAGATCTGCTTCCCGGATAAGAGCCCGGAAGAG  
CGGGATGCCATTGCACTGACCTCGATCCGGGTCCGGCTCAAGAGTCTGTTGGGATTTGGCGAGTTACCA  
TGCGCAGTCAAGCTTATCTGATGAGCCGGATCGAGGTGATCGGTTGGGAGCATATCGAGGCGGAGCGGAC  
GGCCGGCCGTCGGTGGTGGTGGTGGTGGTGGTGGTGGTGGTGGTGGTGGTGGTGGTGGTGGTGGTGGT  
CAGCGCGGGGTGCCCATGTGCACCATGATGAAACGGGCGCGCAATCCGGTGTGTTGACTGGCACCTCAACC  
GTGCACGGGCCAAGAACGGTTGCCCGCTCTATGAGCGCAGCGCCGGGATCAAGGCGGTGATCAGGACCAT  
CAAGAGCGGTGCGAGCTTCTTCTATCTGCCGGATCAGGATCATGGCCGCGAGAAGAGCATCTTCGCCCCC  
TTCTTTGGCTATCCCAAAGCGACCCTGCCTGCCTTGGCCCGTCTGGTGCAGGTCAGTGGCGCCAAGGCGG  
TGCCGCTGCTCGCCTGCTATGACGAAGCGAACCCTGCTACCGGCTGGAGATTGAGGCACCCTTCGACAA  
CTATCCCACCAGGATGTGATGGCTGATACCTGTGCGATGAACGACATGGTGCAACAGCAGCTGATGCGC  
CATCCGGGTCAATACATGTGGTTTCTCAAGATCTTCGATACCCGTGAAGATCAGGAGGGGCTGGATGGCC  
TCTACGAGGCGGGGATCCAGCGGATCCGCAAGGGATTGTGCCCCACGGCTGACCCAGAAATTTGCGTTGA  
TTGAAATGGCCCCAAGTGGGCCATTTTTTATGATAACTAGTCTGATCAGTGCCTTGGCGGTGATGGCCA  
GCCTCCCCAGGGTAGAAAAAATGTGAGGATAACTACAATAACCGTTTTGTTTTTGTGATGACTTGATGGTCC  
CCATGTCTGCGTTAGATCCGGTATTTGATACCTCATTTTCATAGCCCGCTGCTGCATCCCAAATGGTGGCG  
CAGCTGGTGGCGCTTGGCCTGCTCTCCCTGCTGGCATTTACTCCTGCGAGATTGAGGGATCGCTTTGCC  
GATCTGGTCTCTCAACCCTGCTGCGTTTTTTCGAAAAAGCAGGCCTATATCGCAGATACCAACCTCAAGA  
TCTGCTTTCCCGAGCTGGATGCCGCCGACGGCAGGCGCTGCTGCTCAATCGATCCGGGTCCGGCTCAA  
GACCTTTATGGGCTTTGGCGAGCTCAGCTGGCGCAGCAAGGCGGACTGACCCGCCGATCAAGGTCACC

GGCTGGGAGCATGTGCAAGCGGAGCAGGCTGCAGGCCGCCGGTGATCCTGGTGGTGCCTCACACCTGGG  
CGGTCGACATGATTGGCCGCTACTTCTCCATGATGGGCATCGAGATGTGCACCATGATGAAGAGCCCGAA  
AGATCAGGTGTTGACTGGTACATCAACCGCGAGCGGGCCAAAGGGGGCAAGGTCTATGAGCGCAGCGCC  
GGCATCAAACCGGGCATCAAGTCGATCCGCGCCGGTGCCAGTTTCTTCTATCTACCGGATCAGGATCACG  
GCCGCGAGGCGAGCGTGTGTTTCCCTTCTTTGGCCGCCCAAGGCAACCCTGCCAGCCTTGCCCAAGCT  
GGTGAAGCTGACCGGTGCCAGAGCGGTGCCCATCTTCGCCAGCTATGACGAGGATGAGGGGCGCTATCTG  
CTGGAGATCGAGCCGCGTGTGACCCCTATCCACCGCCGATCTGCTGGCAGACGTC AATACCATGAACC  
GGGTGGTAGAGATGCAGGTGGCGGCCATCCCGAGCAGTACATGTGGTTTCTCAAGATCTTCGAAACCCT  
GGAGCATCAGGAGGGGGATGACGGCCTCTATGAAGCGGGGATCCAGCGCATTCGTCAGGGCTTGCCGCC  
GAACCTTGAAAATTGGCCCGCTTGCGGGCCATTTTGTGGCACAGGCGCCTTTCGTATTTGGTCTGCTG  
CTGGTGGTTTTTAAGCGAACGGGTGGACAAAAACAGCGCAAACAGGGGATAACAGGGTGTCTTATGAAA  
GGGAGAGGCAGGTGAGCGTGC CGCGGAGCTATCTTCGAGAGCGGAAATAGGGTAAAAGGGCGGCCATGAAA  
ATTCCAAATCGAATCCAACCTCTGGTTGATGACGGCCTGGTCGATGAGGTCGTACGCCGTTGATGAGCG  
GCAAAGAGGCCGACGTCTATGTGGTGCCTGCGGCGACGAGATCCGCTGCGCCAAAGTCTATAAAGAGGC  
GTCCAAGCGCAGCTTCAAGCAGGCCGTGGTCTATCAGGAGGGGCGCAAGGTGCGTAACAGCCGAGCGCT  
CGCGCCATGGAGAAGGGCTCCAAGTACGGCCGCAAACAGCATGAAGAGGTGTGGCAGAACACCGAGGTGCG  
ACGCCCTGTTCAAGCTGGCGGCGGCCGGTGTGCGGGTGCCGACGCTTATGTCTGCCTCGATGGCGTCCCT  
CTTGATGGAACCTTATCACCGATGAGGATGGCAATGTGCGCGCCGCGCCTCAACGATGTGGCGCTTACCCCA  
GAGCAGGCGGTTCATCGACCATGCCAAGGTGCTCCGTTACGTGGTGCATGCTCTGCGCCGGCCTTATCC  
ACGGGGATCTCTCCGAGTTCAATGTGCTGGTGGATGAACAGGGTCCCGTCATTATCGATCTGCCCCAGGT  
GGTGGATGCCCGCCAAACAACAGGCCAAGGCGATGCTGGAGCGGGACGTC AACAACATGCGCAACTAC  
TACGGCATGTATGCCCCGAGCTGCTCAAGACCCGTTATGCCAGGAGATGTGGGCGCTGTTTGAAGATG  
GCAAACCTACCCCCGATAGCGAGCTGACCGGTCACTTTGAAGAGAGCAGCGCCGCCATCGATCTCGATT  
GGTGTGTCAGGAGATCGAGAGCGCCGAGGAGGAGGCCTATGCCCGTCAGGCCCGGATGAAGGCGGAGCAG  
GAAGACAGCTACTAACGGTCTTGCCACGTTTCGAAAAAGAGCGCCTTCGGGGCGCTCTTTTTATTACTGC  
TGCGGCTATGGTCGGCTGGGGCAGGGGGCTAGCTGATACATCTCCAGCCAGTTGCGATCCCCGGATGGA  
AGCGCCGTCCCAGCAACACGCCACCGGCTGCTGTAATGACCTTCGCGGAAGCCAGATTGTCTTGGTCACA  
GCAGATCAGCAGCCGCGCTGCCAGCCTGTGTTGCACCCAGCGCAGCAGCACGGTTCGCGCCCTTCG  
CCAGCGGAGAGGGGCGGGTTTTCGTAACCGATGATACCCAGCCACTGGCGGGTTGCTCATTTGCTACCGT  
GACGAAGACGCAGGGTGGCGATGATCTCCTCGCCATCGAGGGCAAATAAGGTGGTGGTGGCGAGGTATCC  
ACTGGGCAAGTTGCGCCCTTCGGCGTGGTCCAGCAGGCTCTGTAACCAGCCGTTTCGGGTCAAATTTGCGCC  
ACCTGATAGAGCGGTTGTCCGTTCTTCGGCGGATTCGGTGACATAGCGATGGTAAGCCGGAGCATCTGCCA  
GTCTGGCCGGTTCGGCATTG CAGAGCGAGCACTGCGCTCATGACAGGAGCGCGCAGGGCGGCGAGCGGCTGC  
GGCTCGTTGTGGTGGAGCTCCTGCACGCAGGCCGTTGCTCCAGCCTGTTTGGCGGCGTAAAGGGCCT  
GATCCGCGCGCAGGTAGGCCGCTTCAAACCCCTCGTCAGGGTGCAGCGAGGTGAGGCCGATGCTGAGGCT  
GATGGGGCCACCGGCCAGCGCCCGGGTGCCTCGCGATCTGCTGTTGCAGGCTGTGACAGTAGTCGGGC  
AGGGTCTGCGGGTCTGCCATCAGCAGCAGGGCCAGCTCATCGCCGCAAGCCAGCGGCCATGCCCTCGG  
CAGGTAGGGTATTGGCGATCACCCGACCCACGGCCCGCAGCATGGCATCACCGGCGGGGTGGCCGTGGCG  
GTCGTTGATCTGCTTGAAGTTGTCCAGATCGATCAGCAGCAGCTGGGCGGGGCTTGTACCTCGCGGGCG  
CGCAGGGTCACTGGCGTTGCAAATAGTGGCGGCTGAACAGACCAGTCAGCTCGTCCGTGATTGGCGCGCC  
GCTCCAGCTTGCGCTGGGTGGCCAGCAGGGCTTGCTGTTGGCGGGTGTGGACCAGGCTCAACAGCAGATA  
ACTGCGGGCGATGGTAAAGAGCAGGCTGAGCAGGATCACAGGCCGAGCAGCGGGTCCGTTGAAGGAGTTG  
GCCGCCAGCTCCGGCTGCCAGAGGTGTTTGGCGATCCG CAGCAGTTGCAACAGTAGTTGCAGGCCGAGCA  
GCAGAATGGCAAAGCGCAGCACCCGATAGACGGGGGCCAGCCGCTGGTAGCGCCAGAGCTGCCAGATAAG  
CAGTGCAATCTGCAGCGAGAGCACGCCGGAGAGTACGATGATCCGGCTATGCACATCAAAGAGGGGTTGC  
TGCAGCGCGGTTCAGGGCAAACAAAACGAAACACCGAGGGTAAACGGCGGGCAGCAGCCAGCCAGTTGGT  
CGGCTTACGGCGAAAGAAGTGGCGCATCCCCGTT CATAGAGCAGGGTGGTTCGACATCAACAGCAGGTT  
GGTGCAGAGAATATTGGCAAAGGGATGCATTTCCCTCAAGGGGGCGCAGCAGCAGGCAGCAAAAAGCCCC  
GCGATAACCAGTTCCCCCGCTGACCAGTAGATCAATGCCCTGATCTGGCGATGGGTGTGCCACATGGCGG  
CGAAAATGGTGGCGACCCCAACATGTGACAGCGTGACGAAACAGCACCAGACTCAACAACCTGGGCTGAGGA  
AAACAGACTTGGCATCAAGGGGCTCTCTGGGAAGTCACTGTGAACGAACAGGCGATGGGGTATCGCCCCG  
CTGGCAGTGGCCGATCACAGCATGAATCCAACCTATTATCAATGGGTTAAATGGCTGAATGTGCTCACCT  
CCGACTTCTTGCACGATGGCAACTGCTGACTCGATTTATCAGCGCACAAGGAGCCATTTTATTGTCTTGT  
CAGTCAATTTGTGCTGCGTGAACGGTGGTTGTGTAGGTGGTAGGGTGAACCAACTGCCTGACGTGCTGCT  
AATCGCAGGTTGCAGCAGGCAAGCGCATTACGATGGCCTCCCTGTCCAGATGGGTG CAGCAGGCGGCGCAC  
ATCGTCGAGGCGGATGATCAGAGTAGCGGTGTTGACCAACGGATGGCACTGCACCTGTTTCGGCCTGCCAG  
ATGGCCTCGTCCACCACAGCTCTACCGCATTTTCCCTGTGCGCACCATGGCGAGCAGGGTTACCGAGC  
CCGGGGTAAGGCCGAGCACCGCATCGAGCCGCTCGGGGGAAACAAAACCTCAGTCGCTTGACGCCAAGGGC  
GGTTGCCAGCGCCTTGAGATCGACCCGGCTCTCCTCCGGTGTACCACCAGAAAACAGCCGCTCGCTTTTC  
GGGTCGCGCAAAAAGAGGTTCTTGGTCTTGGCGGGGGCAGGTTCGGG CAGCAGCCTGCTCGCTCCCTCAC  
AGGTA AACACCGGGGGATGGTCAAAGCGCTGGTAGGGGATAGCCAGCTGATCCAGCAGGGAATAGATTGC

CACATAGACTCCTTTTTGTGCGGCGAAGAGTGGTCAGAACGGGATGGGCGGGAATCACGACCGGATCGAGCT  
TACCAGTTTGACTCCCGCCTCGCAGCCAGCGTGACGATTGCGAGCAGGCACTGTATGAACGTACAATAGT  
CCCATTCTCGGACAGCCCCCTTTACGCTTCATGACTGCAACCCAGCCCACCGTACCCGCCACTCCGCCCT  
CGACGGTTTTATCCTGACCCGCCACGGTTCGGGACGTGCGCGGTGCGAACGGGCGAGCTGCTACTACCGAA  
ATCGTGATGTGGCTCTGGAGCGCGCAGGGGCCGGTTCGGGTGGTGGTGCCGGGGCAGGAGCCGGTGTCT  
TTTTGCCACAGAGCCACATGGCAGAAGCCGCCGAGTTGTTCAAAGGGGGCCGGGGTGAGCGGGCGGTTTTCG  
CCGCCTGCCGATGCACACCTTCGACGGTTCGCCCGTGGTGGGCTGCTATTTTCGCTACCCGTGAGCGCTTT  
CACCGCGCCATCGAGCTGCTGCTTATTCGCGGTCTGGAGCACTTCGAGGCGGATATCCGGCTGCCGGAGC  
GGTTTCTGATGGAGCGTTTCATCACCGCTGGTGTGCGCTTCGATGGCCGGGCGGTGAAAAAGGGCGGCAA  
GCAGGGCTACTGGGAGGTGAACGAGGCACGCTGCGCGCCGAGGCGGTGACGCCAACCTCTCTGGGTA  
TCGCTGGACGTGGAGTGTGCCATGGACGGGGCCCTCTTCTCGGTGGGGCTCTACAGCGAAGAGGATGCAC  
GGGTTCATCATGATCGGCACCCCGGAAGCGGATCCGAGAGCTGGGGCACTCAGGTCAGTCCAGTGGGTAGAGGA  
CGAGAGCGCCCTGCTGAGTGCCTGGAGAGCTGGTTCAGCCTGCATGACCCCGATCTGGTTCATCGGCTGG  
AACGTGGTCAACTTTGACTTTTCGCTGCTGCTGCGCCGCGCCGAGCTTAACAAGCGGCGACTGCGGCTCG  
GGCGGGGGCGGAGCTCTGCTTCTGGCGCTCGTCACGGGGCGATCCCCAAACGGGCAACGTCATTATCCC  
CGGGCGCATGGTGTGACGGCATCGATAACCTCAAAGCGCCACCTGGCAGTTTTCAGCTACAGCCTG  
GATGCGGTGGCGAGCGAACTGCTCGGCCGTGGCAAGGATATCGAGGACGTGGCCAAATCGGGGGGAGAAGA  
TCACCGAGCTGTTCCACTCCGACAAGGAGGCGCTGGCCGCTACAACCTGGAAGATTGCAAGCTGGTGTG  
GGAGATCTTCGATTACTGCCACCTTATCCCGTTTGCATCGAACGCGCTCCCTCACCGGTCTTGAGCTG  
GACAGGGTAGGGGGCTCGGTGGCGGCCTTTACCAACCTCTATCTGCCGCGGCTCCATCGTGGCGGCTACG  
TGGCCCCCAATTTGCCGGCCGACGGGGGGCTGGCGAGCCCCGGCGGCTATGTGATGGACTCCAAACCCGG  
TCTCTATCGCCATGTGCTGGTGTCTGATTTCAAGAGCCTCTATCCCAGCATCATCCGCACCTTCTGCATC  
GATCCCATGGGACTTATCGAGGGGTGCAACACCCCCGACCACGCTATTCGGGGCTTTCGCGGCGCCATGT  
TCTCCCGCGAGCGGCACTTCTTGGCCGAGCTCATCGCTACCTTGTGGGCGGCGGGGATCGGGCCAAGGC  
CGCCAGCAACAAGGCGCTCTCCAGGCCATCAAGATCATCATGAACTCCTTCTACGGCGTGTGGGGTTCG  
GGGGGCTGCCGTTTCTATGATCCGCGACTTGCCCTCGTCCATTACCTTCGCTGGTTCACAGCATCATGCAGC  
AGACCCGCGAGTGGATTGAGGCGAAGGGGTTGAGGTGATCTATGGTGACACCGACTCCACCTTTGTCCA  
TCTGGGGCGCAGACCCAGCCGATGAGGCGGACGAGATTGGCCAGCGACTGGCGCAAATGATCAACCCAT  
AACTGGGGCTGCACTGACTGAGGCGCGAGTTCGACCTCCGAGTTATCTCGAGATCCAGTACGAGACCCACT  
ATCGCCGCTTTCTGATGCCACCATCCGCGGGCTGGAGAAGGGCAGCAAGAAGCGCTATGCCGGGCTGGT  
TGGCAAGGCCAGCGAGGGGAGCGAACAGCTGGTGTTCAGGGGCTCGAATCGGTGCGTACCGACTGGACC  
ATGCTGGCCAAGCAGTTTCAGACCCGCTCTATGAGCTGGTGTTCACGATGAAGATCCCAGCGGTTATG  
TGCTCACCATGGTAGATGAGACTCGCGCCGGTTCGCCACGACGATCTGCTCATCTACCGCAAACGGCTACG  
CCAGAAGCTCGAGGAGTATCAGAAAAATGTGCCGCCCATGTGCGGGCGGCGGGCTGGCCGATGAGGAG  
AACCTGCGCCGCGGTCTGCCCCAGCGCTATCAGCATCGGGGCGCCATCGCCTATCTGATGACCCCAATG  
GCCCAGAGCCGCTGGAGTACCGGCGCAGCGCCATCGATTACGAACACTATATAGACAAGCAGTTGCGGCC  
CATTGCCGATGCCATCCTGCCCTTTATCGGCGAGTCGTTTCGACCGGATCTGTGGTTCAGCAGCTGGATCTT  
TTCTGATTGGTGAAGATGGTACTTTACTTCCATAAATACTGGATAAAAAATACAGTTATAAATCATGGA  
GAAGTTTCTATGCGTCTTGAATCATCATCGACAGAAAACATCAGATCCCGACCTCGACCATGGAGGGC  
CTGCGTCAGGAGCTGCTCAAGCAGCTTGGCGAAAAATTTCCCCGACATCCATGTGCGGGTTCGCGCCGGGCA  
GTGCCATGGCCCTGACCGTTAGCCGTGCCAGCAAGGAAGACAAAAGAGCTGGCCGAAGCCATGGTGCAGGA  
GGTGTGGGAGAACGCCGAGAGCTGGATGCCGGAAGAGAACGCCGCTCCTGATCCCGCACGGTTCAGTGA  
TAACTCGGGCGTTGGATAAATGGGTGCTGATAAACGGGCATGCCGCTACTGATCCGTTGACCTTCGGA  
CAACAAAAACCGCAGCCAGGTGGCTGCGTTTTTTGTGGGTGGTGGAGGCTCGCGGTGGTTTTTCTAGCT  
TTGGGTTGAGCCAGGCCAATTACAACCCCGCCAGCTTTTCAGGCTCTGCTGCTGCACCCGGCGATTGGC  
TTCGCGGATCTCCCTTTGGCGCGAGTTCGGCCAGCGCAATGGGCAGTGCAGTGCAGTCCGATCTCGTCACTG  
CTCATTCGGGCTTTGAGGGCCGGGTGATAGGCCATCTTGAGCAGCACATAGTCCAGCCCGGTCAAAAAGC  
TGTGATGCTGTTGTCATTGAAGATGGAGGGAAAACACCTTGTCCGAGTCGTTGGGCAGTCCCATCACCTG  
GGTGAACCTCCTCCACCACACAGTTCAGAAAAGCGCCCTTGGCTCTGCTGTAGTCTACCGGAATGATGATG  
GTGGCAGGCTGATCTCGTGTTCGATTTGGTTCGAAAGTTGGCAAGGCAAAGCCCCCTCCTTGAGCGCCA  
TCTTGACCGATGGATCCCCCCCCATGGTTCGGTTCGGCCAGCTCTTCATCTTGTGTAGTCCGGTTCATGAT  
CAGGGTTCAGGTTGGGCTTTGCGGCCACCATGCTGATGGAGTGGCCGGTGCAGGGCCAGATGGGCTGCC  
TGTACCTTACCACGTCGGCCTGCAGCGGCTTGTACCCGATTCGTTGATAAGTTGCAGCCGATCGGCT  
GCTGCCAGCGGGCAAACGGGTCTGCCTGGCTTCGCCATACTCCCGCTCCATGGCGATGGCCATAAAGCT  
CTCGACCAGATAGCTGTGCTCTGCCAGCGCTCATCGGCACGGGCGCTGTGGCCCGCAGCAGAAGCAGC  
AGGGCCAGCAGCCCGCTGATGCGCGGCGGGGATAGTCAGCGCGGCCAAGCTGGTCAATTACCAAAGTGG  
CAATAAAGCGGGTGGCACCAAAGGGGATGGCGGCAAATGACATGTTTCTCCCTGAAACGGTTGTACGCC  
TAGCGGTTGGCCTTGTGATATCGCGCCAGGTGAGCCAGAGCCTGAGATCAAACCTCAGTTGATGATAGT  
CGGGCTCCATGTGCTGGCAGAGTTGGTAGAAGCTCTTGTGTGATCTTTCTCTTTGATATGGGCCAGTTC  
GTGCACCACGATCATTTTCAGGAACGGGGGCGGTGCCTCCTTGAACAGGGCGGCGATGCGGATCTCGTTC  
TTGGCCTTGAGCTTGTGCCCTGCACCCGGCTGACGTAGGTGTGCAGGCCAGGGCATCCTTGATCACGT

TGATCTTGCCATCGAACACCACCTTTGATAGGGGCGCCGAGCTCTTGAGGTAGCGGTTCTTCAGCTCCAT  
GGTGTAGGCGAGCAACGCCTTGTGCTCTGGATCTGGTGGCTCTCCGGATAGCGTTTGGCCAGCATCTCC  
CCCAGCTTGCCCCGCCAATCAGCTGCTGTACCTGTGCCTTGAGGGGTCTGGATAGCCGCCAGATAAG  
TCAGTTCCGCCATGGTGTCACTCGTTACATCAAAAAGAGCGTCATTGTAGTTATCTCGGGCGGGCTTGCC  
TACTGCGGGCCGCTACTGCAAGGGGGCTCTGGCGCAAGAAAAAGGGCGGCCATTGCAACAATGGCCGCC  
TGCGGGCGTATTGACGATCAGCGTCGGCGATAGAGACCCGGATCCACCTCTTCATAGTGGCTGGTCAGGT  
ATTGATAGAAGGCAAGATGGGAAGGGGAGCTCGGCTTTTTTCAGCTCCTCGCTCACCCGATCCGGCTTGGC  
GATGATGAACTTCGGGCTCTGGCGCTGGATATCGGCCAGCACCCGCTCGCGCACGTCATAGGGCCGATG  
ACGTTGGCAAAGAAGAGGTAGGCGGACGCTGGCTGGCGATCGGTCCAGAGATAAATTTGCGGCTGGATGC  
CATCGACCCAGATCTTGTGCTTGGGACTGTCTCGGCTTGTATGCGATCGACCCGTACCTGCGCCGCCGG  
ATTGAAAGGGCGACCTTGAGGGTGCCTTCCAGCGCTTGTGTATCATCAGCAGCAGCATGGCAAGCGTT  
GCCAGCCAGGGGGTGGCACTGCGCACATCCCAGGCGCTCCAGAGGGGATGAGGATCAGCACCCGGCAGCG  
CCCACAACAGGCTGGTGGCGAGCACCTCGTTGACCCGCTCGAGGGACCACTCCTTGGTGCTCCAGCCAAA  
GGCGAGTTGCTGGGCCAGCAGCCAGCTGGCGGTGAGCACACCAGCGAGATGCAGAGCAGGCCGATGGCA  
TCAGCCTGCTGTTGCTGCGATCCAGCAATACCGCCAGCGGCAGCACTGCCAGTTGCAGATAGAGCACGT  
CGTAGTGATCGAACACATGGCCGAGACCGAGTTGGCGATCAGGGTGAACAGCACCCCAAACAGGGTCCG  
CAGCAGGGCGGTGAGATACCACTCCTGACGGCGGCTCAGCATCAGAATGATGAAGGCGGGCAGCAGCATG  
ATAAGGCCGGTGCAGCAGGCGGACGGCGCCACCATGGGGGAGAAAACCAATTGCCGTAGCTCCCCTCGA  
AGAAGATGTGCAAGGCGTAGTATTTGAAGCCCGCCAGCAGATCATGCTGCTGGAAGTAGGCGTAAAGCGG  
GCCGCCAATCAGCGCCAGTCCCAGCAGGCTGGAGATGAGCAGCAAGATGGCGTACGCCACTTCTCATGC  
AGACACCAGTGGCAGAACAGTACCAGATACCAGGCGCCCCAGAAGGCGCCGTTGTTGGTGGCATCCAGG  
CGACGATGGCGAAGGTAAGGGCTGCAACCAGCGCCGGCCACCAGCGAAATCCCTTGTCCAGGAGCAGGGT  
AATGAAGGCCCACTGGGCGATGAGGGCGAGGTGGAAGGTCCAGTCTCGGTCATGTTGCCGTAGTAGTAA  
CGGGTGCCGTAGAGAGCCAGCACCCGCCAGCATGGCGCCAAGGCGTGCTTGAACGAGAGTCCGAGCTGGG  
CAAAGGCCTGCCAGCTGGCCAGCAATCCGAGCCAGCAGAGCACCCACTCCAGCGCCAGATCCCGACAAA  
ACCCCCATTCCATAGCCAGCGCGTTCGAGGGCGAAGATCATCGGCCCTTGTATGTCGATCATGTCGCGA  
TAGAGCAAGCCCCCTTCGCTCCACATCTTGCCATCACC CGAACAGCGAGGCATCAAAGCCCGGTGCCA  
TGGCGTGGAAGCGGGTTCGCGCAGACAGAAGAGCAGCGCCAGCAAGGCGGTGAGCAGCAACAATGGCTGG  
CTTGATACCCGGGTTGACGCGAGGGGAGTGAACAGGATGGAGTGATTGATGAAAGTCCGCTGTTCCGCA  
GCTGGTCTTGAAGCGGGCCTATCTTGGCGAGCTAGTGAGTGCATGCAATGGGGCGGGCCCGTGTGGGG  
CAAATATTCTCGAAAAAGCCCGTTCTTGCAGGGAACCGGGTGTGGCTGCGGCAATTTTGGCCGTGAGG  
GGATGTGGCAAAGCCATCCCCCGATATCAACTGAAAGTACTCAACCAGGGGCGGCTGCGCTTCCAGTGT  
GGCAGGTGACGGGCCAGCGGATAAAGGCGTGGCCAGGGTGATGCCGAGCTCTTGATTGTGCTGGGTCA  
GGGTCCGCGCCAGTGGCGGTGTAACCTCCTTGCCGAGGCGGTATAGGCGCTCGACACCCCGCGATAGAC  
CTGTTCCGCATTGACCGCTTGGCACTGGCCGGGGCGGCTTCCCACTCCAGTCCGGGTGATGCGCTGGCC  
TTGGGCCGATCGGCCTGATAGGTGAATCGCACCCCGCGGTGTAGGGGAAGTGCCTTGCATTGCCGA  
CCACGCCGTTGTTGGTGGCGTTGTGATGGCATTCTCCAGCGCTTCCGCCAATCGTGACCGTGCACCCG  
ATAGAGGGTGAGGGGAATGGCAAACGGCAGCAGGCGACCGCGATATCCGCTTCGCTCAGGGGACCCGGC  
TCCAGCGAGCAGCGCACGCCGCCAGCATTGTGCAGGGCAAAGTCCACCTCGCCTACCTGTTACGGGCGG  
CGGTTAGCATGGCGCGGGCCACCAGCGGGGCGAGCTGGCTGCCGTGGGGCAGGGTGGCATCTGGCAGCCG  
CTGATGGGGCAGTGACGCCCGCAGTCCGGGTGACGATGCGCTGGCTCATGGTTCAATCTCCGGCCGGTAG  
CGTTTGGCCAGATGTTGTTCAAGCTGTTGATCCGGCTCGCAGAAGGTGAGCCCGGCGGGTGGGGTGGAGG  
CAAATGGCCAGGGCTGCCAAGGGAGCCACTCCAGCTGTCCCTGACTTTGCACGACGCGGCCCGACTCATC  
GAAGGTGAGCTCGCAGACACCGAGGCAGAGGGCGCTGTGGCCAGCGTGCAGGATAGCCACCCGTTGTT  
ACCAGCGGATAGCTGCCTTCGCTTGGCAGACCCAGCGCGCGAGATCGCCGAGCAGGCTGTGGGTATGGC  
CACCAGATGATGAGGCTGAGCTCGGGGAAGCGCTCGGCCAGCAGCTTGTCTGATCCAGCCCGAGGTGGCT  
CAGCAGCACGATATGCTGGATCCCTTCGCGCTTGATCTCCCGCAGCACCCGGGTGAGGGTGTGCGGACC  
GCGTGGAACCGGTGTGGGGATCCGGGTTGGCGATGGCAGCCATCTGGGCGAGGGTGTGCCGAGCAGCG  
CAAAGGGAACCCCGTCGATCACCTGACGATGCCAGGGCTGATGGGCGTCGTAGAGATGGGGAATATCCCA  
CAACCCGAGGGTTGTGTCGGCAGGCTCCTGACTGTTATCCAGATTGGCGGCCAGCACAGGAAAATCGAGC  
TGGCGCAAGAACTCCACCAACGGGCCATTGCCAGATCGAACTCATGGTTGCCAAGTACCATGGCATCGG  
GGGCCAGCATGGCGAGCAGGTGGCGGTTGGCGCGCCCTTGAAGCGGTTGAAATAGAGAGAGCCCTGAAA  
GGAGTCCCCACCGTGCAGAAACAGAAAACGCTGGCCGGCTGCTGCGGCTTTGGCACGCAGTTGGGTGAGT  
CGGGTCAGGATCCGGGCATAACCGCCGCACTGGGTGCGCCATTGGCCTTACCAGACAGGGGAGAAGCTCA  
TGGGCGCGCCATCGAAGTGGGAGTGGCAATCACTGAAATGGGCAAGTTGAACCGTAATACTCATCTCGGT  
CCTCCTTAGGGGAAAATGAGCACCGAGTCTACTGCAAAGGGGGGGGAGGATACCAGCCCGGCGAGGGTGC  
GGGCTGGTCAGCGATCAGGCGGGAACCATGATCTGGGTGGCGACGATCACCACCAGCAGGCGGACGGCTA  
CCGGCATACTGGTGGCTTGGCACTTTCGAACGGCGAGAGCTTGGCCATCCCCGCACAGGCGACCACCAC  
CCCAGAGACCGGAGAAAATGGTGGCAGCCAGGTTAGAGGCTTGCAGCATCGGGATTACCAGATAGGCCGGG  
TTGATGCCAAGGCTGCTGGCCAGGTTGGGGATCAGCTCTACGAAGGCGTAGAAGGGGGCATTTGCCGTGAGC  
CCGTGGTGAAGGCGGCCAGGGTGGTGTATCACCACCAGCGACAGCATCATGATCAGGCCCGGGAGCCGAG

ATCCTGCGCGTGAGCCAGCAGGGTGTGCGATAAAGCCGATGGTCATCAGGCCCTGGGCAAAGACACCGGCA  
CCGACCAACAGCATGACCACACCGGCAAAGGCGTCAGCCATGTTGCGCCAGCAGACCTGCAGACCGTCCA  
GCAGCTCCTTGCCATTGCGGATCCGCACCAGCTCCAGCAGGCTGGCCAACACCATGCACATGACGATGAT  
GGTGACGATATCCAGTTGTGGGCCCCATTTACCGTCAAACACCAGCACCCCAATGATGGGGGTAAAGGGC  
AGGATGGCGTAGAAAGCGGGGGCGGTAGTCACCAGATCACCCGGTGGCACCAGGCTCGTTGTGTTACCCGG  
ATTTCTGGTCAAGGTAGCGCTGCCAGAAGAAGTGGGTACCCGCCATACAGGCGATCGCCACCAGCGAGAT  
GGGCAGGGTCAGCTTGAAGGCAAAGTCCAGCAGCGGCATGTTGGCGGCTGAGCGGCCATCACACGTCA  
CCCCAGGTAGGTGCCAGAATGATGGCGGCTGGCGAGGCGCACACGGCCGAGCCGCGCCACGGGAGATCC  
CCATGTTGACCATCAGCGGGAACAGGGTGGCCATCAGCAGCACGCCGAGGCGGTAGCGGAGCTCACCGC  
CAGCGACATGGCGCAGGCCACCAGATAGGCAGCCACCAGGATATAGGGGGACTTGATGATGCCGAGC  
GGTTTGCTGGCCAACTTGACCAGAATGGTGTGGCGCCGATATGGCTCATGTAGCCGGCAAGCCGCACA  
GCACCATGATCAGCATCCCCAGTCCACCGCCACGGTCTTAGCAGGAAGCGGACGTATTCGAAGATATC  
GGTTGCAATGTAACCGGTGCTGACCACCTTGCTCGGCAGTACCGGCTTGCCCATCATGGCGGTGATGACC  
AGCAGCAGCAAGCCCGCTCAGCAGCACCCCGGTGCGGGAGTATCCTTTGAAAATGGCACGGCCACCA  
CCAGGGTGACCAGGGTGCCAACGATGAGTTCAGCATATGTTGCCTTCTGATTGGATGAGAGTGAAGGGA  
GTCTATTCCGATAGGGGTAGAGTGGCGACTGGAAACAGGATGTTGTGTGAGCTAAATCAACGTTTAACCC  
CGTGAACAGAATTAAGAAAGGTAAAGGTACTTTACCCAGCGGGTTTGGCTACCTACCCTTGCCAGCCTT  
GGTTGTCTTTTGGAGCTTTTATATGGCGATTGGTGTCTGTAGGCATTAACGCTCTCTTTTCCCTGCTT  
GCGATGCTATTTTACCTACTTGCGTGTGGCGTAACCAATGACGGTTTTTCATCAAACCGGTCTCTCATC  
AGGCGGTGCGCATGCGGCGTCTCATGGCTCCTCACTCTTATGGGTTACTGGTGGTTGCCGAGGGGAACAG  
ACCCCGTTTTGCGCGCTGGCATCCAAAACCACCGAAGCAAACCTGCCTGGCCCGTCAATGCCATCCGGGTA  
GATGGGGTTCGCGCTGCTGGTCAACCCGAGATTCTATGCCAAAAGAGGGAAAACGGGGACTTTGCGAGCTGT  
GGCTCAATGAGGGGGCAGATCAGGACTTTTTTGGCAACCGCCTTAAAAATGATCATTTTTATTTCAGATAGA  
TGGTCAATGACATCAATGTAAAAACTATCACCTCGACTGGCAGCGCATCAGCCGTCATGCTCAATAAAAA  
TACAGTTTTGGCCTTGTGCCATACTCTGCTCACGCAACCTGTGAGTGTGCTCTGATTTCTGGGCGCATCA  
TTGTATTGCGCCGCTCGTCTCACACATAGGCTATAACCCGTCATCTGTGTGGCGGTGGGTTTTACCAAG  
GTTGGTACTTCGCCCCTGCAATCAAGGAAGGTAGTCTGGCATGGTCAAGGTTTTATGGAGTAGTGGGG  
GTCGGGTTGTTGCTTTTCCCTGATGAGTCAGGTCAGCCGAGCCGCGCCGCAAGTGGTGCCAGCAGCC  
GCATCAATGTCCGTTTTTATGAGGTCAATGCAACCACTCCGAGCAGCTTGCCCCGGGCGATTGCCAGAG  
TGCTCCCAAGGTGAATGGCAAGCCGTAAGTCTCGGCAAGGCGAGTTATCAGGTGGACTGGCAGCTGGATACC  
GAGCAGTTGCCGGGGCGCTGCCAGCTCAACCGGGTGACGGTGACCACCAACGCCACCGTGTGCTGCCCC  
GCTGGCGTCAGAGCGGAACAGTAACGATCCTGCCCCGACGCTGGGGGGCGGCTGCTCTCCAGCATGTT  
TGACTACGAATCCCGCTTCAAGGAGATGGTGTGCAAGGGGCAATCAGGTGGGTGGCGCTATTGCTGGG  
CTACCCGGACATGCAGATTGCCAGGCGCTGCGCTATGCCGCATGGGCAGCAGGCAAGTGGCGAGCTGAACA  
AAATCAAGGGACGGCTCGACGGATTCCAGCGTCAGACAGGTTACGGCGAACAGCTCGGGGTGCACTGGCC  
CAAGTGAGCGCTATCTCAAGACGCAATAGCCAGCATCGCACGATTTGATAAATAGAATGGCCGCCCGATG  
GGCGGCCATTCTATTTGCTTGCAGAGTCCGGTTCAGACCAGCGCTTTGCCCTTGAGCAGCTTGCCTACCC  
AATAACGGGCCGGGTGGAGCGCTTCCAGCAGATCGGCGGCCAGCGGAGGGGCTCGCCGAGATCTCGCT  
GGCGAGCAGCTCACACAGAGCGGCGCCGAGCAGAGGCCCGTGAGCCGAGTGCCCCAGCATATAGAGG  
CCGGGGTGAAGGGGGTGGCGCTGGGCGTTGTGCTGATCATGCTGCAGCTGCGCATAGTGTATCCGCCAGAC  
CTTGCAATCTGGCCACTGGCCCCACCACCGGCAGGTGATCCCGACTGGCGCAACGCACCCCTACGCGCGC  
CTTGTGGTCTGCTCCTCGGCACGAACTCAAGGCTGCTCTGGTTGCGGCCATAGCTGGCACCAGTGCAGT  
GGTGTATCGTTGTGATTGGCGTGAGGTAGCCATCGTAGCAGAGCACGGTATTGAGCCGGCTCAGGCTGGC  
TGAGGTGCGGCACATGGCTCACCTGACCGCGCACCCGATAGAGCGGCAGTTGCGCAAAGGGGAGTAGTGCT  
GGCAACTGGTGACCCGACGACCACAGATTGGGGGCTGCCAGTGGCGGCCATCCTGGCTTTCTACTT  
GCCAGCCATCGGCCTGCTCGGCAATGGCGCTTACTTGGGTGTGGTACTCCACCTGCAGCAGACCCTGGC  
TTGTGCTTCTTTGATTGCAGCGGGGTGAGATCCGCAGGGCAGAGCCAGCCCCCAGCGGGTAACTGACG  
CCGCTGTGGCCGAGGGCAGGCCAACACCTGCTCTACCTCTGCTGTAGAGAGGGGATGCATCAGTTCGG  
ACGGGAAGGGGCCCTGACTCATCTTGGCCAGCTTGGCTGCCGATTTGTGCTCATAACCGAGCTGGGTTAC  
CCCGCACAGCGCAAAAGCGATGGGATGACGCTCGGCCAACGCCAGCAGCCGTTGGCGGGCATAGCCAAAG  
GCGAGCGAATAGAAGCGTGACAGGGCATCGTCTCGCCGTTAAGCAGTGGATAGAGGGCTCCTTGGCGGT  
TGCCCGAGGCGCCGATGGCCGGTTCGCCATCTGCACACAGCAACGTCACCTTGCAGCCCCGCTCCACCAG  
AGAGAGTGCCGTCATAGCCGAGGCGATGCCGCCGCGATGATCACTACCTCGCCAGCGGCTCCGGCAGGA  
CGGGCATAACCAGGGGGCGATGGTCTGCTGCGGCTGCTTGTGCGGTGCGATCCCCCACCAGCATCTCCCGCT  
TGCTACCGTGGCCCTTACCTTCTTTCATGGCAAACCGGCGCAATCAGGCGCGACGGACAAAACCGGC  
ACAGGTAAAGGTGGCGATGGAGCAATCGGGACGGGCGAGACGAGCGAGACCATCAAACAGCTCCTGTGTC  
CACATCTCCGGGTTCTTGGCCGGGGAGAAACCATCCAGATACCAAGCATCCACCAGCCCCCTTGGCCGGT  
GAGGCACCTGCGGCAGCATATCCTTGATGTGCCAAAACAGAGATCGAGGCGAATGCGGGCCACCCGCAAA  
ATGCAGGCGGTGGCAACCGGAGACCGGCAGCGCCATTTGGGCGACAAGATCCTGACTCAAGTGGCCAAAGT  
TCAGGCCAGGCGGCCAGCGCCTTGGCGAGATCGTCCCGGTCAGAGGGTATTTCTCGAAACTGATGAAGT

GCAGACGGGAGCCGTTGCCGGATTGAGGGCCTGTTCCAGGAAGGCTTGCATTGTCGCCAGAAAAGTTAAG  
GCCTGTGCCGAAACCTGTTTTACCTATCACGAAACTGTCACTATCGTGGTGCGAAAATCGCGCAGGTAGC  
CGGTTTTGCTGCAAAAAGACGTAGCGGGTTTTCACTTAGACCGTTATCATTGGAAAAGTACACATCCCCGA  
AGTCACTGGAGACAGGAGTTCCCGCTTCATTCCAGTCCAATCGGGCATGATGTAAGGATGTTTGACTCAC  
GTTTTTCTCGGCTCGCGTCACAAAATCGCGGGCATTCTACGTGAAAAGCAGACCAGTTTGGCAGCCGAAAG  
CGGGTAGACTTGGCGCCAGTTTTTCCAGACGAGATGAATTAATGAGAAGAGCAGTGATCACCGGTATCGG  
CGTCATCTCCAGTATCGGCAACAACAAGGAAGAAGTGCTGGCCTCCCTGAAAAGCAGGTAAATCCGGCATC  
ACCTATTCCGAGCAGTTCGAGCAGCACAACCTGCGCAGCCGTGTCTGGGGTAACATCAAACCTCGATCCGT  
CTGAACTGATCGACCGTAAAGTCATGCGTTTCATGGGGCAGCCTGCGGCCACGCTACGCTACCTCTCCATGCA  
GCAGGCCATTGAAGATGCCGGTCTGGCGGAAGATCAGGTCTCCAACGAGCGTACCGGCTGGTGGTCCGGT  
TCAGTGGTGCCTCCGGCAAGAACACCTCGGAATCTGTGGACATCGCCCGTGAGAAAAGGGTCAAGCGTG  
TGGGCCCTTACATGGTGCCGCGCACCATGTCTTCCACCCTCTGCTTGCCTCGCGACCCCGTTCCAGAT  
CAAGGGGGTCAACTACTCCATCAGCTCCGCCTGTGCCACCTCTGCCACTGCATCGGTACGCGCTTGAA  
CTGATCCAGCTTGGCAAACAGGATGTGGTCTTCGCCGGTGGCGGTGAAGAGCTGGACTGGTCTCTACCA  
TCCAGTTTTGATGCCATGGGCGCCCTCTCCACCAAGTACAACGACACGCCGGAAAAAGCGTCCCGTACCTA  
TGATGCGAACC GCGACGGTTTTCGTTATCTCCGGTGGCGGGCATTCTGGTGATCGAAGAGCTGGAACAT  
GCGCTGGCCCGTGGCGCTCACATCTATGCCGAGCTGACCGGTTACGGTGCTACCTCCGATGGCTACGACA  
TGGTTCGCGCCGAGCGGTGAAGGTGCGGTGCGTTGCATGAAGATGGCGATGCAGGGTGTGGCAAGGTTGA  
TTACATCAACACCCACGGCACCTCCACTCCGGTGGGTGATACCAAAGAGCTGGAAGCTATCCAGACTCTG  
TTTTGGCGCAACGGTCCCAAGATCTCTGCCACCAAGCGATGACCGGCCATGCGCTGGGCGCTGCGGGCG  
TGCACGAGGCTGTCTACTCCCTGCTGATGATGGAACACGGCTTTATCGCCCCAGCATCAACATCGAGAC  
CCTGGACGAGAAAAGCCGAAGGCCTGCCCATCGTGCGGAGTACGAAGCGGGCCGAACCAACACCGTCA  
TCCAACAGCTTCCGGCTTTGGCGGTACCAACGCCTCCCTGGTGTTCAGCAAGTTCAAAGCTTGATCATCCG  
GTTGATATGAAAAAGCGCCTCAGGGCGCTTTTTTTGTCTTCGGGATCTGCCATCACTCATTGCAGAGCA  
GAGCAGAGCAGAGCAGAGCAGAGCAGAGCAGAGCAGAGCAGAGCAGAGCAGAGCAGAGCAGAGCAGAGCA  
GAGCAGAGCAGAGCAGAGCAGAGCAGATCGACCATGTGGAATAGAGGGAGTGGGTTGGTGGCAGATTTAG  
CGCAGATGGGGGGCACACACCAATGAGCCTGCTCCGCACTTGGGAGAAAAGGCAGATAGCAAGAAGGGAG  
CCTGAGGCTCCCTTTGTTAGCGGTAATGCTGATAGCTGTGGCTAGAACCAGAACCCGATGATAAAGG  
AGCCCGCAAGGGTCAGCATACGTTGGCCACCTGATAGTACCAGGATAGCCGAGCCGGAATGAGAGCT  
GTTGGCTGCCTCGTTGACCACATCCATCGCCGGGGCACAGGTACGGGCACCTGTGATGGCACCAGCAGC  
AGCGCCGGGTTTCATCTTGAGCACCCAGACCCCGAACAGATAGCCAACCAGCACCGGCAAGGTGGTACCA  
GCATGCCGGAGAAGAGCACTACCGTACCCACCTCGCTGAGGTGGTTCGAGGATGCCGCCACCGGCTTTCAG  
ACCCGTACTACCATAAAGACCGCAAGACCGAGATCCTTGGCCAATCTGAGCGCACCGGGCGGCACATAG  
CCGACCGTCCGGTGGTTGGCCCGCAGATAACCCATCAGAATACCAGCCAACAGCAGGCCGACGGCGTTGC  
CGAGACCGAATTCGATCTGACCGAACACCAGCGAAACGGAGCCGATCAGCAGACCGAGTACGAAGAAGGT  
GGTGAAGCCACCAGATCTGTGGTCTGGCTGTGGATGCTGATAAAGCCGATCTTGTGGCCAGCAGTTTG  
ACCCGCTGCTTCTCGCCGCTGATCTGCAGTACGTCGCTTTTTGCAGCATGATGTTGCGATCGAACGGCA  
TCTCGATCTGGGAGCGCACACCCGGTTGAGGAAGCACCCCTTCTCTGTGAGGTTGAGCTCCACCAGATG  
GCGGCCTACCACGGAGTCATTCTTTACCCTATCTCTTCGGTGACGATCTGCAGGTCAAGCAGGTTGCGG  
TCGAACACCTCTTTACCGTTGCGGTAGTTTACATCCAGCTTTTTCGTGGCTCTCGGGATAGCCCACCAGGG  
CGATCTCATCCCCTTCTGAATGACGGCATCGCCATCGGGACTGGCCAGAATGCCGTTGCGGGCGGATCCG  
CTCTACATAGCAGCCGGTATGGGGATAGATGCCGGTCTCCCGCAGGGTACGGCCACCGATCCAGGCTGCC  
AGTTCGGGGCCCACCCGATAGGCGCGGATGATGGGCAGATAGGTCTTGCAGCTCTCGCTGTCGGAGAGAC  
CCCGCTCGCGGGCGATTTTTTGTGCCTCGGTATTGAGGTGAGGGCAGCCAGCGAGGGGAGGTAGCGCAC  
CACCAGCATCAGACCCACCAGACCCACCAGATAGGTACGGGCGTAGCCGATGCCATGTTGTCTAGCACC  
GCCTGCATGTCCGGTCTGATGGGGCAGGTTGAGCAGACCGCTGCGCAAGGCATCCTGGGCACCCACCAGCG  
CCGGGGTCGAGGTGAGGGAACCCGCCAGGATCCCCGCCATGCCCGGCCAGATTGAAGAACTTGGC  
CAGCCCCACAGTCAGCAGCAGGGCGGTGAGCAAGATCACCAAGGTGAGGGTGTAGTGGATGCCGTGCG  
CGCAGGAAGACGCTGAAGAAGTGAGGGCCCCGCTCGATCCCCACACAGAAGATGAACAGCATAAAGCCGA  
CGTTTTTCAAGTGGTGGCTGCAAATTCGAAAACCCATCTGGCCGAACAGCAGGGCGGTAAACAGCACACCTAT  
GGTGTGGCCAATCTGAAAGTTGCCAATTCGAACTTGGCAAGCAGCAGGCCGAAGGCCAATACCACGAAC  
AGCAGCAGGGAGTCGCTTTGATGTAGCAGTGTACGAAATCTATGGTCATGCCCGAAAAACCGAGGAAA  
AAAGTGGGGTCGATATTGTGCCGATCTATCCCCAATAAAGAAGCGCAAGGGATCGATTAATCGGACGTT  
ATCGGACGCTATTTGTGGAACCGGGCGGCGTATAGGGAGACAAGCGGATGAAATCTGGCAATTTTTGCTG  
TAACCGTCGTTGTCAATTAGTGAATCTGCTGCCCGCAGCGAAGTGTCTGGCGCAGGCCGATATTTTA  
GATTCTGCTGTCCGGCCGCTTGGCGGGGATCAGTTTTACGAGATTCAACCGATGGCCGCCATGGTTGGCT  
GAGGGTCAAATCAGCTTGATATTTGCCCGTTGCCCCACAGGGAAAAGGGTTGGCAAAAAGATACCTCTGAA  
AAGTGCCAATAGAGCCTGTACCCCGCTGTTTCTGAGGGGGCAAAAAACAGCATAAAATCAGGTTGGCC  
AGCAAAATGACTCTTCGCCGGGGGCCATCAAGGGCAATCCCGCTCCTGACAGGGCTTGTGCACTTACC  
CACAGAATCTGTGGATAACCCTGTTTATGAAACTTGTTCATCGCCCTGAAAGCCGCGCCAGTACTGGGAT  
GCAAGGGCTGTTCAAAAAATACCGGAAGAAAAATGTTTGTATAAAAAATCAAATAGTTAGGTGCAACAGGA

GAAAACCTCTGTGCGAGCCGGAACGGGTAAACAAAAGGGAGCGTCAGCAGCAAGAAGGATCTTGTGCATTAAA  
ATTGGCAGGAGAGGGGACTAAAGTGGATAAAGTGCACCGAGATGGTGAGGAATTGGCTCCCCGACTGGA  
CTTGAACCAGTGACATACGGATTAACAGTCCGCCGTTCTACCGACTGAACTACGGGGAAACATCAGGCAA  
GGAGGAGCATCATACAGAAGGTGTTTCGAGGTGGTCAAGCCATTTCGCGGGATGATGGCACGGGTGTACCGC  
TGCCAAACCTCGGTTACACTGCTCCTCTGCTGTTTTGTGTGCGGGAGTGTTCATGAGCAAATTTGTTCAAG  
TTAGCCAGCCAGTTTAAACCCGCGGGGATCAGCCCACGGCGATTGCCAACTGCTGGATGGCATCGAGT  
CGGGGCTGGCCCACCAGACCCTGCTCGGGGTGACCGGTTTCGGGCAAGACCTTCACCATGGCCAACGTCAT  
CGCCACCCTGAACCGCCCCGACCATGATCTTGGCTCCCAACAAGACCCTGGCCGCCAGCTCTATGGCGAG  
ATGAAGGAGTTCTTCCCCGACAATGCGGTGGAGTATTTCTGCTCCTACTACGACTACTACCAGCCCCAAG  
CCTATGTGCCGACCACCAGACACCTTTATAGAGAAGGATGCCTCGATCAACGATCACATCGAGCAGATGCC  
ATTGTGCGCCACCAAGGACTGCTGGAGCGGCGGATGTGGTGTGATCGTTCGCTCGGTTGGTGTGATCAACCAGC  
GGGATATCCTGCGCCGTTCTCGCCGAGCTGCAATACACCCGTAACGACATGGCGTTTCAACGCGGCACCTT  
CCGGGTGCGCGGTGAAGTGATCGACATCTACCCTGCCGAATCGGACAAGTTGGCCCTGCGGGTGGAGCTG  
TTTGACGAGGAGGTGGAGCGCTCTCCAGTTCGATCCCTGACCGCGCCATCGAGCAGACGGTAGTGC  
GCTATACAATTTACCCCAAGACCCACTACGCCACCCGCGGAGACCATTCTGGGGGTATCGAGCATAT  
CAAGGAGGAGCTGCGCAGTCCCGCGAGCAACTGTTGTCTCTCAACAAGTTGGTGGAGGAGCAGCGCATC  
AGCCAGCGCACCCAGTTTCGACATGGAGATGATGCAGGAGCTGGGTTACTGCTCCGGCATAGAGAACTACA  
GCCGCTACCTTTCCGGTTCGTGCGCCGGGGAGCCGCGCCACCCTGTTTGACTACCTGCCGGGGATGG  
CTTGCTCATCATCGATGAGTCCACGTCACGGTGCCGAGATCGGCGCCATGTTCAAAGGGGACCCTCC  
CGCAAGGAGACTCTGGTGGAGTACGGCTTCCGGCTCCCTCGGCGCTGGACAACCGGCCACTCAAGTTCG  
ACGAATTTGAAGCGCTGATGCCGCAGACGGTGTGTTGCTCGGCGACTCCCGGCCCTACGAGCTGGAGAA  
GTCCGGCGGGATGTGGTGCAGCAGGTGGTGCGCCCAACCGGCCCTGCTCGATCCGGAGATCGAGGTGCGT  
CCTGTGACTACTCAGGTGGACGATCTGCTCTCCGAGATCCGCAAGCGGGTCCGCCGTCGAGGAACGAGTGC  
TGTTACTACCTGACCAAGCGGATGGCGGAAGACTTGACCGAGTATCTGGCGGAGCACGACGTC AAGGT  
GCGCTATCTCCACTCCGATATTGATACGGTCAACCGGGTGGAGATCATCCGCGATCTGCGCCTTGGCAAG  
TTCGATGTGCTGGTGGGCATCAACCTGCTGCGGGAAGGTCTCGACATGCCGGAAGTGTGCTGGTGGCGA  
TTCTCGATGTCAGATAAAGAGGGCTTCTCTGCGCTCCACTCGTTTCGCTGATCCAGACCATCGGCGCTGCGCA  
GCGTAACTCAACGCGCAAGGTCATTTCTACGCGCATACCATCAACCACTCGATGAAGGTAGCCATTGAG  
GAGACCAGCGCGCCGCGCCTTTCAGCATGCCATAACCTCAAGCATGGGATCACCCCTAAAGGGCTCA  
ACAAATCCATTGGCGATGTGATGGACATGGGGGGCAGCCGCACGGCAGGCAAACCAGGCAAGGGGATGCG  
CAAGGCAGCCGAGCCGCAAGGGGAATACCATGTCCGCTCAGCCAGCGAGATTGCCAAAGAGATCAAGCGG  
ATGGAGGAGCAGATGTTCCAGCATGCCCGGGATCTGGAGTTCGAGCAGGCGGCGGCACCTGCGGGATCAGA  
TCCAGCGGCTGCGCAGCGAGTTGATCGAATCATGAGCCGTAACCGTGGCTGATTTGGCAACGACTTCGT  
CGTCTCTATCAGGGCTTTCCGATCCCTGTACCCCTGGTGGGCGAGGGGCTGGTGTATCCTTATCCTGC  
TCTATGGTATCAGTCCGGTGGATCTTATCCCTGACGTGGTGCCTTGTGTTGGTGGTTCGATGATGTGAC  
CCTGCTGCTGGTGTGCTATGGGGCTGGGAGCGTTGCTTCCCCCGCAGTGGCAGCGATCTGGAACAG  
GCCTCCTAGTTACCTTTTCAACACCACGCTCGACATCACTCTGTGCGCTCCCACCCTCGAAGGAATCGG  
AAAAACGGTTTTCAATTTGAAGGTGGGCGCTGCGGGATGAAAAAGAGGCAGGCTCGGTGATTTGTCGCCCGGA  
TGGCATTGGCGTAGACTCCACGCCGTTCACTTTATGGGTATGGAAAAAATGGATCTGATCCTCTTTGCAA  
TCGACTTTATTCTGCACGTTGACGTGCATTTGAAAGAGCTGTTTCGAGAACTATGGCGTCTGGGTTTACGC  
CATCCTGTTTCTGATCATCTTCTGTGAAACCGGGTGGTAGTGACGCCGTTTCTGCGGGGTGACTCCCTG  
CTGTTTGGCCCGGTTGCGCTTACCGTGGGACGCTGCTGGACGTCCATACCCTGGCGGCCGTTGCTGATCA  
TCGCTGCGGCTGCTGGGCAACGTGGTCAACTACCCATTGGTCACTTCTTCGCGAGCAGCTGTTCCGTAA  
CCCGGACTCCAAAATCTTCCGCCGGGATTATCTGGAGAAGACCCATGCCTTCTATGCCAAGCATGTTGGC  
AAGACCATCATCATCACCCGCTTCTGCAATTGTGCGTACCTTTCGCGGCTTCTGTCAGGATGGGGG  
CCATGACCTATCCGCGCTTTTTGGCGTTCAACCTGGTTGGCGGCCCTGCTGTGGGTACTCTCCTTCGTATA  
TGCCGGCCACTTCTTTGGCAATCTGCCGGTGGTGCCTCACAACCTTTACCCTGCTGATCTTCGGCATCATC  
GGTATCTCCCTGTTGCCATGGTGATTGGCGCGGTCAAGGCCAAGATGGGCCCTGCCAGGGCGTAATCAG  
AAATACGGTCAGCCAGAACGAGAAAGGGGGAGCCATCATGGCTCCCCCTTTTTATCTCCACATGGCCA  
TGACTACTAGTTACAGCAACGCCCTTTACCAGATTGCCGATGGCCACTACGGTGAAGACCAACAGGTAA  
GCGGCGAAGATGACAACCAGCCACTGGGGCATGGAGTAACCGAAGAACTGCCAGGTGATCTGGGCACAAT  
CCCCTTCCGGCATAAAGAGCCAGGGGAGCCACTGATCGAGCGGAGCCAGCTCGGGAAGTCGGCAAACGG  
GCTGCAGACGTTGAACGGGGAGGGGTTAACCTGATAGTCCACATGCTTGAGGGCCAGCTGGAAGCCACGG  
AAGGCACTGTAGCCCCACAGCAACATGGCACTCCAGCGAACATACCCTTATCCGGCGCCACCATGCCGA  
GCAGACCAGCGGCCAACACACCAAGGGTCCGCAACCGTTTCGTAAACACACATCACGCACGGGGAGAGGCC  
CAGCACATGCTGGAAGAAGAGGGGCGCACAACCTCGAGGAACAGGGCTGATGCTGCCAACAGGCCCAAGCC  
AGCCGATGGGCGGCAATACGGCGGAGAACTCGATCATCTCATTGATCTCTCAGAAAAAACAGTGGCTGA  
ATTAGAGCAGAGCGGGGAGAAAAGAAAAGGGCCCTGAAAAGGGCCCTCGGAAACCGTCGCAACGGATTAA  
TGCAGTGCCGGTGTACCCTGGCAGCGCACTCTCCATCACCAGCCATCCGTGCTGATAGAACCACTCGG  
TGGCAGGACCAAGCAGCAATTTCGACAGAGAAAAAGCCGATCAGCCCCAGCACCAGGGTGTAGGGCAGCGC



CATCCAGACCATGCGGCCATAGGAGAGACGCAGCAGCGGCCAATGCCGAGGTGAGCATAAACAGGAAG  
GCGGCCTGACCATTGGGAGTGGCGACCGACGGCAGATTGGTACCTGTGTTGATGGCTACCGCCAGCAGAT  
CGAACTGGGGCGGGTCGATGGCACCATTGAGCATGGCCGTCTTCACCTCATTGATGTAGACGGTGCCGAC  
AAAGACGTTGTCACTGACCATGGAGAGCACCCCGTTGGCCAAATAGAAGAGGGGCCAGCTGGTTCTCCGGT  
TTGGCTGCCAGTACCAGCTGGATCACCGGCTTGAACAGCTGCTGATCGATGATGACGGCGACCACGCTGA  
AGAAGACCGCCAGCAGGGCGGTGAAGGGGAGTGCCTCCTGGAAGGCTTTACCCAGCGAGTGTCTCTCGGT  
GATCCCCTGTCAGGGAGGTGGCCAGCACGATGACCGAGAGGGCCAATCAGACCAACGGCAGCCAGGTGCATG  
GCCAGACCGACGATCAGCCAGACCGCAATCAATGCCTGAACGATCAGCTTCGCCCTTGTCTTGCTGGCTGC  
GTTTTGCCTCTTCGTAGCGGTTGTACTCCTCCATGATGGCGCGCACCGTGTCCGGCAGGCGGGCACCATA  
GCCAAACACAGCGAACTGTCTCCACCAGCAGCAGCTCAGCAGACCGCAGATAAAACGGGGACGGTCCAG  
GGGACATACGAATGGCAAATTCGGCGAAGTTCAGCTCGCTTGCTCGCCGATGATGAGGTTTTGCGGGCT  
CGCCCACCAGGGTGCAGACCCCCACCCAGCGGGTCCGATGGCGGCATGCATCATCAGGCTGCGCAGGAA  
GGCGCGAAAATCATCGAGATCCTGGCGATTGAGCTCGGCGACTTCTTATCATCGGTATGGTCATGGCTG  
TGACCAAACCTCCTTGCCGGACGAGACCTTGTGATAGATAGCGTAAAAAGCCGGTGGCGACGCTGATACCA  
CGGCAATCACGGTCAGGGCATCGAGAAAAGCCGACAGGAAGGCGGACACCAGACAGAAGGAGAGGGAGAG  
CAGGATCTTGAGCGTACGCCGATCAGCAGCTTGGTGAAGACATAGAGCAGCAGCTGCTTCATGAAATAG  
ATGCCTGCCACCATGAACACCAGCAACAACAGCACTTCGATATTGGCGACCAGCTCGTGTGTTGACCTGAT  
CGGCGGAGGTCATGCCGATCAACACGGCTTCGATCGCGAGCAGACCACCCGGTTGCAGGGGGTAGCACTT  
GAGGGCCATGGCCAGGGTGAAGATAAACTCAACGACCAGTAACCAGCCGCAATGAAAGGATCAAGGTGG  
AAGGCAATCGGATTGATCACCAGAAAATAGCAAGATGGCGCTTTTATACCCTGTGGTGCATTGCCAAGA  
AGTTCTTGCGAATGCCTGCCCTAGGCTTATTGGCATGATAATGGGTCTCAACTTTGTTGTTAGGATCTG  
CTTCTATGCAGTCAAGGATGATTGACCTGTGCCTCCCAGTGTGGCCTTTATCTGTCTGATTCCTCGTG  
ATTTTAATCAAAAAGCGTGACGATTATAAATGATAGCCGATGGATCTCTGCCCATGTGTCTGTTTTATAA  
CCACCTTGTCGGGGTTGGCTGGCTCCCTCGTGGCGATTAGATACATATTTCCCAACACTATATTTGCCATA  
TGTGAGCAGAGGACTGACCTTATGCTTGCCAGCCATCATCGCTTTGATATCATTCGTCAGCCTTTTTACG  
CATTACAACAGAGTCAATTCATGGTTATAAAAAGCGCAGAGCCAGCTGGGTTTTGCCGAGGAATACATCAT  
CGAGTCCATTTTGGAACAATCGCTTTCTCCCGATCTATTCTGCCCGCCGAGCGTGAATATCCGAGTTG  
ATCGGGGTGACCGCGGACGACCTTGCAGCAAGTGTCTGAGCAGCAGCTGGCCCGTGTGTTGACCATAC  
AGCATGGCAAGCCGACCAAGGTGAACAATTTCTGGAAACCTCCGGCCTCAATATTTGAGAGAGCTTGGC  
CCGTCTGGATCAGGACAAGGTACCTGATCTGATAGCTCAGCTGCTCTCCGCCCGTACCCATATCTGCACC  
ATCTTTATCCGCGGGGCGATCCGTCAACAATCCGGAACAGGCGCCGAGATCCTGCGTGGCGCCGATGGGG  
TCGAGAACAACGCCAGGCTTATGCCGAGTTTCGATTATCGTCTGCACCACCAGCTGGCGTTTTGCTTCCGG  
CAATCCGATCTATGCTTTGATCCTGAACGGTTTCAAAGGGTTGTACAGCCGGGTTGGCAGCTACTACTTC  
TCCGACAAGCAGGCCCGCAGACCCGAGATGCCTACTACAAGACCTGCTCAATCTGGCGGAGACCAAGA  
ACCACGAAGCCGTGTTTCATGACGGTGCCTCAGTACGGTATCGAGTCCGGCAAGCTGTGGACTCGCCTGCG  
TCAGGACATGCCAAGCGATCTGTGCGACAACCTGATCCCTTGCTGTGCTGTCCAAGAAACGCGCCATTCC  
GCGCGTTTTTTTTATTCTGCCGTGTTTGTGTCTATCCTTGACTGGTGGTGGTAATGTTTTGAACTAAATGG  
ATTTTTGGCCAAAAGCTTGATCCAGCGCAAATGAACCCCTGCATTTATCACTTTGGTGGCATAGGACCCA  
ACCGCTGATTGAGGTCAAATGGAGGCATCAAGAGCGGAGCCAATATCCGCCAGAAGGAGCACACCTTTCA  
CCGGATGAAGGACACAACAATGAGTCTTCTTGAACACACCATCTGGACAGTACTGGGATATGGGGCCATG  
CCCTTTATCTTTCTGAGCGGATTTCGTGGCGGTGGCAGTGACCTGTTGCATGCTGCTGAATGCGTTCCGGG  
TACAGTCCGCCGAGAAGTGTGAGTGCCTTCTCCATGCCGCCAAATGCCAGTCTTCGGACTGGCATTGTTTT  
TTGTGTCTTTTAAAGCACTTATCCCGCAGGGAAGGGGAAATCTTTGGTCAGGATGGTCAAGCTGCCGC  
CGATTTTGATTACACTGGCGCCCGTATTTCCACTCACCTTCTCTTATCAGGTGTTCAAGGTTTTCTAT  
GGCTCTCAAGGCAACCGTATTCAAGGCTCAGATCAGTTTGTCTGATATGGATCGCAATCTGTATCAGGAC  
TTCTCCCTCAGCTGGCGCGCCACCCCTCCGAAACCGATGAGCGGATGATGATCCGGCTGGCGGCCCTTTG  
CCTGGCACGCTGCCGAGCGACTGGAATTCACCAAGGGATTGAGCGCCGATGATGAACCCGAGCTCTGGTG  
CAAGAATACTCGGACGAAAATAGAGCTCTGGATCGAGCTGGGCCAACCCGATGAAAAACGGCTCAAAAAA  
GCCTGCAACCGCGCCCGTCAGGTGGTGTCTATCTCTACGGTGGTTCGTGGTACAGCCGTCTGGTGAAGC  
AGAACCAGGGCAAGCTGAGCCAGCATGGCAACCTCAGCATCATCGAACTCTCCGACAGCCAGACTCTGCC  
GCTCACCGCCATGGTCAGAGCACCATGCAGCTCACCTGCACTATCTCCGATGGTCAGCTCTGGGTGAGT  
AACGGCGCACTGGAAGTACGCTGGATCCGGTGGTGTGATGGGCAAGCCGGCTGCAAACTGTAACGGA  
CGCCGCCCATGTTACAGCGCCCTGCTCAATATCGTCAATTCGGTGTTCGGTGTGGTGGGCTCGGCGCCCT  
CTACGGGCGATTGCGACCGGGGGCTGCGCTCGGTTACGTCAATCGAGCCAATATCGAGCTGTTTACCCCG  
GCGCTGGTCTTCTCCGCGCTGGTCAAGTATCCGCTGGCACTGGCGGAGCATATGCCGCTGATTGCGGCGG  
GGGCGCTGGTTATTCTGTTACCCGGCCTGCTGCTCGCGCTGCTCAAACTCAAAGGGATTGAGCGGGCTGC  
CCTGATCTTGCCCGCCATGTGTAACCTACCACTAAGAATGAAAAACCGGGAGCTGGTGAACAAGTGGG  
AGATGGCGGGACAACTCAGGAATGGTGGGGCTTGTAGCGTGATACGGTTAAACCAAGCCGTTTTGTAGTG  
GTCAACTAAATCCGGACACTTGGTTAGGCCAAACCTCGGCTTTTGTGCGGGTATCCCGTCAATGTGGTG  
ATGTGGACGCCCGCAGTTGTAGTAATTCATCAGGTAATAACTGATATCTCGTTTTGCCCTCGCAAGCTC  
ATGTATCCCATAGCCGGGAGCCACTCTGACTTCAGGCTTCTGAACAACCGTTCCATCGGGGCGTTATCCC

AGCAGTTGCCACGCCGACTCATGCTCTGGGTTATGCGATAACGCCACAGTCGTTGCCGAAATGCCCGACT  
GCCATATTGGCTGCCCTGGTTCGGAGTGAAATAGCGCACCGGATGGGCAACCCCGCTGCTGATAGGCCATC  
TCCAGTGCTTTGATTGCCAATTCTGCATCAGGTTTATCAGACATCGCCCAGCCCACGACCCGCCGGTGT  
GCAGGTCAAGAACCCTGCCAGGTAATGCCAGCGACCACCGGCCAGACGTAGGTGATATCGCCACACCA  
CACCTGATTGGGTTGCTGGACATCAAATTCGCGGGCCAGCAGATTGGGAATGTCCGGTCTTCAGACCGA  
GCGACCTGATAGCGATGAGCGCCCCGGTTGTTTGGATAACCAGATAGGCTTCCTTCATCAGGTTACGTACTT  
TGAATCGACCAATCTGATACCCAGCTCCCGCATCATCGACATCAAGGCACGGCTGCCCGCTGAGTTCCG  
GCTTTCTTTGAACAAACGGCGCAACTCAGAGCGCTGCTGCATACGCTCACGGTTAATCGCCCCCTGCGG  
GCCAGATAATCGTAAAAACAGGAGGTGGGAACATCGAAGGCGCTGCAGACCAGAGTGATGGGGGCTTGCT  
CCCTTAATCGGCTATCAGCGCGTACGTGTGAACCTCGTCCGCCATCAAGAGAGCAGTAGCCATAATGGGAT  
GGTCTGCTCCACCCACCCGCTATGCTGTAGCCAGCATCAAGGAGGCTCATCATGACTCAAGCGCAGATT  
TACATTTACGGGATCGATTTAGGCAAAAATTGGTTTACCTGGTGGCGATGGATCGCATGGGGCATGTAT  
TGACCAAGCAAAAGCTCACGCGTTCACAACTGAAACAGTTTCATTAGCACGACCCACCCCTGTGCGGTGCG  
CTTCGAGGCATGTCTGGTTCGCAATACTGGGGGCGCTGTTTCAACAGGCGGGGTTTCGAACCCAAGATT  
ATCCCTGCCCAATTTGTGAAGCCCTACCTCAAATCAAAACAAGAAATGACTTCAACGATGCTACCGCCATTG  
CCGAGGCTGGTAGCAGAGGTAATATGCGCTGTGTCCCGTTGAAATCTCATGAGCAACTGGCATTGCAAGC  
GACTCATCGCGTCCGTCAGCGTTTTCATCGTCAACGTACCGCCACTGTCAATCAGATGCGAGCGTTGCTG  
CTGGAATATGGGCTCACCGTGCCAGTCGGCAGAAAAGTCTTCGAGCGCTCTCTGCCGACGATCCTTGAAG  
ATGCCGAGAATGGCTTGCCCTGACTTTATCCGCGCCCTGGTATTACGCTGAGAAAACGGTGGCAACAGCT  
GGATATTAGATTGATGACATGAGCCTCATGCTCGGACAAGCCTCAAGCGCATCAGGTTTGTGCCAAAAA  
ATCAGTACCGTCCCGGCATTGGACCGATTGTCTCAACCGCGTTGATTGCCGCGATTGGCAATGGCTCAC  
AATTCAGAAAGCCCGGACCTGTGAGCTTGGTTGGGGCTGGTCCCCAGGCAATACTCAACGGGCGGCAA  
ATCTTCGCTCGGCGGGATCAGTAAGCGTGGCAATAGCTATTTAAGGCAAAATGGTTATTCAAGGCGCCAAA  
GCGCTAAAAATTACATGAAGCGTGACAAATCATCGTTAGGCGAATGGGTCGCTAGGCTGGAGGCTGGCC  
ATCACCATCATGTGGTTCTTATCGCCTTGGCCAACAAGATAATGCGAATTTGCTGGAAAGTACTGACATC  
CGGCAGGGATTACCAACCCTATCCCAACGCAAGCGCAGCCGTTTAAACAGATATAACTCATAACCCGTTTT  
GCGAGCCAAAAACAGATGACAGAAGCGTTACCCACGACGTTGCAGCCTGGCTAAAAAAGCAGTCTCTC  
ATGACTGGTAGCTTATTAGGACGATGACGTCGGATCCCATCAAGGCCAGAGCCGGAAAAACGGCTCACA  
GACAGGCCGGATACATTGACGCAACGACTTCTGGAATCAGTTCAAGCTTGCAAGATAAGGAGCAGACCA  
TACATTTTTTTAGAATGTCTTCTCACGTTGAGCCGGTTGATGCGGGCTTCCAGTCTCGGATTTTTCTGC  
TGCTCAGGAGTTAGCGCTTTGCTGATTGGGGTTGTGCCACTGCGTTCGGATTGAAGCTGCTGAACCCAGC  
GACGAAGTACGGTTTACCAACGTCCAGTGAACGGCTGGCTTCGGGGACTGAATATCCCTGGTCGAGCAC  
CAGGGATGCGGCTTCGAGTTTGAATTCGGCAGTAAATGAGCGACGTAATCTTGTCAATTGAACACCTCAGG  
TCATGGTGGGCGACTGTACCACCTAAAATGGTGCCGAGATGATTAGACCACTACACTACACCAGCAGCCA  
ATTCCAGCCGAAGATGTGGCCTGGCGCGCACCGGGTACTTTGCTTCACCAAGATGGCGAATTTGGTTG  
GCGAGACCTACAGCCGCGCATCGGATGGGGTCTATCGGTTGATCTGCTGTGGTGAATCGCCGTTATAT  
GGTGGTTGCCAGGATGACCCGGCATATGGTCCCAGGACTACAACGCCGTAGCCGCCGACTATCAGGCG  
CCAAAACCCTACCCGCTGGTGGTGGCGTGGCGCCCGAGCCGTTCCCCCTGATTGCCCTGCTCAAGAGGA  
AATAACCATGATCTCTATGCCGAAGGGCTGCGCACAGCTCGCGCCAGCTATTGGCCACGGCCATTGAT  
ACAGGCAGCGGGGCCAGTGCCAAGCTGACCATCTATAACCGGCACCAACCAGGACCCAGGGGCGAGCTACGA  
CTGACCAGCTGGCTCTGGTGGTGTGACGTTTACGCCACCCCTTGCGCCAAGACGATCGCTGGTGGGGTGT  
GACCCTGAAACCCCTTGC CGAACAGATGGCCACTGGCAGCGGCGCACCCACCTGGGGGCGCATTTGTTGAC  
CGGGATGGAGCCTTTGTGGCGGATCTCGATGTGGGGTGGCCGGCAGCGGCGCCGATCTGGAGCTGCCCG  
CAGCGGAGTTTTTTGCCGGTGCCTGATCCGATTAATACCGCCACTATCACTGAACCGTAACCGGGGGG  
CCATATGGCCAGAAAGGACGCCAGCCTGGCGCTGCGTAAGGCTCGCAGCATCAATGGCCAGTTGGAGCTG  
AACCAGTCCGACGTGGTGCCTGGTGGCCTGCTGAATAGTACCAACTTGCCGCCACGCTGAGTGGCGT  
CAGCGGGTCTGGTGTGCTCATCGGTATTGGATGGCGCTCCGCATCGCTCCAGCGCCATGCTGGGCGGATC  
AGTGGTGTGTTGATGCGGTGCTTGGCAGTCATAACCATAGCCGTGGGGAGCTAGTCGGCGCGTTCGTCAAT  
GAATGCACCATGGCCAGCACATCCCGCGCCCCGAGCCTGTGCTCGCCGGGCGATGACCAGAACGTAT  
TCCGAGGCCCTGCCAGTGCAATGGGGGATGAGTGGGAGCGGGCAGATAGCCATTCCCAGGCCCTCAGTAG  
CGAATGGCAGAAGGCCGGTACCGAACGGGCAACCAGCCGCTCCCTGTGGCAGCAGGCGCCGCGCATCAG  
CAGCAGGTGGCCGAGCTGGGCGAGCAGATGCACCAGACGTTTCATGGCCAATCAACAGCGCTTTGCCGAGG  
GGCTGCCGGTTCAGCCAGCAGAACCGCCAGGGCTATGACAGCCTGGCCGAGGCCATGTGGCGAATCAGTC  
TCTGTGGGTTGAGGCGGCGCCGGTTCAGCAGCTGGCGCCTGGTGGGTTTACCAACCCGCCGCGCTTTGAC  
AAGGCTTGGCAGGCTGACCAGTGGCAGGAGGGCATCCCCATCGGTAAGGGGTGGCCGCTCAAGCCTGGC  
ACCACGGCAAGCCGCTGATAGAGGGCTGGCGTGTGCTGGGATGAGGCCATGTTGCCACCTGGGGCAA  
GACGCTGCCACCAGAACCACCAAGCCTCCCATCCGTCCCGATAAGCGGGTGTGCGGCTGGCGTTCCGGG  
CGAAGCGCGACACGGCAGAGCTGGAGTTTGTCTGGCAGGGCAGTGATGCGGCAATCGTCAATCCAAACC  
GGAGGGTTTATCTGGTGGCAATACAGCAAAAGATTGTGCGGGTACGCGATGGGCTCGATATCCCGGCCAC  
AGCGGTGAGCATCGAGCTCGATACTACTCCTGGGCGTGGCAGTTTACGCGCTCAAATTTCCCGTATCGCG  
GCGGCTGCGCTGACCGATGAGGAAGACGTGAGCATTCATATCAACGGTTCAGCAATGGGACTGCGCGTGGC

ATGGTTGGCAATCGAGCCAGAGTTTTGGCCGCGAGTCGGCAACGCTGACGGGTCGCTCTCGTACCGCTTA  
CTTGTACCGACCCATGTATTGGCACAGGCGGTGAGTGAGCCTGCTGCTGCGACCATGGCTCAGCTGGCG  
GCCGCCGTATTGCCGGTGGGTTGGTCGCTGGATTGGCAAGCGGCTGACTGGTTGGTGCCTGCCGGGTTCT  
TTAGCCTGGATAAACCAGACCCCGATCGAGGTGGTCAGGTACCTGGCCGAGGCGCCGGTGGTTTTGTGCT  
GCCACACCAGCGCAACCGCCATCTGGTCATCAAACCGCGTTACCCACAGTGCCATGGCAGCTCGATACT  
GCGGAGGCCGATGTGGCGATCCCCCGCGGATCATTACCACCCTGGGCAGTGACTTCCCTGCCGGGTATG  
CCGCCAACGGGATCTGGGTGAGTGGTGGCCACCAGGGAATCAGTGCGCGGGTGGTACGCCAGGGGACGGC  
TGGCGAGCAACAAGCGCCGACCATCACCCACCCGCTGGTATGTGATGTGACGGCCGCCGTGCCCTGGGT  
GTGGTGGGGTGGCCAAGACCATGCCAAGCGTACCCAGACCATTGAGCTGCCGTTGTCTACTGATAACCG  
GCTTGATCTTGCCGGTGGCTGCTGCTGCGCGTGGACGGGTGAAAGGGTTACAACCGGGGCGTCAGGCTCTC  
TGCTGCGCTGCAGAACAGGGCCATGACGGTGCGCCAGCAACTGAGTGTGGAGCGATTTGTATGAACCTGT  
TTAAGCGATTCCCTTGAGCTGGTACCGGGCGTATCCCTTGCTGGTTGGTACCGTGACCCGAGTAGGTAC  
CACGACCACCACTCTCACCGCTTGGCGGGTGAACGGTCACAGTACGGGGCACTGGGGTAGCCATTGGC  
AAGAAGCGTTTTTACAGGGGAGGGGAGCTGGCAGGAGAGGCGCCGGATTTACCGACCTATGAGATAGAGG  
TTTAATGCCGGTTTTAACCTGCTTATCAAACCTGGGCGATTCCGGTGCCACCAAGTTTGATAAACTACTGGG  
CCGGTAGCTTTTTCATTTTCCCGCAAGTCTTTTTCATTTTCGGCGGGGCTACATCAAGTGCAACCTGC  
TCTATCTGCTGGCGGGGGATTGTGCTGCTGCTGGCGATCTGGCTGTTGCCGCTCAAGACGGAGTGGAT  
CCCGCTGTTGATGTTGTGCGTTTTCTTGCCCCCTGCGGTCTTGAATTACATGCTCTGCGAGCAGTATCAC  
TGCCAGCCGGACAAGGTGGCCAGTATCGTGCTCGGCGCAATGCCCTCTCTGTACTGGTATCCCGCTGG  
CGGTCTGGTTGGCACTTCATCTGCCCCGCTAAGTCAGATTGCATCGCTGCGGCTCTTCTCGTGAAACGG  
TTCGTACCAAATCATTGCCTCCGTGATACATCTGTGCTCCCCGTATCCGGCCCTGAGCCCCAGTGCTAAC  
GGCGACAGCTATAGTATGAAAAAGAGCTGACTGACACTGTTTTAACCAATGCCAGTGAGGGAAACCGGATG  
GGACAAGTGAGCAATCTGATCCTGTGGGGCAGGCAAAATCGCGCTATGACCCGGCATTGCCCTACCGGTT  
ATGACTGGCGCAGACACCGCCGTTTTATCCTCAGTGGCGGTGGTTACAAGGCAGAAATGCAGCCGTCGCAA  
CTGGTTTTTGGAGTTGCTCAACCCGGTGCCCTATGTGGTAGTGCACGACATAGCCATCGGCGGCATCGGT  
ATTCTGGGGGCCATACGGTTGAAAGAGGGGGATGAGCTAGTGATTGCCATTCCCTCTGGCGAGAACTGC  
GCGGTCTGGTCTGTGAGATCCCAGCCAGACCCACTCTTCCAAACTCTATCGCACCCGGTATTCGCTGCA  
TCGTTATCAACCGCCGAGCTGTTTTGCTGCTGCGCAAGTTACATTCAGCCGCAAGATAAAGCGGATTTTC  
GACCATGAGTCCCAAGCTTGAACAGGTACCGCGCCGCTGAGCCAGATGCCATTTCAAGTGGCTGTTTTTC  
CCACCTTCAGCATGATTTGTGATGGATTCCACAGATCAGCAGGCTTGGCTGTCCCGAGTGGTTTTATCT  
TGCTGCATGTGTTTTCATCTTCATGTTTTTATTGAATTTTTATCTGTGCCTCTGAAGTCACGGAGGATACG  
GATCATTTTTCCCTTTTTCGTGATCCCCCGAAGTAGTTCCCCCTGATATCCCTTAGTATCTGGCCAGCAT  
GACTCCCTTTCCGGGGAGGATAACAAGAACAAGGAATGATGGATGAGATCCGTGAGCAACCAGTGTC  
TGTTGATGCAGATCCAGCCGACCATCTTGCGCTTTGCCAAGATGCTGGCGAGTGTGCTGCAGCTTGAGGT  
CGAAATTGTGGATGCCGATATGGTTCCGGTGGCTGGCACCGGGCCCTATGGCAAGTTCTTCGGACGTCAG  
CTGGAGGGCGACTCCCGCCTGCTGCGCTATGTGATTGATAACCAGCGGAGAAAGATCGTTACCCACACCA  
GTGATGATCCCGTGTGTGACGGTTGTACCTGCAAGGAGAGCTGCCGTGAGCGCGCTTCCCTCGGGGTGCC  
CATCATGGTGGACGAGCGCTGCATCGGGGTGATCAGTTTGGTGGCTTTCAGCGACGAGCAGCAGGCGCGC  
CTCAACAACAATCTGCAGGATGTGTGCGACTATGTGCGCCACATCTCCACCATCTTTGTGGCAAGTTGC  
TCGATTCGCGCGGGCTGTGCGACGGGGTCAACAAGGTGTTCCCTCAATCTGATGACCAACATGGATCAGGG  
CTGCCTGCTGCTCGATGACAAGAGTCAACTGCTCTACGCCAACGAGGCGGCGCTCCATCATCTGGGTTGC  
CAGCAGGAACAGCTGCAGGGGCGCAAGTGGGGATCCGCCCGCTCACCTTCTCCAGCAGGGGCTGAGTG  
GTCATCTTCAGCACATCATCACCTTTGAAGGTCGTGAGGAGCTGATCATCGCCAGCTACACCATGTGCA  
GGGGCAGCAGCTCTTCTGATGGCGTTTACCAGTCCACTCCGGTCAGGTTCAAGAGCCGGATCCGGAT  
GTGCGGATCGATCAGCTGATCGGCGAGAGCAAGCCGATGCGCACCTCAAACGACTGCTGCACCCGATCG  
CCCAGATCCCTCCAGCTGCTGATTTGTGGCGAGAGCGGCAACCGTAAAGAGGTGGTGGCCCGCCGCT  
CCATCGCCTGAGTCCGCGGCAGGACAAGCCGTTTCATCGCCATCAACTGTGCCCATTTCCCGAGCAACTG  
CTGGAGAGCGAGCTGTTTGGCTATGTGAAGGGCTCCTTTACCGGTGCCCTCCAGTGGTGGCAAGCAGGGCC  
TTATTACAGGCGCCCATCAGGGAACCTGTTCCCTTGACGAGATTGGCGACATGCCGCTCACCATGCAGGC  
CAAGCTGCTGCGGGTGGTGGAGCTGCGGGAGGTGACCCCATCGGTGCCAGCCGACCGGTACCGGTAGAT  
ATTGCGATCATCGCCGCACTCACAGCATCTCGATCAATACATCGCCGAAGGGAAGTTTTCGTGAAGATC  
TCTACTATCGCATCAACGTCATCCCGCTCAACCTGCCGCCGCTGCGGGAGCGGGAAGGGGACGTGGAGCT  
GCTGACCCACTACTTCCCTCAACCTGCACACCAGCCGGATCGGTATCGTCTATCCCGTTTTGGCTCCCAG  
GTGATGGCGCAGCTCAAGGGGTATCGCTGGCCGGCAACGTGCGCGAGCTCAGCAACCTCATCGAATATC  
TGGTCAACGTTAGCCAGGCGGGCGAAGTGAATTGAAGCCAGCCTGCTGCCCCCAACATCATCCGCAATCA  
GGAGCCCCATCGCGTGGCGGGCCAGTCGATCCCGGTGACCAATCTGGATGCGTCTTCAATGTGCCTGCC  
ACAGCTCCGCTCGCCGCCACGCCGGAGAACTGCCTGAGCCCGTTCCGGGTGAGAGCGGTCTTGAGAGCA  
TGGAAAAACAGATGATAGAAGAGACCTGCAGCGGCTTGGCAACAAAAAACTGGCCGCACAGGCGCTGGG  
GATTGGGATTGCCACCCTCTATCGCAAGATAAAGAAGTACGAGATTGCCGTGCGAGCTGAAGATCTGGC  
GGCATCTATCCGGCCCGTGTGTTTTATCGGATGACACGGGTTTTTTTTATGGGAACAAGGCTCTGCGCCGT  
TGCCCGGTGGTAGTGAACGGATTGGCGGGCAGGGGAGTGGCTGGACAGAATGCAAAAAGCCCGCTCGA

TGAGCGGGCTTTTTTAATCTGGTGGTCTTAGTGGATTGGAACACCGACCCCCACCATGTCAAGGTGAT  
GCTCTAACCAGCTGAGCTAAGGACGCAGGGTGCACAATGCGACTTTTATTTCTTTATGCAGAAGTGGTGG  
GTTTAATTGGATTGGAACCAACGACCCCTACCATGTCAAGGTAGTGTCTAACCAGCTGAGCTATAAACC  
CACATCTGGAATAACTGCAAAGTATTGAAACTGAATGGTGGTCTTAGTGGATTGGAACACCGACCCCC  
ACCATGTCAAGGTGATGCTCTAACCAGCTGAGCTAAGGACGCATAATCAGTGTCTGTAAATGGTGGTCC  
TAGTGGATTGGAACACCGACCCCCACCATGTCAAGGTGGTGGTCTAACCAGCTGAGCTAAGGACGCATC  
ACAGAAAAAGTGGTGGGTTTAATTGGATTGGAACCAACGACCCCTACCATGTCAAGGTAGTGTCTAACC  
AACTGAGCTATAAACCACCTTTCTCTTACTTCACTACGCCAGCGCTGCTGACGTGGTCCGCATACTACCC  
ATGCCCCCAAGGCTGTCAACAGGCCATACGCACAAAGGAGACTGTTTGCCAGTTCTTGCGCAGCCTGT  
TGATTTTGCAGGCGAGTTGCCGCTTGCCAAGCCCTGTTACTGAGATCGCGACAGGGTCGTGCAGGCTTCC  
GGAGTGGCAAACCGGCATAGATGTAGCGCAATCTCGCCCCAGCATCAGGGCCGCATGGTGGAGCCGA  
CGATAAAGCCGATCCAGAAGCCCTGCGGCCCATCCGTGGCACCAGCCAGTCCGTCAGACCCAGGATCAT  
GCCTGTGGGCAGCCCCAGTCCCCAGTAGGCGACGATGGTGACGTAGAAGATCGCCTGAGTATCCTTGTA  
CCGCGTAGTGGCGGGCGGGCAGCCACCTGCACCGAGTCGGAGATCTGATAGATGGCGGGCAAGAACAGCA  
AAATGGCTGCCAGGACGATCACCTGCTGATCATCGGTATAGATGGAGGCGATCTGCTCGCGCAGCAGCAC  
CGTCATGGCGGCAGTGGCAGCGCAATGGCCATCCCCAGCATCAAGCCGGTGGCAGCCGCCACCCGGGCG  
TGATGGGGCTGCCCTTACCAGTGTGTGGCAACCCGGATGGTGACACCACCCCGATGGAGAGGGGCA  
GCATAAAGACCAGGCTGGAGAAGTTGAGGGCAATCTGGTGACTCGCCACCGTCTCGGCACCGAAGGGGGC  
CAGCATCAGGGCAACCACGGTAAACAGGGTCACTCGCAGAAGATCGCCATGGCGATGGGGAAGCCCAAG  
CGAAACAAGCGCCAGATCCGGCTACCGTTGGGGCGAGCCAGCTGGGAGAAGAGGCGGATCTCGGTGAAGT  
GACGGGAGAGCTTACATAGAGGATCATCGCCAGCAGCATGGCCACAGCACGATGGCCGTGGCCACGCC  
ACAACCCACCCCGCCAGTTTCGGCATGCCGAAGTGGCCGTGAATGAAGATGTAGTTGGCGGGAATATTG  
ACCGCCAGCCCGACAAAGCCGATCACCATGGTGGGCATGGTGTGGGAGAGACCCCTCACTGAAGTTGCGCA  
GCACCTGGAACATCACGAAGGCGGGCAGGCCCCACAGGATGGCGTGCAGATAGCCGGTGGTCTTGCGGGC  
CATCACCGGCTCCACATCCATGAACTGCAACGCCAGCGGGCTGTAATAGAGGGCGATCATCGCCAGTGGG  
GTGACGATCAGTGCCAACCAGAAGCCCTGATGAACGGCCGGACGAATTGCCTCCCGTTTACGGGCGCCAT  
TGAGCTGGAAGACGATGGGGGTGAGCGCCATGATGATCCCTGCACCAGCAGGATCACCGGTAGCCAGAA  
GCTGGAGGCCACCGATACGGCGGGCAGATCGACCCGCATCACCTGACCCGCCATCACGTTATCGACGAAG  
TTCATGGCGACTTGGCCACCTGGGCGACCAGAATGGGGCTGGCTAGACCGGACGAGCTGCTTTCGCCCTCGG  
ACCAATAACGTTGCACTGACACCTCCGAGTGGATCAGATAAGAGTAAAAAAGAGCGGAAATCGGGAAGAG  
CCTTTGCACTTTTCGGACGAAAGTGCAAAGGGTGGGGGAGGCATTCTAGCCTGAAATTCAGCCAGGACGAA  
ATAGTTGCCACCCCAAGGGGCGAGGATCAGGCGTCTTCGTGATCGCTGATCAGCAGGTTGGCTGCGGCATA  
GGCAGCCTGCTCGCGCAGCTCGGCGGGTACCCGCTCATCAGCGGCGACCGCGTTGAGGGCGCGGATAGCG  
GCGGCGATGGCCTTCGGCACATAGCCCTGCTCGCCGGAGCCAATCTGGTTATAGGCGATACGGATCGCTT  
CACAGCACTCATAAACCATCATGATTTGCTTCCCTGAAAGTAAAAAGGCGAGCAAATATAGCGGTTTTTC  
TCCCATTTTGTGAGTCTCGCGGTTGTAATTTGCGGCAAGCCCGTTAGTTTGGTTACCCCTTTTCTCTGTT  
TCGGCCTCTTTGATGCTGCTCTCTTCGCGCAATTCAGTGGCGATCTTTCTGACGCTGTTTGTCTTCTCG  
CCCTGACGCTTAAGGATGGCGCGGACAAATATCTGGTACTCCATGGCTACTCCGTGATGGAAATGGTCTG  
GTTTTCGCTTCTTTGTTCTTTTCTCGGTCTGCTGCTGTTGTTGCCAAGGCGCACCGTGTGCGGCTGCTG  
GCGGTGGATCGCTGGTTATTGCTGCGCTCGCTGCTGTTTCTGGTCTGTGCGCTGGTCTCGGTGATTGCGC  
TGGCCCATGTACCGCTCAACGTCTACACCATCATTTGCCAGCTTGGTTCGCTGGCTTTTCGTGGTGGCGGG  
CGTGATCTTTTTTCAGGGAGCGTCTGACCCGGGCAAGGTAGCGGCCGTGCTGTTGGGGTTGTTTGGCGTG  
CTGGTGGTATCCATCCTGACGGGGGCGACGCGAACCTCTACTATCTGCTGCCACTGGTCATTTGTACTGG  
CCAACACCGGCTACAACCTCATACCAAGCTGGTGGATCCACGTCTGACCACCTCGATATCCTAATCGT  
CACCTGCTTTCATGCTGGGGATGGTGGCAATGGTGCAGCTCTGCTGGCAGCCTGCACTGTGGCGCTTTCCG  
ACGCTTGGCGACTCGCCCTATCTGCTGGCGCTACCGGTGGTACCCTGCTCTCCAATATTGCCCTTATCA  
AGGCGATGCAGTATGCGCAGGCCTCTACTCTGGCGCCTTTCTTCTATTTCCAGATCTTTTTTTCAACCC  
CTGCGGCTATCTGATGTTTGGTGAATGCCGACCCCTCAGTAGTATGGCGGGGTGCTGCTCATCGTGCTG  
GCTGGCATAGTGGTCATCCATTTCCAGCGCCGGACTCGTGTGTTGGCGCTGTCAGAGGCGGGCGGAGCAGG  
TGTGACAGTTTGTATAAAACGAATTGTGTA AAAAGCGGATATGTAAAAAGAGCGGCCCGGGCCGCGAT  
AAAAACAGAGCGTGTACCAGAAAACAAAGAGGTGATGATGTTTACCAGGAAATGTGCAAGGTGTGGCCGAG  
CTGGTCGCCATCGAAGAGAGTGCTTCATTTCTGTAACACGTGATCCGCATGCCAGCCGGGAGTGGGGGG  
AAGGGTTGGCCCTCGGCGCCTCGGTGCTCACAACGGCTGCTGCTTGACCCTCACCCAGGTCGAGGGGGA  
TCTGGTCAGCTTCGATCTGATGCAGGAGACCCCTGCGTCTACCAACCTCGGCCTGTTGCTGGTGGGGGAC  
AAGGTCAATGTGGAGCGGGCCCGCCGCTTTGGCGACGAGATCGGCGGTACGCCATGTCCGGCCACATTA  
TCGGGATGGCGGAAGTGACCTCGGTGATCGACACCCCAACAACCGTCAGGTGTGGTATCGCCTCGCCCC  
CGGGCTGATGAAATATGTGCTGACCAAGGGGTATATCGGCATTTGACGGCATCAGCCTGACCATAGGTGAG  
GTGCGCGAGCGGGAGTTTTGCGTTCACTGATCCCCGAGACCCCTGGCTCGCACCAACTTGGGTTGGGTCA  
AGGCTGGCTGGCAGACCAATATCGAGATCGATCCCCAGACCCAGGCCATCGTTCGATACGGTGGAGCGGGT  
GCTGGCGGCACGCGGGGGTAATTGAAGGGAAAAACGGCTTGGATTCAAGCACCTCATAAGCAAGGGCCTGC  
AGTATGCAGGCCCTTGTATTTCATGTGGTGA AAAATCTCTACTCGATTTTCTGTGACTCACAATCAAAAACA

GCTGCTCGTCTGTCATCCACAAACAACACTGCAAACAGTCGCGGGCTTCGTGCGGGTGAAGCCGCAGGTG  
GATCGGATTGCAACAGGCCATGCAATCTTCGTAACACTCCTGATCACCTGGCTGGCATCCAGCTCGACC  
CGGGTATGGTGGCCGAGTGGGGGCGAGACGATGCGCTTGTGTTACTCGATCATGATAACCTCCTCGG  
GCCCTGGGGCCGCTATCTACCCTGATTCTAGTCGGGCAGCAGGGGGTTAACCCGCGAGCAAACGCACGTT  
TATGACAGAGATCAAGCCTGAGGGATGGCAAGGTGCAACCGGTTGGAGTGGTGTGCGAGAGGAACAA  
TCTGGTTGTGAATGACAGGTGAAAAGGGGGGGATTGCCAACGGTFTTGTCTGGTAATAACAGGGGGCTGGA  
GCCCCCTGCGGATATGAGAACGTGAGCGCAACAAGGCGCCGATAGGCGCTATTTGACCCAGCTGGCCAAC  
ATGTCGGCATTACAGCTCGGCCAGTGAACCGAGCTGGTAGTTGGCGATGGCCAAACGTGGATCACCCACTA  
AAGCAGGATCCGGCACGATCAGCGCAGTCATGGAGGCCGCTTGGCCGCCAGCAGGCCGGTAAAACGTGC  
TTCGATGGCCAGACAATGAACCGGCTCTACCCCAAGTTTCTCGGCAGCGTGGATATAGACATCCGGGTGC  
GGTTTGGCCGAAACGCTCGATTTACGCGGAGTGCACCCGATGAAAGCGATCGCGAATGCCAAGTTTGGCGA  
GCACCGCTTCTACCATCGCAAAGGGGGGAAGAGGTGCCAGACCCACTTTCAGGCCGTTGGCCCTCGATAAG  
GTCGAGCGCTTCCAGCACACCGGCTTTGGCCTGACCTTCGGAGAGGATCAGGGCGTTGACCCGATCCAGA  
ATGCGCTGTACCACCTCTTCTGAGTTGGGCCGCTCCACGGGCGCAGGCGATACCAGTGGGCAACCAGCT  
GATCGATGCGCACGCGGATGGTTCGATTCGCAATCCTCTACCGTGTGGGGGTGACCCAGTTCCGAGAAAAC  
GGCGATCTGGGCCCGTTGCCAAAAGGGTTCCGAGTCGATCAGAACACCATCCATATCGAAGATCACGGCA  
GCTAACATCTTGTACTCCTGACAAATTTGAAGAGGGGATATAAGCCTGACGGGGAAATGCAAAAAGGGGC  
ATTGCCATGCCCTTGCGCCGATCACATCGGCAACGTTTGTFTTGTGTGGCAAAAAGCCCTTAGAA  
CAGTACTTCGACCTTGGCGGCCACGGCTTTGGCTTCTCTACCGCATCCTGGCAATCCTCTGCGCGAGCC  
AGCGCCACGCCAAGACGGCGGCCAGCCGGCGATCTCCGGTTTCCAAAACAGCCGAGCTGGGCACCCGGCA  
CCAGCGCAATGCCTCACCAATCCCTGATAGCGGATATTCTTGCTGTGCCCTTCGCGCAGTACCACGGC  
GGAGGCACTCGGCCCGTACTGGGTGATGGTGGCCAGCCGCGAGCCCAAGATGGCGCGTACGTGCAGGGCG  
AACTCGGAGAGATCTTGCAGATCAGGGTACCATGCCGGTATCGTGGGGACGCGGGCAGACTTTCGCTGA  
ACCACACTTCATCGCCTTTTATAAAGAGCTCGACTCCGAACAGGCGTAACCACCGAGGGCCTCGACCAC  
CTTGGCGGCCACCTCTTTGGAGCGGGCCAGCGCCAGCTCGCTCATCACCTGTGGCTGCCAGGATTCGCGG  
TAGTCGCCATCTTCTGCGGGTGGCCGATAGGGTTCGAGAAGTGAATGCCATCGACGGCGCGTACCCTGA  
GCAGGGTGTCTGTAAGGGAACGAAGCCCTCGACGATCACCTTGCACGGCCGGCGCGGCCGCC  
TTCTTGGCGATCGACTCCAGCTCATCGAGCTTGGCGAGATCGCGCAGTACGCTCTGCCCTTCCCGGAC  
GAGCTCATTACAGGTTTTTACCACGATGGCAGGCGATGGCCTCGACGGCGCGGACAAAACCTCTCCCTGC  
TCTGGGCAAAGCGGTAGGGGGAGGTGGGCAGACCCAGGGTCTCGCGCGCGAGGCGAGGATCCCTTCCCG  
GTTTCATGGTGAGCTGGGTAGCGCGGGCGTTGGGCACTACCTTGACCCCCACTTGCTCAAGGGCAGCCAGG  
GTATCGGTGGCAATCGCTTCAATCTCGGGGATGATGAGGTGCGGGTTTAACTCGGCAACCAGGGCACGCA  
GGGCGTTGCCATCGAGCATGTCCAGCACGTGGGCTGCGTGGGCCACCTGCATGGCGGGGGCGTTGGCATA  
GCGGTGCGCGCGATCACTTCGATCCCGAACCGTTGCAACTCGATGGCGACCTCCTTGCCAAGTTCGCGG  
GAGCCCAGCAGCAGGGCACGGGTGGCGCCGGGGCGGGTTGCGGTTCCAAACATACGATCTCTCCTGATGT  
CGATGGTCAATTGTTGATGATCGCTATCGCATGAATAGCGGACAAAAAAGAGGCACGCATGGCGTACCTC  
AGGAAACGGGTTTGTGAGCGCGCTGCTCCAGATGGGTGAGCAAGGTAATGGCGCAATGATGATGGCGGC  
GCCAAGCCACAGACGGCCGGGGGGCGCCAGCCAAATACCAGCCAGCTGCCAGCACGTTTCATCGGCAGC  
TTGGCAAATCGAAAGGCTGCACGAAGGAGGCTCCGCCACGCTGTAGGCGCGAGCGATGGACATGTGCG  
CGAGTGCCGACAGAATGCCCGCTGCCGCCAGCAGCAGCCATTGTGGCTCGGTGGGGCACTGCCACTCCGG  
CAGTGCCAGCATGACGTTGAACGGGGTACTGAAGATAAGCAGATACACCACTATGGTGTGGGATGATTTCG  
TTGGCTGCCTGATAGCGCACCATCAGGGAGTAGCCGGCCAGAACAGCGCCGCGCCACCCGGCAGTAGGG  
AGGCCAGTTGAATTGCTCAGTCCAGGGGGCAGGATCAGCATGGCGCCGGCAAAGCCCGCCAGGGTGGC  
CAGAATGCGGGTGCGGCTCACCTGCTCCTTGAGCAGCAGCGCGGAGCCAGGGTGGCAAACAGCGCGGAG  
GTCATCAGCAGGGCGATCCCTGCCAGATAGGGACGGGGTACGCCAGTGGCCAGAGCCAGAGCTGGATGC  
CGATCACCGCAACAATACCCGCAACAGGTGCAACCGGAACGATGTTGGTCAACAGGATGGCGCAGGCC  
ATGGCGAACAGCCAGGGCAGCAGGCAGATCAGGGCGATCAGGTATTGATGAAAAGCAGACTTGGGTGAG  
GGGAGGCCAAGCTTGAAGCTGACATACTGGCTCAGGCTGTTGACGGCGCGAAGCAGAGTCTGCCACCA  
TCATCCAGACTGCACCGGCCAAAGGAGAGTGCCTGCGCGAGGGTATCATGGGATCCGGGTGCTGGAAAA  
AAGTGGCGGGATCATAACGGCAATCGTTTTGTTCTGCCAAGGGTTGAAGCGCGGGCCGAGGGCTGGCTGG  
CGAGGAAGTGGCCTTGATCAAAAATTTGAACAAGTTGAGCATCTATTTTCGCTATCAGCAAATAAGCG  
CAATGTTTAGAGTGACCTCCATCGACAGCAACGCTGTTCAACCGACAACCAAATGGAGTTTCACCATGGC  
CAATATCCTCGTACTCAAATCCAGCATCCTGGGTCAATATTCCAAATCCAACGCCCTGATCGACGGCTTC  
CTGGCTGACCATCAGGATGATGCCGTACCGTGCCTGATCTGGCTGCCCTCAACCTGCCGGTGTGGATG  
GCGAGCTGGCCTCCGGCCTGCGCGGTGGTGATAACCTGAGTGAGCGTCAGTTGGCGGTGATCGCCAGTC  
TGACGAGCTGATCGCCGAGCTCAAAGCGAGCGACTTGGTGGTGGATTGCGGGCCCCATGTACAACCTCAAC  
ATCCCGACCCAGCTGAAAAACTGGATCGATCTGGTGGCTCGTGTGGCGTCACCTTCCGCTATACCGAGA  
CCGGTCCGGTCCGGTCTGGTTGAAAATACCCGTGCGCTGGTGTATCAGCCCCGTGGCGGCATGCACGTTGG  
CAGTGCCACCGATCTGGTCACTCCCTACATGCGTACCGTGTCTGGTTTCATCGGTATCAAAGAGGTGGAT  
TTCATCTACCGCGAGGGGATGGGTATGGGTCCGGATGCCAGAGCAAGGGGATGGAAGCGGCCAAAGCGC  
AGCTTGAGGCTCTGGCTATCTAAGGGCTCTCTATAAGGGCTCTCTATCCTGTCAGGGGTTATCTCTTC

AAGGGGTTGCCCGCCAGATAACCACAACGCAGCCATCAGGCTGCGTTTGTTTTTTGGCTAGATATGATTGC  
GACAGACGTTGCTGCTGCAGAGAGCATCGCGGCAAGCGGTGCGTATAGACGTTCCGGCGGAGTCACTACT  
CCATCATAAAGCGGGCGACAACCCGCGCACCAGCAGCAGCGCCACCCTGACCAGCAGGCCAAGCAAGAGGGT  
GGTCAGCCACTGTTGCGTACTTTGCGGCAAGTGGGGCGTGAAGAGGCTGATCATCAACAGGGTACAGAGC  
GTGATCAACAGGCTCTGTGCGGGTCATCAATATCATGGGGTCATCCTTGGTTTGTCTTACCTGAAACGATTT  
TAATGCCCTCTTGTGACAGGGTGTATATCCGTGCATCACCCTGTTGGGGCTCTTCAGACCATATCAGGT  
TTTTACCGCAGAGCCAGCGCCATCACTGGCGCTGTGATCCCGATCCCGCTAGCTCTCTTTATCTGAACTG  
TTTCTGCGCTGGCTGGTAGTGAAAATCGCCGCTTGCAGCCGCGCTTCCAGTGTGCTGATCGATCTCC  
TGTGCCTTGCAGAGATCATCCAGATCGTCATAGCGATCACGCAGTTGCATATTGACGACGCTCAGCAGCA  
TGTTGATGTCCATGGTGGCGAACTTCTTCAAATCCATGATTATTTCTCCCGATCCAGTGATTGCAGCTGC  
TCGATGGCGGGCTGACACTGTGCAGATGCTGGCGGATCGCCTCGCGGGATTGCTCGGCAGATAATCGG  
TCAGGGTATGTTGCCAGCTGCCCGCTTCACTCTTGAGCTGCAGGAAGAGGGCGAGCCCGGCATTGGTGAG  
GGAGACCAGGCTGATGCGTTTGTCTGCTGCTGCTCTCGGTAAGATGATCCCTTTTTTCGACCAGACGG  
CGGATCTCGCGGGAGATGCGCACCTTGTCCATGCCGCTCGCCTCGACCAGCTCTTTCTGGCTGATGGGGT  
AGTTGGGGCCGAGCACCATCATCAGGCGCCACTGCGGCACGGTCAGCTGGTAGCGCTGTTTATAAACTG  
TTCGAAGGTATCCCGTAGCATCTCGGCGGCATGTACCAACTGATAGGGCGGGTAGTGAGCGAGTAACGCT  
ATGATTTTTGACATATTACACCCTGCTGTGACGGCTGCATCAGATGCAGTTTCTTTTGATACTTTGACAT  
TGATGATACGAAACTCAAGCTGATTTGTCTGACCCGGTTGCGATGAAATGTGCGGTGGCGCACGCCCTCA  
AGGAAAAACCGGGTCTGACCGACGGGATTTAAGCCAACGCTGTTCAACCTTTACGCAACCAGATGAGGG  
CGTTCTGCTTGAGCCAGGCCTCACGAGTGTGGATAGCGTAGAGCGCGCCTCGTCGCGGCTGCCCGCTTG  
CCAGCTTTGTGGCTCCTGTTTGGGCAGCTTGCCTGACCCAGCAGGCAGGCCGGAATGTGCGGGTTGGCC  
TCGATGGCGACCAGCAGATGGGGCTTGGCTGCCTCGGCACCCTCGGTAGCAAAGACCATCAGCGCCTTGT  
TATAGAGCAAACCAGCTGGAGGCTTCATCGAAGCGCACACCAGCAGGGCGGCCAACGCCCTGCCAATCCCCTTG  
CAGTGCATAGAGGGTGGAGAGGTTGTAGCGGCACCCAGTTTCATCGGCCATGCAGATTGTCAGCAGCGAC  
ATATACTCCGCTTTGGCCTCGCCAGCTTGCCAAGGCGCAGCAGGCAGTCGGCGCGGCCGGCTCTGGCGG  
CCAGCAGAGGACGCAGCTCGGGGGCACTCCAGCCGTGGCCGGCGATTTGCTGCCAGAAGGCTCCATCAAA  
GAGCGAGTGGCATGGCGGATGATCTTCTCGAACCAGCCGAGGCGGGCCTGATGATCGCGGCAGCTGTGCG  
GCCAGCTCGAACCCAGCTGCCACTGTTGGCCTGCTGCCATTGAGGGCCACATCAGCGCTGGGGCGG  
CCTGATACTGGTTCGAGGTTGAGCAACTGGTTGAGGCGGTTTTCATGTTCTGGCGCTGGCGTTGCGAGAA  
CTCGACAAAGGGGAGTTGCTGCGCGCGGCGCTATAGAGCATCTGGGCCATCTGCTTGTGCGGAAACAGG  
CTCAGCTCTGCGGCCAGACTGAAGCGGTAAGTGGTGGTGGGGCGTTCAAATCCTTCGGCTTGGGGCCAGG  
TGGCAAAAACCCATGCTGAAGCCATAACACCATTGACCGAGGGGGTGGCTCTGTTGGAACACCTGCTCGGG  
GTTATCGCTGGGCAGGCGGCACTGGCTGGGCAGGGCCAGCTGAGCGTCGTCGGCTTGGGATTCCAGCTCG  
GCGATCAGGTTGTTGAGGGCTTCTGCGCTTTTTTTCATCCAACCTCGGCATCCTGTTCCAGCAAACCAGCCA  
GCGGGCGTTGCCAGTCAGGGCTTTCGGCCCCACCAGACGAGCACAGAGAAAACCGTGCAGGGCCGGGTA  
GGTCATGTCTGATCGCTGTGGCTCTGGATCCATTGATTAAGATGGCGGGTACGAGTGGATGGGTTTCATC  
GACAGTTCTCTGGATTTGAACAGCCGCGAAGTCTACCTAAAAGTGGGGTTATTTGCAGCAAATGGCCGC  
CTGTTTGGCGATTTAATCACCATTGGCGGATAAGATAGGGGCGAAAGGGCGGCTCGTGGTGGCTTGGGGA  
CTAGGCCGGATCACCCTCTTGGAGTAACATGCGCGCCCATAGGGGCCATGTTTCAGTTGGCCCATCCGGG  
TAATGAAAAAAGAGAGCACCATGATACAGATTGGCAAGATGAACACCCTCACCGTTGTTGAACTCGAAGA  
CCGTGGCGCCTGGCTTGGCGCCGATGAGTACGGTGAACCTGCTGCTGCCAAAACGTCAACTGCCGGAAGGG  
GTGAAAGAGGGGGATAGCGTGCAGGTCTTCTCTATCTGGATGCCGATTCGAGAGCCGGTATCACCACCG  
ACAAGCCATTTGCCATGGTGGACGAATTTGCCGGTCTGAAAGTGGTCAATGCCAACAGATTGGTGCCTT  
CCTCGACTGGGGCATGAAAAAGGATCTGTTTGTGCCAGCCGCGAGCAGAAACAAGCCGATGCAGGTGGGC  
CACGTTTATCTGGTGGCTCTGCAACTGGATAACGAAGGGCGCATGGTTCGGCACCAGCCGCATCGAGCGTT  
TCCTGACCCCGGGCCGAGCAACTTCAAGGTCGGTGCAGAAAGTACCAGCGCTGCCGGGGGAGCACTCGCC  
CCTTGGCATCAAGGTGATCGTCAACGGTCAAGTATCCCGCATGCTGTTCAAGAACGAGGTGTTTGGCCGG  
GTGATGACCGGTGCGCCGCAAACCGCCTGGGTCAAGCAGGTGCGCGAAGATGGCAAGCTCGATCTGACCC  
TGCAAAAAGCCTGGTCTGGCGCGGGTTGATGATGCCGGTGAACGCATTCTGAGCCGGATGAAAAAGCAGGG  
TGGCACTCTGGCGGTGGGTGACAAGAGCGAACCAGCTCATCTACAAGCTGTTTCAGCATGAGCAAGGGC  
ACCTTCAAGAAGGCATCGGCGGACTCTACAAGCAGGGCAAGATTGTCATCGAAGATAACGCCATCACTC  
TGGTGGCCACAGAGACCGACTCGGCAGTGGATAGCGAATAAGATGCCGAGCCCTGTGTTGGCCTCTGCA  
AGGCGAAAGATGGGCTTTGTCTTGGTTGTGGCCGACCCCTGACCGAGATCGGCCACTGGTGGCTATGGA  
TAGCAAGGCCAGCTGGCGGTGATGGCCGAGCTGGATGGCACGAAAAGTACCACCGCTGTCCGGGTTGT  
GGCGAACCGGCCTATTGCGCCGCTCTGCGGGTGCAGACATTGCGCAGTGTGGTGCAGCCAGTTGCCGG  
TATTACCGATGCAGGAGGCCAGCGCTTGTGGTGGCGCCGCTGTCTGGCCAAGGCCATCGCGGGCGAGGA  
TTAGCAGAGAACAGCAATAAGAGTGCACAGAAAACAAGAAAGGGCGCCGATGGCGCCTTTTTTATGCCTGCT  
GCTGGCGATGCCAGCGCACATGCACTTGTGATCTTCCGTGAGCAGACGGGGCAGCAGGAAGGTGGCGAAGAT  
CACCTCAAACCTCATCTGATGATCCAGCAAACCGACCCACACTTCGACCCAGCGCTCCATATCGACCGGC  
TCACCCAGCTCGGTGACAGTCCGCATTGGGCAGGGTTGCCCTCACGGCGCCACGCTGCTCAAACCTCA  
GGGTGATGTGCACTATTTGTTCCGGGGCCAGCATATCGCGGCGCTGCTCAAGAACTGATCATAGGCCCA

TTTCGACCAGCTGATCCGGGGTACGCTGTTCCATGAAATCACTCCAGATAACATCGAGGTTGCTACTGTAA  
CAATTATTGGCTGTGGCGGCCAGACCAGTGCGCCGGCAAGCCTGGCCTGTCCAAGTTGCCGTTGGGGGA  
GTATGGTTAAGGCGCGGATCATCTGGCAGGGAGTAAGGGGATGAAGCAGCGGGGACGGCGGCAACAGATC  
AAGCGACGGCGCGAGGCCTGGTGGTGGCACTATCTGCCGCTTCACCGCGAGACGGTGGGCGGTATCTGG  
GCCCACCGGAGAAACCCGATGAGCCCTGAGGATCAGTCGGCCTGATGCACCCGATTGAGGGTGTCTGGC  
CCAGTAGCCCCATCTGGCGGGCGGATCCAGACCCGAGCGCTTCTGCACATAGGGTGACGGGGGCTTGACCCG  
ATAGCGCCACGGATTGGGCAGGGCTGCGGCCAGCAGGGATGACTCGTAGCGGGTCAAGCGGCTGGCCGGT  
TTGCCAAAGTAGGTGCGGGCGGGCGCTTCGGCGCCATAGATGCCGGGGCCGAACCCACGATATTGAGAT  
AGACCTCGAGAATGCGTGCCTTGTCCCAACCCAGCTCCATCAGCAGGGTAAACCAGGCCTCCAGCCCCTT  
GCGCAAGAAGCTGCGATCACTCCACATAAAGAGGTTCTTGGCGGTCTGCTGGCTGAGGGTGTGGCACC  
CGCACCCGTTGCTGTGCTGGTTGTGCTTGGTGGCGGCTTGGTGGCAGCTTGCATCCATGTCAAAGCCGTTGTGAT  
CGGCAAAGCGCTGATCCTCGGCGGGGATTACCGCCAGTTGCAGCTCCTTGGAGATGGACTCCAGATCTAC  
CCATTGATGGCGCACCTGGGTGATTTTGGCGGGCGGAAATAGAGCCCGCTCGATACGCCAGCTCCACATC  
GGCGGATCAATAAAAACGCAGCAAGGCGACCGAGCCGACCGAGCAGAGCAGCCGGCCAGCGGATCTTGC  
CTGCCACCTCAACACCCGGCGCCAAACGATGCAGATGCGCGCACGGGGGCCACGGCGTCAGGGTCAGA  
CTCCCACTGATAGTGGCTGGGATCATCGGGATCCGGAATTTATGGGGCAGCCATTCGATGTGGCAGAACT  
TCTCGTCAACACGGCGGGAGAGCAGCATGCGGGCAAACAGGTGCTCATACTCTTGTCTTCTCGTTGCCAAG  
GCCGACCCAGATCTCGGCATAGTCGGTGTGCTCACCGCAAAACCCAGTCCGCTTCCCAGTCATCGGCC  
GGATCGGTTTTCGGCCAGCAGGCCGCGATCGTTGAACTCCTGATTGAAGCGGGCGATCTCCTGCTCCGGCA  
GGTTGTGTCAGAGGCCAGCTCCATAAAGAGTTCGAGGGCGGTATCGAGCAGTTCCCTCGACGCTGTGCATTC  
GTCATTCATAGACATAAAGCGGTTTGTTCAGAAAAGAGAAAAGGTGCCGGCGCAGATCACTGCCTGCGG  
GGCGGGCTATTCTAGCGGTGGTAGACCCCTTGGCGAGATGATGCGAGCCGCTGTGACCTGTTTTTGTG  
CCAATAAAAAACCGGATCCAGTGACAGGATCCGGTCTTCATTTGGGGGAAGGGGTACGCATAGGGCGTCA  
GCTCATCCCTTCTTGTGTCATCGGCGAAGGTGATGTTGAGCTCCAGTACCAGCAGCTCATCACTCTTCTGAT  
CCAGTTGGACGGTTATCTTCTCCGGATCAATGTTGACGTATTTGCGGATCACATCGAGGATATCCTGCTT  
GAGCTGGGGCAGGTAATCCGGCCCCCTCTGGATGAACGCTCGTGAGCAACAATGATCTGCAACCGCTCT  
TTGGCCAGTTGTGCGGTGTTCTGTTTCTTGTGTTGGAACGAAAATAATCCAATAATGACATGTTTAACTCCC  
GAACAGTCGGCTAAAGAAGCCCTTCTTCTCTTCCAGAAAACGAAATTCCTTGGCATCGCCACGAGG  
CGGGACACCGCATCTTCGTAGCCCTGACCCGCTCCAGATCCTTGTCCAGAATGACCGGTTGCGCCGAGT  
TGGAGGCGCGCAGCACCCGCTGGGACTCCGGGATCACCCCGAGCAACGGGATGGCCAAGATCTCCTGCAC  
ATCCTGCACGCTCAGCATGTGCGCCGCGTGTGACGCGGGTCCGGCAGTAGCGGGTCCAGCAGCAGGTGCTCC  
TTGATGGGGTCTTCCGCCAGCTCGGCGCGACGGGACTTGGAGGCCAGGATGCCAAGGATGCGGTGCGGAGT  
CACGCACGGAAGAGACTTCCGGGTTGGTGGTGACGATCGCTTTCATCGGCAAAAATAGAGCGCCATCAGCGC  
GCCTGCCTCGATCCCCGCGGGGAGTGCAGACGATGTAATCGAACTTCATCTCCGCCAGCTGATCCAAG  
ATCTTCTCGACCCCTCACGGGTGAGGGCATCTTGTCCCGGTCTGGGAGGCGGGCAGGATAAACAGAT  
TTTCCGAGCGTTTGTCTTGTGATCAGCGCCTGATTGAGGTTTGTCTCCCATTTGATGACGTTGACGAAGTC  
ATACACCACGCGCCGCTCGCAGCCCATGATGAGATCCAGGTTTCTCAGACCGATGTCAAAGTCAATGACC  
ACTGTCTTGTGACCACGCTGGGCTAAGCCGGTGTCTCAGGGCCGCACTGGTTGTGGTCTTGCCAACGCCAC  
CTTTACCCGATGTAACGACTATGATTGCGGCCATTCTCGCTTCTTGTAACTCTATTTGATACGGTCTAT  
TCGGAGTTGTTTATTGTCAGCCGGACGTTGATACCGGTTGCTGGATCAGGCCTGCCGGCAATGCATCGCTC  
AGCTGGAATGTGCCCGGATGGAGAGCAGCTCGGCCTGTAATTGCTGGCAATAGATCCGGGCTGGGTGT  
TGCCCCGGGCACCGGCAATGGCTCTGCCACGCAGGGTGCCATAAATATGAATGCTGTCATCGGCGAGCAC  
TTCGGCTCCCGGACTGACGGACCCAGCACCACAGCGAGGTGCCGGCGGGTAAATCTGCTGGCCGGAA  
CGAACCGGTCCCACATGTACCTTGTCTCGGGATCAAGGGGGCGGGTTCGGGCTCGGGAACCACCTCAGGG  
CGGCTGGCGCGGGGGCAGGCTCGGGTTCGGTTCGCTCTTGCAGCTCTTGCCCGAGGCCATTACAGCCAG  
TCCCACCGCTTGGCGGCTGTCTTCATATCTTCACTGCGCGCACCCGCTGATGCCTACCAGCACAAAACCT  
TCGGACTCCACCAGCTCCTTGAGCTGTTTCGAAATCGGGAAATATGTTCCAGTCCGGAAACATTGATACCA  
GCGGCGCACAAATTAATAAAGTAGGGTGCCTGGGCCACTTTTTTCGGCCAACAACCTGACGTATCCGCTCAGG  
CTCGCCATCGCTGATATGCAACACAGAAATAGTGAAGGTGGTCCCTTTCAATTTCGTTATCGCGCTCAACC  
ATGAATCTTCCCCGAGGCAGAGATGCTAATCCGTTATTGTTATTCAATTCCCTGATGTTATAGTTTGCCCC  
CATCAGAGGCAATAAACTCGTCGGATTATATCAATTTCCATGTTGTGTGCAGTCTATAAAAGTCGCAAAA  
AAGCCGAGACCTACCTTTTTGTTGAAAAAAGAGAGGATTTCTCCCGGTTCCCGCGCCACTGCTGAGCGC  
ATTCGGGCGTCCCGAGCTGGTGTGATGACCAAGCTGGATCCGGCCAAGCCCTTGGGTCTGGTTGATGTC  
GGCAAGGTGATGGCCGCGCTGACCAACCAGGGTCTACCTGCAGGTGCCACCGCCCCCTGAGAATTTGC  
TGGAGCAGCATAAAGCCAGCCTGAAAAAACCATCCTGAATATCCAGCCCCGTGGTGTGTTCTGCCAAGCG  
GGGCTAATTTCTTGTGACTCTGCATGACGCATTCCAGCCCCGAAAGGTGGCTGCGATTATCCCGTGAC  
AGGATCTGGCCAAATTAACCCCTCCCTTTGGTGTATTTACCTTTTCGCTGTTTAAATAGAAAGTCAATCT  
ACTCCCAACACCATATCCTCAACCTTTGCTGGCGCTCACAAAAATAGCGAGTGGCGGCTACTCATATCCG  
CCATTTCAACGGCTATTGGCTCATTTCATCGATTATTTTCAGCCTTCTACTTGGGCGCTTTTTTGGCCCTCC  
ACTGCGCGATGAGTTATCCATCAAATGGGGTGCAAAGAGGGCGGTGATCACTGCGCTAAAACAGTTTGA  
GTGATGCGCTGTGGCCAAAATGATGAGCTAATCCCTGTTTGTGTGCTTGATTGTTTGCCTGATCACGA

AAGTGCCACATAGATGGCTATCAGCATGTAATTCGCAAGGGTGAGCGGTAACCGCATTGTTGCCAGGCAAG  
GGTATGCCCCAAAGTGGAGGGGATTGAGCTGAGGGGCCATCTCGATATCGATTAGTTGTGAAACCGTGACC  
GGTTCAAGATAGCTAGTAAAGGTTTCATGTAGGGGCGTAATGTCCCTTTCATGCATTGAGAAGAGTTAA  
TCAAGGTATGTAATTAGAGAGGCATTTAGACAAGGCAATCCGCATTGCGGTGGCGTAGCAGGGGTATATC  
CGCGACGCCCTACAGTGAAATGGTTCGGTATGCCGGTATAAGTGCCCGGCATCCCATTCGGGCAATAAAAA  
AGGCGGGATATCCCGCCTTTGTTTCAGATGAGGGTCGTAACCCCTATTTATTCGCAGGCAACCTGCATCAC  
CTTGATGGCCAGACCGCCACGGGAGGTTTCACGGTACTTGGAGTCCATGTCCCTTGCCTGGTGTATGTACATG  
GTCTCGATCACCTTGTCCAGAGAGACGCGCGGCTTGGAGGTACGACGCAGGGCCATACGGGAGGCGTTGA  
CCGCTTTCATGGCTGCGATGGCGTTACGCTCGATGCAAGGCACCTGTACCTGACCGGCAACCGGATCACA  
GGTCAGACCCAGGTTGTGTTCCATGCCGATCTCGGAGCTTCGCAGACGTGCTCCGGGTACCAGCCATC  
AGCTCGGTAAGACCGGCAGCGCCATGGAGCAGGAGACCCACTTCACCTGACAGCCACTTCGGGCGC  
CGGAGATGGATGCGTTCATCTTGTAGAGGATGCCGACGCGCACCGGCAGCCAGATAGAAGCAGGTTGTACTC  
GTCGCGGCCAACCGGCTGGATGAACTTGTGCTAGTAAGCCAGTACGGCCGGAATGATACCGGCAGCGCCG  
TTGGTGGTGCAGTGACCACGCGGCCACCGGCAGCATTCTCTTCACTCACGGCCAGAGCGAACATATTGA  
CCCAGTCAACGATGTTTCATCGGGTTCGCTCGAGAGGTTTTCGTTGGTGTGAGCTGACGGTAGAGCGGTGC  
GGCACGACGGGGTACACGAGTGGGCCGGAGAGAACGCCTTCGGTACGGCAGCCGCGCTCGATACCTTCA  
CGCATGGTGTTCAGATCTTGCCGAACTTCTTGTAGATCTCTTCCGGAGTGTGAAAGCACTTCTCGTTTT  
CCATCATCAGGGCAGAGATGGAGAGACCGGTTTGGCTGCAGTGGGCAACCAGCTCAGCGGCGCTCTTGAA  
CGGATAGCGTACGGACATGTCCCGCTGTGAGCCTTCCGAAAGTCTCTTTCGTCAACGATGAAACCGCCA  
CCGATGGAGTAGTAGGTTGCTGTAAACCACTTCATCTTCAATCAGGGCAGTCAGCTTCATGCCTTTT  
CGTGCAGCGGCAGGGCTTCGTGCTGGAATACCATGGCGTCACGCGGGAAGCTGACGGTGTGGCAGTGCAG  
GCCGATCGGCAGGCGCTCGGTCTGTTCAACACGGGAGATAAACTCGGGGATGGCATCGATATCGACATTT  
TCCGGCAGGTTGCCAGCCAGGCCCATGATGATGGCAGTGTCCGGTATGGTGGCCTTTGCCAGTCCAGGAGA  
GGGAGCCGTAGACATCGACATTTGATCCGGGTTACATCGCGGATCTTGCCTCCGCGCAGCTCGTCAAC  
AAACTGTTTGGCCGCTTTCATCGGGCCAACAGTGTGGGAAGAAGAGGGGCCACACCGATTTTGAAGATA  
TCAAAAACGCTGATCATGTCACTATTACCTCAGGGTAGAAGGGGGCGGCATGCCCACTCACAGAAATTTG  
GGAGATCCATGGAACGCGCTTGTGAGCGCAGGTACAGAACAGATAACCAGTGTGTAACGGCTCCAGAC  
CTAAAAAAGTTGAAATAGATCTATTTTTGTTGTAATCTGAGGCGGAGTATAAAATTTATTTTGTGCTT  
ATCCATTTTGTAAAGCTTTTGCCTATAAAAATACCCGCGATGCGCGGCATTTAGGAACCAAAATGGAGTC  
ATTTGCCGTTTTTTAACAATTCGGTAATGTTAACGGCGAGGCCGCCACGGGCGCTCTCCTTGTATTTGGTC  
TTCATGTGCTTGGCGTCTCCACATGGTCTTGTATCACCTTGTGCGAGCGACACCTTGTGCTCGCCTGTGC  
CGCGCAGGGCGAGGCGGGCGGCATTGATCGCCTTGACCGCCCCCATGGCGTTGCGCTCGATGCAGGGTAC  
CTGCACCAGTCCGCTATAGGATCGCAGGTGAGGCCGAGATTTGTGCTCCATGCCATTTTCGGCGGCGTTC  
TCCACCATGGCCGGGCTGCCACCCAGCAGTTCGGTCACTGCGCCAGCCGCCATGGAGCAGGCGACTCCCA  
CTTCCCCCTGACAGCCACTTCGGCGCCGAGAGGGAGGCGTTCCTTCTTATATAAGATGCCGATGGCAGC  
CGCGGTGAGGAAGTAGCGGATCAGCGTCTCGTCACTCACCTTGTGAACGAAGCGATCGTAGTAGTGCAGC  
ACGGCGGGAATGATGCCCCGAGCGCCATTGGTGGGGCGGTACCACCCGGCCACCGGCGGCGTTCCTTT  
CATTGACGGCCAGCGCAAAGAGATCGACCCACTCCATCACCATCAGCGGATCCTTGTGTAAGTTGGTCTC  
GCAGCTTAACTGGCGGAACAGCCCCGGGGCGCGGCCGGAACCTTGAGGGCGCTGGCAGCACCCCTTCG  
CTTTTGCAGCCTCGCTCGACGCAGCCTTGCATCGCCTGCCAGATCTTGCAGCCCCCGCTTTTATCTGCT  
CATCGCTGCGAAATATCCGCTCATTGGCCAGGATCAGCCCCGAGATGGAGAGGCGCTCTCCTGACAGTG  
GGCCAGCAGTTGGGCGCCGCTGTGCAACGGGTAGGGGACAGGGTGTTCGGCATCGGACTTGGCGGCTCT  
TCTTTGGCGGTGGCAAAGTGGCTCTCTTCAATGATGAAGCCGCCACCGATGGAGTAGTAGGTTGGCTGA  
AGCGCAGGTTTTCTCTTTATCAAAGGCCCGCAGAGTCATGCCGTTGGTGTGGGCCGGAAGGTTTTGCG  
ACGGTTGAAAATGATGGCACCCGTTGCGGGGAAAAATGGCTTGGTTGTTTCGCTGCCAGCTGCAGGTTCTGT  
TCCTTTTCCACTCGAGCCAGAATGGCGGGAATCGCATCGATATCGACCCACTCCGTTCAAAGCCCGACA  
ACCCAGAAATGATCGCCTTGCCAGTGCCGTTGCTCTTTGCCGCTTGGCCAGCGAGCCGTAACACTCCAC  
TTCGACCCGTTGTGATCTGCGGCAGATGGCCTTGTGCTTGGAGCTGCTGAACGAAGGCATAGGAGGCACGC  
ATGGGGCCGACGGTATGGGAAGAGGAGGGGCCAATTCGGATGGAAAAACAGGTCAAACACGCTGATCATGA  
CATCAATCCGGTGTGTTTATGTCTGTTTATTTAGGATTTTTGCCATGGATAGGAAGCGGGGATGTGC  
GGTGTGTGACATGGATACAGATAATGGGGCTGGGGGGCAATAAGGTTGAAGGGGCTGATCCCTTCAA  
CCGGCCTGATCAGTCGAGAAATTCGCACAGATAAGCTGTGGGGGTTTTCACTTCCAGTTTGAAGGAGGAG  
TGACCGGCCACCAGGAAGGATTCACCTGGCTGTAGGTGTGCCACTCATCTTCATCAGCCAGCTGGATGG  
TGAGGGCGCCCTTGCATCTGTCATCCGTTCCGGGGCGGCGGTGTTGAACAGGTAGTCACCGGCGTTCAT  
CACCCCGACGGTTGATTTCTCCCTTTTTGTTGCAAACCGATGGATTTTACATTTCCGTCGAAATACTCG  
TTAACTTTTCAGCATCTTTACATCCCTGTATGTACGTTTGTGCGCCAACTAGCACAATTTTTGCCAGT  
TGTGATGGGGGATGAGGTAATAATCGCCGAGACCGCTTTGAACTTCACTTTTTTCGCAAACCTTATTAATA  
GCCAAGGTTAATGATTTGCTGATTTAAAAACAGCAATTAATGTGAGATAACACGCGCAAACAGGGGAATG  
GGCAGCCGCTCATTCCCTGTTTGGTTAATTCGACTGGGAAAAAGTGTGAATTTTGTACATAAAGGAACA  
TATTGTGTTAACTAAAGGACTCATTAAAAACATCGGCTTCCAGGTTGTGGTGCCTATGGTACTGGGCGCA  
GTGGTGGCGCGTTCATGGGTGAACAAGCCACCGTGTTCGACCCTCGGTACCTGTTTATCCAGCTGA



TCAAGATGCTAGTGATCCCGCTGGTGGCGGTTGCCATCCTCTCCGGCGCCGCAATCTGGGCGCCAGCCC  
GGCTGCGGGCAAGATCGGGGCAGCGACGCTGGCTTTCTTCTCGTGACCTCCGCGTTGGCCGTGTTGCTG  
GCGCTGGTGTATGGGGCAGATCTTCAAGCCGGGTGTCGGGGTCGATTTTCGCTTCCGTTGCCTCCATGTTTG  
GCGGTGACTATGCCGATAAAGGGGGCGTTGCCGGATGCAGTCGCCACCTTGCTTGGCATGATCCCCACCAA  
CGTCTTCAACTCCCTCAACGAAGCGAACATCCTGCAGATCCTGGTGTCTGCATGTTCTCGGCATTGCG  
CTGGCCAAACAGCCGCGGAGCGGGCCAAAGCCACTGGTCGATGGGCTCAATACCCTGGTGGATGCCTTCG  
TCTGGATGATCAACAAGGTGATGATCATCGCGCCGCTCGGGGTGTTCCGGTCTGATGGCGGAAGCCATCGG  
TACCTATGGCTTCGATGTGCTGACCCTGGTACTCAAGCTATTCGTGGTCTATGTGGCTGCCATCCTCATC  
TTCGGCTTCGTGGTCTATCCGCTGCTGGTGTGATGTTCTCCAACACGCCGGTGTGAAGTACCTGTCTG  
CCATGAAGAAGCCGAGATCGTGGCCTTCTCCACCGCTTCTCCATGGCGACCCTGCCGGTCAATATGGA  
GACCTGCGAGCATGATCTGAAAGTGACCAACGCGACCCGCTCCTTCGTGTTGCCGTTGGGTGCCACTATC  
AATATGAGCGGCAACGCCATCTATTACGGTCTGGTCGCCATCTTCTTCGCGCAGGTTTACAACATCGATC  
TGAGCGTCGGTGCCTGGGCGCCATCATTGTGACCTCCACTCTGGGGGCGATCGGTACAGCCGGTGTGCC  
GGGCCAAAGCTTCTGGTGGTTGCCGTGCTGCTGGCGGCCGGGATCCCCATCGAAGGGTTGCCGCTGCTG  
TTCGCGCTGGACCGTCTGTTTCGACATGATCCGCACCTCCCTCAATATCACCGGCGATGCGGCCCTGTGCTG  
TCATTGTTGACCGCTTCAGCCCCGAATATGACCCAGAGCGCTGGAACAAGGCATAACTGCTTTGAGCTGG  
GCTGAGATATAACAGCCTTAAGCTGACACTGCGTAACGCGAGCCCCGCCATGATGGCGGGGGCTTTTTTT  
ATATCTGCCGGACAAGTATCAGAGCAAAGGTGTGCTCAAGAGATTGCTAACGGATGTAGCTGTGTTGAAT  
GGAGAGTACAGGAGGGGAAAACATCAGTCGTGGGCATGGGCCGTATGGCGTCAACCGCCTGTTGTAGAT  
GCCGGGGTAGGGGATTGTCAAACGACGGGTAACAAAAAGGGGAGCCTTGCTCCCTCGGATATGATCTGC  
TGCTGGTTCCTACTCCATCAGGCCATATGGTTAAACCATCCTGGTTACACCCTTGTGGCGAAAGAAACAGC  
GTCAACGTGATGAAATCATATCTATGTTGACCATCTCGGCATTGTCACTGAAAAGCGCCAGTTGGTGGCG  
ATTAACAGACATGGCAAAGAGGGTCCGGTCCGGATTGATGCCTCTCTATCCGGCTCAGAAGTGTGACAGT  
GAGGGCAGAGAGACAGCAACCAGGGTGAACAAACCCGTGAACCGGCAGTAATGACAAACTCTTTCATTT  
TTCTCTCCCTAAGTTGTTGGTTGATGTAGTCAAGATAACCATAACAAGGGGGTAAAGCAAGGATGAAACAA  
GGGTAAAGTTTGTAAAATGATGGATTTTATCAGTGTATGGGTTGAAGTTGTTGTTTTTACATGTTGAGC  
TTATTTTGTACCCATTGCTACTCACCACCCATGAAAGGTCAATCAGTTATATTTATGTTGTTTAAATTC  
AATGCTTATGTGTTTTCTTGGCTTTTGGGTGGGTTTATATAGGGTCTTTAAAAGGGTTTTATAAGT  
TATCCCTCTCATAATGGCATCATTAAAGTCATTAAAGGCTGCAAGAACATGGTTTGACGATTCCTGGCG  
TAGATAGCCCATCCAAAAGAAGTCTATGGAGACAATCTGGTTGCCAGCCCTTGTGCGACCCACTTTTAT  
CAGTCCAGAGTCTCCGCATTTTTTACCACAATACTGGGTTTCATAGGGAGGAGAGCGGTGCATCGGGGGG  
ATACAGAGTGGCAGCTGGCTGTTTTATCACCAACATTTCCCGTGGCTCGGAGTAGACATGGCCGCA  
GCAAGAGTGAAGTGCAGCAATAGAGCAGAGGCGTATTCCTCGGCTGGGCTGGGCTGGGCTGGGCTG  
GGCGCAGCAGCGATCTGCGTGGGCGGTGCACCTGCGTGAGTCATGTGATTGCAATACGAGATCAGAGCC  
GGAGCATGGTTGGGTAAGATATCTGAATCCCTTCAAGATTGAGATATAAAAAGCGGCGTATGACGAG  
GAGGCTGAACAAGCTCGTTTTAGGGTGCACAGAGCACAGGTCAACGCAATCCGGATCGCAGTAATAAAC  
ACATCCACGACGATAACCGAACTCTGTTTCGTAGGCTGATGCCGTTGCTGTGAGGAGGGGAAGGCTAGTG  
ATCAACCAGATGGCGCAAGGGTTGGTAATCAGGCAACCCTGTAGTGAGGGGCACACAACGTGCCGATGCA  
CCCGTTTTTGTAAAGATATTAACAAACCCCTCCGACGGAGGGTTTTTGTATCAACAGCCGTTAAAAGCCG  
CGTGGTTTTAGAACAGGGTGGTGGAGAGGTTGTAAGCTCCTGATCGAACGGACGCTTCATATTTCTCGATG  
CAGTCGATGATGTGCTGGTGTACCAGCTCGTTGCGCTGGATACCAGCGCAGCGACCACCGTGACCAGCCA  
GCAGCTGCTCAACGGCGTAAGCCCCATACGGCTGGACATGATGCGGTCACGGGCAGTCGGGGCACCGCC  
ACGCTGGATGTGGCCCAGGATGGTGGCGCGGGTTTACGACCCGGTCAGGGCTTCGATGCTTTTCGCCAGG  
GCGTTCACGTCCGTAACGTGCTCGCAGATGGTGTGATGCGGTGCTTCTTGCCTTGGCTTCGCCTTCT  
TTATCTGCTTGAGCAGCTTCTCTTTGTGCAAGGCCACTTCCGGCACGATCACATACTCGGCACCACCGGC  
AACCGCGGCAGACATGGCCAGATCGCCACAGTGGCGGCCATGATCTCGACCACGGAGATACGGTGGTGG  
GAGCTGCAGGTGTCGCGCAGGCGGTTCGATGGCGTCAACCACCAGTTCAGGGCGGTATCAAAGCCGATGG  
TGAAGTCCGGTACCGGCATGTGCTTGTGATGGTGGCCGGCAGGCCGATGCAGGGGAAACCCCTCTTCGGT  
CAGCTTCTTGGCACCCATGTAGGAGCCGTACCACCCGATGACGACCAGCGCATCGATACCCTGTTTTTTTC  
AGGTTTTTCGATCGCTTCGGCGCGCACTGCGGGGCTTTTGAAGCAGGGAAACGGGCGGAGCCGAGGAAAG  
TACCACCAGGTTTACCACGTCCGAGACGCTGTGACGCTCCAGCTTGACGATACGATCCTGGTGCAGACC  
GAGGTAGCCATCATAAATACCGTAAACTTCCAGGCCATGATGCAAACCGGCGCAACCACGGCGCAATG  
GCTGCGTTCATACCCGGTGCCTGCCACCACTGGTCAAAACACCAATACGTTTTGATTTGTTTGGTCATGA  
GTGCCTCTGGATCTGAGTTGTCAAATACGAATGTTTAAATAGACAAGCCACTTTTACTATATCGGCTTTC  
ATATGGGATGCGGGGGCCACCATAGGAAAAGCGATACAAGAGAGGGGACGAGCCCTCTCTTTGCCGTAA  
TCAGCGATTACTTGGCAGCGCCAGCGATGATCTGGGAGAAGTCGTCCACTTTCAGGGACGCACCACCGAC  
CAGGCCACCGTGCATGTCCGGCTGACCGAACAGGTCCGGCTGCAGTGGCGCCAGTGACGGAACCGCCATAC  
AGGATCTGTACTTTTGGCAGCAACGGCGGCATCAAAAACCGGCCAGGTAAGTACGGATGTGAGCGTGAACGG  
ACTGAGCGATCTCCGGAGTGGCAGTCTTGGCAGTACCGATGGCCCATACCGGCTCGTAAGCGATAACGGC  
GTTGTTGAAGGAGGCGATAACCGCAACGGTCGATAACGGCTTTCAGCTGGGTCTCAACCACGTTCTTGGTC  
ACGCCGGCTTCGAACTGCTCCAGAGTTTACCAGATGCACAGAACCGGCACCGGCCCTTCTGGATCG

CTTCGTA CTTGGCAGCA ACCACGTCGTCAGTCTCTGCGTGCAGGGTACGACGCTCGCTGTGGCCGACCAG  
AGAGTAGGTGCAACCAAAGGCTTTTCAGCATGGAGGGGGCGTTTTTCGCCGGTGAAGGCACCAGACTCGTGA  
ACGTCAGCGTTCTGGGCACCGTAGGCAATCTTGTGCCAGCGGTCAGTTGCTCAACCAGACCCAAAAAGA  
TAACCGGGCGGCAGACGGCGACTTGCACAGAAGGATGAGCGGCAGCAGCCGGGGTCAAGTCTTTGATCAG  
AGCTTCTACAGAAGCCTTGGTGCCATTCAGTTTCCAGTTACCCATTACCAGGTGCTGTCTCATCTTTGTAT  
ATCTCCTAGGCATTTGATTGCGCGACATTATATGAATTGAACCGAGCCCAAGATAGCTGACCCGGCGGCA  
AATGACGTAATTTTTTTTCGCTTTCTGATCCAAATCAGGAATGAAACGCTTGATCGCTCATTCGTTAAC  
CTGCCCCCGCAAGCGAGCCCACCATACCCCATCCATTCGTGGATGGCAGCTTCGGAATACATCAAATAA  
CGCCCTTTGGGCAAATAACTGTAGAGCGGCTGGGGTACCTGGCTCTGCTTGGCGGTGTAGTCGGTGGGG  
CCGGCACGGCCTTGAGTCCCTGACCCTGATAGAGGGCCATGGCGCGCGCAGATGGGTGGCAGAATGAC  
CAGCGCCACCTCTTTTCCCTTTTCAGATGTCGGCTGATACTGACCGCTCATCATGAGTGTCTTTGTGTTT  
TCAAACAACGTCATTCGCGAACGGGGTATGCCGAGGCTCTCGGCCATCCGAGCGTTGACCTCGGCATTGG  
AGAGGGTATCCCCGACACATAGCCGGAGAACCAGCTCGGCTTCGGGATAGGCCGGGCGAGGCGCAC  
CCCTTCGAGAGTCCGTGCCAGCGAGATATTGTTCTGCCAACTGCGCATAGGCACTGCTGGGTGCTGACA  
TGACCGTTGCCGAGCACCAGATGGCATCGATGTTGGGATGCTGGCTCACCTCGAACGGCGGGAAGGTCT  
GCTCGAGCCCGGGCCAGTTTCGTAGCTCACCGCCGATTCACAGCAGGGCGACCAGCAGCAGCGAGAG  
AGTCGCCAGCAGCTTGCCGGTTTTCTGAAAACGGGTGAACCAGAGCAGCAGCAGGGCGACCAGCAGCAGG  
GAGAGGGAGAAGGGGAGCGGCATCAACAGTTGACCAGCCACTTTTTGAGCACAAACACGGCAGACACTT  
CCTTGAGTTTTTCAGCAAATTCGGGATGTGACAGAATACCTCTCTTTTTTGGGATGGCCACAACCCTGTGG  
CGCTAATGTTGAGTTTCTCCTTGAAGCACGATCAAAGTTTTGACGGGCGCGCCACAAGTTCGCCCCGAA  
CATTTACGACTCCACCAAGGGGCGCATCCGCACCACCATTGTCTGGAGCGACATCGAAGCCTGCCTGGCC  
CGCCTTGGCAACCGTCCGCTGCGCATCCTCGATGCGGGGGCGGTTTTGGCTATTTTGGCCAGAAGCTGG  
CGGCCATGGGCCATCAGGTGGAGCTGTGCGATCTGTGACGAGAAATGCTGGAACGGCCCGCAGCCAGAT  
CGCCGAGAAGGGGCTGGAAGACAAAATCCGTCTCATCCATTGCCCATTCAGGATCTGAAGCAACACGTG  
ACCGGGACCTTTGATCTGGTGTCTGCCATGCGGTGCTGGAGTGGCTTGCCGAGCCGCGCCAGACCTTGC  
TGGGTCTGTTCCCTTTTCGTAATGCCGGGGCATACTGTGCTGCTTTTTTACAACCGTCATGGCTTGTCT  
GTTCCAGAGCCTGGTGGTGGGCAATTTTACTATGTGCGCCTTGGTCTTCGCAAGAAGCGTCAGACAGCG  
CTCACGCCCCACCAATCCCAGCTGCCGGAGCAGGTCTATGACTGGATTGGTTCGCGGGGGGCTGCGCATCA  
TCGGCAAGACCGGGGTGCGGGTGTATCCACGACTATATGCTCACAAGCAGGATCAGGTGGAGAAGTTCGA  
CGATCTGCTGGCCATGGAGCAGCAATATTGCCGTGAGGCTTTTTGTCTCCCTCGGTGCTATATCCAT  
GTGATGGCCAGAAGCCGGCCAGCTGATTGCTCGCTGTTTACGTCATGTGAACCATGTTTTTCGATGCTA  
CCGGATGTAGCCGCGCACGATTTTGCGCCCAATACAACAACGAGATGACAACATCATGATGAGTACAT  
CCCGTACCCTGCCAGAGCGTTCTTTGCCGGAGCTAGTAGGGTGGGTGAGGAGGAGGGGTTGGCGCTGAG  
CCTGCCGACCGACCGGCTGGCCTTTCTGATTGCAATCAAGACCTGTCCGAAGATGAGTCGGACCTGTCCG  
GAAGCGGCGCTGCACGACGCCTTTGGCTATGTGACGAGCGCCTTCGGCCAGATGGACGAGACCCCTCACCG  
GTCGCGCCAACAACGCTATCAACGATCTCATTGCCAGCAGCTGCTGTGCGGTTTTCAACACCGACATGGT  
GGCGGGGGAGAGCCTTACC GCCTGTGCGCCTGGGTGTGAGCATCGTCTGACTTCTTTATGGATCAGCGT  
CAGGTTGACTCCATCAAGCTCTCCATCCTGCTCGAGCACCCTGGCTTCCGAGCTCGACACCGCCCGAAGG  
CGGCGCTTGAGACCAACACCCGCGAGCAGTGGGATGCCGAGGTGCTGCCGCGCCTCACTTTCTCGCTGGA  
AGAGACGCTGGGGCGGATCGATCTCACCCAGCGCGCCATGGATGAGCAGCAGAATCAGGTCAAGAGCGAG  
ATTGCGGCCCTGCTGACCCAGAACTGGGTGATGCCATTACAGCTGCGAAAAGCTGCTGCACGAGACCG  
GCCAGACCCTGCGCGAGCTGCAAGATACTTTGGATGCTGCTGGCCACCGCCTGCAGGCGGGGCTGCTCAA  
CATTCAGGAAGCGGCGCAGGGGCGCAGCATCTGTTCCACGTCGAGGAGCTGACTCACGCCTTGAAGGG  
CGCCTTGACGTCATACCAGCTGGGGTCAAGAGTGCATCGAGCTCTGGTCCCGCTACGACAGACACGTCC  
ACAAATTTATCCGCAACGCCATCGACATGGACAAGAACCGCGCCTTCAGCCAGCGGCTGCGCGAGTCCAT  
CCGCAATTTTCGAGCAACACAACACTGGCAGCTGCGGGTGGCCGAAGAGCCCCGTCTGCTGGAGTGCAGC  
GAAACCATCGCTATCCACGACGAGGAGGTGACCGGTGAGGTGCCCTCGAGATGGAGTACGTCGAGATGG  
TGGACATCAACCAGGAGCTGGCCGAGCGTATCGAGCGCTATCTGGCCCCGTACCCCGAGCAGGGCCAGCA  
GCTGGACTTGGCCGATGTGCTGCGCGAATACCTGCTGGACTACCCGGCCCATGCCACTTCGATGTGGCG  
CGTCTTCTGATCGACCAGGCCGTGCGCCTGGGCCATGCCAGCGGCGAGCGGAGCTGCATCGCCAACCCG  
CATGGAAACCCATTAACCAAGCTGGATCCAAGGTTTCAAGCCTATGTCATTGATCAATACTGAGTTTCCCT  
TGCCGCTGCGCCTTGACAGAGGCGATTGCCAACCCCTTGTTCCTCGCATCGACACCGCCTTGGCCTCCGG  
TCGCCACATCAGTGCCGACGAGTTCGAGCAGCATTCGGCGCTGGTTCGAATATCACAGCAGCTGGAGATC  
TTCTACGGCCGCTATCAGGTGGAGCTGATCAAGGCGCCGAAGGCTTCTTCTATCTGCGTCCGCGCCCGA  
GCTCCGACATCGGCACC ACTGTGCTCTCCGAGCTCGATATGCTGGTGGGCAAGGTGCTCTGCTACCTCTA  
CCTGAGCCCGGATCGTCTCGCTTCGGAAGGGGTATTGCCATGGCCGAGCTGCAAGAAGAGGTGCTGAGC  
CTCGCCGACGAGAAGCAGCTGCTGCGGATGGTCAACAGCCGCTCCGGCGGTACCGATCTCGACAAGAAGA  
AGTTGCTCGAAAAGATCCGTA CTTCCATGCGCCGCTGCGCCGCTTGGCATGATCACCGCCCTTGGCAA  
CGGGGATAAATTCGGGTCAACGAATCGGTGTTCCGTTTTCGCCGCCGACGTGCGTTCCGATGAAGATCCG  
CGCGCCGTTTCACTGCGGATGATCCAGGAGGGTGAAGCCATCTTCCACGACGACGAGATGCCGAGCAGCG  
ACTCGCTCTTTGATGACATCGAGGCGGATCTCGATGAAGAACAACCTGGATCTGGAGGTATAACCGGTGCC

AGGCAAGTTCAAATCCCTGACCATGGTCAACTGGAACGGCTTCTTTGCCCGGACCTTCGATCTCGACCAG  
CTGGTCACCACCCTTTCCGGCGGCAACGGCGCGGGCAAGTCCACCACCATGGCGGCCTTTATCGCGGCGC  
TCATCCCCGACCAGTGCCTGCTGCATTTCCGCAATACCACGGAAGCGGGATCGAGCAGCGCCTCCCGTGA  
CAAGGGGCTCTACGGCAAGCTGCAGCGCGGCCACTGCTACTCACTTCTGGAAAGTGATGAACAGCCGCGAA  
CAGCGGATCTGGGTTCGGCGTGCACCTCGAGCAGGTGGCCAACCGCGACAATAAGGTCAACATCACCCCGT  
TTGCACTGGTGGATGTGCCGGAGAATCTGGCGCCGACCATCTGCTGCTGGAGAAGCTCGATGGCGGCAA  
GGGGCGGGTACGCGCCTTTACCGATCTGAAAGGGGCGGCCGCTGAGCTGGGGGCGCTGAAAGTCGCCAAA  
TTCAATACGGTGACCGACTATCACAACTTCATGTTTCGAGTTCGGCATCACCCGGAAGAAGCTGCGTGATC  
AAAAAGATCGCGGCAAGTTCTATCGCCTGATCGAAGCCTCCCTCTACGGCGGCATCTCCTCGTCCATCAG  
CCGTTCCCTGCGCAATACCTGCTGCCGGAGAATCCGGGGTGCACAAGGCGTTTGCAGACATGGAGGCG  
GCCATCTATGAAAACCGCCGACGCTGGAGGCCATCAAGGAGACCCAGGGTCAGCGGGATCTGTTCAAGA  
ACCTGATCACCGAGACCACCCATTATGTGGCCGCCGACTATGTGCGCAACGCCCGCCGAGAAAGAGCGCCT  
CTCCGAGCTGGCCCTCAAGGCGCGCCAGGAGCTGGCCGACAAGCGCCGATCTGGCCGAAGAGAAGCAG  
CGCGCCATCTATCTGGCCGACGAGGTGGAGCAGCTCACCAACCGTGAGAACTGCTGACCGACGAGCTGG  
AGTCTGCCTCCGAGCATCTGGCCAAGGTGATGGCGGCTGTGAGCTTGCAGAAAGAAGATCGAGATGTACCG  
CGCCGATCTGGCGGATCTCTCTGACAAATTCGAACAGCAGCAGGCAGTAGTGGAGGAGATCCACGGCCAA  
CTGCTGGAAGTGGAAGAGCGCAAGGAGCTGGCACAGGCAGAAGTCGACAGCCTCAAGACCCAGCTGGCCG  
ACTACCAGCAGGCGCTCAATATCCAGCAGACCCGCGCCATCCAGTACCCTCAGGCGGTGCAGGCGCTGGA  
GGCTGCCCCGCGAGCAGTGCAGCTGCCGGGGCTGACCGCCGAACAGGCGAGCGACACCCTGCACCAGTTC  
CGCGCAGCCGAGCAGAGCCTCACAGCCGGGTGCTGGGGGCGCAACAGCAATTGGCGCTGGCCAAGGCGG  
CGGTGGCCGAGCATGAAGCGGCGCTGGCGCTGCTTTTGAGCATCGCCCCGAAACAGTGCGCGAGGCCG  
CTGGCCACCAGCGCAGGCGCTGCTCAAGCGTCACATCGAAGACAAGGCTCGCATTTGCCAGGGGCGAGGG  
CTGCGCGCCGCGCTGGCTCGCCTCGAGAAAAGAGAGTGACAGCCAGAAGAGTCTCTTCAAGTTGCGTGACG  
AGCTGCAGCAGGCTCTGGCCAGCTGATTGCCAGCAGCGATGAGCTGGAGATCTTCTTCAAGCCCAGCG  
CACCCGTCAGGAGGAGCTCTCCGAGCAGCAAGCGGAGGTGAACCAGCGCCGCGCCAGCCTTGAGCATCAG  
GGCTCTCAGCTGGGGCGCGATATCAGCGATCTCACCAAGCTGGCGCCGCGCTGGCTGAAATCGTTTCGAGA  
AGCTCGAGCAGCTGCGCGAGCAGAGCGGTTTCCACTCGCCACTGCCAAGAGCTTTTCGGCCGGTATGCA  
GACAGTCTCGACAAGGAGCGCGAGTTTCGAGCAGGAGAGCAATCGCAATTGCGGCGCAAAAACAGGCGCTG  
GAGCTGCAAAATTCGCAACCTGCAGCTGGGGCGAGGCGGATCCGCGTCTTGGCCAGCCATCGCCGAGC  
AGGTGGGGGGCGTGCTGCTCTCCGATGTCTACGACGACATCTCCATCGACGATGCCCCTTACTACTCCGC  
GCTCTACGGCCCCGCTCGCAGCGCTCTGGTGGTGCTCGACCTTGAGGGCGCCATCGAGCGGCTGAAAAAG  
CTGGAAGATTGCCCGGAAGATATCTACCTGATTTCAGGGCAACCCCGACTCCTTTGACGAGGATCTGGTGG  
AAGCGGACGAGCTGGGAGACCCGTGCTGGTGCACACCAGCAAGCGTCAGGTGCGCTTCTCCCGCTACCC  
CGAGCTGCCGCTGTTTGGTGCAGCCGCCCCGGGAAAAACGGATCGAGCAGCTCGACCTTGAACGCGAAGGG  
CTCATCGAGGGTTACGCCAAGGCCGCTTTTCGAGCAGCAGAAGTACCACCGTCTCTACGGTCACTTCCGCG  
ACTTTATCGGCCAGCATCTGGATATCGCCTTCCGCCCCGACCCGGAAGCCGAAGTGCAGGCCAAACAGGC  
CGAACTGCGCGCGCTGCAAGGGGCCATCGGCGAGTGCAGACAAGCAGCTGAGTGCACAAAGCGGCCGGC  
GCCAGCTGACTCGCCATATCCAGCTGGTGCAGGGGATGCTGCCCTTTGCTCACCTGTTTGGCCGAGACAG  
AGCTGGCGGCCCGCCTCGAGGCGGCTCACGCCGATGTGGAAGCCCTGAAACAGGCCGAAGCCTTTATCGC  
CAAGCACGGCAAGTCGCTGGAAAACTGGAAACCATGGTGCAGGTGCTGCGTCAGGATCCGCAGGATCTT  
GCGGCGCTGCAGGCTGCCTATGATGAGGTGAGCGATCTGCTGGCCGAGCAGAAAACGCCGGTGTACGCC  
TCGATCAGCTGGTGGCCCGCCTGCCGCACTTTGCCTATCAGGATGCACAAGACCTGCTGGGCAAGGCCTC  
CGAGATGAGCGAGCGACTCAAAGAGAAGCTCAAAGCCGCCGAGCTGGCGGCCCGCACCCGCTGGCGAGCAG  
CACAAGCAGATTGCCAGCGCCACACCGAGGCGTTTCAGCTGCGTACCAGCGTGAACCTCAGCGTCCGAGG  
CCAAGCGCCAGACTCTGACCGAGTTTCGAGCAGGAGCTGGCGGCCATGGGGCTGACCTCTCTGATGACAT  
GGAAGAGAAGGCGCGCCCAAGAAAGAGATTGAAGAGCTGCTGATCCGCACCCGTTCCCGTCCGCACC  
AGCGCCGAGGCACAACCTGCAGGTACCAAGCGCGAGATCGAATCCCTCGGTGGTCTGTTCAAGCTCGAAG  
GCAAGGATTACTACAGCGCCCGTAAATCCCTGGTGGGCCACAAGGCGAGCTGGTTCGCGGGTGGTGCAGCT  
GGCGCGGAGACCGACGTCGAGAAGCGCCTCAACAAGCGCGAGCTGGCCTACCTCGACAGCGACGAGCTG  
CGCTCCATGTTCGACAAGGCCCTCGGCGCCCTGCGGGTGGCGGTGGCCACGACGAGGCTCTGCGCGATG  
CGCTGCGACTGTTCGAGGGCAACCGCAGCACCAGCAGAAGGTGGCCTTCTACGTGCAGGCTTACCCTTA  
CCTCAAAGATCGCATTTCGCAACGACATCATCCGCTCCGATGATCCGGTTGAGGCGATCGAGGAGATGGAG  
ATCGAGCTGGCCCGTCTGGCTGACGAGCTCAAGCAGCGGAAACCCATCTGTGCTCTCTTCCACGAGG  
TGGCGGCCAAGATCACCAACATCATCCGCCGCGAGCAGAACCAGCATCCGGGTGCTCAACCAGGGCTTGCA  
GAACATCGCCTTCGGTCTTGTGCGCGGAGTGCGCCTCAACGTCAATATCCGCGAGGCCACACCCGCTCTG  
CTGACCGCGCTGGCCGACCAACCGCCATGCACAACGATCTGTTCCGCCACAAGGAGCTCAGCTTCTCCG  
AGGCGATGGCCAAGCTGTTCCAGCGCCTGAACCCGAGATCGAGCAGGGGGATCGCAGCTATCAGGTGAT  
GGGCGACGTGCTGCTCGACTATCGCAACTATCTGGAGCTGGAGATCGAGGTGCAGCGCGGGGCCGATGGC  
TGGCTGCGGGCCGAGAGCGGTGCGCTCTCCACCGGCGAGGCGATCGGTACCGGTCAGGCCATCCTCTTGA  
TGGTACTGATCAGCTGGGAGGAGGAGTCCCGCCGCTGCGCGGCAAGGATATCGCCCCCTGCCGCTGTT  
GTTCTTCGACGAAGCGGCCCGTCTGGATGGCAAAATCCATCGCCACCCTGTTTCGAGCTGTGCGAGCGGCAG

GATATGCAGCTGCTTATCGCGGGCGCCGAGAACATCAGTCCCGAGAAGGGCACCACCTACAAGCTCATCC  
GCAAGGTGCAGGGCAAGCAGCAGCATGTGCATGTGGTGGGTCTGCGCGGCTTCGGCTTTGCCGACGACAA  
GCTGATTGCCTGAGAAGTCTCTGGCCCATCCCCGACACGGGATGACCGGTAAGTACTAGTTGAAAGGGAGGCAT  
TTGCCTCCCTTTTTACATGGAAGATATGGCAAAGTAGCCGCACCATCGCTGCGGCCCTGACAATAAGGCGA  
AAAGTTGCTTGCGAACATGCCGCCAGTGTACCCGGCCGCATCGAAGATGCAAAAATAGCGCAGAGTGA  
AAAGAAGAGAGGAGAGGGGAAGGTGCAATATATCCAGAAAAGGGCTGCTGTTATCTCTTTGCCCTGCTGTTG  
GCGGCCTGTAGCAGTGGTTATGACGAGAGCCACGGCGGCAGCTGGCGCGGCTATAGCGAGACCGGTTATG  
CCAGCTATTATGCCGACCCTATCACGGTAAAAAGACCGCCAGCGGCGAGCGCTATCGCAACAACCTCAA  
TAGCGCCGCCCATATGGAATTGCCCTTTGGCGCCATGGTGCGGGTACCAACCTCGCCAACGGCAAGAGC  
GTAGTGGTCAAGTCAATGACCCGCGCGCCTTTAAAAACGGGCGTATTATCGATCTCTCCAAATCGGCTT  
TTAGCACCATCGGCAATATTCGCGACGGGATTATCAAAGTAAAAATAGAGGTGCTTAGGCTGGGTGAAC  
CCGTTTATACACGAAAATGGATGTTGATGAATGATATTGGAAGGCTGACATCGACCAGTACGCTTTTCGG  
TAGATAAAGATATAACATTGATATGGATCAATATTTAATTCAGCTAAAAATGGATTTGTTATCAATGGAA  
AAAATCGATGATCGTGATTGATATTTATTTTACTTATCTCGCCTGTTCCGGCCTTACTATGGGGCAAACG  
GAGGGATTAGTGATGATTATCTATGGTAAATATGGTGGTGCAGCCCTGAGAGCTGTTTATCTGATGGTGC  
AGAATAATTATGGGCATGCCACCGCTGGGATATGGCTATTGCTGAAGCATTTGGTGGTGATATCAGTAC  
AGGAAAATTCAAAAATAATCCAAAGGTAACCTTTTTGACTATTTGCAGTCTTGGTTGTATCAGTTGCATC  
ATGCCAGTTTATTATGTAGCTGCGACCAAAACCAGAGCATATGTGTTGGCTGCCATTGATTTATTTGCAC  
ACAAGGATATTACCAAACCGATCAATCCCGAGCAGTTATGGCTGGAGGTGATCTCGGCCTGTAAGAGCGG  
CAAGGTTGTGAAGCATAACAATCAGATGGATGTCATTCTGACACTCTGGTATGCCGGTGTGCTCAATCCC  
GAGTGGGATAGGGATGCCATCAGGATAGATTATCGACGAATATAAAAAAGCCAAGGTAATGAATACCTTG  
GCCATGAAACATCAATTGGTTCTGGTCAGGGATGCACTATCGGAGTGTGCGAATGGCTTGCCATACACCA  
TCAGGTTGGTGGTTTTGACTGTATTTGAGGAGATCTTTCTCTGAGAAGTCCAGAGTCATCGAGAAATCCGT  
GGTGGAAATCATTAAATGGTCATATAATTGCTTTCCGCAATACCGCGCTTGCCCGTCTTGAACCTCGATTTTG  
TTACCCGCTTTGCCTTCAGTGACCACACAGACTGCACGGGGTATACAGTATGAGTTGTAAACAAGTTGAT  
TAGTCTTGTACATAAATCAGATAGCCGCTGGTGCATGAAATTTCCCATTTATCGCTTTTTCTGAATACTTC  
CTGTTTGTAAATACATGGCTACCAGATATTGTTGCTGCGCATTTTGTAGCATCGGCAGCCGGTTCAAAAGTA  
ATGACTTCCGTAAAAGGGTTCCACTGCCGGCCCCCTTTGCCAACTTTGCTACCCTCCTGGCCGGGCTCA  
CATCTACACCACAGCATCGGTGCTTTTCCATGTGCCAACCACTGAGCTAATGGACCAAAAATCCAGACC  
GTTGATAAATAGTGTGACTCTGCGTGAGCGAGCGTGGCAGGTAATTAATGCTATGGGTAAGATAACT  
TTATTCATTGTGATAACTCCATCACTAATAATGACTTGCGAATAAATATGTTTCAGCAAAGTAATTTGTTAT  
AACGCACCAAGGGTGTGGTCAATGATATTTAGTAATGGTGGTTCGTTTTTTGTGATGTATGATTTGCTTTTT  
TCGTGGCTAAATAAATGAATTTGATATAAGACAATGTTGTATTTTTTTCATCGCGCTTCCCTCAGATATAT  
CGTGATAGAGATAAAGGAACATTGACATGATGCGATGATTATATGTC AACGGCGTGAATATTTCACTCA  
GCCCCATCAATTGAAGGCATAGCCACTAACTCTGTGGCACCCCTGACCCCTTTATCGAGATAGAGGCTGC  
TGATAGTTGGCCCTGTGGGTGACAAACATCACCTGATGGCGCTGCCGTGCGAGAGGATAAGGAAATCGCC  
CGCCTGAGCGGGCTCTGCAAGGTGATCTCCTGCTCGGGGGCGGTCAGGCGATCGACATCATCCTTGAAG  
GTGAGGGTGTAAAGAGAACATATGGCGCTCCACTGCTGGCTCATATCAAACACTCCGTTGAAGGTAGTTGC  
TGGCATGGGCACGCGCGGCCGCGCCGATTGGCGCTGTTAGACCAATAGCTGAGATGGGAAAGCGCGTGGTT  
TCAGTCCGGCTGTTTTGCTGAGGTGTGCTCGAGGCGTTTTACATTAAGGCCATCGGTATCAAACGATGGT  
AAAGGGGCGAAAAGGGGATGAAAAAACCGCCAGCTGGCGGTTTTCTTTATGCTGTGGGTCTTACTTCAGG  
GCCTTCTTCAGCTTCTTGATCTTGCTTCATGCTTGGAATTTTCTCAAGACGAGCGGCGATCTTCTTTTT  
TGATCTCTTTCTTGCTTGCTTTGGCCATCGGTGGCGCTCCTTTGCAGTGGGGACACATGAAGTGTGAGT  
TGGGTCTTCCCTTTGACGTCCCAGAGTGCCACAGGGCTCCTTTGTGAACCAGTACTCTGTTGCTTTAATA  
GCCAGCTCGTATAACTGCAAGGGGCTGAGCCAGCGCAGCAGTTGCTGGCTTACCTGCGGGTTGCCGAGC  
AGGGCCATATGGCTGGTGCATAGACAATCAGGGTATGGCCAGGAAGAAAAGCCAGCTGATGGCGCGCCT  
CGCTGTGCTGGCCGAGGGCGCTACGAAGGGGCACCAGCCCATCGCCAATCAGCCGTTGGCCAGCAGGCT  
GCGCTTGGTGGCTGTGGTTCGCGGCGATGGCATAAGCAGTTGACCGCCCGGGCAAGGGGAGTGGCGCGCGT  
GGGTCTGTGAGGGGACTGCGGGGTGGGTGGGGCAACGGCATCGATCACCTTGCCGTGGCGTAAATCCT  
TGATGCCTGCACTGCGTAGCCGCGCCAGCCTGACGAAGGGTTCGCTGTAGGCGGTGGCGGGCAGCAACTG  
CTCCAGCCAGTGACCGCATGTTTCAGAGCGTGCGCCGTGGTGGGGTGTGCCGAGAAAGATCAGGTTGGCA  
AGGCGTGCAGGCCAGGTGAGCCCGCCACGCCGCATGGTGGCAGGCGCTGCGTGAACCAAGTCCCCCA  
TGCTGTAGCCATTATCGTTATCTCTTTGAGCTCTCCCGCCAGTAGGCGAACAGCTCCTCCAGCAACAG  
GGCAAGTAGCTGCCCGTTATGTGCGATAGGCAGGCCCGAGTTGTAGCGCAAGTAAAGAGGCAGATAGCCA  
AGCGCGGGCGCAAGTTGCTCCCCGTGATTGACCGGTTTGCCTTGATGCTCGGCTTCCACTGCAGATTGT  
TCATGCACAGGCCATGGATCATCAGCAGCACCCGTCCCTCGCGGGGTAGATCCTCCGGCATCGCTTGCCA  
ATCGAGGGGCTTGCCCTGATAGCGCAGGGTCATGGGGGTGGCGAGGGCATTTGTGGTGTCTGACCAGCTTG  
TCCCCAACACGCCGTTGAGCGTGGCGATCAGGGCTGCACGTTTCGGGGTTTTCGGGGATCTGGTGGGGCG  
GCGGTGTGGCTGGCAGGCTGCTGAGTAGTTGGTTGATACCGCTGCTTAGGGTGTGGCGGGCCATGTAC  
CCCCTTGTAGACCAGCCCGGTGATCCCGCTGTTTTTCCCTCATCTGTCCTTGAGCCCCATACCACTC  
AGTACCGCTTGATGTACCGCTTCGGTGTATCTTACCGCGGGCGGGCAGGCCAGAGTCAGCAGGTGCGCCA

GCTCGCGGATATCCGAAAGATGCCAGGAAGAGGATGGCGAGGGGTCTGTGGCGTCGCTCATGGCAAGCCC  
TTGTGAAAGCGGGTATCGCGTTGTCGTGCCGCGAAGAGCGCAGTGTGTCTCTATATCAAACCAGCTTGCG  
CCCTTTGTGGCAGGTTTACCAGTAACGGGCCATGCATGGCGGGGTGATAAGAACCCTTGCGAAGCCGG  
TCACGGTAATGACAGGGAAAATCTCCTCTACTTCGTGCATATGAAGCCACATGGAGAGGTGAGGATGTCGC  
TGTTTTGATGAGGTGCGGGTACAGGATTTGTGTGCACGGTTGCTCGATAGCCAGAACGAGAAGGGGTGCAC  
CCTTGAGAGCAGGCATGGCCGCAAGTTGAAAGAGTTGTTGCAGACGAATTGTGGGTTAAGACCTTTTGGG  
CGAAGCGCTCGTCATGTATTAACCGAGGCGGGACGGGCTTATCTGATCAGACAGCTGGCGTTGGTGGCGC  
CCCCGAACCGAACAAGGGTGAGCTGCTGCAACGTTTGGGAGTGAGTTGCCTGCACGGCTCAATCAGGC  
CTGTTTTTATGCCCTCTGGCATGGGGACAGCAAGCATTCGCGGTGAGCATCCCTTGACAGCCACAGCTT  
GCGGACTTGACGCTCACGAAAGATGAGGTGATCCGCATCCGCACCTCGAGCCGCTCTCACTGGTCGATC  
GGCAAGGCCAGCAGCAGCATATGACGGTAATGATGGCATACTGGGAGAGTTGGCGTTGCAGGAGCGGAC  
TCTGGGCACGCTGGCGGCCATCGGCTGGCAGGGGGAGCGGTCATTACGGTGGAGAACAAGGGGGCCTTT  
GTCGACTACCCGCTGCAACCCGGGCAACTGCTGCTCTTTGCTCCCGTTCGCAATACCTCCCTGGCCAAAC  
AGCTGATTCCGCTGCTGCCTGCGGGCGTGCAGTGGGCACATTTTTGGCGATCTCGATCAACGGGGTATCGA  
TATTGCCGTCGAGTTGGCGCGGAGCTAAATCGACCGGCCATGCTCTGGCTTCCCTGTGAGTTGCAACCT  
TATCTGGAGCACTATGCCCGCCTGTTTCGCACCTTTGCAACGGACAGTGGCAAGGTGCCCTGGCGTGTGA  
CGACGCAGGCTGATCAGGTTGATGGTCATGGCAGCCGGCAGGTGTTCCCTGGCTCGATAAACTGATCAC  
AGACGGGACTTGGCTGGAGCAGGAGGTTTTGATTCTGGCCCTCACTGGCGGAGCTGGTCATTGGAAGAG  
ATGGGCAATCAGGGGTGAAACGGGGAGCCTGTGCTCCCGTTATTTCTGTGGTCAGCTGTTTACTTGGCGT  
TGATGGGCCCCCTTGGTGGCGGCATCATTATCGACCCAGCCATCTTACCCCTGATGCGGCGATCCCCCTG  
AATTGTGTAGATGACCATGCCATCCTTGAACACCAGCGGCCATCGGATTTCTTGGCATTGACCTTCTTG  
TCGTTGACCCACACCTGATCCTTGCCATCGATGCGGATATTGGCCACGGTGGCGCCGGTTTGAGGGAAGG  
TGGCGATCCAGTTGCCCGCATAGGGGCTGCCGCTGGTTGCCGCGCCGGAGCATTGCCAACACCGGCAGC  
CGCGTTCTCAGCCTTGGTTTTGTTGATATCGCAGCCATTGAGCTCGCTCACCTGAGTGCAGCCCGAGCGC  
TCCAGCTTCTGCTCATAGCTCAGATTCAGACCGCCCTCCGCCGAGGGGCGGCCGCGCAAATCCCCGCT  
TGGCATTTCGCTTTGGTTTTGTGAATGTACAGCCCTGCGCTCGGTGACCTGGGTGCAGCCGGATCG  
CTCCAGCTGCTCGGCATATTTGGCACTGATGGCGTGGGCAGGGGTGATACCGAGCAGGGTCAGGGTGATG  
AGCAGAGCAGCATTCCTGGACATAGATAATCCCTCAAAGATGTAAGTCATGCAGGTTTATCCGCGCAGTT  
GCGGCAAGTGAACGTCGCGCATCTGAGCATCCGATCAGATGCGCAGCTGGCGTATTCACTGATCCGACC  
TTGGGCCAACCAGCGCCAGCGATGTTGCCGGAAGATAAGGCGAGAGGTGATACGGGAGTGCAGGGGAGGC  
GAGATGGCCGAGACATTTCTGCAGAAGAGGTGGTAACAAAAGAGCAAGTCGCTGCACGGCATTATCATAA  
TGATAACGACAGCCCCGCTGATATCATTTAGCCCTTGAAACTGACCTTTGATGATAAATCTCACCGATG  
CCGAGATATCGCCTCTGATTATTACTCGGCTATTTTATGGCTTGGCTGATCCGCTCACCTTTTTTATT  
GAATAAACCGCTTAAATAGCCGCTGATTTTGTGGGTGGCATCACACACTTTCGCCATTTATTAATATCTG  
CCTGCATTTTATTGGTTTTGGCACGGTTATTGATTGCCTCATATCGACGCTAACCGACGCGCTCACCCACA  
ACCGGGATGCTGGTGACATCGTGAGTAAAGGGGAGCTATCCATATCTCATCCAATGATTGGGGCGAAGC  
ATGAAAGCAGTTAACGAATTAATCAAAGAGATCAGAGCACTCAAATCCAACCTGCATGAAAAAGATTTTC  
TGCTGACCTGGGAGCAAACCCCTCAGGAAGTGGAGCTGGTATTGAAACTGGCCGAATCCCTCAAGACCT  
GCGCGCCGAAAATATCTGCACCAAACCTGTTAACAGCGGGCTCGGTATCTCGGTTTTCCGCGATAACTCC  
ACCCGAACCCGCTTCTCTTACGCTCTGCCCTGAACCTGCTCGGTCTGGCCCAGCAGGATCTGGATGAGG  
GCAAATCCCAGATCGCCCATGGTGAGACCGTCCGTGAAACCGCCAACATGATCTCGTTTTGCGCCGATGC  
CATCGGGATCCGTGACGACATGTTCTCGGTGCCGGTAACGCCTATATGCGCGAAGTGGGTGCGGCACCTG  
GATGAAGGGTTCGAGAAGGGGGTGTGCCCCAGCGTCCGGCGCTGGTCAACCTGCAGTGCAGACATTGATC  
ACCCGACCCAGTCCATGGCTGATCTGGCCTGGTTGCAGGAACACCTTGGCAGCTGGAGAGCCTCAAGGG  
CAAAAAGATTGCCATGACCTGGGCCTACTCCCCGAGCTACGGCAAGCCGCTCTCCGTGCCGAGGGCCTC  
ATCGGCCTGATGACCCGTTTTCCGTATGGACGTGACCTGGCCCATCCGGAAGGGTATGACCTGATCCCGG  
ACGTGATCGAAGTGGCCAAAGAGAATGCCAAGGCCTCCGGCGCAGCTTCCGTGAGGTACCTCCATGGA  
AGAGGCGTTCAAGGATGCCGATATCGTCTATCCCAAGTCTGGGCCCCCTACAAGGTGATGGAGCAGCGC  
ACCGAGTTGCTGCGTGCCAATGACCACGCCGGCTCAAGGAGCTGGAGAAAACACTGCCCTGAGCAGAACG  
CCAAGCACAAGGATTGGCACTGCACCGAGGAGATGATGAAGCTCACCAAGGGGGGCGAGGCGCTCTATAT  
GCACTGCCTGCCGGCTGATATTTCCGGCGTCTCTGCAAAAGAGGGCGAAGTAACCGAAGGGGTATTTCGAG  
AAATACCGTATCGCCACTTACAAAGAGGGGAGCTGGAAGCCCTATATTATCGCCGCCATGATCATGGCC  
GTAAATTTCCGCCCGGCGAGAAACCTGGAATACTGATTAAAGAGGGCGAAAAGCGGGTGAATAAAT  
AGCAGAAGGGCAGGGTGAATATTATCTCTGCCACGCTGTGGAATCCATTATTTGAGTTTTCTCCCCGT  
GGTATCTGAATAACTGATCTCCCGGCGAGGCGAGCTTTTATCAGGTAACGCCAGTGAGGTAAGCATGTC  
CCAATTTTTCGCTGAAGATGGATATTGCCGATAACCGCTTTTTTACCGCCGAGCCATCTCCGCTGTTTTCC  
CGTGTGTAAGCACAAAAGGCTCGCGCTTTTTCAAAAAAACTGGCCGGCTATGAACCGACCCATTGTGCG  
ACCTGAAAGATCTGGCAGCCTATATCGGGGTGAAAAATATATTGGTCAAGGACGAGTCAAAGCGCTTTGG  
TCTCAATGCCTTCAAGATGCTGGGTGGCGTTTATGCCATCGCCAACCTGCTCTGTGAAAAGTACGGGGTG  
GCCATCGAGGATTTCTCCTTCGATCTCATCAAACGCACCATCAAGGAGCCGATGACCTTCGCCACAACCA  
CGGATGGCAACCACGGTTCGCGGCGTGCCTGGGCCGCAAGCAGGTAGGTCAGCATGCGGTGGTCTACAT

GCCCAAGGGCTCGGCCAGGAGCGGGTTGACCACATCCTCAATCTCGGTGCCGAGTGCATCGTCACCGAC  
ATGAACTACGACGACACCGTGCCTGACCATGAAGATGGCCGAAGAGCGCGGTGGCACATCGTTCAGG  
ACACCGCCTGGGAGGGTTACACCAAGATCCCGACCTGGATCATGCAGGGTTACTCCACCTGGCCGATGA  
AGCGGTTCGAGCAGATGCAGGCCATGGGCATCAAGCAGCCGACCCACGTGCTGCTGCAAGCCGGGGTTCGGG  
GCGCTGGCGGGCGGGGTGCTCGGTTATCTGGTGGACTGCTTCGGGGCGAAAAATCTGCACAGTATCGTGG  
TCGAGCCAGATCAGGCCGACTGCATCTACCGCTCCGGCGTGGCGGGGAGATGGTCAATGTGGGTGGCGA  
TATGCGCACCATCATGGCCGGTCTCGCCTGCGGGCAACCCACCCCTTGGCTGGCCACTGCTCAGAAGC  
TGCACCACCCAGTTTATCTCCTGCCACGACAAGGTGTGCGCGCTGGGCATGCGGGTGTGGGCAACCCCC  
TTGGCAATGATCCGCGCATCATCTCCGGCGAATCCGGCTCGGTGGCACCGCGTGTGGCGGGCGGTGCG  
TCACCACCCGGACCGCGCGCGCTGATGGCTCGCCTCGGGCTGGATAGCAACTCGGTGCTGTGATCATC  
AACACCGAAGGGGACCCGATGTGACCCACTATCGGGAAGTGGTGTGGGAAGGCAAACATCCTGCCCTCGG  
ATTAACCCCGCTGCGAGTAACTCCCTGCGAGAGCAGACTCGAATTGAAGAACTGATCGCGCCTCGCC  
AACGGGGCGCGGTAACGGGCACAGGGCGCTGCCGACGAACAGCCGCGCACTCAGTTGTTATGGAGAA  
TCACAATGAGCAAGCAAATTCGGTTTGAATGGTGTGGAGAAAGGCTTACCAGTACAAGGCCGAGATGAG  
TCAGTTCCTGCGGATATGATTGCCATCCCGAGCGAGAGCTGCGATGAAGAGCGCGTGTGCTGCGCATC  
AAGCAGGAGATGGAGAAGGTTGGCTTTGATAAGGTCGAGATCGACCCCATGGGCAACGTGCTGGGCTATA  
TCGGCCACGGCCCGCACCTGATCGCCATGGATGCCACATCGACACCGTGGGCGTGGCAACATGGCCAA  
CTGGAAGTTCGACCCCTATGAGGGGATGGAAGATCACGAGATCATCGGCGCCGCGGGCGCATCTGACCAA  
GAAGGCGGCATGGCCTCCATGGTCTATGCGGGCAAGATCATCAAGGATTTGGGGCTGGAAGATCAGTACA  
CCCTGCTGGTGCACCGTACCGTACAGGAGGAGGATTGCGATGGCCTCTGCTGGCAGTACATCATCGAGCA  
GAGCAAGATCCGCCCGGAGTTTGTGGTCACTACCGAACCCACCGACTGCCAGATCTACCCTGGCCAGCGT  
GGCCGCATGGAGATCCGCATCGATGTGCAGGGGGTCACTGCCACGGCTCCGCACCGGAGCGCGGTGACA  
ACGCCATCTTCAAGATGGGCCCGATCCTTGGCGAGCTGCAGGAGCTGAGCCACAACCTCGGCAATGACGA  
CTTCTCGGCAAGGGCACCCCTGACCGTCTCCGAGATCTTCTTACCTCCCCAAGCCGCTGCGCCGTGGCA  
GACAGCTGCGCTGTCTCCATCGACCGCCGCTCACCTGGGGCGAAACCTGGCAAGGGGGCGCTCGACGAGA  
TCCGCGCCCTGCCTGCGGTGAAAGCCGCGGTGCAGAGGTCTCCATGTACCAGTACGACCGTCCGGCCTA  
CACCGGTCTGGTCTACCCGACCGAGTGTACTTCCCACCTGGAAGGTGGAAGAGGATCACATCACCGTCA  
AAAACCTCTCCAAGGCTTATCGCGAGCTGTTCAACAAGGAGCCGCTGGTGGACAAGTGGACATCTCGA  
CAAACGGGGTCTCCATCATGGGTGCGCCAGCTATTCGGTCACTCGGTTTGGCCCCGGTAAAGATCCCGGA  
GGCCACGCCCCGAACGAGAAGACCTGGAAAGAGCATCTGGTCAAGTGCGCCGCCATGTACGCCGTGATC  
CCCATGCTCTATCTGGCCGAGCTGGACAAGTAAGGGGGCCGCGGGCGGTGACTCTCATCACCGCCCGTCT  
TGTTGCAAGTGGCCGCTCTCCATTGAGGCGGGGCTTTGCTGTTTGAAGTGATGTTTCGAGGTGGTGGGGAT  
GAAACGGCTGATCAAAAACGGTGTGCTGGTTCGATGCACAGGGGGAATATCGTTCAGGATCTGCTGATCGAG  
AACGGGGTGCATCCGCGCGGAGCCGCGCTATCCAGCCGATGGCGAGACCGACGTGATCGATGCCAGCG  
GCTGCTATGTGATGCCGGGCGGCATCGACGTCCATACCACTTCAACATCGACGTGGGCATTGCCCGCAG  
TTGCGATGACTTTTTAGCGGTACCCGTGCCGCCGCTGTGGTGGCACCACCACCTTGTGATCACATG  
GGATTTGGCCCCGGGGGTGCAATCTGCATCACAGCTGGCCCGTATCACACTATGCCCGCGATCAGG  
CGGTGATCGATTACAGTTTTACAGCGCTTGTCCAGCATGTGGATGACGCCATCCTCCACGAGATGGCCGC  
CATGGTGCAGGAGGAGGGATCAGCAGCTTCAAGCTCTATCTCACCTACCAGTACAAGTTGGGGGATCAC  
GACGTGCTGTGCGCCCTGGCCCCGCTCAAGGAGGTGGGGGGCGCTTGCCACCGTCCACCCCGAGAACGATG  
CCGCCATCGCGGGCGCGCCGGGGCGCCCTGCTGGCCGCTGGCCATCATGAGCCTTGGTATCACCCGCAAAG  
CCGCCCGCTGGAGTGCAGGGCGGAGGCGATCGCCCGGATGATCAATCTGGCGGGGCTCTCGGGTAAATGCG  
CCACTCTATATCGTCCACCTCTCCAACGGCTTGGGGCTGGAGTATCTGAAACTGGCGCGCCGTCAGGGCC  
AACCGGTCTGGGTGGAGACCTGCCCCGAATATCTGCTGCTTATGATGAGCAGTGTATTACAGGGAGAACGG  
GGTGCAGTATCTGCTGAGCCCCGCGCTGCGCTCGCGCCGCGAGCAGGACAAGCTGTGGGTGCGTATCGCT  
GCGGGCGACATCGATACGGTGGCGACCGATCACTGCAACTTCTCCCACGCCAGCGCATGACCCCTCTCGG  
GGGGCGATTTACGCCGCTGCCCCAATGGCTTGCCCGGGGTGCGAAAACCGGATGCTGCTGCTCTTTGCCCA  
CGGGGTATTGGGCGGGCGCATCTCGCCGTCCCCTTTGTAGCTCTTACCAGCGCCAACCCGGCGCGCCTG  
TTTGGCCTCTGGCCGCGCAAAGGGCAAACCTGCAACCGGGTCTGACGCCGATCTGGTGCATCATGGATCCCC  
GCGGTGACACCCTGATTTCTCACCCACTGCTGCATGACAACGGCGACTACAGCCCCACGAGGGGATGCG  
CTGCCCCGCGCGGATCAGAATGACCCTGAGCCGTGGCGAGATAGTCGCTCGCGATGGCGAGTTTCTGGGG  
CGGCGTGGTGCATGGCCGTTTTCTGGCCAGAGCGCCCTTTGATCCGGCGTTGGCGCCGAGCTGCACCTCGC  
CTTGCCCCACAGTGGCAGGCTGACAATTCGTTGAAACACGCAGAGCAGCAAGGTTATGTGAACAACGAA  
AGGTGGGCCGGTATTGCACCGGCTTGTCCCATCACTGGAGATAACAAGATGAAACAGAGAATCGTACTGG  
CCCTTGGTGGCAATGCGCTGGGCAACAACCTGCCCGAGCAGATGAAGGCGGTGCAGAGCACGGCGGGCAC  
CATTGCCGACCTGATCGCCAGGGGCATGAGGTGGTGGTGACCCACGGCAACGGCCCGCAGGTAGGGATG  
ATCCAGCAGGCGTTCGAGGTGGCGGGCCGCCACGACCCCAAGGCGCCCCATCTGCCCATGTCGGTCTGCG  
TGGCCCTGAGTCAGGGTTATATCGGTTATGACCTGCAAAAACGCCCTGCGCGAGGGCCTTACTGGCGCGTGG  
TATTCACAAGCCGGTTGCCACTTTGGTGACCCAGGTGGAGGTGGATAAAAACGATCCCCGCTTCTTCGAC  
CCGAGCAAACCCATCGGCGGTTTTCTTACGAAAGGAGGAGGCCGAAGCATTGATGGCCAAGGGGGAGCGGC  
TCAAAGAGGATGCCGGTTCGGGCTATCGCCGGTAGTGGCATCCCCAAACCCGTCGATATCATCGAGAA

GGAGACCGTCTCTGCCATGCTGGCTGCCGGTCAGGTGGTGATCACCGTCGGTGGCGGGCGGCATTCCGGTG  
CTGCGCGAGGGCAATCACCTGCGCGGGCGCCAGTGCGGTGATCGACAAGGATTGGGCCAGTGCCAAGCTGG  
CGGAGCTTATCGACGCCGACATGCTGATCATCCTTACC GCGGTAGAGAAAAGTGGCCATCAACTTCGGCAA  
GCCCCAGGTGCAGTGGCTCGATCAGCTGAGCGTGGGAGATGCCCAGTGTTTTATCGAGCAGGGGCAGTTT  
GCCAAGGGCTCCATGCTGCCCAAGGTGGAGGCGGCTCTCGTTCGCGACATCCATGCCGGGGCGAAAAAT  
CCCTGATCACCTTGCTGGAGAAGGCCGCGGACGGCATTGCCGGCAAGACCCGGAACCCCTTATCAGCCGCTA  
GGCGTTCAGCTCGGGTTGAGTGTGATTGCCGGGGCCGTCGGCCCCCTTGTTTCATTTTGGGGCAGTCATG  
GTCAGCAGAAGATGAGCGGCGTAAGATGGCCGCTTCAAGCGCGGGCAAGACGCCGAGAGCAGACCCGGC  
GCAATGAGTGACAAGAGGTGAGTAACAAACAAATGAGCGGAAAGATCAATATGGCGGCGCTGGTGGGATT  
GATCTGTCTACCCGCCCTGCTGGAGTTACAGTGGATCGTGATGAAGCAGGTGATGCTCTACGCGGGGGCC  
TTCGAGTTACCCGCCCTGCGCTGCCTGTGCGGATCTCTGGTCTTGTGTGGTATTGGCCCTGCGCGGTC  
GCCGTTATCTCAAACCCACCCCGTTTCGCTATAACCTCGCCATCGCCCTGTTCCAGACCTGCGGCATGGT  
GGGGTTGGCCAGTGGGCGCTGATCAGCGGCGGGGCGGGCAAGGTGGCCATTTTGAGTTACACCATGCCG  
TTCTGGGTGGTGATCTTTCGCGGCGCTCTTTCTCGGCGAGCGGATGCGCAAGCTGCACTATCTGGCGGTGCG  
GGGTGGCGGCTGCGGCTGCTGTTGGTGATCCAACCTGGTGTGTCATCTTGAGTCCCTCAAGAGCGC  
GCTGTTGGCGATCCTCTCCGGCATCTGCTGGGGGATCAGCGCCATCATCGCCAAGCGGATGTATGCCCGC  
CATCCCGGGGTGGATCTGATGTCCCTACCACCTGGCAGATGATCTATGCCACCTGGTGTGACCCGTGG  
TGGCCGCGCTGGTGCCGGAACGCCCATCGACTGGCAACCTACGTGATGGGAGCGCTGGCCTATAGCGC  
CATCTTCGCCACCGCCATCGCCTGGAGTCTCTGGTGTGTTGTGCTGAAAAAACTGCCAGCGGGTATCGCC  
AGCCTCAGCACTCTGGCGGTGCCGGTGACCGGCGTGTCTCTCCTGGTGGCTGCTCGGGGAAAACCCGG  
GGCCGGTGAAGGGAGCGGCATCGCCCTTATCGTACTGGCGCTTCTCGTCATCAGCCGCAAGGGCAAGCG  
CTCTGTGGTGTGGTGGCGGGGGAGACCCGCATCAAGCACGGCTGAGTGGTGACTGGGCTGCCAGTGGCA  
CGATAAACAGCACTCAAAAAGAGCCCGCGACAGGGGACCAGCCCCCTGTTACAATGGCGTGGTCTGACTGT  
GCTGGAGCACAGGTATCTGATTTATTGTGATTATTTCAACGAACCTAACGGCAAGGATGAGACCCGTATGA  
TGACGCTGGTGTGGTGGCTGTAGGCCTGGTGTGTCTGGTGGTGGGGGCCGAATCTCTGGTGGCGGGCGC  
ATCTCGCCTCGCCACCATGATGGGGATATCGCCACTGGTGGTGGGATTGACCATAGTGGCCCTTTGGGACC  
AGTGTCTCCGAGCTGGCTGTGAGCATCCAGTCTGGCCTCGAGGGGCAGGCAGGGATAGCGGTGGGGAACG  
TGGTCGGCAGCAATATTTTCAACGTGCTGTTTATTTTAGGTATTTTCGGCACTGATCGTACCCTTGACCCT  
CTCCAGCAACTGATACGTTCTCGACGTTCCCTGATGATAGTGGTCTCTTTTCTGGTGTGTTGCTGGGC  
TACGATGGCCGATTGCAACCATGGAAGGGGCGCTGCTGTTTTGCCGGCATCATCGCCTACACCGTGTTC  
TCTTTGTCCAGAGTCGACGGGAAAACAAAGCGGTGCAGGCGGAGTATGAGCAGGAGTTTGGTACCCGTGA  
AGCGAGTACGGCGGGCAACTGGTTGCGCAATCTGCTCTTTATTGCCGAGGTCTGGGTCTGCTGATCCTC  
GGCTCCCGCCTGCTGGTTGGCAGTGCAGTGGAGATTGCCCACTACTTCGGGGTGAGCGATCTGATCATCG  
GCTTGACCATAGTGGCGGCGGTACCTCCTTGCCGAAGTGGTGACCTCCATCGTTGCAGCTCTGCGCGG  
GGAGCGGGATATCGCTGTGGGGAACGTGGTGGCAGTAATATCTTCAATATCCTCTGCGTGTGGGGCTC  
ACCTCCATCGTCACTCCCGGTGGGCTTGAAGTGTGCGCCACCGCCCTTCAGTTCGATATTCGGTAATGA  
TTGCGGTGGCGCTTGCCCTGCCTGCCCATCTTCTTTACC GGTACACCATCGCCCGCTGGGAAGGGGCCCT  
GTTTCTGGCCTACTACATCGGCTACACCTGCTGGCTGATCCTCCACGCCACATCCAGTCCGCTGCAAGGT  
CAGTTCAGTGCAGCGCTAACC GGT TTTGTGTTGCCGCTCACCGCCATCACTCTGGTTGTGCTGGCGGTGC  
GAGCCTGGCGATTGTAACGAACCCGGTCTGATGCAGGTTCTCCTGATGTAAGGAGCTGCATCAACCGA  
CAGGCCGAAAAAAGCCCCACCATCATGGCGGGGCTTTTTGCTTGCTGAGGGGACGCGAAGAGCCGTTATC  
GGCGCTGGGCCAGATGCATCATGGCTTCAGCACGGCGCCGCGGATAGCGCGCGCCTTGTCAGAGACGGT  
GGAGGCATCGGCGCGCTCGCCACGCGGGTCGATATACCAATCTTGAAGCCGACTGGCACTTCGATGCCA  
TCGCTGAGCAACCCCGCACCATGCCCCGAGAGGGGCGGATAATGGGGGCATCCCCACATGGGCAATCA  
CATCTCCCTCCTGCACCAGATCACCGAGCTTGATAAGGCTCTTATCACCCCGCGACGGGGGCGCGCAC  
CACCCCGGGGCGGATGCTCCCGATCACCCCGGAATGCCGTTGGGCTGGGCGGGGCCCTGATAG  
ATAACCCGCCCCAGATGATGACCGCGGTTGGTCTCGATCACCGCATCGCAGTCCGCGCCCGCCCAAAGC  
CCGGGCGAGGGCGACCGTGATGGGGCCATCTCCTTGTGGGTGCCGAGATTCTGCTTGGCGAGGATGGC  
ATCCACCAGATAGCGGGGTTTGGAGCTCGGCGAGGGTGGCACAGTCCGGGTCAACCAGTAGCGGAATGACG  
CCCCGATCCAGCTGCTCGAACGCTGTTTCGACGCTCTCGACCCGCTTGGCACGCACTCCCTCAACGCTGG  
TTTACCGTCAAACATCCCTGAGCGAAGGCAACGGTACGGCGGATCACGGTGGGCTTGTGAGATCCAG  
CATCACCACTTGAAGCCGGCATTGTGCAGGCGCAGTGCCACCCCGGTGGCGATATCGCCGAGCCACGC  
ATCACCAACAGCTGATCCCGCTTGAAGCGCACATCGTCTTGCATCAGACCACCCGCTTTGCCGTTTTTCA  
CTTGAAGCAGCTCGGCGAGGATGCTGATGGCGATCTCCTCGGGGTTTCGGCTCCGATGTTGTAACCGAT  
GGGGGCGTGCAGCTGCTGCAGTTGGGTCTGGCTCACCCCTTGTGCTGGCGCAGCGCTGGGTGAAGGTCTGC  
ACCTTGCCTTGTGGCGAGCAGCCCCAGATAGGTGAGGGGACGGCTGATGAGCCGATCCAGCGCCTCCT  
TGTCTGATGGTTGGTGGCGATGATGACGAAGTTGGCGGGCTCGATGGCCAGTTTCTCGATCACCGCGCT  
GATGGTATCGGCCTGCATCAGATGGGTACCGGCTGGGAAGAGGTCAGGGTTGAGGCTCCCTCGAAGCAA  
TCCCCTACATGGACATCAAAGCCGAGCGGCGCCGCGGCATGGGCCACAGCCCGGTTGACGTGGCCGGCAC  
CAATGAGCACCAGCCGTGGTTCGAGACCATAGACATCGATATAGACCGACATGGCACCAACCGCAATCCGA  
CCCCACCGCATGCTCACCGTTGCGTGCCATCCGGCCGTGGAAGATGCGCGGCTTGCCTCGGCAATGGAG

GCCATCGCTTCCTCGATCACCAGCCGCTCGATCATGCCGCCCTATGGTACCGAGGATCTGGCCATCGG  
CCATCACCAGCATCTGGGCTGATGGCGGGGGTGGAGCCCCGGCTCTCGATGATCTGGGCCATGGCAAA  
CGGCGTGTTCCTGTTCCAGTCCGGGCTGCGTGTGCAAACAGATTCATAAGGTACCTCTTTTCATCCTTA  
AAACGTGAGGGGTGAGGCTAAAGCGCCTCCCCGTGCGGAGCTGTGCAGATCAGGTGACGGATGGGGGGG  
ATTGCGCACAGCCCCCTGCCAGATGGCGTGGATCTCGGGGTGGCGGCTCTGAAGCTTTATCAATTCCGC  
CAGCCACGACGCCTCATTTTGATAATCGCCATTGATAAAACAGATCCGGCGCGCCCCGGGGTGGCC  
TTGAACAGCCCCCTCGGGGTGGGAGAGCAGCTTGTCAAACAGTGCCCAATCCAGTGGCTCACCCGCCGAA  
TCCCCGTACAGGGCCTGCAATTCAGCCAGCGGTGGATCTGCGCCGGTTCGGCATTGGCTCCCACCATTC  
GCCGCCAGCAGGGCGATCACCCAGTCACTCTGGTGTGGAATGCAAGGTTTCGTGCAAAGCGGGCACTTTC  
AATAACTTGTGATGGGCGCCATCCGCTTCGACCAGGATGAGATCGAAGCGCCGCTGCCCTTGATGAGAT  
CAATCTGCTGGGCGTGGGCCCCACCTTTCCGGTGCCTCGTTCGATGAGATGGCTGAACAGGGCAACCAG  
AGCCGGGCCATCCGGTAGCGCCTGACAGCGGGTAAGTTGACGAACGAGATCCGTCTCGATAATCAATTC  
CGATAGTGTGACGGGCGAGGCAGAAACATCCGGGTGGTGGTAAATTAGCACCTTTTACCCTGTTGAT  
AAAAATATTCCGCCAGCCAGAACAGGGTGTGGTTTTTCCACCGCCCCGAGAGGCTAATTAAGGTGGT  
ATGGCTATCAATATTTTTGGTGAGTGGGTTAATAGCGGATCTATATCTGGAAATGCGACAGCAACAACG  
TGTGGGTGCGACATAATGACGACAAAATAAATATCGAAGGGAGTGGAAAACAACGTTGCCAGGAACAAG  
AGCAGTGTGACTGTATAATAACGGCGGGGTTTATCTTCCGAATGGGTACTTGGAAAATGATGCTACC  
TTATTGCCAGGGACAATGCTTGATGCAAGTCTCAAAAATGCCCTGGCTTTTTGTCAGCGGGTTATTCTG  
GTGGTGGGCCATCGTGGCGAGGAGCTTCAAGCCCGCTACGGATCACGGCCGATATTTTTGTCGTCCACA  
ATCCCGACTATCGGCAGGGGCTGGGCAGCTCCATCCGCTGCGCCCTGGCGGCCAGTGACGCTGACTACCT  
CTTTATCAGCCACGGGGATCTCCCCTGTATCCCGCGGATGTCTATCAACAGCTCTGGCAGACACGGGGC  
GGTGAGACACTCTTTCCACCTGGCAGGGGGAGGCGGGTTCATCCGGTGTGCTGCCAAAATCCCTTGCC  
GCGAGTTGGCAGCGCCCCGGTGCAGTTCGTGGTACGGCGCTGGTTGCAAGGGCATCCGCACCGTATGGT  
GCCAGTTGACAGCCCCGCCATCCTGTTTGTATGTGGATACCCCGGAGCGCTATCAGGGCGTGTGGGTGGC  
ATTCTTGAAAATGAGAGCGAGCCCACGAAATAACCAATTTAAAAAGATAACGGGGAGATAAATGGCGTA  
TCAAAGTGATATTTCTCGACTTAATTTGATAGGGTGGATTTCTTTTAAATCAGCTCATCAATTGAATTC  
AGAGTTATTGATAACTACTCGAATAACCTATAATGGTGGCATCGTAAATTTCTCATCATTAATTGGAGCTG  
CCTCACGCTTTTACCCTAAAAATAGTTTTGTAGCTCGTTTTGTAAGTGTAGTGGCTGATAGTTGCCCTCCT  
CCCCTTGCCAAAGGGTAAAGCCCGTGGGGATACCCCATTTATTCATACTGCCAATGGCAGAGACAGCTG  
CAAGGAGATAGCCATGGCGATATTATGCGACCCGTTCCGTTCAAGAACCCTGCTGACCCGATTTTTGCG  
GAATATAAAGAGAGTCAAGACATTTTCGGTATTCCC GCCGCAATTCATCGCAAGCAGGACGAGCGCA  
AGATCAAGGTGTTCCGTGAAACCTGCGAGACCCCCATTGGCCCGCAGCCGGCCCCCATAACCCAGTTGGC  
CCAGAACATCGTCACTCCTGGCTGACCGGGCGGCTTTATCGAGCTCAAGACGGTGCAGATCCTGGAC  
CGTCTCGAACTGAAAAGCCCTGCATCGATGCCGAGGACGAGTGTTC AACACCGAGTGGTCAACCGAGT  
TCACCCTGCCAAGGCATTTGACGAGTATCTTAAAGCCTGGTTTGCCTCTATCTGCTGGAGGAGGTGTT  
CGACCCGCGCCTCGACGGAGAGGCCAAGTCTTTCATCTTCAACATGAGCGTGGGGTACAACCTCGATGGC  
ATCAAACAGCCACCGATGCAGCAGTTCATCCACAGCCTGATGGATGCAAGCCAAAGTCCGAAATTTGCCG  
AGTACCAGCAGGTGCTGCGCGAGCTGGTTGCCGACGAGCTTTATCGCCGAGCTGGGACTGGGGGCGCG  
GCGCGATCGCCTGCAACAGCTGGTGGAGCGCATCCCGGCTGAGCTGGTGCACGGCGTTACCCTCTCCACC  
ATGCACGGCTGCCCGCCCAACGAAATTGAGGCCATCTGCCGCTATATGCTGGAAGAGAAGGGGCTCAACA  
CCTTCGTCAAACCTCAACCCGACCTGCTGGGTTACCCGCGGGTGCAGGAGATCCTCGATAACCTGTGGCTT  
TGATTACATTGGTCTGAGCGAAGAGTCGTTTCGATCACGACCTCAAGCTGGATCAGGCCAAGGCGATGCTG  
ACCCGTCTGATGGCGCTGGGAGCCGAGAAGGGGCTCACCTTCGGGGTCAAGCTCACCAACTCTCGGCA  
CCATCAACCGCAAAGGGGCGCTGCCGGGGGATGAGATGTATATGTCCGGCCGGGCGCTGTTCCCGCTCTC  
CATCAACGTGGCGGCGCTGTGTCCCGCGCCTTCGATGGCAAGCTGCCATCTCCTACTCGGGCGGTGCC  
AGCAAGTTCAACATCGCCGAGATCTTCGAGACCCGATCCGTCCCATCACCATGGCCACCGATCTGCTCA  
AGCCGGGTGGCTACCTGGCCAGATTGAGTGCCTCAAAGAGATCGACGCCCTTGACAGCTGGGGCATGAG  
TCAGGTAGATGTGGCCAAGCTGGAGGCGCTTGCCGCCAAGGCCCTCACCATGGATTACACCCAGAAGGAG  
TGGAAGTCCGAGGAGCGGATCGAAGTGGGGGGCGCCTGCCGCTGACCGACTGCTACGTGGCACCCCTGCG  
TCACCGCTGCGCCGTGCATCAGGATATCCAGAGTACATTCGTCTGATGGGTGAGGGGGAGTATGTGGC  
AGCCCTTGAGCTGATTTATCAGCGCAACGCCTTGCTGCCATCACCAGCCACATCTGCGATCACCAGTGC  
CAGTACAACCTGCACCCGCTCTCGACTACGACAGCGCTCAATATCCCGAGCTGAAAAAAGTGGCGCTGG  
AGCGCGGCTGGGAAGGGTACAAGGCCCGCTGGCACAACCGGCTGGCAGCGGTGACAAGCACCCGGTCCG  
GGTGATTGGCGCAGGCCCGCGGCTCTCCGCCGTTACTTCTGGCCGCTGCCGGCCATCCGGTACC  
GTGTTTGAGCGCGAAGCGGATGCCGGTGGCGTGGTTAAACACATCATCCCCGAGTTCGCGATTCCGGCCG  
AACTTATCCAGCATGACATCGACTTTGTTGACGCCACGGGGTCAAGTTCGAGTTTGGCTGCGATCCGGC  
GCTCACCGTGCACAAGCTGCACGCCAGGGCTTTAGCTATGTCTTCGTCCGCATCGGGCGCCACAAGAAT  
GGTGGCATGCGCCTCGAAGGGGGACACGAGCGGATTTACAAAATCCTTCCACTTCCCTGCGCAGCTTCAATC  
AGGGCAAACCGCTGCCGCTCGGCCGCCATGTGGCGGTGATCGGGCCGGCAACACCGCCATGGACTGTGC  
CCGCGCCGCCCTCAAGGTGCCCGGTGTCAGCGATGTGACCGTTATCTACCGTCCGACGAAAAAGAGATG  
CCTGCCTATCGCGAGGAGTATCTGGAAGCGGTGGAGGATGGGGTGCCTTCTGCTTCTCACC AATCCGG



AGCGTTTTGAGAAAGATGGCAAGCTCACCGTGCGGATGATGGCGCTGGGGGATCCTGACGAGCAGGGCCG  
CCGCCGTCCGGTGGCCACCGAGCAGACCGAAGTGATGCAGATGGATGCCTTGATCACCGCCATTGGCGAG  
CAACCTGACTGCGAGGTGCTCAAAGCGATGGGCATTCTCTAGGTAGCGATGGCTGGCCCGAGGTGGATG  
GCCAGACCGGGCGAAACCAGCCGTGCGAACGTCTTCTCATCGGTGACGTGCGAGAGCGGCCCGTCTCCAT  
CGTCGGTGCCATCGGTGGTGCCCGCCGCGCCGCGGATCTGGTGCTCTCTCGCGAGCATATCGCCAGCCAG  
CAGAGTGAAGTGACCATCCAGCCGTGGGCAAGGATGAGATCTACCGCCGCAAGGGGAGCATCGCCATCA  
CCATGGTTGACAAGAACGAGCGCGATGCCTTCGTGGCGCAAGAGGCGCACCGTTGCCTCGAGTGCAACTA  
CCTCTGCAGCAAGTGCGTGGATGTCTGCCCAACCGGGCAACGTGCCCATCGCGGTGCCGGGCTTCAA  
GACCAGTTCAGACCCTGCACCTGGATGCCTACTGCAACGAATGTGGCAACTGCGCCAGTTCTGCCCGT  
GGCAGGGCAAGCCCTATCAGGACAAGGTACCATCTTCAGCCTGCCCGAGGACTTCGACAACAGCCGCAA  
CCCCGGTTTTCTATCTGGCTGACGGTGGTGAACCTGCGGGTGCCTCAGGATGGCGAGACCTATCGCCTGACC  
ATCGATGCCCAAAGCCGGATCAAGGATGCGCCAGCGCCCTTGGCGACATGTGCCGGATCATCAGCCATG  
TCCATGCTCATCACCCTACCTGCTGGGGGCCGTCGAGGCCTGAGCGAACCACGAATAAGCGAAGGAGCA  
AACCATGTTTTATTCTGAAGAACGTACCCGCTGTCCAGCTGGAGCCGACCCGGGTGCTGGAAGGGGTGGAT  
ATCGCCATCGAAGGATCGCTTATCAAAGCGGTGGGGCCCAATCTGCGGGCCCTTACC CGGAGGCCAACT  
ATCGGGAGATGGGCGGCAAGCTGGTGATGCCGGGCATCGTCTGTGCCACAACCACCTTCTACTCCGGCCT  
GTCGCGGGGGATCATGGCCAATATCGCCCTTGCCCGGACTTTATCTCCACCCTGAAAAACCTCTGGTGG  
CGGCTCGATCGGGCGCTCGATGAGGAGTCCCTCTACTACAGCGGCCTCATCTGCTCGTGGAAAGCGATCA  
AGAGCGGCTGCAGTGCAGTGCAGTGCAGCACCACGCTTCGCCCAACTTCATCAAGGGCTCCCTGAATGTGTT  
GCGCAAAGGGTTTTATGGAGGCGGGCCTGCGCGCATGACCTGCTTCGAGACCACGACCGCAACGGCGGC  
CTTGCCGAGCTGCAGGCCGGGTGGAGGAGAACATCCTGTTCGCGCAGGCCATTGATGCCGCAAGGCCA  
AGGGGAACGAACCCTATCTGGTGGAGGCTCATATCGGGCCTTACCCTGCCCCCTTACCCTGCCCCGACGAGGG  
GCTGGCCATGCTGCGCAAGCGGTGCAGGTACCCGGTGCAGGGCTGCATATCCATGTGGCGGAAGACCGC  
TACGACATGGCCACGGCCACCACCTATGGCAAGGAGCCCATCGCCCGGTGGACGAGTTTGGCCTTG  
TCGACAGCAAGACCCTGATCGCCACGGCATCTACCTGAGCCCGCCGACATCGAGCTGCTCAACAGCCG  
CGATGCCTTCTGGTGCATAACGCCCGCTCCAACATGAACAACCACGTGGGCTACAACATGCACCTGCCG  
GAGTATCGCAATCTGGCGCTGGGCACCGATGGTATCGGCTCCGACATGCTCGAAGAGCTCAAGTTCCGCT  
ACTTCAAACCAAGGATCGCCGCGGAGCGCTTGGCCCGACAGCTTTGCCCGGTTCTCTGGAACGGCAA  
CACCTTCTGAGGAGCAACTTCGGCGCCAAATTTGGCCCGCTGGAGCCGGGTTACAAGGCCACCTCACC  
ATCTGCGACTACGCCGACCCGACCCCGCTGGCGCCGCAACCTCGGCGGCCATCTCGCCTTCGGTATGG  
GCTCATCTCGGTCAACAGCGTGATGGTTCGAGGGACGCATGGTCTATCAGGATCGCGAGTTTCGCCTTTGA  
CGTCGAGCCATTTATCAGCAGGCCAGCAAGGTGGCGAGCCGCTGTGGCAACGGATGGATCAGCTGGCC  
TAGGGCCACCCTCCACAGTTTTTGGACCGGATTGCCCGCCCTGTGGATCTCCCCGGCGGGGGCTGCAAGA  
GTAAGGACGACACATGATTGAGCAATTCTTCCGACCCGAACAACCTGGGTCAGGCTTTGGAACCAAGGCC  
CGCTTTGGCAACGACGCCGCTTACATGGGGGGCGGCAGCAAGCTCAACGCAGCCCCGACCCGACCCGACA  
AGAAGGTGCCATCTCGCTGGACAAGCTCGGACTTGGCCAGATTGAGCAACAGCACGGTCAACTCCACAT  
CGGCGCCACCCTCACCTGCAAGCCCTCAAAGATGACCCCGTACCCCGCCGCTGTGCGAGGCGCTG  
GGGTTTTGTCTACTCCCGCCATCTGCGCAATCAGGCCACCATTGGCGGCGAAATTCCTGCCAGCAGCAGG  
ACTCCCCGCTGTTGCCGGTACTGCTGGTACTCGAAGCCGTGGTGGTGTGGAGAACAATCAGTTGCAACC  
CATCGATGCCTATCTGGCGGGCCAGCGCAAGGAGCTGGTGTGGGGGTGGTGTGCCGGAGCCCGCGCTG  
CGCTGCGCCACTCGTCGCATCAGCCGTAACGCCGATGGTCTGGCGGTAATGACTGCCGCAGTGGCCCTCG  
ACGCCCTTGGCGAGATGCGGGTTCGCCGTTGCTGGCGTTACGCCGAGCCGATGCGCCTGCGTGTGTGGA  
GCGCCGCGATCTGCACGATGCCCGCTGGAGGCGGCCGTGAGCGAGCTGGTTGCACCGCGGAGGATCTC  
GGCGGACGCGTGACCTACAAGCGCTATATCAGCGGGTAGTGGTGGCGGATCTGCTGGTGCAGTGGCAGC  
AGCAGGAGGTACAGGCATGATGGAACCTCAACTTCACTGAACGGTGCCTGCGCACCGTCAATTACCCCG  
GCTGGCGAGAATGCCAGCGGGTGTCTGTTCAACAGGTGCCGATGCACTCGGTGCGCAACAGCGACGACG  
GCTTTGGCTTTGCCGGCTCAGATGCCATTCTCTTCAACGGCAAGGTGATCAACGCCCTCCCTGCTGATCGC  
CGCACAACCTGGATGGATCAGAGGTGCGCACCCGCCGAGTCGCTGGGCAGCTGGAACCAGCTCAGTCTGGTA  
CAGCAGGCGATGGTAGATGTGGGCGTGGTGCAGTCCGGCTACAACGATCCGGCTGCGGCGCTCATCGTCA  
CCGACCTGCTTGATCGCCATCCAGCCCCAACCGTGATCAAAATCGACGACGCGCTCTCGGGCCTGTTTCA  
CCGGGACGGCGGCTACCAGCAGTTCTATCAGGCCATCGAGCTTGCCAGTTCACGGATGAAGGATCCCGAT  
TATCTGTGCCAGATTGCCCCGAGTTTCTGTGACGACCTGCGCCATATCGGCAAGAGCTGCCCGAAAGTGG  
ACGCCGCCAAGATGGTGCAGGCCAAACCCTGCTACGTGGAGGATCGGGTACCAGGATGCGCTGGTTCAT  
CAAGATGCTGCGCAGCCCCATCCTCATGCGGTGATACCAAACCTCGACGTGAGCCGCGCCGAAGCCATG  
CCGGGGGTAGTGATGTCATCACCCACCTCAACTGCCCGGATATTTACTACACCCCGGTGGCCAGAGTG  
CGCCCGAGCCGTACCCGCTGGATCGCCGATGTTTGGCCGCAAGCTGCGTACGTTAGGTGACCGGGTGGC  
CGCCGTGGTGGCCGAGAGCGAAGCCATCGCATTGGCCGCGCTCAAGCTCATCGAGGTCGAGTATCAAGTG  
CTGCCGGCGGTCATGAGCATTGACGAGGCGATGGCCCCAATGCACCGCTGGTGCACGACGAGCCCATCG  
TCTACATGGCCGGGGCACCGGCGGATCTGGAGCAGCAGAACCGCTGCTCGGTGCGCCGCGGGCAGCAGCA  
CATGATCATCAACTTCCCATCGGTTCCCGCCGACGAGAACCTGGCCGCCAGCGTCCATGGCCAGATC  
GGCGATGTGGCCAAAGGCTTTGCCGAGGCGGACGAGATTGTGCGAGCGCACCTACGAATCGACCCAGGCC

AGCAGTGCCCCGACCGAGCCACACATCTGCTTACCTACATGGATGGCGATCGTCTGGTGATCCACGCCTC  
CACTCAGGTGCCGTGGCACGTGCGCCGTGAGGTGGCGCGCATCGTCGGCATGAAGCAGCACCAGGTGCAT  
GTGATCAAGGAGCGGGTAGGGGGCGGCTTTGGCTCCAAGCAGGATATCCTGCTGGAAGAGGTGTGCGCCT  
GGGCGACCAAGGTACAGGCCGTCCGGTTACCTTCCGCTACACCCGTGAAGAGGAGTTCATCAGCAACAC  
CTCCCGCCATGTGGCTAAGGTGAAGGTGAAAGTGGGGGCCAAGAAAGATGGCACCATCACCCGCCATCGAG  
ATGGATTTTCGTGCCAACACCGGTCTTACGGCAACCACTCCCTGACGGTGCCGAGCAACGGCCCTGCGC  
TCTCCCTGCCGCTCTATCCGTGCGACAACGTGCGCTTTACCGTCAACACCTACTACAGCAACATCTGTCC  
GACCGGGCGCCTATCAGGGCTACGGTGCGCCAAAGGGCAACTTTGCCCTGACCATGGCCATTGCCGAACCT  
GCCGAGAAACTGGGCATCGATCAGCTCGACATGGTGGAGCACAACCCGGGTGCATGAAGGGGACATCCTCA  
AGGTGCTGGGTGCCATCGGCGAGGGCAAGATGCCTACCTCGGTGCCACGCGGCCAGCTGCGCCCTTGA  
GCCCATCCTCAAGCAGGGCCGCAACTGATCGCCTGGGATAGCCCCAAACCCGCGCAGGGGATTGGCGC  
ATCGGTGCTGGCGTCGCCATCATCATGCAGAAATCGGGGATCCCGGATATCGATCAGGCCAACTGCATGG  
TCAAGCTGGAATCGGACGGCACCTTTATCGTCCACTCCGGTGGCGCGGATATCGGCACCGCCCTCGATAC  
CGTGGTGGCCAAGCTGACTGCCGAGGTGCTGCACTGCCCGCTCGGGGATGTGCACGTCTCTCCGGCGAC  
ACCGACCACGCCCTGTTGCAACAAGGGGGCTACGCCTCGTCAAGTACCTGCTTCTCCGGCAACGCGGCCA  
AGAAGGCGGCCGAGAACCTCAAGGAGAAGATCCTGTTCCATGGTGGCGCCATGCTGGGCGAGCCGGTAGC  
CGATGTTGAGCTGGCGTTCCCGGGCGTGGTGCAGCGCAAGCTGGGGGAGGTGAGCTCGCCAAGCTGGCC  
CACAAGGCCGAGACAGGTACCGGCTTCGGTATCCTCGTGGGCACTGCCAGCTACATCACCTCTGAGCTTG  
CCTTCCCGTACGGGGCCAACCTTCGCCGAGGTGGCGGTCAACGTCAGAACCCGGCGAGATCCGGCTCGACAA  
GTTCTACGCCCTGCTCGACTGCGGCACCCCCATCAACCCGGAACGGCGCTCGGCCAGATCTACGGGGCG  
ACCATGCGGGCCATCGGCCACACCATGAGCGAGGAGATCTGCTACGACAGCAAGGGCATCCCGCTCACCC  
GGGATCTGAAGAGCTATGGCGCGCCCAAGATTGGCGACATTCCGCGCGACTTCCGGGCCCTTCTGTTACC  
GAGTGATGACAAGGTCCGTCTTACGGCGCCAAGTCCATCTCGGAGATCGGGGTGAACGGCGCGGGCGCC  
GCCATCGCAACCGCCATTACGACGCCTGCGGTGTCTGGTGCAGCAAGTGGCACTTCACGCCGGAACAGA  
TCCTGCGCGAACTGGGCAAGCTGGAGCAAAAAGTGTGGCATAACAAAAGAAAAGGTGAGGGGCGGGCGC  
CAGCTCGCCCCCAGCGCCTGACGGCGGAATGAGTACTCCGCTACATTTCTGTGTGATGGGACAAACACGA  
TGTCTAAAACAACACGCAAGCACTCGGATCTCATTTACGAGCTGGAAGACAAACCCCGTTTTATCAAAC  
CCTGATGGGTGACCTGACCCATCTGCTGCCATTTTTGTTCTATGGTAACCCCGCGCTGATCGTCCGGC  
GGCGCCCTGGGCCTCTCCACCGAGATCACCCCTATCTGCTCCATGGCGATGATCGCTCCGCTCCGTTATCG  
GCACCTGGCTGCAGGTGAACCGTTATGGCCCCATCGGGTCTGGGTGCTCTCCATCCAGTCCGTTCAACTT  
CTCCTTCGTGACCGTGATGATCGCCCTCGGCGGGCCATGAAAAAAGATGGCATCCACGAGGAGCTGATC  
GTCTCGACCCTGCTCGGGGTCTCCTTTGTGCGGTGCTTTCTGGTGATGGGCTCCTCCTTTGTGCTGCCCT  
ACCTCAAGCGGGTGATCACCCCGACCGTGAGCGGGGTGGTGGTACTGATGATTGGCTGAGCCTTATCAA  
GGTGGGGATCATCGACTTTGGCGGGCGCTTCTCCGCCATGAGCAGCGGCACCTTTGGCAAATATGAGCAC  
ATCGGGCTGGGGCTGCTGGTGTCTGCGTTATCGTGCCTTTAACTGCAGCCGAAGCCCGCTGCTGCGGA  
TGAGCGGCATTGCCATCGGCCTGCTGGTGGGCTATGCGGTTGCCCTGATGCTTGGCATGGTGGATTTCTC  
CGCCCTTGAAAACCTGCCGCTTATTACGGTGCCTATCCCATCAAGTACGTTTCTCCTTCGATTTTCAT  
GCCTTTATGCTGGCGGGCACCATCTATCTGTTGAGCGTGTGAGAGCGGTGGGGGACATCACCGCCACCG  
CCATGGTTTTCCACCGGGATATTCAGGGCCCCGAGTTTTCAAAAACGGCTCTCCGGCGGGCTGCTGGCGGA  
TGGGTTGGTCTCGGTGATCGCCTCGGCCCTCGGCTCTTTGCCACTCACCACTTTGCCAGAACCAACGGC  
GTCATCCAGATGACCGGAGTGGCGTCACGCCATGTGGGCAAGTTTATCGCCGTCATCCTGGTGTGCTGG  
GGCTTTTCCCGTAGTAGGGCGCTTCTTCACTACTATCCCGTCACTGTGATGGGGGGCGCCATGGTCAT  
CATGTTCTCCATGATTGCCATCGCCGGTGGTGCATCATCATCAGCCACGGCTTCGATCGACGGGAGACC  
CTGATCGTCGCCACCTCGCTGGGTCTTGGGCTTGGCGTTTCTATGACCCGAACGCTTCAAGGTGCTGC  
CGGCGGGTATCTACATGCTGGTGGAGAACCCCATCTGCGCCGGCGGCATCACCGCCATCATCATGAATCT  
GGTGTGGCCGAAAGCCGAAAGCGCAAGGCGGCCGTGAGGATGCCGAGGCGGTGGAGGTGATCCAGCTG  
AGCGACAAGCCGGATGTGATCTTTACCGCCCCGAGTGGCGGCCAGCCATCGGCCAGCAAGGGTGAAGGTT  
CACAGAGCCAGTACCCGGGGAGGCGGTGGCGCCACAGGTGGAACGGATCTGACGGTTAAACCGGCAAAA  
AACGTCAACAGAACAAGAAAAACAGGGAAACGGTTATGAAAAACGACAACCTCTGTCAAAGCGGTACGCGG  
CAGCTTCTTCGATATCACCCGGGTGGTGGGTGAGCCGAGGAGATTGAGTCCAACGCCCGCTTATCGAG  
GATGGCCTGCTGATCATTGCAACGGTTGCATCGACTGGTTCCGTGAGTGGGAGGAGGGGAAAGATTGCA  
TTCCGGCCGAGGTGCGGGTGCAGGATTACCGCGGCAAGATGATAGTGCCGGGCTTTGTGATAACCCACAT  
TCACTATCCCCAGAGCGAGATGGTAGGGGCTATGGCGAGCAACTGCTGGAGTGGCTCAACCGCCACACC  
TTCCCGGCCGAGCGGCTTACAACGATCTCGAATATGCCCGGAGATGTCCACCTTCTTTATCAAGCAGC  
TGCTGCGAAACGGCACACCACCGCGCTGGTGTTCGGCACCGTTACCCCGAGTCCGTTGGATGCCCTGTT  
CGAGGCGGCCAGCCGATCAATATGCGGATGATCGCTGGCAAAAGTATGATGGATCGCAATGCACCCGAT  
TATCTACTCGACACCGCCGAGAGCAGCTATGTGCAGAGCAAGCAGCTTATCGAGCGCTGGCACGGCAACG  
GTCGACTGCTCTATGCCATCACACCACGATTTGCACCCACCTCGACACCCGAGCAGCTGGCGATGGCGCG  
GCGACTGCGCGAAGAGTTTCCACCACTATCTGCACACCCATCTGTGCGAGAACAAGGACGAGATCGCC  
TGGGTCAAATCTCTTTTCCCGGCGACAAGGGTTATCTCGATGTCTATCACAGCATGGCCTGACCGGCC  
ACAACCTGCGTGTGTTGCCACTGCGTCCATCTGGAAGAGCAGGAGTGGGATTGCCTGAAGGAGACCGGCTC

CACCATCGCGTTTTGTCCCACCTCGAATCTTTATCTCGGCAGCGGGCTCTTCAAGCTGCACAAGGCGTGG  
CGCAAGCAGGTGAAGGTGGGGATGGGCACCGACATTGGCGCGGGCACCACCTTCAACATGCTGCAGACCC  
TCAACGAGGCCTACAAGGTGATGCAACTGCAGGGCGAGCGGCTCTCGGCTATCAGGCCTTTTATCTGGC  
GACCCTGGGGCGGCCATTTCGCTGGGGCTTGACGAGAAGATCGGCAGCTTTGCCGTAGGCAAGGAGGCC  
GATTTTCGTGGTGTCTCGACCCCGTGCACCACCCCGCTGCAGCAGCTGCGTTATGACAACCTCCACCACCTTGC  
GCGACAAGCTCTTTGTGCTGTTGACCCTGGGGGATGACAGATCCATCTACCGTACCTATGTGGATGGCCA  
ACTGGTGCATGAACGGGGGTAGGGGCTGGAGTGGGCTGCCGCGGCGCAGCCCCAACGAATACGGCGGCTG  
GCGTACCCAACAGGAGGCCAGTCTTGCCGCACCACAGGGGATCTCCCCGCATAGAACGTGAAATGGCCCC  
GTTTTTTTTGACCAGCAAGGCAAACGTTTGTAGTCAAGGCTGCCTGCCCTGGTCTGTCTGTGCGCATCCTCTG  
CCACCATCGCCTGTTTTCTCATCAAACCTGGCGCGAGCCAGACCCGAGATCCTGTGCCCCATTTTCGTCATGG  
AACATTCAGGCGCTGTGAAGGAGTTGGGTATGACCAAGCAAACAGCAGGACAAACAGCGTGGAAACAGC  
TGGCCAATGATGACGCCAGCCAGAGCGCAGCAAAGCAAACAGCCGCTCACGGCTCTTGATCGCTACTTTAT  
GATCAGCGAGCGGGCAGCAATGTGACAGAGGAGTGTGGCGGGCCTACCACCTTACTTGCCATGGTCT  
TACTCGGTGATCGTGGTGCCGAGCATGCTCGGCAAGGCGGGCTTTCCCTCCCGGCGCCGTGTTTTGTGCGTA  
CCTGTCTGGTGGCGGGGTTTCGGTTCGCTCTTGATGGGGATCTGGGCCAAGTTGCCGATGGCCATCGGCTG  
CGCTATTTCCCTCACGGCGTTTTACCGCTTCAGTCTGGTGTGGGGCAGCAGATCCCCATTCGGTGGCG  
CTGGGGGCCGTTTCTGATGGGGTGTGTTTACCCTATCTCGGTGACCGGGGTGCGTAGCTGGATCC  
TCGACAACCTGCCGATGGGAATTGCCACGGCACCAGGATCGGGATTGGTCTCTTCTGTGCTGCTTATCGC  
CGCCAACGGGGTGGGGCTGGTGTCAAGAACCCGCTGGAGGGCTGCCGTTGGCGTGGGGGCTTTTTACC  
TCGATGCCGGTCATTATGTCCCTGATCGGCCTTGCGGTGATCTTCGGGCTGGAGAAGCTGAGAGTACCAG  
GGGGGATCCTGCTGGTGTATTATCGCCATCTCCATCTTCGGCCTGATTTTCGATCCGGCGGTGAAGTATCA  
GGGATTGTTTCGCCCTGCCGAGCCTCTCGGACGATCAGGGCAAAGTCCCTCATCTTCAGTCTGGATATCATG  
GGGGCCCTCTCGCCGCTGGTGTGCCCAGCGTGTGGCGCTGGTGTGACGGCGGTATTTCGATGCCACCG  
GCACCATCCGGGCGGTAGCAGGGCAGGCCAACCTGCTCGATAAGGATGGTTCACATCATCAACAGCGGCAA  
GGCGCTCAGTGCCGACTCGGTGAGCAGCATCTTCTCCAGTCTGGTGGGGGCGGCCCCCGTGCCTGCTAT  
ATCGAATCGGCGGCGGGCACGGCGGGGAGGCAAACCGGCTGACCGCGACCGTGGTTCGGCGGCCCTGT  
TCCTGTGATGCTGTTCTCTCGCCGCTCTCTATCTGGTGGCGCCTATGCCACGGCGCCGGCAGTGT  
GTATGTTGGGGCTCTTGATGCTGAGCAACGTCAACCAACTCGATTTTCGATGACTTTGTGCGGGCCATGTC  
GGGTGGTGTGCGCCGCTTTATCGTGTCTCACCTCAATAATGTCACCGGCATCATGCTTGGCTTCAGCT  
CGCTGGTGTGCGCCGATCTGCTCGAAGGAGTGGCACAAGCTCAACGTCGGCACCGTGGTTCATCGCCCT  
GGCGCTGGTGTCTTTTTATGCTGGGGGTGGGCTATTTAGGGATAATCCGCCCGTTTGGGGTGCCTCTGG  
CGCCCCATTTTTATGCTGCTATTTTTATCCCTGCGTTGCTCAGCCTGCCCTGGCTGGCTATCACGCCTC  
GGCGTCTCTGCAGCTGGGGCCATCGCGATAACATTTTTGATAAATCCTCCTACCAGATTGATAGGCTCCT  
ACCCTTGCTCTCCTCTCTGCGCTTTTTTACCAGAGATGTGCCCGTTTGTCTAGGGGCCACGCTTG  
GCTTGTGCTTTTCGGCCAACAAAAGCGGGCTAGATGGGATCCCTTTCACACTTCTCCCCATTTCTCCTGAC  
GATGGCGGGAAACAGGCGCATATCTTGTGTTTTTATGCGGTTCCAGATTTTTCCATTCGAAAAAGGA  
CTTGATATGTCCATAGGATTACCGCTCAAGCGGGTGGATGCCGAGGCCAAGGTGACCGGCAGCGCCGC  
TATACCGATGACAACATCATGCTCGGGATGCGCCACGCCAAGTACGTGCGAAGCAATATTGCCACGGCA  
AGGTGCTTGCCATCGATGCGACCGAGGCACTGGCCCTGCACGGGGTTCGAAGCCGTGTTTACCCATGAAGA  
TGTCACCACCTGCTTTTCGCACTGCCGGTACGCCTGGTCCCTCGATGAGGCCAAACGGGACGTGAAA  
GACCGGCGTCTGCTCACCGACCATGTACGCCACTTTCGGCGATGGGGTGCCCATAGTTCGTGGCGCGGATC  
CGCTGGTGCAGGAGAAGGCTGCCGCCCTGGTCAAGGTGACTTACGAGCCGCTGCCGGTGTGACGGATGC  
CCAAAGCGCGCTGGCCGACGATGCCTATCCATTACCCGAGCGGCAATCTGCTGCGCCAAAGTACGCTT  
CGCGCAATGACCCGGAGCAGGCCATTGCGGCGGAGATCTGCAGTTTCAGGGGCACTACCGGACGCCG  
TGGTGCAGCACTGCCATCTGGAGACGGTACCTGCTACGCCTACATGGATCAGCCGGACCACATCATCGT  
AGTCAGCAGCACCCAGATCCCCAGATAGTGCAGCAGCCGGGTGGCTAAATCCCTCGGCTGCCCTGGTGC  
AGCGTGCGGGTGATCAAGCCCTATATGGGCGGTGGTTTTTGGCAACAAGCAGGATGTGCTGGAAGAGCCGA  
TGGCGGCCCTTTTTGAGCTACAAGCTTGGCGGCGTGCAGGTTCAAGGTTACCTTGAGCCGGGAGGAGTGT  
TTTTGCCTCCCGCACCCGTCACGGTTTTGCCATCGATGGCAAGATGGGCCTCAACCGCGACGGCACCCCTC  
AAGGGCTATCAGCTCGACGTGCTCTCAAACACCGGCGGCTATGCCTCCACGGCCACTCCATCGCCAGTG  
CCGGGGGAACAAGATCAGCTACCTCTATCCGCGCAGCGCTTCGGTTATGACGCCAAGACCTTCTACAG  
CAACCTGCCACCGCTGGTGCCATGCGCGGTTACGGCGCGCCGAGGTGATTTTTGCCCTCGAGTGCATG  
CTGGATGATGCCTGCGCCGAACCTGGGGCTGGATCCGCTCGATGTGCGGATCGCCAACGTGGCGCGGAGG  
GGGATGTCAATCAGGTCAACCAGAAGACCATCTACAGCGCCGGGTTGCCGACTGTCTGCTGCGTGGTGC  
CGAGATGTTTCGAGTGGGATCGGCTCAAGGCCGAGTGTCTGGGGCAGGATCCTGCCGCGGGTGCGGCGC  
GGCATCGGGGTTGCGTGTCTTAGCTACGGCTCCAACACCTATCCGGTGGGGGTCGAAATTCGGCGGCC  
GCATGCTGCTCAATCAGGATGGCACCGTCAATCTGCAGATCGGCGCCACCGAGATAGGGCAGGGGTCCGA  
CACTGTCTTTGCCAGATGGCGGCCAGACGTTAGGCATTCGGTTTTGAGCAGATCCGGGTTATCTCGACT  
CAGGATAACCGACATCACCGCCTATGATCCTGGCTCGTTCGCTCGCGTCAGAGCTATGTGGCGGCCCCCG  
CCATCCATCAGGCGGCGTGCAGTTGCGGGCCCGATTTTTGTGCTGGCGGCCAACCTCTGCCATCAGGA  
TGTGGGGTCAATTGACTCTGATCGACGGTTACGTGGTGTGCGCGGTGCGCCGGAGAAGGTGTTGATCAGC

GTCGCCGAGGTGTCGGTCAACGCCTACTACCACCTCACTATCGGCGGTTCAGATCACCTCCGAGGTCTCCC  
ACAAGACCACCACCAACCCGCCAGTTTTCGGATGCACGTTTGTGATCTCAGCGTTGATATCGATCTCTG  
CAAGGTGACCATCAATCGCATCATCAACCTGCACGATGCAGGCAAGATCCTCAACCCGCAGCTGGCGGAG  
GGGCAGGTGCACGGCGGCATGGGGATGGGGATCGGCTGGTCCCTGTTCGAGGAGATGATCATCGACGCCA  
AAACCGGCGTGGTACGCAACCCCAACCTGCTCGACTACAAGTTCCCTACCATGCTGGATTTGCCGAACT  
TGAATGCGACTTCGTGCAGACCTACGAGCCCCAGTCGGTCTATGGCCACAAAATCCCTGGGGGAACCGCCC  
ATTATCTCGCCGGGCCCCGGCGATCCGTAACGCCATTCGCATGGCGACCGGGGTGGCCATCAACGAGCTGC  
CTATCACCCCCAAAACCTGTTCCGGGAGTTTGTTCGCGCGGGTGGTGGATGGCGAGGGATCAGGGGAGGA  
GCAACACCATGTTTTGATATTGCCCGTTACTACAAGGCGCACAGCGTGGCCGAGGCGGTTCGCCCTGCGTCA  
GGCTGATCCCCGAGGCGCGTTTGTGCTGGCCGGTGGCACCGATGTGATGATCCAGCTCCATCACCTCAACGCC  
GCCTATCGCCATATCGTTGATATTACGACTTGCCCGAATCAAAGGGGTGTGCGAGTTGCCTGATGGGT  
CGATCCGCATCGGCTCCGGCACCACTTTACCAGCTCATCGAAAACGAGCTGGTGCAGCGCCGCCTGCC  
AATGCTGGCCGAAGCCTCTGCCACCATCGCCGGCCCCGAGATCCGCAACGTCGCCACCTATGGCGGCAAC  
ATCTGCAACGGCGCCACCAGTGCTGACTCGGCGGCGCTACCCTCGCGCTCGAGGCCGAGCTTGAGATTG  
CTGGCCCTAACGGCACACGCCGCATCCCCATCGCCGGTTTTTCACACCGGCCCGGCAAGGTGGCGCTGCA  
ACCGGGGAAATTTGGTGGCATTTCACCTTTGCGCCGATTTCTACCCCCATGTGGGCTCCCACTACTTC  
AAGTACGCCATGCGCGATGCCATGGATATCGCCACCATCGGCTGCGCCGCCTACTGCCAGATTGAGAATG  
GCCACTTCAAGCGCCTGCGGCTGGCCTATGGCGTGGCGGCCCGACCCGGTGCACCTCCTCACGCGGA  
AGCGGGCGCCGAAGGGCAACCCCTGACTCGTGCCACACTGGCCGCGATTGCCGAGGCGGTGGTGGCCGAT  
GTGGCGCCGCGATCCTCCTGGCGGGCAGAGAAGGAGTTTCGCCTGCACCTTATCAAACCCCTGGCGCAGC  
GGGTGGTGCCTGCGCAGTCGAACGTGCCGGAGGCAAGATCCTATGATGCAACCGCAAAGCTGTCCCGCA  
GTGGAGATCCAGTGCAGATCAACGGCAAGCCTTACTCCTATGCAGTGCCGCCACCATGTCGTTGCTCC  
ATTTCTGCGCGGGCAGGGGCTTATCAGTGTGAAAGAGGGGTGCAGTGTCCGGTGGTGGCGCCCTGTAC  
CGTGGCGGTGGATGGCACTGCCATCGACAGCTGCCTCTATCTGGCGGTGTGGGCGGATGGCAAATCCATT  
CGCACCGTGGAGGGAGAGCGCAAAGGTAACGAACTCTCCGACGTGCAGCAGGCCCTTATCGACGAGGGGG  
CGGTGCAGTGCAGTTTTTGCACCCCGGGCCTCGTATGGCGAGCGCGGCTCTGCTCGACAAGACCGAAGC  
CCGTCCGCTGACCGATGCGGAGATCCGCCGGGGTGTCCGGCAACCTCTGCCGCTGCACCGGGTATCAC  
AACCTGGTGCAGGCGGTGAAGAAGTGTGCAAGGGTTGAAAGCAGTTTGCCCTTCGTTGACGAAACCGG  
CGTAACAAGCAATAAAACCAAGGCCCGCTCGCAAGAGCGGGCCCTCTCTCTTTGAGTCTTAAACCGG  
GTTGATTACCCTTTTTGCGGCTCGATCACCAGTTTGCATCCTTGACCGGAATGGTGGCGCCCGGGGCTT  
GCTTCATGCGGATCACCCCTCCTGACCGGCGAGGCGATAGGTACAGTCATAACCAATGGTGTGACGCT  
CGTATCCTGTACGGTTTTGACAGCGCTGCTCGGTGGTGGTGTAGGTATCGCCCCCTGCATATTGCCCTGC  
ACCTGATTGCCGGCATAACCTCCCAGCAGCCCGCCGGCGGAGTAGCCACCTTCTTGCCGCTGCCACCGC  
CAAATGGTGGCCGACCACGCCACCAGCGCCGCGCCACCACGGTGCCGAGGATCTTGTGCTCATCCTG  
TACCGGCTTGCGGTGAGTACGGTGCAGTTCGACACTCCTGGCGGGGAGTCTTGATGGTCTCGGTGATC  
GGCTTGCTGGCTATCACCTCGGCAAAGGTGGGCTGGGGTGTAAAGAGGGAGCTGCTGGCCGCCCGGAGA  
GTGCCAGGGCCGAGGCGATGCCAATACCGATACTGCCATCATGGATCTGTTTATCTTATGGTTCTCCTG  
CATAACCATAACGGGCTGTTCCAATCTGGCGCCATCTTGTGATAACCGGTTGGCCGACAAGGCGAGGGGG  
ATGGGTCTGCGACAGGCGCTGGCAAGGTCAAAAAACAGCCCCCTGAAAAAGTGTCTGGCTTTGGCGACA  
ACGGACTAAAAGTGACCGTTTTCCGGCGCATGGCGGGCTTTGCCAGTGTGATAAGGAGCAATTCGAGTGC  
CAATTTGCAAGGCGGGCGGTGAGCAGCATGCCAGAGTGGCAAAGTGTGACGGGGGCGAGTCAAGGGAGG  
TCTTGAACAAGGGCTCTGTTGTTGAGATGGCCATGCAAGTGGTTGATAAATGGCTCCAGCCCCATCGGA  
TGTTGGCCGATAAGAGATCACGGCAAGCATTGCTTTGATTTGGGTGAAGCAGAGGGTGAACGGGTCCGGC  
AGACAACCTGCGTAAGTCTGAAATGAAGAGGTTTACCCGAGGTTCATCGGATCAACGAGGGGGAGATATGT  
CAATGTTACCCAGCTGGATCACCCCGCCATTGAGGCAACATCATCACGGTGCAGCAGGCCGAACGTCT  
GCTCTCATCCCTTACCCGCCCTGGCCGAGCAGGAGAGGAGCTTCCCGCCGATATCGCCGACATCAGC  
CTCAAGCTCTACTGCTTCCGCCAGCAGGGGCGGGTACGCCACTAAGGCTTACAAAAGAACACCCCGCGCC  
AGGCACGGGGTGTGTTGCTACTCATGTATCACAGGCCCATCAGGCCAACATCACTTGCGCCACCAGCATCAG  
GGCGCAAATCCCAGCACAAAGCCACCATGGGCAGCACGAACTTGACCCACTTGTGAACTGGATGCCG  
AGCATCTGCAGGGTACCAGCACCAGTCCGGTGGGGGCCAGAAAACAGCATGGCGTATTGGCCCCAGTTGT  
AGGCCGACACCAGATATAGCGAGGGATCATCACGGTATCCGCCAGCGGCCATGATGGGCATGGAGAG  
CACTGCGAGCCCCGAGGAGGAGGGCACACCAGCCCCAACAGGGTGAACACCAGCATCTGCGCCACCAGC  
AACACGGCGCCATGCATGCCGGAGACCAGATCGGAGGCGTAGGCCAGAATAGTGTCCGAGATCATCCCT  
GATCCAGTACCAGATTGACCCCCCGGCCAGCCCGATGATGAGGGAGACGGCCACCAGCTCCGACGCCCC  
CTGAGTGAAGGCCTCGACCGCTCTTTCTCTTTGAGACCCGAGATAAAAAATGATGATGATTGCGATGGTC  
AGGAAGGAGGCCGCCATCTGCGGGAACCACCAACCGGCCATGGAGACGCCCCACACCATCAGCGGGAAGG  
CGAGGATAAACAGGGTCAGAATGATCTTGGCGCGCAGGGTGAAGGGCACCCCTTCGTCCATAGAGCCCTC  
TTTGAGAAAACGGGCGTGA AAACTCTCTCTGTCTCATAGGTGTAGGAGAAGGCCGGGTTGGCTTTGATC  
TTCTTGAGTACCAGTAGAGATAACCGATCACCACCAGGGTGCCACCAGACAGCCGACGGCGCGAAAGG  
TCAGCCCTTCGGTAAAGGGAATGCCGGCGGCATTTGGAGGCGATCACCACCAGAGAAGGGATTGATGGTGA  
GAAGGTGGTGCATGGAGGCGGCGAGGAAGATGGCCCTACGCAGACGATGGAGTCAATAGCCGAGCGCC

AGAAAGATGGGTACCAGTATGGGGTAGAAGGCGACCGCTTCTTCTCCAGTCCGCAGGTGGTGCCTCCCA  
GCGCCATCACGAAGCAGACCAGCGCCACAAACAGGAACCTGTTGCCCGGGTCTTGTGTGAGAGGGCGAC  
AAGCCCCGCACTGAATGCGCCTGTCTTGTGTGATGACCCGATCAGCCCCCGAGCACCAGAATAAAGACG  
ATGATATCCGCCCCCTCTATGGTGCCTTGACCATGCTGACTGCCACGTCACCGAGCCCCCTGGGCGCTT  
GCTCCAGCCGTGCATAGGTGCCGGGAATGGCGATGGGCTTGCGGATGGTGCCGTGGTAAATTGCTCTAC  
CGCAATATTGATATTAAGTTTTGCCTGGGCATCCTGGGTTGCGGGAAGTCGGCTTATTTCCCCCTGTGGG  
CTATTGACCATCAGGCTTTCCTGCGCCGATATAAGAGAGTTTGGCATAGGCGCCCGCGGAATTATCC  
AGGTCAGCGCAATGGCCAGCAACATAATAAGAAACAGAATGGTAAATGCAGTAGGGAATTGTCTGCGTGG  
TGTGGTATTTCGGCACGGCACACATAAAATGCTCCTTGATAAAGCAGGTTTGGGCTCGGCGGAATATCGGG  
TCGATAGGGTTTCTGCGTCATACATCCAAGGTACGCAAATTCCTGTGTATTGCGTAGTGATTGGCGAGA  
AATCTGGCCTGATATTGGACATCCGGTAGATTGTTTTCAGTTGTAACCGTAACCCGTGCGCGGCTGGAT  
AACATGGTGCCATGCTCGCTTATGGGATGGCTCACAAAATTTATTTCCATGGATTTAACAGCTGATAT  
GAAATAAAAGTTATTATGCAATAACTATTTACGCTTTCGTTTTACGCGGCTTGCTTAAATAAAGTTCAT  
GAAAATAGTGCGTACCAGATGAATGAAATAACACATAAAGCAGCTTTTACGGAATAATATTTGCGCATC  
ATCTGTTTTCCGTTATTCGCCAAAAACAGTCTGTGAAAAAATGGCACGCTTTCAGTAACGAAATATTTT  
TTTGCAACGAAAACAGGGGGCCCTGTTGGCAGCAGGCTGCCCTGTCTAAGACGTTTTGCTAATACCTG  
CCGCCGAGGCTCACTGTTAGGCTGTCATCCCATAAAGAGACCAGTGACGGGCAGGATGCCATGTGCGT  
GTCTGATCTCTGAATCATCCGAAACTGCCGTTTTGTGCCACTTGTGAGGAAGGAATCCGATGACAGTG  
CAGAACATCTATGAGCGCGACCTTGCCAAAACCGCCCAATTTTGAGGCCCTGACCCCATCAGCTTTT  
TGGGGAGGGCGGAGCGGGTCTATCCCGACTATCCGGCGCTGATCCACGGCTCGCTACGCCAGAGCTGGGG  
CGAGACCGCCCGGCTTGCCGCCAGCTTGCCCGGCTGCGGCTGCGCGGTATCGGGGAGGGGGATACC  
GTCTCCATCGTCGCGCCCAATATCCCGGCGATGTTTTGAAGCACACTTCGGGGTGCCCATGAGCGGGCGCG  
TGCTCAACACCATCAATACCCGGCTCGATGCCGAGTCGATGGCCTTTATCTTCCAGCATGCCCAGAGCAA  
GGTGGTGTGGTGGACAGGGAGTTTGGCGCCGTGGTGCACAAGGCACTGGATCTGCTGGAGCGCAACCG  
CTGGTCATCGCCATCGACGATCCCCTCTACCGGGAAGGGGCGCTTGTGAGTGAACCTGACCTATGAGGCCT  
TTATTGCCACTGGTAACGGCGATGAACCCGGCTGGTTGCCAGAGGATGAGTGGCAGGCGATCCTCCTTAA  
CTACACCTCCGGCACCCGCAACCCCAAGGGAGTGGTCTATCACCATCGCGGTGCCACCTCAACGCC  
ATCAACAATGTCTCTCTCTGGAGCTGCCCAAACATCCCGTCTATCTCTGGACCTTGCCGATTTTTCACT  
GCAATGGTGGTGTTCCTTGGACGCTGGCCAGCCACCGGGGTGAGCGTCTGCTGCGCCATGTGCA  
GGGCGCTGCCATTTATGAGGCGCTGCACGAGCACAAAGGTGAGCCATTTTTGCGCGGCGCCATCGTGCTC  
AATATGCTCAACAATGCCGATCCGGCGCTCAAGCAGGGGCTGGATCACCCCATCAAGGTGATGACCGCTG  
GCGCTGCGCCCCCGCCACCGTGATCGCCGGGATGGAGGCGATGGGGATTGCCGTGACCCACGTCTATGG  
CCTCACCGAAACCTATGGTCCCTGCGTGTGTGTCGAGCCGAAAAGAAGCTGGCAAGGTCAGGATGCCACC  
ACGCTCTCCCGCTCAAGGCGCGCCAGGGGGTGGCATCCCCTGTCAGGGAGAGATGCGGGTCAATGTGGT  
CGGTGAGCGGCGAGCCGGTGGCCAAAGATGGCAAACCATGGGGGAGATAGTGTGCGGGGCAATGTGGT  
GATGAAAGGCTATCTGAAAAATCCGGCGCCAGCGCCGAGGCGATGGCGGAGGGGTGGTTTTGCGAGTGGG  
GATCTGGCGGTGTGGCACCCGGATGGTTATGTGGAGATCAAGGACAGATCCAAGGACATCATCATCTCCG  
GCGGAGAGAATATCTCCAGTCTGGAGGTGGAAGATGTGCTCTATCGCCATCCCAGTGTGGACGAAGCGGC  
GGTATCGCCATGCCCGATGAGAAGTGGGGGGAGGTGCCCTGCGCCTTCGTGAAATTGAAAGAGGGGCGA  
GAGACTACCCAGGCGGAGCTGATCGCCTTTTTGTGCTGAGCAGATGGCCCACTTCAAGGCCCCCAAACGCA  
TCATCTTACCCCGCTGCCGAAGACCTCGACCCGGCAAGGTGCAAAAATTCGTGCTGCGCAACAGCTGGG  
GTAGCGGTCTGTTTCGTAAGGCGCCAGCACAGACTTTTATAGAAGGGAGAAACGAGGGCGCTGGAGGGCTG  
CTGGCCCTCCCGTTGTATGGCTAGGGAGCCTTGCAGGCGACGAGTTGCGGCCGCTCTGTTTTGGCCTGAT  
AGAGCATCTGATCGGCGCGGGCGTAGAGGCTCTCCATCAGTTCCCCCTCGCCATTTTCCACCAGTCCGGC  
GCTGATGGTATAACCAGCTTATCCCCATCGGCGAGGGGCACTGGGCTTTGCATCACCTGCAGCGCGACG  
CGCTCGGCCAGTGATCGGCGGCTGGAGGGTGGTGTGGGAGTAAAATGGCGAATTCGTCGCGCCCGCA  
TACGAGCCAGCACATCTTCGCTGCGCAGCACCAGATTGCATCACCTGCCAGATGAACCCAGCCTCTGTC  
CCCCAGGGGATGGCCGAAGCGATCGTTGATGCACTTGAACCTGATCCACGTCCAGCACCATCAACCCGAG  
GTGAGGTGGTGGCGCATGTCCAGACTGAGGTTCTTCTCGCACATCTCGAAAAAGAAACGGCGGTTGTAGA  
GTCCGGTGAGGCCATCGCGCACCGACTGCTGGTGCAGCTGCTCCTTGAGCTGGTGCAGTTCCGGTGATATC  
GGAGGAGATAACGATCAGGGTGGGGTGGCCATCCCCAACAGAAAGGGCACTTTGACCGACCAGTAGTAG  
TGCTGATTGCCTTCGGGATCGGTGAGCATCTTCCCCGGCTTGCAGCTCGCCGGTTTTGCAATACCCGGT  
TGTCCAGTCGCCACAGCTGGCAGGCGCTGGCAGCTGGGATCACCTCATCATCGCGCCGATGATGATCTG  
CTCGGCAGGAAGGCCAGCAGATCGGCGACCTTTTGGTTGACGTAGAGAAAGCGGTGCAGGCTGTCCTTC  
ATATAGATATGGGCATCCACGTTGGCGAGGATGATTTCCAGCAGCTGATGCTGCTCCGCCATGCGGGCCT  
CAATCAGCTTGTGTTCCGGTATATCGGTGGAGATGCCGCACAGACCAGTTCAGTTGCCATCCTTGTGATG  
GATGGGCTTTTTAACGGTCCAGTAGCAGCGCTTTTCCCCGGTGGATTTGAGGTAGTTGATCTCCTCCTGG  
GCGATGGCGAGTTGCTGCTCCAGTACCAACCGGTCGTTGCGTTGAAATGGTGTGCGGAGAATTCGAGATCAA  
AAAAGGCCCGATCATCCTGCCCTGCAACTCGGCGAGAGTACAGCCAAAGAGACCCAGCACTGCCGTGATT  
GGCATAGGTGTAACGGCCCGCAGATCCTTGGTAAACATGTAGGCGTCCGTCTCGTTGAAGATGGCTTTG  
AGGTGATCCAGCTCATGCTGTAACGGATAGAGAAGGGGTCATCCTTCATGGAGTTAACCATCCTTGGTT

AAGGGCGTCGTTGTATACAGCGTGAATATATGTACCAACTGTTTAAATTAAGCACTTCACAGGCCATATT  
TCGCGTTTTATTTCCGCAGGATCTGCGCCATGTCACACGATTGTCATCGTTGGTGTGGTCAAAGGAAATCA  
ACTGAGTCCGTGGCTATGCAGATAACTGTCCCCTCATATCGGCCCTGCTTCGTGGGCCAGCAGCAAAGA  
GATTGCCCGGCAGTCAAATACGCCAGCCGAGCGGTATAAAGGGCAACAAACAGGTCTTTAATCAAACATA  
TTTTCACTGTGTCCCTGATACCATTGCCGCACTATTTGGCTTGGGGAGTGCAGGATGGCAGAGCGAACAG  
TATTTGACTGGCTGGAACCGATTACATGGGATGGGCCGGGAGCCATTGACGGAGTGGTGGAAAAGTTGGC  
CGGTGATCGGCTGGAACGCGCTCGCTATGCCGAGTTTCTGACCAACTACCTCGCTGCCGAAGGCAAGCAG  
CGCAATTATGTGCTCAACCTCAATGCCGAATGGGGGGCGGGAAAAACCTGGTTTATCAAGCGCTGGTATA  
TGGAGCTGAAAGCGCACTATCCCACCGTCTATATCGATGCTTGGCAGCAGGACTTTTCCGATGATCCCTT  
ATTGACGGTGATTTTCGTGATTATCGATCAATTGAGAGATGCAACGGGAAATAAGGTTGCCATACCTGAT  
GGCATCAAGTCCAAACTATTGGGTTTGTCTCAAAGTTGGCGGGAAATGGTGTCTAAGTCAGCCATTA  
AAGCTGGATGGGAAGATAGTGACTTTTCTATGGAAGGAGAAGACGCAGACAGGCTGGTTGATACGCTTTG  
TAGTAATCACAAAGAGCGTTATGAATCTATCCAGTATCTTAAACAAGAGATCCGGCAATGGGTTGCAGCG  
GCGGTTTTAGCAAACCTTAGATCAGGTGGATGGGAAAAGTTCGTTTTGGATTACCCCGCTTTTTATTTT  
ATGAGCTGGATCGCTGTGCTCCTTCTTATGCGGTAGAAAATGCTGGAGACTATCAAGCATATATTCGATAT  
TCCCAAAGTAGTGTGTTGATTAGCAACGGATACCGAGCAGTTACAGCATGCTATCAAGGTCATTTATGGC  
GATGGTTTTGATGCAGAAAGCTATCTTGACGATTTTTTTCATAGACGATTTACGTTAGGCAGTATCTCTC  
GGCGAGAGTTTTATTACAGCAGGCAATTGTAGATAAAAAAATGCAGTTTGAACACGTCATGTATGGCCAGA  
GATCACTGATAGCCAAGTGTGGTAAATGTATTGACAGCTGTTTGTGATCATTTTTTCATTGAGCTTAAGA  
AAAACAGAGCAAGTGTGGATAGAACGATCGCTTCCATCGTTAATTAACGAAGTTGCACATTAATTTGA  
TTTTTCTTGTGTTACCTGTTCTCTATGCGAGAAAAGCAATGGAGATTATCGTGTGTAGCGGACGGCAA  
AATGCCTACGACAGATAACCATCCTAAGCTAAAAGGTTTTCAATACTCTTACAAGTGAGTATGAAGAACAA  
CATTTTTCAATGTTTTATAAAAAGCAGGGAGTGCCATAGGAAAGTTATATTGAGGATATCGATCATGAACGAT  
ATCTAAATCCTTTTTATAGATGGAATATATATGGTTTTCATTAAAAAATATGTTAGCCATTTCTTATGAAAG  
TCTATTGAAATCGACTTCAGATGATGAGTGTTCATATCGTTTTATCACGTTAGCAAAAAGATTGTGTTAAG  
CGAATGCGGAATTTGACTGTAGAAGAAAATACTATTTTTGGCAGAAAAAGAACTATCACAGTTGGAACGAC  
GTTTAACAACCGTATAAAAAATTTAGTTGAGCTAGCCGTGCATCTTGACTAAGTGTACAGATCTAGTTATCA  
CCTGACACCCGCTCAAACCCGGTCTTGTGTTACGCTACTTTAGTGCACACTTCCTTCGGTATCAATTTTC  
AGACCCCTTCTGAACATGGTGTAGGGGTTTTGACCCCTCCATCATCTGCTTGCCTTGATGAGGCGCTGGTGT  
TGTAGTGCTCCAGGTAGCTATCCAGGTCTGTCTGCATCTGCTCTACCGACTCATACCAGGTCGCTCCTCC  
CTTGATACGGAAGTGCTCATCCAGCAAGGTTTCGATGCAGCCGTTTCGATAAAGCCGTTGCTCTGCGGCCTG  
CGCACCTTGGTGGTTTCGGTGCTCAATCCCTCCAGTTGCAGGAACAGCTCGTAGGGATGGTGGTCAGGGC  
GCCCACAGAACTCGCGCCGTTATCCGACAGGATGGTATAGACCCGTGCCCTCGTGGGTTTTCAAAGAATGG  
CAGCACCGTTTTCGTTAAGCACATGGACCGAGGTGATGGCAGTTTGTGTTGATAGAGCCGCCCCAGGGC  
TGGCGGCTATAGCAGTCCAGCACGGTTTTGCAGATACACCTTACCGACCCCTTGAGCGCGCCGACGAAGA  
AGGTGTGACCCGCCACCAGTTCCCCGGTGTAGTGAACCTCAATCTGGCGTTTCGCGAAACTCGGGGCTGAA  
GCGCTCTAACAGGCGAATTTGCTCGTCATTGAGCTCAATGGTCTGCTCCCGTGGGTTTTCTCGAGGCGC  
AACAAGCGGTGCTGTTTGGAGAGCAAGTCATGACGTTGCCACACGCCACGCACGCCCGCCGACACTGACAT  
TGATGCCTTGAGAGCCAGTTCTTGGGCGACCCGACGGCCATGAGTTGGTCTGGTGGAGGGAGTAATC  
GAGTATGGCCTGCTCAATCTCGGGAGCGACCCGATTGGGATGAGCCCTTTACAGCCGGGCAATTTGTGCG  
AGCAATCCCTCGGCGCCATAGGTCTGGTAATTACGGCGAATTTTCGTAGAACTGCTGACGACTGTAGCCGA  
TGAGCTTGACAGGCTTTGCTGACATTATTGAGCTCTTTGGCAAGCTCTAGCAGGCTGAGTTTGGCAGCTGC  
TACTTTCTCGTTGGTGGTCATACGGTACTCCGGATAACACGGTAGGGTACCGTTTTGTTATCCGGTTTT  
GAAGCCGTATGACCACTCCCTTTTTGTGGGCAACTGTCAGGTGAATACCATCTCCATACAGACTAAGTAAA  
GCCGGGATAAACCCGCTTACTATCCGCTTATTTATATGCCGCTTATAAAGCCGCTGCACCACATCCTG  
TAATCCCAGCCCTTCATGTTGTAGCAGCAGGTTGAGGTGATAGAGCAGATCGGCGGATTCGTTGATGAGC  
TCTTCCCGATCCTTGGCCATGGCGGCCAGTGCCACTTCGACACCTTCTCACCAGCTTCTGGGCGATGC  
GCTTGGTGCCTTTGCCGTAGAGGCTGGCGGTGTAGCTGGTGGCCGGATCGGCCCTTTGCGGGCTGCCAG  
CACCTGCTCCAGCTCTGCCAGAAAACCGAGGGGCGGCAGCGGGTGGCCGTTAAAGCAGGAGGTAGTGCC  
TTGTGGCAGGTGGGGCCGACGGGTTGGCGGCAATCAGCAGGGAATCCTGATCGCAGTCGGTGTGATAG  
CCACAAGGTTGAGCACATGGCCGAGCTTTACCCTTGGTCCAGAGCCGCTGTTTGTGCGGCTAAAGAA  
GGTGACCTGACCGGTGGTCTGGGCTTTTTCCAGCGCTTCGCGGGTCATAAAGCCCTGCATCAGCACCTCG  
CCGCTGGCGGCGTGTGACGATGGCGGGGATCATGCCGTACACTTTTCCAGTCGAGTTGTTCCGGCAA  
GGGGGCGCGCGCTGGCGGTTGTGTGTGTGTTATCAGAGAAGTTATTCACGGATGGCGACTCCTTCGGTTT  
TCAGCCAGCGTTTTCAATTCGGGAATGGGGATAAGCCCTTGTGGAACACAGAGGCGGCCAGCGCCCGCTC  
CACATCGGCGAGGGTGAAGGCATCGCGAAAAGTGTGCCATGGCACCAGGCGCCGCGGAGGCAATCAGCGGC  
ACCTTGAGACGCTACGCACCAGCTTGAGCTGGTTCGAGATCATAACCCTGACGCATGCCGTCTGATTCA  
TCAGTTTACAGCAGATTTTCGCCCCGCGCCGCTTTTTGCACCTCCTGCACCCAATCGAGGGTGTGCCAGGC  
GGTGGTGGGGTGGCAGCTCTCGTCACCGGTAACCTGTTGACCTGATAGTGGCCCGTGTCCGGCTCGAAG  
TAGGAGTCAATGCCACCACCACGCACTGCACGCCAAATCGCTCGGCCAGTCGGCTGATAAGGGTCCGGT  
CGGCCAGCGCCGAGAGTTGATGGAGACCTTGTGCGGCCAAACTCGAGGATCTGGCGGGCATCTTCCAC

GCTTTTAATGCCACCGGGCAGCAGAAAGGGGATATCGATCACCTCCGCCACCGGCTCACCCAGCTCTTG  
TCCACTACCCGCGCATCGCTGGAGGCGGTGATGTCATAGAACACCAGCTCGTCAGCGCCCTCTTCGGCGT  
AGCGGGCGCCAGCTCGACAATGCCGCCATCACCTCGTGGTTGCGAAATTGCACCCCTTTGACCACCAC  
GCCATCTTTACGTCGAGGCAGGGGATAATGCGTCTTGCCAGCATCAGTTGCCCTCCTGTGGTATCAGCAG  
CGGGGGCTTGCCAGCAGGCGATGGCGTCACCCACCGAGAACTTACCCTCCAGCAGGGCGCGGCCAAGGAT  
GATCCCCTTGACGCCGGAGCCCTTGAGCGCCTCGATATCCGCGATGCCGCCAATGCCGCCGGAGGCCCTGA  
AAGGCGACGCTCGGGTAGCGGGCGCAGAGATCCCAGATAGAGCTCGACGTTGGTGCCAGCCAGGGTGCCGT  
CACGGCTGATGTCGGTGCAGAGCACATGCTTGAGACCGGCAGGGAGGAAACGCTCGATCAGCGCCTCGAT  
GGTCACGCCGCTGTTCTCCTGCCAGCCTGCCACCGCGATATGGCGATTGCCCTGCTCATCGATATTGACG  
TCCAGCGCCAGCAGCATCTGCTCGGGGCCATATTTCTCCATCCAGCTGGCCACCAGATCCGGGGATTTGA  
CCGCGGTGGAGCCGATCACACCCGGCTGGCAGCCGGCCAGCAGATCTGCCACATCTCGTCTGGTACG  
CACGCCCGCCAACTTGACCCGGTCTCGTGGTGGCCGACAGCAGTTGGGTGAGCAGGGGCGAGCTGGCGC  
GCCTTGGCATCCTTGGCACCGTCAAGATCTACCAGATGGAGCTGCACCGCCCTGGGAGACATATTCAT  
CGAAGCGGGCCTGCGGGCTGCTGCTGTATTGCGTCTTCTGCTCGTAGTCCCCCTGATAGAGGCGAACCAC  
CTGACCGTTGATAAGGTCAATTGCGGGAATGATCATGCTAGTACAGCTCCAGAAAATTTTGCAGCAAAC  
GGGCACCGGCTGCGCCTGAGCGCTCCGGGTGGAATTGGGCGCCGAAAGTTGCTGTGCTCTGCAACCC  
ACCGACGATGGCGGTAAACGGCTGGCCATAGTCGAGGTCGCCAGCGTCGCGTCGGTCACCTCCAGCGCA  
TAGGAGTGCACGAAGTAGAAGTAGCTGCCGCTCGGGATCCCCTTGAGCAGGGGATGGGTCTCGTCATGCT  
CAATCTGGTTCAGCCCATATGGGGCAGGCGCATGCTTGACTGGTGTAAAGGTGCCACCTCCATCAGCCG  
GATCTTGGCCCGCATAACCAAGGCAGTCGATAAGCCGCTCTGACGAGTCATCCGTACCCATGCTCTCT  
TCGGAGGCTTCCGCCAGCATCTGCATGCCTAGGCAAAAAGCCAGCAGCGGTGCTTGGCGGCGCAATAA  
GGGGACCAGCCCCGTTTCGTTGAGGTTCTTCATAGCGGCTACCGCGGTGCCGACGCCGGGCAGGATCAG  
CTTGTCCGCTGCTCGATATCAGCCGCCACGCTTGAGACCAGCGGCTGCACGCCGAGGCGTTTGAACGCC  
ATTCTGACCGAGGCCAGATTTGCACAGCCGGTATCGATAATGACCAGCTTCTGCTTGCTCACATCCATCA  
CAGCACTCCCTTGTGGAGGGGAGCTCGCTCCCTTCCACCCGAATAGCCTGACGCAGGGCGCGGCCAAAG  
CCTTTGAACAGCGCCTCCACCTGATGGTGGGTGTTGCCGCTGCCACCTTCATCTGCAATGTGATGGCCA  
TGGCGTCCGACAAGAGCGGAAGAAGTGGGGCACCATCTCGTGGCCATCTCGCCACGTTGTGCGGGCC  
AAAGCCGCTCGGGCAGTCAAGACGAAGTAGGGGCGACCGCTCAAGTCCAGCGCTGTGCTTACCTGCTGC  
TCGGTCAGCGGGCGCATCGATCACCGCTGCCACCTCGTCCATCGCCAGCACGAAGGCTAAACGGCCGA  
TACCGCGCTTGTGGCAAGGGCCTGACGCAGCGCCTGACCCAGTGCCAGCCCAACATCTTCCACCGTGTG  
GTGATCGTCGATATGCAGATCACCGCTGACGTTTACGCTTGAGCTGGAAACCTGCGTGGGTGGCAATTTGA  
TCCAGCATGTGATCAAAGAAACCGATGCCGGTGGCGATCTGGTTGCCGCCGCTCTTGTTTGTGGCAGAAG  
GGTCCAAATCCAGCACCACCTGGATGCGGGTCTCCTTGGTATAGCGTTCCACCGAGGCTACGCGCCCTT  
GGATAACAGCTGATCACGGATGGCGAGCCAGTCGTGATCCTGTGGGTGGTAGCGAATGCCGCCAATGCC  
ATATTCTCGGCGAGTTGCAGATCGGTCTGTCTGTACCAATAACGAAGGAGTTGGCAAAGTCGATGCGAC  
CCGAGGCGAGATACTCCTTTACCAGCCCAGGTGGGGCTTGGCGCAGCTGCAACCGTCGGTGGGGAAGTG  
CGGGCAGATCAGCACCTGTTCCCACTTCACTCCTTGCATTCAAACAGGTGCATCATCAGGTGCTGGGGT  
GGCTGGAAGTTCTCCAGCGGCAGGCTGGCGGTGCCAGCCATCCTGATTGGTACCATCACCAGCACGT  
AGCCAGCGGCTGCAACTCGCGCAGCACCAGGAAATGACCATGGGCTCGAAGCGCAGCTTGGCGAGGCTATC  
CACCTGCTTGTGCGGTCACCGGCTCTTCAATCAGGGTGGCGTCCGCGGTCGATAAACAAAAACGGGGTCTTC  
ATCGCTACATCCTTGTCTTACAAAGTGGGAGAGGGCAGATCACGCAGTACGGCCAGCACGGCATCCATCT  
CGCCCTGATAGCCGATGGTGATGCGAATGCTGTTGTCCAGACCCGGCTTGTGGAGAAATCCCGCAGAAT  
GATGCCGGCGGCCTTCATGGCGCAAAGACGGCTGCGCCATCCACAAAGCGCACCAGCACGAAGTTGCC  
TTGTCTCGAATACTTCCCTTACGCAGGCAAGCTTTGCCAGCTCTGCCCTGAAGGCGGCTTTTTGCTTGT  
TGAGCTTACCACTCGCTCGCGCATCAGCTCCAGCCCCATGGGGGAGAGGGCTTGCGCCGCGATCTGGGC  
GATGGGCTCGGGGATGGGATAGGGGGCGATCACCTTGGCAGCATGGCGATCACCTCGGGGCTTGGCCAGC  
GTAAAGCCGCGAGCGGATCCCCGCCAGGGCAAAGGCTTGGAGAGGGTGCGGGTCACCACCAGATTGGGGA  
AGCGGGCCAGCAGGTCCACCACGGACGCTCGGGGCAGAACTCGATATAGGCCTCGTCCACTACCACGAT  
GGCACGATCCCTGGCTTTATCCAGCAGGGCGATAAGGCCGTACGCCCCACCAGATCCCCGGTGGGGTTG  
TTGGGGGAGCAGAGAAACACCAGCTTACATCAGACAGACGGTCCGCGATGGCGGGCCAGTCGGGCTGGC  
GGCTGGCGGTGAGCGGCTGCTCGACGATGCCGACGCCACAGGTCTCGGCGCTGATGGCGTACATGCCGTA  
GGTGGGCGGGCAGATGAGGATCTGATCTTACCCGCTTCCGAGAAGGTGCGGATCAAGAGCTCGATGGCC  
TCGTCGGCGCCGCGGCTCACACGACCTGATCGGGATTAACCCCGCATAGGCGGCATAGCCGTTACCA  
CCTCGGCCGGTTGGCACTCGGGGTAGCGGTTGAGGCGGCTCCCCCGATGGTGAAGGGATAGGCCTGTGG  
CGCCTCGTTGGCGTTAAGCCAGACGTGGCCCTTGGCCCGATGCGGCGGGCGGATTGATAAGGGGTGAGG  
GCCCCACACGCGGCGGCCAGATTGGCAATGCTCATGACAAAATCCTTCTGCTGTGCTGTTGGTTGGGG  
CGCGGCGGCCAGGGCATTCAACCTAAGGGTGCAGGCATTCTTGTGGCCATCGAGCCCCCTCGGCTGGGGC  
ATGCGCTCGACAATGGGGCAAGGCCGCAATACCTTCCGGCTTCCAGCTCTTGCAGTGTGTAGCGGCGCT  
GATAATCGGCAAGGCCAGGCTGGAGCAGGTGCGGGCATAGCCGTAGGTGGGCAGGGTGTGGTTGGTGCC  
GCTGGCGTAATCGCCGACCGATTCCGGTGTCCATGCTCCGAGGAAGATGGAACCGGCGTTCAGATTTA  
TCCAGCAGATCGCGGGGGCTCGGGTCTGCACGATCAGGTGTTCCGGCGGCTAGGCGTTGGAGATGGCAC

ACGCCTCGGCCAGATCGTACAGAGGATCACCAGACTGCTGCCGAGCGCCTGGGCGGGGATATCGCGGGC  
GCTCAACTTGGCCAGCTGGCTCTTGATCTCCCCTGCGATGGCATCGGCCAGCAGGGGCGAGGTGGTCACC  
AGCACCACCTGGCTGTGCGGGCCATGCTCGGCCTGAGAGAGCAGATCCGCCGCCACGAAGGCCGGATTGG  
CGCTCTCGTTCGGAATCACCAGCACCTCGGAGGGGCCGGCTGGCATGTCGATGGCGGGCGCCGCCAGTC  
GCGGGATACCTGTCCCTTGGCTTCGGTACAAAAGGCGTTGCCCTGGGCCGAAGATCTTGTCCACCTTGGGG  
ATGCTCTCGGTGCCGTACGCCATGGCGGGGATGGCCTGGGGCGCCCGATGGCGAACACCTTCTCGACCC  
CGCAGGGCGGGGCGGCGAACAGGATCTCGTTCGCTGGCGGGGAGACGGGGTGCAGAGCACCCTTACGGCA  
ACCGGGCATAGCAGCCGAATGGCCAGCATCATCACGGTGGAGGGGAGCGGGCGCGTACCCCCGGCACA  
TAGAGGGCCGACCCGACTGATGGGCTGGGTGCGCAGCTCGCATAACCACCCCGGGCTGGGTCTTACCCGTA  
CCAATGGCTGCATTTGGGCAGTGTGGAAGGTGCGAATATTGGCAATGGCTGCTTCGATGGCATTTTTGAT  
GTCGTTCATCCAGCCGCGCAGGCAGCTTCAATCTCATCTTCACTGACGCGCAGCTTCTCACGGGGGGCG  
CGCTCGAAGCGCAGGCTCAGCTCGCGCAGGGCCTCATCGCCACGGCTACGCACCGCGCGATGATATCCC  
GCACCACGGCGCCGATATCCGCCTCGTCACTCAAGGCCGGTTCGGTTCAGCACGTTCGGCTGCTGGGGCGG  
GGAGAGGGTCTTCCAGATCAGGGTCTGCATGATGTCCCTTCCCTTATTCCATCATTTTTTTCGATGGGCAGC  
ACCAGAATGGAGCTGGCACCCAGAGCCTTGGAGCTGCTCCATGGTCTCCAGAACAGGGTCTCGCTGGAGA  
CGACGTGCAGGGCCACCTGATTGGTGTACCAGGCAGTTGCATGATGGTGGGGCGCTCGGCACCCGGCAA  
CAGATCGGTGATGGCATCGAGCTTGTCTTTGGGGCGTGCAGCATGATGTATTTGCTCTCGCGGGCCTGC  
TGCATCCCCTGAATGCGGGGCGCAGTTTGTGATGAGCTTCTGCTTGGCATCGGACAAAAGGGTTGGGGG  
CCTGTACCAGTACCGCCTTGGAGCGGTAGATGACCTCCACCTCTTAAAGCCATTGGCTTCCAGCGTCCG  
GCCGGTGGAGACCAGATCGCAGATGGCATCGGCCAGACCCGACGGGGTGCCACTTCCACCGAGCCGCC  
AGCATCACGCTCTTGAAATTGAGCCCTTTTTTCGTCAAAGAAGCGCTTGGAGCAGCCGGGGTAGGAGGTGG  
CGATGCGTTTTGCCGGCAAAGGCTCGCTGGCCCTGTGTAGTTACATCTTCCGGCACCGCCAGCGAGAGGGC  
GCAGCCACCAAAGTCCAGCTGCTTGGAGGGTTTTGACCTCGAAGGGCAGTCCCTGTGAGGCACGAATAAGC  
TGCACCTCTTCCAGCACGTTCTCGCCGATGATGCCAAGATCGACCACCCCTTCCATTACCAATCCAGGGA  
TGTCGTATCACGCACCCGCGAGGATATCGATGGGCATGTTCTCGACATGGGGGATAAGGGCGTGTCCGCG  
CAGGTTGATTTTTAGACCACAGCTCTTGAACAGGGCTTGGGAGTCTTGGCTCAGACGACCGGACTTTTTGC  
ATGGCGATACGAAGCAGTTGTGTTTTCCATTGCTCGATTTCTTCTAGTCAAAAACGAAAAACCCCTCGGA  
AGTGTGTGCTTCCGAGGGTTTATGAATCTTGCGGTCTTTTGGAAAGTACCAGTTAAGTGTCTTCCAGCA  
GTCAACCTCTGAAAGACTAGTCGGGATGATGATGGTGTGATGAGTCTTACGGGTGGTGAACCTCAGAT  
AATCAATCCTTTACAAAATAAGATGTGTAATTGACGCTGATTTAAACTACCTGCCCTTACAGAAAATG  
CAACCCGAAATTGTGATTTGATCGATTAAAGTGGCGAAAACGGTTTTTCTGGTCGATAACTAGACAATAAC  
CCCTGCAGGAGTCGCCATCATGCCAGCCAGGACCTGTTATTCCCCATTTTGCCCCGGGCGCCCGCCGCG  
CCCGGCAGCGAAGAGATCAAGCGGGAAGTGAATCAGATCAGCAAGAAGCATCAGCTGCGCAAGACCAGCA  
CTGACAACAGTACTCCCAGCAGCGCCAGCAGGCGTATAGCACGCCCGCAAGCGTGATCAGCCCAAGGC  
GGAGGAGGGTGCATACAAGCCGGACCCCGAGCATCAGATCGATCTGTTCTGCTTAGGCAGATTATCTGTCC  
CGTTTTTGCCGCGCTTTTGGCATAATGGCCGCTTTTGTGCGGGACGCCCTTTTGACCATCCAGACCCTG  
TTCAAGCCAGATGGCCCTCTGGCCAGCCATATCGACGGTTTCAAAGCCCGCGCTCCCCAACTGGAGATGG  
CCGAAGCGGTTCGCGCGGCCATCAAGAGTGGTGGCCGCTGCTGCTGGTTGAGGCAGGAACCGGTACCGGCAA  
GACCTACGCTATCTGGTGCCTGCGCTGGAATCCGGCAAGCGGGTGGTGATCAGTACCGGTCCAAGAAC  
CTGCAGGAGCAGCTCTTCTATCGGGATCTCCCAGCATTACCGGCGCGCTCTCCTACACCCCGCCGGTGG  
CCCTGCTCAAGGGGCGCAGCAACTATCTCTGCATCGAGCGGATGAACCGGCTCTTGAGCGAATCTCATCT  
GCAAAAGCCTGAAATTCTCAACGATCTGGTGAAGGTCAAATCCTGGTCCACTGCTACCAGATAACGGCGAT  
GTGGGGGATATTCCGGGATTGCAGGAGAACCCGAGATCCTCGCCACGTCACCAGCACAACGATAACT  
GTCTTGGTTCGCGACTGCCCCATTACGACGACTGCCATCTGGTGGTGGCCGACGCCGTGCCATGGATGC  
CCAGGTGGTGGTGCATCAACCATCACCTCTTCTCGCTGATATGGCGGTGAAAGACACCGGATTTGGCGAG  
TTGGTGCCGGAGGCGAAGTCTATGTGTTGATGAAGCCCATCAGTTGCCGGAGATCGCTACCAACTACT  
TCGGTAAGTCGGTAGGCAGCCGAACAATTCAGGATTTGGCGCAGGATATCCAGCTGGCCTATCGGGCAGA  
GGCCACGACATGGCCAGCTCGGCAAGGCGGGACCGGCTCGCTATCGCCAGTCAGGACTTGCCTCTC  
GCCTTCGGGGTGGATGGCGGCCGCGGCAATACCCGCGACATGCTGCGCCAGCCGCTCTGGGGTCAAGCCTT  
TGGCTCGTCTCAACGATGCCATCGGGCTCTGCTACGAGGTGCTGAAACTGGCTCTCGGCCGTGGCGAGCA  
GCTGGATCACGCCTTCAGAGCATCAGTGAACCTGCGCACCCGCTTGGCGAGGTGCTGGCGGTCAACCAG  
ACCGGTTTTCTCATACTGGTACGACTGCTCACGGCTTCATTTACCCTCAATCTGACGCCGCTGTCCGTGG  
CCGAGCGATTAGTCCGAGGTGCAAAGACCGGAAGTGGCCTGGGTCTTACCTCCGCCACCCTGACGGT  
GGATATGCGTTTTGACCACCTTCAAAGCCGAGCTGGGACTGGCGGGCAGTGTGAGCTTATTCTCGACAGC  
CCGTTTCGACTATGGCGAGCAGGCGCGGCTCTGTGTGCCCCGCTATCTGCCGGAGCCCAACGCCTTTGGTC  
GCGGGCAGCAGCTGGCCAATCTGATGATCCCGCTTATCAACAAGACACCGGGGGGCTGTTTTCTCCTCTG  
CACCAGCCATCAGGTGATGCGTCAGGTGGCTGAGGTGCTGCGCCGGGAGATTGGCCGCACCGTCTTGTG  
CAGGGGGAGGACAACAAGCAGCGGCTGCTCAAGGAGTTTGTGCGAATGGCCGTGCCGTGCTGGTGGCGA  
CCAGCAGTTTCTGGGAGGGGATCGACGTGAGAGGGGGCGGCTTGTGCTGTGTTATCATCGACAAGCTGCC  
GTTTTGCCAGCCCCGATGATCCGCTGCTCAAGGCGCGGGTGGATGATTGCAAGCTCAAGGGGGGCGATCCC  
TTCGCCGAGCTGCAGTTGCCCAAAGCGGTGATTGCCCTCAAGCAGGGGGTGGGCCGGCTTATTTCGTGATC



GCAGTGATCACGGGGTGTCTGGTGATCTGTGATCCACGAATGGTCAACAAACCTTACGGTGCCACCTTTAT  
CAAGAGTCTGCCCGCCATCCCACGCACCCGGGAGTTGGGCACGTTGGGGAGTTTTTTTCGATCGTACTGAA  
CGCGGTGAATAAGTGTGCCGCCAGATAACAGATTTGAACAACGGGTGAGCATATCTCGCTTGCCGGTTAT  
GTAATTGACTGATTTTATAGAGATTGGAAAGCATGAACGAGTTGAAGATCCTGGCCGTTGATACCGCCAC  
CGAAGCCTGCTCCGCCGCCTTGCTGGTGGGTGACAAGCTGTTCTCCCGCTGGGAGGAGGCCACGGGAT  
CACACCCGAAAAATCCTGCCCATGGTTTACGGCTGTGTTAGAGGATGCCGGGATAAGTTTGTAGTGACCTCG  
ATGCCATCGCGTTTCGGCCCGGGCCCGGGCTCCTTTACCGGGGTGCGGATCGGCATCAGTGTGGCGCAAGG  
TCTGGCGTTTTGGTGCGGGTGTGCCGCTGATCGGCATCTCGACCTGGCCGCCATGGCGCAATGCGCCTAT  
CGAGTGGATGGCGCCCAGCAGGTGCTGACCGCCATCGATGCGCGGATGAACGAGGTATATTTTCGGCCGCT  
ATGAGATGATTGATGGCCGCATGCAGTTGGTGGGGACGAGGTGGTGTAGCGAGCCCCGCGGCATGGTTGA  
CGTCCGTGGCAAGCTGGCCGGCCCTGTGACCTGCGTCGCGCACCGGTTTTTGAACCTATGGCGAGACCCCTG  
AGTGGTCTGGCCGATGAGCTGGCGGTGAGCCAGGTGCGCTTCCCGCGCGCAGAAGACATGTTGCCGCTGG  
CCCCGCGCCGCTGGCTGGCGGGGGAGGCTGTGCCTGTGGAGCAGGCCGACGCCGGTCTATTTGCGTGACAA  
GGTAACCTGGAAAAAACTGCCGGGTGCGGAATAAGGGCAGGAGCACTGACAGCATGTCGCTCTTGCCGCT  
CATCAGCTGCAATATAAGCGGGTGGCCCCGACGGGCCACGCCGGAACAGGAGAGTGACATGATGCGTAAT  
AGCAGAAGCGACATGATGAAACGCACTATGGTGGTGGGGCGCTGGCTCTGCTGCTCGGGGCCGTCAGCT  
CGATCCCCAAGGAGCTGGCCTATGAGCCAGAAAACAGCTGGTGGCCTATCAGCCCGCCCTTGCGGGAAT  
GGAGGGCAAACCGCCCGCTGGAGCGGCGTTATCTCGGCGGTGCACAACAAGGCGGATCAGAGCGTTATT  
GAAGTGGTCTATCTGCCGCTCAAGTCCAACGGTGTGCCGAGCAGACCAGCAGAGCCCCGGGCCGTTTTTC  
TGGCCATCATGAAGGGTTTTGTGATCCGACCCCTCTACGCCAAGGGGCGCAGCCTGACAGTGTGGCAC  
CATAGGCCAACCGGTTGATAGCCAGATTGGCGAGCACAAGTACCCTTCTCGGTGCTCAATGTGACGGGC  
AGCAAGCTGTGGCCGCCAGTCAAGGAGGTGGAGGTGCGCTATATGGCCCCCTACTTCTACGACCCCTTCT  
ATGATCCCTTCTGGCCGAGACGGCCGCTGCGTCTGTTAAGGCTTGCCATGATCAAGAGCATCAAAAGCACT  
CTGCACGAACGTCTGCTCACCTTGGCAGATGGTGGCAGGTGGCCCTGCTTGAGAAATCAACTCGCGGGTC  
AGGCTCAGCAGGGCAAACCCCTGCTGATTGCCCTGCACGGCTGGCTCGACAACAGTGCCAGCTTCTTGCC  
GCTGGCGCCGCATCTGGGGGATTTTACCTCATCTGTGTGATCTGCCGGGGCACGGTCACTCCGATCAC  
AAAGCCACCCCTATGTCTTTGTGCACTGGCTGGACGATCTCTACCAGATCGTGCAGGGCGGGCTGGT  
CGCGTTTTCACTCTGCTCGGTCACCTCCCTCGGGGCGCTGATCGCATCCGCTATGCCGGGTGTTTTCCCGA  
ACAGGTGGAGCGGTTGATCATGCTGGAGGGCTGGGCCCGCTCAGTCAGCCCGATGAGGAGGTACCTGCC  
CAGCTGCGACGTGCGATTTTAAACCGTAGTCGACCCGGGAGCGCAGTGCCAACGGCTTTGCTCCATCG  
ATGAGGCTGTGCGCCCGCTTGCAAGGTGGCGGATATCACGCCGAGGCGGCGCTTTATCTGTGAACG  
GCAGCTTGAAGAGCGGGCAGGGCGCTGGCACTGGCGCAGCGACCCCGTTTGCGGGATCTTTCACCCCTG  
AGAATGAGCGAAGGGCAAGCCCGAGCGCTGATGGCGGCTATCCGCTGTCTGTGCTGTTGATTCAGGGGG  
AGCAGGGCTTTGCTGCGCTTGAAGCCCAATGGCAGGCCCGTCAGGATGCCCTCCAGCAGATCGAGCGGGT  
CATATTGGGTGGAAACCACATTTTCAATATGGAATAATCGGTTGATACGGCCGTTTGTATCGTAAAGTTT  
TGTCAGTTTCGGTAGAATCGCCAGCTTTCAATAATCTAGGTTTGTTTTCTCCCTCACATTTTTCTGTTG  
TTAGTTTGTGTTAATTGATGTTGCGCTGTGTAATAATGTGCGGCATTAGAGCATCAGCTTAAACAACC  
GATTAATAATGGATGTGAACCGGGACGGAGGCAACACAGTGAGCGCACAGGTGCTAGTTATGCAGGAGAAG  
TTTTGTGAAAAAGTCTGGCTGAAACGTTATCCGGAAGGGGTCCCCGCCGAGATCAATCCAGACCAATACA  
GCTCCCTGGTTCGAGATGTTTGAATCCTCGGTGACCCAGTTTGGCGATCAGCCCGCCTTCGTCACATGGG  
CCAAACCATCACCTACCGCCGGCTGGAAGAGCAGTCCCAGCCCTTTGCTGCCTACCTGCAAAACGAGCTG  
AAGCTGGAGAAAGGGGATCGGGTTGCGGTGATGATGCCTAACCTGCTGCAATACCCCATCGCCGTGTTTCG  
GCATCCTGCGCGCCGGCATGATCGTGGTCAACGTCAACCCGCTCTATAACCCGCGCGAGCTGGAGCATCA  
GCTCAAAGATTCCGGTGCCAAAGCCATCGTCATCGTCTCAACTTCGCCCATACCCTGAAAAAAGTGGTC  
TACGACACCCCGATCAAGCAGTTATCCTGACCCGGATGGGTGACAACCTGGGGCTGGCCAAGGGCACCC  
TGGTCAACTTCGTGGTCAAGTACGTCAAGAAGCTGGTGGCGAAATACAATCTGCCCCACGCCACCACCAT  
GCGTCAGGCCCTCTCCAAGGGGCGTTTTCTGCAAGTACATCAAGCCGAGATCACCACGACGATCTCGCC  
TTCCTGCAAGTACACCGGTGGCACACCAGCCCTCTCCAAAGGGGCCATGCTGACCCATCGCAACATGATTG  
CCAACGTCGAGCAATGCCTCGGCGTCTACGGCCCCATGCTGGAGCGCGCAAGGAGTTCGTGGTACCAGC  
GCTGCCGCTCTATCACGCTTTCGCCCTGACCGTGAACCTGCCTGCTCTTTATGCGCATCGGTGGTTACAAC  
CTGCTGATCAGCAACCCGCGGACATCCAGGCTTTGTCAAAGAGATCAAGAAGTACCCCTTACCTGTA  
TTACCGGGGTCAACACCCTGTTCAATGCGCTGGTCAACAACGAAGAGTTTCAGGGGATCGCCTTTGACAA  
GCTCAAGCTGACCATCGGTGGCGGCATGGCGGTGCAGCGCGCGGTGCGGAGAAAGTGAAGATGCTGACC  
GATACCCCGCTGCTGGAAGGCTATGGCCTGACTGAGTGTTCGCCACTGGTGAGCGTCTGCCCTACGATC  
TGACCGATTACAACGGCTCCATCGGTCTGCCGGTCTGCTCTACCGAGATCCGTTGGTGGATGACAACGG  
TCAGGTGATCCACGCCCTCGGCACCCCGGGCGAGATGCAGGTTTCGTGGCCCGCAGGTGATGGTTGGCTAC  
TGGCAGCGCCCCGAGGCGACCGCCGAAGTATGCAGGATGGCTGGCTCTGTACCGGTGATATCGCCGTGT  
GCGACGAGCAGGGCTTCTTCAAGATCGTTGACCGCAAGAAGGACATGATCCTGGTCTCCGGTTTTCAACGT  
CTATCCGAACGAGATCGAAGATGTGCTTGCCTGCACCCGAAAGTGTGGAGTGGCTGCCGTGGGTGTG  
CCGCACAAGGTTTTCCGGCGAGCTGGTGAAGATCTTTGTGGTCAAGAAAGATGCAAAATTCAGGAGGACG  
AGATTATTGCCCACTGCCGCAACATCTGACTGCCTATAAGGTGCCGAACTGGTAGAATTTCTGTGACGA

ACTTCCCAAGACCAATGTGGGCAAGATCCTGCGCCGCTACTGCGCGACGAGGAGATTGCCAAGCAATAA  
CCGGACTGAAGCTGCAGAACCCTCTGCAAACCAGCACCGTCTGTTATGCAAACCCTGGGTTCATCCCACGG  
TTTTTTCTTTTTGGCCCTGATCAACC GCGCAGGCACAGATGCACTATCAACTTATCACTCAGCAAGCCGA  
ACTTGAGCAGTATCTCGTTTTCTCTGGCCGATGTTCCCTGGCTATCGATACTGAATTCGTTCCGACCCGT  
ACCTACTACCCCCAGCTTGGCCTGTTCCAGATCTATGACGGCGAGCATCTGGCGCTGCTGGATCCGCTGA  
CCCTGGATCTCTCCGCCCTCTGGCAGCGACTGGGCCGGGAAGGGCAGATCGCCATCCTGCACGCCTCTGG  
CGAAGATCTGGAGCTTATCCAGCATCAGGCGGGCCACCTGCCAACCAGATGCACGATACCCAGCTGGCT  
ACCGCCTTTCTCGGTTACGGCGTCTCGGTCTGGCTTTGGTGCCTGTTGAATGAATTCCTCGGGGTCGAGC  
TGGAAAAAGATCAGGCGCGCACCGACTGGCTGGCCCCCGCTTACACCGCTCAGCTCGAATACGCGGC  
AGCGGATGTCTTCTACCTGATGCCGCTCTACGAGAAGGTGATGGCCAACTGCGGGAAAGCGGCAAGTTT  
GCCTGGTTTCGAGCAGGAGTGTGAGAACCCTCTGCCCGCAAGACCCAGGGTAGCGATCCCCGCGAGCTT  
ATCTTGACATCGTCAACGCTGGCAACTGGTTCGCCGCGAGCTCGCCATTCGCGCGAGCTGGCCGCCTG  
GCGCCAGCAAGAGGCGGTGCGCCGCGATCTGGCCCTCAACTTTGTGGTCAAAGAGCTGCACCTGTTCAAG  
GTGGCAGAGCGCCGTCTGCTCTGCGGGATCTCAACGAGCTCGGCCCTCTCGCCCATCGAGATCAAGA  
TCCACGGCAAGCGGATGCTCGATATCGTTCGCCAAGGCGCAGCAGAGCGATCCTGACAGCTGGCCCCGAGCC  
CATTCGCCGACTGGTGGACTTCCCCCAGTACAAGGCCGAGCTCAAGCGCATCAAGGCCATGGTGGAAAGAG  
AAGGCCAAGGCGAACAATATCCCGCCGAGCTGATTGCCAGCAAGAAGATCATTACCAGTACTTCACCT  
GGAGCTGGCGGATGAACGACGAAGAGCGGGCCCGCAGCGACAAGCCGATGCTGCTGCAAGGGTGGCGTCA  
TGAGCTGGTGGTACCTGCTGGCACAATAAGCCACCAGACGGTTGCTCCTATAAAATCAATCCTCACCT  
CGGGTGGGGATTTTTATTGGGCGAAAGAGACAAAACAGGCATGCTGAACTGGAGAACGCAGAGGGGACATG  
GCTGGCCGGATGGCAGGAATCGAGAGTGAAAAAGAGAGCAGAGAAGAAAAGGCAGCGCTAACACCGCTG  
CCTTTTTTTGATCACCGATAGGCTGGGTTCAGGTAGGGGTTGCTCGCCTTCTCGCGGCCGAAGGTGGAGCT  
GGGGCCGTGGCCCGGGATAAAGACGATCTCGTCAACCAGCGGCAGCAGGGTCTCGGTGATCGACTTGATA  
AGCGTGCCGTGATCGCCACGGGGGAAGTCCGGTTCGGGCCGATGCTGCCGGCAAAGAGCACGTCGCCAACCC  
AGGCGAGCTGGTTCGGCTTGGGAGAGCAGCACGATATGGCCCGGGTGTGGCCGGGGCAGAAGTAGACATC  
CAGCTCGCACTGGCCAAGCTGCACTTTGTACCCCTGCTCAAGCCAGCGATCCGGCGTGAAGGCGGGAGTA  
TGGGCGAAGCCGAACATCTGGCTCTGCTGGGGCAGCATGTCGAGCCAGAAGGCGTCTTCTTATGGGGGG  
CGGTAATGGCGACCCCGCTTTTTCCCGCAGCTCGCCGGCGCACCCACATGATCCAGATGACCCGTTGGGT  
CAGCAGGATATGGGTCAGGGTCAGGGTCAGGCCCGCTTTGGCGATGGCCGCGCAGGTTTGTCCGCTTCGTCGCC  
GGATCGATCAGGGCCGCTGATGGGTCTCGTACACCAGATGAGGGAGCAGTTCTGGGCGAACTGGGTGA  
CCGAGATCACCTCGAATTTCAACATAGAGTTTCTCGCTTGGGATGGGTTCAGCCGCGCAGTGCCTGGCAT  
GCTGCTCGGCGAAATAGTCGAGGCAGGCTGCTTGTACCCGCAAACACGATGCGCTCCTGCTTGTGGCC  
AAGCTGGTAGAGATACATGGGGTCTAGTAGCGGGTTAGCAGCAAGGTGATCCAGGCCAGATGCAGTGGC  
GTATCGCCGCTCTTTTTCTGCTCGGTGAGGGCGGTTTGCATCAGGGCATCCAACCTCGCGGTGGGCCGAT  
CGCCGAGGCGGCGCTTGGAGGCGGGCCAGCGCATCGGTGAGGTAGGCGGCAAACAGCGGCCAGCCAGCCTC  
CTGGCCATACATGGCTTGATAGCGCAGCCAGAGATCGTGCACGTAATCTTACGGATCTGCTCGGCCCGA  
TCGATTTGCGGTACATCCACCACCAGCGGTGCTGACTCATGGCCTCATGGAGAGAGAGGGGCGAGGC  
AGCAGCGGCCGATCAGGCGGCTCTCGTCTCGACCACGAAGGTCTGCTCGCCGCGATGGCGGCGCTTGAG  
CAGTTGATGGCGAGGTTGTTTTCAAAGTTGATGTTGCTGGGCTGGCCGCGGGCAGTTGACCGAAGGAG  
GAGCCCCTGTGATGGGCGTGCCCTCCAGATCCACCGCCTGGGTACCTGATCGAGCATATGGGTCTTGC  
CGGAGCCGGTCATGCCGGTCAGCACGCTCCAGTGACACTCGGCAGAGGCTTGTCTGGGTGTCGATCAG  
GAAACGGCGCAGCTCCTTGTAGCCACCGGCAGCGGGGGGAGTCACTCCCGCTTCAGCCAGCCACTGT  
TGCACGGTTTTGCGAGCGCAGGCCGCGCGAAAGCAGTAGAGCACGGCATCGGGCTGCTGGCGCAACTGCG  
CCAGCCAGCCTTCGAGTCGCTCGGCACGTACTGCTCCCCCACCAGCTTGTGTCCAAGCTCAATGGCGGC  
GGCCTGACCCTGCTTCTTGAAGCAGGTCCCCACCTGGGCGCGCTCATCGTCTGTCATCAAGGGCAGATTG  
GTCGAGCAGGGGAAGGCCCCCTCCTTGAACCTCGATGGGGGCGCGACATCAATCAACGGCACATCGTCCA  
AAAAGAGTTGGGCGTAGTCCGTGGCCAGTGGCAATTCATCATTGGACAATCTCGATAAAGCGGGAGCCC  
TCAAGGGGCTTGATCTGGCCGATGGGTGAGAGCGCAAGGCCAGCTTCGCGCGCGATGGCGAGCAGCTCGG  
CTTCTGCTCTCTTTACCCACGGCGACCAGCAGGCCCGCTGGTTTGGCGGATCGCACATGATGTTGCGGGT  
GCGATCGTCCATGGCATCGAGCTTGTGGCCGTAGGAGTCTGGTTGCGCAGGGTGCCACCCGGTACGCAG  
CCCTCGGTGAGGTAGTAATCCACCTCGTCCAGCAGCGGCAGCGCTTGAAGTCGAGGCGGGCGCTGACAT  
TGGATCCTTCGCACATCTCCAGCAGATGGCCCGCAGACCAAAAACCGGTGACGTCGGTTCATGGCGTGGAC  
ACCCGGCAGCTCGGCAAACGCTGGCCAATCTTGTGAGGGTGCACATGGCATTTGGGGGCAACTGCTCG  
TGCTCGGGCTTGGCTTGGCCTTCTTCTGGGCGGTGGTGGAGATACCGATACCGAGGGGCTTGGTCAGAT  
AGAGGGTGTACCCACCTTGGCGGTGTCATTCTGCTTGGTGGCTCGAGAGGCACGATACCGGTTACCGC  
GAGGCCGAAGATGGGCTCGGGGGCATCGATACTGTGACCACCGGCCAGCGAAATCCCGCTTCGTTGGCAC  
ACCTGACGGCCGCGCTCGATCACCTGCTGGGCCACTTCCGGCGCCAGGGTATTGATGGGCCAGCCGAGGA  
TGGCGATGGCAACGATAGGCTTGGCCGCCATGGCGTAGATATCGCTGATGGCGTTGGTGGCGGCGATGCG  
GCCAAAGGTGAAGGGGTCATCGACGATGGGCATGAAGAAGTCGGTGGTGGAGACAATGCCCTGACCGTTG  
CCGATATCGACCACGGCCGCTCATCCTTGTCTGCTGTTGCCAACGATCAGGGTCCGGTTCGTTGAAGCCCG  
GGATCTGGCTCTTGAGAATGGTGTGAGCACCTTGGGAGAGATTTTGCAGCCACAGCCAGCCCATGGCT

GTATTGGGTCAGACGAATGGAAGACATACTTACCCCTTGTGTTGTGCACCGTGTGCAGAGGCTCTGCGGGA  
GCCATCTTGGTCAATGCGCGGCCATCTACCGTCATGTAAAGAGCCGCAAAAAATAGGTGGCCTTGGCTGC  
TTCTGGAAGCAGTGTATGTCAGGCAGTCACGCAGGGCTGCCGGTAGGACGGGGAAGAAGAGGCGACAGAT  
GCGCCAACACAGCCCCGCCAAGGGCCACAGGACAGGGCATTATGCCACAAATGCCCCCTCTGGTTCGAAC  
AGGAATTCACACAAAGCGAAGGGGATTGGCGGGTGGAGGGTTAGGGAGGAGGGCTCTGGCGTGAGCCGCT  
CAGTTATCAGCATGGGTGAAGAGAACTCGCGGAGTTGCCCCGAGAGGTTGGCTTAACCTCTGCGGGGCA  
ATCAGCTGGCGAAAGCAGATTAGCCGGCTTGTCTCAGCACCAGGCTGGCGAGCCTTGCCCCAGCGGCGCAG  
GCGCCGTTGCAGCGGCCGCTCCAGCAGGTTGTAGCTCAGCGCCGAGAGCCGATCAGCACCGCCAGCATC  
AGCAAGGTTGCTACCACCCCCAGCAGCGTGTGGTCTGGCCATACCACCATCTGTGATCCCCGGTGCCA  
GATAGTGGATGAGCTCGAACCCGGTGAGCAGCACCAGCGCATGGAGCAGGTAGATGGAGTAGGAGAGATC  
CCCCAGCCAGTTGGTGAAGCGGTTATCCAAGAGGTGCAGCAGCGGGCTTTGGCGATCGCCCTGGCAGGCG  
GCAATCCAGATCAGCAGCACGTAAGGCGACCAGCAGCGGCAGATCATGCTTCATCATGGGCAAGCCTTTTGC  
GGCCTTGACCCTCGGCAGCAGCCAGAGGCCAAGCACAAATTCACTCACCCCGCGCCCCACCGCCAAGGCG  
CCGCTGGTGACATCCAGGGTGGCGGACTGTGCACGATAAAGGCCAGCACCAGTCCAGCGCCAGCAGGGGG  
CGAGATGGCTCCAGCGACTGCGGGTGACCGCCAGCGGACTCAGCAGCGGGAACAGCATGTAGCTGATCCA  
CTCCACGCTGAGCGACCAGGCAGCGAAGTTCAGGTCATCCGTCATCGGTTACCACCTGTAGCAGCAGG  
AAGGCGCTCGGCAGCGCTCGGCCGGGGTGAAGGGCGAACCAGAAAGGCGGCATCCCTTCCCCTCCCACA  
TTTTGAACAGGGGGCCGGCATAGAAGCCACCCCGTCTGCGCTTGTAAAGCTCCCAGCCGACCAGCAG  
CAGCAGGGTTACCAGGTAGAGGGGGTAGACACGGGTGAGCCGAGCCAGAGAAAACGGCCATAGCTCAG  
GTGCGGGGCGTGCGGGTGAAGGCCCTCGCCATAGACATGGGCCAGCACCACGCGCTCAAAATAAAGAACA  
GGTCGACCCAGAGGTAGCCATTCTCGATGAGTTGGGTGTGGCCTGCGAGCGACTCCATCCACTGGGGAAA  
GAGCAGCAAGCGGGCATGGAACAGCACCACCATCAGGGCAGCGATGCCCCGAGCGGGCTTAACAGCGGC  
AATGATTGATTACATAACGGGATCCCTTGTGATGTTTCTAGCTTGGCCTGACATCGATTTTTGTTGTTGTACC  
GTCCATCACTCCTGATGGGACGGTTGCCCGGGCTTGGCTGCCGAGGCGGGATCACACTACGGAAAAGAG  
AGCCATACGGGTGTGATTTAAATCATAAATGCGCAGTTATTTGTGCAAAAAAATTTAAACAGATAAAGACG  
TGAGACGCAGGCAGGAAAGAGGAGAGAGAAGCAGCCATAAAGCAGAGAGGGTGGTCAACGGGGCGAG  
GGTCAGGCTCATAGGCGTTAAGCAAAAACAATCAGCCCGCAAGGGGCGCTGATTGATCACAAGGGGAGGGT  
GGTTGCGGATCAGCGGGCGCTACCACACAGCCCTGAGGTAGAAGCCTTCCGGATAGCAGGTTACCAGT  
GGGTGATCAGAGGCTGGGAGAGCAGCTCCAGGATCTGGGCATCGCGACCAGGATCGAGCGCTGCATCGG  
CAACGATCTTCTGGAACAGGCTCTGCTCCATCAGGCCGGAGCAGGAGTAGCTCAGCAGCAGCCACCCGG  
CGCCAGCAGCTGGAACGCCAGCATGTTGATGTCTTTGTAGCCACGGCAGGCACCCAGCAGCTGGGCCCTG  
CTCTCGGCAAACTTGGGCGGATCCAGCAGCATGACATCGAACTTCTCGCCCTTCTCGCGGTATTACGCA  
GCAGCTTGAACACGTCGTGACGGACAACTGGGTATTGCTGGTATCCAGCCGTTTCCAGCTCGGCATTTCTG  
GCGGGCGATATCCAGCGCATTCTGGGAGAGATCGACGTTGACCACTTCTTGGCGCCGCCCTTGGGGCA  
TAAACGCCAAAACCGCCGGTGTAGCAGAAGCAGTTGAGGACGCGCTTGCTTCCGTTGACTTGGCGGCAG  
CCTGACGGTTGTCCCGCTGATCCAGATAGAAGCCGGTTTTATGGCCGTTGCGAATATCCACCAGGATCTT  
GACGCCACCGTTCTCCTCGATGACCACCGGCTCGTTCCGGGTCCTCGCCATAGATGACGCCGTTGCGCTCT  
TTCAGCCCTTCTTCTTCTGCGCACTGCCACATCGGAGCGCTCATAGATGCTGCACTCTGGATAGAGGGTAC  
GCAGTGCTTGGCTTATCAGCTCACGCTGGAACTCGGCACCGGCAGAGAGGATCTGGCACACCAGAAAATC  
GGCATAACGGTTCGATGGTCAGACCCGGCAGGCCGTCGGATTCCGGCGGCAGAGGGGATAACCAGTGAGG  
CCCTGACGCTTGCATCAGCGGATCGCGGACTCCTGCGCATATTTGAGGGCAGCGGATAAAGAAGTTCGAGAT  
CGACGGTCTCATCTTGTGCAAGGTCCAGACCCGGGCACGGATCTGGGAGCTGCCTGACCAGGCGCCACG  
GGCGAGCCACTTGCCATCGTTGGCATAAGATCTCGACGGTATCGCCGTCATGGGGTTGCCCTGAACCCGC  
TCAATCCCCTTGGAGAAGATCCAGGGGTGGCGACGCAGCAGGATTTTTTCGCGGCCCTTTGACGAGATAGA  
TGGAAGCGCTCATGGATGTTTCCGATGGTAGAAAAGAAAGGGGCCACATTTATGTGGCCCCGAGGTAA  
AACTCAAACAACCCTATGTAATGGATGGGGTGGCCCTGATCTGACTCCTCATACGATCAGAGCTTAATCC  
CCTTGAGCGCCCCGGTTCAGCTCGCTGGCGGTGGCTTTTCCAGCCCTTGGCTGCCAGCCACCGAGGCGCTGGC  
AGACTCCTCCACCTGCGCCGCTCATGGCGCACTTGCATGAGATTGTGGGTGATCTCGGCGGCGACCGAG  
CTCTGCTCTTCCGCTGGAGGTGGCGATTTGGGTGCTCATCTCCAGTACCAGTCCGCTGTGGTTGCTCAGCT  
TCTCGATATCGAGCCCCACCTCGCTGATGAGTTGCTGGCTGCTGGCGGCGCGCCCTACAGTCTTTTCCAT  
GATCTCGTTTCCAGCGCCCCGTTACCGGTCGAGCTCTTCGATCATCTGCTGGATCTCCACCGTCGCTGT  
TGGGTACGGCTGGCGAGGGTACGCACCTCATCAGCTACCACCGCAAAGCCGCGACCCTGCTACCAGGCAC  
GGGCCGCTTGCATGGCGGCGTTGAGGGCCAGCAGGTTGGTCTGCTGGGAGATGGCGTTGATCAGTTGAC  
CACCTCGTTGATCCGGTTGGCGTTGTGAGTCAAGCGCTCGACCGCGCCGAGGCGTTGCCAATCTCGTCCG  
GCCAGGGTACGGATCGCCTCTATGGTACGGGCTACCCGGTTGGCGCCATTGGCCGCTTCTCGCTCGACT  
GGCGGGTTTTGTTGCAGGGTGTGCTTGGCATTGCGCGCCACTTCGCGGATCGCTGCCGACATCTGTTCCAT  
GGCGGTGGCCAGTGAATCCATGTGCTGGCGCTGGGAACCGCCATGCTCTCGCCCTCGCGGGCATGGTCA  
CGAAACTCGTCGGCGGCCATGGTCAGCGCTTCGGCAGACTCCTCCACCAGTTTGCAGATTGGTGTGCTGGC  
GGTCCGTTAAAGCGGTCGATGCTGCCCGCCAGGGTGGAGAATCGTCCCACCGGGAAGAAGTTGAGTCCG  
GAAGGTGAGATCGCCGTCGCCACGGTTTGCAGCGCCTTGTGGTGGAGTAAAGCGCACCGGAGACAAAG

GTCATCATGTAGTGGATCACCAGCGCCATCAGGGCGGCCAGCGGCCGATCAGGAGTAGGGTCGAGCCCT  
GACCCTCCCACATTGAGAGGTTGCCGGTATCGAGATCACCGGTGACGTAGCCCGCCTGACCCGCTGGTGC  
GGTGAAGCGGTAGCGATCGCCCTGCTGTTTCGAGCCCCTCACCCCTTGTGGCTGGATGCGTAGATCGGCT  
GGCAGAGTGAGCGTTGGCTGCTGGCTGACCAGTTGCGCCGTGGTCTCGACCCCTTGTGCAACTGCGCTA  
CCCCGAGGGAGATCTCCTGCTGATGGCTGGCCGCCAGCATATAACCAGCTGAGAAAGGCGATGATGAAGAG  
AGGTAACCAGAACGCGATATGGAATTTTTCACTGATGGTGAGGTGAATGAGATAGCGGTCAACCCACCGG  
AATTTAACTTCTTTATAATGGAGCTGCATCCTGCAGAGATAGAGTGTGCGGCACATTTATCGTCTCGGGA  
ATTTTTTTCTTAAGCAGAAGGTGTGAGAAATGGGAGAGCAATCGTTTGTCAATTCGGGTGTGGGGGCAGGT  
GCAGGGGGTGGATTTTCGCTATTTACCCGTGAGCGGGCGCTGCAACTGGGTTTTCGGGGCCATGCCTAC  
AACCTGGAGGATGGATCGGTGGAGATCCTCATCAGTGGCCCCGCGCAGGGGGTGCAGATGATGCTGGGGT  
GGCTGGAGCATGGCCCCGCGCACCAGAGTGACCCGGATGGAGTATGAGGAGGCGCTGCCGCCACCGG  
TCAGGGCTTTACACCAACTGAATGGGCGGAGACGAGATGGACGCTGACAAGGAAAGTCTGTTGCTGACT  
CAGGCAACAAGCTGGGTGCGCCGTTATCAGGAGGCGGCGCGGGCGGTGCGCGAAGAGGCCAGCGAACCGG  
CCGTGCATGGCTATCGTATCGCAGCGCGCCGCTTGTGCGCTGCTCGCCCTGTGGCGACCACTCACCTA  
TCATCCCGAGCTGGAGCGGCGTCTGCTGCGCTCGGTGCGGCGCTCTCGGCGCTGCGGGATGCTCAGGTC  
TACGCCGAGCGTTTTGGCAAGCCGCTGCCAGCACGGGTAATACCCACAAATCGGCCGTGTCGCGTGCCCC  
TGTTGTCGCGGCGACTGGCCCGCTGGCTTGCGGCGGTGGCGCAGGTGCCGGATGCGCGGGCATTGGCGTT  
CCTCTATCAGCAGCATCTGGCCCTGCGCCTTGATGAGGCGCAGAGCGCTCACGATGAACCTATTTCCCTGC  
GTTGGGAAATCTGCCAGCTCCCCTCAGCAACAGTTGCGCCGCTGGCATCGGCTGCGCCTCGAGATCAAGC  
AGGCCCGTTATGGCGTGAAGTGTGTTGGATCTGGGGAGTGGGGAGCCCGGCTGGTTGAGCACCCGTGAC  
TCACTGGCAGGAGCGACTCGGCCAGTTGCAGGATTGGCGGCAATGGCGGCGGAGGTTGCGAGCCGAGCAG  
GGGAACAACCACAAGCAGGCGAAACTGCGGCAGCAGTTGAAGGGGAAGATCACCCGCCCTTTGCGTCAAC  
TGGACTGCCAGCAGGCGGAGCTGGTGGCGCTCAAACCTGACGATGCTGGCAGGCCACAACATGAATGACAT  
GCCAAGTCCGCTGGTCAAGTATTCAGAACAAAATGTATCGCCCGCAATCCCTGTTGTTGATAGCCCCGA  
GACCGCAATCTGCGGAAGTCACTCCGCGACCAGCATCTACAAAAACTATCCAGGCCAAACAGGTGAGACAA  
AAAAAGAGAGGCTGTTTTGGCCTCTCTTCTATCTGGCTGTGGTGCAGTCAGCGATATGCTTACTTGA  
CGCGCATACCAGGCTGGGCGCCTTCTGTGGCTCCAGGATCCAGAGATCCTTGGCCCGGGCCCTGCGGC  
CAGCACCATGCTTCGGACTGCCGAAACGCAATTTGCGCGGCGCCAGGTTGGCCACCATCACGGTTCAGC  
TTGCCTCCAGATCTTCGGGTTGTAGCGGACTTGATACCCGGCAAAACACCTGACGGGTTTACCACCGCGA  
TATCCAGTTGCAGCTTTGAGCAGCTTCTCGGCTTCCGATACCCTTCCGCTTCCGCTTCTTGTATCAGCGCAGCGG  
CAGGTCAATCTTGGCAAAAATCGTCATAGCTGATGGTTTTCGCTGATGGGGTCAATCAGCCAGCGGGCCGCTC  
ACTTTCCGCTGCTCTTTGGCCAAGTCTTCTTGGAGGCTCGATCATGGCTTCAATCTTTCGAGGCT  
CGATGCGGGAGAAGAGGGCCTTGAACGGCGCAACGGTATGATCGACCAGCGGCATCTCGATGCCATCCCA  
GCTGAGGGTTTTCGCCAGGAAGGCTTTCGGCACGTTTCGGCCAGCAGCGGCATGACGGGTTTTGAGGTAGGCC  
ATTAGCACGCGGAACAGGTTGATGCCGACCAGCAGACCGCTGCAGCTCGGCGTCAGCCCCCTTCTGCT  
TGGCGATAACCCAGGGCGCCTTGTGCTCCACGTAGCGGTTGGCCTTGTGCGCCAGCGCCATGATTTGCGG  
GATGGCGCGGCTGAATTCGCGGCTCTCATAAGCCTCGGCAATGGCGGTACGAGCATTGGCGAATTCGGCG  
TAGAGCTCGGGTTTCGGCGTAGGTTGCCGCCAGCTTGGCCGCAAAACGCTTGGCGATAAAACCGGCGTTGC  
GGGAGGCGAGGTTGACCAGCTTGTGACCACGTCGGCGTTGACGCGCTGCACGAAATCTTCGAGGTTTCAG  
GTCCAGATCGTCGATGCGGCTGTTGAGCTTGGCGGCGTAGTAGTAACCGCAGGCACTCCGGATCAAGGTGG  
TTCAGGTAGGTAGATGCCTTGATAAAGGTGCCCTTGGACTTGGACATCTTGGCGCCGTTGACGGTTACAT  
AGCCGTGCACGTTGACCTTGGTTCGGCTTTCGGGAAGTTGGCACCTTCCAGCATGGACGGCCAGAACAGGCA  
GTGGAAGTAGGCGATGTCTTGGCGATGAAGTGGTAGAGCTCGGCGTCGGAGTCCGCTTTCAGTAGCTG  
TCAAAGTTCGATGTCGCCACGCTTGTGACAGGTTCTTGAAGAGGCCATGTAACCGATGGGGGCATCGA  
GCCAGACGTAGAAGTACTTGGCCGGGGCGCTGGGGATTTCAAACCGAAGTAGGGGGCGTACAGGGTGTGAT  
GTCCCACGTGCAGGCCGCTCTCGAACCACTCCTGCATCTGTTGGCCATCTCTTCTGAAATGGCGCCG  
GAGCCACGCACCCACTCAGAGAGCCATTTTTCAAACCTGCGGCGAGTTCGAAGAAGAAGTGTGTCAGAGTCT  
TCATTATCGGAGTTCGCGCCGGAGACGGCAGATTTTCGGATCGATCAGCTCAGTCCGGCTGTAGGTGGCGCC  
GCAGCTGTGCGAGTTGTGCGCCATACTGCTCCGGAGATTTGCACTTGGGGCAGGTTCCCTTGACGAAACGG  
TCCGGCAGGAACATGGATTTTTCCGGATCGAACAGCTGGGAGATGGTGGCGCTCTTGATAAAGCCACCAT  
TTTTTCAGGCGGCCGTAGATCAACTCCGCCAGCTCGCGGTTTTTCATCGCTGTGGGTGGAGTGATAGTTGTC  
AAAGCTGATGTTGAACCCGGCGAAGTCCGCCTGGTGTCTCTTGGAGACAGCGCAATCATCTCTTCCGGG  
GTGATCCCCATCTGCTGTGCCTTGTGATGATCGGGGTGCCGTGGGCATCATCGGCACAGATGAAGTGCA  
CCTGATGACCGCGCATTTCGCTGATAACGAACCCAGATATCGGCCGATGTTGTTCCAGCATGTGGCCAAG  
ATGGATGGAGCCATTGGCATAGGGGAGGGCGCAGGTTACCAGCATTTTACGAGGATCAGTTGCCATATTA  
CGTTCTTGTGCTGTTGTTGGGATGATAGAGTGCCGTGCATGTTACCCGAATTGGGGGTAGCCTGCCTAG  
GGTTGTGGCTGTGCCAACCTTGGCAGCACCTGCTGTTACGATGGCAGGCAAGCCACTGATTTGTGTGCGG  
TAACCGTTCACTCAAGATAATGACAAGATAATGAGGAGTTAATGGTGATTGATTCAGTAAAACAGATCC  
TCGCCGAATTTAAGCCAGCAGGCTGGCACAAGGATCTGGTGGATGCCGGATTCGTTTCGCGAGATCATCAA  
TCAGGGTCAGGGGCTTACTATCCGGCTGGTATTGCCGTTTTCGGGCTCTCTCGCTGCTCGATCAGCTCAA  
GAGAATAACGATGCCAGGCTGCGCAGCGCCACCGGCGCCGCCGCTATCGACTGGGCACTGGAGATTGACG

TCGCCAGCATGCCGCGGGCGCAGGGCCTCAATGCCGTGCAGGGCATTGCAACATCATCGTGGTCGCCTC  
CGGCAAGGGGGGGGTGGGCAAATCTACCACTGCCGTCAACCTGGCGCTGGCCCTGCAAAAAGAGGGGGCG  
CGGGTGCCCATTCTCGATGCCGATATCTATGGCCCTTCCATTCCCACCATGATGGGCACCTCAAGGAGC  
GCCCAGTCAGCCATGACGGCAAGCTGATGGAGCCGGTGATAGCTGCGGCCCTCAAGAGCAACAGCATCGG  
CTATCTGGTCTCCGAGCAGGATGCCACCATCTGGCGCGGCCCGATGGCGAGCAAGGCGCTGGCGCAGATC  
CTCCATGAGACCCGCTGGGGCGAGGTGGATTATCTGGTGGTAGACATGCCGCGGGGCACTGGCGATATCC  
AGCTCACCGTGGCCAGCAGGTGCCGACTTCGGCGGCAGTGATCGTACCACCCCAAGATGTGGCGCT  
GGCCGATGCCCCGAAGGGGATCGCCATGTTCAACAAGGTCAATGTGCCGGTGCTCGGCATCATCGAGAAC  
ATGAGTTATCACGTCTGCAGCGCCTGCGGTATCATGAGCCGCTGTTCCGTACCGGTGGCGGCCAGAAGA  
TGGCAGAGCAGTATCAAGTGGCGCTGCTTGGCCAGTTGCCGCTGCACATCGACATCCGCCAACACATGGA  
TGATGGCTGCCCCGACGGTGTTCGGCGCACCCGGAAGGAGCCTGGCTCAGGCCATTTTGAAGCTGGCGCG  
AGGGTAGGGGCTGAACTCTTTTTTCAGCGCAAAACCGATTGCGACCCCCCTCTATGCCATGGCGCTGGATG  
AATAATCGGCGGTGCGTCACTTGAAAGGGAATTGAGGGTGGGCATGACCCACCTTTTTTATATAATGGA  
TCGGTTTTAAACCATCCCCACTGCTCTTCTCTTTTTAGGTATTTTGTATGTCTGATACTCAACATTCGTGTG  
TGATCATCGGTATTGCGGGCGCATCTGCGTCTGGCAAAAAGTCTTATAGCCCAGACCATTTATGAAGAGCT  
GGTGGCCGAACCTGGGCGCAGGTGAGATTGGTGTGATCACCGAAGATTGCTACTACCGTGATCAGACCCAC  
CTGACCATGGAAGAGCGTGTCAAGACCAACTATGACCACCCCAACGCGCTCGATCAGACTTGCTGGTAC  
AGCACCTGAGCCAGCTGGTCAAAGGTGACGCGGTTGCCATTTCCCAGTACTCCTACACCGAACACACCCG  
GATGAGCGAAGTGACCCCGTTTTGCGCCGCGCCGGGTGATCATTCTGGAAGGGATCCTGCTGCTGACCGAC  
AGCCGCTCTGCGGGATCTGATGGATGCCTCCATCTTTATGGATAACCCGCTCGACATCTGCCTGCTGCGCC  
GTCTGGTGCCTGACGTGCAGGAGCGTGGCCGTACCATGGACTCCGTGCTCAAGCAGTACCAGAAGACAGT  
GCGTCCGATGTTCTGCACTTTATCGAGCCGTCCAAACAGTATGCCGATGTGATCGTGCCCGTGGTGGC  
AAGAACCGCATCGCCATCGACATGCTCAAAGCGCGTATCCGCCACATGTTGATTGGTTAAGATGAAACAA  
GCCGGGTGATGCCCGGCTTTTTTAAAAGCACAATTTGTGAGGAGAGTCGCCCAATGCGTCTGTGTGATAT  
CGATATTGAACGCCATCTGGATGAAGGCAAAAATCGTCATTTAGACCACGGCCCGGGGTAGAGCGGATCAGT  
GGTGTGAGTGTGATGTGCTGTTGGGTAACGAGTTTCGGGTGTTTCGCGATCATAACCGCGCCCTATATCG  
ACCTGAGCGGCCCCGACGAGATGGCCGATGCCATCGATCGGGTGTGAGTGACGAGATCCATATCCC  
CGATGCGCAAGCCTTCTATCTTACCCGGGTCAGCTGGCGCTGGCGGTGACCTACGATCCGTGACCTTTG  
CCTGCCGATATCGTTGGCTGGCTGGATGGCCGCTTCTTCAATTTGGCGCGCCTGGGTTTTGATGGTGCATGTGA  
CCGCGCACCGCATCGATCCGGGTTGGTCCGGTTCGATCGTCTGGAGTTCTACAACGGCGGCAAACTGCC  
GCTGGCACTGCGCCCCAAGATGAAAATTGGCGCCTTGAACCTTCGAGATGCTCTCCGGCGTTCGCGGCCCGT  
CCCTACAACAAGCGGGAAAATGCCAAGTACAAGAGCCAGCAGGGCGCCGTTGCCAGCCGATCAATCAGG  
ACTGATGACAGGCGCACAGCAACGATCCAAGGGAGCACAAGGTGCTCCCTTTTTTGCATCTGGAATCAAA  
CGGATATGGGGTTGATGGTGTGCTGGTCCGATGAGATTGGTGGGGCTGGGACGTTTTTATCACCCTTCTGCC  
CGTTTTTCCCGTCATAAAAACGTCATAAAAATGAAATTAATTGGCTTAATTGTCAGCTATTTTTTGCCTTTT  
CCGCAATCATTGATGGCTTTAATTAATCGATGGCAAGCCGATGAAGACTGGCTCTAGGATATTTTTTCC  
AAAAAGCTCTTTTTTTTTATGGCTGAAATATTTCAATGGTGGCTATGGTGTGGCCGCCATCTGGCATAA  
TCCGCCGCAACTCATAAACAGGCTTTTTTTTTATGTTTGAATGTTTAGTGGTTTGGGTTTTGTGGTGGTCA  
ATCGGTTTTGGTATTGGCCGTTTTTTTTTGTGCTTGCCATGAATTTATCAACGGCTTTCACGATACCGCCA  
ACGCGGTAGCAACGGTTATCTATACCAAGGCGATGCCAGCTCACCTGGCGGTGCTTGCATCGGGGATTTT  
CAACTTTTTTGGCGTCATGTTCCGGCGGTCTGGGTGTGGCCTATGCCATTGTCCATCTGCTGCCCATCGAC  
CTGCTGCTTGGGATGGACTCCACCAAGGGTTGATCATGGTCTTCTCCTTGCTGTTTTTCCGCCATCGTGT  
GGAACCTGGGCACCTGGTTCTTCGGGATCCCGCCTCCAGTTCACATACCTTGATCGGTTCCATTTCTGGG  
GGTAGGCGGCGCCTATGCCTGGATCACCCATAAACCGGTGACAGAAGGGATCAACGTGGGCAAGCGATC  
GACATCATGCTTTCCCTCATCATCTCTCCACCATCGGCTTCATCATCGCGGCACTGCTGCTGGCGA  
TGAACCGCATCTGGACCAGCAACAAGATCCACAAAACCCGGAAGAGCGTCAGCTGGTGGATGGCAAGAA  
GCACCCGCCATTCTGGGCGCGTCTGACCCTGGTGGCCTCGGCCATGGGCGTCAGCTTCGTTACCGGCTCC  
AACGATGGCCAGAAGGGGATCGGTCTGGTGTGATGCTGGTGTGATCTGTATGGCGCCCGCCTATTTGCGCG  
TGGACATGAACAGCCGCTCTTATGACCTGGATCGGACCCAGGATGCCAACAGCGCATCATGGAGATATA  
CCAGCGTAACAGTCCGCCCTCTCTGGCGTCATCAACTTCTCTGCACCCGGCAACGGCTCAGGAAGAGCTG  
ATGACCCACTGCTCCGAGATGGCGTGTGAGGCGATGGCCACCTGGATGCCCGTCTGGGTGCCGTGC  
GTACTTATGATCAGATGAGCCTGACCGACCGCGGAAGTGCCTGCTGCTGCTGTATCGATGACAC  
TGCCCGCAAGGCTGCCAAGCTGCCGCTGCCCGCAAGGAGCTGACCATCTGGCCAAATGGCGCAAGGAT  
CTGACCGCGACCGCTGAATACGCACCGACCTGGGTGATCGTCTCCATCGCGCTGGCGCTCGGTTGCGGCA  
CCATGGTGGGCTGGCGTCTGATCGTTTATACCGTGGGCGAGAAGATCGGCACGACCGGCATGACCTATAG  
CCAGGGTATCGCGGCCAGATCACGGCTGCAACCTCCATCGGAGTCGCCAGTCTGACCGGTATGCCGGTG  
TCCACCACCCACATCTCTTCTGCGGTGGCGGGGACCATGATTGCCAACAAATCCGGCCTGCAGAGCC  
AGACTATCAAGACCATCTGATGGCCTGGGTGTTGACTTTGCCGCTGACCATGCTGCTCTCCGGTGGCCT  
GTTTATCGTCAGCCACCATCTGTTTGGTTGATCTGCTGCGTTCATAACCGCATCACAATGACAATGCCG  
CCCGGTGCAAGATCGGGCGGCATTTTTTGTGTCTATGAATTTTCAGTGGAGTTGTATCTCCACCTGATG  
TTTTTTGTTCTTGAGGTAAACAGATAAGAAGGCTCTTCTTCATTTATTTGATTGACGACTCGTTATGTTTT

TTCTGGCTGAACTTTTCGTCATCGAATATCTCTTTCTAATAGTGTGCTTCTCTTGTGATTAATGGATTAAC  
CAATTAGCGTGTGTTTTGGCGAGGTGCAGATGCACCATCTGATAAAGCGTCACTGAGGAGTAGATGATGAAG  
CTGATGATCCCGCCCATGGTGGATTTTTCGACCGGCAGCTTGTCCGGTGCCGAACTGGTGGAGAAGTGTA  
CAAGGTTGGCTGATCTGTATGGCTTGTTCGCCGATCCTGCTTCTGAAGCAGGGGTTGACCCGCAAACGGT  
GCTCTATCGTGTGGCGATGTTGCCAGCAGTGGCGTGGAGGGGATCTCAACATGGGAGTGACCTATCTG  
GAGGCAGGCCGGGTTCGGGCAGGAATTTTTCATGACCCGCGGTTCATATCCATGCTCGCGCCGAGCAGGCCG  
AGTACTACTTCGGGTTGTGCGGAAAGGGACTATTGCTGTTGCAGGATATGGCCGGTGTTCGCCGGTTGGA  
GCAGGTCTTTGCCGGCAGCGTTCATCATATCCCTGGCCACGTTGCCCATCGACTCGTCAACACTGGCGAG  
ACGCAGCTCTCGGCGTGGCGGTCTGGCCTGCCATTGCCGGTTCATGATTACCGGCTGATGGCAGAGCGGG  
GGTTTTGGCCTGCGGGTGGTTCGACGGGAAGGAAGGGGAACCTTGTGTTGTGAGCAGCAGGTGAGTGTCTC  
AATCACCTAACCATCAGCTGCATGGTTCGTGAGCGACCCCGTTAGCGGCTGCCGCAAGATTGGCGTACC  
ACCAGGGTAGGGGGCAGAATGATGCTCTTGGCCGGCTCGTTCGTTGCCGGCCATCCGCTCAAGCAGCAGCT  
CGCCCGCTTTCGGCGCATCTCCCGCGCAGCCACCAGACGGTGGTGAGCGCCGGTTCGACCAGCGCGGT  
TTCCGGCAGATCGTCAAAAACCCACCAGTGCAAAAGTTCTGGCCGATGAGCCGCCCTGTTTGCCTAGCGCC  
AGCATGGCGCCGAGCGCCACCACATCCTGATAGCAGACCGCCCGCTCACCTCGGGGTGCTGCTCCAGCA  
GCGCCGTCATGGCGCGGGTGCCTCTACCCGGCTGGCGCCGCAACCAGTATCCACTCCGGTTTGGGCGA  
GATGCTGTGTTTCGAGCAGCTTGTCTCATGTAGCCACCAGGCGTTGGGAGCGGCTGATGGAGGTGGGGGAG  
CCCCGACAAAGGCGATATGACGGTGGCCGAGTTTTCAGCAGGTGCTCGGTCGCCAGCTGGCAACCAGAGAA  
AGTTGTGCGGTGCCAACAAGTGCATCGCCACATCCGGCACCAGTTCGCACCACCAGAATGGTAGGCATATG  
GCGCCGCTGCAGGCTCTCGAAAAAGCTGTGGGGGGTGGGCTGGGCAGCACAGATCACCATACCGCGCGCG  
CTGTTGCGTTCGAGCAGTCCATAAACTGCTGCTGCCTTGGCCCGACTCCTCGCTGTTGGCAAGAAACA  
GCATCAGATCGTGTGCTCCATCTCCCGGCTCAGGCCCGCCGTCATCTCTGCATAGAAGGGGTTGGTAAT  
GTCGTGCAGCAACAACCCGACCTGATTGCTGCTCTTGTTCGCGCAGGTTGGCGGCAGTCTGGTTGTAGACA  
TAGCCGAGCTCGTCGATGGCTTTGAGTACCCGCTGGCGGGTGTGGTTCGGAGATGCGTCCCTTGTTCGCGA  
AGGTCATGGAGACGGTGGCGGTGGAAACGCCCAGATGGCGGGCAATATCGGCAACAGTCCACATTGCTCAT  
GGTGTGGGTCCAGTCATGATCGTGTGCATCAAGATATATCGATTAACTTCATTTTCGGATGAGAGAAGGTT  
GCAAGTGAGCGATTGATCACGAATTTACCGCAATACCGATGATATATCCCAATGTTTGGAGTTAATCG  
TGTTTTATCAGGTTGTGTTAACGGGTTAATCGGATTATCTCTGTCGTAGGTGTCAACGAGAGAGCAACCG  
AATGATTCATTCGAGTTCAGTCTCCAACCTCAGCAATAATCCAGAAGTAACCGTTGTGTCGATATGAACAG  
GCCGCTGCGCGGGATGGGACGCGATTGCCCATCAGCTGAAGGCCAAAGTGAACGGGCAGGAGAATGCGA  
AAGTGGTACTGGTGTGACTGCTATCACGGCGTGGATCAGACCCGAGCTACGCACCCAGCTGCTGACCAG  
ATTCGGGCTCACACGCTCATCGATGTGGAACAGGCGCGCCTGCCCGAACCACAAAGTGTGGCGATGCTG  
GATCGCTTCATCACCGATGACAGGGTGTTCGGCGTGTGGCACCCACAAAGATGGTGGAGTTTTTTGACC  
CGGTTCGCTTGGCGCGCCTGCAACAGCAGATCGCCGAGATGGCCGAAGGTCGTTGGTGGTGGTGTGAGGAG  
CGGCGCTTCGCTGGTGGCGCAAGGGGATGTGCGGGTCTATGCCGATCTTGGCCGCTGGGAGATCCAGCAG  
CGTCTGCGCCGTAAGAGATTGGCAACTGGGGTGTGATAACACCGAAGAGGACATATTGCGCCGCTACA  
AGCGCGCCTTCTTTATCGAGTGGCGGGTGTTCGACCGCCATAAACTGGCCAGCTGCCACCATCGATTT  
TCTGCTCGACACCAACACCAGGGGGCAAGCCGACCATGGTAACGGGGGCGGCACTGCAACAAGGGTTGCAT  
CAGGCGGCGCGCCAGCCGTTCCGGGTGGTGCCTTCTTCGACCCGGGGGTCGTTGGGTTGGGCAGTGGATGA  
AGCAGGTGTGTGATCTGGACCCGGCCAAACCAACTACGCCTGGTGTCTTTGACTGCGTACCCGAGGAGAA  
CAGCCTCTATCTGCGCTTTGGCGAGGTGAGGGTGGAGATCCCGTTCGCAAAACCTGGTGTGTGCCAGCCC  
AGCGCCTTGTTCGGGAGCGGGTACACGCCCCTTTGGCACCGAGTTCGCGATCCGGTTCGATTTTCTCG  
ATACGGTGGGGGGGAGCCGCTCAGTCTGCAGGTGCATCCGCTGACCGAATACATCCAGCAGGAGTTCGG  
CATGCACTACACCCAGGACGAGAGCTACTACATGCTCGATGCCAAGCCGACTCCTGCGTCTACCTCGGT  
ACGCGCAACCGTATCGACCCGAGGAGATGCTGGCGGATCTGGCTGCCGCCAGCGCGGCGAGAAGCCCT  
TCGACGACGAGCGTTTCATCAACCCTTCCCGGCCGCAAGCAGATCACTTCTGATCCCGGCCGGAAC  
CGTCCACTGTTTCGGGAGAGGGGGCCATGGTGTGTCGAGATCAGCGCCACCCCTTACATCTTACCTTCAAG  
CTGTGGGACTGGGGTCGGGTTCGGGCTCGACGGCATCCCGCGCCCGATCCATCTGGAGCATGGCAGCAAGG  
TGATCCAGTGGGAGCGCGACACCGACTGGACCCGCGAGCATCTGGTCAATCGCATCGAGCTCGTCGCCGA  
AGGACCGGGCTGGCGCGAGGAGCGCACCCGACTGCATGAGCGGGAATTTATCGAGACCCGTCGCCACTGG  
TTCAGTGTGCCGGTGGAGCACGACACCGGCGCACGGTGCAGGTGCTCAATCTGATTGAGGGACGAGAGG  
CAACGGTGGAGAGTCCCGACAATGCGTTCGCACCGTTTGTGGTGCATACGCCGAGACCTTCATCGTACC  
GGCCTCGGTTCGGCGTTATCGTATCCGCCGAGCGGCGAGAGTGAAGGGGCGACCATCGCCACCATCAAG  
GCCTATGTGAGGGGGTAACCAAGATGTTGAGGATCCTTATCGCAACCCATGGTTCACTGGCGCCGGCCCT  
GCTGGCCAGCGCCAGCATGGTCTACGGCGAGCTGCCCGCCGTAGCCACAGTCTCTTTACCGAAGAGGGG  
GGAATAGAGGCGTTTCGCACCGAGTTTGAACAGACCCTGCGCCGTCATGGCGCGGGGGGTCACGGGGTGC  
TGGTGTGTGCGACATGGAGTGTGGCACCCCTACAACGTGGCATGCCGCTTTGCAATTTGATCCCGCATG  
GCCGAGCCGGTAGCCGTGGTACCAGGGGTGAACTTTCCCATGCTGCTGATGAGTGCCGACTGGCTTGGC  
GCGACCGATGTGCACGAGGCGGCCCGCCAGTTGCTGGCCTAGGCACTGGAAATCCATGGTGTGCGGGCC  
CGGCGGCGCACACAGCAAGATGACAACCTTAGGAGAGCGAGATGGCGATTTCATTTGTACGCATTGACGA  
TCGGGTGATCCATGGCCAGCTGGTGCAGCGCTGGGCCAGAGAGCTGCCCTGCACGGCATCGTCGCCGATT

GATGACGAGGTGGCGGCCGATCCGCTGCTCTCCCTGGTGATGATCGGCGCTGTGCCGGACACCAAGGTGT  
GGTTGTTTCGATGTGGCGACGGCCATTGCCAAGCTGCCCAAGGTGATCGCCAGTGACAAACGCTACTTTCGT  
GATTGGCAAGTCGCCGGTACCCCTGCAGCGGCTCTGCGCCCGGCATCTCTTTGAGAACCACAATGGC  
AAGATCAACGTCGGGCCCATGAGTGGCCGCGAGCAGAGCACCACCATAGGCCCAACCAGTCGGTGACGG  
CGCAGGAGATCGCCGCCTTTGACTATCTGGCCAGCCTTGGCCACGAGATTGACTTTTCGGCTGGTGCCGGA  
CGCCAGCCACTACAGCTGGGCGGATGCCCAGAAAAAGCTGAAATAGGGAGCAAACATCATGTTTCTGGAA  
GCAACTCTCATCGGGATACTCTGTTATCTCGGTGCCCTCAGCAGCCCTGGCTGCTGGGCTTGACCGGTG  
GCTGGTATAACCATTACTCGCCCGTTGGTATCGGGCATGCTGGTTCGGTGCCATTTCTGGGGGATATTGAGAC  
CGGGATCCTGATCGGGGTGGCGGTGCAGGCAGTCTATATCGCCATGGTGACGCCGGGCGGTTCCATGCCG  
GCGGATCTCAACTTCGTCGCCTTTCCGGCCATTGCGCTGGGCATCATGTGCGGCAAAGAGCCGTGCGTTG  
CCGTGGCGATTGCCGCCACCATCGGCATCGCCGGGACCATCTCTTCAACTTCATGATGGTGTTCAACTC  
CTACTGGAACCACAGGGCCGATGTGGCGCTGGAGCAGGGCGATGAACAGGGGGTTTACCTCAACAGCGCC  
ATCTTCCCGCAGGCCAGCAACTTTGTGCTGCGTTTCGTGCCGACCTTCATTGCCGTCTACTTTCGGCAACC  
AGTACATCGAAGGCTTCATGAACAGCCTGCCGGAGCTGGTGATCCGTACCATGACGGTGGTAGGCGGCAT  
TCTGCCTGCTGTGCGGTATTGCCATCTTGCTCAAGCAGATCATCAAGCAGAACAGCATGCTGATCTACTTC  
CTGGTGGGCTTTGTGCGCATCGTTTTTCTCAAGCTCAACATGGTAGGGCTGGTAATGATTGGGGCCCTGC  
TGGCGCTCATTCACTACAACCTACAAGCCGGAACAACGCCCTGCAGTCGCTGCCTGTGCTGCCACCCAAAC  
CGATGATGAGGATGAATTCTGATGAACACAGAGCTGCAATCAGCGGAGCTGGCGGCCAAGCAGCCGGTTG  
CTCTTACCCACGGGATCTGCGTGCCTGCTGGCGTTCGTGGATGATGTACAACCTCTCCTCCATGAGCTT  
CGAGCGTCTCGAATCGTTCGGCTTTTGCCTTGGCATGATGCCGGCGCTCAAGAAGCTCTATCCCGGCAAG  
GCTGAACGGATGGAGGCGATGAAACGCCATGCCTCCTTCTATAACACCCGAGCCCAGATCGGCGCCATTA  
TCAATGGGTTGGCAGTCGGGCTTGAAGAGAAGCGGGCCAATGGCGAGAAGATCGACGGTGAGACCATCAA  
CACCTCAAGGTTGGCCTGATGGGGCCCATCGCTGGCATCGGTGATTCCATGATCCCCGGTATGCTGGTG  
CCCATTCTGCTCAGTATCGGGATGGCGCTGGCGGCAGGGGGGAGTGTACTGGGGCCGCTGTTTTACATCA  
TCAGCTTCAACGCCATCGCCATTACTGGCTCCTACATGTTGTTTATGAAGGGCTACAAGCTGGGCACTGG  
TTCGGTGGAGTCTTTGGTCAGTTCGAGTCGGCCAAGCTGCGCGAGGCGCTCTCCCTGCTGGGGTCTTT  
GTGATGGGCGGGGTGGCGGCCAGTTATGTCAACCTCTCAACCGGACTCGATTTTGTCACTCGGACGGGG  
TCAATATCCAGGTCGACAGCATGCTGGATGGCATCTTCCCAAACCTGATGCCGCTGGTGGTGGTGGG  
TACCTGGTATTTGATGAGCAAGCGCAACGTTTCGCGGTCAAAGCGATGCTCGGGCTGTTGGTGTCTGGCC  
TTTTGTCGGGGTCGCCATCGGTCTGTTCTGATGGGGTCAAGGCCATTTGGTCAACAATGGGAGAGCCTGGC  
TCTCCCTTTTTTATCGCCGTTGCGAGAGGTAATTTATGCATATCGAGGTGACTGAGGCCGCACAGCGTTGC  
CATCGCTGGCTGGTCTCCGAGGCGCTGCCCTTTGGGGCGCGCAGGGGGTTGACCCCGAGCGTGGGCTGT  
TTGCCGAGGGATTGGATAGTGTGTCAGCCTTTGTGGCAGCCGACCCGTTTTTCGGGTACAGAGCCGCCA  
GATCTATGTGTTAGCCACGCCACCTTGCTGGGGTGGTACGACGGGCGAACCTTGCCGAGCGTTCGCA  
TTGATTGGTATGGGTCAATTTGACGATGGGGCGGGGCATAGCGTTTTTCTCCATTAATCGGGATGGTTCGA  
TTGCTGATGCATCAGTCTGCAGCTATGAATACCGTTTTGCTCTGCTGGCTGAGTGTGCTGGCTCTATCGTTT  
GAGTGGCGATCCACGCTGGCAACAACAGGCCGAGTCGCGCTATCAGACCATTGAGCAACTCTTTGTGGAC  
CCGCTGCACGGTGGATTTCACTCCAGTTGGCCATCTGGCCACTGCGCAGCCAAAATCCCCATATGCATC  
TGTTTCGAGGCGTTGTTGGTGGCGGCAGACAGCTTTGATGATGTGATATGGCAGCAGCGGGCAACC  
GTATCGGCTGTTTTCGTCAGCGTTTTTCTGGAACCCGGGTTACTGCGCGAGTTTTTTCGACGATGCGCTGCTG  
ACGCGTCATGCCGACTCCCGTCTCATCGACCCGGTTCATCACTACGAGTGGTGTGCTGGCTGCTGGCAGCCT  
ACCGGACTCTTGCCAGCAGCTGGGAAATCCAGCAACCAGCACCAGATTTGACGAGGCAATCGGGATATT  
GACCCGCTTTGCCATCCGCCACGGTACGGGCGAACCCGGGCTGGTGATAGATGAGCTGACCGATGACGGG  
CAGCCCCATCGGGCGACAGTCCGGCTCTGGTGCCAGACCGAACATCTCAAGGCGCTGCTGGCGGCCATG  
AGCAGCAGGGGGATGAGGCTACCGCCTGCCAGATCAGCGAGGTGGTTGCGCGGATCTTCCACTACTACCT  
GTTCCCGCGAAGCCCGACAGTGGATTGACCAAGTGGATAGCGAGGGGAAGCCGCTGACCTCTCATGCG  
CCAGCCAGCACGTTTTATCATCTGTTGGTGGCGTTTTAGTGAACCTGGCCCGGATCGCGGGGGTGGGTATCG  
GGGAGTAGGGTGGCCTATGGGAGACGCTTAAAAATCCAGCCGGGTTGTGCTTGGCGTTCATTGAGCGCG  
CCTTCTGTGCTTGGCGCGCAACCTCGACCCGGCGTTTTGCGATCCCGGCACAGGCGCATCACCTCTT  
GTTGCTGGGAGGGGTCATGGTGGAGCAGTTGAAACGCTCTTTCGCGATTGCGCAGGCAACCCCTTGCAGTA  
GCCCTTGTGTTCACTTCGACAGCCCGATGCAGGGGCTCTGCAGCGGGAATATTTGAGCTGTTCCATT  
CATCACCTCGCACATCCTGTACCTTGTATAACCAGCGGATCCCCTTTGGAGAAATCCTGCTTCAAGT  
GATTGATGTCGTTTTGCTTTCCCTGCAAATTTGGCATCTTCCCGCCGAGCATGGCTCTTGGCGTTATA  
TGAGGACATATGAACAAACACCGTACTGGCTGACCGCCGAGTGTGGGACTGGCCGGTTGTGCGGGCA  
ACTCTGAGAAAGCAGAAGTGCCCAAAAAACAGACCGACAACAGATGCTTTCTTAACTGCGAGGTGCCGGA  
AAATCTGGGCAAGCAGTATCTGGACGGAACCTTGCTGAGGATCTGGTGGGGTAGAGCGGGTCAATAGC  
CGTGCAGGTCGCCACTACAGCAAGTTTGGCCCGCAAAGCAGACTGGTATTGGAGCGCTCCGGCAAGATGA  
CCCGCGTTATGGCGAGCTCTATCATCAGCTCTCCCGCTGGGTAGCGGGCGGTGGCAATCCTGCCGATAT  
TACCCGTTACGGTATCAGCCTGGCCAGCTGGGCGGTGCCGATCGCATGGGGAACGTGCTCTTTACCGGT  
TACTACTCGCCGGTGTGAGGTTGCGCCACCGCCGGATGCCAAGTACAAATATCCCATCTATGCCATGC  
CAAAATGTGGCGGTGCTGTCCGACCCGGGCGGAGATCCATCAGGGGGCTTGGCCAATCGCGGGCTGGA

GCTGGGTTACAGCAAATCCCTTATCGACAACCTCCTGATGGATGTGCAGGGCTCGGGCTTTGTCCATTAC  
GGGGATGACGATCGGCTGCAATATCTGGGCTACAGCGGCAAGAACGGTCACGGTTACGTCAGTATCGGCC  
GGGTGTTAATCGATCGCGGTGAAGTGCCCAAAGAGCAGATGTCGATGAAGGCCATCAAGGAGTGGGCCAA  
CCGTCAACCGGAGGAGAGCGTCAAGGAGCTGGTGGAGCAGAACCCTCCTATGTCTTCTTCGAGCGTCGA  
CCCACCAATGATGTGATCGGTGCGGCCGGTATCCCGCTGCTGCCGCTGGCGGCCGTGCTGCCGACAAGA  
CCCTGCTGCCGATGGGTACCCCGATCCTCGCTGAAGTTCCTTGCTCGACAAAGAGGGGCAACTGGACCGG  
CAAGCACCAGCTGCGCTTGTGATTGCGCTGGATGTGGGCGGGGCGGTGAAGAAGGGGGCACCTCGATCTC  
TACCACGGTATGGGCGAGAAGGCCGGTGTGCGGGCCGGTCACTATAAGCACTTTGGCCGGGTCTGGAAAC  
TGGGCTGCACCATGGGCCGACTGCCGCCCCCTGGTTGTAATCCTCTGAGGGGTTGGGCGTCTGTCATCG  
GGCGCCCCGAGCAATGTGAAGAGACAAAAAAGCCGCCGATTGCTCCGGCGGCTTTCTATTTTGTGCGAG  
TTGCCAGTCTGTGGCTGCGTCAGCTCTTCTGGATATCCAGCCGGATGGCGCCGACCGGTTTGCAGCAGCA  
GGGGAGGCACTCCCCTTGGGCGACGAATGCCAAGGGCACCGCAGGATAGTGCACCTTGCCAGCCATCAGC  
GGAGTGCGGCAGGCGCCGAATAGCCGCTGCGACACTGAAATTCCACATGATGACCATGGCGCTCCAGGG  
TCTCCAACACGCTTTTCGCGGGGATGGGCGTGCAGCACGGCACCATCCCGGGTATGTACCCGTGGTGCCAC  
GACCGCCTGCTGTTACGAGCTGCGTGCAGGGGCGAGGGTCAAGCTGTTGGTGGCATCACTCACAGCTCGA  
AATCACCAGGTCATCGGCATTGACTTCGCTGTGATCTGACCGACCAGATAGGAGCTGACCTCTACCTC  
TTGCGGGGCGACCTGCACGTTGTGCGATGACAGCCAGGTGTTGATCCAGGGGATCGGGTTTTGCTTGGTG  
CCGGCAAAGGCTGGCTGCAGGCCGACCGCGCTCATGCGCAAGTTGGTGATGTACTCCACGTACTGGCAGA  
GGATGTCTTGTTCAGGCCGATCATGGAGCCGCTTGGAAACAGGTAAGTCCGCCCCACTCTTCTCTGAAT  
GGCTGCTTCTTGAAGATCTCGAAGCAGGCCTGTTGCGACTCGGCGGCGATCTCGGCCATCTCCGGGTCA  
TCCTGGCCGGTGCATCAGGTTGAGCATGTGCTGGGTGCCGGTGAGGTGCAGCGCTTCGTCGCGGGCGA  
TCATCTTGATGATCTTGGCGTTGCCTTCCATCAGTTCACGCTCGGCCAAGGCAAAGGAGCAGGCGAAGCT  
GACGTAGAAGCGGATTGCCTCCAGCGCGTTGACGCTCATCAGGCACAGATAGAGCTTCTTCTTGGACTCG  
CGCAATGTGATGGTCACTTCGCGGCCCGCGACGGTGTGGGTCCCTTACCATGCAGGTTGTAGAGGGCGG  
TCGCTTCGATCAGGTGCTGCTAGAAGTGGCTGATGGAGCCGGCGCGCTCAAGATCTGCTCATTGGTCA  
GATGTGCTCGAACACCTGGGCGGGGTGTTGACGATATGCGGATGATATGGGTGTAGGAGCGAGAGTGG  
ATGGTCTCGGAGAAGGCCAGGTCCTCAATCCAGGTTTCCAGCTCCGGAATGGAGACCAGCGGCAGCAGGG  
CCAGCTTGGGCTGCGACCTGAATGGAGTCCAGAGGCTGTTGACTTTCAGGTTGGAGATGAAAATGTG  
CTGCTCGTGGGCGCGACGGCCGATAGTGCATGCGATCAGGGGAGACATCCACCTTCCCGGCCCGCAG  
AAGAAGGAGAGCTGCTTCTCGATCAGCCGCTCGAACACTTCGTGCTTTTGTGATCATAACGGGCTACGT  
TGACCGATTGGCCAAAAAACATCGGCTCTTTGAGCTGGTTCGTTTTGGGTTTGGCAGAAAGTTGAATAGGC  
CATGGTTACCAGAATATGTGAATAGAGAAAAACAGGAGAGCGGGAGTTTGTGCTCCCGCCCGGTTATCAG  
TTCTTGTGCTGACTTAGATTTTGAAGCCCCGCCAGCGCAACCGTCATCTTGCAGATCGGTCGCGGCATC  
GTCTGCACCATCACGGGTGTTGTGATAGTACAGGGTCTTGGAGCCGATTTTGTAGGCGGTCAGCAAGTCC  
TTGAGCAGCTGTTTCATCGGGACCTTGTTCCTTCGAAACGGGCAGGGTCGTAGTTGGTGTGGCGGAGA  
TCGCCTGATCCACAAACTTCTGCATGATACCGACCAGCTGCAGGTAGCCGTCAACGCTCGGTTGCTTCCA  
GAGCAATTCGATATTGATCTTTCAGGCGATCATACTCGGGCACCACCTGTTTGAAGATGCCATCTTGGAG  
GCCTTGACCGAGACCAGGCCGCGCGGGCGGCTCGATGCCGTTGGTGGCGTTGGAGATCTGGCTGGAGGTCT  
CGCTCGGCATCAGGGCGGTCAGGGTGGAGTTGCGCAGACCCACGGATTTGATCTCTTACGCAGGCTTTC  
CCAATCCAGATGCAGCGGCTCGTTGCACAGCGCATCCAGATCCTTCTTGTAGGTGTCGATGGGCAGGATG  
CCCTGGGCATAGGTGGTGTGCGCAAATAGCGGGCAGGGACCGAACTCGCGGGCCAGCTGCACTGAGGCTT  
TCAGCAGGTAGTACTGAATGGCCTCGAAGGTGCGGTGAGTCAGCGCCAGACCCGAGCCGTCAGAGTAGCG  
GGCACCGTTTTTGGCCAGGTAGTAGGCGTAGTTGATGACGCCGATCCCCAGGGTGCAGCAGCCCATGCTG  
CCCTTCTTGGCGGCGGCAATCGGGTAGTCTGATAGTGCAGCAGGGCGTCGAGGGCACGCACGGCCAGAT  
CGGCCATCTCTTCCAGATCTTCCAGCTTCTCGATGGCACCAGGTTGAAGGCGGAGAGGGTGCACAGGGC  
GATTTCCGCACTCTCGTCTGATGTTGTTGAGCGGCTTGGTGGCAGCGCAATTTCCAGGAGCAGAGTTG  
GACTGGCGTACCGGCGCCACGCTCGGGTCCGAAACGGGCTGTGGGTGTTGCAAGTATCGACGTTCTGGATGT  
AGATGCGACCGGTACCGGCACGCTCTTGCATCATCAGGGAGAAGAGGTCTACCGCTTTCAGGGTCTTCTT  
GCGAATGGCCGGATCTGCTCGTACTTACGCTAGAGCTCTTCCGAACTTGTCTGATCGGCGAAGAAGGCA  
TCGTACAGACCCGGCGCATCGGACGGGGAGAACAGGGTGTGTCACCGCCCTTGTGAGGCGCTGGTACA  
TCAGCTTGTGATCTGCACCGCTAGTCCATGTGACGAACACGGTCTCTTCCACGCCGCGGTTGTTCTT  
CAGCACCAGCAGGCTTTCACCTTCCGTGTGCCACAGCGGGTAGAACAGAGTGGCCGACCGCCGCGCAGC  
CCGCCTTGGGAGCAGCACTTACCGCAGTCTGAAAGTATTTGTAGAAGGGGATGCAACCGGTGTGGAACG  
CTTCCGCGCCACGGATGGGGCTGCCAGACCGCGGATGCGACCGGCGTTGATGCCGATACCGGCGCGCTG  
GGAAACATAACGCACGATGGAGCTGGCGGTGGCGTTGATGGAGTCCAGGCTGTCGTCGATTCGATCAGT  
ACGCAGGAGCTGAACTGACGGGTGCGGGTGCAGCAGCCGCTCATGATGGGGTCCGGCAGGGAGATCTTGA  
AGGTGAGACCGCATCATAGAAGCGCTTGTGATGAGTCCAGACGGGTATCTTTCGGGTACTTGGAGAAGAG  
GCAGGCCGCAACCAGCATATAGAGGAACTGCGGGCTCTCGTAGATCTCGCCGGTAACGCGGTTCTGGACC  
AGATATTTGCCTTCCAGCTGTTTACTGCCGCTAGGAGAAAATCCATGTGCGGCCAGTGTCCAGATGGG  
TGTTTCACTCTTGAATTCGGCCTGGCTGTAGTCTTCCAGCAGGTGCTTGTGATTTTGGCCATGTCCAC  
CAGACGAGCCACGTGCTGGTAGAGGTGGGGCGGTTCCGAACTGGCCGTAGGCCCTTCTTGCAGGTTGGAAG



ATGGCCAGACGGGCTGCCATGTACTGGTAGTCCGGGGTCTGCTCGGAGATGAGGTCAGCCGTCGCCTTGA  
TGATGGTTTTCGTGAATGTCGGCGGTACGGATACCGTCATAGAAGTGGATGTGGGATTTGAGCTCTACCTG  
GGAGACCGACACGTTGTCGAGCCCTTCGGCGGCCAGTCCAGCACGCGGTGAATTTTATCCAGATCGATG  
GGTTCTTTGTGTCCGTTACGCTTCGTCAAAACAAGTTCATTGGCTGATGACCTTCAGTTGATTCCCAGAA  
AAACCATCGCACAAATGACGCCACCCAGGCCCGGGCGGTGTGCGGGAGTTGGGTAGAGATTGTGCGATGAA  
TCACAAGATGTAGTGTATTTTAAAGTTCGAGCTACAAGATAGTGAGGTCAGCCCGCCATTGCAATGTGTG  
GATAAGTGACGAGCTGTGGATAAATTGTGAGTCTTGCAACATCAGTTAGTGACCGCTCACAGTGAGCGGG  
TTTTTCATTTCGTCGCTCCGCTAAATGCAAGTCTCCCGATCGAAGATGGAAAAATTTAAATAACTTTTTTTG  
CTTGCGAAACGGGGGGCTTTTTACTAGCAAACGGCGGCTGATTATCCCTTATGCAACAAGGGTCAAAGC  
TGTCCAGTTGTCGACGCGCGGGCTCAGCGTGGCAAGGGCTTTGCATCAGATGACGGTGGTTTTGTGGCCG  
CTTTGTGACGGCTGTGAGCTTGTCAAATGGGTATCCAACAGGCAGAAAGCTGCCTTTATTATCCATGAAT  
AGACGAGTGATGGTGGCGCAGGTGCGCGAAGTGTAAAGGAAAGATGCAAGGGCGGAGAGTCTCTTCGCC  
CCGTTATCGCATATCAGCCGGTAAAGGCTGCGCGTTACGTTTTGGCCGCAACTCGTAGCGCAGCCAGTGG  
TGCAGGGCCTGCACGGTATCGAAGTGCAGATCGGCGCCCCACTGGGCGGGATCTTCCTCATTATTGAGAT  
AGCCCCAGCCTGCGACCGCGGTACGCATGCCAGCATTGCGGCCCGCTTCGATATCCCGCACATGATCCCC  
CACATAGAGGCAGTGAGCCGCTCGACCCCCAGCTTCTTACAGGCAAAGAACATGGGGGCGGGTCCGGGC  
TTGCGTACCGGCAGGGTGTGCGCACTGACCGTACGCGCAGCTGGCAAGCTGTGGCAGGGCTGCCAGCA  
GTGGCTCGGTGAGAAAGCCCGCTTGTGGTGACGATGCCCCAGGGGAGCTGTTTTCTCGTCGAGCCACTC  
GATAAGATCCACCATTCCCTCATAGGGGCGGGTACCGACGCAGAGATTGGCCGCGTAGTAGTCGAGCAGG  
GCATTGCGCAGGCGTGTGGTCCCCAGCTCTTCAAGCAGTTCTGTCGCCGAGGCCCGCTTTCAGCAGCCGA  
GCGCTCCGTGGGAGGTGGTCTGACGAATAATATCGTCAGAGAGCGGCGCAAAGCCTTCGCTGATCAGTAC  
ATGGTTGACGGCGGCCCCAGATCCGGGGCTGTGTGCGAGCAGGGTGCCGTCCAGATCGAACAGCACGCAA  
CGAAGAGGCTGCAGATGAGAGGCGTTCATCAACCTTGCTCCGGGCGGACAAACTCCACCATATAGTTGAC  
GTCGACATTCTTGCCGAGCTTGAAGTGGTGGTGAGGGGGCGTAGTGACGCGCTCATGTCCCGAAC  
AGCAGGCCAGCTGCTTACCCATGCGACACAGTTCGGCCGGGGTGTGAAATTTTTGTGATCGTGGGTAC  
CCTTGGGCACCATCTTCATCAGGTATTCGGCCCCGATGATCATCATCAGATAGGATTTGGGGTTGCGGTT  
GATGGTGGAGACGAACCCCGCCCGCCGGGCGCACTAGGGTAGCGATGGCGCGCAGCACGGAAGCGGGG  
TCCGGCACATGCTCCAGCATCTCCATCGAGGTGACCACTGATCTACTGGCCGGGGGCTTCTCAGCAGTGTG  
CTTCGCGCAGTGATCTGGCGGTACTCGAGCTCGACCTGCTCAAGGGCGTGCAGGCGGCGGACGCGCAG  
AGGCTCCTTGCCCATGTGATGCCGGTGACCCTGGCGCCACGGCGGGCCATGCTCTCGGAGAGAATGCCA  
CCACCGCAGCCGATATCGAGAATGCGCTTGCCAAACAGACCGCCACTTTTTGTGCGGTGATCCAGTCAAGGC  
GTACCGGATTGATTTGATGCAGGGGTTTGAATTCACCTTCCATGTCCCACCAGCGGGAGGCGATGGCTTC  
AAACTTGGCGATTTCTGTGATGACATTTGGCATCACTGTTCAATTTTTCGAAGATCCTGTGGCAGGGCG  
CCCGCTTCTGAGTCAGGGGCGCAATCTATTGTCTTGGCGGCATATAACGGACGGACTTTGTACACCA  
GCCCCGATCTGATAACCGATTTGTGGCTTAAAGGATTTGGCTCAGTGTGTTACCATGTTGCGCTGTTTAA  
CCAAAGAACAATAATTAGGGATAAGGCTTTCTATGAGCGATCTGGCCAGAGAGATCACGCCGGTCAACA  
TCGAAGAAGAGCTCAAGAGTTTCTATCTTGATTACGCCATGAGCGTGATCGTAGGACGAGCTCTGCCGGA  
TGTGCGTGATGGCTTGAACCCGGTTACCCGCCGCTTCTGTTTGTATGAACGAGTTGGGGAACGACTGG  
AACAAGCCCTATAAAAAATCGGCCCGTGTGGTTCGGTACGTAATCGGTAATAATCACCCGCACGGCGATA  
GGGCTGTGTATGACACCATTGTCCGGATGGCGCAGGATTTCTCCATGCGTTACATGCTGGTTCGATGGTCA  
GGGCAACTTCCGTTTCAGTCGACGGCGACAGCGCCGCGGCGATGCGTTATACCGAAGTGCGGATGGCCCGC  
ATCTCCCACGAGCTGCTGGCTGATCTGGACAAAGAGACCGTGGACTGGGTGCCGAACATGACGGCACCG  
AGATGATCCCGCGGTCATGCCTACCAAGGTTCCAACCTGCTGGTCAACGGCTCCTCCGGTATCGCGGT  
GGGCATGGCGACCAACATTCCGCTCACAACCTCACCGAGATTGTCAATGGCTGCCTGGCGCTGATCGAA  
AATGGCGACTCACCATCGACGAGCTGATGACCTACATCACCGGCCGGATTTCCCCACCGGCGGCATTA  
TCAACGGTCTTCCGGCATCGTGCAGGCGTACCGTACCGTTCGTTGGCTCCATCTATGTGCGGGCCAAAGC  
TGAAGTGAAGTGGACGAGAAGACCAGTTCGCGAGACCATCATCGTTACCGAGATCCCTATCAGGTGAAC  
AAGGCTCGACTGATCGAGAAGATCGCCGAGCTGGTCAAAGAGAAGAAGATCGAGGGCATTAGTGCCCTGC  
GCGATGAGTCTGACAAAGACGGCATGCGCATCGTTATCGAGATCAAGCGCGGCGAGTCCGGCGAGATTGT  
GCTGAACAATCTCTACAAGCACACCCAGATGCAGACCAGTTCGGCATCAACATGGTAGCGCTCGATAAC  
AACCAGCCCAAGGTGATGAACCTTAAAGAGATCCTGGATGCGTTCCTGCTGCACCGCCGTGAAGTGGTGA  
CTCGCCGACCGTGTTCGAACTGCGCAAAGCGGGGATCGGGCACACATTTTGAAGGTCTGGCGGTAGC  
CCTGGCCAACATTGATCCCATCATCGAGCTGATCCGTACAGCGGACCCCGCCGACGCGAAAGCGGGC  
CTGGTTGCCAAGGGCTGGAACTCGGCAACGTGGCCGCATGCTGGAAAAAGCGGGGACGACGCGGCAC  
GGCCAGAGTGGCTGGAGCCGGAGTTCCGGTATCCGTGAAGGTCAATACTTCTGACCGAACAGCAAGCCCA  
GGCCATCCTTGACCTGCGTCTGCACAAGCTGACCGGCCCTCGAGCACGAGAAGATCCTGGAAGAGTACCAA  
TCTCTGCTGGATCTGATCGCCGAGCTGCTGCACATCTTGGCGAGCCCGGCTCGTCTGATGGAAGTGTATCC  
GCGATGAACTGCTGGCTGTGCGTGAGCAGTATGGCGACGAGCGTTCGACCCGAGATCAGCATGTCCAGTGC  
CGAGATCAACATCGAAGATCTGATCACCCCGGAAGATGTGGTGGTTACCTGTCTCACAGGGCTATGTG  
AAGTATCAGCCGCTCTCCGACTATGAGGCCAGCGCCGCGGGTCTGGCAAGTCCGGCCACCCGGATCA  
AGGAAGAGGACTTTGTGGAGCGTCTGCTGGTGGCCAACACCCACGACACCATTTCTGTGCTTCTCACCCG

TGGCAAGGTCTACTGGCTCAAGGTTTACCAGCTGCCGGAAGCGTCCCGTGGCGCCCGTGGTCGTCGGATC  
ATCAACCTGCTGCCGCTGGAAGAGGGTGAGCGTATCACCGCTATCCTGCCGTTGAAGGAGTATGATGCCG  
AGAAGTATGTGTTCTTCGCCACCGCCAATGGTACCGTGAAGAAGACCAGCCTCTCCGACTTCAGCCGTCC  
GCTCTCCTCCGGTATCCGCGCCATCAACCTCAAAGAGGGTGATGAGCTGATTGGGGTGGATATCACCGAC  
GGCAGCAACGAGATCATGCTCTTCTCCGATGCGGGTAAAGTTGTTTCGCTTCGCCGAAGGCAGCGGTGCGG  
CCGATGCCGATGTCAGCGATGACGTTGAAAACCGACGACGATGCCGGCAATGACGATGATGGCAGCGACAA  
CGGGCAAGGCACCGAAAGCAAGGGCACCTTCAAGGGCGTTCGCTCCGATGGGTCGTACCCGACGCCGGTGT  
CGCGGCATCAAGCTGGGCGCCGGTGACAAGGTGGTTTCCCTCATCGTTCCGCGCGGCGAAGGTGCCATCC  
TCACCGCCACCGAGAACGGTTACGGCAAGCGGACTGCGTTGGCCGAATACCCGACCAAGAGCCGTGGTAC  
TCAGGCGTATCTCCATCAAGGTGGATGAGCGTAATGGCAAGGTGATCGATGCGATCCAGGTGCAAGAT  
ACCCAGCAGATCATGCTGATCACCAACGGCGGCACTCTGGTTCGCTACCCGTGTTGCCGAGGTGAGCGTCA  
TTGGCCGTAACACCGCGGCTGTCGCTCTGATCCGTAACCGTACCCTGGAAGACGAGACCCTGGTTGGCCG  
CATCGCCGAGAGCGACGAAGACGAGAACGACGCACTGGCCGTTGACGGTGAGGTATCTGAAGGTACCGAT  
ACCGCGACCGGCACTGATGCAGTCGATGCAGGGGAAGCGGGCGACGAGTAATCGTCACCAGTTACCCGAG  
CAACGTCTCTGATCAAAAAGAGCGACCCTGGTGGTTCGCTCTTTTTATTTGCTGCTTTTTATGACTCTAC  
GCTGCTCTTACGGCTGGATCACTCCTGCAGCCACATTTGCGCTGCGGGCGGGAAATGGCGACCCGTACC  
CACTGGCTCTGCAGTTGACTACGGCCCCCTGGTTCGAGCACGTCCTCGATAGTTGCGATAACCAGTTCATCT  
CGAACCTGGCGGTATCGAGCCAGTACTCTTGTCTGATGCGACTTGTGATGCCGACCAGCCCCGTGTTT  
GCCCCGTTTGAACAGCACGAAGCAGTCACTGCTGCCGATCAGCTGCATGGGTTGACCCTGCACCGCATTG  
TGGAAGCGGATCATCCCTTGAGATCGGCTCGCTGGTAGTAATCCTGCCAGCGCAGTCCATCCTTGGCC  
GGGTCTCGCCGTGATCCGAATAGACCAGCGGCGAGCCACCATCGCGGCGAGCAGGTAGGCATAGGCCAG  
CTTCTCGTCTGTCTGGCTCAGGATCTGATAGCGGAAGCCGTCGTTGGTTCGGGATGTCTGGGTACGGCA  
AAGGTGACGGCACGACTGCCCGCAGCGCCTGACCATAGGCGCCCGGATCCGCCAGCAGGTTTATGCTGC  
CACCGTAACTGAAGGCACCGCGCAGGGAGGCAAAACAGCGGAAAAGTCATAGGCTCCCTGGCCGCTGCTGTC  
GAGGTAGGGTTTTGAGGAAGCGCTCGTAATCGGTGCTGCCTGCGCCCCCTGTGGTGATCACCTCGCCAAAC  
ACGTGCATCCCTGTTTATCTCGGGGTGAACACGGCGTTGATCTGGTAATCGCTCATGTGTTGACCG  
CATCGAACCGAAAACCCCTGATCCCCATCCCTTGAGCGCCTTGAGATAGGCTGTTGCTGGCTGACTGACA  
CCAGTTGTTGGGATCCAGATCCGGCAGCCCCCTGTACCCGGCACAGAGACGCAAACTGAGGTTGTTG  
TGACCCGGATCGCTCCAGTCGCTGATGCACCCCTCGGATGAAAATCCTGACCCGAGGAAAGTTTGGCC  
CGAGATCGCCAAACAGTTGTTTCTGGCGCTCGAAAATAGGCCGGGTTGCTGGCGTAGCTTTGCAGCAGCTC  
GTTGCCAGGATAGTTGAGATCGCTGCGTTTTCCAGCTTTTCGTTGGCCATGTGGTTGAGCACTACATCGGCA  
TAGACGGCGATACCCCGCGCCTTCATGGCGGCGATCAGCTGCTCGAGATCCTGCTTGTGTTGCCAAGAGGGG  
AGTCGACAAGACGAGATCCTGCGGCTGGTAACGGGCCCCACTCGTTGCCGATGACTTGAGAGGCGG  
CGAGATGAGTACCTGTTTGTAAACGGCCGACTTGATAAGGTCGGCTTTGGCCGTCACCTTCACTGTACTTC  
CAGTTGAAGGCGTGAGTATGACGTCGGCTTGCGCCAAGGGGGCGATCAGCATGCCTGCGATCGCCATA  
TTCCCGCTGTGTGTTTCAATTATTGTGTCCTGTTTTTATAGATGCCTGAATGGGCAAGCCAGCTTTGGCG  
GGGACAGAGTGAGCTGCAATCCACAACCTGCAGATTTGTGACCGCTTTCAGGATGATTTTCGCCGAATATG  
TGAAGTGTTCGGCTTTTCTCGCCACCACCAGTTGCCTTTTTACAAGTGATTTTTTGTGATTTCCCTGT  
CATTTCCAGCCGCTATCCTGCTAGGCGAGTGGTGCCTTGTGTCATCACCTTCACCGTCAGGAGCTGCAT  
ATGACCAGTTGGATCACATGGGAAATTTGGTGGAGCCGGGTATGGGGCGAGTCAGAGGTGCCGCTGTATG  
AAGAGGATGAGCACGAAGTGGCTCATGAACCTCGCGACTACCGGTTGAAATGGTGCAGCAGGGTCGGGA  
TCAGCGCGCAGGCTAAGGCGTTAGCCCTCTCTTACCAGGATAGCGCTTTCCTTGTGGCGACATGGCTAATC  
CGTAGAAAACTTTGAAGAGCGGGGTTTCCACAGGATGTGTTGCGGCAGGTAATCCTTCAACTTCTTGG  
CACGCTGATGTGTGAAGGGCGTGAGCAATGGGATTAGAAGAGCGACAGCTGCTCCCCGGGGCGTATAAA  
CCCATCCAGCCTGAGCTGAATATGGCGTTTGGCCAGATCAAGGCGCTTGTGATAAGGCGAAAAGCGCTGA  
GCCAGCAGATCGGCAAAATGTCCCTCACCCGCATGCGGGTGCCGAAGGCGGTACTGTTGAGCCCGCCAC  
CGCGGCTGGCTCGCAACTGATTCAAAATAGCCTCCTTCTGGCCCGATAGTGGGTATCGAGCCAGTCCCC  
AAATAGCGGCGCCAGTTTCGTGGGGTAACCGCAGCAGGATGTAATCGGCGCAGCTGGCGCCTGCCTCGGCG  
GCTGATTTGATGATCTGCTCCAGCTCAGGTTTCAATTAAGCCGCGGGATCATCGGGGCGGCGAGTACCCCA  
CCTGCACGCCAGCGTTTGGCAGCTTCTCGATCACTTTCAAGCGGCGGCGACCCGCTGCTGGCGCGGGGCTC  
CAGCTGTGCGGCGCAGGTTTTCAATCAAGGTCGTCACCGACACCATTACCTGACACAGTCCCTCGCTTGTG  
AGCTCGGTCAACAGATCGAGGTCGCGCAAGATCATTCGCTCTTGGTAATGAGTCCGACCGGATGGCGGT  
GGGCCAGCATCACTTCCAGCAACTGCCGGGTGAGGCGATAGCGATGCTCGATGGGTTGATAGGGGTGCGGT  
ATTGGCGCCAATGAAGATGGTCTGTGGCTGATAGGCAAGTTTGGCAAACTCCCGGCGCAGCAGGGCGGCT  
GCATTGCGTTTTAGCAAACAGCTTGTCTCGAAAATCAAGGCCAGGGGAGAACTCCAGATAGGCGTGACAGG  
GTCTGGCATAAGCAGTAGATGCAGCCGTGTTGCGACCCCTGATAGGGGTTGATGGAGCGACCAAAGGGGAC  
ATCCGGCGAGCTGTTGTAGCTGATGATACTGCGTGCATCGATCTCCCGCACCTCGGTGCCAGGCACAGAA  
GAAGTGAAGGCGGCATCCCAATCAGACGATTGCCAGCCGTCATCGACCCGCTCGACAAGGGGACCGCTAA  
AACGGTGCATGATATTGTGGGGGCTGCCTCGTCTGCCATGGTACGCACCAACACTGTTTATATATACAG  
CTATTTTGGCCGTGCCCTGGATAAATGACAACAACCTGCTGAGCGACCGGGTGCAAAAAGGGTTGTTGCAG  
GGATCTCTTGCTTGATTGCGGCGCTACATTTGCTTACATAGACGAAATGAGAAGTGGATCACGGAAATC

ATCATGAGCCCCACCACTTCCCCTGGCTGTTTATCGGTCTGCTTGGCTGGTTATCTGGCGTCTGCTTC  
CGCTCTCCACCGAGCAGGAGATTGCTGCCGCCAACCGTGCCTGGCGTACCGGTCACCTTGTATGAGGCGAC  
CCGGATCTGGTGCCTACTGGCCGAGCAAGGCCAACCTCGGGCACAGGCATCATGGGCTGGAGCCATGAG  
GTGGGGCAGGGGAGCGAGCAGGATATCCATCAGGCCATCAGCCTCTATCGCCAGTCGGCGCAGGCAGGGG  
ATCCCTTTCGGCCAATACCGGCTGGCAGAGCTCTATCTGCGCGGTGTCGGGGTCAAGCGAGATCTGCGCCA  
AGCCTTTCACTGGATGGATCTTGGCCGCCCAATGGCGATGTGCCGGCCATGCTGAAAGTCGGCGTCTT  
CATCTGATGGGGGTGAGCGGCAGGGTCGATCTACCTCAGGCGAAAACAGTGGCTCTATCAGGCGGCACAAA  
GGGGCAACAAGTTGGCGCTTCAGGTGCTGCAAGAGCTGGCGCTGGCCGAGGAGGGGAGCAGTGACTTTGA  
CTTCAACTGGCAATCTCTGCTTGGTGAATAGTCGGCAGGCGACTCATTTGACTGTAGAAAATATCTGCAA  
ATCCGATACAGCACGCCCGACTTCTGGTAGCATGGGGCCGTTTTGGCTTGGTTTGTACAGTTAGACACGC  
TGTTTTGCGTGTGAGCCGCTTTCGCAAAGTCTGTGGAGAACCACAAACATCACCTTTTTTGAATCTTTTT  
CTATCCCGCATGTGACCTTTGGTAGGGGTCACCCTGTATAAGGAAACACATAATGCCAATCATTACTCT  
GCCTGACGGCAGCCAACGTCAATTTGCCACTCTGTTTCCGTCATGGATGTGGCTGCGGACATCGGTCCC  
GGTCTCGCCAAGGCGTGCATTGCCGGTGGGTAAACGGTGAACCTGGTGGATGCGTGCGAGCTGATCGAAG  
CCGATGCCTCGCTGGCCATCATCACCGCCAAAAGACGAAAGAGTCTGGACATCCTGCGCCACTCCTGCGC  
CCTTGTCTGGGTGATGCTATCAAGCAACTCTGGCCCCAGACCAAGATGGCCATCGGTCCCTGTCATCGAC  
AACGGCTTCTACTATGACGTTGATCTTGACCGTACCCTGACCGATGAAGATCTGGCTGCCCTGGAAGAGC  
GCATGCTGGCGCTGGTAGCCAAGGATTACGACGTCATCAAGAAGAAAAGTCTCCTGGCAAGAAGCGCGCA  
TGTATTTCGAGGCGCGCGGCGAGTCTTACAAAAGTCGAAATCCTGGATCAGAACATTCGCGCTGATGACCAG  
CCAGGTCTCTATCATCACGAAGAGTACATCGACATGTGTGCGCGCCCGCACGTGCCAACATGCGTCACT  
GCCACCACTTCAAGTTGCTGAAGATGTCCGGCGCCTACTGGCGCGGTGACTCCAACAACAAAATGCTGCA  
GCGTATCTACGGTACCGCCTGGGCTGACAAGAAGCAGCTCAAGGCCTATCTGCAGCGCCTGGAAGAGGCC  
GCCAAGCGCGACCACCGCAAGATCGGCAAGCAGCTCGACCTGTATCACATGCAGGAAGAAGCACCCGGTA  
TGGTGTCTTGGCACAACGATGGCTGGACTATCTTCCGTCAGCTGGAAAACCTTTATCCGCGGCAAGCTCAA  
AGAGTACGACTATCAGGAAGTGAAGGTCGGTTCATGATGGACCGCGTTCCTGTGGGAGCGTTCAGGTCAC  
TGGGAGAAAATACGCCCAGGCCATGTTCACTACCAGTCCGAAAACCGCGAGTACGCCATCAAGCCGATGA  
ACTGCCCCGGGTACGTCAGATCTTCAACCAGGGTCTGAAGTCTTACCAGTCTGCCGCTGCGTATGGC  
CGAGTTTGGTTCTGCCACCGCAACGAGCGCTCCGTTCCCTGCACGGTCTGATGCGGGTGCAGCGGTTT  
ACTCAGGATGACGCTCACATCTTCTGTACCGAAGCAGCATCATGGAAGAGGTCTCCGGCTGTATTTCGTA  
TGGTCTATGACGCTACGGTACCTTTGGCTTCGAGAACATCGTGGTCAAGCTCTCCACTCGTCCCAGCA  
GCGTATCGGCTCCGACGAGATGTGGGATCGCGCCGAGAAAAGCGCTGGCCGAAGCGCTGGAGCTCAACGGT  
CTGAAGTACGATCTGCAGCCGGGTGAAGGGGCGTTTTACGGTCCCAAGATTGAATTTACCTGCACGATT  
GCCTTGATCGTGGTGGCAATGTGGTACCGTGCAGCTCGACTTTGCCCTGCCGGTCTGGTGGTGGCCAC  
TTATGTGGGCGAAAACAACGATCGCCATGTACCTGTGATGATCCACCGGGCCATCCTAGGTTCTATCGAA  
CGCTTTCATCGGTATTCTGACTGAAGAGTACGCCGGTCTGTTCCCGACCTGGTTGGCACCAGCTCAGGCTG  
TGGTTCATGAATATCACGGACAATCAGGCCGATTATGCGGTGAAAAGTAGCCAAAGCATTGAATGATGCGGG  
CCTTCGCGCAAAAAGCGGACTTGAGAAAATGAGAAGATTGGCTTTAAAATCCGCGAGCATACTTTGAAGCGA  
GTACCTTTTCATGCTGGTCTGCGGCGATAAAGAAGTTGAAGCCGTAAGATTGCAGTACGGACTCGTAAAG  
GGGCTGACCTGGGCACTTATCCTGTTGAAGAGTTCATCGCTCTGTTGACCCAGGAAGTTCAGACCCGCGG  
ACAAAAGAAAAGTGGAGGAATAAGCTATAAAAAGGCGGAAAAAAACTGGGCAAGCAACCGCAAGCCCGCGCT  
CACCGGATCAATGAAGAGATCCGCTCTGAAAAGAAAGTTCGTTGACTGGTCTGGATGGTGAAGCCATTGGCA  
TCACATCCATTACAGGATGCTCTGAACTTGGCCGAGAGGCCGGAGTTGATCTGGTAGAGATCAGTCCAAA  
TGCTGAGCCGCGCTTTGCCGGATCATGGATTACGGCAAAATTCCTCTACGAAAAGAGCAAAAACAACCAA  
GAACAGAAGAAAAGCAGAAAAGTCCGTCAGGTTAAGGAAAATCAAATTCGTCCTGGCACTGACGAAGGCG  
ACTATCAGGTAAAAACACGCAACCTGGTTCGCTTCTGGAAGACGGGGACAAGGCTAAGGTCACCTGCG  
TTTTCCGTGGTTCGTGAAATGGCCACCAGGATCTTGGTATCAAGGTTCTGGAGCGCGTCAAGAACGATCTG  
GAAGAGTTGGCCGTAGTCGAGTCGTTCCCGAAAAGTCGAAGGCCGTCGAAGCTGTGATGGTTCTCGCACCTA  
AGAAGAAAATCTTAAGGCCCAAGAAAATTGACTCATGGGGCTGCCCCATGAGTTGGTTTCGCTTGGCAT  
TTTTGTTGTCACTACAATGCGGAGTATGAAATGCCGAAGATGAAAACCAACCGGGGTGCTGCAAAGCGCT  
TCAAAAAGACTGGCTCGGGTTCGCTTCAAGTGAAGCACAACCACCTGCGTACATCCTGACCAAGAAGAG  
CAGCAAGCGTAAGCGTCAGCTGGGACCGAAATTCATGGTTTCTGCTGCCGACCACAAACGTTGTGCTGCT  
TGTCTGCCGTACGCATAAGGGGGGATGTGAAAAATGCCAAGAGTTAAACGTGGTGTGACTGCTCGAGCTC  
GTCACAAGAAAAGTAATGAAAGCCGCCAAAAGGTTACTACGGCGCCGTTCCCGTGTTCACCGGTAGCGGT  
ACAAGCGGTAACCAAAGCTGGTCAGTATGCCTACCGTGACCGTCGCCAGAAAAGCGTCAGTTCCGTCAG  
CTGTGGATTGCGCGTATCAACGCTGCAGCCCGTCAGAACGGTCTGTCTACAGCCGTCTGATCAACGGTC  
TGAAGAAGGCTTCTATCGAGATCGATCGCAAGATCCTGTCCGATATCGCCGTTACGACAAAATGGCTTT  
CACCGCCCTGGTTGAAAAGCTAAAAGCAGCTCTGGTTTTAATCCAGTCTGTTATAAACGCTAAAAGGAGG  
CTCAGGCCTCCTTTTTTGTATCTATAACTCTCTGTGTTACATCAGTTTTTCTCTCTCGTCCATATTC  
TGTCCACTGTTTTACACGAGCTGCATATTTCTCCACACAAGGTGATATGTGCGAGATGACCTGTTCTACA  
AATAGTCTATATGCCAACAACACTAGATGTTTGTTCAGTATTTTCCAGGAGTGGCAGTGAACCGATGAGACT  
CGCTTGATATAACAAAATGATTTGTAGGGAGAAAAGCCAACCTTAGCTATGGTCAGCGAAGGGGCTTTTT

TTGTATTATTCCACTCTTGACCTTATTTAGCCTAAAGGCTCCTGTACCGGGAGTGGTGACGAGGAAGACA  
TGCAACAGCTTGAAGAAGTAGTCGGCCAAGCCAGAGCCGAAATTGAGGGCGTGAGCGATATCGCGACCCT  
CGACGAAATCCGGGTCAAATATCTGGGTAAAAAGGGCTTTTTTACCGAGCAGATGAAGGGCCTGGGTGCC  
TTGTCTGCTGAAGAGCGTCCCGCCGCGGGCGCCGTGATCAACCAGGCAAAACAACAGTTTCAGGATGCGC  
TGAACGAGCGTTCGTGAAGCGCTCGAAGTTGCTGTGCTGAACCAGAAGCTGGCAGCCGAGACTATCGACGT  
CAGCCTGCCGGGCGCTCGCATCGAGAATGGCGGTCTGCATCCGGTAACCCGCACCATTGAACGCATCGAG  
CGCCTGTTTGGCGAGATGGGCTTCAAGGTTGCCCGGGTCCCGAGATTGAAGATGGCTTCCACAACCTCG  
ATGCGCTGAACATTCCGGCTCATCATCCGGCGGTACCGATCACGATACCTTCTACTTCAATCCTGATCT  
GATGCTGCGTACCCACACCTCCGGTGTGCAGATCCGCACTATGGAACATCAGCAGCCGCCGATCCGCATC  
ATCGCGCCGGGCGCGTCTATCGTAACGACTACGACATGACCCACACCCCGATGTTCCATCAGGTTGAAG  
GTCTGCTGGTTGACGAGCATGCCAGCTTTACCGAGCTGAAGGGCATTCTGCACGACTTCCCTGCGCAACTA  
CTTCGAGGAAGACCTGACCATTCCGTTCCGTCTTCTATTTCCCGTTCACCGAGCCTAGCGCTGAAGTG  
GACGTGATGGGCAAGAACGGCAAGTGGCTGGAAGTGTGGCTGCGGCATGGTTCACCCGAACGTACTGC  
GTTCCGGTCGGCATCGATCCGGAAAAATACTCTGGCTTTGCCTTCGGCATGGGCGTTGAGCGCCTGACCAT  
GCTGCGTTACGGGGTCAACGACCTGCGTGCCTTCTTCGAAAAACGACCTGCGCTTCCCAAGCAGTTCAAG  
TAAGGGCGAGAGAACATGAAATTCAGTAAATCCTGGGTGATGGAGTGGGTCCGCACCGAGTTGAGTGACA  
ACGCACTGGCCGAGCAGATCACCATGGCCGGTCTGGAAGTGGACGCCGTGGAAGCGGTTGCCGGCCAGTT  
CAACAATGTGGTGGTGGGTGAAGTGGTCGAGTGCGCCAGCACCCGGACGCCGACAAGCTGCGGGTGACC  
AAGGTCAACGTGGGCGAGGCCGAACCTGCTGGACATCGTCTGTGGCGCGCCGAACCTGCCGTGAGGGCTTGA  
AAGTGTGCGTGGCCAAAGTAGGGGCGACCCTGCTGGTGAATTCACCATCAAGAAAGCCAAACTGCGTGG  
CCAACCGTCCCACGGCATGCTCTGCTCTTTCAGCGAGCTGGGTATCGACGTTGAAGCCGATGGCATCATC  
GAGCTGACGGCCGATGCTCCCATTTGGTACCGATATTCGTGACTACCTCAATCTGAACGACGTCTCCATCG  
ACGTGGATCTGACTCCGAACCGTGCCGATTGCCTCGGTATTGCCGGTCTGGCCCCGCAAATCGGCGTGCT  
CAACAGTGTGGACGTGGTTCGAGCCGACCTGGGCACCAGCTGTTGCCACCATCGATGCCACCTTCCCGATC  
CGGGTTGAAGCGCCGGCAGATTGTCCCGTTATCTGGGGCGCGTTCATCAAGGGGCTGAACCTGCAGGCCC  
AGAGCCCGCTCTGGATGCAAGAGAAGCTGCGTCCGGGCGGCATTCGCTCCATCGACGCCATCGTCGACAT  
CACCAACTACCTGCTGTGGAATACGGTCAGCCGATGCACGCCTTCGATCTGGCTACCCTGGAAGGGGAA  
CTGGTGGTGCCTGCTGCCACGCCGATGAGCCGATGACCTGCTCGATGGCAACGAAGTGAAGCTCAAAG  
AGACACCCTGGTGAATTCGCGATGCCAAAGTCCCTGCCATCGATGGCCGGTATCTTCGGCGGCAACCCGAC  
CGGTGTTTTCCGAGACCACCACCGACATTCTGCTGGAGTGCCTTCTTTGCGCCGCTCTCCATCACTGGC  
CGTGCTCGTGCTTACGGTCTGCACACCGACTCCTCCACCGCTTCGAGCGCGGGGTGGATCCGCAGCTGC  
AAGCCAAGGTGATGGACCGTGAACCTCGCTGCTGCTGGACATCTGCGGCGGCGAAGCGGGTCCGGTCAT  
CGAGGTCAAATCCGATGCCATCTGCCGAAAGTGGCCCCATCAAGCTGCGTCGCAGCAAGCTCGACAAG  
GTGATCGGTATCAGCGTGGCTGACGCTCAGGTGGTCGAGATCCTGACTCGCTTGGCATGCAGGTCACCTG  
TGGATGCTGACGGTTGGACCGCGCTGGCACCCCTCCTGGCGTTTCGATATCGCCATCGAGGAAGACCTCAT  
CGAGGAAGTGGCTCGCATCTACGGCTACAACAACATCCCGAACCTGAAACCCGCCCTCTCTGGCGATG  
GTGGAGCAGGCAGAAGGGCAGGTGACCTTGAAGCGCGTACGCGACCTGCTGGTTGACCGCGTTTTCCAGG  
AAGCGATCACCTATAGCTTCGTTGATCCCAAGACCCAGCAAACCTGTTCCCGCAGAGCGATGCCATCGT  
GCTGCCGAACCCGATCTCGGTGAGATGTCCGCCATGCGTGTCTCTGTTCCCGGGTCTGGTGCAGGCC  
GTCGTTTTACAACCAGAACCGTCAAGCAGCCGCGCGTGCCTGTTTCGAGCAGGGTCTGCGTTTTATCAAGG  
ATGAAAGCGCCGAGAACGGTATCCGTGAGGAGCCGATGCTGGCCGGTATCATCACTGGCAACCAGAGCGA  
CGAGCACTGGGATATCAAAACCCGTGCAGCCGACTTCTTTGATTTGAAAGGGGATCTGGAAGCGGTGCTG  
GACTTGACCGCCGAAGGGGCCACCTTTACCTTCGAGCGCACCCGAGCACAGCGCCCTGCACCCGGGCCAGA  
GCGCAGCCATCCTGCGCAATGGCGAGATCATCGGCCACATCGGCGTGCATCCACCCGAGCCTCGAGAAGAA  
GCTAGGCCTCAAGAGCCCGCGGCTGATGTTGAGCTGGAGCTGGACAAGCTGACCCCGCCAAGGTGCCT  
GTGGCTGCCGAAGTTTCCAAGTTCCCGGCCAACCCTCGCGACATCGCCGTGGTGGTGCATCGTCAAGTTT  
TGGCAGGTGATGTGCTTCCGGTAATTAATAAAGTTGGCGGAAATCAGGTAGTTGGAATAAACTGTTTTGA  
CGTATAACCAGGGTGTGGTATGGCAGAGGACAAGAAGAGCCTGGCCATCAGTCTTGTATTGCAAGACACC  
CAGCGCACCCCTGGAGGAGAAAGAGATTGCCGAGACCGTAGACAATGTCGTGCGGGCCCTTGGTGAAGAGT  
TGAATGCATCCTTGAGGGATTGATCTATGGCGCTTACCAAAGCCGACATTCAGAGACCTGTTTACCCCA  
GCTCGGGATGAGCAAGCGTGAAGCCAAAGATATGGTGGAAAGCCTTCTTTGAGGAAATCCGACAGGCGCTT  
GAGCGTGGTGAACAAGTCAAGATTTTCAAGCTTCCGGTAACTTTGACCTTCGTGAGAAGAATCAGCGTCCCG  
GACGCAACCCCAAGACGGGCGAGGATATTCCTATCAGCGCCCGCGGTGGTGACCTTCCGGCCTGGCCA  
GAAGCTCAAGGCCAGGGTAGAAAATGTTGAACCCAACGAGTGATAAAAAGCCAGGCAGATGCCTGGCTTT  
TGTTTTTCAGATGACCAAATTTCCCATTTTTTCTTCTGGGTGCCGTACTGGCACTGCCATTGCACGCCAAGC  
CTTTGACAGACCACTGTGCTGCCGTTGGCGCCGGCGACCCAGGCTTATGTAAATTCAGTGCAGCTTTT  
GCTCTGCTATCCTGAGTGCCTTCTCCACCATACTGATGGCCGAGGGGGGACTGCTCAAGGATCGTCTC  
GCCCGGTTGCAGGAGCTGTTCCCGGTTCCCTCGTGCTCAAAGAGTTGCCCGATTGGCAGACATTGCGCA  
ACGGGCTCGCAGAGGGGGAATGCGACATCATTCCTATGTGGAACCCGCAAGAAGGCCGTGGAGGGCAT  
GCGGTTAAGTCGTCCGATGATGGAGACCGATGCCGCCATCCTCTACAAGGGTGAATACTCAAACAGGCC  
CGTTTTCTGGTCTACTCGGTGGCAGACTCTGCCCGCTGCTGCACGAGCTCTATCCCAGGCACGCATTA

TTTCCCTAAAAAGCGGAGAGAAGGTATACGACGCGCTGCAGAGTGGCAAGGGTATGCCTATCTGGGGGA  
CTATCTGCAACTGCGCTATCTGATGCGCGAGTTTCTGCGGATGGTTTGCGCCTGCGCCGCTGTTTTGGT  
GAGGATCGGATCATCAGCTATCGACTGATGATGCGCGATCAGCCGAGTTGGCCAATCTGGTGGACACCC  
TGATCCGTCATATGCCCGCCGTTACTATCTATAACCGATCTGGCCCGTTATCTCGATCAGGGGTCGCTCTA  
CGTCAACCAGCCCCACTTCAGCGATACCGAACAGGCCTGGTTATCCGGCCGCGGGGCGACCAATTGCGCTG  
GTGGTCAATCCCAGTTGATGCCCTATAGCGGTGTCAATGATCTGGGAGAGGCGAAGGGGTGGAGCGCGG  
ATGTGTTGCGCTGGGTAACCCAGGAGACCGGCCTGAAATACAAGCTGGTGCCGCGCCAGCAAGGCGGA  
GGCCGTAGAAAAGCTGCGCCGTGGTGAGGCGGATATGATGGCCGGCTTGCCGGAATCCCCGGCATTGACG  
GATCAGTTTCAATTTTTCAGTCGGACGATCTCCACCAACCGGTTTGCCTTGATCAGCAAGCGCAAGCTGGCTG  
CCGATCGCATCACCCAACCTCAAGCGGCAGCGTATTCTGGTGGCCGAGTCCCTCTACGATCCCTCCCTTGCT  
CGCCCTGCTCGGTGATCAGGAGTGGGTTTCGACCCGACGCGCATCGAGCAGGGGCTTGCCCGGATCAAACAG  
GGCAAGGCTGACGCCATGCTGAGCGAGCTTTATCCGCTGCAATATCCCCAGCGTACCAACCTGCTGGAAG  
GGCTCGATATCGAGGAGCTGGAAGATCGCTTACGCTTGGCTTTGCCATCAACAAGAGTCAGACCGAAGT  
GGCCGGGGTGATGGATCGCAACCTGATGGCCCTGACCAGCACCCAGATCGACGAACTTAACCAGCGCTGG  
CGCCGCTTGCTCGTGCAGCAGCCCGGCGTGGCTACGCCGCTGGTTTGGCTCCATCGCCATGGCAC  
TGCTGATCAGCGCGTTGTCATCGGCGGATCTGGCGTTCCCGCCAGCAACTGGCACGGGAAGTGGCCCA  
GCGTCACGCCCGGAGAAGGCGCTGGCCATCGAGAGCGAGCTGCGGGAAACCATGTTTCAGGCGTTGCCG  
GTGCCCGTCTATCTGCGCAATAGCCAGGGCAAGGTGATCAAATCCAATAAACAGGGGCGACGCTGGCCC  
TGCGCTATTGCGAACAGTTGATGCTGCCACCGGTACAGCCCAGAAGAGTGAAGGGGAGCTGGTGTGGG  
GGATCAGGTCTTCGCTATGCCAGCATCCGCTGCGGCTGGACAAGCAGGCACCTGCCACCGATCTCATC  
GCCCTGTCGGATATCAGTGTGCTGCGTGAGCAGGCCGTTTTCGCTCAGGCAGAGCGCCGCTGCGCG  
CCCTGACCAATACCGTTCCCGGCGTGGTGTGCAAGTTTATGTTTCGAGCGGGGACGGGTAGGGGGGATCGA  
GTTTTATCAGCCGGGGCTGTTACGAGCTGCTGGGGCTGGCGAGTCAGCAGATCCGTCGTGAGCCCAAACGG  
GTGCTCATTATGCTGGAGCGCGAGGATCGTCTGCGGTAAGCCGTGAGATGTTTCGCCATGTTGCAGGCTG  
GCAAACCCCTTCGCGTTCACCATGCGCTATTACCATCCGACCAAGGGTTCGCGCTGGTTGCAGCTCTATGG  
CCGTGGCCGCGAGTCAGCCGCGAGGGTTGGCGAATTTATGCGGTGATGCAGGATGCCACTACCAGGGTCGAG  
CAGGATCAGCATTGCAGCACTCCCATGAGCAGGCGCAACAGGCAGTTCTGGCCAAGGGGCGCTTTCTGG  
CCGCCATCAGCCAGAGATCCGACCGCATGAAACGGCATGCTCGGCTTGCTGGAGTGGCTGGCCAGTAC  
TCCTTTGTCGAGAGAGCAGGATTCGCGCTGGCGAGGTCGCTCAGGCGGGGGATGAGTTGCTCGGCGCTG  
CTCAACGATGTGCTCGACTTTAGCCGCAACGAAAACAGCAAACCTCTCCCTCTCGCCCCAGCCACTGATT  
TTGCCGAGCTGTGCGAGCACGTGGCGGCGTGCAGTGGACCAAGGCGCGGGCCAAAGGATTGCAACTGCG  
CCTTAAGTTGGATCCGGCTCTGCCAGCCCTGCAGACCCTCGACCCTCACCGGGTACGGCAAGTGTCCAC  
AACCTGCTCTCCAATGCCATCAAGTTCAGCCTGCGTGGGGAAAGTGGTACTGTGGGCTGAGGTGGTTCGCAT  
CAACCTTGCTTCCGTGTGGATGATCAGGGGCGGGGATCACCGCCAAGATGCGCACCACGCTCTTTAT  
GCCGTTTCGAGCAGTTTTCGCGTTGAAGGCCAGCTGCGGGCGCCGGGCACCGGTCTTGGTCTGGCGATCTGC  
AAGCAGCTGATCGAGCAGATGGGGGGTCTTATTGATGTCGAGGGCGTCCGGTGGTGGTAGCCGCTTTT  
ATTGCGAGTTGCCCTGAAGCGGGTGCAGCAGGAGCCGACTGGCTGCCAATGTGCGGCAGCTGGCACT  
CTCTTTACCCACGATGAGGCGCAAGCGCTGTCGCCCTGGCTCAGTCGCTTGGGGATCGCCACCGTACAGC  
AACCGCGTTGATACGCTGCAAGCGGAGGTGGACGAGAAGGGGCTCTACTATTGGGCATGGCAAGGGGAGT  
CCTGGGTGCCCGGGACCATCATCACTCTGCTGCAGCCACGGTTGACACCGGATCAACCGGTGGCCGGCAC  
CCAGCCCGGGCTCGGCATGCGGGTACTGCTGGTTGAAGATCACGATGTCAATCGCGAGCTGATCAGCCTG  
CAACTGGGGCAACTTGGTGCAGCGTTATCACTGCCGCAACGGGCAGCTGGCGCTGGAGATGCTGGCGC  
AGCAAGAAGTGGATTTTGTGCTGACCGATCTGCAGATGCCGGTATGAACGGGGCCGAGCTGTGCAGGCA  
ATTGCGCCAATCCGCCCCGTTGGGCCCGTCTGCCGGTCTATGTGATCACCGCAGATCTCAGTATCAGGCG  
GCAAGGGAGCTGCAATCCTGCGGTTGCGATGGCCATCTGGACAAGCCGGTTCGCCCTCAAGGAGCTGGCGA  
CCTTGCTGCGCCATATTGCCAAAGAAGGAGCAATGTTGTCGCCCCGACACCGGTTGCCCTCGTGCAGTGC  
CGATGAACTGGCCGCCCTTTATCTGAAGGCTACCCGTGATGATTTGGCCGAACTTGAGCGCTGCAGCACA  
GAAGAAGATGAAGTTGGCGTGAATGCTGCTTTACACAAGTTGAAGGGGGCCGCCAGAATGGTAGGGGCGA  
CTGCGTTGGTGGCGGTCATTGAAGAGTGGCAACAGGCGCCCCATCCGATGCTGCAAGCCAGATTGAACCG  
GGCACTGGATGAGTTCAGCCAGCAGTTTTCAAAGAGGGCTCAAGATGATCATCACTGATGAAGAATTACT  
GGCGTTGCTCGATTGCGAAGAGCATGAGGCGGAGGATTTTGGCCCATTTGCTCTATGCCCTCGACAGC  
ACCGCCCATGAGTTGGCCAGCACCATGACATTGCCCTCCTATGTCACGCTGCACCGTACCCGACCGGATG  
CCTGCTGGCAGTGGGAAGGGTTGTTTGGCGAGGTGCCATTGCCCTTACGACCCCGCCGCTCATCAGCA  
GGCTGACTATTTCCCCAGTTGCAGCAGCATGAGGGGATCTACGCTATCGGCGAAGATTGGCTGGGGGGG  
CTTGCCGCGAGTTATCGTACTGGTGCAACTGGCTGGCCGCTAACAAGGTGCTGCTGCTCGAGGATCACC  
CGTTTTAGGGGATGCAACTGCAACAGACCATCGCTGGGTGGGGCTCTCTGTCAGTGGGTACAGGATGA  
ATCGGCCTGCCTTGCGGCATTGTCGGCGGGGCGACATCAGCCTGCTGGTGTGCGATCTCAGTCTGGTGGAG  
CAAGATGCCATCAGTCTGCTGATGAACCAGCCCCAGTTGCAGGAGGCGGGCTGCCCAATTGTGCTGCTTT  
CGGCCCATGAGCAGACGCTGATCGACGGTGCCCGCCGCTGCTGCACGATGCCGGTTTCAATATTTGGC  
GGCGCTGGCCAAGCCGCTTGAATGCGACGAGCTGCTCAGGTTGCTGCGTGCAGTCTATCTGGGCCCCGCTG  
CGTCAGCAGCGCTTGAGCGGCCAGCGTCTCCATCCGCCGTGGCAGGGGGAGGTGCAGGGTCAGCTAG

GGCTGCTCTCCAGTCCCGGACCCCTCATCCGGTCTGGCTCTGGCGGTGACGGGTTTGGCCAGCCGCTGG  
GAAGCGCTCAAGGATTGGCTGACGGAGCAGTCGCGCACCCAGCCGAACTGACCCTGCTGATCCACCCTC  
GAGACCACCTGCTCGGCAATGCCGATCGCTTCGACTGGTGTGCAAGCCAGTCTGGCGGGGAGCAAGCT  
GGCGCTGCTGCTAGATAACAGCCAGCATCTGCCATTGATCTGCTGGAGCGTTTGGCCGTGCAAGCCTTG  
CTGCTGGGGCAGGGGATCTTGCCGGAGATGGAGTCCCTTGACCGGTGACTCCCTGCTGGGACGCTTTATGG  
CCCGGGTTCGAGAGCTTGGGATCGCCGTCTATCTGGATGATCCTTACAACCTGCTCGACGTGCAAGTGTG  
GCGAGAGCGCGGTATGACGGGGCGCTGGTAAGCCATGCCGCGCTACCTCTGCTGGCCCATGCACCGGGAG  
CGCCTTGGCAAAGGGCTGGATGGCTGGCCTCATCCGGTTTCCCGGGCCGCACTGCCACTGGCTATGGAGG  
TCTCCGGGGTGCCTTGCTGCTGCGGAGCTGCATGGTGTGGCGCTGCCCGCATGCTGGCCGCTTACGA  
TGCATTGAGTGAAGAGACATCTATCTGCGCTTATGCGTCCGAAACGGACGCCGCCACCGGAACAGGTG  
GCCCAATTTCTCAATTACCATCCCGCCGCCCTTCATCCCGATCGGGCGGAGTTTCTTGCATCGTGCGGA  
TCACTTTTACGACAAGGGGGCGGGGAGGCGCATTCTGCTGGCGCTGGCACTGCTGGCCAGAGCGGACGGG  
ATCCGGGAGTGGACGGCGGAAGTGTGGCCAGAACCGGCCCATGCTGACCCTGCTCAAGCGCCTTGGCT  
TACCCTGACCCCTGGTACCAGGGCGGGAGATGGTCTTTGTGACGGCTGGATCTGTCGGTACTGGATGCCTG  
GTTACCCGACCCGCCAGCGGGCGCCGCTTAAGACCAAGGGCGAATAGTGACACTTTTTTCCCTGTGCTAAG  
GTCACATTTATTGTGCGGGGATAGACGGAGCAGCTTATGGCGCAGTCATATAAACATATCGTGATCCTGA  
CCGGCGCGGGGATCTCTGCCAATCCGGCATCAAGACTTTTCGTGCCTGCGACGGTTTGTGGGAAGAGCA  
CAAGGTCGAGGATGTGGCGACCCCCGAGGGGTATGCCCGGATCCCGAACTGGTGTGCGCTTTTACAAC  
TCCCGCCGTAAACAGCTGCAACAGCCCCAGGTTTCATCCCAATCCGCCCCACTATGCGCTGGCCCGCCTCG  
AGCGACTGCTGCCCGGTTCCGGTACTCTGGTCACCCAGAACATCGACAATCTGCACGAGAGCGCGGGTAG  
CAAGAACCTTATCCATATGCACGGCGAGCTGCTCAAGGCCCGCTGCCCCGAGTCCGGTACAGGTGATCGAG  
TGGCGTGGCGATCTCCATCAGGACGAGCTCTGCTCCTGCTGCCAGTTCCCTCAGCCGATGCGTCCCCATG  
TGGTCTGGTTTGGCGAGATGCCGCTCGGGCTGGATCGGATCTATAGCGCGCTTGCCCACTGCGATCTCTT  
TATCTCCATCGGCACCTCTGGCGCAGTCTATCCGGCCGCCGGGTTTGTCCATGAGGGCGGGCTCAACGGG  
GCGCACACCATCGAGCTCAATCTCGAACCAGCGAGGTGGGTAGCCAGTTTACGAAAAACGCTATGGCC  
CAGCCTCCCTGCTGGTGGCCGCTATGTGATGAGTGTGCTGGAGGCGTGGCGCATTCATCAACCGAGGCA  
AGTCGAGGGGCAACAATGGATGGAGATGCGTGGTCCCTGACTACTGTTTCGACGGGACAGTTGCAATGGT  
TCGGTGAATCGCCACACTGGCAACCAATTTAAAAAATGGGACTCAGTTGGCGCAAAATACCATGACCGCA  
GTCAAGCAATGGATCGCTTTTTTCTCCTGGTGTGGCCAGTGCCAGTGCAATCGGCCATCCCCCTGA  
TGACCCTGATACTGCCAGATGGCCAGCAGGTGAACCTCGATGAGTCGGCCCTCTCCGCTTGCCACAGAC  
TGAATTCACCACGACTACCCCTGGACCCAGGGCACCCACCACTATCGCGGGCCGACCCTGTCTGCCGTG  
CTGGCGGGCAAGGGGTCCCGGATGCCCGCAAGATCGCCGTCTCGGCCCTCAACGGCTATCAGCAGGTGG  
TGGATCTGGCCCTGTTTCGACGACGTGCCGCTGACCCTGGTGCCTCAGGAGGACGGCAAACCGCTGACCCG  
GCGCAACAAGGGGCCGCTCTGGCTGCTCATCCGTTACCACCTATCCCAAGCTGGACGTGCCTGCCATT  
CACAACCTGCATGGTGTGGCAGGTGACCCGCATCGAGATCGTCGATTGATGGGGCTATCCCGCCAAAATCT  
GCTGTTGGTTGCGGTGTGCTGCTGTTTTCTGCTCTCGTTCGGGTAGCAGCCTCTATCTGCAGTATCGGCAG  
GAGCAGTTGGTCGATACTTTCTACCGCAATGTCCACTGGAACATCAGCCAGGTAATGCTCGAATCCCAGC  
GTTTTCTCTACGACCTGCAGCTCTACCGGGCTGGCAGACTGTGATGGAGACCCCTGAGCCTCGATTACGA  
TCTGCTGTGGAACCGGCTCGACATCTTCCCTCATCAGCAGTGAAAACCGCCGAGATGCGCCAGCGGCACGGG  
CTCGGCAAAGTGCTGGCCACCCTGTTTCGAGCAGATCAAGCAGCTCGAACCCAGATGGAAGCCGGTGCGC  
TGCGCGAGGGGGTTGAGCTTGCCCGCTTGCAGGAGGCGATFGCCAGCCAGACCCGCTCATCGAACAGAT  
AGGGGATCAGATCCTCTCCGGCCAGGAGCGGGAGCATTCGATCAGCCAGATCCGCAACAGCCTGTTCTGG  
CTGCAGATCTGGCAACTGATCCTGCTGCTGACCGGTGGCGCTCTGGTGCAGCCCTCATTCGCGCCAATC  
TGGCGAACCCGCGGCTTGCCCTGCTCGATCCCTGACCCAGCTTGGCAACCAGCCGCTGCCCTGCAGGAGCA  
GCGCTCTCGCGCTCTGCATGCTGGCGAGGTGAGCGCCCTGGTGGTGTGCTCGATCTCAAGCCTTCAAGCAG  
GTCAATGATCTGCTGGGTTATCAGGTGCGGTGATCGGCTGTTGCAGATGGTGGCCAAACAGCTGCAACAGG  
CCCATGGCAGCCACGCTTACCAGCTCCGCGGTGACGAATTTGCCGTGGTGTGACCAAGGCGGATGATGC  
GCTGGAAACCGCCATTGATGAGCTGGTGGATCTGCTCCATTTTCGAGTTCGTGACCCGGGAGTGCAGCTTC  
GATCTGGCCTGTGCGCTCGGGGTTACCAAGGCGCAGCAACAGGATGCCGCCCGGCTGCTGGATCAGGCCA  
TCCTGGCCCTTAACCAGGCCAAGCGTAGCCAGGAGGGGGCGATCAGCTGGTTTTCGAGCTGCCATGCTGCA  
GCAGCTGCAGTTGAGTCAGCAGCAGCTTTCATCAGCTGCGAGAGTGGTTGGCGGGGCGGAGCCAGCACCG  
CTGCGAGTGGCATTGCAGGTGCTGACGGACGGGCAACAGAGATGTGGCAATTTGGCGCTTGTGAGTGGC  
GCGAGCAGGGAGTCCCATGCCATATGCGCTGGCTGCAGGAGTGCGGCGTACTGGGGCCCGTGTGGCCCG  
TGTGCTGCAGGCGCACGAGGCGCAGTATGCCGATGGTTCGGGCACTGCTGGTCCCCTCGACAACCAGGCC  
CAGCTGACCCATCTACTGGCCTATTTGCCGGAGGCTTCCTGCACGCCGCTAGTGTGCTGGTACCAGCGC  
TACAGCCGGATGGTGCCTGCTAGCGGGATTGCGGCAGCAGGGTTGCACTCTGGCGCTCAGAGAGATTGG  
CAGCACACCAGCGGGCGAGTTGGCCGCCGGCTGGCCTGTCCGCTACTGGTTGCCGAGGGTGTGAAGAT  
GGCGAGTTGTTGCAACCTCTGGCCAGACGATTTGGGGCTGGAGCCACTGCAAGTGTGGCAGCCAGGGAGA  
CCCGGTGCTGGCCTGAGGGCAAAAAGCGGTATTGCACTGGCAAGAGACAAAATGACACAAGGCGACCTC  
GGGGTGCCTTGTTCGTTTATTGCCCTGAAAGTCAGGGGCGAGGGGCGCAGGATTGTCTGATCACCAG

GTCAGGGTCGACGGTGATCAGGTGGTTCTCCACCGCTTCGCCGTTGATCCGCGCCAACAAGCGGGTGACG  
GCGAGGGCGCCCCAGCTCCTCTTTGGGCTGGTTGACGGTGGTGAGCGGCGGCGACATAAAATCTGCCAGTG  
CCACATTGTCATAGCCAACGATGGAGATATCCCGCGGGATCACCAGCCCCGCTGATGGGCGGCACCTGAT  
GGCTCCCATCGCCATCATATCGTTGCAGACAAAGAGGGCGGTGGGGCGCTCGGGCAATGCCAGCAGACGG  
GTCATCGCCTGATGGCCGCTGGCGCAGTCAAAATCACCTCCTGGATCCACCCTTGATTGAGCGTGAGCC  
CGGCCTGCTGCAACGCCTGCTCAAAGCCAGCTTGGCGCTGGTTGGCGGGGGCGCGGCTGTGGGGCCCTGT  
GATGCAACCGATGGCGGTATGGCCAGCTCAATCAGATGGCGGGTTGCGAGATAACCGCCATGGAAGGAG  
TTGTGCGGCGATAAGATCCACATCCTCGCTGACCAGCCCCAATCCATCACCACCACCGGCAGGCTCTTGA  
GCCAGTCGAGCTGATTGAACACCTCTTGTGGCTTCGCTACACATGATCAGCAGGCCATCGACCCGCTT  
GCGCAGCATCATCTTGAGGTAGGAGAGGGCCGCTCGGCCCTGACCTCGGTGTTGCCAGCATCAGGTTG  
TAGCCCTGCTCGAAGCAGTAGCCTCCACCCCGCACCACTCGGCGAAGAAGGGGTTGCTGGAGGTTG  
TGACCAGCATGCCGATACTGTTGGTCTCCTTACCTTGAGGCTGCGGGCCACCAGACTCGGGGCATAGTT  
GAGATCGCGCATGGCCGGAAGACCCGCTCGCGGGTCTCCTCGGCCACAAAGCGGGTCTCGTTGATGACA  
TGGGAGACGGTGGTGGTGGAGACCCCCGCCCTCGCCGCCACCTCCTTGATATTGGCCATCAGTGCCCCTG  
CGCAGTCTGCTCAAGCAGGAAGGCGTCAACCTCCTGCTTGCTCAGGATGGAGCTCTGGGCGCCGAACCGG  
GTGACGGAGAGTGCCGCCGCCCGTGGGCAAAGCGCACCGCGCTGTGGAAATCGGCACCGGCCAGTTCGG  
CTGCCAGCAGGGCGCCGTTGAAGGTATCGCCCGGCAGTGGTATCCACCGCTTGACCCGAAAGCCCGG  
GATCAGCTGTTGCTGCTGGGCGTTGCTGCAATAGACCCCTGCGACCCAGGGTGATCATCACGTCCGCA  
ATGCCCATCTGGTGAAGCGGGCGGCCGCTCGCGGGCGCTCGCTTCGTCGGTGACTTTGACGCCGGTCA  
ACAGCTCGGCTTCAGTCTGGTTGGGGGTGATAAGGTCGACCAGTGCCAACAGCTCAGCGGAGAGCGGACG  
GGCAGGGGGCGGGTTGAGCACCACCCGGGTGCCATGGGCGCGGGCCAGCCGTGCAGCTTCATGAACGCTC  
TCGAGCGGCACTTCCAGCTGCAACAGCAGGGTGTGGGCGCCGGCGATCATCGCTTCGTGGTTTTTACCA  
CAGCAGGAGTGATGGCCCCGTTGGCTTCGGCGGAGATTCCGATACTGTTCTCCCCCTCATCGCTCACATA  
GATGATGGCGATAACCGGTCCGGGAGCTTGGGATCGAGCTCGACGGCGCTGACGTCGATGCCATCTTTGGCA  
AAGCCGCTCTTCATCTGGTGGCCGATGGCGTCATCACCGATGCGGGCGATAAAGGAGACGGGGGCGCCGA  
GGCGGGCGGCAGCGACTGCTTGATTAGCCCCCTTGCACCCGGGACTACCTGATAGCTGTGGCCGGTCA  
GGTTTTACCCGGGCGAGGAAAGTGGGGAACCGCAGCACATGGTCTGCATTGACACTGCCAGAACGACG  
AGACGATTCATCTTGACTACTCCTGATGCATCTTGCTTGAACACTGTGATGGAGTGAGCCCAAGCCGG  
AGGCACCTGAACGAGAGAGGTAAGGGGAGGCGAACCTCCCCCGAGAACTTACTTGTCACCACTTGCAG  
CGGTACCGGAATGGATTTCTCGACCGGCTGACCTTTTCAGCACCTTGTGCGGAGTCTCGACGCCGATGGCA  
CCGATCAGGGCAGGTTGCTGGGCCACGGTGGCGGCCAGTTTACCCTTGCTACGGCGGCTTTGCCATCGT  
CAGTACCGTCGAAACCGACGATCATTACCTCTTTCCCGGCAGCCTGCACCCGCGGGATGGCACCCAGCGC  
CATCTCGTCGTTCTGGGCGAACACAGCCTGTACGGTCCGATGGGCCGCCAGCAGGTTTTCCATGACGTT  
AGACCCCTTGGTGCGGTCAAAGTCGGCAGGCTGGGAAGCCAGCACCTGCAGCTTGTGGCTGCCACGGCCA  
GGGCAAAACCTTCGCCACGGTCACGGGCGGCGGAGGTACCGGCAATCCCTTCCAGCTGGATCACCTTGGC  
ACCGGTGCCAGTTTTCTCGGTGATAAAGTCACCGCCAGCTTGCCTGCTGCCACGTTGTGCGAGGCGATG  
TGGGCTTGACCTCACCTGCGCAGCGCCGCGGTCCAGGGTCACTACCGAATGCTGGCGCGGTTGGCCA  
GACGGATGGCGTTGCCGACCGCTTCGGAGTCGGTGGGGTTGATCAGGATGGCGCCGACCTTGCACCGGT  
GAGATCTTCCATGTTGGAGAGCTCTTTGGCCGGGTCACTTGGGAATCCAGTACCACCAGCTCGTAGCCA  
AGCTCTTTGGCTTTGGCTTCGGCACCCCTCTTTTCATGGTGACGAAGAAGGGGTTGTTGAGGGTGGAGACCA  
CCATGGCCAGGGTTTGATCGGCGGCATGGGCGGTGCCCAGCACGGACATGATGGCGGCAGCGAGCAGGGT  
ATTGAGCTTTTTTCATCATTTTCATTCCTTGTGTGTGGCTTGTCTTATCAACGATTGCTTTTGTATCGATC  
ATCACGGCAAGCAAGATCACGCTGGCCTTGGCGATCATCTGGTAATAGGAGGATACGTCGAGCAGGTTGA  
GGGCGTTGTTTCAGGAAGCCGATGATCAAGGCACCGATCAGGGTCCCATGATGCGGCCCTTGCCGCCAT  
CAGGCTGGTACCACCCAGCACCACTGCGGCGATGGCATCCAGCTCGTAACCCATGCCGCCGCTCGGCTGG  
GCAGAGGAGAGACGAGAGGTAACGATAAAGCCCTGCCAGTGCCGAGAGCGCGCCGCACAGACCATAACCC  
CCAGCTTACCCGATCCACATTGATAACCGGAGAGGCGGGTGGCGGACTCGTTGCCGCCAGCGCGTAGAT  
ATAGCGACCGAGGCGGGTGTGGTTGAGCATGAACCAGGCGAGCAGGAAGACGATGGCCATCAGCCAGATG  
GGCACCGGCAGACCGAACAGGTAACCGGTACCGAGCCAGGCGAAGTGATCGGCGCCGCTCACTGAAACCGG  
TGGAGATGGGGCGCCCCTCGGTATAGACCATGGTAATGCCGCGCAGGGCAGTCATGGTGACCAGGGTAGC  
AATAAATGCCTGCACCTTGCCTTGGCAATGATGAGACCGCTGACACCGCCAGCAGGGCACCGGCACCC  
AGAGTGAGGGGCACCACCAGCCAGATCTGCAGCTCCATGGCGACCATGGTGGCGGCCAGCGCGCCGACA  
GGGCGAGCACAGAGCCGACCGACAGATCGATACTGCGGTAAGGATAACCAGCGTCATGCCACCGCCAT  
GATGGCGTTGACCGAGTTTTGGCGCAGGATGTTGAGCAGGTTGTGCGCGGTGAAGAAGTTGGGGCTCAGA  
AAGGAGACCACACCAATCAGGACCAGCAGCGCGACCAGGGATTTGTTCTCGATCCACCACGCTTGTCTCA  
TGACGCCACGGCGGGAAAGGGTTTTGGGTTGTGATTGGGATGCCTCTTGCTCTGCTTGCCACTGTTTACCG  
ACTGCCGCCGCCATCAGCTTCTCCTGATTGGCATCGCGGGTGTGAACTCTGCGCTGATGCGCCCTTCGT  
GCATCACCATGATGCGATCACTCATGCCGAGCACTTCCGGCATCTCGGAGGAGACCAGAATGATGCTCAT  
CCCCTCCTTCTTGAAGTATTGATCAGCTGATAAAATTTCTTCTTCGCCCCACGTCGACCGCGCGGGTT  
GGCTCGTCAGGATCAGCACCTTGGGCGGGTTCAGCAGCCCTTGGCGATGGCCACCTTCTGCTGGTTGC  
CGCCGGAGAGCAGCTTGATCAGCTGATCCTGACTCGGGTCTTGATGTTGAACAGACGCACATAGTCGCT

CACCGCCTGCCGCTCGGCCTTGCCGTCGATCTTGCCGTTGCTGATGAACTCGTCGAGGGCGCACAGACTC  
ATGTTTTTCGCGCACCGACAGCTCCAGCACCAGCCCATCCCCCTTGCATCTTCGGAGATATAGGCGATGC  
CTGCGGCCAGCCCATCGGCCGGGCTTTTTGGGCACCAGAGCATGACCGTCCACTGCCACTTCACCGGCGCT  
GATGGGGCTGGCGCCATAGATAAGCTTCATCAGCTCGGTACGGCCGGAGCCCATCAGGCCGCTAAAACCC  
AGAATTTCTCCCTGACGCAGGGAGAAGCTCACTCCGCGCACGCCGGGACCAGGCCAGATCCTTCACCTGCA  
GGCTGACGGGGCCAAGCTCGCGCTCAAGGCGCGGATACTGCTCTTCCAGTCGGCGGGCCACCATCATCTC  
GATGATCTTGTCTTCATCCAGATCGCTCACCGCCCTTCTCACCAGTCCACTTGCCATCGCGCAGCACGGTG  
ACCCGATCGCAGATCTCGAAGATCTCCTTGAGGCGGTGGGAGATATAGACGATGCCGCAACCTTGCTCAC  
GCAGCTCGCGGATCACCTTGAACAGCTGTTCCGGTTTCGGTATCGGTCAACGCATCGGTCCGGTCCGTCAT  
GATGATGACGCTGGCATCGAACGACAGCGCCTTGCAATCTCCACCATCTGCTGTTCCCGATGGAGAGA  
TCCCCGAGCCGGGTATCCGGCCATGCTTGACACCAAGTCTGTCGACGAGGCCGCTTGCCCGCTCGCGCA  
GTTGTTTTGTGGTCGATGCTGCCAAAACGGGTACGGGTTTCGCGACCGAGGAAGATGTTGCCGGCAATCGA  
CAACTCCGGCAGCAGGTTAGCTCCTGGTGGATGATGCTGATCCCTGATCCTGAGAGTCGCGGGGGCC  
TTGAAGTGGACCGACTGACCGCGGTAGCTGACGCTGCCCGCATCGGCCGATAGATGCCGGTCCAGCACCT  
TCATCAGGGTGGATTTGCCGGCGCCATTTTACCAGCAGGGCCATCACCTGGCCCGGATAGACCCGCGAG  
ACCCGCTTCGTCGAGGGCGCGCACACCGGGGAAGGTCTTGACGATCCCGGTCAGCTCCAGAATGGGTGAG  
AGGGGGGAGGTTGTGCTCATTTGCAGCTTCCCTGAAGAGGCCCTTCTTTGAAGAAATCAGAACGCCACACC  
GGCGCAGAGGATCAGGTTGGCGTAGGGAGTCACTCGCCGCTGCGTACGATCGCCTTGCTCTGGCGGGAG  
CGGGTTTTGAACTCCTCATGCAGGCAGTATTGATGGCGATGGGCTTGCCCTGGGTGGCTGCGTGAGCCT  
CAAGCTGATCGACCAGCGCCTGATGGGCGGCCGGGCTGATCTGCTTGATCTCGCTTGCCATGATCGCTTT  
CTCCACCACCAGATCGGTGAGCAGGGCGGTCAATACGGTTTCAAGACTGGGCGTTCGCCCATCAGCGCC  
AGATCGATCCGCTCCGGACCTGCCGGAATGGGCAAGCCTGCATCGCAGACGGTGATCTCGTCCGGTGTGGC  
CCATCTGTGCCACCAGAGCACTCAGGGGAGCATTGAGCAGTACGCCCTCGTTTCATACAGCACCTCATCAG  
GCCTTGCCCGTCAATCTGTGAACCGTTAGGCAACCGGTTACGCAACCGGTTGCTTTATGGCGCAAAGAT  
AGGCTTTTTACCAGGGGAAGGGCCACGGCAAAACCACGGAAATGTGAAAACGATCTCAAAGGCGGGGGAGG  
AAAGAGAAAGAAGGGTCCAGCAGAGCCTCGGCACCCCTTCTATTTGATTTTTTACTTAGTTGGAGAGGGC  
TTTTGTTACGGCCGAGCGCTCAGCATCCGGCGATAATGATCGGCCACTTTGGGGAATTCATGATCTCG  
ACCCCATCGCTTTTTCAGCAGCCCGCGACCAACAGATAGATGTCCGCCACGCTGAACTGCTGCCCA  
GTACCCAGGGGCTGCCAGATAGTCTCAATCTGGGCAAGCCATCGCGCATATTTGCTGGCGACTTTT  
CTGCTGCATGGCGGCAATGGCCTGCTCGTCACTCGGCCACGCGGCTGCCACGGCGACCGTGGGCATGGGAG  
ACATGCACTGTGGAGGCGAGGAAACTGTTGACCTCCTGCATGCGGGCCAGCAGGAACGGGTTGTCCAGCG  
GCGCCAGCTTTGCATCGGGGAAGCGCTGTGCCACATAGAGCAGCAGGGCCGGGGTCTCGGTCCAGGGTGGC  
CTGCTCGGTGACAAGGGCAGGCACCCGCCCTTTGGGGTTGATGGCAAGATACGCAGGATCACGCTGCTCC  
CCTGCGGCGAGGTTGACGAGACGGGGTTGGAACGGGGCATTCGCTTCCAGCAGGGCAATCTGCACGGCCA  
TGGCACAAGTGCCGGGAGCGAAATAGAGGGTCAATCGGACATGAATACTCCTGATTTGGCTCAGGCCACC  
CGCGATATCGGCGAAAGATTGCTTTCGCGGAGCATCACGGGCAGTCAAGAAAAAGAGAGGGGGCAACGTT  
TGCCCCACAGCCAATCTACACCCCTGAGGGGTAATGAAAAAGCGCAGAAATTAATCGGCTCTGATCATCT  
GGTTTTAGGTGAAGTTAGGATGTATGAGCAATATCTTCTCTAACTCACGGACAGCTTTAGCTACTTTTTA  
TGGAAAAACGTCGCTCTACCTCAGAGTCGGTTAGTTTCTTCGCATCATTGCCAAGCCAAAGTGCAAGAAT  
ATCTCGTTTTTTGACTGACATCAAGGCAGTCGAAATTAGGAATGTAATGGTGTCTGTCCGGTTGTTCCGCGC  
TGTAGCTCATAAAATGTCTTAATTAGAGATTTTGGTTGAATCTCGCCATTGGGACAGAAGCGTTCCAGTGA  
GTTTTTTAATTGTATGATTGATGGCGGAAGTTGTGATGTTGTAGTAACCTTGGGAAAAGTATGCTGCCCA  
TCCAAGGCGCTTTCCTTCAAAAATACATCCCGTAATCCTAAGATTTAGTTTCCACTTACAGTAGGCAAGA  
GCTCGCTGTTTATCAATGTGCTTCTAGATATAGCTAATTTATGTTGTACGCAGTGAATAATTTTACAA  
TAACTAAATGGTTCAGTGAGACTAGCAACTTTGGATTTGCAATCTAAGCCAAACTCGTGTGGATTGAGT  
TTTAGTGATTTAATGCCGAGATTAATTCTGTTGCAATAGTATTGGCTTGTCCTTTTGGCGTTAAAATAA  
GGATGTGCTTACATATCTTTTTATAACAAACACCTTTTTCGAGACTCGAAAACCTGAATCGATTTTTTTGGAG  
AGATATCTCAGCTAAAAGATTGATATAGCCAAAACCTTGAGGAACTCCTACTGTAGACCTGGTTGCGCCT  
TTACCTCCTTTAGATTAGGCACGGTTGGAGTTTTTACTGCTTCGAGAATTAATGTCATAATCTCATTTTT  
TTCTTATTTTACCTTTTATGGCTGAAATGATTAATTCATGAGGAATGGACGGATAGAAGTCTTCAAATC  
AATTTTGGCATATTTCTGATAGGTGTGAGAGTTAGAGCAACTTTAATGAATCAATGACCCCTTTGTGGA  
AGGCTTAGCTTAGCTGTTGAAATATATCAGAAAGACATTCGCATAATGCCCGCAGAACAAATCTATCTC  
TTGCTGTGGGTATCGATATTTTCCGTGGGTTGGAATCAGCGCCTTTAAAATAAGCTTTTCTTGTATGC  
CGTAAAATGATACGTTCCCTGTTTTGTTTTCTGAACAATATGCTCAAGTCTTTCATCTAGTTGATTATTA  
AGATTGGCGGGTCTGGTACGGTCTAACCCATTGCTCCGGAGTCTTTATTTTATCCGTGTATATTTTAC  
GTAAACTATTCTTAGAAAAATATTTTTTGAAGCTGATAGCTGCACTCATAACAGACCTCCAAGTGTAGACG  
GTTATGATGAGTGGTAGAATGTAAAGAGTTACTGTAATTAATATGCGAAGAGTTAGCCACCCATATACAT  
GGAACACTTCTATTTTTGTAGGGTGTCTACTTGTAGCCCTTGATAAAGACGGCAGCTATCTTGTCTATC  
TATTTCTTGGTGGTTTTCTGACTCAGCTAAGAGCTCGTAGTATTTATTAATTTGGTCTTTGGTGGGGACG  
GAATTTGTAGGTATATCTAAGTATAGCTTCTGCAATTTAGATAATTCGTGCGCATGAGCATGGCTCTGA



CACGAAAATCCCGATTAGTAACAGTCAGGGATACACCAAGTAGCGCAATCGCAAGAATAGTGGCCAAGAT  
ATCGGTGTTTTGAACCAAGAATCATACTATGTCTGATGGTAAGCACACCTAATGTTGCACTGAGAATGGCA  
TACCACATCAATAGTAGCTGAGAGTGAAAATCCAACCAGCTTAAGCATTGTTAGCTTGAATTCCTTGCTT  
TATAAGTAAACCAAATGTTATCGCGCAAACCTCTTCTCCATTTAAGGGAGAAAGGGCAGGGGAATTTGA  
GTAACATTGAACATCCCCAAAGGGGATCTGCGAGAGTAAGCGAAGCATGCTTAAACCCGAACAGTCGAAA  
CTGTTATTTATTAGAACCACCTCATTCATATGAGAGGAAAAACCTGCCCTTTCGAAGAAGCATCTTACA  
ATGTCATCAATAATAGTTAAAGTTGTCCGTGTACAATTGACTAATCACCCATATAAAAACTACGGCTGA  
TATCATTGACTTGTGAGTTGAGTAGGAGCACTTCAGAACCAGATTCGATTAGCGAAGCGCAATCGGAC  
GTTTCGCGGTTTTGATAATACTGCACAGTCATTCCCCATCAACGCATCTATTGTGCTTATCTCCCCGCAA  
ATGAGGCAACTCATATTGGTTGCCGTGAATCGAGGTTCCCCGTACCTCTCGGTGTTAAAGCATATTGCCGT  
TGAGAAACCGTGCAGGTTGTGAAAAAGAGAAGGGGACAAATATTGCCCTTTATCCATTACGCCCGTCA  
GGCCGATTAAACCGCGATTAAACCGCCCTTGCCACCATGGCTTTAAGCTGCAGGAAGTACTGCTCGTA  
GAGGCGGGAGGCATCACCCACATCGGACTGGAACCTGCCCTTGCGCTGATCTCGTCTCGTGGGAAGACC  
ATGGGGTTGTTGCGAAACCGCGGGGTGAGCAGGGGAATGGCATCCTTGACCGGGGTGGGGTAGCCAATTG  
CCTTGCCACCTTGCCGGCCACATCGGGGCGCATCAGGAAGTTGATCAGGGCGTGTGCCCTTTTCACATG  
CTTGCCCTTGCCGGGATGGCGAGGTTGTCCATCCAGAGCACGGCGCTTCTTCGGGGTAGGTCATCTGG  
ATGGAGGGGATTTGCGCTGGGCGCCGTAGGCCGAGCCGTTCCACAGCATAACCGATATTGACCTCACCGG  
CGATAAAGGGGTGCGCCGGGTTGTGCGAGTTGAACGCCCTTGACGTTGGGCATCAGTTTTTTTCAGGTATTC  
GAACGCTTCGGCAATTTGCGCCTTGTCTTGAGTGTGGGACTGTAACCCAGCTGCACCAGCGCGATATGG  
AACACCTCGCGGGCATCGTCCATCAGCAGCAGGCTCTCTTTCCACTCTGGCGCCAGAGCTGCTTCCAGC  
TGGAACCGGTTGCTCGATGATGTGCGGTGTTGGTGCCGATCCCGGTTGCGCCCCAGATATAGGGGATGGA  
GTAGCGGTTGTCCGGGTCGTAATCGTGGTTGAGCAGGGTTGGGTCGAGATGCTTGAAGTTGGGCAGCTGG  
GCGCGATCCAGCGGCTGCAGCATTCCTCTTTAGCCATTTTCGAGATGAAGTAGGTGCTGGGCACCACCA  
CGTCATAGCCGTGCGCCATGGGTTTTAGCTTGGCGTAGAGGGTCTCGTTGGATTGCTAGGTGGAGTAGAT  
CACCTTGATACCGGTCTCTTGTGGAACGCTCCAGCAGGCCGTCGGGCACATATTCGACCAAGTTGTAG  
AAGTAGACCACCTTGTGCTGCGCCGCGTGTGCGCTCTGGCTCAGCAGCGGGGTGGTGAGGGTGAGGGCGG  
CTGCCAGCAGGCGCCGGCCTTGTGTTGATTGTCTCAACAACCTCTTGGGGTTATGGGGCCTTGCGGC  
CCACCGTGACAGATTGCGCAAAGATGGCGGGGACGAAACCGGCAGGGTTAACCTGCCGTTTACCGCAT  
AACAGTTGCGCAGCAGCACCATCCCGAGGGAGGCCAGCAGCATCAGGGTGGCCAGGGCTTACCTCGG  
GGGAGACCCCCACCTTGACCATGGAGTAGATCTTGAGCGGCAGGATCTCGTAGGCCGGGCGGTAACAAA  
GGAGCTCACCAACACGTCGTCAGCGACAGGGTAAAGGAGAGCAGCCAGCCCGCCATCACCGCCGGCAGC  
GCCAGCGGCAGTATGATGCGGCGCAGGATGATCCACTCGCCAGCCCCAGATCCCGCGCTGCCCTCCAGCA  
TCCGCACATCAAAACCGCACAGCCGCGAGTAGACGGTATCACCACAAACGGCAGGCAGAAGGTGATGTG  
GGCAATCAGTAGCGACCAGAAGCCGAGCGCAATGCCGGTCACTACAAACAGGGTCAGCAGTGAAATGGCC  
ATGACGATATCGGGGACATCATCACACGAACAGCATGCCGCTCACGTAATGCTTGCCGCGAAAGCGGT  
AGCGAAACAGCGCCACGGCAGTGAGGGTGGCGATCAGGGTGGCCGCGTGGCGGTGAGGGCAGCGATGGT  
CAGGGAGTGTGGGCCCGCTGCATCAGGCTGGCGCTGGCAAACAGCTTCTCATACCAGCCAGGGTAAAG  
CCGCGCCAGTCGATAACCATATTTGACAGGTTGAAGGAGTTGGCGATCAGCACCCCGATGGGCACATAGA  
GATAGCCAAACACCAGCAGCAGGAACAGAGCTTTAGTGCAGCATCATGCCAGCTCCCCCTTCTTGCTG  
AGCAGCTTGCCCTGCCCGCCAGTAGCAGTAGACCAACAGCGCCATCAGCACCGTCAGCATCACGCTGATGG  
CGGCGCCAAAGGGCCAGTCACGGCTGTTGAGGAACTGGGTCTTGATCAGGTTGCCATCAGCAGGTGCTT  
GGCGCCACCCAGCAAGTCGGAGACATAGAACATCCCCATGGCGGGCAGGAACACCAGCAGACAACCGGCG  
ATGATGCCGGGCAGGGTGAGGGGAAGATGATCCGCACCAGCCGCTGCCAGCCGTTGGCGCCGAGATCTC  
GCGCCGCTCCAGCAAACGGCCATCCAGCTTCTCGATGCTGGAGTAGAGCGGCAGCACCATAAAGGGGAG  
CAGTACATAGACCAGCCCGATGATGACGGCCACCTCGGTATACATCATCTGCAGTGCCGTTTCGATAAGC  
CCCAGATCCAGCAGCCACCCATTGATCAGCCCCGGGTGCCGAGCAGCACTTTCAGCGCATAGGTGCGGA  
TCAGGGAGTTGGTCCAGAACGGCACCACCAGAAACAACAGCAGCGGGCGGATACGCGCTGGCAGATG  
GGCCAGCAGCCAGGCAAAGGGGTAGCCCACCAGCAGGCAGATGGCGGTGGCGAGCAGCGCCAGCCAGAGG  
GAGTGGAGCAGCACCTCGAAATAGAGCGGGTCCAGCAGGCGGCCATAGTTGCTCAGGGTAAAGAGCGGCG  
CGATAAGCTCGGATTATCACGGGTGAGGAAGCTGACGCCGATGATCATCAGATTGGGCAGGAAGACAAA  
CAGCGTCAGCCAGCCGAGGATCAGCGGATGGCCCCGTTGCGAAAGCCGTTGTGGGCAAAGCTGTGCGCT  
ACCCGCAGATTAGTGAGGCTCATAGGGCAGCACCACTCCAGCTGTGACCCAGTGGATCGCCACCTCC  
TGACCCAGACGGTAGTCAAAATCGGGGTCATCCTCGTCGAAGAACTCGGAGATAAGCAGCTGTTTGCCAC  
TTTTGAGCTCGATCACCGAGTCCAGCGTCGCCCCCTGTAGTTGCGCTCGCGGATATTGCCCCGACGCGC  
GCCGCACTGATCGTTCATCCTGATCAAGAATGCGCAGATCTTCCGGGCGCAGCAGCACCAGTACCTTCTCC  
TCTGGCTGGAACGGCAAGGTAGTATGGAGCAGGCATTGCGCCCCCTTACCTCGGCCGTCAGATACCGG  
ACTCGCGCTGGCTGATCAGCTTGCCATCCATCACGTTGATCTCGCCGATAAAGCGGGCCACGAACAGATT  
GGCTGGCGATTGCTAGATATCGCGCGGAGTGCCACGCTGGATGATCTTGCCGCCCTCCATCACCAAGGATG  
CGATCAGACATGGTGAGCGCCTCTTCTGATCATGGGTAACGAAGACAAAGGTGATGCCAAGGCGACGTT  
GCAGCGCCTTGAGCTCGCTCTGCATCTGTTTGCAGCTTGTAGTCGAGCGCCGAGAGGGATTGCTCGAG  
TAGCAGCAGGCGGGCTTGTGACCACGGCGCGGGCAATGGCGACCCGTTGCTGCTGACCGCCGGAGAGC

TGATCCGGGGCGGCGATTGGCCAGCTCGGTGAGCTGCACCATGGCGAGGGTCTCCTCGACCCGCTGGCGGA  
TCTCGCTGGCTGGTACTTTCTGCATCTCGAGGCCAAAGGCGACGTTTTCAAACACCGTCATACGGGGGAA  
GAGCGCATAGCTCTGGAACACGGTGTGGATGTGCCTGTGTTCGGCGGGGATATGGGTGATCTCGTCACCG  
GCCAGATGAATGGTGCCACCGTCGACCGATTCTAGCCCCGCCAGCAGGCGCAGCAGGGTGGTCTTGCCAC  
AGCCGGAGGGGCCAGCAGGGTAAGAAATTCACCGTCATAGATTTGAAGGTCAAGGTCACTCAGGATCAC  
CTTGCCATCGTATTTTTTGTGATCTTGTTCAGCGCGACAATTACCTGTGGATTGTTTCATCATCCGCCAG  
TCTCACCCAGCCAGTGGCCATCGTGTGAAAAGAGGGCCGCATTTCTATGCAGCCGACACATGAAATCAA  
GGCTTTTTGGCCGAATTAGCCGCAAGTGTGTAGGAAAAACGGCTACGAATAGCAGGCCAAGTCGCTATA  
ATGTGCCACCTGATTTGGTCGTTTTTCGATATTGGATAGTCAATTGAGTAATAAAAATGCGTATTGGCGGCT  
CCCTTGAGCAGTCTCTGAACCAGGGCTACCGCCTTGATCTGAAAAGGGGTATCCAGGAGGATGGCAACA  
GACCCGCGTACCGGATTTGGCCTGCTGCTGGCGATTGTCGGGGTGACGGCGATCTGGATCCTGCTTAGC  
AATGTGCTGCTGTTGCCCTATCTGGGGGATGACAGCCAGATGAATGTGGCCATGGTGTGAGCCTGTGTA  
TGACGGTGGTGTAGGCCCCCATGACCAGCTCCCTCGATATGCTGGGGTTCAGCAGTCCGGTTCGGGGTGGC  
CGCCCGCGCAACCAGGTGTTGCACTTCTTCCGCCACTTTGTACGCCCTCGGCATGTTGAGCCTGCTTGGC  
AGTCTGCTCACCAGCCTGTTTGGCCCGCTGTTTCGATCTGCTGGGATTGCCGCGCTACTCTCTTTCATTC  
CCTCGGCCCTTGATCGGCATGGGGCTGCTCTTACCGTCCCGCTGGTGTGGAGCGCGGCCGACGCCGCC  
CCAGGCCATTCTGGTCTCTCTCAAGCTTTTCGCACGCGGCTGGCCAGCATTGTGCTGTTCCACGGCCTG  
ATGACCGCGCTCTTCTTCCCTGGCTCTGATCCCATGGGGTGGGGCTTATCTGGGTGGCACCCTCTATT  
TCAACTGCAAGGGGATCCTCTATCGGGATCTCTGCGGGGTGGGGTAGAGGTTAACGAGGTGACAGAAGG  
CCCCAACCATTTCAATGCATGATGCAAAAGGACGTTGAATGACCCGTCGATATGGAGTGACCCAAGCCTT  
GCGCCTGAGCCTGCTGGCCACGCTCTTGCTGCCAGGGCTGGCGCTGGCTGAGCCGGTGTGGATCTGCAA  
TACAGCACCTTCTACAGCCAGATGAAGACCTTTGCCAAAGGGGAGTTTGGTCACGCCAGACTGGGGTTTT  
ATCTGACCGATCCGCAAAATGGCCAGCGCTGTGGCCTCACCTTTGCCCGGGTTGCAACCGACAGTAAGGA  
GGTGGCGGGGCGAGGTAACGGTGCATAGCGAACTACGCCCTGCCCTTTGATGAGGATCTCAACCTCGACAAG  
GGGATCGTGACCGTTCGGCCTGAAAAGAAGAGCACGCCACATGCGATATGACGGTACAGGTGATGGCCGACG  
CACCAAATGGCCCCGAGCTGCCGCTGGCGGAGTTGGCGGCCCGTCAGCAGCAGATGCAGTCGCTGCTCGA  
CAAGATGGCGGGCATGGTCGGCAAGCACTTCTGCCGAAGATGGAAGGGGTACGCATTACCCTGGTGCAG  
CAGAGCGCCACTGCTTATCTGATTGATGGCGCCCGTCAGGAAGCGCTGCCCTGGCAGGAAGGCCATCGGT  
TGCTTAGCAATGAGCAACTGCCCGCTTCGCTCCCGGCAACTGCGCCTGCAGGGTAACTGCTGCTGACT  
GACCCCTGGCTGCATAAAGGGTGAGATCGGTTCGCGCTGTCCACCGCAGTGACAGGGTAACTCCAGAAAGCA  
AAAAGGAGCGATGATCGCTCCTTTTTTATTGTGTGGCGTTTTGCCCTTGTGAGCGCGACTTAGCGCACTTCA  
ATTACATCCAGCATGTCCATCTCGTCGATATCCAGCAGCGGCGCCTTCGGCATCTCGGGCGGATCAAACG  
CCTTGTGCGCCGCATCGATGATGCCGGAGTTCGCGGTTGATGCTCTTGAAGTCAAACAGCTTGTGGTTCGAG  
CAGGTGGCTCGGGATCACGTCTGAATGGCGGTGAACATGGTCTCGATACGACCGGGGAAGCGGCGATCC  
CAATCCTGCATCATCTGTTTGTGATGGCCTGACGCTGCAGGTTCTCCTGCGAGCCGCACAGGTTGCACGGAA  
TGATGGGGAAGGCTTTGACGTCGGCGTAGCGGATCAGATCCTTCTCTTTGACGATAGGCCAGCGGGCGGAT  
CACCACGTTCTTGCCATCATCGCTCACCAGCTTGGGCGCATGGACTTGAGCTTGCCACCCTAGAACATG  
TTGAGGAACAGGGTCTCGAGGATGTGCTCACGGTGGTGGCCAAGGGCAATCTTGGTGAACCCAGCTCCT  
GGGCGGTGCGATAGAGAATACCGCGGGCGCAGCCGTGAGCAGAGGGAGCAGGTGGTTTTGCCTTCCGGTAC  
CTTCTCCTTGACGATGGAATAGGTATCTTCCCTCGACGATCTTGTACTCGATACCGAGGGAATCCAGATAC  
TCGGGCAGCAGATGCTCGGGGAAGCCGGGCTGCTTCTGATCCAGGTTGACGGCAACCAGATCGAAATGGA  
TGGGGGCACTGGCTTTGAGGCTCATCAGTATGTGAGCATAACCGAAGCTGTCCCTTGCCGCGGAGAGGCA  
GACCATGACCTTGTGCGCCTCTTCAATCATGTTGAAGTCGGCAATGGCCTGACCCACGTTGCGCCGACG  
CGCTTCTGCAGTTTGTAAAACCTGTATTTTTCTTTGGCGTTCAGCTCTTCTAGCATGCTCGTAAAACCCG  
GGACACAAATAAGCGCGTTATTATAGCCATGTCCCGGGGAGGGCAAGGTGCCAGGCACCTTATGATTGA  
TTGCGACGACTGTGACCCGGCAGCTGTAGTCCCGGTTTGGAGATCAGGATGTCGAGGAGAGGCGGT  
CAATCACATGTTTCGGCGGTATTGCCGAGCAAAGCTGCAGAAAGCCCGGTACGGCCGACGCAGCCCATGAT  
CATCAGGGTGCCTTGAGATCTTCTGCCATATCCGGCAACACCTCTTCCGGTAGTCTTCCAGCTACCCGG  
GTCCAGAGATGACCGATCCCGAACTTGTGCGCATGGCTGAGCAGCAGGCTTTCGTGGTGTGTTGCGGATAG  
CTTCATTGTAGGCGTTGGGATCAAACCTCCGGCAGCTCGATGGCCACGTTGACCGGGGTGCCCGGGTAGGT  
GTTGACCAGATAGAGGTTGGAGCCAGTAGTTCGGCGATGTGCTTCCCTCCTGGGTGATCCGTTCCGTTG  
AGCAGTTTCTGATCCGGATCGTTCGCTTGTGAGCAGTTGATGGCGCGATGATGTTGCCGCTCGTTGCCAGT  
GACCTCCTTGACCAGCAGCACCGGACAGGGGCATTTGCGCAGCAGGTGCCAGTCCGGTGGGGTAAAGAT  
GAAGGTTTGCAGGAAGCTGTGATGGTGTGAGTGGCTTTGACCACCAGATCGTGGCGCTGCTCAAGCACCTCC  
TGAATGACACACTCGAAGGGGCGATTGTGCCAGACCACTTCACTTCGCACTCTATCCTCTGTGCCCGAT  
AGGGGGTACAGATCTCGTCCAGCCACTCACGTGCTGTGAAATGACGCCGTGCGCATCTCTTGCCGCTC  
GTCCACCGAGAGCATGGCGGTCAATTTATACGAGAAGTCATAGATGGTGAGCAGCAGGGTCCAGATGGGCT  
TTTTCGTCCAGCTCGGCGACTTTGACTGCCCGTTCGAGGGCGATTTGACGCTCCTCTTCTGGATTGATAA  
CCACCAGAATATTCTGATATTTGACCATCTTCTCCTCCTTGGAAAAGTCCAATGACAGCAGAATCTTAGC  
CATTACAGCTTAGCGCAGGAGGAGGGTATGGGGAACGTACCGGATCACATTCCAGAGGAAAGGATCCGGC  
AGGGAAGCAGGAGAAAACGGGAGGGTAAGCGGAAAAATAGCCGACGGGCGGGGAGTAGCTCCGGCCA

TCATGCCCAGCGGACCTGATCCAGCACGGTAATGTATTTGCCTTTGACGCTGATGAGACCGGACTTCTG  
GAAGCGGCCGAGCAGACGACTGATGGTCTCGACGGTCAGACCCAGATAGTTGCCAATGTCACCACGGGTC  
ATGGAGAGACGGAACCTCCTTGGCGGAGAAACCGCGCTCGGAGAAGCGTACCGACAGATTGTGCAGGAAG  
CGGCGAGGCGCTCTTCGGCATTCTTGGAGAGCAGCAGGATCATCTCTGATCGCCCATGATTTTCGCT  
ACTCATCAGACGCATGATCTGCTGGCGCAGTTTGGGCATCTTGCCGGAGAGATCATCCAGCACTTCAAAC  
GGGATCTCGCACACCATGGCCGTTTCCAGCGCCTGGGCGAAGGAGGGGTGGGCCCTGCTTGTGATGGCAT  
CAAAACCGACCAGATCACCCGCGAGGTGGAACGCAGTGATCTGCTCATCCCCTTGCTCGGTGATGGTGTA  
AGACTTGATGGTCCCGAACGGATGGCATAGAGGGATTTGAACTCATCGCCAGCCTTGAACAGCTCTTCA  
CCCTTCTGGATCGGCTTCTTGCCTCGATGATGCTGTCCAGCTGATCAAGCTCGTTGTCTGTTTCAAGTGA  
AGGGAATACAGAGCTGACTGATGCTGCAATCTGGCAATGAATTGCACAGCCACCGCTCTGGATACGTCT  
GCCAGGTTTCTTTTCGGGATCATAGGCTCATACGAAATAATTGATTTATATCAAACAAGTTTACCATCAA  
CTCATCCGTTTTGGATAGGGTTTTCAAAGGAAGCAATGCCAATCCAGAAGGTATGTACCCCGAACAAAAT  
GAGCAGCAGGGCCCCGCCAAGGCGCAAACCTGCGCAGGGTGAGCCAGTATCTCAGGCGATCGGCGAGCCCC  
CCCAACGCAAACAGGGTGGGCGAGGTTGCCGAGACAAAAAAGAGCATGATCAGCGCCCCGCCACTGGCCG  
AACCCGCGCGCGCTCCAGGTGAGCATGGAGTAGACCAGCCCGCAGGGGAGCCAGCCCCACACCATGCC  
AAAGGGCAATGCCTGCCGCGGTGAGGTGAAGGGGAGAAAATTTGCCCGCCAGCGGTTTGATACGGGGCCAA  
AGTCTTGCCTGAGCCGCTCCAGCAGCAAGATCCCTTGCCACCAGCCCGCCAGATAAAGGCCAAGCGCAA  
TCATCAATAGCGCAGCCACCAAGCGCAATCCGGCGATGGCGTGTGCTTGCCAGCCCCAGCTCGCTGGTGGT  
GGCGAGCAGGCCGCCACCAGTGCACCTGCAATGACATAGCTCAGGATCCGGCCGAGGTTGTAGTTGAGC  
AGATAGGCAAGCCGACCCCAAAAATGCTGCTTGTGGCGGGATCGCCATGGAGAGCGCGGCAGAGACAC  
CCCCACACATGCCGATACAGTGGGCGAGGCTGCCAGTCCGACCAGCAGGGCGCCGGCCAGATCAAGGTT  
GTGGGTGATGGTTCAGCAGGCTTTGCGGGTTTTGTGGGTGGGTTGCTCTTCGTCAAACAGGATGTTGGAACC  
CTGCCGGTTCGAGATCTTCAAACCTGCTCGGAGCGAATGGCCAGAAAGAGACGACCCCGGCGATGATCACA  
AACAGGATGGCGATGGGGATCAGGACAAAAATATATTCATGAGAGGTACCTTGGCGTTCATCCTTGGCA  
AGCGTCCCCTATGGTAACCCTGTTTCGGGCGAGGGGGCCAGCCGCTATCAGTGAGAAAATGTGGCCTGCATCG  
GAGGCAGGCCACATTTTTCAGCTATTTTCCGCCACCAGCCTCATCGGTTGAGGCGCATGGAGTTGGTTACC  
ACGATGAGTGAGCTGAGCGACATGCCCCGCCCGCCAGATAGGGGGGCGAGCCAGCCGAGGCCCGCCAGCG  
GCAGCACCAGCAGGTTGTAACCGATGGACAGGCGAAGTTCTCGATGATGATCTTGCAGGTTACGATGCT  
CAGCATTCTGGCCTCGAGCAGTCCGCTCAGGTCATCGCCAGCAGGATGGCATCGGCTGTTTTTTCGCC  
AGATCGGTGCCACCAGCCATGGCAAACGAGGCGTGAGCGCCAGCCAGTACCGGAGCGTCTGTGATGCCAT  
CGCCACCATGATGCTGATATCCCCCTTGGGCTTCCCGGGCCTTGAGGTAGGCCAGCTTGCCATCGGGTGA  
GACCCCTTGACCAGCTCATCCACTCCCAGCTCGCGGGCAATCTCGTCTGCCTGCAAAGAGCTGTGCGCA  
GTCAGCACGGTAGTTTGCAGACCTGCTGCCTTGAATGCCGCGATCAGCGCCCTGGCATCGGGGCGCAGGG  
TATCTTCCAGATTGAAGCGAGCCAAGACCTGCTGCTCGTTAGCCAGATAGATAGCCAGACCGCGGCGCG  
CTCTTGCAGCGGATCCAGCCAAAGCCAGCGGGCACTGCCGATGCGGTAGCGTACGCCATCCACCAGCGCC  
ATGATGCCGTGACCGATGACAGGGGTGATCTCGCGGGCGGATGACAGCACACTGATACTGTCCGTTGGGTA  
GCCGGAAGGCGCGAGCTATGGGGTGTCTGGATTGCGCCTCCATGGCCCGGGCGATGGCGAGGCATTGCGT  
CTCGTCCATCTCTGCCAAGGTGGTGGTGCCGGTCCAGCTGATCTCACCTGTGGTTCAGGGTGCCGGTCTTG  
TCCATCACGATCCGGTTTTGCCTTGGTTCAGCACGTCAAGCACATGACCACGGCGCAGCAGAATGCCGTTGC  
GGGTTCAGATTGGCGGTGGCCGAAGTTAGCGCAGTCCGGGTGGCCAGCGACAGGGCACAGGGGCAAGTGGC  
AACCAGCACGGCGAGGGTGACCCAGAACGCCTGATCCGGTTGATGGAAGTGCCAGAAGGTCCAGACCGCA  
GCGGCAATGATCAGCAGCACCAGAATAAAGTGGCGCGACAGCTGATCCGCCATCTGGGCGATGGCCGGTT  
TGTCATCGAGGGCATGATCCTGCAGCCGATGATCTGGGCGATCCGCGACTCTTCAATACGGTGGCTGAC  
CCGGATCTGCAGCGGCGCATCCGTGTTGATGGTGCCGGCATAGACCTGATCACCGCGCTGTTTGGCAGG  
GGCAGCTGTTTACCAGGTCAGCATGGATTGTTGATGCTGGCTTGTCTTTCGACAATGATGCCGTCCGCCG  
GCAAGGTGGCGCCAGCAGCACCCTACCCGATCGCCGACCTGCAAGGTCTTGGCCGCTACCTCATGTTTC  
CCCTTTCATCATCGATCGGGTTCGCCATGATGGGCACCAGTCTGGCCAGGTTGGAACTCGATTCCGACGCC  
TTGCGCCGGGCCCCGAACTCGAGAAAAGCGCCCCAGCAGCAGGAAGAAGACGAACATGGTGGTGGAGTCGT  
AATAGACCTCACCGGATTTGAACACGGTGGCCACATGGAGGCGATAAAAAGCCCCGATCAGCGCCAGCGA  
CACCGACACATCCATCGACAGGTGACCCTGTTTTCAGGCTGCGCCAGGCACCCACGTAAAAGGGTTGGGCC  
GAGTAGATCATGATGGGGTGGAGAGCAGCAGGCTTATCCACTTGAAGTAGACCATGAACTCATCTTCAA  
CGCTGATGAAGAGATCCATATAGAGGGCCACGGCGCACATCATCACCTGCATTGAGCCCAGCCCTGCCAG  
TGCCAGCCGGAACATATAGCTGCGCACCTCTTTGGCGTAGAGCGCTCCTGTTGATGGGTCTGGAACGGA  
TAGGCGCGATAGCCGATCTGGGCAAATCCCTTGGAGATGTTACTCAGGGAGAGCTGGTCCGGATCCCCT  
TGATGCGGGCCCCGGTGGGTGGTGGTGTGACGTTGATGTAGCGCAGGCCACCAAGGGTTCATCAGGTGGCG  
TTCGATAAGCCAGGCACAGGCGGCGCAGGTGAGCCCCCTCCACCGTCAGCTGGATTTTCGCAAGGGTACCG  
CTGTCCGGTGCACAACTCCTGTTGCACTTCTGCCAGATCGTAGTGGGTGAGGGCGGCGCAGCTCCTCGGGCA  
CCAGATCACCTTGGTACCGGGGGCGGTACGGTGCATGATGATGAACTGGCGAGGCCGCACTCCATGATGGT  
TTCAGCCACCGCCTGACAACCGGGGCGAGCACATGGGGCGAACAATCCCCCTTATCTCGAGGGCATAGCCA  
CTATTGGCGGGTACCGGCTCGCCACAGTGAAAGCAGGGGGTTCATGATTGATGCCCCCTGAATGCAGAAT  
GCAAGCAGCAGGGGCGCTGGCGAGAACCAGGCTCGCCACAGTGAGAACAGCCGGTTCATGGCTTAGCGTCT

TTCGGGTTCGAGTTCGACAGGGGCCAGGGTGGGCAGCTGGACGGTCTCTTGCAATCGCCACTGGTGATCGA  
AGGCATCGACCCGAATGTGCCACTTGCCGACCAGCGCTTGTGAAATGGAGGCGATAGGTGCCGCTCGC  
ATCGGCGGTGATCATGTGTTTCGCTGTCTTGACCGCCAAGGTCGGGTGGAACAATGAGAGATAGAGAGCT  
TGCCCGGCAGGAATATCGCCGCTGATGGGTTTTGAGGGTCAGCTCGTTGCCGTCACCTTCCAGCCCAAAGC  
GGATATTGAGGGCTTCGGAGCGGTCAAACCTTGCTCAAGTCTTGATTGATCTCTTTCCCTTGTGTTAATA  
GTCCTCGGCCACCAGATTGACCCCATCTTGCTGGCGATGATGGCGGTGGCGATACTGCCGACAACAGCA  
GCAGTGGGGAGGGCGATGATAAACCAGGGCCAGAATTGGCGATAACCACGGTTTGGATAGAGGCTGGGTCA  
TGATTGCTACTGCCATGAAACGAATGATTAACGTGGAAGATGGTTTTTACGCAACACAAGATAACAAAAA  
GCCTCGAGGAGTCGAGGCTTTTTGCTGTGTAATCACGTGTTTATCACATGTTACAACGTTACGGGCGAAC  
CTTATTTGGCAGACTGTTGATGAGACAGGCTGTAACGTAGGAGGCCAGCAGGTGAACCTTGTCTCACC  
CAGAATGTCTTTCCAGGCTGGCATCACACCGTGACGACCGTGGGTGATGGTTTTGTACCACCACCTTCGCGG  
GAGCCACCATAGAGCCAGGTGTTGTTGGTCAGATCTGGCGCACCGACGGCAATACCGCCCTTGGCATCGG  
CCCCGTGGCAAGCTGCGCAGATGGCAAAGCGTGCTTACCTTTCTTCGCTTCCACCAGGTGACCTTGGC  
ACCGGAGAGGCTCAGGACATAGGAGGCCACTTCTGAAACGCCATCTTTGCCGAGGATTTACACCCAGGCA  
GCCATGATCCCCTGACGACCGCCCATGATGGTGGTCTTGATTTGATCAGGCTGGCCGCCCATTTGCCATT  
CGCTGTGCGGTGAGGTTCCGGAAAGCCACGGCCACCACGGGCATCGGAGCCGTGACACTGGGAGCAGTTCTG  
CAAGAACAGACGCTGACCCACTTTAGGGCTTCCGGATCTTGGCGATCTCGGTGATGGCACGATAGGTT  
TTGCCATCCGCTTCATAGGTGAGTTCACGGAACCTTGGCGCGTAGATCTCGTCAGCTTGGCGACCTCGC  
GGTTCGTACTCCACCGCGCGACCTTTCGGCCTTGGCCGATTTCGGTTGCTGCCCTTGGACTCGGCCAGCGAGCG  
CACGTCCTGGTTGGAACCTTTGCCAGCCCAACAGGCCCTTGAAGTTGCCAAGCCCCGGGAAGGCGACCAGA  
TAGACCAGACCGGTGACGATGAAGAAGAGGAACATGTAAGTCCACCCTTCGGCAGCGGGTTGTTGATCT  
CCTCGATGCCATCGAAGGAGTGACCCATCGATTTGCCTTCTTCAACACCCATCTTGTCTTGGCGCACCA  
CATCAGCAGCAAGAAGCAGCCGAGGATGGTTCCCAGACTGATGACAGTCACAAAAATGCTAAACAGAGTG  
CTCATTATTGTTTCGCTCCTGCGTTCTTTTTATCAGCACCGGGTTGCTCATCATCGGCAAAAACCAGATT  
GGCAGCCTCGTCGAAAGAGGTCTTGGCGGCTTTGCTGTAGGCCCAGACGATGATGCCAATCATGATGGCC  
ATCAACAGCAAGGTATACAGACCGCGAAATGTGCCGTAGTCCATTTTCGCTCCTTATTTACAGGGCATGA  
CCCAGTGAATTCAGATAGGCCACCAGCGCATCCAGCTCGGTTTTGCCCCTTACCGGCTTCGCCGGCACCCCT  
GAATATCGGTCGGTATAGGGCACACCGGAAGTGTGCGGAAACAGCGCCAGTTTTTTGCCGGTCATCTC  
GCCAGTCAGCACATTTGATCAAGCCAGGGGTAGCGGGCATGTTGGATTCCGGTACCACATCGCGCGGG  
TTGATCAGGTGAACCTTGTGCCACTCGTCGGAGTAGCGGCCACCAACACGGGGCCAGATCAGGACCAGTAC  
GCTTGGAGCCCCACAGGAAGGGGTGCTCCCAGACGCTCTCGCCAGCGACCGAGTAGTGACCGTAACGCTC  
GGTTTTCGGCACGGAACGGACGGATCATCTGGCTGTGGCAGTTGGTGCAGCCTTCGCGAATGAAGATGTGCG  
CGTCCTTCCATCTGCAGAGCGGTGTAGGGCTTGGAGCCCTCCACCGGCTCGGTGGTTTTGCTTTTGGAAAGA  
ACAGCGGAGTGATTTCAACCAGGCCCCCCAGACTGATGGCGAAGATGATGCCGACCACCAGCATGGGAAC  
GCTTTTTTCAAATATTTTCGTGACGGTTATTGTTGCTCATGGGTTGACCTCTTCAATCATGCTGGCTGGGC  
GACAGGTTCCAGAGAACCTTTGGGCGCAGTGATGGTGCATAGGCGTTGTAAGCCATCAGCAACATGCCG  
GTGACGAAGAAGCAGCCACCCAGGAAGCGCACGAAATAGAAGGGATAGGATGCCTGCAGCGCTTCAACGA  
AGCTGTAGGTAAGGGTGCCTGCTTCGTTGACTGCACGCCACATCAGGCCCTGCATCAGCCGGAATCCA  
CATGGCAACGATGTAGAGCACGGTGGCCACGGTGCACGCCAGAAAGTGAACGTTGATTAGCTTGACGCTG  
TACATCCGGCCCTGGCCGAACAGGTTCCGGGATCAGGTGATAGACAGCACCGATGGAGACCATGGCAACCC  
AACCCAGCGCACCGGAGTGACCGTACCGACGGTCCAGTCCGTTGATGAGGGAGAGGGCGTTGACGGTTTT  
GATCGCCATCATCGGGCTTTCGAAGGTGCACATGCCGTAGAAAAGAGAGGGAGACGATCAGGAAGCGCAGG  
AAGGTACGAACAGGATCAGGGACATCACCATGCCAGTACTGGGCCAGTCAGGCAGTGCAGGTGTAGTG  
CAGGTGATCGCGACCGGCCAGATATAGAGGGAGATCAACGCCAGAAAGTGCACGATTTGAGAGGCGATAG  
GAGTAAACCGGACACCGCCCTGTTTGGGCACGAAGTAGTACATCATCCCCAAGAAGCCAGCAGTCAGCA  
GGAAGCCTACCGCTTGTGGCCATACCACCACTGTACCATGGCGTCCATGGCGCCGGAGTACATGGAGTA  
GGACTTCATGCCGAGAGTGGCACTTCCATGTTGTTGACGATGTGCAGCACCGCAACGGTGTGATGATGAAG  
GCGCCGAAGAACCAGTTCCGCCACATAGATGTGGGAGGTGGTGCCTTCATCAGGGTGCCGAAGAAGACGA  
TGGCATAGGCGACCCATAACCACAGTGTGGCGATATCAATCGGCCACTCCAGCTCGGCATACTCTTTGGC  
GGAGGTGTAACCCAGCGGCAGAGAGATGGCGGCAGAGAGGATGATTGCTTGCCAGCCCCAGAAGACGAAG  
GTTGCCAGCGGGCCACCAACAGTCTGGTTTACAGGTGCGCTGAACCACGTAGAAGGAGGTTGCCATCA  
GTGCACTGACCCGAAGGCGAAGATCACTGCGTTGGTATGGAGGGGCCGACGACTGTAAGTCAGCCA  
CGGGGTCTCGAAGTTGAGGGCAGGCCAGATCAACTGGGCTGCGATCAGTACGCCAACCAGCATGCCGACA  
ATTCCCCAGACAATCGTCATGACGGTAAACTGGCGAACAACGGTGTAGTTGTACTCAGGATGGTTAGTTG  
TATGGCTCATCGTTATATTCCGCTTCCGATGCTGCTGTTGTTTTGGTTTTGTATCCGGAGAACCAGGACTGG  
CTTCATCAGCCACCGCCGACCAGTTGTTAACATCTGTTAACGAAAAGGAAAAGCAAAAGATGGCTAAATGA  
AAACTGCATGGGAATGATACTGAAAGTACAGGTAATAAACAAGTATAAACAAGTATATTTGGCTCCGT  
CCGGTCTCGATATGGCAGTTTTTTTACCTTGTTCGAGATCACAAAAAATAATTTAATTGCATCTTAATCG  
GGCTGTTTTTGTGAAAGAGAGACTTACCGCACGTAAAGTTTTGCACCTCGTACTGGTATTGGCGCTGTT  
ATTGGCGCTGATGGCCTATCGCACCTGGTTTTTCGGCCGATAACAGCGTCTCTGCTGACCAGAAAAAAGAT

CAGATTTGTGATCTTTCCACACCCCTTGCAGCGCGCTGATTGGTGACAAGCCGCTGACGGTCGCCATCA  
AGGAATTACCGCTGCGCGCTGAACATGACTTTGCCATCGCTATTAGCGGCGGCGATCCGGCCATCAAACC  
GGTGAAAGCGACACTCGAAGGCAAAGATATGTTTATGGGCACCATTCCGGTGAACCTTTGAACAAATAGAC  
GGACAGTGGCAGGGGGTAACCCAGGTGGGGAGTTGTACATCACCCGTCATGATCTGGTTGTTAAATATCG  
AGTGAGTAATGGTCAACGCCAGCAATTGGCGCTTTCCGTTGCCCGGGAATAACGGCGCAAGGAGCGGGG  
AGTGGAATAATTTGAAATTTCCCGGCCAGGCGTTACCTTCCCCAAACCATCAGGGAGTGAAATTCAT  
TTAATCATGATTGAAAAACAACCGTTTATCGCACCTCAACCAGCAGGCCAAGGCGCTGCTGGAGGGGG  
AAACCGATCTTATTGCCAATCTGGCCAACCTCTCCGCACTGCTTAATCAGGAGCTGGAGGAGATCAACTG  
GGTCGGTTTTTATCTGTTGCAGGGCGAGACCCTGGTATTGGGGCCATTTTCAGGGCAAACCGGCTGCGTG  
CGGATCCCCTGCGCGCGGGGTGTGTGGTACAGCAGTGGCAGAGGGGAAAACCCAGCTCATTGACGATG  
TCCACCAGTTCGACGGTCACATCGCTTGGATGCGAGCAGCAACTCGGAAATCGTGATCCCCTGCGCCG  
TGGTGGCGAGATCATCGGGGTACTCGATATCGACAGTCCGATTTTAAACCGTTTCGACCAGGAAGACCGG  
ATTGGCCTCGAAGAAACGGTGCAAATTTTGGAAAGCATGCTCTAAGTCATTGCTAGATGGTTCGAAAAG  
GCCCCAAGCTCTCTATAATGGGGCCTTTGTTGTGCTCGGGACGTGCCCGTGCGTTTTATATGAAAGCCAAG  
GTTATACATGGAAAACACTGAGAAGCTGAAGAACAGTAAAAGAGATCGTTGCCACCTGGTTCGAGAAATTC  
CCGGCCTGCTTCGTTGCTGAAGGAGAGGCCAAGCCGCTCAAGATTGGCATCTTCCAGGATTTGGCCGAGC  
GTCTTGCTGACGATGCCAGAGTCTCCAAGACCATGCTGCGTTCCGCACTGCGTCAATACACCTCCAGCTG  
GCGCTACCTGCACGGTCTCAAAGCTGGCCAGGCTCGCGTTGATCTGGATGGCAACCCGGGCGAGCTGCTG  
ACCGAAGAGCACATCGAGCACGCCAAGCAAGCTCTGAAAGAGAGCAAAGAGCGCGTATTCGCCAGCCGTC  
GTACCAACACCAAAGAGAAGGATGAGAAGGCCAAGAAGCCCGTCGTCCTGCTGTGCGCAAAACCGAGAA  
AGCTGATGTAGCTGTCAAGCCGAAAAGCTGCCGCCAAGCCACCGGTCGCTGACGCTCCGCTGGTTAAAGTG  
GATGCCGCTACGCTGAAAAGTGGGCCAGGATGTGCGCGTCGTTATGGGTAATTTCCCGGTTCCGGCAACCA  
TCAAGGAAGTAACCAAGGACGATGTACAGGTCCAACCTGCAGACCCGGCATGATGGTGCGGGTCAAATCAGA  
GCACTTGGTTCTCTAAGGAGACAAATGTTGAAGCATGGCGTAATTCGTTTTTCCCTCGTTGCCGTGTAGCC  
TGGCGCTTGCCGGGCTTGACAGGCCATCGAGCCGGTGTCAAGGAGAGTGATTTGCCGTGTTGGCTCA  
AGAGAGCCAACATGCTACGGCCAGCAAGCGAATTACCAATCTGTTTACCCGCTCGCACTACAAACAGTTC  
AAGCTGGACGATGCCTTTTCCCTCCGTGATTTTCGATAAAATATCTGGAGAATCTGGACTACAGCCGAACC  
TGTTTTTGGCCTCTGATATCAGCCGTTTTGAAAAGTACCGTAACGGTTTTGACACCGCACTCGAAAAGG  
CCGTCTGGCTCCCCTACGAGATGTTCAACCTGAGTCAGCAGCGCGGTTATGAGCGTTTCGAATACGCC  
CTCAAACCTGCTTGATACTCCTTTTCGATTTTACCCAGACCGACAACATATGTGTTTGCAGGAAAGGGCGG  
CTTGGCCCAAAGATGAAGCAGAGCTCAACGAGCTGTGGCGTCAGCGGGTCAAGTTCGATGCCCTGAGCCT  
CAAGCTCAGTGGCAAGGAGTGGCCGAGATCAAGGAGCTGCTTGGCAAGCGTTACAACAACGCCATCAAG  
CGGATGTCCCAGACCGAGAGCGAGGATGTCTTCCAGCTCTTCATGAACTCCTTCGCTCGCGCCATCGAAC  
CGCACACCAGTTACCTCTCACCGCGCAGTGCCGATCGTTTCAACACCGAGATGAACCTCTCGCTGGAGGG  
GATTGGTGCCGTGTTGCAGGCGGAAGATGACTTTACCGTCATCCGTTCTCTGGTGCCCGGTGGCCCGGCA  
GCCAAATCCAACCACCTCAAACCCGATGACAAGATCACCGGGTGGGGCAGGAAGATGGCAAGATTGTGCG  
ATGTGATCGGCTGGCGTCTTGATGACGTGGTCGAGCTCATCAAGGGGCCAAAGGGAGCAAGGTCAAGCT  
GGAGATCCAGCGCGCAAGGGCGCAACCCGCAAGACCGAGCAGATCGAGCTGACCCGCGACAAGGTGCGC  
CTTGAAGACCGGGCAGCCAAGTCCAAGGTGATTAACGCCGAAAAGCAAGAAGATTGGTGTCTCGAGATCC  
CGAGTTTCTACGTCAATCTGCACGATGACGTGATCAAGGAGCTCTCCAGCCTGAACAAGAAGAAGATCGA  
TGGTCTGATCATCGATCTGCGCGGTAACGGCGGGCGCCCTGACCGAAGCTTCCGCCCTCAGCGGTCTC  
TTCTTTGCCAGCGGTCCCCTGGTGCAGATTCGTGATCATATGGGCCGTATCACGGTCAATGGCGATGACG  
ATGGGAACGTCTACTACGGCGGCCCATGTCCGGTGTGATCGACCGCTACAGTGCTTCGGCTCCGAGAT  
CTTCGCTGCCGCCATGCAGGATTATGGCCGCGCCCTGATCCTGGGTGAAAACCTGTTCCGGCAAGGGGACG  
GTGCAGCAGCATCGCAGCCTCGCCAAGGTCTATGACTTCTACGAGCAGCCGCTGGGTACAGTGCAGTACA  
CCATCGCCAAGTTCTACCCGATCGACGGTGGCAGTACCCAGAACAAGGGCGTTGCGCCGGATATCAGCTT  
CCCGACACCGGTTGCTCCGGAAGAGACGGGCGAAAAGCCGTGAGTTCAATGCGTTGCCGTGGGACAAGATT  
GCTTCCGCCAACTACGAGAAAACCTCGGCAACTTCGCCAGCGTGTGCCCCAAGTTGCAGGCGGGCGCACGATG  
CCCGGATCACCAAGGATCCCAGATTTGCCTATGTGATGCAGGATATCGCCGACTACAAGGAGGAGAAAAGA  
CAAGAAGTCGGTCTCCCTCAACGAGGCGGAGCGTGTTCGAGAGCAGGCGAAAACAGGATGAGAAAAGCGCTC  
AAACGTACCAACGAGCGTCTGGCACGTCTTGGCAAGCCAGCGGTGAAGAGTCTGGATGAACTGCCCGCTG  
ATTTTGAAGCGCCCGATGAGTATCTCATCGAAGCGGCCAATATCACGGCAGATCTGGCCAAGGTGAGCAA  
AGGCAGCTGACACGGCGACCTCCAATGCACAAGGGCGACTGCGGTGCGCCTTTCTTTTTGTCTGGCGTAT  
CTGACGTAATGCAAATGTTTGGACCCCGCCAGTTGGTTGTGACAGCCTTTTCTCGCCTTAAACAAGCGT  
GGAAGCAGACAATAATGACAGATCACTCCCAGGCCATGACGGCCAAATATCGCCAGGATTATCAGGCGCC  
GCTCTACTGGATCGACACCATCGACCTCGATTTCCAACCTGCAGGAGCCGCTGACCCAGGTACCTCCATC  
ACCCGCATTCGTCGCAACGGTGAGCACAATGCGCCGCTGGTCCCTCGATGGTGAACAGCTGACCCCTCAAAA  
GCGTTGCCATTGATGGCATTCCCTGTGACCACTACGAGCAAGGGCAGAGTAGTCTGACCCGTTCACCT  
GCCGGCCGAATGTGTGCTGACCAATTGTACCCTGCTGGATCCGGCCGCCAACACCGCGCTGGAAGGGCTT  
TACAAGTCTGGCGATGCCTACTGCACCCAGTGTGAAGCGGAAGGCTTTCGCCGCATAACCTATTATCTGG  
ACCGCCCCGACATTCTGGCGCGCTACAGCACCCGCAATTACCGCCGACAAGTCCCAGTTCCCTTCTGCT

CTCCAATGGCAACAAGGTCGACAGTGGTGTATCTGGATGGCGGCCGTCCTTCGTGCAGTGGCAGGATCCT  
TTCCCCAAACCGAGCTACCTGTTTTGCGCTGGTGGCCGGTGATTTTCGATGTGGAGCGCAGCCACTACACCA  
CCAAGAGCGGCCCGCAAGGTTGCCCTCGAGATCTTCGTGCACAAGGGCAACCTCGATCGCGCCGGTTTTG  
CATGGAGAGCCTCATCAACTCCATGCGTTGGGACGAGCAGCGTTTCGGCCTCGAGTATGATCTCGACATC  
TACATGATCGTTCGCGGTGGACTTCTTCAACATGGGCGCCATGGAGAACAAGGGGCTCAACATCTTCAACT  
CCAAGTTTCGTGCTGGCCAATCCGGCCACCGCTACCGATGGCGACTACCACGGTATCGAACGGGTGATCGG  
TCACGAATATTTCCACAACCTGGACCGGCAACCGCGTCACTGTTCGTGACTGGTTCCAGCTCAGCCTGAAA  
GAGGGGCTGACAGTGTTCGGGATCAGGAGTTCCTCCTCCGACCTGGGCTCCCGTGGCGTCAACCGCATCA  
ACAACGTGCGTACCGTCCGCGGCCCGCAGTTTGCAGGATGCGCGCCCATGGCACACCCGATCCGCCC  
GGATGTGGTGTGATCGAGATGAACAACCTTACACCTGACCGTTTATGAAAAAGGGTCGGAAGTGATCCGC  
ATGATGCACACCCCTGCTGGGGGAAGATGCCTTCCAGCCGGTATGCGTCTCTACTTCGATCGTACAGCAG  
GCTCGGCCCGCCACCTGCGATGATTTTTGTGCAGGCGATGGAGGATGCTTCCGGTGTGCATCTTGGCCGTTT  
CCGCCGCTGGTACAGCCAGTCAGGCACCCCCGAGCTGACCGTGACCGAGTACGATGCCGCCAGCGGT  
GTTTTACCGTCTGCATGTGAGCCAGCACACCCCGCGACTCAGGATCAGCCGCAAAAGCTGCCGCTGCATA  
TCCCCCTCGATATCGAACTCTATGACGAGCAGGGTGCCGTCATTGCGCTGCAATATCAGGGCAAGGCCAT  
CGGCAACGTGCTCGACGTGCTGGAAGCGGAGCAGACCTTCGAATTCGATCGGGTGGCCGTCAAGCCGGTT  
CCCTCCCTGCTGCGGGACTTCTCTGCGCCGGTCAAGCTGCACTATGACTACAGCGACGAAGCGCTCGCCT  
TTCTGATGCGCTTTGCCCGCAACGAGTTTGCCCGCTGGGATGCGGCCAGATGCTGATCAACAAAGCGGT  
CATCGATGGGGTGGCGGGTCCAGCACGGGCAGGGGTTGAGCTCTCCAAACCTGCTGGCCGCTTC  
GTCGCCATTCTGGACGACAGTGAACCTGGATTTGGCCCTCAAGGCGGAGATCCTGGCGTGGCCGGTGAGG  
CGACCCTGGCCGAGCTGTTTCGAGGTGGCCGATATCGATGCCATCCATCAGGTGCGCGACCGATCCACAC  
CCGTCTTGCCGAGGCCTTTGGCGCGCGTTTTGGCGGCGACCTATCAGAGTTTGGCTCTGAACGGTTATCAG  
GTGGTGCACGCCGATATGGCCAAGCGAGCCCTCAAAGGGGTTCGTGCTCGGCTATCTGGCGGGCGTGGATG  
CGGAGCATGCCGATGCGCTGGTGGCGGAGCAGTATGCAACTGCCGACAACATGACCGACACCCCTGGCGGC  
GTTGACAGGTGGCCAACGGCTATCTGTTGCCATGCCGTGCCGCGCTGTTGGCCGATTTTGAAGGCAAGTGG  
GCCAAGGATGGACTGGTGTGGACAACCTGGCTGCGGCTGATTTGGCAGCAAACCGGCTGCCGATGTACTCA  
GCGAAGTGAACAGGCGATGAATCACCCACTTTCAGCATTCGCAATCCGAACCGGCTGCGAGCGCTGAT  
CGGCAGTTTTTCGATGAGCAATCAGGTGCAGTTCATGCGGTGGATGGCAGTGGTTACCCTTCCTGACC  
GATCTGTGATCGAGCTCAACGAGGTGAATCCGAGGTGGCCTCCCGCTCATCACTCCGCTTATTTCAGT  
TCAAGCGACTGGATGAGGCGCGCAAGGCCCTGATCCGCGCCGAGCTGACCCGCTTTGCCAACCTTGAGGG  
GCTGGCGCGGGATCTGTTTCGAGAAGGTAAGCAAGGCGCTGCAGCAGTAACTGTCGACGGGGCAGGTGCGT  
GAATGCGCCTGCCTCTATTGTGTGATTTGTGCTGTGATCAGGAGCAAGCGTGAAGCAGTTTACTTTTTCGG  
CTCTCATTGAATAGCGATGAGGTGATGCTGATGTATCAGGGCCATGCCAGACGGCTGGTGGTGCAGCG  
AACAGGGATTGACCCTGGAGCTTGGCATAGAAAAAATACGCCCTTTGTGCGCATCAATGGTGTGCATGG  
CTATTTTTCGGCTGAAAACCCAGGACGATTACCCTTTATCAGTCTCGAACGCATAAGTTAACAAAAATCG  
AACAGATTACCGACTGTTTATCTGCTTTGCGTCACTATCTATCCGGTAAACTGGCACAAAGGTAGTGGGA  
ATTTCTGTATTTTTGGTTATTTGCAAAATTTCTCACAGTTTAAAGCCGTGATCTGTACCTTGTTTTTAACA  
TCTCGTTAGCACCATTCTCGCCTTCCCTTATCCAAGCCATTACACTTCGCAACAACCTGACACCAGCGG  
GTAACCAGGGTGGTTGCTTCTGCGTGGTGGTTAATGTCGTCGATAAGGAATATAAAAAATGGCATTGAA  
AGACGCCCTACCTCAGTTCTGCTCGAAAACGTTCTCAGTCTGATCCATCAGAAGTTGCCCAAAAACAGT  
GCCTCTCTGGTTCGAGCGCTTCGTTGCCAAGTTTTACGGCAACATGGCGAGCTCCGACCTGCACGATCGCA  
ATGACAGCGATCTCTATGGCGCGGCCCTGAGCCTGTGGAATGCCCTCAATCAGCGCAGCGGTACCGATCC  
CTACATCCGGGTCTACAATCCCAGACTGACCCGTACGGCTGGCAATCGCCACATAACCATCGTCGAGGTG  
ATCCTGCAGGACTCGCCCTTCTGCTGGTGGACTCCATCCGGATGGCGCTCAAGCGACTCAATATCACCGCCC  
ACATGATGCTGCACCAACCGCTGCACCTCATTCGTAGTGGGATGGCAAGATTGACGCCATCCTGGAGCT  
CGACAACACCGGACGGCAGACCTCGGTTGAAACGGCATTCTTATCGAGATCGATCACCTCACCAGCGAG  
GAGCAGATGGCCGCGCTGGCTGCTGAGCTCAACTCGGTGGCCGGTGAAGTGGCGCTGGCAGTCCGCGACT  
GGCAGCCCATGCTGGCCAAGCTCAATGAGATCATCGACGAACTGCCCAAGCGCAAGCACCCGGTACAGCAA  
GGAGGAGGTGGCCTCCTGCGTTGCTTTCTTAAATGGGTGGCTGCCACAACTTCACCCTGATGGGGTAT  
CGCCGTTACGACGTCAAGGCGGTGGAGGGGGATCACGAGATCCTGCCGAGGCGAGCTCCAGCCTTGGGC  
TGATGAAAAACTCCATCAAGGAGGTGGGTGAGCGCTTGGCAACATGCCGGCCAGCGCCCGTACGCTGC  
TCTGAGTTCTGACCTGCTGATCCTACCAAATCCAACAGCAAGTCCCGGGTGCACCGTCCGGCCTATGTG  
GATTACATCGGCATCAAGCGCTTTGACGAGCATGGCAAGGTGATCGGGGAAGATCGCTTCATCGGTCTCT  
ACGCCTCTTCCATCTACAACACCAGCGCGACCCAGATCCCGCTCATCAGCCATCGCCTCGAACACATCAT  
GGCGGCCTCTGGTTCATGAGAAGGGCTCCACGCTTACAAGGCGCTGCTGAACGTATTGGAAACCTATCCC  
CGTGACGAGCTGATCCAGGCCCGCAAGAGGAGCTGTTGGCTACCGGCCCTGGGGTGTGGAGATGCAGG  
AGCGGGACATGCTGCGGCTGTTTCGTGCGCCGCGATGTGTACGGCCGTTTCTTCTCCTGATGGTCTATGT  
CACCAAGGAGCGCTACAACACGGCGCTGCGGATCAAGACCCAGCAAATATTGCAGAAGTATTTTGGCAGC  
AATGAAGAGGTGGAGTTCAACGTCTACTTCACCGAAGGCGTGTGGCGGGACCCACTACATAGTGGGG  
TCAACAACAACAACGTGGATGTGGATGTGAACGAAGTACAGAACAACCTGATTGAAGCGGCCCGCAGCTG  
GGACGACAGACTCGACTCCGTGCTGCTTTCCACTATGGCGAGGCCCCGTGGCAACGAGCTGCGCCGCCGT

TTCAGTACTGCATTCCCTCGCGCTTACAAGGAGGATGTGCTGCCGGGCTCGGCCGTGGCCGACATCATGG  
CGCTAGATAACCTGAGCGAGGCCGAGCCGCTGGGCATGCTGTTCTACCGCGCGCAGGAGGAGGAGAACGA  
CCGTCGGGTACGGCTCAAGCTGTTCCACCGCACCGAGCCCATTCACCTCTCCGATGTGCTGCCGATGCTG  
GAGAACATGGGACTGCGGGTGTATCGGCGAGACCCCGTATCAGGTTCCGCACTCCGGGCGGTGATCTGTTCT  
GGATCCTCGACTTCTCCATGCTGCTGCATGGCGAGCAGCCCTTTGATCTGGCCCAGAGCCAGCAGCGCTT  
CCAGCAGGCTTTTGCCGCCATCTGGAACAAGCAGCTGGAAGATGACGGCTTCAACCCGGCTGGTGTGGGG  
GCGGGTCTCACCGGCCGTGAGGCTCGGTGCTGCGCGCTTACGCCAAAATACATGCGCCAGACTGGCGTCT  
CCTTCAGCCAGTCTATATCGAAGAGACCCTGACCCGTTATCCCGATATCGCCCAACTGCTGTTTACCCT  
GTTTGAGCAGCGCCTCGACCCGGCTGGCAAGCAGGACGCCAAGGTACAGGCCAAGCTGCACGAGGAGCTG  
GCTGCCAAGCTGGATCAGGTGGCCAACCTGGATGACGATCGCATCATCCGCCGCTATGTGGAGATGATTG  
ACGCTACCCTGCGCACCACTACTACCAGCTGGACAAGCGGGCAACATCAAGCCCTACATCTCCTTCAA  
ACTGGCCCCCTCCAGCATTACCGACATGCCGCTACCGTTGCCGAAATTCGAGATCTTCGTCTATTACC  
CGGGTGAAGGGGTACATTTGCGCTGGGGTAAAGTGGCCCGTGGCGGCTGCGCTGGTCTGATCGAAAAG  
AGGACTTCCGCACCGAAGTGTGCTGGGTCTGGTGAAGGCCAGCAGGTCAAGAACACCGTCTATCGTCCGGT  
GGGGCCAAGGGCGGTTTCTACTGCAAGCAGATGCCGGTGGGGGCGCCCCGTGCCGTCATCCAGGAGGAG  
GGCAAGGCTGTTATCGCCTGTTTATCCCGCGCTGCTCGATGTAACCGACAACATTATCGGCGGCGAGG  
TGATCCCGCCAAATCCGTGGTACGCCACGATGAGGATGACTACTACCTGGTGGTTGCTGCCGACAAGGG  
GACTGCCACCTTCTCGGATATTGCCAACGAGATCAGCCTCGAATACGGCCACTGGCTTGGCGACCGGTTT  
GCTTCCGGCGGCTCGGTGCGTTACGACCACAAGAAGATGGGCATCACCGCCCGGTTGCCTGGGAGTCGG  
TCAAGCGCCACTTCCGTGAAATTGGCGTCAACTGCCAGACCACCGATTTTACCTGCGTGGGATCGGCGA  
CATGGCGGGGGACGTGTTCCGGCAACGGCATGCTGCTCTCCGAGCACACCCGGCTGGTGGGCGGCTTCAAC  
CACATGCACATCTTCGTGACACCCACTCCGGATGCGGCCAAGAGCTTTGTGAGCGCCAGCGGCTGTTTCG  
ATCTGCCGGGTTCCAGCTGGGATGACTACAACCGTGAGCTGATATCACAAAGGGGGCGGCATCTTCCTGCG  
CTCGGCCAAGTCCATCAAGCTGAGCCCGGAAATGCAGACACTGCTCGGCACCGACAAGGCCAGCATGGCG  
CCGAACGAGCTGATCAAGGCGCTGCTTTGCCTCAACGTCGACCTGCTGTGGAATGGCGGCATTGGCACCT  
ATGTGAAGAGCGCTCGCGAGAGCGATGGGGAAGTGGGCGATCGCAGCAACGACTCACTGCGGGTCAATGG  
TCGCGATTTGCGGGCTCGTATCGTGGGTGAGGGGGGCAACCTCGGCTTTACCAGCTTGGTCCGGTGGAG  
TACGCGAGTACGGCGGCTCGCATCAATACCGATTTTACCGACAACGTGGGCGGGGTGGATTGCTCCGATA  
ACGAGGTGAACATCAAGATCCTGCTGAACCACTGGTGGCCGAGGGGATCTGACCTCAAGCAACGTAA  
CCAGATGCTTTACGAGATGACCGACGACGTGGCGCAGATCGTGATCACCAACGCTTATCGCCAGTCCAG  
TCCATCTCGGTACCCAGCTTCCCGGGCTCTGAACAACCTGAAAGAGCAGCAGCGCTTTATTACGGGGCTGG  
AGCGGGAAGGCAAGCTCGACCGTGCCTTGGAGTTCTTGCCATCCGATGAGGAGCTTTCGAGCGGATGGC  
GGCAGGGCAGGGACTGACCCGCCCCGAACTGGCAGTGTGGTGGCTTACGGCAAGATGGTGTGAAAGAG  
CAGCTCAACTGCCCAGGAGTACCGACGAGCCCTTCTCGCTAACATGCTGGTACCAGCTTCCCGGCCA  
AGGTGCAGCAGCAGTTTGGTGCACAGCTGGCCGATCACCCGCTACGCGGCGAGATCATCGCTACCCGAGT  
GGCCAACATGTTGGTCAATGACATGGGGCTCAACTTCGCCAGCCGATGAAGGACGAGACCGGTGCCCTCG  
GTCGCCGAAGTGGCCTGCTGCTTCGCCATGGCCCCGGAAGTGTTTGGCATGAACCAGCTGTGGCGGATA  
TCGAAGGGTGCAGAACCTGATGGATGCCAGACTCAGCTCGAGCTGATGTTCTACAGCCCGCGATCGT  
GCGCCGTGCCACCCGCTGGTTTCTGCGCGCCCGCAATCGCAGCTGGAGCATCAGCGAGAACATCGCCTTC  
TTCCGTCCGGCGTTTCGAGACCTTCGGCACACACCTTTACGAGGTGATGGATGAGAGCGAAGTGGCCGAGC  
ATCGTACAGGCTGTTGCCAAGTGGATGGAGAAAAGGTGCCGGAGGCCATTGCCCGTCAAGTCCGCCATAT  
GAGCAGCCTCTTCTCCAGCCTGGATCTGGCGCAGATTGCCCGGAGCACAAAGACCGATATCCTGCGCGCC  
GCCAATGTCTACTATCGCCTCGGTGCCAAACTGGATCTGCACTGGTTTCTCGACCAGATCAACCATCAGC  
CGGTCCGCAACCACTGGCAGGCGATGGCGCGAGCCTCCTTCCGCGAAGATCTTGACTGGCAGCAACGCAG  
TCTCACTTCTGTGTTACTGGAAGGGTGC AAAGATCAGGGAGAATGCGCTACCATACTGGCCGACTGGATT  
TCGGAGCATGAGCAACTTGTGTCCTGTTGGACCCATATGTTGGCCGACTTCAAGACCACCGATACCACG  
AGTTCCGCAAGTTCTCGGTGGCCTTGCAGAGTTGAACCTGCTCCAGTTGAATTGTGCGGCACTTTAATT  
GCCAGATTAAGGCATGACACCGACATTACACCCAAAGCCCCGGCCAGTTGCCGGGGCTTTCTTTAAGGAG  
CAAAGATGTTGTACCCCATCGCCAGGCATTTCTGTTCAAACCTCAATCCGGAACAGGCTCACGATCTCTC  
CATGAAATATTTGCCCCGCTTCTCGGTACGCCACTCGATTGTTTCTTCCGCCAGAATTTGCCGAAACGC  
CCCGTCACTGTCATGGGGCTTTCTTTTGCCAAATCCGGTGGGATTTGGCGGCCGGTCTGGATAAAGATGGTG  
AGTGCATTGACGCGCTGGGCGCCATGGGATTTGGTTTTATCGAAGTCGGTACCCTCACCCCCAGACCCCA  
AAGCGGTAATGACAAGCCGCGCCTGTTCCGGGTTATTCGGCAGAGGGGATCATCAACCGGATGGGATTC  
AACAACAAGGGGGTGGATCATCTGGTGGCCAAGGTAAAAGAGGCCAAATATCAGGGAGTCATCGGCATTA  
ATATCGGCAAAAACAAGACACTCCCATCGAACAGGGCAAGGATGATTACCTGATCTGCATGGACAAGGT  
TTATGAGCATGCCGGTTATATTGCCGTCAATATCTCTTCCCCAACACCCCGGGTTTGCGTTCACTGCAA  
TATGGCGAGGCGCTGGATGAATTGCTGGCCGCCCTCAAGGTACGTCAGCAAGAGCTGGCCGCCAATATA  
AAAAGTATGTGCCGCTGGCGGTTAAAATTGCCCCGATTTAAGCCTTGAAGAAAATAGATCAGGTGGCCGC  
GTCGCTGGTGCATGATGGTATTGATGGGGTTATCGCCACCAATACCACCTCGAGCGCGAAATGATTTAT  
GACATGCCCCACGCCGGTGGAGGCGGGTGGCCTGAGTGGTCTGCTCCGCTGCAGCACAAAGTACCAGGTTGA  
TCCGTATCTGGCCAAGGCGCTCAATGGTGTCTGCCAATTATCGGTGTGGGTGGTATTGATAGTGCCAT

GGCCGCCCCGTGAAAAATTGGCCGCCGGTGCCAGTCTGGTACAAAATTTATAGCGGCTTTATTTATAAAGGG  
CCGGGGTTGGTCAAAGAGATTGTGACCAATATTTAAGAAATAGATGGCGGAGCCCTTTATTTGACGTTGC  
TGATTTCTGCATATGGAATAAAGTCAACTGGTAATTATCAAGTAAGGGCTCCAAACATGTTTATCCAAC  
CGACCGATAGCTGGCAATGGCACTATGATGCCAGAGTGACCGTCTGATGTTGGACCTGTCTGATAACAT  
GTTATTTGCGACCGAGTATAAAGGGCGGCAATTGGTGCCAGCTCGTTTACGACCCAACTTTTTGTGTCT  
GATGATGCTGCCCTCTATTATCAGTTGATGGATAAAGCAGCCGAACTTGAGTGGAGTATTCGCGCATCAGG  
TTCAGTTGGTGCTTAATGCCATCGCGGTGAGTCGTTTTTATAAACTTTGATGCCGCAAAGCTGGTTTTT  
TAGTGAACAGCATCCGCAAGTATCCCGAAAAACGGTGATCTGGTCTGATGAATACACCCCATGGCAAC  
GGCGAATTTATGGTCATTGAAGCAGGGGATCAGGCCAGCGTCTGTTTGAACCTCACTGCCGATCTGGTAT  
TGACCACAGTAAAACCTTGCCGCGTTTCGGGGTGATCAAGGTGATGAATAACCGGATGAAACCGCGTAT  
TACCGTGACCGAGCAATATCGTCAGGTCAGTTGATATCTTTTCAATCAATCGTTTTATCTGTGATTACA  
CCACTGTCTGATTTTTACTGTTGTCACTCAATCGCCCTCGTTTTCTGATACTTCATTGATCCGCGAACA  
TCTTGCCCTATTCTCATTGATCTTCATGGTTGTGATCCAGCCTCTCTTGAGGCTTGTTACATCCACTTGCA  
CCTCGTGTCTGACCCACGCAGTGTCTTGGTCTTTTCGTGCTGCAAGCATGGTGTCTCATTCTTGTTCGT  
TCTGCTTGCGTAGTGCCCTCCACCTCAGTGTCAACACATCACTCACTGCAGCGATTTTCTTCATACGGCAT  
TTTTATGCTTGAAACGAGAGCTATTCTCACTTACATTTTTGTTATAACATAACAAAATGGAGTTGCCATGAA  
GCCTCATATTCATCCTGATTATCGTTTGGTCTGTTCATGACACGGCGGCAGATGCCTTTTTCTCGTCTG  
GGTTCAACCATCAAGAGCGATCGCCGCTACACGTGGCAAGATGGGAAGGAGTATCCCTACGTATCGCTCG  
ATGTTTTCCAGCCAGTCGCACTCGTTCTATACCGGCAAGCAGAAGCAGGTATCGAGCGAGGGGAGTGTGGC  
CCGTTTTCAACAAGCGCTTTGGCGCATTTTCAAGCAAGAAGGAGTCTGAATGCAGGTCGTCTGTTCACCT  
AAATCCGCACGGGCGCTCATCCCATTGTGATGGTGGCGCGTCCGGGGCAAATGTTTCGTGATTTGCA  
AAAGCAATCCCCGTTTTCAAGGCTCGTATGAAGTATCCGCTAAAATGATGTCTGGCCCCATGATCTCGCCA  
TCGGGTAGTCATGGGGCTTTTACCTTTTACCACCTATCAATCTGTTTCCATCCTGCTGTTTGGCGCCGA  
CTTTTGCATGCTCCAGCCCGCTGATGAGGTATAATGCGGCACTATTTTTATGGGTTCCCGGTGAGCGTG  
ATGAAAGAATTTTTTGCAACCTGCCCAAGGGGCTGGAAAACCTGTTGGCCGACGAGCTGACCACCTGG  
GCGCAGAGCAGGTCCGTGAGACCGTGGCTGGCGTCACTTCAAAGGCGAACTGGCAATTGGCTACAAGGC  
CTGCCTGTGGAGTCGTTTTGCCTCCCGTATTGTGCTGGTGTCTCTCGAATTCCAGATGAACGACGATCTG  
GATCTCTATCTGGTGGCCACACCATCCCTCGGAAGAGACTTCTCCGGTACCTCAAGCATCGCGGTGG  
ACTTTACCGGTACCAACCCGCCATTTCGAATACCAATATGGCGCGCTGAAGATCAAGGATGCCATCGT  
CGACCGCTTACCAAGCGCGGTACGTGCGTCCGGACGTGGACAAAAAGTCGCCGGATATTTCGCATCATG  
GCGCACCTGGGCAAAGGCAAAGCCAATATCACGCTGGACTTGTTCAGGCCCGGCGCTGCACCAGCGTTTTCT  
ATCGTCAGGGAACCGGTGAGGCACCGCTCAAAGAGAACCTGGCCTGCGCCATGATTGCCCGTAGTGGCTG  
GGCCGGTGAGCCCATGATGGACCCGATGTGCGGTTCCGGTACCTTGCTGATTGAAGCGGCCTTTATCGCC  
GCCGACATGGCGCTGCGCTGCGCCGAGCGCTTCGGTTTCGATCGCTGGCTGCAGCACGATAGCGAGC  
TGTGGCAGAGCTTGATGATGGAAGCGCAAGTGCAGCGCAAACGCGGCATGCAACGTTGCGAAGTGAAGCT  
GTTTTGGCTGTGATGCCGACCAGCGGTGCTGCTCAAAGCTCGCGACAATGCCAAAGCGGCCGGTGTGGCC  
CATCTCATCACCTTCAAGCAGGCCGATGTACCAAGCTGGAAAACCCGCTGCCGATGCCTGCCCTGTTG  
AAGGGGAAGAAGGTCAAGGGGAGGCCCGCCAGGTCCGTATGCTGATCTCCAACCCGCCTTATGGCGAGCG  
TCTTGGCGAATTTCCGGCGCTGCTGGAAGTGCATCAGGCCCTCGGCGATGCCCTGCGTGCAGCTTCCAG  
GGTTGGAAAGTCTCCATTCTGTCCGCATCCCCGAGCTGCTCAGCTGTCTGCGCCTGCGCGCCGACAAGC  
AATATCGCCTGTTCAACGGCGCCCTCGAGTGTGAGTGCAGTAACTACCAGATCGCACTGGACTCCGTGGC  
TTCCCAAAAAGAGGTGGCACAGGACTTTGCAAACCGTCTGCGCAAGAATCTGAAAACCCTCGAGAAATGG  
GCCAACAAAGAGGGCATCGATTGCTATCGCATCTATGATGCCGACTTGCCGGAATACAACGCGGCCATCG  
ACCGCTATCAGGACTATCTGGTGGTGCAGGAGTATGCCGCGCCCAAGGACATCCCCGCCAGAAGACCCG  
TCAACGTCGTGACATGTTTTCAGGCCGCCATCAAGGTGACCGCATGGATGGCGAGAAGGTGATCCTG  
AAGGTGCGCGAGCTCAGGAAGGGAACACAGCATATCAGAAGCTCTCCGAAGAGCAGCACCAGGATGGAAG  
TGCAGGAGTACGGTGCCCGTCTGTGGGTCAACCTCTACGACTATCTGGATACCGGCCCTTCCCTCGACCA  
TCGCCAGACTCGCCGATGCTGGGTGAGATGGCGAAGGGCAAAGCGCTTCTGAACTGTTTTGCCTACACC  
GGCAGTGCCACCGTGCACGCAGGTCTTGGCGGTGCCAGCGAGACTACCACGGTGGACATGTCCACACCT  
ACCTGAACTGGGCGCAGGACAACATGCGTCTCAACTCGCTGGTGGGCCGTCAGCACAAGTTTTGTCCAGGC  
CGATTGCCTGAAGTGGTTGTCTGAAGCCGATGAGCAGTACGACCTCATCTTCATCGATCCGCCCACCTTC  
TCCAACCTCAAGCGGATGGACGAGAGCTTCGACGTACAGCGCATCACCTGCTGCTGATGCAGCACCTGA  
AGCGCCTGCTGGCGCGGACGGCACTCTGGTCTTCTCCAACAACAAGCGTCACTTCAAGATGGATTTGGC  
CGGTCTAGAGGCCACTGGTCTCAAGGCCCAGAACATCACCCAGAAGACGCGACCGAAGGATTTGAGCGC  
AACCAACACATCCACAACCTGCTGGATCATCACCCATGCGTCCGAGCAAGGCGAGGCGTATGCTGACCC  
GTTTTATACCGACGGTTGCCACCTGTGCGAGCAGGCCTGGGCGCTGGTGGAGGAGGCTGGTCTTGCCACC  
GCCACCCGCCAGTGCAGCATCATGGATGATGAGCAGTGGCTTGGCCCTATCGGGTGCAGATTCGGGTGC  
TGCGTGACGAAGCAGGCCGCGAGCTCGGTTGGCCCTTCACTGGCCGAGCTCAAAGCTGGGCCGCCCG  
TCAGGGGTGAGAGTGATTTGACGATAAAAACGGGGCAGACCCAGTCTGCTGCCCGTTTTTTTTCATATGAA  
ATAAGGAACACACATGGCTCTTTTAAATTGCACGGCGCATGCTGTGCTCAGTATTTCCCGCTGCTC  
GACAATGCCGAATTGACCATCGAACGGGGCGAGCGCCTCTGTCTGGTTGGCCGAACGGGGCTGGCAAGT



CCACCCTGATGAAGGTCATTGCCAGCGAATTGCCGCTGGACGACGGGCGTCTGGTGTGCAACAAGATTT  
GAAAGTGACCCGCTTGAGCAGGATCCGCTGCTTCCAGCGAGCTGACGGTGTGTTGACTATGCCGCCGAA  
GGGCTGGCGGGGGTGGGTGAGTTGCTCAAGCAGTACCACCACATCTCCATGGAGCTGGCGAGCGATCCGT  
CAGATGCCAACATTCGCAAGATGAGCGAGTTGCAAGAGCAGCTCGATTATCAGAACGGCTGGCAATTCGA  
GACCCGCATCAGTCAGGTGTTGACCCTGCTGGGGCTGGATCCTGACGTGACCCTCGACAGCCTCTCCGGC  
GGCTGGCTGCGCAAAGTGGCGCTGGCCCCGTGCGCTGGCTTGGCGATCCCAGACTTGTGCTGCTCGATGAGC  
CGACCAACCACCTGGATATCGAAGCCATCAACTGGCTGGAAAGATTTCTCAAGGATTTTCGCGGCGCCAT  
CGTCTTTATCTCTCACGATCGGGAGTTCATCCACAAGTTGGCCACCCGGATCATCGATCTCGATCGCGGC  
GCCATCACCTCCTGGCCGGGCAACTACGACGAGTATCTGCAGGGGAAAAGAGGAGTGGCTGAGGGTCAAG  
AGCTGAAAAATGCCGAGTTCGACCCGAACTGGCCCAGGAAGAGGTGTGGGTGCGTCAGGGTATCAAGGC  
TCGCCGTACCCGTAAACGAAGGTCCGGTGCGCCCTTGAGGCAATGCGGATGGAACGCTCCGAGCGCCG  
GAGCTGCAGGGCAAGGCCAAGCTGCAACTGGACGAGGTCAATCGCTCCGGCAAGCTGGTGTTCGAGACCG  
AAGGGCTGGGGCTGGACTTTGGCGATCGCACCCCTGTTCAGGGGCTCGATCTGCAGGTACTGCGCGGCGA  
CAAGATTGCGCTGGTGGCCCCAATGGCTGCGGCAAATCGACCCGTATCAAGCTGTTGCTGGGGCAGCTT  
GAGCCGACCCGTGGCACCCGTCAAGGGGGCACCAATCTGGAGGTGGCTACTTCGATCAGTACC GCGAGC  
AGCTTGATCCCGAGCAGACCCGTGGTGGACAACGTGGGGGAGGGCAAGCAGGAGGTGATGGTGCCTGGCCG  
CTCCCGTCACATTCTTGGTTACCTGCAGGACTTCTGTTCGAGCCCAAGCGAGCCCGTACCCCGGTCAAG  
GCGCTCTCCGGTGGCGAGAAGAACCGCTGCTGCTGGCAAAGCTGTTCTCAAGCCGAGCAACCTGCTGA  
TCCTAGATGAACCGACCAACGATCTGGATGTGAAACGCTGGAGCTGCTGGAAGAGCTGCTTTCGACTA  
CCCCGGCACCCCTGCTGCTGGTCACTCAGTACGATCGCTTCATCGATAACACAGTACC GCGCTGCTGGCTG  
TTTGAAGGGGATGGCCGCATCAGCGATTACGTGGGTGGTTACGCTGACATGATGGCGACCCGCGAACAGC  
AGAATGCCCAGCAACAGGCCAAGAGTGCACCCGGTCAAGGCGCCCAGCCGGTCTGTTGTCGCCGTGCCAGA  
AGCGCCGAAGAAAAGCAAGAAGCTCTCTTACAAGCTGCAGCTTGAAGTGGAAAGGGTTGCCGTGCTGCTT  
GAGCAGCTGGAAGCCGAGCTGGATGCGCTGCAAAGCGAGATCAACCAGCCTGGGTTCTTCTCGCTGCCGG  
CAGATAAAACCCAGCCGAACTGGATGCGCTCAATGCCGCTGAAGCAGCGCTGGAGCAGGCATTTGCTCG  
CTGGGAAGAGCTGGAAGGACTCAAAAATCAGGAGTAAGTTCCTGTAATTAATACTTAATCCAGTTTCACT  
GCCTTGTGTACATCAGCCAGTTAGGGTGGAAAGTTTTTGTGTTGACCCAGTGCCTCGCAGGATAAAGAT  
GAAAGCGACCCATGAGCAATGGTCTGCTTTTTTGTTCACGAAAGAGGGTCTGATGATGAAGAGACAG  
AAGCGGGACCCGTCTGGAAGAGCTCGTCTGCTGTTATCAGGCTGGCGTGGTTCGGCAACAGAAAGAAG  
CGTGTCCGTATCAATGCCTGGATGCCCCAGGGCATTGGCTTGGTGGTTGGCGTGACGCCATGGAAGGGCG  
GGGCTCAGGCCTCTTCATGAAGTAGCAGGTAATTCATCATTACATAAAGGAAAGGGGCCGTTGTGGC  
CCCTTTGCGTTAATGCTGTTTTACCACCAATCAGAGAGATCAGAATGCGGTGGTATCTTTGAACAGGCC  
ACTTTCAGGTCGGTGGCGCTGTAGATCGGACGGCCGTCAACTTCGACCACACCATCAGCAATCCCCATCA  
CCAACCTGCGGTTGATGACGCGCTTGAAGGTGATCTTGTAGGTCACTTCTTGGCAGTCGGCAGGATCTG  
GCCGGTGAATTTCACTTACCTACGCCAGAGCACGACCCCTTGCCGGGGCCACCTTTCAGCCAAGGAAG  
AAGCCAACCAGCTGCCACATGGCGTCCAGACCGAGACAGCCAGGCATCACGGGATCACCCGGGAAGTGGC  
AATCGAAGAACCAGAGATCCGGAGTAATGTCGAGCTCAGCCAGGATCTCGCCCTTGCCGTGTTCCGCCG  
GTTGTCAATTGATCTTGACGATGCGGTCCATCATCAACATGTTGGGGGCAGGCAGCTGACTGTTACCCTCA  
CCAAACAGTTCGCCACGGCTGCAAGCCAGCAGCTCTTACGGGTAAGAGTTCCTTGCCCTGTTTCGCACA  
GGGAAAGGCGGGCTTCCATGGTGGTATTGTCTACGGTACGCGGTATTTCTTCAAATGGGTCAAAGCCG  
GGCAATTTAGCTTACAGTTGTTTCGCTAAACAACCTCCGATCACTTATCAGCGGCCAAACAGGCGCCCCA  
GCAGGGATTGCAGCAGTCCGACTTTGGCTGTGGAGCCATTTCAACTCGTCCAACCCGCTCCTGAATACGACC  
AAACAGGGTATCGGGCATATCAGGCTCACCGGCGACACAGCCAGTCAGCAACTCGATTGCCCTCTCCACA  
TGATCCACCCGGTGGATGTGAACTGGCCTGCTTCAACCGCTGCAATCACCTCGTCAGAGAGGTTTCACT  
GCTGGATGTTGGTGCCTGGCAAAATGATCCCTGCTTGCCTGATGCCGTGGATTTTGCACACCCGGAA  
GAAGCCTTCAATCTTCTCGTTGACGCCACCAACGGCTGCACATTCGCAAACTGATCAACCCGACCCGGT  
ACGGCGAAGTGCTGATAGATAGGCTGGCGGGCGAGGGCAGAGAGCAGGGCACACAGGCGGTAAGGGAGG  
CGCTGTACCCGTCAATTTCTGTTGTAAGACTGCTCAAACACCAGATTGGCCGATAGGGGGGAGGGGTTCTC  
TGCGCAAATTTGTTGGAGAGATAGCCGTGGATAATCATCATCGCCTTGGCGTGGATATGACCGGCCAGC  
TCCGCTTTGCGCTCGATATCCGCCACATCGCCATCACCAAGGTGTACGGTAGCAGTGAGGCGCACCCGGCT  
CGCCGAAGTCATAAGGGTACCAGGACCTGAATGACAGACAGGCGTTGATCTGGCCAATCTCTTCGCC  
ATCGGTTTGCAGCAGGATCTGGCCGTGATAAACCCTGATCTGACTGCTCAACCAGATAGTTGAGGCGG  
TAATCCTGCTCTTCCAGTGCCTCGAATATGCTCGTGGTGACCACATCAGATTCAGCTCCCGGGCCA  
GACTGTACCCATCCGATGATGGCGGAGAGTTGCACTTCGGAGAGCGACAACCACTCCTGATGGTCA  
GAGGCGGCTGGCATGACGACAAAGGGCGGCGAGGGCGGCTGGCGTGAAGTCCAGCAGGCTCCAGCGCTGG  
CGCAGCCAAGCCAGGTAATGCAAAATTCCTGAGATCCTTCAATATTCACCTCTGACACCAGATCCG  
CGCGCAGGAAGATGCGCTCGGACATATCGCGATCCAGCATCTGGAACCTCGGCCACGTGAGTCCGGTACC  
GACCAGGATCAGCTTGGCTTGGTGGGGTTCAGGCGCGAAGAGGGGGTTCAGGGTTTTCCCTTCC  
TGATAGGCGTTCCAGTCCAGCTCGCCTTTTTGCATGGCATTTTTTCAGTTTGAACCAGAGGTGCGGCTGAT  
CCAGCAGCTCGTCCAGTTGCAAAATGAGGTAGCCGCGTGGCTTCGCGCAGCAAGCCAGGCTCCAACAG  
GTGCTGGTTAGCATAGACAGAGCCTTGTGCTGGTGTGATGGAGCCAAACAGGGTATCCAGTTG

AGATCGCGGCCATAAATCACCGGCGCTTCTCGCGCTTCGTGGTGGATCAGCAGGTTGATCAGAATGGGGT  
GCTGGAACCTCCAGACCCAATGCCACGTGAGCCGCCAGATCGGAGAGGAAATCATCGATTTTCGGGTCATT  
GTTCTGCTTGCGCATGATGCGGGTCACGATGCGTTCGGCATCGAGATGGTGGCTCAACAGCTTGAGCAGC  
TCGCCAACCATTTTCGCAAAACTCAACGCCGGTGCCTGGTTGCAGGCCGAGCCAGATAGGCTTGTAGGGGT  
TGTTTCAGATTCTCGGTGTAGCAGAGATCAAACAGGTCACCATCCTTGCCATTGGAGTCGGCAATCAACGT  
TTGGCAAACGCCTTCGTAATCTGCGCCGGGGAATCCGTTGAGTAGCATGACCCGGACAGTCACCATCAAAA  
CTGGCAAGACGTTTGTATGCCAGAAATGGCTCTGGGTTGCAGAGCAGCAAAGGTTATAGGTTCAAGCTCGC  
TAAGCTTGGGGAACGTTCATCGCAAAAGCGGGTTTAATTTGTTCTGATGTTAATTCAGCCACTTAAGA  
CATCCGGTTCGAAGATAGGATCAATTGTTGCCATTATACACAGTTCATAAAGTGGTTACAGGAAACAAGAT  
ACTGAATTTAACATAATATACATTATGCGCAATGACGGATGCAGGAGGACGGAATGAAGAGAACCGAACA  
ATGGAGCCGCTTTGATGCGGTTGACTGCTTGCCACCGAGGCCGACATGGTTGCCTATCTGCAGGCAGCC  
CTTGAAGATGGCGATCCGCGCTGCTGACTGCGGCGTTTAATGATGTGGAGCGTGCCCGGCCAAACTGC  
GTGGCCAGCCGAGCTACACACTGGAAGAAGTGTGGCTCAGTGTGACCCCAATGCCACGCCACCAGGTGA  
AATGGATTGAGATCAGGGCTGAGTATTCTTAATCATGGTATTGAGCCGTAACACCTTGCCCCAAAGATTC  
GGAGGCACCATCACCAGCTCCTGGCCGGCTGCGGGCGCAGACGGCAGCGGTATGGGACGGTTACTCTCAA  
AGTAGAATTCAAAGGCGGTTACCAGCGCGTCACGTGCCCTCGGCCAAAGCTTCTCGCGAGAGTCTCCGCC  
GGTTAAGGCTTCTGGTAAATCTGGAATAATGCCATCCAAGCATCACCATCAGCTCGATCATTACGGGA  
TAATTCATACCTTTCTCCTTGAACCAGCACTATCGAACGAAATGCCGATAAATAGGGTTATCGGCATCAC  
GTGAGAGATAACGTAGGGGAGATTTAACCCTACGGCGACACAACCTCTGTATTAATGCGATCCATGACG  
AAGAACCATCATGGACACCTTGATCAGCCAAACGCAGAAGATCCTCACCTAAAGCAGACAATGCATCGTG  
CTTGGAGCCATAGTGTGGCAATAGGAATTGGCTAGTTCAACCAACTGCTCATTAGCTGCACCCGAACA  
TCTCTTGGAAACCATGTCCCTCCCTTAGTCGATATTCTGAAACCACAAATGTCCCATTTTGAGACAAGA  
GTCCACTATTAAGACAGTGGACTCTGGGGCCCGGATGCCCTTCCCCCAGGGTCAGCGCGGGGCAT  
CTAGCGCGCAAGAGCCGATGTGGTTTCAAAAAGCAGCGTGCAGCGCTTGTGGATACGTCTCATCAGAG  
CAACAAGTTGCTCAGCCGAGCCGCATCGCCGATGAACACCAAGAGGGATGACCTACGCATAATCACCCCC  
CCTAGCCGAAAATGACAGCCAGGCTACGAATGGATGGGGCCAACGAGAAAATGCGCATGCGCAAAAGTTT  
CGCATGCGAAACTCGGGGCCCATGACCAACCTTGAGACACTACCCCGCAAGCGGGGGTCCCTTCTCAAGG  
TTGTTCTGGAATACGTGGAGGCGTAGTTTCAAGGGAAGCGCAGCGAGAGCCATCGTTGCCGAGCTTTCT  
TGCTGGGGCTTGTTCCTTGCCTGACAGTACAGAAAATGCTCCCGTTCATCATATACCAAGCGAGCAGACAAG  
GCCAAGGGAATAGACCTGATAACCGCCATCATTAAAGTCGCTCAGTTTTCATCGGGAAGGAATAGGCATT  
GTTGCCCTTGGCTTCCAGGTAGTACTCGAACTGGGTATGAAACTTACCAGTATTGTCTTATAGGATGTA  
TCCGCCAGCCGTAATGGTATATCAAACCTTGGAGAATGGGGCTTCTGCACGCTTTTAGCGGGGGGAG  
TCGGCATGACGGGTGCCGTTGCCTTCACTTCTGGGTGAGAAGGCGTGGTGTGCGCTGCCGCTGCTCTAC  
CGGCATAGATAACCGAGCTGGGTCACTGCCCAGCATGTTGAACAGGGACTTTACGCTCATCGGGACA  
CCGATGAAGATGAGGATCACCGCAACCACAACCACCTCTTTTCCACAGCGGCACAATGTCGGAGGCTT  
TGGCCTCCTGAACACTGCCTTCTGTTTGGGTATGGGACTTGTAGAACGGGAAGAAGCTTGTGCTGACCG  
GCGAACAGATTGAGAGAGGCGAGTTGCGCGAGCCCCAGCACCATCGAGCACTTTGCGGGTGTAGGTTTTTA  
TCAGAGCCCGCAGCGCGTGTGTTGCTGACCAAGAAGTGGATCTCGATCATGTCACGCAGATCCTTGTGCA  
CCTTCCCCAGGGACTGGGTGATGAACAGAATGTCGTGGCCATAATGACGATGCATGGAGAAGTATTCCAG  
GCAGTTGATGAGGTCATCGCTCGCCTTCTTGTACGCCCTGCTCGGGGGTATTGGAAGTGACATTCATCA  
ATGACAAAACAGCGGGCCTTGCCCTGCTCGTTGCGCCACTCCTCCAGGGTGAAGTGTGCGGGTTCAGAGA  
ACGCCTTGATGGCGCGTGTCTCCGACTAAAGCCATCCTGGCGAACCTCAACGAGATCCCTCACCTCCTC  
GCCAAACACGGCGATCAGATGATCCATCATCAACGGCAGGTTGGTGACCACCCGACGCCCTTCTTGTATG  
GCTGGGATCACGTGAAATGCGACTGCTTCATACGATTTGCCAGAGCCGGGACGGCAACAATGATGTTTA  
GTGCCATGTTGTCTCCTTATGAACCGAGTCTGGTGAAGGGAACCAACTGGAGGAGCAGGCCAAGCCAAAT  
CGCTGTCACAATGATGGCTGAGGCGTCAATCACCCCGCTATCGCCATGATGTTCTGCACATCAGCGGGG  
AGCATGGAGAAGTATTGAATGATGTTTATGGCCCCGAGCATGGAGCCAAGGCGGAGATAGCCAGGTGAA  
CAATCGACAAGGTCGCTTCAAAGAGGAAGCAGGCCAAATCCTTGAGCATGTCAAAGAGCGAGAGCAGCAG  
TGAATAGAGCAGGTTTCAAGGAGTCAATCCAGCGGTGAGCAAACAATCAAGCATGAGAGCACCTCATTTTT  
TCGCATGAGAAAATCAAGCAGCGCGGACTTAGCCGCCGAACACTAAACGCTTGGCCAGCAAGCCGGAGCA  
GAAGATGACGAAAGCACGAATGGCTATCCAGACATTCGGCGGCACGGTCAGTTGATGGCAACCGAAGTCA  
GCGAACCCCATGTCAAACAGATTGTCCAGGTAGGGTATTTCCCTCCCCCTGACAGCTGTAGGCGGAAGC  
CATTAAAGCCAGTCAAAAAGCGCGGTATGTTGCAGTTCCTTGCCTGAAATCCGCTCCATACACCTGCCATCC  
TGCAGGATAACGAGACTTCCACCAAGAGGTTCCCTGTGCGGTATCGGGCAGGTTTTGCGCGGGGACACTG  
GTTGTTAAGGTGTGCGAAAGCAGCCGGTTAGTTTTCATCAATCCGCGTTTCTACGCCATGAAGGTCAACGG  
CGTTAGTGTAGCCAATAGCTCATTGGTGCAGGTCGAGACGAGATTCCAGGCGCCAAAGGTTGGAGACGGT  
AACAGAGCTGGGTATGCTGCCAGTGCCAGTGCCAGTGCCAGTGCCAGTGCCAGTGCCAGTGCCAGTGCCA  
GAACCGGAGCCTGTGCCGGTTCCCGAGCCAGTCCCAGAACCAGTCCCCTGCCAGAGCCTGATCCAGTAT  
TGCCACCTTACCTGGAACGGTTGGTTTTCGGGCGGTGATAACTGGGCGAATTACACCGCCAGCAATTGC  
GCCAGCATCTGGGTCTGTAGTCCGTTTCCCGGTGATAACCGAATTAATGGCATCACCATATATTTGGGTCA  
GTGACGGGAGGTAGTGGCTTACCCGATGGTAATACAACGGGAGGTGTCCCAATAATATCGAAGTCTGGGC

GGTTATCAGGCTTAACCGGAATGACAACCGAGTTATCTACCAGGTGAGGCTTGGGAAGGCGGGTGCCTGG  
ATTTTTTCATGTCTGCAAATAGTGATCAGGGATAGTACCATCAACGCTGACACCATCGAGAACACTCGCT  
ACCGACTCTTCCAAAACCTCTTCCCTTATTAGTTGACTCAACTTTAAGCAAAGCAGTTTGGTAATCATATG  
AAACGGCAGAAGTTACAACGGATGATTTAACCATTTGTGTCATTTCTGTATTCATTAACGACAATGTCAAC  
ATCATAGGCATAGCGGTAGTTTCGTACCTGAAACACCAAAGAAAACCTTAGATAAGGGGATTGGCCTCACAG  
CGGTTAAAAAAGCGAACAAATAGTATTTATTTGGCGGGGTACATCCTCACGGGTAGAACTTACATGTCCGGT  
TGGTATCCAAATACTGTGATGTACGGATTGAAAGGACGCTGTTGGCTTCCCTCAGTGATATAAGAAAACACA  
GGTGGCCATATCTAAGGCTTTGTACCTTGCTTGTAAATAAGGGTCATCACTTTTATTTCTGGAAGGGTCA  
GGAAGGCCTGTAAATCTGTCTGGAGGAATACAGCTAGAAACTGGGGTTGAATCGGCGTAGGGGGAGTAAC  
TGAATCCTTTCATAAGATCACAATCAAGAAATCCTGAAGAAGAAAAGTCGCAACGTTTGACGTTATCAAG  
GCTATCACCATTGAGAGTTATCCCGTAACGCTTGAGCTGGAAGAAAAGCATACCGTAGGGGTCGATCTTC  
AAATCCTCCTTTGCGAAGTTCTTAAGCAACGGCGGAGTTGATATTGCAACAGCAGTAACAGCAGCAGCAC  
CCGCGGCGTACTGGACGGCCAGACGAGTAGCTAGGGTCTGCCCCGTCAGATTGCGGCTTGTTCGGCCAT  
AGCCATCACACGGGGCAAATGCCGGTAAGAACCGCGCTGCTTGGTTGACAGGCAGCCAGGCGGTGAGA  
AAGCACAATGAGTAAACAAGGAGTCTGCGCCACATATGGTGTCTCAAGAAATTTAGCGGCTAAATTTTTTC  
GCATGAGAAAATGGCGCTGTAATATGTTGTATGTTGTAAAACGCTACAACATATTACAGTTGGCTTGCCT  
GGCTAAAAGTTTTGCGATGAGAACTTTCCGTTAGAAAAGGGGGCTTATGCCCCCTTCAATCCATAACAA  
ACGCCATTCCTGATAGTCCCCCTATCGTAATAATTGACGACATGAAGACGATATAGGCAAAGGAAGCGGT  
CATTAGGCTTTGCTGACCAAGCGTTTGGCCAAGGAGATCCCCCTGGTTGCCAGCGCGATGCCAACAAATAG  
TGACACCGGCACTTGCAACGAAGGTTACAACCGTTCCCAAGTTGACAGCAGCAAACATCTGGTCAAGAGC  
CGATGTTTTCTCCGGCAGCAAAAAGCCGGTGCAGAAGCTGCAACGATGATTACAGGAATAGCTTTTTTTGATA  
ATAGACATAAGTACCTCACAAGAGATTAATTACTTTTTTTCGCTACACCGATAGCGAAGCCAGGAAACCAA  
CCGAGAACAACAACCTGCGCCAAACGCCCATGAAAAACATAATGGCGATATCTGACGGTGTATATCAACGG  
TGGATTGTTTTATATTCTCTACGGTTTGGATAATCATAGAGGAACATTTCTTTTACAGGGATATCTGTCTG  
ATACAGAAACCCCTGCTCATTAAACAGCGATGCAATAAGCCATTTTTGCCTATGGTGTATTCCCATGAGC  
GATAAAGAGTCTTCACTACCTTTTTCAATTCCTGCTCAGTGTGAAAACGTATTGCCGACATATACCAA  
GTCATCATCAACGTAGTGAATATGATCCCAGGTATCGAACTGGTGAAGTAATGTCGTTTATCGCTTGAA  
AGAGCCTCTAGAACAGGGGTTGTCCTCCCTCCTCAACAATGGATATGCTTTTTGAGAAAATTTGAGGGCCATC  
ATCACACCTTGTTTTTCTCATGCGAAAAGTGAGGTGACTTCGCGAAGAGCCGCATCATGCTCATGTGGTA  
GGTCACGTTGGCTCCACGCTGACCAGACCATGCTTCAAGCCAAACAGGGATCTCGACAACCTTTGTGATC  
ATGCTGTTGGCTGACGCGGGATGCCTGCTTGGGCAAGGGCGTTGGGAACACGGATCACGATTTGTTCTT  
CCTGGAAGCCGCAAAGCCATTGAAACGGCTCACCGCAATGCCGATTTTCATGGCGAGTGATAGGGCCGTT  
CCGCCCCCTGTGTGTTTTGCTGACGAGAGCCGAGCATAACGGCCACGGATGAGAACACCTTGATGCATAAAT  
GACACTCCTTAACCTGACGGCCCTGAGGCGGAGCCAGGTGATGATGGATAAGCACGAGGCGGCATTGCC  
CTGCTATTGGTTCGATGAGGGTGCGGTTACTTTGGGTAAACCGGACGGATCTCGCTCAATCGTGACGAC  
CTCTGTGGGTTGTGCTGCTGCGGCCATGCGGTCTAACGTGCTGACGGGTTGACATACCAATCGGGGTGC  
TGCTGGCCAAAGTCGATGTTGATCACCTGGATCAGCGGTACCACATTTGGAGGCTTCGCCAGAGAGTTTT  
GTAATTGTGCCTTGGTGGAGCCCTACAGCCATCAGGTGCGCCAAATGACGGCGAAATGTCTCTCTGCTCAT  
GCTGCGATAAACCCTTTCATACCTTTCATTGAGTAGCCGGCGATAAAAAGCCATGAACCCTTTGGGCCCTG  
GCATAGCTGGTGTTCCTTTCGGGGTGTATGCGCTGATAACTGGTGTAGAGCGGTTGCGGATCTCGTCTGT  
CGGTGTAGACCTTCATGGGCTGTTCCCCAGGGCATCAAACAGTTCTTTAAATGCGGCTTTCCATAGATC  
GGCAATCAAACAGCGGCCGCTTTGCTCGTAGTCTTTTTGGTACTGGATGGCGTCAAACAATTTGAACGGG  
ACGCCATGCTTGGTCAGCGCCCGTTGTTTCAATCGGGCTTCAAAGCGAACACAGAGGCTCGCATAGAGCT  
GCAATGCTGGGTTTTTCATGACCTCAACACAGCGGCGAAGTGATTCATTTTTCGGCTGTTTTTGAAGGCG  
TTTTCATGTATTCGGCCAGCTGACGCTGGAACCTGCGGCCCTTCAAATAGGCTTTTCAGGGATCGATGACGG  
CTGCCGGTGTCCACTCGGCAGTGGTTTTCATGATCACGGTTCATCCTGCTCTGCTTGGTCTGTCCGGAAC  
GGATGTTCTTGAGTGCAGAAATGACCTGTTTTCCCTGCTCTTCTGTATTACCCGGGCGGAGAACGTTAC  
ATCGATCCATTCAAGGGTGGTGTTTGGAATGTCCAGCATTTCAAACAGTTCAGGGCAGGCACATGCCAGA  
GTTGCCAGCAGTTCCGGTCGAGCAGAGCTCAATGCTCGTTGGGCCGAATACGTTGTGGCCTTGCAGCAGTT  
TTGCTGGAGAGGCTTTGAGTTGACACCTGGAAGGCGGTTGCTACCCCCCTTGATGGATCTTCATTGCAAG  
GCTGCCGAAGTGACTTGGCAGTGACTCGAAGGGATGGGACAGGCCGGAACGGTCAAATCCCCATCAATC  
TCATACTCAACTGCCATAGCGGAGAGCTTTAGCCTCCCCTGCTTAGCGACCTGCTCCAGATCGATATAGA  
CCCCCGAGCGATGATCGGCCGTTGGAGATACCAACTGCCATTCGCTTTTGAAGGGTAAATCGAGCTTGAG  
AAGGTCAATCACAAAAGGCCTGTCAATAGACAAATGTGTGTTTAAATGGCCACAAATGTACATTATGG  
GTAAGATGGGGTCAACCTTAAAAGGCGTTGGTACGGTGACATTAATGGCACTCAAATCGAGCGAGTCAAA  
AAGGCAGTGTAGACTGGAGGATAAGTAATGAAACTGGCTGGGTATTATGAAATGGCAGACGTAGCAAGA  
GCAGAACGTATCAAGAACACCATACTGGCGTATGGGACTTACGAGGATATGGCTGACAGAACCAGGCATAA  
GCACTAGGACATTAGTGCGAATGGCAACAGCAAAAACCTGAGCCTAAGTTTCGCTGATGTAATAAAAAATTGC  
AGAAGTGACGGGGACAGAATTGTCTTGGCTGGCGTTTGGTGGAGGTAAGGAGTACGCAAGCCTAGAGGAA  
ATGCATATTGTGAGGCTGTGAAGACGTTGAGCGGAGAGTCCAGAGATACCTTAAAGAAAGTGTCCAGA  
GCATGACGTTAGCGGACAAAGTATTGGAACACATGGCCGGGGGAACGCAGTAGATAATCCCTTCCCAAGC

CTACCGATTTCAGGTCGCTTGATCTGTTTGTCACTGCGCATAAAATGCGGATTATGTTACGGGGCGCTCTGTC  
GTTGGGACGATGCCGCTTCGCGTCCCACGTCCCTGCCTAGTCGCGTCCCCCTGCCCTTCGGGATTATCG  
CAGGGGGAAAACCCCTCAACATAATACCGCGCCACATTATGCGCAGTCGCACAAGCCACAAAGGACAGAA  
GACCTTGAGTGTGCTTGTCTTCGACAGGAGGATCCAGCAGTCACCACCCGCGCCCATGGCCTGCAGGGT  
CTCGCCGAAACAAACAGACGTTTCGACTCAACCCCTTACGACCCGGCGCTCTGCCTGGGGCACTAAAGATCG  
GTTTTGCAGGAAAGGGGTGTACCTGCCTCGGGGAGAGATTCCAAAGAAGTTTCGGCCGACCTACCCTT  
TCCACAAAATGGACTGCAGTGGGCGGCTTATAGGGGCTTTCGCCCTGTCTCTGGTATACAAATAGCT  
CCAAGTGTAGGGAGACACATGGAAGATATGATGCTCAACTTATTCGCCAACGCCATCACCATAGGGATAT  
GTTTCTATCTGATTAACCTTGTAAATCGTCTGCATGATGGCGCACTCGCTCAATCGAAATGTGTTTGGCTG  
GGTCTACGTGTCCATCTTTTTGACCCCGATTATCGGGATAACCATACTGCTATGCCTTCCGAGCATTGAA  
GAGCCAAACATTGTTTCGTGCTGACCCGCGGATGTAATAGCAACATTTCAGTAACTTTACTTTAAAGC  
CTTGCCACCACAAGCCCATCGAGTGCCTCGATAAAGGCGCTGCACAGACTTGGCGTCCAGGTCTACACCG  
ATACGAGGACCGTAGAACTTGGCCGCCGTCAACAGTGAGCTCAAGGTGGTTACGTCAATCCCGACTTAAACG  
TAACGGTGATGTTCTTCTGGTGCTGACGCTCACGATAGCGGCGCTGTTTCTCTGCTGGGGTAAGAGGTGC  
ATCGCCAGGCATGGACGACCAGGGGAACGAGTTACACCGAGTTCGAGCTGCACTTCCCTTTGCTTGGCC  
ATGTTTCATCACTCCATTTAGTAACTGTCACTTAATTATAGCTCAAACCAAAAAATGAGCAACATAAAGTA  
ACGGTTACTTTATGCCGATAAAATAGGGTTATCGGCATTAATTTGTGAGAGATAACAAGGCTTATTGATAGCA  
GTAGCCCGCAGCTTTTTCTTAGCTTAAAGGTTTCGAAAATCGACCAAGATCGAGGCTACACACAGACCTCC  
AGCGATCTGACTGCCCAAAGCAGAAAGACAATATCTGGTTGATTCTCTCTGCAGATGCTCTTGCAGCGAC  
AACAGAATAACACAGGCAACCGCCCTGCCCCACATCACCAGAAATGTCCATTTTGGAGACAAAAGTCCACG  
ATTAATCAATACGTTGTGCGGAATCCCCCTCACTAATTGAACGTTATGTTTGAATTTTACAGTTATAAC  
CCTCGTTATTACAATGAATATTCTTAGAAAATATCTGTCCCTACTTGGAGGTTATCTCTCTGAAAATATT  
GATACTCCTTCTTGTAAAGCAGCCATAAAAAATGCCGATTATCGCGATAGATTCCCTCCCTTAAATCCTC  
ACGGCTTATTGTTGTGACTGGCATGATTGCGACTTTTTTGGAAAGTCGGGTCAATTCATATTCAGGCACG  
TTTGGCGATGGCCAATGTGGGTGGCTGGCAGGTCAAGTAGAGGTTGCTGTTAAACTGCTGCAATATACGT  
TTGAGCTCGTTCATATCGTCGGGATGGAGGGTTAAGGACCAGAGTGTCTGGGCTGGCCATGATGGAGGC  
CATTGGTATAGATAATGGTCAATCTTCGATACGCAACTCTTTCAGTGGGCTCCATCTGCAGGCCCCAC  
ATCCGGAAACAGATATGCAGTGTGCCTGAAGAGATAAAGGTGAACTGGGCCATGAGCGACCTTTTGCCA  
ACGACTCTGAAGGTCTTTCCACCCTGCCACTGCAATTCGCTCCCTGGCTTCTCGTTAATATTTGACA  
TCAATATACCAATGATGACTGGATATGCAAGTGTGATAACAAGGCGCTGTTCAATCCGAATATGATTGC  
TTCCGGCATGTTACTTAGCTTTTCGGCATCGGGGGTTCTCGTTGTTTTCAGCAAGCAATTTTCGTTTTTTGCT  
TCTCTGCTACGAGTTAAATATGTATGCCGAGATGGCAAGGTGCCTGTTCTGAATCATCCATGTGAGCCA  
AAAATATTTCTGAACCGATTGCCATCCAGAGAAGTACGACATCGCCGCACCAACTTCAATGACATCCCA  
AACAAGCCATTCTGTGTTCTAAGAGCAGTCAATATAAAATCAGGGTCAATGTCACGTTGTTTCGTTAGTCCTT  
GTGAGTGTATCTCTCACATGTTGGTTCAATCGGTCCAGCGGCTTTTTGCTGGGCGCTCTCATGTGCTTCA  
CTGTTGCTGGTGTGAGGATTTTCAAGTGGTGTGATGCTGTGATGCCCTGCATCGGCTTGTACGTGGG  
AAAGCGGTCTCCCATGCAGGTTGATGTCATGGGTGATCCCGGTGTGGCGGATCGCATGGGGAGAGAGTTG  
CCGCATTTTCGGCCGCATCCTGGACAAATCCATCCTGCTCTGCCAATTTTCGCGCTTTTACCGATGATCACC  
ATGATCAAATCCCGTAGCTGGCGAATTTCAAGGTTGGCGTTGAGTTCCCTTGAGCGCGACCATGTGCTG  
CCGCTTTATGGCGAACGAACAGTGGTGTCTGTTTCATCCGGTGTGCGCAAGGGAGAGAGACCGAGGAAGCG  
GCGGTAGCGTTTCAGTGGCCAGCAGCGCTTGGGATACCGCTACGGTACGCCGTTTGGCCCCCTTTGCTT  
TGCGGAATAAAGTAGCCCCAGACCGCGTTTTTCGATCCCGCTGAACTGCCCCATCACAGGGGTAAAGC  
CTGGCCGGGCTGCAACCTCAGAGATCCGAGATAGCAGGCGTACATCAGAATGGTGAGAAAACGGCTGCG  
CTCGTGTGCTCCGGATGGTTCGTTGGCAAGGGTATCGGCGGCTGCATCACGTATGACCACTGCAATTCG  
CTGAAGGCTGCACCTGATCATCGGCTCCTGCTGTTGCGGCCGTTTACCCGCTGCAGTAGCAGAGCGG  
GATTCCTGTCCATGTACTCCTCCTGGATCAGGAAGTGAAGAAAGGCCGACAGGATGGCGAGCTTTGCTCTT  
CATCGCTGCTCGCTAAGACGATAGGGCAAGGTGCGGCCAGCTCCCGTTTGCCTAAAAACGGACGCCAT  
TGCGGGTTGGGTAACCGCTCCCCCACTCCTTGTGCGAGGACAAAATGCGCTACGTTGCGATAGGCGATCA  
ACTTGTACGGGGGGACTGACAATAGTCGAGATATCGGATCATGATGCGGCGAGTGAGATCTTTTCGGGCT  
GATGGCCGCTCGCGAAAGCACCAGTGTAAAAAAGTGGTCACTTCGCTGCGATAGGTTTTGTAGTTGTTT  
TCGCTGTTGCGCTGCTCTAGCAGCCAATCGACCGCAGTTCGTAAACCAGCCGGCATCGGGCACATCAT  
TGAGGCTGAGGTTGGCAAGGTAAGTACTGATTGACCTGCGGATTCAGCTTCCAGATAGATAAGGTTGTCAA  
CAGCGGCATGGCTGGCGGCAAGGATAATGGTTGTTGAGTCAATGGTGTGCTTGTGATGATGAGATGAAT  
CGATATGGGCTGTGAGCCGAGTTGATAGAAAAGGGCTCGTGATAGATGAATGCGGCTTCTATTGGGATT  
GGTACTGCCTCTTGTGTTGCTGATTAAGGTCACCAGGAGCGATCTGGATAACGTTCTCTCCACTGTTTG  
CTCATTATTTCTCATAGATCTGACTGATGTGCTCAGTGGTGCACGCTATTCAGTTATGCATTGGATAT  
GCACCGTTGTTAGAAAATTTCTCGGGGTAAAATAGCCGTAAAAATGGTTTTAAATGCAAACAAAGTGAATGA  
AGCGAGCTGTTTATCCCGAGAAAATAGCAGGTCTGTGCAATCAGGCCACCTGCTTTAGTGGCTTCTCCTTG  
CGCTTGGCTGCTGGGGCTTCTCTCTTTCGTGCTGCTTGAACCTTGCCCGCCGCGCAGCGGGTTTGCA  
GCACATCGCGTGTGTTCTGCCAGGTAGAATGCCAGACTCTCTTGTGCTCTGGGGCCAGCTCGAGCGGGG  
GCCAGCCAACAGGGTCACTCACTCGTCCGCGTATCCAGCAGCTTGTTCATAGGCATCGGCTCTTTTTTG

CTGGCAAAGGTCATTTTTTCCACTCCCCACGAACAACCACATATTTGATCTCGACAGCCATGATGGCCT  
CCTCTTGGTGATGATGGATAGAGTGTATGTATGGATATACAGTATTGCAAATAACCTCACCGGAAAAGAG  
TTCGCCGGGGTTTAGCGACAAAAGCCGTGCTGGATCAAGCTGTCTCAAAGTGCCATTTGACTTCCACGCC  
TGACTGGTCGGATCATGGCCTTATGACGATCGTACGACACCTGTTTATCCTGCTGATGGTAGAGGTGCTG  
CTCCTCGGGAGTATCGCCCACTTGGTCGTGGGACTCCCCTGGCTGCTGACCCTGCTGTTTGTGGTGTGTTG  
CCCTGTTTTGGGTTGCGTTGTCTGGTGGTGTCTCGGCAGCTGGCTCTTTACCCGCTTCTACCCCTCCCCGGC  
TATCGGCCCCCTGGCGCAGGGTGAAGATGATGGCGCAGGAGATGTTGGCCTACCTCTACACCTTACCTTG  
TTGTTACCGTTTCGAGCCTTTGCTGATGGCACCCGATCGGCTGCGTCCGTGCCAGCGCCCCGTATTGCTGG  
TGCATGGTTACGGTTGCAGTCGCGGGATCTGGCGCACCCAGCGCGCCCGACTGGAGGCTGCAGGCCATGT  
GGTTGCTACCATTACCCTGATGCCACCATTTGGTCATATTTGATGAGATGGTGCCACTGCTGGCCACCCGG  
ATTGACGATGTGCTGGCGCAGACCCGGGCTGACAAGCTGGTGTGCTGGTCCGTCACAGCATGGGGGGGCTGG  
TCTGCCCGACTATCTGGCTATCCATGGCGGTGACAAGGTAGATCGCCTGATCACCTGGCCACCCCCCA  
TCAGGGCAGTCAGCTTGCCGCCCTTGGGCTTGGGGCCAATGCCCGGAGATGGAGCCCGTTCCGGCTGG  
TTGCAGCGTTTTCGCTTCGGTGGCGCTTTGCGTACCCGGCATCTCGGTGCGCACCCAGTCACGACAATGTGG  
TGATGCCCGCAGGAGCGGCAACGATTGGCGGGAATGGAAGATATCGAGTTACCTGCCATTGGCCATCTCTC  
TCTGCTCTACTCCCGCCGACGACAGATCTGCTGCTTGATCTGTTGTCCCAGTCTGACCCTCCTTATTC  
GTCCTTCACTGTTGTTCCAAATAAAAACAGGAGCCTGATTGCTCAGGCCCTGTTGATCTCTTTATTGCAT  
CACCCGGTTAGAAGTGTATCCCCTTATCAGGGTCGAGACGGCAACCTGATCGGCGGTGCGTTTTGGATTT  
GTCGCCATCCTTGGGATCGGCAAAGGTGCGGAAGCTGGTATTCATGATCACCTGCGCAACGCGAGGTGCC  
AGAGCATGCACCACCTGACCAAACACCCCGAGGCGAGTGGCCAGACGAACGTGCTTGTGATGATGGTAT  
CGCACACCAGATCGGCCGCTCTTCCGGCGTCATCATCGGCACCTGCTCATAGACCTTGGTCGGTGGCGAC  
CATCGGCGTTTTTACCAGCGGCATATTGATGATGGAGAAGCTGACCCCTTGTCCGGCAAACCTCGGAGGGC  
GCGGTACGCACCCAGGCATCGAGGGCCGACTTGGAGGCAACATAGGCGGAGAAGCGCGGGCGCATTTGGTCA  
ACACCCCGATGGAGGAGATGTTGATGATGTGCCCTTTTTTCTTCTCGATCATGGTGGGTAGCACCCCAT  
GATCACCTTGAGCGCGCAAAGTAGTTGAGCTGCATGGTGGCTCCAGATCGTGGAAGCGATCGAAGGAG  
TCCTCGATGGAGCGACGGATGGAGCGGCCGATTTGTTGACCAGAATATCGACGCCACCGTGATCGGCCA  
CGATGCGAGCGGTGATCTCCTCGGCCTGCGCCAGATTTGGAGAGATCCCCTGATAGATCTCGATGGTCAG  
CCCCAGTCGGCAAACCTCCGCTTTAGTCTCGCAATCTTGTCTGCTCGTCGGGGCGATGGTAACAGACGTTG  
GCCCCCGCCCCCGCCAGCTTGCAGCGGTTGCACGGCCGATACCCGGAGGTGGCCCCGTCACCAGACCA  
CCTTGCCCTCGACCCGACCACGCAGGGAGCGATCGATGAAGAGCTCCGGGTCCAGGTGGCGCTCCAGTA  
ATCCACAGACGCCAGGCGTAGCTGTGCAGCGGCGCACTTCGATACCCGTCCTTTTCCAGTACCCGCTGG  
GTTTTCGCGACTGTGCAAACGGGTGGGATAGCTGATAAGGCGGAACACATCCTTGGGCAGACCCAGATCGG  
CGATGGCGGCATCGCGGATACGGCGCACCCGGCGCCATGGTTCATCAGCATGGCGGTCCAGGTGGCGGGGAAT  
GAAATTAAGAGAGAAGTGTGATGCGGATCGCAGGCTCTGGCGCATGGGCGGCGGGGAGAAGGTGCTC  
AGCATGTGCCAACC CGCATCGGGTTGGGTCGGTCAGATGGAAGGTTTTGTTCTCCTCTCCCTCCTGAT  
GGCGGATATGCTCCATGGCATCGACCACAAAGTTGACAGGCACGATATTGATACGGCCCCCTTCCACCC  
AATGGCCGGCATCCAGGGCGGCAGCAGACGCCGAGCTTCTGGATGGTCTTGAAGAAGTAGTAAGGGCCG  
TCGATCTTGTCCATCTCGCCGTTATTGGAGTCACCGACGACGATGCCAGGACGTTAAACTCGCCACGGAA  
CTGTGCACTCATTGCGCACAATCCCTTCCGCTTCGTGCTTGGTCTGGAAGTAAGGCATGTGAGGTTGTC  
GGCCTCATCGAACATGTCTCGCGAAACAGACCGTCAAACAGGCCCGCTGCAGCAATGGAGCTGCAGTGG  
TGGAAGTGCCTCCAGCCGCTCGGCAAGTTGAACAGCCTGACGGGTCCCTTCGGTGTGACCTGCT  
GCTGGATCCC GGCTTGGCGTTGAGATCATAGATGGCAGCCAGATGGAAGAAGTGGTCTATCTTGCCGAT  
CAACTGCTCCTGTATCTCGACTGATACCCCGCAGCGGTTGCGTCATGTCGCCAAAACCCGGGACTGCG  
CGCGATTCATCCACATTCCAGCATGAGAACAACCTTGGCAATTTATCCTGATGAGAGGCGCGCATCAGAA  
AATAGACGATACAGTCCGGATGCTGTTGGAATAACTTTTTGATCAATCGACGCCCGATAAAAACCACTACC  
GCCAGTAATGAAATAGTTTATAAAGAGAATCCTGCTACTGATTAGGGTGTACTAGGTTGTTAGATATAT  
CACGATTCATATGGGAATCCGCAATTTGATTGTGCGTTTCGTGAGCAAACCTTAATTTCCGGTGGTGTGCC  
GTTCCGTTATTAGGTAGAACCCTCTATTTTTTCTCCCTAGACTGAAGTTGAAAAATCAGTAATGCCACAA  
CCCGATTGCAGTTTTCGTTGTGCGCCATTACATTTATCTGTGCTTATTCAAGGAGAAGATCATGGCTAAGAA  
ATTGAAAGCGCTGGCAGGGTCAGTGACCGACAACCAACTCACCTCCACCATCAAGGAGTCCACCCAGCAG  
ATCTGGTTGGCGGGTCTGGGTGCCTATGCCAAAGCACAGGAAGAGGGTGGCAAGATCTTTGAAGCGCTGG  
TGCAGGAAGGGGAAGCATTGCAAGCAAAAACCCGTGAGAGCGCAGATGAGAAGATTGCCGCTGTGACCGA  
CAAGACCGCAATACCTGGGGTCTGCTGGAACAGGTGTTTGAAGATCGCTGGCCCGCTGTGGCCAGC  
CTCGGCATTCCGACCCGCAAGGATATCGACAAGCTCTCCAAGCGCATGGCCGAGCTGACCGACGTGGTCC  
AGCAACTGCTGGATGCACAGGAAGAGGAAGCCCCGTGCCGCTGAAGCCAAACCGGTGCCGCCAAAAGCC  
CGCTGCCCGCAAGCCTCCGGTAAAGAAGGCACCAGTAGTAGCCAAGGCCAAAGAGGCCGTGGTTGAGCAG  
GCCGCCGATCTCCTCTCCGCTGCGGAAGATGCGGTGAAAAGAGGTGAAGGCCAAAGCAGAGAGCGTCTGTC  
CCTGATCCCTCGCGGTGACGGAAGGTGATTGATACCCGGCCATGCCCTGCGCTGGGCGGCTCTTGTGATG  
GTGAATGTCATGGATAGAGAGGCGACGCTATGAGTACCATCGCAATTGCCCTTGTGCGGGCGGGCCGCT  
CGGCGGCATCTACGAGATCGGTGCCTGTGCTGCCCTCTCTGACAGCATCAACGGCTTGGCCCTTGACCAT  
GCCGATATCTATGTTGGCGTCAGTTCCGGGGCCGTGGTGGCATCGGCGCTGGCCAACGGCATCTCGCCGG

CTAAGCTGGTGC GGATCCTGCTCAGCGATGACTCGGGGAGATGTTTGACCCGGCTACCTTGCTACGCC  
CGCCTTTCGTGAATATGCCGACCGTCTGACCTCGATCCCGCCGTGGCGTGGCAGAGCCTGACCTACTAT  
TTGGCAGCGCCCTGGAAGCGCAGCCTGTTTGGAGTCGCTGCAGGGGCTCTCCAAGGCCATTCCGACCGGAC  
TGTTTCGACAACCGCGGAGTGGATCGCACCCCTGACCCAGTTTTTCTCTCGTCCCGGCCGCAGCAATGATTT  
TCGCCAGCTGCGCAGCAGACTGTTTGTGGTAGCCACCGAACTCGACACCGGTTCATCCGGTTGCCTTTGGT  
AGCCCGGGGCTCGATGACGTGCCCATCTCGGCGGGCGGTACAGGCGTCCGGCCGCTGCCCCGGCCTCTTCC  
CCCCTTCATTGATTAACGGTCGTTACTATGTGGACGGGGCGCTGATCAAGACTCTGCACGCTTCGGTAGC  
GCTGGAAGAGGGGGCGGATCTGGTGTTCGCATCAATCCGCTGGTGCCCTATGATGCGGACATGGCCGCC  
GGCGCGCCGACCAATCTGGTGGACAGCGGTCTGCCGGTGGTGTGGCCAGACCTTTCGCGCCATCATCC  
ACTCCCGCATGCATGTGGGGATGGATCGCTACAAACACCAATATCCCGACGCCGACGCCCTGCTGTTTGA  
GCCCTCTTCAGCCGATGGCGAGATGTTCTTACCAATGTGTTTCAGTTACCGGGATCGTCGCGCCCTCTGC  
GACCAGCTTACCAGCATAACCCGCCGATCTCTGGCAGCGTCTGTAACGAGCTGGCGCCGGTGTGGCCA  
AGCATGGCCTCGAGCTCAATCTGGCCGCGCTGGCCGATGAAGGTGCACCTTGCTGGCCCCGGCATTGG  
CTCGGTTCGCCCCCTCGACAAGTCGCTGGAGCAGTTGCAGCACTGGCTTGCCAAACGCTATCGCCACGGC  
GTGGCCGTTTCATCACAAAGGAGTAGCATGGATCGCAAGCCAAACGCCGTACCCGGGAGCGGATCCTG  
ACCCTGCCCTCGCCTGCTTCAATCGACAAGGGGAACCCAGCGTCAACACCTCGGCCATTGCGGCCGAGA  
TGGAGATCAGTCAGGGCAATCTCTACTACCACTTCCACAACAAGGAGGAGATCGTCATCGCCCTGTTCTG  
CGAATTTGAACAGCAGATGGATCGCCTGCTGGAGGCGGTGACACCCCGTCCGATGAGCCAGAAGATATC  
TGGCTCTTTCTCCACCTGATGTTTGAAGCCATCTGGCAGTACCGTTTCTCTACTACGATATCGCGACCC  
TGATGAGTGGTTATCATCAGGTGGAGCAGCGCTTTTCCGCCCTGCTGCGCCGCCAGGAGCAGACCGCCAT  
CGCCATTTGCAACCATCTGCAAACGGCCGGGCTGATGGAGGGCAGGGCGCAACAGATGCACACGCTGGCG  
GCCAATGTGGCGCTGGTGGGCACATTTCTGGATCTCTTACCAGCGGGCACTGCATCCCAAGGCGGACGCCG  
ATATCGCCCTCGGCGTCTTTAGGTGATGCAGCTGGTGCACCCCTATTTGCGGGCCGATGCCCGCGCTCA  
TCTGGGCGCCCTCGCCACCACTACACCGACAAGGTTTGGATTACATGCTACAGGGAGAACAAGCATGAC  
CACTTACAACTCGAATTTGTCCCCTTCCCCTACGCGGATGCGGCCATGAGTATGCTGGCCAGAAGCTG  
GCGGACAACCTGGGATCGTCTCCATCAGGGGGATGTGCAACCTGGCCCCGAGGATGAACAGGTACAGGATG  
CCTGGCGGGCCTATCATCCCGGGATTTTGGCCAGGCGCTGCCCCCTGGCGAAGCGGCCGGTGGAGCGGG  
TCTCAATGTGGCGAACAAGCGCTGGTGTATCCATGCCAGTATCTGCTGGAAGACAAGTATGCCAAGCGC  
GCCCTTCGAGCGGGCGGCCAGCCATGCCGAGAAGCTGCAAAAGCGTCAGCCCAAGAATCGCCAAACGCCCT  
GGTATTTCCACGCGCTGGCACTCGGTGCTACAGTCAGGTCAATTTCCATCTCAAAGGCCCTCTCGCAAGG  
AATTGGCGACAAGATCAAGGCAAGCCTTGAGAAGGCGCTAGAGCTGGCGCCAGATCACGCCGAGGCCCAT  
ATCGCCTTTGGTGCCTGGCATGCGGAGATCGTCGACAAGTTGGGGGCCATGATCGGCGGCCATAACCTATG  
GCGCCAAGAAGGAGGAGTCCGAACGTCACTTCAAGGAGGCGCTGGCGCTGATCCCCGAATCGGCTATCGC  
CCGCATGGAGTACGCCAACGCTCAGGTGATGCTGCACGGCAAGAGCCGCTGAAAGCGGCCGAAGCTCTC  
TATGCTGAAGCAGCCGAGTGCGAACCGATGGATGCCATGGAGCGCTCGATGTGGAAGCGGCCGCGGAAG  
AGTTGGAGGATTAACCGCCACACTTGGCACGGATAGACAACAAAACAAGAGGCCAACCCGCGGGTTGGCC  
ATCTTTTATGATGGGAAGCTGACCGGTTGGCTACGCCGTCCTGTTGCTCAAATGCATGCTCAACCGAG  
CAACGCATCCAGTCCGTTGGGGTCAAACAACAGCTCCGGCTCCATCAGTACCAGCAACAGCAGTTGCTCG  
AACTCCACCGCAAACCGCTCGACCACCCGATCCGGATCAGGTACCAGCTTCTTGTCGGTGATAAGGCCCA  
GCTGCACCTTGTGATCATAAGAGAGGATGGAGACGCCAACGCCGATATCCCCGATTGCGGCCACCCAGAA  
CAGCGGCTGACGCAATTTTGGTCCAGCCAGATAGAGGGTCTGCTGCGGGCCGGGCACGTTGGTGATCACT  
GCACTGGCCTTGGCCGTGAGCAGCTCGACGGCCTGCTGCTGCACCGCATTTGGGGGCCATGCCAAGGGCAT  
GTAACAGGTTGAGCACCACCGGTTGTAGAGAAGTGCAGCAGCCTGCATCCGGTCACGTACGGTATA  
GAGCCGCTGCAACGGGTGTTCAACATCCAGTGGCAAGTCCAGGGCCACCAGCCGAAGCGGTTGCCAAGT  
GCCCCCTCATCGTCCGGTGCACGCATATTGACTGGCACCAGGGCGCGGATCTTGACCTTGTGTCATCAT  
CCCCCTTCTCCTGCAGTGTGGCGAAACGCCCTTCCGGTGGCGGATCAGCAGATCGTTGACCGGAGCA  
GCCCAGTACCTTGGCCACCGCCTTGATATCCGGCAGATCAATTTGCTCCGACCAGGCCACCCGCTTGGTG  
CTGGTAGTCTTGCCACGCAGGCGGCAGGGTGAATCATCACCGAGGGTGGCGATATTGCACAGCTCGCTCG  
CCACATCCCGCCCGGCTTTGAGGTAATCCACCGCCTTGGTGGGATGGGTGACCACTTCGACATATTTGGA  
CCAGAGGCTACCGGTGAGCTTGGAGACCGGCCCGCACCAGACGGCTGCCCTGGTGGCAATCTCTCATCC  
TCGTCATCGCTGTCATCCAGTGGCTCCGGTGCAGGTGGTTCGCGGCCCCCTTCCGGTGTGTTATCCATCA  
TGGTCAGCATGGCCGAACAGCGAGAAGCCGTGCCCCATGGCGTGGTGAATGCGCACCACCAGCGCTTG  
CCCACCCAGCGACGTGTCGGTCAAGTGCATATCCACAGGGGGCGCTGGTGGTTGAGCGGCGTCGAGGCG  
AGATCGGCCACCAGCTTCTCCAGCTCCAGCTTGCCTGCTTACCCGGCAGGATCACTCGCTTGGGTTGCT  
GATCGAGATCGAAATCGGGATCATGACGCCAGTAGTAGGAGCCCCCTCCAGCACGGCCCGCTGATGGAA  
GCGGGGTTGCACCGAAATGGTGTGGCATAATCCGGCCCCGACGCGTTTCATCAAGCTCTCCTTCAAAC  
ATCAGGACACCGATGATCTGCATCAGGTTGTTGGGTCTGTCCATGCGTAACCAGGCGGTATCGACGCAGG  
AGATAAATTAAGTCAAGTGGCATGGTGTGTTTCCCTACAAAATGAATTTACCAGGGCGGCAAATGCTTCTG  
CCCTCATATCCGGATGAAGACTTGGATGCAATCAGAATGACATTAATGAGTGGCGACTCGAAATATGAAAT  
AAAGATGAAAGATTACTTACAAAATAGAATCGAGACCTCGCCGAATAATAAATCTGACAAACCTTATGGC  
TTGCCAACTTATTTCAAACAACCATCGTTTACAGCTGGTTTATTTAAAGCCAGTGAACGAAGAGTTTCA

AACACGTTTGGGGCAAGGTAAGCGATTGTCGACATAATCGAGGATCTCTTGCTCCAGTACGCTGCGTACT  
GGCAACAGCATCAAACCAAGATGCACTTCCAGTTCAGGGTATCTTCGTCCAGGGTGAGAGTGCCATGTA  
CCCCTGAGCCGCGAAAGCGTAGCTCGGTCTCCTCTTCATCTGCCAATCGAATCGAGTTGATAGCTCTC  
GCTCATGTCCGCAGCGATGGCTTCGGCCGCGAGCCGGGCGGGCCAGTCCAGCGGATGCTGACGGCTG  
ATCTGGATGGTAGAGAGTGCCTGCTGCCAGCGAGCGAGTTGAAGAACATGGTCGTTACTCTGGGTGATA  
AGTTAGTTATTGATATTAACACATGTTTCAACAACAAATGAAAAGGATGGTTCACATAAAATGGGACTCACTT  
AACAGAGTCGAGAGGGGATGCAGGCCATCAGCGGGACATGGCATTTATTTCCCTCCCCGTGCGCGCTACAC  
TTGTACGGAACGGTCAGCAAAAGCTGCTTGTTTTTTCATTCACTTGTATCTTCGTATCACCGAATTCCCA  
TCAATGGGCCCCAAGGCCAGAGAGCTGTAGATGACGCATCAAGAACATGCCACGACGACGATAGCACCCT  
GGGTCGGCTCTACCGCCAGCTCAAGCGGGTTGCAGCCTTGCGCGAGCAGATGCGTGCCACCCGGAAGAT  
CTGCAGGATCGGGATCGGCTACGCCAGTGGCAGCCGACCGGTTGGGGCGAACCATCGAGATCTGCTGG  
AGAGTGACCGCTACGGCCCCCGCCGAGTTTTTCTGACCGATCTCTATGGCCCCGGGGATTGCGCCCCG  
CCGCGATGCGGACGTGATGCGGGTGTAGCCAACCGCCGAGCGGCTGTGCGGAGTCCGGCCTCAAGGTG  
CTGGCGCAGGCGATCGAGCTTGTAGTCCCTCTCCGAAGAGCTGGACTACCTGATGGTGGTGGCGCTGCGGC  
GCATTGATGGCATTGATCCCATCACGCCAGACACTACACCATCGCCTATCGTGCCGTGGGTGAACAGGC  
GCGCCGTGAACATCAGATTGCATTGGTGAGCGAGCTTGGCATGACGCTGGACAGGCTGGCGAGCAAGCCG  
CTGGTGGGGGCAACCCTCAAGCTGGTGTGAGGGCCCCCATCTGGCGGGCTTGGCGAGCTCTTCTCCT  
TTGTGAGCACGGCTATCAGGTGTGTATCAGATGGGGCGTCCAACGAGTTTCTCGAGACCATCGCCAG  
TCGTGAGACGGCCATCATGACGGCGCTCTTTAACGGCGACAGCAGTGCCTTGAGTAAGGCTTATCGAGG  
GATCAGCCGCGGAATAACAAAGCGGGCCTATGAGCCCGCTTTTCGTTTATCACTGTTTGCCGATATGTT  
GGCCAATGCAAGACCGGTGAGATCACCAGCAGATCCATAAAGCGGTGTACCGGGGTGGCGGCAAGGCGCG  
GCCCCGTCTGACAGAGGGCCAGAATGTGCTGACCCGTTTTCGCCGGGAAGCGGGTGGCCAGATTGTGCTG  
GAATTTCTCCACCAGCAGCGGGATCCCCCTCCTCCCGACGGCGGGCATGGCCGACCGGGTACTCCACCTCC  
ACCTTGGCGGTGTGAGTGCCGTCTTGAAGAAGATCTGGATGGCATTTGGAATGGAACGCTTGTGAGCCT  
CCAGATATTCACGGCTGTAGCGTTTATCCTCCTGCACCACCATCTTGTACGCAGCCCATCGATGCGGGG  
ATCGGCGGCAACATCGTCTCGTAATCCTCGGCGACAAGGCGACCGAAGATGAGCGGCACCGCCACCATG  
TACTGCAGGCAGTGTATCCCGATCAGCCGGGTTGTTGAGGGCGCCGACCTTGTGATGATGCGAATGGCCG  
ACTCATGGGTGAGTTGAGTTCGATACGGTCTGATCTCGTGCAGCCGCCCCCTCACCTGACCATCGAGCTCAT  
GGCGCACTCCACCGGCTTGGGCATGGAACCTCGCGGATAGGAGATCTTGAACAGCACGTTCTTCCATC  
ACATAGCTGCCGTACCCCTGATGACGGGCGAACTGGTTGCCCTTGAACAGCACGTCGTAAAAACCCCACT  
TGGGCGCGCTTAGTACGCCGGGATAGCCCATCTCGCCGCTAATGGTGATAAGGGCGAGGCGCACTGCGCG  
GGAGGTGGCATCCCCCGCCGCCCAGCTCTTGCAGCACCCCTGCATTGGGGGCATGACGGTAGGTACGCAGG  
CTTTGGCCATCGACCCAGGCTTGGGAAACCGCATCGATCACCTGATCGCGGGTCCGCCAAGCATATGAG  
TCACCACGGCGGTACTGGCGACCTTGACCAGCACACGTTGATCGAGACCGACCCGGTTGAAGGAGTTCTC  
CAGCGCCAGCACACCCTGAATTTCTGTTGGCTTTGACCATGGCCACCAGCACATCGGCCATGGTGGAGCGGC  
GCCTTGGCCCTCGGCCACGCGAGTACGGGAGAGCCAGTGCAGCGGTGGCCAGAATGCCCCCAGATTGTGCG  
AGGGGTGACCCCACTCGGCGGCCAGCCAAGTGTGTTGTAATCGAGCCAGCGGATGATGGCACCAGTGTG  
CCAGGCCGCTTGCAGGGGTGAGGCAGAGCTGGGTACCGGGCACCCGGGCGCCGTGGGGTACCAGTGTG  
CCGGGGACGATGGGGCCAAGGTGTTTGGTACACTCCGGAAAGCGCAGGGCCAGCAGGCCACAGCCAAGGG  
TGTCCATCAGGCAGTAGCGGGCGGTGTGCGAGAGCCGCTGGCTGGTAATGGGGTGGTTGCAGACATAATC  
GGCAATATCGACCAGCACCTGATCGGGCTCGGGTCTGTGGTTGACGTCGACGTTGGCGGACATCGTGATT  
TCCTTATCGTTGTTGTAGAGAGACAAAGTACGGGGGGCCGGGCCGACATAATCGGCGCTCGGACGGATG  
ATCCGGTTGTGCTCGCGCTGCTCCATCACGTGGGCGCACAGCCGGTGACCCGCGAGCAGACGAAGATAG  
GCGTGAACAGCTTGGTCGGGATCCCCATGTAGTGATAGGCGCTGGCGTGAAGAAGTCGGCGTTGGGAAA  
GAGCTCTTTCTTCCACATCACCTTCTCCGCTCGCAGGAGACGCGATAGAGGCGATCATACCCACC  
GCCTCGGCAAGCTTGGCCGACCCTCCTTGTATGATGACGTTGCGCGGATCAGAAGTGCGGTAGATGGCGT  
GGCCAAAGCCCATGATCTTCTCCTTGGCCGCCAGCTTGGCCAGCAGTTCGCGCCTTGCCTGCGCCTCGTC  
TTGCCAATCTTCAATCATCGCCATGGCCGCTCGTTGGCACCCGCTGGAGCGGGCCACGCAAGGTGCCG  
ATGGCGGCGGTGATACAGGAGAACATGTGAGAGAGCGTGCAGGGCGCAAACCCGCGCCGCAAAGGTGGAGG  
CGTTGAACTCATGTTTCGGCGTAGAGGATGAGGGAGACATGCATCACCCGACGCTCCAGCTCGCTCGGCGC  
TTTCTGGTGCAGCAGCGGAGGAAATGGCCACCGATACTCTTTCATCGGTATCGAGGGCGATGCGAAGC  
CCCTCGTGACTGAACTTGTACCAGTAGATCAGAATGCCCGAAAAGACGGCCAGCAGCCGATCCGCCACTT  
CATGCTCATGCTCGAAACCATCTTCCGGCTCCAGATCGCCGAGCATGGAGCAGCCAGTGCAGCACATC  
CATGGGATGGGCATCGGCGGGAATGCGCTCCAGTACCTCCAGCAGCGGCAGGGGCAAGGTGCGCAGGCGA  
CGCAGTTGCGCTTGTAGGCGTCAAGCTGCTGCTCACCGGGCAACTCCCCCTTGAGCAGCAGATAGGCGA  
CCTCCTCGAACTGGGCGCTATCGGCCAGCTCCTTGTATGTCGTAACCGCGATAGGTAAGACCGGTACCCT  
CTTGCCACAGTGCAGATGCTGGTCTCCCCCTGCGCTTTGGCCGCGCAGACCGGGCCCCGCCAACGGTTTT  
TGCTGTCCATAAGCTGCCTCCTATTCTTGGCTGTAAACAGACGATCCAGTGTCTGCTCGTAGTGGTGA  
TATCCGAGGAAGTCGTAGAGCGACTCCCGGGTCTGCATGGTCTCCACGACGGCCCTTTGATGGCCATCCT  
GGCGAATATGGTGTAGACGTTGAGGGCGGCTGATTGGCGGCGGGTTGGCGCTTAACGGGTAGAGCAC  
CATGTGACCCCGTGCAGCGCCAGTTGCTCCTTGTCAAACAGCGGGTTTTGCCAACTCGGTCATGTTG

CGGAGGATCGGCACCTTTGGCCGCTTGCTTGAACCTGGTCGTAAGGGCCAGCTCGGTACCCGCTCGGCCA  
AGATCATGTGCGCCCCAGCGGCCACATAGGCGGCAGTGGCTTCAAGAGCCGACTCCATCCCCTCCACAGC  
CAACGCATCGGTGCGGGCCATGATGACGAACCTCGCTATTCTCGCGAGCATCTACTGCCGCTTGATGCGA  
TCGCACATCTCTTCAAGCGTGACCACCGCTTGTGGGGCGATGACCACAACGCTTCTGAGCCACCTGAT  
CTTCCATATGGACGGCGGCAACTCCGGCTCGCTCGAACCGCGGAATGGTGCGGGCGATATTGAATGCCCC  
GCCCCAGCCGGTATCGATATCGACCAACAGCGGCGCACGGGTTGCGGCGGTGATCCGCTCGGCATCGATC  
AGCACGTGCTTGAGGGAGGTCATGCCGAGATCCGGCAAGCCGTAGGAGGCATTGGCCACTCCGGCGCCGG  
AGAGATAGATGGCTTGAAAACCGCTGCGCTCGGCCATCAGCGCCATATAGGCATTGATGGTGCCGACGAT  
CTGCAGGGGATGTTTATTGGCAAGGGCGGTGCGAAAGCGCAGGCCTGCCGAGGGGGACAACTGGACATC  
ATGACTCCTTTACCTGTCTAGTCTGGCTATCTAATATACGTTTACGTTAACGTTAACTATACTTTTCGT  
AACATTCGGGCCAGGCAAGACAGGAAACCGGTTTACGGGTAATTTACCAATTCCTTCAACAGGTTG  
AATTGTATGATGGAGCCCGGTTCCGTGATTGTCTGTCCGGCTGCGACTTGTCTGATCCAGCGCAAAGCAC  
TGCCGCTGCGTCGCCATGCCACTGCCCGCTTGTACCAACATCTCTATGGCCGTTATGCCTTTTCGTCC  
CTCCAGTTGATGGCCCTGACCATCACCGGATTTCTGTGCTGCCCTCCGCATTTTTTTGAGCCGCTGATC  
TATCTGCGGCTGGCTGGGGTCAATACCGACGCCGACCTGCTGCGCGGTATTCTGGTGTGTTTTGGCGAGG  
GCGAATGGTGGGTGGCCAGCCTGGTGTCTGGTGCGCCGTGTTGGCGCCGGTGGGATTATTGGCGGGGAT  
CTTTGTGCTAGCTTCGGGTCTGGCCAAACGTTGGCACATTAATCCCGTCACCTTGAAGCTGGTCGAGGTG  
TTTTGCCACTGGCCATGCTGGAGGTCTATATCATCAGCCTGCTGGTTGCCCTGTTCAAACGATCGACA  
TCGCCGATGTGCGCCTCGGTGGTGGCTTGTCTAGTCTCGGTATTCTGATGCTGCTCAACATGACCCTGCT  
GATCCTGTTTTGACCCCGCCCCCTACTGGGCGCGGATCCCGTTAAAGGAGCCGGAACATGACCAGCGCCCG  
TGAGATGGGGCTCTGCCGCTGCCATACCTGCGGTCTGCTGGTGCCTTATCAAGCCGGGGCAGTCTGCCCC  
CGTTGCAGCAGCAAATTACAGGTGCGCATTCCTCCGCTCCCTCGCCTGGTTCGTGGGGCTTGTGGCGCTCG  
CCACCTTCATGTTGTTGCCTGCCAATCTGTTGCCATAACCCATTTCTACAACAAGGGGTTGCTGCAGTC  
AGATACCATCTTCAGCGGTATCATGATGCTCTATCGCAGCAAAAATGAGCGGGATTGCCACCATAGTTCTC  
ACCGCCAGCATACTGGTGCCGGTGGGCAAAAATATTGGGGCTGGGCTGGATCTGCTGGCAGTTGCAGCGGG  
CCAAACCGGTGCGGCGCAAGCGCCAGCTGGTGTATCGGGTATCGATTTTATCGGTGCTGGTCAAT  
GCTGGACTTGTTCGTGATTTTCGTGATGGTGGCACTGGTGCATCGGGGTGTGCTGCTGAGTGTCCGCGCA  
GGCCCGGGGGCCACCGCTTTGGCCGGTGTGGTGGTGTGCTGACCATGATGTCTGCCCGCATGTTTCGATACC  
GTTTACTGTGGGCAAGGCGCCCGTTGATGATTTCTCTGTTTTTGTCTGATGTGCTGTTTAAACAGCC  
AATAAGGAGTCGGTATGATCGGGGCTGAACCCGTCATTGAAAAGCGTCGCTGGTTATCGCCGCTGGCT  
GTTACCCCTGATAGCCCTGCTGCTGGCAGGTGGCTTTCTCTATCAGCAGGTATTGAGCCGTGGCCAGCTT  
ATCCAGATCAACTTCGCCCAGGGCAACGGCATCTTGCCGGGTAACCCAGGTGCGTTATCAGGGGGTGG  
CCATCGGCGTGGTGCAAGAGCTGGAGCTGGCTGAAGATGGCCGCAAGATTGCGGTGATGGCCAAGATTGA  
CAGCCGTGCCAGACCGCTGATCCGCAAGGGATCCGACTTCTGGCTGGTGGAGCCCAAGGCGTCCGTCACC  
GAGATCTCCGGCCTCGATAACCTGGTCTCCGGCAACTACATCAACCTGCAACCGGGGCGTGAAGCAATC  
CGCTGGAGGAGACCTTCGATGCCCTGGAGGGCCCTCCTCCCGCTATCAGGCTCAGGTCGATGCTGCA  
CCTGACCGCCGATTCGCTGGGCTCGGTGGGGATTGGCGCAAGCTCTATTTCCGCGGTATCGAGGTGGGC  
AGCGTCATCAATACCCGCTGGGTGAGGACAACCAGAACGTCATTCTGGATCTGGTGTGATCGAGCCGCTT  
TCGAGCATCTGGTCAAAGCTGATACCCGCTTCTGGAGCATCAGCGGCATCAAGGGCTCCTTCAGTCTGGC  
CGGGGTGAGCGTGGAGGCCGGCAGCCTTACCTCCATCCTGAGCGGCGGTATTGCCCTTTGACTCGCCAAA  
GATTCACCGGAACCGGAGAAGGGACAGACCTTCGTCTCTATAAAGGGCTGGCGGAAGCGGCGCGCGGTG  
CGCGTATCGACATTGCGGCTGGCGATCTTCCGGTCAAGGAGGGGATGCCATCCTCTATGAGGGGATCGA  
GATTGGTGTGTCGACCCATTGCGCTCACCGATAAAGGCCGGGTGGTTCACAGCGCTGATCAACCCGGAG  
CAGGCTTATCGCATTACCGACAAGAGTCAACTGGTGTGGGAGAGTGTCTCCCTCTCCGCGACCGGTGTGC  
AGCATGCAGATCGCCTGCTCTCCGGCCCCGCCATTGCGCTCGACTATGTGGCGGGCAAACCGGTACAGAA  
GATGACCTGACCGATCGCGCCCCCAGAGCGGTACCAAGGTGACGCTGCAGGCTGACGATCTGGCGGGG  
CTCAATCAAGATGCCCTGTCTGGTACAAGGGATTGACGGTGGGCGGTATCAGCCAGCTCACCCGGATG  
CGCGCGCAATGCCAGCGTCGAGCTGGTGTGCGCCGAACTATGGCCATCTGCTCAATCGTGCCCGCTT  
CTATCGCGCCCGCCGTTGACAGATCGATGCCGATCTGAGCGGCATCAAAGTAGAAACAGTCCGGCCAGT  
GCCTGGTTGGGGGGCGGGATCAAGCTGATACAAGCCAGCAGTGGCGAGCGGATTAACCGTCTCTACCCGA  
GTCAGGAGCTGGCACTGCTCGGTACCCGTGATGCCAAGCCGAGCGCTGGTTGCTCAAAGCAGATCAGGC  
CGATGGCATCGGCATTGGCTCGCTGTGCTCTATCTGGGGCTGGAAGCGGGCAAGGTCAAACAGCTGCGC  
GCCGCCAAAGAGGGGGTCGAGATCGAACTCGAGATTGATGGGGTCTATGCTCCCTCCTCGCCAGCAAC  
CCCAATTCGAAAAAACCGCCATCGACACCAAGGTGCGGGTCGATGGGGTGCAGGTCAAGGTGGGCAA  
CCTCGGTACCCTGCTGCGCGGTGCCATTGAGTTTGTATCGGTTGGCCAATAGCCGAGCAGCCATCAACTG  
TTCGATTCCAGGGAGCAAGCCAAGGCCAAGGTGCGCCAGCTGTCAGTGGTGGCAGAGAGCAATCCGGGGC  
TCGGGATTGGCAGCCCGATCCGCTATCGTGGGGTCGATATCGGCAAAAATTGAAGAGATCGAGCTGGAGCC  
GTCTCTGGGTGAGGTGATCTTTAAGGCCGAACTAGATGGCCACTACGTCGAGCGTTTCTGCAAGTCCGGT  
GCCGCTTTACTCTGGTGCAGGCCAAGCTGGGGCTGGGCGGTGTGCTCACCTCGACACCCCTGATCAAGG  
GGGCGTTTTGTAGAGGCACAACCCGGTAAAGGCCGCTGGCAAAGATCGCTTCCCTTGAGTCAGGTCCGGCC  
GGTGGGTCTGGCCCTGACCCTCAAGAGCCCCCTCCGTCAATGGCTGAGCGTCGGCAGCCACTGCTGTTT



CGCAAGATGGTGGTGGGCGAGTGTACCAAGGTGGCGCTGGCTCGGGATGGCAGCGAGGTGGTGTATCGATG  
TCAACGTGGATCAGGAGTATGCCCATCTGGTGGGGCCAACTCCCGTTTCTGGAATGTCTCCGGGGTCAA  
GGCGGATATCGGGCTGACCGGGCGCACTATCGAAGTGGAGACGGTGCAGAGCCTGCTGGCCGGCGGCATT  
GCTTTTAATACGCCGAGAGAGAGATGGGGCCAAACCGTCAAGACGGGGCATAGCTATCCGCTCTATGGCA  
AGGCCGAGAAAGAGTGGCTGGAGTGGAGCCCGGTATCCAGCCCTGATCTCTTCCCTTTGTATCTCATCC  
AAGCCCGGCACTGTACCGGGCTTTTTTATATTTCCGGTGGTGTGATAGGGTTCAGATTCAGAATATTTCT  
TAGCCTTGTGGTAGGATATCGCCCCCTTTTTTCGGTCAACGAGACGGCACAGTGCACGACAACACCTTCC  
TTCCCGATTACTTTTTACGCCACATTGCGGCCATCATGCCGGCCATCTCTCGATGGAAGACTTTGTGGC  
CAGTTGTGACGTCCGCTGCGCCGAGCATTGGGTCAACACCTTGAAGATAGCCGTCTCGGATTTCTGTC  
GCCCTGATGGAGCCACTGGGTTGGCAGCTCGACCTGTGCCCTGGTGTGATACCGGCTTCTGGCTGACCC  
GCAGCGATGAAACTGTCCCCCTTGGCAACACCCGAGCAGCTTGGAGCGGGCTTCTCATTTAGGAAAGC  
GAGCTCCATGCTGCCGGTACGGCAGCTCTTTGCCAGCGACAAGATCAAAGCGGATGGCATGTTGCTGGAT  
GCGGCGGGCGCCCCGGCTCCAAGACCACCCAGATCGCGGCTCTGATGAACAATCAGGGAATGCTGGTTG  
CCAACGAGTTTTTCCAGCAGCCGGTTGAAAGTGCTTAGCGCCAATATCCAGCGCTGCGGCGTGACCAATGT  
GGGGATGACCCATTTTGTAGTCCAAAGGTATTTGGCCAGTGGTTGCCGGAGACCTTCGACGCCATCTGCTC  
GATACCCCTGCTCCGGTGAAGGTACGGTGCAGCAAGGATGAAGATGCACTGCGCAACTGGAGTATCGAGA  
GCATCGACGAGATCGCGGCGGTGCAGCAGGGGCTGCTGGAGAGTGCCTTCCATGCCCTTCAAACCGGGTGG  
CGTACTGGTCTACTCCACCTGTACCTTGTAGTGAACAGGAGAATCAGGCGGTCTGCCAATCCCTGCTGGAC  
AAGTTTGGCGATGCCTTGTAGTTTTGACTCGCTGGCAGACCTGTTCCCCATGCAGAGCAGGCCTGTACAT  
ACGAAGGATACCTGCACGTTTTGGCCCCAGATCTTCGATAGTGAAGGCTTTTTTCGTCGCCAGATTGCGCAA  
GCATCACTCGGTGCCAACACCATGTTCAAGCCTGGCAAGCTGGGTAAATTCCTTTTTGCGCCGCTTCCCT  
GCCAAAGAGGGCGGAACCCATGTTGCGCGAGATCGAAGCCAACTTCGGGGTGGCACCGCAGGGTCAACTGT  
TTGGCCGCAATGACGAGATCTGGCTCTTCCCCAGCTGTTTGTATCAGGTGCAGGGCAAGCTGCGCTTCGA  
TCGCATCGGCATCAAGTTGGCCGAGACCTTCAAGAAAAGGTTATCGCCTCACTCATGAGTGGGCACTGGCC  
TATGGCGATAAAGCGAACAAGGGCGTGGTTGAGCTTGTATAGCGCAATGCGCGGGAATTCATGATGGGGC  
GGGACTTCTGGCCAGAACAGGATGCGGGCACTGGCGAGGTGATCGTCCGCTATCAGGGACATACCTGGG  
GATGGGGAAATGGTGGGTAGTAGGGTCAAGAATGCCCTCCCCCGAGCTGGTGGTGCACAACAATCTG  
TTCAATCGGTAGTGGGCTTCCGTTGCATCAGCAGCTTGAACGAGTCTGAAATACCCACACTGTGGTTGAA  
CGTTTTCTCGGATCTTGAAGAAGCCTTGTGACCTTGTCTAAGCTTAAGGCAATCCGAACACCACTGTAGCGCA  
CGGCTCTGCAAGGAGCCAATTCCTTATGCCAGGTACAAGGAATTCGTACCTGGCTTTTTTTATCTCTTC  
ACGTATCGCTGTTACTTCACTCTTGTGTCTATTCAACGGTCTCTTCGACCTGTGTGGCGACGCTATTTTC  
AAACGGAGGTTCTCTACCCAGCTCATGTTGGTAGAGCAGATCGATCGCCTGCTCTATGAGTGATGCCTGA  
CTGTCTTCGAGATGAAGACCCAGTGCAGGCAATCGTTCGGCGTGCCGATTGCTGATCCAGCATTGCAGTC  
TGGTATGGGTCTCTTGCTTGGTTTTACATGTTGGCGCTGCCGCTCGGCATTGTTTTGGGGCCCCGCTC  
TTGCACTTACGCCCTGTCAATTTCTTGGTTCATATGTCTTGTAGATATTAGGTTTCCGAGTTTGTATCT  
CTCATTACATGCCATTATCCATTGGAAGATGCCCTTCCCTTTGGGCTGTTGGCTGCGCGACAAATATAT  
CATCAGATCAACAAGATATCATTTAACAATAAAAAACAAAGTACGACGAGTTGTGTTGTCAGGCCAGATTG  
TAATGTCCGCTTTGAGCCAGATTCAAATGTCCGGCTAGGGCCCCCTCAGTTATACCTTGTGAGATAGGTG  
TCACCACGGAGGGGTTCTCATGGCACAAAGCGAGCTGATATTCACCATGAAAGAGGTAGACCGTCTCAAG  
ACCATCCAGGCCGTGGTGGAAAGGCCACATACCCAGCACGATAGCGGCACAGCGCCTGTCAATTGACGCCAC  
GGCATCTACGCCGCTGGTGGCCCCGTACGTGGAAGATGGCCCATTAGGGCTGCGCTCCCGCAAGTTCGG  
GATGAAAGGCAATCGGCAACTGCCGAGTGGGCTCAAGGAACAAGCCTATCAGCTGATCACCCAGCACTAC  
CCTGATTTCCGGCCGACCCCTGGCCGCTGAGAACTGGCGGAACAGCACGGTATCCACCTGGCCGTGGAGA  
CCGTGCGCCAGATGATGATTGCCACGGGGCTATGGGTGCCGCGCCGCAACGGCCACCCAGGATCCAGCA  
ACCTCGTTACCGCCGCGCCTGCTTTGGTGTGATCCAGGTTGACGGTTGCGACCACCGCTGGTTTGA  
GATCGAGCGCCAGCCTGTACCCCATCGTGTTCGTGGACGATGCGACCAGCCAGATCACTGCCCTGCGCT  
TTGTGCATTCCGAATCGACCTTTGCCTACTTCGGCACCTTGCAGGATCACCTGGTTGCCACGGCAAGCC  
GCTGGCGCTTTACAGCGACAAGGCCAGCGTGTTCAGGGTCAATCACAAGTCCCTCCCGTGGCGAGGGCCAG  
ACGCAGTTTGGCCGCGCCCTGGATGAACTCAATATCGAGGGGTTCTGCGCTCATAGCAGTGCAGGCAAGG  
GCCGTGTAGAGCGCGCACATCTGACGTTACAAGATCGCTTGGTGAAGAGCTGAGATTGGCAGGGATCCG  
CTCGATTGACGATGCCAATGCGTGGCTGCTTGCCTTTCATCGCGGATTACAACCGGCGCTTTGGTAAAGCC  
CCCATGCATGAGGTGGACGTACACCGCCCCCTGGGCCCTCATGATGACTTGGAGCGAACCTGATCTGGA  
AGGAGCCCAGGCAGGTATCAAAACGGCTCACAACCAATATGACAAGGTGCAATACCTGTTGCTCGATAC  
CCCCGCCCAGCGGGCTGATCGGTCGAGAGATCATGGTGTACCACTATTGCGATGATCGGGTGGAGTTA  
CGAGGGCTTGTAGGCCAGCTCCTGGATTACTGCATCAAGGATCAGCTGGCACCGGTGAATCAAGGGGCGA  
TTGTGATAACAAGCGACTTGGCCATGTGCTGTTGATGGCCCAAGAGGTTCAAGCCATGCGGGATGATGT  
TCGTTTCGCGAGCAGCGCAAGCAGCCGATGACGAACCGCCGTCGCGGGCCGCATCCTGACAAGGTGAAG  
CCAAACCGACTAGGGGAAGAGCAGTATTACAAGGCCCTGCTGGACGTTAGCGGGCAAGGCTGGAAGCGC  
AACCTGACAGGCCTGAGCTGGCGGACATTGCGAAGGAAGCCGCGCAGACGGTGGCAAGCGCAAACGGGG  
TAGGCCGCGAGATCACCGGCCCGGGACGAAACACCATCCCTGTTGTGCAAGCGGCCATCAGTCAGTGG  
CAACAGAGATCGCGACAGGACGAGGTTTAGTTGGGCGCCGACGTCAGTGTCCGAACGGCACATTTCCGAG

ACGTTATCTCTCAAAGAATTGAGACTCTGGTGGGATCTGTACCACAAGGTCTGATTAACAAACAGACTTG  
CAGCCGCCCATCATCGTCATGTTGACCATCGGATATGAAATCAACGCCAAATGGCTGAATTATCGCATAT  
AGGCAAGCCCCTACCTGGTAGCACTTATCTCGCTTCGGACGTGCTCCAAGGGCCTCCCTAACACGGTTTA  
ACAGGCGCTGGCGATCCCAGCGCCTTGGCAGTTGCATCCGATACGGCAGGGTTTGAAGATGATCAAGTGC  
AGCTGCAATGTGAGCCTCGCTGATCACCAGTTCTTGAGGCTTACGCCTGCTGAGCAGCAAGCGGGTTGCC  
ATCAATTTCAAGTTCACATACGGAGCTCTTTTGATGATCTGGTTGCGAACTCAACGCCCTGACGGCGGG  
GTGGGGTTGTTGCTGTACTGCGGCTAAATCGTAATTGACCTGCATTTGCCAGCCAAGCCCAGCCGTACCG  
ACTCCGGCCAGCTCAAGGCGATGCGCCAGCTCAGGACTTAGCGCGGCATGACCATTACAGACACGGCACA  
ACGATACACGCGACACACCCAAGCGGGCGGGGACCTCGGCAATTTTCAGGCCAGCGCTTTTATCACATC  
TTCTCCCAGCAGTTCGCCGGGGTGGGAGGATTATGCATCATGGTCATGCTCCTAGTGGTAGTCCAAATA  
GTTGACGAGCTCGAGTCTCGGTTATTCAGGAAACGGAACGTGACCCGCCAGTTGCCGTTAACCGTAACC  
GACCAATACCCTTTAGTCTTGCCTTTCAATTCGTGCAACCTGTAACCAGGTAAGTCCACGTGAGCAGGGA  
TCGCCGCCACATCAAGCAGTGCCAATATCCGCTTCAGTTTGGCGCTGTGTGCAGGCTGGATCCCTTGGT  
GGTGCCGTTGGTGTAGAAGTCTCAAGCCCTTTGTGTTTTGAAACTCACGATCATTGCAAAGGGATCCCTTT  
CTCGTACCTCTGTTGAGCATGATAAAAAGTGTATCGCATAGAGATACGATCAGCAAGGCAAATAGGCAGC  
ACTACGAGGCTTCCGACACTGACGTGCGGCCAGCCGAACGGGCGCCGACGTGAGTGCAGAACGAACAA  
GGCCAGCTCGAAAGCTGGCCTTGTGATTTTTGCATTTGGTGGTGGACTAGGGTCTGACCGCCGCGGGG  
ATACCTCCCCAACCTCCCTCTGTTAAGTTTACTGGCTCAAGTCCACATCCCGCTCAAACCGATCCGGT  
CTGCTTATCATCCCCGGCTGCTATAGGTTCCCAGCGAATATAGCACACCGCATCAGGCATTCAGAGGGT  
GGTATTCGTTACGACACTGACGTGCGGCCCGCTTTAAATGATTAGTATGAGTACCTGTACTCATACTAAT  
CGCTCCCTAACAGGGAGCTCAATCCCCCATCGGGTGAGCTTTTCACGGACTTTATCGGAGTCCCGTTTT  
ATGTGGGCTCGGGCGTATTCACCTTGATGAAGAGACTTGCATGGCCACGGCTTGAACCTCTGGGTGAGTTT  
TCTTTCTGCGCGTCAACGCCTGCAAATAGCGCTCTGCCAATTCCTGGCTATCGGAGACTGACTGAGGC  
CCCAGGGCCACATAAGCGGCCACCTGCGGACATGAACAGCGAGCCCTTTTCCAATTCACCAACCAGTTCA  
AATGGCACTCGATCTGAGTATTGAACTTGCACCGTGAACCACTCAATTTTGTGTTTTACATTCATCCCT  
GTGCCGATTTGCTTTTCGTACCAGGCAATAAATGCTCCCAGGGAAAGAGAACGCATTTTTTGTGAGCGCTT  
CAGCAACTTCGGGCTCGAAGCACTCGGTCACATCATCATAATCTTCTTCGCTTGAAGCGCCAGCTCTGG  
TTGTTGTTCAACCCAGCGTAATGGCTGTCTCGTACGCGAATCAGCCTCTTCAGCCAGTCCAGCATG  
GTTCTGTTTTGAGTCAACAGTCTTCTCTTGAATCTTCAGCAGCTGATTTTGACATGACTCTTAACT  
CAATTTACCAAGAAGTTCGACATTTGGATTTAGCTAAAAACCGGTCAATTTCAAATAGTTTTTGCATGT  
GTCAAAGCAAGCCATCAAGGGCATGATCGGAGAATTTGTGGGCGTCATCGAAATACTCCTGCAGGGTTGCG  
CATATCCTTGTGGCGCTCACCTCAATGATCTTGTTCATCGGCTTGCCGGCAGTTACCGCCGAGGTGATA  
AATCCACGGCGCAGGCTATGGCCACTGACGTAGAGATCGTCGATGGTTTGGCCGGTTCGCCGCTTGATCA  
TCAGATTGATGCCCTGGGGCCGAGTGGCTCGGCCATCAGTTGGCCCCAGCGGTTTCATGCGCCGAAACAG  
CGGCCCTCGCTGATCCGGCTTTTGTGTAGCCATTTTTGCAGTGCCGACACGGGGCAATAGTGTGTTGCC  
GGAATCAAGGCTATCTCGGTTTCATGCAGCTGATGCTTGTCTGGTTTGAAGCGAAGGCGATCCCTGCC  
CCACAAAATCGAGATCGCTCACCTCAATTCGGGCTGCTTCGAGCGCGCAAGGCACCCTGAACATCAA  
GAGCAGCAGGGTGTGATCACGCAAACCCGCGAGGTCAATGGTGTGATGCCATCCAGCACCTGGGTCAA  
GGTTGCAGCGTCAGGGCACCGGTTTTGCGCTTACGGTTATCCCCAACCTGACAATACCGCGCATCATCT  
CCTTGATTTCCGGATGTTCCGGTGGGCATGGGGTGAATGCCTTTCTGCTTGAAGGCATAACGGATCCCGGC  
AAGCCGTCTACCCAGGGTTGCCGGTTTTGAGGTTACCGTTACGCAGCTCTCCCTTCCCTCCTCTTTA  
TCCAGCCATACCCAGTCCGCCAATACGCCGTGAGCTGATCTGCGAGAAAAATTCATGATGTCGTGATGGG  
TGGTTTGCAGTGGATCCAGCCCGTGAATTTGGCACCAGAAGACAAAAATACGGGTATCCGCCGTGATAGGC  
ATTGAGGGTGAATCCGCTTTTGCAGTGCGCAAAAAGCGGCGTGCCGACTATTTAGTGCAGCATCGAAA  
ACAGTCTGCAGTACTGATGAGCCGGATTGGACAAGTTGGGTATGTCACAGAACTCTATGATTCATATG  
AAGTTTGAGAGGATCTTACAGGATCTTCCACACACATCAAGTATCGATAATGAATATTATCGATACCTTAG  
GACATCTTATTTCAATACCCTTTGACCACGCTGAACAAAAAGAAACATCGGAATATCATTCGACCTGGTTT  
AGCAGAAAACGAAAAAGTAAAATTTGGTAGGAAAACGTGAGAGATAACGCAGCTCGGTGTTTTATATTCAGGT  
GGGTAATCAGCTTGGTATTTGAAAAATATAAAAAGCCCCGAGCAACGGGGCTTTGGGATTATTTTTTCGCC  
AGTTTGAATAGTGCAAAGAAATTCGGCTGGTGGCTTCTGCCAATTCATTAAGCGGAATCTGACGCAGAT  
CGGCAATAAACTGCGCAACGTCTCGCACAAAGGCGGGTTCGTTCTCCCTCCCCCGATGCGGCACGGGGGC  
AAGATAGGGCGAGTCCGTTTTGACCAGCAATCTGTGAGGGGAAGTGCCTTGACCACCTCTTGCAGTGCA  
GACGCATTTTTGAAGGTGGCGATCCCGGAGATGGAGATATAGAACCCCATTGCCATCGCCGCTTGCGCCA  
TCTCGAGAGACTCGGTGAAGCAGTGCAGCACACCGCCGACCTGATCTGCTCCCTCTTACGCATGATCTG  
CAAGGTATCTTGTGGGCATCGCGGGTATGGATGATCAGCGGCTTGTTCAGCGCGGAGCAACCCGGATA  
TGTTTCGCGGAAAGAGGCTTGTGAATTTCTTGTTCGCGGCGAGTAAAAGTAATCGAGACCGGTCTCAC  
CGATGGCCACCACAGTGGATCGGCCGCTTGTCTGAGCAGTAACTCGGCATCGACACCGGGTTCCTGATT  
GAGCGGGTGTACCCCGCAAGAAGCAAAACACCTGGGGATAGGGGGCAATCGCCTCGAGCATGGTCCGGAAAC  
TGTGCCTGAGTCACTGACACAGAGAAAAATATCCACATCCAGTTTCGCGGCCCTTGGCCAGTACATCAG  
CCATGCTGGTCTGCTTGTGCCATAGCTGAGGCAATCGAGATGACAGTGGGAATCAACGAGTAACATATA  
AAACCTTTCTGCTTGTGAGTACTTATAACCAGCGACTGAGCCAGTTCATCAGATGGATGGTGGGATTGGA

GAGCTGACCCGGCTGGCAGGCCGCTTTCAGGGCAACCAGATCTTGTCTGCCTCCAGCAGTTTTTCGCTG  
GAGTGTCTGCCGACAACCGTTGACTCAAGATGGCCAGATCAGGCATTGCCAGCTGATGGTGACCACATC  
CGGCCTGGGTTTTTCAGGGCATCGCACAAGAAGAGCTGCAACCAGTGCAACCTGACCTGCGTCTCCTGACC  
AAGCTGGCTGCACAATGCCGTGCCTTGACCGGACTTTGACTCAGGGTGACAAACTGTTCCAGCAATTCG  
CGGCGAGTACCGTCTGTTGCTGCTCGATATAGTCGAGTACCCGACGCGGGGCCCTTGACAGATCCGCA  
CCTGAGCCAACGTGGCCTGATGACCCTGCTCGGCCAACCAGCGTACTGTCTCCCCCTTCTGCAGGCAACTG  
ACAGACATGTTTGTGACAGCGACTGAGAATGGTGGGAAGCAACCAGGAAACCTGGGAGGCAATCAGCAAC  
AGCAAGCTGTGCGCCGGCCGGCTCTTCCAGGGTTTTCAACAGGGCATTGGCTGCCGATTCCGGTCATCCGCT  
CCGCATCAGGAATGATCACCACCTTGCCACGGCCGAGCTGGGCAGAGCCCTGCAGCCGGGTGCAGATCTC  
GCCAATGGCCTCGAACCCGATGGTCTTGTCTGTCGCGAGTTATGGTGCCGAGATCCGGGTGGTTGCCCTG  
TCAAACAGCTGGCAGGAGTGGCACTGACCACACGGTTCTCCACGATCGGGTTGCTGGCAAAGGTGCAAAC  
GCGCCAGCCACTCGGCCAGTTGCTCCTTGCCAAGACCGGGATCGCCAGCAACAACCAGGCGTGGCCGAG  
ACGACCGGACTGGGCCGTCTGGCTCAGGGCATGCCAGTCGGGGATCAGCCAGGGATACATAGCGACTCGT  
TCGACAGATAGTGATCCAATGCACGTTTCGATGGCAGCTTTGACCTGTTCCGGCGTTTGCGCCGATCGAT  
CACCACAATGGAATCATCCTTGGCGGCCAGTTCGAGATAACGAGTTCGGGTACGCTCGAAGAAGCTCAGT  
TGCTCCAGTTCGATGCGATCCAGCTCGCCGCGATGGCGAGCACGCTGCAAGCCAAGGGCAGGATCGATAT  
CAAGATAGAGGGTGAGATCCGGCTTCAAATTGCCAAGCACCGCTGCTTGATGGCACCATAAGCTGGGC  
ATCGATAACCACGGCCGCCACCCTGATAGGCTGGGAGGAGAGATCGTGGCGATCCCCACCACCAGACT  
CCGTGCGCCAGTGGGGTTTTGATGCGGGTCTCCACCAGTTGTACCCGGGAGGCATAACATCAGCAGCAATT  
CCGCCTCGATGGTGAGGCGCTCGTCTGACCTCTTTGACGATGGCCGCATCCGCTCGGCCAGTGGCGT  
ACCACCCGGCTCGCGGGTGCCTCGATCCGGTTGATGCCGTGGCGCTGCAGATAGTCGGTCACATAACGC  
ACGGCCGAGCTCTTCCCTGCCCTTCCAATCCTTCGATCACAATAAATTTAGACATTAAGTTTTCTTCAA  
TATGTATTTCGCGAACCGCCCGATTGTGTTTCATCGAGGGTCTTGGAGAAATAGTGGGCACCGCCCCCTTG  
GCGACAAAATAGAGATAGTCGGTCGATTTGGGGTTAAGCGCAGCTTCGATGGAGGCCCTTGCCCGGCATGG  
CGATAGGCGTGGGCGGCAGACCGTCAATCACATAGGTGTTGTAGGGATTCTTGTGCGGTCAGATCGCTGCG  
GCGAATGTTACCATCGTAGCGATCTTTCACCCGTAAATGACGGTGGGATCGGTTTTGTAACCTTCATGCC  
AGACGCAGACGATTGACAAACACCGAGGCGATCTGTGCTCGTTCGTCCGGCTGGCCGGTCTCCTTCTCGA  
TGATAGAGCCGATCAACCGCTCATAGGGGCTCTGTAAGGCAGTTGGCCTGACGTTTTCTCCGAGT  
CTGTCTGACGAAAGTCTCATAATCCTGATGGGCACGACGAGATCGAGAGATCGTGGCATGGGCGGTA  
TAGGCGTAGGTTTTCCGGCAGGAACCCCTCCAGCTTGCCATTCTCGATGCCGAGCTCCTGCGCCAGGT  
CGGCTTCGGATTGCTCGACGGTCAATCGCTCAAGGTATGGGGCGCTGGAGAGTTGCTTCTGCCAATCCTC  
GAAACGGGAACCTTCGACGAAGGTGAGACTGAAAGTAAACTCCTTGCCCGATGCGAACAGAGAGAGGGTC  
TCCTTGAGGGGAGCCCTTCCCTTGATTTCTGATAGGTGCCGATTTGATGGCCACCAGTTCGGGATGGCTGC  
GCAGCCAGAGCCGTACCGCCAGGGGCTGGTTTTCTCCTCACCCAGTTCGGGGATGAGGCGCGCCGCATG  
GGCGCCCTTCTCCACCGTAAAGAGCCGGTTCGGCCCTTGTGGTGAGCGTCTCTACCTGTTGCCATTTG  
TAATGTACATAGCCCCGGCAGCGGCTACCGTCACTGCCGCCCCCGGAGCAGGGTGTAAAGCCGATTA  
ACTTCAATGACCAAACGCTCCTGTAAACGGCGACTCAATACCGCTGGGGGATAGTGAATATCCTCGATGC  
CATTGACCGGCACGACCCCATAAAGGATATTGGTGAGCCACACCTCTTCCGCTGCCATAGTGACTCCAG  
CGGAGCCTCTACCACACGCAACTCAATACTCATCTGTTTCAACATCGCCATCACCTGGCGACGCATGATG  
CCATCGACACCACCGCGGGCGAGATCGGGCGTAAACACCGTCTTACCCCGACGCCAAAACAGATTGGCAC  
TGACCCCTTCAATCAGAAAACCACGACTGTTAAGCACTATCCCTTCGACTGCATTTCCGGTGCAGAGTTC  
GCTTTTTAGCAATACCTGCTCCAGACGATTCAAGGTTTTAAGCCCTGCCAGCATAGGGCGATCACCGATC  
CGCTGGCGGCACACCACCATCTCGATCCCTCCTGTTGCCACTGGCCATAGTGAGTGGGAAATGGCGCCA  
GAGTGACAATCCGGGTTGTGTGCTGACATCCGCTGCCGTATAGCTCGCCCCCTCGCCGCGGGTCCAG  
GATCACCTTGGCCACGATTGTGGCTGGTGGCCCTCCATCTCTTCAACCTCCCGGGTCAAGAGATCCCAG  
TCCGGTTCAACCAATCCCAGCCGTTGTTGGCCAGCTGCAACCCTGCCAGATGGGCAGGCCACTGCAACA  
CGCGACCCTCCCTGACCGCCATGGTGGTGAATGACCGTACCATAGGGCCAGCCCCGATCATGGGCCGA  
GATCGTGTCAAGCTTCATGCCATTGATAAGCAAAGGGATCCCTCCGATAAAAAAGGCCGATACCGGCAG  
TATCGGGCCTGTGTCTTTGCCCTGCGGCAAATATACGCGTGTGAAGATCAGTGAGCCATTGGTGCCGCC  
GAAACCAAACGAATTGGAAAGGGCGTACTCGAAGCTACCTGGCTTGCCACATGGGGTACCAAATCCAGA  
TCGCACTCATCATCCGGGTTGTCCAAGTTGATGGTGGGCGGAGCCACTGATCACGCAGGGCCAACACAG  
TGATGATCGCCTCGATGGCACCAGCGCGCCCAACAGGTGACCGGTCATGGACTTGGTGGAGCTGACCAT  
CAGGGATTTGGCGTGTCAACAAACACTGACTTCATGCCACGCAGCTCGGCTACATCACCCAGCGGGGTG  
GAGGTACCGTGCAGCTTGTGTAACCAATCTGCTCGGGGGCAATGCCGGCATCCTTGATGGCATTTCATCA  
TGGCACGAGCGCCACCGTTGCCATCTGCAGGAGGCGCAGTCAATGTTGTTACGCGTACCCTCATGCCAAA  
ACCGACCGCTCGGCGTAGATCTTGGCACCACGGCCCTTGGCGTGTTCGTACTCTTCCAGCACCAGTACC  
CCGGCACCGTCAACCAGCACGAAACCGTTCGCGATCTTTATCCACGGACGGCTCGCTTTTTGCGGGCTCGT  
CGTTGCGGTTGGAGAGTGCTTGGCGGCAGAAAACCACCCATCCCCATCGCGGTAGAGGCTTTCTCGGC  
ACCGCCGGCGACCATCACGTCCGCATCACCGTAAGCGATCATCCGGCCAGCCATACCGATGGCATGGGTA  
CCAGTGGTACAGGCGGTGCTCACAGCGATGTTCCGGCCCTTGACAGCTTTCATGATGGAAAGATGACCGG  
ACACCATATTGATGATGGTGGACGGAACGAAGAAGGGACTGATCTTGCAGGGCCCGGCTTGACCAAACCT

TTCGTGGTTCTGTTCAATCAGACCCAGACCCGCGATAACCGGAGCCAATCGCCACGCCGACACGTTCCGGCA  
TTCTCTTCATTGATGGTCAGGCCGGAATCATCAAGCGCCTGCATAACCGGCCGCGATGCCGTATTGAATGA  
AGAGATCCATCTTTCGAGCGTCTTTACGGTTGATAACCGTACTGCTCGGGATCGAAATCCTTGACCAGACC  
TGCGAAGCGGGTTGCAAACCTCGCTCGCATCAAAGTGTGATAAGGGAAATGCCGCTCGCCGTTGAGC  
AGTGCTTGCCAGCTGGATTCCGGCAGTGTACCACCCGGGAAAGCATCCCCAAGCCGGTACCACGACTC  
TGCGTTTTGACACTGAGGTAGTCTCCGAGAGGTGTTTTGAAAAAGAAACAAATACAAAAGAAGCGGCCCTT  
GGGCCGCTTCTTTCAGAACAGGAACCTTATTCCTGATTAGCGGTGATGTAGTCGATAGCCGCTTGAACAGT  
GGTGATCTTCTCGGCTTCTTCATCAGGAATTCGGTATCGAATTCCTTCCAGCGCCATTACCAGTTCA  
ACGGTATCCAAAGAGTCAGCGCCAGGTGTCGACGAAGGAGGCAGCGTTCCTTGACGTCTTCTCTTTAA  
ACCCAGTTGTTTCGATGATGATTTTTCTTACCGGTTCTTCGATGTTGCTCATGACCTGAATTTTTCTTTA  
AAAATACGCTATTTGCGTCTGGTTGGGTAGTTTATTCAATGACGTGAGTTTGCAAGTAGCTTGCCGCT  
GGTCAAACCACGAAATGTGCCAAACTTCGGCCTACTATCGCAAATTTGAACAGATCTTACGACAAATTTGA  
TTACACCATGTACATCCCGCCATTAACATGCAGGGTTTTCGCCGGTGATATAGGCTGTTTCATCAGAAGCC  
AAGAATACCACAGCTGCGGCAATTTCTTTTTGGATCACCCAAACGGGCGGCAGGCACCTGACTCATGATGC  
CAGCACGTTGATCGTCATTACGGGCACGGGTGATGTCGGTTTTCGATGAAAACCGGGAGCAACCGCGTTCAC  
TGTGATAACCAGGGATGCCACTTCCCGTGCCAACGATTTGGTAAAACCAACCAGACCGGCCCTTGGCGGCA  
GCATAGTTGACCTGACCGCATTGCCCATGGTTCACCACCGGAGCCAATGCTGATGATGCGACCATGAC  
GTTTTCTTCATCATGGCACGCAACACCGGTTTTGCTCAGACGGTAAAGCGAGGTCAGATTGGTATCGATGAT  
CTCGTTCCACTCGTCATCTTTCATCCGCATCAACAGGTTGTCACGGGTGATAACCGCGTTGTTGATCAGG  
ATGTCGATGTCGCCAAAGCGCGCCTTGATGGCGGCGAAGACAGCTTCGATGGATTCCCTGGCTGGTCACGT  
TCAGTGCCATAACCGCAACCATTGTCGCCCAGATAGGCGCTGATTGCCTCGGCACCGCTCTCGCTGGTCGC  
CGTACCGACCACTTTTCGCGCCACGGGCCACGAATGTTTTCGGCAATCGCACGGCCGATGCCACGACTGGCA  
CCGGTCACCAACACAACCTTATCGGTAACCACTCATCACTTGTCTCTGTTTACTTGATCTGGGCCAGCGCC  
TGCTCGAAAGAGGGCGGCATCGTTGGCGTGAATACCTTCCACGCGCTTGTCGATGCGCTTGGCGAGCCCGG  
TCAACACTTTGCCCGGTCCCATCTCGATCTCGAGGGTAACCCATCATTTGGCCATCCGCTCGACAGTCTC  
GGTCCAACGAACCGGGCTGAACAGTTGACGTACCAGTGTCTGCTTGATGGCGGCCGGATCCTGTTACAG  
GATACGTCGACATTATTGATGACCGCGATGGTTGAAACCTTGATCTCGATCCCGTCCAGCGCAGCTGCCA  
GTTTTTCTGCGCGCATTTTCATCAGCAGCTTGGCGCGTCAACGGCCTCTTTGTGACCGGCGATAACCCGTTG  
CCCGGGGAGTTGAAGTTGACCGGAGAGACGACCTGCCCTTGTGCGCTTTTTTCGAGTTGGCTGCGATGG  
ATTCGTTATCCAGACCGATGATAGCCGCCATGGCGCCGGAGCCTTCCGGTACCGCTTCTTGCATGGCCAG  
ACCACGAGCTCGACAGTTTGACCGCATCGGCAAAATCGAGTGCGCCGCTGCAAACCCAGCGCCGAGTAC  
TCACCTAGGCTGTGACCCGCCATCATGGCAGGCGTTGCCCCACCCAGCTGTTGCCAGAGGCGCCACAGGG  
CGACAGAGGCGATCAGCAGCGCAGGCTGGGTGCGCCAGGTTTTATTCAGATCTTCAACCGGACCATCCAT  
CACCAGGGCAAACAGGTCATAACCCAGCACCTGACTCGCTCGGCGAAGGTCCTCTTGATCACGGCATGT  
TGTTCCGGCCAGCTCGGCCAGCATGCCAACGGACTGGAAACCTTGTCGCCGGAAGGCAATGGCAAATTTGGG  
TCATCATTGATTCCTTTTAGATAAGACAAAAATGAAATCGGTGACGGGATGATGGGCGCACCATCCCGCC  
GAAGATCAGAGGCGAACCAGCGCCGAGCCCCAAGCAAACCGCCGCCGAAGGCTCCAGCAGTACCAGCT  
GACCCGGTTTTGATCCGGCCATCCCGCACCCCTTCGTCGAAAGCGACCGGAACGGAAGCGGCAGAGGTATT  
GCCGTGCTTGTGAGGGTCAGCACCCTTTATCGAGGCTCATAACCGAGCTTCTTGGCGGTGGCGCTGATG  
ATGCGGAAGTTGGCCTGATGCGGCACCAGCCAATCCAGCTCGCTCGGCTCGATGCCAGCAGCGGCCAACG  
TTTTCGGTGACGATCTCGCTCAGACGGGTGACCGCGACCTTGAAGACATCGTTGCCCTTCATGTACATGTA  
GGCTTCGAGCTCTGACCCGGCATGCCACGACGGGGATGAGGCAGCTTGAGCAGCTCGCCATAACGGCCA  
TCGGCATGGAGATGGGTAGAGAGGATGCCCGGCGTCTCGCTGGCACCGACAATCACAGCCCCCGCCCCGT  
CACCAAACAGGATGATGGTACCAGCATCTTGGGATCGCATGCGGGAGAGCACATCGGCCCGCAGCAGC  
CAGCACATGGCGGGCGGCACCAGATTTGACGAACTGATCGGCAATAGAGAGTGCCTAGGTGAAACCGGCA  
CAGGCAGCAGCCACGTCAAAGGCAGGAATGCCCGGTACGCCGAGCAGCCCTGCAGCTCGCAGGCAGCAG  
CCGGGAAGGCATTTTTAGCACTGGTGGTGGCCAGCACTATCATATCGAGATCGGCAGCGGTGAGACCGGC  
TGCTTCCAGGGCCCGCAGGGCGGCTGGCAAGAGAGGGTGGCAACGGTTTTCGTCAGCCCCGGCAATGCGG  
CGCTCACGGATAACCGGTGCGTTCACGATCCACTCATCACTGGTCTCAACCATCTGCTCGAGATCGGCGT  
TGGTACGCACTGAACTCGGCAGGTAGCTGCCAGTACCAGAATTTTGTATGCATAGAGTTCTTATAGAT  
CCCTGTGAGAGAAGACAGCTTCAAGGCGATCTGCTATTTGCAGTGAAGTTGATGTTTTGGCCTCTTGTGC  
GGCCAGCAGGATCGATTACACAGAGCGCGCCGTTCCGGCCGCCATGACTTTTTTACCACAATGCCCGGC  
AATCCTAACAGACTTGCCCCGTTATACTGGTCGGGGTTCAGGTAAGAAAAACGCCGTTTTGAACATAAATC  
CGGCATCCGGCCAAGAAAAGTGCCTTCTTGCGGGATATCCGGCCAGCTGGGCCATCATCCGCACCAC  
ACCTTCTGCCGCTTTGAGGGCGACATTGCCGACAAAACCGTCGCAGACGATCACATCGCTATCGCCGCTG  
AAGATGCGATCCCTTCGACGAACCCGACATAATTGAGCGGTGGCACTGACGCAACAATTCGGCGCTGT  
GGCGCACCAGATCGTTGCCCTTGATCTCCTCCTCACCGATGTTGAGCAAGGCAACACGGGGGGATGCAAT  
GCCTTCTACCTTTTTCGGCCACGACGGAGCCATCACCGCAAACCTGCAGCAAGGTATCCGCATCGCAACTG  
ACGTTGGCGCCTAGATCCAGCATCACGGTACGTTTCCGCTCAATGTCGGCAGCGCCTTGATAAGGGCAG  
GTCTGTCTACCCCGGCAGGGATTTGAGCACGCACTTGCCATCGCCATCAACGCACCGGTATTGCCAGC

ACTGACGCAAGCATCGGCCTCACCGGCTTTACCAGATTGAGTACCACCCGCATGGAGGAGTCTTTCAGG  
GTACGCAGCGCCACGATCGGTTTATCGCCCATGCCAACCACCTGGGATGCATGTACGAAACGAACGCGGG  
GATGATTTCAGCAAGCCATGTTGCTGCAGCAGAGAAGAGGTCTGGTGTGGTCGCCGACCAGGATCAGTTT  
TAGCTGGGGTAAAAGAGACAGTGCCTGCACGGCGGCAGGCACTGTTCCGAGGGGCCAATATCTCCCCC  
ATGATGTCTAGCGCGACAGTTTGCCTAGACAAAGGCAATCCTTAAGCGATTACCTTTTTTACC GCGGTAGA  
AACCATCGGCAGTCACGTGGTGACGACGATGAATTTTCGCCACTGGTCTGATCAACAGTCAGGGCAGCGGT  
GGTCAGTGCATCGTGGGAACGACGCATGCCACGCTTGGCACGGGTTTTACGGTCTGTGTGACGGCCATT  
GTAGGCTAACTCCTAAATTAAGCTCTTCAAGAACTGCAAAGGGATTTCGGCCGCTCATCA  
GCAGGTTTCGATTTACCCAGGTCATCTCCATGTTTCTCTCGGGCATGCATCCAGAGAATGCATTGCCA  
CTTGAGGCAACGAGAGGATGAGTTTCATCTCCAGGATTTGATGAAGATCTATCTCGCCGTTTTTCGTCAA  
CTCAATGGGCTCATAAGCTTCCGGCAGTTCTTCTCGTTTGTCTTTTCGAACAGCGGAGTGTAGATAAAT  
TCAGCTTACAGAGGTGTTTGAATGTCTCTCCGCAACGTTGGCAAACCAGTCAACCTTGGCATGGGCGAG  
TGCCTTTTATAACGGTCAACTTCTGGACATCTTTGCCAAAGTGCAGTGATACATCGATATCACTCTGCAA  
GCCAGCGGTTGATTCTCCAGCCTGGGCATCTGCGACTTTTTCCACTATCCCGATGTAATCGAGCAGCTTC  
AAGGCACTACGGACTGGATCAACCTTAACGGGCAACTTACCTTTTTGCATAGGGCGCGAATAATATAGGT  
CCAACAAGTATAGTCAAAGGAAAAAGTCTTACCGCCGATGATTTTAAACGTCACAAGTCCCTAGAAATGC  
CGGTACCTGCTTTCATCGGTAAGTTCGATTATGCCACAGAATCTGATCCTCGCCTCAACTTCTCGCTATCG  
CAAAGCCCTGCTGGAGAAGCTCGGACTCCCCTTTGAATGTGCCGCCCCGATGTGGATGAGCAACCCTG  
GCTGGCGAATCCGCCGAGGCGCTGGTGGCCAGGCTGGCCCATGCCAAGGCAGATGCTGTCGCCAACATC  
GTGATCACGGCTTGATTATCGGCTCTGATCAGGTGTGTGTCTGCGATGTTAACATCCTCGGCAAACCGGG  
CACCATCGACAATGCCATCGCCAGCTGATGGCGGCTCAAGGTCGCAGCGTCACCTTTTTACACCGGGCTG  
TGCGTGGTGAATGCCGCAACCGGGGAGGCTCATCAACTGGTGGAACTTTTACCCTCCATTTTTCGCCCC  
TCGATGAAGCCGCCATTCGCCGCTATGTAGAGGCAGAAATGCCCTTAGATTGTGCGGGCAGCTTCAAATG  
TGAAGGAATGGGTATCGTGTGTTCAAGGGGCTGGAAAGGGCGGATCCTAACGCCCTTGATCGGTCTGCCG  
CTGATCGGCCTGATCGAGCTGCTGGAGCGCCACGGTATTTGCCCTGCCCTGATTCGGGACGGATAGATAAG  
CTAGATCGAGGATATAAAAAGCCCGGTCAATACACCGGGCTTCTGTTATCAATCAGATTGATGTCTCTTA  
AAAAGAGGCGTCTACAACAGCGCGCGAAGAGCCGTCATGGAGTCCACCACCGCCACAGGTCCGTGACGAC  
TGAGGGCATCGCGCTATCTACACCCCAAGTAAACGCCGATGCGCGGCATGGCAATTGCCCTCGGCACATCGC  
CATATCGTGAACAGAGTCCGCCATCATTACCGCTTCCCGGGTGACAGCCCCAGCTCGTCTAGGATCTGC  
TCAAGCATCAGCGGATCAGGCTTGGAGCGAGCCTCATCGGCCCGCGACTGGTTACAAACAACGGGCGCA  
GTCCGGTCTCATCAATACCCGATCCAGCCACGGCGTGATTTGCCGGTTCGCGACGGCCAGTTGCAGCCC  
TCGTGACCGCAATCATGCAGCAACTCCCCTACCCCGGAAAAACAACGGGCTGGGGGTGGCATCGTGCAGA  
TAGTGATGACGATAGCGATCGATGAGTGCAGGCAATCTGGCGCTCATCAAAGGCACTGCCACTACTTAAAG  
GGAACAGACGGGGCATGGCGACATCAAGGCTCAATCCGATGATCTGCCGGATCTGGGCTGGTGCAGGTAC  
CGCCAGCTCACAATCTCTGGCGGCCCTTGACACAGGCAACAATCCGGCCCACCGAATCCATCAGGGTA  
CCGTCCCAATCGAAAACGGCGAGCCGGATATCCTGCATCAGCGTGGCAAGCCGTTGAGGAAGTTGTGCGAG  
CTCAGGTGCCAGCGGCGCTTCTACCTGCATTTTCGCGACCATCGGCCGATGGGTGAAGCTGAGCTTCCAG  
GCATGCAAAAAGAGCCGTTTTAGCCCTTGGCTGCGCATTTTCTCGTCAAACGCCGCTTACCCTACTTAT  
CGTACAGGCGATCGGGTGACCGGCATGCAGGGTGTGCACGGGATCTGGTGGGTACGACCAGTAATGGG  
GCTGCACTCGACCAGAGTCGCTTTCGGCAAATTTGACGCACGATACGGAACCGGGTTTTCGGAGGGCTTGCCA  
TCGGCACTGACCCGCACCACCCGTTTCGCCAGACTGCAGGTCTGTTTTTTCGCGAGCGGCGCATTGACCACCT  
TGACGTGAGCCTGCCATTTGCCACGCACCAGCGCCAGATACTGCTTGCATGGTCTTGACCCGCAACTG  
CTCATGCAGGCTGCGCAGGGCGCTGCGTTTCTTGGCAACCAGCAATACACCAGAGGTGTCGCGATCCAGT  
CGATGAACCAGTTCGAGAAAACGGGCTTCCGGCCGAGGGCTCGCAGCCCCGATAACGCCAAAGCTCA  
GGCCGCTGCCACCGTGTACTGCCATGCCGGAGGGCTTGTTCAGCACGATCATGGCATCGTCTTTCGAACAG  
GATCTGGCTTCCAGACGCTGGATAACCCCGAGGTTGGCTGAAGGCAGCTCATTTTTCTCGGCAACGCGC  
ACGGGGGAACCCGCACCTCGTACCTGCGCAGAGTTTGTACTCCGGTTTGATGCGCTTTTTGTTTACTC  
GCACTTACCTTTGCGAAGGATGCATAGATCAGGCTCTTGGGGACGCCCTTTAGCTGAGTCTTGAGAAA  
ATTGTGATGCGCTGCCCGTATGCTCAGCTTCGATGGTGAGCAGCTGCACTTGTGTTGTATCTGTGTC  
ATGGCGCGGATTTTAAACTGCCAGCGCCCTTGGCTGCATGGTTTTGTTGAAAAATGGCGCCTTGCTATA  
AAAGAGGTTTTAAATGGGATAATAAACAAGGTTTTGTGATTTGTGTTCAAGCCTTGTACTAAGTGGCCAAAA  
AGTATGCCACCCAATCCCGAAACACCGTGTATAACAAGACATGACGGTTCGGGGTGCAGGTTACAACGC  
ATGGAGAACAACAACATCACCGTTTATTTGTCTCCATTTTCGGCATCCTTATTCATTCCTTCTCGAGAAGT  
GATGACCAGAACGCCCTTAGTTTTGCGCCTCATGCATACCCCAACCGGGAGGTTGCCCCAGTATGCTGAAG  
ACCCGAGGCGGCGCTGGCAGGACCCAGATGGAGGAAATCAAATGACACAATAATGAGAACTCAATGAA  
AAGAATGCTTATCAACGCAACTCAAGAAGAGGAGTTGCGCGTAGCGCTGGTTGACGGACAACAGCTCTAC  
GATTTGGATATTGAAAGTCCGGGACACGAGCAGAAGAAAAGCGAACATTTACAAGGGTAAGATCACCCGCG  
TAGAACCCAGCCTTGAAGCTGCTTTTTGTTGACTACGGCGCCGAGCGCCACGGTTTTCTGCGGTTGAAGGA  
GATCGCCCGCAATTAATTTCCCTCCGGTTACTCCTATCAGGGTCTGCCAACATCAAAGAAGTGGTCCGC  
GAAGGTGAGGAAGTTATCGTCCAGATCGACAAGGAAGAGCGTGGCACCAAGGGTGCAGCCCTCACACCT  
TTATCAGCCTGGCAGGTAGCTACCTGGTACTGATGCCAAACAACCCCGTGGCGGTGGTATCTCCCGCCG

CATTGAGGGTGTAGAGCGGACTGAACTGAAAGAAGCCCTGAGCGGATTGACCGTACCGGAAGGCATGGGC  
CTGATCGTACGTACCGCAGGTGTGGGCAAGTCGCCAGAAGAGCTGGAGTGGGATCTGAACGTTCTGCTCA  
ACCCTGGGACTCCATCCACAAGGCCCTCTCAGGAGCGCGCTGCGCCGGTGTGATCCACCAGGAAAGCAA  
CGTCATCGTGCCTGCCATCCGTGACTATCTGCGTFCGCGATGTGGGCGAGATCCTGATCGACAATCCGGTG  
ATTTTCGAACCGCCAAAGGCCCATATCGAGCTGGTCCGTCCCATTTCCTCAACCGTGTGAAGCTGTACA  
AGGGTGAAGTTGCCCTGTTCAACCACTTCCAGATTGAAAGCCAGATCGAATCTGCCCTTCCAGCGTGAAGT  
GCGCCTCCCCTCCGGCGGCAGCATCGTTATCGATCCGACCGAAGCACTGACCTCCATCGATATCAACTCC  
TCCCAGCCACCAAGGGCGGCAGATATCGAAGAGACTGCGTTGCAAAACCAACCAGGAAGCCCGCCGACGAAA  
TTGCCCGTCAAGTTGCGTCTGCGCGACTTGGGTGGCCTGATCGTAATCGACTTCATCGACATGACGCCGGT  
TCGCCATCAGCGCGAAGTGGAAAACCGTCTGCGTGGAGTGTCTGCCAGCGTCTGCGCCCTCCCTCAACGATCCA  
GGCCGATCTCCCGTTTCGGTCTGCTGGAGATGTCTGCCAGCGTCCGTGACAACGAATCCCTCGCCCTGTCCAT  
CCTGCGTCTCATCGAAGAAGAGGCCATGAAAGACAATACCGAGCAGGTTACCGGCCAGGTGCCGGTGGAT  
GTTGCCCGCTATCTGCTTAACGAGAAGCGTGGCCCATCGCCAGTCTGGAACAGCGCAATGATGTGCGTG  
TTTACATCATTCCGAACCAGCATCTGGAAAACCCGCACTACGAAAGTACTCGTATTCGTCAGAACGAGAT  
TCCGGAAGCGCCAGCTACGAGCTGAAAACCGAGATTGCCAAGCCGGTCTACCAACCGAAGCAAGCTCAG  
GTGATCGAGCGTGAACAACCGTGTGCAAGGCTTTGCCAACCAGGCACAACCAGGCCCTGTTGCACCGC  
AACAGCCGGCGGCTCCCCTGCTGCGGCCCTGCCGAAGCCGGCTTCTTCAGCAAGCTGATCAAAGGCAT  
TACCGGCCCTGTTACGACGCGATGCTGCCCTGCCGACGTGAAAGCGCCCGCCGAGAAAACCTGCTGCTCGT  
GAAGCACGCAAGGATGAAGGTCAACGTCAACGAGCGCAAGAAGTTCGTGGCCGTGGTCAAGCTCCTCGTC  
GTGACGACAATCGTGGCAACCGCAACAATGCGGAAGCTGGCGAGAAGCGTGAAGGTGGCAACCGCGAAGC  
CGGTGAAAACCGCAATCGCCGTCCACGTAAAGAGCGCGAGCCTCGTCAAGGAGCGTGAAGCTCGTGGCGAA  
GTACGCAGCGAACAACGCATGGAACGTGAAACCCCGTCAAGGAGCGCGAGCCTCGAGAACCAGCGCCAGGCAC  
GTGCGCCACGTCCAGCCCGTGAAGCCGCGCGCCGAAGTTCGTTGAAATCGGTAGACGCCGTTGATGCAAC  
TGCCGTCCAGCCACGTCAAGGAGAAAGAGCAGAAAAGTGGCCGAGCGCCGCAACGTCCGCAACTGCGCAAG  
CAGATCCGCGTGCATGTGCGCGCTGCTGACACCCCTGCCCTGCCGGTTGAAGAAGTACCAGCGCAAGCTG  
AAGTGCATCGATGCCACCGTGGGTAACGAGCAGGAAGAGCAGAGTGAAGGCCAGCGCCGTTACGCCCGCAC  
TCCCGCAGCCAGCGTATCGAAGGTCAAGGTCAGCGCCGCAAGCGCATCAACGAAGATGCCCGCAGCCACGTGAC  
GAAGAACAGCAAGATACCACCACTCTGACCACCGCAGCTCAGGCAGATATTGCCAAAGCGCAGGTTGAAG  
AGCCGGTAGTGCCTGTTGTTACCATCCCGAGCGCTGAAGCCGTCGCTGCTGCCCTGCAAGCCTCTGCGGC  
ACTGACCGAGCATGTGGTTGTGCAAGCCGTTGCTGAAGAAGCTGCCGAGCAGGCTGCTGCCAGCTCGAA  
GCAACTCAAGCCGATGTGATCGCTAGCCCGGTTGTTGCAGCTCTTGCAGAAGTCGTGGTTGCAGCAGAGC  
CAGAAGTTGCTGTTGTAGCTTCCGCGGCTGCCGAAGTGGTCAACCGTACCATGGTTGAAACGGCTCCGGT  
TGTTGAAGAAACACCGCCGTAACAGCCCTGCTGTTGAAGCCGCACCTGTCGCGCTGCTGTTGAAACA  
CAAACCTCTGCTGCTGTCATCGAAAACCCCGCTGCCGTGGCTGCGGTTGTAGTGAAGAGACTCCGGTCCG  
TTACCAAACAGGTATCTCACGGTGCCGGCTGCTGGCTGCTGCCGCAAAGCATCCGCGCCGATGGCAAC  
CCCTGCCGAAGCCCTGCCCTGCTGCTGAGCCGGTTAACTACCCGCGCTGGTACGCAACGAAGTG  
AGCACATCAGGTCGTATGGTGGCAGCACTGCCGCCGTCAACGTGGCCACCTGCCCGCCGGTCCGCCCT  
AAGCAACCCTGGTTGACCTCCTAAACAAAAGCCACACCAACCCTGGTGGCTTTTTTATTTCTTTTTCCC  
CTGTGCACTCACAGACACATTAATTGCTCTGCAAAAAGCCGCTTTGTCTGTTATCTCTCTATCATTTGAACA  
CTGCGTTAACTCATGTTTATTTTTTACATAACAGAGAAAAGCCAGTTTTTTCAGCGCCGATGTTTCAGCATG  
CAATGGGCGGGTGTGGGGTCAAGATTCATTTGATATGGAACCCCTCGGTTCAATGCATACTTGCCAACC  
AGGGCATTTCGGTTGTACCGAAACCTGAATCCTCCTTTCGAGAAATGGGGAGGTTTCGACATAAAGCAAGC  
CTGCCTCAGGTCCTGTTCAACTGATGATCAACTCAGGTTGCATCTACACAGATGTACATATAGGTAACGT  
TCGCTGATACAGATTTGCTTCCCGAAAGCTCGCCAGTTTCCCTCCTATCCTGGCGGCAGCACAATCTATA  
CACGAGATATTGGTTACGACCTTCCCCACACAATCAAGTGTGAAACTGAGCAAGACGCTAGCCCCAATA  
CACGAGAATTCAGTAACCGCTGCTCAACGATTCTGTTTTAAAAGGCATATAAAAAATGCCGCCCGGCTTTGC  
AACCGGGCGGCATTGAACATCTTCTGTTATTGAGAACGAACTATCAGGCTGTTGCCACCTTGGCCTGCTC  
TTCACCTCGTTTGTAGCATGGCGTAGGAGACACCAGTCAACAGCGAGCCTGCCGCAATCGCCACGATATAC  
ATCATGACGTTGCTGATGGCGTGGGGGATAAAGAGCACGAACAGACCGCCGTGGGGTGCCATCAGTTCCG  
AGCCGAACAGCATGGAGAGCGCACCGGTCAAGGCGCCGCAACCATAACAGCCGGGATGACGCGCATCGG  
ATCCTTGGCTGCAAACGGAATGGCCCCCTCGGAGATAAAGCACAGGCCAGTACGAAGGAGGCTTTACCC  
GCTTCTGCTCCGCCTTAATGAACTTGGTGCAGCGCCAGGAAGGTGGCAATACCCATGCCAGTCCCGGCA  
CCATAACCGGCGGCCATCACGGCGGCCATCGGGCGTAGGTTTTGGAGGCAAGCAGGCCAGCCCCGAAGGC  
GTAGGCCGCTTGTGACCGGGCCGCCATGTCAAAGCACATCATGGCCCGATGATGACACCCAGCAGC  
ACGGCGTTGGCAGAGCCCATGTTGTTGAGGAACTCGGTCATGGCATTCATGATGCCGGCCACCGGGCCAC  
CCACCACATAGATCATCACCAGACCGGTAACAGGCTGGCAAAGAGCGGAATGATCAGGATGGGCTTGTAG  
CGCTTCCAGAGTCAACCGCAGGCGCACCTTGTCACTCAGGATTTGGCACTGTAACCGGCCAGGAAACCG  
GCGACGATGCCGCCGAGGAAACCGGCGCCAGCGAGCTTGCAGCATGCCGCCGATCATGCCGGGAGCGA  
GACCCGGGCGGTCAAGCATGGAGTAGGCAATGTAACCGGCCAGCACCGGGATCATCAGGGCGAAGGCTGA

GCCACCACCGATCTTCATCAGCGCGGGCGCAAGAGTGCCTTCCACCTTGAACGCTTCGATAACCGAATACG  
AACGAGAGCGCGATGATAAGACCGCCCGCCACCACCATGGGCAGCATGAAGGAGACACCGGTCAACAGGT  
GCTTGTAGGGGCGGCTTTTTCTCTTTCTTGGGCTGGCTGGCACCGCTGTGGCGATAGAGTGTGCCTC  
GTTCCACGCCTTGTTCGAGTTCGGCGCGGGTTTTCTTCAGCGCAGCGCCGGTGTGGTGCATAGACCGGC  
TTGCCGTGAAACGGGCCATGTCCACTTCGATATCGGTGGCAAGGAATACCAGATCGGCAGCGGCAATCT  
CCTCGGCAGTCAGGGCGTTCTGGGCACCGACCGACCCTTGAGTCTCGACGCGGATCTGATAACCCAGCTG  
TTTGGCCATGGTCTCCAGCGCTTCTGCCGACATGAAGGTGTGAGCCACCCGGTCGGGCACGCTGTCACT  
GCCACGATGCGCTTGCAGCGGGCGCCGGTTTTGGCAGCAGCGGGCGCGCTTGATGGCGATAGAGGCTGG  
CGCCGCTGGTGGCAGCTTCCAGCAAGGCAGCCGGATCCTGCAGGGCGAGATCCATGCTGCCCTGATAGAC  
CCGCTTGCCCTCATAAGCGCGGAGATCCACCGGGGACTGGCGACAACCAGCACCAGATCGGGCGGGAA  
ACCTGTCTCTTATTCGGTACCTTGGCGGAGTTGCACGCTGGAGCCGACGTCGAGGGTGAGTTCACCGCAG  
CCAGTTTGGCCTGCTGTTCTATCCGTTTTGCAGCGAGAAAGCTGGTGGCAATGCCCGCGGGCAAGCCGT  
AACCAAGATTGCTTTTATTGGGCATCTCCTGAGTTTTCCATTGAGGGGGTATTGCATTGAACAGGTGCCA  
GCTCATCCAGACGCTCTACGCGCACCTGTTCAAGTAAAGGGTTGAGCACATTGATATCGTCAAAGCCGAC  
CGCCACCTGACTGACCGCCAGTGGCGAGACGGCGGTGGCCAGCCGACGGGTCTGCTCCGGCGCCAGCCA  
AGGCTGAGACCATGTGCAAGACCGGCAGCAGCGAGTGCACAGCACCACAGTGTGACCACCTGCATCC  
GCGGTGGAATGGCCTGCCAGACGGCATCCGGGGCAAACCAGATGAGGCCATCGGCGCCATTGGAGATCAC  
CACGTTGGGGATCCCGCTCGCTGCAGCGCGGGCACACTCGGCTGTTGCTCAGGGTCTTGATGGGG  
CGGCCTGCCCCTGGCTCAGCTCCTCCAGATTGGGTTTGACCAGGGTCGGCACTGCCTTGATCCCTTCGC  
TTAAGGCCGCGCCGCTGCAATCGAAGATCACCTGCTTACCCTTGCCCTTGAGCAAGCGGATCAGATGGGC  
GCAGTAATCGGGGGCCATCGCTTTGGGCAGACTGCCCGCCAGCAGAACCACTCGACGTGAGGTGCCAAT  
TGATCGATGGCCTGCTCCAGCGCGCTCACCTCCCCTTGCTGGATGGTGAGCCCCGGCAGGTTGAGATCGG  
TGACCCGACCGGACTGCTCGGAAATCTTGACGTTGATGCGGGTGTGCCCGGACACGGACAAAGTGATC  
ATCCAGCGCCCGCTCTGCAAACAGGGAGACAAAGCTCTGCTCATTTGTCAGCGCCAGCCAGCCGGTGACG  
CCTACGTGCGGGCCAGATCCTTGAGCACCATGGCGACGTTGATCCCCTTGCCCGCCGCGCAGGTTGG  
CCTCGCTTACCAGATTGACCTCGCCAAGGCTCATCGCTCGAGGCGGGTGGTGAGATCAAGGGCGGGGTT  
GAGGGTAGGTAACAATCTTCATCAATGCGCCCCCTCGCCGAGACCAGCGGCGATCGCCTCACCGATCC  
CCTTAAGGCGGGCTCGGCTCGCCCCCTCGGCGGAAATGCCAGACGATGCCACACTGACCCCAAG  
GCCGATCACCTTCATCAGGCTCTTGGCGGAGACCGCTTCGCCGCTACCATCCAGATTGGCAACCCGGATG  
TCGGATTCAAACCTTTTGGCCACCTTGACCAGCATGGCGCCCGGACGGGATGCAGACCGTGGGGTTGA  
TGATGGTGAAGGTTTTCGGAAAGACCGCTCGCTGGCCCTGCCTGCAGCATGGCCAGTCCCTCGCCGCCCCG  
CAGTGTAGCGAGTTGGCCGGCAGCCGCCAGTTTGGCCAGATTCTCCAGCTGCGGCAGATGGCCGCTATCT  
GCAGCGCACAGCAGCAGCATGGCGCTGACCGTTTTGTTCCCTGCTATAAGTGGCTGCTCGGGGTGGCCA  
ACACCCAGCCGGTCTGGGCCGCTTGTGCTCGAGCGAGCCAGACGCCCTCACCCAGATAGGCGGGATCGCT  
TGCCAGCAGGGCGCTCACCATGGCGGCATCGCCCCAGCCCGGATTTGGCGGAGCGGCTGCTCCCAGC  
AGCAGTTGGTTCGCGATCATCGACCGGGAAGTCAGCCAGGGTCAGGTATTGCACCTCTTTGGCGCAGTGG  
CGCCAGTCAGGATGTTGATGATGGTGGCAGCATCGGTGGCCTCTTTGAGCTGGGCTGCCGCTGCTCGTC  
ACCCAGCACATGGGTGAGCTGGCGCAAATGCCAGATGCTCGTGGACTTGGCGGCGATGCCGATGGCG  
ACATAGGCGATCTGCCCTCATCCACTCGATAACATTGGGGAACCTGGGCCACCATGACGCCTGTGCTCT  
TCACCAGATGACGGGTATCGGTGGTGCCGTGGGGAATGGCGATGCCGCTGCCAAGATAGGTGGCATGCTG  
CGTTTACGGGCCAGCATCCCATCCATAGCCCCGCTTCCACCAGACCGGCTTCGGTCAGTTTGCCCTGCC  
AGCAGGGCAATGGCGTCCGACTTGGTTGCCACCGACTGCCCCAGCAAGATCTGCTCTCGCGCAACTTCA  
ACATAGAGACTCTCCATCAGGTTCCGGCCGCGCCGGTACGTCACAATTGAACATTTCGGGTAACCTCGCCAG  
CTGACAATAGACCCGATCGCGGTTCACTGTGATCGGGGCCGATTTTCAGGCCACTGGGTCTCTTCGTTG  
CTGACAGGCTGAATCGTTTCACTTACACTCAGACTGAATCGTTTCAGCGAATTGATCAAGTACCCACAAA  
GAGTGTCTTTTCAATGATATGATCCCGCGCACACTTTTCGGTGGCCTCACCCGGCAGTGACCGTGGCCCT  
GCAACTCAAACAGAGCCAATATGATGAAACTGGATGAAATCGCCGCCCTCGCCGGTGTCTCGCGCACCCAC  
GGCAAGCTATGTGATCAATGGCAAGGCCGACCAATACCGCATCAGTCAGGCCACCCGCGACAAGGTGATG  
GCCGTGCTCACCGCCACAACCTACCAGCCGGACAGCCGCGCCGCTCCCTGCGTGGCGGCCAGACCAAGA  
CCCTCGGCTTTATCCTGCCCGACCTTGAAAACGCCAGTTACGCCAAGCTGGCCAAACGGCTGGAACAGGG  
GGCCCGGGCGCAGGGCTATCAGCTGCTCATCGTCTGCTCGGAAAGATGATCCCGCCACAGAAAAAGAGCTG  
GCCAGATGCTGGTGGAGCCCATGTGGATGCCCTGCTGGTGGCCAGCTGCCGCGCAGACGCCCT  
TCTACGGCAAATTCAGGGCGCAAGGCAGCAAATCCTCGCCATCGACCGGGCGATGGCCGCCGACAAGTT  
CGTCACCGTCCAGTGAACAGAGAAAGCGAGCTTTGATCTCACAGCTCCCTGCTCACCCGACTCTG  
CGCCATATCGCCTTGTATCACCGCGCTGCCGGCACTCACGATCAGTCAGGAGCGCAAAGCCGGTTTTCGAGC  
AGGCGGTGCGCAGTCACAGCGCGGCTCGCCACCTGTGCGAGGGGGATCACTTCTCTCGCCTTGAGGGGTA  
TCGCCTGATCAAAGATCTGCACCAGCAGCTGGGTCAACTGCCCGAAGCGCTGATCACTACCTCCTATATC  
CTGATGGAGGGGGTACTCGACTACCTGTTGGAGCAAGAGATCGATATGAGCCAGCTCGCCATGGCCACCT  
TCGGGGACGATCGGCTGCTTGACTTTCTCCCTTTGGCATCAACTCCCTGCCCCAGCAGCACGACGCGCT  
GGCGAGCCAGGCGCTGGATCTGGCGCTCAAGGCGGTCAATGGCGACTACCAGAGCGGGCTGCATATGTG  
AGCCGCACCTCAAGCGCCGTGCTAACCTGACCGCAGCAGACCCGATTTGCTGTCAATGGGTGGGTA

CGAACAGATGACAATAAGGCTGCCAGCATCGGCAGCCTTATTGTTTTCCCCACAACCCTACCCGCCCG  
CTTTACTTTCTCTACCGTCTGGCCGACTAAACAACCGGCCCTCCACACTCCTTTACCCCGTAACTAAACG  
CCAACGCCAGGACAAGGCACTCCCCATCCGTGCAGCAACCATTGGCTGACCTGTATCAATAAGCCCT  
GCCAGTCATTTTTTCGGTGATTTTTCTGCAATTAGCTATCACTGTCATCATTTATTTCCACTTGTGGC  
ACAAGCCAGCACAAGATCCGTATAAAAAGGGTGTGTTCCGCTATTTTGATCCGCTAACGTGGCAACCATC  
TTTTACAACACTGACAGGTTTTAGGTACAGATGTTCCCGTTCGATATTGCTAGCCTCCGGCCCTATCACCG  
GAGGCTCCTTCTGATAACGCCAATCGGCCCTCTGTTGACGTCCTGCTGACATCGCCTGTTTGCACCTG  
ACACCGCTACGTTCCGATGGATAACATGAATACCAAAAACCTTGGGTTGCACCCTGTTGATTGCCGGCACC  
ACCATAGGCGCCGGCATGCTGGCCCTGCCGCTGGCCTCCTCCTCCCTCGGCGGCCCGCCACCCTGATGT  
TGATGGTCGGCCTCTGGGCCCTGATGGCCTTACCGCCATGCTGCAAGTAGAGGCAAGCCTCAACACCGG  
CAAAATGGTACCTGCACCAGCTGGCCGACCATCTGCTCGGCCCTGGGGCAAGCGCATCGCCTCCTTCTGT  
ATCCTGATGCTGTTCTACTCGCTGGCCTCCGCCTACATCAGCGGTGGCAGCAGCCTGCTGGCACAGGCGC  
TGCCGATGCGGGCATGCCCTGACCCAGGAGCAGGCCGCTGGGCCCTTACCCTGCTGTTTGGCGGCAT  
GGTCTGTGTTGGCACCCGCTCGGTGGATTACCTCAACCGGCTGATGTTACCGCTCAAACCTGGTGATCATG  
GTGGTGGTCTGGCGTTGCTGCTGCCCGCACCGAAGGGCAGCATCTGCTCTCGATGCCGCTGGGTGAGG  
GCCTGTTGCTGGCGGCCCTGCCGGTCATCTTACCTCGTTTGGCTTTCACGGCTCCATTCGGAGCGTGAT  
GCTCTACCTCGGTGACTGCCCAAGCAGTTGCGCCGAGTCTTGTCTGGGGCTCAGCCCTGCCGCTGATC  
CTCTATGTGCTGTGGCAGGTAGCAATCCTCGGTCTGCTCGGCCAGCAAGCCCTGCTGCAAACCGGTGGTG  
CGCTGGACAGCCTGCTGGCCAACGTTGGCAAACCTGGTGAGCTGGCCTGCGTTTAATCAGGCGATGCACCT  
GTTTGGCGATCTGGCGCTCGCCACCTCCTTCCCTCGGGGTGACGCTGGGACTGTTTCGACTTTATGGCCAAG  
GTGACCCGCCGCAAGGACAACCTGGCAGGGCCGACCCAGACTGGCCTTATCACCTTCGTGCCGCCATTGC  
TGTTTGGCCCTCTACTTCCCGCAGGGCTTTATCATGGCGCTCGGCTACGCTGCCATTGCGCTAGCGATCCT  
CGCGGTACTGCTGCCGGTGGCGCTGGTATGGCAGAGCCGAAAACAGGCGCCAGCCACCCTACCGCGCC  
CCGGGTGGCGTAGTGGCGCTGGGTGTGGCCGCCCATGGGCGTGCTGATTGTTGGCGTCCAGATCAGCG  
TCAGCCTTGAATGCTGCCAGCGCTGTAATCCCCGATACTGAATGCCCCAAATAGCAAAGCCCCGCCAAT  
TAACTTGGCGGGCTTTTTGTTGGAAAAGAAATCAAGTTGGATACAAGCATCCGCCATTAATTAAGAGAG  
CGACCCTTACCAAACAACACCCAAACCTTACGCTATATACCGACCTTTTTACTACCAACCCTGAATAA  
TCAGTTCAAACACGTTTCATGCCCTTTCGCTACACTGCCCGCTCGTTTATCGCGTTCAGGAGTTTGAAA  
CAATGATGTTGACCTCAAGAAGAGCACCCCTTGCCTCGTCTGCTTCCGCGCCAGCGGCTTAGCGC  
CGCCGAAATCGCCAACAACAATATTACCAGGCGGAGATCAAGGCCGCGCAGGATGGTTGGGGCGGGCG  
CTTCTCAAGATCAGCGATGACTATCGCGCCGGTGGGATTGAGCGCGCCAAGGCGACCGCCGAGTGGTGC  
TCGACAGCGCTTATGGCTACCAGCAGGGGCCGGTGTGTTCAAACCCACCCTTGCCGGTGGCGAGCAGAC  
CTTTTCGACCAACCGCGAGGGGGCGCTGGCCTACTTTGTGCGCAACAACAGCGCTATCCGGCCGATAGC  
GGCTTCGCCCTGAAAAACTGGCAGAGCTATCGCTATGACAATGCCGCGTCTATATCAACGGCGACATGG  
CGCTGACCATGGGCAAGGTGCATCTGGTGGATCGCGACAACAAGGAGACCCTGTCGACAAGACCTGGGG  
TTTTAAGAAGGGGGATGATGGCAAGGTGCGCATCGTCTGCACCACTCCTCCCTCCCTTATGAGGGGTAA  
TGACGGGGCCCTGCTCTGCCACCATCAATATGATCAAAAAACAGCCCTGCCACCTCGGCAGGGCTGTTT  
TTTTGCGCCTGCGCTTGGCAGATGGCAAGTGAATAGATGACGGTCTGTGCTAAAGCAGTTTGTGCTACCC  
TCAAGGCAAACCATTGAGATGCCGAGCAATATCGCGTCTCTGAACACCAGCTACTCGATATCATCACACA  
AGGAGCCAGATACAATGACCATACTGCCTGTTTACGCGGCCCTTGCTCGCCCTGCTGTTTGTGTTGCTGAG  
CATTCGAACCATTTCGACCCGCCATAGCCGCAAGGTGGCGCTGGGGCATGGGGATGACCCCGCCATGTTG  
CGCGCCATGCGGGTACACGCCAACTTTGCCGAGTATGTTCCCTCGCCCTGCTGCTGATCATTTTCGTG  
AAACCGGCAGCCATGCCCCCTGGCTGGTTCATTTGCTGGGGAGTGCCTTGTGCTTGGCCGCCCTTGCCA  
TGCATTTGGCATGAGCCGCACGCCGAGAACTTCCGTTATCGGGTGGCGGGAATGGGGCTGACCTTCACT  
GTGATCCTGGTGAGCCGCGGCCATATCTGATCAGCGCGCTACTCCCTGACCCAGCCGTACAGAAATAGC  
TTGCGAAGCGGTCTGGCAGCCATCCCTATCGGCTATTCTTCACTGCACATATAGTCGCAACAGTGTGCT  
TAAACAAGCCCGATTGAGGAGTACGATATGAAGTGGATTGGCTGGTTACTGCTTGTGCGGGTACTCACG  
TTGCCCATGCAACCCCGCTGAAGCTGGCGGCAGCGGTGCAACACACTGCGATATTGCGCCCTTTTTATTCA  
TGACTGGTTTTGGCCGGGCCGCATCGACTTTCAGTTGATCCCTGCACCTATGCCCGCTGCGAAAAGTTG  
ATTGAGGCAGACCATGCCGTCGATGGCGATATGGCCGGATCAAGGGCTTTGATCAGACCTATCCCCACT  
TGCTGCAGATCGGTGCCCCATCTCGAGGGCGGCATTTATGGTTCAGCAAGGGATAACCCGAGCTGGCC  
CCCTGCCAAGGGTACCGTATTGGCTGCCTGCGCGCATCCAGTGGTGCAGCGCTTCCCTCGGCAATTAT  
CAGGTATCTGGTTGAACGATGAGAAGCAGGGCTTGCCTCAACTGCATCGAGGCAAAGTGGATTGGCTCA  
TCAAGATGCGCCCCGCTCTCAACCTGCACTGGCGTCCCCCTGGCAGAAGATCACCAAAGAAGAGGTCTT  
TCTCTACCTCGATAAAAAGCACCAGGGCGAAAATTGCGGCCCTGCTCAAGGTACAGCTGGCGTTTTATCAAT  
AACGGCCGCTGGCTGGCGATGCAACAGCAGTACCTTCCGCCATCTAGCGCTGTTCTCGCAGCACCACAC  
AGTGCCGATTACATGGCTGAAAAAACAACCCCTGCCAGATTGGCAGGGCTTTTTCAGTCAACCGCATA  
GCTGGGGAGTCAAACCTCCCGAGCCGCTTACTGGTTGTGAGTAGAGCGACGTGGACGACGGGCCCTGAGCCG  
GTTTGGCAGCGCCATCAGCCGGACGCTGACCACCTTGGCGCTTGGGCTTGGCCACCGTTACCGGTACGTGC  
ACCACCCGATTGCCATTGGAGGCGGAACGACCGGCACCTTACGCTGGCCTTACCTTGGGACGCGGC  
GCTCGGCGCTGCTCGCTCGGATCGCGGGCTCTTTGCGAAGCGGCGCGCCGATACCACGGGCGATGTTGT



CGAGGGTCTCGCGGGAGGCTTCAAAAACGGCCACCTGCTCACAGGGGATGTTCTGCTTGGTCAGACGCTC  
GATCGCCTTGATAAGCTTGCCTTCATCTGCAGCAACAAGCGAGATGGCGTGACCGGCAGCACCGGCACGG  
CCGGTACGACCGATAACGGTGCACGTAATCTTCCGCCACGTTGGGCAACTCGAAGTTGACCACCTTGC GGCA  
ACTTGTTCGATGTCAAGACCACGGGCGGGCAGATGTCGGTCCACCAGCACCTTGACGCTACCATCCTTGAA  
ACCGGCCAGCGCGAGTACGGGCACCTGGCTCTTGTACCCTGGATGGCGGGCGGGCTGACGCCGTTT  
TTGTTCGAGGGTCTCGGCAACACGGTTGGCCATGTGCTTGGTACGGGTGAACACCAGTACCTGCTGCCAGT  
TGTTGCTGGTGACCAGATGACTCAGCAGCGGATCTTGTGGCTTGTTCGCACGGGTGCACCAGCTGCTC  
GATACGCTCGGCAGTGTGTTGCGCGGGGCGACTTCAATGACAGCCGGGTTATCCAGCAGACCAGTGGCC  
AGTTCGCGGATCTCGTTCGGCGAAAAGTGGCGGAGAACAGCAGGTTCTGGCGCTTCTTCGGCATCAGAGCCA  
GGATGCGGCGGATGTTCGGGATAAAGCCCATGTTCAGCATAACGATCCGCTTCGTCCAGTACCAGGATCTC  
CACTTTCGTCGAACCTTGACGGCGTTCTGGTTGTAGAGATCCATCAGGCGGCCAGGACAGGCCACCAGCACG  
TCCAGACCACGGCGAGTAGCCATCATCTGCGGATTGATGCTGACGCGCCGGAAGACAACATGGCTGCGCA  
TCGGCAGGTGTTTGCCGTAGTTACGCACACTCTCGCCACCTGGGCGGCCAGCTCGCGAGTCCGGGTCAG  
CACCAGCGCACGAATGCGGTTTCGGAGACACCTTTCGCTTGGCTCTCCATCAGACGTTGCAGCATCGGCAGG  
GTAAAGCCTGCGGCTTTCGGGTCCTGTTTGGGCCCGCCCATCAGATCGCGGCCAGCCAGAACGGCGG  
GGATCGCTTGGTGTGAATGGGAGACGGGGTGTTCGTAGCCTTGTTCGGCAACGGCACGCAACAAGGGTTC  
GGCCAGACCGAGGGAAGTAAACTCATAATTACCTGCTAGAGATAGGGGCGCCGGGGATTTGTGGTGGGG  
CTCCTCTGCTGAGCCGATGCCATCTCACAAGATCTGGGCTATTGAGAAAACAACGATTTCCCCGGGGAG  
CAGAGCAAAGGGGAAAGAATAGAGGCGCAGTCTAACGGAGTTGCCCGGATAAACGAGAAAAATGTGATG  
CTCCTCCCAGCACGAACAGAAAATCCCCCTCCTGCCCCCGAATAATCCCGTTGATTGATGTAGCAGCA  
CCACACTATTAACCTGGCAACACAATATCAGCCCCCGCAGGCATGGCTCGCAGGGCAAAAGCACGGGATAG  
AAGAACAACAATAACGAGGTTTAGCTATGACCACGCCATATCGTCCCCGCGGCAGCTGGCAGGCAAGGATT  
GGCCTGCTGCTTCTGCTGCTAAGCCCTGCCCTGCAGGCCAGTCAGACCCTGACCGTGGCCTGGAGTCACT  
GGCCCCCTTCAGCCAAATCAACAACCGGGGTGAGCTGGATGGGCTGGATGTCAGCCTGACCCGCCAGAT  
CCTCACCCAGGCGGGCTTTGCCCCCAAGTTTCGCGAACTTCCCTGGGCGCGGGCACTGCATCTGGTAGAA  
CACGATCAGCTGGATGTGGCGATGGCCGCCCTCCCTCTGCCGGAGCGCCAGAGTTATGCCCGCTTCTCGA  
CCCCCTACCGCCAGAGTGCCTATGTGCTGCTGAGCAAATGACCCGATTTCCCGGCCATCAGGATCGCTGGGC  
GCAGCTCGATAAATCTGCCCGCTGTGCAACAGGAAAGGGCTCAATATAGGCAAGTTGCGCGCAGCCCGC  
CCCATGCATCAGATGGATAGCTGCCCGCGCTTAAAATGGCGACCGAATACAACGCCGATGAGCGCATGTA  
TCGATCTGCTGCTGGCCCGCCCTCGATGGCATCATCATGGAGTGGCAATATGCCCGCTACCGGCTGGC  
CCAGCTGGGGGCCGAAGAGTTTATCAGCTGCCAACTGTTGCTACACCACCAGCCGGTTCAGCCTGATGTTT  
GCCAAAAACAGCGTGAGCGAAGAACAGATCCTCAAAGTCAACGAGGCCATTCATGCCCTTGCCCAAACCCC  
ACAACAAGTTCTCGCCCCCAGGTGTTCGCTCAATGCCGATCCGGGCGCCCGGATCTGCTGACCCGCAC  
TCTCCGCAAGCATTGACGGGATAAGCCGCCACCTGAAATAGCAAAGGCGACCCGAAGTTCGCTTTTTTGG  
TATTGTGCAACTTGTTCGCCGAACAGGGAGCGATCAGTCGATGTGCAGCAACAGCGATCAGCGCAGTTGC  
GGGGTATGGGTCAACACCCCCAGGTTCTGGGCGCGATGGCGCAGCAGGTGATCCATCAACACCAGCGCCA  
GCATGGCTTCGGCGATGGGCACGGCGCAATGCCGACACAAGGATCGTGACGACCTTGGTGTATCATCTC  
GATTGCCTTCGCTTCGGTATTGATGGTCTTGGCCCGCACAGTGTGCTGGAAGTTCGGTTTGGAGCGCCATG  
CTCACACAATATCCTGACCCGACGAGATCCCACCCAGAATGCCGCCCGCATGGTTGCTGGCAAAGCCCC  
CCGGGGTTCATCTCGTTCGCGATGCTCGGAACCTTTTTTGTCTCCACTACCGCAAAGCCGTTCGCCGATCTCTAC  
CCTTTTACCCGATTGATGCCCATCATGGCATGGGCAATGTTCGGCGTCGAGACGATCAAACACCGGCTCA  
CCCAGGCCACCGGCACATTGCTGGCAATGACCTGCACCTTGGCACCAGTACTGTTGCCCTCTTTTTTCA  
GGTTCGCGCATGTATTGATCCAGTCTTCCAGCTTGGCCGATCGGGGAAGAAGAAGGGATTCTGCTCAAT  
CTGCGCAGCGTCAAACACCTCAGCCTTGTGGGGCCGAGCTGGGAGAGAAAACCGGTGATCTCGATGCCA  
TGCACCTGTTTCAGTACTTCTTGGCGATCGCCCCCGCGCTACCCGCATCGCGTCTCGCGTCCCGAGG  
AGCAGCACCCCGCGATAGTCCCCTGACCATACTTCTGGTGGTAGGTGTAGTCAGCGTGACCCGGCCG  
GAACAGATCCTTGATGTTCGGAGTAATCCTTGGAGCGCTGATCGGTATTTCTCGATGAGCAGTCCGATGGAG  
GTGCCGGTGGTCTTGGCCCTCAAACACCCCGGAGAGGATCTTACCTCGTCCGGCTCACGGCGCGGGCTGG  
TGTATCGGGAAGTGCCCGCTTTCGCGGATCCAGATCCCCCTGTAGATCCGCTCGCTGATCTCCAGCCC  
CGGCGGGCAGCCATCGACCACGGCCCCCAGCGCCAGGCCGTGACTCTCGCCAAAGGTAGTGACCCGAAAG  
AGTTGACCAAAACTGTTCCCTGCCATGCGCGCTCCTGCTTAGTTCTTGTAGATGGCGAAATGATCCTGAT  
ACTGAACCAGCTCGTACGGGTATCACAAGACGCCATGACCGCCGTTTTTCGAATTCACCCAGGTA  
GGGGATCTCGGGAACTGGGCTTCCAGATGGATCATGCTGTTGCCACTTCGACCACCAGCACGCCATTA  
TCCTTGAGGAAATCTGCCGATGGGCCAGCAGACGCTTGGTTCAGCTTGGAGCCTCGGAGCCGGACGCCA  
GCGCCAGCTCGGGCTCGTGCAGGAACTCGTCCGGCAGATCCGACATATCTTCGGAGTCCACATAGGGCGG  
GTTGGAGACGATGAGATCGTACTTGTTCGCCCCCGGCGAGATCGCGGAACAGATCGGAGCGGATCGGAATG  
ACCTGCTGCTCCAGCCGTGATCGTTGATATTACGCTCGGCCACGTTTCAGCGCATCGATGCTGATGTCGA  
TGGCATCCACTTCCGCTTCCGGGAACTCGTGGGCCATGATGATGGCGATGCAACCTGAGCCGGTGCACAG  
GTCCATGATCCGGGTCCGGTTCATGTTTGGAGGAGGGTGCAAAACGGTTGGCGACCATCTCGGCAATCGGG  
GAACGGGGAATGAGCACTCGCTCGTCCACGTAGAATCCCAACCGGCATACCAGGCCCTTGTGGTTCAGGT  
AGGCGGCCGGTACCCGCTCCTGTACGCGGGGATAATGAGCTCGGCATACGGTGACGCTCGCTGCTGGT

GAGACGGGAGTGGCGCATGGCCGGGTCTACATCCGGTGGCAGATGTAACGCGGGCAGTACCAGCTGCACA  
GCTTCATCCCAGGCGTTGTGCGTTCCATGACCGTAAAAATCCCAGCGTTCGTTGAAACGACTCATGGCCC  
AACGCAACATGTCTGGATGGTGTGCATCTCGGCAACCACCTCATCGATAAATATCTTGTCCAAATCCAC  
CTCCAAGTCGAGTAATATCCGGCCCCGAGCCCCGTTTACCTGGCGGGCAAGACGCATACCTAATACATGAG  
CATCTGATGAAAAAACGCCCTCACCGACAGACGAGGAAACCCTGCTGTTCCGCGATGCGATAAAAAGGTA  
CCCGGAAAAATCAAGCAAGATACCATAAGGGCCGAGTTACGCCCGGTCAAGCAGAAAACGCGAATTGCGCGA  
AACCCGCGAAAAGCTTGGGGTTGACCACTATTTACGCGATGAGTATCAGCCCCATCTCGACGATGATGGG  
CCGACCCGTTACGTGCGGGAAGATGTGTCAAAATTTGAGCTGAAAAAGCTCAAGCGGGGGATTTATCCGC  
CGGAGATCTATCTCGATCTGCACGGCATGAACCAGCAGCAGGCAAAAACAGGAGCTGGCCGCCCTGCTCAC  
CCTCTGCCAAAAAAGAGACATTCACGTCGCCTCGGTGATGCACGGCATCGGCAACATATTTCAAGCAG  
CGAATTTCCAGCTGGCTGGCCAGCCCCAATGTGCGCGCCTTCCATCAGGCTCCCCGTAATGGGGCG  
GCGACAGCGCCATTCTGGTGTGCTGGATATCGAAGAGTAGTTAGCCAAACGACCACACTATACTGAATA  
TCAATATGTTATTTCGCCGTGGAGGTGCGATGTTTACACAGGGTTCATGCGCACATAAAGTCATCTCTC  
GATGCCATCGGCGCCGCCGTGGCGGTGTTTACGCTCGACAAAAGATGATCACTTTGTGCTGGTCTCTGCCA  
ACGATACCTTTGCCAAGGCGTTGAGCTGGATGTCTTGGCAGTATTGGCAAACAGCTGAGCGAGATGTT  
TCCCCGCTACATACCAATACCATCGAGCCGCAATGCACGAATGTGTACGCATGCAGACAGGGCTCGAG  
AGCGAGCTGCCCATCGACAGCCTGTGCGCACCAAGTTGGTGGCGCTTTATTTCTCTCCCAATCATCCCCG  
AGCAGGCACGGATCAACCGGATCATCGTGACCGCCATCGATATCACTGCCAAAAAGCAGCTGGAAGAGGC  
GCTCACCAACAGTCGCCGTGTTTTGAAAGCGGTGGTCAACTCCGCTATGACGGCATCATCAGTGTGACG  
AGCGAGTCACGCATCGAGCTTATCAATACCGCCGCTGCGAGATGTTGCGCATCGACGAAAGCTATCTCG  
GCAAGCGGCTGGAAACCCTGCTTCCCCAGCGTTTTTCGCGCCAATCAGGAAACCTATTTCAAAGCCTTCAG  
CAGCTCCCCCATCAATTCGCGCCCAATGCATGCTCGCGCCTCGGTGATGGGTCTGCGCCGCGACGGCAGC  
GAATTTCCGCTGGAGGTGACCATCGCCAAGATCAATCTGGGCCCGACCACCGAGATGACCGCCATCTTGC  
GGGATATCTCGGAGCGAGCCCGACTGGTGGAGGAGTTGAAGGTGCGCCGCCACCAGGATCCCCTGACCGG  
CATTGCCAACCAGCGCCGCTTCAACGAGCTGGTCAACGCCGAAATGCAACGCTGCCAGCGTTTTTGGCCAT  
ACCATGAGCCTGCTGCTGATCGATGTGACCACTTCAAGGAAGTCAACGATACCTTTGGCCATCAGCAGG  
GAGATCTGGCGATCCTGAGTCTGGTGAACGGATCAGCAAACAGCTGCGGGAGGTGGACATGCTGGGTGCG  
CTGGGGTGGCGAGGAGTTTATCGTGTGCTGCCGAAACCTCCCTCGAGCTCGCCTGGGCCAGCCGAGG  
CGGATCAGGCTCGCCATCGAATCCCAGCACCATGGAGGGGGCTCTTGAGATCTCCCTCACCATCA  
GTATCGGGATCAGTGCCAGCAAGGGCAGCCATGACACTGTAGAGAAGATGGTTAGAGCGGGCCAGACCCGC  
CCTCTATCTGGCCAAGAAACAGGGGCGCAACTGCTGCCGAAAGAGGAGCAGGAGCCGACTTAAGGACGC  
ATGCCACTGCCCTCTGGTGACACTGCTAACCTTTGCCTGCAGAGATAACCAACCGCAACGAATACAAAAG  
ACAGCGGACTCTCTTCGGTAGCGCTGCTTTTTTTCATTCTGCTTTGGGTGCACTTTTCAATCACAACCAT  
CAAGGGGACGGCTAAAGCGCAGTGGGCCGCCATCAGCCAGAGAGAGTCTCACCGACAGCATGCCGCCGTT  
GGGCAATTGCCACTCAAAGAAGTCATCAAATCCGGCAATCGTTACGGCGCGGATCACCTTTGGCGACTACA  
CCATGCGCCACCAGAAGTATCCGCTCCCCTTGCATGGTCAAACAAGTTCCGTGAGTCCCTGCGAGACCC  
GAGCAATCACCTCATCAATGGTTTTACCACCGGGTGGAGATTACAGCCAGCGCTGGGTGATATTGCGCGC  
CCACAGCTCGGGATAGCGTGTCTTGCCTCTACCAGCGTCAGTCCCTCAAACAGGCCGACATCAGCTCA  
CGAAAAGCAGGCACAAGCTCCACAGGCAATCCCAACTGACGAGACAAGATGGCTGCACCTCTCCGTTGTTT  
GCAGCAGGGGGGACGCCAGCAGCCGATCGAACGGGGCCTGAGTGGCCGCTACCTCGTCAGCCAATCGGGC  
AATGTGCCTCTGGCCACTCTCATTAAGCCCCGATATCCAGTGCACCCTGATACCGTCCCTTCCGCATTGGCT  
TGCGTCTCGCCATGGCCGATCACCAACAGTTCCATGGTGCACCTCCTCTTCTGCTATCTGCTTAGTGAT  
TAAACCGCATAACGACTTCCCATTCCGATAACGAGACGACAATCCCCATTCATCTGCGCACCTTAAACGATT  
CTTTAAAATCGAACAAGATTACCTTGCTTCCAGTGAATAAATCTGCTGAACTACGCACACTCATCCGTA  
AACAAATAGATACACATGACTTTTACCTCTAATATGTTCAATTTTCTCTCTGTGAAATAAATGTCACCAA  
GGTGATACCATGAATTGATAGATGGGAAGAATAAACACCCCTCATATAAATACGAGAAGGTAGCGTCAAG  
GGTGTGCTCTGCGAACCCTCGTTTTAGAAAAACATCACTCAACGCTTTTTAATAATTGCTTAGCAGCAAGG  
TTAAAACATTAATAATATAGCCATCAATAATTTTTGATGCGGGCCGTTTACATCACTTTAAATGGGAAATGAA  
AATTGGCCGAAAAATACAGCAGCCCCCTCCAGATTGATGGTTCTATTTTTTAATCACTACCACATATTATCT  
CATAACATAAAAAATATATAAAAAAGGGGGCAAGCCCCCTCTCCTTATCAATCAATGGATGGACTGTCTCT  
TTATTGGGGTGTACCAACTCCAGGGGCCACCTTTGGCGGGATCATCCCCTTGCGTCCACCATTTGGCC  
TGATAGACGGCGCCCTTGTAGCTCACCTTGCTGCCAGCGGTGTAGACCTTGGTGCCTTCCCAGGCCGGGT  
TGCCACCGATGGGGGGTTGGCTCGGATCGACCGCGGTGGAGTCACTTTGTCCACGATACGCACCTTTCGG  
CCAGTTGGCGTGGGAGCCGTAGAAGTTGGTCAACGACTTCTGTAATCACCCGGCACCAATGCAGAATAA  
GCGGTCTGGAAGCCCACCAGCTCGCACTCAAAGGAGTAACCGCCCGGGCGATCCGGATAGTACTTCCAGT  
TGCCATCCCAGTTGGTGTAGAGCACGTGCGTAGCACCGTTGAGATTAAGGCTGCCATAGGGAGTCTGCTG  
CCAGCAGGTGTTCTTCTCATCCGCTTGAGCGGGATCTGGTAGTGGTCCGCCAGCCCTTCCCAGTAGCGG  
ATGCGATTGACCGGCTGCCCTTGTCTTGTCTGCTCGCCGCACTCGATACCGCCGTTGATGACGTTGA  
TGGTGGTGCCAAAGCCGTAGCCGATACCAGCGTCAGCTTCCCGTTTGGAAAGGTACCCAGGTGCGATCAAT  
CACGTGCAGCATGGCCGGTTTTCCGGGCCCTGCGGGGTGAGGAAGAACCAGATGGCAGAAGCGAGGTTGAGC  
CAGGAGTCCGCCACCAGCCCCGGGTTGTTGAGCAGCACGGAGGCATCGCCATCAAACATCGCCTCGGAGA

AGGCGCCGTAGTTGAAGTGGTAAGAAAGCTGCTTGGCGCCGCGGCCGAAATACCCCTGACCCGTGCTGCA  
GGGCCACTTCTTGTCTGCCAGTCGTTCTGGCCACAGCCGGTGGTATAACCGGTCTGTCCCTCTGACCAA  
CCCATCTCCCGCACATGCACCAGCGCCTGTTGCCACTCCTCCAGCCCCAGCGGGTTATCGGAGACGTTCT  
CCTTGGCAATATGGCCACCGGTCTCCTGAGAGAAGTGGGCAAAGCCGTCACAAATGGATTTTTTACAGAT  
CGCATCAGCATCGCGACCGTCAGTATATTGCCACAGAACGCAGGGAATTTACCGATGGCCCCGAAGAAG  
CGGACATAAGTATATTCCGGCGCAGCCATCTGGGTAAATATTCCCATTAGATTGGGGAAATACCCGTT  
CAACCCGTTTTACGTTGTAGGATTGCTTGGCAGACCCGGTTCAATGGCATCAACGATTTTATTTGACCG  
GGTCGCCAATGCCTTGGCCCATATTGCATACATGGGATTGGCCGCTTGGCTTTTTCCACAGCGGCCAGA  
TCCGGGGCCGCAATCACATATCCTCCCGCATTTTGGCGATCGGGTTGAATATTCATGGCTGCACTCATTTG  
CGGCATAGCTTGGCAATGGCAGGCGGCAGCATCAGCCAGGCACAACGCTTGGGTTTGAACATGTTTAT  
CGTCTTGTGTTGAATTAATGCGTTCCAAGAGTAGGTGTTTCAACAATAAATTCACGATGAGAATTAAGA  
AATAAGCAAATTTGTGAACCATTTACCTTGTGATATTCAGTGCAGCTGAAACAAAGAAAAAGAACCCA  
AACGAAAACGCCACAGCGTATCTGTGCGCCATTTTTAGAACAGTTGAGACGGCCAGGTGACCTGCCATA  
CGGTCATTGTTTCGTGATGAAAAAATGGCTGACAGGCTCAACCTGTCAGCCATCATCAATGTTCAAGAAA  
AATGCTCAAAATAGCCGGATGTCAGGCACGCACGGCACGGATCAATATATTGCGCGGGGTTCATGGGTTTG  
GCACAAAACCTCCCCACTTGCACACGATAGCCCTGCTCTTGCAAAAAGAGCGCGGATCCAGCGCCAGCC  
AGATCTCGAGTGGACGGCGAAACAAATGACGCACCAGCTCCATGCGGGCGACATCACCAAAGCGGGCGCTC  
CCCGTGTTCACACCAGGCGGGATAGTCGAGACCGGTGGCAGCACAAATCCCTTTGTGCTCTGCAGCCAA  
ACGCAGAATGCCTCGAAGGTGCCGGTCAGCAGGCTCTTTTGCATATTGGGCACCGGCAGATACTCATCCA  
CCCCGCGCACCTGACGCTGCAGGCAGTCAAACCCGAGACGCCACACCCTTCTGCTCGCGCAGGCGGGC  
GATCCGCGCACCGCCGGTACCGTCTCCTGTAGCGGCAACTTGAGATCCGCTTTGCTCAACACCAGCTCG  
CTGGCATTGGCCGCGGCCGACAGCGGGCGATAGTGGCTGCTGCGGATCAGGTGGTAACAACAGGGAGAGA  
TGGTCACGCCGCTGGCACTGCGCTCGGCCACCCGCTCCAGCAGATGGGTGTGAAGCTCGCCGCAGGCATG  
GAGTGCCATAGCGTGATGTTCCGGGGCGATCAGCGCCGCGGACTCGGGGGCAAAGCATCGGCGCAGGTA  
AAGGTCAATATTGGCGCCATCCCGCTCGGCCAGCAGCCGACCTTCGTCACAAAGCTGCCCTTGAACCTCA  
GACTGAGGATAGGAGCCTGTGATGAAGTGACACCAGCCGCCAAGATGCCCTTGGCAGCACACCCTC  
CAGATAGGGGCCCTGATGGGCAGGCAGACAGGCGGTGAACGACTCGATCTGGGCTGCTTGCGCCCGGC  
ATATGACAGGCCCATCTCCTTGTGTCAGGTTATGGGTCGCGGGTAAACGGGGCAAGCTGGCTAAGTTGCT  
GCAGCTCGGCTCCCTCGGCAATCCAGGGGGCAGCAGACTGCTGAGGGCGCCCATATCTGCATCGAGCTC  
CGCCAACTGGCCGAGCGTACGCCATTTAGCAACGCCGCCAGTTTCGGGCGCTCATCGGCAAAGGCCATG  
GTCAAATGATGATATGGCTGATATTGCCACCAGCGTCCGGTAGCGGGTGAGCAGTCGATCCAGTTGTTGAA  
AACGTTGAGCCAGCACGAATGCCCTTGCCTTGCAGTCAAAAAGGAGGCTCATTTCTAGCGATCCCGCTTCA  
AATTGCACTCTCAATACCTGACGATCAGCGCCGCGCAACAGCACGGCCAACCTGTGAGCCAGGGCAGAC  
CTGACAAAGTGCGGGGTTTTATGCTATATTCCGCCCTCTTTTACGCGCCCCGCCAACGCGGGTTCGCT  
TTACTAGCTATGGGACCAACAACATGACCATCAACGCCATTTGCAAGCGCGCGGGCGCCAAGTGT  
GAACTGTGCAGCGCCGAGCAGGCGCTGACCGCCTTCGTGGTGCCTCACTCCCCGCCAGCGACGATGATC  
ACAGCGTTGCTATCTGTGACACCTGCCGTGGTCAGCTGGAACAACCGGATACCCTGGTGGTCAACCCTG  
GCGTTGCTGAGCGACAGCATGTGGAGCCAGGTGCTGCGGTGCAGGTGATGGCATGGCGCCAGCTGAAA  
GCACTCTCCGGCAAGGGTGAAGTGTGGGCTCAGGATCTGCTGGACATGATGTACATGGAAGATGAAGCCA  
AGGCCTGGGCTGAAGCTGGTATTGCTGACGAAGATGATGACAGCGTACCAGCGTTGACTCCAACGGCGC  
CGTGTGCAAGAGGGGCGACTCCGTCACCCTGATCAAGGATCTGGACGTGAAAGGCGCTGGTTTTACCGCC  
AAGCGCGGCACATTGGTCAAGGGCATCCGCTTGACCAACAACCCGCTCCATATCGAAGGCAAGGTCAACG  
GCGTGCAGATCGTACTGGTTGCTGCCTACCTGAAAAAGGCTAAAGCCAAGGGCGATTGCTCTGCTGTCT  
GCTGCCAGAGCACAAGCACAACGAAAAAGGATGGCGTGGCGCTATCCTTTTTTATGCCCGTTGCCGAAA  
ACGACCAACCTGAGCCATAACAGGCCAGCCAAAGCAACAAGGCGCATCCGGATGGATGCGCCTTGTTTA  
CATGGCCTATGCCGTTTTAACCGACAGCAGGAACCGTCACTCAGGAGGAGAGTTTGCCATCGAGCTCTGC  
AATTTTTCGCAGACCAGTAGGCCGGGCCGGTTTTCGTGGATGTTGTTGCTTCGGAATCGACCACACAGTC  
ACCGGCATATCTTCCACTTCAAACCTCGTAGATCGCTTCCATGCCGAGATCGGCAAAGGCCACCACGCGGG  
CCTTCTTGATGGCCTTGGCCACCAGATAGGCGGCGCCGCTACCGCCATCAGATAGACAGCCTTGTGCTG  
CTTGATGCTCTGACGGTTTTTCGGGCCACGCTCGGATTTGCCGATCATGCCGATAAGGCCAGTTTACCC  
AGCATCATGTCCGTGAACTTGTCCATCCGGGTGGAGGTGGTGGGGCCAGCCGGGCCAACTACTTCTGTCAC  
GCACCGCATCAACCGGGCCAACGTAATAGATAAAGCGGTTGGTGAATCGACCCCTTCCGGCAGCCCTTC  
ACCACGGGCCAGCATGTGCGGATAACGCTTGTGGGCTGCATCGCGACCGGTAAGGATTTTGGCCGATAGC  
AGCACGGTATCACCGCTCTTCCAACCTGGCCAGCTCGGCCTTGGTGTATGCCATCGACGTTGACGCGGGCA  
CATTGCCACCCGCTTACGGGTGATCTCCGGCCAGTCGCTCAGTTTCGGCGGGGTCAGCTCGGCGGGCCC  
TGAACCATCCAGCTCGAAGTGAACGTGTGCGGGTCGCGGCGCAGTTGGGGATCATCACCACCGGCTTGGAG  
GCGGCATGAGTCGGCGCAGATTTACCTTACATCCAGCACGGTAGTCAGACCACCAGACCCTGGGCAC  
CGATCCCCAGCTTGTGACCTTGTGCTAGAGCTCGACCCGCGACTTCTCTTCAAGTGGTTTGGGGCCACG  
GGCGATCAGCTCCTGAATGTGATATGCTCCATCAGGGCTCTTTGGCCAGCACCGCCGCTTCTCGGCG  
GTACCGCCGATGCCGATGCCAGCATGCCGGGCGGGCACAGCCTGCGCCATGGTTGGCACGGTTTTTCA  
GCACCCACTCGACGATATCGTCAGAGGGGTTGAGCATCACCATCTTGGATTTGTTCTCGGAGCCCGCC

TTTGGCCGCGATGCTCACTTCCACCTTGGTTGCCGGGGATCATGTCGATATGCACCACGGCAGGGGCGTTG  
TCTTTGGTGTTTTTTGC GACTGCCGGCCGGATCGGCCAGCACGGAGGCGCGCAGCGGGTTGTCAGGATTGG  
TG TAGGCACGACGGGTCCCTTCGTCCACCATCTCCTGCACTGTCATGTCGCTGTCCCCTGAACTTGCAT  
GCCGATCTTACAAAACAGGTGACGATGCCGGTATCCTGGCAGAGCGGACGGTGGCCCTCGGCAGACATG  
CGGGAGTTGATCAGGATCTGGGCCAGCGCATCTTTGGCGGCCGGGTGGCCTCACGGTCATACGCCGCTT  
TGGCAGCCTGAAACAAAATCCAACGGGTGGTAATAGGAGATGTACTGGAGGGCATCTGCGATAGAATCGAT  
GAAATCCTGTTTTTTTTATAATGCTCATATCATCTCACTGGTCCCTGTCTCTGCCACGGAGCAGGGCAAG  
GGCTTCCATATGATGGGCCGTGCTGACGTGCTGGCTAAAACTATCAACCAGCAAAAAGCGAACAAACACGG  
CAGTTTTTTCTTAAGTCACCGACACCTATGATACGCTTGCCACCAGCACCGACTAGGGTTCCGGGAACCA  
AACTGTTGCCTGTGTAACATAAAAATGACGCCAACACTTCATATCCATCATCTAGACCATAGTGTGAACT  
CCATCAGCTTTTTTCCCGCTGCAACATCAGCCGTGGCCATGTTGCTGGAATCGGCGGGACCACACTCGGT  
GCCGATAACGGCTTTGATATCATCACTGCCGATCCGCTGGCGACCCCTCGAAACCCGTGGCGAGGTGACCA  
CTCTGCGTGTGGGGCGAATATCAGCAAAACACCACGAAGATCCCCCTCGCCCTGCTGGCCATACCCAGCA  
ACAGTTGCTGGGGGAGCTGGAACCTGTGCGCCACTCACCTGCCCTTTATTGGCGGGCGCCCTCGGCCGT  
GGCTATGATCTGGGCCCGCTTCGAGCGACTGCCGGTGCAGGCCGCCCGGATATCGCGGTGCCGGACA  
TGGCGGTGGGCATCTACGACTGGGCACTGCTGCGCAATGTGGCGACCGGCGACTGGCAGCTGGTGCCTG  
GGGGGATGAAGCGGGCCTTGCCAACCGGCTGGCTGGCTTGAACAGCAACAGGCCAAACCGGCCCTGCC  
TTTGCTTGCAGGGTTCGTGGCAGAGCAATATGAGCCGCGCCGAGTATGGCGAGAAGTTTGCCTGCATTC  
AGGAATACCTTGCCGCGGGGATTGCTACCAGATCAACCTGACCAGCGTTTCAGCGCCCCCTATCAGGG  
GGATGAGTGGCAGGCCTATTGCCTACTGGCAACCGCCAACAAGGCCCTTCTCAGCTTTATCCGCCTG  
CCGGACAGTGCCTGCTGAGCCTCTCCCCCGAGCGGTTCCTGCTGCTTGATGGCCGCCATATCGAAACCA  
AACCCATCAAAGGCACTCGCCCTCGCCACCCCTATCCGGCCACCGATCGGCAAGTCGCGCGGGAGCTGGC  
ACAGGCGGACAAGGACAGATCAGAGAATCTGATGATCGTTGATCTGCTGCGCAACGACATCGGTGGGGT  
AGCCGGCCTGGCTCGGTGAGCTGCCTCATCTCTTTGCGGTGGAGTCGTTCCGGCGGTACATCATCTGG  
TCTCCACCATCCATGGTGAGCTGGATGCACGCTGGCAAGGGGTGATCTGCTGCGGGCCTGTTTTCCGGG  
TGGCTCCATCACCGGCGCCCCAAGATCCGCGCCATGGAGATCATCGAAGAGCTTGAGCCCCAGCGCCG  
AATGCCTATTGCGGACAGCATCGGCTATCTCAGCAGCATGGCCGGATGGATACCAGCATCTGCATTCGCA  
CTTTGATCGCCGAAGCGGGTTCGTCTGCACTGCTGGCCGCTGGCGGCATCATCGCCGACTCCGACCCGA  
CAGCGAATATCAGGAGACTTATGACAAGGTCCGGTATCCTGCGCGCGCTGTCGGCGCTGTAACCTCC  
CCACTGTCTGGCCAACGCACAGGAGAGCTCCCCGCCATGGATCGCCACGAACTGTTGACCCGCTTCCAGT  
TGCAGCGACCCCGCCCCGGCCATCGCCTCGCCATCGGCGGGCTCAGTCCGGCGGCAGTGTGATCCCGGT  
GGTGATGCGCGATGAGGGGCTCAGCGTGTATTGACCCGGCGCAGCCCACGGCTGCGTCATCATGGGGGG  
CAGATCAGCTTCCCCGGCGGGGACAGGATCCCGGCGACGAAAACCTCATTGCCACGGCGCTGCGGGAGA  
CCGAAGAGGAGCTCGGCATTCCGGCCGACTGATTGAAGTGATCGGCACCCCTCAACCCGCTCAATACAGT  
GTCACGATTGAGGTGCTGCCGGTGTGGGGTGTCTGATGGCAACTATCCCCTCATCTGAGTCCGGAT  
GAGGTGGAGCACGCCTTCGAAGTGCCGCTGACCCATCTGCTGGATCGGCGCAACCATATCCCCCTGACC  
TTTTCCAGAGGGGGGAAAGCACACACCATCTACTGGATCCCCTGGCAACAGCACTTTATCTGGGGGGCCAC  
CGCCAGCATGATCAACCAGCTAGCCCCGCATCTCGCAAAAATAACAATTCACCTACATTTGACTGAGCGAG  
ATTTAATCATTAACACTAAAATAACGTGCCAATTGATAAACAATAATTGATTTTTTCTTGTTTTGATCAC  
ATTTCCATAAGAAAGTGCGGTTTTTTCATGCCGTAAAAGATGAATTTGATCAACATTTTTTGATTAGAAAAAC  
CGTATCCTTGCGCCGACTTAATAAGAACCACACATTCGGGGTGAGATAGATGTCAAACACAGTCACTGGC  
ACGCAGGGAGTTGCGGCGTCAACAGAGCAAGGGATCCGCTCTACTCAAACCACTCGTTGGGAAAAACGCG  
ACTCTACCTGGGTATCAGTCTGTTCCGGACCGCGGTGGCGCGGGTATCCTGTTCCCTGCCGATCAACGC  
GGGTATGGGCGGTTTTCTGGCCGCTGGTGTGTCATGGCGCTGCTGGTAGGTCCCATGACCTATTTGGCACAC  
CGTGGTCTGGCCCGCTTCGTGCTCTCCTCAAAAAGCCAAATGCTGACATCACCGAAGTGGTGGAAAGAAC  
ACTTTGGCGTGGGTGCTGGTAAATTAATCACCCCTGCTCTACTTCTTCGCCATCTACCCCATCGTGTGAT  
CTACGGCGTGGGTATCACCAACACAGTCAAAAGCTTCATGGTCAACCAGCTGCAGATGAGTGGCCCGCG  
CGCTGGATCCTCTCCATCGTGTGCTCATGGGCATGATGTCGGTGATGCTGGCCGGTGAAAAGTTGATGC  
TGAAAAGTGACCGAGCTGCTGGTTTTATCCGCTGATCGCCATTCTGGCCGGTATCTCTTTGTACCTGATCCC  
GGACTGGACCGGTGCCGCGCTGGAGCAAGTGCCCTCTGCCAAAAGATTTCCGCCACTACCCGTGGCTGACC  
ATCCCGGTACTGGTCTTCTCCTTCAACCACAGCCCGGCATCTCCAGCTTCTCTCTGGCCCAGCGCCGCG  
ACCACGGTGATCAGGCTGTGAGAAAAGCCGATGCCATCCTCAAGCGTACCGCCATGGTGTGCTGTTGGCTT  
CGTGATGTTCTTCGTCTTCTCCTGCGTCATGAGCCTGACACCGGCCAGCTGGCAGAAGCCAAGGCTCAG  
AACATCGCCGTGCTCTCCTATCTGGCCAACCAGCATGCCAGCCCCATCATCTCTACTTCGGTCCGCTGG  
TTGCGTTTCGTGGCCATCGTATCCTCCTTCTTCGGCCACTATCTGGGTGCCCGTGAAGGTCTGAAGGGGAT  
GATCGTGCAGAACATGCGCAAGTCCGGCAAAGAGCCGAACGCCAAAAAAGTCGAGATGTTTCATCATCGCC  
TTCTTCATCCTGACCCGTGGGGCACTGCCATTGCCAACCCCTCCATCCTGGGCATGATTGAATCCTTGG  
GCGGCCCGATCATCGCCACCATCCTGTTTCATCATGCCGATGTACGCCATCAAGCGCGTACCGGCCATGGC  
GAAATATCAGGGCCATATCAGCAACGTCTTCGTTGCAACCATGGGCATGATCGCCATCTCCGCCATCTC  
TATCAGCTGGTCCGTTAATCCCCTACCTGCCACTGATAGCAAAAAGCCAGCCGAATACTCGGCTGGCTTT  
TTTTATTGCGTTGTCCCGTCTGATTAGTCTTGCCACTCATCACGAGTTATTGCAGCCACAGCACCTGA

ACTCACACAACAACCAAGGAAACAACCCCTTATCCGGCAACCACATCATGATGTTTCAGGGCTTCTCACCG  
AACCTCGACCAACAAAAATGCCAGTCGGGTAAGCGACTGGCATCTCTTGATAAACACGCACTATCTCTGG  
CTGATTAGAGTGGTTGCGCTTCCAACAGGAACGGCGTGATACCGGTGATTTCCGGAATACCGAGCACCAG  
GGTGTCTTTCTGACCATTGCTACCCGGTTTTATGGTCAGATATGCAGTGACACTGGCGTTGCGATCGGCA  
AATTCGCGCATCCTTTTTTTCCAGAGCCCTCATAAATTTTTCCCTCTTTGATATCAGCAGGCCCTGTCA  
AGGTATTGAAACTGCATGACCGATTGCTCCAACCAGTCAACGTCAGCTTGTTCAAACCTTGAGTGTGGC  
CTCTGTCTCACCGCTTACAGAACACCCTTCTTTAAACAGGATGGTCAGCTTGATCCCCAAGCCATTGTTG  
CTGCGCTCGGTTTTGAAATCTTGAAACAGTGCACCTCTCCCAAGGTTGTACCAGGAGTCCGCGTTGATAG  
GCGCAGTGACCATCGGCTGCAATGCCACTTGGCCGCCCAATTTCTGAATAGTGAGTGCAGAATCGATTTT  
GGCTTTGACGGGTCGATAATCGAGTACCCAGAGTGACTGGCTGCTTCCCGCCGTATCTGGCACAGACGCC  
ACCTTGACCAACCCATCGACATTGGTATTGGACTTTTGCTCAGCCGAGTGAAGTACTGGGTTGGCTTT  
TGTTACCAGCAACGACAACGTCAGTGGGTAACCTTACCTTTATTCAGCGAAGAGAAGCCTTGAGGGAA  
GGTATAAGTGCTGACTGTGGCACTTCTTTTCTCAGCAATGTTTCATCGCCCAACCCGTGCCCTCTGTGGAC  
GCCGGATAGACAAGACCGACCGCACGATAACTGTGCTTGACCGGACGGTTGATTAAGTGCCTTGAGCGT  
TCATCAGGACGGGAGATAGACGCCAGCCACCGGCAGCGCCCTCGGTTGCGGCTCCGGTGGCGTGGTACC  
ACCACCACTATCTCCGCCACCACCACCGCAACCAACCAAACTAATGCACCAATAAATGCCACGAAAGC  
GTAGTTTTTTTTTATTATTTAATCTCGTTTTTTAGCCTGAACCTTATTATTCCGCAGCTATTTTAACGGGG  
CAGCACCCGCACTGTCTGTGCGCTATTTGTAACCAAACATTTTCATCAAAAATGAATGTTTTCTTGCGCACT  
CCTCTCCTCAACACATTTAGGCCCGCTGATATAAAAAGCCCTCACAGAGAGGGGCTGAATCGAAAAATC  
GAGCTACCGGCTCACGCTCGCTGCTGGGCAGCGGGAAGGTTCCAGCAGGTTTCATCTTCGGCCATGC  
AAGCAGCGGCGGTGAACAGCACGTCGGTGGAGCTGTTTCAGCGCCGTCTCGGCAGAATCCTGCAGCACGCC  
GATGATAAAGCCGACTGCTACCACCTGCATGGCGATGTCATTGCTGATGCCAAACAGGCTACAGGCCAGC  
GGGATCAGCAGCAAGGAGCCACCGGCACACCGGACCGCCACAGGCACTGACGGTGGCAACCACAGAGA  
GCAGCACGGCCGTTGCCATGTCCACTTCCATCCCCAGGGTATGTACCGCCCATGGCAAGCACAGTGAT  
GGTGATGGCCGCACCCGCCATGTTGATGGTGGCACCCAGCGGGATGGAGACCGCGTAGGTATCTTTGGGC  
AGGCGCAGTTTTTTCACACAGCGCCATGTTGACCGGAATGTTGGCGGCAGAGCTGCGGGTAAAGAAGGCGG  
TCACACCGCTCTCTTTGAGGAGGTCAGCACCCAGCGGATAAGGGTTGCGCTTGATCTTCCAGAAGACGAT  
CAGCGGGTTAACCAAGGCGATAAACACAGCATGACGCCGATTAGCACCACCAGCAGTTGAGCATAACCA  
AACAGGGCATCGAAGCCGGTCTCTGCCAGATGGAGCAACCCAGACCCAGGATCCCCGAGCGAGCACAGC  
GGATCACCGCTTTTCAGATGGCGGATACACCGTGAGACAGGTCAGTGATCAGCGCCTTGGTGCTCTCGTT  
GGCATGGCGCATGGCGATACCCAGACCGATGGCCACGCAAGGATCCCAGATATAGTTGGCATCCATCAAC  
GCCTTGACCGGGTTGGTCACCACGTTGAACAGCAGGGTCTGCAGTACCTCGGTGATCCCAGCGGGCGGGG  
TGATCTCGGCAGTATTGGCCACCAGATGGAGGTTGGAGGGGAACAGGAAGCTGGCAATCACCGCGACCAC  
GGCCGCAGAGAAGGTACCAAACAGGTAGAGCGCCAGCAGCGGGCGAATATTGGTCTTCTGACCCGTCTTG  
TGACCAATGATGGCCGCCATCACAGTACGAATACCAGCAGCGGAGCTACCGCTTTCAGTGCACCAACGA  
ACAGACTGCCAAGCAGACCTGCCGTTTTCGCCACTCGGGCGCAAACAGTGCCAGCAAGATACCGAATAC  
CAGACCAACCAGGATCTGGCTGACCAGGCTGGTGCTATTGACCAGCCGAAGGAGGGGGTGTGTGTGTGTC  
ATCAAAAAGTCCCTAAGCACCGTAGTGCATGAATCATGAGTCTGTCTGCAACCCTCATCGGGAGACC  
CCTGTGCCCCGAATGTGGTGTCTGTGGCCAGCCTTCTGTGCGGGCCGATCCGCCAGTACCCGGATTGCATG  
ACGGAATATCCCATTGCCCATCTTTTTTTTTCCAGAGACTCACCAAAAAATATCCCGTTTTCCATCACAAAA  
AACCGCAACAAAACCTTAACCACAGCGCAACCACCCATTTTTGTACGTTTTATCGCACTCTCTGCCCTT  
ACCCTCACGACCATTCCTGTGTACCCGTGACCGGCATCGCTGTGCTATCATCCCCATTTGCCGCGGAG  
CCTTGCCATGATCCCATCCCTGCTCAACCAATATTTGGTTTTCTCCGCACTCAGGCCAGGTCAGGAAGCG  
GTGATCAGCCGGGTGCTGGCAGGTCAGAGTGCCGCGCCATCTTTCCACCGGCTCCGGCAAGTTCGCTCT  
GTTATCAACTGCCTGCCCTCGCCCTGCCTCACCTGATCCTGGTTATCTCGCCGCTGCTGGCGCTGATGCA  
CGATCAACTCGCTTCCCTCAAAGCAAGGGAATAAGCGCCGCTACCCCTCGACTCAAGCCAGAGCCGGAG  
GAGAGCCGACGAGTGATGCAGCAGGCGCTGGATGGCCAGCTCAAGATCCTGATGATTTTCGGTAGAGCGAC  
TCAAGAACGAGCGCTTTTCGCCGCTTTATCCAGCAAGTGCCGCTCTCGCTGCTAGTCTGATGAGGCGCA  
CTGTATCTCGGAGTGGGGCCACAACCTTTCCGCCCGACTACCTCAAGCTGCCGAGCTATCGCCATGATCTG  
AAGATCCCAGGAGTGTGCTCCTCACCGCCACCGCCACACCGGCTGTTATTCAGGATATGCAGACCAAGT  
TCGGCATCGCGCCGAAGGGTCTGTTGTTACCGGTTTCAATCTTGCTCTGGCGGTCATTCC  
CCTGGCGCCCGATGCGCGGGATAGCTGGCTCGCGCAGGAGTTGGCCAACGATCCAACGGCCCCCACCATC  
GTCTACGTACCTTGCAGCACACCGCCGAAGCCTGTGCTGAGCAACTCATTAGAGAAGGGATCAACGCCC  
GCGCCTATCATGCCGACTCGACTCGGCCTGCGCAGTCAGATCCAGCACGACTTCATGGCGGGCAAGGT  
GGATTGCATCGTCCGACCATCGCCTTTGGCATGGGGATCGACAAAGCGGATATCCGGCGGGTCATTAC  
TACGATCTGCCAAATCTATCGAGAATACAGCCAGGAGATTGGCCGCGCCGGACGGGATAGCCAACCAT  
CGCGCTGTATCGTGCTGGCCAACCAGAGCCAGCTGCCGGTGTGGAGAACTTCGCTACGGCGATACGCC  
GGATTTGAGTGCCATCCTCCAGCTCCTTGCATCATCAAGCAGAGCGGGAACGAGTGGGAATTCACCCCTG  
CTGCGCCTATCCAACGACACCAATATCCGCCAGTTGCCCTTAAACCCCTGCTGGTCTATCTGGAGATGG  
CGGGCATCATACCCCGGCTACAGCTACTACGCCGACTACCGCTTCAAGTTTGTGCTGGATAAAGGCGA  
GATAGTGAGCCGCTTCAATCCGAAACGCCGCCAGTTTCTGGAGCAGCTGTTCCGCTGTGCCCGCAAGCG

CGCAGCTGGTGCACCATGGACTTTGACGCCCTCTGGCAGGGCTATCAGGGGGAGCGGCAGCGGGCCGTTG  
CGGCGCTCGACTACCTGCAGCAGCAAGGCTGGATCGAGCTTGAAAGCAAACAGATGACCGAGGTCTACCG  
GATCACCCGTCAGGAATGGGACAACGAGCAGGAAGCAAATGCCCTGCATGCCCTGTTCCCTGCAAAAAGAG  
CAGAGCGAGCTGGCCAGACTGCAAGCCATGCTCGACTTTTTACCTCAAGTGAGTGCCTGAGCCACCGCC  
TCGCCCCGCTATTTTTGCCGATGAGGTGGCGCCGGTTCATTGTGGCCACTGTTCCGGTTTGTGCGGGCAGGT  
GGCGCATCTTCTCCCTACCTCACTGACCATGCCAAACGAGGCGGGGATCCGCGCCTGGTGCATCCG  
CTGATTGCCAAGACAGGTTCCGGTGGATGCTCGTGTCTGGCCCGTTCCTGTGCGGCATCACCACACCGC  
TGACCAGCCGGGTCAAGGCCAAATCGCTGGCGGGTGCAGGCCAGTTGGCCGCGCACCCGTTTGCCAGCGT  
CATGGCGGCAGTGCAACAAGCCTACCCTTGCTAGATGAGTGTGGCGGCGTCAATAGCCACCAGCAGAAA  
CAAGCGTTTACAGACGCAGAAAAAGAAGACCCCTCGCGGTTGCGAGGGTCAAGCCAACGGAAACGTGCTTA  
AACAGACTTGGTGAGGCAACAGTCAACTCTCTTGCTAAAGCATCTTGCTGCTCACACCTCGCAATCTA  
GGGCACTCAAAATGTAGCGTCAATGTAAAAATTAGAGCCAAGACTTCAAACAAAGTGATTTACGTTGACG  
TTCACGTAATGACATTCTCATCCATAACCCCGCAACCCGACGCCCATTGCCTTTCGTCAAACCCCTTA  
ATCTTTTTGCAATAAGTTCCTGTTTTCCCATAAAATTTATTTTTTATGTCTTTGACATTTACCTCACTA  
TCGTGGCAAAAATAATTTAACAGTCAGTAACATAGCGGTGTTGTTGACTGACCCCTCCCGCACAAGGATC  
GGGCAGGTTTCTTACAGATTTAACCTATCAACCGTGATGGATTAAGTGGAGTCTGTTGACTAGGCTTTAAA  
AGCGCACAAACAAAAGCAGTCATCCACTTTTTTCAGGGTAAGCGACTATAACGAGGGCAAAGTTATGGG  
CATATTCGAGCATTACCAACAGCGATATGAAAAAGCGAGAGAAGAGGAATATACCATCCAGGAGTTCCTG  
GATATGTGTAAGCAGGATAAAGCCTGCTACGCCTCCGACGCCAACGTCTGCTGACCGCCATTGGTGAGC  
CGGAGATGGTAGACACCTCAGCCAACCCAGACTGAGCCGACTCTTCTCCAACCGCGTGTGGCACGCTA  
TCCCGCCTTCAAGGATTTCTACGGGATGGAAGAGGCCATCGAACAGATCGTCTCCTACCTCAAACACTCC  
GCCAAAGGGCTGGAGGAGAAGAAAACAGATCCTCTATCTGCTGGGCCCTGTTGGCGGGCGGTAATCCTCGC  
TGGCAGAGAAACTCAAATCCCTGATGCAGAAAGGTGCCCATTTATCGCATCAAGGGGTCACCGGTCAACGA  
TCACCCCTTCTGCCTGTTTCGATATCGAAGAGGATGGGGAGATCCTGGAAAAAGAGTACGGCATCCCGCGC  
CGTTACCTGCGTCCCATCATGTCCCCCTGGGTGGCCAAACGCCTGCACGAGTTTGGCGGGCAGATCACCA  
AGTTCAAGGTGGAGAAGGTCAACCCCTCCATCCTCGATCAGATTGCCATCGCCAAAACGGAACCGGGTGA  
TGACAACAACAGGATATCTCCTCACTGGTTCGGCAAGGTGCATCCGCATGCTGGAGCATTTCGCCAG  
GATGACGCCGCTTACTCTACTCAGGTGCGCTGTGTAAGCGAACCAGGGGGTTATGGAGTTTGTGG  
AGATGTTTCAAGGCGCTTCAAGGTACTGCACCCCTGCTGACAGCAACCCAGGAGGGTAACTACAACGG  
TACCGAAGGGCTCTCTGCCCTCCCTTTGACGGCATTCTGCTGGCCACTCCAACGAATCCGAATGGCAG  
CAGTTCCGCAACAACAAGAACAACGAGGCCCTTCTCGACCCGCTTTACATCGTCAAGGTCCCTTACTGCC  
TGCGCGTCTCGGAAGAGGTGAAGATCTACGAAAAGCTGCTGGTCAATAGCGAACTGACCGAGGCCAAATG  
CGCCCCAGGTACCCTCGAACTGCTGGGCCAGTTCTCGGTGTTGTACGGCTGAAAGAGCCGGAAAACTCC  
AGCATCTACTCCAAGATGCGGGTCTATGATGGCGAGAGCCTCAAAGACACAGATCCCAAGGCGAAGAGCT  
ATCAGGAGTATCGCGACTACGCCGGTGTGGACGAGGGGATGAATGGTCTCTACTCGCTTTGCGTTCAA  
GATCCTCTCCCGCTTTCAACTTCGACCACGCGGAAGTGGCCGCCAACCCGGTGCATCTCTTCTATGTG  
CTGGAGCAGCAGATCGAGCGGAGCAGTTCCCGCAAGAGCTGCACGATCGCTACCTTGAGTTCATCAAGG  
GTTATCTGACTCCGCGTTATGTGGAGTTCATCGGCAAGGAGATCCAGACCGCTATCTCGAGTCTACTC  
CGAGTACGGTCAGAACATCTTCGATCGCTACGTCACCTACGCCGACTTCTGGATCCAGGATCAGGAGTAC  
CGTGACCCCGAAACCGGCCAGCTGTTTGACAGAGCGTCCCTCAACAGCGAGCTGGAGAAAATTGAAAAAC  
CCGCCGGGATCAGCAACCCGAAAGATTTCCGCAACGAAATCGTCAACTTCGTGCTGCGTGCCCGGGCCAA  
CAATGCAGGCCGTAACCCCAACTGGACCAGTTACGAGAAGCTGCGCACCGTGATCGAGAAGAAGATGTTT  
TCCAACACGGAAGAGCTGCTGCCGGTATCTCCTTCAACAGCAAAAACCTCGGCCGAGGAGCAGAAGAAGC  
ACGATAACTTTGTGCAACGGATGATGGAGAAAGGCTACACCCGCAACAGGTGCGACTGCTCTCCGAATG  
GTATCTCAGGGTACGCAAGTCATCCTGACCCCTGACTGTTCAAGGGGGAGTTATGGCGATTTTATCGACC  
GCAGGCTCAACGGCAAAAACAAAAGCGCTGTCAATCGGCAGCGTTTCAATCCGCCGCTACAAGAAGCAGAT  
AAAACAAGCGGTCTCGGATGCTGTCTCCAAGCGCAGCATTACAGGACGTTGACAAGGGCGAGAGCATCAGC  
ATCCCGACCAAGGATATTGGCGAGCCCCATTTTCATCAGGGGCACGGCGGTAAACGGGAGATGGTGCATC  
CCGGCAATGATCAGTTCGTCTCCGGCGACAAGATTGACCGTCCCAAAGGAGGAGGTGGTGGACAGGGTTC  
CGGCGAGGGACAAGCATCCAATCAGGGTGAAGGGGCCGATGATTTTCGTGTTCCAGATCTCCAAGGATGAG  
TATCTCGATCTGCTGTTTGAAGATCTGGAGCTGCCAGGCTGCAGAAAACCCAGCTCAATCAGCTGATGG  
AGGTGAAAACCTATCGTGCTGGCTACACCTCAAACGGGGTGGCCGCAACATCAACGTGGTGGCTTCCCT  
TCAAATTCGCTGGCGCGGCGCATGGCGCTGCAAGCGGGCAAGAAAACGCAACTGCACGAACTGGAAGAG  
CGGCTGGCTCTGCTGGCCACCGATCCCAACGAACACTTTGCCGAAATCGCCCTGCTCGAGAAGGAGATCA  
GGGAGCTGAAACGGCGGATCGATGCGGTGCCGTTTATCGACACCTTCGATCTCAAGTTCAACAACCTTCGT  
CAAACGGCCCCGTCCTCAAGCCAGGCGGTGATGTTCTGCCTGATGGACGTCCTCGGGTCCATGGATCAG  
GCCACCAAGGAGATGGCCAAACGTTTCTATATCTCTGCTCTATCTGTTCCCTCAGCCGGACCTACAAGAAGC  
TTGAGGTTGTTTACATCCGCCACCATAACCCAGGCCAAGGAGGTGGACGAGCACGAGTTCCTTCTACTCCCA  
GGAGACAGGGCGCACCATCGTCTCCAGCGCCCTCAAGATGATGAATGACATCATCAACGAGCGTTATCCC  
GCCAACCAGTGGAACATCTATGCGGCGCAAGCGTTCGGATGGTGAACACTGGGCCGATGACTCACCGCAGT  
GCCGTGAAATTCGGCTCGGGACATCATGCAAGGGTGAGGTACTACTCTACATCGAGATCACCACCCG

TGCTCACCAGACCCTGTGGCACGAATATGAGTCGGTAGCCAGCCAGTTCCTCCACTTTGCGATGGAGCAC  
ATTTCGAAGGTTCGAGGATATCTATCCGGTGTTCGCGAGCTGTTCAAGAAACAAGCGGCGTGAGGAGGTC  
ACATGATCGAAACAGAAAAACGTGTAGCGCCACTGGATGACGGACCAGACTGGAACCTCGATCTGCTGGA  
GACCTATCACCAGGAGATCGCCCGGGTCGCCCCTTCTACAACTGGATACCTACCCCAACCAGATCGAG  
GTGATCACCAGCTGAGCAGATGATGGATGCCTACTCCAGCGTCGGCATGCCCATCGGCTATCAGCACTGGT  
CGTTCGGCAAGCGCTTTATCCATACCGAGCGCAACTACAAGCGCGGCCAGATGGGGCTGGCCTACGAGAT  
CGTCATCAACTCCGATCCCTGCATCGCTACCTGATGGAGGAGAAACCCATGCCGATGCAGGCGCTGGTG  
ATGGCCACGCCTGCTACGGTCATAACTCCTTCTTCAAGAACAACCTACCTGTTCAAGGCCCTGGACCGATG  
CCTCCTCCATCATCGACTACCTGCTGTTCCGCAAGAACTACATCACCCAGTGTGAAGAGAAGCATGGCAT  
TGAGGCGGTGGAACAGCTGCTCGACTCCTGCCATGCCCTGATGAACTTCGGGGTGGATCGTACAAGCGT  
CCCCAGAAGATCTCGATGGCTGAGGAGAAGCGGCGTCAGAAGCGCGGGAAGATTATCTGCAGACTCAGG  
TCAACGAGCTGTGGCGAACCCCTGCCCAAACAGCATAAAGCGGCTGGCGTGGAGGACAGGCGCTACCCCGC  
AGAGCCCCAGGAGAACATTCTCTACTTCATCGAGAAGAATGCCCCCTTGCTGGAGCCCTGGCAGCGGAA  
GTGGTGCGCATAGTGCGCAAGATCAGCCAGTATTTCTATCCGCAAAAAGCAGACCCAGGTGATGAACGAGG  
GGTGGGCCACCTTCTGGCACTACACCATCCTCAATCACCTCTATGACGAGGGCAAGCTGAGCGATCGCTT  
CATGATGGAGGTGCTGCATAGCCACACCAACGTGGTTTTATCAACCGGCTTACAACAGCCGCTACTACTCG  
GGGATCAACCCTTATGCGCTGGGGTTGCCATGTTTACCGACCTGCGCCGCATCTGCGAGAACCCGACCG  
AGGAAGATAGATACTGGTTCCCCGACTATGCCGCGACCAACTGGGTGACACCCCTCCACTTTGCCATGCA  
GAACTTCAAGGACGAGAGCTTTATCAGCCAGTCTTAAGCCGAAAGTGTGCGGGATATGAAGCTGTTT  
GCTATTGATGACGACGATCTGAAGAACTATCTGAAGGTCTCCGCCATCCACAATGACGAGGGGTACCGTC  
AGGTGCGCAATACCCTGTGCGCCCAATACAACCTCAGCAATCTGGAGCCCAATATTCAGGTCTACAACGT  
AGCCGTGAAGGGGGATCGCTCCCTTACCCTGCGCTATGTGCCCCACAACCGCATACCCCTTGGCGACTCA  
CGCCATGAGGTGCTCAAAACCTGCATCAACTGTGGGGATTCGACGTGGTGTGGAGCAGGATAACGGCG  
AGCTGCCGCCGATATCATCGGCCGCTGCCCGGAGCGCAAAACCGGGGATCTGACCCATGCCCTTAGATCT  
CTACGGCCACTTCGGTGGGCCGTTTTTTAATCGGTTGCTTCTGCCAGCATGAGCGCTGCCAAGCCGTA  
CAACCCGAACAAACCACAACATAGAAAAGAGGCCCGCATGGTGTGCGGGCTCTTTGCCCTTGGCGTCACTC  
TGCAGCGATTATCAGTAGAAGGTCTGCTGCTGCTGCGGCCATCGCCTTGAGACGGGCACAGGGGGCGAACC  
GGTCGCGGTGGCGCTTCTGGTAATACTCCAGACGGCCAAACAGATGATCGATCCCGAGCGTGTCCATATA  
ACGGAACCGGACCGCCGAGGAAGGGCGGAAACCGATCCCGAAGATGGCACCGATATCACCATCAGCAGCC  
GAGGCCACCACACCGCTATCCAGCGCCATGGCCGCTTCGTTGAGCATCAGCAGCACGCGAGCGCTCGGCGA  
TCTCCTGACGGGCCAGCTTGGCAGAAGGCTTGATGCCGAGCACGCCATAGACGCTCTCGTCCACCCTCTT  
CTTGCCCTCTTTGCCGGTCAGCTTGTACGCGGTGCCGCTTGGCCATAGAGGTAGAAGCCCTTGGCGTTC  
TTGGCCCCCTTGGCATCATTTTGCAGCAGCTTGTGCAACGCTTGGGCGCTTGGAACTGCTCGCCGCCCA  
GCTCTTTCTCGAGAATGGGGGAGATCTTGGCGCCACGTCGATACCGACCTCATCGAGCAAAGTGTATGGG  
GCCAACCAGGGAAGCCAAAGTCCAGCAGCGCGCTATCCAGCACCTTACTGGCTCCCTTCCAGCACCAGA  
CGTGCCGCTTCATTCATGTAAGGCGCGAGGATGCGGTTGACGTAAAAACCGCTTCGTCCTTACCACGA  
TGGGTGTTTTGCCCTGGGCGCGGGCGAAAGCCAGAGTGGTGGCCACGCTCTCGGCACTGGTGCCAGCGTG  
GGGGATGATCTCCGCCAGCGGCATCTTGTCCACCGGGCTGAAGTAGTGACGCCCCACGACTCGCTCCGGA  
TGCGCCGCTCTGCCGAATCTGGTTAATCGGCAAGGAAGAGGTGTGGAGGCAAACACTGTGTGTTTAC  
CGCACTCACGCTCCACGTCTTACCATCTGGTGTTTGAGCGCGAGATCTTCAAACACCGCCTCCACCAC  
CATGTGACCCGGTGGAAACCGGAGTAGTCGAGGGTACCGGTCAACAGGCTCATCTGCTTTTCCAATTTCG  
CTGCGCAAGATGTGACGGCGCTTGGCTTCTTGGCCAGAATGTCATAGCTGTAGCGCATGGCATTGCCGA  
TCCCCGCACTTGCCACATCCTTGATCCGACCGGCACGCCGCTTGGTAGCGGTGACGAACGCAATGCC  
GCCCCCATCAGACCACCGCCAAACACGGCGGCATAGGCCACCTTGCAGCGCTCGGCCCTGATAGGTG  
ACCTCTTTCTCATCTCGGTGGTGGCAAAGAAGATGGAACGCAGGGCGGCAGACTCAGCAGTCATACCA  
GCTCGCCAAAGTGGCGGATTACGCGGCCAGACGGCTTCAATCCCTCCTCCACACCGATGCGCACAAC  
GTCCAGGATCCGCTCCGCGCGCGGGTAGTTGCCACGGGCTTGGCTTTCACCCCTTGCTGGCCTGATCG  
AACAGCACCTTGGGACCCAGCTTGGTGGTCTCCAGCACCTTACCCTGCAGATCCCGTTTCAACTGATGGC  
GCGGTTTGCCCTTCTTGGCCAGCTTGTAGCAGCATCCAGCAAGATTGACGGCGGCACCACATCGTCCAC  
CAGCCCCAATTTCTTGGCCTGTTTGGCCGAACCTGCTTACCGGTGAGCATCAGATCCAGCGCCTTGGCC  
ACCCCGATAAGGCGCGCAGACGCTGGGTACCGCCAGAACCAGGCAGCAGACCGAGCTGAACTTCCGGCA  
ATCCAGCACAGATTTGCCGTGATCGGTACCACCCGACCATGACAAGCCAGCGCAACTCCAGCCCGCC  
TCCGAGGCAGGGCCGTGAATGGCGGCGATACCAGGAATGGTCAGCCCTCGATCTCGGCAAAGATCTCC  
TGCCCTTCTCGTGACAGGGTCTCGGCATCCTTGGCACTGGTGCAGGCGGCCAGCATGGTGATATCAGCAC  
CAGCGATGAAGGAGTCTTCTTGGCCGAGGTGATCACCAGACCGATCAAATCCTTGTGCGTTTTCACTTC  
GGCCAGCACGGTGCAGGATCTCCTCGACAAAGGCGGCTTACGGGTATTCATGCTCTCGCCCGGCACATCC  
ATGGTGAGGATACCGATGCCATCTTTGCGAACATCCAGGGAAAAAGTCTTAGCGCTCATCATTC AACCTC  
CAACACCATAGCCACGCCAATCCACCCGCGCGAGGCTGTGTTGAGCCCCAATCCCCCGCGCGACGA  
CGCAGCTCGTGCAGGGTCTGGGTGATCATCCGCGCACCGGTGCGGGCAAAGGGGTGGCCATAGGCCAGCG  
AACCACCGAGGACGTTGAACTTCTCCATGTCCACCTCGCCGATGGCCTGATCGCGGCCAGCTTGTACG  
GGCAAACCTCGTGGCTGGCAAACATCTGAGGTTGGCCAGCGTCTGGGCGCAAAGGCTTCGTGCATGTCC

ATCAGGGTTCAGATCGCTGAGCGTGATGCCGGCTCTGTCCAGCGCCAACGGCGTGGCATAGGAAGGACCCA  
TCAGCATGTCTTGCCAGACGTCGATGGCCGAGAAGGCGAAGCTGCGGATATAGCCAAGCGGCTCGAGGCC  
CAGCTCTTTTCGCCCCGACCTTCCCGCATCAGCAACACGGCAGCGGCCATCGGTCAGCGGCGTGGCGTTG  
GCTGCAGTGAAGTGTGCCATGAACCCGGTCAAACACCGGTTTGGAGCTTGGCGTAGCTCGCCAGATCCGAGC  
TTTTACGGATATTGTTGTCCCGCTCGAGCGGTGACTTGTAGGGCGGTACATGAGCGGTAAAGACCTCGCC  
GCTGAGCTTGCCATCGGCCAAAGCCTGCGCGGCCAGAGTGTGGGAGCGATGAGCCAACGCATCTTGCGCC  
TCGCGGCTGATCTGGTGGCTCTTGCCATCTGCTCGGCGGTCTGTCCCATGGAGAGGCCAGTAGAGTATT  
CCGCCACGGCAGGCGGTACCGGCAGCAGATCCTTGACCCTCAATGTCCGCAGAAATATTGAAGCGCTGCTG  
CAGATTGCGCGCCTTGTTGAGATCCACCAGGGCGCGGGCCAGCTTCTTGCTCACTCCGATAGGCAGTACG  
GAGGAGGAATCAGCACCCGCCAGCGATGGCGATGTCTACCGTACCGGCCATGATGGATTCCGGTGACGTTGG  
CCACCGCTGAAAACCTGGTGGCGCAGGCGGGGAGACGCTATAGGCATCGGTATTGACGCTCATGCCGGT  
ACCGAGCACGATCTCGCGAGCAATGTTGGGGGCTTCCGCATCTGAACCACCTGACCACACCCAGCTGG  
TCGATAAGCTTGGGATCGAGATCGGTACGGGCAAGCATCTCGCTCACCACCAGTTTGGCGAGATCGACTG  
CTGGCACGCCATGAAAAGGCGGTGGCCTGCTTGGCAAAGGGGTACGCAGCCCCGCCACGACGGCAATCCG  
TTCGCCCTGGCGAGTCGTCAAGTTCAATGGCTGTTTTCATCCTGGCTCCTTGGTTTAAAAGGCAGAGGTCT  
GACCTCATTGCGCCACATCTTAAACAATCCAATCACAAGTTTCATACAGCTGATTGAAACTAAATTAAGCG  
CGGCAAGGCCCTTTGCTCGCCCTTGGGAAGCAACTGGAGTATAAAAAGATCAACTTCCATAAAAACAAC  
GGGTTTATCACATGGCAGCGGCCGAGTTCAGAGCACTTAGGGACTATCTTGGCAGTCAGGTCCTGGGGCA  
GGAGGAGCTAATAGAAGGGCTCCTGATTGCCCTGTTATGTGAAGGACATGTGTTAATCGAAGGGGCCCC  
GGGCTGGCCAAAACCCGCGCCGTCAGGGCGCTCGCTGGCGCCGTCGAGGGACGCTTTGCCCGTATCCAGT  
TTACCCCGATCTGCTTCCCGCCGATCTCACCAGGCTGCGAGGTGTTTACCCCGCAGGATGCCAGTTTTGT  
TTTTCCAGCCAGGCCCCCTTCAACCATCTGGTGCTGGCAGACGAGATCAACCGGGCGCCGGCCAAGGTG  
CAATCAGCGCTGCTGGAAGCCATGGCTGAACACCAGATCACCCTGGGCAAAAAGAGCTGGCGGCTGCCAC  
CTCTATTTATGGTCGCCGCCACCCAGAATCCCATCGAGCAGGAGGGTACCTATCCCCTGCCGGAAGCCCA  
GCTCGACCGCTTTCTGCTCAAGTTAATGGTGGACTACCCGAGCCCCACCATGGAGCTCGCCATCTTGCGAG  
CTCAACGCCAGCAGCGAACAGCTTGGCGCGCACCAAGTACTCTGAGCCAGACCACCTTGAAGGTGCTC  
GCAGCGAAGTGTGGCGGTGACCATGCAAAGCCGACTGGAGCACTATCTGGTGGAGCTGGTCTGCGCTAC  
CCGCCAGGCAAGTGGCTATGCTGCCCTTGGCGCTGATTGCGCTGGGGGCCAGCCCCCGCGGCAACA  
CTTGGGCTGGCTCGCTCCGCCCCGCGCCCGCATGGCTTGGCGACGAGATTATGTGCTGCCGGAAGATA  
TTCAGCTGCAAGCCTATCCTGTGCTGCGCCATCGCCTTATAACCAGCTATCAGGCACCTGGCCGACAATCT  
GGATAACGATATCCTGATCGCCCAACTGCTGGATCAGGTGCCATGCCCTTAGAACCCGGTCTGCATCCCCG  
ATATCGTCCTGTGCTGCCACGGCTGCTCAATATCCGGCTATGGGCCAAGGCCACGAAGCCACCTCACGC  
AGGCAGAAGCAGCAGCGAACCGGCCAAACCGGGCCGCTCTCCCGACTCACGTTTCGCGAGCTGCGCGCC  
TATCAGGCTGGTACGAGGTACGCCATATCGACTGGCGAGTGACCGCACGCCCTCGGTCTGCCATATACCC  
GCCTCTATAGCGAGGAGCTGGATCAGGCGCACTGGCTGCTGCTCGATCTCTCTCCCGCCATGTATTTCCG  
CTCCACACTGCAACTCAAGGCGCGCCTCGCCTGCGAGCTGGCAGCAGCCTTGATCTGGCAAGGGGAGAAG  
CAGCACAAACCCCTGATCTGCCACGGGCTTATCTCCCATCACCAGAGCCAGCGCGGCAGCGTGTGCCCC  
TGCTCGAATCCCTCTGCCATCACTATCAGCAAGGGCTGGCCCCGCGGGCGCTTTCTCACTCGCTGGCCGA  
CACTTTGTCCGGCGTGAAGCTGCCTCACGGTGCCATGCTGACGATCATCACCAGTACAGACCCCTGCGAG  
TCGGCGCTCTGTGAGCAATTGCAGCTGCTCTCGCGGCCACGATATCCACTATTGGCAGATCCGCGACC  
CCCTCGAGGCAGCCCTTCCCTCTGACGGCCAGCTGCCAGTTGCCATCGATCGGCCAAGGCAACACTATCA  
GGGCTGGCTGGATGGGGGCCATGCCGGTTTCTCCAGCGCTACCGGTATGCCCGGAGCAGCAGCTGGCC  
CACGGCAAACAGTTGCTGTTGCCATTGGTGCAGCGCCTCTATCTGCTCGATAACAGCCAGACTCTGCAAC  
AGCAGTGGCAGGAGGGGTTATGTATCAGGGATGATCTCGCCCGCCGAACTCGACAGCGCCAGTCCAGCC  
TCCGACGCCATCACTCCGCGCTGGTGCCTGATGCGAGACATCCACCCGGGGCCGATCTGATTGAAC  
AGAGCTTTGATCCCAGAGTGCAGGCGCTATTGTGGCTCTGATCGCCGTTTCTTCTACTGATGATCGT  
CCTGATTGCCAAGAGGGTGATACGTTACCGCAGCTGGTGTGCCAGCTGGATGGAGATCCGGCGCTGCTG  
GTGGCACGCATACAGGAGGCCCTGCGTCATGAAGCACTGCAACGCTGGCCCCGAGGCGCACCAGCTTCCAGG  
GAGAGGCGTGGCTCGCCTTCGTGATCGTACGGCGGCAGCAATTTTAGCCAGTTTTCGTCTCACTGGAG  
CAGTTGGCTCTATGGCAGTCAGAAGCCGAGCAGCAGAGCGAACAGCTTCGGCAACATTATCGCCGC  
TGGGGTCAAACCCCTCTTCTTGAACGCTCCCCCGCTCTGGGCGTAAAGTCGCGCGGAGGCATCCATGAT  
CCTGGCTTGGCCCTGGTTTTCGCTGGCGCTGGTGTGCCCTTGTGGTGCCTTTCGGCTTGGCGCCCCG  
CGCCGCGGTTATCTGGCTCATCCCGGGTTTTCGCTGCTGCACCCCTCAGGCCGATTGCCGCTCTGGCGCG  
CCATGCTGCTCTGGTGCGCCCTTATCCTCGCCCTCTGCCGCCCCAGTGGTGGGGGGAACCGGTGATCAA  
ATATGAGGGGAGTCGGGATCTGCTGCTGGCGGTGGATCTGTGAGACAGCATGCGTACCCCGGATATGCTC  
GATAACGGCGAGCAGCAAGCACGGCTGACGGCAGTGCGCCAGCAGATCAAGGCGCTGATCGCCAAACGGG  
CCGGAGACAGGGTGGGCTCATCGTATTTGCCGATCACGCCTACCTGCTCTCTCCCTCACTCAGGAGAT  
CCCGGCGCTGTTGACCTTGAAGCAGAGCTCGATTTTGGTCTGGTCCGCGAACCACCGCCCTTGGCGAA  
GCCATCCAGCTGGCACGTGAGCATGGGGATCCTGGTTCGCCCCACCGCCCTGCTGCTGGTCACTGATGGCC  
GCAATACCGCAGGCAATGCCGACCCGCTGCAGGAGGCCAAACTCGCCCGCAGCGCAGGGAATACGGCTCTA  
CACGCTGGGGGTGGGGCCGATCCCGATACTTTATCCAACCTATGATGAGGCGGGCAGCGGTACGGCC



GATCCCAGCAGCGAACTGGACGAGCCGCTCCTGAAAGAGCTGGCACAGACAGGCCAGGGACGTTACTTTT  
GGGCACGCACCCAAAGCGATCTCGATAACCATCAACGTGACTCTCAATGCCCTTGAACCTGCCCCATGCC  
GATTGCCAGTACCAGCCGGTGATCGAGCTCTACCCCTGGCCGTTGGCACTGCTTTGTGGCTTGTGTGCTT  
CTGCCGTACAGGGCACGGCAGGCTGGAGTTTCGCATGGTGGCTAGCTGGCTGACACGAGGTGCACGCAGAT  
GGATCTGATCTTGTCTCCGCCCCCTGTGGCTGATCGCACTCATCCCTGGCTCTGGCAAGGGTGGAGCCGT  
CGTCGCCAGCCCCGCTGCTCGCACCTGCAATGCAGGCTTATCTGCTGCCAGCATCCCGTCTCAGCGCC  
CCTGGCTCTGGCTGGCAACCCTGCCCGTCATTTTGGCCCTGAGTGGACCGGCATTGCGCGGTGAGCTGCA  
ACAGCAGCCTGCAGCACCGCTAGATATCTGGCTACTGGACTTGTACGCTCGATGACCGCCACCGATCTC  
AAACCGGATCGGGCAACCCGGGTGAGATGGCAGTTGCAGCAGCTGCTGAGCCGCGCCAAGGGCGAGCGCA  
TTGCGCTGATCCTCTACGCAGGCGATGCCTACCTCGCCATGCCGCAACCCGGGATCATCAGCCCTTTT  
GCTGTGCTGCCCCGACTTGGCCCCGATATCATGCCCTGCAGGGCAGCAACCCGGCAGGGCGGTGGAA  
CTTGCCATGACGCAGCTGGCCCCCTGGAGAACAAGCGCTCTGCTGCTGATCACCGACGACCTCACCCAGA  
ATCAGATGACCCAAATCGCCGCCCTGTGGCCCTGCCAGCAACGCCTTCTTTGCCGCGACACCCAGTCCGG  
ACGCCTCGATATTCTGCTTGGCAGCAGCGGTCAACCGGCCCCCATGCCCGCCATTCCGGCCAGTGAAGTTG  
GGGTTTGGCGCCCGCATGCCCGCGCAGTTGCCCGCCCCGATAGTCAGGCCATTGCCGCACTGGCCAATC  
GCCTCGGCGGTGAGCTGCAATGGCTTGATAGCGATGTCCCTCACTTTGCACCGCTGCCACCACCACCTC  
GGCCCTCACCCCGGCACCACTGGATCTTGGCCCTGGCTGCTGATCCCTTGTACCCTGGCCCTTGTCTG  
GCCAGAGTCGGCGCCCGGTTGATGATGGCGCTGATGGTGGGAGCTCAGCTGCTTGCGCCACAAGATCTGC  
AAGCAACAGAGAGGGGGGATCTGCAAGCGATGCAGGCTTATCAAGAGGGGGATTTTCAGCGGGCAGCCCG  
CACCTTCAACGATCCAGTCTGGCGCGCAACGCCTGGTATCGGGCTGGTGCCTACCGGCCAGCCATCGCA  
GCCTATCAGGAAGCAGAGAGTGCACCCGCCACTACAACCGAGGCAATGCCCTGCTGCAACTGGGGGAGT  
TTGCCCGAGCCAAAGAGGCCTATCTGGCCGCTCTGGCACTGGAGCCCGGCCATGAAGATGCGCTCTATAA  
CCTCTCTCTGTTGCAAGGCGGCGCGGTGGCCGCTCCCGATAGCAACAACAGCAAGCAGCCCGAACCAGCG  
ACGGATCAGCAGGGCAGCAATGCCCTGCCACCCTCTCCCCGGTGTGCTGTTGGAGCAGCGACTGC  
GCAAAGAGGGCGCTGCGCCGGGATCTGATTAAGGTGGAGGAGCCCTGGTGACGCGGGCAGGATGGGGACTG  
TTGTTGCACTGGCGAGTCCACTTTGCTGGGCCCTGCCCCACGGGCAGAGTTGCTGCAGGGGGCCGACC  
CCAGCGATTGGCTGCTGATCATCGAAGCGGATGGCGAGCGCCAGAGCAGCGAGCTGGAGATCACCCCT  
ACTGCGTCAGTTGTCAGTGGGCAGAGTGACCATGAGCCGGGTACCACCCCGGTACAACAACCTGACACGC  
TGGCAGATCCCGCTGCACAGAGCAATTCACCCGCAAAATACAGAGGTGGTGAATGGCCCTGAGCTGAGC  
GAAATGAGTTACCCCTCGCTCACCTGCCATTGAGAGAGGCGAAAACAGCCGCTGCCACAGCCCGC  
AGCCCCCTCGCCACTCGAGATGCAGGCCAACCTTATCATCAGGGCCCCGCTCTATCCCGCCAGCCGGTG  
ATCTACCGGTGACACTGTGGCTGCCACCAGTATGCAAAAACCCGGCGCTAAGCGAGCTTAGCTCTGCC  
ACTTACCATCCGTCGCTCGGTAGCGACGAGTGGATCGCCCCGCTCAGGCAGGTCTGCCCGGCAGGCT  
CACCCGAGCTGGCTTATTAGGCAAAAAGCGCCGGGACTCTGGTACCTCGACTCGCCCCGCTTGCAGGGG  
CAGCTCACGCAGCAAGGGGAAAAGCGCAAAAACCTCTCGGCCGTCGGCACCCTAGAGGTGAGGGTGC  
ACAAGGCCCCCGCCACGCCGGTGGCCACCCGGCTGACCCTGAGTCAACGGTTTGAACCAGCCACCAAGGG  
GGAAGTGGGTGAACCGCTGATCCGGATCCTCACCTGACCATGGAAAATGGTGACAGTGGCCAGATACAG  
CTTGCCCCCTGATGGCCATCAACTGCCAAGCGGCATACAGGCACATCCCGATGGCGAGCAACAGCAGG  
AGCGTTACCGGATGGCAAGCTGCTGTTTGGAGCGACAGTGGCGCCAGACTTTGGTAGCGGAGCAGAGCGG  
CGACTACCAGCTGCTCCCCATTGATCTGCCCTGGTTAATACCCAAAGTGGCCGGATTGAGCAGGCCACC  
CTGCCTGCCATCACGCTGACGTTTTCAGGCAACGACAAAATCGGCAACCTGATCAGCAGACATCGCAGATGG  
CACTGCGAGAGAGCCTTTGGTGGGTGCTGCTGGCCGTGGCGCTGCGTACGCTACGGCGCCACTGGCCCCG  
CTGGCGCGCCTTCTATCAACTGCAACGTGCCCTTGCCCAACAACAGCCGGATGCCAGTCGCAAGGCGCTG  
ATCAAGTGGGCGACCATGCGCTGGCAGGTCTCCTATTATCAATTAGGCCAGTTGCCCTGACGCTGGGCATA  
ATCGGCTCGGCAACGCGCTCGCCGCACTCGAGCGAGCCTGTTTTGCACGACCCTCTTCTGGCCCCCAT  
CGAGTGGCGCGCTCTGGCGCTACCCCTCAGGCTGATGAAATGGCCGTTATTGCGTACCTGATTTACCTG  
CTGGCCACGGGAGTTCCCGCTCCCGCCGCCACGCCCTGACAAGGATTGCCCTATGGCACTGCTGTTTT  
TTTTAAAAAAAACGTGCTCAGCAGCATATTGGTGGAAAATGATCCGGCACTTCCGCCGCTCTCTGAGCCCA  
TGGCTGACAAAACAAACCAATTTGAAGCACTGGTTTATGCGCTGCATGGCGATCTTACCAGGTATGCCTA  
CTGGCTGACCCGGGATCCCAACGTGGCGGAAGATCTGGTGCAAGAGACCTTCCCTGCGTGCCTGGAAGGCT  
ATCGACACCCTGCAGGATGACAAGGCGGCTAAAGGGTGGCTGATCACCATCCTCAGACGGGAGAACGCC  
GCCGCTTTGAACGCAACAGCTGGAGCTGATTGATCTCGACGATCACCTCAACCCAGCAGATGCGCT  
GCACAGCGAACAGGAGATGGAGAACGAGTGGTTGCACCGTACATCGCCCGTTGCCCGAGGAGTATCAG  
GAGCCACTGCTGCTGCAAGTCGTGGGAGGATTCAGTGGTGAGGAGATTGCCGAGATGCTCGGCCTCAACA  
AGAACACCGTCAAGCCGACTGTTTTCGCGCCCGCAACCAGATCAAGGAGGCGATGGAGCAGAAGAACCA  
AGCAAGAGGACACGGACATGGATGAACTCGAATTTGCCGCAACACCATGATCCAGCCCAACGATCAACA  
ACCGGACTTTTCTCAAAAACCGCTGAAGCAAGCCAGGCCAATCGGAACTACCTCGACGAGATGAAGCAGTTC  
GACAGAAGCCTCAAGCGTGCATGCAGGTAGAGGTTCCCGCCGGACTGGCCGAGCGGATCCTGCTCAGGC  
AAGCCATGCTGCAAGACAGTGCATGCGCCAGATGATATGCCGCCATCCCGACCCCTTGGCACGGCGCCAGT  
CAAGCTCCGGACATCAACATCCTGGCGCCAGATCGCCCTGGCTGCATCGGTCGCTTCCCTGCTGGGAATG  
AGCACCCGCTGGATCACGCTGCCAGAAAACGGCTCCTGCGGCCCTCTCCCTCGCACAGGTGGCGATGGCTC

ATGTCTATGGCGAAGAACCCTTTATTGAAGGTGTCGATGAGCAGGTCAATCTGCATAACATCAATGCCAA  
GATGGAGAAGTATGGCGCCACCTTAAGCGGGATGGATGGGCTCGAGGTGACCTATGTCAATCACTGCTCG  
TTTTATCAGGGACCAGCCTTGCACATGGTGTATCCAGGAAAGATGGGGCCAGTCACTCTCTTTTTAGTGC  
CCAAACATGTGCCATTAACCCTGCAACAGGCCACCTTTGAAGATGGCACCCCTCAAAGGGGAGATTGTCCA  
GCTCAAAGGCGCCAATATGGTACTGATTGGCGAGATGAAAAGGCCACTTGCCCCGTTGCCAACGCCCTG  
CAGTCACGTCTGCAGTGGGACATTTAACATCGCTGGTTAACAAACCTCAGAGCCATCCTCAATAGCAGGTG  
GCGGTACAGAGCCGCTGCCTGTTCCCCCCTGATTACTCCCTTTGTCACTCATTTGCCCTCAAGATTTTCG  
AAAAATTGACAAAATTATTTTTGTGACGGAGATCGGCAATCCAGGTCAATAATCCATCTTTAGACCCTGA  
AAATGATGAATTAACAGCAAGTTAAAACAAATGATTAACACATCGATCACTTTTATGTATTCTGCTGTC  
ACTGGTCTGATTTCTTACCTCCTACCAGATCCATAGAATCACGCCAGAATTGATTGGGAAGAAGCTGAAA  
TAAAACCGGATTTTGTGAGGTTTGCATTGAACGTGCAGCCAATATCGGCAAAAAAATCTGCCCTACAAGA  
GAGAACACCATGACGACAACATTTTTCAAGAAGAGCCTGATTGCCGCCACCATCGCGCTGGCCACCGGT  
AAGTCCATGCCGCGGCATTCCAGTTGAACGAGCACTCGGCCTCCGGTCTGGGTGCGCGCTATGCCGGTGA  
AGCAGCTATCGCCGACAACGCCCTCCGTTCTGGCCCGTAACCCGGCTGCCATGACCACCTTCGACAAGATG  
GCAGTTTCTGTCTCCGGCACCTACATCAAACCCGGATGTGGATGTGGATGGTGTGTTTACGCTGGCGCGA  
ACAAAATGGCTCCAGCCAGCGAAAAGTGGCATTGCTCCGGCAGCCTTCGTTCCCGCCTCTACTTTATTTCA  
GCCGCTGAATGACCAGTGGGCTTGGGGTATTGGCATTCTCTCCAACACTACGGTCTCTCCACCGAATACTCC  
AAAACCTTCCCGGCTGGTGCCGGTGTGGTGATACCGAGTTGATGACCTTCAATATCAACCCGAACATTG  
CCTATCGTGTCAACGAACACTTCAGTGTCCGGTCCGGTATCAACGCCGTTTACGGTGCCGCCGAACCTCAA  
CCGCTATGCCGGTCTGCTGGGCCCGTTGAACCCACCTAGCCAAGGTGGCCCGCTGCCGACAGATACTCGT  
CTGGCTCACCTGAAAGGCGACACCTGGGGCTTTGGCTGGAACGTCCGTACCCGTATGAAGTCAATGAAA  
ACCATCGTTTTCGCACTGACCTACCGTTTCAAGTCGATATGAGCTTTGACGGTGACTTCCAAGGCGCGAG  
CTCTCGGAATCGCACCGTGGATGGCAACCTGAAGCTGGATCTGCCTGCACAAGCCGAGTTCGCCGGTTAC  
CATCGCCTGAGCCCGCAGTTTGTGTTTACTCCGTAACCTGGACTGACTGGAGCGCCTTCCAGGAGC  
TGAAAGCAACCAGCAGCCAATGTGCTGGCGCGTATGTCTGCAAAAAGATGAGAAGTTCAAAGATTCTAC  
TCGCTACTCCATCGCGCGTACCTGGTATATCAACCCGGCTTGGGAAGCACGTCTGGGCTTTGCCATGAC  
AACACCCCGATCGAAGCTGACTACCGCAGCCTGAGCATTCCCGACTCAGACCGTATCTGGTACAGCGCCG  
GTGCCACCTACCATCAACACCGATATGACGCTGTGACTTCGGTATGGCTTATCTGGACGTTAAAGAAGT  
TGACGTCAACGAAGGTCTGCTAGCCACTCCGACGCTCGCTTGGAAAGGAACTTCCCAACCGGCAACGCC  
TTCTGCTTCTGCCAGTTCAACATGAAGTTCTGATTATTGATAGAATTGAAAGAGCGCCTGACGGCGC  
TCTTTTTTTTATCCGCAAAAGCCAGTTCAGCGCACACATGTAGCACACACGTGTTTATTTTTCTTTTCCAA  
TCAAGCTATTAGAGTGCATCATCCCAGCATTTAATCTTGTTTTATCCAGATACTGGCCATTACCGTTGCC  
TTACTGGTCATACCATATAAAAATCCTGCCTCCATTATATGACCGATTGAACCTTCGGGTAACAGCAAGG  
ATTTTGGCATGCATCCCATCATCAAACCGTCCGCCATCGCCCTGCTGGTGATCGCGGGTACAGCCCATGC  
CGCCGGGTTCCAATTGGCTGAACAGTCCGCTACAGGACTGGGACGCGCCTTTGCCGGTGGAGGAGCCATC  
GCGGATAACGCCAGTGTACTCTCCCGCAATGCAGCAGCCATGACCCGCTTCGATCAGATGGCGCTCTCTG  
GCGGAGTCACTATGTGCTGCTGACGTCATATTTGAAGGCAACACCCGCTTGCCGACCAAAGCCGGTAT  
CGTCACCTCCGATGCCAGTGCACACGATATCGCCGCCGACGCTGGGTACCCAACGCCATCTCATCATT  
CCACTCAATGAGCAGTGGCGACTAGGCTTCTCGGCAACCTCTTACTACGGCCTTGGCGTCAAGATGCCGG  
ATAACTACAGCGCGGGACACTTTGGCAATGTCTCCGATATCAAGACCATGGATCTGGGTACCTCACTCGC  
CTATCGCATCAATGAGATGTGGTCAATTGGTGCCGGGATCTCTGCTATTCAGGGCGAAGGCGAAGTCCGT  
GGCACCTTCCCTTCTCGCAACCTGATCGCAAAAACATTTGCAAGGGGATGGCTGGGCATGGGGCTGGAATG  
TCGGCACCTTGTGAGTGTCCGAACAAACCCGAATTTGGCTCTCCTACCGTCACGATGTCACTTTAC  
CCTCTCGGGAGATGCTATCGTGGGCCGACCCAATGCAGATGGCTCCGTTACCGAGATCAGAGATACCGGT  
AGTCTGGATCTGCCGTTGCCAGCGACGGCAGAGTTGGCGGCGTTCATCAGCTGACTGACAAGCTGGCTC  
TCCACGGCAGCCTGAACTGGACCAACTGGAGCAAATTCGTTTCAAGTTGGAAGCTGATCTCAACAATTTGCA  
GAACATGCACATCAAGGACGAGCACTGGGAAGATAGCTGGCGCTACGCCATCGGTATGACCTATCAGGT  
ACTCCCAAATGGCAACTGCGCTCCGGTGTGGCCTATGACGCCAGCCCTGTGCCAGCCGATCGTCTGATCCA  
TTTTCCATCCCGGATGCCGATCGCCTCTGGTACAGCCTGGGAATGGGGTATCAGTTCACGCCCCAACCTGAC  
CGTGGATCTGGGGCTGACCTTGTGATCGATGGCAAAAAGGTGGATGTCACTGAAAAAATGGAGCTGCAACCG  
GGTAATCCGATGACGACCTCCACCTTCCAGGGCACTTCCGAAGGGGATGCCTGGCTGGCTGGTGCACAAT  
TGAGCTATCTCTTAAATTCCTTCCCTGCAAAAAACGCTATGCCAATTAATGCCTTACTCAATAAGGTG  
AACACTGGCATAAGTGTCTGCAACACCATAAAAATCAACCCAGTACCTTTAGTGGAGCAAGGCATGTATTC  
CTACGTAGCAAGACAGCCGATCCTCGACAGAGACCTCAAAACTCATGCCTATGAGCTGCTCTTTTCGCGAT  
AGTCTGAATAATGTCTTTCCGAGCATCTCTCCCAACAGGCGACGTCACGCTGGTGGTGCAGACAGTTCC  
TGCAACAAAATATCGATCAGCTGTTGGGCGGCCGCCCTGCTTTTATCAACTTCCCCACTCACTGCTGCT  
GGAGGGATTGGCAGAGTGCCTGCCGCCCCGAAAAAGTGGTGATTGAGATCCTGGAAGATTCCCCACCGGAT  
GATGCCCTGCTGGAAAAGGTGAAAACAGTTGCACAAGCTGGGATATCAACTGGCACTCGATGACTTACCCA  
TGTCGCCGGATTGGGAGCGCTTCTCCCTTTATCCACATCATCAAGTTTGTATCTTCGTGCCACCCCCCT  
GATGCAGATCAAAGTGTATCCAGCGGCATCAGACGCTGGGGCTCACCTATCTGGCGGAAAAAGTAGAG  
GACAAGGCGGAGTTCGAGCGGGTCAAACAGCTGGGGATCCAGCTGTTCAGGGCTTTTTCTTCAGCAGAC

CCGAGATGGTCAAGCAAGCCACCATGGAGCCAGCGCAAGTCGTGGTGATGCAGTTGCTCAACGTGGTCAA  
CGAGGCAGAGCCTGATATCAACAAGATTGAGCAGCTACTCGGTCAGGATATCTCCCTCTCCCTCAAGCTG  
TTGCGCTATGTCAACCATCTCAAAGGTCACACCAACCTATTTTCGTCAATTCGCCAGGCTGCCATCTATC  
TGGGCAACACCCAGTTAAAGCGCTTTGTCTCGCTGGTAGCCGCGACCAGCGCCGGCAAGGGCAAGAGCGC  
CGAGCTCTACCAGATGTGCATGATCCGAGCCCCGATTCTGTGAACTGCTGGCCCCACGCCACGCCCCGAGC  
CAGCAGGCACAACAGGCCTTTATCACCGGTCTCTTCTCCCTGCTGGATGTACTGATGGAGCAGCCGATGG  
ACAAGCTGCTCGGCACTATCCCTCTTATCGACGATATTCGGCTGGCACTGCTGGAACGCAAAGGCAATCT  
GGGTTTCTACCTCGCGTTTTGTGAAGATTACGAGAGCGCCAACCTGGTCACGGGTCACGGCCAGAACAGCC  
CGCCTGGGGCTGAGCGAGGATAAGGTGAGTCACTCTATCTGGCCGCCACCACCTGGGTACGGAACAAC  
TGCTGGCGATGGAAGCCACCAATTAATTCGCTCATCATTCACTTCGACCAGGATAGCGGTCCCTCCCC  
GCCCCGATACAGAGCGCGCTACGCCCTCGCCCCAGACCCCGTTGCCGCGAGCGCGGCGATCAGCGTCAAC  
AGAATGCGCGCGCCACTCGCCCCAACGGATGACCGAGTGCACAGGCCCCACCATGCACATTGACCTTGT  
GATGAGGGATGCCGACCCCGCTCATGGCCAGCATGGTGACCATGGCGAAGGCCCTCGTTGATCTCGAACAG  
ATCCACCTCTTCCACCGACCATGTGACAGCGCCAGCAAGCGTGAAATGGCGCCAATGGGTGCAGAGGTA  
AACTCGGCGGGAATGCTGCATGGCTCTGATAACCGACAATCCGTGCCAGCACTGGTACCTGCCAGGCTT  
GCGCCGTGGCGCTATCCATCAATATCAGCGCCGCCGACCGTCCGAGATGGAGCTCGAATTTGCTGCCGT  
AATGGTGCCCTCCTTGCCAAACGCAGGCTTCAGGGTAGGGACCTTCTCCGGTCTGCCCTTGCCGGGCTGC  
TCGTCTTCGGCCAGCAACAAGCGCTCACCGGATAGACGCTTGTAAAGCTCGGACACAAACGCGCTGGCTT  
GCTGCGCATCACGGGCACGCTGCAACGACGCAAGAGCAAACCTCATCCATGGCACTGCGGGTCAAACGGGC  
CTGATCGGCGCTGCGCTGGGCATGTACCCCCATCAGCTGGCCATCATAGGCATCTTGCAAACCGTTCGAGG  
AAGAGGTGGTCCAACACCTTTTGATGCCCCATCCGAAAGCCGTTGCCGGCATTATCCAGCAGATAGGGGG  
CACGGCTCATACTCTCCATCCCCCCCCGCGACCACCACCTGTTGTCACCAAGGCGGATGGTATCCGCCGC  
CAGCATCACTGCTTTCATGCCGGATCCGCACACCTTGTFTTACCGTGGTAGCAGGCACACTATCTGGTAAC  
CCTGCTTTCAACAACGCCTGCCGGGCTGGCGCTTGCCCCACGCCCGCCGCGCAGCACATTGCCCCATAAACA  
CTTCATCGACCTGCTCCGGACGCAGCCACTTTGCTGCAGTGCCGCTCGATGGCACAGGCTCCCAACTC  
AGGCGCAGTTACCTCTGCCAATGCCCCCTGAAACGCCCCCATTTGGAGTCCGTTTTGCCGCCACAATTGCA  
ATATCCATTTGCCTGCCTCTGTTTGTACATGGCCATAACATAGGGGTTCTGACGCGATGGAACAAGAGT  
TGCAGTGCAGTTTACGTTTAGGTAAGGTGCAGACAGGATTTAGTTGCGCAAGAAGTCTGTATGAACAACA  
AGGATGAAGGACGGCGCTCAGCATCAGTGAGCTGAGCCGGGAATTTGATATTACGACGCGCATATCCG  
TTTTCTACGAGGATCAGGGATTGCTCAATCCTGCCAGAGGGGACAGACCCGCAATTTACAGCAAGCAGGAT  
CGGGTTGCGCTCAAGCTCACCTGCGTGGCAAGCGGCTCGGGTTCAGCCTCGCCGAGATCCGCGAGCTGT  
TTGATCTCTATGATGCCGACAAGAGCAGCCGACCCCAATTACAGACCATGCTGGGACTGGTTGAGGAGAA  
ACGGGAGACACTGCAACAGCAGATGGAAGATATCAGAATGGTGCTGCTGGAGCTGGATGCTGCCGAGCAG  
CGCTGCCAACAGGCCCTTAGCCAGCTGGGATAACCGCTTGCTGGGCTGACAAGGTAGCTCTTTCAGCCC  
GATCACAAGATGCCAGATAGCAAAAAGCCACTCCTGAGAGTGGCTTTTTCTTCAACCTGACGGTTGCGTAT  
TAAACGCGAACGAAGTCCAGGTGGATCAGCTTGTAAAGTACCGGGTGACGCTGGATAGCTTTTACTTTTA  
CGTTAACTTCTTACCGTTGATAACCAGAGTACGTACAGACTCATAGAATTCGGGCTTCTCTTGAGCCAG  
GATCATTTTTCTTGTGGTCAACTGTGATGGACAGGGCTTCTTTGCCCTGCACCGTAAACGATGGCAGGAACT  
TGGTCAGCTTGACGCAGGCGGGCGGCTCGCACCTTTCCCCAGGTCAGAACGGACTTCAGCTTGAATACGA  
AAGACATAGTATGTATCTTTTTGGATGAATTTATGGTGCTAACTGCGACCGGTCAGCACCTCGCAAAAC  
GAGCGGAATACTACCACGGGCCAAATTCGGATACAAGGCACCGACTCTGCATTTAGCGCCCCCTGCTCCA  
ACCGGGCGAATTGCTGCTGACGCTGGGCCGGGCTCAGGGCATCAAACCTTCGCCAGGGTCTCGGGCGCGCG  
GCAGTAGAGACCCTCCCCGTTCTGACTCGAATGCTCTTGCCAAGCCGCTGCTGGTTCTCTGCCACCAGC  
GCCAGCAAATAGCTGTAGGTATCGGCTCCCCGGGCGCTGGATAACTGGTTGGCAATGCCACAGGGTCT  
CCCCTGCTGCGACCTGATGACACACGGTTTTGTGGACCGCCGCGCCGAGGAGCCGAGAGAGTAAGCATGGC  
GTCACTGCCTGCGGATAAGCTAGCCGTGTGGCTGGCGAGCGCCATATCGGTGCTCGTACTCCCTCATAT  
CCTTGGGCACCCTCATCCCCGAGTGCGAAAGGTCACCCCCAGCTGAACCAGTAGAGTTTCGCTCTCGG  
CGGGGTCGGTGAGCATATCAACACCACCGAACGCCTCTTGAGGTGTGCGGAATTCGGCGATAAAGGGCGC  
GGCAGGTTGCGCGTGATAAGCAGGGGAACCACTCCCCTGCTGCACGATTGCAGCGACTGGCCGGGGGCA  
ACCCCGTAAGCCATCTCGTCGATACGCCGAGCCTTGCCAGATAGGTTTTGGAGAGCTGCGCCTCCCCCT  
CGAACAGATCGAAGGGGGCACCAATCGGGCTGGAAGAGGATCTGCCAGCGACCATGCTTCTGCTTTTTG  
GGCCAGCGCGGAAACTGATTGCCACGCCAGGCCACAAACATCGCAGGAGGCGTGCGCGCCAGCGGGTAA  
TATTCGGGTTCAACTGCACCCAGGTTTTGTTCGCGATGGGTTGATAACCGCTGATCACCACCTGCGCCA  
CACTCAACCAGATCCCCAGCATCCTTGCCCTCCCTGACTTGCGTTTTGAAGGGGCGACCTGACCGGCAACC  
CCTTCTCATCACCCGCTATCATGCTGTTAAACAGTTAGATAGCAGCTTAGCACTGAGCAATGGCGTTAA  
GCACCCGTTTTATCTGAGACCGGATAAAGGGGTCCCCAGATTCTGGGCAAAGAACGACACCCGAGCTCCTC  
GATCATCCAGCGGATATTGGCCACCTCGGTGGGAATAAGCTGGGATTTGGGGATCTTGGCCAGCAGCGCC  
TTGTACTCCGACTCCACGCTGTGCACCTTGAGCATGTAGACCCGATCCCGGTTGGGATCGATGGCGAGCT  
TCTCCAGGCGGCGCTCGATGGCGCGCAGATAGCGCAGCAAATCAGGCAACCGCTGCCAGCCGGTCTCGGT  
GACAAAACCTTTGTGAATAAGGTTGCCGAGCTGCTGCTGGATATCCGACATGGCAAAGCGGTGTCGAGC  
TGCATCTTCCCCTTGAGCCGCTTCTTGATCTCATGGGACAGCGTCAGCACGGCTTCCACCTGCTTGGCAA

CCTCCACCACCGCATCGTTGAGCTCGGCACGGACAAACTCCTTGAGCGCCTCGAAACCGACCTCGTCCCA  
AGCCAGCCTGCCATGCTGCTCGATCAGCTTGTGCGAGCCACAGGCGATACAGTCATCAATCAGCTCCGCC  
ACCTTGCCAAACGGGTTGAAATAGAGCCCGAGCTTGGCCTTGTGGGCAGCTTCTCCTGCAGATACTTGA  
TGGGGGATGGCACGTTGAGCAGCACCAGCCGGCGCTGGCCCGCCACATCAGCTGCTGCTGCACCACAGG  
GCTCTCCACCAGCTGAATGGCGACCGAATCCTTCTCGTCTACCAACGCCGGATAGGCTTTACCTCGAAG  
CCGCCGCGCTTCTGGCTGTACTCCTGGGGCAGTTCGCCAAAAGCTCCACAGGGTGAGACCGGACTGCTCGA  
TGTCATCATCCGCCACTTGGCAGAGGGTCTCCTGCACCTTGCCACGCAGCGACTCTTTCAAGGCTTCCAG  
CTCTTTCCCTTACGCCACCTTCTTGTGCTTGTGCTCCACCACCCGGAAGGTGAGTTTCAGGTGATCGGGC  
ACCGCATTCCAGTCCCAGGATTCGCGAGGTACGGTGACGCCGGTTCATGCGGCGCAGTTGGCGCTCCATCT  
CGTCAGCAGCGGTCCCTGCTCGGGGTTGAGGTGGCGAGCAGCGCATCGGCGTAGTTCCGGCCCGGCAC  
AAAGTTTTTGGCAGTCCGCTTGGGCATCGACTTGCAGGGCGACCAGCAGCTCATGACGCAGCCCGGGG  
ATCAACCACTCAAACCCCTTACCTCCACTGATTCAGGAGCGGCGAGCGGAATATGCAGGGTACGCCAT  
CGGCGGCTCCCCCGCTCGAACTGATAGGTGAGTTTGGGTTTGGGCGTCCCTGCTGCCAGAAGTTGGG  
ATAGTCGAGATCACTGATGTGAGCGGCATCCCCCTTTCATCAGCATCTCTTTTTTTCGAAGTTGAGCAGCTCG  
GGATCCTGCTTTTTGCACCTCTTTCCACCCTTATCGAAGTTGGCGGCTTGCATACCTCCTCCGGCAAAC  
GGGCATCGTAGAAGCGGAACAGATCCTCGTCATCCACCAGAATGTCGCGCCGACGGGACTTGTGCTCCAG  
CGCCTCCACTTCGGCAAACAGCTTGGCGTTATCGCTGAAGAAAACGGTGACGGGTCTCGAAATCCCCCTCC  
ACCAGTGCAGCGGCGGATAAACAGCTCGCGGCACAGCGCCGGATCGATACGGCTGAAGTTGATGGTGGCT  
CATTGACCAGAGTCAGACCATAGAGGGTACCTTCTCCTTGGCCATCACGGCACCGTTTTTCTTCGACCA  
GTGGGGGTGCTGTGGTGCAGCTTGCAGGTGACCTGCCAGCGGCTCCACCCTCGGGTTCAATCTTG  
GCGTTGATGCGGGCGTAGAGGCGCGAGGTTTCCACCAATCTGCGGCCATCACCCACTTGGGCGGCTTCT  
TGAACAGACCCGAGGCCGGGAACAGGTGGAAGCGGCCATTGCGAGCACCAAGGAACCTCGGGCTTTTCCAG  
ATCCTTGTACCGATGTGGCTCAAGAGGCCGGTCCAGCAGGGCACAGTGACCGCTTGTAAATCCGCCGGT  
TCATGGTTGGCTTTAAAACCCAGCTCCTTGACCGTCTGACGCAGCTGGAAATGGATGTCTGCCATTCGC  
GCACCCGCAGATAGGAGAGAAACTCCTTCTGGCACATGCGGCGGAACGGGTTGCTGCCAAGGGCATCCTG  
CTGCTCTTTCAGGTAGTTCCACAGATTGACGAAGGCGAGGAAGTCGGAATCCTTGTCTCAAAGCGCTG  
TGCTGTTGCTCGCGGCGCTGCTTCTTCTCCATGGGCCGCTCGCGGGATCCTGAATGCTGAGGGCGGCGG  
TGATCACCATCACTCGCTCAGCAGCCAGTCTCGCCCGCTGATCACCATCTTCGCCAAACCGGGATC  
AAGGGGAATGCGCAGAGCTGGCGACCGATCTCGTCAGCTGCAGTTTGGCTTACGCTCACCGGTGGCG  
GGCAGCTCGCGCACCGCTCCAGCTCTTTCAAGAGAGTCAGGCCATCCTTGATATGGCGGGACTCTGGTG  
GCTCGACGAAGGGGAACGCTCCATATTGCCAAGGCCGAGCGCCAGCATCTGCAGGATGACGGAGGCCAG  
GTTGGTACGCAGGATCTCGGGGTGGTGAAGGCAGGGCGGCTGTTGAAATCCTCCTCCGAGTAGAGGCGG  
ATACAGATGCCGTCCGCCACCCGACCGCAGCGCCCTTACGCTGATTTGGCACTGGCCAGGGAGACCGGCT  
CGATGGGCAGGCGCTGCACCTTGGTGCGCCAGGAGTAGCGACTGATGCGGGCGGTACCCGGATCGATCAC  
GTAACGAATGCCCGCACCGTCAACGAGGTCTCCGCTACGTTGGTGGCGAGCACGATGCGCCGTCCGGTG  
TGTTGCTGGAATACCTTGTCTGCTCGGCGTTGGAGAGGCGAGCGTAGAGCGGCAGCACCTCGGTATCGC  
GCAGGTTGAGTTTGGCAGGGCATCGGCGGTATCGCGGATCTCCGCTCGCCGTTTCATGAAGATAAGAAT  
GTCCCCGAGCCCTCGCGGGCCAGCTCTTCCACCAGCGTCAAGATCCCTGCAGTTGCTGCGGCTCTTCC  
AGCCCTTCTGTTCTTGTCACTGCTTTTTTTTATCAACAAATAGTGGACGGTAGCGCACCTCCACCGGATAAG  
TGCGGCCGGAGACCTCAATCACCGGTGCCTTGTGAAATGGCGGGAGAAAAGTTGCGGGTTCGATGGTGGC  
CGAGGTGATGATCACCTTGCAGATCGGGGCGCTTGGGCAGCAGTTGCTTGCAGATAGCCAGAATGAAGTGC  
ATATTGAGACTGCGCTCGTGGGCTCATCGATGATGATGGTGTGCTACTGGGTCAGCATCCGGTCTGTTCT  
GGATCTCCGCCAGCAGGATACCGTCCGGTCACTTGCAGTGTGGGTCTGCTCACTCACCTGATCGGTA  
GCGCACCTTGTAGCCCACGTAGTGACCGAGTTCGGACTCCATCTCCTCGGCAATACGGGCCGCGACGGTG  
CGGGCTGCCAAACGGCGTGGCTGGGTGTGGCCGATAAAGCCCTTCACCCCGCGCCGAGCGCCAGACAGA  
CCTTGGGGATCTGGGTGGTTTTGCCCCGAGCCGGTTTCGCCAGCGATGATCACCACTTGCAGTTCTTGAAT  
GGCCTTGGCGATCTCCGCTGCTTCTGGCTGACCGGCGAGGTTGTCCGGATAGGTGACCTTGGGCACTCCG  
GCCAGACGGGTTTGCAGTGCACCTTCCGGCGGCGCCAAATCAGCGGCGATGGTCTCCAGCACGGCGGCT  
GTTTGCCTTACAGCAGCTTCTTGCACCCGTCAGACGGCTGGAAAGCGGCGGGCGTCCAGGTTTCATGCA  
GGCAGAGAGACGGCGGCGCAGCGCCTCGATAGAGAGAGACAAGGTACGAATTCCTTAAATAGGTGCCAA  
AGGGGCCATATCGATAAGCTGGGAGCGATCCTAAAGAGCGAGCGGGAACGGTGCAGCCTTAACGTAGCG  
TTATATATGGGAAGACAGAGAGATTGGCCGCTCCTCAAACATGACAAAACAACCTTGTAAAGATGGCATA  
ACATGAATAAATGGCAGCATATGAAATAGCCAAGGCAAGCCGAAGCTTGCCTTGGGAGAGAGAAAAACAG  
GGTTAACCGTGGGAGTGCAGTGCACAAAACAGGTGGTGAGCTGGGCGTGAATGGCTGCATGACGTTGTGGC  
GATTGATGACACCGAGCAGACGCCCTCCTCCACTACCGGATAGATTTTCGGCTTTTGGCCCATCATCAT  
CTCCGCCAGGCTCAAATGCTGGTATCTGGCCCCACCGACAACACCTCCTTGCAGCATCACATCCTTGACC  
TGCGCCACCTGTTTCGAGTGCATAGGCTCCTTAAGCAGCACTGCGATGCAATCCTGCTCGGAGATCCAGC  
CAATCAGATGGCCCTGCCATCCACCACCGGGCCACCGAGCTGATGACTGTTTCAGAAATTTCTCGACCGC  
AGCTTGACCATCATGTGCGCAGTGAAGGTGATGGGTCTGCTCTGCATATAATCCTTGGCTTTTAGCGAT  
TCCATATCTGCTCCCCTACGGTAGTCCATCAAGCTGGCGTCTTGTGCGCCGGTACCGGCACCATGCTCGG  
CTTGTTCGAAGCATAGCTGGCTCGCGGCAGTATGAGTCAGCGCCAGCCTCTCCCTCAATTGATGGCATG

ATCCGGCTCGCGATCCGGAATGGCTGCCATCATCATCTGCGGCAGGTGATCGGCCAGCACCCGCCACCACA  
GCGGGATCGACCCGCCCTGATCCGCCAGTTGCTGCATAAAGGTCAATGCGTCACGGGCAGGCAGGCCGC  
GCCGATAAAGTCTGTCTGCACCATGGCCTGAAAAATATCGGCGACCCGCAGGATCCGCGCTTCGAGCGC  
CATGGCGGATGCCGGCAGGTGGAACGGATAGCCCTCACCGTCAGGCTCCTCATGGTGATAGGCCGCCAG  
CAGGCAATCTCTCAAACCTTCGATATGACGCAGGATCTGGTAAGTCTCGAAGCTGTGGGTATTGATGA  
TGGCCCCGCTCCTCTTTTCGTCAGGCAGGCTTGTTCGAGGATCTCGTCCGGCACCCCTGAGCTTGCCCAAATCG  
TGCAGCAAACCGGGCATCTCCAGCATGTACAATGGATGGCACTGACTCCCATCTGCTCGGCCAATGCC  
GAGACAACCTACTCACACCGAGTGAATGCGTCATCGTGAATGGGCTTTTGGCATCGACAATGCCGGAGAA  
GATCTGCGCCAGCGCTTTTAGCTCCCCGTTGAAGGTGAGGCAAGGCTCCCGCACCTGCAGCATCTCCAGC  
ATGTAATCATTGATGGAGCGGGCTTCCAGCTGCAGCGAGAATGCCTCAGAGCGAGACGCCTTGAGAAAAG  
CATCCACCAGCTCGGGGGCAAAGAAGTCTCGTCCCGAAAATCCTGCAGGCGTGCAGCGGATCCAGTGGTATG  
CATCAACAATGAACCATCACCATAGTAGGGCCGCCAACGCATCGCAGCGATCCACCAGAAAAGATAAGG  
TTGGCCTGACGGGTACATTGGGGTCCACATCGGCCATCTCGCGCAGCAGGTGCCAGTGGGTGTGGTGTAT  
AACGGATAGGCAGGGCCAGTGGGGCCAGCAAACGGAAAATCCTTGAGCAGCTGATATCCCACCTCGCAGTG  
GCGCTGGGAGGACTCCCAATCGAACTCGCTGACCAGATGGTGTATGGGTGATGGTTCGAGGAGACCCGATA  
TCATGCAGCACCCCAACTCGAACAGCAGACTGCGTTTCGGCCTCACTCATCCCCAGCTCCCGGCTGCACT  
CGGCAGCCATAATCCCAGCCGTTTACCGTGGGCCACATCGCCAATGCCACCAGATCCAGAGAAGCTGA  
CAGGGCATAACACCCTGCCTTAGATCCACTTGCAACGAAAAGGGGGCTGCGCCCTGCGCTCTGTCCATG  
ATCCGGGTCCCATGCGATGTTGTGCTATCAAACCTGGCGCTGTTTTATGCTTCGCCTTCTATCAACTTAGT  
CAATAGCCGAGCCTTTTACCTTGTTTTTATAGGTATTTATGAACCTGCGCACCTTGAAAAGACAAAGATC  
ACAGCTGGATTTATTTGGCCACTCCCATTCAAGTCATATTTATCCATTCAAAAATATGCAAGTAGACTTT  
TTAAATCTCGCGTAGAGATTGTGAGCAATTTTTAAAACCTCATATCTGAACGAAACAATCAACACCTCCACT  
TTACTTAATTATGACTTAATCAGAATTAAAGTGTGCTCGGTTTGCCAGTTAGAATTTTGAATAAAGGCAG  
ATCACAACCTCATAACAGCTCTCATCCCCTAAAATTGATTAGCCGAACTGTGAACTCCATCACCCATTTA  
TTCGCCTTATCGCCATCGATAGCAGTAGACACCTCACGCTTCTTGATACAGCTTTCATGCTCGCTCCA  
GCCCACACGATAGCCTGCGACCAAAGGGTGGAGAAAAAATAACGGATAACCAGCGTTATATTCGCATAT  
AAGGCGACAGGATAAACCAGGATTTATAGAGTGAAACTGTTGAAAGCTGATTTCCAAGCTGCGGTTAACA  
CAGGCTATTACAGTACTCTACTCTTTGACGGTATAACGACAGCGATAAAGGGGAATGTGCCATTCGCG  
GTATTTCCATCCCCTCCAACAGCCTGCACGGGATGATATTTCCACCGCGTTAAACGCACGTCTTTCCATC  
GCCCATTTTTGTGTACCAATTCACATCAGATTAGGAGTGGAGCCAATAATGGCCATTCAAATAAACAAAAT  
AGCCATGAGCCTTGCCTTAATGGCCACCGCTGGTAGTGCCACAGCAGCCGCCAAGCCCAATATTTCTTGCC  
ATCATGGGCGATGACATCGGCTACTGGAACATCAGTGCCTACAACCAGGGGATGATGGGCTACCAGACCC  
CGAACCTGGACAGGATCGCCAATGAAGGGGCCCTCTTTACCGATCACTACGGTCAGCAATCCTGCACCGC  
CGGCCGTGCCGCTTCAATACCGGTGAAGAGCCATTCGGTACCGGTCTGCTGACCATCGGCATGCCCGGA  
TCCACCCACGGCATTCCGGATTGGGCCCCACCATCGGTGATCTGCTCAAAGAACAGGGTTACATGACGG  
CTCAGTTTCGGCAAGAACCATTTGGGCGATCAGAACCAGCATCTACCGACCAAGCACGGTTTCGACGAGTT  
CTTTCGGTAACCTCTATCACCTGAACGCGGAAGAGGAACCGGAAACCTACTACTACCCGAAAGATCCGGAG  
TTCAAGAAGAAGTTCGGCCCCACGCGGCGTCATCAAATCTTCTGCGGACGGCAAGATTGAAGATACCGGCC  
CCATGACTCGCAAGCGCATGGAGCATGCTGACGAAGAGTTCCTCGAGTCTCGCTGGCGTTCATGGAGAA  
AGCAGTCAAGGCCAAGAAGCCCTTCTTCATCTGGCACAAACGCCACCCGCATGCAGTCTGGACCCGTTTG  
CAAGAGAAGTACCAGGGTAAATCCGGCGTCAGCATCTATGCCGATGGCATGCTGGAGCACGATGATCAGG  
TGGGGATCCTGCTCGACAAACTGGACGCGCTGGGGGTGCGCGACAACACCATCGTGATCTACACCCTGA  
CAACGGCGCCGAGACCGTCAGCTGGCCGGATGGCGGCACCACCCATTTCTACGGCGAAAAGGCACCACA  
TGGGAGGGCGGGATGCGGGTTCCGCAACTGGTTCGCTGGCCGGGCGTGATCAAGCCAGGCACCAAGGTCA  
ACGCCATGATGGCCCATCAGGACTGGATGCCGACCTGTTGGCCGACGCCGTTACCAGGATGTGAAAAGA  
GAAGCTGGCCAAAGGGTACAAGGCCAACGGCAACAGTGGCGGGTGAACCTGGACGCGTTACAACCTCATG  
CCGTACCTCGCCGAAAAGCCGACACCTCCCCACGCAACTCCATGCTCTACTTCTCCTCAAACGGCGAAC  
TCAACGCCGTGCGCTGGAATGACTTCAAGCTTAACTTTGCCACCATGGAGGGCAACATCACCGACGCGGC  
GCGCGTGACTCCAAACTGGCCGAGATCATCAACCTGCGCGCTGATCCGTTTCGAGAAGGCACCCGATGAG  
TCAGGCATGTATCTGCGCTGGATGGCAGACAACATGTGGCTGTTTCGTACCTGCACAGGGGATCCTGAAAG  
AGTTCTTCGACACTCTGCCAACTACCCGATGCAGCAGAGCTTCCAGATGAACCCGGCCAGCATTAGCTC  
CCAGAGCCTGATGCTCAAGGGCAAACCTGGCAGAGCTGGACGCACTCAAACAAAAAGTCGCCACCATCAAG  
TAAGGCGGTGACTCCAACGCCCATCACTCTCTGGTGGGCGTTTTCAATTTCCAGCCGGCTCGCCCCGTGC  
CAGCTGGAAATTGAAAACCTGTTGGCCCCCTCCTCGCCCAATCTCTGTCTCGTTAAATGTACCCTGTGGAA  
AACCCATATGAACCCCTTGCAACAACAGATCTCGCAACTCATCGAACAGGTTGGTACAGTGTGGTTGGCC  
AGTCCCATGTGATCCGCGCCCTGGTCATCGGCTTACTGACCAATAGCCACGTGCTCCTTGAAGGTTTGCC  
CGGCACCGCCAAGACCCGCTCGGTCAAGGCGCTGGCAGAAGCCCTCAATACCAGCTTCGGCCGATTCAG  
TTCACCCCGATCTGCTCCCATCAGATGTAACCGGCACCGAGATGTATCAGGAGCGTGACGGATCCCACC  
AGTTGCGTTTTCCAGCCAGGCCCATCTTCAACAGCATCGTATTTGGCCGATGAAGTGAACCGCGCACCCGC  
CAAGGTACAAGCGGCGCTGCTGGAGGCGATGGCAGAAGGCACCGTTACCGTCGGTGACAAGAGCCATCGC  
CTGCCCCGAGCTCTTTATGGTGTGTCGGCCACCCAGAACCCATCGAGCAGGAGGGTACCTACCCGCTGCCAG

AAGCCCAGATTGACCGTTTTGCCCTCAAGGTCTCGGTGCGCTACCCCGATGATGAGGCAGAGCTTGCCAT  
CATTTCGGCTGGTGC GGCCGAAGAGCGCGGTACCCGCCAGCAGAACGAGGGGTTGCCCCCTCTCCCT  
GAACTCATCTTGCAGGCCAGATCAGCGCTCTCGGCCATGACGGTCTCACCGTGGTGGAGCACTACATCA  
TTGCGCTGGTTCATGGCGACCCGACACCCGATCGCTACCCAGCCACCGGGCTGCCACAGTGGATTGCGGT  
CGGCGCCAGCCCCCGCGCATCCATTGCTCTGGACAAGTGC GCCCGCGCCTATGCCCTGGCTGCAAGGGCGC  
AACCACGTGCTGCCCGACGATGTGCGCGCCATGGTGCCAGCGTGGCTTGGCCACCGCTTTACCCCTCAGCT  
ATGACGCGCTGGCAGATGGGGTGGATCACCAGCAGGTGGTGGTACTCTGCTCGATCAGTCTGTCATCGG  
GTAAGCGATACCATGACACCTCGCTCCTTATCCCATGACAGGCTGACACAGGGCGGGCAACTGCCAGTG  
GTGCCCCCGCATCCACTGCGACTACCTGACACTGGTCCGGCTTCAGTGGCTGATCGGCCAGTTTTCACT  
GCTGCCCCGACTAAACAGCGGCAACCTGTATGCGGCCGTACGCTTTGCGGGCCGTGGACTCAACTTTG  
AAGAGTTGCGCCATATCAGCAAGGGGATGATATTCGACCCCTGGACTGGAAAGTGACCCTGCGCACCCG  
CCGCCCCCATGTGCGCAGTTATAGCGAAGAGAAAAGATCGTCACGTGATCCTCTGCGTTGATCAGCGCAGT  
TGATGTTCTTCTCCTCGGTGGAGGTGATGAAGTCGGTGGTGCCGCCGAAGTCGCTGCCCTGCTCGGCT  
GGCAAGTACTCAAAGAGAGCGATCGGGTTCGGGCTCGCCATTTTGCAGTGGCGATGGCGTGGCGTGGCTGAG  
AGGCCAGCGCTCCCGTGGCCACTGGTTGCTAGGGCTGCGCCAGCTCTGTGCCGCCAATCATGCTCTCTCG  
GCCACCAGCCGCGACAGCGAGGCGACCGGTCTGGCCCCCTGCTGGCGATGCTGGGGCCGCTCAAGTTGA  
AAAATACCACCTGATCTTTCTTAGCGACTGGCAGGCGTCACCGAGGCCGACCTGACCCGCTTGGTTA  
CTTGCAACAGCACAACGATGTGCTGGCACTGCACATCGCCGATCCCCTCGAGTCGACCCTGTGACCACA  
GCCGCTGACGCCAGCTGGGTAGTCGGCGATGGCCAGTACCAGCTCAATATTGCTCCCCACCAGCTCCCTG  
TGCTGGATCAGGGGCTAGCCCGCCAGCAGCTGAAAAAAGATCAACTACTGCGACTGATGGCCCTCAA  
GGGATTGCCGCTTATCACCCCTCGACACCCGGTGGCCACCACCTCGCCCGCTCATTACCGCATGGGAGGA  
GATCACTGATGAACCACAAGCTGCCCGGCACCTATATGCTGCGCGAATTGCAGGACGTGACCGTACCACC  
CACCATCAGCTGGCAACCCGAAAACCGCAGGCTGGCTGCTGCTGGCGCTGAGCCTGGGGGGCGTGGCGCTG  
CTCTGGCTCTATCACCGGGCACAGCGCTGGTGGCAACAGCGTTACCGCCGTGAAGCGCAGGCGGCCCTGC  
GCACGATCAACTGGTCTGATGCCGGGGCCAGTCTGGCGCTGTTTACCTGATCAAGCAGGTGTTGACCCA  
CCTAGATCCCCGGCACGGCAAGCTGTTTGGCATGGCGTGTGCTGCAGACCCCTCGACAATGCCATGGCTGAT  
AGGCAGCCCCGTTTTGCTACCCGAACTGGGGGAGCGCTGGCTGGTATCGCTGGTCTGTGATCAGGTGGTGC  
TAAGCGTCACTGATCAACTGCTGCTGCTTCCCTTGCACGACTGGCTTGCCACCAGCTCAACTCAAT  
ACAAACAGCCTCGTTGGCGACGGAGGCTCATCATGCTGATGCCGCTCGAGTTTGGCCACCCCTCATG  
TTTTCTGGCTGCTGCCCTGCCGTTGCTGGTGTTCGCTTATTCCGGCTATCGCACCCGGCAGAGTGCC  
ATCAAGGTGCCCTTCTTCGACCTGCTGATCGACCTGCTGGATGAGCCGCCGCTGAGGGGGCAACCCAGC  
TGACTGCCAGCTGGTGGCAACGGATCGCCCTGATCACCGTTTTGGTACTGGTGGTGTGGCGCTGGCCAA  
GCCTACCATCTATGGCCCCCGCAAGTGC GCGAGCGGTTCCGGCGGGATGTGATGATAGTGTGGATCTC  
TCCGGCTCCATGGCCGAGACCGACTTCTCCCCGACCCGGCAAGTCCCTCAGTCGGCTCGACGCCGCCA  
AAGAGGTGCTTAAACAATTTGCTGCAACCGGTAAGGAGATCGACTCGGGCTCATCTGTTTGGGGATGC  
CGCCTTTCTCCAGGCGCCGTTTACCGCCGATCTCGAGACCTGGCAAACCTGCTGCAGGAGACCGATGTC  
GCCATGGCAGGCCAGAGTACCCATCTGGGAGATGCCATCGGTCTGGCAATCAAAGTGTTCAAACAACAGTG  
ATCGCCACGGGCAACTAGACCAGAACAGCGCCAAGCGGGGAGAAAGTCGCCATCATCTTACCGATGGCAA  
CGACACCGGCAGTTTTGTGACCCCGCGGGATGCGGCCCGGGTAGCCCGGTC AACGGCGTGC GGCTGCAT  
ACTATCGCCATGGGGGATCCGGCTACCGTCCGGCAACAGGCTCTCGATCTCGATACCCCTGCAACAGTTGG  
CGACCCTGACCGGGCGCCAGTTGTTT CAGGCTCTTGATGAGGCGCAGCTGACGCGCGCCTATCAGGTGAT  
CGGTGAGCTGGAGCCACAACGCTACGAAAGCACCCGCTTT CAGACCCGCGAAAGCCTGCACCATTACCTC  
ATCGCCGT CAGCGTCGGCCTCTATCTCACCTCTTTTCCCTGTTGACCCTCAGGCGCTACCGCTGCGCA  
CTGCTCTCTCAGGAGACACGCCATGATGGATCCTCTCTACTGGCAACAGCTCTGGCTGAATGCCACTTT  
CTGCGCCCCCTGGTGGCTGCTGGCCTTGTCCCCCTTGTGCGCATCTGCTGCTGCGCTGGCACATGGATG  
AAGCGAACAACCTGGCAACAGCGGCTGCCGCCCATCTGCGCGAGGCGCTGACGCTGGGGGACACCGGCTG  
GAAAAAGAACCTGCCCTCAAGGTGCTGGGGCTGCTGATGGGGCTGGCCATCTGATCTGTGCAGGGCCG  
ACCTGGAGCCGTGAACCTCCCCCTTTGGCGAAGATCAGGGCGCCCTGCTGATCCTGCTCGATAACAGCG  
ACTCCATGCTGGAAACGGATATCGCCCCAACCGGTTGACGCGGGCCAAAGCAGAAGATCAGCGATCTGCT  
GGCGACCCGCGATGGCGGGCGCAACGGGCTGGTGGTCTTTGCGGGCTCGGCCACACCGCCATGCCGCTG  
ACCCGTGACAATGCCGTCTATGACCCTATCCTCGCCGCATCCGTCCCAGATCATGCCATAAAGCGGGCA  
AGCGCACCGAACAGGTGATCCCGCTGCTCACCGAGCTTCTGGCCGATGAGACAGGCAGCACCGTTTTGCT  
GGTGAGTGATGGCATCAGCCCCCTCCGCCATTGCCCCCTTGGCTGACTATTTCCGTGGTCAATCCCCTCAG  
CTGCTGATCCTGGCCGCTGGCGACCCGGCACTGAGTGGCAAACGCCGCTGGAGCTTGCCCTATTACGGC  
GACTGGCCAGTGACAGCGATGGCACCCCTGCTCACCATGACGGTAGATAATGGCGACGTAGAGCGCATCAA  
CCGGGGGATTGAACGCAACTTTTTGATCCACAACGACTCCCTGATGCCCTGGCAGGACATGGGTTACTAC  
CTGCTCTTTCCGGTCTGTCACCCCTGCTGCTGCTCTGGTTTTCGCAAAGGCTGGCTGGTGCAGTGGGGTCTGG  
TGGCAGCCATCAGTCTCTCCCTGTTACAGACGACGCTGCGCAGGCCACCACCTTCTCGCTGGCGCCCGT  
AGAGCCGACAGAGCCTGCGATCAATCACTGGACAAAAGGAGCTGAAAACAGCAGTGGTTCAACCTCTGGCTC  
ACCCCGGATCAGCAGGGGCGAGTGGTACTTCCAGCAAGGTGACTATCTGAAGGCGGCTAAACACTATGAAG  
ATCCCTTCTACAAAGGGGTGGCCTACTACTATGGCGCCGAGTTTGCCTGGCTCAGTCAGCATTCCTGCA

AGCCGACTCCGAACAGGCTCTGCTCTATGCCGGCAATGCCCTGCCAGACAGCGTGAGTATCTGGCCGCC  
CGCCGGCTGTTCCGACAACCTGGCTGACGAGGCCAGCGACCCGAACGTGCGCCAATCAGCCGCCACAAC  
ATCAGGTGATGAGCCGGATTGTTGACGAGATCAACCGGCCAGTCAGAGCCAGACCGGCAGCCGGATGG  
ACCTGATCACTCCAGTGAACCGCCGATGAAGAGCCACGCAGTGCCGACGGAGCGGAAGAGACCGTGGTT  
TCATCCCTGATGGCGCGCAAACCCCTGAGCGCAGATCAGATCCTGGCCAATCCGGCGCAGGCCGAAAAGT  
GGCTGCGCCGGGTGGAGTCTGATCCCCTGACTTCTGCAAGCCAAATCCGCCCTCAGCTACACGCACA  
GCAAACGGGGCGCAACCGCCCGTCTCTGTTCTGCCACCCACAAGGAGCTACCCATGTGCAACCGGCACAA  
TAACTCCGCCACTGGCTGTGCAGATATATGGTGACTGCTACCCTGCTCGGGCCGTGCTGCTCACGGTC  
GAAGCACAGGCTGCCGAGGCTTCTGATGCGACTGACGCCACTCAGGTAACCCCTCAAGAGCTGGCTGAAAG  
ATCAGGGGGGGGAGAAGCGCCCTATGCCGTCAACCAACAGATCACCTCTATCTGGAGTTGGCCACCA  
ACCGCTGGTTTACCGCGGGTACCCGCATCCGGCAGTTCGAGCTGCCGGGGTCAAGGTCAGCAGCCGAG  
CGAGCTGGCGACCAACTTCAACCGCCGCGCAATGGCGAGACCTGGTCGCACCCAGCGCTGGGAGCTGACG  
CTTTATCCCCAGCAATCCGGCGAGTTCGAGATCCCCGCCATCGCGGTTCCGGCCACCGTGGCGCGCCCTG  
AAGGGGGCTCCCCGCGAGATCACCCCTCACCAGCCACCCCTCAGCGTTTTTGCCGCGCTCTGCCCGACCCAGC  
CCTGACGGTCGGCGGGCGTTGGCTGAGCGCCAGCAATCTCACCCCTGAGCCAGCGTTGGCAGCGCTCTGCG  
GATGACCATGCTGACGGCGAGCTGCGGGTGGGGGATGCTATCACCCGAACTGTTACCGCCAACGGACAGG  
ATACCCTCTCGGTGCTGATCCCCTGCTGATCACTCCGCTTGAAGCGATGGCGGGTACAGGCCATACC  
GGCGCAAGCCCGACTGAACGATAACCCAGGAGCGGGGGGAGTACCTCTCGACACGGGAAGATCAAACCTACC  
TATATCGTGCAGCGCGGTGGTGAGTTGACCATGCCGCGCTGGAGCTTGCCTGGTGGAACAGCCAGACTG  
GCCAGTTGCAGACCCCTGACCCCTCCCTGGGCAGACCCCTGCAAGTGCGCCACACTCCCGCTCCTGGCTGGC  
GGCCTACTGGCATCAGTTGCTCGGAGTAGCCGGTGGTGTAGCCCTGCTGGTGTGGCCTTCTGGCTATG  
GCCCCTTACTACCGTCACCACCCCTCGCCCGCTCGGCTGGCAATATGGGGCCGCCATCTGGTGCAGGCAGT  
GGGGGGCGGTGCGGGTACTGGCCTATCGCTATCTGCGGGCCAAGAGGGGTGGCTGGAACCTTAGCCGTGT  
CAGTTCCGATCCGGTTTGGCAGCAACAACAGGCTGTATTCCAGCAAGCTCCCCCTGATCGGGCTGATGCG  
CTCAGGATGGGCTGGCGCCTGCTGGTGCCTGCAAAGGCGACGGGGCACCTGTCTTGGCAACATCCGTT  
CACGGTTGGGCCACATTGTGCGCTGGCAAGCGGCCCTGCCGGAATGCCCCCTGACTGGCAAACCGAC  
CTCAGCGGATCAATCATCTGCAACGTAACAGATAAAATAAAGTGCGCCATGCAACAACCCAGCCGGCAC  
TGGTTGCTCCCACTTTGCCCACTTACACTGCCAAAGTGGGATACATGCTGGCTGCCAGCCACCTGA  
CTGGCGTGGCAGGTTCTCCCTCCCGCTACCCCGCAGTCCCAAGGCAGTGTGATTTTTCCACGAACTGTA  
ACGAGGCCTCTCTTGTAGACATCAGAAGTACCAGCTGAACCTGATCCCGATCTTTGTGCGCATCTATG  
AAGAGCGCAGCCTCTCCCGGGCGGCGACACGCATGGAGATCAGCCAACCCGCGCTCAGCAAGGCCCTCAA  
GCGACTGCGGGAGATCTACGGTATCCTCTGTTTAATCGCAAGGTCGTGGGGATGGAGCCCACCTCGTTT  
GCCATCGACATCTATCCGGCGATGGCGGCCGCGCTGAAAAACTTCAGTTCGACCCATCTACATCGCGCA  
CGTTCAATCCACGCACTTCCAGCGAGTCTTCTCCATCGCTGTGTGACTGATCAGCGCCCAACTGGT  
CCCCGCGCTGCTGTGCAAGATCCGGGCACACGCCCCGGTATTTGCTCGAAGTGCATCCCCCTCTTACC  
GAGGATATGGAGAGTGACCTGCGGATGCAGCGTTATGATCTCATCGACATGACCCAGAGCGGGCGCA  
GCATGCTCAAGAGCGAGGTGCTCTATGGGGAGCAGGTGAAGGTGGTGTGTGCCAGCAACCACCCGCGACT  
GGGCAGCGACTTGACGGTGGAGGCCTATTTTACCAGGAGCATGTGGCGTTGGCCAGTGGCAGGTCAGA  
GGCAGCATGATCACCGCCGAGCACCTGCCGCAATGGCCAACCGCAATATCGTGGTGCGGGTGCCGACCG  
CCATGGAGATGCTGCCCATCATTGCATGCAGCGAGATCATCGGGGTTTTGCCACCCTCCATCATAAATAC  
CTTTGCCGGCATGTATGATGTGCGGGTACTCCCCTTCCCCTTCGAGGAATCAGTATTCAGCCTGTCCGGC  
ATCTGGCACCCAGCCGACCACCGAGGCGGGCCACCGCTGGTTGCGCCAGCAGTTGTTGCAAGTGGTCA  
GCGAGCTGGGGCTGACCACCTCCATCGTTTCAAGTCTTAAAGGGCATCTCGCACCAGTCGCAATCCCATGTC  
AGCCATCATCACCGACTGGCTGGCGAAATCACGCCGAAATTTTCAGATAATTCAGCCTCATAGGCGTAG  
CTGCCGCTCGCACCAGCTTATGGGCGAGGTGGCTCTTGTCTCCTGGGCATTGTTCCGGTTCTCTTGAG  
GACTGTGGCGATAGAAGTCTTTCATAGGCATCAGCCACAAACTCCCCACATTGCCGGTCAATGTCGTA  
TAGCCCCAGCTCGTTGGGCTTTTTTCAGCCCCACCGGATAGGCGGATCTTGGCGTTGGCGCTGTACCAG  
GCCACTTCTGCAATCTGATCGGAGCCGCTGTAACGATAGCCTTTACTCAGCTTGCCCCCTTGGCTGCAT  
ACTCCACTCAGCTTCCGTGGGCAGGCGGTAGTGAGCACCGGTCAGCTCATTGAGCCTTGTACAAACAG  
ATTGGCCTGTTGCCAGCTGAGGTTGTTGACCGGTACATCCGGCGCTGGAAATAGCTGATTGAGGGGCC  
ATCACCGCCTCGAACAGGGCCTGGGTCACTCGAATTTTGCCATGTAGAAGCTGTTGAGCGAGACCGTAT  
ACTGTGGCCCTTCGCTCGCTTTGGCGCAGGGTCTGTTGAGCCCATCTCAAACGGCCCCCTTCCACCAG  
CACCATGTCCGCTTCAAACCTTCTGTGCGAGCGGATGGAGCGGCTGGTTGCCCTGTTTGACCGAGAGGGTG  
CAGCCGGCCACCAGCAGGGTGGTCGCCAGCAACGGAATTCGAATTTGAACGGTATGAGCGTTATAACCT  
GACCTGTGCAGTAAGAGAAGTGGCAGCCATCACTGGCCAGCGAAACCGCGGTGTGCTCGTCTTGTCTCG  
CGCGCTTGCTATTGAGCTCGGCCAGCACCTGGGAGGTGCTATCTTGCCAAGTTCACTCATGCAGGCGTC  
GCTCTTGGGGTGATCGTGGCGAAGGTAGATATCGCACACCCGATAGAGCTGCTCCGGCGCGCCGGAGATC  
CTGTAGGCAAGCTCGAACGAGCCGATGGCTTTCTCGAGATCCAGCGGCTCTTGCAGCACCCCGTTGAGAT  
ACCAGAAGTAGCTGTTATTGCCAGCGAGCTCCGCCGCTGTGCCATGGTGACTGCCGCTTCGCTCTTCTG  
ATCGAGGCGCACCTGGGTGAGCGCCTTGGCGTAATGGAGGTTGGCATTCTGCGGCAGCACAAAGGATCCCC  
TTGTTGAGCAAGGCCAGCGCCTCGGCATCCCGTTGCTGGGCCCGCAGGTTGTCAGAGAGACCAAGCCAGA

TCAGGGGATTATCGGGCTGATTGGCCAGCAGTTGTTTCGTAGCTTGCCTGCGCCTTGTCCCACTGCCGGGT  
CCAGCGATAGAGACCTGCCTGCAACAGCTGCTGCGCAGGGTCTGTGCGGGGCGAGATACTCGCTCAAC  
TCCGCCAGCGGGTGGCCAATGGCGCTCAGTTGCCCTCATTTCATGGCGCCATAATCGCGAGCCAGATTGA  
GGGTAGCGGGCGGGCGAACCTCGGCAGTGTGTGAGCCAGCAGCGGTGAGAGCAGTTCGCCAGCGGTGCGC  
AAACTGATAAGGGTTCGGCAGCCACGACCCGAGCTTCTCGCACCAGCGCACTCTCGTTCGGCAGAGTTCTG  
GCCACCGCCACCAGACTGTTCTGGTTCGGATAAGCCGCCAGCTGGCGCAGGGCATCGGCCCGCTCCACCA  
CTGGCAGGGAGATATCCTGCGCATTGTAGGCCACTGCTGGATCTGGGCGGCTGAGGGCGCACTGGCCGC  
CACGGATGCAGTGGGTGCCTCATTTCGTGATGTGGTGACCAGCGGCTCAGGGCTGGCTACCGCCAGCGCT  
GCGCCAGACAAGGCCATGCCAAGGGCCAGCCACAAGGAGCCCATGGTGCCGAGCGGGTGGCAGCAAAC  
CGCAGCGACTCAACATACTCTGCATCGCTTATTTACTCTGACCATGTGTTCATGACGCCGTTATTCATCAC  
CGCATCACGATACTTACCATTGGGCCACCGGATAACCGGCACGGCGCAGGATATAGGCCATCGACTGATCG  
ATATGGCTGAAAAACTTGTACCAACCGGCACAGAGGTAATTCAGACCTGCCTCCCCCTCGTGGGTGCGAA  
TAAAACGGTTCTTCGGGCACTCCCCATAGCAGGCAAACCTGGTAGTCACACTGCTGGCATTGGCGGGTCAG  
GCTGCGCGATTTGGCAAAGCCGAAGGCTTGGTGGGCGGGCGAATACGCCAGCTCACTGAGCGGGTGTATGG  
TGGATATTGCCGATCTTGTACTTGGGATAGACATAGTGGTTCACAGGCAAACACATCGCCGTTGGGCTCCA  
TCGCCAGCCCCTTGGCGCAGATCTCCCCAAGGTACAGAGGGGTTCTTTCGCTCCCATCCAGGTCTCGAC  
ACTCGCCTCAAAATATTGCACGAAGACCCGTCAGATCCCGCTGCACCCACTCATCGAAAATGGTGATG  
AGAAAATCCCCCACCCCTCGGCCGAGACACACCAGGGCTCGACCACCGAATTTTTGTGCCAGGGATTGA  
GGCGCTTGTCCCCCTGCTTGGTGTGCTCCTGCGGTTGCCAGGTCTGGGGCGCGGTGGTGCGAAAACCTCT  
CTGCTCGACGATGGGGATAAACTGCATCTGGGGCGACTTCACCTCATCACGCAGGAAGCGATAAACCTCC  
AGCGCATCTTGTGCTGGTGAGGTTGTTGACGCAAGTCAGGGTGGCAAACCTCACCTTCCATTTGTGCAACA  
GCGCCACCGCCGTCATCACCTGATTGAAAGTACCGCGCCCGGCTCGGTTGACCCGATAGGCGTTGTGCAG  
CAGCTCGGGGCCATCGATGCTCAAACCGATGAGAAAAGTTGTTGGCGGCCAGAAAATTCACACCACTCATCG  
TTGAGCAGGATGCCGTTGGTCTGCAGATCGTTGGCGATCACCAACCCCTTGGCGGTGGTATTTGCGCTGCA  
ACTCAACCACCTTGGCAAAATAGTCGAGCCGAGCAACGTCGGCTCGCCCCCTGCCAGGAGAAGATGAT  
CTCGGGGGTATTCTGCCCTCGATATATTGGCGGATATAGGTTCTCAAGGGTCTGCTCGTCCATCTGGGGC  
GAGCATCCCTTCTTGTATTCCAGCAGATCCTGCTTGTCTCAGGTAGTAGCAGTAGGTACAGTCGATGTTGC  
ACACGGCCCCGATAGGTTTGGCCATCACATGCATCCGCTTGGATGCCATGCCGTTGAACTGTGGACCCCTG  
AGTAATCACCATAGACTGACCACCTGCAAAAATGATGTTTTGAGGCCGTCAGTCTAAAGGCTCCCGCTGT  
CACACGCTGGTTATAACCCCTTATAACCGGATATGGGACCAGGCTAACATTTCTGATGTCATAAAAAAT  
CATCGCTCCTACGAGATAAAATGGTTCGTATAGTCCCGGTGAGCAAGACAGAAGTGCATAAGATATCGGG  
AGCAACCGCCCAATAAAACCGCCACCTGCACGGCTCGCCCTTCGTTCTGCCTGCGCTATGGTTTACCATGC  
ACACAATTGTGGTGCCTGGCACCAGCCACCCAGGCGCTAGCCGCGTTCATCGGATACCTCATCTCGAGCA  
ACATGAGCAAAACAGCACACGCGGGCAACGAGCAACATTTCTACTTTACGACTACGAGACCTTCGGCAT  
CAGCCCCGCCAAGGACAGGCCATCGCAGTTTGGCGGATTCGTACCGATGCGGATTTCAACATCATTTGGC  
GAGCCGCTGGTTCATCTATTGCAAGCCGCGGGGACTACCTGCCGATCCGGAGGCGTGCCTGATTACCG  
GTATCACGCCGCAAAAGGCGATGAAGGATGGGCTGTGCGAGGCGGATTTTCATTCGCCAGATCCACGAGCA  
ATTCGCCACGCCGAATACCTGTGTGCTTGGCTACAACAGCATCCGCTTCGATGATGAAGTGACCCGTTAC  
ACCCTCTATCGCAACTTCTATGACCCCTATGCCTACGCTTGGCAGAACGGCAACTCCCGCTGGGATATTC  
TCGACATGCTGCGGGCCTGCTATGCCCTGCGCCCGGAGGGGATCGAGTGGGCCTTTGATGATGAAGGCAA  
ACCGAGCTTCCGGCTGGAGAAGCTGACAGTCGCCAACGGCGTCCGCCATGCCAATGCCACGATGCACCTC  
TCAGACGTGCTGGCCACCATCGAGATGGCCAACTGGTGAAGGAGCCCAACCCAAAGCTGTTTGGTTATC  
TCTTTGATCTGCGTAACAAAAACAAGGTGAAGGCGCTGATTGACGTGGTGACCATGAAGCCGCTGGTGCA  
CGTCTCCGGCATGTTCTCCCCCTGGCAGGGTGTGCAAGCTGGGTCTCGCCACTTGCCTGGCACCACC  
AACCAGAACCGGCTGATCATGGTGGATCTGACCCGTGACCCCAACCCGCTTATCGAGCTCACCAGCGAGG  
AGATCCGCGAGCGCCTCTATACCAAAAAAGAGGAGCTGGGGGATCTGGCGGGCATTCGGGTCAAACCTGGT  
GCACATCAACAAGTGCCCGGTGCTGGCACCAGGCGCCACCCCTGACCGCGGAGCGTGCCGACGAGCTCGGC  
ATCAATCGGGAGCAGTGCCGCAAGAGCCTGGATCTGCTGCGCGCCCAACCCGAGGTGCGGGAAAAACTGG  
TGGAAGTGTTCAATCAGGAGTTTGGCGGAGCAATGAGAGCGACCCCGATACCCAGCTCTACGCCGGATT  
CTTTGGCCATGGCGACAAGTCCACCATGGATCTGGTGCCTGCCACCCCGCGGATCTGCTGGGTGAGCGG  
GAGTTGCTCTTACCGACTCCCGGCTGCCGAGATGCTGTTCCGCTACCGCGCCCGCAACTGGCCGCACA  
CCTTGAGCGAAGCGGAGCAGAAACGCTGGCGCCTGCACTGCAGCGACTACTTCAGCCGCGTCTGCCGGA  
CTACGTGCCCCGCTCTCGAGGCGCTGGCAGAGCAGAACAGAGTAACGAACGGAACCTTTGCGATTCTAAAG  
AGTCTCTACCACTATCTGGAAGATTTATGAGTTGTGAGTAGTTTACAATAAAATCCTTCCCGCCATCCC  
CTTCTTCAGGTCATAATGACGAAGGGGATTTCCCCAAAAACCAATATCTTGCAACATCTGAGCGGATGT  
CTCCAAGCAAGATCTCTCTTTGGCCGAACGGAAGCCATTTGCTGATGCCCTGTCACCACGCACTGCTCG  
GATTACTGGCCCTGCTGCCGCTGGCAGCCAACGCCGATACCGGTTGATGTGCCGGATTATCTTGCTCG  
CCTGCCCGAGCAGACCTATCGCATCGTAGAACAGAACTTCAACACCCCTTTATCAGCAGACTGATTTCACT  
CCCCTGATCACCAACAGCTACTTCAACGGCTCCCATCTCTACAAGTTTGTTCGGGGTACCGCTGGCCATCA  
GCGCCCAGTCAGGTTTCCAGCTGGAGGTGTTTGGTCAAGTCTATAACCGCGCTTCGCAAGCCTATATGCA  
CCTGAGCGAGGATATGTCCCTTTATCGGGTGTATGCGGGTGCATCTGATGGGAACCCCAATGATCAGCTG



GCCATCGGTTTTGGTCTGGGGGTGCCCATCACCCGTTGCTAACCTCAAGGCGATAGCCTCCGGCAGTG  
ATATCCCGGGCTATGGCTCTGCCAAATACGCCGTTGGTTTTGAGTGGCGTTACTGAAAACGTGACTGATA  
ACCGCTAATTGAAACAATTCAGGCTCCATGATGGAGCCTGAATTGTTTTGGTGACGCAGTGATCAGGTGTA  
GCGGATCACCCGCCCTCGCCCCCTTGCAGGGTGACAGCCGTACCGACAGCCTGCTCTTGCCAAAAATCG  
GTTCCCCCTTCCGGTAGCAGAACTCCTGTGGTTGCCCTCCAGTTGAAGAGGGCAGAGCAGAGTGCCGC  
CCTCGGGCAGGCTCACTTACCCGAGGCAAAAGTCCATCGACTCGAAACGGGCAGAGGGTGCCCGGGCGGC  
GCAGAGCGCCAGCAACTTGCGCAGTTGCGCCGCTGCTCCTCATCGAGATCTTGACAGCCGATCACCGGCC  
AGCATCATGCCACCGCTCGCCACCAGTGCAGCCAGATGGAACTGTATTCAGCTTTACTTGCCTGCTGGC  
TCGGTAGATCCCGCAGGCAGATGCAGTCGGGGTCGAGGGCCCAGAGCTTGTCATTTTGCCAGGCGCGGCA  
GAAGGCTCGCGGCAATCTGGCGATAGCGGTGGCCATTGCGCTCCACGTCATCGCTAACCCGCATGCCG  
TGACCCAGCCCAAGGCTCGGCCAGATGGGGGAATTGCAACCGAGCAGGAAAGCTCCTTACCTGCACCAC  
GCAGGATGGCCGCCATACCACGCCGATAGGCCCTCGAACCGGGTGGCGGCCGATCGTGGAAACGACCACC  
GTGGATGGCGCCCCAGAAGTTGGCATCGAGTTTGAAGTAGTGGATGCCCACTGCTCGCGCAAGGTGCGG  
AACACCTGTTCAAGGTGCGCCTGCACCTCAGGGTGGGTACCATCCAGCACATACCAGGGAGTGCAGCGCC  
AACCGCCGTAGGTGACCCGCTCGGAGGGCAACGGCAGACCCTCATCGTCTTACAAAACAGTCGGGGTG  
ATCCTGAAACACCTGCGAACCGGGCTCGGCAATAAAGGGGGCGACCCAGAGGGCGGGCTCGCAGCCAGCC  
TGTTTTGATCTCGGCAGCCAGTGAAGCTACACCTTGTCTGAACTTGGCCGACGGGGTGAGCCAGTCGCCCA  
TCTTGTCTGATAGCCGTCGTCGATCTGCACGTAACGCAGGGCAGGAAACGCTCGGCACGCACCTGCAG  
GTTCTCGCGAATATCGGCAGCGCTCACCTCGGCGTAGTAGTGATAACCAGGAGCACCAGCCGCTCGGGCGC  
TCACTTACCTTGCCGATCAGCGAGCCGCTGCTCGACCTCGATCAGCCGTGCCAGCTCGGCCAACAGATCCT  
CGCGCTCCGCCCTTTCAGAGCAGATCAGCTCCTCGCTCTGCCAATGCTCACTGGCGGCAAGTTTTCGCCC  
TTCGCGATTCATCAGGATCTGCAAGCGACCATCGGGATAGAGGCGAAACTCCCCGCCAAAACGGTGGCAG  
CTGGCAAAGGCGAGCAGCAGCCACCCCTTGCCATGCTCCACCAGCAGCAGGTTGTGAATTGTGTGATAGC  
CATTGTTCATCAGTAATGCGATAGACGCTGGCATCGGGACAACGGCCGACATGTTGTGGTGATTGCCAGCT  
ACCCATGGTCTGGGCCAGCATCTGGAATCCTTCGCCATAGATGGAGCTCTCCACCGGCAGGCCAAGCTTG  
CCGTCAAACAGCACCCAGCGCTCGACCGGGGTGGCATCAGAACCAGGTTGTGTCGAGTCGCACCCGACACA  
GGGGCCCTTCCCCTGACGGGTTTGCAGCAGATGGGGTGGCAATGCATTATCGTTGCCAGCTGGCGAAC  
TCGGGCAAGAGGGATGTCATCACTACTCCTTGTAGTTCAAAAAGGGTTCTATCAGGCACTTTTTCAAAA  
ATGCCAATCAAATCAGCTTCAAATGAACGATTGATTCAGTTGTTATGTTTAAATGCCGACCCCGCCCTCT  
CTGGTAAACTGCGATTTTTCTTCCAGTCGATGAGGTTCACTGATCGCGCAACGCGCCTTGTGTACTT  
TCGTGACTTTATGGTCATCGTCGCTGCCTGCTGGCAGGCAAATCCGTGGCAGCCATCCTGCCGTTTCGCC  
TTTTCCCGCAGCATCATCGGCATGCTGCTGCTCTTCGTGCTGCTCTCCCTGCAACTGATCAAGCTGCACT  
GGGTGAGCTGGGCGCTGGCTTGTGCTGCGCCACATGGGCGTTTTGTTGTCGTGCCGGTTCGCGGTGGGCT  
GGTGGCCTGGCTTGAGCCCTGCGCCAATCCTTCGGCGTCATCATGCTCTGCATCGTCTCGGGATCGTG  
CTGATCCTCGCCACCGTCGGTGGCTCTACCAGAGGATGAACAAATGATCTTCTGGCTAGCGATCCCTCT  
GACCCTGGCGCTCTATTTCCGCCACCCGCGCCCTCTATCGCCGCTGCCCTGGCCATCATCAACCCTGTG  
CTGGTGGCGACCCGCGGTGATCATCGGCCTGCTGCTGTTTGTATCTGCCCTTGAGAAGTACGAGCGCG  
GCAGCAGCCCCATTACCATGCTGCTGGAACCCGCCGTGGTGGCGCTGGCGCTGCCGCTCTATCAACAAGC  
GCGCCAGATCCAGGCCAAACTCAAGCCCATCCTAATCTGTACCCTCGCCTCCGTCTTGATCTCGGTGTGC  
ACAACCCTGCTGATCGGTCATTTTTATGGGCACAGATCCGGCGCTGCTCGCCTCATTTGGCAACCAAATCCA  
TCACCACCCCGCTCGCCATGAGCGTCAGCCAGTCCATCGGCGGGCTTCCCGCCATCGCGGGCCGCGTGGT  
GGTGGTAGTGGGAATTGTGCGCGCCCTGATCGGCTATCCACTGCTCAAACGCTGAAAGTGACTGATCCG  
GAAGCGCAAGGGCTCGCCATGGGGGCTGTGCCACGCCATCGGCACCGCCACCTCCGCCGAGAAGGGGA  
TCACCCAGGGCGCCTTTCATCGCTGGCCATGGTGGTGTGCGGTATCCTCACCGCAGCCGTTGCGCCCTT  
CCTTTTTGCCATCTATCACTGGCTGATCTGATCACCCATGACCACCTGTTGACCATTCCGGGGGGCCT  
GCCGGCCTCTCGGGGTGCGACCTGCCGCACAATTTGCACAAGACAAACGTTTCCATTACCATCCCCCTCC  
GTTTGCCCGTCAGGGCGTGAGCCTGCTCACACATTTACCCGAGCTTGTCTCCCTACAATGGCCGCCAATT  
GGCCTTTGAGGACACACTATGCATCCCCGTTTTTGCCAAGCCATTCGATACCCTCTCTGCCCGCTCAAAG  
CAGCCGTGCAGCCCATGCTGGATAGTGGCGACTTCAACGCCCGCTTACGCGGAGCAAGTCGCCACCCCT  
GAAAGCCGCCACAGGTCTCGATGATCGCGCCCTGCGCCTCGCCCTGTTGCCGCTGGCCGCGCCTGTTTCG  
GTGGACCCATTTCCAAGTTTTATGTGCGGTGCCATCGCCTGCGGCCCTGAGCGGCACCTGGTACTTCGGTG  
CCAACATGGAGTTTGCAGGGCAAGGGTGTTCACCTCGGTTACGCGGAGCAGTCCGCCATCTCCAACGC  
CTGGCTGGGTGGCGAGACCGGGATCTCTGAAATCACCGTCAACTACACTCCCTGCGGCCACTGCCGTGAG  
TTCATGAACGAGCTGAGCACCGCCAAGATCCTGAAAGTCTCTCTGCCCGATGACCTGAGCGCCCTGCAAT  
CCTTCTGCCCCACTCGTTTTGGCCCGGCGGATCTCGACATCACGGATGCGCTGATGAGCCCGCAGGATCA  
CGCAGAGCTTGAGCTTCAAAGCGAAGACCCGCTGTGGCAAGCCGCGCTGGCCGCGCCCGTCAAAGCTAT  
GCCCCCTATAGCCAGGGCTATGCCGCGGTGGCGCTGCAATTTGCCGATGGCCGCATCTTCTCTGGCCGCT  
ACGCCGAGAACCGCCCTTCAACCCAGCCTGCCCGGATGCAGATGGCCTGCGCCCATGCGGTGCTTAA  
CGGCGAAGATCTCGCCACCATCCGCCGCGCCGTAAGTGTGGAGAAATAAAAACGGCCAGATCAGCCAGCGT  
GACTCCGCCAGTCCACCCTCAAGGCGCTGGGCTCGGTCGAGCTGGAGTATCAGGCGGCTGACCCCGG  
CTTTGTGTCGATAAACGAAAGCCCCCGCACCTTGGTGGGGGGCTTTTTACTTGGCCGTTTAAACGGGGG

CTGCGCTTGGCGCGGTTGATCACCCCGTCTAACCGATTGCTGATCAGACCGGTTTCAGCCGCGCGGTGAA  
GTGGCGCAGCAGCGCGGCTCGTAGTCAAAGGTGAGCCCGGAATGTCGCTGGCCCGCTTTCACCGCG  
ATCAGGCAGTCGGCCACATAGTCCATGTGATCCCGGGTGTAGACCCGACGCGGAATGGTGAGACGCAACA  
GCTCAAAATCCGCGAGCCTCCTGCTTGCCGGTGGCGGGATCGCGCCCCAGCAGCAGGGAGCCAATCTCCAC  
CCCCGCGCACGCCCCCTTCCAGATAGAGCTCGCAGGCGAGCGCATGGGCCGGAAACTGCTCGGCCGGAATA  
TGGGGCAGCAGCTTCTTGGCATCCACAAAGACCGCATGACCGCCGGTGGGGGTCTGGATCGGGATCCCCG  
CCTCGGCCAGCCGCTCGCCGAGATAAGCCACCTGACTGATGCGATAGGTGAGATACTCCTCATCCATCCC  
CTCGCGCAGACCGATGGCGAGCGCCGCATGTCCCGCCGGCGAGACCGCCATAGGTGACGAATCCCTCC  
ATCGCCACGCAGCGCACCTGCACAGCGCGGAACAGGTGAGATCCTCTTTAAAGCAACACAACCCGCGGA  
TATTTGACCAACCCGTCCTTTTTGGCCGACATGGTGAAGATGTCCCCAGCGCGAACATCTGGCGCACTAT  
CTCCTTGATGCTGTGCTTGGCATAGGCCGGTCCCCTCCTTGATAAACAGCGCTTTTCGGCAAAGCGG  
GCGGCATCGATCACACCACCGAATATGGTGGCGACGGCCAGTTTCGGAGACCGCCCTCCATATTGGCCATGG  
AGACCGGCTGGCCACCGCGCTGTTGCAGGTACCGTGATGATGATGCGCGCCACATTGGCGGCCCCAG  
CGTCTCGATGGTGTGCTCAGGCGAGGGAGATCAAAATCCCCCTTTCAGGCGTAGGGCACCGTGGTGTGCG  
AGGGCTTTTCGGGGTGGAGCAGATTGATGGCCCGCGCGCCAGCCAACTCCACATGGGCCCTGGTGGTGTGCGA  
AGTGGTAGTTTGGAGATAAAGACCGCGCCTTGCCCCGGCAACGCTTGACCAGCTCGGGGAAGAGGATCTG  
CTCCGCCCCGCGCCCTGGTGGGTGGGCATCACATGCTGGTAGCCAAAAATCTCGCGCACCGTGGCGCTCC  
AGCTCGACGAAGTTGCGGCTGCCCCGATAGGCCTCATCCCCATCATGATGCGGCCCACTGACGATCGG  
ACATGGCACCGGTGCCGCTGTGCGTCAGCAGATCGATATAGACATCTTCAGCCAGCAGCAGGAAGGGGTT  
CCAGCCAGCGGCCTCGAGAGCGGCACGGCGCTCGGCACCAGTGGTCTGTTTGTATGGGCTCGACCATCTTG  
ATACGAAACGGCTCGGGTATACGACGCATAAAAGACTCCTCACCGGCGCAAGGCCAGTGTGTTTGAATC  
GGAATTGGCAAAGAGGCCGGGACGATCAGGGTCTGTCGGCTGACAAATTCAAACGGCGGGTGGCCCAAT  
CAGCGGTGAGGAAAGTCGAAGGTGAGAATGGGATCCCGGGTATACCAGTGGGCGAGCAGGCAGGCTGCC  
GGGGCGTAGCTGTGATGATTGGCATCACTCCCCTCCATATCGGTTGTAGACAGTCGGTGGCCAAACAAGAT  
CCATTGATGGATGCTGCCAACAGGCAGCCTCGCCACGTTAACGGCTGGTTAATTGGCAAACAAGGGGCGC  
ACCGACGGGCTGTGCGCCCGCTCACAAAGTGGGCGTCTGCGCGGCAAACCGGCAGTGAGGTTGATCCGCC  
CGCGCCCCGGTTTCGTTATTCTCCCTACCCACAGCCACATCCCCATCAGCCAGGGCCGGAAGCCATCA  
TGCATCCGCAAACCCATCTCCCCGAGAAGAGGTTGCTACTGACCGAGCGCTGTGCCACGCTCGCTGCGCAG  
GTGGGCGCAAGCTGGGAGGAGGTTGCTACTGACCGAGCGCTGTGCCACGCTCGCTGCGCCAGCTCGCTG  
CAACCTGAGGGGGAGCGAGTCTGATGGAGCTGCGCCTGATTCTCGGCGATCAGCTGAACGCCACTCACAG  
CTGGTTTTGCGACCCCGGATCCGGCGGTCTGCTACCTGATGGCAGAGCTACGTCAGGAGACTGACTACTGC  
CGCCACCATCGCCAGAAGGTGCTGGCCTTCTTTGCCGCCATGCGCGCCTTCGCAGCAGCACTCACCCAAG  
CGGGCCACCGCTGTGTTACCTGACCCTCGATGAGAGTGGCCGCTGGCCCGACTTGCCCGGCTTGCTGGA  
GGCTCAGCTCGAAGCACATCAGGCCAACAGCTTTGCTTGGCAGAGCCCGGACGAGTGGCGCCTCGCCAGC  
CAGTTGAAAAGCTGGGCGGCGGGTCTTGTGATCCCTGCCACCGAGGTGGAGAGCGAGCATTTTCTCACCC  
CCCCGATGGCTGGCAGCGCTCCCCCACAGCCGGATGGAGTTCTTCTACCGCGCCCTGCGAAAGCAATA  
CCGGGTGCTGCTTGGATGAGCGCGGCCAACCCCTTGGCGGGCGCTGGAATTTTGTATGACGAGAACC  
AAACTGCCGGCGAGCCAGCCGCTCCCGGCCCTCTCACCTTTGTCAACGAGGTGAGCGAGATTGACGCCA  
TGCTGACCCGCCACGGGGTACGACCATAGGCGAGGCAGATGCCAGCAGGCTGCCCTGGCCATCACAAAG  
GCGCCAGAGTCGTGAGCTGCTGGCCCATTTTCTCACCCACTGCCCTGCCCACTTTGGCCGCTATCAGGAT  
GCCCTGAGCGAGCGCGGCTGGAGCCTGTTTACAGCCGCTGTGTCGTTTTCCCTCAACAGCAAGATGCTTC  
ATCCGCTTGAGGTGATCCGCGTCGCCGAGACCCACTGGCAGGCTAATCAGGCCACCATCACATTGGCGCA  
GGTAGAGGGGTTTATTCGCCAGATCCTCGGCTGGCGGAGTTTGTCCGTGCCCTTACTGGGAGAAGATG  
CCTGACTACCAGCAGACCAATTTTCTCGAGGCCAACCGGCCGCTGCCCGGTTTCTTCTGGAGCGGCCAAA  
CCAGGATGGCTGCGTGCCTCACGCCATTGCCCAGTCTCTTGAGCACGGTTACGCCACCATATCCAGCG  
GCTGATGGTGACCGGCAACTTTGCTCTGCTGGCGGGGCTCGATCCTGACGAGGTGGATCAGTGGTATCTC  
GGTATCTATGTGGATGCCATCGAGTGGGTGGAGCTACCCAACACCCCGCGCATGAGCCAGTTTGCCGATG  
GCGGCCTGATGGGCAGCAAGCCCTACGCCAGCAGCGGCGCCTATCTCGAGCGGATGGGCCACTACTGCAA  
GGGGTGCCACTATCAGGTCAAAGCCCGCCACGGTGGTGGAGCTGCCCTTCAACAGCCTCTACTGGCAC  
TTTTCTGCGCAATCGGGACAAACTGGGCGGCAATCCCCGCTCGCCCTCCCCATGCCAACTGGGATG  
GCCAAGCCGACGCAACAGCAGGCCATTCTGGCGACGGCGGAGCAGTACCTGATCAAGCTGGAGCAGTT  
GTAAGCGGGCCATGCCTCCTGACACACGCTCTGACAACAGCGCAGCGATTTACGCTGGCAATCAGGCTC  
ACCATCGCACCAAACACCAGCTTGTGACAGGCAAGCAGACGGAGATCCAATCCTGCGCAGAGCGGTTGA  
ATATCCTGTGGCGGCTGATTATGGTGGTGGCCACATCAGGAGATCAGTCAAGGAAAGACGATATGGAGAT  
AGTGGTTCTCGGTGGCGGCGTGTGATCGGGGTAACCAGCGCCTGGTATCTGGCCAAAGCGGGTACAAGGTG  
ACTCTGCTGGAGCGACAAGGTGGCGTCCGCTTGAAACCAGCCATGCCAACGCCGGGCGAGATATCCCCGG  
GTTACGCGGCCCCCTGGGCGGCCCCGGCATCCCCCTCAAGGCCGCCAAGTGGATGCTGCAAAAGCATGC  
CCCCTTCACTGTGCGCCCCACTGCCGACCCCTTCCAGCTACGCTGGATGCTCAGAATGCTCGCCAACTGC  
ACCCCGACCGCTATGCCACCAACAAGGGGCGCATGGTGGCTCTGGCCGAATACAGCCGCGACTGCATGA  
AGCTGCTGCGCGACGAGTTGAGCATCGATTACGAAGGGCGCCAGCTCGGCACCCCTGCAGCTGTTTCGCAG  
CCAATCCCAGCTCGATGCCAGTCAGCGCGATATCAGGTTGCTGGAGGAGTATGGCGTCCCCTACCAATCC

CTTGATGCCAGCGGCTGCGAAGCGGCAGAGCCTGCGCTGGCGGGTGGCGGGCAAATCGTCGGCGGCT  
TGCGTCTGCCCCGGCAGACGACCGGGCAGCTGCTTCCGCTTACCAAGGCCCTTGCCCTTGAAGCCGAGAA  
GCTCGGGGTCAAGTTTCGTCTTCAACTGCGATATCGACGAGATTGAGCAAGCCCGTGGCCGAGCCGTGGCG  
GTGAGGGCAGGCGAGCAGCGCTATCGCGCCGATGCCATCGTCTGTGCGCTCGGCAGCTATGCCACCGGCT  
TTTTGCGGCCGCTGCTGCGCCCCGCTCGGGCTGGAGCTACCTGTCTATCCGGTCAAGGGCTACTCCCTCAC  
CCTGCCGATGATCAACGCCGAGGCCGACCCGCGCAGTACCGTGTCTGACGAGACCTACAAGGTGGCAATC  
ACCCGTTTTGACGAGCGGATCCGGGTGCGCGGCATGGCGGAGCTGTGCGGTACAACCTCGCTCTCAACC  
CCAGACGCCACGACACCCTGGCGATGGTGGTGGGCGATCTCTTCCCCGAGGGGGCGATATCAGCAAGGC  
CGAATTCTGGACCGCCTGCGCCCCATGACGCCGGACGGCACCCCGCTGGTGGGGCCAAGCCCCATTCCT  
GGCCTCTGGCTCAATACCGGCCACGGCACCCCTGGGCTGGACCATGGCGGCCGTTTCGGGTACGCTATTGT  
GCGATCTTATCAGCGGCAGCGAGCCCGCATTAGCGATGAGGGGCTTACTCTGGCCCGTTACGGCTAGAC  
GCCCACACAGTCCGGCTGTTTACACAGCTCAACTGCGACCCAGACAAACAGCAGAGGAGCTTCTCAACCGC  
TTTATTGACAGGCCACCGCCAAAAACGGTGGCCTTTTCGTCTGATGTTGACCTTCTCCCTCCCCGCTGTC  
CTGAGCGGTAGTCTGGCTGCCGGTTAATGCAGCAAACGGCACAGAATATTGCGCAATTGACTTGGCGCAA  
GCCGCCACAATCCGTAATGTGGATAGACGCATTTTTTCGACGCGCATATTTTTTAAATGGCCTGTAAACCG  
CTTGTAACAGGCGTCGCCAGACAAGGGTTACGGGTGTACCCGCGAGTTTCTTTAGCAGCAATCCAGGG  
TAGGACAATATGAAAAAGTAGGTTTGGTCGGTGGCGTGGCATGGTGGGATCGGTTCTGATGAGCCGGA  
TGCAGGAAGAGCAGGATTTGCCCCATATTCAACCACATTTCTTACCACCTCCCAGGCCGGTGAGGCCG  
TCCCAACTTCGGCGTCGATGCCGGTACTCTGCAAGACGCCCTTCGATATCGAGGCGCTGGCCAAGCAGGAT  
ATCATCATCACCGCCAGGGCGGCGACTACACCAAGGATGTCTATCCGCGCTGAAAGCCGCGAGTTGGC  
AGGGCTACTGGATTGACGCCGCTCTCCCTGCGGATGGAGAAAGACGCCGCTCATCTTCTGGATCCGGT  
CAACGGCGACGTATCGAGCAGGCCCTGAACGATGGCATCAAGACCTTCGTGCGGGGCAACTGCACCGTC  
AGCCTGATGCTGCTGGCCCTCGGCGGCTGTTCAAGGCCGATCTGGTGGAGTGGGTGAGCGTGGCTACCT  
ATCAGGCCGCTCCGGTGGCGGTGCCCGCCATATGCGTGAGCTGGTTACCCAGATGGGGATGCTGCGTGA  
CGAAGTGGCGGTGAGCTGGCAGACCCCGCCTCCGCCATCCTCGACATCGAGCGCAAGATCACCGAGAAG  
ACCCGCTCCGGCACCCCTGCCGGTTGACAACTTCGGCGTACCGCTGGCCGGTGGCCTTATCCCTGGATCG  
ACACCAAGCTCGACAACGGCCAGAGCCGCTGAAGAGTGAAGGGTCAGGCCGAGACCAACAAGATTTTGGG  
TATCGAGAACCGCTGATTCGGTGGATGGTCTGTGCGTTCGATCGGCGCCCTGCGCTGCCACGCCAG  
GCCTTACCATCAAGTGAAAAAAGATGTCCGCTGGCGGAGATCGAAGCCCTGCTGGCCGCCACACAG  
ACTGGGTGAAAGTGATCCCCAACGATCGCGATATCACCGCCCGGAGCTGACTCCGGCGGCCGTCACCGG  
CACCCCTCAGCATTCCGGTGGGCCGCTGCGCAAACCTCAATATGGGCCCTGAGTATCTGGCCGCCTTTACC  
GTGGGTGATCAGCTGCTGTGGGGCGCCGCGGAGCCGCTGCGCCGCATGCTGCGTATCCTGCTGGCGCGCT  
AAGCCGCCACAGCAGCAGATAACAAGGGCGGGGAGTACACTCCCCGCCCTTTTTCATTGCTGTTTTT  
TATGACCCGTTTTAACGGGTTACGGCCTTGCCATTACTTGAGCAGGATTCGCTGGCAGCCGCTGTAGATT  
TCGGCCCCCGGGGGCGGCAAAAACCCACAGGGTGAGACCGGTCTGCTCGGCCGTTTCGACCCGAAGCT  
CGGTAGCGGCCGAGATGGCGAGCAAGATCTGACCCCGCGCTGGCGCACTTTTGCACCATCTCGAAGCT  
GGCGCGGCTGGTACCAGAATGGCGCCGTCGCGCCGACCCGTGCGGCACAAGTCCCCACCAGCTTGTCC  
AGCGCGATATGGCGCCCCACATCCTCGCGAATGGCGAGAATGTTGCCCTCACCATCCAGATGCACCGCCG  
CATGAGTGGCGCCGGTGCCTGACCCAGCAGCTGGAGCGGGCGCAGCGCGCTCAGCACCTTGTGATATG  
GCCCACCGCCAGACGCTGACTGTGCGGCAAGCTTGGCTGGGTGCGGATCACCTGCGCCAGACTCTCGCTG  
CCGCAGATGCCGCAACCGGTACGGCCCGCAGGGTGGCGCCGCTTCTCTTTAAGGCGATGGACGCAGCGGT  
TGGCCAGGGTGATATGCAGCTCAATCCCCTGACAGCCATCAATCTGCTCGATGTCGTGGATATCGAGCAG  
GCTGTGATGATCCCCTCGGATAGCGAAAAGCCGATGGCGAAATCCTCCAGATCGGAGGCCGAGCACATC  
ATCACGCTGTGGCGATGCCGTTGTAGACCAGCGCCACCGCGTCTCGGAGGGGAGCGCCATTTTGTCTGT  
CGCCGCCAACTCAAGTAGCTCTCTCATGGTGGCAGCCCATCGATGATCTCGGGATCTCTGGCCGAGATGC  
CGAGCCGCTTCATTTTCGAAAAGTAAGGTGGTGGCTTCATACCGAGGCGGTTGGCCGCCCCCGTTCCGCC  
AGCGACGATGCCGTTACAGTCGCGCAGGGCGGCGATGATCGCCTCGCGTTCATCGGTGCGCCCCCTCTCG  
GCAAAGAGCGGCGTGGCGGGCTCGTCATAGACCAGGGTCTCAATCTTGTGGTAACCCCTGAGTGGCATCA  
GCTCATCGGGCGAGAGGTTGAGCACATGGCCGCGGGTCAACACAGCGCGCTCGATGACGTTCTCCAG  
CTCGCGGATATTGCCGTACCAGGGGAGCGATAACCAGCATTTTTCATGGCATCGGCGGGGATCGAGGTGATG  
GTGCGGCGCATCCGCTTGCAATCTTCTTGATAAAGAAATGACCAGCAGCGGAATATCCTCGCGCCGCT  
CCCCGAGGGGTGGCAGCTCGATGGGAAAGACGTTGAGGCGGTAGTAGAGATCGCTTCTGAAACGCTTGT  
CTTGACCATGGAGAGCAGATCGCAGTTGGTGGCGGCCACCAGCCGACATCCACCGCTATTGGGTTGCTG  
TTGCCGACCCGCTCCAGTTTCGTGCTCCTGCAATACCCGCAAGAGTTTGGGCTGCAAGTCCAGCGGCATAT  
CCCCACTTTCGTGAGGAACAGGGTGGCCTTGTGGGCCCGCTCGAAACGGCCGATCCGCTGGGTGAGGGC  
GCCGGTAAAGGCCCCCTTCTCATGGCCAAAGAGATCGCTCTCGATAAGGCCGGTGGGGATGGCGGCGCAG  
TTCACCTTACCATCTCGTGGTCAATGGCGGGCACTCAGGGCGTGAATGGCCTGGGCGATCAGCTCCTTGC  
CGGTACCGGTCTCACCGAGGATCAGAACCGTGTGCTGCTCTCGGCCACCAGCCGACCTTCTCCAGCAC  
GCTCTCCATCACCGCGCTCTGGTAGATGATGTGGGGAACTCCCCCTGCATCTGCGGCTCGTTGATGCCA  
ATGGTCTTCTTTTTGCGCCGTTGGTGTGGAGATCTCCTGCTGCGCCTGCACGTTGTTTCATGGCAATGG

CCGTGCGCGCCGCCACCTGCTCCAGCAAGGAGATATCGATATCGGCAAAGAAGTCGGCGTTGGGATGCGA  
GAGGATCAACACCCCCAGCAGGTTGCCCCGATAGCGCAGCGGCAAAATGCAGGAGCTGTCGGCCTCTGGC  
GGCAGGATCTGGGAGGTAAAGCGGCAGCGATTGCTGCAACCGTGACCATGTTTCGCGATAGACGAAAAACG  
GCTCGCTGTGGCCAAGGGCCCCCTGCAGGCACTTCTTTTCGAAACAGGAGTGATCGATGATGCCCGGCTG  
CTCGCTCTGGTGCTGATTGACCAGATAGCTCTTGAAGCTGTCGGAGGTGGCGTTGTATTCGGCCAGACAC  
AAGCTGCTGATGCCGAAGTGGTGGTGCAGGATGGCAAAACAGGCTCTTGGGCAGTTTCGGCGATGCGCACCA  
GTTTGATCACCGCGTTGGTTACATCCACCAGAATTTTTCAGCTGTCGCGCTCAAGGCGCAGGGAGTTGGC  
CTGCTCCAGAGTGCCTCCTTGTGAGCAGCTTCTCCAGCGCAATGGCGATAATGGCCGCCAGCTGGGTC  
AGCTTGGCGAGGGTTTCCATGGTGAACCTGTCGAGCTGGGTGTTGATAAACTCGACCCCGCCAAAGTGGC  
TGCGGGCGGTGGTGTATGGGAGCTGGCAGTAGGAGCGTAGCCAGCGTAGACCCATTTCGCGATCCAGCGC  
CGGGCAGCGATTCTCAAAGCGGGCGGCAGCAGAGAATGATGGCCTGTTCCGGGGTCTCTTTGGTAGGACGG  
GGGAGAGGTGCAGCTCTGCCTTGGGGCAGACAGATGCTTTGGGCCGGAATGTCCCATGAAATAGAAGA  
TGGCCTCCTCGTCCGCACCCATGTTGAGGATCAGGTTGACCCGGGTCACGCCGCCAAGCTGGCATCTAT  
CTCGTTGAGTTTTGTGGATAAAAATCATCGAGCGTCACGGCCGACAGGAGGGATTTGGAGAGCAGGAGGAAA  
CCGTCGTCCCAGATGGGAGAGATCTCGTCCAGGGGGATGGCACTCACATTTAGCATTTCGGCCCTCACGTT  
ATATCGATTTAGTCACCAGTCAGGCTGTCCATGCCATCGCATCACGACAAGCACCCGTCACCAAAAATAAA  
TAGCCCGAGCCCGTAAAAGCGGCTGCCAATAAGAAAAGCGGTGACGAAAATTTGTCGCATGTTGCAATTC  
AGAGTTGTTATTAACGAACGACAACAAAAAGTAACATCGTTATCGGGGGATATATTGGAATGGCGACTCA  
TCATAGATGAGCTCAAATTTTATTACAATCCGATTTAATATATCTGATGGCCATATTTAACCAGTTATTT  
CATCAGTTCTTGATCTCAATTAAGGCGCCTGAAAAGTGGGCCCGCTCAACTGTCAGATCTGCCCTTTCC  
TCTTCGCTGGCTGCGGGTTTTCAAGATGGCGTTTGTGCTGCCCATCCATCGGCAATTTACGAGGTGATGATCC  
GGCTGTGGCAGCACTTCAGGCCACCGAAGATAAAGAGGGCCGACAAGCTCTGGAAGGCCATCAGCAGCCA  
GCTGGCGTTTGTGGCAAGCTCGGGCGGTGACGCTCTGGTGCCTGAGGTAGATCAGCAGGGTGATCACCCCC  
AACAGCAGGCCGTTGATCAAGGTGGTGGAGATAAAACCCGATCAGCCAGGCACTGGAAAATACTCAAGGCAG  
AAAATACGCTGCTCATGGCGAGCCTTTCGGCCATAAAAACAGCCGAAAAAACCGAAGCCAGCAGAAATAT  
CATCTCGTTCGCGCAAATATAGCAACCTATTTCCAGCAATATCGCCGCCAGATAGGTGCCAATATAGAAA  
AGTCCGAATAAAGCGACCAATTTTATGTTGCATCATTTACTCCCTTTTTTTGGGTAATAAAAAGGGTGGCC  
GACTCGATAAAATCCGATCGGGTTCCTTATTTGTGCAACCTCGTTTTTTAGGGCGATCAGCCCTTGGC  
TGCGCTGCGCAATTTTCGCTTTCGCTTTCGCTTTCGCTTTCGCTTTCGCTTTCGCTTTCGCTTTCGCTTTCGCT  
TCAATGCGCTCGATCTTTCACCGCGCAGTACTTGTACTCCGGCGTGTGGGAGACGGGATCGACGTGCTCGA  
TGGTGTAGCTCGTTACAGGCCCCGATCCACCCTGGTAGGTTCATGTAGACCACCCCGGCGTTGACCCGGTC  
GTTGTAGTTGGCCCGGGTGTACCTTGCCACGGCGCAGAGATCCAGACCAGCGCTGATCCTTACC  
CCAAGCTTTTTGGCATCGCTCGGGTGGATCTGCACATAGCCCGGCTCATCGGCCAGGGTTTGCAGCGCCG  
AGCAGTTGCCGGTTCATGGAGCGGCAGGAGTAGTGACCCACCTCGCGCACGGTGGAGAGCACCAGCGGGTA  
CTCGGCACAGGGCTGCTCCAGCGGGCGGCCACTCGGAGGCGATCAGCTGACCCCTTGCCGCTCGGGGTG  
GTGAACACATTTCCCTCGAACAGGGTGTGGTGGCCGGGTGATCCTCGGTGGGCAAGGCCACTGCACAC  
TCTTGAGATCGGCCATCTTGTGCTAGCTGACCCCGGCATAGAGCGGGCAGAGCGCACGCATCTCGTCCCA  
GATCTCTTCGGTGTGTGGTACTCCATGGGATAACCCATGGCGGTGCGCATCAAGGAGAAGATGGCCAG  
TCCGGTTTTACGTTCTCGGGGGCGTCAACCGCTTGTAGAAGCGCTGGAAGCCGCGATCCGCCGAGCTGT  
AGACCCCTTCATGCTCGCCCCAGCTGGTGGCGGGCAGAATGACATCCGCCATCTCGGGCGTCTGGGTCAT  
GAAGATATCCTGCACGATCACAGCTCCATCCCCGCCAGAGTGGCGGGAAGTACCCAAAGTCAGCTTCG  
GTCTGGGCCGGATCTTACCAGGATGTAGAAGGCTTGCATTTGCCCTCCTCCACCTTGTGGCCAAGCT  
CGGTGAGGCGATAGCCGGTTTTCCGGGAGAGCGACTCCACGCCCCACGCTTGGCGAACTTGGCGCTGAT  
GGCGGGATCGGCCACCGACTGATAACCCGGAACTGGTGGGGCAGCATCCCCATGTCACAGGTGCCCTGC  
ACGTTGTTCTGACCACGCACCGGGCCGACCGGTCGCCACGGCGACCGAAGTTGCCGGTTCAGCAGCGCCA  
GACCCGCCAGCCCCCTTGACCACGTCCACCGCTGACCGTACTGGGTACCCCCATGCCCCACAGGATCAT  
GGACGCAGGCGACTCGGCATAGGTGCGAATGGCGGGCGGATATCGGGCGCTTTGAGGCCAGTGATCCCC  
TCCACATATTTCCGGGGTGTACTTGGCCACCGTTCGCTTGAAGGTCTCGAACCCCTTCGGTGTAGTTGGCGA  
CAAAGGCCCTTGTGTAGAGCCCTTCATTGATCAACACGTTGGCGAAGGCGTTAACCAGCGCCATGTTGGA  
ACCGTTTTTTGAGCGGCAGCCACTGATCGGGCATGCGGGCGGTCTCCACCATACGGGGATCACACACAATC  
ACCTTGGCCCCGTTTTGCCTTCGCTTTCGCTTTCGCTTTCGCTTTCGCTTTCGCTTTCGCTTTCGCTTTCGCT  
AACCAAAACACCAGCAGGCACTTGGTCTCTTGAATTTTCGGGAATGGCGTTGCTCATGGCGCCGTTGCCAC  
AGTTGTCTCCAGACCGGAGACTGAGGGGGCGTGTACACCCCTCGCGCAGTGGTGCAGCTTGTTCGTCCCA  
ATCACCGCACGGGCAAATTTCTGCATCACATAGTTGGCTTCATTGCCGGGGCCACGGGCAGAGCCGGTGG  
TCATGATGGCGTCCGGGCCATATTTTGCCTTTCGCTTTCGCTTTCGCTTTCGCTTTCGCTTTCGCTTTCGCT  
GTCCAGGAGACGGCCTCGAACTTGCACCGCGCTCGCGGGCGGATCATCGGGCTCTTTCGAGACGGGGGGT  
AGCAGGTTGGTGTGCTTCAAAAAATCCCAACCGTAATAGCCCTTTCGAGGCGAGCTGCCCTCGTTGGTCC  
GGCCGTTGGCGCCTTCGGCCCCACCACCTTGTGCTTTTTCAACCAGCAGGTTGATTTTGCACCCGGTGGC  
GCAATAGGGGCACACGGTAATGACTTTTTTTCATGACTCACACTCTTGTGTTGTTAACGAAAAACGGCTCGG  
CAAGCCCGCTCACACCCGCGCCGGCATCGCCAGCAGTGCCTCGGCACTGGCCAGCTGCTTTCGCGGTTTC  
AGGGTTTTCAAGATGCTCCGGCGTGACCAGCCGAGCGCCTGGGTGGACACACCTCGACACAGGCCGGGC

CCGCCTCGCGGTGACGGCAGAGATCGCACTTGGAGCGCCTGCGCCTTGGTCTGCGGACGCTTGAAGAGCGA  
ATCGGCAGCGGGTGCCACCTCTTTGAGCACCACCGCCATGGCGCCGTAAGGACAGGCCACCACGCAGGAC  
TTGCAGCCGATGCAGCGCTCCTGCAACACCTTGCAGCAGCCATCCTCGCTGACGATGGCATTGTTTCGGGC  
AGGCCATGGCGCACGGCTTGTCTTACACTGGCGGCAGAGCACCGGCGTGGTCACCTTGCTGCCACGAT  
CACCTTCAGGCGCGGCTGAAAGTAGCTGTCCCTGGAGACCAGATGTCCATCCTCGATGGCAAGATGCAGG  
CCGCCCTCCCCTCAAGGGTCCCCTGCAAGACCCTGACTGGTGTGAAACGGCGCAGGCCACCTCACAGG  
TACGACACCCAATACAGAGACTGGGATCTGCAATCACGAAGCTGTTTATAGAGAGGGATCCTAAATGGTT  
CGTTACACCGGGCCCGCCGACAGGCAAAGAGGGCGCCAGCCCCCACAAAGCATTATCAGACCCAAA  
ACGGGCCAAAGGTGCGATAAAAAATCACAAACCTGAAAAATAAGGAATAATCAGAAATAGGTGCGTGC  
TGGATTGCCCTCTGACGAGGGTGCAGCAGGGCTGGGAAGTGTGATCGACACGACAAAAGTGACGAGCTC  
GACACCGGCTGACAAAGCGTATCGCCCTGGCCCTTTCAGCTCAATTGCTCAAGCAGCAACCAATCAATGA  
CTAATTTATTGATCTCGACAGATTATGCGCCGATTGCCCTTTTACCCCTACCCGATTGGATAGCATG  
CTTCAGTTGGCAACCTGTCTGTTAAGGGCGTTTCCATGTTGATAAGCATAACCCGCACAGATTAATAAC  
AGCAGACTGGGAGTCTGGATGTTTACAGACAGTGGCTAGAGACAACCTTCTATGTATGCATTCACTAGATT  
AGCCAATTACTTTATTTCGTCTCCTTAAATAGGACGTTATTGTTCTCACAAATTAATAATACCCTCT  
ATGTAGGATTAATAAATGAGGTGAAAAATGGAAGATCCAGGTAATTAATTTGGAACATTGCATGCGATG  
AGTCTGGCGTTAATGGTGCTAGATATTATGGCTTTGGTAGTATTTGGATGAAATGGCAGCGGCGAGGTGA  
TTTTTCAAATTAGTTTTCAGATTTAAGAGAGAAAACACCCTATCATGATGAAATAAAGTGGCAAAGGCA  
CATAGCAAACAATTCGAAGTTTTTATCTAGAGCTAATAGAATAATTTTCAAAGAGAATGGCTTGCTT  
TTCATTGCATAATTATTAAGAGTCAAGATGTAAGAAAAGAAATGCCACAATGGTACTACGATTTAGCTCG  
ACGCAAACATTTCAATCTATTACTTAACTCAAAAATTAATCAGTTTAAAGCAGCATCCAAATAGAGAA  
TGCCAGTTTCGCATAGTTGTAGATCCTATTGCATCAAGATATAAAAAAGCAGATGAGGCCTCACATATTA  
TTGTCAATAACCAAATACACCAAGTAACTAACTCTCCGATGTCATCGATAGTTATGTAACATAAGACTC  
CAAGACATCTGTTCAAATTCATTTGTGTGATTTACTACTTGGTGCTGTAATGGCTGCATGGCAAAGAAA  
GCCACCTCAGAAGGTAAGATTTAATTCAAAAAGAAATTTCTGACTATCTGGATGGATAGATCCTTGAGG  
CAGATACGAAACCATCTGAGCGTAAATTCACATTTGGTATTTCTACGATAAAAACTTAGGACCTAGAGA  
AGTGAANAACAGTCAAATTTGAAGTATCCACTACCACAGTGCAGACAAAACAATAAAATTTATGCTA  
GATAGTACTGACTCAGATATAAATCAGCCCTTAAAATTTATCAAGCACAGGATCTTATGGCAATCACCTA  
CTTGAAAATTTCTGATACAACCATCAAAATTTGCAATTTGGTGCATTAATTAGTGCCGTAGGCAATAAG  
CGCAGCGCATTGCACCTCTTGCTCTTTAATACTTGGTGCAATTTACTTTCGTTTCAAGTACCTACGAT  
TATATTTTAATGGAGTAAGATTTGATGAATATAAAAAATCCATAATGAACATAAAGATGATATCTTCAATG  
TACTTGTGATAACCTTAGACAATTTAACTTTGATAAAAAATGGGTGAGGAACGCTCCCAACCTTTAATTTGT  
TGCCATTCATGATGATAATGACGAAGTTGTGCGGTGGCATTGCCGGACGTAATAATTTATCATCAACTGTTG  
ATCGAAGTACTTTGGGTACACAATGACAAGAGAGGACAGGGGCTTGGCATTCAATTAATAGAGATTGCTG  
AACCGGAGGCAAACAAACGGGGATGTATTGCTGCTCAAGTGCACACCTCTCATTTCAAGCACCCAAATTT  
TATGAAAAAATGGGATTTGAAATAGTCGGTAAAGTGCAGCGGCTTAAAAATAGTCTGACCGCTATTTTT  
TATTGAAGCACTATCATGGAGAGTAGTAATTAAGTGTAGGGTGCATAAAGCGCAGCGCATTGCACCTCTTA  
CCTATTTAAATACTTGGTGCATTTCACTTTCGTTTCAATTCGACTCTACCTTCCCTCTGGCGAATAAAGACT  
CCATCGCAGCTCAACTGCATCCCTTTGCCATCCTGCCAGCATTAAATTAGCGATTACTTTATCGTCTAT  
TTATTATCCGTTTTTGGAAAAAGATTTTAGCCAAACCACTTCGCTAGATAAAAAACAACAGTTGCTCGATT  
CCCGCCATACATTTCAATCGCCGGATAATTAATTTCTTACTCAAATTTGAATTTTGAATTTTATAACT  
GAGCATAGTCCCGCAGAGTGTGTGTCATTATAAGCTTAATGACAGATGAACAGACTGTGTTCCATGACAA  
GCAGATCACTATTCGTTAGCGCCCTTTCCATCGCAATCCATTAATTTTCTCCCGATTAATAATCACGA  
CTCTCTGTTAGGTGCGGCAGCTGTGCGTGGCAAACGTGTAACATCAAACTGACAAGATGAACATCATG  
AACTGTGATAAACAACAAGCCACTCCCGCGCTTATGCTGGCGGCGATTGGCGTAGTCTATGGCGATATCG  
GCACCGCCGCTCTATACCTTGGCGGAGTGCCTGTGAGTCAATTCGATTCGCGTTCGCGCTCGAGCCGATC  
CATTCTCGGCTTTCTCTCGCTGATCTTCTGGCTGCTGATCCTGGTGGTGTGCGTCAAGTACCTCTCCTTT  
GTGATGCGGGCCGATAACCGCGGCGAGGGTGGCATTCTCACCCCTGATGTCGCTGGCGACCCGCAACGCCT  
CCACCCGCTGGACGCCGCTGCTGATCATCTCGGCCGATTGGCGGCAGCTTCTTCTATGGCGAGGTGGT  
GATCACTCCGGCGATGTGCGGTGATGTGCGCCATCGAGGGGCTGAGCATTCTCACCCCGCCCTCGACCC  
TATATCGTCAACCTTTGCGTGTGGTGTGACCTGTTGTTTGCATCCAGAAACATGGCACCCGATGG  
TGGGCAAGCTGTTTGCCTCATGCTGATCTGGTTTATGACGCTGGCGGTGCTGGGGCTGCGCGGCAT  
CATCCACAACCCGAGGTGCTGGGGGCGCTTAAACCCGCTTGGCGGTGCGCTTCTTTGTCCAGTACCAG  
ACCACCTCCTTCTTTGCCCTCGCGCCGTTGGTGTGCCATCACAGGGTGGAGGCGCTCTACGCGGATA  
TGGGCCACTTTGGCAAATAATCAATTCGCCCTCGCCTGGTTTATCGTGGTGTGCTGCCCTCGCTGGTGTCAA  
CTACTTCGGTCAGGGGGCGCTGCTGCTGAGTAACCCGCTGCCATTGCCAACCCCTTCTTCTGCTTGGC  
CCGAAATGGGCGCTGGTACCGCTGCTGCTGCTGGCAACCATGGCGACGGTGTGCGCTCCAGGCGGTGA  
TCTCCGGGGTCTTTTTCGCTGACCCGGCAGGCGGTGCGCCTCGGTTATCTCTCCCCCATTCGCATCGTTCA  
CACCTCCGAGCAGGAGTCCGGCCAGATCTATATTCGGTTCATCAACTGGATGCTCTATATCTCGGTGGT  
ATCGTCATCATGAGCTTCGAGCACTCCAGCAATCTGGCGGCGGCTACGGCATCGCGGTGACCCGCCCA  
TGGTGTACCTCCATCCTCTCTGCTCGGTGGCCAAGAACAGCTGGCACTGGAACAAGTATCTGGTGGC

CATCCTGTTTTGCCGCGCTGCTCTGTATCGACGTGCCGCTGTTTGCCGCCAACCTCGCCAAGATCTTCTCC  
GGCGGCTGGCTGCCGCTCACCTGGGCGCGGTAATGTTACCGTGATGACCAGCTGGAAGAGCGAGCGTT  
TCCAGCTTATTCGCCGCTGAACGAGCATGGCAACTCCCTTGAGCCGATGATCGCCTCGCTGGAAAAATC  
CCCGCCGACCCGGGTGGCTGGTACTGCCGCTATATGTGCGGGTGGTCAATGTGATCCCTCATGCGCTG  
CTGCATAACCTCAAGCACAAACAAGGTGCTGCACGAGCGGATCATCCTGCTCACCTGCGGGTGAAGAGG  
TGCCCTACGTCCACAATGTGCGCCGGTCTGCATCGAGCAGCTCTCCCCACCTTCTGGCGGGTGGTGGC  
AAGCTACGGCTGGCGCGAGACCCCGAACGTGGAGGAGATCTTCCACCGCTGCAACGCCGAGGGGCTGAGC  
TGCCGGATGATGGAGACCTCATTCTTTATGGCCACGAGTCGCTCATCATGAAAAGACCGCCCTGGTATC  
TCTATCTGCGCGCAAGCTCTTTATGCTGCTGCAACGCAACGCCCTGCGGGCCCCGGATCAGTTCGAGAT  
CCCCCCAAACCGGGTCCAGAGCTGGGCTCGCAGGTGGATATCTGATGGCGGGTGGTGGCCTTTAATGG  
CATAGAAAACGTGACGAAAGAGAGAGGAGGAGCATTGGCCTCCCTCTCTTGTTCGGTTAACCCGGTTACCG  
GCCCCCTCATCCCCAGCCCTTCTCCCCGAAGGGGAGAAGGGGGCAAACCACACGACCATATGCTGAAAA  
CGGTGCAATTCACGTTCAATGCACCCTGCTCCCGCATGCTGCCGATATGGTTCGGTTCCTGCTGCGTCCG  
ATTACGCTTCGCTAATCGAACCTACGGTTTTCAAGACAGGCGGTCTCTATCCGAACAGGCCACCACCGTAG  
GGTGCAACAAGCACAGCGCCGTGCACCGCGAAAAATATGTGCGGAGAGGTGCAATTCAGTGCCTCTTTGCA  
CCCTACTCATGCTGCGTTTTTCAAGGTGACGAACCTCCCGGCGGCTTCGTCACAAGTGACGAACGTCAC  
AGTTCGACAGCCGTACCAGCCCTTTCACCCAACCACATAAAGATTTTTATTTATTTAAAAACAGCTACTT  
AAAACCAATTTATCTGCAAAAACCAATCTGGCCCGTATCTTGCCAACCTGCCCTACTTTCTCCGTTCCG  
GACACGACAAGGTAGGCTATGAACCGCTTCGTTATCGCTGACCCCAAGCTTTGTATCGGCTGTGGCACCT  
GTATGGCGGCCTGCAGCGAGGTACACAAGGCGCAAGTTTTGCAGCAAGCCCCCGTTTAACCGTTATGCG  
ACACGAGCAGGCGACCATGCCGGTTCAGTGCCGCTCACTGTGATGATGCCCTGCATCAAGGTGTGCCCG  
GTCGAGGCAATTCGCCAAACCGGCGATTGCGTGCAACTCAACGAGTCGCTCTGCATCGGCTGCAATCTCT  
GCGCCGTGGCCTGCCCTTTGGTGCCATCCAGAGCGGCGGCAGCCGTCCGGTGGCCGTGGCCACCAGTTA  
CGACACCTATATCCCCTGCTCCATCCGCTCCAGCAACCCCTCAACCTCTGCCGGCTGCGTTGCTTTGGC  
GAGGATCTGTTGAGCTGGGAGCCGGGCGTACGAGCATCGCGGTCAAGTGCGACCTGTGCGAGTTTTCGCG  
CCGATGGCCCCGGCTGTGTGCGGTGCTGCCCTCCAGGCGCTGAAGCTGGTCAATGACGGCGACACCGA  
ATGCGCCCGCCGATCCGTCGCCAGCAAGCGGCGGACACCAACCCGCAAGGGGCTCTGCCTTCTCGGCG  
CCCCGACCGCGATCCCTGCATCCGATATATCCACCAAGGAGGAGCGTGCTGATGTTGTCGCCCTTGT  
TATGGCCACGCTCCTGCTCTTTTTGCTGGGCTCGCTCCCGTTTGCTGCTGCAAAAAGTCCCCCGACTG  
GCCAACCCTCAATAGCGGCTTTGCCCTGCTGGGCTCGCTCGCGGGTCTGGTTCGCCCATCCAGATCT  
TTGCCAAAGGCGCGCCCGTGCAGCGCCAGCTCTGGCTGCTGGGCTCGGTGCACCTCGACATGCTGGCCGC  
GCTGATGCTGCTGGTGATTAGCACCGTCCGCGTCCGCTCGCCCTCTACTCCTTTGCCATATATCCGCGAA  
TATCAGGGCAAGGGGATGTGGCCATCGGCGCGCTGATGAACCTCTTCTCTTTGCCATGGTGGGCATGG  
TGCTGGCCGACAATGCGCTCGGTTTTCTGCTCTGCTACGAGCTGGTGACCCTCACCACTACTGGCTGGT  
CAAGACCAACCCGAGGCGCCAAACAGAGCCGCTCTATCTGGTGATGAACCATATCGGCATGGCACTG  
GTGCTGATCGCCTTCTGGCTGCTCTGCCGCGAAAGCGGCTCGCTGGAGTTCGCTGCGCTACGCGAGCACC  
ATCTGGCGGGCGCCCTGGCCTCTCTGGTGTTCCTGCTCAGCTTCTGCGGCTTTGGCCTGCGCGCCGTTT  
CGTGCCGCTGCACGGCTGGCTGCCGGTGGCCGAGCCGTTGCGCCCTCCCATATCTCGGCGCTGATGTCC  
GGTGTGATGGTCAAGCTGGGTCTCTTTGGCATCTTGCGGGTCAAGCATCGATTTTCTCGGCGCCAGCCAGC  
TCTGGTGGGGCTATGTGGTACTGATCTTCGGCGCCTGTTTACGAGTGTCTCGGGGTGCTGTTTGGCGTGGC  
CGAGCATGACCTCAAGCGGCTGCTCGCCTACCACACGGTGGAGAACATCGGCATCATCCTGATGGGGATG  
GGCATCGGCATGATCGGCATCGCAACCAGCAACCGGCACTGGTGGTGTGCTGGGGCTGCTCGGCGCCCTCT  
ATCACCTGCTCAACCACGCCATCTTCAAGAGCCTGCTCTTTATGGGTACCGGCTCTGTGATGTTCCGCCCT  
GCACACTCGTGACATGGACAAGATGGGGGGCCTGGCCAAGCTGATGCCCTGGACCGGCTGGCGTTCCCTC  
ATCGGGCCCATGGCCATCTCGGCGCTGCCCGCGCTCAACCGCTTTGTCAGCGAGTGGTTTTATCTATCAGT  
CGCTCCTTTCCATGACCAAGCTCGGCACCTCCGTCGTCGCGCCGCTCGCGGTAGTAATGCTGGCGGTGAC  
CGGCGCCATGGCGGTGATGTGTTTTGTCGAAGGTGATGGTATCTGCTTCTGCGGCGCCCGCGCAGCGAA  
CACGCGAGCCACGCCCCGCAAGTGCCGGGCGCCATGGTGGCTGGCACCTGCTGCTGGCCGCGCTCTGTC  
TGGTGTGTTGGTCTGGGCGCCCCCTGGATTGCCCCCCATATCGCCAGCTATGGTCAAGGCACTCGTTGCCAG  
CCAGATGAGTGTGCCACCGGCGCCACCCTGCTGCCACTCGATAGCAGCCAGGCGATCCTCTCCCCGCC  
GTTATCGCCATCACCTTGCTGGGTCTGTTCCCTCATCCCGCTGCTGGTACTGGCCATCTTCAAGGGGCCA  
AGCTGGGTGCTGCTACGCTGGCACCCCGTGGGCTGTGGTTACGCCTATGAGGAGCGCATGAGCCTCAC  
CTCCGGCGGTGTACCCACACCTTGCGCCAATCTGCGCGCCGCTCTATCGCAAGCAGCCGAGCTCGAT  
CTGGCCACCGCCCTGCTCGGGGTGAGCGATAACCAGCGGGACGACCGGCTGGCTGCTGCACGGTATGGTGC  
TGGCGCTCTTTATCCTGATGGCTGTAGGAGTCTGATATGCCCTGTTCTTGAATGCCGAGCTGGGGCATGG  
TTGCCCTCGCCCTGACCCAGGCCATCGCCATGCTGGCGCTGGCGCCGCTCGCCACCGGTTTTCAACCGGGT  
GCTGCGGGCCAAGATGCACTCCCGTCAGGGGCTGGCCTGCTGCAGGATTACCGGGATATCGCCAAGCTC  
CTGCGCCGTCAAGGAGGTGACCCCGAGCCTGCCAGCATCATCTTCAACCTGATGCCCTGCGCTGCTCATTG  
CCGCCCTCTTGTGGTAGGGATGGCGCTGCCGACCTGACTCATGAGTCCCCCTTCCCCATCGCCGGGGA  
TCTCATACCGACATCTATCTGTTCCGATCTTCCGCTTCTTCTTTTCGCTGGCGGGGCTCGACAGCGGC  
AGCATGTTTGCAGGGATCGGTGCCCGCCGAGTTGACGCTGGGCATTTCTGGTGGAGCCATTTCTGGTGC

TCGCCTGTTTTATCATGCGGATGATGGTGGGCAGCTCGGATCTGGGCAATATCAGCAACTATGTGGCGAC  
CCAGCCACTGGCCGCGCCGGTTGCCACCCTGCTGGCCGGTGGCCCTGCGCCTTCGCGGTGTTTTGTGCGAG  
ATGGGCAAGCTGCCCTTTGACTGCGCCGAAGCCGAGCAGGAGTTGCAGGAGGGGCCACTCACCGAGTATT  
CCGGTGCGGGCTGGCCCTGCTCAAGCTCTCCATCGGCCTCAAGCAGCTGGTGGTGGTGCAGCTCTTTCT  
GGTGATTTTTCTGCCCTTCGGCAAGGCGGCCAACTGGAGTCTGCCTGCGCTCATCGGCGCGGCGCTGATC  
CTCGCCTGCAAGCTGCTGGTGGCCTTTTTACTGGCCGGCATCATCGAAAACGCCATGGCCCCGTACCCAGT  
TCGTGCGCACCCACAACTCACCCGCTACGGGTGGGGCTGGCCCTGCTGGCGCTGCTCGCCATCTGGT  
CGGGATCTGAATCATGCCCAGCAGCACAGCAACTTTTTCCGATTTTCATCATTTGTGAATGCTCATTTCCCG  
AACATTAAGTGAGAAGTGCATGACCATCGCCATTTTCGGATCGCATCGGCTGCGACTACATCCAGCAGGT  
GCGAGCACAACTGCCCCACGCCATCGTCGACGAGGAGTGGCAAACCCGCCATCAGGCCACCATTACCGTC  
AAGCCCACAGTCTGGTCGAGACCCGAGCTGATCTTCCATCAGCTGGGGGGCTGGTCTCCGCTCCTCT  
TTGCCAATGACGAGCGCAGCCTCAACGGCCACTTCGCCGCTTACCACGCTTCTCCATGGAGGGCGACAC  
CAAGTGCTGGATCACCGTCAAGGTAAGTGGTGGATGCCGATACCCAGGAGTACCCCTCCATCACCCGACC  
ATTCCGGCGGGCGGTGTGGGGCGAGCGGGAGATCCGCGACATGTACGGCCTGCGCGCCATCGGTCTGCCGG  
ACGAACGCCGTCTGGTACTGCCGGACGACTGGCCGAGGATATCCACCCCTGCGCAAAGACGCCATGGA  
TTATCGCCAGCGCCGATGCCACCACCGACACCGAGACCTACCCCTTCGTCAACGAGCTGGGTAGTGAT  
GCCAACCGCATCGTGCCGGTTCGGCCCGCTGCACATCACCTCCGATGAACCGGGCCACTTTCTGTCTGTTCG  
TCGATGGGGAAGACATCATCGATGCCGACTACCGCTCTTCTATGTCCATCGCGGCATGGAGAAGCTGGC  
GGAAACCCGCATGGGCTACAACGAAGTGGCGTTTCTGACCGACCGGGTCTGCGGCATCTGCGGCTTTACC  
CACAGCGTCGCTACACCACCTCGGTGGAGAACGCCATGGGCATTCGCGTGGCGAGCGGGCCAAGATGA  
TCCGCGCCGTGCTGCTGGAGGTGGAGCGCCTGCACAGCCATATTTCTCAACATCGGCCTGTGAGCCACTT  
CACCGGTTTTGACACCCGGCTTTATGCAGTTCTTCCGGGTGCGGGAAAAATCCATGACCCTGGCCGAGCTG  
CTGACCGGCGCCCGCAAGACCTATGGCCTCAACCTGATTGGCGGGGTGCGCCGCGACATATTCAAAGAAG  
ATCGCATCAAGGGAGCCCAGCTGGTGCGGGAACTGCGTGATGAGCTCAAACCCCTGGTGGCCATGCTGCT  
GGATACTGCCAACATCTCCTCCCGCTCATCGGTATTTGGCAAGCTCGACCCGCGAGATTGCCCGCGATTTT  
AGCTGCGTTCGGCCCATGGTGCGGGCGAGCGGCTTCAAGCGCGACGTGCGTTCGGGTTACGATTTTGGCCG  
GTTACCGCGAGCTGCCGATGGAGATCCAGACCAAGGCGGGTTGCGATGTGCAATCCCGGGTGTGGTACG  
GATCCACGAGCTCTACGACTCCCTCGCATGATGATTTGCGCTTGAGCACCTGCCGGAAGGGCCGCTT  
TTGACCGAAGGCTTACCTACCAGCCGGGCAAGTTGCGCTGGGCTTTACCGAAGCGCCCGCGCGGAGAGA  
ACGTCCACTGGAGCATGACCGGGGATAACCAGAAGCTGTTCCGCTGGCGCTGCCGCGCCGCCACCTACGC  
CAACTGGCCTGCTCTGCGCTACATGCTGCGCGCAATACCGTGGCGGATGCGCCGCTCATCATCGGCAGT  
CTGGATCCCTGCTACTCTGTACCGACCGGGTACCCTGGTGCACCCCAAGAAGGGCAAATCCACCGTGG  
TCTCCTACAAGGAGATCGAGCGCTACGGCATCGATCGCAAAAACTCTCCGCTGAAATAAGGGGTATCAT  
GATCAAGCTGTTCAAGACCATCCTCAAGGCTGGCACCCCGACCGCAAGTACCCCTTCGCCCCTTACGAG  
GTGAACCGGGATTTTTCGGGCAAACCCAAATATCAGGCGGATCAGTGCATCGCCTGCGCCGCTGCACCA  
AGGCCTGCCCGGCAATGCGCTGGTGATGGAAGTGGACATGGAGACCGGCGAACGGCGCTGGGAGATCTC  
CATGGCGCGCTGCATCTTCTGCGGCCGCTGCGAGGAGGTTGCCCAGCCGCGCCATCGCCCTCTCCCC  
GAGTTGAGCTGGCGGTGACCAACAAGGCGGATCTTTATGAGGAGGCGCGCTTCGCGCTGGCCCCCTGCA  
CCCTGTGCGGTACCTACTTTGCCCCGAGCAAGCTGGTGGCGCTGGTGGAGGACACCCTCAAGCAGGCGGG  
CAGACCGCTGACCAACCCGGAGCGGCTGCACCACTGCCCCGACTGCAAACGAAAACAGAGCATGCTGAGC  
CAGCCTGACTCGGCACTGATCACACCGATAGCCACACCGATGGCCGCACAAAAGGAGTGGATGTGATGAG  
CAAGATCAAAGGCATAGAACCGGTTGTGCGCCATGCCATAACCCGCGCCGTACCGCTGGCACAGGATCCC  
GAGATCACAAACTCAAGAAGACCCTGCTCAAGGACATTCGCCGCTCGGCCTATGTCTACCGGGTCGATT  
GCGGCGGCTGCAACGCCTGCGAAATCGAGATCTTCGCCACCATCACCCGCTGTTTGTATGCCGAGCGTTT  
CGGCATCAAGGTGGTGCCTCCCCCGCCACGCGGACATCTGCTCTTTACCGGCGCGGTGACCCGGGCG  
ATGCGGGTACCGCCCTGCGCCCTACGAGGCGGCGCCGATCCCAAGATCTGCATCGCCTACGGCGCCCT  
GTGGCTGTGACGGCGGCATCTTCCACGACCTCTACTGCGTCTGGGGCGGCACCGACAAGATCGTGCCGGT  
GGATGTCTATATCCCCGGCTGCCCTCCGACACCGGCGGCCACCATCTACGGCTTTGCCGTGGCGCTCGGT  
CTGCTTGAGCAGAACTCAAAGCCACCAGCCACGAGGTGCAACCGGGTGGAGCGGGTCAAAGTGCAGCACA  
CCGGCATCCCCAATGAAATCCGGGTGATGATCGAACCGGAGGCGCGCCGATGGCCGGTTACCGGCAGGG  
GCGGATCATCGCCGACGAGTTTCATGGCCCTGCTCGAAGGGGCGACCCAGCAGGATGTGGATCTGCGCATC  
CAGAGCTACCTAGATCAGCACGACGATCCGCGCTGGCGGAGATCGTCAACAACCTCGCAAACGCCTGCC  
TCAACCGGGCGGCGGCAAGGGAGAGGCGGTGCATGGCTGACGAGGTTTTCTTCTATCGCCTCTCGCGCA  
AGTTCTGTCGACGAGCAGTTTCGACGTGCCGGAAGAGGCCAAGGAGGTGATGTACTACAGCCTCGCCATCGG  
CCACCACCTCGGCATCGTCGATTGCCCTGCGAGCAGACCTGGTCTGCTCGCTGACCGGTTATCGCGACTGG  
GTAGCCAAGCTGCCAGAGGGGAGCGAGGCGCGCCGAAGATGGAGGGGTTTCTCACCTTTGGCGAGATCA  
CCATCTATCGCGAGCACTGCCACATGCTGGCCTGCGCCTTCGACCGACTGCGCAAAGCCGACAATCTACT  
CAATGAGCAGGAGCTGGGCTGGACCAACACCTTTATGGATCAGCTGACCGCCCTCTTTAACGACCCCCAT  
ATGTACCTGATGGTAAGGAGCCGCTGATGGGCTGCAATCTCGTGTGACCGTGGGCAATGCCATGATGGG  
GGACGACGGTGC CGGCCCTATCTTGCCGACAACTGCAAGCCGCCCCCTGCCCGCTGGATCCATATT  
GACGGCGGCATCGCGCCGAAAATGTGGTCTACAAGGTGCGGGAGCTGCAACCGGAGCGGGTGGTGTGG

TGGATGCCGCGAGATCGGGGAGAAGGGGGGACCTGCAGGTGATCCCCCGAGACCATCGCCGAGAT  
GTTTATCTTCTCGACCCACAACATGCCGCTCAACTTTTTGATCGACGAACTCAAGACCTTTGTCCCGAG  
GTGATCTTTGTGGGGTACAACCGCCATCGTGGCGTCTCCTTCCCGATGACCGAGATGGTGAGCGAGG  
CGATGGATTATCTTTATCAGCATCTTGATGCCGCCAGGGATACTGGTCTGTTAATAGATAAACTGGATCA  
GTGGAATATTGCCAACGCCAACCGGTGATTATTTGACGAGTTGTTAACGACCCTTATTGACCAACGGTTA  
TGGCTATGTGATCGAGGCCCGATGTTAAATTA AAAACATCGGGCTAATTGTGCTGAACTTGATATAAAAC  
AAGGTTCTTTGATTTTTTCAAAAATCGCTAACTCTCGCTTTTTTATGACAAAAAGCGTTGCCAGTCAC  
AGAAATTTGCCACAAAATGGCGACCGTTACGGAAGTTGATGGGGTCTGGTGGCCTCCTCGGTCTTCAAAA  
CCGATGTGAGCCGAGAAGGCTTTGGCAGGTTGATTCCTGCCTCTTCCGCCAAATTTATCTATTGAACAA  
ATACTCCCCCGCTGAATTTTTCGGCCCTGGATGTTATTTCCATTGTTTGTTC AATATGTTTGAAGTAATAC  
CTTAAAAAAGGTGCTTGGCCCTTGCCAATATAAATCCGAATCAGGTTATCTCGCTGGCCAAAAATTAATT  
TATCAGCATCGATGCAGCATTAAATTTATACCCGCTCATGGATGCACCCGGTTTGCAGTCAACCGCAAATC  
GCCAGCAGTGCCATAACCCGTCAGCTCGGCCTCTCTATCGGCCAAACCGGTGCGCATCCCGAACCCGCA  
CTGCACTGGTAATCCCATGCCGAACCTCGTCTCACGCGTCAGCTATCCCCCACCAGCCAGCCCGCATCAGGT  
ACGGCTGCCGACGATTCACTGCCAGATTACAGCAACAGCCCGGCCAGCAACCAACGCGCCGTTTGGCCG  
AAGTGGAACAGCTGCTGCAGCAACCCCTTTCTCGCCGGGTTTATCGAAGCGCTGAGCCGCCCGCTGGTGAC  
TCAGGCGGTGCGCGACACCCTGAGCGAGCTGCGCCAGAGCGAAGATTTTTCGCCAGCACGGCGTCGCCCC  
GAGCAGATCGAGGCGCTGATTGCCAAACGCTGCCAACAGCAGTTGCGCCAGCGTCAAACCCGGGTGATCA  
ACGCCACCAGCCACCTGGTGCATACCAATCTGGGGCGTTGCGCGTTAAGTGCCGATCTGTGGGACGAGGT  
GCGTGACCTCAACACCGGCTACAACAATCTGGAGCTGGATCTCGCCACCAGCAACGCGCGGGGCGCAAG  
GGGCTAATCGCCCCCTGCTCCGTTGCCTCACCCAGGCCGAGGATTCGCTGGTGGTCAACAACAACGCAG  
CTTCCCTCTTCTGTTGCTGCAGGAGGTGGCCAAGGGGCGCGAGGTGATCGTCTCGCGCGGGCGAGCAGAT  
CCAGATTGGCGGGCGGCTTTTCGCATCCCCGATATTCTGGCCCTCTCTGGCGCCAAACTGGTGGAGGTGGGC  
ACCACCAATATCACCACCGCCAAGGATTACCTCGATGCCATCACCGATCAGACCCGCGTGGTGCCTGATGG  
TGCACAGATCCAATTTCCGCAATTCGCGGCTTTACCGAATCCCCGATATCGGCGAGGTGGCCCCGCGCCCT  
GCCCGAGCACGTGGTGCCTGGCTGTGGATCAGGGCTCCGGCTTGACCACCGAAGAGTTTTCGCCCGGATGAA  
ACCTCGGTACGCGAGTACATCAAGGCGGGGGCGGATCTGGTCTGCTACTCCGGCGACAAGCTGCTGGGTG  
GCCCGCAATCGGCGATCATCAGCGCCCGCGCGATCTCATCAAGCGGCTGGAAAAACACCCCATGATGCG  
CACCTTCGCGCCGAGCCGATCGTCTACTCCCTGCTCGAAGCGCTGCTCATCCACAAGCTCAACAAGTCC  
CCCATCGGTGAAGGGATTGCCAGCGCACCTTGAGCAACCCGCGCCGATGCAAGGCGAGAGCCGACCAGC  
TGATGACCGCCCTGCCCGGCTGCTTTGTGCCGGTCCCCGCCAGCTGGTGGTGGGCGGGCGCACCTTGCC  
GGACGAGTTTACCCGGCCCCCTGCGCTCGAATGCACCGACCCGCTCCGGCCCCAGCAGTTACTCGATGAT  
TTGGCGAACTGCCGGTGCCGGTCATCGCCACCGTGCGCCAGCAGAAGGTGCTGCTCAATATGGCCACCC  
TGCTGCCGACCGAGATGGAATGCTGATCGCCAACTCAGGGAATGCTGCAGCCCGCCCCGTTCAATGC  
AACAAATGCGACCGAGGAGCCCTGATCCATGACCCCTATCGCGCCGTTATCGGCCTTGCCGGCCACGT  
GGATCACGGCAAGACCCCTGCTGATCAAGGCCCTCACCGCATCACACCGCCCGTGCCCACGAGCAGGCC  
ATTGGCATGACCCAGGATCTCGGCTTTGCCACTTCGACGACGGTCAGGGCAACACCATAGGCGTCATCG  
ACGTGCCCGGCCACGAGCGCTATATCCGCAATATGGTGGCGGGGCTCTGGAGTCTGGATCTGGTGCCTGCT  
GGTGATTGCCGCGACGAGGGGTGGATGCCGATGACCGGCATCACCTGCGCCTGCTCAAGGCGATGGGG  
GTGCCGCGCATGCTGGTCTGCATCAACAAGTGCATCTGGTCTCCCCGACGAGCTTTTGTGTTGGAAG  
AGAGCCTGCTGGAGCGGGTGATGGACGAGAGCGGCATGGTGGCCGACATCGTCAAGCCTCAGTGCCAAGAC  
CGGCGCCAATATGGCCGCCCTGCACACCGCCATCGTGCGCCAGCTTGCCGAACTGCCAGCCTCACACGCT  
GCCCGCGAGCAGAGCGCCCCGCGACTGTATGTAGACAGGGTCTTTACCGCCAATGGTACCGGCACTGTGC  
TTACCGGCACCTTGCAACAGGGCAGCCTCAAGGTGGGGACAAGCTGCGCCTTACCCTGCCGATCGGGA  
GGTGCAGGTGCGCTCCCTGCAAGCCTATCACCAGAGCGTGCAGGATCGGCGCCGCTGCGGGGTGGCG  
GTGGCCCTGAAAAAAGTGCCCCACAAGGAGGTGGCCCGCGCCACTGCCTTACCAGCACTGCTCGGCCAGT  
GCGAGGCGGCAACCCACCTTATTGTGCGACTCAACGCCGAGAGCCTGAGCGGCAAGGCGCTGCGCACGCA  
GGAGATCGAGGTGGCCCTTGGCAGCTGGCATGGCCGGGCCCCGTTTCGTGCCCATCAAGGACTCCCGGCTG  
GCGCGGCTGATCTTTACCAGCCCCATCCCTGCTTCTTCGGCCAGCCGCTCGCCATCATTCGCCACGGCA  
GCAGCGAACTGCTGCACGGCGCCCGCATCGTCTGGTGGCGGACATCCATCCCGCCAGACGCAAGGCTCT  
GCACGCCCTGCTGGGTGAGCTGCCTGATGACTTGAGAGCTACAACCCCGCAGCCTTGACGCTGGGGCTC  
AATGGCTATGTGCTGGCCAGCCGCTTTGACCAGCGGCCGAGCTGGTCAACCCCTCGGTGAGTGGCTTC  
TGGATAACTGCTGGCTGGCCAAAGCCGCGACCAACTGCTCGCTACGCTGGCCAGCGAACCCGCTGAGTGC  
CGCCGAGCTGGCAACCCGCTTTGGCATCGCCCTGCCGGTCATTCAGGCCCTGCTCCAGCAGCTCAAGAGC  
GAGCAGCTTGTTCGCTGCACCATGACAAGTGGCAGCAGGGCAGCGGCAAGTCGGAAGATGATCTGGGGG  
AAGAGGCGCAGCTGGTGCCTCAAGGTGGTGCAGATCAAGGCAAGGAGGGGTACGAGCCCGGTAAACTGGG  
CCCCGGCGGCGTGGAGCTGGATCCCTTTATCACCCGCCAGCTGCCCGGGCCCTGCAGCAGGGCCTGCTA  
CAAAAAGGCGCGTTGCAAAAAGCAGCTGCGCAATCTGGCGCGACTCAAGTATCTGGTGCAGCTCGATGGCC  
CCATCTACTACGACCGCGAGCTTTACAACCAGATGGTGCGCCGCGTGTGGCGGGCCAGCAGGTGGGAGA  
TCTGATCGACATGGCATCCCTCAAGGAGATCACCGGTTTGTGCGCAAATACGCCATTCGGTTCTGCCCTG  
CGCATGGAGATGGATGGCTGGGTGCGGCGGAGGAGAACGAGCGCCGGGTGCTGCGTTTACCGCAGACTC



AAGATGAGATGGAGCCGGCATGAGCTCCACCATCGCCCCTTCTGGCTCTTCCAATCCTGTGGCCAATCGG  
CTGCGCCGCGAATTTTCATATCGACGGCATCGTACAGGGGGTTCGGCTTTCGCCCCCTCGTCTATGGGCTGG  
CGCTGCGCCACGGCCTTGCCGGTTATGTGTTGAACGATGCCAACGGCGTCACCATAGGTGCCGAAGGATC  
CCCTGAGCAGCTGGCCAGCTTTGCCCCGGAAGTGCAGGGAAGTGGCGCCGCCCTTAAGCCGAATCGATCAT  
TTTAACGAGCGGGAGCTGCCCAAAACCCGAATCCCATTACAACGGCGCCTTTCATATCAAGGCAAGCC  
AGCAGCAGAGCGCGGCCACGGTTCGCCATCTCGCCGGATCAGGGGATGTGCGAGGCGTGCGCCCGGGACGT  
GGCCAATCCCAACGATCGCCACCACCTACCCCTTTACCAACTGCACCCACTGCGGGCCCGCGCTACACC  
ATCATCCGCCGCCTTCCCTACGACAGACCCCATACCGCCATGGCGGGCTTTGCCATGTGCCCGCGCTGTG  
CGGCGGCCTATGAAAACCCCTTGGACAGACGCTACCACGCCAGCCGGTGAGCTGCCCCGAGTGCGGGCC  
CCACCTCAGCTGGCTCAGCGGCAATGGAATGCGCTGGCCGAACGCGAGGAGGCCCTGCAGGCCGCTGCC  
CGCGCCCTGCAAGCGGGAGCACTGATCGCAGTCAAGGGGATGGGGGGTATCACCTGATATGTGATGCC  
GCAATGAACAGAGTGTGGCTAGATTGCGAACACTCAAGCGCGCGCGCAAGCCGTGGCGGTGATGAT  
GGGCTCCCTTGCCGAGGCCAAACTGCATGTACCGGCTGCGAAGCAGAGTGGAAGCTGCTCGCCTCTCAG  
GCCAGACCCATCACCTTGCTGCGCAAGCGCATTAACGATGATCGGATCTCAGAATCCCTACTGACAACCG  
CGCCGCTGGCCGAGGGGATCGCCCCGGCATCCCCTACCTTGGCATCATGCTCCCCATAACCCGCTCCA  
TCAGCTGCTGCTGGACGCTGCGCCATGCGCTGGTGGCCACCAGCGCCAATGGTCGCGGCAGCCCAATC  
CTCATCGAGTGCAGGCGGTGGTCAGGAACTCGGCAGCGAGATTGACGGCATTCTGGATCACAACCGCC  
CCATCCTGCACCCGTGTGACGACAGTCTGGTGCAGTGGCAGGCGGGCGGCCAGACGTTGCGCCTCGC  
CCGGGGCTATGCCCCCTGCACTCCAGCCTGCAAGAGGCGGTCAAGGCGCCACTGCTGGCAGTCGGAGCG  
CAGCAGAAGAACCAGCTGGCGCTCGCCTTCGGCAGCCAGCGCATCTACAGCCCTATATCGGCGATCTGC  
ACAGCCTGCCAATGCAGGAGCACTTCGAGCAGACCTTAGCGACCTTTCGCGATCTCTACGATCTCAAACC  
CGAAGTTCTGGTCTCGGATCGCCACCCGGGCTACCTCAGCCACCAGTGGGCCAAAAGCTATTGCCAGGAG  
CTGGGTGCAACCCATCTCGAGGTACAGCACCATCACGCCACCTGCTGGCAGTGATTGCCGAGCACAACA  
TCACGGGCCCCGGTGGTGGTTCGATGGCACCGGCTTGGCGATGACGGCACCCCTCTGGGGTGG  
CGAGCTGCTGCTGGCCGATGTGAAGGACTTTACGCGGGTTGCCACCTCCAGCCTTACAAGCTGATCGGC  
GGCGAGGCGGCCATTCGCGAGCCGGTGCGCCAGCTACTGGGGCTGCTGTTGAATCGCACAGTCCTGAGC  
AGATCAGCGCCCTCGATAATTCGGTGGTAAGCAAGTTGCCCTTGAAGCAATCCGCAACCTGCACCAGCT  
CTGGCAGCTTGGCCCAACGCCCCCTACACCAGCTCCATCGGTTCGGTTCGATGCGGTGGCGGCTC  
TTGGGGGTGATCGACACCCCGATTACGAGGGCGAAGCGGACTCTTGCTGGAGGCGGCCGCTTGCAGC  
TGGCCCCCGATGAAGCGCCCTTCCCCCTCGCCTTTGATCTCAGCCAATCAACAGAGGGGCCACTGCAGAT  
CCAGTGGGCCAAGCTGATCCATAACCTTGTGACGAGCGGCGCCAAGGCACCTCAACCGCCAGCCTGGCT  
GCCGGTTTTATCCGCGCCATCAGCAATCTGGTGGTTGCCCTTGGCGAACGCTTCCCCGGCTATCCGGTGG  
CGCTCGGGGGCGGCTTTTTCAAAACCGGGTGGTGGTGGACCAGCTGGTGCCCGCACTCGAAGCCGCGG  
CCAGCAGGTATTGACCAGCGAAACCTGCCGCTCAATGACGGTGGCATCGCCGCGGTCAGCTCTGGTTT  
GCCATCCACCATCTTGCCACGCATCAGCCTGCCACAGCCGGTGTGACCCTTGTGCGAGTCCGAAATT  
CATGTGTCTATCCATTCCCTCTCAGGTGGTGCAGCTGCACCCGAAGATAACTGCGTCACCCTCGACACC  
CTGGGGGTGCAGCGCGCGCTCAGCTGCATGCTGCTCGAAGAGCCCTCCAGGTGGGCGACTATGTGCTGC  
TCCATATCGGCTTTGTGATGAGCAAGATTGACCAGGAGGAGCGCAGGCCAGCCTCGAGAGCTTCCGCCA  
GATGGTGGCCCTGATGCCAAGCAGGATATCTTGCCATGCTGACCTTGAATGATCTGTTTCAGGGCTTTC  
GCCAGCCCAGGTGATCCGCGCCCTCGCCGCCAGCTCACCAGAACTGGCCAAAAGATCTGCCCGAACCGCT  
GCGGGTGGTGGAGGTGTGCGGCGGCCATACCCACACCATCATGAAGTACGGCCTGCACCAGCTGCTGCC  
GCCAGCATCGAGTTTGTCCACGGCCCCGGTGGCCAGTCTGCATCATGCCAAAAGAGCGCATCGATCAGG  
CCATCGAGCTCGCCCGCAACCGAACGTTATTCTGGTACCCTGGGGGACATGATCCGGGTGCCGGGCTC  
CAAAGGCACGCTGGCCAGCAGCGCGCAAGGGGAGCGATATCCGCCCGGTCTATGACCCCTCGATGCC  
CTGCGTATCGCCAAAGAGAATCCGGAAAAAACCGTGGTCTTCTTCGCCATCGGTTTCGAGACCTTACCC  
CGATGACGGCCGCTTGTCTAGCTGCGGCTGAAGCTGAGGGGATTGAAAACCTGCTGTTTCATATCAACCA  
TGTGCTGGTGGCCCCCGCCATTCATGCGGTAATGGCCGACGGGGTGGCCAAGGTGAACGCCCTTTATCGGC  
CCCTCCACGTCAGCGTCATCACCGGCGCCGATATCTACCTGCCATCGTTCGATCGTTATCAGGTGCCAG  
TGGTGGTGGAGCGCTTCGAGCCGGTGGATGTGATGGAGGCGCTCTTGATGATGGTGGCCAGAAGGTGGA  
GGGTGCTACGCGCTGGAAGTGCAATACAGCCGCGCCGTACCGCCAGCGGCAATAAAGCCGCCAGCGG  
CTGGTGCAGCGCTTTTTTCGAGACCCGCGAGCATTTTTGCTGGCGAGGTCTGGGGGATATCAATGCCCTCC  
CCCTGCGCCTGCGCGATGCCTTCGCCAGGCGCGATGCGGAGCGTCACTTCCAACCTGATCAGACCCCAT  
CGATGACCACAAGGCGTGCCAGTGCGCCGATATCTGCGCGGCTGGCCAAGCCCAACCAGTGCAAAGTC  
TTTGGCCGGGGCTGCACCCCGACCCAGCCCATGGGCAGTTGCATGGTGCAGTCCGAGGGGGCTGCAATG  
CCTACTACCGATATATGGGGGTCCAGGAACAATGAGAGAAATCCAACCTTAGCCACGGCGCGCGCGCGT  
GAGATGAACCAGCTGATCAATCAGCTCTTCTTTGCCACTTTGGCAACGAGATCCTGCTGCGCGGTGAAG  
ATGCCGCTCTGCTGCCGGTGGAGCGGCCCCGTTGCCTTACCACCGACAGCTTTACCCTCTCGCCGCTCTT  
CTTCGAGGGGGGCGATATCGGCAAGCTGGCCATCGCCGGTACGGTCAACGATCTCGCCATGATGGGGGCC  
AAGCCCAGATCTGAGCTGCAGCTTTATCATCGAGGAGGGGTCCCTACGCCGATCTGGCCCGCATCG  
TCGAGTCGATGGCCCGGAGCTTGCCAAGAGCGGCGCCCGCATCGTCTGCGGCGACACCAAGGTGGTGCC  
CAAGGGGGCAGCCGACAAGATCTTTATCAACACCAGCGGGTTCGGGACTTTCCCGCTGCTGAGCTGAGC

CGGGGCATCTCGGTACGCAACCTCAAGGCCGGTGACGCCATTCTGGTGTGCGGGGATATCGGCAGCCAGC  
GCGCCTGCATCCTGATGGCTCGTGACGCCCTGCAACTGGGCTCCGATCTCAAGAGCGACTGCACCACCCT  
CTGGCCGCAGGTAGAAGCGCTGCTGCAAGCGGGGATCACCCCCACGCCCTGCGCGATGCCACCCGCGGT  
GGCCTTGCCGCCGTGCTGAATGAATGGAGCACAGCCTCCCAGGTGGCCATCGAGCTGGAGGAGTCCGCCA  
TTCCGGTGTGCGATCCGGTGCCTGTGCGAGCTCTACGGTTTTCGAGGCCCATGGTCTCGCCAACGA  
GGGAACCATGGTGTGTCCTGCTGCCGAACAGGGCGCAGGACGCGCTGGGCATCTTGGCGCAATTCAAC  
CCCGCCGCCAGCCAGATCGGCGTGGTGTGCGGAGCGAGCGCCACAAGGTGATCCTCAACAACCCCTGGG  
GCAGCCGCCGTTATCTGGAGCTGCCGCAAGGGGAGCTGCTGCCGCGGATCTGTTGAGCAGCCATGCCGTT  
CCGTCAATTTACAGGGAGGAGTCACTGCTCCTCCCATATCGGTTAAGGAGCCACCATGCACGAAATGTCT  
CTGGCCATGGCCGCCATCGATCTGGCGGCCGAGACGCCACCAGCGGGGCTTTACCAGGTGACCGCCC  
TCTGGCTCGAGGTCGGCAACTTCTCCTGCGTCGACCCGGACACCATTGCCTTCTGTTTTCGAGGCTGCCG  
TAAGGGCACCGCCGTCGAAGGGGCCAGCTTCACTTCAACACCAAGCGGCAGAGGCCCTGGTGTACGAC  
TGCAACCAGACGGTACCCTCACCGAGCGCGGGCAGGCCTGTCCGAGTGTGGCGGATACAAATTACGAG  
TCGCGCAGGGTGATAGCCTGCGCATCACCGACATCGAGGTAAGTTGATATGTGTAGCGTATGCGGATGCG  
GCCAGGCGCGGATCGCCGGCCATGAGCACGATCATGAGCATCATCACGAACATGAACATCACCATGAACA  
TGGTCATGAACACGACCATCATCATGCTCATGACGCCCATCACCATCATGATCACGAGCAGAGTGCGCCG  
CGCACCCCTGATCATTACCACCCTATCACCATCAGGGGGATGTCCATCACCCTACCACGGAGTGGGG  
CTCCCATAGCCATGAGGGGCATGATCACCCCATGAGCACCCATGATCACCCACGACCATCATCA  
TGATCATGCCCCTCTCATGATCACGGCCATTCCACGCGCATCCCATGATCACTGCCATGACCATGAC  
CATGACCATGACCATGACCATCAGCAGGGTGTGACTGACTATGGCAAAGGGGAAGCGGGATTGTGGTGC  
CCGGTATGGGGCAGCGTCAGCTGATCGCCATCGAGATGGATGTGCTGGCCAGAACAACAACCTGGCCGC  
CCACAACCGCGAGCACTTCGACGAAGCAGCCCAGCTGGTGTCTAACCTGGTGTGAGCCCGGGTTACGGC  
AAGACCACTTTGCTGTGCGAAACCTTGCGCCAGCTGGCCGACAAGCGCCCTGCGCGGTGATCGAAGGGG  
ATCAGCAGACCAGCGCCGATGCAGATCGCATTCGTGCTACTGGCGTCCCTGCCGTGCAGATCAACCCGG  
CAAGGGCTGCCATCTGGATGCCAAAATGGTCCACGACGCTGCCACCAGCTGCCAGCCAATGAAGGGGGC  
ATCCTCTTTATCGAGAACGTGGGCAATCTGGTCTGCCCCGCCAGCTTCGATCTCGGCGAGAAGTACAAGG  
TGGCGATCCTCTCCGTCAACGAGGGGGGAAGAGAAGCCATTGAAGTACCCGGACATGTTTGCCCGGCCCA  
GCTCATGTTGATCAACAAGATCGATCTGCTGCCCTACGTCAGCTTTGATGTGGCCCGGTCATCGAGA  
GCCAAACGGGTCAACCACTATATTACAGGTGATCCAGGTGAGTCCAGTCCAGCCACCACAGGCCAAGGATGGCT  
GGCTTAACTGGCTGGCCAGTGTGAAATCAACCGGTTAAACGCCGCTGATAACGTTAGAAAACAAGAGA  
GGGAGGCTGATGCCTCCCTCTCTTTTATCTATGAACCTTGTCTGCCGCTCTAACTGTTTACAGAGTGACCAG  
CATCCCACACTCGCGTCCCTCACCCTGGCCCTCTCCCCAGGGAGAGGGAAACCGGTTTGTGGATGCAGGC  
AATAAGTTCGAAGTACGCGCACTGCGAGCATAACAACAGCTTGTGCCCCCAAGCTTGGGGAGAGTCAAC  
GTCTGCTCCCTTCTCCCTTGGCGGAGAAGGGCTGGGGATGAGGGGGAAACCAATCCTCATGCCACATT  
GCAGACCATCAATTCCTGCTCAGCCGTCTCCTACCAAAGCGCAGCACCCGATGGCAGATCTGGCGCAGC  
AGCGCCTGCTGATGACTGAATATCACCATGCCAAGCCCGCGCTGCTCGCACTCAATCATCAACTCCTGCC  
AGAGCTGGCGCTGAATTTGCGGGTCCAGCTGGGCGGTACCTCGTCGGAATCAGCAGACGAGTGCAGG  
ATCGAGGGCGCGCAGCAGCGCAATGCGGGCCAGCTCGCCACCGGAGAGTTGACCGGGTTTACGACCGAGC  
CATTCAGGCTTGACCATAAAGCGGGCCATCATGGCGTCATCGGGGCGCCACACATCCCACAGCGCCTGCC  
CTGTGGTGCATAGGGATTGAAGGTGAGTTCGGGTGCTGGGGCACCAGCTGGATGGGGTTATAACCTTT  
TACCTGTTACAGTACTGGCTGCCCATCCAGCAGGATCTGCCCGCCGGCCCCAACCGGTTGCCAACCAGCC  
AATACCCGCCCCAGCGTGGTCTTGCCATGGCCACTCGGCGCAGAGAGGGCCGAGCCGTTCCGCCGCTTTCA  
CCGTACGCGATAACCCCTGCCAGAGGGGGCGTTCCTCCCTGGGCGATAGTGAGATTTGTAATTTCAAACAT  
CAGGAAACCTCCGGCACAGAGAAGAGTGCATTGAACTCCGGCAGCGCTGCCAGTGGGCACGGAGCATCT  
CGTCCCCCTGCCCTGGCGCAGATGGTGGCAGCTCAAGGTATCGCTCACCTGCCCTGATGCACGCGCCAC  
GATGCGATCGGCGAAGCGGGCCCGCAGCGCAGATCGTGGGTGACCCAGAGGATACCGTGCCTGATGATG  
GCCAATTCACGCAACTGGCCGAGCAGCAAACAGGCCAGCCCTCGTCGAGCCAGGCGGTGATCTCGTCCG  
CCAGAATGTAGCGGGCACCGCCGAGCGCCGAGTGCAGGCCAGAATGCGCTTGGCCATGCCGCCGGAGAG  
CTGGCGCGGGTACCTGTCCAGGGTGGTGCAGGGCAGCTGGTAGCGCAGCAGCTGCTCGCCGAGCCGCTCG  
CGAGAACCCTGCTGGCCGAGAGAGCTGCCGACGTCACAGCTGACGCTCCACCGTCAACAGTGGATTGA  
GGGCGCTCACCCCTGTGGCACATAGCAGAGGGTATGGCCGCGCAAACGGGCCCTACAGGCATCGCACAG  
AGGTGTACCATCAAGAGAGATGGTGCCGTGCATCCGAGATTGTCCGGCAGCAATGTCAGAGCGCTTTGC  
AACAGCAGGCTCTTGCCCTCGCCGCTCCCCCACCAGCGCCACTATCTCCCCGGCGCCAGTTGCAGGC  
TGATATCGGTGAGCAAAGGCTGCCAGCTGCGCCGTCACAGCCAGGATAGTGGGCTGCCTCTATGGTCA  
CTGATCAAAACTCAGCATGGTTCACTCCTGTGCCACAGAAGCTGTTGCAGAGCGCGGGTAGCCTGATCAA  
ACAGCAGAACCAGCAGCAGCAACATCAGCCCCGGGAAGAGGGCCAGCCACCAGCCGCCACCAGCCAGATA  
ACGCAAGGCATCGGCCAGCAGCAGGCCAGGGAGGCTCGTGGGCGCCAGACCAAAGCCGAGAAAGCTC  
AAGGCCGCGCTATGCAATACCGCATGGGGAAAACATCAGCAAGGTGCCGATAAACCACTGGGGCAACAGCC  
CCGGCAGCAGGTGGATGCGCCAGCGACGCGCCCGCCATCCCTGACAGCGGGCCAGCACCATAGTC  
GCTGCAGGCGATCCGCCGCGCTTCTGCGCGGAGAATGAGCGCCAGTTTGGGCCAGTGGGTGAGCGCCACC  
GCCAGGATCACCCCGCGCATAACCGCCCCACGGTAAAGCAGATAAGGATCAAGAGCAGCATATGGGGCA

GC GCCAGCATGGCGTCGATCACCATTTCGTACCGCCGCATCACATCTGGGGTGAATGAGCGACACGCTGGC  
CGCCACCATGGCCAGCAACCCGCTACAGAGCGCCGTGCTGATCCCCAGCTCCAGACTGGTGAGGGTGGCC  
TGAAAGGCCCCGCAACCAGAGATCCCGTCCCATCTGATCGGTGCCGAACCAGTGGACCAACGAGGGGGGCT  
GCTGGCGCGCCAGCAGATCCATTGGCACATCTGAGCCGACAAACTCCAGCCATAGGCAGCCAGCAGCGC  
CAATCCGAACAGGGCAAACCCAGCCGCAGTATGGAGGGGAAGCGGATTAACAGCATGCTCGCCCTCCCA  
ACCCCGATTGATGCGGGCCAGCAGCAAACTGGCCACCGTGTTCGCAATAAAGACCAGCAGGGTGCAAAAG  
AGCACGACTCCCATCAGCAGGGGGATATCGCCCTGAGCCCCGCATCCACGGTGGCCGAGCCCCG  
GATAAGAAAAAACTTTCTCCGCTAACAGCGATCCGCCAATCAGCTCACCAAGGGAGGCAAACCTGCAGGCA  
GAGCGCCGGGGTCAGGGCGTGGCGCAGCACGTGAAAACGCAGCATGGGCCAGCCGCCATCCCCCTGAGCG  
CGGGCGTAGCCGATAAAGTTCGCTCTCCAGACCTCGGCCACCCGCCCCGGGTATGCAGGGCAATGTTGC  
CCAGCCCCGAGCAGGGCGAGCGTGGTCACCGGCAGCAACAAATGGCGCGCTCGCATAGCCCAATCTGCCCT  
ATCGGGCGAGAGGCCCGCGCTCCAGGCGCAGCAGACTGGCAGTAGTGCCCAATGCACCGCAAACAGGGCG  
AGCAGCAACAGGCCGACCCAGAAGGTGGGCAGGGAGGCGAGCAGATAGGCAAAACGGCAAATCAGGCGAT  
CGGGCCAACGATTGAGATAGCGACCGGCGCAGAGGCCAAGCAGAATGCCGAAAAAGCCGGAGAGCAGCCA  
TGCCCCCGTCAGCAGCAGGAAGGAGGCTGCAAAAACGCTGGCCTATTACCTCACCCACCGGTACGTTATAG  
AGCATGGAGTAGCCAAGATCCCCCTGCAGCACCTGGCTAAACAGTGCAGTAACGCAGCCAGAGCGGTT  
GATCCAGCCCCCAGCGGGCGGCATACGGGCGTACTGCTCCGGCGGTACATGGAGCAGATCGTTGCCGAT  
ATAGGCCTTGATGGGGTCGATGGGGGAGTAACTCAGCAGCACAAAGGTAGCGACCGAGACCAGACATAAC  
AGCCCTGCCAGACGCAGCAGGGCTTTTAGCAACAAATAACCTGAATGACTCAAGGGCGAACTTAACGGCA  
CGTCCACCGCCAATCTGCAGGTTGTTGAGGAGTGACCAGCTACCGTGGATTTCCGGCGCCCCCTTGCCA  
AGATCGATGCAACGGTTGGCGAGATAGGTGTGCTGCACATTGAGCAGCCAGGCCAGGCGGCATCTCCCT  
GCACTCCGGCGCCGGTTTTTGCCATCCCCTCCACCTGCTGCCAGAACGGCACGGCCGCTGCCAGTTCGG  
AGCATCCAGCGCCTGCTTGAGGTGGCCATCCACCACAGGGTTGCTGTAGTAGCCCGGGTTGTAGAACTCC  
ACGCCACCGGAGCCGCTCTGGTAGTGGTGATAGAGCTCCATGGGAGCCAGACTCCCCCACCCATTAGCA  
CCGGATTGGCGTGCATCTCCCGCTCCACCTGCTCCAGCTGCCGGACTTGAGGCTCACCTCAAGACCGAT  
GGGTCTGAGCATAGCGCGCACCGCTTCCGCCAAATCCCGCGGGTGCTGTGCCACTGGTGTACCAGAGG  
GTAAAGGCGGCGCAGATTGCCCTTGTGGCGAATGCCGTCACTGCCATCTTCCAACCGGCTGGTTCGA  
GCAGGGCGTTGGCGTGGGCGCATCCCCATCTTGAAGCGGTGGCTTTTGTAGCCAAGGCAGGCCTTC  
TACCGCGCTGTAGGCGGGGATGGCGTCCCTTCCAGCAGTTGATCGGCCAGCAGCTTGCGGTCGATGCGG  
TAGTTGATGGCGCGCGCACCGCCACATCCGAGGTACATCGTTCCCGATGGGATAGCCCTTAGCATCCT  
TGCCACCCGCTGGCGGAATGGGGAAGACGATGCCCGGTTCTCCACGCTCGGCCGCACCCACAGCTTGAG  
GGAAGCAGGCACGGTTGGCGCAAGCGACGGGGCGATGCCGACCACATCAAGCTGGCTGCTTGGGCGGCG  
GCATAGGGCTCTCTTCGTCGATAAAGACAAAACACCAGCCGCTTGAAGTCATTTGTTGCCGCCAGCGTAAT  
AGGGGTTTCGCTCTACCACAGTTGCTGGCCGGGCGAGGAAGCTCACAGCCGGTAGGGGCGGCGACCGAC  
CGGCTTTTGGGCATAGGCTTTTTCGTCGTAATCTGCTTCGACACTATCCCCAAGGATCCCAGCACATTG  
ACGAAGGTGCTCTGGGGGGCGCTAAGAGTGATGGCAACCTCGGTGGGCGAGAGCACCTTGCCCGAGACAA  
AGTTGCCCATGTGATCTTCCCGCCGCTTGGGCTGCGCTGTTGTAGGTAAAGGCCACATCTTCGGCGGT  
GAGCGGCGCGCCATTGGAGAATTTAGGTCAGGCTTGAGGGTAATGAGCCACCCCTTGCCATCCTTGCTC  
GGGGTCACCGACTGGGTGAGCACATTCTGCCAGCTGAGATCGGCGTCTGCTTGAGCAGCGGGCTATGCA  
GCAGCAGGTAGCTGCCGTGACTCCAGCCAAGCAAAGGGTCAAACCCCTTCGGTGGGTTTCGGCGCCGATGGC  
GAGCTTGAGCTCGGCAGGCACAGGTTGGGCAGCGGCCAGCGCCGCTGAGAGGCAGTGCCCAGCAGCAAA  
GTCAACAGGGCGGCAGCACTGGTGCCACAGTAATGGCGAAGGGAAATTCGCTGGAACAGTCATGGGGATCC  
TTCTTGTTTTGTACCACTCACGGATCATCACTCAAAAAAGAGGCGGAATGCGTGTCTGAACATGGGAGTG  
AGGGGCCAAAATGGCCCCCTATTCTAAACTTGATTTTCGCGTGAACCTAGCGACTATGCCGTTGACCGC  
GCCGGGCAACGAATAGCCGCTGCTGCGGCCAGATCCACGCGCCAGCCCTTGCTGCACCGGCAAGGAGAG  
CAGCATCTTGAGGGTGTGCTCACCAGTGAGCGCCCCCTCCCCGGCCCCAAGATGGGGATCGAGCGGCGAC  
ATCAGGGAGCAGGCCAGCAACTGACCACTTTTCGGGCAATTCACCCACCATAAAGGTCATGTTGCCGCGAGG  
GGAGCTGCAGGGCGAGCCGATCGCTACTGCTGCGCACCGGCCAAAAGCTGATCCGGGCCCGGCGAGCACCC  
CACGCTCAGCATCCAGGGGGTGGAGCAGCAGCCGAGCCACTGACCTTCAAACAGCACGCACTCGGCCAGG  
ATGGGCATGGTGGCGTGATAGAAGGGCAGCGCCTGCATCTCTTACGAGCGATCCGCTCATACTGGGCTA  
CCAGCAGAGGTGCGGGATCGCTGGTAAAACCGGCAAATTCCTGCACGTCATCAAGCCCGCTTAAATGGGA  
CTGCACCATAGGCCCTCCCGTGCTTGTTCAGCTTTTTCTTGCTCAGAGAGCGGGATGGCGGGCGCGCCAA  
CGGCGGCCAGCAGGGTCAAATCCGATCCGTCGCTCCCCATGGCCGCCGCCACCACGGGGGTGAGGCC  
GATGCGAGGTTGAGGGATTGCGGCTCGACCCCGATCAGGGTGAGCCGCTGGGCGACTCCCCCGTCATG  
TGCAGCGCCGAAAGCACGTCCGCCAGCCCCAGCTGGTGCGGGGAGATCTTGCGGCCAAACAGGGTCGAGA  
TCTCCTCATCCTTACGGGTCACCACTGTGCCCGGCGGATTACCGCTGCGCACCGCATCCACCAGAATGAT  
GTGATCGCGACTGGCCATCGCTTCGAGCAGCTCCATAACGGCGGTACCGCCATCGAGCAGCTCGATGCCG  
GGGGCGAAACGGTATTTCGCGCCCCAGCCCCCTCAACGATGCCGACGCCGACGGCCCTGCTCACTCAAGAGCA  
GGTTGCCACGCCCAGGATCAAGGTGTTTCATCACAGCACCTTCACCTGAGTCGTTTCGCCATTCGGGTA  
TCCACCACATGCACCGCACAGGACATGCAGGGATCGAACGAGTGGATGGTGCACACCCTCCAGCGGTT  
TGGCGGGATCCGCCACCGGGGTGCCACCAGAGATTGCTCGTAGGGGCCGGGCTCATCGTTGAAGTTGCC

CGGGCCCGAGTTCCAGGTCGATGGCACCACCGCCTGATAGTTCTCGATCTTGCCGCCCTTGATGACGATC  
CAGTGGGAGAGCATGCCGCGGGTGCCTCTTCAAAGCCCACTCCGCGAAACTCCTTGTCCGCCGGGATCT  
CCGCCTTGATATAGGCGGTGGTGTCCCCCTTGCCGATGTTGTCCACCAGCGCCTTCCACTGGTGCGCCAG  
GGTATCTTTGAGCACACAGCAGCGCACCCGCGGACCGATGATGCGGCCATGGTGGAGTGCAGCTGTTCCG  
GTCTTGATGGCAGAGCCGGTGAGCGCCTTGTAGATGCCGTTTCCAGCTGATCGAAGTGCCTACCGTCTCCG  
GGTGTGGGCGGAGCTTACCAGCAAGTCGGCAAGCGGCCACCTCCACCACCTTGCCGTAGAAGGT  
GGGGGATTTGACCCAGGAGTATTTGCCATCATCTGCCAGCCGGTGTAGTTGGGCTCGGTCTTGCCCTCC  
CACGGCTTGAGGGGGCGTCATCCTTGTACCAGGCGTCTTGTGCTCTCGGCGATGCCGTCCATCAGCC  
AGCCATCCTGATGGCTCTCGATGGGGCGATAACCCGCCAGATTGCCATTCTCGATGTAGCCGCCGGCAT  
CAGGAAGCTGCCGCCGTTGGCGTCCGTTGGGGAGCTCCGGCACGCTCAGGTAGTGCTTGCCCCCTGCCCC  
AGACTCAGCCACTCGGGGTAGTGCAGCGGCTATGATGGCGGCATCCACCTTGTAGACTGTGATATAA  
CGCAAGCCGGTCGATAAAGCTCTTACATAGAGCAGCCGCTCCAGGTTGAGCACGCTAGGTGCATAA  
ATTGATGGGGTTGGCCACGCCGCCACCAGGATTCTGGATGTGCGGGCTCTGCCACCGAGGATGGCG  
ACAATGCGGTTGGCATCGCGCTGGCACTCCAGCGCCTGCAGGTAGTGGGCCACGGCGATGAGGTTACCT  
CCGGCTCAGCTTCTCCTTGTGACCCAGTAACCGTTGGCAAAGATGCCGAGCTGGCCGCTCGCCAC  
CAGCGCGGGATCTTGTCTGCACCTTGGTCAGTTTATCGGCACTGTTGAGGGACCAGGTTGATACCCCC  
TTGAGCATGTCCGCCGCTTTTTGCGGATTGGCCTCAAGGGCCGCGGTGATGTCCACCAGTCCAGCGCG  
AGAGCTGATAGAAGTGGACGATGTGATCGTGGATGTTGTGGGCCGCGATGATGAGGTTGCGGATGTACTG  
GGCGTTGACCGGCACCTTGGCACCGATGGCGTCTTCCACCGCCGACCGAAGCGATGGCGTGAATGGAG  
GTACATACCCCGCAGATGCGCTGCACTATCATCCAGGCATCGCGCGGTCGTTGCCCTTGACTATCTCCT  
CCATCCCGCGCCACATGGTGCCGGACGACCAGGCTTTGGTCACTTTGCCGCCCTCGATTTGCGAGTGCAT  
ACGCAGGTGCCCTCAATGCGGGTGTATGGGGTCTATGGTGATACGTTGGCTCATACTGGCTTTCCCTC  
GGCCTGATAATCTTGGTGAACACGTTCAAGTGATGGCAGTACCGGCAAGAGCCGGATCAACAGCAAATA  
GGCACACACCTCGATGGCAACAAAGCCAGAGAGATCAGCACCTCCTCCGCGGAGGGGAAGTAGTGGTAG  
CCATTGCCGGGGTTGAAGGCGAGCAGGGAGTAATCCAGCCGCCAGAGGGCGGCGCCAGCAGCATGCTGA  
GGGCCCCCAGGAACAACATGCGCGAATCCCGCGGCTCTTGTCCAGTGGAACACCAGCAGCGGGAAGAT  
CATCAGCGCAATCTCGTCCAGAACATGATGGAGAAGCGATTGAACTCGGAGAGATACTCCGACTTGTCTG  
TGGATGACGACTCTGGCAAAGCGCAGCGCCACAAACAGATCAGGAAGATATCGATCACCTGGTGCAGCA  
TGTAGAAGAGCTACTTCTCATTGGGGCCCCCGCCAGTCCCGCCTGCACCAGAGGCCCTCAAATAC  
CACGATGGAGAAGCCCATGATGAAGGCGGTGAGCAGCGAAAAGACCGGCGAGCAACTCGTAGCTTTGCCAG  
AGCGGATGGATCTTCTCCCCGCCACTATCATCAACGAGCCCATGGAGGATTGGTGCATGGTGGGCAGCA  
GAGCCCCCAGCGCCAGCACGAAGAACATGATCTTGTGAGGCGAATGAGGGACGCCCTTCCAGCCGAACCTT  
CTCCAGCAGCACGGGAGCGAACTCCAGTGCCATCACCCGATATAGATGGTTCATGCAGACCGCCGCTCTCG  
AACAGCACCGAGGAGGTGTTGAAGTGACCGGGCAGGTAGAAGTACGGCAGGTTCCAGTAACGGCCACGT  
CGATGGTGTATGGAGAGGCCGCCAGCGAGTAGCCAAACAGGCTCGCCAACAGGGCCGGTCGCACCAGCGG  
GTGATACTCGCCCCGTTGAACACATAGACAGCCAGGCCAGCGCCAGCCGCCACAGGCCAAACCGGTA  
CCGATCAAGAGATCGAACGAGATCCAGAGCCCCCAGGGGTAGCCGCATTCAGATCGGTGACCGAACCCA  
GCCCCAAGACGAGGCGTTTCAAGATCAACATGCCGCACAGCACGGCAAAGGGGGCCAGCACCAGCACAGG  
CCAGCTGACCAGCTTGCCGCCGAGGGGATGTGCCTTGTGATTACTCATGATCCTTGCCCTCCCTTTGTGGT  
GCCCTGACCCTTGATCTGCGCACTCCCCTGATCATGGCCATCATCGTGATGGTGATCGTGACCATTCTTG  
GTGTTGCGGGGATCAGCACCGAGAGGCCGGTTCAGCACCCATGGGCAGCACCATCCCCTTGTAGAGGG  
TGTGCTGGATATGCTCGGAGCGGGCACCGGAGGAGACTCCGGCAGGTCGGGCATGTCGAGCTTGGTATA  
GGGCACCCCGCCAGCACCGACCTGGGTGCCGCCCCCTCCTTCTCGCCATAGACGTAAGGCTGGTAG  
TTGGGCACTTCGTGCAGGTAGGGGTGCTTGGCAGAGAGGGTCTGGCGCGGATAGGCATATTCGTGCCCG  
GAGTCGCCACGACGACGACGCTTGGCCTCGGCCATCAGCTCCTCGCGGTGCCGAAGATCACGGCCCGGT  
GGGGCACACCTCGACACAGCCGGGCAACTTGCCCTGATCGATCCGCTCAAGCCCCCTTGTGGTTGCAGAGC  
TCGCACTTGTGGATCGCCCCCAGCGGGTGTGCATAGTCATATTTGGGTACATCGAACGGGCAGCCACCA  
TGCAGTAGCGACAGCCGGTGCAGACGCTCGGGTCTAGTGAACGATGCCGGTCTTGGGATCTTTTTTAAG  
AGCCTGCACCGGGCAGACAGAGACGCAGTTGGGATCGACACAGTGCATGCACTGCTTCTTGATGTAGGCG  
TAGCCATCCACCAGCTGATCCTTGTGCTCGCCAGTGCCGCTCTTCCACACCTGAATGATGTTGTTGGTGT  
AGGGGGTCAGCTTGTGCTTGTGGACCAGGTTTGCGCCCGGCTGGATTGGCCGGGTTGCCGTTGAGGCG  
CTGACACTCCGCCACACAGGCCTGACAGCCGACGAGGGTAGAGTCGTAGAGCATGCCGAGCGCGCCG  
GGAATGGGCGGCTTGTCTTGGCCGCTGCCAGTGCGGTGCCGGGTACGGCTGTGCCCGCCGACGTCAC  
CGACGGAGGCAAATTTGAGGAAGTTGCGTCTGTTACAGGTTACTCCTCCCGTGTATGGATGCTGCCCGGCT  
TCGTGGCGCTTCTGCTGGCGACCGAGTTACAGCACCGTCATCAGACTCACCCCCACCAGCACCCCGAGGG  
CGCCACCAGATAAGGCCAGTGCAGGTTGGGCGAGGTATAGCCCCCTCCTGAATTTTACATCTGGTTTTATC  
CACCCGCGGAGTCGGGTTCTTACCTTGGCAAGCTGGAAGATCCCCCTTGCTAAAACCGACCCCTGCTCG  
TTGCAGCCATAACAGGGGTGACCGATGCCGACCGGCCAGATGCCGCCGCCACATCGCAGAACTCCAGGG  
TCGAGCAGTTGCCGTAGGTCTCCGGCCCCCTTGCAGCCAGATGGTAGAGACACCAGCCCTGCCGGTGGCC  
CTCATCGCCAAACTCCTTGGCAAACGCCCTGCATCGAAGTGCAGGACGGCGCTCGCAGTTCTCGTGGATC  
AGCCGTTTCATAGGCAAACAGCGGACGCTTCTTGTATCCAGCGCCGGCAGCTTGCCGTAGGTGATGTAGT

AGGCAACCGTGGTGAGGAAGTTGTGGGGATTGGGCGGGCAGCCGGGATATTGATGATGGGAGTGCCGAT  
ATTGCCGAGCGCCTCTCCAGGCTGACAGCGCCGGTTCGGGTTGCCGCCGCTGGCAGGCACACCGCCCCAG  
GCGGCGCAGGAGCCGATGGCGATGACGGCAGCGGCATCACTGGCGGCACGGCGAATATGGTCGACGATAG  
GCTCACCGGCCACCATGCAGTAGACGCCACCATCTTTGAGCGGAATGGAGCCATCCACCACCAGTACATA  
TTTGCCCTTTATAGCGCTTGATGGCGTTGTGCTTGTCTCTTCCGCTGATGACCAAAGGCAGCCGAGAGT  
ACCTCGTGGTACTCCAGCGAAATGGTATTGAGGATCAGGTTCTCGATGGTGGGGTGAGTGGCCCCGAGCA  
GTGACTCGGTACAGCCGGTGCACCTCTGCGCCCCAATCCAGATCACCGGCGGCCGCTCGGGGCTGGT  
CGCGGTGGCCATCTTGGCGACGGCATGCTGACTTAATCCCAGGGTTGCGGCCATCCCGGCACACAATTT  
ATAAAATCACGGCGATTAATCCCATGAGCCGATAAAAAATTAATCCTCGACCATTTACTTATTTCCCGTAG  
TGAGCACTTGTGGATAAAATGCTTAATAGCGGAAATGCTAAGGACTCACCCACCTGCAGTATTGATCTC  
TATCAATTTGACCGGCTCACCCCTATTTTCATAGCGAGCCATATCACAAATGAAATTAATTAACCTCCAA  
AGAGATATTTAGCAACTCCGTAAATTTTATGAACCTTAATGGATATTAATAAATTAATTAACCTGCATATCC  
TCTCTTTCACTGTGAGCCAAATTAACATGATTGAAATCTTGGCTATACCGCTCATTTTACAATACTGATG  
CCCACCAATAAATGATCCATTGAATATATCTTTACTCATCTCATTGCATATTTCCATACAGTCATTTACGG  
GCAACCTCCTGACTTGCCCTCCCCACACCAGAGCGGTCTCACGGCCAGCTGCCACCGGTAGCAAGCACGGC  
CTGCACGGCACGGTTTACCTGCATGTGCTTGGTTTTCAGTCTGCATTTTACCTGCACCTCAGTGCGACAC  
GTTTACTGCGAGCCCACACAGCACAAACCCGCTTGGCCTCCCTGCCGTTTAAACACGGCTTAGTGA  
AAGATGCGCGGAGGTATGCATATCAGTATGACCTCCCCCACTCTTTATTTGATTTGGATGCTTGTGAGTAA  
ATATCTCGCTCACGGATATGTTTACGCATCATCGTGAATCTGCATTCAAATTAATGGTGAGAAAAAAGGC  
AAGGTGGAAGGCTGCCTGCAACATAATGTACATATTTAACTCGCGATGCATTCGCTCACCCCGTTACAGA  
TGTTACCACCCACCTTCACACTATTTACCTTCACGTCACCTTGCCTAATTAACCAGAGCGTAAATATCCA  
TTCCCATCGATATAGATGATAATTATTTCTTGTTCATGGCAACACCAAAAAATGAGTTTGGATGACGATA  
AACATGACAAACGATAAGGGTGTAAATCATCAGCCGAGCAGTGGCTCCAGCAACTACCTTGCCTTATCGA  
ACTCGAACTCGTTGACAGCCCTGCTCACCTCGTGAATGCAGCCGAAAGCGGCCGAGTTGCAGAGAGAG  
GCCTCCCCCTGACTGCCTCTGATAACCACGCCATGGAGCCTTGTFTTCTGGCTGGCCCTAGGGACACTTGC  
CAAGTGCGGGAATTAACAAAAACGAGAAAAATCAAGATAGATAGCCAAATTAATAATGACATAAATGACT  
ATAGTTCAATCGAACGTTTGA AAAACGTTGACCACTTCACATGGGCCAGCGCAATGACCACTGAACGGGA  
ACAGTTGATCCGCTCACTGTTTGTGATGATACATCGAGCTATATTCATCACGGGATGATCGACTCACACG  
CGCTTTTGC CGGCAGCAGTGTCTTGTGTTTACCAGATAAAGATGAGTGGATCCGGATAACCCGCGCCGAT  
TTTGTCCAGATCCCGGCAGGATCCGCTGGAACACTCGATGTAACCTGCAAGATCTGGCCGCTGATG  
TGGTAGCAGTACC GCCTTCTTTTCATATCCATCTACCGAAATCAGAACCTATCCTCTCCCGCAGAACCGC  
CAGGTTGGTATTGATTTTTTCGACACGAAGCCATGGCGTGGAAAAATGCTCACAGCAGTATCTCCATCCCT  
TACAGTGGCGCTCGGGAACGAAATTTACCCGATGACCAGTCTGGAGGAGCGCAACATGAGCTGGAGC  
TCATTATCGAGCTCAGAACCAAGGAGCTGGCGGAAGCGAACCGGAACTGGAAGCGCTGAGCAATACCGA  
CGGGCTCACCAATATCGGCAACCGTCTGTTTCGACAACTCATTTGAACAGGCTGGGAGCACTGTATT  
CAGACAGAGATGCCGATTGCGCTCATCATGCTCGACATCGATCATTTCAAGCAGTTCAACGATCTCTATG  
GCCACGTTGCCGGTGCAGAGTGCCCTTCGATTGCTGGCCATACTGGCGCAATCCGGGCGCCGCTCGGG  
GGAGTTGGTGGCTCGCTACGGCGGAGAGGAATTTGTCACTCTGTTGCCACATGTCGAGCGTCAATCCGCC  
TATGAAATGCCCAACATATCCAGCGGCTGATTTTTGCACTGGCGCAGCCACACGCACAAAATGCCACCG  
GTCTGGTGACCGTTAGCATGGGTGTTGCCTGCCTCAGACCATCGAGTCACTGGCAGCCATCTGAACTGGT  
CAAATGGCTGATGCTGCGCTTACACCGCCAAAATCATCCGGCCGTAACCTGCATCAGAGTGGCGGAGTCA  
CCCAGCCTCCCGCAACCAGTCGGCCCATAAAGTCCCTCATGCGTGACCATCCTCCCCACGGGGAATCACTG  
CGCGTAACCATGCACGGCAAGGCTCAACGCATCCCATCGCAACATACTTCCCACTGATCCAGTGTGCT  
TTGATAGGTATCTGCCCGGTTGTAATGGACCATGGCATGCAGGCGGGCATGATGGCCAAGTCGCTTGAGC  
ACGTCGGGCATGGCATTGAGGCTGGCCAGCACCCGCGCCAGATCGCCGGGATCGTTTGGCTGATATTTGC  
GGCAATTCAGTCACTCGGTGAGGTGTCGATCCCACAGCGCCATCGCCGGGATCACTACGCATAAATCC  
TGCCGCCATGGCCTCCAGAATGGAGAGGCCAAACGGTTCTGATGGCTGGTGGAGACAAAAATGCCGCAT  
TGAGATCGGATCTCGTCAAGATTGGCGGGGTTGGCATAACCAGTGCCTGCTGGCAGCTGTGGCTGAGGCT  
GGCTACATGGTTGCAGCGTGCCCTTGGGTTGCAGATAGCACACCATCAGCTCGGGGCGAGCGTCAGGGAT  
CATCTGATGGGCGGCCAGCATGGTCTCCAGTCCCTTCCAGCGCAGCAACGAGGCAGCCACAAAATGCGG  
TTACCACCCCGGGTTCGCTTTGGGCAATCAATCTCGCTCAAACCGTTGGTAAATGGCTGCCAGTGTGACG  
GGAACCTCGGTCTCGCAAGCCGGGCCAGCAACGCCGCCAGGGAGCTGCGGGTTGATTCGAGATAAAACAC  
AAAACCTCGCCGTTGCAATGCTCTGGCAGAGAGCCCCGAGCACCCACAGGGCCATGGATCAGCTGAACC  
ACCCGGCACCGCAACCAGCGGGCCGCCAGTAACAGCAGAGATCCACCCCGGCCCGGACGCCGCCACCA  
AGCACTTCACTGCCCCAGACGCAACACCAGCCAGAGGATCAGCAGGCTTGCACCCCTGTTTTAGCAG  
ATAGCCGATGCCGACTCCCGCCCTTCAATATGTGGGGCAGCCAAAGAGGATGATGCTGACAACGGGAC  
CAGGAGTCCGGATCCTGGGTCAACACATGGTATGTGAGCCCGGGCATCCGTTTGGCCAACTCATCGAGCA  
GCACTTCGGTTCGCAACCTTGGAGCCACCGCGAAACGGGATGGGATCCACGACGATGACCTTTCCAAACAC  
CGGCTCAGTTTGCATGCTCATCTTACTGCTCCCTTACTCTGGTACCTTGGCGGGCCAAACCCAGTTGC  
ACTTTTTGCGCCACTTTGGCCATCCCACTCGCCAGCATATTCGCCCTTGGCAAGGAGTCTGTTTCCCG  
CCCAATGAATGAGTGGTCCGAAGGGTGTGGGGCCCGCGGCTGCCAACGACCAGCCCGCGGAGTCCCA

CACCGCCGTGACCCCGTCAACGTAGCGGCCACCGTGAACAACCTGTGCGGCACGCAACTGAGCGGCCCG  
CCCATTTACATCGGGCTGCGGATTGCTCAATTGCCGCCAGTGATCAGCCATCTCGGCCAATCCCCG  
GGGTTGCCAGCAAGCCGGTCACCCCTCTTCCACCCTTCGGGGATGCCGCCACTCGGTAGGCACCTGAC  
CGGAAGCCCCAACATGCCCGCTCCGCCAACGTGACACAAACCTCCTCACGGGCTCCGGAGACCAGC  
AGATCCACCCCGCTCGCAAGATAGCGGCCTGTCCGGCCGCTCGCCCAAAAAGTGGACGCGCTCGGCCA  
CCCCGAGCTCGACAGCCAACGCCATCAATGCTTCCCCTCCGGGCGCTGCCAATGACCAGCAATTGGGC  
CTCTCCCCCGATGCCATCAGGGCAGCCAGCGAGCGGATCAGCAGATCAATCCCCCTTGCCTTTGATCAGG  
GAGCCAACGGTTGCGATGATCATATCCCCGGTGGCAAGCCCAGCATGCCGACGACCGGCCAGTGAGCAC  
CGCCATTCAGGCGAGCGGCATCCACCCCGTTGGGTACCCGGATCAACCGATCGGCCGCGCAGCCATCCTG  
GCGCAACCCGGTCAACACCCGGCTCGCTCACCCCAATCAGCAGCTTGCCCTGATGGACCCGACGGCTGAAT  
CTGTCTCTGGGCTGGTAACGGGCATGGAGGTGGCAGCACCAGCGGTACCTGCAACACTCGACAGACCCCG  
CCAGCCACTGACAAGGGGCGCGCTGTTGGCGTGACACCAGCCCAATCTGCCGCTCGGTGATGAGCTCTCT  
GGCTCGCCGGGAGAGGCGCCGATGGGCTGCAAGATCAAAAACGGGGCGCTGCCATCCCAGCAGCAGGCTG  
AACGGCTCGACCATGGTTTCTACCCCGAGGGTGGCCGCTCTGCCGCCAGAGCCGGGCTATTGCACCAGA  
GCAGGGGCGTAAACCGGCTGCGATCGAGGTGGCCAGCAGATCCAGCAGGCAGCGTTCCGCTGCCGCGGAT  
CCAGTCTCTCCGTAGTGAACCAGCAAAACAGGGGTTGCGTTTATCCTCTTGTCCCTTTGGTGGCACTG  
CCGGCAACCCGGTTGCCTCCTGATGATCCTTAGCGGTGGCCTTACCTCTGTGGCCGCTGCTGCACGTA  
CTTGATGGCGGCGACGGCCAGCGCCAACCTCAGATAGATGGGCCAGGTAAACCCCTGGGTGAGGAAGGAT  
CCCGAAATCACAAACCCACCATGCTGGCCATCACCCCTGCATCGCAGTGATCACTGCAGGAGGCATGC  
CAGCAAGCTGACAACGCCAGCAACTGCGCAGGGTACCCTGACCATGCCGATAAACAGTGCCAGCCCGAC  
AAAGCCGGTTTCCAGCCAGCACCCCGAACCAGGTGGAGTGCACCGCATGATTCAGTCCATCCCAATGGGG  
CTGTAGAAGAAATAGTTGTAATAGAAATTGGACAAGCCACCCCCACCAGCGGATGGCCAGCGCCATGC  
CCCAGGCCGCTTGCAGGCGTAGATCCGCCCATGGCCGAGGCATCGACCCCGCTCTCGGCGGCGCCGCC  
AGATGCCCGGTCAGTATCCCGGCGGCGGCAAAACAGCACCACCAGCGCGACCATACCCAGCGAGATCAAC  
AGGGTTTTTCGACTTACCCGCTGCCAGGCAAAACAGGCGCTGACCGCACACACGCCAAGCAAGCCGCCG  
GGCTCTGGGTGGCGATAATGGCGGCGACGGTCAGCGCAAAGCCAAGCCCCCAGCAAACGCCCCCCCCAC  
CCCATTACCCTGATTGAGCAGCAAGCTCAGCGAAAAGCCTGCAGGAAAGAGCAGCACCAGCGCCAGATCG  
TTGGGATCCCCAGCAGAGCCAGCTCGCGCCCTATGGTACCCCGGTTCCCTCCACCAGCCCGATCC  
CGCTCGCCTTGTGTAGAGGGCCACCAGCGCCACCATAGCAGCCCGCCACCACAAAGGTGCGCACCGCCAG  
CGAAAATCCCCCGAGTGCGCACTAGCCAGGCGGTGGCCAGGGTCATCAGATAGATCTTGCTGTAGCTG  
CCGGTCCAGGTGGCGATCGCCTCGCCCCGGTTGCTGGCAAAACAGCACACCGATGGAGACCATCACAAAGA  
AGGCCGTGAGCCAGCTCAGTGTGGACTCCAGTAGGGCTTGTATCCGGCCGGTCCAGCAAAATGTGCCAGAC  
CAGCGCGCCGATGGCGGCCAGCGAGAAGAGCAGCGGGATCTTGGAGGGGATAGAGCTGGGGGAACACCTCA  
TGCAGCCGAAAAAGGAGAAGGTGACAAAACCCAGCACCATCAAGAAGGGCCAGCGCAGGGCAAACCCAGA  
TGGCGGGAATGGCAAGGCCGAGCACCGGTAGCAGCAAGGGATGGGGCAGCCGCCACCAGAGCAGGGCCAG  
CACCAGACAGATGGCGCTTGCAGATGGCTGGCGTTAGACGAGCCATGATCCTGCCACCATTGGCCGA  
GCCAGACCATCGCCAGCGCCCCGAGCGAACTGGCCAGAGGGTCCAGAGGCGATACGGCAGCGGCAGCAA  
CCGCTGGCTCACCAGATAAAAAGGCGAGCGCCCCGACCAGATAGACCAGCAGCAGGGTCCAGGTCACCCCG  
GCAACCCCGAAGGGGGGGATGGCGAGCAGAAAGCCTGCCACCCCAAGGGCGCTGCAGCCAGATTGATCA  
CCATCTGGGCATTGCTCTTCTCGCCGCTAAAAGCAGCCGACATTGAGCAAGTCCGAGACATTGCGTACCAGC  
CATGCCAGCACCAGCAGCGGAATATAGGGCATCGCTCCATGATAGCTCTCCGGGGTCCAGCCAGCGAATA  
AGCAAGGGGGCGGTGAGCCCGACAATCCCCGCGGTAACAAAACCCAGTACCGACCCCATCACGCTGTAGT  
GGGCATTGAGCCGAGTCCATCCGGCTCGCGCAGCAGCATGAAACGGCGGGGATACCACCAGAGAGCAAA  
GGGTTGCAGCAACAGCCCCACCGCCAGCGCCAGCTTGCCTGCCACCGCGTAGTAGGCGAGCAGCGCTCC  
CCCACCACATCGGCCAGCAGCCAGCGATCCAGTCCGCTCAGGGCAAAACCTGCCAGCCCGCTCACCACCA  
GGGGCAATCCATAGCGCAGCAGCGGCCGATAGTGTGCCAGTCAAAGCGGATCCCGCTATCTCGCCACTG  
CCAGAGGCTCAGCAGCAACGCCAGTGCAACGCAGGTGAGGGTCCCGGAGGCCAGCACCCCGCTCACGCC  
CAGCCGAGCCAGAGCCACCAGCCGGTTCAGCAGGGACTGGATCACCGCCTTGCCTGCAGTCCGCCAGAAAA  
AGAGCCGGGCTGATTGCGCATCCGCAGCCATGCCAGCGGCACGCCGATCACCCCTTCAAACGGCAGGGC  
GCAGAGCACCCAGCGCACATCCGCAAGGCGGGTTTCCACCGGCAGCCAAGCTTGCACCACAGGCGCCAGC  
AGCCAGAGCAGCACCAGACTGGCCAGGGCGATCAACCAGACCAGACCAACATGCGGGCCACCACCTGCT  
GGCGCTCCTGCTCATCTTTCCGCAATCCGGCAAAGCGGTAGAGGGCATCCACCAGCCGAAGCCCAAAAT  
AAGGGAACCCAGATTGATGAGGGTTCAGCAGCACCTCCAGCTGGCCGTATTACGAGGCAGCAGCTGATGG  
GTCAGCACCGGCAGCATCAGCAGGGAGATCCCCTTATCAGGAGCAAGCCCGCGGCGTAATAGAGCATGG  
CAATCTGGTTACACCAAGTTTTCATAGGGCCTCCAGCCACCCGACGCATCCCGCTTCCGGGTCAGCTACC  
GCTAATGCAAAGCCACGCCACTCACTCCCGCCCTGAAGCGATAGCCCTCTGTGCGGCTTAACCGTCCA  
GAACAGGCCCAGAATGAGACTGGCATTGCGTTTTGCAACCGCTGGCTGCAAAATGACCCGACCGGGCGC  
AATCTGCCCTCCTCTTAGCCCCATTTGGCCCGATCACACTGGGGTTCGTCTTGGCCCGATCCCCTGCT  
TTCTGCTTAGCGAGCAACGGACTGCACCAGAGGGAGAGGTGCCATGAACACCATCAACCTGCACCGGAT  
GAAAAGCTGGGCCAAACAGGGGGAGACGCCACTGGCTCGCCGGGTATGGCGACTGGCCAAAAGTGGCCCGC  
CACTGGTCATGCCCCGTGATCCCTCCCCTGCATCGGCTGCTTTATCGGCTCTATCTGCTGGGCAGCAACG

CGCTGGCAACCCCTGACCCGCACCCCTCTGGTGGACCCCTTGTTCATCTCGCCTGACGGCCCCCGCCCC  
GCGCCTCTATCTCTATGGTGGCATCCCCTATATCAGCGGCCCGTACCATCGAGATCGGCGCCGACTGC  
CGCCTCAGCGCCGCATGACCATCAGCGGCCGGGCATCGAGCCAGACACCAAGGCTGGTCATTGGCCGCA  
ATGTCGGGATTGGCTGGCAAACCACCCCTGGCGGTGGGCAGCAAGATAGTCTGGGGGATAACGTCAGAAT  
TGCAGGGCGCGCCTTTCTGGCGGGCTACCCGGGGCACCCGGTCAACGCCCGCGACCCGCGCTCTTGGCAAA  
CCGGATCGCGATGAACAGGTGGGGGCCATCGTGTGGAGCAGGATGTCTGGCTCGGCACCCGGGGTGTATGG  
TGATGGCCGGTGTACCATAGGCGCCGGTACCATTGTGCGCCGAGGCAGCGTCTGTCACCCGGGATCTGCC  
CGCAGGTGTGCTGGCAGCGGGTGTACCGGCCACCGTACTGCGCCCCTTGCAACCACAGGATCACAGCGAC  
CTCGCACACGCCTCGGAGACCCCTTGCATGAAACCACACTCACTGCCGCAACTGGTGGTATTGGGAGAGGA  
TTGGGGCCAGCACCCCTCCAGCACCCAACACCTGATCAAGCGTCTGTTGCCCGATTATCAAGTGCTCTGG  
GTCAACTCCATCGGCATGCGTTGCCCTTACCCCTTACCTTTCATGATCTCACCCGCATCGTCCGCAAACTGG  
GGCGGTGCTGCGCGCGCGCACCATGCTGGCGGCCAGTTCGGTGTGCCATCAGAGGTGACAGCCCCCG  
GGTACTGCCGCCGCTCGCCTTGCCACTGCCGGGCAGTTCGGCTGGCGGGCAAGATCAATGGCCGCTGGCTG  
GCGGCGCAGATCCGGCGCCAGTTGCCCGAGCTGGATCGCCCCCTGCTCTGGATCTCCCTGCCAGCGCCG  
TCGATCTGATTGGCAAGCTCGAAGAGCGGGCGGTCTACTACTGCGGCGATGACTTCTCGGCGCTGGC  
GGGGGTGGATCATCAAGCCATTGCCACTGCGAAGCCCGACTGGTGGAAAAAGCGGATCTCATTTCTGGCC  
GCCAGCCCCGCGTTGGCCAGCCGCTTTCCCCCCCATAAACTCGGCTCCTCAGCCAGGGCGTGGATCTCG  
AGCTGTTTTATGCCCCCAGAGAGCGCCCGGGCGGATCTTCCCTCCGGCCGCCCATTTGCCGGATTTTACGG  
CAGCCTGAGCGACTGGATTGATATTCCCCTGCTGGCAGAGACGGCGACCCGCTGCCCACTGGGATCTG  
GTGCTGATTGGCCCGGTCCAGACCGATATCTCCCCCTCAAGGGGTCCCAATATCCATCTGCTGGGGC  
CCCGTCCCCACCACAGCTGGCGGCCATGCCAGCACTGGCAGGTGAGTCTGCTGCCCTTTGTGACAA  
CGCCAGATCCGTGCTGCAATCCGTTGAAATTGCGCGAATATCTGGCCGCAAGGGCGCCCCATCGTCAGC  
ACCGATTTTCCGGCTCTCGATGGCTATCGGGATCAGATCCAGCTCCCCACGATGGGGAGAACCCTGGCCC  
AGGCCATCAACCGGGCCGCTTTGATCAACCAATCCGGGCTGGTTTCAGGAGAGTGGCTGGGAGGGGCT  
GACCCACAGCGAAGGGCGCCACACGCGCAACAGCAGGTGGCCCTGCAAAGCTGGGATCACAAGGCTGCC  
GAGCTGAACAACCTGGTTGAAGGGGCTGCCCGGATGAGCAGAAGGCTCTGGCTGGTTATCCTGCTCTGCGC  
CAATGCAGCAATGGCCACCACTCGGCTGGAGGGACTGACCCCGCTGCCATGACAGGTAACCAGACACCC  
CAGCGGCTCGATCTGAGCTCCCAACAATAGGCAGCGATGATGAACTGGTGAATCGAGGGCCATA  
ACCCAGCGCCCAACCCGCAAACTGATCCTGCGTATCGACGACGAGGCTCGGTCAACTACCCGACGCCG  
GGTCAATCTGGAGCGGATTGTGCCCCCGGCCCTTACCCAGCGCTTTGCCCTGAGTGAGTGGCGCACC  
AGCCAGCCAGAGCGCTGGCGCTGGACAAACTCACCAAGCTCTATCTCTTTATGGCCGATAACGCCCCCT  
CAATGACCATTACCGCTGGTACTGGGAGCCTGGTCTGACTCTGCTGAGGGCACCATTGCGCTGGATCT  
GGGGGCGGCCGCGCGCCCCGATTTACCGGCTTTGAAGCCCTAAGCCCGGGGGATCCCCGGCTGATTGGC  
CATCCCACCCCATCTTGCGCCCTCCGGCGATGCCCTTGTGCGCGATGGGCTGCGCAATCTGGATGGCG  
TACGGCTGGAGGTGCGCAAGGGGCGCTACCAGCTCACCTCTGGCTGGATGACCCCGCGAGTGGGAGTA  
CCTGCCCCACCCCTTCGAGCGCAGCGTGTGGTCAATGGCGAGCCTATCTGGGCCGAGCAGTGGCAACCG  
CAGGAGTGGCTAACGCAGCGCTATCTGGCGGGCAATCTCGCGAGGCACTGCCAAATCCGGATCCCTGGC  
CGCTGTTCCGGGGCACGACAGGGCGGCCCGGTCCATGTACCCCTGAACCACCCCGCGGCCGATCACTAT  
CACACTGGTAGGTCACTCACCGGATGCCAAATACCTGGCAGGGCTGCTGCTTGCCCCCTATCCGGCCAGC  
ACCAGCAAAGAGGCTCTCCCGAATAGTGGAAAAGATCTCGCCGTATTGGCTGACGCTACCGCAAGCGTGC  
TGACCAAGCAGCGCCAGCTGTTTTTGGAAAAGTGGACTCTGGCCCCCTATTTCCCAACCCAGCCCCAGC  
CCCTGCTTCCAGCAACTGAGCCTCACGCCGATTACGGATGCCGCCCAACCCCTGCATATCGCCCCACTA  
TCTGCGGCAGATGCGTTGAGCAGGCTGCGCAACCGGTGCTGGCCGCCGTGGCAGCCAGCTGTTGCTGG  
AGTTTGCCATCCACGCCGCCACCGACGATCCGGCCCCCTTGTGGTGTATCCAGCCCCCGAACAGGCAGG  
ATCACCCGCTGGCGCTGACCCCTATTACGGCAAGTGGCATCTGGTTCGCCCCGAGGCGAGCGGCACCCCTG  
TTGGCCCCCTCGGATCAGGAGCTGGTTCGAGGGGATCGCCGGGCTCACCTGCTGGCAGGCGTACCTCGG  
GTCTGGTGTGTCAGATCACCGTCCCTCGCGATGCGCCTGCCGGTCACTATCTCGGCAATATTCAGCTGCT  
CAGCCAACAGCAACTGGTGCAGCTGCCACTGACTATCGAGGTGCTGCCGCTGACTCTGCCCGCGGCCAGC  
AAGCCGGTCCGCATCTATGTGCAAGCGCCCCCTTATCTGAATTGGCTGAGCCCCAATCCCGAGGCGTTAA  
AAGAGCAGATCGCCCGGCCAGTTCGCTGCGATCTGCAGCGGCTAGCCAAACTCGGGATCAGCGGCCCTCTC  
GCCCGCCCTGCCACAAGATGAGGCGGGGATGCGGGAGGTGATGGGAGAGGCGGTGGGGCTCGGTTTTGTG  
CCCCCCTGCTGGCCTATAACCCGCTCAAACGCTGGGGGGCGACCCTGTCAGCCAGCTTGAACAGTGGC  
AGACCGGCAACAGGGGCTGACCGCCAGCGCTTGCCGCCAGTGGCATGGAGCTGTTTGTATGAGCCGGA  
TCTTGGCACCCCTGCCCGCCATTACAAGCCTGGCGCGGGAGATGAAACGGCGGGATCCGGCGGTGATCCGC  
GCAGGCCACTTCAATCATCTGGTCAAGTTGGTCTGCTGGCAGAGGTGGAGATTGCCCTGATCAACGCAG  
GCTTTGGCGCCGACAAGGCCGATGTGGCGCGGGTGCGCCAGCACAAGGTACCCCTGGTTTTTACAATCT  
GGGCACCCCGAGAGCCGCGGGTCTATCTGTGGCAAAAGCGGCCGCCGAAGGCTATTTGCAAGTGGCATGGC  
CGCATGCCACCGCCCTGCCCTATGACCCACCGACGGGCGGGAGAGCGACTTTATGCTGCTCGGCCCGC  
AAGCCTGCGAGGCGCACCGCCTCTCTCACGATCTGCTGCTGTTGCAGCAAGCCATCGAAGATCTGCGCTG  
GCTCGCCTGGCTGGAGCAGGAGGCCCGCTATCAGGTGGAAGCCGCCCTGCTGCTGGAGCGTCTGCGCGAT  
CAGCTGCCGACCCGCTGGCAGGTGGCAGAGCAACTGCCCTCTGCCGCTGGATCCAGTGGCGCCCGGAGA

TTGAACAACCTGGCCAAGGGATTGAAAACATTGCAAACCTGGTGCCAACTCATCCTCCTGAAGTGACTGCGT  
ATGGCCAACCAGACTCCCCGCTCCACAGCCAAAGACAGCGCCCTGCGCCGCTGTTGCCCTGATGCTGC  
CGTTGCTGATCCTCACCAGTTGCGCCCGTCAGGAGCCAGTCAATGAGACCCTGCCGATCCTCAACCAGTT  
GCGGGAACAGCAAATGGCCGAACAGCCCCAGCTGCAACTGCAGTACCAGCAAGCGGAGACACAACCTGCCA  
GCGGATCAGGAGCAGCAGTTGCATCAGTTTTTGGGACGCAAGGATCCGGCCCCGGATTGCACTGATAAGCG  
GCCCAGGGCTGCAAACCGACATGCTGGAGAGTGCAGCGGATGGCGAGCGTGCAGGCTGACCCGACTCACCCG  
CTTGCTGGGAGCTCGCGCCATTGAGCTGGAGCCCCGCTATGACCCCATGCTGGCCCCCAATACCTTGCTG  
ATCCGCATTCTGCCAAACGGTGAACCGGGGGCTGTCACCCCATCGGCGGCGCAATAAGGTCAATGCAAGA  
CGTCGGCAAGGCCACCCGATAGAGGGGATAAGGGGCCAGCCCCACAACCTGCGCCAACCTGGGTAAGA  
CGGTACGAGAGCAGCGCGGACTCTGGTGCAGCTCGCTAAAAACATTACCCCTGATTCATCCCTTAC  
CCGCCAGCGTCACTGACATCGCCTCGCTATCCGGTGCCCAATACCAGCGTAGCCACCCGCAAGCGCCATCCC  
GGTATGGGCCAGCTGATAGCTGACATAGGTGCCGCCAATACCAGCGTAGCCACCCGCAAGCGCCATCCC  
AGCTGGACCAGCTCCAGCAACATGGGCTTGGCCCCCTCGTTAACTGCCGGTTCTGATAACGCCAGCCCA  
TGGCGGCTGCACTGAGCAGCGCCACCAACAACAGCAGCAGATAACCCCTAGATAGATGCATCACAACGTC  
CCCGGATAAAGAGGATGGTCATCACCAGCAACATGATGGCCCACTGGTAGAGCTGGGCCAGCGAGCCGGT  
ATGCAGCCAGCCATAACCAGCGCAGATCCAGGCTCATCAGCACCACCCGAGCTGATTGGCCCCGATATAG  
AGCAGGCAGACCAGCAGCAACATGGGCCACTGCCGGTAGAGGGGGCGCTCAGGCGCCAGCCAGCAGCAGG  
AGACCAGCCAGGAGAGCACCACCAGATAGAGTTGAGAAAAAGAGGAGCACCCTTGAGCACAATCAGGGC  
ATGGCCTCCCAGCCGCTCGATGCGATTGCCATCAAGGCGAGTCTCCAGCCAGCAGCTGCAACCCTGG  
CCCACCCCCAGGCGTGCAGCGCCAGCACAGGGCCGGAGAGCAGGGCAAACACCTGCTGCCCCACAACA  
CCGCCACGGTAAAGGCGAGCACAATCTGCAACACCCGCCGCTCATCGCCACTCTGATGACGCGCCACAG  
CGAGGCCACCAACAGCAGACAGACCAGCGCCTTGCAACTGGCGCTGGGGATCAGGATCAGCAGGATAAAG  
AGGGCGAGCACCAGTGGATGCGGGCGCCAGCTCGGTGCAACCCGCGATGCAATTTGCCACCAGATAGCAA  
TCAGCAACACCACCAGCAAGTTGAAGTGGCCCATATTGAGCCACACCATGCCCCACTGATTGGCCAAACC  
AAGTAGCAGCCAGTTGGGTGCCACTGCCAGGGACGGATCTCCATCGCAACTCCTGCCGGTTATCAGCGC  
TTTTGACCGCTGTCGCCAGTTCTCGCAAGTTCCATGCCTGCCATCCTCACCCGGATCAAGCCAAGTCAG  
AGGATGAAACAAAACCTGGCACGCTTTATTCACTCCCTACTGGCACTAGCGCCAAGGAGAAGGAGTGGG  
CAATGAAACTCAAACCGTTGGCAGGGCTGCTGGGATGTTGTTGGTAACCTCCCCACATCGCTTGAC  
CGAAGTCGATAACCGAAGTCAACTGCTGATGGATGTTGGGCGAGCGTCAAGTTCATCGGAATTCATCTG  
CAATTACAGGGCTATGTGGACGCTTTTACAGTCAGGATGTACAAAAGCGCCATCCTCGACACCAGTGGCG  
ACAAGCTGGGGTCCATCGCCGTACAGATGATCATGTGGAGCAGCAGCAACCAGCAGAGCGTGATGACTGA  
CTGGTTCCACCTCTACGACATGACCTCCATCAACAACCTTCGCCGCCACTCTGGATGCCCTGGTCCGCCCC  
TATGCGGGGATGACGGCCCCGGTTCCGCCATGGCCTTTGGTGGCCAGCAGTTTGATACCAACAACCTCA  
CCGCCGCCCGCCAGGTGATGGATGTGTGAGGTGACGGGATCCAGAACAACGGGCTGGATACCTCTACCGT  
GCGGGATCAACTGCTCGCCTCCGGCATTGATACCATCAACGGCATCACCATAGGTGAGGACTATGCCGAT  
GGGGTGCTGCAAGAGTGGTATGTGGAGAACGTGGCGGGCGGTCAGGATGCATTTGTATCAATGCCACCA  
CCTTCGCCGACTTTGGCAATGCGCTGGAGCTCAAACCTGGCGGCCGAAATTGAAGGGGGCATTATTCCGGA  
AGGGGCACTGGCCGCTCCCATCGAGGAGATCCCGCTGGCCGCCAGCTGCTGCTCGGTATGCCGCTACTG  
CTGGCCTGGCGCTATCAACGCCGTAACCAGGGACGCCTGCAGCAAGCCAACCTGGCAACAAACGCCTGCCA  
TCGGCTGATTTATCACCCGTGTGTGCGGATTAGGGAGCTATGGCTCCCTGTAACCACAAAATCCAATGA  
TGGGATGAAAAATACCATGCATTGGAAATCACTCTTAAATGTTTTGTTAATTCGCTGACTCTTCGACTTT  
TTTTACTATTTTTGCAGATAATTTGGTAATGAATTTACTAAAAGTAGATCTTGGCCTTACCCTCCTGT  
TTTTAAATAGCAGGGATCAATGAAAGTCACTTTATTTTTCTTCAATGTATCAAAAACTTTTGCATCATGAT  
TTGACAAGTTTACCCTTTATCTTTAATCGCCTGCTCTGTATTACCACTCACCAGATCTAAATATTTTTTC  
ATATGATTTGGTATGGATTTTCAATGCGTTTTATCAAAGTAAAGCTGATATAAAAAGAAATCCAATATTGATCA  
ATATCAAACAAGTTCTCGCTGAAACTGCTTTTGCGAATTTTTCGATTTTGTCTTATGAGATTCGTACA  
AGTATAGAGTCAAGATTGCCATGCAATCTTGTGTAGCGATGATTCGGTCTGCCAGCTCACTATCTACGCT  
ACTATCGTAATATTTTCTGATATAAAAACAAAACACCAACCATGCCATCAGAGCTTTTTATTTTTTAATGCTT  
TCATTCAATGTAATAATTAATGATTGGTAATAATGTCTCCTTGTTTTTTTTATAGCATATGGAAGTAGCT  
TAGCTAAAAGAGGAAGTAAAATAGGATAATGCATTGTGAGATTAGATACATATTTCTAACAACTTAACTT  
AGCTTGGTTATTAGCTTTGTTTATAAGCGACTTAACTGTATATTTTAGAATGCTTCCACCAGGGTTCTTA  
TCTTGTAGTTCAACGGCATAATCAAGCATTGCTGTACAGTAGTATTCGTTTTATTTTTTCCGTTGACTAA  
GTCTTGAACCAATATCAGATAACCAATCAACAGATGTTGGCTTTGGTAATTTTTTAATTTCTGTTTTCTT  
GATATTTAACAGTAAACAATAGGTCGACAATGCTTCAGACAGGTCACGCACAAAACCTTCAGCTTGTTC  
TATGTACTAAAAATGCAGTGAATCGTCGATGAAACGATAAAAATTCATAACCTTTTTTCAGAAAGTAATT  
TGTCCACCTTGAACAAGATTATTTCACTAACACGTTTTGATGTACCAGGACCGATAGCGATACCTGTAGT  
TTCATTACGCTTTCATCATCTTTGGTTATAATCAAGCTGATTTGCAAAAACCACTCTTTGGATTTTTCTTT  
GCTTCTGGTACGCCCATCAAAGCCCAAGGAATCGCGTGAGTATAAATGCTAGGATAGAACTCGCGATAT  
CAGAATGAACGATAAACTTTTTCCCTTGGCAGATTGATGATAACGTTTGTCTTTCTTTGACTGTTT  
ATAAGTCATTACGATGATACGCCCATCAGGATGTGCTACCGGACGGATTATACTATTTCTCGTTACTCTCT  
ATGTGCTGTAGCTTATCCCAGTTGATGCTATTTCTTAACTAAATGAGAGTAAGGTAATGGATGTGGAA



TTGCCAGACAGCGATGAACATTATTGAAACGAGTCGCATTGTAGCTACAGTGGTCATACCCACCACCTTCT  
TAGTGAGATTTTCGCATAATTTATCAGCAATATCAGGCGTTAATAGTTCGCTATTAATAATGCTGGGCAAT  
TCTTCATTTTTTATTCTTCTGTAGGGGGAAATAATTGTACCGAAGCAACGAATCTTTAACGTATTTTTTCGT  
TTATCATTTTTTCTCTCGACATTAATAATACGATATAACAGTAGTTAGATGGATGGACATATTAATGTGT  
TAACAATACCTTTTCATCTAACTCCGCACTACCACTCGTCATTACAATAATAAATGATTTTTAAAAATCACT  
GTATTACCAACCAGCATCTGATTGGTAAGTCCATTATCAATAGGCTTTCGCGCCGGCTCCACGTGTACCACT  
GGGTAAAACTACCGTCAAGAAACGTAAGCAGAAAAATGAAGCCTATATCCTCTGTATTATGGCTTGC CGCGA  
TGTTTTACTCCACCATCTGCACGATATAAAAAAGGCCATTATCACAAGGCCTTTTTCAGAAATATCCAGATTC  
AGGCTGGTAGCCCGTTTTTTTTCCGCAATCACCCCGGCTCTGGTGACATGGGCAGCACCTGCCATCCAGC  
GCATGATCACTATTGGATGGATAGTCCGGCATTGGCTCGCAGTAGGGAATGCGGCTTAGCACCGGTGCAT  
TGACCAGGGCGGCCAGCTGATCGGAGCGGCGAGGCTGCATCCGCCAGTTCGGCCACCCAGCGCCAGACC  
GCAGCCGAGCCCCAGCCCCCAACAATGCCCGCCAGCAAAAAACAGCCAGAGCGGGTAGTTGCTCGGCTTG  
CTGGGGGCGAAGGGTTTTGTGATCACCTTGATCCGCTCCCCCTGCTCGAAGTTGCCAGATCGCCGGTCA  
CCTTGCCCTTCTCATAGCGCAGCAGCAAATCCTGATAGAGGGTGCCTTTGACCGCCAGATCCCGCTCCAG  
CTCGGCGAGTTGGCGCTCGGTATCCCCCTGGGAGTCGACCACCTTGTCCAGCCCATCCAGCTGGCTCTTC  
AGGCCGGCGGCGTTTTGTCCGCTCCGTGAGTTGCGTCTGGGCCAGCTGCCACTCGGGCCCCGCGGGCCA  
TATCCGGCTGGGATTTGAGCTGCTCGAACTCCTGCTGCAACTGGTCAATCTGATAGCGCAGACTCTGCAC  
CTTGCTGTGCTCGTCTGTAGCGGGCCCGCAGCAACACCAGCTCGGTGCGCATCAGTTGCAGCTTCTCA  
TCCAGTTGGCGGGCCAGCTGGCTCTCCTGCCCCAGCGATAGCTGATCGACCCGGGCCCTTGGCCTGCTGCA  
AGGTGATCAGGCTCTCGGCATAGCGCTCCTGCAAACCATAGAGACGGGCGACGTTGGTACTCTGCTGCTG  
GGCAAGGCGCTGGCATGCTCCCGTTTTGAAGTCGGCGAGCAGCTGCTCGGCCGCTTGCAGTTGCTGCGG  
CGGCTGTGAGCTGGCTTTGCAGGAAACGTTTCGGACGATTCCGCCGACTGGCGCCCCCTTGTGAGCAGGT  
TGAAGAAAAAGCGCCGTGAAATGGCTTCGAGCAAAACCGGCGCTGTTGGCCCGCGAATCCGCTTTGACCTT  
TATCTCGATCACCTCATCGCCGATCAGCCGAGCGAGACGGCACTCGAGAGCCAGTCCATGATGGCATCG  
CGCTGGGCTGGCGGGGTCTCGTCATTGACCAGACCGGATCCCGCGCCACCCCGTCCAGTACATAACGGC  
TGCGCAGCAGGGCTTCGAGCACCGCAAAGCGGTCTTTCAGGCTCTCCTGAGTGATCAGATCCTTGAGGGT  
CGGGGTCTGGTTGGCATCTTGCGGCACCAATAAAGGTGGTGC GGCTCTCATACTCCTTGGGGGTGAGCAGG  
CCGATCGTCAAGCCACCGGCATCACCACTACCCGGATCACCAGCAGATAGCGACGATAGCGACGGCCAGGCCG  
CAAAGAGAATGATGTAGAGGTTGTAATAGAATGGCAGGCATGGCATCACTCCCTGAGAAAAGCCCTCC  
CCCGCACGATGCAAAGGCAGTGCCACCAGAGGAGCTGATCGCCTCTGTGGGCAGATCGCAAGAGTGGTAC  
AAGATTTCGATTCTCCCGCTATCCGGGGTGTACCCCTTCCCTTGC CGGAGCGCGAACCATGTTGTATC  
AACCCCGTTCGCACAGACCCCATCCCCACGGGAGCGCCAGCGCCAGCCCGTCTTACAACCTGTCTTGCAA  
CCTGTTGTTCAACCTGTGCTACAAATCGTGCAGCACCTGCAGCCCGGCGGGCTGGAGACCATGGTGTCA  
ACCTCACGCAGGCGAGCCCCGCGAGCAACCGGTGCATATCATCTCCCTCGAAGGGAACAAAGGGGATGT  
GGTAAGGGCGTGGCCCGCCCTGTATCCCTTTGCTGGCAATATTCAGTGTCTGGAAAAGCCCGCGGGCTGG  
TCGCTGGCAACCCTCTGGCGGCTCACCCGACTGCTGCGCAAACCAAGCCGTCGCGGTACATAACCACC  
ATCTGGGGCCCATGCTCTATGGCGGCTCGCCAGTCGGCTGGCCCGGGTGGCCACCCTGGTACACACAGA  
GCACGATGCCTGGTATCTCGATGATCCCCATCAGCGCACGCTGGCCCTGTGGGGGTGCGCGCCTTCAA  
CCCATTCTGGTGGCCGATGCCACGCCGGTGGCCAACCAGCTGCTGGCCAAGCTGGGCGGGCTGTGCCAA  
CCGTGATCCCCAACGGCATCGATGAGCGGCGCTTTGCCCGGGCGCCGCCCGCCCTCGCCCGTCAAGGAT  
GGGATTGCCGCAAGGGGTCAAACCTGATTGGCTGCGCCGCCCGCCCTTGGAGTCGGTCAAGGGTCAACCTTG  
CTGCTGGAGGCGATCCCGCCCTGCCGGAGGAGGTGCATCTTGCCTTGGCAGGGATCGGCAGTTTGCAAA  
ATGCGTTGCAACAACAGTGTAGCAACTGGGGATCGCCATCGGGTCCATTTTCTGGGGCTGGTCAAAAA  
CATGCCGCGCTTCTATCAGGGGCTGGATCTCTTCTGCTCCCTCACTGGCGGAGGGGATGCCGCTTTGC  
GTGCTGGAAGCACAGGCTGCGGGTACCGGTGGTGTAGAGCATGTGGGGGCGGCCAGAGAGATCGTCT  
GCCAGGCCAGCGGCCATATCCTGTGCGAGCGGGATCCCGCCCGCTTGGCCAGCTTCTGGCACAAAGGTT  
GCTGCACGTCCATAGCCTGCGTGCCGTCACCCGTGAGTTTTGTGTGCCAGCAAAGCAGCTTGAGCCGGATG  
GCTCAGGCCTATCAGCAGCTTTACAGCCGCTGATCAAGCGACCCGATGACCAGAGGAGCATCCCATGGAA  
TGGATCATGATCGTGTCTGGCTGTGCGCTGTA CTGGTGGTCTACCACCATGTGCGCTATCCCCCTGCTGC  
TCAAATTCGGTGGTTCGGCAGGCGCGCAAGGTAGCCAATCCGCCCGCCCTGGATCGGGGATTCAAAGC  
AGAGGCCGCCGATGAGGCGCTGCCGACCATCACCTGCTGATGCCGGTCTACAACGAGGCGGCGACCATC  
GCGGCCAAGCTGCAAAACCTGCCAGCCTCGATTACCCCGCCGACAAGCTGTGGGTGCATGTGCATTTTCG  
ACGGCTGCAGCGACAACAGTTACCCCATTTGCGCTGAGCCAGCTCGGTGATCCCGCCCTGCAGCAGTTGCA  
GATCAGGCTGTTTGTACACCCCGCAATCGCGCAAGGTGCGCGTGTCAACGAGGCCATGACCCGGGTG  
CACAGCGATCTGGTGGCCCTCACCGATGTCTCGGCCCTGCTGCCATCGACAGCCTGCTGCTGGCGGTGCG  
CCCATTTTTGCCGATCCCAAGGTAGGGGTGGTGGGGAAAGCGTACCGCTTCTGGCAACCGGGCTCCAGGG  
CGAGGAGAGTTACTGGCACTATCAAAGCCAGATCAAGCTCTGCGAATCGGCCCTTGGCGGCATGCTGGGT  
GCCACGGGGCTTTTTACATGATGCGCCGGGAATGCCTCACCCCGCTGGCCGCCGATACCATCAATGACG  
ATTTTCATCCTGCCGATGCAGGCCATCGCCAAGGGGTATCGGGCTGTCTACGACAATCGCTGCGCCGCACT  
GGAGCTGGAAGTTTTCCGATGCCGCGCTGGAGGCGACACGGCGAAGCGGATCGGCGCTGGCAACACCCAG  
CAGCTGCTGCGGTTGCTGCCCTGCTGCACCCCAAGTTCGGCTGGGTGCTTCAACTTTGCCAGTGGCA

AGGGGCTGCGAGTGTGATGCCGCTCTGCCTGACCCCTGCTGTGGCTCTGCGCCATCCCGCTGGCCACCCA  
ATCCCTGCTGTTTCAGCTGCTGCTGGGGCTGCAACTGCTGGGGTATCTGCTGGTCATCCTGATCCAGCTG  
CCCCCTGTCCACCCTTGGCCCAATCTGTTTCGCAAGATCCACTATCTGGTGTCTCGACACTGGTACAACG  
GCATGGGCACCCTGCGCTACTGCCTGCGCGCCCCCATAACGTTTCATGTACAGGAGAAAGCCGTATGACA  
CACCCCATTCCAAGATTGACCCTGGTGGTCAAACGCAGCATGGATCTGCTCGGTGCCACTCTTGGCCCTGC  
TGCTGACGCTGCCGCTGTGGCCGCTGATCATGTTGGCCATCCGACTCGATAGCCCCGGGGCCTGTGTTCTT  
TCGTCAGCTGCGGATCGGGCGCAGCCATGCCACCCATAACCGAGCTCTTTTTTCATGATCAAGTTTCGCACC  
ATGCGCGCCGACGCCGAGGCGGCCACCGGGCCGGTCTGGTGTGGCAAGGGGGACAGCCGGATCACCCGCA  
GCGGGCGACTTTCTGCGCAAAACCCGGCTCGATGAGCTGCCGAGTTTATCAATGTGCTCAAGGGGGAGAT  
GTCGATGATCGGCCCCCGTCCGGAGCGACCCGGGATCGCAATCGGCTGGAAGATGCGGTGCCGTACTTTT  
ATCGAACGCACCTATGAAGTGGCCCCCGCATTACCGGTTGCGACAGGTCAATCAGGGTTACGACGAGT  
CGCTGGATGATGTGCGCAGCAAGCTGGCGTTGACCTGGCCCTACTCGGTTGCCCTGCCACCCCTGGCG  
CTGGCTGGTGCAGGATGTGCATATCATTGGCAAGACGATCGCCATCATGGTTGGCAAGAAGGGGCGCTAA  
TCCCCGCGCACCAACCTCAACCACATATCAACGCCCATCAGGCCATTGCTACTGCAATGGCCTTTTTTTAT  
GGCGCATCCTTGTGGCACGTCCGCGGTGATCACAGAAAAGTCAGCGACCTGATCGCCATCATCTGGCCCC  
ATCCACAGGCCGGATGTCCGCTTGCCCCACCGCAGAAAACCAAGCGTTGCGTGATCACAGAAGCAATCCG  
CCCCCTGCAACCCCTAACACCGGCACATAAAAAAACGAGTAGCCAGCGGCCACTCGTTTTTGGCGGGTTT  
CCCCTTGGGGATTACAGGCGCCGTAGACAGCCAGAATATCGGTCACTCTGTTGTTGACGCTGTACCCGCGG  
GCGATGGTGTGTCGCGCCGCTGGCTCATTTTGTGCGCACACCCCATCGCTGCGCAGCCAGTAGTTGA  
CCAGCTCCGCCATATCCCGCACATGGCCGGGCTCCACCAGCCAGCCATTGGATTTATGGTCGATCAGATT  
GACCAGGCCCCCACCGCAAAGGTACAAACCGGTATGCCGTGAGCCATCGCCTCCAGGGCCACCAGCGGC  
AACCCCTTCAAAGCGGGAGGTGATGCAGAGCAGGTCGATGTTGTGCCACTCATTTGGCCATGTTCTGAAAC  
CATGAAGCTGGACGCGATCACCATACTGCTGCAACAAGGCACTTTTCATGGGGCCATCCCCGTAGAGATG  
AAACGCCCATCCGGACAGAAAGCCGATAACTGACAAAATGCCTCCGGCCCCCTTTCCGGCGAGAGGCGG  
CCGACAAAGGCAATCCGGTTGCCAGCCACCGATGCTGGCGTCGACGGCATGGGCACAAAGTTGCTGATCA  
CCGTGCTTGGCACTGGCAATCTGCGAGCGATGGGCTCGCTCACTGCAATACACTTCGCAAAACGCGCGGT  
GGTGCATCCAGCCAGCTGTAAAACCTCAGCAAGCCCTCCCCGTATCCCCGCTGTGAAAGGTCGAGACC  
ACCCATTTTCCGCTGAACCAAGCCGTCAGGCGCCCCAGCACCCCGCCCTTGTAGCCGTGGGTGTGGAGCA  
ATACAGAGCCAGGCTGGCGGGCCAGACGGCGCATAAAAATCGCGGCTGTTGTGGCACACTCATAGGGCAA  
GCCCTGCTGTTTTGAGCAGGGTTCGTAACGGGGTTCATGCCGTGGTTGCTCACCAGCACTATGGTAGGGCGA  
AATCCCCTGGCCAGCAGATCGTTGGCCAAGTGATAATGTGAACTTCTATTCACCAGCCTGACGCGCAT  
CGATGGCCAGCCATATCTGCTGCATGGGTAAACATAAAGGCCCTCCTCCCCTGGCTCCATGCCACCTGAAAT  
GAGGCGCTGCATAGAGCGGGCCAGTCAGGCAAAAGAGGGGCTGGATCAGGCGCCGGGACAGGCGACCAGCA  
GGAGGGTCATGTCATCGAGGGCGGCATCATTGATGCGCTCATCAAACCAGCGGGCAATGCGATGAGCCAG  
TTGCTCAAGACCGGGCCCCGAGGTCAGGCAGATCTCCTTGTAGCAGCGACTCCAGCGCTGGCGCTCTGCG  
GCATCACGGCTATCGAGCAGGCGGTCGGTCCAGAACAGCAGGATCTCGCCGGGCTTGAGCTGACGCTCAT  
TGGTCACGAAGTGAGGATCCGGGCGCAAACCGGGCAAGGGGCGGTCACGCCGACCTGACGGATGGTACC  
GGGCCCCAGCAGCCAGGGCGCAGGGTGGCCCCGCGCTGGCCACTGCACCCGCCCTCGTTGCCGAGCTCA  
ATACAGAGGGTGGTGAGCAGGGTTGCCCCGAGGAGCGGATCACTGTGAACCGCATTTGGACAAGATGGTCA  
GCAAGCGGGCGGGGGCGCGCTCCAGATCGTGCGCCGTCAGCAAGCCACGCAGATAACCGGCATAGGCATG  
GGCGAAGAAGTTGGCTTCCGCGTCTGGCCCATCACATCCCCGAGCCACAGCACCCGATCCTTGACCAGC  
AGAAAGTCCCCGCTCCCACGGTGGCCGCGCGTGTGTTGCAACGCCAACTGGTATCCCCCTATGGAGGTGG  
CGGGCAATAACGGGCGCAGCGCCGAGGTCATGCGCTGATCCAGCTGCTCACCCATTGCGACTTGAGCTG  
CTGCGAGCGTTGACGACCCCGCAAACCGCCAGCAACAGGTCCTGCTTGGTGATGGGTTTGACCAGAAAG  
TCATCGATCCCCAGCGCCCCCGCCGACTCTGGGTCCACTGATCCTGATGACCGGTCAGGAAGATAAAGG  
GCACCCCTTTCATCTTGGGATCCTTCATCACTGCTGGCGCAGCCCAAAGCCATCGATCCCCCTCCATCTC  
GATATCGGAGAGCACCAGCGCGGGAGGTTGCTTTCCAAGCGCCAGCAGGGCGGCATGGGAGTCCGGCATAA  
CTTTCAACCCGGTAGTGCTCATGAAGGTAGGCGGTGAGCAAGGCACGCATCACCTTGTGATCGTGCATCA  
CCGCGATCACCGGCAGTTGGTTGACAGTGCCCTGCTGGCGAAGGGTACACGATTGCGCTCACCGTCCGCG  
AGAGAAGTGCACCTCGGCAAAACAGCTGGTGCACCAGCGCCAGCCGATCCCCCTCCTGCAGCTCATCG  
GGTAACGGCGCACTGGCAAGACCGGGTTGCGGGCCGCCATCATCCTCCAGTATCAGACTCAAACCCGTTT  
CATCCTCTTTACGCGTGAGCCAGAGCCGGGTGCGGGAGGAGCTGTGTGTTTGACGCTATTGGTGGCCAG  
CTCACTGAAACAGAGCAGCCAGTTGGCTTATCCTTTGGGAAAACCTGAAACAGGGAGAGTCCCTGCGCC  
AGCCGGTTGCGCAGTTGCGCACCCGACTGCAGGGTTGCCGGAGCAGATCGCAACCAGTATCCATATCGG  
GCCTCCATCAGCGGGCGATCAGATCCGGAAATTGAGCAAGGCGCTGCGCCGGCACCAGCGCTTGAGCCAT  
TCGGTCACCCGGTTGCTGGGCAGCCGGTTGAGCTCGCGCAGGATCTCGCTGGCCAGCCCCGGGTTGAGTT  
TGTCGTTATAGACTGCGCCAATCAGATTGGCCCTCGGCACGGGTCAGTTTATCCACCAGCACTTTGCACCAC  
GGTGTGCGGGGTCACTCCCGCCAGCACACCAGCAGTGCCCTTACAGGGCCCCACACACCTGATCGGCC  
GGAATATTGCCCCGATTGAGGGCGGTGAGCGGGCAGGATTCGAAGATCACACATCGTAATGTTCCAGCC  
AGCGAACAGCAATTGGCGCAAGGTATCCTTGTGCGAAAAGCCATCAGATCCTTGCCGGCGCCGGGAG  
CAGCGACAACGACCGGCCATTGGCCACAGGCTCGGGCACATCATTTGGGCCCCAGGCAACAGCCGGGGCG

CGGCCGGGGTGATAGAGATTGAGATCCACCAGCAGGGTGCAGCCCATCCGCTTCCGAGCGCCTTGCCA  
GCGCATCGCAGATGGAGCTCACCCCTCTCCCCCTTCCGACGAGGTGACCGCCAGCGAGCGGATCCCCCG  
GGCGACCGTCCGCGCGTAGAGGGATTGAGCTCCAGATATTGAATGGGGATGCTCATATCAAAGCGTCCC  
GACCAGGGCCACCACCGAGATCGTGGTCAGGATGTCGCGCATGCCATCCATGAAGATGGCCAGTTGCTG  
CTTTTGGCTATCAGGGATAAAGACGGTGTCCCTGCACGCAGCACCAGCAACTGGCTAAAGTCGGGCTCTT  
TGGCAAAGCCGTCGAGATCGAAGCTGCGGGCTGATCCCCCTGACCACTGGTAGCCATGTTGATCACCAC  
AATCTTCTTGATATAGGCGCTGCTGGTCGGGCCCCCTGCTCTGCCAGCAGATCCAGCAGGGTCATGGAG  
GAGTCAAAGCGGTAGCGACCGGGACGGGCAATCGCCCCAACACCCGAATAGTGTCTCCTTGGGCTCAT  
CGAGCCAGGGGCGATTCTTCTCCGGCAGGTAGATGGAGTCGCCGGGCAGCACCTTGGGCAGCAAGTTTC  
ATCGCCGGTTTTCAAAGTAGAGGGCAAGATCGAGCTTGTGACCCGCGCCGTGCTGCCACTGCGATGGGCG  
ATGCGCACATTGCGCAGATCCGCGCCGAGTCGGACCATCGGCGCCGACAGGATGTCGATAAAGCCCA  
TCTGCTCATTTGAAGGCATAGCGACCGGGGGCCCCGACCTGACCGAAGATATAGATGGAACGTCCGGTGA  
CTGGCGCACCCACTGGGACTTGTGTCACTGGGATCGGTGGGCAGCTCGGGGATCATGATGGTGAATCCG  
GCCCCGATCTTCCGCAGGCTGGCCAGCGCCCCGCCCTGATGAAGGAACTTGTGAGATCAAACAGGGTTG  
GCGTGGCCTGCCCCCTTCCGGCGGTGAGGATCTGCACCTTGGCGATATCGGCCCGCTCGTTGGGGCCACC  
GGCGTGGGCGATCAGATCCAGCAACGACATCTCGTCAGACCATTCATAACGGCCCCGGGATCCGCACCGCC  
CCCATCACCATCACCGCCCGCCGGGTGCCACTTTCAACCAGGACTTCTCATTGATATCAGTTTTTTCCG  
GCACAAAGATGGCGTCACCGGGTTTACTTGGGGCAGCGCCTTTTGCATCCCTTCGGTATAGGCCGTCAA  
GTCGATGGGTTGATCGTGCATCGGTGCGCAGCAAACGGATCTGACGACTCTCGGCATAGCGGGTCGGG  
CCGCCGGCATTGGCCAGAATATCGAGGAAGGAGTCCCCCTTCCCGCCCCCATAGGCACCGGGTTTTGAACA  
CCTCACCATGATGTAGATGGTGCCTGCCCCCGTTTTATCTGCTCTTCATCCTTGGGCACGAAGATGGT  
GGCGCCCCGGCGCCAGATTGGGCAGCAGCTTGTGTGGTGGCCGAGTCGAGATAGGCTTTGAGATCGAACAGT  
TCGGGGGCATCACCATTGATCACCCGGATCCGCTCCACCCCGGCAAAACGGGTCACCCACCGGCTCGCA  
TCAGCAGATCCACGATGGAGTTGCCACTCTTGAACCTAAAGGCGCCGGGGCTGTTGACCTCACCAAACAC  
CTTGATCGCCTTGCCTGATCGCCATCCCCGCTGCCGCCAGGGTTGCCGCATCAAAATCAATCTGCACG  
TTGCCGATCAAAGGGGATGCTGGCACGAACACCACATCAAGGGATTGCAATGGCGGCAACACGCTGGCAT  
CGCCGGTATCGAGATAACGCTTGTAGTCGAAGCTAGAGACCGTGTGCCGCGCCGACCTGCATGTTGTT  
GAGCTGGGACCGGGCAGCAGCCAGCCGACGCGCCATCGAGGGCCATCTGCACGTTGCCATCGGGCCAGA  
TCATAACTGCCCCGGTTTTTTGACATAGCCCATCAGCTGATCAGCAGCCGCTTTTCCAGCAAGGTGACGG  
TCAATTGAGAGAGGTTGTTGTAACAGGTTTGGAGGGCGGTGCGGATCAGCTCATCCGCTGTTGCAGGGT  
CTTCCCCCCCCACCACTAGGTTGCCGACCTCAGGCAGTGCAATCTCCCCCTGCTTGTGATCTGGAAAAGC  
TGATCAAAAAGCAGGCTCACCGGGTTGCACTATGGCCAACCGATCACCGGGAGCCAAAAGGTGGAGGCCA  
GTAACGGGCAGGTGAACAACAGCAAGAGAACACAGATCAATCCTTCGAGAGCGCCCCGTTTTCATAGACAT  
CCTTTTTGCTGTTACGTCTGCCCCATTGGCGTAAGGGGAGCCCTGACCAATCAGCACGACAGCCATCC  
GCTGTTGTCTGTTGAGCCGCAAACGTACTTGTGTAGTGATTTGTGCCAACACGGTCTGACGCCAGGCTA  
CATCCGACCAGAGCCGTCCTGTCATATCCCGTTCGATATCAATACGTTGAGATTGTAGCCGTTTTAACTC  
GGCAGGCATACACCCCTGCAGACTCGCTTGAATTCGTCAGCTGCAAGTCGAGTTCTTCTGACGC  
TCATCATAACGAGACCAGACCCTCCGTTTCATCCTCATTGACCGGAATACGGGTGGGTCTTGCCCTTGCCA  
TGCCGCCATACCCCTCCGGCGGCCACTGCGCACAACCCGACAGCAGAATGGACGAGAGCAGGATACAAA  
GCGTTTTCATGATGCAGCGCCATCATGCCACGGGAACGCATATAGGCCCTTGATGCTCTCATGGCAGGGGA  
TCACCCGGTGCATATGCAGCATCTCCAGCAGGTGATGGGGTTGACCGGGTCCGCAGACAAGGGCCATCTG  
ATGCCCGTTTCATAATCAATCTTTTATAGAGAAATACCAAGGCTCCGATCCCCGACGAGTCGATAAAATGA  
ACATCGCTGATATCGGCCAGGATATCTCCCGGGTGGGTGCAAAGGGTTTTCAAACAACGGGCGGAGCTCAC  
TGACGGCCATCGCGTCAAACCTCGTTTTCCAGTACCACTACCTGGATATCATTAAGGGTGTAAAGTCATGCT  
TTCCATCGCTAGCTCCTTGTGATTTCTCAGACTATTTGCTGTACGGCATTTCAGCACGTTGCAAATGTTA  
TGCCGGGCAGTGCCACGGCACTTGTCTCCAAATGATACTTTTGCCTTATTACCAGACCCCACTCC  
TCGTTTTGATTGCCAAATTGCAATTAACCTCCCCCGCACGTTGCAAACCTGCAATTCACCTTGGCCGAGAT  
CGTCCGATAACAGGCTAAATGGCTGATAATTCAAAGCCATTAGACTGGGCCCGATTATTGCTTGCCTTTG  
GACACACTTCACAAGCCACCGTTGGCTCGGCCCCCATGCCGCCATTTTCCAGGAAGGAGAGATCATGAAA  
GCAGGCCTTTACATCGCACCCTGTTGGCAGCCCTTTGCGGCACCGCATACGCAGCCCCCTCCCTGACA  
GCGCCGTGTTGAAGGTTGAAGGCGCCATCAGCAGCCCCACTCATCAGGCTCTGGCCCTGTGGGACAGCGC  
CATGCTGGATCAACTGCCGTTACACGAAATCAAACCCATAACCCCTGGTATGACGAAGCCAAGACTTTT  
CGCGGCCCGCTGCTGCAAGATGTATTGGCCAAGGTGCGGGCAACCGGCAAACAGCTCACCATTACCGCGC  
TCAATGACTACTCGGTACAGGTGCCGACAAGCGATGCCGAGCAGTATCGGGTCATCCTCGCCCGCACGAT  
CAATGGCAAGCCACTGTGCGTGCCTGACAAAGGGCCGCTGTTCTTGTCTATCCGTTTCGATCAATATCCC  
GAACTGCAAACAAGCTCTATTACGGTCCGGCTATCTGGCAGATCAGTGCATAAAAGTGGAGTAGATCC  
CATCATGCGTTCCATGGCGGCCAGTCAACGTTTTCTTGTGTTGGTGGTCTGCGGTGCTGCTCCTTGCCTTT  
GCCGGTATTGGTACCATCCAGTACCGGCAATTTTCCAGGATCTGCAGCGCAGTACCAGCCAGGGCGAAGACA  
ACGTGATGTGGAATATTTCCAGCTCTATAACGAAGCGCTGCGTTTTCAAAGCTCGCTGCTCCATGAGTC  
GCAACCGACCTTCCAGCTCAGATACGATATTCTGGTCAGCCGCATGGATCTGGTGTGGAGAGCAAGGAT  
CGCAGCCTGCTTCAGCAAACAGAGATCTACCAGCAGGCAAGCAAAGCCATTCGATCCTACATCTCTCTGG

CGGATATCTGGCTCGGCCCGGAAGCCACCAAGCCGCTCGACAATCTTGCCCATCAGGAGCTGCGCCAACA  
GCTCGCCTCCCTGCTTCCCCTGCTCCATCAGCTGACTCTGGAGGTGAACCAGCAGGCGACCCTGTTTTGAT  
GTGGCACGCCGCGACAGCGTGAGGGAGCAGATCATCACGACGACTCATCGCGACCTGCAATTTGCGC  
TGCTCTTTGTGCTCGCTCTGCTGATCTGGCGGCAAAATGAATATCTCGTTTCTGCAACACAACTGATGCA  
GCAGCTCAATGACAACTGCTGCGGGCAAAATCAGGCGGCAGAGGCAGGCACAAGAGCCAAAAGCAGCTTT  
TTGGCCAACATGAGCCATGAAATTCGCACCCCCATGAATGGCATTCTCGGCATGCTCTCACTGTTGGCCG  
ACCGGGATATGGATCCGAGGGAGCGAGACTATCTGGAGACGGCGCGGAATCGGCAAACCATCTGCTCGG  
TCTGCTTAACAACATTCTGGATGTATCCAAGCTGGAAGAGGGCAAGATCGAGCTGCAACTGGCCCCCAT  
CACTTGCCCCAGCTGCTGGAGGATATCCGGGCCCTGATGCAGAGCAACTGCGATGCAAAAAGGGATCAAAC  
TGACCCTGACTGCTGCCCCCCGATACGCCGGAGTGGTTGATGATCGACCCGCTGAGGGTCCGCCAGATCCT  
CTTCAACTTGGTGAGCAATGCCATCAAGTTCACCCATCAGGGGGAAGTAAAGATCCATGTTGATAGCACC  
CTGTTGGAGCAGGATCGCCACTCGATACGCATCTCAATCCAGGACACCGGGATCGGCATGAGCAAAAAGTC  
AGCTAAAGAACCTGTTTTCAACGTTTTCGCCCAGGCGGATGTCTCGATCACCCGCCAATATGGCGGATCGGG  
CCTGGGACTTGAAATATCCCCTAACCTCGCACGCCTGATGGGCGGCATATCTCGGTAGAGAGCAGCGAG  
GGGCATGGCAGTACTTTTTACCTACATCTGGCCCGCCAGATCCACGACCCCTCGATTGTTTTGCCGTGCCGT  
CCAAGCAGCTGGATCAGGAGAGCTATCGCATCTTGCTGGTTGATGACAATGCCACCAACCGCAAGGTGAT  
CGGCGCCATGCTCGACTCCGTGGGCCATCAGGTCACACTGGCCGTTTCAAGGAGAAGAGGCGCTGGAGAAA  
CTGGGTACACCGAATTTGATCTGGTGTGATGGATGTCCAGATGCCAGTGTGGATGGCCTGGTGGCCA  
CCACCCGGATCCGCACCTCCAGATGCCTTGGGCAGATATCCCATCATCGCCCTGACGGCGGATGCGAT  
GCCGGAATCCAAGCAATACTATCTTTCCCATGGCATGAACGGGTATATCACCAAGCCCATCAATAAAGAG  
ACGCTACTGAGCGAGATAAAACAGACATATTTCCCATGGGCGGCTCAAATACACGCAGCCATGCGTGTCA  
CCAAACAATAAAACCTTGGAATCCGGGGTACTGATTGCTCATGTGGGGCAACATTGACCTCTGCAGGCCAA  
CTGAATGGGCTTGGGTCTAGAACGCACACAGGCAAGCAGCTTCGCAACAGCTGCACGGGCGCTCAGCTTC  
TCTCGGGTATGCAGGGATTTTTTATGATCTGTACAGATCTAGTAATCCCTCCCTACAACGTCCAGACCAGA  
GTGAATGACTATATTTATGTTTTAATGCATCAATAACCACTCTTAATGCGGGTGAAACATTCGGGTGAG  
GATAATAGAGGTACAGACCAGCCAAACGGTACTATAGGGTTTCAATACCTGGATTAAGATGCCGCGCTC  
AAGTTCATCGCTACCAATTCCTCTGGCACATAGGCCAGTCCAGCCCCATTTTGGCAGCAGCCGCCCTCC  
ATATAACTGTGAGAGAAAGCCCACTGCCCTGTGGTGCATGCTTAATCGCCTTCCCTCTTGCCACAGTT  
CCCATTGATAGAGGTGCCATCGGCAAAATGGTAAGCGATACAGGGATGTCCCGCCAGATCGGCAGGCGC  
CTGGGAAATCCGTATTGAAGAAAATGATCTGGTGTGGTACCATCACCATCTCCAGATCGGGCGTAATG  
CGCACGGCCACCATCCCCTCATCCACCTCGTCACCCAGTCGCACGCCAGCATCAAAGCGCTCATCGATGA  
TGTTACGAAGCGGCTTTCACTGATGAGTTCAGCCGAATATCGGGATAACGCAGCCTGAAGATAGTCAG  
CTTGGGAAGCAGCACCTTGTGATGGCATGTTGGCTGGCGTTGATCCGTACCGTGCCGAAGGGGTATCA  
CGATAGTGGGCGAGCGTGGCCAGACCCGCATCAAGGGACTGAAAACAGCCCTGCGCCGTGCGGTACAAC  
GCTCACCCGCTTGGGTTAAGGAGAGGCTGCGGGTGGTGCGCATCAGAAGCTGCACCCCGAGCCGGGCTC  
GAGATCCCGAATCGTTCGGCTGACCCCGGACTGGGCAAGCCCAACCTAGCTGCGGCTTGGTAAAACCTC  
CCTTCCCGAGCGACCAGCATAAAGACGTGGAGATCGTTGTAATTTCTCGCGCCTGTCATTTTGTTACCC  
CCTATATTCCTGTCCGCCACGACCTGAGTCAGGTGCGCGTCAGACGCTTAATTTAGAACAGGTAAGCAT  
TAATGTTATCAAAAAACCGCCTCTAATCATCACTATTAGTTCTAACTAGACTGTGTGTGCTGGTTCACAG  
AACCAGCCCTCCACCACCAGGACCACGCATCAGAAAATCCGATTTTCGAGGAACTTTGCCATGAATGTTCTC  
CCCAAGAAACTGACAGCTATCGCGTCTACCCTGCTGCTGGGCGCCGCATTAACCGGAGTCTCTACATTGA  
GTCATGCCCAAACAACCAACCCCACTGAACCAGTCTCCATGGTCACCCAATGGGACAAGACCTTCACCCA  
AAGCGACAAGGTCGATCATCGCAAGGTACCTTCAAGAACCGTTACGGCATCACTCTGGTGGCTGACCTC  
TATCTGCCGAAAAACCGGGGAGACGCCAAGCTGGCGGCCATTGCTCTGAGCGGCCATTTGGTGCCGTAA  
AAGAGCAGTCGAGCGGCTCTATGCCCAAACCCCTGGCTGAGCGTGGTTTTGTACGCTGGCGTTTTGACCC  
CTCTTACACCGGTGAGAGTGGCGGCCAGCCGCTGATGTGGCTCGCCAGACATCAACACCGAAGATTTT  
AGCGCCGCGTTCGATTTTCTCGGCCTGCAAAAAGAGGTGACCCGCAACCGTATCGGTCTACTGGGGATTT  
GCGGCTGGGGTGGCATGGCCCTCAATGCCGCGCTGGCGACACCCGCATCAAGGCGGTGGCAACCAGCGT  
GATGTATGACATGAGCCGGGCCATGGGGCATGGGGTGGGCGATGGCAAGGATCGATATTCACCGCCGAT  
CGCCGCGCGTGTGGCATACTGAATGAACAACCGTGGAAAAGACGCGGAAAAGTGGCACCTATGCCCATA  
GCAATCACGACCTCTATGTGATGACAAGGGAAATGTCACCGCTGCCGCCCGCACCCCTGCCAGAGGTTCT  
GCCGAAAACCCGCACCCGTACTCAAGGAGTCTTTCGATTACTACCGTGTACCGGTGGTTTTCCATGCC  
CGTTCGGTGAACCTCAACGGGGCTGGACCACTACCATGCCGAGTCAATCATGAATATGCCGCTGCTGA  
GCTATGCAAGCGAAATATCCATTTCCACCCCTGATCGTGACCGGTGAGCAGGCTCACTCTCGTTACTTTGC  
CGAAGATGCCTTCAAGGCCGTTGGCAGCAAGCAAAAAGAGCTGGTCTGTTGTGCTGGCGCCAATCATGTC  
GACCTGTATGACAACAGGCTGGCAAGATCCCGTTCGCCAAGTTCGAGCAGTCTTCAAGACCAACATGA  
AGTAAGCGTCAAAAACCGGGCGGCTCTTTCGCCGCTTTTTCTCACTGGTTTCGACGCCACCAATTCAGTTC  
ACATAGGGAGAAGCTCAATGATCAGAGGAGTGTTTGTTGGCGGATGGCTCTGTTGCTGGGGGTGACCTG  
CACAGCAACCGCTACAAGTGCTAAGGCTCAGAACAAGGCAGATAGTATGAACATCAAGATGACGATAGCC  
AGCCAGATCATCACGGCCACCCTGGAAGATAGTCACAGCGCCGGGACTTTTTTGGCATGCTCCCCCTGA  
CACTGTCCCTCGAGGATTACGCCGACACCGAGAAGATTGCTTATCTGCCCCGAAATTGACCACACAGGG

CGCCCCAAAAGGCATTGACCCGAACGTGGGGGATCTCACCTATTACGCCCCGTGGGGCAATCTGGCGATC  
TTCTATCGGGACTTTGGCTATTGACCCGGACTGATTAAGTTAGGGCGCATTGAATCGGGTCTCTCCCACC  
TGACCACAACCTCGGCCGCCAGCATCACGATCGAAGCAATCGAATAAGCCCATATTTACCTCCAGGTCA  
TGCCATGAACGTAACATCGTTATCATCACATACACCCGCTGTCTGTCACGAACTGGTCTGCGGTTGCT  
GCCATGTCCCTGTGTGGTGGCACTGCTCATTGCCGCCGAATTTATGCCGGTCAGCCTGCTGACGCCGATCG  
CCACCGATCTAGGTGCCAGCAATGGCATGGCCGGTCTTGCTATTGCCATCTCCGGCCGTGTTTGCCGTCCC  
GACCAGTTTGCTGATCGCACCTCTATCTCACAGGCTGGCCCGACGTCATGTGCTCATGGGGCTGGCCGTC  
GTGATGCTGACCTCTTTAATCGTGATCGCCCTAAGCCCCAACTTTACCGTGCTGATGGTGGCACGCGCTC  
TGCTCGGGATCGTTATCGGCGGTTTTTGGGCGCTGGCAACCGCCACCATCATGCGGTTGGTCTCCAGCCA  
ATCCGTCGCCAAAAGCGTTGGGCATCCTGTATACCGGCAATGCGGTGCGGACCGCCTTTGCGGCCCCAT  
GGCAGTTACTTGGGTGGACTGATCGGCTGGCGAGGCGTGTCTGCTGCTGGTACCGTTGGTAGTGATCA  
ACCTGCTGTGGATGGTACTTTGCTGCTGCCATGCCATGCCATGCCAAGCACGCCCGCACAGCGCATTTGCGCT  
TATGCGCAGACCCAACGTGCGCCATTGCTATCATGGGCGTGACGCTGACCTTTGCCGGCGCCTTCAGTGCC  
TTTTACCTATTTTTCGCCCCCTTCTGGAGACACGCACCCAGGTGACCTGCCACAACCTCTCGGCGCTGCTGC  
TGGCTTTGGGGCTGGCCGGTTTTTGTGCGCACACAGCGGTAAGCATGCTGCTGCGCCGTCATCTTTACCG  
GATGCTGCGCTGGTTGCCGCTGGTGTGCTGCGGCTTATCACCTGGCGCTGCTGGCGGTGGAGCATCACTTC  
TGGAGTGTGGCCCTGATGCTGATCCTCTGGGGCGCCCTGAACTCCGCCATTCGGTTCGCTGGTCCAGCCT  
GGATCACCCAGGGTATCTCAGATTCACCCGAGAGCGGTGGAGGCTGATGGTGGCAGCTATTCAGCTGGC  
GATCACGTTGGGGGCTGCCGTGGGGGGGTGGTTACTGGATTCCCTCTCTATCAGGGCCACCTTTATGGGC  
AGTGCCTGTTACTGACCGCCGCTCCATGGTGGTGGCAATGGCAGCCGACTAAGGCCCGTACGCTTG  
ACCAGTAAGTTGACCCATCCGTTAGCAAATCCATTGCCATCGCACAGTGCAATTTACCCAGCGCCTTG  
ATGAAGCAGCCGATGTAGTTCTTCTGGTTGCTGAGCTCTTTCCGGTGCCTAGGAGAGGGCCTTCTCTTTTT  
GCTAGCGGTACACGAGACCGACAACAACGGAGCAAGCGGTTTGGCCGCCGGAACAGCAGGCTTGATATT  
CGGCTGAGGTTGAGGGTTATCTGGCTCGCTTGTGGGTTGCACAACCTGGCTTGGGCTGGAATGCACACAG  
GCAAGCAGCTGGGTACCTTGTGGCGGGCCTTCGGCTTGTCTCGGGTATGCAGGGATTTTTTGTATCTCT  
TACGACGAGTGGTGACTTTCCGGTAATACCAGATGCCGTGGGGACTGAGCCAGAGATTCATATGAAGAC  
TCCGGCTCCATCCACACAAGTGGATTACCAAGAGGTCTTAAGGGGGCTATTAGCTGTAACCTTATTGAAT  
TGTCGCTTAAACAATAAGCTGACATAACGTATAGCCATAAAATCAGTAACCTTACGAGAGTTTTTATAACCA  
TAAGTTGACATAAAAAATAAACATGACTGACATAGAGTACATCAACCCCTACACCCCTCCCTTCCCTGCGGG  
GTTGTTATTTTTACCACTTTCAGAAGTCTGTTCCGCTTTCATACCCAGCATGAAGCTTCTCGGCTTCCTGTA  
TGGTCCCGTGTAGGGGTAACCAGCCGTGCTTTCATGTAAAAAGTGTCTATCCCTGCTGGGATGATCACTA  
CCGGTATTTCATCCACTGTGTATTGGTGAACGCTGGTTGTTGCACCTAAGGAAGGTGCAAACAAGTCCCTTG  
ATGTGAGATCATCAGAGCCTCTTGGTACCAAGGACGAAATCCACCGTAAGTCATCAACTGACCTTCGCTG  
ACGGCGGGTCTACGACAAACGCTGCCAGACCCGAAAGAAATGTTCTCTCTCTCGGCTATGTCCGAAT  
CCGCAGAAACAGACTTCCGTAAAAAACACGAAAAGCAGTTTGAACGACACGATTGAACACTATAGGCTGTA  
GCCCTATTGGATGCAATAAGCTGTCTATTAGTTTTTATGGGGAAATCAAGTTGGCAGAAAAGAAACACT  
CATTAGCGGGCAATACGGACGGTCAGGAAGGCGCGGCTTGAGCCAGGAAGGCTTCTCCGACGTGTC  
CAGTCGTACCTATATGAGTTCGCTGGAGCGGACTTGAAAAGCCCGACTATCAACAAGTTGGCCGAGCTG  
TGCGAGGTCATGGGGGTTACCCGCTCACGCTGCTGACGCTGGCGTATGCCGGGAGTGATCAAACCAAGA  
TTGATCGACTGCTTGTTCAGGTTCCGGCAAGAGCTAGAGTTATTAGGGAAAACAGACGATCAATGACACTT  
CTCCAGAACGACCCACCACCCAGCTTGCTTTTTCTGTCCATGAGAAATAGAGGAGTCTTTGCACTCCTTC  
TTGGATCGGGATTATCTCGCTCCGAGAAATTCCTACCGGCTGGGAGATTACTTTGGATCTGGTGCGCCG  
TGTGGCATTGGCGCAAGGTGCTGAGGAACAGTCCGACTGGGCTAAGTGGTATCGTGACAAGACGGGCCAA  
GAGCCTAACTATTCCGCACTGCTTGGAGGATTGCAAGTTACCCGATGAACGTCGGGCAATATTGCATC  
GCTACATTGAACCCGATGAGCAGGATCAAGAAGAAGGTGCAAGGTTCCGACCAAGGCGCATCAAGCGAT  
AGCGCAGTTGGTTCCGCTCCGGCCACATACGGGTTATTGTTACCACCACTTTGACCGGCTAATGGAAAAC  
GCGCTGCGGGAACAGGGGGTCGAGCCGACAGTAGTGTCTCCGAGATGCGCTTGCTGGCGCTGAGCCGT  
TGACCCACAGTCGCTGCTACATACTGAAAGTTGCATGGCGACTACAAGGACGCGCGCATCCTGAACACCGA  
TCAGGAAGTGAAGCACTTATCCCGAATGTTACGACAGGCTACTAGATCGCATTTTTTGTGAGCATGGACTG  
ATCATTTGCGGCTGGTCTGGCGAATGGGACCATGCGCTTCGCTCTGCTTTCTGCGTGCACCGAACAGGC  
GCTATCCGGTTTACTGGGCTGCCCGAGGTTCAATGGGTACCGGGGCCACCGAAGTACCGGCACACCGTAG  
CGCCAAGACAATTTGATCACCGGTGACAGAGTCTTCCGTTGCTACAGCAGCGTGTGAAACACTT  
GAGCAAAGCCAGCGTCAGAATCCTCTAAGCATCGAAGTGTCTGTTAATAGTGCCAAGCGCTACCTTGCCA  
AGCCAGAGCACCGCATCCAGTTGGATGAGTTGTTCTCGCAAGAAACCGAGCGACTCTTGACGCAGCTCGA  
CGACAACCAATTTTTCCCGCAGGGCCAGTGAATCAGGATGAATTTGATCACGGGTGCAGCGATATGAA  
GCACTAACGGAACCCCTTGGCACGTATGGCTGGCGTACTAGGAAGATGGGGGGATGGTAGTGAATTACCAT  
TGCTCCTGGACATTATCAGGGGGCTATATCACCCAGGAGAGAAAGATCGGAAACGGTCTTACCGTCTGGCT  
CGGCTTGCCTCTTATCCCGCTGTATTGGTATTCATGACCTACGGAGTGGGCCTGACGCGATCTCAGCGA  
TGGAAAACACTTCACGAGCTGCTGGTTGCACCTTGGCTCGGGAAACATCGCGACTCGAAACGAGTGGTTT  
CCACGCTGTTCTAGGTGAGTGGAAAGGCGGAGAAATGAGGTATGGAACAGTTGGAGGGCCTCGATCG  
CCGCAAGACGCCCTTAGCGATCATCTGCTCGAAGTGTGACGAACTGGCGGTCACGCTTTGCAGGTGTA

TCGGCTGAGTTTGGAGCTGGTGTGTTGAACGATTTGAATTCCTTGCTGCTCTTACTTATCTGGAGGAGGACA  
GCGAAGCGAGTTTGAACAAGCCCATGCCAATACACCTCACGGCCTGTTGCGCCGCATGCCCGTAGGGCG  
CGTTGGGTGGCGTGAGTCGTAGCCAATTCCTGATTCTGGAGCTTCAATCGGAAGCTACCATCACAGCT  
TTGCTGGACGCAGGCTTTGCGCGGAACAGTCGCCCGCTTCTAGAACTCTCCATCGAGAGTTTCAAGCGCT  
ACGTGGGCAAGATGTCATGGTAGCAGTCGCCCCGCCAAGGACGAGGCGACTGCAGCGATCACGCCGCT  
TGGGCTTGCTGCGGACCAGATGAGATCGTGCCTGCCGTTTACGCCCTCGATGAGCCGGGCATAGACCGT  
GGCCGGAACGAAGGATCGTTCGAGGGTACGGACAGGTCCCCCGTCCGGCTTCGCTGGTTTTCTTCCAG  
GCCGCGCAATGTCGTAGCTTTCCGCCTGCACGTGGAAGTCAGGGGCGCTTTCGTTGTCGCCCTTGTCTG  
TGGGAACGAGTTTACGTTTACGGGTCAGGGTACGGAGCTGGCCGGTGAAGCCGCTTCTTCTGCGGTGA  
AGGTGCCGATGTTAGCCATGATGTTTTCTTCTTCTGGTTGAACAAGGTCGCGCCAGTGCCTCTTGTG  
TGATCCGTCGACGGAGCCGGCTGGGCTGTACCGCGCAGCGGTTCGGAACAGCGTGGAGAGCCTGGAAG  
CAGAAATAATTTGTTCCCGAGGAAGCCGCTAGCGCGGAGAAAATATTTCTGCTGGAATGTTGCAGCC  
ATGCAGCCCGAGGCGCAACCCTGCCACCGCCAAGATTACGACCAACCAAGGGCGTACAGGCCGACCCT  
ACCGAATGGAGACATGGCCGACCCGGCATCCCCTGATGACTTACCGGCTCGCAGCCTGACGTGAGCA  
AGGGCAACTTCCAACAACAAAGCGGGAGCGCCCTTAGAATGATGATTGAAGCGCGGGGTGGAGGCTCCAT  
AGCGATACCAGACAGTGTGTCCGTGTCCAGCCTTCGTGACATAGTGGACGAACTGCCAACAACGGGGGT  
GGCACACGGTTACTTAACCGCAACCAGCCATGGCGAAGTACAGCACCCTCCATCACGGCGGCATACCAT  
CGCTTGGGGGCTCTGGGTTCTGAGTGCCGAGAAAACGGAAGTGAAGTGCAGAAATGAGTTGGGCCCTTACCA  
CAGCAGGAAGATGGAAGAACAAGATTGGCTATCGCAAGGGAAGAGTTTTGACTGAGCAAGAGAACATTG  
TCCGCTATTGGCATGCCGTTGAGTTGTTGCAGCCGAATCCGCCCCAAGTTGAAGAAGCGCAGCAGCC  
CTACGGTGCCTTATCCACGACACTCCCATCGGGCAGACTATCCCGCCATGGTCCGGCAGCAAGTATCGTT  
GCAAAGCAGCATTGCCCCAAGCGGGCTGTCTGGAGCCACACGCTCTTTGCCCATCTCTATGACAGTCGGC  
GTGTAGCTGAACAGCTCAAGGAGGCTTATGGCGCAGACCAGGGCTATCGAGAACCAGCAGTATCGAGAATC  
GGCGCTGTTTCGCTGCAAAATTCACCATGGCGGGCAATTTTCGTTCGATGACAGTTTCGTCTCTCTAGCGAG  
GCATGGTTTTCTGGGGCGTGTGTTGGCGGGCAGGATTGGACCCGTGGTTTCGAGGATGATCAAAGGGCCA  
TCAGCGATAAGGTGAAGGTGCTGTTGCAAGGTGAGGTGTCGGCGAGGCGCTACGTGAGCTGACCCGCTG  
GATTCTCCAATATCTTGGCGTAGCGGGCTTCTTTGGCGACATGGATGGGCAGGTATTTCTGTTCCGCTCT  
CAGCCCGTCAATCCCAATAAGCCAGAATCGGAGGACGACCCGCTCAATAGCTTCTCTCGCAGCATCTTG  
CCGCCGTCGCGCAGCAGCATCGGTAACGACGAGAAAAGCGAACCCTTGGATCACTATCTGCGCAACACGA  
TACTCGGCAGCGTCTGCATGTAGACGATGACCGCGCATCGCTGTCGCTGATTGACCGTCTGATGCCCGAC  
GCCTATTCCATAAGTTGCTGGCCTTCCGAGCAGCATCTGGGGTTGGTGCATTCCCAGCAACTCGCCGTCA  
ATAAGATCCTGGCCACGCTTGGCAATGCCCAAGGGCTGTTAGGTATCAACGGCCCCCTGGCACAGGCAA  
GACGACTCTGCTGCGGACTTGGATTGCTGCCATTGTGACCGGCGGGCCGATGCGCTCTCCAAGTTGCGT  
CGCGCCTCCGATGGGTTTCATCAGTAATGGGCGGAAGCGGCCAACGACGGCGGCAAGCAACAGACTTGT  
TCAAACCTCAATCCAGCGCTGTATGGCTTCGAAATGTCGTGGCGTCTTCCAATAATGGCGCGGTGGAAAA  
CGTCACGCTCGAATTACCCAGCGCGACAAGATCGACAAGAGCTGGCTGCCCGAAGCGGAGTATTTTGGC  
GAGCTGGGCGAAGTGGTGGTGGAAAGCCTGCGTGGGGATTGATTTCCGTTGCGCTGGGCAGCAAAGCAC  
GGCGAACCAAGTTTCGTGGAGCGCTACTTCTATGGTCAGCGCCGTTTCGGCAGCGACGACAAGGCGGACTC  
TGAAGCCGAAGATGAGGCTGAGTTAGACGATAAATTTGGCGACGTTTTGAAAGCCTTGTTTTCTAAGCC  
TCCACGGCGGAAGAAAATCCTGGTGAAGCGAGGACCACGCCGAGCCACCGGCAGACAAGGAAGAAGGAC  
CGAAAGGCTTTTTCCGTTGGCTCAATATATGCGCTGAGGTCAACAAAAGCCGCTCTCCGGAACAACGCCA  
AACGGTGTGGCAGCAAGCCATCGCCGATTACGAGGCTGCCAAAAAGAGGAGTGCAAGGCGCGTGGCGCT  
GCCAATCGCATCCGCGAGCAGATCCAAGCCCTCTGCAAGACAAGAAAGCAGGTCGAGATCAATCTGAAG  
CGCTACGCGCTCTCGAAAAGAAGTTAGCCGGTGTGCTCAATCAACTCTCTCGCTGGATGCTGAAGAGAG  
CCGTCTGCCAGCATGGCGCTCAAGCACTGCTTGGATGCACTTGGGAACATCAAGCGTGAAGCCGGGA  
TTCTGGGCAAAAGTTTTAGTTTTGTGGGCGACGAGGACTGGGATGCTAAGCGGAAACGGCTCGAAG  
ACCAGCACGACTTGGCCAAAATCCGAGTTACGCCGGATAACACGCTCACCAAGCAATTTGGATGCATCGCG  
GGAGACTCTGAAAAGCAGACCCGCGATACCGGAAGTGGGCTTACGCACTTGGCAGTCAATGCCAAGAA  
CACACGCAAGCTGCCATCGACGTGGCAAGGGACGGCCAGGCCGCTCACCTGCTTGCCTGGCTGCAAGACG  
GCGCTATCGGTCGCGGCGATGCCATCGAGCTGGCCGAGCCTTGGCGTATTGACGGCTGGCGCCAAGCACG  
CGCTCGCGTCTTCAATTCAGGCGCTCAAACCTTTCATCGGGTGTTTTTTTGAGTTGGAAGCATCCCGCATGCGC  
TCCAACCTGTTTCTTATCAACGGCATGTTGACGGCACCCTACCAAGGCTTCTCGCGTGTATGCTATTC  
GCTCGGCCTGGACCTCGCTGTTTTCATGGTTCGTGCGGTATTGAGTAGCACCTTCGCGTCTGTTTGGCGGCTC  
ATTCGGTTTCGTTGGGAGCCGGCGAGATTGGCTGGCTACTAGTGGACGAGGACAGGCCAGGCCGCCCCCAA  
GCAGCGGTTCGGCGCGTTATGGCGGTCCCGCGGTGCATTTGTTGGTGGGCGATCCCTGCAACTCAAGCCGA  
TCGTACCCGTCTCCGACCGCTGCTCGAACACATGCGCAGCGCTACCAGGTCGATACCCATTGGCTCCC  
CAATCGACAATCCGCGCAGACGCTGGGGCGATGAAGCCACCCATTGGGGGCGCATGGCGGGACCGGCCGAT  
GGTAAGACCTGGGTAGGGTTGCCGCTGGTTCGTACACCGCCGTTGCGACAAGCCTATGCACGCGCTCGCCA  
ACCACATCGCTTATGACGGAGCGATGGTATATGGCACGCTTTCACCACGCCCCGGCAAGGAAACGCCAGC  
CAGCCTCCCAACAGGATGGATTCAAGCCAGGGGACGTCGCAAGGCAATTTGGGTACCCGCTGAAGGCAAA  
GCTCTTCAGGAGCTGCTTGCCTGTTGCATGATGATGGAGTGCAGGCTAACGACATTGCAGTTATCACGC

CCTTCAAAGACGTCCAGGAGAATCTCAAGCGCATGCTCCGTGGCAAGATGGTAGCCGGCAGATCCATAC  
CATGCAGGGTAAGGAAGCATCCGTCGTCATCATGGTGTGGGCGCAATACCGAGTGCTCAGGCGCCCGT  
AACTGGGCCGTCTCGGAACCGAATCTCTTGAACGTGGCGGCTACACGTGCCAAGCGGCGCTTCTACGTGA  
TTGGTGATAGAAGCGACTGGAAGAACCGGGCATTGTTCTGCGATGTTATGGACCTGCTGCCATTGCAGAC  
AATTCGGTACCAGAGCAGGAAAAATGTCATTTCTCAATAGCCGTCATTTGGACTCGATAGCGCTGGT  
CTACGGCGCTGTTGCCGCAATGGCCACCTGCCGGACGGTCAGAGCGTCGTAACCGTTACCCGAGGGTATCT  
TGACAATCGAAGGTTTCCAGGTGTTTCTTAGCTGACACATCTAGTCTTCTGGAGGGTAAAGACATTTCCCGGT  
GAACGGTTACAGACCGTCGATGAGGGCTGTGTATAGTCTTCCAGCATTGTGGCTTGTGAAGACGGGCTA  
GAGGCGTCTTGGTGATAACGGAACTGGTACGCAGATACTGCTTGCGGTGATAACGGCGTAACCCGTAATC  
GATTTGAGCAATAACGCCCACTTTGAGAACACAACCTTGCAAATTTCCGATAAAATTCAGATGAGAGTAGT  
AACTTAGTAAACCGCCCAAGTAACTTGGGCGATTTGTATAACTAAGTTCCGAAAAATAATTATAAGCATCT  
AGACATGATAGATTAATCATTTTTTGCTATCGGGTTGCACAACCCCAAATGACTTGAATCTTATGAATTTA  
GAACCAAATTTTTCTTCCGGAACCTTGAGTTTTATAAGTTTCATAAAAAGTTTTCTGTCATGTGTAGAAAGAA  
TTATCTGTGCGATCAAAGTTGATAGAGATATTTCTTAGTAAGTCGATAAAGTGAAGGACGTTAATCGAGTC  
CATGGAGTTGATTGGATCATCAATAAGTATCGCCCTTACTGGAGCGCCTTCATGTTCAATGTGTAGCGCC  
TTTGCAAGGAAAATACTGAGACTAAGTATATTTAATTTGCGCAGAACTAAAATACAGTGTGGAGAAATTTG  
GCTGGCTCAACTCATCCTCATAAAGATAGACCTTAACCTAGGTTTATCTTCAACTGGGAAAACACATTC  
AAATTTACGATTTTGA AAAACGGATGTGGATCAATTTTTCTATAGATTGATGTAATTAGATCGGTGTAA  
AAGAAGTTATCGATTTCGCTCCTTAAGTTTAGCCTCAACTTTTTTAAGCTCCCGATACACAAGTTCTCTAT  
CTGGTTTTTTTGCATCTCTGTGCAACTCAATTTTAGCCCTCATTTCCCTAAATTTAAAGAATGGCAGAACA  
TCTGAAATTTGGGCTTGGACAATGTTGGTAAGCATCAAAGATGACGAAGCGTTAGAAGTCTTCTTGTCAA  
GGTCAGCTTTTTTGGAGTTGCAACCCATTTAGCAATGATTTCGGTTGATGTATTTAAGTCATTAACAAGAGG  
GATAATAAAATACTTCTATTCTCGCAATCGCATCTTCAATTTTTATGTAATTTCTTCAGTGAGTGACACACGT  
TTATCAATAAGAAGAGGCTCGGATAAAATACATACCCGGTTGGGCTAGTGAAAATTTCTAGTTTTGTGATGG  
CCTCAGATATTGAAGCTATTTCTTTATGAAGATTGATTTTTAGTTTTCAGTTAGATCACCATATATTGGTGA  
AAAGAGATCCTGAACACCGCCCTCTGGAAGTATATATTTTGCCTTAAAGGTTTTGTATAATGTGTATATA  
TCACTCTGTTTCGATCACCTCTAATTTGGCAACAATAAAAAGCTCTATTTGAGGCCATCTCGACAGCCAAGT  
CATTGGCTGATTTGATTGACATTTTTAGATCTTCAATGCTGTGTGTCTACCTTCACTATGTCTGCTTTAAC  
ACTAGATATTGAATTTATTAATAAATTTGACATAGTCTGCTTTTTGTAAGGTTTCGAGCTCCCGTTTTAGT  
CTATGCAAGTTATCAGTTTTTCACTGCCTGCTCATGTTTTACGTCAGCCAGTTCTTGATCTAAGCGTACGA  
TATCAAATTCACATTTGATATCCGTTTCGTTGATGTTTCGCAATCGCAGCTGCTTTCAGAGAGGTCAGATA  
AATGTGCCCGCGGTCTAGGAATTCATCTATCTGAACAATTTCTTTTTCTCCAGGTCTGCTCTGCTCATTAGA  
AGCGACTGGAGTGCTGCTTCTATGCTTCCATTCGATTGGATTTTTCTCTAAAAGAGCGGTATGAGATTCAT  
ACTGTGTATTGCACACCGGGCACGAATCAGACCGAGTCTTGTATAAAAAGATTTTTTGCATCTTTATTAG  
AGAGAACAGATCAGCTGATTGGCCACTTAAGGCCCTTAGCATTTACATCTAATTTATGGATTTGCTCTTGT  
ATATCATTTCTTTGCTTTAAATTTCTGATGATAACTCATCAAAATTCGGGATCTGGCTTAAGCCGTGCTT  
GAGCATCCTCTGATATTATTGACTTCCCAACTGCAAGATTGGCGTACTTTGACAACCAACCTGTAATGA  
TTTTTTAAGAGCATGCGCTGTTATGGTACGCCCTTTCGGATTTCAGTAACTTTAGATTTTTAAAATATGGATG  
AGTTTGTCTAGTTTCATCAATTTCCAAAACTGAGCTTCGACCTTGGACAAATCGTCAAGCAGGGATGCCA  
TCTTGGTATCATTAGTGATCCGCTCATTTTTTAAAGACTCCAAAAGTCTGAGTATTTGCACTATTAGATAT  
ACTTATATCTGCCAAATTTCTTTGTCAATTGAGGATATATCATTCTTATAAATGGTAATGTTTTCAACTGC  
ATTATTAAGCTGTTGCTGATTGGATAGTATCAAGGATATTGTGCTTATCTCATCAGTAATATTTCTAAGT  
CGCTGCTCTAAAATTTTTTTTGTATCTATTGACTTAGCTAGCGAGTTAATCTCATCCCAATTTGAATTTA  
TTTTTTGCAAGGTCAGCTTTAAGCTTATCTCGGTGTTCTCGATATGCATAAGTTGAGGTAATTTCCCTAC  
GCAATAGTCAATCGCTTCTGCTGATCTAAAGACTCTAGCTGAGTATTTATCTCGATTATTTCGCTTT  
GAGAGCAATTGATAATAGCTCGGTTTTGCTCTAGCTCAGAGAATGTATTCCCAATTTTAGGGAAGTTACCTC  
CATAAATATTTATCTCATCTATAGTTTGATTGACTTCATCTACGCTAAATTGCAAAGTGGGTTTCGCGTAA  
ATTTTTCTTCGAGAGAGGAAATGGTCTCGCTGAGCTGTTTTAGCTCGCGGCTACAGGACTTAATAGAGGTG  
AAGAGGCTGCTACGATATTTTTCGTCTTCCCTCCAAAAGCACCCATGAAACGATCATAGCGTTGCTCTG  
GGCGCTCTTCTTTTAAAGAGGCATCGATAGCATCTTGGAGATAAAAAAATGCTGCTAAATGTTTTCGTGGT  
TTTGTCTGTCCGCGCGGTGTCATAGGTATAGTCGCGCTGTCTGCTGCGGGACGCCTAACCGTACGTTTTA  
AAGTCTTTTTTCTGTTGTGCATACCTTAACGTATGATGGAGCATTTCTCATCAATATACCTGTTTTTTAA  
GTATTCTTTGGGATGACTCGCTCGTGTTTAGGTAGAGTGATGCTGAATCATTGTTTTGTACGCTGGCTATC  
TCTGATATAGCGACCAATATTTATTTGTTATTGCCATTTCTACGGCATCGTAAAATGAGCTTTTTCCCAAAG  
CCATTAGGAGCATATATTGAGATAAAAATGGACACCTGGCCGCTGAGTTTTTAAAATCGAATGAACCAT  
CACCATCCTCTGCGTATGCGCGAAAACCTACGATATCCACGGATTTAAATTTCAATTTGTCGGAATCCACT  
TGGCTAAATGAAGAACGTTTTTCCGAAGAAAGGGTTGAATTTGACCTTTTTGTCGGAAATCAGTTGGTTCAA  
TTTTATGTTCAACGGTGTAGTTCCGCTTCATCTGTTGGAGGTACATATGAAAAATATATGACAAAGTTTT  
AAGTCGGCACCTAAAATCTCATTATTTAAAATACAACCTCAGCGTCGAAAATTTATTTCCGGCATCTGATACTA  
CAAGTTTTCTCATTGAGAATTTATTGTTTTCAATCTCATACTTTGTAGTTTTAGAAATGCTGGATGTAAC  
AACAAATGCAAGGTATATATTCCATGCGTCAAATTTATTTTCCAATTCATTTGGTATTCGTATGCGATT

ACGCTGGCTATTTTTTCCATAAAAAAGCAGTTCATCTTCATTTTTTAACTTGCAAACAAAAACAACCTTAT  
GTAATCCTCTGGTTCTGATTTATATAGTGATAACTCAGCACTAGGAACTGTGTTGACAAAACTCAATA  
CTTTGTATGGATTTAGATATACGCATTGTAAAGACCTTTAATTAGGGTCATTAGTTCAACTTCACTGTGC  
CCCTCATTGCCTGAATAGTATTCTGAAAAACGCTCATCGTCATTAACTACACAGAGTCTGTGTAAACCCA  
TCAAGTTATAAACTTTGAAATCAATCGCTGGATTTGTTATTCCAGAGTCGACCATTATTTTCACTTTCTTTG  
GCCGCGACCAATGTCGACTACGACTTGTGTAAACGATGATGAACGTGCTTCATGTTTCGGGGCACTATCC  
CCAGTACTAACCACAACCTTTACCACCGCGCTTTAGCCCACGAAAAATCAGATCGGAAGATATCCATTAAC  
TCCAGATCCAGTTATCCTTATCGGTAGAAAAATAAGAACCTTCGGCGAGTAGAATTATCATCAATATAAGA  
AAAATCGACAACATCAACATCATCGATAATACAACCTTATTATTAAGAAATTCGAAGTATGCAATCCAAAGG  
TCTTCGTTGTATAGATTTTGTCTAGGGCAATCTCAATCAATAGCTTCCTCTTAAATTTTTTCATAAAGCA  
CAAAAGGATTTATGTCAATTAGTCGGATTGAGTGTAGATCCACGATTTTGAAGTTGGCTGATAAGGAATCT  
AAGATTGTTAGGATCTTCGGCTTGCAGCAAGCAATTGAATGTTTTATCCACTAGCCCTATAAAAACATGCC  
ATAGAAGGAGGATATATCCTTTCAAGACCTTCTTCGGAGATGATGTTTTCAATCATAGATACGGTGTAC  
AGAGCACTCGTCCATGAAACTCACGATCGACAACCCCTTCAACCCGTGACTCAACTCCCAGAAGGAATAT  
ATCACCTCCGATCTCAGCAAATACACCACCACCAGAGGCCCTACAACCTCACCCCATTTGTGGCATCCCA  
TCTAGGGATACAGAAAATCTATCTAACTCAATTTCAATTTATTTCCCTGGATATTTCTCTCAATTTATCGC  
GGGGAACATAATTCTCGACGAATTGTAGGGTATCCATAATATAGAACATTTATGTTTCTCTCTGGTTTTGA  
TATTGCAATTTGCAGGTCAGAGTCTAACTTGTGCTTGTGATCAATATCGCGATATCATAGTTAGCGCTG  
ATTATCCTCCTAGCTAATTCAATTTCTCTCCCCTCATCTTTGTGATGTTATTTTCAATCAACATCACAGT  
ATTCTAACGAACCAGCCTCTATTTCCAATACGTGTTAGCCGTAAGTATATAGCTGTATTTCCCTCGTGC  
AGCTTGGATTATTACACCACTTCCATTATTAACCATAACAACATGAGAGCGAATTTTATTAATTTGGTCA  
GGCAAAGCTTAGCTCTCCAGATAGCGCAACGACATAACCTTTATATTGAGTAAGCTCTGCATCTGTGTAG  
ATGTTTGAGATCACTGACTCGTAATTAATAATTTATTTTTGCGGTTGAATTAACGCTGTGTATTTCTTGCAA  
AAGTTGTTTTATTTGGGAGACCATGTCGACTTGCATCAGTGTCTACTATATAATTCGAACATTTTATTAT  
GGACAGCAACTCAAGGCTTGTATTGCTTTTGTCTCCGTGGTGAGAGAGCTTAACATTTCTGCGTTGATG  
GGGGTGTGGCATCGTACCCCAACGCTGTTAGGCCTTGAGTAATGCTTGTAGGTTGAGCATCACCGAAGA  
AAAGAAATTTATGCTTGCCCACTTTTTAAATGAAAGAGATAGAGCTTCCGTTTGAAATGAGTTATCCTC  
CTTGAATGTGCTTGTTCAGCAGTTCCTTGTAATTTTTTTTCCAATCAGTTTTGGATGCAGAGGTAAT  
GGGGTGGGTTGCTTTTTTCCATTTTGTGAGCAGTTTTTGGAGCTCGTTCTCGCTAGGTGTAAGGAATA  
TTACCTCACCCCTTCAAGAGAATACTTATCACCTTGCTTTTATCACGCTCTCATGCCATATCCCAAGATT  
CTTTAGTAATCGCTCAAGGGTGTTCCTTGATTTATTGAGGTATTTGGGGATTGGGTGAAATTCCTTAGT  
ATTTCTTTATCAGGGTCTACTGGGGATTGAAGTATTCATGAATGAGCCGTCCAGAATTAATAATTTACTT  
TTCGTGCCAGCTTTGTGAGTCCGTCTTTGACCTCAAAGGCTCTTATCAAACCACCGATGTGATCATCATC  
AACATGTGTTAGTATAACAAGATCAATTTGCTTGCTTCAGCCTCTAACTCGTTGAGCAAGGCTCTGAGT  
TCTCCCTGTGGAGAGACACCAAAGGTAGCCGCTGGGCCCCATCGATCAAAAATCCTCTCCGTGACCGTTT  
CTGACTCAACTGTTATGAATATAACAATCACCATGAAATGCTTTTAAACACGAATGTTAACAGGCATAAC  
CTTCCCTCTCCAACCCCTATTGCAAGAGTAACAGCATGCACAGCAATGCTAGCTACGCATGGTTATCCAAA  
ATCTGGGCAATATTTAGCGCAAGGCACTAGAAAATTTCTATTTAATATCTCAATTTAATCCTTGATTAGC  
AACACATTATCGATTTTGGTCTGGGTGGGCCACCTTTTACTTTTGGAACTATGAGGGCTCGATGAACTG  
CTCTTTCTCGCCACACCAACATGTCTAACTCTAATCGGGGAAATACTTACCAAACCGCCGAGCTCGTTC  
GCGGGCACCGACACACTGCTCGCGATAGCAATAGCCATGCAGGGAAAAGAGCCTCCGACTCAAGGAAGCAA  
TATTTACAAACCTTGGGTCCCTCCTCCACCAGACCGGTACAGAAATGCGTTGTTTGTAGTCCGGTACCA  
GTTGGTCTACAGCCGTTGAATGCACTTTTATCAAACGCTACGTTCAATGGCTTCTTTACGCTTATT  
TTCCATCCGCTCCCAGATAGCGTCATTCCGCTGTTTGCCTCCACCATCAGACGCTGTTCCCTCCTCATCT  
TGTTGCTGACGAGATAACCGTAACACCGCTCCCGTTTTTGTGCGCTCCTGTGCCACTCTCTGTTTCA  
ACTCACGCCGTGATCGCCGCTCAGGCTCTCTCCGGCTCTTCTTCTGCCACAGCCGACAGCTCCTCCTC  
CTCTCTCGCACGTTGCTCGGCCCGAATCCTCGCCCTCTCCTTGGCTTCATGCTGCAAGCGGATACGTACC  
CGCTCTGCGGCGGGATGATATTGCCAGTGCAGGCACTTCGGATTGGAACGAGTATGTGGAACATCCATG  
ACGTGGTATCCATGTGCTCTGGGCGATCCTTCCGAAATAGATGTTTCCAGCAAAGGTGCTATACACGACCGA  
GAGAATGCCTGTTTTAGGGTTGGTACAGGTGTAATCGTCCAGCCAATAGGGTTTATCCTGTGGCGATTCA  
TTAGCAGCAGGGAAATCCAGCCCAAGTCGATAATCGTTCCGCCCTGTAGAGCATAGAGCGCTGTCGGTG  
CCAATTGCTGACACTCTTGGGACGTACGGTACACTTTGATGTCGGTGTGCGGCGGGAGATCAGATGGTT  
GACTCCCTCGGACAAGATCTCGAAGGCAGGAGTATTGAGCAACGTGATGTCATTGAGTGCAGAGAGCAAC  
ATCAAGCGAATGCTGGTGTAAAAAGCGTATTGGCAGGCTTCTTACTAGCAGTGTGATGCGCAAAATGAT  
GTGCATTTACATCAGCTTTTTTGGCCACCAAGCGTCCGCCACAGCTGGGGCACTTACAGTTGCAAGCTAG  
CCCCGAGCAACCTCATCAATTGACACCATTTCTCCGGTATCAATTTCTGAACGCGAAGGGAAATACGAATA  
TCTTGCCACATAGGGAGATCTCAACGACCAACAGGTTTAGGCAATGTGCCATAATATCAAATCTATGATT  
CAACGAAGATCAGCACCGATTATACCAACTCAGAACAAGGAGGTTAGGTGAAAGACAAGGATACCATCGC  
GCTCTTTATTGACGCAGATAACCGCCGGAAGAAAAATAGAAAAGGTTGCTATCAGAATTTGGCTCTCTAT  
GGAGTGGTTAATATACGCAAGGCTATGGCAACTGGAAGAATACCAACCTCAAGCCATGGGAGGACATAT  
TACACGAGTACGCCATCCAGCCGGTACAGCAATTTGACTTGGCCAAAGGCAAGAACGCTACAGACATGGC



GTGGTGCATCGATGTGATGGATGTGCTCTACACCAAGGATATCGATGTTATCTGTCTGGTCTCTTCAGAT  
TGTGACTTTACGCCCTTGGTCACTCGCTGTCTCGGGATGAAAACTGGTGGTCGGGTTTGGGGAACGCA  
AGGCTTCAATGCCTTTTCGTGAACAGCTGCTCCAAGTTCCTTTATCTAGATCCACCCTCCAGGAAGTGAA  
AGACGCAATGCCGGTTGCTATCCATGCGAAGAACCTGAAAGGGGACACGCGTCTGATCAATCTGTTGCGG  
CAAGCCATTGATGCAGTGGAGACGGGGGATGGTTGGGCATCACTAGGCGGGGTTGGCAGCCATATCTCAA  
ATCATGCGTCTGTTTACCCCGGTAACCTATGGTTTTCAGGAACTGAGCGACCTGTTTGGCCGTATTGACCT  
ATTTCGAGTTGAAGAAGAACGAAAAATCGGGATTGATGGTAAGGAATCTCAAAACGGCACCTCAGATCAAG  
AAGGTCGCCAAGCTGTGACATCTATTTGCCAATTGGCTCAATATCGAGCGATATTTCGCGTTGAGCTAGGG  
TCAAAGTAGACGAACTTACCAAGGTGGACGGGGAGTCTACATCTAGTAACTCTATCACCCCTCCCCC  
CTTATTAATGAATGAGGTGAGTGTCAACATTCGACGCTTCAACCCAGTGGTCGATTATTCACTGTGGTA  
ATGAGACTCTAACGTGAGACAACGAGCCCTCCCATCAGTGGAAATTAATGATCTTGTCTGCGGTGACC  
CCCACGGGGAATTTGGCCATATAATTCAACATGTTAAGCAGGAACAACCTTCCGCACTGATAATGCTAGG  
GGACCTGTGTCTGTCAACAACCTTGAACAAACCTTCGCTTCCATCTTGGAGTTAACTGACATCTGGTTC  
ATCCATGGTAACCATGACACAGATGACGTGCGATATTACGACCATCTGTTTCGCTTGTCTGAGCGTAACC  
TTCATGGCCGCGTCATTGAGATAGATGGACTCAAGATTGCAGGTTTAGGCGGTATATTCCGGAGTCAAAT  
CTGGTATCCCCCTGAACCACCTCGATACTTACCCGGCTAAAATTTCTGGCCAAATTGTGGAAAAGGAAAC  
CTCTGGCGAGGCAGCCTTCCACGAAAGCACCAGCTTCAATTTTCCCTGAGGATATTCAACTTTTTTCAGG  
GGATCAAAGCCGATATTCTCGTCAGTCATGAAGCACCTCGAGCCACCCTCATGGTTTTCAAATCATCGA  
TCAACTGGCTCAGTCTCTCGAAGTAGCAAGCATCATCCATGGCCACCACCACGATCCATTCAAATATGAT  
GACCCCAACACGATAAACGTTGGGTTGCGAGAAATTTATACAGAACTTGCTTACCACAGAGCGACAAT  
TCATGTCATAGAACCATTGCCGTCTGGTTTTAACCATCTATCTAACTTCAAAAATGACATCAGTTGGTA  
CGATGCACAGCTAGGTAACCTTGAACCTGTGTACGTCGAAGAAAGGCTCATAAGGGGGCGTTGTTGCCAAA  
TCAGCCAGCAAGTCATGACTTCCCCAGCCCCAGGTGACCGCTACACTCGGAGCTTTCTGACAGGTAGACC  
AAGGGTGTTCAGTTTGTATGCGCTTACATACGCCATCACTTCCCCACCTGACCGTTGTATGTTTCGC  
AGACTGATTTTGGCCGTCATCAACTGCTTGAACCGATACATCGCCGTCCTGCTGCGAGCGCCGGTAT  
ATCCCGACATCTTCTTCCAGTGCGCCAGCCCTTCCCTGCGCATCACAGCACCGCCTCATTTCTCGGATG  
TCCCTTTTCCATAAACCCTCGCTTCTTGGCAGGCGGGATACACGCCGTCGCCCTTTACGCGCAATCAAC  
CGATGGCTGGCTTTGCTGTCTATAGGCACCATCCGATAAACACGTCAGCTTCCAGCTTGCGCCGATGGTGA  
GCAAGGTGCGCAACTCCGTCATGACATCTCCAGCGAGACTTCCGCCGCAACGATATCATGGCT  
CACCGAGTCTACTGCCAGATGTAACCTTGCGCCAGACTCGCCGCTTCTCAGCGCCGTGTTTTCTGACCTTC  
CACTCGCCTTACCAAATACCTTGAAGCCAGTTGAGTCGATAAACAGGTGCGTAATGCATCCCTTTGGGG  
GCTGTGATAAGCCACCGTCACTGTGCGTGCTCGCTTGGTGTGACACAGCTGTAATCGGGGGCACAAAGCGG  
TACGTTTCACTCAACTCGAATAGGAAGTCGAGTAGTCCCTGGGTTGCTCGCAGAGTGAGGTTGAAAAATCCCC  
TTGAGCATCAGGAAGGTGGCGATGGCTTGGTGGTGTAGAGCTGGCTGCGCCCGCGCCGCCATGATGGT  
CGTGGTGAACCAGTTGCTCATGGCTCGGCATCAACCAGAAGGTGAGTGAACCACGGTTAATCAGAGA  
CCTGTTGTATTGAGGCCAGTTGGTGTGAGGGTGAAGCGACGTGCCATTATGCAAATTTGAAGAGGATGG  
TGGTGTATCAGATCACCAGTCCCTTAGTTAGTTCATTCAAGCTGCATCGATTTGGGCAACAACGCCCTCA  
TAAGGGACTAAATAAAAAGCCAGACGGTAAGCCTGGGCTTGACTAAAAACTGCCTTTCCGGCAGAAAACA  
GCCCCCAACTTGGGTGTTTTCTTCCCTGTCTAATCTTGGCTGCTTATGCGGCAGTTCACGTGCGCTCCGC  
TGGCCACCCCGAGCAATGGCGTTTCTTGGCTGCTTATGCGGCAGTTCACAGCATATAGTTATAGATAAGA  
CATTGAATCATTTATAAAAAAATACCAATTC AACGCCTTAACCATCATTTCCGAGTGATTTTCAAATCCT  
TGTTTTACCTTGCTAAAGATAGTTCAATTATGAAAAAGGGTGAAAACAAATTCGCCCAGCTCTGGTACGTC  
GCCAGTGTAGACCTCGTTGGATGCCAAGCCATAGCTGCTATAGGAGTCAATTCCTCATTTAGTTTACGTC  
TGTTGCTTCTGTATGTGCAGAATACAACTATGCCACTGCTAGCGCTTTGCATATGAACGGTATGAAAA  
TCCCAACTTCCCTCGTCCCAGCAGGTATTTGAGGTTGGAATACTTCGCCTCGAGCCTTGCCTGGCAATAACCGG  
TGCTCTGGTCAGTCGCCGCTTTCGCTCCCCACAACAATTTGCGCAGATTCTGGTTGCGAATAAACCGG  
ACATTCTGGCAAGTCTCTGGCACCTCCAGCACAGCGCTGAGCGCAAAGAGATTATCCGCTGCATCACCT  
GAAAATAGGATCGAGATCTAAATCGTTTCCAACATAGACCTGTTTCGTGCTGACGTAGGCGATCGAACGACC  
GAGGCTACGATTGCTCCACTCAGGAAAGGCCACACCGATCTGGATATTGGGATGAGCTCGACTAAATCCG  
TGGAGGGTAGATATACAGCGCCAGCCAACAGACCACAATCGACATCATCAGGTAGGTACCGGACAGCAA  
AAAAGTAACGGCTTTCTGTCTATCTCCCTTCCCTTTCTGAAAACAATCCCCCTTTGACCAACACCGCCATT  
AAAAAATGAACATCTCCTGGCAGCTCGCACCTCTGTCTGAGACTCCATGTCTGTAAGGTACTGATCGG  
CCCTTGTGCTAGGTGGTAAAAATCCAGCTCGGATGCTGGATGACGAAAAGCAGTGAGGGCCTCGTGATT  
GGCCCCATATTCATGAACTCTTAGCGGCTGGTCTGCGTGTGAGCCACCAATCATCTATCTGCTGCAGT  
GCTGCACCAATTTTCTGTGGATTAATACAGGCAGCCAGTTGACCACTGAGGCATTTCGGTAGTAGCTAACT  
GTCGGCTTGTACAGCGTGATCATCTGTTTCGTTTCAGTAAATTTCTGACTAGGATAAAATTTCTTGGCAAAA  
ACCAGTTTTTTCAGTTTGGCGGTGACATCGGCAAAACAAAAACACATTTGGGCTGGCTCAAGGCATTCGCCATC  
TCGCCCGCAACTGCCCAATTTGTTGCTGGTGGGGTCTGACCAACCGCCCGACCAACTCAACCTGCGGG  
CATCTGGAATATGGTATGTGGAACCAAGCGAGGTGTTGATCTCGATTTTCGGTTCCCTGAGTGTATTGATT  
GCGCCACAGCCAGGTTCCCATCAGCACGTTAGCGCTGTAACGGCGGGCCAACCTCATTTGATCCGCCCTAGA  
CGCTGATATGCCTGAGCCAGTCTGGCCATCACGCGCAATACCTCAGGGTTAGAGCAGACTGACGGCTGCA

TTGAGTTGGCCTCTACCTGAGCGAAAAACGGCAGTGCAGTTCATCAACATTCGGAGGAACGTAACAGAC  
CTCGATTGTTTGGAGATTGCTATAGGCGAGTTCATGGCGCTCAATATTTTTTCGGCTTTAGATTTGCGTCA  
AACCCCTCAGTGTAGCCGCAATTTTTGGCCATTAATTTTTCGCCACTTCGATCCGCAATGGTACAAAATCGG  
ATTCCGCTGTTTTATAGAAAAACACTGCCTTACCGGGAGAAAAGTGAGCGGCAATAGCTGAGATGAGTGCA  
AAGTTCCATGTATCTATCCCATGTTTTCTGGGCCCTTCATCAGGATAGTCCCCTTCTCATCCCTCATTCCG  
CCAAAAAGCACTTTTATAGAATGGGGGTTTGCCTGCCAATCTCATTTCCACAGGATTAATACACAGAGCC  
GTGCTGATGGCAGACTCGGCGTAGACATGCAGATTTTCGAGGCTTCCTGCCCGTTCCGTTGGCTCCTCAA  
GAAAGACAAACCCTGTGATAACCGACATAATCGGCGATCTAGGGCTAAAAGCCTCCGTGAGTTCCTCTAC  
ACTGGATAGCTCTCTATTAGAGGGGTATAACCCAGCATCCATATCGCGGGAGCCTAGATAACCGCGTAAAC  
AATGCATCCTGATCCTGATACAAGTTGCACCAATTTGCTCCTCATAACAGCGACGGCGGATGCAAAACATC  
CTCCAGCGAAAACGAGCAGTGCCTGCCCCCAACAGATCAAGGCAATGGGTTAATGACTGGGTTCCATC  
GGTTGGAACAAGCACCTGGATAACCCAGATCCATAACCAAAATCACAATATCTTCCATCGATCATACTGGG  
CGGCGAATAGCTGAAACGGCTCTGGCATGTTTCGGGTCTATCTGGCTCAGACAAAATGTTTACCCGTCACCC  
TGCTGTAACGGCTCAGGTACCACGCTATAACAGTAAAGCACACAGGTTGCTTGAGCAAAGATATCAACCG  
ACGCTCATAGTCATGACAAAATCCAGCCAACGCAGACAGCGAGGTTATGCCGCACAAAATAGGGGTTTGGC  
AACGCCGACGATCATAGACAGTTAACCCCGATAAATGCAGATAGTAAGAGGAACTTGGTGGCTGGGCC  
CCTCCTTATGGTTAGCTAACTGCCTGAGTAACCATAAAAATCTGTGATTTGATCGGGGCCATCAACTCGGG  
ATGAAACGCATAACGCCTACCAACCGGATGGTTTTGCAGCTCAAGATGAAATCTGCTTGGCCACATTCAAC  
ATCAGGTCAGGTAACGCCTCTTGAGGCTGAGTGAAGTAGCCGAATTCAGACTCGCTACTGGCAGTTCAC  
TAGGATCGTTGCTTCCACCGCTCTCAACCTCATCCCGCCACTCAATGATCGGCCCTAACCATGCGGCCAA  
TTGCCGACGCAGGTAGCGAAGCGCGGAAAGCCGAAGTTGGCGCTGCTGCCCTCGAGTTAATCCGGGTCGG  
ACTATCAGATGCTTTAGGGCATCAAGAAAATACATGGTTCGTTGAAGATAGCGCGATCAAACAGACTCTGGC  
CATCAGCGTACTGGCTTTCTCTGGCTTGTGAGAAAATTGCGATCTTTGCCCTTACTGACCGGTGGTGGGTA  
ATCCAGTACAGCCACTTTGCCGCCCCAAAGCACCAACCAACCTCCAACACTGGCAGGGTGATCATGCTGT  
ATTAGGGTATGGTGCAATTTCTTTTCATGGATAACATCTTGCAGATGGGCTAGTAACGCATGGCTGACAA  
CAGGTGTGACTGAACAGTACTGGCCTCGATAAGGAAAGCGGCTCTGCTTGGAAATATGGGCTTACCTCACT  
AGGAATCACTTCCCCCAGATGACCCGCTAACTGCTGGCACCAGATATCAAGCTGCTGTTGCGTCCCC  
CCTAACCCCTAGCAGTCCGACCCATACCATATTCCTAGCTACTAGCTGTAATGCTAGATAGTTAGTTGCGT  
CGCCGTGGTATCGAAACGAAGTGCAGAACAACCTTACCAAGTTTATATCTGAGCTATCGTGGGCCCAACC  
CATGCGCATAGGTAAACCAGCGCTAGTGATGATTTCTGTGATAACTGGGGGTGCGTTGACGATGAGTCGC  
TGGCCACTGACCCGAGTGTCCGGGTATTTTTAGATTGTGGGTATGTAGCCAACGCGCGGTATGCAAACAAT  
GTGCGATGTGACTTGCATCGTTCAAAAATATCCCGCGCTTACGCTCATTGCAAAGGTTATCGACCCGGTC  
CCGTTTGGAGCGTCAGATTCAACAACACAACATAATGTTTTCTCTCAGCATCATCGACATCCATATCCGCA  
GAATAGGGGGCGAAGTGGCGTCTGTAACCTGCCTGTACGCTCGACGTGTTTCAAGCTATGCCTAATAACTCTT  
GGATGTGCATCGTCTGACCATGCAGGCAGATACGTTGAACTGTCATCATGATGGGACTGCATACGCGCC  
TGGCGTAACTCGACCACATGCCGAGGTGAAACACAGCCCGATGGGGCGATACAGTGTCCGGCTAGCCG  
GTCTGATAGCCAATGGCAAAAATCCCTCATGCTGTAAGCGGCGAACCTGCTCGATAGACGTAGATAGCAA  
GGTTCGAGAGTCTAAGGCTGAGAGCAAGAGATCGCCTACATTCGCGACCCGCACTGAGGATGGCTTACG  
ACTAGATCAGTCAAAAAACGATCAGATCTTTGAGGATAAAAATCTGTCCCGTATTGCGCATTTGGAATGC  
GGCGACAATCAGCCACTACGCTCCCGAAAACATCAACAAAATCGGTATGATTCAGCTCTTTGGTTTTGCCT  
GACCAATGCGTCATCCACCATCTGCTGCAATTTCCCCCAGAAAAGCGTCAGGCCATGCAGCAAAGTGACCG  
ATAGCCTTTGCAAGAACCCTGTCTACACACACGGCTCATGGTCACTTAAGTAACGCTGCTGATACCAAA  
GCAAGGCTCCAAATCGCGCACTCAAGCATCCTATGGCTAACAGCGGGTTTACGATTCAAACGAACAGCC  
ATATGCCAATGCCGACAATTGTATTTTCATCGGGCTGGGCTGGGACTGTTGATGCTGTGCGTAAATCAAAC  
CCACACTGGCAATAATTTATCAATTCGCTGGCCAAGTAATTAAGGGATTCACCACAAGCCGGGCAACTAT  
CTATCAATCTCCCGCATGACGATGGCATGCAACATACGGCTTGAAGTGCCAGCATTGACGCACATACGC  
TGACTCGCGCAAACAATCTGGACAACAAGGGATTTTGTGCTGGTGAATGAAACAGAGTGAATATCGACG  
CCCGACCGGTGTACAGCTTTATGGTGATTACCAAAAATGATAGCTGAATGGCTCAGCGCCAATTGGAGGA  
GACGAAAAGGAGCTCCATCAGTCAATCTATCCACGAGTTGCAAGGCTCTGACCCGCAAACCACTAGAGCG  
ACTCGCATGAAAGATGTTGAGCCTGAATAGCTCCAGCGGAAAAGGCTCCAGCCGCGGCATGATCCGTTGTA  
TGAAGCCAATCCTTTATTACACCGCTAAAGAGGTAAGGAGCGCTCAAATCCGTTCTCTTGGGACAAACGTA  
AAAAATAGCTCTCAAGGACTCGTCAAGGGAGGGTCTGGTGAATAAGAAGATGCATTAATCACCAAA  
ACTAAATATTACTTAGTTTTAAGGTGTAGCACAGATCCTTGTAAATACCATCCGAGCAGACACACGTTTTA  
GTTCCGGCAGCACACTACAGCTCTCTTTCTCTCAAGAAGGATTTAAGCAGATATCAGCTTGTCTAGA  
TGTGGAAGTTCAACACAACAACATCATGCCGAGTATCTCTACCTAAATAGGCACCAACACGAAAAAAT  
GATTAATATTTCAACTAATGTATTGCGTAACGCTACGCGCAACAGGATAGTTGTTGTTATGTGTCCACTG  
GCACTAATTAGCAATAGGAGATATGTATGGACATTATCGAAGCACGCCATCCTGGCGAGCGCATCAAAAC  
AGAGGTTTTTCCCTGCAAAAATGTCCGTACAAAAAGCTGCCGAGCTGATTGGTGTGGGGCACCAGGCTCTT  
TCTAATCTGCTTAACGGAAAAGCATCTCTCTTACCGAAAATGGCAACCCGCAATTGAGAAGGTATTCGGAG  
TTCCTAGGGAAGACCTACTCGAAAATGCAGGCTCAGTACGACGCTTCAGGGCTAAGCAGAAGAGCGCCCC  
GACAAACGCAAAGCGTATGTCCCCAGTTCCTAGCAATCAAGGCCAACGACATAGAGCACTGGGCTTCA

CACAACATCGCCGCTCGCAGCAGGTTTCGCGGTATTCCTAAGGACCTTGGTTCATTTCGACAGGTAGCGGCC  
TCTCGGAAGTCGACTTCCCTGGGAACGACGACTCCCAGCGCGCTGGCTGGGACGGTCGAGTCATGGCAAA  
CGAGGGGACTGCTTGGGTGCCATCTGGACGTTCTGGTTGGGAATTTGGTACTAACGAGGATCCTAAGACA  
AAGGCAGATAAAGATTACAAGAAAAGCGTAACTGCAAAATGATGCAAACGACAGGGCATCAATGGAGTTCG  
TGTTTCGTCCTCCTCGCAGATGGGCAGGCAAGAACGATTGGGTTACTGAAAAGAAGAAAGAGTTCTTG  
GAAGGACGTCCGAGCCTACGATTCTAGCGACTTGGAAACAGTGGGTGGAAACAGTCTCTGCCCCGGCCAAGCA  
TGGTTTTGCCAACGAGACAGGATCCCCTGCGCAGGGCGTCCGCTCACTCGACAAGTGTGGACAGACTGGG  
CGAATGTAGCAACTCCGCCACTGCCTGGCTCGCTGTTCAATTCAGCCATTGAGGAAGCGAAACGCAAGTT  
CGTTTTCCCGCCTCGAACAGGAGTTTACTGGACCGATAGTGGTTCGACGAGACTCCACCAGTGAAGCACTA  
GCCTTCATTGCCAGTGTTTTAGCCCAGAAGGAGTGCAGAACTGGAGCCTTATCGATACCTGATTCTGG  
TTTTTCGATAAAGCAGGCATCTTGCCGCAACTTGTGCGGAAACGAGGCCGTTCAATCCCGTGGTGCATTC  
ACACGAAGTCGAAATTGAATTAGTCCCTATGCGGAACAGATGCACTCCATCGTGGTATATCCGAGGAAC  
TCGATCAACGCAGAGCCAGACATCGTTCTTGAACCCGTCAGTTTCGAAAGTGTTCGACTCCGCGCTCAAAG  
GAATCGGCAAAAATCGAGATGAGATTAGGATCTTGGCAAAACGAGTCGGGACACTCACTCACCGTCTTACG  
CCGCGCGCTCGCGACCGTTCGAGGCAGTGCGAATACCACTTTGGGCAACACAGCAACACTCCCCAGAAAGC  
CTCATCGCCTTCATGCTGGTTGGCGCCTGGCACGATCTTAACGAAAACGACAAGGCTGGTCTGTCCCTGC  
TTGCAGGTGACCGCACGTACGAAATACTGGCAAAGGACTGCCAACGCTGATCCAACGAACGACGCGCC  
GCTCTGGTCCATTGGAACGTATCGCGGGGTCTCTCGAAGATTGACTTGTCTACGCCATCGCTCGCTAC  
ATAACCAGCGACGACCTGAAGCGATACTTCGATGTTGCGCGGATGGTGTCTGGGGGAGGATGACCCATCCC  
TTGATCTCGCTGAAGAGCAGCGATGGGCTGCGTCCATCCACGGAAAACTCGGGAATTCTCTCCTGCGTT  
CCGCCAGGGTATTTTCGAAAACGCTAGTGCTCCTGGCCGTTACGGCGTGAGCCTCTTCAAGGCACGCCTG  
GGGATAGATACAGAAATAGAAGCCGCTCTGGTAGTGCGCGACCTGCTTAAGGATCCCCTTACCACACGCA  
TGCTCGAAGCCAACAACCGCGACTTGCCGCTCTACGCCGAAGCAGCGCCGACCGAGTTCCCTCTCGATCAT  
CGAACGCGACCTGAAGACGGACACTCCTGCAGTTATAGGCCTCCTTCGTCCCCGTGGGTCCGGCATATTC  
GGCAGTCCATGTTCGACCCGACTTCTCTGGGCGCTAGAAGGACTAGCATGGAATCCGGAGACGCTTCCCTC  
GTACTGCGATGATCCTTGCTCGTCTCGCGCAGATCGAGATCAACGACAACGAGGTCACAAACCGGCGCA  
TTCGCTGGCAGCGATATTCGATCATGGATGCCACAGACCGCAGCCAATAATGACGATCGCTCAGCACTG  
ATGAAAGCTCTGTTCACCCGGTTCGCGATATCGCTTGGACGCTTTGTGTAGCACAGTTCGGCAATCACC  
ATCAAACCTGGGGACTACAGCCACAAGCCGATGCGCCCGGACGGATACGGCCACGGCGAGCCTTTCC  
GACCTGGGGACCGATATTAGAGTTTCGCTGAGGAGATGATACAGCTGGCCTTATCCCAGGTACGCTACACC  
GTCTCGATGCTGTCTGACCTGATCGATCGCCTACATGATTTGACGGACCGCGACCAAGATCGCGTATGGG  
CGCTAGTCGATGCATGGGCAAAGACCGCCAGTGACAGCGACAAGATTGCGTTACGCGAGAAGATTCGAGT  
CTCGACGTTATCCCAGCGTACAGCACTACGTGCGAGGAGAAGTAGTAAGCAATCACGCATTGCGAACGCA  
GCAAAGCACATCCATAACCGCTCGAACCAGAGTAACCCCTCGACAAGCACGCGTGGCTTTTCAAGGGCT  
CTTGATCGATGAGTCTGCCGACGAGCTCGAAGACATAGAGAACATTAACATGAAAGAACGCGAGGTGCG  
GATTCGAAAACAACGGGTCGATGCACTAAAGGAAATCCATGGTCAGTATGGCATCACAGGCTTACTCAAT  
ATGGCAACCCGACGTGGAGTGCCAGGAACAATTGGAGCCCTTTCTGCTAAGTATATATTAGATGAGGAAG  
AACTGCTGTCACTCATCATTCTCGCCTTTCAGAAAAGGAGTGAGAGCGAGTCCGCTGCTCGCTCCTCGGA  
ATGCCTGATCCAAGATATTTTAGGTGTGCTCACCAACGATCAGAAAAGCGAAGCAGTCTTAAGGTCCGCC  
ATTACAGCAATTGGTCCCAGAAAACACGGTACACCTTCTTACACTCGCTCCCTTTGGCGAAGCTACTTGGT  
CGCTAGTATTTTTCATACGGCAAAGGAGTTGAATTACGGTACTGGAAGGAGTTGTTCCAAGCTGGCTGCG  
GGACATCCCTGCGGAGACCTCTAAAGCGGTGACATGCTCATGAAAGCTCGGCGACCACGCGCTGCGTTT  
GCTCTCGTTAAGTATCATCCAGAAACACTGCCAGTCTTCAAACGTTTCCAACCTTCTCACAGCCATGGCAC  
AGGGGAGTGATGAAAAGGCTAGCGAATACCAGCTTGAACACCATTACGTCGAGCGAGTATTCGAATGCAT  
CAACAAAACAGCCGAACGTGCACTTGAACAGAAGGCCGGCCTCGAGTTCGCGTATCTAGACGTGCTTTGAC  
CGCGCATGGGACCGGCATGCCAAATCCGAGTCCCAACCTTGAAGGATATATCGAGTTCCACCCAGAAG  
TATTGGTCCAAGCCATCGTATGGACATACAAGCGCAATGACCGAGCTGAAGACCCACCTGAATTCAGGT  
TGAAGAAGACAAGACTAAGCGCATGGCTGAGCAGGGATACAAGCTTTTACAAGCACTGAAAAGAATTCCT  
GGCAGCGACGAACAAGGACACATTGATACCAAGCGTCTAGCGAATTGGACCGAAACAGTACGCAAGTCTC  
GCGCGGAGTTATCGCGTATAGAAAATCGCTGATGCAGTAATCGGAGAACTGCTTGCCTCGGCACCGATTGG  
TGAAGACGGTGTCTGGCCTTGTGAAGCGGTAAGAACAATGATGGAGGATATCCAGTCTGAGGACATGATG  
CACGGAGCACATAACCGCGTTTTACAACCTCGCGAGGGGTACATGCCCGTGGTCTGACGGAAACCAGGAAC  
GTCAACTTGCCGACAAATACAGGAAGTGGGCACAACAGATACGGATGTCGTCACCGTACGTCGCTTCCGA  
GCTGCTTATGAAGCTGACAGAAACCTACGAGCGGGAAGCTGCTCGAGAGGATACCGAAGCAAAAATCAAC  
CGGAGATTACGCTAGCTGACAGCAGGGTGGAGGCTGAGCGCAGCAAAGGTGATCGCTGAGCTGCACTCA  
CAGCCTGCGAGCCAGAGGATTGGGTGCGCAGACTCTAGATCAAGTCTACTCGACCAAAAACACTCGGGATC  
TGCTGGCTCATAATCATCAGAAAACATTTGATTTTGCCGATGAGACTGGCGCAAATACGCAAGGGTTTTCA  
AAGAAGCAGCTCTCACAAGATGAACGTATATCGCTCTCCGTCATGCTGGGAGCCATATCCCCAGTTGG  
CAGACAAGGTTGCATAGTTCTGCTCCCCGTCATCATTTGTGCTTTCGCTACAGATATCGCAGCGTACATC  
TACCACCTGCTCAGTTGGAACACGGCTTTCACCAGCATGTGCACTCCTTAACCTCCGTGTTGTCTATAC  
GATTCACGATCGGAATGGCTGATGGGCGAAACGGAGACTCACCGCCAAACGATGGGGCCGAGTCACTC

CGCAGAATCTCGTGATCCCGCATGTTCCGGTGACAGACAGCTTCTGTAGCAACTCTCGTTGTTTTCTCCTCT  
GACAGCTTTGCCATCATGCAGATCAGTTCGCCAAGCAGTTCATCATCACAGTAGAAGTAGGCCACCGGAT  
AACCCAACTCCTGAGCAATGCGTTGCATGGTCTGGTAGTCAGGGGCATGTTTCCCTTCTCGTACTGGTT  
CATCCTGGCGCTAGCTGTGCTCTGTTCCATACTAATCGTATCCCCAACTGCTGTTGAGTCAGACCCGTC  
GCCTTTCTTGCGGCTTTGAGTCTGATGGGTAATGGGTTTGTTCATGGGGTCTCTGCTAGCTGAGGATCAGG  
TAGCTAAGATTTTCTTAGTCTTATACGAATAAGTGTACTAAGCAATACTTAGTTTTTGATATTCAGAGGA  
AAAATTTACGTTATCGCTTTTTTAGTAACTGACTGATAGGGAGCTTGTCCGGTGAATTGCAGCGGGCTCA  
GAATCTCTTCTTACCTACTGCATCAATTTATAACGTGAATATGTTTCACTTCACAAGCCTGTATCTC  
ATCAATCGGTTGCAAAAACGGATTCACTTGGTCTGGATAAAAACCCCCATATGCCACAGCAATGTGCTCA  
TGTTTCAGCTCTCGGCATGAACAGCAAGTGCCTGTTTACTGACTCATCCAGCAGCTGTTTAAAGTGCAC  
GCAGGCTACCATAACAAGCAGCAAGCAGTGCCTAAATGTATGCTTGGTCTCCAGCCTGACCTGAGTTTC  
AAAAGGCATACGATTTGGCTAATCCATAATGAGCGAATAAAAATTTCTCTATCATCCGACAATTTGAAG  
TATGGAATGGCTCTACGTATCAATAGCCTTGAAGACCATTGTGGCTCTCAGCAATTTTGATAGCCCACG  
GCATAACCAACCAACAATCGGGATTTTGGCGGTTTCGCTGATGTATTTTAGCCGATTAGCAATCTGATT  
GCGTTTTTTCGCGGGTCTGTTTTTCGATGAGTTCCTGAAACTCATCGATAATAATCAACTCAGTCTCGCAG  
CGTTTTCAAACACTTAATTAATGCCTCGGTAAGACTTTCAGCAGAACTCTTGTGAATTCGTTCTGAACTAC  
CAAATTTGACCAAGATCCTTCAGTAGCTCAACCATGGTGGACTCCAAAGTCGGTCTACTGGGGATCCTGCT  
GACAAGCAGTGGCTTATGAATAAAAACCATGTCTGACTTGTCTGGATATTTGGCAGCATAATAACGGATT  
AGGGAAGATTTACCCGTCCCGGTATCACCCGTTAACAACATACATTGCGGTTACCAGCAAACCTGTTTAT  
TAAAGCGAAGACGATCAAAATCCTCTTGGATTGTCCGTAGTAATGGTGTCTCGACATAACATTCGATAAA  
CGATCTGAGTTTATTTGCATCATCACAGGATAGTTCATTAGTAGGGCTCCAGACCAGAAGTGAACTTAT  
CCCAATCATCATAGTGTCTGGCTGACTTGCCTTCTCCATTTTAGAAAACACGTCATTTGTGGCCGAAAT  
ATTGAGTTCGTGAACAATGCTGGTCTTGCATGGCTGCCAACATTACGATATTTTCGCAATTTTGTGACT  
CCTTTGACATTACGTTGTCTAAGATTGTGCCGGACCTCCACTAATTCGTTTTTTATTCATTTAGAT  
AGGTTTCGTGCTTTTGATAAACTGACAACATCCATTTGTTTCAATTAATGAAAATCTCGGTGTAATTTACATT  
AATTTGATGTTTCTGTAGGCTCAAACCTTTTGTATAACCTATAGGATCAATGCACGGGACACGAATATAG  
CTACCAATCTCATCAAGAAAAACATACATAAGATATGTCTCTTGGATTGAGTTTTACGAGGACTTTCC  
GTTTTCCCTTTGTCTTGTGAGATAATTCATCCGGTAATAAGCCAGCTCATCCGAATCGTAGCGGAGGTG  
ATGGCACTGGATGCCACCTCGCCTATGCGTACATTTAAGCTGAGGCTCAGGATTACTTCAAGCTTCGTC  
AGGTCATACCAATAATAGGTGCGGGAGGTACATTTTTGCTTCCATGTTGCCAAGATATAATTGGAATAT  
AGCGACACCTACTATCTGGTTTCGTAATGGTAGACATCGATGACCCAATGATGAAAAATCTCTAGGAAGGT  
GGAAAAACGCATGACTGCATCTTTCTGCGGATCGTAATCTCCTTTTTCTGAAATATTGGAAAAGGTTTTTA  
CTAGGGATCGGCTCCAGAAGTTTTCGATTAATGATGCCAAACATCCGTTTCGATCATAGGTTTCAGCCATG  
GTTTTCTAACTGGGTTGTATTGGATATTGATCCCAAGTTCCAAAACAAGCCTGTGCAAGGCTAGCGCTCCA  
AACTCAACTCCATTATCAACAACCAAAGTCTCTGGTTTACCATAGCATGGCCATTCATGTTCAATTGAT  
GGATATTTATTTCTTACATAATCTTTTTTAGAAAATGCTACTGAGCAATGCGTTACGAACAGATTACATAAC  
TAGGCTGGTTGAAATTCAGATTAACAACTACAACACAATGGCTATAAGCATCAATTAGCAATGTCAAACCT  
CGGACGTCCTAAGGGAACATAAATCATCATCGAGTAAAAGTAGATCCAATGGTGTATGGTCTATTTCT  
ACTCTCTCCATTATTCTGCTTGGTGGTTTTATGACTACCAATGGCCTTAAATTC AACATTGGCTATATATG  
AACCTTCCGACTTTTTCATGACTTGATAAGCTGGCAGTTTTCTTCACTCTATTATAAAAAGCCATATAAGA  
TATGGTTTTTATAGAATTTTCGACCACACCGAGATTCGCTATTAGAATAGAATCACTGTAGAGTTGAAAC  
GCGGATGCGATTGAAGGTTGCTCACCTACCAGATAACGATGGACAGCTTGTCAAAAAACAGCTCATCAC  
TAGGTTGGAAGCCGACTTCGAGAGTTCCCTTTCGCTTGGTGTTTAGGAATGAGAGAAACCAACGTCCTGCC  
ATGCTGGATATAGATCTTCTCCAACGCGCCAGTGTTCGCCAATTAGGGATGGGAGGGGGTAAAACCTAAT  
GCCGCGTCAGCAAGCAATGGCGCCAGGTTTTCTCTGTCCAGCCTCCTGCCAAATTTTTTTCAACCCAAA  
GGATATAATCGCGTCGATGCAGTCTTCTACCTTGAGAGCATCAGGAAAACCTATCCACTGTAGCAGGTAC  
AACAGCTTGAATGGCATCAATGGGGGAAGTGGAGGCCGATGGTTGAGGAATGACGAACCTCGTCTCAAAC  
AATCCATTATGCTCATCCATGGTCAATTCCTGAATGACCGCTAGCCACACTAAAGTGGAAATACCAATT  
TCCTGTACCGTCAGATCACTCTGCATGATTCTCTGGCAATCAATGACAAGGCTGATGCCAGGACTTCTT  
CTGGTGGCGCATCTATCGAATCAGATAACCGTAGCAATGATACGCGGCCAAGCTTCTGTACTAGCCCAAG  
AAGCTGCATGTGCAAGGGTGTAAAACCTGAAAACCGGAGTATCGATGCAACAATTTCAAATTTCCCAAA  
ATAGGGTCAATTCGATCTGCTTTTTCTGTAACGAGCTTTAACGGGGAGGAAAGCTCGATGGCTCTCTGCT  
GCTTAAGCGGAAATCGATGGAGAAAATCAGGCTCAGCGACTTTATTTGAAGTTTTATTTCAAGAAAACCT  
GACACTGTCATTCTGGTCAACTAAACGAAAGTCTGGAGTATAGGGGCATTGCCTTCCAGCGAATTCGTAA  
TAGAAGCCTTCTGGCTGGGCCTCATAAAAATTTGACAGAAGGAGACTCAAGATGAAAGCAAGTATCGA  
ACTCCAAAGCTGATTCCACTGTAAATACAGTGTTCATTTTAGCGCTGACGAACTTGAAGAGTTTTTTGAC  
ACGGGAGTGTGAGATGCCGACGGTACATAACACACCACCAACCTGTTGTTACTTTACTACAGGTTTTAG  
GCTATGTCAGCTTATGATGCAAGATCATGTGAGCTTATGCTTTGGATATGTCAACTTATGATTTAGACGA  
CATGAATTCAGAAAACAAGTGGTGGCCCTACCAGCCACATCCCGGCACTCGAGTCCCCCGCCTTGGCTGC  
TACCTTCCGGTCTGACCAGGTCGACGGGTTATCAATGCGAGAGGACCAATAGGACCACCGGCGAGGAGA  
ATAGGCAAACCTGGGCGTTCAATGCAACGGCTTTCTACCTTCGATTGTTTCGTTTTGCCTTATTTTTCAACA

ATCTGCCGAATGAATCAGCTAAACAGCATAAAATTTGCCCCACCAGCAGCATCAGCAGAGCAAATGCCT  
GCTTGAGGGCTCTTGGTGACAATCGGTGTGCCAGCTTGGACCAAGGCGGGCAAACCTGGGTACTGGTCAG  
CACAATGCCAGCAGCGCGGGCAGATAGATGTAGCCACACTCCACTCGGGCAGATCGGCATGACCCAA  
CCCGCATAGAGGTAGCTGAGGCTCCCCGCCAGCGCATGGGCATGCTGCAAGCTGCAGAGGCCGCTACCG  
CATTGCGCATTGGCACCGAGTTCCAACCTCAGATAAGGGACGGTGAGCGAGCCACCGCCAATACCAAACAG  
CGCAGACATCCAGCCAATGATGGTACCGGGCATGCTGTGCCGAGCGCCCCCGGCATATGGCGCTCCGCT  
TTGGGCTTGAGATTGAGCCCCATCTGTAGCGCCATGCTCCAGGCGAAGCAGCCGATAATGATATTGAGGG  
TGCTGGTACTGAGCAGATTGGCGGTATGCCGCCAAGCCAGCCCCAATCAGCATGCCGGCGCCGAGTCCG  
GCGGATCATCACCCAGTCGACGGCGCCCGCTCCCGGTGGGCCCCGAGCGAGCTGAATCCGGTAAAGATC  
ATGGTGGGCAACGAGGTGCCGAGGGCCAGATGGGTAATGATTTTCAAGGTCGATGCCCTGGGCGCGAAAG  
TCATGACCAGCACGGGGACAATGATAAGAGCCCGCCGATCCCGAACAGTCCCGCCAGCATACCGGCAAA  
GGCGCCAGCAGGAGGTAACCCATAAACAGCATAAAAAATTCCTGTGTTAAACAAAAACTGGCCAACACGG  
CCGGGCAACTGTGGATATCAGCATGAAAAAAAAGAGATGGCGCGAGGGCCATCTTTCATTGTGCCGTT  
AGTGCAAGTGAATGGTACCGTCCATCACCTTGTAGAAGGCCAGCACGGCACAGCCAAGCAGGGCCGCGCT  
CATCCCCTGCTCCAACCGGTTAAGGCCGCGCAGACCGTGATGCTGACGCGCTTCCAGTAGATGAAGATG  
CCCGGGCTGTAGAGCAGCGCCACCAGCAACAGGTACTCCACACCGGCAGCGTAGACCAGCCAGCAGCCGT  
AAACCGTCGCCACCAGGGCCAGCAGCAGGTACGCTTGCCTGATGGGGTTGACCTGATAGGTCTCCCC  
TTTCAATGCCAGCTTCAAGCCATAAGCGCCGAAAAACGTAAGGCACCAGCGCCCGAGGTTGCGATG  
TTGACCAGCGCCAGATAGGTGCTGCTCTGGAAGTAGATGATGATCAGGAAGATCTGCACCAGACAGGTGG  
AGCACCAGAGCGACACCTGCGGCGAGCCGTTCTTGTCTCCTTGGCAAACCAGCCCGGAACACACCGGT  
CTTACCTGCGATGTAGGGCACTTACGCGGCCAGCACGGTCCAGCTGAGCAGCGCCCCATCACAGACACC  
ACCAGACCAATGTTGATAAGCCAGGCGCCCCAGGGGCCGACCACGGCTTCAAGGATCATGGCGGTGAAAG  
GGTTCTTGAGCGCCGCCAGTTGCGGCTGGCTCATGACACCCAGCGAGAACAGGGTCACCATCACGTAAG  
CGTCAGGGCGCCGAGCAACGCCAGCACGGTAGCTCGGCCACATCCTTGCATGACGGGCACGGGCAGAG  
ACCACCAGGCCCCCTTCAATCCCGATAAAGACCCAGAGGGTCACCTTTCATGGTGGACTTGACCTGATCCA  
TCACGGAGCCAGCTCCATGTTGTTCTGGCCCCAGATATCCAGAGTGAAGGTATCCATGTTGAAGGCCAG  
CAGGATCGCGACACAGAAGCAGATGAGCGGCACCATCTTGGCGATGGTGGTGACGATATTCACCAGCGCA  
GCGACCTGCACCCCGCAGCAGCAGCAGCAGCAGCAGCAGCAGCAGCAGCAGCAGCAGCAGCAGCAGCAGC  
CCGGCGTATTGCGCTCACCGAAGATGACGTTGTACGGCGTATCGAAGAAGTAGCTCAGGGCGCTAAACAC  
TACGATGGCGTAAGAGACGTTGGCCAGCAGTTGGCAGAGCCAGTAACCCAGGCGCGCTGAAACCGATG  
AAATCGCCGAAACCGGCTTGGCATAGCTGAAGATACCGCCATCGAGATCGGGGCAGCGCATAGAGAGGT  
TCTGATAGACCAGCGCGAGACAGATCATGCCAAGACCGGTGATGGCCCAACCCAGGGCGACCGCCCCGGC  
ACTGGCATGCGCAGCAATGTTTTGTGGCAGACTGAAGACCCCGCGCCGACCATGGAGCCGATCACACAGC  
GAAATGAGGGCGCCAGCCCTAGTTTTCTGTCCATTTCAATCCTGTTTATTTAGGCGGCGGCAGAGCGTC  
CGTATTACTACTGCGCGCAATATGGGAGGGGCTGGGAATCCTGACCCCGTAAAAAGGCGGCAACTATAT  
TGCATGACTATTCCGACCGCAATCCCTCGTCCCGTCAATCATGCACCGCTTGACCGCGCAATTTTAC  
AGCACTGACCCATATGGCCTGTGAGCTGGCTCAAATTAACCAAGACCCATTGATATTTCTCATTTTTCTG  
CCAACACAACCTGACTCGCATGGTTCCATATGCATCGCCATTCAGGCGCTCTCTGTATAAATAATCTGCAT  
AAAAAGCCCCGGTGGAAACACCGGGGCCATTATGTAAATCCCTATAAACGCAAACCGCCATCCAGTTC  
AATCATCCGCCCCGACAGATAGTGGTGGCAAAAATAAAGCTCACCGTCTCGGCCAGCTGTTGCGCCTCG  
CCAAGGGTGCCGACCGGAATGGCCTGCTGCATCCGCGCCATCGCCTCCGGCTTCATCGCCGCGAGTCATAT  
CGGTGGCAAACACCCCGGGGGAATCCCATCACCCGAATGTCATGGCGCGCCAGCTCCCGCGCCAGGT  
CACCAACAGCGAGGCAACCCCGCCTTGCTGGCGGCATAGTTGCTCTGGCCAATATTGCCGGCGGGGGC  
ATAGAGGAGATGTTGATGATGACGCCCCCTAGCCCCCTTGCGCCATCAGCGCCGCCCTCACGCCCCG  
AGAGGAAGGTACCTGTGAGGTTGACGTCAATCAGCTCTGCCACTGGGCCAGCGTCATCTTCTCCACCAG  
CTCACCTCTTTTACCTTGATCAGCATGCCATCGCGCAAAATGCCGCGCAGTTGATAAGACCGTGCAGC  
ACGCCAAAACGCCCCCTGATGGCAGCAAAACACGGCCTCAACCTCGGCTTCGCTCGCCACATTGCAGACAA  
ACAGCTCGCACTGGCTATCTTGATCGCACTGATCATTCTGGCTGCGCACCCAGGCTGCAGTGCCTCCAG  
ATCGGCGGATGATGTCGAGCAGTGCCAGCGTCCGCCCTGTGCGCCAGGGCCAGCGCAATGGCCCGT  
CCCAAGCCAGTCCGGCACCGGTAATAACGATGACCTTATCTTTGATATCCATCAATGCTCCTTGTAGCT  
GGTGAAGAGAGATGCCTTGAAGAGAGGTGGCCCGTCAGGCGGGATCCTGTTTATCCAGATAGAGTTCGA  
CGATGCTGGAGAAATCGCGGCTCCCTGCCCTGAGCGGCATGCAGGTTGAACAGGTTGCGGGCCAGCGC  
CCCCATGGGCACAGCGCTGTGGCCATGCTCGGCCAGCGCCATGGCCAATCCCAAGTCTTTACCATCAA  
CGGGTCATAAAGCCCCCTGATAGTTGCGGGCGGCAGGGACATTTCTCCATCACCCAGGCCAGGGTGT  
AGCGCTCCAGACTCCAGTTGTTGCCGGAGCTCTTGGCCATGATGGTGGAGAGCACGGCGGGATCCAGCCC  
CTCCTTACCCCCGAGGGCCAGCGCCTCGGCAGTGCCCGCCATATGGATCGCAAGCAGCATGTTGTTGCAC  
ATCTTGGCAATCTGCCCGGCGCCAGCGCCCCGGCGTGAACAGGTTCTGCCCCATGCAGGCGAGCAGAG  
GTTTTGCGCCCTCGAAATCCGCGCGTCAACCAACGATAAAGGTGAGCGTCCCGGGCGGCCACCGGC  
GACACCGCCCGAGACGGGGGCATCGATAAAGCGCAAACACCGGTGCGGGCTGCCCTCCCCGACCTGACGG  
GCAGAGTCGACATCGATAGTGGAGCAGTCGATCACCAAGTGCACCAACCGGCAGAGCTGCCAGCAGATCCT  
GCCCCCTCAGACAACCAAGGTGCGGCACATGCTCCCCCGGGTAGCATGCTGATCACCACCTCGCAGCC

GGTCACCACCTCTCGGGCATCCCCGCGGCTATGCAGCCAGCGGCGATGGCGCGCTCAATGTTTTGAGCA  
ACCAGATCAAACACCTGCACCGTGTGCCCGGCCCTGGCCAGATTGGCCGCCATGGGCCCCCCCATATTGC  
CGAGCCCGATAAACCCCTATCCTTGTTCATCCCGCTTGCTCCTTGCGTTGCTGATGGCGGCGTCCGCCGGTT  
TCCAAGATGTTATTCTGGCAGGCCAACGGATTGCGCCCTGCGGCCAGCGATAGAACTCGTCTGCCAC  
TCCCCCTCCGGTGGCAACAGTTGCCAGCGGGGATCTTTATCCTTGTCGATCAGCAGTGCCCCGTACCCCTT  
CCACAAAATCCCCCTTACGACACGCAGTTGACCCGAGAGGGTTCAGCTCCTCGGCAAATACCTCTGCCAGTGA  
GTTGCGGCGAGCCTGCCAATATTGACGCCACAAAATGGCGCGGCTGATGGGGCTGCCGTTGCGGCAAAGC  
TGCTGCGCCTGCCTGAGTACCGTCTCCTGTTTCATCGAACTGAGCCTCGAAGAACCAGCGCAATACCCCTT  
GCAGCGTGCGCCCGCCAGCAGGGTATCGATCCTCTGTTGATGGGGTAGCAGCACAGGTGCAGGCAAGCG  
GGCCGCCACCTCACTGTGCAATTCCTGAGCAGCAGATCGATCTGCTCACGGGGATCACCCTGCCAGTGC  
CAGTCGAGTACGGCGAGGCGTGACAACAGCGCACTGCGCTCGCCACTGGCGATGGCGTGCATCCGCCAGCC  
CAAGACCGATGGCATCACTCCCGTTGAAGCGGGCGCCAGTCAGACCCAGCCAGAGCCCCAGCCGCCCGG  
CATCCGGCTTAAAAACAGCTTGCTCCCACGTGCGGGTAGAGGCTATGGTCACCTCCGGCATGGCGAAC  
AGGCTTCTTTTCGGTGACAACCCGAAAATCGGCTCCGGCAAACAGGCCAATACCGCCCCCATGCAGATAC  
CGTCCGCCACGCAAATAAGGGGCTTGCGGTAAGAGTGGATGTGGTGGTCGAGCCGGTATTCTGCTCGAA  
AAAGTCGCGGGCATACTCGAACAGTTCCGCCTCGCTCGCTCCTGCTTGCGGTAATAGAAGGAGCGGATA  
TCGCCACCGGCACAAAATGCCTTCTACCCGCCCTTGCAGCAGCACACAGACGATGGCGGGATCCTGCT  
CCCAACGGGTTCAGCGTCTGTTGAGGATCTGGATCATCGGCAGGCTCAATGCGTTGAGAGACGCAGGGCT  
GTCGAGGGTCAACACCCCGACCTGATGACCATCTTCGGTGGGATAACAGCTAACCTTGACCGGCTCACTC  
ATAAACGGCTCCGATATGGATTTACTCTGTTGGCCATATTGCCAGCGCGGTAAGCGTTTCTCCAGGAAG  
CGGCCACCCCTTACGCTGGTTGGCATCGCTAAAGAGATCGAGAAACAACGAGCGCTCAAGGGGCAAGGC  
GGCATCCCGCGGGCCACTGCGGCCCTGATTGATCAGGGTTTTGTCAGGCGCGCAGGGCACTCGGGCTCTGG  
CGCTCCACCAGATGGGCCATCTGGTGCGCCGCTCCACGCTGACCGGTTTTACCCACCTCCTCCACCA  
GCCCCATCTCGTAGGCCAGCGAGGCACTCACCTTCTACCCGAGAGGATCATCCGCTTGGCCAGCCCGG  
CCCCACCGCTCGGTACGGCGCTGGGTGCCACCGGCACAGGGAAGCAAGCCCACCGAGGCTTCCGGCAGT  
CCCAGCAACGCCTGCTGCTCGGCGATGCGGATATCACAGGCCAGCGCCACTTCCAGGCCACCGCCCATGG  
CATAACCATTGATCGGGCGGCGATACTGACGCCGTGAAAACGGGCCAGCGCTCGAAGGCTTGCCAAAGGC  
CTCGCTACTTTCGGGGCCAGCTCGACATTCCTTCCGACAAAACATATTGAGGTTCGGCACCCAGCAGAAA  
AATTTGTCGCCCCGACCCAGGATCACCAGCCACCACCGCTCGGGACGACTGTCGAGCTCCACCATCACT  
GCAAAAAGACCTGCAGGCTGGCGAGAGTCCAGGTGTTGGCAGGGGGATGGTCGAGGTTGATATAGGCCAC  
GTGGCCATGATATTGAGTCTGATCCTTGTTCATAACATTGTCCTTGTTCGATGAAGCTGCCGCCATGATGA  
CAGTCTTGAATGACGCCAACCTGTGGCTGGCTCACAAAAGCCGAAACCGGCATGGCATGGTGCAAATCGGG  
TGGCAGGCAACACACCCTTATGTCGACACCAGGTTAGCCAGCGACAAGCCGGGATCGGCCAGCATGCGG  
CGTGCATGATGAGTCGCATCACCTCGTTGGTGCCTCCAGAATGCGGTGTACCCGGGTATCGCGCAGAT  
AGCGCTCGAGCGGATACTCGCGGATATAACCATAGCCGCCAAAGAGTTGCAGAGCCTCATCACAGATTCC  
ATAACCCACATCGGTGGCAAACCGTTTGGCCATGGCACACCAGGCACTCTTGTTCGGTGCCTCCGATCC  
AGCTTGTTCGGCGCCTGACGCACCAGCAAACGGGCGGCAGCCAGCTCGGTGCGCATATCGGCCAGGCGAA  
ACTGCACGCTCTGGAATTCGCTGATCGGGTGACCAAATTGCTGGCGCTGCTGCACATAGGCCAGCGCATC  
GTCCAGCGCTGCTGGGCGGTGCCACCGAACAGGTGGCAATATTGATGCGCCCCCATCGAGGGCTGC  
ATGGCGAACTTGAATCCTTCCCCCTCTTCGCCCAGCCGGTAGCAGGCAGGAATGCGAACCCCGTTGAAAA  
CAACCTCCCGAGTCCGGCTGGCTGTTCCAGCCCATCTTCTCTTCCGGCTTGCCATAGACGATAACCCGCGCT  
ATCTGCCGGCACCATAAAGGCAGAGATCCCCTTCGCACCTTACCACCCGTACGGGCCATCACCACCAGC  
ACATCGCTGCTGCCTGCCCCGAGATAAAGACCTTGGTCCCCTCGATGAGGTAGCTGTACCCCTCGCGCA  
CCGCCCGGGTCTTGAAGTGCCTCCGCATCGGAGCCCGCCCCGGCTCGGTGAGGCAATAGGAGCCAGCAG  
CTCGCCGACGGTCTTGGGCAACCCACTCTTGGCAACCTCGGTGGGCAACCAGCTACCCAGCATCCAG  
CTCACCATGTTGTGGATAGTCAGATACGCCGTGGTTCGAGGTACAGCCCATGGCGAGGCGTTTGAAGATGA  
GGCTCGCATCGAGGCGCGGCAGCCCCAATCCGCCAAACTGCTCCGGGGTATAGAGACCACAAAACCTAG  
CCCCGCCGCTGCTTATGATGGTTCGGGATCGGAAACTCATGCTCCTTGTCCCAGCGCGCGGCATGGGGTTTG  
AGCGCCTCATCGGCAAAGGCGGCGGCCCTCCACATACGCTGTTGATCATCTGTCAGGGTAAAAATCCA  
TCTCGTCTTTCTCTCCCTTGTGCCCCGCGCTTATTTTCTGCGTTAGCGCTTTATGACGCGGCGCCAC  
ACGCTGCGTACGTCGGATCTGCCACTATGGCGCTGTTGTCGTGGTAGCTGATGACGCTCTCACTACCACG  
GCTTTATCGACACACAACAGATTAACAATTGATTTACGTTTACGCTAACGTAGACTTGTGGCAGAAGTGA  
AGTACAAAATGGACCGACCACTGCTAGTCGTAACGCCGAGTCAGCCGGTCGACCAACCTTCCAAACCGA  
CTGTCATATCCGCAAGGAGAGCATGGATGCAGATGGATGAGACCCTGAATGCCCTGACCGAACAGGTTGC  
GGCCTTCTGCCAGAAAGTGCATGCCCCGCGGCCAGCGAGATCGATCAGAGCAACGCTTCCCCCGTGCAT  
CTCTGGCCCCGGATGGGTGAGCTGGGGCTGCACGGCATCACGGTGGCGGAGGAGTATGACGGGGTGAATC  
TCGGCTATCTGGCCATGTGCTGGTGCATGGAGCAGGTGAGCCGCGCCAGCGCCTCGGTTCGGCTCTCCTA  
CGGCGCCCACTCCAATCTCTGCATCAATCAGATCCACCCGCCAGGCACGGCGGAGCAAAAAGCGCGCTAC  
CTCCCCCGCTGGTGCAGCGGCGAGCATGTGGGGGCGCTAGCCATGAGCGAGCCGGGCGCGGGTCCGATG  
TGGTGCAGCATGCGCCTCACCGCAAGCGCGAGGGCGATCACTTCGTGCTGAACGGCAACAAGATGTGGAT  
CACCACCGGACCCGATGCCGACACCTTCGTTCATCTATGCCAAGACAGATACCAGTGCGGGCCCCAAAGGA

ATTTCTGCCTTTATCGTTGAAGCCGGCACTCCCGTTTTTCTACCGCCAGAAGCTCGACAAGCTGGGGA  
TGCGCGGCTCCAGCACCTGCGAGCTGGTGTTCGACAACCTGCCGGTACCGCAGGAAAACCTGCTGGGCAC  
CCTGCACGGCGGAGTCAAGGTGCTGATGAGCGGGCTCGATTACGAGCGGGTGGTGTGGCTGCGGGCCCC  
CTTGGCATCATGCAGGCCTGCATGGATGTAGTGCTCCCTATGTGCGTGAGCGCAAGCAGTTTGGTCAAG  
CCATCGGGCAGTTCCAGCTGGTCCAGGGCAAGCTCGCCGACATGTATAACCGCCTCGCCAGCAGCCGGGC  
ACTGGTCTACTCGGTGGCGAGCGCCTGCGATCAGGGCCGTACCAGCCGCAAGGATTGCGCCGCCATC  
CTGTTTGGCGCCGAAAACGCCACCCAGATGGCGCTCGATGCCATCCAGCTGCTCGGGCGCAACGGCTATA  
TCAACGAATACCCACCGGCCGCTGCTGCGGGACGCCAAACTCTACGAGATCGGTGCCGGCACCTCGGA  
GATCCGCCGCTGGCTCATCGGTGCGAGCTGATGGGAGAAAATGCATGAGTCGTATCCACTCCCGCCTCG  
ACACGGCGAGCCCGGAATATGCGGCCAATCGGGCCGATGCAGGGGCTGGTCGACGATCTCCACGCCCCG  
CATTGGCAGATTGCGCAAGGGGGCGGCGGCCAACACGCCCCGCATCAGGCCGTCAGCCAGCTGCTG  
CCCCGCGAGCGCATCAATCAGCTGCTGGACCCGGCTCCCGTTTCTCGAACTGTGCGGCTGGCTGGCT  
GGCAGGTCTATGACGAGCCGGTACCCGCCCGGTATCATACCGGCATCGGCCGGTCTCGGGCAGGCT  
CTGCATGCTGGTGGTGAACGACGCCACCGTGAAGGGTGGTACCTACTACCGCCTCACGGTGAACAAACAC  
CTGCGCGCCAGACCATCGCCGAGCGGCTGCGCCTCCCTGCCTCTATCTGGTGGATTCCGGTGGCGCCT  
TCTTGGCGATGCAGGATGAGGTGTTCCCGACCGGGATCACTTTGGCCGCATCTTCTACAACCAGGCCCG  
TATGTGCGGCTCAGAACATCCACAGCTGGCAGTCGTAATGGGGCTCTGTACTGCAGGCGGCGCCTACGTG  
CCCGCCATGGCTGATGAATCCATCATGGTCAGGGAGCAAGCCACCATCTTCTGGCGGGTCCGCCGCTGG  
TCAAGGCCGCCACCGGCGAGGAGATCAGCGCCGAGGCCCTGGGCGGCGCCGAGGTACACTGCGCCACTC  
GGGGGTAGCTGATCACATGGCCCGTGACGATGCCACGCGCTGGCCATCGCCCGAACCCCTGCTACCCAT  
CTGGGCAGTGATCATGTTCCGCTCTCGGGTTTGGCATCGGGCAGCCCAACCACAATGAGCCAGCCTACC  
CCACTCCCTGTTACCCGATCGAGGAGCTCTACGGTCTGGTGGGCACCAGTCTCAAACGCCCTTACGACGC  
CCGCGAACTGATCGCCCGACTGGTGGATGGCTCTGACTTTGACGAATTC AAGGGCTTGTGGTACCCT  
CTGGTGACCGGCTTTGCCCGTATTTGCGGCATGGAGGTGGGGATCCTCGCCAACAACGGCGTGTGCACA  
GCGACAGCGCCAGAAAAGGCGCTCACTTTATCCAGCTCTGTAACCGCCGACCATCCCGCTGCTCTTTTT  
GCAGAACATCACCGGCTTTATGGTGGGGAGTAGCGCAGAAAAAGAGGGGATCGCCAAGCACGGCGCCAAG  
CTGGTACCCCGCTGGCCTGCAGCCGGGTGCCAAGATCACCTGATCGTTCGGCGGCAGCTTTGGTGGCG  
GCAACTACGGCATGTGCGGTGAGCTTATGAGCTTATGAGCCGATTTTCTCTTTAGCTGGCCCAACAGCCATCT  
TGTCATGGGGGGGAGCAAGCTGCCGGAGTGTGGTGCAGGTCGCTCGCGACAAGCTGACTGCCAGGGC  
AAAGAGTTGAGCGAGCAGGAAGCGGCCATCCGAGCCCGGTGATCGAGCAGTATGAGCGCCAGGGCC  
ACCCCTACTACGCCAGCGCTCGAATGTGGGATGACGGCGTCAATCGACCCGGCCAGAGCCGCACCGTGT  
GGCGCTGGCGCTCGCCGCATGTGAGGGTGGCCGATTTGAACCCGAGCAGTACGGCATCTTTCGGATGTAA  
GGAGCAAACCCATGTGAGATCCACTTACTTCTCAGCACTTGGCTCTTCAACACAGGGCCCCGTTTCGGCT  
GGAGCGGCACGGCCCGCTGGCCGAGCTGGTGTGTCGCGCCCGGCCACAACGCCCTTGTATGCCGAC  
CTGATGCTGGGGCTGCTCGACTGCCTCGATGATCTGGCCATCTCCATGGTCATGATCTCGCCGAACGCC  
CTCACGCCCTGCTGCTACGTGCCGAAGGCAAACACTTTTGC CGGGCGCCGATCTCAACTGGATGCGCAA  
TCTGGCTCACGCCGATTTTGAACACAATCGCGAAGACGCCCGGTATTGGCGGGCTGATGCAGACCCTC  
GATGAGCTCCCTTCCCCACGGTGGCACTGGTACAAGGGGCCCTATGGCGGGCGCTGGGGCTGATCT  
GTGCCTGCGATCTGGTGTGGCCAGCGACGATGCCCGCTTTTGCCTCTCAGAGGTAAGCCTCGGGCTAGT  
GCCTGCGGTGATCAGCCCCTACGTGGTACGTGCCATGGGAATGCGTCAAGCGCGCCGCTACATGCTCAGT  
GCCGAGCCGTTGATGCCATCACCGCCTGTGCGCTCAATGTGGCACATCAACTCTGCAAGCCGGATCAAC  
TGCTGGCGGAGGGACGGGCACAAGCCCTTCGTATGTGCCGCAACGGGCCGGAAGCGATGAAAGAGACCAA  
ACGACTGCTGGCGGCCATAGAGGCCATCCTTCCCGCTGCACGAAGAGAAAACCTGTCGAGACCATTGCC  
CGGGTTCGGGTGGGACTCGAAGCCAGGAGGGGATGCAGGCCCTTCTTCGACAAAACGTCCTCCCGCTGGC  
GCCCCGTTTTCAAGGATGAGACATGACCCATCACACTCAGATTAACCGCTGCTGATTGCCAATCGCGGC  
GAAATCGCCGTGCGCATCATCAAGACGGCGAAAACGCTCGGCATCCACACCATCGCCCTACTCCGATG  
CCGACGCCCATGCCATGCACACCCGCTTAGCCGATGAGGCCCTGGCATCTGGGGCCCGCACCGCCAGAGA  
GAGCTATCTCGACACCGGCAAAAGTGTGAAAGATTGCCAAAAGAGGCGTGCGCCGATGCCATCCATCCCGGT  
TACGGCTTTTCTGTCGGAACACAGCATTTTGCACCCGCTGCGAGCAGCGTGGCCTGCGTTTTGTGCGGC  
CAAGCGGCGCAGCCATTCTCGCCATGGGCGACAAATCGGGCGCAAGGCGCTGATGCAGGCAGCCGGCGT  
ACCTGTGCTGCCCGCTATCACGGCACGGATCAACGGCCGGACTTCTTGC CGATCAGGCGAGCCAGATT  
GGCTTCCCGCTACTTATCAAGGCCGCCAGTGGCGGGTGGCAAGGGGATGCGCCGGTTCGATCAGCTGG  
CCGACTTTGACGAGTGCCTGGCGGCAGTCAAACGGGAAGCCAAGGCCCTTTGGCGACGATCTGGTGT  
GCTGGAGCGCTATCTGCCCCAGGCTCGCCATGTTGAGGTGCAGGTCTTTGCCGATAGCCTCGGCAACGCC  
ATCTATCTGGGGGACAGGGACTGCTCCTTGCAACGACGCCATCAGAAGGTGATCGAAGAGGCGCCCGCC  
CCGACATCCCTCCGGCTCTGCGCCGCGCCATGGGGGAGGCAGCCGTGGCCGAGCCAAGGCCATCCACTA  
TCAGGGGGCTGGCACCATCGAGTTCCTGCTCTGCAAGGATGAGTTCCTTTTATGGAGATGAACACCCGG  
CTGCAGGTAGAGCATCCGGTCAACGAAGCGGTGACCGGGCAGGATCTGGTGGCCTGGCAGTTGGCCGTAG  
CCGAAGGCAAGCCGCTGCCACTCACTCAGGAGGAAGTGGTGTGCGCGGCCATGCGGTGGAGGCGCGCCT  
ATACGCCGAGGATGTGGCGGCCGGTTTTCTGCCTGCCAGCGGGTCTATCCACTGGCTCCATTGGCCCGTT  
GGCGTGCATCGACACCGGCGTACCGCTGGCGATGAGGTGAGCCCTATTACGATCCCATGATCGCCA

AGCTGATCGCCCACGGCCAGAACC GCGCCGAGGCGTTCGCCAAACTGGCCGATGCGCTGGCGGCACTGGA  
TCTCGGCCCCGCTGGTGCACAACGGCGCGCTCTTGCTGCGCCTGTGTGAAGAGCCTGACGTCTGGCCATG  
GGCCACCATAACCCAGTGGCCCATTCCTACCACAGCACGGCCCATTCCTGAGCTCGCCTGGCCGCTGGCCA  
CCCTCTGGCTGGCGAGCCGCCCTGCGGGCACCTCCCCCTGGCAGCAAGCCTGCGGATTTTCGGCTGGGGCC  
GGATCGCTGCTGGACAGCGGGCGGTGCGCATCGGTGATGAGCACC GGGTATGACCCTTAACGATCATGGC  
GGCCAGTTT GAGTGGCAAGGAGAGACTCATTGCTACCAGAGAGGTGACGATCATATCTGGCTGCAGCAGG  
GTGACTGCTGGCAACAGATCCCCATT CAGACGGTTCGAGGCTCGGAGGCAGCCTTCATCATGACCC TGGG  
GTGCCAGCGCATCCGCTTCGCGGCCGATGATCGGCAGCACAGCCACCACCATGAGCAGGCAAACGAGAAG  
GCGCAGGGCGCCATCGCGCCATGCACGGC ATAGTGGTAGCCGTGATGATCGAACCTGGCCAAACGGTCA  
GCAAGGGGCAACCCCTGCTGGTGTCTGGAGGCGATGAAGATGGAACACCAGTTGCGTGCAGAGCGGGACGG  
GGTAATTGAAGCCCTGCAGTGC AAACAGGGCGAGCAGGTAAGCCAGGGAACCGTGTGGTGCCTTTGCC  
GAAGAGACTGCTTACAGGAGGAACCCCATGAACCGATCACAGGACGTCCGTGACGACAGGTCAGTCT  
GGTGGAGATGGGGCCGCGGATGGCCTGCAAAAATGAAGCTGCGCCCTCTCCCTGGTGCAGCGCTGGAG  
CTGATCCAGCGCCTTACC GACAGCGGTCTGCAGCGCATCGAGGTGCGAGCCTTCGTATCGCCCAAAAAGG  
TGCCGCAGATGGCGGACTCCG CAGCGCTGTTTCAGGGCACTGCCGCGCAAGGGCTCAACCCGTTACGGTGC  
CCTGGTGGCCAACTGCAAGGCTTGCAGGCAGCCATTGCCGCCGAGCCGATGAGATTGGCCCTTTCACC  
GCCTGCTCCGACGGCTTTACCCGCTCCAATATCGGCATCAGCGTGGAGGAGTGCCTGGTGCCTTCGCCC  
CGCTGGTGCAGGAGGCGCGCCGCTCGGCATCAAGGTGCGCGGTACCTCTCCACCGTCATCGCCTGCC  
GTTTCGATGGCCCCGACCCGCCGAAACGGGTGCTGCCATGGCCGAGCAACTGCTGGATCTCGGTTGCCAC  
GAAATTTGCTGGGGGACACCATAGGCGTCCGACACCCCGGGCACGTTGGCGCCATGCTGGATGCGGTGC  
TGCACGAGATCCCGCGGGTTCGACTCGCGGTCCATTTCCACGACACCTACGGCCAGGGCTTGGCCAACCT  
GCTACCCGCGCTGGAGCGTGGCATTTCGCACCATCGACTGCTCGGTGGCGGGGCTTGGCGGCTGCCCTAT  
GCGCCGGGCGCCTCCGGCAATGTGGCGTCAGAAGAGGTGGTCTACCTGCTGCACGGCCTTGGCATGACGA  
CCGGGGTGGATCTCGACAAACTGGCGGCCACCGGCCAGTGGGTGAGCGAGCAGCTCGCTCGCCCAACGG  
CTCGCGGGTGGT CAGGCCCTGCACGCCAATGCCGAGCGGCTGCGTGGCCGCTCTGCCAGCCACACGCC  
CAGCAACAGGAGTCATGACCATGTCCCGTTCCTGCCCGCAAGGAGATCACCTACAGCATTTTCGGAGCT  
GGCCCAAGTAATTCGATGTACGCGCGAACCATCCGCTACTACGAGGATGAGGGGCTGCTCACC CGCTG  
CGGGAGGGCAACCCGCTACAGCACCAGGCAAGATCCGGCTCAAATGACCTGCGCGCAAAAC  
GGCTGGGGTTTAGCCTGGCCGAGATCCGCGAGCTGTTTCGATATGTACGACACCCGACAAATCGAGCAAAAC  
CCAGCTCCACTCCATGATCCAGCTGATCGATGAAAAGCGCGACGCACTGCGCCAACA ACTGGAGGATATC  
CAGATGGTGTGAGTGGCCGAGCTGGAGGCTGCCGAGCAGCGCTGTGTTAATTCCTTAACAGCTTGA AAACTG  
GCGCAGATTAACCGAATCTGGGAGCAAGCTATTGCCCTGGGGATCCCATGAGATATTGGTGTGGTTTTTT  
GCTCTTGTT CAGCCTCTCTGGCTGGAGCCATCCCCTCATCAAGGTTGGTGGATACCCCTATGCCCCCTTT  
GTGGTCAAACCTCCCGATTCCAGCTATGAAGGGCTGACGCTGGACCTCATCGCCAAGCTAAACGAGATCC  
AGCAAGAGGTAAGATTCGTGTTTGTTCACCTCGGCCGCAACCGTTACAAGGCGCTCGATCTGGGCCG  
TTTTCTCGCTGATGCTGTTTGAAGACACCAAGTGGGGCTGGGACACAGATAAAATCAA AATGACAGCCCC  
TTCTCGGTGGTGGT GAGGTCTATGTGGCCCTGAACAAAACGGGTGCGGATCAGCGCTTTTTTCGATGACC  
CCTCTCAGCATCATCTTATCGGGGTGACCCGCTACCACTACGGCGTTGGCCAGTTCAATGCCGATCCCGT  
CTACCTGCAGCGCAAGCTCAATATCACCCCTGGTCAAGGACAACGTCAGTGCCCTTGCAAGCGCTACTCAA  
GGCGTGGT GAGGTAGCCATTCTCAACGTTTTCCTACCTTAACCAATATCTGCTTTCCACCCCGACACCG  
CCGACCAGCTGCTGATATCGCAAAAATGGGATCAACAGTATCAACACCCGAGCCATCCTTCACCC T GAGGC  
TCCCATTACCCCTGCCAGCTGGAACAGTGGCTGGCAGCGCTGCAAAAAAAGGGGGA ACTGGATCGCCTT  
TGGACAAAGTACGGCGTACAACAGCACGCAACCCCATGATTACTATCCAGCTTTTCTGTACCATGGCGGG  
AACCAAATGGGAGTGCACCAAATGAACACCACCGAGCCCGCTCCCCAAGCTCCGCTTGCTGCGCTACC  
TTGCCTACGCTTTCTCTGCTGTTTCTTATCCTGATCACTCTGCTGCTGTGGCAAACCCCGCTCTGATCCA  
GCGCTATCTGCCCCGCTGGCTGGCCGAGCACTATGGCCTGCAACTGACGCTGGGGGAGATTGACGTAGGG  
CTGCGCAACCCTTCTCTCACCCCTCGGCGCAACTGCCCTGCTCGATGCCAAACAGCAGCCTATCATCCGTT  
TTGAGCAA ACTCTTTATCACCCCAAACCTGCAAGCCAGCTGGCAGCAGAAAGGGGTGCTGCTTTCCGCGCT  
CACCCCTGACCAAACCCGTTGGTGTGCTGCAACGGCTGACAGACAAAAAAGGGGATGTTCGACTCAATCTG  
ACCGATGCGCTAGCCACCCTGCTCGCCCTGCCCTCCTCCGAGCCCGAGACAGCCAGCGCCCGCTAC  
TGGTTCGACATCGCCAGCATCGCGGTCACTGACGGCCATGTGCGCTATCAGGATCAACGCAAGGAGAGCGA  
ACCCGGCTGGTTGCCGCCCTCAATCTGAAAAAGT GACCCTCAAGCTCGATAACCTGCGCACCAGGCA  
AACCATCCGACCGCCTATCAGCTGAGCACCGCCATCAACGGCAAAAAGCAGCTCGCCGCTCACGGCAAGC  
TCGATGTGATGAGCGGCATGGGT CAGGGTAAGGTGAGCCTCAAGCAGGTCGACCTGAAACCTTTCGCCCC  
GCTCTGGGCACCCATCTCAAGCTGGATCTGGCCAAGGGCCACGCCAATGCAGAGGTGGAGTACCAGCTT  
AAAGAGGGCAAGCAAGGAGTGTGTGGCAATTGTCCAAAGGCAAGCTGACCC TGGACA ACTGGCAGCTTA  
AAAAACACCAGGGCGACGAATTTGCCCGCTTCGGCCAGCTGGCCCTGAGCGATCTGGCTGTGATGGCCA  
GAAACAGTCGCTCCAGATCGGCAAGGT CATCTGCAACAACCCCTGCTCAAGGCCACCCTCAACCCACAG  
CAGGA ACTGGATCTGGCTGACTTGTGATTGAACAGGCCCCCGCCAAAACCCGCCAAAGGGGACCACGCCG  
CAAACGAGGTGGCCAACAATGCTGCGCCAAGTCCGCACAACAAGCAAAGACAGCCGTTAACGGCAAGAA  
ACACGGGGCAGACAAACCCCTGGCAGTGGCAGATCAAGCAGATCCTTATCGAAAAGGGCGATCTCACCCCTC



ACCGAATCGAGCAGCGGCAAACCGCAGGCACGCCAGCTCTCCGGCCTCAAGCTGGCGTTGGGGCCACTGG  
GCAGCAAGGGGGAGCAACCGAGCAAACCTGACTCTGGCCACCCAGTTCAACCAGAGCAGCCCCCTCGCCTT  
TGATGGCCAACTGACCCTGACTCCTTTACCTTAAGCGCGACATCAACCAGCAGGGGCTGCCCTGACG  
CTGGCACAGCCCTATCTGGCCGATCTGGTACGCATTAAGGTGCAAAACGGGCTGCTGAGCAGCAAGACCC  
GCCTTGATCTCGCCACCACCGCCCAGGGAGATCTCAGCAAGCTGACCCTGCAAGGGGGGCTCGATATCAA  
CGGGCTCAAGGTGGTTCGATCGGGCAGACAATCAGCGGCTGCTGGAGTTCAACACCCCTGGCACTCACCGGT  
CTGACGTATGACGGCATCAGCCAGCAGATGCGGATCAAGGACATTTGCTCTGAACAAGCCCTTCGCCCGCA  
TCGAGATCAACGAAGATGGCACCACCAACCTGCAACAATTTGCTGTTACCGCAGCCGGCGGCAGCCAAAAG  
TACTCAAGTGGCGGCAGGCAGCAAGACTCCCGACTTTTCGTTTACCATCGACCAGCTGCGCACCGAGCAG  
GGCAACCTTCGCTTTGCCGACCCGAGTCTGAGTCAGGATTTTGTGGCCGATATCGCCTCGCTGGGCGGCC  
AGAGTCGCCATATCAGCAATATTTCCGGGCAACGCTCCGATCTCGCTTCAACGGCAAGGTGGATCGCTA  
TGCGCCGGTGACCATTTCGCGGCGGTACCAACCTGCTGGTGGCCAACCCGATCCTCGACATCGCGGTGCT  
TTCCACAATCTGGAGCTCACCACCTTTACCCCTATTTCGGGCACCTATGCCGTTTATGCCATTGACAAGG  
GGCAGCTCTCCATGAAGCTGCACTACAAGCTGGAGGGCAACCGGCTGGAGGGGGATAACGACATCACCAT  
CAAGAAGCTGCAACTGGGCGAGAAGATCAAGAGCGATCAGGCCAAGGATCTGCCGCTGGGGCTGGCCATC  
GCCCTGCTGAGCGATGCCAACGGGGTGATACAGATGAACCTCAAGGTGAAGGGGGATCTCGATCAACCGG  
ACTTCAGCATCGCAATATTTTTCTGGGATGTGCTGGGCAACACTCTGAGCAAGGCGATCACCTCCCCCTT  
CTCCCTGCTCGCCTCGCTGGCCGATGGCACCAGAGATCTCGACGAACTTCCCTTCTGCCGGGGGATCCC  
GATCTCACCCCCACCAACAGGAAAAACTGGTCAAGCTGGCGCAGGCCCTCAAGGATAGACCAAGCTCA  
GCATGAACATTCGCGGCAAGGTCAACTTCAACGAGGAGCGCCCATCCTGCAACGGCAAAAGCTGGAACG  
GGTACTGGCCAAGCTCACCAGCAATCAGGCGGATCTCGACCTGCTGGAACAGGACTCAGCCCTGCAAGAG  
GCGCTGGCCCCGGGCTATGAAGAGCGCTTTGGCGAAGATCTGGATGACCTGGCCGATCGCCTCCATCTGG  
ATGAAGAGAGCGCGGCACTGCGGGCCAGGCGGTGATCCTGCTGCGGGATCAGCAGCTCATCACCGCCAA  
ATCCCTGCGCAATCTCGCCATGCGCCGGGCGCAAAATACCAAGGAGTTTCTGGTCGACAGCCAGAGGATC  
GCCCCAGAGCGGCTGTTTCGTGCTCGACAGCCAGGTCAAGGAAGAGGACAAGGAAGCCAAAGTATCCTGA  
CACTGGATCAGTAAGGCCCGCCGCACTGCGCAAAAGCGTAAGAAAAATACAACCCCTCAACTATTTTTGACA  
CCTTTTGTCTACCAAAACAGCCTGTCTTGGTGAACATTTGGCTCTGATGCAAAATAATCACGTAGTTTTTT  
TACGATTTTATCCCCCTTGCCCCCTTGCGGGCGCCACAGCCTGCCTAAAAATCGCGCGTCTTTTTGTAAAC  
CCCCACTCTATTTTTGGAGAACGCCACTGAGCGCAAAAAATTTGGCCAACCTTGCCCCCTGTTGTTGATG  
GGTTTTCGGTATGACCACCATCTGCTGAACATCCATAACGCAAGTTTCTTCCCCATCAGCGCCATGATCC  
TGGCCATGGGCTGTGCTACGGCGGCATCGCCAGATCATTGCTGGCATCATGGAGTACAAGCGTGGCAA  
CACCTTTGGTGTGACCGCATTCACCTCCTACGGCCTGTTCTGGCTGAGCCTGGTGTTCCTGCTGATCATG  
CCGACCATGGGTCTGGCCGAAGCCACTCCGACGCTACATGGGTGGTATCTGCTGATGTGGGGCATGT  
TCACCCTGTTTCATGCTGGTTGGCACCATCAACTACCCGCGGCCAAGCAGTTTCGTGTTCCGCTCCCTGAC  
CGTGCTGTTCTTCTGCTGGCCGCCCGTGACTTACCCGGCAGCACCTGATCGGCACCATCGCCGGTTTTC  
GAAGGCATCATCTGTGGCGCCAGCGCCATCTACCTGGCCATGGCCACCCTGATCAACGAGCAGTTCCGGCC  
GCACCGTGATGCCGATCGGCGATCACAAGAAAGCAGCCCGGTACAGCTGAAAGCCGCTGCCTGATAGGC  
AAGCCACTCAGATTGTGAAAAAGGCACCCTCGGGTGCCTTTTTGTATCTCGCAAAGCTGATTGTCCCGC  
GCGCACTTTTTTCTTTACCGCCTCACAGTCAAATATCCCAAGCCTTGATATTTGCCGCATCCCCCTCGTT  
ATCCCTTCCCCCTTATTGACCTCTTTTAGCCACTTCAGAACAGCTATATCAGCGCATTAACCGCAGCTCA  
GGGAACGGGTGCTCTGGTTTTGTGATGTTGCCGCTGGTAAGGACCCGCTTGATGGCTGGTGTACGCCA  
CAAGGAGGCAGAGAGAGCCTACCAGAAGCATCTATGGGGTCTGCTCATAAGATTAATAAGAAATTTATTCG  
CTAAAACGCACATTTTATAATTACCGATTGAGCCCCGATTCAAAAGATGTAACCTCGAACAGCTTATTG  
ATAAACAGTATTTTATTGTGCGGAACGAATATGAGCGAAGATGATGTCAAGCGTATGTTGCAAGGCTTC  
TTTACACAAACTCCATTAGTGATTGTGCGGTTCCGGACTATCTTTGGGAGAAGGTGTGTCTGGTATGTGGC  
ATTTGTCAACAATTTGAAAAAAAACATTTCTGATTTGGTAAACGGCGAAGAACTCGAAGAATGGCGCAG  
AATTGAACTCGAAATTGATGCAGGCACCATGTTTGAAGATGCGATGTCAAAACTAAACCCACACAGCGCT  
CTAGTTCCACACATAATTAATGAAACTGCATCATTATTATCTGGTGATGAACAGAATATATTTAAAGATG  
TTCTTACTAGAAAGAAATTTCTGCAATTGGAGCTTCTTATCAAGCATCTTTCACACAATCAAAATGAAAT  
TGTTTTCGTTACTCCTAATTACGACAGACTAATTGAACTAGCATGTGAAATGCAAGGTGTTGAGATTCTC  
ACGGGGTTTTAATGGTGTATTACTACCACATAACCCGATAGGTGAAAAAGATAAAGTAACTATTATTG  
AACAACGGAAAAATCATAATGCAAGAGCCGCATTTCACTAAAAGAAAAAGCTCCATGCTCATATTTTAA  
GCCACATGGGGGGCTTGATTGGTACGAAGATAATGATCAAGTATTCAAATCTCAAGTTAACATTTTCAGCT  
AAAAGACTAATGATAACTCCTGGAACCAGTAAATTCAGAGCAGGATACCAACACCCTTTTGATTATCATA  
GGGAACGGGCAAATACGTTTATAAAGTCTGCCAACTCCATTTGATCATTGGTTATGGGTTTTAATGATGA  
ACAACCTGAAACGCATTTAAAAAATAAATAGTTACTGGGACCAAAAGTATTTGTTAATAACTAAAGACATC  
AGTCCCAATGCAAAAAAATATGTAATGGAATGAATAATGTAATGACTATATCAGCTCTACAAGGAGATG  
ACCACAAGACTATAGTTTTGTATCAATGGTATTGAGACTATTCATGATGGCATGTGGTGGGCATTAGGCTC  
TTTTATCAAGGAGGTTCTTGAATGACAGAAGTTAGCAACATTTATATCAACTAATCTCGACGAGTACATTG  
GTCGAGTTGTTAGTGTAGACACAAATAGAGCATTGATAGTCTGAATCACCAGAAATAATCCAAGAGCT  
GACAGTTTCAGATTTAGTCGCCATATCAGGTAATACACCACAAGAAATTTGATAGGTTTTAATTGAAAA

GTAAAAAGAACACTTGGTTCAACAATAAATGGCCTTGAAATAATCAGTGAAGAAGAAGATCCTTTAGAGG  
ATGTGGATATACCCAGTGATACAGGATATGATGTCATCCAAGTAGCATTAAATTGGAACCTTATTGGGAGGT  
TTTAGGTAGTCGCCGCTCAGTATTTAAAAGAGGGGCAAAAATATTTTCCAAAAGTTGACAAAACCCGTTTCAT  
TTAATCAACAAAAATAGTCTAGAACAACCTGATGTCTGTGGTCGCCAATGATACACCTAAAGACTTGCAGT  
TGATTTTAGGTACTTATGGCGATACATCATCTAAGGCTGTAGCCAACGGCAATAAACTATTCCAACGGCA  
TGCTGCGTTATTAGGCAGTACTGGGTGAGGGAAAAAGCTGGACTGTTGCATCTTTATTAGAACAAGCGTCT  
AAATTGAAACATGCAACATTATAGTCTTTGACATCCATGGTGAATATAAAAACGCTAACAGACGAAGCAG  
TTGGAGCAGATTTTACTCCAATAGCAAGATATTATCGAATCGCAGGTCTGGTGACATTGAATACGGTGC  
AAGAAATTGTATATTTGTCCCTCACTGGTTATTAATAAAGATGAAATGCTGGCTTTATTACTAGACCGT  
TCTGATAATAATGCACCTAATCAGGCATCCAGATTCATACATCATGTAAGAGAGCTAAAAAAGAGTATT  
TGGAAAGTGTGGTCTTGAGCATCTAATTCAAAATCTAATCTAATTTGATGCACCGATTCCATATTCTATTCA  
TACTCTACTTGAACGTCTAAATGCAGATGATTCAGGAACAAAACCTGGTTCAACACGTGATGTCAAAGGG  
GATTGGAATGGTAAGTTGACTCGCTTTATCAGCCGGCTTCAATCCAAAAGTTGATGACAGGAGAAAACGCAT  
TTCTTTTTGAAAACCATCTGAAAAGCAATGACTACACATGGTTAGAAAAGATACGCCAGTGAATTTATTGA  
AACCGCAGATGGCACTCTTGGTATAAAAAATAATTGATTTCTCTGAAGTACCATCTGATATTCTTCTCTATT  
GTAATCGGTGTTTTACCAGATTTATATATAACATCCAATTTTGGAGAAAAGAAAGCAATAGAACACCAA  
TTACATTTGTATGTGATGAGGCACATATTTATTTACCTACAAAAGACTCTGTAGATACTGACTCTAAAAT  
TGCATTAGACACATTTGAGAAAATCGCAAAAAGAGGGAAGAAAATACGGCGTATCTCTATTTGTTGTGAGT  
CAACGACCATCAGATGTGAGTCGTACAATCCTGAGCCAATGCAATAATATTTATTTGTTAAGACTCAGCA  
ACCCTCAAGATCAATCTGTTGTGCATAAACTAATGCCTGACTCTTTGAGCTCATTGACATCGATACTTCC  
TATACTAGATATTGGTGAGGCAATTTTATTAGGTGATTCTGTTTTATTACCCCAAGGATAAAAACCTTACT  
CCACCAACTTTGAAACCAGCAAGTGCAACAAAAGAGTTTTGGCAAGAGTGGTCACAAAACATTTTCAGATA  
GACAATCCATTTGTGAAGCTGTGGAGTCATTACGCCGTCATCTCGACTACGATAAAGGATATATTAATG  
GTGTATCTAATTATAAAGATACACCATTTTACAGCGATCCTAACGTAACAACCTACCTAGTCATGTTGCCA  
ATCCAGTCACGGATAGTTAATTTTAGTTTTCAAACACAAAACAAAAGAGAGGACATAACCACGAATAGAGAA  
CATCACGATATCCGTCGACACCCAATCCCGCAATCCACTCTATGAGATAAAAATTTTTGCGAGAATAACT  
TCCGGCAATAACTCCCCTCTCAGGGCACGTGACATCTAGGATTTTCTTGTCCAAGGTAATTTGGATGGAGT  
GAAATTTTTGCAACAAATCGCATTTTTTAAAACGTTCTCTGTGGATGGAATAACATAACAGTAAATTTATA  
TATGTCTAATTAATGTTGCTTGTCTGATTACGATTGTGATGTGTAATAATCACATCGTGTTTTTTAAAGTAT  
CTCAGCATGATGCATATTGTATTATTACCTTTTACTTTTTTAAAGTATATTATCAATCTCGGTATTAACAA  
TCACCAAAACCACTATTTGATTTATATGCAGAATACATATTAGATGGACATTATATTGGAGAAAACATATTC  
AGCATACTATTTTGAATTTTATTCTCTATTTAGTTACTCCCTTGTGTTGTCTTTTTTTCGATATTTATCGTC  
ACTTCCATCTATAGATGGA AAAAGAAAGAAAGTGGAGCGATAAAAATCGCCATTTTTTATGAGTATGCCCTAT  
ACGATGACCAAGACCATTTACTCTTCTTTCAGAGTTACAAGCGAAAATTTGGCTGTTGAAAACCATAAATA  
GCAGAACCCCGACAATATGGGGTTTTGCTATCTCGAATAACCGTTCAACAGATCGGTTATCAGCTCAGTG  
ACTTGGCGTTGGCGTCCGCTCCCCCGCCAGCAAACGGGTGCGGGGAAACGCAGGGCGGGATCCTGGCT  
AAAGAACTGGCTCAGTTGCCGGTATACCCGAGGATAAACCTGCTGCAGCCGAGCGGATCAGTAAAGAAG  
CACTCGCAGCTGACGGCGAAAACCTCCGCGGGATGTTCCGGCAGCATAGGGATCGATGGCGGTCACTTCGT  
CCCGGTGAGCTGCTGGCACAACCTCGTCGAAGGCTGTCTGAAAGGCTGTGTCACAGCTGGCTGCTCAT  
CTGCCCCGGCAACGGCGGGCGCGCCGCTCCGCTCACCGCCCAGCATGTGCGAGCTTATGGGCCAGCTCGTGG  
ATCACAGATTAAGCCGTCCCAGTCGCCATCCTGCTGCAGTTTCGCTCCAGGCCAGCACCAGCGGCCCTT  
GCGGCCAGGATTCACCGGCGTTCTCTCTTCAAACCTCGCTCACAGCCCGAACTCATCCTGCACCTCCTG  
GCGCCGGGTGACGGGCTCGGGAATAATGATGACTTCGTGAAAAGCCGCGATAACAGTCAAGGCCAAGGTGC  
AAGATGGGCAACGCCGCTGCAGCGCCAGCACCGCTGTTGACGGCGGCTGAGCTTACCCCGATCAGGG  
TCAGGGTCTTGGCTTGTAGTACTGTTGCCCAAGCCGATAAAGCGTTGTCTGCTCGGTGCCGCTGAGCCC  
TTGCAAGATGGGCACAGCCGCTGACGCCACAGCCCAACTCATCCTCACTCATGGGCGTTTGC  
GGCGACCAGCCAGCATTGAAACCATCCCAGCACGCTTACTCTTCTTTTGTGATGCAAAACAACAGGTCAC  
AGCAGTTTTGACGAACCGTTTTCGGCCGCTCCTGATAATCCTGCGCCAGATAAAAACGGTGGGCGCCTCGC  
GCTTGAGACTGCTGGATAGCTCCAGCTGGGCGCAACCTGCGGCCCGCGCCATCGCTTCTGCTCCTTTGAG  
CAAGGCTGCGCCACTCCCGCCCTCTTGGCCCTTCATCGACAACAGCGCCGAGATCAGGCCCAAGCT  
GGTGCAACATGCAGCGGTGCCAGCTTGTGCCACACCAGCACGCCGACCACCTTGTGCGCCCTGAGAGGCGA  
GCAGCACAACGCTCGCGGGATCCGGCGCCAACAGGCGCGCCGTCACGTCAGCGCTTCCGGCAGGATACCC  
CAATTGGGTGAACAGGTGGGCGATTGCGCTCCCGTGTGCGCCCTCAGGGGAACGGATCGTCAACGTCTCA  
GGGTCAATTTTTATTGTTGGCCTCATGTTTGTCTTCCATTGTGTTACGCCCGTCACATTGTCTGGCGCAG  
ATCAACAAGGAGGATCTCATCTTTACTCATAGAAAACGCTGCCTGCCATTATCCCCCACCTTGTCAAT  
TCACAAATTTGCAACAAGGCAACATTTTTGCTGGGAAGCACCAGATACAACCTCGATATGTTACAAGCCAT  
ACATGGCGCGTGTGTTGCGCTCTGCTTAACCCCTCAACCTCGCGCTCATTTGTTAACTGGATTGTTAAACAA  
ACAGGGCCAAAAACAGTGACAGAGAGCGAGGCCAAGATCTCGCCAAGACAGCGCCACAAACACAACAAG  
GAGTTGTTGTACATGAATGAAATCGTCAATGCCATCAATGGTGTAACTCGGAGCCCTGCGCTCATCTACC  
TGTGTCTGGGGTGGTCTTTACTTCTCCCTGCGCACCCGTTTTTTGCAACTGCGTCATATGAAAGAGAT  
GGTGCCTGATGTTTGTGATGGCAAGAGCACCGATGCCGGTGTCTCTCTTCCAGGCGCTGGCCATGACC

CTGGCAGGTTCGCGTGGGTACCGGTAACATCGCAGGTGTGGCCACCGCCATCACCTTCGGTGGCCCCGGGGC  
CCCTGTTCTGGATGTGGATGGTTGCCCTTCCTCGGCGCCAGCTCCGCCTTCGTGGAGTCCACCCTGGGTCA  
GGTCTACAAGGAGAAGATCAACGGCGAATACCGCGGCGGCCCGCCCTTCTATATCGAGAAAGGGCTTGGC  
ATGAAGTGGTACGCCTGGACCTTCGCCATTGCTACCGTCTTCGCCTGCGGCGTGCCTGCTGCCGGGGTGC  
AGGCCAACTCCATCGGTTCCAGCCTGCAGACCGCCTTTAATATCGATCCGAACGTCACCGCCGCGGGTTT  
GGCGCTGCTGCTCGGCTTTATTATCTTCGGCGGGCTCAAGCGTATCGCCAGCTTCGCCAGTACCCTGGTG  
CCCTTTATGGCGCTCGGCTACATCATCGTGGCTTGCCTCATCATCGCCCTCAATATCGGCCAGCTGCCGG  
GCGTGATCCTGCTGATCTGGAAGAGCGCCTTCGGTCTGGATGCCGGTTTCGGTGCCATTTTGGGTCTGGC  
CATCATGTGGGGCGTTAAGCGCGGGGTCTACTCCAACGAAGCGGGCCAGGGTACCGGGCCGACGCCTCC  
TCTGCTGCGGCAGTGAAGTACCCCGCCAAACAGGGTCTGGTGCAGGCGTTCTCCGTCTATATCGACACC  
TGTTTCGTCTGCTCCGCAACCGGCTTTATGCTGCTGATCACCAGTCTCTATAACGTACAAGGGCCGACGG  
CGCCGCCATCTACACGGGTATTGCCGGTATCGCAGCAGGCCCCGGGCTATGTGCAGACCGCCATGGAGAGC  
ATGATGCCGGGCTTTGGAAGCATTTTCGTGGCTATCGCGCTGTTCTTCTTCGCGTTCACCACCATCGTTG  
CCTACTACTACATCGCCGAAACCAACATCGCCTACATCAACCAGGATTAATCGCCCTTGGCTCACCTT  
CTTGCTGAAGATTGCGCTGATGGCTGCCACCGTCTACGGTACCGTCAAGACGGCAGATCTGGCGTGGGGC  
ATGGGTGATATCGGGGTTGGCCTGATGGCATGGCTCAACATCATCGCCATTCTGCTGCTGCAAAAGACCG  
CCTTACCTGTCTGAAGGATTATGAAGCGCAGCAGGCACAAGGAATTGACCCGTTATCCACCCGGAGAA  
GCTCGGCATCAAGAACGCCGATTACTGGGTGGGCAAACGCTCCGAAGAGAACCTGGAGCTGGAGAAATCG  
GGCCATCAGTTCGAGCCGGATCAGGATCGCAAGACCTCCTGAACCAGAACGACATAAGACATCAATAAAA  
ATGGCAGCCTCGGCTGCCATCTTTATTTGTTTAAATTTCAAATAGTACATTCAAATCAAGGAGTTAAGTG  
CCACATGAGGTGACACTTTGGGACGTGAAAAGACACCAAAAATGGCTAAATGTGGACACTTTTTTCTGCC  
CATTCCCGGGGAAATCACGCTGGTTGAAGATGGTTTTTCCAACGGGTAAAGCGGACAGCGTCAATTGAGA  
TAATCCGGTGCAAAGTGGGCGTATGTCATCGTCTGATGAAATATCAAGTGGCCGCCCTCAAACGGTGGAA  
CGCCCCGTTTATGGATTTTCGCGTGTGCGAGGCTCACACGACGGCACCCCGCACTGGCATCTGCTGCTA  
TTTATGCGCCCGAAGATCGCAACCGGGTATCGGCATCCTGCAACGCTATGCCCTGACCGATGACCACG  
ACGAGCTGGTACGGGATATCAAGGGCGCCCCACCTTTACCGACTTTACTCCCCGTTTCGACTGGAAAAGA  
GATAGACACGCAAGGGCGATGCCCGGGCTATATCGCCAAATACATTGCCAAAAACATCGACGGCGCC  
TACCTGGACGACGACGAAGAGGCTGGCACCGCCGATGAGGGCGCCCTGCATGCCGTGGCGCTGGGCCA  
GTTGGTGGGGCATTTCGACCTTCCAGCAGATTGGCCGTTGCCCGGTCGGGGTATGGCGGAGCTGCGCCG  
TATCAGCAACGCCAAGAAGCATGCCGATTTGGTGGGCCCCACCAAGCCCGTGTGCAAGACCCCGCATTT  
GAGGCGCCCCGCTTTGCCGACGATAACGGCATCTTTTCGCTGCTATCTGCACGCCATGGGTGGCGCACTGG  
CGACCCGTGCCGAACACCCCATCAAGCTGGCCACCTTATCGAGGCGCAGGCCAACAGCTATGGCGAAGA  
CATCAAGCGCCTGATGGGTATTACCTCCGCTCGCCTTTGCATCAAGACCCGCTGCAAGGGTGGGAAATT  
GTGCCCGCCGGCACCCATGAAGCCAGGAAAGCCGCCGAGGCTGCAGCGAGGGGGTTGGGGTTAAGACGG  
GCGACAGCCCGGCACCTTGGAGCTCTGACAATAACTGTACGCGGCCAGATCCTGATGCCCTTACAGAGCA  
GATCATGAGGGAACAATGGGGGTTATCGCCCTTCTCCATCGACCGTTTACGGGTGGGGCCAGCGTAAGG  
GCAGACGGTTTACCCTCTGGCTGGAGAACGGGCAGGTGCAGTGCAGTCTGATGGTCCAATCGGACGATG  
GCGAGCCCCTGATAGAGCTAGAATGGCTTCGTGCCATGGTTCGGTGTACCAGAACCGGACGAACAGCCGA  
CACTATTTCATCCCGATGATGAGCACTGGCCGACACTGGTGATGGATTGCTACGAGCTGTTTAAACGCTGC  
GGATTTCGAGGCATGCCATCAGTGGATCTCTGCTTTGCCCAACCCATATCAATGTGAACTCTGGCGAGTAC  
TTGATAAATTAGAGTGGGCAGACCGACACGAAGTGGAAAGCCACGGTTTACGAACTGATGAGCGAGGT  
AGCCTGTGACTGATCTTTTTTCCAAGCTGGAAGCCCTGCAGGGCGAATTGCCCGATAACATCGCATACTA  
CAAACCGCTTTTCGGCGCCACAATATGATGCACTGGAATGCCAGATATATCGGATGGGCCCTCAGATTGAT  
AGCACACCTGCATGGTACAGGATTTGATGCTTGAGTGGTTACGAGAACAACACCGCATATCAGAGGAG  
TGGCCATCGCCATGATGCACCGGATCTATCGACCGGAACGCACTGGCTCCCCCTCTCCCTCAAGCCAT  
TCCGGGCGCCAGAAAGTACAACACTAAACCCGTTTTTCCACAATCCATGTTTCATCAACAATCATCGAA  
TACAATACGGCACGCAACACCAACATTTATTTAACCATTTGACAGCAGTTTATTACATGGCTTTTGTGTA  
TTTTTCTTCTAGCTCATCTAACTGGCTGCATAACAAATTATAACCATCATGAAAATCACTATTTCAGTCTA  
GCCAACTCAATATTATCAGCCAGAATATCATCTAGGATATTTTTGGTTCATGTCAGGCTTGGGGTGCCTTAC  
TTAAATACTCATCTATTTTTTGGCAGGAAAGTTTGTAAAGAGAACATTTATTGGCCCATAGGCAATCGTT  
TTTATCAATAATCTGATCTATATGGTTAAACTGATCTTCTAATATGGCAAAATCAATTTCCAACGTTTTT  
CTACTTTCATCAATCAGTCTAATTTATTTTCTCTTATCATCAGGGATGTTACTTGGCTGACGGAAAT  
TATATTTAAAAACATAACCAATTCATATTTTACTATTAATTTTCTTAAATGAGACTTTTGCACCCCAAT  
ATAATTAAGATAAGGCCCAACTTTATTTGGTCAATCCAGCTATTAACACCAATAACTGCTGCCACTGCC  
GCGACCATTGTAGCAACCCCCCTAGGAAGCTGCCAAAAGCACCTATATCTGATAACGTTTGGCTAAATG  
CTTTTCTGTCATCTACGAATGTAGACATAATGACAACCTCCTCCAGCAGAAACCAAGGAGGAAGCTAGAAA  
TATAAACCAATACTTCATAAATTTCTTCATACACTTACTCCATATAAACACGATGACTTTTATTAATGCG  
TGAGTCTTAGCATGTCTCAACAAGCAGAGTTGATGACTTGAAAAATTGATTAGAAAATTTACATAGAAA  
GCCTAAACTCTTCAATCTTTTCGACTTATAATTTTCATCTGCTCGCCCCCGCGGACACAGTTTTTAGCAT  
AGCCTCCACATCGTTGTCATCGAGAACAATAATCATTTTCTCATGGACCATCCATTGTTCCCTCAATGTG  
TGCTCACACCCAGTAGCATCTCCACCATTCTTGAAAAATAAGGCCAAATTTACCAACACCATGTGGCT

TAAGATAATTAGCTATTTGAAGAACATCATTCTTCTTAACTTTTCGAGAGTAATTCTTGGCATCAACTAC  
AATATAGTCCGCTGAATACTTCTCCCTAATATAATACCAAAAACCCCTCAGAGGAATAATTTGGCATAATA  
AAGTCTCGTCTATTAGCTTTTTATTTTATCGCTAAGCTCTGGCAATGGTTTATTCAAAGGTGGGGAGAATA  
TGTGCTCAAGGATATCGCCAACCAAGCTCTGATATAAGTAACAGTCCTTCTGCCAGGCTTGTAGCTTTT  
TAGTCTATCTAATAATTCTAGCTCTCTCGGATGATCAGATTGAACTGCAACAGCTAAAAATAGTTTCTTA  
AAATAACTATCTCTAGAAGATTTAATTTCTTTTAGATATTTTGACACTAAAAATCTATATCCCAGACCT  
CAATGCCATGGTTTACCAATTCATTTTAAATAAAGTCAGGTAAGCGAGCAGGCAAGAAAAAACAGACG  
ACTATTTCCCATATTCCTTTTGATAATAAGTGAGCTTTTCGACAACCTGAGAGCTCATTCTTTTTGATATT  
GCACGATATGATTTACATTCTATTATTATGGCCTCACTCATTGAGCCATTATTTACCTTTGCCAAAAGGT  
CTATCTAGCTCTTGTGCCATTACCTACAAGCGCCTCAGTTTTTATTTTCATCGAAAAGGCCTGAATTACT  
TAAAATCTCATTAAAGAAATTGTACATATTCAATTTCTCTTGGCCCTAAATCCATATTTGCATGGCAATTA  
GGACAAATGAGAAGCAAGTTATCTTCTGTTGCTATCTCCACCATATGCATAAAGGCATAAATATGGGAAATAT  
TTAACTTTGTATTGTGCGCCGAGATACCGCAAACAGAGCATTATTTATTGAACTTATCTTTGACTTTTATC  
TTTTGTGGCCGGGTGATTAATTTTTCGCTCTCTCATTACACAAGTCTCTTATTTAATGATCTAGTAATTA  
AAAGTAAGTATCCAACAAGCTTCTGACAATCTCGGGTGTAAACGAAAACCTCATGTGAATAAGGTATCAAA  
TGCAGCTCAATCTAGTCAGTCTAAAGTGATCTATTGTGCTTATTTTTGATGGTGGTCTGCATTATTCTAC  
AAAAACATAGGGAGATAGGGACTCTTAAGAAAACACCGCCTTGCAGCCGCCACATTGTAAGAGCGAAAA  
ACTGGGGGCGCTATTGCGCCCCAGTCTTTTTCAGTACCAGCTGCCGTCCCTCCGGAGTCAGCGAGCCCAT  
CAAGCTCAGCACCAGCTGGTTGGTGGTCTTGGCCGAGGGGCTTAGGGTATGGGCGAACGACAAGGTGGCC  
ACCCAATGTGGCCACACTCTGCATCGGTACACTGGCAGTAGAGATCCGAGACATCATCGCTCAGTCGGT  
TGGTCTTGGTAATGCGACCCCGCTGGCCACACACTTTGCAATAAACCCGCAATACGCCCCCTTTTCTATC  
CAAATCAACAGCCTATCTTGCCACAGCAAGCACTGTTTTGTTTTATACAGTTGAACCGATATTCTCCCGAAA  
GTCGACCCAGAGGGAGCGAGGGAGTCCCGCACTGTTGATGGCATCCTGGATAAGCTCACACAGCGGCAGC  
ACCTCATTGCGGGCATAGGTGGCATCGTACTTCTCAGGGTCTCCAAGCCCTCCCCGCCATTGGTCGGGA  
TGATGCCGGCCAGCGCCCGCGAAAGCGGTGGCTGGTCAATACATCCTGAGCGGTGATCCCCTTGATAGC  
CGCGAATCGTCTTGGTGGCAATGTCCCCACCGGGATCAACTGATGCCATCGGGCTTGGCGTCCGGG  
ATGTTTACGAACATGGAGCGGAAGTTCCCTACACCTTGTGCTCGCAATCATCTCCTTCATCTCCTCCT  
CGGTGTCGTCATCCATGTTCCGGTCCGTGGCTGAGAGTAGAAGTGAAGCCATGTGGGCGCGGTTGAGGAAGTA  
TTTGCAGCGAAACAGGGTGGCATCCTGATTGAGCAGCGCCGACTGCAGGCCACCCAGGTAATCGGGCATA  
CCGTAGATCGCTCGTGCAGCTCGCAGTCAGAGCGGATTGCGGCGCGGCCGAAGGGCAGTCGCCAGCGAA  
ACAGGCTGTTAAGGGTGGCTCGCCACTGATTGGGTGCTCCTAGGATCTGCTTTTGCAACCGAGTCTCTTC  
CTTCAGCATCGCCTCATCGCTGCGGGCCAGGCCTGGCTGTAGAGCTGCTTGATCCCCGCCAAGGCATCG  
GGCGACTTGGTGATAAGGGTACGGGCAAACCTCCCGCCTCCACCAGCGGATCGGGCGAGACCCGGCTCA  
CCATCCCGAGAGATTTGCGCTCGACAGCATCCAGCTCGCGCCGCTCATGGCCAGCTCCATGGCGGTATC  
CAGCCCCATCAGGTTGCGCATGGTGACACTGCCACTCATGTGCGGGATGATGCCCCACTTGATCTCCATC  
ACCGAGAAACGGCAATCGGGGTGCTAAACGAAAAATCGGCGCAAAGGGCGATCTGCAAGCCACCGCAA  
AACAGACTCCCTGAGTGACCGCAATCACCGGCACCGCAGCTGGTGCCAGCCATAGGCAACCCGCTGGGC  
CAGATTGGTGCCTCGTCTGCTTACGCTTGAAGAATATCGAGCGCCGTACCGGCTGTCTCAGCATGGAT  
TTCACATCCAGCCCGGCACAGAAGGCCCGCCCTCGCCGTGCAAGGATCACCGCCCGCAGCCCTTGTGCC  
GGGCGAGCTGTGTGAGCTCTCGTGCATAGCGCTGAACATGGCGCGGTCCAGCGCATTGAGTTTATCCCC  
CCGCGTCAGCATCACTTCGGCAATCCCGTCTGGATCTCGCACTTGATCCTTGGTTTTTCCATCTCCCTT  
GTCCTCTCCTTGATCCCTGAAACTGACTCACTGGTCATAACCACCGTTATCAGAGTGTGAACAGGCGGT  
ACAGCTGAGACTAAAGTGGCTGGTGCCTCCCCCTCCCTTTGTACACTGGGAGCTGCATGAGTGCCGC  
AAGCCAGCAGAGGACGCTGTATGTCAACCTGTTCAATTTTGCAGACCACCGTTTCGACCGACTGGATG  
AGGAGGCGCGCAACGGCTATCCCGTCACTCTCGCTCTGCTATTTTTCGGGCCGGGATCTGCTGCTCAA  
GGAGGGGACGAGCCTCCCGCCTATCTCATCATCAAGGGGGCGGTGGAAGAGTCTGCCCCCACCAC  
CAGTTTTGGTGATTACGGGGTTGATGATCTGTTTCGATGTGCGCGCCAGTTTGACGGCCGCTGCCGCCACC  
GCTTACCGCGCTGGAAGATAGCCTCTGCCAGCTCATCCCTCGCCACACCTTTTCTGGCGCTCTGCGAGCA  
GGATCCGCAGTTTGCCAGCTACTTACCAGCAATCTGGCCGAGCGGCAGCGCCAGCAGGAGCAGCGCGAA  
CAGCTGGGTGAGAAGAATCTGGCGGAATTTATCTGACCCGCATCGAACCCGGCCACCTGCAGGCACCGC  
TTATCGTCGACAGCAAGCTGTCACTGCTGGCGGCAGCGAAGCCATGGTGAGCAAGGGGACCGATTGTCT  
GCTTACCCCCGCCACGACGGCTCCCTCACGCTGGCAACCCGCAAGACCTTGCTCCACGCCCTGACCCTC  
AAGGGATTGCCGCTGACAGCCCCCTCTCGGTGCTGACTCCACGCCCTTGATTGGTCTGCCGCTGGAGA  
GCTATCTGTTTATGCTGCTGATGACCCGCCATCGCATCAAGCGACTGGTGGTGTGGCGTGGCAA  
CGAAGTGGCGGGCATCTTGCAACTGACCCAGGTGCTGGGGCTCTTCTCGACCCACTCCCACGTACTGACG  
TTGCGTATCGCCCGCGCCGACAGCCTGCCGGCACTGGAGGCGGTGGCCCGCAACAGCAACAACCTGACCC  
GATCGTTGTTTGGCCAGGGGATCCACACCGCCTTTTTGATGAAGCTCATCGCCACCATCAACGAGCAGCT  
GATCGCCAAAGCCTTTGCGCTGGTGTATCCCCCGAGGTGCAGGATAGAGTCTGCCGTGTTAATGCTGGGC  
TCGGAGGGGCGCGGCGAGCAGATCCTCAAAACCGATCAGGACAACGCCCTGATCCTGCCAGAGGGGCTGG  
CATGGCCCACCCAGGCAGCCGATCTGGCCGAATTCAGCGCCCTGCTGGAGCGACTCGGCTACCCGCTGTG  
CCCCGGCAGGTGATGGTGAACAATCCGGCTTGGGTAAAAACAGGCAGCGAGTGGCAAAGCGCTATTGCC

AGCGCCTGTACCACGGCAAAAGAGGATGAGCTACTCTGGCTCGCCACCCTGGCCGATGCTCACCCATCG  
CGGGGGATCGCCAACTGCATCTGCCGGTTGCCAGAGCGCTGCGCGAGCAGTTGGCGGACAGACGGGATCT  
GCTGGCGGAGATGGTGCAGCCGGCAGTGGCCTTTTCATGCCCCCTCACCTGTTTGGCCGGCTGGAACAG  
CCACCGGAAGGGCTGGATCTGAAGCGGGGCGGCTGTTCCCGCTGGTGACGGTATCCGCATGCTGGCC  
TTGAGGCAGGCATTCTGGAGACTTCAACCCTGGGGCGTATCGACGCACTGGTGGCCGCCGATCGGCTCAG  
TGCCGACTATGGCAGCAATCTGGCAGAGGCGTTCCGGCTCTTTATCCGGCTGAGGCTGCGCAGCCAGCTA  
AAGGGAGGCAATAGTCCGGTGCAGACAAGCGAGCTCAGCCACAGCGAGCGGGATCTGCTGCGCCAAGCGC  
TGCATCAGGTGAAGAAGTTCCAGCAGTGGCTCACCTTGCACTTTCGTCTGAGACAATAGCCATGTTGAGC  
CGCGTTCGACGCTACTGGTATGGCCGCGCGTTCGAACGGGCGAGTTTCGCGCCGCTCTTTGCCACCCAC  
CGGAAGATGAACGGATCGCCCTCGATTTTCGAGACCACAGTCTCGATCCCAGCAGGCCGAGATCGTCTC  
CATCGGGGGCGGTGCGCATTCAAGGTAACCGGCTGCTGACCGGCGAGGCCCTCGCCATCAAGGTGCAGCCA  
CCGGCCAGCCTGACCAGCCAATCGGTGGTGGTATCCACGGTCTGCGCCATCAGGATCTGCAACAGGGGATGG  
CGCTGGAAGCCGCGCTGCGCCTGCTGCTCGACTTTATCGGCCCCCGTGAACGGTGGGCTATCACATCGC  
CTACGATCTGCGTATTCTCAATCTCGCCTGCCAGAAAATTGTGGGGATTGACCCTGCCCCAGCGAGGGATC  
GAGGTGAGCCAGCTTTATCATGACCACCTCTATCGCCGCTATCCCGATGCGGCCATTGACCTGCACCTGA  
GAGCCATCTGCAGCCACCTTGAACGCCATCCCTGCCAGCCACGATGCCCTTGCCGATGCCACCACGGC  
CGCGCTCATCTACCTGCGCCTGACCTGCGGCTCGCCACTGGCTTATCCCAAAGTCTAATTGTCAATAAAT  
AACATTTAATTACATTTTTGCTTACATGAGCAGATTGCCTGCTCGTGGGGTTACCCCATCCACCGCTGA  
CACTCATGTGCATGGAGAATGCAATGGAACAGCAAAGCTATCTGAGGATCCAGCAAGATCCCAACTTCCA  
GGAGCTGGTGCAGCAAGCGCCAGCGTTTTGCTGGGCCCTCTCGGCTCTGATGCTGGGACTCTACCTGGCG  
TTTTATTCTGCTCATCGCCTTTGCCCCGGTTGGCTCGGCACCCCGCTCAGCGACAGCACCACCGTACCC  
GTGGCATTCCGGTGGGGTAGGACTGATCCTCTCCTCCTTCGTGTTGACCGGCATCTATGTGTTTCGGGC  
CAACGGCGAGTTTGACGAGCTGAATCAGAAGATCCTCAAGGGAGTGCAGTCATGAGCGCAAAAAGCATGA  
AAGGCAAGTGGCTGCTGTTGGCCTCACTGGCCTCCTCCCCCTGCTGGCAGCGGATGCGCTGACCGGCGA  
GGTACAACGCCAACCCTCAATGTGTGCGCCATCGTGATGTTGTTGGTCTTTGTAGCCGCCACCTTGTTT  
ATCACCTACTGGCCTCCAAGCGCAACCCTCGGCTTCGACTACTATGCCGCCGGTGGCCGTATCACCG  
GCTTCCAGAACGGTCTGGCCATCGCCGGTACTATATGTCGCCCGCCTCCTTCTCGGGATCTCCGCGCT  
GGTCTACACCTCCGGTACTGATGACCTGATTTACTTACTCCATCGGTTTTCTGTTGGGCTGGCCCATCTTCT  
TTCTGATCGCCGAGCGGCTGCGCAACCTTGGCAATAATACCTTTGCGCATGTTGCCCTACCTACCGTCA  
AGCAAATGAGGTGCGTACCCTCTCCGCTGTGGTTCGCTGGTGGTGGTGGTGGTGGTGGTGGTGGTGGT  
GATGGTGGTGGTGGTGGTGGTGGTGGTGGTGGTGGTGGTGGTGGTGGTGGTGGTGGTGGTGGTGGTGGT  
GGGATCCTGATGGTGGTGGTGGTGGTGGTGGTGGTGGTGGTGGTGGTGGTGGTGGTGGTGGTGGTGGT  
CAGTGATGCTGCTCTCCGGTGGCAGCTTTCATGGCCATCATGGTTCATGAAATCGGTCAACTTCGATATCGG  
TGCCCTGTTTAGCGAAGCGGTCAAGGTGCACGAGAAAAGGGATCGCCATCATGAGCCGGGTGGCCTGGTT  
GCTGATCCCATCTCCGCCATCTCGCTCGGTCTGGCATTGATGTTGCGGTACCGCCGGCTGCCCATATCC  
TGATGCGTTTTCTTACCCTGAGCGATGCCAAAGAGGCGGTAATCGGTGTTCTACGCCACCGGCTTTAT  
CGGCTACTTCTACATCCTCACCTTTATCATCGGCTTTGGCGCCATCTTGCTGGTGGTGGTGGTGGTGGT  
TTCAAGGACGCCACCGGCCCTGCTGGGCGGCACCAACATGGCGGCAGTCCATCTGGCCAATGCGGTGCG  
GTGGCAGCCTGTTTCTCGGCTTTCATCTCCGCCGTGGCGTTTTGCCACCATTCTGGCGGTGGTGGTGGATT  
GACCCTGGCCGGTGCCTCTGCGGTCTCCCATGACCTCTATGCCAGCGTGTGAAGAAGGGCAAGGCTAAC  
GAGACCGATGAACTGCGTGTCTCCAAGATGACGACTCTGGTACTGGGCGTGGTTGCCATTGGTCTGGGGA  
TCCTGTTGAGAAAGCAGAACATCGCCTTCATGGTGGGTCTGGCCTTCTCCATCGCCGCCAGCTGCAACTT  
CCCGGACTGTTCTCTCCATGTTCTGGTACGCCTGACCACCCGTGGCGCCGCTCATGGTGGCTGGCTG  
GGGCTGGTGGTGGTGGTGGTGGTGGTGGTGGTGGTGGTGGTGGTGGTGGTGGTGGTGGTGGTGGTGGT  
AGGCCATCTTCCCTACGAATAACCTGCCCTCTTCTCCATGGGGTTGGCTTCTGTTGGGATCTGGTCTT  
CTCCATCACCGACAGCTCCAGAACGCCCGCAGCAGCATGCCAAGTTCCTGCCGAGTTCGTTCCGCTCC  
CAAACCGGGCTGGGTGCCTCTGGCGCCACCTCCCACTAGCAGATCAAGTTCATCCTTCCAAGCCGGCTTC  
ATGCCGGCTTTTTTTTATTGCCCATGGCATTGTTTTCCCAAATCAGCCAGTAAGTCATGACTTCGCCAGCCC  
CAGGTGACCGCTACACTCGGGGCTTTCTGACAGGTAGGCCAAGGGTATTCAGTTTATTTATGGCGCTGAC  
ATACACCATGACTTCTCCATTTGGTGGTGGTGGTGGTGGTGGTGGTGGTGGTGGTGGTGGTGGTGGTGG  
AACCAGATACATCGCCGCTCGGCCAGTGGCGACGGTGATAACCCGATATCTTCTTCCAGTGGCCAGCC  
CTTCTTTGCGCATACACAGCAGGCTTCATTTCTGGGTGCCCTTTTTTCCAGAGCCCTGCATTTCTTGGC  
AGGCGGGATACAGGCTGTGCCCCCTTTGCGCGAGATAAGCTGATGGCTGGCTTTGCTGTCGTAGGCGCCA  
TCCGCATAAACACGTCCCAGCTTGGCGCCGAGAGGGTTGAGCAAGTTCGGCAACACCTCGGCGTCATGGA  
CATTTTCCAACGACACTTCCGCCGCCACGATATCGTGGGCCATCGGCTTACCAGCCAGATGCAACTTGGC  
CCACACTCGCCGCTTCTCGGCGCCGTGTTTTCTGACCTTCCACTCGCCTTACCACAAACACTTTCAGACCG  
GTCGAATCGATAACCAGGTGGTAAATGCGTCCCTTTGGGGGCTGTCGATAAGCTACCCTCACCGAGCGTG  
CTCGCTTGCTGACACTGCTATAGTCCGGCGCACACAGCGGTACGTTTCATCAACTCGAACAGGGAGTGGAG  
TAGTCCCTGTGTTGCTGCGAGAGTGGGTTGAAAATCCCTTGGAGCATCAGGAAGGTTGCGATGGTCTGG  
TCAGTGTAAAGCTGGCTGCGGCCCGCCGCCATGATGGTGGTGGTGGTGGTGGTGGTGGTGGTGGTGGT  
CATCAACCCAGAAAGTGGTGAACACGGTTAATCAAAGACTTGTGTTGATTGAGGCCAGTTGGTGGTGGT

GTGAAGCGACGTCGTGCCCATGATGCAGACTTGAAGGGGATGGTGGTGATCAGATCACCGAACCCTCAGT  
TAGTTCCATTCAAACCTGCATCGATTTGGGAAACAACGCCATTGCCCATCAATCGGCTGCACGCCCCGCTT  
GCCCCGATTGTATGGAGATGGTATTACCTGACAGTTGCCACAAAAGGGAGTGGTCATACGGCTTCAA  
CCGGATAACAAAACGGTACCCTACCCTGTTATCTGGAGTCACCGTATGACCACCAACGAGAAGATGCAG  
ACAGACCTGGATAACAACCTGGAGCACTACAACACCCAGCGGCCACATCAAGGCAGGATGATGGAGGGTC  
AAACCCCTACACCATGTTCAAGAAGGGTCTGAAATTGATACCGAAGGAAGTGGCACTAAAGTAGTGTA  
AACAAGACACCGGTTTGGAGCCGGTGTGAGGTGATAACTAGATCTGTACACACAACAGCCCCCTCAAAAA  
ATCCTTTATTTTAGTTTTTCATACACGGAGCCACTAGCAATTCATCCCCCTGAATGAAATGGAGACAGGA  
TCATGCTCCACCACTTTTTGTACTTGGTGTCTATGTTCAACTCACCATTATATTCGTTCATCAAAAAACA  
GAAGTATCAACATCGGAGGTAAATCTTCCCCAGGGAATCGATATGGAACATCTCGCCATTCCCCATAG  
CATACAAAGGGAGATGATTGGCCTACATAATCTCCCTGGCATCATAAATTCAAAAAATATTGGCGATT  
CTGTAGTGAGCTGACAATATATGCCAATTGGATTTACTGGATATACTGCTTTTAAGAACAACATTGTACTT  
ACCATCTTTTGACACCACACTAACAGATGGAGTCTTGTCAAAGATGTCCCATGATACGTGTGCTAACAGC  
AACCAATATGCCACGAATATCAACACCAAAAAACATAGCCAGCTTCTTCATAAAATATATAATTCTCTGATT  
TGGGAGAGGGTGTAAACCAAGCACATCTGAAAAACTATAAAAACTCTCTCCCGAATTATGTTTTATCTTGC  
CAATCACGGAAGTCGCGATTAAATACAGGAACAAATCCGCTCCATTTTCGAGCTAACATCCCATATAAAC  
CTGCACCATATGATGATAAGTAGGTAGCACTTTCAGCTTTAGTTAACACACGATTTTTACTCCATATCCC  
CAATGGCTCAGTTGTTATCTTATTGCCATCCACAAAATCATATGTATCTTTGAGATATAACCAACGCGT  
TCTACAAAGAATGCAGGGCGTTTTCTGGTGTGTCCCGAATATCCGCTTACTGCAAACCTTTAGGTTTGCAT  
TGCCAATTGCCCCATACCAATCATCAATTGTGTCAAATAAACCAACGCTAATCGTGTAAACGTGTGC  
AGTGGCATCCAACACTCGAGCACTGTCACTCATACCTAATGGTATGCACATATTTGGAGAGTATCCTGCC  
GCCTTTAATTTATTACGCAATTCATTAATACCAGCAGGCGAGTTCCAACCTAAGCATTCTTTCCCTGTAGTT  
TTTTCTTTATAAAAAGGTCTTGCCACGCCATTTTGACAATAGTGTTCATTGAATCTGTTCATTAGGGATTGT  
TCTCGCATCACTACGTAGAAGTGTCTTTTTGGTTTTCTTCTGTGAACTTGTACGCTGGCTTTAAACTGAAC  
CAATGACGCATGAGCTGAGGTGCAACCTTCCATCCCATCTTTTCCATGGCATCGGGGATCTGATCAAGAT  
TGAATATATCAACCTTTACATCTTGCCCTTCGTATTTGCACTGGGTGATAAATTTACATTAGCAACCGT  
CATTATCGCAGCCCTACCCTTGTCTGGAAAACATAATCAAGGGTTAAGTCTCTTCAGACTTTCCCTTTCA  
CTTTGGAAGTCTTGCCACTTGTATCGACAATACCTTCTACAACCCCTGTTGAAGATGTCATGCCATAGGC  
GAGATGTTTTAAACGGCATCCCAGTTTCACTATCCATGATGACAGCGTGTCTCATCAAACAACCCGCAATG  
ATGGCTGGGGAGATAACAGGCGGCGCTACGTCAACAACGAAGACGGTTCTTGAGCCAATGATACCCCCAC  
CACAGTCAACTGCACCACCTGTTATTGCTAGTGGTTTTACCGTTTTACCAGCACTGTTGATGAGCCTGAAGC  
AATCTTGCGCGGGTGTGGGGGGTATTTGGCTTGTTCATGTGGCTCTAGTGGGTCCCAACCCCTCGCTGCA  
GGCACTCCATCAATGAAAACATCTGGTGAGCCAGCTGTAATTTTGGTTGGAGGAAAACCATCATGATCGG  
TTCCGATATTGCCGACCTTGCTGCATTCTTCGACACGTAAAATCTTTTATCTCAAATGGAATCATGA  
TATCGAATGATTGACTGTTTTTGAAGCGATATATCCATATGGATCCACTATAAACTTATATGTCAGTTGC  
TCGATGCTATATCGTCAGCTCCGCCAACAGCTTCTCACAAAACAAAAAAGCCAAGGATCACTCCTTGGC  
TCTTCAACTTCCGAGCGGCTTAGATCAGGAAGCTCTCAAGCGCTGCGCCACCCTTACCGCATGGGCAAT  
TGCTTGGGCATACGGCCTTGCCAGTCCAGGTTTTCTCTACACCATCTTCGGTGTATTTGTACTTGGCA  
GGACGAGGAGCTCGGACGCGCTTAGCTGCGGTCTCCTTGGTGCTTTACCTTCACCAGCACCCAGCAGTT  
CGCTCGGGTCAATATGTAGTGGTCAACTAAAATCCGGACACTTGGTTAGCCGGAACCTCGGCTTTTGTGCTG  
CGGTATCCCGTCATTGTGGCAATGTGGACGCCGCCAGTTGTAGTAATCCATCAGGTAGTAACCTGATATCT  
CGCTTCGCCTCTCGCAAGCTCATATATCCCATAGCCGGGAGCCACTCTGACTTCAGGCTTCTGAACAACC  
GTTCCATCGGGGCGTTGACGCTCCTATGTCAACAGGCTCGCGCTGAGTCAGCTAAATCGGCCAAGATCAA  
AGGGTAGAGCTCCCTGACGATATAGCGTTTTCAAACAACGCAGGATCTCTTTTGAAGATAAGCCTTGGGCG  
CTACGTCGTGCGACGTAAGATTGGGTTTTGTGGACCTCCCCGCATCCGACCATTGTAATCGTCCATAACG  
CATTGTTTTGCTGACCGTTACCACCTCGGTTTTAAGCGATGTCGTACGGTCTTTCCCGAGGATGCGGGTAA  
AGGATTAACCCACAAAAGTGCCGCGAGCGATGCTTCATTTCTTAACCGTTCCGGGTTATTGCCAGCCGTT  
GACAGCAGCACTGCTGCGGTTTTGAGGGCCGACGCCAAAATTGCTCGCGCAGACGGCGAGCATGTTGATGGG  
TCAAGGCATCCAACATGGCATCAAGTTTTTCAACTTCGTCTGCCAATAGCAACCAACGCTTGGCCAGCAG  
GCACAGGGTGTGCTTAACGTATGCAGGAATTTCTGTGCTACCCAATGACCTCACTCGTGCACATCCCTTT  
GCACAGTCAGCGGTTTTGCTCTTCCAGAGCCGTTACGAAACATCTGGGGGGCACTGACAAGCAGCGTTC  
TTAGTTGATTCAATTGCCTGCGTTTTGGCTTTGACAGCGCTGCGTCTGGCCACTGATACCACACGCATCAT  
TTCTGCCGACCTGACTGGGTCTTTGCTATCGCGGTAGCACTACCGAAAAGCACTGATCGCGCAGCATTT  
TCAGCATCGGTAGGATCCGATTTCCCCTGGAGTCTGCGTTTTGGAGCGGTCAGGACGATTAACCTTGAAGA  
CCTCGACACCATGCTTACGCAGTACACAGGCCAAGCCAGCACCGTACGTGCCGTGTGCCCTTCAACGCCCTGC  
TCTCTTCAAGCATCCGAAAGAGTTTTGCCAAGTCACGAGTCTCTCATATCCGCTGATATTGGTCTGTGACC  
ATCAAGCATCCCAGCAGATGTCTTGTGCGTTAAGCAAAAACCCCAACATGGGTATCCAGATGGGTGTCTA  
CACCAGGATAAATTGAGCTTTGTTTTCTGGAATTGTTTCATGGCTCATTCCTCCAAGGAATATGCACTACC  
AACCCCATACGCAGGACAGGCACTCAAGATGCAGCACAAGGCTCCTATTAGGTCACAGACGCTGGACCC  
AGCAATGCTGGGGAACATCAGCATCCAATGCACAGGTCAACGCAAAGGCATTATGTTCCGCAATCCCAGC  
ACGGGTGAGATTGGGCTGATGTTCTTGGACATAATGAGCTGAGTATCCAGCAGTTACCACGCCGACTCA

TACTCTGGGTTCATGCGATAGCGCCACAGTCGTTGTCGAAATGCCCGGCTACCATATTGGCTGCCTTGGTC  
AGAGTGAAATAGCACACCCGGATGGGCAACCCCGCTGCTGATAGGCCATCTCCAGTGCTTTGATGGCCAAC  
TCTGCATCAGGCTTGTGCATACATCGCCCAGCCACGACCCGGCGGGTATGCAGGTCAAGCACCCGCGGCCA  
GGTAATGCCAGCGACCACCTGCCAGACGTAGGTGATATCGCCACACCACACCTGGTTGGGTGCTGGAC  
ATCAAATTCACGGGCCAGCAGATTGGGAATATCCGGTTCGTTCTGACCGTGCCACCTTATAACGGTGTACG  
CCCGGCTGTTTGGATGCCAACCCGGCCTCCTTCATCAGGTTACGTACTTTGAATCGGCCAATCTGATACC  
CCAATCTCGCATCATCGACATCAAGGCGCGGCTGCCTGCCGAGTCCCTGCTCGCTTTGAACAACCCGGCG  
CAACTCAGAGCGCTGCTGCATGCGCTCACGGTTAATCGTCCGCTGCGAGCCAGATAATCGTAAAAACAG  
GAGGTGGGAACATCGAAGGCGCAGCAGACCAGAGTGATGGGGCTTGTCCCTTAATCGGTCTATCAGCG  
CATACTGTGAACCTCGTCCGCCATCAAGAGAGCCGTAGCCTAATGGGATGGTCTGCTCCACCACCCCGC  
TATGCTGTAGCCAGCATCAAGGAGGCTCATGACTCAAGCGCAGATTTACATTTACGGGATCGATTTA  
GGCAAAAATTTGGTTTACCTGGTGGCGATGGATCGCATGGGGCATGTATTGACCAAGCAAAAAGCTCACGC  
GTTTACAACCTGAAACAGTTTATTAGCACGACCCACCCCTGTCGGGTGCGCTTCGAGGCATGTCTGGTTT  
GCAATACTGGGGGCGCCTGTTTCAACAGGCGGGGTTGAAACCAAGATTATCCCTGCCCAATTTGTGAAG  
CCCTACCTCAAATCAAACAAGAATGACTTCAACGATGCTACCGCCATTGCCGAGGCTGGTAGCAGAGGTA  
CTATGCGCTGTGTCCCCTGAAATCTCATGAGCAACTGGCATTGCAAGCGACTCATCGCGTCCGTCAGCG  
TTTTATCGTGAACGTACCGCCACTGTCAATCAGATGCGAGCGTTGCTGCTGGAATATGGGCTCACCGTG  
CCAGTCCGCGAGAAAAGTCTTCGAGCGCTCTCTGCCGACGATCCTTGAAGATGCCGAGAATGGCTTGCCTG  
ACTTTATCCGCGCCCTGGTATTACGCCTGAGAAAACGGTGGCAACAGCTGGATATTCAGATTGATGACAT  
GAGCCTCATGCTCGGACAAGCCTCAAGCGCATCAGGTTTGTGCCAAAAATCAGTACCCTCCCGGCATT  
GGACCGATTGTCTCAACCGCGTTGATTGCCGCGATTGGCAATGGCTCACAAATCAAGAAAAGCCGCGACC  
TGTCAGCTTGGTTGGGGCTGGTCCCCAGGCAATACTCAACGGGCGGCAAAATCTTCGCTCGGCGGGATCAG  
TAAGCGTGGCAATAGCTATTTAAGGCAAAATGGTTATTCAAGGCGCCAAAAGCGCTAAAAATTCACATGAAG  
CGTGACAAATCATCGTTAGGCGAATGGGTGCTAGGCTGGAGGCTGGCCATCACCATCATGTGGTTCTTA  
TCGCCTTGGCCAACAAGATAATGCGAATTTGCTGGAAAGTACTGACATCCGGCAGGGATTACCAACCCTA  
TCCCAACGCAAGCGCAGCCGTTTAAACAGATATAACTCATAACCCGGTTTTTTCGAGCCAAAAACAGATGACA  
GAAGCGTTCACCCACGACGTTGCAGCCTGGCTAAAAAAGCAGTCTCTCATGACTGGTAGCTTTATTAGG  
ACGATGACGTCGGATCCCATCAAGGCCAGACCCGGAAACGGCTCACAGACAGGCCGGATACATTTGACG  
CAAACGACTTCTGGAAATCAGTTCAAGCTTGACAGATAAGGAGCAGACCATACATTTTTAGAAATTCCTT  
CTCACGTTTCGAGCCGTTGATGCGGGCTTCCAGCTCCTGAATTTTTTTCGCTGATCCGGAGTCAGTGCTTTT  
CCGATGGGGGTTGTACCACAGCGTTTCGGATTGCAATTGCTGAACCCAGCGACGGAGCACGGTTTTACCAA  
CATCCAATGAACGGCTGGCTTCAGGGACAGAATATCCCTGGTTCGAGCACCAGGGATGCGGCTTCGAGTTT  
GAATTGGGCAGTAAATGAGCGACGTAATCTTGTTCATTGAACCCCTCAGGTCATGGTGGCGGCTGTACCAC  
CTAAAATGGTGTCTGGGATGATTAGACCACCACACTGTTTCATCTTTTGCCCCCTGCGTGAACGCGCTGC  
AGGATCAATTCAGATAACTGGGGCACTTTTGGACGACAGAGATTGACATGCACCTACCAGGTGGCATGAT  
CGTGCGCCAAACATTGCGCCAGTCTTCCGACCAACCAAAGTTGTGCCGACAGGCCACCTTTTTACTCT  
GGTGTTTTTCTGGTGGCCCCATGGCAGGCAGCAATCAAGAAGTCTGGGGTTCGTTATCGCCGGGCTTACC  
AATTTAGGCATACTTTTGCCAGTTGGAACATCACCGCTCACGGAAACCTTGCCTTCATAGCTGAACAGAT  
GGGTCAAACTCTGCAAGAATGTTGCAAGAGGTCTATGGAAAATGGATCGAATCGGCCAGCCGAAGTGAG  
GTCGATTCTATCTGGAGTTTCGATGCAAAAAATGGGCATTTGCCCAATAGCGCCCCGAAATTTTCAACC  
AGTGCAATAATGCGCTGATAATTAAGGAATTTTTTAAACACACTATGCTTAGTAGCAACAACATCACCATG  
CAGTTCCGGCGCAAGCCGCTGTTTGAAGACATCAACGTCAAGTTTGGCGGCGGCAACCCGCTATGGCCTTA  
TCGGCGCAACGGCTGTGGCAAGTCCACCTTATGAAGATCCTCGGCGGTGATCTGGAGCCACTGGCGG  
TAATGTGAGCCTAGACGTCAACGAGCGCATCGGTAAGCTGCGTCAGGATCAGTTCGCCCTACGAAGATATG  
CGCTACTGGACGTGGTTCATGATGGGTACACCCGAGCTATGGGCGGCCATCGCCGAGCGCATGCCATCT  
ACGCCAACCTCGAAGCGACCCGACGACTACATGAAGGCCGCAACTGGAAGGTCTGGTTCGCCGAGTA  
TGACGGCTATAACCGCGAGTCCCGCGCAGGTGAACCTGCTGCTGGGTGCGGTATTTCCCATCGAGCAGCAC  
AACGGCCCCGATGAGCGAAGTGGCCCCCTGGCTGGAAAATGCGGGTGTGCTGGCACAGGCGCTGTTCTCCA  
ACCCGATATCCTGCTGCTGGACGAACCGACCAACAACCTGGATATCAACACCATTTCGCTGGCTGGAGCA  
AGTGCTCAACGAACGTGAAAGCACCATGATCATCATCTCTCACGACCGTCACTTCTGAACTCCGTCTGT  
ACCCATATGGCGGATCTGGACTACGGCGAGCTGCGGCTTACC CGGGCAACTACGATGACTACATGCTGG  
CCGCCACTCAGGCGCGGAGCGTCTGCTGGCCGACAACGCCAAAAAGAAGGCCAGATCGCCGATCTGCA  
ATCCTTCGCTCTCCGTTTTCAGTGCCAACGCCTCCAAGTCCAGCCAGGCGACCTCCCGCTCAAGCAGATC  
GACAAGATAAAGATTGAGGAAGTGAAGGTCTCCAGCCGTCAGAACCCTTCATCCGCTTCGAGCAGGAGA  
AGAAGCTCTACCGCAACATTTCTGGAGATCGAAGGCCCTGTCCAAGGTTATGGCGAGGCGCCCTGTTCAA  
GGGCTCAACATGATGCTGGAAGTGGGTGAGAAGGTGCCATTCTGGGTACCAACGGTATCGGTAAATCG  
ACCCTGATCAAGACGCTGGTTCGGGGATCTGGCACCGGATACCGGTACCATCAAGTGGTCCGAAAACGCC  
AGATCGGTTACTACGCTCAGGATCACGCCGAAGATTTTCGACACTGATCTCAACGTGTTTCGACTGGATGGC  
CCAGTGGAAAACAGGAGAACGAAGACGAGCAGGCTGTACGCTCCGTAAGGCGGCTGCTCTTCTCCAG  
GACGACATCAAGAAGCCGGTCAAGGTGCTCTCCGGTGGTGAACAGGGTTCGCATGCTGTTTGGCAAGCTGA  
TGATGCAGCGTCCCAACATCCTGATCATGGATGAGCCGACCAACCCTGGACATGGAATCTATCGAATC

CTTGAACCTGGCTCTCGAGATGTACAAGGGTACCCTGATCTTCGTCTCCCACGACCGGAATTCGTCTCC  
TCTCTGGCGACCCGCATCCTCGAGCTGAGCGAAGATGGTATCCGCGACTTCGGCGGCACCTACGAGGATT  
ACCTGCGCACCCAGGGCGTGGTATAACCCCCGCTCCTGCGCAAGTGCGCAATGCAAAAACCGGCACCTCAGGT  
GCCGGTTTTTTATATCTCGTATTTAGACGACTGAGATGACGTATAGCAGTGGTGTGACTACACGCCACAG  
AGCAGAGAGCAGAGAGCAGAGAGCAGAGAGCAGAGAGCAGAGAGCAGAGAGCAGAGCTTAAATATCCCCCTCTTAC  
CCACAGATAAAAAAACGGCTCCATCACGGAGCCGTTTTCAATGGATTGCGCAGTGCCGATTACTCGACGG  
TCGCTTCCACACTGGTGAAGTACTCGATCTTGGCCGCTTTGCGCAGCTCGTCGATCAGAGACTTGTAAATC  
CACCTGAGCTTTGCCCTGACCCAGCTGAGCTTGCAGCATGGCGGCCATGCCGGATGCCGGCGGCAGGGACG  
TTGACCTTGTCCAGCGCAACCACAACCTCGGTACCATTTGGTCTCGGCAACCAGAGCCACGCTCGGCTTGC  
CGTCGATCGGATGGGGCAGCGTGAATGCTTGGGCAATCAGGTTCTGATCCAGCTCGCGATCGAAGCGGGC  
AACCCCTTTGTGGGTCTCCACTTTTCAGACCGAGTGCAGTCAGATCGGCTGTGATGCTCTACCGACCTTC  
AGCTTGTCCAGCAGGCCCTGGCCCTTGCCACGGGCCACTTCACTGGCCCTGTTCATGCTTGTATGGCGGCAA  
TCACCTGCTCTTTACCTCGGCCAGCGGCTTGACCGCTTTGGGCTTGTGACCAGTGATGTGCAGCACCAG  
CGCCTTGCCGTCAGCCAGCTCGATCACGTCGGAGTTGGTGTGTTCATCGCGTAGCTGTTTCGGAAAACGCC  
ACGGAGAGCACCTTGGGATCGTTCAGCGGAGCCGGAGCAGTCGCCTGGGTGAAGAAAATCGGAAGATTGAA  
CCTTCATCCCCATAGCATCAGCGGTGAGATCTAGCGAGTCCGGGTTTTTCGAAGCTGTTGTCAGCCATTTT  
CTGCTGCTCGGCGAAGAACTTCTCCTTGGCCTTGTGAGCTTGCAGACGAGTGATGGTCTCTTCTTTTACA  
TCGGCAAACGGCTTGGTCTGGGCTGATTCAACCCCCAGCAGCTTGTATGATGTGGAAACCGAACGGGCTCT  
TCACCACGGTGGAGAGATCGCCAGCCTTGTTCAGGGCGAACGCGCTTCTCGAAGGCCGGATCCATCAC  
CCCTTTCTCGAACAGTCCAGCTCGCCGCTTTTTTGGCAGAGAAGGTATCGGAAGAGTCAGCCTTGGCC  
AGCGCAGCGAAATCATCGCCCGCTTGGCTTTGGCCAGCAGGCTTCTGCTTCTGCTCGGCAGCTTTCT  
CATCCTTGCCAAACGGGATCAGGATGTGAGCCACGTGGCGACGCTCGGCACGCTGGAACAGATCCTGGTG  
CTGATCGTAGTAATCCTGGGCATCCTGCTCGGTGACCTTGATATCCTTGGCGAGGTTGGCGGCGTCCAGC  
AGCAGATAGTCAACCTTGACTTGTCTCGTTCATGAAACGGGCGCCATTTGGTCTTGTAGTACTGCTCCA  
GCTCGTTGTGCGGAGACCTGAACGTGAGCCATGTAGTTGGCAGCAGCCAGACGCACCAGACGCAGATCGCG  
AGTCTGGTTGTAGAGCTTGTGAGCTGCTCCGCTTACCCTTGAAGGAGAAATTCGGTGCCAGCAGAGCG  
CTCATCAACTGTTGACGCACCATGTCTGACGCAAGGAGTCAAGAACATTTTCAAGAGTATGCCGGCGC  
GACGGATCAGCTGCAGATAGCGGTCAATTGTTGAACCTTGCCTTCTCGGCAAACCTCCGGCATGGCCACGAT  
GGCTTGCTTGATCTGTTATCGCTGATGCGCAGACCCAGTTTACGCGGCCCTGCTGTCCAGCAGCGCTGA  
TCGATCAGCCGATCCAGCAGCCCGCGCGGAACCTGTTTCATGTAATCGGGGTTTCGCGGCCAGCTGGCTGA  
ATGCCTCTCCCATCTGGGATTCCATGCGGGCGCGCTCGTTACGGTAGGCATTTTCCAGTGCCGCAGCACT  
GATCTCGGTGCCATTGACGGTGGCGGGGGCGGTACGGGCCGGGCGTTCAGGTAACCTACCTACACCAGCC  
AAGGCAAAGGAGAGGATGATCAGGCCAAGATAACCTTGGCTACCTTGCCCTGCGCCCCCTTCGCGTAGTT  
TATCCAACATCATGTTTGTACTTATGCTCCCGAACTCGATGGGCGTAAACAATAAAAAGGCGCACCGATT  
GCGATGCGCCTTGGTCAATCAGTATGAGAGAAGACTCTCTAACTTGTCTGGTCTGCGACCAAGGACGGTA  
GCCGACGGATATCAGCGACCGGCTTAGTTAACAGCGTCTTTCAGGGCTTACCAGCTTTGAAGGCAGGAA  
CTTTACCAGCAGCGATTTTCGATGGTTCGCGCCAGTCTGCGGGTTACGGCCTGAACGGGCAGCAGCTCGCG  
TACAGCGAAAGTACCGAAACCAACCAGAGCAACCTGGTCAACCTCTTTCAGCGCTTACCAACAGCATCA  
ATGAAGGCATCCAACGCACGGCCAGCGGCAGCTTTGGAGATATCGGCACCGTCTGCAATCTTGTCAATCA  
GTTGAGATTTATTTACTCTTATATTTCCCTTTTTATCAAACACCGCTGCGGGCGCTGATTTCCCTGGCCACA  
ACAAGTGGAGGTTTTATAGCAAGCCTCCTGATCAGTTGCAAGTGACAAATCTGGCGCAAACCCGCGCCACA  
CAACGCATTGCGACTCATCACGAGTACCCGATCGGTGGTCAAGGCTACTTCCGTTATCGGGCGCATGCAA  
GCCTTAACCAACCCGCCAATGCGCCAAATTTGCGGCGCATCAACATTTACACGACAGAAACGCGCTCAA  
CCCCTGTGGATTGTCTGCAACGCCAATTCAGCACCTCGTCAATCCAGCGAACAGGATAAAATTTCAAGG  
TCTTGTTTGAGCTTTGCCGGGATCTCCTCAAGGTACGCTCGTCTCTTTTCGGAATAAGCACTCGCTTGA  
TGCCCGCACGGTGGGCTGCCAGCAACTTCTCCTTGAGACCAGGATAGGCAGCACTTCGCCGCGCAAGGT  
GATCTCCCCTGTTCATCGCCACATCAGCAGCAACCGGATTACCGGTCAAGCTGGAGACCAGGGCGGTACAC  
ATGGCGATAACCGCGCTCGGACCATCTTTTCGGGGTTGCCCTTCCGGTACGTGCACGTGGATATCGCGCT  
TCTCGTAGAAGTTCGGCTTGTGCGCAGCTTCTCGGCACGGGCTCGTACGACCGTCATGGCCGCTGGAT  
GGACTCCTGCATCACGTCACCGAGAGAACCAGGATAAAGTGAGCTTGCCCTTGCCCGGCATGTTGGTGGTC  
TCGATGGTGGAGGTCGCCCCCACTTCCGGTCCACGCCAGACCACACCTGACCCACTTGATTTCTGGT  
CGGTGGCCTTGGCGTAATCGAAACGCTGCACCCCGAGGAACTCCTTGAGGTTCTCCTGATTAACCTGAAC  
ATGCTTGTGCTCTTGTCCAGCAGGATACGCTTGACCGCTTGCAGAAAATCTTGGAAATCTCGCGCTCC  
AGACTCCGCACCCCGCCTCGCGGGTGTAGTAGCGGATCACTCCGACCAGGGCAGAATCTTCGATGGTGA  
TCTCGGACTCTTTACAGCCGTTGCGCTGGATCTGCTTGCAACCAGATGTGCTTGGCAATGTTGAGCTT  
CTCATCTTCCGGTGTAAACCGGAGAGACGGATAACTTCCATCCGGTCCAGCAAGGGGCCCGGATATTCATG  
GAGTTGGAGGTGGCCACGAACATCACGTCCGACAGGTCATAATCCACTTCCAGGTAGTGATCGTTGAAGC  
TGTTGTTCTGTTCCGGATCAAGCACTTCCAGCAAGGCGGATGCGGGATCGCCGCGCATGTCCGAGCTCAT  
CTTGTGATCTCGTTCGAGCAGGAACAGCGGGTCTTTCACGCCGACTTTCGCCATCTTCTGGATGAGTTTG  
CCGGGCATGGAACCGATATAGGTACGGCGGTGACCGCGGATCTCCGCTTCTGTCACGCACCCCAACCAAG  
CCATCCGCACATATTTGGCCCTGTGCCTTGGCGATGGATTGGCCAGCGAGGCTTGGCCACACCGGG



AGGCCCAACCAGACAGAGGATGGGGCCCTTGAGCTTGTTCACCCGTGCCTGTACCGCCAGATATTCGAGG  
ATGCGATCCTTGACCTTCTCGAGGCCATAGTGATCGGCATCCAGCACCTCTTGCGCCTTGCCAAGGTCTT  
TTTTGACCTTGGAGCGCGCTTCCAAGGCACCTGTACCATCCAGTCCACATAGCTGCGAACCACGGTAGC  
CTCGGCGGACATGGGAGACATCATCTTCAGCTTGGAAGCTCGGCCTGGGCTTTTCACGGGCATCTTCC  
GGCATGCCAGCCTCTTCAATCTTGGGATTGAGGGCTTCAAACATCCGGGCTATCTTCCAGCTCACCCA  
GCTCTTTCTGGATGGCCTTCATCTGCTCGTTGAGGTAATACTCGCGCTGGCTCTTTTCCATCTGCTTCTT  
GACGCGAGTACGGATGCGCTTCTCGACCTGCAGCAGGTCAATTTCCGACTCCATCATAGCCATCAGGAAT  
TCGATGCGCTCGGAGACTGAGACGATCTCCAGCACCTTCTGCTTGTCTTCCAGCTTGAGCGGCATATGGG  
CCGCCATGGTGTAGCCAGACGCGCAGCATCGTCGATCGCCGAGATCGAGGTCAGTACCTCGGGCGGGAT  
CTTCTTGTGTAGCTTGATATAGCCTTCAAACCTGGCCGATGGCGGAGCGAACCAGTACTTCCATGATCCTTC  
TCCTCAATGGCTTGGGAGGGGATGTACTGGGCTCGCAGCAAAAGAAATCCTTGTCTGATCATCCGCT  
CCAGGCGGGCAGCTGTCCCCCTTACTACCAGCACCTTGACGGTGCCGTCCGGCAGCTTGAGCATCTGCAG  
AATATTGGCCACTGTCCCGACGGTGAAGATCTCCTCCACCCTGGCTCATCGGTTGACGCATCCTTCTGG  
GCCACCAGCAGAACCTTCTTGTCTGCTCCATGGCCGCTTCCAGACAGCGAATGGATTTTTTCCCGCCCCA  
CAAAGAGTGAATGACCATGTGGGGATAAACACCACCGTCACGAAGAGGCAGGACGGGAATCTCGATGCG  
TTCTGAACGCTCTAGGTTTATATATGTCCTCTCGGCTTGTATATAACCGTTGGCAAAGCGCTTGGCTGAGTA  
TATGGGGGCGCTGAGATGAGATTCAATCGCCGAAACCGTAAAAAGCATGAAAGGGGCAAAAAGCCCCCTC  
CATTTGATTAATAATCAGACATTTACTCTGATGCAGCTGCCTGGGTTTCGGGATTTTCGTAAATCATCAA  
GGGCGCAGAGTCCCCTTTGATCACGGTCTCGTCGATCACACCTTGCTGACCCCTTCCAGAGAAGGCAGG  
TCATACATGGTATCCAGCAGCACGGCTTCCACGATGGAACGAGACCAGCAGCACCAGGTTTTACGCTCCA  
TCGCCTTGGCAGCAATGGCGTTGAGTGCCTCGTCACGGAACCTCCAGCTCAACCCCTTCCAGATCGAACAA  
CGCAGCGTACTGTTTGGTCAGCGCGTTTTTTCGGCTCTTTCAGGATCTGGATAAGGGCAGACTCGTCCAGC  
TCGGTCAGGGTCGCGACCACCGGCAGGCGGCCGATGAACTCGGGGATCAGACCATACTTGATCAGATCTT  
CCGGCTCTACCTTGGCGAAGGTCTCACTCAGGGTGGCCTTGGCATCCTTGGATTTACCTCGGGCGCCAAA  
ACCGATAACCGGTTCCCTTTCACGGAACGCTGCTCGATCACCTTGTCCAGACCAGCAAAGGCACCGCCGCGAG  
ATGAAGAGTATCTTGGAGGTATCAACCTGCAAGAACTCCTGCTGCGGATGCTTGGCACCCTTGGCGGC  
GCACGGAAGCAATGGTCCCTTCGATCAGCTTGTAGCAGTGCCTGCTGCACCCCTTCCCCGGAGACATCGCG  
GGTGTAGGAGGGTGTCCGACTTGCGGGAGACTTGTCTGATCTCGTCGATGTAGACGATGCCACGCTGG  
GCCTTCTCTACGTCGATGTCGACTTTTGCAGCAGCTTCTGGATGATGTTCTCCACGTCCTCGCCACAT  
AACCGGCTTCCGTCAGGGTAGTCGCATCGGCCATGGTGAACGGCACATCCAGCAGCAGGCCAGAGTCTC  
GGCCAGCAGGGTTTTTACCCTACCGGTCGGGCCAATCAGCAGGATGTTGGACTTGCAGGCTCCACACCA  
CTGTTTTTCCCGCTGTTGCGCAGACGCTTGTAGTGGTGTAGACGGCAACGGCCAACACCTTCTTGGCGT  
ACTCCTGCCCCGATCACATAGTCATCGAGATGAGCGCGGATCTGATGAGGGGTCGGCAGCTCGTTACCATC  
GCGCTTGGGCGAGATCTCACGGATCTCTTCCGGATGATGTCGTTGCACAGCTCGACGCACTCATCACAT  
ATGTAGACGGAAGGGCCAGCGATCAGCTTGCACACTTTCATGCTGGCTTTTCCGCAAAAAGAGCAGTAGA  
GCAGCTTATCGCCCTCACCTTGCCTTCTCTGTCAATCAGCAACCTCGTTTTTATCAATAGAGGATGGAT  
CGGCCTGTTGAGTTTACAACAGACCGGGACACCTGCTCAGCTACGCTGGCTCAGGACACCGTCAACCAG  
ACCATAGGCCACGGCCTGCTCGGCGGACATGAAGTTGTACGATCGGTGTCACGCTCGATGGTAGCCATG  
TCCTGACCGGTGTGGAACGCCAGGCGCTCGTTACGGGTATTTTTGATCTTCAGGATCTCCTGGGCGTGGGA  
TCTGGATATCAGATGCCTGACCCTGGAAGCCACCCAGCGGCTGGTGGATCATCACGCGGGCATTTCGGCAG  
GCAGAAACGCTTGCCTTGGCGCCACCGGCCAGCAGGAAGGCCCCCATGGAGCAGGCTGCCCCATGCAG  
ACAGTGCTGACATCCGGCTTGTGAACTGCATGGTGTCTGATGAGGATGACATACCTGCAGTACCGAACCAC  
CCGGCGAGTTGATGTAGATATAGATGTCCTTGTGCGGGTCTCGGACTCGAGGAACAGCAGTTGGGCAAC  
CACCAGATTGGCCATGTGATCTTCAACCTGACCAGTCAGGAAGATCACCCGCTCTTTCAGCAGACGGGAG  
TAAATATCGTAGGAACGTTACCCCTTGGCAGTCTGTTGACACAGATGGGGACCAGCGCATTTGCTGGGGG  
AATCGGTCATATCGTTATAGTTCTTGTACATAAGGCATTTGTCCTAAAAATAAAATGGCCCCAGTGGAGAT  
CACACGAGCCATTATACTTAACAGTCTTGACCTTAAGTCAAATGTTCTTAGGCAGCGGCGCAGACTTGT  
TGATCACTTTCGTCAAAGGCAACTTCTTTTTTTCGGTCACTTGCCTTTGGACAGGATCAGGTCGATGGCTTG  
ATCTTCTACTGCCAGGTTACGAACCGCTTTCAGCATCTGTTTCGTTCTTCTGGTAGTACTCGATCACTTCC  
TTCGGATCTTTCGATAGGCGAGTCGCCATGGACTCGATGATGCTGTTTACACGGGCATCGTCAGCCTTGATCT  
CGTTGGTGCAGATCACGTACCCAGCAGCAGGCTACGCGTACACGACGCTCGGCTTGGACCTGGAACAG  
TTCAGCCGGCAGCTCGGGAGCGTTGCCGCCCTGGAAGCCACCGAAACGCTGCAGAGCCTGCTGACGCAGT  
GCGTCGATCTCTTGGCAACGGCAGCTTTCGGCAGGTCGATTTGGTGGCTTCAACCAGACCGTTTCAGAA  
CCTGCTCTTTTACGCTGTTTTTTCAGGGCTTGGCCAGTTTCGCGCTCCATGTTCTTGGCAGCTTTCGGCTTT  
CAGCTCTTCAACAGAACCCTTTCGATACCGAAACGCTTTCAGCAACTCTTCGGTTCAGCTCAGGCAGGATC  
TGCTCTTCAACCTTGTGATCAGCTTGGAAAGCGAACTTGGCCTCTTTGCCTTTCAGGTTTTTCAGCGTGGTAGT  
CAGCCGGGAAGGTCACTTCGATGGTGAACCTCGTCGCCCCGCTTCTTGGCCAGGATGGGCTTTCGAAGCC  
CGGGATCATACGGCCAGCGCCAGAACCCAGGTTGAAGCCTTTCAGCTTTCGGCCCGTCCGAACCTTTCACCG  
TCGATGGAACCGACGAAGTCCATGGTTCACACGCATGCCATTTGGCAGCGGCAACATCGGCATCAGCCCAGG  
TAGCGTGTCTTGGCAGGGTGTGATCATGTTGGCCAGATCTTCGTCCTTTCAGGTCGCAACCGGCTT  
CTCGACCTTGTGGTCTCGAGACCTGCAACTTCGAACTCCGGATACACTTCGAAAGTGGCGGTGAATTCG

AAATCCTGACCTTCTTTGATCTCTTTTCGGATCCATGGTCGGGGCACCGGCCGGGCTCAGTTTGTTCGAT  
TGATGGCTTTGATGAAGTTGCTCTGCATCATTTCATCAGCAACGCGGGCGTGAGCCATGGCGCCGAACAT  
CTTCTTGATGATGGCAACCGGAGCCTTGCCAGGACGGAAACCGTCGATGCGACGAGTTTTGGCCAGGCCA  
TTCAATTTCTTACGCACAGCGGGCTCTACGGTAGCGGCCGGTACAGTGATGGTAAGACGGCGTTCCAGAC  
CCTGGGTTGTCTCTACAGAACTTGCATTCTTCTACCTCGTTCAACTCAGCACTGTGTGCTGACCTTTTA  
TTGCCCTGGGCAAAGCCCGGAGTCTTCTGTTTATAAAAGACAACGATATGTCTTTGTGATGAGAAAATA  
TGACGCGGCATTATAGCGGCGCACTTTGGTCGAGTCGAGCCACACATCCCCACATTGAGCGGTGTGCAA  
GCACAATTCGTGCAAACTGCCCTTATATGGGGAGAGAGGTGCCAGACTTCAACTATCCGATGGCAATA  
ATTTTGCCTTTGCTCACCTTTTTTCATCCGAACGCCGCTTATTTGCCATCTTTTCGCCGAAAAACAGCCC  
ACCGTTGCGGGCGGCGCACTCAATTTGACCAGCCAAATGGCGATTGAGCCAATCAACCATTGCGTCCCAC  
CCCTCCCTCGTTATGGTGGCAACCAAAATGATGATCTGGAGTCACTACATGGCCTTTTTCCGCTTCTTG  
TTCAATCTGCTCTGGTTTGTACTGGGAGGTGTCTTTATGGGCTGGCCTGGTGGCTGGCCGGTCTTGTCT  
GCTTTATCTCGCTGGTCGGCATCCCCTGGGGACGAGCCTGCTTCGTGATCGGCACCTTTACCTTCTTCCC  
GTTTGGCAAGCAGGCCGTCAATCGCAAGACAATGACCGGCCAGAGCGATATCGGCACCGGTACTCTGGGG  
CTGATTGGCAATATCTCTGGTTCTGTGATCGGTGTCTGGCTGGCCATCGGCCACATCGCTTCCGCGC  
TGGCCTGCTTCGTGACCATTATCGGTATCCCGTTCGGTATCCAGCACCTCAAGCTGGCACTCATCAGTCT  
GGCTCCTATCGGCCAGATGATTGTGACCAACCAGGAGGCGGAATCGGGCCGTATATCCGCTAACTGCGG  
GAAATGCGCGGGCAGACGCTGCCCTGCAACGAAAAAAGGGCAGACTAGGGTCTGCCCTTTTCTATTCTC  
TTTTGTTGAGGCCATCATGTTACCCAGCCACTTTTTCGCCAATCTCGCCCGCATGAAACTCATCTACCGC  
TGGCCCCCTGATGCGCAACATCCAGCCGAAAAACATCGCCGAGCACAGCCTGCAGGTGGCCATGGTGGCC  
ATGCCCTCGGCATCATCAAAAATCGACTGTTTTGCGGCAGCGTGAATGCCGACCGCGCAGCAGTGATGGC  
GCTATACCACGACAGCAGCGAGGTGCTGACCGGCATCTGCCACCCCGGTCAAATACTTCAACCCCGAA  
ATTGCCCGCGAGTACAAGAAGATAGAAGTGGCCGCGGAGCAGCGTCTGCTTGGCATGCTGCCGCGGAAAC  
TGGTGGAGGACTTTTCGCCCTGCTCGATTTCGGCAGCCAGGATGACGAGCTGGCTAGGCTGGTGAAGA  
TGCCGACACCCTCTGCGCCTATACCAATGTCTGGAGGAGATCAACGCCGGCAACCGGGAGTTCGAACCG  
GCTCGCAAGCGCCTCGAGGCCATGCTGGCAGCCCGGATGAGCGATGAGATGCGCTACTTTATCGACACCT  
TCGTGGCAGCTTCTCCCTGCCACTCGATGAGCTTAACGCTCACTAAGCCAGTCTACATGACCTGAAAAA  
CAGAAGGGCCCGGGTTGCAACCGGGCCCTTCGTTCTTTATTACGCATTAGATGCAACGCATCAGT  
GACCCAGCTCGCGGGACGGTACCAGCCGCTCGCCGATGCAACTCAGTTCGGCAAAAAGTGCATAAAG  
CAGGATGGCGGGCCCGTACGATGAGCAGATCCTGCAATGCAACTCAGTTCGGCAAAAAGTGCATAAAG  
TAGATATCCGGATTGAGGAAGCGGTGACCGATGAGCTTTTTCGACAACGCTCAGGATCTGGGTGAGCTTGC  
TCGAAAGCAGCCACCCAGCAGGGCACCGAGCAGGGCACCGGCCACGCCGTTGACCATCCCCGAAATGAC  
GAAGGTAAGCCGGATCTGGCCGGGGCTCGCCCCATGGTCTTCAGGATGGCAATCTCGCTGCGCTTCTCG  
TTCACCGCCATCACCAGGGTGGAGACGATGTTGAAGCAGGCGACAGCCACCACCATCAGCATCACCACAT  
ACATGACGGTACGCACCATCTGGATGTCTGATAGAGGTAGCCTTGGCTGTTTATCCAGCTACGGATGTA  
AACATGATGGGGAACTGCTGCGCGGGCGCTACCGTGTGATTGCGCCTTGTAGCACGTGCTCACCAGC  
AGGCTGAAGCCCTCCACATCGCTGCCCATAACAGTATCGCTTGTGCGCATCGGCCAGATGCATAAAGCCGA  
GCAACCCGTCGAGCTGACCGCCGATCTCCAGCAGCCCCACCAGGTCAGGGCTTCGCGCCGGGGATTCTT  
GATCCCGGTCTGATCACCCCTTGTGGCAACAACAACCAAGAGTGTACCCACCTTGACGCCCAGTTTG  
TCGGCAATGGTCTTGCCAAGGATCACCCACGCTCACCCGGTTGACGCTCACGCAGGCCGCGGGCCCGTCA  
TGTATTTGCCCGCATCCGACAAATGGCTTCCAGCTCCGGCAATACCGCGCGAGTTGCACCCCTTGAG  
GGCAGAACCATGCTCCAGCAGGCCATTGAGGCGAATGACTGGGGCAGCCGCTCAACGCCCGGCTGGGCC  
AGCAGGTAGTCACGCAGACGCGGCAATCCGGCAGCGGCGCTCGACGGCGTCCAGCTCACCTTGGCGCA  
CGACCGAGAGCACCCCTGTCTTAAAGCTCCCGCTCGAAACCGTTCATGGCAGAGAGGCCAGGATCAGCGC  
CATCACCCCGAGGGCAATACCGATCAGGGAAAGAGGCAGAGATAAAGGCGATAAACCCTTGCACGGCCG  
GAGCGGCTGTAACGCAGGCCAGCCAGAAAGAGGGGCAGCGGTTTGAACATCAGGCAACCTCCGCCATCACGC  
GCTCACAGGGTCAACCGCGATGGAGCTTGGCCGCCAGGCTCAAGTCTGAGTCAACACCACAAACGCA  
GTGCCAGTTACGATTACAGTTACACAGCAGTTCGTACACCGCGGTGGCACTGGCGTGTATCCAGATTAC  
CGGTGGGCTCATCCGCCAGCACCAAGCTCGGTTCTGTTGACCAGCGCCCGGGCGATCGCTACACGTTGACG  
TTCGCCACCAGAAAGCTCGGAGGGACGGTGGTTCAAGCGATGGGAGAGCCCTACCTACCCAACATTTTG  
GTCGCTTTTTCGGTGGCAACCGCCACCGACTCACCGCGATCAGCAGCGGCATGGCCGATTTTTCCAGCG  
CACTGAACTCGGAGAGCAGGTGGTGGAACTGGTAGACAAAGCCAGCTCGCGGTTGCGAAAACCTGGCCTG  
GGTGGGCTGTCCCAATGGTGGATATCTCCCCCTTGAACAGCACGGCGCCACTGGAGGGGTTGTCCAGC  
GCCCCATCAGATGCAGCAGAGTGGTCTTGCCAGAGCCGAGCTCCCCACCACCGCCAGCATTTCCAGCG  
GTGCGACGCAGAGATCGATCCCCTTGAGCACCTGAGTCTCCAGTCCCCCTCTTTATAGACATGATTGAG  
CGCTGGCAGCGCAGCAGAGGTTACGGGATACGGCTTCATTATAACAGGGGCTCCACTTGCCTCGGTA  
ACAACGCTGGCACCCGCAACTACGGGGGCACCAGTCAACAACAGAAGATGCATTATTACGGCATTACTCA  
TAACGCAGCGCCTCGGCCGGTTTACCCGCGCAGCGCGGGCCCGGGTAGAGGGTGGCACTGAAGCTCA  
GCAGCACGGCGCCAGCAAAATGGTGTGATGACCTGAGCCGGCTCGACAATCACCGGCAGGCCACTGCCGCC  
CGCCGCCATATAGAGGTTGAGCCCCACTGCATTGAGCAGAGGGTTGAGACCAAGGGAGAGCGCCAGGCCA  
GCCAGTCCGCCAAACAGGGCGCCAATCACCCCGCTGGAGGCGCCAAGCACCATGAAGATTTTGACGATCC

CCGATTCACTCATGCCCATGGTGGCAGGATGGCCACTTACCCTCCTTGTCCGTCACCACCATCACCAG  
CGCGGAGAGGATGTTGAAAGTAGCGACGGCGATGATCAGAACCAGCATCAGCCCCATCATCCGTTTTTCC  
ATGGCGACCGCTGGAACAGCTCGCCCCGCTCGCGGCCAATCCTGCCACAGCAGCCCATCCGGCAACG  
GCGTCTTGATCACCTCGTCAGCGGCAAAGGGATCATCGAGCCAGAGGCCAATGCCACCGACGGTTTTCTGG  
CGGCAGACGCAGCAGCCGCTGGGCATCCCCAAGGCATCAGCGCAATCTGGTTATCCACATCGGCGCCG  
ACCCCGAAGATGCCGGAGACGGTAAAAGAGGCGCTGGGCCGGTACCCGACCAAACGGGGTGAAGCGGGTCC  
CTTCAGTCAGGATCAGACGAACCTGATCGCCGATGGAGACATTTAGGGCGACGTGCCACCCCTGCCCCAG  
CACGATGCGGTAGTGGCCGGCTGCAGGGTATCGAGGCGCCCCCAGCATCTGGGAGTGCAGGATGTCA  
TCCTTGGGCCACTTCGCAGGATCGATGCCCTGCACACTCACCCCGTTCAGCTGGCCGGGACTTTGCAGCA  
TCCCTTCGCTGTCTGAGCATGGGGGCCGAGGCGACCACATGGGGTAATTTGGCCAGATCCGGCAAGCCTTG  
CGGGTCGGCATCGATGCGGCCAGCCTGATTGGTCACCAACATGGGGGATCACCCCGAGGATGCGCCCT  
TTGAGCTGCCCTTCGAAACCCTTCATCACCGAAATGACCACCATCAGGGCGGCAACCCCGATGGCAATGC  
CAAAGGTAGAGAACAGGGAGATAAATGAGACGAAGCGATTGCTGCGCTTCGAGCTGCATAACGCAGGCC  
GATGGCCAGCGAAAGGGGCTGAAAAAGTCCGGTCTTCAAGGATATGTACGTTGCCAACAAAATAAGATAC  
CGGATAATAAAGGGAAACCGTCCATGACAACAAGGGATAGCCTCCATGCAGGAACAGTTCTTCAGCGTCA  
CTCATGCCACGCCGGTCAATGTGATCCCATGCCGGCCGACTTCCACCTCCCTCTCTGGAGGAGCTGGA  
CGCTGAGCTGCCGGAGCCCTTTCGGATCTCTTCGGCCATTACCTCCATCGATCTGGTGACCACTCGCCTG  
CTGCGCAACCAGAACGAGTGCATGCACGATCTGATCGAGATCGTCAATCAACAGTCCCGCAAGATCGACA  
TGATCATGGGCTATGTGCTCTCCCTGCAGGACCATCCGGAGCAGCGCTTTCACACCCTGCGCTTCGGGGC  
TGGTCAACTCACCTACCTGCACCCCTATCATGGTCACGGGGATGCGCCGCACCTGCACCAGATCGTGCGT  
CTCAAGATCTTCTGCGGGAAGAGGCGGCCCATCTACTGCTATGGCCAGGTCAAACAGCTCGACGGCG  
GTGAACATGGCACCCATGTGCAGCTCGACTATGTGCGGATCCGCGAAGATGACCCTGAACTGCTGGTTCCG  
TGCCAGCCTCCACGTGCAATCGAAGCAGCTCAAGCTGCGCGCCCAAGAACGTCAGCGCTAACCCAGAGCGA  
ACGTCGCGATAGATAACGTCAACGTTAAAAGAATCGAACCATGCCAATGACACTCCCCGCTTGGCCGCC  
AAAGCGGGCCAAAAGATCACGCTCGGCCAGCTGGTGGCGAGCAGCCTCTCGCTGATTGCAGCCCGTCTCA  
CCAGTGAAGCCAAGGGCCAGTACTGCTTATCACTGCCGATACCCCGAGCGCCCTGCGCCTGGAGCAGGA  
GCTACAGTATTTGCTGGCAGACAAGCAGCTAGCCGATCAGTCCGCGCCGGTATTGTTGTTCCCCGATTGG  
GAGACCCCTCCCTACGACACCTTCTCTCCCATCAGGATATCATCTCCAGCGGCTAGAGACCCCTTACA  
AGCTCCCGCAGATGAGCAAGGGGTAAGTACTGATTTCCCATCTCCACCCTGATGTTGCGCTGCGCCCCCG  
GGTCTATCTCGACAAATACAGCCTGATGGTAAAGGCCGGTACCGCCTCAATCTGCAACAGCTGCGCGGA  
CGCCTGGCCGAGGCGGGTTACGTGGCGGTGGATCAGGTGCTGGAACATGGCGAATTTGCCGCCCCGCGCT  
CCCTGCTCGATCTCTTCCCCATGGGCAGCAGCAGCCCTATCGCATCGACTTCTTCGACGATGAAGTGGA  
CTCCATCCGCCCATTCGATCCCGAAACCAGCGTTCCAGCGAACCGGTCAAGACGGTCCAGCCTGCTGCC  
GCCCGGAATACCCTACCGACGAGGCGGCCATCGAACTGTTTCGCGCCAGTTCGCGGAGCAGTTCGAGC  
TGTCGCGGGCCGAGGGTCCGCTCTATCAGGAGGTGAGCAAGGGGCGCTGGCCCGCCGGCATCGAGTATTA  
TCTGCCGCTCTTCTTCAACCAGACCGCCAGCCTGTTTACTACCTGCCGGAAGAGACCCTGCTGCTCACC  
GTGGGGGATATCTACCCCGCCGCCAGCCTTCTGGAACGACATCGGCCAGCGCTATGAAGACAGACGCT  
GGGACAACACCCGCCCCCTGCTATCCCGGCCAGCTCTATCTGCGGTTGGAGCAGCTCTTTGCCCTCTCT  
AGGCCAATATGGCGCGGTGCGGCTGCAAGAGGCCGCTACCGCCGGTGTGCGGTCAGCATGATCTGCC  
ATCTCGGCGCTGCCGATCTGCAACTCGATCACAGCAAGGAGCAACCCCTGCTGGCGCTCAACCAGTTCC  
TGCAAGGCTTTGCCGGGCGCACCCCTGTTTGGCGGTGGAATCCGAAGGACGGCGGGAGGTGCTCGGCGATCT  
GCTGGCGCGTATCTCGCTGCAACCTAAAGAGTTCCCTCCCTCGACGCCTTTATGGCGAGCCCGGATCGC  
CACGGCCTGCTGGTTGCACCGCTTGAGCGTGGCTTCTGTGGCAGGAGGCCGGTCCAGGATCCACTGGCGC  
TGATCACCGAAACCGAGCTGCTGGGCGGCAAGGTGCGCAGCAAACGGGCGCGGAGAGCAAAAACCTT  
AAGTCCGATGCGGTGATCAGAAACCTGGGCGAGCTGACCCAGGGTCCAGCCGGTGGTCCATCTGGATCAC  
GGGGTCGGCCGCTATCTGGGACTGGAGACCATCGACGCCGGTGGTCTGCTTACCAGTTTTTGCCTCG  
AATATGCCGGCGGCGACAAGCTGTTCTGTCGGGTCACCGTTCACCTTATCAGCCGCTACACCCGTTTC  
TGATAACCCGCCAGCCACAAGCTCGGCGGCGAAGCCTGGAGCAAGGCGGCGCAAGGCGGCGGAGAG  
GTGCGGACGTTGGCAGCCGAGTTGCTGGATGTCTACGCTCATCGCGCCGCTCGCGCCGGTTTTGCTTCA  
AGCACGACAAAGAGGCTATCGCCAGTTTGGCCGACGTTCCCGTTCGAGGAGACCGACGATCAGCTCAA  
CGCCATCAATGCGGTGCTGGGGACATGTGCCAAGCCAAGAGCATGGATAGACTGGTGTGCGGCGACGTG  
GGTTTTCGGCAAGACCGAAGTGGCTATGCGGGCGGCTTGTGGCCGTGCATGGCGGCAAACAGGTCGCCG  
TGCTGGTGCCACCACCCTGCTGGCGCAACAGCACTACGACAACTTCCGCGACCCTTTGCCAACTGGCC  
GGTGGCGGGTCGAGGTGCTGAGCCGCTTCCGCTCCGCAAGGAGCAGAGCGCTGTGATGAAAGAATTGGCT  
GAAGGCAAGGTGGACATCATCATCGGCACCCACAAGCTGCTCGGCTCCGAACTCACCTTCAAGGATCTGG  
GACTGCTCATCGTCGATGAGGAGCACCATTGGGGTGGCGCCAGAAGGAGAGATCAAGGCGCTGCGGGC  
CGATGTGGATATCTCACCTCACCGCCACCCCTATTCCGCGCACCCCTCAATATGGCGATGTCCGGCATG  
CGGGATCTCTCCATCATCGCGACTCCACCCGCCAAGCGACTCGCCATCAAGACCTTCTGCGCCAGCACG  
AACCGGCTGCGGTGCGCGAGGCGGTGCTGCGGGAATGAAAGCGTGGTGGTCAGGTCCTACTACCTGCACAA  
CGACGTGGATAGCATCGAGAAGTGCGCCGCCGATCTTGCCGAACTGGTGGCGGAGGCCCGCATCGGCATC  
GCCCACGGTCAGATGCGCGAGCGTGACCTTGAAGCGGATCATGTCCGACTTCTACCACCAGCGCTTCAACC

TGCTGGTCTGTACCACCATCATCGAAACCGGCATCGACGTGCCGAGCGCCAACACCATCATCATGGATCG  
GGCGGATCATCTCGGTCTGGCCCAGTTGCACCAGCTGCGGGGCGGGTTGGCCGCTCCCACCATCAGGCC  
TACGCCTACCTGCTCACCCCCCATCCCAAGCTGATGACCAAGGATGCGGCCAAGCGGTGGAGGCGATCG  
CCTCGCTTGAAGATCTCGGCGCCGGTTTTGCGCTGGCGACCCACGATCTGGAGATCCGTGGCGCAGGTGA  
ACTGCTCGGCGACGATCAGAGCGGCCAGATCGAATCGGTTCGGCTTACCCTCTACATGGAGATGCTGGAG  
CAGGCGGTTCGAGGCGCTGAAAAATGGTAAGGAGCCGTGCTGGAGCAGCTGATGAGCCAGCACACCGAGG  
TGGAGCTGCGCCTGCCTGCACTGCTGCCGGATGACTATATTCGGGACGTCAACATGCGCCTCTCCATGTA  
CAAGCGGATCGCCAGTGC GGCGGACGAGCAGGAGCTGCGCGAGCTAAAAAGTGGAGCTGATCGACCGCTTT  
GGCCTCTTGCCGGAAGCAACCAAAACCCTGCTGGAGCTGGCCGCCTTCCGCCAGCGTGCCACCGCCCTTG  
GCATTCGCGGGGTGGAGATGAGCGAGCGGTGGCGGTATCTCGACTTCAACCAGGAGACCAAGGTCAATCC  
GGCCTATCTGGTCAAACCTGCTCTCCAGCCAGCCAGGCTTACAAGATGGACGGGCGACCCGGTTGCGT  
TTCCAGGTGCCGACTCAGGATCGCGCCATGCCCTGAAACTGGTGGATGGTTTGTGGTCTGATCTGGCCA  
ACAACAGCCTGTGAATATCTGCAACGCTGGCGGCGAGCCAGGAGATAATAACCAACTAAAACGGGAGCCA  
AATCGGCTCCCGTTTTTGTATGTTGGCTGGTACTAGCGTCTCCCTTCTCCCTTGTGGGAGAAGGGTC  
GGGGATGAGGGGGGCATTGAAAACCATTCCCTCACCTGCCCTATCCTAGGGGGAGAGGGAATCGCACC  
GGTAAATGTTGGGCTTCGCTGCGCTCAGCACCAACCTACACCTCTGACGATCAGCCCTGGTTGGCTGGAT  
CCTCATGGCCGGAAGACTCGCGCATAAAGGCCCTCGGCGCGCTCCACCATCTTGGTCGAGCCAACAAAGTA  
AGGGGTACGCTGGTGCAGCGCGGTGGGCTGGATATCCATGATCCGGCCAAAACCGTCAGAGGCCCTTGCCA  
CCAGCCTGCTCTACCAGAAACGCCATCGGGTTCAGCTCATAGAGCAGCCGACGCTTGCCGTTTCGGCGAGT  
TGGTGC CGGACGGATAGATGTAGATGCCGCCCTTGAGCAGGTTGCGATGGAAATCGGAAACCGGGAGCC  
GATATAGCGGGAGGTGTAGGGTCTGTGGGTGCGTTCGTCGCGCTCCTGACAAATTTTCAGGTACTTCTTC  
ACCCCGTCCGGGAACCTTGATGTAGTTGCCCTCGTTGATGGAGTAGATCTTGCCCTCTTCCGGAATGCGGA  
TGTTCTCGTGGGAGAGGCAGAAAGCAGCCGATGGAGGGGTGCTAGGTAAGCCGTTGACGCCAAAACCTGT  
GGTGTAGACCAGCATGGTGGAGGAGCCGTAGACCACATAACCGGCGGCGACCTGACGGTTGCCCGGTTGC  
AGGAAGTCCCTCCAGGGTACC CGGCAACCTGCGGGCTCAAACGGCGGTAGATGGAGAAGATGGTCCCGA  
CCGAGACGTTGACGTCGATATTGGAAGAGCCATCGAGCGGGTCGATCAGCACCACATACTTGGAGTTTTT  
GGAGAGCGCGAGTCAAAGGCGACGAAGTCTTCTTCTTCCGAAAGCCATGCCGCACACCTCGCCGCGC  
GCTTCCAGCGCCGCTTGAAGCGTTTCGTTGGCTGAGACATCCAGCTTCTGCTGCACCTCGCCCTGTACG  
TTTTAGCGCCCATGGAACCGATGATATCCGCGAGTCCCGCTTGTGATCTCCCGGTTACCACCTTGGC  
AGCAAGGCGGATCGAGCTGAGCAACGAGGTGAGCTCGCCGGTCGCGGTAGGATAAATCCGCTGCTTTTTG  
ACGATGAACTCACCCATGGTGTATGTTTTCGCATTTTTTGTTCCTTTAGATCGCATCCGTTGGCATTGAA  
AACGTTTTGCAGGCATCGGCCAAAAAATGCCGATCACCGGCGGCCTTGATTTGTAACCTAATGTAACGTC  
TGTTTTTTTGTTTTTGCAGCGAATTAAGCGGCTATTAATAAGGCTATTTTCGCTCACGTTATGGTAAAAG  
GCGCTTTTTTATTTCGTTTTATTGATAAGTTTTCGGCCCTTAATTCGTGGCAATAACCTGCGACAGGCCA  
TGATCCGACTGGCCTTGGGCCATTAATAAATGGAGTCTGATGGGCTGCTACTCCCTTAGCCATTGCCCTCT  
TGAGATCCGATCGCCAATCCAGCACACTGATTTGCTTTGGAAGCAAATAAACTCAAGGATTATCAATG  
AACAAGACTCTCATTGCCGGCATGGTAGCCGACTGTTTGGCCTTCCCGCTGGGCTGCCAGGTGCCGTG  
CCGGTACCAAGCTGCTGCCGGATGCCCAACAAATCTACGTGACCAATATCGGCACCGAACCCACCACCAT  
CGACCCCAAGCTGGTAGAAGAGACCGCCGGTAGTGCCATCGTCAACGATCTGTTTGAAGGGCTCTATGAG  
CTGGATAATACCGGCCAAAATCAAACCAGCAGGCGCCGTGAGCTACGACGTCGACAAGACAGGTACCCTCT  
ACACCTTCAAGCTGAGGCCCGAGGCCAAGTGGTCAAACGGTGAACCGGTCACCGCCGCGGATTATGTCTA  
TGGCTGGCAACGGGCGGCCGATCCCAAGACGGCTCCAACCTACGCTGGTTTATCGAGTTGACCGGAGTG  
GTCAATGCAAGCGAGGTGACCCAGGGCAAGAAGAGCCCGTCAGAGCTAGGGATCAAGGCGCTCGATGACC  
ACACCTGACAGGTACCCCTGAAAAATCCGGTCCCTTCTTCTTGAAGACGCTGGCCACTACACCAGTT  
CCCGGCCCCCAAGGCCACCATTTGAAAAATTCGGCAAGGATTTGGTCAAACCGGGCAATATCGTCTCCAAC  
GGTCCCTTTGTACTCAAGGAGTGGACACCCAACGAGCGGCTGAGTGCCGAGCGCAATACCCACTACTGGA  
ACAACCAGCACACCGTCTGAACAAGGTGATCTATCTGGAGATCGTCTCCGAAACCGCCGCTACAACCG  
CTATCGCACCGGTGAACTGCACTACACCACTTATCCGCTGGAGCAGTACAAAACAGCTCAAGAGCAAGAGC  
CCGGAAGAACTGGTCAGCGTCCCCACGCTGGCCAGCTATTACTATGTCTTCAATACCCAGCGCAAACCGT  
TCGATGACCCGAAAGTACGCAAGGCGCTCTCGCTCGCCATCGACCGGGAGACCATCACCGACAAGATCCT  
GGGACAAGGACAAATTTGCCGATATAGCTTACGCCCCCATTTGTGGACGGTTTTTGAATGAAAAAACCG  
GCCAGCCAGCTGCAGAGTAAAGAGGAGCGGATCAAGCAAGCCAAAGCCCTGTTGGCCGAAGCGGGTTATG  
GTCCGGACAAGCCACTCACAGTGGACATTTCTTACAACACCAACGAGAGCCAAAAAGATTGCGCTGGC  
CGTCTCCTCCATGTGGAACACAACCTGGGGGTCACTGCCACCTCAACAACATGGAGTGAAGACCATG  
GTCTCGGCACTCAACGAGGGGGATTTTTGGCGTTAGCCGCTATGGCTGGAACGGGGATTATAACGACGCT  
CCACCTTCTCGATATCATGACCTCCAGCAGCAGTGCCAACAGCGGCAAGTGGTTCAACAAGGAGTACGA  
CGCCCTGCTGGCCAAGGCCACGACTCGCTGGATCCCGCTGAACGCAATGCCCTGTATCAACAGGCAGAG  
GCACTCATTGATGCGGATGCCCCCATCGCCCCATCTATTTCTCGGTCAAATCCAGGTTGCTCAAGCCTT  
TCGTGAAAGGCTACCCACCTTAACCCGAGGATGTGGTCTACAGCAAGGAGCTCTATCTGGTTGCCCA  
GTAACCGGCTAGGAAGATGTAACCATACTAAAGCGCCTGCATGCTGCAGGCGCTTTTCAATTGGCGGCCA  
AGCGGGCCATTGGGCTACTTACACTTTACGCAAGATTACTTTCGGGACAAGAAGCCAGCACTACCCG

CGGGCGACCCATCACCACCGGACGCACCAGCAGCTGTGCCAGCAAGACACCCAGCAGGGTCAACCCACCC  
CCGATCAGGTGATAGCTGGTCAACCGCTCACCCAGCAGGGTGATGGCAAGGCCAGCCGTCATCACC GGCA  
GCAGGTTTCATAAAGATGGCGGTACGGTTGGCACCGAGCAGAGCGATACCTGCATCCAGAGCCACGGCGA  
GAGCGCCGAAGTGGGAATACCGGCATAAAGGATCAACCACAGGGCCCGACCATCCGGCCACTGGCCATCC  
ACCAGCAAAAAGAAGGGTGTTCAGGATCACCACACTGCAGATCACCTGACCGTAGAGCAGCGACCAGTTGT  
CGAGCCCCAGATCCCCTTCTTGAGCAGCACGCTGTAAAGGGCATAAGTACCGGGCCGAGATCAGCATATA  
GACAGAGCCGATATGAATGCCTTGGGTAAACAGCCGGGTTCGGATCCCCCTGCCCCAGCAAGATAGACAAA  
CCAAGGATGGAGAGCAGCGCCCCCAGCACGGCGCCCCAGGTGGGCGCTCACGCAACAGCCAGATGCTGA  
ACAACACGGTCAGCAGCGGCGTCAGTCCCATCATCAACCCCATCTCGGTGGCTCCCAGGGTTTGGCGCCG  
GTAGTAACCAAAAAGTCTGGTTGAGCACCATGCCCCAGCAGGGCCAGCATGGCGATCTGCCAAAGGCCAGCG  
CGCAGACGGGCACGCGCACGCCATACCCGACGGGCAAGAAACGGGCTTAATACCAGCGCAGCCACCACCC  
AGCGCGACCAGGCCAAGGCTGCAGGGGACAACACACCAACCGCCAGTTTACTGACGATGCCATTGCCAGC  
CCAGATGGCAATGCAGGAGAAGGGAAACAGAAAGGCAAGGGGCATGAGAAGATCCAGACCGAAGAGACAA  
CAGCGGGCCAGTATAGGGGGCGATGGGAGAGAAAACAAAGGTGTGGGCTGAACCGCCACGCGGTGAACGC  
CAGTCGCCAGAAAACAAATATGCCCCAAAAGTGGGGCATATCAGTGCAGAAAACAGGTTTCAGAAGCGCAT  
CACGCGGCATCCATGTGCAGTCTGGAGATCAGCTCGTTGACCTCGGTGACTGTCTGGCGATGAGGAATAT  
CCGCCGGATTCCGCATCAGCAACAAAACCTGATTGGAAATCAAACCGCCCCGACCATGGATGTAATCCG  
ACCTTTAAAGAAGGTTTTGACATGCTTTGCCACCATCAGTGGCAGGTACTTCTTGAACACTCTCATCGTT  
TGCAACCTCTTGCAAGTTGATCCGTATGACAGCAGCTTCTGCGAATTAATTCGGTAAAGTATTTATAAAA  
ATCCGGAAAACCTCGCCCATCTCTTCCCAAAAATTCATCTATAACTTTTTATTAACTTTTAGCCTATTG  
TATGCGGCCCTTCGAGCCAGAGCAAGGTTCCCTTTGCCATCGTGCCACTCGATACAGGCGATCCCCGAGGT  
GGCGAACATGGGTGCTCCTGCGGCCGGGCAGAGGCTTTGCACCAGATAACCCACCAGCGGCAGATGGCTG  
ACCATCAGGATCTGGTCATGTTGCTGCGCCAAAAGTGGTGAGGTAGCTGGCCACGAAAGCGGGATCACCGT  
ACGGGGTAATGTGCGCCACTCTCTTCAACGGCTGCTGCGTCAGGTAATTCAGTGCATATGGCTTGCAGGT  
CTGGCGTGCCCGCAGATAGTTGCTGTGGATCACCCGATCCAGCGGGCCAATCAGCTGAGACGCCAGCCAG  
CGGGCCATCTGGATAGACTCTTCAATACCCTGCTCGGTCAATGGACGCTGTTTCACTGTTTTTCGCATTCA  
TGCCAGCCTGGCCATGACGCATGATATAGATCTTCAATACAACCTCGCCAACGGGCTGTTTTGATAGC  
CGGGAGATCTTACCCCGCAGGGTGTGAAACAATTCGCTACCTCTCAGAAAAGGGTTTGCCTGACCG  
GATAGCGGGGTCGATAATCATGTTTTAAATTCAAATAAATCAAACGTGAGTCACACGCCAAATGAGCCATA  
TGCCAGTCCCAATGACCATCGGCAATACCATTTTTCTGGAGCTGGCCAACCGGCTCAGGGTCTTGTGATT  
TGTGATCCCGACACCGACAAAATCCGCCGCTCGCTGGCGGTCAATACCGGCCATTTTGAACGATCCCGCCG  
ACCGGCAGGGAATGGCCATTTTTCTGGAGCACATGCTGTTTCTCGGCACCTGCACCTACCCCAAGCCTGG  
TGAGTACCAGCAATTTATGAGCCGTATGGCGGCAGCAACAACGCTGGACCGGTACCGAGTTCACCAAC  
TTCTTCTTCGAGATCGACAACGGCTTCTTCAAGCGGGGCTGGATCGCTTCTCCAGTTCCTTTATCTGCC  
CCACCTTTGATCCGGAGTGGGTGGACAAGGAGCGTAACGCGGTTGACTCCGAGTATCGCCTCAAGCTGCA  
GGACGACATGCGCCGAGCTATCAGGTGCATAAAGAGACAGTCAACCCGGCGCACCCCTTCTCCAAGTTC  
TCGGTGGGCAACCTCGATAACCTTGCCGATCTGCCGGGACGGGATCTGCGCTCCGACCTTATCCGTTTTT  
ACGAAAGCCACTACAGCGCGGATCGCATGGCGCTGGTGATGATCTCGCCGGAATCCATCGATACCCAGTT  
GCAGTGGTGTGCTGCTACTTTGCTCCCATTTTTGAATCGCAATTTGGGAACCCCGACCTCACCATGCCG  
CTCTACCGGCTCGACGATCTCGGCGTGCATCCACATCAATCCGGTCAAGGAGACCCGCAAGCTGTGCG  
TCTGCTTCCCTCTGCCAATGTGGACGAGTTTTACGACAAAAAGCCCTCACCTTCTGAGCCATCTGAT  
TGTTATGAGGGGGATGGCAGCCTGCTCTCCCTGCTCAAGGCGAAAGGCTGGGTCAACCAGCTCTCGGCG  
GGCGGTGGCATCAGCGGCGCAACTTCAAGGATTTTGGCGTCAACTTCGGCTCACCCCTCTGGGCCCTTG  
AGCATGTGGACGACATCCTCGCCGCCCTGTTTGGCTATCTGAAACTGATTGGCCGGAAGGGTTGCAGAG  
CTGGCGCTACGACGAAAAACGGACCGTGTCTGAATCGGCGTTCGCTTTCAGGAGCGCGGCCGCCCTC  
GATAGTGTGTCAGGGCTGGTGTCAACCTATTTAGCTACAAACCTGAGGATCTGCTTACGGCGACTACA  
TGATGCGCGAATATGACAAGGGGCTGATCCGCCGCTTCCCTCGCCAAGCTCACCCACACAATTTGCGTAT  
CACCATCACTGCGCCGGAAGTGGCGACCGATCGGCTGGCCCGCTGGTATCAGACCCCTACAGCGTGGCG  
ACCATTACCGAGGCCGAGAAAATTCGCTGGCAGCAGAGCGAGCCGGATCCGGCGCTGGCGCTGCCAAGC  
CCAACCCCTTTATCAGCAGCCGACTCGATCCGCGCACGCCAGAGCTTGCCCGCGACATGCCCGCTGCCCT  
TATCGATCGCCCCGGTTTTTGCCTCTGGCACCTCCATGAGCACCTGTTTACGCGTACCCAAGGGCAATCTC  
TACATCTCCATCGATAGCGAACATGCGGTCAAAAATCCGCGCAATATCGCCATGGCGCGCTCGCCGTGG  
AGCTGTTGGCCGACCACCTCAACGCCCTCACCTATCCGGCGGAGCTGGCGGGACTGGGCTATCAGATCTA  
TGCCCATCAGGGGGGCTTTACCATCAACCTGAGCGGTTTTTGGCGACAAGCAGCCGCTGTTGCTCGACATG  
ATCCTCGGCAACCGCACCCCTGGGGTATCCGGATCCGGGTGCTTTCGCCGAGATCAAGGAGCAGCTCATCC  
GCAACTGGGACAACCAGTCCAAGGCACGCCCCATCTCCAGCTCTTCAACCAGCTCACAGCCGTGTTGCA  
GCCGAACAACCCGCCGTTTCGAGCAGTTGCTACGCCACCTGCGCACAGTCGAGCTTGAAGAGATGCCGGC  
TTCGTGGCCAGCTGTTTTGGCGAGGTGCATGTGAGGCGCTGGTACACGGCGACTGGACTGCCGCCAAG  
CGCTGGAGCTGGCCGCCCTGATGGAGCGCCACCTGAGCGATATCAATGGCACCAGCAGCAAGCCGAGTGG  
CGAGACCCGCCCGCCGCTCATCTCCATTGAGGACAGGGGACCCCTTATTCGCGAGCAGGGTTGCGATCAT  
GAAGACTCGGCACTGCTGGTCTACTACCAGTCCCGCACCAACCCGGGCGGGGATCTCGCTGCTTCACTC

TGGCAAACCACATCATGTCTCCACCTTCTTCCACGAGCTGCGCACCCGCCAGCAACTGGGGTATGTGGT  
GGGCGCTGGCAACCTGCCCTCAATCGCCACCCGGGGCTGATCTTCTATATCCAGTCGCCGGTGGCGGGG  
CCGCAGATCCTGCTCGATGCGGTGGAGGAGTTTATCGACCTCTTCCCCTCGCCATGCTCGAATTCACCG  
AGCAGCAGTGGCAGGAGAGCAAGGCGGGGCTGCAAGCTCAGCTGAGCGAGCGGGATGCCAACCTGCGCAG  
TCGCGGCCAGCGGCTGTGGGTGAGCATAGGCAACAAGGATCTGGGGTTGATCAGCGGGAACGGGTCTGC  
GACGAGGTGGGCAAGTTGAGCCGCGCCGACCTGGTGCCTTTATCACCCAACTGCGTTTCGCGCACCTCCG  
ATCGGCTGATCCTCTGCAGCTATGGTCAGGGGCACGAACATGACGAGCGGATCACCGGCCAGTTTATCGA  
CGATCCACGGGCATTTTCGGCTCAATGCCGCCACCTTCGAGGCCTGATCCGGCCTCGCACTCCTCCGCTTT  
TCCTGCCCCACGGCAAATCGCAGCCAATAAAAAGCCGACCCACGAGGGTTCGGCTGGAAAAACCATAACAAT  
TGCGACCAAGATCCGCCAAAAGTGAACATGAGCGTGAAAAATCAGACACTGAGTTGCTGATCAGCAAGCGGG  
AAAGACCCGATACTCGCTTTGCAATGCCAATGAGTATTGAGAAAACAGCCTCATATTAGGCACCTCCCCCG  
CCAATCATGTTGATCTACGTCAAAGGAGGTAGCGAAGAGCGCATAGCCCCGATGATTTGTGCGCGCAGATC  
ACCCTTTGCTCGCCGTTAGCTGCCCGTTAACCCCGCGAACCAACCGGTAGGCCACCTCATCGAAATAG  
GAGAGCTGACCCGACAGCACCCGCGGGTGTACCTCGGCGCGCGCCCCAGCACCTCGATACGAAAAGT  
CCCGTTTCGAAAAGGGCTCGCACCTCCATCTCACCCACCGAGAAGGGGGGCTGACTCTGCTGCTCCGGCTG  
ATATTCAAGGGTACCAGCAAGATCTGGCCACCGGTCTCGACCAGCGCACTGATCAGGGCCGCATACTGG  
CGGCGCATCGCGGTTCGGCAGGGCGATCAGCGCCGCGCGGTTCATAGACCAGCCGGTAACGGCGACCCAGGC  
TCGGGGCGGCAAAAAATCCCCCTGAAAAATGCGCAGGCTGTCCACCTGATGGCACTGATAAGGGCCAC  
TTCGCTCACTGTGCGGCGAGCTGGTTTTCACTGAAGAACTGGCTGACGGCAAGGCTCGATAGCTCGAAA  
CCGTCGACCCGGATGGCCCTGAGCACTCAGCCAGAGCATGTGCGGGACTTGCCGCACAGGGGAACCAGCA  
CCGGCTCGTCCGCTTGCTGGGCTGACCACCAGGATTGCAGCCAGTGGTTGAAGTCCGCTGATGAAAGCC  
AATCCGGTTCTCTTCCCAACGCTGATGCCAAAACGCAGCTTCCATCGTTATTACCTTCTGTACTAAAGA  
TGCCTCAATATCACAACTTAACCGGCACCCGCGCAACCTCTGCCCTCCCCCTTTTGGCGCGCAGCTTCTG  
CGTGTATCGGGCGAAAGACTGGGCTTCTCTTTGCCATGTACCTCGCTGTGCGCAATGAGCGCTATTGGGT  
GCGTTTATGACGTGCAGAAGCATACCAACCCATGCAAAACCGTCATGGGTGTATGGCGATGAATGAATAA  
AAGGAGTGGCGTTGGCAGGCCAAAACGTGCCTGCCAACGCCAGACAGATCACGACAGTGTGGCGCGGGCG  
GCCGCCAGCTGACGGTCGATATAAGCAAAAATCGGGACGATCGGCAGGGAGTTCCGAGAGGCCAGCCGCTT  
TGAGATGATGCAACCCACTCAAGCGGTGAGTCTTTCGATTCGCAATGGGCCAACAGCTCCTCCAGCGCA  
GCCAAAGGCGCGCACTTCCAAACGCTCAAGTCTCAGCCCGCTCGCGGTCGCGAGCCGCTCATATAAGGAA  
GCGGCGCCCAAATCCCCCAGCAGGGCGCGAGCCGGTGCCTGAGACCCACGGGCAAACAGGATATTGTGAC  
CGTAGAGATCCCCGTGCATGATGCCCGCGCGGTGCAGATGGCCCCGCCACCGAGGCGATGCCATGGGCCAT  
CGCCAGCGCATCTGGCACACTCAGATGCAGCCCCCTCGGGATAGACATCCCCGGGTGCAGGAGTCCAGGCTC  
GGCGGCCAGCCAGATTGGCAAAGGCCGGGTGCATCAGCTCCATCACCCAGCGCCGGAATGCCGGAGGGGT  
GATCCGCCACCTTGCCCATCACCTTGATAAGGTTTGGATGAGAGCCCGCCGCCAGCGACGCTGCCATCTC  
GCAGCGGGCAACCCGTCCTGACTGGTACCGCCCCCTTGAACAGCTTGACCGCCACCTGACTGCCATCGCT  
CTATCGCTCGCTGAGTCACTTTCATCAGCAGGATTACCACAAGGGTGGCGCGATGGATAACGCCGGATG  
CCCTCTGCCCCAGCAGCTCGCCAGCACCAGCGTCTCCAGGCAAGGGGAGCGACATGGGCATCATCGAT  
GGCCCGCTCTCCTCCCTTCGCTAAAGGGGTTGCCGGAGTAGGCAAGCCATGAAAGGCGAGGCAGCGAG  
AGCAGCCACTCGGGGAAGCATTTCGATGCGGTTGGCGGCGATGCGCAGCAGCTCCAGCTTGCGGCAGTTGG  
CAAGGCTCGTCGGCAGCTCGCGCAGGCGGTTGCCCGCCAGCATCAACTTTTGCAGGGCGTCTACTGGCC  
CAGCTCATCGGGCAGCCTTTCAATTGCGTTATCGGTGAGGATCAGCCAGCGCAAACCGGGCGGGCAGCGCT  
TTGGCCGAAACTGTGACGATCTGGTTGGCTTAAAGCCACCATGGTGAGCGCCGGGCAACGCCCAACA  
CCTCGGGCAGCTCGGTAAGCGGTTCTCGGAGCAGAAGATGATGCGCAGTTTGCCAAACCCGGCCAGCTC  
GTCAGGGAGCGTGTAGCTGGTTGCCGGTCAAATCCAGCACCTCCAGCGTCTCTTTTCAGGCTCAAATC  
TCGGTGGGAACTCCGTGAGTTTTTCAGAGAGCTTCAGATGGCGGGCACCGCACAGTTACCTGCGCGCA  
GCTGTTCCAGAGTATGCATAACCGTTTTCTCAATCCTGATGATCTGCCTGATGGCACAGCGACCATCAGCG  
CGCGCCAAACCCGGTCCGGCGGTTTTAAAGGGGGGCATTATAAAGAATTTCGGGGCTCAGTTCTCCCTT  
TTGTTGCCGCAAAGGCTGTATCGACATGTAGCAAAAACGAGTTGGAGAGAAAAGAGAGCAAGATTGGGGT  
GTTCCAGCGAGGAGTGGTTGCCATAGTGGGGGCCAAAACCAAGTCCGGTTGGAACCTATTGGGATTTCCAA  
CCACAACCAACCTTGTGCGCCACTTAGCTGGCACACAACACTCAGCGAGGGAACGCCATGTCAATTAC  
TGTCCAACAAGGTCGCCATCATCACCGGCGCCAGCTCCGGCATCGGTCGCGCCAGCGCCATCCTGTTTGC  
CCGCGAAGGGGCCAGCGTCTGTCGTCGCGCCCCGCCAGCCGAGCTGGATTTGCTGGTGGAGGAGATC  
CGCCATGAGGGGGGCCAGGCGGCAAGTCTGGCGGGAGATGTGAAAAGCGAGACTTACGCCCGGATCTGG  
TGGAGCTCGCGCTAATCCGTTTTCGGCGGGCTCGATATCGCTTCAACAACGCAGGTACCACAGGCAGCC  
GGGCAGCGTAGAGGAGCTTGGAGCTGACGCAGTGGCAAGAAACGCTGGATACCAACCTCACCAGCGCTTT  
GTGGGAGCCAAGTACCAGATCCCCGCCATGCTGGCGCGTGGCGGGCGCTCGCTTATTTTTTACCTCTACCT  
TCGTCGGCCATAACCTGGGGCTGCCCGGTATGGCGGCTATGCGGCGAGCAAGGCGGGCTCATTTGGCT  
GACCCGGGTGCTGGCTGCCGAGTATGGGGCACAAGGGATTTCGGGTCAACGCCCTACTGCCGGGGGGCACC  
GACTCTCCATGGGGCGGGCTTTTGCCAATACGCCAGAGAGCCTCGCTTTGTGCGAGAATATGCATGCCC  
TTAAACGACTGGCCAAACCGGAGGAGATCGCCCGCTCGGCCCTTTATCTCGCGTCCGATGCATCCAGCTT  
TACCACCGGCAATTGCCCTGCTGGCCGATGGTGGGGTATCAATTTGTGCGACATGATGTTGTCGCCCCAA

CACCCTGCGACCGAAACCTTATCGTGAGAGCGTCTTATGTCTGATTACGCCCGCATCGCCGATGCCATCC  
GTTTTTATCGCAAGTCAGGTGGAGCGTCAGCCCCTCTGGACGAGATAGCGGCGCACGTGCACCTAAGTCC  
CTTTCACTTCCAGCGGCTGTTTCAGCCGCTGGGCCGGAGTGACGCCCAAACGCTATCTGCAAGTGCTGACC  
CTGGAGCGGGCCAAGGCGCTGTTGCAGGAGTCGCGCCCGCTGCTTGAGGTGGCCGATACCCTGGGCCTTA  
GCAGCGGCTCGCGGCTCTACGATCACTTCTGTGCAACTCGAAGCGGTAACGCCGGGGCAGGTACAAGCAACG  
CGGGGCCGGGCTGGTTATCGATCACGGGGTGCACGACACCCCTTTGGTCAGGCATTCGTGCCCCGACC  
CCGCGGGGGATGTGCAACTTCTCGTTTCTCGATGACCAGACCCCTGAGACGCCGCTGGCCGCCCTCGCCC  
ACAGCTGGCCTGAGGCAACGCTGCAAGAAACGCCATCACGCACCCAAGGGATCATCAACACCATGTTCTGA  
TGGCAGCAAGACGCCGGATCGCCCCATCTCCTTGACGCTGAGCGGCACCAACTTTCAGATCTGCGTCTGG  
CGGGCGCTGCTCGAGATCCCCCGCCGAAGGTGGTGAGCTACGCCCAGGTGGCGAGCGCCGTCGGCAATC  
CCAAGGCCGCCCGCGCCGTGGGGTTGGCGGTGGCGCCAAACCCGTCGCTTGATGATCCCCCTGCCACAG  
AGTCATCCAGCAAACCGCAAACCTCGGCGGCTATCACTGGGGCGAGACCCGTAACACAGGCGATCCACGCC  
TGGGAAGCGGCGAGGTATGAGTGAAGGTGGCCTTTATTCTGCTCGGCTGATGAGGAAAACAGGAATCTT  
GGTAGTGAGTCAGCAGACAATCAGGCAGCGCCGGACAAAACGTGCGGCGATATAAAAACGGGGACATAAGAA  
GAATCGGGGCGCAGATCGCCCCTTTTGTTGCTTTGGCAAGGTATGGCGCTTAACCACCCAGCGAATTGA  
CGAAGAGACGTAGGATGCAATAAGCGCAGCGCATTGCACCGTTTGAAAAATACAGTGTAATAAGATGTG  
AAGTAGGAAAATTTGCGGCGTAATCAAGTTGTTCACTACTCGTTGCGACTACGAACAGGCTTTTGTCTAG  
CAGTAATTCACAAAATTTGCGAATATAGGATCCATGTGCGAAGACGATCCTATAAAATTCGAAAAGCGG  
CGCCTATTCTATGAATCATTACAACCAATAAAAAATCACTCTCCGCTCGCTGAGTTAAGTCAACTCAT  
CATGCCTGGTGTCTGGGGTTCTATACGCACATAGAATGTACAGAGTTGTTTCGTAACAAACCTGAACAT  
GATGGCTCATTCAATGTTTTTACGATTGTGCTTGCTGAGGAGCGGGCAGATACCACCCAAAATATTGATT  
GTTTTCTTAACACCTAAGCTTATTTCGACTCAAGTCTTAAAAAGGCTGGAGCTTTGGTATTTCGTGATACAC  
GCGTCTATCAATTTACTTATGGCGGCACTGATTGACTTAGAAGGAGGAAAAGGATGGAACTTTTCAGGG  
AGTAAATTTGGATATAGGCAAATTAATACCAATGCCGTCTCAGTTTGTGCCACCTGAAAATGGGTCTCCAA  
TTCAATGGAACAAGCTACTGAAAAACAATTTTTGGAATGGCTCACATTTATTTGAATGGAGCGATCATAA  
AAAAGAAGTATTGCACCGTTTTTATGAAGATCCTCGCAGACTGCAAGAGCTATCAGAACAAGTCGAAAAA  
TATATTTCCAATACAGATTGCTGGCATGTGACAGAGACTTGGTAACCTAGTACTCCAGTACCAGTTAGTG  
TAGTAATCGCTACATTTCAAATGCTTATGATGGTAGCTTTTCAGGTAGAGCATGTTTGGCATAACAAAGG  
GACTCCACGGCCTTTAAGTCTTTCTGTGAATTAGAACATGATGACATTGTCACTGGCTTTTCCCTCTGCT  
CGAATCGAACATAGGATCACTAAACTTCCCATGTACGCGGGAAGAGGGTTATACAGATGTTTTCATCTGGG  
ATGAACAATAACAACCAACTCCTCATGGCATCCGGCCCAAGCTCCTTTATTTCAACAATCTCATTTAAGAT  
GCGCTCATTAGATCCTGAGCCTAGAGTATTTTCGGTTAAAAATGCAGATGGAAGTATTAGCCCACGACGG  
ATCAGCTTAATTTGGATTATCCAATAATAGCCTGATAGGTAATCCTCATTCAGATGACAATGGGGGGTGG  
CAGCAAAACGTATGTACAAAGAACAAGCAAATAAGTTGGCTGCTGAACGTCGATTTATTCAGTACCGCCC  
AGACCATAAAAATGATAAAAAAGAAAGCCGCCCAAAGCTCTAGATGACCTTCGAGCTCTTATCTCTACA  
TATGGTGAGAATGGAGTTTGGCTGTGGGATCCATATTTATCAGCTCTTGATATACAAGAACTCTCTTTT  
ATTGCCCATATCAAGGGGTTGATCTTCGAGCTCTAACACAACAAGGTTGGAAGAGTGAAGAGCTCAG  
ACAAACACTGACGGAGTGCAGAAAGTAACTGGAGAGGTTTATCTCTTGAGTTTCGAATGCAAAAAGGCCAA  
GCAGGATGGGATTTTACGATAGATTTATAATATTTCCATCTGGACCAGATGGAGCAATGGCTTGGTCAC  
TCGGCACATCCATAAACTCAGTCGGTACTGCTCATCATATATTGCAGAAAAGTTGATAATGCACGGCTAGT  
AATGGATGCCTTTATCGATCTTTGGGATCAACTATCCAAAACCGGAACATCTCATCTGGAAACACAACAA  
TGAATACGTCTAACGCATTACTCTTAGCTATAGAAAAGGCTACAGAAGCTGGACATTCGCTGCCCCGTA  
GCAACTCATTACTCTTATTGAAGCCAGCAATGACCCATTTCAATATTTGTCTGATTGGAACAGTAATTTA  
GAAATTTTCAATGTTATCCAGCTATATTATTCATTGCTAACCCCACTCTATGTAATACTCAGAAAAGAAA  
ACCCTGATGATCTCAGCAAAATAATTGAACTTCTTCGATGGCTTCGACAAAAATGCACAAATTTGGCATT  
ATCATTAGATAAAAAACATACTCTTCTAGTGACATTTTTCAGCATAGGACAATTTTTCGAAAACATATCA  
GAAGATTTCTGGGCCAACGCGCCAGATGAATTTAAACCTAATGATGAACATAATGCTGAACCTAGTAAAC  
TCATCAGTAACATAAAATTCATCTCTACAACCTCATGGACTAAATCCGCCTATCTGGGAACAAGAGGCCAT  
TGAACGATTTGAACAAGCTGATGTAAAAAAAGATTGGGTAGAGATAGCCAAGGGTTGGCGCCTCATAGAA  
CATGGATTTATTCTAGCGCGGTTATTACACAAGCCTCTAAGTGGTTAGATAGATTTTCTCCCCCTACATT  
TGTTTCATGCAACTTCTGGCCTACAACAAATGGCTTCTGTCTGATGAGTATAATGTTAGCTCTTTTACCTAA  
GTCAGCATTACGTCTAGGTGCAAAATCTGATAATCCATATGTTCAATTTTGCAGCAGTTTATAGAACAACG  
TCATCAAGAGTAAATAGAGAAACACTGGACTTTACATCTCGAGATTTTTTGTAGATAAATATTACAGCTAG  
TATCCAAAGATGACATCAGATGGTCTGAGTGGATGCATGTTTTTAACTTATATCCTTTGCAATTTCCCTGA  
GTTACAGATCCCCTAGGCCACGTTCTTTCCAACCTCGGATATATCCACACTTAAATTTATATCTGGACACA  
ATTAACCTTACACTGGTCTGGGCAAGACACAAGACTTTTTTGTTCAGATGCTTCGATTCATTTCAGAAAAGA  
ATGCGCCTTTAGAAAACGTCAGGCTATGTGGAATTTAGCTTATCAACGATGGGTATCTTGGCGATTTGG  
CCTAAATGAAAAAGATGCAAACTAACAAAAATTTGCAAGGTGTGAATTAGATTATGCCCTTGGTTGGTTATT  
TTATAGAATGTATTGATGACGTACAGCGACAACATATTTCTAGAATCATTAATAAAGAACTTCAAGCCGT  
GGAAGATATGTGGCATTTAGATATCACAGGATGTATCTCTGAGCTAAATGCCGTGCTTTCAAAAATGCAG  
CCGTTATTTTTTAGCTATAGGCGTTATAGGTACAGATGCAGATTGGATTGAGGAAAATAAAAATAATGAGAT

TGCCATTTCGACCCAGATAAGGAAATTTATCATATTTTAAAAATATGGCAAACCCAAAATTTACTAGAACCG  
TTACGTATATGTGTGTTTTTCGAAATACACAACATCCTTTACATTGACATGACTCATGTCAATACATATAA  
AAAGACGCCCTAAGGCGTCTTTCTTATTGCTGGGTGTTTCGAGCCAACCGGTTAGAGGCTATTCCCCCTCC  
CCACCTTACCCCGCCCCAATCAAATCGGGGTAATGGAGGTGATATGGGCATCCCCGTCCAGTGATTTGAA  
GATCTGCACCACGGCTTCGCCATGGATCGGTTTTGGCAAAGCGGCACAGTGCTCTTGCACTTGAAGCGGTAG  
TTGGTGCCAGCCACCACCTGGGTGGAGACTTCAAAGGGTACGTAAGTGCACCCCGACAAATCCTTTCAGCG  
CCTGATCAAATACCGCCTGATCCTCGGCGGTGAGCTTGTGATATGCGGTCCATCCACCCACCAACTGC  
TTGTTCTGACATATCAAATCTCCGTGCTCTATGATCCCGACTCGTTTTGGCCGTTTCGGGCTGCGCCCCGT  
TGATTCAAGTGGTTTTCCGGTCTCCACCGGGGTGTCGTCACTGCCGTTGGCGGATGACGATGAGCCAAT  
TTGCGCAGCTATCTGCAACTGGATCAGCCCTCCCCAGCCACAAGCCGCTGTTGACAGCGGGCTCAATT  
GGCATGAGAGAGCTAGTGCGGGATGGCAAAAATGCCCTGTACATATGACAGGGGCAAGGTGGCAAAA  
AAGCTGCTCGAAAAAGAAGATGTGTGGCGCAAACGATTGAGAAAAAGAAAAGACGCCCAAGGGCGTCTTT  
TTGCATTTTTATGCTCGAAGGGCAGAAGGGCGGAGCCGCTTATTCCCATTCGATAGTTGCGGGCGGCTT  
GCCGGAACGTCGTACACCACGCGGGAGATAACGTTGATCTCGTTGATGATGCGGTTTCGATACGTGACCG  
AGGAAGTCGTACGGCAGATGTGCCAGTGGGCGGTGATAAAGTCGATGGTTTTGACGGCGCGCAGGGCAA  
TGACCCAGTCATATTTACGGCCATCGCCATCACGCCAACGGAGCGCACCGGCAGGAACACGGCGAACGC  
CTGGCTTACCTGGTTGTAGAGGTGGGCTTTGCGCAGCTCTTCGATAAAGACTGCATCGGCGCGGCGCAAG  
ATATCGCAGTACTCTTTCTTCACTTCGCCAAGGACGCGCACGCCAGACCCGGGCCCGGGAACGGGTGAC  
GGTAGAGCATGTCTGAGGGCAGACCCAGCTCCAGACCAACGCGGCGCACTTCATCTTTGAACAGCTCGCG  
CAGCGGCTCGACCAGACCCATCTTCATCTCTTCCGGCAGGCCCGGACGTTGTGGTGAGACTTGATGACG  
TGGGCCTTGC CGGTCTTGCTGGCAGCGGATTTCGATAACGTCGGGATAGATGGTGCCTTGCGCCAGCCACT  
TGGCGTTTTTTTCAGCTTTTTTCGCTTCGTGCTCGAACACTTCGACGAAGACGCGGGCCGATGATCTTGC  
GGCTTCTGGCTCGTCAACACCGGCCAGCGCGGAGAGGAAGCGCTCTTCGGCTTCAACCTTGATGATGTT  
AGACCAAAGTGGTCACCAAACATCTCCATCACCTGCTCGCCTTCGTTTCAGACGCAGCAGGCGGTTGTCCA  
CGAAGACGCAGGTGAGGCGATCGCCGATGGCACGGTGCACCAGCATGGCGACCACGGAGGAGTCAACACC  
GCCGGAGAGGCCGAGGATCACTTCATCGTCACCCACTGCTCGCGGATGCGGGCAACGGCGTCGTCAATG  
ATGGTGGCCGGGTCAGAGGCATTCGACGCCGAGATGTCTTTGACGAAGTGTCCAGCATGCGGGCAC  
CCTGACGGGTGTGGTCACTTCCGGGTGAACTGCACGCCGATAGAACGCTTGGCTTCGTTGGCCATGGC  
CGCTGCGGGCAGGTGCGGGTCTGGGCGATGGTGGTGAAGTTCGGCCGGAATGGTGGTGACCTTGTACCCG  
TGGCTCATCCAGACATCCAGCAGGGCATTGCCGTTGTCGGCGATGGCATCTTCGATATTGCGCAAGAGGG  
CGCTGCTCTTGCAGCTTCGCCCAGCACTTCCACCTTGGCGTAACCGAATTCACGCTCGGTGGAGGATTG  
CACCTTGCCACCCAGCTGCTCGGCCATGGTCTGCATGCCGTAGCAGATACCGAACACAGGCACACCGGCG  
TTGAACACATACTCGGGGGCGCGGGGCTGCCCGCTTCGGTGACGGACTCGGGGCGCGGGAGAGGATGA  
TGCCGCTCGGATTGAATTCGCGGATCTGCTCTTCGGTTACGTCCAGGCCACAGTTTCGAGTAGACGCC  
GATTTTCGCGCACGCGGCGAGCGATCAGCTGGGTGTAAGTGGGAACCGAAGTCGAGGATAAGGATACGGTGC  
TGGTGAATGTCTTTAGTCATTTTATTCTGCATCAGGCTGATGTTGTCACAAAGGGCACGGGATAAAAA  
AGGGTGGAAAAACGGGGCGCAGGGCCCCGTTTTATCAGCCATCCGATAGTTGGGGGCTTCTTTGGTAAT  
GGTCACATCGTGGACGTGGGACTCTTTCATCCCGGCGCCGGAGATGCGCACGAACTCTGCCTTGGTGC  
ATGTCGTGATGGTGGCGCTGCCGGTCAGGCCATGGAGGAGCGCAGGCGCCCATCTGCTGATGGATGA  
TCTCTTTGAGGCGACCCCTTGTACGGCACGCGACCTTCGATGCCTTCCGGCACCAGCTTGTGCGGCGGCTT  
GTCAGTCTGGAAGTAGCGGTGCTGGAACCTTTGGACATGGCGCCAGAGAACCCATACCACGGTAGGAT  
TTGAAGGAGCGACCCCTGATAGAGCTCGATCTCGCCCGGTGCTTCTTCAGTACCGGCGAACATGGAACCTA  
CCATGACGCAGTTGGCGCCCGCGGCAATGGCCTTGGCGATGTCGCCGAGAGCGGATAACCGCCATCGGC  
AATCACCGGAATACCGGTGCCTTCCAGCGCGTCAACGGCGTTCGGAGATGGCGGTGATCTGGGGCACACCC  
ACGCCGTCACGATACGGGTAGTACAGATGGAGCCCGGGCCGATACCGACCTTGACCGCATTGACACCGG  
CAGCAGCCAGCGCCTTGGCGCCTGCGGCGGTAGCAACGTTGCCACCGATAATCTGCAGATCCGGATAGGC  
GTCGCGAGTCGCTTGGATGCGATCCAGCACGCCCTGGGAGTGGCCGTGGGAGGAGTGCATCAGCAGTACG  
TCAACACCGGCTTCCACCAGCGCAGCGACGCGCTCTTCGTTACCAGGACCGGACCGGACCGCAGCACCGA  
CCCGCAGACGCCCTTGTGATCTTTACAGGCGTTCGGCTTGCCTCAGCTTTCTGGAAATCTTTAACGGT  
GATCATGCCCTTGGATTTGAAGTGGCGTTCACCACCAGCACTTTTTTCGATACGGTGCCTTTGATCAGG  
GCAACCACCTCTTACGAGGGGCCCCCTTACGACCGGTGACCAGACGATCTTCTGGGTGATGATCTGTT  
CAACGGTCTGGGAGAGGTCAATCACGAAGCGCACGTGCGGCGGTTGATGATACCGACCGCTGATGTC  
GTCAGTACACCAGGGGTAACGGGCAAGCCATTTCTGTGGCTCAGCTCCTTGATTTGGGCGATGGTCATG  
TCAGGGCGCACGGTAACGGGTCAGTACCACGCCGCTCTGTAATCTTGACCTTGCACACTTCGGCAG  
CCTGCTGCTCGATGGACATGTTCTTGTGGATAAAGCCGATACCGCTTCTGGGCCAGTGCATAGCCAG  
ACGGGCTTCCGGTCACTGTGTCCATGGCAGCGGAGATCATCGGGATGTTCAAGCTGATGGCGGAGGTGAGC  
TTGGTACGCAGATCGGCAGTATTGGGAAGAACTTCGGAGTGGGCGGGAACCAACAGTACATCGTCAAGG  
TTAACGCTTCTTTGGCAATCCTGAGCATGGCAATATCTCACCGTTGAGGAAGTGGGGGTGTAATAATTTG  
CCGACGAAGTTTACTCACGCATTTGGTCACTGGTAAAGAAAGTTTTTTGAATTTTTTATGGCATAGCCCTCT  
TTTAGGCGGCCAAAACGCCAAAAAACCAAGATTATCAGTACGAAAAGCGCCATTTCCGGGGCAAAAGAGTT  
GGCTAACCGGTGATTTATGCAAAACCGGTAGGTGCCGACGCGCCTAACCCCATGCAAAGGATGATCG



ACAGGGGCTCAGGGGCAAGCGGCTTCTGCCCCCCCTCCCCTTGTCTTGTGTCTTGTATTGTCTCTTACC  
CTCGCGGTGACCACTCGCACCAGGATCATTCTCTTCTCAATGTCTTTGTCTCGGGCTGGATAATAAATTT  
CGCCCGCTGCCAATATATATATTTCTGGCACAACAAGGTTGCCTCTCTTTATTTATTTTCGCCCCACCATC  
CGCAGCAAGGTATTATCTTTATCCAGCAGGTGATGTTTTCAACGCTCCGACAATGTGCACCAGCAAAAATG  
CCAGCATGATATATGGCAAATAAATATGGACTGTGTGAGCAATATCCCTAACGGATTCACTGAATGGAAT  
CACATTTGGCCGGTTCATGGATATCTGGATTTCATCGGGATAATAGACCAGCCAAATATCGCGACACCTCGG  
CCAGCCGCTGCGGAATAACAGAGACCCGGACACCGGAATAAGCAGCGTTGAAATCAGCAAACCCAGTGGA  
TCGCCCTGGCTGCCAATGCCTCGTAAACAGGATATTGACGCACAGGCTCAGGCCACCCTTTAAACAAGGCG  
GAGAATGGCGCGGGGAGGATCAAGATCAGTGCAATCACCCCCAGAGATTTATGCAGGGCATAGAGATCC  
CATATTTCAAATTTACCATCAGATAACCGACAAGGTCAGGCCAATCATCAGCAAGGCAACCCGACCAGT  
GCAGCAAACGGGTCGTCAAACCTTAAGTGGGCTGAGGGATTGATAAGTACTCCAACTGGGGGCGAGCGA  
ACGCTGGTCAAGATGGTGGCGCCGTGAATATCAGCGGGACAAGATATATCAACGGCATCGAGACAAGCCG  
TAACTTGGCCAGATGCAGGCAAGCGCGGGGGCTTTGTGCGGAGCCATACTGCCGCGGATAAACGGCA  
GCGTTTTCCAATCTTGTCTTTTCTGCTGCTGACGCCGCTGCTTAGCGCCCTCCCCCTGTTTCGGGTTAAGA  
TAGCGGCCACCGTTTTATCCCGCCCCGCGGAGCAGACCACAGGTACGCCATTGAACCGATTTACTCCA  
TCCAGTACGGCGAACGGCCGCGAGCAGGCTTTTACCGTCACCCGCTCAACAGCGCCGTGCGCATGA  
TCCTGGAGCAGGATCTCGGGCTGGTGTGGCTGACCGGCGAGCTCTCCAATCTGGCGATGCCAAGCTCCGG  
CCACTGGTATTTCTCGCTTAAGGACATGTGCGCGCAGGTGCGCTGCGCCATGTTCAAGGGCAACAACCGG  
CGGGTGGCCTTCCGCCCCGAGGATGGCATGCAGGTGCTGGTGCAGGCGCGGGTCTCCCTCTATGAGCCGC  
GCGGCGACTACCAGCTGATCATCGAATCGATGCAACCGCGGGCGATGGCGTACTGGCGCTGCGTTTTGA  
AGAGCTCAAGCGCCGCTCGGGGCCGAGGGGCTATTTGACGAAAGCCGCAAGCGGCCGCTGCCCGTGAA  
CCACGGGCGGTGGGCTTATCACCTCCGCCACCGGCGCCGCCCTGCACGATATGCTGACGGTGTAAAC  
GGCGCGCGCCGATCTGCCGGTCTTTATCTACCCGACTCAGGTTAGGGGAGCGCCGCCATCAGCCAGAT  
CGTCGCGGCGATCGCAAAGCGAACAGCGTGCAGGTTGGATGTGCTGATCGTTCGGGCGCGGCGGGC  
TCGCTCGAAGATCTCTGGTGTTCACGAAGAGGTGGTGGCGCGGCCATTGCCCATTTGCCATACTG  
TGGTGTAGCGCGGTGGGCCACGAGGTGGATGTACCATCAGCGACTTTGCCGCCGACTTGGCTGCCCTAC  
CCCATCGGCCCGCCGAGCTGGTGGCGCCGATCAGAGCGCCCGCGCCAGCGTCTGGTTACACCTCAAG  
CAGCGGCTGCTGCAGGCGATGAGCCGCCAGCAGCCGCGCCGCGCCAGATTTATCTCTGCTGCAAAAG  
GGCTCGACCATCAGGATCCGAAGCGCGGCTGGAGCAGCAATCCAGCGCTCGACGAGTCTCCACCCG  
TTTGCAGCAGCTATTGCGCCAGCGGCTGCATCAGGGTGAGCGGCCCTCGCCAACCTTGAGTGCCTG  
CAGGGCAAGAGTCCGGAGCGCTCTTGGCAGCTGGCAAGCGCCGCCACCAGCTGGCTGAAGAGCGGCTTC  
ATGCCCTGATTGCCAAGCGCCAGGATCTGGCGAGCCACCGCTCGCCATGCTCACCGCCCGCTCGACGG  
GGTGAGCCCGCTAGCCACTCTGGGGCGCGGCTACTCCATCACCCGCACTGCGCGTGGCGACGTCATCAGC  
CGCGCCGATCAGGTCAACAGTGGCGACGAGCTCATCACACCCTGGCACAAGGGAACCTGCAGGTGCGGG  
TCGAGGGGATCGTCAAGGACTCTGCGCAGTAGATCGGCTGAGTCAAACGACCAGCCAACGAACATCCAG  
CCCAGCTGCTGGCTCGTTAATCAACCAAACAAAAGGCCACCACCGCAAACACGGTGGTGGCTTTTTTTA  
TCTTGGGTGCTGCCGCCGCTCACCCCTTGGCGCGGCGGGCGACCAGGTTGAACTTGTAAATCATCGCTCT  
TGAAGAAGTTGCGACTGAACTCGAACACGGTGCCATCTTGCAAAAAGCCACGGGAGACCTTCTCGATAAT  
GGGCTTGGCAGGATCGATAACCGAGCGCTCCACCACCTGCGCCGAAGGGAGCACCGGAATGATCTCCTGC  
TCGCTGCGGTCAATCACAGCTGCTTACCTCTTCGATGTAGTGGTACTTGGAGCCCTGCATCACCGCAT  
AGCTGAGATCGGGGAAGAGGGCGAGCGGCATCCAGGTCTCCTCCAGCGTCACCGCGATCTGGCGAATAAA  
GCGCACCCGCTTGACGTAGTAGACCAGCGCCCTTCCAGCAGATTTAGCCGCTCGGCCAGCTCGCTGCTC  
GCCTTGATCACCTCGAAGGCGAGAATGTGCTGTGGGTCTCGGCCGCCGATCGGTACCTTCTCATAGA  
GGCTGGTGTAGCTGATAGATGTGCTAGTTACCTTCTCTGCGCACGTAGCTGCCGCTGCCCTGAATGCT  
CTCGATGACGTTGAGTTAGTCACTGCTTGGGGCTGGCGCACCGTCAACCGGCTCACCCGAACTGC  
TCGCGCAGCTCGGCTTGGTGGGCGAGGATCGCCGGGGGAGCTCCCTTGCAGCAATCCACTGCTGGA  
TGGTGTGCGCTATCTGGCGATACATGGGTTTTTTTCGACACGAAAGGCCACCTCGTTCGGCTCTGCGCCATG  
ATAAATGGAAGAGGGCGCCATTCTACCCAGTTGCCCGGCGAGACAAAACGGCTTGGCTCATTTGACCTAA  
CAAATCATCATGAACAAAACAATACAAAAACAATAAATAATGAATTGTATGATACCACTCACAAAAATC  
AGTCGGCCGGTTTGTAGCATCGCTGTCACTTTCACCATGACGGCTTGTGGCAAGCCAACCTGACAGAG  
GATCATCATGAATCTGACCAGTCTTACCGGCCCCATCTCATCACGTTGCAAACCCGGTTTGGCGATCGG  
GATGCGGCCATTCATGCCCTGGCTGATCGGCTCGATCAGGCCGGCAAGCTGCACGACAAGGCCGCTTTTC  
TGGCTGCGGTTCATGGCCCGAGGGCGAGGGCCCCACCGCCCTTGGCGAAGGGCTGGCGGTGCCACACGG  
CAAGTGCAGTGCAGTGCAGGCGAAGCGGCCCTTTGCCGTCGCTACCTTAAGCGAGAAGCTGGGCTGGGAGGG  
ATCGACGGCCCTGAGCCGGTCAACCTGATCTTCATGCTGGCGATCCCGACCGATCAGGCGGGCTCCACCC  
ACATGCAGCTGCTCACCACTTCAACCTGCTTGGTGGATGACGATACCCGCGAGGCGGTGCTGGCGGC  
ACAGAGTGCAGGAGCTGATGGCGCTGCTTGGTGGTGAAGGGGATGGCGACAAGCAACCAGAAAAAGAA  
GACAACCTAAATACAAATAAACCCACTGTGGTCTGTGTACCCGCTGCCCGGGGGATCGCCACACCT  
ATATGGCTGCCGAGTATCTGGAAAAGGCGGGTCGCAAGCTGGGCATTCGGGTACTGGTTCGAGAAGCAGGG  
TGCCAACGGCATCGAGGATCGCCTGCCGCAAGAGGCACTCGATGCTGCGGTGGCCATCAAGGAGCAGGAG  
CGTTTCGCCGGCATCCCCGGATCGAGACGCGGTTGGCCGAGCCATCCGCCATGCCGAGCGGATCCTGA

ATGAGGCGCTGGAAGCGGCCAAGGCCGGGCGCACCGCCCCGACGCCAACCCAGCCAGAGCGATGCGCC  
GACCGGCAAGAAGGTGAGCCTCAAGACCGAGCTCAAGCAGGCGTGCTGAGCGGTATCTCCTTTGCCGTG  
CCGCTGATCGTGGCAGGCGGTACCGTGCTCGCTGTCTCTGTGCTGCTGGCCCAGATCTTCGGCCTGCAAC  
ATCTGTTTTGATACCGAGAAGCTCCTGGCTCTGGATGTATCGCAAGCTGGGCGGCGGCATGCTGGGCACCC  
GATGGTGCCGGTGCTGGCGGCTATACCGCCTATTTCGCTGGCGGACAAACCGGCGCTGGGCCGGGCTTT  
GCGGCGGGACTGGCCGCCAACATGATTGGCTCCGGTTTCCTCGGCGGCGTGGTCCGGTGGCCTGATCGCCG  
GTTACCTGATGCGCTGGGTCAAGCAGCATGTGCGTCTGAGCCCCAACTTCAACGGCTTTCTCACCTTTTA  
CCTCTATCCGGTGATCGGCACTCTGGTGGCGGGCAGCCTGATGCTGTTTGTTCATCGGCCAGCCGGTAGCC  
TGGCTCAACAACAGCCTCACCGAGTGGCTCAACGGCCTCTCCGGCACCAATGCGCTGGTACTGGGCGCC  
TGCTCGGCTTTATGTGCTCGTTTGACCTGGGTGGCCCGGTCAACAAGGCGGCTACGCCTTCTGCCCTCGG  
CGCCTAGGCCAACGGGCTACGGCCCCCTACGCCATCTTCGGCGCGGTCAAGATGGTCTGGCCTTTACC  
GTCAGCTTCTCCACCATGTCTGGCGCCGCGCTTTCAGACCTTCGAGATCGAGACCCGCAATCGACCT  
GGCTGCTGGGGCTGGCGGGGATCACCGAGGGCGCCATTCCGATGGCCATCGAAGATCCAATCCGGGTGAT  
CGGCTCCTTCCCTCGCAGGCTCGGTGGTCCCGGCGCCATGGTGGGAGCCATGGGGATTGGTCTCTCCACC  
CCGGGGGCTGGCATCTTCTCCCTCTTCTGCTCCACGATGGCGGCCACGGCGCCCTGATGGCTGCCGCCG  
TCTGGCTCGGTGCGGCACTGGTGGCACCCTCATCTCCACTGTGGTGTGATCGGCTGGCGCCGTACGC  
CATGCAGCGCGGCACCTATCAGGTGGTCCCGCAGAGTAAGGCGCATCTTCAACAACCGATTTTTCAACAG  
ACTATTTTTCCGCACGGCAGGCAAGGGCCGCGTGCCTCAGCAAAGGATCATTGTTCATGACAGTTTCAG  
AGTTCACATCACGCCGACATGCACTGGGATCGGGAGTGGTACTTACCACCAGGAGTCCCGCATCCTG  
CTGGTCAACAACATGGCGGAGATCCTGGCGCGCTTGAATCCGACCCCGACTACAAGTCTATGTGCTCG  
ACGGCCAGACCGCGGTGCTGGAGGATTAATTCGCCATCCAGCCCGAGAACAGGCCCCGGGTGAAGGCGCT  
GGTGAAGCGGGCAAGCTCATCATCGGCCCTGGTACACCCAGACCACCCATGCAGGTGAGCGGCGAG  
TCCATCCTGCGCAACCTGCTCTACGGGATGCGCGACTGCCTCAGCCTTGGCGAGCCGATGAAGATCGGTT  
ATCTGCCTGACTCGTTTGGTATGTCTTCCCAACTGCCCCACATCTGCAACGGCTTCGGGATTGACCGGGC  
CATGTTCTGGCGCGGCTGCTCCGAGCGCCACGGTACCGACAAGACCGAGTTCTCTGGCAGAGCAACGAT  
GGCAGCGAGGTGACCGCCAGGTGCTGCCGCTCGGCTACGCCATCGGCAAGTACCTGCCGGAAGATGATG  
CGGGCTGCGCAAGCGGCTCGAATCCTACTTCGAGGTGCTGGAGAAGGCCCTCGGTGACCAAGGATATCCT  
GCTGCCCAACCGCCAGATGCGGCTGCAACAGAACATCTTCGCCATCATCGACAAGCTGCGGAGGAG  
ATCTACCCCGAGCGGAATTCCACATGAGCCGCTTCGAGCAGGTCTTCGAGCGCATCGAGGCGTGCCCGG  
ACCAACTGGCCACCCTCAAAGGGGAGTTCAACGACGGCAAAATACATGCGGGTGCACCGCACCATCTCCTC  
CACCCGGATGGACATCAAGCTGGCCCCACCGCCATCGAGAACAAGATCGTCAACATCCTCGAGCCGCTG  
GCAAGCATCGCCTGGGCGCTCGGCTTCGAGTACCACCATGGGCTGTTGGAGAAGATGTGGAAGGAGATCA  
TGAAGAACCACGCCACGACAGCATCGGCTGCTGCTGCAGCGACAAGGTGCATCAGGAGGTGATGACCCG  
CTTCAATTCTGGCCGACGACATGGCCGAGAACCTGATCCGCTTCTACATGCGCAAGATTGTGACAACATG  
CCGGTGGCGCTGTGTGAAGACGGGGTACAGGTGGCCGACAAGCTCTGCCTCTTCAACCTGATGCCCTTCC  
CCCGTACAGGAGGTGGTCAACACCAGCATCCGCATTCGCGCCCAATCCTTTGCCCTGCGTGATGAGGCGGG  
CCAGCCGGTCCCCTACTTTCATCCGCGCCAAGCGCGAGATTGACCCGGGACTGGTGGACAGGCAGATCGTG  
CACTACGGCAACTACGACCCCTTTATGGAGTACGACATCCAGCTCTGCCATCCTCTGCCGCGCATGGGCT  
ACTGCACCCTCCATATTGAGGGCAACCAGCCGGGACTGGAGCAGCCGGTGACGGCCAGCGGCGAGCTGCT  
GGAGAACAATTTTTACCGCATCGCCCTCAACGACAACGGCACCTTGCAGATCCTGGACAAGCTTTCGCGGC  
ACCACCTTCGATCAGGTGCTCACGCTGGAAGAGGGCTCCGATGATGGTGACGAGTATGACTACTCGCCGT  
TGCGCGAAGAGTGGCTGCGCTACTCCACCGAGTTTTCGGGTGACCCGCGAGGTACCCATCAGGCGTGGCA  
GAGCATCGCCACTCTCAAAGTGCATGTCATGTCCTGCCAACCCTCGCCGAGCGCGCAACCGCCAGTGC  
AGCGGCCACCTTGATGTCATCTGCCGATCACGCTGGCGCATCAGAGCCCGGTATCGATATCGAGCTGG  
AGCTCGACAATCAGGCCGATGACCACCGGGTGGAGTGTGCTGATCCCCACCCCTTCCCAGGCGACACCGT  
GGTTTCCGATAACCAGTTTGGCTGCATCACCCGCTTACCACGACAGCGCCATGGCGAATGGGAAGCG  
GAGGGGTGGAAAGAGGCTCCCATTCGGTCTGGCAGCTGATGAACTTCGTCGCTCTGCAAGATGGCAAGC  
AGGGGCTGGCGGTGCTGAGCGATGGTCTGCGCGAGTTTTGAAGTGATCGGCGAGCAGTGGCACACCCCTGGC  
GCTCACCTGCTGCGCGGGGTCGGCTGCTCGGTAAGAGGAGCTGCTGCTGCGCCGGGTCGCCCTTCC  
GGCATCAAGCTGCCACCCCGGACTCCCAGGTGCGCGGCAAGCTCAGCTGCCGTTTCAGCTGCTGGCGT  
TTGCCGGTGCATCACATCAGCGCCAACGTGATGCAGGCGGCGCAGCTACCTCACCCCGGTGCGCTGCTA  
CAACAAGATCCCGTTGCATGCCATGAAGCTCAACAAGGCAAGCTTACCACCCCGCTGCACTTTCAGTCTG  
CTCGCCATGGATCCCTCCGGTCCGGTGTGAGTGCCTGAAAAAAGCCAGGATGAAGAGGCGCTGGTGA  
TCCGGGTCTATAACCCGAGCGAGCAGGCTGTGCTTGAGGGTGGCAAAGTGACCAGCCAGCACACCTTGG  
CGACTGGCAAGCGGTGCGGATGGACGAGCAGCCCCCTGCCCTTGAAGTGGCCGCTGGCAAGTTTGGCGAG  
CTGGCGCCGTGCCACTCCCGCAGCGTGCCTTTTCGGGTGGCTCGCGGCTAACCCACCGGTAACACCCACAG  
CTAGCAACAGGCGAGGAAGAGTTCATCCCTCCCGCCTGTTTATCCCTTCAAGCTGGCCTGCCCGCTTG  
ATAAAGGCATAAAAAAAATCCCCGCAATTTGGCGGGGATGTTTATTGGGTTCTGCTTCATCCCACGAGCG  
GGAGAGCACGCTTAGCTGGCCTTTCGCGAGGATCTGCTCAAGGTAGTTCGGCGAAGCGGTGACCGTGCATGCT  
CCAGCAGTTTTCGGGAACATAGAGATGGAGGTGATGCCCGGGAAGGTGTTGATTTCAATTCAGCAGGATCTC  
CCCCCTCGTCCGGTCAGGAAGAAGTGCATGCGGGAGAGATGGGTGAGTTTCAGCTGACGGAACGCCCTTGAGG

GCATACTCGTGGATCGCATCGGCCTGCGCCTGAGTCAGCCCCTCGGCACGTAGTGCCGTCTCGGTATGGC  
TGGCGCTGCTGTACTTCTCTTCATAGGTGTAGAACTTGTCTGCGGCACGCAGATCTCGCCCGGATAAGT  
CGCCACCAGCTCGTCCACATACTGGTAAACCGCCACTTCCAGCTCGCGCGGCTTGACCGCCTTCTCAATC  
AGTACCTGCTCGGAGTAACCGAAGGCATCGGCAATACCTTTTACCAGATCCGCTTCGTTGCTAGCGGAGT  
AGCAGCCAACGGAAGAGCCTTGGGAAGCGGCCTTGATAAAGACCTTGCCCCACTTGGCCAGCGCGGCTTT  
GGCCTCGGCCAGCGCCGTCTCATTTTGTCTCGGTGAGGAAACAGGTACGGGGTGTAGGAATGCCAATGGCG  
GAGAGCCACAGCTTGGTGCTGATCTTGTGAAAGCAGATCTTGTCTCGCCTCGGCATCACAAACCGAGATAAG  
GCAATCCGGCCAGTTCGAGGAAGGATTGCAGATCGCCGGTCTCACCCGGGTAGCCGTGGATGCAGGGCAC  
CACGTAATCCACCGGACGGGCCACGCTGTCAAACGAAAGCAGCTTGTGAGCCCCAGCTTGCACCTCGCG  
CCATCGGCACTGAGCCAGCGATCGGCGAACATCTCGACGCGGGTCACTTCGACACCGGGCAGAAGGCCCA  
GTTGTTGCTCGAGGAAATTGGCGCTGCGCAGAGAAACCTCGTGTCTCGGAGCCACCGCCCGCACAGCAG  
CAAGACATGCATGTTCTTTCATTAGATGTGATCCCTTGGGAAAAGCGCCTCGTATGACCATTTGATAAG  
CCAACCACCATAAAAAACCGGACGAAGCCAGATACGAACATAAGTGCAGCGCCAGTGTAGCAAGGGAGATCA  
ACCCTTGTGAGCTGATGGGAGACCCATGACCCCACTTCTTGCAGTGAAAAGTCTCCCTGTGTCAAATC  
GGGACACATTGCACCTCAGCGCGGGGGATCGACCCTTCCCATGCCGTTGCCATTGACCCGAAACCGCCG  
GCAATGCTGTAGCGCTCTGATTGGCAGGCAGTACCTCGTGGGAAAACCTCGGAGAGAAAACATGACCA  
GCCGCCCCCCTTGGGGCTGACATCCATCAGAAACTGCTCCTTGTGTCATACATGCGCAGCACTCCACC  
CGCTTCGGGCAGCCAGTCTGTTGAGGTAAAACACGGTGGTAAGACGGCGGTTGGAGCGACCGGCAAAG  
GCATCCCGATGGGTGGCGTAAAAATCCCCGCTGCGATAGCGGGCAAGTGGGCTCGTAGTCGAACAATC  
CCAGCATCAGCATCCGTTGGCGGCAAGACGCAGGGACTCCATCCGGGCGAGGTAGTCAGCCACCGGCGC  
ACCGAGGGAGGGCTCCAGCCAGTGGATCTGGTACGGCGAATATCGGGATTGCCCTGGTGCAGGGCGTCA  
CGGCCGATCCCGGCCGGTTGCCATTGCCTGGCAAACAGGCTTTGAGGGCATCCACCTCGGCGGGGTCA  
AAAAATCATCCACTATCACCCATCCCCGGGTGTAATGGCATCCATGGCAGCTTGATAGTCCAAGATTGG  
CTCACAATGAGTGGAAAGAGGGCGCTTTTTAGCGACTTACCGGCAAAAGTCACAAACCGGTTTGTCTCTCT  
TGAGAAGTCCCAACATCAATACGCGAGTTGCTGACCGCCGCCCGCATTTTTGTGCGCCAGTTGTGATCCC  
GCGCTGCCATGGAGCGTATTGGCTGTGAAACTGTGATGGCCCTTGCAATCGGGACGAGGAGGCCGCCGCG  
GCCTCCTTGCGGTACCAAGAGCCAACCGATAACCGTAGCCGCATCGCCATGTTGCTGTTTATCCGGCGCTT  
GTCTCTGTCCAGCCGAAACCACTACGGCAACCCCGCATCACCCACGAAAGGATCTTCTCATGCCT  
CTGCCCGATCTCACTTTGCAACGACTGGATGGTACCCCTACCCGCTGACTCAACTGGCGGGCAAGGTAG  
TGCTGGTGGTCAACGTGGCCAGTCTGCGGCTTTACTCCACAATATGAAGGGCTGGAAGCCCTCTATCG  
GGAGCTCGGCCCAAGGGGCTGGTGATTTTTGGGCTTCCCTGCAACCAGTTTGGCAATCAGGAGCCGGGG  
GATGCGGACGAGATCGCCCGCTTCTGCTCCCTCGACTATCCGGTTCAGCTTCCCCATCATGGCCAAGTGGC  
ATGTCAACGGTGAGCATGCCACCCCTTCTACCAGTGGCTCAAAACAACAGAAACCGGGATTTCTTGGGCT  
GGAAACGTCAAATGGAACCTTACCAAGTTCCTGATCGACCGGATGGCAACGTGGTGGAGCGTTTTCGCC  
CCTCAGGCCAAACCGGAGAGTCTGGCCGAGCAGATTCGCGAGATGCTCTGATGCTCCCGCACCGTTTTAC  
GCCACTGCGTTGAACGATTGTGTGGCGGTGGTGGCAGCTACTGCGCAGCGGCCGCTTTTTGTCTATA  
TTACGGCCCCGTTATCTTTTTTCATATCGTGGCTGGCCCCAACACGCGGCTGCCGTTGAGCCAAAGGCT  
CATCTCAGGAGTTTCTCTCGAACATGTCAATCAACGAACTGGGTCTGTCTCCGCATATTCTGCGGGCCGT  
CAAGGAGCTGGGTTACGAACAGCCAACCCCATCCAGCAGCAAGCGATTCCGGCCATTTCTGGCCGGTTCAG  
GATGTGCTCGGCGGCGCTCAGACAGGCACAGGCCAAAACGGCCGGTTTACCCTGCCGATGTTGCAGCGTC  
TGCTGGCCAACCACGGTCTGGCCGCTCGTCAAGTTCAGGTCGCGCACTGGTACTGACCCCGACCCGCGAACTGGC  
GGCACAGGTGGGCGAGAGCATCATCAAGTATGCCACCACCTGCCGTTCAAGACGCTGATCGCCTATGGC  
GGTGTGAGCATCAAGCCCAATCTGGACGCCATCAAGCTGGGGGTGGACATTTCTGGTTCGCCACCCCGGGC  
GTCTGCTGGATCTGCTGACCCAGGGCGCCCTGACCTGAGCCAGCTGGAAGTGTGGTACTGGATGAAGC  
GGATCGCATGCTCGACATGGGATTTATCGTGCACATCCGCCGATCATGAAGGCGCTGCCTGCAGAGCGG  
CAAACCCGTCTTCTCTGCCACCTTCTCAAACGACATCAAGGCGCTGGCGGATGACCTGCTGAACGACC  
CCACCCTGATCGAGGTGGACCCAGCAATACTGCTGCCGAGCAGGTGACCCAGCGCATATTCAAGGTGGA  
TCGGGAACGCCCGCGGAGCTGCTCTCCACATGATTGGCCGTGGCAACTGGCAACGGGTGCTGGTGT  
GTTTCGACCAAGCAGATCGCCGACCGCTCGCCAGCAGATGCAAAAAGATGGTCTCAATACCGTGGCGA  
TCCACGGTGACAAGAGCCAGGGTGGCCGCAACCGGGCGCTGGCCGATTTTCGCGAGTGGCGAGGTGCGGGT  
GCTGGTAGCGACCGATATCGCCGCCCGGCTGACATCGATCAACTGCCCTACGTGATCAACTTTGAA  
CTGCCCCAGATGGCGGAAGATTACATCCACCGTATCGGCCGTACCGGCCGCGCCGCTCGTGGCGGCGAGG  
CCATCTCGCTGGTACGCCAGGACGAGCTGGGTGAGCTCAAGGCGATCGAAGCCCTGATCGGCCAATCCCT  
GTCCGTAGAGATCCTGGAAGGTATGAGCCAAGCGGCAAGCCGAGTCGCCAGACTCTGCCCGGTAGCAAG  
CCGGTGCAGAACCCGCTCGGGCTCGCGGCCATGCCAACGCCAAGAGCAGCAATGCCAAGGGCAAGCCAG  
CCGACGGCAAGGGCAAAGCCAAGGGTGCAGCCAGCAAAAATCCCGCCAGTCTCTCAAACAAGTCCCG  
CAAGCGCAAGTGGTGGGCGAGGATATCGGCTTTGCGCCGATGCGCCGCTGCCCCAAGCAATGCGCGAC  
AGCTATCAGGAGAGCAGCGACGAGTAAGCTCGCACGACGCTAACTGCCAAGCCGAAAGAGGGAGCCACTA  
AGGCTCCCTCTTTGCTTATGAATCGCACGGAGCCGTGCAAGTGTTCCTGCAAAATGCTCCGCTCGGGCTC  
AAACCAGCGAATGGCGCACCGCGGGTACCATGGCTGGGCGGCGTGAACCATCGAGCGGATTGAGCTG  
CAAGAACTCGAACAAGCCAGCCTGCATATTGACGTTCCAGAAGCGGCCGGCGAGGGTGAATTGCAACCGT

CGTTCCTCGATCTCGGCCAGCCCGTGCTGCTGCCAGGCGGCAAAAAGCGGCATCAGATGGGTGAGCAAAG  
GCGCTGGCAGACGATCCAGCGCCAGCACGCCGCTGTCGAGGGCGCCACGCAGCAGACCGTCCATCCTTGC  
ATTGGGATTGCGCCCCATCACCATCCCGGGCGCCGCTTGCCACTGGCCAGCGCGTCTGCCAGGGTGCC  
AGATCCCGCCATACATCAAACCGTGACCAAGAATGTTGCCCCCGCACCGGCACCAAAGGGGAGGATCT  
CCGCACCGCGCTTGGCCATCTGGTTATAACGACTCTGCTCGGCCGGACTGCGCCGCCAGTGGCTGCAAGA  
GAGACGCTCCCAGCCGTGAGCTTCCAGTTGCTCCCCGCCATAGGCATACATGGCCGCCCGCTGCTGGCCA  
TCGGCGAGCCAATCCAAGGTGCCCTTCTCCTGCGCCGCTCCAGATTGGTGGCTGCATGGCGATGAGCT  
GGTAGAGATCGACCCCGTGTACACCGCTCGCCATCACATCGCGGATATCCTGCTGCCATACGACATCATC  
CTGACCGGGCAGACCAAAGATGAGATCCGCCACGATCACAGCCGCATCATCCCGGGTCCAGCTCACCCAGA  
CGGGTCAGCAAGGTCTCCCTGTATCGAAACGGGCCGCTGCTGACGCACCCGGGTATCAAAGCTCTGCA  
CCCCGAAGGAGAAGCGGTTAAAGCCCCCGCCAGCGCCACTGCCATTTCTCATCATCAAAGCGTTGAG  
CCGCCCTCCAGCGTACCTCGGCATCGGCCGACAAACGGCGGATCACGGCGGGCAGCATGGCC  
AGCTCGTCGGCGCTCATGTGCGTGGCGTACCACCCCCACATAGACGGCTGAAAACGGCATGCTCTGCC  
CCAGCGGGGTGTGAGCCGCTGCGCAAGGGAGGCGCAGAGGGCGTTGACATAGCGGTTAATCCGCGCCGG  
GTTGGCGCCATTTTTCAAAGAAATTGCAGAAGCTGCAGCGCTTTCGGCAAAAACGGAATATGGATGTAGAGG  
GCGCGCTCCTCAGCTTCACTCTCTCGCTGCCACCAGCTCTGCCAGCCAGCCTCATCCAGCGGGAAGGGGC  
GCATCCCTCCCCGACTGGCGTGAGCCGAGGTCTTGGCGCTAAAAGCAAACCTTGAGGGGATCCGGCGTGGC  
AATACCGGTTCATGGAAGGGGTGAGATTTCATGATGGTCACTATTATTAGCAAATAATGACAATGATAACGA  
TTATCGTTACTGGCAATTTGTTCTGGATCAACCCGAGGAGCAGCCCCCTCCCGAAAGGCATTTTGGCAA  
CCTGCATTACCGATCTGCTTAACAGATTATTTACTCAAGAGTGGTTATCGTGTGCCGATAGAGAACCATC  
TCCCGCCGTTTCTTCGTCTACGATCAAGATGATACGGGATCACATAACAAACACCAAGCGCATGGAACCTG  
CCCAAATGCATAACCTCTCCTTGAACCTGGAAAATATTCTCCCTCTTGGCGTGGTTCATCAGCACCACCT  
TTGGCCTCTGCTTTCGAACTCTCCGCTGGCTGCAACGGGATCTCGCCATCCGGCTGGCAGAGGAGAAAAGT  
TGAGAGCATGGCCAACACCTATATGGATCAGGTGAACGTGCTGATGATGACAGGTGGCATGGCCAACCGG  
CAGATAGTGCAGACCAAACCTCAAGAGTGAAGCGGGCATCGTTGAGGGCCGCTGGTGGCGCACCGGGCCG  
TCAGCAACCTGTTTGGCCCGGGTTCATCCGGATCAGAAAGCGCAGGATCCCTCGATGAGCGTGGCATCAA  
TCAGGGCGAAGCCATCCTGGAGCAGCAGGGCAACCGGCTCACCTGATCAAACCGTTCAAAGCTTACAAG  
GAGTATCGCGGCACCCAGTCCCTCACCTGTCCAGGATCGCTCAATGAAGGAACAGTGCATGGGGGCTGTGCGGA  
TCAGTTATCAGCTCAGCCACACCTTCGGCGAGATCCGCCAACAACCTGATCCTGAGGGCGAGTCTGGC  
CGCCGTTTTCAGCATTGGCTTCGGCTTGGCTCTGGTGGGTATTGCAACGTTACGTGAAACACCCACTGCGC  
CAGTTGCAGCTCACCATGATCCGGATGGCCAAAGAGCGCGACCTCGCCCTCCCTTGGTCAATCACAGCC  
GGGATGAACTGGCCAGATGACCCGCGCCGTCATGACATGGTGCAGGGCTTCCGCCACAGCTGCAGGA  
GGTGAAGGGGCAACCCACCAGCTCTATCAGGAGTCAAACCAGATCCGTCAGGTGGCGACCCAGACCGAA  
AACTCGGCCCGCCAGCAAGAGGGGATGACCACCAGGTGCGCCGCGCCGTCAGCGAGCTGGCCGCCAGCT  
CTCACGAAGTGCGGAACATGCCCGCCACAGCGCCGAGCTCTCCGCCCTACCAATCAGGATGCCGCTGA  
CACCAGTGCCTCGCCAAACACTCCATCACCAGATATGGGCGAGATGTCGGCAGAGATCGATCGGGTGGAT  
CAGGTGATCCAGCAACTCGACAGCCGCTGCCTGGCGGTTGACGGCGTACTCGAGGTGATCAAGGGAATTG  
CCGATCAGACCAACCTGCTGGCCCTCAACGCTGCGATTGAAGCGGCTCGGGCAGGCGAACAAGCCGTTGG  
CTTTGCGGTGGTGGCCGATGAAGTGCGGGCCCTCTCCAACCGCAGCCGCGCGGCCAGCGAAGAGATCTCC  
CAGATGATCGCCGCCCTGCAAAAATGAAGCCAGAGCGCAGTTACGGTGATCGGGGATGCAAAAAGCAAAG  
CCGATGAGAGCATCAGCAAGACCGAAGCGACCCCTGGCAGCCATGCAGAACATCATCGAGCGCATCGCCCG  
CATCAATGACCTCAACGCCCAGATGGCTCAGTCGGCCGAAGAGCAGGACAGGGTCTGCCATGAGGTAGAC  
AGCTCGGTGAGCGATATTCGCAACACCTCCAACGACACCCCTGGGTGAGGCGCACGCCGCCAACCTCGCCA  
GCATCCAGCTGGTGGAGCAGTGCCAGAACTGGAGGCACTGCTGAAAACCTACCCTGGTAATGCACTTC  
ACCAACGAAAAAGCGCGACCCGAGGGTTCGCGCTTTTGTCTTATGGATTGATTTGGCCGAGCGGCCGCT  
TGCTATTTCCAGCGCGCGTTGACGATTAACAGCGCCGCCAAGATAGCTTTAACGGGCGTTGCGGGTTGCA  
ACGGCATCCGCCAGGTTGCGCAGCAACACTTCGGTATCCGCCCAACCGATGCAGGCATCTGTGATGCTCT  
GGCCGATGGTGGATTACACCCCTTCCACCAGATCCTGACGGCCTTCTACCAGATGGCTCTCCACCATCAC  
CCCAAACACCGCCTTGCTGCCGGCACGCAGTTGGCCGGCCACATCCTCGGCCACCACCATCTGGTTCTTG  
AACTGCTTGCTGCTGTTGGCATGACTAAAGTCGATCATCACCTTCTGCGGCAGACCGGCTTCTCCAGCC  
CCTTCAAACTTCGCTGACATGGGCGGCGCTGTAGTTTCGGCTCACGACCACCACGCAGAATGATGTGACA  
GTCCGGGTTGCCGCGGGTTCGCCACGATGGCGGAGTGACCGTATTTGGTAACCGACAGGAAGTGGTGGCGC  
GCACTGGCGGCACCGATGGCATCGATGGCAACCTTGATGGTGCCGTCAGTGGCTTCTTGAAGCCACC  
GGCAGGAGAGGCCGGAGGCCAGCTCGCGGTGACTTGGGATTCAGTGGTACGGGCACCGATCGCACCCCA  
GCTCATCAGATCCGCCACATATTGCGGGGTGATCATGTGAGGAACTCGGAGGCAGTCCGGCAGCCCATG  
TCGTTGAGATCCAGTAACAGCTTGCAGCAATGCGCAGACCGTCTGTTGATCTTGCAGCTGTTGTCAGGT  
ACGGATCGTTGATCAGCCCTTCCAACCCACTGTGGTGCAGCGGTTTTTTCGAAGTAGACCCGCATCACGAT  
CTCCAGCTGACCTTTCAGCTCGTTCGCGCAACGCTTGGAGCGCTTACCATACTCCAGCGCGGCAACCGGA  
TCATGGATGGAGCAAGGGCCAATCACCACCAGCAGACGATCATCTTCGCCAGCCAGGATATTGTGAATGG  
CCTGACGGGATTCAAAACCGGTGGACGAGGCCACCTCGGTAGCCGAAAACCTTCAAGCACCGCAACCGG  
GGGTAATAACTCTTTGATTTCACTGATACGAACGTGCTCGGTTTGTGATGCTGCATGACAAGGCTTCTGCT

AGATGACTGCGATTAGGAAATCTCAACATAGCCCGCGACAGGGCATGTGTAATAGGAAATTACAGCAAT  
CACAAAACATATTTTATATATCAATCTTGCAAGTTATTGAAATGATGCTAGGCCGAAATGGAAGTGC GGATG  
AGGAAGGCCAAAAGGCCCGCTCAGCGCGGGCCCGAAGCGTTCGGTATGACGGGTTTGTGAGTGATCAGCC  
ACGCTGGCTGATACTGGCCAGCTTGTGCGAAGTAATCCGGGAAGGTCTTCGACGTGCACCTGGGATCATTG  
ATGGTGACCGGTGTATCCGACAGCGCCACCAGCGAGAAGCACATGGCGATACGGTGTGCTGTAGGTAT  
CGATCTCGGCATGCTTGAGCTGGGTTCGGCGGGGTACGGTGTATAAAGTCATGCCCCCTCTCCACTTCGAC  
GCCCAGCTTGCGCAGCTCGGTTCGCCATGGCGTGCAGACGATCGGTCTCCTTCACCCGCCAGTTGTAGATA  
TTGCGAATGGAGGTTCGGCCCCCTCGGCAAAACAGCGCTGCAACGGCGATGGTCATGGCCGCATCGGGAATAT  
GGTTCATGTCCATATCCACCCCGTGCAGCGGGCCTGCTCCGCTCGATAAAAATCATCGCCCCAGGTGAT  
GCGCGCGCCCATCTTCTCCAGCACATCGGCGAAGTGGATATCACCTGAATGCTGTGCTTGGCCGATACC  
GTGACCCCGCACCTTGCCCTTGATGGCGCCCCCGGAGGAAGTAGGAGGCGCTGGAGGCATCTCTTCCA  
CCAGAAAGTCACCCGGCTGATGTAGGTCTGGTTGCCCTTGATGTAGAACAGCCTGTAGTTGTGCTGCTC  
GATGACCACCCCGAAGTCTTCATGATGTGCAGGGTGTGTCGATGTAAGGCTTGGAGACCAGCTCTCCC  
TTGATGTGAATCCGGGTATCACCGGCCGCCATCGGCGCCGCCATCAAAAACGCGGTTCAGGAACTGGCTGG  
AGACGGAGCCATCGACGTGCACATCGCCGCCCCACAGCCCCTTGGCATCCACCACCAGCGGCGGATAACC  
ATCGTGTGTTGAGGTATTGGATATGGGCACCCGCTTCACGCAGGGCATCCACCAGATGGCCGATGGGACGC  
TCTTCCATACGCGGCTCGCCGCCAGGGTATATTCACCGAGCCGAGGCACAGGGCGGCGCACAGCGGTC  
GCATCGCAGTACCGGCTTGGCGAGGAACAGATTGACCGGCTCTTTCACCGCAAAGCTGCGCCCCAGACC  
CTGCACGGTACACTCGGTCTTGTGCGGAGAGAGCTTGTACTTGACCCGAGCTGGGTTCAGCGCAGCCAGC  
ATATGACGAATGTCATCGCTGTGAGCAGGTTGGTTCAGACGGGTGGTCCACGAGCCAGCGCCGCCAGCA  
GCAGCGCACGGTTAGAGACACTCTTGGAGCCGGGCAGATTGACCTCACCGGCCACATGAGAAATGGGTTC  
CAAACGCAACGAATTCATAGACTTCTGTGCTATCTCAAAAATAAACGCCCTGTTCCGACGTTAACAGCCT  
GCGTCCCGCTCGGCAAGGGCACTTTCAGGGGAAAATCGCACGGTAAACGCCAGCGCGCTGGTTCTGTTGAA  
AAAAAGACGCCGGGGTATCCCCGGCTTGAATCACTGCAATAGCTGGAAGCGGCTCACGAGTTGTAC  
GAGAGGCCGCAAGCAAGCACGTATGACTTTCTTTTCAGCCGTGGCGCTTGGCAAAGTCATCCATAAAGC  
TCACCAGGGCCTTACCCCTCCAGCGGCATGGCGTGTAGATGCTGGCGGCATGCCACCAGCAATGGC  
GTGTCTTTGAGGGCCAGCAGGCCAGCGGCTTCCGATTCGGCCAGGAACTGCTTGTCCAGTCGGCATTT  
TTCAGCTGGAACGGGATGTTTCATACGCGAAGCCAGCTGACATCCACCTGATTGCCATAGAAGCTCAGT  
GATCGAGATAGTCATAGAGGAAGTCCGCCCTTCTCCTTGTGTCGCGCCTCCATCGCTCAGAGCCACCTG  
TTCTTTTCAGCCACTCGAACACCAGACCGGCCAGATACCAGGCGTAGGTGGGCGGCTGTTGAACATGGAG  
TCGTTCTTGGCAGTGAGCTGGTAGTCGAAAATCGACGGTACATCAGCGCAGGCTGATCCAGCAGATCAT  
CGCGCACGATGGCGATGGCAAGCCCGGACGGCCCGATATTTTTTTGGGCACCAGCATAGATGATGCCAAA  
GCGGCTCACGTCGAGAGGGCGGGAGAGAATGGTGGAGGAGAGATCTGCTACCAGCGGCACCTCGCCGGTG  
GCCGGGATGTGCAACATCTCGATGCCGTCAATGGTTTCGTTTCGGACAGTAGTGAACATAAGCCGCATCGG  
CTCGAAACGCCGGGGTTCGGCAGCAGGTGAGAGATCCCTGCTCGTTCTTGGCAACCCCTGGAAGTCTG  
GATATCGCCATATTTTTTTGGCTTCATCCACCGCACTCTGGGACCAGACACCGGTCAGCAGGAAGTCCGCC  
TTCTTGTGGCCCCCGCCAGCAGGTTTCATGGGCACGGCGGAGAACTGACCGCGCCCGCCCGCTGCATGA  
AGAGCACCTTGTAGTTGTCCGGCACCGCCAGCAGCTCACGCAGATCCGCTTCGGCTTCTCGGCAACCGC  
CATGTAGGGCTTGGCCGATGGGAAAGCTCCATGACCGAGGCTCCCAGCCCTGAAAATTACAAAATTTCG  
CGCTGGGCGCGCTCCATGACTTCAACCGGCAGCATGGCGGGGCCGGCGCAGAAGTTGTAATCTGTTTGC  
TCATGACGCTTTCCGTGAGTGGATGAGAGTAATCGATGACTTGTGAGGTTTTACACAAGAGCAGCCAGCG  
GATCAAAGGCTTTTTTGGGAGCTGGCTCAACCTTTTACCGTCACTCTGCGTCCCCCTTGCAGTAGAAAAAG  
CCCTGAACGGGTTCAGGGCTTGCAGGGAACATGCACAGAAATGGCGGGCAGAGCGCATAAACGACCACAGC  
TCAGCCATTTCTGACAAATTTACAGTTTGGCGGTGAGCTCAGGCAGCAGGGTGAAGAGATCCCCACCAG  
CCCCTAGTCCGCCACCTGAAAGATGGGGGCGTCTGCTGTCTTGTGATGGCCACGATCACCTTCGACTCC  
TTCATCCCCGCCAGATGCTGGATGGCGCCCGAGATACCAGCCGATATAGAGCTCCGGCGCCACCACCT  
TGCCGGTCTGCCCCACTTGCAGATCGTTGGCGACATATCCTGCATCAACGGCAGCCCGCAGCCCCCAC  
CGCGCCACCCAGCTTGTGCGCCAGCGCTCAATCAGGGCAAATTCGCGCTTGGAGCCAAGCGCGCGGCCA  
CCGGAGACCACCACCTGGCGGCGGTTCAGTTTCAGGCCTGCTGGAGCGCACCGCGCGGCGCTCGACCAGCC  
GGGTACGGCCAGCAATTCGGGCACAGCCAAGGGCTCGATGAGAGCCTGCCCGCCCGTTCGCCCTTGGC  
AAACGCGGTGGCCCGCACCGTTCATCACCTTGCAGGGCGCCGAGCTTGGCACTCTGGCGATGGCATTGCC  
GCATAGATGGGGCGCAGGAAGGTGGCGCTGCTCTCGATAGCCGTCACTTCGGAGAGCATCTCCACCCCGA  
GCCGAGCCGCTACCTGTGGCAGCAGCGCCTTGCCATGGTACTCGCCGCCATCAGGCAGTGGCTGTAACC  
TTCGCACCAGCAGGCCAGCAGCTTGTGACCCCATCCAGCAGCCGTCGGCCAGCAGGGGATGCTCGGCA  
AGCAGAACCTTGTGACACCGCTGAGGGCTGCCGCTGTTACCCGCTCGGTCAGCCCCGACCCAGCA  
ACAGCAGGTCAACTTGACCGCCGATGGATCCGGCGGGGAGGACAGTTGTGCCACGTTGTGCGCCAGATG  
GCCCTGATGATGTTTCGGCAATGATCAGCACGCTCATGGCAGCACCTTCGCTTCGTGTTTGTGTTTGTCCA  
CCAGCTCGTCCACCAGCCCACCTTGATCCCGGCGCTGCGGGCTGGCGGCGCCATCACCCCGAGCAAGCG  
GGTCTGGTTGGTTCACCTCAACGGCGAGTGTGAGAAACGGAGCGCTATCAAGCGGCTTGGCTTGGCTTC  
ATGATGTTGGGCAGCGAAGCAAAGCGCGGTTTCATTCAAACGCAGATCGGCGCTCACCCCGCAGGCAACG  
GCATGCCAGGGTCTCAAGGCCACCGTCGATTTTCGCGAGTACCAGCAGTTCTCCCGCTTCCACCTTGAG

TGCTGACGCGCAGGTGCGCAGCGGCCAATCATTGAGGGCAGCTAGCATCTGGGCCACCTGATTGTTGTCT  
GAATCGATGGACTGCTTGCCGAGCAGCACCAGATCCGGCTGCTCCTGCTTACACACCTTGTGCAAGGCGC  
GGGCAACCGTCAGCGGGGGCAGCGTCTCATCGGTGACATAATGCAGCGCCCGATCCGCCCCAGCGCCAG  
CCCATGGCGCAGTTGCTCGGCGGCAGCGTCAGGGCCAAAGGTCACCACCACAGTTTCGCTGGCAACCCCG  
GCTTCCCGCAGCCTGACCCCTCCTCCACCACAATTTACAAAAGGGGTTGATCCCATCTTACATTGG  
CCAGCTCCACGTGCGGAGCCGTCTCCCTTACCCCGGATCTTGACGTTGTAGTCGACTACCCGTTTGATTGC  
GACCAGCAGCTTCATGGGGTCATGCCTCGTCTCTTTGGATTGAAATTCATTAGTGTGCCCTCGCTTTGTT  
GCAGTACGCTCTTCCCTGATTTTTTGTCTTTTCTTGCTCAGTTTTGCTTACAACCGCTTTACGTTTACGT  
AAACTACCAGCATTACCCTAGGCCAACAGAGCGCAGAGGCAAGATGAAACGGGAAGCAATGGAATTTGA  
TGTCGTATCGTTCGGCGGCGGTCCGGCGGGGCTCAGTGCAGCCATCGCCCTGAAACAGCAGGATGCCACT  
CTCTCTGTCTGTCTGCTGGAGAAGGGAGCGGAAATTTGGCGCCCATCTGCTCTCCGGCGCCCTGTTTGATC  
CCGTCGCCTTGCAAGAGCTGCTGCCGGATGGCTGGCAGCAAGCGCCGCTCGGCGTGCCGGTGCAGCGACGA  
TCAGGTTTTCATCTGCTGCAAAGCGAGCAACGTTCCCTGCAACTCCCGCTGGGCGGTGCCGCCCGGATG  
CACAATAATGAGGGCTGTACATCATCAGCCTCGGCAATCTCTGCCGCTGGCTTGGCCAACAGGCGGAAA  
AACTGGGAGTCGAAATATACCCGGGATTTACCGCCAGCGAACTTATCATGGACGCGGGCCGGGTCAAGGG  
GGTTATCACCGGCGATCTGGGGCTGGATCGCGCGGGCAATCCAAAAGCTGATCATGTGCCCGGCATGGCG  
CTGCTCGGCCGCTACACCCTCTTTGCCGAGGGGGCCCGGGTTCATCTCGGCAAGCAGCTGATCGCCACAT  
TCAATCTGGCAAGCCCTGCCAGCCCCAGCACTATGCCATCGGCTTCAAGGAGCTATGGCAACTGCCAGC  
AGGTCCGGGGCAAGGCGGGACAGGTGCTACACGGTAGTGGCTGGCCCTTGGCAAGCAGGGGGCGGCAAT  
AGCCACGGCGGTTTCTATCTCTATCACATGGAGGGGGATCAGGTGGCAGTCGGGCTGATTGTGATCTCA  
ACTACCAGAATCCCTGGCTCAGCCCGTTCGACGAATTCAGCGCCTCAAGCATCACCCGCTTATCGCCGG  
CGTGTGCAAGATGGGGAGCGCATCAGCTATGGCGCCCGCGCCATCACCAGGGGGGGTGGCACGCCCTG  
CCCCGTATGCACTTCCCGGGCGGCTGCTGATCGGTTGTGATGCGGGCACTCTCGACTTTTCCCGGATCA  
AGGGGATCCACACCGCCATGAAGTCCGGCATGCTGGCGGCAAAAACCGTCGCGATGACGCTGCGGGGGGG  
CGATGAGGGTGGACGGGATCTGGCCAGTATGGCGACGAGCTGCAACAGAGCTGGCTGGCCCGCGAGCTC  
AAGGCGGCGCGCAACTTCGGCGCGGCGCTTACCCTGATGGTCCCTGGTTGGGCGGGGCTTCAACTGGC  
TGGAGCAGCGGGGTGCCTCCTTCCCTCTGCTGGGCTCTATCACCTGTTGGACAAGGAGCCTGACTACC  
TCAGTCTCGCATGGCCAGCCGTTGTCAGCCCATCAGTATCCAAACCCGATGGCAAGCTGAGCTTTTAC  
AAGTCTCGTCTGTGTATCTGGCCAACACACAGTACGACGAGGATCAGCCTTGTCACTCAAGCTGCAGG  
ACGAGCGCATTCCGGTCGAGGTCAATCTGCCACCTGGGCGGAACCCGCCCCAACGCTACTGCCCGCCGG  
GGTGTGTTGAAGTGTGAAATGGAAGGCGCGGCCAAACTGCAGATCAACGCCGCAACTGCATCCACTGC  
AAAACCTGCGATATCAAGGACCCAGTCAAAAACATTATCTGGACGCCACCACAGGGGGGGTCCGGGCCCA  
ATTATCCGAATATGTGATGAAGCGGGGACGCGCAACAAGCAGCCCCAGCTAGCCCTCCCCAGCCAAAG  
GCTGGGTTCTACCCCGCATAGCCGCTCAGGTGATCCGACCTCGTGTTTTTTTGAACAAACAGGCTGGAT  
CCCTGATGAATAGCCCTGACAAGCGCGGCCCGCCCTGTATAGTTCGCCGATTCAGGTTTTCCATCGG  
CCCGATCTGCTTATCCACGGGATCGCTTTCTGCAGCGATCTAAGGCCGATGACCTGTGCAACCATCCCT  
GATTACCCATGACTTTTTAAGGGGGGACAGATGATCACCGCTACATTTCTCAACAACAAGGTGCTGGACA  
TAGTCACGCTCGGGCCTGACGACATAGTACCTGACAACACGGTCTGGCTGGATGCCATACAAGCCGGACAC  
GGCAGAGCGAGAATGGTTGACGGGCTGTTCCTGGAAGAGGTCCCCGACAAGGAAGAGCTCGACGACATC  
GAAGCATCCGCCGTTTTTACTGGGATACCGATGGTCTGCACATTCACCTCCCTGTTTTCCCCAGCGGATCG  
GTCGTGACACCAAGGGGGTCCACGTCTCCTTTACCCTGCGCAACAACCTGCTGATCAGCATTCGTGAAGA  
TGACATCGGGCTGGTGCCTGCTGCGTCACTATATGCGCCAGGATCGGCTGGAGGTGGAGGATGCCCTC  
GACATCCTGCTGGAGGTGAAAACCTCAAGGTGGAGTACCTCTCCGACCTTATCGAAGATGGTTACAAGA  
CCTTGGAAAACACCGCCGATCAGATCTTCAACCGGATCAGATCAACCCCATGCTGAAAGAGTTGATGGC  
ACAGGAAGAGGCCAACGGCCAGATCCGTCTCTCTGACGATACCCGCCGCGCCCTGCGTTTTCTCAA  
CGCAGCCTGCGCCAGCGCATGAGCCTTGAGCAGAACAAGTGGATCGACGAGATGCTGCACGACGTGGAAT  
CCCTGTTGCCCCACACCCAGTTCTGTTCGACAAGATCAACTTCCAGCTGGAGGCTCCATGGGGGTGAC  
CAATCTGGAGCAGAACAAGGTGATCAAGATCTTCTCGGTAGCCGCCGCTGATCTTCTGCCGCCGACCCTG  
ATCGCCAGTATCTACGGCATGAACTTCGGCCGATGCCGGAGCTCGCTGGGAGTATGGTTATCCCATGT  
CACTGGTGCTGATGGTGTGATGTCATCGCTCGGCACCGGCTCTTCTTCAAGCGCAAAGGCTGGCTGTAACG  
CCGCCGACGCGCTGCGATATCTGAAGAAACCGATTGGGGGGCATGGCCCCCGATTAAATTTGCGCCAC  
GCCAACCGCTTGCAAAGGACGCTTCGTGCCCCATATCCCTCCATCACTCAATTCAAGTGGATAACGG  
GCAACCATGACCCTTACCCGAACACCGATATGACGATCACGGCCAGTTGCGCCCGCTCTCTGGTTCT  
GGCCCATCGCCTTGTGCTGACCCGCTCGGTCTGGCTCTTTCTGATGGCAGGGGTACCCCGGAGAGCGG  
CAGCGAGATCCTGACCCTCTTTTATCCGGACAAGATCACCTCTACATCAGCTGTGACCGACGTACCC  
GCTATGCTGGCGTTGCTCGCCTGTGGCGGCACCTATCAGCAGACCCAAAGCATTCGCGCCAGACTCCGGC  
GCCACAGCCCGCTGCTGCTACTCTGCTCTGCCGTGACGGCCTGCTGATGCAACTGCACAGCCTCAATTT  
GCAGAAGTGGTTCAGCTGGCCACCAGCTGGTGTGGTTCGCCAGCCTCTGGGCGCTCTGGTATCTG  
CTGCGCAGTCGCCAGCTACGGGAATATGCCGAGATCAGCCCCACTGACGGGGCTGACACCTATTGACGA  
GTGACCCGGATCTGCAGGGTCCGGCGCTCGCTCTGGCTGCCTCGCCCCCTGTAGCTGGGTACCGAGGC  
TGCTCCCTGATCCGCTGAGCTGGTCGAGAGCTCCCCACCGTCAGCCACTGGCCCGGGGCCCCGCTCAC

CTCGGTGGCACTCTGCCCACGATTGATGGTGCCCTGATCCAGCCTCGCCTGTTCACTGCTCAGCGCAATC  
TGCACCCGATCCCCAATCAAGGTGGCCGTGGCATAGAGGCCGTTACCAGCGGCATCATCCCCACCACGG  
CCCCCGTTCATTGGTAGAAAGTCACCGGTTGATAGGAGCCCATCTGCAGCAGCACGGGACGGCCGA  
CAGCCCGCGCACCTGCCAGCTGTGCTTCTGGCTACGCTGGTACTGCTGTGCGCTACCATCGAGCAACCAC  
TGCCGCTTGGCCTCGTCGCGACTGATTGAGCCCCCAGTTGCTGACCGCTGGCGACACCATCGACCCGCC  
ACTCGATAAGCAGGCTTTGCGGTGGCTGGTTGATCTGCGCCAGCGTGGCTTCGGCCTCCTGCAGCTGGGC  
TGGCGTCCCGCTCAGCACCAGCTGATTACCCATGGCGCTGACCCCAAGCTGGGGATAGATCTCCTTGAGG  
GTCTGCACCGCCGCTGCGCCTCGAAGACCGGGATCACCTTCACCTCGGCCACAGCGATGGGCTCCAGA  
GTCCCATCATGCAGCAAGCCACAGCAGCGCCCTGCGGCCAACCTTGCCCATCCGAACCATTACGCTCTC  
CTCGTTCTCTGTGCTCTTCTCGCTCTCTGTTCTCTCTGCTCAGGCGTAGACCTGCGCCCGCAGCCAAC  
AGCTCAGCCCTATTTCCGCTCACCCCTTCGATGATGAACCCGCGGTTGCCAAAAACAGTCGGGAATGCAG  
CAACTCCGTGATTTCCCAAGGTATGAGGCTCTCATTCACCGCCGTTATCGCGTAAGATAGCGCCATCAT  
AGTTGCCCAAGCGGAATCCATCATGTTGAAACAGTTGTTGTTACTCCCCCTCGCCCTGCTGCTGGGGCC  
TGCTCCCTGACCCAGTACAACGTCAGCGAGGCCGAAATCAACCAGTACCTCAAGGATCAGGTCTCTTTTG  
AAAAACAGCTGGGGATCCCCGGTATCATGTGAGCAAGATCCGTCTGGATGAGATGCAGAGCCGTATCGG  
CCGCAAAACAAGCAGATCGCATCGAGCTGGACGCCCTGGCGACCTGCAGGTGAGCAGCCCCCTTGGCAGC  
CAGCAGATGAAGATCCGCTTTGCCCTGAGTGCCCGCCGGACTATGTGGCCGATCAGGGCGCCATCTATC  
TGCGCGACCTTGAGCTGGTCTCGGTGAAGACTGAGCCGACCGATATCGGGGCCGCCCTCACCCGCTGCT  
GCCCACCTTCAATCAGTCGCTCTCCCTGTTCTGTGCGAGACCCCGTCTACCGCCCTGACCCGAGCCGC  
AAGAACGAAGCCAGGATCAAGGAGAAGGTGCAAGCCCTCAAAGTGGAGCCTGGCCGTCTGGTCATCCCGT  
TCAAGCTGCTCTGATCGCCGCCGACCCGGCACTTTCAGCGCAATAAGCAGATAACCGTCCGCTTCGACAG  
CGCACATCCGGTTTTAACGTGCAGCCGAATGGGGCGGTTTTTTTACTTCTCAAGTCTCCCTTAACACAGCAT  
AATGCAGACCATTCTCATTTAGATTTCGTTCATGAGAAGCGTCAATAATAAAAACCAATGGTGAGAAGGGACA  
TGAGAAAAACCGTACTGGTTTCAAGGCGATCGCCTGCGCACTGATCAGCGGCGCCGCACACGCTGCCGTCAA  
GGTGAAGATAAGACATTCAATACCGCCGCAACATGCTGGCCTATAACCGAATTCGAGCTCTCCGGTGAG  
CCGCTGGCCGAAGCGCTGGGGCTGGATCTGGATGTGCTGGATGCCAACCCTGCCGATGAACCGACCCCGT  
TCGACTTCGCTCCGGCATCGAATCCTACGAATACTCCGAAGAGGCGATGTACGCTCTCAACTACCAATC  
CGGATGGGCGCCGATCTGGTGAACGGGCGCCAAAACCTGGCCCGTGGCGGCACCATGGCCCTCTATGGGA  
CAACGGGTACTGGCCATGGCCGACCCGTTGGCTTCCCGCTGATGAAGTGCCCGCAGGGCATGTATCCCC  
TCTCCCTGCCCTACGCTCCGCCAATCCGGAGTTTGCCAGGCCGTTCAACGCCACCCCGGTCAATGGCGA  
CCAGATCACCATCAAGACCGCCAAAGGGACCGAGAAAACCGTCAAGACCCAGGTGCCCGCCTACTTCCGC  
GACTACAGCACCTGCGCTGGAGCGGCAGCGACAACCTGCTGGTGCCCGCAGCGGTGGGCGGCATCCTGC  
TCAAAGAGGTGATGTGGTCCAGGACTTCTCGGCGGCATGCACGTGGCCGAGACCGATGAAGAGGTAGA  
AGCCGCTCCGCCACCATGGATCAGGATGGCAAGCACAAGCTGGGCGTCTCTGCAGCCGATGGTTTTCAAC  
GGCATGATGCTGACCGAGCAATCCATCGACAAGCTGGCCATCATGCAGAACCAGCTTGGCTTCGATGGCA  
AGCAACTGGGCGCCAAAATCACCCCGCAGTACGATCCGGTCAAGGGCGTATTTACTTCCCCCATCAGGT  
GAAAGTGACCGAAACCAGCAACAACGATGCCGGTCCCATCGGCAAGCTGGAGGTGGTGGATGGCTCCGCC  
CAGCTGCGCGATGCCTGGATGATGCTGTGGCCACTTCCGAGTTCTATGCCCTTCAGCGATCAGCGCAGCG  
CCAACACCAACCAGAACC CGCCTTCCACGCCGTGTTTTGACGGTGCGCCGTTTGCCGCGCACCCGGCTGC  
CAACCAGGTCAATGACCTGGGCAAAGCGGTTGCGGGCAGCGATGCCCTTCTCGCTGGCGATCAATCTCTCA  
AACCTCACCTTCAAGAACCTGGCAGCCCTGCACTTTGATGCCAAGGCTGGTACCCTGGTCGACAGCTGGC  
AGGCAGGCAAACAGGGCAAGCAGCTCACCACTTTGACGCCGCTTACGCACTGGTCGCCCCGACAGATCTT  
CCAGCGCGCTCAGGACGCGCTGCCGGTACGCCCGCGGTGACAATGGCGAGCTGAACCTCAAGACC  
AAGCAGGGTCAGCAAGCGCTTGAGCTTATCCGCAAGCAGGCCGATTTTCATCCTTGCCAACCTCAAGGGCA  
AAAATGGTCTGGTGCATGACGGCATCAGCTGGTGGTGGCAAGCTCGATGCCGGCCACTCCATCGATGCACA  
GTTCCCGCCCATCCGTGGTCTGACCGCTGCGTTCTCCGCTACCTCCGATGCCAAGTACCGCACTGCCGCC  
CGCGAGCTGTTTATCGCTGCCGACAAGGCCCTACTTCAATGACAAGCGGGCACCTGGCTGGCGGGTAAAC  
AGGGTGAATACTCCCTGGACCCAGGCTGCCATCTCCGGCGCACTGCGCTCTGCCATGCTGAACCTGGC  
CAACGAAGGGGCGAGAAGGCGCCGAGCTGGAGCTGGCCAAGCTGACCGGTCAGTACGTCAGCTGGTTT  
CGTGGCACCGTCAACGGTGGCATGCAGATGGCCGAGTGGATCGGTGACTCCGGCGAGAACATCATCGAAG  
GTGCCGGCAGCGACACCGATGAAGATGGCGTACCGAAGTACCCTGCGGTGGCAAGCACGGCACCCGC  
CATGGTGCATGGCCGCCAAAGCGGTGGTTAGCGAGTAATCTCGCCATTCACCAGCATGAAAAAGGGAGCC  
AACTTGGCTCCCTTTGCATTACAGCGTCTGACACAGTTTCAAGGACTTTCCTCAAACCAGCTTGTCCAGC  
ATCTCCTTGGTACCAGCACAATCCCCTGCTCGGAGCGGTAGAAGCGGCGGCTATCCTCATCGGCATTCT  
CGCCACCACCAGCCCATCGGGCAGCACACATCCCTTGTCCACCACCACCCGGCGCAGACGGCAACCGGC  
GCCAATCTCTACCCCGGGGAAGATGATGGCCTGATCCAGGGTGCAGAAGGAGTGACCCCGCACATTGGTA  
AAGAGCACCGAGTTGAGCACAACGACCCGCTGACGATGGTCCC GCCGAGAACATGGAGTTGATGGTCA  
TGCCATGCTGACCATTCGATCCTGCACGAACCTGGCCGGTGGCGTCAGGGTCTGGCTGGTCCAGATGGG  
CCAGTTCTGATCGTAGATGTGAGCTCGGGCAGCACGGAGGCGAGATCCATGTTCCGCTTCCAGAAGGAG  
TCCAGCGTACCCACGTCACGCCAGTAGGGCTTTTGCCCTCGCGCGCCCGCACACAGGACATGTTGAAGG  
GGTGAGCAAATGCCATCCCCTCCTCCAGATGCGGGGATCACGTCCATCCCAGTTCGTTTGGAGTC

CTGATTGTGAATATCCTCCTCCAGCAGTTGGTAGAGGTTACTCCGCCTCGAAGATATAGATCCCCATGGAG  
GCCAGCGAGCGATCTTCGCAACCTGGCATGGCGGGCGGATTGGCCGTTTTTCGACGAAGGCGCGGATCT  
TGCGCTGCTCGTTCGATATCCATGATCCCCGAAGGCGGATGCCCTCGGCCCGCGGCACCTCGATACAGGCGAC  
CGTCACCTTGGCACCAGGCGCACATGGTTCGAGCAGCATGGCGGCGTAATCCATCTTGTAGATGTGATCC  
CCCCGCCAGCACCAAGTATTTGGGGCCGTAGTCACGGATGATATCGACGTTCTGATAGATGGCATCGG  
CGGTGCCGCGATACCAGTGCACCTCATCCACCCGTTGCTGGGCAGGGAGCAGGTCGATGAATTCGTTTCAT  
CTGGTAACGCAGGAAGGACCAGCCGATTGCAGGTGACGCAGCAGGCTGTGAGATTTGTATTGGGTGACT  
ACACCAACGCGGGCGGATCCCCGAGTTGATACAGTTAGAGAGCACAAAATCAATGATCCGGAATTTGCCAC  
CGAAATGGACGGCAGGCTTGGCGCGGTTGTCACTCAACTGCTTCAGGCGACTACCACGTTCCACCCGCCAG  
CACCAGTGCCTACTCTGGTTCAATAATTGTCGTGCTTTGGCACTATTTTCGGGCTCTAACAAACATGAT  
TACCTCTGCTTGGTTGATCTATTTTCAACTCATCTTCGCTGTTTCGGCACCTGTGAAAAGTGGTTTCAC  
TCACATTTAACCGATCTCAATTTGACCTTTTCACCGAGTTGCGAGGAATAGCATGCTTTGCTCCGCCAGC  
TTGGTTAAAATTTCCCCACAAAGCAGCCACTTCAAGGATGACAAGATGGTTTACAAGCTTCGGACGTACCC  
TCTTTCTGATCGCCACCATAGTGACCATAACCCCTGCTGCTCCTGCAAGCAGTTTGGTTGGCCCTTCAGAG  
CACACCGCTCACATTGGCCATTATTCTGGCCACCACACTGCTTGGCATGATCCTGCTGTTGATGCTGGCC  
ATCCGCACCATGGATGGCATGCTCCAGCATCAGGAGCTCACCTGGGTCAAGGCGATCAGGGGACGGGATC  
CCTCACAACTCGATGAGCCCGCCTCCAGGAGGTGCTGCAACAGCTGCTGGAACAGTTTCAAAGCGCCGA  
GCAGAGCGCTCATCGCCAGCTGACCGAGCTCAGCAACCTGGCCACCACCGACGAGCTGACTCAGCTTCTC  
AACCGCCACGCATTTCCGCGGACATGACCGAGTTGCTGCAGCGGGATCAGGACACCCAGACCGCGACCC  
TGGTGTGATCCGTGCCACCGAGCTTGGCAAGATCAACGCCAGCGCGGATTCCAGTCTGGTGTGATGCCTA  
CATCAAGGACATGGCGGCCCTTATCAAGCGGGTGGTAAGCCGCTTCCAGGCAATCAGGTCTACCGCATT  
TCGGGGGCTGATTTTCGCCGTGCTGGTGCACCCGGTGGCCAATATTTCTCCCCATCTGCTGGGGCAGGATT  
TGAAGGTGGCCTTCGATCACTATCAGGATCAGCACGAGCTGGAGAGCACCCGGTTACTCGGGTCTGACCAA  
GCTCAGCAGCGGCCAGAAGATCGAAGCCGTGCTGGCCAGAGCGGATCTGGCGCTGGCTCGCGCCCAGACC  
GAAACCATCAACGGCTGGGCCATCCAGCAGGATGACAGCGCTCCGATCTACAGGGGCAACACCACTGGC  
GCGACGTGCTGACCGAAGTGTGGCGCAGGAGCGCTCAGCTTTACCTACCAGCCGATCCAGCCACTGCA  
CCGTAGCATGCTGGCCTACAACGAGATCTACACCCGCTTCAGCGGCAATGACGGCACTGCCCTGCCACCC  
GACACCCATGTTTGGCATTGGCAGCGGCTCGATGTTGATGCGGCTGGAGCAGTTGGTCAATTAACCCATA  
TCATGCGCCAGTATCGGGCCTTTGGTGCCAACAGATGCTGCTGGGAATCAACCTCTCTCCCAACTTTGCT  
GCAAAACAGCGCCTTCTGATCTGGCTTGACCGCCAGCTGCTCAAGGATCCCAATACCAGCGCCAATCTG  
GTGTTTGAAGTGGATGAAGAGCATCTGGAACGCAACCTGACCGGCGCCAAGCGGGTGTGTTGAAGTGTG  
GCCGCAACGGCAGCCGCTCGGCCATCGCCAATTTTCGGCAAGGGGATCGGCTCCTTTACCCGTGTTTCGCGA  
GCTCAAGCCCGACTACATCAAGCTGGACCCAGCCCTGATCACCAGGCTGGAGCAGGATCAGACCAACCAG  
CAGTTTCGTGCGGATGATCGTTCGATGTATCACATCGGATGGGGTGTGAGGTGATTGCAGAGGGGGTGAAC  
AGCTTGGCCAGAAACAGCTGCTGCAGGGGATGTACGTGGATGGCTTGCAGGGCTATCTGATCGCCCGGCC  
GCAACCGCTGCGACCGGATATCAGCCAGCTGGGGCTCTTTACTGAGGATGCTTCAGCTTCAAAGGGTCA  
GAATGATGTCAATTGAGCTGGCGATAGCGCTCCAGCTCTTTCTGATCGTAACGGGTCGCCAGTGTGGTGGG  
GTTGTGGCGGTTCTTGAGGTAACGGTTGATTTGCAGGCGATTGAACCCCGCCACCTGATAGACCTGGCCG  
AGTAGGGTATTGAGTTCATCGTGTCCAGACCGGCTCTGGCCAGATAGTCCCCATCGGCGGGACTCTCGG  
TCTGGTGGCTCCACTTAGCAATACGGCCGCTCTCTTGCAGATAGCTGAGCCACTGCTCGATATAGAGCGG  
TTTGCACCCCGCCAACAGGTTGAAAAAGCCACCCGATCGCAACGACAACCGCTCAGGAGTACGACCGCC  
AGCTGATCATCATCGCACTGGAAGGTCACTGGCCCGGCTTGCGCCCAATCCAGCGCTGCACCCGAATGC  
TGGCCTTCTCACCCGAGCTCCCGTTACGTGCAATACAAACATGGCGCTCCTCCCTTGGCAAAGGTTGA  
TGATGGACCATCCCCCTGACAGGTGCAAAGGCAAATCGGCTTTTAACTCATCAATCGGGCCATTCGACCA  
TAAAAAAGACCGGCACCCCTACGGAGGCGCATCTTTGTCCGATGGCTGTGTGTTTCAGGCCATCAATGG  
AGGCGCTTTTCAGGCTCCAGTTCAACCAAGTGCCTTGGCCAGCTCGATGGGTTTCGAGCTCCTGGCCCTTCCA  
GATCGGCGTTCCAGTTCGGGCGGACCAATACATCGTCTTCATCCAGATCGTTGATCCAGATATCGAGAAA  
CTCTTCCAGATCGATCACTTCCGGCTCGTAATCGGCCCACTCGTCAACACAGTGCAGACGGGCGTCTCT  
TCGGCAGACCAGAGCGGCATCACGTGCGCATCTTCAAATTCGGCGGAGCGGCAGACGACCCAGTCTTCCC  
CATAGCGCAGGCCCCACACCTGACCCGACTCGCGGACTTGTTCGATAAAACAGTTGGAAATTTGGCGTCAAG  
GTTGTGCTTAAGCATGCTCATGGGATTCTCTCTTTCTTTCGGGTGCTGCGGCATTGTTCGGGCGACAATAC  
GATGGCCAAATGGTGTGTAAGTACATGGACTCAAGCATATTTGGGGTTATTTCCGGGGAAAAAGCCGA  
GATAACTCCCATTTTCTGCAAAAACGCCTCCGATGGAGGCGTCTTGCAGATTCAGGAGATCAACGCTC  
CCAGTAAACCTCTTCCAGGCTGTCTCTTTCTCCGGCAAACCGCGGGAGAGACGGGGGCTGCTCTGGGCC  
AACACCTCGTAGCTGACACGGTTGGCGTATTTGCACACCTGGGCCAGTGAAGGATAGGTCAGGAACCTCGG  
AGATGTGCTTGGCGGAGTTGGGCACATTCATCCGGTGTAGGAGTTGGCCACCATGTCGTGCAGCACGGC  
GGAAAGGGCGCCATCCCCTGCCCGTTGGTGTCTTGTATCTTCTCCGGGCCACCCATGTACGGGGAGATG  
TGGGAGTAGATACGGGCGGTTTTCGGCACTTGGCACGGGCCATCGGGCGGCTGAACTCATAACATGTTGA  
ACTCGGGGATAACGCCCGGACAGGGTATGAGTGGTCTCGCGCTTGTAGTCCCTCATCGGTGTAGCTCGC  
CATATAGAGGCGGATGGGGCCAGCAGTACAGAGCACCATGTCGGCCAGTCGAGCGCTTGTTCGGCCGCA  
CCGAGCGGATCAGCGATACCGGTACAGGCTTACCTTCGTTTCATCGCCAGCACGGTACGTTCT



CGGCAATAAAGTCGCGCCACCACTGGGGATTTTCGTGATGACGAAACGGGTGCCAGGGTCAGCACCAC  
GGGAATACCGGCTCGCGGCATAACGCACCGCGGTCATGGCCGCTCTTTCATCGGATCACCATCGTCA  
CCACGCACCAGATAGGCGGTGATCACCAGTGCAGACGCCCTTTGATCACATCCTCCGGAATGTGCTGCA  
CATCCAGCTGGTTCATCTTGCCAGCGTTGATGCCGAAGCTGCGCTCACCGCACTCGGTAATGAAAGTGAA  
GCAACGGCCGATGGGGCCATCAACCGGCTGCAGATAGTCCAGATTGACGCGGGAAGAGGTGTTGCACAGA  
TAACGGTAGGCGTAGCAGCCGATGCGAATATCCTGACTCATCACACCAGCAGGATGGAGTGGGAATCGG  
CCAGTACCGAGTAATTGTGTACCGTGTGGCGATAGTGCCACCGGCAAACTCGCTCACTACCATGTTGTT  
GGCCTTGAGCTCGTCATAAATCCGTTCTGCTACATCGTCTGATAACGACGGAGTGGCCCTTGCTCAGA  
CCATAACGGGTCAGAAAGTCTTCATCCACATGGGCTTCGATATCAACCAGGGTCTGATCAATCCCAGCGA  
CGTAGGCTTTGCCAGCTCGGTTAACAGGGGATTTTGCGGAACCAGGGGATCGCGTCTGTGACAGGGAA  
GTAGTGTTTGGACTTGCCTGACCGGAAATTTTCATGGCAATGTTCTGTGCTCTGGGGAAAGAGGGGCG  
GGATTTTAAACACAATCCGCCGCCCGAAAAGTCGCCCTGTTTAAATAATGGAGTCAGTATAGACAAGGCT  
TGCAAGGAAAAACGTTTGCCTTTTACCATAAAAAAACACCCTGCCCGGGTGGTTCCATAGCATAAAAA  
AAGCGTCGGTTTTTACGGCGGCCCATCCCCTGCAACAGGGCCAGCAGCGAGAAGAGGGCCGAGGGCTAGC  
CAGAACAGCAAGGTGCCAGAAAACGGGGCACATTGGGGGCTTTGGGGATCTGGATGCCAATGGCATGCA  
GGATGCGGCCGACCAACAGCATGGCGCCACCGGCATGCAGCCAAAAGCGCACCGGCACCGGATAGCTCGCA  
CAGCGCCATCAGCAGCAGGGTACGCGGCACATACTCGGCAAAAATTACCGTGGGCCCGGATCGCCGCCAGC  
AGCTCGGGGGCTCCCCCTGCCCTATCATCACCCGAACTGGGCGGGCGTTTGACCACCAGAAGGAGA  
GCCCCAGAAAACAGCAGCCCAAGCAGGCTGCGTAGATCAGCGTGATATGTACCATGACTCGACTCCTTGT  
TTGACTGACTGCCGGTCACTCATGCCAATTCGCGGCAGATGAGCGAGACCATCATCCTGATGTGGCCCTG  
ATCGCTGTTGAGGGCCGGAATATATTCAAACCGCTCGCCACCGGCTCCATGAAGATCTCCGATTCTGT  
ACCTGAATTTCTCGAGGGTTTTCGAGGCAGTCGGCGGCAAGGCAGGACAAAACACATCGAGCCGCTTGA  
TGCCCGCAGCTGGCATAACCGGCATGGTCACGTCTGTGTAGGGCTTGAGCCACTCCTCCTTGCCAAAGCG  
GGACTGGAAACTGGCCGTCCACTGCCCGGCTCCAGCCGAGCGCTCGGCCAGCAAGCTGGCGGTATGG  
CGACTGGTGACCATAGGGGTCCCCTTCGTTCTCGTAGCGCTCGGGAATGCCGTGGAACGACATCAGCA  
GGTGATCACCTGACCGTGTGCTCCCAGTGACGGCGCACACTCATGGCCAGCGCTGAATGTATTCGGG  
ATGGCGGATGATAATCAGCAATGAGCCGTACCACCGGCAGATTGCGCTCTCTTTCATCGCCTTGCTCCAG  
GCATCGAAGACCGGAGCGGTGGTACTGACCGAATATTGCGGATAGAGCGGCAACAGGATCACCCGGTTGA  
CCCCTTTGGCCTTGAGCGCTGCCAGCCATCATTACTGACGGGGAACCATAGGTATCGCCAGCCTCCAC  
CGGCACCTCAACCCCTCCCCTTGAGCTCCTGCTCCAGCGCAGCAGCTGCTGCTTGTATCACCATC  
AGCGGCGAGCCCTGCTCGGTCCACACCTGCTGATAGAGCTTGCCCACTTTGGGCGAGCGCTCGGCAAGA  
TGATGAAGTGAGCAGCGGGCACCAGAGGTAACGGGGCAGGTCCACCACACGGGGATCGTGCAGGAACTG  
GCTGAGGAACGCTTTGACGGCAGCGGTGGTGGTGGGCTGGGGTACCCAGATTGACCAGCAATATTCGG  
GTTTTCGTGGTACGTTGGCTTCTGTCTATCTGTCTATATGCAAAAAGGGCCCGACAGGGCCCTTCTCT  
TTATTTATCTGATGGCACGGGAAACTGTGCCGGCAGCAAAGATCAGCCAGAATGGTGGCAAGCTGCTTG  
CTGACCAGATCAACCGGCTGGGTGCCGTGATCTTGACATAACGGGTGTGGCCCGCTTCCGCTCTTTGC  
CGTAGAAACCGATCAGCGGCGCGGTCTGCTGATGATATACATCCAGACGCTTGCGTACTGTGGTCTCTTC  
GTCGTCGGCGCGGATCACCAGATCTTACCAGGTCACGTCACTTGGCTTCCACTTTAGGCGGGTTGAAC  
ACCACGTGGTAGGTACGGCCGGAGCCGGAGTGAACGCGACGGCCGCTCATGCGCTTGACGATCTCTTCGT  
CCGGCACATCGAACTCCAGCACGAAATCAACCACGACACCGGCGTCTTCATGGCTTGCGCCTGGGGAAT  
GGTGCAGCGGAAACCGTCCAACAGGAAGCCTTTGGCGCAGTCCGGCTGAGCGATGCGCTCTTTGACCAGA  
CCGATGATGATGTGCTCAGAGACCAGCTGACCTGCGTCCATCACAGCTTTGGCTTTTACAGCCGAGCTCGG  
TGCCCGCTTTGATCGCCGACGAGCATGTGCGCGGTGGAGATCTGGGGAATACCGTGTTTTCCATGAT  
GAACTGAGCCTGGGTACCTTTGCCGGCGCCCGGAGCCCCAACAGAAATGCGCATAACGCTCCTATTT  
GATTGGTTATTCAAATCTTGCAGAGGCAAAAAAGTACACGGTTCGCCCCGTTTCTACAAGGGTGAGCCAC  
TTGAATGAGCACTTTATCACCACAATAACCGGCTGATCGAACAGGATTTTCATCGCAAGGGGAAGACGCAA  
AAATAGCCAGGGATTCAGCATAGAGCGCAAAAAGCAGGGAGGAGGTACGACAGAAAAAAGATCCCAGCT  
CAGGGCCGGGAATTGCGCTCAAAAAGTAACTACTTGTGCTCGTAGTAGGAACAGGGCAATAGTAGTTTGC  
CCCCTGTGCGTCAACAACCTGTCAGATGTGACAGGCAGGCCGCTATGAAACCGGAACTGCGGATCCGGCGA  
GCAGATTAGCTCGGCTTCCAGCTTGCCAAAAGAGGCCACCCGCTCACTGATATCCTCCCCTGCGTACTGT  
TCGGCCAGGCTCAGGTAATCCTGATAGTGGCGCGCTCGGAGCGCAGCAAAGAGACGTAGAAGCGGCTCA  
GCTCTTCGTCCAGATGGGGCGCCAACTTTGGCAAAACGCTCGCAGGAGCGGGCCTCGATATAGGCGCCGAT  
GATCATCTTGTGACTATGGTGGCCGGTTCATGGGTGCGCACATGCTGCATCAACTGGCGGGCATAAGCGG  
GAGGCCGTACCGGCCCGTATTTCGATGCCGCGGGCTGCATGATCTCCAGCACCTGCTCGAAGTGGTGC  
GCTCCTCCTGAATGAGCCGCACCATGGGAAACAGCAGTGGATTGCGCTCCAGCTCGGCAAAGACGGTGC  
ATCAGACTCCCCATGCTGCGTTTTGCCAGGATCTCGGCCCTTCTCCGGGATGGCATCCAGCTCGCGATAA  
AACTCCAGCTTTGGGCAGCAGATGGCGCTTGCCCTTTGGGCAGGCAGTAGCGGGCACCAGACTGTGGGCAG  
TGAGTGCGGCCTTGGTCTCGCAGTTGGCGTGATCGATGAGCAGGGTCCGGTAAACGGGGCCGATCCCAGCG  
CATCTCCACCCACTCATCCGGGGTCTCGCACTGCAAAAACCTGGCGCACTGGGGCTAGCAGATCATCCATC  
TGAATCTCGTCTCTTAAAGCGTATCGGTCAATATGTTGCCGCTATGCTAGCGGATCCCCTGGCCA  
TGCCCATATCCGGCAAGATAAACGGATGTTTTTCAAACAGATATCTCTCCCCCTTCTGCCCGTGTAGG

TAGAAACGACAATGGGGGCCACAGGCCCCCATCTCGCTATCCCATCCGGCAAACCGCAAACGTTTAACT  
GCCTTCGTTAAAAATTTCCAGATTGCTGGTGCCTTCCTGCCATTACGCACCGCTTTGGTGTGCATCGTTG  
CGCAGGGCGTTGAGGTGATCCAGATAGGACTGGTCCACGTCGGAGGTGACGTAGTGGCCATTGAAGACCG  
AGGTCTCGAAGTGACGCAGATCCGGGTTGATCTCCCGTACGGCGGCTTCCAGATCTTCCAAATCCTGGAA  
AATCAGACCGTCAGCGCCAATCAGCTTGACACCTCTTCCACTTCACGGCCGTGGGCGATCAGCTCGTTG  
GCTGTGGGCATATCGATGCCGTAGACGTTGGGGAAAGCGAATTTCCGGCGCCGCCGAGGCGAAGTAGACTT  
TGGCTGCCCGCTTACGGGCCATCTGGATGATCTGCTCGGACGTGGTACCACGCACGATGGAATCGTC  
CACCAGCAACACCTTCTTGCCCTTGAATTCGGAATGATGGCGTTGAGCTTGCAGCGCACCGACTTCTTG  
CGCTGGGTCTGGCCCGCATGATGAAGGTACGACCGATGTAGCGGTTCTTACGAAGCCCTGACGGTATG  
GCAGTTCGAGGGTGTGAGCAATCTCCAGCGCCACGTCACAGGAGGTCTCGGGGATGGGAATGACCACATC  
GACGTCGAGATCTTCCACTCGCGTGAATCTTCTGACCCAGCTTGCAGCCATGTTGAGGCGGGCGGG  
TAGACCGAGACCTTGTGATGCACGAATCGGGACGAGCGAAGTAGACATATTCGAAGATGCAGGAGCTCA  
TCTGCGGGTCTCCGCACACTGCTCGGAGAAGAGCTGGCCCTGCTCGGTGATGTAGATGGCTTACCCCG  
CGCAATATCCCGCACCGTCTCGAAACCGATGGCGTCGAGCGCCACGCTCTCGGAGGCGAGCATGTACTCC  
ACCTGGCCCTGCTCGTCTGACGACGACCGAGGATCAGCGGGCGAATGCCGTTGGGATCGCGAAAACCGA  
TGAGACCATGACCAATCACCAGCGAGACCACCGCATAAGCGCCGCGGATCTGCTGATGGGTTCTGCGCAC  
CGCGGCGAAGATATCTTCCGGGCGCAGGGCCATCTTGTACAACGATCCAGCTCGTGGGCCAGCACGTTT  
AGCAGCACTTCCGAGTCGGAGGTGGTGTGATGTGACGGCGGGCGACCTTGAAGTCTGCTCCTTGAGCT  
CCTTGGCGTTGGTGTGAGTTGCCGTTATGGGCCAGCACCATGCCGTAGGGCGAGTTCACATAAAAAGGTTG  
GGCTTACGCGGCACTTGTGACTACCTGCGGTGGGATATCTGACATGACCTATGCCGATGTTCCCTTGCAA  
CGCTGCATGTGGCGCACTTCAAACACGTCCTTACCAGGCCATTGGCCTTGCGTTGCCGGAAGTTTCCAC  
TATCAATGGTCACGATCCCGGCGGCATCCTGTCCCTGTGCTGCAACACCGTCAAGGCGTCTAGAGGGC  
CTGATTGACGGGGTGGTGCCTAATACCGACAATACCACACATGTCTTTGCTACCTCGAAGTCACTAT  
ACCTGTTTAAAGAAAATGGATGAGTTCAACATGAACCCGAAAAACCACTGGATCACCGGCTTGAACCTCG  
GCACCAGCTTGGACGCCACCCACAGTCGCTCTGGGAGAGGCTGGTGAAGGTATCCATGAAAAAAGCAG  
GGCACTGACGATCAGCACCCCGCAATTCACCGAAGCAGACCCCGACCCGATCGGTACCGGAGAGG  
CCCGTCTTGTCCACCAACAGGCCACCCACATAGTTGACCACGCTGCCGAGGATCAAAGTCGCCACAAACA  
GCGCCGCGATGGCCAGACCGTTGCGAACCAGCGCTCGGAGAAGGAGGTGAAATAGACGGCGAGATCGGG  
ATAGAAATGGCTGGCAATAAAGAAGGCGACGAACCGTGCACAAGAGACATGGCCTCCTTGACGAAGCGG  
CGCACAGGCTGATGAGAGCAGAGAAACCGACGATGCCGATGATGGCGTAATCAATCCAGACCATAGAAA  
AAGATGTCTCTGCTAAATTGCGGCGCAGTCTAACAACAAACGATTGCGCATTGCTTGATAAAAATGTGTTAA  
CTGTTCAAAGCGACGCCGAAAAGCCGCATTTTTTTCAGCACTAAAACGGTTGTTTCGGCGCCAGAATGCACA  
ACGCCATGGCAATGCCATGGCGTTGTGGTCTGCGGTGTGAGCTTACCCGATGTGGGTGAGGCCACCCATG  
TAGGATTGCAGCGCAGCCGGGATGGCGATGCGGCCATCTTCTGCTGGTAGTTCTCCATCACGGCAACCA  
GGGTACGACCCACCGCCAGACCGGAGCCGTTAGGGTGTGCAGCAGCTGCGGCTTGCCGTCGATACGCAC  
GCGAGCCTGCATGCGGCGCGCCTGGAAGTCGGTGCAGTTGGAGACAGAGGAGATCTCACGGTAAGTATTC  
TGGGCCCGGCGAGCCACACTTCCAGATCGTAGGTCTTGGAGGCGCAGAAGCCCATGTCACCGGTAGAGAGCG  
CCATCACGCGATACGGCAGCTCCAGCAGTTGCAGCACCTTCTCGGCGTGACCGACCATCTCCTCCAGCGC  
ATCCAGGATTTCTCCGGGTGAACCAGCTGAACCATTTGACTTTGTGCAACTGGTGCATACGGATGAGG  
CCACGGGTATCACGACCGTAGGAACCGGCTTACAGAGCGGAAGCAGGGGCTGTGGGCGGTCTCTTGATCG  
GCAGCTCTTGGGCGTCAAAGATCTCGTCACGGGCCATGTTGGTGTGAGCGGCACTTCCGGAGGTGCGGATCAG  
GGAGAACTTACGCAGCTTGCCTCTTCTTCCCTTTCGCTTCGATACCGGTATTGAACAGGTCTTGGGCA  
AATTTTGGCAACTGACCGGTGCCATAGAGGCTGTCCGGTTTACCAGATAGGGCACGTAGCACTCGGTGT  
AACCGTGTCTGGGTGTGCAGATCCAGCATGAACTGAGCCAGGGCACGGTGCAGACGGGCAATCTGACC  
CTTACATCACCAAAAACGGGTACCGGAGAGTTTACGCCATCTTGAAGTCAACGCCCTTGGCCGCTTCC  
CCCAGGTCGATGTGATCGCGTACCGGGAAGCTGAATTCACGCGGGGTACCCAGCGGCGCATCTCCACGT  
TGTGCTTCTCGTCACGGCCACCGGTGTGGTCTCGCTCGGCAGGTTGGGGATGGCGTCCGCAATGGCTTT  
CAGCTGAGCCAGCAGGGCATCCAGCTCGACCTTGGTGGTTTTCCAGCTCGTCGTTGATTTTGGTCACTTCG  
GCCTTGAGCGGGCAACATCTTACCACGACGGGCGACTTACCAGATGGATTTGGAGCGGGCGTTGCGCT  
CGGCCTGCAGCTCCTGGGTACGGGACTGCAGATCCTTGCCTTCTCTTCCAGAGCGTTGACAGCCGCTAC  
GTCCAGAACGTAGCCACGTGTGCCAGACGAGCGGCAGCCTCTTCGATATCGCTGCGCAGATATTTGGGA  
TCCAGCATGGTTTACCTACTTTTTTAAAATGGGATCTGGGCTGAGTCGTCATGACGGGCTGGGAAACAG  
ATCCGGAAGTTAACATCGGTTGGCGCACCCCAATCGTCTTCAGAATCGGGCTCAACAATCAGGCCTTCG  
AGATCAAGAAGATGGCGCAAGGCCAAGACAAGCGGGGTGAGACGGGCAGTGTAGCAGACCGCCCCCGC  
CCGAACAGGGACTATTTGTGTGCTTTTTTACCGACTTTGGCACACAAAACCGTCTGCATATTCAAACGCCT  
GACCAATTTTTAGCCACGCGGGTAACAAAAGGGGCTATTTGCCCGTTGCTGCGGACTTTGCCTGTCCAG  
TTCATGGAGGTAATCGAGCTTCTGACCAATCTGCTTTTTCAAGGCCGCGATCGGTGGGCTGGTAGTACTGC  
TTGCCCGCCAGCTCGGGCGGAAAATACTGCTCGCCAGCGGCATAGGCACCCGGCTCGTCAATGGGCATAGC  
GATACTCGGCGCCATAGCCAGATCGCTCATCAGTTTGGTTCGGCGCATTCGCGAGGTGCACTGGCACCTC  
GAAGTCAGGGAGGTTTTTGGCATCATGAAGCGCCGCTTCCAGGCGGTGTAGACCGCATTTGCTTTTCCGG  
GCGCAGGCGAGATAGACGATCGCCTGGGCGATAGCCCGCTCCCTTCCGCCGGCCCGATCCGATGGAAC

AATCCCAGGCCGACAGGGCGACCTGCATGGCGCGGGATCGGCATTGCCACATCTTCCGAGGCAATCGC  
CAGCAAGCGGGCGGGCTATATAGAGGGGATCGCAACCGGGCGCTCACCATACGGGCGTACCAATAGAGCGCC  
GCATCCGGCGCCGAGCCGGAATGGATTTGTGCACCGCCGAGATGAGGTCGTAGAAGTGATCTCCTCCCT  
TGTCGAAGCGGGCCACGTGCTCCCCACCACGGCAGCGAGCAGGGCACTGTCGATCACCCGCGCCCTGT  
GCTGTCCGTTTTCGGCCATGTCCGGCCAATAGCTCCAGATAGTTGAGGGATTTTCGCCCCTCCCCATCCACC  
GCCTTGGCCAGCGCCTCTTTAACGCCGGGGGCGAAGGTGAGTGCCGGATCATTGAGACCACGGGGATCGG  
TCATCGCCTGATCGAGCATGGCGAGAATATCGCTCTCCTCCAGTCGCTTGAGCAGATAGACCCGGGCTCG  
TGAGAGCAGCGCCTTGTGAGTTTGAACGAGGGGTTTTCGGTGGTGGCACCAGATAAAGGTGATGGTGCCA  
TCTTCGATGTGAGGCAGGAACACATCCTGCTGGCTCTTGTGAAGCGGTGCACCTCATCCACGAACAGAA  
TGGTGCGCACCCCGCGCAGCTATTCTCCTTCGCCTTGTGCATGGCGGCGCGGATCTCCTTGATACCGGA  
GGTGACCCGACAGAGTCGCTCCACTTCCGCCTGACAGTAGTGAGCCATCAACTCCGCCAGCGTAGTCTTG  
CCGGTACCAGGGCGGCCCCACAGGATCATCGAGTGGCAGTGACCCGCCAGAATCGCTTTGCGCAGGGGCT  
TGTCAGCCCCAGGATATGTTGCTGACCGATATACTGGTCGAGGTTTTCGCGCCGCATCCGGGCGCCAG  
CGGACGAAAGTCCGATGAGAAAATCCAGCGACAAGTTACTCATCTGTATTGACCGTTTCACTATCACGGATA  
CCGCCATGGAAAAACGGTCCGACGAGAAAATCCAATAAGAGGTTACTCATCTGTATTGACCACCCAGCGTC  
ACGCCACTCACCTTTGACTGGCGCAGTGGCGAGCAATCCAACGACCGCTTGTCTATTAGCGCTGGTCTGT  
CAGTTTCGACCCCTTTCGGGATCTTGA AAAACAAATTCGTTGCCCTTGAGCACCGGCTTTCGGTTGAAGCTG  
CTCAGGGTGAATTCACCTCCACTGCCCTTTCGCCTCTTTCACATCGAAAACGACTGATGTTGTCTTGTCTGT  
CGAAGGTGACACGGAAGGAGGCGATCAGCTCATCCTTGTACGGCTGGTACGGTGTAGACATCCCCCTG  
CTGGGTTCAGTCATAGTTCTTCCAGAACTTGTCTGTCATTGCCAGCGATCAGAATAAAGGGGGTGTGAGC  
ACCGCATCTTTCAGCTTGAGGGCGGTCACTGCTCGACGAAGGGATCATAGACCCAGACATCCTGACCAT  
CGGCCACGATCAGGCTCTCGTCCGGCGAGGTGGTGTGCCAGTTGAAACGGTTTGGCCGCTGCACCAGCAG  
ATCGCCGCTGGCCTTTTTCAGCTCCTTGGCCTTGTGTGCATAGACGGTCTGGGCAAATTTGGCGGAGAAG  
AGGCTCACCCCGCCAGCTTCTGTTTTCAGATCGCTGGCCGCATCGGCCACACCTGGCTGCTGGCCATCA  
GCAACACGGTACCCATCAACAGTTGTTTTTTCATCACGCTCTTCATAAAGACGCTCTCGATAAAAAGGCCA  
CGCCCGCGGAGGGCATGGCCAGGGATAGTATGAAACGGTGAGGTTTAGTCCCGCACCGGCGGGTGGCA  
GCACGTCGCGCTGACCAATTGCCACCCGGTGAGCTGACGATGCCCTGATTCTCCATCTGCTCGATGAGACG  
GGTGCCTCCGTTTGAACCAATCTTGAACCTTGCCTGACGCTGGAAGTTCGAGCCACGGCGGGATCCACC  
ACAAAAGCGACCGCTTCGTCGAACAGGGGATCCAGCTTTCATCGCCACCACCGCCATATTTCGCCCTGC  
CACCTTCGCCACCCGACTCACCGGAGAGGATCTCCTCGATGTAGTTTCGGCTCGCCGCGCAGTTTCCAGTC  
CGCCACCACCTTGTGCACTTCGTGGTTCATCGACGAATGCACCGTGTACCCGGGTTCGGGTTGGAGGTCCCG  
GCCGGCATGTAGAGCATGTGCGCCATAACGAGCAGAGATTTCGGCGCCGCCCTGATCGATGATGGTGCAGC  
AGTCGATCTTGTGTCGATACCTGGAACGAGATACGTGTGCGAATGTTAGCTTTGATGAGACCGGTGATGAC  
ATCCACTGACGGACGCTGGGTGCGCAGAATGAGGTGAATAACGGCGGCCCGCGCCTTCTGGGCGATACGG  
GCGATCAGCTCTTCAACCTTCTTGGCAGCATCATCATGTCGGCAAATTCGTCCACCACCACCACGA  
TATGGGGCAGTTTCTCCAGCTCTGGTGGCATCTGATCCATGGAGTACCCGGACGCCACAACGGATCCAG  
CAGGGGTTCCCCCTCCTCGATGGCGGCCAGTACCTTGTGTTGTAGCCCTTTCAGGTTGCGCACCCCGACT  
GCCGACATCAGCTTGTAAACGGCGTTCATCTCGCCACACACCAGCGCAGGGCGTTGGCGGCGTCCCTTCA  
TGTCGGTACCACCTCGGTTCAGCAGATGCGGGATCCCTTCGTAGACCGAGAGTTCAGCATCTTGGGGTTC  
GATCATGATGAAGCGCAGATCATCGGGGGATGACTTGTAGAGCATCGAGATGATCATGGTGTGACCCCC  
ACCGACTTACCGGAACCTGTGGTACCGGCCACCAGCAGGTGCGGCATCTTGGCCAGGTTTACCACCACCG  
GCTCGCCGGCGATGTCTGACCCAGGCCATGGTTCAGCGGGTTTCGGCTATCGCGGAAGGCATCGCAGTC  
GAGGGTTTCGCGCAGGTAAACGGTCTGACGCACCCGGTTAGGCAGCTCGATACCGACATAGGTTTTTACCC  
GGGATCACTTCCACCACCCGACGCTGCTGGCAGACAAGGAGCGGGCCAGATCGCGCAGAGGTTGGTGA  
TCTTGTCTGCCTTCATGCCCCGCGCCAGATCCAGCTCGAAAACGGGTAATAACCGGACCCGGATAGACACC  
CACCACCTTGGCCTGACGTTGTAGTCGGCAAGCTTGGCTTCCACCAGACGGCCATGCGATCCAGCTCA  
TCCTTGTCTCATCATCTGGGTCTTGGCTGGTGGACGGTTCGAGCAGCTCGATACTCGGCAACGGTGGCATTG  
TTGACTGCGGACGACGCTTGGGCTTGGTTGGTGGCAGCGCTACCGGCGCGGCGACCTCGTCTCCCTTC  
GGCCAGGGCAGATCCAGATCGTCTCATCATCGTCATCGGCCACAGCCAGTACCGGCTGGCGGCGACCA  
TTGGCGGCCGCCACCGCACGTTTAGGCTTGGCAGCCGGAGCCGGCTCATCATCTTCATCATCAAACCTGGG  
GATCGAACTCGAAGGTATCGTCGTGAGTTCGGCAGCCACTCTTCGGCGGCAGCTTCTGATTCTTGGC  
CTTGGGCTTTCGAGTCCAGCTGGTGTGCGGCTCATCTTCTCATCATCAAACCGATGGCCCCTACCCCG  
CCTTCCAGCAAGGGATCCGGCCCCCTCGTTGCGGGTTGACGCCAGCCACCGGTCAGCCAGCGGCCGAGGG  
TGGTTCGGGAAGTGGTAAACAGCGCTGACCGAACCGGTACAGGCCCGCGCCATCTGCTCGACGATGGTGG  
CCAGGACCAGCCGGTAAACAGGGTGTATGCCGGTTGCCACGAAGCAGAGCAGCATCAGGTTGGCCCCGACG  
CCGCCAAACAGCGGCCACCACTGCAGAAGCGATCATATCCCCACCAGACCACCGGCGGAGAAGTTTTCGA  
TATCGTTGAAGTTCATGCTGGCAATGGCCGACATGCCAAGCACAGTCAGGATAAAGCCGATGATCCGCAC  
CCCCAGGGTGAGGTAATCCACATCGAGCAGACGGCTCGGACGCCAGAACAGACTCCAGCCCAGCAGTACC  
ACCAGCGGCGGCACCAGATAGGAGAAAAGCACCAAAAGGTA AACATGGTGATGTCGGCGAGCCAGGCACCGG  
CACTACCGGCGAGGTTCTTACCTCCCTTGCAGGAGGTTTGGGACCAGCCGGGATCAGCGGGATGATA  
GGACAACAGGGCAAGCAGAAGATAAGCAGCCATCAGGGTATGGCGATCAAGACGGCTTCGAAGATCCGT

TGTGTACCTGATAAAGGAGTAAACAGCTTTTTATCGGCCAAACTCCGGCTCCTTTCTGAAAACATGTAAT  
GCAGGAAATAAGGGGGCTAGTATCCCCGAAAAGCCCATCGATTGTCAGCCAGAGCCTGATGGGACGGGG  
CCATATTTGCAATTATCTTTACAAGAAGAAACGAGCGGACCGGCCGCTCGTTTCTGACTGTCATGGTGT  
TCATATGGAAAAGATACCACGGCATAACCTGCTTTATCGGGTGTGATCACCAGACGACTGCTCTGCTTG  
ACCTCTTCCATCACCACGTAGGTGCGGGTGTGATTGACACCGGGCAGACGCGAGCAGGGTTTCCCCCAACA  
GACGGCGGTAAGCCGACATGTGCTGACTCGGGTCTTGAGCAGATAGTCGAAGTCACCGGAAACCAGATG  
ACACTCCTGGATCTCTTCGAGTACCTGAACAGCCTTGTGAACTGTTCAAACACATCAGGCGCCCCGCGA  
TTGAGGGTTATCTCTACAAACACCAGCAGAGATGCGTCCAGATAATGAGGGTTCAGAATAGCGGCATATC  
CTTCGATATAACCTTGTGCTCGAGGGCAGCAACCCGTTCAGACACGGTGTAGGACTCAGGCCAACTCG  
CTTGGAACAACCTAACATTCGAAATCCTGCCATCCTTTTGCAGTTCATTAAGAATGTTGCGGTCAATCCTG  
TCCAAATCCTTTAGCCGACTTTAGCTTCCATCTTTTATTCATCCTTTGGCTATTTTTGGTAAAGAAT  
CACCAGTCATTTTATAATTATGGTCACAAATCCTGTCAATACCTGAATATACTAGGCGCAAATGTTGGTT  
AACATCTTGGCAACATGAAACACCAATCTATAGACGAGGGATAGCATGATTATCGGTGTACCTAAAGAGA  
TAAAAAACCATGAATACCGCGTAGGCATGGTTCCGGCCAGTGTACGTGAACTGACAGCACGAAACCATA  
TGTTTTCGTCCAAAGCGGTGCCGAAACGGCATTGGCTTCAGCGATGCAGATTATATCGCTGTTGGAGCC  
GAAATTTTGGCCTCTGCAGCAGAGGTTTTTCGCCAAAGCCGAGATGATCGTCAAGGTCAAGGAACCTCAGC  
CTGTGCAATGTGCCATGCTGCGCCCGGTCAAACCTGTTACCTATCTGCATCTGGCGCCAGACTTGCC  
CCAGACCGAAGCCCTGCTGAAAAGCGGCGCCATCTGTATCGCCTATGAAACCGTCACCGACGGCCGTGGC  
GGCCTGCCCCCTGCTGGCCCCCATGTGAGAAGTGGCCGACGCATGTCTATTCAGGCGGGTGGCCAGGCGC  
TGGAAAAATCGCGCGGTGGAAGCGGTGTGCTGCTCGGCGCGTACCCGCTGTCGAACCGCCAAGGTGGT  
GATCATCGGCGGTGGCGTGGTTCGGCTCCAATGCGGCCCGCATGGCCATTGGCTGCGCGCGGATGTCACC  
ATCCTCGACAACAACGTGATACCTGCGCCGTCTCGATAACGAGTTCAGGGAGCAGCCAAGGTGGTCT  
ACTCCAACAGCGAGACGCTGGAGCGCCATCTGCTGGCGGCCGATCTGGTCATCGGCGGGCTGCTGGTACC  
GGGTGCCACTGCGCCAAAACCTTGTCCGCCGTGACCACATTGCGCGCATGAAGCCGGGTTCTGCCATCGTC  
GATGTGGCCATCGATCAGGGCGGTGTGTGGAAACCTCCCACGCCACCACCACAGGATCCGACCTATA  
TTGTGATGAGGTGGTGCCTACTGTGTGCGCAACATGCCGGGGCGGTTGCCCGCACCTCGACCGTGGC  
GCTCAACAATGCCACCCTCCCCTTTATCATCAAGCTGGCCAGCAAGGGTATCGTCAGGCACTGCTGAGC  
GATCCCAACCTTGCATGACGGGCTCAACGTGATGGAGGGCAAGCTCACCTGCAAGGAAGTGGCCGTGGCAC  
ATGGCCTTGCCTTACCGGATCCCCTGACCTGTGAACGATCTGCGCTGGCCTGGCAGTGGAGATG  
AGTGAATAATCCGCGCGATGGGCGGTTTTTTTTATTCTTTATTTTGCATGTCACCCCTTGTGAACACGA  
TTAGTGCAATCGACTCACCAGCCTTTGACCCCGGATCACGAATTACCTACAATCGCGCAAACCTCATCACA  
TCCCAGAAATGACATCATGAGCCAAGTCACTCACAGCAAATTTGCTGATCTTAGGGTCAGGCCCGGCGGTT  
TACACCGCGGCGCTTACGCGCCCGCGCAACCTCAATCCCCTGCTCATCACCGGCATGCAGCAAGGGG  
GTCAGCTGACCACCACCACCGAAGTGGAGAAGTGGCCAGGTGATCCGGAAGGGCTGACCGGCCCTGCCCT  
GATGGAGCGCATGAAAGAGCATGCAGAGAAGTTCGACACCCGCATCCTGTTTGTATCACATCAACAGTGT  
GAACTGACTCAGCGCCCGTTCCGTCTCAAGGGCGACAACGGCGAGTACACCTGCGATGCCCTGATCATCG  
CGACCGGCGCCTCCGCAAAGTATCTGGGCTGCCCTCCGAAGAGCCCTTCAAGGGGCGGCGTCTCCGC  
CTGTGCCACCTGTGACGGTTTCTTCTACCGCAATCAGGAAGTGGCGGTGATCGGCGGCGGCAACACCGCT  
GTTGAAGAAGCCTTGTATCTGGCCAACATCGCCAAGAAGGTGCACCTGATCCACCAGCGCGACGATTC  
GTGCCGAGAAGATCCTGATCAAGCGTCTGCACGACAAGGTTGCGAGCGGCAACATCGTGTGCACACCCA  
CCAGACCCTGGACGAAGTGTGGGCGATCAGATGGGGGTACCCGGTGTGCGCCTGCGCAACACTCAGGAC  
AACAGTACCAGCGAGCTGCCGCTGATGGGCGTCTTCATCGCCATCGGCCATCAGCCCAATACCCAGATCT  
TCGATGGCCAGCTGGAGATGCAAAACGGTTATCTGAAGGTACGTGGCGCCTCGACGGTTTTGCCACCCA  
GACCAGCATTGAAGGAGTCTTCGCTGCTGGCGATGTGGCCGACCACAACACTACCGTCAGGCGATCACCTCT  
GCCGGTACCGGCTGCATGGCAGCCCTCGATGCCGAACGCTACCTCGACGCGCAATAAACAAGCGCAGATG  
TGATATAAGGCATACCAGTCGGTATGCCTTTTTTTAAAGGAGTCTAATGAAACAGAAGATATTGATT  
GTCGAAGATAGCCTGACCATCCGCGGTATGCTGACTCAGGCCATTGCCAGCAGACAGGCTCGAGATTG  
ACGCCTTTCGATAACCTCGAAGGTGCCCGTCACTGCCGGGGCGAGGAGTATGTGGTTCGCGCTGGTGGACCT  
GACCTTGGCGGATGCGCCCCGTGGCGAAGCGGTCAACGAGCTGCTGGCTCGAGGTTTGGCGGTGGTGTATC  
CTCACTGCCGACATCAGCGAGGATAAACGTGCCGCTGGCTGGAAAACCGGCGTGTGGACTATGTGATGA  
AGGATTCGCGCCACTCGCTGCAATATGCCGTGAGTCTGGTGCACCGCTCTATCTCAACCAGTCGATCGA  
AGTGTGGTAGTCGACGACTCACGCACCTCCGTCACCGCACCATGGCCAGTTGCGCAAGCAGTTGTTG  
CAGGTGCATGAGGCCAGTCATGCCCGTGAAGCGATGGCGATGCTGGAGCAACACCCGACATCCGGCTGG  
CACTGGTGCCTACTATATGCCGGATATCGATGGCATCAGTCTGGTGGGATGCTGAGAGAGCGTTACAG  
CAAGCAACAGCTCGCGATTATCGGGATCTCGGTCTCGGACAAACGCGTCTCTCTGCTCGCTACCTCAAG  
CAAGGCGCCAACGACTTTCTCAACCAGCCGTTGAGCCGGAAGAGCTGCAAGTGTGGGTCAGCCACAATC  
TGGAAAGCGCTCGAGCAGTTCAACAGCATTCAAGGAGTCAGCCAATCGTGAATACCTGACCGGTCTCTACAA  
CCGGCGCTACTGGTTCAACGAAGGGCAAAAATGGTTTGAAGAGCATCAGCGCCAGCAGACGCTCTCGCA  
CTCTGTGTGCTCGATGTGGATCACTTCAAGCAGGTCAACGATCACTGGGGCCATGCCATCGGCGATCAAC  
TGCTTTGCCATCTGACCCGGCTACTGACCCAGTCTTCCCCGATGCAATGATCGCCCGTTTTGGTGGAGA  
GGAGTTTGCATGATGGTGCCTCACTGTACCGTCCCCGTGTTGATCAAGCGTCTTGAAGGGCTGCGTCAG

CAGCTGCGCCAGCAACCCCTTGTACCCGAAACCCCGCTCTTTGTTTCGCGCCAGTTACGGCGTGATCAGCG  
TCGGGCGGATATCCATGGACGAGGCGCTGAGCGTAGCGGATCGGCTGCTCTATCAGGCAAAGAACC  
TCGCGACAAGATAGTCTCTCAAGAGATAAATATCTGAATCCTCAGGGCATCAGTCCCCTGTATTACCGCC  
CGACAGACTTTCCGACAGGAGAGTCTGCGGGTTCCCTTTCCCTGCCACAGTCTCCCCATCACCATGACTATC  
GAAAGTCAGTAAGTCTTGTGACCCCGCACCCCATCATCGAAGTAGAGAATGCGCACCTTGTCTCCATTGG  
CAAAGACCATGGCGGGATCATAATCCTGGATCACGTTGATAAGGGCATTTTGCTCGTTGCGGATCAGCAG  
CTCCACCAGCTTGTTCACCACGGTTCCCCGGACTGGTATTGCTGCGCAGCCGACGCTCCCGCCAGC  
GCCCCGACGGCGGTGGCGATTTACGACCATGACCGCCACCAAACCTGGTTGCCAGCAGACCCGCCAAC  
CGGCACCACCCAGCGTCTTCCAGCCAGAGTGTCTGGACTCCAGGATCTGGCGCTGGGTAATATTGCGCAC  
CGTTTCGACCTGACCAAACACCACCTGATTGACCGGCCGCGCGGTATTGCGCTGGTAGACCTCCGCCCCG  
GCGGGCGCCGTGACAAAGCAGAGCAAGCTGGATACTATCAGGATAATGGCCTTCATCTAAGACCTCGTT  
GCCTTATGTCTCGCTATCTTACCCAACCTGGATGATGAGCTTTGCTGGTTTCCCGACCCAGCCATGCGCT  
GGAAGAGCCCAACCGCTTGTGGCGATCGGGCGGGATCTCTCCCTGCCAGATTGCTGGCAGCTTACCAC  
AAGGGGATCTTCCCGTGAATGAACCCACCAACCGACCTGTGGTGGTCACCGGATCCCGCGGGGTGA  
TCCGTCCCGACCAACTCCATGTGGGGCGGACACTGCAGAAAGATTATCCCGCGAACCCCATTCGATATTC  
CGTCAATCGCGCCTTTAATGAAGTCATTACTGCTGCGCCGCCCTCGTCGCACTGCCGATGGCACCTGG  
ATCAGCCAACCCATGATCGATGCCTACCAGCAGTTGCACCGGCTGGGTCATGCCACTCTATCGAGATCT  
GGCAAGGGGGAGAGCTGCAAGCGGGACTGTATGGCTCTCTATCGGCCGACTGTTTTGCGGTGAATCCAT  
GTTTCAGCCGGATTGATAACGGCGCCAAACTTGCCATGGTGGCACTCTGTGCGCACTTCGCCCGCCATCAC  
GGCGCCCTCATCGATTGCCAGATGCAAAACCCGTTTCTGGCGACCTGGGTATCGAGGAGTGGCCAAGGG  
CCCGTTTTCTGGCCGAGCTGGCGCGCCTTGCCATCAACCACTATTGGCTTCTGTGGCAAGAGGGGA  
GATCAGCTTATGACTGAAGAAGTGATCCTCAAAGTAGGGCTGACTCCCAAGCATCCCTGCAGTTATCTGG  
ACCATGAACAGGAGCAGTTGCTGGTGTGATGGATCACAATCTGCTCAACGCCAACGGTTACGAGCGATT  
GTTGACTGCCGGTTTTCGCCGAGTGGCAACGACATCTATCGTCCCCACTGCCCGCGTGCCATGCCTGC  
CAATCCCTTCGTATTCACAGTGAACACTTTCGTCCCAGCCGCGGCCAGAAAGCGGATCCGCCAGCTCAACA  
GGGATATCGAGATCGTCTGAGCTACGATGACAAACCCGAGTATTACCTGCTCTACGAACGCTATATCCG  
CGAACGCCACCACGATGGCAGCATGTATCCCCAACCCGACCCAGTATCGCGGTTTTCTCCATTGTGAC  
TGGATCCCGCCACTCTATCTGGAGATGCGCAAGGAGGGCGCTTATCGGCGTGGCCACCACAGACCTGC  
TACCCCACTCCTTGAGCGCCATGTACACCTTCTTCGATCCGGATTATGCGGATCGTCCCTGGGACCTT  
TGCCATCCTTTGCCAGCTCGATCTGGCCAGGCGAACCGGGCGAAGCTGGCTCTATCTTGGCTATCTGGTA  
GAGGCGTGTGCAAGATGAATTACAAACGCAATTACCTCCCTCATGAGCTGTTAATTCAGGGGGAATGGA  
AAAATATCGACACCAAGCCCGAGTAAACTTTACACATAGCCTTAAATCCGGCATGATCCAGCGTTTTTTT  
GTTGTGGCTTATCAAGAGGATTCAATGGCTAAAGAAGACAGTATTGAGATGCAGGGCACATTTCTCGAAA  
CCCTGCCCAATACCATGTTCCGTGTGAACTGGAGAATGGTCACGTGGTTATCGCTCATATTTTCAGGCAA  
GATGCGCAAAAACACTACATTCGTATCCTGACTGGAGACAAAAGTAACGGTAGCACTGACTCCCTACGATCTC  
TCCAAGGGACGTATTGTTTTCCGCTCTCGCTAAGCCAGGAATTCAGCAAAAACCCCAACCTTTTCGGTTG  
GGGTTTTTTTGTGTTTTCTGATCACTGACGCTTAGTGGGAAACAGCTTCAACATTGACCTGAAAATCAA  
GCTGAGGCTGTCAATTTACCAACTCAACCTTCACAATTCCCCCGTCAACCAGTGAACCGAACAGGATCTCG  
TTGGCCAGGGTTTTCTTGGGTGCTCCTGGATCACCCGCCCATAGGTCTGGCACCCATGGCTCTGTCTAT  
ATCCCTTCTCTGCCAACAGTGGCGGGCACGCTCGGACACCTCGAGAGAACTCCCTTCGCATCCAGTTG  
AACCTGCAATTGACAATAAACTTGTGACACCTGATGAATCACCGTCAATATCGAGATGGTTGAACCG  
ATGGTGTGATCAAGCCGGTTACGAAACTCCGGACTGAAGGTCTTGTGATCACCGCCATGGCATCGTGGC  
TCAAATCCTGTTGCTGGAAGCAATCGATTTGCGCTGAGTCTCCTGCACACCGCGGTTGGTAGTCATCAC  
CAAATGACGTTACGGAAATCCGCCTTGGCTCCGTTGTTATCGGTCAGGGTACCGTTGTCATCACCTGC  
AACAGCAGATTGAATACGTCGGGTGAGCTTCTCAATTTCTGTAAGCAACACAACGGAATGAGGATGCT  
TGATCACCGCATCAGTCAGCAGACACCCTGCTCAAAACCAACATAGCCGGGAGGCGACCAATCAGACG  
TGAGACGGTGTGACGTTCCATGTACTCGGACATATCAAAGCGCAGCATCTCGACACCCCAATGCCTTGCC  
AACTGCTGGGTACCTCTGTTTTACCAACACCGGTAGGACCGGCAACAGGAAGCAACCAACCGGACGAC  
GCTCGTTGCCAAGTCTGAACGAGAGAGGCGAATCGCATCGGTCAGCACCTCGATGGCTTTATCCTGACC  
AAAGACCACCATCTTACGATTGCGCTCCAAGTTCTTACGACCTCTTTATCCGAGGAAGAACTGATTTT  
TCCGGAATGCGGGCTATCTTGGCTACGATGGACTCAATTTCTGACATTTGATCACTTTCTTGGCCTTGC  
TCGCCGGCAGTAACCGTTGACCGGCACCCGCTCGTTCGATCACGTCGATCGCCTTGTGCGGTAGGTGACG  
ATCATTGATGTACTTGGCAGAGAGCTCGGCAGCTGCACGGATCGCCTTGGCGGTATAGCGTACGCCGTGG  
TGGGCTTCGTAGCGACTCTTGGACCCATCAGGATGCGAGTGGTGTATCGATAGTTGGCTCGACAATAT  
CGATCTTCTGGAAGCGACGGGCCAGCGCACGGTCTTCTCGAAGATCTGGGCGTACTCCTGATAAGTGGT  
GGATCCACACAGCGGAGCAAACCATGGAGAGCAGCGCTTGTATCAGGTTGGCCGCATCCAGCTGACCA  
CCGGATGCCGCACCGGCACCAATGATGGTATGGATCTCGTCAATAAAGAGAATGGCCCCCTTCTGACGCT  
CAATCTGCTTGGACGAGTACCTTGGAGCGCTTCTCGAAAATCCCCACGGTATTTGGTGCCCCGCCAGCAGAGA  
CCCCATATCCAGCGAATAGATGGTACTGCCCGCAATCACCTCGGGGACATCCCCCTTGACGATGCGATAG  
GCCAAGCCTTCGGCAATGGCGGTTTTTCCCACGCCAGCTTCAACCACAGCAGCGGTTGTTCTTGGCAC  
GGCGGCAGAGCACCTGAATGGTACGATTGAGCTCCTGATCACGGCCAATCAGCGGATCGATGCGCCCTT

CAGCACCAGCTGGTTTCAGGTTGGTAGCAAAGCTCTCGATCTGTGCGGCCGAGACATCATCATCAGACTCG  
GGATTGTTATTGCTGCCGAGATCCGGCTTGGCTGTCTTGGCTACCCCGTGGGAGAGGAAAATTGACAACGT  
CGAGACGGCTGATTTCCGGCTTTTTTCAGGAAATAGGCAGCTTGTGACTCCTGCTCACTGAAGATAGCGAC  
CAGCACGTTGGCGCCGCTGACTTCCGGTATTGCCGGAAGATTGCACATGGAAGACGGCACGCTGCAACACG  
CGCTGGAAGCCCAGTGTGCGGCTGGGTTTTACGATCTTTCATCGTCGCGCGGTATGAGCGGAGTAGTTTGGG  
TGATGAATGCGCGGATCTCCTTGGCGATCTGCTCGACATCGGCACCACAGGAGCTCAGCGCCTCATGGGC  
TGAACTGTTATCCAGAAGGGCTAACAAACAGGTGCTCGACGGTCATGAATTCGTGGCGCTCGTCACGGGCC  
AGTTTGAAGCCTCGTTCAGCGTCTTTTCTAGATCTTTATTCACATAGGCACCTCCCCTAGTACAGCTA  
CAATGTGGTGTCACTCGCCATCAAGTCATCAGATTCAGCCTTTTCCATAGTACAGAGCAGTGGATGT  
TCGTTGTTACGTGCATAGGTGTTGACCTGGACAACCTTGGTTTCGGCGATCTCTGCGGTAAACATGCCGC  
AGACACCTTACCACTATAATGCACACTCAGACTGACCTGAGTCGCCTTGTCCAAATCCATACCAAAGAA  
CTTTTGCAGCACCTCCACCACAACTCCATGGGCGTGTAGTCATCGTTGTTCAACACAACTTATACATG  
GGTGGCGGCTGCAGCTTTGTTTTCTCTGCTTCTGCAATCTCTTCATTAGCAAAGAGTTCTTTCTGCTTGC  
TCATAATCGCGCTTTGGTACCTCTAGATTACTACCGTCTAACACAAGGTTGTCAATAGACTTGTAAACCA  
GATCACATCAGCTGTTAACTTCTTGGCTCGCTCAAAAAGTTAGACTAGATTGGTTACTTGTAACTCTG  
TGCCCGTCTGCTATGGGCCATGTCCCTAGTTATAAAGGGCTGGCGCAGGTTACTCAACGACTTCTGGGT  
AATCAATAAAAGGATGTAGAAGTATGGCAACCGGCACAGTTAAGTGGTTTAAACAACGAAAAGGATTTGG  
GTTTATCTGTCCGGAAGGGGGCGGTGAGGATATCTTCGCTCACTACTCCACGATTCAAATGGAGGGCTAC  
AAGACCCTGAAAGCGGGTCAAGCTGTCAATTTGAACTGCAACAGGGGCCGAAAGGAAATCACGCCTCTG  
TTATTGTGCCAAACGAAGCACAAAATATGTAATAACACCCGTTGGATAAATAAAAAACCGTTCTTCTC  
TGAGCAACCGGTTTTTTATTGTGATTTCTGGCGAATCCTGCCCTCCTCATGGGATCACAGGTTATCAC  
CAGCCATGATCAGTCGTGATATTCAGTGCAGGCGATCAGGGTATTTTCCATCAGGCTGGCGACCGTCTATC  
GGGCCACGCCACCGGGTACCGGAGTAATGAAGGAGGCATGGCTGCGCGCCGCTCAAACCTCCACATCCC  
CGACCAGCGAGCCATCAGCCAGGCGATTGATGCCACATCGATTACCAGTGCACCGGTTTGGATCCACTC  
GCCAGGAATGAAGTTGGGCTTGGCGACTGCGACAACCAGCAGATCGGCACGGCGAACCTGCTCTTCCAGA  
TCCCCGGTAAAGCGGTGACAGGTGCTGGTGTGTCAGCCAGCCAGCAACAATTCGAGGGTTCATGGGACGCC  
CGACGATGTTGGACGCTCCCACCACGACCGCATGCAGACCATGTGTCTTACGCCGGTGGTCTCGATCAG  
TGTCAATGATCCCTTTCCGAGTGCAGGGGCGCAGCCGGAATACGTTGGGCCAGACGGCCGACGTTATAC  
GGGTGAAATCCATCTACATCCTTGTGAGGCTGGATCCGCTCCAGCACCTGAGTGGTATCAAAGTATCCG  
GCAATGGCAGCTGAACCAGAATGCCATCAACGTGGCTATCCGCATTACGCTGATCAATCAACGCGCAGCAG  
CTCTTCCCTGACTGGCAGTGGCACTCAGGTCATAGGAGCGGGAGAGAAAACCCACCTCCTCGCACGCCCGA  
CGTTTACTGCCGACATAGACCTGAGAGGCTGGATCCGCCCCCACCAGAATGACTGCCAGCCAGGAGCCC  
GTTTCCCTGCCGCAACCGCTGTTGGACTTGGCGCGGACCTGGCTGCGAATCGTTTGGCAACCTGTTT  
TCCATCTATGATTTTGGCAGACATCGTTCTCCACTCACCATGTGTTCAACTGCCGCGCATTTGTCGATTT  
TTTTAGCCGGGATGTTAGCGGCAGACGCACGCCAGACCTGTAGCGGCAATAAGTAGGCACCTTGAATTTA  
CTGGGGGAAAAGTCGTTGACGCTGGCCCTTACGCTTGGCTATGATGCCCGCCGTTGCCAGTACGACT  
CATGTCGATATGCTGGTCAGGGATTTCCGGTATTAGCGCAGTCCGGTAGCGCATCTGGTTTGGGACCAG  
AGGGTCAAAGGTTGCAATCCTTTATCACCGACCATGTTTCATCGACTCGTCCCTAAGACGTGTTGATACAA  
AGCGCCCTTAGCTCAGTTGGATAGAGCAACGGCCTTCTAAGCCGTGGGTGCGCAGGTTGCAATCCTGCAGG  
GCGCGCCATTGATGTTCCCAATCCTTCTGGATTGGCGAGCGTTGATGAAAAATTTCTGTGGTGGCTGTA  
GCTCAGTTGGTAGAGTCCCGGATTGTGATTCCGGTGTGCTGGGTTGAGCCCCATCAGCCACCCATTA  
TTCTGTGATAAATCGCCGTAAGGTGATGTCCATCGACTTGGTGCAGTGACCTTCTGGTCTGCTCAGCGAA  
AAACCGGCTTGGCCGGTCTTTTGTGTTTGGCTCCACAGTGCATGCTTGTCTGCAAGGCCATCATCCT  
CCAGATCGATAAACGTGGCTCCGCCCATTTGTACGATTGCGCCTCCTCATCGATACACACAGCCACTC  
TCCCCCGCATCAGCTGCCCCGTTCTTTTCTGTATTTCCAAGCGCCATTGATATGCTGATCGCTCT  
TCTTCTCCTGCTTTCCGTTGGAGCTTTTCTATGCAACGCATTTCTTTTGTGCAAGATGATCCCGAGAT  
TGGCCAGCTCATCAGCAGTTGGCTCGGCCGCCACGATATGGAAGTGATCCTCGAGCCCAGAGGGGACATG  
GCGCTGGCCCGGATCGAGGCCGAACAGCCCGATCTGGTGTGCTCGATATCATGTTGCCGGGGTAAGATG  
GCATGTCCCTCTGTGCGGATCTTCCGCCACGCTTCGACGGCCCCATCGTAATGCTCACCTCGCTGGATAG  
CGACATGAACCAGATCCTGAGTCTGGAGCTGGGCGCAACGACTACATCCTCAAACGACACCACCACCG  
GTGCTGCTGGCCGACTTCGGGTGAGTTTCGCCAGCACCCGCAAGCATCAACCAACCGGCAGCCACCA  
GCAGCGTTCCCCAGCAGCTGCAATTTGGTGGCTGCGGGTAGATGGCCGGGACGAGATGTGCGCCTCGA  
TGGCGAGAGCATTGCCCTCTCGACCGCCGACTTTGATCTGCTGTGGGAGCTCGCCTGCCACGCGGGCCAA  
ATCTTGGAGTAGGGAAGCCCTCTTTCGAGCTTGCAGCGCCGGAATACGACGGTCAGGATCGCAGCATGG  
ATGTGGCCATCTCCCGCTGCGCCGCAAACTGGGTGATAACCTGACAACCCGACCCGGATCAAGACGGT  
GCGCCAGAAAGGCTACCTCTTCCGTCACCCACGCTGGGAATAACCTCTTTCGGGAGCACCGCCATGCGC  
CGTCTCTTTATCCAGTTCTATCTGTTGCTGATCGGCTGCTTACCTTGGCCATCCTGCTGGTTGGCGTGG  
TCTATCAGGTGACCGCCGAACGGGCGGGTATCGCTATCTCGAACGCATGATGCAGGGCTCTCTTGGCCT  
GTTGACCGGCGAGTTGGCAAGAACCCCGCCAGAGCGCTGGCCGATCGACTGGCCGAGCAGAGCAGTCAG  
TTTACCCTCCCCCTCAAGATCGGCGAGCTGGTGCGCCAGCCCTGGCCAGCGAGGATCAAGCCTTTCTGG  
CCGCCGGAACATTGTCATCGTTGAGGAGGATGACACCTTCTGACGCGCATCCCCGATACCGATCGGGT

GCTGATTGTCGGCCCTGTACCCTACCTCTCCTACCTGCACGAGCTGCACTGGGTTCGATGTGGGGCTACTG  
CTGGTGATCGGCCTATCCCTCGGCCTGCCATTCTGCTCTGGTTGCGTCCCCACTGGCACGGATTGCAGC  
AGTTGGAGCAAACCGCACGTGCGGTAGGCGATGGGGATCTCTCTGCCGAACCAATCTGCCACCGGGCAG  
CAGTCTGGCCCGGGTGGGACGCACCTTCGATCAAATGGCGACCCAATTGCAGGCCATGATTGCCAGCCGC  
AAGCAACTGACCGATGCCATCGCCACGAGTTGCGCACCCCGCTGGTCCGGTTGCGCTATCGGCTTGCCA  
TGCTCGATCCTTCCCTGCGGAGCAGGAGCAGCAGGCGCTGGAGCGAGATCTGGGAGCGCTGGACGCTCT  
GATCGAAGAGATGCTCACCTACGCCAAGCTTGACAGGCCAGAGCTGCCACTGCAGCGGGACGAGCTGGAG  
CTCAGTCACTGGGCACAAGCTCATCTCGGGACTGGCAAGCGCTGGCACCCAAGAAGAGGGCTCACCCCTCG  
ATCTGCCACCACGCCACATGCCCTGGTGGGGGATCAGCGTCTGCTGACCCGCGCGGTGGAGAACCTGAT  
CGGAAGTCCCTGCGCTACGCCGAGAGCGAGGTTACCTCTCCATCTCGCGGCTACAGGAGAATATCTG  
CTAGAGGTGAGCGAGATGGACCGGGGATCGATCCGCGCGCTGGCGCCCCAGATCTTTGAGCCGTTCTGTC  
GTCTTGATCAGAGTCGGGATCGTTCGCACCGCGCGCACCGGTTGGGACTGGCCATCGTGCAGCAGCATTC  
CCGTTCATCACGGGGCGATGTGGCGCTGCTGGCCAGTGACCACGGCGCCCTCTCTGCCTCACCTGCCT  
GTACATTTGGATACAAACCGTCACCAACCGCTCACTGAAGGGCCCGCAACCGTCATAGGATGACTGTC  
ATGGAGAACGCTCCATAACATCAACCCGAATAAGGAAATTTGAACATGAAAAAGATCATTTCCCTGACCC  
GGCTGCCGTTCTCGCCCTCACCTCCGGTTTTACCATGGCGGCCACCCCGACCAAGACAGCCACACCGCAG  
GCGACCCAGACCAAGGTGGTAAAAAACACCATAAAGCCACCCACGCCAAGACCCCTGCCGTCAAAGTCG  
CACCGAAAACCAAGTATCAACCCGGTCACTGGATAGCACAGAGGGAGGCTGACGCCTCCCTTTCCATCT  
CTTCCCGAAATTTTCTGACGAGCACCTCCCTCGTCCAAACCGGATCCACGACCCGGCTCCCCCTTTGCG  
GGAAACGGTCAATGACCACAGGAACATGGCATGTGGCGTCACTGCTTAAATGGCTAGGCCCTTTGTGCA  
GCTTGCTGCTGCTCGGCACCGCACTGACCGTGTGTATCACTGACTCAGGCATGGCACTGGCACGATAT  
TCGTGTGGCCATCTGGTCCCAACCCCTGCCGCGACTGGCGGGCGCCCTGCTGCTGACCCCTGCTTAGTTAT  
GGTTGCCTCTGCAGCTATGACATGCTGGCGCTCCATGCGCTGGGCAAGCGCCTTCCCTGGCAACAGATCA  
GCATTACCTCCTTTATCGCCTACACCTTCTCCAACACCCCTGGGATTTGCCCTGCTGACCGGCACCTCGGT  
ACGCTATCGGCTCTACTCAGCCCTCGGTCTGGCGACCGGTGAGGTAGCCCGCGTGGTGTGTTCTGCTCC  
ATCACCTTTTTCTCGGCCTGCTGGCGTGGGGAGGTGGCGCCCTACTGACCTGCGATGTATCACAGCTGC  
TGCCTGACTGGCCGAATGGGCAGATAACCTGCTCAAGCTGGCGGGCGTCACTGGCTCTGCTGTTGGTGGC  
CAGTCACTCTGCTGGCTACACACCGTCTCTCCCTGGCGAAACACATCCTGACCCCTGCCCGGCTTCAAG  
GTTCTGCTGTTGTCAGCTGTTGGTTCGCGCTGGCGACTGGATGGCAGCCCGCCCGCTGCTGTTTGTGCTGT  
TGCCTGCAAATAGCGTCCCTACCCTGTGCTGCTCAGTGCCCTTCGTGCTGGCAAGCTTCTCTCGGGTGT  
GGCCACGTGCCGGGCGGGATCGGGGTGTTGAAAGCGAGCATGAGCCTGTTGTTAGCTAACTACCTGCCA  
ACGGACAAGCTGCTCGCCTCGCTACTGCTCTACCCTGTCATCTATTATCTGCTCCCTTTCTCTGTGCC  
TGCTGCTCTTTGCGAGTCAGGAGATGCTGCAACAAAAAGCGCGCTGGCAACGGCTACAGGGGCTGATGAG  
CGCAGTGCAGCAATTTCTACCAGCCCTCATCAGCATGGGAACCTTCGCCCGCCGGCAGCCTGCTGCTCTGC  
TCGGGGATGATCCCGACCATGCGCAGCCACATCGAAGTGTGGCTGCAGGTGTTACCGCTCCATCTGCTGG  
AGATCTCCACGTGCTCGGCAGCGTGAGCGGTATCTCCTGATCCTGCTGGCACGCAGCCTCTATCGCCG  
TCACGACGCCCGGTTTTGTCATCACCCAGCTGCTGCTGGCTCTGGGGATCGCCTTCTCCCTGCTCAAGGGC  
GGTGACTGGGAGTCAGCCCTGCTGCTCGGCAGCTTCCTGCTGATCATGACCCCTGCCGCTCTCTCTTCT  
ATCGCAAGGGGTGCTGCTCTATCCCCAGTACACCCCGGGCTGGCTCATTTTCAGTCGGCGCCGTGCTGCT  
GGGAGCCCTGTGGCTGCTGCTCTTCTCCTACCCTGAGGTGGAGTATGACCACGCCCTCTGGTTCCACTTC  
TCGCCCCACGGCGGGGCTGCCCGCGCCCTGCGCGCCATGGGGAGCGTGATAGCTGTGCTGGCCTTGGCCG  
GGGTTGCCAGTTGCTTGCGCCGCTGCGCGTGGTTCGGTAAAAAGCCGGACAAGGAGGCGCTTGTCTCGCGC  
CCACGAAGTGGTGGTGCCTGAAGGGGGGATCCACGGCTATCTGGCCAGCTACAGGACAAATCCCTGCTG  
TTCCACCCCGCCGGTGACGCCTTCTGATGTATGGCATCGAGGGCAACAGCTGGATTGTGATGGGGGATC  
CAACCCGGTCTTTTATCAGGTGTCGGCCCGCTATCTCCGCTTATCTGGAGCTGGGGCTGATCCCCCTTC  
AAGCTCGGTGAAGAGGCGATGGTTCGATCTGGCTACCTTCGATCTGGCGGGCAGCCGGCTGCGCAACCTGC  
GCCAGAGCCACGCCAAGGGCAAACGGGAAGGACTGACCTTCGAGGTGGTTCGAGGCAGGTGCAGTGGCCCC  
CCTGCTGCCAGATTGCAGACCGTCTCCGATACCTGGCTGCAGAGCAAGATGGGCAAGGAGAAGGGCTTC  
TCGGTGGCCGCTTCGAGCCTGACTACCTGACCTTGGAGCCGGCTGCGCTGGTGTGGCACGAGGGGCAAA  
TCGTCGGCTTTGCCAACCTCTGGGTGAGCGACAACAAGGAGACCCCTCTCCATCGATCTGATGCGCTACAG  
CCTGGATAACGGCACCGCCCCCATCATGGATTTTCTCTTTGTGCGAGCTGCTGCTGTGGGGCAAGGCGCAA  
GGGTACGCCAGCTTCAATCTGGGGATGGCCCCATGTCCGGCTTCAACGATCACCGGCGCAACAGCTACT  
GGGCCCCGCTTGGCAATAACCTGTTCTGTCGGTGGCTGCCGCTTTTACAACCTCCAGGGGCTCAGACGCTA  
CAAGGAGAAATTTTCGCCCGCTGGGAACCCCGCTACCTGCTCTGCAGCAGCAAGCTGGTACTGCCCAGA  
ACCCTGACTCACCTGATCACCTGATTAGCCCGGGCCCGCTGGGGCTGATCAAGAAATAGGAGCATGGCC  
AATGAGAGCCTTGATTTTGTGTTACTCAGTCTCGTACTGCCCGTTTCATCTTTTGGCGGCGCACGCGCC  
CCGGTCAAGGATGACCTGAGCCTGATTGAGCTGCCGGTCAAGCAGCCATCCGACACCCCATGGTGTATCT  
TTCTCAGCGGCGATGGTGGCTGGGCGGCCCTCGACAAGGGGCTGAGCGCCAGTTTCAGCTGAACGGCAT  
GCCGGTCTGTTGGGCTGGAGCTCCCTCACCTACTACTGGAAGAAGAAAAACCCCGGAGCAGGTGACCGCCGAT  
CTGGAGCGGATCCTCGATGATTATCAGGCCCGCTGGCAGCGCCCCACTGGCTGGTGGTAGGCTTCTCGT

TTGGTGCAGAGATTGCCCCCTTCGTTCATCAACCGGTTGCCGGAGCACTATCGTCAGGGACTGGTCGGGGG  
CGTGATGCTCTCCCCCTCCACCAGCTCGGATTTTCGAGATCCACGTCAGCGATATGCTGACCCACAAGGCC  
CGCAGCTACCCGACCGAACCACAGGTGAAGACCATCCGCGACCTGCCGATGCTCTGCCTGCAAGGTGCCG  
ATGACGATGACGGCGACCGCCTCTGCCCCCGTCTCAACCAACCAACGTCACGACCGTACCCTGCCGGG  
AGGACATCATTTTTGACGATAACTACCCCCAGCTCTATCAGGCCATCACAGGAACACTCACCCCCAAGGGC  
CTCTGGGAGATTTACCGGGCCACCCCCGACCCAGAACCGGGCGCTGCCACCCGAGTTTCATCTTGATCGTAGG  
GCCAACCAGTGTGACGCCACCACCATCCACCTTGATAAAGCAGCCGCCACCTTGACGGTAATTTTCAGAT  
CCCCCTCCAGCACCACCTTGGCGCCAGCCTTGACGTGCACCTCCTGCCCGGCTGGGTGAGCCAACTTT  
GTCCCAGTTTTTGGTGCATGGAGGCATCCACCGTCAGCGAATAGTCCGTCCTTGATGTGATCCCGTTTTTC  
ACCCTCCACCGTCAGGTGGTCAATTGGCCTTGATGCGGGTGACCCGCTCGTTGTCGATATCGGTGTGCTGG  
TCGTGCTTGATATGCCACGCAGCATCGTTCTCTATCAGCAGTTCATTGAAGCCCTCGCCCTGGTGGGTTTTCGGTGCG  
CAGCACGGTGCAGTCTTGTTGGCCGGCAGCTCATACGGCGGCCGGTTGGTGGCGTGGTAGGTGCGACCC  
GTCACGATAGGCTGGTTCGGGGTACCTTCGAGGAATGAAAACGATAAACCCTCATGGCCGATGCGCGGGATGG  
CCATCATGCCGATTGACCGCCCGCCAGCCTTGGGAGACTCGCACCCAGCAGGAGCTCTGGTCGTTGCT  
TGAACCGTAGCGGTCCACGGAAACTGCAGTTGACCCGGCCATGCTCGTCGCAGTAAATCTCCTCCCCT  
TCCGGGGCCACCCTGTGGCTATCTGCGGGCCATCCACCATCGGCTTGTGGGGCGCCTCGGGGCTGCCGA  
TGCGGGCGCGCCAGGTGGTACTCGCCTTTACTACACCAAATTCGTTGTGGTAAACGGTCGGGCCGCTACC  
GCCCTCCTCCTCCAGCGCCTGCGGTTGTTACCGGTATGGCGGATATGAACGATTTGCCAGTCGGTGTG  
AGGCTGCCGTTCCGATGTTCCGGTGAGTGAGAAGTGTGACCTGGTAGCAATGCGGCGCTGTTGGATTTGC  
CGCTACCCGCCACTGCGTCATTGCGCAGGGCATCGAGTCGATGCAGGGCAAAGGCCCTGCCGCTGCCGTC  
CTGCTTGTAGCGACCCGGATAATCGAAGTGCTGGTAGGTATCGCGTGGTGTCTCGAGCTCGGCCCCCTGC  
TTTTTGTGGGAGAGTCCATAGGCCGGGGTCTTGAAGCTGTAATCTTTCAGCTCCACATCCGAGGGGCGCA  
CCGCTCGCGGTAGTGGAACTGGCGCACGTAAGGGCCTTGTTCAGCGAGCGGTTGCCGAGGTTGAAGAA  
GAGCTCGGGGCGCGCAGTCAGGGCTGCCGCGTCGTCGGCAAACACAATGCGGTGCTTGCCGCTTCAAAC  
TCGTGGAAGTAGAAGAGCCCCCTCTTCGGCAGCGAGGCGATTCACGAAATCGAGGTGCGTCTCGCGGTACT  
GCACGAGTATTCGCGTGGGCGTGTCTGTTTTTCAGGGCAAAGGCGTAGTCGGTGATGCCGTGCTCTTG  
CAGCAGGACTAGGATTTTCATCGGGCTTCTGCGGCTGAAAGATGCGGGAGTTCTGGTGCAGCCCAAGC  
CGCCACAGGCTAGGTTGACTTGAACACTGATAGCGGCTACGACGAAAGCCGCTGTCCCCTTGGGCAAAC  
CGCTCACACCCCGCATACCCTTCGCTGCAGTTCGCGGTTGTACCACACCATCAGCTCGCAGGGCTGGT  
CAGCACGGCGCAAAGTCGACATCGAGCTGGTACTTGGCACCTCCAACCGCAAGTTGAACGGCCGGTTTC  
AACCCCTCATCCAGCTGGAAACTGGCCACCACAAAGGTGTTCTCAGGCAACGCCCCACCTTGACGGTAA  
ATTGTAATCCTGTGCTTTGCGCCATGACTCTGTTCTTATCCTGCTGTCGCTACCGGAACCAATCACC  
ACGCCACCACAATCCACTGCCGTGCCGGTGACGGCGATGGGTTTGCATTCACCAGCACAGAGCCAACAC  
CACCGGCAATGGCCCGTGGGTGCCGCGAGTTGTTGGGCTTGTTCATGGGGCGCCAGTGGATCACCTTGACG  
AGCCACAGGCTTGCCATCTAGGAACACGTCGGGACTGGCAGCTATCACCGGGTTCGGTGGGAAGCCATCG  
TGGTTCGGTGCATATGTCACCGAGCAGTGCAGATAGCGGGGCACATAGTCATTTCCATATGAGCGGGGAGA  
CGCACAGACATCATCCCTCTGCCCCCTGTGCCCGATGGAACGCACCAGGCACAGGCGATTTTGATAAACAG  
CGGATAAACAGAACAGGCCACAGCACAGGCTATGCCATTTAGCACTGGCGAAATTAGCCAAATAAAATCA  
AATGGTTAACCTCTTTTCGATAGATGACGGGGTTATCCATTCGCAAGGGATTGCGCAAACCTGGGCTATCCC  
CCTACCAAATATTGCATCTGCAGTACAACCTCTGGAATATGCGCAACTGGTTGCGCATAACAGAGCAAT  
CAGTACCGGATAGTCCCTGTTGCAGTTGGTAAAGCCGGATGTTGAGTGTCTTCAAGTCACTCTCTATCC  
CTTTTCAGCTCGGCAGCCGTAATAGGTTTCTGCGACGCTTTTCGCGCCTCCAGTTCGCTCAGGCGCAAGCT  
GAACGGGACCTCCTGCATCAGGTTCTTCTGTACCTCGTAGAGCTGAGACTTGGGTAGGAAATCGTGACT  
GTCTTGCCTGACGCTCCAGCTCCAGCAGCTGATCGATCAGGGCATCGACCCGCGCGCGCCTCCAGAT  
AGGTCGGCACCCGTTGAGATCCCCCTGCTGGCCGGCAGCGCGGTTGCCACTGTTTGTGAGGGCCCTT  
GACCGCCAGCGAGTCGGGATAGAGCATCTGCAGCGAATTCGCGAGCCCTCGCCATAACGGTACCAGTAG  
AGGGGCGAGGTCTGCTCCAGCCGATCCAGTTGGGCTGATAACGCGACACCAGCTCGCTCTCCATCCCCT  
GCAGGGTCTGCTCCCCAACACGATGCGCGCCTGCCGAATATCGTCATAACTCAGGGCTGCGGCAACGC  
TGCAGCGGGTTGTTGCAACCGTTGCGCCGCGATGACCTTCTCCTGCTGCTGATGTTGCCAGCCAAGCCAT  
CCCATCATGGGCAAGGCGCAGGTGAGCAGGCCACAGGCAAACCAGAACCAGGCCGGCCGCTGTTTGGCGT  
GCTGCTCAATCTTGAGCACGGTTGGCTTCATCTGCCCTTCTCACGCCCCACCAGGATACTGCCCTGAGG  
CAGGTGCGGGGTTGCCCGACAGAGGCGCCGTTGGTGCCTCTCCATGTCGGATTTGAAGAAGACCATCGGC  
GGGATCTGCAGCTCATCCTTGAGGCCCGGCTCATCGGAGACGATGACAATCTCGGTCTCGTCAAACAGAT  
GGGTGTACCCCTCGATAAAGTGCACCAGATTCTCGACCCGGGGGATGCGGCTCAAACCGGCGTTGTGCAG  
CTTCTCGCTGATGAGTTGCAGCGCCCGCTCGCAGCGGTAGATCAACCGCTTGTCTCGTGGCTGATCTGG  
TACTGGCGGATCACGTGCTGATGCGGGCGATAAACAGTCGAGCATCTCGATGCGGGGCCGCTCCTGAT  
GCACCGGTGGCCAGAACTCTCCCCTGAGGTTGACGATGAGGTTGGCGAGAACTCGCACCCCTTCGGTAAA  
GCCGCTCAGCCCCTGAATGCGGGAGCGCGCCAGAGTGAAGTAGATGGCAGTTTGCAGATCCACCCCGTGC  
TTTTCAAAGATTTGACTGGCAAGCTGATGGATCCTGACCAATCCACCTCGGGGCGGGAGGCGTGGCTAA  
GCTTGTGATCTCGGCGCGCAGCGCCTCGTACTCCGGCAACATTTCTGGGGTACGCCCCACTTTCAATGC



CTGCTGGCCTTGTGATTCTGTGACATATCGGATTCCAAAATGCGGGGTGCATGACGCCCCCAACATGA  
TCAATAGAGGGATTTCAGGCAAGCTGAACTGGCTGAACAGGCCCGCGTGAAGGGTTCTGGGCGCTGTGC  
GTATAGACCCGATAGGTCATGGCACCTGATCCACCGGAAGCGCACATCAAAGGTGGCCTCGTTGACCT  
GAGTCAGCTCCCCCTTGTCCATCAGGCGGAACATGGCCCAGGGACCGACAAAGCCCTCGCTGCGCGGTGA  
ACGTTTCGCGGGCCCGCGGTACCAGGGTGATCTTGGCTTTTCGGCCCCGTCGCGCATGGTGTGGCCACACC  
AGCGGGATCTTGTGCGACGGCCGTGGGCATACTCCAGCAACTGGCCATCCAGGTTGAGCACACTACGCC  
GCTTGTGGCGGTGAGTTCGATGGGCTCGAGGGCAAATTCGACCTCCAGATTGCCCTGCTGGCTGAAGAA  
GATCTGGCGGATCCGCGCAGCGCATCCAGCTGTTTGATAAGCTCGGCCTGAATGGGTGAGCTCAGCTCT  
CCCTCCATCAAGCCCCCTCCACCATGGGTTTGGAGTTGACCTGATAGAAGCTGTCCAGGGTGCCGCCCG  
GCGCAAAGAAGCGCTCCATCTCGGAGAGCGGCACATCCTTGGCAGAGCTCGGGTTGAACGGATAGCGATC  
CGCCAGTTGGCTGTTGAACGGTGCAGCCTTCGCTGCCACTCCTGATTGAGGGATGACATCGCCAGA  
TCAATCACCAGTTGCGAACTCTGATCCGCGACTTGACCCACCCAGCGATTGAGCGGTTCGGGCAGACCAC  
GAGCATATTGCTGCAATGCAAAGACCGGATCGGCGTACTTGTGGTCAAACGCAGTTGCACCGCCTTGAG  
GGCTGACTGTCCCGCTCGGTGGCATTGACGATCAGCTCCATATAGTGTGCTGCAGCTCAATCAGCTTCTGG  
TTCACTTCCGAAATCAGCGGCCCTGTTCCCCACGGCCAGTCAAGACGCCATTGGTGGCCATAAAGGGGC  
GACCGATCCGGGCAGTGATCGCCTGCGCCGGATCTCCTTCGCATCGGAGATCTTGGCAATACGGGTATT  
GTCATCCAGCGCAGCGAGCACCCGCTGGAATGGCTGGTGTGCTGCGGTGATGGCCGAGAGCACATCGAGC  
GCCTGCTCGGGACTGGCAAGGGTCTGCACATCCAGATTGGTCAGCAATTTTTGCCACTGGTTGACGTAAT  
CGGTGACATAGCGATCGTTGACCTGACGGGTGATCTCCTTGCATCCGCTCGCTCAACTGGCTCAGCTT  
GCGCTGGCCCAGCACCCAGGCATCCATGGCGGTGAGATCGATCAGCGCCTTGTCTGTTTGGAGGAAGAAA  
TCACTGAACCCGGGCCAGGTGAGCAAACGCGGCACCTGACCAGCACTCTCGTTGCGCAGGGCAAACACGG  
TATCGAAGGTGGGGCCACCTCGTACCGGACATTGAGATCCGGCGGCAACACATCACCCGCCTTACCAC  
CAGATTCTGATAGACCCGCTGATACATGGGCAATTTGCCAGTTTACGCTGGGGCGCCATACACCGGCTCC  
TTGAACGGCACAAATGCCGTGATGGCAGCCTGATCCCGAGCGGCGCGAGCACCATGCCAGTCGGTATGAT  
CAAGGGCATAGTCAAGATGTCCATCAACTGCTCCTGGACCGCCCCCTGTCCCGGAACGCTTTCTGCCA  
GCGGCTGGCCATGTACTGCTCCACCAGCTCCTTGTGCGACCTGAGGCATCATCGAGCATCCGCATCACC  
CGCAGGATGGAGACTTCTCTTCGCTGCCAGCCGGTGCCTGGTTAAGATCCTCCAGCAGTCCCTGCATCT  
GGCAGGCGAGAAACCGCAGCCCCAGCAGTTGCAGATAGGAGCCTTCCACATAGGGGGCAATCTGCTCCCC  
CTGATAGAGGCCAAGGTCTGCCACCAGCGGCATCCGCTCGCGATAGTTGCCAAAAGAGGGTTGCCCTCG  
CGAATAAGGTTGAGACGTGGCAACTGGCTGACACCGAAGGCATGTTTCATCAGCGACCTCGTTAGTCTCGG  
TGAACGCTTGCCTTGGTCACTACATTGCGCCCCGCTCCTCATTTGACCCGGTAGAAGTAGTGCCAGCC  
ACCGATCAGGGCTGCAGAGAAGAGCGACAAGCAACTCAAGCCAATGGCCATCCGGCGACGACGATAGAGG  
GTATGCAGCCGATTTTCTCCGGCCAGATGGGCTCGGGGAAGATGATCGAAGAGAACAACCTGCGCACAA  
AATAGGTGTTGGACTCCCCGCGCAGGGCTGAGTGAATCGGCTCGGGCAAGCTGTAACGCCGGGAAGCGGC  
CTGAGCAAAGGCATCGAACGGGACACCTTGTGATAGACGGAGCTGATATAGACGCCCGCGCACCAGCAGT  
GGTTTGTCTCTTCAATGGTCAGGGTTTTCATCGAGCAGGCTGGTACATAATCCTTGAGACCCGCCAATT  
GACGAACAACGAGAAGAGGGCGTTGCGCTGGGCGGCATCGAGCCGGGCCAGCATCATCTCCGGCAGATT  
GCGGTTGAGATTGTGACCCACTGATCCAGAACAGCGCCAGATCCTGCTGCCAGGATTTGCCCTGACTG  
CTGCCGGGGTTGAAGGTACCCCCAGCACGGCGTACGGGCTCCTTTATCCAACCTGCTCATAGACCACAT  
CAAAGCCGCGCAGCATATCGAGTTTGGTGAAGGTGACATAGAGTGGCAGCCGGGTATTTCATGGTGGCCGA  
CACCTCTTGCAACCGGGCACGCATCAGCTGGGCATACGCTTTCGCTCGGCCACGCTGGCCGCGGACAGC  
CATGCCAAATCAACGGTCAGTACCAGACCATTAAGGGGCTGACGACGACGGTGTCTGTTGAGCCAGTTCA  
GCAGATGCAACCAGAGCCGCTCATGCTTGCAGCTTTCGGATCCAGCTCGGGCTCGGCTTGTGACAACAG  
CGCGCCGGCCGGATCCAGCATCACGGCTTGTCTCCCCAGCCAGCAATCGACCAGCTGGCCTTGCGCCACG  
TCCCCGAGTTCCGGTATCGAGTCTGGGATTGAGCTTGTGGCCGATTTGGCACGGTGGATCAGGCTGCTCT  
TGCCGCTGCCGGGCAGACCCAGCACCAGATACAGGGCATGGCGTAGAGCGCCCCCTTGCCAAGGTGTTT  
ATTCAAGGCTTGCAACCAACGATTGAGGAACCTGCGCCTGTTTGTGATGAGCCCTTGACCGGATCTTGT  
TCCAGCAGCACCTCATGCTGGCGCTCGGCTTGGAGCTGCTTCATCTTGCGCCATACCCGCCAGGAGAGTA  
CCCCAGCAGCAACCAGAGCCAGAGCAGGGTAAAACACCACCCGCCCCCAAGGGCTCGAATGGCTTGGC  
ATCACGGATCTCGATGCGAGGCCCCAGCCACCACACCAGGATCAGGGCGACAACCCACAGCACCACCCG  
AGCAGGGGCCAGGAGGGTTTTCAGTTTTCGGCAGCTGTTGCCGAGAAAAGGTAAAGATGGTTTTGAACATAA  
AATGTGATCCAACCTCCGACTCAATGACTCATTTCGGCACTTATTTTCGGCAAATGGGTGGCATAGGGGGCC  
AGGCGGCTGACCAACCCGGGCTCCCACTGCGACAACCAAGGCGATCTGCCTCTTGCCACAAGTGTGAT  
ATTGCTGGCGCGCAAGCGCCTCCATGCCTTCTGCTCCAACAACCTCCGCTGCACCAGCAAGGCATGGAA  
GCGGGCTCTTGGCTCTTTTCATCTGTGCCATCCGCTCATCAAGCAGGGCGAGCGCGGCGCAATCCCTGCT  
TCCCCATGACGCAAGGCGACCTCCTCGGCCAGCTCGGCCTGTCCGCTGCGCCCCCACTGCTCTTGGCAG  
GCTGCAACCAGCGGCTGCACTCGGGGGAGAGAAAACGGGGAAACCATCGCTGAAGGTGAGATCTCGCAGCGC  
TGGCAGGCGCTGCAAAAACGCATCCAGCTCCGCCATGATCGCCTGCGCCACCACGCCATATCCAGCTTC  
TGGGCCACCTCGGCCGAGAGCCTGTGCCCTCGAACCAGTAAGGGGGCCAGCGTGAGGCTCTGCTCGATGC  
GCTGCCAAAGCGCCAGATCTGGCGTGCCATGGCTGCGCGATACTCATCCACCATGTCTGCCGACATGGA  
GGCCAGCTGGGTTTTGTTCCCTGCGCGTTATCGGCGGGGTGGTATGCCGGCCAGATGGCGTGACGA

CGCAGTCGATAACCGATCGCCGCTCCGGCTGGCGCTCAATCAGCAGCTCCGCCACCTTGAGCTGGGTCT  
GTCGCCATGCCCCGATCGTTGGAGCTATCAATCTCGACCCCGGAGCCCTTGCTGCTGCCACTGAGCACCAT  
GGTGGCCCGCATGCCACTCGCACTGGCGGTGGCTGCAGCAGAGCTGCTTGCAGGTTGACCTCCGGCATCT  
GCCTGGGCCTGGGCAACCTGTTGTGCTGGGCCCCGCTTCAACCCCATCACCAGAGGATCCAGCAGTTCCC  
CCTTGTTCAGGGCACTGGGCCAGCCAGACGGCCTCCAGCTGTTCTGCCTGCGCAAGCAACTGCGCCAGTTC  
CGCCGCGAGGGCGCTTTTCGCTCACCTTCGGCAGGGCACCCTCGAAGCGCTTGATGATCTGCACCATCAAT  
CGCTGCTTCTGGGTGCGATTCCCGGGCCAGGCCAACAGCCAGTAAGCCTTGATCCAGGCTTCCAACAAGC  
TCAGCGCAGCCCCATCGGGGTGCGCTTGGCAGGATGCTGCAGGCAGCGCAAAAAGCTGGGCCAGCACCCG  
CATATCCTTGGTGGGCTCTCCAGCAACCCAGACAGGCTTCGGCGACCGCATTGAGATCGACCTGGCTG  
TGGGCAAGGGAGCCCAACTTGACCAGCTGGTCTCCACATAGTCCAGCGAGGCTCATCGACCAGCACGG  
CCCCCTTGATCTGTGCATCCGGCAAGCTGGTGAGCAGACGGCTACACCAGGGGTGTTGATAGCTCATCTT  
CCCCCTACCAGCGACACTGTTGGCGCACCGGTATCAGCGCCTCTTTCAGACCGCTGAGATCGATCCGCA  
GCAAGGCGCCGTTGGCCGCTGAACCTGCAATTCACGATGACCGATCCAGCGTTTTAGCTCCTCGATGGC  
GGGAGACCGCGCCATATTCGAGCAGCCATCCCTGATCCCGGATAAAACCAGCTCTGACTGCTGCGAGTC  
GCTTGTCCATCCAGCGGACCTCGACTCTCTCCCGCGCCACGGCGCATCCAGCCGCAAGCGAATATGGG  
TGATGCTGTTGACACAACCAATCGCCAGGGTGGCACCAGCGCAGGGCCGGACGAGTCAATACCGCCGTGCC  
GCTCTCCTCATCTTGTGCGCAGCAGGAAGGGTGAGCTATCCGGCACACGGGCCAACTCCTGGTCCGCTATC  
GCCAGCCAAGCCGAGACTTGGTGCTCTCCTTGTGCTGATGGCGTCACCTCATTGCCAAGGGCGTCAT  
AGCAAGCGAGCCGGATCAGAGGGGATGGCTCGCGACGACACGCTTGCCACGCCGCCATATCGAGGGGAGG  
CACCGCATTGCCGGTGCAGCAACAGGGGCAACAAACCCATGATGCTCATCAGTTCACCTCCAGTTTCT  
GACACTTGTGATCCAGGGTGCCTTGGGAATATTGAGGCTCTCGGCCACCAGCATGCGATTGCCCTGAAA  
GTAGCGCAGGCGAGCTTCAATCACCAGATGCCTCGTACTGCTGCATGGCCCCGGCGCAGATCGCGGATATGG  
TTGTAATCGTCCAGCGCATCGGGCAGCTCGGCACAGACCCGATCCCGCAGTTCCGGCGGGCAAGGGCCAA  
GCCCCACCTCTTACCGTGACGAGTGTGAGCACAGGCCACCTCCAGCAGATTGCGCAGTTCCGCGCACGTT  
GCCGGGGAAGTGCCTAACTTTGCAGTTGCTTGGAAACTTGCCTGCAAGCCAGCCAGTCCCTTGTCTATCC  
TGCGCGGCAAACTGGGCCATGAAGTGTGACAGAGCAGCGGCACATCCTCGATATGTTCCGCGCAAGGGGG  
CGATCAGCAGCAGACACTGGCAGAGACGGTGGTAGAGGTGCGCACGGAACCGCCCCCTCCTCCACATGGCG  
GGTAAGCGGCTGATGAGTGGCCGCGATGAGCGGAAAATCGGAGTGATACTCCTGCTTGCCCCAAGCGCC  
CGGTAGCTGCGGGTCTCCAGCACCCGTAGCAGCTTGCCCTGCATGGCGCGGGGCATATGCCCCACTTCGT  
CGAGAAACAGGGTGCCACCATTGGCCTGCGCCACCAGCCCGGTCTTGTGGAGAGGGCGCCGAGAAGGC  
CCCTTTCTGATAACCGAACAGCTCGCTCTCAATGAGATTCTCCGGGATGGCGGCACAGTTGATGGCGACG  
AACGGCTTGGCGGCGCTCGGAGCACTGGTGACCAAGCGGGCGACCACCTCCTTGCCACTGCCGGTCT  
CCCCCTGAATAAGCACGGTACGCTTGTGCTGGCCCGCTGGGCGATCTGCTCGCGCAAGCCGCGGATCAC  
CGCCGACTGGCCAACCAGCTGATCCCGAGCAACTTCTCGTGTGGCGCTGACGCTCCCCCTCGCCCTTG  
ATCTGACGCAGGGAGTTCGCGCAGCACGTTCTGATCCCGGCGACTACGCCCAGATCGCGGATCAGAGTGA  
GCTGGTTGCAAAAGACCTGCGCCAGACTGGCCAGCTCGGGACGAGCCGCCACTCCTGCAACACATCTCC  
ACTGTCCATCATCGCCAGCACGGCAAACGGCTTGCCGTTGCCATCATTGAGCGGAAAGGCGTGCAGACCG  
CACTGCTGGCCAAGGTTGGCCAGCAGTGCAGCGAAAACCGGCGTCAATGCGGGCACCGCCATGGAGGG  
AATCCCAGGTGCGGGATTGCGCCTTGTGCGACACATAGGCGAGTGGATGAGAGAAATCATCTACCGCCAG  
CGCCAGCGCAACCTCCTGCCCTTGACCCACCCTTTGCACTCCAGCTGGCGGGCCGCTCACGTCCAGCATG  
CCAAGCAGCAGTCCCTTGGGCTGGAAGCTGGCATGGAGGGTGAACCTCCACCAGTGGCAGAGATGTTGTT  
CATCCCGTTGCGAGGTGAGCGCGAGGGCGAATGCGAGGGCTTGTCCATGGTCAGCCCTCCACCTCGGCC  
ACAACTGGTGTGATCGGCCACCGAGAAGCGTACCCGGTTGATGGGCTCACCGGCCGAGAGGGCGTGCACA  
GTTGCAGGGAAACCGGCGGACAGGGCACCGTGCATGACGGACTCCAGCATCCGCGCGCCGTTCTCGCT  
GCGGTTGGCCCGCAGCAGGATCTCCTCGGCCACTCGCTCTCCAGCACCATCGGCACCAAAACGCTCC  
TTGAGCAGCTTGACCAGCCGTTGAGTTTGCCACCCAGCATCTGCACCAAGGTGTCGTGACCCGAGCGGCA  
GGTAGGGGATCACCTCCATCCGCGCCAGCAGGGCCGGCTTGAAGAAGGCGGCCAGCTCAGGGTAGAGCGC  
ATCCAGCAGGTATCAGGCTGCTCGGCATGATCAACGATGGTCTGGAAACCAAGGTTGGAGGTGAGGAAG  
AAGACCAGTTCTTGCAGTCGATGATCCGCCCTTCCCCATCGGCCAGCTCGCCCTTGTGCAACGCCTGAT  
AGAAGAGGTTGAGCACGTGAGGATGGGCTTTTTCCACCTCATCCAGCAGCACCCAGGATAGGGTTTTCTG  
GCGAATGGCTTCGGTACGACGCCCCCTCGCCAAAGCCGACATAGCCGGGAGGCGAACCAGTACAGCGG  
GAGACTGTGTGCTTCTCCTGATACTCGGACATGTTGATGGTGGTCAGATACTGGCGACCGCCAAACATCA  
GCTCGGCAATCTGCAATACGGTTTTCGGTCTTGCCGACCCCGCTTGCCCCACCAGCAGGAAGGCACCCAG  
CGGACGGCCTGGACGACGCAATCGGCGCGTGCAGGTCAGAGGTTTTGTGCGATGGGCCACCGCCACA  
TCCTGCCCTTGATGAGCTCGCCAAGGTAATCCGGCAGACGGGTACCACATCGAGCTCCCCCTGGGAGA  
TGCGATTAAGCGGCACCCCGGTCCACTCGGCGATCACCCTGCGACCTGAGTCTTGTGCGACATGGGCGGA  
AACCAGCACCTCACCTGTTGCAGCTCGGCCAGCTCGCGCTCGAGCCCCGGCCAGTTGCTCGGCAGCCGCT  
TGCGGATCGAGCGGCGCATCGGCCAGATCCAGCGCTTCTTGCCAGCATCTCATCCTGCTGATCGGCCA  
GCAGGGCGGCACGCAGCTCGACAATCCGATGCACCAATCCCTGCTGTTGCTGCCACTGGGCTTCTGCTC  
ACGCAGGGTGTACGGCAGGTCTGCTGGGCCGCTTTCAGTTCTATGAGTGCCTCATCGTTGTACCCAGA  
CCGATCAGGCTCTGGCGTTCCAGCTGACGGATCTCCAGCTCACGCTGGCGCAGTTTCGTTTTGCAATGGC

TGACCGCGCGCGGGCGGTGGTGGAGTTGATGGCCACCCGGGCACAGGCGGTATCGAGCACGTCGATCGC  
CTTGTCCGGCAGTTGACGACCGGAGATGTAACGGGCGGAGAGCTGGGCGGCGGCTTGCAGCGCTTCCCTCA  
TCGATCAGCACCCCGTGGGCCTTTTCGTAGATGCTGCGCAGGCCGCGCAGGATCACCGTAGCCTCATCGG  
CATTGGGCTCACCCACTTTCACCAGCTGGAAACGGGCGGACAGGGCGGCATCTTTTCCACGTACTTCTT  
GTACTCGCCCCAGGTGGTGGCGGCGATGGTGGCAGCTCGCCACGGGCCAGCGCAGGCTTGATGAGGTTG  
GAGACATCCAGCCCACCCGCTGATTGCCCCCGGATCAGGGTGTGGGCTTCATCGATAAAGAGGATGA  
CAGGTGCGACGGCGTCTTGACCTCCTGCATCACCCCTTGAAACGCTTCTCGAACTCCCCCTTGACCGA  
GGCACCAGCCTGCATGGCGCCAAGATCCAGGGTCATCAGCTCCACATCGCGCAATTTTTCCGGCACCTGG  
CCTGCGACGATGCGCAGCGCCAACCTTCGATCAGGGCACTTTTACCGACACCCGCTCCCCACCACGA  
TGGGGTTGTTTTGCGGCGACGGGAGGATGTCGATCATCAGATCGATCTCGTGATCCCGGCGAGAGTAC  
GGATCAAGCGAACCCCTGACGGCCTGCTCGGTACATTCAGCGTTAAAGCGGGCCAGCAGAGTGGCGTCCG  
GTCGGCAGTGCTGCCGTTGCCGTGCTGCCATTGGCCGATTTGGTCAACGGCGTCTCGGCAGACTCCTTGA  
CCCCTCGTCGAACTGCTGGCGCAGCAGCTCGCGATTGACGTTGGCAAGCAAACGGGTACCGAGCCCGG  
CAGGTAACGCTGGGGAGTCATCAGCAGCACAAGCAGCATGACGCCGCTGCGCAGTTGGCCATGTTGCAGC  
TCGGCAGAGGCGAGCAGCCAGCTGTCTTGCAGCCACTCCACCAATAGCGGCGAGAAGGAGGGATAACCC  
GACCATAACCGTTATCGGCCCGGAGGGTTCAGCAGGCTCTTTAACTCTTCAACCTCAACTTCGGCCCC  
TTTTGAGGATCTGACGCACATCGCTGAGGGGGTCTCCAGCATCTTGAGCAGCAGGTGCTCGATGCGGATC  
TCGGCGCCCTGATGATTGACACAGAGGGCCGAGCCTCCTCCAGCATGTGACGGCAGATGGGGTTGAGTC  
TTTCCACCAGTACCGGTAGCTCTATACGAATCAAGGCGTGCTCTCCTTAAGTATTTATTTAATAATTTCG  
CCCAGTTGACGCAGTACGTCCTGGGTCTGGTTATTGAGTTGGTGGTATAGAGGCCAAAGATGATGGCCA  
GGATCAGCGCGCCGCCATAAACAGGGTGCAGGAGACTTGGTTCGCGCAGCTGGTAGCGAGATGCCTG  
CTGACCGAGGTCGAGATGAAACACGCTGGGTGCCTCACCGCCACGTTTCGAGTGACAGCTGCTTGTGCAGT  
TGCTTGACGATCCGTTCAAACCTCGTCACGGCCCTGGCTCATCACCTTGTAGCGCCCTCAAACCAAGGC  
AGAGGCAGAGATAGATGAACTCCAGGATGTGCGGATAGCGCACCGGATCTTCTGACAGCGCGACAGCAG  
CACGAACACCTTCTCGCCACCCAGGTCTCGTTGTGAAACCTGGCCAGCAGGGAGTGTGGGACCATTTCG  
CTCTGGCTGCCCCAATCGCGCCCCATCACCGCCTCATCGATAAAAAGTACAGAGGATGTAGCGAAACGAGA  
GGACGAAACCGTTCTCGTAACCCCTGAGCCATCAACTCCTGCTCGATGGCCTGGATCTCGGTACACCCCG  
TTGATAAAGCTCGGGCACCCGCTGATGCTCGTACGCAACAGCAGCACCCTGTACCAGCCCCAGCCGGG  
GTCACCGCATCGATCATCGGGTTGATGCTCTGGCCACGACAGCGGAACCAAGTACGCGAAATCCATGTCCA  
GCTGCTCGGCGTGATCGAACAGCAGGTGCTGCTCAGTTGCTCGTTGTTGATAATGTCCGTGGTCTCTGTC  
TTGTTTTCTTGATGCGATCACTGGCTACGGATGGCCAGAGCTGCATGTGAGCTCGGGGAAATCGCCGG  
CAATGTGGAAGGCGAGCGTGTGCTGACCGCCAGCATCTGCCAGGCAGGGCTCTGACGGTTCGAGCTGGAA  
GTAGCTGTAACCGGCGTGATAGGGCAACTGGCGCGGCACCACCGGCAGCGGCAACAGCGGGATACCTGGC  
AGCTGCAGGCTGATGAGTTGCGGATCTTGTGCTGCGACCCACTTGGTCTGCTGCAGCAACTGTTTGC  
GCAACTGCTCCTGCGGCATGCGGGCAGCAGTCCAGCAGCAAGTCCGGCCTCTGCATCAACTCGCTCTC  
GTTGACCATGGCCACCATGACGCCGACTGGTCTTGCAGCTGGATGGAGACGGCACGTGGCGACAGC  
ACGGTACTGAGCGCCTGACGCAGGGCCAACATCACCGGCTCGAAGCTCACCTGCTGATCGTCATGACGAT  
AAGCGGGGAACTCGGGGGCAGACGGGACTCGTCGGTAAAGGTCATCAACTCGCCACAGAGCTGCACCAG  
CGCTTTCGTGCAACCGCTCGGGGTGCAGGGTGC AAGACGCGCCAGATGGGAGAGCTGGGGCTGAGCCCG  
TTGAGCAGTTGCAGCATCATGAACTCGGCCACATCGGCCACCCCTGCTGTCCCGGCGCAGCGATGCGCT  
GGGAGAGGCTGCGAGCCCGCTCGGCCACGAGACCAGCCGATTCGCCGAGGAAGCGCTTGAGGGTTCGGAAT  
GGCAGAGACACTGATACTGCAAGGCATGAAGTTGGGATCCAGCACACCAGACCGCCATCCGGGCGTTTGTCC  
AGAATGCGGGCGATGGCGAGGGACGCATAGGCGCTGCGATCTTACGCTCCAGCATCAACCGCAAGCTGA  
CCCCACCCACTTCGAGGGAAACACGTCACCCCTTCGCTGTGAGATCCCGCACGTCGTGGCGATGGGC  
CTGCAAAACGGGTGGCGACCTGACCGCCCTGATTGACCTCGTTGACCCCGCTCACCGAGAGCGGCAGCGCC  
AGATAGACCTTCTGGTTGGCCACCGAGGCATCGGTGATCTCCAGCGGGTTCGGCAGCAGCATCATCGTTCCG  
GGATGTTGAAGACGGTGCCTGCCGTCAGGATACCGGTTGGCCCCCAAGGCGATGCGGGCCAAAGCCGAG  
GTAATCCTCGTTGATGGCAAGCGACTGCAACCCGTAGAAATAGTCCGACAGCGCGCTCAAACGCGCGTGC  
AGCGCGTAATCTGAATGTCTCTGTTGTTGCTGGAAAGTCTGGGGCTTGATAAAGAGCCCTTACGCCAGA  
TAACCCGATTTGACTCGACATGGTTATTCTTCTTCTTTTGTAAATTCACCTTCATCCAGGCGCAGGTGC  
ACCAGGATTTGATAGGCCGTTCCCTTGTCTTGCCTTGCCTTGCCTTGCCTTGCCTTGCCTTGCCTTGCCT  
CGGCGTAGCGTGCAATCACGCCGATGTAACGGGCTTCTCTGTCAGCTTGCAGGGAGGAGGATTTTGA  
CTGGCCGGGACAGAGGTTGATGCTGATCCAGGTAGTTCTTGCCAAGGGCTTCTCTACATCCGCC  
GTCACCTGGTCATAGTCAGTAGCGAGCAGCTTGGAACTTTCAGCCAGCACCACCACCTGAAACTCGATGG  
GTGCCGCTCCCCGCTCTCGTTGGGGTTGACATCAGGCTCTGCCAACAGGCTAAGCCCCAGGGTGGAGGG  
CTGGTCATCATTGCTCCCCACCTGGATATCCGGGTTTCATGGCCACGTCAGCCATCTTGCCCATGGTGGTA  
CAACCGGCGAGGGTCAGCAGAGCCGCCCCCAGCATCAGCGCACGTATCATCAAATCAGTCCCTGTTGCTG  
ACGCACGGCCTGGTCATACGCTGGGCGTAAACCTGATGGAACAGCTTGTGCAACCCCTGCTGGCGGGCA  
GAGGTGAGCTCGCGGTAGTAGTGTGGTACATATTCAGGCCCCACCTTCATCAGCCATCCCCGGCGCGC  
CGCTGCGGCGGTATTGCTCGAAACGGCCGAGCAACGCTCGGGCGAGAAGGCTTGCAGGATGCTGTCCAG  
CGCAGCGCCAATAGCCTGCTGGTTCGCCACGTGGTGAATGCGCACATTCGCGCAGACTCTCGGCTACCGCA

GCAGGCGCGGTCAGGTGCACCGGGCTCTTCTGCTCGGCAAACATCACCGCCAGGGTCTCGTCATAATCGA  
GACCAAGGCGCAGCGGGTTGTCTCGATGGGGTGAGGTGCTTGTCTGCCAGCGCAGCCTGATCGCTTTG  
CAGTTGCAGCAACCCCTCCACCATGGCAGCAGTGTCTTGCCCATCTCTTCGAGCATGTCGTGAGCTTGC  
TGGGTGTCTTGCAGCTGCAACGGCTGGCCCAGACCACGCATCAGCGGGTTCAGGGCGACGTGATCAACGC  
CCTCCAGTGGCTGGAAATCGGGGTGGTTCTCGATGGTGGGCATATCCAGAAATCTTGGTTTCATGGTGT  
CTCGACGGCTGAAAATGGAGCGAGGGATACGGTGTCCATATCCGGTTGAAACTGCGGTTGAGCCTGCAGG  
CGAGCATCCACCAAGGGACTCGGGGCCGACGCTCCTGATGCAATGCCAGCAGAGGGTTCGACCGCCAAGG  
CCTGTGGATCATCCAGGGTCTGGGTGTGGTGAAGATCGCTTGCCAGCCACTCATCAAGCTGCTCGGTCCG  
ACGGTTGCCCAGCACCTGCTGCAAACCTGCTCGGGGGAGATGGCACCGAGATAGGCTCTCAGGGCAAAA  
GGGCCGACAATCAGCTCGTACCCTGCTCGAGGTTGACCTTGCAGCCCGCCGATGGGGCAGGTGGCAC  
CATTGATGTAGGTCTGGCCGCTGAGATCGCACAGGCAGAAACGACCATCATTGAGCTCGACGCGGGCATG  
GGCTGGCATCACCGCCCCAACCTGTCTCGCAGTTGCCAGTTCATCTGTTTCGGAGGAGCCCAATGTTCCC  
CCCATCTCGTCAAGCGATATTGCACCTGCTGGCTGCCGTCGAGCTGCTCGCTGTTGAGCACCACCAGAG  
ATAGTTGCTGGTTAAAGTCGTCCACATTCACTCCTGCACGTATTCTTACACTGAATTTCTGTGCTTATTC  
CTGTACACAGATCGTCACGAACGGGTCACTCGGCGGTTGGCCGAGAAAAGTACTCCACCCCAGACGGGCA  
CTCTGCTCCTCCCCAATCTCAGCCCCTTGGCCTGCTCCTGGCCGAAGCCAAGCCGAGATCCCAAGCCA  
GCTGATCGCGCAAGATGAAGGAGACAAAGGTCACCAGGGCGTGGAAATGCTCCCCGTTCCGGGAGAAATCC  
GAGAACTGGCTAAAATCAGATCATTGATTTTCAATAAAAACTTGCCGGCACAATCATTAACCTTGTCA  
CCGATGACGAAGTCGTGCCCCAGAGTGGCGCAAGCACCGCCCAAGCGGTTTTGCTGCTCCGGATGGATCG  
GCACCTTGCGCCACTGCCAGGCACTCACTTCCACATCCGCCAGATCGAAGCAGTGTGCCACCAGACCGGC  
GACCACCTCTGGAGAGCGGCTGGGGCTGGCCAGCATGCCCGCATAGGAGAGCATCTTGGCGCGGTTGACC  
GGCAAATCTGACAGACGGCATCGTTGCCAAGCCCCACCAGCGCAAACATCAGACGGGAAAACCCATCCT  
CACCGTCATCCTGAAAACGGACGTGGTAGCGATACTTGCGCCAGATCCGGTGCAGCAGGGTCAACAGGGC  
GTGGTGAAGAAATCCAGGAAAAGACCGAGCTTCTGTTACCCTAGGCGTACTCCCACGCCAGCGAGTCCG  
AGGTAATACCCCCGCATCGGCGACTGGCTGCCGTGCAGACCAGAAAAGGCCACTTCCAGTTTCGTGACGCC  
CCTTCTCGTCACGACCAATTTGCAGCACGTGCTGGTGGGAAATCCAGCGATGCTGTCCGCTTGAACG  
AATATTCTCGTCACTCGGCAGGTGGTGCAGACACCGTCTCTGATCGGCACCATCCAGCCGGTTGAGCAGC  
TCAACCAGCTGGAAGAAATGAAACGGGGCGCTCGATTGGCAGCACTCACATCAGGGAGTGTGACCGAT  
CTGGACTGGCCACTGATAGCCTCCTTGTATTGATCGAGATTGACCACCTCAAGCAGGTGGAAAGCTTGTAGC  
CTGGCATAGAGCGAGAAGAAATGGGCCAGCATGTGCTGAAGAGATAGAGCTCCCCCTCGCTGCCAAAGG  
CGGACTGGCGGATGGAGAGCACCGACTTGAGCCCCCGCACCGGCATGCCGCGCACCCAGCCTGTCCACAGG  
CTTGGTCTCGATCTCCTCGATCCCCGCCAGCCGCTTGCGCGACGCTGCTCTGCCTGCTTGTGCTGCAAA  
GCGGGAAAGTCATAGGTACGCAGCACCTGCACCAGGGCATCCCGGCGCAGCAGAGAGACATAGTTGAGCG  
ACAGGTTGGAATCAGGGTCCAATGCAGGCTGCCATCCAGTGCAGGACGCAGCGGCCGGGTCGGCCGGAT  
CAGGTTGCGGAAGGTAGCAAACGACGGTGAACCTGCCGTCGGCACGCAGATACTGCCACCTTGAAGCGG  
GCAGCGCGGGAGCGGTTGGTGCAGGTGAGCGTACCAGATGGATTTCATCCAGATCGACCGTAGTGGTTT  
CATCCCCCGCACAAACGACAGACTGTGCTCGAAGCCATCACCCTCACCAGTCCCTGACCCGCACCCG  
GTAATAGAGCGCCAGCCGCTGTTTGGCCCCGCTCAATCTGATGCTGAAAATTTCAAACGGCTGATAGATG  
CGTGGCGTACCAGCGGGAGCGGCCCATATTGCCCTCAACCCAGCCTTCAACCTGATCCACCGAGAAAATTT  
CGAAACTGTGCGCATAGCGATAGCTCGCCTTGAGCGGGTATTCCGCCTGACGGCCGTTGAGATTGACCGG  
CTCGCTGTGCTGCTGGAACAGGTTGATGGCCGGCACGCAGTTGAGCATGAAAAGTTCAGGGCGGATCTTG  
AGTTCGCTGGCAAGGGCCGGTCGAAAACAGAAATGGATTTTGAATTCACTCACCGGCAGCGGCTGTTTGG  
GCCACTCACACCGGAGAGTTGGAAGAATAGAAAGCTCTCCGGAAAGCAGAAATACTCCTGCAGGATCCG  
GTAGCCGGAATAGACATTGTTCCGATAGGGCAGCAGCGCATCGTCGCGCTCGAAGCCGACCGATTTGAGT  
GCCTTGGCCTCCTGACGAAAGCGCTTGCCGTCGATCTCCAGCTCGATATGGGAGAGCTGGTTGGAGAGCC  
AGAAGTAGAGCTCATACCGGTTGAGCTGTGCTGCCACCAGGAAAAAGCGCAGCTTGTCCAGCTGCAATTC  
GCTAAGCGGCAGAGGGGCATGCAGCGCAATATCGAGCGAGATAGTAGAGAGATCGTTGCCACTTTGCGCC  
GTTATCTGGCGCATTTTCGGCCGGATAGACCCAGGCATCGTGCAGGCTGAAAAATGGCAGGTACGTCGT  
CGATTGGCAAATGTCCAGCTGGCAAACCTGCCTGACCAGTGCCGGTTGGGCAATGGCCCCCGGAATGAC  
CGAAAATGCATGATGGTCATGCTGGGGACGGGGCGCAGATAGTTTCGGCCAGAGCATATTGAGCAGACCG  
TGAGTCAGCTCGGGAACTCGTCTCGATTTTGGCGCGCAGGTTGCCCGTAAGAAACGCAAAGCCTTCCA  
GCAGGCGTTCCACATCCGGGTCGGTATTCTGCTCCGACAAAAAGCGGGTGAAGTTCCGGGATAGCTATCGGC  
AAATTGCGCCCTTGCAGGCGCAAAAAAGCCAATCATCCCTGAAGTAATGTTCCAGCGACATTGATCAG  
ACCATGCGGTAGTGACGGTACTGTCCATATGGACGTTGAACGAGGTAACCTGCTCGATATGCTCCAGCC  
GCACATGGGCCGTCACCTGAAACGACATCTCAAGCGGACTTGCTGATAGTCCGGTGAACGGACATCCAC  
ATGGATGATCCGAGGTTTATAACGACGGATGCATTGCCGGATCGCTCCCGGATCCGCCCCCTGATATCC  
GCACTGCCCTGAGTGGCGTCATTGAGATCAATAACCCCCAAATCGGGTGCCTGCGGCAATTCGCGGGAC  
GGGTGTTGAGGATCTGGTTCGAGCTGACGTTTGCAGAGTGCACCAATTCATCAACTTCCGAACGAGGGGA  
GGAGCCAAGCCCCCTCCCCCGGATGCGATCAAACAGGCTGGCCGCATTTCTCTATCCCAGGAAGAGAGA  
TGCGGCATCGGGCCTTATTCCTTGTCCAGTGCACCTACCAGAGAGAGCTCGAAGCTCGCCCCATGTACT  
TGAAGTGGGGCGCACGGCCATGGCAAACCTGGTACCAGCCCGCTCCCCCTCCACATCCAGCACCTTGAT

CTGGGCGGCGCGCAACGGACGACGGCTACGGACGTCTGCCGGGGTTCTCTTGGTCTGCAACGTACTGC  
TTGATCCAGCCGTTTAGTTACGCTCCAGATCCTGACGCTCCTTCCAGGAGCCGATCTGCTCGCGCTGCA  
GCACTTTGATGTAGTGCGCCAGACGGTTGATGATGAACATGTAGGGCAGCTGGGTACCCAGCTTGTAGTT  
GGTCTCTGCCTCTTTGCCCTCTTTGGTGTGGGGAACACCTTGGGCTTTTGTACCGAGTTGGCAGAGAAG  
AAGGCGGGCTTGTGCTGTCTTTGCGCATGGTCAGGGTGATGAAACCCCTCTTCGGAGAGCTCATACTCGC  
GACGGTCGGTGATGAGCACCTCTGTGCGGATCTTCGCTGACGCTGACCCATCGCCTCATAGACGTGCAC  
CGGCAGATCGTGGATGGCACCACCGCTCTGCGGGCCGATGATGTTTCGGGCACCAGCGGTACTTGGCGAAG  
CTGTTCGGTCAGGGAAGTGCCATCAGATAGGCAGTATTGCCCCACAGGTAGTGGTCGTGATCCGAGCTGA  
TATCTTCTTGTAGTTGAAGCCCTTGTGGGGTCTCGGTTCGGATCGTAGGGCAGACGGGGCCAGGAAACG  
CGGCGAGTCAGACCCAGATAGCGGGAATCTTCCGATTCACGCAGGGAACGCCATTTGGTGTAGGCCGGT  
CCTTCGAACACCGAATTCAGATCCTTGTATGGAGGGCAGATCGGTGAAGCTGTCAACGCCGAAGAAAGCGG  
GGGCGACAGAGGAGATGAAGGGGGCGTGGGCCATGGCACCCGACGGCACTGACATACTGCATCAGCTTGTAT  
GTCAGGGGAGCTGTGGGTAAAGGCGTAGTCACCGATCACGGCACCGATCGGCTGACCGCCGAATTGGCCG  
TAGCCGGTAGAATAGACATGCTTGTAGAGACCCGACTGGGTGATCTCCGGGGAAAACCTCGAAATCTTCCA  
GCAGCTCTTCTTAGTAGCGTGCAGCACCTGGATCTTGTATGTTTTTACGAAAAATCGGTGCGATCTACCAA  
CAGCTTGAGGGAGCGCCAGGAGGATTCCATCTCTTGCAGCTCTTTGGCATGCAGGATGACGTCCATCTGC  
TTGCTCAGCTTCTTATCGAGCTCGACAATCATGCTGTCAACCAATGCCTTGTGACCGGCTCGTGGTGG  
TACCGCTGTCCAGAATGTTGGCGATAAGCGCAGCCACACCCTGCTTGGCAACACTGTACCCCTCATCAAC  
CGGTGTGATGCGAGCCTGCGCCATGATTTTCGTCAGCAAAGAGGACGAGGAGGCTGCACCCGCCCCCGCT  
TGAACCTGTTCTTCGACCAAAGACATGTTTGTTCCTTCTCGTCAGTCAATACAACCCGCCGATCACTCG  
GCAGGCTTGTCAAATCCAGCTCTTTGAGCAGTTGCTCACGAGCCTCATCACTGGACAGCAGATCCTGCA  
AACGATTGCGGAAAGAAGGGATATTGCCCAATGGCCCTTCAGGGCAACCAGCGCCTCACGCAGTTCAAG  
CAGCTTGGCGAGCTCGGGGACCTGTTGGGCAACACTGTGAGGAGTGAAGTCTTCCAGAGACTGGATTTTG  
ATCGAAACCGGCATCTCGTCTGGCTGTTCTTCCAGACGATTTGGGAAACAGAGAAGTTTCAAGTTCCAGTG  
CAGATTTCTTTCATGACGGAAGAAAAGTTGTTTTTGTGATGGAAACGGTTTGGCGCTCCTCGATCGGCGT  
TTCTTCGGTACGGCCCTTCATATTACCAACCACCATCATAGTCAGCGGAAGTTCAATTTCCGCCGTGTA  
CCACCGGTTGCCGTTACATATTTGATATTGATACGTTCTTTGGGCGCAACTGTGGCGCGTCAATTCCTT  
TTCCCATGTCTAAATACCAAGTTAAGGGTCACCCAAAGACCTATAGCTTATACCCCTCCCCTCAACTGT  
AAGATATTACAGTTGAGCCATCCTATGGACGATCTGTCAAAAGAGGCACCTCACCAACGATGCATTTTGA  
TATATTTCAAGCAAAAGCTCTAGTTATCAAAAGCACAATATTTCTTGTATTATCTACAACCCGATGCC  
TCAACTCAATGGTGTGAGGTCATATTGGCATTAATGCCTATTTTTGAGCGGCATGGTATATAGAGAGAATT  
TGATGGTCAACGAATAATTCTAACTCGAACACATAAAAAACATTAACCATTAAAAAAAACAAATACTT  
AATAGAGAAATCAATCTTCGCGACAATAAAGACGCTTGCACGATGACTTCACAATAACAACCTGTCATTT  
ATTACAGTTGACCTAGGGTCGATTAGAAGAATGCGCCATCGAATCACATTATTGATACCGCCTTGATCG  
CTATGCGAGTGCATGCGTCAAAATCAGTCGTTAAGCCAATCGAATGAATTGAATTAAGTAACGCTAATAA  
TTTTGATTTCATATGGCTTGCCTTGCATTTATGGCCAGTTTAAAAAACAACAACCTATTTATCGAAAACATAA  
ATGACAATCCGTAGTCATCACTCCCTCATAAATCCAGCCGTAGCGTACAAGCCCCCTAATCTACAAG  
TTATGCAACATTGAATCGCGTTGAGACCAGAACAAGCTATTAGGCTGACAACGCCATGTCCTGCATAACC  
GCTACACTGGAGCATTTTCGCTTGTTTAGGCGCATGCCCCACCAGACCAACTACTAAATGCAACTTTTCGCT  
AAACAACCCACACGTTTGCACCATCATTGATGACGTCCCCGTTCCCTTCACATTGAGAGCATCCTTGCTA  
ATCCTCAGCGCATTTCATCAACTCTAAACAAGGTATCTAGTCCCCCTTCACTGCCTCTCAAGATGAGGCAGA  
AAACCCTGCGCATCCCAAATGGCCTGATCGGTGTAGAGGGAGTTGATAAACTCGGATACGTCGTACCTG  
TGGACGTGGCAGCACCTGCTACGTAGCCTTGTATCAACCTGTGAGCCATGATCGCTCACAAAGCCTATTG  
CGCCGAGGCCATTTCAGTATAGGCGGAGACGCGTTCCTATAGTGTGATTTGAAGAGAATGACGCGATTT  
GGCATCAGGTAGTATTTGATTGGCTAGTGAAGGCGTGGATATGAGATGGGAGAAGAGTATTCATAACCCA  
AGTGGCATGACAGGCTATTTTCGAGAGCGAGCGTTTCTATCCCGTTGTACAACGCATAAAGACCAACTTTG  
CGACAGGTTCTTTTTGTTCTTTTTCCGGGTTAGAACAGGATTTATTTGCAGCTCAGTGGTCCACCGCTTCG  
AAGCGGCCGTTGGCAGCCATGCATAAACCCGAACGACTCCCGTGTGGATTTTTTCCCTCGCCGGTATAAG  
AGTTCCGTATAGCAAAAAGCCCTGATGTTTCCATCAGGGCTTTGCAATTTGGCGGTGAGGGAGGGATTGCG  
AACCTCGATACGTTGCCGTATACACTTTCCAGGCGTGCTCCTTCAGCCACTCGGACACCTCACCAA  
TTTTGGTCTGTGGTTTAAACGTGTTAGCCAACACGTTGTTTCGCTGCGCTGTTGCGCTGGAACGGGGCGTA  
ATTTAGGGGAAAGCCCCGCGTCAACGGCTTTTTTCACTGGCGAACCGTTTCGAACACTTAATGCAC  
AGATTCCGGTGAACCTGGATTTCCGGCAGGTTGAGGAAACCGAACGTTTCGATTCGGCAACCAGTTTCG  
TGGGTTGCTGCGATGGTGTCTTTCACGAACAGCAGGAACTGCTCGACGCTGAGTCCGGCTTTGGTAAAGA  
CGGTGTGACCGACCACCAGCCGCGGCAGGTTGTCATCGATGATATCGAGGAACACCTTGAGGGAGGGGTA  
CTGCATATTGAGTCGGCCAGTTTCGGCAACCAGCGGCAGCATTGCGGAGGGGGCGCACTTCCAGCTCGGAG  
GAGAACAGCAGGCTTCTCTTCCACGAAGATCCGGCTCTCTGAATACCATCGACCGACTGCAAAGAGA  
CAATGTGGATACCGTGACACTGGTTCGAGACATAGTGTGATACGAGCCTGTTGCAACCAACGCATTAT  
CATTTCCGAGCTGGGGATATTCATCATTTCCACGACAAGATTGGGATCAAGGGGGCGCAGTCTAAACCAAT  
TTGCTATCAACAAAAGCACGCCAACCCGATAACCTGCGGCTCGCTTCTTTTTGGCAAGCGCTATGCAT  
ATACTCAGCCAAATCCACGACGACGCTTGGCCACAGGGGGCCCCATGACCATCCAAGAAAAGTATCGCC

TTCATCTGAAATCACTATCGGATGAACTATTGGCACTGCAAAAGCCCATCCGCATTCTGGATGCCATCAA  
GTGGCCACGCCATCTGCAAGAGCGTTTTCTGGCAAGCGGTGGCAGAGAGCTGCCCGCTATCGACAGGCAC  
TTCTATGATACCCTCCCCCTTGGCTTCGAACCGCGCAACAAGTATCTGGAGCTCAAGGAGCTACGGGACC  
GGATCCGCAGAAAACCTGGGGCCGAGGACGATCTTGGCCGGATCCTGCAAGAGACGGTTCGATCAGTACAT  
GGTGGTGATCGAGATGCTGCGCCAGCGCGGCCAACCCGATTTTTACGCGTTATAGCCAGCTGCTCTATGGC  
TCTGCCAGCGATCACCTGCGCGGGGATCGCAAGACTCTCAAGGAGCTGGGTGCCCGCTGTGCGATATCT  
TCTCCCTGCCCGGCGCGCCATCTGGTTCGCGCCCTACCCCAAGGAGTTCGAAGGAGAAGCCGCTGTGCG  
CAAACCTGCAGGGCAAGCTGTGAGCTACTTCAGTGACGGCACTGTGCAGGTGAAGCTGAGCGATGGGATT  
GTCTCCGATGCCGCTGCCGGTGGGACTACATCAAGCTCAACTCCCACGCCCGTTTTCTCCGAGCTGGACT  
TGCAGGTGCTGGAGGTACATGAGGGCTGGGTCCATGTCGGCACCACCCTCAACGGTCGCCAGCCCTTA  
TGCCACCTGGCTGAGCGCGGTTCAACCGGATCACCCTGTGAGGAGGGGCTGGCCCTCTGATAGAG  
ACCCTCACCTTCAGCTCCTTTCCGGATCGGGCCAACCGTATCTCCGATCGGGTGATGGCCATCGACATGG  
CCGAGCGCGCGCCGATTTTTATCGAGGTGTTTTACGACTTCGTGCTGCAAGGCACCAGCGAGCACGACGC  
CTACAAGATCACCCAGCGGGTCTTTTCGTGGCGGCATGGTGGGCGGCGCCGCTGCTTTACCAAGGATCTC  
TCCTACGTGCGTGGCTATGTGGAGACGGTCAACTTTATCCGACGCGCCGTGCTGGAAGGGGTGCCCGAGA  
TCCTGCCGATGCTGTTTGTGCGCAAGGTGACGCTGGATGACATTCGGTGCTCTATCAGCACTATCTGGA  
GGGGCTGATCGCCGCTCCCCGCTATTTGCCGCGATGTTTTGCGATCTCACCGCCCTATGTCTGGTTTC  
GGCTTTGCCTCCGGCATGTCACTGGTTCGATATAGGCCGGGTACAGCACCATTTTTGCCTGCTGTTTCAAC  
GCCTGCCGGTGGCCGACCCCATCATTGCGCCGGTGGATATCGAGATCGACTGAACCACAGCGATAACAAGT  
TGGGGTGTCTAGTCTGAAATAGGTTTTACACATTTTCAACTAGCATTTCTCTACTCAGAGCCCCCTATGT  
ACCGCATAGGGGGTCTGTATTTCAACGCATGATGCGGCCGCTCCGCGTTGTAATATCCACGGCTTCAC  
GCACCATTTCCCGCGCTTGCCTCAAATCCTGCGGGCTTTGCAACAATAACTCTCCTTTCAAATCCCCTT  
CACCCGCTCCGCCAACGCATTCTGGTAACAGTCATACCCATCCGTCATCGAGCATTTACCCCGTACCCT  
TCATGTAATGACTGATACAGCCCCGAGCAATACTGCACGCTGCGGTCCGAGTGATGGATGAGTTCACCAC  
CGCCACGCCGTTGCTTCAGCGCTTTCTTGAACGCCATCGCCACCAGCTCCGCGTGCAATTCCTTCGTGCAC  
GTGATGGCCCACTATCTTGCCTGAATAGGCATCCGTACCAGGCTCAGGTACAGCAGCCCGCTCCTGGCT  
GGCAGATAGGTGATATCTGCGACCCAGACCTGCTCCGGGGCCACCGGCGTGACCTGCTCTGGCCCCGCT  
TGAGCAAGTTGGGATGACGGTAGAAAACGGTGAACACTGTGGGTGGTCTTGTGATACGCCCGCTTAGGCTG  
CACCAGCCAGCGGTGCCCGCAATATCCGAAACAGCTGTGACGCCCTACCTTGAGCCGCCCATTTATCC  
TGACCCAGCAGCAGATAATGCAGCTTGCGGGTGCCGACCCGCGGTGTCGCGAGTCAACCTGACACACAA  
AGCGCACCACTGTAGCCCTTGTGCATGGCGCTCGTTCGGCGACCCGATTGCGCTTGTAGTAAGCCTGCCG  
GCTTATCCCCGAAACAGGCAAGCCCTGACAATGGTTCAGCCTCTCGACTTGCCGCTGCGAGAGGACTTGC  
CGGGTGCCTTTTTTACGATGGAGACGCCGTAGTCATTTCTCAGTACATCGACGATGGCCCAAAGAACTG  
GGCCTTCTGACTCATCAGCGCCAGCTGCTGCTCGAGTTCCTTGATGCGCTGTTCCGGCGTCTGGTTGTGCG  
GGGTACGGCATGGTGTGCTCCTGCAGGCGCGCACAGAAGCCCCAGGCTCCAATCTTGCCGACCATGTT  
TACGCAACCATAACCAGAACGGTGGAGCGGCCCTGAATGCCATAACGGACCTGAGCCTGTTTGTAGGTGAG  
CTCGCCTTTTTCAATCTGCTCGACCAATGACAGTTTTAAAAGTCAGCGAGTAATCGCGCTGTGTCCGTTTC  
ACACCTTGTCCCATCGGGTCTCCATTTATTGGGGGAAAGGTGTAACCATATTCAGGACGGGACAGGA  
CACACAAATAAGACAGCGGGATGCGGTTTTTATTTTTTATGATGGCTTTTTATTTTTTATAGGCGCAAGC  
AGGGGGCGACCCGGCATAATCAGTCCCCACGGCCTTGCACCGCTGCGCGCTGCTCGCGCCATACTCACTC  
TATTTACCCCTGTACCCAACATCGGAGTTCTCATGCGTTCGATTCAATTTTCATGCTCAATGGCAGCAGATT  
GATGATGTTCCCCTTCTACATTTGGCATTCTCATCTGCGTGGTATTTGCTGATGGTGAAGTTTGGCATGCAG  
CTCTATCAGCTTTCTGTAACATTTTCGAGATCCCTATCTGGACCTCATTACCGCGTGCTGACCCCTGG  
TGGACTTTATACTGGTGGCCAGATGCTGATCCTGGTGTCTATCTGTGGCTATGTGCAATTTATCCAGAC  
GGAAGAGCAGCGGCATCCCTTAGCAGCAACTGGCTTAGCAAGATCAACTTTGCCTCCCTCAAGCTCATC  
GTCATCAACTCGCTGGTGACCAATTGCCGGAGTGGAGTACTCAAAGCCTTCTCGAAGATGGCATCATCA  
ATGAAGTCGATATGAAGTGGTCCGTGGTGGTGTTCCTCGCCTTCTCGCTGGCCGCGCTCATCTATGCGGT  
GACCGAGCGGATGGCTGAGCATAAATAGTCGAGTTTTGATCACTGTGCTTGTTCAGCCTTGATTCACCAGC  
AATACAATTGATAACACTTTTTCACTACTTACTGCGTTATAAACTTGCTCCCCCGGGCTGCCCGCCC  
GGGTGCTGGAGCCTTTATGACAAGCCTTTCTCTCACCACGACAATTTCTGGCAGTGGCTGGCCTACCAC  
CATCAGGCCGCGAGGGCACCCTCTATCTGATGTTCTTCTCCGGCTGCTGCTGTGGGAGCCGCTGACCC  
CGCTCTGGTGCCTGGCGCGCTGGAATCTGTTTTTCCATGTGATGCTCTCGCTCACCCCTGTTTCCCCTGCT  
GTTTTGGCGCCTTCTGGTTCTCCACCGCAGCTTGTGAAACCGCAGCAACAACCCTTTTTTGGCACCACG  
GGGCGAATTATTGAAGCCCTGCTGCTGATCTGTCTGGCCAGCGCCTGCTGCTGGTGTGCTGCACGGCACC  
CGGGCGATGCCATGGGCAACCTCGCCAGCTGGGCCACTGGTTGAGCGCGTTGGCGTTAACTCCTCTGGT  
GCTGCGCCACGCCTGGCGCTGGACCATCTTGAATGGCGCTCCTGATCCCATGTTGAAGTCATCGTTCTC  
TGATATTTGTACCCCTGCTGGCCCTCGCCCTGCTGCTGACCAGCCCCCTTTGCCACTGCCAGCAGATG  
GGTGCCGGGATGCTCGCCTATGAGGAGGGAAAGCGCCCCGCGCTCGTCACCGCCAACCTGAGCGCAGGCT  
CGGTACCCCTGCTTGAAGCGGATAGCGGAAAGCGCCTGAAAGAGGTGCAGCTGGGGGGCGATCTGCGCCA  
GCTGGCCCCGCGCGATGATGGCACCCTGCTGGTACCAGCTACAGCGGCGATCGCCTGCTGCTGCTGGAT  
GATGATCTCGATCTGAAAAGGCGATCCCCACCGGCCACCGCCCTATGGGGTCACTTTCGATGCCAAAC

GGCAGTGGTTCTGGGTACGCTGTTTGAATCCGCTCGCCTGCAAGCCTACGACACCGCAGGCAACCTCCA  
GCTGGATGCAGAAACCGCCGAGACCCCGGTGGACTGGCCTTGACCAACGACGATCGCCTGCTGCTCACC  
CACGCCATGACAGGCCAGCTCGCCATCTATGATCTCGCCAAACTCGGCAATAGCGCAAGGGCTCTTCGC  
TTCCCAAGCCCAAGCTCATTACCCTGGCCGAGACCCATAGCGACACGCCGAGCGACTCGCAGGGATTGCC  
GCGCCTGCTCGACGGCATCGCCCTCTCCCCGATGGCAGCGAGGCTGGCTGCCCATGTGCTGTGGAGC  
TTCGACCACCCCTTCCAGTTTTCAGAGCACCGTCTTTCCGGCCGTCTCCATCATCGATCTCGATGAGGAGA  
AAGAGCGGGTCGATGAAAGAAAGCAGCTCTTTTTCAGATCAACCTGCCAAGCGTCGGAAACCGCAGCCA  
GATCGTCTCCAACCCGTTTCGACGCGCTTTGCCGCCGATGGCAAGCGGGTCTATCTGACCCCTGGCTGGC  
TCGGAAGATCTGCTGGTGTTCGATCTCTCCCGCAGCGGCAAGTCCAACAACAACCGTCACCGCCGCAAGA  
AGTTTTCAGGGGGCCGCAAGGCGACCCAGCTCTTTCGCTCACCTGCCGGGCCAGAATCCGCGGGATCTGCT  
GATCGATGGCGACCATATTCTGGTGCACAACGCCATGGGCGAGGATCTTACCCGCTCAATAGTGGCGGC  
AGCGGCCCGTTTGCAGGTCACGGTCGATGTGCCCCACTTCGCCAAACTGGTAGAGACGGATCCCCGCC  
CCGAGCCGCTTTCAGCGCGCGAGCGGCTATTCAACCTTGGTAACACAGCGTCCAACCTCACGCTTCCCCAT  
GGCGGGGACAACCTGGATGAGCTGCAACTCCTGCCATCTGGACGGGTTCATTTTACCACCCGCTATCTG  
ATGGCGGCCCATCGCCAGAAGAGAGGGCGACAACGCCATCAACGGCCACGCCAACCTCTCCAACATGGTGG  
CGGGGGATTTTGTGGCGAATACCTGCGCATGACCCAGCAGACCCAGGGCGGCATGGGCCATGACACCCG  
CGATGGCGCCGAGGCGGTTAACCCACGAGGCCCAACCGGAAGTGAAGGCCATGATGGAGGACTTACAC  
GCCTTCGTACCCGCGATGGCAACCTCCCTATCTTGCACACTGGCTGCGACTCGATGCCCCGCGCACGG  
ATCCCGCCAAGGCGCCGACAACCCACCCGAAAGAGTGGCTCAACTCCGCTCCTGCCAGAACTGCCACAG  
CCAAGCGTTCAAGGATTGGAGCGAGAGCAACCACCGCTGATGGGCAACTCACACCCCTACTATAAGGTG  
GTGCAGGCACTGGCCCGCAAACCGAAGGGGAAGCGTTTGGTCAGTGGTGTGAGGGCTGCCATATGCCCC  
AGCAGGTGATGACCGGCCAGCTGGATCTGCCCAAGGGCTCCCATATGTTTCGAGCAGGGCGGGCGCTCGCT  
GATTGCCGCCACAAGGCGGGCGAACCTGTGGTGGAGGAAGGGACCGGCTGCGTGTCTGCCATCGCATC  
ACCAAAGTGAAGATGCGGGCGGCAACAGCGCCTTTACCGTGAATCTGAAAGACCGCGAGAGCTATGTGT  
TCGAGGATGCCCCGGGCGGTAGCCTCCAGCACTGGATGGCTGAGCGGCAGATCAACGCCCCGTCGGCGGC  
CCACAAAGCCTCCTATCAGAAGGATTTTACCGCGACGCGGCTCTGTGCAAGTCGTGCCACAACGAGTTT  
GCCCCGGGACCCGCGCCAACATCGTCAACACTGGGACGAGTGGGAAAAATCCAGCTTCGCCAAGGCCG  
AGGATCCCGCCAAGCGCCGACCTGTATCGACTGCCATATGAACCCGAGCCGGGCAATGGCGCCGCGC  
GGTGGCGGGCCACTCCAGGAAAACGGCAGACTGAAAACCGCGGCTCTATCGCCACAACCTTACCGGCC  
CAGCACCAGCTGGTGGGGCTGCGTAATCCTGGGCTTGAACAGGAGAGTCTGGCCCTGCTGCGCTCCAGCG  
CTACCCTCTCCGCCCGTATCGAACAGGCTGCCGATAGTCAGCAGCTGGTGGTGCGGGTGCGCAATACCGG  
CGCGGGCCATGCCCTGCCACCGGGGTAGCTGATTTTTCGTGAACTCTGGCTGGAGCTGACCGTCACCGAC  
GCCAGCGGCAAGCTGGTGTTCAGCAGCGCCAACCGGTGGATGGTGTGTGCCCCGAGGATGCACGACTGT  
TCAGAAAAGTGTTCGGCGATGCCGAGGGCAAGCCGTGGGGCTCAAGTTCTGGCGCTACGCCAAGCTCTT  
GGAAGATACCCGATTCGGCCGATGGCTGGCGCATGAAGCCTGGCCGCTGCCAGCAGATGCCAAGGG  
CCCTTCAAGGCCGATATCAAACCTCAATTTCCGCACCTACCCCAAGTGGGTCAATGATGCGGTGCGCGCC  
CCGAGCCGAGCTTCCCGGAGCCACCCATAGTCAGCTAAATCGGTTGCAACTTAGCCTGCAGCCTCTCCC  
CGTCACGCCCCTACGGAGCCTCAATCCTGATGTTTGAAGTTTCTGATTAACCTGCGCGAGGGGCTGG  
AAGCCTTCTGCTGGTTCGGCATCTGCCTCTCCTACCTCGCCAAGCTGGGGGCGAGCCGCTACAACAAGTT  
CATCTATCTGGGGGTGGGGCTTGGCCTTATCGCCTCCCTCGTTCGCTCGCCTTCCCTGTTCCAGGTGGTGGT  
AGCCAGTTCGAGAGCGAGCGCTACAACCACCTCTTATGGCAGGGATCCTGATGTTTGCCACTCTGGTGC  
TCACCTATATGGCGATCTGGATGCAAAAAGCAGGCCAAAATCCAGGTGGGGGCCATGACGGCGCGCATCGA  
TGCGGCCATCGATGGCGGCAACCTGTTTGGTCTGGTGTGCTCGCCTTCTCGCTGTGATGCGCGAAGGG  
TTTGAACCCGTGCTCTTCTTCTCCGCCCTGCTCTACTCCGGCCAAGGGGTGGATCTGCAATCCGGCCTGA  
TGGGCGCGCTGGCTGGGCTGCTGGTCTCCATCGCGCTGGTGTGGGGGCTGCTGCGCTCCACCCGCAAGGT  
GGCGCTGGCTCCCTTCTTCCGCTGGACGGCCCTGCTTATCATCATCATCGCCGAGGCTTGTCTCTGCTC  
GCCGTCAACATGTTGCAAGCGGCAGACATCATCACCTTCTGGACCACGCCAGTGTTCGATATCAGCCACA  
TTCTCGACGATCAGGGGGTATTTGGTACCTTCCCTGCGCGCCCTGTTTGGCTACAATGCCTCACCCGCTGG  
CTTGAGCTGCTGACCTGGGCCCTCTATCTGGCGATCTTCGTTACCCTCTGGCAACGCAGCTACCGCCCG  
CAGGTGAGTGCAGGACTGGCAAGGGCTAAGCCCGCACGCCCTGTGGCAACAAGGCCGCGGGGTAACAAC  
ACTATTCGAGAGCCGACCTTGGCGCGGTTCCCTTATCTATCAAGCAGTTTCGGAATAGGTCATGAGCGA  
TAACAACAAGAAAAGCATTGCAGTGTGGGCGCTGGCCCCCGGTTTGTGATGGCTGCCTGGCGCTGCGC  
CGCGCCGTTTTCAGTACCCCTGTTTCGAGCAGGAGCCGGTGGTGGCGGCATGTGCGCCACCCAGACCT  
TCAAGGGGCGCGATGGGGAGTATCGCTTCGACTACGGCGGTACCCGCTTATACCAAGAACCCCGAGCT  
GCTCGCCTTATCGACGAGCTGATGGGAGACGACCTGCTCCACGCCGAGCGCAAGAGCGTCATCCGCTTT  
GGCGGGCGCACCTATGACTACCCATTGAACCTGCCCAACCTGCTCAAGACGGCGCCGCTCGCCCTGATGG  
CCGGTGCGGTGAAGACTTGTGCTGTTGCCCTTTAGCAAGAAGCCGGACGATTTTGGCAAGGCCGAGCTT  
TGCCGAGTGGATCCAGAGCCACTTTGGCCGCACCCCTCTATCGCCAATCTTCGAGGGCTACACCGGCAAG  
CTCTGGGGCATCAATCCGGACAAGCTCTCCGCCGACTGGGCCGGTCAGCGCATCAGCCTCATCGATCTCA  
AAGACGTGGCGCGCCGCTGCTGCCAAGACGTAACGGCAGCATTTTCGGTGCACCTATGCCCCGAAATA  
TCGCTACCCCAAAATATGGCTTCGGCCAGATCTTACCACCTCTGGGGGAGCGGCTGGTGGCAGAGGGCGTT

GAGCTCAAAACCGGGCGCTACCATCACCCGCCTTGAGCAGGCTGATGGCCGCATCGAACGGGTGTATTGGA  
AACAAGATGATGTTGAGCAGAGCGAGTGCTTTGATCAGGTGATCTCAACCCTGCCGCTGCCGCTCACCTG  
CCAGCATCTGGGCTTGCCGTGCGATCTGCACTATCGGTTCGCTTCGTCAATATGCCGCTCAAACAG  
GAGAACCTGTTCGGACAACACCTGGCAGTACCTCTCCGACCCCATATTTCTGGCGACCCGTTTGCAGGAGC  
CGCGCCGCCGAGCCCCCTTTATGGCGCCACAGGGCCAGACCTCGGTGATGCTGGAGATCCCCCTGCAATCC  
GGGGGATGCCACCTGGCAGGCGCCGCTGGCCGATCTGCGCGGTTCGGGTACCCTGATCTGGCGAGCCTC  
GGTGTGATACCGCCAAGCTTGGCGATGAACTTTTGAAGCGGTAGCGAATACGCCATACCGCTGATGG  
ATTTGGGCTATCAGGCTCGTCGCAACGAAGCCATCAAGGCGCTGATGCCCATACCAACCTCATCATGAC  
CGGCCGTACAGGGACATTCCGTTATATCTTACCAGACACCGCCATGGAGATGGGGATGATGGCCGCCGAC  
ATGGTATGATCGAGGGGTGGACAGACGCCACGCCATCTTCAACCATCGCAACGAAAAATACCCTGATCGAAA  
CCCAGAGTGTGGCCTGATGGCCGCGCCATTGGCATAAGTAAGGAGAACAGGATGACCATCCGCCCCGGTT  
TACTCGCCCTCACCTGTCTGCTGGCCCTGAGCGGGCAGGCGCAAGCTTACTCCTACGCCCGCCGGCAA  
GGAGCCTCTGATCGACGCCCGCAGGCACTGCTGGGCGCCGCACTGACGGCAAGGATGCCAGCGCCACC  
TTGAGCGAGATTGCCGACGAGCTGACCTATCTGGAACAGCACCACAAGGTGGAGCTGCAAGGGCCGCTGG  
CCGCCGCTATCAAAGCCAAAGATGCCGCTGCCACCGCCGCTGCTCAACCGGGCTACAAGGCGGAGAT  
CGAGCGCCGCTCGAAGGGGCCAGCCAGAATCTTGGCGACTACCAGACCGCCAAGGTGCTGGTGGTCAAG  
AGCAAGCGCTTCCCTCGACTTGATCCTTCCCTCCCTCAATGAAGGGGATCGCAAGGCAGCCGAACAGGCGC  
TGGCCAAGGTGCTCGATGCCATCGGCAACCCGGGGTATTCGGGGTGGGCGCAAGCCCGCCGATGCCGC  
CGCCTTTAGCGATGCAGAAAAAGCGCTGATGGCCGTGCTGGCACCCTTTGATGGCAACCTGCCAATCAT  
TGCGCCACCTCGCTGTGACAAAAGGCTGGGTTTCGCTGCGCTCTACCCACCTACGCACGGCCTACCGATA  
AATGCACCCGGACCGCGTTTGGCCCCCTTCTCCCTTTCGCGGAGAAAGGCTGGGGATGAGGGGGAAGGCA  
ACGTCTCGGCGTTGGCCTTCCCCCTGCTCCACCACCATTTGGCTGCTCATTCTGCTGCAACTGGCCTGGC  
TTGGCTGGCTGCTGGCCTTCCCGGTGGCGCTCGATTCCGACGATGCCCTCAATTTTCGCCACGGGGTAC  
GCGCTTTAGCGTGTGGAGTTCTCCCCCACTTTCCGGGTACCCTCGCATTTATCTGGCTGGCGCGGCTC  
ATCAATCTGCTGGTGGACGACCCGGCCCGCGCGGTGAGTGGGCAAGTCTGCTCGGTAGCAGTTTGTG  
CGCCGCTCGCTGCCTTGTGGCGGTGAGATTGTGGCAACGGCCAAGCTGCTCGCCCCAGTCTGGCTGCT  
GGTGTGGCCCTGCCGCTCACCCCGACGCTGGCGCTCTCCGGCTTTCTGACGGGTCCCGCTTGGCCGCT  
TGGCTCGGAACGCTGCTGCCCTTGCAGCAGCGTAGAATTGCACTGGCGGGTCTGTTACTCGGCTGTTG  
TGGCCCTGCGTCCCTGCTTTTTTTGTGCTGGCGCTGCTGCCCTGTGGCTGGGGATGAGCCGAGGAAAC  
GCGCATCAGATTTGTGCTCCCCATCGTGTGCTGGTGGGGTACGCTGCTGCTGTTTGTCTGGCAGGCCAT  
GGCTGGGCTATTTTCAGCGAAGGGCGGCGCTTTACCAGCGCCACTTTACCCTATGGGGCAACACGGCGG  
CAGCCCATGGCGATCGACTGCTGAGCTGGGCGCGCACCTTCAAAGATCAGCTCACCCCGCTTTGGCCCTT  
GGCTGTTGGGGCGCTGCTGGTACTGCCGCTTTGGCAAAGAGCAAAAAACCACCTGCCGCCCCCTCCCCA  
CTCTGGACACTCTACTGGCTCGCCCTGCTGCTCTGGACCTGTTTGGCCAGAACCCTGACAATCCCCGCC  
ATCTGGCCCCCATCACCTGCTCGGTATTGTGCTGCTGGCAGGCTGGCTGCCGCGCCGTGGCGAGGGGT  
GGTCCGGTGGCCGGATTGCTGCTGCTCGGCGGACCTTACCCTGCCCGTCCGTCCGCCATGGTGCAG  
GCAGCAAGGCTGGCAGAAACAGCGTGCCCGCTCTGGTGAACAGTGGGGAGTGGGCTGCTGCGGGAAA  
CCACAGCTCTGCCGGTGAACGATGGCTGGTATAAGGGGGATGCGGCGCTGGTGTCTCTCAGGGAGCCTG  
TCGCCTCAGTCGCCGACCCATCGCCGCGAGCGAAATGCCCACTGCGGTGCGCCAGCACTGTTTGGCCCCG  
CGCTTTGCCGCGGAGCCCGGCTCTGGCTCGCCATACCGGATCCATAGCCGCGACAAAACCTGATAGACTG  
CTTTTTTTCGCGCTTTTCAACCCGACGTTTCGCATCAACTGGACACCTATGCCCCAATCGCCAACAGCTC  
AGGCTGCCGCCCTCTCCCCCGTTTCTGTTTATCTGCTCGGCGCTCTGGCGGGTCTGACCCCGCTGGC  
GGTGGATATGATCTGCCCGCTATTCCGGCCATTGCCCGGGATCTGGCCACCAGCATCGACGGCGCCAG  
CTCACCATCAGCGCCTTTTTGGGTGGCTTTGCCATCGGCCAACTCTTCTACGGCCCGCTCGCCGATAGCT  
ATGGCCGCAAGCCGTTGATCCTGGCGGGCTCATCATGTTTGCATCGCTCGGTGGGCTGCGCCATGGC  
GGACTCCCTGCCGAATTGCTGGCCTATCGGATGCTACAGGCGGCGGGTGGTGGCGGGGTTCTGTGGTG  
GTCAATGCCCTGCTGCGCGATCTGTTTCGAGAAGGATGCGTTTTCTCGCGCCATGTCGTTCTGCTATTCTGG  
TGATGACCCTGGCACCGCTGGTGGCCCCAGTGGTGGGTGGCTATATCAGTGCCACGCGACTGGCGGGT  
GATCTTCTGGCTGCTGGTGGGGATCAGCCTGCTGATCTGTCTGGTGGTGGTGGTGGTGGTGGTGGTGGT  
CTCAAGCCTGAGCACCGCCAACCCCTTAATCTGGGCCAGATCCTCAAGAACTACTGGGGGGTGTCTCTCC  
ATCGCGGCGCCATGGGCTATGTGCTGTGCGGCTCCCTCTCCAGCTCCGGCATGTTTCGCTTTCTTAAGCGG  
CTCCCCCTTACGTCTATATCGAGTACTTCAAGGTACCGACCGAGCACTACGGCTGGCTGTTTGGCCTCAAT  
ATCCTGCTGATGATGGTGGTCACTTCGTCAACAGCCGACTGGTAAAAGGGTGGGCGCCGAGCGGATGC  
TGCAATACGGTCTGCTGGTGGTGGCCTGCGCGGGCGCCCTGCTGGTCTACAACGCTGGAGCCAGACCGG  
CGGCCTGTGGGGCATCGTCAATTCCGGTGGTACTGTTTGTGCGCCATATCAGTCTGGTGGGCGCCAACGCC  
ATGACCGGCTGATGGGCCACTTCCCGCAATCTGCGGGCACCGCATCGGCACTGGCGGGCACCTGCGCT  
TTGGCATCGGCGCCCTGGTGGCATTTCTGGTCAACCTCAATCCGCCCCACTCGCCGCTGCCCATGGCCAT  
CGCCATCGCCTGCTGCGGGGTGGGTTCAACCTGAGTTACTGGCTGCTGACCGGCAACGAGGCGATTGA  
TCCCCCTCCCTCCTGTGAGGAAAACGAAAGAGGCTTCCGTCAACGGAAGCCTCTTTTCGTACTGGCGCCC  
AGACGTTTCAAGACTGGGCACTGTTGAGCCAGAGGTGCGCCCTATGCTCACAGATAACCGAGCAAGATG  
GCTGGCAGCCACTTCAAGTGGCCAAAAAAGGTATACATGCCGTGGGCTGTCCCATCAGGGCCACCCCGG



CCGCAGAGCCGATGGAGAGCAGGCTGCCGCCACTCCGGCGGTCAGGGTCACCAGCAGCCACTGCCCCAG  
TGCCATATCCGGGTTTCATCGACAGCACGGCAAACATCACGGGAATGTTGTGATGACGGAGGACAAGACC  
CCGATGAAGATATTGGCCATGGTGGGATCCCCAGCGTCATACAGCCAGTGTGATACCAGCTCCAGATAGC  
CCATAAAGCCCAGCCCCCTACACACATCACCACCCCGTAGAAGAAGAGCAGGGTATCCCCTCCGCCTT  
GGCCACCTTGTTGAACACGTCAAATGGCACCACAGAACCAGACTCCGCAACCGCACCTCATCACCATTG  
CGTTCGTAGAGCGCCCCGTTTACGTGCCAGCGAGCGCGGTAACGACTTGCGCAGATAAAAACCCGAAAAACT  
GCAGATAAACCAGCCCCAGCATCATGCCAGTACGGGTGGCAGATGGAGGAACTGTGGCATTAGCACCGC  
CGTGATGATGGTCAGCAAGAACAGCGGACGATGCGACGGGCACCCCGCTTGAGATCGACCACCTCGTTA  
TCAGCCTCCGGCACATGGCGCGCACCATCAGGCTCATCAGGATGGCTGGCACCAGAAAATTGAGCAGAG  
AGGGAATAAGCAGGGTGAAGAACTGGCCAAATTGCACCTTGCCCGCTGCCACACCATCAGGTTGGTGAT  
ATCGCCAAAGGGACTGAACGCCCTCCGGCGTTGGCGGCGATCACTATGTTGATGCAGGCAAGATTGACA  
AAACGCCGATCACCCTTGCCACCTTCAATACTACGGCGCACATCAAGAGCGCTGTGGTCAGGTTATCTG  
CCACCGGCGAAATACAAAAAGCAAGCCCCGCCGGTCAACCAGAACAGGGTGCAGAAAGTAAAGCCGGATCG  
CACCAGCCAGGCGCGCAGGGCATCGAACAGCCGCCGATCCTCCATGGCGTTGATATAGGTCATCGCCACC  
AGCAGGAACAGCATCAGCTCGGCATATTCCAGCAAGGTATGGCGGAAGGCCTGTTCCGGCCGAGGGCTCA  
TCCCCTGTTGTGCATAGGCGATACCGATCAGGATCCAGATCACCACCGCGGCCACCAGCACGGGTTTGG  
CTTGCGCAGTTGCAGATACTCTCAGCCATCACCAGGGCGTAGGCCAACACAAAATCCGACACAAAAA  
AGTCCGATTGAGGAGGATGTCAACAGAACTGGGCCACTACTGGCATAGGCGGGAGGGATAAACAGGGACA  
GCAGCAAATAACAGGGGTGAGCGCAGACATGGTCTCTTCTTTTGTAGAACCATCTGGCAATGATGCTAGC  
ACCTGGATGAAAAGAAAAATTCATCCAGGTCAATTAACGCTTAATTGTTTGTCTGTCGAAACGCGGGATT  
ATTTCTTGCCGAAACCCGACTGCTTGAGGGTATAGCCTGCGCTGTTTGGCAGGCATCCAGACCGCTGCC  
GTTATTGCCCGCCACCAGACTGGCCGCCAGACTCGGGCTGTTGAACAGCTGATCGGGCGTAAAGACAAAG  
CCACCTGACTGCGGGGCACTATGACCCCTTCTCCAGCAGTTCGTGACGCAGCTCGATCACCGCTTCCAC  
GCAAAGAGGGCGGCATCCTCGCCATTGGCGGTGGAACCGGCCAGCACCATAAAGCCCGGATTTTGGCGCTT  
GCCCACCGGATAACCGTGGGCTCGGCCCTTGCCGTTGAAGTGGTAGAGCTCGCGCTCCCCGGCCGA  
TTGTCCGAGAGTGCCTTTTGCAGGGTCATCAGCTCGTTGTAGATCTCGATGGGGACGACGGCAGCCTGCT  
TGTTGCCCTTGCTATCGATGATAAACTGACTTGCTTGTGTAAACATCCTTGCTCATCCTGTGACCCATGG  
AAGCCCCATTTCATACCCACTCGGGCAAGCGGGATCCAGCAGGATCCACTGCTCTTTTGGCCCTTGAT  
CACTAAGTGCCTACTTGATCAACCGTAAGGGGTGTGATCAATGCTGCGCGTGTGCTACCAAGCAT  
GATGAAAGCCATTGACCATCAAACGGTTATCCCATGTGACCCCTGCGCAACCTCTGCAAGAGCTTCGATA  
ACGGCAGTGAACGACTGCCGCTGTTCCACCATCTCGATCTCGCCCTCCCCGAGGCGAGATCACCTGCT  
GCTGGGCCAAAGCGGCTGCGGCAAGTCCACCTGCTCAATCTGATCGCCGGGCTGATTGCACCGGATGAA  
GGGGAGATCTGGCTGGGGGAGACCCGGATCGACACCCGATCCCCGACGAGCGGGCGCGCTGCGGGGCC  
GCCATTTCCGATATCGTCTATCAGGATTTTAACTGCTGCCGACCCTGACGGTGGCCGAGAATCTGGCCCT  
GCCGCTCGCCATCAACGCTCTGCCTCAAATGAGACAAAGATTGACCAGTTGCTGCATCGGCTCGATATG  
AGCCACAAGCGCCATGCCTGGCCGGAGCAGCTCTCCGGCGCCAGCGACAGCGGGTGGCGCTGGCCCGC  
CCCTTATCCATCAGCCCGTTGGCTGCTCGCCGACGAGCCACCAGCAGCTCGATGAACACAATGCCGA  
ACAGGTGATGGCGTTGATGGTGGCGGGTGCAGGATACCGCGCTGGCTTGCTGCTGGTGAGCCACAAC  
CCCGCTATGCTGCGCTGGCCGACAGGGTGTGCGCCTCGAAGGGGGGCAACTTATCGAGCTCAAGGGGC  
CCCGTCACTAGGACGAGCTGCGTCTGTGCGGGGACGCTGATGCTGCCACTCAAAGCGCTGCTGCG  
CCTCTATCGCAGTACCCCTTGGCTGCTGCTGATGAGTCTGGCTGGGCTGGTATTGGGGGTGTCGCTGGTG  
GTGGCCATCGAAGTGTCAATCACAGTGCCCGACCAACTTCGTGCGCCCGCCGAGCCAGCTGGCAGGAG  
AAGCCAACTACCGGCTGGCCCCGCTGGCGGGCTGGATGAGCAGCTCTACGTGCAGCTGGTGACCAGCCA  
GCCCCGCTTGGATGCCATGCCCCAGCTCCATGGCTGGCTCAAGGATGAAGAGGGGCGCAGCTTTCAACTG  
CTGGGAATGGATCTCTTCAACCCCGCCCCCTGCGCCAGTTGTTTGGCGCCCAACCCGCGAACGAACCCG  
CCTTCAACCCTAAACCGTCCGACAGCATCTGGCTGGCGGCCCGCCGAGCGCCGACCCCTGACCTGACGCTG  
GGGCCAGAGCCCGCTTTTGTATTGGGTGGCAGCGATGGCGCCAGCGCCGACCCCTGACCTGACGCTG  
GCGGGCACCTTTCAGACCGGGCGCCGTGCCCATGGAGCGGCTGCTGATAACCGATATTGGCCTCGCCAGC  
CGCTGCTGGATAAAGCGGGTGGCTCGATCGCATCGTCTTCAAGCTAAGCGAATCAGGAGCTCGCACCCCT  
GCAGGCCACCCTGCAAACCGATTACCCGAACCAGCCCTTGTGGCTTGAGCCCATCAGCCCGGCGCTCGAT  
GCCAGCCAGCTTGGCGATGCACTGGCCCTTAACTGACGGCGCTCTCATGCTCGCCATGGCGGTGGGAC  
TGTTTCTGGTGTTCACGCCAGCGATTTGTCCAGAGCGTGCGCCGCCCCCAACTGGCCAGTTGATCAT  
TCTGGGGATGGGGCCGAGCCGGGTGCTGCGTTGGCTCATCTGGAAGTGTATTCTTGGCCACCATCGGC  
ACCCTGCTCGGGGTGCTGCTCGGCAGCCTGTTGGCGCTGGCGCTGATGGGGCAACTGACCAGGCGCTGG  
CTGATCTCTATGGGCCCAACCCCATCGATCTGTTGCGCCTCTCCCTGTCAGCTGTTCAAGGCGCTGTT  
GATCGGGCTGCTCGGTACGCTGGCCGCCAACCTGCCCGCTGGTGGCAACTGCTGCGCCAATCCCCCTC  
GAACTGCGAGCAGGAAACAGCCGCCCCCCCGCTCACCCGTGGCGACGGCGCTTGTGGCCATCGCCATCT  
TGCTGCTGTGCGCCCTATGCCTGTGGCTGCCGCAAACGGGTCTGACCGGCGCCCTCTTTATCGCCGGAGG  
CTGGCTGCTGGCCATGGCGCTCTGGCTGCCCGATGCCCTGCGCGGCTGCTTGGCTGGTTGCGACGGCGC  
GCGGGCGGCCCCCTCACCGCCCGGCTCGGGGTGGCCGAGACCCCTCTATCACTCGATCGCACCGCCATCG  
CGGTGATGGCGTTGCAGCTCGCCATCGCGGCGGCCATCGGCATCGGGGTGATGGTGTGAGCTTTTCGCTC

CAGCGTGGAGATCTGGCTCGGCCAGCGTCTGGCCGCCGATCTCTATGTCACCGCCCCAAGGGGTGGCG  
GGCAACAAGGGCACCTTGAGCGACGCCACCTCGAGACTCTGCTACCAATCCGCTGGTGGAGCGCCGCT  
CGCGCCGCTCGGTACACCCCGCCGCTGGCAGGGGCAGCCATCGAGTGGGCGCAGATGGACTTTATTCC  
CCAGCTTAAAGCGGCCATCCGCTGCTGGCCGGACGCTGGCCGACCCGTCGCCGACGAAGTGTGGCGAGC  
GAACCGCTGACGGTACGCCTCGGGGTCAAGGTGGGCCAGACATTGGCGATCAGCGGCGAGCAGGGGCCAA  
GGCAGCTCACCGTCACCGGCTCTATCAGGATTACGGCAGCGACAAGGGACAGATCCTGCACGCCTTCGA  
GGCGGGGGCGGTGCAATCCCTCGCCCTTTTTAGCGACGACCCGAACTGGCCGACCGCTGCGCGAG  
CGCTTTGGCGAGCAGCTCAATCTGCTCTCCGCCCCACCATCCACAGCGCGGCCCTCAAGGTGTTTGACC  
AGACCTTTGTGGTGACCGAGCTATTGAACTGCTGATCCTCGGCATCGCTTTGTTCGGCATTGGCTCGGC  
CTTTATGGTGTGGGCTGACGCGCCGCTGGCGAGCTGCAGACCTTCAGAGTCTGGGCTTGAGCCCTCGC  
CACTGCCCGCAGCTGGTGTGGCAAGGAGCGGATTTGGGCTGCTCACCGCCCTGTGGCCCTGCGCCG  
TGGGCTATGGCCTTGCTGGGTGCTGATCGAGTGGTCAACCCGCGCGCTTTGGCTGGCGCTCGCCTT  
CGAAGCCTCCCCCTCCATGCGGTACGGCCCTGTTGCTGGCGCCGCTGTGCGGGGACTGGCCTCCTGG  
TATGCAGCAAGGAGAGTGGTATGAACTGATCAAAGGGTGGCCGCTGGCGCTGGGTATGCTCTGGACGCT  
CTATAGCGGGCTATCGCTGCCAGCGATCTGGGTTCCCTGCTCGGCGGCGCAACGACAGTTTTAAAAAG  
GTGCAGCCGGGGCAAACCATCCAGCTGCCGGAGGATCACGCCGCAACCCCGATTACCGCTCCGAGTGGT  
GGTATCTCACCGCAACCTCAAGGATGAACAGGGGCGCAATATGGCATGCAGTGGACCTGTTTCGGCA  
GGGGATCGAGCAAGAACTCCGCACCAGCAACCCCTGGCTCACCCCCAGCTCTGGCTGGCCAGTTTGCC  
ATCACGGATCTCGACCGTGGCAGCCACCGGCAAGATGAACGGGCCAGTCGGCAGGGGCCGGGGCTGGCGG  
GGGCCAGCGGGCGGTCAATATTGGCTAAGGGAGTGGCGGCTTGCTCGCAAGGGGCGGCGTATTCCCCGC  
CACCTCAAGGTGCAGAGCAAGATTGGCGAGCTGAACCTCACCGTCACCGCCGCAAGCCGCTGGTGCTA  
CAAGGCAAGGCCGTTACAGCGAGAAGAGCCCCGGGCAACGCCCTCCTGTTACTACTCCTACCCGCGCCTGC  
ACTTGAGCGGCACCCTGACTCGTGATGGCGAAAACCCACACCGTCACCGGACAAGGCTGGTTTGATCACGA  
GTGGAGCAGCTCGGTATTGGCCGAATGGCAATCGGGCTGGGACTGGTTTTCCCTGCAACTGGCCGATGGC  
CGCGAGCTGATGCTGTTTCGCTGCGCACCAAGACGAGCCGCGCAGAGCCGAGAATCGTACGGCATCT  
TGATTGAGCGGGATGGCAGCAGCCGGGTGCTCGCCCCGACGCGATTGCTCACCCTCACCCGGGCAACACCTG  
CGCGGGCCCCAAGGGGCAAGAATTACCCCGTCGAGTGGCAGCTAAACGCCGCCGGAATGAGCCTCACCAT  
AAGGCCCGTACGCCAATCAGGCCATGCAGAGTGCCTTTGACTACTGGGAGGGCGCTGTCTGTCTCGG  
GGGATCCCAAGGGGGTTCGGCTATCTGGAGATGACCCGCTACTGAACACCCCTCGACAAACGCTGGTGGTCT  
GCTCGATTTCCCTAAAAACAAATCACCTTATAACAGGGCATCACAGTGATATCGCCAGCCATTCCAGTC  
ACTTGGTGCCAGTAGCCAAGGATGTCTTATCTGTTTGTATTATAAACACCCCTCACCCACTCACCCGCGC  
CAACTTGGCTCAAGTCTGATCCCTGTCAAAGAAATCATCAAAATATGAGCCGTAAGTGACTTTTCACTCA  
CTTAAATTATTTCGTCGCTTGATATCATCCTCACTCGAGACTTGATGAGCGATGGGGTTTATTATGATTTA  
TCAATATCCCCTTCCAACAACCTTGATTGAAAATAATCATGAATGTAAAGGTAACATGAATAAAGAAGA  
TATAAAAGATGATTTGACGATATTAGCATTGATTTCTTTTATTGGTTCTCTCGATTTGAATTTGCATTA  
AAAGAAAATGGAGTTCTTAAGTACTATGATATTGGCAGCAATGCAGAACAGGTTGGGATGATTTCAATTA  
AAAAATATTCAAGTGAATTTAAATCAAGTGAAGCTCCAAGAGATTAATAACATTAACCCCTCTCAGACA  
AAAAATTGGTGAGAATAGAACTTTAGAATGAAATCTGTTGGCATAAAGGATTGTAATAGTGAACTTTGC  
ATAGTTGTTTCGATTACTAAAGACGATAAGAAATAACTTATTCCATGGTGGCAAGCATGGAGCTGAGGGAT  
GGGACAACCCAGACAGAACAAGAGTTATTGACACATGGGATTAATACTTAATCAATTTGCAGAAAT  
GACTGGATGGGAAGATGACTACACTAGATTCTACTAAAAATAAATAATGCTTTCCCGGTAACGAGACACCT  
ACATATAGTTACTATTTATTGAGTGAGCATGGCATGTCCTAATAATGTAAAAATGCAGTTGAGTTATAGTG  
AGACCAATATATTAATGAGTAATAGTCATGATAATAAAAACCCACAAGAGACTAACATTAAGCTATGGG  
TCGAATTACTTATTTTCTTTGCTCATACTACCCACTTTTCTTAATTTCTCTTTTTAAGAGATAAAGCAA  
AGACACCATAGGAATTTCAATTGGTGTGCTTGAGTGGGAACACAAAGTGAGTTTTTTGGCTATCACAATG  
ATAACCATATCATCATGTGCCACTTTGCTGACTGGGTACATAAATAAGATCATTATTAACCGATACAGAAG  
GTGCTTTTCGTTATAAAACTAACAGAAGTAAATGCTGTTTCGTTGGAGACATGATAAATTAACCCCTTCTTT  
TCTTATTGGACTATTTGCATTTGACTATAAAACTTGGCAATCAATAATTTCAATTAATTGTCTTCTTATCT  
TTTATGTTTGCATTTCTCTCGAAATGAGAGAATTAATTTACTGAACCCAATGTTCCCTTCTTTTAGGTGTT  
GCCTGTACAATATTAAGTATAAAAAAGATTGGACAACCCAATGCTGAATTTTCCCTCAAGTGCCCTATGCAT  
GGGATCAGCCAGACAATCAGAAGAAAAAGTTTCGTTTTTTAGAAAACTCTGGAATTACCTTTATTTCCGCA  
TTAGTTGATAGGTGGCAAAATGACTATAAATCCATTAATAACCGCCGAAAGAAATACAACAAGAAGTACAG  
CGAGAGCTTGATCAAGCAAGTTTGGATGCTAAACTCGCAGAGCTACAATCACTCGACTTATCAGAAGCCA  
CTGTAAATCTATGGGTTGCTGAAGTAAAGATTGGAATAAAAAACAAACGATTTGGTGAGATTAATAATTT  
AAAAGTCCATTCCGACTACCAAGACCATTTTCGTCATATGTTATTGAATGCATTCAGGTAATCAACAT  
ATCGATGAGCTGCGCCAATTACAACATCCAAGATAATAGATTTTTCTACGTTGAAGCTAGTGCCACTG  
ACTTGAGTCAACTAAAGGAAAGGGTTGAAAAGCGGAACACTGATCAGCATCAATCAAGAACTGAACTAAA  
CGGGTATAACTCATACGTTATTCAACTCACCTTTGGTGATCCAGAATTAAGCATCTATGCATTTTCGCTAT  
ATCAAAGGTGCTTGGTCATTAATAATACTTCTAATAGGACTTTACGTACAAGTTTTTCAGAGGAATCAAT  
TGTTGTAGAAATGATCAAAGTTTCAAGTTTTCAGATAACCCATATATTGACTTCATTAATATGGCTC  
TGATGTTTTTCATCGCTGACCTTGTCAATTTGAACTGCGATGAACTATCATGAAAGACTCAAAGAGAAA

AAAGTCGAAACAATCAAGGCGCTAGGGAACAGCCCAGCAATGAACTCATCGGAAGCAATTAAGCTGACTA  
CGCTAGTTGCGGAAGATAAGCGCCTAATGCGAAATCTCGCATCCGTCTATGAAAAGCAACATTTTAGAAA  
TGAAATTTGGCTAAGGAAGTTACGTGAAGCCGAGAAGCAGCAGGTAAGTGGCAAATTAATTCGATACT  
CAAGGGAAAATTTTAGTTCAAGAGAACAAGGAGTACGTAAAGGAAGTCTAATCTTTTACAAAACAAGC  
GAGTTAAGACTGTGGTAGATGGCTTGGTGTGATGTCGAGGGGGAGTTAATAGCTATTTCCCGAGGCTTC  
AAGAGCATAAAGCAAAGAAACTAGCAAGTATCAAAGGTAGCCGTCGCTAAAAAGCACCTTCATTTATGA  
AGTACCCCGATAGAAATAATTTCTGTGGGGTTTTATTTTACTAAAAAATCCAGACACTGTAATTTAAA  
TAAAAAATGGACGAGAAATATTTTCTCACAGCTCCTAGCGATTGAATAAATGCCAGCGTACGGCGATTA  
AACTGCTCCGGCTGCTCCACATTGCAGACATGGCCACACCGTTCTATCACAGCCAGTGAGGAGCTGGCAT  
CGCGGGCCACCTGTTCCGCGACCCGGTGCCAGAAACATATGATCCTCCTCCCCATCACATAGAGGGTGGG  
AATGGGACAGGAGCGTTCCGCGAAGTAACGCATCAGCGGGTTGACCTCGGTGGCGAGGCGGAACAGCGC  
TTGAACTCTTTCTGGCAGAGCTTCCGCGGCTCGCGCACAAAGAGGTTGCGCGACTCCTGATGGTGCTGGC  
GCGGCATGATGATGAAGGCAAACAGCCGGTAGAGCCACATATAGGGCAGGAAGTGCTGGCCGAGTCGGCC  
CAGTTGCACCAGCACCCGCGAGCGGATATCGAGCCGCAAAATGGCGCCCCCAGTACCATGCTTTTACC  
CGCTCCGGGCAGAGCTCGGCCAGATGGCGAATAAGAATGGTGCCAAGGGAGATGCCGACAAAGTGGGCGC  
GGCGGATATCGAGATGATCGAGCAGTCGAACGATATCCTCGGTCACCGCCGAAAGCTGTAGTGGCCCTG  
GATCACCTGCTGCAGCTTGTGGACTGGCCATGGCCGCGCAAATCGAGCAGCAGCACGTTGAAGTGCTCG  
CGATAGGCTCGCAGCTGCTTGAACCAGATGGAGGAGCTGCCACCGGCGCCGTGGACAAACACCACCCAAT  
CCCGCTCGGGACCCAGTTCGAAAGTCTTGTGATACAACATCAATAGGCTCCCTCGGTGATGGGGGTATA  
CTCGGCAGCGCATAGTAACAGATGCCTTCCCTGATTGATATGCAACCGCACTGATCGGATCACCCACTG  
CGAGACCAGACCATGGAGTTAACCCCTTTACGCCACTTCTGCTCTCGTTGCCGGGCAGTCAGGAAGATA  
CCCCGTTTTGGCCCGGAGATCCTGGTCTACCGCATCGCCGGCAAAATGTTGCGCGTGGTGGATTGGCAAGC  
TGACCCGCTCACCATCAACCTCAAGTGCAGCCCGAGCTGGCGCTGCTGCTGCGCGAGCTTCACCCCTGAG  
GTGAAACCGGGCTGGCATATGAACAAGCAACACTGGAACACAGTGACCCTGAACAGCACCTTGCCCGATG  
ATCTCTGGCAAGGCTGGGTGCTCCACTCCTATGAGCGGGTTGTCGCGGGTTTGGCCAAAGCCAAACGGCC  
CATGGCCCCCGCCGCAATGCCGCTGATCAGGGTGTTCGGCATGACGCATCTCCTCTTTATCGCCCCC  
TTGGCGAGCAGCATATTCAGCGCTGGTCACCCCTGTTTCGAGCAGGCAATCCGCCACACCGCCCCCAGCA  
CTACAGCCCGGAGCAGGTTGAGCAGTGGGCCCTCGTTTACAACATCCGGGCTTTGTGACCCAGCTGCGC  
GAGACCACCGGCTGGGTTGGCGGAGCAGGCAAAATGTCGCCCTCGGTTTGTACCCCTGAGCCCCGATGGCC  
ATCTCAGTCTGCTCTATGTGAGCGCCGACCATCAGCGCCAGGACTGGGCAATCTGTGCTCACACGGC  
GCTCGCGGGGGCCCGAGGGCTCGGTATGACCCTCATCACACCGAGGCCAGCGCCTTCAGTTATGAGCTA  
TTTTTACGACATGGCTTTACGTTGACCGGGCTGGAGTGCCTGGAGCGGGGCGGAGTCAGTTTTACTCGCC  
ATCGCCTGCACTGCTGCTTGCCAAGCTAGGGCAAGCCACTAAAAACGATTAATTTTCGTATTGTTACTG  
TATTGAGGCAGCAACCATGGTGGTAGAAAGTGAAGGCTATATCTCGCTGATCGAGTATCTGGTGGAGAGT  
TTGGGATTGTTTTGAATCCAGCAGCAGAACGATGGTGAAGAGACCATCGAAGATCTGGTCAGTGGCCGTG  
TTGCCAGCAACCTGATGGCCATTTGCGAGCAAAAACCCAGCTCGATCCCAAGGTACGTTTCGCCATCAT  
GCAGGAGGCCGATGCCGTGGTCCCGATCTGGAAGAGGTGCTCTCTGCGCTCTGGCTGCGCGCCCCGACC  
CCGGAACAGAAAACCTTCCCTCATCGAGTTTATCGATCTCATCAAGAACCTGTTTCGACAGCGCCATCGGCT  
GATCTGCCGTCCGGCTCTCCCGCCCAACGCAAGATTTTCAGAACAGCAGATAAGGAAAAGGGCCGCTTGG  
TGGGCAGCCCTGCTTGCTATCATTTTTCAACCCGCCAGTGCCTTCATTCATCAGGCGGTTATCAAGGCAAG  
AAATGTGTCTGGACTTTGCATCCGATCCCTGGACGCTACCTAGTTAGTCCCGACTGGTCGCAATAAGTTC  
CCTCCTCCGACCATTTATTTTCACTTTTATTAAGAAATCGACTACAAAACCTGTTACAGCGTTACAGGCTGG  
GTGGCAAACAGACTCCAATACCACCAATCCGAGTAGCCATCCGGATTTTCTCCAGATATTGCTGATG  
GTAATCCTCGCGTAGTAGAAGGGCGCCAGCGGCAGAATGCGGGTGGTAATGGCACGGCTGTCGCCGCTT  
GCCGCCATCGCTGCTGATAGGCCGCCATGCTCTGCTGGGCAATGATCTGCTGGCTCTCGTCGCCATAGA  
AGATCACCGAGCATACTGGGTGCCAATGTCCCCGCCCTGACGCATCCCTGCGCCGGATCGTCTGCTGCT  
CCAGAACAGTCTGAGCAGATCGCCGTAGCTGATCACCGCCGGATCAAACACCACCTGCACCGTCTCGGCA  
TGACCGGTACAGGCCACTGCACACCTCTTTGTAGGTGGGATTCTGGGTACGCGCCGCTGATAACCTGCCG  
CGGTGGAGTAGACGCCCGGCTGCTGCCAGAACAGGCGCTCCACGCCCCAGAAGCAACCCATGCCAAACCA  
GGCGATCTCCATGTTCTCGGGCCAGGGGCCCTGGGTGGGTTGCCATTCACCGCATGCTGCTGACCAATC  
ACCATCGCTTCGCGTCTGCCGCGAGGCATCTGCCGTTGAAATAATCTGTTCCATGAATTCGTCTCTTG  
TATAAAACCTGTGAAATCACACAGCTGACGAAAAGGAGCATCGAAGATAGCAGTTTATCGCGCCGGATC  
AACCGGCGGGCCCCCTCCCCGCTCGCTCCGGCGGCCATCTGCACCGTCCGTCACCTTTTCCGATCCGCAC  
GGCCAACCCGCCCTCGTAGACCAGAAACGGCAAAAATCAATATTTAGTCTTGATTTGTGAATTAATTTT  
CATATATTGAGCCAATCGCTGTTTTTTTTATGGAAGAAATATCAAGTGCCTGAACGCGAACTCAGTCTGGT  
CAATGCCTTCCGGCAATCCACCCCTATGTCAATGTGCATCGGGGTGCCACCTTTGTGCTGATGATGGGG  
GGAGAAGCCATCTGCCACCCCAACTTCGCCAATATCGTCAGCGATATCGCTCTGCTGCAGACACTGGGCA  
TACGCTTGGTGTGGTGTGTTGGTTACGTCCGCAAAACGATGAAGCGCTGGCCCCGCGCCGGTATCGAAGC  
CCAGTATCACAAGCGGATCCGGGTACCGATGACGAGAGTTTACCATCATCAAGCAGGTGTGTGGCGGC  
CTGCAATACGACATCACCGCCAGCTCTCCATGGGGCTCGCAACACCCCTATGCAGGGGGCGCGGATCA  
CGGTGGTGAGCGCAACTTCGTCACTGCCAGCCGCTGGGGGTGGATGATGGCATCGACTTTTGCCATAG

CGGCCGGGTGCGCCGCATCGACGTGGAGGGGATCACCCGCCAGCTCGATCAGAAGAGTCTGGTGCATC  
TCCCCCATCGGCTGCTCGGTCACCGGCGAGAGCTTTAACCTGAGCTCCGAAGAGGTGGCCCCCGGGTGG  
CGGTCGACCTCAAGGCGGACAAGCTCATCTGCTTTAGCAGCACCCAAGGGGTAATGGACAGACGTGGCGA  
AGCCATCTCCGAGCTCTTCCCCGAGCAGGCCGAAGAGCTGCTGGTGGAGCTGGAGCAGGCGGGCGAAGAG  
ATGTCCGGCACCCGCCGTTATCTGCGCGCGGCCATTGCCTCCTGCCGCGGCGGGCTGCCTCGTCCCATC  
TGGTGGAGCTATCAGGATGATGGCGCCATGTTGAGAGGAGCTGTTTTCAGTCGCGACGGCCCTCGGCACCCAGAT  
CGTGGCGGAAAGTGGCGAGCAGGCCCGCGCCGCCACCATCGAGGATATCGGCGGCATTTCTGGATCTGATC  
CGCCCCGCTGGAGGAGGAAGGCATTCTGGTGCGCCGCTCCCGCGAGCAGCTGGAGATGGAGATCGACAAGT  
TCACCATCATCGAGCGCGATGGTCTCATCATCGGCTGCGCGGCCCTCTACTGCTTTATGGAAGAGGGCAT  
GGCGGAGATGGCCTGCGTCCCATCCACCCGACTATCGCAACTCCAACCGGGGAGATCAGTGGTGGCC  
AAGTGGCCGAGCGGGCCAAGCGGCTCGGCATTCGCCGCTGTTCTGCTGCTACCACCCGCTCCATCCACT  
GGTTCGGGAGCGGGGCTTCGATCCGCTGGAAGTGGAAAGATCTGCCGTTGGCGCGCCAGCGTCTCTACAA  
CTGGCAGCGCCGTTCCAAGGTTTTGTCAAAGACCATTGCCTAAGTCATTGATCCTGCGTTGAGTTCGCTG  
ACACTTTGAACTTTTTTCAAACTCGATTGACAGTGCAATCCAACGCAGGGTATTTCTAAATGCACTCCA  
CCGCCCTGGTGGAGCCAGAAGAGGAGCGCTGCCAGGCAGCCCAAGGGAGGACACCAGCGTCCGGTGAAC  
TTGGGTGAGGGGAGCAGCGCCGAGACGAGTGAGGAGACTGGTGACCTCAACGTCGGCTGCGGGGGCTGA  
ATCCCCCGGGTGTGATCGGTAGTGATCATCCACACCGCGCTCTGTCAGGGGCGGTACGGGATGGGCTC  
TGCAGGTGGAGTGCTTCTGGCCGGGATAGCTTCGTTTCAATTCCTGCCATTTTCAGCTCCTCCTCTCTTTT  
TTGCCCGATGGAACCGGAATCTTAAAATAAGACAGGAGTAAGCAATGAGCCCGATCAATGTCGCCAAGTT  
TGGCGGAACCAAGTGTGCGCAACTTCCCGCCATGAATCACTGCGCCGACATCGTGTGGCCAATCCCGCC  
ACCCGGGTGGTGGTACTGAGTGCCAGCGCCGGTGTCAACAACCTGCTGGTCCGCTGGCACAAGGGGAGC  
TGGACGAAGCGGGCCGCGACGAGCAGCTGGCCAACTGGCCGGGATCCAGCAGGCCATTCTGACCGATCT  
CGGCAACCCCGTTGATGTGAGCGCCCTCATTCATGGCCAGCTGGACGAAATTCGCCCTCATGGCCCAGCAA  
GCCACCATCATACCGATGCGGAGCTGGCCGACCGCCTCATCGCTGCGGCGAGCTGATGTCACCCGCC  
TCTTTACCGAGCTGTTGCGCCAGCGCGGCGTCAAGGCCACTGGCAGGATGTGCGCCAGCTGATGCGCAC  
CGACAGCCGCTTTGGCAAGGCCACCGTCGATCTGGCCACTACCCGTACCCCTGCCAGCAGACGCTGGGC  
CCGCACTTTGGCGACAGCCTGATCATCACCCAGGGCTTTATCGGTGCCGATGGCGATGGCCCGACCACCA  
CGTGGGGCGCGGCTGACTACAGCGCAGCCCTCTTGGCCGAAGCGCTCGATGCCCGCAGTATCGA  
GATTTGGACCGATGTGCCCGGCATCTACACCAGGATCCGCGCCTCGTCACCCGCGCCCACTTCCC  
GAAATCAGCTTTGTGAGGCGGCCGAGATGGCCACCTTCGGCGCCAAGGTGCTGCACCCCGCCACCTTGC  
AACCGCGGTTGCGCCAGAATATTCCGGTGTGTTGTCGGCTCCGCCAAGGATCCTGCCGCGGTTGGTACCTG  
GATCCGCGCCAGCACAGATTCAAGCCCGCTGTTTCGCGCCGTCGCCCTGCCCGCCAGCAGGTGCTGGTG  
ACCCTGCACAGCCTCAACATGTTCCACGCTACGGCTTCTTGCCGAAGTGTTCGGCATTTTGGCCCGTC  
ACCGCATCTCGGTAGACCTCATCACTACCTCGAAAGTGAGCGTGTCACTGACCCCTGGATCACACCGGCAG  
CCAGAGTAACGGCGAGCCGATCCTGAGCGACAAGGTAAGTGGCCGAGCTGGGCCAGCTTTGCAAGGTGGAG  
GTGGAACCCGGTCTGGCACTGGTGGCGCTCATCGGCAACCGGATGAGCGAAGTGAACGGGTGGGCAGTC  
AGGTCTTTGACGCCCTGCGCGAGCACAACATCCGGATGATCTGCTACGGCGCCAGCGCCACAACCTCTG  
CTTCTGGTCAAGGAGAGCGAGGCGGGCAATATCGTCAACCGCTCCATCAGGAGCTGCTGGACTGATCC  
TCACCCGAGGCAATTTGCAACACGCAACAGGGCGCCCGCAAGGCGCCCTGTTCAATTTGACTTCGCAAAG  
GTATTGGCTCAGGCAAGGCTGGTGGCTGGCAACTGACAGGCGACGGCTTCCCGACGCAGCTGCTGCAAGC  
GGGCCAGCAGCCCGTCTGGCCGAGCTCCGTCTCCTGAGGCGAGAGATTGTCCACCAGCAACGGATAGTG  
ATCCGTACCCGCTGCATCAACCAGTCGAGGCGACGAGGGTGGAGCGGGCCGAGCTCTGGCGGCTCAGA  
TCATCGGCCACATCGAGCCGGTGGCTGCGATACATGTCCCGCCACCAGTTGGCGACCAGCGCCTCGTCCG  
TCGCCAGCGCGGCGCTCCACTCCCCTTGCAAGGCGTGCAGGCGGGCCAGCACGGGCGCGCTGGCTCCTTC  
GCGGATCAGGTGGTGGATCTCCCGTTTGACCCATTTAGGCAAGCTCGCGCCAGTAGCGAAATTCGGGC  
AGAGGATCGGCCCTCATCGAGCCAGATCCGGAGAGGGTGGGGTCTCCAGTCGCTCCGGCACATGGAAC  
GCGGGTCGACCAGACCATTGGAGTTGTATTCAAAGCGGGGATCGAAGGTTCCACATATAGCCAAAGTCGAA  
CACGCAGATCTGCTCGCCGTCATCGAGCAGGTTGCCCGGGCTCGGGTCCCAGTCAAACCAGCCCCAGCGG  
GCCAGCTCCCCCTGCACCTCCAGCATCTGGGCCAGATTGCGCTCGTTGAGCTGATGGACCGGCACACCCC  
GCAACCAGGGGAGACCAGCACACCGGCCCGCGCCGAGCCGAAGCTGGTGCAGACCACGTGGGAGAGGAC  
AGTAGGATGCAGCTCGCGCAGCGCCTCGATTTACGCGCCGCTCCAGCTCGGTCAGAAAGGCAGTCTTG  
CCATCGAGGTTGGCCACCAGCGAATCCTGACGGCGCCGCTTGGAGCACCAGTGTGCCCCCTCCACCTTGA  
GGTGAACACCTCGGCGGTGAGACCGTGGCGATAGACCTTGACCACAGCCGGATGGCTATCCTTCAGCTT  
GACCAGTTGGGCCAGCGGCAGCGGGCAGTCGCGCTCGGTCGGATCCGGATCTCTTCTTGTCTCTCCAGC  
ATGCGCAGCAATCTGGCCTGACGTGCCATCACTTTGGGATTCATACATGTACCTCCAGTCGCTATCGAGA  
GACTAAACAGCAGCTCCCTCCCAAGCCAGTGGCAAAACCCATGATGACGCTTTCATCACATATTCGGAA  
CAACCCCTCGATCGGGATCACAATTTGCAAGGTTGAGCTGTAACCAATATTCATTAAGTGGTCATTA  
TTGACAAGCTGAAACAAGGCCCGCACCATCGGGTCAAACCTCTATGCGGATGAACGATCTCTCCCTCACTC  
GCTCAAAGGATGAGCTTATATGAATCGCCCCCTCTCAGGCCGCCCCCGCTCCTGAGTCTGCCCTCTCTG  
CTGCTTGCCTACTGGGTGGATTGCTGCTGCTGACCCTGTTGTTGCCGCTGATCAATCCCGGCAGCTGGC  
TGGGCCGCGCCAGCCGCTGGTGTGGGCCCGCGACAACCCGCTGGCCACCTCACCCGCCAGCCCT

GCTCTATAAAAAGCGACAGCCGCGGCTCTATCTGGTGGTGCGCAGTCAGTGGCAGTTGCGGGGGCCGCTG  
CAAGCGGGGACAAGGTGCGGGTGGAGCTGCTCAACGACAAGGGGAGCGGATCGACCAGCTCAGTCAAG  
CGGTGGATAAAGCGTCAGGTGTGCCGAATAACCGCTGCACCTGGATCTCAACAGCACCTGCGCGCCCC  
GGATGACGCGCTAGCAAGCCGTTATCAGTTGCGCATCGGTCTGCTGCTCAAGGATCGCCCCGAGAGCGGC  
GATTTTCAGCCAGATCCTGCAAACCTGCCGGAGCAGGGCTTCAACCTCACCTATCTGGTGGTGAGCCTGA  
CGCTGGTACTGGCCCTGAGCGCCGCGTGTCTCAAGACGGTGTGCCAAAGCTGCGCCGACAGCCTGCGCTG  
GCGGATCATCGGCAGCCTGCTGCTCGGCAACCTCACCTTCGTGCTGCTGCACGGCTTCGTGGTATTCAAG  
CTGGGGGAGTTTCTGCTCTGGTCAGGCTTTCGCCAGAGCACTACTATCTCGCTGGGGCAGCATGGTGC  
TGGGCTGGAGCCTCTGCGCGCTGGCGGGCTTCAACCTCTATATGGGGCTGGTCTTTACCGCGCTTTCCGG  
TATAGCCCTGCTGGCCAACCTTATGAAGATCGTATCTACGGCGTGCCGCTCGGCGGGGACGATTTTGGC  
AACCTGCTGGCGCTGCTGCGGATCCTGCTCGACAGCACCCATCCTGCCATCTTACCCGTTGCTGGTGG  
CACTGTTTCTGCTGCTGCGCTTTGCACTGTGCGCTGGTGTGCTGCGCACTGCCGCGCCACCGTGCCTT  
CTTTGCCCTGTGCGTCTTTGCCACCCAGACCGGCAACAAGCTGCTGGGGGCCAACATTGCTACGTGGAT  
CGCGCGGTCAACTACCACAGGGACATCATCCGCTCCGGCCCCGGCTCTATCTGTTCAATCTGGTGGACG  
AGATGCTGCAAAGCGGCAGCGTGTTCGCTACCCCTTGAGATCAACGAGCTGGCCCCGAGCTGAGCTA  
TCCGCCCCAAGGCATAGCGCCGCGCTGGGATCTGGTGTGCTGCAATATGAGTCGCTCTGGCTCGAC  
TGGAAGGGGCGGATCTGCACCCCGCCCCACCCTCTCCCTGCCCGCCAGCGTGCAGCAGTGGCAAAAAA  
CCATCCACTCCCCACCACCGCGGCATGACGGTGTGGCGGAGTTCGAGATGAACACCGGCCCTGCCAGT  
GGGCTTGTCTCAAGCAGGGGGTGGTGCCTACTACTACCTCTGCGCAGCAGGTGCCGGGGCTGGCCCAGAGC  
GCCAGACAGAGCGGCTACCAGACCCCTGTTCCGCCACCCCTATGTGAAAAAATTCTGGGGCCGCGCCAAGG  
CAATCCCGCGCTGGGCTATGAGGAGCGCTGGTTCGACACCCGCTTACCACCCCTGAGCACAAGGGGCT  
CTATATCTCCGACGATGCGCTCATCGACCACCTGCTCAAGCGCAGCGAACAGGATGACAAGCCGCTGTTT  
GCCTATGCGGTACCCATGCAGGGGCACGGCCCCCTTCGATGGCCCCCGCTATCAGGGGGCAGGAGCACAGCG  
GCGCCTGCCCGAACAGAGCGGAGAGCGACACCCAGCTGCTCAACACCTATTACACCGGGGTGGTGGATGC  
CATGGCCTCGCTGGAGCGACTACTCAAGACCCTAGACCAGTCGGACAAGCGCTATCTAGTGGTGGCCTTT  
GGCGATCACAGCCGTTTTTGTATGTCCGCCGGCAAGGGGATTCACGGTGACAAGCCGGCGCGCATGCCA  
CCTACCAGATCCCCATGATGGCCTTACCCGCGCCGATGACCCCTCAATCTGGCGACCCAGTTTGGCC  
GGTACCGCAGCTACTACAGATGGGTGAGCCACCGCCAGTTGCTGGCGGGGGATATCACCCCATCGAA  
GAGAAACCCCTGTCCATCCGGTGTGGGAGAAGGAGAAAGGATTCGACCCATCAAGCTGGTGGCCGAGA  
TCCGCGCCAGCTTCCGGCCCGATGCCCTGCCCTGATCCCTCCCCACAAAAACAGACAAGGCCGATCAGC  
GGCCTTGTGTGGACATTCATTTCTGTGCTCATTCTGCTCGCCACCAGGGCTCCAGTAGCGTGAGCTGCT  
GGCGGTGAGATCGAGCGCCGCTCGATGCCAGCGGCAACGTCAGCATGGGGTGGGTATGGGCGCAGTC  
AAACTCCGCCAGAATGGGGAAGTTCGGCGCCCCACCACCTCCAGCAGGATATCGAGCGGCCGCGGGCCG  
CTGCCCTGACTGTGAACAGTTCATGTTTCCGAGCACCAGGGCACCGATGCGATCAAACACCCCGCACA  
GCTTGAGGTGGGCAAACGAGCGCTCCACCGTGTGTCGCAAAATGGAGGTGTCTCCAGCAGCAGAATGTC  
CCCTTGCTCGATGGCTGGCATATAGGGGGAGCCCCAGATCCCCGCCATCGTATTGAGGTTGCCGCCGATA  
AGCCGGCCCCGACCCGACCGGTACCCACCGAGATCAGTCGGTTTGGTTGGCACTGCTTGGCCCGGTCT  
GGTTTTCCCAATCCAGTCGTTTCATCAGTCCACTGCGCCGGGGTCGGCACTGTGTGGGGCACGGCGGTGCC  
CCCCGGCCTGGCAGATCTGGCGAAAGCCCCGCCAGCGTTTTCGTCCACCAGTGGCGATAGCTCGCCGAAAGAG  
GCCACCAACGCCGGCCCCGTAGAAAGGTGACCAGGCCAGTGCGGGCATGAATGCCGAGCAGCAGGGCCGTCA  
CGTCGGAGTAGCCGATGACTATCTTGGGATCGCGCTTACAGCGCTCAAAAATCGAGGTAAGGGAGCAGGGA  
ATTGGAGTTGTTGCCGCAATCACCGACATGATGCAGCGCACTTCGGGGTCGCGAATAAGGGCATTGAGC  
TCCTCGGCCCGCGCGGCGATGGAACCGGAGCGCCAGTGTCTGCTGGCCGGTGGAGGTGCCCGCCTTGA  
GCCTAAAGCCCTGCCCTCAAGAAAGGCTTTTGCAGCGGCAAAACGCTGCGGGGCCAGGCGGTGCGCCG  
GCTGGAGGGGGAGAAAAAAGCGATGGTATCGCCACGTTTAAAGCAGCGGGGGAAACCAGTAACGTCATAAAT  
TGCTCATCCTTGCCAATATCCAGCCATCACAGAGTCGTTGAGACTCCTACACAACCCCTTTGATCACAAC  
GGGTTTATCACCATCGTTTAGAAAATACAAAACACTTGATTTCATTATTAACAGATATTTCTAAACACCATCC  
CCTTCTAGAAATGACCTCATTGCGATGGCCAACCCCGGTTGGTTGTCAGAACGGTCCGGCCTGACAGCCCCG  
GACGTTCTCTTTCCCACTTTTTCTCTCTGACTTATCAATGAGGTGCCTGTCATGAACAAAAACGCATCCC  
CCAGCGCATTGGTTGTAGAAGGCGGCGCATATTTGCCAGCGGCGTGTGGATGCGTTTTAT  
CTCGCCAGCCAGCATGGCCGAGCCACGAGATCCTGACCAAACCTGGCGTGCAGCCAGCAGTTTATGGATC  
CCCTGCGTTTTTGTCAAGGGGGGCAATCTGGTGGATATCCACTGGCTGTGGAACACCAGCTGCCGCAAGTA  
TCCCCTCGACATTCACGCCTACCGGGAGACCGGCATCCCCCTTCTATGCGGTGGTGACCAATACCCTGACC  
GGCAAGGCGGAGTACATCCGGGTCAAGCCGGAGAACATGAACGAGGTGTGCCCCGAGCTGCGCCATTC  
CCCTCGCCTCCACGAATACCCGGAAGTGCACGGGGTACCGATGACAGATGGCGGGGTGGCCGACTCCAT  
CCCCGGTGTGAGGCTACCGCCGCGGTGCCCGTCACTGACGGTGTCTCTCCGAGCCCCCTGGCTAT  
CGGCTCAAGCCGATGCCTTTCCCTGGATGATCCGCACTCTGCTCAAGACCCGCCCCGCGTGGCACAGG  
CGCTGGAGCAGCGGGATCGCAGCTACAACGAGGCGCTCGATTTTATCGCCAATCCGCGGAGGACTGCCA  
GATCGAGGTGATCGCCCCGCGGACTACTTCCCCGTTTCCCGTTTACCCGCGATATCAACAAGCTGGAG  
ATGGGATACGTGATGGGCAAGTGCAGGCTATCAGGCCGCCCTACTCAATTGATAAGGGTTTTACAGGC

ATGACCCGACCTGCCGCGACGCACGCGCCGCCAACACAATAACAATCGGGTCAGTTGAGCAACATGAGTC  
ATAAAAACAGACCGTGGCGAGGCAAGCGCGGCCAGAACCGATGCCAGACATCCTGACCGGCCGCTCCTC  
ATCCCTATGCCAGGGCATCTCACCCCTCATACAAGGTGTTTATTTATGTCTTCTTCTCACCCATCCCGC  
GCTGGCGCAGCTGTTTCGAGCGGCTGCTGCCAATTACCGGATCATGGCGCCCGCGGCCGAATATCGGGGC  
GGCCGCTTCTCCGACACCGACAACGTACCTACCACAGCATCCGCCATCCGGCCGATCTGGTGTGGCAGG  
AGAAATCCCCTTCTCCCCGAAAGAGGTGGTGTCTCCCCATCACCCAGACCCCTGTTCCACTTCGACAATCT  
GGAGCTGGCGAATCAAAGGTGGAAGCCAAACCCACCCCTGCTGTCTTGCAGCTGCGATATCCACGCT  
CTGGCGAGGCTGGATCAGGTCTACCTGAAAAATGGCCAGAACAGCGACGTCTACTACGCCCGGCTGCGCA  
GCAAGCTCAAGCTGGTGTCTGGAGTGCCGCGAGAGCTTCGAGAACTGCTTCTGCGTCTCCATGGGCAG  
CAACGAGACCCAGGACTACGCCCGCCGCAATTCGTCTGAGCGATGAGGGTGCCCGTATCGAGGTGAAGGAT  
CCCGAGCTGCTCGGTTACTTTGCCGAGCTGGGTGAATCCGACGACTTCACCCCGGAATTTGTCCAGAGCA  
ACCCGGTCAAGGTACGCACCCCGGACAGCGTCTGTGACGACCCCGAGCGGATCCGCGAGATCCTCACCGC  
CCATCCGGTCTGGGCCGAGTACGACAGCCGCTGCATCGGCTGTGGCCGCTGCACCCTCCTGCCCGACC  
TGCAGCTGCTACAGCGTGCATGACCTACCTATGCGGAGAACCCCGAGCAGGGCGAGCGCCGTCGCCAAT  
GGCCAGCTGCATGGTGGATGGCTTTAGCGACATGGCCGGTGGCCACGGTTTTTCGCGCCAAGCATGGCGA  
GCGCCTGCGTTATCGCGCCCTGCACAAGGTCAACGACTACAAGGCCGTCAGGGAGAGGAGCACATGTGC  
GTCGGCTGTGGCCGCTGCGACGATCGCTGCCCTACTACATCTCCTTTAGCAACATCATCAACAAGATGA  
CCGATGTGGTCAACAGACCATCGCAGCCGACAACGCGCAGGGGGCGAACTGATATGTGCCAGTGCCAGC  
AAACCGCAACAGCAGAACAACAGCAGGAAGCAGTCGAAAACCGCCTGCTGCCAGGGCCTACACCATTCT  
GGCCATCGAGCGCCACACCGAGCTGGAGTGGAACCTTCGGGTCTCCCGGACTTTGATGTCCACTACGGC  
CAGTTTGTGGAGATCTCCCTGCCACCGTTGGCGAGGCGCCCATCTCGGTCTCCGACTATGGCGATGGTT  
ATGTGGATCTGTTGATCCGCAAAGTCCGCAAGGTAACCGATGAGCTGTTTGCCTCGATGTGGGCGACAA  
GGTGTGGATGCGCGGCTCCACGGCAACGGCTATCCGCTGGAGACCTACCGCAACCAGCACCTCATCGTG  
GTGGCGGGCGGTACCGGCGTCGCGCCGGTCAAGGGGCTGCTGCGCCGCTTCAGCAAACATCCGGAAGAGG  
TGAAGTCCCTCGACATGATTCTCGGCTTCAAGAACGAGCAGGCGGTGCTCTATCGTCACGAGATGCCGCT  
CTGGGCCGAGCAGCAGAACCTCATCGTCACGCTGGATGAGGGTGAGGAGAGCGAGCAGTTTCGCATCGGC  
CGGGTACCCGACTACATCGACAGCTGGATCTCGCTGACAAGGAGGATATCCAGGTGATCGTGGTCCGGC  
CTCCCATCATGATCCGCTTCGTGGTGTAGCTTCCCTGAAACGGGGCATCCCCAAGGATCGCATCTGGGT  
CGACTACGAACCGCCGATGCGCTGCGCCGTGGGCAAGTGTGGCCACTGCCGGATGGGCGCACCTATATC  
TGCGTGGATGGACCGGTCTTTTCGTTTTGACCAGGCCAGCATCTGATCGACTGAGGGAGAACCATGAG  
TCTCGATATCGACATCATCAAGGCCCGGCCAAGAACGAATACCGCCTCTCCAAGGTGCGCGGCGAAGCG  
ATGATCAGCGTACGCATTCGCCGGCGGATCATGCCCGCCACCTGCTGGCGGTAGCCAGCAGATCGCCG  
AACAGTACGGCAACGGTCTGATCCACCTCACACCCGCCAGAAGCTGGCGATGCCCGGCATCAAGTATCA  
GGACATGGACAAGGTTAACGCCGCCCTCGAACCCTTTATCAGGGAGATAGAGGTGGAGACCTGCGGCATC  
GAGGTAGAGGACACCACAGCCGTTACCAGACCATCGGCGGGCGCAACATCGTCGCTGTCAGGGCAACA  
CCATCTGCCAGAAGGGCAATATCGACTGCACCGGGCTGGCCAGCGGATGGAGAAACACCTCTACCCAA  
CCCCTATCACCTCAAGATGGTGTGATCGCCGGCTGCCCCAACGACTGCGCCAAGGCCAACATGGCCGACTTC  
GGCATCCTCGGCATCGCCAAGATCCACTTCAATGCCGAGCGCTGCATCGGTGCGGCGCCTGCGTCAAGG  
CATGCAGCCACCACGCTGTGGATTGCCTCGCCATCAAGCATGGCAAGGCGGTCAAGGAGGAGAGCAAGTG  
TATCGGCTGTGGCGAGTGCCTACTGGCCTGCCCGACCCTGGCCTGGCAGCGGGATCCCAAGCAGCTCTAT  
ATGGTCAAGCTGGGGGGGCGCACAGCAAGAAGACCCCCCGTACCGGCAAGCTTTTCTCAACTGGGTCA  
CCGAAGAGGTGCTGCACGCGGTGATCAAGAACCTTTTCGAGTTCGAGGCCGAGATGCTGGATGGCAAGCC  
CATCTACCTGCACATGGGTACCTTATCGACCGGGCCGGTTATCACAAGTTCAGGAGCGGGTGTGCGC  
GGCGTACCCCTCAACCCGGAAGCCATGGTGCCTGACCGCATCTTCTGGGCCGAAGATCAGTACGTGCCA  
ACATGCACGTCAAAGCGGTGCAATAGGAAAAACCTCGTTTTGGGGAAGCGTGATCAAGTGGCCGACACCGG  
TGGGATCTGTGCTGGTGGCCCGGCTAGATCACCTTCCCTTTTATTTCCCGTGGGGGATCTTTCC  
CCGACCATCCGGGTGCGTACGGCGCGCCCTGCTATCTCGCCCGCGCGGCATTGCGAGCAGGCCAGCA  
TCCGGAGCCTGTTATGGACTTTCTCCCTCTTCTGTCAGCTGCAAAAACAAGCCGGTCTGATCGTGGC  
GGCGGTGAGGTGGCGGTGCGCAAGGCGCGCCTGCTGCTCGATGCCAAGGCGAAGATCACCATCAATGCC  
CGCATCTGGAACCCAGCTGATGAGCTGGGCCGAGCAGGGTGCCTGACCGTCTGCGCCGCCGATTTTCA  
TCCCGAACTGCTCGATGGCAAGTGGTGGTATCGCCGCCACCAACCAGCCGAGGTCAACCAGCAGGTA  
TTTTATGAGGCGAACCTGCGCCAGATCTTCTGCAACGTGGTGGACTCTCCGGCCACTGCAGCGCCATCA  
TGCCCGCCATCATCGACCGCTCGCCGCTGATGGTGGCCATCTCCAGCGCAGGCGCTGCGCCGGTCTAAG  
CCGCCAGTTGCGGGAAAACTCGAAGCCATGCTGCCGCAACACCTCGGCCAGCTCGCGGCGCTGGCGGGC  
AAGCTGCGCGAGCGGGTCAAACCTATTCCGGACAAGCTGGCCCGCCCGCTTCTGGGAGCGGCTCTTTA  
GCCACGATCGCCTCGCCCGCAACTGGCCCCGCGCCAGCAGCAAGCTGCCGAACAGAGCGTCCCGCATCT  
ACTCGATGAGCAACCACAGAGCAAGGGAAGCGTGACCCTGGTGGGCGCCGGCCCCGGCGATGCGGGACTG  
CTTACCCTAAGCGGTCTACAGCAGTTGCAGCAGGCGGATGTGGTGGTCTATGACCGACTGGTCTCGCAGG  
AGGTGTTGGCGCTTGTTCGCCGGGATGCCGAGCGGATCTTTGTTGGCAAGGAGGAGGCCCGCCACTGCGT  
ACCCAGCAGGCGATCAACCAGCTGTTGCTGGAACAAGCGCAGCTGGGCAACAGGTTGTGCGGCTCAAG  
GGGGCGATCCCTTTATCTTTGGCCGTGGCGGTGAGGAGCTGGAGACCTGGCCGAGGAGGCATCCCT

TCTCGGTGGTACCGGGCATCACGGCTGCGTGGGGCTGCGCCGCTACAGCGGCATTCCCCTACCCACCG  
CGATCATGCCCAGCGAGTACAGTTCATCACCGGGCATGACAAGGAGGGCAATATCGCCCAGGAGTGGTCCG  
GTGCTGGCGGGCCCCACGCCAGACACTGGTGTCTACATGGGGCTGGCCCACGCCACCCGCATTCCAGGATG  
CGCTGCAAACCCACGGCATGCCCCGGCCACACCCCGGTGGCGCTGGTGGAGCAAGGCACCCAGCTCAGTCA  
GCGGGTGGTGCAGCGGGAGCTGCAGCAGTTGGCCGAAGTGGCCCGTCAAGTGAAGAGCCCGAGTCTCATC  
ATCATCGGCTCGGTGGTCACTCTGGCCGACAAGCTGGATTGGTATGGGGAAAGCCAAATGCCATCCACGGCA  
TCTAACCCCGCACGACTATCACCAATAGAGACAACAAAAACAGAGAGCGGCCATGCCGCTCTCTGTTTTT  
TGCATCAATGACCAAGCCGTGGCACGGCGCTCTGTTACTCCAGTGTGATGGGGCCGGTATTCTGAACAT  
CGCTGTCAATTCCAGTGCCTCTCATCGGAATACGCGGATCCCCCTGCAAGGTGTAGAGGATGGTTCCCTG  
ACGAAACTGTAGCGCGCCATCGGCCCGCTTGGCCTTACCTTGACCCCGTTGACCCACACCTGCTCCTTG  
CCATCCACTGAATATTGGCCACCGTGGCACCTGTCTCGCGGTTTTTGGCGATCCACTTGCCCTGATAG  
GCGAGTCCCCCTTGGCCATCGGCAGTGCAGCGGCTTGCCTGCGCGTTTTGCCCGCCAGCGGTGCAAAAAGCC  
GTGGGCCCGGGGATCATGCTTGATGACGTAATCCAGGGTGGGTTCGCTGGCGGGCAGATCGAAGGTGATC  
CCGATGACCACCTTGGCCGCTCGTGGCCGAATAGGCGGGCGGCCAGCGTTTTTCAGGGTTCGCTTCTTGC  
TATTGATAAAGACGTTGCCCCCTTGGCAGTTGACCCGAATATCGGTGGGACAAGTGGCGCTGAAGTTGGG  
CAGCGCTGCGAGGGCACTGCCGGCATGGGCGGTATGGCCAACATGACAAGGGTTCAGCAGAGCAGGTTTT  
TGATTACATAGTGATAACGCTTCAAAAAGAAGAGAACCTCGTCCGTGAGCGGTGTCGTTCCCTGATGGCGGCA  
CTCTAGCTTGACCTCTCGGGCCACCCAGTAAAAAAAATAAAAAATCGGTTCAGTGGAAATTAATAATAATA  
TAAATATTTAAAATCAATGAGTTGAGTGATAACCTGCCAGCCGCCACGTATCAGACAGGCAATAAAAAA  
GCCGATAACCCGGTTATCGGCTCATTGCCCATGCAGAGCGGGTGGCCAAATCAGACCACCACGGCGGTGC  
CACTGATGCTGACCATCAGCATGCTGCCATTTGCCCCACCACCTCGTAGTCGATATCGATGCCGACCAC  
CGCGTTGGCACCAAGGGCCGCTGCGCGCTCTTTTCAGCTCATCGAAGGCATCTCGCGGGCACGGGCCAGC  
TCTTTTTTCATAGGCGCCGGAGCGGGCCCGGATGATGTCGCGGATCCCGGCGAAGAGATCCTTGAAAATGT  
TGGCGCCGAGAATGGCTTCGCCAACCCACGATGCCCGGTATTACGAATGGCTTTGCCCTCCAGCGTGGG  
GGTTCGTCGAGAGGATCATCTTGAACCTCTGTGAGTAGCAGAAGGGTTCAGACTACCCCAACTGCCCCAAA  
ATCCCAACCGGGGATGACCTGTACGACGCGCTCTTAAAAATCACGACAGCCAGATAAATAAACACCCG  
GCACGAGGCGCGGTGTTTTGTTTCAGAGGGCCATTACACCGTTACGGGTTGTAAGAGACTACCGAGCCACT  
GAGGCGGTCATCTGGGAGATCTCCCTGCATCCCTGCAGTTTGGCCTTGAGACATCCGCCCCGATA  
AAGAGCCGGTTGAGCTGACCTGCACCGGTGTCGCGCGCAAGTGTGGGCAGAGTAGCCCGAGCCCGCA  
GCTTGCTCACCAGCGCTTGACGCTGTGACGTTCTTGAAGGCGCCAAGCTGAAGGATCCAGCTGCCCTG  
CGCCGGTGCCGACAGAGCGCGGGAGTGGTTCGGCTCATCTTGCTTTCAATCAGATCGTCGAGGGAC  
TTGATCTGACCCGCTGCGGCTTGGCCGGGGCGGGCGCTTGGCCACTTCAACCGGTTTGGCTGGCGTCCG  
GCTTGGGTGCTGGCTTTGGCGGTTCTACCGTTTTTTGGCCACCCTTCCGGCTTGGGTGGGCATCTCTG  
TTGCGACTGTACCGATGCGGCAGGGGTTGTGCGCGGCTGTGCACCGTTGCCCTGACCGGCGAGGGTCATG  
GGGTACGCCACCTCTTCCACTTGCCACTGCTGGGCCGAGAGGCTGTTGCTGGCTGGCCAGATGATCGG  
CGGGCAGGCTGCTGGCTGCCGAGACCTGCAGCGCAGGCTTGGCAGGCTCCAGCTCGGGGCGCAGCGGGAT  
CTTGGCAAAGGCCTCCTCCTTTTGTGCCAGCTTGTGACCATCCAGCAAGTCCGGCAGGAAAATAACAACC  
AGGGCCACCAGGATGACGGTGGCCACCAGACGGTTTTTGAACCTTCGAGGCAAGTTGAATCCTACCTTTA  
CGTAACTCAATATGCGATTTGGCTCCCCGCCCCGAGGGCCGGGGAGCCGGGGTACGGCCTAGACGGCGACA  
CCCCGCAAGATGTGCGGACAGTGTAAAACGAACCAACACAATGACCATATCGTCCGGACTCGATGCGG  
CCAACGCTGCCTGATAAGCGGCACTGACATCATCAAACTCCCTGGCAGGGCCCTTGCCCTCTCCCAGCGC  
CGCAGCCAGTTGCGTTGCGGTGGCGGGCGCGGGCCGGTGAGACTGGCCAGATACCACTCGCCAATCAGG  
CCATCGAGTTTCGGCAAGGGATCCCGCCATGTCTTGTCTTTGAGCATGCCGACCACGGCGCGGCACAC  
CCGTGCAGGGCATCTTGCGAATTGCGCGGCCAGATAGGCCGCCGAATGGGGGTTGTGGGCCACATCGAC  
GATCACCAGCGGCGCACTTTGCAGCTGCTGCATCCGGCCAGCCAGACGGGCATTTGGCCAGCCGTCGCGG  
ATAGCAGACTCCGGCAGCGCAAGCCGAGGGATTCCAGCGCCAGCACGGTCCACCGTTTTCATCAGCG  
GCAGCGCCGGTTTTTGGCAGATCCCGCCACTGGTTGAGGCGCGTATAATCCCAACCGCTCTCGTGCTCATC  
GCCACGAAAATCGATAACCGACTGACGCAGGTTGGCGCCAAGACGCTGTGCTTCGCTCGCAATAGTCGCA  
GGCGGATTGGGCTCACCGCTGATGGCGGGTTTTACCGGCGCGATACACGCCAGCCTTCTCCACCGCCACAG  
CTTTCGCGGGTATCCCCAGCCAGTGCAGTGCAGAGGCAATGGAGGTGATCATCGCCACATCGGACTC  
CACCACATTTGGTGGCGTCAGTGCAGCGCCAGTCCCACTTCCAGCAGCAGCACATCGGGCGCGGCACGG  
GAGAAGAGCCACAAGCCAGCCAGGGTGGCGAACTCGAAGAAGGTAAGGGCAATCTCGCAGCGAGCGGCCCT  
CCACCTCGGCAAAGGCGCGCAGTGCATGCTGTGCGGCAGCTCTTGCCGTTGACCCGCACCCGCTCGGT  
AAAGCGCAGCAGATGGGGCGAGGAGTAGACGCCGACCTTATAGCCTGCGGCCATCAGAATGCTGGCCGCC  
ATGGCACAGCTGGAGCCCTTGGCGTTGGTACCCGCTACCGTGATCACCTTGAACGGCAGCTGGGTGAGAC  
CCATGCGACGGGCGACAGCACCAGCCGATCCAGCCCCATGTCGATATTGACCGGATGGATCTGCTCCAA  
ATAAGAAAGCCAGTCGACAAGCGACCGGCTTTGGGATTGTTGCATGTTTGAACCTCATCTTCACTCTTCGA  
TGACGTGAGTATTACGATTTTTGGCGAGCAGGCTGGCCAGACGGTTACGCATTTTCGCGGGCAGTCGATGAT  
GATATCGATGGCACCCTTTTTCCAGCAGGAACTCGGAGCGCTGGAAAGCCTTCTGGCAGTTTCTCGCGCACG  
GTCTGCTCGATAACACGCGGGCCGGCAAAGCCGATCAGCGCCTTGGGCTCGCCACGTTGATGTACCCA  
GCATCGCCAGACTGGCAGAGACGCCACCCATGGTGGGGTTCGGTTCAGCACGGAGATATAGGGCAGGCCCGC

CTTGGT GAGT CGGTCCAGCGCTGCACTGGTCTTGCCATCTGCATCAGGGAGAACAGCGCTTCCTGCATG  
CGAGCACCACCAGAGGCGGAGAAGCAGACCAGACCAGGCCTTCCTTGATGCACTCCTCGACGGCGCGCA  
CGAAGCGGGCACCAGACCAGGAGGCCATGGAGCCACCCATGAAGGAGAATTCGAACGAACAGGGCACAAC  
CGGTACCCCTTTGAGGGTCCCTTTTCATCACCACCAGCGCATCTTTCTCCGCCGTCTTTTCTGAGCGGCA  
GACAAACGATCCTTGTAGCGCTTGAATCCTTGAATTTTCAGTACATCCTGCGGGCTCCAGCTCGGCACCGA  
TCTCGGTACGACCCTGCTCATCGAGGAAGCTCTCGAGACGGGCGGGCGCTGATACGCATATGATGATC  
ACACTTGGGGCACACTTCGAGGTTGCGCTCCAACCTTGCCCGGTAGAGCACCTGTTTACAAGCACTGCAC  
TTGGTCCACACCCCTTCCGGAATGTTGTGACGACGAGGCGCAGTGATCTTGCTCTTGGGAAGAATCTTCT  
CAAGCCAGCTCATGGAATTCCTTAATGCTTTTGTGCCTGACAAAACGCATCGAGCCTAGATTGTTCAATG  
ACTTAATAGCTCGATGGCAACAAATGACGGGTCAATAAACCAATTTTTTCGGGCGCAGTTACTAAAAAC  
TGGTCGTACCCGGTCCGAGTCCGGCAGCCACAGCGGGCCGAGCGGCAACTGCGGTAGAGCAAACCTCGGC  
CGGATAATCCACGTGACAGATAGAGGCCACCGCCCTTGGCGGTTCGGCCCGCCAGATTGCGATCCTTG  
GCAGCCAGCACCTCGGCAATCCACTCCACCGGTTTGGAGCCCTGCCCCACCAGCAGCAGGGAGCCGGTGA  
TGTTGCGCACCATATGGTGCAGGAAGGCGTTGGCCTTGATGTCGAGCACGATGTAGGGGCGGGAGCGGCT  
GACACACAGATGGGTACATTGCGCCACGGGTTGGATTGGCAGGCGACGGCACGGAAGGTGCTGAAG  
TCGTGCTCCCCAGCAGGCTCTGGCCCGCTGGTGCATCAACTCCGCATCGATGGTCTCGTGGTAGTGGC  
TGACGCCACTGCCGAGGATCGCCGGCCGGTAGTTGTGGTTGTAGATGACATAGCGGTAGCGACGGGCGGT  
GGCGCTGAAGCGGGCGTGAAGCTCTCGTCCACCTGCTTGACCCAGCGCACGGCGATATCCGGCGGCAGG  
TTGGAATTGAGCCCCAGGGTCCAGGCCCTTCGGCACGGTTCGCCTCGGTATCGAAGTGGATCACCTGAC  
CGGTTCGCATGGACACCGGCATCGGTGCGTCCGGCACACTGGATGGAGACAGGATGGTTGGCAATCCGGCT  
CAGCGCCGTCTCCAGTTCAGCCTGCACGCTGATCACTTCACGCTGACGCTGCCAGCCGAAATACCGGCTG  
CCGTCAATTTCAATACCTAGGGCAATTCGCATGGATAAACTTGTCTTGTGTGAAAACGCAGTGAAAGAA  
ACGGGGCGGATTATACGCGCTCAGCCCGAAAAGTCCACCACGCGCGCAATTTGGCCTGGATTGCGAACCT  
GCGCGGCCATGATCCCCCATCGCAAATCGCCAAAAGAGGGGAGCCTGCTGGCTGCCCCCGTTTTTTC  
TGATCCCGTAATGGGAGATGCTTTAGCCCAACCGCTTGAGCAACTTCTCGGCTTCGGCACGCTGGTGATC  
GCTGCCCTGCTCCGCCGCTCTTGCAGCAGCTCGCGGGCGCTATCCTTGTGCTCAATCTCGAGGTAGGCA  
CGGGCCAGATCCAGCTTGGCACCCACACCGCCGTGTCGCGCATCCACATCAAACCCAGTGGATTCCGGCA  
GCACCTCGGGGAGCCATCGAGCCCCACATCCAGCGAGAAGCCCTGATACGGCTCCTGCTCCGGCGGCT  
GGCATCCGCTTCAGCCAGCAGCTTGTGATCTCGACGTAGCCGCTCTCCTGCGCCTGCTCACGGGGTTGA  
ACATCTGCCGGATGAGACTCCACCTCGGCAAACGCATCTTCGAAATCGGAGAGCGCCAGCTCGTTGGGAT  
CCCCTCCAGATCCAGCTCCGCGTCTTTCGCTTGACAGGCTCAAGACCGAGCTCGGCCAGCATGGCATC  
CGCACTCTCGTCAGCATCTTCTGCGGCACTGAGATCAATGGCGTTGTCATCTTTCCCTGTGGCGGGCTCG  
TCGAGGGCATTGTGAAATCACCGAGATCGAAGCTCGCCAGATCGTTCGTCAGCGGGCGCCGACTTCGTCGA  
TGGAGTTCAAATCGGGCTCGAGGTGCGCTGAGAGATCCGCATCCAGCTCGGCAAACAGGGCTGCCGTCAG  
CTCCTCTTCGCTCATGATCTCGTCAGCGCCTTGGGCTTTGGGTTGAACTCGCTGGCCAGATCCATGGCG  
GGCTCGTTGGCCAGCGGATGGGCTCATCCAGCGAGAGATCGAGATCCGGCACAGATCCGGGTACAGAC  
TGGCTGGCTGGGCCGCCATCCGCTCGGGCTCGAAGCCCTGCAGCTCCATCTCGCCGTGTCGCTGAACAC  
CAGATCGACATCCGGCTTGGCGGCCGGCTCGTCAGGCTCCATCGGCATAAAGCCATCCGGGGTGTGAGA  
TCCGGCACCGGTTCGACCCGGCTCGTTGTGCGGTACATCGACGCTCAGCAGATCATCAAACCTCGCTCTGCT  
CCTGATCCATCATCATGGCGGTGGATTTCGGAGAGGCTCTTCTCCTGCTCTTCCAGTTCGCGGGCAGCACG  
GGCACGCAGCCACAGAGTACCAGCGCAAGACCAGCAGCACAGGCAGCAGAAATGATCATGGCGAGGTTG  
AGCGGGCAGGAGAGCAGATCCATCAACCAGTTTTTCTCAGGCTCAGGCTCGGATGCCACCGGGCGGACCG  
GTTGAGCCTTGAGCTCGGCAATCTCTTTTTCAGCGCCGTCTGATCTTGCAGCTGGGCCCTTGGGGTCTC  
CACCTCTTCAGTCAGGATTGCAGACGCAGCTTGCAGCTGTGGTTTCATCTCGGTACCTGGCCGAGCTGG  
GCATTGGCATCTTCCAGTGCAGCGCCATCTCGGTAGCCGGTTTGGCCACCGGTTTATCCAGATCGGAAG  
GCAGAGGCGCCGGTGTGGTGCCTTTCGAGCGCTAGGAGCAGGTGCTACCGCCTTTTCGGCGCAGGCTC  
GCTCACCTTGGCCACTTCTTTGGTTTCAGCAGCCGGTTGCGGAGCCACCACCGGGGCGGGAATGGGGCG  
GCTTTTCGCCACTGGTAGCGGCGCAGGCGCAGCCTTACCAGCTCGGTCTTGGCGGGCTTCCACCTTCGCGG  
GTTTGGCGGCAGCGGGTTTGGCGGTATGGGCTGCTTGTGAGCCAGATATTTGGGGCTTAACCCCTTCCA  
GCTGGCGTTGTGCTGCGGAACTTGGCGGGGCTGAGCATCAGTGATGACGCTCGCCTCGGCCGCGGTC  
GGCAGCAGAATGCGGGATCCACCAGAATGTGGTTGATATGCCATCGGCAAACCTGCGGGGGTTTTTCT  
CGTAAATCGCCACCATGGTCTGGTAGACGCTGACCCGATTTGGAGGGCGATATTTGCTCGCCAGGCTCCA  
GAGGGTATCGGTTCGACGAACGGGGCCATAGCTACCAGCATTTGGCAGTGACCTGACGCACCACCGGCTGG  
GCGGTTGCACGCACCGGTTGCGCGACGGGCTTGGCGACCGGCTGCGCCAGCGGCTGGGAATTGACGGCGG  
GAGGTGCGGGTTCGTCAGGGCCTTTTAGCTCGACAAAAAAGGCTCCCGCGCCGAGTCTTACAGCTGGAC  
GGTGCCAGCAGACCAATGCGAGTAGCGTTGCCAATGTTATGCGGGAATGTCCCATATTCGTTCCCTTCG  
TATGACGGCCCTATCACATTTGAAAAATCTGGATAGTTACCCCAAAACAGTCGGTTCAATATAAATCAGGC  
TCGCCTGGCAAGCCAGCAGTCCGACACATTTAGCACCCAACTTGACCCTGAGTGTAGGAAAAAATTAAT  
CAGTTGATATCGCAACAGAATCTTGAAGTGACGGAGTGGGCATGGGTCACACCCCGGTTTGTACACAGG  
CCGGATGCGCAGCACTCCCTGCTGCGCATCTGTGGCATCTGACCAGCCTTACAGATAGTCGGAACCAGC  
AGCTCGGCAATCTGTACACTGTTGGTTGCCGCGCCCTTACGAACGTTATCGGCCACGATCCACATATTGA



TACCACTCGGGTGTAGAAATATCCTGGCGCACCCGGCCACCAGCACCTCATCCTTGCCGGTTGCGTCAGC  
CACCGGGGTCGGATAATCCCCTTCGTTCATCAAACAGGGTCACACCCGGCGCATTGCGGAGCAGCTCCTTG  
ACCTGTTTCGGCATCGAGCGGCTGGTGCAGTTTCGACGTGTACCGCTCGGCGTGGCCGTAGAAGACCGGCA  
CCCGCACGCAGGTGGGGTTCACGGCAATGCGGGCATCCCCTAGGATCTTCTGGGTTCACACACCATCTT  
CATCTCTTACGGGTGTAACCGTTGTTCAGTGAAGCTGTTCGATCTGCGGGATCAGGTTAAAGGCGATCTGT  
TGCGGATAGAGGGTTCGGTTCCACCGGACGACCGTTGAGCAGATGAGCGGTCTGACCTGCCAGCTCGCTGA  
CCCCCTCTTTGCCGGAGCCTGACACGGATTGATAGGCGGCCACGTTGATGCGGGCAATGCCACTTCGTC  
GTGCAGCGGCTTCAGGGCCACCAGCATCTGGATGGTGGAGCAGTTGGGATTGGCGATGATGTTGCGATTG  
CGAAAATCGGCCAGCGCATCCGGGTTCACTTCCGGGATCACCAGCGGGATATCTTCGTCGTAACGGAAGC  
AGGAGGTGTTGTTCGATGACGATGCAGCCGTGTTCCGACGCAATCGGCGCCCACTTGGCAGAGACCTCGGC  
ACCGCGGAGAAGAGTGCAGATCTGCACCTGGCTCCAGTCAAACGCCCTCCACATCGAGGATCTCGAGGTTT  
TTGCCGCCAAAGCGCACTGTATCACCGCGCTGCGGCTGGAAGCCAGCGGATAAAGGGTTCGCTACCGGAA  
ATTGCACTCTTCCAGGATCTCGATCATCGCTGACCCACGGCGCCGTGGCACCCAATACCGCTACGTT  
AAACTGCTGGCTCATTCTGTTCTCCTCTGATAATGCTGCAATGGCGCCGGGTAGCGCCATGGTAGGCAGT  
CTCCCGCAAGGCGAGATGACGCTGCTGATATGGCTGAGCCGGCGCAGTAGCATCTGCGCCAGCTCAGTA  
AAAAAGGGGGGCGAGGTAGCCAGTACGGCTCACCTCTTCCAGTTATCTTCCAACCTCTAGTCCCCGATTC  
AGGGGCGTGACAGCGCAAATCCCAACGCACCGAGCTCCTGGCTGGCAAATGCGCCCTCGATCTGCAGGGA  
GGATAGTTACGGCGCTCGGGATAGTGTTCGCTGCTCGTCAAAGCTGCCGGGCAAGCCGAGTCCGGGCC  
CGGAAACGGGCATCATCGCGACGCACGTATAAACAGATGCACCAGCTGCTTGATCAACGCCTGATCTG  
GTGCGCGGCCCGGCACCACCGCCTGCACATCGGGGGCAGGCAACAGCTGACTCAAATCCTGACGAGGCTG  
GCGCCCCATCTGCTGGCAGAGCGCCTGATAGAGCATCCAGGTACCGCGGGCCTTCCCCCTCAGGCTGTAA  
CCGGCGATATGGGGGTGGCAAATCTCGGTATGGGGCACCAGCGCAGCCAGTGGCTCGGGCTCGTTCTCCC  
ACACATCCATCACCAGTCGCAAAGGCGCATCGCCCAACTGGCGCGCCAGCAGGTCACGGTTATCCCACAC  
CTCGCCACGGGATGCGTTGATCAGGATCTGTCCGGCAGGGCGCGCGGCAATCTGTTCCGGCATCGAGCAGA  
TGGTAGGTGGCATCCGGCCCTTACGGGTGATAGGCACGTGGAAGCTGACGATATCGGCGCCAAGGGCAG  
TCTGATAATCGACAAAACCGCCGGCGGGATTATCCCGCGCCTTGGGTGGATCGCAGCGCAGCACCCGCAT  
GCCGATCGCTTGGGCTTGCAGCCACACACTCGCCGTTATTGCCCGGCCAATCACCGCCAACGTCATG  
GCCGAGAGGTCGAGTTTCGTAACGCTCCGCCAGCACCAGGGCGGAGAGCACATAATCCCCACCAGAAAT  
ACTTGTGTGCAACCGGGGGCGCTGAAGAAGGGAATATGCGGCTTGCAGCAACGCCCTTGTCCACATGGTC  
GGTGCTATGGTGGCGGTGCCGACAAACCGAGTTTGGGGCTGGTCCGCGCAAAATCGCCGTTGACGCGG  
GTGACCGAACGCACCAGCAGCACATCGGCATCGAGCAGATCGCAGGCTGCATCTGCCGTCGGGGCAAGG  
GGATCACCTCGCCAAATTCGGCAAACAGCTCCACGGCATGGGGCATATTCTCATCAACGACTATCTTCAT  
CGGGCTCTCTTTGGTCACAACCGCCACGGGGGCGCCATTCTAGCGCAAAGCCGCCCGAGATTTACGCTG  
TGATGCAATCCGGCGGCAAACGGGGCCACATTGCGCGGCAGCCGCTCCATCCGCCCGCTCAAACAGAGGA  
TGTCGCCCAAATGTGTAAGCAGAGGTAACAAACGTGCTGCTCGGCTTTGTCCGGGCATATCACGGTGGC  
ACAATGCCTCTCTTTTTTCGCGATCGCCCATACCCACCATGCCGCCACAGCTCCGCCGCTCCCAATGTCA  
ACCGCCTCACTCACCCGAGTCAGGTGCTTGGATTACAGCCCTGTTGATCCTGCCCTGTTACTGCTCG  
CCACCCTGCCCTGGCAGCCTTTTTCTGACCGGCTCCCTGCAATCAGGCTGGCTATGGTGGTCATACGCCCT  
CACCCGCATGGTCGATATTTCCGGGATCGGGGTACGTGGCGCCCTCTTGCTGCTGCTGACCCGCTACAAA  
CTGAAACTGGAAGTACCCCTTTCATTGCGCTGGGATGCGCGCTGGCAGCCCTGCTCGCCAGCGACTGGG  
TGCTCAAAGCCTGATCAAATACCTGACCGAAGAGCCCAGACCCTATCTGCTCTGGCTTGAGAGTCAGGC  
ACTGATCCCTGCCATCAAGCACTTCTACGCCAGTAGCATCGATGTGCGCAGTGAACAGGTTACGCGCGC  
AGCCAGTTGCTGGCCCTGCCAGAGTGGCTCGGCCACCACTGGCAGGCCGAGGTGAACACTACGCTTCCCCT  
CTGGCCACAGCATCGCCGCCATCAGCCTGGCCCAATTTTTTGGTCTGATCTGGCTGGCCCGCTCCAC  
GGCGTCTGGCTGCTGCCATTGTGGGCACTGGGAATGGTCTGTGCGCATGGTATGGGAATGCACTGG  
CCGGTGGATGTGCTGGCCAGCGCCCTGCTGGGTACGCTCAGCGCGCTGATTGCCGCCGCTGGTGGCTGC  
ACAGATATTGAATCCGGCGCCATCTTGGCGCGGCATCCTGCGTGGGATGGGGGGACAAGCCTGTGCTTTT  
TTGCCATAATGCCGCTCATTTTTATCCCGACCGAGATCCCATGACCGACGCAAGTTACATACCCTCAAGGGC  
CGTTTTCCGTGGTTTTTACCCCGTCTGTCATCGATGTTGAAAACAGCCGGGTTCAACGCCAAGACCGATGCC  
TGCTCGAAATCGCGCTTACACCCTGAAAATGGATGAGCAGGGCTGGCTCGTTCCCGATCAGGTATTCCA  
CTTTTCATGTGAGCCTTTTCGAAGGGGCCAACCTGGAAAAGGCCGCGCTGGAGTTCACCGGCATCGACCCC  
TACAACCCGTTGCGTGGCGCTGTCTCGGAAAAAGAGGCGCTGACCGAGATCTTCAAGGGGATCCGCAAGG  
GGATGAAGGAGCAGGATTGCGGCCGAGCCATCATAGTGGCCACAACGCCACCTTCGATCACGGCTTCGT  
GATGGCTGCCGCCGAGCGCGCTGGCCTCAAGCGCAATCCGTTCCACCCGTTTGGCACCTTCGACACCGCT  
GCTCTCTCCGGATTGGCGCTGGGTGAGACCGTGTAGCCAAAGCGTGCCAGAGCGCCCGCATCCCCTTGT  
ACAATAAAGAGGCGCACTCTGCCCTCTATGACACCGAACGCACCACAGAGCTGTTCTGTCATATCGTTAA  
CCGCTGGAAGAGCATGGGGGGTGGCCGCCAGCGCATCCGGATGATGACACAACCGATGCCCTGCTGAT  
GATGAGGGGCAAGAATAAACGGACGAAGGCTGCCACTGGCAGCCTTTGCTTTTTTGGGGAAGTGATTGAT  
TGCACGGCGCACCGGAAATCGCTATCAAGGCCACTATCCACCGCTGCGCACGTGATACAGGAGACAAAC  
AGGTCACAAACCCCTCATGTTGAGCAACCTTGTGCCACATGCTGCTGCGATATGAGGGGTTTACTGATTT  
TTTACTCGACATTTGTACATTTTTTCGAAAATAACTCCCCTTCACATGACAGACAGCAATAACAAACTA

TAAGGAAATCAAATGAATCCAGTTGTTATCGCAGTCGGGCTGATGCTGGTGCTCAGTCTGCTGCGGATCA  
ATGTGGTGGTCTCGCTGGCGCTGGGGGCCATTGCTGGCGGCTGGTGGTGGGCTGTCGTTGACCGATAAC  
CCTCACCACCTTCAGCGGTGGTCTGGGCGGTGGCGCCGAGATTGCTCTCTCCTACGCCATGCTGGGCGCC  
TTTGCGGTTGCCATCTCCCGCTCCGGGATCACCAGCTTGTGGCCCGCAAGGTGATCAACCAGTTGGGCA  
AGGATGCCAGCTCGACCCGCATCATGTGGGTCAAACCCTGCTGCTCTCTCCGTGCTGGCCGTGGCGAT  
CTCGTCCCAAAACCTGATCCCGGTTACATCGCCTTTATTCCCATCCTGATCCCGCCACTGCTGCATGTG  
ATGGCGCAGATGCAGATCGACCGTCTGTCAGGTGGCCTGTGTCTCACCTTTGGCCTGACAGCCACCTATA  
TGGTGTGCGCGTGGCTTTGGCGGCATCTTCTGAATAACATTTCTGGCCAAGAACCCTGATCGATAACGG  
CGTGCCCATCACCACCAGCCAGATCCCGCTGGCGATGGCCATTCGGTTGCCGGTATGGTACTGGGCCCTG  
CTGATTGCGGTATTTCATCAGCTATCGCAAACCGCGCCAGTACGATCTGGCCAAGATCCTGGATGCCGAGC  
CCGAAGCGGTGAGCTCAACCTCACCCATCTGGGTGGCCCTGCTGGCCATTGGGCTAGCGCTGGGGCT  
GCAACTGATGACCAACAGCATCGTACTGGGTGCACTGGCCGTTTGTGTCATCTTACCTGCGGCGGCGTC  
ATCAAGTTTTCGCGAAAGCCAGGATGCCTTCACTCAGGGGGTGGCGATGATGTCGTCGATCGGCTTCATCA  
TGATCTCCGCGCCGGTTTTGGCGGGTGTGAAAGGCAACCCACGGGGTGGACTCTCTGGTTACAGGTGGT  
TGCCTCAGGCATCGGCCAGCACAAAGGGATCGCCGCTTCTGATGCTGCTGGTGGGTCTGCTCATCACC  
ATGGGGATCGGTTCTTCTTCTCCACCGTGCCATCATCGCCACCATCTATGTGCCGCTCTGCCCTGCAGC  
TTGGCTTCTCACCAGTGGCGATCATCGCCCTGGTGGTACCGCAGGCGCGCTGGGGGATGCGGGTTACCC  
GGCCTCCGACTCGACTCTGGGGCCACCTCCGGCCTCAACGCAGATGGTACAGCAGACCATACTCTGGGAC  
AGCGTGGTGGCCACCTTTATTCACTACAACATCCCGCTGGTGTGATCTTCGGCTGGATTGCCGCCATGGTGC  
TCTGATATGTAAAGTCAGCATCTAACTGAACTATTATATAAAAAACCGCCAATTGGCCGTTTTCTGTTTT  
TATGCGCTGGCGCTCTCTCTATTAACCCAGACGAACCCGGGCGTTGCGGAACATCCGCATCCAGGCGCCG  
TCCTCGCCCCAGTTGTCCGGGTGCCAGGAGTTGGCCACGGTGGCGAACACCCGCTCCGGGTGCGGCATCA  
TGATGGTGGCGCGGCGGCTCGGTGGTGGTACCGCGGTGATAACCATCCGGCGAGCCGTTCCGGTTGGCCGG  
GTACTGCTCGGTACGCTGCCGCGGTTGTGACAAAAGCGCAGCCCTACCAGACCGCTCTGCTGCAGTGGC  
TTCAGGTGAGCGGCATCACGCACCTCGACACGCCCTTCCCGTGGGAGACGGCAATGGGCATCACCAGC  
CTGCCATGCCGGCGAAGAAGGCCGATGGGGACTCCTGCACCTCAACCAGACTGAAGCGGGCTCGAAGCG  
CTCGGAGCGGTTGCGCACAAAGCGCGGCCAGAGATCAGCACCCGGGATGAGATCCCGCAGGTTGGACATC  
ATCTGGCAACCGTTGCAGACACCAAGAGAGAGGATTCGCCACGCTCGAAGAAGCGCTGGAACCTGCTCGC  
GGGCGTTGTTCATTGAACAGGATGGACTTGGCCAGCCTTACCAGGACCCCAACACGCTGAGCTAGGAGAA  
GCCGCCACAGGCCACCAGGTCTGGAACCTCCAGCTTGTGATGCGACCGGAGAGAATGTCGCTCATATGG  
ACATCGACCGCCACGAAACCGGCACGATCGAACGCCCGCCCATCTCCACATGGGAGTTGACCCCCCTGCT  
CGCGCAGCACCGCCAGACGGGGGAGACCCCGGGCAATGTAAGGTGCAGCCACATCCTCGGACGGGTT  
GTAAGTCAGCTTGGCATGCAGACCCGGATCGGTTGCGTCTGACGGCCGCGTGTCACTGTGCGGCGCAC  
GCCGGATTGTGCGCAAGCGCTGCATCTGCCAACTGGTCTCGCCCCAGATGGTGGCAAGGGCAGTGGCGC  
TGGCGCGATAGACCTCCTGACCGCCCCGCTGCAAGGTGATGAGATCCCTTTCGCGCACGGTACCGAGCAC  
ATGGGAGCAGGCAGCCAGACCGTGACCGGCCAGCAGGGTATCACCGCCTCTTTATCTTACGACGCACC  
TGAATGACGGCGCCAGCTCTTCGTTGAACAGCGCCGGCAGCAGCTCGCCGCCGATGCGATCAAGCTGGA  
TGTCGAGGCCGCGAGTGACCGGCAAACGCCATTTCCGTCAGGGTGACGAACAGGCCCGCCGTCGGAGCGGT  
GTGGTAGGCGATCAGCTTGCATCGGCCACCAGTGCCTGAATGGCGTTGAAGAAGCCTTTGAGCTGGACT  
GGGTTGTGCGAGATCCGGCGCCTTGTACCCAGCTGGCGATAGACCTGCGCCAGCGCCGAGGCGCCGAGGC  
GCTGCTTGGCGTTACCAAGGTGATGAGGATAAGGTTCGGTTTACCAGGATCGGTACGCAGTTGTGGCGT  
AACCGTGTTCGCGACATCTTCGACCCGGGCAAAGGCGGAGATGAGCAGGGAGAGCGGCGAGGTGACGCTG  
TGCTCCTTGCCATCCTGCTGCCAGCGGGTCTTCATGGACATGGAGTCTTGGCCACCGGAATGGTGTG  
CCAAGGCAGGGCAGAGCTCCTCACCTACCGCTTTCGACCGCTCATAGAGACCGGCATCTTACCCGGGTG  
ACCGGCAGCGGCCATCCAGTTGGCGGAGAGCTTGACCGCTTGAAGGAACCGATGTGGGCCGGTGGCAGG  
TTGGTGAGCGCTTCCGCTACCGCCATGCGAGCGGAGGCGGCTGGGAGAGCAGCGCCACCGGGGTACGCT  
CGCCCATGGACATGGCTTCCCGGTGATAGCTGTGCTAGGTGGCAGCGGTGACGGCGCAATCGGCCACCGG  
GATCTGCCAGGGGCCAACCATCTGATCGCGATTGACCAAGCCAGTCACGCTGCGATCGCCGATGGTGATA  
AGGAAGGACTTCTCCGCCACGGTGGCAGGCGCAGAACCCGCTCGGCTGCGTCACTCAAAGTGATGCCAT  
CGAGCTGGAGCGCTTTGCCTTGTGAGGAGAGTACCACGTCGCGGTGCATCTTGGGGGCTTGGCCGAG  
CAGCACGTCCAGCGGCAGATCGATGGGCTGGTGTCAAAGTGGTGTGTCAGAGAGGGTACAGTCTTCTCT  
TCGGTTCGCGTACCGCCAGCACGTAACGCTCCTGGGATTCGTTGCACCAGATCTCCAGCGGGCTCATGCC  
CGGCTCGTCTGCTGATGGCGCGCAGATCGAAACGACCGCCACGCTCACCGTCTGTTGACCAGCTCCGGC  
ATGGCGTTGGAGAGACCACCCGCCCCACATCGTGGATAAAGACGATAGGGTTGTGCTCACCCAGCTGCC  
AGCAGCGATCGATCACCTCCTGGCAACGGCGCTCCATCTCGGGGTTGTACGCTGCACCGAGGCAAAGTC  
GAGATCTTCGGCCGACTGGCCGGAGGCCATGGAGGATGCGGCACCACCGCCAGACCGATGTTTCATCGCC  
GGGCGGCCAGCACGATCAGCGCCGACCGACCGGGATATCCCTTTCTGGACATGTTCCGGTGGGATGT  
TGCCGATGCCGCCAGCCAGCATGATGGGTTTGTGGTAGCCACGCACCTCGACCGCGTTGTGGCTCGGCAC  
CTCCTCTTCGAAGGTACGGAAGTAGCCGAGAATGGCCGGACGGCCGAACCTCGTTGTTAAACGGCGCGCCG  
CCGAGCGGCCCTCCTGCATGATGTCAAAGGCGCTGACAATGCGGCTCGGCTTGGCCAAATCCTGCTCCC

AGGGCTGCTCGAAGCCGGGAATGCGCAGGTTGGAGACGGAGAAAACCGACCAGACCCGCCTTGGGCTTGGC  
ACCGCGACCGGTGGCTCCCTCGTCGCGGATTTCCGCCCGGAGCCGTTGGCTGCGCCCGGGAACGGGGAG  
ATCGCGGTTCGGGTGGTTGTGGGTCTCCACCTTCATCAGGATGTCGACCTGTTCTTGGTGATACTGGTATT  
CGCCGTTGGCCGGGCTCGGGAAGAAGCGCCCCCTGGCTCCCTCCATCACGGCGGCATTGTCTTTATA  
GGCAGAGAGGACATGATCCGGCGTCTGCTCGAAGGTGTTCTTGATCATCTTGAACAGCGACTTGGGCTGC  
TGCTCGCCATCGATGGTCCAGTCGGCATTGAAGATCTTATGACGGCAGTGCTCGGAGTTCGCTGGGCGA  
ACATGTAGAGCTCGATGTCGTTGGGATTGCGACCCAACCTTGGTGAAGTTCTCCACCAGATAGTCGATTT  
GTCGTGGCCAGCGCCAGACCGAGCGCCACGTTGGCTTCGGCCAAGGCTGCGCGACCACCGCCAGCACA  
TCCACCTGGGTGAAGGGGCGCGGCTCGTGGTGAGCAAACAGGGCGGCAGCTTCGCTCATCTCGGCAAACA  
CCACTTCCATGATCCGATCGAGACCGCGGCAATGGCGCTGCGCTGGGCGGCAGCTCAGCTCACCTG  
CCCCTTGATGGTCAGGTAGTAGGCAATACCACGCTCCAGCCGCTTGACCTGTTTCAGGCCGAGTTGTGG  
GCGATGTCGGTTGCTTTGGAAGACCAGGGGAGATAGTCCCGGGGCGGGGGTAAACAAGAAACAGCTGAC  
CGCTGGGGGTGTGTTTCGGGGATGGTCGGGCCGTAGCGCAAGAGCTGGCCCAAGGTCGCTCGCTCGGGGG  
AGAGAGGGGGCTTGTGAGCTCGGCAAAGTGACATACTCGGCATAGACATCCTCTATCTCTACTCCGCTC  
TCTACTCCACTCTCGTTTTCTCATCTGTGCGAAGCGTTGCGAGCAGTTTTTTGGACACGAAAATCAGACAGTG  
CTGGGGACCACGCAAGATATCCATATGACCTTTCTCACCAAGTTTTTAAAGTGGGGGGGAATTGAGACGC  
GCGTATTATAGGGATCTGGCTCACAGCGGACAAACGTTTTTCTCACTTCGTGCAGTGTGACTCTGCGCAC  
ACTCTCTGGTATAAAGGTGCCTCTTTTTTACAAAATGCCGATTTTTTCAACAAAGGTACTCACCTACTTG  
CGCTGCATTTTTTCGACTGTTTATCGGGCTGTTGTTGACGCTGACACTGGTTGGCTGCGACTTCTATAGCC  
CCTCCAGCCAGCTGGAGCAGATCCGCCAGCGAGGCGAGATCCGGGTTGGCACCATCTATGGTCCCACCTC  
CTATTACCAGCGTGACGACCTCGCCCAGGGGTTCGATTACGAGCTGGCGCAAAATATGCCGACTGGTTG  
GGGGTGAAACTCACCATCATCCCGGTGACACCCTGACCAACTGGTCACACTGCTGAAAAAGGGCAAAC  
TCGATCTGGCGGCTGCCGCCATCATGGTCACCCCAGAGCGACGCGAGCTGTTTCGCTTCGGCCCGGGCTT  
CTATCAGGTCTCTCCCAAACCTGGTCTACCGCAACGGCAAACCCAAGCTGCCTCATTTGAACGATATCAAG  
GGCAAGCTGGTGGTGGCCGCCGGCTCCACCGGTGAAGATCTGCTCAAAGAGATGAGCAAAGACAATCCGA  
AACTAGCCTGGAGCACCAGCGACAACGCCGATGTGGAGGAGCTGCTTAAACAGGTGGTGGATGGCAAGAT  
TGACTACACGGTGGTGAAGATAACCGTGTGGCCGTACCCAGCGCTACTACCCGGAGCTCACCAGGGGG  
CTGACCCCTGGCCAGAAGCAGACCGGTTGCCCTGGGCCATGAGCAAGCTGCCCGATGACAGCTCTATGCCA  
GCGTGATCGACTTCTTCGGTCAGCGCTTTATGGATGGTGGCCATCGCCAAGCTCGACGAGAAGTACTTCGG  
CCACGTGCAGAACTTCGACTTTGTGATACCCGACCTTCCTCAAGCGCGCCAAGAGCTGCTGCCCAAG  
TACCAGCCGCTGTTCCAGACTCACGCCAAGAATATCGACTGGCGTCTGCTCGCCGCCATCAGCTATCAGG  
AGTCCCCTGGGACCCGACGGCCCGCTCCTACACCGGCGTGCAGCGCATGATGATGCTGACCGAGCCAC  
CGCCAAGGCGATGGGAGTCAACGACCGGCTTCATCCGGAAGAGAGCATCAAGGGTGGCTCCCTCTATCTG  
CAACAGATGATGGAGAAGGTGCCGGATTCCGGTGCAGGATGACGAGAAGGTGTGGTTTTGCCCTCACCGCC  
ACAACATCGGTTACGGCCACATGATGGATGCCCGCCGCTGACCAAAGAGCTTGGCAAGAATCCCAGCGC  
CTGGAGCGATGTGAAGGAGGTGCTGCCGCTGCTGCAACAGGCGCGCTGGCACCAGGTTACGTTACGGC  
TATGCCCGTGGCAGCGAGGCGCGCAACTATGTCAACAACGTCGCGCCAGTATTACCAGAGTCTGCTCTGGC  
TCGACAACGAGCAGCAGAAGGCACATCAGCGGGAGAGTCTCGACAACGACAGCGAGCCCGAGCTGGCCGA  
GCGCCCCACCGCCATTGCCGAAGTGGTCAATCAGATCACCATGCGCTAACCAGCCATTATTTCGGCTGTTT  
TCACGCAAACCTTCTCTGTTACCATCGATTACATCGGAGCCTATCCGAAATCGCATTGTTTTTATTATGT  
TGAGAGATTAATAACAGCAATTTTCGGATGGGCTCCATCAATGACCCAAGGCCGGGATGGCCACCTGAGT  
TGGGAGGAGACCAAGATGCAAAAACGTAGAAAAATCAGTCTGGTTCAGAAAAGCGAAGTGCAGCTGGAGCC  
CCAGACGCAAACCTCAAGCTTAATGACATCAAGCGCAATCTGTGGCGCAGAAAATCGATCCTATAACCTGCT  
TATTGCAGAGCACACAGCATAAACCCTGCAATTCGCGGGTTTTTTTTATCTTCTTCTCACCTGATTATCG  
TCTTACACCAGCGCCGCTTGAACGTGACCGTCCGCTTGGAGATCAGCGAGTTGCAGTGGTTGCAGAAGT  
AATCCACCGCGCCGCTTGGAGACGCTCCAGCTCCTGCTGGCAGGTGGGGCAGATGGCAGTAATGCG  
AACAGGGGCTGGCACTGGCCACAGTTTTGCTCCTTGTGCTGCGGGTATCCAGTTCAGCCTGGCATGATGGA  
CAAAGCAGGGCTTCCATAATCAACTCCTCGAAAAGTGGATCTGCCATGGTCTTGTTCATGGCAGATCCC  
CCTCCCCTTATTCTCACCTTAATTCCTCACCTTATTCTCACCTTAACATGGCGAGGATAACAAAGCGG  
CTGCCGGTGGAGGACCGCAAGGGCTTATTTCTTCTTCTTCTTCTTCTTCTTCTTCTTCTTCTTCTTCT  
GACTCAGGGTTCATGGTGTCTTCTTCTTCTTCTTCTTCTTCTTCTTCTTCTTCTTCTTCTTCTTCTTCT  
CGAGCCCATGATCTTGGAGGACTTGCAGGAGTGTGATCAGATACCGCTTGTAGGAGTCCGGCAAGTCCG  
TTCAGCTGGTTGCCGTGGATCACGATACGCGGGGGTGTAGCCACCGGCGTGGGCATACTTGGAGCTTGA  
CGCGGCGACCATGACCATCGGCGGCTGGTGTATCTTCTGCGCCATCTGCATGATGCGGGTTCAGCATGGC  
CGTGCTGGTACGACGGGTGGCGGACTGGTAAGCCTCCTGAATGGATTCAAACAGATGGCCGACACCGCTG  
CCGTGCAGGGCGGAGATGAAGTGGACGCGAGCGAAATCGATGAAGCCCAAGCGACGATCCAGCTCGTTCT  
TCACATCCTCTTTTACCTTCTGATCCAGACCATCCCCTTGTTCACCACCAGCACCACGGAGCGACCGGC  
GTGGAGCAGATAGCCAAGGATGCTCAAGTCTGATCGGTGATGGTCTCCTGGGCGTGCATCACCAGCAGG  
CAGACGTTGGCATCTTCGATAGCTTTTCAAGGCTTTGATAACGGAGAATCTTCCACCGTCTCGTGCACCT  
TGCCACGACGACGCACACCGGCGGTGTCGATAACCACATACTTCTGCTCGTCACGTTCCATTGGAATGTA  
AACGGAGTCACGGGTGGTGCAGGCGATGTCATAGACGATGACCCGATCTTCAACCAGCATAACGGTTGGTC

AGGGTAGATTTACCGACGTTGGGACGACCAACGATGGCGAACTTGATGGGCAGGTCGGCGAACGGGGTCT  
CCTTGGAGTCCTCTTTGGTATCGAGTTACCGGCAGCCACCATGCGCAGCAGGGCTTCTTCGTCGAAGTC  
CTCCTCTTCTCATCTGCGCATCTTCATCGGTAGCGGAGTCGACCAGGGTCTCCAGATGGGGAGCCAGG  
GCCAGTTCCAGCAGGCTCAGCACGCCACGACCGTGGGCGGCAGCGATCTGGTAGACCTCGCCCAGCGCCA  
GACCGTAGAACTCGGAGACCGCGGAATCACCGTCGATACCGTCCGGTCTTGTGGCCACCAGAAAAACCTT  
CTTGTGGGCCTTGGCAGAGTCTCGGCGATGGCTTGATCCGCCGCGGTGACAGCCGGCACGGGCATCCACC  
ATGAACAGCAGACGTCGCTTCTTCGATGGCCAGCAGAGATTGCTCGGCCATCTTCAGCTCGATCCCCT  
CTTCGGTGCCATCGATAACCGCCAGTATCGACCACGATAAAATTCAGCTCGCCAACTTCGCCGTGACCGTA  
TTTACGGTCCCGGGTCAGACCGGAAAAATCGGCAACCAGGGCATCCCGAGTACGGGTCAAGCGGTTAAAC  
AGGGTGGATTTCCCCACGTTGGGGCGGCCACCAGGGCTACTACAGGAGTCATAAAAGCCTCATTCTCAA  
GACGACAAAGGCTCCGGTCCGAAGACCAGGAGCCGGATATTCACATTCGAGACGATCAAGGACGTTG  
AGGGCGTACAACCTGCCGTCACGGCTCTGCACATACAGGGTCTCGCCATCCACCAGCGGGCGGCATAGA  
GACCACTGCTATCGAGCTGCTGCATCGCCTTGATGGTACCGTCCGGTACGATCAAGCCAATACAGGTATCC  
TTCGACATCACCCACCACCACGTAGTCACCCGAAGATGACTGGTGCAGTGACAGTACGATTTTTCCAGCTGG  
GTGTTGGACCACAGCTCCAGACCGTTGCGACGGTTCGATGGCAAAATAGATGGCTGCGGCTGTCGGTCAGCA  
CGATGGCATTGCCGGTTCATCGCCAGATCGCGATAGCCGGAATACTTGCCTTCCACACTTCATCGCCGGT  
CATCAGTTTGCAGCCATCAACTGACCGTTGTAGGCGATGGCGTAGAGCTCATCACCGCGATCAGCGGG  
CTGGCATCGACGTCACCATGCGGTCCAGCTCGGTGGCACCAGCGCGGATCAGCCACCTTGGACTGGCGCA  
CAGGCTGGCCGTTGCTCAGCAGGGCGATGCCACCTTGCCATCGGCACGACCGTAAATCACGGCGCCGTT  
GGTGATCACCGGTGCACCGGCACTGCGCAGGGTCAGCGCGGCTGCTCTTCGGAGAGCGACCCTGCATC  
TTGCCTTCATCAGTGTGAGGGCGATCAGGCGACCGGAGGTGGTCAACACCACCAGCGGCCATCTTCCA  
CCGCGGGGCTTGCCACCCTTCCCGGGGCACATTGGTCTGCCACAGCACTTACCATTCTCTTCGTTTCAG  
GGCGTAGACCACCCGTTCTCGGAGCCGAGGAACAGCTTGCCGTAACGGGAGACCAGACCACCGGAGAGG  
CGGGCGCTGCGCTTGTTCGGCGTTGACCGGCAGGTTCGGCCAGATCGACGGTCCAGAGGCGATCGCCACTGG  
CACGGTCAAAGGCGCTGACATCGCCGTCGCGGGCCGCCGCTAGATGCGATCCTCTTCCACCACCGGCTT  
GAGCTGGGAGTAGAAGTCACCGATAACCATCACCCACAGTAGATGACCATGCGGTGTCGGCAGTGAAGGCA  
GATTCACCTTTGGGACGCGCGCCATCGGGTTGAGATCCTCTTCGGAACGTAACAGGGAGCACCCCTGCA  
GAGCGAAGGAGACCCGACCCCGCCAGCCACCATCTTGAATAGATTACGCATCCGGTGCCTCACCAGTCG  
CAACGGCCCGCAGGGCCAGATCGTCCATTTTCAGCTTGAGCTCGGCGCTACCTTGCAGCCGCGGCATC  
CGCCGCGCCTGATAGGCATCACGAGCCTCTTCGGTCTTGCCCTGCTTTTGCAGCACATACCACGGGCT  
TCGGCTACCTGCGCCTTGAAGGCTCATTCTGGATGGTTCGCCAGCTTGGCCAGCGCTTTCATCTGCCTTGC  
CCTGATCATTAGCACACGGGCCAGACGCGAGCGCCGCGATGGGACGAATGCTCTCGTCACCCGTGGTTCGC  
CACAGCTCCAGCTGCTCGGCAGCCAGATCCAGCTTGCCCGCCTTGACGGCAGCGGCAGCCAGTTGCAAC  
GCGGCCAGTTACCGTAGGAGTCACCCCTGTTGGCAGTGACAAACTGCTGTGCCTGCTCGAAACCGGCGG  
TATCGCCCTTGGCCAGCTGCTCAATCACCTGGTTGTAAGAGTGGGAGGATGCCTCCATGGTCTCTTGCTG  
GTGCTGGTTGTAATAGCGCCAGCCGAACAGACCGACCGATCACGGTCCCGGCAATCACCGAGGTT  
CCGTTCTCTTTCCACCCTCCTTGATAACCTCAACCTGTTGTTCTTCGGTGGTATAGACTTCCACAGCTT  
ACTCTCCTTTGGCTGCCAGCAGGGCAATGGCGCGTCAACCTTGACGGTCTGTTGCTCGGCCTGACCAG  
CAGATATTTGATAGTGATCTCCCCGTTTTTGACCTCGGTCTCACCAAGGATCAGGGCGATTGCCGCGCCG  
CTCTTGTGCGGCACGTTTGGAGTTGTTTCTTGAAGTTGCCACCACCGCAGTGGCTCATCAGGCGCAGGTCCG  
GCAGGGCATCGCGCAGACGCTCGGCCAGCTGGAAGCCAGCCTGTTTCGGTCCCCTCGCCCACCATCGCCAG  
ATAAACATCCACCGCCGGGCGGATATCGGCGTTGAGCTCGAGGGTCTCCAGCATCAGCACCAGACGCTCC  
ATGCCCATGGCAAAGCCCACGGCCGGGTTCGGTTGACCGCCAGCTGCTCTACCAGACCATCGTAGCGGC  
CACCGGCACAGACGGTGCCTTGGGCACCCAGACTGCTGGTGACCCACTCGAACACGGTCAAGTTGTAGTA  
GTCAAGACCACGACACGACGCTCGTTCACTTCGATTTGATAACCGCAGACTCGAGCAGGCGCTTGGAGC  
CCCTCGAAGTGGGCGAGCTCTCTTCGCCAGATGGTTCGAACAGACGCGGGGCACCCGAAAAATGGCCT  
GCACCTTTTCATCCTTGGAGTCGAGCACCAGCGGGTTCGCTGTACATGCGGCGCTGGCTCTCTTCGTC  
CAGCTGCTCCTTGTACTGCTCCAGATAGGCCACCAGCGCATCGCGGTAAGCGGCACGCTCGGCGCTCTGA  
CCCAGGGTGTGAGCTGCAGGGTGACATGCTCGCTGATGCCAAAACAGACGCCACAGACGGTGGGTGAGCA  
TGATCAGCTCAGCGTCAATGTCCGGCCCGTTGATGCCAAAACAGCTCGACACCGAACTGGTGGAACTGGCG  
ATAACGGCCCTTCTGGGACGCTCGTGACGGAACATGGGGCCATGTACCACATCCGGCGTTCCCTGGTTA  
TAGAGCAGACCGTCTCGATAACCGCACGGACGAGCTGGCGGTCCCTTCGGACGCGAGACTCAGGCTGT  
CGCCGTTACGGTCTTCAAAGGTGTACATCTCTTTTTGACACGTCGGTCACTTACCAGTGGCGCGCTT  
GAACAGATGAGTCTGCTCGACAATCGGCATGCGCACTTCGCTGTAGCCATAGCTTGAACGACCTGGCGC  
AGGATCTGTTCAACCTTCTGCCATAACCGGCTCTGCTCCGGCAGGCAATCATTCATACCAGCAATAGCTT  
GGATCTGTTTTGCCAGTTGATACTCGAGAAAAAGAGGTAAAAATTTGGCCGATTTATAGGGATTTTCCCC  
CCCAAGGTAATAATCAGGGAATCCGGATGCGGGATTTAAAAATCAGTCACCTGGAAAAAGGGCCACCCAATG  
TGGCCCTGTTTCGCTCACTCCTTGTCCATCGGGATCCGGTTGGCGGGATCCAGCATGGCGGCGCGGGCGC  
GAATGCGGCGCTCCAAAGTTGGAATGAGATCCTTGTGTCGAGCCGATCGACCCGCTGGCCCCCTTCATA  
GAAGGCACTCTTGTGGCTGCACCGGCCAGACCAAGGTCGGAGACCAGCGCTTCGCCCCGGCCATTCACC  
ACACAGCCGATGATGGAACATCCATCGGGGTGATGATGTCTTCGAGCCGCTTTCAGCGCATTTGACGG

TGGCGATCACATCGAACTCCTGCCGTGAGCAGGATGGGCAAGCGATAAAAGTTGATGCCACGGGAGCGAAT  
ACGCAGGGATTTGAGGATATCGAAACCGACCTTCACCTCCTCCACCGGATCCGCCGCCAGCGAGATACGC  
AGGGTATCGCCGATGCCGTGCGTAAGCAGCATGCCCAGACCAATGGCAGACTTCACCGCGCCGGCAGCGA  
AACCGCCCCGCTTCGGTGATGCCAAGGTGCAGCGGCTGCTCGATCTGCTTGGCCAGCAGGCGATAGGCACC  
GACTGCCAGGAACACATCGGAAGCCTTGACGCTCACCTTGAAATCCTGGAAATCGAGGCGATCGAGATAG  
TCCACGTGACGCATGGCGGACTCTACCAGCGCCTCTGGGGTGGCTCGCCGTACTTCTCCTGGATATCTT  
TCTCCAGCGACCCGCCATTGACCCCGATACGGATCGGGATATTGAGGTCGCGTGACAATCGACCACCGA  
GCGCACCCCGCTGCTCGTTGCCGATGTTGCCCGGGTTGATACGCAGGCAATCGGCACCATACTCGGCCACT  
TTCAAGGCGATGCGATAGTGAAGTGGATATCGGCAACGATGGGGATGCGGGTCTGCTGTTTTGATAAGCC  
GGAAGGCTTCCGCGCTTCCATGGTGGGCACGGAGACCGGACGATATCGGCACCAGCCCGTCGATCCG  
CTGGATCTGCTCGATGGTGGCGGCACATCTGTGGTCTTGGTGTGGTCAATGGTCTGCACGGTAATGGGG  
GCATCGCCCCCAACCGGTATATTACCAACCATGATCTGTCTGGATTACGACGAATGATGGGGGATTCGT  
GAGAAGACATGGGAAACAGATTACTCCTGCGGCAGTGAGAAGCGGGCTGTACGACCGTTGTTGTAACGGC  
TCATATCAAACGACTGACCCCTTGTAGTCAAGCTTGACGGCCATGGGCGCGCCAATGATGAACTTCAGGGG  
CTCGGGCCTTCCAGCACCAGCTCGTCTGTTGGCCTTCTTCAGACCACTGAAACAGGGTCTTGCCGTTGGCA  
TCCTTCACATCCAGCCAGCAATCGGCGGTGAAGCTCATCTTCAGTTGCGGCGCAGTCGCCGGATCAACGA  
CAGCCTCTTCAGATTAGTGCCATTGGCACCGGATACTGCAGCATCGGTGCGAGTGCCGACAGCCGCACT  
GACATCGGTGCGGGCAACAGCCGAGAAGCAGGCGCCAGGGTAGCAGTCGCATCGGAGACCCTGCAGGG  
GCAGCCACGTCCGTGGCGGCCGGTGGCATGGCAGCGCCTTCCACCGGAGCGGTGTTGATCGCATCGGGCG  
GCGTGATAGCAGGTTGAGCCGAGTGAACCGGTTGCACTCATCTCGTGGTGGCTGCCAGCGCTTCATCACC  
GGCGGAGCGACGGGAAGTACTCTGCCACCACCAGGCGACCGAGAGCGCAATCAACACCAGGATCACCAGC  
CAGGTACACCACCTTGAGCCGACTGTGCTTGGCTTGTGCGGGGAGCGACGGGAGAAGCTCTGCATGTGCA  
TATTGTGCGGGAGGAGTCAGACCCAGCTTGTGCTAAGCAGCCAGAATGGTCTCGTCCGGGGATCCCGACCAG  
CTTGGCATAGGTACGCAGATAGCCCCGAATAAAAGGGATGGGAGGTGTGCTTGTGCTAGGTATCCGATTTCG  
ATAGCGGGCATCAGGGTCAGACGAAGGTGAATGCGGGACGCAACCTGTTCTCGTGTCCAGCCAAGCTGTT  
CACGGGCGTTGCGCAGCAATTGGCCTGGGCCTACTGCCTGGGAGTCGTCTTGAAATCGTGTGCTGTTT  
AATAGTCAATTGGCTAAATAACGCTTGGCTTGTGCGAAGTGGGATATTGCCTTACCAGCTCAGTCCCGAA  
TTGCTGAAGTAATGCGCGCTTGTCCATTGCGCTGTCGACCGGAAGTCTCAACCAGAGACTCTCCTCGTTT  
TCGTCTGACACATCGGCAAAAACGGGCGAGGTAGGACTGCACATCAGGCAGCTTGCCACTTTTCATGTA  
GCTCGGCCAAGTCCAGCAATAACCCTGGATTGCGGGGATTATACCCCAAGGCCAGGCGATAGTACTCGCC  
TGCTTTATCATTTCTGCGATTTTGCAGCGCACAAAAGTGCCGCATTTTCATAGGTATCGGCAATTTTTTACG  
TAGCCTGGCTGAATAACAGCCTGGTTGAACGCCTGATCTGCCTCGGCATACCTGCCGCGATCACAGAGGA  
AGGCACCATAGTTGTTTATTGCGTCAGCATTGGACGGATCCATGGCAAGGGCGTTCTTGTAAATGGGTCTC  
GGCTGCCCTGAAATCTCCTACCTTCTGGTAAAAGTAGGCAAAACCGATCTGGATCTGGGGGTTGGAGGGG  
TCATACTGGAGGGCGCGGTCAAGATTGAACTTGGCCTGCTCGGCATTGCCCTGACGCAGGTACTGGATAC  
CCAGGTCAAGGCGGGTTTTGGGCAGCCGCCTTGGGTCAGGACCCACTTCACGCTGGGTGCAATTCTGGCC  
AGCGTAAGTGGTCTCGGTACACAGCCTGGCAGCGCGCAGAGCGCTGCCACTACGATCAATGTACGTGTA  
TCCATTCCCTGTCTATACAATGGCTTAGCATTAAACCATTTTGACGGAAATCCCATCCTGTTGCATCCG  
ATTTTTGATAGTTGCTTGGTACGGTCAATCACGTCACCCACCAGCTGACCACAGGCGGCATCGATGTCA  
TCACCACGAGTCTTGCGGACAATCACGGTGAACCGTACTCCATCAGCACCTTGGAGAAGCGATCGATAC  
GACTGTTGCTCGGCTTGCATAAGGGTTGCCCGGGAAGGGGTTGAACGGGATCAGATTGATCTTGCTCGG  
AGTGTCTTGGACACCTTGGCCAGCTCGTGAGCATGCTGCATATCGTCATTGATATGATCGAGCAGCACA  
TATTCGACGGTCACCCGACCACCGTTGGCATTGGATTGGCCAGGTAACGACGGACACCGGCGAGGAACT  
CCTCGATGTTGTACTTGTGCTTGGAGCGGCATGATCTCTGAACGCAACTTGTGCTTCCGGGCGTGCAGGGA  
GATAGCCAGCGCCACGTGATCTGGTCAACCGCTTGTCCAGCGCAGGTACCACGCCAGAGGTGGAGATG  
GTCACCCCTGCGCTTGGAGATGCCAAAAGCCGTAGTCATCCATCATCAGACGCATGGCGGGCACCACTTGG  
CGAGGTTGAGCAGCGGCTCGCCCATCCCATCATCACCACGTTGGTGTGGGACGCTTGCCACCAGCCAC  
ACGGGCCGACGCCACACCTGACCGATGATCTCGGAGACTTTTCAGATTGCGGTTGAAGCCTTGTGAGCC  
GTGGAGCAGAACTTGCACTCCAGCGCACAGCCAACCTTGAAGGAGACGCAGAGGGTCCGCGGGTCACTTT  
CCGGGATGTAGACGGTCTCGACCTCCTGATCGCCACCTGCAGAGCCCACTTGTGTTGCCATCGGCAGA  
GCGCTGCTCGCGGCTGATCTCGGGCGCCTTGTCTCGGCGATCGCCTTGAAGGCTCTCTTTGAGCACCTTG  
TTGACGTTGGTCACTGATCGAAATCATCACACCCAAAGTGATAGATCCACTTCATGACCTGATCTGCC  
GGAATGGCTTCTCGCCAGTTTCAGCAGAAAAGGCACGCATGGCATCCCATCAAGATCCAGCAGGTTGAT  
TTTTGTTTTGCTCATCAATGGCCTCAGTTCAAACACTTCATCAATTATTGGCTGACGACGTCAGGGGGCG  
GCATTGTACAAATAATGGGTCTGGCTTTCCACCTGGAGAATAGAGGGATATTGCGTAAACGGCGAAAACA  
ACAAAGGGAGCCGAGGCTCCCTTGGGTGATCATCCACAAAAATCAGCCGCGCGGGCAGATCTCGTTGTCA  
GAGAAGAAGTAGGCAATTTGCGGGCAGCGGATGCCGGTGCATCGGAGCCATGTACTGCGTTGCGATCGA  
TGCTCTCGGCATAACAGGCACGCAAGGTACCAGCCAGCGCCTCTTTCCGGATTGGTCCGACCCATGATCTC  
GCGATTGCGACGGATGGCGTCTTCCCCTTCCAGCACCTGCACCATGACAGGGCCAGAGGTTCATGAAGCTG  
ACCAGATTGTCAAAAAGGCTTGGCCTGATGCTCGGCATAGAAAACGGCAGCCTGTTCACTGCTCATGT  
GCAGCATTTTGGATGCCACCCTTTCAAGCCTGCGCTTTCGAAACGGCTATAGATGGCACCGATCAGGTT

CTTGCTGACAGCATCCGGTTTGACGATAGAGAAGGTACGTTGATGGCCATTGATATCTTTCTTAAC  
CAGAGTTTTATTGTTAGAATCCATGTTTCGCTGGCGATTATACGTAAACAAAAACCGAAAAACACACAAA  
CAAGCAACTTTTTATTAAACATCACTCCCTTGCAATCAACATCCACACTCATCTTGACCGAGCAGAGCCG  
GAAAATATGTGCGCTTGCGCACGATAGTTACCTTAAGCCGCCAAAACCCCATCTTTTGTTACAAATTCGA  
ACAGCATGAAAAAGGCACCCGAAGGTGCCTTGTCTCGCCTATTTGGCTTCCGCCAGCAAGGCCCGCGCTA  
TGGTGGCGCATCCCCAGGGTATTGGCCCCCGGCGCCAGAGGGCATCGCCGTTGTCACTGAAGCAGGCGGC  
CAGATCGATATGCAGCCAGCCCATCCCTTCGTTGGCAACGAAACGGGAGAGGAAACCCGCGCGTTGGAG  
GCGCCACCCGGCCCCCCCCCTTACCGGACGGCTGTTGGCCGTGTCGGCGTAATGGGAAGGGCACTGCT  
GGCGGTGCCAGGGCTCCAGCGGCAGCGGCCAGGCTGGCTCATGCTCGGCATCAGCATAGGTCATGGCCCC  
GCTTACCAGCCCTTTATCGAGGCCAAAACAGGGCATTGTAGCGCCACCCAGCGCCATCACGGCTGCCCA  
GTCAGGGTTGCGGCATCGATGATCAGCGGTGCGCCGACTCGCTCGCCAGTTGCAAGCCATCGGCCAGTA  
CCAGCCGCCCTCGGCGTCGGTATTACAAATCTCGACCTGGTGCCGTTCTTGTAGGTGAGGATGTCGCC  
CAGCTTGTAGGCGTGGCCGGAGACTAGGTTCTCGGCACAGCAGAGGATCAGCTTACCCGCTTGTGAGC  
CCGCGCAGCATAGCCAGCGCCAGCGCACCGGTGACAATCGCCGCGCCACCCATGTCGCACTTTCATGGTGA  
GCATCCCTCGGAGCTTTCATGGAGTAGCCGCGGAGTCAAAGGTGATCCCTTGCCCACCCAGCGCTGC  
CGTACCGGCGCCTTGGGGTACGCCCCGGGTTGAAGTCGAGCTCCAGCAATACCGGTTTCGCGCGCACTG  
CCGCGGCCACCTGATAGAGGCCGACCCAGCCGCTGTTGCAGCGCTTCGCTTTCAAATGCGATGAC  
TCACCTTGTCCGGCGCCAGCTCGGTAATAAAGGAGGCCGCTTCCACCGCCAGCTCCAGCGGGCCAACTG  
CTCCGGGGTGGCATTGGTCATCTCGCGCACCCAGCGCCACAGAGCCAACGCGCTTCCAGCTCCTCTCTA  
TCCTCTTCCGAGGACATGGCCCACTGCAGTTGCACCTCCGCTTGGGGTTTGTAGCCCTTGGGCAAAAG  
CCCCTGCTGTTACGCTCCAGTACCAGCCAGGGTCACTTCTGGATCCCTGCTGGCAGAGGCGACG  
GGCCGCTGCTGGATATCGAGCAGCGGATTGGCCGTCACCAGATGGATCACCATGCCGTGCGCACGGTGA  
GAGAGCAGCGCCCCCTCCCCCACTCGGCCGGTGCAAAATTCACGACTTAACCAGACATTCATGCAGTCA  
CTCCTGCAGCCAGCGTGTATGGTACGCAGACCTTGCCCTTGGCGCCAGTTGCCAGAGATCGTTGCC  
GATTTCTGATAAGAGGCCGCCAGATCCAGGTGCACCCAGCCCTTGCCTCATCACGCACGAAGCGGAAA  
GGAACGCAGCAGCCGTGGTGGCACCGGCCGAGCCTTCTGCCGAGGCGACGTTGCCAGATCGGCAAAGGC  
CGAGGTGAGCTGGCTGGCATGCCAGGGTTCCAGCGGAAGCGCCACGCCTGCTCGTTTTCCACCTTGGCG  
GCGCCAGCGCACGACGCTGTTCCGGTCTCATCGAGGGCAAACACCGCATTTGTAGTCGCGCCCAAGCCCA  
TCTTGGCGCGCCGGTCAAGGTTGGCTCGCTCAAGGATATAAGCCGACCCGCTGTCGGAGGCGCCATCAG  
GCCATCGGCCAGCACAGACACCTTCCGCATCGGTGTTCTGGATCTCGACCGAAACCCCATCTTGTAA  
GTGAGGATGTCGCCCAGCTTGAAGGCGTGGCCGGAGACCAGGTTCTCGGCGCAGCAGAGAATGAGCTTCA  
CCCGCTGGTTACAGCCACGGCTGATAGCCAGCGCCAGCGCGCCGGTACCATGGCCGCGCCGCCATGTC  
GGACTTCATCGGCAGCATGTTGTAGAGGACTTCATGGAGTAGCCACCGGAATCAAAGTGTATCCCTTG  
CCCACAGAGCCGCCACCACGGGTGCATTGCGATCACCGGTGCGGTTGTAGTCGAGCTCCAGCAGCACAG  
GCTCGCGCTCGCTGCCACGGCCAAACGACAGATCCGATATGGCCGACTCGCGCAGCGCTTACCAGGC  
GGTGTGCGAGCTGTAACCTGATCCCCAGCCAGACCAGAAATGAGCAACAGGGCCGATTCGCCAGACTC  
ATGGGGTAGATCTCTTCCGGACAGCCATTGGTGTATGTCAGTACCAGCGAGCCGCTTGTAGCAGCGCAT  
CCAGTTCACGGGCTTCCGCGTCTGCTGGCCAAAATCCAGTTCACGCGCACCCCTTGGCGGCGTAGAA  
CCCCTGGGCGAACGCGTAGCGACGCTCCAGATCCAGCCTTACCAGCCAGCGTACCAGCTTGTATCCCG  
CTCGATTGAGGGCGACGGGCGCGCTGAACGGTGCAGAAACATCCTTCTGCTGACCGGCGGCACCAA  
GATGGATCAGTGCCTCGTCGCCATTGAAACTGAGCTGGGCGCCCTCGCCCCAATAGGCGGCGCAGCTTG  
GGTGGATAACGCTACCTTCATCATGTAGCCATCGTGTGTTGCTTCTTTTACTGGCACTATGTATAAGC  
ACTCTTTATGGGAAAGAGCTTATTGGCAAAGAGAGAATAACGAATACAAAAAAGGCCGTGCCCCGAGGG  
TCACGGCCTTCCACCATATCACTGAAGCACACAGGATGCTGCACGTGCAATTCATCATGTGTAATTA  
TGGCGTTGAGAGGCAAGGTTGAGGTTGACTTGGGCACTTCCACCAGATCCTCGTCCGCCAGTTTTG  
CCTGACAGCTGAGACGGGATTCGGCTCCAGCCCCACGCTTGTCCAGCATGTCGCTTCCAGCTCGTC  
ACTTGGCTCGAGCGAGTCAAAGCCCTCGCGCACCCAGCAGTGGCAGGTGGTGCAGGCACAGGATTTCTCG  
CAGGCGTGTGCTGATTTGATAACGTTGCGCAGCGCCACATCCAGAATGGTCTCGCCGCTTTGCCCTCGA  
GGGCGGCGCCATCCGGACAGAGTACGGGATGAGGAAGAATGATCAGTTTTGGCATATTACACCTTGTGTA  
CGTTTTGTCCGGTACGACCTTGGCGATGGAGGCGTCCATCCGGCGGGCTGCAAACTCGCCACTGACAGC  
ATCGGCTGCCTCAATGGCTTCTTTGATTTGATGGGTTGCGCCGCTGTTGCGCATGGTCAGCAGATGGGCG  
ATGGCGGCATCAATTTCCGCACGCTCGGCAGCATTGAGCAGGGCATCGCCATCGGCGGCCAGCGCCGAT  
TGAGACTCTCGACCACCGGTGCGCTTCAACCTGCTGCTCGGCCAGCATGCGGGCATCCATATCCTGCTG  
GGCATTCTCGATGGAGGCACTCAGCATGTTGAGGATATCCTGCTCCGCCAGCCGTAAGAGGGCTTGACC  
TGGATCTCGCCCTGCACGCCGAGGATTTCTCCATGGCGCTGACCGAGAGCAGACCATCCGCATCCACCT  
GAAAGGTGACCGAATATGGGCGGCGCCGGCTGCCATCGGCGGAATACCGGTGAGGTTAAAGCGGGCCAG  
GGAGCGGCAATCGGCCACCAACTCGCGTTACCCCTGTACCAGTGAATGGCCATGGCGGTCTGACCATCC  
TTGAAGGTGGTGAACCTCTGGGCGGGGCAACCGGAATGGTAGTGTGCGCGGGATCACTTTCTCGGCGA  
GGCCACCCATGGTCTCCAGACCCAGCGACAAGGGGATAACGTCCAGCAGCAGCATCTCGGCATCGGGCTT  
GTTGCCACCCAGAAATATCGGCCTGGATGGCGGCGCAATGGCGACCACCTTGTCCGGATCGATGCTGGTC  
AGCGGCGTACGCTGGAAGAACTCGCCACCAGTTCACGCACCAGCGGCACCCGGTGGAGCCACCAGCA

TCACCACTTCCAGCACTTCCACCTGCTCGAGACCGGCATCGCGCAGGGCGCGGGCGCAAGCCAGCAAGGT  
CCGTTTTACCAGCGGGGTGATGAGTTCATCAAACCTGGCTACGACTACTGAACCCTGCCAGCCAGCAAAA  
GTGCACGCCACCTGCTCGGCATCGGTCAGGCCGTGTTTTGACGGCAGCGGCCACATCCAGCAGCTCGCGCT  
GCAGATGGGCATCCAGCTCGCCGGAGAGGCCCGCTTGTTTCTTGATCCAGTCCGCCAGCAGGTGATCAAA  
ATCATCACCGCCGAGGGCGGAATCGCCGCCGGTGCACATCACTTCAAACACACCGCGGTGCAGACGCAGG  
ATGGAGATATCGAAGGTGCCGCCCCCAGATCGTAAACCGCGATCACCCCTTCTTGACCGGAGTCAAGGC  
CATAGGCAATCGCGGCCGCGGTTCGGCTCGTTGAGCAGACGCAGTACGTGCAGACCGGCCAGACGGGCCG  
ATCCTTGGTACCCTGACGCTGGGCATCATCGAAATAGGCGGGCACGGTAATGACCACGCCGTCGAGATCG  
CCCCGAGAGTCTGGGCGCCACGCTCGGCCAGCTTTTTGAGAATTCGGCCGAGACCTGTACC GGATTGA  
CCAGCCCCGACGGGTTTGCAGTTGCGGCATGCCATTGTGCGCGCAACAAACTGGTAAGGCTGCTGGCC  
GGTATCGATATCGGCCAACGCCCTTGCCCATCACTCCGTTTAAACCGAGACGATGGTGTGTGAGGATCGAG  
GCCGCTTCGCGCTTGGCATCAATTCGACTCGAATGGCGTCGCTTTGATAGTGCACCACCGAGGGAGCA  
GGTCGCGCCCTTGCTCATCGCAAAGGGTATCGGCGTGACCGCTGCGAACCGCAGCGACGAGAGAGTTGGT  
GGTGCCGAGATCGATGCCGACGGCACGTTTTGTGCTGATGAGGAACAGCGCTCTGGCCGGGTTTCGGCGATT  
TGCAGTAATGCCATGGGTAATGAAACTTCCAGCGTTAAAGGATCAAGACTCGAGAAGCGAGTCTTCGAAT  
CGTTCCAGCTCTTCGAGGAGCTTGTGCACAAACTTGAGTTTGCGAACGCAATCAGCGGCAACGAGATCTT  
TGCCGGCGCAAGAGACTCGGTCAGCTGCTGCATCAACATCTGGTGATCATGCCTGATCTCGCTGCGAAA  
ATCCTTGATGGCGCGCTCAGGGTCGGCGTCATCTTTCAGATCGGCCAGACGCTCGCGCCACTCCAGCTGC  
TGCATCAGAAACCGGTATCTTGCAGGGTCTGCTGTTACCACGGATATCGGTGCCACGCAGGGAGAGTA  
GATATTCGGCACGGCGTAGCGGCCCTTGAGGGTGGTGAATGCTTCGTTGATCTGGGCGGCAGGTTGCAC  
CGCAGCCAGCTGCTCCCGTTTCGGGGCGGTGGCAAAACGATCAGGATGGAAATGGGTTTGCAGCTGGCGG  
TAGGTATCAGCCAACCTGACGGGTATCGAGCTCAAAGCCTTCAACCAGCCCCAAACAGCTCGAAATGATTCA  
TGCAAACCTCTTGAAACGTTTCGCCACAACCTCACTCGCCCTGGCAAATGAGATGTGATTGAACGGGT  
ATGGGCAACCCGCTCAACCACAGACGAAGGATCATTGACGTCAAACATCTCAGACACTGAAGCTTTCGCC  
GCAACCACACTCGCCTTTGGCATTGGGATTGTTGAACTGGAAGCCCTCGTTGAGGCCCTCCTTGACGAAA  
TCCAGCTCGGTGCCATCCAGATGGATCAGGCTCTTGGCATCAACAATAATCTTGACGCCCTGCTGCTCGA  
ACACCTGATCCTCATCGGTCAGTTCATCAACGAACTCAAGCACGTAGGCAAGACCGGAGCAGCCGGTGGT  
TTTTAGCCCGGAGGCGCAGGCCAATGCCCTTGCCCTGCCCCGTTAGCCAGAAAAGAGGAAACCCGTTCCCGCGG  
GCATCTGTATGGAATAATAGCCATACTGCTCTCCGCGCTTAGAGACCTTCTTCTGCTTGTGATCGCGCA  
TGGCGCCCTTGATGGCGTCTCAGCCAGAATGGAGCAGTGGATCTTCAACCGTGGCAGGGCCAGCTCTTC  
AGCGATATCTGTGTTCTTGATGCCAGCCGCTTCGTCCAGGGTCTTGCCCTTGACCCATTTCGGTACCAGG  
GAGCTGGAGGCGATGGCGGAACCGCAGCCGTAGGTCTTGAACCTGGCATCTTCGATGATGCCTTCGTGCG  
TGATCTTCAATTGCAGCTTCATCACGTGCCACAGGCGGGTGACCCGACCATGCCGGTTGCAACGCTGGG  
ATCATTCTTGTGAAACCACCGACGTTGCGAGGATCTCGTAGTGGTCGATTACTTTTTCTACTGTAAGCC  
ATATCTCACTCCTGCTAATTCTGTTGCTCACTGACCAGATAGATCAGTATGAGCCATTTCGACCGTGT  
GAGATCGACGCCGCTTTTGTACATCTCCACAGAGGGGACATCTCGCGCAGACGACCGATGGAGTCACGA  
ATAAGCTTGACCGCGTAGTCAATCTCTTCTCGGTGGTGAAGCGACCCATGCTGAAACGGATGGAGCTGT  
GTGCCAGCTCGTTCGATCAGACCCAGTGCAGCGCAGCACATAGGAAGGTTCCAGGCTGGCGGAGGTACAGGC  
CGAACCGGAAGAGACCGCCAAATCTTTCAGCGCCATGATGAGGGATTCCCTTCCACATAGGCAAAGCTG  
ACGTTGAGGTTACCCGGAACACGTTGCTCCAGATCGCCATTGATGTAGACGGCTTCAATATCCTTGATGC  
CATTCCACAGACGCTGGCGCAGAGCCATGATGCGCTCGCCTTCACTCACCATCTCTTCTTTGGCGATGCG  
GAAAGCTTCGCCCATCCCAGCATCTGGTGGGTGCGCAGAGTACCGGAACGCATGCCGCGCTCGTGGCCA  
CCGCCGTGCATCTGGGCTTCCAGACGAACCGGGGTTTGCGGCAACAAACAGTGCACCGATCCCTTTCG  
GACCATAACCTTGTGCGCAGAGACGGAGAGCAGATCCACTTTCAGTGCTTCCACATCTACCGGGATCTT  
GCCCACACTCTGAACCGCATCCACGTGCAGCAGGATCTTGCGGGAACGGCACAAATCGCCGATGGCGGCA  
ATGTTCTGAACACCGCCGATTTGTTGTTTACATGATGCTGACCCAGGATGGTGTATCAGCATGCG  
CATTCTCGATCATCTCGATAGTGAACAGGCCGTTGGGCATCGGCTCAAGATAGGTCACCTCGAACCCCTTC  
ACGCTCCAGCTGGCGACAGGTATCGAGCACCGCCTTGTGTTCCGGTCTTGGAGGTGATGATGTGCTTGCCC  
TTGCTGGCATAGAAGTGGGCAACACCCTTGATGGCCAGGTTATTGGATTTCGGTCCGACCGGAAGTGAAGA  
CGATCTCGCGGGGATCGGCACCGATCAGATCTGCCACTTGATTACGGGCCAGATCCACCGCCTCTTCGGC  
TTGCCAGCCAAAGCGGTGAGAACGAGAGGCCGATTGCCGAACAGGCCATCCATGGTGAGACACTGCATC  
ATTTTTTCTGCGACACGCGGGTCCACCGACAGGTTGCCGAATAATCAAGGTAATAAGGCAGTTTCATGT  
TTTTCTCCGTACAGTCCGGGTATACAGAGTCCCGCTGTGGAAAGCACGTTTATAGTTGGACTTTCAAG  
CTCACATCGCCGTGTTCTGCCCAGTCAACCAGGGACAACACGGTCTTCATTTGTTTATCTGCTTGCCGG  
CAATCCGGCGCACATCGGCCCTGGCGTACCAGCTCGGCCAAGGTAATATCCCCGAGGAAGCTGGAGATCCG  
CTCACTCAGGTGCGCCACAGGGAGTGAAGTCAAGGACTGGGTACCGCCGTGGCAACCGCCCTTGGCGAGG  
CACTTGGTTGCATCGACCGACTCATCGACCGCGGTGATCACCTGACCAACCGAAATCTCGCCTGGGGCCA  
ACCCGAGGCGATAACCACCGCCCGGGCCACGCACGCTGCTCACAGACCATGTTTGGCGAGGCGGGGCAAA  
GAGCTGCTCGAGATAGGACAACGAGATGCCCTGGCGCTCGGAAAATATCGGCAAGGGGGACGGGCCCTG  
TCTGCATGCAGCGCCACGTGAGCATGGCGGTTACAGCGTAACGTCCTTTTGAAGTCAGTCTCATGTGCC  
TTACCGTCTTGCGAAGCAATTTAATGGGGCACATGGTACATACCCGACCAATCAGTCAAGTATATGGT

TGAGTAAATCAGTCGGATTAATCCGGTACGCGCGCTTTCTGCACCGAGGTCAGAATACCGCGCAGAATGT  
TGAGCTCCGCCGCTTCCGGCCGAGCCCGATTGAACAAGCGACGCAGCTTGCTCATCACATGACCCGGATG  
GTCATCGGCAATAAAACCGGTCTTCATCAGGGTTTGTTCAGGTGCTGATAGAACCCTTCCAGCTGGGCG  
GCACTAGGATAGACCATCTCGTCTTCAGGCTCGGCGGCCTGCCCTGCAGCCAGCGCATCCGCACTTCGT  
AGCAGAGAGTCTGCACCGCCATGGCCAGATTGAGGGAGCTGTAATCGGGATTGGCCGGAATGGCCACGTG  
GTAGTGGCACTTTTGAATTCGTGCTTGGTGGAGACCGGTGCGTTACGGCCAAAACACCAGCGCAACCGGG  
TGCTGCATCCCCTCAACCACCGACTTTTCGCCGGCTCACGGGGATCGAGCATGGGCCAGCTCAAGGTTT  
GAGAGCGGGCGCTGGTCCAATCACAAAACCACAATCAGCGATCGCGTCATCCAGAGTCGGGACGATACG  
GGCATTGGCAAGCACATCGCTGGCACCAGCCGCCAGGGCGAAGGCATTGTCATCCGGCAAGGCTTGGCGA  
TCAACCAATACCAGCTGGGTCAACCCCATGGTCTTCATGGCGGTGCCGAGACCCCATGTTGCCGGTAT  
GAGAAGTGTTTACCAAAAACGATACGAATCTGATCCAACATGCCAGTCAATCTTCAGTCAAAAATGGCGC  
GCAATTGTAACATAAGAGAACACGATGTTGGCACCGTAAAAGCCGAGCCATTTTCAGAACAAAACAGCCG  
TTTGTATAACAAACCAGCATGAGGGAAGTGAGAGGGGGGGACTAAACTTGATGGATATCCGATAAACGGC  
ACAGGAGACACCACGCCATGCTTCCCTTTTATCTATGAGAGATTGCCAGCCTCTACCTGCTGGCAGC  
CATTGCCATTATTACGTTGAGTGAACAGCCCTGCTCTGGTTTGCAGGCGCCTTGTGTTTTATCGCCGA  
GCGGTGACCTGGATGATGCGCTCCAGCTACCGGCTACCGACCTGATTATCTTTCCGAGCAAACGCTGGC  
TGCAGCCGGAGTGGCTGTATGAAGCGCAGCCCTTCATCTGGCTGGCTGCGGGCTGGCCATGTCACAGCT  
GCCCCCCCCTGCGGCACTCATCGCCTTGGTGCCTGTCTGTGGGCTGTGCTTGCCTCTGGGCACGGCAC  
CATTATCGTCGCCATGCCCATGGGGTGATTGTCCACTTAAGACGGGATCCC GCCGGCGCCGTCTGCACC  
GGAGCCTGCGCTGACTCGGTGCGGGCGCGTTTCGATAAACGTCGCCAGATCCATCAGGGGATACTTCATCA  
GGCTCGGCAAGCCATCGAGATCCAGACTGTCCATCAAGTTTTTCACCTCAAGGCCAGTTCGGTATCCCC  
TTCTATCTTCAGCTTGCCTGGAAAAAGAGCGAATCCGGATCCTCTTTGCGACCAGCGATGAGGATCAGG  
TCGTTGGCGGTACCGCTGAAGCAGACATCGGCCTTGCCCACTCGCGAGCTACCACCAGCTGGCCATTCT  
GCTCACTGATAAACCCAGCACAGCTCCAGATCAGAGACTTCGACTTTCAGCCACTTGTCTGCCAGAACTC  
GAAATCGCCATCTTCGATAGCCTCTTTGAATACCCGGGCCAGCAAACCTCCATCAGCTGCTTTTGCAGA  
TTGAAGGGAACCAGCTTGAAGGGATGGCGCAAGAAGCGCGGAGCCTGTTTCGACCAGGCGCGCTTGCAGTT  
GTTGAAACACGATAGACTCCCTTTTTTGCCTTCAAACACAGGGAGAGTGTCAAGATCCTGTTGAAAT  
CAAACCTGTGTCAGGGTTACCTCAAGAAGGGTAAAGCCACACAAAGCTGCCTCAGGTCAAAAAGGGAGT  
GCATGGCTGCATAACAATCAGGGCTCGTTTTGCCCTTCATATGCCTCTCGGAGCGTACCAATGGAATTACT  
CTGTCCGGCAGGCGAGTTTCCCGCACTGAAAACCGCCGTGGATAACGGGGCCGATGCCGTTTTATATCGGT  
TTCAAGGATGACACCAATGCCCGCCACTTTGCCGGTCTCAACTTTTACCAGCAGCAAACCTGGAGAAGGCGG  
TAGATTATGTGCATCAACATGGTGCAGAGTGCATATTGCCATCAATACCTTTGCCCATCCCGGGGCCGA  
TGCGCGTTGGAAACAGGCGGTTGATCGCGGGGTGGCCCTCGGGCGCCGATGCGTTAATCATCGCCGATCTC  
GCCGTGCTGGAATATGCCAGCCGCCACTACCCGAGATGGAACCTCCATGTCTCGGTGCAGGCCAGCGCCA  
CCAATGCCCGCCCATTCGCTTCTATCAGCAGCAATTCATGTTACACGGGTGGTGTGCCCGGGTGTCT  
CTCCATGCATCAGGTCAAGCAGCTGGCCCGCAGACCGATGTTGGCCTTGAGGTATTCGTTTTTGGCAGC  
CTCTGCATCATGGCCGAGGGCGCTGCTATCTCTCCTACATGACTGGCGAGAGTCCCAACACCGTCCG  
GCGCCTGCTCACC GGCCAAGTTTCGTCCGCTGGGAAGAGACCCCGAATGGTCTCGAGTCGCGACTCAACGA  
AGTGCTGATCGACCGCTATGGCCCCGGGCGAAAATGCCGGTTACCCGACCTGTGCAAGGGGCGTTTTGCAC  
GTGGATGGCCAGACCTACCACGCGCTGGAAGAGCCCACCAGTCTCAATACCTGGGTCTCCTGCCCGAGC  
TGTTCAAGACCGGGATCCAGTCCGTTCAAGATTGAAGGACGCCAGCGCAGCCCCGCTATGTGGAGCAGGT  
GACCCGAGTCTGGCGTGCAGCCATCGATGCCTATCAGGCCAATCCCAGGGCTATCAGGTTAAAGTTGAG  
TGGGATGCCAGCTCGCACGCGTCTCCGAAGGTAGCCAGACTACCTCGGCGCTACCATCGTCAGTGGC  
AATAAGGAGTCCACCCATGCAATTTTTCTCTCGGGCTCTGCTCTTCTACTGGCCAAAAGCCGATACCGAA  
GCCTTTTATCATGCCGCTGCCGACAGTCAAGCCGACATCATCTATCTGGGTGAGACCGTCTGCAGCAAG  
GGCGCAACTCAAAGTCGATGACTGGATTGCGCTGGCCCGTCAAGGTGAGGAGTGGCCAGCTCCGGCAAGCAGGTGGT  
GCTCTCGACCCCTCGCCCTTATCTCCGCGCCTTCCGAGCTCAAGGAGGTGAAGCGGCTGGTTCGACAATGGC  
GATCTAATGGTGAAGCCAACGATCTCGGTACGGTGCAACTCGCCTGGGAGGCAGGGATCCCCTTCGTCT  
GTGGCCCCGCCATCAACGCTATAACCGCGATGTAAGTGCATGCTGCTCAAACAGGGGATGAAACGCTG  
GGTCATGCCGGTGGAGCTCTCCCGTACTGGCTGATCCAGCTCAATCAGGATCTGGGCCCCCTGCGCGAC  
CAATTTGAGGTGGAGGTGTTTGCCTACGGCCATCTGCCGCTGCCTACTCGGCGCGCTGCTTACC GGCC  
GATCCCCTCGACAAGCCCAAGGACAACCTGCGAGTTCGCTGCATCAACTACCCACCGGACGACTGGCCAA  
CAGCCGCGAGGGGAGCGGGTGTTCATCTCAACGGGATCCAGACCAGTCCGGTTACTGCTACAACCTG  
GGTAACGAGCTGGCTGGTATGGAAGGTCTGGTGGATGTGGTCAGACTTTCACCGCAAGGGATGGAGACGC  
TGGAGATGCTGGCCCGCTTCAAAGCCAACCGGCAGGGCCAGGCTCCCCCCCCCTGCAGCAAGGAAGCGA  
CTGTAACGGCTACTGGCGCCAGATCCCCGGCATGAGCCTGGTGGAGTAAACCCGCCATTCGCCCAACAAA  
AAGGCCTCATCGCGAGGCCTTTTTTACCCTATCTGGCAGTGGTTTCAGGAGGGCTGATCACCCTTGTTAC  
GAGCGCTCTGGGCACCTGGCGGCAAGGGTTTGC GCGCCATCAACTCCAGCTCCAGCAGCGCATAGCGGTG  
CTCGATGAAGTCATAGACGTTGTTAGATAAGGCCAGCTTGAAGTAGCTGATGGCTTCCCTGCGGTTGCCT  
TTGCCAGCTCGAACTTGCCAGATAGAAGTAGGTTTACACAGGCGCTCGGCGAGCTCCCGGTTATCCT  
TCACCCCTTTCACCACGTTGCCCATCAGCTGGGAAGCGTTGATCTCGCCGGTATAGAGGCGTACCAGATC



CCAATTCCAGGCATCGTCATCGTACTTGTGAGACGCTCGCGCATCCGGCTCATGGCGGCCGACGGGTGCG  
AGTTTCTGCTCGGCCAGATAGAGCCAGATCACCCGATAGGGGTCTTCCGGCTGCGCCTCGTAGAAAACGCT  
TCATATCGGCCGAGCCAGTTTCGGGACGGTTGCCGTAATAGAGGGCGATGCCACGTTGAGATAGGCATA  
GTCATAATCCGGCGCCAGTTTCGAGGGCAGAATCGAACGCATCATAGGCTTCGTCGTAATTCTGCTGCTGT  
ACCAGATAGACGCCGATGAAGTTGTAGGCTTCGGCGAAATCCGGTTTCTCCCGCAGGGCAGGTTGAAAT  
CGAGCCGCGGAGGGAAACGCAGACCAACCCGATCAAAACACCACGGCACGCTCATAGAACAACCTTGCCCCG  
TTGCTCGGTGGTCAGTTCCATTTCACTGAGCATCTGCCCGAGTCGGGCGAGCGCCAGCTCACTCTGGTAG  
GAGACCTGCAGGGGGTTCGCCAACACCAGTGAAGCAGGCTGCGGCTTGGGAACCTTGGGGGTGTTAACCT  
GACTGCTACTGCTGCAACCCACATGGGAAGCAACAACAGGATACCGAGGAGGTATCCAATCCCTTTTCCT  
GACGTTCAATGAACACTCCGACGCTTACGCTTGACCCCGCATATGGTAAAGGTCAACTGCCGCTTTGTCA  
TGTAGCTGTGCCCTTACCTCAAATAAATCAGGATTCGACAGGGTATCCGGCATCGCACCAACCGCGAA  
AGCCGCGTTCGACGCTGATCACCTTTCGATAAACCATCTGTTGTCAGGTTGTCGCGCCAGAATGGAGCG  
AAAACCACCACCACAATAGAGGTAGAGCTCGGTCTCAAGATCCGGGAACGGGTCTCGATATCCCGCTCA  
ATTACTCCACGACCCAGATATCGGGCACCGGGCAGATGGCCTTTGGCCCACTCGCTCTCTTCCCGCACGT  
CGATCAGGTGAAACGTGCGCCCTTCGTCTTCCAGCGCTTGATCTGGTGAACATCGGTTTCGGTGATGCG  
GGAGCGGATCCCGTCAACCAGCGCCAAAAACGGGGATTGTGATGCATGACAACTCCTGTTGTTTAAAT  
CATGTGCGTCAGCAAACGACACGCAGAGATAAGAAAAGAGCGCCATGAGGCGCTTCACTGTTACGGCA  
GGATTTCTGTTGGTCCGACCCCTCTTTCTTACCTGGGTGGCAGCATGTGCTCGCGCTTGACGCCGAG  
GAACATGGCAAACGCACCTCGCCACATAGATGGAGGAGTAGGTACCGAACGCCACACCGATCACCATGGCC  
ACGGCAAACCGTGGATCAGCGCACCGCCCTTGAGCAGCAGCGCCAGCACCACGATAAAGGTAAGCCGG  
AGGTGATGATGGTACGACTCAGGGTCTCGGTTCATGGAGAGATCCAGAATGTACTCGGTATCCCTTTACG  
CACCTTGCAGGAACTTCTCCCGCAAGCGGTGCAACACCACGATAGTATCGTTTCAGGGAGTAACCCACCAGG  
GTCATCAGTGCCGCCAGTACGGTCAGGTGCAACTCGTACTGGAAGTAGGCGAACACGCCAGGGTGATCA  
CCACGTCGTGCACCAGGGAGAGAATGCCCCCCAGCGCCAGACGCCATTCGAAACGCACCTGCCACGTAGGC  
CAGGATACAGAGGATGGAGGCCAGCATGGCCAGCGCACCGTCTGTGCGCAGTTTCATCCCCACGGAAGGG  
CCGACGAACTCGACGCGTTTGTAGCACTGCGCCCTCATCGAGCTGCTTGGCCGCCCGCAGCACTTCGTTAC  
CCTGTTGTTTACCTTGACCCCTCTTTTCGGGGTCAGACCGAAACAGCACGTCACGGCTGGAGCCAAAGTG  
TTGCAGGGTTCCCTTCAATCTTCTGCTCTTCCAGAGCGTCGTGGATCTTGTCCAGGCTCACCAGCTGC  
TGGACCCCACTCGATGGTGGTACCACCGGTAAAGTCCAGACCCAGTTTCAGACCCCGATCAAACAGGA  
AGAACAGGGCTACCACCATCAGCACGGAAGAGAAAACCACCCCGCTTGGCATAGCGCATAAACGGGAT  
CGGTTTTTCAAATGTAGAATCTGAAACATCTCTCTATCCTCAGATGGGCAGCTTGTGATACGCCGTTCC  
ACCCCAAGCCAGGTTGATAATGGCACGGGAAAACGTGATGGCAGTAAACATGGAGGCGGTGAGACCAATG  
CCCAGCGTCAGGGCAAAGCCCTTGATGGCGCCGGTGCCGATACCAAACAGGATCACACAGGTGATCAGCG  
AGGTACGTTGGAGTCGGCGATGGTGGAGAATGCTCGATCAAAGCCAGATGGATGGCTTGCTGAACACC  
ACGACCGTTGCGGATCTCTTACGAATACGCTCGTAGATCAGTACGTTGGCATCCACCGCCATACCCAGC  
GTCAGGACGATACCGGCGATAACCCGGCAATGTCATGGTGGCACCAGGGATCATCGACATGATGCCGACAA  
TCAACACCAGGTTTCATACAGAGCGCCAGGTTGGCAACCCAGCCGAACGCGCGGTAGTAGATCCCATGAA  
CAGCACGATCACCAGCATGGCCAGCCGATGGCTTCCATAACCGCTGTCGATGTTCTGTTGACCCAGGCTC  
GGGCAATGGTGCCTCTTCCACGATCTGGATCGGGGCGATCAGGGCACCGGCACGCAGCAGCAGCGCTA  
GGTTGTGGGCTTCGTTGGCGTTGTGATACCTGTGATACGGAACTGGCTGCCAAGACGCGACTGGATGGT  
GGCGACGTTGATCACCTCCTCTGCTTGGCGAACTTGGCGCTTGGCATCCGGACCCGGTTGACCGACCGGC  
TTGTAATCGATGAAGACGGTCGCCATCCCTTTACCGACGTTATCCTTGGTAAAGTTGGCCATCTTGTGTC  
CACCTGGCCATCCAGCTTGATGTTGACCTGGGGACGGCTGTACTCGTCGAAACCGGACTGGGCACCCAC  
GATGTGGTCACCGGTCAGGATCACCTGCTTTTGCAGCACCACGGGACGACCATTCGATCGTTGTAGACC  
TTGGAGCTGGGCGGGACACGGCCATCGGCCGAGCCTGGATGTGCGCAGTCTCATCGACCATGTGGAATTC  
CCAGGGTCGCGGTTGCACCCAAGATCTCCTTGGCGCGGGCGGTATCCTGAATACCGGGCAGTTCAACGAC  
AATGCGCTCGGCGCCTTGCTGTTGTACCAGCGGCTCGGCCACGCCAGTTTCGTTGACCCGTTACGGATG  
ATGGTGATGTTCTGCTCGAGGGCGTACTTCTTCACTTCCCTTGATCTTGGCTTCGCTCAGACCAGCCAGCA  
GGATGAACTCATCCCTTTCTGCTCGGTAGTGAAAGTCAAATCAGGGTTCTGACGACGCAGATGAGAAAC  
GGCGGTTCTGATCGGCTTCGTACGGAAGATCACCTGCACCTGATCTCCGACCCGGCGTACGCCGGAG  
TAACGGATCTTCTGGGTGCGCAGCTCGGAGCGGAAATCCTGCACCATCTGCTCTTGTGCTTGGTCAGTG  
CTTCCGGCCATGTCCACTTCCATCAGGAAGTGCACACCACCGCGCAGATCAAGACCCAGCTTCAGAGGCAC  
CGCACCGATGGCTTCGAGCCAGGCGGGAGTGAAGGTGCCAGGTTGAGTGCGGTAATGAAGTTGTCGCCC  
AGCTTGTGGCAACGATATCGCGCGCCTTCAGCTGGTCTTCGGTGTCTTCAAACGGATCAGGATAAAAC  
CGTGCTCGAATGCAGCATGTTTACCAGGGATCTTGGCCGCTTCAAGGGTCTCTTTCACCAGATCAAGAGT  
ATCTAGCTTGACTTCGGCACCCAGGCTGGCAGAAACCTGCAAAGCCGGATCTTCGCCGTAAGATTGGGG  
GCTGCATATAGAAAACCGATGGCGATCACCAGGATCACCATCAGGTATTTCCACAGCGGATAGCGATTCA  
ACACGCTGTGCTCCTTGGGAGATTAAAGGGACTGGATAGAACCCTTGGGCAGAACGGCAGAGACGAAGTC  
CTTTTTGATGGTGACTTGAGTCTGGTTCAGGGCGATCACCAGGTAATCGCTGTCTGCAGCCACTTTG  
GCAATTTTGCACACAGGCCACCGGAAGTGAGCACTTCATCCCTTGGACAAGGAGCTCATCAGATTGC  
GGTGATCCTTGGCACGTTTGGCCTGGGGACGATAGATCATGAAGTAGAAGATCAGGCCGAATACGGCCAG

CATGATGATCATTTCATACCACCACCTGTGCACCCGGTGCTGCGCCTTCTGCATACGCCTTGGAGATA  
ATGCTCATTAAACAACCTCTTATTGATGTAGATTTAAAAAACAATAATATATGTTGTTGTTATTTAACG  
TCATTTTCAGCTAACGGAGGCACAGGCTTCCCTTGCCGACGGTAAAACCTCTGTTACAAAGTCGTCTAATT  
TACCCTGCTCGATCGCGTCCCGCAAACCTGCATCACGCGTTGGTAATAACGCAGGTTATGAATCGTATT  
CAGACGGGCACCGAGGATCTCGTTGCACTTGTCCAGATGGTGCAGGTAGCTACGGCTGTAGTTCTTGCGAG  
GTGTAGCAATCGCATTCGGCATCCAGGGTGTGGTGTGCTTGGCGGTGCTGGGCGTTGCGGATCTTCACCA  
CGCCATCGGTGGTAAACAGATGACCGTTGCGGGCGTTGCGAGTCGGCATGACGCAGTCGAACATGTGAT  
ACCACGGGCGACCCCTTCCACCAGATCTTCCGGCTTGCAGACCCATCAGGTAGCGTGGCTTGTGAGCC  
GGAATTTTCGGGCAGACGTGCTCGAGGATGCGGTGCATGTCTCTTTGGGTTCAACCACGGCCAGCCAC  
CGACTGCATAACCGTCAAAACCGATCTCCAGCAGCCCTTGAGGGAGACATCCCGCAGATCTTCGTAAC  
CGAGCCCTGAATGATGCCGAACAGGGCGTTCTTGTTCGCCAGCGCATCAAACCTTGTGCGGGAGCGCTTG  
CCCCAGCGCAGGGACATCTCCATGGACTTGCAGCTTCTTCATAAGTAGCCGGGTACGGAGTGCACCTCGT  
CGAAGATCATCACGATGTGCGAGCCAGATCGTACTGGATCTCCATGGACTTCTCGGGGTGCGAGGAAGAT  
CTTCTCGCCATTGATGGGGTGCAGGAAGTGGACGCCCGCTTCCGGTGTCTTGCAGTAATGGCCAGGCTG  
AACACCTGGAAACCACCGGAGTCAGTCAGGATCGGGCCCTGCCAGTTCATGAAGTCATGCAGATCGCCGT  
GGGCACGCATCACCTCCTGACCCGGGCGCAGCCAGAGGTGGAAGGTGTTACCCAGCAGGATCTGGGCACC  
GGTTTCACGCACTTCTTACGGGTCATCCCCTTACGGTGCCTAAGTCCCGACCGGCATAAAGGCCGGC  
GTTTGTACAACACCAGTTTGAAGACCAGTTGACCGCGACGGGCACGGCCGTGCGTGGTTTTTCAAGTCAA  
ATTTTCATTGCTACCTCGGCTGCGTCAGATAAACAGTCTGACAATAGGGGGGCCACTCACGGCCCGTAAA  
TAAGCTGAAGCTTATGCTTCAACCTGGCGACGGGTGACGAACATGGCATCCCCGTAGCTGAAGAAACGGT  
ACTGCCCGGCCACGGCTGCCTGATAGGCCGCCATCACGTTGTCATAACCGGCCAAGGCGCTGACCAGCAT  
GATCAGGGTGCAGTCCGGCAGATGGAAATTGGTGACCATGGCATCGACTATCTGGAACCTGTAACCAGGG  
AAGATGAAGATATCGGTGTCACTAAAGAAGGGCGCCAGCGGTTTGCCTGCGCCAGGGTGACCTTGGCCG  
CGCTCTCCAGCGAACCGGACCGGACGTGGTCCCCACCGCGATCACCCGACCACCACGGGCACGGGTGGCCG  
GATGGCATCCACCACCTCTTGCGGCACTTCCGCATACTCGGAGTGCATATGGTGATCTTCAATCTTCTCA  
ACCCGCACCGGCTGGAAGGTCCCCGCCCTACATGCAGGGTGACGAAGGCCGTTTCAACCCCTTTGGCC  
GAATTTTCTCAAGTAGCGGCTCATCAAAGTGCAGGCCGGCGGTTCGGAGCGGAACGGCCGCCGGCTTTTG  
ATTTAAACCGTCTGTTAGCTGCTCCTTGTGCGCATCTCTGTCGGGACGGTTCGATATAGGGGACAGCGG  
ATGTGGCCGATGGCTCCAAAATCTCCAGTACCGGACCGGGTCTAGGAAGTGGATCTCGAAGCAGAGCGT  
CGTGGCGGGCGCGCATCTCTGCCTCCACACCACCATCCATGATCATCCGGGTGCCGGGCTTGGGCGCCTT  
GGAGGCACGGACATGGGCCAGCAGCTGTGCTCGTCCAGAATGCGCTCGACCAGTACCTCCAGCTTGGCC  
CCGCTGGCCTTCTGGCCAAAACATGCGCGCCGGAATGACACGGGTGTTATTGAATACCAGCAGGTACCCG  
GATTGAGCTGATCCAGCACATCCACAAAATTGACCGTGGCGCAGGGCGCCAGTTTGACCATCGAGCTGCAA  
CAGGCGGCTGGCGGTACGCTCTGCCATCGGATAGCGGGCAATCAGCTCGTCTGGCAGATCAAATGAAAA  
TCGGATACTTGCATCTTTACCTCGGGGGGAATCGGCGGCTAGTCTAGTTATCCCCATCTTCCAAGGCAA  
CCCAAAAGACCAAAAACCAAGAGAGACAAGGGGTAGCGAGCAATATTGAGACACACATCCGGTTAATGA  
TTCTTTAATGTTCTGTATTGACCTGATCATGTTTTGCCAGTTGGGGCTGGGCTAGGGTGAAAGCAGATA  
CACAAGGAGGCCACCATGATGACCTATCCGAAATCATGACCGAACACCCCTTCACTCTGGGTCCGTCA  
AACAGTGTCAAACAGGCGATGGACCTGATGCAGCAGGAGCGGATCCGCCACATTCCTCATCGTATGAGC  
AGCATCACCTGCTGGGGTTGGTAACCCTCACCGATATCCTGGCCACCCGGGAATCCAAGCTGCTGCTCAT  
CAGCCCGGAGCGGGAAGCAGAATTTACCGACAGCGTGCAACTCGACGAGATCATGACACGGCAAGTGGCG  
AGCGTAGATCCTCACGCCGCATCAAGGAGGCGGCACTTTACCTACAGCGGCACAGATATGGCTGCCTGC  
CGGTACTCAAAGGACGCAAGCTGATCGGCATTGTACCGAGTCGGACTTTATTGCAAGTGGCCATCAACCT  
GCTGGAATTGATGGAAGAGCAGGAACCACCTACCGACTTTTACAGCTCTGACTGTAATTAATTAACAAT  
AAAAGCGTTTTTCAGCCGTCAAACAAGCTGAAATGATGAAACACTTTTCAATTTTACTGAAAAATTACACC  
AAATGGCTTGCCCTTGATCTGCGTCCACTATCATCTCATGCAATAGTTGCCGAGGGGAGCAGGAGG  
GATTGTGCACCCATTATCTTCTCTCATATGTCTGCAAGTTTGCACACCCCGTAGTTAGTCTTTGCTGTA  
AAGCATTGTTTTATATAGCCATTCCCTTGTGTTGATGACCCGGCCCTGTCGTTGCGATAGCGCCGGGATTTT  
TTTTATCTGCGCTTTTTCGGCTTCCCCCTTACCAGCACATCCCCCATCGCTGCGAGCAGCGCCCTCAACCTC  
CTGCGCCACCCGTTTGCACCACCGTTTATCTCATCGCGTCATCGTGGATCTGCACACCTCTTCCCATGCC  
TTGAAAAGGCGATGTAGCGCACAGATATTGAACCAGACAAGGAGTTATCTCAGTAGGCCAGAGATATTC  
ATGTTAGGTACAGCCATAGTGAGCTATCTAATAAGTAGATTTAAGCGATTCAAAATTGCGGCTTTTATCG  
ATTAGCGGAAGCCCTATGATGAATCCATCGAAAGTTAAGCGCTCGTCTGGCAAGACTCTTCAACACCA  
GACCGGCATATGTACATCACCAAGGAGCAATTACATGTCTACCTACATCAACACTGAAATCAAGCCGTTT  
AATGCTACCGCTACCACAATGGCAAATTCGTTTACGGTGTCTGACGCTGACCTGAAAGGCAAGTGGTCCG  
TGGTCTTCTTCTACCCGGCTGACTTACCTTCGTTTGGCCGACCGAGCTGGGCGACCTGGCTGACAACCTA  
CGCTGAATTCAGAAACTGGGCGTGCAGATCTACTCTGTCTTACCAGACCCCACTTCACTCACAAAGCA  
TGGCACGACACCTCTGACACCATTCAGAAGATCCAGTACCCGATGATTGGTGACCCGACTGGTACCATCA  
CCCGCAACTTCGGCGTGTGATCGAAGAAGCTGGTCTGGCTGACCGCGGTACCTTCGTAATTGACCCGCA  
GGGCATCATCCAGATCGTGCAGATCAACGCTGGCGGCATCGGCCGTGACGCACTGGAACCTGCTGCGCAA  
GTTAAAGCGGCCAGTACGTTGCCCTCCACCCGGGTGAAGTGTGCCCGCTAAATGGAAAGAAGGCCAAG

CCACTCTGGCCCCGTCCTGGACTTGGTAGGCAAGATCTAAGCCTCCCGCTTCCAAGACCGGCCCGCATA  
AGGGCCGGTCTGCTTTCCGGCATTGCCAAATAGGCCTGAAAGCAGACCGACTCACATTTAATGCCAACTC  
GCCATTACAAGAAGGAATTCGACCATGTTGGATACCAACCTCAAACAACAGCTGAACACCTATCTGCAGT  
ACATCGTCAATCCCATCGAGATCAGCGTGTCCGGCAACGACAGCGACAAATCTGCAGAGCTGCTGGCACT  
GGCCAGCGAGATCGCCGAGATGTCCCCCAAGATCACCCAGACCTCTGGCACTGCCGCTCGCAAGCCTTCC  
ATGAGTGTGCGCGCCGAGGGCCAAGCCCCGCGCGTTCACCTTTGCCGGCATCCCCATGGGTGATGAATTTA  
CCTCTCTGGTGTGCGCCTGCTGCAAAGCGGGCCACCCCTCCAAGGCCGATGCAGCCGTGCAGGAGCA  
GATCCGCAATCTCAAGGGCGAGTTCACCTTCGAGACCTATATCTCCCTCTCCTGCCACAACCTGCCCGGAC  
GTAGTACAGGCTCTCAACCTGATGGCGACCCCTGAACCCCGGCATCACTCACACCATGATCGATGGCGCC  
TGTTCCAGGAAGAAGTCCGCGAGCGTCAAATCATGGCAGTACCGAATGTCTACCTGAACGGCCAACCGTT  
CAGCCAAGGGCGGATCTCGCTGGAAGAGATCGTCGCCAAACTCGACACCGGTGCCGCCGAGCGCAAAGCC  
GCCGAGCTGAATGAGAAAGCTCCCTACGATGTACTGGTGGTAGGCGGTGGCCCGGTGGCGCCGAGCGG  
CCATCTATGCCGCTCGTAAAGGCATTTCGCACTGCCATCGTTACCGAGCGTTTCGGTGGTCAGGTGATGGA  
CACCGTCCGCATCGAGAACTTCATCTCCGTGCCCTACACCGAAGGCCCCAAACTGGGTGCGAGCCTGGAG  
CAGCACGTCAAGCAGTACGGCGTGAAGTGATAACCGAACAGCGCGCCGCCATCAGCAAGGATGGCT  
ACGTCAATGTGGATCTCGCCTCTGGCGCCACCTTGAAGAGCCGCGCCGTGATCCTGGCGACCGGTGCCCG  
CTGGCGTGACCTGAACGTGCCGGGCGAGCTCGAGTACCGCACCAAGGGCGTAGCCTACTGCCCGCACTGT  
GATGGCCCCCTTCTTCAAGGGCAAACGGGTTGCGGTGATCGGGGGCGGTAACCTCCGGCATCGAGGCAGCGA  
TCGACTTGGCTGGCATCGTCGAGCATGTGACTGTGGTGGAGTTCGCCGACACCTGCGTGCCGATGAAGT  
ACTGCAGAAGAAGGCTCGCTCCATGGGCAATATCGACATCATCATGAGCGCTCGCACCACCGAAGTGATA  
GGTGATGGAAGCAAGGTGGTTCGGTATGGACTACGAAGATCGCACCACAGGTGAGATCAAACACCTGGCGG  
TGGCGGGTATCTTCGTCCAGATCGGCCTGGTACCGAACACCGAGTTCCTGAAAGGGAGCGAGATAGCCCT  
GACCCGCTTTGGCGAGATTGAGATCGATACCAAAGGGGGCGACCTCACTGCCCGGCGTCTACGCCGAGGG  
GATGCCACCACGGTACCGTTCAAGCAGATCATCATCTCCATGGGTGCCGGCGCCACCGCTGCACTGGGTG  
CGTTTGATTACCTCATCCGCAACCCCTGCTCCTGAAGCGACCCAGGCTGATGCTGTGACCGCTGATAAAC  
CCAGCGCAACAAAAGCCGACGCTCGATTAAGTAAACACGAGAGTCGGCTTTTTTATATCTGCATCGATG  
CGCAATAAAAAACCCCGCAGCAAATGGCGGGGTTGTTTCACTGACTGGACTTAAACGACGGGCATCACTCCAG  
CAAGAAAACAGCCTCGATATTATCACTTACCGTGTACTGCTGTTGTTGATAGCTGTTGTCCGCCATAACC  
GCCGAGGAGCAGCCATGCCATGGCCTGCACCACTTCAGGTTGCGGCTGTAGGCGGTAATGGGCGAAG  
CATTGCGGTACTCCACACTGTAGACCTTGCCAAGCTTCATCCCGAACGCCCTGGCCAGAGATTTCAGCCTT  
GATTTTGGCATCCTCAACGGCATTTCAGACGGGCTGCTCCTTGATGACCTGCGGGCATTTCAACCCGTAC  
TCAATCTGGGATACGGACTCCAGCCCGGCTTTGAGTGCGGTATCCATCAGGGGGCTCAATTTATCCAGCT  
GATAGAGTTTGACAGCCAATTGCCGCTGGGCACGGTATCCAGCAATACCGGCTTCTTGTCTCGCCATA  
CTGATATTCCGGCGAGACCATCAGGTTGCCAGCCTCAACATCGTTCGCTTGATCCCCAGCCCTTCCAGT  
TGGCTGAAAAGGCTGCGACCTTGGTATCGACCTGCTGCTTGGCCTTGAGGCCCTGCTTATCCAGTGCAC  
TCACCGCCACATTGAGGGTGAGCATAATCGGGTTCGGTCTTCTGCTCGGCATAACCGCTCACCACCAGATG  
GGGCGCTTGGCGCACTTCAATCGCCAGCAGCGGAACACTGACAACCAGAGCGGAAAGAGTAAGAAGGGGA  
CGCCACATAGAAAAAACCTCAATCGGAAAGATTGAGGCCATTATGCCCGTGCAGCTACGGGATTCATAT  
ATCGTGCAAGGGGGGAGCTGATCCAGTATCTGATTGGTTCAGATCGAGGCTTATGGTGACCATGCTGCCG  
GGATCCTGGCTCTGGTTTGGCATATCCAGCGCAGGAGCCGCGCCACAGACCAACACCTCATCATCGAAAT  
GGAACGAGTCCCACGACAGAACGTGTCTTGCACCGCTGTCCGATATTGGTGCCACCACTATCCTCCTC  
CATCGCAGACCAAGGGATGGTATCAGATGGCCCTAGCAAATCTTGAACAACGGAGAGTGAACCTGGCC  
AGCGGATACTCCTGCTGACCCCTGATGATGGCCAACCAGAATCATGTTATGGGCAGACTCGGTATCCATAA  
CCGGCACATAAGTGATAGAGGCCGTAGCGAAATCAACATAGAGCGAGCCCGCTACATCACCGCCCTCAT  
CTCAATCTCCATCCCATCCCAGCCGATCCCCCGCATCGAGGCTGATAGCCAAACTGGCCTGCACAGGTA  
ATGTTCCCTGCCATCCCAGCTATAACGGATGCCATCAATGTGACCCAGTTGAATGATGCATGATTA  
CCCCCTCCTCTACTACCGCTATCTTATCCATCCCTTAGGGAAAAAACAGGGGCCAGGCAAGCCCGGCC  
CCGAGACAAGGTTATAGACCCACCTTGAAGTTGCCAACATCCTGCAGTTGCTTAACGATGTTGTTGCAAT  
CGGTGGTAGGACCATTAACCTCCAAATCGAGACTACCTTAGAAAAGTTCTGTCTCTCCACCTGCCTCAGCG  
GAATCGATAGTCAACGTCTTGGTAGTCATAAGCTACAAGTAATTTCTCCAACACCACCGCCAAATCTTCGT  
TTTTATCCCATGCTGGTACGCCAACAGCAAATCAGACAGATCAAGTACATCTCCACCGCTGGCAGGTGT  
CCCCAAGGTGAAATCCGTGACAGTGTAGGTACTGCCATCCGTATGCCAGCTATCCACTTCCAGGCATTG  
CAGCCAGCGCCACCGGTATAGTGTGCAACCCAGAATAAGGATGCTCTCACCAAGACGACCAATCAGGG  
TATCACTCCCTTTTTGCCAAAGATGATGTCATTACCCTATCTCCCTCAAGGGTATCATTTGCCACCGCT  
ACGTAGCCATTATAGTGGTCTAATCATCCCGGACATCATTTTAGGTGGTACAGTCGCCACCATGACCTGA  
GGTGTTCATGACAAGATTACGTGCTCATTTACTGCCGAATTCAAACTCGAAGCCGCATCCCTGGTGT  
CGACCAGGGATATTAGTCCCCGAAGCCAGCCGTTCACTGGACGTTGGTGAAACCGTACTTCGTGCTGG  
GTTTACGAGCTTCAATCCGAACGCAGTGGCACAACCCCAATCAGCAAAGCGCTAACTCCTGAGCAGCAGA  
AAATCCAGGAGCTGGAAGCCCGTATCAATCGACTCGAACGTGAAAAGGACATTTCAAAAAATGTATGGTC  
TGCTCCTTATCTGCAAGCTTGAACCTGATTTCCAGAAGTCGTTTTCGTCAATGTATCCGGCCGTCTGTGA  
GCCGTTTTCCGGCTCTGGCCTTGTATGGGATCCGCACGTCATCGTCTAATAAAGCTACCAGTCATGAGAG

ACTGCTTTTTTAGCCAGGCTGCAACGTCGTGGGGTGAACGCTTCTGTCATCTGTTTTTGGCTCGCAAAAC  
CGGGTATGAGTTATATCTGTTAAACGGCTGCGCTTGGGATAGGGTTGGTAATCCCTGCCGGATGT  
CAGTACTTTCCAGCAAATTCGCATTATCTTGTGGCCAAGGCGATAAGAACCACATGATGGTGTGGCCA  
GCCTCCAGCCTAGCGACCCATTTCGCTAACGATGATTTGTACGCTTCATGTGAATTTTTAGCGCTTTGG  
CGCCTTGAATAACCATTTGCCTTAAATAGCTATTGCCACGCTTACTGATCCCGCCGAGCGAAGATTTGCC  
GCCCCGTTGAGTATTGCCTGGGGACCAGCCCCAACCAAGCTGACAGGTCGCGGGCTTCTTGAATTTGTGAG  
CCATTGCCAATCGCGGCAATCAACGCGGTTGAGACAATCGGTCCAATGCCGGGGACGGTACTGATTTTTT  
GGCACAAACCTGATGCGCTTGGAGGCTTGTCCGAGCATGAGGCTCATGTCATCAATCTGAATATCCAGCTG  
TTGCCACCGTTTTCTCAGGCGTAATACCAGGGCGCGGATAAAAGTCAGGCAAGCCATTTCTCGGCATCTTCA  
AGGATCGTCGGCAGAGAGCGCTCGAAGACTTTTTCTGCCACTGGCACGGTGGAGCCATATTCAGCAGCA  
ACGCTCGCATCTGATTGACAGTGGCGGTACGTTTCGACGATGAAACGCTGACGGACGCGATGATGTCGTTG  
CAATGCCAGTTGCTCATGAGATTTCAACGGGACACAGCGCATAGTACCTCTGCTACCAGCTCGGCAATG  
GCGGTAGCATCGTTGAAGTCATTCTTGTGTTGATTTGAGGTAGGGCTTACAAAATGGGCAGGGATAATCT  
TGGGTTGAAACCCCGCCTGTTGAAACAGGCGCCCCCAGTATTGCGAACCAGGACATGCCTCGAAGGCGAC  
CCGACAGGGTGGGGTCGTGCTAATGAACTGTTTTCAGTTGTGAACGCGTGAGCTTTTGTGTTCAATACA  
TGCCCCATGCGATCCATCGCCACCAGGTGAAACCAATTTTTGCCTAAAATCGATCCCGTAAAATGTAAATCT  
GCGCTTGAATCATGATGAGCCTCCTTGTGCTGGCTACAGCATAGCGGGTGGGTGGAGCAGACCATCCC  
ATTAGGCTACTGCTCTCTTGTGATGGCGGACGAGTTCACACGTACGCGCTGATAGACCATTAAAGGGAGCAA  
GCCCCCATCACTCTGGTCTGCAGCGCCTTCGATGTTCCACCTCCTGTTTTTACGATTATCTGGCCCCGA  
GGCGGGCGATTAACCGTGAGCGTATGCAGCAGCGCTCTGAGTTGCGCCGTTTGTCAAAGAAAGCCGGAA  
CTCAGCGGGCAGCCGTGCCTTGTGATGTCGATGATGCGGGAGCTGGGGTATCAGATTGGTTCGATTCAAAGTA  
CGTAACCTGATGAAGGAAGCCGGGTTGGTATCCAAAACAGCCGGGCGCACACCCGCTATAAGGTGGCACGGT  
CTGAACGACCCGACATTTCCCAATCTGCTGGCCCGGAATTTGATGTCCAGCAACCCCAATCAGGTGTGGTG  
TGGCGATATCACCTACGTCTGGGCAGGTGGCCGTTGGCATTACCTGGCAGCGCTGCTTGACCTGCATACC  
CGGCGGGTGTGGGGTGGGTGATGTCAGATAAACAGATGCCGAGCTGGCCATCAAAGCACTGGAGATGG  
CCTATCAGCCGCGGGGTTGCCATTCCGTGTGCTGTTTAACTCCGATCAGGGCAGCCAATATGGCAGTCCG  
GGCATTTCCGGAACGACTGTGGCGCTATCGCATGACCAGAGTATGAGTCCGCGTGGCAACTGCTGGGAT  
AACGCCCCGATGGAACGTTGTTTCAAGAGCTGAAGTCAAGTCAAGTGGTCCCAGCAACGGGATATGAGCT  
TGCGAGAGGCGAAGCGGGATACAGTTACTACCTGATGAGTACTTACAACTGGCGGCTCCACATATAAATA  
CAATCAGGGATGCCGCCAGCAAAAAGCCGAAGATCGGCCTAACCAAGTGTCCGGATTTAGTTGACCACTA  
CAAGTTGGGCTATCGGGAGATGAAGCACAGCCTGCAACAACACCCGCTGACCCTGCGCAGCAAGAAGGCG  
GCGGGGATACGGCAAGAGCTGTGGGGCGTGTGCTGGCGTATAAACCCTGCTGCGCAGCCAGATGGTAAAGA  
TGGCGGCGAGTCTGAAGGGATACACGGCGAGCCAGCTGAGTTTTTACATGGCATAGGTGTACCTCATCCA  
TGAAGTGAAGTGAATGCCGTACCTGTACCCGGGAGTATCCCGAAGTGGGTGGCGGAGCTGGATAAGCAG  
GCGGGGCGAGTTTGTATTACCGGAGCGAAGGGAGCGGAGTTACCCCGCAGTGTGAAGGCAAGACCACAAA  
AGTATGCGGTGCAAAAAGCCAATAAAAACAATGCCAGTCAAGGCTTAACTGACTGGCATTACCTATCGGGG  
CCATTTAATTCAGACAATGGGAAGGCAGGATGAACAAATCCCTGGTAAACATCGATATGCAACTTGGAA  
AGCAGTTCACCTTGTGATGTTGATCCTCGACACGGGTCGCAATGGTGGTACACCCGGCATTGTGTGCGGCGC  
GACACACTGCAGCCAGGAATGAGGTGTACGCCCCGGCTCCATGACCTGACTGGTATAACCCTGATCAAC  
CTTGACATAAGCCGGCGACAACCTCCAGATAGCCAGAGACTGGAAGTGCAGCCATAGTGGTCAACC  
CCCCACTGGAAACCATGAGCTTGAAGGTGCCAACCAACGCAGCCACGTTGTCTTTATGTTTTCATGATGG  
CAGCTTCAGGATTTCAAATAACAACCGCTCTTTGAGCTCTGCATGCTCGGTTCAGATAGCGCGTCAGCCA  
GGTTAAAATTCATCCGAGCAGAGCGAGCCAGCAGTGTGATGTCGCCAGTACCAGATCAGACTGTTTTT  
TGCAGTAATGGAACGCAAGCATCAAGCACCGCCTGGTCAAACCTCGCCACCCAATTTGAACTGTTCAATCG  
CGGGCAAGAAGTACCCGGCAAAAATAATCAGTGCATCCCGAGAGATAGAAGCAAATAGCTCGGCATGCAA  
CCTTGCTCCATTATCAAACCGGCAAGCTGGTGTGCTTTGAAGCGCAAAGTTGTCGTGAAATGGCATCT  
TGTACCAGATCTCGCCAGGCCAAAACGCCCATCAAACCTTGTCTCGGTCCCCCTTCCATCACCACAGCAC  
CACGGCGTTTATTGCGCGCCTTGCCTAAGCGCATTATCGGCTTTGGTCAACAAGGCAGAGAGATCATCATT  
GCCATCACGACCAGCAATACCGATGACGGAGAGCGCATCCCCCTTCGCCCATTTGGATTACACCACAGATCG  
GCAATGCGGCTATTAATCACTTCAGCCAGCTCTTTTAACTGAGTGTGATCGTTCAGTTGGACAGAGCAGCG  
CATATTCGCTCGCGGAGATCCGTGCCAAGGCTGCGCCATCCCACCTTTTAAATGCTCTTTCAAAGCCTG  
AGCTATCGATTTGACCATGTTGTACGGGAGCAAAGCCTTCATCGCGATAGATATCATCCAGCATGTCCG  
ACCGCAACCAGCATGACGCCACCTTGGCCAGCCTCCGCTATCCATGCGTTTACCTGGCCACAAAATAGG  
CTCGGTTGCCAAGCCCCGACACGGCATCGACATAAACCCGCTCACGCAATTTCTCGGCCTCATCGGCTTG  
CTCTTTGAACTGCAACGCCAACTTGTCTTGAAGGGTGTGATCGCTGAACGACCTGCTTCAATTCATGG  
GTTTTAGGCTCCGGGATCGTATGACCGAAATGGTGCAGCTCAATCTCGACGGCTTGTATCACAGATCTGTT  
TGAGTGGCTTGAAGTAGTTGAGTGTCTCATCAACAAAATGGTGGTGTATCAAAAAGCCGACCAGAAA  
CCAGCTCGCCAGCTCGCTCATCCCCCGCCACAACCTCGTAATAAGCCTGGCCGGGGTGGACCACTACTTTTT  
AATTTTCCAAGCTGCAACCAGCCAGACGTCAGAATGACTCGTTGGATACCTCAGGAAACAGTCCCAAT  
TTACAAACCACCGGGTACCCCTGAATATTGTTGGTATTTTCTGCTCGATGACATCCTTTGATGCCAG  
CAAATCCAAGCGAACCAATCGATAATAGCCACCATCAAAAATGGCTGGATCACCGACTCGGCACCGACC

TTGTACCGTTTTCCAGATAGGGGGTGAGCGCAAGCCCCAGCGAGGTTGCCGTATTGATGACCGTTGTTT  
CCTGTTGCTGCGCAAGATAAGTGC GGTTGAATTGAATTGCACCCAGTATGTGGCCGCAAATAACAATCC  
AAACAGCAGCAGCATGGTGGCTAATAACTGTTCGATAGAGCGTCATAGGTTAATCATCCAAATTCACCACT  
GGCCGAGCCAATCGCCCCGAGGTCATGCGATTGCGTAAATCATTCCATAATCCCAAGCGGGATGATTGAC  
CAGCCAGTTCCCCTTGGCCTCGTGCCTTCATCAACCACAAGTGACTACCGTTAAAACGTGTAATAGGCAC  
CAGATCACGCCGCTGTGTGGCAGGGCGAATCGAGCCTATCAAATTTATCCAAAATAACCGGAACGGAAGAG  
GGTGTCTCATAATATGCAACCACCATGTGAAACTGGTTGTAATCAAGAGCCTTTACGTACACCATTTCGCA  
TTTTATCATCCGGGATCCCAAGCTCGAGCAGCGTAGAGTATTTAGCGATACTGAAATCTTCACAGTCTCC  
CCCCGGGGCTCCCAAAAATTCAGCGGGGTTGCCAATAATCCTTTTTGCTCCACAACCTTGATATCGTCA  
ATAAAACGCATCCGATTGAAAAAATTATTAACCCGCTCAAGCTTTTTTCTTCGCTCAGGGCCCTGCCCT  
TCGTCTCCATGACCAACATACGCCAACTGGTTACAGCTTGCCGGCTTCGCGGCTTCGGCGCCATAGGTTGCTCCGC  
CCGCTTGATCAAGTTGAGATCTTCTGTGGCAGAGGCTGACTGGCACAGAGCAGAAGTGAGAAGGGTAAC  
AGCAGGATCCATAAGGAGTGGCGCAGAGCGGTAAGGATCGGTATCTCCATTCATTGAGAAGATAACACC  
ATCGGCTACCGGTACCACGCTGGAGTGTACGTCATATTCCTGCTGCATTATTGCTGCTGCACTCCTCAA  
AGCCCGTGCAACCACCTGCTTTAGCCAAATATGGTGACTGCCAGCAGCAGTCACCATATTGACGTTTATA  
ATCCCTGCGGGATCATGGGCAAACGGTTATTGCCGGCCTGCCATTCAGCAGGTTGTTTGACGCTAAATG  
CATTGAGCAGGCTGCCTGTGCGGTTGAGAATGCGATAGTCCGCCAGCAGTGCATCATACTCGGCAGTGAT  
ATAGCTGCGACGCGCCTCGAACAGTTCGTTCTCGGTGTTCAATACGTCAGCAATGTCGGTTGACCCAAC  
CCAAACTGCTTCTTGATGCCTGTACGGTGTACATAGCTGGCGTCAACATGCTCTTTCAGGAAGGCTTCTCT  
GCTTGGCCAGCGACTCTTTCGCGTTCAGGCCAGACGAGTGCCTTCTCCACCTGGCGGAACGCATTCAA  
ATGAATGTCTTTCGCTGAGAGTAGAGCGCCGATGTTGCATTGCTCTCTGCCACATCAGAACCGCCACGG  
AACAGGTTGTAACGCATCCGCACCATTGCGGTGAGATCATCGTTGCCCCCTTTGACCGCATCGATATCCT  
CATTCCAGTTCTGATCGACCTCGAATGTTACATTGGGGTAGAAAACCGGATTTGGCACCTTCATGCTGATA  
CTTGGCCGCTTCGATATCCTGCAGGGAAGATAGCAAGGTGCGATGGACTTCGGTCGCTGTTTTTCAGCGCA  
CTATCGAGGCTGGTCCGGGATAAGCTCGGTATTGGGAACCGGCTGTACCAGATCTTTGGGTACCTCGTTCA  
CGACACGAATAAATCACTCTCTGCGTTCGATAGTGTGTTTCAGCAGCGGCTGATTTGAATAGGCCCG  
GGCAACACGACCTTCAATCTGGGTCTGATCCGAGTAGAGCCAAGACCTGAATCAGTCCGCTTGCTGATG  
TCGCTGCGGATCTGCTCGTGGGTTTCCAAGTCTGTTTGGAGAGTTCCAGGATCTCTGCTGGCGCAGCA  
TATTGAGGTAGCTCAGCTACTCGACGCGGATTTTTCAGCTTCGGAGATCATCGCCAGACGCTGGGG  
ATTGGCTTCAGCTTCGGTTCTGGAGACGTTGTTGCTGACATCAAAGCCATCAAACAACATTTGTGCGAGA  
CTGAGTCCAGCCTCTTTGCGAGTCAACGAATCATCACTGTTTGGGTTAATTTCTTGTGCAAGGACTGTCCG  
TTTTTCTCGTAACCTACGCCGCCACGCAGATCGATCGTAGGATAATAGCCACCCTTGGCTCCATCATGCTG  
ATAGAGTCGTGCCTGATACAGATCAAACGCTTCTTTATCTTGGGATGCGTAGCAAGTGTCTGTGCCACC  
GACTCTTCCAGAGTCTGGCCTGACCCAAACTCGGGATCAGGATGCAGCCACTGACCAGCATGGCAACAA  
TCGTTTTTTTTCATGTTATCTCCAGTCATGTTTTGTTTTAGATTGTTGGCTTATCGTTCTCTCAGTGCCG  
ACTGCTTTGCCCCGTAATAATCGGCTTAAGCAAATAGTCTAGGACACTTTTTTTTACCAGTAATGATATCAGC  
ACTGGCTAACATAACCGGGGATGATGGGAAGTGCCTTAAGCTCATCGCCCAAGTAACTTCTCTGTTCGA  
ACCCGAACCAGATAAAAAGGAGTTCCCCTCCTCATCTGATCGAATCCGCACCTTATCTGTTCAACCTTGC  
CCTGCAATCCTCCATAGATTGTAATAATCGTAGGCAGTAATTTTGACGATGGCATCCAGCCCCGGTTCGCAG  
GAAGGCGATATCTTTCCGGCGACACCTTGGCTTCTACCAGCAAGGTATCCTCCAACGGCACAATCTCCATC  
AAATCCATGCCGGGCTGAACCACGCCGCAAGGGTGTGATCTTGAGTTTCTTGATGGTGCCCTTGAGCG  
GAGCAATCACGCTGGTCCGGTGCACCCTGTCTCGCAAGCCAACCTGCCCTTCTGACAACCTGGCCAAGCCG  
CCCCTGTTTCTCATTACGTTTCACTGCTGGGAGTCTGCTCTGAACTTCAGCGCAATATCATTACGCTTGGAG  
ATGGTCTCACGCAGTACCGAATTGAGTTTTGGGATCAGCAGACGGTTGCTCTCCAACCTCCCCCTGCATCT  
CGTTGACCTGCCGCTCCAGCTTGATTAGCTCCACTTGAGGCACTATACCCTCTTTCGCCAACGGACGGCT  
AATATTCAGTTCTCTGCTGGCCAAATCCACACTGCGATTCAGGTTGCGAATTTTGGCATTAAAGTTCAATC  
AGCTCCTGCTCTTCTGTTTCGATTTGCTGACCAAGAATATAGAGCTGGTTCTTCAGGTTATTGAGGCGAT  
CCCCGCTGTACAGACCGCTCACGGTGTGCGTATTCCGGCAAAGACGGTTTCATAACCATCGGGGAACCTGGAT  
TGGCGCTTCTCCTACCACAACCTGCTCACGCCACCCAGTGCCGGGTCGTTTCTCACCTCGACGCTGGCC  
ATCTCGGCGCGCAGACGGCCACATCCCCCTTGGAGGTGACCACCTCTTGCTCCCGTTCTCTAAAGTCGG  
AGCGGAAACGGGTGTCATCAATGCGCAGCAGCGGCTGCCCTTTTCAACGATATCCCCCTCTTTGACGAA  
GATCTCTTTGACGATCCCCCTTCCAGGTTCTGGATCACCTGCAGCTGACGGGATGGAATAACTTTGCC  
TGACCCACGGTGACTTCATCCAGTTCCGGCCAGGCCGCCAGACGATGGCACTCATGAAAAAGAGGAAAC  
AGCACCATAGCAGGATGCGAGCACCGGTCCGGCTGGTTCAGCAGTACAGCTGCCGCGCCGTCATCGACAAA  
CTCCAAGTGCTCGGGTGTGGCAATACCTCGCCGGAAGGCGTCTTTTTGCTGCGCTTGAACCAGTCCATG  
AGCCCTTAACCATGGGACACCTCCTGCACGCGCACCTTGCTTCTTCAACTGCTGCAACACCACCTCT  
TTGGGGCCATCAGCAACGATCTGCCCTGCTCGATGACGATCACTCGCGATGCCACATCCAGCATCGAGG  
TTTTGTGAGTGATGAGGATCAATGTGGTTTTCCGGGCCAGTCTGGCAAGCTCCTGTTTGACCTGCATCTC  
GGACTGGTTGTCCATGTTGGAGGTCGGCTCATCCATCACCAGAAATGGGGGGATCATTGAGCAGGGCGCGT  
GCCAGCAGGATCGACTGACGCTGACCACCGGAGAGCTGACGGCCACCTCACCTATCTGCCGATCCAGCC  
CGTTGGGATCCCGGTTGGTAAAGTTGGTGACACCCGCCGCTTGGCGGCGCGCAAGACTCTCACATCATC

CACCAGCGGATTACCCAGCATGATGTTGTCCCGCACAGATCCGAAAAAGAGAATGACATCTTGCGGAACA  
CAGCCGATATTGCGACGGATCACCCGAGGTGGCAGTTGATCGAGTTCAAAACCGTCGATACGTACCGAGC  
CATCGGTTCGGTCGATACAACCCCATCAACAGCTTCTCGAGGGTCTTTTACCCGCCCAATCCGGCCGAT  
AATCGCCACCTTTTTCGCCCGCTGAATGCGCAAATTGATATTGTGCAGGGTCTGGTTTTCCATTCCC  
TATTTGAAGGAGACATTTTCAAATTCATGCGACCGGCAATCACCGGATGATGGATATATTGCTTGCCCT  
CCTCCTGCTCACCCGGGTTTGCATGATTTTTTCCAGAATATCCAGTGCTGACTTGGCCTGGTTATAACG  
GGTCGACAACACGGAGAGTTGCACCATAGGCGCAATGGCGCGACTGGAGAGCATCACGGCGGCAATCATG  
CCCCCATGGTGACCAAGCCTTCCGAGATCTGGTAAACACCGACGATCACCGACCGACCGTACCACCT  
GCTGGATATAACTGGCCAGCGAGGACATGGAGTTGGTAATGCGGCGGGTCTGTACGCCCCAGGTGGAAAT  
ATGGGAGACCGCCTGTTCCAGCGATGCTGGAACATGCTCTCGGCGCCGAAAATCTTGACGGTTTCCAGC  
CCGGAATACTTTCAATCAGGTTGGCGTTCTTCTGGGACGCCAGGCGTGACCCCTCTTCGATGGACTGCT  
TGAGGGGCTCCTGAATATAGAAGCTGTAGGCGATGAGGATCAGCATGGCGACGATGGGAACCAACCCAT  
TACGCTGCAAACATCCAGATAATAAAAAAGGAAGAAGACGGCAAAAAGGGAGATCGATAAGAGTAGAAACC  
GTTGCGGAGGTGAAAAACTCCCGCACCGATTCAAATTCCTGCAGATGTTTTGCGAACGCGCCAGTGGAAAG  
CGGGACGAGACTCCATCCTCATGCCATCACCTTGGCGAAAAATCTTGGCGGACAGCAGCACATCAGACTT  
TTTACC GGCAATGTCGATAAAGTAACTACGCAACTGCCGCATCACAAAATCGAAGGTAAAGACCACCATG  
GCCCCGACCGCCAGCACCCAGAGCGAATCAAACGCCAGATTGGGCACAATCTTGTATAAACGTTTCATGG  
TAAAGAGCGGACTGGCGATGGCAAACAGGTTGATCAGAATGGAGGCGATCAGCACATCGCGATAGATGCC  
GCGGGATTGCAACAAGGTGCTCCAGAACCAGTGTCCATCACGGGTTTCAAGCACCTTGGGCGAGCGTTCCG  
TCAAACCTTGAAGTCTTCTTTACATAGAAGAGGCGCCCCAAATACTCATCACCCAACTGGGCTGCGGTCA  
GCCATTGCGCGGCATCACCGACTGCGGGAAAAATCACTTTCCTTGGCTGCGATCTTCGTTCCACTCCAG  
CAAAATGCAGGCGCCACCCTGCGCATCTGCAATACGCAAGGCAGCAGCAAGGGAGAAATATCGGCCAGT  
GGCTGGATCACTTACGGGCGGATAAACC CGCCCCGCTCGGCAGCACGGCAAAAAGAGTGGCGTTGTAGGC  
GTCCGGAGACCAGTGGCAACCCGGTCTGACTGTTGGGTACACCATAAAAACGGGTCAA  
GAAGACCAGACACTCCAATAACTCATCAATACGACTTGTCTTCTGCTTGCATAGCATCCTGTCACTGCATA  
AATGAGGTAGATAAGAGCGTTCATCGCTCATATTTCCCTGCTATAGCCACGCTAAAACCGAGTAGCCTTC  
CCGCTGATGAGACTGCGATCAGGGGATAAACCTGTCCAGATAGATCGCGACACTCATCCCCAATTTCCCGGC  
ACAGCAACTGAGGACTGATTCGTTTATTGGTAAAAATAATCGACTCATCAACACCATGCTAACACTGC  
AACAGGGTGAATGTCGGAGTTAATTGATAATTGACATTTATTATGGCGCACCACTATATCAACCGGCAG  
TACCAAACTATAGTTTAGGGTATGAAGTTTTTTATATAACCTATGTTTTACGTGAAAATAATAATCTG  
GTGCTCAATTATAGGTGAGGAAGTATGAAGGGTCTGCCAACCGCTGACCTTGCGGGCGGTTCAATGAGA  
GTGCTTTGGCAATATCCGCCATGGCCGTCCAGCGATTTTACACACAGGCTGGCGCCAACAGGGTTGGACG  
GCGCGCGGAGGCCGAAATCCGGTGATACACCACCTCGGGCGGCGTGTGCTGGATCATGGCAACGGCCGCC  
TCCACATACTGCTCCAGCGTCAATACCTCAAGCCGCCCGCATGCCACGCTTTGCCAAGAGTACTACCCT  
CTACCACATGAAGCGGATGCAGCTTGTATCCCTCAACACCGGTCTCAACGATGCGATGCAGGGTATCGAG  
GCTGTCCATCGGCACCTTCGCCCCGAGGCCGACGATCAGATGAGCACATACCTTGTATGCCGCGTGTATGG  
GCACGTCTTACCGCATCCTCATAGGCGGCATAACCGTGGCCGCGTTGATCCGTTGCAGGGTCTTATCGT  
TGGCACTTTGCAGCCCAGCTCCAGCCACACCTCGTAACCCCGGGCTGATAGCCCGCAACAGATCCAG  
CACCGCATCCGGCACGCAATCGGGGCGAGTGCCACACAGAGCCCCACCATAATCGCTCACTGACAGCGCC  
TCTTCATACATCCGCTGCAGATATTGACCTCGGCATAGGTAAGTGGTATAGGCCGAAAGTAGGCAAGAT  
AGCGCTTGGCACGGGTGACTTTCGTCGCGGAGCCAGCAGTTGTGTACCACGGAGAGTTGTTGGGCCGA  
CTCGTCGGCAAAAGAGGATACGTTGCAGAAGGTGCAGCCACCACGGCCAGGGTGCCGTCACGGTTCGGG  
CAGGTGAAGGCCCGTGGATGGAGAGTTTGTGGATCTTCTGACCATGACGCTGCTTGCAGATCCTGACCGA  
ATGTATTGACGAGTTTCGTGTAACCTGCATGACACCTCCGCTAAAGGAGCGCCATTGTACGAGCTTGC  
AACAGGGGCTGAGCTGGATCAAGCTAGCAGAGAGGGTAAAAACATATAAATACCCGACCAATTTTGAATAA  
ATATAGAGAAAAAGCGCAAAAAAAGGATTTTTACAGTTCTTTGACGATTTAAACAGTAAACATCCATATG  
AAAAATGAGACCTGATAACCCACTGTTGAACAATGAAAAATCCAAAGAGACCCGACAGCACACAATTGCAA  
GCATGGGATATTGAAAATGTGATCACTTCCGCTCTCGGTAGCATAGGGTTGGTAAAATTTACTACATTCGC  
CCATCGTCGCCGAGCACACCATTGAGCCCGTCAATGGCGATATATTTAACCACAAAAATCAAATAAACA  
GAATAAACTCCATAACTGCGAGCTAATCCCCCTAACCCGACATTTTGTATGCGAATGTAACCATGAA  
GACAAACCTGACCTGCGATTGACCTCGCCAGAAAAATCCATTAGTTTGGAGATTCGCCACGTCAGGCAGA  
CGGAACCACAAGAGCCAATCGCAATTTATGAGTCAAGTGTGACTGTGCGATACAAGGCCGAGCAAGGG  
AGAAATGCAATGTCACTATATGATCCAAAGCTGGAGAGGGATAACTGTGGCTTCGGCCTGTTGGCCACA  
TGGAAAGGGGAAGCCAGCCACAAGCTTGTTCGCTCGCGATGTCAGCATTGGCTCGCATGCAGCACCGCGG  
CGGGATCTCCGCCGATGGCAAGACCGCGATGGTTGCGGTCTGCTGCTGCAAAAACCGGACAGCTTCTTC  
AGAGCTGTGCGCGAGGAGAAGGGATGGCACCTTGGCCGCAACTATGCGGTTCGGCATGCTGTTTTCTCAACC  
CTGACCCCGTATTGGCCCAGCAGACCCGCGACATCATCGACGAAGAGCTGGAAAAAGAGACCCTGAGTCT  
GGTCCGCTGGCGCAAGGTGCCCGTGCATACCAACGTAAGTGGGTACCATCGCAAAAAGCCTCCCTGCCAGC  
ATTGAACAGGTCTTTGTCAACGCCCGCCCGGCTGGGTGACAAAGGATCTCGAGCGCCGCTCTATATCG  
TGCGTCCCGCATCGAAAAGCGCGTCAACGACGACTACTTCTATGTGGTCAGCCTCTCCAACCTGGTCAC  
CGTCTATAAAGGGCTGTGCATGCCGGTGGACTTGCCGCGCTTCTATCTGGATCTCGCCGACATCCGTATG

CAGGCGGCCATCTGCGTCTTCCACCAGCGTTTCTCCACCAACACCAGCCCAGCTGGCCGCTGGCCCAGC  
CGTTCCGCTATCTGGCCCACAACGGCGAGATCAACACCATCGCCGGCAACCGCCAGTGGGCCAAAGCGCG  
CAGCTACAAGTTTGGCAGCCGCTGATCCCCGATTTGCAGGAAGCGGCCCTTCGTCAACACCACGGGG  
TCGGATTCCCTCCAGTCTCGACAACATGCTGGATCTCTCTCCGCGGTGGCATGGACCTGTTCCGCGCCA  
TGCGCCTGTTGATCCCAGCATGGCAAAAGCACCCGAACATGGATGACGACCTGCGCGCCTTCTACGA  
CTTCAACTCCATGCACATGGAGCCGTGGGATGGCCCCGCCGTATCGTCATGACCGATGGTCGCTACGCC  
ACCTGCGCACTTGTATCGCAACGGTCTGCGTCCGGCCCGCTACGTATCACCAGGACAAGTTCATCACC  
TCGCCTCCGAAGTTGGCACCTGGGACTACACCCCGGACGAAGTGTGGAGAAGGGCCGGTTCGGCCCCGG  
CGAGCTGTTGCTGGTGGATACCAGCAACGGCAAGGTGTGGACCAGCTTCGAGATCGATGACGATCTCAA  
AACCGCCACACTACAAGCAGTGGATGGATAAAACATTGCCGCCGACTGGTCCCTTCGAGCAGATGGAC  
ACAGCCAGACCCGTAGCCGCGAGTTCTCCGACTGACGACTGAAAACCTATCAGAAGCTGTTTGGCTACT  
CTTCGAAGAGCTGGATCAGATCATCCGGTACTGGGTGAGAACGGTCAGGAAGCGTTCGGTCCATGGGG  
GATGACACCCCGATGGCGGTGCTCTCCTCCGGCCCGCGACCCCTTTATGACTACTTCCGCCAGATGTTTG  
CCCAGGTGACCAACCCGCCATCGATCCGCTGCGGGAAAACCACGTATGTCGCTGGCCACCTGTATCGG  
TCGCGAGCAGAACGTCTTCAACGAGACCTTCGGCCACGCCACCAGGTGCTGTTCCAGTCGCCGATCCTG  
CTCTACTCCGACTTCCACCAGCTGCTGGCACTGGAAGGTGAGTACTACCGTCATCAGGTGATCAGCCTCA  
ACTTCAAGCCCGAAGAGGGGCTGGAAGCGGCCATCGTGCATCTGCGATGAGGCCAAAGCCGAGCCAA  
GAGTGGCACCGTACTACTGGTGTGTCGGATCGCATATCAGCGCCGACACCCTACCGATCCCGGCCGCC  
ATGGCGGTGGGTGCAGTACAGCGCACCCCTGGTGGACAACAACCTGCGCTGCGACGCCAACATTTCTGGTGG  
AGACCGCAAGCTGCCGTGACCCGACCACTTCTCGGTGCTGCTGGGCTTTGGCGCGACCGCAATCTACCC  
CTATCTCGCCTACGAAACCCCTGGCCAAACAGGTTGAAGAGGGGGTGTCTCATGCCCTGCGCCAGGCG  
ATGGTCAACTACCGCAACGGCATCAACAAGGGGCTCTACAAGGTGATGTCCAAGATGGGCATCAGCACGG  
TCGCCAGCTACCGCTGCTCCCAGCTGTTTGAAGCGGTGGGCCCTAGCCAAGTCGGTGGTTCGATACCTGCTT  
CCGCGGCGTATCGAGCCGATTCAGGGTGGCGATTTTGGCGATATCCAGCAGGATCAGCACAACTTGGCC  
CGTCAGGCCTGGCTGGCCCCGAAGTCCCTCCCCACGGCGGCTGCTCAAGTTCGTCCACGGCGGCGAGT  
ACCACACCTACAACCCGGATGTGGTGCAGACCCCTGCAAGCGGCGGTGCGCTCCGGCAACTATGCCGATTA  
CAAGGAATACGCCCGTCTGGTGAACGAGCGTCCGGTTGCCACCCTGCGCGATCTGCTGGCCCTGAAGAAG  
GTCGACAATCCGGTGCAGTGGATCAGGTTGAGCCGCGACAAGCTGTTCCCCCGCTTTGACTCCGCCCG  
CCATGTCCATCCGGTCCCTCGGCCAGAGGCCACGAGCGCTGGCTGTTGCCATGAACCGCTCCGGCGG  
TCAGAGCAACTCCGGCGAAGGTGGCGAAGATCCCAAGCGTTTCGGTACCGAGAAGAACTCCCGCATCAAG  
CAGGTGCTTCCGGTTCGCTTTGGCGTCAACCCCACTACCTGATGAACGCCGATGTAGTGCAGATCAAGG  
TGGCGCAGGGTGCCAAGCCCGGCGAGGGTGGCCAACCTGCCAGGTGACAAGGTCACCGCCAGATCGCCCA  
GCTGCGCTATTCCGTGCCCGGCTGACCCTGATCTCGCCGCGCCGACCCAGATATCTACTCCATCGAG  
GATCTGGCCCAGCTCATCTTCGACATCAAGCAGATCAACCCGAGCTGTCTGGTGTCCGGTGAACCTGGTCT  
CCGAGCCCGGAGTGGGCACCATCGCCTGCGGCGTGGCCAAGGCTATGCCGACTTCATCACCATCTCAGG  
TTATGACGGCGGCACTGGCGGAGCCCTCTCACCTCGGTCAAATATGCCGGCTCCCGTGGGAACCTGGGT  
CTGGCTGAAACCCAGCAGGCGCTGGTCCGCAACGGTCTGCGCCACAAGGTGCGGCTGCAGGTGGATGGCG  
GTCTCAAACCTGGCCTCGACATTATCAAGGCGGCCATCCTCGGCGCCGAGAGCTTCGGCTTTGGCACCGG  
CCCCATGGTGGCGCTCGGTTGCAAATACCTGCGTATTTGCCACCTGAACAACTGCGCCACCAGGCGTTGCC  
ACTCAGGATGAGAAGCTGCGTTCGCGAGCACTTCAACCGGCTGCCGGAGATGGTGATGAACTACTTCAAGT  
TCATCGCCGAGGAGACCCGCGAGCTGATGGCCAGCTCGGCGTCACCCAGCTGACCGACCTGATTGGCCG  
CACCGATCTGCTGGAAGCCCTGCCCGGCTCACCGCTCGTCAGGCCAAGCTGGATCTCTCTGGCATCTG  
GCCCGTCCGGTAGCACCAGCAGGCTCCAGCCTGTTTACGCCAGCAGCACAACCCCACTTTCGACAAGGGC  
CGCTCAACCTGAAAATGGTGAAGATCTGCTGGAAGCGGTGGAACCTCAAGCGGCGGCGAGTTCGGCTA  
CAGGGATGGCGGCGATCCGGTCAAGGTGCACTTCAACGGCACCCGAGCCAGGCTTCGGCTTCGGCTGGA  
ACGCGAGGCGGCTCGAGATGATCCTCACCGGTGACGCCAACGACTATGTGGGCAAGGGGATGACCGGCGG  
CAAGCTGGTGATCAAGCCCCATGTGCGGCTGGCGTTCAAATCCCATGAAGCGGCCATCATCGGCAACACC  
TGCTCTACGGCGCCACCAGGCGGCAAACTCTACGCCGCTGGCACTGCCGGCGAGCGTTTCGCGGTGCGCA  
ACTCCGGCGCCCTGGCGGTAGTCGAGGGGATTGGCGACAACGGCTGTGAATATATGACCGGTGGTATCGT  
CACCGTACTGGGTGAGACCGGCTCAACTTCGCGGCGGCGATGACCGGCGGCTTTGCCCTACGTGCTCGAC  
GAGTGGCGCAACTTCGCCAATCGCACCAATCCCGAGCTGGTGAAGTGTGGACGTGGCGGATCTCGCCA  
TCCATCAGGAACACCTGCGCGGCATCATCACGGCGCACCTCAATGAGACCGGCAGCTCGCGCGCCGAGGA  
GATCCTGGCCAACCTCGACTCCTATGTGCCAAGTTCAGGCTGATCAAACCAAGTCCAGCGACGTGAAA  
TCGCTGCTGGGTACACCAGCCGTTCCAGTGCAGAACTCAGAATCCAGGCGCAATAAGGAGGGAACCCTA  
TGAGCCAGAACGATTTTTCAGTTTATCGATGTCCAGCGGGTTCGACCCGCCAAGAAGCCGCTCAAGATCCG  
CAAAATCCAGTTTGTGGAGATCTACGAGTCTTCAATCAGCCGAGGTACAGATGCAGGCGGATCGCTGC  
CTCGAGTGGGCAACCCCTACTGCGAGTGGAAAGTGTCCGGTCCACAACCTACATCCCCAACTGGCTGAAGC  
TGGCCAAAGAGGGGGCGCATTCTGGAGGCGGTGGAGCTCTCCACCAGACCAACAGCCTGCCGGAAGTGTG  
CGGTCCGGTCTGCCCGCAGGATCGCCTCTGTGAGGGCTCTTCACCCCTCAACGATCGCTTCGGCGCGGTG  
ACCATCGGCAACATCGAAAATACATCACCGACAAGGCGTTCGAGATGGGCTGGAAGCCGGATCTCTCGA

ACGTGGTCAAGACCGGCAAGCGGGTCGCCGTATCGGTGCCGGCCCTGCAGGCCTCGCCTGTGCCGATGT  
GCTGGCACGCAATGGCGTCACCCCGGTGGTGTGGTGGACAAGTATCCGGAGATCGGTGGCCTGCTCACCTTC  
GGTATCCCCTCCTTCAAGCTGGAAAAAGAGGTGATGCAGCGTCGCCCGAGATCTTCTGGGGATGGGCG  
TGGAGTTTTCGTCTCGAGACCGAAGTGGGCAAGGACATCACCTTCGCCGACCTGCTCGGCGAGTTCGATGC  
GGTCTTCTCGGGGTTCGGCACCTACAAATACATGAAGGGCGGCTTTGCCAACGAAGAGGCGCCGGGGCTC  
TATGACGCCCTGCCCTACCTCATCGCCAACGCCAACCGGTGCTGGGCTTTGAGAAGGCGCAAACCGACT  
ATATCGACTTCGCTGGCAAGCAGGTGGTGGTGGTGGGCGGTGGTGAATACTGCCATGGACTGCGTGCGTAC  
CGCCATCCGTTCAGGGGGTTCGACAAGGTTATCTGCGCCTATCGCCGCGACGAGGAGAACATGCCGGGCTCC  
AAGCGGGAGGTGAAAAACGCCCGCAGGAGGGGGTTGAATTCATGTTCAACCTGCAACCGGTGGTGGTTCG  
AGCTGGATGCCAACGGTCGCACCGTCGGCATCAAGGTGGTGGTGGTGGTGGTGGTGGTGGTGGTGGTGGTGG  
TGGCCCGCCCAATCCGGTGGTTCATCGAGGGCTCAGAGCAGGTGTTGGCCGCGCATGCGGTGGTGGTGGTGG  
TTTTGGCTTCCAGCCCAACCCCGAGCCCTGGATGGCGGAGTTTCGGCATCGAGCTCGACAACCGGGATCGCA  
TCAAGGCCCGCGAGCAGCGGAATACGCCTTCCAGACCAGCAATCCCAAGGTGTTCCGCCGTGGCGACGC  
GGTACGCGGCTCCGATCTGGTGGTGGTGGTGGTGGTGGTGGTGGTGGTGGTGGTGGTGGTGGTGGTGGTGG  
TATCTGGCGGTCTGATCCGACCGGCCAAGGCCCTGATGCGCTTTACAATCAGCCCGCCAATGCGGGGC  
TGATTTTTTTGAGCTATCCACCTCCTACAAACGCACCACCAGCCACTCCCCCTTGGCCGACCGGCACCAGC  
GAGGTGGCAAAGGCCGATCCTGCCCGACCTCGTTCATCCACTCCACCATCTCGCTGCGATGGGAGATGG  
CGTTATCGACCACCAGCAGGCCACGGGGTGCCAGCAGGCGGCGGATCTGCGGCCACCATGCTCGGTAGTG  
CTGACGATCCGAATCGAGGAAGATGAGCTGATAGCCGGCTTGCAGCAAGGTTCGGTAACAGCTCGCCTGCA  
TCCCCTGCCAGCAAGGTTACCCAGGGGGCCAGCCCTGCCCTCTGAAAGTTGTCATGGGCCAACACGCGCT  
TATCCTCATACAGCTCAATGGTGGTTCAGTGCCTTCCAACCGACGACCGCTTCTGCCAGCCAGAGTGT  
GGAGTAACCATTGGAGGTGCCTATCTCCAGCACCGCCTGCGCCCCACCGGTCTGCACCAGCACTGACAGC  
AACTCCCCCGTGTGCGGGGTGATATTGAGCAGCTTGCGGTGGCGTGCCTGCTGCATGCTGTCAATTGCGCT  
CGCCAAGCTGCTCCAGCTGGCGTTTTAACTGTTCCAGTTCATCGATATCCCCTTTCGTCCTTACCCAAAA  
CTGTTTCGCCACTCCTCTTGGCTTGACATTTGGGAGTCAAATGATGCTTTCACCCGCCATTCACACCAC  
AAAGGATGAGAAAAGGACAACCATTTGAGGCAGAATTTGTGACGTCTATCTGTTACACTTCGCGCCCCGCC  
ATTTTCGGCTCACTCTCTGACTTGATGTCAGGCGCAGCCGTTCGGTGGTTACAACCTCCGTCTCGCTCAT  
GCCCAGCTAACCAACCAACACAGCCAGCTGGAACACAGGAACCCATTATGAGATTTGAATCTGTTGCA  
TTTTGCCCCCAGAGATTTTTCGCTGCTGCTCAGATTCAGCGTTATCAGGAGATGACCCCTGTGCGAGCAACAG  
GCGATCCCGGCCATTCGCGGTGGCCGCGATGTGCTGGCCAGCGCCAGCCGTTACCGGCAAGACCGCCG  
CCTTCGCTCTGCCCATCTTGCAGCGTCTGGTAGACAATCCGGCTCCGGTCCAGCCTTCCAACGCCCGGGT  
GCTGATCCTGACCCCGACCCGCGAGCTGGCGGCTCAGGTGGCGAGCAACATCAATGACTTCGCCAAGTAT  
CTCGATATCACACCATCACCATCGTTCGGCGGTGGCAAGCAGGACGTGCAGGCCAAGAAGCTCAAAGCGG  
GCGCTCACATCATTGTGGCCACCCCGGGCCGTCTGTTGGAGCACCTCACCGCCTGCAACCTCAGCCTCTC  
CGGCGTCGAGTGTCTGGTGGTGGTGGTGGTGGTGGTGGTGGTGGTGGTGGTGGTGGTGGTGGTGGTGGTGG  
AAGATCCTGCAAGCGGTCAAACAAGACCCGTCAAAACCTGCTCTTCTCCGCCACCTTCTCCGACGCGGTGA  
AGAAGCTGGCCAACCTGATGCTGGACAGACCGCAGATCGTCAGCGTCAACAAGCAGAATCCACCGCCGA  
CACCGTCAGCCACACCGTCTATCCGGTCGAGCAGAAGCGCAAGCGCGAGCTGCTCTCCGAGCTGATTGGC  
AAGCAGAACTGGCAGCAGGTGCTGGTGTTCGCCAGTACCCGCGAGAGCTGTGATGTGCTGGTTCGAGGAGC  
TGAACCTCGACGGCATCAAGTCCGCCGTTGTCCATGGCGAGAAAGGCCAAGGGTTCGCCGCGCCCT  
GCGCGAATTCATGGAAGGCAAGGTACGGGTACTGGTTCGCCACCAGGAGTGGCCGCCCGTGGTCTGGACATT  
CCGGATCTGGAATACGTGGTCAACTATGATCTGCCGTTCTTGGCGGAAGATTACGTCCACCGCATCGGCC  
GTACCGGTTCGTGCCGGCAAGCGCGCATGGCCATCTCCTTCGTCAGCCGTGAAGAGGAGCGCACCCCTGCT  
GGAGATCGAGGCCCTGATCGGCCAGAAGATCCGCCGATCATGGTGGCGGGTACGAGGTGAGCAGCCGT  
GACGAGCTGATCAAGCAGTTGCAGGAGCGTCGCCGCTTCGGCAAGCGCCCGCAGCGTGAAGATAACGCCG  
TGGCCAGGTGATGGCCGAAGCCAAGCTGCAGGTTAGCCCTCAAGCGTCTGGCCGCCCAAGAAGGCC  
CCGTGAGCCGAAATAAGGCGGGCAGTTGCTCTATTGAACCGCAAAGGGCGCCACTGGCGCCTTTGCCATCT  
CTGTTCATCGGTGTTGGCCCTGGTGGTCAACTGAAGGATTGCTTATGACCTCTCCGACCTACAATCAGGC  
CCTGCTCGAGATGGCCACCCAGAGCCTGGCCGAACTGGCCCGCACCGCCGAGCAAAAGGCGGGCAAGCGC  
ACTCCGGCGCAAGAGAGCCACTTTCTCTGCACCTGGATGGCCGACTCCCTCAAGGAGAAGCGCTTCTCCC  
GTCTGGTGGTGGTGGTGGTGGTGGTGGTGGTGGTGGTGGTGGTGGTGGTGGTGGTGGTGGTGGTGGTGG  
GGGGCTACTGGAGCGCATCGCCTTCCAATACCAGTGCGCCATGACCAATCCGCAGCAATTGGGAGCCAAG  
CTGGCTGCCCTGCTGGAGGATCTGACGGCGCAGGCTGGCTGGTGGTGGTGGTGGTGGTGGTGGTGGTGGTGG  
AGCTGCGCCTGCAATCTGGCGATCAGGCGATCAGGCGAGCCTAGTGGTAAGCCATAGCGAGTATCAGGGT  
CACATCGAAGCAGGTGAGCTTGTCAAACCCCTCACCTCTATGTGCGCGGTGACGAGAAGGTGCTGGCTG  
AGGCGGCCCTTCAAGCACGGCCTGCTGCTGAGCCAGGGCAACAAGAAGACCACCTGGTCAAACATCACAA  
GGCCTACCGGCTGATGCCGGACAACGCCAACCGGCGCTGGCACTGCTGAGCGAGGCTCGCCAAGGCGCC  
TGATCCCGCCTGTTTTTCAGTAATAAAAAACGGCAGACCCCTCGTTTTAAAGCAGGGCCTGCCGTTTTTTCTTG  
TTCGATGTTTTGGTGGTGGTGGTGGTGGTGGTGGTGGTGGTGGTGGTGGTGGTGGTGGTGGTGGTGGTGG  
ACTCGAACATCACCTCCTCGCTCTTGGCGCAGCAACTGCCACCACAGACCCGACTCTCGCGCTTGATAAC  
CCGCCCTTGGCGATCCAACGCCGAGCATGGCTCCACCGCATCTTCGAGGTGTGGAAGTGGCGAGCC



AGCTCGCGCCGGCTCACCTTCTGCTGCGCGGGCAGGTAATCCCCAGCTCGCGCAGGATCATAAGGTCAC  
CACCTTGC GGGAACGATATCACCGTGACGGCGACCGGCCACCAGAGCAGTACCAGAGAGAGGGCCGTAG  
CTGACGATCCAGAACAGGCTCTGCTCCGGATGAGCGGCGAAGGTCGCCACCTGATAGAAGAGGGTGGCGC  
ACATAAAGGCCATATAGTTGCACCATAACCGCCGTCATCAGCGCCCACTGGCGACCGGTTTCCCGCACCAG  
CGCGCCCATGGCTGCGGGCGCAAGGCATGTAGAGCAGCACGAACAAGAGGTAGGCAAAGGCACCGGCCGCC  
CCGTGCAAGTGGGTCTGCATATTACCGTAGGTGGAAACATCGACCTCCTGCGCTTCGGCGGCAGCTTTCT  
GGTTCGTCGAGGTTGCCAACATCAAGCCCCATGGGGTCGCTCGGGTTGATCTCCGCCAGATTGGCCGCCAC  
GGCATCGATCGCCTCGTGAAACTGGCCACCAGCGAGAACTCGCTCTCCTCCTCTGCATCGCCACCACCG  
GCGTAGAGGCTGTTGAGGGTACCGACCACCGCCTCTTTGGCGAAGATACCGGTGACAATAACCGACCGTGG  
CCTGCCAGTTGTCACTCGCTACACCGATGGGGTGCAGCACCGGGGTACCGCCTGGCTGATCTTGCTCAG  
GACCGAGCTCTCCTGCTCCTGATGGCCAAAGCTGCCATCGGTACCCAGGGAGTTAAGCACGCTCAGCACG  
GCAACCACCAGTACGATGGTTTTACC GGCGCCAAAGACGAAGGATTTGAGCTTCTGCCAGGTCTTGATGG  
CAACGTTGACCGGACGCGGCCACTCGTAATCCGGCATCTCCATCAGCATGGAGTTCGCTCTTGCCCGGCAG  
CAGGGTGTGCGCAGCAACAGGCCGGTGAGCACCGCCACCAGAA TGCCGATGAGGTAGAGACCGAACACC  
AGGTTCTGGCCAGACTCGGGGAAGAAAGCCACCGCAAACAGGGCGTAAACCGGCAGACGTGCACCGCACG  
ACATGAAGGGGGCCATAGCGGAGGTCATCAGCCGCTCCCGCTCGGAGTTGAGGGTACGGGTGCCATCAC  
CGAGGGGACGGTACAACCAAAGCCCATCAGCATCGGCACGAACGCTTGCCCGGCAGGCCGAGGGCGCGC  
ATCAGGGCATCCACCACGAAGGCGGGCGGGCCAGATAGCCGGAGCTCTCCAGCACCGCGAGGAACAGAT  
AGAGGCAGCCAATCACCGGAATAAAGGTGGCCACGGTCTGCAAGCCGACACCAAAGCCATCAGCCAGAAT  
GGCGCCAGCCACTCGGGGGCATTGACCAGCCCCAGCAGGTGGTGCACCCCATCGACAAACAGGGCGCCA  
CCCATGATGTCAAAGAAGTCGATAAAGGCGCTGCCAACGTTGATGGCAAACAGGAACATCAGGTACATGA  
CAAACAGGAAGAAGGGGATGCCAATCCAGCGATTGAGCAGCACCCGATCCAGCCACTCGCTCTGGGCCTC  
GGTGAGCTTGCCCTTCTGCTGACGAGCCTGTTGTACCCACTGGTGGATATGGCCGTAGCGAATATCCGCC  
AGTTGCAGGTCGATATCCTGTCCCTGATGGGCGCGAGCCACTACATTTGGCGGCGGCCCTGCTGACCGG  
GCAGCAGGGTCTCCTGCATCACCGCATCCTCTTCAGCAGGCGCAGGGCGCGGCCACGGGTAGTGAGGTG  
ATGCGGGGGCAGCAGGGTCTCCAGCTCCGCCAGATCGGTTTCAAGCTCGTGGCCGTAATCGAGCTGCAAG  
CGGGCTTGCGGCTGACCGATAAACTGCCGGATCTGCTGCTTGAAGGCGGCAACCTGCTTGCTGTTGTGGG  
CAGAGAGGGCCACCACCGGGCAACCGAGGGATTGCGGAGCTTGCTCTCGTCGATGACGATGCGGGCGCTT  
TTGCAGGATATCCAGCTTGTGAGCACACCACCTTGGCAGGCCCAGTTTCGCGCAGTTGCAGCTGAGG  
TAGAGTGAGCGCTCCAGATTGGCGGGCTCGATGACGTTGAGCAGCAGGTCGGGTTGTTGGCCCTGGGCAA  
AGCGGCTTGCGATCTGCTCGTCCAGACTGCCATCCTGACTGGCCAAGCTATAGATGCCGGGCAGATCCAT  
CAGCTTGAAGTGATGTTACCCGAGCTGAACTCACCCATCTTCTTGTGACGGTGACGCCACTCCAGTTG  
CCTACCTGCTGGCGGGCGCCGGTCAGGGCGTTGAACAGGGAGGTTTGCCGCTATTGGGGTTACCTACCG  
TTACCAGGGAATAATTACATACCAGCTCTACCTCTATTTCTTCTGAACCCGCGCGTGTGTGGCAAGCTG  
CTTTGACAGTTTCGACTTCTTGTCTCTGAACCGCTCCCGGTGACGTTTCTGAACGGGAGCGGCAGCCGAGC  
AGGGGGTTATAACCGCTCGACTTCTATTTGCTGGCCAGACTCTTTTGCATGGAGAGACAGATCCCTTGG  
CACTGGATCTGGAGCGGGTCCCCCAGGGGAGCGGAGCGCAGATAGATGACTTCAGTCTGGGGCAACAGGC  
CCATCACCATCAGTTTTCGCGGCGCAGCGGCCGGGCGAGCTGATTCATATCTTGATGCGAGCACTCTGTCC  
CGGTGACAACCTGCGTGAGTACCATGACTGACTCCTGAAGTTAAACAATAATAATTCGCTTTTACTTGGGG  
CATTATAAGCTGTGTCTTCAACTTTTTATTTGAGTAAAAATCAAACCTCCGCTTAGCTAACCCATAAAGTATT  
GCCATGAGTCACGACAACAACAGCCGCTCGTTTACAGCACAGATGGCGGCATGATCAAGGAGCAGAGCG  
CTCCCCAATCCGCTCCCCCTTCCCCACCGACGGCACAGTGCGCATTCGCCGCGAGACCAAGGGGCGCAA  
GGGTGCCGGGGTGATCACCATTCATGGCGTACCCGCCGATCAGCAAAAAATCCCTGGCCACCTGCTCAAG  
AAAAAGTGCGGCACCGGAGGCGGTATCAAGGAGGGAGTGATCGAGATCCAGGGGGATAAACGGGACCTGA  
TCAAAGCCGAGCTGGAGAAAGCCGGTTTCAGCGTCAAGCTGGTGGGTGGCTGATCCCTTGTCACTCATG  
CGGTTTTTCCCTAGAATGCCCGTCCCATCGAGGGGAGTAGTCTCGCACACCGGTGCCATCCATTGCAT  
GAATACCGGTTTTCGACCCCTGATCAACATACTTGGTGCCAAATCACCATGGTCAGGGTGATCCATGCCAG  
CCATGGATTTGACAAGACCTTTGACGGGCCAGTGCCAATACCGGGGACGGATGGCGCAGGCTTGTCTTTG  
GTTTTATAACAATTCCGTCCCCCGGTCATTTTTATGGAAGCCTTGTTAACCTCAACCTCAGCGTCGCTAT  
TGCCGAGATCGGCGATAAAACCCAGCTGTTGGCGTTGCTGCTCATCTGCCGTTTTTCGCAAGCCCTGGCCC  
ATCATCGCCGGCATGCTGGCGGCTACCCTGCTCAACCATGCGGGCGCTGCCTGGATTGGTGAGTTCATCA  
GCCGCTGGCTCGATCCCAAGATAATGACCTGGCTGGTCGCCATCGCCTTTATCGCCATGGCTATCTGGAT  
TTTGGTGCCGGACAAGATGGATGACGAGGAGAGCCCGCTGGATAAAATACGGCCCTTTTATGGCCACCTTC  
GTGCTCTTCTTTATTGCCGAGATCGGCGACAAGACCCAGATCGCCACAGTGTCTTGCCCGCAAATATG  
ACTCGCTGGTGCAGGTCATTACCGGTACCACCTCGGCATGATGCTGGCCAACGTGCCTGTGGTGTGCTGAT  
CGGCAAGCTGGGGGCGAGACAAGCTGCCGCTCAAGGGGATCCGCATCGCCTGCGCCATCCTCTTCGTGGC  
CTTGGGGTGAGCACTCTGCTCTTTGCCTGATCGCCTTTTTCCGCTGCTCAAGCCCTCCCTGTGGAGGGCT  
TTTTTGTTTACTGCTGTGTCTATTGCGTAACCCGCTGTGCGCAACCACCAGCCTTACAGCCAAGGGGAGT  
GCACGGTTGCGGGTGCCTCATGCCATAATGGGGCAAACCTCGTGGAGTCCCCCATGCACAACGTATCAA  
GAGAGACGATTCTCGAATGGGTCAAACAGGGACGGCTGGCGCCAGAGAAGCTGGCGGACGCCCTGACCCT  
CGCCGATCTTCCCCCATCCGGCGCGCTGGCAGTGGCTGTTGACCGGCTGCTGCTCTGGCTCGGGCC

CTCTGTATCGGGGCTGGCCTCATCTTCTTCGTGCGCTTCAACTGGCAAGAGCTGGGCCGGGTCTCCCCGC  
TCGCCCTGCTGGAGGCGCCGCTGCTCGCCATGCTGCTTCTGCTGTGGCGCAAACCGCTGGGGGATAACCC  
CCGTCAGGCGCTGCTGCTCGCTATCGCCCTCAATATCGGCGCCCTGCTGGCGCTGGTGGGTCAAACCTAC  
CAGACCGGCGCCGATCCCTGGCAACTGTTTCGCCACCTGGGCGCTGATGCTGGTGCCGCTGGCGGCATTTG  
GCCAAAGTCCCCTGCTCTGGACCTTGAGCTGGCTGCTCGGTACAGCTGGCGCTAGTGCTCTACTGGCGGT  
CGGTTTTGTTACGTTCTTCTTTACCTTCGATGAAGAGGGATTGGGCTGGTGCCTTACCCTGCTCAACGCC  
GCCCTCTGGGGTCTGCTTCTGCTGGCGCAACCCGCTGGCGCCTGATGCCAAGCTGGCTGGCGGGTCTGG  
CTGCCGGTCTGGGGGTACCCTGCTCACCTGCTGGCGCTGTTTGATGCCGCTCCCCGCTGGTGTGGCC  
GCTCTGGTTTTGGCTGGCTGGCCGCCGCTATGCCCTTTGGCATCACAGATTTATCGCCGGACTCGCCATG  
GGTGGCTCAGCCTGATTGCCGTCATCCTCGCGGCGCTGGGCAAGTGGATGGAGCCGACATCAACGGCT  
TCTTGCTGCTGAGCCTGATCGCCATCGGCCCTTCTGTACCGCCGCCGCTGGCTGCAACAACAACGGAG  
GTCTCATGAATGATCTGACCCTTTGGCAAGCACTGCAACAGGCCAATCTGGTGGAAAGGGATCAGCCCCG  
TGATAACCCAGCCCCACTGGTCGAGCCGCTTTCTGCTGGGGCTGGTGGGCTGGATTGCCGCCCTGTTCCCTG  
CTCTTTTTCTGTTTCTCACCTTCGAGCAGCTGACCCGCGAGGCCAACAGTGCCCTGCTGCTCGGGGCCG  
TGCTGCTGGCGGGGGCCTATGCCCTCAATCGCAGCCAAAGCGGCGATCTCTGGGATCAGTTCGTGCTGGC  
CCTTACCCTGGCGGCAGATGCCTGGCTGCTCTATGGCTGCTCGATCAGCTGGACCTTCATCACGCCCTG  
CTCTGGTTCGGTCTGTGCCTGCTGTCCCTTGCCATCGCCGTGCTGTTTCGATCACTGGCTGGTGC GGCTGT  
TTCACAGCGTGGCGGCGGCCCTGCTGCTCACTCTTGGCCTCGCTGCCCTCGGGCTGCAACTGCTGGCCCT  
GCCGCTGGTGTGATGGCGGCCATCACCTTCTGCTGGCTGCGGGCAGATAGAGATCCAGAGCGTACCAGCTC  
TACCCTCCATCACGCTGGGGCTGGCCCTCTCGCTGCTGGTGTGGGCCGTCTGCACCACCCGCTGTGGG  
ATGGCGGCAGCAGCGTGTGACGAACTGGGGCTGTCCCGCTGCCGCTCTGGTCAATCCCCTGCTCTG  
CGCCGCCCTGCTGCTGGCGGTGATGGTGAAGCTGAGGCTTCCCCTGCTGTTTGGCCCTGCCACTGGTGTG  
ATCAGCGCCATCATCCCCGGCATGGGGGCGGGCGCACTGGTACTGATCCTCGGCTTTTATGCTGGCAGTC  
TGGGGCTGATGACCCTCTCGGCCCTGCTGCTGCTCGGCTATGGCTCGCTCTATTACTACGATCTGGGGCT  
CACCTGATGACCAATCCTGGCTGCTGCTGGGCTCCGGCATCTGCTGCTGGGGGCCCGCCAGCTGCTC  
ACCACCTTCGCGGCAAGGAGCGACTCATGAAACCCGTCACCCGACAGCTCGCCCTGTTGCTGAGCGGCC  
CGCCATCCTGGCAGGCATCAATGCCACCGTCTGGCGCTATGAGCACGCCATGAGTAGCGGCGAAGTGGTG  
CTGCTACGCTCGCTCCGGTCGATCCCCGCTCCCTGATGCAAGGGGATTACATGCGGCTCAACTATGAAA  
TTGCCCGCAGCTGACCAAGCCGCGACGCCCTGTAATCAAGACAAGGGCAGCGATACCCTGGTGTATCCG  
CCTCGATGCCCATCAGGTGGCCACTCTGGTGGCAGCTGGCAAAACCGGATCGGCTCGCCAGCGATGAGCGG  
CTATTGCAGGTTACCAGAGCGAACAGCAGTGGCAGATCGGCCCGATGCCTACTTCTTTGAAGAGGGCA  
CGGGGAGCAGTACGAGGCAGCCCGCTACGGCGAGTTCCGGCTGCAAGCCGATGGCAAGACCCCTGCTGGT  
GGGGCTGCGGGATGAGGCCTACCAACCCATCGGGCAGATCCGCGCCCGCTGGTAACGGCAGTGAGTGGCT  
ATTTACTCTGTTTCATGGTCAACTCAAGGGAAGGTTGATCGCTAAGGATGTTCCCAATGAGGATATGGCT  
GATCTGTCTGTTGCTGCTCTGCTGGCCCTCGACGGCCCGGGCTGATCTGGGCAAGCTCGAGTACCTC  
ACCGAAGAGTACCCCCCTACAACCTCAGCGATCCGCAAGGCCAGCCACCGGCTTGC GGTCGATCTGC  
TGCAGATGATCTGGCAACACAGCGGCGTACCCCCCAGCCGTTGCGCATCTGCCCTGGGCGCGGGGTTA  
TTACTTGCTAACCAGAAAGCCCAATGTGGTGTCTTCTCCACCGCCGACCCAGGCGCGGGAAGACCTC  
TTCAAGTGGGTCTGCCCCATCGGCTACTCGGAGTACATACTGCTCGGCCGCAAAGCGCAGAACATCACCC  
TGACCGCCTTCGATCAGATGAGCCAGTACAAGATCAGCGCGGTGCGCTCGGACGCCGCCGAACAGTTGCT  
GCTCAACAACGGCATGGATGACAACAACATCATCCCGGCCAACCGCCTGTCGCAAGGGGTTGAAGATGCTG  
CTCTCCGGCCGCGCCGACCTGCTGGCCACCAGCAAGCTGGCGGGATATGACGCCATTCGCGAACCTGAAGC  
TCAATAGCGACGACTTCAACGTGGCCATGGTGTGAGCGCCGAGCAGCTCTGCTACGCCCTCAGCCGTC  
GGTCCCCGACAGCGAGATCACCTCTTTTCAGCAGGGCCTGACCCGCGCTCTCGCCTCGGAAGAGTTTCGC  
AAATTGCAGGCCAAATACCTGCCGGTGCCTGAGCACTCACTCACCCGATGGGCAGCAGTTTCGCTGCCCA  
TTTTATTGATGAAAGATGCAATAGAGGTGGCTAGCTATTCCCGCCACAAGCAGTCAAACCTGGGCTACATA  
GTTGATTGCGAAGGATCTTTCCCGTGC GGACATGGCACTTACCTCATCTGCTACTGCTCTTGTGGGCCAC  
CTTCGCGCAGGCCGATCCGGGCAAGCTCGAGTATCTGAGCGAAAATCTCTCCCCCGTTTAATTTTCAGCGAC  
CAGCAAGGGATGCCGACCGGATTGTGGTGGAGCTGATGCAGCTTATCTGGAAAAGCGCGGGGCGTGTGCG  
CCCAGCCCATCCGATTTGCGGTTGGGCCCGGGGCTACAACCTGCTGCAACAAAAACCAATGTGGTGTCT  
GTTTGCCACCGCCCGCACTCCGAGCGGGAAGCGCTTTTCAAGTGGGCTGCCCCATCGATCACTCGGAG  
TTTGTGCTGCTGGGGCGCAAGGCGGACAACATCACCTCGGCTCGGAGGCCGAGATCAGCCGCTACAAGG  
TCGGCGTGGTGCCTCTACCGTCTCAAACAGCTGCTGCTCGAACGCGGTATCGATGAGCACCAGCTGAT  
GCTGGCCAATCGCCTCACCCAGGCGGCCAAAATGCTCACCTCAGGTCGCGCCGATCTCTTTGCGACCAAC  
AAGCTGGCGGGCTATCAAACCTGCAACAACCTGGGCTTCAAGCCGATGACTTTCATGTCACCTTCGTGCT  
TGGATGCCAGACCGCTCTGCTACGCCCTTCAGCCGTCAGGTACCCGACAGCGAGGTCGCCCTCTTTTCAGCA  
GGCGCTGACCCACGTCGTCGCTCGGCGGATTTCTCGGCCCTGCAAGCCAAATACCTGCCGCTGCGCTAA  
CGCCCTGATCGCCGCCGACATTTGGGCGCAGGATGGCGGCCGCCCTCGCGCTTTTTTGGCAAACATGCTC  
CGTACCTTGGCGAAATCGGCCAGCTTGGTTCACACTTGGAGCAGATATTCCTTGGATCAGGATGGCAAAAA  
TGAAACCATGGATTGGATTGGCCGGGGCGCTGCTGGCCACCTCGCACAGGCGAGTCCCTGAGCTCGGCAA  
ACTGCACTACATCACCGAAGAGTACAAACCTACAACCTACGCCGATGCCAGCGGCGCCCCACCGGCTC

CGGGTCGAGCTGCTGCAACTGGTATGGAAAAAGACCAACACGCCGGCGCAGCCCGTCACCATCATGCCCT  
GGGCGCGCGGTTACTACCTGCTGACCCAAAAGCCCAATGCGGTGCTCTTTTCCACCGCCCGCACCAGGC  
ACGGGATCCCCTGTTCAAGTGGGCCTGCCCTATCGGGTATGCCGAGATCGTGTGGTGGGGCTGGCCGAT  
CGCAATATCACCATCACCAGCTCGACGATGCCAAGGCGTTCAATATCGGGCGCGGTACGGGCGGATGTGG  
GGGAGCAACTGCTGCTCAACAACGGCTTTGACGAAACCAACTGATGGCCGCCAACCGGCTGGCACAGGC  
GCTCAAGATGCTCACCTCCGGCCGGGTGCGATCTGGTCTCCACCAACAAGACCACCATGGAGCAGCTGATC  
GTCGAACAAAACTCGATCCCGCCCGCTTCAAGGAGCAGTGGGTGCTGAGCTCGGAGCAGTTCTGCTTCG  
CCTTCAGCCATCCGGTGAGCGACGAACTGGTCAAGGAGTTTCAGACCGGCTTGACCCAGGTACTGGCGAG  
CAGCGAATACCCGCTGCTGCACAGCAAATACTTCCCTGCCCCGCCCAAATAGCGGCGCCGCGTCCGAG  
CGCCAAACAAGGGGCCATTGCGGGCCCTTCGCTTTTTTCCGTTTTCGCTCCCTCTTTTTACCCTT  
TGCATCCTCTCGCGGCGTCACCCACCCTGCAAGCTCCAAGCCGACAACCAACTAATCGCTA  
ATTAATAAAAAGTTTGTGCCAGCGCAAAAAATCACTTTTTCTGATAGTTAGCTCATCAAAACCATAGATA  
AGACCCTCTGGCTCCGTAATATGGCGACGGGCGTCTGTTGACCCCTTTTCCGAGATCAATGGTCAACGG  
CGCAATCTGGTAGCGACAGTCAGGGGCGGTAGCGACTTTAGCGTAGGGTCGATTAGCGAAGCGTAATCGT  
CCGCGGTAACCGTCCCCTCTCCCCTTGC GGAGAGGGTTAGGGT GAGGGGTGGGTAACGCTTTTGCCCT  
GCAACAGGGTATTGGTATGGCTTCGCCAGTAGGGTCGATTAGCGAAGCGTAATCGTCCGCGGTAACCGTT  
CCCTCTCCCCTTGC GGAGAGGGTTAGGGT GAGGGGTGGTAAACGTCATTGCATAGCGGATTATCGCCC  
CCTCATTGGCATGGCTTCGCCATGCAGGACGCGAGGACTCCGTCTCGACGGGGTTTCGCCCGCGCTGCG  
CGGCTTGGCGAGTGACTTTGGAAAGACCCGCTCTCTTTGGCAAATAACACCAAAAGTCTAATCCCCACT  
TGTTTCGCCCTCCTGCGTCCGGTTCCCTCGGTTCACCCGTTTGTCCAGCGCGCTCGCTCGGCGAACAGC  
AGGGGGCAACACCCGACCCATAGCCCCGAGGAAAATATCAGATACAGGATTCATGCCGATCTGAGATAGA  
GGTGTAAATCACTTCGTTTCACTTACTCTACGATACACACCGCTTTCTATAGAATCATTCCTTATCAGAC  
GATAAGCATTTTTCGGGATTTACATGAGCAACAAAATTAATTAAAAACTTGAAGTCATTTAACCCTAAAGAG  
CGGTTTTATCTGGTTGGCCAAAATGCTGGGAAACCCAGATTTTCGCATGGATGACAAACAGCTTGATGAGA  
TATCGAGGCTAATCGGTTTAAACAATCCCAGAGAATATTTGCCGCGATGGATTATCACCTTGACTCCTT  
GACTGGATTTATGCCAGTTTGTCTTAACCCAGAATGATGCCAACGAAGCTTTTAAACGAACTTCATCG  
ATAATAATGAAAAGGTAGACTTGCAAATATCAGGCACCAAGAAGATGTCGATTTTCTTCTTGCCTTTGT  
TGACGAAAAGCAAACCAACCCACTTGTGATGATTTGAGCTAAAAGGCGATAGCTACTTTAGCAATGCTCAG  
TTAGACAGTAAAAACAACAGATTCAGGCTATTTTCGGCAATGAAAATACATGGCCGAATGTCAAACCTC  
ACTTTTTAATTTGCAGCCCTAAAGAACCACAAAAGATAATCATTCAAGGAACAGCATTTTTATATTTAA  
CAAAAAATCAGAGCTTACTTGGTTTCCACTCGAGATGGGCGATGGCAAAAAATAAGTAACCTCGATGTAAT  
GAAAGCGATAGAGCATGTAACGATGGTAAACATTTGGAAGGTTGAAAGTCTCTCTTAGAAGCTGTGCAATG  
CACTTCATTTATTGTCTCTGGGCTTCGGAACACTGATTGGGGAACTGTCAATATACACACCCATACCATG  
GCAAATCCAGATTAACGCACCTATGCAACACACCAAATCAACTTGGTTTCATACATACAGAATAGATTTG  
AGTGCGAAAATTTCTGTAATAGGAAAACCTCCACAACATTTCTACTCCATCTTTATCATTATTTCCACTTA  
AAAAAGAAAAAGCGATTGAAATTTCCAATCCATTGTCATTGTTAACTTATAAAACAGAGGCGGTATGAA  
TTTTCAAGCAGAACCTGTGACAATAAACACTTTATTGTCCGTCAGCAAACAATACTACATCCCAGATAT  
CAACGTGATTTTTCATGGGAAAAAGAAAATATAGATGAATTATGGTCAGATTTACTCGAATGTATTAGCA  
TCGTGGATGGCGAAAATAAAATGTGAAGAATATTTCAATGGGACTCTTGATTTAGCTGGTAAAGACGAAGA  
TTTTTCGAATTTGAAGTTGTGCGATGGACAACAACGGTTATCCATTATAACTATGCTCATTAGCGCCATATCA  
AGAGCGCTAGTTGCGTTAGGAGAAGACAGTGTGGTACTCGACATTTACAACATTTATAAAAGGAAAAG  
ACAGAAAAGGTGTAGAGTTTGC AAAAATAGAACCGAATGGTCGATCTGATTTCTTTAACTTTTAATTCA  
AGATTTAAAGCAACACGAATGTTCTCCCAAGAATGAGGAAGATGAATTAATAAAATCAGCCTTCGATTAT  
ATTTCCGAAAACACTATTATCTAGAGGCAATATATTCAAGTCTATTTATGACAAAATCAAGGGAACCGATT  
CCGAATTAATATCAGCATTAAATGCCCTCATCGATCTTATAGCTGACCATCTAAAAGTGATCAGAGTTAA  
TGTTATCGACACTGATGATGCATACATGATCTTTGAAATATTAATGCAAGGGGTATAAATTTAAGCCCT  
GTCGATTTGATAAAAAACAACCTTCTTGCTAGTTGGGGAACAGCATATCCAATGATTTTGCATTAAGTA  
AGTGGACTGACATTAGTAATAATTTATCTAGTAGAGCCAATAGCGTTAGCATTGACGATTATGCTGTTCA  
TCACTGGACTACTATATATCCATATACAAGCAATCGAAATTTATATAAGTCTTTTAAGAAAAGACTTTCC  
GATGTA AACAGCCTTTAGAACCACAAAAATATCTAATAGACCTTCATGAAAAAGCTCTTTGTATATGA  
AGATTGCATCCCCAATGCAATTGGACTGGAAAACAAATAGATCAGAAAACCAATATATGAGTCACTGACAGC  
ATTACGAATATTCAATGTAAGCATTATGAGATCATTGTTCTTTCACTTACTTACAGCTCGTAAAAATAAA  
AAAATAACACAGAAAAATTAATTTCTTACATTACGTTTTATAGAAAATTTTCACTTTTATATTCAATGCCA  
TATGCTCATTACGTCCATCAGGTATTGAGGGAATATATGCAACTCATGCAAGAACACTCAACAATGCGTC  
ATCTCATGCTGAAGCTAGAAAAATATTGATGAACTGTACAAAAACTTAAGAGAAGATTGCCCTACAAGT  
GAAAGCTTCAAAGATAAACTGGTAAAATATCATTACGAATGACAATGTAAGTCAGAAAAAACTAATAC  
AATACCTTTTTTATTTCGTTTAGAGTGAGATGCAAGTAGTGCAGAAATTTGAACCTAAGGATCTTACTATCGA  
GCATATTATGCCCTCAAGCATCTGGAAAATACCATGGCTGGTTTGTAGGAAACCTGATTCTCTTGGCTCT  
AAATTAATGAATTAGCAGACACTTGTAGCTTCGACAAAAAATAGAAAATATATGCCAAATCTGATTTTG  
AAACGGTCAAACGCTTGATTTCAATTA AAAAAATATGACAAAGGATGGAATGAACAAGAGATTAATGAGTG  
GGGAGCTGAACTAGCACGATGGTCTGTAGAAGTTTCTGGCTAAATAACACATAAGTACCTCAACTTCA

TTAACAATGTAGTCACATTAATCCCGCTTAAATAGAGCATTAAAAAACTGCAGCCCTTAGGTTGCGGTT  
TTTATTTCTATTCCCAAACACTCTTTAACCCAAACGCTTTTGTACAGATCTAGTTATCCCCTTTCAAC  
GGAAAAGGCAGTCAACATGCAAGCAAAAGCCACGGGCGGGCACGGTATTGGTTCCCCCTGCAAACCGCTG  
AGTCGAGTTCAACGGGTGAGGAGCGCCATCAGGGATGATGGCGCAGCCGAGTCGGCATAGGGGCCAAAT  
CGGATCAGGGCGAGCACTGCTCGACCCCGATTTGGCGCGAGAACAAGGATGTTTGAAGCGGGCTTTGGCC  
GCAGCCATGGATGGCGTAGGCCAAAAGTGCCGCTCTGCGGGCGCTCCGTCGACCCGTTGGACGAGACGAGGG  
AACCCGCAAAGCGGGCGGTTTGGCCGGGGAAAAGACTTTTGGTGACTTTTGGTCTTTCAAAGTCACTCG  
CCCCAGCCCGAAGGCGGGCGAAACACCTTCGAGGGCAAGGCCCTCGCGTCTGCATGGCGAAGCCATGCC  
ATTAAGGCGTTGGAGGGCATTAGCTGAGGAATGACGTTAGTCCCCCTCACCTAGCCCTCTCCCAGCAAG  
GGGAGAGGGGATCAGAGCGCAGGCCACCGAGGCTTAAGCAGATCGCAGAGGCTTAAGAGGTGTCGAGGGA  
AGAGACAAAACAAAAACCCGACGCCCTAGGCGACGGCGCCAGCTGGTCTTGGCGGCGCTGTCTTCCAGCACGATAC  
GCAACAAGGCCAACCGGCCCTTAGGCACGGCGCCAGCTGGTCTTGGCGGCGCTGTCTTCCAGCACGATAC  
CCATCTCGGTGAGACGTTTGGGGCGGCATCCGCCGCGGCCAGTTCTTGTGCGGCAGGGCCTGATTGCG  
CTCGGCGATCAGGCGCTCGATTTGCGCAACTTCTTCATCCGCTTCGTCACCCCTTGAGGAAGGCTTCGGGG  
TCTTGTGTCAGGATGCCGAGCACGGCGCCAGCTCGCGCAGACGGGCGCCAGCGCGGGCGGCAACGGCCA  
TGTCTTCGCCCTTCTGGCGGTTGATCTCGCGCACCAGATCGAACAGGGCGGAGTAGGCTTCGGGGTGT  
GAAGTCGTCGTCATCGCTTCTTGAAGCGCGCACCTGCTCGTCGCCACCGGCAGCAGCGGCGACCGGC  
AGATCGCGCAGGGCGGTGTACATGCGCTCCAGCGCGGCGGGCTTGTGAGGTTATCTTCCGAGTAGT  
TGAGCTGGCTGCGGTAGTGGCCAGACATCAGGAAGTAACGGACGTTTCGGCGTCGTAGTGGGCCAGCAC  
ATCGCGGATGGTGAAGAAGTTGCCAAGGGATTTGGACATCTTCTTTATCCACCATCACCATGCCGCTG  
TGCATCCAGGTGTTGACGTAGTCGCCACCGTGGGCGCAGCAGGACTGGGCGATCTCGTTCGTTGTTGCG  
GGAATGCAAGATCTGAGCCGCCCGCTGGATGTCGAAGTGGTTGCCAAGGTGCTTGGAGTTCATGGCGGA  
GCACTCGATGTGCCAGCCAGGACGGCCCCGGGCCCCAGGGGCTTTCCAGGTGCGGCTCGCCGGGCTTCGAC  
ATCTTCCACAGCACGAAGTCGAGCGGGTTGCGCTTGGCATCCACCACGTCAACGCGGGCACCGGCTTGCA  
GCTGCTCCAGATCTGACCGGAGAGCTTGGCGTAGTCGGCATAGGATTCGACGATAAACATCACATCGCC  
GTTATCCGCCACGTAGGCGTCTTTTTCCAGCAGGGATTCACCAGCTCGATGATCTCTTCGATGTGC  
TGGGTGGCGCGCGGTTGATATCCGGGCGCACCATGCGGAGGGCGTCAAGTTCGGCGTGCATGTCCGCAA  
TCAGACGCTCGGTGACGTCGTCAGGTGACCGGGTTTCAGCGGCGCGCTTGATGATCTTGTATCCAC  
GTCGGTGTGTTGCGCACGTAGGTGAGTCTGTAACCGGCTAACGCGAGGTAGCGAGCCACCACCAAAAG  
GCGACGAAGGTGCGGCCGTGGCCGATATGACAGTGTAGTCGATGGTGACACCACACATACATGCCCA  
CCTTGGCCGGGTGGATAGGTTTGAATTCTTCTTTTTGACGAGTGAGTGTGTTGTATATCTTCAGCATCTT  
CTAACCACTGCCTGTGAGTAAAATGGTTGGTCATAATACCCCGTTTCGGGGGCAGAAAACGAGGCAGAAAA  
GAGGGCCAATCCCGCTGCCAGCACGGTTACGGCGCCTGAGAGACTATGCCGCCAGCCCCGATGGGCTA  
GAATTGCCACCCTTTATGCCATACACCTGCGGGCACTTCGTCGTCGCATCAAATGAAAGGACATATCA  
TGGTCACTCTGCACACCAATCACGGCGACATCACCCCTCACCTGAACGCTGAAAAAGCCCCGAAACCGT  
GGCCAACCTTCTGCAATACTGCCGTGACGGTCACTACGACAACACCCTTTCACCAGCGTCACTCGACGGC  
TTCATGATCCAGGGCGGCGGCTATGCCCCGGGCTTTGAAGAGAAAAGACACCCGCGTCCCATCAAGAACG  
AAGCGGCCAATGGCCTCTCCAACAAGATCGGCACCATCGCCATGGCCCGCACCATGGAGCCGCACTCTGC  
CAGCGCCCAGTTCTTCATCAACGTGAACAACAACGACTTCCTCGACTTCAAATCCGCTACCACCCAGGGC  
TTCGGCTACTGCGTATTCCGTGAAGTGAAGTGCAGGCGCATGGACGTGGTCAACAAGATCAAGGGCGTCAAGA  
CCGGTAACTACGGCCGCATCCACCAGGACGTACCGGTAGAAGACGTGGTGATCACCAGGTGACCCCTGCG  
TGACTGATCTCTGCCGACTCGGCACTGACAAAAGTGCAGCCCCGGCCGAGTTTTCATCTGCCCTCCCC  
CACTGCCAGCCAAACTGGCGCCGCTCGACTATCTGGCCACGGCAACCCGCGCCAGCGCTCGGCCCAT  
GCCCTGCTCACCGCCGGTGTGTGGGATGCGCTGGCCGCGCAGTGCGCCGATCTGGCGCTGGTGGACACGC  
TGGCCATCGCCCTCGATCGGCCGGGCGAGCATCTCGATATTCTTCCAGCATCCCGATCCTGCGGCGT  
TGCCACAACGTTGAGGCTCAAGGTTGGCAAGCGAGCGACAAGGGCGGCAATATCTGGCTGCTGGAGCGC  
ACCTTTTCTGCTCGACCCAGCACTGTGCTGTTAGCGGTTGCGATCAAAGCGATGCCCGCTGGCCGCTGG  
AGCTCTATGTACCCCCGCCCCATCGAGACGCTGAATGGCTGGCGCCACCTCACCTGATGGCGGCTTT  
GCTACAACGCTTTGGCGATGACTTCTATCTCGAAGTGTGCGCTGCGCCTTGAAGAGGGATTAAGGGG  
GAAGCAGCCATATGTGGTGTGGTCTGGCGGGCGATCCTTACGCCGCCCTGCTGACGCTGGAGGGGC  
GCAATCTGGCCGAGCTGTGATGGCAGCCGCATCCCGTACGATATCCATACCTCAACTGGCGCGATGGC  
GCCCCGAGCGCACTATTCGTCCTGTTGTTTCTACTACCTCTGCCACCCCTGTTTGGCCGTTTTCGACC  
GAGAGCCCCGACCCACATCATGAGCACCCCTTTTATCAGTGACATTCACCTCTCTGCCAGCGGCCCGA  
TATGACCGCGCATTGGTGCCTTTCTCGAGCACGACGCCCCGGCGCCGATGCCCTCTATGTGCTGGGG  
GATCTCTTGAATCTGGATTGGCGATGATGACCCCAATCCGCTCCATCAACAGATGGCCGACGCTTCT  
TGGCCCTGAGCCAGCAGAAGTGGCCATCTACTTTATCCAGGCAACCGCGACTTTCTGCTGGGCCAGCA  
GTTTGGCAAGCGCGCGGGGATGACATTGCTGGGTGACCCCTTGGCTGATCGACCTTTATGGGGAACGGGTA  
GTGCTGAGCCACGGCGATCTGCTCTGTACCCTGGATGAGGGGTATCAGAAGTTTCGCCGCATCACCCAGC  
TCAAGTGGCTGCGCTGGCTCTTTTTGCGGCTGCCGCTTGGCCCGCTCAGGCCATCGCCTGCAAGATGCG  
CGGCCAAAGCCAGATGGAAAATGCCACAAGAGCCAGATCATCATGGATGTGACGCCCCGCGGGTGGAC  
GACACCTGCGCGCCCACGACTGCCGGATGATGATCCACGGCCATACCCACAGACCTGCCATCCACGACT

TCATCCTCGATGGCCAGCCCGCGGGCGCATCGTGCTGGGAGACTGGTTCGAGCAAGGCTCGGTGCTGGT  
CTGTGCGCCCCGGCGAGCAGCGGCTGGAAATGCGTGCGCTGGCAACGATCGACCCCGCCGCTCAGCCATCC  
GGCTGACATCCCCCTGTGCGGGCTGCAGGCAAAACCTGCGGCCAGCATCCCTGTTAACCCGGTGAAG  
CGACTCATTACGGTGTAGCTCAGGCTGGTATGGCTGTGCTGATGGGGTGTCTGCCCCATCCCTATCGGTT  
CTGCTGCGCCAGCAACACCAAATACGGCAAAAGCCGGCCCCAAAAACATCCAACATGCTGAAAAATAAAGC  
AAAATGACCATTCAATCAGCGTTGAAGTAAGCAAGGCAGCTCATTAGACTACCGACTCCCTTACCCGTCG  
TAACACAAGGAACGTATCAGACAATGAAAAAGACGGTTCTCACTCCCTTACTGGCGCTGTTGATCACAGG  
CTGTGGCGGGGCTGATGGCGAACAGGAAGAGACCCCTATCCGCCCCCTGTCACCCCCAACTATTTTCGAG  
GCATCCAGCCAGAGCAGCGCGGGCGGACAGTTGAACCCACCAGCTGCGGTTGGCGGGGGTGAACAGG  
GGCGCTTCTCGGTACAGGCTGACAGCGGTTACCTCCTGACCGAGATAAGCGGATGTGATGGCACCCTGGA  
CGGCCACCTATACCACTGGCCCCATGAGCAGCATTTGCCAGATCTCGGCCAGCTTACGCGAGGAGAT  
GCCGCCGTCTATTTCAACGCCACTACCCAAGCTTCTCAGGGGGCACACTCAGCCCCGACGCTCTGCGTC  
TGAACGCCGGTGAACAGGGCCGTTTACCCTGACGCCCCGAGAGTGGCTTCGTACTGACACAGATCGCAGG  
ATGTGAGGGCACCCCTGACGGGTAATACCTACACCACAGCACCCATGCGCGCCGATTGTGATCTCGGCC  
CGCTTTATCAGCGATGCCGCAATGCGATTGCCCGGGAAGATCATACCCCTGCCAGCGAGCAATCCCTGA  
TCGCCATGCCCGTGCACGATTGCCGACAGTGAGGCGCACCCGACCGAACTGGTTGCGAGCCTCTATCA  
GGGAATGGCACAGATCAGCTGGAACCCGAGCCACGACTCCATCACCTTTTCCAGCTTCCAGCCGGAGAGC  
ACGGTGACCCTGCTCCCTCCAACATCAATGGCAAGGGGGAGAGCGAGATCCGGGGTCTGGTGATGGTCT  
CCGAGCAAGCCGATTACCGTCAGGCCGCCATGGGGGCGAACCTGTTTTCCGTTGACCGCACAGCGCAGAG  
CGAGGCGCTGCTCAAGGGGCTGATTGGCTGGCTGACCCGGGGCAAGGATAGCGATGGCTGCGCATCCTC  
ACCACCCAGATGCCTAGTCGCGCCGATAGCGTCTATTTCCCCACAACGAAGGCGTGCCTGACTGGCTCA  
AGGCGATCTATCCCAGCAAGCACAGTATCAACCCGGCCAATACCTGCGATTATCAGGCGCTGAGCGACTG  
TATCGACACCATGGCGCCGGAGCTTATCGTGATCAGCGATATCGACCGCCAGGGGCTGGGGTATCAGGGG  
ATCGCACAGGGGATCGCCAAGGCCAAAGCGGCCGGGATCCCGCTGCTGCTCTCCAACATTCGGCGCGATG  
CCAGCCCGCTGCTAAGCCCCCTCTATCTCGATATGGGGCTGGTACCTGGGGCAACTACTGGTCAAACCT  
CAGAGCCAGCGATCTGGCAGTGAACACCATCATGGCACCCGACGCCAGCTGATGGCGGTGATAACCTG  
CTTGGAACCTTCAGAGATCGCAACTTCACTACCCAGTGGCTCGATAGCTGCGGCGGCAACTTTATCAATT  
GCGGTGGCTCGGAGAGCTTCAACAGCAGTCAAGCTGGTGCCGACTGGCTGAGAAATGCGGCCATCAC  
CCTCGACAAGGCCGGGATCGGTCCCTTTGCCCTGACCGCGTGACACTGTTGCCCGCCACCTGCTGCTG  
GCCGACAAATACCGTGCCGCCATCGACTACCCATTGCTGGGGTGAACATCAATCCTGGCAGCAGGCCGA  
TGTTTTGCCGACTGGCTGGTGAGCTATGCCCCGACCCGTTACCCCGGCCAGCCGATCTGGGGGAGTACGT  
CACCGATCGCAACAAGGTGGTGAAGGGACAAGCAGCTCACTACGCCATATCCCGCGACGCTCACCGACAGT  
CGGCGCATTTTCGGTTCCCTACAGCGGGCAGTGGACTACCACCGGTTGGTATGCCCTGCCGGGACAAACCA  
TCACCCCTGAGACGCACCGATAACGCCGATGTGTCCGCTACCGTCCGACTCAACTACCACAGGCCAACAC  
CAATCGCGCTATGAGCAGAAGATCTATCGAGCCCCGCTGGAGCTGACCACCGGACGACTGATCTTGCC  
AAGGGGGGAGTGTACCTTCACTTCTCCTTATGGCGGCCCTATCTACCTCTATCTGGAAGGGGGGAGC  
ATCGCTGGCCGTCAGGTGAGCGCCACGGGCGTACCCGTCATCCGGCCATCATGGATTTTCACTGATGAG  
CAGCAGATACGCGAGTTCAACGAGCGGCTGGAACAGACCGAGCTGCCCATATCGATCTGCGGGCCGATG  
GCGCCGAACAGCATCTGCGCCGGGATCGCTTACCAAGGCGGTGGGTGGCGTCAATCCCGACACCAATGC  
CCTGCTCGACAGCATCGCCCGGGATCACATCAATGGCGTCTACACCCTGGCGGGGCTGAAAAATTCAGGGC  
AAGGGGCTCGATGAGTCGCTGCCTGCGGATGTTAAAAACGCCCTGCGTGGCACTGCTGGGGGAGGGTTGTC  
TCGATGAGTCGATTATACCCGACCATCATCCAGCATGCCAATATGACCAGAATGCCCATTCGGGCAG  
CGGTTGAGTGGCAACCCGTTGGGACTCTTCCGGCAGCATCAGCCGACCGGCTGGCTCGACAATCACGAA  
CTGGGCCACAACCTGCAGACCAACCGGTTGAACGTGCAGTACGCTGCGGCAGGCGATGCCGACAATGGA  
GTGGCTATGGCAGCCGGGGCGGGGAAAACTCCAACAACATCTTCCCTTATGTGGTGAAGTGGCGCGCCCA  
TTATCTGAGGGATGGCAACACTGCTCCCATCAAGGATGGGCACATGAATCACAAGGATCTCTTCTATGTG  
TTCATGTCTGATGCGGCGCAGGTACGGGACAGGAGTGGCAACCGCGTCTGCTCGGGGCCAACTGCCAGG  
TGCTCGATAACCGGCGAGAGTCGCTACGAAGCCCCCTGGAAGAGCAATGCCTACGCGCTCCACAACGGCTA  
TCGCATGGCGTTTTATATCCAGATGGCATTACGCGCCCACCGTATGATCCTGACTGATGGCACCAGCTG  
AACGATGGCTTCACTATCTTACCCTGCTCTATCAGCATTCACGGATCTTCCGGCGGGCAGCCGACAGTG  
AAGCGCAGTGAATGCCAGCAAGGATAGGCTCGGCTTTAGCTGTTCCCTACTCGGGGCATGCGGTCTA  
TGGCGGCAACCGGTGCGCGACATAACGGGCAATGACTTTATGCTGGTTGCACTCAGTCGGCTCACCGGA  
TGGGACTGGCGCAATCACTTCGATCTGCTTGGCTGCGTTACTCCAGCCTCGCGGTGCTCAGGTGCAGG  
CCAACCAGCGTTATGGCAGCCTGCCGATGGGGATGTATGTGCTGGAGGATGACCAGCCCCAGCCAACAT  
GAGCGAAGGCGTACATTCCTGCCGCTCTCTGAAAGTACGGATCCACCCCTGGCCCCGCAACAGTGGC  
TCGCCAAGCGCTGCCAACACCCTGAATAGGATCATCGCGATAACCACAACAAGCGCCAGCAGGGCGC  
TTGTTGTTTTATCCGGCCTCTGGCTCCGTTGTTGATGATGTGAAGAGGGTGGAAATAAGTGGTGATCGCTCA  
CAGATCAGCAAAGCAAACCTGCACTCCTCCTTACAGGACACAAGGTTGTGTGAACCCCGTACCTTGCCCC  
TTGCCAATTGAGAGGATGATGGCGCTCAGGCAGAAACATCTTCTCGCCAGCTATTTCAACAAGTTGAGG  
TTTGTATGCCTGACAGCAATGCGGTGCTCACCCGTTGATGCCAAGAAGATCAATGTCAACGATCCCTA  
TGAGATGAAGCAGTGGATCAAAATGTTTCAGTGCACCGAAGTCCAGCTGAAACGGGCGGTCAAGGCAGTC

GGCACCTCAGGCAAGGCGATCAGAAAATACCTCAAAAAGTGAGGGTGCAACCCCGTCACAAACCCGGCCC  
CGCTTGCAGGGGCTTTTCTCATCTTCGCTTTACGTGGGCGCGTCCCGCCCTGTTTGGCGGCGCACATA  
CCGCCATTAGCCGCTCATAAGCGGACTGTACAGCCGACCAGCACTGGCCGCGTCCGACAGCTTGTGA  
CCAGCCAGCACCGTCTGGCCCTTCGCATCCCGGCATCCCTGCCTATAATGCGGGGTCAAACACACAGAGA  
GGATTAATCCATGGGCTTTATCACCTGGATCGTATTGGGACTGTTGGTGGGTATTCTGGCGAAGTGGATC  
ATGCCGGGTGCGGACGGCGGTGGTTTCTTCATGACCGCCCTGCAGGGGATTTGTCGGTGCCATGGTTGGCG  
GCTATGTGGGTACCCTGCTGGGGCTGGGCTCAGTGACCGGTTTCAATATCCCGAGCATCGCGCTGGCGAC  
CGTGGGCGCCCTTATCGTCTGTTTGTCTTCAACAAGATCCGCAGCTGACCCCAACGCCATCTATGTGT  
AGATAAACAGGGCACCGCGAGGTGCCCTCTATTTTTTATCGCCCTCACGATGTTGCCAGCGGCAAGATCA  
GCCTCACCAAGCAAGCCCCAGCTGGGTGGCCGGCAGCAACACCACTTCGCCGTGGTGGTAGTGGGCGAT  
ATCGCGCACCAAGTCCAGACCAAGCCCCGCTCCCGGCTGTTTCGCTCCCTGCTCGAGGCTGGAACGGC  
TGCCAGACTCGCTCCGACAGCTCGGGGGCGATGCCGGGGCGGTATCTTACCTCCAGCCAGACCTGCC  
CGTTGCTTCGCACCACCCGCGCCGTACAGGTGCCGTGGGGCGGGGTGATTTGATGGCGTTGTCGAGCAG  
GTTGGCACAAAGCTCCCCGAGCAGCAGCGGCTCCCCGCCACCATGATGGCGGACTCCTCCCCCTCGTAC  
CCGAGATCGATCCCCTTGCTCCGCGCCTGCGCCAGCCGTGACAGACAGGCTGCTGCACCAGCGCCGTCA  
TCTCGATGGGCTCACGCTGGCGCAGCCCGAGCACTCGTCTGATTTGAGTCGCGCCAGCAGCAGGAGCCG  
CTCGGTGAGGGCGATGGTGTGATCGAGCCGTACGGCCATGGCATCGAGGCTTTCGCTCATCAGGGCCGGA  
TCGCCACTGCCGCGGCCACCTCAACTTGGGTTTTCAAAATGGTGAGCGGGGTGCGCAGCTGATGAGCGG  
CATCGGCGCTAAAGCGCTCCTGCCGGGCCACCAGCTGGCGCAATCTGGCCAGCTGGCGATTGAACGCCTG  
CACCAGCGGTGCGGTCTCCTGCCACGGGAGCAGGTGCGGCAAGGGGGCAAGATTGGCGGCATCACGGCGC  
AAGATCTCCCGCGACAGACGGCGCATCGGGGTGAGCAGCCGCTTGAGCAACAGATAAGCGAGCAGCAAGG  
TAAGCACCACCAGCGCCCCCTGGGTGAGCAGGACCGACCAGAGCAGTTGCTCCGCCAGCTGCTGGCGACC  
GAGCAGGGTTTTCCGCCACCGTGATGCGGGCCATGCCGTTGACGCCCCCTCGCCCACCGGTTGCAGCAGC  
ATCACGGCGCGGATCGGGCCTCCTGATAGAGCCGTATAGAAAGTAGGCGAGCGCCGGATAACGGTCGG  
TGAGCGGCGTACCGTCCGGCATGGGGGGCAGATCGTCAAAGCCGGAGATGACCCCATCGTCGATGCCGCG  
CACCTGATAGAAGAGGCGATCGCGCATGTTGCGCTCGAAGCTGTCGAGCACTACGTAGGGCACATCCACC  
TTGAGGATGCCATCGCTTGCCTGAGCCGCTCGGCAACGGTGCAGGGCCGAAGCGAGCAGGTTGCGATCAT  
AGGCGGAGGTAGCCGCGCCAGTGCCTGAGTAGCTGTACCAGGCCGAGGCGGCCAAAGGATGAGCAAA  
GGGGCCCCCAGAAACAGCAGCAGTGTGATGGAGCAGGAGCGACTAATGGGAGGCCCTCCGGCGCCGCTTC  
CAGCAGATAGCCAGCCGCGCAGGGTGGTGTATCACCACCCGCTGCCACCAGCTTTTTGCGTAGCCGG  
TGGATATAGAGATCGATGCTGTCGAGACCTACCTCGTTCATCGAGGTTGAACACCTGCTCGAACAGCTGCC  
CCTTGGCGACGGGGCGCCGTGGCGGTACATCAGCGCCGTGAGCAACGCTGTTGCGCGGGAGTCAGGGC  
CAGGCGGGCATCCGCCAGCAGAAAATAGCCATCGGGATGCAGGGTCAGACGCCCCAGCCGCAACTCGGTA  
CCGCCACTTTACTGCGCCGAGCAGGGCTCGCAGCCGGGCATCCAGCTCCCCAGATCGAACGGCTTGG  
CCAGATAGTCATCGGCACCAGCATTGAGGCCGAGATCCGCTCCTCCACCGCGCCGCGGGCGGTGAGCAG  
CAGCACCGGCACCCCCCTGCCCCGACTGCGCAAGCGACCCAGCACCGCCAGCCGTCGAGCTTGGGCATC  
TCGATATCGAGCACCGCCAGCGAGTACTGTTTCGTGGCGCAGCAGGTGATCAGCCTGAGCCCCGTCAGCCA  
CCCAATCCACCGCAAACCGGCGCTGGTGTAGTGGCCGCGACAGCCAGTGAGCCAGTTTCGTGATTGTCTTC  
TGCCAACAGCAAAGCGCATCCCTCTCCCTTGTTCCTAACACGGCATTCAGCCGCACTGCTTCAACTGCA  
TCCCTTCGTCACTGCCAGTGCAGGGAGAAGGTGCGATCAGGGTCCACTCCCGGCTCTTGGTCAGCGATTG  
AAAGGTGAATGAAAGGTTGTTGTTTTAAACAATTTTCGCATCACTTCGTCTATCGACGGAGTCACACCCAGG  
AAAAACAACGACAAGATGGAGCACACAACCATGAAGCAACGCACACGCCGTGCCCTCGCCCTGCTGACCC  
TGCTCGGTGCCCTGCCACTGCAGGCAGCCGAAAGTGCCACGACTCCGAGCCGTACCGAATGTATCGCACC  
GGCCAAACCGGGTGGTGGCTTCGATCTCACCTGCAAGTTGCTGCAGGTGAGCCTGCAGGAGACCGGCACC  
ATCGACAAGCCGATGCGAGTCACTTATATGCCGGGCGGGGTGCGCGCCGTGGCTTACAACGCCATCGTGG  
CCGAGCCCCCCGAGGCGGGGACTGTAGTCGCTTCTCCGGCGGCTCCCTGCTCAACCTCTCACAGGG  
CAAATTTGGCCGTTACGGGGTGGACGATGTGCGCTGGCTGGCGGCGAGTGGGTACCGATTACGGCATGATC  
GCGGTGCGCCACGATGCCCCCTATCAGAACCTCAAGGAGCTGGTGAGCGCCATGGAGCGCGATCCCAACA  
GTGTGGTGATCGGCGCGGGTGCCTCCATCGGCAGTCAGGACTGGATGAAGACGGCGCTGCTGGCCAAACA  
GGCCGGGGTTGACCCCCACAAGATGCGCTACGTGCGCTTTGAAGGGGGCGGCGAGCCGGTACCCGCGCTG  
CTGGGCAACCATGTGCAGGCGGTCTCCGGCGATCTGAGCGAGATGGTGCCCTATATCGGCGGCGACAAGC  
TGCGGGTGTGTCGGGTGTTCTCTGCCGAGCGGCTGCCCGCAAGCTCGCCACCATCCCCACCGCCAAGGA  
GCAGGGTTATGACCTGGTATGGCCGGTATCCGCGGCTTCTATGTGCGCCCCAAGGTAAGCGACAGCGAA  
TACCAGTGGTGAAGCAGACCTTCGATCAGTTGGTGAAGACCGACACCTTCAAGGCGCAGCGGGATCTGC  
GCGGCTGTTTCGAGTTTGACCTGACCGGCGAGGCACTCGACAGCTACGTCAAGGAGCAGGTAGCGCAATA  
TCGCGAACAGGCCAAAGCCTTCGGTCTGGCCAAATAGGAGCCGAGCCATGAGCGATCGCATCTTCGCCG  
CCATCTGGCTGCTGCTCTGTCTGGCTGGCGCCGCCATCGCCTGGCAGATCCAGAGCGAATACAGCTATGA  
GCCGCTGGGGCCACGCCCTTCCCCTCGGCATCATCGGCCTGATGGCGCTCTGCGCCCTGTTGCTGCTG  
CGCCGCCAGCCGACACCGTTACCTGGCCGCGCTGCGTACCCTGCGCCACCTCGCCATCATGGTAGTAG  
CGCTGGCCGGGTACGGTGCCAGCTTCAGTGGCTGGGCTTTCGCTGGCTACCACCTGCTCACCTTTGT  
TCTGGGGCGCCTGTTTGGCGCCTTGCCAAAGCCGCCCTGCTCTCCGGCGTCTGCGCGGCTCGGTGCTC

TATCTCGCCTTCGACCGGCTGCTGGATGTCACCTGCCCTCGGCGTCTGGTTCTCTTAAGGAGTCAATA  
TGGATACCTGGATGTACCTATCCCAGGGCTTTGCGGTGGCACTCACCCGGAGAATCTGGTGATTGCCCT  
CATCGGCTGCTTTGTGCGCACCGTGGTGGCCCTGCTGCCGGGCTTGCCCAATCAACGGGGTCGCCATC  
CTGTTGCCGCTGGCTTTTGCCTCAAGCTCCCCCGAATCGGCGCTCATTTGCTCGCCACCGTCTATA  
TCGGTTGCGAGTATGGCGGGCGGATCTCCTCGATCCTGCTCAACGTGCCGGGGGATGCCGCCGCCATCAT  
GACCGCGCTGGATGGCTACCCCATGGCCAGCAGGGCAAGGCGGGAGTGGCCCTCTCCATCTCGGCGGT  
AGTCTCTTTGTGCGGCTCCATGCTCGCCATCGGGGGGATCATACTGTTGCCCGGGCGCTGGCGCGTGGT  
CCCTCGCCTTCGGCCCGGGCGGAGTATTTGCCCTGATGGTGTTCGCCATCGCCTGCCTTGGCAGCATGAT  
GAGCCAGAACCCGCTCAAATCCTTTATGGCAACGCTGATTGGGCTGGGGCTGCCACCGTCGGGGTGGAT  
GCCAACACCCGGCTCTATCGCTTACCTTCGACAGCGTTCACCTCTCGACGGGGTGCAGTTTATCGTGG  
TGGTGATCGGCTCTTCTCGGTGAGCGAGATCTGCTGATGCTGGAACACACCAGTGGCGGGCGCAAGCT  
GGTGCACACCACCGGGCGGATGCTGTTCAACTTCAAGGAGCTGGTCCATTGCACCGGCACCATGCTGCGC  
TCCTCCACCATCGGCTTCTTCGTCGGCATTCTGCCCGGCGCCGGTGCCACCATCGCCAGTGCCATCACCT  
ACATGACCGAGAAGCGCCTGGCGGGGCGAATGCCAAATTCGGAGAAGGGGACATTCGCGGGCGTGGCCGC  
ACCGGAGGCGGCCAACACGCATCGGCCCTGCGGCTCCTTTATCCCCATGCTGACCCGGGGGTGCCGGGT  
TCGGGTACCACAGCAGTGATGATGGGGGCACTGACCCTTACAACATCACTCCGGGCCCCACCATGTTCA  
CCGAACAGCCGATGTGGTGTGGGGACTGATCGCCGCCCTCTTGCTGGCAACGTCATGCTGCTGGTGT  
GAACATCCCCATGGTGGGGCTCTTTACCCGCATGCTCTCCATCCCGCTCTGGTTTCTGGTGCCCGCCATC  
GCCAGCGTCTCGGCAGTGGGAGTCTATGCGGTGCACAGCACCACCTTCGACCTGTTGCTGATGGTGGCC  
TCGGGGTCTTTGGCTACCTGCTGCGCAAGATGCACTTCCCCATGTCACCGCTCATTCTGGGCTTCGTGCT  
GGGTGAAATGCTGGAGCAGAACCTGCGCCGCGCCCTCTCCATCAGCAATGGCGACACCGCCATCCTGTGG  
AGCAGCGGCATCAGCCAGACCCTGCTGGTACTGGCGATTGCAGTGATCACCCTGCCCCCGCTGGTACGCC  
TGCTGCGCCGCGCAAGCCGATCCGCTGATCCCGGACGCCCCGCGGAGCAGGGTGCCTGACCCGATAA  
GAAAGATGACGTGACATATTGATATAAAAAGGGCGAGATCTGAACGATCTCGCCCTTTTAAACAGACCGCA  
TCCATCTGTCACTAACGTTATAAAAAACCCAAATATATCAACGTAATCGCCCCGCTTCTCTGGCACTT  
CAAGAGCCTCAAATTGACGTCATTACAGCAGGTCTTATGAGCAAGCCGCTACGTGACAAGGAAATATTAG  
ACTGGCCGCTGTATCCCTTTTTCTCGATCTGTATTTCCACCGAGTCAAGGGGTGGCAAGCCTTATAGTG  
AGTTGAGGTGGCAATTAACGCGGAGGCTCTACCGCAACACCTGTTTGGATCAAATGTGGATCTCGG  
AGGAAAAAGAAAAAGCCACTATTTCTAGTGGCTTTTCGTAACCTTTGATTTTAAATGGTGGAGCCGGA  
ATCGAAGATTGCGCACCAAGCCTTTAAAATCAACAAATGCACATTATAAAAAATTTTCATCGTATACCTAT  
CCGTATAACCAATAATATTTTAGTGCTACCGTCTGCATGTATCGACACCCAGTACCGATCTGGTTCAATT  
GGCAAGGCCAAGCAGCAAAGAAGCTTCATGCAGAGGGTACGACACCCCTGTTTATCCGGAGCAGCCCCA  
TCTCGGAGCGAGAAACACTACGACAACCAGATATCGACCTGGCTGCAGACCCCGTGACCTGCTTGCAT  
GCTGCTGCGCATCTGGAGTGATGATGTCAGCTATATGAAGAGGGGCATCATTTTAGTCCCGTCAACATG  
CACAGTGAGACCTTTTTGCTGACCGGCAGCAGGATCCTCTTTGCGACGCACAGATGAAAGTGACTGACC  
AGATCAATCAGAGAAGATTGGGGAAGGTCTACTTTGCACCCGGGGTGGACTTCATCAGTAGCCCCCTCA  
AATTCGTAATGCAAAGGTAGGGGGCGACTATTCTTATCGCACACATACAGCAAGGCTCGCAGCGATGCA  
AGTCTTGCTCATGTCTTGTCTGTGTTAACGTCAGCCCCAGCGTACAAGTGGCATCGGCACCTCCCTGCAAT  
CGCTCAGCTTGCTGCTGCACCAAGTAGGTTGAGCCAGTTCAGAGTCTTTGCCCCAGCTAGGCGTCTGAG  
TCATTCGGCGACACAATGACCAAACTCCGCTTCTCATCACCTGGCTTGTGAATCCGCCCGCCGAGTGGGT  
ACGTGTCCGCATTGATTGTGAGCTGGGAGAAGCTGAAGGTGTAGCCCTGTACCACCTGCCATACCCGCCA  
GATATCGGCCACCGCAAGGGCTGCCGTCCGTCATGCAGATCCGCCAACATTCGGCCCTGCCGATCTCGTA  
GCAGGGTTCGAAGAACTGATGATTGGTACCAAGCAGAGATGCCCTGTTGCCAGGCGCGGCGGTAGATA  
GGCATTTCGCCACAGTCTAGGCCCTAGCATTAACTTTGGTGTAGTGTCTGTGCCGGGCTGCACCTTCT  
CTTTGATACCATCCATAGTTGGTGTACTGAATTTGCCCGGCCGTCACGACATCCAAAGTTTTGAGA  
CAGGTCTCTGGCCGATCACCAAGACCCGCATCTGAGCGATGTGGTAGCTAATCTGCTGATAAATGC  
AACGAACCGAGTTAGATGTAGTTTGACGGGATTGCACAAACCGCGCTCCAGCCAAAGATTTTTTTGCT  
TTGGCTGGTATGTTAATACTTTTCATTCATCGCGTGTTTTTGTGCGATCTCTCTACATGTCACGCCTTCAG  
CACATGGACCAAATGCTGTCTGAATCAAATTCAAACAGGCACAATGTTTGCCGCTGCGATCACTGCATCG  
ATAACTTCAGCAACATCCGACGGCTCGACCTTGGAGCACAACCCCATTTCCAAGGAGTGTTCAGCG  
AGGCAGCTGTAATATTCGACGATCCAAGATAGGCAAAGCACCGATCACATAACTGCTTTTTGCATGGAA  
GGTTTTCCCGCCACCATCCGCACGTGGGATAGAGTAGTTGTAGACTTTCACACCTTGATCCTTGAGCCAT  
GAACAAATGGCGTCATACCCTGCTGGATAGTCTTTTCGTGAGGAGTCATCCAACTGCGGAGTATCAAAG  
AGCGTTCGACACCTGAATGAACCTGAGACATTAACCTCTGAAGCCATGCTGCACCGGTTACGTCGAAAAA  
AGGTGTATCACAACACTACTCGGCGTTGTGCTGCCCGTACCATTCCATGGAAAGCATGCTGCGTTGGCTCC  
AGTCTATTCACTCTCCAGCAAGCTCTGATAGCTTTTGTCTAGCGTGCTCGGTCTGGGCGGTTTAGTGA  
GTACAACCTGCGCAATTGTGCGATCTTGGTGAATCGTACAGCGATAAAAAATGCACAGAGTTCAAACAAG  
GGTAATCGTGCAAAACGAGAATGGACACCCCGACGTGGTTGGTAACCAGAAATCAACTGTTTCCAATAAA  
CCTAGTTGACTGAGCGCATCAACAATTCGCTTGCAGCTCCTTCTTCCGTTACGCCAAGCTGCGCTGCTG  
CTACAAGAGATCGAGCAGACAGTATAGAATTGCTAGGTAATCTGCCCATGCATCCAATAGAGATGCAGC  
TAAGCTGGCCCTGTCCGATAGACCAGACACGACAGCTTGTCAAAGGCGGTGAGTTTTGAGACGGACATT

TAGGATTTACCTTGCTGCTATATCAAGATAACCATTAATCGGTACACCTTGCTTATCGAAACGTGGCACT  
CCACCAATAGAGCGTAAAACCTGATCGCGATAAAAAGCTTGTGCTCACAATACAGGAGTTTCGGGCATCA  
TCACACAATCAGGGCAGGCACCACCGCGCTCAGTGCAAAGAGAGCCCGTCCCGCAGTGGGTAGCCTTAGA  
GCTCAACATTGCAGTTAGCATCGCCGTCCCAGAGTTACGCCAGAGCGAAGAGAGATTACCCAGATCCATA  
GTAGTTCCGTTGCGGTAGACTACAAACGCCAGGTCAGCAGGGAAGATGTACTCACCAGAGAGCCTAAGT  
CGAGGCCTGAGTACTCCGACACGTGCTTCATCAGTAAGTGCGAGTAGCTGTGGAGAAGGGTGTAAAGATA  
GAAGTAGACCGGGCGGGTGTGGTCTCCGGCAAGTTATCCAAGAACGGACTCATCGGGTGTGCCGACCC  
AGTAGACCTGCACCTATTTTTCTCCACATTCAGTGAGAACATATCCGGACACTTCAGGCTATGGAGCC  
ATTCAAGAACAACCTCTTCTTAAGACGCACATACAGAGCCTCATTACCCTGTTGCACAACGTAGACGGG  
ATACTTTGTGCTGCCGCTCTATCCCACCGGTGAAATAGGTTGAGGCGAACTGGCATATCCATGCCCCG  
TTGTCTCGCAGAATGGGGTTCGATTCCATGCGGAGTAGCCGAAGCTGAAGCGGCACAAATCGAACTCTC  
GGATGAGGCCCATGTCTCGAGACCGAGCTTGTCTAGCAAGACGCGCTCGCAGTCTGCACCTTGATCAGT  
ATTGTCCTTGTCTTCTGGCGCCAGATCTTCATCCAGCCGAGTGAAGGACACATACTGTTTCTTCCATTG  
GTACGAGTTTTCAACATCTAAGCGTGTGCTCTTAAGCGCCGCTGCTCGACGGCAAGGCGAAAAGGATCGA  
ATTTGGACGCGAACATCGATTGCTTCTGAAGTTTTGAGACAACCGAAGCAGGAAGATCTACCTGGGA  
CAGCAAAATCAGTCTTTGGCGTAAGTCATCAAGGATACGTTGCTGGTTGTTGTAGGCAAGATCCAACAA  
TTCCTCATCGTGGCGCGGAGTGGTTCCGGGTAAGTCTCCAACCTGGGGTCTACTACTCGGATTTGTTCCA  
CAGCGGCCAGGTAGTCCGCTAGGTCTTTGGTACATTCCTGGCTTGCCCTCGCAGGCTTTCTTACGTTTTTC  
GTCAGTTATGGGCTGGATGGCAAAACCATATTGCTTGCCACAAAATCCTTGAGCTCCACCTCCCTCCCC  
GGCCGCGAGTCCGGTTAGCAGTTGCTGGCTGCCGCTTTTGAATCAATGAACAAGTCTGACTTGACGTAAT  
ATGCACTCGACGCTCGATAGGGTGTGCTGCATCCGCACCTCGGTCAGCCGGTCCAGTCCCATCGCCAG  
TCCGAGAATGCGCAAGGTATCGCGGTCATTCTGAAGCCATTTAGGTGACAGCGGTTTGTGCGAGGCGGCA  
CATTCGAAGAACCAATCGCCGATGCCAGCAGAGCGTCGATTGAGCTTGAACCTGATGACTTCCGCAAACGC  
AGCTGTACGGCGCTTGATGGCTCTGGCATCACGATCACTCCAATGCCACTGACCAGGAAAGGCCCCCTC  
CCAATGGCCGGACCAATGCACGAAGATGACATCGAGCTGTTCCAGTCACATTTGGCCCTTCTTCTTGGGG  
TTAGGGCAGTGATTTGGGGTTCAGCTTCCAGAGGTTTCGATCCAGTTCGCGAGGGTCTCATAGTCTTGAA  
ACATGCCACAGGTGCGGCACACGAATGTAGAGGCGCTGGCGTGTACTCCATGTGCGAGGGACGACACAG  
ATAGAAGCGCTCCTGACCCGGCAGTTGGAACCTCCGTTCTTGTGCGGTCAAGCAAGGCTTGATCAACGCAC  
TGCGTCCGCGAGGATACGGGGCTTAGCCGGTCCGCGTCCGCGCAGACAAGGCAGTGTGAACCATGCTC  
TCCCTAGTTTCGTTTCATCCGTTTGAACACCAAGTCCATCGTGGATTCCGAGAGCTGAATGGGCTCGCCGGC  
TGAAGAGCGGGCAATGCAGGCCCCCATCCCGCTTTCGAAGGTGAAAAAGCTTTCCGGGGCGTAGGCCGTA  
GCAAGCTGGTTACGCGACCGATTCAATGTTTTGGCTTTTTGCCATCTTGTATCTCCCTCAGCTCCGCGCTT  
CTGTGCGCTATCGGTTCGAGTCAATGTGACACCGGAGCCCCGCGAATGAAGGTCATCACCCGAGCTGT  
CATCCCTTCCGCCACACGCTTGTAAAGACGCATCGACGCGGATTCGTGAATAAGGCCCGGCTGGTCTACA  
TCACGAAGCGAAGTCATCGGTGCTAAGTGGCTGTTGCGTGCCGAAAGAACTCGACCAAACGAGAGCCGT  
TAACCAATCGGTTCGACACCCAGATCCTGCTGGTAGTGGGTGAGTTGCCCTTGAGCATCGAACGGTAGTA  
GTTCTTCCCTCCGGAGAGGGTGAAGAAGCAGACCAAGCGCTTCTCCATGAAGGCTCGGTGCTCTTC  
ATATTGGCTGGCACAGCGAGGAAGTCATGCACGTCCGGCGCCATGGCGAAGGTGAGGCTATTGCGCTTCT  
TGTCGTGCTCCGCCGCGCACAAACGTTTCGATGGCATTACATACCGCACACATACTCCTGGAAGAAGCTCGG  
CATCACCCGTACCAGAGCTTTCTCAGCCCAGCGGTCAACAGCTGCTGGTAGAATCATACGCTCTAGGAAC  
CGGTGGAAGATGTGCTGAATCTCCAGCACGAACCGGTGCGGATACCGCTGCGGCACAGGCACCAGCAGCG  
AGAACCACATGCGTACGGCCACGCGTATGACGCTGGATGTACTCCGCGATATCCGACGGGATGCC  
AGCAAAGAACATCGGTTGAACTCTTCCAGTCGACGCGGTGCGAGATGGCGGAGGTGGCGATGACTGAC  
CGAAGGGTGTGCTTCAATTCCGGAAACGGTTTGTGGTGGCAACGCGGGTCTCAGCCCGCGGACGATGT  
CCTGGATGTGACGCGGACACAGCACCAGATGAGTTCCGAGCTTAGTGCCAGGATGGGATAGCCCTC  
AGCCTGGTGAAGTCTCAAACTGGACCTTCTCGGTATCGATGACCTGGTTCGCCACCTTTCTTATTCTGTG  
ACGTAGGTTAGGGCAATACGGTGTAGGTCCACCAGCGTCAGCAATTTGTCTGCGTCCGCGCCCGCAGGA  
GCCGGACAAACTGAACCTGCTGAGGCCCGGAGATACCCACCGAATCAGCTCGTTCGCGGGCTGCTGCCTC  
CTTAATCGGGTCTCACTGCGTAAACGCTCATACAACCCAGTGAGCATCACATGGTAGTGGCCGAGCACT  
GAGGCCATAGCCACAGTATGGCGATGTCGTTGGTTAGGACAGAGGCGTAGACGCGTGCCAGTGACTAC  
GCAGCTCCACGTTGTCCGAGGTATGGTCAACCGCTCAGTATCGTCAGACGTAGCATCGGGCTGGAGGGG  
GGTAGCGTAGAACGAGTCATAGAGCGTGGGCCAGGATGCGGGAACGGATCGTATTGTGCGCTGGTAG  
AGGTTGCGCATCTGCCGCTGCGGCTCACTAACCGTGCCGACGCGGCAATGACCTTGATTTTTCGACGGA  
TTGTAGACTCAGGCTCGTAAAAGAGATGACCTTCAACAATGGCGAGAGTTGGTGAACCCCGCTTCCAA  
CGCTGATTTCGAACAGACCGGAGAACGTCCCCAGTACTCGTCCAGCAGGTGGGCTCATCTGAATCAGC  
AGTGCCGGAACGGGTCAAAGAACCTCTTCTCGCCTGAAGCGAACGACGGGAACAGGGCGCGTGTGCCTG  
CGCCCGGGTGGCCATCCCAATCCTTAGGCTTCATCGGCACGTACAGGCGTTCCTGCCAGTCTCGACCAG  
TGGGGCGAAGCCGAACATCCCGAAGAACCTTGCGGATAGTGCCCTGCGATTGACCGATGGCAGCGAGCTTG  
TCGACCGTCCCCAAGAGAACAGAGGGGGCAAGTCGTATATGTCTCGTCGACGATGTAGAAGGGCAACG  
GCGTTGGCTTAGTGAAGCGAGCGTTCAGGAGCACTGGTCTTCTGTTGGCCGTGACGATAGTGCCTTGC  
GTTGGAACCGGTGCCAGATTGACGGCGCAGCGCTAAGAGGCTGCCGCTTGTTCACAGAACGGACAC



GAGGACAGCTTCAGCCAGCGCTCACGGGCGCTCTTGTAGGGCTGGATGCCCTTGTGCCCGGTTTCCGCGC  
TCGGGGTGACGTCATCGCTCGCTGGGCACGTCTGTGTAGCCATCTTCGGAGTGCCAGTTTGGAGTGTTCGT  
GCCGCCCACCCAGAACCCAAGAGAGAACGGCTCACCAGGATGCCCGCGCTATATCGAATTTCCCTCAGCA  
GCCCCATTATCCCCGAAAGTGCGACGAGCTTGCTGCAGAGTGAGCAGACGCAATGGGTAGCGCATCAGGG  
CTGATACACCTCGGTGCTTGCCCCGAGGCGGTGCGAGGAAGAGCACGAACGTCAGCAGGCCAGGAAAGC  
TTCAGACTTGCCACCACCGGTGCGAGAAGTACAGTAACGTCACGGCGTTGGCGTGTTTGGCGACCTCGGGC  
GTGTAGTAGCTGTGGAACCTCCGGAATGCGCGTTCGCGAAGGCTGGTATCGACGCAAGGATGAAGGTGAGCT  
GGAACAGGCGCCACTCGTCATAGCCCTTCGACTCGGCCACCTTAGCCATCGCGGAGTTCATCGACACCCA  
AGCCTCGAACGGAATGCCGAGCGGGGACTTTTGCACGCCAGGTCCGCTCCAGCTTGTTCGGACTTCTCA  
AGGATCGCTAGGCCACAGCGGATAGCACCCAGCTCCTGCCGCCAGGCAGTCACGTCCAACAGCAATTTCT  
CCTTCTCGGCCCGCAGTTGCTCGACGGCATTTCGGCCGCTCAGGCCAGCGAGGCAGTCCGGTTCGCGACA  
CTTGGTCAACCATTCTCGTAGGCCGTGATAAGGGCCCTCAGGCCAGCGAGGCAGTCCGGTTCGCGACA  
TTCGCGATGTTGCGCTCAACGGCTCTATCGGTTCGGGATGATTTCGAGGCAGCACGTAGCGCGGGCCAGG  
TTGTACTCATATGGTGCAGCTTGCCGTCGACCGCAAGTCTGATGCCACCGTTGAAACCCAATGCCGGGTA  
TTGGAGATACTCGTTGTATCGGTAAGATGGCTTGACGCGGTCCAAGCGCAGGAACTTGTGGTTCGGTAGCC  
AGCACCGTCGTGGTTCACAGAAACCTGAAAAACGATGGTTCAGCTCCTTGAAGTTGCTCTTAGTAAGCG  
GATGCGTCCAGTTTTCAATCGCAACATGGACTGTGGTTCGGGTCACGTCGACAGGGTCCGTATCACTTG  
AACGACCCAACGTAGCTCAATATGGGGCACTATGACCGCTAGTTCAGAGGCGGTACCCGTTCAAGGTAT  
TGCGTCCAGGCGTGTACGTCGGATGGTTCGAACTCGAGTTCGTCGTTACCCCCACGACTGGCCTCCTGTTT  
CTGGATCGGAGCTTGCAGCCAGTCGGCAATCTGTTTTGAGATGGATTTCGTTTCAGGGCGGCCGTCGCCTT  
TTTCGCATCAGCCTCCGCCGTCGCCGGGGTGAACTCGAAGGAGGGAAGCACTAGATCGAGCCGAAGCCAC  
TTTGGAGGAGGAGGAATGTCGTAGCCAAAGCGGTTCGGGAGTGGTTCAGGTCCACGGCGATCTCTTGA  
GGCGTGTCTCGCCTACATCGCCAACCTTCGTCGTTCTCACCTTCGGTGTCTTCGGCTTCTGCCTCACCCTC  
TGCCGACGCACGGTCCAGTTCGGTGTTCGAACGGTAGTCCCATCGACCCGTAGACGGCCTTACGAACCTCG  
TAGCTCTTTGCTGCCCAATCCGGATGCGTCTTTCGGCCCGGTAGGGCAGAAACGAGCTTGTTCAGTGCCT  
CCTTGACCTTGTCCGAATTTCCGGCAGGACCTCCCGAGTCAGGGGAAACGTTGCCCTCAGTCGACCCCC  
GGGCTTCACTTTCATCTTTCAGTCGGCAGAATGCGAACGTATACGGCGCCAGTCAGCGACAGCCACGCGT  
GAACTCACAGCAGCCGAGCGAATTTGGAAGTCCATGCCGTGCGCGCTGATGCGGATGAGTCCGCTCCTT  
CGTCGCGCCAGCTTCTTGTGGCATCGGCACTATGAACTCCGACATCAACGCGGCGCTTGGTTTTGTC  
TCCATAAATGACCTTGTAGAAGTCACCTCGCCCGGAGCCGCGCCGACAGTCCGTTGAGCAAACCTGTCG  
ACGACGGCCTCCTTGTAAAGCCGGGTGGATGTCACGGGGTTCCTTACTGAGAATGGGCACTTGCCTCTCCC  
TCCTTGTAGTGGTTACCAACGCCGGCGGCTACGACCGTTCGACTTGGGAGATGCAGCGCAGCGCGT  
CTTGCTGCAATTGCCGGATGACGCTTCTTGGCACCTTTCGATATACCGCAGCACTTTCAGACTGGAACAG  
AATCTCGGCGTATCGAGCGGCCAACTCTCGCCCAAGGTGCTGATTCAGACGCCGCGCATTCGCGACGAAG  
CCCCAGTGTGATCAGCCGCTCATCGCTGATGCCCAAGGCCCTTCAGAACACCTTGAAGTACTTGAAT  
CTTTGGAAGCGTGAGGTGCTGTATCATCCTGGCCCTGCAGAGCCAGCCAGTAATACACACGACCCGGTTCG  
GCAGTTCGCGGCCCTAGGATCCAGTGCAGCCATCTTTGCGTGAATTTTCGCGAGCCAGCGCCAGCCGCTTG  
TTGGACGTGAACATCAACCTGCAGCGTTCGCTGAACATCGTCATGGTAAAGCTTCAGCAGCATGCGAACAG  
GGTCCACTACGGAACCTCACACCTTCATCATTTCAGTTGCAGTGACGACTCCAGCGTGGCAGCGAGCTCGTC  
ACTCATATCGAAAATAAAGTACCAGGCTGAATAGCGCCTACAGCTACACGACGAAACAGAGGGTCTTCA  
TCGGGCTCATAGCGATAGACCCAGCCAGTGGCATAGGCTAGGTAACCACCTTCCAACCTCGAATGTGTAGT  
AGGTTCGGTGTTCATGCTTAAAATCTCGCCATTATCTCGAACGAAAATGTCATTTGGCATGTCACGGAG  
CTTATTAATAACAATAGGATTCCGGACCTCAGCCAGACGTCGCTCGATCTCTTTCAGCCAAACCCCTATG  
CGCCCTCTATAAGCTTTAAATACACCAACTTCCTTCATGCATGCCAGTGTCTTTCAGGGTTGATTCGGCCT  
GCCTATAGCCGATCAAAACTACCGTTCGATGCGGTATTCCTGGATGAGTCAACAGAATACGAATTACATC  
TGGGTTACACCCGATAAATATTAATGCTTGAATTTACAGTCACTGGTTAAGTCTTGGCTACTGTAGGC  
AGGGTGTGCCATTCAAGTAAATGCTCAACTAACACCCAGTCTTTGCCAAATTTTCGTTGAAGGAAACGAC  
GAGCCAGAAATATGTATCTGTTATTAGGCAATACTAACGAGATACCATGATGACTAAAATTTTCGATGTTT  
TTTGATTTCCGCAAGCATGCGTGCAGCCATGGGCGTTGCATCATTCCAGTCATCAATGAGATTGTCAGCG  
CGAGCTATGGCTCGCTCAACTGACTCACGCGACTCGTTTAAATGCGCCAGAGGCAAGCACGGTGGAGTAG  
CTAGCTTTATCGGTGTCCAGGCATCACGAGAACTGCTGTAGTTGCCCTGCCTCTGCATCAGCTGATGATGA  
GGTTAGATCTGCATAGCCTGCCGGCAGGTTGACAACCCGAGGATGTACAGAGAGGCCCTGAAGTAATGCA  
TGATATGCAGGGTCTCTTCGCTGCCTGAGGCGCCATTAGCTTTTGGAACATAAGAGCAAGCTGAGATG  
CGTCTCGATCCACTATGCTTACGCTGAAATTCGAGTTGCTGCGTAGGGCTGGCATCCAATTTGGGGCTAT  
AGGCTTAGTAGAAAATAGATTGTTGTCGCTTCCACTGCCAGTACTTTCGTGTCGAATTTCAACTTGAAC  
TCAGAAAGTTGAGAGCGGAAGATGAAGAACGCTCTGGGGTCATCGGTAATAATGACTTTTCCACAACCAG  
AGAGTCCATTCTCATGTGCTAAACACAAATATTCAGGGATGCGTTTAAACCGCAGAAATAATCTTCTTTGT  
CACAGCATCGGTTGCGTGAACAGAAAGAAATTTCTGGTTGGCTTGGGCTCTTTAATGCAGCTGATTTAAGA  
ACATCCTTCCAATCACGCTTTTTGGCTGCATGGTGTATAGCCATAAGGGCACCTGGTGCCTTTGTTTGGAA  
CACTCCATTACAGAACTAATTTTTGGCGAAGATTGCGCCGGTTTGCAGGCGCGTTACTTTTTGAAAGCGT  
TCTCTTAGCGGACTTTTTCCCGTGAACCCACTCATGTTGCGCGGGTCAAAATATAAAGTTGGAACA

AGTTCTGCCAGGGACGGATTAGGTAGTTCGGGATGTTGGATCCGAATATCATTGACTGCCCTAGAGCTG  
CAATAAAAGACTGCGATGTGGTATGGCTAACTTCGATAGTAGAGCCACCATCAACCTCCCATAATGACCG  
AAATAAGTCACTCAGCTGTGTTTTTCCACAAGGATATTATGAAGAGGGGCACTAAATGCATGGGTGCT  
GGATAGAGTAATGTTTCAAGTCCGCGCAGATCCTTGGCAAACGACGCTCAAGATTAGCTAGTGCATGAA  
GTTGTGGCAGCGAAGTCAACTTGGCTGGCCATACTAAGCAGAGCATGGTGCTTCTTTGGTCTGCTGCTAC  
CAGCAGTGTATTTACGAGCTCTACAGTCCATGGTTGCGGAAAAATATCTTCTGCTGCCGCTCTAGTTTGA  
AAATTTAACTTGGTACTACCAGCTCTAACTTGAGCCAAAATGCGTTGTATGTATGGTGCGGCAGGTGGAG  
TAGAAGATAATACTTTGGTCTTGGGCTTCGTTTCTGTTCTCTTATTAACAGTTTGGCGAATCTTAATCTT  
ACGGATACGTTTACGCTGCCTAGCTCGGGCTTTTGTCTGGTCTGCTAACCGTTCTTCAAATGATTTGAAA  
TAACCTATTGATAAGTAGCCCTCCTAGCTGCACCCATTTGTTTTCTAACCGAATTTGGTAGCCATTTAT  
GACGGCTTCAATCCCATGTCTGGCCACTATTCAAAGCCCGTTGAAGAGCGACCGGATCCGGCAATGCAAGT  
TGGTTAAGCTCAAAGCTGAAACATTTGTTGCACCAGAAAATGCACCTGAAGTAGCGCTCCACGGCATAACG  
AACTGAGAAGCTCTACCAACTCTGTTGGAGAAAAGAACAGGTATATCGATGATTTGCTCGATGATGACTAC  
ATGATTTTTCTCCAACAAAACCCACCATAGATTTTGAAGATATCCTGAGAGACAGTAGCCGCAACAAGGCGT  
CGGGGTTGTTCAATTCGAGGTTACTCGTTGCAATACTATAACAAGGTGACTCAACCACTGATGAGCTCGTTT  
TACTACCAAGATCAACAAAACGGTGTCTCCATCCCGTTTAGAGTTCTCTTCTATTCGTACGATCCCTTT  
ACTGGAAATATCTCGCGACCACAATAGAGGGATTACCTCCCTGAAGATGCCAGTCTTGGCTCCTGAAGT  
GACTCGTATTTCCGGTCGTTTTGTCTCGGTTCCAGACATAAGCACCGATACGCACCTATAGCCATAGTCAA  
ATAATCGAAAATGGGAAAAACATACTGTCTAACGAGATCCACGTCTCAATAGAACGAGGAATAGGCCA  
CGCGGCACCTGCATGCGGTATCGCACACTCCCCGATGCTCCTGTATTGACCAGTACCAGAAAACAACCTGAC  
ACTCTAGCACGTGTATTAGTACGATCTTCTTCAAGACGACGACGCAAGATACTCAATGCTGTTTTCTTGCT  
CGACATCGATAAATACACCCTGTGATCACTGACCATTCCGATATGTTCAATATCTGTGTTACGAACAAG  
GAATTTTTCGTAGCCGACTAAAATACTGACCTGATAGGAAGCTAGTAGGAGTCACAAGCGCAGCGCAACCA  
CCGTCTCGCAATAAACGAATGCAAAGAGTAATGAACAAGCAGTAAAGATTTGGTTGTGCGTCAATAACTT  
CAGCGTACATAGGCCGAAAGGTGCGAGCTCTTCTGCTGTCAATTTACGATAGGGAGGGTTACAGACCAC  
TACATCCACCCTCCCATATTTGTCTCCAAATCAGTTAATGAATTCGCTGATAAACATTAATCTTGGAA  
ACATACTCAGACTCTTGGATCTCCTCGTGGAGAGCCATACAGAGGAAGTGTTTGGACAGTTTACACAAAAG  
TCGTGTCCAAATCGGTACCATGAAGGTGCTTTTTCGATGTGCTTGAGAATTTTTCTTGGTGCTAGCCCTCT  
TGCCAACAGTGCCATTCGCATTCGTATTGCGATCGCGCAAGGAAAGCAGCTCCTCCGCAAGGCTGCGTCC  
ATGAACGATTGACTTCCAAAGTCGGTACCTTGCTCGGCTAAGTCGTTGAGTAGTCCATCCGTCAACGACA  
CAGGAGTGAAGAACATCGCCATCTTTTTGCGGTAGCTATCTTTCAGTCAGGATTGCATAGGAAGAGCTGAG  
CCAGTATGTAGCATCAAGGAACCTTAGTTTTTCAAGGACGGCGACGAAAGCTGACACCTCCGGTTCGGCA  
GCCAAAGGCTGTGAATACGGTAGTGACGATTCAGGAAGAGCAGGATACGCATTGCTGCACCAAACCTCGCA  
GGATAGTGCCTATAAGCGTTGTAGCATCAACATCGCAGCGCTCTGCAATAGACCAAGCGTTTCAATACG  
TCGCTTGATGGACAGTTTTGACAGTATTGTACCTACATCACCACAGATATAGAAAGCGACATAGCATGC  
GCAATATTGTTTCGTCCATGTGTTCTGCATTGATCACCTTGTGCATAAGTTCAATTCAAATAATCACAAC  
TGAGCCAAGTTGTTACGCAAATAACCCCATATATAGCGCGAGAATCTGAGTCCATTCGCTCATCGTTAGC  
TGTAATCCACCCCTCTAACTGGATAGGGCTTTTACGGGTTGATGAAGTTGTGAGCTGGGCTTGGCCAA  
GGTCATCATCCCTAGTGATTTTTTATTACATAGCGCTCGTCTTTAGCCATCTGTCCAAGATTGAGGTTGAC  
CAGCGCCCGTTCGCATCCGGTTCAGCATGATCGATGGGCGACACAGCATACTCCGGTTTTAAAAGAGAAGTGG  
TGCTGATGTTCTCATGAATACGGGGATGTATGGGAGAGTTATGAGTCCAAAACCTGAGCTGGAACATACC  
TGAAGCGTTATCAAAGGAATAATCACCTACCCAGATGGCTAATACGCAGACCGGCAAGCTCGTTTTACG  
CTGGCGGGCGACACCCAGCCGCGCTGGCTCTTGAACCTTATAAACTCAGTTATCTTTAGATACCTCGCA  
ATCTTTCGTCCCAGTTTGGGGGATTCAAAAACGTGACTGTGATTTACCTGCATGCTCCCGTGGCGAACG  
CCCGAATTTTTCTCGCTGCCCCCATCGCCGACTTCTTGGGAGCCAACCTTCGAGGCCAGCCATTTACGA  
GCATCGATCTGCAGGCGGGCAGGCAATCAGATCATGGTTAACTTTACGTTCCCGTTGGCGTTCGAGGA  
AGGTGTCAATTGCTGCCGTCATCGGCAATTTGGAGGATCTCGTCCGGCCAGTTTGTGCGCAAGATCCGCG  
CGCGCACGCGTACTGGTCCCTAAATTTCTATGTAGCGTTTCATCAGCCAACCAGCGCATCACCATGGATTTG  
GACGGCATGCCCGGACGAGCCAGCACTGCGCGTAGACTCACCCCATCAGCAATGGCGCTACATATGGCCT  
CCCCAACTCGTTTTGTGTATGCGCTCCGACGGCTCTTGTACCCTTGGGATTCGACGTATTGGTTTTT  
CACAGTGGAAACCTGAGGAGTGAAGCTGGGCTCATAACCTCAGTTGTGGCATTACATGTTTACGCGCA  
CTTATAGGGGCCGTAGGCATAGCTGAAGATGAGGCAGCGTTAACAGGTGTTGTGACTCTTGACCATTTGT  
GCATCTTGGCCCGCTTGTAAATGGCGGTATGTGAAATGCCGTGCTCTATCGCTATCTGGCGAACACTCTG  
GCGGCCAGCACAGTACGCAAATTCGATACTGCGCCAGTCTGGGTAATCTGTTGTATGCATAGGGGAATAG  
GTCATAGGCTACCAGTATTTACGAGGGAACAACTGGTATCCAGCCCTACAGGGGGGAACCTCCCGTCAAGT  
ACAAACGCGTCAGTGCGGCAAGAAGTTGTCTGTGATAGTCACTTGGTCACTATGTTGATAAAACATCCCGC  
CATCATTGGGCTAGCAGCAAGTAACCGTGATTTTTTTCATGGTCTCTGTGAGTCACTCACATCACTCTTTTG  
AGCACTGCTTTCACTGATCCATCCACTCATTGCGTCATCTCCCATCTGTATCCATCAAGAAGCATCAGG  
GCAGTGACCTAGTGACAAACAGTGACCATGAATCAATGTTGGTCACTGCATCCCAACCCGGGAGGACAA  
GGCATTACACAGTAAAGTGAAGTCACTGACTATGAAATGGGGTATGCCCCCTCCCTCAAGTTAGCAAAA  
AAGGCCCGCAAGGAGCCCAATGCTGTTCACTAAGAGAATTTGAGTTCAGTCCACGTAGTATCAGGGC

TAAAAAATGAGGGAGGCATGATGCCTCCCTCTTTCTATTGCAAGCCACGCAGGATAAAGGCGGAAAGAAG  
ATCGACTGGAAACAGCCTTGCTCCCCCAACTCAAGTCGCATTTATGAATAATCAGTCAAAAAAGTGCTTA  
TCTGAACAGCATTGCCGCAAGGAGCCTTCTTGTACCAGCCGTTTGGCCTCATTAAAGTCATATCGGCCCTAC  
AGGGCCCGCGAAGATACTCCTCTGCCTGCTCGGTGAGTGCAACATGGTTTGTAGTGTGACCATTGGTCT  
TGCGCGTCTTGTACTCCGCACCCAGCTCCTTTGCAGCCTGTTTGACGGCTTTGCTGAATGAATTAAGCGA  
GAGTGGGCGGTTCAAGCCGTGGTACTCCAGGTAAGCCAGGTAGAGGTGATACAGGAATTTTCTCGGCTCC  
TTCGTACACAGCGACATTTCCCCCATAACAGAGCCTTTTCGGCTCAGCCAGAAAACCCAAGGTGGCGCAA  
AGTCGAGTACGTGGTCAGCCTCGCGTTTACCAGCCAGCGCATCAGCACCATCCCCTTGTCTCCAGCAG  
ACGCTTGGCCTGGTCAGGGTTGGCAAACCGGGTCAGCAGATGGCGAATGATCACCAGGTAACCTCAGCGGCA  
ATCTTGTGCGCAAGGGCCCATCCCAGATCAGCAGATGCCACCACAGCCCCGAAATGGAAGATCACCCGGC  
GACGACGATCCCCCGTTGCGCTCGTTAAACACCATAGGCACGTTGTTGGTGACCATTATTACAGCAGG  
GATCCGGGTGCTGAAAATCGTCTTACCTTTAGGGTTGACCGATACTTTATCGCCCGCCAGTGATCGCCTTA  
AGCACGTGGCCATCGCCAACGTACGAAGGTTGGTCCGGCAACAAGATCAGGCGTTTGTCCCAGACACTTT  
CCAGACCAAATTGGCTCTCGAGCAGCTTCATCGAGCTACTACCCACATTTTCTTGGCCAACCAGCAATTC  
ACACAGTGCCGCATGACCGATTTGCCACTGCCGCTTCCCCCGTTACCTCCAGGAACAGTTGCCAGTCG  
TAGCGATTCGCCAGCACCATGAACAGTGCCTTAATGCGATCCATCTTGGCCATGTCAGTGTCTGTGCG  
CGTAGCTCAGCCACTTCATGAAGTGAGGGGCACCCTGCTCCAGCAACTCCCCACCAGCGGCTCGCTGTA  
TTCGATCCCCTTGTGAGTCAGCAAACCATCGACGAGGGAATGCGGGCGAAACGCGCGGAGCACTAAGTCA  
TAGACCCCATTTGGCAAACCAATCAGGTTGAGTGCCTGGCGGCTGGTATCTCATCAAGGCCAGTTTCATGG  
TATCCACAGCAGTGTGATTACCCGGGCACTATAGTATTTGGCGCTTGTCTGTTAAACATTGCAGCCAT  
ACGGCGCGCAAGCACCGCATCCGGCATCGACTCCACAGGCTGCCGGTGTACGGTATACCAGGCTCGTG  
TCGACATTGATGGCCAGGGTTCCCAGACTAGCAGCCAGTGCCTCACCAGCGCTGGCAGGCACTCATCTGAT  
CCAGTATCAGCACTGCATCGCCCTGCTCAGGGTGCAGAGAAAACAACATTTGGCCGCCAGCAAAGAACCCTGT  
TTTTTGGCTGGCCTTCTTATCGGCCAACAGTTGACGTTTTCGGCGGGGCTTGGCGTGGCTCCTGCATCCCC  
TTCTGGTGCACACTGGCAATAGTGCCTTGACCTCCAGTGCAGATTTGGCCAGACGCCATGCCAGCAGCAA  
ACAACCTGACGCTCTGCGTCCGGCTGGCAGATCTCTCCACCAGCGACCAATTTGCGCCCCCCCCAGCGCTC  
CCGGTTGAGTGTCTCGTTCCGGCTCCCCATCGGCGCGCTGACAATCGCCTCACAGGCACTCGTCAACGCT  
CTCTCGCCATAGCGGCTGGTCTCTGCGGAGCTGACCATGAGGGGCCAGCACCTTTGGCTCATGCTTGGGTT  
TGGTGATCCACGAACAAGATGGCAGGACCTCCGGTAGAGCGGCACTTGGGGGATGGTATCGCGCGG  
CAGCACCTTACCGGCTTTGATGTAGATCAGCTGATTGCCGGTCTTTACATCTACGCCCGCCAGTCCATTC  
GCGTTGTTGACGCTCTGCTTCAAGCTGGCAAGGTTTACCCAGCAGGCAAGCGGAACAGCCAGTGATACG  
AACCCTCAGGCTGGGTGTGCGGTGAGCATCCGGTACTGGATCGGGAGCGTCTCATTGGGCAATCCGAGCAT  
CGCCAGCAGATCCCTGGGGTGCGGCGCTCGGGTACCTTGTACCCTCCAGGTCAGCAGGACCATTTCA  
TCCAAGCGAACACCAAACAGGGTGTATCTCACGCACCATGGAGGACGGGTAGCGCTGCTCATTTGCCAT  
AGGGTTTTCGGGTTGCCGTTGTCTGATACGGAATGACAGCGTGGCCGTTGGCCTCGATATTTGCAGCCTT  
GGCTTGCAGGGTGGCGTTTACACCGTACCCCTACCACGCGCAGCATGGCACGCTTGTGATCGAACAGTG  
ACACGCCGTCATCGTTCTCATAGGCTTCTTGAAGCGGTCATTTCTCGATGCGCGCGCTGTTGGTGTCT  
TGGGGAAGCACCATAACAGGGCGAACTGGCCACAAATAGCATCCCTGCTAATTTATCCCCGACTTTGCGCGG  
CACAGGCTTTTGTGTTGCCAGCGAGCGCGCAGGTGCTACGCTCTCAGCGCCAGGTTTAATTTATCTGGCCAA  
TATCAAACATGCTAACCAGAGAGGCGCCGTACCATGGCGGCTCTTTTTTGGGTAATTTGGTACTGTCAT  
CCTCGCCTCCTTACGCCTCACGGCTCTTCTGGATCTGGGCGATGAGCCATGCTTCCAACCTCCTCTTCAAT  
CCAACCAACGGCTTTTGGCGGATGGACACCGGTTTGGGAAAGGTCGGGTCATAAACATTTGGGGTACTTC  
GGATTGGGACGCATTTTGGCGTAGATGGTAGAGCGGGACAGCCCGGTGCGGGCTTCAACCTCATACGGC  
GAATAATGGTCAGAGTGGGTTTGTCTTTAGCCATGTTAGTCAATCCCTGTCATGTACTGGAACGAAA  
TGCACCAGCATGGCTCCTTATTTTTATCATTTCTGTCACCAATTAATAACCTACAGGGGGAAACCCCGTC  
AGAGACGCACCTGACAAGGGAAATTAATGGCGAGTAGGTGTGGATGACTTCCCTGGAACAGCAGCGAAAT  
CTGCTGTTGAACGGCGGAACCGGGACGGGTCAAACCCACCTGGCATCGCCTTGGGACGCAATGCTGAGGG  
CCGGGTCAAGCGAGAGCGTTTCTATACAGTGGTGTACTGGTCAGCGAACTGGAGCAGGAAAAGGTGGCAG  
GCAAAGCCGGGCTGCTTGCCATTCGGTTGGTCAATGTGATGAGTATTCTGGGCAACTGAGCTATCT  
GCCGTTTGGCGAAAGCGGAGGCGCTCTGCTGTTTACCTGATCAGCAAGCTGCGCAAGCGCACCAGCCCCG  
CTCCTGACCTCCAACCTGGCCTTCTGCAAGTGGAGAAGATGACAATGGCGATGCTGGATAGGATCATGCG  
AGTTCATCGAGACAGGCAACGACTCCTATCGCTTCAAACAGAGGATGAAATCAGCCAGCTAACCCTGGTC  
AATGTTGGACGCTGATCCCTGGTCATTTTTCTGATGCTGATTGACAACCCGATCCGCTCTATACAGACAGAC  
TGTTTGGCAAGTGAATTACATTGCTCTCCAACCCGGTAAATTCATGGGGTGGCACATAGTGATGCTTGCA  
ACAGTCCAGCCAGTCAGCCCACCATTGCACCATCTGTTGCCGCTGGGTGATAAACTCTGCCCGATGAATG  
TAAGCCGCCCGCACACCGTTACGCTCCTTATGGCTCATCTGCCGTTCAATTGATCCTCACTCCATTGAC  
CTGATTTCAAGCAGAGCGCTACATGCCATCGTCCGGAAGCCATGACCCGATACCTCAACCTTGGTGTCTATA  
ACCTAGCTGGCGCAAGGCACTATTCACTGTGTTTTCACTCATGGGTTTTGATACATCATGGTCACCGGCA  
AATACCAGATCAAAACGCCCGGTCAAAGGGCGGATCGCCTCAATGATGGCCAGTGCTGGCGTGACAACG  
GCACAATGTGCGGTTCTCGCATCTTGGCACCACGATGTGAGTATTTGACCCCTTCAATGGGGGGCGGGA  
CGCCGGGATCGTCCAGATTGCTCGCTCGATATCGAGCTCATCCAGCGCATGAAGCGCAATTCACCTCGAA

CGGACAAAGGTTAACAAAGGTGAATTTACCGCCATCTTGGTCAGCAGGCGTCCCGAATAACTATCGAGAC  
GACGCACCAGCTCGGGAATATCCTGTAGCGGCAGCGGGATGATGCTGGACTTTGCGAACCAGACAACGC  
CCCCGTCAAATCAGCGGCAGGATTGGTCTCAATCAAATCAGTTTCGCATTGCATAACTCATTATGCCATTG  
ATGTGTTGCCGCACTCGTCTGCCAAATCAAGCGCATTTTCGCTGCTCTATCTTACGCAGTGGAAACAAGCA  
GGTCACGAGTCTTGAGTTCGGCAACGGGGCAATGGCCAATCAATGGAAACACGTCCTTTTTCAAGCCGGGT  
CAAGATGCGTGAAGCGTGATCGGAGGACCCTTGCCAGCATTTTTTACATGCCATTCACGGGCAACAGCC  
TCAAAACTATTCACTTGTTCGGGTAATGTCGTTACGCACCTGCTGCTTATGGACGACAGGGTCAATAC  
CCTTGGCCAACAAATTTTCGTGCGGCAGCGTGTTCGGCACGGGCCCTCCGTCAACGACAGGATGGGGTAATC  
GCCAAACGCCATCAGCCCCGGCCTTACCATCTGGCTTGGTGAACCTGAAGCGCCACGAACGGGTACCGTTC  
TTTTTGACCAATAAGTGAAGCCATTCCCATCGAACAGGGAATAGTCTTTTTCTCGCGGGCGGGCATTGC  
GACACTCGGTATCAGACAAGGGTTTTGGTAGTTCGCGCATTTGGTATACGACTCCTTTTATCGAATCGATGT  
ATACCTAAGCGTATAACCAATTTATAGCGGATGTGTTAGGAATGACTCGGAATGTTCTGGACGTAAAAAAA  
CCAGAGACGTTGAATTCAGTGGTTTTTTGAACTTTTTTCGGAATACTTTAGAAGTATTAATGGTGCCCGA  
GGCCGGAATCGAACCGGCACGACGCGAACGTCGAGGGATTTTTAAATCACCAGTGTTTTTAAGCTATATCT  
TGGCTAGATGAATATTTTTCTAATAAAGAGCTGCTCGCAACCCATTGTTTTAACAAGTGGTGTGAGTGA  
TTATTAGGAAATGAATGCATCCATTTGAAGCCGTAATCTGAGCAAATCGGCTGATGCTTTTTGCCAATG  
GCTCAATTTATTTACACCATGAACCATCGGTTTTCTTTCGCAAGCCACCAAGAGCCAAGGCGAGCTGATAA  
AGGCTAGCCACATCATGCATTTATGATTAACCAATCTTGGCTTTCTATAGCTTTCAGTGGCTCTTTGCTT  
GGCCCCATTTTGGCCCCAAATGACAGATTTCCACATCTTTTGGCCCCAGGATGGCCCCAAATTTGGCAGAT  
GATTTCTTGGCGCGATCATAATTATTGTTGATGCCGGAAGCGCAAATCTTGCTGATAGCCAGCAGCCAC  
TTCCAACATTTCCCCCTCACTTTTTGCTCAGCCTGGAATGGGCCGAGCACGCAGCTCCGATCCTAAAG  
TACACATCAAACCTCCATCTCAACCTCTAAAGAATCACATCACTGGTATGACCAGGCGGAATCTACAGTCA  
TGGTGTGACGAAAGATATTGGTTGGCCGCTACATTTTTTTCATATATGAAAAACCTGTCAGATCTGACAGG  
GTACAATTGAGCACGGGCAACGTTGTAACCTCGGGAGTTGCCCAATGAAGAACAGACGAAAGGCTATCTG  
ACCGCCGCGAACTGGATTATGTGGCTGCCGGAAGCGCTACCTGGCCGCCATTCGCTGAAAAGGGTA  
TTAGCGAGTCGCAACTGGAGGAGATGACCGGGATCCCGGTCTCAACCTGAGCCGCTGGTTATCGCAGGA  
GAGGGGTGAGTTCATGACGCTGGCTGATGCGCGCTGATCTGTCGCTATCGGGATCGATGTGCAGGCC  
ATGCTGCCCGGCAACTTTGGGATTTCTCGTATCCAGAGATTCGCAGATGCTGGTGTTTTTTATGGGTA  
TACCACTGCCACACTGAAGTGGCTTCGAGATCTATGAGAAAAGGGTTGGTCAACCTGTGCAAGTAATA  
TCGTTTTGATTTAAATGCCATTAACAGAACTTCTGAGATGAACATAGTGCCTGAGTCTTTGTGGAAAGC  
TAAAAAAGAATGCCCCGGCAATTGGCCGGGGCAGCTACCAGGTAAACGCTGACACAGCTTCGACACTGGC  
TAGCGTAGCCACCGCCAGTTCGGCGGGCTTGTGGCCTGCCGGTTCTGTTACGCAGGGTGAGCACATCG  
GCTACCGTCTCGAACCTGTCTCGCTAGCAGCTCACGCTCCTGCGCCGTTGCAACCGCCAGTCTAGCG  
CGGTGATGCGGCGCTCAGCCTCGGCTTTTATCTCGACGACTTTAGCCGCTTCGCTCGTCCAGAGTAAT  
GGGCTGTGGAATGGGCTCTGGCTCTGGTTCGGGCTTGGCTTCTCGCGCAACTATTCGGATAGAATTTA  
TCAGCAAATCCGCATCTGCAATGATCGTATTGATGACAGTCCAGAGCTGTCTAGGATTTCAATTTCCA  
TTATCCCACCTCCGAATAGCAACGAGGCCCTCACCGTTAGTACCAGATGACTTATACCCTGGGATTCTA  
TTAAGCCACCCACCTCTCCAGCTTGCCCGTGAGTCGCTGTTGACCCACAGTCAATCGATACGTTGGTGC  
CTGACAGCATTTGAACAACAGGTACACCCGCTGGACCGCCGGCTCCGCCGAATGCCCCCTCCAGCCCCACC  
GATTGCAGCGTAAGAGAAAATACCACTTGACGAGACCTTGATTAACACTCCTGATTGGCCGTTAGAGTTA  
AAAAGCCCACCACCGCCCCCACACGGAAGATGTCGCCGTTTGTATCGGCCCTCCGCCCATCTCCACCTT  
TTTCGTTTATGTCTCCGCCTGAAGCACTGCCCCAGTTTTTGTATTTGCCCATTCGCTATCATGTTTCAG  
CGCAGCATCAGGGCATACTGTCGAGTCGCTCCAGAAGCCCCCTACAGTAACGACTACGCTCTGCCCC  
TTCTGCAGGGGGCGAGAAAGACATATAGATATACCGCTGCGCCACCGCCGCTCAGTACTGCTGCGCG  
CGCGAGTGCACGACAGGCCAGCGCCATGCCCTCTCCGTGATTTTTGCGACGCATAGCCGTTACGAAACGT  
TGTGTCTCCACCAGGATAACGATAATCTCGTACTCGCGTCAATCAGGTACAGTCCACGAACTACTACTA  
AAGAAAACAAACCAAGGGTATTCGATAGGCCCAGAAGAGCTGGAACCTCGCCAAATCAGCAACAGCCTTTT  
GGGTGAGCTTAACCTCGTTAAGAATGACCGGATCTAGTGCCTCATGCGCCCCCTCTGTAGTCTGTAAG  
CCGGTAAGACTGCCAGCCTGATAGGTGTATGTGGTGGTTCTGACAAGCTGCCCCAGTGTCTCCACCGCGC  
TGGTCAGCCGACCGTCTGTGTAGCTGTACGCCGTCACCCGCTCCACGGCAGCCAGTTGCTCGGTCAATTTG  
GGTCAGCAGGCCATTGGTGTAGACAAATGCTGCGCCGACGTTGGTAGCAGTGGTGCAAAATTTGCGGCTC  
ACCGCTCAAGATCATCAATGGATGGAACGTTAAGATTTCTGCCTGGCGATCTCCACACTGGGCAGATCGG  
CCAGGTTCTGCTCTTTGAGTAGCGATCCGCCAGTGGCTGATCAACCAGCTCTTCCGCTTCTTGGCGGC  
GGCGGGGCTCGGGTCTCATGCCCTCGGCCTTGGTTGCGGCATCAGTGGCAAGCGCAGCCTTTGGCAACC  
GCCGTGGCGGGCGCTGTAGTCGCATCCCCCGCTTTGGTGGTTCGCCGCTGGGCAGCAGTCCAGCCTCGC  
TCTCATGCCCTCGGCCTTGGTTGCGGCATCAGTGGCAAGCGCAGCCTTGGCAACCAGCGTGGCGGGCGC  
TGATGTCGCATCCCCCGCTTTGGTGGTTCGCCGCTGGGCAGCAGTCCAGCCTCGCTCTCATGCCCTCA  
GCCTTGGTTGCTGCATCAGTGGCAATCTTGGCCTTGGCAACCGCTGTGGCGGGCGCTGTAGTCGCATCCC  
CGGCTTTGGTGGTTCGCCGCTTGGGCAGCAGTGGCAGCCTTGTCTTTCATGCCCTCAGCTTTGGTTGCGGC  
ATCAGTGGCAATAGCCGCTTATCAACCGCCGTTGGTGGCCTTCCCGCTTTGGTGGTTC  
GCCGCTTGGGCAGCAGTGGCAGCCTTGTCTCATGCCCTCAGCCTTGGTTGCGGCATCAGTGGCAATAG

CCGCCTTATCAACCGCCGTGGCTGACGCCGTGGTGGCTTCTCCCGCTTTGGTGGTAGCCGTTTGTGCTGC  
GGCCTTGGCTTCTGTAGCAAACCCCCAGCCTGCTCTACAAGCGCAAATTCGTATCAAACCAATCCTGA  
CTAGCAGACACAGATTTTAATACGCTGGAAAGAGACGGTACCGTGATTTTTGTCCCGTCTGGTTTTGTCA  
GTGTGATATCATCATCACCAGACATAAGTAATTCAGAGTGTCCAAGTTTTCTTGGTAATACGCAAACAT  
CGCTGATATTCGCTGAGCATATTCACTCGGTGAATCTATTAATGCGGTTTTCTATACCGTATTTAGAATCT  
ACAAGCGGTTTCGCTCGCCAAGCCTCGACCAAATCCAACCTCAGTGTCGGAGATGATTGAGCCAATCTCCA  
CCACCTCACACCCAACCGCTAACTGGATGAACATTATATGTCCAGGTCTAGCTGGTGGCTGATGGCTTTT  
CCACTTTGTGTTTACACCTATCACCCGTTTAGAACCAACTAAACAACCTTATAGTCCACGCTAATCCAT  
GCCATAAGTTTATACCAACTTTATCTTTAACTCCGAGCATCATAATGTTTCGCTTTACGCAGATTATATG  
AGCCAGCGTGGTAAGTATTACCGACAGCAAATTCAAAAGTGTAGGTTTCCTGCTGGCAAATCCACCTGAT  
GAACATGATCACACTCGCAGAAAAGTATCCATTATACTATCGCTTTCAGCCCAAGAAATAAATGATATTA  
CCGTAACGATCCCGCACAAATTAATGTGCGGTAAGTTGGTACTACCACCTTCGGCTAATGCAATACCGT  
TAAGTAAAACGACACATGATGCACCTGTATTAATGTTACCGTATCTGTAATACATCCAACCTGAAGTTGC  
GCCTTGATTATTTGAAATCTTTACATCAACATTGACAGATTTATAAACAGGAATGGAGACAGCATTCTTT  
GCAATATTAAGCGTGTCTACGAAAGCACCTTCGCGTAAAAGTCTATTTGTTTTAATTTGACCGTCATTTG  
AAATGACTGTGTGCCATGTTTACCAGAACGCCGATAGGGGCCACCCTTGCCAAACGCTGCGGAACCTACC  
TTTAAGTACGGAGTTAGTAATTGTGCGAGCGTCTACAGTTTTACCTTAATATAATCAGAAATTAATGTT  
CCAATCTCGGCCATATCCATGATCGCCGCGTTGATGTATACAGACCATTTTTTACAACAAACGGGTGGC  
GTTTACTGGTTCGCCCCCTGAGCCCTGGACAGCACAGCAAACACATCGGCATCAATTACAAATGATGACAG  
CACGCTACCATCGGATGACATCTCGACAGAGAGGCCAAACCCGGCAACCGAGCCATTCAGCTGGGCCCTG  
GTATAACCAACCGGCACGCACCTCCCTTTTACCGAGGCAACTGCCTCGCTGACGGTTTGCACGGCTGCTG  
AGTTTTTGGCCGCTTGGCCTCCACTTGGCTCACCCAGCGAGATATGGCCTGATCCGCAGTCCGCCCTGAC  
AGATGACTCCTGCAGAATGGCTGCGTGATTTTTCTCCGACCTGAGCCCCAGCGTTTTCAATTTCTGCTGGCG  
TGGGCTTCTGCTCGGTAGCCATCGCCTCTTGTGCGACCGTCAGCATGCCAACATTTTTACGCCGCCCT  
GATCCGATTCAGCACCAGCCAGGGCCGCCAGACCGGCACCAGCAGCCGCATCGGGCGTAGCCTTGAG  
AGACTCCAGAGATTGAGCCAGCGAACCATCCTCCAGGGCTCAGTGATCTCTGTGATAACCGTCTTTGATG  
CTGTCAACATCGAGCGCGATATCTTTGATGCTCTCAATGGGCTTGCGCAACTCTTCGCGCAAATGCTCAG  
CGCCGATCTCGCATCCATGTCGAGAATGGAGTGCATGTCGTAAGCGGTTTCGAGCCTTGGCTGCCAG  
CAGCTCTGATTTTCCATAGGCGTTGACGGTTCTCAGCCAGACAAAATATTCAGTATCTGGCCGACGCCCC  
TGCAGCGTCATAAACCGGCGCATGCCACACCAATTTGGCTTTTATCCATCGCCTCGCCGATCGGGTGCTCAA  
CGTGACTGAACCACCACTCACACATGGCAGCAGGCTGGGCGCCACCATAACCAGACCGGACGGAGCGCCAA  
GCTCCAGTTGCCAGCCTCAACATCAAGACCGACCGGCACAACCTGGCGCCTCAATGGTGAAGTGAACAGCA  
GCGGGGGGAGACAGCCTGCCGGTATACCCTACCGCCTGACCTGCGCCGTATAGGAGCCCATCACCAGAC  
CATTACGCGGGCAGGAGTACCAGGGCCGCCACGGTTAACACGGTGCCTGGTGGCTGACCTGGCTCAAG  
ATGCTGAACGATCACCCGGTTATCTGCGACCTGTCCAACGTTGCGCCAATAGAGACGCCCCGTACTGTCT  
TCGCCGATCTGCTCGACCTCGTAACGCAACTGATCAGGCGCCGAATACCGCCACTTGGCAGCCACTCA  
GCTCCGGGCGCTCCATCGGCTTGGCCGTAGCATCAGCCAGATTTGCGAACTCTCCTGGCGAAGGGTGAG  
ATTTACACCAGTGCCAAGCGAGAAGTCCAATCGGTAACACGGAACCTCAACCCCATTCATGCCAAGCGCG  
GGCAGGAATAACTTGACCAGCGAGCCAGGCCGGTACTGCCATCCTGAAAGATTGAGCGAGAGGGTCAATGG  
TGCTGGCAAAGCGGCGCTGGTGAAGCACGATACGAGCAAGCCGCTGGGCTTGCCACGAAGAGGTAACAAA  
GCGCAGATCCAAGTCATCTACATGCTCAAACCCGCCATCCTCTTCTATCCATGACAGCTCGCGCACAGCG  
GGAAAATCCGCTTCTGAAAGCTGACCGGATCGATAAAGGTACCGGTGACGGTATTGATCCGATCGGCCA  
TGGTGGGTTTCGGCCAGCAACTCCAGATTGCCGATGATTTGATGGGGTGAAATTTCCAGCGTGGCGGGCC  
GTAATATGCCCAACGATAATGCCATGACGGCCGCCGATGAAAGTTGGCTGACCGGCACACGCCATATGC  
ATGGCTTCCAGGATCTTTGCCGGGACTCTGGCAGATCAAACCTACCATTTGATGGTATAGCGTTTTTTCAG  
TGGTGCCATCAGCCAGGGTATGATCTCATCAGATGTTTGCAGCCATCGCAAACCTGGCAGATATCAAG  
TTCATCATCAGGGACAAGCAGCCAGGTTCTGTAGTAATCCAGGATGATCAGGGCAGCATTTGTCCTCCAC  
TTGATAGAACCATCGCGGGGATCGTAAACGCGACTAGAACCAGAACTTTTCAACCCGAATGTTTGGCAGGC  
CAGACGGGAACTTTTCTGGATTAAATCGCAGCGACATCCGAAGCCACGCCAGGCCGCGACCGACCATGTC  
ATCCCGCAATCCTTGCAATGCTCCAACATGTAGGGGTGACGAGTCTGACGATCATTTGTGAAATTCGTAG  
CTGACATAATCACTGTAATCGGCCACGGATCATCACTCAACCAGATGCGGTTGATGTGCGATAACGGAT  
GGCCTGACAACACCAGCGAGAGGTGCAGCATCTCATCCGATCCTGCTCCCTTCTGCTCAGCGGCAAA  
CGAGAGCAGACCTGAAGACACCACCTGCCATAAGTGGCCACCTGATCAGCAGCCGACGCCCTCAACACC  
TGCTGGCGCTCGGCGCTAGAACGGTAATCACCGAAGTTTGGCACCTTCATCGTCAGCATCATGGCCGCGAG  
TGGCCACCAATGTACCGATCCCCACAGCAATGGCCAGGGTGGCACCTATAGCGGCGGCACCGGCACCGGC  
TGCCAGACCGACAACGACAGGGATTACAGCTGCGGGCATGACACTCTCCAAGCAATACGCGGAATAACAC  
CATGAAGCGGGCGAGCACCATCCTCGGTCATAGCCCAAAAGACTGCCCGCCAGATGACCCCGCCGCTCTC  
ACCGGACGGGCCATCAAACACGACAGCATCACCTCGTTGGGCCAATGACACCGGAATGCGCTCAAACAG  
GCATCCAAAGCGCCAGCTATCGAACCATGCTCTTTTAGCAACACTCTGCGAGCACCTATCTCCGTGGTGT  
AGCGCCCGGATAAACGGCAGCAGGGTCAACCCAGCAACAGCAATGCACGCATCAGCAGTAAACAAGCA  
GCAATCAGATTCACCCAAACAAAAGGCCGCCCATGGCGGCTCGATATGCATCAGCAGGCCAACCCTGC

CAGTCAGGATGTCTCATCATCAGTCCTTATATATAAAATCCGGGGGCATCACGCTTGTGCCCCAACTGAT  
TGAACGGTTTTGACATTTTCATCCTGAAATCGGAAAAACCTGTCTTGC GGATAACGGCGGGTGC GATTCA  
TCCGTATACCGCTGTGGCAAGCCGCGCTTCCACTCTTCAAAAATGTTGGAGAGGGTCAGGCGAATGGCAT  
TAACCTCCCCCGCTGGATGGGCGCCGATGCAACCCGCCCTTGAACAACAAGGAATGGCGCAGCGGCTC  
ACCGTTTTCACTGAGCAAGCAGAGATACAGCCTCCCCATACACCCGACTACCCGCTCACTCATAACGGCG  
CCGAGCAGCGCTGATCAAGCCCCGTCAATGACACTGACACCTGGGTGCGGAGGTCGTTAGCTGCTCCT  
TCGCCTGTGACACATCGCCAAGGCTACCAACGCCATAGAACACCTCACCATCAAGAACAAGCTCGCCCAG  
CCCAGAGTGAAGGCGGGTTATTCTGAAGGCAGATCCAATCTAAACGCCAGCAACGGATTGACGATGCCC  
TCGCACATCAAGCGGGCCATGTCTGATCAAAGCCGGTCACAATCATGGGTAAAATGCCTCCACAAACGA  
GAGCGAATAGGTGGAGAAGTCCCCGGTGTCTGATCGCCGCTCCAGCTATCCTTGTCCAGCCGAAACACC  
CCGCGAGGTCTGCGCACCTCGATATGCGTTCCTTCCACTTGCCAGCTCTTGCAGCAGCATCGGCGCAATACGAA  
TGGATGCGACACCCGCCGATCGGCAACAACATCACTCAACACCCGCTTAACTCATCCCCACCTGTAT  
CCTACTGCCACGCCGAACACAGTGGCGCCGGGTTCATCCTCGACTGGACAGCACCTTGCCCATCGAG  
TTAGCAGATGAAACAACCGGAGCGCAAGCACGGGAGGGGGGAGCTGACCAGACGGGCGGAAAATCCC  
ACAGGCGTACTCGTCCGGCGGCGCTTCCAACCGAAGAGCAACGCCTCTATCTCGTCCGACTTGTCCCG  
GGTGAGATTGTTGAACTTGATAGTACAAATAACTTTGGCGCCAGGATCGCTGCGGGTCTGGTCAGCATTG  
GTAACGATGATGTGAATGTTTTGGTGTGTGACGACACCCCAACGACATTTCTGACGGGATCAGAGAAT  
CAGGCCAATCGATCACAGATACCTCATACTCAAATGCGCCGGATCTGCCACGCGAGTTGATGTCTT  
GCAAGACCATCTGATACCCGCGCTTGCCCCAGCCTCGGCGCTTGCTCTGCTGCCGAGCGCATCGCATT  
AGCTAGCGCCTCATCACCGGAACCGCTGACGCTGATGTCTGAATAATCGTCACCCCTCACCCGACTGG  
CCACGCCCGGCGGCACGGTCAAGAATGGCAGCGGACTCGCGGCGGCTGGTCACATTGGCAGGGCCACGAA  
CCAGGGTGCCGTTGACGAATTCATCACCCAGCTCGGAAACGATCCCGAACGGTTGGCCGGGATATAGCC  
GCCCTTGTGCAACAGACCTGCGATGGCCTGCCCTGCCACCATAACCGGCAGAGGCATAACCCATCGTCTTG  
ATACTGGCGGCAAGCGGCATGCTGTAGGGTGGCGGAAAAGCGGCCAGCGCCTTGGCCGCTGCCCTTTCGG  
TCGATACGATGATCGAGGGGATGGCAGCTGCTTCTGCATGGCAACAGCGCCTTGTAGACGCCAGTGTG  
CTCCATGCCAGCCTGTTGCATCGCCGAGGTGGTGATGCTCATCTGCTGCTGGGTAAATGTCAGCAGCTCG  
GCCGCCACCTGGCTGATACTCTCGCTGCTTGTGACCCGGTCTGTTTCGATTTGTAGCAAGCGGGATT  
GGTGATCTTGCTCCAAAGCTCGCGGGCACCGTAGCCTCCATCTGCAGTTGCATCTGCAAAATCATGATT  
GCCAGCGGCAGCATATAAGCGCTGCGCTACTGCTGCTCAGGCGGGCTGGGCATCCGACGCGGCTC  
GACTCTTCGATAATCGAAGCGCCATAAGCTTCTGCGCCTGTACGGCGCGGGCGTCAACCACGCGTGTAT  
CGGCCCCCGCAAAGCGGCATTGCTGTTTTCCAACAACGCCTGGCGCTTGGTTAGCTCGAGGGAGATCTG  
GGTCTTTTTCTCACGAAAGAGTCGACCGCGGCATAGTTGGGGGCTTGGCTTTCTTTCGAAGCCTTGGGG  
GCATCCGGGATCGCCACCACCCGACCGGGCGGCCAGCACCAGGCGCAGGCAAGGGCGCCTCGCCATCAC  
CTGCCGTTGTGGCTTCGGCAATCTTCTGGCGGAGCAACCCGAGGTTCTTGAATAAACCATCCCAGCCGTT  
GCTCTCGCCGATGTTTCAGAAACGACTTGACCCGCTCCTCAGCCTGAGACAATGCCTCGCCCATTTGCGCA  
AGATGGCCAAAGGCGGGAGCGGCCCGCACCTTCATCACTGGACGCAGCGATAAACGCCTTCTCGCCCTCGT  
TGTAGTCGACACGAGCAGCGAACAGGTCGGCACGGGCTTTGAGGTAGGGCGCCCGCATCGACTCATTCTAT  
CAGGGGCTCGACCTTGTGATCGTCTGGTCTACCCACTGCATCAACGCTTGAAGTGCACGGCTGGCCTGC  
TCCACGCCATCGATCACGTAGAGTGCGATTCCCTTACCCAATTCGGCAAAGCCGCCCTTGGCCTCGGCAC  
TGTCCGTGATCCAGGTTCCGATCAGGCGGGAGCCCTCCGCCACGGCCGGAGCCATGCTGGCCTTGACCTG  
TTGCCAGAGAGCCCCTATCACCGACACCAGCCGATCCAGTTTCGAGACGGGCATCGCGCACGGCGGCGAAC  
TGGCCACCGGTGAGCGCCATCCCATCGCTCGATGCTGTGCGCAAAAGTCAGCAGCTCCCCGTTGCGGG  
TGTAGAGGGTATCGAACAGCTCGGCGGGCGCATCGTTCAGCTCATCGAGCCAGAATCGTGATCGCTGGC  
GCTCATCTTCTGCAGCTCGGCGGTGAAGCGGCGAGTTGCTCGTCCGGCGAGAGGGCCGCCAAGACTGC  
GCCGACTGGCCGATCTGCTTGAAGAAGTCCGCCATGGGGCCGCCACCGGCTTGGCGGCTCGGCGATCT  
TGACGTTGAGATCTTTGATCACATCCGCCAGCCGCTCACTACTGGAGCCCGCCACTTGC GGCCCTGGGC  
GTAGGCATGCCACTGCTGCGCGGCAATGCCACGTTGCGGCGGAGCTGGGCAGTCTGGTCCAGCGAACTG  
TACGCGCCTTGATGCCCAGGAGGCGAGCCCCGAGCCGAGGGCAATCAGCGCACTGCGCAGGCTGAATA  
TCTGCGGATCGTGGCCTGAACGCCACCGGCCACCGCCTTGGCACCGGTGACGATGCTGCCGCCAAAGCT  
GGTGAAGTCGTCTCGGGAACGTTTTAGCTCGCTGCGAAACTGTGCAGCATTGAGCCCCAGGGTGGTGACC  
AGGGAACGAAGTACGGCCATGGGGCTCCTTACCCAAGCAGCGCCTTGACGGCAAGCCGGGACTCTTCTG  
GTGTGATGGTGTGCGGGTCTTTGCGGGTGGGGTGCAGACGTTCTGTGCTCAAGCCAATACCACGCCAGCCA  
GGTATTCAATTCGAGACCGGCAAGGCCATGATCTCCGTGAGGCTCTTGTGTAGATCCAGCGCCAGGCGG  
ATCACAGCTTCATGGTGTGCTGGCGCTTATTCTGTTTTTTCTGCTCCAGTGCCTTCTCGCCATGTG  
GTTGAGGCGCTTGGCCACCGGCAGCAGCCGGTCAACCAGGGATATGGGCATGGCGTCCATCAGCTGCGGC  
ACATCGTCTTGGGTCGCCAACGGATCTCCGTCTCGTTGACCATAACAGGCCACGAGCAGGGAGACCATCC  
ACTGGAACGGGTTGTGATCAGGGGGTGGCCGCTGAGTGGGTCAAAGTTGCGCTGCTGGTAATCCTGCAG  
GCCGGCGACGGACATCTCACGCACGATGATCTCCATGCCATCCCCAAACTCGGGAGCCGGGACGCGCTCA  
TGGCGATAGGCCAACTTGTGAGCAGGGCCAGCGCGTGCAGGTGGTACCCTTGGGTTTCTTTCGCTGTCA  
TGTTTCGATTACGCCCCACCTTCTTGCCCCAGGTCACTTGCCGTTTTGCTTGCACGGCACCCCAATC  
GATAGTCTTGTACCCCCAGTCTCATCGCGCATATAACCCAGCAGCACCACTCATACTCGGCGGTACC

TTGT CAGGCCACTCGT GCTGGATGATGACGATCTTT CGCGCCGTGCGGCAGCAAAGAACGCTTGCTGAC  
CTACGTCGGCGTCATAGGCTTTACCCCTTGAACCTCTGTCCGGGCCATCGAACAGGCCGGCGATATAGCG  
TTTGGAAAGTGTCTCCAGGGTGGTTTTGCTCCAGAGTCGGGGTCTTCTCGCCGACCTGACCGATGGAGATA  
GTGCCAGGCACCTGCTGGAATTTCTGTGGCGGGCCCTTCTCCTTGAAGTAGGTCAGGGTGCCGGCGCCTA  
GAACGGCGTCTTGCGGGGATGCTGGAGTGGTCATGCTCTGTTTTCTCCTGTGGTGGTTTTGGATCTCAACG  
ATGGCGCGCAGCTCGCTGCCGCCCTCGCTCTTCGCGTCCC CGCATCGAGCACGGTCACCCGTTGAAACT  
GATCGGTGGTGGCGCCGTCCAGGGCGGAAGCCGGTGGCCAACCTCGTCGAGATCCGTGCGCCGAGTGGC  
GAACAGGTCGATCTGCCAGTTGTGACTCTGCAGGGTGATCCACCCCTCCAGGGTGCGGGCCGCTGCACC  
GGCGAGGTGAGGAAGTAGCCCGCCCGGCAGCCTAGCCTCTTGAGGTACGGTGT CAGGGTATGGCTCAA  
GGCCCCAGGCCACCGTGATCAGCCGGTGAACGCTTCTCTGAAAATCATCGCAATGCCTTGTGATGGCC  
GCTGACAGCGTGGTGCCTGGATCTCCAGCGCATCTCCTGATATGGCGGTCAAATGCCGGCGGATAAAAAG  
GGCGCGCCTCGATAACCGGGGTGAATAAGGATCTCCTGCCAGGGCGGTGCGCGCGCAGGTGGGGCGCCTT  
CTGCGCCTTGGCAGAATCGCCGAGCTTCTTGAGGCTGGCCCCGAGGCGAGGCTGTGCTCGCGGGTGCCG  
TGCTCCAGCCAATAGGCGTACACCGGGGCGTCGATGGCCTTGCC TGCCGCCACCTGCACCTTGTAGTTCT  
TGAACACCCCAACCGAGGCCACCACATCGGCCAGGTGGGATTGCGCGGAATGCTGACCCGCAGCTTGAT  
ACTCTCGCTAAGCTGGCCGGTGTGCTGGTCCAGTTTTGTTCGTACAACGACTGGGTATCGGCCAGCACC  
GGCTGAGCAGAGGTACGAGCAACTTCTCTCAGCACCTTCTTCTGCACGGCCAAATCCAGGTTGGCGAGTT  
GGCTTTCCAGCTCATCGAAGCCGGACACATCGAACGAGGTGGTCATGGGTGACCCCTCTCGCGGTGATA  
GTCAGCCAGGCGCGCGCTGGTCTGGCTGAGCCAGCTTGATGTCCAGAACTTACCCGGTACC GCCAGCC  
GGATGCGCTGCGCGGTGGTCAGCCGGGACGGTGGCGAATCCGGATGCTGTACTGCCCTCACTCACCTC  
TCGACCGGCACGGATCTGCTCGCGCCCGCAATCATCTGAACATCCGCCCAGATGGGGTGGATTTCATCC  
CAGCCATTGAGAGGCTGGCCAACGGCATCACGACCAGACTGGCGAGTAAGCAGGGTGATACGGTCTCGCA  
AGCGGCCTGCAGGCATGTTTTCTCCGGCAATAAAAAAACC CGCCATGATGGCGGGTTTTATGTTGCTGATT  
AAGTTACCAGTCTGAACGACTGGCGGTGAAGCTACTCTTCATTTTCATCACCAAACCTCAAGAAGCTTAGGT  
TTCACAGCATCCAGATCCCTCGAGTTTTGAATCGGTAGTTCCATGGCGGGATACGACCCAAATTCACTGA  
CAGTTGCAGGCATGTGAGAAGAAGGTTTTTAAAGTCTGTTTTAAACTTACCGTCTTTAGTCTCAACCTT  
CATCGTGAACCTTA ACTCTCCAAGATGCCTTACCAATACAATCGAAGCCGGCACATGGATAAATTGATCATG  
CCATTGCCAATCAAGACTCCATCAGCAGATTTTGATACTCGATGACCGACTTGGCTGATTTAAAGTTTT  
CAGCGATCCACTT CAGAGAGCCCTCATAAATCTGCTCCTTTGACATGTTAGGAACATCATAGATTTGAGA  
GAACTCTCTATCTGATGGGTTAATAGGCATATCCGCAGGGGAGGTAACACATCCACTTAAGCCAACAACC  
ACTGCCACCGAAAGACACTTTTTTCATCCTATCCTCCTCTAGAACAAGGTAAGTAGGATATCGTTTTGAAA  
CCAATCGCATTCAATGTAAATGCACCATGGAACAGTGATCAATCCCTCACAACTCAGGATACAGAATTGCG  
GTACGGGCCAGCAAATGGGCATAGGCCAGCGGAACCTCGCTGACGATGGTGCCGGTGATGATGTTTTTAC  
CGGCGTCATTACAGCTTGCCGCCTTGCCAAACATCTAATCATGTGTATT CAGATAAAGACCGGAGTATAG  
GGAGCAAGTAATAGGTCAACTCCCATTGGAAGGGGTTTTAACGCATCAGAACTTACTGATTTCTGTTTTT  
CATAACAGTGAGAAATCAGCAACATGGCGGCTAACTTGATGTCTCATCATATGCCTGGCTACCATCGAC  
AAGCCCATCTGCTGGATCAATGAGCCTCTTGCCGATACGGTGTTC AATGTGGCGCTCAGCCGCCTTGATG  
TAGATAGCAATGAGTGAATCCTCATCAGACTCTTG CATATCTAGCCGACACTGTCGTTTTACGTCATCAA  
GTGTGACCAGCGCCATGATAATATCTCCTATTCTTCTTTTAGCTCTACGAGCGCTTTCTTGAGAAGCAGC  
TCAGCTTCCGCAGGTGACATGCGGGTTATATCGCCGCGGCTGTAGTTCTTCCACGGGCGGTTGAAGCGCA  
CCAGCACCCGCTCATCAGGAAGGGGCGCAGGCTCATCTCCGCTCTGCTGCTCGTTATCGGAGTTAGTGGC  
ACCAGCGGACTGATCACCGGT CAGTGGCGCGGTGCCAGCTCCGGCTGCATCGCCTGGCGCTTGACCTGCT  
GCGGGGTGGTCAGAATCTGATTCATCGCCTTCGCCAGTACCTGAGCCGTCTGCTGGCCAGAGCCTGCGT  
CGGCATCGGGTTGGGGGTGT CAGTTGCATTGCTGGTGGCTCCTGCGGCAGTTCGCCGCTCTGCTGCTC  
GTGATCGGCATCAGTGGCAGGTGTTTTGCCCTGCGCGATCGCCTTTCTGTTGGCTTGCCATGTCGGCTCCT  
TGTTACAAGGGGATGAGAGAGGGCGCCAGTGCGGCCCTGCTGCGTCTTACCAGGTGACCTTGGTACC  
CAGTGCCAGACCTTCCGGATGACGGAAGCCACGTCGTGGTTGCCGACTAGGCGGATCAGCGACTGGTTG  
CGGGAGAAGGCGCTGACCAGATCGCCGTTGGTGTCTTGTAGGTGGCTTCAGTGGAGAAGTCGATGGTCA  
TGTTGTCTCTGCTCGCCGATCACCACGTGCTTCCAGTCCGGCGAAGTAGATCTCCGACTCGTTGGTACC GGT  
GCCGAGGTTGGCCGGGATGGTGTGGTGTGCGCAATGGGGTAACCCCTTGAGCAGGCCAGACGCCATCTCC  
GGATAGACCTTGTGCGGTTGCCATCGCGCAGGCCGAACAGCTTCATCCAGGTGCGCGGGCTCATAACCC  
AGCCAGGGTTGATCATCAGGCTGTTGGAGTTCATCAGCATCAGGATGAGCTTGTCCAAGTAAGCGTCGAT  
GGTCCGCAGGTCCGCGGTACCAGCCACTCGATGGTGC GGCTATTGTGCGTGCACACCTTCTTGAAGCCG  
GTCGGGGTGTGCGGTTGCCGT CATCGCGCAGGAAGGCTTTATCCTCGCGCACCGCCATGGCGGCATCA  
TGTCGCTCAGCACCAGCTGTTGACGTTGTAGCCAGCGCGCGGATCAGCTGGTTGCTGATAGGCACCAG  
GGTGATCATGGTCTTTGCGGACAGCTTCACATCGTTGAACTGGCTGGCGCTGCTGTTGGCATCCGTGCC  
TCGCCAACGTAGCTAGACTGGGCACCGCCACTCATGCGAGGCAGAGAGGGTGCCATTGGGCAGCGGAA  
GTACGCGGGCACCCAGCTTGCGCACAATGGTCTTGGGTGCGCAGCAGCTCGATCACTTCGGAATGCAGGTT  
CTCGGGGATCAGGGCGCCACCGGAACCGGCGGGTGTGATGGCCATAGCCACCTGCTTATCGCCGATC  
TCTGTGGCGGCGAACTTCTCTGCCAGTTGCAGATCGCCCTTGCCGGCCGCGACTGCCATCGCCATACGGG  
CAAAGCCTGCTCCCTGATATTGTTTTAAGCTCCTGATTCACATGGACAGCCGAGGCGCTGGGAGCCGTG

AGCATTGACCGGTACAGCCTGCTGCGCCATCAGGCGCTCGGCGCTCTCCTGACGGGCGATGGCTGCGCTG  
ATCTTGTGTTGCTTCGCTCTCTAGGTCAGCAAAGCTGCTGCAGTTGCTCGTTCGGTGGGGCAGTACCGCTGG  
CTTCGAGTTCTGCCAAGGCTTTGACCTGGGCGGCGATTTTCGCCACGCTCGCGGCGGAGGGCTTCGATAGT  
CTTCATAGATTGGTTTTCTTTGGACATAAAAAAGCCCTTTTCGGGGCTTGCCTGGATCGGTTCCGCCGCTG  
GGCTAGAACTGGTTCTGTAATTCGATGGCGCGGGCCCGCATGGCGATGCTTTGCGCCGGTTTTGTCAGGCT  
TGGCCACGCTAGCAGCCAGACCGTTGAGATAGTCTTGCAGGTTGGCCAGCTCATCGGCCAGCCCGTTCTT  
GACCGCCTCATCCCCGCTGTAGAGGGTGGCTTCGGTGGCCTTCACCTGCTCGACTGACAGGCCGCGATAG  
CGGGCTACCGAGCTGATAAACAGGTGCTAGGCCTGATCCATGCGGTGATTGATGGCCGCCATGGCACCGT  
CGCTGAGGGGCTCATGGGGGGTGCCTCCTTTTTGCGGTGCGCCGGTAGAAGGTGGTGAACCTGAGCCC  
AACCTCTTCTCTCCACTTACTCACCTCCATGTGCTCCATGATGACGCCGACAGAGCCGAGCCGCGGCTT  
TCACTGACTACCACCTTGTCTGACGGCTGCGGCAATGAAGTAGGCGGCCGAATAGGCTGAGAAGTTGACCA  
GCGCGGTGATCGGCTTACGCTGCGCTTGGCATAAGATGATGATGCGCCAGCTCCTTGCAGCCAGCCGATG  
GCCGCCGCCGGAGTTGATGTGAGCAGCATCTCTTTGACCCGCTCGTCAGCCAGCGCCGTGGCGATCTGC  
GCCCCGCGCCACTCGTAGCTGGTCAGCTCGGTGACGGCGTTATCGATTTGACCGCGCCGCGCGACCAGAA  
TGCCGTGACGCGGGATCACCGCCAGCCCTCCACGCGGTAAGTGCATTCGCTGCGGGCCCAAGCTGCTT  
GGGGTCCAGCCCATCCGGCAGGTTCATCGGCGGCCATCACCTCAATCTGGTTGCCAGCATGCGGGGCATC  
AGCAGGCTCTTGACCCCTGCCAGCACCTCCTGGGTGACGTAGAGCGGACACCCGAACACCTGGCTGGCCA  
GGTGCGGGTAGTTGATCATCAGCTTCGGCATAAGGATGGCTCGATTTCCGTGATTTGTTCTGGGTGCGC  
TGGCTAATGCCTTGCAGCAGCTTGTGCGTAGAGACCATGTTGAGCGGGTTCAGGTAGATATCACCACCCG  
GGATCGGGGGCAGGTTTTCCAACCGGCGGATATCGTTGACGCTGAGCCAGCCCACTGGCGACCGAGGGC  
GTATGACTCGTAACGGGATTTCTGGTCTGCCCCGAGCAGGCCGGAGAGGTTGAACTCGATATAGAGGCT  
TTGCGCTCACTCGGCAGCAGCAGGTGCGGCATCATGGCGGCCCTCGAGGCGCTTGACCCACGGCAGCAGGG  
TGATAGTACGAACTGCAGCCCTGATGCTCGATGTTGTTGTTGGTTGCCCGATCCAGCTCGCCGATCAT  
GTGCGGCGGGACCTTGTAGAGGCGGCAGATTTTCGATGGCGCCATATTTGCGCGACTCGAGCAGTTGGCTC  
TGCTCGTTGGTCATCGCCATCTGTTTGTACTGCATCCCTCCTGCGAGGATCGCCACGCCGAAGGAGTTGC  
GGGCGCCAGAGTAAGTCTCGATAAATTTATTTCTGAAATATCAAGAAGATCTTGGGTTCCAAGTGGCTT  
ATTTGGCGCTTCAATAACGCCTGACAGAGTGGTGCCTTGGCAAATACCGATCCGGCATGCTCATCCACC  
GCCATCGCCAGCCGATTGCATCCGGGTTGCTCTGGATCGGCGAGACGCCGAGGTAACCATCCAGACTGA  
AGGCTTTGACGTTGGTACCATCCGCATCCGCATCCGCAAGACTGCTGGTTGCTGCCATCCAGCAGTGGTAGAAG  
CAGCCCGTACAGCCCTTGGACCCATCATCTTGTACGGGTTGACCGGGATCAGCTCGGTGATGTAGCCG  
TCGCCACTGCGCTCGATCAGGCTGTAGCTGTTGCCGCGCAGGCCGAGGTGGCCCATGCGCTGCTCGTTGA  
ATTTCAAAGTGGTGTCTTTCTGGTTGGGGCAGGCGTGGATAATGTCATACAGCGGGTGGTTCGGTTCGCCCC  
GGTGCGGCTGTGCTCGCTGCGCTGGTAGAGCTCGCACGGTAGCTGGGCAATGGATTCAGCCAGCAGGGTG  
ACGCAGGCACGGACCGTGCCTTGCGCCAACGCAGATTCGGCGTGACCATGACGCCCGCCTTGTGCGCC  
GCGCCCTACGCTCGAGATCCACTGACTGAAGTTGCCACCGCCCCCTGCGCTCAAACAGGAATGGGAA  
GAACATCAGCCACCCCTCGCTGTTTGTGTAAGTGGTGCCAGGCGATGGCGCGGCTCAACCAGGCAGACC  
AGCCAGCGCCAGCAGGCCACCGACCACCCAGCCGAGCGGGGAGACCAGAGCCAGGCGCCATAGGTCAG  
CGCGGCGGCACCCAGCAGGCCACCAGAAAGGCGACGATGTTTCATCAGCATAGGACGTCCGTGGTTTTCGT  
AAATGGATTTGGTATTGCCGCGGCCCGCGACCATGGCGCGGCCGATGGCCATCATGAGCGCGACTGCGCC  
GTCAATTTTCTGATCGGCAGACTCCTTGACCGGGCGCACCCATCATCGTTACCGGGCAGGTTCTTGCCG  
ATCACGTTGCCGATACACCAGGTTCATCAGGCTGTTGCCATCGTGATGGAAGCGGCCGGACTGAATGGCAG  
CCTCCAGTTCTCGCATCGGATCGCTCATGTTGGTGTAGTTCTGGGTGATGGAGATGGGGGTCAATCCCTC  
ATCTGCCAGATCGTGAGCCAGCGCGGTTGCGCCTGCCGGGTCTAGCGGGACTTCCAGCACGTTGCCACTG  
GCCGCCGCTCTTTGGCTACGGCCAGGATTTGCGGATAGTCGATCTCGGCACCTTTTGTGGTGTGAGCT  
CGCCAAGGTTTCATCCACTTCTGGTAACGCTCTGCCAGCCGCGGTTGTGCGGTGTTGAAGGCCGTATCTTC  
CGGCACCCAGAATTCGGGGGCGATCGAGTAGTAGTGGCGTTTGGCGTCAATATCTGCCAGAACAGGCGA  
GCCATGGAGTTTCATGTGAGCTTGCGGGCAAGGTGCAACGAGAGGATCAGCTCCTGCCCTTCAACTGCT  
CCAGCGTCAGGCTGCGATCTTACAGGCCTTCCACGCTCCATGTTGTAGTAGGCGGTTTTGGCCGACAC  
CCAGACGTTGAGGTGCTTTGTTTTGAAGATGTTGGCAAAGCGGGCCGACTTGATGGCTTGGCTGCTGC  
GCCAGCAGGATTTCCGGCTAGACGGAGACGCCCATGTTCCGGTGGCTTGGCCAGTACCTTGGGATCCG  
TCCAGTCGTCACCTCGTCAATGGTGTAGATGATGCCGAACAGCTCATCATCCGGCACCGTCCAGACAG  
CATCTCGATCACCTCCCTCCGCTTGTGCTAGCAGGGCCGTCGATGTTGTAGCCGGCTGTGGTGTAGACC  
CACATCAGCGGTTGGCGGCGGGCGCCATAACGGTGTATGTTGGTGTAGAGGTCATCCGTGTGCTGCT  
CGTGGTACTCATCCAGATGGCGCAGGATGGCGACTGACCATCACAGGGTTGCCTATCAGCGGCTCGAA  
GCGGGCGCCGTCAGACGGGATATTCAGGTTGCTGGCGTTGACCTCGATACCGTAATTTGTCGAGGAAGTCT  
TGAGTACGCTTTGCCATCAGGCGGGCGGGGCGAAACACCTCCACGCTGTTTTTCTGTGGTGGCACCGG  
AATAAACCTCGGCGCCGAATTCATTGTCTGCCGCGAAGCAGTAGAGGCCGACCGGCGCAGAGAGCGCCGA  
CTTGCCATTTTTACGCGGGATCTCGTTGTAGACCTCGCGAAAAGCGGCGCAGGCCAGACCCCTTGCAGC  
CAACCAAACACGCAGCAGATGATGAACATCTGCCACGGCTCAAGGTTTCAGGGTTCGGCGCTTGAAGGCC  
ACTCCCCTTTGGTGTGAGGCATGAGCTGGACAAACTTGGCGGCACGCTCAGCCTTGTCTTGTGCAAGCG  
GAACCGAACTTGGCCGACTTCTCTTTGGCCAGATCATCGAGGTGGCGCTGGCAGGCTGGATGACGTAG



CGGCAGGCGGGGATCTTGCCGCGCACACGTCGCGGGCGTAGCCGTTGCCACGTTGACATAGGGATAAC  
TTTTGCGTGTGGCCATCGGTCATCCCTGCAAAGCTGCGAACCGGTTACCCCTCCCGGCTTCTTGTGGC  
TCCGATCAGGCGTGAGCGGCTGGATGGGTCCAGCCCCAGCAGCGAACCGTAGGTGGTCATCTGCTTGAGT  
GATTCGTTGGCCACCGTACAGGCGGGGTTTTTGACCGGCCACCTGTTGCCCTTCGACAACCAGGCCGT  
GTTTTGGTGATCTCGAGCTCGGCTCTGCGCCAGCGTGAGTAGGCGGCGCAGAAGGCCCTCGAGGTTGTGCAG  
GTCGGTGACGCAGAGCACCTCGGCACCGCAGAGCTCACGGATCACCATGTCCACATTTGTCGGAGCCAC  
TGATCATCTGCCAGCCATTAGGGCATTCGACATAGAGCAGCGGGGTGAAGGTTGGCTCTGCGTTGTTC  
GCGAGCGCTTGCCAGGGTTACCGGCCAGCCGCTTCAGCGCTGTCGGTTTGTGCTTGCAGACCTTGGCCTGG  
CGCTCTTGGTGCCCTGCCATTACGCTCTCCATTTAAATTTTTAATTTTCGCGGGGTGAAAAATTTGACGA  
GGCGGCGGTACTATGGAAGATTTTGTCTGAAGGATTTCCCCCCCCCTACCCCTGCGCCCCCTCGGGGG  
AGTTTTTCGAAGCATGGCAGGACTTGACAGAGATCGCAGGTTACCATCCTCATCAGTGCCGCTTGAAC  
CTTGGGATAAATGTGGTCAACCGTCGTCGCGGTGTCACAGCCCTTCGATTGGCACTCCTGGCAAAGGC  
CCCGATCGCGCTTACGACTTCGGCCCGTCGATTCTCCATTCTTCCGTTAGCCCCGCTGGTGACGCGA  
GCGACCGCCCTGGTGGCGCACCCATCCGTTGTGCTTGTGGCTTTTCGAGTAGCCGCTCACCTCATCAGTC  
AGTGTGCTACACCCTCGGACTCGGCAAACCTGTTAATGCGTGGGGGCATAATGATCACTTGCAGTTGGG  
CGCCGACCGGACGCTGTTACCGGGACAACCCGTCAGTTTGGAGAGTGACTCGGGCGGCAATTCGGTT  
AATCGGGATTGGTCAGGGTGAGGTAGGCTCTTTGGCAGGCCAAGCCTGCTGCTCGAGCTCGGTCATACGC  
TTTTGCCAACTCTCCCGCTCGCGCATCAGCCCGGCGGAGCAGGTCGGCGAGCACCACGGCGGACTGTCCG  
GCTGCATCGCCTGACTGGGCAGAGCCGGAATCGCTGGCGCACTGACTGGCTCGCTTGGCCAATCTCCCG  
CTTGCTCGCGCAGCCCCGACAGCAACAGCATCAGCGGCAACAGCGTCGCGCTCAGCACTGGCAATCTGTTT  
TTCTGCATCTTGCTCACCCTCTCGATATCTGCTGACGGCGCTGCTCAGCGGAGCGGGCAGCCAACCTCG  
GCATCCGCCCTCGCCGTCGCCAGTTCCGGTCGCTGCTTGTTCCTTGGCAGACCACTCCAGCTCCTTAT  
CGTGAGCGCTTCTGTATAGCCTGAATGGTTTATCCACCACACCAGCAGCGATACCGCAGCCAAGCGAAC  
AAGAAACCAAACCTACCGGATTGGCACTGAGAACTGCCTGACCGGGTTCATGCTGCTACCACTCCATACT  
TGATGGCGTCGCGGCCGCTCATGCCGTTAAACCGCCCATCTCAGCGTGGCGGCGGCTGGTAAGGCCCGG  
CATCGGTTTGCCGTCGTTCTTGTTCCTTAAAGAACTCAAGGGTGCCTCGGCGTAGTCACCCGCATTC  
AGCTTGCGAACAGGGTAGAGTCACCAAGCCCTCAGCAATAGTATCGCTGTCGATATCAAGGCCGACGT  
TATAGGCAAAAGCTCACCAACGCATCGAACTGGCCCTGAGTCAGAGGCATTTAACAGAGATGCTACAC  
CGCTCAAAGTGGCGAAGGTCGAAATAAAGGCATCCTCGCTTGTGCTGAGTCCATACCAATCCCGGT  
TTAACTCTGGGCCAGTGTGTCCCATCCGATGGTCCACGGCTCGCCGTTTTTACTGCCAGGGTCAGGGT  
ACGCCTTACGCTTGCAGCTCTCGAAATGATGCATCAGCAATACCCCGTCAGCGGAAGCTCGCTCAATTG  
TGCCATTGCCAAACCTCCTATCCAGCATGCGGGCGGCGAACTCTCGGATCTTCTCTACGCCGAGAAAGCC  
TATGGAGCCGCCAACGAATCCAGATGCGGTGCTGGAATGCCGAGCATAATCCATCCCCGACATAACCGAG  
AGGGAGATAGCACCGCACAGCAGGGACTCGAGCAGCCGTTGACGCATACCGCCGCGGAATAGGTAACAC  
GCAACCAGCTAATAACCAGAGATAGGATAAATCCGTACAGGGTGGGCCAGTGGGCATCTACCCAGGCCAG  
CAGCCAGGCCACAGGCCAAGGCTTTTTTCAGGCATCTTCATACCCACCACCCCGCAGGGCCCAGAAACG  
AAAAACCCCGGCATCGGCCGAGGTTTTGAAGCAGAAAATAAAAAAGACCGCATCCGTTAGGTTGCAGTC  
TTCCATCATTTGGCGTTCACTCTACACAAAATTGCTTTTAACTGTCAACTGCCCTTCAATCGGCAAACCTGCT  
CCACCCTCATCAAAAGATACCGCGCTGACCATGCTCTCCGGTGAAGTCGATAGCACAACGAGATGTAGC  
CTCTTCATGTACCCGCGAGATACCTGATGATCGACTAATAGTGCCTCTCCGATGGCCGTTCTTTTTACGA  
GTCCACTTGGGCTGGTAAACAGCGCAGAGCACGTATTGGCCTGCTTGCAGTTAACCTCCCTAAAAATCC  
ACCTGTACACATTGCAGCCTCTGTCTGCGATATGTAGTGACCCTCACCCCATAGCGCTCAGGCTTTGGCT  
CTACCTGGAACAGGCGCCGTTAGAAATAGCCACTTCAACAAGATCAAAGCTCATCACCTCATCTGCCATAG  
CGCTCTACCTGCTGTAGGAAGATGGCCTGCATCTCACCTTGTAGTTTCCAGCTCGCTCTCTGCTGGCT  
GTTTTATCTCTGGGTTTCTCTCCTTCCACACTGCGTAGGCGGCTTATCCACCTCGACACGCTCTTGTTC  
ATCCTTTGGCAGGGTGCACATATTGAATGACATGGGATACTCAAACCTGATGGTTTGGCCGGATCTTACC  
TCAATCGAGAGCCAATCGCCCCACGGTGATCTTATCTACTTGCAGCTATACTGTATCTATATACAGCA  
CAATAGAGCCATCACCATGTTAGCAGTACCAGATCTCGACGCTCCTGCGTTGGAGCTTCCCCTGTTCCCT  
TCGCTGCGACCTGTGGCTTCCCCAGCCAGCACAGGACTACATAGAGCAGACCATCGACCTAAACCAGA  
TCTGTATCGAGCATCTGCCGCCACCTTCTATGTGCGGGCCAGCGGACACAGCATGGTGAATGCTGGTAT  
CAATGACGGGGATCTGCTGATCGTGGATAGAGCAATCAAGGCCAGTCACGGCGCCATCGTGTGGCCTGC  
CTCGATGGGGAGTTACCGTCAAGCGGCTACAAGAGCGCCATTCGCAGCCCTGCTCCCTGCCAACCCAG  
ATTTCCAGCCGATCACCTGCTGGAAGGCCAGGAACTGGAGATATTCGGCGTAGTCACCTTCGTGCTCCA  
TAAGACCAAGCTGGGGTAAACCATGCCGAAGGCTATTGCCCTGGTAGATGTGAACAATTTCTACGCCTCA  
TGCGAGCGCTGTTCCGCCAGACCTGAAGGGGCGACCAATCGTGGTGTCTCCAACAATGACGGGTGCA  
TTGTGGCCCGTTCCGGCAGAGGCGAAAGCGCTCGGGATCAAGATGGGGGTTCCCTACTTCCAGATCCGTCA  
GTTCTTTGAAGCCATGGGAGGCGTCTGGTTCTCCAGCAACTACGCCCTCTATGGCGACATGTGCAACGT  
GTCATGACGACCCCTGGAAGGTATGGCGCCGGCGGTGGAGGTTTACAGCATCGATGAGGCCCTTATCGAGC  
TCAGCGAATCATGGGCAGGTGACCTCACGACATACGGTTCGCCAGATCCGTGAACGGGTGCAACAGTGGAC  
TGGCCTCACCGTAGGAGTCGGCATCGGCCACCAAAACGCTGGCAAAGCTTGTAACTATGCCGCCAAG  
AAGTGGCCGGCCACCGCGGCGTGGTGGATCTGCGCGATGAGGCAAGGCGGGCTAGGCTGATGGCCATCA

CCCCGGTCTGAAGAAGTGTGGGGAATTGGCCGACGACTGACAGCCAACTGGAATCACAGAGGATCCGGAC  
CGTGGCAGAGCTGGTCTCAGCAGATGCCAAGTGCCTGCGGCGGAGATATGGGGTCTGTCGTCGAGCGAACT  
GTCCAGGAGCTGCGGGGGATCCCATGCGCCGAATTGGAAGAGATGGCCAAGGCCAAGCAACAGATCATCT  
GCAGCCGGAGCTTTGGCGATCGCATCACCCAGATCGGCGCCATGCACCAGGCCCTTGCAGGCTACATGGA  
ACGGGCCCGCCGAGAAGCTAAGATCTGAAGGGATGCGCTGCCGTACCGTACCCCTGTTTCTCCGCACCAGT  
CCATTCAATGACAAAGAGCCGTACTACGGCAACCAGATCAGCACCCGAGTAGCCATCCCCACCAACGACA  
CCAGGGCGCTGCTTGCCCTGATTGGACCGCTCCTATCCAATATCTGGCGAGATGGACACCCGCTACCAGAA  
AGGTGGCGTCATGCTGGCCGACTTACCCCGGACAGCATCCAACAGGGCGACCTGTTCCGCCAGCGAGCAA  
CAAGGGCCCCGAGCAATGCGCTGATGCAGGTGATCGACAAGATCAATCAGGAAGGAATCGGGAGGGTCT  
ACTTTGGCACAAGGGGACGGGATACCAGCGAATGGATGATGAAGCGGGAGCAGCTCAGCCCGCTATAC  
CACCTGTTTTCAACGAGCTCCCCGCGGTGAAGGTATAGACTTGATAGGAGATCTATCGTTGGACGAACT  
CATCAGCTTTAGATAGCCAAATTACCCATACGAGACACATTCACTAAATGACCCACATTTTCTCATACAA  
AATGAGATCGAAATTGAGGTCGTTTACTGCCGCAAAATGCCACCAGTAACAAGTGTGTCCATCGCCACAA  
ATTTAGAGTAAAAAATTGATCAAAGATGAGCAAAGAGATACGATGTATATACAGAGTGTGAAGTGAGAGG  
GATTTTCGTGACATACATAATATCACCCAGAGTAAGAGCAAAAAGTACAGCCAGAAACATGGTGGCGTTTCTG  
AGTCAGAACTCGATGAAGCTTTTGCAAAACCGAGATGGAGATTTTCTCATCGACACGCGTGAGGAACATAA  
GACGAATCCTCCTACGGAATGGTTTGTGCTCAGACAGATAGAGGACGGCTACTGAAGGTTGTTTTTGT  
AACCGAATGGATGGCACTATTGAAATAAAAATCTGCATATACCCCTGAGCAACCAACCATAGCTTTTTTACA  
AGCGTGTAGCTTACTAACTCAACCAGTAACCAGTAACCAGTAACCAGTAACCAGCTACACATAACCAA  
GGAAAGAGCATGAGCACCCAACCAGAAAAGATTCTCGGCACCGATGAGGCCTGGGAAAGTGAGCAACTGG  
GCGCCGATGAGAAATATGCAGTAAAATCAAGCCATTCTACCGAAGAGTCTATCAATGATGCGCTATCTCT  
GCAGTTGATCTCTATCCGCTTACAGAAAGGTTTGGATCGATAACCTGAAAACCATAGCTGAGCTGAATGGC  
ATCGGTTATCAACCGCTAGTTTCGCCAAGCACTGACTCGCTTTGTGCAATGCGAGATGAAGCAAATTGCTA  
ATCGAGCACTCGAAACCAACGTGAGAACTCGAACAATTTGAACAAGAGAAGCTTCTAGCCAAAAGAGC  
TTGAACTACAACAGAACAAAATGAAGGGGGCTCAAAAAGCCCCCTTTCTTATTGAGGCAACGGCAGATG  
CTTGAGTTCTACGCCCTCACCGAGCCAAAAGTGGCGTCTTCTAATCAAATCCTCTCTACATCCAGCCCC  
GGATAATTGTCCAGCGTCAAAGTGCACGGTTACTATGGTTGTGCAAAATGAAGCTGCACCACCAAAAACAG  
AGATAGATATGTCGATTGAAGAAGCGCTGGAACCATGGCTGTCAAAGCCTACCTGGTTTAGCTCACACCC  
GTGAGATCAGAACTGTTTACGCCCTTGCATGCGCCAGCTTAAACAGCTCCAGGTAACACCGAGCTGGAT  
GAGTTGGAGAAGGTGATCATCAAGCGAGTGGATCGGCTGCCCGCCATGCTCGGCACACCTAGCGATATAT  
CGGGAACCTGCCAGACAGTTTCGCCATCAAGATCCACGGGATGTTATAGGTGTCCATCACGGGCGGCGATGT  
GCCGCCGAGTCAAGCTCACATTATGAAAGCTTGCCCTTTCATCAACCGCAACGCCAGCTTTGCCACAAAG  
CCGAACTGCTCTGCTCGCATCTCTCTTGGAGTGGATCGCTATCCGGTACTCCGGTAACGTGCCAACTCT  
CATGGGCCAGCATATGGAGCACCATATCAGGATCCGCATCCTTGTGACCCATGCGTGAATGGTGTGCT  
CTCGGTATCAACCCAGCCCCAGCATCCCATCTCGACCATCCCTTCAAATGCCTGCTGGTTAGAGACGCTG  
ATTTTCGTTGCCGTGATATCAAGCCCCATGAACTCACTGCTATCTAGCAGTTCATCAACCGTCAATGCCAT  
TCTCTTCTGCTGCGCTGCGCCACAGCTCGCGGTGCACATCAACGGGATCGCTGTACCAGACGATGCTGAG  
TTCGGGTGGAGGAGCGTAACGTGGGTCTATCGCTTTGTCTGTGATAGGGTTATCCATATCGTAGGCTGGC  
ATCACGCCGAGTAACTCGCTTGTAGAAAGGCTTCCACCTCACTCTCCTGCACATGGCACCATGCCAGCAC  
CGCCTGATAGAGCGGGTACCCTGCTGTTCCCACTCGCCGCGAGTCAGAGTACCGAGTAGCGGCTCGATG  
GCACGGCGCACCTGAGTGCCCGGGATTGGGCGCAGGCCGGTACCCTTGCAGCGAGGGCATGTCTTGTCTA  
TCGCCTTGCCATGCAGGCGGCTCAACTCCAGATCGCGGATCACCCCGCGCCACGGCAGAACTGCGGGTG  
ACAGGCCGCCCGGGGGTATCCACGGTGCGGCAAAAAGTGTTCACGGCGAGGGCAGCCAGCGCCTTAAGC  
GCCATGCCGTGTCTCGCGTCTTGTGGCTCCACATACTTTGGCGCCACATTGCTGCAGTGGGCCATCA  
CGCCGCGCACTGCCACGGTGTGGCTCTCCCTGCTTGGTGTAGCGGGCCATAATCAGCGCCAGGCCAAC  
GGCTCGTATTTCTGACCAGCCCCAGCGCTCCAGCATCACTGCTTGGTCAAATGACTTGCCTCTCTGTA  
GAGCGGGATTGAATGGCCTGGATCATCACCGAACGTGGGGCACCGATCGAGATTGCATATTGAGCCGCA  
TCAGAATGCCTCCAGTGACCAGTTGGCGCCTTTGCGCATCACGCCGACGAAGGTGAACATCCAGTGCTGC  
TTGGCGGCCACCTTGATCTTGACCCGGGCGTCATCTCCAGAAACCCCTTACCTCGTGCAGCTCGATCA  
AGCCATCCTTGCCACCACCATGAAGTCAGGGGTGTAGAAGGTCTTATCGGCCAGCTTCAGCTTGAGCGG  
CTCGAACTCATAAGAGAGGATCTCCCCGCGCAGCATCAACAGGCGCAGGTGATCGGCATAGGCCGTCTCT  
GTCTGGTTTCACTTGCCTGGCACCGCCCGTGGCCGTGCCCTGCCCTTTACCTTCTTGTTCCTACTGTAAG  
GCGTCATCAAACACTCCCAGGCCAGCGCCTTGTTTAACGTCATCGCGACGTGAACCAGCTGGCTGCCG  
TGGGTACGCTCCCCTGCTGCCAGCCCTTGTGTGCAATTCATGTGCGCATCATGGCTAAGCGGAAAGG  
TCATCAGGTGCTTTCGCTTGGCTGCCCATCACGCTTAGGCCGTGGCCGATCGCATGGTGCCTCGACCCC  
CTCTGTCTGGCCTGTCAACACGCGAGGGCAGCTGGCGCACGAACGCCAGATAGTTGGCAGACTCCCAACGC  
TTCATCTTTGGGCGGGGGATGTGCAGCATCGGCGGATCCGGGTGATGGCCTTACCCGCCGGCTTGGCGC  
GGATCTTGGGCCGCAACTCAGCCAGAGGGTCTTGTCTCCAGCAGGGCATCCTGGTTACCCGATAGCGGGC  
ATCGGTATCCCGATAACCGCGCCCGGGCACCAGCACCCGCTCAGGCTCCAGTGGCGGCAACGGCAGGGC  
TGGCGCACACAGCGATCGGCAGATGCCCTGCACCTTGTAAACGCTGGCCACCAACAGAGATCTCGTG  
CCTGCAACTGGGCAAGCTGAACCCCGCACACCAGGGCGACCCGAGTCAGCAGCGCCCGCAATGGTGGT

GGAATGCTTGGCTGAGTTGAATGGCAACTGACCATCCCGATACTCGTTATCGTGGTGCCAGCACAGAGGA  
AGCGGCAGCCACCCATCTCGGTGGTACTGTCTCGCCAACACACCCCTCGCCGATCAGGCACTGGCCCA  
CGCTGCGCAAGGCCAGTTCCGCCACCGGCAGCTTTGACGATATCGGGGTGAAGCAGCGAGTTGGCCAGATC  
GGGGAAGTATCCAGCAAATCGCCCCCTCTGTGGCGGGTACCAGCATTGCCCGACGATTGCCAAGGGAT  
GAGCGCAGCTTGGCCAACCCATCCCCACAGCCAGCAACACCATCCCCATCTCAGGTACAAAGACCGGAT  
GGGTGGGTGTCATCCCAGCTTCTCCACCATCTCGAGCTTGTGCGAGCAACGGGGCAAGGCGAGCGAGCAGC  
TGATAGCTGGCGCTACGGCGCAGGGCGGATGATTCTGAGGGGATAACGCGGGCGGGCGCCCTCGGCTGCGG  
TCAGGCCAGGACTGGCAGTGTGATAGAGCGGAACAGCTCTGCACTGGTATTGAGTTCGGCACCACATCGG  
ATTGGCGGGCTTGACGCTGTAAGTGTGCGTCTTGCCGCACTGCGGCTACTAAACTTGTCTCATGTGACCC  
CTTTACCTCACGGTAGTGGTTTCCAGCCGATCGCGAAAATACTCCTGGTACTCCGCTGGCTGTTGAGTGATG  
GCCTTGGCGACATCTGCACGACTCGCCAGCCAGCGGACACTGCCAAACAAGGTAGGCGCCCTGCTTAT  
CCAATTGTACCCTCTGACGGTCCCCTTCAGGAAGCCTCGCCAGATTGAATGTCATGGCCGGATACCTCGC  
TTTTGATCCTGTGCGCGGCACTGGAGGCATGATCAGCAGCAAAGGCCAACGCCCTCCGACGTTATCCCCT  
GCTGGCCGCATGGCGCATAAACCCTCGGCGGTTTCGCTCCAGCTCATACAAAGCCTTGGCTAGCTGCACCTCC  
AGCACGGTAGCATTGCGCACTACCTCCCCGTTGCTATCCACCACGAAATGAAGCGAACGGGCAACAGCC  
CGCTGTAAGGCCACAGTGATAAACCAGGGCAGGGCGCATCATGCCTCACCCCCAGCAAGCTGCTGCCTG  
AACGCTTTTCAAGATGGCGATCAGATAGGCCCGCTCATGGCGAGCGTCTGTCAGGGCGTGGTACGAACAC  
CCTCGAATGGCAGCTGATACTTGGGATCGATGTCCAGCAGCTGGCGGCCATCCAGACCACAGTGGCAAG  
GCTCTGGTTCCCACGAAACCACCAAGGCTGTTCCACACCCATTTGCCGTTAGGCATCTGCCAGCAACAGC  
TTGTGCAACTCGCTACCATACCCATCAGCTCAACCCTGCCACCTTGTCAAAATGACGGCCCAAGAAGT  
TGGATAGGGCATTGAGGGCGTCGACCAGGAACAACGGCCAGCGTTGCCAAACATCTCCTCCCACGCGGC  
AGGACTCTCGGCTTTTCTGTCTTTCCCAGAATGCCATCGTGTTCATCGTCCCCTGGCGGCCCTGCGCCAGA  
TCCACCCGGCAGTAGAACTCATCCACGAACTGCAGCAGCGCAACATCAACAATCACCCCCCGATCGAGC  
CGATAACTGCATCAGTCCCCTTGCCAAGGGTCTCGATATCCACGACAGCGACCAAGCTCCGGTTACTCAT  
ATCTCATGCCCTTCTGGTAAATTGCTTGTCTCATGCCGCTACCTTCCCAGTCCGACCTTTGCCAGCAGA  
TCGGCAAACGGGCTCTGATACCAGTGGGGGCGAGTCTCTCGCTGGCAGCGCGGATCCACGATGTTTTTGC  
CATAGCGCAGCCAGCCGGGGTGTGACCCAGAACTCCTTCTGCTTATCCGGTGTATTGGAAGAGGGGGCG  
AGTCATCTTGACGACCAACCTTTTCGACTCCAGCAGGGCGTGAAGTAGCGGGCCGATGGTCAACCCG  
TGCTGCTTCAACCCCTCAGTGGCGGAGAATGTCGGCCGCAACTTCCATCTGTGGCATCACTCGGCCAT  
CAATTGCGTAACTCGGCAGCAGATTGGGCAGGCCGCTGCTGGCGCTGGATGGTCTGCGAGCATCCCCAGCTT  
GCCGGAGTTGCTGACGTTACGCATACGGGCAGCAGTCTCAGCAAACAGCAACTCCACCTGCACCGCCTCC  
ACATTGACCGCGGGACTGGGCGCCATCTGGTAGTGGCTACCTTGGCGAAAGAGGGCAACACTTTCATTCA  
TCACCCAGCGCTTGAACGCCCTTAGCGGCGGGCAGAGTGTGGACATAATCGCCTGATACAGGCCAGCCTC  
AGTTATAAGTACTGATTTACATAGTTTACTCCATTTTGGAGCACCTCTTGGCCTTGTCTCTTCATCA  
ATCAGCTTGTTCATACTATTGGTTTTCTCATAACCAAGCGCCCGGCCACATCAGACGCCACGAACCACA  
GCTGATCCCCTTCTGCTCGATCCGGATAGAACCAAACTGCTCACTGCTGAACATCACAACCTGCACTACT  
ATCTCCGGCCATGTCACTCTCCCGATTGTATGATGATGGGGTCCAGACCAAATATTACTGTTTATTTATAC  
AGGCAACAATCACCGTTTGTAGGTGCTCAAGGTGGTATATGACCTACACCAGCAATGGCAGATGTTGGC  
AGACCATCTTCTCGCAAGCCAGGGCCGCAAAATCCAATTGCAGCAGCTCCAGCCCGAATGCGTGAGCCCT  
TGTGAACTCCTGCCGCGCTCCCTTGTCTGCTGCCAACCAGGGCAAAAACGCAACTGCCCTCACACTCCATC  
ATCATGGGGATGGCGATCCGCATAGACCTTCACTCCAGTCAGGTCGATCAACCCCTGCTCGTTCAGCTCT  
TTCGGTTTAAACGGTCATGATGGGCTCCTCGGCCAGATCGCGATTCATGCGGTTTACGCTTACCAGAACC  
GCCTTTGCCAACGCCAGGAACAGGGTCCCGCACACACCACCGCCAGCAGCACGGCCCGCAGTGGTGGCA  
GTAGCAGGCGGGCGATCTGACGGGGGAACATCACCATCACCAACCAGCCGTGATCACCCACACCACCGG  
CGCTGTAGCATCTGCCACCCTACCCACCCCTCATATGGCACATGGGCCAGAAACAACAGCGCCACAAAG  
ACGTACATCACCAAGAAGAACAACCTTAACCATGACTGGCCTCTCGGGTCTTGGCCGCCAGTTCGCTCAGC  
TCGCGGCAGGTCGATAACCAACCAGCGGCTCATCATCTGGCCCGTCCCATCCAGTGCAGGGGCAAAATTCCT  
CTGCAATCCACTGGCGAACAATAACCACCAACATGGCCAGCAACGCCAGCCAAAGCAGTCCCAGTATCAG  
AAACATCCATCCAAGGCTCATCAGCTCCTCCCCCTCCCGGTGGTGGTGGTGGGCGGCGGATGGAGCG  
CCACCCGACGATCTGGGCCACGTGAGCAGCCACATATCAAACCTTTTGTTCATCAGCAGTACAGGGGT  
CTCGGTGCATTGGACACCAGCAACCTCGCCTGCTGACCTCATCAATCCTGAGCACCGGCGCGAACCAG  
TTGCGGGTTGCCGTGTGCTGGGCGTAGTAGTCATCATGATGCACCGCCTTTGGCCTTGGCGATGGCATC  
AGCGCAATGGTCACGAATTACCATCATGTTGTGGGTAATATTGCTGCCAGATGCGATACGGTGAACCTCC  
TCAAGCGCCTCCAGCAGCTCGTCGCGGACCGTTCAGCGGCAAGAAATCTGGCACTAATGGAGGTAACAA  
GCCCTTTTTGCTCAAGCTCATCGTTTCGATAGGTTGCGGCACGCATTCACGCAGGCCACAATACGGCGGGC  
ATTTTACAGCTGTTTCGCTCACTGAACTCCCTGTGCTCAACATCAATCCACAACCTTGGCGATAGTTCCACCA  
TTCGCATGGCATACTTGGACGAAGGTGTGCTGCTGCTTATCGACTTCAACAGCGTTCCACGGTTCCCTTG  
TGTGTTTACTCATGACCAACCCCTCACAGCTCAACAGCTTTGCCACGGATCCGCTCCGCTCTGCTCGC  
GCCTCTTACGGGTACCAACAACCAGGTAGTAACGGTATCAGTCAGGTATTCCGCTCTTCCGAACCTCT  
CCGGTGAATTTGCAACCTCGAGCTGCACTCGCTCCCCTACCCAGCCGCGCACCGGCGGATAGATGGCAAC  
CCGGCAGAACTGCGCCTCACGCACATCGCGCTCAGCTGTGTCATGAATTGACTGGCCATCACGCACCC

CTCCACGCTTAAATAGAGCCTTGAGCTGCGCCACACCACGCTGCCCTGCCTGCTGATAAAAATTCCGGACT  
GTGCTGGATCTGCTCCCTGGTCGGCAGCCCCCTTCATCACCTCGGCGTTCAGGTCTTACCTGCCATC  
CGGGCACCAGCTGGGCATAGGCCTGCTCGAACACCGCGCGGTAAGCGTCTGCGCTCAGCGTCTTGC  
CCCAGCTTGTGCGCTTGGCGGCCAGCTCGACGGCGGGATGGGTATAACGGCGGGTGCGTACCTCA  
CGCACTATCCAGCGTGGGCAGGCCAATGACTCAGGCGTCACCTCACACCACCGGATGAACTTGC  
CTCGGGAAAAAGTCACCACCGTGGCTGCGGGCCATCCGCATCCCCAGTTGCAACTGTTGCGGG  
AACCAGCATCGACCAGAGCGGGTCCACTCGGCCAGTGCAGCGGCTGATGGTCAGTGGGAATGC  
CTGTTTCCATGCTGGGAACACCGCTTTGAGCTGCTCAAACAGGGTGGCAACCATCTTGGAGTCC  
GTCAGCGGGCGCTGCTGCTGGGTGATGGCTCCACGGTTGGCGCAGTGGCGATCTCATGCAGC  
TAAGTGGTTTCATGGTTCATCAGAAACCCCTCCTGCATGCGCTGGTTAAGTTCAGCGGGG  
GTCAGGTCGGTGTGGTCAATTGCGGGCGCGCTGAAGCCCTGCAGGCCATTGCTGCCACCAGG  
ACTTCGACAGCCAGGAGTTGATAAACCGGTTGATCCCGTCCCTGCTCTTGCCTTTGCGCTTT  
CAACCAGCCAGTCATGGTGCAGCTCTTGGGCAACATCGACAGCCGGATACAGGGCTTGCATCT  
GCGAACGACTCGGTGACCGCATGCTCCCCGCTGTTGAGCGGCATGATGATCACCCTGGCTCTT  
CCGGCTGTTTAGCTGGAAGTGAACAGGCTCAGCAGAAACAGATTCAATCACCACCGGCGTGG  
GACAGCGGGCTCGGCGCTAATGTTTTGATCTTTTGTCTTTCTTGTCTTTTGAATATTGTC  
CCCTGTTTTCGGGGAAGGTGCTTTCCCTGTTTTGGGAAACTTTCCTTCCCTGTTTCAGG  
TGTTTTGGGTAATGTGAGTTTTCCCAATCAGAGATGACCTTATTTGGGCTATTTTGC  
CAATACGCCCATCCGCAACAGGTCGTTCTTGGCGGTGCTAACACGAGTGAAGGGATGTTG  
GCGATCTGCTCGTTGGTCATCCAGTCCATAGACTTGTGTAATCCGTAGTTTTTGC  
CGACTTTGTAAGTGGTGGTTCAGGTCAGCTCAATCAGCGCTCGAGCAGGTCGTTCCG  
GTAACCATCATCACAATCTGCCACCATACCTCCTGTGGCTTCACTGGTGTGCTATTGGC  
ATAACAGTGGCTACGTTACCCATGGCGAACCTCCTGCAGGTGCTGCAGCAGGCATTGC  
GCCTGCTCGGGGGTACCCGGATCTTGGACCCGCTTTTCAGGCTGCCATAGACCAAAAAG  
TGCCATCAACCAAGCGCGCAGCACGGCGGGGATCACCTTGCAGCGCTCGCTGGGAGTGA  
ATTAGCCATGTTTGCGCCCCCCCTGCTGGGTGGTGCACGGCGCAATGCTGGGCACGGG  
TGTTTGGGTGGCCGCAAGTGCAGTGCAGTGCATCGCTGCTACTTGGCGCGGTTTGCAG  
GACCAGAGCCAGATGTACCCGATCGTGCAAGGACGCCAGCGCGGAGCCAGCCAGCCAT  
CATAGAGCTGGCCATCCAGTTTGGCCAGCAGGGCGGGCTGTGCCAGCCGCTGCTCCAT  
GCGATATAGGCCTCCTTGAACCTCGGCAGCACGGCGGGCGGTAAGGCCATCGCCACGA  
CGCGGGTCAGTTGGTAGCAGGGCTTTTTGCGGCCAAGGCCATCGGTATAGGAGATGAGCG  
CTCAATGAAATCGAGGGAGCAATCGAGAGTTTTCAATCTTGCAGAAACATCGCGATGG  
TATTCAGCCAGATCGAGTGAAGTGGTAACAGCTTGGCCGTGAACACCCGAACGACGGG  
TAGGGACAGTAGCCATGATGGCAGCCTCCGGATGCGATAGGTTGTACTACCAGCAGAGG  
CATGGTGGTAGCCCGAACGGGTTGGAACCTACCGGCGCATCCAGAGGAAACCGGCCAG  
CCCCCGAGCCACCATAACGCTGAGGATGCCGATGCCGGGTAGGCGAACAGCACCCCAA  
GGCGATCGCTGACAAAAAACACGCAAGAGCGTGGGTGAGCTCCAGATGCAAGTTCGGG  
GGCTGCGGATTTTGCAGCAGCACCCACACTATAACTCTCGTTTGCCTAACGGTCAATTT  
TTAATATCGTCCAGCTCGGTTTTATCCCAGACTTGGCCAAATAGTCTTGATATCCGTAT  
TCACATCCTCACTTGTGCTTGAACCATGGCCCCGACTGTTAGCGCAGTGCAGGCGGCTT  
CTGCTTGGGTACCAATCCGCTCAATCTGGCTGTGCTCAACCCGGTCGATAACGCCGTC  
GTGGATAGCCTGCATCAGCTTGGCGAACCCGACTGGGCCAGTAGCACCTGCTCCACCAG  
CTGACGACACCCGGCCAGGTCACCCAGCCTTGCAGAGGCTGGCTGCCAGGCTTCCACA  
GGTTCGCGCAGTGAGTTCTGTGAGAGCGCAGGCTTACCAAGATTGAGTGGTGGCTGTC  
CAGCTTGTGGCCAGAACGGTCTCACCTTGGCCATCAGGCGGGCGAACTCGCTGATGTT  
CCGAGCAGATAGGCAGCCAGCAAAAACATCCGGACGTGAAACCATTTGGTTTACTTCT  
TTGTCTGTGTCATGATCTGCTCCGTGTTTATCTTTTGGGTTTCACTGCGGACAAAGAT  
TCGCTAGAGGCAAGGCTGAAATATCGACTTGGCTCAAACCTTGTGTTTAAAGCTTGA  
TGGGACCTTACCTCTCCGAAATGCATTGCTTACTGCTTCTGGCGTATGTTTCACTGCA  
CTCTTGGAGCCAAATCGAGTTATCAGGGTATGCATGGCGTCCCTGCTTCTTGCATCGA  
ACCAGCGGTTAGGTAAAAACCTCAAGAGCTTAAAGTTAGGCGGGAATCACAAATAATA  
GATATGAATGAGAATCAGACAGAAATGGCGGTTACGAGTCCGACAAAATCGCATTCG  
ACCTCGCCCTTGATGAGTTGAATTGGCCGAGAGAGGCGAATTGCCAGCTGAAACGCA  
GGATCTATCTGAGATTTCTGTTGAAAATGGCTTAGAGGTGATGGCTTACCTGAAGTTA  
GAGCTTTCCAGAATTACCGGAAAAAGTGTGCAATGGCTGCTGACTGGCACTGACACCA  
TAGAACCCAGCCATATCCTGTTTACAGGGTTCCACTGATTTTCGTGGGTGAGAGCTGG  
TTGCGGGTTGGCTCCTACTCTAGAAGATGCCGAAGAGACCATCAAAAGCCAGTACGTG  
GCTTACGCTGTGCTGGTCAAAGGTGACTCGATGATCTTTCACAAGGTGGGAAGTCA  
CCATCATCATAGTTGACCCCGACATTAACCTGCGCCAGGAAAGAAGGTGATTGCCCGCT

CATGACGTTCAAAGAGTTGGTTCTGGATGCAGGCAATTGGTGGCTTAAACCACTAAATCCTCAATACCCC  
ATGCTGCAGGTCAATGAGGATGTTGAGATCTGTGCCGTGTTAGTCTGTGCGGTTATGATTGAGTAGCAAA  
TTGCGGCTCACCTTGCCTCGCAATTTGCTAGCAACACCATTTTGGAGTAACGACTGAGCATCCATCAGGCT  
CTACTCCATCCATCCAAAACACATCCTATAAGCCCTGCCTTTAGTCGCCACTCATGTGGCTAGAAGGCAT  
TGCATCTCCTGCCTGAATCCAGGCAACGCCTTTACCCCATCAGTACAGAACCAGACATACCTTCGGCCTC  
AAACGCCATATCCCGCCCTGAACTACATCCACGACACCAATCGGCCAAGTTAAAAAAAACAAAAA  
AACTTTTGGCTATTGACGAAAAATATAACCGATATATCCTAACCAAGTTAGGAAACAACTGAATGCG  
AAAGACAACCCCAGCCGGAGGGCCAGCACAACTGGCAGCGGTGGCCAACTACCGCTTGGGGATATAAC  
ACCGGCAACCCGGCTGACACACCTCCCCGCTCTCCCTTGGCAAGGCTTGAATGCGTGCCGACCAAGGTGA  
CCGAAAAACATGGTCAGTGACCCGGCTGGCACTGGAAAGACAGTGAAGTGCGAACGAAGCGAGTGGCGGG  
TCTGACTCCCCAGCCACCCACCCGGTGAAGGCCGGACACAACCTGGGATTGCATTGCAGGTGAGCCTAG  
GCCCATGGGGTACCGCAGCAGAGACCCGGTACCAGTGCAATCCACAGTTGTGGTGATAACCATCCCATC  
AGCTGCGAACAGCCGGGAGGTGCCGATAGGAAGTGAATCGTAGGCCACCACCGCCAAACCGTCAGTTGG  
GCAAGTCGAAAGACCTCAGCGCTGACACCGGATATGGGTAAACCGGCAGGATGCAGACCAACGAGGCGGG  
CTGCAACCATGATCCCGCCTAGTTTCGTAGCAATACGCGCAGCGTGTATCCGAACCGAGCTTGTGGAA  
GGCGAGCGCACAACCTGCATTGGCACTGCGCGACCAGCCGCGAAAACCTGGCACGGAGTGTATAGGCGAAAG  
AAGCTTAAGTACCGAGGCTGAACCAGCACCCGGCCAGTGGGTAGCTTGTGGGGATGCCCTGATAAATA  
TCGGAGCCTGCTTCTCAGTCAGTGCCAATGACAGTTGTGGTGAACCTCCTGCTGAGGTTTGGCTTGGCCA  
GTAATGGACCTCTCTAATGGTCTTGGAGACACAGGGAAAAAATAGAGGACGTTGTGGCCCTCCTCCACA  
ACGAACCCGTCATTCCGCTGGCAGCCTTTAACTGAAGCGAGAGACGCCGGATAGGGTAACCGGCAACCAA  
CCCACCGCAGGGTTACGCGGTGCCTGGTACGCTGTGAAGCGCCACCAAGGCCCTCGCCGAGAGGCGAC  
AGTTTTCGAAATGGTAGGTCTGCCCGTGAGGGCGCACTGGTGGCGACAACAAGAACGGCTGACTCGCTGTG  
AAGCGCTCAGCCTCACCACAGGTGCAACGCATGTGGTTACTACTCCTGATGTTGATCTTGTGCTCGGGC  
TGGCAGCTGACCAACAAGCAACACCAACCGTCACCTCCATGGCGGCGCCATCAAGGGCAGTTCCACCGCT  
CACGATGGCACAGGGCTCCAGGCCCTGCCAAAACAGCCGACATGTTCTCTCCTGGCCCCGGCAACGGGG  
CCCTTATCCCACAAGCGATAGCGGCCAACAGCGGGTACGGCCTCCTATTGCCGTGCTGCTTGTGTGATG  
AGTCCAATTTAGAGATAGCAGAGGACCCATGCACCAAGCGAGTTTCAATGCCAAGCACATCAAGGCCAA  
CGCTGGAGAAAAGAGCAATTTCCCCCCCCATGCTATCTGCTGGGCGTGGCTGAAGCCAAGCCTATTTTCG  
ACCGGACACCCAGCTTTGCCAAAGGGAAGGTGTTCGATGAGTGCCCTCAAGGCGGCCCGCAGTGAAG  
GATCGCGAAGAAGGCGGAATCGGCCAAGCAGGCCAAGCCCTGATCCGGGGTACGGGTGCGAACGAGTGAG  
GAAAGACCATGACCAGCTTCTACAAAACCACTGATGCCAGTGTGTTAGCTGCACATGCCAGTTTTGAGGC  
GGCCAAGAACGCCCTGATCGACAAGGCAACGAACTGGGGAAAAGAGTTGATGGCAAGCCGAAGTTTTGTC  
AGCGATGTTACCGCTTCAAGTGCCTCACCTGATACTGAACAACCTACCACCAGCGTGAAGATAAAGACC  
TCTGGACCAAACCTGACCAGAACTACCTCTCCGCCCCACGCAAGGGGAAGGTAAGGGTAAGACCAAGGA  
GCAAAAAGAGCTGCAGGATCGCTACTGGGATATGTTCCCGGAGCCAGTGGAAAGCTAACCCGCTTTACGAG  
TCAATGGGGCTGAATTTGGGGCGAGCTGCTGTTCCGGTGGTGGCTTACCATGTTTGGCCATGATGGCGCCA  
TTTACCTGCGCACCCGGTGCCAAGGTTGGGCCAATGATGACCGAGATCCTGGGCAGCGAGTTCAACGCGGC  
TGAGCAGAACCTGAGGCAGGAGAAGGCAGCATGACCAGCTTCTACCTGCGCGATACCAGAACCAATGTAG  
GCAGCACCTGCATGTTCTGGGCGCTTAATGGCAATGGCTACACCTCAAACCTGGACAAAGCCCACGTCTA  
CACGCTGGAGGAGGCCAGCGCCACTTCAATGGTTCGCCACACCGATGTTCCGCTCAGCAAGGCGTTGGTC  
GATGAGCTCGTTACCGTGCGGGTGGATCACCAGTATCTGGATGACAGCATGGCTGGTCTGGTAACAGGCT  
GTGATCAGTATGTGATCCACTGCTGTATCGGTGATTTGACAGGTAACGACGCTTACTGGAAGGCCAGAA  
GGGCTCGACAGTATGCCTGTCTGATGCGCTGATCCTGACGGCAGAGGAGGTAAGGCATGCTCTGTGGAAC  
GACGAGGTGCGCTTTTACCCGCTTGAAGTACGTGAAGTCCATCAGCCGCCGCACATTTCAAGCGCGCAACG  
TCAACGAGCGCCGAATGATCACCATTGCCGGGATACGCAAGCCAAAGTGGCCCGCGAGCGACCCGACAAC  
CGCCCGCACCCGCGCAACTGCCCTGACTGTGAAAGGTCACATGGGACTTAACCCATACGAGGCGTAC  
ACCTGCGCCGAGGCTGCCAGAGAGAAGTATGGCGCCAGCCACATGACGACTGCGAAGACGCAGCCAGAT  
ACAGCAAAGCCAGAAAAGGAGCTGTGATGAACCACTACGCCAAAAGCACTGGCAGAGCTCCAGCTCCAGCCT  
GACCACGAACTCAAGCAGATCGGCGACCAGTGGCAGACTCCCAAGCCGCTAGCCTGGGGCCTGTTCCACC  
ACTTCGCCCCACCCTGGGGCCGGTGGTGTCTGCACATGTTTCGCCGATGACTGCAACGCCCTTGGTGGCGAA  
CTACTACGATGCGGCCGACAACGCCCTCACTCAAGAGCTGGCATCCGACCTGCGCCGCTGGGTGGTGC  
GCCTACGGCAACCCGCCCTACTCCCGCCCTGCGGCGATGGTGAAGGCAACCCTATCACCGGGATGGAGC  
CAATCCTCAACTTCTGCCGTGAGCAGCGGGCGCAGGGCGCCAAGATCATGCTGCTCATCAAGGCCGCTAC  
CAGCGAAACATGGTGGCCGGAGGATGCCGACTTTATCCAGTTCATCAGCGGCCGCATCGGATTTGAGGTG  
CCGAGCTGGTACGTCCCGCTGATCCGAAGAAGGACAAACCAAGCTCCAGCGGTTTCGCCCTCCGCCGTGG  
TGATCTTCGATGCCAGCTGGCAGGGCGAGCGCCGCCCGAAGCGCGCTGCGCCGTGACGACCTCATCAC  
CACGGGCCAGATCATCCTCGACATGATCCACCGCCAGGCTGTTGCGCTCAATGAAGAGGCCAGCCAAGCG  
ATTGCTAAGTCAGTCAATGCAGAGCCCGCCATGCTGCAAGACCTGCCTGCAGTTGCAACGCCCGGCGGAGT  
GGGAGCCTCCGGTGGCAACCGATAACCAGACCAATGAGGCCGCGAGCTCAAGAGCTGGCTTTGTTGGAGAT  
TGGTGAAGATAAACATGCTGAGCAGGTTGAGCAGGTCACGACTATTGGCACACATCACCCTGACTATGCC  
GAGCCCCGTCTTTATCTGGTTGATATGTGATGAAGTTGCCGAGCTCTCAGATGCAGACCAGAACACC

TGCGCAGCTATCTGAAAGGGTGGTTTTGATGAAGGCGAGTCACCGTCCGAGATCTGCTATCGCCTGACGCT  
GGCGGGCGGCAACCTCAAAGCGGGCAAGCAGGTCCATGACGGCTTTGTGTTGCGCGGTGCTACTCCGACA  
CTGCCACACTGGCAGCGCCACCCAGCTGTCAAGGCGGTGATCTACCAGATTGACGATGCAGACATCCTGA  
CACCGGCCAAGACGTCAGAAGTGGCAGGCTGGGTTCATCGACAACCTGACAACCAGCTTTGATCTGGTGG  
GCTGGCTGCAGCCAAGGCTGCCGAGATGCTCGGTAAGCGGGTTTCATACCGAGCAGCAGCTCGACATGCTG  
GATGACACCCGTCAGCAAGGAGCAGCAGCATGAATCGCCTGATAGAGACCGCTGTGCGCGCTATGGTTGG  
CTGGCTGCGCGAGGGATATTCGCTCTGCGTATCCCTGAGCTGGGGCAAAGATAGTACCGCCGTGCTGGTG  
CTGGTGATCGAAGCGATGAAGCGGGCAAAAGCTGCGAGTATCACTCTGCCACAGTGTTTTGCTATCACCA  
GCGACACCACAGTTGAGAACCCGGCTCTTGGCGCCTTCTTTGAACAGATGTCCAGCAGCTCGAGCAATT  
CTGTGTGCTTAACGAAGTGGCGTGGAGTACCGGCTCGTGACTCCTCCACTGACTGCATCGTTCCACTAT  
GTGACCCGTTGGTTCGCGTAAGTTGCCACGCTACCCAGGCATGAGCCGGGATTGCAGCAAGGATTGGAAGA  
TCAACCCGATCGTCAAGGAGAAGAAGGCGCTGTCCAGCAGTTTCGGCAACGCAATTATCAGCTTAGTCGG  
CACTCGCTTTCAGTGAGTCTGAAGAGCGTGAGGCTCGCATGCTGGCGGAGGTGATGAGGCTGGCGTCATC  
CTTTCTAACCCAGATGGCGACCTGTACGCAGTGCCAATCGCAGACTGGGATGAAGTCGATGTCTGGACGC  
TGCTGCGCAAGTGCACCAACGCATGGGCAATCCGCTGATCACCTCATTCGTTCCGCCACTTTGATGACCT  
AGTGCTGCTTACAAAGATGCCAACGGCGGGTGTGTATCCGGATTGGCAGACAGTCAGCTCAACAGTTTCG  
GCCTGCGGTGCCCGTTTTGGCTGCTGGTCATGCGTCGCCACCGGCGAGCGGACAAGTCGCTGCAGGCCA  
TGATCGAGAATGACCACGACCAATACGGCTATTTGAAGCCGATCGCCGACTTCCGCGACTGGTTGTTTCGG  
CGTCCGTTGGGATATGTGCGCCAGAGAATGGTTAGGCCGTACAGTTGACCCGGTTACCGGTCACATCGTG  
CTTCAGCCTGATTACTTCAGCTTTAAGACCCGCCCGCAGATCTTGCCTGCATGCTGAGCATTGATGCTG  
ATGAGTGCCTGGGCAGATGAACACAATGACGGCTTCCCAGGTTCCAGCTCATCCAGCCGTGGCAGTT  
GGTCATCATCGACTTCATATGGTCTATCTACCGCGATGCACCCCATGCGTTTTTCAGCGCTGTATGAGTAT  
TACCAGATCCACCGCTGCGGCCCGCGCTACTATCCGGAGCAAGGTCAGCCAGCAGAAAAGGCGCCAGTAC  
CAAAGCGCCGCTGGTTCAAGCCCGGGAAGGGTTTGACCACCTGATGGCATTTGGCGGCTGACCCGACCC  
GCTGATTATTCATGCGCAGCGCCATGCTGGCATTAAAGCAGCCACTATCAAGGACCGCGTCACCGGGGTG  
GAAAAAGAGATCATGGCCTTCGACATAGTGCCAGAGATGGAGATCGACAAGAGCGAGGCACTGCTGTGGC  
TGGAGCATTTTATCGATAACCCGATAGCCATCGAATGCACCGGAGAGGACCCGGCAGAAGCCATCAAATT  
TTACCTGCATACCCGATGGTAAAAGTGAGCCATGGCCAAACCCGCCAGCCTGGATGAAATCATCCAGCGC  
TCAGAGATGTGGGCGCTACAGAGAAAACCTCAACGCTCCCCGACATTCAGGCATGGGCAATAGAGAAC  
CTATCTCCGATGAAGAGCACGAGGCGATCAAAGCGTTCTATCCGAAATCGAGTCGCCATAACGTCATTTT  
TATGGAGGCAGCATGACCACCAACAGCCAGAAGCTGATCTGCAGCAAAGGCTGAAGAAAAGACCGATCGG  
CGGCCGAAGCGCTCAAACGCCGCCAGCAGAAGCGCTCAAACGCCGCCAGCAGAAGCGCAATGAAATCGAA  
CTACGCAAGCTGGCCAGCCAGTATGGCATTGACCACAAGGAGATGCAGTGATGAGCATCGTGCAGGACAT  
AGCAGAGTGGATTACGGCAGAGAAGGCGGGCCATCAGTGCCGAGGTGGCAGCCGAGTTACCCCTCACT  
GTCAGCGAGGCCAGCATTGTTATGGGGCAGATCCACAGAGAGTCCCGCTTCACTACCCGTGTTGAGCACT  
TCCGTCTGGTCGGGGATAACGGCCGTGGCCGCCACTCGCCGCTCTATGTTGACGTGGTGAAGCCACC  
GCAGTGGCGCAAGACCCAGTGATAGGGACTTGGCGGGATCTGGTAGTCCGTTTCGACAGCGTCACCGAC  
GCAGAGACCAAGGGCGTTTTGTCCGAGTTGGTATCACCCGCTGCTTGGCCGCCAGCAGGAAAAACAG  
GCGGGTACCGCTGGCAGATAGACACCTCTAAAGGAGCAGGAAAAATGCACCGCTACAGCTACACCCCTGAAT  
GCCGCGACCGAATTGGGCTCTGCGCCAGATCGCCTGACCGGCACCATCGAGGGCGCACCACCCGATGACCC  
ACCAACAGATCAGGCTGGCCGCCATTGATAAGGCCCCAGCCCAGTACCTCAAATTCAACGAGCTGGAGTA  
CCAGGAGATTGAAACGAGCACAAATTTGAAGGGCTGGCAATTTCTGGCTGGCACAGCACTGATTTCTGGCCAC  
CATGGCCGCGATGTAACAGATAACAACTGTCCGGGAGGACACGATGAGCACCAAATCCACCAACGCAAT  
TACCGCGATGATATGGCTCAGGCCATCCAGCAAGAGCAGTCAGGCAACTTTGCCGATGCGGCGCTCTCCT  
ACAAGAAGGCCACACCAGCAGCCAGCCAGCCAAACATGCTGAGCAAGGCAAAGTTTCGCCATGGCCCCGCG  
CATTCGCTGCCTCAAGAGCGCCAAGATCCTGCGTGGCGTCTGGTAAACGAGAAGTTTCAGCAACTCCAC  
CAGACGCTGGAGGCTCGCTGATGGCCAGCCGTTGGTATCAACAAAAGTCATCCTGATCGGCAATCTCGGTCA  
GGATCCGGAAGTGCCTACATGCCGAGCGGCGGCGCTGTACCAACATCACCCCTGGCCACCTCTGAAACG  
TGGCGTGACAAGCAGACAGGGGAGCAGAAAAGAGCGCACCGAGTGGCACCGAGTCGTTTTCTGGGGCGTAC  
TGGCTGAAGTGGCAGGTAAGCACCTGAAGAAAAGGCTCCCAGGTCTATGTGGAAGGCAAACCTCAGACCCG  
CAAATGGCAGGACCAGAGCGGCCAAGAGCGCTACACCACCGAGGTGCTGGTCGATAGCTTACCGGCGTG  
ATGCAGATGCTGGGCGCAGGCCACAGGGTACCGGTCAGCAGCAGGCACCAGCTCGCAGCCACAGGGCG  
GATATGGACGACCAGCCAGCAGCCAGCCAGTCCAACCAGAACTACAACGAGCCGCCACCCAGTTTGA  
CGACGATATCCCCTTCTTTAGATTTCGAGGACACCCATCGCTGATGAACTGCATCTGAGGCACGACAGAA  
CAACCGGCGGCTCCGGAAGCCGCCCTCTCGCCGTGAGGCGTAATGAAATAGGGGGCTCAAATGCCGTTT  
CATATCCTGACAGAACAGGAAGTGAAGAGCTTACTGGCTATGCAACACCATCAAACAGAAAAGAGGTAT  
TGCAACGGAACGGGATTTATTTCTGTTGAGGGAAAAAGGCGGTAATAATCCGCACAACAAGCGAGAATATAAG  
GTGGCCGCTGCCAACATTGGCAGGGAGAGGTATGTCACCACGAGATGGTGATGGGTTTAACTTAGAGGCA  
ATCTAATGGGGAGACCCAGAAAAGTCTGACACTTGGTTACCCCAAGGGTTTATAGGGGCAAGTCAGCATT  
TGAATTTTCATCCTCGTAGCGGTGGAGCCATTGCTTGGCTCCGCTTGCAGCAACGCAATCTGCCGCTCG  
GCCGATATGAACACATGATGGCCGAGCAGGATGGAGATACGATCAAACGCTTAGTTTCATGAATTTCTTG

AATCGGCAGACTTCAATGACCTGAGCGCTACGACTCAGAAGGATTATAGAAAATACTCCATACCCGTTAT  
CAAGGTATTTGGCGGTATGGACCCGGCAGAGTCGAGTCACCACACATCCGAAAGTACATGGATAAACGA  
GGCCAAAACCTCGAAGGTCCAAGCCAATAGAGAGAAAAGCCTTTTTCTCCCGGTTTCCCGGTGGGCATACG  
AACGGGGAAAAGGTGAAAAGCAACCCTTGCCAAGGGGTTCGCCAGTTTAAAGAAAAGGCCAGGACAAGGTA  
CATAACCGACCTAGAATTTTCAGGCTGTTATGGACGCTGCAAGGCCAGCTGTCAGAGTTGCCATGGAGCTG  
AGCTATCTGTGTGCCGCTCGGAAAAGGTGACGTTCTCGCGATGAGGTGGTCACAGGTCGGCGAAGAAGGCA  
TAACCATCCAACAGAGCAAGACCTCAAAGATCCAGATCAAGGCATGGTCACCAAGATTGATCGCAGCAAT  
AGAACAGGCAAAACAACCTTGCCGGCTCGGTGGTACGTTTCGTCTATGTCATCTGTAAGCCAAATGGTACC  
CCATATACAGACAACGGTTTTAATGCTGCTTGGAGGGAGGCCGTGCTGACGGCAAGGGAACAAACTGGTT  
GGCCTATGGACTTCACCTTCCACGACATCAAGGCGAAGGCCATATCCGATGTAGAAGGTAGCAGTCGTGA  
TAAGCAGCGGATCAGCGGGCACAAAACGGAGGCGAGGTTGCAGCTTACGACCGTTCAATCGAAGTTGTC  
CCTGCTGTTGATAGCGTGAAAAACGCTGAAATATTAGGACAGAGTATTAGGAAAGTTTTAGGAATGATGT  
AAAACAAAAAGGCTGCTATCACTAGCGGCCCTTTGTAAATCATTGAAATCTATCTGAATTAATGGTGCCCG  
AGGCCGGAATCGAACCGGCACGCTCGAAAAGCGAGGGATTTTTAAATCCCTTGTGTCTACCGATTTCCACC  
ACTCGGGCACCGCAATCGGTATCAAGCTCGCGTGGCGGGCTTGTCAATATGGAGGCACGTTCCGGAGTCG  
AACCGGACTAAACGGATTTGCAATCCGCTGCATAACCGCTTTGCTAACCGGCCATGCAAAAAGAGAGTTGG  
CTCTCTATTGTCTGAATTTGGAGCGGGAAAACGAGACTCGAACTCGCGACCCCGACCTTGGCAAGGTCGTG  
CTCTACCAACTGAGCTATTCCCGCATTAGTCTGGCTGACTGCCTGACTACGAGGACGCATTTCTAGCGATG  
TTCTTCGCCCAGTCAACCAGAAATATTTAATTACCTGATCGTTTCGGGCATTTTTTGGCCTTTTTGAACAG  
TTTTAGCGCCTTTGCCCGTTTCTGCCTCAAATCAGCGAAAACCTCACCTTGCGGCGCAGGTGACTCACA  
GGTTGGCGTGGTGAAGTCAAATCGCCCCAGGCCGCTTCATGTACTGGAACATCGACCAGAAGGTGAGCAC  
GGTGGCGACATAGAGCATCACATAGGCGAGCCACACCATCCAGACGTTGTATTGCCAAATCAGACCGGTG  
AGTGACACCATCTGGATCATGGTCTTCCACTTGCCAATCCAGCTGACCGCCACCGAGGAGCGTTTTGCCGA  
GCTCGGCCATCCACTCACGCAGGGCGGAGATGATGATCTCGCGGCCAATCATGGTCATGGCGGGGATAGT  
CACCCAGATGGTGTGTAGTGTTCGACGATGACCACCAGCGCGGGCGGCACCATGATCTTGTCCGCAACG  
GGGTCAAGGAAGGCGCCAAAGGCGGTGGACTGATTGAGCTTTCGAGCCAGATAGCCATCAAACCAGTCGG  
TGGCAGCGCCGAGAATAAAGATGATGGCGGCAGCCAGATAGGACCATTGATAAGGCAGATAGAACAGGAT  
GACGAAGCGGGAAATGAGCAAAAATCCGGAAAAACGCTCAACAGGTTAGGTATGTTTGTCACTTATTTTCAGC  
CACTTCTTGTACGTCGATACATAGTGCGCCAAAGCCGATTTGCGATGCAACCCGCACTGGCCATTTCTTGTG  
GTCTTTTTAATCCATCAATCTTCTCAAAATGCGAGGGCCATTATGGCATTACGGCCCCCGCGTACG  
GCTCTTGTGCATCAAGGAGTTAGCGATTTTTGCCATGCCGTTAACCCTGCTCAGGCGCTGTGCAAGCCATC  
GTGGATGGTCTGGGCCAGCTCCTGACTGATGCCGGGTACCTTGGCAAGTTCATCCACGCTCGCCTTTTTG  
ACCTCCTGCAGGCCCGCCAGATATTTGAGCAGCGCTGCCCGGCTTTGGCCCCACCCCGGAATATCCT  
CCAGACTGCTGCTGGTGCGGCCTTGGCACGCCGCGCCGGTGGCCGTAATGGCAAAACGGTGGGATTC  
ATCGCGAATATGTTGAATAAGGTGCAAAGCGGGCATACTGCCGGTAAATGCAGCTCTTCGTGGCTCTCC  
CCCATGATGAGAGTTTTCAACCCCGCCTTGCGGGTGACCCCTTGGCAATCCCACCAGCAGCGGATATT  
TACCGCCGAGAAACTCCAGCTGACGGGCCAGGATCTCTTCGGCGCGGCGCAACTGGCCGAGTCCACCCTC  
GATAAACAGCACGTCGGGCACCTTGTCCGGCTCCTGCTGCTTGCCAAAGCGGCGCTCCAGCGCCTGCTCC  
ATCGCCGCGTAGTCATCACCACTGTGATGCCGTCGATATTGAAACGACGATATTCGGATGAGAGCGGCC  
CCTCCCGGTTGAACACCACGCAAGAGGCCACGGTGCCTCCCCATGGTGTGGGAGATATCGAAACACTC  
CATGCGGGCGATGGGGCGCTCCAGCTCAAGCAGCTCTTCCAGCTGGTCGTAGCGGGCGGTGATGGTGTCT  
TTGTGAGCCAGCCGCGAGCGTAGCGCCGCTTCGGCGTTGATGGAGGCGAGCTTGATAAAGCGGGCCCGTT  
CGGCGCGGGTACGGCTCACCAACCCGCACCTTGTAGCCTGCGGTCTGGCTCAGAGTCTCGGCGATGACGCT  
CTCGTCTCAAGGGCCACATCGAGCAGCACCTCGCTCGGGATCTGCCGCCCCCTTGGCCCGACAGATAG  
AACTGCAGCAGGAAGGATTTGCACCACTCGTCGAGTTGGGTATCGGCCGGCACTTTTCGGGAAGTAGCTGC  
GCGAGCCGAGCACCTTGCCTGACGGATAAAGAGCAGCTGGATGCAGGCAGCGCCTTGTCTGAAGGCGAC  
CCCCACCACATCCAGCTCGTCCAGCACGTTGCCGCTCACCGACTGCTGCTCGGTGACCCGGCGCAGCGCC  
AGGATCTGATCCCGATAGCGGGCCGCTCTTCAAAGCGCAGATCACCGCTGGCTGACTCCATCTTGCCCA  
CCAGCTCGCCAATCACCTGCTGGTTCTTGGCCCGCAGAAAACGCTTGGCCAGCTCCACCTGCTGGGCATA  
TTCGGCCTCGCTCACCACTCCGGGCACGCAAGGGCCAGCGCAACGCTTGAAGTGGTAGAGCAGGCAGGGA  
CGGGTGCGGTTGGCATAGACCGCATCCTCGCACTGACGCACCGGAAAATATCTTCTGCATCAGGTGCAAGC  
TCTCGCGCACCGCTCCGCCAGAGGGGTATGGGCCGAAGTACTCTCTTTTTATCTTTCGGGGCACCGGATG  
CACGCCGATGCGTGGATGCTGGTGCCTGTGATGATGATCCAGGGGTAGGATTTGTCTCCCGCAGCAGC  
ACATTGTAACGGGGTTGGTACTGCTTGTATCAGGTTGTGCTCGAGGATCAGCGCCTCGGTCTCGGTGTGGG  
TGACGGTGTCTGGATATCGGCGATCTGGCGCACCAAGGTTGCGGGTCTTGTATGCTGTCGACGTTGGTGC  
AAAGTAGGAGGCGAGCCGCTTTTTTCAGATCCTTGGCCTTGCCACGTAGATCACGGTGCCACCGCTGTCA  
TACATGCGGTAGACCGCTCTGATGGGTGACGGCGCTCAGAAAACGCTTGTGTGTAAGAGAGGTTCCGG  
GAGAGAGGGTCAATCAGCTACTCGGCTCACACAAAAGGCAAAAATTTGACGGGCAGAGCATACTGCCCCCGC  
GCCTGAAAAGCAAAAGGGCAGAAAAGCAAAAAGGCGGCACGCGCCGCTTTGTGACCACACGCCACCCGA  
TTAGAGGGTATCGGCATCCAGCATGCCATAGCGAATGGCCAGATGGGTCAGTTCCACGTCACCGTTGATC  
CCCAGCTTGTGTAACAGGCGATAGCGGTAGCTGTTGACCGTCTTCGGGCTCAGGTTGAGCTGCTCGGAGA

TATCAGTCACCTTCTGCCCTTGGTGATCATCATCATGATCTGCAGCTCGCGCTCGGAGAGGGACTTGAA  
GGGATTCTCGTCAGCGGAGGCAAACCTGGCTGAGGGCCATCTGCTGGGCAATCTCCGGGGAGATGTAGCGC  
TGACCGGAGTGCACCAGCCGGATCGCCTGGATCATCTCGTCGGGGGCCGCCCTTGGTCAGGTAACCGG  
CAGCGCCGGCCTGCATCACCTTGGTGGGGAACGGATTTCTGAATGAATTGTCAGCACTATGATGCGCAC  
ATCGGGGCGGATCCGCAGAATTTTGGGGTTCGCTTCCAGACCACCAATACCCGGCATGTTTCATGTCCATC  
AGGATCACGTCCGGATGGTGTGGCGGCAGAAAAGTGACTGCTGTCTCGCCGCTCTGTGCTTCGCCACCA  
CCTTGATCCCGCGCACATCTTCAAGAATGCGTCTTATCCCTGTACGCACCAGCTCATGATCATCGACCAG  
GAATACATTTATCACCCAAACACCCCGTTTTATCTCGTTTTAGCCGCCCGTTAGGGTTAACAGGGCGTC  
TTGCATCATAACCAAACCTCGTCGCTTTGGCAAACCATGCACGCCAAAAGTTTGAGAAAACCCATGTTTAG  
CGTTTTAAAATCAAATAATTATATAAAATTTCAAACAACAAAACGGTGTCTTGCACACCGTTTTTCATGAT  
GTTAGTGTGTGGCCATCACTTGGCCAAAAGGCCCGCACCTTCTCCAGATCGGCCTGGGTATCCACCCC  
GACCGGCGGCGCTTCAAGGGCCTGGGCGACGTGGATCTTCTCCCGTACCAGAGCACCCGCAGTTGCTCC  
AGTGCCCTCGACCTGCTCCAGCACGCTCGGTGCCAGTCTATGTAACGCTGGATAAAGCCGGCGCGATAGG  
CGTAGATACCGATATGACGCTGGTAGTGGTACCAATCTGCTCATGGCTCTTGGCAAAGCGATCCCGATC  
CCAGGGAATGCTGGCGGACTGAAGTAGAGGGCGTAGCCATCCTTGTGTCAGTCACCACCTTTCAGTGCCTC  
GGATTGAACGCTCTTCCGCATCCTTGATCGGCACCGACAGGGTCCGCATCGGCGCCGTGGCGGGGCCA  
GATTGTCCGCCACCTGACGAATGATGGCGGGCGGAATGAGCGGCTCATCCCCCTGCACATTGACGATGAT  
GGTATCGGCGGCAAAGCCGTAGTGACGGCACACCTCGGCCAGACGCTCGGTGCCGGACTGGTGTCCGGT  
GAGGTTCATGCATACCTCGACGCCGGTGTCTAGCAATGCCTGTGTACCCGGGCATCGTCACTGGCAACAA  
TCACCCGATCGGCACCTGATTGACAGGGCTTCTCCACCAGTGTGCACCATGGGTTTACCATGGATATC  
CGCCAGCGGCTTGCCCGGCAGACGAGTTGACGCATAGCGGGCAGGAATGACGACGACGAAACTCATGACG  
GCAGCTCATCGCTGTTGAGCGGACGGGCACGGTTCTCCAGCAGTACCCGGATCCCCCTTCCAGCGGATA  
GGCCAGCTTGTCAAAGCGGCAGACCAGCTCATGAACTGCTTTGTTGTAGTGCAGCTTACCCTTGCAGACC  
GGGCAGGGCATGATGTGAGCAACTTGATGTCAAAGCCAAAACGATACTCCTTCAACGATGTGCGCGTG  
GCGGCTTCATCACGCCAGCGATGGATGTGAGCAACCAGATATTCATACGGGACCGCTATTGGTCCACT  
TCTCCCCCGCTCAGGCAAGAGAGATTAATCTTGCGCCCTGGTTCGCGCCCTTTGCCTTCGCCCCAGCTTG  
TGCAGCAGGGTGTCTGAGCAAGGAGGGCGGCAACTCGGCACTGACCCGCAGATACCACAGTTATCGAGGG  
CAAACGGGGGCTACTGACCCGATCCTTCTCGGTATCAGCAGCGGCTTGCTGACAAAGCCGCCACCAG  
CTCATCCCGATCGAAGGGATGATGATCGCCGTAGCGGCCCTGTGATCCAGCTGATAGCCGACCATCTCC  
AGGGTGGCAAAGAAGCGGGGCGGATGACCAATCCCCGCCAGCGCATCGACCCGGCCCGACAAGGGGGCAG  
CCAGCGGGGCATCGTCGCATACCCGACGCGGCGCATCGGCGACCAGTTGCATGGGGTACTCCCCCTTGCC  
CGGCTCGCCGCGGTTGAGATGATGGCGTCCACCCGTTTGGAGACGAGTGACCCGGCTCGCGCAGCGGCCCC  
ATGGGCAGCAAGCAGGCATTGCCGAAACGGCGCGCTCCGTCCACCACCACCAGCTCGATGTGCGGGGCCA  
GCGCGTAGTGCTGCAGACCGTCTGCGGTGATGATGATATCCACCTCACCGCTCTGCTCCAGCAGTCGTAC  
CGCATCGGCCCCGTTTGGGGCAACCACCACCGGGCAGCCACAGCGCCGGGCAATCAGCACAGGCTCATCT  
CCAGCCTGCGCCGTGGTGTCTGCTCATCCAGACGATAGGGATAATAGGGCGCCTTGCCGCCATAACCAC  
GGCTCACACCACCCGGGTGATAGCCACGGGCTTGCAACTGCTCCACCAGCCAGACCACCACCGGCGTCTT  
GCCGTTGCCCCCGACCGAAATATTGCCACCACGATCACCGCAAGGAGGAGCGATACCCCTTGTGCCAA  
CCGTGACGATAGGCATAGCGGCGGCTGCCGCTGATGATGGCAAACAGCAGGGCAAAGGGGGCCAGCAACC  
AGCGCCAGCCACTATTTGCATACCCAGAGCCGTTCCAGCATCAGGCCTTGTCTCCCGGCTTGCCAAACTGA  
ATAGCGCGCAGCTGGGCATAGGTGCCGCGCTGCTCCATCAATGCTTCGTGGTTCCCGCGCTCGACGATAT  
GACCTTCGTGATCACCAGGATCTCGTCCGCTTCTCGATGGTGGAGAGACGGTGGGGCATCACCAGCGA  
GGTACGGGCTTGCAAAGCTCGTCGATAGCCGCTGAATGTGGCGCTCGGACTCGGTATCGAGGGCCGAG  
GTGGCCTCATCCAGCAGCAGAACCAGCGCATCGCGCAGCAGGGCGCGCAATGGCAACACGCTGACGCT  
GGCCGCCGGAAAGGGATGCACCGTTCTCGCCAACCACAGTGTATACCCGTTGCTCATCTTGTGCTGACGAA  
CTCGTCGGCATGAGCGATACGGGCGGCTGCACGATCTGGTTCGCGGCTGTATTTGTCTTCTGCTGCTGAG  
GCGATGTTGTTGGCCACCGAGTCATTGAACAGGTGAACATGCTGGGAGACCAGCGCGTACTGCTTGGCGA  
GCTCACTCAACTTGTATTTCGCGGATGTTGATGCCGTCAGCAGGATCTCGCCCTGATCGATGTCGTAGAA  
GCGGGTCAGCAGGCTGGCAATGGTACTCTTGGCAGAGCCGGAACGGCCACCAGCGCCACCGATTTACCC  
GCCTCCACCTTGAAGCTGACGTTGTGACGCGCCGGAGTATCCTTGGTCCGGTAGGTGAAGGTGACGTTGC  
GAAACTCGATCTCGCCGCGGACGCTCCAGAGTACGGGTGCCGGTATCCTGCTCCGGCTCGGTGTCGAG  
CAGGCCAAACAGGCTGTGGCAGGCGGTGATGGCCCTTGGAACTGGTTGTTGACGTCGGTACGGCTTTTC  
AGCGGCTTGGAGCAGCATCATCATGGAGGTGATCATGACGGTAAACGTACCCGGCAGTCAGAGTTGACTTGA  
CGCTGTCAATGGTTCGCGACGTAGAGGAAGGCAGCCAGCGGATGGAGGCCACCATCTGCACCACAGGGCT  
GCCGATGGCATCGGCGGCGACCATCTTTCATGGTCTGCTGGCGCATGTTGTTGCTGACCTGGAAGAAGCGT  
TTCTCTTCCACCTTCTGGCCACCAAACATCAGCACCTCTTTGTGCCCTTTGAGCATCTGCTCGGTGGAGG  
TGGTGTATATCCCCACCGCTGCTGGATATGACGGCTGATCTGGCGGAAACGACGGCTGATAAGGCCGAT  
GATGACCCCCACCAGCGGGCCAACCACCAAAAAGATCACCGACAGCTGCCAGGAGTGCCAGAACATCAGG  
CCGAGCAGACCGACCGGTTCGCCCTTCCCGCACAGGGTACCAGCGTGGTGTCTCGCCCGCGAGGAGA  
CCTGACTGGCGTCATAGGTACCTTGGAGAGCAGATGACCGGTGTTCTGGCGATCGAAGAAGCTCATCGG  
CATCGCCACCATGTGATTGAACACCTGCTGTTGCAGACGCATCACGACATGGTTGCCGACCCAGGCCATG



CAGTAGTTGGAGAGAAAGTTGGCGACACCGCGCAGGGCCACGATGCCGAGGACGAAGAAAGGCATCCATT  
TCAAACCGGTGCTGTCGTTGCCATTGATGCCCTGATCGATCAGCGGCTTGATGGAGTAGACAAAGGTGGT  
ATCCACGGCGGGCTAGCCCAGCATCCCGATGATGCCACCGACCAGGCCAGCTTGCATCAGCGACATAA  
CCGAGCAGGGCGTTTGAATACTGGCCAGCTCTCTTGTGAGGTTTCTTGTGTCATGAATAGCCGTTAGTAAT  
GGAAATGACGGGCTATTCTAGCCAAAGCGCAGGCTTACACCAAGCGCCGCCACCTATATCGCATTCCTAC  
ACGGCAGAAATGGCCGATTATTGCTCAAACCACTCGCGGTGCCACCACTCACCCTTCCGCGATACC  
AGGGCCCCAGATCTCGCTCGGCGGTGACGCTCAAGCCCCGCTGCGGTGGGTTCAACCAGCATCGCCCCTTG  
CTGACCGGTGATCCACTGGCGGGCATCCCGATAGCGGGCCACCACATCGGGACGGGGAAAGCCCCACTGA  
TTCATAAAACCGGCGCTGTGGATCACCTCCTGCGCCGCTACCGCCGCGACAAACGGGGGCGTGGAAGAGG  
TGCGACTGCCATGATGGGGGCTCACCAGCAAGGTGCTGGCCAACCCCTCCCCCTCCAGCGCCACCAGTCT  
CAGTCTGCCTGATCGGATATCGGCATCAGCAATATGCTGCGCTGCCATCGTATACGCACCACG  
CAACCATCGTTATTGCGCCCGCCACCGGGCGTCTTGGCCAGAGCACTGCAAACGAGAGCCCTGCCAGC  
GCCACTGTTGCCACGCTGGCAGAGCGTCTTCCCTCACTGAAGGGATAAGAGGATAGCTCGTGACGCAC  
CGGCATGGCGCTGAGCAGTCGCTTGGCATTGCCGGCATGATCCCGATCCTTGTGGCTGATGATGAGGCGA  
TCAATGACCCGGATCCCCAGATGGCTCAGCTGGGGCAGGATCACCAGCTCCGCCATGTTGTAGCTCCGG  
GATAGCGATCACCAGGTGTATAAAGGATGGCACGCTCCCCCTTGCTGATCAGCACCGCCAGCCCCTGCCC  
CACATCCAGCACCCGAGTTGCCAGCGGGCGGGAACAGGCCAGCATGCCAACACCAGCGCAAGGGCGCCC  
GGTAACCAGAGCCAGCGTCCCGGTGCCACTGCGCGGCAACCAGAGCAGCAACAGCAGGGTGCAGAGTG  
GCAGCCACCAGGCGGGTAGTGGCCACCACAGTTGCAAGTTGATCGGCCAGCCAGTTCAGGATCGTCAACAC  
CCACCCGAGCCCCAGATCCGCCAGCCAAAACAGGCCGCTAGGCAAGCGAGGTGGAGAGCGGCGCCAACAGC  
ACACCGATCAGGGCCAGCGGGATGATGGCGATACAAAAGAGCGGCACCACCAACAGGTTGATCACCATGG  
CAAGGGGCGCTATCCCCCTCGAACAACGCCAGTTGCAACGGCAGCAGACCAGCAGCAGCCAGAGCTGGAT  
CTGCCAGAGCCCCGGCTTGTCTGTGGACATATCCCACCAGCAGCAAGATGGCCACCAGCCAGAAACGAGAGC  
CAGAAGCCGGCCGAATAGAGGGCGAAGGGATCCCAGAGGGTCAATACCACAAAGGCCACAGCCAGATGC  
GCCAGGCCGGCCACTCTCGCCGGCTCCAGCGCAATACACTCCACACCAGCACCATGATCAGAGCCCCGTT  
GGTGGCCACCGCAAATCCGGCCAACGCACTGTAGACGGCGGCAACAGCAGGGAGGTGATGATGGCGCCG  
CGCAGACCAACAGCCTGCCAGCCACCACCAAGCACCAGCCAGCAGCGATGTGTTGCCCTGAGATGG  
CGATGATATGGGTGAGGCTGAGGCTGCGCGGAAACAGCTCCCACTGGGCATCCGTGATGCGGCTCTGCGC  
AAAAGTGAGCGCCGAGCAAGGGGGCATAAGTCAAGCGGACGCCAACTCTCGGTGCGGCTCCCAACAGC  
CGTTCACGCCACCCGCTGGTGCCTGTTGAATGTCGATCACCAGCGCAAATGCCAGTGGCGGTGATCC  
CCTTGGCCAGCAGCAGACGCCGCCATCCAGCCCCGCTCGTTGGCCAGACCCTGAGCCGGTTCACCGA  
GGTACCAGGGTATCCGGCTACCTACCGTTCATGGCGGCAATGCCTGATAGGCATTGACCCGGATCAGG  
GGCTCAGGTGTCACCGTTGCTCGTCGAGGGTGTCAACCCGAGCAGCAGCCGGACAAATTTATCCCCCT  
CGGGCTCTGCACTTTGCACTCTGCGGTTATCATGTGGCTCGTCTGATCGCCCAACCGCTCCAGCCAGGC  
CAGCCGATAGGCAAGATTGGCCTGCATCCAGAGGATGCCGAGCAGGAGAAACAGCCACAGCCAGGCACGG  
CAATATGCAAGGGGGATCAGCAGGGACAGCAACAGGCCCCCCCATGCGAGTGAAGGTAACCATGGCCAGA  
GCAGTGAGGAGCTTGGCCCCAGGGCAAACGACAACAGACGCAGATCCATGGAGCAAGTATTTAGCAAGGT  
TTCAATATGCCCAAACGACTCATTAAACGCTGGATGCCCGATCAGCAAACCTGAAAGAACAACAGCACC  
TGCGGCTGTTGCGCAAACCTGCTGCTCGATGCCAACCTCTGGCATCTCAACCGCCGCTCGGCCGCGGGGC  
ATTTGCGGTGGGCTCTTTCATGGCCTGGGTGCCGCTCCCCTGCCAGATGCTGTTGGCCGCGGGTGGCGCC  
ATCCTGTGCCGGTCAATCTGCCGCTCTCGGTGGCGCTGGTCTGGCTCTCCAACCCCTTTACCATGCCGC  
CCCTGCTCTATGGCGCCTATCTGGTGGGTGGCAGTTGCTGGGACATTCGGCGCAGCAGATAGAGATTGA  
ATTACTTTGGGAGTGGCTGGTCTCGGTAAGTGGGCACAGTGGCACCAGCCGCTGTTGCTGGGCTCGCTGATC  
CTTGCCCTGCTCAGTCTCTTATCGGTTACACCTGATCCGCACCTTCTGGCGGATCAGCACGGTGGCC  
AGTGGCAAAAACGCAAGATGGCCCCCCATGCTGAGTCGCTGGTGTGCCCCGCTTCAAGCTCGATCCCGAT  
ACCCGCGCCAGCAGAAGTGGTTTGGCCCTGTTGGTGGGAGCAGTCTTGGCCAGCCCTGGCAAGGGG  
GCACCCGCGCCCTGAGTGGCGCGGTGGCGGCCGGGATCTTCGCTGCTGGTTCCCATCCCGATGCACCTC  
GCTTATCGCAGTCGGTCTGGCGCTGGCATTACGCTCAACCTGCCGCTGGCACTGCTGGCGGTCTGGTTC  
AACAATCCGCTGACCCCTGCCATTATGATATCTCTACGCCTATCGCACCGGCTGTCTGGTGTGCACAAGA  
CGCCGGAGCCTTTCCACCTCAGCTGGACCCCTCACTGGCTGGAGCAGGAGGCGGCCACCCCTGGTGCCTCC  
CTTCTGCTCGGCAGCCTGCTGCTGGCGGTAATCACCAGCTGAGCGGCGGCTCCAGCCGCTGCTG  
TTACAACCTGCGCAAGCTGTGGCAAGGTGCCCGCCACCACTGAGCCGCTTACCCTTGTGGCGATCAG  
CCGTTGGCGATCAAAAAAGCCCGTCAACAAGGTGACGGCTTTTTCATGGCATAGAGCCAGAGCACAAGG  
TGATGCGATTACAGCACCTTGGCGATCGCCTCGCACAGGGGATCGATATTGGCGCGGGTAATACCGGCCA  
CGCTGATCCGGCCTGAGCCGACGATGTAGATGGCAAATTCGCTCTTGAGGCGCTCCACCTGATCCTTGGT  
GAGACCGGAGAAGGAGAACATGCCATTCTGCTCGCGGATAAAGCTGAAATCCTGGCTCACACCGAGGGCA  
GCCAGCTTCTCGACCAGCAGCTCGCGCATCTCGCGAATACGCACCCGCATGGCAGCCACTTCTTCGACCC  
ACTCGGCATAGAGAGCCGGATCGCTCACCACGGCGGTGACCACAGCGGCGCCATGTGACGGCGGGTTGGA  
GTAGTTGGCACGGATCACTGTCTTACCTGAGTGAAGGCCACGTCGGCGATCTCTTTGGTTCGCGCTGACC  
AGCGTGAAGGCGCCGACCCGCTCGTTGTAGAGGCCAAGTTCTTGGAGAAGGAGCTCGCCACCAGCAGCT  
CGTCATGGCACTCGGCAAGATGCGCAGGCCTTCGGCATCCTCTCGATACCACGGGCAAAACCCCTGATA

GGCGAAGTCAAACAGCGGCAACCAGCCGGCGGCCGACTCTGCTTGGCCAGTGC GCGCCACTGATCGCTA  
GTGGGGTTCGATACCGGTTCGGGTTGTGGCAGCAGCCGTGCAGCAGCACCAGCTCACC GGCTGCACTTCGG  
CCAGCGAGGCCTGCATGGCAGCAAAGTCGAGCCCCCTTGGTGGCGGCGTCTAGTACTTGTACCAC TTGAC  
GGTCAGACCGGCGGCTTGAACACGCTGACGTGGTTGGCCAGGTGGGATCGGAGATCCAGATGGTCTTG  
GCCAGACCGTTGCGCACCACGAATTCGGCCCGGATACGCAGGGCACCGGTACCGCCCGGCGCTTGC GCGG  
TCTTGGCGCGACCGCTGGCAACCAGCGCAGAGTGTGCCCGAACAGCAGTTGCTGCACGATGCGGGCCATA  
TTCGATATTGCCTTCAATACCGAGGTAGTTCTTGGTCTTCTCGTCGGTCAGCAGCTTCTGCTCGGCTTTC  
TTGACGCAGTGAAGAATGGGGGTGGCACC GGACTCGTCCTTGTAGATCCCTACGCCAGATTGATCTTGT  
GGCTGCGAGAGTCAGCGCGGAAGGCTTCGGT CAGGCCAGGATCGGATCCGCTGGGGCGGCAACAACCTT  
TTCAAACATGGTTTTCCCTGTATTCCGTTGAGTTCGTTGGGTGGCAAAGCGGCTTGATAAAACAAAAGCGC  
TCATCTGGCGAGCGCTTCGTCAACTCTTTATATCACCGCGTTC AATGGGGGAAAACCGCTTTTTTGGCTC  
GCTTTCAGACCAATTTCAACCAACGGCATGCCACGCTGGCGCCAGTGC GCACACCTCGGCCGACAAGCCA  
CCATTGGACTCAACCAAACCGCTACAAACTGCTAACAATGACTTGGGGATCCGGCTCGGTTCCAGTGCC  
GGGCTCAGTCAAAGGTTGGGCATACGCACTGAGAATGGGGGCCAGATCACGGGGCAACCACCAGCTGGC  
CGGACGACCCAAGCGCTGGGCCAGCGCTGCAGCCGATCCACCCGGCAGGGTCGAGGGCGGTGAGATGA  
CTCCACAGCACATTTGGGGGGCAAGGCGGCCACCACCTGCTGCAAGGCTAGAGGAGCCGATGGGGAGGCC  
ACACCAGCAAGGTGCCGGTTCAAGAGGCAGCTCGGCAAAGGCGCCAACGCTGTCTGTGGTGATCACCCG  
CTCGATACTCCCCTCCCCCACAGGATCTTGCCAAGACCCGCCAGGGTGCCTCGGGCAGCGCCACCTCC  
CCCAGCGCCTGCAACCAGGGGGCTGCGTCGATCAGGGTGC CGCCGCTGAAAAAGAGGCTGAACGGCTGGG  
CGGCGCGCAAGCGCAACAGCTGATCGGCGCAGAGCCGATCCCC TGTCTCGAAATCGATCTGCTCGTT  
GGGGGTGAAGTTCACCTCGCTCTTGCGATAGAGCGCCGCCAACACCCGTTGCTTGACCTGCTCCCCAAT  
TGCCAGCCCTGAGCATGCAACC ACTCCTCGGGCTCGGGGGGCGCGGTGGCGATCTCGGCCAGCATCAGCT  
CGCGGGTGAGATAGCGCCGTCCGGCCGGGGTGAGCTCATAGCTGTGGCTGCCATGGGCGAGCAGCAGCTG  
GTTATCCTTGAGCAGGCCACCAGCGGTTGCCACTGGCGGCCACGGATCACCAAGGTGAGTGGCTCAGC  
AACTGCTGCGCCAGCGCCCGCATTCCGGGTGACTAAAAGTCGATCAATTACAATCCATCCCTGT CAGTGC  
TCAATCGGATAAACAGCCTGAAAAGGTACCGTTACAGGCCGATGACACCAAGCCTCCCGCGCCAATTACG  
TGACCTCGCTCCCTGCAATTTCCCCAAACAGAAGAGCCACCCTGGGGCGGGCTCTTCCCTGGATAACAC  
TCGATGCTTATTCGAGCTTGAGACGCAGCTCGGCGTCGTTGCCAACCCAGTGGCAGGGTCAGCAGCTGATC  
GATCAGCTCCCGCGATCGGATTTCTCCAGATAGCGGAGATAGAGCGGACGGCTCAGCGGCTGGCCCCC  
TCCACCAGATGCAACGCCCTTTCTCGAGGAAGGGGCTGACCATCCGCCGTGGCAGGTAGGCAGCACCAC  
CGTTGGCCAGCACGAACTGCAACGCCATGCTGGCGGAGCTGGAGTGCAGCACCGGGGTCTTTTTGCAGGCT  
CTGCAAGCGGCTGGGTTGCGGCTCGAAGCTGGTGCCCCAGTCGAGGTGGATGTGCGGCATCTGCATCAGG  
TTGTGCGCATTGGCGGCCGGATCCCGGCTCACCAGCTCGAACACCAGCTCACCGATGGGATGCAGTGCAA  
TCTCGTCGATCTTGGTGGGCTCGGAGAGCAGGGCCAGATCGAGGGAGCGCTCCAGCAACTGACGGCAGAG  
GTGCTCGCGGGAAGCCGTTTTCCAGCCGACCGCCAAACCGGGCGCCAGCGCATAGATATGATTGAGCCAG  
TCGTTGAAATCGAGCTCCAGAACACAGCGGGTGCGCCGATAGCCAAC TGTGGCTGAATCCTGGCGAGA  
GCGCCACATCCTGCTTGGCAGCACCAAGGGTGTGCAAGATGGCGTCTGCGTAGGGCAGCAGACGCTCACC  
GGAGGCGGTGAGGCGGATGTTGTTGCGATGACGGGCAAACAGACTGACACCCAGTTGCTGCTCTAGCTGG  
CGGATACGGAAACTCACCGCCGACTGGGTGAGGTAGAGATTTTCAGCAGCCCGGCCAAAGTGCCGGGTCT  
TGCTCACCTCGATAAAAGGTCCGAAGCAGCTCGGTATCCATTAATCGATGGACTCGTCACTGCCACCACCG  
CTGCCACCACCGACATCAAAGCTGCCGCCACCGCTGCTCTCTTCGCTGGCACCGCCAACGACGGTGCAGA  
GGCGATGAACGCGCTTGGGACCGATCACCTTGAGGTACTTAAACCACACCTTGGCATGGGGGTTGGCACC  
GGCTGCGCCGATTTGACCTGTTTCGACGAAGGCGGACTCGACATCGTCACGGGGTGCAAGGTTGCCCTGG  
TAGAGTGCCAGCATGGCGGTACCATATTTTTCCAGACTGTCCGCTTCGGCCACAGTGAATTCGCCACTGC  
GACGCAAGGCCAGGGGAAAATGTTTGAAGTCGTTGAAACGCTTGTCTGATTCGAAGCTCATAGTGTCTTT  
TTTTCTGGTTAGTTTGACCTTTGCGGGCAAGTATCATCAGGCCATCGCCGAGTGCAAAAATCAATTTTCTC  
ACTATGTTAATAAATAATCTTTTATCGAAGTCACTTTGCCCCATCGTTGACGCGGATTTTGTGGCATAACA  
CACAAAAACGTTGATAAAATAAATAA ACTTATGTAAAACATGCAGCCAATTTGCACGTCACTTTTTTGGACTG  
TGCAGGCAAAAATAAAGCGCCATACGGCGCTTTATTTGTACACATCAGGTGAACCAGCTGAACCTTTGGTT  
CAAACATGCTTACTCAATCATGGCCGGTTGGGCCAGGTTGTCTGCACGCCACAGACGGTAGCGCACTTCA  
TACTCCTGCGGCACGTAGATCACGAACGGCAGTTTTT GAGTTGTAGTTTACGAAGAAGCCCTGACCGTAGA  
TCTGGACGAAGGTCTCTTTCTGCTGGTTATCCGGGCACATCATCAGGGTGTGATGGGGTTCGGAGACCTT  
GCCCAGTTTTCAGGTAGTTGTAGCCCCAGCCTTTGACGCTGTGCTGTTCCAGGTTGCCTGCAAAACGCGGT  
ACGTTGCAATCAACCATCATCTTTTTGCCGACCTGCAGCTCGACCATCATGTGGCTTCTTTCTCGACTT  
CAGGCAGGCGGATCACACACGTTCTGATTACGCTCAGCGGCTGGGAACATGCTGATATCAAATTTTTT  
CGGCTCGGCGGCGAAGGCATGGCCACCCAGCAACAAGGCGCCAGCAGGCTAAAACGCAATACGGTTTTTC  
ATCTGTACCTCATGGGGTTGGTTCAACGCCGCTAGACTAACCGCTCTGCCGATTTTCATGCCAGCGATCTG  
CTACGTAAAAACTGCGTAAAAATGATGCAGATCCGGCACACCATGACGTGATCTGGCTATTTTTCTGACAGG  
GCGCACACTCCCGTTGCGGGAACCTGAAACAAAAAGCGAGGCCAATTTGCCTCGCTTTGCATTCAAATGG  
CGCCAGAGTGCTATTTGGCCGCTCTT GATGGGCTTGTGATGACGGCCACCGCCTTGTGAGGGAAGTCACT  
GAACACCCCGTCCACATCGGCTTGATAGAGGAAGATGTTGAGCAGATCGGTGAAGTCCCTGGCATAGGCC

GGGATCTGCCCTCATCCTGACGGAAGGTATAGGGGTGAACTTTCAGGCCGCCGCGTGGGCTTCTTTTA  
CCATGCCGGTGAAGACCGGTTTTGCCCAAAGTGCCCGCTCGGTGACGATCATCGGCTTCCACGGGCCAAT  
CCCTTCGGCATAGCTGGCGATGGTTTTTCATCGCTCCCGCTTGAACATCCAGTCATAGTTGTAGGGGGTC  
GCCTTACCCTTGGCGTCGTAGACCATGGTCTCGTTCAGTCCGGTCTCGGCCATCAGCTGCACCAGTTTCA  
GATCCATAACCCATGGCGGGCATCAGCTCGCTGTTGATGCGCTTGAGTTCATCGGCATCGAAGCACTGCAG  
ATAGACCTTGTTCATCCTTCCCGGTGTAGCCGTACTCCTTGAGCACCTTCAGCACCGCCTTGGAGATATCC  
TTGCCTTCGTGACGGAACAGCCAGGGCGCCTTGATCTCCGGGTAGATGCCGATGTTCTTGCCGGTGCTCT  
TGTTGAGCCCCGAATCATCTCGATCTCCTCCTGGAAGGTGTGGATCTTGAAGTCTGACTTCCAGAGTGG  
GAAACGGGCTGGATAGACCTGCACCTGCTTGCCATCAACCAGCTGGAACGGCTCGGTCATGCGCAGGGAA  
CGCACCTCGTCCAAGGTGAAATCCACCACATAATAACGGCCGTCCGGACGGGCACGGCCGGGGAAGCGCG  
CCGCCACATCGGTGATGCCATCGAGGAAGTGCATCGTGCATCACCACCAGCTGGTCATCCTTGGTCATCAC  
CAGATCCTGCTCCAGATAGTCCGGCCCCATGCCGTAAGCCAATGCCCTTGGACTCCAGGGTATGTCGGGC  
AGGTAGCCGGAAGCGCCACGGTGGGCGATCACCACCTTGCCCTTCATCGGCAGCCAACACGGGTAATGAGA  
GGGATGCCCAAGGCTCAAGGCGATGAGGGAAACGGCGAGTTTTTTTCATATGTGATGCTCTTTATTATTG  
TGTGTAGGTAATTGTTCTATCAGAGGTTTGTGTCATATTTACGGTGGAAAAGCGGTGGGCAGCAGCGCACT  
GCCCACCGTCACTCATCAGCTCGCCTTGCGCAGAGCCTGATGGTATTTGGTCGAGCCAGATCTGCAGCATC  
TGCTGCTCTGAGTCGTTAGGCGCAGCCCCAGCTTGCTGCGGCGCCAGAGGATATCGTCCAGTGAACAGG  
CCCCTCCCGCTCGATGAGATAACGCACTTCCGACTCGTAGAGGCCGCCACCGAAGTGAATGCCGCGATC  
CTCTTTTCAGCCAAAGACGGGCATGGGCGCCATAGGCCTCGGCAATACGCAGGGCGCTGCGATCATCGAGC  
CAGTCAAACCTCCAGCGCAAAGGCGGGCCAGCTCGCGCACCAGCAGTCAAACCTCGCCGCCGGGCAGAC  
GGCTGGTCGCCGTCCAGTCCATCCCCATCTGGCTGAACCAGGGCTTGAGCTTGTGTCAGGCGGCCCTGCGC  
CAGCTTGCGATAGGTGGTGGTGGCTTGCCGCCAAATACCGAGAGCAGCGGCGCACCGTCCGATTCCGCCAGAG  
AGTTTCGAGGGTGTAGTCGCGGGTACCAGCCTGCGGCGAGTCTGACTCGTCATCACAGAGCGGGCGCACCC  
CGGCGTAAGTCCAGATCACATCTTTTCGGAGCAATTTGGCGAGTGAAGTGGGCGTTGACCACCTTGCACAG  
GTAATTGATCTCGGCCTCGCTGATCTTCGCTTCCCGGGGCTGCCGTGGTGCCTCCACATCAGTGGTGGCG  
ATAAGGGAGTAGTCTGCTGATACGGGATGACGAAGACGATGCGATTGCTTTCGTTTTGCAGGATATAAG  
CCTCTTCGCGCTCATGGATGCGCGGCACTATCATGTGACTGCCTTTAATAAGGCGAATGCCGCGGGGGGA  
TTTTCTCGTCAGGCTCTCGTCATAGAAAGTCTTGACCCAGGGGCCCGCCGCAATTGACCAGACCACGGCAG  
GTGACGGTGAAGTCTCGCCCCCTTCCCGCCAAAGTGAAGTCCAGTGTGTTGGAACCGCGCACCGCCCT  
TGATGCAACGGGTGCGGGTCTGCACGTGCGCCCCCTTGTACGGGCCATCATGGCAATTGAGCACCACCAG  
CCGGGCATCGTCGACCCAGGCATCGGAATATTCAAACCCCTTATTGATCCCTGCGGTCAACCCATCTTGT  
GGCAGGAAGCGCACGCCACAGCTCCCCCTTGAGCTTGTGCGCTTGGCCAGATTGTCATAGAGGAACAGAC  
CGGCGCGGATCATCCAGGCCGACGCAGGTGCGGGCGGTGCGGCAGGCGAAAACGCATGGGACGGGCGAT  
GTGAGGCGCCATAACCGAGCAGCACCTCACGCTCCGCCAACGCTCTTTACCAGCCGGAATTCGTAATGT  
TCGAGATAGCGCAAACCGCCGTGGATCAGCTTGTGAGTTGGACGAGGTGGCAGAGGCGAGATCTTGGC  
CCTCAAACAGGGCAACCTTACAGCCCCGCCCTGCGCATCGGCTGCGATGCCGACCCCGTTGATGCCGCC  
ACCGACGACGACCAGATCATAATGTTTCGCTCATGTTCACTACTTTTATTTTTATGATTGCTATAACAGC  
AATGTTTTGATTTTCGCTCATTTTTAGAACATGAAAATACAACAAGCGAACATTTTTATGATGAAAGTGTGATC  
GCCACAGCCCCGCCAGAGGTGGCAAAGGGGACAGGTACGCGGAGCAAATGGCGTCCGGGCCAACATCGGCGG  
GTTAATAACCAAAAAAACCAGATTGAATAGTGGTTTTTGGCAATACCCAGAAAAGGGGGGAGATGAGTGGCG  
GGCTAGGGGAGAGAAAAGATAAAGGAGGCCGCCCTGACGGGCGACCGGCACAGCCTTTACGTGTTTCGCGG  
TCAGCAGATGTGGCAGGCAATCTGGTGTTCGCCATCAATCGCGTCAGCTTTTCCGGTGGCTCCTGATCG  
GTAAAGAGGGCGTGGATCTGGCTGAGATTGCCAGATTGACCATGGCATTGCACCAAACCTTGGTGTGGT  
CGGCGGCAAGGAACACCTGACGGGAGTGGGCGATGATGGCCTGGGCAATCTTACCTCGTGATAGTCGAA  
ATCGAGCAGGGAGCCGCTGTTGTCGATCCCCGAAATCCCGATGACACCATAGTCCATGCGAAACTGACCG  
ATAAAGTCCGCGGTGCTCCTCCCCACGATGCCGCCATCGCGGTTGCGGATCTCGCCACCGGCAATGATGA  
CGGTGAAGTTCATCCTTGGCCGTGAGAATGCTGGCCACGTTGAGGTTGTTGGTGCATACGCAGCTCGCG  
GTGATCGAGCAGGGCACGGGCAATGGCCTCGGTGGTGGTACCTATGTCGATAAAGAGCGATGAACCGTGC  
GGAATATTGGCAGCGACCTCGCGGGCGATGCGCTCTTTCTCCTTGAGTTGCATCACTTTACGGGCGCTGT  
AGGCGGTATTGACGGTACTCGAATGCAGGGAGGCACCGCCATGATGGCGCCGGATCTTGTCTGTTTCGGC  
GAGATCGTTTCAGATCCCGGCGAATGGTCTGGGGGCTGACGTCAAAGTGGGTCACCAGATCGTCCGGTCCAG  
ACAAATCCCTGCCGCTCAGGACGTCCAGGATCTCCAGATGTCGTTGGGTTTTGCTTACGCTTGCACCTCC  
GATGATGAGACAAAAAAGGCCCGGCAGATGCGGGCCTTTTGGCAGTTTACCTGATCCCCCTTGGGAT  
CAATAAGCTGAGGATCACGTTTTATGCCTTATGGGCAGCCGCTTTCTTGGCCGCAACGGCAATGTTCTCA  
TGCTTGAGGGTTCATCGCCAGCAGGATGATGGAGAGCACACAGGAGACTGTCAGCACCATGAAGCCGCCAT  
CCCAACCGAAGTGGTCAACGGTATAACCCAGCATGGCGTTGGCTGCCACGGCGCCGCCAGATAACCGAA  
CAGACCGGTGAAACCTGCCGCGATACCGGCTGCTTTCTTCGGTGCCAGCTCAAGAGCATAGAGGCCGATC  
AGCATGACAGGGCCGTAGATCAGGAAGCCGATAGCCACCAGCGCCATCATGTCGATGGTCCGGTTGCCGG  
CCGGGTTGAACAGTAAACCAGCACAGCCAGGGTACCAGCACCATGAACAGGATACCGGCCGGGGCACG  
GCGGCCTTGAACATCTTGTGAGAGATCCAGCCACACAGCAGGGTACCAGGAATACCGGCCACTCGTAG  
AGGAAGTAAGCCAGGAGGAGTTGTCGACGGTGAAGTGCCTTGGCCTCTTTCAGGTAGGTTGGCGCCAGT

CCAGCACACCGTAACGAATGAGGTAAACGAAAGCGTTGGCGATCGCGATGTACCACAGCAGTTTGTGTG  
CAGCACGTACTTGACGAAGATCTCCTTGGCGGAGAACTCCTGCTCGTGGCTCTCGTTGTAATCCTTCGGA  
TAGTCGTTCTTGTACTCCTCGATGGGAGGCAGACCGACCGATTGCGGGGTATCACGCATCACGAAGAAG  
CGATCACCGCGATGGCGGCCGCCGCTGCCGAGGCACATAGAAGGCGCTGCGCCAGTCGTTGAACCAGCC  
CATCCCCGAGGATAAACAGCGGGCCAATCATGCCGCCACCCACGTTGTGCGCCACGTTCCAGACCGCAACC  
ACTTCGCCCGCGCTCTTTCTGTGACCACCAGTGCACCATGGTGCAGCCGAGGGCGGCCAGCCCATGCCCT  
GTGCCAACCGTTTCAGGAACAACAGCACAAACATGATGGCAATGCTGGAGGTGGCCAGTGCATGGTACC  
CATCATGAACATGATGGCAGCCGAGAGCAGCAGACCCGGCGGAGAGGAAGTAACGGGGCGTTGGAACGGTCA  
GAGACGTTCCCCATCAGGAACCTTGACAAAACCGTAAGCGATGGAGACCCCGGAGAGCGCGAAACCGAGAT  
CACCACGGGAGAAGCCCTGCTCGATCAGATAGGGCATCGCCAGACTGAAGTTTTTCCGTACCAGGTAGTA  
GCCGGCGTAACCGAAGAAGATCCCGAAAAACCTGCCAACGCATGCGTTTTGTAGAAGGGGTCGACCTTG  
TCAGCCGGGAGCCTGTGATGTGCGCCGAGGCCGTAAGAGACTAAGCATGTTCTGCTTCCCTATTGTTG  
TTATGGGCGGTTGAGGATGCCCTGACCATTCCAACGAATCATGTGAGTCCACTGATTCGTAAGCGAGCCA  
ATTGTGCTCATATGCGCTCATTTAATCTGTGATGCATGCTCAAAATATTGCAGTTTTATTACAAATAAAAG  
CTCAAATGAGAAATCAATCAGCAAGCGCCAGCCCTTGTGTAGCAAGGGTTGCAGGCCACCCCCAAGTG  
GTAAGTACGCGTTATCAAGATGCTTTACGTCACATTTTCTTAGCAATGAGTGGGATCTTGTCCACATTT  
CTATGGAGGGGGATGGTGAATTTATTGGGAAGGGTTATTTTCTGTCACGACCGATAACGAGCGCAAACG  
AGCATAACGTTTTGCGCAAGACGCAAAAAAACAAGGAAACGTTTTTCGGCAGCAACGGATAGACAAAAA  
GATAAACGGAACATCAAACCTCTACGGGTGGATATAAGGAACAAAAGTATGAGCATACAAAGACCCAAT  
ACCCTGCTTGGCGAGTGCATCGCCGAGTTTTATCGGAACCGGCCCTGCTGATTTTTTCGGCGTCGGATGT  
TGGCGGCACTGGTGTGTCAGGCCCAACTTCGGGCAGTGGGAAATCTCCATTACCTGGGGTCTGGGTGT  
GGCCATCGCCATCTATGTGACCGGGCGGCATTTTCAGGTGCCACCTGAACCCGGCTGTAACCCCTGGCACTG  
ATGACCTTCTGCGGGTTGCAACAAGCGCAAGGTGGTGCCTTACATCATCGCCAGATGGCCGGTGCCTTCT  
GCTTCGCCGCCCTTGTCTACTTCTTTATGGTAACCTTTTTCAACCAGTGGGAAGTGACCCATAACGTGGT  
GCGCGGCAGCGTCGAGAGCCTCGGCACCGCCGGGATCTTCTCCACCTACCCCAATGCCCTGCTGACCAAC  
ATGCAAGCCTTCGCCGTCGAGCTGGTGTACCCGCCGCTCTGATGCTGGGCATCATGGCGCTGGGTGACA  
ATAACAATGGCGCCCCAAAGGTTTTCGCAGCCGCTCTGCTGATCGGTATCCTGATCGCGGTGATCGGGCG  
CTCCCTTGGCCCGTTAACCGTTTTGCCATGAACCCGCTCGTGATTGTGGTCCGAAACTGTTCCGCTTC  
TTTTGCTGGCTGGGGTGTGCTTGCCTGACCGGTGGTGGTGACAACCCCTACTTCTGGGTTCCGATCCTTG  
GCCCCATCGTTGGCGCCAGATTGGTACCGCTCTGTATGTCAAAGTGCTGGCTCCCTGCGTCCCGGGCAA  
CCGTGTCTGTTACCACCGAGCAAGCGACCCAAACCGCCAAAGAAGAGGCTGCCGCATAAGAGCGGCCCCCT  
CCAACGTATAAAAACGTGGAAAATAGAAAACGTGGAGAACATCATGTCTGCTGAAAAGAAATATGTCGTG  
CTCTGGACCAGGGAACCACCTCTTCCCGGCCATCGTGTTTGATCAGGATGCCAACATTGTCCGGTACCTC  
CCAGCGGAGTTACCCAGCACTACCCGAAAGCGGGCTGGGTAGAGCACGACCCGATGGAGATCTGGGCG  
ACCCAATCCTCCGTCTTTACCGAAGTGTGGCCAAGACCGGCCCTGCGCAGCGAAGAGATCGCCGCCATCG  
GTATCACCAACCAGCGTGAACCTACCGTTGTCTGGGAAAAGGCCACCGGCAAGCCATCTACAACGCCAT  
CGTCTGGCAGTGCAGCCGACCGCCGCCATCTGCGAAGAGCTCAAAGCTCGCGGTCTGGAAGAGTACGTT  
CGCGAGAACACAGGTCTGGTGTGATGCTTACTTCTCCGGTACCAAGGTGAAGTGGATCCTCGACAACG  
TCGAAGGTGCCCGCGAGAAGGCGATGAACGGCGAACTGCTGTTCCGGCACCATCGACACCTGGCTGGTCTG  
GAAGATGACCAATGGCGAAGTGCACGTTACCGACCCGACCAACGCTCCCGTACCATGCTCTACAACATC  
CGCGAGCTGAAGTGGGACGAGAAGATGCTGGACGAACTGGGCATCCCCATGTCCATGCTGCCGGAAGTGA  
AACCTCTTCCGAAGTGTACGGCTACACCACCCGTGGCGGGCGCTCCCGCATCCCCATCGCCGGTATCGC  
CGGTGACCAGCAATCTGCCCTGTTCCGCCAGCTCTGCTTTGAAAAAGGGATGGCCAAGAACACCTACGGC  
ACCGGCTGCTTCATGCTGATGAACACCGGCACCGAACCAGTTCGCTCCAGCAACGGCTGCTGACTACCG  
TTGCCATCGCCCCGAAAGGGGAAGTGAATTATGCCCTGAGGGTGTGTATTTATGGGCGGCGCCACCAT  
CCAGTGGTTGCGTGACGAGCTGAAGATCATTACGATGCCCGGATACCGACTACTTCGCCTCCAAGGTG  
GGCGATAACCAACGGCGTCTATCTGGTACCGCCCTTCGTTGGTCTGGGCGCGCCCTACTGGGATCCGTATG  
CTCGCGCACCATGGTCTGGTCTGACCCGTGGTGGCAACCGCAACCACATCATCCGTGCTGCGCTGGAATC  
CATCGCCTATCAGAGCCGCGATGTGCTGGATGCGATGCAGCAGGACTCCGGCATCAAGCTGGCAGCCCTC  
AAGGTAGACGGCGCGCCGTAGCCAACGACTTCTGATGCAGTTCCAAAGCTGACATGATGCACACCCCGG  
TGGTACGTCAGACCCGATCGAGACTACCGCATGGGCGCCGCTTCTTGGCTGGTCTGGCAGTCGGCTT  
CTGGAAGAGCTCGGACGAGCTGGAAGACAAGTTCAGCGTGGACCGGAGTTCATCCCGCAGATGGACAGA  
GACGATCGCGCAAACGTTACAGCGGCTGGCAAAAAGCGGTTGAGCGTTCACGCCGTTGGGCTGAAGAGG  
ATTGATCGGGCACCCGACATTCCGTTGAGATAAACACCAGAGAGCCGACAGCAATGTCGGCCTCTCTTT  
TTATGCTTTCCCTTGGCGGTTTTCTGCCCCCTTCCCCGCTAATTGCTCCCTCCTGTTTTTCTGCCACCCTC  
TGTTGTTACCATCCGCCACAACGCAATTGAGTTATCTATCTATAATCATCATCTGGGTGCGATATGCGAC  
CTTATTTATGAGGAGAGCGATATGGAGAGGGCGATACACCGTTTTTACACTGCACTCACTCTGGTCAGGGC  
TCGGGATCCGCACCCGGATCCTCGCTGGCGTAGCGATACTGATGGCCATCGCCATCAGCTGCATCACCTT  
GATCCTCGAGCAGATATCCACAGTCAGGCCAGCAGCGGGTTCGAACGCTACGAGCTGCCAAGCAGCGTG  
GATCGCATTGCCAACAGCTGACCGCCAGCTTATCCAGCACCTGACCGAAGCGCAGGGCGTGGCCAGCA  
ACCGTTTTGTCTGACTGGCTGACCGCTGGCATGCCAGAGCAAGAGTGGCCGCCATGGAGCGTTACTT

TCAGGATCTGCAACGGCGGATCGGGCGCAACGTCTTTATCGCCCCCGCCAGAGCAACACCCTGATCAAC  
TTCAGCGGGCGGCCCCACCGCCCAGAAATCGCTAAGCGAATCAGACCCGAAAGATGGGTGGTTTTTCGGCT  
TTCTCAAACGCAGCAAACCTATGAGCTGAACCTCGACATCTCCGATTTTGACAAGCGCGCCTCCCTCTA  
TATCAACACCGCCGTCACCCACGAGGGCAAGACCCTGGCGGTGGCAGGCACCTCCATCGACATGAGCGCC  
CTGAGCAAGCTCATTAGCGGCTACCGGATCGGCAAGAGTGGTCAGGTCTATCTGGCGGACATGGAGGGCA  
ATATCGAGATCCACCCGAGCAGGAGGTGGAGGGGGCCGCCACCACCAGCAATCCTTCCCTCGATACCGT  
CAAGCGGCTTATTCCCAATGCCCGGGAACAGGTGGCCGTAGAGGGCGCTAACACTGGAGGGGCAAACCTAC  
CTCATCGCGGTACGTTACATCCCCACCCTCAACCGACTGCTGATTGGCGAGATCAACAGCGCCGAGCTGG  
AAGAGGGACTGCAGGAATCCCGCCAGCTCATCATCATGGTGTGCTCGCCATCGGCGGGATCGCCATGCT  
GGCTCCGCTTGGCTGGCTCACTCCATCAGTCGCCCCATTGCTCAGGCTGCCGATGGCATGCACCACATC  
ACCGCCGATCGGGATCTGGCGACCCCGCTCGACTTCTCTGACGAGTTCGAGCTGGGATGATGGCCCGA  
GTTTTCAATCAGCTGATCCAGAGCCTGAACCAGAGCTTCTCCCGCTTCCAGCAGTCAAGGCGAGCCCTCTC  
TGCGCAGTCGTCCCAATCCATGCAGCAGGCCAGGCACCTGGCAGGAGAAGCGTGCCAGCAGGCCAGAGC  
ATTGAGGAGCTGACCACTGTGGTCACCACCATCGGCGACAACGCCGAGCAGATTGCCAGCCGCTCGGAAG  
GAGTCAACGACGTAACCCAACGCATCGCCAACCATATGCTCAGCATCGAGCAGGATGTGACCCAGAGCGC  
CGCGCAACTCGACACCTTGGCGCAGCAGCATCGGCAGCTCCTCGGCCCTGCTCGATGAGGTGGTGAAGAC  
AGCAACAACATCACCCAGATCATGAACCTCATCCGCGATGTCTCGAACCAGACCAACCTGCTGGCCCTCA  
ATGCGGCCATCGAAGCGGCCCGGGCAGGGGATATGGGACGGGGCTTTGCGGTGGTGGCCGACGAGGTACG  
CCAGCTGGCGGTGCGTACCCAGACCCGCCACCAAGGATGTGCAGGATCTTATCTTGCCTGCAGGAGGGA  
ACGCGGCAGGCCAGCAGCTCGATGGCAGACTCCCACAACCTGAGCGAAGAGGGATACAACCGGATGAATC  
AGGCCAGAGAGGTGCTGGTTGATGCCACCAGCCAGATCTACCAGACCGCCCTCGAGATCAACGAGATCAG  
TGCGCTGGCGCAGGCGCAGAATCAACAGATGGGGCAAGCCAGAACGGCGCTCGACGAGCTGGCCATGGTG  
GCCGAACACCAGCGGGAACACGCGCAGGAGAGCAATGCCGCCAGCCGCGAACTGTTGAACTGGCCAAGG  
CCATCGACGAGCAGATCCGCCAATACCGGATTGGCTAGGCCCGGGCGCTTCCCCCTCTCCCTCTCAATAAC  
CAAGACGCCACCGCAGGGTGGCGTTTTTCATTTTGCAAAATCATTTTGCTGCGCTCTCGAAACGGGAATGA  
CGACAAAACCTCGCAAGATATTGATAATTAACATGAAAAAATGTGGAACGGCCATTGCTTAGTGATATCAG  
ACTCAACAGAGGGATATCGCCATGAAACCGACCACCACTCAAGCGCCCGTAGCCACGTCGCCACTCAAA  
AAGAGACCTGACCCCGCAAGGCACCTTCTCTGATGATGGTGGCCAGCTAGTGGTGTGCTCACCTGCAT  
GCTACTGGCCGCCACCGTCGCGCCCTCTCTGGCAGTGGACCCCTGCTGCTGACCAATCCGCGGTGCTC  
GGCGGCGCCCTGCTCAGCCGGGTATGGGGCAAACCTGCCCCACTAACTGCGCTTCAGCTCACACACCTTCC  
CGAACCGGCGGCCGACCCTCAAGTCGGCCGTCTGTTTTATCTGCCACCTGGCTCATGCTGATTGGCCGCAA  
CGAAGGCGCGGCTTGTCTTTCGCCAAGCAAACCGCAGCGACTCACCGTTCAAACAAACCGCACAAACCAA  
CCTGCGCTAAAGGGTATGGCTGCCAGCTGCTCTTTAAGAAAAATCGAGCCAGACCCGAGTCGGATATCC  
CGCTGGGCATCGGAGTAGAAGACCGCATTGATGGGGCGGAGGCGCCACTGTTACTGCGGGCCAGCACCT  
CCACCAGCGGCCACTCTCCCGATCCGGCCCGGTATGAAATCTGACAGACAGACGATCCCCCTGCCCCG  
CAGCGCCAGCTGACGCAAGGTTTACCGCTGCTGGCAGCAAACCTTGGGGTATGGCAAAGCGATCCCC  
TGCTCGGCACTGAGCAGCGGCCAGTGATTGAGGTGATCGGGATGCAAAAAGCCGAGTAGCTCGTGACCGC  
TCAGCAGATCCGCGGTTGGCGCGGGGTACCGCGCTCGCTCAAGTAAGCAGGAGAGGCCAGCAGCCGAG  
CCGCGAACGGCCAGCGGCAGCGCACGCAGGGAGGAGTCGGTCAGCTCGCCGATGCGGATGGCCATGTCC  
ACCCGCGCTCCATCAGATTGATAAAGCCCTCCGAGCTGTGCAGCTGTAGCTCGATGGCAGGGTAGCGGC  
GGCGAAACTCGCCGATGATCGGCACCAGCCGGTGCAGAATAAAGGGGGTAGCGGCATCGACTCTCAACAC  
CCCTTCCGGTTGTTCCCGGCGCATCAGCAGATGCCCTCCGCTCGCTCATCTCGGTCAGGATCTTACC  
GCCGCTGATAGAACCAGCTCCCTCCTCGGTGAGGCTGACCCGGCGGGTGGTGGGATTGAGCAGCACGG  
TGGAGAGCTTCTCCTCCAGCCGCTTATGTCGCGACTCACCAACGAGTTATCCATGCCGAGGTTCTCCG  
CGCTGGCGAAAACCTGCCCCCTCCACCACCGCCACAAACAGGGTCAGTTCATCAGAATGGGTCTTTCAT  
GCTGTTATCCGGACAAGAGTAATGGGCATTTATAGGCGCAGCCGCTGTGGATTGGCAAGAGTGGCGGTAG  
GAGAGTTCTTTTTTATACAGAGAAAAGAACGTGACCGCGGGCCACATCATGCTCGCGATTTATCAGTAC  
AATGCAGCCTAAAAGCACCGTATGACACCCTTATTTTACAAAGGATGAATACCATGACATTTGAAGAACA  
GCTGGCCGCGCCCATCAGGAACTGGCAAGCAAAGGGGTATGGCATGCCAACTACAATCCCCCGCTGTGC  
AGGCTGGTACGAGATTCCGTTATCCCGTCCAACCGCTCACTATGAGGGCTGGCTAACCAACGTTCTGA  
TATTCGGCGTCCGTTATGGCCTTGTCTGGGGCATGGTATGTGGTTTTTTCAGCTGGCAACCCATGGGGAT  
AGATCCGCTATTTGCCCTGCGCCAAACAACCTGTTTGCGGGATTTCTCGGCTGATCATGGCATCTTGG  
CTCTGGCTACGGCGAAGCAGCTTAAACTGACCCCGTGGGAACAACCTGCTGAGCCCAGCGATGCTGATG  
ATGAGGGAGACAAACTGAATGAAAGCCCATGAAAAATTGAACTATGTGGAGTTTGGCGCCAGGGATCTCG  
CCGCGACCAAGGCATTCTTTTACAGCCGATTTTGGCTGGCAATTTGTCGATTACGGCACCGACTACTGTGC  
CTTTGCCGATGAAGGGCTGGATGGCGGATTCTATCGTGCGGATCAGTGCAACCTGACCGCTCAGGGCGGC  
GCCCTGCTGGTGTCTACAGCGCGGATATTGAAGCGACTCAAGCCAAGGTGAGCCAACACTGTGGCACCA  
TCAGTCGCCACTATTCGACTTCCCCGGTGGCCGCGCTTTCCACTTCGTTGAGCCCAGTGGCAATGAGTT  
TGCAGTCTGGGCTGAACCGTCCAACCGCTGATATCAATGTACGATAGGTGAAACGCTTACCGTCCACAGC  
ACTTCACGAGCAGAGGCCACACAAATTTATCCCAATGAAAAACAAACTCATAATTTATTATGTGATCTT  
ATGTTGCAGACCAACGAGCTGCATATATTAACATTTAAACTCTGGCAAAAATCATCTTTAGTAGGGTAGA

CTTAATTACTTTAATATCAACAGTCATTTTGTAAAAAACACATCCGGATATATCATGGCCCTACTAAAA  
AACTCTGTAATAACGAGTGTCAACAACCTTAGATAGTTCTGAGTTTTGTTTCAGACGACTTTAAATTGT  
CTTTCCCTGACAATGGTAGCACTTTACTATCTATAGTATTCATGGCAAAAGAAAACACTACTATTTTCATGT  
AAAGGAAGATACAAAAGCTATTACATCAATTGCTAATCACTCAATGCTCTCTTTAGGAGGGCACTCAACG  
AAAGAGTACATAAATGTGTTTAAATGCCATATTTCCCCGGGGGAATATAAAAAACACAGAAATAGTTTCTC  
ATGATGAACTTGATAATGCGATCTCTTACATCCATACATGGACTAAACATATCAGAGAAGAATTAGTTAG  
CGCGAGATATGCTAACAATACCGATCCTGATGACTTTCTTCAAGAAATGCATCAATCCATTGATGATACC  
ATCACCTCCCCGATGAATATTTTACGCCGTTCGGAAGCAGAACTGCTGCATCAAAAAC TAGCGGCTTTAC  
AAGCAAGATTATCTGAGCTGGAATCAAAAATATAATTTAACCTCTGCGGATAAAAATAAAATTAGAAGCTAC  
TATAGAAAAAACAAATCAGATATCAGTGCATTTCCAAAAGGAATTTGGTACAAAACAGCTGTAAGCAAA  
ATCACTAAAACAATAAAGGAAGTGTGAAAAC TAGTGAGGGACGCCAAGCCTTATACGATGTGACAAAAGA  
AATTGATTGATAGCCTCTAAGTGAAATCTTCGGCACCAGCTCTATCGGTGCCACTATTTTACTATTGCT  
GCTCTCCCCTCAATACTGTTTTGCGACCAGCGCCCTGTTTTCCAGCACATCGCGGCAGGCATACTGACCCT  
TCGTTTTTTGCCAAGGAGGTTT CAGATGTCATCACCCGTGATTTGTGATTGCCAGCTTGAAGCCAAACCCGA  
ATTCGCGCCAGTTTTGCGCGCCCTT GAGCCGCTGATTGCGGCCACCTTGCAAGAGGCGGGCTGCCAG  
CGCTATCAGTTGCACCAAGACTTGGACAATCCACACAGCTGGATGCTCTACGAGGTGTGGGAGAGCGAAG  
CTGCCCTTACTGCCCATCAGGGGCAGCCCCACTTTACCGAATTTGTCGCCAAGGCCGAGCCCTGGTTTTGC  
CAGCAGCACCATTGCGCGCTATCAGCCACTGGGCGCTGACTGGCCCTAGAGCCTGTTTTCTGTTTCAGCCC  
ATCAAGGGCCAACCACCACCCCATTTGAGGAACGAGATGATCAATATGCCACCATGGGTCTGGGCACCTT  
CCGCCTGAAGGGCGAGCCGCTGCTTGCCACCCTGACCAACGGTCTGGAGCTGGGCTATCGCCATATCGAT  
ACCGCCAGATCTATGACAACGAAGCAGAGGTGCGCGCCGTGCTGACCCGCGAGCACTGTTGCCCGCCACG  
AGATCTACCTGACCACCAAGGTGTGGACCAGCGAGTTTTGGCCCGGGCAAGCTGATCCCGAGCCTTGAGGT  
GAGCCTCGAAAAACTGGGCGCTGACTATCTGGATCTGGCGCTGATCCACTGGCCCTCCCCAAGGATGAG  
GTGCCGATGGCAGTCTATCTGGAGCAGTTGGCCGAGGCCAAGGCCCGGGGCTGACCCGGGAGATCGGGG  
TCTCCAACCTTACCGTGGCCAGCTCAAAACAGGCTATCGAGATTTTGGGGCCGGGGCCATCGCCACCA  
GCAGATCGAGGTTTATCCGCTGCTGCAAAACCGCAAGGTGGTTCGAGTTCTGCAAAGCCAGGGTATCGCC  
GTCACCCGCTATATGCCGCTCGCCTATGGCAAGGTGCTGAGCGAGCCGCTGCTGATGGAGATTGGCAAGC  
GCCACGGGTATCGGGCGCAGGTGTCGCTGGCTGGCTGCTGCGCGCAGGATATGACAGTGTATCCCGAG  
CTCCACGAAACGGGAGAATCAGGCCGCCAATCTGGCCGCTCTCGATATCACCTTGAGCAGCGAGGAGATG  
GCCGCCATCGCCATGCTGGATCGGGGCGAGCGCTGCGCCAATCCCGACTTTGCCCCCGCTGGGACTGAC  
GCGAAAGGCGTGAGACTAACCGCAAAAAAGGCTGGCTCTGCCAGCAAGCCAGATAAAAACAGGGAGAGCAT  
CATGCTCTCCCTGTCTCTTTTCTTGCCTCACGCTTTGCAGCGCTTGCTGAACGTCCAGCCGCCATATTGA  
TGCCAGATGCAGCCCCGCAATCAGGGCGGTTCTGGCAAAGGGCGGGATCGAATACCTGATTCCAGTCTG  
ATTTTCATATCGACCACCACCAACCCCGCCTTTTGCCTGCGCCAGCCGTCGATCAGTTTTGCCGCTGGC  
TGGTGGATGACTGTGCTAGGCGTATTGCGGCTTGGCATCGGTGTGGTGCACCAGCAGGCCGAAGGTGTGG  
TAATCCGGGTTGGTTCGAGGTGTATTGCAGCATGGGCAGTCCGATCGCTGTTACCAAAGGCGCCGACCG  
GACGCTGCCCCATAAAGAGGTGAATGGCGGCCGTTTTCGCTTGTGCTCATCGAAATAGGCGCCGTTTCAT  
GGTCTTGCGGATCTCGCTGCCCTCCCCGGTCAGGGCAAACCTCGCCGAGGGTAAAGGAGCCAATCACCTGC  
TGGGGCGGGATGCCATACATCTGCTTGGACATCACCCGCATAAAAATCGACGCCCGCCCGGAGACAATCC  
AGGTCTGGAAGCCATTATCCCGCAGATACCCAGCAGCTGCTTCATCGGCAGATAACCGAGCTGATCGTA  
GTGGCAGCCAAAACGGGGATCCTTGCTGCTGTTGACCCAGCGAGTGACCCGCTCGGCAAAACCTCGGTGGTA  
GTCATGCCGCTGTGGGTGAGTCCCACCAGCTTGGCGAGCCCTTCTCCCCGATTTGGCCACGGCCTTGA  
GGTCTGTTGTTTCAGCACTGCCGCGACGATGGGGTGGGCTTCCACTCCGGGTGTTCCGGCGCCAGGCGCTT  
GATCTCGTCCATCGAAACTGCAGCTGATAGGTTCATGGGCGCTT CAGGCCAGAGGGTGCCGTCATTGTCA  
GACACCACATGGCGCTTCTCTGGCGGAATAAAAAGTGGCCTGCTGCTGATCGGTGGCATTGGTTACCCAGC  
GGGTGATCGCCTTGGCTGCGGTGTCATTCCAGCGAGAGGGGATCGCTTGCCAGCCTGTACCCG  
AAAGGCGCCGACAGCAGCAAAAAGAGAGGAGTTCGGTTCAATGTCATCATGTTACCTGTCAGCTGGATA  
TTGCCTGTCTATTGCTGTAGATGAAAAGCGCACGGCCATCACAAACCCGGCGCGCATGGGTTCAACACAC  
TCGGGTTTTACAGGGAAAATCCTATGGCGGCCAGCTTGTACTGGAGCTTAAGCAAGCTCAGAAAAGGAGC  
AGCGTTCATCCCGTTTTTGCAGGACAGATCACTGCGTTGCGCTCACGCCGCGGGCAGCACAAATCCCCTCCC  
ACTCAGCGTTATTGCTGCTTATTTGGCAAAGTAATTTGATGTCACCGTCATTTTTTGCCAAACAAAACCCA  
TCGGCATACTGGCGCCATTCTCCCGTCGGGAGTCCCAAACCAAGGAGTTGTTATGCCACTGGCGTTATTT  
GCCCTTACCTTAAGTGCTTTTGCATCGGCACCACCGAATTTGTGATCGTGGGGCTTATCCCTACCATCG  
CCGAGCAGCTCAGTGTCTCGCTCCCCCTGGCGGGCCTGTTGGTACGCTCTATGCCCTTGGCGTAGCCAT  
CGGCGCCCCCGTGTCTACGGCGCTCACCCGCAAGGTGCCGCGCAAGTGGTGTGTTAGGGTTGATGGCG  
CTCTTTACCGCCGGCAACCTGCTGGCCTGGCAGGCCCCAGGTTACGAGAGCCTGATTGTGGCCCGCATCC  
TGACCGGATTGGCGCACGGGGTCTTCTTCTCGGTGGGCAGCACCATAGCCACGGGTCTTGTGGCCAAAGA  
GAAGGCGGGGAGCGCCATCGCCATCATGTT CAGCGGCCCTTACCGTGGCGCTGGTGACCGGCTACCGCTC  
GGCACCTGGATTGGT CAGGTCTTTGGCTGGCGGGAAACCTTTCTGGTGGTAAGTCTGCTCGGCCCTCGTCG  
CCATGGTGGGTAGCCTGCTGCTGATCCCGGGCAACCTGCCAAGGGGGCAGCCTCCACCATCCGCGAGCA  
ACTCTCGGTACTGACCAAGAAGCCGCTGCTGCTGGTCTACGCCAAAACCGCCCTCGGTTATGGCGGTGCC

TTCACGGCGTTTACCTTCCTCGCCCCATCCTGCAGCAGGTGAGCGGTTTTAGCGCCGGTGCGGTGAGCC  
TGATCCTGCTGGTCTACGGGGTATCGGTCGCCGTCGGCAATATCTGGGGTGGCAAGCTGGCCGACAAGAT  
GGGCCCATTGCTGCGCTCAAGTTGCTGTTTGGCCGCTGGCGCTGGTGTGCTGGCCCTCACCTTCACC  
GCCCCCATCCGGTGTGCGGCTGCTCACCGTGTGGTGTGGGGCGCCTTTGCCCTTCGGCAACGTGCCGG  
GTCTGCAGGTAAGTGGTGGTGAAGCAGGCCGAGCTGCACACCCCCAAGGCGGTGGATGTGGCATCGGGCCT  
CAATATTGCCGCTTCAACGTGCGCATCGCGCTCGGCTCCGTGGTGGTGGCTGGTGGTTGAGCACCTC  
GGCCTGATGCACACCCCTTGGCTCGGGCGCCCTTATCGTGTGCTGGCTACGGGGTGACCCATGTCAGCG  
AGCGCCGTGAAGCCGTCCGGCTCGCCGCTGTCAAGCATAAGCTGCGCCAGCAGGCGTCACGCAAGGGCG  
TGGCGCCTGTGCAATCGGCGCGGCAGGCTTCTATGCTGTGACACAGCGTCAACCCGGCAACCATTTTCAG  
CAACTGTTTCAGTAACCAAGCCTGTACCCCTCGCATCATTTGCCACGGAGTCTGTTATGAAGGTGCTTAT  
TGTCTATGCCCATCCCGAACCGAAAAGTTTCAACGGTGCCTCTTCTGCCACGCTATCAGGGCGCTGGAG  
CTGGCGGGCCACACAGTATGACACAGCATCTCTATGCCATGGGCTTTGATCCCCGTCTCGGATCGACGCA  
ACTTACAGCCGCCAGCGATCCCGATTTTCTTAAGCTGCAACTCGAAGAGCTGGCTGCCACCGAGCAGGG  
CAGCTTTGCCCGCAGCTGGAGCAGGAGATGCAAAAAGCTGGAGGCGGCCGATCTGCTGATCTTCCAGTTC  
CCGCTCTGGTGGTGGTGGCTGCCCGCATTTCTCAAGGGGTGGGTGGATAGAGTCTTTGCCATGGGGCGGG  
TCTACGGTCAGGGCCATATCTACGAGAGCGGCAAGTTTCGCGGCAAGCGGGCGCTGTGAGCCTCACCC  
CGGCGGCCCTGCCGAGACCTATCTGCCCGATGGCTTCAACGGCGATATCGACGGGGTGTGCGTCCCATC  
CAGCGAGGGATCCTGCAATTTGTGCGCTTTGACGTGCTGCGCCCCATATCTGCTATGCCCGGTGCGGG  
TCTCGCAAGAAGAGCGGGAAACCTGGCTCGCCAGTGGGCCGAACGCTTGGCCAGATTGAGCAGGAGTC  
CCCCATCGCGGTGCGCCGCTACCAGTAACGGCTGATGCAGCTGACACTCCCACCCACACAGCACAAAAA  
CAGCGAGCGGGCCCCCGGCCGCTCGCTGTTTTTACGCTCTGTGCTTATGGTTTTTGTATCCGTGGGCAA  
GCCTTATGCCGCTGTTGACAGCCTGCTTTGCCGGTTCACGGCACGTTTGAGCCAGTAGTCGAGGCTGACG  
TAGCGGCCCCCGCCGTAACCCAGCAGCACCAGCAGCATCACGAAGTAGGTGGCGGCAAACTCCATCCCGT  
TGTTGAGCATCACGGGGTCCCCGAGCTCGGTGATGTAGTTGTAGCGACCGGGGAAGTTGGCGGCCAGCCA  
CTCGATAAAGCCGTTGAGGCGTACAGTGGCCTCCATGCTGCCGGTGGCGATGGCATCCCAGCCGTGCTTC  
AAGTGCACCATGGCGCTCGCCACGCTCATCAGGAAGATGGTGGGAATGGCCATGATGCGGGTAAAGAGGC  
CAAGGGCAATGCAGATGCAGCCAGCACCCTCGGTGCCCGCCGCAAAAAGGCGAGCAGGGTCCGGAAACGG  
CAGGTTGAGCCCTCCTCCGAGACCGGGGCAACAAACAGCGGACCCGTGCCGGCAAAGCCATCACCTTTG  
GAGTGGGGCCCCACATAGATGACCGGAATGAGATAGAGCGAATGGCCAGCAGGGCCAGAAAATCAGACT  
GCTTGCAGTGGGCTACCGCCGCTCGTACCCTGGATCAGGGTGTGTTTCATGGGAATTTCTCCTGGTGT  
TTGCTAAATGGGTGCAAGGGGGCGCCGGCTGGCGCTCACCGACGGGCAGGATCAACAGACCCAGTCCGT  
GAAAATGGCGTGCCACTCGCTCAGATCAAAGTGCCTGCGAACCTGTTGTACCTGTTGCAGGAACGCGGC  
TTGGGTGATCCCCGTTGCTGTTGAGCAACTGGATCAGCGCCACATCCCATTCCGCGCAACCGTGGGT  
ACCACCTGATGCTCCGGGCTGCGAAACAGGCCATAGAAGTGGTTGCCCTGCCGGTCCGGCACCACGCCG  
TGCGACGAATGGCAAAGGGGAGCTCCAGCAGTTGCAGGGTGGGATTGAGCACAAGCGAACTCTCCGCCG  
CACCTCCGCCCCGCAATAACTTGCAGCACCACCCCTTGGTCAATCTCGACACAGAGGCAGGCCACTCA  
TACTCCAGCAGCGCCAGCCGCTGCCTGGGCCAGTTGAGGGAACCCCTCACCGTGGCGATGCTGCACATAG  
GGACAAACTCGGTGGCGATATGGTGAACCTCGGGGGCTCGGCGCCGTGCGCGATAACAAACCCCTCCAC  
CAGCTGCCCTCTGTCCACCGGCGCCAGTGAGCGTGGGTGAGCGGAAAAGCGCTCTCCAGCACCAGCTCC  
ACATTGGCGCGCACGCTGCGGGCATAGTGGCAGGCGATGCCATCCTGCGCCAGCTCGGCCCTCCAGCTCTG  
CCAGCGGTGGCAGATGGTGTATCCCGCTCCAGCAACAGGGGGCGCAGGCCGTGGGTCTGCACCGTATAACG  
GGCCAGCGCCACCACCTCCTCGCACACCGGTTTGGCATGGGTATCCAATAAAGTGGCGTCCGCCCTCTTC  
AGATGGCCGGCGATATGGAATAGCGGATCGCACTGCCCGCAGCCCGGCGATCATCCGCTTGGGGCAGT  
AACCGTGGTTGCGGCTGTTACAAAAGACGTTGTTGATATCGAGCAGCAGCTCGCAGCCGCTGCGCGCCAC  
CAGCTCGGCGAGAAAATCCTCCTCCGGCATCTCGTGGTCAATAGCCGTGGTAGTAGGAGATATTTCCAGC  
ACCAGCGGGCGGGCCAGCCCTCCTGCACCTCGCGATCCGCTCTGCCAGATAGGGGATGTTCTCCACT  
GACGCGGCACCGGTAACAGTTCTGTAGAGATAACCCCTGCTGGTCACGGGAAAAGCTCAGGTGCTCGCTGTA  
GATCCCAGATGCCGAACCTGTCAGAAAAGGTGCGGATCTGGTTGAGCAGGGTGCATTTGAGCGGCTGGCAA  
TCACCGAGGGAGAGGCTGAGGCCGTGGGCCACCAGCGGGTAACGCTCGGCCAGCTGATGCAGCTGCGCCC  
GCCTGACGCGCCGATAGCCATCCAGTTCTCCGGCGCCAGCTCGAGAAAAATCGATGCCGGGGCGGACGGG  
GCCGGAACAGAGCGCATCCAGATGCTCCTTCCGAGCCGATCCCCGACTGCGGGAGCTTATTGGCCGC  
ATACCCCTCCGTCATCTTGTGCTGCCGTTGTTGGAACCGGATCTGTGCGCATCAATCCCTCGCCCGCCAC  
GCCACACTTGCCGTGCGGGCACGTACCAGCCGCCCTGTGGGTCACTGTGAGGGCCTGCTTCTCGAAG  
CGCTTCTCGGTGCCGACTTGGCCGCCGACACTTGCAGCCGTGCTGTTGCTTGGCGCCGCTTTCACCG  
GCGCATCACTCGGGGTGGCCGCCAGCGCCAGCCCCGGGTGAGGGCAATCAGGCTGGTCAATGGCAATGGA  
GAGGGTCAGTTTGTGGTCTTGTGCTGCTTGGGTACTCATGGGTGGACTCCTTACCGGATGAAACGGG  
GTAGCTGGAGAGATCGCGGGCGGCAATCACCTGACCGCGGAACTGCGACTTGACGATGTCGAGCGCCTCG  
CTCTTGGCGCTCAGCCCCAACCCCATCCAGTGGTTGAGCACCAGCAGCTTGGGGTTCACCTCGGCGGCAA  
TTTTGGCCACCACCGACGGCTTGGCATGAAGCGAGGGCCGAAAACCGGGTCTGCCCCCTCGTGGATGGCGAG  
CGGCATCACAGAATGTGCGGCGCCCCGGGCAAAAATCGAGGAAGTCCGGGTTGGAACCGTTCTGATCCGCC  
GAGATGACGATGCTCCCTTCGGCGCTCTGGATCCGGTAGGCCAGACAGGGCACGTCACCATGGGGGATGC

CGAGCGGGTGATGGTCAAGCCATCCTGCTGATAGACGGTGTGGGGTTTTGGCCCCGATAGGGGACATC  
AATCAGGGTGATGGGAAGAGGCCATCGGTGCCATCCTTGAAGCCGCTCAGGTAGGCATAAGCGCCCTTC  
TCCTTGTTGAAGAGGGCGTCAAAGTAGCCGCTCATGCTGGGAAGGCCGAACCCGCTCAGGCCCGCCA  
GATCCAGCGGATCGCTGCGCTCGAAGAAGTAGGCCCTTGAGCAGGGCGGGCAGGTCGGTCACATGGTC  
GGTGTGAAAGTGGGTAATGCCGATAAAAATCGACCTCTTCGAGCTTGCCCCCGCTGACCGAAGCGCAGG  
TAAACGCCGCCACCGGCATCGATCAGGATGCGGGATTTCCCTTCCACCAGATCACCTCGCTGGAGGAGG  
CTCGCTGATCGTTCGGAGATGGGGCCGCGCTACCGAGCACCTGCAGGGTGAAGTTCTTGTCTGTGGCGT  
CAGTTGTACGCCCTGGCTGGCGGCACCCGCGCGGGCGGCAAGGGCGCAGCCGATGGCCAGCGCCACC  
GCTTTCAATGTCTGTTTCATATTGATTACCTGTGCGTTGAGTGACAGTTTCGCGACTGTCAAGTGAAGTGGC  
AGGGTGGGAGATCGGGCTGCGCCGAGGCAGCCGACCGGGCATGCGGGTCAACCCCGAGATCAGATCT  
GGTCGCGGTTCAGCCGCTTCCAGCGCGCTTCCAGCCAGCAGATTCACAGCCCAACAGGGCAA  
GCCGAGCCCCAGTATCCAGGTGAAGTACCACATGGCGTCCCTTATGGTCAGTAGAGTTGATGGCCGTC  
GCGCTTGATGCGGGCGGGTCGAGCTTGCCGCGCACCACCCGATAGACCAGCCGCTGTAGCCAGGTTG  
ACCGGCATCAGCACCAGCACGATGCCGAACATGATGGCCAGGGTCTTGTAGCTGGAGGTGCCATCCCACA  
GGGTGAGGCTGCTCGCGGCATCAAGGGTTGAAGGGAGCACAAAAGGGGAAGAGCGAGATGGCCACCGAGCC  
AAGCATGGCGATGCAGGCCACCGCGCTTGCACACAGTGCCAACCGTCCGCGCTCCAGCCAGGCGGGGATG  
CCGCTCGCCAGCGGGCGCCAGCGCTCCAATCACCGGCACCAGCCAGAGCAGCGGCTGCTCGTGGTAGTTGC  
GCAGCCAACCGGCGACATGGGGGGTGACCCCTTCATCAGCGGGCTCAGCACCGCATTTGCCGTCAAAGGG  
CTGACCCGCCAGACCGCTCAGCTGATAGCCCTGCAGATCCACCAGATGCCAGCCGCCAGCAGGTAGAAA  
AAGGTACCAGCGGGGCCAGCAGAATGGCGATGCCCCGTGCGCGCACCGCAGGCGCCCCCGTTACCTTGG  
CCTGCAAGAAGCTGGCGCCGTGCAGCAGCAGCAAGGCGATGGCGGTGGCCAGTACCGAGAGCAGCCAGCC  
CCAGTGAAGGTGAACGCGCCGTAGTGCAGACGCAGCGCCGTGTCGAAGCGAAACGGCAAGCCCTGCATC  
ACCAGACCGATGGCGGGCGCAAGGATCAGGGTTCGGTATCAGGCCCCCCGCCACCAACGCCCGATCCCACC  
AGCGGGCCACAGCGGGTTCGGTTCAGCTTGTGCGATAGTCAAAGCCGACCGGGCGCAGAAAGAGGCCGAG  
CAGCAGCACACCATGGGGATGTAGAGCACCGAGAAGGCGGGCGCATAGACCAGCGGCCAGGCGGCAAAC  
AGGGCGCCGGCACCGGCAATCAGCCACACCTGATTGCCCTCCACACCGGCCCCACGCTGTTGATCACCA  
GTCGCGGGTTCGTCATCATCTGCGAGACCACCGGCAGCAGCATGGCGATGCCGAGATCGAAGCCATCCAT  
CAGATAAAGCCACCATCATCGTAAGAGCAGCAGCGCCACCGATGAGTTTCAGGGTTGCGTAATCCATC  
AGGCGATCCTCGCAAGTTTCGGGTTGTTCCACCGCTGTAGCGGCTGGTATGGAGAATGGCGGGCCCTTGGCG  
GATCACCCGGCGCAGCAAGAACAGCTCCACCACCAGCAACAGGGTGTAGATGGAGCAGATGGCGATGAGA  
CTGAACCAGAGCTGGCCCCGGGTAAGCAGGGAGACCAGGCGGCACACCGGCAGCACGTGCTGATGGTCC  
AGGGCTGGCGACAAACTCGGCCACAAAACCAGCCCGCTCAATGGCGATCCAGGGCAGCGGAATGCTCCA  
GAGCAGGGTCTTGAGCAGCCGCGGCGAGTCTTGCAGCCGGTTCGCGCATAGCTGGACAAAACCTCACCACC  
ATCAGCCCCAGCATCGCGACGCCAGCCCCACCATCAGACGAAAACCGAAGAAGAGCGGCGCGACCTGCG  
GGATGGAGTCCCTCCACTGCTTTGGCAATCTCCGCTCCCGCTTGGCGATATTGCTGGCATAGGGGGT  
GAGCAGCAGACCATAGCCGAGATCCTTCCGCTGTTTGGCAAACAGCGCCCGATTTTCGGCCGTGTCGTTG  
CCGGCGGGATCTGTTTCGAGCGCACCGGACGCCACCATGCCGCTGCGAATGCGCGCCTCGTGTGCACCT  
TGAGATCCTTGATGCCGGTCAACCGCTCATCGAGGGAGCGAGTGGCGATGATCCCCATCAGATACGGGAT  
CTTGATGGCGGGTGGGTGGTCTCCCCCTGCTGATCCGGGAAGCCGAACAGGGTGAATGACGCTGGTGC  
GGCTCGGTGTGCCACTCCGCTCGATGGCGGCAAGCTTCACTTCTGCACCTCGCCGGTGGCATAGCCAG  
ACTCATCCCCGAGCACGATGACCGAGAGGATGGCGGCCAGCCGAAGCCGGAGGGGATGGCAAAAGAGCG  
CAGGGCGAACTGCACCTCGGTTTTGCGCAGCAGATAACAGCTGCTCACCCCATCACAAACATGGAGGCA  
GCCACATAACCCGACGACGGTGTGAACGAACTTCACTGCGCCACCGGGTTGAGCAGCACGGCGGCAA  
TATCCACCAGCTCCATGCGCTGGGTGAGCAGGTTGAACTCGGCCCCACCGGGTTTTGCATCCAGCCGTT  
GCCGATCAGGATCCAGAGCGCCGAGAGGTTGGAGCCGAGCGCCACCAGCATGGTACCAGCAGGTGCTTG  
CCGCGGGAGAGCTTGTCCCAACCGAAGAAGAAGAGCCCCACCGGGTTCGATTCGAGGAAGAAGGCCATCA  
GCCCCCTCGATGGCCAGCGGGTACCAGAAAATGTCCCCACGTAGTGGGAGTAATAGGCCAGTTGGTGC  
GAACTGAAACTCCATGGTGTATCCCCGTGGTGACCCCCATGACGAAGTTGATGCCAAACAGTTTGCCCCAG  
AAGCGGGTGTATGCTGATAGATCACCTTGCCGGTTCATCACATAGGCCGACTCGGGCATCACCAGGATCC  
AGGACAGCCCCAGGGTGGAGGGGACAAAAGGAAAGTGGAAACAGGGCCGTGGCGCCAAATTCAGGGCGGA  
CAGGCTGACCACGTATCCGATTGATCATGCGTCACTCTCTTTGTTGTATTTGCCCTTGCACGTTTTCAT  
GCAGGACAAGTACACCAGGGTTCATGACACCTATAACAGATGCAGTTATAGTGAATAGCACCTATAACAG  
TTGATCCGGATCATGCCTCTTTACCAACAACCTGGCCGAACGCTGAGCCGCGAGATCGATGACGGCATCT  
GGCAACCGGGGAACGCATCCCCCTCCATCCGCCAGAGCTGCAAGACCCACAACCTGAGCCCGATGACGGT  
GCTGCAGGCCTATCAGTTGCTGGAGAGTCAGGGGCGGATCCTCGCCCGTCCCCAGTCCGGTTACTACGTC  
AAGGCTGCCTCGCCGAAGGTGGCGCACCACTCCCCGAGCCAGACACACTACAGCGGCTCGGTGGATATCA  
ACGATCTGGTGTTCGAGGTGTTGCAGGCGAGCAAAATCGCGGGATCTGGTGCCCCCTGGCATGTCGGTGGC  
CGACCCGACCCTGTTCCCCCATCCCCAGCTCGGGCGGGCGCTGGCCAGCTGCATGCGCAAGCTCGATCCC  
TTCAGCACGGTGGCCGACCTGCCCCCCGGCAACGAGGCACTGCGCCGCGCCATCGCCAGCGCTACGCCA  
GTGACGGGGTGGCGGTCAATCCGCAGGAGATCATCATCACACCGGCGCCATGGAGGGCTCTCCCTCAG  
CCTGCAGGTGCTGACCGAGCCCGGTGACTGGGTGGTGGTGGAGTCCCCACCTTCTATGGCGCCCTGCAG



GCCATCGAGCGGCTGAAGCTCAAGGCGGTGGAGATCCCGGTCATCCAGGGGTGGGCATCGATCTGGCGC  
TATTGGAAGACGCCCTCAGCCAGATGCCGATCAAGGCGTGCTGGCTGATGGGCAATGTGCAGCACCCGCT  
CGGCCACACCATGCCTGATAGTCACAAAGCGCGGCTGATGGCGTGCTCAACAGCCATGGGGTGCCGCTG  
GTGGAGGATGACGTCTATGCGGAGGTCTACTTTGGCCGCGAGCGCCCAAGCCGATCCGCCACTGGGATC  
AGCGTGGCGACAGCCTGCTCTGCAGCTCCTTTTCCAAATGTCTGGCACCAGGGCTTTCCGGTTCGGTGGGT  
AGTGGCGGGGCCCCATGCCGAGCGGGTGCAGCGGCTGCAACTGATGTCCACCCTCTCCACCAATGTGCCG  
AGCCAGCTGGCGCTGGCCGAGATGCTGCGCCAGGGCGGGGTGCATGCCCACTTTCCGCCACTGCGCCACA  
CCCTGGCCCAACGCCAGCAGCAGATGCGGGCGGCCCTGCAGCGCTTGTCTCCGGAGGAGGTGCGGATCTC  
CTCCCCGATGGCGGCTACTTTCTCTGGCTGGCGCTGCCTGCCATTTTCGACAGCCGCGCCCTGCACGCC  
AAGGCTCTGGGCAGCGGTTTTTCAGTGGCCCCCGGCCCTCTTTTCCAGTCAGGGACAACAACCACT  
GCCTGCGCCTCAACAGCTCCCATCCCTGGAGCGAACAGCTGGAGCAGGCCCTCACCCGACTGGCGGAGCT  
GATTGCGCGCAGCTCGGTGAAAAGTAACGTGGCAAAGAGCTGCTGACGAAACGAACAAAGGCCGTAAC  
GGGCTGTGTAGTTGGGGAGTGACGCACCTTGGCTCGCCATAAAAAACTGATCATCTGGCCATGATCTGC  
GACTGCACCTTGAAACCCAGCGCCTCGTAGAGGGCTTTGGCACGCTCGTTGAAGGCCATCACTTCCAGCC  
GGATTTGCTGAGCATCACGGCCTTGGCCCACTCATCGCAATGGGCGATCAGCGCCTTGCCAATCCCGCG  
AGAACGGTGTGCTCATCCACCACCAGGAGCCGATCCGGCAGATAGGCAGCTTGTGAGAAACGGCACA  
GAGTCATTGATATCGATCCGCGCCGTCAAAAAGCCACCACCCTGCCATCCTGCTCGGCAACGCAGAACA  
GACGCCCTTCGGCGCCGATGGCGTCGAGCAAAAATGCCGCTCCTCTGGCGAAGGGGGGCGAACAACCTC  
GGGATAGTGTGATGGTGGATCTCTCCTATCTGCCGGTTCAGCTCGACAATGGAGTCGATATCCAGTTCC  
CTTGCCCTTGCATCTCCAACGGTTGCTCCTTGCAAAAATGGTGTGATGGTTCTGCGCCATCTTAGGGGCTG  
TGCCCGCAATCCAAATAGGCTTATCCGCATCTTTTGACGAGCAGCAGAAACAACAACGCCCTTGAGCG  
GGGCGTTATCGGCAATCCATGGCGGTGAGGGTATCAGGCGGGTGCCTTAAGCTGGGCCACCTGCCGCTCG  
ATGCTGCCCTTGAGGTTGTTCATCGAGCTTGAGGGCGCGGCCAGTTCGTGAGATAACCAGCGCTCCATAA  
AGTGATCCACCTCGATGGCGAGCAGGGAGGCGAGATAGACCTCGGTGGCCAGCTCCATATCGGTCACTTC  
CCGCGCCAGCGCGTGGGGATCGAGGGGGCGGGCCAGCTCGGCGTCAATCCAGCGGGCGACATCGCTCTGG  
CCCTGTTCCGTACAGTACTCCTGAATTTTCTGGCGCTCGGCGCCGTCGATATGGCCATCGGCCCGGGCCG  
CGGCCACCATGGCGCGCACTAAAAGCGCCGACGGGCATCCAGCGCATTGCCCTCCAGCCACTGATGGG  
ATGGGTAGGCTGGCGGGCGCCGCTGCTGGCCCTGCCAATCCTGATAGAGCTTGTAGGCCAGCCCGCCA  
AGGGCTGCGCGCCCGCCAGCCAGCGCCCTTGCATCTGCCCTTGCCTTGTCTCCGCTTGTCTCCGCTTGTG  
GACCGAGCGCGCCCGCCAGCGCCCTTGCATCTGCCCTTGCCTTGTCTCCGCTTGTCTCCGCTTGTGAGCCA  
GCCTTTGCCAGCCCCAGCAACTGTTCCAGCATCTGTTTCATGGTGTCACTCCTGCGGGTCAAAAAAGTG  
AAATCGGGATGAATAGAGCAAGATAGTGACCCCGCCCCCTGAATCGGGGATGAACCTTGACCGGGCAG  
GCCGATGGGGCAAAGCTCAGGGAACCTTTCAGGCAATAAGGATGTAACCTGTGTCCAATCGCGAATGAC  
CCTGCAATTTCTGGCCGAACCTCCGACGTCAATTTTCGGCGGCAAGGTACACGGCGGCATGGTGTGAG  
TGGATCGATCAGGCGGGCTATGCCTGCGCCGCTGGCTGGTGGCGGGCTATGCGGTGACCGTCTATGTGG  
GGGGATCCGCTTTTTTGCGCCCATCCAGATTGGCCAGCTGGTGGAGGTGCACGCCAGGTGATCCACAC  
CGGCACCACCAGCATGCATCTGGCGGTGGATGTCTACAGCCGCCACCCACCCAGAGCCGAGCGCCACAAG  
ACCACCCACTGCATCATCATCTTTGTGGCGATGGATGAGCAGGGCAAACCGACCCCGGTGCCTCAGTGGC  
AGCCGGTGAGCGAGAGCGATCTGCTGTTGCAGCAGTACGCCAAAAAGCTGATTGCCCTGCGCGAGGAGAT  
CGACAAGGAGATGCGCCAGCACCTCTGACCTTCATGCCTCATAGCCCGACAGAGCGGGCGCTTTCCGGCCA  
ACGGCGGGCGCCCTGTATAATCCCCCTCTTCCCGCAACCGGAACCTGCCCATGTCACTGGAAACTGCC  
CCGCCCGAGGTAAAACCTCGCGGTGGATCTGATTGAACTGCTGGAAACCAATGAGCTGGCTCCCGAGCTGG  
TACTGGCGGGCTGGCCATCGTGAAACAGGATTACGAGCGCAAGCTGGCGGAGGGGAAGGATCTCTGATC  
GGCCCTCACACTTTGTTGCGCTTTTTTCAGACTTCAACTTTTCCCATACCGCAAATTAAGTGCAGCCCAT  
CACCTCATCACAGAGGGCGATCAGGGCCGAATCAGGCGGCTGAGCGGTTACCCCCATCCTTTGCCGCA  
TGGAGCGCCAGCTCCACCGATGCCACCTTGGGCCACTGGGTGAGGGCCAGCTGATCGGCGGGCATCAGCC  
GTTTGGGCAGCAAGCTCACCCGATACCCGCGCTACCCGCCCTTGCCTTGTCTCCGCTTGTCTCCGCTTGT  
ATAGGCGATACGCCAGCGCCGACCCAGACCATCGAGCGTCTCGGTTCATCTGCTGGCGATAGAGCCCTTCC  
CTCGGGAAGGCGACCAGCGGCAGCGGATCACGCCCTTGGCTGGCCAGTCGCGGCTATCGACCCACACCA  
GCGGCTCACTCCAGCTGGCGAGCGGCAGCCCTGTCCGCGCACCTGTTTGACCAGCGCCAGATCCAGCTC  
CCCCGCCGAAAACGCTGCCAGATGTGGTGGCTCAGGCCGCTCTCCACCTCCAGCCGACCTCGGGGTAG  
TCGCGGGCAAAGGCGGCCAGCACCGGGGTAATGGCACCGGCGGCGAAATCCTCCGGCACCCGAGGCTGA  
GCGATATGCTCCCTCGCTCACCTGCTCCTCGGCTGCGCCAGCAGCGCCAGAATGCGGCGGGCCAGCCC  
CAGCAATTTTTCTCCCTCCGCGTTGCCACCACCTGCCGACCGGAGCGGTCCAGCAGTGGACAGCCGAGC  
TGCTGCTCAAGGCGGGCGGATCTGCTGGCTGATGGTGGATTGGGTGAGATGGACCCGTTACCCGCGCGGG  
TAAAGCTGCCGGTATCGATAATGGCGCAAAAACCTGCGCAATAACAGGGGATCCAGCATGGGGCGCTCCAT  
TTACAAAACCACTGAACCCCATTTCTATCATTTAATTTCCAAATGACTTTTCGAGCCCGCTAGGCTGCCGCA  
TTTTGCTCCTTTGACGGTGTATGCCATGTTTCCAGCCCCGATGACTCCGCGTCCCGAATGCATCCCACTTC  
TCCCAGAACCAGGAAACTGCACCCGATGAATCAACGAAATGCGGATCAACCCGCGAGGCCAGACTGCCCTGC  
TGGTGTGGTGTATCCTGATTGGCCTTAATCTGCGCCCTTTCTTACCGCCATCGGCCCGCTGAGCGGCGA  
GATTGGCCGCGCCCTGTGCTCGGGATGGATAACCTGGCCTGGCTCACCTGCTGCCGCTGTGGCTCATC

GGGATTGGCGTGCTGCTCACCCCCAGCCTGCGTAGACGCGCCAGTGCGTGCCAACTATTGGGGGCGGCC  
TGCTGCTGCTCGGCATTGGCAGCGCCATGCGCTTCGATGCCCAAAGCGGCAGCTTGTGATCGCCAGCGC  
GGCGCTCTGCGGCCCTTGGTTGCGTACTGGTGCAGGGAGTGCTGCCCCGCTTATCAAGCAGGCCCTCGCC  
CACAAGGTGCCGTTGGTGATGGGGATCTTCTCTGCTGCATAATGGGGGGCGGGGCGTGGGGGCCAGCC  
TCACCCACAGGCTGGCGGCCAGCCTCGACTGGTGCAGGGCGCTGGCGTTCTGGAGCCTGCCGGTGTGCT  
GGCCCTCGTCTGGCTGGTGTGGCAAGTGCGTCTGCCACGGGCCGCGGCAATCGCCATTCCCCACGGCGAA  
CAGCGGCTGATCACCTGCCACGCAGCTGGTTGCTGATCGTCTGCTTTGGCATCATCAACAGCGGCTACG  
GCATCGTAGTGGCCTGGCTGGCCCCCGCCTATATGGCGCAAGGGTGGAGCGCCGCGCAAGCGGGCGAGCT  
GGTGCCTGGCTGGCACTGGCGCAGACCGCCAGCGGCCCTCGGCCGCTGCTGGCGGCGCGCAGTCTG  
ATCGCAGACCCCTGGATAGGCCCTTGCCATGCCATGCAGCTGGCGGGATTTGGCGGCCATGGCTGGCGC  
CAGCCAGTGCCTCCCTTCTCTGGTGCATGCTGTGCGCGCCGCGTCTTTGGCGGCAGCTTTTTCGTCATCAT  
GGTGATTGCGCTCGATCACCTGCCCCGACCCGCGCCGCGCCGCGCCCTGAGCGCCCTGATGCAGGGCTTC  
GGCTTTATGCTGGCGGCCACCGCCCCCTGGGTGGCGGCACGGCTCTATCACTATGTGAGCGACTTCGCAG  
CTGCCTGGCAGTGGCAACTGGGGGGCTTACTGCTGATGAGCCTGCTGGTGTGCGCCTCGACCCGCGCCA  
CTACCCCGCGTCAATGGGGTTACCGACCGCCAGCGAGCCGACCCCTTTCGGCGCCCCCTCCCGGCCAGCTCT  
GCGGCCCAAAGCAACACACCGGCCCTGAGGCCGGTGTGTTGGGGATAACCGTGTGGGGATGACAAGGTAG  
GCTGACGCCACTCAGAGGGGCAACTTAGCGCCCCCTTCTTCTGCCGTCCTGTGTTAGCGGTGCGCGGCTTG  
CCAGTGGCCGGTTTTGCCACCCTTGGGAGCCCCCTTGGCAGCGCCGCCCTTGTGGCAGCACCTTTGCCCG  
CCCCCCCCCTTGGCCACCGGCAGCTTCTTCTCGAAAGCTTCGGGGCCCGGCACATTCGGGCGACCGCCAAT  
CTCGTGATCGTCATCGCGGCGCGGCTTCTTGCCTGCCCGGTTTGGCGGTTTGCGCCGAGGAGCCTTG  
GCCGCTTCGGTTTTGTGCGCTTTGGCCGGTTTTACCTCGGAAGAGGAGTCTCAATCAGCTTGAACAGAT  
CGATCAGCTCGTTCGTTGAGATCGCGCCACTCGCCCACCGGCAGCCCCCTTGAGGCTGACGTTTATGAT  
GCGGATGCGCTCCAACCTTGGTCACTTCAAAAACCGAAGTGCTCGCACATGCGGCGGATCTGGCGGTTTCA  
CCCTGCACTAGCGTGATGCGAAAAGACAAAACGGCGCCTCTTTCTTCACTTGCATTTCTTGGTCACTGTAC  
CGAGGATCGGCACCCCGGCCGCCATGCCGCGCACAACTCGTTCGGTCAACCGGCTTGTGACGGTCAACAG  
ATACTCTTTCTCGTGATCGTTGCCCGCCCGCAGGATCTTGTGACCAGATCGCCGTGGTTGGTGAGGAAA  
ATCAGCCCCCTGCAATCCTTGTGAGCCGCGCCGATGGGGAAGACCCGGGTGCTGTGGTTGACGAAATCGA  
CGATATTGTCTTCTCGCCCGCCTCTGTGGTACTGACGATGCCACCCGGCTTGTGAGGGCGATCAGCAC  
CAGATGTCCGCTCGCGGCTCGATCACCTGACCTGACCTGACCTGACCCAGATCACCAACCTGCACCTGA  
TCGCCAATCCCGGCCCGCTTGGCGTTGATAAAGACGTGGCCCTGCTCGATAAAGCGGTCGGCCTCGCGGC  
GCGAGCAGATAACCGCTCTCGCTGATGATTTGTTTACGGCGCATGGATTGTTAGCCAGCATGGATCACCT  
GCCACAGGTTCTGGGCCGCGCCCGGTTGTGCCATTGCTGTTCCGGCTGCGCCGGGGAGGCTGTCTGCTG  
CATCAGCCAATTCACACTAGTCAAAGTTCTGCATAACATTCATCTTCAAAAAAGGCCAATGCCAGCTTAT  
CCATCAAAAAACCGCTACAGTAGCATAAATGCCCCCTTTCAGGGGCAGATAGTTGCAAGGTCGCGAGCG  
CCCAAGCGGGCATCTGCGAACAAGTTCACGCCGCGAGATGGCCCGCATGCCGCTTTGAACAACCGGCC  
TGATGCCAACGGCGGGATCAGGCGCCACAGCCTGCGCACCTAACGCCATCAACTATAACATACCTT  
GTTTCCATTAGGCTTTAAGCCGATTGGCCGCGCTCAATGTGCTGCGCCGAACCTCGCCCGCCAAAGGCGG  
CCCCACCCCTATCGCCAAGGATTGCACCATGCTGGCTCACACTCGCCGCTTGTTCGCCGTGCTCTGCTG  
ACCCTGTTGCTGCTGTTGCTGACCGCATGGGCGGTGATCGCCTACTTCGCCCTGGCAGGCAGCGCCGCTGC  
AACTGTGGCACACAGTGGTGCCCCCGAACTCAGCGCCGATGAGCTCGATAGCAGCGACTGGCAAGCCTA  
TCTGGCCCCGGAAGCAGAGCTGTTGAGCTGGTGGCCACCGAGGTGGTCGCCAAGACGTCACCCGAGCAG  
CAACTGGCCAGCAATCGCTACTATCAGGACGCCCCATCAATCCCGCCGCTTTCAGCAGAACTGGAACC  
GCTCCTACCTGCTGCGCCCCGAGGGGGAAGTCAAAGGGGTGGCGGTGCTGCTGCACGGCTGACCGACTC  
CCCCTACAGCCTGCGCCATCTGGCCAGACGCTATCAGCAGCAGGGTTTTATCGCGCTGGGGCTGCGGATC  
CCCGGCCACGGCACCGTGGCCGCTGGCCCTCGTGGATGTGGATTGGGAAACCTGGCTGGCCGCCACCCGAC  
TGGCGGTGCGGGAGGCCAGATTGCTGGCACCGGGCAAGCGCCGCTGCATCTGGTGGGCTTTTCCAACGG  
CGGCGGCTGGCGGTGAAATATGCGCTCGATGCACTGGCCGACCCGAGCGGCGCACTGGCAAAAACCGGAT  
CGGCTGGTACTGATCTCCCCGATGATCGGGGTGACCCGCTTTTGGCCGCTTCGCCGGGCTCAAGGCCGTGC  
CTGCCCTGCTGCCCCGCTTTGCCAACCGCCGCTGGCTCGAGACCATGCCGGAGTTCAACCCGTTCAAGTA  
CAACTCGTTTTCCGGTCAACGGCGCGCGCCAGTCTATCGCCTGACCCACGCCATCCAGCAGCAGGTACGC  
CAACTGGCCGCCAGTGGCGAGCTGGCGGCGTTTCCCCCGCCCTCACCTTCCAGTCGGTGATGGACTACA  
CCGTGAGCACCCGCTCCATCATTGCCGATCTTACCCTACCTGCCGCAACGGCAGCGAACTGGTACT  
GTTTGTATATCAACCGCAGCACCTGTTTGGCCGCTGATGAGCTCGGCCCTCCGAACTGGCGCTACACCGC  
TTGCTGCCAAACGCCCCCAGCACTATCGCCTCACCGTGGTGGGCAATGTGGAACCCGCTCCCCCGCA  
CGCAGGCCAGAACGCTGGCCAGCGCCGACCGCCTGAGCAAGTTCACCCGCTGGGTATCGATTATCCCAA  
GGAGATCTACTCCCTCTCCACGTGGCGCTCCCTTCCCGATGGACGACCCCTCTATGGCATGGCGGGC  
CGCCCGGAGCAGCGGGAGCAATCCGGCATCAATCTCGGCGGTCTGGCCCTGCGCGGCGAGCGCGGAGTGC  
TGATCGTCAACCCCGGCGCCCTTACCCGCACCTCCTCCAACCCCTTCTACCCCTATCTGCAGCAGCGGGT  
GATGGAGACCCTCACCGCCCTCCCATCGCCCCGCTGCTGCCGTACCCCTGCCAGCAACGGTCAACCG  
GATGCGGCTATAAGGCAGAAGTGGAGCAGTTTTTACAGGAGAGCGACGAGAGCAGCGCCCTTCTAGG  
GCATTTCTGGAGTATCGGCAAAGAGCCACTGGCGCTGGGTGATGGCGATACGAGAAAGGGGCCGTTCAAT

TGACGGCCCCCTTTCTGTTGATGATGGCGATGGGAGTGATGGCTTGGTGGGCTCAGGGATAGATGCTCACT  
TCTATCAGGTTCTGGTCTGGATCGAGGAAATAGACAGATTCTATCGGCCACAGGCACCGCTTTTGGTCA  
CCGGCCCCCTCGACAATCTCCACCCCGTGGCAGGCCAGCTGGGCCATCACCTGCTCCAGCGGCCAGCGGT  
GATAAGGCAGACATCCCCGACCCACCTGCGCCCGATTGCGCGGCTCCTGCCCCAGCAGCTGCAGATTG  
ATCTTCTGGTTGCCAAACCCACCGCCCCGGCGCCCCGCACCGAAGGTAATGGCTCCATATTGAGCACCG  
AACTGTA AAAACGCCACGGCCCGTTCGATATCACTGACCGTCAATACCAGATGGTCGATATGGCTGATCAT  
GGTTACCTCCTGGTGGTGTATCTATCACTGCCCAATCACAAGAGATAAAAACCATATTTGATCACC AAATAA  
TGTTAGTGTCTATCTCTTTTTAGAAAAGAAAATTTCAAGCACAAACCGTTAGGTGTCAAGAAAGTCTATTCT  
CTGCAATCAATTCTGCGTTTTCAATTACATTTGACAGAGAACCTGAAAATACCATTCTTGTAAATTAATT  
CTTCGTATCATCATATGAAAATGATAGTAACTCATACGAACCGCTATCTTCATTTTCGAAGATTACCAG  
TCCGTTAGTTACATCACCGCTTATTAGCCATGTCTGATAAAACCAATCAGCAGACAAAACCAATCATAGGG  
TAACGACGATTCAATACACCTATCAAAAACATCAGAATTCATATCACCCACCATACCAGCCACATCATTTTT  
TCAACATTCAGAATCATATCATCCACACATATGAATGGATAATAAAAAATAATATCCACCACACATTTAA  
ATCATACAAAATTGATATAAAAAAGGGGGTTGGGTAAAATAGCATCCTTCAATATTAATGTGATTATTTACTA  
TTCATTCTGATAATTTAACTCACATCCACCAGCAATTTACCATGACTTGTACCCTGGTCAGCCACCAG  
CTGATAACCAGGATCAAACGTTCTGGATCATGTGCAAGCGCCCTTTCAGAGCACACTCCCAGATCGTCA  
AACGGCGGATCCCCAGCTGTTCAAGCTCGGCTAGGTGACGAGCATCACGCGCAGATTGCTGGCAATCTT  
GGTCTGCCAGAAGTCGGTTCTGGTCGATGGGAGTTTGAAGAGATGGCAGTCATGTCCGTGCCAGAAACAA  
CCATTCACCTCGATCACCGCACGGTAGCGCGCCAGCCAAAGGTCAGGCTTACCCGGCAAGGCTGCATTGT  
GCAGACGGTAGCGAAATCCGGCATGATGCAGCAACTGGCGAATCTGTATCTCCGGCTTGGTATTGGCATT  
CTTAATCCCGGACATAAACCGGCTTCTGGTCTCTGGATTCACTATGTCCGGGCATACAGATACTCGTTTGA  
AAGCGAATGATTGATACTGTATTTTTTTTACAGTCTCGGGCGTTCTCTCTGGGTAAATGAGTGATAAGAT  
TCCGCGCAACTGCAACACGCCCAGATTTTGATATGACATACTCAACCACCTCTGCACACAACACACCTGA  
AGAAGATCAGGCATTCTCCAGCAAACGCCAAGCTGAAGATCGCCATCTGATGGATAAAGTCTTGGAAATC  
TACGACCAAAGCAAGTCGCTGAAAAGTTGCGTGCATTTGGGCGATGCCGACTGGACTCGTGAATCCCTGA  
ACCGCTGGCTCAATGGCAAGATCGAACAAAAGCCGCTGACTCATCTCGAAACAGAGATGCTGAAAAATCT  
CATCCCTTCGCCCCCAAGCATCATGGCCATTACGATTTCAAATTTATTGACCTGTTTGGGGTATTGGT  
GGCATTCGGAAGGCTTTGAGGATATTGGTGGGCAATGTGTCTTTACCAGTGAATGGAACGAACAGGCTG  
TCAGAACTTACAAAGCCACTGGTACTGTGATGAAACTGCACACAAAATCAATTCGGACATCCGTGAAAT  
CACCATGCCGGACAATGACGATCGTGATTTTGTCTATGCCACATAGATAAAGAAATTCAGATCATGAC  
GTACTGCTTGCCGATTCCCGTGTGACCCCTTCTCACTGGCAGGTGTATCCAAAAAGAACTCTCTTGGAC  
GCGCTCATGGATTTGAGTGCGAAGCTCAGGGAACTTGTCTTTGATGTGGCTCGTATCATTGATGCCAA  
AAGGCCAACAGCTTTTGTGCTTGAGAATGTGAAAAACCTAAAAGAGTCATGACAAAAGGCAACACATTCGG  
GTAATCAAGGAAGCATTGACCGAGTTGGGATATTGGGTTGCAGACTTGGATATCAACGGTTCAGATGACC  
CCAAAATCATCGATGGCAAACATTTTATCCCTCAGCACCGGGAACGTATTGTACTTGTGGTTTTAGAAA  
AGATCTGAACCTGCATGAAGTTTTACGCTAAGAGATGTTTCAACATTAATTTCTGAAAACAGGATTACT  
TTCGAGATCTGCTTGAGCCAGTTGAAAACCTCGACTCGAAAATATATTTCTGACCCCAAGTTGTGGTCTT  
ATCTATATCAATATGCGAAAAAGCATCAAGCTAAAGGAAATGGCTTTGGCTATGGTCTTGTGACCCCAA  
AAACCCGACAATGTGCTAGGACTTTGTCCGCACGTTATCACAAAGATGGTTCTGAGATTCTGATTGAT  
CGTGGTTGGGATATGACTCTAGCGGAGACTGATTTCAATAATGAGCAAAAATCAGCAAAACAGACCAGC  
GTCTTACCCCCAGAGAGTGTGCACGGCTGATGGGATTTGAACAACCGGGTGAATATAAAATTCAGAAATCC  
TGTTTCAGATACACAAGCCTATCGTCAATTTGGTAACTCTGTGCTAGTTCCCTGTATTTGCTGCCGTTGCC  
AAGTTGATGAAGCCATACATAATGAAAGCAAAGAAAAATTAATAAAAAAGCCGTCATATATTTCTATGAC  
GGGCTTTTTTATCTACTGGCAGCCTTTTACCTCGTTAATGAAATCTCGAAATGACATTAATTGAGGTTGC  
TGCTGGGGCGTATAAGTTTGTGAATAGTCGTAGGTACAACAAGTTGCAAGTTATTTGCTTGCATTTGCT  
CTGTCTGATTCTCACTGATTGCAGGCTCCATAGTAATCAGATGCTTACGCTCCACCCCTCGCAGCCCTGCG  
CAAGACTTGACGCCATCTGTCTTTACAAGTGGTTTTAGCCCCATAATATTTCTCAGCTTTTCGGAAGGGAAA  
TTTTTATCTGCATAACAAGCAGAGCTTGGAAAATATGAAATCCGGTTTTCTGACGAGCCTCAGTCAAAGCAC  
CTCGTTCAAAGTAAACACCAGACTTGTTTAAAAATAAATTCAAATATGATTTTCAAAGCATGACCACTACG  
AGATTTCCGACGATTCTGCACACTCAGAGAAAAAGCGAACAAAACCTCATCTACGTCATCACCATTTTCCCA  
AAACCTGCTAACAGAGTCTTTTTTACAATATGCCTTTCCAATTTGACGGAATGCAGACTCTTCTACCTCCA  
TCCATTC AATCAGTGCATATCGGGCTCTTCAACAGGACAAAATATCTTTTCCAATGTTCTGGTAAATGC  
AGAGAAGTCTTTTGTTTTAGGAAATGCCGCACCAAACCTTTTCCAAAATAGTGTCTAGATAGTCTGGGCCA  
TTATGACCAATTTTCGATGCCGTAACGAGCAAGCATTAACCTGATGGGAACAGCCAACCCCTTTCAATAT  
TTAATCGTGTGACACCCTTTTCAATTGGCTTCCACACTCCTCGCCCCGAATAGTGACCGGATTTGCACTTC  
AAAATCGCTATGTGGAGGACAAAATATCATCAGGAGAGAACCTTCCCGAGTCAGGGCAATCAGGAAAAAA  
TCACCGGGCTTGAACGGTTGCTGACATCATTTGATTTGTAGTAAAGCCGCCACTCAGCCCCCTCGGTCTCT  
CTTTTTGATACCGAGCATCATACCAAGTAACAATATCTTCCGAGACCAGCGGCTCATCATAGCTTTTCGCT  
CAAATAGACCATCGTCGCCCGGATAGTGAGTTGGCTCCCATCGTCAGGCATCCCCAATTTCTACCAATA  
CCGGCATTAAACAAGGCCCGGATTTTATGCTGGTGGGAGCTTTTGGGATCCGCATCAACAACGGACAGGT  
ACTTGAATGCGGCAGAAGAAAAACGTCAGCAAGCTGTTTGAACATGTTTCACTCTGTCTACAGGCCA

GGAAACCATAGAGTAACGTGGCTGATTGCGTTATGCATCAATATGTTATGAGCATGTGACGCCATCACCA  
CCCACAATCTATAAAACTGTGCGAGCATTACACCCCTTCCAGAATTGGCTACAGTCCTCTCCGCCAAAA  
AGTGCGCAGAGCCTCCTGGAAGTGTGTCGATATTGGCTATTTGACTAATAACCATGCGGCCCTTGGCGTTG  
TTTAACTGGCCCTAACGTGAGATAATACCGCCCGCTTCAAACCCCGATAACCCGACTTTTCAGTGACGGT  
AATTGATGACTGAGTACCTGCTTTTATTGATCGGCACCGTGCTGGTTAACAACTTCGTGCTGGTAAAATT  
CCTCGGCCCTGCCCCTTTATGGGGGTCTCCGGCAAGCTGGAAAACCGCCATCGGCATGGGGCTGGCGACC  
ACCTTCGTGATGACCCTCGCCAGTGCCAGCTCCTATCTGGTGGAGCACTATATCCTGCTGCCGCTGGATA  
TCGCCTATCTGCGCACCCCTCGCCTTTATTCTGGTGATCGCCGTGGTGGTGCAGTTTACCGAGATGGTGGT  
GCGCAAGAGCAGCCCGACCCTCTATCGCCTGCTGGGGATCTTCTTACCCTCATCACCACCAACTGCGCG  
GTGCTCGGGGTGGCGCTGCTCAGCATCAATGAGCGACACGACTTTATCCAGAGCGTGATCTACGGCTTTG  
GCGCCGACCGGCTTCTCGCTGGTGTGATCCTGTTTCCCGCCATGCGCGAGCGTCTGGTCCGCCCGA  
TGTGCCCGCGCCGTTTCGCGGGGTGTCGATTGCCATGATCACCGCCGTCTGATGTCGCTGGCCTTTATG  
GGCTTTACCGCCTAATCAAGATATAACCATGATCCATATTCTCTTTGCCATTCTGGTGCTACCCTGCT  
GGCGCTGGCGTTTCGGGATTATCCTGGGCTTTGCCCGCTCAAGTTTTCATGTGGAAGCAGACCCCATCGTC  
GATCAGCTCGATGCCCTGCTGCCCCAGACCCAGTGTGGCCAGTGCGGCTATCCCGGCTGCAAACCCCTACG  
CCGAGGCGCTCGCAACGGCGATCAGATCAACAAGTGTGTGCCGGGTGGCGAGGCCACCATGCGCAAGAT  
TGCCGATCTGATGGGGTTCGAGCCCCAGCCGCTGGGGGGCAGTGACGAGGCTGCAGTGCCAGTCAAAAAG  
GTCGCCTTTATCCACGAAGATCAGTGCATCGGCTGCACCAAGTGCATTCAGGCCTGCCCGGTGGATGCCA  
TTGTGCGGCGCCACCAAGGCGATGCATACCGTGATTGCCAACGAGTGACCCGTTGCGATCTCTGTGTCGA  
TCCCTGTCCGACCGACTGCATCGAGATGATCCCGGTGCCACCACGTCGATAACTGGAAGTGGGATCTC  
AATAACGTGCATGTTCCGGGCAAGATTCCGGTCAAGATAGTGAATAAACAGCGGAGCAACCATGCATTC  
CTTACTCGAACGTATCAAAGCCGGCACGCTCTGGGACTTTTACGGTGGCATTCACCCCGCCGACAACAAG  
CTGCAATCAAGCCAGAGCCCGGTAGTAGACGCCGGTCTACCGCCCGCCTCATTATTCGGCTGCGCCAGC  
ACGCAGGCCCCCGCGGCGATCTGCTGGTGCAGGTGGGCGACAAGGTCAAAAAAGGGCAGCCGCTGACCCG  
TTATGCCAAGGGGCGGGTTCGTCCTGTCCATGCCTCCACCTCCGGCACCATCACCGAGATTGGCAACCAC  
ACGGTTGCCACCCCTCCGGACTCGGCGATCTCTGCGTCATTTCTCACCCCGATGGGGAGGATGAGTGGG  
GCGAGCGCAATGGCAAAGCCGATTACTGGAATCTGGAGCGGGGCGAGCTGCTCGAGCGCATCCAGCAGG  
GGGGTTCAGGGGCTTGGCGCGCGTGTTCGCGACCCACAGCAAGCTCGACGGCCGCGGCTCACC  
GAGATCTGATCGTCAACGGGCTGGAGTGCGAACCCATATACCACCGATGATCGGTTGATGCAGCAGT  
ACGCCGACGAGATCATGGATGGCATCCGAGTGCTCAAGCACCTGCTCAAGCCCAAGCTGACCCTGATCGG  
GGTGAAGACAACAAGCCGAGGCAATCGAGCAGCTGACCCGTCACGCCACCGACGAAGATGTGCTGGTC  
AAGACGGTGGCGACCAAGTACCCTCTGGCGGTGCCAAAACAGACCATCGAGCTGCTCACCGGTTCGTCAGG  
TGCCCAAGGGAGGCCGCGCGGTGATATCGGCATCATGGTGTCAACGTTGCCACCGTGTTCGCCATCAA  
GCGCGCCATCATCGACGGCGAGCCGCTGATCGAGCGGATCGTCAACCTCACCGGCGACAGCTTCAAGAAG  
CCCGGCAACGCTGGGTGCGCCTGGGTACGCCGTTTCGCTGGCTGTTGCAGCGTTTCGAGCTGCAACCGG  
AAGCGGAGCAGCGGGTGTATCATGGGTGGCCCCATGATGGGCTTTACCTGCCCCACGCTATGGTGCCTGT  
GGTCAAGGCCACCAACTGCCTGCTGGCGCCGACGCGAGCCGAACTGCCCGCCCCGGCCGAGCAGCCC  
TGCATCCGTTGCAGCGCCTGTGCCGATGCCTGCCCGCCACTCTGCTACCAGCAAGAGCTCTACTGGTACA  
GCCGGGCCAAGGAGTATGACAAGGCCGAAAAGCTCAACCTGATGGACTGCATCGAGTGGCGCGCTGCGC  
CTGGGTCTGCCCCGAGCGAGATCCCCTGGTGCAGTACTACAAGATCGCCAAAAGACGACATTCGCGAAGCC  
CGCGCCGAGGCCGAAAAGCCGAGCGCGCAAGCAACGTTTCGAGGCCAAGCAGGCCCGCTTCGAGCGGG  
AAAAAGCGGCCCGCAAGCGCGCCATGCCGAAGCCGCGCCAGCGCCGTCAGACCATGACGGCCGCGAGG  
CGGGGAAGATCCGGTGGCAGCGGCTCTCGCCCGCATCAAGGCCAAGCAGGATGCGCCCATCACAGCCATT  
GCCGCCACCGCCGAGGGCTTGCTGACAACAGCGCAGTGATTTGCCGCCCGCAAGCCCGCAAACGGGAAG  
CGGAGGCGCGCCGCGCCGCAAGCTGGCCGAGAGCGCAAACAGCGAAACAGCCGCTGCGCCGCAATCCGC  
CGAGCGGCTGACCTGCCAGCGATCCCAAGAAAGCAGCCATCGCCCGCCACTGGCCCGCGCCAAAGCC  
AAGAAGGCAGCTCAGGCAGGCGAGAGCACCGAGCCTGTGACTGCCGAAGCCGTTGCTGCCCTGCGGTAG  
ATGCTGATCAGCAAAAAGGCAGAGGTAGATCCGAAAAAAGCAGCGATTGCCGCTGCCATCGCTCGTGCCAA  
AGCCAAAAGGCCGAAGCCAGTGGCGAGCCGGTAAGCGCAGCCAACGGCACGGCAGCCGAGGTCAACACG  
CAAAATGATGCCCTGTGATCCCAAAAAAGCTGCAATTGCTGCCGCCATCGCTCGTGCCAAAGGCCAAAA  
AGGCGGCCAGCAGGGTGACAGCGCTGAGGGCGATCTGACTGCAACCGCAGGCTCCAGCGAATCCGCTGC  
AACCCAAAGCGATGCGCCATCTGCTGTGAGCGAAGCGGTGATCCCAAGAAGGCGGCTATCGCCGCTGCC  
ATTGCCCGCGCAAGGCCAAAAGCTGGCCAGCAGGGCGCAAGTACCAGTGTGAGGTAGAAAATGCCG  
GTGCTGAGGGTGGCGAGAGTGAGCCAGCTGCCAGCGCACAGACCCGCGACGTGGCGGTAGCCAAGAGCGA  
AGTAACCACCAGCCAAAGCGATACGGCTGCAAGTGAAGCGGTGATCCCAAGAAGGCCGCTATCGCCGCA  
GCCATCGCCCGAGCCAAAGGCCAAAAGCTGGCCAGCAGAGCGCAAGTACCAGTGTGAGGTAGAAAATG  
CCGGTGTGAGGTAGAGAGTGCCGGTACTCAGGTAGACAGGGCCGAACTGAGGGGGGAGCGCGCACCCGGC  
CGAGCCGATGCAAAGCGATGCAGCCAGCAGTGAGCAACCACTTGCCGTCCTGCGGTCCTGAAGCGAAC  
GCCCCAGCAGCTGATGCCCGGTTGATCCGAAAAAAGCGGCCATTCGAGCCCGCGTGGCCCGCGCCAAAG  
CGAAGAAGCTGGCGGCCGAGGCGGCCAGAGCCGAGAGACCACCGCTGAAGATGCCCGCTCAGCCGACCG  
AACAAACCACAAGGTAATCGACAGACTCATGTTCAATATTGCGACTGCGCCGTTTGGCCATAACCCGAAAC

AGACCCGAACCTGATGCTGCTGGTGATCCTGGCCTGCGTGCCGGGCTTGCTGGCCCAGACCTGGTTCTT  
CGGCTGGGGCTCCTTTATCCAGATCCTGCTGGCGCTGGTCACTGCGCTGCTGTGCGAGGCGCTGGTGCTC  
AAGCTCCGTGGCCGCGCCATCAAGCCTGCCCTGATGGATGGCAGTGCGGCGCTCACCGCCGTGCTGATTG  
GTCTCTCCCTGCCGCCGCTACTGCCATGGTGGATGCTGGTGGTGGGCACGGCCTTTGCCATCATTTGTCGC  
CAAACACCTTTACGGCGGACTGGGTGAGAACCTGTTCAACCCGGCCATGGTCGCCTATGTGCTGCTGCTG  
GTCTCCTTCCCGGTGCAGATGACCAGCTGGCTGCCGCCGGAGAGCGTGCGCGCTACAGCCTCGGTTTTG  
GTGATGCGGCGTGGTGTATTTACCCGGCTTTAGCCTCGACGGCTACAGCATGGCCCAGCTCAAGCAGGG  
GGTGGATGGTCTCACCATGGCGACCCCTCGATAACCTGAAAAACGGCCTGACTCAGGGGCTCACCACC  
GGCGAGATCCTGAGCGGCCCGCTGTTTGGGGTGGGGCGGAATCGGCTGGAGCTGGGTCAACCTCGGCT  
ATCTGCTGGGCGCCTCTTCTGCTGCGAGCAGAAGGTGATCAACTGGCGCATTTCTACCGCCATTTCTCGT  
TGCCCTGTGGAGGCCTCCACCATCGGCTATCTGGTGGTGGTGGTGGTGGTGGTGGTGGTGGTGGTGGTGGT  
CTATTACAGCGGCGACTATGCTGGGAGCCTTCTTTATCGCCACCGATCCGGTCCAGCCTGCACCACGC  
CGCGCGCCGACTGGTCTATGGCGTGCTGATCGGGGTGCTGGTCTACATCATCCGCCGCTTTGGCGGCTA  
TCCCGATGCGTTTCGCTTCGCCGTGCTGCTGGCCAACTTTGTGTGCCGTTTTATCGACAGCCTGACTCGT  
CCGAAGGTATACGGAGCCCGTCGCCAATGACCAAGACGATAACGCCGAAACGTATCGAGTGCTGCTGGCC  
AACCTCTGCGTTGCCATTTTTATCGACACGCTGACTCGCCGAAAAGTGTATGGAGCTCGTCGCCAATGA  
TGTTTTCTGCCCTTTTCCCCATCACAGCTGACGGAGCCCGGACATGTTAAAGAGCATGCGCAAGAACGGC  
CTTATTCTGGCGATGTTTCGCGCTCGGCTGTACCGCGCTGGTGGTACTGACCAACGAGTTGACCAAGGATA  
AAATCGCCCACCAGCAGCAGCTGGAGAAGCAGCAGACCCTCTCGGTATTGCTGCCAGAGGGGAGCTATGA  
CAACGATCTGGTGGCCAGCTGCAAGCAGGTGACCAGCAGGAAGTATCTCGGCAGCGATCAGCCGCAGGCC  
CTCTATAACCGCCAGCAAGAATGGCGTGGTGACCGCTATGCATTGGAGGCGATTGCGCCGGATGGCTACA  
GCGGGGCGATCCGCATCGTGGCGGGTTTTGATGCCAAGGGCACCATCACTGCCGTGCGCGTGCTCGCTCA  
CAACGAGACCCCGCCTTGGTGACAAGATCGAGCTGAAAAAATCGGACTGGATCAACAGCTTTGCCGGA  
AAATTCTGACCCATGACAACGAGCCCGAGTGGGCGGTGAAGAAAAGATGGCGGCGAGTTTCGATGCCTTTA  
CCGGCGCCACCATCACCCCGCTGCCGTGGTCAAGGCGGTGAAGAACCTGCTGAAACTGCAGCAGGAGCA  
ACCCGAACTGCTCAGCAACGCCCGGCTTGTCCGGCGGCGAACTAACGGAGTCGAGCCATCATGAACCAG  
ATGGAACAGATTGAAACGGGCGCAGCCCCGATTGCCGAGCTGGAAAGCCGCAAGGGCGAGCTCAAGGAGC  
TCATGAGCTCAGGGGCTGGGAAGAACAACCCCTCGCTGGTGCAGGTGCTGGGTCTGTGCTCACCCTACCTCGC  
CGTCTCCTCCACCTTTACCAATGCGCTGGGCTGGGCTTGGCACCATGGCGGTGCTGGTCTGCTCCAAC  
CTCGCCGTCTCGCTGGTGCGCAACTGGGTGCCGAAGGATATTTCGATTCCGGTCTATGTGATGATCATCG  
CCTCGCTGGTGACCAGCTGCAGCTGCTGATGAACGCTACACCTATGGCCTCTATCAGGCGCTCGGCAT  
CTTTATCGCCCTCATCGTTACCAACTGCGTCATCATCGGCCGCGCCGAGGCGTATGCCCTCAAGAACCCG  
CCGCTGCTGGCGGCCCTCGATGGCCTGATGATGGCCTTTGGCTTTACCCTGGTGTGCTGGTACTGGGCG  
GCATGCGCGAGATCATCGGCATGGCACCCCTGTTTATGGCGCCGAGCTACTGCTGGGCGAGTGGGCCAA  
ATCCCTGCGCATCGAGCTGTTCCACGCCGATGCCAGCCTGCTGCTGGCGATTTTTCGCCCGGGCGGCTTT  
ATCGGGCTGGGGCTGCTGATCGCCGCAAGAACGCCATCAACGACTGGCGGGACCAGCAACAAGCAGCCA  
CAGTGGCCACTGCAACGTTGCCCGGCCCGCGTCCGGGCGACCGAGCTATGATTGGACGCAAGGCATGA  
ACAACCAGAAACGCAGAGAGATCCTCGAGCGGCTGCGGGAAAACAATCCCCACCCACCACAGAGCTCAA  
CTTCAATTCGCCGTTTTGAACTCCTGATCGCCGTGCTGCTCTCGGCGCAGGCGACCGATGTCAGCGTCAAC  
AAGGCGACCGACAAGCTCTATCCGGTGGCCAAACCCCGCAAGCGATGCTGGATCTCGGGGTGGACGGGC  
TTAAGGAGTACATCAAGACCATTGGCCTCTTCAACACCAAGGCCGAGAACGTCATCAAGACCTGCACCAT  
CCTGCTGGAGCGCCACGGCGGCGAGGTGCCGAGAACCGCGAAGCGCTGGAAGCCCTGCCGGGCGTTGGT  
CGCAAGACCGCAACGTGGTGTCAACACCGCCTTTGGCTGGCCACCATCGCCGTCGATAACCCATATCT  
TCCGCGTATCGAACCGCACCGGCTTTGCGGTGGGCAAGAATGTGGATCAGGTGGAGGAGAAGCTGCTTAA  
AGTGGTGGCCCGGAGTTCAAGCTGGATGTCCACCACTGGCTCATCCTGCACGGGCGTTACACCTGTCTG  
GCTCGCAAGCCCCGTTGTGGTTTCTGTATCATCGAGGACCTCTGCGAGTACAAAGAGAAGGTCTATCCCG  
AGAGCTGATAGCCTCGCAACCGAGATTGAAAGCAGTACACATACCAACCCCGGAGAACTGAGCAATGAGA  
ATTCTGCATACCATGCTGCGTGTGCGGATCTGCAACGCTCCATCGACTTCTACACCCGCGCTCCTTGGCA  
TGAAGCTGCTGCGCAAGAGCGAGAACAGCGAGTACAAGTACACCCTGGCCTTCGTCCGTTACGGTGACGA  
GAAGGATGAAGCGGTGATCGAGCTGACCTACAACCTGGGGGGTGGAGCGAGTACGAACTGGGCTCTGCCAC  
GGCCACATCGCGCTGGAAGCGGACGACATCTACGCCACCTGCGAAGCGCTGCGCGCCCGCGGTGCCAAGA  
TCACCCGCAACCGGGCCCGGTCAAGGGCGGTACCACCGTGTGCTGCTCGAAGATCCGGACGGTTA  
CAAGATTGAACTGATCGCCAAGAAAGATGCCGGTACTGGCCTGGGTGACAGCTTCTAAGCTGCCCTAATC  
CCACGGCCTAATGGCAGGATCAAAAAGAGCGCAGATGCGCTCTTTTTTATGCTGCTGATTTGGACTGC  
CGGGCTAGATCTCGCCATTTCCGCCATGCTGATCACCACCCCGCGGTTCTTGGCACGCCCTGTTCCGGT  
TTCGTTGGAGGCGACGTGCTGCTTCTCGCCATGCCCTCCACCGAGATCTTGGCCGGATCGATCCCCAGA  
TCGACAAACACCTTCTTATGGCATCGGCCCGCTTCTCGGAGAGTTTCAGGTTCCGGCCAGCGGCCCGCT  
AGCTGTGCTGTAGGCGTGCATCACCACCACGTGCTGCTTGTCCGCTTGATAAACTCGCTGATCAT  
CGCCAGCCCGCCTTGGAGGGGATGGAGAGCTGATCGCTGTTTTTGTGCTAGGTAAGCACGCTAAAGGCG  
ATATCGTTGAAGCTGTAGGGCAAGAGCCCGCTCAGACAGTCGATAAAGCCCTGATATTTACCCGAAAGT  
TAACCGACGAGAGGGACACTCGCACCGCGCGGTTCTGGCGATACCAGTCCCGATACTGGAAGGTCGGCAT

CCGCCCCCCTCCAGCTCGTTCGAGCATGGTCCAGGCAGTTTGCCCTCCACCAGCCCATCGAACTGCTGA  
TAGAAGCGCAGTTGACTCACTTCTCGCCCGGCATGCCCGGGCGCCATACCGGCGGCATGATGCCAAGGC  
TCACCGTCTGGGTCTGGGCTGCGGTTCGCTTGCCTTAAGCTCGAAGTCGAGATTGATCTTGCGCCCGGC  
ACGACTGACAAAAGCCCCGTTCCCCAGTTGGGAATAGGATGCTCGAGGCCACACTCAATCTGGGTATCG  
GAGGTCAAACGCCAGACGGATTGATCCAGACCGGCACCAAATTCGGTGACCCAGCCTGTAACCTGCATAC  
TCACGGATATGCTGACCAACCCCAACACCCAAGCGTTCAATTGCTTGTCTCCACACGATCTCACAAGAG  
ATATCGGCGGCAAGAGGCCAAGCTTTAGCGACAAACTGCAAAGGCGTGCCGTTGGTGTGGCAAAGGCTTG  
CCCCCGGCGGCAACCGACCGCAAGCGGCGCTCACTCTCCCCCTCTTTGCTCCGTGCCAACCGGCGGGAAG  
CTCGCTACAGTAAAGCCAGGGCAATCAGACGCCGCTTATCGGGAACCACACTCATGCACCGCTCTTGCTT  
CTCTTTATTGCAGATGTTGTTGCCAATGCTGCTGGCGCTATCCGGCAGCGCCGTC AAGGCCGAACACAG  
GATCAGGAGTGGGACAGGAGCGCGCAAATGCGGTGCTCTCGCTGATGACCTTCACGGTGGTGCCGACA  
TCACCGCCAGCAACCTCGATATCGGCAGCGGCACCAATCAATCTGCCGCCCTCAACATGACCAGATCGG  
CGGCGGCGCCACCATGAGCGAAGCCGTGCCCATCTATCTGGAAGGGGCGATCGGCTTTAGCCGCTACGAT  
CCCCAGTTTGTGGTGAGCAACGGCACCGAGAGCCGACCCCTCCCGACCAAATGGAACAGCCTGACCGCTT  
CGGGCGGGATCGGCTGGGATATCGCCCTCCATGAAGACCCGCGCGGTGGCCACTGGGTGCTGCGCCCAT  
CGCCAACGTCTCGCTCGGTACCATGGCCAGCGATCTGCGGATCGGCAACTGGCTGCTGGAGCGCACCAAG  
GGCTACTCGCTGGATTTTCTCGATGGTGGGCGACTCAATATGTACGGACTGGGAGGCTCGCTGATGCTCG  
ACTACGAGCTCTTTTCAAAGGCGCAGGATATCGATGTGGAAGTGCCTACTCCTACCAGCACCTGCAGAG  
CTTTGGCGGCACCTCGACCAGCGTCCGTGGTACGCGGAGGCGGAGAACCCTCGCCCTCTATCTGCGCCGC  
CGGGCCCCGTTGTTTACTGGACACTGCTCGACAGACCGGTGCGCTATGTACTGGAGGGGGCCATACCG  
CATATCTGGGGGAACAGCGGGGGTTGCTTGGCTTTGACTCCCTCAACTCCATCGGCGCCGGTCTGGAGCT  
GGACAGCAGCAAGTACGACATCATAGTCACCCGTACCCGGCTGGTTGCCCGCTATATGTTTACGCCACAAC  
ACCAGCGGTTATTCATCGGGTTGGCCATGAGTTTCTGAGTCGTTATTTTTGCTGCCACGAATGGGGAA  
TCCTCAGGAAAAGTACATTAACACTCCAGATAATTACGCCCTATTGACGGAGGGTTTATTTATTTCTGTCC  
TTTTCATATGCCTCACCACCCAGTCATATCAGGTAATAATATCTTCTGCTGGTAGGCTAATTTCCCCCT  
CGCACACAGAATATTGGAGTTTTTTGTCTGTGATTTACGGCGCGCAATGGCTGATTGGTCCGTGATGT  
CGCCAGCCTGTGCCCGCTTGCAACAGGAAAAATACCAAACGCCCGACATCACTGACCGATGGCCAACCTT  
ATCCGATCCCTATAAGGAACACCCCGGAGTCCCCCATCTTTTGCACAGTGGCTTAAGTTGCACATAAAT  
CATTGTTTTTAAACGGTTTTATAGTTTTTTCATTTTTATGATTTCAATTAATCCTGTTTTTACTTTTACA  
TCACCCGACTGCTAAATTTGGCGTCATCCCGGCAGGACGAGGCGCACTGAAACGACTGACTACGGGCTAC  
CGATAACAGGTGTGCAATGAGCACAGAAATAACGTTTACGGCATAGCAACCGTTATTTTACGACATCACA  
CTTGCTGATCCTTGTGATTGAGGTTATCTGATGAAAAAACGCTGCTTGTCTCTCTGTATTGGTCATA  
ACCGGAACCGCATATGCAGGGGTGCCTGATTTATCCGCCAGCTGTCTTAGACATATTAATCTTCGCGTCCG  
AAGATGGCACGGCTTATATCAATAACCAGCAAGTTCCACTTAAAAAAGTGAATTCAAATTTCTACGAGGC  
GAGCAAGGGGCGCACACCCTCTCCATGGTGAAGTGGCGACTGGGGCATCACCTATTTTGTCCAAAAT  
GGCGACAGCGGCGCCTGCCAGCTCAATGACGATGAGAACGATGACGACGGCGATGATAATGAAATCGCCA  
GTAGCAGTGCCTACAACGGCAGCACTGCACAAACCAAGTTGACAGAGAACGCTGCATGAACGCCGTCCG  
CAGAAAAGCGGGCGTCAGCCGACGAAACTGACCCTCGACTATGTTGCCGACTCCAGGGCGGGATGATG  
ATTGATATCAAAGGGCCCCATGACCGGTTCTGGCACTGCCTCACCAGCGCCCGCGGCCATATTTCTGGCA  
TCAATCAGGACTGATTTGAGCCACGGCTCAACGGGCCCCACACTACCGTGGGGGCTCCACCCCTTATCC  
ATTGCAATTTATTTGATACAGGTAATGAAGATGAAATCCAAAACAGACTCTGCTCAATGTCGCCCTCGGTT  
GCCTGCTGGCGGTTCGGTATCTCCGGCTGCGCCGTGGCCAAAACCCATCACGGCCACAAGACCCATGCCCA  
AGAGCACGCTCAGGAAGGGGCGGTGCAGTATGGCGACGAGAGCCGTGGGCTGGCAACTATAAAGCCGTT  
ACTGACGATGGCCGACCCGTGGCCGAAATTCACGTCGATACCACAGGGGAAACCTATATCGATGGCAATC  
AAAAGCGGCGCCAGCTGGAAAGACAACGATGCCGGCACCGGCGCCATCCTGTTTCGATTGATAATCC  
CGACACCGCCCTTGCCAGACACCAAGCCCCGCCAAGGGGCTTTTTTGCACCTGCGATTTACCATCAACCA  
CAGCCCCCCCCGAAAAATCCAGCCTTGTTCACAGAGTTAGTGCAATCTGTCCACATATTTCTGTTGATGAAA  
TTGTTAGGATGGCTCAATTCGGCACCTCATCGCCCAATTCAAAAGCGAGTTGAAATGGACTTCACACCCG  
TTATTGCTGTTCTGCTAGACCAGTTCTGGTATCTGCTGCCCTGTTGTTGATTGCCACCCGATCAAAAAC  
GCCCAGGTTCAAGGGGATGGTTGGGAGACATTTATCAACTTGGGCATCCGGCTTTTTTCTCGACAAGCGG  
GAGTACCACCTGCTCAAGAACGTGACCCTACCGAACCCGAGGGTACTACCAGATCGACCATGTGATCG  
TCTCGCGCTTCGGGCTGTTTGTGATCGAGACCAAGAACATCAAGGGGTGGATATTTGGCAATCCGGCCCA  
TAAGAGCTGGACCCAGCAGCTCTATCGCCGACAGACATACATTTCAAATCCCCTGCGCCAAAACCTATCTG  
CACCTGATGACGCTCAAATCCTTGTGGTCTTGTGATCATCAGTCCATTCGATTATCTACTTTTATTG  
GCGACTGCACCTTTAACCCCCCATGCCGGATAACGTGATGAACCGTGGGCTTATTCGCTATATCAAGAG  
TAAAACCACGCAGGTGTTGACCCCTGTGGAAGTACCAGAGTGATCGACACCATCCAGCGGGGACGACTG  
GCCGCCAATTGGCAGACCCATAAACAGCATGTGGCTCAGTGGAAAGCACGTCACAGCGAGGTTCCCGGCC  
CGCCTTTATCCGTAGCTGCAATGCCTGTGGTCAATCAGGTGGTGAACGCCCGCGCAACCATCACCGAATC  
GCTCACCCAAGCAAATCCACTATGGCCAGATGCGGCAACCCGATGGTATTGCGTACCGCCGAACGGGGG  
GATAACCGAGGCAATCGGTTTTTGGGGATGCAGTAGCTATCCAACATGTCGGGGGATTACACCACACCAAT

AAACATAACCGACCTGAAGTACGGCCAAAACCATAAAAAGGTTACCCATATTCACAAACCAAAAACACATCT  
ATTCAAAGGGAGTTGATTAATGAACATCAAGAAAATGTCGGTATTAGCAGTAGTGGCCAGCATCAGCATG  
CTAATGACAGCTTGTGCATCACCACCACAACCGACATGGAAAAAAGAAGGTGTTACAGATGACGATACCC  
TCACTGCATTATCTCAATGCAGATATGAGATACGTCTTAACGATATTTCTGCCGAAGAAAAAACGAAGT  
AATCACGGATTGCATGCAAGCGAAAGGCTTCCGTTGGAGGGTCTATTAAGCATGCGTGCGGGTTGCCATT  
AACAATGGCAACCCGCTTTGCAACTAGTCTCGAAGCAAATCCAGTCCCTACCTAATCGTCGCCATCTGCCG  
CACACATCGCTGCTCTCTGTCTATCCACCCGCTTGGCAAACCAGGCGGTGGTGAGGTTGCGGGTAATTTTC  
GGACTCTTTAGCTGAATGCCGGGCAGGATGGCGCGGGGCAGCCGCTTGCCCGCTTGCTTGTCCGGCCAGGG  
TAAAGATGCGATGGTAGAGGTCCGTCTCGGCAAATTCGGCGGTATCCCCTTTACGCAGGCTCTGGTGGAT  
CGCCTGTTTTGCTCATATTTGACCCGGTTGGCGAGGGTGTAGACGGCCAGTTCGGTGTGCCCCGAGATCC  
GAGTCATAGCCGATCAGATCCCCGTCCAGCGCCAGAGCTTTGCCACTCAGGCGGCTGACGGCGGCCCTGAA  
AAGCGGCATTGCGGCTGGCGTACCAGCCGGCGTTGAAGTCGGCAAACCGGTAGAGGGTATCCGGGTAGTC  
GACGGGATAACCGAAGATATGTTTTGGTGCCAAACCAGATGCCCGCGGACGGGTAAAGACTTCGTGGCGA  
ATGGAGTCCTTGATTGGATAGGGGTAGCCACGGGCGTTGGCCTCGGCAAAGGCGATGCTCACCTGCATCG  
GGCCACCGGTATGCACCGGGTTGAGGTTGCCAAAACAGCGTCTTGCCCATCGGCAGCATGCTGATCATATC  
TTCGAAGATTTCACTCATCTCCCGCTCGGTACGCAACTTGTGATCCGCTCGGCGTAGCTCTTGCCCTGTG  
GGCGAGTTGATGGAGAGCGCGGCCCGCACCATAAATTCGGGGATCAGCAGCTTGGCTGCCCGTGAAGTTGA  
TCTCTTTCCAGGCGATCTTGCCAAGGCCCGGCACCACGGGGTCCGCTGATAAGTGGCTTCCCTGCTCCGC  
CACCGCCAGCACGCTACAGACATTTGTGATCATTACCGTACCCCTGGGTGGTGAGCGCCGTACCACG  
TCGTTGGCCACCCCTGTTTTGTCCGGCACCTGACGGGGCAAGAAGCGCACGATGCGGCTCTTCATATCCG  
CCGGTTTTGCGCGGCTGCATGGCAGGCGGCGTTTTGGGGTTGCTCACGCTCGCCTCTTTGGCAGGCGCGGA  
GGCGGGATCACTGGCACAACCGGCCAGCAACAAGGCAGAGCAGAAGGCAAGAAGACGACAGGAAGGCAAA  
GCGGTACATAAGCATGTCCATTTTTTGTAGGCCCGACAGGCAGCGCCGCTGGCACTGTAAGTGCACAAAG  
GTGGGGCCATTGTAGAGGATTGCCCTGCCCGAGTTGAAAACCCGCGCTCGCAGCATCCCCTCCCCTTGCCAG  
CTTTTGCCACCCACGCGCCATCCGTTGTCTGCGATGCGGAACTCATGACCTTCCCTCAATGGCTCACCCG  
GCCAGAACCGTACGGTGTAGCGACAGATAAAAAGAAAACCCCGCCATCGCTGGCGGGGGTTGGTCGTCTGG  
CAAGTCGGGCTGATCCCCGCTGCAAACCTTTAGCGGTTTTTACCTTCTGGTGCAGCTCCTGCACCCGAGT  
TGACATGGCGGTTGGCATCCACGCTGATGGCCATGCAGTTGGCAAACGCTCGTTTATGGTGGTGGTATA  
CGCCACCTTGTCTGCAAGCGCGCGCAGCAGCTGCTGGAGTCTGGATCGCCACCCGCTCTTTCGGCG  
GTGTTGACGATGTAGGTGTAAGTCTGCAATTTGATGCGATCCAGAATGTGCGGGCGACCTTCGTGCACCT  
TGTTGACCAGGCGCGGGTTGATGCTCGCTTACCCAGCGCGACCGCGGTGCCGTGAGTGGCATCCAGCTC  
GTAGCCAGCTCCAGCAGCTTGGCGGCCAAGTCGACCACCTGCGCCTTGTGCGTGTGACGCACTGACAAG  
AGGGCACGACCCCTTTTCGGTACGGCGTGGTTGGCACCCAGCTGCGCCTTGGCATAGGCCTCGGCAAAGC  
TGCTGCCCACTCCCATTACCTCACCTGTGGAGCGCATCTCTGGCCCCAGCAGCGGGTCAACCCCGGGAA  
CTTGCGCAACGGCAGTACCACCTCTTTCACCGAGTAGTAGGGTGGGATGATCTCTTTGGTGAAGCCCTGT  
TCTTGCAGCGACTGACCGCCATCACACGAGCGGCAATCTTGGCCAGCGGGGACCCGCTCGCCTTGGAGA  
CGAACGGCACGGTACGGGCGGCACGCGGGTTCACTTCGATGAGGTAGATGTCATCGCCCTTGACCGCGAA  
CTGCACGTTTATCAGACCGATAACGCCGAGCTCCAGCGCCAGCTTGCGCACCTGCTCGCGGATCTCGTCC  
TGAATTTTTCTTGACAAGGTATAGGGAGGCAGGGAGCAACCGGAGTCAACCGGAGTGAATACCGGCCTGCT  
CGATGTGCTCCATGATGCCGCCGATGACTACATCGGTGCCGTGCGAGATGGCATCCACGTCCAGCTCGGT  
CGCATCGTCCAGGAAGCGGTCCAGCAGCACCGGCGATTGCTTGGAGACGCTCACCGCCTCGGCGAAGTAG  
CGACGCAGATCCTGCTCGTCATAGACGATTTCCATGGCGCGGCCACCCAGCACGTAGGAGGGGCGACCA  
CCAGCGGGTAGGTGATGCGCTCGGCCAGCAGCACCGCCTGCTCCAGCGCGGTGACGGTGCCGTTTTCCGG  
CTGCTTGAGGCCGAGGCGCTCGACAGCAGACTGGAAGCGCTCGCGGCTCTCGGCGCGGTGATGGCATCC  
GGGCTGGTACCAGTATGATCGGCACGCGGTTGGCTTCCAGTGCACGGGCCAGTTTCCAGCGGGTCTGGCCAC  
CGTACTGGACAATCAGCCCTTGGGTTTTTCGATGCGCAGCATTTCCAGCACATCTCCAGAGTGACCCG  
CTCGAAGTAGAGACGATCCGAGGTGTCGTAATCGGTAGAGACGGTCTCAGGGTTGCAGTTGACCATGATG  
GTCTCGTAACCATCTTTCGCGCAGAGCCAGTGCCGCGTGCACGCAGCAGTAGTCGAACTCGATACCCCTGAC  
CGATACGGTTCCGGGCCCGCCGATGATCATGATCTTGTGCGGGTTGCTCGGGGCCGCTTCGCACCTCCTC  
GTCATAGCTGGAGTACATGTAGGCGGTGTTGGTGGCGAACTCGGCGGCGCAGGTATCGACCCGCTTGTAG  
ACCGGGAAGATGTTGTGGCGGGCGCGAGTTTTGCGCACTTCCCCTTCGGCCACACCGAGGATCTTGGCCA  
GACGGGCATCGGCAAAGCCTTTGCGCTTGGAGGCTCGCAGGAAGTCGGCATCGAGACCGGCCATGCCGCG  
CTCTTTACCTCTTCTCCAGTTTTACCAGGCTTCAATCTGTACCAGGAACCAAGGGTCAATCTTGGTC  
AGCTTGAAGATGCCATCCATGGAGAGACCGGCGCGGAACGCATCGGCGATATAGAAGATACGGTGCCTAC  
CGGCGTCTGCAGCTCGTGACGGATGCGGGTACGGGAGTCCGGGGCATTGAGGTCAACCATGGGGTGCAG  
GCCGGTTTTGCCAGTTTCGAGGCTGCGCAGCGCCTTGTGACAGACTCCTGGAAGTTGCGGCGGATGGCC  
ATCACTTCGCCGACCGACTTCATCTGGGTAGTCAGACGGTTCGTTGGCACCGGGCGAATTTTTTCGAAGTTGA  
AGCGCGGCACCTTGGTACCACGTAGTCGATGGCCGGCTCGAAGGAGGCGGAGTCCGACCGCGGTTGAT  
ATCGTTTATCAGCTCGTCGAGGGTGTAAACCGATGGCGAGCTTGGCGGCGATCTTGGCGATGGGGAAACCG  
GTCGCTTGGAGGCCAGCGCAGAGGAGCGGCACACCCGCGGGTTTATCTCGATGATGACCATGCCGCCAT  
CTTTCCGGTTGATGCCAACTGGACGTTGGAGCCCGGCTCTCGACGCCGATCTCGCGAGTACCGCCAT

GGAGGCATTGCGCATCAGCTGGTACTCCTTGTGGTTCAGCGTCTGGGCTGGCGGACCGTGATGGAGTCA  
CCGGTGTGGATACCCATGGGGTCGAAGTTTTTCGATGGCGCAGACGATGATGCAGTTGTGCTTGGGATCCC  
GCACCACCTTCCATCTCGTACTCTTTCCAGCCGATCAGCGACTCGTCGATGAGCAGCTCTTTGGTGGCGA  
CAAGTCCAGACCGCGCTCGCAGATCTCGACGAACCTTCGGTGTGTAGGCGATGCCGCCACCCGAGCCG  
CCCATGGTAAAGGAGGGACGGATGATGCAGGGGAAACCACCATCTGCTGCACGCCCCACGCCTCTTCCA  
TGTTGTGGGGGATACCGGGCGCGGGGCACTCGAGGCCAATGCTGCGCATCGCCTTGTCAAAGCGGGAGCG  
GTCTTGGCCCTTGTGATGGCGTGGCGGTGGCACCGATCATCTCGACACCGAACTCGGCCAGCACGCCA  
TGCTTCTCCAGCGCCAGTGGCAGTAAAGCGCAGTCTGGCCGCCATGGTGGGCAGGATGGCGTCCGGGC  
GCTCTTTCTTGTGATGATTTTCGCGCACCACTTCCAGGTGATGGGCTCGATGTAGGTGGCGTCTGCCATCTC  
CGGGTCGGTTCATGATGGTGGCGGGTGGAGTTGACCAAAATGACGCGGTAGCCCTCTCGCGCAGGGCT  
TTGCACGCCTGGGCGCGGAGTAGTCAAATTCGACGCTTGGCCGATGACGATGGGGCGGGCCGAGGA  
TCAGGATGCTCTGAAGGTCGTTACGTTTTGGCATGAAACTCTTCTCTATTTCTTAGGCGCGATACTGC  
TTAATCAATTCATAAAGTGGTCAAAAAGACCGGCACAGTCGTGCGGGCCCGGGCTCGCTTCGGGGTGC  
CCTGGAAGCTGAAGGCAGGACGGTTCGGTTCGATGGATACCTTGCAGGGAAACCATCGAACAGGGAGACGTG  
GGTGGCGCGCAGGCAATCCGGCAGGCTGTTCTCGTCTACCGCAAAGCCGTGGTCTGGGCGGTGATCATG  
ACGGTGTGTCATCGAGGCTCTTACCAGGATGGTTGGCGCCGTGGTGGCCAAACTTCATCTTGACGGTCT  
TGGCACCGGAGGCCAGACCCAGCAGCTGGTGAACAGACAGATGCCGAATACCGGCGTGTGGTATTAAG  
GAAAGCCTTGATGGCCTCGATGGCGTAGTCGCACGGCTCGGGTTCGCCGGGGCCATTGGAGAGGAAGATG  
CCATCCGGGTTTCATCGCCAGTACCTCGGCGGCCGGGGTCTTGGCAGGCACCACGGTCAGGCGGCAGCCAC  
GGTCAACCAGCATCCGCAGGATGTTGCACCTTGACGCCAAAGTCATAGGCTACCAGTGGTATTTACAGCTG  
GTCGGCATCCGGGGTGACGTGCCCTTGCCAAGCTGCCAGCTCCCTTCGGTCCAGTTGTACGCCTACCA  
ACCGTCACCTCTTTGGCCAGATCCATCCCTTTCAGACCCGGGGAAGGCGCGGGCTGTTTCGAGAGCATAGG  
CTTCATCGACCTGTTTTCCCGCCAGAATGCAGCCAGCCTGAGCGCCTTCTCGCGCAGGATGCGGGTCAG  
TTTACGGGTGTGATGTGGCGATGCCAACGATGTTGTGAGACTTGAGGTATTCGGAGAGGGATTGCTGA  
TTGCGGAAATGGAGGCAAGTATCGGAAGGTCGGGATGATCAATCCCTGAGCATGGATCTGACTGGACT  
CTTCATCTTCGCTGTTGGTGGCGGTGTTGCCTATATGGGGTAAGTGAGGGTGACTATCTGACGGGAATA  
AGAGGGTCCGTTAGGATTTCTGATAGCCCGTCATCGACGATTTGAAAACCACTTCACCAACGGAAATC  
CCCTCGGCGCCTATCGACAGCCTTTGACACAGTTCATCTTCCAGCACTAGCAATGCAGTGTGATTCA  
AGACAACCTCCAGTTATTTAGCTTTAAATTCAGCAATTTACCTGGGTGTTGCGGGCTCGGTTCCGGCTTT  
GGACAGGACTCGAACCCGGCAGATTTCTGGCAAATTTGGGCGCATTCTACTTAAAAAAGTGGCATTTCAA  
CGTCTTTTTCTCAGATGAAATGCATCTAAATTCATAAAAAAGCAACATCACCCACTATCTATGCACCTTAA  
TCGCTTTGCAACCCCTCCCGCGAAAAGAAAAACCACCATCAAAAAGATGCTACCAAGCCAGCAAT  
AACGACAAAAACAAACAAAAAACCAATTAACAATGGTTTTTATTTTACACAAAAAACATTAATGAC  
AAATTTAACGCTTATACGATGACAAGAGTGAACATGAAAAATGGAAAACGTTTTTCTGTGTTTGAATTTT  
TAGTCTTTTCCAGTTTCGTGTAATAAATGGCTTTATCCGCCATAAAGATGCTCAAATCTGTTACCTGGTG  
ATGACATTCAGGAAGGAAAAATCTGGCGGATAACGCAATAGTGTGATTTATAAGGAGTTTCAAGTAAAAAT  
TACAGGCAGCGTGTCTTTTTACACAACTCTGGCTGACTGACAGCAAAAACCCCGCAAGCCGGGTTTTT  
TCACTGGGGTAGCAGTAGTACGAAAGTGCCGCTCAGAGGCATCACTTGAGATTGAGCACATCCTGCATGT  
CATAAAGACCGGCACCCCTGCTGACCAAGCCACTTGCCCGCCCGCACAGCACCGTTGGCGAAAGTCAGGCG  
ACTTGAAGCTTTGTGGCTGATCTCCACCCGCTCGCCGATATCGGCAACATGACGGTATGCTCCCCACC  
AGATCGCCGGCGCAATGGTGGCAAAGCCGATAGTGTGCGATCCCGCTCGCCAGTGTATCCCTCGCGAC  
CATAGACTGCGCACTCCTTGAGATCCCGGCCAGCGTTTTGGCGACCACTTCCCCATGGAGAGCGCAGT  
ACCGGATGGCGCATCCACCTTGTGGCGATGGTGGCCCTCGATGATCTCGATGTCGGCGTAATCCCCATC  
ACCTTGGCGGCCTGCTCCAGCAGCTTGAACACCAGGTTGACCCCGACCGAGTAGTTGGAGGCGAACACGA  
TACCAGTCTGTGCTGCCCCCTCTTTCAGAGCAGCCTTGCTGCATCGTCAAAAACCGGTGGTGCCGATCAC  
CATCTGCTTGTGGTGGGCGAGCGCAAAAAGCCAGATTGGCAAGGGTCACTCGGGGCGGGTGAAGTCGATG  
ATGAGATCAAACCTCGTCACGCACCTTGTCCAGACTGTCACTGATCGCCACACCCAGATGGCCAGCCAT  
TGAGCTCACCGGCATCAAGACCGATCACCGCCGAACCCGGCCGCTCCAGTGCAGCCCCGACCACTACGCC  
ATCGGTGTTGGTGTGATGGCCTCCAGCAGCACCTTGCCCATACGACCATTACAGCCCATCACGGCCACACGG  
ATCGGATTGTCCATCTCCACCTCTCATCTCTTTAATTTATGGAAAAGAGACCGTTTTTACCAGCCCGCGCC  
GGGTTTTGAAAAGCCATGATGCCACCACTCCTTGTGCGCTCTCCAACGGCAGCGCACACTGGCTGGCCAA  
GAACTTCTTTTTGGTACAGGCCGTTTTTTCATCGTCTCACTCCATCATTTGGCAGACCGGGTGGCATCTG  
ATAGGTTTGAACGAGTGAATGCCAGCATAAGCAAAATCAGGGCAACGCCGTGTCGATATCAAACGAGG  
TGCAAGGATGAGCGCAGGATTGCTGTTTGTGTTGGGTTGATATCACTGACCCTGGTCATACTGGCCGCG  
GCTCTGCTGTTTTGGCGGGCCGAGTCCGGCACCGGCGATGGCCAGCATCAACGACCTTTCAAGGGGAGTG  
GCTGGAGCAACATGCCACCCCTCTCAAGATACCCGGCGGTGACGGCACGCAGCTGGCCTATCGGCACATA  
TGGCGCAGAGGGCAATACGAAGAATAACAAGGTCAAGGGCAGCGTGGTACTGGTTCACGGCTCTTCTGCC  
AGCAGCCAGAGCATGCACAAGATGGCGGACGCCTTTTCGCAAGCGGGATATGACGCCTACGCCCTCGATA  
TTCGCGGCCATGGCGCATCGGGCGACAAAGGCACCATTGCCCTACATCGGCCAGCTTGAAGACGATCTGGA  
AGATTTTCATCAAGTCGGTGGCCCCCGCAAGCCTGCAACACTCGTCGGCTTCTCGTCAGGGGTGGCTTT  
GTGCTGCGCGTGTGCTGGCAGCACGCGACAAACCTGTTTCGAGAGCTATCTGCTGCTCTCCCCATCTTG



GCCCCACCGCCGCAACTACCGGCCAACAGCGGTGGCTGGGTGCGTGTGCGGCTTGCCTCGCCTCATCGC  
CCTGAGCATCCTCAACGGTTTCCATATTTCCGCACTCAACCATCTGACCGTGTGAACCTTGCCTTAAT  
GATGAGGCGAAATCACTGCTGACCCCTCTACTCTTCAACCTTGCCTTAACCTTTCAGTCAGAGCGCG  
ACTATCAGCAGAATTTACGCAATGTGCAACGCCTCTGCGCCGTGATCGCGGGTGCAAATGACGAAGCCTT  
CCAAACAGATCAACTTGAACCTGAGTTAAGACGTCTCGGCATCTCCTGGCCTGTACCCTGCTGCCTGGA  
ATTGGCCACATTCGCTGACGCTGGAACAGGATGCTCTCGCGACAGCCGTTTCAGGCGGTGGAGAACTGA  
CACAGTAACCACACAGCCAGGTCTTGTGTCCACGCGTCTTGAAAATATCCGTATCATGCTCACGTAGAG  
ATAGAGAGAGGGGCTGCGGGAGAAATCCCCATGATGGCATGCAGAGATCTTATCGTTTACCCTTTCCCTTA  
TTAAAGGCACGCGATACCCCCAGATACCCGCTGACTGCGTCAGAACAGCAATGAACAATAAACAGCACCA  
ACTTCTTTTTCCGAATATTCTTTGGATATCTCAACAACACCAGAATCACCAAACAAAAACCATATCCAT  
CTGGACGTCTATCTTGACCAAGCGAGGTGACTACTACTGTGGGCACCCCAATGCGGCAGGATGCCCGC  
CCTGTTTTCCCCCTATCCCTATCCGATACCGATACAGGTACAAAGCAGTTTATGACAGGAGGTATTGTTCAATTT  
CAGAGGAACACATGATCCAGATCCAACCCAGTGCCAGGGCCTTGTGCGCACTTCTGGTTTTTCTCGCACT  
CTTTATCGGTACCGGTACCTGGCTGACCCTGCAGGGGGTCGAATTCGCCTTCTATCAGCTGCCCGCTCCG  
GTTGCTGCCCTGCCTGCGGTGATGCTGGCCCTGCTGCTTGGCAAAGAGAGCTTCAACAGCAATCTGGAGA  
CCTTCTTCAAGGGGGTTCGGCCACAGCAATATCATGGCGATGTGCCCTTATCTATCTGCTGGCGGGCGCCTT  
TGCCAGCGTGGCCAAGGCCACCGGCGCGTGTGATGCCACCGTGGCGCTGGGTCTCTCCCTCATTTCCCGGC  
TGGGCGCTGTTGCCCGACTGTTCCCTCATCTCTGCCCTTATTGCTACCGCCATGGGCACCTCCATGGGCA  
CCATAGGTGCCGTGGCGCCGGTTCGCGCTGGGCGTGGCGCAGGCGCCGGTATCGATCCGGTGTGATGGC  
AGGCACCATTTCTCTCCGGCGCCATGTTTGGCGATAACCTCTCCATCATCTCCGACACCACCATAGCAGCA  
ACCCGCAGCCAGGGGTGCGAGATGAAGGACAAGTTCCGCGAAAACCTCAAGATTGCGGCCCCAGCTGCCA  
TCGCGGTGATCCTGCTCTATCTGACCCTGGGCTCAGTGGGTGAATCCCCAGCCAACGGCAGCGCCATCGA  
GCTGTTCAAGGTGATGCCTTATCTGCTGATCCTGGGGCTGGCGCTCGCCGGAGTGAATGTGTTTGTGGTG  
CTGGGGATCGGTATTCTGGCCGCCGGAGCGGTGGGCATGATCAACGGCTACGCCATCGGTGAGTTCAGCA  
AGGATATCTATCAGGGCTTTACCGCATGCAGGAGATCTTCTGCTCTCCATGCTGATCGGCGGCCCTCGG  
CGCCCTGATGGAGCGTCAGGGTGGACTGGCATGGATCAGCGAGCGCATCAGCGCCCTGATTGCCCGTTTC  
ACTCGCGAGACAATGGTGAACAGAACGAGAAAAGCCGCGAGCTCGGCATCGCCGGGGTGGTGAGCCTCA  
CCAACCTCTGCACCCCAACAACAGCGTGGCTATTATCGTCCGAGCAAGGTAGCCCGGGATAGGGGCA  
ACACCACGGTGTCAACCCCGCCGCGCCGCTCATGCTCGATATTTTCTCTCGCTGCTGAGTACAGGGCTG  
ATCCCTGGGGCGCACAGGCGCTGCTGCTGGGATCCATCTTTCGCCCTGTGCGCCGTTGGCGGTGGTGAGCA  
TGAGTTTCTACCCGATGGCGCTCGCGGTAGCGGCACTCATTGCAGTGTGTTGTAAGCACCAGATGCGCGG  
CAAAGCTGACAAGTAACAGACCAGACGCTGGCGCGCCGACATGCTGTCAACAGGGGCCACACCTTGGCCC  
TTGTTGACTACTAACGGATCAGCCAGCATTTATCCACCGTTCCGGACATCAGCCGTCCGGGGCGGGAG  
TTCCCTGTCCCCCTTAACGTCAAGAGTGAATGTGCTAAGGTAGAGCGGTTCAAGCCATCGATGCGCAG  
CTATGCCAGAGGTTCCCCATGCATGAGTCCCAACCCGAACGTCAATCCCTGCGCCAACGGTTCGTCAAC  
GCCGCAAAAATCTGAGTCCGGCCGAGCAGCAAGCGGCGGCCAACAGCTGCTGGCCCAGTTCAAGCAACA  
CCCCGAGATCCTCGCCGCCAAACGCATTGCCCTCTATCTGGCCAATGACGGGGAGATCAACCCCTTGCCC  
ACCATCCATTGGCTGTGGGCCAGCACAAGAGGTCTACCTGCCGGTGTCCACCCCTTTACTCCGGGT  
ACCTGCTCTTTTTGCGCTATAACCGCTACCAGTCCCATGGTACGCAACCGCTACGGCATCGAAGAGCCGGA  
GCTGGATATCCTGCAGGTGGTGCCCCACTGCACGCTCGATCTTATCTGCACCCCGCTGGTTCGCCTTCGAT  
GCTCAAGGTAATCGCCTTGGCATGGGGGGCGGCTACTACGATCGCACTCTCGCCATCTGGCATGAGCACA  
AGCTGGGCCCAAGCCGCTCGGCATTGCCACGACTGCCAGCAGGTGGATGCAGTCCCGCAAGAAGAGTG  
GGATGTGCCGCTGCCCCAAATCATCACCCGAGCCACTGCTGGCGCTTTGAATAAGCTGTTTTTGGCAGG  
GAATCCCGGCTTTGTGCGCGCAAACGCAGAATAAACAGGCAAACGATTTACAAAAGTCCCTCTTTTTTGCC  
AGGAACGTGAGCAACAAGTTCGCGACGGGGTACCGGGTGGATATAATGCGCCCGCTTTTTTCTTAAGGA  
ACGATCATGACTCAAGATGAAATGAAGAAGCGCCGGTGGGCTGCGCTCAAGTATGTGGTTCCCGGCA  
CCATCGTCGGGGTGGGCACCGGCTCTACTGTCAACCACTTTATCGACGCGCTGGCGACCATGAAGGACGA  
GATCAAGGGGGCGGTATCCAGCTCCGTTGCCTCTACCGAGCGCCTCAAGGGCTTCGGCATCACCGTATAT  
GATCTCAACGAGATCGACGCCCTCTCCGTCTATGTGGATGGCGCCGACGAGATCAACGCAACCCGCGACA  
TGATCAAGGGCGGCGGCGCAGCCCTGACCCGCGAGAAGATCGTTGCCGCGTAGCTGACAAGTTCATCTG  
CATCATCGACAACACCAAGACCGTTCGACGTGCTGGGCCAGTTCCCGCTGCCGGTGGAAAGTATCCCGATG  
GCCCGCAATAACGTGGCCCGGAAATTCGAAACTGGGTGGCAACCCGGTGTGGCGTGAAGGCGTGGTCA  
CCGACAACGGCAACCACATTTCTGGATGTAAGAGGTATGGCCATTACCGACGCCAAGGCGTGGAAAGTGGC  
ACTGAACGCCATTGTTGGCGTGGTCACCAACGGCCTGTTTCGCCGCGCGGCGCCGATGTTGTCCTGATC  
GGTACGCCGGACGGCGTGATTACCCAGTAATCCCGATACCGGCAGCACAGTGCAGCGGCATCCTCGCACG  
CCAGCGCCACTCTGCCACCTCTGACGCAGCAGCAGCGTTGATTGAGCCCCGGGATGGGATATGACCCAAA  
CATTGCACTGTGAATAAATGACGGCGCCTGATGGCGCCGTTTTTTATTTATCCCTCAACAAGTTGCATACG  
GATGTTTACAACATTCGTTGATAACTTCAAAGAATTTGACTTTTCGTACAAAATATTCCTCTCCCAAACG  
TTTTTGTACTTTACGGTTTTCTTCGCACACCAAATCTGCACTTACGTTTGCACATACAGAGGGATCGTC  
ATGACTGCCAAGTTTTCGTTGGACAAGGATAAAAATCAAGGTTCTGCTGCTGGAGGGGGTTACCCCAACA  
CCGTAGAGACCTTTTCGTGCCGAGGTTACACCAGTGTGGAGTATCTCAAGACCTCGCTCTCCGAAGAGGA

GCTGATCGAGCAGATCCGCGACGTCCATTTTCATCGGGCTGCGCTCCCGTACCCAGATCACCGAGAAAGTC  
CTCGACGCCGCCAACAAAGCTGGTCGCCATCGGCTGCTTCTGCATCGGTACCAACCAGGTCGAGCTGGAAG  
CGGCCAGATCCGCGGTATTCCGGTCTTCAACGCCCCCTTCTCCAACACCCGTTTCGGTCGCGGAGCTGGT  
ACTGGGCGAGATCCTGCTGCTACTGCGCGGCATCCCCGAGAAGAACGCCAAGTGCCATCGCGGCGTGTGG  
GAAAAACTGGCCAACCGCTCGGTGGAAGCGCGCGCAAGAAGCTCGGCATCATCGGCTACGGCCACATCG  
GTACCCAGCTTGGCATCATCGCCGAGAGCATCGGCATGAAAGTTTATTACTACGATATCGAGAACAAGCT  
CTCGCTGGGCAACGCCATCCAGGTGCCAAGCATGGTCGAGCTGCTCAATATGTCTGACGTCATCAGCCTG  
CACGTACCGGAGACCGCTCCACCAAGAACATGATCGGTGCCGAGCAGCTGCGGATGATGAAACCGGGCG  
CCATCTTCATCAACGCCGCCCGCGGTACCGTGGTGGATATCGATGCGCTGGCTGACGTCATCAAGAGCGG  
CCATATCGCCGGCGGCCCATCGACGTCTTCCGGTCGAGCCCAAGTCCAACGACGAGGAGTTCCAAAGC  
CCGCTGCGTGGGTTGGAGAACGTCATCCTGACCCCGCATCGGTGGCACCACCCATGAGGCGCAGGAGA  
ACATCGGGTGGAAAGTGGCCAACAAGCTGGTCAAATACTCCGACAACGGCTCCACCCTCTCCGCCGTCAA  
CTTCCCGGAAGTGTGCTGCGCTGCCGGGCCACAAGGGCTCCAGCCGCTGCTGCACATTCACCGCAACCAGCCA  
GGCGTGATGAACCAGATCAACCAGATCTTCCGCCGAAGAGGGGATCAACATCGCCGGTCAATACCTGCAGA  
CCAGCAGCCATATCGGTTACGTGGTGATCGACGTGGAGACCGAGCACAGCGAGAAGGCGCTCGCCAAGCT  
CAAGGAGATCAACGGCACCATCCGTGCCCGCATCCTCCACTGATAGCCCCGTTTATCCAAGCACCACAAAA  
GCCCGCTCGTGATGACGGGCTTTTGTATGAAGCAGAACCCTCAAAGCAGCGTGATGGCTTACCACCACCCCA  
ACAGGTTGCGCCTACTAGCGCGCCCCACACCAGGGCATTGAGGGCCAACGCGATAAAGACGGCGGCAGA  
GCCCAAATCCTTGGCGCGACCGGAGAGCTCATGATGCTCGGAGCCAACCCTGTCTACCACAGCTTCAATG  
GCGGAGTTGAGGATCTCGACGATCACCACCAGCCAGCTGATGACGATAAGCAGCAGGATCTGGTTGAGAG  
AATCCCCCAGCCAGAAGGCAAGTGGCATCAGCAACAGGATCAGCATCAGCTCCTGCCGAAAAGCCGCCTC  
GTTAATCCAGGCTGACTTGAGCCCCCTTCATGCTGTAACCGGTTGCGTTGATGATGCGGGTGACCCCGGTT  
GCCCTGGCTTTGCCACGCTAACTACCTCATTTGGAATCGATTTTGGCCTCACATCCTATCAGAGCCCCC  
CAAGGTTTCAATCAGGGGACTTTTGTCTTATTTTATCTCTTTGCTTTTTTCGCCCCCTGCGGGCTGACACCA  
CCACTCGAGACTTGAGTTGTATGTCCATTCACACAGATGAATTCGCGACCCGTCGCCCTGGAGTCACTGA  
TCACTCCGAGCGAGCTTGCCACGCGTTTCCGATCACCATAACCTTGCCAGAATCTGCTGGATGCCCG  
TCGCGAAGTGGAAAGCATTCTGGCCGAGACGATCAGCGCCTGCTGGTCATTGTGCGCCCCCTGCTCTATC  
CATGATCCCGCTGCTGCTCGCGAGTATGCCAGCTCAACGCCCCCTCAACGCCCCGCGGAGCAGTATAAAGAGCC  
TCTGCATCGTGATGCGCACCTATTTTCGAGAAGCCGCGCACCATCGTTCGGCTGGAAAGGGCTCATCAACGA  
TCCGCGCCTCGATGGCAGCTTCGACGTCAACGAAGGGCTGAAACTGGCGCGCAAACCTGCTGGTCGACATC  
AACGAGATCGGCATGCCACCGCCACTGAGTTCTTCGATATGGTGACCGGCCAGTATATTGCCGACCTCA  
TCACCTGGGGCGCCATCGGCGCACGTACCACCGAATCCCAGGTACACC CGGAGATGGCTTCGGCCCTCTC  
CTGCCCGGTTGGCTTCAAGAACGGCACCGACGGCAATACCCGCATCGCCATCGATGCGGTGCGCGCCGCC  
CGTCACAGCCACATCTTCTATTTCGCCGACAAAGACGGCAAGATGACCATCTACCGCACCGCCGGTAACC  
CCTTTGGTCATGTGATCCTGCGTGGCGGCCACCGACCAACTACGACACTGCCAGTGTGATGAAGCATG  
TGAAGCGCTGGCCGATGTGGCCCTGCCAGAGCGTCTGGTGGTCGATTTACGCCACGGCAACAGCATGAAG  
GATCACCGTTCGTCAGCTGCTGGTGGCGCAAGATATCTGCGATCAGCTGCGCCGCGGCCGTACCGGCATCG  
CCGGCATCATGGCAGAAAGCTTCTGGTGGAAAGGGCGTCAGGATGTGGAGAACGGCTGCGCCGCCACCTT  
CGGCCAGAGCATCACCGATGCCTGCCTGTCATGGAGCGACACCGAAACCTGCTGGCGATGCTGGCCGAA  
GCCGCACAGGTGCGCCTGAGCAAACAGGCTTGAACCTGCGAATAAAAACCAAAGGGGCGGGTATTTTTGATA  
CCGGCCCCCTTCTTCTGCTGTCAGCCGATTACGCTTCGCTAATCGGCCCTACATGCGCCCTCTTTCTCTGT  
ACACCCGACTTACAAACTGGGCATAAAACACACGCGCCCTGCCGCTTCGATGCGGTTCGGTTCGGATCTGG  
AATACCTGCGCCAGCAGCGCCTCATCCACAGCTCGACACCCCTTCGCGCACACCAGCGCCCCCTTGCA  
GGCAGAGAAGGCGGTTCGGCCAGTCGATGGCCAGATTGATATCGTGATGGCTAGCACCACCAGCAAGCC  
CTGCCCGGCCATGGTTTTTCAGCAAGCGCAATAGCGCCAGCTGGTGTGATGCAGGTCGAGCCCCCGCAGCGG  
TCGTCACAGCAGCAGCACCTTGCCGGTTCGATTGAGGCTCGGCCACACCTGCAGCAGGTCGCGGCAATCA  
GCACCCGCTGCTGCTCGCCCCCGACAACCGGCTGAAATCAGAGCCAACAAGGCTTCCAGTTCCAATGC  
CTCGCACAGTGCATTTATCGCCTCATTCTGTCTGGCGGGTGCAACCATCTCATCGAGCCCCAGGCTCAAC  
ACCTGAAACACCGGAATATGAAACAGCTGGGGCTGACGTTGGGGCAGCATGGCGCGCCGTTTGGCAAGCT  
CTGGCCAACTCATGTGAGTAAGCACTTCCCCCCCCAGCAGCACTGTGCCATCGGCGGATAAAAATCCCCGC  
CAGCGCCCCGAGCAGGGTCGACTTGCCACTGCCATTTGGGGCCAAGCAGCGCCACCAACTGGCCGCCATGC  
CAGCGGATATCTAGAGGAGAGAGCCGTCCGGCAATGGCGAGTGCGCGCCTCCAGCAGCGGCGCAGCAG  
CACGAGAAGAAACCGGCATGGGATCAGCGGGTGACATCGGCATCTTGCCTCAACAACGGTAAATAAGGA  
GACTGCACGCCCCGACCAAATCATGCAGATATTCATGCAGCACCATCGGCAGTTTGCCTCAATAGCAGGT  
AGATAAAGAGCGGCGCCCCACCGAGGCGGTGATGACGCCGATAGGCAACTCCCCCGCGCTCAGGCTGGA  
TCGAGCAACCAGATCGGCCGCCAGCAGCAGGGCCCCCGCCGAGCGCGAGGCGGGCAGCAGGAAGCGC  
TGATCGCTGCCACCGCAGAGCCGAGCAGATGGGGCACCACCAACCCGACAAAACCGATGACACCACACA  
ACGACACCGCCACACCGGTCAGCAGACAGACCGCAAGCACCAGCCGCCCCCCGCATCTTGTGACATCCAT  
CCCCATCAGGCGGGCTGAGTCTCCCCCAACAACAACCTGTTGACAGCCCTTGCCCTGCCAGCAGAGCCAG  
CCCAGGGTGTAGCGGCAGCACCAGCCACCAGGCAAACTGCTGGCTGCCGTAAGAGAGGCTCCCCATCA  
TCCAGAACATGAATTCACGCAAGGAGCCATCGTCGGCAAAGTACATCAGCCAGGTCATGGCCGATTTGGT

GAGGATGCCGATGGCCACACCAAACAACAGCAAGCGAGCATGACCGAGACGCGCCCGGCGAGCCAGCCGA  
ATGAGCAGCATGGTACCAGCAAGGCGCCACCAAAGGCCGCGCAGCGACAGCCCCAGCCGGGAGATAGA  
GGCCGAGGGACTTGGCCACCGCCATCGCCACCATGGCAGCCAGTCTTGTCCGCTGAAACGCCAAGCAG  
CCCGGGTTCGGCCACCGGGTTGTGCAGCATCACTGCAATACGGCGCCGCCACAAGCGAGCGCGGCCA  
GCCAATAGGGCCAGCAGGGCGCGCGGCAGGCGCAGCTCCAGCAGGATGCGCTGTTTCGAGATCGCCAAGGG  
GCTGCCAGGGCAGCAGCACAAACTCGCCCCAGACGAGGGGAGAAGAGAAAACAGCAGCAGGGTTCAGCAGCGT  
CAGGCCACAGAGCCAGCGCCGCTGCCAGCGCCGCTGGCGGGCGATAAGGGAGAGGTACAAGGATGATCCC  
CGAATAACAAGGCTTCCCCCGGCCCTGTGCGAGCGCCGGGGGAGAAGCAGGAAAAGGGCATGATAACAG  
TGGCTTGCCACCCAAGGTC AAGGCTGGTAACGCTTGGCCATCACGCTTATCTCGCCGCTGGCCACCAGAT  
TTTGCAGAGCCACCCAGCAAGGGCTGGCGCAGCGACTGGTGAGGTGAGTGCTTGCTCATCCCCAGATAGAG  
GGTCACCGGCTGGCGGGGCGGTAGTCCGCTTGCCTATCCGCTGACCCGCTGCACCATGCGCAGCAGTATG  
TCCACCTGACAGTCGGTGCCAATCATCAGCGCGCAGGTGACCCGCTGCACCATGCGCAGCAGTATGATCTT  
CGGTGGGCACTCCGTGCTTGTGCGAGGCGGCTGTCACTGTTGAAGGGCTCAAAGTAGGCGGAGTTGAGCAC  
ATAGCCACCTTAACCCCTGCAGATCGCGGTATTGGTGGATCCGGGCCACATTGACCGGCTGACCATAA  
AACCGGGCCAGCACTGGTAGTAGGCAGGCTGCAGATAGTCGATGAACTGCGCCCGCTCGGCGGTATAGG  
CGAGGCCAATCATCAGATCGACCTGACCGGTCTGCATCTGCTTGAGCGCCCTGCCCCACGGCATCCGCCG  
TACCTGCAACTCAATGCCGCTCGCCTGCTGCAACCGGCGCAGGATGTCCATGTCGAGCCCTGCAACCGG  
CCATCCGCTTGCAGGATGCGAAATGGCGGCCACAGATCGGTGGCCACCCTCAGCGTCGGGGCCGCACGCA  
CCGGCATGGCAAATAACAGTAAAAACTATCCCGCATAACTTGCCATCCCGTCGCATACCTCGCACGG  
CTTATCCTGTTGGTTAAAAATACCCTCCCGCACCACGTATGAAAACCCGTGGTTCAGGGATAAAATGCGC  
CGGATTTTCAAGGAGAACCCTATGAACCCGATTTTACCAGTATCGGTCTGCTGCTGCTGCAGCAACGCT  
TTATGACCTTCGCTGGTACGCTCACCTCAAGAGCATGAACCATAAAACCCCTGGATCATTGCCGCCCTGGT  
GAGCTGGGGTATCGCCCTGTTTGAATACCTGCTGCAAGTGCCCGCCAAACCGCATCGGCCATACGGTGATG  
AGCGTGGGCCAACTTAAAATCCTGCAAGAGTGATCACACTCACCGTATTCGTCCCTTCTCTATCTTCT  
ATCTCAAGGAAGATCTGAAATGGGACTATCTCTGGGCAGGGCTCTGCATTCGCGGGCGGTCTTTTTTGT  
CTTTCGCGAGAACTGACCGGCGCCTGAGGCTGTACTCAATATCATCCCGCTCATGGCATCTCATTTGA  
TCGACGAGGCCAAAAAATGGAATTGCGAGACATGTTACAGATCCTGGCCAAGCAGGATGGCTCAGAC  
TCTATCTGTGACCGCGCGCCCCCTGCGCCAAATTAACGCGCGCCTGCGCCCCCTCAACGAAACGCC  
GCTGGAGCCGGGTGAAGTGGCGCGGATCGCCAGGATCATGGATGGCGAGCAGAAGCAGATGTCGAG  
AAGGATCTGGAGATGAACCTCGCCATCTCCCTGCCCCAGATCGGCCGCTTTCGGGTCAACATCTTCAAGC  
AGCGCAACGAAGTCTCTCTGGTGGCCCGCAACATCAAGACCGAAATCCCCCGCTTGAAGATCTCAAAC  
CCCCGCTGTGCTGCTCGACACCATCATGGAGAAAACGCGGTCTGGTGCTGTTTGTGCGGCGGTACCGGCTCG  
GGTAAATCCACTTCGCTGGCGGCGCTTATCGACCATCGCAACCGCAACAGCGGCGGCCACATCATACCA  
TCGAAGATCCGGTGGAGTTTCGTTTCATCGCCACCGCAAGAGCATCATCAACCAGCGGGAGGTTGGCGTGGA  
TACCCGTAGCTTCCACGCCGCCCTGAAAAACACCCTGCGTCAGGCGCCGGATGTCATTTCTTATCGGCGAG  
ATCCGCGATCGCGAGACCATGGAACATGCGCTGGCTTCTCCGAAACCGGCCACCTTGCCATCTCCACCC  
TGCACGCCAACCAACGCCAACCAGGCGCTGGATCGCATCATCAACTTCTTCCCCGAGGAGCGCCGCCCCCA  
GCTGCTCAACGATCTGGGCAACAACCTCAAGGCTTTTGTCTCCCAACGGCTGGTGAAAACACCGATGGC  
GGCCGCCGGGCGCAGTGGAGATCATGCTCGGCACCCACACCATCCGCGACATGATCAAGCGCGGCGAAT  
TTGGCGCCTCAAAGAGGTGATGGAAAAGTCCAAGGCCCTCGGTATGGTCACCTTCGACAGTGCCTGTT  
TGATCTGGTAGTGGAAGGGGTAATTGAGGAAGAAGAGGGCGGTGAAAAACGCCGACTCGGCCAACAACTG  
CGCCTCAAGATCAAGTTGTGGAAGGAGAAGGGGCGAGATTGCCAGCAGCAGCGATGCCACCGGCTGGAGCC  
TCGAACCCACCAAGGACGAGAAGGGCGATTTTTTCTAACTAGCCCCCGAGAACCCCGGGCCCGCCGGG  
GTTCTCTTTATCCAGCACGGCTGACCCGACTTATCCGCTCAGCCACGCAGATCACAGCCAGTACAGCACC  
AACGGCGAACCGCTGGCAATACGCCACATACTCGTCGCCGAAACGGGCGCGTAGCAGCCGCTCCTCCGG  
CATGATCTGAAAGCGGGTCAGCCAGGCCACCAGCAGATTTGGCCCAACCCAGACCCAATTCACCCGAGA  
TAGCAGCCCCAGGCGACCAGCCAGCAGAGCAGTCCAGATACATGGGATTGCGACTGACACGATAGACGC  
CACAGGTACACCAGACGACTGGTGTGCTGAGGTTTTGGTGGGGCTGACCGTGGTTTTGGTGGTGACGAAACCG  
TTGCAGGGCACAAAGCCCATGATGGCCCCGCAACGACCAGCACAGCCATCAGCGCCATTGCCAGATG  
CCGGGCTGACTCTCCTCTCTTAGCCACCACATGGCCCCGGCACAGAGCAGAAAAGATCAGCGGTGGTGGA  
AACGTAACCTCAAGATTAACCATTTTTCTTCCCTGACGAGTGTGCGCCGAAACCCGTGTTGCGGTAGACTCC  
CAACCAGTCAGCGCCTGTTGAGAGTGACAAAGATCATAATAATAACAACAAGTTGTGGTTAAACCACCAC  
CAATGTGGCCGACCCCGTCCAAACTATCCAACCGGAATAACAAAAAGGAATCACCATGCACAAGAAAAC  
CTGCTGGCTACCCTGATCTTCGGCCTGCTCGCGGGCCAAGCCGTTGCGGCTCCCTATCTGCCCTTGCGA  
CGGATCATCGCAACGGCCAGGAGCAAACCGCCAGCAACGCTGGTTGGAAGTGGATCTGGGCGCCTTTGA  
ACACAATATCCAGACCCTCAAGGATCGCCTCGGCGACAAGGGCCCGAGATCTGCGCCATCATGAAGGCC  
GACGCTTATGGTTCATGGCATCGACCTGCTGGTCCCTCCGTGGTCAAGGCCAATATCCCCTGATCGGCA  
TCGCCAGCAACGAAGAGGCGCGCTGCCCCGCGAGAAGGGCTTTACCGGCCGCTGATGCGGGTGCCTGC  
TGCCACCCCGGATGAAGTAGAGCAGGCCCTGCCCTACAAGATGGAGGAGCTGATCGGCAGTCTGGTCAGT  
GCCCAGGGTATCGCCGATATCGCACAGCGCCACCACACCACCATTCGGGTGCATATTGCACTCAACTCCG  
CCGGCATGAGCCGCAACGGCATCGACCTGCGTCTGGCCGTTGCCAAGCAGGATGCGCTGGCTATGCTCAA

GCTAAAGGGGATCACCCCGGTGCGCATCATGACCCACTTCCCGGTGGAAGAGAAAGAGGACGTCAAGATG  
GGGCTGGCCCAGTTCAAACCTGGACTCCCAGTGGCTGCTGGAAGCGGGCAAGCTGGATCGCAGCAAGATCA  
CCATCCACGCCGCCAACTCCTTCGCCACCCTGGCAGTGCCAGACGCCTACTTCGACATGGTGCGCCCGGG  
CGGCCTGCTCTACGGCGACTCCATCCCCTCCCACACCGAATACAAGCGGGTGATGGCATTCAAGACCCAG  
GTCGCCTCGGTCAACCACTATGCAGCGGGCAACACCGTTCGGTTATGACCGCACCTTTACTCTCAAGCGTG  
ACTCCTGGCTCGCCAACCTGCCGCTGGGCTACTCCGATGGCTATCGCCGCGCCCTCAGCAACAAAGCCTA  
TGTGCTGATCCAGGGTCAGAAGGTGCCGGTGGTTCGGCAAGACTTCCATGAACACCATCATGGTGGATGTG  
ACGGATCTGAAAGGGGTGAAACCCGGTGACGAGGTGGTGTCTGTTGGCCGTCAGGGTGACGCCGAAGTGA  
AACAGGCGGATCTGGAGGAGTACAACGGCGCCCTGCTGGCGGACATGTACACCATCTGGGGCTACACCAA  
CCCCAAGAAGATCAAACGCTGATAACACGATATGAAAAAGGGCTCCCGCGGGAGCCCTTGTGTATTGCG  
TTCATTGTCTGCCGCGCTCAAGCGGCCTTTTTTCGGGTACAAAACAGACTCAGCCCCATGGATGACAGCA  
GGATCAACGCGACTACGCCAGTGCATGCCCGTTCGGGTCTGAAGATATCCAGCAGCAGCATCTTGAC  
CCCGATAAACATCAGGATCAGTGCCAGACCGTATTTGAGCAGGGCGAAGCGATCAGCCACACCAGCCAGC  
AGGAAGTACATGGCACGCAGACCCATGATGGCGAAGATGTTGGAGGTGACGACGATGAAGGGATCCGTGG  
TCACCGGAAGATGGCCGGGATACTGTCCACCGCAAAGATAAGATCGCTCACCTCCACCAGCACCAGAAT  
GAGCAGCAGCGGGGTGGCATAAGCGCACACCGTACGCCAAAACGAAGAACTTCTCCCTTCCAGGGTCTCG  
GTCACCTTGAAGCGACGGCGCATCCAGCCTAGCAGCGGATTTGTTGGCCAAGTCCGGCTCCTTGTGGCCG  
CCCACAGCATCTTGGCACCGGTGACGAGCAGGAAAGCGCCGAACAGATAGAGGATCCAGTGGAACTGCTC  
GATAAGCCAGCTACCGGCGAACACCATAACGGCAGCATCACGATGGCACCCAGCACCCCGTACAGCAGC  
ACCCGGCGCTGCAGCTCGGCCGGAATGGCAAAGTAACCGAACAGCATCAGCCAGACGAAGACGTTGTCCA  
CTGCCAGCGCTTCTCGATGAGGTAGCCGGTGAGGAACTCCAGTCCCTTCTGGTTGGCGATTTACAGGCC  
CGCGCTGTGATCGAGCCAAAGCCAGATGGCCAGGTTGAAGAGCAGGGCCACACTGACCCAGATGAGGGAC  
CAGACACCCGCTCTTTGAGGGACACCTTGTGTGACTTGGCCGACCCGACAAAGCGTATGTCTATCCATA  
ACAGGACCAGCACTATGCTGAAGAAACCGGTCCACATCCACCATTCACCCATTTTTCACGTCTCCAAAAA  
CGAAAAACCCACGACCGAGAGGGCGTGGGTTTGGCTTTGGAGCAGATACACCTTGCCTCTCGGCAAGGTC  
TCACTTACAGCTGATTTGCATCGACTGCCCGGTGCCGGGTGCACTGCAGGATATGGGTGCACCGTAATG  
ACGACAAACCGGCGAGAAGTTACTCCCTTGTTCGCGGATAGTAGCAGCGGTAAAAGATAACGCCAAGA  
GGCATCTTACTGCGCTCAAAAATAAATCGGGGCCCCATCAAGGAGCCCCGCAAGCAGGTTCAACAGCAGC  
CCCATCAGAGCGGGTGCAGCTTGAGGCAGGACCGCGTATCGAAGTTCCCTCCAGCTCAGCCGCGGGGT  
CTTGGCGCACTCGGGGCCAGCCACCGGGCAGCGGGTGGCGAACACGCGAGCTGACGGCGGATTCATCGGT  
GAGGGCAAGTCTCCTTCCAGGATCTGGATCACTTTGTTGCGCTCCAGCTCAGGGTCCGGGATCGGCACCG  
CTGACATCAGCGCCTTGGTGTAGGGGTGCAACGGGTTGGCGAAGATCTCCTTGGGGTCCCTAACTCGAC  
GGCGTTGCCAGATACATCACCAGCACCCGATCGGAGATATGCTTGACCACCGACAGGTCGTGGGCGATG  
AAGATAAGCGACAGCCCCATCTCCTTTTGCAGGGATTTGAGCAGGTTGACCACCTGTGCCTGGATAGAGA  
CATCAAGCGCTGACACCGGCTCATCGCAGATGATCATCTTGGGCTCGAGGATCAGCGCCCGGGCGATACC  
GATCCGCTGGCACTGGCCGCCAGAAAACCTGTCGGGTAGCGGTTGACCAGGTTGGGCAAGAGCCCCACC  
TTGCTCATCATGGCGCGCACCTTCTCCTTACCTCTTCCCGTGGCAGGTTGGGATAGAAGGTGATGAGCG  
GCTCGGCAATGATGTGCGCGATGGTTCATGCGCGGGTTCAGAGAAGCCAGCGGGTCTGGAAGATCATCTG  
GATCTCTTTGCGCTTCTCGCGCAGGGCATTCTGATCGAGCTTGGTGAGATCGTCACCCAGCCACACCACC  
TTGCCATCGGTGGCCGGTACCAGACCGATGATGGCGCGGGCAAAGGTCGATTTGCCGCGAGCCGGATTCAC  
CCACCACGCCGAGGGTTTCCCTTTCGTAGAGGGCGAGGGTAACGCCATCGACCGCCTTCAAATCGGATGG  
CTTGGCCCAAGGCCACGCCTTGCCACTCTTGATACTGAAGTGGACCTTGGAGTTCAGACACTTCCAACAGC  
AATTTTTTGTGGCACCCATTTAGTTGGCCCCCTTGTTCATGGCATCCGAAACCCAGTGACAAGCACGCT  
CCCGACCGTCTGTAACGGAGTCAGGATCGGTGACTGCTGGCCGCAAATCTCGCTGACCCGGTGGCAACG  
CTCCTGGAAGGGGACGCCGTTGGGCGAGCAGCAGGTTGGGCGGATTTGCCGGGATGGTGGGCGAGCAT  
TCCCCTTCGGTATCGAGCGGGGAATGGCGCGCAGCAAACCTTCGGTGTAGGGGTGGTTCGGGCGATAGA  
AGATATCGTCTACCTTGGCGTACTCCATGGTACGACCGGCATACATCACCAGCACCTTGTGTCAGATACC  
GGCGACCACGCCAAGGTCATGGGTGATCATGATGATGGCGGTGTTGAACTCACGCTTGGAGCTCGTTCATC  
AGCGTCATGATCTGGGCTGTACGGTTCAGTTCAGCGCGGTGGTTCGGCTCGTCCGGGATCAGCAGTTGCG  
GCCGGCAGAGCAGTGCATGGCGATCATCACCCGCTGACGCATGCCCGCGGAGAACTCGTGGGGATACAT  
GCCCATCCGCTTGGCTGCTTCGGGAATTTTACCAGCATCGAGCATCCGTACCGATTCTTCGAACGCTTCC  
GCCTTGCTGACGCCCTTATGCAACATCAGCACTTCCATCAGCTGATCTTGCACCTTTCATGTAGGGGTTGA  
GCGAGGTCATGGGGTCTGGAAGATCATGGCGATCTTCTCGGAGCGGATCTTGTGAGCTTGGACTCCGG  
CAGGTTGAGGATCTCCTCCCCCTGAAATTTGGCGGAACCGGTAATAATGCCGTTTTTGGCCAGCAGCCCC  
ATGATGGCAAAGGCCGCTGAGGATTTGCCGGAGCCGGACTCGCCGACGATCCCCAGGGTTTACCCGCGAG  
AGAGAGAAAAGTTGAGGTCGTTGACCGCCACCACATTGCCGTCCGGGGTCTTGAATTCGACCCGCGAGATC  
TTTACATCTAGTAACTTTCATATAAAAACTCCTTATCGATCTTTTCGTGATGCTTTCCTGTGATCCGATG  
CTCGATTAACGATCTTTCCGATCGAGGGGCTCACGCAGACCATCCCCGAGGAAGTTGAAGCAAACAGGG  
TCACCACATAAAGCAGGCGGGGAACAGCAGTTGCCAGATGGCCACTTCCATCGACTTGGAGCCTTCATC  
CAGCAGGGCACCCCAGCTGGTTCATCGGTTCTTGAACACCAAGGCCAGGAACTCAGGAAGGATTCAAAC  
ATGATCATCCCCGCCACCAGCAAGGTGGCGTAGACGGCCACGATACCGAGTACGTTCCGGTACGATATGGC

GGGTGATGATCTTCCACTTGGAGACGCCACAGACGTGGGCTGCCTCGATAAACTCCTTGCTCTTGAGGCT  
GAGAGTCTGGCCCCGCACGATACGCGCCATGTGAGCCAGCTCACCGCCCCGATGGCGATAAAGATGAGC  
GCCAGATTGCGGCCAAAGAAGGTGACCAGCATGATGACGAAGAACATGAAGGGGAAGGCGTTGAGGATCT  
CCAGTACCCGCATCATCAGGCTGTGACCCCGCCCGCCGATAAAAACCGGAGGCAGCGCCATACAGGGTGCC  
GATGATGACCGCCACCATGGCGCCCATGATGCCGACCATCAGGGAGATGCGACCGCCAGCAGGGTGCGC  
ACGAACAGATCGCGCCCCAGACTGTCCGGTTCGGAAGTAGTGACCCGCTTCCATATCCGGCGGGCAGCTGCA  
TGGCGCCCCAGTCCGGATCGTCAAAGGTGTATTGGGACAAATGGGGGCCAAAAGATGACCGCCAGACCGAT  
GATGGTCAGAATGATCAGGCTGGTCAGGGCCGCTTGTTCGCGAGGAAACGGCGACGGGCATCCTTCCAC  
AGGGAGCGCCCCTCCACCACTTCCACTTTTTGCGCGAACGCCTCGACGGCATCGCGTTTTTTCAGTTGAAA  
CAACCATGATGAACCTCTGAATTAGTAACGGATCTTGGGATCGATAAAGGCGTAGAGAAATATCGACCACA  
GCGTTAAAGGTGATGGTGAGGGCACCGACCAAGATGGTCAGACCGAGCACCATGGAGTAAATCACGGTTAA  
GAGCACCGTTGACGAACAGCTGACCGATCCCCGGCAGGCCGAAGATGGTCTCGATCACCACGGAACCAGT  
GATGATGCCGACAAAGGCCGGGCCAGATAGGAGACCACCGGCAGCATGGCCGGACGCGAGCGCTGTTTT  
AGGATGATGTGACGCGAGCGGCAAGCCCTTGGCACGGGCGGTACGGATGAAGTTGGAGTTCATGGTCTCGA  
TCATACTGCCCCGCATGATCCGCGAGATGGCAGAGATGTAGTACATCATCATGCCGAACACCGGCAGCAC  
CATAAATGGATGCCACCACCCTGCCATCCACCGGCAGGGAACCAACCAGATGAATACTGAAAAACAGC  
ACCAGCAAGGGCGCCAGCACAAAGCCCGGGATCACCACCCCGCCATGGCCGACGACATCAGTAGATAGT  
CGATGATGGTGTCTGTTCAGGGCCGCTATGGTCCGAAGGTGACCCCGCAGCAGCAGCGCGAAGAAGAA  
GGCCGTGGTCCCAGTCTTGGCGGAAACAGGCAGCGCCTGGCTCACCAGATCATTGACGGTGAATCCTTG  
TATTTAAAAGAGGGGGCCCAAATCACCTGCACCAGGTTGCCAGGTAGGTGAGATATTGCATGCCAATGG  
GTTTTGTCGAGCCCGTATTTGGCCTCGATGTTGGCGATGACTTCGGGGGGCAGTGAACGCTCGCTGGTAAA  
GGGGTTACCGGGGGCGAAACGCATCATGAAGAAAAGACGGTGATCAAGACCAGCAGAGTCCGGATCGCT  
TCCAATAGCCGTTTTAAAAATGAATTTCAACATAGACATTTCTGTCTGTACTGCTTCCAAATGGTCCGG  
GTTGTAATAAAGGCCCGCCGTCCGGCGGGCCCTGCTTGTATGCGACTTGTTCGCTTTAAATCAGTGAGCA  
ATGATGTACATATCTTTGCTGTAGAGGTTATCCAGCGGGTTGGCCGGGTAGCCGCCACATAGGGTTTTGA  
CCATACGGGCAGTCACGTACTGGTAGATGGGGCGATCGGCATGTCTTTGGCCAGGATCTCTTCAGCCTG  
GACGTAGAGCTTGTTCGCGGCAGCCACATCGACCTGATCAGGGATGAATCCATCAGCTTGTGCAACTCC  
GGATTGGAGTACTTCCCGTTCGTTTACCGTGGGTGGTCTGCATCAGATCCAGCATGGAGGAGGCTTCGT  
TGTAGTCGGCGATCCAGCCGGCAGCAGCTACCTCAAACCTGACCCCTGTTTCTTGGTTTTCCAGGTAAATTT  
CCACTCCTGGTTGACCAGGCTCACCTGCACGCCAGCTTCTTCCACATGGAGGCCACGGCCACAGCCACT  
TTCTTGTGGTTGTTCGTCGGTGTGTAGAGCAGCTCGAACTTCAGCGGCTTGTGGCATCGAAACCGGCCCT  
CTTGACGAGCGCCTTGGCCTTGGCATCACGCTCGGCCTGGGTTCATCTTCGACCACTCGGGCGCTACCGG  
CTTGAAGCCATCGACGAAGTCCGGCACCAGGGTGAACCCGGCGTCTGACCCGACCCATCACCTTGTGCG  
GCGATCACGTCGCGATCGATGGCATAGGAGAGCGCAGTACGGACACGCACATCGTCAAACGGCTTCTTCT  
TGACGTTGTAAGCGCTCGATGGGCATCTGATAGGTGATGTCCACTTCGCCCAGATAGCGGCTCAGG  
TCGGCGTGGTAGACTGGATGGGCAGATAGACCACCTTGTGATGACGGTCTTGGCATCGTTCAGTAGT  
GCTTGTGTCGCTCCACTTCGACGCGCTCGTTTACCACCCAGTTCTTCAGGGTATAGGCACCGTTGGATAC  
CATATTTTCCGGCTGGGTCCACTTGTACCAGAACTTCTCGATCACCTTCTTCGGTACCAGGATAGGTGGTA  
GTGTGGGAGAGCATGCTGACGAAGTAAGGGATGGCTTTCTCAAGCTGCACTTCGAAGGTGTAGTGTGCGG  
TCGCCTTACGCCCAGCGTATCAGCCGGCTTTTTACCTGCGATGATCTCGGAGGCATTGGCAATGGTCCG  
GATCTCCAGATACCAGGAGTAAGGAGAGGGCGGTTTTTCGGATCAACGGCAGCTGGAAAGCAAAAACGAAA  
TCGTGGGCAGTGACCGGGTACCCTTGGACCACTTGGCATCTTTCGCGAGGTGGAAGACGTAGTGTGTT  
TATCCTTGGTTTTCCAGGATTCAGCCACAGCCGGGAGAAATTTCCCTTTTCGGGCCGGATGCAACGAGACC  
TTCGAACAGGTGCGCGCAGGATATTGGATTGCACCGTTCTTTCGGTCTTGTGCGGGTCAAGGGTCCGAGCC  
TCGGAGCCGTTGCCTTTTTACCAGTTGCTGGACTTCAGCCAGCTTGGTTCCCGCCGGAACATCGGCAGCCCT  
GAGCCACATTGACGCCACCAACAGTGCAGCCACCAGCAATGTGTTAATCATTGTTTTTTTTATGAGTCAT  
TTCCCTACTCCAACAAGAACATTCCATGCATTTTTTTAAAGTGACGGGGTTAAAACCCGCTCCCAGCATAA  
TTCCCTGCCAATTCCGATAATGCAACAGATATTGTGAGGGTAATCGTCATTTTCTGGTCAAAAAATCAGC  
TGACGTGCGCTTTTTTTCAGTATTTAAAACACCGGCAAAAGCGCTCATTTTTTACACAAAACGACCGATTCTAGA  
AAAGACCGGGCAAAAAGCAACCAATAAAAAGCCGGTTCAGGAGACCGGCTTTCATAAAGCGGAGCTGGCT  
CACATCAGGCTGGGGAAAACCCCTTGATACCGGCCACCATGATCTCGATACCCAGCGACATCATGATAA  
GACCCATGATACGGGTACCACGTTGATGCCTGTGTTGCCATGATCTTGAACAGCAGCGGCGCGGCAGC  
GAAGATGAGCCAGGAGCAGAAAGAGAAGACCACGACAACAACCTGACATGCCGAGCAGCTGCTGCCAGTGG  
CTCTGGCTGGCATAGACAATTACCGAGGATATGGCACCGGACCCGCCATCAGCGGCAGCGCCAGCGGTA  
CCACGGCGATAGACTCGCGCACCGCCAGTTACCCCTTCTCCTGTTTGTGTTGCTTCACCTCGCCCAGCTT  
GCCCTGCAGCATCGACCAGGCAATCAGGGTAATCAGCGACCCACCGGCATCCGGAACGATGCCAGCGAG  
ATGCCAAACCCATCGAGGATCAGCTGCCCATATACATGGAGACCAGCAGGATCACCATCACCGCGATAT  
TGGCGGTGGTATTGGTTTTTTCATCCGCTCGGCCTGGGTATGGTGGCTGGTCAGGCTGACAAAACACCGGCAA  
CAAACCAAGCGGGTTGATAATTGCGAACAACCGACAAAAAACTTCAGATACAACGAGACGTCAATTGCT  
GCCATAGGCGCCTTCCAATAGAGTTTTCGGGCCAGCGGGCCAATCCATTAATTTCTGTGCGTAAATTTACA

TCATAGCCAGAGCGGGACCAATCAAATAATCTCACCATTTTGGAGGTTTTTTAGTTAGTTCATCTAATG  
CATCTGCGCTAACTGGCATAAACCGATGCCAAAAGCCCTTTCTACCACCCGACACGCGTTAGAAAAAGTGA  
GCGCAAGCCTGCTTAATCATGACCAGAGAGTCCGACAGTGCCTGACCGAATGACCAAGCGACTCGAGAGA  
ATCCAGGCTTTGCCTTCCCCTACTATTTAGAGCCAGACATCACTTCATTGACTCGGCAAGAGAGCCACAATG  
CAAAAACCGGGAAAGGGGACAGAAATGGCCCCCTCGGGGAATAAAGCGGATTAGTCATGGATTAACAACAA  
CAATCATTTTTGCAACAAACGCTGGAATAAAGTGCCTTTGCCGGTGATTTTGAAACCAACTCACTCATAT  
TTGCTAACCTATAACCGCCAAAATAGCTCTGTAATACTATGGCTGAGTGCAATTAACCACTTGATAAATGT  
GGTTTATTACTCTGCATTAACAAGTCTCTCGCCTTTCCCTTTGATGCACATTCGGATAACATCAGTCAAA  
CAAGGATTGTGAAATAAAATTTCTTTTGTCTTTTGTACACATGATCCAGATCAAGTTTTTCTGAGTCA  
GCCCCGCTCTATAACTCGACTCAGAAAAGCGATTTAGTAAGGCATGTGAAAAAGCTGTTGCAACGATAACCGT  
CTTGACAGGGCGACTATAAATTTGCCGGCATTGCCAACGCTTTACTAAACAGTTTTCAAATAATCAGGAGA  
TAAACATGGCAGTAACCAATTTGGCTGAACCTGGATGCCTTGTTCGCCCCGCTTAAGGAAAGCCAGCGTGA  
ATTGCCAGCTTCTCTCAAGAGCAGGTAGACAAGATCTTCCGTGCCGCCGCCCTGGCCGCCAACACGCC  
CGTATCCCCCTGGCCAGATGGCCGTGGAAGAATCCGGTATGGGTATCATCGAAGACAAGGTTATCAAGA  
ACCACTTCGCCTCCGAATACATCTACAACAAGTACAAAAGACGAGAAGACCTGCGGCATTTCTGAGCGAAGA  
TGATCAGATGGGTACCATCACCATCGCCGAGCCGGTAGGTATCATCTGTGGTATCGTTCCGACCACCAAC  
CCGACCTCCACTGCGATCTTCAAATCCATGATCGCGCTCAAGACCCGCAACGCCATCATCTTCTCCCCGC  
ACCCCCGTGCCAAGAACTCCACCAATACCGCTGCCAAGCTGGTACTGGATGCAGCTGTTGCCGCTGGTGC  
ACCGAAAGACATCATCGGCTGGATCGACCAACCGTCTGTTGAGCTCTCCAACGCCCTGATGAAGCACGAA  
GACATCAACCTGATCCTGGCCACCGGTGGTCCGGGCATGGTAAAAGCAGCCTACTCCTCCGTAAGCCTG  
CTATCGGTGTAGGTGCCGGTAACGTACCTATCGTTATCGACGAAAACCGCCGACGTGAAGCGTGCCGTTGC  
CTCCATCCTGATGTCCAAGACTTTTCGATAACGGTGTGGTCTGTGCTTCCGAGCAGGCAGTCACTGTTGTT  
GATGCCATCTACGACCAAGTTAAAGAGCGCTTTGCATCCCACAAGGGCCACGTGCTCTCCAAAGAAGATG  
CTGACAAGGTACGTAAAGTCATCCTGATCAACGGTGCCCTGAATGCCAACATCGTTGGTCAGCCAGCCAC  
CAAGATTGCCGAGATGGCAGGCGTACTGTACCGGTGATAACCAAGATCCTGATTGGTGAAGGCGTCAAG  
CTGTGTGCAGAAGATGAGTTTGCTCACGAGAAAATTTGCCCGCTGCTCGGTATGTTCCGTGCAAGCAGCT  
TCGAAAACCGCGTTGATATGGCCTGTGACATGGTCAACATCGGTGGTATCGGCCACACCTCAGGTCTGTA  
CACCGACAGGACCGCAACCGTACCCGCATCAAGTACTTCGGCGACAAGATGAAGACCGCGCTATCCTG  
ATCAACACTCCGTTACTACCAAGGCGGTATCGGTGACCTGTACAACCTTCGCAATGGTCCGCTCCCTGACCC  
TGGGTTGCCGCTCCTGGAGCGGTAACCTCCATCTCCGAAAACGTGGGTCCGAAAGCACCTGATCAACAAGAA  
GACAGTCGCAAAACGGGCAGAAAACATGCTGTGGCACAAACTTCCGAAATCCATCTACTTCCGTGCTGGT  
TCCCTGCCGATCGCTCTGAGCGACCTGGAAGGTAAAAAGCGTGCCATGGTCGTAACAGCCGCTTCCCTGT  
TCAACAACGGCTACGCCGATGAACTGGTCAGCCTGCTGAAAAGCACAGAATATGGAAGTGAAGTGTCTTA  
CGAAGTAGAAGCTGACCCGACCTGGCTGTGGTTCGCAAGGGTGCCGAGATGGCCAACCTCTCAAACCG  
GACGTTATCCTGGCGCTGGGCGGTGGTTCACCGATGGATGCGGCCAAGATCATGTGGGTGATGTACGAGC  
ACCCGAACACTGCGTTGAAAGATCTGGCCATGCGCTTCATGGACATCCGCAAGCGTATCTACAAGTTCC  
GAAAATGGGCGTGAAGGCCGAACTGGTCTGTATCACCACCACTTCCGTTACCGGCTCTGAAGTCACTCCG  
TTTGCGGTAGTAACCGATGAAGTGTCTGGTCAGAAGTATCCGCTGGCTGACTACGAGCTGACCCCGAACA  
TGGCCATCGTTGATGCCAACCTGGTCATGGGTATGCCGAAGTCCCTGTGTGCCTTCGGTGGTATCGATGC  
CGTGACTCACGCCATGGAAGCCTATGTTTCCGTAAGTGGCTAACGAGTACTCCGACGGCCAGGCGCTGCAA  
GCCCTGAAAATGCTGAAAGAGTACCTGCCGTCCAGCTACCAGAACGGTGCCAACGACCCGATCGCTCGCG  
AGAAGGTGCACAATGCTGCCACCATCGCCGGTATCGCGTTCGCCAACGCCCTTCCGGGTGTGTGCCACTC  
CATGGCTCACAACTGGGTGCCGAGTTCACATTCGCGACGGTCTGGCTAACGCCCTGCTGATCAGCAAC  
GTCATCCGCTACAACCGCAACGACAACCCGACCAAGCAGACTGCGTTCCTCCAGTACGACCGTCCGCAGG  
CTCGTCTGCTTACGCCGAAGTCTGCTGACCACTGGGCTGACTGCTGCCGGTGACCGCACCGCAGCCAA  
GATCGAGAAGCTGCTGACCTGGCTGGACGAGCTGAAGGCTACCTTGGGTATCCCGGCTCTATCCGCGAA  
GCTGGCGTGACTGAAGCTGACTTCCCTGGCCAAGGTTGACCAGCTGGCTATCGAAGCTTTCGATGACCAGT  
GCACCGGCGCAACCCGCGCTACCCGCTGATCAGCGAGCTGAAGCAGGTTCTGCTGGACTCCTACTACGG  
TCGTCCGTTACCGAAGCCGCTCCGGTAACTGCTGCCCCGGTTGAAGCCAAGGTTGAAGGCAAGAAGAAA  
TCCAAGGCCTGATAACCGGCTCTGAGATAACAAGCCCGCCTGCGCGGGCTTTTTTTTATCTGCCACTT  
GCCACTAATCACAGCCATCATCTCCCTGCCGATTGCGCTAGTGCAGCCCCTAACCTCCAACCAACTCGC  
CCCAGCCAATCCGTTATCGGCAGCCCAACCTGTGACTCAGCATTGATGCCCTCGGTGATAACAAGAGCAC  
GCTCCATCACCTCCTATCCCCTTCCCGCAACGAATTACCTGACGGGCAGATGTGAGCAGTCAACGCCAT  
CTCAAGAGCTAAAGGTGTGATAAACAGGATAAGCGGAGCCTCGTAAACGCAATGCAGCAGAACTGCCGAC  
TGGCGTACGTGCAGGGCCAACCGGCTGGCAGAGACAGAGCAATGATAATGCGCAGAGAAAAGCGGGAAAGA  
CTGTGAGTAAAGAGAGTTGTTGACCCGGTGTCTCAGCCGACACATCAGCAGTTGCCACGATGCAAAGATA  
AAAAAATGGCAGCCATCTGGCTGCCATTGAGAGAGCACGATTCAGCGATCAGAGGGTCCGAGCGATTTCA  
TCGGAGATGGAGCCGTTGTGATACACCTCTTGACAGTTCGTCAGATCTTCCAGCATGTGATCAGACGCA  
TCAGCTTGGGTGCAGTTTCTGCATCCAGCTCCGCTTCGGTGGAGGGGATCATGGTCACTTCGGCGCTCTG  
GGCCTTGAAGCCGGCAGCTTCCAGACCATCCAGCACGGTACCGAAGTCGTTCCGGGTGGTGTACACCTCG  
ATGGTGCCATCCTCTTCGGTGAACACGTCATCTGCGCCGCTTCCAGCGCGGCATCCATCAGGGCATCTT

CGTCTACGCCCACGAAAGTCAGCAGACCTTTCTTGCTGAACAGATAGGCAACGGAGCCGTCGGTACCCAG  
GTTGCCACCGCACTTGCTGAAGGCGTGACGCACTTCGGCTACGGTACGGTTACGGTTGTCGGTCAGGCAC  
TCTACCATCACCCGACAGCCAGCCGGGCCGTAACCTTCGTACACGATGGTCTCGAGCTGTTCCGCCATCGC  
CACCACCGGCCACGCTGAATGGCAGGTTGATGGTGTGCGGGTCATGTTGTTGGTTCAGGGCGGCAGT  
CACCGCAGCACGACGCGGGTGTGGCGGGATCGGCATCACCCAGACGCGCGGAGGTAGTGATTTTCG  
CGGATCAGCTTGGTGAAGATCTTGCCACGCTTGGCGTCTTGAGCGGCCCTTGCGGTGTGGTGGTGGCC  
ATTTACTGTGACCTGCCATAGAGACTCTCCGTTATTTTTTAAATGTCAGTAACACTGATCATGACTAACC  
CAAGGAAACACAGAGGCCGACGCGGGCGGCCCTCCGGTGCCGGTATCGGCTTACTCGTCGCCCTTGACG  
GTGGTTGCAATCGCCAGCTCACCCAGTTGGGCGGCATTTGGCAAGGCTGGGGGCGTCTGTCATCAGACAGG  
CAGCCCGGTCGTTTTTCGGGAAGGCGATGACATCCGAATGTTTTTCGGTGCCGGTCAGCAGCATGCTGAG  
ACGGTCCAGACCGAAGGCCAGCCGGCGTGGCGGGTACCGTACTTCAGCGCATCCAGCAGGAAGCCG  
AACTTCAGGCGCTGCTCGGCCGGGGTGATACCCAGGATGTGAAACACGGTGGATTGCATCTCGCTGTTGT  
GGATACGGACAGAGCCGCCACCCACTTCGTAGCCGTTGATCACCATGTCGTAGGCGTTGGCGTAAGCACC  
TACAGGGTTGGCTTTTCAGCTCGGCCGGGCTCATGTTGCTCGGCGCGGTGAACGGGTGGTGCATGGCGGCC  
AGACCACCTTACCATCTTCCCTCGAACATCGGGAAGTCGATGACCCACAGCGGTTTCCAGCTGTTCTCCA  
GCAGGCCAGATCGCGACCCACTTTTCAGACGAAGGGCGCCATGGCATCGCAGACCACCTTCTTGCTGTC  
AGCGCCAAAGAAGATGATGTCGCCGTCGGCAGCGCCGGTACGAGCCAGGATCTCGCGCACGATGGCGTCA  
GAGAGGAACTTGCAACCGGAGACTGCACACCTTCGATAACCATTGGCCGCTTCGTTGACCTTCCATCCAGG  
CCAGGCCCTTGGCACCGTAGATGCCGACAACTTGGTGTATTGCTCGATCTGCTTGCAGAGAGTTTCCAGC  
ACCGCCCGGCACTTTTCAGAGCAGCCACACGGCCCTTCGGATCGTTGGCGGGGCCCGCAACACGGCGAAC  
TCGACAGCAGTCAGCAGATCAGCCACATCGACCAGCTCCATTGGCAGACGCGAGTCCGGCTTGTCCGAGC  
CGTAGCGACGCATGGCTTCGTGCAAGGTCATGATCGGGAAGTCGCCCAGATCCACGTTTCCAGGATGTGCAG  
CCACAGTTTTCGGATCATCTCTTCCATCACTTTCACGCACTTTCGGCGCGGTCATGAAGGAGGTCTCCACG  
TCGATTTGGGTGAATTCGGGCTGGCGGTTCGGCACGCAGGCTTCGTTCACGGAAAGCACTTGACGATCTGGT  
AGTAGCGATCGAAGCCGGACATCATCAGCAACTGCTTGAACAGCTGGGGTGATTGCGGCAGAGCGTAGAA  
CTTGCCCTTGTGCACGCGGCTCGGCACCAGATAGTCACGGGCGCCTTCCGGGGTGGCCTTGGTCCAGCATC  
GGAGTCTCGATATCGGGAAGCCGTGCTCGTCCATGAAGCGGCGTACGAAGGCGCTGGCCTTGGCACGGG  
TCTTCAGGTACTTGGCCTCGGGACGACGACATCCAGGTAGCGATACTTGAGGCTGATCTCTTCGCT  
GTTGACCTGATTGAAGTCCAGCGGCAGCGGCTCGGCACGGTTGATGATGTTGAGTTCTGGGCGCAACACT  
TCGATGGCGCCAGTGGCCATGTCGCTGTTTTGCTGGGACTCGGGACGGGTGCGCACCCACCGCGGTACCT  
GGATGCAGAACTCGCCGCGCAGCTCGGAGGCCAGGGCGAACGCATCAGGCTTGTCCGGATCGAAGAACAC  
CTGAACGATCCCTTCCCGGTTCGCGCATATCGATAAAGATCAGACCGCCGAGATCACGACGACGATGAACC  
CAACCGCACAATGTAATGGTCTGCCCTGCATGGGCTCATTTGACCTGTCCGCAATAGATAGAGCGCATGG  
ACTTCTTCCCTTCGAAATTTGATAGAGACGGTTAACCTTGGGCCGCCGGGCACGACTGGCAAGCACCGTCT  
GTCTCACAGCTGGCCAGATTTTTTTTTCTTACCCTTGAATCAGTCTCGTACCATCCGGTTCCTTGA  
GCCGGAAGCCTGCCGCCGATATCAGCTTGACCAGATTTCGGCTTGCTACAGGCCGGACAGTCCGTCAGGGG  
GGCATCGGAAAGCTTTTGCAGTTTTGCCAATTCATGGCCACAGACGTCGCAACGATATTCGTAGATAGGC  
ATGGGTCAACAAGAAATGAAAAACAAAAGGGCTGGCATTATAGAGGAAAACCCCTTTTGGGTAAAATGG  
CCAGCAGCCTCCTTTTCGCCAGTTTTTTGCACTCGATGGCAAAAAGCGGGCAAAAATCGGCACGAATGCA  
CCAAGAGCGAAGAGAATAGCCATCATGAGCCTCTATTTGGGCCTGCCACAGTGGTCCCACCCAGCTGGC  
CCGGCCAGTTGCTGGGCTTGGCGCAAGCCTGCCGAACACCTCGCCCACTACGCCACCGTGTTCATTC  
GGTGGAGGGCAATACCACCTTCTACGCCCTGCCGCCCCCGATACTGTACAGCGCTGGGCCGATGCGGTG  
CCCGATCACTTTCGTTTCACTTCAAATTTCCGCAAACCATCAGCCACCAGAGCGATCTGGTGAGCGCAG  
ACAAACAAGTCGCCGACTTTATTGCTGCTCGCCCCGCTGCACGACAAGCTGGGGCTGCTCACCCGTGCA  
GTTGCCCGCCCGTTTTTGGGCCAGAGGGGCTGGCCAGACTGGCGGCTTCATCGATCGGCTGCCGCGGGC  
TTTTCGCTACGCCCTCGAGGTGCGTCAACCCGACTTTTTTCGCAAGGGGGAGGCCGAGCGGGCATGTAACC  
GGCTGCTGATGGAACAGGGTGTGAACCGGGTGTGCTCGACAGCCGGCACTCTTCTCGGTGCCAGCAAC  
CACGCCAGCCCTTGTGATGCCCAGGGCAAGAAAACCGCGCCTACCGGTGCATCTGCTGGCCACCGCCAAC  
GCCCCATGGTGCCTTTATCGGCTTCCGGATCCGGCGGCCAATCACCCCTTCTGCCCAGCTGGCTCC  
CCCCTGGCGCCAGTGGCTTTCCGAGGGCAAGGATCTCTACCTCTATATACATACTGCCGACAACGCCCT  
GGCACCTGAGCTGGCCCGCCAGATCACCCGCTTGTGAGCAGGAGATGGCCCCCTGGCCGGGGGAAAAC  
GATCGCGCACGGCAGGAGTGTGCGCTTTAGCCAACCCATTTCTGCGGCCATCGTTTTGCTGCAAAAAA  
AGTGCTTTTTTGTGGCGTGGCAAGCCCTGGCGTCAAGACAAAACGGCCATCAATCCTTACACTACCGCC  
CAAGTAAGGGTCCGGAACATGGCCCGTACGAACAGGACAGGTCCAAAGGATTTTCATGACCAGCCACCCCG  
TTCGTAAACAGGTGATAAATCTACTCTGATGGGTGTACCCAACGACTCAATTGAACAATACAGCCGGGT  
GATGTCGGACTGTGAGTTGCGCCAGCATGCATAACAAAGATCAAATTTTTGCGGCCCGGATCGCCCGA  
TTGGGTGACTTCTGTTTTGACGAACAGGTGCTCGATGTTTTTCCCGATATGATCCAGCGCTCGGTGCCGG  
GTTACAGCAACATCATCTTGCATCGGCATGATGGCCGCCGCTACGCCCAACCCGAGAGCCGACTCTA  
TGATCTCGGCTGCTCACTGGGCGCCGCGACCCAGGGCATGCGTGCCTATGTCAGCCAGCCGGCTGCCGC  
ATCACCGCGGTGGATCTCTCCATCCGATGATCGAGCGGCTCGCGCCACCTTCCGGTTTTCAAATCCG  
AGGTGCCGGTGGAGCTGGTAGAGGGCGATATCTGCGACATCGAGATCGAGAACGCCCTCCGTGGTGGTACT

CAACTTCACTCTGCAGTTTGTGCGAGCCAGAGAAAACGGGCCCCCTGATCCAGCGCATTACGATGGGCTG  
CGCCCCGGGCGGGATCCTGATCCTGAGCGAAAAGTTCTGCTTGAAGATGAACCGGTCAACGAGCTGCTCA  
TCGATCTGCATCTCGACTTCAAGCGGGCCAATGGCTACAGCGAGCTGGAGATCAGCCAGAAAACGCACTGC  
CCTTGAGAACGTGATGCGCACCCGACAGCCTGCCGGTGCATCAGGCACGCCCTGCGGGATGCCGGTTTCGTC  
CATCAGGATCTCTGGTTCCAGTGCTTCAACTTCGGCTCCATGATTGCCATCAAATCCAGCGACGCCCAGC  
CATGATCGACTTTGCCAATTTCTATCAACTGATTGCCAAAAACCGGCTGAGCCACTGGGTGCATACCCCTG  
CCCGCCAGCTACACGCTTGGAACATGACAACCAGCATGGCGACCTGCCGCGCTGGAATCGTGCCCTCA  
ACAAGTACCGGTGGTCTCCCCCGCAACATCGAGCTGAAAAGCCGGGTGCGAGATTGGCTCGGCCGAGAG  
CCTTGGCGAAGGTGAACGCAAGAAGGTGAGAGCCTGCTGCGCCACTTTATGCCTTGGCGCAAGGGGCCG  
TTCACCGTGCACGGCATCCATATCGATACCGAGTGGCGCTCTGACTGGAAGTGGGATCGGGTGTGCCCTCA  
ATATCAGCCCCGCTCGAAGGCCGTTACGTGCTGGATGTGGGGTGCGGCAGCGGCTACCACCTCTGGCGCAT  
GGTGGGTGAAGGGGCCAAGCTGGCGGTGCGCATAGACCCGAGCCCGCTGTTTCTCTGAGGCTTCGAGGCC  
ATTGCCACTTTCGCGGGCAATGATCAGCGCGCCACCTGTTGCCGCTCGGCATTCAGGAGCTACCGGAAC  
TGCGTGCCTTTGACACCGTTTTCTCCATGGGGGTGCTCTATCACCGCCAAATCCCCATCGAGCACATCGA  
GCAGTTGCGCAATCAATTGAAAAGATGATGGCGAGCTGGTACTGGAGACGCTGGTGATTGACGGCGGGGTC  
AACGACGTGCTGATGCCACCGACCGTTACGGCAAGATGCGCAACGCTCTGGTTTATTCCTCAAGCCGCG  
CCCTCAAGCTGTGGGTGAGCGCTGCGGCTTACCGACGTGCGGATAGTAGACGAGAATATGACCAGCAC  
CGACGAACAGCGTCGTACCGACTGGATGATTAATGAATCCCTGAGTACTATCTGGATCCAGACAATCCG  
GCACTCACGGTAGAAGGACACCCGGCGCCGAAACGTGCCGTAAGTATTGCCCGCAAGGCCAAAGACTAGC  
CGATGGCGATTACAGGAAGTTACTACTGACCCAATTCAGGAAGCACAGTTAAATGAATGACATGAAAAGCA  
AATTAAGGAATGACCCTGCTCTCCCTGCTTAGTCTCGGCGGGTGTCAATATGAAAAAGCGCCTCA  
GGTCCCTGCTCTGACGCTGGCCGAGCTTCGTAGCGAGCTGAGCCAGAGCGAGCAGCGCCTGCAAACATCC  
ATGGAACAGCAACAGAAGCAGTATGTGCAGCAACAGCACCTGCTGGTTCAGCTCAACACAGATGTCACCA  
ATATGAAAAGAGTCCGTCAAGCAAGTAGACCACAAGCTCGCCACCCCTCCCTCCGAGCCGCCAAGCCGAT  
GGCCATCCCCACCGAGAAGTGCCCGGCCCCCAATCAGGGTACACCATCGATGGCAAGCTGATGGTCCGTT  
GAAGCCGAGTGGATCTGGGTTGATGCGGCCAACGACGCCTTCAGGCGCGGGTGCATACCGGTGCGACCA  
CCTCCTCCATCAGTGCAGGAGATACCAATTTTCGAGCGCAACGGCAAAAACTGGGTGCGCTTCTTCCCT  
GAGCCATCAGGAAGTGGACGACAAGATCCAGATCGAAGCGCCGCTGGTGCGCCATGTGCGGGTGCAGCAG  
GCCTCTGCGGACGATCTGGACCCGCTCCGGTAGTGCCTTGGCCGTGCGCATTTGGCGACATGACCAGAGA  
AAGCCGAATTTACCCTGAAAGACCGTAGCGACATGACCTTCCCTGTGCTGCTGGGTGCGCAATTTTTGAA  
AGACATCGCCGTGGTTGATGTGGCCCCGGAATATATCCAACCCAAACCAAGCTCAAGGATGTGAAATAA  
TCCATGGTTTTCCCGTAAGCCGTTCTATTTGCTGGTAGCCCTGCTGTACATTGTGCGCCTAGGGATGACGA  
TCTATCACCATATCGCGTTGGATGTACCCCTGACGCCCGGTGAAAAGCGCCAGATCTGGTCCATCGAAGC  
CAAGCTGGAGTTTGGGGCAGCCGGTGGAGCCGGTATCGCCTCTCTGGCCATTCGGGGCACCAGCCCGGT  
TTCACCCTGATGAACGAGAACGCCGCCAGCCAGGTTACGGCCTCTCGTTTGTGAGAAAAGATGGCGATG  
CCCGCGCCGAGTGGTCCATCCGCACCGCCTCCGGCCGTGAGGAGCTCTACTACCGCTGACATGATGGC  
GGATGCCCATGCCAAACCGGCCGCAATCCGCAGCCGCTGCCATCGAGAAGCAGATCGAGAGTGAGCCT  
TACGCCACCGCGATGAAGCAGATCCTCGAGCGGGCCAGGAGCGCTCTGCCGACGGCTACACCCTGACTC  
GCGAGATCATCAAAGAGATCGAGAAGCAGGAGCAGAACGCCGAGCTGCTGAAAAGCACAAGAGCCGCGC  
CAACCTGATCGCCGAGCTGCTCAACAATGCTGACGTCCCCACCCGCGTGGTGATGCCCTGAATCTGGAA  
GATGGCCGCGCTCGTCAGGAGCTGGTGGATTACCTGCAGGTATTCAACAGCCCGACCGACTACAAGCTGT  
TCAACCCGCAAACCGGTGAACAGGGCCGTTCCGGCCAACCTGCTGCTGTGGGAATACAACCTCCGGCGCCCT  
GCTGGACGTGACCGGTGGTCAACTCCCGTGTGAGCTTCTCGATGATCGAGCAGGAGCAGCCGGTCCAGC  
GTTGCTCTGGCCAGAAGTTGAAAAATCAGAGATGATGAACTTCTCCATCCACAGCCTACCACTGGAAG  
AGCAGACCTGTTCAAGGGCTTGTGCTGATCCCGATCGGCGTGTGATGGTGGTGTTCCTGCGGGTCT  
GGTGGGGATCAAGACCTCCGGTACCTTTATGCCGGTGTGATCGCGTGCCTTTATCCAGACCTCGCTG  
GTCACCGGTCTCATCGGTTTCTGCTGATCGTCCGACCCGGTCTCATCATCCGCTCCTATCTGTCGCGC  
TTAACCTGCTGCTGGTTCGCCCCGAATATCGGCCATCATCATCATGGTTATCTCGATGATCGGTATCTTCTC  
CGCGTTGCGCTTCAAGCTGGGGCTGACCGACGGTATGAAGATCACCTTCTTCCCGATGATCATCTCTCC  
TGGACCATCGAACGGATGTCCATCCTGTGGGAAGAAGAGGGCCCCGAAAGAGGTGTTCCGCCAAGGCGGTG  
GCTCTCTGCTGGTGGCTGTCATCGCCTATCTGGCCATGGATAACGAGCTTATTCGTCACCTCACCTTCAA  
CTTCTCGGCCTGCAGCTGGTGTGATGGCGACCGTGTGTTGATGGGTAACACACCGGCTACAAGCTG  
AGCGAACTGAAGCGCTTCAAGCCGCTGGTGGACGAGATGAAATCTGGCGTCAACCCGGGTAAGGACAAGT  
AACCGATGTGGTTCTGGGAAAATAACACCACCCCGTGGAGCTGTCCCAATCAGGCATCCTCGGCATGAA  
CAAACGCAACCCTCTACATCAGCCGCTACAATCCGCGCAGCCTCTATCCGCTGGTGGATGACAAGCTG  
CAGACCAAGCAAATTCGCTGGATGCAGGGGTTACCGTGCCTGAGCTGATCGGTACCATCCGTGCCCAGC  
ACGATGTGGGTGCGATCACCGAGCTGGTAAAAGATTGGCCGGGCTTCTGCATCAAGCCGGCCCGTGGCTC  
GGGCGGCAAGGGGATCCTGGTGATCCTGCGCCAGGAAGATGGCCTCTTCTACAAGCCCAACGGCAGCGCC  
TCCAACGGTCAAGATCTGGAGCGCCATGTCTCAACATTTGCGGGGGCTCTATTCCTCGGCGGCAAGC  
CAGACGTGGCACTGGTGAAGGCCCTCATCAACTTTGATGATGTGTTGACGGCTACTCTTTTGAAGGGT  
ACCCGATGCCCCGGTGTATCTTCAAGGGGTTCCCGTGTGATGGCGATGATGCGCCTCTCCACCGCAGCC



TCCGATGGCAAGGCGAACCTGCACCAGGGCGCCGTGGGGTGGGTCTGTGCCTGCGTACCGGTCGTGCC  
TGCGGGCAGTGCAGTTTGGCAATCCGCTGCGCCACCATCCGGACACCGCCTCGATCTCTATGAGCTCAA  
GGTGCCTCCACTGGGATACCCTGCTCACCTGGCCGCTCCTGCTACGAGATGTCGGGTCTGGGTTATATC  
GGTACCACATGGTGTGGACAAGTTCCGCGGCCCCATGCTGCTGGAGCTCAATGCCCGTCCGGGTCTTG  
CCATCCAGATCGCCAACGGTCGCGGCCTGGTGCCCAATCTCAAGACCATCGAGAAGCTGGGGCAGGTGAA  
GATGAACGTGGAGCAGCGGGTCAATTTGCGCAAGGATCACTTCGGGATCTTTGAGGAATAAATTCTTCGC  
TTGTGAACATAAGCGCGCTATGGCGCGCTTTTTTTATGGCGATTGTCTGTGCGGCATATCCCCCACCAG  
CCATTCCGATCAGCATCTCATTTGAAACAACGAGTACGCCAGCGAACGGCAGCTTGGAAATAGCGATGGA  
GCGAGAAGAGTGTGACCGCAATGTGAGGGGATGGATAAATCTCAGGTATAAAAAAACCGGCGCCAAGACG  
CCGGTTCTTCAAGGAGATGCAGCCCCGATTACAGGGAGTACGATTTCTCGGACAGGTACTTGGCAACGCC  
GTCCGGAGAGGCTTGACATACCTTTTTGCTTTTTTCCCATGAGCCGGGCACACTTCGCGGTGCTCTTCG  
TGGAAATTGCAGGGCATCGACCATGCGCAGCATCTCGTCGATGTTGCGGCCCCAGCGGCAGATCGTTGACAA  
CCTGGTGACGAACGACACCGTTCTTGTGATCAGGAAGGAGCCGCGGAACGCCACGCCGGTTCGGGATG  
CTCAACGTATAGGCTTTGACAGATTTTCGTGTTTTACGTCGCGCATCAGCGGGTACTTGGACTGACCGATA  
CCGCCATCTTCCACTTTGGTGTACGCCATGCGTTGTGGGAGAACTGGGAATCGATGGAAACACCGATCA  
CTTCCACGCCACGCTTCTGGAATCTTCATAACGGTGATCGAAGGCAATCAGCTCAGACGGGCAGACGAA  
GGTGAATCGAGCGGGTAGAAGAAGACGACGGCAGCTTTGCTTTGATGTGGGATGACAGGTTGAATGAA  
TCAACGATCTCGCCATTACCCAGAACAGCTGCGGCGGTAATAATCGGGTGCGGGACGGCTACCAATACCA  
TATTTCAATTCCTCTTTATGTGAAGTGAACAATCCGGTGAGGATTGGGCTACCTAGAGCCAAGTCCATCTA  
ATTTCAAGCGACAAACTATAGACCCGGTGGTAGATTAGTTAAATCAAATTAATAGATAGCATTAATCGGG  
TTTTTCTATGCAACGTTGGCCCCAGCCTCAAACAGCTGCAATATCTGGTCGCTCTCGATGAGCACAAGAAC  
TTCAACCGCGCCGCAAGGCCTGTCTATGTCAGCCAGTCGACCCTGAGTACCGGGATCCAGACGCTGGAGG  
ACATGATGAACCTGCAACTGGTGGAGCGGGACCATAAGAGCTTCATTATGACCCCGGTGCGGCATGGAAAT  
CGTCGAGCGCGCTCGCAATTTGCTCTCCGATGCGCGGGATCTAATGGAGCTCGGGCAACATCAGGGCGGC  
GTGATGCAGGGGACGGTACGTCTTGGCTGCATTTCCACCATCGCCCCCTTCTGCTGAGCAAGCTGCTGA  
AAGAGTGCAGCAAAACCTATCTGACCTCGAATTTGTGCTGCGTGAAGACACCACCAGCAATCTGCTCAA  
GACGCTGGAACAGGGTCAGCTCGACTTGTGCTGATCCTCGCCAGCCATCGAGATCGGTGGATTTCACTGC  
AAGACCGTCGCGCAGGATCCGTTCCACATGGTGTATGCCCGCAGCATGGCGGCGGCTGTCATACCCCGT  
TCGACTACAAGGAGCTGCCCCAACAGAGCATCTTCTCTGGAACGGGAGCACTGCCTCACCAGCAGCGC  
AGTGAGCGCTGTGCGCTGCGGGACAAGAGCAAGATCAACCCGTTGCGCGCCACCAGCTGCACACCCTG  
GTGACAGATGGTGAAGCGGGTCTTGGCACACCTTCTGCGCAGATGGCCATCGATGCCGGCATTCTTG  
CCAACTCCGATCTGGTGGCCATCCCGCTGCGGGGAGAGACCTCTATCGCGAGATCGGGCTGGTCTGGCG  
CCCCAGCACACCCGAGTGCAGACCTTCTACAAGCTGGCCGAGCTGCTTAAACCGCTGATCAGCCACAAC  
GAGTGACAACAACGCCAGCCCTCGGGTTGGCGTTTTTTCAGTTCCCGCCACATTTTTCTCTCGGAGAC  
TAGGTCTGGAGCCAGATCCCTGTTTATGATGGAAAAGTTGTCTCGCCCCCTACTGCCAGAACGATTTGGC  
AAGATATGGCGCTCGATAAATGTCTCGTTTGGTAGACCCGTCGTTGGAGAGAGCCCGATGTATCGCAAGC  
TGCTGCTATCCCTGCTGACTCTGCTGCTGGCCGCTGTTCCAGCACGCCAGAGCCACCTCCGGCCCCCG  
GCAGAGCAGTGCCTTTGATGGCTTCTACCAACAGTGGCGCGGAGTGCCCTACCGGATGGGCGGCGCCAGC  
CGCGCCGGGCTAGACTGCTCCGCTTACCCAGCTCGCCTACAGTCAGGTGCTGGGCTTCAACCTGCCAA  
GAACCACCGAATCTCAGGCCAGCATTGGCAAAACGGTGGATCGCTACCGGCTGCAACACGGGGATCTGGT  
CTTCTTCAAGACCGGCTGGCAACAGTACCATGTGGGGGTCTACACAGGTGCCGGCGAGTTTATTCACGCC  
TCCACCAGCAAGGGAGTGCATCCGCTCCCGCTCGACAACGTCTACTGGAACAGTCGCTACTGGCAGGCAC  
GTCGGGTGACCCAGTAACCGCTCAAACGCTGCTTGCGGCACAAGTTGCGTGCCGATACTCTCCGTCAAT  
CCCTGTGCTATGTGCGGACACACAACCCGCGCTTATAACTCAATTTGGCCCCAAAGCCTGCATATCACAC  
CATTTTGTGATAAGTGGTGGCCAATTTTTAACACTTTTGCCTTTTTCTCATAACGCTCTCTGTCTGAT  
GACAACACGCGCGCGGATAACAAGCAGCGCGCGGCAAGTGGAGTGTGGCGCAACACTGCCGGACGGGT  
GTCCACAGCTGCAGTATCAAGGGTTAAATAGATAAGGAGATCGTGCAATGAAACAGTATCAAAGCTGGC  
TGGGGCAATACCTGATGAGTCGCCGTGACGGTACCACGCCATGGCATGCGAGATGGCGAGTTCCATCTG  
CGAGTTCTGGCAGCAGCAGGGTGTGAAAACGAACTGGACAAGTGGCAGCAGATTTACCAGAACCATCTG  
GAAAAGACCACCTGATCCCGACCGTTGCCTTGTGCTGCCAGCCATCCGGTGTGGGCGAGCAAGGCCACTCGCG  
ACCAACCCTATCAGCCAACCCCTCTCCCCAATTTTCCGCTACGTTAAACCGCTACCTCCGTAACTC  
GCATGTTGCCGCTTCAATTTTGTCTCTCGCTGACAACCGCAGCTCATTCCATCTCGGCAGCCACTTCC  
TGCGCCAGTCGATAAAGCCTGGATCTTGGGACACGCCGATTTGGGCGGGTCCCATGTAATAACGCT  
GCTCGCACTTGTATCTCCAGCCCCGCAAAAGGGGCCACCAGCTCGTTGCGTGCAGTGCCTTGTCTACCAG  
ATTCTTGCGCCCATGGCGATCCCGCGGTGATTTCATGGCGCGGATGATGGCGAGATCCGAGCGATCAAAA  
CCCATGCTCAGCTGGCATGCCTCGAGGCTGACCCCGCGTGGCGAGCCAGCAGCTCCATTCATCGGTAT  
CCGAGTCAAATCCCCATGCCTGCCGATCATGAAGCAGACGGCACAAGGACAAGTTGGCGGGATTGCCGAC  
AAGCCCGTGTGCTCGGCATATTTCCGGGCTGCAGACCGGCAGCATGAACTCATCCATCAGCGGGTGGATG  
GCAAGCCGCTCCGGGCTCTTCTCATGAAAATAGAGGGTCAAATCGATGCCATAGCCATGCAGGTTGATGT  
TCTCGTTACCGGTGATGATATTAAGCTCGATCTGCGGATGCAGGCGGGAGAAATCAGCCAACCTGGGCAC  
CAGCCAGCACTGGGCGATGGAGGGACCGAATAGATGGTCAGGGTACCGGAGAGCTCCTGATTTGTATC

TCCAGGATCTCCTGATTGATGAACTCCAGCGAGGATTTGAGCGCCAGAACACCCGCTGCCCATCCGCGG  
TCAGTACCACCTTGCGGTGAAAACGCTCAAAGAGCTTGAACCCAGCTCCTCTTCCAGCGCGCTGATCCG  
GTGACTCACGGCACTGGGGCTCAGCGACAGCTCATCGGCCCCATGGCAAAGGATCCGTGGCGGGCGGCC  
GCCTCGAAGGTGTGCAACTTGGCCAACCTGGTAGCCGCTCAACAGCTTGTGCGAGATATGTAATTATCCC  
CGTTATACATTTCATCCCCCTCTTCGCAATGGCCGCCGATGATACACCCACAGGCCACCTTCAGGATGAAA  
CCAAAAGACCCAAAGAGTGTGATTTTCGATAAAATGTGACCAATGTAGCGCCTTTGCATCACCTCATCTCA  
CCCAAGTGGTCGATTTTCATCATTGTGTCAGCCCCGCTCATTTCATTCATAAGCGCATAAAACAATCACA  
CACAACAGATGTCGAGGCGCAGTATGAGTTCAGAGGTATGGGTCATCGCTACCTTGCTAAGTAGCATCGT  
TCTCATCGTGGTTACCATAGTGAAGGGCAAGGTGCATCCTTTCCTTGCCCTGCTGCTGGCGAGCTTCTAT  
GTCGGCACCCCTGATGGGGATGGAGCCCCCAAGATGGTCAGCGCCATGGAAGATGGCATTGGCGGCACGC  
TAGGCTTTCTCGCCCGCTCATCGGTCTTGGCACCACTACTCGGCAAGATGATGGAGGTGTCAGGGGCGGC  
GGAGCGCATCGGCCCTCGCCCTGCAGAAATGCCGCTGGCTCTCGCCACAGGTCATCATGGTGTGGTTCGGT  
CTGGTGTGCGGCATCACCTGTTTTGTGCAAGTGGGGGTAGTGCTGCTGATTCCGCTTGCCCTTCTCCATCG  
CCCCGAAGACCAACACCTCGCTGCTCAAGCTGGCCATTCCGCTCTGCACCCGCCCTGATGGCCGTGCACCTG  
CATAGTGGCGCCCCACCCGGCAGCCCTCTACGTCACCAATCAGCTGGGGGCTGACGTCGGCTCGGTTATC  
GTCTATGGCCTCGCGGTTCGGCTCTTTGCTCGCTGGTGGGCGGTCCGCTGTTTTCTGAAGCTGCTGGGTA  
ACCGGATTCCATTCAAGGAGGTACCCGCTGCCTTTGCCGACATCAAGGCCCGCGATGAGGCAACTCTCCC  
GACCTTAAGCGCCTCGCTCTTTACCGTGTGCTGCCATCATGCTGATGCTGGCCAAGACGGTCGCGCGAG  
CTCAATATGGAGCATGCCAGCCACCTCTACACCGTGTGGAGTTTATCGGCAACCCCATCACCGCCATGT  
TTATCGCCGCTTACCAGCCTACTACGTCGCTGGGGATCCGCCAGTAGATGAAGATGGAGGGACTGCTTAA  
CAAGACCGAGGAGTGTCTCTCCATCGCCAATATTCTGCTCATCATCGGTGCGGGTGGCGCCTTCAAC  
GGGGTGTCAAGGCAAGCGGCCCTGGGCGATAGCCTGGCCACCATCCTCTCCCAGCTGGATATGCACCCCA  
TTCTGCTGGCCTGGCTGGTTGCCATCGTGTGTCACGCCGCCGTGGGCTCCGCCACCCTCGCCATGATGGG  
CGCCACCGCCATCGTCTCCCCATCATGGTGCACCTACCCGAACATCAGCCCGGAGATCATGACCCCTGGCC  
ATCGGCTCCGGCGCTATTGGCTGCACCATGGTGAAGTACTCTCTGTTCTGGCTGGTCAAGCAGTATTGCG  
GCGCCACCCTGAACGAAACGCTCAAGTACTACACCACCGCCACCTTTGTGCTCCCTAATGGCGCTGGC  
CGGTACCTTCTGCTCTCCTTTATCGTGAACAAGACCGAGAACAATGAAAAACATCGACGTCCAACA  
GCTCACAGCGCAATTTCCACTGGTGAATCCCTGACTCGCGCTTGAGCCAGTCACCTGGTTCAACCCCAAC  
ACCACCACTGTGGCTCGCCGTCTGCCATGTGGGGCTCGATAACAACAATGTGGCGGACGCTTCCCGCTC  
GGCTGGCCCGCTTCGCCCCCTACATGTGCGAAGCCTTCCCCGAGACCCGCGCCAGCAACGGTATTCTGGA  
GTCCGAGATCGCCGCTATTCCGGCGATGCAGGCTACGCTCAACCAGCGCTACGGGGTTGAGGTACCCGGT  
CGACTGCTGCTGAAAAAAGACAGTCATCTGCCCATCTCCGGCTCCATCAAGGCGGAGGCGGTATCTACG  
AGGTGCTGACTCACGCCGAACAGTTGGCGATCAAGGCTGGTCTGCTGCGGGAAGAGGATGACTACCGCAA  
ACTGTTTACGCGACGAGTTTCGCCAGTTCTTACGCCAGTACAGCATTGCGGTGGGCTCCACCGGCAACCTT  
GGCATGTCTATCGGCATCATGAGCGCCAAGCTCGGCTTTACCGTACCCTCCACATGTGCGCCGATGCGC  
GGGAGTGAAGAAGCGCAAGCTGCGTGAACACGGCGTATCGTGGTGAATATGCCGAAGATTACGGGGT  
GGCGGTGGAACAGGGGCGCAAAGAGGCCGAACCGGACCCCAACTGCTTCTTTATCGATGACGAGAATCC  
CGCACCTGTTTCTCGGCTACTCGGTGGCGGGCGAGCGGGTGAAAGCGCAGTTCGACCAGATGGGTATCA  
AGGTGGATGCCGACCACCCGCTGTTTTGTCTACCTGCCCTGCGGCGTGGGTGGCGGCCCGGGCGGCTGGC  
CTTTGGTCTCAAGCTCGCGTTTCGGGGATAACGTTCACTGCTTCTTCGCCGAGCCCACTCACTCCCCCTGC  
ATGTTGCTGGGGGTCCACACCCGATTGCACGATGCCATTGCGGTGCAGGATCTGGGCATCGACAACCTCA  
CCGCAGCCGACGGCCTCGCGGTAGGGCGCGCTCTGGTTTTCTGTCGGCCGCGCCATGGAGCGGCTGCTGGC  
AGGCTTCTACACCTGAGCGATCAGGAGATGTATGACCTGCTGGGACTGCTGGCGCGGATGAGCAGATC  
ACACTCGAACCCTCAGCCCTGGCGGGTATGGCAGGCCCGTGGCGGGTGGCAGCCAATCCCAGTGGCTCA  
CCGGGCGCGGTTGCGATGCCGCAACCATGGCAGGCCACCCATCTGGTGTGGGCCACCCGCGGTGGCAT  
GGTCCCCCGCAAGAGATGGCAAAGTACCTGGCCAGCCCAAGATCTAGGCTTTTTTCGCCACTTTTATCT  
GCAAATCAACCCGCCATCACGGCGGTTTTTCTGTTTTGGGAACAAGGGGATGGGGCAGTTCTGTGCAAT  
CCATGGCGACAATTTCCCCAAGTTGGTCAAGTTTGTGCTAAAAATGGCGCTCATTTTTTTGACATCTCGCGTC  
ACGTTGCGCGCCAGATTGCCCATCGGGCTCTCTGCCCGGGTCTGACTTTGCACCATCATGCCTGATGAT  
GTTCCCCCAGGATGAGCCGACAGGCTCCCGTCAAGGTGGGCACCCCTCAAGGGCACATGAGATAAGGAGA  
TCGGGTAATGAAACAATATCAAAGCTGGCTGGGAGATTATCTGATGAGTCGACGTGACGGAGATCACGGC  
ATGGCTTCGGAACCTTGCCAACACCATCTGCGCCTTCTGGAAGGCCAGGGTATGAAGCTGAAACCAGCA  
AATGGCAGCAACGCTATCAGCAACACGTAGAGCAGGCGCAATAAGCCCTTCGCTCTTTTCGCGATAAAAA  
AACCGGCGCTCATGGCGCCGTTTTTGTCTTTTCTGGCAAGCAGAAGACATTACATTTGGTTCGATCATGTC  
CTGAGCAAACCTGGGAGCAGGAACGCAGAGTCGCCCTTCCATCAGACGCTCGAAGTCATAGGTGACGGTC  
TTGTTTTCGGATCGCCGCTTCCATGCCCTTGATGATGAGATCGGCCGCTTCGACCCAGCCCATGTGGCGCA  
GCATCATCTCGGCGGAGAGGATCAGGGAACCCGGGTTGACCTTGTCTGACCGGCATACTTCGGCGCAGT  
ACCGTGGGTGCTTTCGAACAGGGCCACGCCGTACCCGATGTTGGCACCCGGTGGGATACCGATAACCGCT  
ACCTGAGCGGCCAGCGCTCGGAGATGTAGTCGCCGTTGAGGTTTATACAGGGCGATGACGTCATACTCGG  
CCGGGCGCAGCAGGATCTGCTGCAGGAAGCGTGGCGATGACATCCTTGATGACGATGGTCTTGGCCGT  
TTTTGGGTTCTTGAAGGAGCACAGGGGCCCGCTTATCAGCTGGGCACCGTACTGTTCTGGGCCAGA

GCATAACCCCAATCCTTGAAGGCACCTTCGGTGAACCTTCATGATGTTGCCCTTGTGCACCAGAGTCACGG  
AGTCACGATCATTGTGCGATGGCATACTCGATGGCGGCACGCACCAGACGCTCGGTACCGGCCTTGGACAT  
CGGCTTGATGCCGATCCCGCAGGATTCGGGGAAACGAATTTCTTCACGCCCATCTCGTTTTGCAGGAAG  
GCGATCACCTTGTTGCTTCGGCGCTGTCCGGCTTCCACTCGATAACCGGCGTAGATGTCTTCGGCGTTTT  
CGCGGAAGATCACCATGTCCGGTCAGATCAGGACGTTTTACCAGGGCTCGGGGTGCCGTTCGTAGTAACGCAC  
CGGGCGCAGGCAGATATAGAGATCCAGCTCCTGACGCAGGGCTACGTTGAGGGAGCGAATACCGCCACCG  
ACCGGAGTAGTCAGCGGGCCCTTGATGGCCACGCAATATTCACGAATGAAATCCAGGGTTTCGGCCGGCA  
GCCAGGCACCTTCGCCATAGACATGAGTCGATTTCTCGCCGGTATAGATCTCCATCCAGGCGATCTTGCG  
CTCGCCCTTGTAGGCTTTCTCGACCGCAGCATTACCACATTC AACATGGCCGGGGTTACGTCAACACCG  
ATGCCATCCCCCTCAATAAACCGGAATGATCGGATGGTTGGGAACCTGCAGCTTGCCGTTGGCATCGACTG  
TGATTTTCTGACCTTGGGTCGGGATTACTACTTTGCTTTCCATCGGCATCTCCTAACTTCGTTTTGTTAT  
CAACTTGTTTTGTTGCGCGCGGCCATCTTAGCCCATTTCAATTTTCATAATAAAAACGACAAGAAAGCATGTCA  
GACCAAAGAGGTAGCCACCCGCCAGTGCGCCGTACCACGCCCTTCCCGACCCAGCCCCGTTATCCCTCCA  
GCTCGCTGGCCGCCCGCTGCGGCTGACTCAGGGAACGGTACTGGGAAGGGGTCAAGCCGGTCTTCTGTTTT  
GAACACCCGGCAGAAGTAGTTACGTCACGTACTGTAACCGCAGCGACTGGCCACCTCTTCAAGACGAAAGCGG  
GACTTTTTTCAGCATGAATTTGGCCGATCGATCCGCACCCAGCTGATGTAATCGGCAAGGCGCATATGAC  
CCTGCTCGCGGAACAGGTGGGAGAGATGGCTGGCTGAAACGTTGAAAGCGGTGGGCAATGGAGTCACGGGT  
GATGGGACGGTGAAAGTTCTCTTGATATAGATGCAGATCCCGTGAAAGAGCTCTGCCCCCGTGGCCGA  
TCCGTGGCGGACTCCAGCAACAGCTGACGGGCACTCGCCAGCAGAGCTGCAGCAGGTGATCATCGGTGG  
GGGAGCGACCCGGATCCTCGGTCAGTACGTTACGCGCCGCCAAAATGTGTTTCGATCACATGGCCCGCCCG  
CGCCATGATGCTGTGCTTTTGCACATCGAAAAAGTCCGGATCTTCACGGCGCTTGCTCACCAGGCTGAAC  
CCCAGCTGGCGTTTTGCCAAACAGCAGGCTCAGCACCCGAGCAGTCGGTGGTCCAGAGCGGGTGTTCACGC  
CGTTGGGGGGGATATAGAGCGCCTGCCCTGGTAACACGCTGATCTCTTGACCCCCCTCCTCCCTGTCCCA  
GATCTGGTTGAGATACTCGCCGCTAAAAGACCAGCTCGAGGCGAGGAAAAGTTGACCTGATAGCTGAAACTA  
GGTGGCACCCCTGTTCACTGGCAAACAGATTTGGTCAAATGGAACCTGTTTCGCTCAGGGCTCCGTCGA  
GCAGTTGGCTGAAGATGAGAGACATGGTGATCCTGATCAAGAGAGAGGCAAGCGGTTGCGGCGCGCACGA  
CCGCCCATGTTATAGTCCGGTCCACAGCAGTAATGCCACCCCTTTCTGCACCCGATTTTCTTCAAAC TAG  
ACGAGGCGTCCCCTTATGAGCAGTAGCATGCTGCCCTCTTTCTGTTGATGCAAAAACCCGATCAAGGCTA  
TGACTGGGGCAGTCATGACTCCCTCACCACCTGTTTGGCATTCCCAACCCCGCAAGGCAAAACCCAGGCC  
GAGCTCTGGATGGGGGCTCACCCCAACGGCTGCTCCGAGGTGACGCTGGCGGGCAGTGTGCAAAAGCTCT  
CTTCGGTGATCGACAGGGCTCCGGCCCGCGCTGGGTGAGGCCACCCCTCGCCCGTTTTGGCAGCCTGCC  
GTTCTGTTTCAAGGTGTTGTGTGCCGAGAAGGCTCTCTCCATTACAGGTGCACCCGAGCAAGGCTCAGGCC  
GAAGCGGGCTTTGCCAAAGAGGAGGCCCGCAGGCATCGATATCAAGGCGAGCAATCGCAACTACAAGGACC  
CGAACATAAGCCGAGCTGGTCTTTGCCCTCACCCCTATCAGGCGATGAATGGCTTTTCGCGCCATCCC  
GGCCATTCTGGCACTGTTTCGAGCGGGTCAATCTGGCGGCCATCGCCGATCTGACCGCAGCCCTTGCCGCC  
AGCCAGAATGAAGCAGGCTGCAGCACTTCTTCCACAGCTGCTGGTACTGGAAGGGGCGCGCAAGGAGG  
AGGCGCTGGCGGGGCTGCTGACCTATGCCGCCGCCATCAGGATGAGGAGACGTTTGCCTCATCACCAG  
TCTGGCGGCCAGTACCCGGGAGATGTGGGCTCTTCTCGCCGCTGCTGCTCAACGTGGTGACGCTTGAG  
CCAGGTACGGCGATGTTCTCGATGCCTGTACCCCGCACGCTATGTGCGCGGCACGGGTCTCGAGATCA  
TGGCCAACCTCCGACAACGTAAGTGCAGCGCCGGCCTCACCCCCAAAATACATCGATGTGGCAGAGCTTTTGG  
TTGCACCCGCTGCTTGCCCAAGCCGGACGACCAGATCCTGCTGCCCCCGCTGTGATGGCGCGGTACAG  
CACTTCGACGTGCCGGTACCTGACTTCACTTTACAGCTTACCCGGCAGGCGAGCATCAGCTCACCAC TG  
CCAGCGCCGAGATCCTGTTTGCATCGATGACACAGTGACCCCTCAAGCAGGGCGAACAGTCACTGCGTCT  
GGAAAAGGGGCAATCAGCCTTTATTTCTGCAGCGACAGGCACTTATCAACTGCTGGCCGAAGGGCGGGTC  
GCCCCGCGCCGCAACCCGCTGCTAATCAGCATAAGAGCCGACTCTCGTTGGAGGGGGAATATGCCTCCCC  
TCCCAACAGAGCAATATGGCCTACCAGTCAAGTCCGCTGTATCTCTACTGCTCTTATGCCTACCTTC  
CTTCAGGCATCTCGCTCTGAAGTCCATCCCTGACTGCATCCTGCTTACCAACCAGCTCCACAGGTTTTTCG  
CCTGAGCTTGGCGCTCCCCTGATGCAGATGACTTGGTTTTGCTGAAAACGAAGAAAATTCACGCTGCACAA  
GCAACGGCAACACTCTGAGTATCCGGCTAAAATGGAGGCAATAAAAAATAACAACCTTACCCTTACTATT  
TTCACCCCTGATGAAAATAAAAACAGCGCATAGATGCATAATAATTAACCTTTCCCCAGCCATCATCA  
TTCGGTCTGTAAACATTTGGCACACGTAGTCATACAGAACCATTGGTAATGAAAACGAAAGGAATCTCTT  
TTGAATTTTCGAGATGCGGCCCTATTTTTTAGTCGTCTATAATTTAATTTCAAGCAGACCATTTCGATCT  
TTGCTGAGAATAACAGCATAAGAAATCAACATTAACACTGATATATAAACAGATTTATTTTTAACTCT  
ACTTTAAATTTGACGTAATCCGTAATAAAAGCCAGGCCGATTAAGTATAATCCAATCAATTTAAAGGCAG  
GATAATGAGAGATTTGATATTTATTTTTGATATGCCAGCCAAACCTCATTCAGTAAAGAAAATAGACCT  
TAAATACCCTCTGTGATTAAGATCTCTTTTATTTGATTTATTTTTAAGGTATCACATCTATTTCGGCGTA  
TAAATTTACACAAAAGATCCGCTGACAAAAATAGATAAAAAGAGGATATATGCTGACAAAAATGACAATTG  
GGCAAAAGCTGACCATGGCGTTTACCCTCTCGCTTTGTTGATGCTGGGTTTTGCCCTGGTTTGCCACTTT  
ACAACCTCTCCAATATTTACCGTGACGCCAGTGAGGTCAGCGATAATATCGTTCCCTCCATCCGGGCATCC  
AGCCAGATGCATGTGCTCTTGTGGACGCGCGCCGTGCCGAACTGAACATGGTGATAGATGCACTGGGCA  
AGGATCCCAGACTCCCTCAACAGCAGCACACAGTCTTTCGAAGCGGCAAGAGTCACTACATGGCCGCCGA

GCAACGGTATGGATCTATGCCTTTTGTGTGCGGAGCGAGATCGCAACATGTTTGCAGAGCTGAAAACCTGCA  
GCAGCCAAATATTTTTTCAGCCCATGGTGACTTGAAAACAGCCATACGGCAGGGAGATATTGCCAAGGTGC  
AGTCGCTGATCAAAAACGAATCCCCGCGCTGCCCTTGAGCAGGCCGACAGGATGGTCTGGAGCTTCGCAA  
GGAGAACGATCGGGTCGCCAACCTGCTGACCAAGCAGAGTGAGGCTTCTATGAACGGGCAAAACTGCTG  
AGCACTACAGTCGGTGCCTAACCTTGTGTTTCGTCGTTATTGTGGCCTGGCTGCTGATCCGGCAGATCC  
GCAATCCAGTGATGACCCTGCTGGAGCAGACCCGCCAGGTAGCGGCAGGCAACCTCACCAGCCAACTCGA  
CATGAAGCAATTCTCCCATGACGAACTGGGTAAGCTGGCTCAAGGGTTCAACGAGATGCAATCCAATCTG  
CGCATGCTGGTCAACGAGGTATCCGGCTCGGTAGTGCAGTTGGGCGCGGCCGCCGAAGAGATCAGCGCGG  
TGGCACAGCAATCGGCCAACAACATGGGCGCCAGCAACATGAGCTCAATCAGCTGGCCACAGCCATGAA  
CGAGATGCAAGCCACTGTACAGGAGGTGGCCCGCAACACCAACGACGCCGCCAGCGCAGCAACGTCGGCC  
AGCGACACAGCCGCACAAGGCAGCGAGCCGTCATGACTCAATCGGCAGGATTGAAAAGGTGGCTACCG  
CCATCGAAGAGACAGCTCTGGTGATCCGCCAGTGGGTGATGACAGCCGAAATATCGGCATGGTGCTTGA  
AGTCATTAGGGGATTGCCGAGCAAACCAACCTGCTGGCACTGAATGCGGCAATCGAGGCAGCCCGAGCC  
GGTGAACAAGGTGCTGGTTTTCGCCGTGGTAGCAGATGAAGTCCGCACTCTGGCCAAACGAACCCAAAGACT  
CCACTTCCAGATCAACCACATCATCTCCGAACTGCAGCAGCGCGCTAACGAAGCGGGCGTCAACATGCA  
ACAGAGTCAGGATATGATGTCCGAGACGGTCCACACAGCTCGTGAAGCGGGAGCCTCTATAGCCGAAATA  
AGCAGCTCGGTAAACAGTATCTCCACATGAATATTCAGATTGCCACC GCAACTGAAGAGCAGGGGGCGG  
TAAGCGAGGAGCTCAATCGCAATGTAGTCAACATCAGCAATGCCTCGGAAGAAGTAGCGACCGGCCGCAA  
ACAAATGGCTCAGGCTTGCAACGACCTCAACCTGTTGGCAACACAACCTGCAGGAGGTTGTACGCAAGTTT  
CGGACATAGCCCCGATTGCCCCCTCATTTCATCAGCCCAATAAGGCTGAAGCACTAAACAGCCCGCCATT  
CATAAAAGTGGCGGGCTTTGTCAAACAAGGAACCATACAAAACCCGAGACACCCATGCTGCACATAACA  
AGTGATCAGTAGATGGATTAACACATCAAGAGCTGCTCTCCCTCTTTCTGATTGTTCTCTCAACGCGT  
TTTGCCAGCACCTTACATTTTTCCGCCCTCAAAAACAGCACACAAATCTCCATGCCCTCCGAAGGCGAAACC  
TTTTCGTGCCTCATGCAAGTAGCAAGACTAATTCATAATACATTTGTTTTATTTGAAAAAATAAAGA  
ATCGGTATGAATTGGCTTTCATGATGATATGCGAGCTGGGTACATGGCGACTTGCCACAGCACAAAAATC  
CAGTAAACGGCACATTTGTCCGATTTCCGCCACCGCGCAACGGGAGAACAAATATCCATGTCAATTTGTCC  
CCCCATCTGCGGCTCGGCAACGGAGCCAGGAGTGAATATGTTACCCACCATGACCAACGGCAGACTCA  
TCTGCCTGAGTTGAAGGCCACCAGCAAGGAGGCCCTGTTGACGAGATGGCACAGATGGCACAGATGGCGCG  
TGGCGCCGTGTCTGATCAACAGCAATTCCTCAAGGATACTGGGCCCCGCAACAGCTGGACTGCACCGGC  
TTCGAGCAGGGTGTGGCCCTGCCTCAGCCAAGAGCAAGCGGTCAGTCGTCGGCCATTGCCATCGGTG  
TCAGCCGCAAGGTATCGAGTACGGCGCCGAAGATGGCAAACCGACCCAGTTGATCTTCATGATCGCCTC  
CCCGGATGGAGGTGCCAACACCACATCGAAGTGCTGGCGGAGCTCTCTACCCGCTGCTGGAACCCGGT  
TTTTATCGAGCAGATGAAGGCGGCCACTACCGTCGAGCAAGCCCTGACTCTGCTCAAGCAAGGCCGAAAG  
CGGAAAAACCGGCTCCAGCCGCCAAACCGGCAGCCACTGCCCCAGCGGCCCCCGAAGAGCGTACCTTCAA  
GGATCGCCTCAACACCATGAAGCAGCACCTGCTGTTTGGTACCTCCACATGATCCCTTTCATCGTGGCG  
GGCGGTGTGCTGCTCTCCCTGTCCGGTATGATGAGCGGCAAGGGCGCCGTGCCGGAAGCGGGCTTCCCTCA  
AAGACATGGCCACCATGGGTATCGCCGGTCTGACTCTGTTACTGCCGTACTGGGTGGCTACATCGCCTA  
CTCGCTGGCTGACAAGCCGGCCCTGGCCCCGGGCATGATCGGCTCCTGGATTGCCGTTACAGCACTATCAA  
ACCGGTTTTCTTGGCGCCATTCTGGTGGGCTTTATCGCAGGTTTCGTGGTCAATCAGCTCAAACGGATCA  
AGCTGCCTGACTCAATGACCTCCCTTGGTTCCATCTTCATCTATCCGCTGATCGGTACCTTCCCTGGTGTG  
TGGCATCGTGATGTGGGGGATCGGTGCCCGCATGATGGAAGGGATGAACCACTGGCTCTCC  
AGCATGGCGGGCTCAGGTAAGTGATGCTGGGTGCCATTTCTGGGTGGTATGACCGCCTTCGATATGGGCG  
GCCCGGTCAACAAGGTTGCTACCCTGTTTGCCAGACTCAGGTCAACACCCAGCCCTGGCTGATGGGCGG  
CGTCGGTATCGCCATCTGTGTACCGCCGCTCGGTATGGCGCTGGCGACCTTCATGTCTCCGAAGCGTTAC  
AAGAAAGAAGCGGTGAATCCGGTAAAGCGGCCGCCATCATGGGCATGATCGGTATCAGTGAAGGTGCTA  
TCCCGTTTCGCTGCTGCTGACCCCATGCGTGTATCCCGCCATCGTCGCAGGCGGTATCGTCCGGCAACAT  
CACCGGCTTTATGATGCACAGTATCAACCACGCCCCCTGGGGTGGCTGGATTGTCCGCGTTGTTGAA  
GGCAAGATGGGCTATATCCTCGGCACCATCCTCGGCCTCTGACCACTGCCATCATCGTCAACCTGCTGA  
AGAAGCCGGTGAGCGAAGAAGATGACGTCACTACCACCCAAACCAGCTTCGAAGTCATTGAAGCGGAAGG  
GGAAGCGGACGTACTGGCCATCACTGCCTGCCGCTGGCGTTGCCACACCTTCCTAGCCGCCAAGAGC  
CTGCAGAAGGCCGCCCGCCAGCAGGGGATCAAGATCAAGGTGCGAGACCAGGGCGCCAACGGCATCATCA  
ACCGCATTACCGCAAGGATGTGCCAACGCCGCTGCGTCATCTTCGCCACGATGTGGCCATCAAGAA  
CCGCGAGCGCTTACCAATATCGAGGTATCGATGTGAAGACCAAGGAGGCGATTACAAATCCGGAAGCA  
CTGCTGGCCCCGACGCTGGGCAACAAGGCAACGCCGCTGATAGCAGTCAGACCAACCAGTACAAGGGG  
CCCATCACGGGCCCTTTTTCGTTGCCGAGCAACCGCATATCATCCACCGACCAAGCCACTGATTT  
AAAACATATTAACCAGTCACATCACGGATCTTGGCGAGCCGTCACAGAACGGTGACGTGTAATAAACAAG  
CAATTGAAGCGCTGGTCAGATCTCATGTCAAATGGCTCCGCTACTAAACTGGAGCATCACAAAAATGAT  
AAAAATCAATAAATTTGGTTCTGGCTGTTACCTCACCCTCACTGCCACCCCTTGTGGCAGCCCACTGG  
ACGTGTGGCGAGCACGTGCGCTTTGGTCTGCCCTCCGAATCGGATCAGAAGCTCTGCCGTGAAGGGTATG  
CGGTCCGGTACAACACTACGACTACAAGGTGGCGGACTGGGTCTCTACCGGATGACCGCCAGAGCGCACA  
GGGCACAGTGCCTCCGAAGGATGCCTTCGCCGAGGACAGGGAGATCCCGGTGCGCTACCGCGCCACCTC

TCCGACTACAAGGGCTCGGGCTACGATCGTGGCCATCAGGCCCGGGGGAGACATGAAATCGAACAAAGA  
ACACCATGAAAGAGAGCTTCCTGCTGAGCAACATGACACCGCAGGTCGGGGTGTCAACCAGAAAGCGTG  
GCGCGTGTGGAGGACAAGGTCAACAAGTGGGCAGTTTCCCGCAAGGATGTGCAGGTGATCACCAGCCCC  
ATCTTTACCGGCTCTGAAGAGTCCATCGGTCAGGGTGTGGCGATCCCGAGCGCTACTACAAGATCGTGA  
TGGACCCGGCCAAACTGCAGGCCATCGCCTTTATCATGCCGACGGAAGAGGTGCCCATCAGCCAGATCGC  
CGACTACCGGGTCTCGGTACGTGAGGTGGAGGAGCAGACCCAGCTCAACTTCTTCAGCGATATGCCGAA  
GAGCAGCAAGAGACGCTGGAAGCCCGCATCTCCCGATGTGGAAGTACTGCGAACACTCGCCAACAGAT  
GGATTGACACCCCATCTGTCTTGCATCGAACAGAGGCAGGGGGAGTTACGTTCCCCCTGCCATTTTCAG  
ATGGCAGCTGATCCGTTGCGGCCACTTTTGGGCCACAGGTGTGGCATCACCCGACGACCCGCCCCGACT  
CACAGTTTGCCACGCGGTTAACTGCTATATTGCCCTCTCTTTGGCACTAACAGACTGAATTGACGCACAT  
TTGCCTCGTCGATTTGGCCCGCAAACCGCTGCGCCACGGCGGATTCAGCCCCGACAGAGGACCTTTTGAT  
GAAACAGACCCCTTCTTGCCCTCACCCCTCGGCCGCTGTGGCGCTCTCCCCCTCGCCCTGCAAGCGGCT  
GAGAGCTCGATGCAGATGGAGCACGACCTCAATAACCTGGTCAGCAAACGCCAGGCAGTGGACATGCTGC  
TCGGCGAAGCGCTGCAGATCTACAAGTCGCCAGCCAAGATCTCCACGCGGTTTACCGCCAAGATGCC  
GAGCAATATGGAGCTGGTGACCGAGCGGCTGTGGCCGCTACCAGCTTGAACCCCTACCGCACCGACTG  
CTCATCTCGGCAGCCAACGCCAGATCTACAACGGCAACCTGAGCCGCGCCATCACCTTGTGGAGCAGG  
CGCAGGCCGTCGCCCCGATGATCTCGACATCAACAGCTATCTCGCCATCTGGCAGCTGGTGAAGGGTAA  
CAAGGAGGCTTCCCGCAGCAATCTGGCGAAAGTGGCGGATCGCAACAGTGGCCGCGCCCGGATCTGGAA  
GAGATCATCGCCCGGTGCAGCGGATCACCGCCGCCCCGCTGCAGACCGAACTGACCGGGGATCAGGTCA  
AGGCCAGCAGGGAGGGCAAACGCGCCATCGTCACCCCTGGGCTACGCCCTCAATCCCGACGGCAGCATGGA  
CAAGATCCTACTGGGCCGCTGCAAACCACTCTGGCGCTGGCCAAGGCCGACCCGGAGGCGCTGATCATC  
CTGACCGGCGGCGTGGCCGAGAACCGCCAGACCGAGGGCAAGCTGATGGCTGACTGGATGGCCAACCACG  
GCATCGACCGCAGCCGCTGATTGAAGAGAACTACGCCACCAGCACGGTGGATAACGCCCTCTACAGCGC  
CTATGCCCTCGCCCGCCACCAGATTGACTATGCGGTGCTGGTGGAGCTCCGCCAGCCATGTACGCCGCGGG  
CAGACGGTGTGGAAATCGCCTGCGACACAGATTGGCCCGGCCAACATCAAGGTGGCGAGCGTCAGCTACC  
CCGACAAACCCCTCGAGGAGCTGGCCACCCGAGCGAGAGCGAGCTGCTCGGCATCTACCGCGACGCCCT  
GCGCACCTACGGCATGTGGAGCTACCGCTCCGCCCACTGATCGAGCGTTGATCGGCCATCAAAACGAAA  
AAGAGAGGGAGGCGTGCATGCCCTCCCTCTCTTTTATTGGCCGATGATTGGCCAAGCCTCGCCCTTAGCT  
GACGATAAAGCCCTGCGAGGGGGCCGCTTTGGGATCGTCACCGAAGCGGTTTGGCCCTCGCTGGCCGTTG  
CAAACATAAAGTAGATAAGTACCAGGGTGGCGATAACGGGGATAAGCCCGAGCAGCCACCAAGCGC  
TGCGGTGCGTATCGTGCAAGCGACGGGCCGCCACCGCCAGCGATGGCAGCAGCACAGCCAGCGAATAGAT  
GGAGCTGATCAGCTCATTGTGCGCCGAATCAGCTTGTCCACCATGCCGAGCAACAGCATGACGATGACG  
TTGCACAGCACGAACATCCAGTATTCCGTGCGACGGGCCCGCCGCTGAATACCGCATATTGCTTGAGGA  
CCGAGATGTACCAGTTCATTACGCCTCCTGAGTGGCCTTTATGCCTATGAATAAAAAGAGAGTCGATAAA  
ACAAGTAGTTAAGAGCTTAGCGGATCATCCCCGAGTCGACAATGATGCCGAAACGCTCTCCCAAATA  
ATCAGCTGCGGCTATCATTGACCGACCGAGCCGGAAGATAATTTGCCCTGCAACAGGGCAAATCTCCCC  
ATCAGCGCATCACTCTCGTCACAAGCAGGAAAATGGTGTCTAATAATCCATTAGCAATCGTATGGACTCA  
GCGTGAGGATAGCGGTAGATTGCGCGCCCAATCCTGAACAGGATCTGTGTCTCCCTCCCATAAATGAATCC  
ACTTATTCACTTCTCCTAACACAGGGATAGCCATGAGTATTACACGCAGAGATTTTCTCAACGGCGT  
TGCCATCACCATTTGCGGCAGGCGTGCSCCCATCAATCTGCTCAAGGCTGCCGAAAGCGGCAGCACGCTG  
GCAGATAAAACCCCTGGCCTACCCGCCCCGCTCACCGGCTGCGCGGCAACCACCCGGGCTCCTTCGAAC  
CGGCCACAGTATCGCCCGTACCGGTAAGCAGTATGACTTTGCCAATATTTCCCTCGAGGGGGAGTACGA  
TCTGGTGTGCTCGGCGCCGGGATCAGCGGTCTGGCCGCGCCTGCTTCTATCAGCAACTGCTCGGCGCG  
GATAAGAAGATCCTGCTACTCGACAACCACGACGACTTTGGCGGCCACGCCAAGCGCAACGAGTTACCA  
CCCCCGATGGCCTGCGTCTGGGTTACGGCGGAGTGAATCCCTGCAATCACCGCGTTCCGTTACAGCCC  
GGTGGCGCTCGGTCTGCTCAAGGCGCTGGAGGTCAACATCGACGAGCTGGCCGCTGGTTCCAGCAGACC  
TTCTATCCGGATCTGGGGCTGAGCCGCGGTGTCTATTTGACGAAAAACACTTTGGCGTCAACAAGATAG  
TGAACGGGGATCCGGGCCACAACGTAGCGGACGATATCCCGCGGATCGCCTGAACGGCAGGCGGCTGGC  
AGAATTTATCGGTGACTTCCCCCTCGATGATGCCGACAAGGCCGCCCTGTTGGCCCTGCACGAATCGAAG  
ATCGACTACCTGAGCGCATGACCCGCGAGCAGCAGGACGAGTGGGTGACCCGCAACAGCTACACTACCT  
TCCTGCGCGATAAAGTGGGTCTCAGCGAGCGGGCGATCACTTACTTCCAGCAGCGACCAACGACTTCCA  
GGCGGTGCGCATCGACGCCACCGCCTGCGCCGATGCGCGCCTCTGCGCATTTGCCGGGTTTCGACGGCCTC  
AATCTGACCGGCTGGATGCCGAGGAGCAGGCGGAGCTGGACGATCCCTACATCTTCCACTTCCCCGATG  
GCAACGCCGGTCTCACCCGCTGATGGTGCGAAGCTCATTCCGCAGGTGGCGCCGGGTACACCATGCA  
GGATGTGGTGTGGCCAAGTTTACTACAGCAAGCTCGACCTGCCGAGCACAAGGTGCAACTGCGCCTT  
GGCAGCACGGCGCTGCAGGCCAAAACGTGCGCCTCGCCGACGGCAAGCTGGCGGTGGATGTCACCTACA  
TCAAGGAGGGGAAACTGCATCGGGTGCAGGCCAAGCAGTCGATCATGGCTGGCTACAACATGATGATCCC  
CTACATGGTGGCCGAGATGCCGGAGCCCCAGAAGGAGGCGCTGCGCCAGAATGCCAAGGCGCCGCTGGTC  
TACACCAAGGTGGTGTGATCAAGAAGTGGCAAGCCTTCGTCAAGCTGGGGGTACACGAGGTTACTCCCCG  
CCGCACCCTACAGCCGGGTCAAGCTGACTATCCGGTCAGCATGGGTGGTTACGAGCATCCCAAGAGCCC  
GGATCAGCCGATGTGCTGCACATGGTCTATGTGCCACCCCTGCCGGGACGCGTCTGTCCGCCCGCAA

CAGTCCCGAAAGGGGCGGCCATGATCCTCGGCATGCCGTTTGAACAGCATGAGCAGATGATCCGCGAAC  
AGTTGCAAGGGATGCTCGGCAGCGCCGGTTTCAACCATGAGCAGGATATCCTCGCCATCACGGTCAACCG  
CTGGTCTCACGGCTACTCCTATGTACCAACACCCCTGTTTGTATGACGAAGCGCAGTGCAGAAAAATGGATT  
GAACTGGGTGCGCAGCCGATCGGCAACATCACCATCGCCAACCTCGGATGCGGGCTGGAGCCCTACGCC  
ACGCCGCCATCGACGAAGCGTGGCGCGCCGTCAACGAGCTGGTAGCCATGAGCAAGGGAGGTGCCAATG  
AGCCGCGCCCTGTACTGACCGCCAGCGCCCTGCTGCTGGCCCTGCCCGCCCTTGCCGCCAACGCGGCC  
CCGCCATGTGGCAGGCGAATACGTGGCCAAGCTCGGGCATGCGCTGCCACACCAGCGAAACCG  
CAAGCCGCTGGCGGGCGGCAAAGGGTTCCCGACCCCATCGGCACCGTATTTGCCACCAACATCACCC  
GACAAGACCCACGGTATCGGCAACTACAGCCTGCCGGAGTTCATCAAGGTGATGCGCGAAGGGGTGGCC  
GGCATGGCCATCGCCTCTATCCGGCCATGCCCTACACCGCCTACGCCAAGATGAGCGATAAAGGATCTCGA  
AGATCTCTACTACTACCTGATGAAGGAGGTACAGCCGCTGGCCATCGCCAACAAGGAGCGACATCCCC  
TGGCCGCTCAACATGCGCTGGCCGCTGATGGGCTGGAACCTGGGTCTACCACGATGACAGCCGCTTACCC  
CGGTGGCGGGCAAGAGCGAAGAGTGAACCGCGGGCCTATCTGGTGAAGGCGCCGGTCACTGCGGCAG  
CTGCCACACCCCGCGCGGGCTTGGCATGCAGGAGAAAAGCGCTGACCGAGGCGGATCCTGTCTACCTGAGC  
GGTGGCGGCTGGATGGCTGGTATGCCCCCGACATTCGCGGCAGCCGTTACAGCAAGCAGGCGCTGATCG  
ATCTGCTAAAAACCGGCCGAGCCAGCATGAAGCGGTGCGGGGCCCATGGGGGAAGTATCACTCACAG  
CAGCCAGTATTTAGCGACGCCGATCTGGCCAGCATCGCCACCTATCTCACCAGTCTGAAAGATGAACCG  
GTGGCGGAGAAAGGGGCCCGTGCCTATGCCAGTGCCAGCGGCAAGGCGGACTACGCCATGTACTGCTCCA  
CCTGTACGGGGTCAACGGCCAGGGCAATGACCACGTTCATCCCTCGCTGGTCAACAACCGCACCGTGT  
GGCGAGCGATCCGTCGAGCCTTATTAACGTGTTGCTGCACGGCGCCGAAACACCGGTCACCCACGACCAT  
CTGGGTTACCACATGCCGGGCTATGGCTGGACCATGGATGACGAGCGGCTCGCCGAGCTGGTCAACACCC  
TGCGCGCCTCCTGGGGCAATGAAGGCACCGCCGTCAAGGCGGGCGGGTCAAGGCCAGCGGAGCTGCA  
CGGCAAGGAGTAAGGGCTGTCCGCTCTCTTTGATCAAGTGCCATAAAAAACGGGCCCTCCACTGGAGGCC  
CGTTTGCTATTGATGAACCAGGTTCCGGTGCTTATCCCTTGCGGGATTTGGGCCCCGGCAGCGGCGCCGT  
TGTTGGCGGTAATCGCCATAAGGGAAGATATTGCGAAACCGCTGGGCCACCGGTTCCGGGATGGAGCGG  
GAGAAGATCAGCTTGACGCCATCGCCATCACGCAGCCCCACAATGCGACCGCGCACCGTGTCTGGCGCA  
GGATCTGTTTAGCATGCTCAATAAAGGCGGGTGACACCTTGCCCTGCTTGACCACTACCTTGCCGGGTGC  
AAGACCGTCTCGAAGCAGGGCGCCACGCCACGCTTCATCAACCACCAGATCAGGGCTATCGCCACATC  
AAGGAAATCCAGCCATTTTATCCCTCCCAAGCTTCTGATATCAGGCAGTATAAGCGTATCCGCTGCGCTCC  
GATAGTTTGGCGCCGATCACAGCCCCCGCTCAACGTAATAACGTCCTTTGCTCAGCAATCCTTGCCCC  
AGCCACCAGCGTCTCACGATAGAGCGCCAGCAAGGCTTCATCGCGCACCGCCACCCCGACCTGCTGCGG  
ACGATAGGCTGCCAGTCATCGTGGGAGTGGCGTTTGCATCGAACTTTTGCAGGGTGTGGCCGATGGCC  
GGGCGCTGGTGATAACCCGACCGGCCCTTCCCGCAGGGTAAAAGAGGGTCCGATCAATCACATAAGCGA  
TGGCGGACGGGTGCTGCACGTGGCAACCGGAGAGCCCAGCTTCTCGGAGTAGAAGCGCAGGTAGAAGCG  
GCTGACATCCACAGGAAGCGGCCCGCTCCCCGCCTTGTCCCTGAGCTCATCCAGATAGGCGCTGCTG  
AAGAAGCTCTGCTGAGTCACATCCAGCCGATGATCACTACCGGCCAATCGGCGGTAAAGACCCGGTCCG  
CGGCATCGGGATCGTCTGGATATTGGCTTCGGCATAAGGGGTGACGTTGCCGCGATGGCCGTTGACGCC  
AAAGGCGCCGCCATTACTACCACCTGTTTACCAGCGAGACAATCTCGGGCGCTGTTGTAGCGCCAGC  
GCCAGATTGGTGAGCGGGCCGATAGTGACGAGGGTGATCTCCCCCGGCGGGCTTTCACCGCTCGACAA  
TATATTGCCAAGCGGGGCGAGGATCCGGAGCGATAGTCACCTCCCCCGCTCCATGTGCGCAAAGCCGCT  
CGGGCCGTGGACTATGGTGGTGGGGCCGACCGGCTCGCGCAGCAGCGGGGCGGCCGCGCTTTGGCCACA  
TCCGCTTCATGCCGACTTCTGCTTGAGCCAGAGGGCGTTGCGGGTGCCATTTGTCGATGGTGGCGTTAC  
CAAAAACAGTGGTGACGGCGAGCAGCTCGATGGCGGGGTGGGCCTCGGCAAACAGGATGGCCATGGC  
GTCGATAACCCGATCGGTATCCAGAATGATTTTATGGGTGATGAGAAATCCTACGGTGACAAACCCGTC  
AACAAAAGGGAGAGTCTACCCGGCTGACGTCCCCGTATCCCGCATGGGATCACAGACCGGGCCCTTTGCT  
CCCGGCAACGACACGCTGCTGGCGACAATCTGCACAAAAACGGCGCGGCCCTGTTGCCAGCGCCGCGCC  
CTTTATCGTTGTTTCGTTATCTGCTATCTGGCAGTGATCTGCCTGACCGGATCCTCAGTGCTTGGCGTGC  
AACCGGGTGAGGTGCGCTTCTCCCCCAGGGAGTAACCGAGGGGAGCAGTGCCCTTCAATCACCATCTC  
GCTGCTGCCAGCGCTCGGCGATCTTCTGGTGCAGCACCCGCGAGTACTTTGCCCTCATGCTCGGCCAGA  
GAGTGGCCCGCGCAAAGAATTCCGGCTGATATTGCAATGCCAGCTTCTGGGCGAATTCTGATGGTGTGA  
AGCAATCCGGCATCCGCTCAACCACATCTTCAAGCCGGGCCAACAGCTGTTGAGTTCCTGGTTCATAGT  
GCTCTCTCCTTGTAGGTTAATAGCCAAAAACCACCCCTTATTAGATAAGTCACCAACGAGCAAACCACAA  
AAGTGTGGGAGACACACAGTCTCTCTTGGCTCCGGCTTGTGGTGAACGGCAAACAGCTTGCCAGCTTT  
ACATTCGGTAACAAACAGCTAGATTTAGACCGACTAATCAGTCGGTCAATTTTTCATGCGGAGAACAA  
TGGGTGCGGCGCAGCTTCAACACACTCCTGAGGATATCCTCGCCATCAAATTTGTCCTGCCGGATCAGCT  
GGCACGGCTCAAGCGGGCGAGTCTGGCTCATCCCATGCCATCCCTGGCCGAGCGCCGGGCGCAGCTGACC  
AAACTCAAGCAGGCGTTGCTCGCCACAAGGGGCGAGCTGTGCAAGGCGCTGGCGGCAGATTATGGTCAAG  
GCAGCCACTACGACAGCCTGATCGCCGATGTGCTGCCCTGCATCATGCAGATAAACTACACCCAGAAGCG  
GCTCAAACGCTGGATGCAGCCCCACCGCCGTACACCGGCTGCTGCTGGCCCCCGCAAAGTAGAGGTG  
CACTTCCAGCCGCTCGGGGTGGTGGCATTATCGTGCCGTGGAACCTTCCGGTGATGCTGAGCCTTGGCC  
CCCTCATACCGCTATCGCGGGGCAACCGGGCGATGCTGAAACTCTCCGAGTTCACTCCCATACCAA

TGCCGTGCTGCGCACCATGCTCACCAGCGTATTTGACGAAAAACGAGATCGCCATCATCGAGGGGGATGCC  
CAGATGGCGGGCGGGCTTACGCTCACTGCCGTTTCGATCACCTGCTCTTTACCGGCTCCACCATGGTAGGCA  
AGCTGGTATGAGCGCCGCCCGCGCCCCAGCTCACCCCCCTCACCTTGAGCTGGGTGGCAAGAGCCCTTG  
TCTCATCGCCCCGACATGCCAGTCGCCACCGCGGTTCGAGCGGATGATCTTCGGCAAGAGCCTCAACGCC  
GGGCAGATCTGCGTCGCCCCCCGACTATGTGCTGCTGCCCCGACGCGAGGTGGATAACTTTATCGCCGCT  
ATCGCCGCCACTTACAGCAAGCTTACCCGACAGGGGCTCAATAGTGCCGACTACGGCGCCATCATCAACGA  
CCGCCAGTATCAGCGCCTCGTCAGCTGGCTGGATGAAGCCGAGCAGGCGGGAGCCCAGCTCCACCCCTGT  
GGCAGCCCCGGCCCCGCGATGACCAGCGTCGCCTGCTGGTGCCCCACCTGCTGACCGGGGTGCCGGTCACT  
GTCAGGTGATGCAGCAGGAGATCTTTGGCCCGCTGCTGCCGCTCATTCCTACGACACTCTGGAGGAGGC  
GCTCGCCTATGTGGCCGAGCGGCCCCCCGCCCTGCGCCTATCTGATGAGCTTCGACCCCGAGCTGCAG  
GCGCGAGTGACCCGGGAGACCCACTCCGGCGGCATCGGCATCGGCCTATCAACGAGAGCCTGTTTCAGGTGGCTGCCG  
ACGATGTGCCGTTTGGCGGCATCGGCCCTCCGGCATGGGCCACTATCACGGCCACGAGGGATTCCCTCAC  
CTTCTCCAAGGCAAAAACCGTGCTGACGCGCGGCAAGTTTACCACCGGCTCCCTGATCCATCCCCCTAC  
CACAGCTGGATCCAGAAGCTGATGATGGCCTTCTTCTGCGCTGATGGAGATGACCATGAACCAGGCTAT  
CCCGCAGCCACAAAACATGACCGACAAGCGCCGAGATCCTGGATGCCGCCCTCGCCCTCTGCGCCGAA  
GATGGCCTGCAGGGGGCCGCCACCGCCCGTATCGCAAGGCGGCCGGGGTGGCCAACGGCCTCTGTTC  
ACCACTTTCCGAGCAAGGAGGCACTGATCCTCGCCCTCTATCAGGATGTAAAGACCCGGATGGGGAGCGC  
CATCCATGAAGCAGATCCCACCTGCCGCTGTACGACAGACCCGCCACTACTGGCAGCTGGCGATGGAG  
TGGATGCAGGCTAACCCCAATGAGCTCAAATTTGTGCTGGGCTTCTTTCACTCTCCGCTGTTGGCCAGAC  
CGGCCCGCAGCCAGATCCTGAACGATGCCCTACGCTTCTGCTGCTCTGCTGGCAAAGGGGCAGGCCAG  
CGGCGAGCTGATGCAGGCTCCCGCGCCACTGTTGCTGGAGGTGTGTGAGGGCCAGTTCCTCGCCTGCGCA  
TCACTGTTTGTGATCAACCGGAGCTGGGAGAGGACGACTACTGGCAAGCCAGTGCCTTCGCCCTCTTCT  
GGTCAGCCATCTCAGGAGCCAATCCCCATGCAAAACCGGATGTTTGAACCTGCGGGCCGCCCTTGGTCGCC  
GCCTCTGGATCACCACTCTGCTCTGGGTGGTGGGTGCGACCCTCTGTGCGCGCCGCCCGCACCAGCAGGC  
GGTACGCCCGCAATTGGCGCCGTTGCCGGACGGGTGGCAATCCGCCCTCGAAGTGGGGCGGCATCGGCTAC  
GCCATGAACATGCACAAGCAGGGTGGGCGCTGGTATCCCGGTGCGCCAGCCGCCCTCATGCCACCATCC  
ATCCGCTACGGGTGCGCTTCAAACACCCCAATATCGCCTTTCGCGCCCTGAGTTTTTCGGCTCGGGGTCAA  
TCAGGATTTGGCAAAAACCCGGCTGCTGGTGGAGAGATCTGACCGTTGCCATGCATCTGGTGCAGGGGG  
CTTGAGCAGTTGCGAGTCCCTGATCCTGCCCCGAAATTATCGCGCGGCCCTGCTGCGCCACTATCCGCCCC  
CGACCAACAAGATCGGCCGGGCTGCAACATCTATCTGGGTCTGGTGACCGGCTAACCGCGAAGGAGCCT  
TGAAATGAGCCGCTATTACGATTTCTTCTGCCCGGTCAAACCTGCTGGCCGGTGAACAGGCGCTGGAGCAA  
CTGGCCAGCGAGCTGGCCAGCCTCGGGGCCCCGTCGCCCGCTGCTGCTGACCGACAAGGGGGTCAATGCCA  
CCGGCCTTGCACCCCTGCTGGCCAATGTGCTGGCCGAGGGGGAGCTGCCGGTCGCCGCCATCTGGGACGA  
GATCCCGGCCGACTCTTCCACCGCCGTGGTGGAGCGGATCGCCAAACGCTATCGCGAGCTCGACTGCGAC  
AGTCTGGTGGCGCTGGGGGGGGGTGGTTCATCGACACCGCCAAGGCAGTCAACATTTCTCACTTCCATGG  
GGGGTGAACACCTGCTCGACTACTCGGGCGCCGTTGCCTGACCCGTCCCTCAAGCCGCTGGCGGTGGT  
GCCCACCACGGCGGGCACAGGATCAGAGGTGACGCTGGTTGCAGTGATCAAGGATGAGACGAGCGGGCGC  
AAGGTGCCCTTACCTCACCTTCCCTGCTGCCCCAGCTGGCGGTGCTCGACCCGCGCCTGACCCAGGGGC  
TGCCCTCAATATCACCGCCGCCACCGCCATGGACGCCATGACCCACGCCATCGAGGCCCTTTATCGGTAC  
CGCCAAGAACCCGGTGAGCGATGCGCTGGCCCTGATGGCAGTGGAGAAGATCGCCAGCGCCCTGCCGCAA  
ATCATCCACGACCCGCAAAAACAAACAACTGCGGCTGCAACTGGCGGAAGGCTCCACGCTGGCTGGCATGG  
CTTTTTCCAACCTCCATGGTGGGGCTGGTGCACGCCCTCGGCCACAGTCTGGGAGCCCGCTGCCATCTGCC  
ACACGGGTGTGCATGAACCTCTTTTTGCCGACCGTGTCTGACTACAACCGCCCCGAGGTGGATAGCGAG  
TTGGCCCCGCTGTTGTTGCCGCTGGTGGGGGACAGCGCTTTCGCGCCACCCCGGCCATCAGCGGGCGG  
AGGCGACCATCAGACCCATTAGCTCCCTGCGCGACACCTTGTGGCAAGCGGTCAAGCTGCCGCGCACCAT  
GAGCGAGGCTGGGGTAAGCGATCGCTCGCTACTGACCGAGATCCGCGATCTGGCGATCAACGACGGTGCC  
CTGCTGTTTAATCGCAAGGACGCCGACCGTGGAGCAGTTACTACCCCTGCTGGAGCGGGCCTGGGCCTGAT  
CCCTCCCCCTTTGCCAACACTCTTGTGCTGACACTAACCGGGTGGCCGACTCACCATCGGGCACCTTGA  
TCTACATCGCGATATCGATTGCCCCCTGTGCAAAAAGGGGATGATATTGACCACGGGCTATCATTATCTGT  
TCTATACCTTGGCTAACAGTTATGTTGTGCCGAGAGACCCAACTTTATGCCAGAGGTGCCACCATGAGC  
GACATCATCCATCAGGCCAACAGCAGCAGTTCATCTGTATGGTGGAGGGGAAAGAGTCGAGACTGCGCT  
ACCGGCGGCTCGATGCCAAGACCATCGACGCTACAGCACCTTCGTACCGCCGAGCTGCGGGTGCAGGG  
GATTGCCGATCAGCTGGCGCGCGCCTTCTTCAACTGGACTCAGGCGGAGGGGCTCACTATAGTGCCGAGC  
TGCCGCTACATTGATGTCTGGTTACGCCGCAATGCCAACAACCTGAACCTCTGAACACCGTCTCGAACAG  
CAATTTCAAGCCAAAACAGAAGCCCTGCTGCGGGCCGATCCGCGAGCGATGGCTGCCGCAAGCCGCGG  
CCGAGCTCAATCTGCCCGACTGGGCGCTGGGAGCAGGCTTTATCCGCAATCTCATCTGGGATCACCTTCA  
CCACAAGGCGGTGCCACCCCGCTCAACGATATCGACCTTATCTATCTCGACAAAACCGATCCGCAAGGG  
CTGGCCGAAGCGGAGCACGAAGCTTGGCTCGCCAAAACGCTGCCAACCAGCTGTGGGAGGTGCGCAATC  
AGGCCCGCATGCACACTCGCCAGCTGGTAACGCCGTTTGTGACGAGCCTTGAGGGCGCTCAGCCACTGGGT  
CGAAGTGCCACCTGCATCGGCGTGCCTGAATCAGGATGGCGAGTTCGAGTGGCTCGCCCCCTACGGC  
TTTGCCATCAACTGGTTCGCTGCAAGTGAGTGCCAACCCAGATGTGCCAGGACAAAACAGATTTTTTACCC

AGCGCATCAAGGAGAAACGCTGGCAGGCTATCTGGCCTGACCTTCAGGTAAACTGGCCATAACCTGATTG  
CAATCTTTTCGATAACCTTTGGGCACACTAGGGGAAAAGCTGGTTGTAACCTCAATGGGTTAAATAATGCGCG  
ACTTCTTCTCTCTCGAACGCTGGCTACCGGGCCCTCGCCGCCCTGCTGCATTACCAGCGCGCCTGGTTGAT  
GCCAGATCTTCGCGCCGACTCTCGGTGGCGGCAGTGGCGCTGCCCGTCCGATCGCCTATGCCGAGCTT  
GCCGGGGTGGGTGCCATCGTTCGGCCTCTACTCCTGCATCCTGCCCATGCTGGTCTATGCCCTGTTTGGCA  
CCTCCCCGACAGCTGATTGTGGCCCCGATGCCGCCACCTGTGCGGTTCATCGCCGCCGTGGTAACGCCGCT  
GGCCGCAGGCGACCCACCCGCTCACTGGCAACTGGTGTGACCATGACCGCCATGACCGGCTTCTGGTGC  
CTGATTGCCAGCCGCTTCAAGCTGGGAGTGTGGCGGACTTTCTCTCCCGCCCCATCCTGATGGGGCTGC  
TCAATGGTGTGGCTATCACCATCATGGTGGGCCAGCTCTCCAAGATCTTCGGCTTACCTTACGCGAACG  
TTACCTCATCGAGCGGATCGCCAGCGGGGCTACCTATATTACCAGACCCATCTGCCGACCTTGGCCATG  
AGTCTGGTGGCTCTGCTCACCTGCTGCTGGCCAAGCGCTACAAAACCGGCATGGCCCTCCTCCATGGTGG  
CCATGGTGGTACCCTGCGCTGGTGTGGGGCTTTAATCTCGGCCAGTTTGATATCGCCACCCTGGGGAC  
GGTGGGCTCCGGCCTGCCCGCTTCCAGATGCCGGAATTTCCCCCGGTCTGATGCGGGAGCTGGTACTG  
CCTGCGCTTAACTGGCCATGGTGTGAGCTTCGTCTCCATGATGCTGACCGCTCGCAGCTTTGCAGCCAAAA  
ACGGTTACGAAATCGACGCAGACAAGGAGTTTTCGGGCCCTCGGTATGGCTAACCTCGCCTCCGCGGTCTC  
CCAAGGTTTTGCCATCAGCGCGCGGATTCACGCACCGCGGTCAACGACGCCAACGGCGGCAAGAGCCAG  
CTGGTCTCCATCATCGCCGCGCGGTGATCGCCCTCATCACCTTCTATCTGACGGCGCCGCTCAAATACA  
TCCCCGACCGCCGCCCTCGGGGTGGTGTGGTAATGGCTCACTCTCGCTCACCGACTTTCGCGGACTGTG  
GGCGCTGCGCCACTCCGATCGCTCCGCTTCTGGCTGGCGCTGGTACCTTTATCAGCGTGTCTACCATG  
GGAGTGATCCCTGGGATCACACTCGCGGTTTTGCTCGGCTTGTTCAGTTCTTGCATGTGATGCGCC  
CCACCGACCGAGCTGCTCGGCATGGATGACGAGGGGGTAGTGCGTACCCTGGGGGACAACGAACAGGCCAA  
GGCGATCCCGGGTATTCTGGTCTATCGCTTCAACTCGCCGCTCACCTACTTCAATGCCCCCTATTTCAAG  
CGCCGGGTGCTGGCCCTGCTGGTGCAGGATCCCCGAGCCCCAAGTGTCTGGTGATCGATGCGGTGCGCT  
GCTTACCCATCAGGACATCAGCGTGATGAGCATGGTGGGAGAGCTGCACAAAAGAGCTGAAACGGCGCGG  
CATCCATATGGTGTGATGGCGGGTCCGACGGCCAGATGACCCACTGGCTAAAGCAGGCGGGCGTGGGGTG  
GGCGATGAAGGGATCATCCTCTGCCCCGACATGTATCAGGCGCTGCGCCTGACCCGCTGCTATCGCGAGC  
CGGTGTTCAAGGATGATGCGGTGGTGGAGAGCACCAGATGCCATCCGCTCCAACCTGGCCGCAGGATGA  
TGCCCTGCCAACTCGGCGCCCTCACCTTGCCAAGCGAACAGGAGGCGGGCGCCACGCTGCCTGATCC  
CTTGGCCTGTGCCCCCTGGCCGATGCAATCTCGACAAAGGATTCACCGGCTTGGCTTGGTGTAAATG  
CGCCCCAGAGGGCACTCCCCCGTCCCTCCAGCTTTTGGACATGCCATGCAATCTCAATCCCACGCAG  
GCCCCGGCACGCTCTTTGCGCTGACCTGGCCGCTCTTTATCGATCTCGCCCTGCACTTTCTGACCGGCGC  
CCTCAATACCTTTCATGGTGGGTACGCTCTCCTATCAGGGAGTGGCGGCGTGGCGGTGCGCAACCAGGTG  
TTCGATCTCGCCATCACATTGTTTACGCTTCGTGAGTATCGGTACCAGCGTGGTGTGATCACCAGTATCTGG  
GGGCGGGCGATCGGGAGAAGAGTGGGTGGTAATCCACACCGCCATCGGCTTCAACCTGCTGATCGGTCT  
GGTAGCGGCCATCGGTGTGATGGCGGGGGCCAGCACCATGCTGGCGCTGATGAACCTGCCTGCCAACCTG  
ATGAGCGACGGGACGCTTTACTTTCAGATCATCGGTCTCTGCCTGTTGCCGGAAGCGGCAGCCCTCTGTC  
TGGCGGGCAGCCCTGCGCGCCCATGGCCACACCCGTCAGGCGATGTATGTGACCTGATCGTCAACCTCAT  
CACCTTCGTGCGCAACCTGCTGCTGCTCTACGGCTGGTTCGGCTGCCCGGTGGGGGTGCGCGGGGTG  
GCCATCAGCACAGTTGCGGGCCGACTGGTGGCGGTGGTGTGCTGGTGTGGCTGGTAGCACGCAAGACCG  
GCATTCGACTGGTGGTGCAGGATATCGTCCACCCAGCCGGGAGATGCTGGGCAAGGTGCTCCATATCGG  
CCTGCCGGCGGCAGGAGAGAACCTCTCCTGGATGCTGCAGTTTATGGTGGTGACAGCCTTTGTGCGACTG  
CTGGGTGACAAGGCGCTGGCGACCCAATCCTACTTCTTCCAGATCTGCCTGTTTATCCTGCTGTTTGGCC  
TCTCCATCGGCCTTGGCAACGAGATCATCATCGGCCATCTGGCGGGAGCAAGACAGTTTCGCTCGCGCCTA  
TCAACAGCTGCTCAAGAGCCTCAAGCTGGGGTGGCAGTTACCTGTGTCATCGCCGTGGCGGCGGCCCTC  
AATGGCCGTACCATCATCAGCCTCTTTACCGATGATGCCGACATCATCACCAGGTGGCGCAGCTGTTTC  
TTATCAGCCTTATCCTCGAGCCCGCCACCTTCAATCTGGTGGTGTGATCAACGCCCTGCGGGCCACCCG  
GGATGCCCGTTTTCCCCCTTACATGGCGTTGCTCTCCATGTGGGGAATTGCCGTGCCACTCTCCTATTTT  
CTCGGTATCATGCAGGGTTATGGACTGGTGGTATCTGGCTGGCGCTGGCCTGCGACGAGTGGGTGCGCG  
GTCTGGCCATGTTCTGGCGCTGGCGCAGTGTGCTGGCAAAAACAAAATTTCTTGTGAAAACAAAAGCGGA  
ATCACAATGAAGAAGATAGGACTCTTGTGGCTGCCATCCTGCTCAGCCCCCTGGCCATGGCGCAAACCTG  
CCCCTGCCGCTCCCAAGGCTCAAGCCACCCAGACCTGGTATGTGGCCCCATCGCCATCGATGAAACCAG  
CGACGCCCAGAAGGCGCTGACCAAGGACTTCATGGCCAGATGATCAAGACCATCAAGATCAACGAGTAC  
CAGACCGGCAAGGCGGTGGGCAACACCAAGAAGCCCAAGTGGCTGATCCGCACCAAGCTGATCCCCGCCA  
GCAACGAGCCGCTGGTGGCAAGAAGCACCCGAGGGTCTCACCTACGGCAAGGGCAATCCGACCCAGGA  
GATCGTGGCGAGCTGCTGATGAACGGCACCCCTGGTGGCCACATCGGCCAGGGCTGGCGCGAGCCTATC  
GTCCCGGGCAGCCGGTGGCTGACAACTCTCCATCGCCAACTATCGCTACGCCATCGGTGATCAGGCCA  
AGTGGCGGATCTGGAGGAGCTGGCGGCCCAGATTGGCTTTGAAAGCGGGCAAGGTGATCCACCGCGATGG  
CAAGCCGCTGCCCGAGAAGAAAATGAAAAAAGAGCAGGCGGACGAAGAGAAAAGATAACGTTGCCTCCAT  
CCATAAAAAGGGGCCACTCGGCCCTTTTTTGGTCTGCGCCCTCACGCCAACACTGCCCTGTTGTGAC  
TTGTGCGACAGTTTGGCTCACCATTCAGATTGACAAATCACTTATCTTGTTTTGTATCAACAAGTTATAA  
ATATCCCGCCGAATACTCCAATCATTGCCCCAAATCCGATCAGGATCACATTTATCCCGGCACATAAG



GGGTAGCTTTGGTCTTACAGGCACAATCAAACGAAACCAAGGAGGCTCCATTACATGTTCCAGAGTACA  
GAGAACTCATCTCGAAACTGAAGAGCAGTGATGTCCATTTCCAGAAGAAGTTTGACTTGCACAACGACCT  
GGATGCGGAGATTAGAAAGTTGGAAAAGCATCACGCCAGCGACTATAGCGCCGAGGTGAGAGATCTGAAA  
AAACAGAAACTCAAACGAAAGAGGAGATATACGACATCCTCAAACAACATCCACGATAGATGCCTCGAA  
GAATATGCGGATAAGCAATTTATCCCCCAGCCCGGCCACGCGCCGGGCTTTTTGTTGTTTCAGTCAATT  
AGTTGACACCCGAGCCTACCGATCTTGCCGGTAGTGTGTTACATTTTTCCCTTGGAATTCAGGGAATAAC  
GGTGATGATAACATGAGCAGAAAACGATCTTTTTATCATCTCTTGCTGCTTTGCCGTGTTGCGATTGAGCC  
ACCCCTGCAGGCTCAGGAGCCTGAACTGGAGCTGTGGCACTCCAGCAAGCCGGTTACGTGATCGACGA  
CGTGATCGCCCGCTTCAATCAGGAGGGGAACACAGAGTACGGGTACCCAGATTGAGCCGGGCAAGATC  
AAGGCGGATCTCTGCTGGCGGCTCAGGCAAGGGGGCTGCCGACCTGATGCTGATCCCTCCGATTTTA  
TCGGCCTCTATCGCCAGATGACCCTCGCCCCCTCCCGCCGAGTGGTTTTCCCCCGCGCTAATGGCCAG  
TGCTTTGCGTTATGTACCCTGGATCGGCAACGCTGGGGCATGCCCATGATGCAGGGCAACCATCTGATG  
CTGTTTTACAACAAGGCGCTGGTCTCGACTCCGGTGACCAATGGCAGCAACTGACTGCTATACCCCGG  
CCCTCAAGGCCAAGGGGGCTACCCCGTCAGCTGGCCCTATCACGACATGTACTACTTCGCCGCTTTTT  
ACACACCTTTGGCGGCTCGCCGGTGACCGAAGGGCGCATCACCTCGACAGCCCGGCCATGGTGCAGGCG  
CTGGAGGCTACCGACCGTCGCCAGCGAACAGTGGGTGATCCCGAGTGCAGCTATGACACCGCCCTCG  
CCCGCTTCAATGAGGGCAAGAGCGCTACCTCATCAATGGGGACTGGGCGTTCAATGACCTGGTGAAGAA  
CATGGGGGATAAGCTGGGCGTCGCCCTGCTGCCCCGCTGGCAAAGCCATCCCATGCACTCCATGAGCGGC  
GCCTACGTGTTGGGAGCCTCCCGCTGGGCGATGGACGATGAGGATCGGCAACCCGTCATCAAGGCACTGA  
TGGCCTTTATCCAGCGTCAGGATATTCAGCAGTTCATCTATCATCAGGGGGCGCTGCTGCCGGTCAATCA  
GCAGGCTTTTACCGCCATCAGCCGCGCTCCACGCTCAGGAAAAAGTACTGCTGGAACAGTTCACCCCTC  
AGTACCCCATGCCCCTCCGACAGCGCCATGTCCATCGCCTGGCAAAGCGATGGAGAAAGGGTTCGAGCGAT  
TTAAAGAGGGGATCAGTGCTGCCGACACCGCCCGCTATATGCAGCAGCTGGCCGATCAGCAGTACCGGCA  
GGTCAAAAACACCATGAAACATCGCACCTTTGCGCTCGGCCCGACCCCTCATCATCATCTGTTACCGTGC  
CCTTGCTGCCGGCACTGCTGGCCAGCACTGTGCTGCTGATCCGCCAGCACCAGATCATCGCCAGAGCGA  
GCAGTCACAGCTGGAGCGGGCCCTACCAGCATGACCCGCGAGGCCCCGCTTTGCGAGCGAGCTGATCGGC  
ACCCAGCTCAATCAGCTCAGCCAGGATCGGGTGTCCATCAGGCCCTAGACAACCTTCTCTTCCAGCC  
ATGCCCGGCTGGCGCTGGCCACCTTTGTCAAATCCAAACAGCCTGCTCACCTCGGCCCTACCTCATCGATGA  
CAAGGGGTTGGTGGTGGAGTACATCAATGGCCAGCCCTCCACCTCGAGTCGAGCGACCTGATGCGCGAG  
GTGATGGCCTGGGGCAAGACCCGCGAGGCGAAAGGGGCAAGCATCTGCTGCTGCCCGTCGATGATCCCG  
TGCTAGTCGACGACATGGAGCAAAACCGCAGCGGGGCTGGCGCTGGTGGCCCCATCTATCGCAACCA  
CCAGCGCGCTGGGGTGATGCAGACCCCTTCCGGCTTCGTGATGGCCATTCTCCCTGGCGACAGATGGCC  
CAGTTGCTGGAGCCCTATCTCAAGGGGAGCGAATATCTGGTGATCTCCAGGGCGAGAACCCTCTCTACG  
AAGGGGCTCACCAGAGCGCAACCGCATGGATGACAGGGAGCCAAGCAAGATGGCGCAGCCCTGGCTAT  
TGGCTGGCCCCAGCTGGAGCAGGAGATCACCCACCATCACCTCTACAGCTACAGCAATGACAGGGTC  
AGCGAGCTCAACAAATCCCAACAGCTGCTGACCGTCAGCATCGCCATCATGTTGCTGCTGGTGGCCATCG  
GCTGCGTCTGGCTCACCCGCTGGCTCACCCGCCGCTGCGATCGCTGGCCGCGCTGGTGCAGCTATGG  
CAAGGGCAATTACCAGCAACGGCAGGCGCCGCTGCGCTTTGTGGAGTACGACGAGGTGCGCCAGTTGCTG  
CAGGAGATGGCCAGCACCATCTCGGATCAGGTGCGGGCGCTCTATCAGCAAAATGAACAGCTGCAGCAGG  
CCAATAGCGAGAAAGAGGCTTCAACCAGCGGCTGCTCGGTTTTCAACGACGAACTGGAACAAGAGGTTGC  
CTCGCAACGACCGCCCTGCGCTCGGCCCTGAGCCGGGAGGAGCGCAGCCGCATATCCTGCAATCCTGG  
CTGCAGTTCGGTCTGCACCAGCAGCTGGATATCGATATGCGGAGCTGGGCAGCTCCGCCCTGCTGCAGC  
TCTCGCAGCTCTATCCCGCCACCGCTGGGACTGGTGATCCGTCGAGACGGGCAGCCCCACTACTCCCT  
GACCCAGGGGGTCGATGCCCCCTTGGCGGATGCCTTGCAGGAGAACTGGCTCAACTGATGGATGAGGAG  
GTTAAACACTCCGAATGCCAGTGAATAACGCTCTCTGGAAGATCATGACTCTGCCCGGTAGCCAAAGTG  
CGTGCTGTTTGGTTATCTGATGGTGAAGCAGAGGGCTGGAGTCCGAAGACAGGGCCATCTTGGCGGCT  
GTTTTGCAAAGCAGTTGGCGGTGGGCATCGAAGGGCGCCTCTTACCAGCAGAGCTGGCGCGGGTCCGCCG  
ACCGACAACCTCACCGGGCTGCCCAACCGGCAGGCGTTGAAAGAGGCTTCCATCACTATCAGGCGGTGC  
TGGCACGCCATCCCGAACGTCACCTCGCCCTCTTTCATGCTCGATCTCAACGGCTCAAGCGTACCAATGA  
CCAGTATGGGCACGAGGCTGGTGAAGCCCTGTAATCCAGATGGCTCGCCAGCTGCGCACCCCTGCGCGT  
CAGGATGAGAAGATTTCCGTATCGGCGGCGACGAGTTCGTCTGCTGGCGGAGGCGGACCACCTCGCCA  
GCCAGCTGCTGGCAGGTAGACTTGAGGCAAGCCAGCAGCACGCCATCGTGCAACATGGGGAGCACAGCTT  
CCCGCTGCGTTTTGCCATCGGCTGGAGCAGCAGCAGCAGACCCCTGGCGGAGCTGAGCCGGTGGCT  
GACGATGCCATGTATGCCAATAAGGCGCGCTTCTATCAGGGGCGAGGATAAAAAGCGGAGGTCTGTAGCG  
TTGGCGAGCCTTTCCGCAACCCCTGATCAGCTCGCAAAAATGGCGCACACGCTAGACGCGGCGCGGAC  
CATGACTAAGATAGGGGCTCTTGATGTCTCGATTTGGAAGGGAGTAGGAAATGGAGTTAGTACTTGGCC  
GCTGGAAGCCCGCTCATCGGCTGTCTGATTGAAAAAGAGATCTGCACCCCGGATCAATATCCCTCTCC  
CTTAATGCACTGGTCAACGCCTGCAACCAGAAAGAGCAACCGCGAGCCGGTGTGGAGCTCTCCGAGCTCG  
ATATCCGCGCCGTGGTAGACGAGCTGATCCGCAAGCGGCTGGTGGTCAACACCGCCGGCTTCAACGCCCG  
GGTGCCCGCTATCAGCACAGATTCTGCAACACCGAATTTGGCGAGCTGAAATTCAGTGCCAGGAGCTC  
GGCATCGTCTGCGAACTGCTGCTGCGCGGCCCGCAAACCCCGGTGAACTGCGCTCGCGACCAATCGAC

TGTGCAGTTTTGATGACGTAACCGAAGTGGATGCGGTGCTGACCAGCTCATCGAACGCGGCCCTATGT  
GGTCAAACCTGCCCGTGAACCGGGCAAGCGGAATCCCCTACGCCACCTGTTTAGCGGCGAAGTGGAT  
ATTCAGGCGATGATGGATGCTGCCCCCGCCGCGCCTATGCCCTCCCCTGCCGCCGACCGTCTGAGCGAGC  
TGGAGCAGGAGGTAAACGAGCTCAAGAGCCGCTCTCGCCGCATGGAAGCGCGGCTGGCTGCGCTGGATGG  
TCAGGGCTGATCGCCTTTACCATCGCCAATCTCTATCAGGGAGCCGGGGCTGATGTCCCCGGCTCCCTGC  
GTTTTTATATCGTGAGGAAGTGCCCGTATCACCCTGATTAAGAGTCTGACCACCAGAAGATGCCCTGG  
AAAAACCAGCAGGGCACCACCAGCCAGATCCTCATCTCCCCAAGGGGAGCAGCCTTGCCAACTCGACT  
TTGACTATCGACTGAGCTCGGCCCATCAAGAGCGCGGACCCCTTCTCCCCCTTCCCGGCTATCAGCG  
CATTTTGTGCTGCCGGTGAGCGGGCTGGCTTTGTGCTCAATGGTCACCCCTACGCCACCTTCGAGGCGGCG  
CACTTTAGCGGCGATGAGGAGACCCACTGCGAATTGCTGAAAAAGAGGTGACCGATCTGGGGCTTATCT  
ACCATCCGGATCGCATCAGCGCCAACGTGCGGGTACTGAACCTCCCCTTCCCCTGACCCCTTACCCTCGA  
GCCAGAGAAGACCTACCTCTGTACCTGCTGAGCGGCCAGCTGGCCGTGCAGGGCAAAGAGGTGGCTATC  
AACGAGACGCTGGTGGTGACCGGGGAAGAGAGCATTCACTTCGAATGCCAGAAGAAGACCGCCATCGCCT  
TCTTTACCCTGCAGGCCAAATAGCGCAAAAAGTCCGGCGTGTGCAGTCATGCCACGCCACACACAAACAGC  
AGAGATGAAAAAGCCGGGAAATCCCGGCTTTTCTATTGAGGCAACCGGCTCGTGCCGGTACGACCTTAG  
TTGACCTTGAAGGAGCCCTTCATCATGGCGAAGTGGCCGGGGAAGGAGCAGAAGAAGGTGAGATCCTTGC  
CCGCCAGACCGTCCGTCTGAAGGTGACGCTGCTGCTCTCGCCGCCCGATCAACTTGGTGTGAGCCAG  
CACACGGGGATCATCCTTGGGCAGATAGCCGTTCTCGGCCCGCGCTCATCCCGGAGTTGCCACTGTC  
TGATAGTCGGCGGTGCTGGCCAGCACCCAGTTGTGACCCATGGCGGTCACAGGCAGCTTGCCGGTGTGAT  
TCAGGGTGACCGTACCTCCTTGCAGGTGGCCGGCAGCTCATCTCTTTGAGGTTGTACTGCATGGCATC  
ATTGCCTTCGATGACCAGTGCACACTCATCCGCCAACACGGGGGAGCCAGGGTACTCAGAAACAGCAGG  
GTAATCGCCTTTTTTTCATCATCTTCTCCTTTGATTGGCAATGGATGGCAACGACTTGGCGGATGTGCTGAA  
CGCTTCGCAAAGATGCCGTCTAAATCGACCTTCATTTTACTCAATTTGTCTTCAATCGGCTATGGTTTTTG  
GCCAAAGCTGCGGGCCAGGTACCAGACGGTGATCTACTCGCCACTCTCTCCCCTCACGGATGGACAATAC  
GACCCACTCCCAGCACAGGTTCAAAAATGTTTAAATTTTTTCTGCCCTTTTCCCCTCCGATTCCCCCATCA  
GGGCTCGCCCCAAGGGCGCCCTTGGCTAAGCTAGCGCCCCGATATGAACCTTCTCCAGATGAGACGCCG  
GATGATAGCGATAAACCCCGTGGCGGCCCTGCGCGGCTGCTGCTGACCCCTGCTGCTGGCGCTGGCCGGC  
TGCCAGCCACCCCGCTGCCAGACCCGATTCAGGGCAAGACCATGGGCACCTACTACTGTGGTGACCC  
TGAGCGATAGTACCCCGTGGGGAGCCCGCTATCAAAAAGTACGCTAGAAAAGTTTGTAGCCGGATGAA  
CAAGGAGATCTCCACCTACGATCCAGACTCGCTCATCTCCCGTTTCAATCAGGGGGCCCGCAACACCCCG  
TTTTGCCATCCCACCCGCCATGGCCATCATAGTCCAGCAGGGGATTGATGCCGGTAAGCTGACCGACGGCA  
AGCTAGATGTGACCGTGGGGCCACTGGTCAATCTGTGGGGCTTTGGCCCGGACAAACGGCCGGTCAAGCG  
GCCCGATGAGGCGGCCATCGCCGCCCGCCGACAAAGGTGGGGATCGACAAGCTGACCCTGACCTCGCAG  
GGTGATCACTTCTGCTCGAAAAACGATCCCGATCTCTATCTCGACCTCTCTACTCTCGGCGAAGGGG  
CGGCATCGGATGAAATCGCCGCCCTGCTCGAGGGCAAGGGGTACACAACCTACCTGATCGAAGTGGCCGG  
TGCGGTGCGCAGCAAGGGCAACAACAGCAAGGGCTCGCCATGGAAAGTGGCCATCGTCAACCCCTCCGAT  
CAGCCGGGAGCGTTTTCCGATATCGTTCATCCCCAACGGCATGGCGCTCAGCACTGCAGGCAGCTATCGCA  
ACTACTACGAGCTCGATGGCCAGCGTTACTCCCATATCATCGACCCCGCCACCGGCCAGCCGGTACCCCA  
CAAGCTGGTCTCCGCCAGCGTCATCACCCCGACCGCGCTGGAGGCCGATGCCCTCGATACCGCGCTGATG  
GTGATGGGGCCTGAAGCGGGGTTGGCATTGTCAAAACAACACCAGCTGGCGGTCTATCTCATCATCAAGA  
CCGAACAGGGGTTCAAGGCTGAGTACACGCCGAATTTGCTCCCTATCTGGCAGAGAAAAACATTGAGT  
TCAAGGCCCTGGCAACAGGGCCTTTTTCTTTCACTCATCGCATGCAAAAAGGCGGACAAACGGAGATGGTT  
CGCAATCGACAACCTTGCCAATTGCTCTTCCGGCGCTTTGGTGGCACACTTTCTCCCATCAGCCCGCAG  
CGCCTCGACCCAGACAGATGCAGACACCTGAACAAGAGCCAGAAAAAAGAGCCAGCCAAGCCACAACG  
CAATTCATGATGGTCAATGAGCAGCGCTCGTTTCAAGGTGATGATGAAGGCATGCTGCTCAATCTGGGTATC  
AGCAACATCACCTACTCAATACCGCCGAGGATGCGCGCGCCGCTGCCAGAAGGGCAGTTTTCGACATCT  
ATCTCATCGATTACGATCTCGGGGCTGGCGAGAATGGCCGCCAGTTACTCGAAAAGCCTGCGCGACAAAGA  
CCTGATCCCGCCCCAGAGCGTGGTGTATGATGGTGGTGGCGACAGCTCCCGCGCCATGGTACTGAGCGCG  
CTGGAAGCCGAACCCGACGAATACCTGATGAAGCCCTTCTCTCAGGAGCAGTTCTCGTTTTCGCCTCAAAC  
GCGCCCTCGCCCGGCGCAACGCCCTGGCCAGCGTCTTTACCGCGCTGGCCGATGACAATCTGGCAGCGCT  
CATTACCGCTGTGCCGAGCGGGCCGATGCGGTACCCCGTTTTTGCCAACTACTGCCGCTGCCCTACAGGCC  
GATACCCACCTCAAGCTGGGTACGGCACAGGAGGCGCGCTTTTAAATGCGCCAGCTACTGGCCGGGCGAG  
AGAACAGCTGGGCCCCGCTGACGCTGGGCAAGGCGTGAACACCCTGGGGCTCCACGAAGAGGCGGTGAG  
CCATCTGCAGGCGACCCCTCAAAAATACCCCGCTGATGGTGGAGGCTCACCTCTGGCTGGCAGAATCCCTG  
CTGGCCCTTGGAATGACGAGCAGGCGCAGCAGGAGCTCAGACGGGCGAGTGGATATCTCACCCAGTCCG  
TGCAACTCTCCCAGACTGGCGGAGGTGTGCTGACGCGCCAGACTACGCCAGGGCAAGGATGTACT  
GATGTGCTGATCGACCTGTGCGCAACTCCATTCACCGCACGCCCCATTATCTGGGGGCTTATATCCAG  
ACCCTGACCCTCTACGCCCTCAACAGCAACGACAGCTACCACATCGCCAACCTGCAAAAGCAGGTCAATT  
CCGCCCTGTGCGCATCCCGACTCGTTGATGATGTCGGAGTTCAACTACCCGGTGTTCGAGCAGATCTG  
TCAGGCCCGGGTGCAGATTGCGCTGGGGGAGCTGCTCAAGGGCAAGAAGATGCTCTATCGCGCCAACCAG  
AACTGGCTCGATGAACCGGCCACCATGCCCCCGCCCTGCTTGGTGGAGACCATCCTTGCCCTTACCAGC

TCGGCGAGTTCGAATATGCCGAAAGCCTGCAAGGGCTGCTGGCGGAGGACGAAGATCGGCTGCTCACCAC  
CTGCATT CAGGCAACCCGCGATGACAAGACGGTACTGGAGCGACGTCAGCGTACCAGCAGCTCAACGAT  
CTGGGGATCAAGGCCTATCAGAGCGGCGAGCTGGAGCAGGCCCTCGGCCATTTTCGCGAGGCCCTGCGCC  
GTGCTCCCGCCAATACCGGTGCCGCCCTCAACAAGATCCAGGTGCTGCTGCAACTGATGCAGAAAAACCG  
AAAGAGTCCGGAATTTGGTGCCGAGTGCAAAGACACCCTGGACGTGCTCGACGGCATCCCCCTCAACCCG  
GCCCAGCAGGAGCGTTTTTCGCAAGCTGCGTCAGGAGTTCAACCAGTTCAGCTAAGACGCCGCCGCGCCCC  
CTTTTCCCCGCTATGCTGAAACCAGTTCGGCAATGCGAGGGAAAACGAAGATGGCGATGTGTGTTATCT  
GGTGGCCGATGGCCGCCACTGCAGTGAAGAGGCTGGCGAGCACGATCTCTGCCACTGGCATGATCCCCAC  
CATCCCCATCAGGAAGCCCACACCCGCCGAGGCGCTTGAACAGTACGTTTCGCGCAGGCGGGCTCTGCCACG  
GCCTGACGCTGT CACGGGCCAATCTGGCGGGCTCAATCTGGTCAACAAGGAGTCCGATCAGGGATTTTT  
GCTAGAGCAGTGC AACCTCTATCGCGCCAACCTGCGCGGTGGTACCTCTACGGCCTGCGCATGAAGGGC  
GGTAGCCTGATGAAGCCGATCTCAGTGATGCCAACCTCAGTGCGCCACCCTCGATGACGTCAACCTGC  
TCGGCATCCGCTGGCACAACACCCGGCTCGACAACATGCAGACCGGCAAACGGGTGATGCAGGATCGCAA  
GGGGCGCCGCAACGGGATCCCAAACAGGCGCGCATCTGGTTCAAGGAGGCGGAAGAGACCTACCGGGAT  
CTGCGCAAAGCCTCCGAGGCACAGGGGATCTTACCATGTCTGGCAACTATATCCAGCAGGAGCTCACCA  
TGCGCCGCTGCAACTGCCGTTCTGGTCGACCCAGCGTTTTTACCTCCTGGGTGGTCGATCTCTTCTGCGG  
CTATGGCGAAGCCCCGATGCGGGTGGTGCTCTTCTCGTTGCTGCTCATCTTTATCTGCAGCATTTTTTAC  
TTCTTCTGCGGACTGCATTTTCAGGGCGAGCACCTCATCTACCAGCCCGGTGCTCCGCTCGAGCAAAATG  
CCATCTTCTGCTCGAATGCATCTACTACAGCGTGGTACCTTCACCACGTTGGGGTACGGCGACTTCAC  
TCCGGTTCGGGCTCTCCAGGATCTTCGCCGCTTCGAAGCCTTCACCGGCAGCTTTACGCTGGCGCTGTTT  
GTGGTGGTTTTTCGTCAAAAAGATGACCCGCTGACACCTCTGCCACCCCGCGGTGCCCTGCCACTGACGCA  
GGCCCGCGCCAAACTTGATCCACC GCCGATTCTTAGTCCAATAGCCACTTATAAAAAATGACATGAGCA  
TCCCCGACATGAAGATCATCTCTTTCAATATCAACGGCCTGCGCGCCCCGTCTGCACCAGCTGCAAGCCAT  
CATCGACAAGCACCAGCCGATGTGATCGGCCCTGCAGGAGATCAAGGTGCACGATGAAGCATTTCCCGCTG  
GCCGATGTGGAGGCCATGGGCTATCAGTGGAGTTTTACGGCCAGAAGGCCCACTACGGGGTCGCCATCA  
TGAGCAAGCAGAAGCCGGTCAAGGTGGAGAAAGGCTTCCCCACCGATGACGAAGAGGCCAGCGCCGGAT  
GATCATGGCCACCTTCGAGCGCGAAGACGGCTCCCTCATCAAGGTGATGAACGGCTACTTCCCGCAGGGT  
GAAAGTCAGGATCAGGACCAAGTTCCCGGCCAAGCAGAAGTTCTACGAGGATCTGCACCATACCTCG  
AGACCAACCACACCCCGGACCCAGCTGGTGGTCAAGGATGATCGGGGATATGAATATCTCTCCACCGATCTCGA  
CATCGGCATCGGCGAAGCTAACC GCAAGCGCTGGCTGCGGGATGGCAAGTGCCTCTTCTGCCATCGAG  
CGCGAATGGATGGAGCGACTGAAAGGGTTTTGGCTGACCGACACCTTCCGCGCCGCCAACCCACCGAGT  
GCGAGCGTTTTCTCTGGTTTTGACTACCGCTCCAAGGGCTTTGACGAGAACC GCGGCCCTGCGCATCGACCT  
CATCATGGCCTCCGACGCCCTCAAGGACAAGGTGACCGAGACCGGTATCGACTACGAGCTGCGCGGCATC  
GAGAAACCCTCCGACCACGCTCCCATCTGGGCTGCTTCGCTGATTCGGCACAAGATTAACCGATGAGC  
CGCGACGAATTCGTAACCTGTGAAGCGGCTCGCGGTTGCCGATAAAAAGGGCGTAAAAAACCATCCA  
GAAAAGGTGCCTTATGGCACCTTATTTTTTGCAGCAAGGAGTGGCTGGCGTGATACGGTTGCGAAGAGCC  
CTGGCCCGGGATGAACATCCCCGAAGCCCCGCCATATCGGAAAAGTCAGACTTTTTTTCGTC AACCGGC  
AACCTAATTGCCACTTTGAGAAGGTTGTGTTCAAGGTTGCCGCCCTATCATCTCCCATTTCCAATCATAA  
AGAAGTTGTTTTTTTTAATCATGAAGTTAATGATGTGTATGGAGAAAACATGCTGAACGCAGCAGCCGAAAT  
CGATCCAACAGGAGTGTGATGATGAAGGTGCCAATGCCGGAAGAGAGGTTTACAAACGCAGCTTGCTGA  
CCCTGGCGCTGCTCAGCGGTCTGAGTGCCTGTGGCGGCGAGACGCCAGACGGCACAGAGCATGCCCGC  
CGTCCCTGTGGTGGTCGCGGAGGTCAAGCTGACCGATGTACCGCTCACCACCGAGATGGTGGGAGAGACC  
GCCGGTTTTTCGCGAGATCGATGTGCGCTCCCGGGTCAGTGGCATCTGCTCAAGCGCACTTATGTGGAAG  
GCCAGCCGGTTACCGCCGGTCAGGAGCTGTTTCTGATTGACCCTGAGCCCTACAAGGTGGCGCTGGAGCA  
GGCCAAAGGGACTTTGGCTCAGGAGCAGGCCCGTCTCAACAAGGCACGTGCCGATCGGGATCGCATCAT  
CCCCCTTTCAAGCGTCAGGTGGTGGTGCAGGACTATGACGACACCATCGCCAACTACGAAGCGGCCA  
TCGCCAGCCATCAGGCAGCTCAGGCCAAGGTGAAAGAAGCGGAGCTCAACCTCAGCTACACCCAGGTGAC  
TGCCCCATCAACGGCATGGCGAGCAAGAGCTCCAGTCCGAGGGGAGCCTTATCTCCACCAGCGGGCAG  
AACGGCCTGCTCACTACCATCACCCAGTTTTGATCCGCTCTACGTCAACTTCTCCTACTCGGAGCAGGATC  
GCCTCAACTTCGAAAACCTCGGTAAGAAAAGGGGTGATTGAGGCGAAGGATGCCACCACCTGGCGCACCCA  
TATTCGCTGCGCGATGGCTCCCTCTACCCGAGGCGGGCAAGCTCAACTTTTCCGACAACCCGGGTGCGAT  
CCGCAGACCGGCACCATCCGTGCCCGGCCATCTTCGACAACAAGGACGGCGTACTGCTTCCCGGCCAGT  
TTGTCCGCATGACCATCGATCTGGGCACCCGCAAAAACGCCATCGTGGTGCCGCCCGCGCCATCGTCCA  
GTCCAGGCTGACCGCATGGTGGTGGTAGTCGATGCCGACAACAAGGTGGTGGCCCGTCCGGTGACCCTG  
GGCGCGCAGTCGACTCCGGCGTGCTGATCGAGAGCGGCCCTGCAGGCAGGTGAGCGCTATATCGTCGAAG  
GCTTGATGAAGGCTCGCCCCGGCGCTGTGGTGAAACCTGTCTCTGCCGACGAGATGAAGGCGATCACCGG  
CAAGGTGGTCAGCCAGTCTGCGGCCAAGTAAGGAGCCCGTATGTTTTCCAAGTTCTTCATAGAAGTCCC  
ATCTTCCGACGCGTGATTTTCGATCATTATCGTGCTGGGCGGGTTGGCGGCGATGCGGGCGCTCCCCATCG  
AGCAATATCCCCAGATCACCCCGCCGGTGGTCTCGGTACGGCGTTTTATCCGGGGCGAACCCCGGAGGT  
GATCTCCAGACCGTGGCAGCGCCGCTGGAGCAGCAGATCAACGGCGTCGAGCGGATGATCTACATGCAG  
TCGGGGTGGCCTCCAACGGCCAGATGAACCTCAACGTCTACTTCGAGATCGGCACCGATCCGGATCAGG

CCACCATCAACGTCAACAACCGGGTCTCGGCCGCATGGCCAACTGCCTGAAGAGGTGAAAAAGCAGGG  
GGTGACGGTCAAGAAGAAATCGACCTCCATCCTGCAGGTGGTCACCCTCCAGTCACCGAACGGCTCGTTT  
GATACCACCTATCTGTGCGAACTACGCCCTGCTCAACATCATCGACGAGCTCAAGCGGATTCCCAGGCATCG  
GTGATACCACCTTGTGGCGGTACCGACTATGCGATGCGTATCTGGCTGCGGCCGGATCGACTGGCCCA  
GCTTGAAGTCAACCCGAGCGACGTGATTGGCGCCATTTCGCGAGCAGAACACCCAGTTTCGCGGCAGGCAAG  
ATCGGTGCCCAGCCCACCACGGCCCCATCGACTTCACCTACACGGTGCAGACCAAAGGGCGCCTTGAGG  
ATGTGAAGGAGTTCCAGAACATCATCGTCCGCTCCATGCCCGATGGCTCCAAGATCCGGGTCCGCGATGT  
CGCCCGGGTCGAGCTGGGGGGCAAGGATTATGATCTGGTGCCTCGCCGCAACGGCAAACCGGCCATCGGT  
ATTGCCACCTATCTGCAACCGGGGCGCAACGCCGTGCGGGTGCCTGATGCGGTGCATGCCACCATGGAGC  
GACTCAAGGAGCGCTTCCCAGGATATCGAGTACCAGATCCCCTACGACACTACCGAGTTTCGTGAAGAT  
CTCCATCGAAGAGGTGTACACACCCCTGTTTCGAGGCGATCGTGTGGTGTTCGTGGTCTATCTGTTT  
CTGCAGAACTTCCGCGCCACCCTGATCCCCTGTATTGCGGTGCGCGTGTCACTTATCGGGACCTTCGCCG  
GCATGCTGGTGTCTGGTTCCTCCATCAACCTGCTGACCCTGTTCGGCATGGTGTTCGCCATCGGCATCGT  
GGTGGATGACGCCATCGTGGTGTCTCGAAAACGTCGAGCGGATCATGAGCGAGAAGAAGTGTCCGCCAAA  
GAGGCTGCCATCCTCGCCATGCAGGAGGTCTCCGGTCCGGTGGTGCATCGTGTGGTGTCTGCGCCG  
TGTTCTGCGGGTGGCCTTTATGGGTGGCATGACCGGGGTGATGTACAAGCAGTTTCGCCATCACGGTCCG  
GGTCTCGGTGCCATCTCCGGTCTGGTGGCACTGACTCTCTCCGGCCCTCTGTGCCGTGTTGTGAAA  
GAGGGACATCACAAACCGGCCCGCTTCTTCGTCTGGTTC AACGATAAAATTTGACCAGCTGACCCGCGGCT  
ATGTACGCGGTGTGGCCTTCTGAAACCGTCCGGTGGGGTGCCTTTGCCATCATCGCCGTGTGATCCT  
CTCCATCTACGGCCTTCTTCTGAAAGTGCCGGGCGAACTGGTACCAAACGAAGATCAGGGCTACCTCATC  
TCCGCCGTGATGCTGCCGGATGCCGCCGCGATGAGCCGGACCCAGGCAGTGGCGGATCAGTTCGACAAGA  
TCGCCATGGCCAACCCCATGTGAAGGATGTGATCACCTTCTCGGGCTTTGACATTTCTCTCCAATGCCAT  
CATCAGCAACAGCGGCATGACCTTCATTACCCTGAAGGACTGGAGCGAGCGTCAGGGGACAGGACAGGAC  
TCCTTCTCGCTGGCCAAGACCTTCCAGGGCTTGAGCCTGATGGGGTGGCGGATGGCTTTGTGCGCTCCT  
TCAACCCGCTCCCATTCAGGGGATGTCCACCACAGGTGGCCTTGAGGGCTATCTGCAAAACCGTGGCAC  
CGGCAACGCCCAAGCCTTCTCCGGCGAAGTGCAGCGCTTCTCGAAGCGGCCAAGGCGCGCCCGGAGTTT  
GCCAGCGTCAACAGCAGCTACCCGCGCAACGTCACAGGTCTATCTCGACCTGGATCGCGAAAAAGCCA  
AGGCGCTGGGGTGCATCAACGCGGTGTTCGACACCATGCAAGCCACCTTCGGCCAGGTCTATGTCAA  
CGACTTCAACCAGTTTCGGCCGATCCTACCGGTGCAGTTGCAGTCCGAGGCAGACTATCGCGCTAAGAAG  
AGCGACATCCGCAACGTCTATGTCCGCTCCGACAAGGGGAGATGATCCCGCTCAGCAGTCTGGTACCG  
TGCGTGATGCCACCGGCCCGAACTGGTTCGAAACGCTTCAACATCTTCCAGGCCGCCAAGATCATGGCCCA  
GCCCGCCCCCGGCTACAGCTCGGGTACGGCCATCGCCGCGCTGGAAGAGGTGCGCAATGAGGCTCTTGGC  
AACGACGCCAAGCTGGAGTGGACCGGCTCCGCCTATCAGGAGAAAAGCGGCCGCAGGCAGCGTGGCATGG  
CCTTTGGTTTTCGGTATCGTGATGATCTTCTCATTTCTGGCCGCCAGTATGAACGCTGGAGCCTGCCGTT  
TGCGGTGATCACCGCGGTACCGTTCGCCCTGTTCGGTGCCTGCTCGCCACCTGGCTGGTGGGGCTGACC  
AACACGTCTACTTCCAGATCGGGCTGGTGACCTGGTCCGCCCTTGCCGCCAAGAAGCCATCCTGATCG  
TGGAGTTTCGCGGTGATGAAGCACGAAGAGGGGATGAGCCTCATCGAGTCGGCACTGGAGGCGGCACGCT  
GCGTTTTCCGTCCCATCGTGATGACCTCGCTCGCCTTCATCCTCGGCTGTGTGCCGTTGGTACCTCCAGC  
GGGGCCGGTGCGGCAAGCCGTACGCCCTCGGCTGGCCGGTGCATCGGCCGGCATGCTGGCGGCCACCTTTA  
TCGCCATCTTCTTTATCCCGCTCTTCTTCCGCCTCATCATGAGAGGATCGGAAAAAGGGCCTGACTATT  
CCGGTAAAGCTCACCAAGCCCTCCCTCACGGAGGGGCTTTTTTATGTCACTCCGTTACATCGCAAACAG  
ATAGGCCTTCATCGCCTTGAGGGCTACGGTGGCGGCACCGATGATGTGCATAAAGCCAAGCAGCGGATGG  
GGTTTATGTGCCGAAATCCAGGCTGAGCCGGTTCGCCCAATTTGGCAAGTCCACACCATCCGGCACCAGCA  
TGTCGAGCACCAGTGTCCGGCCATGGCTGGACATGTTGTTGCCACATGCTGCCGTACATCCTGATCCCC  
CTGCGCAACACTCATCTGGCCCTCCCCCGTACCAGTAAGTACTGAGTGCACCCGTGCCGAAAAGATGCGC  
CCGGGATAGGCATCTACATAAAACTCGGCAAACTGGCCTGGTGTGATGTTGCGAAAACCTGATCCGGAA  
TGCGAAACTCCAGAAACTTGCAGAAAGTGTGATAGGTGCATGTTGCCGTTACGGGAACCGCTGGCAAT  
GTTGACTATCGAGACCTGACCATCAAACGGAGCCTTGATCACCTTCTCTTCATTCCGTGCTCCTGCAAG  
GCCAGCTCTGTCTTAGATTCAACACCTGAGCTTCAATCGCCTGAACCTTCGCTTCACTGGCACTCAGTT  
GCGCCAGATCGCCATCAATTTGGGTCTGCAGCTGGTACCGCTCTGAATACTGGCAAAGTTACCCAAGT  
GGTACGCCAGCCAATTCCTTGTGATTGAGGTTTTCAGTCTGACTGGATCGCTCGCTGCTGGCTTACCTCT  
GACGCCACCTGGGCATGCTGGGCGTCAATCTGATAGCTCAACGCCCGAGACTTACCGTTACTCTCCCAAT  
CCGCAAGACTATAAATGGGCTGACCACGCGCAACACGCTGATTATGCGCAACATAAATCTGATCTATCTG  
ATGAAACTGGTTGATGCTAGTAAGGGTCCCAACACCGCATGAGGTGCCTTGACCGTCCGCCAATCGGTA  
AAATCTACCGGAGCCAATGGCGAGAGGTAGTCAACAAACCAAGCGCCAATAACGCGCCAATTCGCGGTAC  
TCCAAAAACCGTTTTTGGTTTCCAAGGCAATATGTTTCAGCTTGACCAGCAACCAGACGATCAGGATATA  
GGGACGAGGATCTCTTTTATGATGCTTCCCTCATGACGACCACGTCGAATACCATGGCCGATAATAA  
GGCTCATCCGCTCGCTCAGCACATCCCAACGGGCAAAGGTGATGATGACGGCAAGCACCCACCAGGCTTT  
GTCGATAAAACAGTCCGCACAAGGAGAGCGCAAACACCAGGGTGCATGACACCGACTCAGACACCTTGGCA  
CGGTGCACAGCGATCTCATGCAGTTGCCACAGCAGATAGACCAGATAGAGGACCACATAGAGAGTGATCA  
CAGTAATCACCCCATAAAGATCTCGGAATCAAGCAGTACCATGATGGCTGGCAAAGCATGGTTGAACCT

GGTCGCCTCAATTGGATAGATGTGGGCACCTTTTCGAGAAGAAGACAACCAGAGCGACCGTGACCAATATA  
AACGTCAGGCGCCAAAGCCACCGCGCTAACGCAGAGTTGATTGTGATGACATTTGATGTTGTTCCCTTGA  
GTAACGGATGAGCAAACAAGTGGACCTCACGAGCCACCCAGCTAATAACGCGCCGGATCGGCGCGACGGC  
TAGGATGGAGAAGCCCCAACCAAGTGAAGGCTTGCAAGGCTCACAACCTCAGAACGGTGTGACACCCGA  
TGTTGAAGAAGTTTCAGGTAGCTGTTGTTGTAGCTACCGGACAAGTGCGGGGACCGATCCCCTCCTGATC  
CACTGGCATATCACCCAGCTAGGCCAGGGTATAGCTGGCTTCCACATTTGGTGGCTGGGGCTCAACTGATAA  
CTGGTCCCCAGACCCCAGCGCAACCAGAACCCACTGGAAGCATCACAGTTCCGGTACTCATCGCTCACTG  
CACTACTGTCATAGCCAATTCCTACTGCTCAAACGCAGTGTGGGGTGACATCAACCTGTGCCCCCAGGCT  
GGCATGCCATGTATCCTTGTAAATTCATATCAATGGTTTGGCAGCCCATGGCAGATGCCACACCCGATATCG  
CCAAAACGGGACCCTGCTGCCAGTTGGCACTGGCCAGCAAGGCCACTGGTCGTTGAGCTGGTGATAGC  
CACTTAGTGTGATGGTCTGCGGAATCATGATCTGCCCCCTAGACCTGCCACATCAGCACGTGGGAAGAG  
CTGATCTTCAAGCTCCCACTTCAGTTTCGGAGAAGTAGTCAAGCCGATACGGGAGTGTGATCCAGCTCG  
TAAAGTACCCCGAAGGAGGCACCATACGCCCAGTCGCTGTTGGAAAATTCCCGCCCTTCCCCATCCCGG  
ACGTGAGATCCACAGAGGCTTCCAGCGAACCATTCATGGCGATCAGGCTGGCTCCCACCGACCAATTTGA  
GTCAATGCGGTACGCCAGACTCGGAGCAAAGGCGATGCCGGTCACTGGCCGACTGGGTATAACCACGA  
CCATCCCAGCCATCGCCATAATCGATAACCAGACCGTGACTGCCAAAAGACGCCGATACCTGCGACCCATT  
GATCGTCGATGGCATGAGTCAGATAGAGGCTGCCGAGCGGCGGGTCTGCAGGGCATTTCACCGTTGTT  
ACCGCGTTTGTCCAGATCCAGCTCAAGGTGCGGTATACCACACCGCCATTGACCTGCAACTGGGTACCT  
TCCAGTTTGGTCATAACCGCCGGGTTGCTTGCATAGTATCTGCCCTTGGGCACGGGCGGCAGACCCTG  
CGTTGGCCAGCGCACTGTTGGCAGTGTGGTCTCGTAGAGGGCAAGGCCCGCCAGCCATGGCTGATGGACT  
CAGCAAAGCGGCAAGCATCAGCGACAGCAGTGTGGCTGCATTTCAATACTCCTGAATAGTGAACATGGT  
GAGCACCCCGCAAGGTGTGCTGCTCAAAAACACGGTTTTGACTCTTTGATTGTCAGCATCCGGGAGACCTG  
CGGCTTTTATACTGCTCGCTCATGGCGTCACGGGATGGATAAGGTCGGCAAGCACTCCTGCCGCAGTCATT  
TATGCCGGAGCAACAAGAGTGAACCATCACGCCATCGTGGTAACTGACAGGGGCATCCTAACGGGATGAGG  
GGCATGCTTCAATAGGGTTGGGCATACGCAATGGTTAAGCATTTGCTTAAATATCCCCCCCCGACACAGCAC  
CTCTATCACATCACCGGCGCCATTGACCTTCACTCGTGGCAAGGTTTACAGTCCCGCCATCTGCTCCCT  
AAGGATGCTCGGATTTGCTACTACCCAGCTTGTGCAAGATTGCCCTGCGTTGCTCTGGCCCCGGCTATTG  
CTGGCGCTGCTGCTGCTGCAATCTGACCTCTGCATCAGCTGGCATGGTTCTCCCCCGCCAGCCGATG  
CGACCCCAAACAACACTCAGTGCATGGTGTGATGTTGATTCATCCATGGCGATGGCGGATATTTTC  
TCATGCAATGCCCACTCTGGATCACCTAGGCGATGTGATGCCCTCTCCTGCCATCAGGGAGACGAGGGG  
TCAACCATGGGCGATGAGTGCCAGATGCAGACCGGCGTCAATGCTCTCTCCTTCGGCGCGATGACTCTGC  
TGGGTGTGCTGGTCGCTCTGCAGCTCTTTCCCTTGTACTTTGGCAGCAACTTCGCAACTGCACGGCTTGA  
TAACTGGTTGCGGGATCCCTTCTGCGATCGCGCGGCACTCACCTCCCTCCTGGCCGCGCCGACATCTG  
ATGCTGTGCGGTGTTACGCCACTAGAAAGTCTTCTCTTGGCGCACAGGCAAGCTTTAACTTGCCCCGTTTC  
CTGCCGCTTGCCTGACCCTGTGCCCCGGCCAAACCGGTCCGCTCACAGGGAGCCGTGCGCACTGATAACA  
GCTGCGCCCCGTTTGGCGCCAGCCCCCTGGGTGATGCCTTGCACCTCACCCGACCGGCGGCCTGCAAAAG  
AGAATACGTATTATGTACCAGCCCACTTTTACCCTCCAAGGTTGCTGCCTTCGCGGGCGCCTTATCCT  
CCTGCACTTTCTGCATGCAGATCCGCGCCGGAGGCCAGTCATGAACAAGATCATCCTGATGTGCGCCCTG  
CTGCTCGCCCTTGGCGCCGGTGGCGGCTACTGGGCCGCCAAACAGACCTCCGATGGCGCAAGCGCCAAAG  
AGAAGACACCCCTTTACTGGGTCAACCCCATGGATCCCCGCGACAAGCGCGACGGCCCCGGCCAAAGACAA  
CATGGGGATGGACTTTATCCCCGTCTATGAGGAACAAAAAACCGGCTCGCCGGGGCACAGTACCATCAGC  
CCCGAGATCCAGCAGAACCTGGGGGTACGGCTCGCCAAAGTGGAGAAGCTCCCCATCCACCAGCAGATCG  
AGACGGTGGGCTACGTCGGCTATGACGAAGACCGACTGGAGGCGGTCAACGCCCGTATGGCAGGCTGGAT  
CCGTACCCTCGCCATCAAGAGCGAGGGGCGAGGTTGAACAAGGGGAACCTGATTTACGAGCTCTACGCG  
CCAGATCTGGTCAATGCCAGCAGATACCTGCTGGCACTCAACACGGCCAACCCACTGCTGCTGCGCG  
CTGCCGAGGGCAAGCTCAAGTCCCTGCAGGTGCCGGCAGATCAAATTCGCGGCCCTCAAGCGCAGCCGTCA  
GGTGCGCGAAACCATCAGCATTTACGCCCCCAGCAGCGGCTATGTCTCCGAGCTGAAAGTGCAGGAGGGC  
CAGTATGTGGAGCCCGCAGCGGCCCTCTTTAACATCAGCACCCCTCAAGCAGGTGTGGGTTAGTGCCGAGG  
TGTTTCGAGCGTCAAGCCGCCAGCTGAAGGTGGGGGATCCGGTACCATGACTCTCGACTATGCCCCCGG  
TCGCAGTTGGCAAGGTAAGGTGGATTACCTTACCCGACACTGGACGCAGCTACCCGACCCCTCAAGGTA  
CGGCTGCGCTTTGCCAACCCGACGAGTTTTTGAACCCAATATGTTTGGCAAGGTGAGTATTCGCACCG  
GGCAGGGGGAACCCAGCTGGTGGTACCAGCGAAGCGGTGATCCGCACCGGCAGTCAGGATCGGCTGGT  
GCTGGCGTTGGGGGATGGCAACTTCAAGTGGTGCCTGCTACTCTCGGCCCCAGTTTGGCGACAAGGTT  
GCCATCAAGGCAGGGGTAGAGGCTGGGGATAGCATCGTCAGCTCTGCCAGTTCTGCTCGACTCCGAAT  
CGGCCATCGATTCGGACTTCCAGCGCATGACGGCAGTACGCCCCGCTCAGGTGTGGACCCAGGGCGAGGT  
TGAAAGCATCGATCTGGCCAACCGCACCTGATGGTCTCCACCAGCCATCCCCGAGTGGCAGTGGCCC  
GCCATGGAGATGGAGTTCACCGTCGCCGAAGGAGTGCACATCAGCAAGCTGGTTCGAGGGGGCAGACCCTGC  
ACCTGCAGGTAATGCAGGAGGGGGAGGAGTACCGCATCACCAACATCCATCAGGAGAAGGCACCAGCAAC  
TGACGACACCGCCAAGCCTGCGGCAGATGAGATGGGCAAGATGGAAGGCATGGACCATAGCCAGCATCAG  
ATGACGATGCCCGAGATGGAGAAGAAATCATGATCCCTTCCATCATTCGCTGGTTCGGTGGGCAACCGCTT  
TCTGGTGTGCTTTTACCCTCATGCTCACCGCTGGGGGCTCTGGTTCGGTCAAGCAAACCTCCGGTGGAT

GCCCTGCCGGATCTCTCCGACGTGCAGGTGATCATCAAGACCTCCTACCCGGGCCAGGCGCCCCAGGTGG  
TGGAGGATCAGATCACCTACCCGCTCACCACCGCCATGCTGGCGGTGCCGGGGGCGACCACGGTGC GCGG  
CTACTCCTTCTTCGCGGACTCCTTCGTCTATGTGCTGTTTGACGACAGCACAGATCTTTACTGGGCCCCG  
GCCCCGGGTGCTGGAGTATTTGAGTCAGGTGGCCCCAATCTGCCCGCTCCGCCCCGTCCCCAGCTCGGCC  
CCGATGCTACCGGGGTGGGCTGGGTCTATCAGTACGCGCTGGTGGACAGAACC GGCAAGCATGACCTCAG  
CCAGCTCACCTCGCTGCAGAACTGGTTCCCTCAAGTACGAGCTGCAGACGGTGGATGGGGTCTCAGAGGTC  
GCCACCGTGGGCGGCATGGTGCGCCAATATCAGGTGCGGGTGCACCCGGACAAGCTGCGCGCCTACGGCA  
TCCCCGCTCTCCCTAATCGAGACCGCCATCAAGCAGGGTAACCAGGAGACCGGCGCCTCTGTCATCGAGAT  
GGCAGAAGCGGAGTACATGGTGCCTCCAAACGGCTATCTGAAAAGCGTGGAGGATCTGAAGCAGATCCCC  
CTCGGTACCCTGTGCGCGGCGCCCCGCTGCTGCTGAGTGACGTGGCGGATGTGGTACC GGCCCTCAGA  
GCCGGCGCGGTCTGGCCGAGCTCAACGGCGAGGGGAGGTGGTGGGCGGCATTATCGTCA TCGCTATGG  
CGAGAATGCCAGCACACCATAGACGGGGTCAAGGCGCGGCTCGCCAGCTGAAAAGCAGCTGCCAGAG  
GGGGTGAAGTCGTACCGTCTACGATCGCTCCGACCTTATCCAACGCGCCATCGACAACCTCTCCGGCA  
AGCTGGTGGAGGAGTTCGCGGTGGTGGTGTGCTGGTCTGCCTCGCCTTCTGTTCACCTGCGCTCGTCACT  
GGTGGTGGTCATTACCCTGCCCATCGCCATTCTGGTGGCCTTTATCGTGATGCACCTGCAGGGGATCAAC  
GCCAACATCATGTCCCTTGGTGGCATCGCCATCGCCATCGGCGCCATGGTGGATGGCGCCATCGTGATGA  
TCGAAAACGTCCACAAACACATGGAGCGGGAGGCGCTCACCAGACAAGAACCCTGGCGCATCATACCGA  
GGCGAGCATCGAAGTGGGGCCTGCCATCTTCTTCTCCCTGCTGATCATTACCATCAGCTTCCTGCCGGTG  
TTCGCGCTGGAGGCACAGGAGGGGCGGATGTTCCACCCCTCGCCTTACCAAGACCTACGCCATGGCCG  
CCGCGGCCCGGGCTCGCCATCACGCTGGTGGCGGTGATCATGGGTTACTTCATCCGTGGCAAGGTGCTGGC  
GGAGCAGGCCAACCCGCTCAACCGCTGGCTGAGTCAAGGCTATGTGCCGCTGCTCAAGGCCGTCTGGCC  
CGTCCAAAACCCTCTGGCTATCGCCGCGCTGGTGACGGTGGCGGGCTTCTGGCCGCTCAAGTACTTGG  
GCTCCGAGTTCATTCGCGCGCTCGATGAGGGGGACATCATGTATATGCCACCACCGCGGCCAATATCTC  
GGTGGGCAAGGCGCGGGAGATTTTGCAGCAGACCACAAGCTCATCCGACCCGTGCC TGAGGTGCAGAAC  
GTATTTGGCAAGGCGGGGCGCGCCGAATCGGCCACCGACCCAGCCGATCTGGTGATGATGGAGACCAGCA  
TCCAGCTCAAGCCCCGGGACCAATGGCGCCCCGGCATGACCCCGAAAAGCTCAAGGAGGAGCTAGACTC  
CCTCATCCGTTTCCCCGGCCTACCAACGCCTGGGTGCCCCCATCAAGACCCGCATCGACATGCTGGCT  
ACCGGCATCAAGACCCCGCTCGGCATCAAGATAGCAGGGCCGATCTCAAGGTGATCCAGCAGCTGGCC  
AACAGCTTGAGCAGATCGTCGGCAAGGTGGAGGGCGCCTCATCGGTCTACGCCGAGCGAGTGGCCGGTGG  
CCGCTACGTCAAGGTGGATATCGACCGGCTGAAAAGCTGCGCGCTATGGCCTCAACATCGCCGATGTGCAG  
GCGGTGCTCGCCACCGCCGTGGGCGGCATGGAGGTGGGCCAGACCATCGAGGGGCGCGAGCGCTACCCCA  
TCAACCTGCGCTATCCCCAGAGCTATCGCGACTCGGTAGCCAGCCTCGAGCTGCTGCCGGTGGTACACC  
GAGCGGCGCTCGTATCGCCCTGGCGGACGTGGCCCGGGTTTACATCAGCGATGAGGCCCCCATGCTACGC  
AGTGA AACCGCGCGCTCAACGGCTGGGTCTACGTGATATTCGCGGCCGCGACATTGGCTCCTTTGTGG  
CAGAGGCCAAGGCCGAGGTGGGCAAGCAGCTGGTGTGCCACCGGGCTACGCCCTCAGCTGGTCAGGTCA  
GTACGAATACATGGAGAGGGCAAGGCGCGTCTCGCCTACGTGGTGCCATTAACCGTCGCCATTATCGTG  
CTGCTGCTCTATCTGGCGTTTCGCCGCTTCAGGAGGTGCTGCTCATTCTCACCACCTTGCCGCTGGCGG  
TGGTGGGCGGGATCTGGACCCTCTGGCTGCTCGACTTCAACCTCTCGGTGGCAGTCGGGGTGGGCTTTAT  
CGCTCTGGCGGGGTGGCGGTAGAGACCGGCGTCTTGATGCTGGTCTACCTCAACCATGCCTGGGATGAC  
CTGGTGGCCAGTGGCAAGCCGGACAAGGCGGGGCTGCACCGGGCGGTGATCCACGGCGCCGCCCTGCGCC  
TGCGTCCCAAGATGATGACGGTGGTGACCATTATCGTAGGCCTGTTGCCCATCATGTGGAGCCACGGTAC  
CGGATCCGAGGTGATGCAGCGCATCGCCGCCCCATGATCGGCGGCATGGTGAGCGCGCTGGTGTGACC  
CTGCTGGTGTGCCAGCGGCCTATTACCTGTGGCGCAGTCGCAGCCTTGGCAAGAGCGCGAACC CGCAAT  
CCGAATAACCCGATTTACGATCCATATTGACTGAACGATGAGGAAACCATCATGAACTACAAAACGCTG  
ACCCTGACATTGCTGCTTGGCCTTGCCACCCAGACCAACCTGCAAGCCGAAGAGATGATGCACCATGAAG  
GGCAGGAGATGAGTCAGACGGGTGAGATGAGCGAGCAGCCGGGATCGTGATGACCAAGGGGTCATTAC  
CCGCTCGATGAGGGGAGCGGCAAGGTGCGCATCAAGCACGAAGCGATCGAGAATCTCAAGATGCCCGCC  
ATGACCATGGTCTTTTCGAGTGGCAGATCCGGCCCCAGCTCAAAGGGCTCAAGGTGGGGGATGCCATCCACT  
TTCATGCCGAAAGCCAGAGCGGCAAGCTCACAGTGACAGCCATCCAACCGCAATAAACGGCTCTGGCTCG  
CCGAAGAGGTACGATAGACAGTGACAACGCAAGAGGGAGGCATCAGCCTCCCTCTTCTTTGGTCAACCT  
GTTTATGCGGTCAACCTCTGGCACGCGATAGA ACTCAGCTGCGGGTTGCCAGCAACTGCTCCACATCCTC  
GATCACCTTGAGGGCCGCTGCGGGCCGCGCTGGAGGTCCAGAGCGACCCGTCCACGGCGCCAAAGCGC  
TTGGCCTTGATCACCGGCAGTTGCTGGAACGCTGGAGTCTGCTCCGCTGACGCATGGCATCCACCGCAT  
CACCGCTGGCGCTCAGGGTACCGACCACCAGCCAGTCAGCATCCAGCAGGTTGAGGGACTCCAGACTCAG  
CGCCGGTGAGTGGGGTGCGCCAGTACCCTGCTGCTTGTCTGGGCGTACCAGCCCCATCGACTCCACTACG  
CTGCTGGCAAAGGTGCCCTGATACATAAAGCTCGGCCCTTGGGGTTCAGCGCACTATGCTGATGCTCT  
CCCCCTGATGCTTGGCCAGCTTGTGCGAGCCTGAGTCAACCGCTCGGCATACTGCAGCAAGAAAGTATC  
CCCTTGCTGGTGC GGGTTGAGGGTGTGAGCGGTGCGGCGGAAGCTATCCTGCCATAGCTCGCCCCACTTG  
CTGGTACACACGGTTCGGCGCATCTCCCCAGCAAGGCCAGCAGCTCGGGACGGGTCTGGCCGGTCAGGA  
TAAGGTCCGGCTCCAGCGCAATCAGCGACTCCAGATTGGGGCTGTCGAGATCGCCGATCACCTGGATCCC  
CATGCCCGCCTTGTTTACGAAATAGCGGGGCAAGGTGGGTTGACCACGGCCATTGACGGCGCCGATGGGG

GTCAGCCCCAGAGTCAGGGTGTCTGTCGAGTTCGAGCTCGCTCAGCACCACCACCCGCGTTGGCTGGGCTG  
GCACCTGCACCTTCTGGCCAAACGCATCAGTCACTTCACGCATCTCCTGCGCCTGAACCAGCGGCGCGGC  
CAGCATCAGGATGGCTGTGCCAGGGCGGCAAAACGCTTCATCATCTCACTCCTTCTCGTTGCACGGCCC  
GGATAATCGGCCCGCTGAATACACTCGATGGGCCAACAGAGCAGGCCCATATGACTCAACTCGCCGAACG  
CAGGGTGCGGCCATGTTTCGTGACGACGGGGCAGATAATGGGCGCCCCGTGCGCCGGGGGCATTTCAGAATA  
TCGACACTGGTGTGGTAGAGCTGGTTCGATCAGGGACTTGGTACCACCTCCCAGGGCCGGGCCATGGCGG  
CAATGGTCCCCTCGCCGATGGCGATCAGCTCGTCAACAATAGCGGGCCGCCATCGCCAGATCGTGGATCAC  
CAGCAGCACGGTTTTGCCCCTCGGCGGTGATGCGATGGATCGCCTCCATCACCTCGGTCTGGTGACCAATA  
TCGAGGGCACTGGTGGGCTCGTTCGAGCAGCACCATGTCGCTGTCTGCGCCAGGATCATCGCCAGCCACG  
CCCCGTGTGCCTGCCCGCCGGAGAGGGACGCTGCGCTCTGCTGCCAGATGCTTTCAAGCTGCATCCGCTC  
GCAGGCGCTGCGCACCATGCGGGCATCCTCCTCACCCACTGATTGAACCAGCCCTGATGAGGGTGGCGG  
CCATACTGCACCAACTGCTCCACCAGAATGCCGCGCAGGCAGGGTTGGCCGCTGGGGCAGGTAGGCGAGCT  
CCCCGCGCAACCCCTTCATGGGGTAGCTGGCAAGCGGCTTGCCCTTTGAGCAGGATCTCGCCGCTTGGGC  
TTTTATCTGGCCGGATAGCAGCTTGAGCAGGGTTCGATTTGCCGAGCCGTTGGGGCCGACGATCCCCACC  
AGCTTGCCCTCGGCACGCTGAAGGAGATATCCCGCAAAAATGGGGGTCTGCTGATAGGCGAAAATGGAGGC  
GATTTACGGTGTAGCGTTCATCAGTACGCCCTCTGGCGATCGTTAACGAGAAGAAAACAGCAGCAACAGGCCG  
CCGAGAATGCGGGTTCATGATAACGGTTCGCCACCTCGTGGGGGCTGGCCAGCACCCGGACCAGGGTATCGC  
TGGCAAGCAGCAGCAGGGCGCCGCTAAGCGCCGACAGCAGAGCGGCACCACCCGCTTTTCACCAGCCA  
GGAGGCAATAATGGGGCCGCCATGGCGATAAAGAACACGGGGCCGCCGATGGCGGTGCCGAGCGCCGCC  
ACCAGAATGGCCTGGGCCAGAATGCCAGTTGTACCCGATCGCCGTTGACGCCAAGCCCTCGGGCCATCT  
CGGGGCCAAAGCGCAGCACCCGCCAGCGAGCGGGAGAGATAGACGATCCAGGGGCAGAGCAGCAGCAACAG  
GATGGCGATGGGGGGGATGGTGTGTAACCCACGGCGATAAAGCTGCCCATATTCACAGATAGAGGGAG  
CTCAGGTGCAGCAGGGCCTGAGTGGACATCACAACTGGCCGAGCGCCTCGAACAGCTCGGAGAGGGCCGA  
TACCGATCACACGAACAGATAGCCCTGCTCGCCCGGTTTGCGGCAGAGAGCATAGAGCACCAGCGCCGC  
GAAGATGGCGCCGATGGGGGCTGCCACCAGGGCCAGCTGCCACCCTCAGGTAGAGGGAAAAAGATGATG  
ATGGCCAGAGAGGGCGCCGTTGTTGACCCCAACCATGTCGGGAGTAGCCAGCCGGTTGCGCACCAGAGTCT  
GCACCAGACAGCCGGAGAGCCCATGGCCGCCCCGCCACCACCACCCCAAGGATGCGCGGCAGCCGGAT  
CTTGAACAGGGTGTAGCTGCTCAAGCCGCGTCCCCTCCCCAGCAGAGTGTGACCACCCCGTAAAGCCG  
AGCTTGCCGCGCCAAACGCTCAGGGCCAGCAGCAGCCAGCCAGCAGAGCCATGGCCAGCAGAGCAAGCC  
AGCGCCAGCTCGGCAGATGGATCAGCAAAAGAGCGGTTGCCGCGCCGACAGGCAGAGCATATCGGTAGGTGT  
GCGCATCAGCCCCTCACTTGACGGTTCAGTAGGGTACGAAAAGCCCCCGGATGAACAATGGCGATCAGTAC  
AGGCGCGCAATCAGGGCCAGAATAACCCCGTTGGGCGAGCTCGAACGGCTGGATCAGCCAGCGCGCCAGA  
ATGTCGGCCAACAGCAGAAAACAGCATGCCGAACAGGGCGGAGAAAACAGACCTGCACCGACAGCTTCACCG  
GCTCTACCAGTTCGGCCACAGTAGGCAGCCAGAAAAGCCGACAAAAGCCGATGGGGCCGGCGATGGCGATGGC  
ACTGGCGGTAAACAGGGTGGCGGCCAGCAGCACGCCAATCCGCACCCGTTGGGGTGGATCCCCAGCGCC  
TGTGCCTGACTATCCCCATCTGCATCAGGGTTCAGCTGGCGACAGAGCAGCAAGGTGATGACAAACGCCG  
CCAGCACGAAGGGCAGTACGGCAATGATGGCATCGAGATTGGCCGCCACAGGGAGCCGAGGTTCCAGAA  
GCGGTACTGCTCCAGCACCATCTTGTGGAGAGCAGCAAAAAGCTGAAGAGACCCGCAAGGTGGCCGAG  
AGCGCCACCCGACCAGAATCAGCTTGAGGGGGTTGGAGCGGCCAATCATCATGCCGAGCCCCAGCACAA  
TCACGTTGCCGAGCAGCGCACCCGAGTCCGGCCAGAGCAGATAGCCATAGGCAGACTCCACCCCGAACCA  
GGTGAGCCCCACCAGCGCAAAGACGGCCCCGGCGTTGACTCCGAGCAGGCGGGCTCCGCCAGCGGA  
TTGCGGGTTCGCGCTCTGCAACAAGGAGGCAGCCAAAAGATAAAGAGGGCGCCGACCACCATGGCACAGAGGG  
TGCGCGGCAGTCGCAAGGTATTGAGCACCATGGCGAGCTTCTCGTCACTCGCCCAAGGCGGTCACCCAT  
CAGGTAGCCGAGCACCTCGCGGGCACCATAGACACCCGACCCGTTGGCGAGCGAGAGGCAAAACAGCGTG  
CAGAGAAGGAACAATGCCAGCCAGAACAGAGGGGTCTGGTACTTAACCACCCCTTACGACTCCTTGCGTT  
GGGTCTGACAACATGCAGCCAAACCGACGTGAAAACAGGGCGCTCTTGTGTCAACGGAAAATAAAAACGCC  
GCCCCGACGAATAACCCGGACAGCGCAATACTAAATGCAAAATCATTTTTATTTGCAAGTTTTGATATGTGA  
CGGGCTCTCTTCTGCTCAGCTATCCATCACATCATGGCGGGTCTGGTGATAGGCCTCTTCACTCTTGCCCT  
CGGCGCCAGTACGGCACGGCGTAGAGCGACTGGCGATCCACCTCGAGCACAGACCAGAAAATGGCGGCGCA  
GCGGCAGCACAGCGCCTCTTCCCCACCCAGCCAGAAAGACCACCATCGCGCACAGCCGAGGCAAGT  
CACATGCTCCAGCAGGCGCTGACTCGGGCTCGCAACAAAACAGTGACAGCGAACCCCGACCGGTAGT  
GTCAACGGCTGAGCATCGGCCTGATCCGGCACCAAGATCGCAATTTCCCTCTGGCCTCGGCAGGCATCA  
CCTCACACATCGCCATGATGGCGGGCAAGGCGGTGAGATCCCCACCAGGCAGTAGTGAGCGGCCGGTTG  
CAGCATGGGGTTGGGGCCACCCGGCCCGGAGAGGATCACCTTATCCCCGGCTTGGCATGGGTAGCAAAG  
GCGCTGGCGGGGCCACCGTACCCGTGCAGCACGAAGTCGATATCAATTTCTGCTCATCACGGCGAAACG  
CACGGATGGTGTAGGTGCGGATCACCGGCTTGTCTGCCGGTCACTCCAGCGCGGGCCGCTCGGGGTTCAT  
GGCAGGCAGCACCCGCTTACCTGATGGTGTGGGCCAGCATCACCTTGATATGGGCTCCACCCGAAGTA  
AAGGGATAGTCAGCCAACTCGCTGCCACCAAAGGTGATGCGACGCAAAATGGGGGGTGTCTGGGTAATGG  
CTTTGACAGCCAGCAGACGGGGCGATTGGGAGGCAGAGATGGGGACACGATGGGGCTCCTCGTTGAGTG  
TGTCGCCCATGCTACACGCAAAATAGGAATCACTATCAAATAAGATTGTTTCTCGTCTAATAGCTACAAGC  
TGGATTCAAACATCCCCAACCACTCGCGTCCACACCCCAATCCAGAAAATAGGCTTTATGCACGCTAGCTC

CATGATTGGACAAAGAAAGCAGCCGGACAACGCCACTGTTACAAAGGGTTCCATTTGCTTATTTGACCA  
TAGTTTTTTCGAGATCAAATTTTTATTTCCCAATAAGTTTCTATCCTTAGTGAAGCAGTTAATGTAAGCAC  
AGGATGCCAAACAGGATTGTATGATGGATGACCAGATCCTGATTATTGATGATGACGATCTCTCCCTCCC  
CGACGCACAGCAAGCGGGCTGGAAGGTGATGATTGTTGACGATGAGCCTGAAAGTGCATCGCATACCCAAA  
ATCACCTTGAACAAATTCGAGTTTGCACAATCGCCCCATCGATTTTCTGCATGCCATATCCGCGGGCGCAGG  
CCAAGGAGTTGCTGGCCACTACCCCGGACGTTGCTCTGTTGCTGCTGGACGTGGTGATGGAGGTGACCA  
CGCCGGCCTCGATGTGCTCAAATATGTCCGTGAAGATCTGCAAAAACAAGATGGTACGCATCGTGTTCGCT  
ACCGGCCAACCCGGCCAGGCGCCGGAAGATGACGTGGTACCAACTACGACATCAACGACTACAAGGATA  
AAACCGAGCTCACCTCCCAGAAGCTGCGCACCTGCTGCGGGCCAGCCTGCGATCCTATCGGGATATCCG  
CACCTTAGAGACTAACCGTCAAGGGCTGGA AAAAGTCAATCGAAGCCTCCAAGGGGATCTTTGAGAAACGG  
GCCTTGCGCCAGTTTGTGCAAGGCGCCAGGAGCAGTCAAGCCTGCTCCATCTGGGGGAAACCCGAGA  
TATACGACGTCAAGCAATACGCCTATGAGGTGAAGGATCAAGTATTGGAGCCCCCTGCTCCCGCCATCC  
CGCCATGCTTCTCACGACGCGCCGGAGATCCTGCGCCAGGCTATGAGCAAGCGCAGCAATGTCTATAAC  
GCCACCCAGATGGTGTCTACTGCCAGAATCCGCGCCACCACCTGCTGTTCCACATCGAGACCACCCGTC  
AGCTCAGCCAGATCGATAACAGTCTGCTGACCCTGTTTACCGAAAAATCATAAGTGGCGCTGGAGAATAT  
CCGGCTCAATGAGGTGATCGCCGACAACCAGCGGGAGATCATCTATCGCATCGGGCAACTGGTTCGAAACC  
CGTTCAAAGAGTCAAGGCTGCACGTCAAACGGGTGCGCTCTATAACGAAACAATCTGCCACCTGATGG  
GCATGAGCGAAGAGCAGAGCGAGCTGGTGAACGTCCTCGCCGCTCCATGATATTGGCAAGGTGGGAAT  
TCCCCGATGCCATCTTGACAAGCCGGGCAAGTTGACACCGGAAGAGTGGGAGATCATGAAAACCCACGCC  
CAGCTCGGGCAGGATATGCTCTCCGGCAGCGATCTGGCGTGTTCAGATTGGAGCCACCATCGCTGGCA  
ATCACCATGAGAAGTGAATGGCAGTGGCTATCCCCGCGGTTGAAGGGGGCCGATATCCGCTGGAGGG  
GCGGATTGTGGCGCTGGCTGACGTGTTTCGATGCCCTGGGTTTCGGATCGCTGCTACAAGAAGGCGTGGCCG  
CTGGACAAGGTGCTGGCCCTGATTGAAGAGGAGAAGGGGCAGCATTTTCGACCCCCAGCTGGTTCGAGCTGA  
TGATGGCCAATCTGGACAAGTTCTCGAGATCCGCGAGCAGAAACAAGGATGTCTATATCGGGCAACACTG  
ATAGCCAGCTTGTCTGTTTATGAATTCAAAAAACCGCCCTGCTTATCAGGGCGGTTTTCTATATCTGG  
CATCACGCCACTTCAGAGCGAGAAGTACGAGGGTTACTGCTCTGGCAGATTGAGATCCAGCTTGGCAGCA  
GGTTGTCCGGCTTGCTGATTCTCGGCCTGCGCAGCGCCAGAGCACGCTTCAGGGCACGCCGTTTTTGT  
TCACCAAAAACCCGACCCCAATAACCCGAGCAGCACACCACCACCCGCAATGCGCCAGATGACCA  
GCCATTCTCTCTCGCCGAGCTTCATGGTTCGCTCGGCCTGGCAGTGGAGGCGGTTGCGGCGCCGACCA  
ACCTCTACAGGAGGCGCGGTTGGCGGAAAGACATTGAAGGTTTTTCACCGGCAACTCGATTTTCAGCTCAC  
GGCCGAGGCGAGTGGTGCATAGAGGGTTGCTTTTACCTCATGCTGACCGACCTCCTTGATGTTGGAGAG  
ATCGATATCAAGCTTGGGGTCGCTGGCGGTCTCACTGAACTCGTAGAGGCCGCCACATTGCTGGTCACA  
CTCCCTTGACCACCACGGAGGCGGGATCCAGCTCATCACGGTCGATTAGCAGTGAGAGCTTGGCACCCA  
GCTCATCCGAAGGCGGCGACAAGTTATAGCTGAACGGATAGGGGTAAGCAGCACATCCTGATAACGGGC  
ACGGACAACACCTGATTACCGGTGCTGAACATGGCGCGTACTTGCCACCGGGAATATCCTGCAGCGTC  
ACTTCCGCCGTCATGATGCCATCGCCTGGCACCTCATCTAACCCCTTGCCATCATCGGATAGTGGCCAA  
GTACTTGATCCAGCACGACCTCTTTCTTATCGGCATCGCTGAACGATTGCAGCTTGACGGTCATGCCAAG  
ATCAGAGAGATAGTATTTATCTTTTCGGCGGCTGACCATTGATCAGCAACCACGCCCTTGAGCTTGACCACC  
TCCCCCTGATAGAGCTGCATCGGCAGGGCGGGCATATCGAGCCGGATATCGGAGAGTATGCGCACCCGGT  
TGTCGGGATCCACCTCGCCAATCGCCTGCCAGGGGCCCCGGCATGGGATTGCGCAGGGTAATGAGATCATG  
CTCCGGCTGCGCCAGCCAACCCACATCTGCGGGTTTTGACCTTGCCCACGTAAGCTTGCTGCCATCGGGG  
CGAACCCAGGATCACGGACGGGGTGCCCGGCTTGCCTTGATAATGAAGGTGATCTCCTTCACGCCGTAAT  
CGATGCGAAAGCGGTTATCCAGCAGCGGGATATCGGAAGGGGCAATACTCGGTGCGCATCGCCCCAG  
CGAGAGCAACAACAGCAGACCGGCACACCACTTGCTCATTTGCCGCCACAGACAACCTCCTCCCTTCTTCT  
GTACCCAGATCCAGTCTCGCCTCGTGCAGGGCCTGAACCTCGGTGCTGGCACGCACCACCTTGAGGGCAGG  
TCGGTTGCTCTCAACCCGCGAATACTGGTGTCTGATTGCTTTTCGTTTTCTGTTGCTCTCGGTGGCCAGA  
TTGAGTTTGGTCTGGCCGCCGCTCATCAGCAGGTAGACGTCCGCCAGGATCTCCGCATCGAGCAAAGCCC  
CGTGCAGGGTACGGTGGGAGTTGTGCGATAACCGTAACGATCGCACAGCACATCCAGGTTGTTGCGCTTGCC  
GGGGAAGAGATCCCGCCCATCGCCAGGGTATCTGTGATGGTGCAGATATCCGCCGCTTGAAGTTGAGT  
CCGAGCTTGTGAACTCGTAGTCCATGAAGCTCACGTCAAACGGCGCGTGTGGGGGATCAGTTCCGGCGC  
CGCGGATGAACTCGAGGAATTCGTGCGCAATCTGGCTGAACGACGGTTTGTACGCAGAAACTCGTCCGT  
GATAACCGTGCACCTGGATCGCTTCCGGGTGACCCAGACGATCAGGCTTGATATAGACGTGATAGTGGTTA  
CCGGTCAGCTTGCGGTTGATCACCTCCACACAGCCGATTTGATAATGCGGTGCCCCAGATAGACAGGGC  
CACCCGCCGATTCATACCTGTGGTTTCACTTACTCGCTAGTTTACCCCAAGCCTCATGTTAAAACAGAT  
TGATTGCTCATGTTAAAACAGATTGATGTCTATAACCGACGGCTCCTGCCCTCGGCAATCCGGGCCGGGTG  
GTTACGGGGCCGTCATGGTCTACGGCAAGCACCGCAAAGAGATTTCCGCCGGATTCAAGTTGACCACCAA  
TAACCGGATGGAAGTATGGCCGCCATCATGGGGCTGCGCACCTCAACGAACCGTGAAGGTACGCCTC  
ACCACCGACAGCCAGTATGTCCGCCAGGGGATCACCCAGTGGATCATCGGCTGGAAGAAGAAAGGGTGG  
TGACCGCAACCCGCAACCGGTCAAAAACGTCGATCTCTGGAAGGAGCTGGATGCGGAAGTGGGTCCGCA  
CCAGATTGAGTGGCTCTGGGTGAAGGGTCACTCCGGCCATCCGGAGAACGAACGGTGCAGCAGCTGGCC



AGAGAGGCCGCTGCGGCAAGGATCTGGCCGAGGATACCGGCTACCAGCCCTGACGGGCCATTCCCGGTG  
TGGCGAGGGACTTTGGCAGTTGCCAGCGCCGCCGACCGGGATCAGTGAAAAGCGCCGTTTACGGGCCGC  
AATCACGTATACCGATGCAAACGCCCTGCAATAATCCCGCCGATACTCTCTCGCCACCAACTGTGCCAG  
CTCTGTTTTCCATAAACGAATAACCAAAGCGCTCGTCGAACATCACCTCGCATCCCAGCAGATGCAACC  
AGTCCGTACCCCGCCCCGGGGTAAACATCCGTGCTGACCAGGGCATTCTGCGCCGCAAGAACGGCAGCA  
GTGACCGATCCCAGCAGACTCATGGGGTTATAACCACTGATGATCAGCCAGCCATCGTCGGTCAGCACC  
CTCTCGGCCTCGCGCAACACTTGATGGGGATCGGCGGAGAAAATCGAGGCTGTGAGCCAGCAGGCAGGCAT  
CGACGCTGCCGGTCCGTACCCGGCAGATCGAGGGGGTCCCATACATGTCGAGCAGCCGCCCGCCGGGGG  
GACCCCGATCTGGTGACGAATGGAGGAGCGTTTGCAGGAAAAGTTCAGCGCTCAGGGCTCCAATTTTTCAGC  
AGATGATACCCAAACAGATTTGGGGCACCAGTTGTCTGAGCCGAGCCTGGATCTCGGCCGCCACCCAGTCCC  
CCATAGGCAATGCAGACCAGCTGGTCGGGATCTCGATTTGTTGTTTCGGTACGTGCCACCTAATAAGG  
GCTCAACTCGGGGTTTTCGAACGCCATCCTGTTATATAAGATAACCTCCCTAAAGAGAAGCAGACTCATGT  
ATCCAGTGATCACAGTTCCAGCCTTTAATGACAACACTACATCTGGTTGATCCGCCACGAAAATCACTGCCT  
GGTGGTCGATCCGGGCGATGCCGCACCCGTGCTGGAGCGGCTTGAGGCATTGGGGCTGGTGCTCGATGCC  
ATCCTGCTGACCCATCACCATCACGACCATGTGCGGGGCGTCACCGACCTGCTTGCCCACTTCCCCCAG  
CCCGGCTCTATGGCCCCAAACTTGACCCGATGCCGGATCACACGGTCAGTGGCTGGAAGATGGCGATCA  
GATCAACTGGCACGGCCTCGCCCTCGAGGTGATCCATGTGCCGGGCACACTCGCGGCCACATCGCCTAC  
CACGGTAACGGCATGCTGTTTTGTGGCGATAACCTCTTCTCGGCCGGTTGTGGCCGCTGTTTTGAAGGGA  
CGCCGGAGCAGATGTACCACTCACTGCAACGACTCGCCGCCCTGCCGATGAGACCCTCATTTATTGTGC  
CCACGAGTACACCTCTCCAACCTGCGTTTTGCTATGCGGTCGAGCCGGACAACCCGGCGATCCGACGC  
CAGATCGGGCTGATCAGCAAACCTGCGGCAACAAGGGCTGCCAAGCTGCCAACC CGCTGGGTGACGAAC  
GCACTTTCAACATATTTCTGCGCTGCGAACAGGATTCAGTGAAAATTTTCTGCTGAAAAACATGGGCTAAA  
ATGCGTGGAAAATCCGGTAGATACCTTACCATCCTGCGTCAGTGGAAGGACGTTTTTTGAACAAACCTT  
GATCAGGGGGCCATTGCCCTTATGATGCGAGCTGTTTTCTAAAAATGACCGGAACGAGATGAAGGTA  
CGAACGGCCTTATTGGCAGCGCTGTTGCTCAGCGGCTGCCAAAACCTGAGCCATCAGGATGACCGGGCGC  
TAACGGCAATCGAGCCGATCAAGTCCCCCTGGTCAAGAAAAAAGCGCATAAAAAACACTCTTCCCATTT  
CCTGTTTGGCGATGAACAGCTGGACGAAATGGAAGATACGGACAATCTGTGGGTGCGTATCAGCGATGAT  
ATGCAACTGGAAACTCCGGACAATCCGCGCATCCGACGCAACGTGAGTGGCTGTTGCGCAATGATAAGC  
ATCTGGCGACCATTGCCAGCCGGGCTGAACCCCTACCTCTATCTGATGGTAGAGGAGATTGAACGGGCTGA  
GCTGCCAATGGAGCTTATTACTGTCCCGATGATCGAGAGCATGTTTGATCCTCATGCCCGATCCCGCAGC  
AATGCCGTGCGACTCTGGCAGTTTTGTGCCAGCGACAGGCAGAAAACCTCGGTCTGCGCCACGACAACCTGGT  
ATGATGGACGGCGCGATGTGCTGGCCTCCACCAATGCGGGCTCGACTATCTGGAATACCTGAACCGCTT  
CTTTGACGGTGACTGGCTGCAAACGCTGGCCGCTACAATGCCGGTGAAGGCCGGGTGCGCAACGCCATC  
CAGCGTAACCAGCGCGCAGGCAAACCGACCGACTACTGGTCGCTCGATCTGCCGCGGAAACCCGGATGT  
ATGTGCCAAAGATCCTCGCCATGGCTGACATGATCAGCAATGCGGACAAGTACAATATCCAGTTGCCGGT  
GCTCGCCAACGAGCCGAAGCTGCGAGTGGTGGAGACCGGCAGCCAGATCGATCTGAACGTGGCCGCCAA  
CTGGCAGGTCTGCGCACCTCACAGCTCAAGGAGGTCAATCCGGCCCTGAGCCGTGGTGTGATGTGCCCC  
GTGGCCCTTACCGCCTGCTGGTACCGGTAGAATATGCCGATACCTGGAGCTGGCACTGGCCGATCTGCC  
CAAGAGCGAGCGTATTCGTACCCGCTCCTATCAGGTCACCAGTGGCGATAACCTGTGCGTATCGCCAG  
AATCATGGCGTCAGCGTGAGTGAGCTGAAGCTGGCAAACAATCTGCGCAGCAACAACCTGCGTCGCGGT  
AGCAACTGGTGATCCCAGCCACGGTCAGGTGAGCAGCAAGGCCAGCTCCGCCAGCAAACCGCAGCAGCT  
GGCAAGCCGTTGGTAGCAGCCAAAAGGCCAAAAGTCAGTTACAAGGTGCGCTCGGGTGACAACCTGTGGAGC  
ATCAGCCAGGCACACGGCGTCTCCACGAAGAGCTCGCCAAGTGGAAATGGTCTGAATGCCAAGTCGGCGC  
TCAAGCCAGGCATGAAGCTGGTGGTCTATCCAAAGCAAGGGAAGAAGAGCGACAAAATCGATGGTGTATCA  
GGTTCGCCGTGGCGACTCCATCTCCTCCATCGAGCTCGCTTCCAAGTGGCCATCAACGATGTGATGCGC  
TGAATCAGCTGGATAAAGGGGATTACCTCAAGCCGGTCAGGAGCTGACTCTGTTTGTGAAGAACAACA  
GCTAAGCCTCACCCTTGAACCCGATAAAAAACGGGACCAGTCATCTGACTGGCCCCGTTTTTTTATTACT  
GCGGCTAACCGCTGCTGTGTCTGAGCCACCGACTAAAAACAATGGCTTGGCGCCGCTGCGGATGCATCAC  
CGCTCTGAGGCAAAACTATCACCGCTATTCCAGAGCTTTGTGCGCACCCACCATCAGCACGGTGCCTG  
GCCAATCGCCACATTGGCATTGGGGAAGACTACCGCCTCACGCGGCTTCTCGACGGTGTAACGCAGCTCG  
CCATCCTCGGCCAGCACGAACCCCTTGCGGAAATTCGGTAAAGTTGTCCACATCGCTGGCGAACAGGAAGC  
GAAAGTCCGCCGATTTTTTTGGTGATACCCGATCGATGGCAAACAGGGTGAAATCATCCGCCGCCACGG  
CTCCAGTGCCACCTCATCCTGAGTGACCAGCTCCTGCAGCGCTTGGCGGGTTTTCGATAAAGCGGGTCATA  
TCGTTCTCGCCAAACGGGCGCACCTTGCCCAACTCCACCGTAAAGGCGTGGGCACCATGCTGGCGTGAGC  
TGTAAGTAACTGAAGGTCGTGGTGGGCTGGCGGAGAGCAGAATAGTACGCACCCCGCAGGCGCCGAGGAA  
CTGCACCTGCTCGCGCAGTGAGGCCGCTCGTGGGGGAAGGGGTAGACGGCAAACCTTCTCGTGGCGCGAA  
CCGCGAATGGCGGTGTGCAGGTCGTAGTGGTAACGGGGACGAGCAGGATTTGGCAAAGAAGCGGCTCACAT  
ACTGCTCAAGACGCATGGCGCGGATCCGCTCCCGATTGCAGAGCCCCCTCCCCCTTGTGTGTGCTCCGGA  
GAAGAGCCGGTTTCATGTTCTCCTCCACCTCCCGCAGCCCCAGATTCATCGCAGCCGGATTGCCAAACAGG  
AACAGCACCCGATGGCGGGCGCTCAGCTCGCCTGAGAGCAGACGACTCAGCAGCTGGTTGCAGATCTCGA  
TGGGAGCGGTCTCGTTGCCGTGGATTCCGCAGGAGAGGACGATATCCTTGCGCCCTCCCGCTGGCCGCC

CGCGCCACTGGCAGGCTCCAGACAGAGCACGCCGGTATCCAGACGCTGACCCGCGCACCATCGGACAGG  
GCAAATTCAAAGGGCTCAAGCTGCCACTCATGGCTGCGGGTCAAGGCCAAAAATCGTGCTGGGGAATCA  
TCCGTCTCACCTCTTGCGCTGGAATACTATGGCCGGATTATACGCAAGGCATCGCGGCTTAAAAATCGTT  
TTTTAAACAAATTCAAACATTAACGATACAAGTGTGATAACAATCGAACGACGACAGCTATGGCAGTAGC  
AATGTGGAATAAAGAGGAGAGGAAAAAGGACCAACAAATAACAGGGGGAAAAACGGGGGATATAAAAACAGA  
CAATGACAGACTTGGCGGCCGGGCGCCACGGGGTAGAACAGCAAACGACTCAGCAGAAAAACAAGGCATC  
CATGCCCCGGCTGATCAACCACGCCAGAACGGCTTGGTGGTCTCTTGATAACGGTCAGCTTCGTTTCAGGCC  
GATGTCTTTGAGCAGGTACTCGGGCAGCTCGGAGAGCTGGCGACGGCTGCGGCTGCGCTCCAGCCAGGTC  
AGAACGGTCATTTTAACGCGAGCAACCAGATTCAATTGGCTGGAATGCTGGTAACCGGTTTCGGTATAAG  
TCATGTTGGCCATGATGTGGCTCCTCTGAATATTTGTTTACGCACTGGGCTTTATTTGATGCGCAAAGCT  
TAGTCAGGGAGCAGGGCCGACTCAATTGACGAATTTTGATAACGTTACATTAGGAAAACTAATAGTAAAAA  
ACTGACTGATACAATTTTAATACTTTGATTTATAAAGAATAAATTAAGTCACTATTCGACCAATCAACGGCC  
CGCAGCATATTGTGCTGCATGGCACCACCTTACATATGCAATTTACCGTATGCTTATGCCTATGCCTCGCCAAT  
GGATGCGCCATTAGTGGCAACCCCGTCATTACATTCAATTGTTAATTCAGTGATCTAATTGTGATCTTAA  
ATTAACACCATGAAACATAAAAAAACTTACCTTTCCCTCCCTCGCCACTCCCTCGATGACGACCCACAAAC  
GCCCCCTCTGGCGCGCAACCGGCATACTGGTATGGTTATTTATAACAGTAGTTTATTTCCCTGCCCCGACG  
CCATCGTTTATGCGCTCAGCGGCGGATGAAACCACAGGATCATCGATGGATACTTTACCCCGACCGCCG  
CCCTGCGTCAACAGATGGCCGCCATTGAAGCCTCTCTCAACCAGCTGGCCGATCTGCTTTGCCAGCTCGA  
GCTGCAGGAGGCTCATGTCTATCCCTCCCCCGGTTGCACAGGGGGAAGAGCACGACCCGATCGAGCAA  
ATTGAGGTGGGCTATCTCAACGGTGAAGCCGCGCTGGCGGCCACCTCGCCGCTTATCGGGACCACAGCG  
CCCGTCCCGGCTGCTCCACCAAGGCGACTCACCGGCTGCCCGGCTGGTTGCGCTTTCCCTGCCGCCGACG  
CCCCTTGCTGCAACCGCTGATCGACCAAATCAACCAGCACAAACTCGATTTCAAAGCGCTGGTGCAGCAG  
GCGGGGGGACGGGACGAGAAGTTCGAGCTGGTACATAACCGCCCTGCCCGGGGTGATCACTCTGCAGGTCT  
ACCGCAAGCTGACCCTGCTGGCGGGGGAGCTGCAATCCCTCGGCTTTACCTGGGCGGACAAGCAGACCAT  
CAATCGCCTCAGTCGCGAGCAGGTGCTTGAGATGCTGGAGCGCAGCCGCCGCTACATAACCGGCCCTCTCC  
AACAACGAGGAGTGGAGCAAGATGGTGGATCAGGAGGTGTACGACATTCGCCGCTTACCTGCCGATGCCG  
AGTGCAGGATCCGCGCCCGGTCGAAGACCCACCCGATGATCAACCTGCTCTGGCTGGAGCGCACCCCGCG  
CAAGCAGCAGATCAAGCGGAGCCTGCCTGCTGCTGCGCGGATACCCCGCCCGCGGTCACCCATATCGAGC  
GGCAACTATCCCCAAAGACCCGCGCAGGCGCGGGGATCGCAAGATTGGCGGTGAACCCATTATCGAGC  
GGCTGCACCTCTATCTCTATCAGGGGTGACTGGATCAGGGATAGCTGGTTAGGGATAACTGCGTCCGCT  
TGCCGCGATAAACGAGTATCCCGCATCTGCGTCCCAAACGAGAAAAAGGGAGAACATCTCTGGATGTTCTC  
CCTTTTCTGTATCGATAGACGGTATGTGAGGCGGCTCGCCAATCAGCCCATCAGCAGGGCCCGCAGGCT  
CTCCACATCCAGCCCGCGCACCTCGGACTGGCCGCTCAGCAACCCATCGGCCAACGCCCCGCTTCTCGTCCG  
TGCAGGGGACGATCTTCTCCTCCACCGTCTGCTCGCACACCAGCCGGTACACGGTACCCGGCTGGGTCT  
GCCCCATCCGGTGCGCCGATCGCTCGCCTGATCTTCCACCGCCGGGTTCCACCAGGGATCGAGGTGTAG  
CACGGTATCGGCCTGGGTGAGGTTGAGACCGGTCCCCCGCCTTGAGGCTGATGAGGAACAGCGGCACC  
TCCTCGTGACGAAAACGCAGGATGGAGTCCCTGACGGGACTTGGCAGAGCAGCCCCATCCAGATAGCAGT  
AATCCCAGGATTTCTGCTCGATGCGGGCCCCGACGAGGCTCAGCAGATCGACGAACTGGCTGAACACCAG  
CACCCGATGACCGCCGTCGATCGCCTCTTCCAGCAGGGCCATCGCCTCGTCCAGCTTGCTGCTGGTCTGC  
GACCACTCGGGCATCACAGCTCCGGTGAGCAGCAGAGACGGCGAAGCCGGGTCAGGCCGCTCAGCACAT  
GCATCAGAGCGCGGCCATCGGGCCTTTGCACCTGCTGCACCACTTACGCCCCGGTCCGCTCGTAGAGCTG  
ACGCTCCTCGGGGAGAGGCTGATGTGGTGAATGATCTCGGTCTTGTCCGGCAGCTCGGTCAACACCTGC  
TGCTTGAGACGACGAGGATAAAGGGGCTGATCACCGCCCGCAGCAGCGCCATGTGCTGGGGATCCTTGA  
CCGCCTTGCCAAAGCGGCGCTTGAACCTCGCAAAGGCTGCCGAGCAGCCCCGGGTTGATAAAGGTAAAGAG  
ACTCCACAGCTCCCCAGATGGTTTTCGATGGGGGTGCCGGAGAGGGCGAGGCGAAAAATCGCCGTCGAGC  
TGGAACAGCAGCTTGGCGCGCTGGGTACCGGCATTTTGTGATCTGCTGCGCCTCATCGAGCACCATGGAAG  
ACCATCGGCGGGACTTGAGCGCCTCCGCCAGGCTACCGAGCATGCCGTAGTTGATGAGGATCACCTGACC  
GGCCTTGCCCTCGGAATCATCCCCCTCCCGCTCGGCCGGGTTCTCGAACACCACCACATCCAGCTCGGGG  
GCGAAACGGGCCACCTCCTCCTGCCAGTTGGTGACCACTGACTTGGGCACCACCACCAGCGCAGGGCCAA  
GGTGCTGGCGCATCCGAGCAGGATAAGCGCCTGCAGTGTCTTGCCAGACCCATGTCATCGGCCAGACA  
GGCACAAAACCGTGATGGGCCAGGGTCGCCATCCAGCGCACCCCTCTTTCTGATAGTCCCGCAGGGAG  
GTAAGCAGCTCGTCCGGGCAATCGACCTCCTGCTGCCACTCCTGCTGCAGGGATTGCCACGCCGCATCCC  
CTTCCGTTGGTAATGACCGAGAGCAGGCGAGTGAGCGGATAGGCCAGTTTGTGTTGATGCGCTGCTCTTC  
ATCGAGCATGGCCCCAGCATGGTGAGCCGTTCCACCAGCTTGTGCTCAGCATCAGGCTGGTCTTCTCA  
TCGAGCTGAACGGTGCCTGCCCCGGGGTATCTGGCGCAAAATAAGGCGCAGGTCGAGGATCTGGTGTCT  
CATCAAGCGCCAGTGGCCCTTCCGACCTGGAACAGTCTGCGCCGCTCGATGCGCAGACTCAGAGCCGC  
TTCATCAAGGCTCTTGAGGCGAGCGCTGTCTGATGCCAGTGAATGACCACACCGGCATCCACCAGCTCG  
GGCAGGGCATTGACCAGCGCCAGCGCCTGTTCCCCCTGTAGCAGCCACTCGCTGCCGGGCGAGGCCGATGG  
GCAATTGATTGCGCAGCAACTGGGCTGCAGCTTCTCGGCCCGAGATCCCGCTGCCAGTAGTGGTACGC  
CTTGATCCCCTGTGCGACGATCGCCTCCCCCTTGCCAAAGGGGCTGGGGCGGAGATCCTCAAAGCGAGTG  
ACCAGCTTGACCGACAGCTGACCATCCTGCCAATCCAGTTGCACCGAAGGAATGCCCGGCCAGGGAGCCA

ATTTCGGCATTGCCGCTAAGCCCCGCAACCTGACTGTGCCAGGGCAGCTCGGGTATGGCGTCCAGGGTGGC  
TTGCAACTCAGCCAGCCCCCTCGGCGGGCAGCAGCGGGATGGATTTCGAGCGCAGGCAAGCGGTTCGAGCAGC  
GGCTGCGGGGTGAGGATCAGCTGCCACAGATCCTGCGCCAGCGGCATGATATGGGCCCGCGGGCGGCCG  
CATCGGGGCAGAGCTGCGCGCTCATCCCCTGCTCGGTAGCCACCACCTGCAGCAGGGGGGCGCTGATGGC  
CAGTTGCAGCTTCTGCCCTTGGCGTTGAACAAGCGGGGTGATCGGCCAGCGGCGCCAGACATCCCCG  
GGCAGTCGTCCCATCACCCGTGGCAGGGTGCGAACCAGTGCCAGTCATGCTCGTTCGAGCATGGCGGCAT  
ACTGGGTGGAGAGCAGGGCCGGATCGACCCGGCGACCGGGTCCACTCCCCCTTGGTGCCTCAGCTTCTG  
GATCTTGCAGCTCCAGCTCGGGACCATCGGCATGGAGCAGCCACCAACCCTCCTGCGGCTTGCCTACG  
CCACTGGAGCGTCCCAGCCCCCTGCAGCCAGTTGAGCCAGCTGGCAGAGGCCGCGGTTTTATCCTCGTCCC  
CGTCATCATCCTGCTCATCACTGCCCTCTTGGCAGCTCTCCTCACTGCCGCGCAGTTGGCAGAGGGGCGC  
CCCTTTGGCCGCTCGCCCAACAAGATACCGCAGATCCTGACAAAAGGCCATCAGGCGATGATGGGGC  
TCGGCATCGAGCAGATGGGAGAGATCCCACCTGTGCAACATGGCCACCTGCGGGCTTGGGCACCGTGAC  
GGCCAGCGCGCAGAGATCGAGCCAGAGATAGCCCCAGTGGAGCTCCTCCACCGGCAGCTGCAGGGTATC  
GAACAGGCCGACCGCTGACCGTGGCGATCGCCCGCCACTGGCTGAGCAAGTCGGCAAGCAGGGGGAAC  
TGGCCAGTCAGACTGCGCTGCCACTTCTTGCCTGTTCGCTGGCGATGACGGGATCGGCCCTGCTGCAACC  
AGCCAAGCCAGAGCAGGGCGCTGAACGAACGGGGCCACTGGCCCGCTCACCTCATCGGTTGCCTGCCA  
CTGGCCAGCGCGGTGAGCAGTCGCTCGCAAGCGGGCCGCTCTGGCTCTGCTGGGCCAACGCTGCAGG  
GCTGGCCAGCCGGGGGCGGCATCCTTGTCTCGCCGTTGGCGATGTGCTCTCGCCATCCCCGCAAAGCC  
AGCGCCACTCCGCTCGAACGCTTTGGCCCGGGCCTGCACCTCGGGGGCGCAGCGCACCAGCGCATTTGGC  
CAGCGGCCAGCGCTCTTCATAGGGGGCATCAAGCAAGAGTTGCAGCGAGAAGTGTCCAGCAACATTTGC  
TGCCAGGCGGGGCTGGAGCCCGCAGCAACTGGTGGAGCTCCGGGGTATCAAGCAGGGTCAGCAGATCGC  
TGGCCGAGAAATAGGTTCGGGATCTCCCCCGCTTGGCCGGCAGAGCTCGCGCACCACCGCATGGGTAAG  
ATCCTGCCCCGGTCAATGAGGGCACCCGGCTCCAGTCAGGCGCCGGGCAGAGACCGGCACGCACCCCCAGG  
ATCAGCGCCAGCGTTCCCTCGGCGGTTCAGGCTCCACTGCTGCTCCCCGCGCAATCTGACCAGCCCCGCAT  
CCTGCAATAGGGTCAGTTTATCGATCAGGGCATGGCCTATCGCCAGTTGTTCTTGCAGCAAACGGGTACT  
GGCAACCGCTGCAATTGCAGGGTGGCGAGTAGGGCATAACTATCCGAAGAGAGGGTGGACGCAGACATC  
AAGACTCACGGGAAGTGCAAAAGCGGAATTTAACGGTAAAGCGCCAGCGGCTCGACCTTTACCCTGA  
AATAACTCAAAAAGGAAACCGCCATCCATGATGACCGTCGAAAAGTAAACGAAGGAAATAGCCGATCATCC  
GGTTACCTCCACAGCGGGGAAATCGGGAGCGCTGACCCCTAATTCGTGGAGCCAATGCTAGAGTTGGC  
GCCCCGAAAAGCTTTGAAGCGGATCACAGTTGAAAAGGATTTCTGAAAACGGTTTCAATTTTTAGCGGCA  
AAAAACCATGATTTTCGCGCAAATGAGCCATGTCCCCACCCTCCTGCTCACCCGGCAAAGCGGTGAAAA  
CCCTTATGGCAGTCGCTTGTGCAACGCCCTGTGCGGGCAGCTGTCAGCTGTATAGCTTCATCAGAACCCT  
GCCGCCCGCAGGTTAGGTTTCAGGGCAACCGGACATGGCCGAGATGGGCCAGGAGACGAATCGGCTC  
CCTCCCCGTCCGGTAGCTTGGCAAACCGCGCTGCCGCCGTGGGCTCTGCAATCGCCTTGACCACGGCGA  
GCCAAGTCCGCTACCGCCGCTCTTGCAGGAGCGTGACGGATCTCCGCGACGAAACGCATCGAAGATACA  
GGCGGGCAGCTCCTCGCTAATGCCAGGTCCCTCATCTTCCACTCAGGACGCACACTCTCCGAGCGA  
TACAGCCGCACGGTGGAGCAGGCCCGGCGAGCGCTGCTTCTGGGCATTTTCCAACAGCGCCATCAGAGCCT  
GACGGATGCGAAACAGATCGCAGCAAACATGAAGTTGCTATCGAGCTCCCGCTGCAACACAAATCCGCT  
CGCCGCCAGAGGGTGGCAAATGCCTCAAGCACCACGGCAAGCTCGTCGGCCAGCCTGACCTCGGTCCGC  
TGCAACTCCAGATGACCGCTGTGCTTGGAGGCTCAATACCCGCAAATCCTCGATCAGGTGATTGAGCCCC  
CCACCTGACGCAGCAACCCCTCGAAGAGTTGCTGCTGGGAGGAAATACCCCTTCGGCCAGCCCCTGCAA  
ACGGCCCGCAAATGGTCACCGGAGTGCAGCAATTCGTGGGGCATGGCGGCATTCAGAACTCCCGCTCG  
CGGGTCATGCTCTGCAGCTGCTCTGCCATGGCGTTGAAGTCGCGCACCAGTTGCGCCGCTCCCCGATCG  
CCTGCTCATCCTCCGGCAGCGGGCATCGAGTTTGCCTCGGCCACCTCGCGCAGGCTGGTTGCCACCGA  
GTTGAGGGGAGTCAGGATCGGGCGAGAGGGCGAACAGCCACGTACAGCGCCATCCCCAATGCAATGAGA  
ATGGTGGAGCCGATCCAGATCATCTCGACTGAGAGGGCACCCAGGTTCTGGAGATGCTGCCCGGCACAA  
ACGCCACGGCGATGCCATAAAAACACATAGGTGCCGATCACCAGGAGGAGATGATACCAAGCGTCAACAA  
GCCCCAGAGAGCGGATGATCTGCCTGCGAAGGCCGGGGCGCCGATTTTCATGCATCGCCCCGAAAGCGATAGC  
CAACGCCCCAGACACTGGCGGGGACCCCTGAATGCCGTGTGCTCCAGTTTTTTGCGCAACTTGCTGAT  
GTGGCTATCCACCGTACGCTCCTGGGTATCCCCCTCCGGCAAGCAGTGAGTCAGCAGTTTCGGCGGGCTG  
AACGCCCCGTTTCGGCGCCCGCATCAAAGAGGGCAGCAACTTGAACCTCGGTCAGGGTCAGCTCCAGCACCT  
GCTGCTGGTCATCGCGAAAATGCTGGCCTCGTGGCTCTCCAGATCGATCTGAAACAGGCCGACCCGCGAG  
CACGTTCCCGTGGCAGGCTTTACGGCCCGTGTGCGCCTGAGCACGGCCTGCACTCGCGCCACCCTTCG  
GCCGATTGAAGGGTTTACCCACATAGTCATCCGCCCCATGCGCAGCCCCATCAGCTTGTGAGATCCT  
GATCGAGGGCGGTTCAGCATGATCACCGCGTGTGCCACGCGCCCGGATCTCGTGGAGCACCTGCCAGCC  
ATCCAGTTGCGGCATCTGCACATCCAGCAGCAGGAGATCGGGTTTGAATGCCGATGCATGGCCAGCGCT  
TCACGGCCATCGGCGGCATGCAGGGTGCCTAATCCGTGGCGTTGCAGGTAAGCGGCAAGGATGTGGCAA  
TCTCGGCTTCATCCTCTGCAATCAGTACCAGTGACTGGCCCGCCGGCTGGCGGAAGCATTGAGATGGGA  
CATAGTCGGACTCGAAAAAGGTGGCGTTGAACTTTATCATCGCCTCCATGGATTCTCCACAAAGCCTCG  
AATCATTGCAATAGCCCCCTCGCCATAATGGCCGCTCGATGCACTCTTCGGTCAATCACACCGGAGAGA  
CGGTTTAAACGAGGTGAGTGGATGATGTTTGTAAAACAGCGGTATGCGGGCGCCCTGCTCGCCGTCATTGC

CGCATTTCGGGTTGGCGGGGTGCGATGCCGCGCCGCAAGAGCAGGAGGCACCCGCCCTCCTCAGGTGTGC  
GTGCTGACTCTGACTGGTTCGGGAGCTTGTTCATCAGCGAGGATCTGCCCGCCGGGTGGCGGCACCTGCGCA  
GCGCCGACATTTCGCGCCCAGATCAGCGGCATCGTACAGCGTCGCCGTTCGAGCAAGGTGCCGAGATCAG  
CGCAGGTACCGTGTCTCCAGATAAACCCGGCCCCCTTCAAGGCCGATGTCGACAGCGCCGCCGCCGCA  
TTGCAACGGGCGGAGGCCGTGCTGGCTCGCGCCCCGCATCCAGATTGACCGCCTGAAGCCGCTGCTGCGCA  
CCGACGCCATCAGCCGCCAGACCTATGACGATGCGGTCTCCCAGCGGGATCAGGCGGCTGCCGATGTAGC  
CCAGGCCAAGGCGACCCCTGGCCCGGCACCAACTGAACTGCAATTTGCCAGCGTAGAGGCCCCCATCGCC  
GGACGTATCGATCAGGCGCTGGTGAGTGAAGGGGCCCTGGTGTGCGCAACCGATAACCACTCCCATGGCCC  
GGATCCAGCAGATCGATCAGGTCTACGTGATGTGCGTCAACCGGCCTCGGTGCTGGAATCTCTGCGCCA  
GCAAGCTGGCTCAACGGCACCCGGAACCTGGCGGTGAGATCCTCGGCAGCAATGGCACACCGCTGGGCATG  
CAGGGGCGCATCCTCTTCCGGCATCGAGGTCGATGCCGGACAGGCGACGTGCTGCTGCGGGTGTCTGG  
TGGATAAACCTGAGCGGCCCTGTTGCCCGCCCTCTATGTGACAGGCGCGCATTCGCCGGGCCGCTATGC  
CAACGCCCTGACCGTGCCCCAGCAGGCGGTAGTTCGCACATCGGGTCAGACCAGCGTGTGGGTGGTGGAT  
GGCCAGGGGCGAGGCACAGCTGGTTCCGGTCAACACCGCTGAACTGGTGAATAGCCAGTACCGCATCGCGT  
CCGGGCTCAGTGCCGGGCAACAGGTGGTGTGCAAGGGATCGACCGTCTGACCCCGGGGGTTTCAGGTCAT  
TGCCTCCCCCTGGCAAGCACCCGCCGTGAGCAACCGGCTGACGGTGGCATTCGCTGAATCGGAGAGTTA  
TCCATGCCCGAGTTTTTTATCCATCGCCCGGTGTTTGCCTGGGTGATCGCCCTGTTTCATCGTGTGGCAG  
GGGTTCATCGCCATCCCCAAGCTCCCCATCTCCGCTATCCCTCGGTGGCGCCGGTGTGCGGTGACCCCTTA  
TGCCACCTACCCGGGCGCCACGCCGACAGCCCTGAAAGATGCGGTGGTGGTGGTGGTGGTGGTGGTGGTGGT  
TCGGGAGTGAAGAACCTGCTCTACTTCGAGTCGTGCGGTGGACGCTCGGGCAGCGCGCAGATCACCGCCA  
CCTTCAAGCCGGGCACCGATCCGGAGCTGGCCAGATGGACGTGCAAAAACCGCATCAAGCGGTCGAACC  
TCGCTTGCCACAAGCGGTGCGGCAACCGGCCCTGCAGGTGGAGTCCGCCCTCATCCGGCTTTCTGATGATG  
GTCGGCATGACCTCACCGGATGGCCGCTTCGATGAGGTTGCCCTCAACGACTACATGGCACGCAATATTG  
TGCAGGAGTTGCGCCGCATCGACGGGGTAGGACGAGTGAACCTGTTTGGCGCCGAGCAGGCCATGCGCAT  
CTGGGTAGATCCGGCCAACTCGCCGCTACGGGCTGACCATCAGCGAGGTGGCGCAGGCCATCGAGCAG  
CAGAACATCCAGATTGACCCGGGACGCTCGGCGACGAACCCGCCCTGCCGGGGCAACGCCGTGACGGTTT  
CCCTCACGGTTCAAGGGCAGCTGACGACCCCGAGGCATTCGCCGCCATCGTGTGCGAGCCGGTGGCGA  
TGGCGCTAAGCTGGTGTGGTGTGATGTCGCCCGGGTCGAGCTGGGGGCGCAATCCTACGCCTTTTTCCAAC  
CGGGAGAAGCGGCTGGCCGCCACCAGCGCCCATCCAGCTCTCCCCCGCGGCCAACGCCGTGCGTACCG  
CCGATGCGGTGCGCACCCGTCTCGCCAGCTCGCCCCACCCTGCCGGCGGGCATGGCCTATTCGATACC  
CTTTGACTCGCCCCCTTCGTCAAGGTCTCCATCGAAAAGGTGATCCACACCCTGCTGGAAGCCATGGTG  
TTGGTGTCTTGGTGTGTTTCTCTTCCGGCAGAACCCTGCGCTACACCCTGATCCCGGCCATCGTCCGCC  
CCATCGCTCTGCTTGGCACCTTCGCGGTGATGCTGCAGGCCGGTTTTTCGATCAACTCCCTCACCATGTT  
CGGCATGGTGTGCGCCATCGGCATCATTGTGACGACGCCATCGTGGTGGTGGAGAACGTCGAGCGCCTG  
ATGGCCACCCGGGGGCTGTGCCCCGGGAGGCGACGTGCGAGGCCATGAAGGAGATCACAGGTGCGGTGA  
TCGGCATCACCTGGTGTCTACGGCGGTGTTCTCCCATGGCGTTTGGCAGCGGCTCGGTGGGGTTCAT  
CTACCAGCAGTTCACCCTGTGATGGCGGTGTGATCCTCATTTGCGCCTTCTCGCCCTGACCCTGACG  
CCTGCGCTCTGCGCCACCCTGCTGCGTCCGGTCAGTCCGGATCATCATGAGAAGCGCGGCTTCTTCGGTG  
CCTTCAACCGGGGTTTTCGAGCGGTTACGGCAGGCTACGGTGCAGGGTAACCCGGCTGGTTCGGGCGCAG  
CGGACGGATGATGGCAACCTTTGCCGCTCTCTGCGCCGTGCTGGCCATCGCCGCCGCCAACTGCCCTCC  
TCTTTCTGCGGACGAGGATCAGGGTACTTTCATGACCTCCATCCAGCTACCGACCGGCGCCACCAGCG  
AGCGTACCCTTGAGGTGGTCAAGGCATTCGAGGCTCACGTGCGCTCTCGCGAGGGCGTGGACACCAACCT  
GGTGGTGCAGGGCTTACGCTTCTCCGGCGCAGGCCCAATGCCGCCATGGCTTACCATGCTCAAAGAT  
TGGGATCAGCGTCATGGCGCCACGGCAGCCGAAGAGGCAGAACTGGCACAAGCAGTATGGCAAATATTC  
CTGAAGGCACGGTAATGAGCCTGCTGCCGCCGCCATCGACGAGCTGGGCACCGCTCCGGCTTACCCT  
GTTCTGCAAGACAGAGCCAACCGGGGAGATGCCCGCTGCTGGCCGCTCAGGCACAACCTGCTGGAACCTG  
GCCGCCAAAAGCCAGGTAGTCAGTGTGATGTGATCCCCGACAATCTGCCCTCCCGGCGAAAAGCATTCACCTTG  
AGATCAACCGACAGAAGGCCGAAGCCATGGGACTCTCGTTCCGACGCGTAAGCAGTACCCTGTGCGCCGC  
GATGGGGTTCGCTCTACGTCAACGACTTCCCCAACGGCGGGCACATGCAGCAAGTCATTCGAGGCCGAC  
GCGTCAGCGCGCATGCAGCTCGATGACGTGCTCGGCCTGCGGGTGCAGCAATGCCAGCGGCGGCATGGTGC  
CCCTGCGGGAGGTGGTGCACCCGGAATGGCGCAATCGCCGAACAGATGATGCGCTTCGATGGCTTCCC  
TGCCGTGCGTATTGCCGGGGGGCCGCGCCCGCATCTCCAGCGGAGCGGCGATGGCGGAGATGGAGCGT  
CTGGTGGCGCAATTGCCGCCAGGCTTCGCATTTGGCTTGGACGGGACAGTCGTTGCAAGAGCGCCAGTCGG  
CCGAGCAGGCCCCCTGCTGATGCTGTTGTGCGCGCTGGTGGTCTTCTGGTGTGGCGGCACTCTATGA  
AAGCTGGTTCGATCCCGCTCTCGGTGATGATGGTGGTGGCGCTGGGCTGCTCGGTGCCGTGCGGCGCGTG  
ATGCTGCGCGCATGCCAACGACGTCTTCTTTAAAGTAGGTATGATCACCATCATCGGTCTGTGCGCCA  
AGAATGCCATCCTCATCGTGGAGTTTGCAGCGCCAGTTGCACAGCGAAGGGCGCTCGCTGCTTGTGCGGC  
TGTTACTGCTGCCCCCTGCGCCTGCGCCCCATTTCTGATGACCTCGCTGGCTTACCCTCGGGGTGGTG  
CCCTTGATGCTCGCCAGTGGCGCCAGCGGGAGACCCAGCACGCCATCGGCACCGGCGTGTTCGGCGGCA  
TGATCAGCGGCACCCTGCTGGCCATCTTCTTCGTGCCGGTCTTCTTTGTATTTCATCATGGGGGCGCAGCA  
GCGCCTGCACTCCTGGCAGGCACGACGAGCATCAACAGCATTAATCCGGCTCGATGACCACAGATAAC

AGTCAGCTGGATAAATTCCTCAGCACATCACCAAAAGAAAAAGCCCAACCTGCTAAACAGGTTGGGCTTGG  
CATGTGGCGGAGAGACAGGGATTTCGAACCTGGGTGGCATTGCTGCCACAATTGATTTTCGAGTCAATCCC  
GTTTCGGCCACTCCGGCATCTCTCCGTGGGGAGAGAGTTTTACCCAAGCTGGGCCGAGGATGCAATAAAAA  
TTTTCTTAGATATCAAATGGCTGAATCAGATATCTGGGAGCAGGCTCACAAATGCGGCGCGTGATGTTCCGC  
TTGCGAGGCCGCCCTGTATAGCCCTGTATCCACCCGCTCACACACCCGGCCATTATCCATATCGTGATAT  
TCACCCATTGCCATGAGGCGTCTCTTTTTCTGCTTGGCGCTCAAAATTTATGGGTGATGCCGATTTTGGC  
AGGTTTCTATGTATCCCCACATCATTGCGAGTGC GCGGCAAGCTGGTAATCATGGGCTGATTGAGGAAC  
AATCGCGCCATCCTGGCGGCTGTGTTGATGATGTTCCGCCCCGATTGAACTGATGGATCTCCTTATGCGA  
TTGCCGAAACTCAAGCCCCCTACCCTTAACGCCCGCCCTTTCCTGCTGCTGGCAGCGGTCCTGCTCTGCG  
CGGCGCCAGCAGAGGCCAAACGCTACCCGTTGCCACTGCCGGGAGTGCCTCATCGGTGAGCTGGAGGA  
TTACATCATCCAGCAGAATGAACATCTGGAATCTGGTGGCAAAAATACGCAAATTTGGATTTTTGGCGCTA  
CTTGAGGCAAATCCGGGTGTAGATCCCTATTTACCCAAGCCGGTACCCGCTTGACGCTGCCACCAGCA  
TGCTGCTGCTGATGTGCCTCGCGAGGGGATCGTCATCAATCTGCCGAACTGCGCCTCTACTACTTCCC  
CAAAGGGAAGAACGAGGTCATCGTGCTGCCATCGGGATTGGTGATATCGGCCGCGAGACTCCGGAGATG  
ACCACCACCGTCATCGAGAAGAATCCCAACCCGACCTGGGTACCCGGTCCCATGGTGCGCAAATCCTGGC  
TGGAGCAAAAAGGGATCACCTGCCCGCGTGGTGGCCCCGGCCAGAGAACCCCCCTCGGCAAGTTCGC  
CATGCGCCTTGGTTATGGCAAACGCGACTACCTGATCCACGGCACCAACAAGGATTTTGGCGTTGGCCTG  
CGGGTAAGTGCAGGCTGCATCCGGCTGCGACCTGACGATATAGAGGCCCTGTTCAAGATTGTGCCGATTG  
GCACGCCGGTGC GGGTGCATCAACCAACCGGTCAAGGTGGCCATCGAACCGGATGGTCGCCGCTGGCTGGA  
GGTACACTCCCCGCTCTCCCGCACC GAAGAGGAGCTTGAAAATGGCGCCCCGCTGATGCTATCACCGCC  
ATAGAGAGCTTTATCAGCGCACCTGATGTGATGCAGGATGAGGTGACGGCGGCGCTGGAGAGCAAAAACG  
GCCTGCCCCGCCCATCAGCAACCAGCTTGTGAGTGGCTAAGTCACCAGCGCCCGAGTGCACCCGGAGTC  
ACCTTATCTCATGAAATTCCTGCCCTCCTACTCCTGTTGGCCTGTCACTCCTTGTGGGCCAAGGACATT  
CTCTGGATGAACAATGGCGATCGTCTGACCCGGCAACATCGAAGAGATTGGCAAAGAGTCCGTACGCATCT  
CTTTGCCCTATACCCGGTGCCGTTACCGTCAAGCGGGATGCCATCAAGCGCTGGCGGCTGGAGCACCAGGA  
TAAACCCAAGGCGACCGCCAAAGGTGGATTACCCCTGTTCAAGGATGAGCAGGATGAACGTAATGCCTGG  
CTCTGGACCCGGTAGTGGCGATCTCAACATCAAGCTCAAACACAAGGACAAGCACACTAACACGTCACCT  
TCAAGGCGAAGACCGGATTTGGCCAACTGGACTGGCGCTACAGCCTCTCCGGAGAGTACTCTACGAAAC  
GTCTGACAGCGCTACCGGATAACCACGACTACAAGCTGAACCCGACCATTGACTACTTTTTTCGATCAACAG  
TGGTTTTGTGCGCAGCTCGCTCAATGCCGAATATGACATGCTGGAAAGCAACTACTCTAGCCTCGACTATG  
GTACCCGACCGGGTTACCGCTTCTGGAACGAGAAGCGCCGCTCGGCTGGAGTTCGTAGCGCAGGGGGTCT  
GCGTAAGACCTACTTCAGGGAAGAGAGCGGGATTGGGTTGCTCTTCAAAGGCAACCCGGATCATCGACTAT  
CCCTTTGCCAGCATGAACTGGGATTATCGCCAACCCATCCCGATATGGCGGGAAAAACTGGAGCTGTTCA  
GTCAGGGGCGCTATCTGCTCTATCTGGATCAACCCTCCCCCTATATCACTCTGAATCGAGATGTGACCGG  
CAGCGTGGGCTTGCCTACTACTTCAACGACCACCTGCGCCTCTCCTGGTCGAGCGAGATGGAGTGGGAA  
GATGGCGAAGTGCATTTTCGTGCGTCTCGAGCAAAAGTACAAAGAGACCGAATTCAGGCACCTGCTCAATC  
TGGGCGCCAGTTTCTGAGTCAACTGCAAACAGAAAGAGGAGCAAGTTGGCTCCTCTTTCTGTTTTGGTC  
ATCACCTGCCATGGCCCTTCTCCGATGATGGAGCAGGCAACAGATGAGAAACCGGCCGTTAGGCTCAGATC  
AGTCCCCAAGCGGCAATCTGGTAGATCCATAACCATCGCCAGCAGGGTGCCGACCAGCCCCATGATGACAC  
CGATGCGCACCATCTGGTGACTCTCCACCAGACCGGTGGCGTGGGCCAGCGCATTTGGGCGGGGTACTGAT  
GGGCAGAGACATCCCGAGCGAAACCGAAATGGTAACCGCCAGGATCAGGGTGTGACTGCCGCCCCACTCG  
GCCAGCTCGGGCATGCTGACCGCCAGTGC CGCCACCAGTGGCAGCAACAGATTGGCGGTGCGGGTGTGG  
ACATGAAGTTGGCCATCACCCTGCCAGCAGACAGGCGCCGATCAGCACCGCCAGCGTGGAGTATTCGTG  
GAACGGAATATGGGTGATGAGCCGCTCGGCCAACCCGGAGTCTCCAGCGCCAGCCCCAGCGGATACCG  
CCCCAGACCAGCCAGAGCACGTCGAGGGAGATCTTGTGAGATCGTCTTGGTGATGATGCCGTTGGTCA  
GGAACACCGCTACCGGGATCATGGCGACCACGTAGGAGCTCATGCCGTGCAGATCCCCAGTAGCCAGAG  
CACTATGGTGGTGATAAAGGTGAGGTAGACCACCCAGGCGGAGGGTCTGCATAAAGCGCCCCCAATC  
TTGAGATCCATCCGCTTGGGGTGTCTCGGGAAGAAGCGCCCCAGCAGAAACCAGCCAAGCAGCAACAGCA  
ATACCACAAAGGGCACCGCAAATCCCATCCACTGACCGAACGAGATGGCATGATCGCCGGTCCAGGTATTT  
GAGGGCCACTGCGTTGGGCGGAGTGGCGATGGGAGTGGCGATCCCGCCGAGATTGGCCGCCAGCGGAATG  
GCCAGCACAAAGCCGATTTTGGCCGGTCTTGTGCGGGAACGCTGCCAGCACCGGGGTAAGGATGGCCA  
GCATCATGGCGGTGGTGGCGGTATTGCTCATGAACATGGAGAAGGTGGCGGTGATCAACATCAGCCCCAG  
CATGACGATCCGGGGATCCTGACCGAACGGGCGCAGCAACACCCGCGCCAGATTGACGTCCAGACGGTAC  
TTGGTGC CGCAATGGCGAGGAAAAACCGCCGAGAAACAGCATGATAACCGGTGAGGCAAAGGTGCGCA  
TCACCTCGGTGGACTTGAGCAGCTCACCAAACCCCGGTTTACGCTTGTGCGCAGTCATGAACCAGAGCCC  
CTTGTGCGAGAGCAGCAGCAGCTCCAGCACGATGATCAGCACCGAGGTAGCAAAGATAGGGATGGGCTCC  
AGGATCCAGCAGAGGGCGGCCAGCACGAAAATGGCCACGACCCGCTGCTCGAAGACGGTGATCCCCCTCGA  
GCGGGATCCAGTGGGTGGGATCAGCAGGATGGCGAGGCTCAGCAGCAGTGGCAGAATAATCTTGTATT  
GATGGGCACTATTGTCTCCAGGATCGGGAGTAAGAAGCCAATAGTGGCATAACATGCTATCGCCTCACGC  
GGCCAACTCGCCAAAATGAGAGCTGGCTAACTGCACGGCGCACCGTTTTGTGAGTCATATCAAGCTGGGG  
TCGGCGCGCTATGGCTGACGCTCACCCCTTGCAACAAACAGGCAAAAAAACGGGCCCGCTGTTCCGTTGC

ACACGACAGCGGGCCCCGTTTACCATTTCATGCCGATGAGGGGGCTCAGAAGTAGATGCGGGTCACCGACT  
CGATGACGCAACCCGGGGCGGATCCCTTCGATCTCGACCTTGATCTCTTTGAGCAACTCCAGTCCACC  
CTTGATGGGGGTGACCCGGGCCAGCTTGGTGCGGGCGGGATATTGCTGTCCACCTTGATGGGGTACGGG  
AAACGTACCTGATCCAGCCCCAAGTTCACCACCATGCGGGCGGTGCGGAACTCGGGGGTGGCCTCATCGA  
CCGAGCCGGTCAACTGCGGCAGCAGCGCCAGGGTCAGGAATCCGTGGGCGATGGTGGTCTTGAAGGGCGA  
CTCGGGCGCCGACGCTCCGGATCGGTGTGGATCCACTGGTGATCCCCGGTCACGGCAGCAAACCTGATCG  
ATCATCTGCTGGCTGACGTGCAGCCACTCGCCGACATGGGTCTCTTACCAATGCGGGCCTGCAGGGCGG  
CATAGAGCTCGGCCGCCTCGGCCCCAGCTCAACTGCGGGTTCCTGAGCCACGGCAGGCTGACCCTTGGC  
TACTTGTGCCACGGTTGCTGCATCCTGTTGCTGCTCGTTCCTGGGACTCGGCTTGCAAGTCCAGCACACGC  
CCCAGCAAAGGGTGAAGATGTGCCTTTTGTGAAACTCACGCCAGTAGTCGCGGATCGCCGAGAGAGCC  
AATCCTTGAGCTCAAAGGGGTGCTGCGCCAGAATTCGCGCTTGCCTTTCAGAAAATCGACAACCTTTCAT  
CTACCGATCCCTATTTGATTCAATGCCTGTAAAGAGGTCTAACCAAGTCTATTTTATTAAAGTTTCAGCT  
GTAAGTGCAAAAAAATCTCGGCGTACACCTGTACCAAGGCGAAGTAACCTACTTACACCATGTAAACCAG  
CACGATCTGCCAATGAGGAAATCGATTGCCAAAAGATGCCGCCAGCAGGGGAAACTCGCGGGACTCATCAT  
GAAAAAAGGCCCTCATCGGGCCTTGTGGTGGGGGATCAGCGCGCGCTCGACCAGCCGCGACGCAATCCCT  
CCTCATCCAGAAAGGACCAGGCGAGGATCCGGCTCACCTTGTGTCCTGCGCCATGTCGATCACCCGTAC  
CTGACGCGCACCCACCCGGCTCAACGCCTTTTTCGCCCCGGCAGGTTCTCTTTTTTCGACACCAGCGAG  
CTGAACCAGAGGCACTGAGTGGCAAACCTCCTTGTCTGCGCAATCATGTTGGCCAGAAACGCCGCCCTCGC  
CCCCCTTCGCACCAGAGCTCAGCCTTCTGGCCGCCAAAATTGAGTACCGGCGCCCCTGTCACCTCTTTGCC  
CAGATTGCGCAGCTTGCCTCGCTCCCTTGTCTCGCTTCTGCCAGCGATGCGTGAAGGGAGGATTGCAC  
AGCGTCAGGACGAAGCGCTCCTTTGGCCCTATGATGCCGCGAAACACATGGTTGGGGTTACCCTGCAGAC  
GACACTCAATCTGGTTGCCGAGCCATTGCTCTTGGCCAGCAAAGTGGCCGCCCTTGACCAGACCCGGATC  
GATATCCGATCCACAAAACGCCAGCCATATTCGCGGGCACCCAGCAACGGATAGATGCAGTTTGGCCCT  
ACCCCGATATCCAGCACCCCTCACTCCCTTGCCGGTAGGGAGCTGACCTGCGCTCTCGGCTAGCAGGTCGG  
CCGCCAGTGCAGGTAATCCACCCGTCCCGGGATAGGCGGGCAGAGATAACCGGCAGGCAAGTCCCAGTG  
GGCAATCCCGTAGTGATGGGCCAGCAAGGCGGATGAGGGTCTTCACTGCATCGGGATTGGCAAAATCG  
ATGGTGCGGGTGCCGTAGTCATTGATAAAGACATGAGCGGCCAATTCGGGAGTTCGCAGGCAAAGCGCCT  
CAAAGTCAACCCGCCTGATGGCGATTACGGGAGTGAAGTCCGGATTTGCGGTTCGCCCAGCTTGGGGCC  
ACCGGCTGATGGGGTTCGGGGTTTTCATGCTGAGCTGACCGAAGAAAACGGGCCACACTATAGTGATTTG  
ACTCGGGAAGTCTAAACGAGGGCAATAAAAAACCGGGCTATCGAGCCCGGTTCAAGTGAAGTTGAAAA  
ACAGTCCGTACTGCGAGCCGTTTGTCCAGCCTGACTCAGATATCGATCCGGCGAGCTTGCCAGAACTTGT  
TGCGCAATATTGGCTGTCCAGCTTGAGAGCGCTCACACCCGGCTCGGGTCGAGGCGTGGATGAATTCACC  
ATTGCCGACATAGATACCAACGTGGTTGAGACGACGATTGATTTTGAAGAAGACCAGATCACCCTCGACC  
AGATCCTGCTTGAAACGCGCGTCCCTTCGTGGACTTGGGAGCGGGTATCGCGGGTAATTCGATACCGA  
CGGCATTGCGGAACACTTCACGGGCAAAGGCGGAACAGTCGATACCGCGCTGGCTGCTGCCACCCATCCG  
GTACGGAACACCACGCCACTCTTTATATACAGTCAGGATTTTCATTCACATCGGGTGTCTGGGAAGCTTCC  
GGTTCGATGACAGGTTCAACCATGGAAACTTCGATCTTGTCTCGGACCTCGGGTTGGGGTGCCGAGGCAC  
AACCCACCATTCCGAGCGCGACCAGCAGTAGCATCAGGTGGCGCAATCCTTTATCCCCGCTAAATAGTAA  
ATCTTGTAAAATACGGCCCCAAAGGGCAATTTATAAGGCAACAGCACCCGACTATATCCAAGAATTCTA  
TCGAGGCAAGTGA AAAATCCCTATCAAGCTCACATTTTTGCAAGGAAATGCACGATTTTTTCATAATTAATG  
TGATCATGCCAAACAATATACAATCGCAAAAAGAGCCTTGGGCCTCATAGATAACTGGCTTTTTATCCCT  
GCTTCAGCACCTTTTTAAAGTGA AAAATCATGATCGAAAACCGATCTTTTTTTGTTAAAACCGGCCAGGGT  
ATGCCAAGAGCTGCTTGTCAATTGCCTGAATGGCTGTCAACCGATGAACAGCATATCTGGCAAGCCATG  
ACCCATCCTGAACGGCGTCAGGAATATCTGGTGAACCGCGCCCTGCTGCGCCAGCTATTGGCCGAGCGGC  
TGCAACAACCTGCAGCCACTCTGCAATTTTGAACGGCCCCACGGCAAGCCCCGACTGCATGATGATGC  
GTGGCAGTTCAATCTGAGCCACAGTGGCAGCTGGCTGGTGTGCTGGCGCTTGGCCACAGGGGCCGCTTGGG  
GTGGATATCGAACTGGGCAAACGGCGGCATCACCCCTCCCCCTGGCCCGCCGGTTTTATGCACCCGAGTG  
AATATGAGTGGCTCTGCGCACTGCCTGCCCAAGAGCAGGAGAGTGCCTTCTACCGGCTCTGGTTCGCGCAA  
GGAGGCGGTA CTGAAAGCCCACGGTGGCGGCATTGCGGCGGGACTGGAGAAGGTGCGGTTTTCTCCCGGAG  
GAAGGATGGGCACTCGACAACCGGCTCGATGACACCCCTTATCAGGTACAGGATTGGCCCTTTGCCAGCG  
GCTGGCTCAGTCTCGCGGCAACGGCAGCCCTGTGACCTTTTACCGGCTGGATGAGCACTTGAATTGCCA  
CTCGCTTAACCCCATGTTACTTAAACACCCCTTCTGAAGAGTCCAACCTCATGATCGTGCACATTACTCCCC  
AGAATTTTACGCTGAACTTATCGATGCGTCCATGAAGAAGCCGGTTGTCATCTATTTCCATGCTCCGCA  
GATGCCGGAGTGCCAGGGGATGACACCGCTGATCGAATCACTGGTTGGGCCCGCAATGAGCAGGTCACC  
CTGGCCAAGGTGGATATGAACGATCCCCAGCTGCAGCCGCTGGCCAGTCAGCTTGGTCTGCGCGCCCTGC  
CGGCGCTGGTGTGTTCCATCAGGGTTCGCCCTGACGAACAGGGGATCATCGAAGGGCCGAGGATGAAGC  
CACCTGCGCCAGTATTTGCGCCGCTTTCGCCCCAAAGAAGAGGAAGAGTTGCTGGCCAAGGGGCAACAA  
GCACTGGCTGACGAGCAGCCAGCATCGCCTATGCCCATCTGACCAAGGCACACCAGCTGGCTACTGAAC  
GTCACGACATCAGCCTGTGGCTCATTCAAGCTGCGCTCGACCTCAACCTGCTGGAGGAAGCGCAGGAGCG  
CCTCGGCACCATCCCGATGGCGGCGCAGGATGGCCACTTCCATAACCTGAGCTCACGACTGGCGCTGGCC  
CTGCAAGCGGCAGACAGCCCGAGCTGCGCGCGCTGGAAGCCCGCCATGCAGAACAGCCTGATGATTTTG

CCCTGGCTCAGGAGCTGGCGGTGCAATACAACCAGGCTGGTCGTCAGGAAGAGGCGTTGGGACTGCTGCT  
GGAGATCCTCAAGCGGGATTTGGCATTTCGGCGATGCCAGAAAGACCTATCTCGATATTCTGGCGACCATG  
GGCAGCACACCGGGCGGCACAGAGCTACCGTCGCAAACCTCTATAGTCTGCTCTACTGAGCTGAATCGAACT  
GGCTGGTAATGATGGGGGAGTGCCGGGAGACCGGCATGACCTCATGGGTCAAGTACGAAGGAGGTGCGGT  
GGGAATAGTGGAAATACGGTGAATTTTCAGGCCAAAAAATGGCGCAAACTGCGCCATTTTTTTTCGCAT  
GGATTACTTCTTGTAGGAAGTAGCCATGTTGTGATGCGCTGGTTAGCACGCATAGCTTCTTGCTTGGCT  
TCGGCAACATCAGCAGCGATTTTGGACTGATCAGCACGAACTGCGCTAACATCTTGAGCCAGTTGGTCAA  
CTTTGTTAGACAGATTCTGAACGGAAGTTTCCAGTTCGCTAGTGTTTGCGCAACCACCAGCAGAGCGGA  
CAGACCAACAACACCTACCAACAACAATTTTTTCATTTTTAAAGCTCCCTTGAACCTGCCAGACGTTTAG  
CAAGCGCGGTGATTATGGCACAATAAATCTACTTTGCATAGTCCCACCACAGATAAATGCATTAATAA  
CCCTCATTTTTTTTTGAATGAACAGTTTTTTGTCCAGATTTCGCTAATAAATGAGTGCCGTGGTGGGGG  
CACGGACAAAGGTTAACCAAAATTTTTGCCTTATTACAATTTTCGTATGAGGCTCAGGCTGTAGTCTGAC  
AACAATTGACGATATTGCACCAGATCCTCGATGGTCAGCACCGGCATCTGGTGTGCGACCGAACGCAA  
CCAAGTCTGGCAGACGCGCCATCGAGCCATCTTCTTTGGTCAATTCACACAACACACCAAACGGTTTTGAG  
GCCAGCCAGCTGCATCAGATCGACCGTTCGCTTCGGTATGACCACGGCGGGTAAGCACCCACCGGTTTCGC  
GCCCCGAGCGGAAACATGACCCGGGCGGTGCAGATCGCCCGGTTTGGCGCCGTCAGCGATAGCCGCGC  
GGATGGTGGTGTGATGCGATCAGCCGCCGAGACACCGGTTCGTGACACCCTGCGCCGCTTCGATGGTCACGGT  
AAAGGCGGTCTGGTAGTGGCTAGAGTTGGCATCCACCATCATCGGCAGTTCAGCTGGCGAACCCGCTCA  
TCGGGCAGGCAGAGACAGACGATGCCGGAGCACTCGCGGATCATCAGCGCCATCTGTTTATTGGTCATGG  
ATTCGGCGGGCAAAATGAGGTGCGCCCTCGTTCCTCCGATCTTCATCGTTCGGCCACCAGCAGCCGCTCC  
GGCAGCAAGGCAGACAGGGCCGCTTCGACACGGGCAACGGGATCACCGAATTCACTGAGTAGAGACTGA  
TTCATGGTAAACTCCTAAACAAGACAAGGACCAGAATCAGGGCATGGAAAGGCAGACAGAGACGGGCAT  
GCAGCGGCCAGCCCACAAGGGCCAACCGGGCAAGGTCTGTCTTATCCTCTTTTCATCCGGACTATGACCGT  
CGGCTCCGGCATCTCACCGGATCTGCTGACCCCGACCCGGCAATCAGCCAAGTCGGGCGCTCGCGGGCTC  
CCCGAGTCAATCGGGATACCGCCGGTGGGGAATTCACCCCGCCCTGAGAATAAGCGCAGACAGCCTAAA  
GAAAAACGGTTGCAGATACCAGCCAAAATCCCCGACGGCTGAAAAGCGTTTCCACATTCGCGCCGGGAC  
CCGCTCTGCGCGCCGCTCGCCAGCGTGCAGGGCCATGACTGGCGAATTTCTTTATGGCTCGGATCG  
GTTTTATGGCATAGTTCCTCCGAAACCAAAAAACAGGCGCCGAAAGAGAGCCTGAACAACGCTGCGCGGCA  
GACAGCAGCGCAACACCACAACCGGAAAATGACGAGATGGAAAAGAAAATACTGCTACGCGATTGCC  
TGATGCCAAAGGGCTCATCGCCAAGATCACCAACATCTGCTACAAGCACCGCTCAACATCATCAAGAAC  
GATGAGTTTGTGGATCACGAGAATGGCCGCTTCTTTATGCGTACCGAGCTGGAGGGCCGCTTCAACGACG  
AGACCCTGCTGGCCGACCTCGATGATGCCCTGCCACCAGCGCCAGCGCCGCTGGTCAAGGCGGGCAA  
GAAGCGCATCGTCATCCTTGTGACCAAGAGACTCACTGCCTCGGCGATATTCTGATGAAGAACTACGCG  
GGCGCGCTGGATATGGATATCGTTGCGGTGATCGGCAACTACGACACCTTGGCCGAGCTCACCGGCAAGT  
TCGATATCCCCTTCCACACCGTCAGTCACGAGGATCTGAGCCGGACCGAACATGAAGAGCAGGTACGCGC  
CATCATCGACAGCTATGAGCCTGACTATGTGATCCTGGCCAAGTACATGCGGGTGTGACCCCGAGCTTC  
GTCGAGGCCTATCCGCGCAAGATCCTCAACATCCACCCTCCTTCTGCCCCTTCATCGGTGCCCGCC  
CCTACCGGCAGGCGTTTGTGATCGCGCGTCAAGCTGATCGGTGCCACCGCCACTTCGTGACCGACGATCT  
GGATGAGGGCCCCATCGTCAACAGGACGTGATCCACGTCGGTCACGCCTTCAGTGGCGACGACATGGCC  
AAGGCGGGTCGGGATGTGGAGAAAATCGGTGCTGAGCCGCGCGCTGGAGCTGGTACTGAACGAGCGGGTGT  
TCGTCTACGGCAACAAGACGGTGGTCTTCAAGTAGCCCCGCCACATGGCTCGTATGCAAAATGCCAAAAC  
AACAACGGCTCCCGCGGGAGCCGTTGTTGTTTTCTGCGCGAGTGTGAGAGCGGCAGATCGTTTACCGTCA  
CCGCGCCCTTCTCCAGCTTACGCTCGGAGGTGAGAGCTTGTGTCGGCTTCAGATAACCCATCAGGGT  
CAGCTGATCGAGCATGGGGGCCAGTTGCGGCACCGCCTTGCCAGCTTGTGCTGAGGCTGGCATGCAGC  
ACGCCCCGAGAGGGCTGCATTCCCCTCGCTGTTAAACAGCTGCTCCAGCGAGGTGGAGGCCAGCTTCA  
CGTCCCCTTCATGGTCAACCGCTCACCCTGAGCTTGGCGTGGAGATCGGCCAGTTCAAGAGTCCGCGC  
ACGTTTGAGCATCTTGTCCAGCGCCTGCTGGATGGCGGCATCTTCAACCCCTTGCCACCGCGCGCTGC  
AGCCCTGATAACCTTCCAGATCCAGACCGTTGAGGTTGAGCGCCAACTTGTGCTCGGTACCGCCAGGG  
TGTCAGTCTCGTTCTCCAGATCCAGCTTGGCAATTTTCATCTGATAGCTGCTGGAGAGGGTCTGGGCATC  
ATCGCCGGTCAACTGAGTCTCGGTGGTTCATCCCTGCAGAGCGACCTTGCAGCTGTCAGGCAGTTGTACC  
GTGAGGGCCGAGAGGGTTCATCTCGCTCTGGGGCGAGAGGACACACCGCTGATCTCGGCAATGTCCGGCAC  
TCCCTTTCAGATCGGCCAGCAACAGTCCATCTTGTCTGCTCTTCATGGACCGTCATCCCCTGCCAGGT  
CATGGTGGAGGTGACCATTTCCCCTCCAGATTGCCGTGAACTCGCCGCTCAGGGGCAGGAAGCTGAACTCG  
TCCAGCCCCTGTTTGTGATCTTGAATTCCTTGGCCCAGAAACGGCTGCTGTTACCTGTGTCCAGAGACTGG  
TGACCGACTCCAGGCCGAGTTCCCCTGCTCCATGCCAGTGCAGTGGTGGAAACCGGCGCCAGAGTGCCATT  
ATGGGTATCGAGCAGGAAGTGGCTCTTGTGATGTAGAGCGGCAGGATCTGGCTCTTGACCACAGTTGCAAC  
TCGATGGGCTGACTGCCCTCCAGCTCGCTGTGATGGCAGCCAGCTCCTCCGGCGTCAACACGACCTTCA  
GGATCCCCTCACGGGTGAAGAGGTTGCTGCTACCCGGCTGCCACTGCATGTGATACCGGCTCTTGTCTC  
TACCTTGGCGATCTGCTCCGCCATGATGTTGTGCAAGCTGTTGCCCGTGTACCAGCACGCAGCCAGACCA  
CCACCTACCAGTGCCGCACCCACGGCGAGGGCCACTATCTTTTCATATATCCATGTGTCTCCAGGGAGT  
TGTACTGCACTCTACGGGGCGACTCGGGGCTAGGCAAGTCCAATCAAATGGCGAGTCCACTTTCTTGC

GGCTCGCCACAACATCACAACAAGGGGCTGAAGAGATAGAAGATGTTCTCCATCGCCTTCTTGTACCAGG  
GGCGGGCCTGCCATTGGGCCAGGGTCATCGGGGTGGCTTCCGCCATATAGCCCTGTACCAACCGGGTCAT  
CTGGGCCACGAACGAGGGGTTATCCACCAGCAGGGTCACCTCGAAGTTGAGCCAGAGGCTGCGCCGATCC  
AGATTGACCGTCCCCACCAGCGGAAGTCATCATCCACCAGCACGCTCTTGTTATGGAGCAGGCCGGCAT  
CGTAGCGGTAGATCTCCACCCCGGGCCGACGAGCTCCTCCATAAAGGCGTTGCAGGCCTAATTGGCCAT  
GATGGAGTCGTTGCGTGCCGGCAACACCAGCTGCACCTGCACTCCGCGCGCTGCTGCCGAACCTGAGTGCG  
GCCGCCAGCGGATCGTTCGGGTACAAAGTAAGGGGTGCTCAGCACCAGATGGCTGCGTGCCCTGATAGATGG  
CCAGCAGCAGGCTCTGCTGGATGCAGTCGCCGCCGACGAAGGGGCCGGACGGGATCAGCTGGGGCGGGTA  
GTTGGTCTGGGGCCAGGCTTCCGGCTCATGCTGCAGACTGTCGAGCAGCCGCTCGCCGGTCTCCATCTCC  
CAATCCCAGACGAAGATCGACCACATCAGCGGCACCATGGGCCCTGCACCCGGATCATAATGTCGACCC  
ACTGGCCGACTCCAGCATCCTGCTTGAAGAAACGGGGATCCACCATGTTTATGGAGCCGGTGTAAACCAC  
CCTGTTCATCGATCACCACCAGCTTTCGGTGCATCCGAGATCCTGACGCTGGAACAGAATGCGCCAGGCG  
CCGACCAGCAGCCTCCACCAGCTTGCACCCCGCTTGCAGCAGCTTTTTGGGCCAGTGGGAGCGGAAGA  
ACTGCTTGGCTGCCACCAGAAATCGAGCAGCAAGCGACAATCCACGCCCGCTTGCGCCACTTCAATCAGCGC  
CTCGCACACCTCGTTCGGCATCGCCGCCCGGATGCCAGATATAGAATCCAGATAGCAGGAGAGCGTTCGAG  
CGACGGATATCCTGGGCAATCTCGCGCAAGATCCAGTCCGGCTTGTGAGCAAGGTCATGCGGTTGCCGG  
AGAGCATCGGCATGGCGAGCCGTCCTGGATCAGATCGTGCAGCGGCTGTGCCTTGGCGCCACTTTCGCA  
GCAGTGTGCGGGAACAGACGGGCCAGTTGGCGGATCCAGATGGCATAAGGGCGATAACATGGCCTGGGGC  
CGCTCGGCACGGCGGGCCCGCCAGCTTTATTTACCAAACAGCACATAGAAGCCACCCCGCAAACCGAA  
TGGCATAGATCAGCGCCAGCCAAGCCAGCGACACCCCGATGGGACGGCGTTTCATCACCACCCGAAACGA  
CACACCGGTGACAATCACGGTATGAAAAAGCAGTAGCAGCCAACCCAGAAAACGGGAAAACAGCAGTTGA  
AGATCGTGTTCAGACCGTTAAACAACGGGGACTCCTTCTAATCGACAAAACAGCGCGGTGGGCAGACCC  
AACCGGCCGGGATGGTATGCTGTAAGGCAAAATCCATTCTATCAGGTCGCACGCATGATCCTGCAATCTAT  
GCTGCTCAGCCTGGCCATGCTAGGCCAAGGCTCATATGACATCAATGAGCAACAGATAAACCAGTACCTG  
CAATCTCAGGTGCAAGTCGACAAAACAGCTGGAGCTGCCGGGCATCATCAAGGCCCATGTGACGCTTGAGC  
AGAGCGACGTCCAGATCGGTTCGCAACGCCCGGATACCGCCCGGCTCATGGCAAGGGCAAGCTCAAAAT  
CGCCCTGCCAGACAATAACGAATATGACGCCCGCCTGCAGATGACCTATGAGGCGAGACCCCGGATGAC  
AAGAGCCAGAGCCGCGCTGTTTCTCGATAACATGAAGCTGGTGGAGTACAAGCTGGAGCCGGGAGCGCCG  
AGAAGAAGTTCGGGCTGATGCTCAACATGCTGCTCAGAGCATGGAGAAGCGGCTCGAGACCAAACCGGT  
CTACAAACTCAATGACAAGGACCCGGATCAGGCCCTGGCTGAAGGAGAATCTGCTGGGGCTGGAGCTGTCA  
CCGGGCAAGATCCACCTGCTGACCAAACCCCGCTAAACCGCTCAATTCAGGAGGGGCTGGGTGGTATCCC  
GTACCAGCAGCTCCACCTGATAACCTGCTGCTGCTGCCGCTCGTAGAGGGAGAAGAGCGACCCCGCTCAA  
TTGATTGAGGGGCATATCGGCAAAACCCGGCCTTGAGATAGAAAAGCTTCTCGAAGGGTAGCGCCTGACAG  
ACCACAGGTTTGTCCAACAGACCGTGACAGGCGTGTGCAACAGCCGAGATCCCAATCCCAGCGACTGGT  
AGTGGGGCAACAGGCGAAAGCCGCACAGATGGTAAAACTCCTCCTCGTCCCGCAACCGTACCGCCCCAC  
CAGCCAGTGAGCATCACGCACGACAAAGATCCGCTCGGCCAGATCCGGCACATAGTGGGAAAACGTGCTC  
TCGTAATAGTCCCTGATAAGGGAGAGGTCGGCGTCGAGTACTCTTCGAAAGTGAGTTCCATCGCCAGCT  
TGCTTGTACAGACAAATCCTTTGATAATCAGTTATTAGTGCCAGATACGGTGCCTAATCCGACCACAT  
GACGCCAGCACGATAGCATGCCTTTTCGTCAACAAAAAGCGGACGTCGTGGGCAGCTTGCTTACCCGGTG  
GAAGAGGCCATGACCCACCGCCGACTGCCAAAACCGTGTCTTTATGATGACAATCCTTTATTGCGGCAGA  
TACTTTGATCCCGGTCACCGAATCGGGTCATTTGCCCCCTGTTGGCCGCTTGTCTGCCCTCGTCATGAT  
GCTTTACTCAACATGGTCATCACAAGAAGGAGTATTAGGGTTGAAAGCATGGATGCTGGCAGGCCATATG  
TTGTTGATCCCCCTGAGCGGATGGAGCTAGACTCCCCCTCCCGGGAGGTGATCTTCTGACCGCCGCTC  
CCTCCCCCTTGCCTCCGAACAAAGATGCCACTCCCGCTCACAACCCGACACCGCTCAAACAGCAGCAGT  
CGCCACCAACGGCAAGAAGCAGATCCAGGTCTATAAATCGGTGCAGCAAAACGGGGTAGTACGTTACTCC  
GATATGGCGCCCGAACAGGGCCATTACGAAGTCTGCTGTTCAACGACTGCTTCGCCTGCGATCCCAAAT  
CCAGCGTCAACTGGCAGACCACAGGGCTGTTTCTCTATGACTATGCCAGCACCATCAAGGCGGCCGCAA  
AACCTATCAGGTTGAGCCGGCGCTGATCCGGGCGCTGATCCATGCGGAATCCGCTTTCATCCACTGGCG  
GTCTCCCGCAAGGGGGCGATGGGGCTGACCCAACCTGATGCCCGCCACAGCGGGGAGTTGGGGGTGCGCA  
ATGCCTTGGTGGCGGAGCAGAATATCTTCGGCGGGGTGAAATACCTGGCGGGACTGCTCAAGCAATATGA  
TGGCAACGTGGCGCTGGCGACCGCGGCTACAACCGCGCGGGCGCCGTACAAAAACATGGCGGTATC  
CCGCCCTATGCGGAAACCCGTGCCTATGTGGAGCGCGTCCAGCTCCTCCACCTGCGCTACAAAGAAATGC  
TGCAGGCCAAAGGGCTCTGAGGTTAGCCTCAGTTAATGCTCTTTTCTTGGCCCTACAGAAAACAAAAACA  
CGCCCGCAGGCGTGTGCATACCACACTTTGTTTCGCAAATGATTACTTCTGCTCAGTCGCCCCAGGCGA  
TAAGCCAGCGCACCCAGAATGGCACCGACAATCGGGCAACCCAGAACAGCCAAAGCTGGCTGATAGCCC  
AGTCACCGACAAACAGCGCAACACCGGTAAGTGCAGGGCCGGGTTGACCGAGGTATTGGTACCGGAATGCT  
GACGAGGTGGATCAGGGTCAGGCACAGACCGATGGCGATCGGCGCGAAACCGGCAGGCGCACGGCTATCG  
GTGGCGCCCATGATGACGAACAGGAAGAAAACCGGTTCATCACCATTTTCGCATACGAGTGCGGCAGTCAGGC  
TATAACCACCCGGAGAGTGTACCGTAACCGTTGGAAGCAAAAACCGGCAGAGAGATCAAACCCGGCCTG  
ACCGCTGGCAATCACGTAAGCACGGCAGCAGCGGCAATGCCACCCAGCACTTGCGCCACGATATAAGGC  
AGTACACCGGATGCCGAAAACGACACCCCGCCACAAGCCGACAGTCACGGCCGGATTGAGGTGGCAAC



CGGAGATATGGCCGATGGCAAACGCCATGGTCAGCACGGTCAGACCGAAAGCCAGCGAGACCCCAACAG  
ACCAATCCCGACGTGAGGGAAAGCTGCAGCCAGCACGGCACTGCCGCACCCGCCAATACCAGCCAGAAA  
GTGCCCATAAACTCAGCAGCAACAGGTTTACATTATTTCTCCATTTGAGATAACACCGAACAAGACCC  
GAGAAGGGCCCATGCTTGAACAAGCGCAGCATTATGGGAGTGTGAGTCCAGATTGCGAACCCGGCAGGCA  
GGGCTCACTGAATGTGATGTTTCGTCAACAATTGGTTGATTAGATAAGGGATTTATCATTAAGAAAGCTGGC  
TGCACGTCTCATGCCAAAGGGCGTCATGCGACAACCTTGTGACACCGGTTAGCTCGAGTGCCTCATCCCTTG  
AACGATAAAAAACGGAGGCGTGGTCAGTCTCCTGTGCGGGCAAAAACGGCTGACAACCTGCCCTGATGCTC  
AATCCACTCCATGAACATGGCGACGGGACGGGCATAGACCTGACCATCCTGCTCGGATTGATAAATGACC  
AGCTGCTCCTGGGTTTCGGTATGCAGAGCCAGGGCAAGCACTTGATAGTCCCCCCTTGAAGTGGCGAT  
AGCGGCCTGGAACGGGTGCTTGCATGGGAAAACCTCGCAGAAGTGAACACCGATGAGCGAACACATAAA  
GATGACACCATAAGTGCCATTCACCTCATCGAAAAGGGGACGAAGACGATTTTTTACACAAGCCAATCG  
TGCCACAGGATCCGGATATTGCAACACAGTCAGCAGCTTTGTTAATTTCGTTCCCATGTTTCACTAGTT  
AACCTTGGTTAGCACCAAAGATCGTGCTGAATTTAACGTTCTAGCAACCTGTTTTAGGGCTAAAAATCA  
GGGAATTTCTTAAAAAGAGGATTGTTCTAGCATTCAATTTCTGTGAAGAATAGGGGAAAAGAAATTTGAT  
ACTAAAAATCGCCTTTTTTCGCCAACGCGTCCCTGTGGGGAAGGAATCACACTCACCATGTTCCACAATCGA  
CAAGTCGCACAAGCTCGACGATGTCTGCTATGACATCCGCGGCCCGGTGCATAAAGAGGCTCGCCGTCTC  
GAAGACGAAGGCCACCGCATTCTCAAGCTCAACATCGGCAACCCGGCCCGTTTCGGCTTTGATGCGCCGG  
AAGAGATCATCAAGGATGTGATCCTCAACATGCCGCTGAGCCAGGGCTACTGCGACTCCAAGGGGCTGTT  
CTCTGCCCCGTAAAGCGGTGATGCAGTACTACCAGCAAAAAGGATGCGCAAGGTCGATATCGACGACATC  
TACATTTGGCAATGGCGCCAGCGAGCTGATCGTGATGGCGATGCAAGCGTTGCTCAACAATGGCGACGAGA  
TGCTGGTGCCCTCCCCGACTACCCGCTCTGGACTGCTGCCGTACCCCTCCTCCGGTGGCCATGCGGTGCA  
CTATCGCTGCGATGAAGGGGCTGACTGGTACCCGGATCTCGACGACATCCGCGCCCGCATCACCCCGCT  
ACCCGCGGCTGGTGTGATCAACCCCAACAATCCGACCGGTGCCGTCTACGGCAGCGAGTTCTGTCTGG  
AAGTGATCGAGATCGCCCCCAGCACAACTCATCATTTTTCGCCGACGAGATCTACGACAAGATCCTCTA  
CGACGATATCTCCACACCAGCGTCTGCACCTGTGTGACGATGTGATGGTGGTGACCTTCAACGGCCTC  
TCCAAGGCCTACCGCGCTGCGGCTTCCGTGAGGGCTGGATGGTCATCACCGGTCCAAAAGGCCGTGCC  
GCGGTTACATTGAAGGGCTGGAGATGTGGCTCCATGCGGCTGTGCGCAACGTGCCGATGCAGCACGC  
CATCCAGATGCGCTTGGCGGTACAGAGCATCAACGAGCTGATCCTGCCGGGCGGTGCTGCGCAAG  
CAGCGGGACAAGGCGTGGGAGCTCTTGAACGAGATCCCCGGGTTCTCTGCGTCAAACCCAAGGGCGCGC  
TCTACATGTTCCCGCGCTCGACCCCAAGGTGTATGACATACCGGACGATCAGAAGATGGTGTTCGACCT  
GCTGCAGCAGGAGAAGCTGCTGCTGGTACAGGGCACCGTTTTCAACTGGCCGGCGCCGGATCACTTCCGG  
CTGGTGTTCCTGCCCGCAAGAGGAGCTGGAGGATGCCATCGGCCGCTCGCCCGCTTCTCAAGGGCT  
ACAAGCAGTAAGCAAGGCTCATGAAAAAGGCTCCCGGGGAGCTTTTTGTTATCTGTGGTTTTATCCGT  
GCCATCAGCCGTGCAGCAGGGCACCGCTACCAGCACCGCCATGGTGATGAGGGCTACGCCGATGATAAA  
GGGCAGCACCCAGCGCACAAAGCGATCGTAGGGGATCTTGGCGAGCGCCAGACCGGCCACCAGATGGGCG  
GCGGTAGGGGCGAACAGGTTGATCCAGCCGAGGGCGACTGATAGGCGGTGATACCAGATCCCGGGAGA  
TGCCGGAGAAGTCCGCCAGCGGCCCATCAGCGGCATGGAGACGGTCGCCAGCCCCGAGGTGGAGGGGAT  
GAAGAAGCTCAGGATGATGTGCACCAGATAGGCCATCAGGATGAAGACCGACGAGGAGAGTCCGGTACC  
AGCCCTTCCGGCCAGTGTAATAATGGTGTGATGATGACGCCCTGCTCCATCACCCATAGATGCCGCGCG  
CCACCGCCACCACCAGCGCCACCCGATGAGATCCCAGCGCCGCTCAGGAAAGTCGCCACATAGTTGGA  
CTCCGGCATCCGGTTGATCAGCGCGATCAGGATGGAGGCACTGAAGAACAGGGTGGATAGCTCGTCAAAC  
CACAGCCAAAGGTGGGCAGCACATCGATCCCAAGTCCGACCAGGGCACCACCGCATAGATCATCAGCA  
GGAAGGTGCCGAAGAAGACCAGCATGGTGTGCTTCTGCTTCCGGTGAAGGCGAGGTTGCCGCTTTCAT  
CTGGGAGAACTCGTCGTATAGGTGATGTGCGCCAGCACGGAGCGGGACTTGTCTGCTGCACCTGCTTG  
GCGTAGCGCATACGAACCAAGGAGGCAAAAGATCACCAGCAGCAGCCACTGGATGACCCGCAAACCGATCC  
CCTCACCGATGGGAATGCCGCAAAACCGGAGGCGATACCCGGTGGCAAACGGGTTGACGGTGGAGCCGAG  
CACCCCGACCCCGGAGCCGAGCAGGATAATGCCCGCAGCCACCATGCGATCGAAGCCAGCCGCCATCATG  
ACCGGCACGATCAGCGCCAGAAAGGCTACCGTCTCCTCCGCCATGCCGAAGGTGGAGCCGCGGAGGGCAA  
ACAGGGCGATCAACACAGGAATTAGCAGCCGCTCACGCCCGGCAAAGCCACGCACAATGGCCCCCACCCC  
AGCATCAAGCGCACCGCTTTGCATGGTCACAGCGAGAAAACCACCGATGATGAGCACGAACAGCGCCACA  
TCGGCCGCTTGTGAAAACCTGGATGGGCGCTTGTGACCTCGAATACCCCTTTCGGGTTGGGCGGGTA  
ACTCGGTGTAGCTGCCGGCACCGGCAACAGCCGCTCGTCGCCGCTGTAATCGGCCACGGCCGCTGCCGC  
CACCGGCTGCTGGGTCTTGGCGGTGACATAGTCATATTTGCCGCTGGCAGCACCCAGGTACGGGCGGCC  
ATCAGGGCGATGATGATGAAAAGCAGGGTATAAACAGTGGGAGTTGGCGCTTCTTGGGCGCTCGTTTTG  
GAGTGGTCATAGCTTCCGTACCTCGGCAATGCCGCTGTGATCCGATCAGCGCAAGACTAGCGGGTTTTGA  
TATGGGAAAAGGTGATCGCTGATAATAAAATCCGCAAAATTAGCGGAATGTTTGCCAAAAAACAGGGC  
CCCGCGGGCCCTGTTTTCACTTGAGTCAGACTCAGAGCTCGACCACGTGCAATTTACATCCGGATTTA  
CATCCGCATCGTAATCGACCTCATCCAGACCGAAAACCGAACAGGCGCAGGAACTCCTGCTTGTAGCCGGT  
GTAGTCAGTCAGCTCGGAGAGATTCTCGCTGGTGATGGACGGCCACAGGTCGCGGCAGGTCGCTGCACG  
TCTTCGCGCAGTTCCAGTCATCCATGCGGATGCGAGCCTGCTCGTCCAGCGCCATGTCCGACCGGTAGA  
GACGGGTGCGCATCATGCGATCCACCTGCTCCATGCAGCCCTCGTGAATGCCCTTCTCCTCATGATCTT

GAAGGCCATAGAGATATAGAGCGGCATCACCGGAATGGCAGAGGAGGCTTGAGTCACCACGGATTTGAGC  
ACGGCCACGTGAGCGGTGCCGCCCTTGGCAGCCAGATGCCACGGATGGCTGCAGCGGCGGGTCCAGAT  
CTTCCTTGGCGCGGCCAGAGTGCCATGCCAGTAGATTGGCCAAGTCAGATCGGTACCGATGTAGGAGTA  
AGCCACGGACTTGGCACCGTCAGCCAGCACGCCGGCATCACGCAGGGCAGCCATCCACAGCTCCCAATCC  
TGACCGCCCATCACTGTGATGGTGTCTGGATCTCTTCCTCGTTCCGCCGGCTCGACGGTGGCGGTGATGA  
TCTGGTCTTGTGGTATCGATGGCGGTGGTGGTGTAGACCTCACCGATCGGTTTGAGGGCAGAGCGCAC  
CACTTCGCCGGTTTTCCGGCATCTTGGCACCAGGAGAGGCCAGGGAGTAGACAACCAGATCAATCTGACCC  
AGATCCTGCTTGATAAGCTCAATCACCTTGGCGCGGCACTCGTTGGAGAAGGCATCGCCGTTGACGCTCT  
TGGCGTAGAGGCCCGCCTCTTTGGCTGCCTTGTGCAAGGCGGCAGTGTGTACCAGCCAGCGGTACCGGT  
CTTGGACTCGGTGCCCGCCTTTTCAAAGAAGACGCCGAGGGTGGCGGCACCAGTACCGAAGGCAGCCGCA  
ATCCGGGAGGCCAGCCATAACCGGTGGAAGCGCCGATCACAGCACCTTCTTGGGACCATTCTCGATGG  
TGCCCTTGGCCTTGGTATAAGCGATCTGGCGACGAACATTGGCTTCACAACCGACCAGGATGAGTGGTGGT  
GCAGATAAAGCCGCGAACCTTGGGTTTGGATGATCATATGGGGTCTCGGATCCGTTTAAATGGATGAAATCG  
GGGCATAAGATACCTCATCTTGGCCGATAAAGGTGCTCTGATGTGTGAACTGCGGCAGAAAATGGCCATT  
CAGGGTGACAGCTGCCGTCAAAAATGCACAATTTTTTCGGAAAAGCCTCACTTCATCAGTCCGGTAATGAAT  
CTTCCCATATCTATGGAACCGATGACATGTTTCAACACAGGTGCAGTACGACCAACATGATACAAAAAG  
GCCCCGAATCTCGGGCCTGGGGTAATGTCATCGAATATATCAAGCGGCATGTGATCGCCATTTAAA  
ATGATTAATCTGTGTTCTCATTGACTTGGCCATCTCATCAAGACGCTGACACTTGGCCGATACATGGGCT  
GCCGAGTCCGAGGTATGTACTGCGATATCGGCAATATTGACCATGCTGCGCGTCATCTCTTCGGTGACTT  
TGCTTTGCTCTTCGGCTGCAGCGGCGACCTGCACATTGAGATTATTAGATCATCCACGGCACTCACAAT  
TTCTTCCAAAGAGACGCCGAGGTGAGCATCAGGGTATTTCGTTCTTCCACTTCAGATAATCCGATATTC  
ATACTATCAACAGCCATAGTTGCATTTCTGTTGACGGCGATTGACGGTATTCTGGATTTCTCCGGTAGAGT  
TTTGGGTGCGCTGAGCAAGTACCCGGACTTCATCAGCCACCACCGCGAAAACCGCGCCCTGCTCACCAGC  
TCTGGCGGCTTCAATTGCCGCATTCAGTGCAGTAAATTTGGTGTTCGGCAATCGAGCGAATAACCCCC  
ATCACTTGGGTAATGTTATTGCTTTTCGATGGCCAGGTTTTGCAGCACAGTGGATGTATTTTGAATTTGAC  
CAGAGAGCAGAGCCATATTCCCAATGGTCTCCTTGACAACCGCTTGCCCTCTTCTGCCTTATTTTCAGC  
CTGACGGGCGGCAATTTGCAGCGCTATTGGTATTCTGGGCGATTTGTTAACCGTTGCGCTCATCTCATTC  
ATCGCCGCGCACTCTGCTGTCTGCTCCAAACGCTGTGGCCATTTGCTCTGCACCTGGTTAACCCGACT  
CGTTTCAAGTGCATCGCCAGCTGTGATAAAGTTCGGCCAGTTCATCCATTTCCGCAATCAATTCGCGGAA  
ATGGCTAACCATATCATTAGCGCCCGTGGGACTTGCCCAATTCATCTTCCCGAATCGGGGACGGTG  
ACGGTCAAATCCTGCTCATGCTGCAATTTGTAAAGTGTCTACGCAAAAGCGGTGAGCGGTTGACTGATCC  
CGCGAAAATCCAGATCCCCAGCACGGATAAAGCGAACAGGGCAATCCCGGTAATGGAGAGGAAGGCAAA  
TGAAAATCAACGGCCAGACTTTCCAGGGTACCAACATGCTCATCTGCAAAATCTCAGCTGGAGTTCAACC  
AGCTTGCCAGCTCCTCATTAATAAGGATCAACCGTGTGTATAACTGATGAATGCTTATCAAGAGGAG  
CTTTTAAATGAAAGATCACTCTTAATAACCATCCAGTGAATGTGCGCTTTGTTTCAATACCTGGGCAGA  
CTCTGCTATCGCCCGCTCTTCCGAGACATCTTCTGGGCCATGTAACGCTTCCATTCGTTGCTGCTTTT  
AACTGCGCTTCAGTAACGGAACGTTTTGCTCTTACGGGTGATTAATCCAACATGCGCTTTATTGATCG  
CATCAACGACACTGACCGCATAACAAGTCTGAAATCAGCTTCAGTTTCGGATAACTGCTGCACCTCCTCTTC  
ATTACCTGATGGGCAGCCTGATTCATCAGGCGCATCCCCAAAGGGAGAGAGTGCACAGCAAAAATCATA  
CAAAACAGCGGTACCACAACCAGCATCAATAATTTGCTACGAACCGAGATCCCTTTTCATGGTGTGCTCCT  
CATACTCAGGCCACTGGTCGTTTAAATATGCAATTGATACCCAAGCATCACGCGACCACTCATTTCAATA  
CAATCACCCGCTTACCTCATTAATAAGCGCGGTCTGTGCAACCATAGTGAATGCAAGTTGCAACCTGTTT  
GCAAAACCAGACCTTAAACACATCACCGCAGAAGAAGGGCTAATGCCCTTATTGATAATGCGCTTTTTGA  
GTCTATTATCATATTTGTTGATGTCTAATCTTCGCAAAAGCAAAAATCCGTAGCGCGTTGACGCTGCATCG  
TCCATGCACTGATGGCGGCAACGTCACGAAACTAGCAAGCAATGCGAGTGTGTTGCCATCCTGCAGCT  
TATAGAAGGCATCTTGGGGCAACTCCTGTGACAGGTCGCTCATAGTGCAGCTCGGCATAGACGCCACG  
CAGCATGGCACCGAGCAGGCCGTGGGAGATAACGATGGCCCGCTCGGCAATGGCGGGATTCTGCAACCAC  
TGGTGTGCCCCGGCGCTGAATGCTCTCGAAGCTCTCGGCCCCCGGTGCTGCGAGATACCAGTCCCCTTTGC  
CGGTATCGAGCTCGGGATGAGCGAGCCGAGCGCCGGGATCTGGCAGCTCTCCCACTCCCCATCCCCAG  
CTCCATCAACCGATCGTCCAGATGATGCGATCTGCCGTGAGCCCCAGTTGCTCGCACACCAGCAGCGCA  
GTCTGACGGGCACGGCCAAGCGGGCTGGCATAAGACGACCAGCGGGCGGGATCCGCCAGTTCCGGCGGCAA  
GGCGCCGCCCATGGCGATAGCTTGGCCTCACCTTGTGCGTGCAGATCGGAGTTGCAACGCCCTTGCAG  
ACGCTGCTCGGCATTGAAGCGGGTCTGGCCGTGGCGCAGCAGATAGATGAGTCGAGACATGATTTCTCCA  
GCACGTTCAAAGAGATAGAAAATAAAGGGGGAAGATGATAGCAGATGAGCCCGAAGGATGGCCAAAACA  
GAGAGGCTAAAACGGGCGTAAAAAACGGATCAGGGTTGACCCGTTTGTGTCGCAATTTGGCCAGAGTGTGT  
CGGCTCAGCCCTTCTTGTATCTCCCGCAGATAGCGGTAGATGGAGTGGACCGAGATCCCGAGCTGGCGCGC  
CGCAATCTGGGCACTGTCTTTTAACTCGAAGATCCCCATGTCGTGCAGCTGGTTGACGATAACCCGAGTC  
TTCTGGGACGGAGGCACCGCCTCGTTGCCACGCACCTCGGCACCTGACGGTGTGCGATAGTGTGTTGAGCG  
CTTTCGTGATGTTGCGGGCGAACACCTCCGGGGTGGCATGGCTCTCGTGGGGATGCATGCACTCCGGCAT  
CATGGTGCAGTACCGGATTGCAGCGGGCATCCATGTCGCTGTTGATGCAGAGCAACCCGATGGCCCTG  
TGCTCCCCGTTGCGGATCACGGTCTGATGGAGCGCAGCGTCTTGGCGGTGGCACACTTGGTTCATGTAGG

GGCTGGAGATATCCTGCCCGCTCTTGAGCTTCATCATCGCCAGGTTGGTGATGGGGGCGCCGACACTGCC  
GCCGGTGATATGGCCGTTGGCAATCTTGACGATCGAGGGATTGCGCGCATCCAGACTGTGGAGCAGCACT  
TCGGTGTGCTGACCATACATGGCGGCATGCCGTCCACAATGTTCTCCATCGACTTGAGGATCTCAAAAT  
CGCTCGGACTCAACTCTTGACGCTTCCACAATGGGACCTTCTTGCAAGGGTTGCTGCCGGACAATGGACGC  
CGGGCAGCAACCGACAGGGACATCAGGCGGACATGATATCAATAATGGTGCTGTCTGTGGCAGACATGCC  
CTCCTTACCATCTGGCCGACGTTGCGGATGGTCTGATCCACGTCACCTGCGACGATCCCCGCCCCGAC  
ACCGAGTGGCTGTTGAGGGCCATCAGGAAACCGCGCACCGCCGCGCGGAGGAGGTACTGACCTTCATGG  
CGCAGGAGGCTTTCGCCCCGTACATAACCATAACCGGCACTGTCGCTCAGTACGTTCTGGATGGCGAAGCA  
GGATTGCTCGAAGCTGCCGCCGCCAGATAGACCATGGCCATGGAGGCGGCCGCGCTGGTCACGGTATTG  
CCACAGAAGGCCGACAGCGCGGATAGTGGGACTTGATATAGATGGCGCCAGATGGCTCATGATGAGGG  
CGCGAGCCAGCTGCTCTTCCGCTGGCCGCAAAACGCTCGGCAATCACCATCACCGGAATGGTGGCGGCAAT  
GCCCTGGTTGCCGCTGCCAAAGTTGCTCATGGCTGGCAGGGTTCGCCCCCCCCATGCGGGCATCGGAGGCG  
GCCGCCGTCATCATCACGATGCGGTTTCATCACATCCTCACCGATTAGACCGGCATTGATGTTCTGCTGCA  
TGGTGCGCCCCGATCTCGAGGCCATAGGGGTTGTTTCATCCCCCTCGGCGGAGAGCTTGCCGTTGAGCTCCGA  
GGCTTTGAGGATGAACCTGATCTGCTCGAACTCCACCTGGGTGGCGAACTCGTAGATGGCGGCGATGCTG  
ATATCTACCCCGTCGAGATGGAACCGGTGGCGCCGCCCTGGCTCTGATCGGCGGTGAAGGTCACCTCGC  
CATCGCGGCGCTGCTCGACGATGCGGGTATGACCGCCGACAGGGTCACTTCGGCGCTGTGTTCTTACC  
CTTGTCATCAGTGCCATAAACGGTCACGCGGCAGAAGATAAACTCGGGGGCGGCGGTGCGGCTCACCTGC  
ACCTTGCCGGCATCGATCAGCTGCTGGGCACGATCCACCTGTGCTGGCTGGATCGCGGCCAGCACCTCCA  
GCCCGGCATCGGCGTTGCCACCGATGGCACCGGCCGCGGCCAATGGCCAGACCGATCTTGCCGGTGCC  
CGGCACATAGACACCCATCGAGTTTTTATAGAGATTGTCCGACACCGCAACCTCGAGGCGACCGGGCTCA  
CAGCCCAGTTGCCGGATGGCGACAGCCGCGGCATAGGCGGCGGCGATTGGCTCGGTACAACCCAGCGCTG  
GTTTTGACAACCTGTTGAATAATCTGCAGATACTGCTGCCACGCTTGTTCATCACTTGAACCTTTTTTATC  
AGCATTAAACGAGCGATATGGGCGATCGCTTCCACTTCAACCTTGACGCCCATCGGCAGATCCTTCACTGC  
GAAGCAGCTGCGCGCCGACAATCTTCTGGAAATAGGCTTTATAGACCTCGTTGAACGCGGCAAAATCG  
CTGATCTCGGCGAGGTAGCAGGTGGTTTTGAGCACGGTATCCAGCGAGCCGCCAGCGGCTCCAGCACGG  
ATTTCCAGGTTTTCCAGTGACTGGCGGGTCTGGGCGGCAATCCCCCTTCCACCACACCACCTGCTGCTT  
GCAGACGGCAACTGACCGGAGGTAAGATAAAGTGCATAGGCATAGGCAGTGGCGTGGCTGTAGGACCGGATA  
GCGTACAGGTGACCGCTGCTGTGATGATGCTGTTTTCATATAGCCACTCCTGTTTGTGCAATTTTTTTTGC  
AATCATGCATCTCATTCTGTTCAACATTATTTGCTTTTTTATTTTATCCATTCAACAAAAAGATACAAAA  
TGGCGTTTTAAAGGCACCTTTCGGCCTCAATATAAACCGTGATCACCATCCTGATTTGAACAAAAGTACTC  
TTATGGGCATTGTTTATGACAGTTTTATTTCAACTATATTTGCGCCAATTTCCCACATCCCTACAAAAAAG  
AAGGTTTTAATGGACGCGCATAGCACTACACTCGCCAGCCCCGTGATGGGCACGCTGGAATGGAAAGAAG  
CGGTTGCTTCGATAGCACCGACTGGGGCTGGATCATCATGAGCATCGGCATGGCCATCGGCGCAGGGAT  
CGTCTTCTGCGGTACAGGTGGGTCTGATGGGCTTGTGGGTCTTTCTGCTCTCGGCGGTGATCGGCTAC  
CCCCGCATGTACATGTTCCAGCGCCTCTTTATCAACACCTGGCCACTTCGCCGGAGAGCAAGGATTACC  
CCAGCGTCATCACCGGCTACCTTGGAAGAAGTGGGGTGTGCTGCTCGGCGGCTCTACTTCGTGATGCT  
GGTGATCTGGGTCTTCGTCTACTCCACCGCCATCACCAATGACAGCGCTCCTTCCCTGCAGAGCTTCGGT  
GTCACCGACGGCCTGCTCTCCGAAAACCCGCTCTACGGTCTGGTGCTGATATGCGGTCTGGTGGCTCTGG  
CCTCGCGCGGCGAGAACCTGCTGTTCAAGATCTCCACCTTTATGGTGCTGACCAAGATCAGCGTGGTGGC  
AGTGCTCGGCCTGATGATGGTGGACAAGTGGGATGCGGCCAACATCACCGCCATGCCCGCTGCCGGTGAC  
TGGATGAAGGATGCCATCATCATGCTGCCCTTTACCCTCACCTCCATCCTCTTTATCCAGAGCCTGAGCC  
CCATGGTGATCTCCTACCGCTCGCGGGAAGTGCCTGGAAGTGGCTCGCTTCAAGGCGATGCGCGCCAT  
GAATATCGCCTTCGGCATCCTGTTCTGTTGGTGGTGTCTTCTACGCGGTCTCCTTACCCTGGCCATGGGC  
CACGATCAGGCGGTCAAAGCATCCGAGGAGAACATCTCTGCGCTGGCCATGGTGGCCAGGGGATGCCCG  
GCCAGACCTCAAGCTCCTGAGCCTCACCTCAACATCTTTGCGGTAATGACCGCTACTTCGGCGTTTTA  
CCTCGGTTTTCCGTGAAGCCTGTGAGGGGCTGACAATGAACCTGCTGCGCCGCGTCAATGCCGAAAACCGC  
ATCAACAAAGGATTGGTAGGCAAGGGATCATGGTGTTTACCCTCATGCTCTCCTGGGGGGCCATCGTGC  
TCAACGCACCGGTAAGTACTGAGCTTACCTCCATCTGCAGCCCCATCTTCGGCATGGTAGGTTGTCTCATCCC  
GGCCTATCTGGTCTATCAGGTACCGGCGCTGCACAAGTACAAGGGCACTTCCCTCTACATCATCATCGTC  
ACCGGCTGCTGCTCTGCGTCTCGCCCTTCTGGCGTTCAACTGATCGGTTTTCCCTTATCGACCACGGG  
TCACCTTCGGGTGGCCGTTTTCTATTGGCTCGGCTGACCGCGCCCTGCCCGAAGTAAAAAGCCAAGG  
GGATCACAACCTTGAACCGGCCATCACCAAGGGAGGCGCTCGGAGTACTATTAGGCAACACGACTCA  
CGCCCGCACTCAGGTATCGAGGCTTAACATGAAATGGATTTTCAACCCCGCCATCCGGCTGGGCAATCAG  
CTCTCCTTCAAATACAAATTCCTGCTCTGGTCTGCTGCTGCTGCTGCTGCTGCTGCTGCTGCTGCTGCTGCT  
ATCTGCTGGGGCGGCTGCAGGATGACAACGCGCAGGCCAACCGCGAGCTGGCGGGAGTGGTCAATCTCGC  
CCCCGTGCCCACTATCGAGCAAGCCCTGCTCACCCATCGCAATCTGGTGACCCGTCACGCCTATGAGGTG  
GATCCGGTTCGGTGTGATGATCAGGTCAAGGCAGCCGCGCAAGCCGTTGATCAGAGCCTGCAAGCCTTTGCCG  
ACACCCGCCAGAACACCCCTCCTTTGAGGTGATCCAGCAGGGCTGGGCCGCCCTGCAGAGTGAAGCGGG  
CAAGCTGGAAGTGGAGCAGAGCAACCTGCGCCACGACAAGCTGCTGACCGAGGTGCGCCACCTCTACAAG  
CACATTACCGCCAGTAGCAGCCTGATCCAGGATCCGGCGCTCGGTACTACTACATGGTGATCCTCGCCA

CGGAGCGGTTGCCGACGCTGCGCGACCTGCTGGCCAGGTGCGGGATCGCGCCGCCACCATCGCCGATTT  
CGGCCTGTTTTAGGCCGAGGGCTACAGCGGCCTGCGTTTTCTGCTCGACCTGATCAGCGCCACTCTGCAA  
GAGCTGGAGGCCGATCTGACCCTGCTCTACCAGATTGAACCGGCTTATCGCGCCGAGCTGGGTGAGCAGA  
CCGATGCTCTGATACAGCTGGTGCCTCAGGGGGTCGAGACCATGGAAAACAAGATGATGAAGGATCAGCT  
GGTGCAACTCTCTACCAAGGAGGTGCAAGCGCTGGGGGATAAGATGGACGAGGCCATCACCCGCGTGGCA  
GGCGAGGTACGCCAGCGGCTGGAGGCCGACCTGCATCAACGGCTGGCCGCCAACCAACGCCACTTCTGGT  
GGGTACCCGCGCCGCTTACCATTAGCTTGTGCTCTACCTCTACCTGATGATAGGCGCCTATCTCTCCCT  
GCGCGACACCGTGGGTGCGGTGCGGATATCGCCGCCCGGGTCAACGCCCAGGATCTCAGCCAGCATATC  
GAGATCGTTGGTCAGGACGAGCTGGCCGCCATCAGCCGGGATTACAACGTGACCCTCGAGACCTGCGCA  
CCCTGATGCTGCGAGTGCGGGAAAATGGTGTACAGTAGTGGAGAGCGCCACCGAGATCGAAGCGCGCAC  
CTGGCCGCTCACAGGAGGTCATTGCCGATCAGCAAGGGAGACCCATCAGGTCGCCACCGCATCAAGGAG  
CTGGCCGCCACCTCCAGGACATGGCCGGCAACGCCCTGCAAGCCGCCCGCATGACCCAGGAGGCGCAGA  
ACGTGGTTGGTCAGGGCGAGGATGTGGTGGAGCGCACTATCAAGGCAATCGACCATATCAACCGCGAGGT  
GCTGCGCACCCGCCACCATCGGCCAACTGGAGCAGCAGTGCAGCCAGATTGGCGGGCTCATCAGCGTG  
ATCCGCGGCATCGCCGAACAGACCAACCTGCTCGCCCTCAACGCCGCCATCGAAGCGGCCCGGGCCGGTG  
AGCAGGGTCGCGGCTTTGCAGTGGTGGCCGACGAGGTGCGGTCTCTTGCCAACCGCACCCAGGGGGCTAC  
CGTCGAGATCCAGCAGATGATTGAACAGCTGCAATCCGGTGGCCGCGCTCGGTACCCGCCATGTCGGCG  
GCCAGCCATGAAGCACAGGAGGGGGTGGGCTGGCGCAGGAGGCAAAAACAGGCTTCGGCGCCATCACCG  
AGAAGGTGGATCGGATGGTCGATACCAACGCCATCATCGCCAGCGCCATCGAGCAGCAGGGAGCCGTGGT  
CAACGAGATCGAACGCAACGTGGTGCATCTCGGATGGCAGCGACGAGGCGCTGCAAGTGGCCAACGCC  
GCCCCGATGCCGCCGCCAGATCCACCAGCTCACCGAACAGCTGCGCGCCATGGTACAGAGCTTCGTGC  
TGTAACAGAGCGCTGACAAGCCGGGCTCAACGTGAGCCCGGCATTATCTCGGTCTCGCCCTGCCAACAA  
CATCTCGGTTGCTCGGATAATCCAGAAAATCTCTGCGACCCACTTGCCGGGCAAACGCCAACAAAGTAGT  
CTCGAACGAAAACAAAATGCGGCATTCGCCGACATGCACGGTCTGCGATGTCGAAGGAAACCAAGCCGCC  
GCGAGCCACAGATTAACCAGCGTACGTCATCTATCACCCGCTTCAAGCGAGGGTTTACCCATGGCCA  
GATACCAGTTTTTTTACCATTCCGGCGTCCAATCGGCAGCAATACACCTTTATCGACATGGCGTCTCCGAC  
TTTTCTGAGTGAAAAGGCGGCACTGCTGACCCAAGGATTGAGGTGGAGGAGGACTTTATTGACGCGACC  
ACTCCACGGGAGCCGCTCGAGAAGTACCAATCCAATTTTCTCTATGTAGCGGATGAGATAGGCAAGTCCG  
ATAGCAGTACGCCCGCGGCTGCCATGCTGGAGATTGGCAAGGGGTTATTGGGCAATAAAAACCGCTG  
AGATAAGGCACCCGCGTGAAGAGTGGTGGCCATCGTGGCAACCGCGCCGATGGCCATATGGCAAGACATC  
AATTCGGTAAGTCAGAAGCGCCCCAGCTGCTGGAGCATCTCGATCAGCTCCTCTTCGCTGCTCGGCTCAT  
AGGCCAGCTGAAGGCTCGGGCAGCGCCCCCATCAGCATGTAGACGTTGGTGTGTCAGTGGTCTGTAGTG  
ATACCATTACCGTCGATACAGACGTCGGTATAGCATCTCGGGTCCCTTTTTCAGTTCCATATGCACATCC  
TTTTGTACATTCCATCAACATCACTTCTGACCGTAAGACAACCCGCTGCGACCGATCTTGATACAGATC  
AAGATGTGCAACGGCAGTGTCTGCGGGCGCAATTCCTGCTGTTTTCTCCCGATGGCGGTTTTGTACC  
GCAAGCATCCCTCACTTCTCTCCCTTCTCTTCTTATCTCCCTTCTATTCGCTGACTTGAGCCTGACTAC  
ACTTAGCCCTGTGACCCACACCACCATCTGGAGTCATACCGATGAAACCGAGGCTTTCCCCCCCCCAG  
ATTTTCTCGCTTTTGTCTGTGGCACACTGCTTGTGCACTGCGGCAAGGCCGCCATCGACCCCAAGCCTG  
CCAGCGAATTTACCATCAAGGCAAACCAGCAGGTGCTCAATACCTGCCCTTCAATGACAAGCAGGATTT  
CGAGGATGCCAGCGTGGCTTTATCGCCAAACCGGAGACCCTGACCATCAAGGATGACAAGGGCAACGTG  
GTGTGGGATCTGGAGCAGTACAAGAGCTACATCGGCCTCGACAAGGCCGCGCCGGACAGCGTCAACCCCA  
GCCTGTGGCGCAATGCCAGCTCAACATGCAGTACGGCTTGTTCAGGTCACCGACAAGATTTACCAAAT  
TCGCGGCTTTGATCTCTCAACATCACCTTTATCGAAGGCAACAAGGGCTGGGTGGTGTTCGATCCGCTG  
ATCTCCCCGCAAACCGCAAGGCCGCGCTGGCCTTATCAACAAGACCCAAGGGGAGCGCCCGGTACCG  
CGGTGGTCTACAGCCACTCCACGTGGATCACTACGGCGGTGCCGCCGCTTTTCAATTCGCTGGACGA  
GGTGAAAAAAGAACGGCGTCGAGATCATCGCGCCGGAAGGATTACCGAACACGCGGTGTCGGAGAACGTC  
ATCGCTGGCAATGCCATGGCCCGCGCGCCGCTTACATGTACGGCGCCCTGCTGCCGCGCAACCCGACG  
GGGGCGTCAACGGCGGTCTGGGGCAAACCACCTCCACCAGCGTGCCCTCGCTGCTGCTGCCGACCCGCTT  
TATCACAAAACCGGTGAAACGCTGACGGTTCGATGGCGTCAAGATGGTCTTCCAGATGACCCCGGGCACC  
GAAGCCCCGGCCGAGATGAACACCTGGTTCCCGGACAGCAAAGCATTGTGGATGGCCGAAAATACCACCA  
ACACCATGCACAACATCTCACCTGCGCGGCCAGGTGCGTGTGCGCTGAAGTGGGCCAGCTTTCT  
CAACGAGACCATCGAAACCTGGGGTATCAGGCCGAGGTCAAGTTCAGAGCCACCCTGGCCACGCTGG  
GGCAATACCAATATCGTCGACTACTTTAAGAAGCAGCGTGACCTCTACAAATACATCCACGACCAGTCCG  
TGCGCCTGATGAACATGGGCTACACCGGCGAGGAGATCTCCGATCAGATCACCTCCCCCCCCGAGCTCAA  
CGACTTCTGGCCGAACCGCGGTTACTACGGCACCCCTGCGCCACAACAGCCGCGCCATCTATCAGCGCTAT  
ATGGGCTGGTACTCCGGCAACCCCTCCGATCTCGACAACCTGCCCCAGAAATGGTGGCCCAAAATATA  
TCGAGTTCATGGGGGGGAGCAGGAGGTACTGAAAAAAGCCAAGGCCTCGTGGACAAAGGGGAATATCG  
CTGGGTAGCAGAAGTGTCAAGCATCTGGTGTGTTGCCAACCCGAACAACACAGAGGGGCAAGCTGTTGCTG  
GCAGATGCACTGGAGCAGTTGGGCTATCAGGCTGAATCCGGCCCCGTGGCGCTCCGCTATCTGCAAGGCG  
CCTATGAGCTGCGCAATGGCGTTTCTAATGTTGGCGGAACAGTCACCGCTCACCGGACACCATCCGGGC  
CATGAGCCCCAGCATGCTGTTTACTATCTCTCGGTGCGCATTAATCCCGAGAAAGCGGCGGGCAAGAAG

ATGGTCATCAACATGGCGTTCACCGACATAGAGGAGAAACATAACCTGAGTCTGGAGAACCTGGTGCTCA  
ACCACACTACTCGCTATGCCGACAAGCCTGATGTGACCATTACCCTGAGCAAGAAGACGCTGGATGATAT  
CCAGCTCGGTGAGGGCACCATGGAGCAGAAGATCGCCAACGGCGAGATCAAGATCGAGGGTATCAGCAG  
AAGTTGAGTACTTCATCGGCCTGCTCGACAAGTTCAACTTCTGGTTCAACATAGTGACGCCATGATGCA  
ACGCACCTTGGCGCATGCATGGTCTGCTCTGCCTCATCCCCGGGATGGGGCAGAGCTGTGGTTATGAT  
GCCCTTTATCCCAATCCGTTTCGAACAGAGCTGGCCCCGGCACGGTCAATATTGCCATGGCGACGGCGACTG  
CGGTGAGCCGCAAGCAGTTACCCCCCTTGGCAACCCTGACAGGCGAAGCCGGCTTCTCCCGTAGCCAGGC  
ATGGCTCCAAACCCTCAAAAGTCGACTCCAGCAGGCAGGGGTAGGCGGGGATCTCCATCCTGCTTATC  
GACTCAGGACTCTGGTCCAGAGTACGAGGCAAGGAGTCCCTACTGCTCCAGCTGCACACCAGCGGCCCAA  
ACCCAAAAGACCGGGTGTGCTGCTGAGTGAACCCGCCATCAACGCCATGTTGAATGGGTCGCTCACCAT  
CGAGCAGGGACTGCAATTGGGTATTGTGGAGCTGCAAGAGAGACGACAATCAGCAGTTACAGCGAGATCTG  
CACAAGGCGCTGAGCTCGCAGACCTGACCACCAGGAGAAAACAGATAGGACAAAAGGGAGGCAAATGCCT  
CCCTTTTTTATGCCTTACGGCGAACGTCAAGCGGGCGCTTATTCATCTTCCAGATAGGCGTAGCCTT  
GCAGGCCAGCTCCAGCTCGTCGAGCAGGGCTTTGCGAGTGGCATCGTCCAGCGCCGGGTGAGCGGGCAT  
CCGCTGGTAGTTTTTCGCGGATCACGGACGGGTGATGTTGACGTAACGCAGCAGCTGGTCGACGGTATCG  
CCGCGCACACGTTGCGAATGTCCATCTTGCCCTCTTCGTCCAGCCACACTTCGGCGCAGTGGGTGTCAC  
CGAACAGGTTGTGCAGATCGCCGAGGATCTCCTGATAGGCGCCGACCAGGAAGAAGCCGACGTGGCACTC  
TTCGTTCTCGCCGTAGACCGGCATCGGCAGGGTGTCTTCGACCCCCAGACCGTCGACATAGTGTCTCGACC  
TGACCGTCCGAGTACAGGTGATATCCATCAGGATACCGCGACGGCTGAGCGGACGATCGAGACCAGCCA  
GCGGCATCACCGGAATACCTGACCGATACCCAGGCATCCGGCAGAGACTGGAACAGGGAGAAGTTGGC  
AAAGCACTTGTCCGCCAGCTTTTCACTCAGTTCGTGACCCAGCGCACGGTGGTTGCGGTTGACCGGGTTG  
AGCATCTCTTTGAGCGCCAGACAGGTGTTCTGGTGCAGCATCTCGGCCAGGCACGCTGTTCAAGGTTCA  
AGAGGCCCATGGTGTACTGGGTATTCACGTCAACCCAAATCTGCCACCGAGTCGTGGAAGATCTCCAGCAG  
GGAGGGATCTTCGCTGCGCAGATCTAGCCAGCCTTTCCACATGTTCTGCAGAAATGGTCGGCGCATCTTCG  
TCCGGCGCGCTGATGTCTGTTTATCTCCACCCCTTCGGCACCAATGATATTGGTGACCAGCACGGCGTGGT  
GGGCGGTGACGGGCACGACCAGACTCGCTGATGATGGTGGGTGCGGCAGATCGAACTCGCGGCAGACATC  
GCCGATACCCCATACCGTGTGTTGGCGTACTCGGAGAGGCTGTAGTTGGCGGAGCAGTGGCTCTGGGAA  
CGGGTTCCCTCGTAGTCCACCCCGAGCCGACCCGACGATCCACAACCTTCGATGTTGGCACCGGAGCGAC  
GCAGTTCAGCGTAGAAACCGCCGACCTCGCGGATCGCCCTGAATGTGCGCGGATATTGGCGATTTGGGA  
GCCAGATGGAAGTGCAGCAGTTGCAGGCAATCCAGCTTGCCAGCCCGCGCAGACGTTTCGATCAGCGCC  
AGGATCTGGGAGGCGGAGAGACCAAATTTGGACATGGAGCCGCCGCTCGATTCCCACATGCCGGAACCGG  
TGGAAGCGAGCTTGGCACGCACCCCGATGTTGGGCTTGATGTTGAGACGAGCTGACTCGTCCAGCACCAT  
TTCCAGTTCGGAGGGCTTCTCCACCACGATGTAGACCTTGTGGCCCATCAGGTTGCCCAAGAGGGCGTGG  
CGGATATATTTCGCGGTCTTTGTAACCGTTCGAGACGATCACCGAGCCTTGCTCATGGTGTAGGGACAGCA  
CGGCCAGCAGTTCGGTGTGGAACAGCTTCCAGGCCAAGCCGGGGCTTGTGCTGTAGGACTGGCTGAT  
GGTCTCGATGACACGACGCTGCTGGTTTACCTTGTGCGGTAACGCAGAGGTAGTCCCCTTCATAGCCA  
GACTTCTCGATGGCCTGACCAAAGGCGTTGAACAGCGCATCGACCCGACTCTTGAGGATGTGCGGGAAAGC  
GCAGCAACACGGGGGTGGTTCAGCCCGGACTGACGCAACTGTTTCGATGGCGTTCAGAGAGCACGATATGCGC  
GTCAGGGCGTGATTTGTGCGGGGCGACGGTTCACATGACCGCGCTCATGATATTGAAAAACCCCGCACCC  
CAGTAGGGAACGTTGTAGACCTTCAAGGAGTCCCTTGCTGGACCAGTTAGTCATGGGCTATGCCTCGCAAA  
TGAGCGACCCAAAGTCGCCTTCGTTACCCTCAATCACATCCAGACCATCTAGTGACAGGTACGGCGAGCG  
CTGCCATCACGAGACGCAGCCACCCAAACCAGCGCTTTCACATCGCGGCAAGCCAGAGGCTGCCCTGGTG  
GATCTTGGGGAAGTAACGAGTCTTGATGTGGGGCTGGTGGCTTTACATCAAGCTCAACGGTATGCGGTGC  
CACTATGCCGTGGCGCCGCGGTACTTTGATGACAGACGACATCAGCCACGCCGTCAGTTTCATCATTCGGC  
AGCGATCCCCGACAGAAGGAGAGGGTTCCAAGGAAGAGAAGCGAAGGCGCCAGCACGATGCGTGTGATA  
GACGACAACACACAGCCACCTCACCGTCACTGACCGCCATGACAAGGGAAGATGATGAGCCGGTAG  
CCCCTCGGTCAAATGAAGGATGAGAGTCTGTTGTTCTCCCTGATACCGGAGCCTAACCGGTATTTAAAGA  
AACCATTTCCCGAGCAGTGTCTGTGCTTTCTGCGTGCCTCGCCCTATAGGCGTATGATCGGTGCGGTTTTCT  
GGCGGCTCTGCCTGCTTACGGGTTGCCCTTGGATCGGCGCGGAGTGTACACACTTACCAGCGGCGAGTGC  
AATAAAAAATAGTGTTCAAAATCCCCTTTTAAATAAGTCGATCAAATCTTGCTGGCGGGCAGGCAGGCTCT  
GGGATGGCGCAGGTTATGCGACAGCCGATTTCCACTTGAAAAGTGTGCGAAAACGCCATGGTTGGGCTG  
ACGCCTTACTGTGCGGTGGCTGAGGGAAATTTGGTGCACCACCGCCAGCGCCTAAATATCGTAATAAATGC  
CACATTTATGCGATCTCCCTCCCGACGTTGCCCGCGCGCCGACATTCGCCGCTCTTCCCTTGCCTCA  
AAAAATGGGAAAAACCTGCGCTGACGCAATGAGAGCCCCGACGGATTGGCCACAATGACCGCTCACAAT  
CGGTTAGAGGCTGACTAATGGATACCCTGCTTGAGCGTTTTCTGCGTTACGTAACCTTTTCATACCCGCTC  
CGATGAGACCAATCCAGCCTGCCCCAGCAGCGAAGGCCAACTGATCTTTGCCCGTGCCCTGCAAGAAGAG  
ATGAAGGCGCTTGGGCTGAGCCGGGTACCCCTGGATGAGCACGGCTACCTCACCGGCTGCCCTGCCAGGCA  
ACCAGCCGGACGCCCCCGCCATCGGCCTGATTGCCACATGGACACCAGCCGACTACGAGGCGGAGCACGT  
AGTACCGCAAATCATCGAAAATATCAGGGCGGGCAGATCTGCCTTGGCAAGGGTGACGAGGTGCTCGCC  
ATCCGTGACTACCGCTTCTGAAAACTATCTGGGTGAGGATCTCATCACACCAGCGGCACCACCTTGC  
TTGGCGCCGACGACAAGGCGGGTATCGCCGAGATCTCACCGCATCGACCACCTGCAGGCCACCCCGA

GATCCCCGCGGGCGATATCTGGGTGCGCTTTACCCCGGATGAAGAGATTGGCCGTGGCGCCAACCTGTTC  
CCGCTGGAGAGATTCCCGGCCAGGTGGGCTTATACCGTGGATGGCGGCTACTGGGCGAGCTGGAGTATG  
AAAATTTCAACGCCGCCAGCGCCACGGTGCCTTTTATCGGCAATAACGTCCACCCCGGCACCGCCAAGGG  
GAGCATGATCAACAGCCAGACGCTGGCCGCCCCGCTTCCACGCCCCATGCCGCGCCAGCAGACCCCGGAG  
TGCACCGACGGGTATGAGGGCTTCTTCCATCTGGCCAGATGAGCGGCACCGTGGAGGAGAGCACCCCTGC  
ACTACATCATCCGTGACTTTCGACGACGAGCACTTCGCCCGCGCAAGGCAGAGATGCAGAGCCGGGTGCG  
CGCCATGCAGGCCGAGTATACGAAGGCCCGCATCGAGCTGACCCGTACCGATAGCTATCGCAACATGCGC  
AGCCAGATCGAGCCACACATGCATATCGTCGAGCTGGCCAAGGCCGCCATGGAGGCCGCCGACGTGGTGC  
CGAAGATCAAGCCTATTTCGCGGGCGGTACCGATGGTGCCCGCTCTCCTTTATGGGTCTGCCCTGCCCAA  
CATCTTTACCGGTGGTACAACTTCCACGGCAAGCAGAGTTCATCCCGCTGCAATCCATGGAAAAAGCG  
GTCGCCACCCCTGGTGGAGCTGGTGCCTCAGCGAGCTGGCGCGGTTAATCGATTACCATGACAACCA  
AGGGGGGAGCCGGTTAACCGGCTCCCCCTTGCATCTGGCCATCACCCATCAACAAAAGGTAAACCGGGG  
AGGGTGCCTCAGGAGCTACTGGCTGCCGCTGCCATCAAAGTGCATCCCGCTGACATGTCGCGGGAACAG  
TGTCACATCATGCTGGGAGCAACGGATCGCCGGAGCCCCCAGATGTTCACTATCGATAACCCCTGCTGACC  
CAGCACTTCCCCCGCTGCTTGGCTACCCCATGCTCACCCCGCTGTTAAAGCGGCTGCTGGGCTGGCTGC  
TCAACGAACGTGCCTTTGCCGACTTTGCCGCGCTACCCGCACCTGCGCGGCCCTGACTTTGTGCGAGCA  
GGCGCTGACCCAGCTCGATTTGCACTATCGGGTCAGCGAGGCGCAACTGGAGCATAATCCCGCCAGCGGC  
CGGGTCATTCTTGTGCCAACACCCCATCGGCTCGCTGGACGGACTGGCGCTGCTGCAACTGCTCGGTC  
GCATCCGCCCCGATGTGAAGATCGTCGCCAACAGCTGCTGGCACAACCTGCTCCGCTGCGCCCTTTGCT  
ATTGCCAGTGGACAATATGGAGGGCAAGACCGATCGACAGGCCATCCTCGCCATGAACGAACACCTCGCC  
CATGAAGGGGGCGCTGGTGATCTTCCCCGAGGCGAAGTCTCGCGGCTTGCCCTCAAGGGGGTGAAGATG  
GCCCCCTGGCAGGCAGGCTTTATCAAGCTGGCCAGCGCACCCCGCACCCCGCTGGTGCCCATCCATCTGGG  
AGGGCGCAACAGCCTCTGGTTCTATCTCGCTTCTTGCTCAACAAGCCCGCTCCGCCCCGCTGTTGCTGGTA  
CGCCAGCTGTTTCGCCAGCAGGGGCGAGCCCTGCCGGTGACCATAGGAGCGCGCATTCCACTCGGCAGTT  
TTCAGGATCTACCCGCCAAGACGGCGGCGGGCTGGTGCGCAACCACCTCTACCGGATTGGCCGTGGCAA  
GGCGGGACGGCTGCAGACCGAGGCCCCCATCGCCCTGCCGGAGGATCGCCGCCAGCTCAAACAGGCCATC  
GAAAGCTCGCAACAGCTCGGCACCACCCCGGATGGTCAGGGGATCTACCTCTACCGCCGCCACGAATGA  
GTCACCTCGGTGATCTGCGGAGCTGGGGCGACTGCGGGAGATCGCCTTTTCGCGCAGTGGGGGAAGGTA  
CGGCAAAAGGGCGGATCTCGATGGCTTTGACAACGACTATCACCACTGATCCTCTGGGATCCGCCCCGG  
CTCGACATTATCGGCGCCTACCGGTTTCGCCCCGGTGGCGGAGCTGCTGGCCAGCAAGGGGAAGGATGGCC  
TCTACAGCCACACCCTGTTTCGGCTTTGAGGATAAGCTGCTGCCCCGGCTGGAGCAGGCCATCGAGCTTGG  
CCGAGCTTTTATTCAGCCCGCTACTGGGGCAAGCGGGGGCTCGATTATCTCTGGTTTCGGCATCGGTGCC  
TATCTGGCCCGCTATCCCCGCTACCGCTACCTGTTTGGCCCGGTGTCGCTCTCCGGCAGCTGCGGCCGG  
CGGCCAAGGATCTGCTGGTGAGCTTCTACCGCCAGCACTTTGCCCCGAGCTGGCGCTGGCCCCCTCCCG  
CCGTCCCTACCCCGAGACGCAGCCTCTGTTTCGAGGGGATGGATTACGGCGCCGATCTCAAAGCACTCAAG  
GCCCCGTCTCGACAATCTGGGCTGCGCCATCCCCACGCTCTACAAGCAGTACTCCGAGCTGTGCGAGCCGG  
GCGGGCTCCAGTTCTTGGATTTTGGTATCGACCCCGACTTCAACCACTGCATCGACGGGCTGGTGTGGGT  
CGATGTGAGCCGCATCAAGTCCCACAAGCGGGCCCGCTATATCGGCAGCCATCTGACCGAGCCGCGCTCA  
TAGCCCTGCTGGCGCCAGGCAAACAGCCAAATGCAAAAAAGGAGAGAGAGGCCATCGCCTCCCTCTCCTT  
TCGCTCTCATGCTCAGCACCTTTTCGAGGCGCTCGGCCCATCTGGCGTTACTCGGCCGCTTGGCATCCG  
AGTGCCGAGATCCCGCTCAGGGGCGATGACGTACGCACCCCGCTGCTTGATCTCCTTGGCCTCGGGGAA  
GCCGTATCGACCACCCGATCCACACCTGCACCCCGCTCACCAGAATGCGGAACCTCCCCCTTGTGGCC  
GGCACCAGCGCCACCTCCCCAGATCGCTGTGAAGGTGGATAGTAGCTCCTGCGCCAGCCAAGCGGGCG  
GCAGCATCCAGCGACAGAGGGTGCAGTAGCGGATTTGATGCGGGGTTTGGTGTATCAGGGTTTCAGACTC  
GGTTCATGAATGACTCCATAAAAAAGCGACAATGGCGGGAAGTAGCGTACTGCCGCCAATGGCCGATCCC  
GATTCGGTCAAATCAGTGTGATCAACCCCATGAAAAATCGGCCAGCCAATGGCGGGCAATGGTACGCATC  
GCCGATTCTGGCAGCTCGAACAGGCCAGGAGCAAGAGGGCCTGCCGCCAGCATCCGGATCCCTTCCATGA  
TCTCCGCCAGCACAGATAGACATATTGCGCAATCACGGCGCCATGGACGAAGTTGACCGCCTCACCCCG  
GTTGAGCAGGTAGATCTGGGTACCATCCGGCCGGTTGAGGGCCAGCACATGGGGACACACCTCTTCGCTC  
GGCCACGGCAACTGGGCCAGCGAGAAGGCAAACTCGTCGTCGGCCGAGGTGACCGAGGCGACCATGGTGC  
CGGGGCGCAGCGCCTGCAGATCCGCCAAATCCAGCGAGCCGTTGCCGGTAGAGCAGATCACCAGCTCGGC  
GCGGCTCAACGCCTCGGCCTTGGTGTATCAGACGAAAACCGTGAGAGAGCGCTTCGACCTGTGCGAGCACA  
TCGGTCTCCACCAGCCGAGATGGAGGTTGCGACAGCGAGGTGCGGGCGATGCTACGCCCCACCTTGC  
CATAGCCAAACAGCGCCGCTCGCAGACGTTGAAAGTACGGTTGAGGTTGCGGGCCAGCGACTCCGCGGA  
GTAGACCACGCTCAAACCAATCTGGATATCCTCGGCCTGCTTGAGGGGGTGCAGCGCCACCAGACACC  
GGAGTGCAGCACCTCCTGCTCATAGCGTTGATGGCCGTTCTCGGTATCTCCACCACCCCGAGGAAAC  
GGGGGCCGAAGTATCACTCAAGATCACCTGGGTTTTGGCAAAGTAACCGCCAATATCGAGGATCAGCAA  
CCGCTCGTGAGGGGGCCACCAGCGGCGCAATCTGCTGGATGAGACTGTGCGGGATCATTTGGTCCAGCGCCGG  
TTGAGGGGCGACCCGGATAGTGTGGGATACCCACTCCAGGGTTCGGGCCGTGTACCGATTTTCGGTTTGG  
GTAATAATGGCACCAATCCGCCAATCCGGGAAAGCGCTTCGATAAAACGGGGGCGATCGGGAAGCAGGTG  
AGTGACCAGCAGAATACAGAGACCATCGATACGTCCTGTCCGGTGAATGGCGAAAAACAGATGCTCA

GATCCTTGACTGCGCAACTGTGGCCTCCTTAAGTGCCGCAAAGCAGGCAAACAGAACCCGGCGCGCCCGG  
GTTCTGTGTGTGTCCAAATAAAATGAAAAACCTTTTTATCTGAAACACATAGGTGGCTCAATCATTATCT  
GCCAAGAGTATGAGCAGGTATGCAAAAATGACTGTAATTGCCGTGTTTTTCATGCAAAAATCAGTACAAAG  
AAGCAGCAGGCCACACCCACCACAGGCTGAGCCCCGGTTCCCGCGGCAGCGAGCAAGATCAACCCACCCCA  
ACGCACTGGCAACGGTTTTGTACAGCAACGCCACTCCAGCAGCGGCAGCAACCAGACCCGGCAGCAACACC  
ACCAGCGGCACCTCCACATATTGCCAGGCCAGCATCTGGACGAAGGCGAGGGCCAAACGCCAGACCCGGCGG  
GTGCTACCTTGATGCCAACAAAGGTGGCAAGCAGGGCGCGAAAAACCGGCTAAAGCGGGCAGCGCACCCGGC  
CAGCTGGGCAATCAGCAGACTGCCATCGATGCCAATCACCAGCGCCAACCAGATAAAAGCCGAGGGCAAAC  
CCGAGCCCTTCGCGGCTGTCACCGCGCAGACCGCTCCAACCAAACCAGAGGATGGCGGGCAGTAGCGCCA  
GCCAGATCCCAGGTTCCGCTCGCCAGTACCGAGGCCAATCCCTGCCACCACACCAGCGCATGAACACCCGC  
AAAGAGCAGCAGTGAACCCGCGCAGATCGTTACCTGAGCCCAATGGCGGGCACCAGCAGGGTCAGCGGC  
AGCCACTGCCACGCCTTTTCCGGTATGCCATAGAGGCCACCCAGCGCAGGATCCCACCAGCCAGAGCGCCA  
GCGCGCCCCACAGATAACCCAGTCGCGGCCAGCGCCACGATAGCAAAGCGGCTCCCAGAGGAGCCGCCAG  
GGTTTTGCAGCAGAAGTTCCGCGCCATTACTTGCACGACGCCTTCGACAAAACAGGTTGATATTTCATCTCGT  
CCGGGATGCCGGCAGCATGTAGCTCACGCCAAAAGTCACTGCGCTTGATGGTGGTGGAGGCGTTGAAGCC  
GCTGCGGTAGCCGCCCCAGGGATCCTTGCCCTCACCAGTCTTGACCAGATCGAAGGCCACTTCCCTGGAG  
ACGCCGTGCAGGGTCAGGGTCCCTTTAGCAGCGCTTTATCCTTGGTGCCCTCGTAAGCGGAGCTGACGA  
AGGTCATCTTGGGATACTGCTTCACGTGAGGAAGTCCGGGCTGCGCAGGTGCTTGTGCGGGCCCTCGTG  
ATTGGAGTCGACGCTGGCGGCATCCACTTCAAAGCTCGCTTGGCGGCCGCCGGTTGGCGTCATCCATG  
CTGAAGGTACCACTGAAGGTGTTGAAGCGACCCACCAGCTCGGAGAAGCCCAGGTGACCCACCTTGAAC  
GCACTGTGGTGTGCGCCGCATCCACGTGCTAATCCGCCGCCATCAGGGGGGTAGCCATAAACAGGCAGGA  
GGCCAGCAGAGCCTTGGTCATTTTTATCCGTTTCGTTCCCTTCATCTTGGGGTTCACATCAGTGGTTAAAT  
GCTAACCTCGTTCTGAAGATGAATAATCAGTGATTTATTAAATTCATTATTTACTGAGGATGGAAAATGG  
ATCAGATCGCCGCCATGCGCACCTTTATCAAGGTGGTGGAGTGCCAGAGCTTTACCAAGGCCGCCAACCA  
GCTCGGCATCTCGGTGCGCATGGCCTCCAACTGATGCAACAGTTGGAGGAGTCCCTCGCCACCCGGCTG  
CTGTGCGCACACCACCGTCAGGTCAATCCCACCGAAGCGGGCCAATTTTACTACCAGCGCTCCCTCGCC  
TGCTGGCGGAGCTGGAAGAGACCCACAGCCAGCTGACCCACCACAACCAGCAGCCGAACGGCACCCTCAA  
GCTCTCGGTACCGATGAGACTTTGGCTATCTGCACCTCTCCCCCGCCCTGCGCTGTTTCGCCACGCTTT  
CCCGATCTCAAGCTCGATATCGAGTACAGCCAGCCGCGGCTGCGCTGGTGGAAAGAGGGGTTTCGATCTGG  
CGCTGCGGATCGGCCACCTCAGCGACTCCTCGCTGGTGGCGCGCCAGCTTGCCACCATTTCGGGTGAGCT  
TTGCGCCAGCCCCGCTATCTGGCACGCAAGGGCAGACCCGAAAAAACCAGGATCTCAAGCAGCAGCAGC  
TGTCTGATCTACACCCTGACCCAGCCGGAGTGGCACTTCAAACGGGGAAAGCGAGCAGCAGATCCGGC  
CACAGGGGCGCTGCGGGCAACAACGGGGTGGCGCTGACCCGCGCCGCTTGTGATGATCAGGGCATCAT  
ATTGCAGCCCACCTTTATCGTGGGGGAGGCCCTGCGGTGAGGGCAACTGGTCAGCTGCTGCCAGAGTGG  
GACAAGGGAGAGGTGGGACTTTATGCGGTCTATCCGCACCGCCGCTTCGTCTCGGCAAAGGTGCGCTGCT  
TTATCGAGTTCGTGAGGAGCGCTATCTCGCCCCGCAACAGTGGGATAAGCCGTGATGATTGCCAGAGCA  
GAGGATACGGCCTGCTGGTCCGGCTTGAACCTAGCGCTGGCCAGGTGCGGCGGTGGATGCGGCAACAGG  
AGTGAGCTTCGCCAGCAGACGCTCCTGCTCGAGACTCAACTGCCAGCGTGGCAGTCCGGTGGCGATCACC  
GACAACCTGCTGCTCACTGAGAGCATAGGGGAGCGCCACTTCAATCTCGGGGAGTCAAACATGGTGGCCA  
GCTGCAGGATCAAAATGAGGTTTGCTCGTCTGTCTTGTGCTTGTGACCCGTTTGGCGATCTCGTGGCG  
CAGCTGGGTTTCGGGGTCCCTGGGTCAATTGCCTGCCAGCCGAAACCGAAACAACGGCACCAGCGCGCTGACA  
ATCCCCAGCGCCGTCATCGGCTGCTTGGGGGATGATAGAGTGGTGGATTCAGCCGAACAGGATTTCT  
GACGAACCTCACCACCACAAATAAAATCGTTTTTCGTCAATTGGATTACCCGTTATATTTCCACTAGACTGC  
GCCGCATATTTTACCCCGATATGCCAACGAGGTGCTGATGCTAAGCGATATCGAGATCTCCCGCCAGTCC  
CCCCGTCTCTCAATCCACGCGCTGGCCGAACGCTCGCCATCCCCAGCACCTGCTCAGCCCTCATGGCC  
ACTACAAAGGCAAGCTCAGCCTCGACCTGCTCAGCTCAACCCAAGCAGAGCGGCAAGCTGGTACTGGT  
GAGCGCCATCACCCCGACCCCGCTCGGTGAAGGGAAGACGGTGACTACCCTTGGCCATTCCATGGGGCTC  
AACCATATCGGCCAGCCAGCATCGCCACTATCCGCCAGCCGAGCCTCGGCCCGGTATTTCGGGGTCAAGG  
GGGGCGCTGCCGGTGGCGGCCACGCTCAGGTGGTGGCGATGGAGGAGATGAACCTCCACCTCACCGGCGA  
TTTTACGCCCTGACGGCGGCCACAATCTGGCGGCAGCTGCCCTCGATGCCCGCTGTACCACGAACAG  
AAACTGGGTGCCGAGTTCACCGCCAAAACCGGCTGCCGCGGCTCGATATCGATGCCGATAACATCTCT  
GGCCGCGCACCTCGACATGAATGACCGCGCCCTGCGCCACCTCACGATTGGACAGGGGGGCGCTGCCGA  
TGGTGTGGAGCGTAGCGATCGCTTCGTCAATTACCGCCGCTCCGAGCTGATGGCATTCTGGCGCTGGCA  
AGCGATCTGAAAGACCTGCGTCAGCGCATCGGCCGATCCAGCTGGCCCGCATATCCACGGCAAGCCCA  
TTACCGCCGAGCAGCTGGAAGTGGCGGGCGCCATGACGGTGTGCTGAAAGACGCGCTGCAGCCGACCT  
GATGCAAACCACCGAGCAGACGCCAGTGGTGCACGCTGGCCCTTTGCAAATATCGCCACGGCAAC  
TCCTCGGTGATCGCCGATCGCATCGCCCTTGGCCTGACCGACTATGTGGTGACCGAGGGCGGGTTTTGGCT  
CCGACATGGGGTGGAGAAGTTCTTCAACATCAAGAGCCGCCAATCCGGTATTACCCCGCCTGCGTGGT  
GCTGGTGGCCACGGTGCAGCGCCTCAAGGCCAACAGCGGCTGCTCGATATCCGCCCCGGCCAGCCGCTG  
CCAGCCTGCCTGCAAGGGGAAGATCTGCCGACCTCAAACAGGGCTGCGCCAACCTCGCCTGGCATATCC  
GGAACGCCCCGTGCTACGGGGTGGCGGTGGTGGTGCATCAACCGCTTCCCCACCAGCAGCGAGGCCGA

GCTGGCGCTGCTGGCCCATGAAGCGCAGCAAGCCGGTGCCTGTGGCGCAGCCATCTCCAACGCCTTACC  
CAGGGTGGTGCCGGTGCCAGCGAGCTGGCCCGCGCCGTGGTCACCGCTGCGAGCAGCAAGCAAAGTCA  
AACTGCTTACCCCGACGAGATGAGCCTCGACGCCAAGCTGGCTACCTGGTGGAGTGGCGCTACGGCGG  
CCGCGGAGTGCTGCTCTCCGACAGAGCGGCCAGCAGCTGGCCAGCTCTCCGCCAAGGGTGGGATCAC  
TTGCCCATCTGCGTAGCCAAGACGCCGCTCTCCATCAGCCACGACCCAGCCCTCAAGGGGGTACCGACCG  
ATTTTCGATGTGCCCATCGACGAGGTGAAGCTCTGCGCCGGTGCAGGCTTCGTCTATGCGCTGGCGGGCC  
CATCATGACCATGCCGGGGTGGGTAGTCTGCCTGCTTATCGCCATATCGATATCGATGAGAACGGCGAG  
ATAGCCGGCCTGAGCTGAGCCCTTCCACAACGCCAGAAACAACAAGCCCCGCCAATTGGCGGGGCCCTTC  
AGTTATCCATGCATCAACCCTTAGAGGGTGAAGCGCTGGGTGCATATGGTGCAGGGTGTGGCCAGCTTGC  
TCAGTTGACGCAAGCCTGGGCGATCTGATGAGCGCCCTGGGCATTCTCGTCAGCGGCATTGTGAATGTT  
GACGATGCTGCGGTTGAGCTCTTCGGTCACCGCATTCTGCTCTTCGGTGGCGGTGGCGATCAGAGTGTTC  
ATGTCGGTGTGCGCACCCAGCCACCATTTGATGGTCTTGATACTGGTACCGGCATCCCGTGCCAGACCGA  
CACTCTCCTGCATCTGGTGCAGCTCAGCTGCATGGCGTTGCCCGCTCGGCGGCGCGGCTCTGCAAGAG  
CTCGATCATCTTGCTGATCTCGGCGGTGGAGTCTGGGTACGCTGGGCCAATGAACGCACCTTCATCCGCA  
ACGACCGCAAAAACACGACCCCTGCTCACCGGCACGGGCCGCTTCGATGGCTGCGTTAAGGGCCAGCAGGT  
TGGTCTGACCGGCGATATCGCGGATCACATCCAGCACCGCTGATGTTGGCGCTGTCGGCCCTCAGCTG  
CTGCACCACTGTGCCTGCCTGTTCAATCTTGACCGACACCTCTTCGATGCTGGTAATCGAGCTGCGTACC  
ACTTCGCTGCCGGCAGCGGAGGTACGGGAGGCATCCTTGGCGGCGCTCATGGCATCAGTGGTGTGGCGG  
CCACTTCGTTGACGGTGGACTGCATCTCGTTCATGGCGGTGCCACCTGGGAGACTTCATTCTGCTGGAT  
AGCCATGCCGCTGGCGGACTGGCTGGAGATGGCGCTCACCTCCTCCACTGCGCTGCTGAGTTGGCTCAG  
GAGCCGGCGATCTCGCTCACCAGATCGGAGAGGGAGCCCTGCATCCGGTTGATGGCGGAGCCAGCTGAC  
CCAGTTCATCGCGGTTGAAGCGGCTGTCACGGATCCACTGCTGCAGTTCGCCCTGACCCAGATCGCCATT  
GGCAATACGCTGGGCTGACGGGCCAGCATGATCAGCGGGTGCAGAAATTTGGCGGGTCAATACCACGGAG  
AGCACCACCACAAGGATCAAACCGATCACAGCGCGATGGTGACACTCAGATTGGCAGATTGATAAGAGT  
CGACAATGTGCTGCGGGATTACAGACGATAACCATGGTTAATCTGGATAAGGGAGGCCACTGACTTGCT  
CAGCGCGGTGTAAAGGGGAACCCCTCCTCAAGGAAGATGCGTTGGGCTTCGGCAAGCTGATCGCTGTCT  
TGCAGTTGCTGGACTCGCTGGTGCAGGGCGACGTAACGATCCAGTCAGATTTACCGTATCGAAGGTAC  
GGCGTCCGCCACATCCTCAGGCCAGATAGTCTTGTCAATGGGCAATCAGCTGCTGCGCGATCGCTTAAG  
CTGTTGACTGGCAATATTCGATATTCAGCCCTTTTCAGCGGCTCGGCAGCCACCACGAAATAACCCAGC  
TCATAACGACGCAACTCACCGAGAGAATCCCCGATCGCGCTGGTGTGATTAACCGTGGCAAGATGCTGT  
CGGTAACCGGATGGCAACATCATTTGTTGCCAACTGGACAAGGGAAAAACCGCCGATAAAGGCGAC  
CATCAAACCGAGCACGGCAAAGCCGGCGGTGAGTTTTTTGCTATGGTTCATGGAACGGTATTCATGGGA  
TATCCTAGTGGTTCGTTAAATTCGTAGCACTCGTCCGGTTCACGCCCTCCTGGCATGAACATCTGGCCAC  
CTGTTGAGTGGCGCACCATCCAACCTTGATGAATATCTCTGAATTCATGAGCGGCAGCGAGAGCCGTGA  
GTGGCGGTAGAATAGCCGATTATTGCGGTTCCGAAAGAGTCTTATGATTAATAAAGCAATCCAAAT  
GACCCCACTCAAACAGGGGTCACTTGGATGAAAGATCAACTATTAGGGGTGAAAACCTTAATAGCGGAAG  
CGCCCAATCTTGTCCATCACATCGCTGGCTAACTTATGCATCTGCTGACTTTGTTTCATCCTGCTGGTTAG  
CCAAACGGGTGATGCGGTTGCCGCTTCATGAATGTTGCTGACATTTGACTGATATCATCGGTGACCTT  
GGACTGCTCCTCTGCCGCACTGGCGATCTGGGTGCCATATCCTGGATCCGATCTGCCGACATAACTATC  
GTCGCAAGCTCGGTACGGCAAGCTCTGCATCCTGCAATGCCAGCTCACTCAAGTTTTTCCCCTCTCCCA  
TGGTACTCACAGCTTCTGCAGTGGTCTGGCGAAGGCGCTCGATCATGTCTTGGTTGAAGC  
CTGGGTTTTGGACGCCAACCCCTGACCTCATCCGCAACCACCGCAAACCCCGACCATGCTCCCCAGCA  
CGAGCGGCTCAATCGCTGCATTACAGAGCCAAACAATTTGGTCTGTTCCGAAATGGTACGGATCACATCAA  
GAATCGAACCGATCTGTTGACCCCTGTTGCTGCAACTCGGCAATCCGCTGTGCCACCACATCTACTTGCAC  
ACTCAGCTACCGGATACCACTAGCGGAATTACTCACCACATGCTGACCTCTATGCACCGCTTTGCGGGTC  
TCATCTACAGCATCAGCGGTAATCTGTGCACTGTGGAGACGGAATCCGCCGTCGAGGCCATTTGCTGGA  
TGGCTGCTGCAACCAGTTCAATCTCTTCCAATTTGCCGATGGCTATTGGACAATCCTTGCTGAGCCAGCTC  
GGCAGATTGGTGGGCGAGCTAGCTGCAAGTGCAGGCCACTTTGTGCCGTATCACTCACAAATATGATGAATA  
GTGCTGACAAAACCGGTTGATCCCTCAGCCAACTCGCCAGTCTCATCTTTACGCATCACATTGAGGCGTT  
GGGTCAAGTCCCCTCCAGCGGCAGAAAAGACGTCTGACCATGCTGGCGGTCTGTTGTACCGGGCGCGAGAT  
GGATCCGGCAGCCCAGGCCAAGCCGACAAGACCAAGGCATGCCACCACGATCCCAACCAGCAGTTGCATC  
CACAACTCTCGCTGAAATCAGCGGATCTCGCCTGTTGAGCTGATCAGCATCTGCAAACAGCGCCGTAT  
CAGCCACCTCAATGATGATCCCCAGGCTTTAGTGACCCCTTTAAGATGGATTGGCACCAGCACGCGCAA  
CTGACCCGAAACTTGTGACTACTGGCCTCTCCTTTGTTGAGCAGATCCATCAAGCCAGACTCTTCAAGC  
CGCCCCCGATCACATCAGGTTGCGCCGAATCCGCGCGATGATGCCGTGTGGACTGATGATCCTGACCC  
GGCTCTGGCCAGAGAACACCTGGCCACTTACCTGCTTGGCCAACTGTTGCAGGTAATTGAGGGAATAGTC  
GACCCCGACCATCCCCAGATAGCGGCCCTGATCCAAAACGGGCACAACAAAAGAGGTCAACAGCGTCCGGT  
TGGCCATTCACGGTATAAACGGAAAGGGTGCACAGCACAGGCAGCCTTGCTCTCCATCGGACAGAGATACC  
ATTCGATGCCCGGATACCGGCTTTGCTCAAACCTTTGCTGTAGTAGTCGCCCAGCGGTTTGTGTTGAA  
CCCCGGTGGACCAGACTCCAGTAAGGGGCAAAGTTGCCAGTGGCTGGCTATGTACCCCGTTAGTCAA  
TACGCACTGTCTGACCATCAAAGGTATTAGGCTCCCAACCACTGTAGATACTGAGAAAGTCGCTGTTCC



GTTCAGCAACATCCTTGAGCAAGGCAGTACGGTAGCCGGTCCAATGGCCTGGGTTGATGAACATTGCC  
AGCCAGCATGGCGGCAAGTGTCTCTGCTGTATTAAGGGCTTGTCAAAGGTGCCTGCAATCTCGCCGGCT  
TGTTGACCAGCCAGAGCCACCAGCCATCGTCCGGCATCCTGACGAGTTGTCTCGCGCATTTTCGCCCTGAA  
TACCACCTTGATAGTCGCAAGAGACAGATAGCTATAACCCGACCACACTCAACACGGTAGCCAGTAAAT  
ACAGCCACCAAAAAACATGACCTGATGTTTTGATTGAACGAAACACGGCTACTCCAACCTGTAATGATGC  
CCTGCTGGTAATGGCAAGCATCTTAAGATGGGGACAGGTTGGTTCGGAAGAGCTACCAGTCAAGATTTTC  
ACACTTTGAGCGTTTCGATCACGAACATGAAATATTCGCTTACGAAAAATAGAGAAAGTGGTCGATGCAGGC  
TCGCCATCTCTGGCTATCGTCCATAAAAAACGCCAGCAATAGCTGCTGGCATCTCGTTTTATTTCAGCAAGGC  
GGTTGCAAAACAACCGCCATCTTATCCACGCAGGCCACCCAGAAATTCGGCCCGGTATCGGGCTGGGTC  
TTGAACACACCACCGAGGGAGGTTGGTGGTGGTATAGGAAGTGGAGTCCATCACTCCTCGCCCTTGACGC  
AGTAGTGGGTTCGCTTTCGATGCTGATGGCCACGTCCTTGGTACCGAGCAGGGTCTGCAACGCCAGGAT  
CTGCTGGGTTCAGCCGCTCCTGCACCTGGGGACGGCGGCGAAGAAGTGCACGATGCGGTTGATCTTCGAC  
AGGCCAATTACCTTGCCACGAGGGATATAGGCCACATGGGCCATGCCGTCGATGGTGACGAAGTGGTGT  
CGCAGGTGCTGGTGAGGCTGATGTCCCGCACCATGATCATCTCGTCCACCTGCATCTTGTCTCGATCAC  
CGTCACCTTGGGGAAGGTGGAATAATCGAGGCCTGAGAAAGATCTCGTTGACGTACATCTTGGCGATGCGG  
TGCGGTGTCTCGCCAGACTGTCATCGGCCAAATCCAGCCCCAGCGTCTCCATGATGGAGCGCATATGGC  
CTTCGATCTTCTCCCGCTTCTGCTGGCTGTTTCAGCTCGTTGGTGACCAGGGGGGTTTCCAGTCCCTGGGC  
TTCGAGGGCAGCCCTGACCAGCAAGGCTTCCGACTTAAGGTTGTCATTATCTTCTCTCCCACGCTCAGG  
GACTGTGAGGGCAGCTCAAGGAGCAACCCCTTATGTTATGGCGCGTACAGGGCCGACGGTATCGCTGTA  
ATGGTTCGCCACACGGGATGTGACGGCCATCTGTTATGGCGGCATAGTAAACGGCCATTGCCGCCAAGATT  
CAAGTCAACTTGTGCGTCACCTCATACTTTATGGCCATCTCCCCCGTTTTAGCGCCGATTACCCCGAGA  
ATCCTTGAGATAACCTGCCCATCCCCGGGGATTTTTGTGATAATCCCGCCTTCAATCATAGAAAGAGGTC  
ATGACGATGGGATTTGATAACAGCGGACTACTCCCTTAAGCGATGCCCTGCAAGGGATGCTGGAACAAC  
TCGCCTGCTGCTGCGACAGCGGGCAGTTGCCCTGCCAGAGGCCCTTGGCCGGGTACTGGCCTGTGATAT  
CGCCTCCCCACTCGCCGTGCCCCCTTCGACAACCTCCGCCATGGACGGTTATGCCGTACGCCCTTGGAGAT  
CTCGCAGCGGTACCCCGCTCATCATGGCGGGCAAAGCGTTTTGCCGGTCAGCCCTATCAGGGCGAGTGGC  
CCGCGGCACTGCGGTGCGGATCATGACCGGCGCCCCGGTTCCCGCAGGCACCGATGCGGTGGTGTGATGCA  
GGAAGAACAGCTGGCCGACGGCATCGGATCACTTTCTGGCACAACCCGAACCGGGCCAGAAATATCCGC  
CGCGCCGGCAGCGATATCGGCAAGGGCGCCTGCGTCTACCAGCCGTTACTCGCCTCACCCAAAGAGAGA  
TGCCACTGCTGGCCTCCCTCGGCGTGGCTACCGTTCGCGGTACGCCGACCGTGAAGTGGCCATCTTCAG  
CACCGGTGATGAACTCAAACCGGTGCGCACCCCGCTGGCCACGGCGATATCTATGACTCCAACCGCTAC  
GGCGTGCGGGCCATGCTGGCGCGCATGGGCTGCGACTGCCTCGACCTTGGCATCATCCCCGACGATCCGG  
CCCAGCTACGCGCCGCTTTATCCGCGCCGACGAAGAGGCCGATGTACTCATCACCCAGGGCGGCGTCTC  
GGTGGGGGAAGCGGACTTACCAAACAACCTGCTGGACGAGCTCGGCGAGATTGGCTTCTGGAAGCTGGCC  
ATCAAGCCGGGAAGCCGTTTTGCTTTTGGCCGCTGCCCATGCCTGGTTCTTCGGCCTGCCGGGCAACC  
CCGTCTCCGCCATGGTCACTTCGATCAGCTGGTGAACCGGCGCTGGCCAAGCTGGCGGGCCAGCAGTT  
CGAGCGCCCGCTCCAGCTGCAAGCCATTGCGGCCGAACCACTCAAAAAGAGCCCGGCCGACTCGACTTC  
CAGCGCGGCATTCTGAGTCAGGGGGCAAACGGCCTCGAAGTGCAGTACCGGTCGCGAGGACTCCGCCG  
TGTTTCAGCTCCCTGTGCGGAGCCAACCTGCTACATCGTTCTTGAACGGGAACGGGGCCGCTCGCCGCGG  
CGAGACGGTGACCGTCGAGCCATTCGGGGGATTGCTGCTGTGAGCGAGATCCTGAGCGACGCCGAACCTAC  
TGCGCTACAACCGCCAGATCATCTCAAATCCTTCGACTTCGAGGGACAGGAGGCACTCAAGCAGGCCAG  
GGTGTGGTGTGATCGGCGCCGGTGGCCTTGGCTGCGCCGCCAGCCAGTATCTGGCGGTGGCCGGGTTCGGC  
CAGCTCACTCTGGTCGATTTTCGACAAGGTGGAGCTCTCAACCTGCAGCGTCAGGTGCTACACAACGATG  
AGCGCATCGGTCACTACAAGGTGGACTCAGCAGCGCAGTGCCTTCGTGCCCTCAATCCCTGGCTCAACGT  
GGAGGCCACGCTGCCGTGGCCGATGAGGCGCTGCTCGATAACCTGCTGCCCTGCACCAGCTGTTGCTC  
GATTCACCCGACAACCTGGCTATTTCGCAACCTGCTGAATCAAAAAGGCACGCTGCACAAGGTGCGGCTGG  
TCAGTGGTGGCGCCATCCGGCTGGAGGGTCAGCTCTGCAGCTTCACTGGCAGGAAGATGAGCCCTGCTA  
CGCCTGCCTCAGCGCCCTGTTTTGGCGAGCAGGCCCTCACTGCGTCGAGGCGGGCGTGTCTGCCCCCGTG  
GTGGGATTGGTGGGCAGCCTGCAAGCGCTGGAAGCTATCAAGCTCTTGGCAGGTATGGGCAAAAGCTACA  
GCGGCCGCTGCTGATGATTGACGGCCTGAGCGGCACTTTCGCGGAGATGAAGCTGCCAAGCGCCCCGA  
CTGCCCGGTCTGCTCACATCCTTGAACCCGAGTGATATGTCTAGTCTGAAATAGGTTTACACATTTTCA  
ACTAGCATTTCTCTACTCAGAACCCCTATGTACCGCATCGGGGTTCTGTATTTCAACGCATGATGCGGC  
TGCTCCGCGTTGTAATATCCACCGCTTACGCACCATTTCCCGCGCTTGCATCAAATCCTGCGGGCTTT  
GCAACAATAACTCTCCTTTCAAATCCCCTTACCCGCTCCGCCAACGCATTCTGGTAACAGTCATACCC  
ATCCGTCATCGAGCATTTACCCCGTACCGTTCATGTAGTACTGATACAGCCCCGAGCAATACTGCACG  
CCGCGGTCTGAGTGTGATGAGTTACCCGCCGCCACCGCTTGCCTCAGTGCCTTCTTGAACGCCATCG  
CCACCGACTTGGCGTGCATCCCTTCGTGCACGTGATGGCCACTATCTTGGGTGAGTACGCATCCGTCAC  
CAGGCTCAGGTACAGCGGCCCGCTCCTGGCTGGCAGATAGGTGATATCAGCGACCCAGACCTGCTCCGGT  
GCTACCGGGCGTAACCTGCTCTGGCCCCGCTTGGCAAGTTGGGATGACGGTAGAAACGGTGAACACTGT  
GGGTGGTCTTGTGATACGCCGCTTAGGCTGCACCAGCAAGCGGTGCTCGGCCAATATCTGAAACAGCCT  
GTCACGCCCTACCTTGAGCCCGCATTATCCTGACCCAGCAGCAGATAATGCAGCTTGGGGTGGCCACC

CGAGGTTGTCGCAGTCGAACCTGACGCACAAAGCGCACCACCTGTAGCCCTTGTGCATGGCGCTCGTCGG  
CGACCCGATTGCGCTTGTAGTAAGCCTGCCGGCTTATCCCCAGAAACAGGCAAGTTAGTCTCTCGACTT  
GCCGCTGCGAGAGGACTTGCCGGGTGCGTTTTTTTACGATGGAGACGCCGTAGTCATTTCTCAGTACATCG  
ACGATGGCCTCAAAGAAGTGGGCCTTCTGACTCATCAGCGCCAGCTGCTGCTCGAGTTCCTTGATGCGCT  
GTTCCGGCGTCTGGTTGTGCGGGTCAGGCATGGTGATGCTCCTGCAGGCGCGCACAGAAGCCCCAGGCT  
CCAATCTTGCCGACCATGTTTACGCAACCATAACCAGAACGGTGGAGCGGCCCTGAATGCCATAACGGACC  
TGAGCCTGTTTGTAGGTGAGCTCGCCTTTTTCAATCTGCTCGACCAATGACAGTTTAAAAGTCAGCGAGT  
AATCGCGCTGTGTCCGTTTACACCTTGTCCCATCGGGTCTCCATTTATTTGGGGGAAAGGTGTAACC  
ATATTCAGGACGGGACAATACCCACAAAAAAGCCGAACCCTGTGGTTCGGCTTTTTGCATCAAGCTTGCG  
CAGATTAACCCGGCGCAGTAGACCCGAGCCTCGCGCGGGGTGATGATACCGAAGGTCACACGGCCAGCAG  
CCCATTGACGAAGGTATGCTGTGCTTCAACACGCACAACCTGTGCGCACCATTGCAAAACGGTGGCCGCA  
TCGATAGTTTTGCTCTGGCCAAACCAGGATGAAGAAATGATGAGTCACTTCTTTGGTGGGCTCGACTG  
CATTACCGGAATGCACGGTAAACCCTTGTGGGCACAGCCTGCAATCATCATTACAACGGCAGCAGTTAA  
CACCATTTTTTTTCATTTTATTATCCCTGACAATATTATTTTTTCCGGCTATACCGGTGCCACACCAAGAGG  
ATTTTCATGTTTATTATCAATAAGATAAAAAGAAAAACTCCAAGCTGTGGGCACACTATCAAAATCCGGAG  
AGGGCAACAAGGCCTTATTTGAGACTTAATGTTGCCAGATAACATGTCACAGATTGCAATAAACTCGGGC  
CGTTCTTGGGGTATAAATGCCAACGTCAGAATGGCCATCAGCACATCTTGGGGCTCTGCTGCATTTCC  
ACACGCACAACTTTTTTCGGGTACCATGGCAGGCCAGTGAAGCATCAACCATCTCACTCTGGCCAATTC  
CCGCCACAACAAAATCATGGTGTACTTCTCTTGTGGCTGACCCGGGTGCCCTCGTGTACGAAGACGGT  
CTGCCGGGCACAACCCGACAACAGCAAGGCGCAACACGCCATCCATACTATTTTTTTCATGCTTCTTATC  
CTGGCTACAGCCATGGTGGAAACCTTAGAAGATCCCCCTTGGCTTTGACCTTTTTTCATATTGGCAACCTGA  
CTCGAGAGATCCTCGATCAAAGGTTCTGCCTCTGTGCCGACAACACTCTGTGCGAGCGGGGGCACTGGCCA  
GTCGCTGGATCAATCTGTGCTGCTCGCGGATCAGCCGGGATTGCTCTTCCAGTTGGCGAGAGAGCAGCTG  
GATGCTGGTGGCAAGGGGAGCCAGATCCTGCTCGGCCCTGCTGATGGCAGCTTGCCAGCGATGGCTTCG  
GCCAGCTGGTCATGATCCAGTGCAGCAGGCAGTCTTGGCTGAGTTCATCCACATCTCGCTGGGTTGCT  
GCTCGCCGAGCCGGCTGACAATCTCGTCCACCAGTGAAGTGGTATCACTCTGTCCCAGCTGTGGGGCCAG  
TCTGGCCACTATCTCGTTGATCATCACATCTGCGGCAGGCTGCGCTCGCCAGCGACCTCACCAGATTG  
AAACACAGCTGGCAAAGGCATGACGCAGGGTCTGATGCTCACCTGCTCCGGCCCCAGCGCATGGCAA  
TCGCTTTGAGAGGTTGGGCGCCAGCAGTACATGAACATGCCGGAGAGGTAGATATCCTTGTGGAAACG  
GCTCTTGGAGAAGTCAAACCTCTCGGTGCCCTCTGGATCTTTTCGCGCCCGTTGATACCAGTTCTGCAAT  
ACCCCGACCGCATAGCGATCAGACTCCAGCGCACCCGGATCCATGTAGATGGAGAAGGTGATGCGCTTGA  
GTTGACTACTCATCGTCAACCTCGGCCATCACAGGCGCTTCGCGATAGACTTCATCCTCTTCCGTGGTGT  
AGAGGCAGATTTACAGAGCCAGCGGGACTGGGCATCGTCCAGCAGCTCGACACGGTCACCCAGGGTGGG  
ATAGGCCGCTTGTATCGCATATAAATCAGAGATGCCCGCCACCAGCAGATAGACACGGTTCGGGTTTC  
TTGGCGAACTTCTTCGCTTCATGCGCAACCTGAGTGCCAGCTCGTGCATCTTGTTTTGCATCTTCTCGA  
GGATCTTGGGGATCTGGCTCTCATCGTTGACCACATCGCGTACAAAGCTCATGTGCTGACGACGCTTGT  
AAATTCGTTGGCCACCAGATAGCTGGAGTGCCTGTCTGCTGCGGCCAGCGCTTGGGGTAGCGTGGGTC  
ACCATGGAGACACCGATCTCGTTGTTACCGTAGACATCGGAGACATCATCAAACCTCACCGACGATGATCC  
CCATATCCAGAGTGGTGGCCACAGTGCATCACCAGAGTCTTGGTGAACCTCGTTGCAGCCTGAACCAAT  
CAGACGGGAGAGCGCAGCAGGCAGACTCTCCGGCATCACTTCGACACTGACGATATTGAACAGCTCGCCC  
TTGTTAAGGGTGATTGGACGCATCAGGTTGCGACGTTTCTTCTCGATCTTCTCTCGTTGCGCTGGCAAT  
CGTCCGGGTTGTAACACTCGGTGATGGGCAGGGTACCGGTAATGGCGACATCGCACGGGTCACACCGGT  
CTGCAACAGGGCATGATGCACGGAGAGCAAGTTGAGATCGTCATACTGGTACTCCACATGAGTGGTGGCC  
AGAGACTTGTGCGAAGTGCAGTCTGAGGTGACTTGGTGTGCTTATCTCGTAGTTGTAGATCTTCTTGT  
CTTTACGCAATCGCGCGCTCTTCCAGTCTTTCGAAAAGGAGTTGGGAGAGATGATGGTCTTGGACACCTT  
GTTCTCAATCCAGCTCACCTTGACGTTGGTTCGAGCCATCATCGATGGCCATTTTCAATTACTTCAGACATG  
AGGAAACACCTGTTAATAGATCAGAAAATGGGTCCGATTGCCTTATGCCCTTGGCAAGGCGATCGA  
ACCAATAGATACACGGGGTAAAAGGGCGACAAGTTTAAATGGGTTTTCTAAAATCCGGTGAAGCAAATGATT  
AAATCCTGAAGGATCTTCCGCGGGCCAGGCGTGGTGGCCGTTGGGAGTGTGGATGGTGGCGTTGGGCAGG  
GCGGCAAACCTGCTCTACCCGTTTTCGCCAGCGGCAGGTAGTCATGACTGGTGGAGATGATGGCCACCGGCT  
GCCAGATGGTGGCAGCCGGGCGGTACCGACCAGCCGGGTAACGCCTCCAGCAGCGCTTGTAGGTTTTT  
CTTTTTATTGCGCACGAAACGCAGCCGGAAGGTGTGGCGCACCTGCGCCAGATCCGGGGCCGGGAAGAGC  
TCGCGTCCCAGCCACCAGGCGAGCGGGCGCATGCCAAACCAGCGCAGCCATTTGAGGCGCTGGGCGTAAC  
GCTCCTGCTCTTTGGGTGTTTCCAGCAGAACTCGCTAAAACCGTTGACCAACACCAGCCCTGCACCTT  
GTGGGGGAGTTGCAGCGCCAGCTCCAGCGCCACCATGGCCCCAACGACAATCCCACCACCCAGGCGGGC  
TCCGGCTGCTCGTGCAGCCAGTTTACCACATCGGCTGCCAGGGTCGCCACATCGAACGGCCCCCTCCTGCA  
TGCTCTGGCCGTGGCCGCGCAAGTCCAGCGCCACCACCCGGTAGTGTTCGGAAAACCGTTTCGATCTGCGC  
CTGCCAGTCGAGGCTGGAGGAGCCAGCCCATGCAGCAGCAACAGCAAGGGGGCCCTCCCCCGCACTGCGC  
AGGGCAAGACCGTTGAATTTTCATCACCTGATTGCGGCGCATCAGTGTATTGCCCTCTCGACTCATCACCTG  
AACCATCTCTTGTGTTATGTTGCCCGTGGCCATCTGCCACGTTATCAGCACGGCGCCCAATCAGCCTT  
CGCTGACCAGACTCACCGCTTGTATATAAGCGTAGATCTGCTGCTCCGGCGCCAGCGCCAGCCCTGGC

GGAGCGGCTGGTGATCCGGGCCAGCAGTATCTGCTCACCAGCGCCAACTGCAACAGGGTCTGGCCGGGG  
CGCACCTCGCGCACCGCCAGCAGACGGGTGACGAGACAGTTGGAGAGGCTGGAGTGCTCGATGGGGGCCG  
TGGCGATCACCACATCGCGCCCCGCCACCTTGATCTGCAAGGGGCCGCTCTCATCCGGCACCTGGGTCAT  
GGTGACCCGCAGTTGCTGCTCACCAAGCTGCAGGGTCGCCATCTGCTCCTCTTCATCGTAGTGAGAGAGG  
GTCGCCGCCAGCATCACCCCGGCATCGTTCACGGCTGGCGAGTGACAGGTACGTACGGGCGAAAAATCTCGC  
TCGGCCGGCCTTGCGCCTCCACCCTGCCACCTTCCAGCAGCACCAGCTGATCGCAGAGCAGGCTCACCTC  
CTCCATGGCGTGACTGACGAAGATCATCGGGATGCTGCTCCTGCTGCAACCCCTTGAGCACATGGGCC  
TGATGGATGCGGCTGCGCCGATCGAGCGCAGAAAAAGGCTCATCGAGCAGCAGTAGATCAGGCTCGGCCA  
GCAGCGCCCGCCCAGCGCTACCCGCTGGCGTTGACCGCCAGAGAGGGCATGGGCAGGCTGCCCCAGCAG  
ATCGGCAAAAACCGAGTCGCGCCGCCAGCGCTTCGGGCTGCCAGCGCCCTCGCCCTTGCGGGCCGCCAGT  
TGCAGATTGCCGAGCACCTCAGATGGGGGAAGAGCGCGAGTCCTGAAACACCAGTCCGATCCGGCCGCG  
CTTCGGGCTGCAGTTGAGCATATTCGATCGCGCCACCAGCAAGCGATCCCCGTTTTGGCGATCGAGCCC  
TGCGATGATGCGCAGCAGGGTCTCTTGCCACAGCCCAGGGGCCGAAACAGGCCAGGATCCCCCCCAGC  
TCGAGGGTCAGAGCGCAATCGAGGGTAAAGGAGCCAAACTCGCGCCGGACATGGAGGTTTCAGGGCATGGC  
GGTGGCGCTCGTTCACTGGCGGCATAGTAGCGGACAGGTTTCATCCAAACACTCTCCGCTGTCGGCGCTGC  
AACACACCATAGACCAGCACCAGCATCACCAGCGAGAAGGCCATCAGGCCGCCCGCCAGAATATGGGCGT  
TCTGGTAATCCATCGCCTCCACATGATCAAACAGGGCTATCGAAAGCACTTGGGTCTCGCCGGGTATATT  
GCCGCCAATCATCAGCACCACGCCAAACTCCCCAGGGTGTGGGCAAAGCCCAGCGCCCGCCCATCACA  
AAGCTGGGCAGGGTCATCGGCAAAATGATGTGGAAGAAGCGCTCCAGCGGGCCAGCCCCAGGGTAGCGG  
CAGCCTCCAGCTCCTTGTACCCATGTTGACGAAGCGGAGGTGAGCGGCTGCACTACGAACGGCAGCGA  
ATAGAGGATGGAGGCCAAACAGCAGGCCAAGAAAGCTGAAGGCGAGCGGGGCGCCAAAGGTGTGCGGCCAC  
CAGGCGCCGAAACCATATTCGGGGGAGAAGGCGAGCAGCAGATAAAAACCCAGCACTGTGGGGGGCAACA  
CCAACGGCAGCGCCACCAGCGCCTCCACCAGCGGCCGAGGCGGTTCTGACTGCGCGACAACCACCAGGC  
CAGCGGGCGGAGCCAGCAACAGCAAAAATCGCTGTGGTACTGGCTGCAAGCTTCAGGGTGAGCCAGACCGCC  
AGCAGATCCCCTTCACTCATTGCCGACCTCCCGGTTGATAAATGCCCCAACGGCATGGTATCCATCCTT  
ATTGCAAAGAGTGGCCGACCCGAAGGCCGACCACTCAGGGTATCGCATCAGGCCATCCCCTTATTGGGG  
CAAGGCATAAACCCTGCTTGCCTTGATCTGCGCCTGACCCGGCCCTTGAGCCAGGCGACCAGCGCCTCGACC  
GCGGCGCCTTCTTCAATACCAGCCCCCTGCTGCTGATGGGGGATAGAAGCTCGCAGGCATGCCCAAG  
CTTACCAGCTTGTCCCGCTTCCACCAGATTTGCCCCAGGCGACAAAGCCCAGCTCGGCATTGCCAGTGT  
GACAAATTGCCAGGTCTGGCCGATGTTGGCGCCGGTCAGCAACCGGTACTGCTTGGGATCGATCTTGAGA  
TGGGTGAGGGTAGCCATGGCGGCAGCACCATAGGGAGCTGTGCGGGCATTGGCGATGGCGAGGTTGCCTT  
TCCAGCTACGAGGGTCGCTCGTCAGGGGCCGCCCCCTTCTTCCACAGCCCCAGCTGGCCGATGGC  
GTAGGTGAAGCGATCGTTCCCTTGGCCCTTTTTTCCAGCTTCTCGGGGTCGCCGCATCGGCGGAGAGG  
AAGAGGTGCAACGGTGCGCCGTGACTAATCTGGGTGTAGAGCACCCCGGTGGCGGCAGACGAGATGGCCA  
GGGTGTGGCCGGTCTTGGCGGTAACCTCCTTGCCGATATGCTCTATGGTGCCCTTGAAGTTGGCCGCCAC  
GGCCACTTTCACTTTCATCGGCCTGCACGGCACCAGTATGCAAGGTGGCGGCAGACGCCTGCGATGACA  
ACAGATAACAGCGGTTTCACTTCCCTTTCTCCTGATGGGGCCCGCACATCCGCGCCCTTGGCGGGGCCGT  
GGTTCCCGTTGAACCTGCGCCCTCGTGATGAACAGGTGAGGCTTGGCAGCGGGCAGCGCGGTTGTGTC  
GCTCTCCTTGGCCTCGACCCAGCGTTGCACACCCTCGGCAGTCAGCTCTTTTTTCCAGAAGGTTGCCCGG  
GTTTTCAAGAAATCCATGATGAAGTGACAGGCATCAAAGGCGGGCTCGCGGTGGGCACTGCTCACCGCCA  
CCAGCACGATCTGATCGCCAAGCCACAGCTCGCCGATACGATGAATGAGGGTACACTCCTGCAGCGGCCA  
GCGGCGGGGGCCTCCTGCACGATATCGGCCAGCGCCTTCTCGGTACATACCGGGGTAGTGCTCGAGGGCC  
AGCCCCTTACCTCCTCCCCCTGATTGAAGTGCAGCACCTTGCCAACGAAAGTGACAATGGCGCCACTGT  
CTGGGCGGGTGGCGAGGCGGGCATATTCGTCGCCAGCGAGAAATCCTCCCGCTGGACCAGAATGCGATC  
GGTATGGTTGCCTCGCTCATCCTTAACTCCGGTACCGGTGGGAAGAAGGCCACCTCATCGCCATCAT  
TGATGGGGGTATCGAGAGGCACCAGGGTCTGGTTGACCGCCACCAGCAGTTTGGCCGACTCGAGGGCCAG  
TGCCCACTTGTGCGCCGCTTACAGAGCGACGCGCGCAGCGCTTCGGCGGTGGCATAGTCGCACGGCAGG  
CTCAGCTCATCGCAGGCCACCAGCTCTCTTACTTGCACAAAAACAGTACCTTGATCATGCTTGCTCCCC  
GCTATTTGACCCAGCTGAAAAATGGCCGGACTTGGCCCTTTTTTCTTACCAGCCGCACCTGTTTCGATC  
ACCATGTCCTTTTGCACCGCCTTGACATGTGCTAGATGGTCAGCGCCGCTACCGACGCGGGCGGTACGCG  
CCTCCATCTCGACACCAGTCTTGGCGGAGAGCTTGCAGAGAGTGCGGATATGTACCCGATTCTGCTCGGG  
CAGCGGCACTATCTCCACCTCGACTTTGGTCAAGGCCAGCGGATGGCAGAGTGGGATAAGATCGGAGGTC  
TTCTTGGCGGCCATGATGCCAGCGATGCGGGCGGTGGCGAACACGTCACCCCTTGTGGTGTGTCGCCCTCA  
GGATCAGCGCCAGCGTCTCGGGGGCCATGGCAACAAACGCTCGGCACGGGCTTCGCGCTCGGTACCTG  
CTTGTGCGGTACATCCACCATATGGGCTTCGCCGCTCTGGTTGAGATGCGTCAGGTTGGGCTGGGTCTGC  
TTGGGATCGATCTGGTTTCATCGCTTGTCTCAGAGGTGGGAGACAAAGTTGCACGGCTTGGTGGGGCAT  
CGAGCTGATCGCGGATCAGTTGCTCCAGCCCAGCTGGCAGGCGCCGGTGGAGCCCGGCAGACAGCAGAT  
CAGGGTGGGATTGGCGAGTCCCGCCAGCGCACGGCTCTGCATGGCGGAGCCCTTAATCTCGGCAAAAGAG  
AGCTGACGGAACATCTCGCAAAAACCTGTACGGTGCCTCGAACAGCACACCCGACCGCTTCCGGTACCC  
GGTTCTGTTTCAATGAAACCGGTACCGCGTAAATCAGTACCACCTGCCCCCTCATCGGCGATCCACTC  
GCTCACCCGCGCCCGGATGCGAAACAGGTTGTCCGAGCAGAGCGCCCGATCGGCCAGCTGATGGCCCGC

TCGGTAAGGGCCGAGACCAGATAGTCGCCCCGAGCTGTCATCGGGCGCAGTGC GGCTGTCGGAGACCGTCA  
GCACGGCGATCTTGAGGGGAATAAATGCGTTGTGTTTCTGTCCCATCGGGCAGCTCCTTGTGGCTATGGG  
CCGTCAACGAGGCAGGAAGAGAAGGGGTATGAGAGGCCAGCTGTCAGGGCGCAAAAACCTGACGCAGACAG  
GGGTGACCAACTTGCTCAAGCGTGTGACGGCGGGCTGATTCTATCAAAGGTTTCACGAGATATGGGATTT  
AAAAGACACACAAATCTGATGCTTGTCCCATATATGAACAAAACGCAGGCCGGGTAAACCCGGCCTGTCCG  
TCGCAGGATCAGAACCCTTTACACCCGGTCATGTCGGGCAGTTGGTGAGCAATCCCCCTTGTGACAGTCGA  
TGCAGGTACTTTACCACTGGCCAGATTGGTAGAGTGCATCTTGGCGGCACGCTGCCCCGTCAGGGAGAA  
GTCCATGTACTCGAAGTTGTGGCAGTTGCGGCACTCGCGCAATCGGTCTCTTTTCATCCGCTGCCACTCC  
CGCTCCGCCATCTCGCGTCGGTGGCACTCGAACTTCTCGCGGGTATCCACCTTGCCGGTGATCATGCCCC  
ACAGTCTCTTGAAGCCTGCACCTTGGCGATGATTTTGTAGGTCCACTCATGGGGTACGTGACAATCCGG  
GCAGCTGGCCCCGACGCCAGAGCGGTTGGCGTAGTTGGATGGTATCGCGTACTCCTGTACACGTTGTCC  
TTCATCTCGTGACAGCTGGTACAGAAGGCCCTCGGTGTTGGATGCTTCCATGGCGGTGTTGAAACCACCCC  
AGAAAATCACGCCACCGAAGAAGCCCATCAGCAGGATGACCCAGAGCGCCGCTTCGATGGTGACTTGAA  
GGTGATCCACAGACGCTGGATAAAGCCGGGTAAATTTTCATCTATGGATTCCCTCAGTTCAGCGCTTCAACCG  
GTTTTAAAGGTATTTTCCACCAGCGCTTGGCATCCGCTTGCGGTACATGGCACTGCAGGCAGAAGTAGCG  
ACGCGGCGACACTTACCCAGGGTCAGGCCGTCGCGGGTCTCGAAGTGAGTCGGACTGATCTTGGGAGCC  
TTCATGGCACTGGCATTCTTGAAGCTGTGGCAAGCCAGGCACTTGTGACCTTGGTATCCACCTCGTAGT  
TGCGAATGTCGTGGGGGATCAACGGCGGCTGATGCATGTAAGTGGCGATCGTAGGGCGCGCCATCCTTGGC  
GAAGTTTTTTCAGGGGTGCGGCGGTGGCATCGGTACCAGATCGGTGGCGCCACGCTCGGACTTGAGGCCA  
CCGGTACTGTTGGTGATCTCGGGGGCCGCTGCCATCAAGGATCCCGCCATCAGGCAGGCCAGCATTGCTC  
CAATCAGCTTTTTTTCATTATTTGTTCTCCGACGTTTTTCTGCCTTGACGGCAAAAACCTACAGTGATTTCA  
AAAACCTTGTTCCGCGCAGACATCGATGCAGCGGCCACAGTTGGTACACTCCTGAGCCGCAATCAAGGGCC  
CGTGACCGCGCTTGGCACCGTGAACAGGCCCGCGCAGGATGGGACGCTCCGGGCAGACCAGCATAACAATC  
CATGCAGTTGTTGCACCGCTCGCGCCCCCTTGGCAGAAAATCTTGATAAAATCCGACCCGGTTGACCAGGGCA  
TAGAAGGCCCCCCACCGACAGAGATGACCGCACAGCCCCGCTCAACCACGAAGAGATCGAACAGGAATA  
GCGCCGTCAGCAGGGCCCAGCCCCGCCCCATGCCAAACAGCAGACCACGCATGGCCAGCGACACAGGATT  
GACCAACTCCCAGCCATCACCCCGACACCGCTGGCACCACCAGCACCATGGCCAGCAGCCAGTAGCGG  
GTCGACCGCTGAACCTGGCCATTGCCCTTGAGGCCAAGTGCCCCCCTGAGCCAAGCTGCGGCATCCGCTGA  
TAAGGTTGACCGGACAGACCCAGGAGCAGAACCAGCCCCGACCCAGCCAGTAGCCGCGCCAGCACAAT  
GGCAGCCCCCAGCCAGAGAGTGGTGATGGGCCAGTGACCCGCGCCAGCGACTGCAACAGCGTGAGGGAG  
TCGGTCAGCGGCACCGTCTCCAGCAACAGCGAGCTGGAGAGGTTGCCCTTGAGGATCCAGATACCCGCCA  
ACGGCCCCAGCAAAAACAGCCCCGAGCACGCTGAACTGACTCAGCCGACGCAGCAGCAGGAAGCGGTGGGA  
ACGCCACCAACCCAGCTTGATGCGAGCCTTGCCCCCGGATAACGACTCATAACCCCTCCGGTTTGGCGG  
TGGGCAGGGTGAGTCTGTGCGCGATGAGCGACTTGTTCCCCGCTTGGCCTTCTCTTCCAGCCGAGCCG  
GTAGTGATGACCCAGCTCACCTTTGGCAAGCTGGCGTGGCACCACCTTGATGGCGGCCTCCTCCAGCAGC  
CAGGCATGCTCGCACTTGGCACAGCCGGTGCAGACATCGCTGTGTACCCTGGGCAGGAACATGGCGTGCT  
TGCCGGTACGCTGGTTATGTTGCAGCTCAAGAGTGATCGCCTTGTCAATCAGCGGACAGACCCGATAGCA  
GACATCACAGCGCAGACCCAGATAGTTGAGGCAGGTCTCGTGATCGATGAGCACTGCCACCCCATCCGC  
GCCTGATCGATGTGCGTTCATCTGCTGATCCAGCGCCCCGCTCGGGCAGGCCACCACACAAGGGATGTCAT  
CACACATCTCGCAGGGCACGGCACGCGCCTTGAATAGGGGGTGCCGGTGGTTCACAGGATCAAACAGCCG  
GGCGAGCTTGAGGGTGTGCTAGGGGCACGCCTCGACGCAGAGCCCGCAACGCACGCAGGCGCTGAGGAAG  
TCTGCTTCATCGAGAGCGGCGGGCGGACGCAGCGCTGGGCAGGCACGGCTTGTGCTGCTGGCGGGCCA  
CGCCACCGAGCCCCACGCAAGCAGGCCACACCGCAGGCCCTTGGCCATGTCGGCCAGAAACTGGCG  
ACGACTACGACTCATCTCGCACTCCCCCGCCTTAAGCCTTCATCACCTTGACGGCGCACTTCTTGTAAATC  
GGTCTCTTTTCGAGAGTGGATCGGTGGCGTCCAGGGTCAGCTTGTGACCAACTGGCTCGCATCAAAGAAG  
GGCATGAAGACCAGTCTTTTCGGCGGACGGTTGCGACACCGGTTCTCGACACGGGCTTTCACCTCGCCAC  
GGCGGGAGGAGACAATCACCTCTTACCACGGCGCACGCCGCGAGCCTTGGCATCGTCCGGGTGCATGAA  
GAGCACCGCATCCGGGAAGGCGCGATAAAGCTCGGGCACCCGACGGGTGATGGTGCCGGTGTGCCAGTGC  
TCCAGCACGCGACCGGTGGAGAGCCACAGATCGTACTCTTTATCGGGCGACTCGGGCGGGGCTCGAACG  
GCAGGGCGAAGATGACCGCTTGGCATCGGGCTTGGCATAGAAGCGCACCCCTCGCCCCGCTTTCACATA  
GGGGTGAACCCCTTCGCGATAGCGCCACAGGGTCTCTTTGCCATCTACCACAGGCCAGCGCAGACCCGCG  
GCTTCGTGGTACTGATCGAACGGTGCAGATCGTGACCGTGGCCACGACCGAAGGTGGCGTACTCCTCGA  
ACAACCCCTTTCTGGACGTAGAACCAGAGTGTGCGCTTCGTGTTTCAGCAGCCCTTGTCTGCTCTTT  
CGGGAACCTGGTTGACCTGACCGTTGGCATAGAGCACGTGGAACAGGGTTTTTGGCCTTCACTTCCGGCATC  
TTAGCAATCAGCTCAGCAGGCCACACTTCTCAACCTTGAAGCGCTTGGAGAACTCCATCAGCTGCCACA  
AGTCCGACTTGGCCCCCTTCCGGTGCTTTTCACTGCTGATGCCAGAACTGGGTGCGGCGCTCGGCGTTGCC  
ATAGGCCCCCTCTTTTCCACCCACATGGCTGTGCGGAGGATGAGGTGAGCTGCCCTGGGCAGTGACGGTC  
GGGTACGGATCGGAGACCAGATGAAGTTGCGCGGATCGCGATAGCCAGGCAGGCCATCGGTATTCATGT  
TGGGACCGGCTGCATGTTGTTGTTGCACATCACCCAGTAGGCATTTGAGCTTGGCATCTTTGAGCATGCG  
GTCTTGCAGCACGGCGTGGAAACCCACCTTGTGCGGAATGGTCCCTCTGGCAGTTTCCAGATCTGCTCG  
GCAATGGCGCGGTGCTTGGGCTCGGTACCACCATGTGCGCAGGCAGACGGTGGGCAAAGGTACCCACTT

CACGCGGGTGCCACAGGCAGAGGGCTGGCCGGTCAGTGAGAAAGGACCATTACCCGGCTCGGAGATCTT  
GCCGGTCAGCAGGTGGATGTTGTAGCAGAGGTTGTTGGCCAGACGCCACGGGTATGCTGGTTGAACCC  
ATGGTCCAGTAGGACACCACCTTCTTGTCTCGGGTCGGCATAGAGCTTGGCCAGCTTTTCCAGCTTCTCTT  
TGGAGACGCCGGAGAGCTTGGAGACCGACTCCACATCGTAATCCGCCACGAACTTGGCAAACCTCCTCGAA  
GGTCATCGGAGTGGCATCGCCGCTGTCCGGTTCCTTCGCTTTCTGCTGCAGCGGATCGGTGGGGCGCAGT  
CCGTAACCGATGTGGTGGCCCCCTTCTTGAACACGGTGTGCTTGTGACGAAGTCCCAATTCACCTTGT  
CGTTCTGGATGATGTAGTTGGCGACATAGTTGAGGATCGCCAGATCGGTCTGCGGGGTGAACACCATGCC  
GTTGTCCGCCAGCTCGAAGCTGCGGTGCTCGAAGGTCGAGAGCACGTGCACCTGCACATCCGGGTGGAG  
AGACGGCGATCGGACATCCGCGACCAGAGGATGGGGTGCATCTCGCCATGTTGGAGCCCCACAGCACGA  
ACGCATCGGCCTGCTGCATATCGTCTGATGCAACCCATCGGCTCATCCATACCGAAGGTACGCATGAAGCC  
GACGACCCGACAGGCCATGCAGTGCAGGGCATTGGGGTCAATGTTGTTGGAGCGGAAACCGCCTTCATC  
AGCTTGGCGGGCGGCGTAACCTTCCAGACGGTCCACTGGCCGGAGCCGAACATGCCACGGCGGTTCGGCC  
CCTTCTCTTTAGGGTTCGCTTGAACCTTCTCGCCATGATGTCAAACGCCGATCCCAGCTGATGGGGG  
GAAGTCGCCATCCTTGTGCAACTGGCCGTTCTTCATCCGCAGCATCGGCTGGGTGAGGCGATCCTGGCCA  
TACATGATCTTGGAGAGGAAGTAACCTTGTGATGCAGTTGAGGCCACGGTTGACCGGGCGCATCGGGTTCGC  
CCTGAGTCGCCACGACCCGACCATCCTGAGAGCCACCAGCACGGAGCAGCCGGTACCAGCAGAAGCGGCA  
GGGAGCCTTATCCCAATGGATGGCAGTCTTGTGGTACTGGTGTGAGATTGGCTGCCAGCGTGGGGGCA  
CTGACACCGGCCACGGCAGCGGCAGCTGCCACCGCTTGGCTTCATAAAGTCGCGTCGACTCAGCTTCA  
TGGCATATCCTCACATTGCTTATCGCGTAATAGTTGTGCAATCTGTGCAACGGGAGCCAGCCATCAGCGG  
TAGAGGGCACACCCGGCATCCCATCACTCTTTTTCAGTGACCGCCAGTTTCATCGAACTGGTGGTAAATCA  
GGGCGGCAGAGAGCACACCCGGCATCGCCTGTATCGCATCAATGGCCGCCATGATCGGCCGCTGGCTCGG  
ACCTTCCAGGGTCACGACCAGCTTGCCTTCGTCACTGACGGCGTGGATCTCGGGCCCTTCAAGGGCGCCA  
ATCTGCTCGGCGAGCTGATGGCGCAAAGGGGGCTGGGTGACACCACCAGACTCGATAACATGGAACCTCT  
GATCCATTGTGGCTTCTGTGTACACGGCTTCTGACTCATTCTGACTCCTGCTTGAGGGTGGGCTGATTC  
GCACCACCGGATGGGGCGGCTCGCCCGTGCACCTTGTGCTGCCAACTGGACAATCCTGCACACAGGCGC  
CGCAGCCATTACAGCGATCCGGCTCGACCGTGGGGTGGGCACACGCCCCAGCACCGGAATAAAACGAAT  
GGCATTGGGCTCACAGTGTCTGACAGCGCTGGCAGAACACCTGACCAATTGGCCAGACAGTGTGGCCCTCG  
ACATGGGCTTGTAGTGCACAGGGGACTCGCTGGTCGGGGGAAACACAGGGCGCTTGCAGACCTGGCGC  
ACTCGGTGCAGAAGGTGCATTCGCCACGCTGGAATCGACCACCGGAAAACCGCCCTCGCCATTCACCAG  
GATCTGCTCCGGACAGGCCGCCAGACACTCCCCGACGGGTGCAGTCCGGCGACAAATGCCACCAGTTG  
ACTGACCAGGGCAACTGCACCGGGCTTCGGCAGTTCTCAGCCGCCCCGGAACAGGCGCGGGCGGGCAA  
GATCGATCTCATCCGGCATGTTGACTCCTGTTCTGGTGAAAAAGGGGACAGTGCAGTCCATGATTGGCA  
TTCTTGATAACCAATTATAAGAGTGGGTGTATATTGGCGCCCTGACAAGGTAAGGGATATACCACCAGGGA  
GATAAACAGGGGGGATTATTGCGCCAGATCAAAGCCTTGCAGCGCAATAAAAAAGGAGGTATCGGTTAAA  
ATACCTCCATGTGAGGATTGCTATTTAATCGTTGGCGATTTTTTTCGGTTATCCGCCGATCGAGGCGAGA  
TGAGGGGTGATGCCGGCATTGCCCTCATGAAGACGATGGGTGGCACTCTTGGCCGAGTGCAGCGCGAA  
TGCGCTGTTGCAGCTCATCAGATTGTGCATCTGCGCCGAGCAGATCCCGCAGGTCGATACCGTTGTGCC  
AAACAGGCACAGATGCAGCTTCCCCAGCGAGGAGACCCGACCGGTTGCAACCGGCACAGAAATCCTTG  
CTGTAGGGCATGATGAGCCCCACCCACCTTGCGAATCGGGGTGCATAAAGACCTGCGCCGGACCGTCAT  
CCGTGCCCCGCAACTGCTGCACCCAGCCGCTCTCCAGCAAGCGCAGTTTGATCTGTTTCGCCGCTGACATG  
GTGGTCACGAAACAGGGTATCCATCTCGCCGGTTCGCATCAGCTCGATAAAGCGCAGCTCGATAGGCTTG  
TGCCTGATCCAGCCAGAAAGGCATCGAGCTGGTAGTTCGTTGAGCCCCCTGAGCAGCACCGCATTGATCT  
TCACCGATTTGAAACCGGCGGCCAGTGTGCTTCGATCCCTCCATCACTTCGGCCAGCTTGTTCGCGC  
GGTGTCTGGTGAACCTGGCGCGGGTTCGAGACTGTGCACACTGACATTCAGCGCGTTGAGTCCAGCATCA  
AACCCTCCTGGGCCCCGCTCTTTGAGGCGATAGCCGTTGGTGGTTCATGGCGACCTTCTCGATACCCGGG  
TGGTGGCAATCACCTTGACGATCTCGGTGAAATCGCGCGCAGGGAGGGCTCGCCCCCGTATGCGCAC  
CTTGCGGGTGCCATGGCGGCAAAACCGCTGACCACGGCGGATCTCGTCAATCGAGAGAAAGGTTGA  
CGCCCCGCTTTGTGACTTTCCGGGGGGCGATAGCCGTCAGGCAAGCAATAGGTGCAACGGAAATTACACA  
CATCGGTCACTGACAGACGCAAAATAGTAAAAACGACGGGAAAAAACCATCTTCAAGTGGCAACATAAACAC  
CTTTCCAAATACGGGAGGCCAGGGCATTCTTTTCTGACCCTTACAGCTCGAACGTCGGCTGACGGCTGG  
TTTCCCCCTATCGCTAGGACTTAGGCAAAACCGCTCGGAGTTCACTAGTTTTTCGATGCTAACACAAGT  
TGGAGTACACTCCCACGCATCTTGGGGGCTCTTACTACTATTCAGAGGTGCGCATCAGTATGGGAAAC  
GGTTCAGGGTCCATTCCGTGAGCAGTGCATTTGGCCGCGCATGGTGTGATCCTCTTCATGGCCAGCCT  
GATCGCGCTGGTTCGCATGGTACCCTCTTCTACTCGGTACCCGATGCCAAGGCGATCAACCTCTCCGGT  
TCGCTGCGGATGCAGGCCTACCGGATGGCCTACGAAATCGAGCGGGGCGACAGCGTGTGGGGCGCCTCT  
CCCAGTTTTGAAGAGACCTGCACGCCGAAGAGCTGCAGGAGACCCAGCGCTGGATCACTCCTGCCTCCCT  
GCGTGCACCTATGGCGAGGTGCTCGGCCAGTGGCAGGTAATGCGCCAGCACATCGAGGATCGCACCCCC  
AGACGCTACACCGATAACACCGAGCAGTTTTGTGGCGGCCATCGACAATTTTCGTCAATCAGATGCAGTACC  
ACGTGGAATTCAGGTGAGGATGCTGGCACTGGCGGAGGGGCTTGGCTGCTGGCCATCATCACCATCGC  
CTGGTTCACGGTGCCTTACCCGCCAGCAGGTGGTTCGCCCCCTCAACCAGCTGGTCTACTGTGCCCGC  
CAGATCCAGCGGCAGGATTTGATCTTAAGCTGCCCGCCACGGCGAAAACGAGCTGGGGGAGCTGTCCG

CGCCTTCGTACCATGGCGGACGAGCTGGGCAAGCTCTATCGGGAGCTGGAAAAAAGGTGGAAGAGAA  
AACTGCCAAGCTGCAACAGGCCAATGACACCCCTCTCGTTTCTCTACTCGACCGCCAGAAAGCTGCACGCC  
GCCCCGCTCAGCACCCGACCCCTCATCAAAGCTGCTGGACCGCGAGCCGCCACCAGCATATCGACCACA  
TCCGGCTGACCCGCTTCGAGCACAACGCCATGCCGGTCTACATCTCGGGGCGTACCGGCTGGCCCCGGCA  
TCTCGATGCGGTTCGCCAGCTTCTATCTGCAGATGGATGAGCAGGAGTTCGGCCGCCCTCGACATCATCAGC  
CAGCACCCCATCGACGAGCGGTTGATCAAAAACTTACCATGCTGCTGGCCCCAGGTGCTGCACAAAGACC  
AGACCCTGCTGCAACAGCAGCGACTGCTGCTGATGGAGGAGCGGGCGGTGATCGCCCCGGGAGCTGCACGA  
CTCGCTGGCGCAGGCCCTCTCCTATCTCAAGATCCAGTCCACCCTGCTCAAGCGCTCTTACGCCAAGGGG  
CAGCATGACAAGGCGCAGGAGGCGATGCAGCAGATCGACGAGGGGCTTAGCAATGCCTATAACCCAGTTGC  
GCGAATGCTCGGTACCTTCCGCTCACCATTTGGCGATGCCAATCTGGGGGAAGCGATCCGCGTATGCT  
TGATCAACTGCAGCCTCAGACCCAGGCCGAAATCCGGTTCATTACGACTGGCCGACAACGACCTGGAG  
GCGGGCCAGCATATCCACATTTTGCAGTTGATCCGTGAGGCAGTGTCAATGCCATCAAACATGCCAACG  
CGCAAGTGATTGATGTTAGCTGTGAGACCCTCGCCAGTGGTAACATTGAGGTTTACAGATTTTACAGATGACGG  
TGTCGGGATCGGACTCGCCAGCTCGGCGATCAACCATTACGGGTTGAGCATCATGAACGAGCGCGCCAGC  
AAACTGCACGGTCTGCTGACCATCAACGAGCAGCAACCACAAGGCACCTGCGTGCATCTGACCTTTCCCA  
CCAGTCTAGCGAGAGACGCTGATGGACGAGATGAAATACACAGTTCTGGTCGTAGATGACCATCCCCCTC  
ATGCGCAAAGGGATTGTGCAGTTGCTGGCTCTGGAAGAGAACATGGAGGTGACCGGTGAAGCCTCCAACG  
GCACAGATGCCGTGGCGCTGGCCAAAGAATCAGAGCCGGACCTGATCCTGCTCGACCTCAATATGAAGGG  
GCTCTCCGGCCTCGATAACCTCAAGGCGCTGCGGGCCGAAGAGATCACCTCCCGGGTGGTGCATCCTCACC  
GTCTCCGATGCCCGTCAAGGATGTGGTGGCTTTGCTCAAGGCCGTGCCGACGGTACCTGCTCAAGGACA  
CCGAGCCTGATCTGCTGCTGGCCCAGTTGGCCGACGTGATGACCGGCAAGCAGATCCTGAGCGAACCGCT  
GCGCCCCCTATCTCGAAAACATCTACGAGCTGGATCACCTGCAGCAGAACTGGAAAGCTTAAACGCGTCGC  
GAAATGCAAAATCCTGCGCGAAATTTGCAAAAAGGCCCTCTCCAACAAAACAGGTCCGCTCGGTACTCCATATCT  
CCGAGGGAAACGGTCAAGGTTACAGTGAAGAGCCTGCTGAAGAAAACCTCGAGGCGCAAAGCCGCGTGAAGC  
GGCTGTATGTATCTGGAGCAGCGCAACTAAGCGCCCTCAACCGCCGAAAAGCCACCCTCCGGTGGCTT  
TTTTATTCTCTGGCACAGTCGCTGCATTGTATATTCAGCAACTACTCAATGGAGGATGGAACATGAAA  
CTACAACCTTTGGCACTGTTCCCTTGCCTTCCACATACTGCCGGGCGGCAAGCTTCCCTCTGCGTCTGT  
TCGAGCCACCCACCTCGAGATGCTCAAGGAGTCAATCATCAACGATCAGGGCTTTGGCATGCTGATGGA  
AGAGTCGACCCCTCGGGCAAAATCCGGCCGATTTGCCGGTGGGCACCCGGTCAAGGTGACTGACTTTC  
TACACCCTTAATGATGGCCTGCTGAGTGTGACGGTGTGGGACTGGAGCGCTTCTGTATCCACGAGATGG  
AAACAGACGAGATGGGCTGCGCCGGGCCAAGGTGGAGATGCTGCCCAACTGGCCGAGCACCCACTCAGA  
TTTTAACGACAAGCTGCTGGTCAATCGCCTGCGGGAAAGTGTTCGAGCAGTATCCGGAGCTTGATGAGCTC  
TATCCGGACAAGCGCTTTGAAGATGCCGCTGGCTCTGCCAACGCTGGCTCGAGATATTGCCGATGCCGA  
TTTTATGAAAAGCAGATGCTGATTGCCAAAACAAAACAGCGAAGCGCCCGTAAATTTCTGCATCGCCTGAT  
TTCACAATGACAAAAACAGCGTTGCAAAAATGCAATTTATTCACAACATGAAAATGTGAAATTCGCATTTTG  
CGAGTAAGTAGGAACGCAAAAACACCATAACAAGAGAGAGCCGCTGCGCTAAACGGCCAAAATTTGAACACA  
AAAGAGTCCCTAAAAAGTTGGCACAGATTTTTTATATAGATTGATACAACCCGATTTTATCCCGTGTCTC  
TTCAGTATTTGCTGAAGAACTGGTCAACCCACAAAGTTGACCATTTTTTTTTATCCGCGCGTCCGGCAACCG  
CTGACCAAAGTGACGCTGCAAACTCTCTCAACCGTGACAAGGTGATAGGCTTGGCGAGAAAGTCATCC  
ATCCCTGCGCCAGACAGCAGGCTTGTCTCCGCCATCGCATTTGGCTGTCAGGGCGACGATAGGCATGG  
TGCATCCCAACTCACGCAAGCGCCGGGTGGCTTCCAGTCCATCCATCAGGGGCAATCCGCATATCCATCAG  
GATCAGATCCGGGAGCTGCTCATCCACCTGCGCCAGCGCTCCAGACCATTTGGCAGCCAACCGTACCTTG  
CCCACAGTTTTTTGAGCATCAGCGACACCACCAACTGGTTTACCAGGGCTGTCTCCACCACCAGCACAT  
CCAGTGGCAGCAGTCCGAAGCCCTCTCCTCCCGCTGCGGTTGGCTATGACAAGGCAGCGCCATGCCGGG  
CAGTTCGAACCCAGAAACAGCTTCCCTTGGCCGCTGCTCTTCAAGTGGATCTCCCCCCCCATAAGCAAC  
ACCAGACGCTTGCTGATGGCAAGACCCGAGCCGTTACCGGAAAAACGCGGGTGGCCGAGTTGTGACACT  
GGGAGAAGGGTTCAAACAGCAGCGCCTGATCCGCATCGGCGATCCCGATCCCGGTGTCGGAGACCCGAGAT  
CAGCAGCTTCTCATCTGCCAACCCAGGTGCAGTGTCACTGCCCTGCTCGGTAAATTTGAGGGCGTTG  
TCCAGCAGATTGCCCATCACCTGCGACAGACGCATCGGATCCCCCTGCAACTCCCGGGGGACCGACTCAT  
CGACCCGATAAACAGCGGATCCCTTGGCGGTGCGCGAGCTTGACGCGGCTCGACCAGAGATTGGCA  
AAGCTGGACGGGTTGCAGGGTCTCGCAGTGAACACCCAGGGTTTGCAGCTCGATTTTCGAAAAATCGAGC  
ACGTCGTGATGATGGTTTGCAGCAATCTGGCCGAGTGGGTGGCATGGCGCAGCAGGCTCTGTTGCTCCG  
GCGCCAGCTCGGCATGCTGCACCAGATCGAGCATCCCCAACCCGATTCATGGGCGAGCGGATCTCGTG  
GGTCATCATGGCCAGAACTGGGACTTGGCACGGTTGGCCGCTTCGGCTCATCCCGTGCCTCGCCGCGCCAGC  
TCCTCTTCCCTACGGATCTGGTTGCTGATATCCCGGGCAGTGCCGCGATAACCAATAAACAGGCCATCAT  
GGTCAAAGCAGGGCTCGGCGCTCACCTCCATCCAGCAGGGGCCGTGTTGCAGCGCAACCTGCATCCGCAC  
CCCTCGCACCGGCTGGCGCAGCGCCAAAAGCTGCAGATATTTCTGGGCATCGCAGCTCTGCTTGTGTCAG  
ACGTAGTCATAGAGGGTGGCCGGGTCGCTGCGGGGTCATCTCATCCAGATAACCCGGCTCTGAGGCGT  
AACTAAGGCGATGCTCGGCATCTGTCTCCAGAACAGTCCGAAGCCATAGCGGGCAAGCTGCGAAAACG  
GCGTTGCTGGCCTGCAGCGCTTCGGTTTTTACCAGCAGCTGCTCCTGCAAGCGGGCCGATAGGTGATG  
TTGACCAGCGCTTGGGCGATAAGCGGACGGCAACGCTCCATGGCGGCTTGTGGTGGATCGAAGGTGC

CCGCCCCGAGCGTGGCGGCAGATGAGGGTGGCGGTAAAAACGGGGGCCTGCAGCCCGGTCAGCATCACGCT  
GGCCCAGCCCCGGCTCGCTCGCCAACGGCGCCAGCTCGGGCAGCTGGGCGGGATCGTAAATCACCAGGGTT  
TCACCCGAGATGGCGCGGGCAAATGCCGGGGTTCATGCGCCAGTTGCGGGCAGAGAGCATCGGCTCGGTAC  
TGAGGTGGGTACTTCCCTGCTCCCCCTCCCAGGCCACCACATCCGCGTGCTCAAAGCCGATAAAGGGTTT  
GAGCACCTGGATAAAGGCTCTCCAGCACCTGCTCCAGCGTCTTGGCATCGGGCAGGGTGGCAACCCCCCCC  
AGCAGAGTCTGGGACTCGTGACGATACTTGGCCTCGCGCTCGCGGCAACGCATCAGATCGACCAGCGTGG  
TCTGCAATTTGTGCGCCGAGGGCTTCCAGTTCAGTGTGCGCAATCATCTTGTGCTGCTCTGTTATGTTT  
TGCCGACTCAACGGGTGAGGAAAATCACGCTCGATAACATCAGGTTGCCGTGGGCCAGCTCGCCATTGGG  
CAGCCGCCCCCTGCTCGCCGAAGGTAAAGGGGGTGATAAAGGGGATCTTGGCGAGGCGAGCCTGGCTCTGC  
TCGACAAAATTGGCACAACATATCACCTAGCGCCAAACGGCAACCAGCACAAAAGATGATGAGCGCGCCGA  
TAGGCTGCAATTCACGTCACCCCATACCCCTGGCTCGATACGTCATGGCATTGAGGCTGCGCTGCAACAA  
CCCTTCCGACTGCTGTACATCAACAGCAGACGCTCCCCCTGACACCACATCGGTAAAGAGCCGACGCCCG  
CCCTGTTTCGGTACAGCTTCCGGATGGGAGAGTGTGTAGTAAGGAATGCCATCCAGTGCTCCACCTGAC  
GAGCCAGCGGGGTGAGCGTGGTCTCACGCAAAAATAGCCCCACCAGGCGAGGGTGTCTCGCGCCCGCACCA  
GCGGGCATAGACCTCGGGCGGAGGCTGGTGATCGATGGTGAGTACCTCCCGCCCGTTGCAGGCTGTGATC  
TCGCCGCTGAATTCGGCAGGCACATAGCCCGAGTGAAACTGAAAAGCGAGCTGGCAATCAGGATAGAGCA  
CCGCCAGACCGATGCCATCCTGAGCCACCGCTCATCCAGCAGAGCTGCCAGTACCAGTACACTGCT  
ATCAGCCGCGGATCCACCAGCACCGGCACCGAGGTACCAAGTTCGGCCTCGATAACGGCCAGCAGCCCC  
TCCTCCTTGGCAGGACTGGCGTGAAACAGGATCAGCTGGGGCAGCTCACCTGGCCGACCACAGTGCCTCA  
TGGCTCGGGCGCAGCAACTGTGCGACATCCACCCCGTACCAGTGGTCCGGCCACCCGAATGCTCCTTT  
CTCGTGTACAGGGCAGCAACCGCCAGCCCATATCCGCTCTCGGGCGTGGTGTCCCATCTCGTTCATGACG  
CCACCGCAAGAGCTGCAACCCAAACAGACGGGTGCTCGGGAACTGGCGTTTGAGCGCGTTCGCGCAGTATCG  
CCCCCTCATGGGCTTGGGTAAAAATAGAGTAAACAGCAGGGAGGGGGCCTGATCGGCATGGTGGCGCAGCTG  
CGCGCAGATATCTTGGGCCGCCAGCGATGAATTTCTGGGCGAGGGAGTGAACGGTCAGAAAATTC AACACC  
ATCTCCTTGTTTTATCGAATGGCAGCCTCAAGCAAAAATCATACTTTATCAAACAATTTATCTCGTTCA  
CTTGCTAACATAGCGGTCAACTGAGACCAATGACAGGACGCCATATGTGGCAAAAAAACATCAATGACT  
TCGATCGGGTTCGTTGCCATCGGTGGTGGCCACGGCATGGGACGAGTGTCTTCGTCCTCTCGTTTCTCGG  
TCAACGGCTCACCCGCATCGTACCACACAGATGATGGCGGCTCGACTGGACGCTCGGCAAGAGTCAAG  
GAGTGCATCGCTGGGGCGATCTGCGCAACTGCCTGAACAGCTGGTGACCGATCCCGATCCGTCAGGACCC  
TGTTGTTTCGAGTACCGCTTCCCGGCAAGGGCAGCTGGCGGGCCACAACCTTGGCAACCTGATGCTGCT  
GGCGCTCGATAATCTCTGTGTCCGTCTCTTGATGCTATCAAGCTGATCAGTGACATGCTCAAAAATCGAG  
TCACAATTGCTACCCATGTCTGAATTTCCCACCGATCTCTGCGCCCATATGGAGTGTGGCACCCAGATCC  
TGGGAGAGGTATCCATCGATCAACTGGCAACACCGCCCTATCCCTCGGCCTGATGCCGGAGGTGCAAGC  
GACCCGGGAAGCGGTGCTGGCACTGCAGCAGGCGGACATGATCATTTCTGGGGCCGGGCAGTTTTCTCACT  
TCCATCATGCCACCACTGCTGCTGGCCGAGATCGCCAGGCCATCAACGAGAGCAGCGCCATGCTGGTTTT  
TCGTCTGCAATCTGGTGGCGGAAAACGGCCCTGCCAGTCACTGGATCTGATGAGTCACTGCTGCTGGCT  
GGAATCCCGGGTTCGGTTCAGGGTTCGGCTGGATGCCATCCTGGCCCCACAAGGCGGGGTGATGCGGGGGAC  
TGGCAAGGGCGAGTGTCAAAGCCGAGCTGGGCGAGCTTGAGCTGCCCATCGGCACGATCGGTTGAAGC  
TGAAACTGGCGCTGGACCGGATCATCCAGCAACTGCTCAACCAGCGTTAGGCAACGGTCACGGCGCCCCG  
GCATCCCTGCATAGCGCCCGCTTACTGATAATCGGCAAGAAAACGCCAGCACCCGGGGCAAGGAGGCCTC  
CAGCAGTTGCAACTGGCGCTCTGCCTCGGCCACATCGGCCTGCTTGCTGGCCATCTCCAGCGCCATCACC  
TGCTGATAACTCGGCATGGCGCCATAGCTGCCACAGGATGATTTTATGCTGTGCGCTACCCGAGCCAACG  
CCTCCCCTCCCTGCTCATAGAGGGGTCTGAGCTGACTCAGCTGCTCGCCACCTCTTCAATAAAGAC  
TGCGATGACCACGGGACAGATATCCGGACCGATATCCTCTGCCAGCTGCAGCAACACCTTGGCATCCACC  
CACTCCATCGGAGGCTCCTCCTGAACGGTATTCAAACAGACCATACTATAGATAGTTTTTCGATGTCGTGG  
CTCACGACCAGGACAGTGTGAAGCACCCGATTGGATGGCTCAGGGAATAAAGTGGCAAAAAAATGTGATCA  
GTATCGAAAATAGCGATGCTGAAAACACCCGTCAGGACAACAACCTGATGCCACAAAATTAACAATTGATCA  
AACAATCAATGCCGTGAGAGTGTGATGCTCAGCAACACCTCTCATCCCTTTTGCCTTTTATGGCTGCTGC  
GAAGAACCAGGGTAGGTATCTACCCTGGTATTTTTTTTATCTTGTCAAGCGCAACCCGATTGGTTCGCCAC  
CCGCTCCCCATGCGAAAACAGATTGAATTCGCGGGGCGCCATTTTGACCCAAATTCATTTGCCGGTTCAGC  
GGACGGGTGGTGATCAGGGTACCACATCGTTGGGGTGGTCTCCCTTTGAAAGTCGATCACCACCTCCT  
CATCCAGCAGGCTCGCCTCGCCAAAGGGCGCACAGCGGGTACGCCAGTGCAGGTTGTTGCTGCAGTAGCT  
CATCACATACTCCCCGTCGAGAGCAGCATGTTGAACACTCCGAACGCTCTGAGCTCGTCACACAGGGTA  
GCGAGATAGCGAAAACATGGCGGGAAAGTTGGCCGGACGCTTGGGATATTTTTGCTCCAGCCTGTGAGCA  
GCCAGCAGAAGGCGTGTTCGCTGTGCGGTATCCCCACCAGGCGGGTGGCGGGCGGTGGGCAGCTTCTTGTA  
GCCGGTGTGAGTACCGTTGTGGGCGAAGGTCCAGTAACGGCCCCACAGCTCACGGGTAAAGGGGTGGGTA  
TTTTCCAGTGACACGCAGCCACGGTTGGCCTGCCGAATGTGGCTGACCACGGCGCAGCTCTTGATGGGCA  
GCGCCTGTACCAGTCTGGCGATGGGAGATTGGGCACTGGGCTCGGGATCCTTGAAGGTGCGAAAAGCCCTT  
CCCTTTCGTA AAAAGGTGATCCCCAGCCATCCTTGTGGGGCCCGGCTTGGCGCCGCGCAGCATCAACCCG  
GTAAAGCTGAAGCAGATATCGGTGCGCACATTGGCACTCATGCCAGCAGTTTCGCACATATCCGGCAGAC  
TCCTTTTCATGATTTGGCTTGTGTTCATGTTTCGACAGCACGCTGGTTCGACAGACAGCAGGGGAAGGCGCA

ATCCCTTCCCCTGTGACTGGCAACAACCGGCAGATGGCGAACCATGCTACCGGGCGCAGCCCTAGTCTGGT  
GACGATGGCCTGATTACTTGGCCATCTCTTTTTTCGACCAGCTGGATCAGGATGTGGATCACCTTGATGTG  
CACTTCCCTGAATACGGTCCGCATAGCCAAAGTGCGGCAGCGGATCTCGACATCCGCCAGACCCGCCATC  
TTGCCGCCATCCTTGCCGGTCAGGGCGATCACTTTCATGCCTTTGGCGCGGGCAGCCTCGATGGCTTTCA  
GGATATTGCCGGAGTTGCCGCTGGTGGAGATGCCGAGCAACACGTCGCCACGGCGGGCCGACCCTTCTAC  
GTAGCGGGAGAAGACATAGTCATAGCCAAAGTCGTTGGAGACGCAGGAGAGGTGGCTCGGATCGGAGATG  
GCGATACCGGCATAACCCGGGCGGTTCTCGCGGTAACGACCGGTCAGCTCTTCGGCGAAGTGCATGGCGT  
CACAGTGGGAGCCACCGTTGCCACAGGAGAGCACCTTGCCCTCTTCTTTGAAAGAGTCGGCCAGCAGTTT  
GGCGGGCGCTTCGATGTTTTTTCAGGTTCTGCTCATCAGCCAGGAAGGCTGCAGCACGCTGGCAGCTTCG  
GTCAGTTTACTTGGCGGATCAATCTTGGTACATGATGTCTCTTCCACTGTTTTTAGTGTGCGTGTAGATCG  
CGGCTATTCTCGCACAGCGAATCGCACAGTCGCCCCCTCGGAGCCACAGCGCTGGCGGGCGGTGAGCG  
TTATGGGGATCACAGAGAGAAGGTAATGAAGATGTAACAGCTTGATAACTTTGTGCGTATGAATTACAA  
CAGGGGTCATAACCAACAGGTCAGACCTCTGGATCAGTTACGCCACGTTGGCAATCTTTCACGCAAGGAG  
CAAGCAATGACGACGACCCTCACTCTGCTCGGGGTGATCCTGGTTATCGGAGCCCTGGCCTATCGCCGGG  
CATCCCTGTTTATCTCCACCCTGGTCACCGGCGCCGCGCTGGTGCTTGGCGCCATCTATGGTCATGTGCC  
CTTGCTGGTATGGGCGCTGTTTCGCGGTGATCGCCATCCCGCTCAATCTGGTGGAAATTTTCGCCGCAATCAA  
ATAACCAAGCCGCTGTTCAAGATCTACAAATCGATCATGCCGGAGATGTCCCGCACCAGAAAGAGGGCGA  
TTGAAGCGGGCACCACCTGGTGGGAAGCCGATCTGTTTCGCGGGCAACCCGGACTGGAAAAAGCTGCACGC  
CATTCCGGTACGACCCCTCTCTGCCGAAGAGCAGGCCTTTATGGATGGTCCGGTCGAGGAAGTGTGCCGC  
ATGGTGAGCGACTGGGAAGTGACCCACGAGCGCGCGGATCTCTCCCCGAGGTGTGGCAATACCTGAAGG  
ACAACAAGTTCTTCGCCATGATCATCAAGAAGAAATATGGCGGTCTGGAGTTCGCGCCTACGCCAGTC  
CTGTGTCTTGCAAAAGCTGTGCGGTGCCAGCGCCGTGCTCGCCTCCACCCTCGGGGTACCCAACTCGCTG  
GGCCCGGGCGAACTGCTGCAGCACTATGGCACTGACGAGCAGAAGGATTACTACCTGCCCGCCTAGCGG  
TAGGCAAGAGATCCCCTGCTTCGCCCTGACCAGCCCGGAGGCAGGTTTCGGACGCGAGGTTCCATCCCCGA  
CTTCGGTATCGTCTGCAAGGGCGAGTGGGAAGGCAAGAGGTGCTCGGTATGCGCCTCACCTGGAACAAG  
CGCTACATCACGCTCGCCCTATTGCTACCGTGTGGGTCTCGCCTTCAAACCTGCGTGATCCAGAACACC  
TGCTGGGCGCAAGAGGAAGAGCTCGGCATCACCTGCGCGCTGATCCCCACTCACATCAAGGGTGTCCGGCAT  
TGGCCGTCGCGCATTTCCGCTCAACGTCGCCGTTCGCAAAACGGCCCGACCCAGGGCAAGGATGTGTTCTGT  
CCGCTCGATTTTATCATCGGTGGCCCGCCGCGCTGCCCCGCTCAGGGCTGGCGCATGCTGGTCTGATCTGT  
CAGTCGGTTCGCGCATCACATTGCCCTCCAACAGCAGGTGGTGTCAAGATGCTGGCCTGGCGAGCGG  
CGCTTATAGCCGCATCCGTCGCCAGTTCAAGCTGCCTATCGGCAAGATGGAAGGGATTGAAGAGCCGCTG  
GCCCGCATCGGTGGCAACGCCTACATCATGGGCGCCGAGCCAACTGACCCTGACCCTGACCGGTATCGACCTTG  
GCGAGAAACCTTCGGTTCATCTCCGCCATCGTCAAATACCACTCACCGATCGTGCCAGAAATGCATCAT  
CGATGCCATGGACATCCACGGTGGCAAGGCCATCTGCATGGGCCCCAACAACTATCTGGCCCGCGGCTAT  
CAGGGTGGCCCCATCGCCGTTACGGTGGAAAGGGGCAACATCCTGACCCGCAGCATGATCATCTATGGTC  
AGGGCGCTATCCGCTGCCACCCGATGTACTGCCGAGATGTGGCCGCCAGCCACCCGACATGGAGCA  
GGCGCTGAAAGATTTTCGACAAGGCAGTATTCAGCCACGTCGGCTTTGCCATCAGCAACCTGGTACGCAGC  
TTCTGGCTCGGTATCACCGGCGCCCGCTTTGCCGCGCCCCCTTACAAGGATCAGACCAAGGGCTACTACC  
AGCAACTCTCCCGCCTCTCGGCCAACCTAGCGTTCTGTGTCAGACATGGCGATGGGCACCCCTGGGTGGCGA  
GCTCAAGCGCAAGGAGCGGGTCTCCGCCCGCTTGGCGACGTGCTGAGCCAGCTCTATCTGGCCTCCAGC  
GCCCTCAAGCGCTATCAGGACGAGGGACGCCAGCAGGCCGACCTGCCGCTGCTGCACTGGGCACTGCAAG  
ATGCCATGTTCAAGGCACAAGAGGGGATCGACGAGCTGCTGCGCAACTTCCCGAACCGCTGGATTGGGCT  
TGCCCTGCGCGCCGTGGTGTGCGGCTGGGTGCTGACCTGAACCGTCCGTGCGACAAGCTGGATCAACAG  
GTTGCCCGTCTGCTGCAAAACCCGAGCGAGACCCGAGTCGCTGGCCAAGGGGCGATCTGACCCGCG  
AAGAGGGTAACCCCTTCGGTCTGCTGGAGCAGGCGCTCGATGACGTAAGTGGCCGCCGAGCCGCTGTTTCA  
GAAAGTCTGCAAGAGCGATGGTATCAAGCGCCCTTTCATGGCACTGGACAAGATGGCCGACATTTGGCCTG  
GCCGCTGGCGTACTGGCCAGAGCGAAGCCGAGCTGCTGCGCCGCGCGAGGTAAGTGCCTGCGCACCA  
TCAACGTCGATGATTTTGAACCCATCGATCTGGTGGCCAACAAGAAGCTGTTTGAAGCCTCCGCTTACCA  
TCACGCGCCCTGATAACCAGCTATCGACAACGCCTCCCTTGTGGAGGCGTTTTTTTATGGGCGCTCACCAC  
TATTCACGGCCCTCACAGCCACCCTCGCACGCACAGCTCCCCGACCAGCTGCAGGCCCGGTGTGGTCA  
GCCGGGAAAAAAGGCACAATAGTCGACAAATCGAATCACCAAGGAAGCCAAGATGACCCCTGAGCACCTG  
ATCCTGTGGCGCCGCGACCTGCACCGCTGCCGGAAGCCGCTGGAAAAGAGTTTCGCACCACCAGCCTGA  
TTGCCACACCCTGAGCGAGCTCGGTTATCGCATCGTGTGCTCGGCGACAAGCTGCTGGCCAGCAATCTGAT  
GATGGGCGGTGATGTGGATGTGGCGGCCGAGAAGGCTCGCGCCCGGCTCAGGGAGCCATCCCGACTGG  
CTGGAGCGGATCGGCGATGTCACTGGCCTGATGGGAGAGCTGGATACCGGCCCTCCCGTCCGACCCTGG  
CCTTTTCGCTTCGATATCGACGCGGTGGAGGTGGAAGAGTCCGATGCTGAACAACACCAACCGCAGCAGGA  
GGGTTTTGCTCCCAACAAGGGGTGGATGCACGCCTGCGCTCACGATGGCCACACCGCCATCGGCATG  
GGGCTGGCCAGCAGCCTGATGGCGATCAAGGAGCAGCTGTGCGGTGCGATCAAGCTCTTCTTCCAACCCG  
CCGAAGAGGGGTGTGCGGTTGGCAAGGCGCTGGCAGCCGCTGCATGGCCACCACCGCTATGCTCGGCAT  
TCCCCGCCACCGCGACGGCATGACCCGCATCAACGTGCGCCAGCTTTCAGCTGGCAGCGGCCGCAACGTC  
ATCCCCGATCATGCCGAGCTGCGCGGTGAGACCCGCGCGCCGACAGCGCGCTCAACGACTACATGTTCA



GTCAGGTACAGCGCATCGTCTGAAGGTACCGCCCTCGCCACGGCGTCACCTACCGCATCATCAAGCAGGG  
CGAGGCCATTGCCCTCGACAACAGCCCGGCCCTGCAGGCCGAGCTGGCGGCGCTGGCCCGCAAACAGGGG  
CTCGCCACCATCCAGACTCGCCGCTTTGGCGCCAGCGAAGATGCCGTTTTCTGATGGAGCGGGTGCAAA  
AGCAGGGGGGGCGAAGCGGCTTACCTGATCCTGGGGGCCGATCTGGCGGCGCCGCCACCATCACAACGAATT  
CGATTTTCGATGAGCGGGTGATGCAAAGCGGGGTAGAGCTGCTGGTCGCCTGGGCCCCGTGCCCGACTGGGT  
TTGGTAGAAGCAACCCTCTCTTGATATCCCCCTCGGCCAGCTCACCGGTTAACGGGATCAAAAAAGGCGC  
CTCGGCGCCTTTTTTCTGCAAGAAAAACCTGACCGCTACTCGCGGAGCTTGCATGACATCGGGGCGGC  
CACCGGTACAGCTATCGGCTCTCCCTCCTCTTTGGCCTTCTCGGCCCGCTTTTTGCGCATCTCGCGGGG  
ATCGGCGATGAGCGGGCGGTAGATCTCGATACGATCGCCGTCGTGCAGCGGCTCGTCCCTTTCACTGGG  
CGGCTGTAGATGCCGAACCTGTTGACCGACAAGTCAATCTCGGGGTGCTTTTGCACGATGCCGGACTGCT  
CGATGGCCGCTGCACGCAAGTCTCGGGCGCCACCCGACGGCAATCACCGTCTGCTGTGCGGCAAGGC  
ATAGACAACCTCGATATTGAGCTGGTCAGACACCCGTATAACCTCCTTCGCCCGGTTGGAGAAGGCGGAGAC  
CATGGAGCTCACCAGGTGCGGGAACACCTGACCAAATGCCACCTCGATAAGCTTGGAGGTAAACTCGAAA  
TCGAGATCAAACCTCCACCTTGCAGGCATCCACATCAAGCGGGGTAAAGGTCCACCAGCCCGCCAACCTTGC  
GGAACGGGCCATCCACCAGCTCCATCCTGATCTGACGGTTACATCCAGCTGATTGCGGGTAGTAAAGGT  
CTTGGAATCCCCGCTTGGCCACATCGACCGACCCATCATGTAGTACATCGCCAGCCTCGTGGACACGG  
CTGCCGACACAGCCGGGCAAAAACTGCGGATAGGCATCCACATCGTTAACCAACTTGAACATCTGTTCTG  
CACTGAACATCACCAGGGCACTGCGCGTAATTCGGGGCATGGCTTTTCTCATCCAATCGGCGCGATTTT  
ATCACCATGTTTTGGGGTGTGGAGGTAAAACCTCAGCCAAACCGCTCAGAAAAGCCACCATTGACCTGCT  
GCGCGTTTTTACAGCCGCCCTGCCTACGTATAATACGAGCCTCCTAGTCAATTGCCGAAAATCGCCCGTCA  
TGAGCAAAAAAACAGTAAAAACAAAGCCGGGTCCAGCACCATTGCACTCAACAGAACCAGCGCGCCACGA  
ATACTTTCATCGAAGAGAAGATCGAAGCGGGTCTGTCCCTGCAAGGGTGGGAAGTCAAATCCCTGCGGGCG  
GGCAAGGCCAACATCAGCGAAGCCTATGTCATCTTCCGCGATGGCGAGGCCTATCTGTTCCGGCTCCAGCT  
TCCTGCCACTGCAAGCGGCCTCCAGCCATGTGGTATGTGACCCGACCCGCAACCCGCAAACCTGCTGCTGAG  
CCGTCGTGAACTCGACAAGCTCGAAAAGCCTGATTGCCCGTCAGGGCTACACCATAGTTCCCTCGCCCTC  
TACTGGAAACAGTGTGGGTCAAGGTGAGATCGGCCTGGTGAAGGGCAAGAAAAGACGACGACAAGCGCG  
AAGATAACCAAGCCCGCAATGGGATCGGGA AAAAGCTCGCATCATGAAGAACAAGCATCGCGGCTAACCT  
TGCCACTGGCAAGATAAGGACGCGCAGTTACCTTCCCTCGCGCAGCTGGCTCTTCAAGCTCAGCTGAGT  
ACAATAAATCGGCAACAGACTGGTTGCCAGGGAATGGGTATCAACGCCTTGCTATGACAGCATTTTTT  
GCGTACAATCGCAATTAACAACCTTGGGGCTGATTCTGGATTGCAAGATTACGAAAACCCAAAGGTGCAT  
GCCGAGGTGCGGTAGGCCTCGTTAATAAAACCGCAAAAAATAGTCGCAACGACGAAAACCTACGCACTAG  
CAGCTTAATAACCTGCATAGAGCCCTTCTACCCTAGCTTGCTGTGTCTAGGGAAATCGGAAGGTCAATCC  
TTCACAGGATCGTGTGGAAGTCTGCTCGGGGCGGAAGCATTA AAAACCAATCGAGCTAGTCAATTCGTGG  
CGTGTCTCTCCGACGCGGTTGGCGAATGTAAAGAGTGACTAAGCATGTAGTGCCAAGGATGTAGTAATT  
TTGGACGGGGTTCAAATCCCCCAGCTCCACCAAACAATGTTCCGGCCGGGAACGAAGAAGTACAGAAA  
CCCCGAGAGCGTAAGGCTTTGCGGGTTTTTTGTTGTCCGCAATAGTCCGAGCGAGTCGCCTAAATCCAGC  
CATAAGAGTAACATCTACGGTCACATTGGTTATGTAACACCGATTGGGGTGTACTACTGAGGGATGTGC  
CGTGAGTAAAGACAAGCTGACCGACTCAAAGCTGAGAACCGCCAAGCCTGAAGCCAAGGAATATAGCTTG  
GGTGACGGTGACGGGCTTTACTTAAGAGTTAAGCCGAATGGTGCAGGGCTCTGGGTATTTCAACTACTACA  
GGCCGAGCGACAAGAAACGCGCCAATATCAGTTTTGGGCCCTACCCTGATGTTACTCTTGCCGCAGCTCG  
AGAACGGCGGGCGAGAGGCTCGTGCCCTATTGGCTCAAGCAATTGACCCCAAACGCCATAAAGAAGAGCAG  
ATTTGCGTTTTGTTACGGCAGAACAAGAAGCTAACCGGAACACGTTTCGAACGTATGGCAGCCATGTGGCTTG  
AGTTGAAGCGTCATGACGTATCGGAAGCCTATGCTGATGACTCATGGCGATCTCTTGAGCTGTATGTGCT  
GCCATTCATTGGTTCTATGCCAATCAACCAGATCCGGGCGCCTAAAGTAATTGAGATGCTTCGCCCCATA  
GAAGCAGACGGTAAGCATGAGACGGTGCGGAGACTGTGCCAACGGATTAACGAAAATCCTCGACTACAGCG  
TTAACCATGGTTTACTCGATGCCAACCCCTGTGCAGCAATTCGCAAGGTGTTCAAAAAGCCAGCAAGAA  
GCACATGCCGACCCTAAAGCCGACAGAATTACCTATGCTGATGGCCGATATCGCCAATGGACGGCTCGAT  
CATAACCACTCGTTGCCAAATTGAATGGAGTCTTCATACCTTAGTTTCGCCCTGGAGAATCAGCTGGTACAC  
GTTGGGATGAGATCGACTTTGAAGGCAGAGTCTGGAACATTCCTGCAAAATAGAATGAAGATGGATCGCCC  
TCATCGGGTGCCACTAACCTCGCAAGCACTTTCCCTTTTGAACGCATGAAAACCCATTAGCGGGCACCGT  
CCCTATGTCTTCCCTGGATAACCGCATCCGTTAGGACATATCAACAATCAAAGTGCGAATGCAGCTCTGA  
AGAGACTGGGATATGGCGGCCGACTAGTCGCTCATGGCTTACGTTCCCTTGGTAGCACGACCCTGAACGA  
ACAAGGGTTCAACCCAGATGCTATTGAAGCAGCACTTTCCCATAGTGATGAGAACGAAAATCCGCCGAGCC  
TACAACCGAACAGACTATTTTGAACAGCGGGTAATCATGATGAATTGGTGGAGTAACCATATTGAGCAAG  
CCAGCCAAGGTAGTTTATCTCTAGCTATTGGCTTTCAAATCCGTCAGCCGTGAATAAGTAAATACAAAA  
TCAAGGCGACCTTCGATATAAAAAGGAAAAAGTAAAGAGGTATTAGCATGGTTGATAAGCTGCAGCAAGGAA  
AACCATCTCTCATCCCTCTCGAGTATTGCACGCTGTACGAGCTGCTCGTTTTATTGGATTGTGAGCTTGA  
AGACATATATCATTGGGCATACATTGGTGCCATCAGATTTTATGCGGATTTTACGGACTCTGAGTTCTAT  
TATAGTAAGTATGAGGATTCGGTCATTATAAATGATGATATTGGCAACAAGTTTCGTCACCTGAAATAATAG  
TGGATGAGACCATAACCTAAAATGTA CTACACTGATTCGAGAAGAACCAGCTTTGGCCTATACGGCCC  
AGATAATTTTATCTATGATGCCTCACTGATTTTTCTCCTCAAGATGAATCGTTAACATTCAGATTTCT

ATCTCTGGTTTCTGGGAAGTAAATAACTTCAAGATATCTAACACAGAGGTTTTTGGGCGGCGTAGCCCTC  
TACATTGGGATCTCAGAGCTAGTTATGTTGGAGATGGAGCTTCTCACACTAAATACATCAATTTATTAGA  
TATCGAAATATGTGATATGAATACCAGATTGAGGGTGATGCATGATGATTTGAAAAAATCTATGAACAC  
ATGATATCTGGCGAGTTGATGGTAAAAAATAGTTATATAAAACCAAACAGAGCAAGCAATTTGACTACAG  
AAAAAAGGCATAAGCCTCATGGTAATGCAGAGAGGTTTTGCAGCCAATCGTGAAGTAGTACTAAAGGCTGC  
TATCTACGCTAAAAACACAGTGGCCGGAAGAATGTAGTACAGCAAAGGGTTGGGCTGAAATCATTTTAGAT  
CAAGAATGGACTCTTTTTGGCGAAAAAGGGTGTCCACTGGAATTAATAACAATCGAGAGATTGCTTGGCT  
CCGCAATGAATAAGCCATGAGTAGATGTTCAAGAATGAACGACTGTTGACGTGTAATTTACTAAGCAGT  
TTAATAAATATTACACGTCATCGTTTTCCCGTCTAACTCGTGCTCTAATAACTCCATCGACACAAAACGAT  
GAGGCAATATTAGGAGCAATACATCCCAACCCCAATCAAACACTACGTTTTTATTCGTGTTGGGGAGGCGG  
TTAAAAAACAGGGTTATCAAAAAGCTCTATTTATGACTTGATGGCCCAAGATCTTTTCCCAAAAACGGT  
TCGCCTTGGGGCTCGCTCGGTAGCATTATCGAATCAGAGATCGATGCTTGGATGGTAGAACGTATCACC  
ACGCGAAATACTCCAGCAAACAGCATCAATAGGCTAAACACGCTTAGGGGATAACTGCTACCGCCACA  
GGTGAACCGATGACCTATGGACGGATTAGCGCAGTTACCCCCAGTCGCCACAAGAATTTCTCTCTCGTT  
CTTTTAGATCCTATTTATATCTTATTTAAACCTATTTATAGAGTGGTAACCAATTGATTTTAAATCAAAA  
ATATGGCCATAGGTGAAGTAAAACGTAGTAAAGGTGAAGTGAATATAGAGTAGGTGAAGCAAAATCTAG  
CAAAGGTGAAGTGAATATAGAATAAGTGAAGAGAAACATAGATGCCTGTGGATAACTCTAGGATGTAAA  
AAAATTATTGATAAATAAGGAAATTAATTATGGAGCATATCGGCATTGCACTACTACCACAGCAAGAATT  
GATAGACCTGATCGAGTCAGTATCACCTAACCTACCTCCCGAGCATGTTGAATTACTGGCCAAACAGTTG  
CAGCCAGCACTCGCACCGCTTAATGCGGCATTTGCGATTGTCGCTAGCCACCCTGTTCTGCATGAAGCTT  
TCGGTGAGCTGCTGTATCGCATAGGCGCTGGCATGGAGGGCATAGCATGATCGTTCTGGTCTGGCCGCT  
GCTGTAGCGGCTCGGATGCCCCGTTGCGGGCTGTGATATGACCGCCACGGCGGCAAGGTGCAGGCCG  
ATATCAAGCGGATGTGCCCTTGGGTGCCCATCAAGGTGTTGGAGTGCAACAACGTGCACCCCTGCTCCAA  
AGCAGAGCTCAAACGGGTGATGGAGCTGCACCAACGTTGCAATGACTCCCTACGCCGCATACTGGCCCTGC  
ACGGCCTCCGGCGTTCCAGTGGACGTGTGCAAAACAAAGCCTTTAATTAATAAAGGTGAAGGTAATTAAT  
ATTTTCCTTACCTTTAAAACTCATCATTTAATTATCTCAACTATCTGCCAGCTTTATATTTAAGATAT  
GCAAACGGGAGGCTCTATGTTTTCAAAAATGATTTTAGCGAATGCTAAAAAATATCTGTTGCTGGTTTA  
TTGTTTTCGGGGATCTGATGGGCTCTAGCCCTGAATGCCGAGCTGTACTAATGGCGTATGATTTGGCCCG  
CCTTTTATGCTGTTATGATAGAAATGTTGATGTTTATTCAGTTTATTTCTTGTGTTTGGTGTGTGAA  
ATGCCGAGCGCAATTCTGCGATCTTGTGTTAATTGGTGTGTGGCAAGCGCAATATTGATTGACGTT  
CTTTCTGGTTATCGCGCTGCCGTTGATCTGTTGCGGGCCAAGTTCCTGCTTGTGTGCTGTTGATACTCC  
CTATCCTTATCGCGATCTGGGCTAGGGGAGGGGATGCCCAAGGAGGGAGATCATGTTGAAGCTGCATAAT  
CTTCTGCTGCTGGCGCTGTTATCGGCATCTCCTGCGATGGCCATTGATACATTTGAACCAATTACCAAAC  
CTGCTGGTGTGATCATCTTCGCTCGATTTTCGGTGGCTTGGTTGACTTCGTGCTCCTGGGGCAATCCTG  
GTCTGAACCTGGACTCATCGGAGCATAACATGGGCGTGTGTTGGTCTCGGAGCCTATTTCTTAGGTATGCTC  
TATTTTATCTTTGGTATATTAAGGGGATGCTTGATTCTGGTGAACCTGGCCGATTTCTTGGGAATGCAA  
AAAGCCAAGTTAAAACCTCCAGTTAGGATGGTAATTGGTACTACCTGTTTATTTCCGGCTAAAAATGGTTT  
TAGCCTCGTCCAAATAATGGTGTGTTGGTAGCCCTTCAAGGGGTTGGTTTGGGAGATAAATCCATGGGG  
GTTATCATGGATTATTTCAAAAACAAATCAATACATTTTAAATCCAGTTCGCCAGATTTCTAGGCTTTTGG  
CTGCTAGTGTTTTTAAATCCCAAGTTTGTACTGCCGCCCTTAATAAGGGGTTGAGGAAACTGGTTTAAAG  
TGAACGTGTGCTATCAGGACAAAGAACACCGATTATTCTGTTGGCTGGTTTTCTCAGAAATGTGCCAGTC  
ACGGAAATTCAGTGGGGTATCCCTGGGGAGGGCTCCCTGTATGCGGTGGATTTACCTGGAAGCGGCAAA  
CGGTCCGAGATAAAGACTCACGGATGATCACGAATGTCGTATGGCCGCTCACAGCGCGGCTATTTCCGA  
TTTGTGTGCTGCTACAAGAGGCCCCGCGGAGGCTCTTGTAACTCTGATGTTGCCCCCTGACTCGTTG  
ATCCAGGAGCTGGCCAATCGCTATAACGCCACTATGCGAGCCGCTGCGGCGCAGGCTGTAGAGCAGACGA  
ACGAGAAGGCGATGGAGCAGTTTGTGAACCAAGCCTCTGACGGAGGATTTCTATGCCGTTACTTTGGAT  
CGACATGTGCGACGCTGGAATGATGCTGTGCAACAGGCTATCAACTCGCTGCCCAAAATCCGCCATTG  
GATATCGCTACGCGCTTCGATGATGTGAGTTTCGCGTACCGTCAGGGACTATCTCACCCCTGGTTGATGCTA  
TGGCGAGAAATAGCCCGGATACACTTGCCAGGCTTACGAAAAATCGCTCAGGGCTGCCGGAGCCTGATGG  
CCCAGAAGCGTTTCCGATTTCTCTCAAAAACGTTTATGAGCGCAGCGCGGATCACTACTGAGCAAGCT  
GCGGGCGGGACGCTTTGCGACATGACCCAGATGCGGGCGCTGGGTGATAACCTCTTGTGGCAGCAGAAG  
GCTCATTGGTGGCCGTGGCCGCCGCTTCCGGAGTTGCTGGTGTAAAGCCACAGAGTGGACGGCGGGGCT  
GGGTTTCTCTTTGAACTCTGCGTTGGCCTCCGCTGGCGGTACTATCACGATGCTGATCGTCTCTATGATG  
GGGCTTGGCTTGTGCTGTCAGTGTATATCCCTCTCATCCCCGCTATGGTATGGACCATGGCCGTTCTGA  
ATTGGCTGCTGTGCGTTGTTGAGGCGGTGATTGCTGCCCTTTGTTTGGCGCTGCGCATATCTCCCCCTA  
CGGCGAAGAAGAGATCGGGACTGCTGGGGAGGGGTATAGAATGCTGGCCAGTCTTGTGATTAACCGATG  
CTGATGGTGTATCGCAGTCTTTGTGGCTATCGGCTTGTGTAACGCAATGCTGGGGTGGTGAATGATATGT  
TTATGCCGATGGTGGCGGGAGCTCAATCAGGTAGTGTGCTCGGGATCGTGAAGTTTGTGGGCATCGTCTC  
TGTCTACGTGCTGCTCATGATGGGCTGACTCATGCTTGTCTTGCCTGGTTCATTGGCTGCCGGATCGT  
GTCATGCTCTGGCTCGGTGCTTCTGTTGCTGGTCTGGGTGGTTCGAGCGCATCGAAGGCGAAGTTAGAG  
GCGGCATGTCTACAGTAGGCAGTAACTGCAAACTACAGGCTTTCCGCAGCTCGTGTATGATCAAAGCA

AACCAAGGCAGATGGCAGCAACCGGAGTCACTGCAGCAGTCGATTAAACCCCCGTCATTCCGGTACTGAA  
AAAACCTCTATGAGGTGTGTTATGTCCGATAGATTGAACGATGGCCTTCTTCTCGGGTATCAAGCGGGGCA  
GGATGATCAGGAGCAAGTCACAGTGATTTGGAAGCGTCAAGCAAAGACGATGCGGGGACAGCTGGAGCAG  
CAAATCAACGACACCCGAGAACAGTGGTTACAGCGCCAGGCGTGGCTGGAAGTCGCTAAGCTGATGCTTG  
ACGAAATCCGCGAGTCAAACCCGAATAGCCACTGGCGAACAAAAGACACGTGAACGGGATTTACCACGA  
GCTCTGCCGCGAAATGCGGGGGCAGCTAGCTGCAGGAATAGAACCGGAAAAGGTAACGTGTTACTCCGAGA  
TAGCGAGACGAACTACAGATACATGTTGCCAACCATGAACCCATTTCTGTGATGGCAGAACTCTCGAAGG  
GAGTTTCTGCCAGAGCCGAGTGGGAGGCAAGCGATAGCGCGCCAGTTCTGGGCACCATGCCCCCTACAC  
GCATAATCCCCCCTGTGACAGCGCCAAACGTGTTTGGTTTTAGCCCCCGCAGGGGCTCCAACCTTTGGC  
ACAAAGTGTGGGAGAACACTTTGTCTCCAAAATTTGGTGCTGTACCAGAGACCAAAACCAAGGCAAAA  
ACAAATGGCACTCTCATTCTCGTAGCAATCGACAAGATGCAGGCCAGCGATCGGCAGAACTGAGGG  
GCATAACCTTCGCCTCCACAAGACGGAAGCCAGCTCAGACCAGAGGCATGGTTTACCCCAAGGGCGC  
CACCAGGTAGAGCTATGGCGACCGGAACGGCTGGCTAAGGCTAAGGGACTGGCCAAGCGCAAAGATGCCG  
TGCAGGCCATCCAGTTCGTGATCCCACTCGGCAACCAGACAGACTGGCGAGATGAGCCCAAGCCGGACTT  
CCCCGAGGGGAGGCCCATCGACATTACCGATCAGATGAACAGTGCCGCAAAGGGGATCCGAGCGTGGGTA  
GAGAAAGAGTTCCGGGATGAGAAGTGTGTCCGGATCGATCTCCACACCGACGAGAGCAGCCCCACTTCC  
ATGTTGTGCTAACGCCGATCAGGGACGGCAAGCTACAGGCAAAAATCGTGGCTGGACGGCCCAAGCAAAGT  
GGCAGCCCTGAGAAAACGGGCATGGCAGGCTGTCAATGCGCACATCGCCTGCGAGTACAAACCCGGGGCC  
GCTGGCGGGGACCCGCACGATCCCGGCAAGGCGGCGGACAGGCTCCGATACCGACTCCATCAATGCTCG  
ATAAGATGACCGGGCATGCCAAGGTCAAACGCCTTGAACGCGAGAATGCCGCCCTGCAGGAGGAGAATGC  
TCAACTCAAACAGGCACTGTTTAGCCGCCAGAAAGGCCGTACAGCGCGGATCTGCTTGAGAGGACCAAA  
CAGGCGGAGCTAGCCGCTGAAATCGCTCAGAGAGCGTTAGACGAAGCCAAACAAGAGCTTTTTTACTTGA  
AGCAGAATGCAGGCCTGTATGAGCAGGCGGTGAAGCGGCTAGAGACCCAGATCCAGAAGCTGGAGGGCTA  
CCGCAATGATCTGTCCGCTCAGCTTAACGAAGCCGAAGAACGGCTGAAGGAACTAGAGCCCAGAAAGAGC  
CATTACAAAGAGCCACGCCCATGAAGGGCTGGCATGTAGCGGCGCTGTTCCGCCGAGTGTCTTCTTAA  
AGGGGTTGTGACCGCCTCGGGAGGCTGGTTTATGGGCTGCTGGGGCTGCATGACTTCTTTGGATGGGAG  
GCCCCCTCATACTTCGAAGGGGCTGCATGGATGGCGGCTTTGCCGCCCTGCTGCGTTGGGCTCGGCCCT  
AGCGGTCGCCAGGTCTATCTCGATACGGCGAAAGCAATGCTATTGGCCGTGTTGGCGGCTGCATCCAT  
CGAGGAGAACCACCCGCCACCCAGCCGCTGCCGTTCGATGACTTCATCCCCCCTTTTCCGAAGCCGACC  
AGATGAAGATGGAACCCCGCCCCCATTGGAGTGGGGACGATCATCGCCTTGGAGAATCCGCCCATGTGCA  
AAATGGTCTTGGCCTCTTTTTCTGCATGATCAAATCCCTATTTGAAAAATCAAATCGACAATTTGATT  
TTACCCTCTCGGGGGTGGAGTCAATCATTTTGCCAATTTGAATTATCGAACCTTAAAAATGATTTTCAA  
TCCAGCTCCAGGCCAAGGCAATGAGGCATTTCCGCCACTTCTCGGCCCTCCAAATCGAAGTTGAGCAGGC  
CGCCTTCCACGCTGATCCAGTTCACAAAATCGAGTAGTCGCATGTCTCCATATCGCACAAACAGCTTACC  
TCTGGCATCGAGTAGCCATACCTCATCACCATAATCTCGATCCAGTGCTTGTGCAACTCCATGTTGCCCT  
CCAGTGCATTCAGTGGGCATGTCTGCGCGCTTCGCTTGCTGCGGGCCGCGGTAGCTGTTCCGAGGA  
GGGTTCCCTCAAATCGGCGGCTTGTACCCCTGGTTGTACTGGCACCCATCAATCCATCACATTGTCGTCA  
TGGTAACCTGTTACCGAATTGGGCAGGTGTTGTGATCCAGTAGTCTCGAAAAGCCGCTTGATCCATGATCA  
CGGGCCAGTAAGCTGAAACCCGTCAGCGAAAAACAGCCATAGGCGGGTCTTCCGAAACCTTCGATATG  
GGAATACCTTAGGCTTCGGGTAACAGGTTCCGGGGGAGCCTGATAACTGCTTCAAGGAGAAAGCAGATACC  
GAATATCAGTTAAGTCTAGCCAGCACCAGCGGCAGCTTTCAAGTACAGCCCCCTCCCCTCAAAGCCAG  
TTCCCGCCCGTGTATGTGGGTGGTAGGACTCAGTGACTACAACGTACAGCACTCAGCCCTCTGCTGTAG  
TATCCGTAGAAAGGGGGTCCGCCGATGAGTAACACCATAAGTCACATTCAGTCAAGTAAATAATTTACAA  
TTCTCTTAATATCATATGAATACCTACTTAGTTCAGCTCCCCCAGCACGTTTGGAAAGGGCCACCTCG  
CAAGAGGTGGCCCTTTTATTTGTCTGTCCCGTCTGAATATGGTTTACACCTTTCCCCCAATAAATG  
GAGAACCCGATGGGGCAAGGTGTGAAACGGACACAGCGGATTAATCGCTGACTTTTAAACTGTCATTTGG  
TCGAGCAGATTGAAAAAGGCGAGCTCACCTACAAACAGGCTCAGGTCCGTTATGGCATTCAGGGCCGCTC  
CACCGTTCTGGTATGGTTGCGTAAACATGGTCGGCAAGATTGGAGCCTGGGGGCTTCTGTGCGCGCCTGC  
AGGAGCATCACCATGCCTGACCCCGACAACCAGACGCCCGAACAGCGCATCAAGGAACTCGAGCAGCAGC  
TGGCGCTGATGAGTCAGAAGGCCAGTTCCTTTGAGGCCATCGTCGATGTAAGTGAAGTACTACGGCGT  
CTCCATCGTAAAAAAGCGACCCGGCAAGTCTCTCGCAGCGGCAAGTCGAGAGGCTGACCATTGTCAGGG  
CTTGCTGTTTCCGGGGATAAGCCGGCAGGCTTACTACAAGCGCAATCGGGTCCCGACGAGCGCCATGC  
ACAAGGGCTACAGGTGGTGCCTTTGTGCGTCAGGTTGACTGCGACAACCTCGGGTGGGCACTCGCAAG  
CTGCATTATCTGCTGCAGGGTCAGGAGGATGGCGGGCTCAAGGTAGGGCGGGACAGGCTGTTTCAGATAT  
TGGCCGAGCACCGCTTGTGTTGTCAGCCTAAGCGGGCGTATCACAAGACCACCCACAGTTTTTACCCTTT  
CTACCGTCATCCCAACTTGTCTAAGGCGGGGCCAGAGCAGGTTACGCCGTTAGCACCGGAGCAGGTCTGG  
GTCGCTGATATCACCTATCTGCCAGCCAGGAGCGGGCCGCTGTACCTGAGCCTGGTGACGGATGCGTACT  
CACGCAAGATAGTGGGCCATCACGTGCACGAAGGGATGCACGCCAAGTCGGTGGCGATGGCGTTCAAGAA  
AGCACTGAAGCAACGGCGTGGCGGGCGGTGAACTCATCCATCACTCAGACCCGCGCGTGCAGTATTGCTCG  
GGGCTGTATCAGTCACTACATGAACGGTACGGGGTGAATGCTCGATGACGGATGGGTATGACTGTTACC  
AGAATGCGTTGGCGGAGCGGGTGAACGGGATTTTGAAGGAGAGTTATTGTTGCAAAGCCCGCAGGATTT

GATGCAAGCGCGGAAATGGTGCCTGAAGCGGTGGATATTTACAACGCGGAGCAGCCGCATCATGCGTTG  
AAATACAGAACCCCGATGCGGTACATAGGGGTTCTGAGTAGAGAAATGCTAGTTGAAAATGTGTAAACC  
TATTTTCAGGACTAGACATCCATGTCCATGTTGTTTACCAGATATCAAACCTGGTTGGATTTTTTCCAATATC  
CCCCTTGAAGTACCTTTTGACAAAAAATCAGGCGCATCACCGCGCAGGCTTTATCATCAGGTTGCCATCC  
CGGTACTAGCCGGACTCACAGCCGCACATTGGCATGTCATGACCCAATATGAGTAAATTTGATGTTGGCC  
GCTGCATTTTAATGCACTTACAATATGCGCCCAATTTCTGTTGGATTCTTCTGATGCTCCGCCAATGTGA  
TCGTCTATTCTGTTTCTCTGCTACTGCTCTGGGGCGTGGCGGCGCACGCCATTACCAGTCTGAATGAA  
GACGAGTTTGATCTGTCTGAGCGCGCCTGGCTGTCATCACACCAGGAGCTGGTCATCGGCATGCCGATGA  
TGGGCGATCCTCCATACAGCTATAAGGATGCAGATCAACGCTTTACCAGCCAGTCCCCGACATTGGCGA  
GCAGATTTGCCAGAACGCTCGGTTTGACCTTGGCTACAAGGTTTACCCCTCCTACGTGGATGCGCTAAC  
GGCTTTGGCCACGGAGCAATCGACATACTGGTGAACGACAGCCAGCCAAGCGAACAATGGCGATCCAATATTG  
TCTCCCTCCCGTTTTTGTCTCTCCATGCCGCGCGGCGTCTGCTCAACAATGGCAAAACGAAGTTGTCACG  
ACAGGATGCCCATGGTTTTGCACTGGGTCTGTGTACAGGAGTCAATGCTTGCAAGTGAATGAAAAAAGT  
GGATTTCCCGTGTGACCGAGGCGGAGAGTGCAGCGAAGCAGCGTTTATGCTCAAAAAGCGCATGGCTG  
ACGCCTATCTTGCTGACATGCCGTCACTGGTGATGGTGAAAGATCAGCACTCCAAGGTTGGCTTACCAT  
TGCAACCCCGGAATGGGTAAGCGGCACGTCTCTCTCCATCAATATGCATAAGAGCGACCCGGCAGTGGTC  
AGCCTGGTGAGCAAGGCATTCAACGAGATACCGGTTGAAGATCGTCGTCATATGCTGGCAGCTACCACGA  
CTAGCCAACATGCGGACTCAGGAGCGGTGAAGTCTGTGCAGTTTACCCCTGAGGAGCAGGAGTGGCTCAA  
CCAGCATCCTGAGCTCACTTACGGCGTCTCTCCGACTGGACCTCCATGAGCGAATTCAAATTACCGGGGC  
AGGCTGGTTCGGTTATGTGGCAGACCTGATGCCGCTGATGCAGCAAGTCTCTGGGCTGAAGTTCTCTCTGG  
TTCGCACCAATAGCTGGGGTGAACCCAGAATATGCTGAAGCTGCGGCAGATCGATTTTTATTCCGGCCAT  
ATCCCCCAACCACGATCGAGGCCAGTTTTGCGCTGTTACCCCCGGCTATCTGTTTGTGATCGGGTCTGTT  
ATTGCCCCCAACCGCAGTGGCGATATCACCGATCTCTCACTGCTGCGAGGGAAACGGGTCGGCATGGTGC  
ATGGCTCGCTGGATAAAGATCTACTGGCCAACATTGGCGCCCATCCGGTAGAGGTCACAATGACAACCG  
CTTGCTGGAGCTGCTGGACACGGGCGATGCCGACTACGTGATGGTCACCCTGCCATCCATCAACAAGCGG  
GTGAGCGAACGCTATCAGGTGGTCTATGCCGGCAAAGACTTGCCTGCGCATCGCCATGGCCACGGCGCA  
AAGATCCCATGCTGCAGCGAATCCTCACCAAGGTGCTCTATTCGATACCGCCGAGGAGCTCAATAAAGT  
GGAGAGACGCTGGCTCTCCATAAGCGTGCAGACCGGCTCAATAACGAAATAGTGTCTGTTCTGGTTCGTA  
ATGAGCGGCGCAACTGCCACCCTGCTGTTTACCTTGTCTTGGGCTGGAACCGTACCCTGAAACGGGAGA  
TCGTGCAGCGACAACGGGCGGAGAAGACGCTCAATGAACAGTTGGTGTTCATCCAGACCCTGCTCGACTC  
CCTGCCCAATATGGTGGCGCTGCGGGATCGCGATCATCGCCTGACCCTCAGCAACCGGGCATAACCGCGAG  
CTGTTTGTGCGGTGATGGGGAAGAAGGTGATCGCTGGGGCTATATGACCGAGGACGAGCGGCAACAGATGC  
TGCGCGAGGAGTGTGCGGTCTGGGAAACCGGCCAGATCTTCCAAGGATCGGGTTATACCCAGCGCGAGGG  
GGATGTTCCCCTTACGTGGTCTACGTCAAGTTGCCCTATCGCGGCGCAGACGGCGAGATTACGGGAGTG  
CTGACGGTCTTGACCGATGTCAGCGCCCTCAAGGCCCGCAAAAACAAGGTGCGGGAAGTGGAGGGCAGAC  
TGCGGGATATCACCGACAGCATGCCGGGTCTGGTCTATCAATATCTCTGGCAAGGGGCCGCAAGGGGAA  
ATTCCTCTATCTGTCCCAGGGGGCCAGCGACATTTCTCGGGATGACCCATCAAGAGTTGATGGCAGCCGAG  
TCTGGCGGCGTGATCCTCGGCTTGAACGATGAGGCTATGGCAACCTTTATCGATAAGGTGGCCAAACATG  
CGAAACCCCTTGAGCCGCTCGATATGGAGGTGCTGGTGCCCTCTGTTACAGGGGGAGCGCTATATCCAGAT  
CCGCGGCAACTTTGTGGCGCAACAGGGCCATGATCGCCTGCTCAACGGCGTGGTGCAGGACATCACCGCC  
ATCAAGCAACAGGAGCATGAGCTGCGTGAGGCGCGCGCCGCGGCGGAGCAGGCGATGCAGGCTCGCAGCC  
TTTTTCTGGCCACCATGAGCCATGAGCTGAGAACCCCATCTCGGGCATGCACGGCATGCTGGAGCTGCT  
GCGCATGAGCGAGCTCAATGATGACCAGCGCTATCTGCTGCGCAATGTGGAGAGCTCGGCCAACACCCTG  
CTCTATCTGGTCAACGATATCCTCGACTTTTCCAAAATCGAGGCGGGTCACTGCACCTCAATCGCCAAT  
CCTGCCGTCTGCAACCTGTGGTGTGCGACGTGATCCGCGGCCATGCCGCACTGGCTACAGCAAGGGGCT  
GAAGGTACGCTCCAGTGGGAGGAGCAACTCCCCAACCTGGCCGATATCGATCCGGTCAAGTGGGCCAG  
GTGATTTCCAATCTGCTCAACAACGCGGTGAAGTTACCGAGCAGGGCGCCATTTTCGATCCAGGCCAGCT  
ATCAGGACCAGCAGCTGGTTATCGCGGTGACAGATACCGGCATCGGCATCGCCGAAGAGAAGCAAGCGCT  
GCTCTTTACCCCGTTTCAGCAGGTGGAATCCGATATCAATCGCCGCTTTGGTGGCACCAGGCTCTGGGCTG  
GCCATCTGTGATCAGCTGGTGAGGAAAGTGGGCGGCACCCTGACGGTCAAGAGCCAGCTCGGTGAAGGGG  
CCTGTTTCCGCTTACGATCCCCTGCTCAATGGCTGTGGGAGCCACCCGCGCTGGCGGGCAGCGAATG  
GTGGTGGCTGGGTAGCGATGCCGCTTGCAGGCCACCATGGCACGGCTCGGCGCCCGGTTGAGCCCCCTC  
GAGATCCACCAGCTCACCGCGATCTCGACGGCTGCTGTTGGCGGAAGAGGCGCTCTGGAGTCCAGTC  
TGGGGAGCGATTGGCACACCTTGTGTCAGTCCGGCACTCTCAAGGGGGTCACTCTCTCCCCCGCGAAGC  
GTTGCGGGGGCGCATGGGCTCGGAGAAGTGGTGGCGCCTCAGCCAATCCCCCTCTATCCGGATCTGTTG  
CTCGAAAGCTGCCGCGAAGTATCACCAGGGCGAGCCGTGACCACCCATGCCGCGCAGCATCGAAAACTGG  
GCGGGCGGGTGTGGTTCGCCGATGATCATCTGGTTAATCGCGCCCTGCTGACCCGTCAACTGGCGATTCT  
GGGAGTGGAGTGCAGGAGTAGTGAAGATGGCGAGAAGGCGTTGCGCGCCTGGCAAAACCCGGGATTTCCGC  
CTGCTGATCACCGACTGCCACATGCCGCACATGGATGGCTACACCCTGACCCGCGCCTGCGGGAAACAAG  
GAGAGCAAGCCCCATCATCGGCGTACCGCCGATACCTCGGAGGAGGCGGCAGCCAATATGACGGCAGC  
CGCATGAACGGCATGCTGTGCAAAACCTATTGCTGGAGTCACTACGCCAGATGCTGCTGCGGTGGTTG

CCC GCGACTACGATCACAGAGAGAGTACCCGACGACAGGCCATCAATCTCGACATGATCGGTCGCTGGC  
AAGATCTGTTTGGCGATGAAGAGATTGCCAAAAGCATGGCAAGGGAGTATCTGGCCTCCAACCGGAAAAGA  
TTGCCACGCTATGATGAGCGCGCTCTCCTCCGATGATAGCCAGGAGCTGGTGGAGATCGCCACCGCATC  
AAAGGGGCGAGCCAGAATGGTCGGGGAGCTCTCCCTGGCCGAGCAGGCGGCGCAACTGGAATCGGCGGCC  
GCCTCAAACAGTTGAGCGAGCTCGCGCTGCTGACACAGAGAGTGAAGAACAGATGAACAATATTGAACG  
TGAAATGGGATTGTGGCTCGATGAGTAGAACGGCAGACGAGTTGGTTCATCATGGTGGTTCGAGGATCACGG  
GTTTCAACGCAAGACCCTGATGCACCAGATCCGGGCGCTCGGTTATCAGCAACTGCTGGAGGCGCGAGAC  
GGCATCGAAGCCCTGGCGCTGTGCCAGAGCCACACTGTCGACATCCTGTTCTGCGATCTGCGGATGCCCG  
GCATGGATGGCATGGCGCTGCTGCGCCGCTCTCGCTGGGTGGCTTTCGGGGCGGCATCATCCTCTCCAG  
CGCGCTGGAAGATGACGTGGTGGAGGCAGTGTGCGCATGAGCGCGGCTATGGCTCCATGTGCTGGGT  
CGCATCGAAGAACCCCTCCAGCCCACAGCACTGCGCAGCTGATCGACTCCTGGGCGCCAAAGTCGGCTC  
CCTCGGGCAAGGACGATGGCCTCGTCTCCTCTCGGTGGACGAGCTCAAACGCGCCCTCGACAACGACCAGTT  
GCTGCCCTGGTATCAACCCAAGGTCGGCTTTGCGTCCGGCCAGTGGGTGGGGATGGAGGCGCTGGCCCGC  
TGGCAGCATCCGGAATACGGGCTGATCTCCCCGGCATGTTTATCCCGCTGGCGGAAAATAACGGCCTTA  
TCGATCAGCTGACCGATGTCATCATCAACAAGTCGCTGCAGGATTGCCATCTGTGGGGACAGACCGGTCT  
CTCCCTCAATCTGTGATGAACCTCTCCACCACCTCGCTGATCGAGGGGGATCTCTGCCACTTCTTGATC  
AACCAGTGTGACGCTGGGGCGTCAACCCCGAGCTGATCACCTGGAGGTGACC GAAAGCTCGTTTGTGCG  
AGGATATCGGCAAGGCACTGGAGGTGCTGACCCGGCTGCGGATGCACGGCTTTGGCCTCTCCATCGATGA  
CTTCCGTTACCGGCTACTCCTCGATGCAGCAGCTGGCGCTGCTGCCCTTTACCGAGCTCAAACCTTGATCGC  
TCGTTTGTGATCGCTGCTATGCCGACCCCTCCCGTCTGGCCATCATCGAATCGAGCATCGAGCTGGCAC  
GCAAGCTGGGGCTGAAATCAGTCGCCGAAGGGGTGGAAGATGTGCAGACCTGGCAACTGCTGGCCAAGCT  
GGGGTGCATATCTGTGAGGGCTTTTTTACC GCGCCGCGGATGCCGCGCAGCGAACTGCAGCATTTGGCAC  
CAGATCTGGCAAGCCCGACTGCCGACCCTGATATCCGGCTGATCTCCTGCGACCAACCCTTTGGGCAAC  
AGCGCGCCGATCGGCAACGTGAATGGCCGCTTCAAAGGTGGCCATTTTCTTTGTGTCGGGCTCGCCAC  
TCACGTATGCCCGCCCTTCTCCAGCAACCGTCTATCCAGCCGAGTGCCTTCATCAAAGTCACCATTTAT  
GCAAAATAAGTTGCATCACAATGGTGTACTGGCGGATCACGCCTACCGATAGCGAGAGCAGCCTCTCT  
TCTACCAGACTCATAAGTAGACAATAAGACAATGAATCGCTTGTTTTAAAAGGAATGGCTCTCAACGATG  
CGCCGAGCCGATGAGTAGACAAGACAACCTGAAATCGTTTTCCCTTTTGAACAATAAGCTGTCTAAAAAT  
CAAATAAAGTTGTAATAATCTTTGTTATGGTAGGCTATAGCAAGCGGCTCCCTGTGCTCGCTCCCTGCT  
TGGCTCCGCCAGATGCAGCATTTTCTGCGCCTTGAAAGCGAGTTTATGACGCCATGATCACCATACCCT  
CGATGGGGCTCAGTTGACGGTTGACCCGACCAGAACCCTGCTCCAGATAGCCAAACAGCACCAGATCGAC  
ATCCCTCCCTGTGCGGTGACAACACCAGCGGCCCAAGACGCGCTGCGATCTCTGCGTGGTGGAGATTG  
CCGGTCTTGGCATCCGGCGCGCCTGCGAGACGCGCCCAAGGCAGGGATGGTGTATCACAACGCAAAGCGA  
GGCACTGAGCGCGCACCGCCAGCAGGCGCTCGGTGCGATCCTCTCGGATCACTACGCCGATTGCGAGGCT  
CCCTGCCAGCGCGCCTGCCCGCGGGGTGGACATTC AATCCTATCTGCACCACATCGCCATGGGGGATC  
ACGAGGCGGCAATGGCCGTATCAAGCAGACCCTGCCAATGCCCTCTCCATCGGCCGGGTCTGCCCTAC  
TTTCTGTGAGGCAGAGTGCCGCGCGCTGGTGGATGAGCCGCTGGCCATTCGCCACCTCAAGCGTAC  
GCCGCCGATCTCGATCTGGCCGAGATTGCCCCCTATCAACCGGCAAAGAAGCCCGCAAAGGGCAAGCGGG  
TGGCCATTATCGGCAGCGGCCCGGGCGGCTCACCTGCGGTTACTATCTGGGTTACGAGGGGTTGAGGTT  
CGATCTGTTTCGAGGCGATGCCCCAAGCGGGTGGCTGGCTGCGCTACGGCATCCCTGAATACCGGCTGCC  
AAGGCGATCCTCGATCAGGAGATCGCATTGATGTGCGAGAGCGGCATGCGGATCCACACCAGCCAGCGAC  
TGGGGCAGGAGCTCAGCCTCTCGGCTCTGTACCGGACTATGATGCGGTTCTGTCTGGCGGTTGGCGCTTC  
CAAGGCGGTGCCGATGGATTACCCGGGACGACCCTGGCCGTTGTTATCTCGGGGTCGATTACCTCAAG  
GATCGGATGCTAGCCAAGCGGCTCACCACTGGCAAGAGGGTTGCGGTGATCGGGGTGGTAATACCGCCA  
TTGACTGCGCCCGACGCGGCTCAGGCTGGGCGCTGAAACCACCTGATCTATCGCCGACCCGCGCCGA  
GATGCCCGCCGAGCAGTACGAAATCGACGAGCGGAGCAGCAAGGGGTGCGCTTTTGTGATGCTACCAAT  
CCGGTAGAGAATCTGCCGGACAGCAGTGGTTCGCTGTGTCAGGTGCGCTCGAGAAGATGGCCCTCGGCG  
AGCCGGACGCTCCGGGCGCCGCGCCCGGAGCCACCGGCGAATTCCTCATCGAAGAGTTTGATAACCGT  
GATTGCGGCGAGTGTGCGAGCAGCCGATCTCAGCTTTATGGAAGGGGAGCCCTCACCTCCCTTACC  
CGCTGGCAGACGCTGGAGTCCCATCCGAAAACATGCACAGCGGCCACGGCAACCTGTTTCGCCATCGGCG  
ATCTGCGCCGCGGGCCCGCCACCGCATCGAGGCGGTTGCCGATGGCCGCAAGGCGGCGCTGGCCATCGA  
TCAGTTCTCCACGGTGACATGATCGACCCGTTGCCCCCTTCAACGCCTGCAAGGCCCCCAAACCTCAAG  
CAGGTGATCCCCGCAATTTGCTCACCTGAAAAAGTGCCCGACCATCATGCCTCATCTGGCAGAGC  
AGGATCGCGAGGGCAGCTTTGCCGAGGTGGAGCGTGGTTTGTGATGATGCCGATGCCCGCAGCGAAGCCAG  
CCGCTGCCTCGAGTGCGGCTGTGAGGCCAACACCGATTGCGCGCTGCGCGACTATGCCACCGAATACGAG  
GTCGAGCAGAGCGCTCTCGATAACCAGCCAGTGCCAGAAGTTTGCAGTGGAACAGCAGCGAATTTATTG  
TCTTTGATGCCAACCCTGTCATCGGCTGCGGCCAGTGCCTGTCAGACCTGTGGTGGAGCAAGCGGTACAAGG  
GGTGTGCGCTTTGCCAAGCACAGCGATGGCACCTCTCGAACC GCGCCAGTTCGACACGGGGCTCTCG  
ATGGGCGACTCCCACTGCGTGCAGTGCGGCGCCTGCGTACAGGTCTGCCCCACCGGCGCCCTGGTGGATG  
CCCGCGACAAGTCGAGGGGCGCACCGAGCTGCTCACGCCGTTCAATACCATCTGTACCTACTGCGGGGT  
CGGCTGCGGCGTACCCTCTATGTGATGAGGTGCACAACCGCATCCGCTATGTGGAGGGAAATCGCAAC

TCACCGGTCAATCAGGGGCTGCTCTGCGTCAAGGGACGCTTCGGCTTTGACTTTATCCAGAGCGAGGAGC  
GCCTCACCACCCCGCTCATCCGCAAGGATGGCGAGCTGGTCCCCGCCAGCTGGCAGGAGGCCATTGCCCT  
GGTGGCCAAGCGCTTCACCGCCCTGCGCCAGCACTATGGCAGCGATGCACTAGCGGGTTTCTCGTCAGCC  
AAAACCACCAACGAAGAGAACTACCTGTTCCAGAAGTTCATGCGCCGGGAGCTTGGCACCAACAACGTGG  
ATCACTGTGCGGACTCTGCCACGCTCCACCGTCAACGGGCTGGAGGCGTCACTCGGCAGTGGCGCCAT  
GACCAACGACATCCCGAGCATCGACCACTCGGATCTCATCTTCATCATCGGCTCCGACACCTCGGCAGCC  
CACCCCATCATCGGCACCCATATCAAGCAGGCAGTCAACCACAGGCAAGGCGGGTTGGTGGTGGCCGATC  
CGAAACGGATCGAGATGGCGGACCACGCCAGCCTCTATCTGGCCACCGTCCCGGCACCGACGTGATGCT  
GCTCAACGGCCTGATGCAGCAGATCATCCAGCACGGCTGGCACGACAAAAGCCTATATCGCCGCACGAGTA  
GAAGGGTTCGAGGCGCTGCAAGCGGAGGTGCTCTCCCCGCTATGCACCGGACAAGGTGGCCCTTGTCA  
CCGGCGTACCGGCCAAGCAGGTGATCGAGCTCGCGCGCTTATCGGCACCGCCGAGCGACCCGAGTCTA  
CTACTCCATGGGGTCACTCAGCACACCACCGCCAGACAATGTGCGCGCCATCGCCAACCTGCAACTG  
CTGTGCGGCAACATCGGCATCGAAGGGGGCGGCATCAACCCGCTGCGGGGCCAATCCAACGTGCAGGGTG  
CCTGTGACATGGGGGCGCTGCCAACTGCCTGCCCGGCTATCAGAAGGTGACCGACCCAGAGGTGCATGC  
CCGCTTCGCCACCACCTGGAAGCAACCGGACTTGCCGCGCACGCCCGGTCTCACCCTCACCGAAACCATC  
GATGCCGCTGTGCAGGCAGCATCAAGGGGCTCTATGTGATGGGTGAAAACCCGGTGTGAGCGATCCGG  
ATCAGCATCACGTATCGAGGGGCTCAAGCAGCTGGAGTTTCTGGTGGTGCAGGATATCTTCTCTCGGA  
AACCGCCCAGCTGGCCGATGTGGTGTCTCCCTCTGCTCTTTGCCGAGAAAAGCGGCCACTTCACCAAT  
ACCGAGCGGCGAGTGCAGCGCATCTCCCCGCTCTCAAGGCGCCGGGGGAAGCACGGGAGGATTGGTGGTA  
TCATCCAGCAGATTGCCAATGCAATGGGTGGCGACTGGCGCTATCAGAACGCCCAGGAGATCACCGCCGA  
GATCTGCCAAGTCAACCCGCAATACGCCGGCATCCAGTGGGATAAGGTGGGTGTACAAGGGCTACAGTGG  
CCCTGCAACGACGCGGGCGCCGAAGGCACCTCGCTGCTCCACAGCAAGCAGTTCACCCGCGGCAAGGGGG  
AGATGGTGCACACCCCGTTCCGCTATGCCGCGCAACTGCCCGACGAGACCTATCCCATCGTGTCACTAC  
CGGCCGCTGCTGGAGCAGTTCCACACCGGCACCATGACCCGCAAGACCAGGGGGCTCGACAAGCTGGCC  
GGGCCGCGGGTGATGATGAGCGTGGCGGACGCCGAGCGGATGGGGATCAGCAACAGTGAGCGGGTGAAGG  
TCACCAGCCGCGCGGCCATATCGAACTGCCCGCTTCGTGACCAACCGATGCAACCGGGTGTAGTCTT  
TATCCCCTTCCACTTCGCCGAAGCCCCGGCCAACCGGCTCACCATCAATGCCACCGACCCCAACGCCAAG  
ATCCCCGAGTTCAAGGTGGCAGCGGTGCGCATCGACAAGCTGGAATCTCATCGCAAGCTGGAGAGTAT  
CCATGCGAAGGAGCCCAAGCCAGACATCGAGGTTGCCCTGAGGGGAATAGCAAAAACCTGCGTAGCCG  
CCTGCCGGGAGGGTTGGCCCGCTGCCCTTCCCTTTGGGGTTGCGATAGCAAAAAGAGGGGGATGAGAAG  
GGTCAACAGCCAGAAAGCACAAAGGGTTAGCTTCGATGAGAAGCTAACCCCTTTGTTTTATATGGTGCCGA  
TAAGGGGAATCGAACTCCTGACCTTCGCATTACGAATGCGCTGCTCTACCAACTGAGCTATAACCGCTTG  
TTGCTCTCCACATTCATAAAAAATGACCGGCAAGTCAATTGAGCCAGCTCGATTTTATGAGTTGGCTCAT  
GGTGTTAGAGCCCGATTTACAGATCGACAACTCGGGGATATGGGCACGGCCGCGGCTTTTCGAGAAATTC  
GAGCAGGGCGCGGGGGAGCGCACAGGAGCCGCTCTTGCGGGAAGCCGCTTCGGTTACCAGACGGTGG  
CAGTGGCCAAAATCGCCAAGAGTAAATGCCACGTGGGAATCGGAGCCGAAAGTGAGATAGGCCCCAGAT  
CTCGCGCGGCTTCGACTATGGCACGGCAGTTGCCCTTCGCTCCCCGACGGGAATGAATGAAGGAGGAGTT  
GTTGATCTCCAGCGCTACCCGATAGTCAGCTGCCGCTTGACCACCGCTGAATGTGATGGGAAATGAA  
GGGTTGCCCGGGTGGCTGATCATGTGACCCGACCGCTCTTGATGGCGTTGATCATCGCCTGGGTGTGGG  
TAGCCTGATCGCAGGGAGGGAATACCTGCTCATGAAAACCCGCCATGATCATGTGAGGGCGGACTCGTA  
ACGCTCGGGAAAATCGATCTCCCCCTCCAGTTTTTTTATGATGTTGGCTCGATAACCCGCGAGGATCCCCACG  
CCGTCCACCACTCTTGGCAGTATTGGCAAGTTGGCAAGTGCAGACATGAGGGGCATCGGCCATCTCGG  
GGCCATGATCCGTGGTGGCGAACAGCTTGTATCCCTTGGCCCTGGCTATCGGCAGATAGTCGTGGATGGT  
GCTGTAGGCATGGGTGCTGGCAATGGTGTGAGTGTGGGTATCGACCGGGTACTTCATCTTCTCTCCCCTC  
ATATTTTGAAGGGCAGCATAGCAAAAGAGCGGCAGCTTGGGCCACGCCAGTGCTTGCCACACTTTGTAC  
AAAATACCGCGAAGCTGACATAGTCTGAGGGGCTCTGGCTGGCATACTGCCCCGTCGATAACATGCCGTA  
ACTCGCATCGACAGTTTGTCTGTCAGGATGACGCGAACTCACTTTCCCCACCGTTCGCGCCCTGCGGCGGTT  
TTTTTTTTGCTGCAAGCCGCAAAACCGGTAACAAAACGCGCAAAAAAAGGCCAACTAGCATGGTGCAGGTT  
GGGCGAGACTTAATGTTTAAATTGCAGTGGCATAGATATAGAGTCTGCTTTTTGACTAAGTTCCGCCCCAC  
TTTGCTTTTTTTCATCGAAAAACATTCCGCTAACACTCATTCACATTTCTTTGACACTTCACGTTATGAAA  
CGTACTTTTTTAAACATTCGTTTAAAGTGAAGTGTCCAGTGAAGTAAAATCGATAACAAAAACCGTATTCTCG  
ACGCCGCTGAAGTGTGTTTTGCCGAGCGGGGATTCGCCGATACTCTTTGCGTCTGATCACCAGTGAGGC  
CGACGTTAATCTGGCGTGGTGAACATCACTTTGGCTCCAAGAAGGAGCTGATCCAGGCGGTGCTCGAC  
CGCTATCTGAGCCTGTTTATGCCCGATCTCGATGCCCGCTGCGGGTACTGATGGAGCAGGAGCAGCTGA  
CCCTGCTGCAACTGTTTGAAGTTTTGTGCGAGCCGCTGATGAAGCTATCGACGTTGCGGGCCAATGGCCC  
GGCCATCTTCATGCAGTTGCTGGGGCGCGGTTATATCGACAGCCAGGGCCACCTGCGCCGCTTTATCACC  
GCCACTATGGCCCCATTTTGCAGCGGATCACCCAGGCCATCTCCAAGGCCAATCCGGCCCTGTGCCCAG  
CGGATCTCTTCTGGCGCTGCACTTCACTCTGGGCACCGTCTGATTTACCATGGCCCTCCGCCGATGCCCT  
GCGCGACATCGCCTTGGCCGACTTTGGCCAGCAGCTCGATGTGGAAGGGCTGGTGGCGAACGTTATTCCT  
TATCTGGCGTCCGGAGTGGGGCGCCGTGGAGTGCACCAGGCTCTCCCTGGCCGTGTAACAACCAACAA  
TAAATCAACGGAAACATTGAAATAGAAGGAACTTCGGTATGATCACATGCTTGTCTGCTGGTGTGGC

GATAGCCGTTGTGCTCGGCATACCCCTCCATCCGTAAAAAGGTGGTAACCCGTCCGGTGTTCGGCATCTTC  
AAAAAGATATTGCCGCCCTTGTTCGGCCACCGAGCGGGAGGCCATGGAAGCCGGTCCGTCTGGTGGGATG  
GCGAGTTGTTTCGCGGCAACCCCGACTGGAAAAAAGTGCACGGCTACGGCAAGGCCGAGCTGACCGCAGA  
GGAGCAGGCCTTTATCGACAATCAGGTCGAAACCTGCTCGCCATGGTTGATGACTTCAAGATCGTCAAC  
GAAACCAAAGACCTGCCGGAGCCGGTGTGGGACTATCTGAAGAAGGAAGGCTTCTTCTCCCTGATCATCC  
CGAAATCCTATGGCGGCCGCGAGTTCTCGGCGATTGCCAACTCCACCATCGTTACCCGCATCGCCACCAA  
GAGCCTGAGCGTGGCGGTACCGTCATGGTGCAGAACTCCCTCGGCCCGGGTGGAGTGTGATGCACTAC  
GGCACCAGGCCAGAAAGATTTCTGGCTACCGGGGCTAGCCAACGGCAAGGAAGTGCCTGCTTCGCCC  
TGACCGGGCCGGAGGCGGGTCCGATGCAGGTGCCATTCCTGACAAGGGAATCGTCTGCAAAGGGATGCA  
CAAGGTTGAAGAGGTGCTGGGTATTGCCTCAACTGGAACAAGCGCTACATCACCTGGCCCGCGCGCT  
ACCGTGTGGGGCTGGCGTTCAAACCTATGACCCCGAAAAAAGTGTGAGTGACAAGGAAGAGCTCGGCA  
TCACCTGCGCCCTCATCCCCACCAGCCACCCGGCGTGTGCGGATCGCCACTACCCCATGGGTCT  
GGCGTTCCTGAACGGCCCCGACCTTCGGCAAGGATGTGTTTCATTCCGCTCGACTGGATCATCGGCGCCCCG  
GATTACGCTGGCCGCGGCTGGCGCATGCTGGTCAATGCCTCTCCGCCGGCCGCGGTATCTCGCTGCCTG  
CCCTTGGCACCGCTGTGGTACATGGCAAGCCGCACCGTGGGCGCTTACTCCTACGTGCGTAAACAGTT  
CGGCATGTCCATCGGCAAGTTTGAAGGGGTGCAAGAGGCGCTGGCTCGCATCGGCGGCCCTCACCTATCAG  
CTGGAAGGGACCCGTCGCATGACCGCCGGTTCGCTGGATTTGGGTCAGGCACCGGCCATCGTACCGCGA  
TTTCCAAGTACCACATGACCGAAATGGCGCGTCAGATCATGGATGACTCCATGGACATCCACGCCGGTGC  
TGCCATCCAGCTGGGCCGAAAAAAGTACACCGGCTACGCTACATGGGTATTCCGGTCCGATCACGGTG  
GAAGGGGCCAACATCCTGACCCGCAACCTGATGATCTTCGGGCAAGGGGCTACCCGCTGCCACCCGTACG  
TCTTTGCCGAGCTGGAAGCTGCAGCCGACACCGACGCTGGAGCGCGGTCTCGAGAAGTTTGACGCCCTGCT  
GATGAAGCACATCGCCTTCGGCGCCGGCAACTTCTTCGGCTCCCTGTTCCAGGGGCTGACCTGGGTGAG  
TTCAACAGCGCGCCGGTAGCCGGTGAACCCGCCCGCTACTACAAGCAGCTGTCCCGCATGAGTAAAGGGC  
TGGCCCTGTGCGCCGACGCTCTCCATGCTGATGCTGGGTGGCGATCTCAAGCGCAAGGAGATGATCTCCGC  
CCGTCTGGGTGACGTGCTGAGCCACCTTACCTGGCCTCCGCCACCCCTCAAGCACTACGAGGATCAGGGC  
CGTATGGTCTCCGATTTGCCGTTTCGTGCAGTACGCGGTGGAGCGCAACCTTACCTGATTGGCAAGGCGT  
TCGAGGGCTTCTTCCAGAAGTTCGCAACAAGGTGGTGGGTGCCGACTCAAGCGCGTGGTGTTCGCGTT  
CGGCTCGGTTACAAGATGCCGGCCGACGATCGCTGCCACCCATCTGCTGGCCATGATGAAGCCGGCG  
GAGTTCGCGCAGCTGACCGCCCTCTGCTATGTGGCAAGGACGAGGCAGATCCGCTGGCCTGATG  
AGCGCGCTTCCAGGCCATGGTTCGCTGTGCAGCCCTACGAGAAGAAGCTGGTGCAGGCCAGAAAGAGGG  
CAAAGTGCCTCCGCAAACTGGCTCTGCCGGAGCTGGTTGCCCGCGCTGACCGGTTCCATCCTGAGCAAG  
GACGAAGCGGACAAGCTGCTGGCCCGGATGCCCTGCGCTACGAAGCGATCCAGGTAGACAAGTTCGCCC  
CGGGCGAGCTGGAAGGCTTCTCCAGCAAGCAAAAGCAGCCAAAAGGTCGAGCACGCAGCCTGATC  
CCTTGGCAAACAGTACCAAACCGCCCTCGTGGCCGGTTTTTTTGTGTTGTTAACCATGCATTTACAAGC  
CGGGAGAATTCCAGTTAAATGCTTGAGTCCCTGTTGCAGGGGCTTTGGAAGCAAGGCCAGCGGAATGGCC  
GATAACAACAAGTACGGAAGAGTGAATGAACCTCGCCAAAACGGCGATCGAACGCCCATCTGGGTGGCG  
GTTTTGATCGTATGATTTTCTGCTGGGCTTGTCTCAGCATCCGGGGACTGCCGATCCAGCTGTTCCCG  
ACATCGACCGTCCACACCTCAACATCTCGGTGAGCTGGCGTTACGCTCGCCCCAGGAGATGGAGTCGGA  
GATCACCGACCCATCGAGCAGGAGATGCAGGGGGTTACGGGGCTCAAGAGCCTTGTGAGCAACAGCTAT  
CCCGGCTTTTACCAGAAATCGACATGGAGTTTGCCTTCGGCACCGACATGCAACGGGGCCAACTCGATGTGA  
TTTTGCGGATTGAACCGGGTCTCGGGATTGCCGGACAAGATCGGCGGCCCTACGTCAACAAGTACAGCAG  
CAACGATACCCCTCACCTTCTTTCATCCAGCAGTTGCCCGGTGCCAAAGGGGTGATCGATGATCATCAG  
GCGTTGATCGAGGCGCGGGTCAAACCCGAGCTGGAGCGCATCGAAGGGGTCTCGACAGTCTCGATCGAGG  
GGATCAACGAGCGCCAGATCCAGATCCGTTTCGACCCCTATCGCGCCGCCGAGCTGGGGGTGGAGATCCC  
GGTGTGGCCAGCCGGGCCACCACCGGCTGGGACGTGTGCGCCGGTACCTCGACATCGTTCGCTGGGAG  
TACAAGCTGCGCTTCGCCGGTCTTACGATGTGAGTGTGAGTGGGGGACAAGGTGGTGGATGGCGCGATG  
GCCTGCCCATCTATCTGCGGGATGTGGCGGAGGTAAGGGTGGCAAGGGAAAGAGAACCCTGGTGTGCGGAT  
CCAGAACGGCAATACCGCCATCGCCACCCAGATCTTCAAAGAGAGCGGTGCCAATGCCCTGGCCTCCCTT  
GAGGCGATCAAGGCCCGGGTGAACGAGCTCAACCGCGAGGTGCTGGAACCGGTCCGGCTGCACATGGAGC  
AGTGTTCGATGCCTCCCTTACATCAATCGCGCCGTGAGCATGGTCACTGCCAACCTGGGGCTCGGGGT  
GCTGCTCTCCTGTGCTATCCTTGGCTCTTCTGCGCCGGCTCAAGGCGACCTGATGATTGCCCTCGCC  
ATCCCCATCAGCATCATGCTCACCTTCTGTCTGCTCAAGGTGATGGATCGCACCCCTCAATATCATCTCGC  
TGGCGGGCATCGCCTTTGCCGTCAGCATGGTGTGCTGACGCCGCCATCGTGGTGTGGAGAGCATCTACCG  
GCGCCACGAGCGGGGGATTTGAGCAAGGCGGAGGCAGCGCTTGAAGGCACCCGTGAGGTGTGGACGGCG  
CTGGTGCCTCCACCCTCACACGGTCCCATCTTCTGCGGGTGTGCTGCTCAACGATGTGGAGGGTCT  
AGCTGTTTTGCCGATCTGGCGCTCACCATCGCCTGCGCCGTGACAGTCTCCATGCTGGTTCGCGGTACCGT  
GCTGCCTGCGGTGGCGGCGCGCTGGATGGGACATGAAACGCTGACCGATCCCTATGAGTTCGCTGTGGCAG  
CGCACTACCCGTGATGTGATCCGCTGGACCTCGACCTCACGCCAGCGCTGGACGGTTCATCACCTGATGA  
TGAGCCTGCCGGCCCTGGCCACCTGGGCGCTGCTGCCCAAGATGGACTATCTGCCGGACGTGAAACGGGA  
CGCGGTGGATGTCTGGATGAACTTCAACCCCGGGTCAATCTCAAGGCCAGCGCAAGAGGTGATCGAT  
ACCCTGATCGCCCGCTCGCCCCCTACATGAAGGGGGAGAAAGAGCCTGCCCTCAAGAAGTACTACATCT

TGCGCTACCCGGGGGGCGCCAGATTGGCGTGGCCCCAAGGACGAGACCCGCATCAAGGAGCTGGAGAG  
CCTGTTGATGAAACAGCTGCTGGTAGGCATTCCCACACCCGGGTGTTTCGGCGGTTCAGGGTTCGCTGTTT  
GGCGGCTTTGACAGCGAGAACGGCGTCTCCCTGCTGCTGCAGGGGGCAACCTGCCGAGCTCTATCAGG  
CGCCCCGTGCCAGCATGGGGATCCTCAGCAAGGACCTGCCGGGAGCACAGTCCGGCCCCAACCAGTCT  
CGACTTACCCGCTCCCCGAGCTCAAACCTGGTGGCCGAAGATCGGGCTCTCGCCGAAGTGGGTTGGGATCGC  
ACACCCCTGCCACCATCATCCAGACCTTTGGCGACGGCTTTCGGGGTCGGCGAGTATTTTCGATGGCGAGG  
ATCGGCTCGACATCATGCTGATGGGGCAGAGCTCCGCCAATCCGGACGAACTGAAGGCAGTGGCGTGGC  
CACCCCTCCGGGCGCATCGTTCCCTTGGCGAGCTGCTACGGGTGGAGCATGACATGGGCCCCGGCCAGC  
ATCTTCCGGGCCGATGGGCGGCGCAGCATCAGCCTGCAGATAGCGCCCCGGCGGGTATGACCATGGAGC  
AGGTGATCGACACCTGAAAAACCGCAGTTTTTGGCCCATCCGTCCCTGCTGCCCGGGTGGCGAGCT  
GCGCATTTCCGGCAATGCCGACAGCCTGCAACAGGCGCTCGACAATCTGGGGACCATCTTCTGTTTGGC  
GTGGTGATCCTGCTGGTGTCTGTGGGGAGTGTTCCTCCCTCAAGGATGCCCTGCTGGTGTCTGCTCA  
CCCTGCCCTTGCCTCAGTTGGCGGCGTGTGGCACTGCAACTGAGCGGGCTGCTGGTGGCGTGGCGAT  
GGATCTGCTCACCATCATCGGCTTTGTTCATCTGCTGGGACTGGTGGTCAACAACGCCATCCTGCTGGTG  
CATCAGACCCGCACCGCCGAGCGGGACGGCATGAGCCGCCAGCTGGCGGTGGCCGATGCCCTGCAAAGCC  
GGATGCGTCCCATCGCCATGACCAGTCTCACCAGCATCTTCGGCATGCTGCCGTGATGCTGAGCCCAG  
CGAGGGGAGCGAAATTTACCGCGGGCTCGCCACCGTCATTGTTCGGCGGCATGAGCTGCAGCACCCCTGTTT  
ACCCTGATCCTGTTGCCTGCCTTCCCTGCGTCTCGGGGAGCAGGTGGCGATCCCACAACCCCTGCGCCAGC  
GGGCTGAGCAAGGAGCTCATCGATGACACACATGATTACCCGAATGTTGGCTGGCGTGTGCTGATTGC  
AGGCAGTGGCTACCGGTATTGGCCGATCAGGGCAAGATGGTACCCTGGCGGATGTGACCCAAGGGGAT  
GCGGCCCGCAATATCTGGGTGAGCGGCACGGTGGCGAGTCCAGCAGCGGGCGCTCAGCGCCGAAGTGA  
GCGGCCGGGTTGAGTGGATCGCCGAATTTGGCAGCCGGGTCAAAAAAGGGGACGAGCTGCTGCGCCTCGA  
CAGCGCGGCACTGCGCCTATCGCTGGAGCAGGCTCGCGCCGAGCTGGCGAAATGGCAGAGCAACTTGCGC  
TTCGCCCGCGCCGAATCCCAGCGGGTACCCCGGTACACCAGCAAAAAGAGCGCTCCCAAAGCCAGTACG  
ACAAGGCCAGTTATGATGTGGAGCAGGCCGCGCTGGCCGAGCGGCTGGCCGCCATACAGGTGAACCAGAT  
TGAAGAACAGCTGCGCCGAGCCACATCTATGCCCGTTCGACGGGGTGGTGAACAACCACCTTCATCCAG  
CCCCGGGAGCATGTGGACGCGAGGCGAGCAGGCGCTGGAGCTGGTCAACCCGGATCAGCCGGATATCCGCC  
TGCAAGCCCCCATCTATGGGCCAGCAGCTGGCCCGCAAAACCCGGCTGCGGGTGGAGGGGGAGCAGCT  
GAGCGGTACGGCTTATTACCAGCGAGCCGCGAGCCGATCCCAAGTCGCGCCTCATCGAGCTGCGC  
CTCAAACCGGAAGCGGGCACCTTCATCATCGGCTCGCCGGTACGGGTGTCCTGCCATGGGGGATCAGC  
AGAGCATGCTGCTGCCCCGAGATGCCTTGGTGTCTCGGCACCGATGGCAGCGTGGTCTATCAGGTGGCGAG  
AAGCGGCAAGGCGCTCAAGGTGAATCGGGTGCAGGTCACCGTGTGTTTGGCGACAGCCAGCAGGTGGCG  
GTGAGCGGCGCCCTCAAGCAGGGGGATAGGGTGGTGGTGGCGGGCGGGGACGCTGCAGGATGGCGACA  
CCATAGCGCTGTTCAAGGGCTAACCGGGCCGACGAGGCTGGCCAATCTTTACCCGCTTGACCCGGAAC  
ATACAGCCAAACGGCCACAGTTTTGCTATCTTGGCGCCATCACTCGCGTTTAGAGCAATCAACACCCAT  
GAGCATTATTTTGGGCATCGATCCGGGATCGCGGATCACCGGATACGGGGTTATCCGGTCTGTTGGCGGC  
AAGGCCGAATACTTGGGCTCTGGCTGCATCCGACCGATTGCGGCGAGCTGCCGGAGCGCCTCAAGCAGG  
TCTATGACGGGGTATGCGAGATCATTACCCAGTTCAAGCCACCGAGTTTGCCATCGAGCGGGTCTTTAT  
GGCCCGCAACGCGACTCGGCCCTGAAACTGGGGCAGGCCCCGGGGCAGCGCCATCGTCCGGCGGGTCAAC  
GCCTATCTGCCGGTGGAGCAATACTCTGCCACCCAGATCAAGCAGGCGGTGGTGGGCACGGGCGGGCGCCG  
CCAAGGAGCAGGTGCAGCATATGGTGACCCATCTGCTGAAACTCTCCGCCACCCCGCAGGCGGATGCAGC  
GGATGCCCTCGGCGTTCGCGCTCTGCCACCTGCACACCCGCCAGAGCCTAATCAAGATGGCCGGCCGTGCC  
AGCAGCTCGGTACGTGGCCGCTATCGCTGAGCCCTTATGTGCTCACGGCTCATCTCGGTATCGCTAAAT  
AAAAAACCAGCCCGGATCTCCGGGGCGGGTTGTTTGGCGGGTAAACAACCGGCGGACTTGTGAGAT  
AAATGTTCTCTCAGTAGCTGGCCATATATTCAGCCGCTTATTCACCCGCGGATTCGCCCCGGCGAGT  
CGAGCCTGCTGTTTACCACGCTTTTCCAACCTCCGAGCTCATGGAGAAGGAGAGCGCCTCCAGCTGGCCAT  
CGAGGCTGGCATCGATGATCCCCACCTCGGTCTCGAGGATGCAGCCCCCTGATCGAGGCGGGCATCGGC  
GGAGATCTCGAGATAGCCGATTTCCGGGAAATCCTTGTGCACCCGGGCAATCTGGTTCGCGCACCGCCTGC  
ACCTGCTCGGGATGAACCCGATCGTACCTGCTTCTGGTTGCTCACCAGCGAGAGCGCCTCCCGCACCA  
CCTTGAGGGTGGAGCGCCACCTGATCGTAATCGTGCAGGAATGCAGCCCCCTGATCGAGGCGGGCATCGG  
CGGAGATCTCGAGATAGCCGATTTCCGGGAAATCCTTGTGCACCCGGGCAATCTGGTTCGCGCACCGCCTG  
CACCTGCTCGGGATGAACCCGATCGTACCTGCTTCTGGTTGCTCACCAGCGAGAGCGCCTCCCGCACCA  
ACCTTGAGGGTGGAGCGCCACCTGATCGTAATCGTGCAGGATCTTGCACCCGCTGCAGCACCCCTCGC  
TCATCTGCTGCTCCACGGTGCAGATAGTACCCCTGGCACTGCAACTGGGTCTGGTGGATCAGCACTGCCTG  
TTCGCGCCGAGCCTCGTCAATCCCAGCTTGGCCAGCCAAGGCTTTTCTGCTCTTCATAGACGGCGCGGGCC  
TCGGCCACGATATCGGCCGCTGGGCCCCGAGCGGCTTACCAACTCCTGTGCGCTCAGGTAGGAGAGGT  
AATCCTGGCTACGCAAAATACGCTGGCTTGGCGCCAGTTGCAGATGGTACTCTTTATTTCAACAAATGG  
CAGCATTGGGGGGTTACCTGTTTGGCAATCTTGGAGCAAAAGCGCCCCGGGCCAGTGGCAGCTGGTACGCCG  
CCAAAGGCCATGATGGCCAGGTGGCGCTAGGGGAAGTGCAGGGTGGAGCGGGCAGCCAGTCCGGGGTA  
GCCTTCCCCTGCAGCCGCCAGCCAGAACTGCAAGCCCGCTCTTCCAGCACCCCTCATCGAGCTGAGCG  
GGCAGAGGCTGCTGCCAACCCGAGGCCAGGGCCGATCAACAAGTGCAGCTGGGAGAGTACGGCTCTGT



CCCCCTCCTCCCCAGCAGGGCGATGATCTGGCGCAGCGTTGGTGCCAGCAAGCAGTGGCGGATCGCCTC  
TCCGTGCAGCACGGCCCCAGACGGCGCAACAACAACACCAGTTCGCTTTGGGGAAAGAGCGCCAATCCC  
CCCAGAGGGCGGGGCATCTCGTAGCCAATTCCCAATGCCAGCGCCTCGAGCAAGGCGCGTTACTGGCTG  
GCAGCGTCCGCCACTCTGGCAAGAGTTCCGGCACCTGCGCCCAGGATGAGGGCAGGTGCGCCTCATGGAG  
GTAATTGGCCGGGCAAAAGCGCAGCTGATAGGGGGTCAAACCAGCCGTCATCCGCGACTCCGGCTCCGGT  
GCCACATGTATTGCGCCAGGTTGCTGGTCACTACCAGCGCCAGCAACAGGGCAATCAGGCCGCCAAGCCG  
CCACTTTGAACCTTCGCTCACTTCAATGGAGAAGAGCGAGGTATTGCGCGGCATCAGCGGGCTCTGGCGC  
ACATCCGCCGAGGGCACCAGCACCACGCTGATCCGGTCTGATAGGCGAGCCCCCTCGATACTATTGTTGACCA  
GCTGTTTGATCTGCGGAATGTAAGTATCGAGCTGGATATCCGCCGCATGTTTGATAAAGACCAGGGCCGA  
TGCGGGAGAGGGTTTCTTGCTGATCCCCTCATTGCCCTCCGGCAGCACCACATGGACACGAGCCACCAGC  
ACGCCGTATATTTCCGACAGAGTATTGGAGATCTCCTGCGCCTTGGCATAGGTGAGGCGAGCCCGCTCCT  
CGGTGGGCGAGGAGATGAGGCCATCCTTGGGAAACACATCCTGCAGAGTGGAGAAGCTCTCTTTTGATA  
GCCCTTGCGTTTTGAGGGTCTCGATGGCCTGCGCCACGTGAGACTCCTCCACCAGCAGCTTGATGCGGCCA  
TCCTTGTCGGCTGCTTGTCGAGGCGATCCCCTCGGTCTGCAGCAACGCCAGCATCTCGTTGCCCTCTT  
TCTGAGTGACCCCGGTATAGAGCTCCACTTTGCAGCCACTGAGCAGCAACGAGGCGCCAAGCACCCCAT  
CAGCATCGATCTCTTCACTACCTCACTGGGTCTTCAACAGGGTTTCTACGTTCTGGCTCATCTTGCCC  
ACTGTCTTGGAATCAGCTCCTCCTGCATGGTATCCGCATCAGCGACCCTGCATCTGCATCAGGCTGT  
TGGGATCATCCCCGGGGTGGCCAGCTCGGCTTGCAAGTCTGTTTGGCTCGACAACTGCTGCTTCAA  
CTCCCCAGCTCCCCGAGCAGGGAGCTCCCCATCCCCTGGGATGTACTCCCCATCGCCTGTTCAAACTG  
GCGATATGGGGCGAGGAGAGATCCACCGCTTCAACTCATCCAGGCTGGTGACCACCGCCTGGGCAGACT  
GTGTAATTTCCATCACGCCTCCAGATCAAGTTTGTGCGAATTGCGCATCAGATTGTCTACCATGCCGTTG  
AGCGGGATCAGGGTCATCAGCTCGCGCCGGGCCAGTGCATCGAGAAATTGATGTCCCGCAGGCACAGCGC  
CCTGCCCGTCCCTGAGCTCGCTCAACAAGTTTCCAGCAACACCTTCTCCCGCCGCGATGCCAAGGGATCAAA  
CTCCCGCATGGTGGCCCGCAACTCCGGCAGATCAATGGCATCCACCACCGGCGACTGACGCTCGCCAAAA  
CGCGCGATCAACTTGTGAGTGACCGGGACAAAACAGTTGCTTGCCAATCTCCGGCGCGGATTTGTGCCCCT  
GTTGGTAGATCTGCCAGAGCAGTTCACGCTTGGCGGCGGGCTCCACACTGGCCAGCAAACCCCAAGGGG  
GGCCCCCTGTTGCCAGCGTTCGAACAGATCCGGCTCGGGAGTCTTGCCAGCAGTCGCTCGAACTGGCGT  
TGAGCATGGATTGCGGGGGGGGGCTGACGACGCGGCTGCTCTCCCCCAGCTGATCGCTGCCTTCAA  
TTTTTCATGAGGCCATCTGCTCAGCAGGCGCGGCAACTGTTGCAAGTTGGCTGACCGCTTCCCTGCC  
AGTCGAGCAACCGTGCAGCCAGCGCCTCCTGCTGACCAAGCCGCGACTCGCACAGGGCCAGCCAGGGCT  
CGATATCCGATGTGCAGTGCTCGCCACCAAGCTGCAAAGCGGCCCTGGTAATCCCCCGGTTTCATCAGGGA  
GGAGAGGCGAATGAGCGTTACACACTCGGTTCATCTCCGGCGCACCAGCCAGCCAGTCGGCAATAGTAGCC  
GCCTCCTGATGGCAATGGTGGCCGGTACCAGCCAGCGCAAGCTCGGCCAGCTGTCGTTGAGTTGAGGGT  
TCATCATCAAATCTTCTGAAAATACCCTGCATCAGGTCTTTCATGGCCCGAGTCACGGTGGAGTTGATG  
TTGTAGATCACCGACCATTTGTTGATCTTGTGCTGCAGCTCGGCCAACAGCGCCGGGTTATCCGGATTGG  
TTTTTCATCGCCTCAATGGCCTTGTGACCTCGGTATTGGCGTCATTGGCTGCCCGGAGAGGTTTCGATGC  
CACCTGATCGAGGGTGTAGTAGTACCGTCCGCATACTTAAAGTAATCAGCCATGGTTGTGCTCCTTTAT  
CTTGCCAATGATCGTGAGCCCCGCTCGATGGCGTCCGCTGTTGTTGCCACTCCCGATACTGTTGCGGG  
GTTCCCCCGCGCAGCAGTTGCCGTTTTACGTCACCCTGCGCCTGAACAAGCTGCTCATGCAGCTCACGGG  
CAAAGGCGGGATCAGCGCCGGACAGTCGCGCTTCCAAACTGGTCATCATGCCGCTCGGCTCCTTTTAATT  
TAACGATGTATTGCTGCTTACCCTTGCTCACCACCACCGCATCGGGGCGAATGGCCAGCACCCGCGCAGCC  
GCTGGAGGTTGCTCCCCGACCGGATAGCGCTGGTTGTCCGCCAGTACCACATAAGGCACCCGGCCAAAC  
GAGACGCTGCGCACATCGAACTCCAGCTCATCCTGACGCGGCGTTCCTGGTCTGATTGATCAGCTCCAGCG  
TCGGGTGTGTACCAAATCCCGGCGAAACTGCTGGTTGACCTGCTGAAACTGGCCAAGTTGGCGCTCATC  
CAGCTGGCCGGAGAGTTCGAGTCGCCCACCCGCTCAGCACCAGCAATGCACCAGCCAGCCCTGCTCC  
TGTAGCAAGGCATCGAGCGCTTTCGATAAAGCCCCGCAATCTGTACCTGATTTTCAACCCCGAGCAGAC  
CGGGCACCTCCTGCTTGAGCAGAGATTCAATAGTGTCTCCACTTGCCATCCTGCCCTGAATTTACCGCT  
GAGCCTGAGCCAGCCGGGCTCCTTGCCATTGCGGATCTGCAGCTGTTTATAAACCAGCTTCTGCAAGATA  
AAGCCGGCACCCCTGCCGCAAATCTTCCATGGTGCAGCTCCAGCCGGTAGCTGAAACCCCTGCTGTCGA  
GGTACTGCTGCAAGGCAAGACGCGGCTGTTCTCATCGACGTAACCCGAGAGTTGCCACAGCTCGGGATC  
ACTGCTGTTTACGACACCCTGACGGTAGTTTGGTGCGGCCAGAAAGCGCTTCAATGCCGCTCACTGCGG  
GCGGATTGCTTCTCGTCGGCGCCATGCCACCAGCCCGTGCAGGAGCAGCAAGACCACGGCGACCACCAGAC  
TCAGGCAGAGGGCCCCCATCCAGACATCGGCGCCCGCTGTCCGCCCGCGGCGCACGAGAAGGAGCAAC  
CACCGCCGCCAGAGCCTCAAGCTGTTTCGGGTAGCGAAGCACTGTTGTACAGAAGCTCCAGAGCAGCGGG  
CCTGCCTCCAGTCGCGTCCCCGCCCTGAGCGTCTCTCCCGCGGTGAGGGCGACACCGTCTGAGTCGGGG  
TAATACCGTCCGCCAGGCTTGCAGGGTATCCCTTCCCCATTACCAGCAGTACCAGATGCTCGGGGGC  
CATCCCCTCATCCACCAGCACCAGATCAGCCTTGGAGGGGATCGGAACCGATGACCAGACGCCCTCTGGC  
AGAGGAACTTCTACCCCGCGGTTGAGCCCGGATATACGCGGCACTTCCAGCTCATCGGGTTCGCGCCCTC  
ATTGCCCGCCTGCACGCACCAGCTGGCGGCCGGTGTACATTTTGTGATCCTTGTTCATTTCCAGCCAGACGC  
CACCCAGCTCATTGCCATCCGGCACTGAGTGAGAGACGAGCTCTTGCCCCCTGACGCAGCAGTTGCT  
GCACGTACGGGCTGCAGCCAGCGGCTGGCATTGCGCGCCTCCAGCACCTTGCCAAGGGAGAGACTCTG

ATTGGAGATCTCATCAGCCCCGAGCACCCCGGCTCGCAGATCCTGACCATTGCCGAGGGCCAGATAGTGG  
GCAATACCGTCAATCAATCAGACGAGGCTCAATGATAAAGAGCCGCACCGAGCGACGGGTCTGGGTGTCCT  
TGCTACGGAACAGCGCCCCCAGATAAGGGATGTCACCAAGGAAGGGCACCTTGCTCAGATTCTCGCTCAT  
CTCGTCGCGGTAGATAACGCCAATCAGCAGGCTCTGGCCGTGGCCGACCCGGGCGATGGTATCGACCAG  
GTGCGACTGATGGTGGGAATGCCATCGGCCCCCGCACTGTTGGGTTTCTGGTTGCCATCCTCGATGTGGA  
GGCTCAGGCTGATCTCGGGTCTGTCACCCATCTGGATCACCCGAGGGGTTCATCCGCAACATGGTGCCGTA  
GGTGATCCCCTGCAGCTCGGCCACCCGCTCGCCGCTGATCTTACGTAATAAGTCTCGCTGTGGTCGATC  
ACCGCCTGGGTATTCTCCTGGGTGAGCAAGGTCGGACGGGAGACCACCTGGGCATTGCCCTTCGTTTTCCA  
GCAAGTTGACCCGGGCCAGCAGATAGTCGAGTCTTTTGAATCCACCAAACCTGCCGAGCGCGGCCCCCC  
TTCAATTCCTTTGCGATCGCCGGTGGTCTTGATAATCACCTGCTGGTTGGAACCGGTGCGGATCCCCACT  
CGCCAAATCCACCCAGCTGGGAGAGATCCTCGCATGATGTCATAATGGAGAGCGCCACCTCAATGC  
GGCCCGCGGTTTGTGCGAGCGCGGATCAGCTTGGCGTACATCGCCATCCGCTCCGAGCATCGCGCAC  
GATCACCGCATTGAGGGAAGGATCAGCCTGCACGATGGCCTGACCGGAGGTGGCCGTGCTGCCTTGCTA  
CCCTCGCCGTTGACCATCTGCACGCCAGCATCGCTCAGCAGCTTGGCCAGAATGGTTCGCCACACCGGGCG  
CCGCCACATCGGTATCACGGTACTGGATGGAGCGGTGAGTCCGCCGAGGCGTACTTGAGGGGGAAGATCTC  
GATGGCCAGCGGCCCGGTCTTCTCGCTGCGCAGCTGGGATTGTTGCTCCAGTGCCAGCGCGGTCTGCTCG  
ATCAGCTCAAGGTAACGGGGCGGGCCGGAGACATAGACCAACCGGTTATCCGCATCGGGGCGCCAACCAA  
AGCGGGGCTCCCAGATCCCGGCTCGCTGCAGCGCCTGCTTGAGTCTGCTGCGCCAGTCTGCTCCAGATT  
GATGAGACGGGACTGCACTTCGCTGTTCTTGAAGACGTAGAGCACATTGCCGTCTAGTACCAGACCAGG  
TTGTAGAGGGAGGAGAGCTGCTGCAAAAAGGCGAGCGGCTCGTCAATGCTCAAACCTGACCGTTGACCTGAT  
CGTTGACCTTGTGCTAACCACCACCGAGACCTCGTAGTTGGCACCGAAGTTGACCAGCACGTGCGCGAG  
ACTCTCCCCTTACGCCACATAGCTGTAAGGCATGGGCACCCAGTCCAGCTCCTGTGCCATGGCGGGACGC  
TGCCACGCCATCACGGCGAGGCAGATCCACAACAGGGGACGCAGCAGGGGTTGCACACTCAAGGGTGCCA  
TATCATCTGTCTCCATTGGGGGGCCAAGGCGGCTCGGTCAATTTGGGGTTCCAACCGCTCCAGCAGGGCG  
ATGTGCTGGCTCAGGCGCTCCGCCAGCAGCGCCTCGTCGAGCCACTCCAGCGAGAGCCGCGCTCCAGCT  
GCAAATTGCCAAGATCATCCAGCACCAGGGCATGGGGGGCATGACGCCCCAGGCCACCACCTGTTGCAA  
CAGACGCTTTAGCAGCGCCGATCATGGGCTCAGCATTCCTCTGACTGCTTACAAGCGGGGTACTC  
AGCAGCAACTCACCGTTTCTGGGGGTGAGAAAGAGGGGATAACCATCGATCCGCAGATGGTACTTTCCCT  
GTGCGTCGGAATAAAAGCCCTTGGCCAAAGTTGCGGCCAATCGATTGATTGAGTGGTTCGCTTGTGCTTCC  
TCGGGCTATCTAGGGCGCAGGAGGCTGCCAGTAGAAGTGATCCTGACCCAGGGCAATGCCCGGCCGGCC  
AGCCACTCATGCAGGGTTAGGGCTGCCTCGTCTGATGGGGCAGAGCCTGCAGGGCATGCCAGAATGTGC  
CGAGCTCAAGCGGCACCGGCATCAGGTGAACCGGGTCTCCCTCCTTGCTCGTGTGTCATAACCATGCAGG  
CCAGGCCAGCTGGAGACGTGTCTACAATCAGTCTGCAGCCGGGTGAGCTCCTGCTCGCGCAGGTTCAAC  
TGCTCAAGCTGATCGGTGATCCGGCTCTCCAGATCCGCCGGTACATCGACCACGGTCTGCCAGAACACGG  
CCTGGGCATTGAGCTGGCGGCGCATCACCTGCAACTGCTCCAGTTCGTTAAGCCAGGCGCCGTAAAGTGG  
TTCAAGACGCTGAACCCACCAGCGGTGCAAGGGATAGAGCACCCAGTGCCACAGCAAGGGACGATCCGCC  
AGATTGATGCGATCCCCAGCTGTTGCATCCAGTCAACAACGCTCACTGCCTGCCAGACGCAAGATCTGTT  
GCAGCTCCTCACGCGAGACGGCCAGCGCGGCATCGAGACGGCGCTGAAACCAGATGGAGCCCAACAGGCT  
CTCCAGTCCGGTTCTTGGCAACAGTCTGTTGCAACAGGGCCATCTGCTGCGAAGTGATCACGCCGGCATCC  
TGATAACGGAGCACGGACAGCTGGCCGACCAGACGATCCCGACTCAGGGTATCTGGCTGGACAACGGTAA  
CCCGACGACCTGCAACAGGCCCTGGTTAGGTGAATGGTGATCTTGCTGACTCATGCTATGCCCTTGCTCA  
TCTTGCTGCGGGCAATAATGGAATGATGTTTCGATATGCTGGCTATTTATCCATTGCCCTCGCTCCGCGG  
CTTATAAAAAACGTCAGATTATTTTAGTCCGGCGTAACTCTGTGCCGTGTCGGGCACGGCTTGGCGTACA  
GCCAAAACGACGACGATAACTCTGGGTAAAATAGGATTGGCTGGAGAAACCGGCCTCCATCGCAATATCG  
ACGATGCTCATTTCACTATTGAGTAATAACTGATGAGCGAAGAGGATCCGCTTTCACTGATCCAGGCGC  
GTGGAGAAACACCATATATCGAGCCAAACAGCTCCTTGAAGTGGTCAATCCCATACCGAATCTTTGGC  
GAATTCGCTGAGCTTCCACTCCATCAGATAGTGTCTTTCCATAAACTGTGCAACCGCTCGACCTGGCGA  
TTGCTCAGCTGGCGCAAAATAGACATCAGTTGAGGCCCTGTTTCGCCAAAACGCGAGCAGAAACAGCAACT  
CTTCCGTTGCGTAATTGAGCCAGTGCAGGGGGATGTTTATGTTTCGGTCAACCCGCGCAGCCCCGTAATACA  
TTGGGTGAGCAAGGGGGATGAGTGAAACGGCAACAGCGTAGGGGCCATCCCCCAGCCGGGGGACTTCA  
CTCAATAGTGAACCGAAACGTTGCAAGAAGCCTTGTAAAAAGGAGTTTGACAGAGGTAACCAAAGCAGGC  
GGCAGGGGCGCTCATCGGTACAGACCGCGTAGTTGCCACGGCGCACGAACAGAAGTTGTTGGGGGATAA  
TTCATAGGTATCGGTACAGTCTGCCACTTCATCGATCCTTCCAGGAGAATATAAATTCCTCTTGCGGA  
TGTTTCGATAACGTTAAAAGCAGACATGCGCCACTGGAGCAGGGCCATATCGCCCTTCTCTGTGGTAGTAA  
TGCCTTTCATGTTTTATTTTCTGAATCTGCGTGTAGTACCAGTAACACCTCCGGAAGCGGGTCTGCTCTC  
GGGTGCTTTATTATTGCTGTTATTTTTATTTATTTTGTAAATCAAGTCATTCGCTGGTGAATTCAAAA  
ATTAATCACCATTTGAAATGAGGGGGGATCCTACAACAGTCACAAGCAGAAAAACAGCCTAAAAATTAGAG  
CTAACACACTATTTATCCAGTACAACGACTCATACTTAATGGTGTGTTTACAAAAAACATACTTCGTTA  
CAAAAAGAAACCTTCAATCTTAACTGACAAATTAATAAACGATTTGATTTGAGGCTTTTTTATTTAAACACA  
ATCACTACTGACATTTGGATAACAAGCTTTTGGCTGCAATTTGAATAACCATTTTTTTGTCAATAAAAAT  
CTTAAAAACGTTTTTGTGACTCATAGCCTGTACCGCAGTGCCATCCATAAATCGTAAACGGGCACGCAGA

TAGATCTCCCCTTCCGCCAGTTGCAGAGGGGTCAAACGCAGATCAAACAGCAATGGCAGCATATTCACCT  
CATAACGGGTGGCAGCCACTTGCAACGGACGCCCCCGATCACGCTGAGCACCACCACCTCCACTGTCCG  
CGGACGTGGCAAGGCTTGCGGGAAATGCACCTCACCTTGAGTTGCTGTTGCGATGGCTTCAGCTCCGGG  
GTGGTGACACAACCGGTGAGCATGGCCGACAACATCAGCAACTGCAGACCTCTCATAACACCCGGATCCG  
CCGTTCACTCAGCGGTGTGTGCTCACCTGCTGCAGTCGCTGCAGCGCCAGCTCCTGGACCTGATTGAGG  
GTAATAGAGCGTTCGAGCAGTGCAGCAGGGGAACTGACTCGCATTGGCTGACCGGGCACTCACAGTTC  
TGCCTGCAATGCCCTACCTTGCCCGCCTTACCCCATGCAGGGCCAGCGCGCTTGTGATTCCTGAAT  
CTTCATGGTTATACCCGCACTCCCATCACCTGATCGCCGCTGCCAGCTCCCAGTACCCTGTTGCAGCA  
ACTCCTGCCAGAACTCGGCATGCTCCAGCATGCTGGCGAGACTCTCTTCAAGGTACGCCAGAGTCAACCG  
GCTTGCCGCCATCTGGCGATAGAGTTGCACCGTCAGACTCTCTTCATCGAAACCGAAGTGAAGATTGAAC  
TGATAACAGTGACGATTGAAGCTGGCTAACTGACGAAAAATCCCCCGCCACCTGATGCACTTCGGCTA  
CGTCAACCTGCAACACCAGCTGAGCCCGCTCAGATACTAAGATCAGGCTGAGTTGCAACTGCTCGTCAAA  
ACAGAGCGCCGAATCCCCTCCTGATTGAGAGCTAGGGATGGCAAACCATATTTGGTGGCAAATTCAGCG  
AGCAGTCGATTGATGATGACAGTTACATCCATGATTTCTCCAGCAGAGAGGAAATCATGTTAGCCAGCC  
ACCGCCATCCGGGATATCACTCAAGGACGGTACTTTTAAAGAAAAATGGCCGGAAAAACAAGGCGCTC  
GAATGAGCGCCTTGATTACCATGGCGTTTATGCAACGCCGAATGCCGCTTCAAAGCCTGATTCGACTC  
TGGGAATACTGCTGCATCAATTGCAGCAACTCTTTCATAAAGTTAGCATTGAAGGACATATTGTCCCTCG  
CCTTCTGCTTCTCGGTCTGGCTGATGGTCGCTCAACCTCGTATTCCTTGACTTCAGCCTGACTTTCCGGC  
CTGAGCTGCCTGTATCGCAGCGTAACTGTTTGCCCAACAGCTTGGAGTACGGTATTAATACTGTGTT  
CGCTCGGTATTACGAGCAAATTTCTTGTCCAACAACCGCTCGCATTACTGTCTGCAACTTGATCCTGTT  
TCCAAACCTTGCCCGCCTCAGCACGGTCAACCTGCTGGCCTCGCGAGTTCAAGCTGTCAACCTTGGC  
AGTCAAGGCCTCTCGACCCGCAATCTTGACGTCAAGAGATTTTTGCTGCTTAATGGTCTTAGCACTTTGT  
GCTAAGCTAAACCCGCCAGCAACAGCAGATAACCCAGCCATCACCCCGGAGACAACCGCCATGACGAGCA  
TCAGCTTGGCACCATAGCGCATTCTTCCACTTGCGCCTGCTGGTGGCTGATGACCAGCTGTTTTTCGAT  
ATCCCGAACCTGTAGCCCCTCTTCCGGGCTGACGGGCCAGCTTGAACAGCAAGGACATAATCTCCATC  
GACTGTCCAACCTGTGCAACCATCTGGGTACCCCTTTGGTATTTGAAAGGGATTGAGGGGCGTGGCAGGG  
CGGGAACACTCTTGTCTCTAACCCCTTGGGGCGGGTGAAGCGGCAGCCTCATGAGCAGTGGCGGCCT  
GCGAACCTTGGCGAGACCCATCCAAATCTACCGAGGTCATCGCGGTGGTACGGGTACGTCATTTGTATAA  
TCACTGTTAATCATGGTCGATACTCCTTAGATAAGCGCGGCTGTCGGGCAAGTTGTTTCATGTCGCGC  
CCTTGGCATTGATCAACTGGAAGATCATCTCCATAGTCTGCTGGAACCGCTCGATCATCTGGGCTATCGC  
CTCCTTGAGCTTGTGATGACCCCTTGCAGTTCGGTTCATCTCACTTTTTGCTCATGGCAAGATCAGCCTGA  
GCATACAGAGACTCGGACTCTTTCGAGACTGGGCCGATTTAGCCGCGCCACTGCTCACATCAATAATTA  
TATCAGTGGTCTGAGTGGCCACAGTTGCGATTTTTGCTGTCTGGCCTGTTAGCTTCACCGCCTCGACGGT  
CGCTTTAGCACAAACTTGGCAGCCATTTACCCGCTTTGGCAGTCATTTACCCGCTTTGGCAGCAATC  
TTAGCGGCGGCATCTGCGATCTTACCACCCATTTGCTGGCAAGACTCATTATCGCGCGACCAACCAACG  
GGCCTAAGCTGACAACGGCCGACATCACTGCAAACGCAATCTCTATCCCATCAGGGCTGGCCCCAGTTT  
CTCCATTACTTCTTGGAGATAAGGCCATCCGCTGCAGCCTGCTGCACGGCCGAATTGACCCTCCGGCC  
ACACCGGAAGCGATCATCAGGGCGCCGGCGACAGCAACATCCCGGTTGCCACCATGATGGCGCCGATCA  
CCAACGAGGCAATGGCACTGAGCCAACCAAAAACTTTGCTAAAGACACCGGCCTTCTTGGCCTCCTGAGC  
ACTCTCTTCTGCCTCTTTAATCTTTGCTCCTGCTTCTCGCCGATCTTCTTCTCATTTCAACGTACGAGCTTGC  
CGGAGATCATCAAGCTTACGCTTGGTCTGGGTCTTCTCCAGATCGCTGGTGGTGGTGGTGGTGGTGGTGGT  
CGAACGCTTCCGGCGAGGTAAAGGCTGCGGTACCAACCCGGTGACGTGCGGCAAAATCAAGCGGGAGTT  
CTCGTTACCGAGGTACCAATTTGCCAATGTACCAAGCTGCTGTGCACTGACCTGGCTATTGCTTACC  
ACCAAAGGTGCGTTACGCGAAACCCCTGACTTGCAGCTTACCAGGTAACGGCACCGTTGCGGCATCGA  
GCCGTGTTTTACTGTGAGTTGAGTAACGGGCATGAGGCCCGGATATCACCTGTGTTTCCAGTGGGGA  
AACCTGTCTTTCACTGATCGGGTTCATCTTGCAGATCCCTTCTGATTGCGATGGCTTCCAACATGAC  
CTTGGCGCTTGCAGCAAGTCTGCCTGCGGGGATCTGTGTCCGCGCAGCAGTCCGGCCGAGTGGGAAGCCA  
CTCTCAGCCCCGTTCAAATCACCTTGTGTCAGCCGGCACTCGGCTGCATGAAACGGGAAACGAGGATCTT  
TTAAGTCGAGCATGGCGCAAAGCTGTAACCTGAACTGCCGTTTCAAACGCTCCCATCGCCTGGCGGCA  
GGCACCCAGCCCAGGAAATAGCGTGGCTCGTAGTGATCCAGCATGCAAAGAGCCTGGAATATTTTGTGA  
GCATCTTCCACTTGCAGCCTGATACTGGCCAAAGGCCAGGCATAGAGCTGCTCCAAGGTGTCGCCAG  
AGATATCCTGCAGCATGGCCAGGGTACCACCGTCAGCTATAAAGCCTCCAGCTCTGCTTCATATTCGG  
GGTCAGGGTGGTGTGCGTCTGCATGATCTCTCCTCAAATTCGCGCAAGAATGTCGCGCATGATGCTGTG  
TATTTCTGGATAAAGCGGTTGAGTGCCTCGATGGCGCGTGTAGCGCGAGCTGACGTGTTGAGGCGGG  
TAGTCTTTTCACTGACCTGATCGTTGAGCGGGCGAGAACGGTCCGCTCACACTGGTGGAGAAGTTGCCAAG  
CTTGTGTTGTGCTTGTGATAGCTGTAGCTGGCTTCGATATTTTTTCATCGCGCCGCTCTTCTTTTGTATCA  
CTTTTCGAGGAACGTTTTAACTGTGATGACCTGCGTGGCTACGATCTTCTCAAATTTGGCTTTTTTACGCT  
CATAATCGATCTTAGCTTCCGCTGGATTTTGGGGTTTAGGCTGGTCGACATTACTTTTTTCCAGCTCATT  
TTTAGCATTGGTGAATCTTGTGTGCTTTTTTACCTGCTTATCGCTAAACATTTTTTGACAACAGCTTG  
AACTCGCCCCCTTCCATAAATTTGGCCAGAGACTCATAGCCATAGAGCTTGTAAATCCAGCAGATTGAAAT  
TGGTGTGAAAGTCTGGCTGGACCGCCGAGAGACACCTTGTGATCTCGGACTGGATCACCCCGTAGAT

CTTCAGCTCAGCGTTCATCTCTGTGTCAGCTCATCCCGCAGCCCTTTACGTTGATTGTCCTGAAACATCATC  
ACCCCGGTAAAGTTGTGATGAGATCGTCATCGATGCGATCCATGGTCAGCGCACTGAGGGAGAGCAGCA  
TAAATTCAGGGATGGTCCAGTGGGTGACTGGCGGGTGTGTTTTCTCCCCGCTCGATCATCCCCTTGAT  
GGCGGCAATGGCCGCATCTTGACCTCCCTTGAAGTGGCCCATCGCCCAACCCCCGTTGATCGAGGCGGGA  
TCCGTGATAGGCAGCCAGCAACTTCTCCAGCTGCTCCTTGCTTAGCGCCGTTGACGGGTGAGCACTGA  
TGGTGTATCTTGCCCTTGAGCAGCTCGACCAGTTTCGGTCAACTTGGGGTTTTTATGGCCCCGGCAATGCGTC  
CAGCGCTTGCCCATCAAGCCAGCCGACAAACGCGCCCGGGTGGTGTGTAGTCAGGGATAGTGCTCATT  
ACGACTCCTTAAATCATCAGTCCGCGCATCATAGTGGGACGGCGACTCTTGCGGCCCTCTCCCCGCTGTG  
CCGGCAGTAACGCCTGTCTGCGCTGGATCTCAGCCAGCAACTCCTGCTCGGCCACGGCCACTTGCCTCGGT  
CGGCGCATCGAATAGCAGCTGACAGGTCTGATCCGAGAGAGCGAGGCCAGCCAGCATCTCTTGCAACAGA  
GCGTTGCGATGATCGTATCGGCAATCGCCTGCTCTGCTCGGAAATGGTCTCGCTATGGTTCGGCAAAAC  
GCGGTTGTTTTCATCTTGCTCCTATTCTATGAGGCCCTTTTGGACATGCCTGTACGCAAGCCGTGCTT  
TTGTGTTTTTCGCATATCTCGCAGGGAACAGACCTGCTCGGCCGCCAGCATGAACCAGCCGGGCTCGGGT  
TCACTAGCTCCCCGTCCAGCACAGGTAGAAGCGGCCGAGCCGCTCACTGCTCAGGCTACTGCCACGAAAGA  
CATCGACGTTGCCGTAGAGGTAATGGCCCCGCCGAGTACAGCCAGAGTGGCTTCGGCCAGCAGATAAAG  
GGCTGCAAAGGGATTGGCCAGTCCGGCCGCTCCCCCTCTCGGCGCACCAGCAGGATCCAGACCCGTCGG  
GTCGAGGATCAAAGCGCCAGGCGAGATAAATTTGGCGATAGCAGAAAGCGTGGCCGAGCTGGATGGGGG  
TTGCCCCCAGATGGTGAGGTACCACCGCCACACCCCTGGCTTGCAGCCAGGGGATCAGGGGGTCAGAGGT  
TAACGGGTCCCCCTCACAGGCAGACCCCTCCGAGGGGCTGGATATTGATCTGCTGGGTGAGCTCCTGAT  
AGGAGATCACCGGCAGGGCATGGTAATCCCCCTCGATCAGCTTGCACACATAGCGGCGGATATCCATGGA  
GACGATGAGCACCAGTTTGTCTGATCTGGGCCAGATCACCGACGGTATGGCGCACCTGATCGAGGAAG  
CTCTGGGTAATGGTGGGATCGAGCGCCAAGTAACTGCCCGCGCTGGTCTGGCGAATGCCGCCACGGATCT  
GCTCCTCCACCTGCTGATCGAGCAGATAGGCAGGCAAGATGTTGTTGCCGTTGGCGTACTTGTAGCAGAT  
GTAGCGCTTGAGGCTGCTACGGATGTAATCGGTGAGCTGCACCACATCCTTCTCTTTCTGGCCCCACTCC  
ACCATCGCCTCTAGGATGGCGCGCATGTTGCGGATGGAGATATCCTCCCCACCAGCCGTCGAAAATTT  
CGGTCAATCGCTGCAGCGAATGATGCGTTCGCGCTCCTTACCAGCTCGCCATAACTCCCCCTCATCTG  
CTCCAGCAGGTAGCGGGTCTCCTGAATGCCGATAAAGTCTTCGGCATAATCCCGCAGCACATGGGATAGA  
TGCCAGGTACCACCTGATCGGTGGTGAGGCTGGCCAGCCGCTGACTTCTCCAGCCGATCCTCATGTTT  
TAGCAGCCACAAGGTGCGTTGTCGCCGAGTAAACCGCCCTCTTCGTAGGGGATCCCCAGATGATC  
GAGCTGGGAGGCACTCTCCTGAACCAGCTGGTGGCCCGGTCGCAGCAGACCGCGGGCGACCGGCACCTCC  
TGCAGCTGGATCAGGTATTGCGCAGGCCCCATTCCCTCGTTGAAACGCAGGTGAATGCCCGGAAAGGGCA  
CCCCGAGATCGAGATAGAGGGCGCGGCCACCCGCACCAGTTCGTCGTTGAGGGCAATCGCCTCCAGCTC  
GGCCTGCAAAGCGGCATCCACATCGATCAGAAGCGGCACAGTTCATGGCGAACTCCTCCTTCTCCCCCAGC  
TTGCCCCGAGGCTTGTGCCCCGTTTTGGCTTGTGCGGGCGCGGGGGCTCCCGCCCCCTGCGCCAGCA  
CGGCAGGAAGATCCTGACTGTTGCTGCTCTGCGCCTTGCCTGACGCAAGCCGATAAAGTAACCGCCCGC  
CGTGACGATGGCCGCCAGCGCAAAGAAGGTGATCATCGGGAAGCCCGGATCAATCCAAACAGCACCAGC  
AGCAGACCGCCGATCAGCAGCGCCTTGGGCTGGGCCACCACCTGGGCGCCGATATCGGTACCCAGATCGG  
AAGACTCTTCGGAGGAGACCCGGGTGACGATAATGCCCGCGGTGATGGCGATCAGCAGCGCCGGCACCTG  
GGAGACCATGCCATCACCCACCGTCAGGATGGAGTAGAGCTGCAGCGCATCGGCGGCGGATAACCCCTTC  
TGGGTACCCCAATGGTGACACCGCCGAGGATGTTGACGAAGATGATGATGAGGGCCCGGATGGCGTCCC  
CTTTTCAAACTTCATGGCGCCATCCATGGAGCCGAACATCTGGCTCTCCTTCTCGATGACACCGCGGGC  
ATCCCGTGCCTCGTGCACGTCGATCACCCCGGCGCGCATGTCACCATCGATACTCATCTGCTTGCCGGC  
ATGGCATCGAGGGAAAAGCGGGCACTCACCTCGGCGACCCGCTCCGAGCCCTTGGTGTATCACCAGAACT  
GGACGATGGTGTATGATGAGGAAGATGACGATCCCCACCACAGATTGCCCCCACCACGAAGTTGCCGAA  
GGTGTAGACGATGTCGCCCGCATCGGCCCTGCAGCAGGATCATCCGGTAGTACTCACCACAAGGCAAGC  
CGTAACAGGGTGGTGTATGAGCAGCACCCCGGAAGCGGAGAATGCAGCGGCGAATGATATAAACC  
CCATCATCAACAGCACCACCGAGATGGTTCATGTTGATGGCAATCAGAATATCGAGGGCCACCGGCGGAG  
CGGCAAGACCATCATAAAGACGATGGCCAGCAGCAGGATCGCCAGCATGATGTCCTTGCCTGCGCTATC  
CGGCGCAGCAGCTCAAGGGAGCGTTGATTCAATCTGCTCTTCCAGTTCGAGGTATTGTTGATAGGCAAAA  
CGGGCTTCATCCAGCCGCCCTGCCAACTGGCAGGCTCGGCTGCGGCAGAGCCAGAGCGGGCCGTCGGCCT  
CCCCCTGCTGCATCAGCTGATCGACATGGGCCAGCGCAGCCTCCCCCTCCCCCTGTTTGGAGAGGGCCAC  
CAGCAGGGTCCGTCGCCCTCCCTGATGGTGGGGTGGATCTGCAGCAGGGCGGCCAGCAGCACGCACGCC  
TTGTGCGGGTGGCCATATTGCAAGTTCGCAACCAGCCGGTGGAGCAGCAGCGCATCCTGCTGCTGTGACGTAA  
GCACCATGGTTCATACCTTGTGACGAGATGAAGGGTTCATCTGCATCAGTTGTTTCATCGGTGTGCATCTGT  
TCGAGCAGCGCGGCGGCCGCTCGCAATTCTGGGCTCTGCCCTCTGCCAGCACACTGCGCAGCCCCGCA  
TCGCCTGATTGAAATCAACCGGCCGCAACAAATCGTGAAAGCCGCGATCCGGAGTGGCGAAATCGAGCAG  
CGCCCGATCCGCCAGCCGCTCGGGGTAGAGGCGGCTGATATGGGGTTTCGATGGACTGGCCATCGGGCAAC  
AGGGCATAACGCCCCGGCAGGCTGCGCTCCTGATCGTCAAGGGAGATGGCGCTGAGCTGCTCGATCCCGA  
TATGCGCGGAGTATCCGGCTCATGACGCCAGCACCTCTCGCTGCAGCCGTGTCAGGGTGGTCACTGCC  
TGATGGAGCTGGGGCAGAGTACGGCCCGCTCATCGAGAGTGACGAAAAGGATAAGCTGACCCCTCCCCCA  
ACCAGCCGCTGCGCACCGGCAGTGCCGGCCCTTGCGCCGCGGCAGTCAAGGTTCATGGCGCGGGATCGC

CTCGCCACTCTGATGCCAGGGCACGGCGGGGCCAACAGAGGGTCAGTTGCCCTGATGGCGCTCCAGT  
TGCAGAGTGCCGCTCTGCTCCAGTTCAAGCTGGATCAGCGAATGGGGTTATCCCTATGGTGATGCCCA  
GATCCTGGCAAACACTGCACCAGCAGGGGTTCAATCCAGTTTCATGACGACTCTCCAGACAATCATCCTCT  
TCCCCTCGATGGCGTTATCGAGCGCCCCCTGACAGCACTGCAACAGGTTCTGGCGCTGCTCCTCCTCAC  
TGAACAGCTCCACCCGGCAGCAGGCGGATCAGCCGCTTGAGCTCTTGATAGAGCAGCACCTGCTGGCGACA  
ATCTGACAGCTCAAGAGCCACACCGACCTGCTCCACATCCCGCACGCTGGCCAGCGTTTCTCCACCAGG  
GCGATCAGATCGCCATCAGATCAGAAGGCCCGTATGCCATGGGCCGAGCCCTCCTTGACCCGTTGCCAC  
AGCTCGTCCACTTGCGCCGAGAGAGTATTGAGCAGCCGAGCTTGTGCATGTCGCTCATCACCCGCTCCA  
GCTTGACCCGATCGAGCCAACGCTGCTGGCTGTCGAGATCGGCGCTCAGGGCCTTCATCATGAAGCCGGT  
CACCTTCTCCAGCGCACCGTTGCCAAAGCGGCTGTGAATATCGCGCCAGGCGGCAGAAAGGGCAGGGTAG  
TCCTGCACCGCATCGGATAGAGATCCCGTAGATCCTGCTCGGCTCCCACGCCCGCTTGGCCGCTTCGG  
CCGCGGGGCGGTAATGCGCGCCCCCAGCAGATGGCACTGCCCTGCTCGTCCGCCAGCTTGGCCAGCGC  
CTGCTCCACCAACGCCAGGGTGCCCTGCATCTCCGGTCGTCGGCGAGGGCCTTGCGCGCTGGCAGAGC  
GCCTCGAACTGCTCGCTCACTTCCCCGAATAGCTCTCGAGGTAGGCCAGCAACTGGGAGAGATTGGCCA  
GCCGACCGCTGCCGAGGTGGCTCACCATCTCCTTGATCTTCTGCTGGCGTTCGAGCTCCGGCACCTTGT  
GAGGTAATCCCCACCAGCGCTCGATCTCGCTGATGCGGGCATGGCTGTCACTCAGCTTGGCGTTGGCG  
AGCGAAAGCTCAGCGCGCTCGGAAAAGACAAAGGTAAGCTCTTCGGCGGCATCGGCCAGCGACTGGGCGG  
CACTGGCCAGCACGACCCGCTCCCCCTGAAATTGCCACCCTGCAGGGGTACCTGACGGGATGCGACCTC  
TGCTCCGCGCAGCTCGGGCTGGGCGGCAGGGGCATAGGGGTTGCTCTGGATAATGGCCATGGAAACTCCC  
GTGACGAATGGATTGACGAGGATGGCATTATAAAAAATCGCCCTACCTCCCTATGCCAAAATCGGCCGTG  
AATTTTTAGCCCCGCCCAACGGTTTTCTAAAAAGTTCCGACTCGCGCTGAAATCCCCGTAGCCCCCAT  
CCCCATATAGTGGCCACCAGTTTTCAATGGCGCAGATTGTTATGACCCCTCCTCCCTCGACCACATCCCCAAC  
AGCTTCGTACGCCATCGACGAGTGCCGCTGATCCAGATCCGTGGCCGGGTACCCAGGTGACCGGCAC  
CCTGCTCAAGGCAGTCGTCCCCGGGTGCGGATCGGCGAGCTCTGCCATCTGCGCAACCCGGACAACACC  
CTCTCCCTGCAGGCGGAGGTGATCGGCTTTGCCCAGCATCAAGCGCTGCTCACCCCCCTTGGCGAGATGT  
TCGGCATCTCCTCCAACACCGAGGTAAGCCGACCGGTGCTATGCATCAGGTCGGGGTAGGCGAGCATCT  
GCTCGGTCAAGTGTGGATGGCCTCGGCAACCCCTTTGGTGGCGGCATCTGCCGAACCCGCCCGCTGG  
TATCCGGTCTATCGGATGCCCCCCCCCATGAACGCAACCGCATCGCCGAGCCATTTCCGCTCGGTA  
TTCGCGCCATCGATGGCCTGCTTACCTGCGGCGAGGGCAGCGGATGGGGATCTTCGCGCTGGCTGGTGG  
CGGCAAAAGCACCCCTGCTGGCCTCGCTTATTCGACGCGCCGAGGTGGATGTCACCGTGTGGCGCTGATC  
GGTGAGCGTGGCCGGGAGGTGCGCGAATTTATCGAAGCTGATCTGGGGGAAGAGGGGCTCAAGAAAGCGG  
TGCTGGTAGTGGCCACCTCGGATCGCCCCGCCATGGAGCGGGCCAAAGCTGGTTTCGTCGCTACCTCCAT  
CGCCGAGTATTTCCGCGATCAGGGCAAGCGGGTGTGTTGCTGATGGACTCCGTCACCCGTTTTTGCCCGC  
GCCAGCGGGAGATTGGTCTGGCTGCTGGCGAGCCGCCGACCCGACGGGGCTATCCGCCGTCGGTGTGTTG  
CCGCCCTGCCTCGCTGATGGAGCGGGCTGGCCAGTCGGACAAGGGATCCATCACCCGCTCTATAACCGT  
GCTGGTGGAGGGGATGACATGACAGAACCCTGGCCGATGAGACTCGATCCATCTCGATGGTACATC  
ATTTTGTGCGCAAAATGGCGGCGGCCAACCCTACCCGCCATCGACGTGCTGCGCTCCGCCAGCCGGG  
TGATGAACCAGATCATCGAGCCGAGCATCAGGCTCAGGCAGGTCGACTGCGCAGCTGGCTGGCGAAATA  
TGAAGAGGTGGAGCTGTTGCTGCAGATCGGCGAATAACCAGAAAGGGCAGGACAAGGTAGCCGATGAGGCG  
ATCGCCCGCATCGAGACTATTGCCAGTGGCTCAGGCAAGGCACCCATGAACCCAGCTCACTGCCGGAAG  
CCCTCTCGACTCTGGAGGCGCTAACCCGATGATTGGCCGCTGCAACGAATAAAAAGACCTGCGGCTGGAT  
CGGGCCGAGCAGCAGCTCGCCGCCAGCAGGCTCGGGTGCAACTCGCCCGGTTCCGCCAACGCGAAGCGG  
AGCAGGAGAGTCTCGACTACCGCAAGTGGCGCCTTGCCGAAGAGGAGCGGCTATTTGCCATCTGTCAGGC  
GGAGCAACTTGATCGAAGGGGCTCAAGGCGTGGCAACAGCAAGTGTCACTGCTACGGGAGAAAAGAGGCC  
CAGCTTGAACAAACTGCCGCCGAGCAGGCCGAGCGGGTTCGCCGAAGAGCGCATCCGCTTGCAAGAACGCC  
AGCTGGCGGTACACCCGCCCCGACAGCAACAGAAATTTGCCGAACTACACCCGAGGAGCAGGCCCTC  
ACAGCAAGCCCTGCGTGACTACAACGAAGAGCAGGAACAGGAAGAGTTCCGCCAGCAGATCAGGATGTAA  
CGACTCATGAACCGAATCCTCCCGATGCAGGGCACAGTAACAGCCCCGGGGCGATACCCAGATGGCTGAAG  
CCAGTCGGTCGCAACAGCAGCGTTTCGAGCAGGCGATGCGGCTTGAAGCGGAACAAAAGGCACCCGACAG  
GTACAGGGCTAATGGCCAGAGCAAGACCCAGGAGCCTCGGCCCTCAGCAACTATTACAGACGCAGCAGCAA  
AAAAACAGGCAGCCGATAACGGTCCGGCAGTCTGATATTGCTGCTTCTCACAGCCAGCCAAAGCATTTAC  
AGACACAGCCGTTTCATCACAAGAAAGGCATCCGGTTTATCCGGTGCAGCCCTCTCTGGCGTGGCAGCCCCG  
TGACCAGCGGGAAGTGCAGAGAAAAAAATCGCAGCAACACGGGATGCGCAGGATCAAGATCCGGAGGTC  
GGGGCCAGCGCAGTGGGGCTACCCGCATCAGAGCGCGGGTTTGCAGCACCTTATCCATGGTGAACGCAC  
AGACCCACGCCCTCCCTCGAGGGATCTGGACTACCCGCAACTGAGCGCGAGCTTGCAGCACCTTTATC  
CATGGTGAGCGCACAGGCTCACTCCCTCCCTCGAGGGATCTGGACTGCCCGCATCAGAGCGCGGGTTT  
GCAGCCCCCTTATCCATGGTAAACGCACAGGCCAGCAACCGCCCCCTCGAGGGATCTGGGCTGCCCGTAC  
CTGAGCGCGAGCTTGCAGCATCCTTATCCATGGTGAACGCACAGGCCCCCGCGCCCCGAGAAAGAAACGGA  
TGGCTCACAGCAACATGGCATGCAGACAACAGGGCTCACCTCTGGTGGGAACTGCCGCAAGGGGCAACT  
CAAACAGCCCCCTCAACAGGGTGTGGCTCTCAGGCTGAGGAGAGCGAGCTCGCCGAGCAGCTCGCTAGCG  
GAACCGTTGAACCGACGAGATGCCCGAGGCTACGGCCCCCCCCCAGACCACCGCTCAAACCGCTG

GTGATCTTCAGCTAGCCCCGGCTGGCACCTGCCGAGAATAATCGGGAGCTGGGTCAATTGCGGGAGCGGCT  
GGCGGTTGATATCTATCAGGAGCTCGGCCGCCCGGAGCGTCCGCCACTGCTGCGTCTGACACTGCCGGAA  
CTGGGGCATCTCTCCATTGCGATCGCCCATCAGGGTGGCGAGTTGCAGATCGAGATCCAAGCGACCAGCG  
AAGGGCAACTGCTGCTCAATCAGGGGGCGCAGCGATCTGGTTCGACCGCTGCAGCGCTCTATCCCCGGCGA  
ACGGGTTCGCCCTCGATCTCTTCGGCCAGCCCAGAGTGAGCAGGGCTCGCGCCATAAACGATCCATCTAC  
GAAGAGTGGGATGCCGACGCATGACACCGATTGCCCTCACCTCCGCCCTCGCTGGCGGAGTTGACTTTACA  
GCAGACCCTGAGCCAATACCGCCAGCACTTTGGCTGGAGTGGCGGCGAGCTTCTCCTCGCCATCGGTTTG  
CCGCCTGCAACGCTCGATAACCGGCTGCAACTGCAGTGGCAGGGGCTCTCTCTGCCGCTGTTGTGCCACG  
GCGCCGAACCTGGCTCACTGGCTGGCGCCGGATCTACAACAGGCGGCGCTGTTACGCTGCCGAGCCGCT  
GCAACTGGCACTGATCGAACGGCTGGGACAACCCCTCGGTGGCATCACCTGCTCGGCGCTGACCCGACAG  
GAGAGGAACGTTTCAGACCGATGAGCCAGCCTTGCAACTGCTGTTGCAACGGGAGGAGGCCACGCTCGCTC  
TCTGGCTGCCGACGCCGAGCCCTTGCTGAGCAAGTTGCCACCACGACCCTGCAGCAGCGGCTGCCGTT  
GCCCTCACCCCTCACCCCTGCAGTGGGGCGAGATGGGGCTGACCATGGATGAGCTCGCCACCCTCGCTATC  
GGCGATGTGCTGCTGCCGCCACCCATCCGCGAGCTCGGTGAGCAACTACTGATCTGCGTGGAGGGTTCGCC  
CCTTTGCTACTGCCAACCCCATCAACAACATCTGAACTGACTGTCATGCATAATGCTGCCCTCCGCTGA  
ACCCTTCGGCCCCGACCGAAGTGGATCAACTGCCGATCCAGGTGAGCTTCGAAAGTGGGCGCCAGACCCTG  
GACTGGCACACCCTCACAGCCTGCAACCGGGCGCCCTGATCGATCTTGGCACGCCCTCGATGGCGAAG  
TGCGTATCATCAGCAACGGCCATTCGCTGGGAGTGGGCCGACTGGTGGAGATCCAGGGGCGCTGGGTGT  
ACGGGTTCGAACGCTCGACAACGAGTACAGTATGATCCAGTTGCCAGACGAGCTAAACCTGATCGTAG  
GGCTGGCGCTGCTGGCTCTGCTCCCTTTATCGCCGTGATGGCCACCTCCTTCGTCAAGCTGGCGGTGGT  
CTTCTCGCTGCTGCGCAACGCCCTCGGGGTGCAACAGATCCCCCAACATGGCGATGTACGGGCTGGCG  
ATCATTCTCAGCATCTATGTGATGGCACCGGTTCGGCTTTGCCACCAGGATTACCTGCGCCAGAACGAGG  
TGCTACTGGCCAAATCCGAATCGGTAGAGAAAGTTCCCTCGATGAGGGGATTGCCCTACCGGCACTTTTT  
GAAAAAGCAGATAAAACCACGGGAGCACGCCTTCTTTATCGACAGCACCAAGCAGCTCTGGCCAGCAAA  
TATGCCGACCGGCTGGAGCCCGACAGCCTGCTGATCCTGCTGCCGCTTTACCCTGAGCGAGCTGAGTC  
GCGCCTTCAGATCGGGTTTTCTCATCTACCTGCCCTTTATCGCCATCGACCTCATCATCTCCAACATCTT  
GCTGGCGATGGGGATGATGATGGTTTTCCCCATGACCATCTCGCTGCCCTTCAAGCTGCTGCTGTTTGTG  
CTGCTCGATGGCTGGGCGCCGCTGACCCACGGCTGGTTCATCAGTTACGGAGGCTAGCATGATGACGCC  
GATATCCTTCACTTCACCAGCCAGGCGCTCTGGCTGGTCTGATCCTCTCGATGCCACCTGCTGCTGGTGG  
CGGCGCTGGTGGGCACCCTGTTTGGCCACCACCGCTGGCTGGGTAACGAGCTCTACAGCTTTGCCGATAT  
GGTGTGTTTCAAGGTACCGCAGATCCAATGACGCTGGAGAGCCTGCAGGCCAGATGCTGGCCTATACCC  
TGCTGCTGCCGCTTTTTATCAGCTGCTTCGTGATGCTGCCAGTGGTGGAGCAACAGATGCTGGGGGGGGC  
GATGATCCGCAACGGCGTGGTCTGCTCGCTGGCGCTCTACGCCTACCCACAGTCGCCGACACCTTGCCG  
GATCAGATCGACGGCATGGCGCTGGCCATGCTGATCGCAAGGAGGTGCTGCTCGGCCGCTAATCGGCT  
TTGTGCGCCCATCCCCTTCTGGGCCATCGAGGCGAGCGGTTTTCTGATCGACAACCAGCGCGGTGCCGC  
CATGGGGTCCCTGTTCAACCCGAGTCTCGGCAGCCAGACCAGTCCCACCGCTTGTGCTGACCCAGACC  
CTGATCACCCCTCTTCTTTGCCAGCGGCGCCTTCTCGCCCTGCTGGCCGCCCTGTTCCAGAGCTATATCA  
GCTGGCCGGTGGCGCATTTTTTCCCCACCATCGACGAGCAATGGGTCAACTTTTTCTACAGCCAGTTCAG  
CCATATGTTGCTGCTCTGCGCTTTGCTGGCGGCGCCGCTGCTGATCGCCATGTTTCTGGCCGAATTCGGG  
CTGGCGCTGATCAGCCGCTTCGCCCCCTCCCTCAACGCTCTTCGTGCTGGCGATGCCGATAAAAAGCGCCG  
TCGCCAGCCTGTTGCTGGTTCATCTACATCAAGCTGATGATGGACCACGCCTATCAACAGGTGCTGGCGGT  
GATGGATCCGCTGCAACTGCTGATCCCATTCTGGAGGCGCGATGAGCGGCGAGAAGACCGAACAACCC  
ACCCCAAAAAGTTGCGGGATGCCCGCCAGAAGGGGCAAGTGGTCAAGAGCAAGGAGGTGGTCTCCACCG  
CCATCATCCTCAGTCTGGTGGGCATGCTGATGGCGATGTCCGACTACTACCTCGAACATCTGGGCAAGCT  
GATGATGATCCCGAATCCACATCAACCTCCCCTTTACCCAGGCGCTCAACCATGTAGTGGAGAACCCTG  
ATACAGGAGATGGCCATCTCTGCATTCCGCTCCTCGCGTTCGCGGTGCTGGTGGTACTCGCATCCCATT  
TCGCCCAGTACGGTTTTCTGCTGAGTGGCGAGTCCATCAAGCCCGACATCAAAAAGATCAATCCGGTGG  
GGGGCCAAGAAGATCTTCTCCATCAAGAGCCTGATGGAGTTCGTCAAAATGAGGTATCCTGATTTTTCAC  
AGACAGTCCCGATTGTTACGATGAGACAATCGGGGGTATTGAATGAAATCGAGAGAACAATATTCACCAG  
AGTTTTCGGGCAGAGGCGGTTGACTGGTGTGGAGCAAGGCCCTGGCCAAGCTGAAGCCGCCAGAAGGTT  
GGGTATTGCCAAAGGCACACTGAGCAACTGGGTGGTTCGAGCCAAAGGAGGAAAGGATAACATCGGCCATT  
CCCGGAGCGGCTTCTGTCGCCGAGCTGGAGGCTGAAGTGGCCCGCTACGCAAAGCTCTCGCACAAGCCA  
ACATGGAGCGGACATCAAAAAATGTATGGTCTGCTCCTTATCTGCAAGCTTGAAGTATTTCCAGAA  
GTCGTTTTGCGTCAATGTATCCGGCCTGTCTGTGAGCCGTTTTCCGGCTCTGGCCTTGATGGGATCCGCAC  
GTCATCGTCTAATAAAGCTACCAGTCAAGAGACTGCTTTTTTAGCCAGGCTGCAACGTCGTGGGGTG  
AACGCTTCTGTATCTGTTTTTGGCTCGCAAAACCGGTATGAGTTATATCTGTTAAACGGCTGCGCTTG  
CGTTGGGATAGGGTTGGTAATCCCTGCCGGATGTCAGTACTTTCCAGCAAATTCGCATTATCTTGTGGC  
CAAGGCGATAAGAACCACATGATGGTGGTGGCCAGCCTCCAGCCTAGCGACCCATTCCGCTAACGATGAT  
TTGTACGCTTCATGTGAATTTTTAGCGCTTTGGCGCCTTGAATAACCATTTGCCTTAAATAGCTATTGC  
CACGCTTACTGATCCCGCCGAGCGAAGATTTGCCGCCGCTTGGTATTGCTGGGGACCAGCCCCAACCA  
AGCTGACAGGTTCGGGGCTTTCTTGAATTTGAGCCATTGCCAATCGCGGCAATCAACCGGTTGAGACA

ATCGGTCCAATGCCGGGACGGTACTGATTTTTTGGCACAAACCTGATGCGCTTGAGGCTTGTCGGAGCA  
TGAGGCTCATGTCAATCTGAATATCCAGCTGTTGCCACCGTTTTCTCAGGCGTAATACCAGGGCGCG  
GATAAAGTCAGGCAAGCCATTCTCGGCATCTTCAAGGATCGTCGGCAGAGAGCGCTCGAAGACTTTTTCTG  
CCGACTGGCACGGTGAGCCCATATTCCAGCAGCAACGCTCGCATCTGATTGACAGTGGCGGTACGTTCGA  
CGATGAAACGCTGACGGACGCGATGAGTCGCTTGCAATGCCAGTTGCTCATGAGATTTCAACGGGACACA  
GCGCATAGTACCTCTGCTACCAGCCTCGGCAATGGCGGTAGCATCGTTGAAGTCATTTCTGTTTGATTTG  
AGGTAGGGCTTACAAAATTGGGCAGGGATAATCTTGGGTTGGAACCCCGCTGTTGAAACAGGGCGCCCC  
AGTATTGCGAACCAGGACATGCCTCGAAGGCGACCCGACAGGGTGGGGTCGTGCTAATGAACTGTTTTAG  
TTGTGAACGCGTGAGCTTTTTGCTTGGTCAATACATGCCCCATGCGATCCATCGCCACCAGGTGAAACCAA  
TTTTTGCCTAAATCGATCCCGTAAATGTAATCTGCGCTTGAGTCATGATGAGCCTCCTTGATGCTGGCT  
ACAGATAGCGGGGTGGGTGGAGCAGACCATCCATTAGGCTACTGCTCTCTTGATGGCGGACGAGTTCA  
CACGTACGCGCTGATAGACCGATTAAGGGAGCAAGCCCCCATCACCTGTGGCGGAGAATCTCCTTGGTC  
AGGTCTTTGCGCCGACGAAGCCCAACGAAGTCTGGACCGGTGATATCACCTATATCGCCACCGACGAAGG  
CTGGCTTTATCTGGCTGGTCTCAAGGATGTGTTTACCTGTGAGATAGTGGGTTATGCGATGGGGGAGCGA  
ATGACCACCGGGTTGGTCAGTCAGGCGCTGTTTCGGGCTGTGCAGCAGAAGAGGCCACCCGTTGGGCTTA  
TTCATCACACAGACCGGGCAGTCAGTACTGTGCCAAGGCTTATCGGGCTCTCCAGGTACAATTTGGCAT  
GCAGGCTCCATGTACGCAAGGGGAAGTCTTCGACAATGCCCCGATAGAAAGCTTCTGGGGTCTCTT  
AAAAATGAACTGGTTACCACCATAGATTCAAGACGAGAGCGGAGGCCAAGGCAGCGATTACAGGAATACA  
TAGAGATTTTTTACAACCGCCAACGTCGGCATTACGACTTGGCAATGTCAGCCGGCGGAGTTTAAACAA  
GAGGTATTGGAGAACGGCTCAGGCTGCTTGATCCGGGACTGTCCGATCTTGTGAGGACACCTCACCTTCT  
ACAAATGGCGCTCCAAATTCGGTGGCATGGATGCCTCCCTCATGGCTCGTCTCAAAGAGCTGGGAGAGGA  
GAATCGTCGCCTCAAGAAAATGTATGCCGAGGAGCGCTCAAGGCCGAGATCATCTCCGAGGCCATAGCA  
AAAAAGTGGTAACGCCATCTGCCCCGAAAAGAGATGGCTACCAAGGCCGTTGCTCATTACGCCATATCCAT  
CCGTCTGGCTTGCCAGGTGTTCAAGGTGAGCGAGGGTTGCTATCGCTATCAGCCCGTGTGGCCGATGAA  
AACTAGGAGATTGCCGACTGGCTGCTGCGCCTCACCGCCAACCAACGCAACTGGGGTTTCGGACTGTGCT  
TTCTGTACCTACGTAATGTCAAAGGCTTTGGCTGGAACCACAAACGGGTGTAAGTGGTTCTATCGGGAGTT  
GAACTCAATCTACGGATAAAACCCAAAGAAGCGACTGGTTCGTTGAAAAGCCGGACGCATTAGCCGTGCC  
GACAATCAAAACTATCCAATCACACACATAGGAGACTCGATACTGGGTCGTTGAATACCCTCGCTTGT  
ATTCGAAAACCGACGCAACATCCCTTCTGTAGTACCTTTCGCGGTGATCCCTGAATACCCAAGTGGC  
CTTTTTCCAACACCACTAAATGATCGCAGTAACGACAAGCTTGGTTTAAATCGTGCAGTACTACTACCAC  
CGTTTTACCTTTGGCGTTCATCTGTCTCATGAGCTTCATCAGCTCAACTTGGTGAGAGAGATCCAGATAA  
GTAGTTGGCTCGTCCAGCATCACACATCTGTATCTTGGGCCATCACCATGGCAATCCACGCCCTTTGTC  
TTTGACCACCGGACAGCGATTCAACTGGCTTATCAGCAAACTCAATCACGCCGGTATCTTGCATTGCTTG  
CTCGACTAAGGTTTTGTCTTGGCGACTTAATCTCCCCAATGAGAGAGATAAGGTGAGCGGCCATACTCC  
ACCAGCTTTCTCACCGTAATGCCTTCTGGGCTAACAGAAATTTGTGGTAGCAATGACAACGAACGAGCTA  
AACGTTTTATCGCTGTAGCTGCTTAGTGGCTTGCCATTATACAGTACTTGGCCGGACACCGGTTTTATTAAT  
GCGTGCCAAGGTTTTTAGGAGCGTCGATTTGCCACAACCAATTTGGGCCGACTAGTGGGTTGATTTTACCT  
TGAGGGATCGACAAAGAGAGAGCTGCAATGATGATTTGTTTACCCTATGCGACGGATAAGTTCTGCGTTC  
GTAACATGCTTACCAACCTCGATAACGATACAAAAGAAAAATGAAATATGGCGCACCAATGACCGACGTC  
AGCACACCCGAGGTAGTTCAATCGGCGGCTGCAAACTCTCGCCAAGCCATCAGCGCAAATCACCAGCA  
GGGCTCCAAGGATTGTAGCTGCGGGAATCAACAACCTTGTGGTTGTGGCCAAAACAACAACTGCAAGATG  
TGGTGAAGTAGACCAACAAGCTGATCGTGCCTGCCACAGAAAAGCTAATGCTCGCCAACAATACAGCT  
GCAATTAACGCAAGAATTTGGAGCTGTCTTGGTTGCGTGCCTGCAAGTGTGGTGGCGCTTCTCCCTCCCGC  
CCATCACATCTAGCCGCCATGCGAGCCAAAACGCAATGGCAACAGTGGCAATAATACGCTCCAAATAAA  
CGGTACTTGTGCAATTTCTGCTCCCAACAACCTGCCCCGTTAACCAACCATCGCCGTGTTGATTTGATG  
GGGTGCACAATAAGAAGGAAATCGATGCCGTTGGCTAAAAATGCGCTGACAGCAACGCAATCAGTGCCTA  
AACGCGCAGGCGTTGGCTTCGACCAATAAGCCAGCACAGTGATAAAACCCCGCGGCCAGTAAACCTCCAGC  
CATGGCGACCATCGGCAACAGTTCAACTGACGCATTCGGATACAGCACCAAGCAAGTAGTAGCCGCCAGT  
CCAGCTCCGGCGCTGATACCATCAGATCTGGTGAAGCAAGTGGATTACGAATGACTCCTTGCCTAAGA  
CGCTGACAGCCCTAACCCGGCGCCGACACCAATAGCGAGCAACATCTTGGCAATCGATATTGGTGAAT  
CACAAAGTCTGAATCAGAGAAAAGAAAACAGCAATGCGAAAACCTGTTGAGCAGACAGATCTGCCATGCCG  
ACAAACAGAGTGAGGGATGACGCAACCAGTAACAACGCAAAATAGAGCAATCAATTTAGCTTGATTCATCA  
TAATGATTTCTCATTGCAATTTGAGATAAAGCAAGGTGTGCCAACAATGCGGTAATCACGCCACTGGC  
GTTTTAGCAGGAAAGGCAATCGCGGAGACAAAGCGTCTGACCACGTCATTAATGTGCGGCCACACAAAG  
CAGAAATCGGAATGAGGATGTGATTGTTGTGACCAATAATTTGGGCGCACCAATGGGGTACTAACAACCC  
GATAAAACCAATTTGGCCAGCAATCGCAACACTAGTGCCTGCTAACAGCACAAACCTAACCCACCGATT  
AAACGCGTAAGACGAATGTTACCACCCAAACCGACAGCAATGTCTTCAACCAGAGCAAGTAAATTTAAAT  
TCCGCGCAATCCAATTTGCGAGTACCAAACTAACGTCGCAAAAAGGCCAAAGTTGTTGCCACTGTTGAGA  
ATCCACCCTAGATAGTGAACCTGTTAACCATTTGCAACAAACTGTAAGCCATGTATCCACCAAAATTACC  
GATGCACGAGTTAACCCATCAACAGCGCACTGATGGCAATGCCTGCCAACCAACCGCAGTGGGTGAG  
AACGAGCAGAGAAAAGCCACCAACAACATGACCGAACCGCCGCTTAGTAACGCGCTAATACTGCGTT

GATGATTGGGTTCAATTGACTAAAGAGCGGCACACCAATGGAAGCAAAAGCCATAAAGCATAACCGCACCA  
GCATTGATGCCGAGAATGGATGGCGACGCCAAAGGATTGCGAGTTAACCTTGCATCAGCAGCCGGAAA  
CCGCGAGCGAAGCGCCAATTAAGGCCCCCGGTAAGCAGAGGTGCACGCAGCGTCGCGAGAATTTGGTG  
CAGCATATTGCCCTCATCAAACGCAAACAAATAGCTTGTAAAGGTCATTGACGCTCAAGGAAAAGTTGGAC  
CAACCGATCATCGAGGTGGCATAGCCTGACAGCGTACACAACGCCATTACACTGACAAATAGGCTCGCTT  
TCCAACGCGGTTTGCTAACCGAAGAGGGGAGGATTGAGATTATCGACGCCCTCATGAGTGCCCCAATAAC  
GCTTCAAGGTTGCGGGCAATTTCTTCTGCCGCAACATGCCACGATTTAACGACCACAACTTTGGAGAAA  
CTTCAACCAGTTGCTGTTTTTTCACAGCAGTTAGCAACTTAAATAATGGATTTTTGCGCCATTCATCCAC  
AATACTCGGTTGAGAGTAGAGTCCAAGTAGTAGCCAATCAGGATTTGTTTTTTCAGTAAAAGTTTGAAGCTG  
GTTGGAATGTAAGCATTTTGCCTGATTGAATCAGCGGGCTGCGGATGCCAGCGTGCCTAAGACACCAC  
CAGCGTAAGAAACCGAGCTATGCAGCCACATCCCTTTGTGCGAAACCACACCAAACCTGAATGGTTTTCTTG  
TGTCACAAAATGCTGCTTGAACCTCCGCCATAGCTGTTTTGTGTTGCTCGATTCGTTGCGTCAATTTGCGCT  
TGCTTGCCAATCGCTACACCGATTTCTGTGCGGATTTCGAGGTTTTCTTGATACGTCTCACCACGGCTTT  
TTAGCAGCAAAGTAGGTGCAATTCGTTGCAAATTTTGTATATATCGCACGATGACGTTTTCAGCATCGGCAAT  
GATCAAATCTGGCTTGGACTGAAATCGCCTCTAAACTCGGTTGTGAGCGTATACCGACCGATTGCCAA  
GGCTCGATCTTGGCAGAACAGTAGGGAGCACGCGTGTGGCATCGTTGTCATCGGCCACGCCACCGGGC  
AGACTCCGACTGCCGCCAGTGCATCCACAAAACGAAAACCTCCAAAACCTACAATGCGCTGCGGTATCGTTTT  
TGGCTCAAAAGTGCCTAGCATATCTTGCACACTACGCCCTGAGCAATTCGCGTAAATGACATAAAAACCT  
AAGCTCAGTAGCATCGACAAAACGGTTGAAAAGTATTTACCCTAAATTTGTTTTTATTTTTTTCATCTTGC  
TTTTTTTTTCCAGTGCTAAGATCGGCAAAGTTCGCCAAGGTAGATTGGCGACTTTTTCTTTTCAAACCTCGGTG  
AACAAAAGCGCTTAAAACTGATAGTTCAGCTCTAGCGTGTAAAGAGCGTCTGGCGCTGGGTATCGACCAA  
CTGGGCTGGTATCAATCCCGCGGAAGTAATACTCCTCGTCAAATAAGTTGTTTACCAGCAACATTCATGCG  
CAACTTACTTTTTGTTGTTTTTGTATAAAATCCGTACCCAAAGTTGAAGTTCCACACGATGTAAGACGGCACT  
TTACCCGTTGCACCTGTTGCATCTTTCAGCACTGGTGTGACGTTATCGGTATACGAATCACTGAAATAGA  
AGCCTGATAGAGTGGTGTCCATACCGTAAAATACGTAGGTTGCATCCCAACCAAGTTGGTGTTTAGAGCT  
GTAAGGCAGCTGGTTGCCTTTATTCGCGCCTTCTCTTCGAGTTTTGCGTCGAGGTAGTTGTAACCTTGGC  
CCTAAACTCAGTACAGGTAGAGCTTCTGGTACATAACGAGCAGAAAAGTTCTAAACCTTGGTGGAGCGTTTT  
TTCCGATATTATCGAAGGTTGCGTTGAGCTTTGCCATTGCAATGCGATTGGTCTTCAAAAATCGATGCGATAAAG  
TGCAGCATTAATAACTGCTGCGCAGCATGGGTATAGCGCGCCCAACTTCGTAGTTCCAAGCCGAAATTCGTTG  
CCTTCTTTTACCCAAGCCTCGGATGTCGGCGATTTGTGGTCCACGAAGTGATTTTTTGCAGCTTTCGCATATG  
TCATCCATTGATCGGTCACGTTGTATGCCACTGTCAAACCAGGCAACCATTTCGGTTCACGGTGTGTCTGTC  
TGTTTTGTTGTTTACCTAGGTCTGTAAACGCCATGCGAACCGATTCAACACGCAGCCCCGGCGTAACCTTC  
AACGTATCGTGAACAAGCCAATTTTATTGCTGACGTACCCAGCAAACGCATCTGTATCTAGATGCCAAT  
CACGCGGTACTTTGGTTGCGCCACCAGCGATCGGAGTCTGGGTAAAGTTTGTAGCTAATGTCTTCGTTGAC  
GTAACGGCTACCCACAATCCAGTTTTGAGTGACGGATTTACCTTCACCAAAGTACATTGCCATTTTTCGGC  
TCTATACCGTACACGGTAAATTCACGTGGAGAAGTGCGAACGCTCTGTGCGAGGACAGACGGATCCGCC  
AATGACCACCTGCGCTATTAAGCCCCACTTGAAGAGCGGTTTTCAGACTTATGACCAAACGACTGTACTTT  
TAGCTCGGTTCTATCAGCAAATGGCAAATCGTGGATGTATTTAACGCTCCAGCGCGTCGACTTACCTTCA  
TAATCATCGTACGGACGTTTTCGATTGATGACGATCTTGTCTGTAATCTTGTGGAGATAGTGCGCCCGGCA  
TTTTGCGTTTTCAGCATCGTAACGTTGCAGGAATGCTTGAATCTCTTGGATATCACTCAGCAGCCACTGTAC  
CTTGGCTTGAAAGTTCTTTCAGTCCGTATCGGAATGTTTACGGAAAGCTTTTCGCCCTTTTAGGGCGTTACCT  
TCCAACCTGCATTGCAAATGTGTGCTTAAACAGCCGCTGTGCGTAAGTAAAAATCATTCAGCGGCACGT  
ATCTACCATCAAACACGGTAAGGCGGTTGCTGACTTCAGTTTGCCAAGTGATGGAATCGGTTTGGTTCAC  
TAGGTTGATCACACCACCAACGTTGTTTGGACCGTACTGCACTGCGGCACCACCAGCGTACGATGTCAATA  
CGATCAAGCATCTGCAGTGTGTGCTGGGAAGATAGACTGACCAGTATGACCGTATGGCGGAGCGTTAGCG  
GCACACCATCCATCAAGAACTGAGCATGACCATGCGGCTTTCGTTCAAACCACGCAGGAAATATTAGG  
CAATACGCCCGTTCCGCTTTTCACTCCTGAACCTTAAATACCTGGTACGCGCTGTAACGCGTTATCAATCGAA  
CCTGCAGCGGTTTTCTCAATTTGATCACGGGTAATAATGGTTTCGAGCACCTGGGTACTCTTTGACGTCTT  
CGATTTTTCAGAGTTGCCAATTACACTGCCAGTGACAACGACCGTTTCTATTGTTGTGGTTTTCGTTTTTTGC  
AGCAAGAGCGGCAACTGCGCTCATGGAAGTGGCAGAAGCGATAGTAATCGCAATCGCAAGCATACTGTAA  
GTGGTAGATAAACCTGCACGTACATGCACTTTACCGTCCAAATTTTGGCAAGACATTTAAGGTATCCTTA  
TGCGAGAGGTCGAGCCTCGGGAAGAACATTTTCCGTAGGCTCTCGGGGCTAAAACCCCTAAATATGAGG  
TAAAAATTGGCTAACGTGCGCAACTACAACACTACGCACAACAAGGCTATAACTGGTATCCGTAGCTAAGC  
ATGAACCTCGGCTGGTGCGCCGTAACCTATCTGGTTTAAAGCAGACGTTCCGTTTCGTTGCGCCAAGAATGT  
ATTTCTCATCCAAAATGTTATAAGCATTCACTTGGATTTTGTGACGACCAGCGGTGTACGCCACCATCAA  
ATCCACCGTGGTGTAAATCGCCAAGCGGACGGCTTCGTCGTTACCGGCTAACGGTACCCGCATATTTTC  
ACGCCCCCCCCAAAACGCCAGTTGTCATCCAATTTGATAGGTAATCCAAAGGGAGAATAAGTGGTCTGATA  
CATCGTTTCGGCTTTTTTACTTGTGCTTTTATCTTCCGCATCCAAGTAGCTGTAACCAACAGAGATGTTCCA  
TTGTTTTGGTAATTTGGCCGCGAGCTTCTAACTCAATGCCTTGGTGGCCGACTTCAATTTTTCTCAATCACA  
TCGCCGTTACGTTGGTTTTGTGGCTGCTCTTGGTCTATCTGGAAAAGTGGCGTATTCACATTAATGCGT  
TGTCCAGCAGGTACGCTTTTCGCCCCACTTCTTTTAGGTCAGTGTGGAAAAACTCCGCCAATTTGGGATC



GATATAGGTGCTGCGTACGGCAACTGCCAAGAGCGTGCTAAGCTGGCGTAAACAGATGTGTGCGTAATTG  
ATGCGGTAAACTAAACCAGCGCATAGCTGACTTTGTCATCATCTAATTTTTCTTTCTTGCGCCCGCTT  
TTTGCTGTTTCGAGATCCATCGAGTCGTAGCGTATGTTACCGATCAAAGAAAGGTCGCCCCACGTGTACAC  
GTCTTGACAGTACACACCTGTGCTGGTGGTGGTATTGTACCGAATGCTTTGAAGCCCGGATCGGGCGTT  
GGCCCCACAACCTGGGTTGTAGATATTTTTGCGGAGGAAGCGTTTTGTCACTTGCCAACGTTAGGTGCGATAT  
CAATTTGGTTGAAATCCGCGCCTAACATCAATTTGGTTGTCATTTGGTTTCCCAAATCAGCTCAGATTGTAA  
AGTGGTTCGTGGTTTCGAGGGTCGTAACCAAAGTTATTACCGGCTGAGACACTTCATTGCTCGTCACTTTA  
CCTTGACGCGTGCCTTTTTGTTCAAGTTCGATATGGTTGAACGCCGCTCGATTGTTCCATACCCATTGAT  
CATTCAAACGCCATTTGTAATCCACCGCAACCGGAAGGCTGTCCAATTCCTGATAATCGTTTCGTACCACC  
AAAGTAACTACTTATGGGCAAATCAACTGGCTTGCCATTTTTTGATGGTACGCCACGATACGCCACTAGT  
TCTTGATGGGCTTATTCACATCAATGTCAATGTGATGTGATCGTCCGCCGCGACATGCGAATGGTTGGAG  
CAATAAAGAAATCGTTTCGAATCAACATGGTCCACGTAAAGATCAGCTTGACCGGTATTCCAAGTTAATACG  
CCCGTTGAGCTTGTGCGAAAAAGACATTGAGCTGTGAGTTGACCAACATACTGGCTGTTGCTGCCACA  
CTGCCTTTTACGTGGGTGAAGCTCTCGCCGTTGGCGCGCTTTGTCACTAAGTTGATGATGCCACCAGCCG  
AGCCACGACCATAACAACGCGCCCGCTGGGCCTTTACAATTTCAACGCGCTCAACGTTCCGCAAGCTGCG  
GTAAGACTGCAACGTTCCGTCGTCTCGCATGCCATCACGGTACATATCATTTGAGTGAGTCAAACCACGG  
ATCATGAACTGGTCGCGGCTGCCTTCGCCAAGGTGTTATTAACCCCGCTACCCCATCCAACGCATCTA  
CTAAGCGTACCGCGCCGCGATCTTGTATTTCCGTTTTGGTACCACCGAGACCGCTGCGGCACATCAAG  
CCATTCCACGTCCGTTTTGGTGCCTGATTGAGGCATGTGTTACGCGTAACCTTCGTACTGATGTCCGTAG  
ACGTGAATTTGTTCCGTTGCCGATGGGGTTGAGTTTGGCTCTTCTGTAGCCACTGCATTGGCGCCACGA  
GTGAAGAACCAATCGCGACCCGCAAAAGGGGTCAGGGCAATAAATATTCATTCCATGATTCGGTTTTAGT  
TTTTAGATGCCACAAATAAAAAACAAAAATCATTTCGATTTGCAATACCGATTGTGAGATCTGTACCTAAT  
GTGCTCTAGGAACCTTAGTGA AAAACAAAAATCAAACACAATAACAACAAGGGAGAAACCTTCAGCCCCGT  
AGCCTCGCGAGAGGCACACAGGAAGCCGACTGTGAGCAAAACAGTATCAACGTTAGAAAAC TAGGAGA  
ACTCATGAGATCTACGATGATTATCGTAAGTCATGTGCTTAATGATGCAGTCACTCACGGTTTTCGTGCCTGTA  
GCTAAAGCAATGGACCTCCACGTGCTTCTCATCACCGATCACAAGCTCGGCCATTTAGATCTGGCGAGTC  
GTGATAGCCACTTAAATCCGGATGTCACTTAGAGTGCATGTCTTCAATCCTTTGGCGATTATCGAAAT  
CATCATTTGAGAATGAGTTAAACCAGATGCTATTTTCAGTAATAGTGATCACTTACAAACACTAACCTCC  
ATCTGTGCACAATTTTTGGTCTACCGCCAAAGATTTGGTTTGTACATTGAAAGCAAAAAACAACT  
TAGCTCGACAAGTGATGGATGAAAAAGCCCTACCCAATACACAAAGCTGTTTACTACGCCACCATTCAA  
TGCGGCGTTGGGCATGGCTTTCCCTGTGCTGGCCAAAGCCAAAGAAGGCGTGGCGAGTTTGGACGTGCAG  
CGCTGTGACTCGCAGAGCGAACTCGACGCATACTGCGATACGTTTTGGCAGAAATACCCTAATACCGCCA  
TTCTGGTAGAGCAGTTTTCTTCAAGGACCATTGGTTACGCTCGAAACTCTCGGAGATGGTAACTGCCTTAT  
CGCCATGGGAGGTTTTGATGTGGCACTCTCTGAGCCGCTTACTTTATCGAAACTGCCGAGACTGGAAC  
GGACCTAACGGCATTGCTCACCGAGAAGCATGCTTGGCTCAGCTGAAAGCATTCCGGCGTTGGTTTTGGGG  
TTTTGCCACAGCGAATTCATCATCACTGAGAATGGCCAGTTCTGGTTCGAAATCAACTACCGCAGCATTGG  
GGATGGTTCGCGAATTTACTCAACAATCTCGCTCACTTCGGTTGGTTTAGCACGATTTTAGGTCTGCAT  
TTGGGCCGGGATTTGGATGGGGATTACCAAATTCATGGTTACGCGACGTGCATATGTGGTAGCGGAAC  
ACAGCGGTGTGATTGACGGAGACTCGACCTCGTTTCATACAACATGATGATGATGTCATACCCAGCAACA  
GGTCTTAAATCGCCTGGAGAACAATTTCAAACAAACCTATTCTAACAAGGATTATCTCGCCGAATTTTCG  
ATTGCCTCGCCAACGGGGAAAAACCTCGACCAAGCGCTGCAGAAGGCACTCAGCAATTTCAATCTAGTTC  
CGGCTCGTGAGGTGGCAGCATGAATCACAACGTTTTGTACTTAACCCAACGACTGATCGATACTTGCCCTG  
CGCGAAGATATCTTTGGAATTTGTGCAACGCCAACTTCAGCAACGCCACCCAAAAAGGGAGATTTTCAT  
CTAAAGATGAGCAAATCTGGCTGACATTTAATAGTTCGACTTAACGCTCTACTTACCCGTTATTGCGAC  
GTACTACATCGCAGCAGTGGTGTATGGCCAAAGCAACGGCGAAACACCTCAAGGTTGGTGGGTAGAGAAA  
AATGGCCAAGTCGAGCATCAGCAGCACTACCAAGAGTTGATTATGTTGCTGACGGAGCTAGCGCATGAGA  
GCTCTCACGGATTGTTGACTGAATATCTGCAAGAAGTGGAAATGTGACAGGCAACACAAGCAGTTGTGTGA  
CCAAGCTTTTTCGTCAACATATGGAGCACATTTCTGAACCGATTTCCGAGCTTGGCTCTTGGCATCAAAAG  
CTGCTGCTTGCCGATCAGATCGCATCCTATCTTGACCACCCGTA TACCCAACAGCGCGGGCTAAGTTTCG  
GTCTGAGCGATGACGACATTAAGTACGCGCCGAGTTCGCACAAAAGCTTTGCTCTGCATTGGATTGC  
GATTGAAAAATCATTGGTGCATTAACCAGCGAAACAACCTGGTTGCTGGCCAACGATGGAGCAAGTCGGT  
CTTCCTGCTAATTTTTGCCCTGAATTATGTGTTGTTCCCGGTGCATCCGCTCACCTTCGTTCTTTAGGGT  
CGCTGCCTGAAGGCATGGTGAGGGCTCCTCTTGAATCCTTAGAGGTGACACCAACGCTTTCCGTTTCGTAC  
TGTGGTAGTCAACCAAGCGCCACATATTCACATCAAAGTTCCGCTGATCATGCGTTCACTGGGTACGAAA  
AACATTCGCTTAATCAAGCCTTCGACACTGTATGATGGCCACTGGTTTGAGCGCTGCTCAGTTATCTTG  
AACAAATCGACGTAGATTTAAACTCTCGCCTGTTCCATTGCAACGAAAAACAGGCGGACATGTGGTGA  
GAATAATACCTTCGCTTACATCGTACGCGAGTACCCACTCACTCATTTGCGAAGAGAAAGCGTTAGTTCCG  
GTTGCCGCACTGGCAAGCCCAATGCCTGATGGTGCCTCTTCTTAGAGCATTGGCTGAGCAATATTATC  
AGCAAGGCACGCTTGCGTGGTTCCAAGATTACGTCGATCTATTTGTCAGGTTGCATCTCACCTTGTGGCT  
TCGTTATGGCATCGCACTGGAATCTAATCAACAAAACGCCATCCTTGCTTTGATCAACAAGGCAAAATG  
ACGCTCGCGATGAAAGATAACGATGCAGCGCGCATTTGGCCTGAACGTTTTCTCTTAGCGGCAGCAGATG

CCTCAGTCAATCCTCCTGTGCATTGCAATGAGTTACTCGATCAACGCATCAAAGTCGATAACGAGTTAGC  
GCTGGGACAGATGTTTACCACCATCACATTGCAACTGGATATCGCGCGATTGTAGAAGCCATGTCAGCT  
AAGGGTATTGCTCCTTTCAGCGTCGCTTTACTCCATGGTAGCAAACAGCATTGCAGAGCAGCTCAACCGCT  
TGAAGGTCAAGGATTAGAGACAACACTGGCTCGCAAGTTACTACAAGAGCACCAAACTTTATGCCAA  
GTATTTGTTGAGCTCTGGCAGTTTACTCTCGAAAAGAAGCCTCTGGCGCAAGTGACATCAACAAGTTCTAC  
GGTTTGTCTGCCCTAACTTCTTGCAACTCACTAGCGAGGAAAGCGCAGCGCGCTACTTACAAGCCGTCA  
AAAAAGTGTGTTGTTAAATGGTCATGACCAAACTCATCTACAGCGTGTGTTGTGCCACTTTATCGCCGC  
GTTTGCCGCGTTAGGCATGCCGCTATTTCTCCCATAGTGTGCGGACGCTAAGCACAAGCATTGATGCA  
GACTGGGCGGGTGTGTTGTTTATCCTACCCAGTTTTGTACCGCGTTGGCGGCGCGCTTTTGGGGCAACT  
TTGCCGATCGTTATGGTCGGCGGCGCTCACTATTGCGCGCGCAACTTGGCCTTGCGGCAGGGTTTGCTTT  
ATGCGGTTTGGCAAACAACACTTACCATTGTTGTGTTGTTGTTGTTGTTGTTGTTGTTGTTGTTGTTGTTG  
ATGGCCGCTCGAACAGTTACTTATCTAGTCACATTAAAGAAGCCAAAACACTCAGCAAGTCGCTCAATA  
AAACCCAGTTATCCGCTCGCTTAGCGCTGATCGTTGCGCCAATTGGGCTGGGTTGGAGTTTGTGAGAGAC  
CAGCCCCTCAATGCGTACCTTTGGTTATGCATTTTGCCTTTACTTTCTATGGGCATCACGCTGACACTG  
CCTGCAGATAACCCCGCCGAACACAACCTCGAAAAGCCAAAACGCTGAACGTCAGCAGGAACAACCCGCTG  
TGCAGAAAAGCAGATGCATGCCATTGCTGGATCTTCTTTGCTCAGTTCGGTTTTTGCCTTCTCCATGGT  
GGTGACCTTTCTTATTTCTCACCATTTGTACAGCAATATGGCATCACCAACCAGCTTGGATCGGTTTT  
CTGTACGCATTGCCTCATGGCGTATATCTGTTGCTTGCAGGCAAAAATCCACGTGTTGTGCAATGGGTTGA  
ACCACCATCAACCGATGAGTACGTTGTGGCTTGGGTTTGCATTGCTTGCCGTGAGTTCTGCCTTACATTT  
GTTTGTGTCCGAAGCCGCGCTGATTGCTGCGAGAGTATTTTTCGCGCTCGCGATGGTGTGTTGCTATCAC  
GGATTGCATCAGCATCTAGCGAGCAATCTGGACCCGCAAACTTAGTGGCAAAATATTTTCTCGCTTTGATG  
CCATGTCCAAATGGGGTGGAGTAACGGCGGGCTTTTTGCGCTTCTTTTCAATTTCTAGCTTAGGGCTGTTTGA  
GGCTCCTTTTCTACTTTTCTGCGATAGTCAGCGTGATCACTTTGACCGCGCTGGTTATCCATTCAAAATTT  
GGAAATCAACATGTTACAAAGTCAATCCTCTCAGACTAGCAAGTTGCGCACACATGATGTGCAACTCAAT  
CATGAGAAAAGCCAACTCAACACGATAATGGGTGTTCTCAATGTTATTTACGTGAATTTGCCTTGCCGA  
ACCAGCAAGTCGAATGGGATTACCAAGCGACATCACTCCCCAGACATTAACGCAACTATTTCCACGAA  
ACAACCTGGTTGCCATTATCTTGTCAACAACATGGTGTATTGGTTTTGCGGATTCACTACGCAAGCAAA  
CTGGGCAAAATCAAATGGCAGAATTGCCATGGGCGAAAATGCGGGTTCAAGCTGGGCGAAAATGGGATG  
CCAAGCAAAACAGCCACACTTTTACTTAACTATCTCAAGCTGGTGTGTTGGCGATCCCCTTTAACCGT  
GATCGAACAACCTGGAACAACAGTGTGCTGGTTACGGAGCAGTTTCTCAACGTCGAGCCCAATATCATCAC  
AACGAATTTATCGCCTCAGAACAATCTCTAATTTGGGGTCATACTTTTTCATCCAACACCGAAAAGTCGCT  
CGGGCGTACCATGGATGATCTCTTGGCGTTCTCTCCAGAAGTCGCTGCACAAGTGCCGCTGTACTGGTT  
TGAAGTAGATTGCTCGTTACTTGTACTTACTTGGGATGGAGAGTCTGCCCCCGCGGACGCATGCTA  
CAACAGCTTACACCACAACACGCAGCCAGTAATGGCAAGATGCTCTACCCCTGCCATCCTTGGGAAAGCT  
ACACCATTTTGTAGCAATCCAAGCGTGAAACGAGCGGTCAAGCAAGGCCAGATCACACTACGAGGATTGGG  
CGGTGAAAAGCTGCAGCCGACCTCGTCAGTTTCGTACCTTTATCACCCAGATATGGAGTGGTTTGCACG  
TTCTCCATTAACGTACGTTTAACTAATTGCGTACGTAAAAATGCTTGGTATGAACTAGAAAAGCGCAGTGC  
AACTCACTTCAATTTCTCAAACCGATTAGAGACAATGAACAGCTGCACAATCCTGTATTTAAAGTGATGAC  
CGAACCTTACGCCACCACGTTGAATCTTGAAGTGTGGCCGAGCACAATGATGAGGACAACATCAAAGCA  
CGCGAATCATTGTTGGGATCTTGTACCGGAAAACCTTTTTCGCTTAAACGAAATCGACATCTTAAAGCCAACCC  
TTGCTGGCGCTCTGTTTGCCTACGACAGAAAACGGCAACAGCTGCATCGCCCAATACCTGAGAAGCAAAGC  
CGGTACAACACAAAACCACTATCAGGACATCGCAACACTGTGGTTTTGAGCGCTATTTGCATTGCCATAATC  
CCGGGCGTATTTAATTACTATTTCAAACATGGAGTAGCGTTTTGAGCCACATTTGCAAAAACACCTTGATTG  
GTTTTGAACAAGAGATGCCATGCTGCGTTTTGGATTTCGTGATTTAGAAGGCACCAAAATTAAGCAGGAGTT  
TTGGCCCGCAGAGACCTTAAACCAATCTGTCTGAACGCGCGGACAATCAGTTTACTACAGCCGTGAACAA  
GGTTGGAATCGAATGGATACTGCACCTTTATCAACAACATCAGCGAAGCGATTTTTTTCATTTGTAGAAG  
GTGATGAACCACTAGAGCAGACACTGTGGAATATGGTGCACAGTGAATTTGCGTTGGCAATTTGGTGA  
TGGAAAAGAGCTGGAACCTTGAAGTGTATTGAATGACGGTCACTTTCCGAGCAAAAATAATTTACCACG  
CGTTTTGATGCAAAAAGCCGATAAAGAGTCCGGGCTATACCCAAGTCGCTGCACCTTGGCAACAACGTAAGA  
AAGGAGCGCAATATGTCTAATTTTCTCTCCCTGCCGACCCGTGTAGCCAACAGATTCAAATGCTCGCAC  
AACAGCAAGATCAACCTCTGTGTGCATACTTGTATGATCTAAACACCTTAGAAGATCACATCAAACAACCT  
ACGTCACGTTTTTACCAAAAATGTGAGTGTGTTTACGCGACAAAGGCCAATCCATCGAGTCGGATTTCTC  
GAAACGCTCGCGCCGTATATCGATGGTTTTGAATCAGCGTCTGGCGGCAATTTGGTGCACCTCCACAAGC  
AACAACCTCGATAAGCCATTGGTCTTCCGGCGGCTCTGGGAAAATGCCAAGTGAATTTGCAACAAGCTATCGA  
GCTTGATATCGATGCGATTATGTCGAAAGCCTCACCGAATACAACGCATTGGTGTGCTAACTAAACGC  
CTAAACCGCCCTGCTTCTATTTTTCTGCGTATGAATATTGATATTGGTGACATAACCCCTCAGCAAGTTGG  
TGATGGGTGGCAAGCCGACTCCATTTGGTTTTGGACGAGTCCGAATTTGAGCAATGCCCTGATGTTGTTGCA  
CGATTTCCCGCAAGTATCGCTGAAAGGTTTTCCATTTTCACTTGTGTCGATCAGCTCGATGTTGAACGT  
CACTTAGCGTTGATGCAACGCTACTTCCAAGTCGTGAAGTCTTTGGCAAGAGCAATTCGAACCTCGGTGAGT  
TAATGATCAACTTGGGCGGTGGCATGGGCATCAACTACCAAAAACCTGAGCAACACTTTCCATGGATGGC  
GTTTTGCGACAAGCTGGAATTCCTGATATCAAAGAGCAAGTGAAGATTGGACACTGCGTTTTGAAATGC

GGACGGTTTATCACCGCTGCGTGCGGTTATTACGTGATGGAAGTGCTGGATATTAACAAAACCTTGGCG  
AAAACCTTCGTATCGGACGTGGAGGTACTCACCATTTCCGCACACCAGCGTCGCAGAGCCATGATCATCC  
GTTTCATCATCCTAAAAACAACAACGCAACGAGGTCTCTCACCCAATCAACATACGAAAGCGACATTT  
GTCGGTCAGCTTTGTACACCCAAAGATGTGTTGGCAGCAATCAACATGTCGCCACGTCGATATTGGTG  
ACTATGTTGTGTTTACTTTAGCGGGCGCGTATGCGTGGAACATTTCTCATCAAACTTCTTGATGCATGA  
ACCGCCATTATTCCATTATTTTTAAGCATACGTCTGTCTTGGACATGCCCCCACATAAATGGAGAACC  
TGATGGGATAACGTTTGAACCGGACACAGCGCGATTACTTACCGACTTTTAAGCTAAATAACTGATCCCA  
ATAGTGTATACCTGATGGCTGATTTGGGGCGGGCCACGGGATCCCGGTAGTCAGGACAAACAGAATAC  
CGTTGAGAGTGGCATAAGTCATCGAGGCGTGGACGGCCACCCCGTGACGAAGGCTGTTGAGGTGGCAGAAG  
TGGCTGCAAGGACTTCCATAGCTGGTTACTGATGATTTTTCGTGTTCATGCGGTCTATGTGGGGATTGGCA  
TCGTTTCAATCAACTTGGTTTTGTTAGCGGCTCTTAGTGGTGGCAATCGTGTGGAAGAGCTGGGGGCAT  
ATCACATAACAACATGTGAATGGGTACCACAGGCGATTGAAGAAGTGAATGGAGCACTATGGGCGGGAAGT  
GAATATCTAATGTTGCCTGCATGAGGCGCTGGGGCGCTCATGCAGCACATAACTAGGACAGAGCCTAAC  
CCCAAAGGGCATCAAAATTAATCATCTCAATTTCTACAAAATTAATTTCTCTTTACTTAAATATCGAAGC  
GATCATTATCCATCACCTTGACCCAGGCCTTGATGAAGTCACGGATAAACTTCTCCTTGCCATCTTGTTG  
GGCATAGACTTCCGGCTAGGCGCTAGCACAGAGTTAGAGCCAAACACCAGGTCAACTCGGGTGGCGATC  
CACTTGACCGCACCGCTCTGGCGATCCACGATATGGTAGCTGTTGCGACCAGTCGGCTTCCAAGTGTAGG  
CCATGTGCGGTAGGTTGACGAAGAAGTCGTTGCTGAGTACCCGACCTGGTCGGTAAAGACGCCGTGGGC  
CGATCCACCGTGGTTGGTACCAAGCACCCGCATACCACCGACCAGGACTGTCATCTCGCAGGCGGTAAGC  
CCCAGCAGCTGGGCACGGTCGAGCAGCATCTCCTCCGGCTGTACCTTGTAAATGCCCTTCTGCCAGTTAC  
GGAACCCATCGTGTACCGGTTCCAGGAAGGCAACGACTCGGCATCGGTCTGTCGGCACAGCATCGCC  
CCGGCCCGGTGTAAAGGGAACGATGATATCAACGCCAGCCAGCTTGGCCGCTGCTCTACCGCCGCGCTG  
CCGCCACGACAATCAGGTCCGGCGATGCTGACCGGCTTGTCTAGGGTGGCCTGCAGGGCGATCAGGGCGT  
TGAGTACTTTCTCGAGGCGAGCGGGCTCGTTCCCTTCCCACTCTTTCATCGGCGCGAGGCGGATGCGAGC  
ACCGTTGGCACCCGCGGATAATCGGAGCCGCGGAAGGTGCGGGCACTGTCCCATGCGGTGGCGATCAAA  
TCGGCTGGCGCCACGCCGAGGCCAGCAGTTTGGCCTTGAAGTCACTCACCTCTTTGTGAGAGTTGGT  
AATCCACCCCGGAACCGGATCCTGCCACACCATGACTTTCGTCGGCACTTCCGGCCCCAGGTAGCGGCT  
GCGCGGTTCCCATGTACGCTGAGTCAGCTTGAACAGCGCGGGCAAAGGCGTCGGAGAGCAGCTTGA  
TCCCGGGCGAAGCGCTCGGAGATCTCCCGATAGACGGGTCAAAACGCGAGCGCCATGTCCGCATCAGTCA  
TGATGGGGTTGCAGCGGATAGAGGGATCTTCCACGTCCATCGGGCGATCTTCTTTTAAATTGCAACGGG  
CTCCCACTGCCAAGCACCGGCCGGGCTCTTCTTGAAGCCACAGTCGTGGCCAGCAGCATCTTGAAGTAA  
CCGTTATCCCAACGAGTCCGGTTGCTGGTCCAGGCGCCCTCAATCCCACTGGTCACAGTATCACGGCCGA  
TGCCACGGCTGCCGTGGTTAGTCCAGCCCAATCCCTGCTCGTGCACATCCGCTCCTTCAGGAGCCGGTCC  
CAGTTTGGCAGCATTGCCGTTACCGTGGGCTTTGCCGACGGTGTGGCCACCGCGGTCAGGGCAACGGTC  
TCTTCGTCATTATCCCATGCGGGCAAAGGTGACGCGCATGTCATGGGCAGTCTTCAGGGGATCGGGGT  
TCCCATCAACCCCTTACGGGTTGACATAAATCAGTCCCATCATTACCGCGGCCAGCGGTTTTTCCAGATC  
CCGCTCACCACTGTAACGGCTCCCCTCACTGCCACTCGCTGCCAACCATTCTTTCTCGGAGCCCAATAG  
ACATCTTTTTTCCGGATGCCAGATATCCTCACGACCACCAGCAAAACCGAAGTTTTTTCAGCCCATGGATT  
CATAGGCGACGTTGCCAGCCAGGATCATCAGGTACAGCCAGGAGATCTTGTGCCGTATTTTTGCTTGAT  
CGGCCACAGCAGACGGCGGGCCTTGTGAGGTTGCCGTTGTCGGGCCAGCTGTTGAGGGGTGCAAAACGC  
TGTTTGGCAGTGTGGCACACCAGCGTCCGTCTGTGGCGCGATAGCTACCGGCTGAGTGCCAAGCCATGC  
GGATCATCAAGCCGCGTAGTGACCCAGTCAGCCGGCCACCAAGGCTGGCTATCGGTATCAGAGCATG  
CAGATCTGCCTTAAGGGCATCGTAATCCAGGCTGTTGAAGGCATTTGGCATAATCGAACGCTTCCATCCATT  
GGATTGGTCTTACTGTATGCTGGTACAGGATGTCAAGGTTGAGAGCATTGGGCCACCAGACTTGATGCT  
CTTGGTTGGCAGAGGTATTGGCGCCGTGGGCAAAGGGGCACTGACCGGTCCCATTAGTATGTTTTTCCAT  
TCACTGTGTCCTTTTTATTAACGTTATAACGGTAAAACAGTTTTCTTTGTAACCTTAAAGATAAATTAC  
AAACAGTGTGTTGAACATAGGATTAATAACTATTAGTTCATAGAGCATGACGATGGAATGCCATTTTTA  
ATGCAACTGAAGTATGGTTTTTATTTGAAAGTAAACCTCAGCATACAAAAATGCTCATCTATCTAGGCTGG  
CTATAGCTTTTTTCAAACATCCTATATTACGAGGGAGCTGATGATGGTTGAGCAGTAAAAATTTTCAACTG  
TTTGCCCTTACTGCTGTATTACCAATTCCTCACAGAGCATTTGTATACCTAAACTACTTTAAATATTTATTT  
AATATGATTCATTAATACCTTTTTTGTCAAAAAATTTACTTTTTCATTTGATTTATATCAAATTTAATTT  
TTATTTAAATTGCCATTTTAGCGTTATGAAAGGCGTTATTTCTCAAATCGATACAGCTTGAATGGAACATA  
CCTGAGGACTCGGTGATCTGATCACACCATCCTCTCAAATCTGCATCATGGGCACGTCGCTTACCCCC  
ATCACCAACAGGCCTCAATACAACAAGTCTTTGATTAACCGTGGTTCACTCACCTTCTGGGTTGATGCCG  
AGGCCATGCGCAACTGGTTTTACCACGACCATCATGGACGCCGGGGCCGAGCCAACTCTACACCGACCA  
GACCATCTCAACCTTCTGATGCTCAAGGGGATGTTCAACCTCACTCTGCGGGCCACTCAGGGATTATTC  
GACTTCTGTTTCGAGTTGATAAACGTACCGCAGTGTGCCCCCGATTACAGTTGTGTGAGCAAGCGGGCCA  
GCACGGAGAAAGTGGCCTATCGACAACCCGCCAAGGGGCGTATCACCGATCTGGTTATCGACTCGACTGG  
CCTGAAGGTATTTGGGGAAGGCAAGTGAAGGTGAGAAAAACCGGCGCAGAGAAACCGCGAGTGTGGCGC  
AAGTTGCATCTGGCGGTAGACCCAGTGACCCACGATATCGTGGCAGCAGAAGTCTCGCTGAAAAATGTCC  
ATGATGCCGAGGTGCTGCCGACCTTGCTCAGTCCACTGCAGCGCAAGTTGGGTGCTGTTTTATGCCGATGG

CGCCTATGACAGCAAAGCCAGCCATCAGCTTATCTCGCACAAAGGGGCGACAGCCTGTATCCCGCCTTGC  
AAGAACGCGGGGTTATGGAAAAAGAGACACCCAAGAAATGAGGTTGTGCTGGTAATGCGCAAGGAAGGGC  
TGGCGCACTGGAAGAAGATATCGGGATACCACCGTCGCTCGCTGGCAGAGACGGCGATGTATCGGTTTAA  
ACAATTACTGGCGGGCGAAATCAGTCTGTGTAACACAGCCAAGTGGGAGAAGTCATGGCGTATGTA  
AGCGCCATAAAACAACTGAATACCTTGGCCCTACCTGTGACAGACGCCCCGAGTCTAGCGTTAACCTGGTG  
CTAGGAAAGCCATGACTTGATGGCTTATTTGGGCAACAACGCCTCATTAGAGCTCACCTCAGTCATGCGA  
CAGAACAAGTTTCGTAGATATGAGGGTTGTCATGATTTGGGTCACTGAACCTGTTAACAGAAAAGGCCACAC  
CGTGAGGGCATGGCCTTGTCTATTTAGATCAGGAATTCATCCAGCTGATGACCTTGCTCGAGTTGCTCAG  
CCAGGAACCTTGGGGGTACGCCCTGACCAGTCCAGGTTTTCTCTACGCCATTTTCAACGTAGCGGTATTT  
CGGTGACAGAGGGCGCTCGTTTAGCTTTAGCCGCACTCGCGGCTGCTGGGGTACTGCCACCAACTCAGTG  
GGGTGCATACCAGCTTGAGCCAACATCGCTTGGAACTCAGCCAGCTTTTGGCAAACGCTCAGCATGGCTG  
CTTGTTCTTTCTCCGCGACCTCCAACCGTTCCAGATAAAATCAGCTCGATTTTCTCGTGGGCTTCTTTGAG  
CTGATCCAGAGACAACCTCGCGCAATGCTGCCCCGAGACTACGGATGTTCAACAACACTTTTCAGAAATTCA  
CTCATAGATATCCTTTAATTAATAACGCAGGGATTGTTCTATAGCATACTAATGAGCACTGACGTGCTCA  
AGCGTCTTATCGTATTTGACTGCAACCAAGTTGCGTTGCCATCCATAACCTTCGTACTCTGTTTACTC  
AGGTAAGCCAGACGAAACAGAAAGTCGTGATAGATTTTATCTCGATTAATTGCCGCATTACGAAATAGCC  
AATAAGTCCCTTTGGGAGGAAAATGAACCAAGTGAGCATGCTCTGGATACGGTAAGCTTAGTGCACACTACA  
CCACGCTTTCTGTATCCTCCCCCATGTTATCACCATCACTTTCTAAATAGTTACCCAGATAGGCGTAA  
TCGTCTCTGTGGAAGAATAGCATGACGTGGTAATGGTGGTGTGCTGATGAGTCTTTTCTCTGCACCAGA  
TGTAAGCAGGTAGAGGAGGCTCCCCCTCGTCGGTTGTACGTTTATGTTTTGCTTTGATCTGACTTTTAAAG  
GGATTCCATGAAGCGTGTGATCACCAGCTGGGTCAGTGCCTGCATGAAGATAAGCTGATCCGGATCGTAT  
TCAGTGGTGTCCACTGCGAACCTTAAATCGCATCGAATAGCAGAGACTCGAGGAGTCTCTGCTAATACTT  
GAGCTGTAAACTCTACACTGCGCGCCAGATAATCCAGGTTTCATTGGCCCATATCCAGACGTGCATTCTTG  
CAACAGCGCTTCAAATTCATATTGGTTAATAATATTCTGCCATACATAATGAGCACTCCTAAATGCTGA  
GTGTTTGATAAAAATGTTGTGCCTAACACAATAACGTGCGTCAGTGTTTTAAATAAAAATCAATCCTCCCC  
TCTCAAGAGAGAGGGGATATCTAGACGATGATATAGAACCTGTTATAGGCCGTATTACGAGTACTTCATA  
GTGGTTATATTAGGTACTCTTTTGTATGCTATATTACATATACCGAACTGCTTTGTTGTACAACAAAATAAC  
CTAAGGCCCTTACAGGCCAGCTATATATTAATAAAGGATTAAGTTATCTTTAAATAAACTACTCTTAAGTT  
ATTAATAAAGTAAAATTATCTAATGTAGTGTTTATCGGTGAAGTTAATATCCCCATATGGTAACGACCAG  
CGTTGTTCTATTTTGTATAAATGCTGACACATCCTCTCAGGATTAATCACTCAATGCAGCATCAAGA  
GCCTGCTTACTTCTTAATTTATTTCGGACAAAACCTTACGAATGTCATTCTTTTTGAAAATGACTCCTCCAT  
TTGCCCCACATTTCTAGCTAACCAAGAACGCAGAAATATCTGCATTAGATGGTTCATCACTTTTATCGAG  
CTTCTTCATTTGTTGAATAAAATGCTCAAAAAACCAATGTGCAATAGTAATCGCAGCATAACATTGTCTGA  
TCTGAGATAAACTCGGCGTTAGGTGTGCAAAAACCCCTCCAGAACCGCAGCAATCCTAGATAACATGCTCCA  
TAAATTTTGAAGCATAGTCGCGGTAAGTCAATTTCCCTAAAGGACCAATACTGAGCTCAATAGCCAC  
ATATTGTTGATTCCACCGGCTAGCGGCTTCTGGCGTCAGCTTTAAGCATTTACGCTCGATCCCACGCTCC  
CTACGTCTAAATCCTCCCTTCAGAAGACCCCTCAACACGTTGATGAAAATGATCTACTGCATCCGGGGCTC  
GAAACCGCAATTTGTGCGAGGTGGAATCGTTGACCTTGAGTAGACTGAGGCTCACAGATCAAACACCGGGC  
CAAAAAACCGGAAGCACGAGCACGCTCCCCCTTGGCGTTCAGACTGCTATTAATAAACCAGGCTGAACC  
ATAAGCATCAAACCCAAACGGTAATCAACTAATTTAGGTCTGGTACTGGCCACCCGCTCGATTGAGATAG  
AATGTCCACTCCACATTGAGTTAATAGCGGTGTCTCTAAAACAGCTCCCCCGACAACAAGCGTCCCGCCTC  
ATCGGAGGCTAGCATTAAACGATGGGCTATCCTTGCTTAGAACTTGCTTGATGGCGGCACTGGTTACATCA  
GATAACACTAACCTCTTTTGAAGTTAGGGCAATCGGTTTTTGTCTTGGCATTGATACCATGCCTCCTCCA  
ACTCTTTAGTTTCTAGCCCTTTCTCCGCGTCTTTAGAAATGCTTTTCTTACGCCCTTCTCCTTGATCTG  
CCACAAGCCAACCTCTCTGAGATAGACCTCTTGTGACTTGATAAATTCAGCTCCAGTTTCAATCTGAAGT  
TTATAGATAGCTTTTCAATTAACCAATTGAACCAAGCTGACTTGCCTCACCTGATTGAGCCAACACGATTA  
AATACAACGATGCAGCAAACTCAGGTTTTCTTGGGTTGCACATCAAAATGATGTCTTGACATGCTAATG  
ACATGACTGCTAGAACAGCTGAGACAATAACCCCAATAGGCGCCTGTGTATCGTCAATAAATGTGCTGTAT  
TAGCCTTCGCAATAGTTTACGGCAACACTTGTACTGGAACTCACCCACTTGATTTTGAATTGTTTATCATG  
ACGGATCTCAGTTTGTAGTTTTTACGGGACTGGATCCAGATATCTACCGATGACTCACGCCATCCAATCGCC  
GAAGTTCCACCCCTGACTGGCCTCGGGAACACAGGTTCAAACCTAGGACTTTTTTGGGTTTTATGCGATCGT  
AGATCCAAGACCGACTCATCCCCACTCGCAACTTCATTTTATGATGCGCAGTATGCGGTCCGGTTTTTAT  
CACTGATGTAGTCATAAGCACTCCTCATCTATCGTGGTTACAAAATGTCTGAGCATGGATTGCACTAATC  
TAGGTGCCGTCGATGTTGCAAAAATCGTGATGCATCTTCTGACTTCACTAGAGAGCGAGATTGAGATTACC  
CTAGTTTTTTTGGCAATAATGGGTCACCTATGCCACCTCTTGAATGACCTGTTATTTGAGTTGAGCATGAT  
ATAAACTAAGCGATTTTAAATTTATAGGAGCTCGAGGGTTTTATGTCCCTAATTAATAAATCAACAACAA  
ATGAAATGAACGATATCGCAAGCTTTATTTGCGCAAGAAGCCTATAGGCTAGCTGTTATAAAAACAGTATCC  
CGAAGATGTTTCTCGCATTTATAATTTAAGTAAATCTGTGAGATATGAAATCCTAAAGCTATTTAAAAAG  
AACACGAACATAGACTATGCTATTGAGAGCATTTATTTATGTGTTGTATGTTACATTGTAACAAAACCCAC  
CCTTTGATGAGTTTTAAAAATGAAATTAGATACCTCATTAATAGGTGGTGGGGGATTGAATCGGAGGACGA  
CAATGATGACATCATAAATAACGACAAAAACGAGTTACTGGACAATTTAAAGAAAACCTGTTATAGAGTTA

TGTAAGAGTAATCAAAATTTCAAATGCAATATTGCTCACAGATACTCAGTTGCAATGTTTGCAACTGAGT  
TTGATAGCACATACTTACTAAAATATTATCACGACACGTTGCAATATATTTATAAAAAAGAATACACTCC  
TATTAGAAAAAATTGCATGACCACTCGGTTAGTTCGTCGTTATAGACTATTTAACCCCATTTGAAGAGCGA  
CCTTTGTACAGCATTGAATGTGCATATCAACAAGTGGAAAGTGCCAACAAGCGCACTATCAAGAATAGATA  
GAGATATAATAATTAATGATGACATAGAAAATTTATGTGCCAGCTATATGATGCTGCATGAGTATCGCAA  
CCAAGAATATGTTGATATAGCAACTAAACTGACTGTGCAGATTGATATCTCAAAATGCTATCAAATAAT  
GAACTTGATAGAATCATATCCTATTTACGTTCTGATATTAGCGTGATACAGACAAAAGAATAAAATTTCTC  
ACATGTGTTTAGCTAAAACCTGAAGATGAACTTGTGAGAAAATACAATATCCCAAGATTGCATACGGATGA  
TTATCCAACCGTGAGTTATCTACACAGGGCAGATACACTAAAAAGTATAAAATGAAAGTCATGCAAAGAAC  
TATCTATGCGCCCTAATTTAATAGCTGAGCACTTTGTAAAAATATACAAAACAAGAATGATAAAGTAAAA  
TACTTTGGAAGAAGATGAAAAAACTCCAATTTAAAAACAGTATGGATTTATTGGCTGCTGCCTTACG  
AGATAAGTATGGAGATAAAAACATTTAACAGCAACAACACTGATAGCAATTTATACATCTGATTTTGCAGGC  
TTCAGTGCAGGGATGATTGAAAGAGGTTATAAAGAACTGAATAAACTAATAAAAAAACATTTAGATTTTT  
TCCAACAAGGAAGAGTTCAATTTGGGAAAAAACTTAAACAGTTCACAAAAGAGATAAACTGCGTGCTGAGTT  
GGAAATTAGCTTGGATAAATTACATCCTGACGATAAAGGTGAAAGCGAAGGATGAGCTTGAAACTCATTTA  
AAGAATGGTCGCCAGGCCTCTGTAAAACCTTGAAGAATGGAAGTTATGTAATCACATGGTGATGCTTTTT  
CCTGCTACTCTTGCTACTAATAGCAAGAGTAGCAGATTGTTTTTTGTAAAAATCATAATTACCCATTGA  
CAACAACATGCTTCTATTAACCTTGCAGTTATTTAACACCCCAAGTGGTCTTTCTTGATCTAAGATCAG  
CACCAATTCTTATCAAACACATTGGAAAAAAATACTGGTATATATCATCTCCATGAACCTCCCAAAAAGA  
TTTTCATGGAGATATCATCATGTTAAATATAATGAGCAATACGATGTATATATTGCAAAGACCAGCTAGAT  
ATCTTATCGGAGCCAAACCTATAAAAAAATAAGGCCCTTCTGTAAATAATACGAATCCATATAGCTTA  
TCGTTCTCACTACGTCAGGTGTTTCATGATTGTCATAATCCATCGCTACCACTGACACAAGATGACACATT  
ACGTCTTTAAACCACTGGTTTTGATTCAATAGATCAAGCCCTAGTGACACTCACGAAATCGGCACCTCATTT  
CATCTATTTTCTCCATTTTCTGGTCATTAAGGTCTCTTCGAGACTTTTGACCATGGGGGTCAGTGTACC  
TTGCCCTATTGACCGGGAGGAGACCATGGCACTGGTAGGTTACGCACGTGTTAGTACGGGAGGTGAGAGC  
CTGGAAGTCCAGCTTCGAGCTCTGGCCGAATGCAATAAAGTTTTTTCAGGAGAAGGTTAGCGGAGCCAGTG  
ATGATAGACCCGCAACTTACTCTCTGTTGGATTATGTGAAGGAGGGAGATGTGATGATGGTTACCAAGCT  
GGATCGTATGGCTCGTAATACTCGTCACTTATGGAAATATCAGAATTTCTACAACACAAGAAGTGTGCA  
TTACGGATATTGAATCTGGGGATCGACACCTCAACGCTACTGGCAAATTAATGCTAACCATGATCGGGTG  
CTATCGCAACATTCGAACGAGAGTTGATGTTGGAGCGGCAAGCTGAAGGGATTGAAATTAGCCAAGCGACG  
AGGTGTGTATAAGGGCCGTAAGCCTACCGCAATGGCAAAGGTAATGAAGTTCTTGCAATTGGTTGCCAAAG  
GTTTTACCCAGATCTGAAATGCTAAACGCACGGGGATAAGTATCTCCAGTGTGCAACGCATTCTCAGATC  
TCAGAGCAACTGAAAGTAGTGTGGTTTACCGTTCTGACGATAGCCATACACATCTATTTGATCATAGT  
TATTCGGTGAGATAAAAAATGAAAAAGCTGACATTCTGCTTACTACTAACTCTTATGTCTGGAAGTCAAT  
CAATACAGGCGGCGGAGCCGTTACAGGCTTTCTGCCTGCACTAGTGCAAGGACAAAACAGGGAAACCATT  
TTGGTGTAAACGCCCATTTGAAGTTAAACAGAAAATGCATCGCAACTGAAATCAGCAATCTTTCAATGGTC  
ATTGTTTCGAGTCAGCCATTCGGTGACTGTGAAGCTGGCATGTGGGGCTGGATCTCCACAGCTGGCTCTC  
CACACAAAATTGCCATTGGTTATACAATTACACCTGATGAAAAATCAATATTTCACTGAAAGATATGTG  
TCGACCAGGCACTGTTGTCAAATTTCAACCAAAACAAGAAGTATAAAAAATGAGGAAGACCTAGTTGGTTTT  
TACAATGGCAAAGAAATATTAGATATCTGGGGCGTAAATAACCAGATGCTTTTTAAAATATGAGTAAATG  
CTACGAGGATTTTTATGAAAGACATACATCGGTATTTATTGGCCTCGACTCTGATATTTTCGGCCCTAGC  
CTGCAATGCGCAAGAACAACGCTACCTCGCTATCCAGCACACTGACACAGTTTACGCAAACCAAGGCGTC  
TGTGCGTATCACTTCTCTTTGGATAGTGGCGGGGCGAGAGTTTGGTCATTTGTATATCACGCTGCAAT  
TCAATGACAAGAAGGGCAAAGCGCTGGCCGAATCAACACTAGAAGTTGAGCCCTTCGGTGGAAGTTCCGC  
GACTCGTTATGGTGGCGGTTTTACGGAAGTGGATTGCGAACAGGTTGAGCAAGCCAGGTTATCGCCATT  
ATTCAGGCGACCGAAGTCTTTGCTCATAACCAAGTTACCCGGCTCCCATCTCCATTTACACCCGAGT  
TTCATCAACCACTGAAGATCACCGTGAGCGGCAAGTAGTACGCTCAGGAAAAATAAAGCCAAAGGCGGTC  
ACCGTGATGGTGACGCCCTTTTTCATTTTCAACCCCTTGATGAGGAACATCACCCCATGACACGACATTTT  
ATTATCGGCGATCACTTGGTTACACCGCAGCCTGAAGGCCACCATCACGGGATTTTCGTTGGCCATGACC  
AGGTCATTTCACTGTCTACCAACGCCTGCCGGTGATCACTCAGGTCATTTGGCGCAGACCTCCTTGCTGA  
ATTCAGCCAGCACACGCTATTGAGGTGAGGCCCATGTCCAACGCCTGTTCTGTGCGAGAGGAGAGCCTG  
ACACGGGCTACGCACGGCTAAGCGAAGGCGAACAAGGCCAGCCATTTGCCACTAGCGAGCAATTTGTTA  
CCTGGTGCATTGAAGGGGTTACGATCCCCGAAGCTGCTGCAGACTGCGGTAGTAACGGTAGTGGCAGC  
CGAAGTGGCCCGCCATACGCTGGTCAAGGCGGCCACCAGTGCAACCGCAGGGCTTGTGCCAGTACTCTG  
GCCACGACTGCTGGCGGTAGTGGGGCCGCTGCGACGGTAGTGTGATCACCGCATGCTTCAGTCCCGC  
TGTTAGCTCCTCTTGACAGTAGGCGCGGTTGCTGCCTATGGCGTCAGCAAACCTTGGGATTGGCTCAAAGA  
CTGAATCGATACGAAGAGACATCATGACAATTCCTTTTTCAACCGTGATGGCGTTAACCTGTTTGTGACAGA  
GCCACTGCTGGTACTACTCAATCAGGAAGCCGTGAAATATGACTTCGACCCTGAACAACCTCACCCGGCTT  
ACCTTCAGCTTTTCGAACCCCTGACTATCAACCTCAAAGTGGTGGGGTCCATCCGGTTGAGATCCAGCTGA  
TACGTGGTCTTGATGGTTGGCTATTGACTACGTCAGTACTGATTTTAGCTACCAAGGCCCTGGGACAAGATAC  
CGAGCTCTGCAAAGAACTCGACTTCAACTTCTGGATAACGAGCACTACCTGCAAGGCTGGGGACCGCTC

CCCATTGCAGATGCCCAAGAGTTATTCAACATGTGGCAGAACAGCTTTCTTGCCTACGCCAGCTGGGCT  
TTTTTACCAGTACCAGTACTGGTGACTGAGGAGGCATGATGCCCAAACAACCGATAGCCGTTGAGTTGGA  
GGCCATCAATCGAGAGGGAGAGATACAGGTGGTACGTGACAGCGCCTGACGGTTCAGGGCTACAGCGTC  
TACCTGCGGGCCGTGGAAGCCAGCGGACTGGCCCTAGCCACCTGGGTCACTGACTACGACACCATAGGAC  
CGGCTTACCAACTGGCGGAACGGCTGAGTGTGGCGCTCGCTATCCCCTCACCGTGCCTGGTCCCCGAATC  
GCTGGTGCAGTGAAGAGTGAAGCCACAGCCATGGCAGCCCCATCACGACGGCCAACTGAACTACCCCTC  
AAAGTGAACCAACAACACCTCTGCATTTAGCCCCGGTATGCCTTGCCTGTCGGGTTTTTTCTTTTTTAAG  
GAGACCACCATGCGTTACCACAAACTAAAAGCCGGGGAATGCCCCGGCACTTATGTCGTCACCTGAGCCCC  
TGACCGAGCAAGACCTGCTGCGTATCGCCAACCAGATTGCTCGCAAGCGCCTGGCCAAAGGCACCGCCAT  
CACCAGTACTACAGAGGCCGCTGAGCGGCTGCAAACCTCTGCTGCAGGACCGGGAGCACGAAGTGTGGC  
GCATTTGTTCCCTCGACTCCCAACATCGTGTCTTGTAGGAGCTGTTTCGTGGCACACTCGACAGTG  
CCAGCATCTACCCACGGGAAGTGGTCAAAGGGCCCTACTGCTTTGTAGTGCATCGATTATCGCGGTGCA  
CAATCATCCAAGCGGTGATCCGGAACCCAGCCACTCTGACCGGTCTTCAACCAGGCCCTCAAAGAGACC  
TTGGCACTGGTTGATATCCGGTTGCTCGACCATCTGGTGGTGGGGCTGAGGGCATAGTCTCGATGGCCG  
AAAGAGGCCAGCTATGAACCAGACCAAGGTAAGTACACCTCACCGCCCTCGATATCCTCCTCGAGCTG  
CGCTGCTGGCTTGAAGATAACGTTTCAAGTGCAGGCGGAGCCGCTATCGTTCGCTCATCTGCCAATGGCT  
ACCTGCTCACCAAGCCGACTGCATCGAGGCCATTGACACACTGCTCCACCAACTACGCCATTAGTCGCG  
CCAAGAAGGGATAAACACCATGCGATTACCAATCCCTATTCCTTGGAGAAACCCCTCGAGAAGCTACGC  
CATAGGCTGGCAGCCGCTGCAACGAGGATGCGCTGACATTGCTGGAGAAGGCCGTCACCAAGGCACATG  
ATGACGAGGCCCTATGCCAAGCATTGTTGAAGAGACCTTGTGCTGAGTATCCACCATCGAGATCCGCGAGTG  
TCTCAGTTGCTTTGGTACTACTTTGAGCGCTCCAGGACAAACCGCCCTATTACCCCATCACGATGCC  
GTTAACGGCATTGATTGTGCGCTCTACGCCATCCTGTTTCGCTCTAGCTCACCCCGACACTGAGCAGGCGC  
ACGAATAACGCCAGCATCCCAAACCCGGATCATCAGCGCCAACACCATGATCCGGATATTCCGACACAAC  
CCACAGGGCCACCTCACCAAGGTGGCCTTTTCGATTTCAAGGAGTCACCCCATGTCCTGCCCTTCATGATC  
GACCGCCAGGATTACCTGGCCTTTGCCGTGACGCTACACCGCTTTTGAATGCCCCATGCCACCGCACT  
ACACCCTTGAGTTGCTACGCACCCCTCTGGTGGAACTCGCAATGGATGTCACCAGTACCTGGACATGGCG  
GGTAGACCGGTTGGTGGCGCTGATGATGCTCGCAACCGCGGGCAGTCTGGCATCGTATCAGTTAGGG  
CGTCAGCAAGAGCACAAAGAACCAGCCGCCCCGCTCGACCAAGCTGAGTCGGTTTTAAACCTGCCCAT  
GTTACCATCAAGCACCACTACCGATGCCGAACCTGGTGGCGCTGTACAAATTCACCTGCTGCGCCCTGTA  
CCAGTCGAGTGAATGGAGTGGGAGTCCCGTGCAGGACCCCGGCTAGTGAAGGTACTACAGCAGTTGCAG  
CAGGCGCTGGCGCAAGACGTGCTGACCCGGCTGTCACTGTGGGAGCAAGCCCCCTGGGGAGAGATGTGAT  
GAACCTTTCCATCACCCCTGACAGTGACAAGCTCACACCGAGCTCAACTACCCAGATAGCCAGCGTATC  
GCCGATGACATGGCACACCTGCATCACCGTCTAGGGGATGGGGTCAAGTATGAACTGGGCATCAGCATCA  
GTTATCTGGTTCGAGCAGTTTTCGCTGCTGGCAGCGGCTTACCGTTACCTGCAGAAAGAGAGAAACACCC  
ATGATCGAATTCAACGATAGCTTCACTCAGGTGCTGTCGCTCAGGCAATGAGCGCACATGGCGATTTGC  
ATCGGCTCATTACCTATCAGCTCACCTTCCCGAAGTGGGCACACGACTATGACGAGACCGGCAAGCGCAC  
TGGTCCCGACAAGATCAAGCCCGTGCACACGATGCACAAGACCACGCTGTTTCGTGAGTCCACTGGACATG  
GTGGACAACCTGCCCGCGAGATTAACCTTTGCGTGGTGGGAGCGTGAAGTGAACGACCTAGGCTATCCCG  
TTGGGGAGTGGCGACGCACCATTTGGGGTGCCTACTTCAACCACGGCAGTAATGACAAGCCGGATTGGAG  
TAGTCACACCTGAGCCACGGCCACCAGCACACACAAGACCTCTAACAGCCCCCTCACGCCGAGGGGCTGTT  
TGCATTTGAAGGAAACCCACCATGCATGACCTACGTGATTACAAGACTCTGTCCGCCCCGACAACTCACC  
ACTGCTATCAGCCAGCTCAACCACAACACCACGCCGAAGATAATGACCCACCTGGCATTACGGGCTAGAC  
AGCAGTACCCGCTTGGCAATAGTTCGAGCAGAGCCAAGGCCCTCGAGTACTACGCCGGGTCAAGAAAGC  
CCGCAAGGCCGGGGCGTATCCCGTTTGGCTCACCGTGCAGGGCTGCCACATCGACCGAGGGAACCATCAG  
GCAAACCGCTACTACTACGACCGTACGCTGCTGGCTCAGGGCTGGCAGCAATACGACACCGAGGAAGATG  
CTTGGTACTTCGGGATATGGATTACACCCGAGAAGCTGGAGACCTTTACCTACGCCGAGGGGATACCCAG  
CCATGTAATTGCACCGAACGTCGAGGCGTTTCGTGCTGAATTGGCGCGGCTCTACCAGTACCACCCGCAA  
GCCCCGGCGTTTTATCAGCATCGACCCAGAGGCTGGCGTTGTGACCCACCATTTTTGAAGCCAAACCGGAGG  
TGTGACATGGCTAAGAACATCACCATCAAGGTGCCCGGCAAACATCCGCAAACCGACGAGCTCACTACCT  
TCGAGCTCAAGGGCCAGCGCATGGATATCAACATCGGCGGGCAGGCCGTGCCCTTCTCATTACGGGAG  
GGGTATAGGGACGTCGCTCACGCACATCCCGAGTGGCTACCGGATAGCACTGCTCGGTGGTTGGCTCACC  
GCTCGTTACGCAATCCCTGAGAATAAGCCCATGCGCCAGATGGCCATAGACCGACTGGTGGCTCAATAC  
GGCTCGCTGCACCTGCTGGACCGTCTTAATTGCAAGCCGGTTATCAATCAGATGTAACCCACAGCCCAGA  
CAACAAGGAACGATGCAATGACCAACCCCTCCCTGCAACACCTGACTCACTGGCAGGCCATTCGGTAAT  
GCAGATGCTGGATGTCGCCATGAGTTCATCATCAGCGATTACGATGACGCAGACCTGGTGGCCGAATGG  
CAATGGGTCAAGCAAATGGCCTCCCATGAACATGTCGGTGTGAAGGATGACTCTGCCTATGAGTACACCT  
TGAATCTGGCCATGGAGCTCGATGCCATCCCGCCAGCACTGCAACCCCTTGCTCACTGCTGCCAGCAGGC  
TGGCGTGAACCTACATCCTGTTTTACAACGGCTAGCTACCGGACCATCTCATCGCTCATCCACACACAGC  
ATAAAGGGCCAGTCTGAGAGGGCTGGCCCTTGGTATCATTTGGAGTCAACGAAATGACCCGCTTTATCAC  
CGGACTCGAGGTGCATCGCTATGCCCCAGAGCTGAACAAGCTGCACCTGCGCAACCGCCAGACGTTACCC  
GCTCCCGGCATCACAACCATCCAACAGGCCAAAGCGCGCTGTTTGGCCGATGGCATCCTGGGCATCAGG

TGACCATCACCGTAAGTCACCCTGACTACGTCAATCTCTCCCGCTCTACCGAGGGCGACTGGCAAGCCT  
GACAGACCTCCCCGAGCACCTAGCCAGACTACGCCAGGCCACAACGTACCAGGCACCATCATCCACACC  
CACCTGAGGTATCGCTAATCATGACCACGACAACCCACACCAATGGCCAACAACCTGCCAAACCAGA  
CCTGCCACCCGGATTTTTGCGCAGTGGGGCTTGCCTCATACCGCCACACCACGCTTTGGCGCTCGTCTC  
ATTCAAGAGCATCACCGGCTGCACTTTTTGTGATCGGGCCATTTGATTGGCGAATGGGAGGCGGTGG  
CTATCGACAGGCTGGAGGCAGCCTTCCCAGCAATCATCAAGGAACTGGAGACCAAAATGCTGACTGGCGA  
ACTGGATGCTCAGCGTCAGCAACGTATCACCGTCCATCACGGTGGTTTACCTGCGAAGCCGATACCCTC  
GGCAGCCACGGCTATGTCTACTTGGCGATTTACCTTGCATGGACGCGGACGCCAATCGGAAACACCTCT  
ATACGTTGCCTGTGCGGGATTAAGAGGAATGTCAACTAGAGGGGGGAGCTGAACTTCAGTTTGGGATAAC  
ATGAGCTTTTGTAGTGGATATTTCTTCCCCTCCGGTTATCGTGCCCTTTGAATCTGGGCTCACGAGAAG  
CTTGTGCGCCATATCGTACATTTAGATAACGGATTTCTCAGCCATGTGGCATGACAACGAGACGCGTTG  
ATTACTTGAATTTTGGGGTAGTGGCAGATGCTTGCCTAGCATGCTCACTCAAGCCAAAGGTGAGCCAAT  
ATCTATTGGCGTTTTCCGGAGGATGGGGGACAGGCAAATCTTCTTTGGTGAAGATGATCGCCACTCGGTTA  
AAAGCCCCCTCAGTGGTTGTGCCCAATGAAAGCAACAAAGCAGTAAATGACTTCGTGGTCCTTACTTTTCA  
ATCCATGGCTGTACCAAGATTTTGTAGTCACTCGCAGTGTCTGCTTCAAGATCGTTGGTGTGAGATAGT  
TAACTTGCCAAAGAGAACGAAAAAATGCAGATAAAGTCACTGAGCTATGGCGTCGAATAAACCTTCTC  
AGGATTGCCAGCTGAGCGGAGAGGCTGCCCTCACATTGACGACTGGCATTCCGATTGGTGGCTTGGAA  
AAACATTTAATAGCATCGCAAACCTTCTTCACTTCTGAGGCAAAGACAGACGAGATCGCGGTAGATTCTGA  
GGGGCTCACAGCAGCGAAAAATGGTTTGTAAAACCGAAAGAACTATTCTCGATGCCAGCCAATATCCAG  
GCGTTCCGAGATACTCTAGAAAGCCTTCTTGTAACTCGAAATCACTTTGGTGAATTTTGTGCGACGACT  
TGGATCGATGCCTCCCTCAAACAGCAATTTCCACACTCGAATCTATTCGCCCTGCTGTTGTTTCATTCGTCG  
TAGCGCTTTTGTGCTTGGCGGAGACAATGATTTTCATCAAGGCCGAGTAAAAGTCCATTTTCGATGGCGCT  
GGAATTTTCCAGGCGATGTGGCCACCAATATTTTGTGACAACTCATTCAGGTGCCGCTTCATGTTCCGAGAC  
TGGGCTCAATGAGGCGAAAGCTTATCTGGTACTGCTTCTGTTGGAACGCGAGGCCAAGGTCCGTTCACT  
CAATCTTGAGCAATTTGAAAGAGCACTTGTAGCTCATTCCTGCAAGATTACGAAACAGTTGGAAAGGCGAA  
ACGATTAATCAAGAGTTTCTCTATGACCTTGTGGAACAAACGAGGCTCTTCCGAGCTTGTGAACCTTG  
CTGAAGGATTTGGCATCACTACTCCATGGCTCGTCAGCGTTAATGCCAATCCTCCGCTTATGAAACGCTT  
CCTCATACCGTATACCTACCGCAGGCCCCCTTTCAGCACTCAAGGGATCAAGCTAGATATGTGCTGATG  
GCGAAGTGGCATTTCTTGAACGCTGTGATGAACTCACTCGCAGAGGCTATCGCTGGTCAAGTACATCCCG  
ACAATGACGCGCGAGTGCAGATCCTTGTGACGAGAAGACGCGGCCACTAAACAAGTGGATTTACTACC  
CCCCCTTCAAGAGCAATTCCTTACACGACAGTGGCTTCAATTAACCCCCCTACTCGGTACAGAAGATCT  
TCGTCCACTGCTGCACCTGAGCCGTGATTCGGATACTCGTGACTTTGGTGTGATGACAATATGAATCCTGAC  
TCACGCAAGCTTCGTGACGCACTGAAAAACGCAACAAGCGGACATCAATCCCTCACGGACCTCATGAACA  
AAGTTGGTCTTGACCAGACAGAACTCGCGATGACTAAGGCGTGGCAGAGTTGCAGTAATGCTCGAACTTG  
GAGGCGAAACGAGGAAATCGTGATGCTCGTTGAGTGTGCAAGACCTTTCCAGTATTAGGGAAGAAAGCT  
GCCGGTCTGTTGGAGCAAGCGCCCCCTAAAACAAGTTGGTCCCGCATCATACCAACCTTAGGAGCTCAGC  
CCTGGGCACGAGAGATCTTGAACGTTGGGCGGATTTAAACGAACTATCAAAGCCACAAAGGCAGCGAT  
TGAAAATCTAAGGAAGAAACACTGATGGGGACTTCAACATCAAGTAGTGGCGGCCGTGCAGGCTCTCCTT  
TTGACCCTGAATGGCTAACTCCAGACCAGACTGCACCAAGCTCAGTCGGTGGTGGAGGGGAACAACCTGA  
CTCTGAACAAAATGGCTCCGGCGATGTACCTGACAATAATGTTACTCCCGTACCTGAAAGCGTCTTAGCA  
CCGAACCGTGGTTTTGGTCCCGCACGTTGAAAACCTAGGTTCTTACCTCCGAAATGGCAACCGAGACGATC  
TCCGTGATGCAACTCGGAGTATGGTGTCAAAAAGGTATGGGTGGGGCAAGCCGTGCAGCTTCCACCATGCG  
CAGCACCGCTCGGGGGCTGGTGTACTAGGCCAGTTCCTTGCGGCAGCTAGGGATGGCACTGACCAACGG  
GTTACGACTGGGTAGCCACTGTAGGTCCGCCAATCTTCCGCGTCTGACTTGGCACTTGAAGTTTTAA  
AAGAGGTGATCTCCGAGCTGGCAGTATTGACGAAGAGTCTCTACGTGACGCTGGTACAGAGGCTCTAGC  
CAAGCTTTACGAAAACCCAGATGTTGATATTTTGTGATCTGACAGATGCTCAAATGGCCGATGTGATC  
GGACTGACGATTTGAAACCAAACTGTGACGCTATAGATATGCAACTCGGCCAAACCTACGAAAAACTCA  
AGCATGATCCAGCCAGATCCAACCTACGCCGAGCTGATATAAAGGAATGGGTATGGGCGGAAGTGCGGGT  
TGTTCTGGAAGAAAAAAGCCACCCATACAGATCCAAAAGAGTTTAGCACAGTCAGTACTTCAATCCGCC  
CTGCAGGTATTTGCCGAATGAACAAAATTTTGTGCTGCAAAAGTTGAAAAGCGTTCCGCCACAACCTCAAAC  
AAACGAGCGAGTGTCTCATATTTCAAGAGTGCCAAACGAGATGGCGTCGGCACAATTGCCAACTCTGG  
CCTAGAGCATTGAAGCGAGCAGGATTCAGCCATCAACGGAGGTCTGGGACTTTGTTTCAAGTTTTGTCTTG  
CTGTTTGTAGTGCCGACTTAGCCAGTCCAGAAGCAGCAGTGCAGATGGATGGACCCGTACAATCCAAC  
CACCGTTGGGCTTTGCGAACCTCAGCGATGGGGACATCTTAAGCCGCTCTTGAAGATTAAGCCGCTCT  
TGAAGAAATGTTGAAGTTTTTAACCGCGACTATTGGACCCTGATATTTAATGACGCTGGGGTTGAGGCG  
CCTCAGGGAGATGGGGCTACCTTCAAAAATGATTGCGTGTCTTTACTATCTGGTGGCCTCGATAGCCTAA  
TTGGTGGCATCAATTTGGTCAAGAAAGGCAACCGCCCTCTCTTTGTCTCACAGCTTGCACATAAAGATTC  
AGAACGGCAGCGCGTTACGCAAAATTTGCTGGCAGGTACGGGCTCACATTATCAATGGAGCCATGGTATT  
AGCTTCAAGAGGTGCACGAGAAGCGTGCAGCTCGAGCCGATCTTTGGCTTCTACGCTTTTGCAGTGTGG  
CTTGCAGCAAGGTTAATCTTCCGAAGCCACCAATCTATATCCCTGAAAACGGATTTATCTGCATCAATCC  
ACCATTAGTCCCCGGCGTGTATCAAGCCTGAGTACCCGAACAACCTCACCTCTCTTCAATGGTATGCTG

CAAAGTGTGCTCGACGAACTTGAATTTCTGTAGAGCTTATTTTGCATACCGCTTCAAAACCAAAGGCG  
AGATGATGCGCGAATGCCTTGACCAGAAGCGATTGAGAGAGCTAGCCTCAGACTCTACAAGTTGTGGGCG  
CTTCAGAACTTATAATCGTCAACATTGTGGCCGCTGCGTACCTTGTGATTGCTCGAGCAGCTTTCTTA  
GCCTGGGGACCAGGGACAGACGCAACTAACTATCGTTTTCCATCCGTACTCGGTAGCGATAAGTCTGGAG  
CTCCTGATGACCCGATGGCAATGGCCCTGGCTGTGCTTGACGCGAAGCAGAGAGGGCTAGATCGATTCCCT  
AGGCGGTACACTGGCATTGCTTCTATAAAATGAACGGCCAGATTATCGCCGCGTCCCTCAAAAGGGACTC  
ACTGAGCTAGAAGCAGTTCTTGTGCAGGATCAATTGCTGTGATCGACTTCCACTGCCATGTAGATCTTTA  
CACCAATGCAAGGGAAATTCATGATCAAACCTTACGTTGCAATACATTCACGTGGCTCGTAACTACGAGC  
CCGAAGGCTTTCCAAGCAACAAGTTCCGTACTTGGTCATCATGAAACAATGTTGATCAGCCCAGGCCTTC  
ACCCTGAGATCGTCCGTGACCGTTTCCAAGAATTGGAGCTCCTATTAGAGCAGCTCGATGGCAGGATTGC  
TGTCCGGGAAATTGGACTAGACCGTTCCAAGAGGCATGCATCTAGTACTCTATGCAGAAAGCAAGTCTTC  
GCTGCTGTGGTAAAGCGATACCATGACATTGGAGGACGAGCAGCTCAGCATTTCATTCGAGGCAAGCAGTTC  
CAGATGTATTATCACTACTCAAGGAGTATCCTGACCACGGTATCCCTGTATTACATTGGTTACCGGATC  
GATCGCTGAGCTTAAACGCTGCAACTTCGCAAGGCTGTTGGTTTCACTATCGGCCAGCTGCTTTTTAATTCT  
GCAGCAGGAAAGGCATTAGCTAAAAGGCTCCCGAAGGACAAAAGTCGTTCCGAAAGCGACGGTCCTTTTG  
CTCAGTTAGATGGCCGTTCCGTAATGCCATGGGATTTGAAAATAACCGTCAATCTACTTAGCGATGCTTG  
GAACATTCCCGCATTAGATGTTGATCTCAATTGATAAGCAATTCCTAAGGTTTTACTTGAACATCTCGGC  
TACTCGATAGCGAATTGGAATAATGACTAAGTTGGGTTTCCCTGGGACATATAGGTAACGGTTACAGCT  
CAATGGCTAAGTGAGTGAATCATCAAGACCGACCTTAACTCGAACGCTTAACCCAACCTTACCTTCAACT  
TTTACAGCCACACCCTCAGCGCTAAACAAGAAGGTGACTGTCTTGCATCGAGCAGATTGTCCAACAGGGT  
ACAAGATAGTCCCATACTAGCCAACATCAGATGGCATAGTGGATGGCATAAGTAAAATCGCACATAAAGA  
AAAAGCCCAAGCAATTCATTTGGGCTTATCATTGGCGGTGAGGGAGGGATTGCAACCCTCGATAC  
GTTGCCGTATACACACTTTCCAGGCGTGCTCCTTCAGCCACTCGGACACCTCACCAAAATTTTTGCTCACT  
GCTTTATGTGCTTGAGCTGCACATTGCTTTCGGGACCATGCCGCGGCGACGTGGCGTAATGTAAGGGATA  
CGATGGCTTTTGGTCAATGCAATTTTTTACTTTTTGCGTTTCGTTGCTCAATATCCGAACCAAGTGACCA  
AAAATATGTGCTTTCGATCCCTTTCAATCAATTTACTGCCGCTTCGTGCAAATGTTACCTTTGAGCGC  
CTCTTCCAGCGAGCCGTAATAATCCAGCTTGCCTGGGCTGCGGCCGACCTTGGCGCGTGCAAGAGTCTTG  
AGCGGTTGGAATGCAACTCGGCCACCCGCACTCGACACCGGCTTTAGCCATCTGCTTGCCAAAAGTGGA  
GGAAGGCAGACAGGCCCCCGCATCGAGGATGAAACCCTCCATCTGCAACACCAGCAGCTTGTGTGCC  
TTTTACTTGCCTTCCAGCTCGGCAAGACCCGTTTCGGCCGCTGCGAAGAGAGCGGGCCGTTGATCTTG  
TAGAGCAGGCCGTTGTTTCGGCACCTCATGGGCATAGCGTTTTGTGCTCGGCCAAATCGTGCAGTTTGGTCA  
TCTTGGCGATTTTCGCGCATAAAGAGCAGGGAAGCCAGGATCACCCCGAAAAGTGATGGCGATGACCATGTC  
GAAAATGACGGTGAGCGCAGGCAGACCAGCAGCACCAGCACATCGGATTTGGGGGCGCGGCGGATCAGC  
TCCACCACCTTGTGCGCTTCACTCATGTTCCAGGCCACGATGAGCAGCAAGGCAGCCATGGCCGAGAGCG  
GCAACCAGGAGAGCCAGGAGGCCAACACCAGAATGGCGGCCAGCACCACCAGCGCATGAACGATCCCCGA  
GACGGGGGACGTAGCGCCGGCACGCACGTTGGCGGCAGAGCGGGCGATGGCTGCGGTAGCGGTAATACCG  
CCAAAGAAGGGGGCGAAGATGTTGCCAAGCCCCCTGCCCCACCAGTTCGGCGTTGGAGCTGTGTTTGCAC  
CGGTTCATGCCATCGAGCACCACAGCGCAGAGCAGCGACTCGATCGCCCCCAGCATCGCCATGGAGAAGGC  
GGCAGGCAGCAGCCGCTCAAGGGCGGCCAGGTTCCATTCAACCGGCAAGCCATCCGGTCCGGGCAAGGCC  
CAGGGCATCACAGGGTTCGGCGGATGGGCGGGATCCCCATCCCTGGGTGCCATCGGCCAGGGTATAGC  
TGAACTTGCTGCCGATGGTGGCCACATCCACCCCAAAGTAATGGAGGCCAAAACCCAGACCTACCCCGAC  
CAGCACCGCGGGCAAGTGGCCGGGCACCGGCAGACGAGCGTGGCCAGAGCAGCAGCACGGCCAGTGT  
GCGACCCCCACCAGGGTATCGCCCCACTGCCAGCTTGGCAGGGCGGCGGCCAGCGCTTCGACCTTGCCCA  
GATAGGTTTCCGGCATCTCGGGCACGCTCAGTCCAAAGAAGTCTTGTATCTGCAAGGTGGCGATCAGAT  
GGCGATACACCAGGTAAGGCCAGCGCTACTGACGGGGGAATGTACTCGATAAGGGCGCCAAGACGGGCC  
ATCCCCATCGCCACCAGAAAAGGCCGGAGATGAGCGTCCCATCAACAGACCACCAGCCCCGAACCTGCT  
GGCGACAGGATAGAGGATCACACAAAAGGCAGCGGTTCGGCCGGAGATGGAGTAACGGGAGCCACCGGT  
CACGGCGATCACGATACCGGCAATGATGGCGGTATAGAGACCGTGTTCGGCGGTACACCGCTGGCGATG  
GCCAGCGCCATGGCGAGCGGGATGGCGATGATGCCACCGTCAACCCGGCGATAAGATCACGGCCGAAGC  
GGGCGATGCTATAGGGTTCATCAATACAGGACTGGCGTAAGGCTATGGCGAGCTTACGCTATTTAAAGA  
GGCTTGCTTGTGCATGTATATCGTAATACCAGAAGAGGGAGATAAAGGCCGGAGAGATCCGGCGCCCGAT  
CATCATCAAGGGCCGGCAGGGCTGTGACGCGGCGATGGTATCTGCGTAACCTTACTCCAGACGGGCCA  
TTTTTTTCGATGGGCAGGATCAATGAAACTCGCCCTTACCATTATTTGGCTATTTGCCGCCAAATCGCC  
GATCTTGACTCCAGCTCTCCCTTTTTAGCCACAAAGATTACCATTGAGCCTCACTTAGTTGCCAGCAC  
GTTTCGCGACATCATGCTGGCATCATCAGGTTGATGCGAACCGAGCCAATAACCCCTGCGCCGGTTGGGGG  
CGTGATGGCAAGGGACTGATTGTGCTGAAAATAAACCACAAAGCGCAACTTTTGGGCAAAACAGTCCGAAA  
ATCCGGTTTTTCGGGAAATTCGCGGGTTGACACCCGCCGCCCTGGTCATTAATATTCGCCCCGCTTTAACG  
AGACAGGCAATTCCTCCTTAGTTTTCAGTCCGTTAGAACGGCGGACTGTTAATCCGTATGTCACTGGTTCAAG  
TCCAGTAGGAGGAGCCACTTTTTCCCTCGTAGTTTTCAGTCCGTTAGAACGGCGGACTGTTAATCCGTATGTCA  
CAGGTTCAAGTCTGCTTTCGGATTGCGAAAAGAGCCAGTTTTATAGCTGGGCTTTTTTCGTATCTATCT  
CTCCATTGTTTCAAGCTGAGCCAGCTACCCCTCACCGCTTGCCTGCCACATTCCTTCGAGTGAGCGA



TCCACTCTCCCTGTTTTCTCTCAACTCAAATTCGACTGACGATTACTCCGGTCCCTATCCGGTCAGCTCA  
GCTGGCGAATGGGTACAGATCTAGCCTAAACCAGACGTCATCCCCTCCCCTGACGTAAATCCCCCAGAA  
AAAACCTCCGGTCACAGCTTCCGGTCTTTCTGCTGGGAGACCATGGGGATGGTCAGACCGGAGCAAGTGG  
CTCTGGCGTGGAGATAACACAGATTGAAAGATGGAGGCGCTCACGAAGGGCAAGGGAGGAGGAATGGTTA  
GTGGGCAAGACCGGAGCAGCTCTGGGGCATATCCGGTCGCTTGGGCTGTAGCTGAATTTGCTCGGAGTTG  
TGCAAAGTCGCGTGCATGCTGACGAGGTGTCCGGTGCACGCCGACGCGACCGTCGGCAATATCTATCT  
CCCTCCACACGAAATAGACGTTTCTCACACAGAATAAAAGTGCATGACAACCGTCACTCTATCTATAAG  
TAATATATTTGCTCAGACCATGCGAACGTATCAGATGCATCACCACAAATAACACATGAAACAATATTA  
AGCAATGAGGGGGGAACATTGTTGGCCTGTAATTTGCATGCTCTTGTACCGATTTCCCATGGGATGATT  
GCTATGTATATAAAAAGCCATAAACTCCCCATACTCTTGTATGGCTCGAGCCACAATGAAGTGCATGG  
AGCAACAAAAACCGCGTCTGACACCAGCAATAGAAATGTTACTCAAGCGTTACTTGAACACGCTTTGTA  
TCAGAATCGCAACCCTTACTTACGAGTATCTCAAAGAGGGCTACCCAGAGATAAATTATGTAGATAAAT  
CAAGGCCTTACAATAAGATAGCTTACAAAACTAGTGGATAAAATACCTAGGCTTTGACCGTAGTGCAT  
ACAATGATCTTGTCAAAAAAATAGATGCAATGGAAAATAAAATCAAAGTCAATCACAACTGATGATTCAAT  
TAAATTGAAAGATTATAAGCAACAAAAGAGATTTAGTGTCTAAAAAGGCTATTGACAATTTAATTGGGTAA  
TTTTTGGCGTCTACAGTGCCATTTTTTTGCCATCGATGGTACAGGCATTCAGTTGGCCACTTACAGTCGT  
CAAACCTCATCACCCCGCAGTGAACCTTAGGAAAGGTGCGACAAGCCTTTGTATAAGCTCATGCTCTCT  
ACTTGAACATAACCTTCAATCGGTTTTAAATGGTATTTTTTCGATAAAGACGGCAATTTACGGCATAATTTCA  
TCGTTACGCTGACTGAGGGTGTAGGTAACATCGCTATTGCTTTCCAAATCGCAGCAATCCAAGTGAAGCC  
AACCGAGGGGACTCTGATTAGCAGGTCAGCACGCATGTGCAAGGCGTGTACTCCATCACCAACTGCTTT  
CAATACAACAAGTATCAGATTTATCGTAGCGCTCTCACCTTCTGGGTGATACCGCCGTAATGAACTGTT  
GGTTGCACCATGACCATCATGAGCAACGGGGCCTCAGTCAGCTCTACACTGACCAAATCTATCTGCACACT  
CAAGGATATGCTCAGCCTCACTCTACAAGCTACCTAGGGACTATTCCGGTTCATATTTGGGGCTGATGGAT  
GTGCCAAGGTGCGTACCAGACTATAGCAGTGTGAGCAAGTGCCTTCGCACAGAGAAAAGTCGCGTGCATGC  
CGACGAGGGCGTCGGACCGTCACGCCGACGCGAGCGTCCGCAAAATTTACGCAAAAATCCCCAGTAAATCCC  
TCGCCCCCTCCCCCGCAGCTCACCCCTGCCATCTCTGTGAGAAAATGGCTCCTTTGGGTATCCCATGTATT  
GAATGAAACCCAAACTATGGCAGACTGCCTGTTTCAAAAACTTTTGCATTTAAAAGGAGTGTGTTTGCAT  
GGCGACCAAGAGTATTGGCGAGCTGACCCAGGATGAGATCTTGAATACTAGGCCCTGACCAAGTGTAGT  
TCAAGAGATGGCAGCCGTGCAGATGTGGGGCCTCGACCAGAGACAGCTGTGTAAACAGAGTTGATGGAA  
AATGGTACAAATCGTGTGCATGCTGACACCATAAAACATCAAAGCATCAAAGCATCAAAGCATCAAAGCA  
TCAAAGCATCAAAGCATCAAAGCATCAAAGCATCAAAGCATCAAAGCATCAAAGCATCAAAGCATCAAAG  
CAACAAAGCATCAAAGCATCAAAGCATCAAAGCATCAAAGCATCAAAGCATCAAAGCATCAAAGCATCAA  
AGCATCAAAGCATCAAAGCATCAAAGCATCAAAGCATCAAAGCATCAAACACGAATAACACTCAAAAAGCT  
AAATAAAACACAAACCTCAGCTTGATTTTTTATTTCTCTCTCCCGCTTCGATATAACATAAAACCGCTCA  
CCTGACTTTATAAACTTCACTTCTCGGAATAGATAGAGTGCATGATTTCTCTCCCGATGTGAATTTGAAT  
ATATCATCAGCACCGAATGCACTTGCAGTATGTTTGCATTAGTGTACTTGTGCTATCCTTTTCACTATGG  
AACTAGACTCACCATTAATACCATTATCTTTAATAATACCTGAGTATTTCTGCGATACATATACAGTCAC  
ATTATCATTGCGTATTTTCAAGATAGCCTCATTACCCCATTTACAATAGTATTCGCCATTCCTGCCACCAAT  
ATTGGCATAACCAATATTAACACGCTGCAAAAACATGACTTCCATTTGTTTCTTTCAAGAACTCTTTTT  
CTCGTCCGGTAATTAATCCTGAGGCTTAGAGGTTATTAATGCTCGCTTATTAAGCTGTCCACTAATAT  
TAACCAAACCATAGAACTTGCAATAGTAGCTATCAATATTTGAAATGAAATGAAATCGAAAATTTTTTGTGTGA  
GATATAAAAATTAAGCCCCAAAGAATGCAAAAAGGATAGTCCATCAATGTTTATCTTCTTAAATGTCACCT  
TTTTATACTTAGGTCTCTTTCTCGAAAAATCCTCAAAAAATTTAAATAATCATCAAGCATCAGCAATGG  
CTTAATAAGCAATTTTGAAGAGAAAGTGACCTAGGCATATCAATGAATACATCATAAAAAAATACGCCAGC  
CCGAAGACTAATGATATCATAACAAATAGTGCATATCCCCAACACTTAGGTCTCGTGGAAAAAACC  
AGTTATTATAATGTTTGAAGACAATTAATAATCCTAATGCTATAGCTATTTTAAAGACAAAATTAATAAC  
TGAAGAAAAGCTGTCAATTTTCTTTGTTACTTCTCAAGGTGATCCCATCTTTCCCTCCACACAAGAAACA  
CTGTATGCAAAACACAGTACACCGGGGAAATGAATAGTTCAATATGATCCACACATTTTTTCAAGATGGGCT  
CAAATTAATAATCCCCAGCCTCACACCACAGGTGATTATTTAAAAATAAAATTTAGTTAAAAATAACGTAACA  
CCTCTACTTTTAAATACATATTAATCCATGTTTATCCAAAACATCAGGCCCAGAACCAACCACTCAGGG  
CCTTTTTTATATCCACAATTCAAAGGACAGAGCATGTTTATCCACCAAATTTTGGCGAAGCAAGTAGCCG  
CGATCAGCATCAAGCCTATGAGAGACGGCAACATTGATTTACGGTAAAGGGCAGCACCAGGGAGCAAT  
CAAAGGCGCTATCACCGGAGCTGGCGTGGGGCCAAAGGCGGTATCCCTGGAGCTGTTGCAGGCACCATC  
ATCGGCGGCCTATCGGCTATATCACTGGACCAGCGGACTGAGGGAGGTTAGCCATGGATGAGTTTCAATC  
AAGAAGGGAAATACGCCTCCACAGAGACGCTAAAGGGTTATGCCACAGCTGGCAGACGTTGAGCTTGCT  
GATGCAGGAGGTCAATTACATGCGGCATGTATGTTCTGAGATCCTGCCAGATGAAAATCAGCCTGTGCTG  
CTGGTGTGATCAAAGAGGCGACCGTGTCAAGGCCAAGTCCCTGCACAGTGAAGCGCCCGAAGTATTGA  
TCTCGATAGCTTCCACACAGGCGAGTCACTCCGGGATGATGACAACGGTTACTACGCTGACTACTGGCG  
GTTAGCTGCAGGAACTATCAAGCAGCTCGACTGTGCCGAAGATGCCGTGTTCTGGCTACCCCTCCCCGCT  
GTCGAAGCATGGGAGGCATATCGCTTCTCTGGCTACGGCTTACCGTTTGTATGCCCTATCCGCACCCTCC  
CAGTATTCCAGCATCTGGCCTTTGCTCTCAAGCCAGATCAAACCTCGCCTGATTTGGGCACCCTATCTA

CTTGAAATCCACTATCTGACGATCCCCGAAGGACGCTAAGCATGAACACCAAACCGATAAGCAAGCAGCC  
AAACAGCAAGTAAATACGACTGCCACAGCCAAGTTTGTATGGCATAACAAGAATCACCAGCCAAGGTGGTCT  
TGGTCAGTGGCGTAGCCACCCTCCTTTCCGACAGGCTCTACAACCTACCGTGGGCTATGAGATTGGCCATGA  
ACCCGAACAATCTGAACTGTTGATCCGTCTGACGGGCAGCAGCGCGGAGGTCTCTGTTCCAAGGAATGG  
TTCGGTCTGGCGCAAGTTGTGATCTGCTAAACGAGCAACAGCCGGATAAAGGCATTTACCTCAGGCCTGT  
TCAAGGTGATCTGGAACCTCAAAGGCAGCAGCAATAACCGGGGTTCTTGGCTGCTGTACTGCGCCATCT  
GGAGTTGACCAAGGCCGCACAGGACGTCCGGTTCGGCCATCTGATCACGGGCAAGCATACCGAGTGGTTC  
GATAGCCTGAAGGCCAAACTCCCAGCAGAGACCAAAGCAGCCAGTAACCGTTCCAACCTCTACTCTCC  
CCCCCCCCCTTTACTCAATCTCAACGAGAACCAAGATATGAAACCTACCTCGTTATCACGGGCTTGCC  
TGTGAGGATAAGTCACGACCTGAAAACCTACTTGAGCAGGCCATCAGCTCAGCGCTGGAGGATTTCCCT  
GATGAGATCCCAGTGGCACAACACCAGCCCTGACCTCAACTACCGAGATCCTGACTACAGTGCACAA  
CAACCGGAGGCTATCACCCGGTCGAGATCCGTCTTGAACGCTGGGATGACGGCTGGCATCTGCGCTATGT  
CACTGACTTTGCCTATGTGGGCCAAGGTTGGTGCACCGAGTTGGCCAAAGAGTTGGATTTTGATTTGAGC  
ATCGAAGAGTACACCCATTGATGCTGGGTGAGATTTCCCCGTCAGAGGTGAATGAATGGTTTGACGTCT  
GGCAGCAGAGCTTTTGTGTTATGGCCAGATGGACGTATTCACCCTGACGGTGACACCAGACTGATCCAG  
TTCAGGCAAGAACTCAAAAAGTCGCGTCCGGTGGCGACGAAGCGTCGGGAACCGTTTAGGTCAATTCGTC  
AGCTCGTCGCCACCGACAGCAAATCTCTACGCTTGGCGAATTTCCCCACCCAGAAGACCGGATATCGACC  
GGAAGTTGGCCAAGCCCTGTTCCACCTCCGGCCTGAGACCAGCATTAGGCTCAGCCAATCCCCAATCTCA  
TCCCCGGCAGCACAAGGAATTGACATCCCTGTGCTGTTTTTTCTTGGGCAGACCAGCCCTACCCACTCAT  
CAAATGACAGGAGACAGACGATGGCAAATGCTCCCTCCCGATTTGCTTCACTCAAAAAGCCATTGAGGC  
GCTACCACCGAACCCACCCCATGCCAGATCAACTGAAGCCGAATACAGTGACACCCAGATCCCAGGCTTT  
AAATGTCTGGTAGGTAAAGGGGAAGGTTCCAAGAAATTTCTGCTTCGGTATCTCTGGCAAGGACGTAAC  
GGGCTATATCCATAGGTGCGCTTTCCCAGATGTAGACCTGAACACGGCCAGAGAGATCGCCACAGACTATAA  
ACGTCTGCTTTGCGAAGGCATCGACCCCAAGCAACAGAAGGAAGATAAACGGCAGGAACCTCACCTGACC  
GAGTTGTTTGAGCAGCATTACTTCCCCTATGCCATGCACCACAAACGATCATGGCGGGATGATGCACAAC  
GCTTTTCGTGACCACTTAAAACCCGCTTGGGATCACGACTACTGTCAGAGATAAAGCTTGAGCAAGGCCA  
GGCCTGCAAACTCAACTGCTGGGCAAGGTAAGCCCTGCCACCAACAACCGGATCACAACTTTGCTCAAA  
GCGATCTGACTTGGAGTGTTCGAATGGGCTATCTGGAACAACACCCAATGAGACATCTCAAGACCTGA  
CCGAGAACAACCAACGTACCCGCTATCTGGACAAGGGGAGATCAGACGGCTGTTTATGGCTGCGGATAT  
CGATGAAAACCGTTATGCCGGTCAGTACGTCAAACCTGCTGTTGCTGACAGGGCTCGCTAAGGACGAGTTG  
AGGCTGGCCAAGTGGGAACACCTCGATCAATCCCAGCTGACCCTCTTCATCCCCCACACCAAGAATGGGA  
AAAGCCGGATCCTCCACCTCAACCATATGGCCATGCAGATCCTCAAGGAGACCCACCTTATAGAAGGGAA  
CCCCTATCTGTTTCCAGGACAGAAACAGGGCCAGCCACTGAACAACGTCACCAGACCAATTAACCGAATG  
CTTAAGCGAGCAAGGATTGAAGGGCCAGTCTGTATCCATACTTGCCGCACTCCGTTGCAGCCTTGATCG  
TCTCAAGTGGAGGAACCTTGTATGACGTGCAGGCTCAGTTGGGTCATGCCAGCAGCCAGACCAGCCAACG  
CTATGCACACCTGCACGCCAGCAGGCTGAGACACACCAGCACTCAAGTGGCCAACCTGTGTGGAACAGGCG  
TTGATACCTAGCAGCACTGCCCACTCTGCCCTACCCCAACTCAGCCAAACGGAGGAATTTAGGGGAAAA  
ATGCCGACGGTTCGTGACGAGCTGACGGACAGACTCGACGCCCTCGACACGATCGTTCGGCATTCATCAACT  
TTTCCGAATTTTCAGATACCAAAGTCCACACTGCTATAACCAACTCTGCTTACCCAAACACTCCCCTGTCCG  
TGAAGATCCAAGTCGACACGCCCTGTCCGGGCACCTCCATGACACTTGGATACCTTTGACTACGATGCTTC  
CCTGGATGGCAGAACACGACACCCTAGCCCAACGCTCGGGCTGATCCTGACCAAGCTCAACAACGGGCA  
GCGGTTGGTGATCTCTGAGTTGGCCCACGAGTTCAATGTCTCGGCTCGTACTATCCAGCGAGACCTGAAC  
GTCAGACTGGCTTATCTACCGCTGGAACGTGACGGACAAACCTATTGGCTTGACCCAGCTATCTGGGGA  
GAACCACCACTCCCGCCATTTTGAGACTGTGTGAGCAACTAGGTGCCAAAGCGTTGTTCCCGGATGATCA  
CGACACCCTGATCAAGCACTGGCTCAACCCAGCATCAACACCTGTATTCGTCTTGTGCTGGCTTTCAACT  
GATGAAGACGACAGCCATACCAATGGCTAAAGCCACTTGCCAAAGCAATCAGCCAACAGCTCAACGTC  
GGCTGTATGGGTCGGTGAGCAAGCAGAGCAAGAGATTGAGCCATACCGCTGGTCAATAAGCGGGCCG  
CTGGTACTTGGCAGGGGTAACGGCGGATACGCCATTTATCGAACCCTTGTGAGTATCGCCAACCTTCAG  
CAGATAGAAACGCCAGCAACGATCAGCGAGTCACAGCAGCACCTTCTTCAACACCTCATCGAGCAAGAGG  
CCATCCCCACTCACGAAGTGGTGATCAAGGCAGCCGCGCTATCGCCACGAATTCAGCTCAGGAACAT  
CCTTCCCGAGCAGGCTCTTATCAGAGAGCTGGAGGACGGCAGCATCTTGTGTCAGCAAGCAGATTTGAT  
GGTGCACAGCTGCTGCCTGTGATCAAAAACGTACCTGCCGCACCTTGAGGTGATCAGCCCTGCGGGGATCC  
AAGCGTTGGTCAAACGTGACCTCAAGACCTGCTTAGCCGGATGTAAGCCAAATTTTCACGCCACTTATT  
TCAATCCTCGACACCACCTGTCCGGGCTAATCACCCTATCGGTAGTTCAACCAACAAGGAGCAAAAACA  
TGGGATCTCCACGATAACCAAGTTATCAGACCTCGTTCTACGTAGTCATGCCGACTATGAAACAGTCTT  
TGAGCACGTAGCCGCTCACCTGCAAGCAGAGGGTGGCACCATCAAGGTTGTTGACCGAGCCAAAGGGACA  
CTGGAAGCGTCTGGAAGTACGGTATCAACCCATTCCGATTGCGCGTGACAGTCCATTTTCAGTTACCCAG  
AAGAAGGGATTGTGAGCTATCGCTGACAGGCTCCTTTCGTTGATGCGATCGACACATGGGGCACCGCTAA  
GAAGAAGGCTAAAGCGATCGCTGAAGTGCTCCCTCGCCTATCGATGCAGCCGCATGGCCATCAGTGAG  
CAGGCGTCTATTCCAGCTTCAACTCAACCAGCCCCAGCGGGAGGCACCGTTTACCATAGAGGTAAGCGAA  
AGGTCTTGATGGCACTACTGGTCTTCTTTGGCGGTGGTATTGGGCTTCAAGTTCTACGCCGGTAACTG

GGGCTGGGGCCTGATCTATCTGGCCGCTTGCACTACTGGGATCCCGGTTCTGCTCTCTCTGGTCGAGTTC  
ATCAAGGTGCTTTGTCTGTCCCAAGAAGAATTTCGACAAGCGTTACAACATCAGGCCGTGAGGGCATTTC  
AATGGGTATGGTAAGGGTAAAGGTAAAGAAGCTCGTTCTGGCGCCAGCGTTTCACTGCTGATGGCACCA  
GCGGCTCAAGCCGATTGCTCAGTAAATGGGACGAACTGACCGTGAAAGGCGGAGAAGCTGAAAAGCTGTC  
CAAGCGTGACCTTGAGCAGCAGGCCGATAGCTTCTTTAAGGAGCCCGAGTGGTCGGCAGGCAAAGCCGC  
TGATGGCCGCAAGCTGGTCAACGTGAGTGGCACATTCACATATGGAGATAGACCTGTCCGTGGCCCTGCTC  
CAGATGTGGGTTCAAGGTGAGGAGTTCAGCGTTGAAGCGCTGGAGATAAACGGCCAGCCACAACCCGGATG  
TCATGATAGATGCCCTGTTGAGCAAGATGTGTGAGGCAGCAAAGAGCCAGCAACCCAAAGAGGGGGACGA  
GAAGGCCAAAGCTCGCGCTGATCTACCATTTGTAGGCAAACGGCGTTTCAACTTCTCGGGGGGTAGCGGT  
ACAGCTGAGTTTATCAGCATCCAGATCCAGAGCAACGGGCATACCGTTGTTGAGAGTTGCGGCTCGGAATGCAGCA  
TTGATTTTGAAGGGCCATTTACTAACCCTCAAGACGCAGTACGGGATCTATCGAGTCCGAGGCCAAGCG  
GATTTTCGAGCTCGATGATAAGGGCCAGGGCAAGACCTGCCAGAAGGCGCTGGGAGACCCAAAGAGATACA  
AAGTGCAGCGTCGAGCTGTATGCGGCTCAGTAAGAAGATCAGGCGGGAGCAATCCCGCTTACTTTTTTTC  
TGACGGCATAGGGCTGCAGTTACGGGGGATGCGCGGTGCCAATGCGCATGAAACAGCGCCTCTAGCATGG  
GGTAACGACCAGAGGCTCGCCGCACCCGAGAGCATGACAAGGGTTAGACAGAAAAATATGGGCTCTGTAG  
GCCAAACATATTTATAACAAGCAGCCCGAGGGAGTGTCCCCCACTCTAGCCAACAAGACAAGCTCGAC  
TCAGAGACGCCGAGGAAAAACCAAGTAAGAGACCAAGACAGCCCGGCCACCAGAGAAGCCAGCGGACAAC  
GCTCATAGAGAAGGCTGGACAGAAGAAGTTTCTCATTCATCTGCTCCACATTTTTTCCACCCTGAAGCC  
GGATCAGGGGGGGCAGAGCCCCAGATGAGGGCGGGTGGGGCTCACCTCATCCCCAACGGGTATAACACA  
CCACCCACAGGGCCATGCCCGCACGGCCTCCCGAAATTCACATCGGCGCTTTTCGGATTTTCGCGCA  
GTTTAACCGCCATTTTCAGCACCGTTCGTAGCCCTTTCGCATCTCGGGGGGGTCAAGGAAATCATCAGC  
AGAGGTATTGCGAGTTGGGCTCATTACTTGAATTTTTCGCAGCGGGCGGGCGGCTGCCTTTATCAGTACCAA  
CACGGCCACGGACATCGTTATTAGAGCGGTGAAGATGGGAGGCTAGTCAGGGGGCAATTTGTGCGGCGCAA  
ATTTAGGGATACGCGCAAGGTGAAAACCTCGGGAAAGCCAAGCGTATCAAGGGATAGTAGCGCGGGGTAAT  
AACGTGCTTTGGGGATGGAGAGCGGATCACACGCCATCGAAGCGCTCTCCATCCCCGCCATGTTGCCCA  
TGCGGTTATCTGGAGCGTTTGTCTGCGGATTGGACATCAGTTGATGCCACAGTGAGTGCCAAGATGGTTA  
TCTGAGGTTTGAACATCCCGCTCGCGCAGCCTCCAAGATCCATGAGTCGCTCATGATAGGGACGGTGGCG  
TGAATCTGCACCGTCCCCAACACAGCATTACTACACCATGGCAGAAGTTCTTATCAGGTGCGGTTTCCCCAG  
TTTGAGTCGTGCGCGTGGGGTTGGAGTTTGCCTGGGATTTTCCCGTGAAGTGATACAGGGGTGATCCCA  
GACCCCGTCTTATTAGTTTCTTTTCAATTATTGCAATGCGGTTGCCGACATTTAGGCCGAGTGCCAA  
ATGTGGGGGACTCTCAGGGTTGGGGGGGGGACCTATATATAAGTAGGGGGGCTATCCCCAGATTGCCGT  
TCATAACGGGCATTTTTCATCCTTCACTTGTAACTGCGGCCCAATGGCCCTGTTTCGTGTTGCCGAAGT  
TTTCCAGTGGATTTAGCAGATAAAAACTTAATGCCCCCGATTACCAACAATCTATAAGGAGCACTTCG  
CACCCAAGCGCGGAACCGGATTTGCTCCTTAATTCATCTTGGACAGCCGCATAGAGCCGAGTCTGAAAT  
TCAAACATGTTGGAGATATTCGTATGAGTAACAAAAAATACCACAAATTCGCCACTGGAGACGTAGTTCT  
GCTAGCCCTTATCGGCTCATGTGCTCACTACCCCGATCACGGGGTATGCTCTTGAACACTAAGGGTGAA  
AAGCTTGTGTTGGTTACAAGAACCGGACAATGACGCTGCGAAGCATATGCGAGATGAGGTAGTCGCGAAGC  
TACTCGCCTAGTAGCTGATCAGTATCACTGGGCCGTATCCCCGTTTAAGGGATACGGCCTTTTTTTTTGCC  
CATAAATGGAGGACTCGTAATGGAGCTCGAACCTGATTTGTCATTTTTAAGTGGACCTTCTTCGACTAT  
CCAAGCGAGCGTGGGGAGCCCTTCCCCATGCTATCTGAGCTGGATATCAGTGAGCTAATAGCTCCACCAG  
CACTTGATGATTTCTTCAATAAAAAACCCCGTCTGCTACCTAGATATAACCCCTAGAACCTTTGGGTTTCGC  
TGATGGTGAGGACCTTTGGATAGGTATTGATGCCGAATGGGTACTGGAGAATGGACGTAATGTACTGCTT  
TCTTACCAAGCCTTTGTGATCACCCATCTTGGCGAGACGCTTGGCAGAGTTTATTACCCTGATAGAGGCA  
AGCGCCTCTCCTTTGAAAAGTTCAATTGCGCGAGTGGTTGAGGATGCGGTGCTGCTGGCTTGATCAAAAA  
GTGGCCTCGCACGCTAGTCGTTGTTGCTCACTTCTGCGTGGCGACCTAAGTACGTTCAAAGACTTCTTG  
CACATGAAGACTCGCTTGGATGGTCAGGGTGGGAGCGTAGTCGGACAAATTTACCAGTACGCGGTTATG  
GCATCGACGAAACTGCTGAACGTAAGCGCCGTGCGCCGCTAAAAGCCATCACTCTGCTCGATCGCAATCG  
TAAGTCCCAGAAATCGATCATCCAATTTGTTGACACATTGTTTCTATCACCTAACAAATCGCCGCTGTCA  
GCGCTGGGCGCAATGCTCGGTTTGTCCAAGGTAGAAATCCCTGATGGCTACAGTATTGAGCGCATGGATG  
AGCTGTTGGCTGGTAACAAAGAGGGCTTTGAAACAGTATGCTCAGCGGGATGCTGAGATTGCTGTGAAATA  
TGCCCTGAAAGTACCGGATTTTCTCGGCGCCAGTTTGGCTTGCAGAAGCTTCCTAGGTCATTGGGAGCT  
GTTGGTGTGTTCTGTATTTTCGGCGACTACTCAAAGAAGCCGATATCGACTACATGACGGCCTTCGGGCTTG  
AGAACGCCAAGTTGGAGCGGTGGAATGCCGGTACAGGTAAAGTCACGACCAAGAGTGTGACACGCCCTTC  
TCCTGCTCGTGGTCTGTATGAAGATCTTGCCATCCGTTGCTACCACGGGGCAGGAATGAGTCATTCATG  
ATGGGGCCGACCCCGATAGGGGATTGGTATGACTGGGACTTGAAAGGTGCTTACACCACGGGGCTCTGTG  
ACCTGTTAGTACCTGACTACGTCAACATGCATACGAGCTCTGACCCCAAGATTTTATCGGTCACGTCAT  
GGGCTTTGCTATGTGAGTTGCTTTTCCCAACGGGCACAAGCTTTCTTGTGCTTGCCTGTCCGATCTGAA  
CAATATGGGCTGCGCTTTCTCTATCAGGGTTGGCATAACGTCACCCGACCTGAAATCGAGTTGGCGTTAT  
CCATGGGGGCTACCATCGTGATCAAGCACGGTGTCAATTGTTTCTTGGGTTGCAGGTAGTCAGCCCTTGT  
TGAGGACTTCACTCGGATGATCCAGCGGTTACGCCGAGAGTATCCAAAAAGAGCCTTGAGGAGGTGATG  
GTTAAGGAGGTAGGGAACCTCGCTATATGAAAAGCTGGCCAGGGGCTTAGCGATAAGCCAGCGTTTCGATA

CTGCTACCGGTTTGTAGCAAGAAGATCGGCCCTCGGCTGTGACCAATCCGTACATGGCGGCCATACAAC  
TGGCCTGATCAGGGCGGTGTGCGGTGAGCTGCTTACC GGATCCCTCACATCGCACGGTGGTATCGGTC  
ACTACCGATGGTTTTCTCACTGATGCCCCCTTTGGAGGAGCTCGACCAGACGGGGCCCCGTGTGTCGTCGTT  
ATCAGGCTTTATGTAGCGGTTGCATGGTGATGAGAGTGGTGAACCTCGTGCCGATGCTGGAACGAAGCA  
CCATGCTCGCCAGATTGTGTCTATCAAAACGAGGGGTCAATGCACCCTATCCAAGGAGATACGCCCCCT  
GTGCTAGCTAAAGCTGGCGTTAAGTGTGCGGGAACGACGGAGGAGCAGAACCGCATGGATCCTGAGGCTCT  
ACCTTGATCGTGAGCCGGGCCAGAAGATCGATGCTAGTCACTGATCTCGCTTCGGGAGCAGTGGCTGAC  
GGAAAGCGACCTGATCGAAATCAAGAAGCAGATCAGACTGAGTTATGAGTTCGACCAGAAGCGGCAGTTG  
GTGAACCCACGGATGGTTGAGGTTGCCGGTGAAACGCATATTGCTTGCGATACGGTGCCTTGGGACGATG  
CTGGCATGGCCGATCATTGCCGTGCCCGTTTCGATGGGTGGCGAGAGGACAACCTGCCTCAAGACCATGGA  
GGACTGGGCTAGTTGGGAGGACTACTACGAATCTGCGCTGGCCCTGCAAGTTCCACGATCGGGATCCGA  
GAGGATGGTTCGCTGGGCATTTGACCCGGATCCTGACCCGTTCACTGGTGCAGAAGGCTTGGTTCGACC  
ACACGATGACTTACGGCGAGATTTGCGCGTTGCTGACATCGGTGGGCTTGCCGTAAACCATCGACACCTG  
CAAGAACAGCAAGCGGGCCGCGCTGCCGGAGAATGTCGTGCTGTTACTGGCGAGGTGCTGCGGGTGTG  
GCTCTGCTGCTACGACAAGTCCCTGAATACCCCTTGGACCTTATTCAAGCCTGAGCGCTTGAAGAGG  
TTAAACGTCGTCTGAATTCTATGGAGATATCACATGAATGAACACCAGTATGGCCGCCAAATTTCTGCGG  
AAATGCAGTGTCTTACCTGCACATGAAGGCGGGTAAACCCAAATATGGTCGTGACGGGCTGTCTAGCTT  
GATTTCCGAGCATGTGCCTACTGTGGCACGTACGTGTCGATTCAGAGCGGAGTTATCGTCGTTAATTTCTG  
CAGGATACGAGTTGGGGGCGACGAGTCTTCACTACCGGGTCTTTGAGTTAATCCGTCGAGAATTTGGTA  
TTGAAGTACCGAATGACCCTGATTATGTGCCGAAAGCGGCTAAAGCCGATGCTATGGCCGAAGCTGTTGA  
GGCCAAATCGCCCTAGTTGAGATGTATGAGGATGATTTGCGGCTGGAGAGGGCGCGGATGGAAGCCGAA  
CATCGACCGTGAATGATGACTAACCGATGTCATATGACAACGCCGCCGTTTCATCATGGCGGCTTTTTTA  
TTTTAATAGCGAGACTCACTCTCCCCATTCGACCTGCTAAGGCTGCTCTTGGCGTGTTCCTAAAGCTCA  
TTGGATCAACAATATCTATCTTGGAAACAATTTCTCCGGACTATATCCGGTCAGACAGGATGACAGA  
TGGCTACAAAATCTCGACGGACGCGACGGCTCGGCGGTTATCCCAATCCGTTGATAAATGAATGAAGTCC  
AGTAGGAAGGTGCAGAAATGGCAAGCTAAGCTCAATTTTTAGACGAAACAAGTAAAAACTTACTTCTGCA  
TGTCTTTCTGATGACTTTTTATTAGATAGATTACTATTATCTGCCCCGCTTAAACGAGACAGGCAATTC  
TCCTTTGTTTCAGTCGTTAGACCGGCAACATCCGATCCGTAGATAACGGGTTAAAGTCTTGGGAGGAGC  
CAATTTCCCTCGTAGTTACGTCGTTAGACCGGACTGTTAATCCGTATGTCACAGGTTCAAGTCTGTC  
GAGGGAGCCAAGTTTGAAGCCAGTTTTGCGACTGGGCTTTTTTCATATCTATCTTTCATGTTTTCAAGC  
CGAGCCAGCTATCCCTCACCGCTTGTCTGCCACATTTCCCTCGCAGTGAACGATCCACTCTCCCTGTTT  
TCTCTCAACTCAACTTCGGCTACCGATTACTCCGGTCCCTATCCGGTCAGCTCAGCTGGCGAATGGGTCA  
CGATCTAGCCAAAACCAGACATCATCCCTCCCTTACGTAATACTCCCAGACCCCCCTCCGGTCACA  
GCTTCCGGTCTTTCCGGCTGAGAGACCATGGGGATGGTCAGACCGGAGCAGGTTGCTCTGGCATGGAGATA  
ACACAGATTGAAAGATGGAGACGCTCAGGAGGGACAAGGGAGGAGGAATGGTTAGTGGGCAAGACCGGAG  
CAGCTCTGGGGCATATCCGGTCGCTTGGGCTGTAGCTGAATTTGCCAGGGGTTGTGCAAAGTTGCTTAGA  
TGCCAACGAGGTGACGGGTCGTCACGCCGACGCGACCCCTCGGCAATATCTATCTCCCTCCAGACGAAGTA  
GACGTTTCTCACACAGAATAAAGTGTGATGACAACCGTCACTCTATCTATAAGTAATATATTGGCTCAG  
ACCATGCGAACGTATCACATGCATCACCACAAATAACACATGAAACAATATTAAGCAATGAGGAGAAAA  
CACTATTGGCCTTTAATTTGCATGCTCTTGTACCCGATTTCCCATGGGATGATTGCTATGTATATAAAAA  
GCCATAAACTCCCCATACTCTTTGATGGCTCGAGCCACAATGAAGGTGATGGAGCAACAAAAACGCC  
GTCTGACACCAGCAATAGATATGTTACTCAAGCGTTACTTGAACACGCTTTGTATCAGAATCGCCAACCA  
CTTACTTACGATTATCTCAAAAGAGGGCTACCCAGAGATAATTAATGTAGATAATCAAGGCCTTACAAC  
AGATAGCTTACAAAATCTAGTGGATAAATACTAGGCTTTGACCGTAGTCGATACAATGATCTTGTCAA  
GAAAATAGATGCAATGGAAGTACAATCAAAGTCAATCAAACTGATGATTCAATTAATTTGAAAAGATTAT  
AAGCAACAAGAGATTTAGTGTCTAAAAAGGCTATTGATAATTTAATTTGGGTAATTTTTGCCGCTACAG  
TGCCATTTTTTTGCCATCGATGGTTTCAGGCATTCAGTTGGCCCCCTTACAGTCGTCAAAACTCATCACCC  
GCAGTGAACCTTTAGGAAAGGTGCGACAAGCCTTTGTATAAGCTCATGCTCTCTACTTGGAGCTATACCTT  
CAATCGGTTTTAAATGGTATTTTTCGATAAAGACGGCAATTTACGGCATATTTTCATCGTTACGCTGACTGA  
GGGTGTAGGTAACATCGCTATTGCTTTCCAAATCGCAGAAATCCAAGTGAAGCCAACCGAGGGGACTCTG  
ATTAGCAGGTGAGTGTAGTGGTCAACTAAATCCGGACACTTGGTTAGGCCGATCCTCGGCTTTTGTGCGC  
GGTATCCCGTCATTGTGGTGATGTGGACGCCGAGTTGTAGTAATCCATCAGGTAATAACTGATATCCC  
GCTTTGCCCTCCCGCAGCTCATGTATCCCATAGCCGGAACCCACTCCGTTTTAAGACTTCTGAACAATCG  
CTCCATCGGGGACTTATCCCAGCAGTTGCCACGCCGACTCATGCTCTGGGTCATGCGATAGCGCCACAGT  
CGTTGCCGAAATGCCCTACTGCCATATTGGCTGCCCTGGTTCAGAGTGAACAGCACACCAGATGGGCAAC  
CACGCTGCTGATAGCCATCTCCAGTGTCTTTGATTGCCAATTTCTGCATCAGGTTTATCAGACATCGCCCA  
GCCACGACCCCGCGAGTGTGCAGGTCAAGCACCGCTGCCAGGTAATGCCAACGGCCACCAGCCCAGACG  
TAGGTGATATCGCCACACCACACTGATTGGGTTGCTGGACATCAAAATTCGCGGGCCAGCAGATTGGGGA  
TATCCGGTCGCTCAGACTGGGCGACCTGATAACGATGAGCGCCCGGCTGTTTGGATACCAGCCCGGCTTC  
CTTCATCAGGTTACGTACTTTGAATCGACCAATCTGATAACCCAACTCCCGCATCATCGACATCAAGGCG  
CGGCTGCCTGCAGAGCTCCTGCTCTTTGAACAACCGGCGCAACTCACTGCGTTGCTGTATCCGCTCAC

GGTTAATCGCCCGTCTGCGGGCCAGATAGTCGTA AAAAGCAGGATGTTGGAACATCGAAAGCGCAGCAGAC  
CAAGGTGATGGGGGCTTGCTCCCTTAATCGGTCTATCAGCGGTACGTGTGAACTCGTCCGCCATCAAGA  
GAGCAGTAGCCTAATGGGATGGTCTGCTCCACCCACCCGCTATGCTGTAGCCAGCATCAAGGAGGCTCA  
TCATGACTCAAGCGCAGATTTACATTTACGGGATCGATTTAGGC AAAAATGGTTTTCACCTGGTGGCGAT  
GGATCGCATGGGGCATGTATTGACCAAGCAAAAAGCTCACGCGTTCACA ACTGAAACAGTTTCATTAGCACG  
ACCCACCCCTGTGCGGGTCGCCTTCGAGGCATGTCTGGTTCGCAACTACTGGGGGCGCCTGTTTCAACAGG  
CGGGGTTGCAACCAAGATTATCCCTGCCCAATTTGTGAAGCCCTACCTCAAATCAAACAAGAAATGACTT  
CAACGATGCTACCGCCATTGCCGAGGCTGGTAGCAGAGGTACTATGCGCTGTGTCCCGTTGAAATCTCAT  
GAGCAACTGGCATTGCAAGCGACTCATCGCGTCCGT CAGCGTTTCATCGT CGAACGTACCGCCACTGTCA  
ATCAGATGCGAGCGTTGCTGTGGAATATGGGCTCACCGTGCAGT CGGCAGAAAAGTCTTCGAGCGCTC  
TCTGCCGACGATCCTTGAAGATGCCGAGAATGGCTTGCTGACTTATCCGCGCCCTGGTATTACGCCTG  
AGAAAACGGTGGCAACAGCTGGATATTCAGATTGATGACATGAGCCTCATGCTCGGACAAGCCTCAAGCG  
CATCAGGTTTTGTGCCAAAAAATCAGTACCGTCCCCGGCATTGGACCGATTGTCTCAACCGCGTTGATTGC  
CGCGATTGGCAATGGCTCACAATTC AAGAAAAGCCCGCGACCTGT CAGCTTGGTTGGGGCTGGTCCCCAGG  
CAATACTCAACGGGCGGCAAATCTTCGCTCGGCGGGATCAGTAAGCGTGGCAATAGCTATTTAAGGCAAA  
TGTTTATTCAAGGCGCCAAAGCGCTAAAAATTCACATGAAGCGTGACAAAATCATCGTTAGGCGAATGGGT  
CGCTAGGCTGGAGGCTGGCCATCACCATCATGTGGTCTTATCGCTTGGCCAACAAGATAATGCGAATT  
TGCTGGAAAGTACTGACATCCGGCAGGGATTACCAACCCTATCCCAACGCAAGCGCAGCCGTTTAAACAGA  
TATAACTCATAACCCGGTTTTTGCAGCCAAAAACAGATGACAGAAGCGTTCACCCACGACGTTGCAGCCT  
GGCTAAAAAAGCAGTCTCTCATGACTGGTAGCTTTATTAGGACGATGACGTGCGGATCCCATCAAGGCCA  
GAGCCGGAAAACGGCTCACAGACAGGCCGGATACATTGACGCAAAACGACTTCTGGA AATCAGTTCAAGCT  
TGCAGATAAGGAGCAGACCATAACATTTTTTAGAATGTCTTTTTACGTTTCGAGCCGGTTGATACGGGCTT  
CCAGCTCCTGAATTTTTTGTGCTCCGGAGTCAGTGCTTTGCCGATTGGGGTTGTGCCAGTTCGTTCCGGA  
TTGCAGTTGCTGAACCCAGCGGGCAAGTACGGTTCACCGACATCCAGTGAACGGCTGGCTTCAGGGACA  
GAATATCCCTGGTCGAGCACCAGGGATGCGGCTTCGAGTTTGAATTCGGCAGTAAATGAGCGACGTAATC  
TTGTCAATTGAACACCTCAGGTCATGGTGGCGACTGTACCACCTAAAAATGGTGTCCGAGATGATTAGACCA  
CTACACAAGGGTCCCTCAACAAGGATGCGCCGAACTCGGGCAAGAAGAGGGCCCGCAGGCGTCGTGACGAC  
GCAGTGCAGTTACCGAGCGGCCCTCTTCACGCAGCCGGACA ACTCCGTCAGCATGATGCGCAATGACG  
ACCCTGTCTGTGTTGAGCAAGGTGGCCGTTTCTCCCGTCCGCGATTTCGCCGCTTGCATCAAATCCTG  
CGGGCTTTGCAACAACA ACTCTCCTTTCAA AATCCCGTTACCCGCTCCGCCAACGCAATTCTGGTAAACAG  
TCATAACCCATCCGTCATCGAGCATTTCACCCCGTACAGCTCATGTAATGACTGATACAGCCCCGAGCAAT  
ACTGCACGCCCGGTCCGAGTGATGGATTAGCTCACCACCGCCACGCCGTTGCTTCAGCGCTTTCTTGAA  
CGCCATCGCCACCGACTCCGCGTGCATTCCTTCGTGCACGTGATGGTCCACTATCTTGCGTGAGTAGGCA  
TCCGTCACCGAGGCTCAGGTACAGCAGCCGCTCCTGGCTGGCAGATAGGTGATATCTGCGACCCAGACCT  
GCTCCGGCCCCGCTTGAGCAAGTTGGGATGACGGTAGAAAACGGTGAAA ACTGTGGGTGGTCTTGTGATA  
CGCCCGTCTGGGCTGCACCAGCAGGCGGTGCTCGGTCAATATCCGAAACAGCCTGTCACGCCCTACCTTG  
AGCCCGCCATTATCCTGACCCAGCAGCAGATAATGCAGCTTGC GGTTGCCGACCCGAGGTTGTGCGAGTC  
GAACCTGACGCACAAAGCGCACCACCTGTAGCCCTTGTGCATGGCGCTCGTCCGCGACCCGATTGCGCTT  
GTAGTAAGCCTTCCGGCTTATACCCAGAAAACAGGCAAGGTTAGTCTCTCGACTTGCCGCTGCGAGAGGAC  
TTGCCGGGTGCGTTTTTTTTACGATGGAGACGCCGTAGTCATTCTTCAGTACATCGACGATGGCCTCAAAGA  
ACTGGGCCTTCTGACTCATCAGCGCCAGCTGCTGCTCGAGTTCTTGATGCGCTGTTCCGGGCGTCTGGTT  
GTCGGGGTCAGGCATGGTGATGCTCCTGCAGGCGGCACAGAAAGCCCCAGGCTCCAATCTTGCCGACCA  
TGTTTTACGCAACCATAACCAGAACGGTGGAGCGGCCCTGAATGCCATAACGCACCTGAGCCTGTTTGTAGG  
TGAGCTCGCCTTTTTCAATCTTCTCGACCAGTGACAGTTTAAAAGTCAGCGAGTAACCGTGTGTGTCGG  
TTTTACACCTTGTCCCATCGGGTCTCCATTTATTGGGGGGAAAAGGTGTA AACCATATTCAGGATGGGAC  
AAGGAAAAGAAAAGAGCGCCAGATTGGCACCCCTTCTCGACGATTCAAATATCGCAGCCGACTTACTTGT  
AGGCCCGACCTTCCAGATAGTGCTTGC GGCAAAAGCGACACATAACGATCGTTGCCACCGATCTCCACCTG  
TTCGCCATCACGCATCACCTGCCCCGCTTCATTGACCCGGGAGTT CATGTGAGCCTTGTGCCACACCAG  
CAGATGCTCTT CAGCTCTTCAA ACTTGT CAGCCAGACAGAGCAGATGGTAGGAGCCCGGGAACAGCTCGC  
CGGAAAATCGGTCTTGAGGCCATAGGCCATCACC GGAAATATCCTGCTCATCGACGATGCGGGCCAACTG  
GTAGACCTGCTCACGGGT CAGGAACTGGGCCTCGTCCAGATGAAAACATCGATATGTTTTCTTCGATGG  
CGCTCTTTACCATTTCAAACAGATCGCAGCTGTGCTGAACACGTCCACCTTCAGTTCAAGGCCAACCC  
GGGCACTGATCACCCCGACCCCGAAAACGATCATCAATGGCTGGCGTCATCGCCAGAGGATGCATGCCCCG  
CTCCAGATAGTTGAAGTGTGCTGAATGAGCTGGGTGGATTTGCCTGAATTCATGGTGGCAAATTTGTAG  
TGCAGTGAAGCCATGATACTGTTCCGAAA ACTGAATTTATGGGGCGCATGCTAACCAAAGCCCTGACAAA  
ACCAAGGGGCCCCGCGGGCCCTTGCTCTATAAATGTTACGCGGTGGCCAGCACTGGCCGCGCTTTGGCCT  
TTTTTCAGGTGATAACCGGTAAAGAGCACGAACCAGAGGGCACTGACACTGAAACCGGCCAGGCTGGAGTG  
CATCAAGCCCATCGCCAGGTAACCCATGGCCGCACCGAAGGCGATGGCCAGCGCATAAAGGCAGCTGGGT  
ATCACGTGATCGATGTGATGGCAACCGGCACCGGTGGCGGAGAGGATGCTGGTGTGGAGATGGGCGAGC  
TGTGATCCCCGAACACCGAGCCAGCCAGTACCGCAGCCAGCATCGGCAGCATCAGGCTGATGTCGCTGGC  
GGCAGCCATGTCACCGGCCAGCGGCAGCATGATGCCAAGGTGCCCCAGCTGGTACCGGTGGCAAACGCC

ATGGCACAGGAGAGGATAAAGACCACAGCAGGCAGTACTTCGATCGGCAGGTTGCCGTTAGCCAGCGAAG  
CCAGGTACTTGCCGGTCTCCACGTCGCGCACCACGGCACCTATGGTCCAGGCAAACAGCAGGATGTTGAT  
GGCTGGCAGCATGGCCATGACGCCCTTGCGGGCGGGCCTTGATCCAGTCTTGCCCCCAGCTTCAGGGCGC  
ATAGCCAGACCGATGGAGACCACCAGACTGCACAGGGCACCCTAAACCAGCGAAGAGCCGACGTTGGTGT  
TTTTGAACGAGCCAAGCACGCTGAAGGGCAGCCCTTTCTCGCTCAGCACCCGAGCACCCGGAATCGATCAT  
GAAATAGATGGTGGCGGGTTCAGGGTTCAGGATCGGCAGTACCATGTGATCATGCCGCCGTTGCTCTCC  
TCCGGGCTTTCCATATCCAGACCGATGGGGCGGCCCTTGACTCATCCACAGCTTGCCCTCCAGCGCCC  
ACGCTTCGTGTTGACGCATCGGGCCGATATCGAGTTGGAATGCAATCACCACCAGCACCATGATCAGGGT  
GAAGACGGCGTAGAGGTTTCATCGGGATCATCTCGACAAATGCCGCGATGGGGCTCTGTTTCAGTCAGACCG  
TGGGCCGCCATGATGCCGCCAACCCAGGCATGATATAGGCACCCCAAGAGGAGATGGGCATCAGCACGC  
AGACGGCGCCGCGGTGGAGTCCAGCAGATAGGCCAGTTTGGCACGGGAGATCTGGAAGAGGCAAACACCATCATG  
CCAGTCAGGGCTTTGGCGCCCTTGCGGGTCTTGGCACGACGCTCGGCCACTCGGCAAAGGCACGGGTCCG  
CCCCGGAGACGCTCATCAGGCTGATGAGGCCACCCAGCAGCAGCATAAACAGGATCATGTTGACGTTGTC  
ACGATTGAGCGGCCATCGACCCAGAAGATCTTTAGCACGGTATTCAACATGTAATGCAGGGATTTCGAGG  
GGTGAAAATGATTGAGCAGCAGACTGCCGGTGCAGATGCCACACCTAGAGACAGCAGCACGGCGGGG  
TCATGATCGCCAGCGCAGACGCCAACAGGGGGGAAGAACGGACCAACCGGAGTCGGCGAAATGACTAAT  
GTCCATGATCTCTTTGACCTAAAGATTACAGGTGGAGATCTACCGAGAGGATCTAAAGAAAACAAACCT  
ATGGGGAGGTCATACTCCTCAGCCCCCTCAGGTAGCGCTCCATAGTGGATGACTATGGCAGTCTGCACC  
TATTAGATGCAGAACCAGCAGCCCCGATGATGGCCTGGCCACTTCGCGCTGACTCCTTTCTTGTGCA  
TCACAGGCATCACCTCCGCACAAATACTCATAGGCAGCGCCCTTACTTAAAGGTATTTCGGCGCACAT  
TTTATCGAGATGGCAGCTTATAGCAAGTTTTTTTGGATTAAATAGTCACGATAAACATATCAAGGTCGAAAA  
ATGGTAGTCAAATGATGCAACAACGCCTGTTTTGACGCTATTTTTACCTACTGCGGTTTCATTGGCATCC  
AATCTCCAAGCCTATTGCAGGCCATATTAATAATCTGTATTGATGTTCCCCACGGATATTATATTTAACC  
CGGCTTGACTTATTTAAATCGCCAAGCAAGAATCAGCTAGAACAATAATTTTTCTCTGACTCGACGTGG  
TAACTCCTATGAATGAATTTTTAAAGGTAAGTCTTAATATCCGCAGTCTGCGTGCGACCTGCCCGAAT  
TTCTCTGGAACAACATGGAAGAGGCACTGGAATAACTCTCTGCGATCGTTGCTGAACGTCAGCAGGATGAA  
GCTGCCGAGCTCAGGGCCGTAAGAGCATCTGCGGAAAATTAACGAATATAGCGAAAATGCTGAAAAGCCG  
CCGGTATTGACCCGGCAGAATTGGTAAGCGCTGTCGCTACCAACCCCGCAAATCAGAAAAGCCAAAGCG  
GGCGCCAGTCTGCCAAATATCGCTATCAGGATAATGGCGTAGAGAAAACCTGGACCCGGCCAGGGCCGT  
ATGCCTTCGGCTATTGCCAGCGCAGTGGCAGCAGGCAAATCACTGGAAGATTTTTGCTATCTGACAGCTCT  
TGCGTTGCTAATAAAAAACCTCGCCAAGGCAGGTTTTTTTTATTGCCGCTTAAACGTGAAATATCAGATAG  
CCGATTGCGGGCGATCTGCTGCCTTGACCCACAGCACTTCACGATACCTGCTACGCAGATGAGATAGCG  
GGCAACGGTAAAGAACCAGTCACTCATCCGGTTCAGATAGGGCAGCACCTCGGGATTGACCCGCTCTTCC  
CGGCTCAATGTCAGCAGCAAGCGCTCGCAATGACGCACCAGAGTACGCACCACATGTGCTTGCGCCGCGG  
CACGGGAACCACCGGGCAATATAAATTGGCGCAGCGCGGCAATGGCTCACTATAACGATCTATCTGCTG  
TTCAAGGCGAGTGGTCCAGGCGGCATTAAGTTCGCAAAATGATTCAATCTGGGCGTCTGCTGGAGAATGCC  
AACTCCCCCCCCAGATCAAACAACCTCCTGTTGCAACAGCTGTAAATCAGCCAATAAACCGATCTCTTGCG  
ACGGCACATCACAAATCAGCAAGCCAATATGGGAGTTGAGCTCATCGATATAACCGTAGGTCTCGACCCG  
CAAATGATCCTTTGGCAACTGGATAACCATCGGCCAGCCGGGTCATGCCCTTATCGCCCTGCCTCGTATAT  
ATTCTCATAACCGACATCCTGTTAATAATGGGAATAATCATGGACTCAAGTCCATTGAGTTTGATTTGTA  
AGCCAACGCCAGCGTCTGGCCCAATTTACCCGCCGAAAACCGCTGCGCGCCATCCACACCAGATAGGGC  
TCTGGAATATCGATGATACGCCGCCCTGATATTTACCGTAAGGCATCTTGTGGTTCAGGGTTCAGCAGCA  
CCTGTTGCTCGGATAGCCAATCCATATTAATCGATATCCAGATATTTATGAGTCTGGATTGAGAGTCCGC  
AGTTACGCGGATACAGGTATCCATCGCCAATTTGGGTGGCCCTTGCTTCTGGCTGATCGGCTGCAAGGC  
AATGACCACATCAGGGCGCAGAGTAGCAGTAGCAGCAGATCCAGCTCTCAATATGGTGCTCGGGTG  
GCCACCGGATGCTTGATCTCGTTGGCCCGCTCCAGCGCCGAGACCAGCACAGGCAGCCGCCCCCTTCATAC  
CGATCTTGGGGGAGACTGTTACCCAGGTCTGCTCATGAGTCTTGATCTCGCTGGTGCCACTGGTTTTCAAT  
TTGCACCTGATAACCCGCGCCAGTAATGCTGACGAGAGTTTCGTGCAGATCGTAGAGGCAGGGTTCCCCA  
CCGGTATCACACATGGCGCGCTGATAACCCAGTTTCGCCAAAAGCTCTTGATAATCTGCGCGGTGCTGA  
GTTGGCTCCAGCAATCGGATTGCTTGAACGATCCAGTACCGCCGCTTACCCACTTCACGAGCCGGATC  
AACAACCCAGGTATGACGGGTATCGCACCAGGGGCAGCCACCGGGCAACCTGCAGGCGAACAAAGATG  
GCGGGCAGGCCGTAAGATGCCCTCCCCCTGGATGGTCTGGAAAATCTCGTTGATTGGGTAGTGCATCT  
CGATCACGGCTTGTGCAAAAAGTCGCGGATTATACCCCAAGCCACGGCAAGACGCAGGCTCACTCTGCGC  
TTTTCTCGCCAGCCCGGTTTTCTCAAACAGTCTGGCCATGATGCCCGCTTATCGGCCAGATAGTTGTT  
CAGGCCGCGACTGCGCAGTTACACGCAGGACACGTGCCGCAACCGTCACCGGCAATGCCGTTGTAGCAG  
GTCAGGGTCTGCTGGCGTACCGTGTGAGGTGACCATAGTGTATCCGCCAGAGCCAGGTCTCGGCCCTTGT  
CGAGCCACATCAAGGGAGTTTCAAAAACGGATGCCGCGATCCAACCCAGCGACACCAGCTGATTGAGGGC  
CTTGACGAACTCGTACGGCAATCGGGATAGCCGGAGAAAGTCAGTCTCGCAGACACCAGTGTACCCGCT  
TCGGCGCCTACCTGATAGGCATAGATGGAAGCCAGGGTCAGGAACAGGATATTGCGACCCGGCACGAAGG  
TGTTGGGCAGCCGTTATCCTGCAGCTCGCAACTGACAGGAATGTCGTACAGGGTCAGGGCAGAGACCGC

CAGCTCATTGAGCAGCGTACATCCATCACCTTGTGGGCGGCAATCCCAGTGCACTGCCAGACGGCGC  
GCGGTGTGCATCTCTTCCCGATGGCGCTGGCCATAGTCGAAGGTGATGGCGTGCACTTCATCATACTGGG  
CCAATGCCTGCACCAGACAAGTAGTGCTGTCTGACCGCCGCTGAAAACCACGACTGCTTTTTTTCATCTT  
GATAACTCCTTGAATTGTACGCGCGGGCGCTTCGGCAAAGTCTGCCACTGGGTATTCAACCGATTGA  
ACAGGGTCAGCAAGGGCGCATAGCGCTCCGGCCTCCCTCCCACCGGGACAAGAGGTGATAGCCCGCCTC  
TATGGTAGAGAGGGGCATCGGGAAAAGGGTTTCTTGCGAATGGCATAATTGACCGGCAATGGCACC  
AATGCGGGAAGCGAGCCAGTGCCTGGTTGCTCTGCAACATGCGATAAGCTTTGCGCCAGGTGCCATCGA  
GCAAGATAAAAAGCAACGGCGGCCGAGTCAGAGGACTCACTCTCCCGCTGTTGGCGAAGATCGGT  
AATAGCATCCTCATCCGGCCAGAGTAGATAGCAGCGACGGGAAGGATCTGCGAGCAACCCATTGAGCCAC  
TCATCGCGGGAAAAGTCCCTCCCCACATGGATCTCGACTGTTGCAAAGAGGCAGCCAGCAGCCCGCAG  
TCCCCTTGGGATGTGCCACCTCGTTGGGGTGTGCAAGATGTAGAGGGCGTGTGATTGTCAACCGGCAC  
AATATAATCGCACAGGCAGGCTTTGAGGGTGTGCGGTGCAACGTGTACAGTATCGACTGTTCTTGT  
GACTGTTTTCATGTTGTGACACAAATCTGGATTGCTCTGGGTTATCACGCTCTCTCACCAGCTTGT  
TCTTCTTTACCGTTCCAAATCTTCAGCTCTCCTTCGATCGGCCCTTGATCGCCGGGGGCGAAGGGT  
GATCATAACAGGCAATCTGGCTCATAACCAATCTGTGGCACCTGCTGCTCAATCTGGGTGGGCTCGCCATC  
CTCTATAGCCTGTTTCGCGACTATCTGGGTGGGGCTCGCCTGCCGCTGCTGATGTTGCTGCTCTGGTTGG  
CAGTGGGCTTGGGGATCTGGTGGTGGTGCCCGCAGACCCAGTGGTACATGGGGCTATCCGGCTCGCTGCA  
TGGCCTGTTTTGTCTGGGGGCAATGCAGGATATCCGCCACGGACGCCGCACGTCGGGCTGGCTGCTGCTA  
GCGGGGATGGGGCTCAAGCTGGTGATGGACTTCTACAACGCAGGAGAGAGCCGATATCCACCCTGATCA  
ATGCCAGGGTACACATCGGCTCTCATCTTATCGGGGCCGTTGACAGCCTGTTGCTCGGCCTGCACCGCT  
ATCACTGAGTGAGCCTGTTACGCACCAGCCAGCTCGGCATTGATGCTGGCCAGCATGGCGGCCGGATCGG  
CAGCCTGCGTAATGGGGCGACCGATAACCAGATAATCGGATCCCCTCGACCGCCGCTTTCGGTGT  
CACCCGGCGCTGATCCCCGGCCGCTGAACCGGTGGGGCAATACCCGGGGTCACCAGCTTGAACCTCATCA  
CCCAGCAAGGCTTTAAGCTCATGGGCTCGTTGGCAGAGCAGACAACCCCATCCAAGCCGGATGCCTTGG  
TCAAGGTAGCCAGCCGGATCACCTGCTCGGCAGGGCTCACATCAAGACCAAGAGGGATCATGTCGGACTG  
CTCCATGCTGGTCAGTACGGTCACCCGATCAACAATGGCGCCTTGTGCCATAAAGCAGCAGCGCCTCT  
TTGGCGGCACGCATCATCCGCTCACCCACTGGCATGCACGTTGACCATCCAGACACCGAGCTCGGCAC  
TGGTTCGCCACGGCTTTGGCAACGGTATTGGGAATATCGTGAACCTTCAGATCCAGAAAGACATCGAATCC  
CTTGGCCACCAGCTGGCTGCGACTGCGGGCCAAACAGGGTAAACATCTCCTTGCCTACCTTGCAGCGG  
CACAGGGCCGGAGAGATACGTTCAACGAACGCTAAGGCATCTGCCTCGTGCTGATAATCCAGCGCTACCA  
GTATTTTGGGATCTTGCATCTCACATCCTATTGCTTGTATTTCACCGTCCAGACCACGGATCGGCTT  
GGAACCCCACTGGCGACAAGACGGGCACTGCCAGAACAAACGAGTGAGTGGCAAAGCCGCACTGCCGACAC  
TTGTGGGTTGACTTGATTTTTATCTGCTCGCCGACCAGCTGTTGCAGCAGCTCGAGGCTCTCCTTGGCAG  
GCCCTCTTCCGCACTGGCCAGCTGAAAACCCACAGCTGGTAAAAACCTTTCATCGACGGATGACGACG  
CAGCTGACGCAACACCAGCGAACGGGCTGGCTCAGGCCATCACGCTTTCACACAGCTTGGCAAGGGCC  
AGGGTCACGCTGACACCGGCGTGATCTTCCACTGCCTTCTCAAGCAGTGGGATCAACGCAGGCGTGGCC  
CCAATGCTGATAGCACTCGAGCAATTTGGGCATTGCCCTCGGAGGCAAAGTCGATATCCTGCTCGAACAC  
CCGCAGCAGCTCCTTGGCTGGCCTGCTCATACTCCCCCTTGCATGGCGAGCTCAGCGAGGCGAAACTG  
GCCCGGGCACATGCCGGATTGATACTGAGCGCCCGTTTTGAGCTTGGCCAGCCCCCTCCCTTTTATTGCCCT  
CACGCAGCGCGATCTCGGCTTGGCTCGCAATAGAAATGGGAGATGGGGTCCGGCCAGCTTCTTGGCCCTGGAA  
TTTTTGCAGACGAACCGCCACATCGATGGCCTTGTCCCAATCCCAGTGTGTTGATGAATGATCAACAGC  
TGTGCCAGCGCCGCTCTTTCATAGTCGCTGTGCTCACACAACCTATTCAGAGCGCTTCAGCACGGTTCGA  
GCAGACCGGCAGCAAGAAAGTCGCGAGCCAGCTCCTGTAGGGCAAGTTGGCGCTGCTCCCGGTCAGCTG  
GCGGGTTACCAGGTTCTGGTGGATCTTATGTCACGATCGACCTCCCACGCTGGCGAAACAGGTTGCCG  
AGGGAGAGGTTGTGTTTCGATGGTTTCACTGTCCACCTCAAGCAGCTGGATAAAAGAGATCCACC  
CGGATTCATCGGACAGCAAAATAGTTGAGGCCCCCAACATACTGGCGGGAAAACCTGGTTACTGTTTTT  
GGTGTCTTGGCGAACACTCCTGCGACCCATGTACCAACATAAACCAGCGCGATGGGCAACAGCAGGAAA  
AGCAGTTCAAGCATTGAGGAACATTATTCTTACCCGGTGACCGGGCCAGCTCCAACCTCGCGGGATTGAC  
GACGCATGGTGGGTTGAGGGTGGGTTTTGCATTTTCAGGCGCAGGAACAGCAGGCGCAATACCAGCCA  
GCCAGCAAAAAACCGCCAGCGAAGAAGGCCAACAGCATGGCAAGCGAAAACCTACCCTGAGCGATC  
AGGTAATTGAACTGAACAGCTGGCCATTTTGTGAGCCAGCGCCAGGGTCAGAACAAACACCAGCACA  
GCGGAATGAGGGCCAAAATACGCTTACATAAGAGCTCCCTGTCAGTATCTAATGAGAGGCTGATTATCCTT  
AAAATCGCAGGCAGACTCTAGAGTGAATGGGAAAAGAGTTAAGAAAACAAGACGATTGGCACAGGAATCG  
GCGCTAAAAAGAAAAAAGGCATAACCCGAGGTATGCCCATTTCTGCATTATTCACGATGTTGACGCGCTC  
GCGCAACTCTTTGCCAGGTTTGAAGTGCGGGACATATTTCCCGGTCAGTTCAACCTTGTCCCAGTCTTG  
GGGTTGCGGCCACACGGGGCGCACGATAGTGCAGTGAAAAACTGCCAAATCCCGGATTTCAATCCGGT  
CGCCGTTTTGCAAGGTCGACGCCATCTGCTCAAGGATCTCCTTGGTGGCGGCTTCGACATCCTTGGCCGG  
CATATGCATGCGGCTGGCTGCCAGTTGTTGATGAGATCTGATTTGGTCATAACGTTAAATCTCCTTCCC  
CGATCACATGCAATATTGATTTTGGCAGGATAAAAAAGGGCGGCGCAATGCCGCCCTTTTCTTGCATCAA  
GGATTACTCACCTTGGCGGCTTTGAACGCTTCCATCATAGCATGCTGAACACAACCTTCTTGTGTTGG  
TTCAGGTTATCGATAGCAACACGCTCATCAGCCTCGTCTTAGCACGGACAGACAGGCTTACGGTGGGTT

TCTTACGATCAACGCCCATGAATTTAGCTTCAACTTCGTCACCAACAGACAGCACCAGAGTGGCGTCTTC  
TACGCGGTACAGAGCAGCGTCGGAGGCACGCAGGTAGCCTTCTACGCCGTCAGCCAGTTCGATAACGGCA  
CCTTTGGCATCAACCTCGGTAACCTTACCCTTACAGATAGCACCTTCTTGTGTCAGCCAGGTACTTGT  
TGAACGGGTCTTCTTCGATCTGCTTGACACCCAGGGAGATGCGCTCACGCTCCGGATCCACTTGCAGAAC  
AACGGCTTCGATCTCGTCGCCTTTCTTGAATTCACGCACGGCTTCTTCGCCCTGGTTGTTCCAGGAGATG  
TCAGACAGGTGAACCAGGCCGTCGATGCCGCCATCCAGACCGATGAAGATACCGAAGTCAGTGATGGACT  
TGATCTTGCCGAAACACGGTCGCCTTTGGCGTGAGTTTCGGCAAACAGCTGCCACGGGTTGGATTTGCA  
CTGCTTCAGACCCAGGGAGATACGACGACGCTCTTCGTCGATGTCCAGAACCATCACGTCAACCACGTGC  
CCAACGTTAACTTTGGACGGGTGGATGTTCTTGTGGTCCAATCCATCTCGGATACGTGTACCAGGC  
CTTCAACGCCTTCTTCGATTTCAACGAAGCAGCCGTAGTCGGTCAGGTTGGTCACGCGGCCAGACAGAC  
GGTGGTCTCCGGTAACGCTTGGCGATAGCAAACCCAGGATCTTCGCCAGCTGCTTCAGACCCAGGGAT  
ACACGGGTACGCTCGCGGTCGAACCTCAGAACCTTGACAGCGATCTCGTCGCCAACGTTGACGATTTCCGG  
AAGGATGCTTAACGCGCTTCCACGCCATGTGCGGTGATGTGCAGCAGGCCGTC AACACCCGCCAGATCTAC  
GAATGCACCGTAGTCGGTCAGGTTCTTGACGATAACCCTTAACTTCTTGACCTTCTTGACGTTAGCCAGC  
AGGCTTTTCGCGCTCGGAGGTGTTCTCGGTCTCGATCACGGCACGACGAGAAAACAACGTTGTTGCGCT  
TCTGGTCCAGCTTGATGACTTTGAACTCGAGTTCTTTGTTTTCCAGGTGAGCAGTGTACGGATCGGACG  
CACGTCAACCAGAGAACCCGGCAGGAAGGCACGGATGCCGTTCAAGTTCAACGGTAAACCACCTTGACC  
TTGCCGTTGATGATAACCGATAACGGTAGCTTGCTCTTCGTAAGCCTTCTCAAGCTGCAGCCAGGCTTCGT  
GGCGCTTGGCTTTTTTCGCGGGACAGCTTGGTTTCGCCGAAACCATCTTCGATAGAGTCCAGAGCCACGTC  
AACGGTGTGCGCCAGCTTGATTTCCAGCTCGCCCATGGCGTTCTTGAATCTTCAGCCGGGATAGCAGAC  
TCGGATTTTCAGACCCGGCTCAACCAGTACAAAACCGTTCTCGATAGCAACGACAGTACCCTTGACGATGG  
AACCTTGACGGGTTTCAACGGCGTTTCAGGGACTCTTCAAAGAGTTGAGCAAAGATTCGATCATGTTTTA  
TGTCAAAATGAAACATCCACTTGCAATCCGGCACAAGCGGGGCTGTTTTAAATAATCTGCGCCATCCTT  
GGTGCAGACGACCGGATGTCAGCTTTCGCTGGCATCACCAAGTTGTTGCTCTGCATAGGCGAGTACTGTT  
GCCAGACTTTCATCTATGGTCATGGCGGTAGAGTCTACCACCAGAGCATCTTCTGCCGGTTTTCAGGGGTG  
CAGTAGCGGATTTCTGTGCGGATCGTCACGTTCCGAATCTCGGTTAAAAGACGCTCAAAGTTAACATC  
AAAGCCCTTATCTTGAACCTGCTTATAGCGACGCTGGGCCGTTCTTCGGCACTGGCGTCGAGGAAAATC  
TTCACCTTCGCTCGGGGAAAACAACCTGTACCCATGTACGACCATCGGCAATCAGACCCGGGCTGGC  
GAAATGCCCGCTGACGGCCAGCAAGCTTCGCGCACCCGGGGGAAAGGCGGCGATTTTACTGGCAGCATT  
ACCCACTTCTTCGGTGCGGATGGTGCGGGAGACATCTTCCCTTCCAGGATCACCTTGACCAGATCGCCC  
TCAACCTGAAATTGCACATCCAGATTGGCGGCCAGCGGCACCAGTGAGGCTTCACTGTCCAGCGCTACAT  
CGTGATGCAGGGCGGCCAGGGACAACCCCGATAGATGGCGCCCGAGTCCAGCAAGTGCCAACCCAGCTT  
CTCAGCAAGCAGCTGACACAAGGTGCCTTTACCTGCACCACTGGGGCCATCAATTTGTCATTACGGGGGCC  
ATCTGAGGCATAACTTCTCTCCTGCACTGTGTTGCTCCATCCCGAAGGGGTGGGTTAATGGGCGCCGAT  
TATACCCGAATGTGGTGAGCCTGGCAGTCATCAATCCGCACAAAAGGGCCAAAACCCCGCCGACAGCTGT  
GCTTGTATCTCATTTGGAGATTTTCAATTAAGCAATGCAGGGACTTGTCTTATGGTCGTTCCCTGACAAGGC  
GCGCTAAACTGGCCCCCTTTTTTGGAGCCGTTAGTAGTAAGGAGCAACCTATGAGCAGCGTTACCCTCGTG  
GCCAAATCCAAATTTGCCAACCCCTGGGGCACCTTCACGCTGGTAGGTTTTTCAGGAAACCGGCACAGGCA  
AAGATCACGCCGCACTGGTGATGGGCGACATTACCGGTGAAGAGCCCGTGCTGGGCGGATCCACTCAGA  
GTGCCTGACCGGCGACGCCCTGTTACGCTGCGTTGTGACTGCGGTTTTCCAGTTGCAGGCGGCCATGGAA  
AATATCGCCAAAGCCGGTTCGTGGCGTGTGCTGTATGTGCGTCAAGAGGGCCGTGGCATCGGCTTGCTCA  
ACAAGATCCGCGCCTATCACCTGCAGGATCAGGGGGCCGATACCGTGGAGGCCAACGTAGCCCTTGGTTT  
CGCCGCCGATATGCGCGACTACACCATCTGCGCCGATATGCTCAAGCAGCTTGAGGTCAAGTCTCTCAA  
CTGATGACCAACAACCCCGCAAGATGAAAGCGATGGAATCTTCGGTATTCCGGTGGCCGAACGGGTAC  
CGTTGACGGAAGGGCGCAATCCCCACAACGAGTTCTATCTGTGACCAAGGCCAACAGCTGGATCATAT  
GCTGAAGAAGTGAGCCTGCATTGACGAATGTGATAGTCAAACGCCTCCCGAACGGAGCGTTTTTCTT  
GGGACGACCCTAGCTATCGCTGTGGTACGGTCAGATTGGCCAGCAGAGCTTCAAGCTCTTCGCCAGTGCG  
GGCAGCACAGTATTGTTTCGACCCGCTCGCGGGTCAATTGCGGCGGAGACGTTCAATCAGATCGTAGAGA  
TAGCCGCATAAAAAATGCCCTCTGCGCAACCCGATAGCGGCCACACCCGCTGGTAGCCAGGGCGCCGTTT  
TGAGCACAGATCGCCATCGCGCTGGGGCTCCAGGCCAAAAGTTGCCATCACTCCGATGCCCATCCCCTG  
TCTGACATAGGTCTTGAGCACATTGCTGTGCTCGCACAGCAGGAGATCCGACTCTCGGCATGAGCGCAA  
TCAGTGCCATGAGCTGTGGAGAGAGCCCTTCCATCGGTACCAATGCAAACCTCCACCAGCTCAGCCGGAG  
TCAGCGATGTTGCTTTGGCCAACGGATGATCCTTGGGTAGCACCAAGCCCGTTGCCACTGAAAAGATGG  
GAGCACAAGCAGATCGCTCCCATCCTCCGGTTCATCCGCCAGCAGATCGGCAGCGCCATCATGCACG  
GCTGCGCGGCACTGCGCCGCACTCCCTTGCATCACAGTTACTGCAACTTTGGGGAAGCGGGCCATGAATC  
CCTTGAGGATGGCGGGCAGAATATAACGGGCTTGAGATGAGTAGCGGCAATGGTGAGGGTTCCCTGCTC  
CGGATGCACATGCTGCCTGGCCATCACCTTGATGGTGGCCACCTTGTCAGCACCTCCGCGGCCACTTTG  
ATCACATCCCAGCCGATGGGGGTGATCTGGGTGAGGTGTTTGCCGCTGCGCTCGAAGATCTGGATCCCCA  
GCTCATCTCCAGCATCCGCACCTGTTTGTGATCCCGGGCTGGGAGGTAAAGAGGCTCTCGGCGGTGGC  
CGACAGATTACGCTGTGGTTGGCCACCTCGACGATATAGCGCAATGCTGCAATTTTCATGGTGTAGCCC  
TCAAGCGAACCCACCGTTAATAGTAACAACTTTCAGCAATGGCCCGCAGCCATCAGGCCGGCGATCCT



TGAGTAGAAAATCGCGCAAGGCACGGTTGGCCATGGAGAGTGGATCGCCACGCCGCCACGCCACGCAGAG  
ATCGAGATAGATAGGCGGGTCTGAAGGGCACGCCACTCAGATCCGGCTCCTCTTCCAGCACCATCCGCAAG  
AAGGTGGTACCCGCAAAGCCTTGCCGCACCACCGCCTTGAGCAGAGGGATAAGATTGCTCTCGAAGGCGA  
TATCGGGTTCAACGCCCAGGCTCTGGGCCAGCGCCTCTATATGCTCCCGGTGATAAAAAGCCACGGCGAAA  
CAGCGCCAGCTCCTGAGCAAAGAACTGAGAGAGGGTGCAGGCCGGTTCGCCGCGCAAGGGGTGATCGTCC  
CCCACCACCATCAACATCTCTTCGCTCAGCAGATGTGCCCCCTCGATGGCGGGGGGAGATCACTGGTGA  
TGAGAATGGCCAGATCGAGGGAGCCATCCACCATCCGGCTGAGCAGCTCGCGGGTACCGGCCCTCTCAAC  
ACGGATCTTGAGGCCGGGTAGCGGTGCTTGAAAGCCATCAGACGAGGGGGGAAATAGTAGGAGCCCATC  
ATGTAGGGGATCCCGATCCGCACCTCTCCTCGCTCCAGCCCCCTTGAGCTCGGCCATCTCGGCCCTCGGCCT  
GATGCATCTGCAACAACAAGCGCTCGGCATGGCGACAGAGCACCTCTCCCTCCGGGGTGAGCCGTACCGC  
CCGATCCTGTGATCAACAGCCGCAATTCGAGCTGCTCCAGCTTGCCGATGGCCATGCTGATGGCC  
GGCTGTGCCACATGCAGACTGTTGGCTGCCCTGGTAAATGAGCCGGCATCCCTAACCCAGCAGATAGG  
TGAGCTGTTTTAGATCCATGTATCAATTCATCTTATGAGATAGATAACTTAAATATATTATTTATAAC  
TGCAAGGACTCTACCCTGACCAAAAAGTAGTCAGGACAATACGCAATGATTGAAGTTGGCAGTCGCGAGTG  
GATACGTGCAACCCTGGCCCTCAGCTTGGGCTCTTTTCTGGTGTCTTCTGAACCTCTACCAGACCCATCCC  
CTGTTACCCCTGATCGCAGAGGTCTTCTCGGTCAACTCCCTCTCGGCCAGCTGGACCCGGCAGGATGCA  
CTGCTGGCCTCGCCGCTCCCTGCTGATCTGCGCCAGACTGGCGGATCGCCATGGCCGTCGGCAGGTCAT  
GCTGGGTACCCTCACCTGGCGATCTTGTCTCACTGTTGATCCCGTTGGTTGAGCAGTTTGTCTCCCTG  
CTGCTGCTGCGTATCCTGCAGGGTGCCTGCTGGCCGGTTACCAGCCACTGCGATTGCCTATATGGGGG  
AAGAGTTTACAGTAAACGGGGCGCTGCTCTCGCGGGTGGGGTTTATATTGCCGCCAACTCCCTCGGTGGCAT  
TGCCGGTCCGGTGGTCCGGCGGTCTGTTGGCGGGTGGTTTGGCGACTGGCAGCATACCTTTCTGGGGATC  
GGTGTGATCAGCCTGTCACTGCTACCGCTGGTCTTCTGGCTGCTGCCCCATCAGACCCGCTTTGTGGCGA  
GCGCCCCCGTTTCGCGGCCAATTTGCTCGCGCCTTGACGCAACACTTGACCAATCCCTTGCTGGTAGGGGC  
TTACCTTATCGGCGGGCTCAACTTTATGGTGTCTTCTGAACCAGTTTACGTTATCTCACCTTCTGCTGGCC  
AAGCCCCCTTTCTCCCTGCCACCCAGTGGCTCAGCATGCTGTTTCTCACCTATCTCTCGGGGACTGTAG  
CCTCCTCTCTGAGTGGCCGATTTGCCAATCGCTGGGGGGCACAACGCATGCTGCTGGTCCGGATCGCCCT  
GATGGCCCTCGGGAGTCTGTGGCTGCTGCAGGGCAGTCTGCTCGGGATCCTGAGTGGCTTGTGATCTCC  
AGCTTCGGCTTTTTCTGACACACGCCTGCACAGCCGCTGGGTTCGGTTCATCATGTCGAACAACAACCCGC  
CCCTCGCCTCCTCCCTCTATCTGGTGGCTACTATCTGGGAGCCAGTCTGGGTGGGCTTTACCTGCACCC  
CTTCTGGGAGCAAGGCGAGCTGGGCGGTCTGGTTCATGGGAATTGAACTGATCCTCATCTTACGGCGGGC  
TTGAGCCTCTGGCTCGGCCGTCTCAAGCAGCGAAGCCAATCGCCACTGCCCGCCAGCAACCCACCGAC  
ACGGGTAACGGGCTCAGCGCAAAACAGGGTCAACCACGAGCAGATGGCGATCTCGCAACCCAGCACCGCCA  
GATAACAAAAGGGGTACACCCGGTGACCCCTTTTGTGCGTTATTCAGAGCCTGTCAGGCTCGCACCCGC  
ATTTAGAGCAGGATCACTCCTGATCGAAATAATCCGAGGCACCGCGACCACAGCACCAGGTCGCCACCTC  
TTCGGCGATCACCTCCGCCAGCGGGCGCAGATGAAACTTGATCTGGCCGGAAGGCAACATCAGGCCAATA  
TCGGGGTTACGGATATCCTGCATGTTGCCAGTTTTGAATGGCAGCTCGGGATAGCGCGCTACCAGCTCTT  
GCAGTGAAGTGACCACCAGCTCGATATGTTCCAGCCCCGCTGATGGACGCGACCCGGTTTTCGGTGCGGC  
CAGCTCGATACAGGGTACCTGTACCTCATCAGCCAGCAGCGGCTGATGCAACTGATAAGTCGCAATAGGG  
CGCCCGCCGATCATCCCTCCACCAGCAAGGAGCCCGCTTCAGCCAATACAGCACATAGCGCGCGGTACT  
CCTGCAAGGTAGCCGCCGATAACAGAGGTGATCGACCGTTCGGCCGGGAAAATGTGACGCCAGCAGTGGC  
CAGTTCCGCCAACAGCTGAGAAAACAAATGGGGCCATTGGCCCCAGTGTGGAAATCGAGTGGATGAGACATG  
CTTACCATTTCTTCTTGGGTTGAAACAGGACATCGAGCTCGTTCGGCTTCCCTTGCTTGTATGTTTTGCAG  
ATCCTGCGCGCTGTTTTGCTGCTGCAGCTCTTCAAGCTCCTTGAGCCCCGTGACGCATATCTTCTTACGG  
GCCAGCAAATAGGGATCCTTGTGCGCCACGCTCGCCATGGCAGAGAGTCCCTTGGTATAGAGCTGGCGGC  
AAGTGCCATATTGGCCCTGAATGCGGGCATCCATCGCCCGCTTGACCAGATTGGAGATATTGATCTTGAG  
CTGCATCAGCTCGAGCGCGCTCTTCTGGGCAAACCCCTGAGGGTCAATCTTGCCTTGTGTGCTCG  
ACCCGACAGCACGGCCCGCATCTTCTTGACCAGCTGCAGCATCTGGATCGCCTGACGATCGGACTCCGGGG  
TCTTGAACCTGCCCTCATCTTGCACGCTGTAGTTCTCCTGCACATTTCTTGATCTGGGTCTGCACATCGAC  
GATGCGCTGCTTGTATCTGATTGTTTCGGCATCACCTGGGCGATAGCGCGATAGGCATCGAGGATCCGGTGC  
TGCAACAGCAACACCATGTTCTTGAGAAAAGGCACCAGATTGACGTTTACGCAACACCTCTTCGGTCTCGT  
CAGCCACCGTCTTGTGTCTGGCAACGGCGTGACGCTTGTCCGCTCTGCCTTCTGCTTATATTGCTGCAC  
CACGTTATAGGCGATAACCAAAAACAGGAGTGCGCCAATAGACAGCAATACCAAAAGTTAAAATCATAGGA  
TGTTCAAACCCCTGTTCTATCCAATTGCGTGATCTTACAACAGCTTACCACCTTAAAGGTAGCCTGCAGA  
TCCCCCTTGGCCACGATTTGTCAACAAGCTGTGCCCCGGTCTCAGGGAGAGATTGCAGGATCAGGGGA  
TGATGACCATGACGGTCACTCCCCATAGTATCGCCATCAGCGCCATTACTTGAGGTTAAAGCCCCGCG  
ATTGACAGGAATCCCAGCATGAAAGGGCGGGACTCCTTGCCAGAAATGGCGCGGATCTGGCCGCTCCAGGT  
CTGCTGCTTGTGTTGCTGCTGCGGGCTGATAGTAGTCCCGGATCTGCTGATCGTACCGGGCCAGCAGG  
TCGCGATCCAGCTCGTGTGGTAGCGCTCCTGATGCACCACCAATCCCTTGGGCAGACGGGGTTTTCTGCT  
CCGGCTGCTGGGCAGGATGACCAAGGCAGAGGCCAAAACAGCGGGATCACCTGATGGGGCAAGCCGAGCAG  
TTCGCTCACCTCGGCCGGATGGTTGCGAATGCCGCCGATATAGACCCCGCCAGCCCCAGCGACTGCGCC  
GCCAGCAAGGCGTTTTTGGCCATCAGGGCGCGCTGATGGCTCCGATCAGCAACTGCTCCGCATAGCCGG

TCTGGGCCTCGGGCACGATCTGGGTGTGGCGGTGGTAATCGGCGCAGAACACCAGAACTCGGCCGCCTG  
CACCACATAGGGTTGATTGCCCCCAGCATGGCCAACTGCTGACGCGCCTCGGGCTCGCAGACTCGCACA  
ATACTGGTACCTGCAAAAAGCTCGAGGTTGAGGCGGACTGGGCGGCGGCGAGAATGGCATCCAGCTGCT  
GCGGGGCGATCGGCTCGGCAGTGAAGTACGAATGGAGCGATGGGAAAGGATAAGATCGATGGTCTGATT  
CATGGCACCTCCAAAATGAGGTAACACCATAGCGAAAAAACGAGGGAGCCCAAGGCTCCCTCGCACACC  
CAGCTTAAGGGGCGGATAGACGTAAGGGGCTTGCAACCCAAAGCGGGAAGCCGAGCGCCAGTAGAGCAG  
CAGGAAAATCGTCCAGCTCACCAGGAAGGCCAGTGAGTAGGGCAGCATCATGGAGACCAGAGTACCGATC  
CCGGTGTCTTACATACTGCTGGCAATAGACCACCACCAGCGGGAAGAAGACCATCAGCGGGGTGATGA  
TGTTGGAGGCGGAATCCCCGACCCGATAGGCCGCCTGGGTGAGTCTGGGGGAGATCCCCACCGCCATCAG  
CATGGGTACCAGGATCGGACTGATCAGCGCCCACTTGCCGGAAGCCGACCCACCAGATTGACGCTG  
GCGGTGAGCAGGATCATCCCGACGATGGTCACTTACCAGGCGAGCGCCAGCGCATGAAGCACTTCGGCAC  
CGGAGAGGGCCAGCAGGGTGCCAGGTTGGAGTCCGCAACCGCCTTGATAAAGAGCGCGCAGAAGAAGGC  
CATCACCATGTAGGAGCCATCTTGTTCATGGTGGCCGACATGGCATCGATCACATCCTTGCCACTCTTG  
AAGCTGCCTGCGACAAAGCCGTAGACAATCCCAGGCAGGATAAAAAAGCAGGAAGATGAGCGGCCTATGG  
ACTTCATCACCAGGCGGGCGAAGGTGGTCAGGGAGCCATCGGCAGCACGCAGCGGTGAATCGCTCGGGGA  
GAGCGCCAGCGCCAGCAGCAGATAGCCGCAGCATGGCAAAACCGGCCAGTTGAAGGCCCGGCTCTCT  
TGCGCGCTGTAGCGCCCATCTCGTCGGCACTCTCCAGATCCTCGTTGAGCGCCACATGCTTGAGGCGCG  
GCTCCACCACCTTTTCGGTGACGAACCAGCCGACGAGATGATCAGCAACGAAGAGGCACCGGTAAAGAT  
GATGTTGCACAGGGTGTGACCATGTAGTCAGGATCGAGCAACTGAGCGGCGGACTGGGTAAAACCTGC  
AGCAGCGCATCCCCGCGGAGGGCAGGAAGTTGGCGGCAAAACCGCCGAGACACCGGCAAAGGCAGCGG  
CGATCCCCGCGCAGCGGATGGCGTCCGGCAGCGTGAAGATGATGCCACCGATGGGGATCACCAGCACATA  
GCCTGCATCTGCGGCGGTGTGGCTGACGATCGCCACCAGGATCAGCATGGGAGTGAGAAAACGGGCAGGC  
GTCACCTTTCAGCAACTTTTTTCAGACCCGGTATTGATAAAACCGGACTGCTCGGCCACCCCGACCCCGAGCA  
TGGGTACCAACACGATCCCCAGCGGGGCAAAACAGTAAAGGTGCTGACCATGGAAGAGAGAAAACCTCGGC  
CAGACCGGCACCGGTGAGCAGGTTGTTGACCACTACCGCTCCCGGTACGGGGGTTGACCAGATCAAAC  
TGGAATTGTGACAACACCCAGGAGCCGACCCAGACGATCAGCAAGGCGTAGAGGAACAGCATGGCGGGGT  
CGGGTAATTTGTTCCCGGCTTTCTCGACGCCATTGAGGAAACGGTTCAGCCAACCTTTGGGAGGGCTGGC  
CGGACGGTCATTGACAGCAGCATGACTCATTATTGCGATACTCCTTTCCCTAGAAAACGAGGTGCGATGCT  
AGCAATTCAGTACAGTCCGCTCATGACCCATCGCAAAAGAAATGATTAAATTTGATTAAATTTGCGGAA  
TAAAATCCCAAGTTGTGGCCTAACGCACACTTGTACTCTGCCATTACGGCATCTAGCAGTGGATAACGC  
CCGACCTGGCACTCCACCACAAAACCGCTCGCCTCGACTTGCGCCACTGTGAGCGGCTTGCTGAACAGAT  
ATCCCTGGAACACATGGCACCCCTGGGTCTGCAGTGCGGCCAGCTCGTGAGGCTCCTCCACCCCTTCCGC  
CATGATCCCCAACCCAGATTGGTAGCCATGGCCGAGTCCGCCGATCACCGGCAAGTTGAGACCGACC  
ACGAAGGAGCGATCCAGCTTGATGTTGTTGATCGGCAACCGGTTGAGATAGGCCAGCGAGGAGTAGCCGG  
TACCGAAATCATCGATGGCAATCTTGATCCCTGCTCGCTCAAATCATCGAGAATGCCGAGGCACCCCTT  
CATATCGAGCATCAGCACGGTTTCGGTCAGCTCCAGCGTCAACAGGGAGGCATCCACCCCGTGCAGCTCC  
AGCTGCTGGCGAACTTGCCCGGGCAGCGCCGACGAGAGCTGGAACCGGAGAGGTTGACGGAGACCGGCA  
CTCGCTGATGGAAGCGCTTCTGCCAGCTGGCGACTTGTGCCAACGCAGTGGAAAGCACCCAGCTGCCGAT  
CTCGCGGATCAGCCCCATCTCTTCGGCCAGCGGGATAAATTCACCGGCGACACATGGCCGAGCACCGGG  
TTGTACCAGCGCAGCAGTGCCTCGTAACCGATCAGACGCCGTTTGGCGGCATCGACCTGCGGCTGGTAAC  
AGAGGCTCAGCTCCTGACGGCCGATGGCCTTGCCAGAAAACCTGTTTGGAGATTGAGCTTGCCTGCAGGGT  
CTGTTGCATGCTGGGGGTGAAACGCTGCCAGCGCAGCCGCCCATCTGCTTGGCCTGGTACATGGCCATG  
TCGGCACGGGTGATGAGGTTGTCCCGTCATCCGCATCATCGGGATAGATGGCGATAACCGATACTGCCG  
CGATGGTACCTCCGGCAGCCCGCTCAGTTGCAGCGGCTTGGTCATCTGGGAGAGCATCTGATCGGCCAC  
CTCTTGCGCCCCGATCCCCCTGATTGCCAGCGGCACCAAGTGTGTGAATTCATCGCCACCCAGGCGAGCC  
AGTCCACATCCCGCGGGCAAAATCTGTTTGGAGCGACCGCGACCCGCTCCAGCAGCGATCTCCCGCT  
TGTGGCCGTAGTTGTGCTTGACCAGCTTGAAGTTGTCCAGATCCATGAACACCAGCGCTAAACGCTCCCC  
CAGCCCCGAATAGGCCTCGAGGGATTTTCATCAAGCCATAACCGATTGAGCAGGCGGTCAGGGAGTCTGTC  
CAGGCGAGGTGGCGATGCTCCAGCTCCTCAAGCTTGCGATCGGTAATATCCCGCATGGTGAAGCAATGC  
GGGCCCCCTGCTGGATATAGCGAACTGATACTGGAACAGCGCATCCCCCTTGAGGGTACGGCACTCCCC  
CTCGGTACCACCTTCATCGAGACGGGAGAGCTTCTGGTAGAAGCTGTCATCATTTGCCGGAGAAAACCTGG  
GAGAGCTTGGCGATCTGATGACCGAAACACATCTCGAAGTGATAGTTGCCACTCTCGAACACACCGTGGC  
TATCGAACAGGCAGGCAAGGGTATCACCGGTTGCCAGCGAGGACTCCTGATAGAGGGTATCGGAGTGCAG  
CACCGCTTCGGTCATCATCATCAGCCGGCCAGCCAGTTGAATACCGGAGAGGCGCAGATAGATCTGCTTC  
TTGACCCCTTTGGGGAGAGGGTCCACCCTCGTTGTAAGTGCAGCCCTGCTGAAAATCACCCAGATAGC  
GCTGCAGCAGCAGATCGATGGCGGTTGCCATATCGGCAGAGAAGTCCGCGGAGCAGAGTTCTGTCGAGTGA  
CGTGCCTCCACACGGAGAGCGCGGCGCTGTTTGGCCAGAAAAATGGTGATGCTCGATGTCATAAACC  
CAGATCGGGGTATGCAGAACATCCATCGTCTTCAGTAACCGTTTCGTCAAGCGTATTCATCTGGTCAAGGT  
CATTCATGCTGGATGGTCACTGGTTAACCGGAAAAACAGATCTGGCAAAACCGCTAGCTGCAGAAATGCAAGG  
TGCAAAATACCTCTCGGCCATTATCCCTTTTACATAGCCAAGAGCGGACAAAACATAATTCAGATATCAAC  
AACAGGGCAGCCTGTACGGCAATACTACAAAGGTCTCAGTCAAGGACCCTGTTAATCCAGGCAAATCATA

TAGTCGATTTTTAACTTTTTTCCCCAGTAAAAACAAGCACTAAGAGCTATCCACTCGAGACCTTGAAAGA  
GCAATTGCATATTTGCTGCGATAAATTTGTTATTAACATTTAAATCAATGGTGGAAATAGTCATCACTCT  
CTGTACAAAAGCTTCCATTAATTAACCAAGCGGATGGATAAACAGCCAAAAAACGCCAAAACGGACAAA  
AATAGTTCACTAAGGCGGAATTGATATACCCCAAATTCATTTTTCAACAGGCAATGAGCAAAACCCGAAT  
ATATGATCTGCATCACATTGGCTGTGGATGGCAAACCACCCCGGCTGAGTACGCAGAGCACCCCGGCGCC  
CTTCCATCAGGTTGCAATATCGGCCTTCGCCCCGGTTATCGCGGAACAAATCAGGGAATATGGCAAACA  
TCTCTGCCGAGCACCATTTGGCATCGTGCAGGAATAATCACCAGCTCGGGGAACTGAGATGACGGGCA  
GATGGAGAACTGGTATCAACAGAAATCGAATCCAGATCAATTAACGCTGAATTACCCTTGCCAACCCGG  
AACGCTCTTTTTATGGTTGCCCCCTTGTACACCCAGAACAGCGTTTATGAAGCACATCGAAGAGTTCTA  
CCTGTTTCGTCAAGGTGGTGAAGAGGGAGGATTCTCCACGCTGCAGCCGCACTGGGCATGCCAACAGGC  
ACCATCAGTCGAGCATTTCACAGCTGGAAGAGCAACTGGTTGCTCCCTGCTACATCGCTCTACCCGCA  
AGCTCCGCCTTACCAGATGATGGCCTCAGATACTACGAACGCTCTCTGCACGCCACTCGCACAAATCGAGCA  
GGCCACCAGCGAGATCCAGGGTCAAGAGGCCGACATCACCAGGCTTATCCGGATAGCTGCGCCGATCGCA  
CTCTCCAACACCATCTCATCGATATGCTGGCCGAATTCGGGCTGCACTATCCCGAGGTACAGTTCGATA  
TCACCCAGACCAATGATCACCAGCACCTGTTTCGACAATGATCGGGATCTGGTGTCTTCAACGGTGAAGCT  
GCCCCAGTCGCTGCCAATGCGATCTGTCTCGCCATATCGAGTACGGCTGTTTGCCTCACCCTCTAT  
TTGACCAAGAAGGGCACTCCCTCCACCCCAACCAGCTGGAAGAGCACGATCTCATCTACTGCTGGCCTC  
ACCAGCACTGGCAGCTGACCGACAAGGATGGCCAGAGCGTCTGCATCAAACGCAGCGCCAACTGACCGT  
CAACCAGACCCAGGCCGCGGTACGCGCAGCCCGCGTCTATCTGGGGATCGTCAACGCCCGCTGCACTAT  
CTGAGCAGCTTCCCTCCATGACGAGCAGCTGGTGGCGTACTGACCGACTGGCAAACCGGCAATCGCCCT  
TCTACATGTTGTGTTGCCAGCACCAGTTCGCTCCGTTGCGTGTAAAGATGTTGCTTGAATTTGTTGAAAA  
ATACTCAGCACGCTATCGCAATCGGCAGTGGGACAACCAATTTTTACAAGGTGATAGCCTCACCATTGC  
ATCTGACCGTTAGCGGGCCACACTTATAGCATCCCTTGCCAACAGAGCCTGCCTAACGCCATGAATGTAT  
TGATATGTGATGACTCCGGGTTGCGCCGAAAACAGCTGGCGCGGGCGCTCCCGGCCGACTGGAAAGTCGA  
TTTGCCTACGCAGCAATGGTCTCGAAGGGATCGAACAGGTGCTGATGGGTCATGGCGATCTCATCTTC  
CTCGATCTGACCATGCCGGAGATGGACGGTTACGGCGTGTGGAGACCCTCAACGGGAGGGTCTACGCA  
ACAAGGTGATCGTGGTCTCCGGGGATATCCAGCCAGAGGCCTATCAACGGGTCATGGGGCTGGGGGCGCT  
CGATTTTCATCAAGAACCTGCCGCCCCGAGACCCCTGCTCGCCCTGCTCAAAAAGCATGATTTCTGGAGT  
GCCCCCCGAGCGGTCAACCAAGCCGCCGAGCAGCCAAACCGCGTGGTAGCCGATGCAGGCGGTCA  
AGATCACCCCCGAAATCCCGCATGTCTATCAGGAGCTGGCCAACGTTCCATGGGTGAGGCGCCGACTT  
ACTGGCCCGTCTGCTCAACGCCTTCGTGGTGTGCCATCCCCAACGTCACGTCGCTGGAGTTTCCGAG  
CTGCACATGGCCCTCTCGGCCGCTGCGGATTAGATAACCTCTCCGCCGCTCTGTCAGGGGTTTATCGGAG  
CTGGGATCGCCGGTGAAGCGCTGATCCTGTTCCATGACTCCAGCTTCAAAGATTTGGCCAAGCTGATGAA  
CCATCAGGGGACGCTGGATCGCACCGCCGAACCTGGAGCTGTTGATGGATAACGCCAACGTCGATCGGC  
GCCTTCTGCGCGGCTACGCCAACAGCTCGACACCCCTTCAGTCAGGGGCATCCGGTGGTGTCTCGGCC  
AGCACAGACCCATCAACGAGCTGATCAACACCAACAAGAGTCGCTGGCGCCGACGCTCGCCATCGAGAT  
CAACTACCGGATCCAGGATTACGCGGTGCAGTGTGATCTGCTGCTGCTGTTTACCAGGATTCATCGCC  
ACCATGAACAACAAAATCATGCACATGCTCTAGGAGTACTATGGAAATCCGTTGAATTTTATTGGTTGAT  
GAACATAGTCCAGAACCTGGACGTAGGCCTGGTAGTGTCTGCACAAGGAGTACAAGGTACAGGTGTGGAAC  
GGCTTTTATGGAGAGCCACAGCGGCCGACTGGCCAGTGACGTGCGCGATGGCGTACTGTTTCGAGCTCTTCC  
CCGATGTGGACAGAGCCTGGTTCGAGCGCAAGGCCAACATGGTCTTCAAGCTCAACAACCGCGCCTTCAG  
TACCTGGGAGCAGAAGCCCTATCTGCTACGTTTCTCCAACCTACCGCCCTCGGCCCCAC  
ATGTTCCAGAACCTGACGCTGGTACCACTGGCCGATTTTCGGCGGTGAGGTGACCCACATCGCGGTGATGA  
TCTACGATGCCACCGATGAGGCCATGCTGATGAGCGCCAGCGGCAGGCTTGAGCTTGACAGAAATAACA  
GAGGGCGCCGCGCGCCCTCTGTTATTTTCGGTATGAACAGGTCTTGGTATAACCTCTACCTGACCAGCCG  
TCTCAACGCGCGCCGATACTCGGTGAAGCGTGCATCACCTCTTCAATATCGTCATCGTTGATCTGCA  
GATGAGTACCAGCCGAGCTCGCCGTAACCGGAGAAGATGATCCCCCGCTCCTTCAATAAAAAGCGAGCAG  
AGGGGCCGATTCCCCCTCACGCAGCCGACGGAACACCATATTGCTCTGCACCAGCGAGAGGTCAAGCTCG  
ATGCCGACAGTGCAGCCAACCTTCGGCCAGCCGTTTGGCACGGCGGTGATCATCGGCCAGGCGGGTCA  
CATGCTGCTCGAGGGCAAACAGACCGCTTGCGCCAGAATCCCCGCTGACGCATGCCACCTCCCAGCAT  
CTTGCAGAGGCGCGCACGGGCGATGAAGTCTGACTGCCACCAGCAGCGAGCCACCGGTGCCCC  
AACCTTTGGAGAGGCAGATCGAGATGCTGTCAAACGATGCGGCGATCACCTCGACCGGGTCTCGCTGG  
CCACGGCGCGGTTAAAGAGCCGGGCGCCATCGAGATGAAGCTTCAAGCCGCGCTCGGCAACGAATGCCCC  
CATCTCCTGCAGATAGGAGAGCGGCAGCACCTTGCCGTTGTGGGTGTTCTCAAGGCAGATCAGACGAGTC  
TGGACGAAGTGGGCATCATCAGGGGCCAGCGCGGCCCTGATATCATCGAATGCCAGCGTGCCATCGCGCT  
GCATCGGCAAGGGTTGAGGGCTACGGAGCCCAGCAGGCACTCCCTGCGCTTCATAGCGATAGATGTG  
AGCGGCGTTGCCGAGGATGGCCCCCTCACCGCGCTGACAGTGGCTCATCACCGCCAACAGATTGGACATG  
GTGCCGACGGCACAAACAGCGCCGCTGTTTGGCCAGTAATCTGGCCCCAAAGGCTCCAGCGGTTGA  
CGCCCGGATCTTACCATAGACATCGTCACCGACTTCGGCGTGGAGCATGGCTTGACGCATAGCGTCAGT  
AGGCTGGGTGACGGTGTCACTTCGTAATCGATATAGCGCATGAGATCCCTCCTGAAACAGGGGAGTGAC  
GTTAGCCATGCGCCCTCGCTTGGCAAGGGGCGCATGAGCAGAATGTGAAGCCAATAGACGTCCATAGAA

CCCCGAGGCGGGATCTACCAAGGCAGCGGCTGACCGTTGAGATCCAGTAGCTGACCCGATTGGGTCAACG  
ATAACCCCTTGATGAGATTGAGCAGTTTCACCGCCACCTCGGCAGGCTCTGCAATTGCTCCGCAGGCAA  
CTCGCTCAGAAAGGGGGTATTCATCGGGGAGTCCATCAAGCCGGGCGCAACGGCCACCACCCCTGCTTGC  
GGGAAACGCTGCGTCCACTCGAGGGCCAGGGTTTTACCCCATGTCGAGGGCCGCTTGTCTATCCGGT  
AGCTGTAACGTCCCCCTCCAGATTGGCGGTGATGGAGCCCGCCAGATCAGAGATGGCACAGAGCCACAG  
CGGATGGTCATTGCCCATCAACCGACTGAAACGGGCAGCCAGCGCCAGTGTGGCCAGGCATTGGCCAGC  
AGGCTGTGCACAGCCACTTGGGGTGACCTCTTCGACCCGCGCTCTGGCATAAAGCTGACATCGTGCA  
ACAGGCCGATGGTGTGATTACACAGTGGGAAGCGGATCGGTGTCGTAGAGGGTAAACAGGGCGTCGAA  
CGAGATGGCGTCCACCTCTTGACAGCGGAAGAAAGCCCCATCTCGATCCCTTTTGGATAGGTGCGCCCG  
GCCAGAAGGAAGGACTCCCCCTTGCCATCAGCTCTCTTGGCAGCGCCAGCCAGCGCACCCGCTTCCGA  
GGATCAAGTAGCTCATCGCCATTCATGGAGATTATCTTGCTTAGAGCGTATCAGAATAATCAACCGG  
CCGTGACACGACCAAAGGGTAATATGCCCTCATCACGCTTCCCCAGATGGCGACCAAACCTCCGCGCC  
AGCGCCAAGTCGAGAAAACCGTCCGCTTTCTTGTGGGTGCGCAAAAACCTGGTAATAGGCGAGCAGGGTGA  
CCAGTGCCCTCCTCATCGGGCAGCCCCACCCGGGTTGCTGCTCGCCAGCAGTAGTTGCGCCGCTGCCAG  
CGCTCCCTGTCTACCACTTCCGCTGACGGTAGAGATAACCGCATCCGGTCGCCAGCCACTCCAGCGAG  
CAGTTGGCCCCCATGGCGATCTGGTTGGCCGCGCAAGCCAGGCTCGGCCCTTCAAATATTTGCGGA  
TCAGCGCTTCACTGAGCCCCACCTTGCGGGCAAACGCGCTCACGCTCATCTCCCGATCAGGCTCTGTAA  
GCGCTCGGCAAATCCTTCCATCCAACCTCTCTCTACTCTGCGATCAGAACCAAAGTTCGAATCATGCC  
ATTGCCCATTTATTGCTTTGCCAGCCACATGAGGCCAAGATGCCCGCAGTCATCTATGTTGCACATCGTTT  
TCGCATCGTGTTTTTCAAGGAGTCAACCATGTCTGTATCCCGTGTGCGCCTGCATCCGCAAGGCCCCACC  
TTCTCTCGCCTCATCATGGGTTACTGGCGCCTGATGGAGTGGCAGCTCTCTCCGGCCGCTCTGCTCGATA  
TGATGAAATATCATCTGGATCTGGGGTCCACCACCATCGATCACGCCGATATCTATGGTGGCTACCAGTG  
CGAAGAGGCCTTTGGTCACGCTCTACGCCTCGAGCCTTCCCTGCGCAGCCGGATGGAGATCGTCACCAAG  
TGCGGTATCGCCCTCACCGCCAAGCCGGAGCATGCTCTCAACCACTACAACACCCGGCAAGGACCATATCA  
TCGCCAGCGCCGAGGCCTCGCTGCGCAAGCTCGGCACCGACCATCTGGACCTGCTGCTGATCCACCGCCC  
GGATCCCCTGATGAACGCAGATGAAGTGGCCGACGCCTTATCACCTGAAACAGGCGGGCAAGATCAAG  
CACGCCGGGGTATCCAACCTTACCAGCCCGTCAAGTTCGAGCTGCTGCAATCGCGCCTCCCTTCCCGCTGG  
TCACCAACAGTAGTGGAGATCTCGCCGCTTCAATCAGGAAGGACCCTCGATGGTACCCTGGATCAGTCCCA  
GCAGCTTGGCATCGGGCAGCGATGGCCTGGTCATGTCTCGCGGGCGCCGACTGTTACAGCTGACGCCCCAT  
GCCCCGCTGCGTGCCGAACCTGGAGCAGATCCGTGAGGAAGTGGGCGCCAGACTATCGAGCAGGTGGTCT  
ACGCCTGGGTAATGATGCTGCCAAGCCAGCCGCTGCCATTGATTGGCTCCGGCAAACGGGAGCGGATTGC  
TGCCGCGTGGCCGCGCAATCCATCGTCTCAATCGCCAGCAGTGGTTCCGCATTCGCAAGGCGGCGCTC  
GGTTACGACGTCCCCTGATCACAGCAAAACATTCAGAAAACAAAAACGGCATGGGGGAAACCCATGCCGTT  
TTTTTATTGCCGAGGCACCTTAGCGGTGGCGCTGTTGCGGGCGACCACGGGGAGCATCTGTCTTCGGTTT  
GGCCTGGTTGACGGTATGGTACGGCCACCGACTTCTGTGCCATGCAGACCAGCGATAGCCTTTTTCGGCA  
TCACCATTGACCGGCATTTCAATAAAAACCAAACCCCTTTGACTGGCCGGTATCGCGGTGATGATGATAT  
CAACCTTGTGACCTGTCCAAACTGGCTGAACAGGGTTTTTCAGTTCGTGCGCCGTCATCCGGTACGACAG  
ATTTCTACGTAAATCTTCATGCCATCCACTCTCGATTCAAGGTGCCCTTCTCTATGCAATTCACAGCATA  
ACGGTAAGGGCACAACCCCTATGCCGGACCTGCCATGGCTTCATGCCGTGGCCTTCTCCACACTGTGCTC  
AAGTGATTGATCTCTTGGGGTAACAGTGCAGACAAGATCAATTCGAGTCACTGGCAGTATCTGAGCTTTG  
CCGGGAATTGTCGAGAAAATAGTGCAGCTCAGGCCGATTGCAGAGCTGACAACCGTTGCGCCAGCATCCGG  
CGACCGTGCCAGGCCCGTTTTAAAGCCGAAGCGATAGACAGACGGGCTCACCGATGGAGCTCCCCGCT  
TGAGATCCAGCAAGGCCATGGCCGCGCCAGCTCCTCTTCACTCAGTTGCAGATCGAGGCTGAAGTCGAG  
CCACTGGCCGTGCTGGCCACTCGCCGCTCCGTTTCAGAGCGCCACCAGCTGGTTGCGGGGACGCGCCAGC  
GCCTCATCCTTGTGCCATTGAGCAGATAGATATGCTGTTGCTCCACCCAGCTCCGCCAGGCGCCAAG  
GCTGCCAGTGCGGGGCAGCGACCCATGATCCCGGTGATGCCACCAAAGACCAGCCACCCAGTTGAG  
CAGCGCCATGGCGCCCCAACCATCCCAAGGAGGCGCCACCACGCCCAACTCACAGCAACAGCAGA  
AAAATGACGCAGCGATAGCGAACCGCTGGCGGCATCAACAGCTGCACCTGCGAACCGGCAAGCAAGGATG  
TAATACGCATGAAAAGCTCCTGTCTATCACGAAATGGCGCCATTGTGAATAGCCATCAGGATGCTGACAAG  
GGGGTTTTCTTTGTCTATCCCCATAAAAATCAATACCATGGCGTAAATGATTCTCAGTGGAAACCCGCTTC  
TTGACCAGCTCGCAACCTGTGTGCGCTTTTGTGGCGTCGACAAATTTCTATGGCGATTTTTCAGGCTCTTC  
ATCACATCGATCTCACCATTAACGGGGAGAGAAGTGGGTTATCTGTGGCCGTCAGGCTCGGGAAAATC  
GACCCTGATCCGCACCATCAACGGGCTGGAGGGGATCGACGACGGCCAGCTGTTCTGTTTGGCGAGCCG  
GTGACCCCTTCTACCTGCGCCGCTGCAAGGTGGGTTGGCATGGTGTTCAGCAGTTCAACCTCTTCC  
CCCATATGACGGTGTGGAAAACCTGATGGTGGCGCCGGTGCATACCTGGGGTTGCGCCCTGAGGAGGC  
CAAAGCCCCGGGCGCTCGGGCTGCTCGAGCGGGTGCAGATTAGGCGCAGGCGACAAGTACCCCAACAG  
CTCTCCGGCGGCCAGCAGCAGCGGGTTCGCCATCGCCGCTCCCTCTGCATGCAACCCGAGCTAATGCTGT  
TTGACGAGCCACCTCCGCCCTCGACCCGAGATGATCCGCGAAGTGTGCTGATGTGATCCGCGAGCTGGC  
TGACGAGGGGATGACCCTGATCTGCGTCACTCACGAGATGGGCTTTGCCCGTCAAGTGGCGGATCGGGTG  
CTCTTTATGGATGAGGGGAAAATCATCGAGTCGGCCCCGCGCCAGCTGTTCAACGCCCTCGTCACC  
CGCGTACCCGGGCTTCTCGAACAGGTGCTCAGCTATCATGGCTAGGCTCAATCGCCCCGCTGCTCG

GCTGGTTGTCAGGCACTGTGATGCTCTGTGCGCTACTGGGCTGGGCGCTCTATAGCGGCGCTCGCCAGAT  
GGGCTATGAGTGGCAGTGGCCGCGGGTGTGGCCCTTCTCGGCGAATGGGATGAGGGAACCTTTTATGCC  
GGCCCTTGCTAAACGGCCTGCTGGTCACTTTGCAGGTGGCGCTGCTCAGTCTGCTGGGCACCTCTGGCGA  
TCGGGGTGTGCGTGGTTCAGCCTGCGGGCTGGTCCCTCCCGGCTCGGCCCTGGCTCGCCATCGCCTATCT  
GGCGCTGGTGCACACCACGCCCCAGCTGGTGCACCTCTATATTCTCTATTTCTTGCTTGGCCCCATGCTG  
GGATTGGCCCCCTTGCCCTGCGCCGTGTTGAGCCTCTCCCTCTATCAGGGTGCCTTCACCGCCGAGGTCT  
TGCGTGCAGGCGTACAGGCCATTTCCAAAGGACAGTGGGAGGCGGCCACTCTCTTGGCTTGTGCGAAC  
CATCACCTGCGCAAGGTGATCCTGCCCCAGCTGGTGCACATCACCTTGCCGCGCTGACCAACGAGCTG  
GTCTCCCTTATCAAACATTCGGCGCTGGTGTGATGTCGCATCTTCGATCTGACCAACGAAGGGCGTA  
CTCTGGTTGCCGATACGTTTTCTGACCTTTGAGGTGTGGTTTACCGTAGCTGCCCTCTATTTGCTGTAAAC  
CCTGACTGTGTCAGCTGTTTCGCGGGCGCTGGCCCGTCACTGAATCCGGATCAACAAGGACGCTAACCA  
TGACTCTGTCAATCAAGACCACCTGTGCGGGCGAGCCCTGCTGCTGGCAAGCCTGCTCACTCCGCGACT  
GGCAGAAACCGCCCCCTCCGACACCCAGGCGCAGATCGAGCAGAGCGGTACCTGCGGGTGGCATGTCC  
ACCTTTCGCCCCCTGGGCGATGCGCGACAAGCAGGGGGCCCTGATCGGTTTTGAGATTGACGTGGCCCCGTC  
GCCTCGCCACAGATAACGGCTGGCAGGTAGAGTTCGTGCCTACCGCCTGGGATGGCATCATCCCCTCCCT  
GTTGGCGAAAAAGTATGACGTATCATCGGCGCCTCACCATCACCCCCGAGCGGGAGAAGAGCGTGCGC  
TTCACCCAGGCCTACTCCATTTCGGGGTGCAGCTGGCCGCTCCAGCACCATGGCCAAAGAGAAGAAAA  
CCGTGGCGGACTTCAACCAGCGCGGGGTGATCCTGGCGGTACGTCTGGCGCCTCACCGGTACAGGTGGC  
AAAAGAACACTTCCCCAAGGCCACCTGCGCCAGTTCGATGACGAGTACAGGTATTTTACAGGAGGTGCTG  
AACGGCCGCGCCACGGCGCCCTCTCCTCTTCCCCGAAACCCGAGCAAGAGGCGCTGCGCCACCCGGATG  
CCCTCTTTATGCCGTTTGCCGAGCCGTTGGCACAAGGCGATGAAGGCTTTGCCCTGCGCAAGGGGGATGA  
TGCCCTGGCTGAGCAGTTCAACGAGTGGATCGCCGCCCCGTCAGGCCGATGGCTGGCTCAAAGCGCGCCAT  
GACTACTGGTTCAAGTCGCTGGCGTGGGAAGCACAGGTGCGTAACCCCTGATGCTGATTGCTCTAAAAGA  
GACCATCCGGCGCATCGTCCGTGGGGCATGTGCGAACATCAACTGGCTAGATGGGGCGATCGCCCTGATC  
CTGCTGCTGGCTGGCCTCTGGCTGGCCAGCCGCTTGACATCGGGGTGGCCTATCAGTGGCGCTGGCATG  
AGGCCTTCGATCTGCTGTTACCCCTGGCCCTCACGGCGAGTTGCCGTACTTTTTTACAGCGGTCTGCTCAC  
CACCTTGGCGCATCGCCCTGCTCGGCATGGTCTGGCGCTGCTGCTCGGCACTGCGCTGGGGGGAGCCGCC  
TTCAGTCCGCCCCCTGGCTGGTGTGATGCCCCGCACTGTTTATCCAGCTGATCCGCAATTTGCCCGCGC  
TGGTCTTTATCTTCACTTCTACTTCTTTATCGCAACCAAGCAGCTGCTGCCTGCGAGCTGCCTCCCGCTG  
GCTCGGCACCGTATCACTCTCCCCGTGGCAAGAGGCGCTGTTTGGCCACCTGCCCGTGGGAAAACCTC  
ATCTCAGGCACCCCTCTGCGTTGGCATGATCAGCGCAGCCTTCGTTGCCGAGATCGTCCGCGCCGGGCTGG  
CCGCCATCCCCCGTGGCCAGTGGGAGGCGGCGCAGAGCCTCGGGCTCTCTCCCTGGGTGCGGCTGCGCCA  
TGTGATCCTGCCGAGGCCATGCTGCTGATGCTCCCCCCTCACCGGCCAGCTCATTTGCGCTGGTGAAG  
GATACCGCCATCGTTTTCCCTTATCTCGGTGCAGGAGCTCACCTTCGTCGGCACCGAGATGGCCAACCTCA  
GCGGACTGGTCTACGAGATCTGGCTGCTGGTGGCCGCGGCCTATTTATTTATATGTTTGTGCTGTTTCGT  
ATTTGCTGAGCCGACTCGAAGCAAGACAAGGAGCACGCATGCTGACGTCCCTGTTGCTGGCGACTGTAT  
TGCAAGCGGAAGCCATCGGTGGTTATGCCGCGGTTGCCTGAAAAACGGCGTATCCCTGCCCTTGAAGG  
GCCGGGTTATCAGGTGATCCGCACCAAGCGGCTGCGCTACTACGGCCACCCGACCTTATCCACTATCTG  
CAAGCGCTGGCCAACCAGACCCGCATGGCCGGGCTGCCGGATCTCTATATCGCCGATCTGGCGATGGCC  
GTGGCGGCCCATTTACCTCCGGCCATCGCAGCCACCAGACTGGCCTCGACGCGGATATCTGGTTTCGTAT  
GGCCAACCGCCCCATCAGCAAATGGGAGCAGGATGCCCCAAGGAGTGGGCACTGATCGACGAACCCAGC  
TACAAGATGTTACCGGGCCGCTTTGGCCCCAGCAGCTCACCTGCTGCGGCTTGGCGCCAGCAAACCCG  
AGGTGGCCCGCATCTTCGTCAATCCGGTGTCAAATCCGCGGTTCGCAACAGGCTGGTAACGAACCCCTG  
GGTCCCAAGCTGCGCCCCCTGGGTGGGCCACTTCAGCCACTTCACGTGCGGCTGCGCTGCCCGGTGGGC  
AGCCCCGATTGTGAACCCAGGCTCCCATTCGCCCCGCAATGGCTGTGGGGAAGAGCTGGCATCCTGGC  
TCAAAGACAAGCCCCAGTTGCCCAAGGTCTCCGGCATCAACAAGCGACCTGAGCTACCTGCGCGTTGTGA  
CAACTGACCCCGAGCTGGTATGGTGTGCACTCTGGTGTGACACCATCCATGGCGCACTATCGAATCGA  
AATAACAAAGGAGAACAACAAGATGGCCACATCACTCTGGCGCAGAACCACGCGAGAGCCTGTTGACCCTG  
ACCCTGCTGCTCGGCTGACCGGCTGCGGCATGAACAATATTCGACCCCTGGATGAGCAGGTCAAGGCGA  
GCTGGGGACAGGTGGAGAACCAGTATCAGCGCCGCGCCGATCTCATTTCCCAATCTGGTCCGACCCGTCAA  
GGGCTACGCCAGCCATGAGCAGGAGACCCTCAAAGCGGTACCGATGCCCGTGGCCGGTGGCAGCGTG  
CAGGTGAGCGATCCTGCCAGCTCAAGGAGTTTGAAGCGGCGCAGAACCAGCTCTCCAGCGCCCTCTCTC  
GCCTGATGGTGGTGGTAGAGCGCTACCCGAGCTGAAAGCGGATCAGCAGTTCCTTGCCTGCAGGCCCA  
ACTGGAAGGAACCGAGAACCGCATCTCGGTGGCTCGCCGCGACTATATCGAGGCGGTGCGCCAGTTCAAT  
ACCGAGATCCGCACTTTCCCCGGCGTTATCTGGTCCAAGTTGCTCTACTCGGATCTGGAGGCCAAACCCA  
GTTTTAGTGCAAACCCGGTGGCGATGAGGCGCCCAAGGTCAACTTCCAATGAAGATGATGCTGCGCTGG  
TTTTCTTCCCTGTCTACTGCTCTGGGCCAGTGCCTGCAAGCGGCACCGGACTTCCCGACGCTGAGCGGAC  
GGGTAGTGGATGAAGCCAGTCTGATGTCCCAGAAACAGGCCCATCAACTGACCCAACAGCTGGCCGCTT  
TGAAAAGCGCAGTGGTATCCAGCTGGTGGTGGTCTCTGTGATAGCCTCGATGGGGAGACTATCGAGGAG  
TACGGCTACCAGCTCGGTGCGCACTGGGGGATCGGCCAGAAAGGCAAAAACAATGGCGTGTGTTGCTGA  
TCGCCAGGATGAGCGCAAGGTGCGGATCGAGGTAGGCTATGGATTGGAAGGCGCCCTGCCGACGCCAT

CGCAGCCAACATCATCCATGGCCGCATCCTGCCCGCCTTCAAGCGGGCGATATGGTGGCCGGGATCATG  
GCAGGCAGCCAGAGCATTATGAAGGCACTCGCCGGGAATATCAGCCGGTCGAGCAGCCAAAGAGTGACA  
ACGGTGGCGGGCCCTGGCTGTTTTATTCTGGTGGTGATTGCGATGATCGTGCTCCACAACCTGCGCGGGG  
TGGTGGCGGTGGGCCGGGAGGACGACGTCGGTCGACCTACATGGCCGGTGGATTGGGTGCCGGCTCCTTT  
GGTGGTCGCTCCGGCGGGCATTACGCGGTGGCGGGCAGTTTTGGCGGGCGGGAGCCTCCGGTGGCT  
GGTAACAGGAGTAAAGAGACAAATCATGATTTCTAAACAGTTCTTCCACACGCTTCAGGCCAAGGTGCGC  
GAAGCGGAGCTAGAGACTGATGCTGAACTGGTCACCGTGCTGGCCCCGGCCAGCGATGGCTATCGCTACA  
TTCCACCCTCTGGGCGGGCCTGCTGGCGATGCTCACCCCGCTGCTGGTGTTCAGCTCGGCTTCTGGCT  
AGGCTGGTACGAAATCCTGCTGGTGCAGTGGTCAGTCTGGCTGCTGCTGAGCCTGCTGTTCCACTGGACC  
CCCATCAAGATGCGGCTAATCCCGAAGAAGGTTGCGCAGCACCGGGCGGCCCTGATGGCCCCGCTGCAAT  
TTGTGAGCAGGGGCTGCACCCGACCCGCGACCCGCTCGGGGTGCTGATCTTCGTCCTGGCCCGGAGCA  
CTATGTAGAAATACTGGTGGATGACGGCATCGCCAGCATATCGACAACGGCCAGTGGCAGGAGATCATC  
GACGACTTCGTGGCAGAGTGCACAACAAGGAGATCGAACAGGGTTTTCTGGAGTGCCTAGAGCGCGTTA  
GCGCCATTCTGACCGATGCCTTCCCGGCCACCCGAGATCAAAAACGAGCTGCCGGACAGTCTGATCATCCT  
CGACAAGCCCTGATCCGGTTTTAAAAAACCGGCATTCTGCGCAAGGGTTAGGCATTCGGAAAAGATTATGA  
AAAATAAGGGGAAAAGAGGTTGACCCACACAGCCCTTCCCTAAAATTACGCCCCGTTCCAGCGCAACAG  
CGCAGCGAACGAAAATTTGGTGAGGTGTCCGAGTGGCTGAAGGAGCACGCCTGGAAAGTGTGTATACGGC  
AACGTATCGAGGGTTGCAATCCCTCCCTCACCGCCAAATCTAAAAAAAACCGACCTCAGGGTCGGTTTTTT  
GCTTTCCGGCAAACACCTATGCCGACAAGTGAAGCCAGGCCAGCAGTGGCAGATTATCCACGCTCTCAT  
CCCCCGGTTTTGCAAAGGCTCTGTCCCAATTACGTGTTGAAAGGCTAATCTTGAAGTAGGCCATCACCTTG  
AGGTCTACCATCATGGATAACCCAGCCTTTCAACACCTGTGTCCCTTTTTCCCCAGTTAACCTGCGCC  
AGCGCCGTGTTGCTCAGCAGGAGCTTACTGCACCCACACCATTACCTCGCTCAATACTCAGTTACGGC  
ATGCAGTGGCTGCCCCATTGTGAGGCGGATGTTACCCAGCTGGCGCCTTGGGGATGGAGTCGGGGACTG  
CGCCGCTACCGTTGCAAACCTGTGTCTGCGCACCAGCACCGTTCTGACCAAGACGCCCTTGGCCAGATTGC  
GTAAAGCACAGTGTGGGAAGACTACGCGCAAGCTCTCATCGAAGGACTGACTGTCCGCCAGGCCGCGCG  
GCGCTGTGGGGTCAGCAAAAACACCGGTTCTCTGGCGTCACCGATTCTTGCAGCGATGGCAACCCAT  
CAGGCCACCCGGGAAGAGGCATTGTTGAGGTGGATGAGACCTTCTTCCCTGAATCGTTCAAGGGGCGAG  
GGGGCTCCCGGCTCACCCAGCTCATCGCGGTGAAAGGTCGAACTCGTGGAAACCGGCCAGATTACAT  
CCCCGTGATGGTGGTACAAGACCGTGCAGGCCACCATCGGATTTCAGTTGGAGAAAATAGATGCCGAG  
ACGGTCATCGCAGTGTGAAGCCGTTGGTGTACCCGGATGCGGGTGTGTGTAGCGATGGGGCGGGTGTGT  
ATGCCTGTTTTAGCAAGGAACAGGGTATAACCCATCAGGTGGTGCACAATCGTCAAGGCGAACGGGTAGT  
CGGTGCGTATCACATCCAGCATGTGAACGGATATCACCATCGGTTGAAAGAGTGGATGGAGCGGTTCCAT  
GGCGTGGCGAGCCTACCTGAAGAATACTTGGGTTGGCGCCGGATGCTGGAGCGTTACGGAAAAGGCG  
TAAATATCAAAACATGTTTGCATGAGGCGCTGGGGCGCCCATGCAACACGTAATGGGACATAACCTTT  
GCAAAGCCCTGATGGAACATCAGAGCTTTTCGTATTGCCAGCTCACGCCCCCTACCTTGCTTTTGTGATT  
GCCCCACCCGACAAGCGTTCCCTTCTGTCAACAAGGAGCAAAAAGAGGCGTTGTTTCCCAATCAATAC  
AGCTTGAATGGAACCAACTGAGGGCTCTGTGATCTGATCACCAAACCAAGCAGAGATAATAGACACGGAA  
CAGGACCTTGAAGAGCATGTTAAAAGAACTCAATGCTTAAGGCCCTGTACATGATCATTTTATAGTTTTTA  
GATATTTACACTTGATTGATCTATTGATGGTTGACATGCTGGACGACTAAATATTTTGTATGTTGACA  
AATGAGGGAGGCGTACAAGCAAGGAAACTTGATCACCCGTTTCGTAACGCTGAATTTGGTATCTGACTCT  
CCCCAGCCAATCTGTTTATTGATTTTTTCAACCATCTGGAAACCATGCTTGATTAATGGCTATCCAGT  
TCATCAAAATACGATTTTCGATATCGCGATATAAAGTTTACAGTGAACCTGCTTTATACGCTCATTTCCATA  
TTTACAGGATGTTCAAGCCACTCATCCTTCTCTTAAATGTATGCCAATTTTCGTGAGCGAGCGGGAAT  
ATAGTTTGTATCAGAGAGCCATCCATGAGCTGTTTGTATGATACACCCAGTTCATCGCCAATTTATGTA  
TATAAGGCTCTCATCTGCTGTTGTAGCGGTGCTTCAACCTCCTCGCAGCCCTCCAAGGTTCACTGTAGT  
ATGCACATTCAGACTCCACTGAAATTGCATTGGTATCACATGGTCCACCACCTGGATTTTATACCAAAGAA  
TGCGACAGGATACTGAGGGGATAGCATGTTATCATACCTACAGAAAAGCAGGTCCCACCCCATATCATT  
TTTAAGTTATCATATTTGTTTTGGATGAACGCAAAACAGACTCTCTTTACACAAGAAATTGATATCCGTAC  
TCATACATTGTCCATTACATCGTCAAAGTGAAGTTAGATTGTTCATTCTGAATTAATAAAGTCAACAA  
GATAGCGTTTTTCACTATTTATGTTTTAAAAGGAAAATTTTCACTACTCGTACTTGTGATTTTTAGAAGCCT  
TTTTATTTTTTCAAGGGGACTTTTTAACTGTTGAAAGTTTCAATGACAGATATCAATTTCTCCCAAGTTCCA  
GAGGGCTTTATACAGGCGTTGTTTTCTAAATCGATGCAGCTTGAATGGAACCTAATTGAAAACCCAGTGT  
CTGATCACCAACATCCCCCTCAAGTCTGCATCATGGGTAAAGCGCTTCAACCCATCACCAATTGGCCTCA  
ATACAACAGGTCTCTGATCAACCGTGGCTCTCTCACTTTCTGGGTTGATGCCGAGGCAATGGATAACTGG  
TTCCACCAAGTCCATCACGAAAACGGGGACGCGAGCCAGCTCTACACCGACCAGAGCATCTGTACCTTTC  
TGATGCTCAAAGGGATTTTACGCTCACGCTGCGAGCCACTCAGGGGCTACTCGACTCCCTGTTTCGAGCT  
GATGAATGTGCCGCTGTGTGCCCGGACTACAGCTGTGTGAGCAAGCGCGCACGACAGTGAAGGTGGCC  
TATCGGCAGCCCCCTAAGGGGCGTATTACCGACCTGGTTATCGACTCGACGGGTCTGAAAGTGTGTTGGCG  
AAGGCGAGTGGAAAGTCAGAAAACACGGCGCTGAGAAAACGTCGAGTCTGGCGCAAGTTACATCTGGCGGT  
AGACCCGGTGACTCACGATATCGTGGCGGCAGAAAGTGTGCTGGAGAAATGTGCATGACGCAGAGGTGTTG  
CCGACCTTGCTCAATCCTCTGCGTCGCAAGCTGGGGCGTGTTTACGCGGATGGCGCCTATGACAGCAAAG

CCAGCCATCGGTTGATTACGCGTAAAGGGGCGACGGCGTGTATCCCGGCTCGCAAAAACGCAGGACTATG  
GAAAAAGGGCCATCCGAGAAATGAGGCGGTGCAGGTGATGCGCAAGGAAGGGCTGGCGCACTGGAAAAAG  
ATGTCGGGGTATCACCTTCGTTTCGAGGAGAGACAGCGATGTTCCGGTTCAAACAGTTAATGGCAGGCC  
AAATCACCTGCGAAAATACAATGGTCAAGTGGGAGAAGTGATGGCGTATGTGAGCGCGATGAACAGACT  
GAACACCTTGGTCTGCTTGTAAAGAAAGCCCCGAGTGTAGCGGTCAACCGGGGCTGGGGAAGTCATGACT  
TGCTGGCTGATTTGGGAAACAACGCCCTTTATACATAGTGACATGATTTACTATCTCTGGATTTTAGTCA  
CAGCCTTGAACCTGTCATGTTGACTTCGCTAAAAATTTATTTATGGCCATAATGCCAGTTCATTTTTTA  
TTCTTGCGGAGACATTTGCTGAATGAATATGAATTTTGGGAGGGATAAAGTGATTTGTCATTACCTCATT  
TTCTATCCAGAGAATCACGTCGTATCCGGTTCCTCTATCATCATCACCGAGGTCATGATCAAGACTAATT  
TCAGTACCATCTCTGTTATTAGCCATGCAATCGCTTCGTCGGCCAAAAGACACGAATCTACCCTACCG  
GATTTTTTCTTTTTCATCGTCCAGATAACAATTTTATACCATTTTTTCCAGTTCAGTTCCAATACGTGAGCA  
ATACCGCGATAGGCCCCATCAACAATCAGCTCACCGGAAACGGTAGTCTGGATGACAAAACCAAGATCGG  
GATCGATGTAGTAGACACATGCGCCAGGGTTGATGTTTTGTAACAGAGAGCTCGCAGGCTCAACAAGCAA  
ACTGGTGCCGACAACACTACTACGGTATCAGCCTCGCAGAGCCAGCGACGAGCTTGTGATACTCATAAATT  
TTTTTACCAAACAGCACGATATCTGGACGCAATTGTGAGCCAGTGGATGGGCTGCGATCACCGATCGCAA  
CATCCTCATGCCAAGGCAGCCGATATTTTTTGGTACGAAAACCTATGGGAACCAAAAACCTGGATTGAACC  
ATGTAGATGAAGGACTTCATGGCTACCTGCTCTCATGTAAGTCATCAATATTTTGGGTGATGACCCTA  
ACAGTACATTTTTGTTGTAGCAGGGCTATCAGATAATGCGCTGTGAGGGGGCGGCTTCTAACATGGTTT  
GACGCCGTTTTGTTGTGAAAGGCCAAGAAACCAGCCAGATCCGTAATCATGCTACTAGCGTGGGAATAGCG  
CCAGTTCCTCATGATTACGCCAAATGCCTTCACTTCTAAACGTGGGCACACCGCTTCCGCTGATAAGCCC  
GCCCCGGTAAAAAAGAGGATTGTGGGATGGTAGTGTGGCCTGTACCGAGGCTTGTGCTCGTTTTTCTC  
TATGACGGCGCTGATGTCTTCGAGCACGGGAAGCTATTGGTTGCATACGACCACCTTTCGTTATGGCAGC  
ACCAGCCCACCCGATTGATTTGTTACTGAACCAGGGGAGTTGGGGTTCACATCTCATTGCTATGTTTCTGC  
TCACCTCATCGTGGTAAGAATGAGGAGGAGCGGCAGTTACCAGTTGAGATCAAAACAGCTGCGACTAATC  
GATGTAATTGCACTAGCAGACCTGGCTCTTTGTTACTGATGGGCTCGCTATGCATGAAAAACAGTAGC  
GGTACTCCTGAGCAAAATGGTCACTTGCCTGCAAAACCGGTTCCCGTAATCGCGTCTTATGCGCTCCGT  
TATGACCCGCTGTTTATCCAGATGCAGATCTTTGAGGCCAAAGCCATGTTGTCGGACACACCAGTCGACA  
ACACCAAAAGCTGTTAATCGTTGTATCGCTTAAACGGTCGGATTGAACTAATCAGATAAAAACAGTTTAC  
CCCTCTGGCAAAGATACAGGGATAGGCCCTCCTCCTTATTTTTATTTTGGTGGACCCGATGATGGTCCA  
GTCCAGGATTTGCAACATACCCTGGGTGGTTATAGTGGGTTTTTGGTCAATGGCACGATGACGAAACGA  
TGGATTTGCAAGACTTTTTCTAGTTGAAATCATGGTTGCTTACTCACACAGTATTTAGCGTAAAGCACACT  
CGTGTAAAGGAAGATTTAGAAGCCTTGAGTTAATGCTGGGGACGATTCTGTGGCGAGGTGAAACAACTTTC  
CCAAGATACAGATTTGAAGAGGATGGCGGAGATCAGATTACCGCCCTTGGTTATTTCCCTTCAAGCTT  
CATCGATTTGCTCCTCTTCAACATACCCTCCTCTGCGGACGTTACCAGCGCCCATTAATTGCTCAGCGA  
TTGGATTTTCATTTTGAAAAACTGATACTAAGTAGCTACACTAGCCATTATCAACATGCAGGGACGTGTA  
AAAGATGAGCTTGATTGGCTTGGTACTGGCGTTGATCGCCATCCTTGGCGGCAACATGATCGAGGGTGGT  
CATCCCAGTGCAGTCTGCTCGATCTGCCCCGATTTCTTATCGTGATAGGTGGCACCATAGGTGCTGCGCTGA  
CCCAGTTCCCTTTCTCCGTCGTGCGCAGCACCATGAGGCGTTTTCAAATGGTGTCTCTCCTCCCTCAAAC  
CGACCTGCTGGAACAGGCCAGTTGCTGGAGACCCTGGCAGGCAACGCCCGCCGAGCGGTATGCTGGCG  
CTGGAAGGGATGATCGAGGAGATCAAGGATCCCTTCCCTGAAGAAAGGGGTGCAGATGATGGTTCGATGGCT  
ACGAGAAGGCCAAAATCCACGAGGTGCTGGAGAACGAGATCGAGTTCGAGCAGGAAGATCTCGAACAGAC  
GGTCAAATTTATGAAGCCATGGGCGGCTACTGCCCGACCATGGGGATCGTCGGGGCGGTATTTGGCCTG  
ATCCACGCCATGGGTCTGCTGGATGCCCCGACAAGCTGGGCGGCGCCATCGCGGTGGCCTTTATCGCCA  
CCATCTACGGGGTATCCGAGCCAACCTGATCTTCTTCCGTTTCGGCAACCGCTACAAAGGGTTCGCCCA  
CCAGATCCGCGACTACAAGGAGATGACCTTGACCGGCATTTCTTGCATCGTGATGGCAATCCCAAGCG  
CGCCTGCAAGTTACCCTCGAACCTTATCTGGGAGTTCAGGTTGGCCAAAAGAAAAAGGCTGAAGCACCG  
GAGAACCACGAACGCTGGTCTCCTATGCCGACTTCATGACCCTGCTGTTTCGCCCTGTTTGTGGTGC  
TCTACTCCTTTGCCATGGCAAAGCAGTCCGAAAACCCGGGTGCTTATCCAGGGCTTTATCGAGTCTGCTGGG  
TAAAATCGGCCTCATCTCCCCGCTGCGGGCTCACCTTTGATGCAGGGGGGCACAGGGATTCTCGAGCCA  
GAATCAAAAACACTACGCCGAGCAGCCCAAAAGAGGAGACTGTGCTGGAGAAAGATGCCCCCATGGCGGCAT  
CGGACCCCTTCAACGAGACCATAGGTGCCTCGAAAAACCGAGCGCCACCGAAGCCTGGCCCCACAAGAC  
CCAGGAGCAGGAGTGGGTGCAGGTGACCAAGCAGAAGCTGGAGCAGCAGCTAAAGGCCAGATTGAATCG  
AAGGATCTGGAGGTGAGCAGCTTGGCAGTCAGCTGGTGTATCCGCATCGGCGAGAAGGCGCTGTTTCCC  
CCGATTCGGCGTTCCCTGCAGCCCCAGTTCATCCCCTGGTCAACAAGATCGCCGGCATTTTGGCCAACAT  
CCCGGGGCAGGTAGTGGTCAACGGTACATACCAGCAACTCCAAGCGCCGTTGGAGTCTATCGCAACAAC  
TGGGAGCTCTCGGTGCTGCGGGCTCTTCCATCGTGACAGCCATGCTGACCAATCCCCAGCTGGATGCCA  
GACGAGTCATCGCTCAGGGTGTGCGGACACTCAACCCCGCTTTGCCAATGACACCCCGAACATCGCCA  
GGCGAACCGCCGGGTGATATCACCTCTCCCAAGGCAAGGCGGCAGAAAGAGTCACTGCAACTGCTCAAG  
CCCTGATCCCCCGCTCCCGCTTACGCGGGAGCCTCTTTTTAAAAACAATAAGCTCAATAATATCAACA  
CCATAAGATCTTAATGATAATGATTGCCATTTATGTCAAGTGGTCAAGGCTCTGCAATAATGCCGCCCC  
TCAGGCTTAAATAAAAAACAATTATCATTATGAACAACTGCTTCAGGCATGGCCGGCACTCCTGTGTGCC

TCCGCTGGCGGGCCGATCTTCCCCCTGTGGAGAAGGCTCGCAGCGACGACACCATCATTGTCACCGGGC  
AACGAGTACAACAGAACTCTCCGATGTTTTCCGGCTCCATCACCGTCATCACCCAGGAAGAGCTGGACCG  
TCAGGTCGCCAGCGAGCTGACTCATGTGTTTTCGCAAGATCCCCGGTGTCTCGGTCACCGGCTCTGCCGGG  
CGACCGCAAAACATCAGCGTGCAGCGGCATCGGTGGCAACCGTATCCTGCTGATCAAGGATGGGGTGGCGG  
TCAGCGACGGCTTTGGCGCCGACAACATCAATGACAAGGTAGGTCGCTTCAACTTCGACCTTGATGACAT  
CAAGCAGATTGAGGTGGCCAAGGGGGCCGGCTCCTCCCTGCATGGCTCCGATGCCATCGGCGGCACCGTG  
GTGATGAATACCAAGCAGCCGGAAGATTATCTGCAACAGCAAGATAGCTATCTGGCGGCCAAAACCCCTCT  
ACGGTGGCGACAGCAACAAGAAGAAGCTCAGCATGACCGGCGCGGTGCGGGCACTGGAGAGCGAACATCT  
GTTGCGCCTCTCCGGCTGGCGTGGCAACGAAACCGCAACTTTGAGGAGAACCAGAAATTCGGCTGATTTG  
GATGGCATGAGTGCCTCCACCAGCAGCCGCCTTCCCCCAATGCCATCACGCTCTGCGGCTGGAGCTGG  
ACTACTACGAGGATCAGCCAAACCGCCAGATGGGGCCAAAGCGGTGCCCAACCCGATGGCAGCTGGGA  
CGTGGTCGGTTTTTCAGGAAGATGGCGATCAGCGACCCAGGGCGGCAAGTTCAGCTGGGAAGCCAGCGAT  
CTGGGCATGATCGATAACCCTCAACTGGAGCCTGTTTTGGCAATCAGTCCCGCAACGAAGCCAACCAGCGCC  
AGCTGCTGCGCAACGATGCCCTGAGCGGCTATCCAGATATCGCAGCCAGCGCACCCCTCTCCACGTTGGA  
GGAGCTGCGCCTTGGCAGTGAGCTGGAGTTGCAGAGCAAGCTGAGCACCAGGCTCGCTGGATCACACCTTC  
AGCTACGGTGTGGAGCTGGAGCAGGCCAACCACGAGCGGCCGGTTCAGCAATCTGACCCGGAAGATGGCA  
TCACCACCCAGGGACAGAAAGCCCCCTTTCAGCAAGGCCGAAACCCGCGCGATGGCATCTGGCTGAGCGA  
TGTGATCGATCTGGCAACTGGCAGTTTACCCGACCCCTGCGCTTTGACCGCCAGCGCTGCGCGCACCG  
GACAGCAATCTGGCCGAGAACCACAGCGACCACTCTCCCCAGTGTGGCGGCCAGTTACCCTTCAACG  
AAACATGGCGCAGCTGGCTCAGCTATGCCAACGGCTTCCGCGCCCCGCTTACGATCAGTTTACGGCAA  
CATTCCTCACTACTTTGCCATGCCGCCGTTTCGAGATCATTGCCAACCCTCAAGGAGGAGACCAGC  
CACAGTCTGGAGTGGGGAGTGAATGGCCAAAGCGACAACCTGGAGCGTCAAACCGGCCGTTTTTCTACAACC  
GCTACTACAACCTTCATCGACTGGCGCCAGACCGGTTTTTCGCCCTCGATGACGGTGTCTTCTGCGCCAATA  
TCGCAACGTTGCCAAAGCAGAAACCTGGGGCGCTGAGCTGGCCGCCAGCCTCTGGCTGAGCGACGAGTGG  
GAGCTTTCGACCAATCTGGCCTGGATGGATGGCAAGGATCACCGCGGTGAGCCGCTGCGCACCCAGACAC  
CGCTGGAAGGCAACACCACCCTGCGCTGGCAACAGCTCGACTGGGGGGTTGAGCTCAGTGGCAACTATGC  
CGCCGCCATGACCAAGGTGCCCCAGTGCGCCAATGCGCAGACTGGCTACAACGGTGCCTGCCAGAGCAGC  
GCAGGCTGGTTTCAGTCTGGATCTCACCGGCGACTGGCAGATCACCGAGGCGCTCAAGGTCAATGCCACCA  
TCGGCAACCTGCTCGATACCCGCTACGTCGCTGACTCAGGATGTGGCCGACTTCCGGTGGCAGCGACAC  
CTCCCTCTACAGCCAGAGCGGCCGCTACCTGTGAGCCAGCCTCAGCTACCGTTTTCTGGGGATGTGATGA  
AGCATCATGCAATCATGGCGGCCCTGTTGGCCGCCCGTTGGCGTGGGCGCAAGAGGCCCTGCCACCGCC  
GATCCCGTCCCAATCGCACCTGATTTTCAGGCAATCCCGTACGCCAGGATCCCTACTTCTGGTTGCGGGAC  
GAGAGCCGTAGCAACCCGGCCATTCTCGCCCTGCTCAAGCAGCAAAAATCGCTGGAGCGAGCAGCAACTCG  
CCACCCAGCAGCCGCTGGAAGCAACCTTGCAGCGCCGAATTTGCCCGCCATCCGGCGGGGGAACCCGTACC  
GGACAACCTGGCTTGTGCGCGGCGATCAGGCATGGCAGCTGCGCCGGATGGCTCACTCTGGCAACGCCAC  
GGGGGCAAGGTGCAGCAACGGCTTCCCGCCAGAGCGGGTGAGGGCTATTACGAAGCGGGCGGCTGGGCC  
TGAGCCCGGATAACCGCACACTGGCCATCGCCGAAGACAGGCGCGGCGATCTCGACTATCAGGTCACCCT  
GCTCGATCTCAAAGCGGCAAGGCGCTGGCCAGTTTGGCGCAGCGCAGCGCCGATCTCGCTGGTCAAA  
GATGGTTCGCATCCTCTACAGCATCGCCAACGAGCGCTACACCCTGCGCCCTGGCAGCTGCGCGGCTGGC  
AGGATGGCCAGGAGCAGACTCTCTATGAGGAGCAGGATCCCGCTGGCTGCTCAGCCTCTATCGCACCCAC  
GGATGGCCAGCATCTGGTGTTCAGGGCAACAACCACGACAGCTCGGAGCAGTACCTGCTCGACTCGGGC  
AAGCCGCGAGCAGGTCAAACCCCGCCAGCGCGGGGTGGAATACTATCTGGACAGCCAGTCTGGCTGGGTGA  
TCAAGAGCAACCGGGAGGGGACGTTTTGCCCTTACTCAGCCAGCACGCCGCTCGGTGAGTGGCAGCGCCT  
ATGGCCCGCCAAAGAGGAGGATCTCGGCGATCCCGAGAAGTGGCGACTGTTTTGATCGCCATCTGGTGGTG  
CAGTTTCGCGCAGCAGGGGGAGGATTGGCTCGCCCTGCTCGATCGCAACGGCCATGAACGCCAGCGCCTGC  
CGCTGGCCAGTGGCGCCGTTACCGGCTGGCTGCAAGGAGAACATGACCCGGCCAGCGACCCGATTTCTGGT  
GCGCAGTACAGGGCTTGAGTCAGCCCCCGGCCAGCGCTGGCTGGATTTGACCAGCGGCCACTGGATCAAC  
GACCAGCACACCGCAGGCAATAAAGCATTGCCCTATCAGAGCGAGCGGCGCTGGATCACCTCTGCCGATG  
GCACCCGGGTACCTGTCTCGCTGGTGTGGCGCAAGGATCTGGCCCTCGCGCTGTACTGCTCTATGGCTA  
TGGCGCCTATGGCACGCCGATGCGCCCTACTACCAGAAAAGAGCTGTTAAGCCTGCTGGATCGGGGCTTT  
GTCTACGCCATCGCCATGTGCGCGGCGGCGCATGCTGGGGGAGCAGTGGACCCGCGACGGACGGGGCA  
TCAACAAGCAGAACGGCATCAGCGACTTTATCGCAGCCGGTACGCCCTGCGCCACTGGTTCGCCCCGACTC  
TGCTCCCCCTGCCCTGTTTTGCCATCGGGGGCAGCGCGGGGGGACGCTGGTTGCTGCGGCCCTAAACCAG  
CAACCGACACTCTTTAGCGGCGCCGTGTTGCAGGTCCCCTTCGTGATATGCTCGGCACCATGAGCGATC  
CTGCCCTCCCCTTGACCCGTCAGGAGTATCAGGAGTGGGGCAATCCGGCCAAGCCGAGAAATATCAGGC  
GATGCGCCGCATCAGCCCCTACGACAACCTGCACCAGCGCCCCCTACCCGCCCTGCTGGTCACTACCGCC  
CTGCACGATAGCCAGGTGCCCTACTGGGAGCCGGTCAAGTGGCTGGCCCGCTGCGGGGAGCACAGCACGG  
GCTCCGGCCCCCTACCTGCTGCTGACCGAACTGGAGGGAGGGCCACCAGCGCCGGTGGTGGCGATCGGGCTCG  
TGAATTTGCCCTTCTTGTTCATCTGGCGGGGATCAATCAATGACCCCTGCCGCTGATTTGGGAGTACCACTA  
TGAACCCCTGTTGCCCGCCCTCTTGTGGGGCTGGCTGGCTTTTCCACTCAGGCCCGGCAACTGCGTTTT  
TGTGCAACAGGACGCCCCGGCCGATACCCGCTCTGGCTCGAACAGCAGCTCGGCGTCACCTGAGTGAT



CCCCGGCCTATCAGCGCCAAGGCAAGCTGGGCCACTATCTGCATTATCGCCAGCAGCTCAATGGCGCAC  
CGATCGCCGGCCTGATGGCCGCCGTCAGTCTCGATGAGCAGGGTCGCCCGTGGCGCCTTTATCACAATAC  
CCGGCTGATGCAGGCACAGGCGACGCCATGTGATGAAGCAAGCCGCGCCGGGGTGGATGCCTATACCGCC  
ACGCTGGATGGCGCTGTGTGGCAATTCGCCGGCAGTGATGAGGCCAGCCCTGGTACTGGCAGGATGGCG  
ACACCCTGACTGCGGCCTGGCGTCTGCTGGCGGTGGAAAGCCAGCCGGGCAACAGCAAAGCAGCCACTG  
GCAACTGTTTTGTACCTGCGATGGCAGCGCCCTGCTGGGGCGCACGCTGCAAGAGGGCAACACCCGTGCC  
GAAGCGGTCCCGCTGGCAGGGGAAGCGGCCACGGTGCAGGCCCGCATCTTTGCCCTCGACCCACGCACCC  
AGCTGCAAGATGGCAACCTGCTGTGGCGCCACGATCTGGTGTGGACAACGGGGCTATCGCACCGTGCC  
GCTCACGGTACAAAAGGTGGATGACACCTACCAGCTGAGTGGCCACGCGCCCGGGTCGTGGATGGCAGC  
GCGCCGAAACTGCCCCCTTTAGCAGCCCTGATGCCGATGGCTTCCAGCTGGATCACCAGCAACCCGCCT  
TCCTCGATATCAATGGCTACTACCATCTGGATCTGGCCAGCGCCATGTGGAATCCCTGGGTAACCCGAC  
GCTGATGGGCGGCCCCCTGGCCATCGATACCGATCGCCGGGAGCAGGACAACTCTCTATGACCCCTTC  
CTGCGCCGGTTGGAAATTGGCCGATAGGGGTGCCCGATGCGGAAGATCCCATGGTGTCTGGCACGAGT  
TTGGCCATGCGGTGCAGCACCATATCCTGCCCGACATGGGAGAAGAGGGTACTGGGGCGCCATCGGCGA  
GGGCTTTAGGACTATCTGGCCCGCAGCTGGCGCCAGCGTAGTCCAGAGGCTCGCCAGTTCGAGCCTTTC  
ATGGTCTTCAACTGGGATGCCAGGATCAGCGGCCGGACGCCCGTCAGCTCGATGATCTGCGGGCGCGCT  
ATCATCCGGGCTTCCCTCTATCCGGCTCACCTACTATCAACGGTAGCAACGGCGACCAGCTGTGGGGCAC  
TCCGCTCTTACC CGCTGCGCCAGGCCGTTGAACAGTATGGCGAGGTAGCCCGTGACGAGTTCGATAACC  
CTGCTGATTGAATCCCCTTCCGGCTCGGCCCGCAGGTGCGGATGCCCGAGCTGGCGCTGTTACCCTGG  
ATACCGCAACCGCCTCTATCCGGATCGCAGCTATGGCAAGCTGCTGGAGCAGGCTTCCGCCACCACGC  
ACTGCTGCCACGCCATCGCGGCCCGCCTTGCCGATGACAGCTACCTGCTGCCCGGGGAGAAAAGAGC  
CTCGCCATCGAATTGACCAACCAGAGCGGCCGCCCTGACCGTGGCTGACGCCAGCCTGCTCCCAGCCA  
AGGGGCTCATGGGTGACGGTCACTGGCAGGGAGAGCTCAACGCTGATGGCACC GGCCCGCTGGACCCTGCC  
GCTGGAAGCGGGCAGCAACCTGACCTGTGGCGAGGCAGTACCTTGCCGCTGCAGTTCCAGCTCACCCTA  
CCCAGCCCCACCGAGCGCCAGACCCGCTTGACCTGCAACTGCCGATCGGTGAACCGCTCTGGCAGCGGG  
CCATCGGCCAGGGTGGCCAGATCAAGGATGCGGTGAGCGATGAACGGCACGGCTGTCCCGCTTCACTCT  
CACCTGCCCCGAGAGCAAGGCCCGCATCGACAGCGGATTCGTGGTGCCTTCGATCTGGAGCAGGCAAG  
CTGGAGCAGTGGAGATCTGGCTCACCTCCCCTTACGGCACC CGGATCAGCCTGTGGAACAAGGGCTAC  
CCAGCCATACCCGGCTTAAGGGGGAGTTTCCCCGTGAACCTGGTACCGTTTCAATCGTGGACAAGCTGCA  
CGGCGAACC GCTCGCTGGCCGCTGGCTGTGGAGATCAACGACACCAGCGCCGGTGACACCGGTGAGTTG  
CGCAACTGGCGGGTAGCCAGCAAGTCGGCGCCCGCTGCGAAAAGGATGAAGCCCTGCCCAACACCGGCA  
TCATTTCCCTTGAGCAGGATGAAGGGGGTGGCGGCACGGCTTCCCCCTGCTGCTGTTGCTGGCCCTCTG  
GCCCCGCTCTGGCGCCGGAGCACCCCGCGCCGTTGAATCCTGTACCACGGGGGTTACCGCCCCCGTGAA  
CCTGTGACCGAATCAAGGAATGTGAAGTGAACCATCCGTA CTGGTTATTGCAACCTCTCAGCCCTGCT  
CAGCGCCTGTGGCGCGGGGAAGATAACGCACCACTGGCGATCCCGGACTACCGGGTCGATGTCGCCCTG  
CCGACTGCCGGTACCCTGTGCGCCGATCTGGATCAGAACTGGCAATGTGATCCTGCCGACCCTGCCGTCA  
GCGGCGAAGGAGCTGTGGCCCTGGTCAGCCGTTCCGCCAACATCGTCAACTCGCCTCTGCTTTTTCGTACC  
GAGGAGCGGAGGCTGCTACTGGCACATCCGGCCGCCAAAGGGGATCCACAACGGCTGCAACCAACCCTG  
CTCAGTACCCTGTGGCAGAGCCGCATTGCCGAAGGGGTGGCCCGGATCGCGCACTGTCACTGCTGCTGG  
CCGATCTCGCCCCGCTGCAACCGGGCAGCGACC GCGTGGCCCTCGCAGGTCTCGGCCAGTTTGTATCTGGC  
GCTGCAACAGGTGGCGATCAGCTTGCAGCAACAGGCCCGCACACGCTTGCCAACGCCAAGGAGACCCAG  
TTGCTTACCACCAGCTATCGCGCCATCAGCCTGATGCTGGCGCAATTTGGCTCAGGAGTGGCAGCGCAACG  
GCCAGTTTGTGAAGAGACCCAAAGCGAACTGCTGACCCTGCTGGTGCAGCAGCAGCCACGCAACCTGCT  
GACCGTCAACGGCGTCAACACCTT CAGCGATGGCAATGACCCGCTGCTGGAACAGGAACCCGCCACTAT  
CCGGGACAAGATGCCAGCTGGAATCGCACTCGTCCCCAACTTGCTATCGCAAGCTCGATGATCGCGGTC  
AGGTGCTCCCCGACAACCGCCGAGCTGGCAGTGGCGTCAAGGATCTCAATACCGGTCTGGTGTGGGAGGT  
CAAATCGGATGATCCCTTGAGTCTGACTGGAAAAGCAGACCCCTTTGCCATGAGGATGAGCAGTTCAAG  
GCGACCGCAGGCGAACAGCAAGCGGCCTACCAGCATATTCATAAGAGGATCGAACAGCTCTCCGCCGAAG  
GAGATCTGGCGGCCCTCGCCCGGACACAGGCGCTGACCACCATGCTGACCACCCGCGCGTATCAGCAGTG  
GCTCAATGGCGAGCAGCGCTGCGGCATCAGCCAGTGGCGGCTGCCACCATGGGTGAGCTGATGTCACTG  
ATGCACTACGGTAGCCTGGCCAAGAACC GCTGGGTGACGCGATCATCGTGGATAACCCGTTACTTCCCGG  
ATATCGCCTCCTCGGAAGATGACACCTACCATGGCTACTACTGGAGCGCCACCAGCAACACCCGCCAGCG  
CTTCTCCGGTGGCCCCATCAGCAAACGCACAGTCTGCTCCTGGGAGAAGATGCGGGCACCACCTATCCC  
GCACTGGTGCAGCAAGATACTATATCGAGCTGATGCAGGTACGACTGGTCTGCTACTCCCAATAATCCG  
AGGAATATCATGAGCCTTTATCGCTTTTTCGTTCCCATGATGGCACTGATGGCCCCCTGGCCACGGTG  
CTGCCATTTGTGATGACACTATGGATCGCACCCGCCCTCTGCCCGTTTCTTGACCATGGCAACGGCAC  
CGTCACGGATCAACACACCCGGCCTCACCTGGATGCGCTGCAAACTGGGGCAGACATGGAGTGGCAGCAGT  
TGCCTGGGGGAACCGACCGTTTACTACTGGCAGCAGGGGCTGCAAGTGGCGGAGCGGATCCGCAGTGACA  
GCAGCCATGCTCTCTACTTTCGGCGGTATCAGCCAGTGGCGCCTGCCCGACATCAAGGAGCTGGCGAC  
CCTGGTTCGAGCATGCCTGCTACAAGCCCTCTCTCAATGAAGCCATTTTCCCGCGGCCATGGCGGGGGG  
GGTAAAGAGGTCAATGAGGGCTATGTCTATCTGATGAGCAGCACGGTAACCTCCGCCAATGGTCAGCGGG

CGTATCTGGATATCACCTCGGGAGATATCGGTCTTCGCTCCATTGGCGCCTACCCGGATCAGGTCTTGCT  
GGTGCCTAATAAACCCCTGACCGCCCCACGCTCGAAACCGGAACGCGATGACAGGAGAGGCTTGAAAGCCT  
CTCTTTTTTATTGCTCTTGCCATCCCCCTGTCTCACCCGCCATCACGCTCTTCTCCCGCCTGCGCTCCCT  
GCCCCGATACCCGGCTGATCCTGCTCCGCACGCGACATACGCCCTTTCAGGTGATGACGAGGAGCAACT  
TCTGCGCTTTCCAGGCTTTTTCTCGCCCGCCATAACCAACAAAAAAGTGCCTTCTTAACAAAATTTAATT  
ACCGGTTAACCGATTAATAATTAACCCGTAAAAATGACATGTAATCAGTGCGAAAGTGTGATAATGCGT  
AAAATTATTGTTAAGTCGCTTGATTAATTTGGTTAGGAAAAACCTCTATGTTTGTGATATTTCTGCTCA  
ACATTGGGCTTTTGCCATTTATGTCATCGGTGCCATCACCATCTGTCTGGTGATGATAGGCCCTCGCCGCC  
CTGCTGGGAGGTGCGCCTACGGCCGACCAAGAACAAGCCATTTGAATCTGGTGTGACTCGGTGCGCA  
GTGCCCGCCTGCGTTTTTCCGCCAAGTTCTATCTGGTCGCCATGTTCTTCGTCATCTTCGACGTGAGGC  
GCTCTACCTGTTGCTGTCTCCGTGCGGAGAGCGGCTGGGTGCGCTTTATTGAAGCCACCATT  
TTCATCGGACTGCTTATCGGCCTGATCTACCTCTGGCGCATCGGCGCACTGGACTGGTCACCCGCGCA  
AACCGCAGCTGAACAACAAAAACAGTGATTGAACCACAGACCCTTTCCTTGAGGTTGCACCATGAAGTAC  
ACCCTGACCCGGATTGACCCGGATGCACCCGTGAGCGCTACCCCCAGGAGCAGCGCCAGACCCTCGATG  
ACCCACTGGCGCAAGAAGCGACGCGCGGCATCATGATGGGCCGTCTCGAGGAGGTGCTGCAAGACACAGT  
CAACTGGGGCCGCAAAAACCTCCCTCTGGCCTTACAACCTTCGGCATCTCCTGCTGCTACGTGGAGATGTGT  
ACCGCCTTACCTCCCCCACGATGTGGCCCGCTTCGGCGCCGAAGTTATCCGCGCTTCGCCCCGTCAGG  
CCGATTTTCATGGTGATTGACAGGACCCCCCTTCATCAAGATGGCGCCAGTCATCCAGCGCCTGTATGAACA  
GTTGCTCGAACCCAAGTGGGTGATCTCCATGGGGCCTGTGCCAACTCCGGCGGCATGTATGACATCTAT  
TCAGTGGTGCAGGGGTGGACAAGTTCTGCCGGTCGACGCTACATTCCGGGTTGCCCGCCCCGTCGCCG  
AAGCCTTTTTGCAAGCCCTGATGCTGCTGCAGGACTCCATCGGCAAGAGCGCCGCCCTCTCCTGGGT  
GGTGGGCGATCAGGGGATCTACCGTCCCCAGATGCAGGCCGAAAAAGAGCGCAAGCGCGGCAACGGATC  
AATGTGACCAACCTGCGCACGCCGGATGAGATCTGACCATGAAAACGACTCGTGATTTTCCCAGCAATTA  
CGCCATGGCCAGTGGCAGCCCAGCGACCACAAGGATGCCAAAGTCATTTGGCGAACTGTTTGGCCACTTC  
GGGGCCGAGCACTTACCGTGCAGACCACGCGCACCCGGGTGCCGGTGGTCTGGCTTCCCCGCGAACTGC  
TGCAGGATGTGATGGGCTTTTTGCGCAAGGTGCCCTCCCCGTTTGTGATGCTGTTTGTATCTCAGCGCCAC  
CGACGAGCGGTGCGCAGCCATCGCGACGGTTCGCCCAGAGCGATTTACCGTCTTCTATCACCTCATC  
TCCATCGACCCGTAACCGCATGTGATGTTGAAAGTGGCGCTGGCCGAGAGTGACCTGCATCTGCCACCA  
TCACCAACCACTTCCCCAATGCAAATTTGGTACGAGCGGGAAGTGTGGGATCTGATGGGCATCACCTTCGA  
TGGCCACCCCATCTGACCCGCATCATGATGCCCAAGAGCTGGCAGGGTACCCCGTGCAGCAAGGATTAC  
CCGGCGCGCTACCGAATTTGATCCCTTCATGCTCGATGCCGCCAAACAGGACATGGAGCAGGAGAACC  
TGCTGTTCAAACCGGAAGAGTGGGGGCTGGCCCGCGCAACGAGAATGAGGACTACATGTTCTCAACCT  
CGGCCCAACACCCCTCTGCTCACGGCGCCTTCCGCTTGGTGTTCAGCTCGATGGCGAGGAGATCCGC  
AACTGCGTGCCTGATATCGGCTATCACCATCGCGGTGCCGAGAAGATGGGCGAGCGCCAGTCTGGCACA  
GTTACATCCCCTATAACCGACCGGTGAGTATCTGGGCGGGGTGATGAACAACCTCCCCTATGTGCTGGC  
GGTTCGAGAAGCTGGCCGCATCAAGGTGCCACAGCGGTGACATGATCCGGGTGATGATGGCGGAGCTG  
TTCCGTATCCAGAGCCACCTCTTGTTCCTCGGTACCTATATTAGGACGTGGGGGCCATGACCCCGGTCT  
TCTTACCTTACCGATCGGCAGAAGATCTACACCATCATCGAAGCAATCACCGGTGCCCGCATGCACCC  
GGCCTGGTTTTCGTATCGGCGGTGTGGCCACGACCTGCCGAAGGGATGGCAACGGCTGGTGCAGGACAAC  
CTGCTGAGCTGGCTGCCCAAGCGGTGATGGATTACGAAAAAGCGGCGATGCGCAACAGCATTTCTGCGCG  
GTCGAACCATAGGCGTCTCTGCCTACACCACCGAGCAGGCGTTGTCTGGGGCACCACGGGGGCCGATT  
GCGCGCCACCGGCTCAACTTCGACGTGCGCAAGTGGCGCCCTACTCGGGCTACGATCAGTTCGACTTT  
GAAGTGCCTGCGGAGCAATGGCGATGCCTACGACAGAGCCACCGTGCAGGATCGAGGAGATCCGCCAGA  
GCATGTGATCATCGAGCAGTGCATGAAGAACATGCCGAGGGCCCCCTCAAGGCGGATCACCCCTCAC  
CACCCACCCGCCCAAGAGCGCACCCCTGCAGCACATCGAGACCTGATCAACCACTTCTGCAAGTGTCT  
TGGGGCCCGGTGATGCCCGCTGCCGAGTCTCCAGATGATTGAGGCGACCAAGGGGTTCAACAGTTACT  
ACCTGACCAGTGACGGCTCCACCATGAGCTACCGGACCCGGATCCGCAACCCGAGCTTGTGCTACCTGCA  
GCAGATCCCCTCGGTGATCAAGGGCAGCATGGTGTGCGACCTCATCGTCTATCTGGGCAGTATCGATTTT  
GTTATGTGCGATGTGGACCGTTAAGTGTGATCCGCCCTCTCGGCCATGGCCGGGAATTGGGATCGCCGGACG  
AGCAGTAAAAGGACAAGCCACCAAAGGTCAAGTCATGAGCCAGCAATGTCAGTGTGACAAATAATCAGACC  
CCACAGGGGCAAGGGGCATGCAGCAGCAACAGGACGACTTCGTTCTGAGCCAGGCTGAACGCGATGCCA  
TCGAACACGAGAAACACCACTACGAAGATCCCCGCGCCGACGATCGAAGCGCTCAAGATCGTGCAGCA  
GGCCAGAGGCTGGGTACCCGACGGCGCCATTACGCCATCGCGGCCGAGCTCGGCATTTCCGCCAGCGAC  
GTGGAGGGGGTGCACACCTTCTATAGCCAGATCTTCGCCAGCCGTTAGGGCGTACATTATCCGCGTCT  
GCGACAGCATGGTCTGCTACATCAATGGCCATGAAGATCTGATGGCCGCTTAAAGGAGGTGATGAACCT  
CGGCCCGGTCAAACACCCCGGATGGCCGCTTACCCCTGCTGCCGGTCTGCTGCCCTTGGCAACTGCGAC  
AAGGGGCCAGCCATCATGATCGATGACGACACCTATGGCGGCTCGATCCGGTGACCTTGTGAAAACAC  
TGGAGGCTTACCCATGAGCCTGCCGAGAACAAAAATCCTCGCCTCTCTTGGCACCGCAACCGCACGGCC  
CGCACCGCCGAGACCCACCCGCTCACCTGGCGGTGCGGGATGACGGCCAACCGGTATGGCTGGAGGAGT  
ATCAGGCCAAACAGGGCTATGAAGCCGCCGCAAGGCGCTCGGCCAGATGAGCCCGGACGAGATTTGTCAG  
CACCGTCAAGGATGCCGGTCTCAAGGGGCGTGGCGGCGGGCTTCCCCACTGGTGTGAAGTGGGGGCTG

ATGCCCAAAGACGAGAGCATGAACATCCGTTACCTGCTCTGTAACGCCGACGAGATGGAGCCAAACACCT  
GGAAAGATCGCCTGCTGATGGAGCAACTGCCCCATCTGCTGATCGAGGGGATGATCATCAGTGCTCGGGC  
GCTCAAGGCCTATCGCGGCTATATCTTCCCTGCGCGGCGAGTATGTGGATGCCGCCATCCACCTGCGCCGT  
GCGGTGGAAGAGGCCAAGGCCGCCGTCTGCTGGGCAAAAACATTCTGGGCTCGGGCTTTGACTTCGAGC  
TGTTTCGTCCACACCGGGCGCCGGCCGCTACATCTGTGGTGAAGAGACGGCGTTGATCAACTCGCTGGAAGG  
GCGCCGCGCAACCCGCGTGCCAAACCCCTTCCCCGCGCTTTCGGCGTCTGGGGCAAACCCACCTGC  
GTCAACAACGTCGAGACCCTCTGCAACGTCCCCGCCATTATCGGCAACGGGGTCGCTTGGTATCACGCTC  
TGGCGCTGCCGGGCTCGGAAGATCACGGTACCAAGCTGATGGGCTTCTCCGGCAAGGTGAACAACCCCGG  
GGTCTGGGAGCTGCCGTTTGGCATCACCGCCCGCGAGCTGTTTAAAAATTACGCCGGCGGCATGAAGAGC  
GGTATCGCCTGAAAGCCTGGCAACCGGGCGCGGGCACCGGCTTCTGCTGCCGAGCACCTCGATG  
CCCAGATGTATACCGCGGTATCGGCAAGGTAGGTACCCGGATGGGGACTGGCCTCGCCATGGCGGTGGA  
TGACTIONCATCAGCATGGTCTCCCTGCTGCGCAACATGGAGGAGTTCTTCGCCCCGCGAGTCGTGTGGCTGG  
TGCACGCCCTGTGCGGATGGCCTGCCCTGGAGCGTCAAGCTGCTGCCGGGACTGGAACGTGGCGAAGGGC  
AATCAGGCGATCTGGGCACTCTGGAACAACCTCTGCGGTTTTCTTGGCCCGGGCAAGACCTTCTGCGCCCA  
CGCACCGGGCGCCGTGAGCCGCTGGCCAGCGCCATCAAAATATTTCCGCTCCGAATTCGAGGCGGGGATC  
AAAGGCAGCGGTGATAACCGCAAGCCGGTCAAAGGGATCCAGCCCAATCTGCTGGGCGAGCGATGGTAAC  
GACACCACAGATTTACAAAACAGGTTTTCAGGGAAAGTTGTATGGCAACCATTTATGTAGACGGCAAAGAG  
TACGAGGTAGACGGGGCAGATAACCTGCTGCAAGCCTGTCTGTGCTGGGTCTGGACGTCCCTATTTCT  
GCTGGCATCCGGCGCTGGGTAGCGTTGGCGCCTGCCGCCAGTGTGCGGTCAAACAGTATCAGAATGCCGA  
TGACAAACGCGGTGCTCTGGTCAATGCTGCTGACCCAGCCACCGATGGCAGCTACATCGCCATCGAG  
GATGAAGAGGCTAAAGAATTTTCGAAGAGCGTGGTGGAGTGGCTGATGACCAACCACCCACGACTGCC  
CGGTGTGTGAAGAGGGCGGGCGCCTGCCACCTGCAGGATATGACGGTGTGACAGGCCACAACAGCCGTGC  
CTACCGCTTACCAAACGCACCCACCAGAATCAGGAGCTGGGCCCCCTTCATCGGTCACGAGATGAACCGC  
TGCATCGCCTGCTACCGCTGCGTCCGTTACTACAAGGATATGCCGGTGGCGAGGATCTCGGGGTCTATG  
GTGCCACGACAACGTCTATTTTCGGGCGGGTCGAGGATGGCCCCCTGGAGAGTGAGTTTTTCGGCAACCT  
GGTGGAGGTCTGCCCCACCGCGTCTTACCGACAAGACCCACTCCGAACGTTACAACCGCAAGTGGGAC  
ATGCAATTTGCCCCCAGCATCTGCCAGCAATGCTCCGTGGGTGCAACATCAGCCCGGGCGAGCGTTATG  
GCGAGTGCGCCTGCAAAACCGCTTCCACCGCAGCGTCAACCACTACTTCTCTGTGACCGTGGCCG  
CTTTGGCTATGGCTACGTCAATCTGGCGGACCGCCCGCTCAGCCGCTGCTCAAAGATGGCAACGACGAG  
CTGACCATCACAGTCGATGGCGCCCTCAACCGCGCCCGGATGCCCTGCGCACGGCCCGCGCCTCATCG  
GCATCGGCTCGCCCCGCGCCTCGCTGGAGAGCAACTTTGCCCTGCGCGAGCTGGTGGGGGCAGACAACCTT  
CTATGCAGGCGTCGAGCAGGCCGAGTGGGCTGTGAGCTGAAAGATGCTGCAGATCCTGCAACAGGGCGGC  
GTGCCGACCCCGAGCCTGCGGGACATGGAAGAGGGCCGACGCCATTTCTGCTGCTCGGGCAAGATGTCACCA  
TGAGCGCCCGCGTATCGCGTTGGCGCTGCGCCAAGCCGTCAAGGGCAAGGCTCGCGAGCTGGCCCGCAA  
GATGAAGGTGATCTGTGGCAAGTCGCCCGCGTTCAGACCCTGGGTGAGAATGAGCGTACCCGCTGCTC  
ATCACAGCCTCGACACCACCCGCTTGGACGATGTAGCGGCCGACAAGCTGCACGCCCCCTATGCCGATC  
AGGCGCGTATTGGCTTTGCCATCGCCAACCTGCTCGACCCGAGTGCACCGGCCGTGGCAGACCTCTGCC  
CGAACAGCAGGCACAAGCGGCTCGCTGGGCCGAGCTGCTCGGCAACGCCAAGAAGCCGCTCATCATTGCA  
GGCTCCACTGCCCGGATGTGGCGCTGCTTGGAGCGGCCAGCAACATTTGCCCGCGCCCTGAAAGGCCCTTG  
GACAGGAAGCCAACATCGCGCTGGTTGGCCAGGAGGCCAACTCGCTGGGGCTGGCCATGCTGGGCGCTCA  
AACCTTGTGAGACAAGCCGCTCGAAGCCGCCCTTGGCGTATCGAGGCCGAAAGAGGGGTTGGCGCTGGTT  
GCCCTGGAGAACGATCTTACCGCCGCGCGCCGCGCAACCGGGTGGATGCTGCGCTGGCACGGCTGCAAC  
ACCTGCTGGTCATCGACCATCAGGCGACTCCGACCGCCAACAAGGCAGATCTGGTGTGCCAGCGGCCAG  
TTTTGCCGAGGCCGATGGCACCCCTGGTGAACATGGAAGGGCGCGCCAGCGCTTCTTCCAGGTCTATGCG  
CCCGCCTTCTACAACGCCGATATTAGGTGCGTGAAGGGTGGCGCTGGCTGGCAGCGCTGCAAGGGGCGA  
TAGAACGCAAGCCGCTGCGCTGGCAGAACTTCGACCAGTCAATCATGACTGCGCCACCAGCAATCCGCT  
GCTCGCTACCATGCTGGAAGCGGCGCCCAATGCAGGCTTACGGATCCGTGGCATGCGACTGGCCCGTGAG  
CCGCATCGTTACAGCGGCCGACCTCCATGCTGGCGGATCAGAACGTCAGCGAACCGCGGGTAGCGCAAG  
ATCCCGACTCCCCCTTCAACTTTTCCATGGAAGGGTATGCCGGAGCCCGTCAGCCGCTGCCGCAAGTACC  
GTTGCGCTGGGCGCCGGGCTGGAACCTCTCCCTCCGCTGGAACAAGTTCAGGATGAAGTGGGTGGCAAA  
CTGCGTGTGGCGATCCGGGTGCGCGTCTGCTGGAAGCAACAGACCCGCGAGGCAAGGCAAGGAGCTGC  
TCGGCTGGTTACACCACCATCCCCGCCCTTCAAGGCCGAGAGGCGCTGCAAGTGGTCAATTTATGCCCA  
GCTGTTTGGCGGCGAGGAGCTCTCCGCTCGCAGCCCGGTCAATTCAGGCCCGATGAACGAACCCGAGCTG  
GTGCTCAATCCCCTTATGCGCAGCGTCTGGCCCTCCACGGGGGAGTCAAGTCTCTTCTCTGGGGCG  
GTAGCCACTGGCAACTGCGTCTGCGGCTTAGCGAGCAGCTGAGCGCCGCTGTTGGTGGGGCTCCCCCTGG  
GGTGAACGGCCTGCCGACGGCCCTGCAACAAGCCTCAATCACTAACCTGCAGGAGGTGATCGCATGAGCG  
AGTGCCTGATCGATCTGTTGCTGGAGGTGGGCAAGGCACTGATCGTGTGGTGGGGATCGTGGGGGCTGG  
CGCCTTCATGAGCTTCATCGAGCGCCGCTGCTGTCGCTGGCAGGATCGCTACGGCCCCAACCGGGTGG  
GGGCGGTTTTGGTCTGTTCCAGCTGGCCGCCGACATGATCAAGATGTTCTTCAAGGAGGACTGGATCCCGC  
CCTTCGCCGATCGACGGATCTTTATCCTGGCCCCATCATCGCCTTCACTGCCTTTATTTGCGGTTTTGC  
GGTGGTGGCCATCACCCACCTGGGGCGTGGCGGATCTCAATGTGGGGCTGCTTACATCCTGGCCATC

CGGGGGCTGGCGGTCTATGCGGTGCTGTTGCGCGGCTGGTCGAGCAACAACAAATACTCATTGCTCGGCA  
GCTTGGCGGCCTCGGCCAGACCTCTCCTACGAGGTGTTTCTCGGGCTATCCCTGATGGGGATTGTGAT  
CCAGACCGGCAGTTTCAACCTGCGGGATATCGTCGAGGCACAGGCAGACTTGTGGAACGTGGTGCCCCAG  
ATTTTGGGCTTTGTACCTTCTGTTTGGCGGTGTCGCGTCAACCACCGTCACCCGTTTCGATCAGCCGG  
AAGCCGAGCAGGAGCTCGCCGATGGCTATCACATCGAGTATGCGGGGATGAAGTGGGGTCTCTTCTTCGT  
GGGCGAATATATCGGCATCGTGCTGATCTCCTCGCTCATCGTGACCCTCTTCTTCGGTGGCTGGCACGGC  
CCCTGGCTGCCCCCTTCATCTGGTTTGCCTGAAGACCGCTGTTTCATGGTGTTCCTTCATCCTGCTGC  
GGGCTCCCTGCCTCGCCCGCTTTGACCAGGTGATGTCGTTTGGCTGGAAAGTCTGCTTGCCGCTGAC  
CCTGATCAATATGCTGGTCACCGCGGCAGTTGTAAGTACGCAGTGAAGTACGCAGTGAAGTCAATATGAAAAT  
TGTTAGCATTATTACAGGTGTCTGCACCCAGTTACGCAGTCTGGCCATGGTCTTCTCCCATGCTTGGCGG  
CCCCGTGAAACCTCAACTATCCGGAGCAGCAGTCTATGCGGCCCGCCGCTACCGCGGTGCGATCGTGT  
TGACCCGTGACCCCGACGGGGACGAGCGTTGCGTGGCCTGCAACCTCTGCGCAGTTGCTTGCCGCTGCG  
CTGCATCTCGCTGCAAAAATCCGAGCGGGAAGATGGTCGCTGGTATCCGGAGTTCTTTTCGCATCAACTTC  
TCTCGCTGCATCTTCTGCGGCTGTGTGAAGAGGCTTGCCCCACCACTGCCATCCAGCTGACACCGGATT  
TCGAGATGGGTGAGTATCGCCGCCAGGATCTGGTGTACGAGAAGGAAGATCTGCTGATCAGCGGGCCCGG  
CAAATACCCGACTACAACCTTCTATCGCATGAGCGGGATGGCCATCGACGGCAAGCCGAAAGGGGATGCC  
GAAAACGAAGCCAAGCCCATCGATGTCAAGAGCCTGCTGCCCTGAGGAGTCAATCATGGAACCTGGCATT  
TATGCCTCGGCCCTGGTGGCCATTTACAGCACGCTGCGGGTATCAGCACCAGCAATCCCATGCATGCGC  
TGCTCAATCTCATCATCTCCCTCATCGCCGTGGCCATGATCTTCTTCTGCCTGGGTGCCGCTTTGCGGG  
CGCCCTGCAGGTGATCGTCTACGCCGGCGCCATCATGGTGTGTTTCGTGTTTCGTGGTGTGATGCTGAAC  
CTGGGGAGTGCCAGGCACAGGAGAAAAAGTGGCTCACCCCATGACCTGGGGGGGCCCTGCCCTGCTCT  
CGCTGATCCTGCTGGGCTTTCTGGCCACGGCATTCTCGGGGTGACCGGGGGCCTGATCGGAGTGACCGA  
GGTGACCGCAAGCAGGTGGGTGTGAACTCTTTGGCCCTATGTGCTGGCGGTAGAGCTCGCCTCCATT  
CTGCTGCTGGCGGGTCTGGTAACCGCCTATCACTGGGTGCGGAAGAGAAGAGCGGTGAAGTGTCTCAG  
TCCCCCGCACAGCATCCCCTCTGCACAAGAAGGAGGTGAGCAATGAATGGAATCCCTATGGAGCACGGC  
CTCCTGCTGGCCGCGGTGCTGTTCTGCATCGGCTTGTGCGGTCTGCTGATCCGCCGAACCTGCTCTACA  
TCCTGATGAGTATCGAGATCATGATGAATGCCTCGGCACTGGCGTFTTGTGGTGGCAGGTAGCCGCTGGGC  
CCAGGCCGATGGCCAGATGATGATCTTGGTGTGTTCTCTGCGCAGCAGCGGAGGCCAGTATCGGCCCTC  
GCCCTGTTACTGCTGCTCTATCGTCTTACCACACCTTGAACGTGGACATTGTGAGCGAGATGCGCGGAT  
GAGCCTCTTATATCTGACTTTTCTATTTCCGCTGCTGGGATGGCTGGTGTGCTGGCCTTCTCCCTCGGCCG  
TTTGGCGAGCGTACCTCGGCGCTGATCGGGGTAGGCTCCATTGGCCTGTGCGGCCCTCACCACCCTGTGGG  
TGGGCATCGACTTTTTGGCCAACCCGCCCCGAGGGCGGCTCTATATCCAGCACCTCTGGCAGTGGATGGC  
GGTGGGTCACTTACCCCAACCTTACGCTGGCACTGGATGGCCTGTGCTGACCATGCTGGGGGTGGTG  
ACCGGAGTGGGTTTCTTCATCCACCTGTTGCTCTCTGGTATATGCGCGGAGAAGAGGGTTACTCCCCT  
TCTTTACCTACACCAACCTCTTTATCGCCAGCATGCTGTTTCTGGTGTGCGGATGACCTGCTGTTTGT  
CTACCTCGGCTGGGAAGGAGTAGGGCTGTGCAGCTACCTGCTGATCGGCTTCTACTACAAGGATCGCAAC  
AACGGCGCGGCGGCCCTCAAGGCATTTGTCGTGACCCGGGTGGGTGATGTCTTCTCGCCATCGGCCTGT  
TTATCCTCTATCGGGAACCTGGGCACCTCAATATCCACGAGCTGCTGGTGGCGCACCGACCTGTTTGC  
CGAGGGCTCCCCTGCCCTGTGCTGGCCTGCCTGATGCTCCTGGGCGGCGCGGTGGCAAATCGGCCAG  
CTGCCGCTGCAAACCTGGCTGGCGGATGCGATGGCAGGCCCGACCCCTGTCTCAGCGCTGATCCACGCTG  
CCACCATGGTGACCGCCGGTGTATACCTGATTGCCCGTACCCACGGCCTGTTCTGCTGGCGCCAGAGAT  
CCTCCATCTGGTCGGGCTGGTTGGCTCCATCACGCTAGTGCTGGCAGGCTTTGCCGCGCTGGTTCAGACC  
GATATCAAGCGGATCCTCGCCTACTCCACCATGAGCCAGATTGGCTACATGTTTCTGGCTCTCGGTGTG  
GCGCATGGGAAGGGGCCATCTTCCACCTGATGACCCACGCCTTCTTCAAGGCGCTGCTGTTCTCTCCG  
CGGTGCCGTGATCGTGCAGCCACACGAGCAGAACATCTTCAAGATGGGGGGCCTGCGCAAGAGTTTG  
CCGCTGGTCTATGCCTGCTTCCCTGGTAGGTGGTTTCGGCGCTGGCAGCGCTGCCGCTGGTACCTCCGGTT  
TCTACAGTAAGGACGCCATCCTGTGGCAAGTAGAAGCCTCTGGCCAAAGCGCACTGCTGTGGGCGGTCT  
GGTAGGGGCATTCTGACCTCCCTCTACACCTTCCGGCTGATCTTTATCGCCTTCCATGGCAAAGAGCAG  
ACCAAAGCCCACGCCGGTACGGTCTGGCTCACCATCTGCCGCTCTTGGTTCTGCTGGTGTCTCCACCG  
GGATTGGGGCACTGATCACCCCGCACTGGCAGGTGTGCTGCCGGCAGGCCAGGTGATCATATCGAAGA  
GGGTGCTCATGCACTGGAGATAACCTCCGGCATCATCGCCATTCAGGGATCGCGCTGGCCGCTTCCCTC  
TTCCTTGGTGAGCGCGTCTGGCCACATCCATTGCCAACAGCGCCCCGGGCCGCTGCTCAGCACCTCT  
GGTTCAATGCCTGGGGCTTTGACTGGCTCTATGACCAGCTGTGGGTCAAGCCCTATCTGCTGGCTACCCG  
TCTGGTTCGGACAGGATCCGCTGGACTGGATGATGGGCTGCCCGCTGGTTCGCCCTACGTGGCAACCAG  
CTGCTGGCCTGGACCGTGACCGGCAAGTTGCGCTGGTATGCCGCTTCCATGGGGATCGGTGCCGCACTGG  
TGCTGGCACTGCTGCTACTGGGGTAAACGCGATGAACAACACGAAAATCGTACAGCCGGGCTGTTTGGCG  
ACCTTGATGGAACAGGGCGTGAATCTCATATGAACTTGAACGAGAGCTGATACCGTGACCTTACTCTGG  
ATCTTGTAAATTCCTTTTCATCGGCGGCTTGGCTGCTGCTGGCAGATGGAGCGTCTCGGCGGGCAGTTTGTCC  
GCTGGGTAGCCCTCATCTCCATGAGCGCCAGCCTGCTGCTCTCCTGTGCCATCTGGCTAAGTGGAGACTT  
CTCCCTTGCCACGACCGGCCCTGCACAGCGCGGGCGTCTCCGGTGTGCCGCGAGTGGCGCCTGCCGTGG  
ATCCCCCGCTTCGGCATCTCTTTGCATCTGGCGGTGGATGGCCTGTCGCTCTTGATGGTGATCCTCACCT

GCTTTATCGGGGTGCTGGCCATCCTCTGTTTCGTGGAAAGAGATCGTGCAGCGCATCGGCTTCTTCCACCT  
CAACCTCCTCTGGATCCTAGGCGGGCTGCTCGGGGTCTTTATGGCGTTGGACCTGTTCCCTCTTCTTCTTT  
TTCTGGGAGATGATGCTGGTCCCCATGTACTTCTGATTGCGCTCTGGGGCCACTCGGTCACTGACGGCA  
AATCACGGATCAACGCCGCAACCAAGTTCTTCATCTACACCCAGGTTTCGGGGCCTTATCATGCTGGTGGC  
CATCATCGGGCTGGTGCTGACCCACCAGTATGCCACCGGAGTCTTCACCTTCAACTATCTGGAGCTGCTC  
AATACACCGATGAGCAAGGGCGTTCAGTGGCTGCTGATGCTGGGCTTCTTTATCGCTTTCGCGAGTCAAGA  
TGCCGCTGGTACCGCTGCACGGCTGGCTGCCGGATGCCACAGTCAGGCGCCGACCGCAGGTTTCGGTGG  
TCTCGCCGGTATTTTGTCAAAAACCGCCGCTACGGCTGCTGCGTTTTGCCCTGCCGCTGTTCCCCGAA  
GCCTCGGCCGAGTTTGTCCCTACGCCATGGTGTGGGCTGATCGGTATCGTCTACGGCGCCATCGTGG  
CCTTTGCCCACAGACGACATCAAACGGCTGGTAGCCTACACCAGCATCTCCACATGGGTTTTGTGATGAT  
CGCCATCTACTCGGGTAGCGAGCTGGCCCTGCAGGGCGCCGTGGTGCAGATGATCGCCACGGTCTCTCG  
GCTGCCGGCTCTTTATCCTCTGCGGTACGCTACGAGCGGTTGCACACACGGGATCTGCCAGATGG  
GCGGCCTGTGGGGACGCTGCGCTATCTGCCCGCGGTGATGCTGTTCTTCTCGGTAGCGTCTCGGCAT  
GCCGGGACCGGCAACTTTGTGCGGAGTTCCTGATCCTGGTCGGCAGCTTCCAGGTTGCCCTGTCTATC  
ACGGCAGTCGCCACCTTCGGTCTGGTGTGGCCTCGGTCTACTCTCTCATCATGTTGCAGCGCGCCTGCT  
TTGGCCCCGCCAAGGATGAGAGCATGCTCAAGGGGCTGGATCGCCGCGAGCTGACCATGATGATGGTGT  
CGCGGGCTGCTGGTTCTGCTTGGCCTCTATCCCCAACCCGTGATTGACACCGCCAGCAGCAGCCTTATC  
AACGTGCTGCACTGGTATCTGCTGCCGACTGCTGGAGCCCTGCAATGACTTTCTCCGCTTCCCAACTGCT  
GGCACTGCTTCCCTGCTGTTGACCACCGGGGCCATGGCGGCCCTGATGCTGGCCATCGCTGGCGCCGC  
TGTGTCACTACCGCCTTTACCGTGACCATTGTTGGCCTCAACCTTGCTCTGTTCTCGCTGCCCATCGTGA  
TGGCGCAAGGAGATCAGGGGGTCACCCCGCTGCTGCAAGTGGACAGTTACGCCGTCTTCTACATGGGTCT  
CGTACTGATCGGTGCCCTGGCCACCTGCACCTTCGGTCAATCGTGGCTGAAAGCCTACCCGGACAACCGG  
GAGGAGTTCTTCTGCTGCTGCTGATCGCCACCGCTGGTGGTCTGGTGTGGCCAGCTCCCGTACCTCG  
CCTCTCTTTTATCGGGATCGAGATGCTGACCCTGCCAATGTTTCGGTCTGGTGGGTTACGCCACCGCGA  
GCGCCACTCGCTGGAAGCCGCGGTGAAGTACATGGTGTCTCTGCCGCCGCCACCGCCTTCTGTTGTTT  
GGCATGGCGCTGCTCTATGCGCAGGCAGGCAGCCTGAGCTTTCAGCCCTGGGGCAGACCCTGGCCGAGA  
GCCCCGGCTACCATCCGCTGCTGATGGGCGGTTTTGGGGTTAATGCTGGTGGCTTTGCCTTTAAACTCTC  
CCTGGCACCTTCCACCTCTGGACCCCGGATGTCTACGAAGGTGCCCGGCACCGGTGCCCGCCTTCCCTC  
GCCACCGTCAGCAAGGTGGCGGCTTTTGGCCTGCTCGCTTCTATCTGGCGGTACCGCGCCGCAAGCG  
ATCCCATGATCCACTGGCTGCTGGCAGCCATGGCGGTGATATCCATCATGGTTCGGCAACCTGCTGGCCCT  
GGTGCAGACCAACGTCAAACGGATGCTGGGTTACTCCTCCATCTCCCACTTCGGTTACCTGCTGGCGGTG  
ATCGTGGCGAGCCGATTTCGGCCAGATGCCGGTGAAGCAGCCGGGGTCTACCTGCTGATGTATCTGTTCA  
CCAGCCTGGGTGCCTTTGGGGTGGTGGAGCATGATGTCGAGCCCTATCGCGGCAAGGATGCCGACTCCCT  
GCACAGCTATCGCGGTCTGTTCTGGAAGCGCTCCTATCTGACTGCCGTACTGACGGTATGATGTTGTCA  
CTCGCGGGCATCCCGATGACCCTCGGCTTTATCGGCAAGTTCTACCTCATCGGCGTACCGTCCGAGGCGC  
AGCTCTGGTGGCTCTCCGGTGCATCGTCTCGGCAGCGCACTGGGTCTCTACTACTACCTCAAGGTGAT  
GGTGACCCTCTATCTGCGCGAACCGGGCATGCAGCAGCGGATGCCAGCGCCGACTGGGCTCTCTCCTCC  
GGTGGTGTGGTAGTGTCTCTGCCGTGCTGGTGGTGTGCTGGGGCTCTATCCCCAGCCGGTCAATCA  
GCCTGGTACAAGGGTTCCAGCACGTGGTATTGCAGTAACCTTTACCGTCCGCTCCCCCTCATTACCCGCAA  
AACCGGCAGCCTTGGCTGCCGGTTTTCTATTTGCGGACCAGCAGCATCGCGCACTCCGCGAGCCAGCAAA  
TGACAGATCAATCAGCGAGGGTGTGCCCATCATGGTTTTTGGCATAACAACCAGAACCGGGCGAGATCCT  
CATAACCTCTTGAATCCTTATTGATATATTGGTTATATTTGGAATGGAGTTCAGATTGATGAAGCAACA  
CTACGTTTGGCAATTTAACCCGACAGAACTGGCTGCCACGCTGGCACCTTGAAGGAGGCAAGCTGACC  
ATACTGCTGGCCGAACAGGATTGCGCTCAGGTCCCCCTGTTGCAGCAGTTGTGCCGCGACTTCAACATCG  
CCCTGGATGGCGCCATCTTCCCCAGCTGATCGGTGCGCAAGGATTGTTGCCGAAGGGGCTGGCTACT  
GCCCAGAGCCAACCCCTATCAGCCACACTGCTGCCCTGACACCCGAGGCCAGCGCAGCATCCCTTGCC  
CAACTGATTGCGGAACAGGTGGAGAGCATGCTGGCCACCTGGCCAACCCCTTCGCGAGCCACCAACCCGT  
TTCTGACCTTCGACAACCTCATTCCCAATATCGCCTCCATTCTGGATGCGCTTTATCTGCAACTGGCCAA  
TCGAGTCAACTATGCCGGCGCAATGCAGGCAGCAGCAGCTTACCCCCCTTGCCTGCCTGTTTCGACAAT  
CAACGGCAACTTGCCTACGGGGTACCTGCACGCTGCTGCCAGCAACAGCTTTCCCTTTCTGGAACATG  
GTTACCAACTCTCGGCCACCGATGCAGGCCACCAGCAGTGAAGCGAACAAGATTGCCCTACATCGACTGG  
CAACCGGCCTTTCAAAAATATCAGGGGCTGATCAGCCAGCAATTCAGCACACTATGGTGGCGGAGGAGC  
TCTACCGTTTTCTGGTGCACATGCCACTGGGCTGTTGCGGGCCAACGGGGATGTGATTGTCAGGATCCC  
CGTGCAGGCAACAGATGACGGCGCCCTGCTCTGCACCGGCGAGGTCGAGAGCACAGCATCCTCACTCTG  
CTGAAGGCGCCGGAGAGTGCACCCGAACATGCCTGCTCACTGGCCAGGCGCTCAACCAGCAACAAACCC  
TCAACCGGGCACACTTGTGGAGGTCTACTACTGCGCGGGACGCCAACTGCACTTCGACCAGCAGACGGT  
GACCGAGCTGCGCACCTGCTGACCCACTCGGGGGCCGGCGATCTGGCAGGAGCCCTCTCCCTTGGCGAA  
ATTGGCAGCGTGCAGCATGGGGATTACCCCCAATTTATAACGGCGCCATTCTCTGTAACGGGGCAGTGA  
TATGAACAACGACCACGCCATGGCCATCGTCTGCGATCTGGCGCTATGCATCGGGCGTGAAGTGACGCTG  
GATGCGCTGCTACCAAGGTACTGCAACGTTTTATGCATCACTGCGCCACGCCGGTTGGTGGGTTATTGC  
AGCAACAACAGGAGGATAACAAGCTGCTCAAGGTGATCGGCGACGAGCAGCTGCCAGCACACCGGCAC

CACCCTGCCACTGCCTGGGTGGGTGAGCGAGGAGGAGCACTGCCTGCTGCAACAGACGCTCCCCCTGCCG  
GGCAGCCGCCCCCTACCAGTTTGCCTATCGGCTCAAGGTTGAAGGAGGTTATCTCATCTTGCTGCTCGCCC  
CCCAGCCACATCAGCAGATCGTACCGGTCTGCCATCTGTTTCAGCCCGGTGCTCGGCAACCTGGCCCGCGC  
CATTTCCCTGTGCAAGGACAGCGAACTGCTCGCCCTGCGTTCAGCAGGCCGAACTGAAGGATCTGAAACAC  
TTCAACGAATCCCTGCTCAAGGCTATCCCGATCCCGGTGTTCTACAAAAGATATCGAAGGGCGATTTCTGG  
GCTGCAACCAGGCCTTCAATCAGGTGATCGGCATCGGCAAGGAGGCGCTGCTGGGTGACGGGTGAGGA  
GCTGCTGCCAGTCGGGCTTGCCGAGGCCTACAGCATGCGGGAAGCCGAGTTGCTGCGAAGTCGCCAGCCC  
CAGTGCATCGAACAGCAGTTGCATGACCGCAATGGCATGCGCTATCAGGTCATCTGTTTCAAAGATCTCT  
TCTATGACCATCAGGGGATGGTTGCCGGCATCATCGGCACCCTGGTTCGACATCACTCGCCTCAAGGAGAG  
CGAGCGCCACCAGCGTGACCTGCTGTTCCAGACCATCAGTGCCTCGCCAGCGCCATCAGCCACAAGGAT  
CGCAACAGTGCGGGCCATGAGCTGAGGGTGCGGCATTTGGCACTGGCCATCGGGCAGGCCATGCAACTGC  
GGCAAGAGCGGCTGGATGCGCTGGGACTGGCGCCATGGTGCACAATATCGGCCCTGCTGCAGATCCCCAC  
CGAGATCATCACCCGCCACGTGAATTGCGGCCGGTGGAGTTCGAACTGATCAAGCAGCACCCCCAGGCC  
GGCCACGATATTCTCAAACAGATCGACTTCCCCTGGCCCATCGCCACCATAGTGCTACAGCACCCACGAAA  
ACCTCGATGGCAGCGGCTATCCGCAGGGGCTGGCGGGCAACGCCATTACCCTGGAGGCGCGCATTATCCG  
GGTGGCCGACTCGCTGATCGCCATGACCTCCCATCGCCGTTCCGCCGGGCCATGCCCTGAGTGACGCC  
ATTGCCGAACTGACCCGCTATGCCGGGATCCATTACTATGAAAAAGTGGTCAACAGCTGTATCGTGCTCT  
GGCAGACCGGCTACCCTTCCGCCCTCCCATCAGTCAACTTGCAGACAAGGCGGGATAAGATGTCCGAAC  
TCCTCACCTCCTGTGCACTCCCCACCCACTGACCGATGCGTCCCCTCCTCGGCGCTGTTGCTGACCCA  
AGTAATGGATCAGCTTCCCTATCGGGTGTGCTCAAAGACACCCGATTCAGCTACATCGCGGGCAACCGC  
CTGCTGGCGGGCGGATCTCGCCCTCCTCCTAGAGGCACTGGTGGGCAAGAACTGACTGCGACTTCTTTCCCC  
CCGAACTGGTACAACGCTATCGGGGAGGATGACGCCCCGAGTCATGCGCGAGGGGATAACCCAGCACATCGA  
AGAGCCCTATCTGAAGGGGGGAGAAGCCCGCTGGCTCAGCACCCAAAGTTTCCCCTGCGTGATGAGGGC  
GGGAGTATCGTGGGGGTGGCGCTTCTTTCGAAGACATTACCAGCAGAAAGTGGCAGCAGGAGAAAAGTGC  
AACAGTACAGCTGGACCCAGCAGGCGATCAGCCGCGCCACCACGCTCTGCTCAAACCGGGCGATGAGCC  
GCAACTGCTGCAGGATATCTGCGATGCCATCGCCGTGATGACCGTTTTTCCGCTGGTGGCAGTGCTGCAA  
GGCCAGCCCGAACTCGCCAAACCGCCGGGATCGTGGCGCAGGCAGGCAGTGCCGATGCATCGGAACAAA  
CGCTGTGGTTGAACGATGAGGCCCTCACCCAGGCCATCTCCACCAGCGGCGCCTCAATCAGGTGACGAT  
CCACGAGCGGCCACCATACCGGCCGCCACCCGTTGCAATCCCCTGCTGACCCCCCTGCCACTGCAGGAG  
GATCTGGCCGGTGCCTGATCATTACAGCGACCAACCAGGTTGTTTCAGCCAGGAGGAGCAACTCT  
TCATCCAGCTGACCGACTACCTCACCTATGGCCTGCAGGCGCGCCATAACCCAGCAGGCTTATCTGCGCTC  
GCAACAGGAGAAGATCTTCCATGCCCGCCAGCTGGAGCTGGCACTGGAAGATGCGCTGGGTGCCATCGCC  
GCCGTGCTGGAGCAGCGGATCCCTATAACCGCTGGCCATCAGAAAACATGTGGCCAAAGTGGCCCAAGCCA  
TCGGCCGGGAGCTCAGGCTGGAAGAGAAGCGGCTGCGGGGGATCTATCTGGGCGCCATGGTGCACGATAT  
CGGCAAGATCCAGGTACCGGCTGAAATTCTACCAAACCGGAACGCCTCACGCCACTGGAGTTCGAGCTG  
GTCAAGGAACACCCCGCCATCGGCTATCTGGTGTCAAGGATATCGACTTCCCCTGGCCATCGCCCGGA  
TGATCCACCAGCACACGAGTATCTTGATGGCTCCGGCTATCCGCAGGGGTTCAAGGGGGATGAAATCCT  
GCTGGAGGCCCCGATCCTCACCGTTCGCCGATATCGTTCGAATCCATGCTCCTCGGATCGCCCCATCGCGCC  
GCCCTCGGCATTTCCCAGGCCAGGGAGCAGATCATCCAGATGCGCGGCCATCAGCTCGATGCGGATGTGG  
TGGATGCCTGTCTGCGGATCCTCAACCGGGGAGACTTTGTCCCCCAACCGCTCGGCTAACCCAGCGCCAC  
CTCCTGCATGATGCTCCGATTGATAAAGTAGCGATGGCAGAACAGCAGAAAAGTCTGTAGTGGCAAGGGC  
CTGGAGTAGAAAAGTACCCTGAATTTTCATCCACCCTATGCTCAGCACCCGCTTCAGCTCATCGTTGTTTT  
CCACCCCTTCCGCCACCACCCGCACACCGAGTTGATGAGAGAGGCTGGTGATCGCCTCGACGAACAGGGC  
CTGACGGGTATCATTGTGATGGCCGTGATAAATGAGCGGTGATTTTGAGCTTGTGCAAAATAGAGTTC  
CGCAAGTAGGAGAACGATGACCAGCCGGTACCGAAATCATCAAGGGCCACCCGCACTCCGATCTGACGCA  
GGGATCGATGATCTGCTGCTCAGCTCGATATCATCCAGAGCAATAGTTTCGGTTCAGCTCGACGATCAG  
CTGTTGCAGGCTTAGCGGCCCTCCCTCATGTTCTCATCCAGCTGGGCTGCCAACCCATAGTGAACATG  
GAACTCGAGAGGTTGACCGAGATCTCCAGCGGTTCAATCAAGTCGCTCGGAAAAGTGGCAAGATCAAGCT  
GCAAGCGCCGGAAGATCCATAACCCGAGCGCTCCCCAGCCGTTATCTTCCGCCAGCGAGATGATATC  
GAGGGGCGGAATAAACCCGTACTCTGGGTGATTCCAGCGGATCAGTACCTCAGCCCCAGTCGCACCTTA  
CCTTGACCACGGACAATGGGCTGATAGTAGAGGCTCAATTGCAAATGCTGTGGTGTGGATCAGCTCGC  
GCAACTCGGTGACAAAACGGCGGTTACGCAGATAGTGTGATACATGCTGCTGGAGAAAACCACGTAACG  
ATTCAGCCGCTTGCCTTGGCACTGTGAGGGCGATATCGGCAAACAGCAGCATCTCCTCCGGCGTGTGT  
ACCGGTTCGCACGTAAGTGGCTGACCCCCATAAAGACCCGCACCCGTTGGGCGGGATCAGTCGCCAAGGCGA  
GCCCGGCAAGTTCGTTACGCAGCTGCTCCAGAAAATGAAAAGCGCAAATAAGTGGGCATAACGCCGAAAT  
AATGATGGCAAACCTCATCGCTACCGGTGCGGGCGGCAAGATAACCGTCAACCGATACCGCGCGGATCCGC  
TCGGCCAGTTGCGTTCAGCAATGCATCCCCACCTCGTAGCCCAGGCTGTCATTTACCTCCCTGAAATGGC  
CAAGATCCACCAGACAGACGGTTCACGCTACTGCGCCCCCTTTATGTCCCCTCAGCTGCTTGGGTGTTTT  
GATCAAGGAGGCCCCGTTTCGGCAAGCGGGTTAGCGCATCATTCACGCAAGAAAAGTGTGGTGGCGCACT  
TCGCGAAAACAGCATCAGCAGCATACCACGGTTCGCCAACATCAAGAAAAGCCAGAATGAAGAAGTTCGGA  
TACGCGACGAGTTGAGTACCTCCCGCTGGGCAATAGCGGATGGGCCAGTGAATTTTTTACCATCACATC

CGGGATGGCAGCCAGATCCCCGAGCCAACTCCTCGGCAAAACGAGCAAGTTCTTTTGAATCTCGCTCTCCG  
CTGACCACGGCCTGCTCATACTTCTCGAACAGAGTCATGATCTTGCCTGCTGCCTGTTTCAGCCCCAAAGC  
GGGTTCTCACCGGCTTGGCCTCCTCCCCGTGCAGGAAGACATCGAGCCGGTTCAGGCAATATCAAAGCG  
CTTGTTTCATCTCTTCTGACTGGTTCGAACCGGTGCGATAGAGAGAGAGCGCTTCATCAAAGCCATGGATT  
TCCAACCTCCAGCTGCGCCAACGCCCAGGCGGAGAGCTGGGTATAGCGAGTCACTGCATTGAATGCACGGT  
CATAGTTCCAGACCGACCAGATGGCAACCCCCAAAAAGGCAGTCACCATCAGGATCAAGCTCAGAACTT  
GCCGCGCAGCATCTTATTTGCTCTCAATCGCCGTGAGTTGCCACACCATCCGGCTGTGATAGAGCTCCTT  
GTTTCAGCTCCGGGTGATCAGAGAGGGGATAGATGATCCAGAGCGGCCCTTTGTTACGCAGGGTCAACGCC  
TTGCCATCCTGCTTCTCGGCCAGCAATACCGCATATTTATCTCCATCTTCCAGCGGCACCGCCGCCAGT  
AGTCAATTGATGGCGACCGCCTTGACCTCCTCACTCTTGAGACCATATATCTTGACCAGATCTCGCAGCAG  
CACGCCAGATAGGTGTGGTCCCCCTCGGTCCACGGGGTCTGGGTCTTGACCTCTGTCTGAGTAAAGGCC  
TCAAACCTCGGCCCGGGTCAACACGACCTCCCCCTTACCATTGCAACAGCCATCCCCCTTGATCTTAAAGAA  
AGGGCTCATCAGCCAACACCATGCTAGAAAACGAGACGCCGGATAACAACAGCATCTGCCAAGCCATCC  
ACCCATGATAGACCTCCGTATCGTACTGTTTGTGTTTTATTGGTTTTCACTCTGTCCACCCACAGGGAAACGG  
CAGAGTCATAATGCAAAAACAATGTTGCTGCAACCAGCTCACCACAACAGGCAACCAGCATCAGGCTGTAC  
CCGAATGCCACCTAAAGCATGGCATCCAGGCTCCGACTGTGCAACCGCACCGGAAAATATTTCATGTCCC  
TTTTGGTTACAGACCCGGCTTGTGGAACAGAAATATGACCCCCACACAGGCAAACTGACGGTACAGTCCCT  
ATCGCATGTCTAGTCTGAAATAGGTTTACACATTTTCAACTAGCATTTCTCTTCTCAGAACCCCCATG  
TACCGCATCGGGGTTCTGTATTTCAACGCATGATGCGGCCGCTCCGCTTGTAAATATCCACCGCTTCA  
CGCACCATTTCCCGGCTTGCCTCAAATCCTGCGGGCTTTGCAACAACAACCTCTCCTTTCAAATCCCGT  
TCACCCGCTCCGCCAACGCATTCTGGTAACAGTCATACCCATCCGTCATCGAGCATTTACCCCGTACAG  
CTCATGTAATGACTGATACAGCCCCGAGCAATACTGCACGCCCGGTCGGAGTGATGGATGAGCTCACCA  
CCGCCACGCCGTTGCTTTCAGCGCTTTCTTGAACGCCATCGCCACCGACTCCGCGTGCAATTCCTTCGTGCA  
CGTGATGGTCCACTATCTTGCCTGAGTAGGCATCCGTCACCAGGCTCAGGTACAGCAGCCCCGCTCCTGGC  
TGGCAGATAGGTGATATCTGCGACCCAGACCTGCTCCGGCCCCGCTTGAAGCAAGTTGGGATGACGGTAG  
AAACGGTGAACACTGTGGGTGGTCTTGTGATACGCCCGTCTGGGCTGCACCAGCAGGCGGTGCTCGGTCA  
ATATCCGAAACAGCCTGTACAGCCCTACCTTGAGCCCGCATTTATCCTGACCAGCAGCAGATAATGCAG  
CTTGGCGGTGCCAGCCGAGTTGTGCGAGTCGAACCTGACGCACAAAGCGCACCCACCTGTAGCCCTTGT  
GCATGGCGCTCGTCCGGCAGCCGATTGCGCTTGTAGTAAAGCTTCCGGCTTATACCCAGAAACAGGCAAG  
GTTAGTCTCTCGACTTGCCGCTGCGAGAGGACTTGGCCGGTTCGCTTTTTTACGATGGAGACGCCGTAGTC  
ATTCTTTCAGTACATCGACGATGGCCTCAAAGAAGTGGGCTTCTGACTCATCAGCGCCAGCTGCTGCTCG  
AGTTCTTTCAGTACGCTGTTTCGGGCGTCTGGTTGTGCGGGTTCAGGCATGGTGATGCTCCTGCAGGCGCGCA  
CAGAAGCCCCAGGCTCCAATCTTGGCGACCATGTTTACGCAACCATAACCAGAACGGTGGAGCGGCCCTG  
AATGCCATAACGCACCTGAGCCTGTTTGTAGGTGAGCTCGCTTTTTTCAATCTTCTCGACCAGTGACAGT  
TTAAAAGTTCGGCGAGTAACCGTGTGTGTCGTTTACACCTTGTCCATCGGGTCTCCATTTATTGGG  
GGGAAAGGTGTAACCATATTCAGGACGGGACAGCAGATACAAAAAAGGCCGCTCAATGAGCGCCTTCT  
TCATAACGGGATCAGCAATCAGCTTTTCGCGACGCTTGCACCGAATTTGCGATCTTTGTTGAAGCCACCT  
TCACGGCGCTCCCCGCTCTTGTGTAACGGACGGTCAACCTGGGGACGGCGATCCTTGTGAAAGGACGGT  
CGCCACGGAACGGACGATCACCACGGGGCGGACGGCTGCTGGTGTTGCCACCGGCCGGCACTTCGGTGT  
GCGGGTGATTTGCAGCGGACGCTGGCAAAACACGGGCTTTCTTTCAGTACATCGGCGGTTCATG  
CCTTTTCGGCAGATCGACGGTGGAGAAGTCATCGGCGATGTCGATGTTGCCGATGAAGCGGCTCTCGATGT  
TCGCTTCGTTGGCGATGGCGCCACGATCTGGCCCGCTTGCACCCGTGATGGGCACCCACGCTACGCG  
ATAGCGCTCCATCTCCACGTCCGGATTGCTTTGAGCGGACGCGGCTCTAGGGACGGCATGCGACGGGCA  
GGACGATCGCCACGGTCAACGAAGTCACGACACCACGGTCTGTAAGTCACGGCGCTCGAAGCCACCAC  
GATCGTTGCCAGCGTTCAGCAGCGGATCCGGAATGGAGTCATCCAGCAGCAGCGGTTGGTACCCTGTAC  
CAGCTTGGCCAATGCAGCAGCCAGCTCCAGCGGATCGGCAGAATCCTCTTCGATCAGCTCGTTTACCAGG  
TTGTGGTAGATCTCGAGCTTTCACCCATCATGGTTTCGCGGATGCGCTCCTTGAACCTGGCCAGACGGT  
GCTGGTTGATGTCCTCGGTGCTCGGCATCTTCATCGGCTCGATGGCCTGACGGGTTGCGTGTCTGATGGC  
GCGCAGCATGCGACGCTCGCGCGGAGCGACGAACAGGATGGCTTCGCTTTACGACCGGCACGACCGGTA  
CGACCGATACGGTGTACGTAAGATTCCGGTGTGTCGACGGAATGTCGTAGTTCACTACGTGAGTGATGCGCT  
CAACGTCCAGACCAGGGCGACAACGTCCGTGGCGATCAGGATATCCAGCTGGCCCTGGCGCAGCTTGT  
GACGGTACGCTCACGCAGTTTCTGCGGGATGTCGCCGTGCAGCGCTTACAGGCGTGACCACGGGCGGCC  
AACTTGCCAGCCAGCTCTTCGGCAGCGTCTTGGTTGTCGACGAATACCAGCAGGGCTTCGTAGGATTCCA  
CTTCCAGCAGACGGGTCATGGCGTCCAGCTTGTGACAGCCGGTTACCTGCCAGTAACGCTGGCGAATAGT  
GGTAGCGGTAGCAGTCTTGGAGCGATCTTGTATCTCTTTGGGCTGCTTCAGGTGCTTCTGGGCCACGCGA  
CGGATCTGCTCCGGCATGGTGGCAGAGAACAGGGCAACCTGACGAGTGCTCGGGCACTGCTCCATGATCC  
AGTCAACGTGCTCGATGAAGCCATACGCAGCATTTTCATCAGCTTCGTCCAGTACCAGAGCTTTTCAGGCC  
GGAGAGGTCCAGGTTCTTTCGACGGATCAGGTCCATCACGCGGCCCGGAGTACCAGCAGCCACCTGGGCA  
CCGCGACGCGAGGGCGCGGGTCTGGGTTTCGTAGGAAGCACCGCCGTAGATGGGCAGTACGTGGAATCAG  
GCATGTGGTGGGCGTAGCGTTGGCACGCTTTCAGCCACTTGCAGCGCCAGTTTCGCGGGTAGGCGCCAGCAC  
CAGGATCTGGGTGTTGCGGTTACCAGCTTCCAGACGAGACAACAGAGGCAAGGCAAAAGCAGCGGCTTTC

CCTGTACCGGTTTGGCGCTGCCCCAGCAGATCGTGTCCCGCCATCAGGTGGGGAATTGCTGCGGCCTGGA  
TCGGTGACGGGCGCTCATAGCCCACGTCCTGCAGCGCTTCAATACAGGCGGCGCCAGTCCAAGCTCACT  
AAAAAGGGGCGAGTTGTTCCGGTATCAGACATAGATTCTTCCAGATTAAGGCAGGCGGCTAACACCGCGGAA  
TAGCAAAAAGGCGGCGATTATAGCGCCACTTTGTCTGCTGTCTTGAAAAATGTGATAAGCCTCTCAAGA  
CGTTGGCAATTATAGAGGGATCTGACGAGTATGGCTTGCTTATTTTGCACCTCATAGTGCCTTATTGCAGA  
TCACTCCTCGCTGGAGTCCTTGCCCCGCTTGTGTTTTGAGCACCGCCATGGTCAGTCGGCTGGTGCACAAT  
AAACGCTCACGTTTCGTCCCGAATTTCAATCTGCCACACCTGGGTGTTGCTCCCAGATGGAGCGGCGTGC  
AACGCCCCGGTCACCACCCCTTCCCGTTTAGCTCGCAGATGGTTGGCATTACCTCCAGCCCCACACAGTA  
GCTATCTGGCCCCGACCGCCATATTGGCGGCAATCGATCCCAAGGTTTCCGCCAGCACCACAGATGCGCCG  
CCATGACAGCATGCCAAGGGGCTGGTGAGTGCAGATGATCCACCGGCATGGTCGCTTCAAGCCAATCGGTGC  
CAAAAAGCCGTGTAGACGATATCAAGATGGGCCATGAGGGTGTTCGAGAGGTTGGCGTTGAGCCCCCTCCAG  
ACTCATGGGTTTACGCCAGATGGGCGCAATATCGTGACTCATTGCGAGCAGACTCCTTATGTAAGCGATG  
AATGCGAACCGATATGAGTGAAACACCCTCCATCGGCAAAATGGTTCTGTTATATGAGTTGTTGGTTACC  
GGGTGACGTGGTAACAACGCAGCCCCGACCCGGAGCTACGTGTTACACAATCATGCCCTTAGGCTGGATG  
TCACCAGGGGTAGGTAACGCCGGGCCACTCGGCCCAAGGCACTTCTCTCCCCGGCAGACGGGGTCTGGC  
CACTGCCACACCCTGGCGAGCCACTCGCGCAGCTGAATCTCCAGCTCCTCATCCGTGATGGGCGCCTCGG  
CCACCTTCCAGAAGAAGAGTTCCACCCTACCTCCGGCAGCACCAGGGGTAGAGATAAACCCCGCCCCA  
AAATTGCGGCTCCCGATCCGGGCTCCAGAGCCATAGGCGAACGAGCGCTTGGCCAGAAATTCGACTGC  
TGCCACTCCAGATCCCCTTCGTGCTGGCTCAGGCTGAAGTTGGCCGAGGGCCAGAGATCGTTCGGGCGAA  
ACAGCTGATGGAGCTGCTCGCGTTCGCGCAACATGGCGACAAACTCCACCACCGCTGAGCGGGAGTAGC  
GGGTAACAGCAAGAAACGTGGGTGCCGATAGGCCTTCGGCACCAGAAACCGCTTGGGAAACGTCAGCATC  
AGAGCAGCTCCAGCAGGGCTTGCAATGGATGTTTTGAGCTTTTTCCCCCTCCATCCGCTTGACCTGACTGCG  
GCACGAATAGCCGGTGCACAGGCAGCGCGCTTTGGGTAGACGGGCGAGCGGGTCCGGCCAGCTCAACCCA  
TAGATGCCCTTGAGTTCTCCACCTGTTTACATCATGACCATAGGTGCCCGCCATACCGCAGCAACCCA  
CTGAGACCGGCTGCAAGCTGGCCCCGAAGCGGCCAAACAGGGTGTCCAGTCACCGTGAGTGGAGGGCTT  
GGCGGTCTTCTCGGTGCAGTGGGCAAAGAGATAACAGGGCTCACTCCCCTCCTCGCTCTTTGCCCTTGCTG  
GCGTATGACAGGCAAGTTGATCTGCCGGCAGCGAGAGCAGCCACTCCTGTGGCAGCAACACCTGAAAATCAC  
CGCGGGCCGACCCCGCCTTGGCATACTCGTCGATAGCAAAAGCACCATGGCCGGATCCACCCCGCCAC  
CATGGGAATGCCAAGCGCCGCTACCTTATTGAGGAATGGGCGCTGTTGGCCGCGTACGGGCAAAGGCG  
CGCAGGAACCCCTTGATATGCTGGGGCTTGCCGTTAGGTTTAAAGGGCAGCAGATAGGGCTGGAACCGA  
GCTTGCTGGCGAGTTTTACCAGGTCGCGCACACCAGGGGCGCATCGTAATAACTGGTGAAGGGATCCTGCAC  
GATGAGCACAACCTGCTTGCGCTGCTCGGCACTCATCCGCTCCAGACCCGGCAGATCAAAATAGCGGGCG  
CGGTTATCGTGCAGGCTCTCGGCCAAGGTGCGCACCGAGAGCAGCGGCACATCGACCATGCCGATGCTCT  
TCTCGGTGCGCTTCTGTGCCACTCTTTTTCGAGGAAGAAGTTGACCAGCTTCGGCGCCTTGGCAAGCAG  
CGGCGCATAGCTCTCCACCGTGCCGACGAAGTAATCCTTGGGGGCGCGCAGGTAGCGGCCGTGATAGAGC  
TGCATAAAGCGGGCGCGAAAATCGGGCACATCCACCTTGATCGGGCACTGGCTGGTGCACGCTTGCAGG  
CCAGACAGCCCGCCATCGCCTCCATCACCTCGTGGGAGAAGTCATACTCGCCGCGTGTGGCCAGCT  
GTTGCGCACCTTGTCCACCAGCTGTTTGAAGCGCACACCACCGGATGTCAGCGCCACCTCTCCGCCAGC  
GGGTCAAAGCCCTGCTCCGCCAGCTGACGCAACCATTACGCATCAGGCCCGCCCGCCCTTGGGGGAGT  
GGCGACGATCACGGCTGATCTTGACCGAGGGGCGACATGGGGGAGTCGGTCTCGAAGGTGAAGCAGAGACC  
GTTGCCGTTGCAATCCATGGCGCGGGTGTAGCTGGTGCACACCAGCGAGCGGGATCTGGCGGTCACTTG  
CCGCGCTTGGGGCCATCCACCGACACCAGCTCGGCGCCGCTACCGTAGGGGATACAGATCTTGCCCGGGT  
TGATGCGGTTGCCGGGGTTCGAATACCCCTTGACCCGCTGCAGCTCTTCCACAGCTCGCCAAAGAAGGC  
GGGGCTGTATTTCGAGCGAAAGCCCTTGCCATGTTCCCCCACATCAGACCGCCATATTTGGCGGTGAGC  
GCCACCACCTGATCGGAGATCGGGCGCAGCAGCACCCTCTGCTCGGGATCGCACAAATCCAGAGCTGGGC  
GCACGTGCAGCACACCGGCATCAACGTGGCCAAACATGCCGTAGTCGAGGCCGTGGGCATCCAGCAGGGC  
GCGAAACTCCATGATGAAATCGGCCAGGGATTCCGGGCGGCACGGCAGTATCTTCGGTGAAGGCCACCGGC  
TTCTTGCGTCTTTCGGCGTTGCCAGCAGCCCCACCGACTTCTTGCGCATGGTGTAGATGGTCTCGATGC  
TCGGCAGGTGGTACACACCTGATAGCCGATGATCCCCGCTCGCCCTTGGCCAGCAGCGGCTCGATACG  
GCGGCAGAGCTCCACCACCTTGGCCTTGTGTTCTGCCTCGTTCGGTATCGGCAAACTCGACGATGTTGAGC  
CCCTGCAGATCCTTGCCGGGCACATCCTGAATAAGTTCTTTACCAGATGCCAGATGATGTCGGCGCGGG  
CCAACCCGAGCACCCGGGAATCCACCGTCTTACCAGAGAGCCTGCGCCTGCACCATAAAGGGGGCATT  
TCGCAGGGCGGAAGGAAGCTGTGCTACTTGACATTTGACCAGGTTGCGGTAGCGCGGGATGGGGGTGATA  
TTGAGTTTTGGCTTCGGTGATAAAGCCCAAGGATCCTTCCGAGCCGCACAGCACCAGGCTCACATCCAGCG  
TGTCGGTATCGGGTTGATAGAGGTGCTTGAAGATCGTAACCGGTCAGAAAGCGGTTGAGCTTGGGGAAGGT  
CGCCTCGATGTCGGCGCGGCGCTCCTTGCCGATGCGATAGAGGGTGCAGATAGATCTCCCCCTCCCGACTC  
TCCAGCGCCAGCTTGTTCGGCCAGTCGCTCACCGGTCAGCGGCTCGGTGGCCATGATGTCGCCATTTCTCCA  
GCACCGCTTTGAGACCCAGTACGTGATCCGAGGTTTTTGCCGTAGACCAGAGACCCCTGCCCGAAGCGTC  
GGTGTGATCATGCCCCCTAAGGTGGCGCGATTGGAGGTGGAGAGATCCGGCGGAGAAGAAGTAGCCATGG  
GGCTTGAATAGGCGTTGAGCTGGTCTTACCACCCCGGCTGGGCGCGCACCCACCCCTCTCCAGAT  
TAATTTCCATGATCTGGTTCATGTAACGGGAGAGATCGACGATAATGCCCGCCCAATGACTGACCATT



GGTGCCGGTACCGCCACCACGAGGGAAAAAACTCAGGGAGGCGAACGCTGGCTCTGCGGCCAGCTTGAGC  
ATTGCTGCTATGTGCTCCGCACTGCGCGGATAGAGAACCGCTGAGGTACTACCTGATAGACGCTGTTAT  
CCGTCGCCATCGCCAACCGGCTTGCCATAAGACTTTTCGATATCACCACGAAATGCGCTGCGCTCTAGCAA  
CTCAAGAACTGCAGGGTTGCGGGTGACAACTGTCTGGTAATCGAGTCTCGGGATCATGAATCCTTGT  
TCCCATCCTTTGCTTGATGCCGGCACGCCGGCGACAACGACTGGCCAGCCGCTGTCAATGGCAGTCAGG  
CCAGTCCGCTCACATGTGAGCGGGCAGTATATCAGCTAGAAAACCGCTTGGCCTTGGCAATATTCACCAT  
TTGAAAGGAGGACTTTTATGGCTCACCACAGCCATGTTATCAGTACGCTGGTCACCACCGAAAAACAGGC  
GCTTACCCTGTGCTGTTTCGGTTGTATCACCTTTGCCATCTTCGGCATCGGCTACGGCCTCTTCGTCCGT  
TCCAACGCCATCATGCTCGATGGTATCTTACCCTGTTTACGATGGGCATGACGGGGCCTTGGCCATCA  
CTGCCTATCTCGTTACCCGCCCTTCCGATGCGCGCTTCCAGTACGGCTATGCCACTTCGAGCCCATCAC  
CAACGTCATCAATGGCACCATATTCTGTCTGCTGCTTGGCCTTGGCGCTCTCTATAGCGGCATCACCACCTG  
CTGGATGGCGGACGGGAGATCGATCTCGGCCACGCCCTCATCTATGCCGCCGTCTCCACCTTCTTCTGCG  
CCATCATCTATCGCATCGAAGCCCAGGTGCGCCGAGCAGGTAGACTCCGAGCTGGTGGCGGTCGACTCCAA  
AGAGTGGCTGGTGGATAACCTGCTCAGCGCCACCCTGCTTATCGGTTTCGTGGTGGCCATTGGCCTTGAT  
GCCATCGGCTACGGCCAATACAACCGCTACATAGACCCGGTGCTGGTCTCGCTGCTGGCCCTCTGTGCCA  
CCCTCATTTCCATCAAGGTGCTCGGTGCAACCTGCGGGAAAGTGCTGAAAATTGCCCCAGAGGGGATGT  
CTCCCAACTGGTCGAGAGCGAAGTCAAGCGCTGCGCCAGCGCCACGGCATCGAGTGTACAGCCATCTG  
GCCAAAAGCGGTGCGCGCTTCGATCTGGAATTGAACATTTCTGGTGGCGCCGGGTCAGGAGTGGCCCGTGC  
AACGTCAGGATGCCCTGCGCCAGGAGCTCTGGTCTCGCCTTGGCGACACCCTGGGGGATGCCTGGCTGTC  
GGTCTGTTTACCCCGGAAAAGCGCTGGTTGTAACGACCGCACGGGGGAGCGCGCACCGCCGCTCCCC  
CTGTGCGATCACAACCCCGATTACGCCCACTGACGCGGCTCTTGCCAAATGGCGCCAGCCGTTATCAT  
CAGGGCTCATTTTTTACCCGAGGTTTTATTGCCCATCATGGACAATCCCCGAAGTTGCCCTTCTGTCTCTC  
TCTGTCAAAGCCTATCTTTTTTCTGCTTAATCAGCGCCTCTGAATAACACCTTTGCCCTTGCTGTTACTGCG  
GCCATCGTGGCCGATCACTCTCTGCTCTGTCTGTTTTATTGAGGTCATCACAATGGAATTACTGCT  
GGATCCCCATATCTGGATCGGTCTGTTTACCCTGATCATTTCTGAAAATCGTGCTGGGGATCGACAACCTG  
GTCTTTATCGCCATTCTGGTGA AAAA ACTGCCCCCGCCAAACGGGACAAGGCCCGGTGATCGGCCGT  
CGCTGGCCCTGCTGATGCGACTTGGGCTCTTGGGTCATGTATGGCTGGTACCCTGACCACCCGAT  
TTTTGACCTGTTGGGATCAACCCCTTCCGGTCGGGATCTGATCTAATGGGGGTGGCCTGTTCTCTGCTG  
TTCAAGGCTACCTCCGAGCTGATGAACGGTGAAGCCAAACCCAGGATGACGGCCCGGTGCTGGCCCT  
ACGCCAGCTTCGGCGTGGTATCGCCAAATTCTGGTCTGATGCGGCTCTTCTCGCTCGACTCCATCAT  
CACTGCCGTGCGCATGGTGAACACCTTGGCGTATGATGGCCGCCGTGACCATCGCCATGGTGGTATG  
GTGCTTGCCCTCAAACCGCTGACCCGTTTTCGTCAACGCCACCCACCGTGGTGGTGTCTGTCTGAGCT  
TCCTGCTGATGATCGGCTTACGCTGGTGGCGGAAGGGTTCGGTTTCCATATTCGGAAGGGCTACCTCTA  
CGCAGCCATCGGCTTCTCGGTGCTGATCGAGTTTTTCAACCAGCTTGGCCAGCGCAGCGCCATGCGTCAC  
GAATCCAAACAGCCGCTGCGCGAGCGCACCACTGCCCCATCTTCAAGCTGATGGGGAGCAAGGCCATC  
AGGATCAGCCGGATGACGATCTGGATGCCCCGGCCGTAGCGCCGGTGGCTTTGGCGAGGAGGAGCGCTA  
TATGGTGGACCGCGTGTCTGCTGGCCGAGCGCTCCATTCGCACCATCATGACCCCGCGCTCGGAGATG  
GCCTGGATTGATCTCAACGACTCCAGCGACGAGATCCGCGCCCTGCTGCAGCGCGAACCCACAGCCTGT  
TCCCCATCTGTGACGGGGATCTGGACGAGGTGATCGGAGTGGTCAAGGCACGCGATCTGCTGTTTGCCTT  
GAATGAAGGGCAATCCTTGAGCGAACTGGCCAAGCAGAACGACCCCATTTATCGTGCCGCAGACCATCAAC  
GTGATCCGCTGCTGGCGGAGCTGCGCAAAGCCAAGGGGAGCCTTATTCTGGTCTCCGACGAGTTTGGCG  
TGATCCAGGGGCTGGTACCACCCACGATCTGCTGGAGGCCATCGTCCGGCAGCTGCCGGACGAAGACGA  
AACCCCGGATATCGTGCGGATGGCGAAGGGTGGCTGATCAACGGCAGCACCAACATCCATCATGTGGAG  
CAGGTGCTGGAGCATGAGGGGCTGGTGGAGCGAGAGCGATGAATACGTGACCCCTGGCGGGCATGCTGCTCT  
CCCCTTCCGCACTCTGCCACCCCGGGCCAGCAGTTGCAACTGCAGCAGCTCAACTTCGAGGTGATCGA  
GGTGAGCGAGCGCGCATCGAGCGGGTGAAGGTGATGCCCGCGCGCTTGGCCTGCCACCAGCAGAAA  
ACCGAAGAGGGCCAGACGGCCCTCTTTTTTATGCTTCAACTTTATGCCCTCAACGCCCTTCTTTCCGCGG  
GTTGCACTGATTGCTGCATCAAGCACAATTCTCTTGTGCAATTACCCCTCTTTTTTCAACAAGATGGCG  
TCATAAAGTGGCCTCACTTCCACCATGAGGAACTCAAGATGAGCCACGATCACCTGTTCTGCCCGCTGCG  
CCTCGGCCAGCTGCACCTTGCCAACCGCATCGTCATGCCCCCATGACCCGCTCCCGTGCCAGTCAGCCG  
GGTGTGTTGGCAACGCCATGATGGCGAGCTACTACGCCAGCGCGCCAGGCGGGCTGATCATCAGCG  
AAGGCACCCAAATCGACCCCATGGGCAAGGGTTATGCTGGACGCCGGGATCTACAGCGCCGAGCAGAT  
CGCTGGCTGGAAGCTTGTGACCGATGCCGTGCACGCCAAGGGGGCACCATCTTCGCCAGCTCTGGCAC  
GTGGGCCGCGTACCCATCTGACAACATCGGCGGCGCCAGCCATCTCCGCTTACGCCCTGCCCGCAG  
TGGGCGTCAAGGTGTTTCGTGATAACGGCAGCGATGCCCCGGCTTTGTGCGAGACAGTCACTCCGCGCGC  
CATGAACCAGGCCGATATCGATGCGGTGGTGGGCCAGTTCCGTCAGGCGGCTCGCAACGCCATCAGCGCC  
GGTTTTTGACGGCATCGAGCTGCACGCAGCAACGGTTATCTCATCAACCAGTTCCCTCGACTCCGAATCCA  
ACGCCCGCACCGACAATTACGGCGGATCGCTGGATAACCGGCTGCGCTTTCTCAAAGAGGTGACAGAAGC  
GGTTAGTAGCGAAATCGGGGCCGATCGGGTGGGGTGGCTTTCGCGCCGCTCACCACCTCAACGGCACA  
GTCGATGCCAATCCGACGAGACCTATCTGGCTGCCGCCGCTGCTGGGCCAGCTCAACGTGGTCTACC  
TGCACATTGCCGAAGCGGACTGGGACGATGCCCCCTGATGCCGGAGAACTTCAAGCAGGGTCTGCGGGA

TGCCTTCCCCAACACCCTGATCTACGCCGGCAAATATGATGGCAAGCGGGCACGCGCCGCCCTAGAAGCG  
GGCTGGGCGGACATGATTGGCTTTGGCCGCCCTTCGTTGCCAACCCGGATCTGCCGAACCCGGCTGCGCC  
ACGGCTATCCGCTGGCCCCCAGATCCGGCCACCCTGTTTGGCGGTGGCGAGAAGGGGTTGACCGACTA  
CCCCGTCTATCAGGCCGATGACGCAGCAGCCAGCCGCTGATTACCAATGGCCAACCCGGCCACGTAACGCA  
GGCCCCACTGGTTGGGGCCTGCCATATTGTTGCGCATTAGCAACAGTGATATGACTGACCGAATCACTGT  
TGCAATGATCTCGTTCTTCTCTCCCTCGCTTTCACAAGGAGTCATCATGAATCACACCCAAGCTTGGTG  
CTGGCATGCCCCGGTGAACCGACCCAGCTTACCCTCGCCGATCTGCCCTGGCACCGCTCGCCCCGAC  
GAGGTGCTGGTGGCAAACCCGGGTCATAGCCTTCAATCCGGTGGACTGGAAGCTGATCGAATATGGCCACT  
CCAACTGGCAGGATGGTCAGGTGCCCGGGTCGATGGCATGGGCACTATCGTGGCCCTCGGCGCCAACGT  
CAACCATCTGCGCCTCGGTGCCCGGGTCGCCTATCACACCGACCTGCGCCACCACGGCAGCTTTGCCCGC  
CACACCAAAGTGCCCGCCCGCTGCTGCCCGGTGCCGATGCCCTGAGTGACGAGGGCGCCCGCCGCC  
TGCCCTGTCCCGCCTCACCGCCTGGCAGGCGCTGGCCAAGCTGCCCGCCTGCACGAGGAAGCGCTACT  
CATAACCGGTGCTGGCAGCAGCGTCGGCCGTTTTGCGGTGCAGCTCGCCCTCCAGCAGGGGGCGCGGGT  
TTTTGCCAGCGCCAGCTCACGCCACCATCACTGGCTCAAGCAGATAGGTGTGCAGGGGGTGGCCGATTATC  
GGGATCCCAGACTGGCTGGCCACCTTGCAAGTGGCCAACGGCAACGAGCCGTTTGGGGGATCATCGATCT  
GGTCTCCAGCCAGCAGGCAGAGAGCCTGCTGCCCGCGCTGGGCTACTACGGCCATATGGTGACTGTGCTC  
GGGCGCATCCCGACAATCCGTTGCCCGCCTTAGCCATTGCCACTCATTGCACGAGATTGCGCTGGGCG  
CCCAGCACGCCTTTGGCAGCGACAAGCAGTGGAGCCGACTGGTGGCCGCCGAGTCACCATGATGGAGCA  
GATGGCGAGCGGGGAGCTGACCCTGCCCGCGCTGGTGGTGGCGACTTTGAGGCGCTGCCTAACCTGCTC  
GAGCGCTTCAAGCGGAAGGACAGGGCGAGAAGTTTCTGGTGGAGTGGCATAACGCTGACCTGCCCGCA  
TAACCACACCGACCATTGAAACGAAAGAGGCCCGCCAGTGATGGCGGGCCTCTTTTATATCTAGTGCAT  
CTCATCTCGACTTCATTGGCGCCTGACTCAATACAGGCTCACCCCGTGAGTTGCGGCATAACTGCGGATC  
TCCCGGGTGAGCCGCGCCTTGTCGGCCAGAGAGAGCCAGCTCGCCTCCACCGCATTGAGCGACAAGCGGC  
AGAGCTGGCTCATGGTCCGCGCAAGGCCATCGGCCAGCGCCACAAAAGTTGGCATTCATATAGCCGCCAAA  
GTAGGCAGGGTGGTCCGAGTTGATGGTGACGCAAAGCCCTGCTCCAGCAGCCGCAACACATTTGTGCTGG  
GCCATATTGCCGAACACCTTGAGCCGGGTGTTGGAGAGGGGGCAGACGGTGAGCGGCAGCCGGGTATCCG  
CCAGATAGCACAGCAGATCGGGATCGTCTGCCGAACGCACCCCGTGATCGATGCGGCATACTGCAGCTC  
GTTGATCGCTGCCAGATGTAGTCGGCAGGCCCTCTTACCTGCATGGGCCACCACCGGAGCCGCGCAGC  
TCGCGGCGAGCGGGCAAAGACCCCGGCAAACCTTGGTGGTGGTTGCCCTTTTACCCAGTTCGAGGCCGA  
TGCCGTGAATGCGTGACAGGAAGGGCATAAGCCTCTTCCAACGTCGCAAAGGCATCCTCTTCGCTCAGGTG  
GCGCAAAAAGCTCATGATCAACCGCCAGCTGATGCCAACTCCTTCTCCCCGGTCTGCAGCGCCCCGCTCG  
ATGCCGCCAGCACAGTGGCAAAGGGGATACCGCGGGCGGTGTTGGGTCTGCGGGTGAAGAAGATCTCCA  
CATGCACCACCTTGTCGGCGGCGCAACGCTCAAGATAGGCCAGGTGAGGTGGAAGAAATCCTGCTCGGT  
CACCAACACGCTGGCGCCGATAGTAGAGGTGAGAAAAGATTGCAGGCAGTCAAAGTCATAGGCGGGC  
CGCACGCTGGCGACATCGGGCCAGGGCAGTGGCACACCGTTGCGGCGGCCAGCTCAAACATCAACTCGG  
GTTTCGAGGCTGCCCTCGATATGCAGGTGCAGCTCCAGTTTTCGGCAGTCCGGCGATAAATTGCGCGGGGT  
GAGGTGTTCCGGTGTGACTGGCTTGGGAATCGGGGTGTCATAGCGACGGCTCCATCAGCAAAGTGATCC  
GGCGTCAGCCCTCCACCAGACTGACCCGACGGCAGCTTTATTTGTGCACCGAAGTGGCGAGACAGGGGAG  
ACTTGTTCATCAAACAGACTTATAATGGCGTCACAAAAATCATAAATGATTGAACATCTTAAACGATTGGCG  
GCTCGCCTGCGTCTGACAAGGAGTTTTTCATGAAGAAGAACGTCATCTGCGATATCGACGGTGTATCCT  
GCACAACAACGATCTCATCCCCGGTGCCGACCGTTTTCGTCCATCGCCTGCTGGAGCAGGGCAGCAAGCTC  
TTGTTTCTCACCAACTACCCGGCCAGACCAGAAAAGATCTGCAAAAACCGCTTCCGCTCCGCGGGGATCG  
AAGTGCCGGAGGAGTGCTTCTACACCTCCGCCATGGGCACCGCCGACTTCCCTCAAGCGTCAGGATGGCAA  
GAAGGCCTATGTGATCGGTGAAGGGGGCGCTGACCCACGAGCTCTACAAGGCCGTTTACCATCACCGAC  
ATAGACCCCGACTTCGTGGTGGTGGGGGAGACCCGCAACTACAACCTGGACCATGATGCAACAGGGGGCCA  
AGTTTCGTCGATCAGGGGGCCCGCTTTATCGCCACCAACCCGACACCCACGGCCCATGATGCACCCGCG  
CTGCGGCGCCCTGTGCGCCCCCATAGAGCGGATGACCGCAAGAACCGTTTTATGTGCGCAAACCGAGC  
GCCTGGATCATCCGTGCGGCGCTGAACCGGATGGAGGCCACTCCGACGACACCATCATCATCGGCGACA  
ACCTGCGCACCGACATTCTGGCAGGCTTTCAGGCCGGTCTCGAAAACGGTGTGTTGCTCTCCGGGGTGGAG  
CAAGGTGCGCGATATCGACCGCATGCCGTTTCAGACCGAACCATATTTTCGACTCCGTTGGTTCGACATCGAT  
ATCGTCTAATCACCAACCAAGCGTTAAACAGGGCAGGTCTCTCTGCCCTTGCAGGATCTGTTATGGAAC  
CCATTCTGATCGCCGTGGCTTTTGGTTGCGGCATGGTAGTCAATCTGATTGGCTGCCCCCTGCTCGG  
CTTTCTGGCCGCCGTTTTATCCTCAACGGCATGGGATATGAAAATACTCCCGCCTGAGCGAAGTGGCC  
GATCTCGGCGTCACCCTGCTGCTGTTCAACATCGGTCTCAAGCTCAATATCAAACCCCTGATGCGACGCG  
ATGTGTGGGGCACCACCAGCCTGCATCTGCTGCTCTCCACCTGCTCTTTACCGTGGTGTGCTGGTCTG  
CAAGGGACTGGGGCTTGAACCTGCCCTGTGCTGGACTGGAACTGGCGCTGCTGCTGGGCTTTGCCCTC  
TCCTTCTCCAGCACCGTCTTCGCGAGTCAAGGTGCTGGAAGATCGCAGCGACATGAATGCCCTCTACGCC  
GCATCGCCATCGGGGTGCTGGTGTGATGCAGGATGTGTTTCGCGGTGGCGTTTTCTGGCGTTTTCCAGCGGCAA  
GTGGCCAGCATCTGGGCACTCTGGGTGCTGGGATTTGCCGCTGCTGCGCCCGCTGCTGTTCAAGCTGCTG  
GAGCGGGCCGGTACGGCGAGCTGCAGGTGCTGTTCCGGGTCTTTCTGGCACTGGTGGTCCGAGCCCGCG  
GTTTTGAAGTGGTTGGCCTCAAACCGGACCTGGGAGCCCTCATCATCGGCATGCTGCTCGCTCCCATCC

TGCTGCGGCAGGGCTTGCAAAGGGCTCTTTAACCTCAAAGACCTCTTTCTGGTCTGCTTTTTTCTCACC  
ATCGGCCTCAACGGCTTGCCGACCCACGACACCATGTTGCTGGCACTGGCGCTGGTGTGGCCCTGCCGC  
TCAAAGTGTCTCTACTATCTGGTCTATAGCGGCGCTCACCTGAGGGTGCCTACCGCCCTGCTCTCGAC  
CCTGGCGCTCACCAACTTCTCGGAGTTTGGCCTGATCGTCGCGGCCATTGCCGCCAAGGCGGGCTGGCTC  
TCTCACGAGTGGCTGGTGGCGGTCTCGCTGGCGCTGGCGGCCAGCTTTATGATCTCCGCCCTCTCAATG  
CCCAGAGCGAGCGCATTTATCACCCGATCGGCCACTGGCTGCGGGGATTGCAGGCGAGCAACCTCCATCC  
GGAAGACAGACCCATCGAATTGGGCGATGCGGAGGTGATCATCTCGGTATGGGGCGGATCGGTGAGGGG  
GCCTACTTCGAGCTGGAGAACAAGTACGGCAACGTCATCTCGGGTGGAGAACGACAGCGAGAAGCTGC  
CCACCCTGCGCGCCAGGGGATGAACGTCATCGAGGGGGATGCCACCGATAACCGACTTCTGGGACAAGGT  
GTTGCTCTCAATCAGGTCATCTGGTGTGCTGCTGGCGATGCCCCACCACTCGGGTAACCTTACGCCATC  
GAGAAGCTGCGCAGCCAGGGTTCAACGGCAAGATCGCCGCCATCGTCCGCTTCGAGGATGATATCGCCT  
CCTTGCAGGAGCAGGGGGTGGATGCGGTGTTCAACGCTTACAACGAAGCGGGCAGCGGCTTTGCCGCCA  
TGTGATCCGCCGCTTGACGCCACTTTGAGTCGTCGACCAGCAGCCCTTGGCAAGGGCTCTTGGCAAGCAG  
GAACGCATCGTTTTAAGTTATGCACAACCTCGTTTTAATAAAAACGAACAAAACGCGGGGCGGGATGGCCCCG  
CGTTCCTATCTGCCGAAGCCAAGGAGGCACCATGAAAGCCCTCAACGACTGGATTTTGTCTCGATCGCCAC  
GATGCGACCCCCACCCACTGATGCCCGCCCCGAACGCATTAAGCGGGCCATCCGAGTCAGACGCAGT  
GGAACCACTACTCCGACCCCAGCCAGCAGTTTACATCGGCTTCTGGGCTTGCAGCCTGGCCGCTGGGC  
CATCCACTACACCGAGCAGAGTATTGCCAAGTCTGGAGGGGGATGTGGTATCCACGACAATCTGGGC  
GGCCAGCTGGCCCTCAAACCCGGCGATCAATTCGTGATTCCGGCAGGCTTTGTCTCGAGAGTGGGAGACCC  
TTACCCCTGTGCGAAGGTCTATGTGATCTTCAACCCGCTCAGCTTGACGTTACGTCACCCGCCCC  
GTTGCAGCAACCCTTATCCTGTTGATCTGCTTGACGCTTACGGCATGATTTTCTGCGGTTTTCCCGCTTG  
CAAAGGTTTTTCCGCTAGGCATTGTGTCTGACGAGGAATGTAATGGAATTTTCGAGCCCAAACGTGGGG  
GGCTCATATAAAAAATCAAGAGGATTACCGCCAATGTGTTCAATTTTTCGGCATTTCTGGATATCAAGTCCGA  
TGCAGTAGCCCTGCGCAAATCGGGCTGGAGATGTCCAAGCGACTGCGTCACCGCGGGCTGACTGGTCC  
GGCGTCTACAGCTCCGACAAAGCCATTCTGGTGCACGAGCGTCTGGCCATCGTCGACCCGGGCAATGGCG  
CCCAGCCGCTCTACAACCCCGAGCGCACCCATGTGCTGGCGGTCAACGGCGAGATCTACAACCACAAAGA  
GCTGGAAAAGACCCCTCAAGGTCGACTTCCAGTTCAGACCAAATCCGACTGTGAAGTGTGCTGGCCCTC  
TACAAGGAGAAGGGCCCGGCTTTCTCGACGATCTCAACGGCATCTTTGCCTTCACTTTTATGACGCCG  
AACAGGATGCCTACCTGATTTGGTCTGCGACACATCGGGCATCTCCCTCTATACCGCCGCGACGAGCA  
CGCAACTTCTATGTGCTCCGAGATGAAGGCGCTGGTGCCGGTCTGCAAAGCGTTGAAACCTTCCCG  
CCGGGACACTACCTGTGGAGCAAGGATGGCGAGCTCAAACAGTGGTACAAGCGCGACTGGATGGATTACA  
GCGCGGTGAGCATAACGTCAGCGACAAGGCGGAGCTGAAAGCCGCGCTGGAAGCGGCGGTCAAGCGCCA  
GCTGATGTGCGACGTGCCCTATGGCGTGTGCTCTCCGGCGGGCTGGACTCCTCCGTTATCTCCGCCATT  
ACCAAGCTCTATGCGGCGCGCCGATCGAGGACGATGGCAAGAGCGAAGCCTGGTGGCCACAACCTGCACT  
CCTTCGCCGCTGGGGCTCGAAGGCTCACCTGATCTCGCCGCGCCGTAAGTGGCCGATCACCTCGGCAC  
CATCCACCACCAGATCCACTTACCGTGCAGGAGGGTCTGGATGCCCTGACGGATGTCATCTATCACCTC  
GAGACCTATGACGTCACCACCATCCGTGCCCTCCACCCCATGTACCTGATGGCCGCTACATCAAGGCGA  
TGGGGATCAAGATGGTGTCTCCGGCGAAGGTTCCGATGAGCTGTTCCGGTGGCTACCTCTACTTCCACAA  
GGCGCCCAACGCTAAAGAGTTCCACGAAGAGAACGTGCGCAAGCTCGCCTCCTTGCACCTCTATGACTGC  
CTGCGCGCCAACAAGTCGATGGCAGCTTGGGGTGTGCGAGGGTTCGCGTGCCTTCCCTCGACAAGGAGTTCA  
TGGACGTGGCGATGCGCCTGCAGCCGGCCGACAAGATGTGTGGCAAAGGCAAGATCGAGAAGCACATCCT  
GCGCGAAGCGTTCGAGGATCTGCTGCCCCACGAAGTGGCGTGGCGCCAGAAGGAGCAGTTCTCCGACGGC  
GTAGGCTATTCGTGGATCGACAGCCTGAAAGCCATGGTTCGAGACCGAAGTGCAGGACAGATGTTCCGAAG  
CGGCTGCATTCCGCTTCCCATCAACACCCCGCTCACCAAGGAAGCCTACTTCTACCGAGCCATCTTCGA  
CGAGCACTTCCCGCTGGAAGCCGCGCCCGCACCGTGCCTACGGCAAGTCGGTCCGCTGCTCCACCCCTC  
ACCGCGCTGGAGTGGGATGCCAAGTTCAAAGAGATGGCCGACCCGTCAGCCGCTCCGCGCCGCTGTAATGGACG  
ACCAGCAGGGCTACTAAGCCAGAGCGGGGCGACCCAGCGGCTAACGCCAGATATCAAAAAGCCCTTAC  
CATGGTGAAGGGCTTTTTCTTATGGCAAATAGAGTAAATAGACGATCAGAACATGGCCCATAAAACCGAC  
GTTGAAAGTGTGAGCATAGGCTCTGATAGAGCACCACATATCGAAGAATGGGGTGGTGTATTCCCTGCT  
ACATAACTGGCACTATGGCATTCTGTCATGTGGAGGCGAAAATCAGGGTAGCCAACACTGTATTAATGTAGG  
CATCAATTAACAGCAATCTATTTTTTTCAGATGCCGATATTTGAAAATAGTGATATTGTCAGCAACCAAGTGT  
CCCAAATATGTTATCCATGAGGTATCTATGTCGATAAAAAACTAGTTCTGCTTGTCTGGCATTACCGA  
TACATGTGCACGCCAACATTTTTTTCATCAAGGGAAAATACGGTCAATGACACAGATGTAGATAATGCAGC  
CATCTACTTCAATGCAGGCATAGACCCGAGACCGTGGCTGGCTGTTATCCTCTATTGATGAAATTAAC  
GGCAATTATCGCAACATTCAAAATATAGGCATATATCTCAATAGTGGGGCGGTGATATGGACTCCGGGT  
ATATGGCCTACGAGGCTTTGCGTAAAAGTCCGACGAAGCTGAATATGATTAACGCATCAAATGTGGCCTC  
TTCTGCAACTATAATTTACTGTGCATCGAATCAGCGTTATGCCATGCCAATGGCATCTTTCTTACTTTCAT  
CCTGCTGCCGCGGCAAATGAAATCAATGATTACCTTAAGCCGGATCAGGCACAGCGTATTTTGGACGATG  
CTGAAAAATACAACCTCGCTCTTTTCGACCATTTACTCCTCCTGCACCAAAATTCGGCAGAGGAGCTAAA  
GGCCATCACCTCGTCTGAGAGTCGACGTGCAATCTACAACATGAAAAATGCCAAAAAGTAGGGCTCGTG  
AATCAGGACATTAACAGCCGGCAACATACCCCGTACCTATTACATCACGGATATGCAGAATAATAGG

CCAATCCCACCATGGCAGCCATTCCAACACACAGGAATGACAGCCATGGCGGTTTACAACACAAGCTGAG  
TTTTGGCAACAGCGCGAACATATTTTCGTGAGCGAGCCAGTCATCTCACTGGCTCAATGAGTATTCCTGC  
TTTAGCCATCAAATGCTGCATCGCGGATCCGATCAGGGTTGCGCGTCCGGCTGGTTGACGGGGGCCG  
CTTGATAAAGGCTTGCAACTGTTTCGCAGTTGGCGACGATGCGGCGGATGGTAGGGTAATCGTCCAGGGT  
ATGTCGTAGCGACGGGCGTTGTAGACCTGGGGCACCAGCATGCAGTCGGCCAGGGTCACTTCGTTGCCGA  
CGCAGTAGACACCGGCTGTGGTCATCAACAGCTGTTTCGAGGGCGGTAAGGTCTCGTCAATCCAGTGGCG  
ATACCAGCGGGCCTCCTGCTCGTTGTTGGCCCTGAAGTGTCTTCCAGATAAATTGAGCACCCGCAGATTG  
TTGAGCGGGTGAATATCACAGGCGATCATGTTGACGATCTGGCGCACCCGGGCCCGCGCTCGGGGGAAG  
AGGGCATCAGAGAGTAGGCGGGATAGGTCTCGTCAAGGTACTCCATGATGGCAACCGACTGACCGATCTG  
CACATCCGCATCCACCAGAAACGGCACCCCTTTCGGGTTGATCCGGCGATAGGCCCTTCTCGCTCTCG  
TCGCCTTGGCCAAATTGATGGGGTGTCTGCTGAGGCGAGCCCTTGAGCTGCAACAGATCCGCACCC  
GAAAACCTTGGCGACGAACGCCAATAGCCAAACAACGCAACATAAATCTGTCCCTGCATCTTATCTGGGCC  
CGAAGCCCGCGAGGTGCTCACCACTGCCTCCTTGTGTATCCGGCACCGGTTGAGGGTCTGTCGTGATCC  
GGACATATCCCGAATAGGTTTGGCCCAACCGGCGCTGGCCATCAACCTCCCTGACCGCTCGCTGACACC  
ACCTGTTGAGAGATGGTGCCAAACAGGTTTTGGCCAGAGCGATCCTCCATCGCGATCGACACTCTATCAC  
CAAATGCAAATAGGGGTTATAGCTTGATCACAATCAAGAATTTCCAGCATGCGGGCGCTCGGCGATGCA  
GGATGAGCCGGCGCTGCGATCGTAGTTGGAGACGGTGGCCGAGCCAATGATGCAGCCCGCACAGAGCGGT  
CTGGTCTTGGCGGCGTGGGCAATCAGCTCGAAGAAGTTGAAGGTCATGTCCACCCCGGCTTCGGGCGCAC  
CAAACAGCGCACCGTTAAGGTGGGTGAGAAGCGGCGAGATGCACTTTGCCATCGCACCAAGTCAATCCCCAG  
CTCATCCGGGGTGTAGGCCACCGGCGAGAAGCGGCTGGACGGTTTGGACTGGAAGAAGCCAAAGCCCTTG  
GCAAGCTCCCCCGAATAAGGTTGCGCAGGCTCACGTCATGACCAGCATCAGCAATTTGACGTGGCTGG  
CGGCCCCCTGCGGGCTCACCCCATCGGCACGTCGTCGGTGATGATGGCTACCTCCGACTCGAAATCGAT  
CCCCACTCCTCCGATCCCATGACAATCGGCCACAGGGGGCGAGAAAAGTGTGCGGAGCCCCCTGATAC  
ATCAGCGGATCGTGCCAGAAGCTCTCCGGCATCTCGGCGCCGCGCGCTTGCACCAAGCTCCACATGGT  
TGACGTAGGCGCTGCCATCGGCCACTGATAGGCACGCGGCGAGGAGAGGCAATACGCTTCGTCAA  
GGGAACGCCTCGGCCACGCGGCCCTCGTTAAGCTGCTGATAGACAGCCTCCAGCTAGGGGCAATCTCG  
GCCACTCGTCGAGGGCGGCCTGCAAAGTGGGGCAATCTCGCTCACCCGTACAGCCCGGGTCAATCCC  
GGCTACTACCACAAAGCGCCATCGCGCTGCCATTTGTTCAATGTTGCCAATTTATAAGCGATTCCTT  
ATTTGCGGCGAGCCGCTCGGGGCGTCCAGCTGCCAGTGGAGACATAACCGGTTTCTCGATCCCTCGCACAG  
GCTGCCGACGTTAGCGCATCGCGGGTGTCTAGCATGACAGCCACCTCGTCCGTTGAACTTCTTGGCATAG  
GCCTGCCCTGCCGCAAACGCCTTGGGATGGGGGCGTGGGTGAAACCGGCGGGATGGAAGGTGACCATGC  
CCCGCTCGATATTGTCCCGGCTAAAGAAGTCCCCGGCATGGTAGAAGAGCACTTCGTTCGTAATCGTCATT  
GCTGTGGTAGAAGGGCACCTTGGGGCGCCGGATCGCTCTCGATAGGGCGCGGCACGAAGGTACAGATC  
ACGAAGCGGCTCGCCACAAAGGTAGAGTGGGCCGACGGCGGCGAGATGGTAGCGGTGGCTCATCAGCGGGC  
GGATATCCCGCCAGTTGAGGCGCACACGACAAAGTCCCATGCCACCTTGTGCATCCAGCGGGTTGAA  
GGGCCAGGTGATGACCGACACCTGATCGTGGCGCTTCACTGCAGCGACCAGGGATTCATCCTGCTGG  
GCCAAAAGCGTTTCGTTGATGGCAGGCACATCCAGCGCCGCGGGTGAAGATGGCGTGATTGCCACCA  
GCCCTTGTCCGGCAGCTGATAGCAGTCGTTGGTTCGCTCGATCATCAGGATGAACAGGGGCGCCGTCGG  
CTCGATGCGCCACATGGTGCCACGGGGGATCACACATAGTCGCCGTCGCCGAGGCTCAGGTGGCCGTAG  
TCGCAGAAGAACTCGCCGCTCCCTCGTGGATAAAGAGCAGCTCGTCGCCGTCGGCGTTGCGCACCCAGAA  
ACGGCATCGCCTCGGAGAGCCGCCAGATGCGATAGCGGCAGTGGGGGTTGCTAAGAATGTGGGAGCCAC  
CCAGGGAGAGAGCGAGCTTACCTCCTCTTGCAGGGCATTTAGGTCAAAACAGCCGTGGCCGACGCGTCCC  
TCCCAACTGATCCAGTCAGTGGGTGCATGCTTGTGGTGCATGTGGGTAGCTGGGCCGAAAAGCCGCTGC  
GCCCCAGTTTCGCGCTCATAGATGGCCTGTTCCGGCAGGTCCGATGGGCCGTCGGGAGTGGGTTCCCTC  
CCGATGGGGGAAGTTAATCCAGTTACGCATCGTTCGCTCCCTCTTTGCGGGCACCTTCTCATCCTCGCC  
GCCATCCAGCACGCCGCGGCGGATCTGGTCCAGCTCGATCGATTCAAACAGCGCCTTGAATTTGCCCTCG  
CCAAACCCTTCGTTACCCTTGCCTGGATGATCTCGAAGAAGACCGGGCTATCACGGTATCGGTGAAGA  
TCTGCAACAGGATGCCATCCTTGGTGGGGGAGCCGTCGATGAGGATACGCAGCTCTTTGAGGGCCGCCAG  
ATCCTCCTGATGCCCTCGACACGACTGTTCACTTCTCGTAGTAGGTATCCGGGGTCCGCATAAAGCCG  
GTGCCGCGGCTGCGCAGGGTGGGATGGTCTGGTAGATATCGCTGGAGGCCATGGCGATGTGCTGGATCC  
CCTCCCCCTTGTACTGGCGCAGGTAATCCTCAATCTGCGACTTGTGCATCCGCCGACTCGTTGATGGGGAT  
GCGGATCTTGCCGACGGGGGCGGTCATGGCGCGTGAATGCAGCCGGTCACTTGCCTCGATATCGAAG  
TAGCGAATTTACGGAAGTTGCCGATCCGCTCGTAGAAATTCGACCAGACATCCATATTGCCGCGATGCA  
CGTTATGGGTGAGGTGATCGATCTCCATAAGACCGGCATCTACCTCTGCCATCCGGGACTGCCAGTCCGG  
GTAGAAGACAAAATCCACGTCATAGATGGAGCCCTTGTGCCATAGCGGTCAACAAAGGAGAGCGTGTCTC  
TCGCCGATACCGTAGATGGCGGGAATATTGAGCTCCATCGGCCAAATCTTGCCGACAAAAGGCTTGGCCC  
CCTTGGCGATGGCGTACTGCTGGGCTTTGCCCGCATCACTCACCCGAAACGCCATGCCGCAAACGCTCGG  
CCCGTGCAGGCTGGCAAACCTGCTCCGCTGGGAGTGGGCTCGGCATTGACCACAAAGTTGATATCCCC  
TGCCGGTAGAGCCAGCACTGCTTGTGTTTGTGCTTGGCGACCTCGGCAAACCCGAGCGAAACGAACAGGC  
TCTTGGGGCGGCAATCCCTTGGCATCGGGGGCCGTGACTCGACAACTCGAAGCCATCTGTGCCATAA  
CGGATTGATGGTGTGGGTGGCGGAAGAGGTGGCATTCATCGGGCGCTCCTTGCTCTTGATTCGGTTAAAA

CGGATTGCAGCACCTCGCGGGCGGGCAAGTGTAAACAACCTTGTTCATTAGAAAGCAGGGCGTAGCAGGAA  
GAGAAGAGGGCGGGTTGCAGATAGTTTTTCGCAGCTGGCAGCAAAAGATGTAAATAGATTGTGACATTCAA  
GCGGCAGCCCTGCGGATCAAACGGTGACGACCCACAGGACTGTCAGCTTTGGCTTACAGTTGCCAGTTTT  
TGACCAGCAGATGGGGCAAGCGGGCCCGGGCTTTTGCAGTCGCGTGGGGCTCGGATTGATCAACCATGC  
CTCTTCCCCCAACCCCAGCAGTGGCAGATCGTGCAGGCTGTCGCTCAAGGCCAGCTCGGCATCGAGGGCG  
CAAATCTCTGGCAGCAGCTTGTGCTGTCCGTGGCAATAGAAGCGCGGCATCAGGCCACCAAAACGGTAGT  
GCATCTGCGAGCCAATGATCCGGTGGGGCAACTGGCCGGGCAGTTGCTGATAGAGCTGGGCTCGCACCAG  
CGCGCAGGGGCTGGCGGAGATCACCCAGCAGCGCGCCCCCTCGTGTTCAGCAGATCGCGAGCCTGACAA  
AACAGTCCCCGGCCTGGTGCGGCAGTAGGCGCGTACCAGCTTGCGCCAGCCCAGGGGAAAGCCCCAACG  
TGATGGCCCCACAGATAAGGGAGATACTTCGCCGCCGCTGACTTGGCAACAAATAGACCAAGCCACCGAG  
CGCAATCACTGGCAACAGCAGCAGCGGCCAGATCCGGCGGCACAGGATATAGCGCAGCAGACCGGCGTGG  
CTGTTCGCCGGGGCCAATGTGTGCTCAAAGTCGGCCAGGATCCAGCTCGGCGCACGTCCGTGAGGATCAC  
GCTCTTTTCGCTGAATGGATAATGGCGTTCGGACGCTGGGCGCATCAGCATCAGGGCGCAAGGGCTGCGATG  
GCGGCCATGAGCTCGGGGGTGACAAAATTCACCTCCCCACATCGGGCGGGCAGACAAAATCGAATGGATCGC  
CCGCCAGCGTAAAACTCAGTCGCCAGGCGTGCAGATAGCCGCGATCGGCTGGCGTGCCGCCATAGCGTTC  
ATCCCCGAGAATGGGGGCGCCGATGCTTTTTGAGGGCAACCCGGATCTGGTGGGTTTTGCCGGTCTGGGGC  
TTGACGCGATAGAGCCGAGCCCTTCGCGCACCGACACCGAATCGAACCAGCTGATGGCAGGATTATCCA  
GCGTGCGCCCAGCAGCCAGCTGCCGCCACGCCCTTTTGCATATCCCCTTTCACCCAACCCCTGCTTCTT  
CTTTCGGTTTTGCGATCGGAGAGCGCCAGATACTGTTTTGCTCACCTCACGGGCCGAAAAGCCATGCTCAGC  
TCACGGTTCGCTCTGTGGTGCGGGCCAGCAGCACCAAGCCGGAGGTCATCTTGTGAGCCGGTGTACCG  
GATAGAGAGTGAGCCCCGATCGGCCCTTCACGCGATTGACCAGCCCCGAATTGACCAGCTCACCGTACC  
CTTCTCGTTCGTGCATGCCGATACCGGGCTGCTTGTGATAACCAGGAAAGCGGGATGCTCAAACAATATC  
CGGTACATAAAAACCTCGGGAACTGGGGAAATAAGGCATGCAGCCAACGACTGGCGGGCGCTCGGGAGTGTG  
CATTCTCCCTGCTCGGCCGCCATTTGGCAAAACCGAGCGGGCAGAGGATGAAGATGAAAAATGACCCCGCC  
TGCAACAGGGCGGGGTCATTTTGCTCATCTTGGCAGATCACACCTTACACATTGCGCGGACGCAGGTGAG  
CGTGCCAGCGCGCTTCCACTTCTTGAACAGCCAGACGATGACAAAGGTGAGCAGCATATAGAGCAGCCC  
TGCGGTCAAACACGCCTCGAACGGACTGTAGTAGCGAGAGTTGATGATCCGCGCCGCGCCGGTGCAGATCG  
ACGATGGTGCATGATGCCCCGCCACCGCCAGCCCTGCAGCATGAAGATCACCTCGTTGCTGTAAGCCGGCA  
GTGCCCGGAGAAACGAGTTGGGCAAAAATGATCCGGGTGAGGGTCTGCCAGCGGGTCAAGCAAAGCGGTT  
GGCTGCCTCAATCTGGCCGCGCGGCATATTGTGCACCGCTCCGCGCACGATCTCGGCGGTATAGGCGGG  
GTATTGAGGGTGAAAGCCAGCAGCGCACAGAACCAGGCTTCGGAGAAGAGCGACCAGGCGGCACCTGTTCT  
TCAGCCACTCCCCTGGGCGGGCGCGTAGTAGATGATAAAGAGCTGCACCAGCAGCGGGGTACCGCGAAA  
GAAGTAGATATAGGCCAGATCGGCCCTTGTATCAGCCAGTTGCGGCTGTTGCGCAGGATGCCCATGGGC  
ACCGCCAGCATCAACCAAGGATCAGAGAGAGGGCCACCAGCCAGACGGTGGTATAGAGCCCCCTCCAGT  
AGGTGGGCCACTCTTTGAGAATGATTGAGAAATCCATGGCTTACCTCGTCTTGTATGGCATAAGTACGCTC  
GGCCACTTGAGCGCCGAGGTGGAGACTGCGGTGAAGATCAGGAAGATCAGCGCCACCGCCATGTAGAAG  
GTGAAGGGTTGCTGGGTGAGCCCCGCTGCCAGCGAGGCTTTGCGCACCATGTCATCGAGGCCGATGATGG  
AGACCAGCGCGGTGGTTTTTACGAGTACCAGCCAGTTGTTGCCAAAACCCCGCAAAGCGTGGCGCATCAT  
CTGGGGGAAGAGGATCCGCACAAACACCTGGGTTGCCCGCATGCCAAAAGGCCCGTGCGGCCTCCAGCTCG  
CCTTTGTCCACCGCCAGAATGGCGCCGCAAAAGGTCTCGGTTCATGTAGGCGCCGAAGATAAAACCGATGG  
TCGCGACACCGGCCACAAAGGGGCTGATGTGATATAGTCCGGGAGCAGGGAGACCCACTCCTGATTGGG  
ATTACTCTCCAGTAACCAGCTGTTGTAAGTCTCGTTGACCCAGGTGCAGATGCCGTTGATCAGCACCTGG  
CCGCCAAAGAAGAGCAGCATCATTAGCACAGATCAGGGATGCCGCAATGATGGTGGTGTAGCCGGTGG  
CGATGGCCCCGGGCCACTTGTAGGGAGAGAGTTTGGCCAGCGCCCCAGCATCCCAGCAGCAACGCCAG  
CAGCAGGAGGGCCAGCGCCACTTCCAGGGTGAACCCAGGCGCCCTCCAGCAGCGAGGCTTCGTATCCTTTC  
AAATCAAACATATGCAGTCCATCGCCACTGAATCTTACGCACCTGCTAACCAGAAGGCTCCATAGCAG  
TCCGAATGAAATATGTGCAGCTCCATTGCAATCAATGCGGGCCCGTAAACTCCCTCAGGGAGGTGACGGG  
CCCGATGACTACTGACGGGATCAACCTGTGCTTACTTGGCGTAGACGTTTTTTGGAATTACTCGCCGTA  
CGTCTCTTTGTTTTACTCTCCGTAAACGTGCAACTCGAAGTACTTGTGCTTGATTTCTTGTACTTGCCG  
TTGGCAGCAGCGCCAGAATGGCGGGCTTGAATTTCTCTTTTTCAGATCCTTGTGAGCCTTGGCGACCGCAA  
TACCGGCACCCCTCGCCAAACCACTTGGGATCGGTGAGTTTTCGGGCCGACGAATTCAAAGGCATCACCGCC  
CTCTTTCTTACGAGACCGTCCGGTGTGCGGCAGAGTCCGCCAGCACATAGTCCACACGACCGGATTTTC  
AGATCGAGATACGCTTCATCGCGGGTCCCGTAAACGCTTGTGATGGTGGCGTTGGGGAAGTTGTGCGTAATAA  
AGGTATCCATGGAGTGCACGCTGCACCGCGACGACTTGCCTTCCATAAAGGCTTGTGAGCTGCAC  
GTCAGTGCCTTCTTGGCGGGCAAGCGGGCCGAATGTGCTGTTACTTCTGGGTGAAGTCCACCTTCTTC  
TTGCGCTCTTCCGGTGTATGTCATGGTGGCGATGATGGCGTCAAACCTTGCGCCAGCAGCAGCGCCGAATGA  
TGCCGTCCCAGTCTGCTTACCAGGGTGCACCTTCACTTTTCATCTCTTTCGCACAGGGCGTTGGCAATGTC  
GATATCAAAAACCTTTTACCTCGCCACTGGGCTCGGTCCAGGAGAAGGGGGGATAGGCACCCCTCAACCCCG  
ATCCGGACCTCTTTTCACTCCTTGGCCATCAGGCTACCGGACCGCAGGGCAGTAACACGGCTGTGCCA  
GCATCAGCTTGTTCATGTATCTCTCTTGTATAAAACAGTTGATTTGGGTAACCAGGCATCCCAGCCATCAGT  
AGATGGAGGAGATGAATTGCTTGAACCGCTCGGATTTGGGATGGGCGAAAATCTCCTTGGGGTTGCCCTC

CTCTTCCACCCGCCCTGATGCAGAAACATCACCTTGTTCGATAACATCCCGGGCAAACGACATCTCGTGG  
GTCACCACCAGCATGGTGCGCCCTCTTCAGCCAGCTCGCGCATCAGGCCGAGCACCTCCCCACCAGCT  
CGGGATCCAGCGCCGAGGTGGGTTCGTCAAACAGCATCACCTCGGGCTCTACCGCCAGCGCACGGGCGAT  
GGCGGCCCGCTGCTGCTGACCACCTGAGAGGTGGCCGGGATAGTAGTCACGCCGCTCCCAGAGTCCAACC  
CGGTTGAGCAGTTGCTCTGCCTTGGCCAGTGTCTCGGGCGGAGGCACCTTGAGCACCTGGATTGGCACTT  
CGATGATGTTCTGCATGATGGTCATGTGTGACCAGAGATTGAAACTTTGAAAACCCATGGCCAGTCGGCT  
GCGGATCCGCTCCACCTGACGCATATCCTCGGGCAACCCTCGCCGGCGCGGCTGGTTTTTCATCCGGATC  
AACTCGCCATGGAGCGAGACGGTGCCGGATGAGGGGGTTTTGAGCAGATTGATACAGCGAAGAAAGGTTCG  
ACTTCCCCGAGCCGGAGGAGCCGATAAGGGAGATCACATCCCCCTTGTGGGCGGTTCATGTGATGCCCTT  
GAGCACTTGTGGGTGCCAAAATATTTGTGCAGATCACGTACTTCCAGTGCGGCAACGTCGCTCATCCAT  
TACAACCTTGTCTGTCCCTAGACGCCGAGGGGCTGACTCAACCATCGTCCATTTAACAAAAAGTTAAC  
CGATGGCAACCTTCAGCGAAAATATCACCCGGATAGTGAAAAACAATACAGAACGAGGGTCTTCAGGGG  
ATTGCTCTATTTTTTATTGCTCTTTGCGTATTTTTTCAGCACTTTGTTTGCATAAACAGCCGTTTTCAATG  
GCTATTCCGATACCGCCTTTTTTATACCCCAATCATATCAGTGGCAAGAGAAAAGCGTGATGTGTGCCAAA  
CCGGCACAAAATGGCTTTATGCACCCCCCTTGCCGAGCGAAAATATCGGCACCCCGATCGGATCAACTTGA  
TTTTATTGGTGCCTCGGGCTCGCACAGAACCTTATCAAAACAGAGAGGTTGTGGCAAAAAAGTAACAACC  
TGCCCCAAAAGGGCTGTTTTCGGCCATGAAAGCGATAGATATGTGACACAGAGCCAATAAGTAATGATA  
AGGTGGTGTTTTTTATCAGTTTTTGTGATCGAGGCCTCGATGCTGCTCAATGTGTTGCTGATCCTGTTGCC  
ACTGGCAATCGGCTATCTGATTTCCCTCTCCTCTGCCGACTGATCAAGCTGGTCAACCAGAGTCTGGGC  
AAGATGGTCTACCTCATTCTGTTTTCTGATGGGGCTCGGGCTTGCTTATGTGGAGAACCCTGGGCAGCAATC  
TGGCGGTGATCTTCAAGGTGCGCCGGGTGATGCTCACCGCATCACGGTCTGCAACCTGCTGGCCCTCTG  
GTGGCTCGACAAGCGCACGCCGCCGACCCACGAGGCGAGCGATGCCAAGATGCCGAGCAAGCTACACCTG  
TTGTGGGAATCCCTGCAGCTCTGCTTTGTGGTGTCTCGGCGGTGTGCTGCTGGGTCTACTGGTAGATCTGC  
GCGCCCTGCCCATCGACAAGTGGAGCGAGTGGGCCCTGATGCTGCTGCTGTTTCTCATTGGGGTGCAGAT  
GCGCAACTCCGGCATGCGGCTGCGCCAGATCCTGCTCAACCCCTGGGGGATGAAGATAGCCGCCACCCTC  
ATCCTCAGCAGCTGGCTTGGCAGCCTGCTGGCGGCCAATTCCTAGGCATGCCCTTTGCCATGGTCTGG  
CGATGAGCTCCAGCTTCGGCTGGTATTGCTCTCCGGCATTCTGGTGGCCGACAACTGGGGCCGGTGTCT  
CGGTTCTGTCTGCTTTATCAACGATCTTGGCGCGAGCTTATCGCCATTCTGATCATCCCGCTTATGATG  
CGATCCACCCCTCGCGCCCATCGGTTACGGCGGAGCCACGGCGCTGAGACTTACCCTGCCGTTTATCC  
AGAAATCAGGGGGCATTAGGTGGTGCCGGTGGCCATTGTCTCCGGCTTTATCCTGAGCCTGCTCGGCC  
CATCCTGATCCTCGGGTTTTCTGGCGCTCTAAGCCTGATTCCCACATTGCAGATAAAAAAGCCCCGACCTTG  
TTGTGGGCTTTTTGCTGTTTGGAGCGACCACGCACTCGCACTGGCTGCGATATTGCCCGCAGCCTTATTC  
GCGCCACTGGCCGCACTCATCACCCGTTTCGATAGCAAAACGTCCGGTCTGTCACCAGCAGCAGATCCGCA  
TCCTGCCCGACCCCGATACGCCCTTGTGCGGAGCCCCAGCGCTGCGCCGGATTGCTCGTCACCGCGG  
CCAATGCCCTCTCCAGCGAGACACCGAGCCGGATCGCGCGCACGCACTGCTGCCACAGGCTGGCAATCTG  
GCCGCTGCGCATCTCGATTAGCCGCCCTTCCGCATCAAAGCGCGCAGGCTGGCGTTGGCATCCGAACATA  
AAGGTGATGCGCTCGGCAGGCACATTGGCGGCCAGCAGCTCGAGAAACGCATCGGCGGCAAGCCGCTCGC  
CATCCTCCAGCAGATCGGGAAAGCTCGAGGTGGTGGGTCGACCCAGCCTCCCCTTGCCCCACTCGAT  
GGCCTCGGCAAGAGCCAGGGGTTCGCGTTGCAGTGGGTAGGATAGAGCTGGCGCAGCGGAATATCAGTC  
TCATCGCGCAGAGCCCGCAGGGGGGCAATGCCCTTGGCATCCCCGACATGGAGAAGCTGACCCCGC  
TCTTGCCCGCAAGCAGCCCTGCCACCCGCGCTCGCTGGCAAGCCTGGCCAGCTCATCGTGGGTGCGCGC  
ACTGGATCTGTGGTTCGCTGATGGCCACCTCCCCACCCCAATACCTCGGGGATCAGGATGATGTCCGAC  
TCCACCGTGCAGGTCAGGGTCTTGACCGGCAGATGGTAAGAGCCGGTATACATAAACCGCGCTCACCCCGG  
CGGCGCAAACTCGCGCACCTTGCCGAGCACCTGCGCGGGAGTGCGGGTGAGGCTGCTCGGTGCCAAGCGC  
CGCCACCAGGGTAGTGACACCTGCCTTGAGCGCCTCGCCCGCCAGTTCCGGGGTGCAGAAAGGCAAAAG  
CCCCCTCCCCCGCCGCGCCGTTGATATGGGCCAGCGGATCCACCAGCCCGGGCACCAGATAGCGCCAC  
GACCATCGACCCTGTGCAGCGGCCAGTTTGTGGGCACCGTCAACCCCTTGCCCATCCAGGCGATACGGCC  
ATCAGCCACCAGCAGATCCTGCTGGCCAAGGTGGGTGGGGCTGAAGATCTCGGCTCCCTCGATCAGGGTTC  
AACATGGCGATCCTCCTTGCACGATTGTGCTTGTCCAATGAAAAGAGAGGGAGCAAGCTCCCTCCCCC  
GTCAACCACATATATATCGTACTTGAAGTACTTCTGGTTGATCTGCTGATAGGTGCCATTGGCACGCAG  
GGCCTTGATCGCCTCATCCAGCTTCCCTTGTAGCTCCTTATCGCTCTTGCACGCGGATCCCCATGCCA  
TCACCAAACCACTGGCGATCGGTGAGGGCAGGCCACATAGTCGAACTTGTGCCCCCTCTTTGCCAA  
GGAGCCCTGCTCGATGGCAGAGGCATCGGCCAGCAGGGCCAGCACCCGACCCGCTTTTCCAGATCGAGATA  
GGCCTCATCGGCATTGCCGTAGCGGACGATGGTGACATTCGAGCCAAAATGTGCGTCCAGGTACTTGTGCG  
TGGGTGGTGGCACGCTGCACCCCGATGCGCTTGGCCGCATGCCCTCCGGGGTCCAGGTCAGCTCGGTTTC  
CCTTGGCCGCCACAAAGCGATTGGGAATATGGGCATATTTCTCGGTGAAGTCGACCTTCTGGCGCCGCTC  
GTCGGTGTGATCGACATGGCGGGGATGATGGCATCGTATTTACGCGACAGCAGGGCCGGGATCATGCCGTCC  
CAATCCTGCGCCACCAACTCGCACTTGAACGCCATCTGCTGACAAAAGGGCGTTGGCGAGATCGATATCAA  
ACCCCTTGATCTCGCCGACGCATCGGTCCAGGAGAAGGGCGGGTAGGCCCTCCACCCCGAAGCGCAC  
GGTTTTTCCACTCCTTGGCCATGGCGGGGGTGGCCAGCAGGCTGGCAACAAAACAGGGCTGAGAGGGTCACT  
CTGATCTTCATCATGAGTACTCCATTACATAAAAAAGCGCACAGGCGCGGACAAGGCACCCGAGGCGAATG

CATGCGATGACCAAAAAGCGGCAAAAATCTGGATGAGCGAGATCACGCCCGAGCGGGCGTCAGTGAAC TGT  
CCAGAGGTTTCGATCTATTTCGTCGAACCACTCGGAGAGATAGAAAAGGCTTGAAGTAGAAGGCCAGAAAAA  
GCCTCTGGCTTTGCGCATCATGGTGGTTTGTGCGCTCCTGTGACAAAAGATGGCAATCACCTTAGCACGCC  
CCAAATTTGCCCGGCAAGAGGCAGCAGCAGGGCAGTAGCAAAAATCCCGATCATGGTCAAGGCGGGCGGA  
TCCGTTAGGCTCGAAGCACCTTGCCATCCCATAACAGACACACAGCGACCGATGAATTTTCTGGCACATC  
TCCATCTGGCTGCCACACCCGAAGCTCCCTCACC GGCAATCTGCTCGGCGATTTTCGTCAAAGGCACGCT  
GCCCACGGGGCTTGCCGCCACTTCGATGAGGGGATCTGGCTACACCGCAAAAATTGACGCTTTCACCGAC  
AGCCACCCCGAGCACAAGGCGGCCGTGCGCTGTTTCGAGGCCCCCTGGCGCCGCTTTGGCGGCATAGTGG  
TGGATATGATCTACGACCACTGGCTGAGCCAGCACTGGAAGCTGTTCAGTACCGAGCCCCTGCCCCGCTT  
CCTGCAACGCAGTTATGACCAGCTATTGGCGGATCACCCACGCTGCCGACGACTGCCACTCCCCCTC  
AAACGGATGGCCGAGCAGAAGCTGGATGCCTCCTACCGCCACAGGGAGGGGCTGGGGCAAGCTCAAATG  
GCATAGGTCGCCGACTGCCCGACCGGTACAACCTGGGAGAGGCGCTGTTGACCTTCGATGAGTGCAGTG  
GCAAACATGCGAGGCGGGATTTCTGCGCTTCTATCCCGCGCTGATGGACTTTAGCCAGCAACAGCTGGCC  
CAATATCGGGCAGCCCAAGGGGCACAGTGATCCCTCTGGATAGAGCTGCTTCCCCATAAAAAACGCCCTT  
TGCGGGCGTTTGTATCAGTTGGCTTCGTCTTTCTTTTTCGGAATGCTTAAGCCCAGCTCCCAGCCAGC  
CAGTCGGGCGTAATAGATGGTGCCGACAAAAGCGAGAGTGGTGAAGACCAGCTCCACCACCGCCAGCCAC  
CGCTCCCCCTCATCCGTGGTGATCAGGGTGAGGGCGTGAGGAAAATAGGGCATCAACACGAAGTTGCCCC  
AGGCGTGGGTGTAGGGTTGCCCTGCACTATCCCCTGAGAGGGAAGAGCAGCGGCACCGTCCAGATCAC  
CGGCAGCAGCCAGGGGTTGAGGTCCGGATGGGGCGACAGCCACAGATGCCAGAGGATGACCCAGCACAGC  
AGGCCGAAGAAGCCGACCAGAGTCAGCCAACGTGCGAAGCGGGTGTCACTTGAGGATCTCCAGCACCTG  
CTCCGGCGGCCGACCAATACGGGCTGACCGTTCCTGATGACGATGGGGCGCTCGATCAGCTTGGGATGC  
TGGTGATGGCGGAATAAGGGCATCACCGCTGACATCGGCCAATCCCAGCTCCTTGTAGAGATCCTCCT  
TGGTGCGCATCAGCTGGCGGGGATCGCTAAAAACCGAGCAGAGAGAGCAGGTTGCGGATCTCATCTTCGCT  
CGGGGCTGCTCCAGATAGAGCACCACATCAGGGGCGACCCCGTGTCTTCCAGCAGAGCCAGGGTTTCG  
CGACTCTTGGAGCAGCGCGGATTGTGGTAGATTTGGGTCTCGCTCATGGTAACTCCCTGATTAATCGCAA  
GATGGGACTAGAAACGGCGCTATTGTAGGGGAAAAGTGATGGTCAGGGTAAGCGGCAGTGGAAGGAATTG  
AAACGAATTTGTTGGCTGATTGTGGCTGGCCTGCTGGGCGCTGCACGCCCGCCCTGAATTTACCGATG  
CCAAAGGACAGCCGATCAGCTTGAGCCACTGGGTGGCAAGCCGCTGTGGTCAACTACTTCCGCCCTG  
GTGCGCTCCCTGCGGAGATGCCCGCCGCTCAACCGGCTGGCAGCGGAGGGCCAGATCACAGTGGTG  
GCCATCAACTACGACCCGACCACACCAGCAGAGCTGGACAAGCTGGCTGCGCAGTACCACATCAAGGTGC  
CCCTCCTTATTGCCAATGAAGATGCCAGGCTCCCCTTCCCCTCGCCCAAGCGGCCGTGCTTACCAGCTATCT  
GCTCGATAGCGAGGGCAAGCTCAAGCAAAACGCTGGTCCGGCAGCTCGACCAGCAGCAGATCGAGATGCTC  
AAGGCGACCGCCAGCAGCATGAGTCACTAGCCATCGCTGCTATCACCGTCCCCCACATCAACGCCACCG  
CCATAAACAACAAGGGCGCACCGCGGTGCGCCCTTGTTTGATAGGTCAATGCCAGGTTTCGTTAGCCCTT  
GAGGCTGTGAGATCCTTCTTGGCACGCTCCAGCTCGGTGATGCGCGCTCCAGACGAGCCAGGGTCATC  
CGGTGCTGGTGGTACCGCGTGCCACGATCAGCTCGTCGATGGCCGCTGATAATCCCCGCGCAGTGC GA  
GCATCTCGGCCCGGCCATATGCAGCTCGGTCACTTCTGCCGCTTGCATAGGCATCGGCCAGCAGGTT  
CCAGGCCAGATTGTTCTCCTCATGGGCGCGGGCATAGGGGTCGAGGATGGCGATGGACTTCTTGTAGTTG  
CCGCTCTCGAGGTAGGCGTTGCCGAGGTTGACCACCACCACTTCGTTATCCGGCATCCGGTGC GGA  
TCTCGAGGCGCGCAATGGCCTGGGCACTGCGCCCCCTTGGCCAGATCGATGTCGGTCTGAGCATCGACGAT  
AAAGAGATCTTCCGGATGACGGGCCGCGCAGCTCCTGCATCAGGGTATCAGCCTCGTCCGGTGC GCTT  
TGGATCAGCGCCAGCGCTTGCATAGATGGCGGCATCCTTGAGCGGATAATCCCCCTTCTGGATCCGGC  
TATCGAAGTAGCTCAGCAGCCCCCTGCGGGGTATCGGTACCAAAAACGCACCTGAATCCGCACCTTGGCCAG  
CCAGAAGTCGAGACTGGGCGGCAAGTCGCGGCGACCATAGCTGCCCGCCGAGCGCGGGCCTCGCTGATC  
CGGGTCTCCGGCAGCGGTTGAGTGAGCAGCATCTCCGGCGGCTTGTGCGGTAACGGTATTCGGCAGCCA  
GTTTCTGGAAGAAGTTGGCCATCCCCATGGGATCGAAACCGCATCATAGAGGGTCTTCATGCCGATGCG  
ATCCGCTTCATATTCGTTGTGCGGGGTGTAGTTGATGGCCGACTGCATGGAGAGACCCAGCTGGTCTGC  
AACGCAGCGATACCGGCAGTCGGGTTGATCACCGCCAGCGGATGGAGCCCCACAGACCGGCCAGGGTCA  
CCGCCGAGCTGCTCGCCTGCGCCTCCATATAACGGGCGATGTGGCGCTGGGTACAGTGGGTGATTTTCGTG  
GGCCAGTACCGAGGCCAGCTCGCTCTCGCTGTGCGGCTAGAGGAAGAGGCTGTGTGTACCTTGACTCGC  
CCGCCGAGGAAGGCGGCCGCTTGTGGTGGGATCATTTGATGAGGAAGAAGGTAACGGGAAACGCACCC  
CATCGGCATTGGTCAGCAGTCGCTGACCCAGATCGTCAATGTACTGGCTCAGCACCGGATCATCGATGAT  
CGGCAGGCCCCGACGGCAAAGCGCATAAAGCGCTTGGCGTAACGCACCTTCTGTTTCGATGGGCAGGGCC  
GCAACCCCGGCCGCTGCCGATGTGCGGAAGCTGATTGTTGGCTCGGCATGAAACGTGGCGCCCATCAGGG  
AAGCCAGCAAGGGAAGCGATGCCATCAGGGGGGAAAAACGTGCCACGTTATCTCTATCTCCATCAGAAAG  
GGCCTCGGCAGAATAACCTTGCCTATCAAGGGCTACAAGCGTTGTTTACGCTCTTATCACGGCCATAAT  
AGCGGCCACCTGCCTGATGGAGTCCCCATGGAAGTTCTCGACCTGACCCCTGGCGCTGCCCGAGCCGC  
TGATCCGGCTCAAGCTCTGGTTAAAGGATGCCAAAAGCGGTCAAACCGTCACCATCCGGTTGGCCGATGT  
GGGCTCCCGGCAGGATATTCCGCTCTATCTGCAGCGTCAGGGCCACTATGTGCGAGATGCAGCAAGAAGCG  
GACAATAACCTCTCTTTGAGTTGGTTGTGCGGGGCAAAAACAGCCATCTTAAGCCCCAGTGATGTAAGGAT  
GCCGTCATGTTAGAAGTATTGAAGCGCTGGTATCAGACCCGTTTCTCCGATCCCAGTCCGTTACCCCTT

TCCTGTTGCTGGTGTCTGCTTACCATCATCTGGCTGTTTGGCGATCTGTTGGCCCCCTGCTGGTGGC  
GCTGGTGATGGCCTATCTGCTGGAGTGGCCGGTCGCCGGCTGCAAAAAGCGGGGCTGTCGCGCACCCCTG  
GCCACCAGCGTCATTCTGATCCTCTTTATTGCGGTAGCAGTCGCCTCCTTGCTGGGTCTTATCCCAGCGC  
TGGTCAGTCAGGGGATCAATCTGGCCAAAGAGGCGCCGGCCATGCTGACCACGCTCAGGATTATGTGCC  
CACCCCTGCCTGACAAATACCCCCGAGCTCATCGACGTCAGTCTGGTGGAGACCCTCATCGACAATATTCGC  
CAGCGCATCCTCAGTGGCGGGGAGCATCTGGTAAGCGCCTCCCTCAGTTCGCTGGTCAACGTGGTCGCCA  
TCATGATCTACCTCATTCTGGTGGCGCTGATGGTCTTCTTTATGCTCAAAGACAAGCGGGTACTGATGGG  
CAGCCTGCGCCGCTTTCTGCCGCGCAACCGCACCCCTGGTCAACCGGGTGTGGGTGAGATGAACAACCAG  
ATCATCAACTACATCCGCGGCAAGGTGATCGAAATCCTCATCGTCGGTATCGCCACCTATGTTCCCTTCG  
CCCTGATGGGGCTGCGCTATTTCGGTGTCTGCTGGCGGTGCGGGTGGCTTCTCGGTGCTGATCCCTTATAT  
CGGCGCCGCGTGGTGACCATACCGGTCCGATGGTCCGCTGCTGCGCCCTGTTCCAGTGGGGCTCACCCCGAGTTT  
GCCTGGCTGATGGTGGCCTATCTGGTCATTTCAGGCCCTCGATGGCAACCTGCTGGTGGCGGCTTTTCT  
CGGAAGCGGTCAACCTCCATCCGGTGGCCATCATCATCGCCGTGCTGGTCTTCGGCGGCTTGTGGGGATT  
CTGGGGAGTCTTCTTCGCCATTCCCTTCGCCACCCTGGTCAAAGCGGTGATCAATGCCCTGGCCAAAACGT  
GAAGAGATGCCCGGTGCCGCAAAAATAACCAACTTCCCTGCAATCGTGACAACGGAGTGTCCATGACCTT  
TTTTCGTCAAATCAGAGCGGCAGGGCTGACGGCCCTGCTCCTCGCTGCCGCCCTGCCCGCCCGCGCCGAT  
ATCGACCTTGGTTCATGGATCTGCTCACCAGCGACAGCCCTACCAGCCCGGTGCCACAGGGCTTTGTGCG  
CCGGTGGCGGCTCATCGGGGACAGGCCCGTTATGAAGCGCAGGACAACGCCCTCTACGCCATCCCAGG  
CTTTATCTACTTCGGCGACGACTTTATGTTTCTGGGAGATCGGGCCGCTACTACTTCCACAAGGATGAG  
AACGTGGCCCTCTACGGCTATGGCCGGGTCCGTTTGGCAATCTGGATCCCGAGGACTCCCCGCTCCTTTA  
CTGGCATGGAGCAGCGAAAATGGCAGCTGGAAGGCGGGATCGGTGGCAACATCATCACCCCTATGCCCT  
GCTGACCTTGGCGGGCAACAGCGATGTCACCGGCCGAGCAAGGGACAGGAGCTGCTGCTGTGGGCCGAT  
TTCCCATCCTGCGTGACAACCTGCTGATCATGCCGGGGATGGGGCTGATGCTGCGCAGCGACAAGATGG  
CCAATACTACTTTGGCGGCATCTCCGAGAGCGAGGCAACCGCCAGCGGCCGCTTGGGATACCGGTAC  
CACCCCTCTCCCCGATGGCGGCCCTCATCACCAGCTACCGCTTCAGCCCCAATGGATTGGCATGTTTGCC  
ATGAATACTCAATGGTATGATCGGGACATCAAAAATAGCCCCATCGTCCAGCACGATGGCGAGCTCTATG  
CGGGTTTTGCGCTGGGCTATATCTGGTAACGGTTATGAGTCTTGAACCGTGAGACACGACCAACAAAAAG  
GGACTTCCCTCGGCTCCCTTTTTACGACCATCATCAGGCTGGTAGTACAGCCTGCTCAAGCTGCCAATCA  
GGCTTACAGCGCCGAGAACTCGGTGAGTCTGATTGACGAAGGCCGATTTTCCAGCGCAAGATG  
TGGCCAGCCATCGGGATCTCCCTGAACGGGCAACCCAGCACTCGGCCATCAGATAGCCCTCCAGCACCG  
GACGGGCCTTGTCTCGCAGCCGGTATCACCAGCGCGGGAGTGGTATCTCCTCCAGCCACTCGATACG  
ATCTTTCGGGGTCAAAAAGCTGCGGCCACCAGCCACCATGGCGGCAATCTTCTCGTTTGGCCAGGCGGCC  
AGACGCGCCTTGAACCACTCATCAGCGCTCATCAGGCTGGCTGGCAAAGAAGATCGGGCGCCACCTGTT  
CGATGATGGGCGCCGACGGTGGCGAGCTGCTCGATCATCGCCAGCATGCCGAGGTAGCGCTCGCAGGT  
GATCTGCGGTTCCAGGCCGACAAAATGTCCATCAGCACCAGACCTTGAGGCGGTTTGGCACCATGCGC  
GCCAGCTCCACACCCACATGCCGCCGATGGAGAGGCCACCAACACGAACTCCTCAATGCCGAGGGCAT  
CGAGCAGCGCCAGGTGATCCCGCGCCAGCGTCGCCAGGGTGCAGCCACCTTCGGGGAGCAGGTCCGAATC  
ACCGTGGCCCCACAGCTCGGGAACGATGCAGCGATAGCTGCCCTTGAGCGCCTCGATTTGCGGCGCCAC  
ATGGCGCTGTCCACAGATAGCTGTGGCCAAACAGCAGTACCGGCCCTTGCCCTTCGTCCAGATAGGCCA  
TCCGGCGGCCCGCTATCTCCATAAAAATGCTTTCATGTTATCTCCTGTTGCCAGCGATGGGCGGGCAGTGTA  
TCACGTCCCCCTTGGCAGGTGACGCCTCCCTGGTGAAGCTGACAGTGACTCAAAGAAGTCACCCATGA  
AAGGATACAAAAGGAGAAGCCCATGGCGAAGGAGAAGAGCAAGAAGCGGCCGCTTGGACAAGAAGTG  
CTACGAGCACCACTTGGCCATCTGCAGGAGGAGCTGGTCAAGCTGCAGGAGTGGGTCAAGCAGGAGGGG  
TTAAAGGTAGTGGTACTGTTTCGAAGGACGGGACGCCGCCGTTAAAGGGGGCGTCATCAAGGCGATTACCG  
AACCGCTCAACCCCCGGTCTGCCGGGTACGGCGCTGCCCGCCCCCTCCGATCGGGAGCGATCCCACTG  
GTACTTTACAGCTTATGTGGCCACCTGCCCGCCGCTGGCGAGATGGTGTGTTTACCGCTCCTGGTAC  
AACCGGGCCGAGTTCGAGCGGGTGGTGGATTTTGCAGCGACCCGAGTATCGCGAGTTTCTGCGCGCCT  
GCCCCGAGTTTGGAGCGGATGCTGATCCGCTCCGGCATCACCTTGATCAAATACTGGTTCTCGGTGAGTGA  
CGAGGAGCAGGAGAAGCGCTTTAAAGAGCGGATCAACACCCCCATCAAGCGCTGGAAGTTCAGCCCGATG  
GATTTGCAATCCCGCTCGCGCTGGGTGGAGTACTCCCGCGCAAGGATGACATGTTTACCCTACCCGACA  
CCGAGGATTGCCCTGGTTCGTGGTGGAGGAGATGATAAACGCCGTGCCCGCTCAACTGCATCGCCCA  
TCTGCTGAGCAAGGTGCCCTACGAGGCGATCCACTACGAGCCATCAAGCTCCCCCCATCAAGACCGAA  
GGGTATGAGCGCCCCGCGCTGGCCAGCCAGACCTTGTGCCCGATATTACCGCCGAACCTGAGGCTTGAA  
CCGGGTTACCTTGCCTATCTGCATGTTCAAATCGCAGGCAATAAAAAGCCGGTCTGACGACCGGCAAAAA  
GGCATTGATTATTAAGAAAGGAAAACCGGCACAACAAAAAATCAGGTACGGATATATTTGGCGGTACGTG  
GGAACGCTGCTCCTTGGCATCGAACAGGTAGCAGGCTTCGGCCGGGATACCCACGCTGTAGGTTTGACC  
GGTGCACACATCCACATCCGAGGTGGCCTTGACGGTAAAGTCGTGACCATCCACATCCATATAAACGAAG  
GACTCGGCGCCAGGTGCTCGGCCACCTGCACGATCCCGCTCACCTTGCTGTGCGCATGGGGGTGATCCA  
GCGGCATCAGGTGCTCGGGGCGAATACCCAGCTCCACCTTGTCACCCACAGCGCCACTGCGGGCATCGAC  
CCGGGCACGCACGGTATCGCCAGAGGTGAGCTTGACCAGGCACCTCTGCTCGCCAATCTCCAGCAACTCG  
CCCCCAGGAAGTTCATCTTGGGAGAGCCGATAAAGCCCGCCACGAACCTGTTGTCCGGGTTGTGGTAGA



GATCCAGCGGTGAACCGAACTGTTCCAGGTTGGTGGCAGCTTCGGCCTTGAGCGGGCTCAGCACCACAAT  
CTTGTTCGGCCAGAGTCATCGCTTCCACCTGATCGTGGGTACGTTAGATGATGGTGGAGTTGAGCTCCTTG  
TGCAGCTTGGCGATCTCGATCCGCATCTTGACCCGACGCGCGCATCCAGGTTGGAGAGCGGCTCGTCAA  
ACAGGAACACCTGCGGCTGCTGCACGATGGAGCGACCGATGGCGACCCGCTGACGCTGACCACCGGAGAG  
CGCCTTGGGCTTTTCTGTCCAGCAGCGGCTCGAGACCCAGGATCTCGGCGGCGCGCATCACCCGCTTGTGG  
ATGTTCTCCTTGTCCATCTTCTTGAGCTTCCAGACCAAGGCCATGTTCTCGTAGATGTTTCATGTGGGGAT  
AAAGGGCGTAGGACTGGAACACCATGCCGACGTTGCGCTCTACCGGCGGCACGTCGTTTCATGTAGCGACC  
GCCGATGGTCAGCTCACCGCTGGTGTATGTTCCAGACCCGCGATCATCCGCAGCAGGGTGGATTTGCCA  
CAGCCGGACGGGCCGACGAAGACGATGAATTCGCCCTCCTTGATGGAGAGGTTGATGTTGCGCAGGGTGT  
CCTTGTGAACAGCCGGATCGTAATTTTGGCAACGTTGTTGAGTACTACTTCAGCCATGACGAGCTCCGC  
TCTTGAATCTTTGCAAATCGTGATAGCGGGGGAGTCAGCTCCCCGGCCATAAACTTAACTTTACAC  
CACCGGCAGTCAGACCACCAACCAACAGCAGCTGTGCCAACAGGAAGACCACAGTGTGGGAAACCGGA  
GAGCACTGCGGCCGCCGCAAATCACCCACAGATAGTTCTGCGGATAGAGGTACTGCTGGGCCCGACC  
GCCAGGGTCAGATTGTTTACATCTTGCAGCAGGATGGAGGCCATGGGCACCTCGGTAATGGAACCGATAA  
AGGCCAGAATAAACTACTACCGCCAGGATGGGCACCGACAGGGGCAACAGGATCAGACGGAATGCCTGCCA  
CGGGGTGCGACCGTCGATGGCCGCCCTCCTCCAGGGAGGAGTCGATGGTCTCGAAGTAGCCCTTGATG  
GTCCAGACGTGGAGGGCAATCCCCCATGTACGCCAGGATCAGGCCACCGTGGGTGTTGAGACCGAGCC  
AGGGGATGTAGTACCAATCTTGTAAAGAGCGCGTAGATGGCTACCAGCGCCAACACCGCCGGGAACAT  
CTGGAATAATCAGCATGCCCTGCAGGATGGTGGACTTGCACGAAAACGCAGGCGGGCAAAGGCGTAAGCA  
CAAGTGGTGGAGAGCGTCACGATCATCAGGGCAGTGTGCGGCGATCTTGATGGAGTTCCACAACCAGG  
TCAGCACCGGGAACGGCGGCGGCGTGTGCTGCCGTCGGCGTTGGTGATGGACATGCCAGCGCCAGCTT  
CCAGTGATCCAGCGTCGGATTGGAGGGGATGATCTCCCCTACC CGGAAGTTACC GTTACGGAACGAGATG  
GCGATAACCATGATCAACGGGAAGATGATCAACGCCAGGAAGCCCCACATGACCAGGTGGGTTGCCACAA  
CCCGGATTTTACTGATTTGGGTTGTACGATTGCCATGTTGAAGCCTCCTTACAGCTGCTTGTTCGGCTTT  
GGACAATTTACAGTTGAGCAGCGCCAGCGCACCTACGATGAGGAAGATAGCTGTGGCGATGGCACTGGCC  
AGACCGTAGTCTTGACCACCCGATCCCTGGAACGCAATCCGGTAGGTATAACTCACCAAGTCGGTGG  
TACC GGCCGAGTGTGCGCGCCGATGATGTCGGGCGCACCGTTGGTCAACAACCTGGATAAGCACGAAGTT  
GTTGAGCTTGAAGCGCAACGAGGCAATCAACAGCGGTTGTCAGCGGCTTCATCAGCAGCGGCGGATGATC  
TTGAAGAAGTTCTGTACCAGCCGACCAATCCATGTCGCGGACGCTTCATAGAGATCTTCCGGAATGGCTT  
TGAGCAGGCCCATGCAGAGGATCATCATGTAGGGGTAGCCGAGCCAGGTGTTGACAATCAGGATCATCAC  
CTTGGCCAGGAAGGGGTTGGTATAACAGTCCGGTTTTGATGCCAAAACGCCGCTTCCAGGAACATGTTGATC  
TCACCGAAGTTCTGGTTGAACAACCCCTTGAACACCAGGATGGAGATAAAATGCCGGGATCGCATAGGGCA  
GGATCAACATGACCCGATAGAAACCGCGCCCTTGAAGCTCTTCCCCTGCACCAGACAGGCCAGCACCAT  
GCCGATAGCCAGGGTGAAGGCGACAGAACAGGTTGAAAAGATCACGGTCCAGATGAAGATCTGCAGGAAG  
GGTGATTGGATGCCCGGATCGGTGACGATGCGCGGAAGTTCTTCCAACCGACGCTCACCAAAAGCCCCG  
GAGCAATACCCTTGCCGACAAACTGACCCTGTTGTCGATGTACTGATAGAAGCCGGTCTCGCCATTGGG  
CAGCATCAGCTCGCCATTCTGGGTATCACGCAGCAGGTTGCTGTCTTTGATCACCAAGCCGGATTGAGC  
TTGATACCATCAACCAAGCGGATGATTGCTGCTTCTGGGCGCAAACCTTGCGCAGGCTGCTCAGGGTCA  
GGTGGGTACCGCCATCCGGCAGCACCAGATCAAGGTCACTCAGGTGAGTACGATGCTCAACAATGGCGCG  
GATCGGTGCGGCCTTGCTGGCCGCTTCGCCAGTGAAGGGCTGCAGCTCGACCACTTGCTGGGTGTTCTGC  
ACACGGCCCTCGCGGGACGCCAGCTCACGGGCTTGTGGTTCATCAGGGAAAACAGGTTGGCTGATAAAGG  
ATTGATCATCCTGTGTGACGAGCAGCTGGAACGGCCATTTGTCGCCACCCAGCAGGGTAAAATCGAATTC  
ACCGCCCGCCACCTTGTAGGTTTTCTTACGGTGGTAGTCCCGCGCTGCTCCACGGAGAGCAAGTTGGAC  
CCCGAATAGTTGGTGAAGGCAATGCCAATGGTGTAGGCAAGAGGGAAAGATGATAAACACAACCATGCCCG  
CAACACCCGGAAAGATGTAGCGATGGGCATAGGCTCTTGTTCATGAAGACATACAGACCAGCGGAAAC  
CACCACCAGATCCAGCAGCGGAATACCCACTCGCCACTGGCGTACATCATCACGGCTGCGTAGCCGTTG  
AGGATGGCAACCAGGGCCGCTATGGTCCACTTAAGCCAGGTGTGCTTATCCTTCGGACCGGCATAGGACT  
CAACAGAAGGTAATACTTCCATGCCAATTAACCTTTATAACGCCAAGAGAGATTTGAGAGAGTGGGAGGC  
CATGACGGCCTCCCGGAGTAGTGCCTTACTGAACGATACGCTTGGCAGCGGTATCCAGAGCTTCGTCA  
ACACCCTGACGACCGGAGGTACGTTCTTGAGGGCAGTTTCGAAGGAAGACCAGAAACGGCTCATCTCGG  
GAACGGATGGCATCGGCTCGCCAGCCTGGGCGTTCAGCATGGTGGCCTTGATGTGCGGATCGGATTCAG  
GGTCTTCTGGAAGGATTTTACGCGCAACGGCCCCAGCGCTTGTGCGGCTTAACCGGCGCCAGACCGGCA  
TCGGTACAGCAGGTAGTTTTCCAGGAACCTCGATAGCCAGATCCTTGTTCGGGCTGGCAGCGTTGATGGTGG  
CACCCAGTACGCCAACGAAGGCTTTGGCCGGCTTGGCGTTCAGGGTCCGCGAGCGGCGCTACGCCGTACTT  
GATGCCGCTCTTGTCCAGGTTGCTCCAGGCCAGGGACCGTTGATCATCATGGCCACTTCGCCCTTGTG  
AACTTGGCGTCCATCACACCGTAGTCGATGCCCTTTTTCCAGGTGACCGGACTTGATCATCTCGGAGATGT  
AGCCACGCCCATCTTGGCACCTGCGTTGTTTACGCCGGTATCTTTGACGTCATAACCGGTAGCGGTTTTT  
CTTGAAGGCGTAACCACCGTTGGCAGCCACCAGCGGATAGCTGAAGTACGGGGTGTATAAGCCACATG  
ATGGCGCGCTTGCCGTTTTTCTTACAGAGTCTCGTCAATCTTGGCGATCTCTTCGAAGGTTTTTCGGCGGCT  
CGGGCAGCAGGTCTTTGTTATAGATCAGGCTGACAGCTTCCATGGCAACCGGGTAGCCATAGTTTTGCC  
ATCAACAGTCATGGCATCCCATGCCAGCTGTTCAAAATTTGCCCTTGGTGGCAGCGTTAGGCGTTACCGGA

ACCAGCAAACCGGCTTTGACCCACTCACCGTAACGGTCGTGAGCCAGAAGAAGATGTCCGGGGCCGTTGC  
CAGTGGCGGGCGGCTTGCTGGAATTTCACTTCAACCTGATCCGGGTGAGCCACAGTAACCTTGATGCCGGT  
TTCTGCTTCAAACCTTCTTACCCACTTCAGCCAGACCGTTGTATCCCTTGTACCCTTGATCCAGATGGTC  
AGCTGGCCTTCATCGATGGCAGCAGTAGCAGAGCAAGCGACGCCAAGAGTGGCCAGACCGATCAGGGATG  
ACAGCAATTTCTTTTTTCATGAGCCTTTTCTTGTATTAGTTCCGCGCTGTAAGAGCATTGTGTGCGAGATG  
AATATTATCCCAAGCGGCAAACGGCTCACATGACGCAACTCGCATTTTTGAAATGCAATTACGTATTTCC  
TTCCAGAAAGTTTTGAAAACATTTTCTTATTTTCAGGGAAATTACGGCCATTTATCGGGCTTAATTTCCAGACA  
ACCACAGAATAATAATTACCAAAAATGAAATAAAAATTTTCATGAATGAAAGGGTTTTTCACCTCAATGAAAAC  
CCTTTCAGCTGGTTTATTTTGTGTTGATTTGTAAACAAAGTACCGCGCCAGTTTCGAGGTCTGCCGGGGCG  
CAATAAAAAAGAGACCCCGCCGGGGCGGAGTCTCTTTTTGCGAGAAATGACGAGTTGATCACACTCGGG  
AGCATGACTACGACTGGCGCAGCAGTGCCTTGAGATTGGGCGGCACACCTTGATGGTCAGGGTGTCT  
GGTCTGGGGGTTCGTAAGAAGATCCGGCTGTTCAACAGCTTCTGCTCAAAGCTCAGAGTCAGACCGCCACC  
GAGCCGACAAACTTGGTCAAACCACGCAAGGTAGAGCGATCCGCCGGGAAGCGCTCTTCCAGCTCATACT  
CCTGACCGATAAAGCTGTAAAAATCGAGGTACCGTCAACCAGGCAATTTCTGCAGACAGCTCCTTGATTTT  
GATCTCTTACCAGGCACTCGCTGTTCCGGTGAATATTTGAAAGACCTGCTTTTTTATAGTCATTGCGCTCG  
GTCGGTTTCAGCTGACGACTGTACAATAATCTTCGACCGCTGCAGCAAGCCTTTATTTTGTACCTTGG  
CATCCATGCCCTCGCGGGCACCCAGCAGATCCATAAAGAAAATCGCCAGTTTGCAGCAATGCGCCCCCTT  
GCTGAAGGTGATATAGCGGCGCAATCAGGTTGGGTTTTCCATTCGGTCAAATCAATGCGGGCCACCAGA  
TTGAGTTTTGCCGATATCCAGATACTGGATATGGCGCAATTCAGCGCTTCGCTGACGGTGACGCTCTCCT  
TGCCCTCCAGCAGGGCAATCAGCAGATAATCGACCCCGACGTAGTTATATTTGGCAAACAGCAGCACCCC  
CTGCTCATCGAGGGCGTGTCCACCAGCTGCTTGACCAGCATCTGGGTACAGTGACCGAGAAGGGAACG  
AATTCGGTCTGCTCGTTCGAGCAGCTGTTTCGAGGGCGATACGAAAGAGCGGAGAAGGCTGTTTGGGGGCGC  
TCTCCCCCTCCGCCAGCTCGGGCAGCAGCGGCCCTCGGGGTGCGCAAAGAAGCCAAAGCCCTTGCCGCCCTT  
GCCGTTGTAGATCCGATGCAGTTCCGCCATCAGTCCCTGTACCGCTCATCAGGGGGCAGGGTCTGGCTG  
CGGGTATCGGGCTGGGGTTGACCATCGCCGCCCTGGCGCAAGGAGTGAAGAATGATCTTGTTCGATATCGA  
GACTCATGTACAAAGCCATAGTGTAGCCGAAAGGGTGAAGTATTATAAGGCGCTTTGAACCGAGATGA  
ACTGAAGATTATGCCTATCGTATCAAAGTACAATAACGAGCAATTTGACGCCCTGATGAACGACCTGATC  
ACCCGCTGGAAGCAATAAAGCGCCCGGTAGATCTCAGCTTATGTTGCTTGGCAATCTGACCACCAATA  
TCACTCAACGGTATGGCACCGCCAGCCAGCCACTGAAAAGTTTGTCCAGGCCCTGACCCCAATC  
GGTTCGATAATCGCCACGACGACACTGAGTCCCCGACTCTGTTGATTTGACGTTTTCTCAACGCAGATGGA  
TCACTATGGTTCGAAACCGGTAACCCCTATCGTGATAATGTCTCTCGCTGATCACCTGGGGGCATTGGTT  
CTCCTTCTTCAACATTATTTCTGGCCATGCTCATCGCCACCCGTTATCTAGGTGCCATCAGCTGGCCATCG  
ACCACGCTTGGCGTGATCTATCTCGTTGTAAGCTGGATTGGCCACTTCTCGTTTTCTGAGTTTTGTACCT  
ACCTGTTGACGATCTTCCCGCTCAGCTTCGTGCTGCCAAGGAGAAGTCGTTGCGGTTTATCTCCGCCAT  
CATCGCCACCCTGGCGCTGGTGCTGCTGCTGATCGACACCAGGTAATCCGGCTGTTCAAGTTCACCTC  
AACAGTCAGGTATGGCAGTTGCTGCTGGATCAGGCGCAAACCGAAGAGGGCTCAATCTGGAGCATCATCT  
TCGTTGCCGCTGCCACCATCTTCTGCTGCAACTGCTGCTGTCGGCTATGTCTGGCGCAAGATCAACAA  
GCGCAAGCGCCGCGCAGTACGGCAACCAGGTGGGACTGGCCCTGCTGATCTGCTTTTATTTGACCCACGTG  
GTCAACAGCTGGGCCGATGCGACCCCTCTATCAGCCGATCACCATGCAGAGAGCCAACTTCCCCCTCTCCT  
ACCCCATGACGGCCCGCTCCTTCTTGCTAAACATGGCTGGCTGGATCTGGATCAGTACGAGAAGCAGGC  
GGCCTCCCAGGGGGATAACAGCGACAGCCGGATGCACTATCCGCTGCGCCCGCTCAACGTCAACGCCCCC  
CTGACTCACAACAATCTGCTGATTGTGGTGGTCGATTCGCTGCGCTTTGACATGCTCAACAACATCAACA  
TGCCCAATCTGCAGCGCTATGCGGATCAGCATCTGACGTTCCGCAATCACCTGAGTGGCGGCAACGACGA  
CCTGATGGGCATGTTACGCTCTTCTACGGGTTGCCCGTCACTACTACAAGGACATCAGCAGCGACAAG  
CGTCCGCCGGTGTGTTGACGAGATGCTGCGCCAAGATTACCAGTTCGGGCTGTTTCGGCGCGATGGAAG  
ATGCCCAGAAGTATCGCAAGAGCATCCTCGCCGCTCGCCAAACAGGTGTTTGTCTCAGAGCAGATGA  
CGATGGCAAGCTGCTGACCGACTGGCAACAGTGGCTGGAGAAGCGCTCTCCCGAGCGCCCTGGTTCTCG  
CTGGTCTATCTCTCGAGCCCAGGCGACTACCAGTTACCCGCCACCATGAAGGGGGCCGTTCCAACCGGAGC  
TTGCCAACTTCAATCCGGCGACCGCTATCGGGCGGAGAACCCTGCAAAAACTGGAAAACCGCTACAAGAA  
CTCGGTCTTCTATACCGACCAGTTGCTTGGAGCAGATGCTGACCAAAATGCAGTCGCAGGGGATGGACAGC  
AACACCATCGTCGTATCACCTCCAACCACGGTCAGGAGTTCAACGACACCCGCAGCAACAGCTGGGGCG  
CAGGCAGCAACTACTACCCCTATCAGGTGCAGGTACCGCTGGTACTGGCTGGCCGGGGCGCGGCAGTGA  
CGTTCGGGAACAACCTAGCAGCCATTTGATCTGGCGCCGACCTGATGCAGGGGATGCTGGGCGTGGCG  
AATCCGGCGCGCGATTACAGCATTGGCCGCTCGCTGTTTGATAACAGCCCGCGCAACTGGCTGCTGGCCG  
GGGATCAGAACGACTTCGCCATCTATGAAGGGGAGACCATCACCCACTTCAACAAGCAGGGTGACTTCGA  
ACTGCTGGAGCGCAACAGCTATCGCCGATCAAGCAGGCACCCCGGATATGGGCGCCATGATCCAGGTG  
ATGAACGAGCTGAACCGCTTCTATCGCAACCAGTGAAGCGCCCGTTGATGGCTTGATACCATAAAAAACG  
CCCCGAATTCGGGGCGTTTTTTCGTTGTATAGCCGTGCCACGTTTACGACTGTTAGCCACCCACCCCTTGC  
GGGTACTTGTAGCCAACAAAACGCTTGGCTGCATAGGCTTTGAAAGCCCGGAGTTGTAGGCCGCGCCCA  
CATCTTTGGCAAAAGGCTGGTCCGCATCTGCGCTTTTACCACCACCCAGTTGATAAAAATCGTAGCTGCG  
CTCCAGAAACAGTCTTCACTGAACGGGATAACCGCTGGAGGCAGCAAAATACCCTTGATCACCGAGAAG

TCCACATCCTCCCGGAGCGGGGCGAGTTGCGCCGCTCCAGCAACACCAGCTTGAGATTGTGCGGATTGT  
TCACCACATCAAACCTCGCTGGCCTTGAGCGGGTTTATCCCCTCCTTGAGAGTGAGCCAACCGAGATCCTG  
CAGCATCAACAGCGCCCGCCTGATTGGTGGGATCGTTAGGAATGGCCACCCTGCTCCCCTCTTTCACC  
TTGTTCGAGTGCCGCCAGCTTGCCGGAGTAGAGTCCCATCGGACCGGTTGGCACCTGGGTAATGGGTGTCA  
GCGACAAGCCGCGATCTTTGGCAAAACTCTCCAGATAAGGTTTGTGCTGGAAGCAGTTCACATCCAGTGA  
TCCGTCAGCCAGAGCAATATTTGGGGTACATAGTCGGTAAACTCCACCAGCTTGACCTTGTACCCCTTG  
GCCTCCAGCTGCGGCTTGATGGAGTCGGTCACCATGTGCGCAAAATCCCCACAGTGGTACCAATCACAA  
TCTCCTGTTTTGGTCGGCAAGGGCGCATCGGCGGCAACC GCGGAAAAAGAGAGGCTCCCAGCCCATCGC  
GGCAATAAAGGTGCTGGCACCAGCAGTGGCGCGCAAGGAAGCAGTCAAAGGAGAAGATAAGAAGGAACGA  
AATGGCATAGGACTCCCTGTCAAGTACGCATCAAACCTATGGGACTACGGCGGGGTGGCTCTCAGAGATT  
AAGCCCCCAAGCCGAGCAATCTAGCCATCAAACCGCTATTTTGGTTACCATAACAGAGCCATCCACC  
GCGGCCAAGCAATAAACCGCTGGTCCCACCTCATCACCTTACTGTACCCCCGAATGCATAGTGTCTCT  
CACGTTGGCACACACAACCATGCCGCTCACGTTCAAGAGCGCACGAGCTCCCCTCGGGATTGCCCCGAAT  
CGAGATGGCTGCGGCGAAGGAGAGTGCAGAGAGGAGTGGATTACAGATAAAAAAGATTAGTAGCGAGCAGT  
GAGAACCATTCTCAATAAAAAACATAACAAGCGTCATTGGAATACCTACCACAAAACAGATCGGATTTCT  
TTGAACCTCATAGCATTTTTTTGAAAATGGCTCTTTTTGAAACCCCTTCCACCCGTGTATAGATTTCCGTCG  
CACTCAGGATGGTGCATCCAAGATGGAGTTAAAAAAATAATGAAGCAAACATCGTTAGCACTGGCGATC  
ACAGCACTGCTGTGACCCCTGCCAGTGGCTCGTTCAGGCAAAATGAAGGTTGTGCGCCGCTCACCGGTA  
AGGAGAGCGGCATGGATATCGGACGCAGCAGCACCAGCGCTGCCTGCCAGGTACCAATCCCCTGCAGGC  
TCAGCAGTGGTATCTGCTCAACAGCGGCCAGGATGGGTTTACGCGCCCGTGGCGGCATAGCGGGCAATGAT  
CTAAACCTCTGGTGGGCTCATCGCACCCGGCTGCTGGGCCAGGGAGTCAATGTGGCCGTGGTGGATGATG  
GTCTGGCCATCGCCACCCGGATCTGGCGGACAACGTGCGTCCGGGTTGAAAAACGTGGTAACCGGCAG  
CGATGACCCGACACCGACCGATCCGGATACGGCCACGGCACCTCGGTCTCCGGCATCATAGCGGCGGTA  
GACAACGCCATCGGCACCAAGGGGATCGCCCCGCGGGCCAGCTACAGGGGTTCAACCTGCTGGACGACA  
ACAGCCAGCAGTTGCAGAAAGACTGGCTCTACGCTCTTGGCGACAGCAATGCCAGCCGCGATAACCGGGT  
GTTCAACCAGAGCTATGGCATGAGCCTGGTCGATCCCCGTCCGGCCAACGACCTGGATCAGGCCAGCTC  
GACCGCTGTTTGAAGCGCAAACCCCTCAAGGCGCAGAGCGCCGCTATATCAAGGCTGCCGGCAACGGCT  
TCAACAAGATAGCGCGCGGCTATGTGCTCAATCGCACTGGCAACCGGCCCAAATTTGCCGTTTTGAGAA  
CAGCAATCTCAGCCCTCAAACAGCAACTTCTGGAACCTGGTGGTAAGCGCGCTCAACCGCGATGGTGTG  
AGATCCTCCTACTCCAGCGTCGGCAGCAACGTCTTCTGAGCGCCACCGCGCGCGAGTACGGTACCGATT  
CCCCCGCCATGGTGACCACGGATCTGCCCGGCTGCGACATGGGCTATAACCGCACCGACGATCCCCGCAC  
CAACCGGCTGCACGGCAACCCGAGCTGGATGCCAGTTGCGACTACAACGGCGTGATGAACGGCACCTCC  
TCCGCCACCCCGACACCTCGGGCGCCATGGCACTGCTGATGTCCGCTACCCGGATCTGTGAGTACGCG  
ATTTTTCGGGATCTACTGGCGCGCAGCGCTACCCGGGTCGATGCCAAACATCAGCCCGTGTGGTACGCTA  
CACCAGCAGCACC GGCAAGGTGCGCGACGTGAAAGGGCTGGAAGGGTGGGAGCGCAATGCCGCCGGCATG  
TGGTTACAGCCGACTTACGGTTTCGGTCTGATCGACGTCAACAAGGCCCTTGAGCTGGCAGCCAATCACC  
AGCCCCCTCCCCCGCTGGTGCAGCTGCCGTGGCAGAAGATCAATGTACCGGCAGTGGCGCTGCCATCCC  
GGATGTGGGCAACAGCCCCGACCAGCTCGGCGACCCGCATTGCCACACCATTGACGGTCTGAAGCGGTTCCAG  
GTGATGGTGGACCTGGATCACCAGCGTCTGCCTGATCTTCTGATCGAACTGGTCTCCCCCGCCGGCACCC  
GCAGCATCCTGCTGAGCCCTTCAAACAGCCTGGTTCGGCCAATCTCTCGACCAGCAGCAGCTGGGCTTTGT  
GCGCACCAAGGGATTGCGTGACATGCGCCTGCTCTCCACAAGTTCTACGGTGAATCGGCCGAAGGCCAG  
TGGCGACTGGAGGTAACCGACGTTGCCAACGGTACCCGTCAGGTCTCTCTGCTCAATCGCAAGACCAAGG  
AGCGCACACCCTGACCGAGCGCAACAACCGTCAACCGGGCAAACCTGATCTCATGGTCCCTGCGGGTCTT  
GGGTACGATGCCAACCAGCTAACACGCTAGGAGTATTACCATGAACAAAACCTGTTACCTTGCTTCTG  
GCAACCCCTGCTGGCCCCCTCTCGGGACAGCTCTGCGCCAGGAGTCCGTCACCATGGATGGCAAGCAGT  
ACAGCACCATAGAGGTGAACGGCCAGACCTACCTCATTCCTGACAACGGCAGCAAGAAGCGGTTACCCG  
CAGCCTTGACAGCAAGGTCCCGCAACAGACCCTGCGCCGCGGTGACGTGTTGATGCAAGGGGCGCCAGC  
CCGGAGCTGACTGTAAGCGGCACCCTGCTGGTGGAAAGCTGACGATGCCACCGCCAAGGCGCTGGCGACTC  
GCCACAGCCTGAACTTCAAACAGAGCAGTGGTGGTATCGCCCTGCTGGAGGCCAAAACCGGGCACCGATCT  
CAACGCCATCGCCACCAAGCTCAAGAGCGAAGGGGTGAATGTGCAGATCGAGCTGTGCGGGGGCCGAACAG  
CAGCCGAAATAGGTGCGGACACACAGATAACAAAGGGGGCCATCATGGCCCCCTTTCTGCTGCTCATTTTT  
GATAGTGGCTTACTTGGCGCCATGCTGCTCCGCCAAATAGAGCTAGGTATCGACCACGGTATCGGGGTTG  
AGCGACACCGAGTCAATCCCCTGCTCCACCAGCCAGGCGGCGAAGTCTGGATGATCAGATGGGCCCTGAC  
CGCAGATCCCCACGTACTTACCCGCTTGC GCGCAGCCTGGATCGCCATCGCCAGCAGCGCCTTGACCGC  
CTCGTTACGCTCGTGAACAGATGGGCAATCAGCCCCGAGTCCCGATCCAGCCAAAGAGTGAGCTGGGT  
ATGTCAATTGGAGCCGATGGAGAAGCCATCCACGTGCTCGAGGAACTTGTCTGCCAATAGGGCGTTGCTTG  
GGATCTCGCACATCATGATCACCTTGAGCCCCGCTCGCCGCGGCGCAGACCGTTCTCGGCCAGGATGTC  
GATCACCTGCTCCACCTCGCCACGGTGC GCGACGAAGGGGATCATCACCTCGACGTTGGTCAACCCCATC  
ACATCGCGCACCCGCTTGATCGCTCGCACTCGAGGGCAAAGCAGGGGGCGGAAGCTGTGCGCAATGTAGC  
GGGACGCACCACGAAAACCGATCATCGGGTTCTCCTCGTGGGGCTCGTAGCCACGACCGCCACAGATT  
GGCGTACTCGTTGACTTGAAGTCCGACATCCGACGATCACCCGCTCCGGCCAGAACCGGCCCCCAGA

GTGGCGATCCCCTCGGTCAGCTTGCCACGTAGAACTCCCGGGGCTGTCGTAACCGGCGATCATCTTGC  
CGATGGTGGCCTTGAGCTCTGGGGTTTGGCTGGTCAAACCTCCAGCAGCGCCTTGGGGTGCACCCCGATCAT  
CCGGTTGATGATGAATTCAGGCGTGCCAGTCCACCCCGGCATTGGGCAACTGGGCAAAGTCGAAAGCG  
CGGTCCGGGTTGCCGACGTTTCATCATGATCTTGATGGGCAGGCGCGGCATATTGCCACCTCGGTACCCG  
CCACGTGCAAGTCCAGCTCGCCGTCATAGATAAAACCGGTATCCCCCTTCCGCGCAGGAGACGGTGATCCG  
CTGGCCCGGCTGAATATGATCGGTAGCGTTGCCACAGCCCACCCTGCCGGAATGCCAGCTCGCGGGCG  
ATAATGGCGGCGTGACAGGTGCGCCCCCGGTTGGTGACGATGGCGGAGGCCCGCTTCATGATGGGCT  
CCCAGTCCGGGTCGGTCATGTGGTACCAGCACATCGCCGGGCTGCACTTCGTCCATCTGGCTGATGGA  
AGAGATGACCCGCGCCGGGCCCCGCGCAATCTTGTGACCGATAGCCCGCCCTCGATCAGCACCTTGCCC  
GCTTGCTTGAGGGCAAACCGCTCGAGGGTGTGGCCCTCTGACGGCTGCGCACGGTTTCCGGGCGGGCCT  
GCACGATGTAGAGTTGGCCATCCTGACCTCCTTGCCCACTCGATGTCATCGCTGATGCAGAAAGCGGCTGCGCTCG  
CTCGATGATGAGGGCCTGTTTCGCCAGCGCCATCAGCTCCTCATCGCTGATGCAGAAAGCGGCTGCGCTCG  
GCCTCATTGGTGTGACAATCTTCACCTGGCGGCCGTGACCGGCATCGTCCGAGTAGGTCATCTTGATAA  
GCTTGGAGCCGAGGGTCTTGGCGACCACCGCCGGGCGCCCCCTTGAGGGTCCGGCTTGTGCACATAGAA  
TTCATCCGGGTTGACCGCGCCCTGCACCACCATCTCGCCAAGACCATGGGCGCCGGTGATAAAGACCACG  
TCGTTGAAACCGGACTCGGTATCCAGAGTAAACATGACGCCGGAGGCGGCGAGATCGGAACGCACCATCC  
GCTGAACCCCGGCCGAGAGGGCAACACCCTTGTGGTCTGAGCCCTGATGCACCCGATAGGAGATAGCGCG  
ATCGTTGAACAGGGAAGCAAACACATGCTTGACCGCCGTCATGACGGCATCGATGCCACGTACGTTGAGG  
AAGGTCTCCTGCTGACCGCAAAGGAGGCGTCCGGCATATCCTCGCGGTTGGCGGAGGAGCGCACCCGAA  
ACGAGGCCTCGACACCGGCACTCAACTTTTCATAGGCAACCCGGATAGCCTGCTCCAGCTCGGGCTGGAA  
CGGGGCTTCGATCACCCAGTCGCGGATCTGCTGACCGGCCCGGTTGAGGGCGGCGATATCGTCCACGTCG  
AGATTGTGAGCAGATGGTGGATCTTGCCGTTGAGGCCGCTTGACTCCAGAAACTCGTTAAACGCAAAGG  
CGGTGGTGGCAAAGCCCCCGGCACGGATACGCCGGCGCCAGAGAGGTTGCTGATCATCTCGCCAAGGGA  
TGCGTTCTTGCCGCAACTCGTTCTACGTCTTGCATTCCGAGTTGTTTCGTACCAGAGCACGTACTGTTGC  
ACTTGGATGTCTCCAGGTTGGTGGGCACCGATGTCATAGCACCTCGTGCGCCGATTTAATCGATGAGGT  
TATGGGTAAGTCAGGTGCGTTATTGTCTGTTTCTTTGTTGCCAACGACCATGAAAACGTTTTCTATTGG  
TTTTCAAAAAATCCCCGAGCAAGAGGTGGGGATGGTGAATGACCGGAACATTTCTACAATGGCGACACA  
AAAAGATAACGATCAGTTTTCGCAAGCCACTTCAACAATGGGCACAGCAGACCGGTTGACAAAAACTGGT  
ATGGTTTCGGGAGATACTTCTCACCCCTTACCCCATGCGACCCCAACCCGCGTATCACAGGAGCCCTACG  
TGCACACCGTATTTTATGTTTCAGACGGAACCGCCATCACCGCCGAAGTGTTCGGTACGCGGTTATTGAG  
CCAGTTTCCGCTGGCCTTCGAGCAGATCACTATCCCCCTTTGTGGAGACACTGGAGAAAGCCCGTCAGGTA  
CGGATGCGGATCGACGAGCAGTTTCGCCAGACCGGGGTACGCCCCATCCTGTTTCACACCATCGTCCGACC  
CGCAGGTACGGGAAGAGGTAAGTAAATCGGAAGCGTGGCGCCACGACTTTCCTCAACACCTTCGTCAGCCC  
GCTGGAGCAGGAGCTGGGGGTCAAAGCCGAGCCCCGCTCCACCGCACCCACGGCATGGAGAACCAGCAAG  
CTCTATGACGATCGCATCGAGGCGGTCAACTTCGCACTGGCCAACGACGATGGCATCACCAACAAAGAGT  
ACGATGAGGCGGACATCATCCTGATCGGGGTCTCCCGCTGCGGCAAGACCCCAACAGCCTCTATCTGGC  
GCTGCAGTTCCGGCATTTCGCGCCGCTAACTACCCCTTTATCGAGCAAGACATGGGCATGCTGGAGCTGCC  
GCCCCCTCAAAGCCAACCGTCAACAAGCTGTTTGGCCTCACCATAGCGCCGAGCGGCTGCACGAGATCC  
GCAACCAGCGCCGCGCAACAGCCGCTACTCCTCCATCGAACAGTGGCAGCAGGAGCTGGCCTGCGTGGGA  
GCGACTGTTTTCGCCAGGAGGCGATCCGCTTCTTCGATACCAGCTCCCACTCGGTGGAGGAGATCAGCGCC  
AAGGTTCTCGAGGCAACCGGTCTGCGCCGCGAGCTCTGTTAAGCCAGCTTGACAGCTATCGGCATCAACA  
AAAGATAAAAAATTACAGTGTGCGGCGAAAGTCAGCTGTGGCGAACTGCAATTCACATAGATGACAGTGA  
AAAGCGTGGATAAAAAAGGGATAAGCACCAAAATGCTTATCCCTCTTCTTGTGACCTTAGCGTTGTGC  
CCTTGTACCTGCTGCCAGTTAGCCGCTATTGATTCGTTCTGCTGCGCTCGGCAACAGCCAGCGTTTC  
ACTAACGATTGAGCTCAGGGTTGTTTCATCAACCGGCCATAGAAGGCCAGCAAACCGTGGCGCAGGCGAAC  
CCGCTCCGCGAGCCAGCCGCAACGAGCGCCCCCGTTACCCCAACCAACAGCAACAGCGGCTGCCAGTAG  
TGCAGCAACCCATGATCACCGAGCGAGAGCCAGCCAGCAGCATGGTGGCGGCCACCAGCAACAACAGCG  
GACTCGCGCAATCCCTAACCAGAGCGCCACCAGCACACCCCGGCAACCCCTTGTGTCAGCACGCTTTC  
GCGCTCTCTGTACTCCAACCTCCCTGCACTCTTCCCTGTACTCTTGTCTGTTTGGCATCATTTGCATCCAT  
TTGTGGCTTGGCACCAAAAAGCACACCAACAAGACAAAATGTCAACAAAAACAGAAATTCGATTGCACAAA  
CATCAACCAAAAACTACCAAGAAGCCTCTTCAAATCATGAAAAAGCTGCCCTTGGTACAAAATACGGCCA  
TTAGAGATGGAATTAGGTGCATTCATGGCGGATTATCACTATTTCTGCTTCAGTTGCCAGCCAACACTAA  
AAATTGAAAATGGCATGGCGTAACGAAATAAATACAGATTTCTGTCAGGTTTTGGCTACGCAATGCGGCCCT  
GCTCAGGATGAGCCCAACACCGACAGAGACAACAGAGACGTAAGGACAGACCCATGGATTTGAAACAAG  
ACGGTGAGGAGCTGAAGCGCGGCCCTTAAAAACCGCCACATTCAGTTGATTGCTTTGGGCGGCGCCATCGG  
CACCGGCTCTTTCTGGGCATTGCCCAAACCATCAAGATGGCAGGCCCTCAGTCCGCTGGGTTATGCC  
ATCGGCGGCTTTATCGCCTTCTGATCATGCGCCAGCTCGGTGAAATGGTGGTGGAAAGAGCCGGTAGCCG  
GTTTATTAGCCACTTTGCTTACAAAATACTGGGGTGGGTTTGGCGGTTTTGCGTCCGGCTGGAACACTG  
GGTGTCTACGTGCTGGTGGATGGCCGAGCTGACCGGGTGGGCATCTATGTCCAGTACTGGTGGCCC  
GAGATCCCAGCTGGATGTGCGCCGCTTCTTCTTCGTGCTGATCAACGCCATCAACCTCTCCAACGTCA  
AAGCGTTTTGGCGAAATGGAGTTCTGGTTCGCCATCATCAAGGTGGTCCCATCATCGGCATGATCGGCTT

TGGCGGCTATCTGCTCATCTCCGGTGCCGGCGGCCCGAGGCGAGCGTCACCAACCTGTGGGCTAAGGGC  
GGTTTCTTCCCAACGGCATCAGCGGTCTGGTGATGGCGATGGCGGTGATCATGTTCTCCTTCGGCGGTC  
TGGAGCTGGTGGGTATTACCGCCGCCGAAGCGGACAACCCCGAGAAGAGCATTCCAAGGCCACCAATCA  
GGTGATCTACCGCATCCTCATCTTCTACATCGGCGCCCTGGCTATCCTGATGTCCCTCTATCCCTGGGGT  
AAAGTGGTGGAAAGGCGGCAGCCCGTTCTGTGATGATTTTTCCACGCTCTGGACAGCAATCTGGTCGCCACCG  
TACTCAACATCGTGGTACTGACGGCGGCACTGTGGTCTACAACAGCTGCGTCTACTGCAACAGCCGGAT  
GCTGTTCCGGTCTGGCCAAGCAGGGCAACGGCCGAAAGCCCTGCTCAAGACCAACAAGAGTGGCGTGCCG  
CTGGTTGCCCTCTCGGTCTCGGCCATCGCCACCCTGCTCTGCGTGTGATCAACTACCTGATGCCGGGCA  
AGGCGTTCCGGCTGCTGATGGCGCTGGTGGTCTCCGCACTGGTGATCAACTGGGCGATGATCAGCCTCGC  
GCACCTCAAATTCGGTAAGGCCAAGGTCGACAGGGGTGTCCAGCCCAAGTTCAAGGCGTTCTGGTACCCC  
TTCGGCAACTATCTCTGCCTCGCTCATGGCCGGTATTCTGGTGATCATGTATATGACCCCGGATTTCC  
GCATCTCGGTGCAACTGATCCCCGCCCTGGTGGTGGTACTGGGTATTGGCTTTGTATCATCAAGCGCAAGGG  
ACAGGCCCAAAGCAAGGTTGCAGCCAATCTGGGTTAATAACCAGCAGCTGAGAAAAACAATGCAAAACGCC  
GATCGCATGATCGGCGTTTTTTTTTATTGCGCGCAGCACTACTAGCAGCCGTAGCCCTCAGGAAGGCAGCT  
CTTGCCCTTTGATCTTGCCGATGCTCCGGGCTGTTGACGCAACACTCATCGCGGAAAAAGGCGATGATCTC  
CTCCAGCACCGCGTATTGAGAGACGCAAAGCAGGGTGCAGCTCTCCCGGTTTTGCTTCACCAGCCCCACC  
GAGACCAGCGCCGATATGGTGGCTGAGGGTGGATGCGGGGATCGCCAGCTGCTTTTGCAGCTCACCCA  
CCGGCAGCCCCCTGCTCTCCCGCCTTGACCAGATGCTTGAAGATAAACAGCCGGGTCGGATGACCCAGCTC  
TTTTCAATGCCTTGGCGACCTCTTCCAGTTGCATCTCTGCTCCCTCCACGAATTTGATATTTGATAATAC  
CAGAAATATCTTGACCGGCCATTCAATTCGATTATTTTGGAAATATAGAAACCAAGTGAGGATACGACAA  
TGAATGAGTGGTTAACCATGCTGACCGATGCAGCCCAGATGTTCTGTTTCTGGCTGTGAGCTGTGGT  
GCTGTTTTCTGGTCAATTAGCGCCGGGGTCAGCCTGATCCGCCAGAAGATCCCCGACGAGAAGATCCAGCGG  
ATGCTGGGAGCGCGCCATGGCAAGGGCTATCTGCTCTCGGCCCTGCTCGGTGCCGTACCCCCTTTTTGCA  
GCTGCTCCACCATCCCCATGCTGAGAGGGCTGCTCTCGGCCAAGGCTGGCTTTGGCCCCACCCTCACCTT  
CCTGTTTTATTTCCGCACTGCTGAACCCCATCATCGTTCGGCTTGATGTGGGCCACCTTCGGCTGGAAAGTG  
ACCCTGCTCTACGCCGTGATCGCCGCCAGCGTCTCCGTATGGCGAGCATGCTGCTCGACAGATTTGGGGT  
TCGAGCGCCATGTCATCGAGCCCAAAGAGGCCACCCCTCTTGCCTGAGCGGCTGTGGCCCGTCGACCCG  
CGCCACCACCTCAAGCATTGCAGTGACAACCAACGCGCGCCATTCGCGCAATCAAACCCCTCAACGCGG  
TCAGCGTGTGCGCCGACCCGCAACAGAGATGGCAGAACAGGCCACCCCTCCCTGCTGCGGCGATGGCA  
CGGCTGCCCTGACCAGAGCGCCACAGCTCCCCACCGCTGGGTCAAAGCTCGCATCGATGCCTGGCAGCA  
GTTCAAAGCGGTATTGCCCTTCTGCTGCTGGGGTGTCTTATCGGCTCGTTTTATTTACGGTTTTTATTCCG  
GCCGAGTGGATCGCCGCCCATGCCGGCGCCGACAACCCGCTGGCCATTCCATTCAGCGCCATCGTCGGGA  
TCCCCTCTACATCCGTGCCGAGGCCGTGATCCCCTGGCGTGGTACTGCTGGGTAAAGGGATGGGAAT  
GGGCGCCGTATGGCGCTGATCATCGGCAGTGCCGGTGCCAGCCTGACCGAGGTGATCCTGCTCAAATCC  
ATGTTTCAAGAACCCCGATGATTACGGCCTTCCCTTACCCTGATCCTAGGCATGGCGATCCTGATGGGCTACC  
TGACGCAACTGTTGTTTTAAGGCACCCATCTTTAAACAGACAGGGTGTAAAGCCAGCTGAGTGTGAAACC  
ATCAGGCTTCCCATAGACACAACGCCGATCAACTGATCGGCGTTTGTCTATTCCGTACGGCAATCTGCTA  
CCGGCGTTACAGATATTGCCCGACGATGGGGAGCAGATCCTCGACGTACCGGGCGATATGGTGGGTTGG  
TGTTCCAGCGCTCCGGGGTTCGCGCGGCTATAGGCGACAGCCACCGATATCACACGGCTCTGCTCGCCAA  
GCGCCGCTTGCAAATGACGGGCAAACCTGCACATCCGCTTCATGGTCACCGATATATATCAGCGACTGGCA  
CTTGGCTGGGCCGAAGATAGACTCCAGACATTTGAGGCCACCGTAAGGATGGGGTTTTTGTGCTGTCCG  
GGCAGTTCATCATAGCCGACTACAGCCTTGAACCTGGCTGTTTACGCCATGCTGCTCCAGTACCCGGCGAA  
TGTTCTTTTGGGAGTTCTGCGAACAATTCGGTGGGGAATGGCAGAGAAATGGTCAATCACCGCCTCCAG  
CCCGGCAAAAAACGCACCTCGGTCCGGTTCATCTCCTGATGTTTGGCCACAGACTGCCAGCCAGCACC  
ATCTCGTCCCAGCAAAACCGTAGTAATCCATATAAAGCGCCTGCCAGTCTTGGCGGCGTGATTTGGCAT  
GGTGATACTCCGCTTCGCTGCGCAGATAGCGCGGAGATGTTCTCCGTCAGATGGGGGGCGACCTCAGC  
CAGGATCTGCCTGGTGATATCGATATTCTTCCGGCACCGAATTGACCAGAGTACCGTCATAATCCATAAAA  
ATCGCATCCAACCTTCAATTGAGTTACCTGTCTCGCTGCACAGCCATAAGTCACGCCATGTTACTTGGCTTG  
CCTCCCCTCGCCAAACCGCGCTGTAAAAATGTGAGACCCATCCCCTCCCCACGCAGTAGCACAAGAGTTA  
ATGTGCAACAACAATAAATGAACATCCTCTGCCATACTCAGACGAAGTATTCGGTTACGCCGAAACCG  
GAGCCTGATCATGGTAACCAGCTCGCTTACACCACAGATAACCGAGGTTGAATTTGCCGACGATATCCAG  
TTGGTATCGACGACCGACCTCAAAGGGGACATCACCTACGCCAATCCGGCGTTTTTGTGAGGTGGCAGGCT  
ATCGCCTGGAAGAGATGTTGGGGCAGCATACAATCTGGTGCGCCACCCGACATGCCAAAGGCAGCGTT  
TGCCGATCTCTGGGCCACCTGCAGGCGGGTAAACCATGGCGAGGCATGGTAAAAAACCGCTGCAAAGAT  
GGTGCCTATTATTGGGTTGATGCCTATGTACCCCGATTTATGAAGATGGCAAGATGGTGGGTTACCAAT  
CCGTCCGCTGCCGCCCCGCCGAGAGCACAAGCGCGTGCACGCCAGATGTACAAAACCCCTTAAAGCCCCG  
TGAAACCGGCTCTGCCATTACATGGGCTGCGTCAACTCACGCCGACCATGATGACCATCCCCCTGCTG  
CTCGTACGCGTATCAGCGCGCTCTGGCTGATCTCACCGCTCCAGGCGCTCTGGGTATCATACCCCTCT  
TGGCAACAATCTGGTTCAATCGCCACCCTCTCTTCTCACGCCGCGATTTCTTGCAGCAGCTCGAGCAGGA  
TTACGACAGCATCAGCCGCTTATCTTCTCGGGGGATGCCCTCACAGCATTGCCGATTTCCATATCAA  
CTCGGGCAAGCGAAGATCCGTACCGTACTCGGCAGGGTGGATGACACCACCGGCTCACTCAATGCCATGG

CCAATGACCTGCGGGCTCCGCCTCGCTGGCCAGCCAGGATATCTCTTCGCAAGACACGCAGATCCAGCA  
GATTGCCACCGCTGTCACCCAGATGGCTTCGGCCGCGAGGAGATCAACCGCAATATTCAAGACAGCAAC  
AGCCAGATTGAAGAGGCCCCGAGCCACTGCATCACCACCAGCACCAGCTTTCGGAAGCAGGAGAAGAGA  
TGTCGGCGCTGGCCACCCAGGCGGAGCAAGCCTTCCAGTCAGCTGTCGAGCTGGCGAGCGAATCCGAGCG  
GATCGGCACCATCATGAGCGAGATTTCGCGGCATTGCGGATCAAACCAACCTGCTGGCGCTCAATGCCTCC  
ATCGAAGCCGCACGGGCAGGCGATCAGGGGCGTGGCTTTGCGGTGGTGGCGGACGAGGTTTCGCAGCTTGT  
CGACCAGAACCACAAGGCCACAGAGCAGATCCAGAACAGCATTGGCCATATCCAGCAAACCTTGGGGGG  
ATGGAAAGAGATGATGCATCTCAATGTGACCAGAACCAACGCCTGCCTCGCCACCACCCGGGCAAGTACC  
GGCAACCTGAATCAGGTTGTGGTCGAGATAGACAAGGTCTCTGATTTTTCCAACAGATCACCGCCGCGG  
CCACCCAGCAACAAGCGGTCATCGAGGAGATCAGTCGAATATCAACCAGATATCCTCGTCTCTCACGA  
TAACAGCCTAAAAATCGATCAAGTGAGTGAACCCAGTGCCAACTGCAGAGCAAAGCGAGCCAGCTCAAG  
GACTTAAGCCGGACATTCGGATAGCAGCATGCAGATAAAGTCCATGTAAACGAAGGCCACCCGCTCTGGG  
TGGCCCTGTTGTTTATAAGGCTTAACTGTAGCTCCTAAACGTGATCACAACCAATTTAAGTTGGAAACTCT  
CTGGTCAAAAAATTCAATATCTTAGCGATTCCCAATATGACAATTAAGTTGGAAACTCAATAGCAATCCT  
CCACCAGCTCAACGAACAAGCAGGACATTGAAGTTGGAAAACCGAGCACTGCATGGCGTGATAAGTTTGT  
GAAATTTTATTACAAATAAGGGCGGTCGTTTAAACGTAACCGCCCTTATGTACAGTGCCTTACTGATCG  
CCCTGTGCGTTACGACTGGGATGAGTGTCTGAATATAGCGGTCGGCCAGCGCTGCGCCTCTGCCAGT  
TCGGCTAGTGTAAATTGTTTGGCAGCACGATCGCGGGACTTAACAGCCTTGTGCGCATAACCGCTGGCCG  
CAGCGACCCGAGAACCAGGCATATGCCTGCTTGACGTCTGTGGCACCCTTGGGCATGGTAATACATCAC  
CCCTAGGTTGAATTGCGCTTCGGCATAACCTTGTCTAGCCGCTTACAGTACCAAACCAAGGCTTGGGCA  
TCGTCTGCACCCTCCTTGGCCATTGGCGTACGACACACCAAGGTTGTAAGTGCATCGGCATATCCTT  
GCTCGGCCCGCCTTTCGGTACCAAGCCACGGCCTGGGTATAGTCTGCGCCACCCCTCGACCATTGTGCTA  
CGACACTCCAAGGTTATACTGCGCACTGGCATTACCTTGTCTGGCGGCCTTTCGGGTACCAGGCCACGGCC  
TGGGCATCGTCTGTGGCATCCCTTGGCCCTCGTCTGATACATCACGCCAAGATTGAACTGCGCATCAGCAT  
CTCCTTGTCTGGCGGCCTTTCGATACACAGGCTGCGGCTGGGCATAGTTCTGTGGTACCCCTTGGCCCTC  
ATCGTACATCATGCCGAGGTTGTAAGTGCATACCCCTTGTCTGGCCGCTTTCGGGTACCAGACT  
ACGGCCAGAGCATCATCCTGCTCCACCCCTTGACCCTCATTTGATACATCCAGCCGAGCTTTGCCTGCGCCA  
TGGCAGCCCTTGTTCAGCCATCTCAATGATTATTTCCCGTGACCATCATGCCATTTTGGCTATTTTC  
CCCGAGAGCGTTTAGGGCATGGGTATTACCTTACTTGTATACCATCTTATAGATGGCGTCCCAATGCATTTGGCA  
TTGCCTTGTCTGAACGCTTGTGGTACCAGACGCTTCCCTTCTTGTCAATCTGTACCACCCCTCGACCAT  
CATCGTACATTCTGGCAAGGTGGTACTGCGCCTCCGCATGGCCTTGTCTGGCAGCCTTTCGGGTACCAGGC  
TGCCGCTGCTTGTCAATTCTGAACTATCCCTCGGCCATAGGAGTACATCGTACCAGTAGGAACCGCGCC  
TCCGCATGACCTTTCTCGGCTGCCTTTCGGTACCAGGCCGCTGCCTGTTTGTCACTCTGTGTAACCCCTC  
GGCCCGTGGCGTATATTCCGCCGAGTAGAACTGTGCTCCACATGAGCTCGCTCGGCCGCTTTGTGATA  
CCAGACCCGCGCTCCTTGTCAATTCTGGCGATCCCTCGGCCATAGGTGTACATAGTACCAGTAGGAAC  
CGTGCCTCCACATGGCCTTGTCTGGCCGCTTGTGTACCAGGTCACAGCCTGCTGGCCATCCTGTGCTA  
CCCTCGGCCCTCAGAGTACATCCTGGCTAGGTGCGACTGTGCTCAGCATGGTCTTGTGGCTGCCTT  
GCTGTACCAGGCCACAGCTTGTCTCATGATCCTGCGCCACCCCTTTCGGCATGGCGTACATCCCGCGGAGG  
TTGTAAGTGCCTTTGCATGATCTTGTCTAGCCGCTTACGGTACCAAGCCACGGCCTGGGTATCGTCTC  
GCGCCACCCCTTGGCCATTAGCGTACATCACGCCGAGGTTGTTCTGCGCACCAGCATGCCCATGCTCTAC  
CGCCTTGTGGTACCAGACTATCGCTTGTTTATAATCCCTATTAACCCCGTTGCCCTCATCGTACATCCTA  
GCTAGGCAGTACTGCGCTTCCACATGACCTTGTCTGGCCGCTTTACGGTACCAGGCCACGCCAGCGTGT  
GATTCTGAGCTATCCCTCGGCCATTGGTGTACATCATGCCGAGCTTAAATTGAGCTTTTACATGGCCTCG  
TTCGGCCGCTCGTGGTACCACGCCGAGCTTGTCTGTCACTCTGTGCAACCCCTCGGCCAGTGTGCTAC  
ATCCAGCAAGTAGGAACGGCCGCTCCACATGACCTTGTCTGGCAGCCTTGTGTACCAGGTCACATGCCT  
GCTGAAAATCCAGTGAACCCCTTGGCCAGTGGCATAACATTCGCCGAGTTGAAATTGAACCTCCATATG  
CCCTTGTTCAGCCATCTCGATAAATTATTTTGTGCACCATCATTCAGCTTTCAGCTTTCGGCCATTTGCTAAGA  
ATGTTCAAAGCATGGGTATTACCTTGTTTTACCATCTTATCGATTGCGTTAAACGCCATGGCATTGCCTT  
GCTCGGCCACTTTGCGATACCAAAAAATGGCCTGTTTCATCATTTCTCTTCCACCCCATTACCTCTAAAATA  
CATTTCTGCGAGTGTAAATTGCGCATACGCATGCCCTTGGCTTGGCGCTTTTAGCAGCCAATTGAAAACC  
CATTGTGCGCGGCTATTTTGTATAGAATAATTATCCCAATACATCATGCCGCTACATACTGTGCCTCTG  
CATGGCCTTGTCTAGCCATCACAGTATGATTTTATGTGCCCCCTTATGTCCATTTTTTGTATATTTGCA  
GAGAGCACTAAAGGCATGGTGTACACCTTGTCTTTCGGCTTAAACGATTATTTCCAATGCATCAGCATTG  
CCTTACATGGCAGCCTTGCAGAACCATGCCAAGGCTTCATGAGCATCTTGTTCACTACATGACCAAGAC  
TATACATTTGGCCGAGACGGTATTGTGCTTTGGCATTTCCTCGCTTGGCTGCTTCGATATACCAAGTCAT  
GGCTTGTATCATTATCTTGTGCTGCACCTTGGCCAAGTTCGTACATCTCGCCTAATGCGCACATCGCATTG  
GTATTTCTTACTAGCCGATTTATGATACCAAGCCTTTCGGTGTCTCATCATTTTTGTGCTACCCCATGGC  
CATATTTGTACATCTACCAAGTCGGAACCTGCGCTCCAGCGATCCCTTGTATCGGCAGCTTTTCGGTACCA  
TGTTACGGCTTGTTCATAATTTTGTCTCCGCTCCCTTGGCCACGGCTATACATCCGGCCTAAGGCGTATTGT  
GCATCAGCATGGCCTTGTATCGGCGGCCTTACTGTACCAATCCACGGCTCGTTCATACTCTTGTTTAAGAT  
CATGAGCTAGCATCACATACTTCCGAGATAAAAACCCCATACCGCTATGCCATTGCTCGTGAATTTCCC

GAGGCGATACTGCGCATCAGCATAACCCATTGATGGCTGCCTTGCGGTACCATGCTAAAGCTTGCTCATAA  
TCTCTTTCTTCCCATTTTTTCGTATATCTCCCCAATGCGAACTGAGCACTGGCAACACCTAACTCAGCTT  
CTAGCTCTAATTTTTCCAGATCCATATTCATCTATTTTATCCTTGTAATAATTTAACACTGGGCCACCCA  
CACAATCGACCACATATTCACATCTTATATTTTAAAATCACACTACGCCATAAAAATGGTTGCTCGCTAGC  
AAGAATGTAAAAGTAATAAAAAATTTTTACGTGATTTACATCACAATACAAAATGTAGTAGTTCAATAGT  
TTTGGTAATGTTTGTAGATCGAGTTAACTATGCTACGCCAATAGATATACCACTCAACATCAGTAGCAAA  
CTCTAATCCATTAGTTGATTCCATGAGTTTCTGAGCGGTGGTCCAGGCAGTTTTGATTTCTCGCCAACG  
AACAACGCACTGAGGGTAATTGATTAGCAGTAATGTCGATATGATATCGAGTACATAGCTCTGTACTAA  
GTTCCCGACGGAGTTGGTTAAGTTTGTATCTCGTCATTTATTTTTACTTCAATGTAAGGAGGGTGTTCGTT  
TTCCACACCTAGGAATATATTTCTCACCAGATGTTTAAATTAACACTAGCGTACCGCTCTTCGCGGCATGA  
TTTTAAAGTGGCGTAAAGTACACATGGTTTCAACATTTCAATATCCTTTAGGAGTGATTTTTTCGTAAAAA  
ATATCCGGGGATATCCCAATCATTAAAAACTCTTTACCCAGCAAATAAACTACTAGAGATAAAAAACACA  
GGATTTTTATTAATTGAATAATGCAATTAATAACATCGCCAATGCTAACAAAAGCAACAATTGTGCTGAT  
AATGCAGGATGATTAATTAGAGACTTGCATCATTCCAATCTTTAATAATAAGACATCTCGTCACGAGCTA  
GTTATAGTAGTAACTCCACAGGCAAGACAGGATCTCCGTTACGGCTCGTCGGACACACTCATCTTATC  
ACTTGCCAGTTTGGAGCAACCTGAGTTGGCAACATGGGGTGTAGATAAGGGCCTTGCGAACATATTTA  
TCCTCATCAGACGCCAGCTCTGCCATCAGCTCTACAGGCAGTCTAAGATTGCTAGCTGCTGCCATACGAA  
TTAGCGGTCTGTATCAGACACCAAGCTGGCTAACTCATCGGATGGCAGGGAATGGTTGCTCGCTACCGC  
AGCCAAGATTCTAACTTCATCATGTCTTGCCAAGCTCAATACCCGAGCCAACAACTAGGCGGGATCATG  
GGATTACAGGCAACCCAGCGCAACCTCTTCCCTGTATCAGGAGCCAGCGTATCCAGCACGGTTGGCG  
GAGTATTAGGATTGCAGGCAACGCCACGACGAACATGCTTATCCACATCACAACTAACATAGCTAGTGC  
CTTGGTTCGGAGTTGAGCAATTCCTTGCCACAGTAGCGCGGGTTACTACATTTTTTGTGTCTTGCAGTGC  
ATGAGCATATCGGCTGGGAGGGCTGGGTTACTAGATGCAACCCCGCTTATCTCGTCATCATCGTCACTCG  
CTAGCTCAATGAGCACTTCGATTGGAGTCGAGGATTGAGAGCTAGATAGTAGCGAACTTCCAACCTCTTC  
ATCAGTCGCCAACACAACCAACACCTCAGAAGCTGTTGTCGGGTCTCGGGCCATATTAGAGCGTTCGTA  
ACAGAGAGATTATTCAGAAAAAGCATATCTACCTCCTCATTTTTAGAAAATTAACGTGTACATTTATAATC  
AACAAAATGAAGTCGACTTTGTCTAGTACGATTTTCGTCAACTGGTGTGTCTGTTCAGAAAAGCCCAAGTGT  
AGCGGTCACCTGGGGAGGTTGTGACATGATGTCGGGATTGGGGAAACAACACCGATTGAAAGTTG  
ATGCTGTTTTACAGGTGTGAGGGCTCGAATAGGTTGATTCGATTTCGAGCAATAGTGGCCTTAAAGGA  
AACATATTGAGTGAATATTGGTTTTCCATATGGGGGTGAGCCTGCTGATTTGTGCTCGAGCCTAATGATA  
ATGATGGTTATAATTGGTCAGCAAGATCATAACGGACTGATTTTTAATGGTGTTTTTTGTGTATCAATTT  
TGTGGCCAACGGCTTGCAGAAATGCCCCAACTAGATGATGACCCAATGAACTCCTGAGTGATGATTTCGCA  
TTGGGCTGCCATCAACAACCCCGAGACGGAGGCGCAGACTCATCATGACTCATGTAGAGCAATCTCCAC  
AACCAGCAATCTATCTGTTCTGGAGTCGCTCGGTCTACCACGTAACCTGGCTAGCCGCCATCAGCACATA  
GTGTCTGGTGTATCTCCTGAGATCGTTCGCAAACTGAGCTCGCTATTGGGGTCTAATACCCGAACAATTT  
GCCAGATGATTGGCATTAGCCGAGACACACTGAACTGCCAAATCAAACGGGGCAATCGCTTATCGACAGC  
TCAGGGAGATCGCGTCTACTGGGTTGCCCTTAGCAGTGGACGAGCCATATCCCTACACGGGGAGATACT  
GCTAAAACGATGAGCTGGCTCACCCGCTCTGCGTGGGGATTGGGTGGTGA AAAACCGGCCGATGTGATTA  
CTACGCCTATGGGAGCGCAGGCAGTTATCGATCTTGTGCGCCGGATTAGGCATGGCATCCCCGTTGATT  
AACAGTTCATACGTGACCATAAAGCACCAACAATAGGCTCATTTGGTGAGCCGATCACCCCGACCAATCG  
GCTCATTTGATGAGCCGATCACCTCGACCAATCGGCTCAATTGATGAGCCGATCACCCCGACCAATCGAC  
TCACTTGATGAGCCGATCACCTCGACCAATCGGCTCATTTGATGAGCCGCTCCCCCGACCAATCGACTC  
ATTTGATGAGCCGATCAACACAACCAATCAAATCGTGGTTAGATAAGCTCTCGATTGCCTTCAATTTTCC  
CAAATTGATCAGGGTCTGCGGGTTGATAATCATCCGAAAACATATTCATCAACCGATACTCCTGTCTCAG  
GTTGGCCAGCCGCCCCAAAAAAGCAGCCTTCACATAGGTGTACCTGATATCGTTACCATCGTGTGCGGAA  
CCATAACCCAGCAAGCTTCCAGCGTGCCGAATTCCTGCGTACCGAGCGATTTAGTAGTACTAGCACCC  
GGACATCGCACAAAATATCGACGACCTGTGTGGTAGGAACGATGGCTTCGACCTTCATGGCAATACTCCT  
CGTTGTGATGCCTGATATCAGAACCTGTATAGGTATCGACGGCGAGCATCAGGGCATAGGATGTTGAGCG  
GCATACGCCGAACCCAGCCGACAGCCAATGCGTAACTGAGCGGTAGACGTGTTTTGTATTTCCCTCAGGC  
AGTCTGGCCTATCGACTGCCCGTTCCAATGCAGATAGAGAGCTTGCCTGCTCGGCCAGCAGCCCCAGTTG  
CTCAGCCAGTTTCTATCCCCTTCTCCCAATCCACACTGGGATGGTGAACCTGCTCGCTTGGCGGCAGGT  
AACTGTTGATACAAACAGGCACGATCATGTTTATAGAGCCAAGTAAATGTGGTTCGACACACCTGTTGCA  
CACAGCCTCGACTGACATCGGCATGCTGTGCCAAATATGCAGCCACCGTTACACGGTGTACGTTAGACG  
GTTAACCCTTCTCAAATGCCGTCGCCAGTCAGACAGCCCTGGTGGCTCTGAATAATGGCTTCGACCGCC  
CCGACAGAAACGCCATGACTGTACGCGATCTGCTGCCGTGCTCCCCCATGAACGCTGACGCCATATTC  
CCCGCTCAACTTCAGCTGTAATGCGCTTGGCAGGGTGTATCAACCGTTGATTGTGTCTCAGGGCGAGTTG  
TTTTGATATAGCCGATGCTGTATCCGGTCTGGCAGGCAATCTGTGCGATGGGAACCCGCTTCACCAACAAT  
GTCAGTATTGTTGTTTCTGATAGCTGTCCGTGCTAGGCGTAGTGGATTGTATCTGCACCGTAGGTGGGC  
TACTGATAGAAAAAATTCGCTGGGCTACGGCTTACAAAACGCCATCAACATCACATGCTTTAGGTAGTG  
GTGATTGCGGTTGCCGTTACCAACCCCGCGACATAACCGATAGTTAGCCAGCCCCGATGGCACTTGGCAT  
GAAGTATCGGTAACCCCCCTGCCAGAACTCCGTCATGGCCTGTAACAGGGCCTGATAGCGCAGATGGCC

TCGGGTCGTCAGATAGCCCTGCTGTCCCAACCATCGTCGGTAATACTCCGTTGGCAATGCCACTGGCGAC  
TGGACGCACAGATACCAATGCAGAGCAGTGATAAATGTAGAGAGATAGAGTTCCTGTTCCGGATGGTTCGGC  
ATAGTTCACACGGCATCGCGGAGTCCGGTATTAGCAGTCGCCGATCAATACCTCCCGCACTGGCCGCCAG  
GGTTTGCAATCGTAGCTCATGCTTGGCACAGGCCGTGACCCCATACAACCTGGTGTACCGTATGCCAATAC  
CCACACCCGAACTGCTTTTTCATCTTCTAGAAGACAGGCCGGACACCATTTTCAGGCAAGCGCCACCGACCC  
TCAGTTTGGCTCAGTTTGGTGGCGGCTTGTCTTGCAGAGGGCCATTATTTCCCTCCCTCACCAGCATAGC  
GGCAACCAGGGCGTGGACTTGGTGGCTTATTGTTTCAGCGTCAGGGCGAACAAATGGGAAACCCGTGCCATGG  
TGCAGCAGGTATTGTGGATCCACTCCCGCAGCCTGAGCTGTTGCCTCAATATGCCCAGGTAATAAGGGGT  
GCAGACGAATGGCAGGATGATGGAATAATTGGTCACAGAAGTGGTTTCGGTTCGAGTAAGCCGACTGCAC  
AAAATACTGGCAGACCCAGCTATAGACCGACTACCAGTAATGTAGGTGGAGAGCACCATTTCACATC  
GATCACCCCTCAGACCTCCAAAGCCCAACCAGGTCGACGCCCTGCATGCTGTAAACAGCAACAGGTGGGCCA  
GCGGGTGCAGCGGATCTCGGGCTGACTTCTCATGTTAGCCCCGTGCATTACGCAACTGGGGAGGTAATTG  
CCATCCCTTACCGTGCCTCTCGGAATTGGTGAAATATGCAGTGAGCGCCAGTGGATCACATTGCGCATCC  
ATCTGCTGAAACCACGCATTGATCGCTTTGATACTCTTGACCGTGCGCATCGGGCTCGCCGAAATGCCCA  
TCGAATCAGTACCAGCTGAGTTAGCGCACACAGGGTGAGAGTGCTCGCGGACTGGGCCAATGCCAGCGA  
CGCCAACTCAATCTCGTTCATTGCTCGGAAAAATGACCATCGTATCCCCCATCCAGTGCCCAACAATGG  
GGGCAGAGGCTCTCGTAGGGTGGGATCAGTTGTTCCGACAGCAATTTGGCAGAAAAACCACAGCCTGCGC  
AGTGACCAGACAAGCCGATTGATGCCGATGACAATGGAACACTCCTGGCAGTTGATGATCTCGGTGGTA  
GTAGGGCATAACCATGGAGCTCATAATCCTCGGTGATACAGTCTGTACACCAACGCCAGTATCGGTGCTGT  
AGATTGTTCTGACCGGTCACCCTCAACCGGAGCGGCGTGTAAACCGCCACGCAGCCGTCAACATATCCT  
GCTCAGGCAGACTCAAAAACGGGGTTAGATAATGGCCGTAGCCATGTGTCTGCCAGGGCTGAGCTATCCT  
CTTTCGCCCCGAAAAATGGCATCGAGGGCTATGTCTGTCGGCATGAGACAATCGTTGGGGGCGAATCGGCGGG  
CTACCTAGACCCAGCGCTTTTACTGTAGCGGTGAACGTCCCATGGATGCTCAGCACATGCATTCGACCAG  
CCACGGCTCCCAGATGTTCAACCGGCAGCAACTCTAAACGATGGAGAAATCATTTTCGGCTTAACCTTATCT  
AGGTTGTAGCCGAGTTGTCTAAACAATACTGACGGCGATAACTGATCCAGTTTTTTTGGCTTTCTGTACCT  
CAATCTGCGATGATACGGGTTTGTCTGCTCAGCTCGACCTCTCCTTGAACACTAGGTTTCATGGCTGGAGGCGG  
AGTTATCTGTGTATGACATCAGAATGGCTCGCCACCGACTCCAGCATCAGCATCGGCTCAAAAATCCTCA  
AATTTGTGGTATACCTCTTCTCAGTCAGTTAACCAGCGGGTCAATACTCTAAAATTCACGATTAATAAA  
CTAAGTCCAGCGCGCTATAGAAGATCTTGATCCTGAGGCTCCAGGAACGTGAGATAGCGAGCGTGGC  
CCTAACCAGGCTGCTGGCAATTGCCGGAATGCCCGCACTCAGATAATGAATATGCCCTACACAATGTATCT  
ACCGATGTTGACTGATTTTTTTAGTAATTGAGTCTGGCATAGCAGGCGGATAAACCGTTTTCCAAAATGAGC  
TATTAGAATCGCAACTCGCCAACAACATAGATCCATTTTTTGGTCACTCGCCGACCGATAGTTGTTTTCCCT  
CTCAATAATGCTAGCGTTGCAAAATGTTCTACCAGCATGATCGGCACACCGACTCTGTTGAACAATTC  
TCGACAAAATTTTATCGACGTTTTTTTTCATTGATACTTAAAACCTTCATTACGGGAGGATTTGGCTAGATTTT  
GGGCTCATCAACGACTACCAACCCAACACTATGACCGATAAGAAGCTTGCACACTATGGTAATTAACCTC  
ATTAACAGACCTATTACGGTGTTCATATGCATATGCTTGTCCGGTCACCTCATCCAGCGCTCCAGCATA  
TTCAACAGCAGCGCTTTTTGACCACGACGCTCGTGAATTTCTACATACAGATACGTTACCTGAGATTGAT  
CAAGCGTATGCTCCTGCCCTTGTGGTCCGTATAATTGAAATGTTCAATAACTTGATCAAAATAGTTTCAG  
AATACGCCTTACCATAAATGATTTACCACGACCCTCAGTCCAATCAACAAATAACTCTGCAATACAGAA  
TAGAGTTCCAAGCTTGATAAATATGCAACCTGATTGGGATTGGTCTTGTCTCTATCGATAGCCGTCAGTA  
TCCGCCGTATATCTGTTTCGACAGGATTGCGTTTTATCATACCCCGCTTCAATCATGCGTCGCATGACATC  
ATATAAACGATATGCCTCGTCTTGAACGGCATAAACATCATTTCAATGATCGATCAGGGTTCGGATATAA  
TAACCATGAAGTGATGCATCAACACCAGTCAAATCAACATTTGTTAATAAAAAGGCAACTCGCTGAGTGCAT  
AAAACCTGCTGCATTGTTAATGGCTGACCCAGCGCCTCAATTAATGGGTTGTCTCGATACTGTGCTATTAGG  
ATGCATATAATAAATTTGGCTGGCTCATTGTTGCTCTTCTGAAAGGATATTAAGTGTGCGGGTCATTCAAAT  
TTTGTTTAGATTGCAGCGATTTGGGCCGATGGATTGATCCCGGTTGTGACCCAGATAGATCGGCATA  
AATGGCTTGCATTTTATTATGTGCTGCTGTACAGCCTCAATATGCTTGAGGGTTTTTCATCCCTGGCTGA  
ATGCCTTTAGCATTGGATTTTTTTAAGATGGCGACTTTCTGCTCTAATAGCATCATCACATTTGTTTTAAAT  
CCATTTCCAATAATGCACGTGCATCAAATCTGCTTTTCTAGAAATAGCCAGTTGTTCTTTGACAATCGC  
TTGGCGGCGCATGACATTGGCCAGATTTGATTTTTTATAGGCTTCGCTACGATCAGTCAAATCCAGTTGG  
AGGAGCTCTCCACTTTCGTCATCTCCATAACCAGATATGATTAGTACTGATATCGGTATATCGAACCCTTA  
TTTTGAAACGACCAATATTTTTTGGCTCGGTCAAGATAGCCCTACGTACAATTTTATTACAATTAATA  
TAAACCTTTGAAGAACACTCCCTGAGACCTAACTGTTGCCTCTGCTTCCGGCAACAATGCGTATCGTAGG  
CGATTTGTTGAAACTCGTGGTTTTCAAGATCGCCTGCTCCATCCCCCAATCCCAAACACCAGAGATGTAA  
AAACCACACCATCTCGCGACATCTCAAATATGAGATAGGACTCGTTCCCTGTTATTGTTGGTAAATAT  
GATACATTTTTATCAGTCGAACCATAAACTGTTTCATAGGTATACAAAGAATTACGGGACGCATGTTGGTCT  
TCTTTTTTTTTGGAGATTTTTTACAACCTTGCAGAAATCAAAGGGGATCGCTAGAGACTGAATAATATCAAAC  
TCTTCTCAACCGTGCCTTTTCATATCACCACGATGATATGCATTAATAATGCTTACAGTAATAACAATTTG  
ACCGCGAAGGAGGGAAGCTATATTGCTATCAGTATTTCTCTGAACCTCGGTCTAACGTTAATTCACGACAA  
ACCTCCTGGCAGGGCAATCAGACTCAGCTATTTTCATAGCCATACTGTCTACAAAATTCGACCTTATTAC  
TCATAGCATTAATAATGCCTGACTGGCACCCTGCCAACAAGGACTATCAAAAACCAACATGAATTTCCAC



AATCATTCCACTGAAACTATCAACAACACTATAGATTACAGGTCGTCCTATACTAACTAGTTCATCTTTG  
CTGTAGGAATATCGAATATATATATCTGCAATAGTACTATCAATTTCTGTAGCGCGATGCCGGTCCCTCGGA  
GCCCCGCTCTCGCGAGCCCGGGCTTGCCGGCGTAATCTCGATCATAATTTATACTACCTACCCGCTTTTT  
CAAAAACGTCAACTGATCAACATATTTAGTAAGCTGGCGCTTGAATGATTTGGGAGAAAATAAGATAATTT  
CTGGGTAGTAACATTTTGAACGGTTTCAGCAATATCCTCGTCCGGGGCTCCCATCGGGCGCAACTCTGTCCG  
AAGCATACTCCATACAAAAATCCAAAATACAACCGAGAAAAGCTGGACTTCTGTCCCCGAGCGGATTTTCTT  
GGAGAAGAATACTATATTTTTAATGTCTTGTGGGTAATGCCACGGTAAGATTTACCATAAAGCGTTTCG  
CGCCCTCGTTTTGATGCAAGACAACTTTCCCTTTTCCAGCTCCAGGTATGTAGTAGGCAACTGGTGAT  
TTTTGCCACATGCGAAGTAATTAGGTAATAGCGCATTTGGAATGCCACCACATCGGAAGTAGCGATTCAA  
TTGACTAGTAGACACTTTTTACTTTTTCTGAAACGATCAATGAGTAGTTTCAAAAATCCCGCTTGAGTCA  
CCATATAGATAACGATGCCTCAGTTCGTGATCGCTTATTAGGGTTCAAGCGCAGCAAGTCTTCCATCAC  
GTTTTTTTATCCAGTTTGGATTTAAGTTATTATCTGCTTCATAGATGATTTTTGGAAAATCATGATCTGCT  
ATATGTCTACGCCCTTGAGAAAATATCATTTTTCAACTTCGTCAAGCGACAAGGTAAATGGCCGTTTCGGTG  
AAACGAGTAGCAATTCAGTTACAGCTAGCCGATTTGATCCCAGCAGATATCAATGATCAGCAACTCGGA  
ACTATTTTTGGTATCAGACACGATCTTTTGGTTAAACCCGATTAGACCTCCGTATTACTGGCAGAGGACG  
GTATAACTCGATTGCTTGTGTCAAATCGATATCAAACGACCGGTATAAACCCGCGTGTGGAACAAACAC  
TGCACCTGAAATTTATCAATATTAAGTTCATAGGCTACCTGATGAATTAACATCAGCAGCGTGGATAAAG  
GGGTTGCTATCATGTGGTACCTAAACCGAACAATAACATTTGACATAAAAATTTCTGCCGAAACCTGAATCAG  
TTCAGCCTCATCAAAAACATTTCTCGTAGAAACTCTAAATTTGAAAATAATGGTGGCGTCAAAAACCTTCTCT  
GTTATCAACACATGATCAATATTTTGGAGTACGCCAATACTCAAGGGCAATTCGCTCTTTTGGCCATGTAC  
GATTAACAACACGGGGGATGTTATTTCTGGATCCATCGCATCAGAATATTTGAAGCTATATGGACTCAA  
TATATGCTTCCCTGCCTCCGTTTGCCGAATAATGACAAAATCCTGAGTCATAGTTTTGGCTGGGATGCGG  
CCACCATGATTACCTCGTTCTTTATAATTACCTGGATGGACAACGTTTCAGAGAGGCAGCAATTTCTAGAG  
TTTGATGCAGTGGTAACGGATACTGTTTCGAGAATGTCGATAACAGTTGGATCGCGTTCGAAAATAGAAAA  
TGGTGCCCTCTCGCCACGACTCAGCAGATGATGCTCACGTCTCGTTTTGTGACTATAACAATCTGCCCC  
TGACCATAGGTATGGGACTGCCGCACCGTGACCCAGGGGCGATACCCCGAAGCTTTGATGTCCTCGGTTGT  
ACCGTGTCTTTTTGCGATCTCCGCATCGGTGACGATGGGCTGCTGAACCGTTTTTTGCTGCATGACTAC  
TCCTACTGACCTCAGTACAACAAGTAAAGTCGGTAGGGGATCGTCAACAACAAGAATGAACGTAAGGTA  
CTGTTTTTACTTATTTATTTTTATAAATAAATAAGTACGACGCTATCATGGCAAAAATACCACATCTCAAC  
AAAATTTTCATTTTTAACTTAAAAAACATATAGTTATAAAAAATCACATAAGCATACATAATCACGAATA  
TTTTATTTTATAAATAAATAAGTAAATGTTTTTTTATTCTTTTTTTGACATAAGAGGATAGCGGATATAGAA  
CATTATTCTGAAGCTATTGGTGGTTCCGCTCAGAAAAGATGTCCGTTTTTTGGCTACAAAAGGATTCATGC  
GAAGAGCAATCAATGCATCCACACCAAAAAATTCAGCCCGCAAGGGTGGCTGCCGGGCTGTGGGCGAC  
TGACGAGCTGATAACTCACGTCAACAAGCGGTTAGCCATGCCATCCAGCTTCGCTTTGGTCTTTTCCCAA  
CCGGGCATCACCTGACCCATCAGCCGGTAAAAAGTGTCTGCTGTGGTTGTGCTCGGCAATATGGCAGAGCT  
CGTGCAAGGATGACGTAATCGATACTCAGCCGGGCGCTTTGACAAGATGCGGGTTAAGCGTATCCGGCC  
ATTGGGGGAACAACCTGCCCACTGGGCTGCGATGGTCAGGATGCGCAGTGGCGGACGCTCGGTGACCCAG  
ATGGCCTGATCGAGCATGGCATTGAGGCGTCTGGCAACACCTCTTTGGCACGGGCTTGTACCAGTCAG  
CGAGCAGTGCCTGGACTTTCTCGGCTCTCTTTGCGCTATCAGTGACTAGGCTCCTGACCGACACCTCCAA  
CTTGCCACGCAGCATTTTTGACCCCTGCACCGAATCAGGGGCTTCGATCACCTTGAGCAGGTACTGCTTG  
CCGAGGTAATAATGACTTTCCCACTGATGTAAGTGGCGTGGGGTGACGTGCTCCAATGCTGGCGAAAAGT  
CGCGTAACTGCTGGTAGATCCAGCGTCCGCGCTGCTTGACCGCTGCGAGAACCGCATCATCAGCCGCCTC  
ACGCGGGGCGGAGACCACGACGCGGAATCGGGATGCACCTTGATAAGCACCTTGCCGCTAGCCTGTCTC  
CGTTGCACCCGCTCGAAGGCGATCCGCTCATCGCCGTAGCGAAAAGCTAAAGGATGTAGCTGGAGCCTGGG  
CCTGAGCATCACCTTTGGCCGAATAGGCACATTCATCTGATCAGACTCCGCTCAAGCCGACTCGGGTGA  
TCTGACACCACCATCTCGAGATCTTCTTGCCCTGCTCCATACCCTGCCGATTGCTTTGCACTCTTGGAA  
CATACGCGGCAGCAACTTTCGGAATACCCGCTCGATGTTCTGCGGGTTGATGGAGTGCTCGGCCACA  
GACGCATCCACGACCGTATCGATCTCGAAGGCCAGCTTTATCCATTTGTCTGTACCTGGCTGTGGTGA  
TGGCAAAACACCTCAGGCAGCACCTTCTTGAACACCCCAAAGTAGGCCTGAGCGTGGCGATGCCAGCAAA  
GGCGTCAGGTATGTCACTCAGGCGGCGCTCCTGCACCTGCTCTTCGAACTCCCGAAACAGCATGCACTGC  
TTGAGCGGGTGTGCAACAGCTTCTCCGCATCAAGGATGGCTGGCGCAACAGCGTGGAGAAGGCTTCCCT  
GAGCGTAGGGTGTGCGGTAGCTCCTGCTCGATCATGCGGGTGACGCGAGTCTTGATGATGTCGGTCTC  
GTTGCGGGTCTTGTCTCGTTCCACTCTTCTGGCTGCTTTTGGCCATCTTGCCGACTTCATAGAAGCCG  
CCCGGCTCTTTAACTCCACCCGACCACATGCTTATCCAGCAGCTTCTTACCTGCTCGGCATATTCGT  
CGTAGTCCACCTTCTCGCCTGCATCCTGCTGCACCAGTTGGCGCAGGCTGGAGAGTTGTTTACCAGTCTC  
CTTGTAGTGACGGCGATCCGCTCGCTAAAGGCACTGTCTCGAAGAAAAGAGGCCGACTGCAACGCCACT  
TTCAGGCAACTGGCAACGCCGTGAGCACCTCGTAGAAGTCTTCTCGCACCTTGAGGTTTCACATCCACCA  
GTTCCGCGTCCAGTTCCCTCCATCTTGGGCACCAGCACTTGACGCAGTTGCTCGATATCCTGCTTGTCTT  
CACCCCGGCGAAAATGTTCCACAGGGTCTGGTAGAGCTGAGGCAGCCGCTTATATTCGGTGGCCATCTGG  
TTGTAGAGACCTTTGAGGTGCTCAACGTATAGCCGCCCTGGGTGCGGGAAGCGAGATCCTGATACTTGC  
CGATGGTGGTATCCAGCTCGGATAAGATGCCGCGATAGTCGATAAGCAGACCGAACTGCTTCTTCGGGTG

CAGCCGGTTGACCCGCGCAATCGCCTGGATCAGGTTGTGCTCTTTGAGTGGCTTGTGATATAGAGCACT  
GTGTTCTTTGGCTCATCGAAGCCGGTCAGCAACTTGTCCACCACGATCAGCAACTTGAGGTCGTCATCCT  
GATCGAAACGATTACACGACATGTCTGGTGTACGCCTGCTCATCCCCAGAACCAAAGAGAGCACCACGATT  
CTCCTTCCACCACCTGAGTGACCAGCGGTGTGGTGCATTCATCGACCTCGGTGTTGCCCTCCCGGCTGTCCG  
GGCGGACTCATCACCACCCGCGACTCGAACAGCCCCGCCTCGTCGAGGTACTTTTTATAGAGCACCGCCG  
AGGCTTTGCTATCGCAGGCCAGCTGGCCCTTGAGCCCCTCGACAATGTGGTTTGAAGTGAAGTGGCGAT  
ATCGAACGCAATCAGCTTGATGCGATCTTCCGCGCTGTAGATCTCGCCCTTGCGGGCAAATTTGCGTTTC  
AGATCGGTCTGCTGCTGCTCGTTTAAACCCTGGGTTATGCGCTCAAACCAGCTGTGATAGCCCCGCTCGT  
TGACCTCCAGATCGGAAATGCGCTCCTCGTAGAGCAACGGCGTCACCGTCTTGTCTCGACCCCGCCGCTG  
CATGGTGTAGGCATGGACGATGGGGCCAAACTTATTGGTGGTCTTGTATCCTTGAGAAGAAGCGGCGTG  
CCGGTAAAAGCCACAACCGCGGCTTGGGCAATGCCAGCTTCATGCGGACATGGTTCTGCGCCCCCTTGGC  
TGCGGTGGCCCTCATCGATCAGCAGCATGAGATCCGGCTCTTGTGATGCACCTCCGCGCAACTTGGTGGC  
TGAGTTGAACTTCTGAATAAGCGAGAAGATGATCCGCTCGCTGCCCTTGCCGATCTGCTCGGCAACCGC  
TTGCCCGAGGTAGCCATGGCCGCTCTTTATCCTTCTTGGCCGCGAGTTCACCGCTGGAGGCAAAGGTCT  
TGCTGAGCTGGCTCTCCAGATCCACCCGGTTCGGTACCACCAGCAAGCGACACTGTTTCAAAGTGTGCTG  
CAGGATCAGCGCCTTGCTGAGGAACACCATGGTGAACGACTTGCCCGAACAGTGGTGTGCCAGATCACC  
CCACCTTCTCTCCCGCCATCGGGACGTTTTTGGTTGATACGCTCGATCAACCCTTGTGCCAAACACCT  
GCTGGTAGCGGGCGACTATCTTGGCCGCTTCTTGTCAAACAGGGTGAACAGGCGGGTTCATCTCCAGCAG  
CCGCTCCGGGGAAAGCAGGCTGATGAGCAGCCGATCCTGATCACTGACCGCCAGCTCGCCAGCCGCAACC  
AGGGACTGATACCAGCCCAGATCGGCGGCGGGCCGGTGGCTAAACAGGGCAGAGCCTTGTTCGGATGAGA  
GCGGCTGATTCTTGATGGCTGTATCTCACCATCGCCGATGTCTTCTCACGCCAGGCGGCCAGAACTT  
CTCCGGCGTACCGCAGGTGCCATATCGCCCTTCGATGCCATTGATGGAGAGCAGTAACTGGCTGTAGGCA  
AACAGCAGCGGGATCTCATCCGGGCGCTGGTTGCGCAGGCTCTGGGAGATCCCTTCCCTTGATGGTCCGGC  
CTTTTTTGGCGTTGCCATCCGGGCGCTTGGCCTCGATCACCACCAAGGGCAAGCCATTGACGAAGCAGAC  
AATATCTGGGCGACGATGCTCTTGAACGAAGAGCCGATGCCCTTGCAGGGGTGACCCGAAACTCTTCCG  
GTAAAGGTAAAACAGTTATTGTGCGGATTGTGCCAGTCAATCAGGGGGATGGTGGGGCTCACCTTCTTGC  
CATCGACAATTCGGTCAACGACATGCCATAGAGAAGGTGGTTATAGAGCCGCTCGTTGGCCGCTGCAA  
CCCTTCACTCAGGCGGACTACACAGCTCGCTCACCAGATTGTCCACTGACTTAGGGGAAAGCGGATAG  
GTTTTGCCCGCAAACACAAAGGTGCGCTCGGCCAGTACGCTGCGTAGCTGTTGACGCTGCACCACCTGAT  
CGGCTTGGCATCCCGCGCCGCCAACGCTTTCAGGGGAGAGGAAAGTCCAGCCCAACTGGGTGAGCAG  
GGTACGGGCTGGGATCTTGGCGCTGTACTCTTCTGAAATTTTCGGCAAGGCCCTTCATAACGGGGGTGCCCT  
CAAAGTGGTTATCAATTTTTTGGCTGAAAGCCGATCAACTCATGAATGGTACTCGTCGTCGGGTTATACAC  
CCACTCATGATCAAAGAGGCTCTTTAGCCGCTGAACCATATAGGCAGAGCCGACCACCAGAGAGTAAAAG  
CGGTTACCCTTACCACGCTGTTGCTCGATATTTGCCAGGGTCCCGGTGGCAGATCCGCCATGATGAAGT  
CAGAAATCATCAACAGGTACGCCTTTTGGTAGGTCTCTGCGTCCATGGTTTTCAACGCATGGCCAAGGGC  
AGGTGCCGATCAGTACCACCATGAAACGACATTTTCAGAAAGTCGATTATCGACGCAAGGCCCATTTCT  
CCACTCAACTCCAACGCTTTGATACCCGTAGAGAAGTTAATCAGGTAACAGGGACGTTGCTCCTCTCTCG  
CTTTGGTTGCCAGAAATAGCGTTCATGGCTTTGGCGATCGTCTCGGGCGCACCGCTCATCGAGCTACTGGT  
ATCAACGCAGAGGATCATGGGGCCGCGCTTCTCCTCTTCGTTGACCTGCCCTCTCCTTCCCTTTAGCA  
TGCTGATGTTGAGTCTGTATACCAGCCATATCAAAGCTCATCAGTCGTGACTCGACGAACTTCAAATCAA  
ACAGCAATGCGGTCTCGTCATCAGCCAACAGGGCTTTCTCGCTGGGTAATACATGCTCCAGATCTCGCCC  
CAACCGAATACCCACTATCTCCTCTCGGGAGTTGATATCGGGCAGACAGAGATCCAGAACGTGGTTGACC  
TTCACCCGCTCAATCTTTTCCGAGAGTTCAATCTGCCGGATCTTGGCAGCAAGTCGCATAACGCATGCA  
ACCCCTTGTGCTTTGCCAGATAGCTTGGCCACTTCTGGAAGTGGGCCAGATCTTGGGCAGAGAGCTGGCC  
ACTGGAGAGATCAACCAGCCGCCCCGATCCAGCCCCAACGCTTCAAGCAAAGGTTGCAACTGCTGCAAC  
AGCTTGAGCATGCTCTCCAATCGTTCCATTAAGTGGTGGCGAGCTGCTCGATCCTGGCCAGCTCCCAAC  
TATTGCGGGCTTTATCCAGCACCTTTTGCATTCAGTAGCCAGAGTTGGCAACTGACCGCCTTATCCGC  
ACTCGGCGGCTCCGCGTCTGACCGAAACTTTTCGGCAACCTGCTTTTGGCAAAATGGCGGATCCGCGGG  
TGCTGGCTGGCTTTACAGAGCGGAGATAATCCGTACCCGCCCTTGAAGAGAGGTTTTGGATATATCGC  
CAAGCGACTCTCTCTTCCGAATGATTAGCTTGTGGGCATGCCCGCGAATGGACACTCGTTGGTCAA  
CGCGGCTCAGTATCTCTCTTCCAATCCTCTATGTGCTGCGTGACCTGGCTGGTTCAGCGAGCTGGAGTGA  
GCCAGCAATCCACCATAGCTGTGCGGAGTTCTCTGTGAGCGAGAAGCGACGACTCTCCACCTGACTTA  
TTTGCATAAGGCTTCCAGCCGTTCCGAATCCTTGATACGAGCTTGAGCTGGCTTATCTGCTCCGTAATC  
CCATCGAGCGCAATGGCTACTTTTTTCTACCGGGACAAATATGGATGCAAGACGCTGTTTATATCCCTGCT  
GCAAGGTCTCCACCTTGTCCAATATGGCACTCAGCTGCGCTCTGACCTCTGTACTGAAGATGAGAGGGA  
ATCAACCAGACGTTGATTGATATCCGGTTTTTTATCGCCCTTATGAAACAACACTTTGGGTTTTGAATTC  
AATGAACCACTACTGGAAATGGAAATACGACGAGAATAAGATACTTTACATGTTCCCTTGCTTATCAA  
CGCAATTCAGTTCGTCAATTTTCAATGCCAGCCTCGTCAAGTGGATGAAACTCCCCCGACTTGTACATACG  
TTTTGTTGAAAGTATATATACGCTGGTGAACGGGTATATCTATTTAATTCATCTTAACTTTGAAATAT  
TTTTACCTTTAACAGAACGACTCAATGAGACAACATCATAAATATCATCTGAACAAAAAAGCTCATTAT  
GAATCTCCTTATCCAGAGAGTCTTTTTTGGATCGACCTCTGCCAGATTAATACCCTGTCAAACCGCT

ATTTTTAACCGCTTGCTCAACGATATCGTTAACGGCAACACGATTATCTTCATGGGTCCACAAGCAGTGC  
CGCAATAGCAAGGCATCACTGTGATTGGTTTTCGCTGCGGCCATTAAAGAGGGCTGCGGCCTTGATAAGTT  
GGGTGCGCCGCTGCCAGCGACGGTCGGAAACATAGACCTTTAGTTTCGTATATCTGGTGGCGAGTTCCT  
GCGGATCAGGCGAATAATGGTCAGGGTTTTCCGGTGACAACTCACCTCATGCAGTTGCTCTCGCCATTTA  
GCCCCTCATCGGCCTTACAATAAACGAGTCATCAACCCTGATGGCCGCTCGCTCGGTTTTACACGCCA  
GCAATCGTTCAAAATTATCAGATTGCTCAATGGGCCCGACCATCAGGCGGATGATAAAGCGATCATAACAG  
CGCATCCAGCCCCTGATTGGCATCGGGCGTTTTCATTCGACGCAGCCACCAAGGCTTTCAGTGGGGTCTGC  
TCGATCTGTTTCGCGGTTGCGAAAGGTGTGCTCATTGATAAGTGTGAGCAGGGTATTGAGGATCGCTGGGC  
TCGATTTCCATATCTCGTCCAGAAATGCAAAATCGGCCTTGGGCAGATAATGCTCGGTTTTACGAACATA  
CCGATCTTCTTTGAGTGCCTTGATCGAGATGGGGCCAAAGACCTCCTCGGGGGTACTGAACCGGTTTCATC  
AGGTACTCGAAGTAGGCCGGATTGGCAAAGGCACAGCGGATGCGACGGGAGATCAGGCTTTTTGGCCGTGC  
CGGGTGGGCCGTAAAGAAAGGTATTCTGACCGCACAGGCACCCAGCAGCGCCACCAGATCACCTCCTC  
ACGCTCAAACATCCCTTACATACCGCGTTGACCAGCCGTTCCATCCGTTGTTGTAATTTTCATGTTTTATC  
CCTAACTGACTGTTTTATCTTATTTAATTTTTTATGGTGATGCGATGCAACCAAGGCTCGCCATTCGCTGG  
CCGTACCCTCACTGAGGGTACGGGCCGAGCGCTGATCAGTGCAAAACAGCACTGCTTGACTTCTTGCC  
GCTACCACAGGGGCAGGGCTCATTGCGCCCGACCTTGGCAGGGGCTTGGCCGTTTTCACCGATGGCACC  
GCGACAGGCTCCCTGTTTGGCCCCGTTGGGCGAGAAAATAGGTGTGCAATTTCAACGCGGCAGGGCCCA  
CTTCGGCCACGCTCTGCTGATGTTCCGGCAGCGACAGGCTGGCAAGCAGTGGCAATTTGGTCATCGCTGCC  
ATGCAGGCGGATCACCTCAAGCCAGGTATCCAGCTCCTCTGGCAAGGCTGACCAGTTCACCAGCGCCATG  
CCACGCAAATAGCCAAAGCACCCTCTTCGGCGTTGAGATCTCTTGTCTTCGAAAAGATTGACCATCA  
ACACAGGGATAAAGTGCTCGGGCTGATAACAGAGGGTATGGGCCAGAATATTCATATGGCCCATGATAAG  
GTCCAGCGCCCGTTTTATCTCCCGCTCGGACGACCCTCGGGGGCATGCCGCCCCAGAGTGCCGGCCAC  
CACTGGCTCGGGGATACAAGCTTGGGGCCGGAAAAGCACGGCGGTGAGAAAAGCGTCCGAGTGCCGACAGAC  
TCAGCATCGAATCGTCGTTGCCATAATCCATCAACCCTGCTCCAGCCAAATCAACGTCGGCTTCGGCCAT  
GGGGTGAATGGTCACTTTTTTTCATGCGGCCTCCCCACCTTGACCCGCGGTTTGGCCGTTCAACAGTTGTT  
GCATCAGCGCCTTTTTCTCCTGCTTAAAGACGTGAGTTTTTGTGTCAGAGCTGAGATTTCTGATCGGC  
GGTGGAAAGTACTGCTGCGATTTTTTGTGCTCCTCTAAGCTTGGGTATGGCAACTTCAAGAATGAAAAG  
TCTTCATAGTATGATTTGCTTTCCATCCCGAATACCGGATACCAGCAACAGCCAGATGACCAATAAAGTCA  
AAGACTTGTAATATGCTTTATAGAACTCATCATCAATCAACCGAATTTGGTTCTAATACGGTGTATGCAGG  
ACTAACCAAGCCTCGATAACTTGAGTATTCCAAACCCTTGGAAATGAGCGAAGGCTAATAATGAAATTA  
CCCCGAACAACAAGTTTTGTAACCTTGGGTAGAGCCGTCAGGCATTACTACTCGACGTTTCGAGCATTGAGC  
GTGGCAATACACCTTGGTCTTGCGTAACCGCCAATAATTTCTTCAGTTTCAGAGTTATTTTTCCGGGAAAT  
TGTTTTGAACAATTCACAGGCCTTTAGCCACCTCCACTCCCCACTAAACCTCACCCCATTTGTTATCCAGC  
AGGCGTTTTTTTTCCGGTAAGCAGTTGTTGCATCAGCGCCTTTTTCTGCTGCCGGCTATTGGCCAGCAGTT  
GCTCGGTGGTGTGATCGCCCTATCCCAAGTGAGAGGATTTGGGCGATTTTTCTTTTGTCTGGCAGTGG  
ATGTAACAGAAATGATAGCGATTTAACATCCTGTTGATTAATGCTGCATTTGTGCCACAGCTCTCTTTGCT  
ACTTTACGAAAGTGCTCCCGCGCAGGCTCTGATTGTAATAATCTTATTAAGTACTCAGGCAAGATTGCAG  
ACTCATCAGGTTGAATCCGCATCATGTTGGACTCATAGACAGTTCGTGCAATCTGTATTATTGAGCCAAAG  
AATTGATTTACCAATATGAGTAAGACTATTCACTCGATTTATTACAATATCTCTTGATGTTAATTTGTAG  
TTTTCAACTTCATTATTTTTCCAAGTGAGACACTGTAATTCATCCGTTACTAGATGACCTTCATTGTCAA  
AATCAGTAATCCTGAGTATTTGTGTTCCGTCTCCGTAGAAAATCAGCGCTTTTATATATTTCCATTCTTGTA  
TGGCTGTGGCAGCAATTTGCCAGTTTTTACAATGGGTAACTGATCACGCTCCATAGCCCAACTCCTCTAA  
ATACTTGGCCATCTCGGTTTTCCAGCGCGGCAAGTCGGGTTTTTCAGTTGTTTCGCGCTCGGCTCGCACC  
AGCAGATCTATCTCGGCTTCTTCTCGAAGGTATCCACATAGCGGGGATATTGAGGTTGTAGTCGTTCT  
CTTTGATCTCTTAAAGCGAGGCAAGATAGGCGTATTTATCGACATTTGCCGCCATTGCGATAGGTTTTGAC  
TATCTTGGCGATATTGTCGCGACTTAACAGGTTCTGTTTTTACCCGCTTGAACCTCGCGGCTGGCGTGC  
ATAAACAGCACATTTGTCATCCACCTTCTGCTTTTTTAAAGATCAAGATGGCGGGCGGGATGCCGGTGCAT  
AGAAGAGCTTCTCCGGCAGGCCGATCACCGCATCGAGCAGGTTCTCGTCGATAAGCGCCTGGCGAATTTT  
CCCCTCGCTGGAACCCCGGAACAGCACGCGTGGGGAACCACGACCCCATGCGGCCAGTCTTGGGTTTTG  
AGGGTCTCAATCATATGGAGGATAAAGGCGTAATCCCCCTTGGTCTTGGGCGGGAGCCCGCGCTTGAAGC  
GACCGAACTTATCGTTCCCGCTTCTCATAAACCCTTTATCCAGCGAAAAGGGCGGGTTGGCGGTCAC  
GATATCAAAGCGCATCAGATCGCCGTTTTTATCCAGTAGCTTGGGGTTGCGGATGGTATCGCCCCACTCA  
ATCTTGTGGTTGTCTTCCCGTGCAGGAACATGTTTATCTTGGCCAGCGACCAGGTAGAGCCAATAGCCT  
CCTGCCCATAGAGGGCGTAGTGCTTCTCGCCATGGTTTTGCCACCACCTTGCAGCCGACTTCATCAACAG  
CGACCCCGAGCCACAGGCCGGATCGCAGATGGTGTGCCCCGGCATCGGCTCCAGCAACTCGGCGATAAGA  
TCGGAAACTTCCGGCGGGGTATAGAACTCCCCCGCTTCTGGCCCGCGCTGGCGGGCAAGTTCTTGATGA  
GATACTCATAGGCGTTGCCGATCACATCCAGGGTGGCGACCCGGCTCGGTTTTGAGGTTGAGCTCATCCTT  
GGCAAAGTCTTCCATCAGATGGCGCAGTATGGTGTCTTCTGCTTCTCTTCGCCGAGGCGGTTCGGTATTG  
AAGCTGATGTCCTGAAACACGCTCTTGGCCGCTTCTTGGAGCTTGGTGCCGTTGGCCCTTTCGATGGCGT  
GCAGCGCCTGATCGATCCGCTCGCCGTTGCCCGGCTCGTGACGACGCTCGAACAGGCTGTAGAAACTGGC  
CTGTTTTGGGCAGCACGAAGCGCTCGTTTTTGGAGCATCTTCAATGAGCTCCGGCTCATCGCCATATTCA

GCCTTGTAGCCATCGTAGTGATCCTGCCAGACATCGGAGATGTATTTTCAGGAACAGCATGGTGAGCACGA  
AATCTTTTATAGGTATCAGGGCTGACAGTGCCACGGAAGGTATCGCAGGCAGACCAGAGGGCCTTGTGAT  
ATCGTCCTGGTTTATCGAGGTAGTCATAAGTCACAATTCCTTGGGCAGTGGCCGGATAAACGGTAAGGCG  
CGGACGCTTGAGCGGGATGCAGGATCCATCGTTCAAGCCAGCGGGCCGCGGGAGAGGCCCGGCACTGA  
GGGTGGCAAGCAGCGGCACGTTCAACAATTTTCGCGTTATCGCCAATGATGCGGGCGGCAGTCTGTGCGAA  
CTGGCGCAGGTGCGTCAAGCGTGCCAGCTCGCATTTTGGCTCTATCACCATGATTGCTATCAGGATCCGC  
CGCGAGCGGACCATAGAATCGGGTCACGTCACCTTATATGCCCAATCAACGCCCCGGCTGTTACTCACCTC  
ATGCACCGCGCAAATAGAAAGACGCTGCGATGCAGGGTCTTTTCAGTTTCCAGCTTAAATGCCCGTGTCTCA  
CCAACCGAGATCATTTTTGTAATTTAATTACAGTGAATCACCGCAAAAAATAAAAAGGCCCTGCTGTTGC  
AGGGCCTTTGAGTTTCCAACCTTAAATGGTGGTTCGTTTCCAACCTAATGTACGGTTTCCAACCTTAAATGGC  
CGTAGACGTCGTCGATGCGGTTACAGATGGCCACAGCTTGTCTGGCGCGCACGGCGTTCGGACGGGAAGAC  
CGCTCGGCGCGGCTGTAGCCACGGGGCCACTCTGCATCCATCACGTCATCTGAGTGTGCGGCGCATGG  
ACCAGCGGGTTGTGCGGCGAGGCTCCACTGCCCTCCTGCACCTTGGTAATCTCGGCGCGGATGGAAGTCA  
TCGCTCGACGAAGCGATCCAGCTCGCGCTTGGATTCCGACTCGGTTCGGCTCGACCATCAGGGTACCCGC  
TACCGGGAAGCTCATGGTTCGGCGCGTGAAGCCGTAGTCCATCAACCGCTTGGCTACGTCATCTCGCTG  
ATGCCAGAAGCCTCTTTGAGCGGACGGATATCCAGGATGCACTCGTGTGCCACCCGACCGTTACGGCCGG  
AGTAGAGCACCGGAAGGATTCCCCAGCTTCTTGGCCAGATAGTTGGCGTTGAGGATGGCCACCTGAGT  
GGATTTCTTACGCCCCCTCGTCACCCAGCATGGCGATATACATCCAGCTGATGGGCAGGATGCTGGCCGAG  
CCGAACGGTGC CGCCGACACGGCGCCGTTGTACGGCTCTCTTGTGCGTCTTGACCAGGGCGTGGCCAG  
CCACGAACGGTGCCAGATGCTTCTTACGCCGATGGGGCCCATGCCCGGGCCGCCACCACCGTGAGGAAT  
GGCGAAGGTCTTGTGACGGTTGAGGTGAGAGACGTCCGCCCCGATAAAGCCCGGCGCCGTCAACCCGACT  
TGCGCGTTTCATATTGGCACCGTCCAGATAGACCTGACCACCGTGCTGGTGAACGATGTGCGCACACCTCCT  
TGATGGTCTCCTCATACACCCCGTGGGTGGAGGGGTAGGTACCATCAGACAGGAGAGTTGATCCCCCGC  
CTCGGCCGCTTGGCCCGCAGGTGCTCGAGATCCAGTTGCCGGACTTGTACAGGGCGGTGACGATCACC  
TTGAGCCCCGCCATCTGGGCAGAGGCCGGTGGTGCCGTGGGCAGAAAGCCGGGATCAGGCAGATGTGCG  
GATGCCCTTACCACGGGACTCGTGGTACTTCTTGTATGGCGAGCAGACCCGCGTATTTCGCCCTGGGCACC  
TGAGTTGGGCTGCATGCAGACCCGCATCGTAACGGTCACTTACCAGCCAGTTTTCGAGGTCCGGCCAGC  
AGCAGCTGGTAGCCCTTGGCCTGCGCCAGCGGGCGCAAGCCGGTGCAACTTGCCGAACCTCGGGCAGGTGA  
CCGGGATCATCTCGGCGGTGGCGTTGAGCTTCATGGTGCAGGAGCCGAGCGAAATCATGGCGTAGTTGAG  
GGCCAGATCTTTTCGCTTTCGAGACGGTGGATATAACGCAACATCTCGGTTTCGGAGTGGTACTTGTGTAAC  
ACCTCGTGGGTGAGCACGGCATCGGTGCGCAGCAGATCCTGCGGGATGGCGTGATGGGTCTGAGCCGCT  
TGTCGAGGGCCTCGATATCCAGTCCATGGCCTTGACCGAGGAAGAGATCGAACAGCTCGGCCACATCAGC  
GCGGGTGGTGGTTTTAGAGAGGGACACCCCTACCGCACCGTTCGAGATCGGCGCGCAGGTTGATGCCGAGC  
CCCTCGGCCTTGGAATGAGTGTCTGCTTTATCTGCCGTCTGCACGGTTCAGGGTATCGAACAGCTGGCAT  
GCTTGAGGGCCACCCCTTGGCCTTGGGCCAAGCGCCAGAATAGTAGTACGACGGTGCACGCGGGAGGC  
GATGGTTTTTCAGCCCCACCGGGCCGTGATAGACGGCGTAGAAGCTTGCATGTTGGCCAGCAGCACCTGA  
GCGGTACAGATGTTGGAGTTGGCCTTCTCGCGCGGATATGCTGCTCGCGGGTTCGATCGCCATACGCA  
GCGCGGCTTGGCCGCGGCATCCTTGGAGACACCGATGATACGGCCCGGCATGGAGCGCTTGTAGGCATC  
GCGGGTGGCGAAGAAGCGGCATGGGGGCCACCGTAGCCCATGGGCACGCCAAAGCGTGGGCAGAGCCC  
AACACCAGCTCGGCGCCCAGCTCGCCCGGGGATTTGAGCAGCAGCAGGGAGAGCAGGTCCGGCGTAACGC  
AGGCCAGCCCTTTCTGGGCTGTACCGCTGCAATCAGAGCGCGCAGATCTTTCACCTCACCTGTGGTGGT  
GGGGTACTGGAACAGGGCACCGAACACCTTTCGCTCACTGCATCGCTCGCGGCGCAACCGCCACGTCG  
AAACCAAAGTGAACCGCGCTCCTTGACCAGCTCGATCACCTGCGGGTGCACGTCATCGGCCACGAAGA  
AGAGTTGGACTTGGACTTGGCCATCCGTTTGGCCAGCGCCATCGCCTCGGCGGCGGCGGTGCTTTCATC  
CAGCAGGGAGGCGCTTGCAGATCCATGCCGTCAGATCCAGCGTACGCTGCTGGAAGTTGAGCAGGGCT  
TCGAGACGGCCCTGTGCCAGCTCGGGCTGGTACGGGTGTAGCGGTATACCAGCCCGATTTTCCAGCA  
CATTGCGCAAAATGACGTGGGGCACATGGGTATCGTGATAGCCCATGCCGATGTAGCTCTTGGCAATCTT  
GTTCTGAGCGGCATAGCCCTTGGCTTGGCCAACGCTTCCACCTCGGTCATGCCGGCACCGATCCCCAGC  
GGGCCCGGCAGGCGAATGGCGGCGGGCACGGTCTGTTCAATCAAATCGTCCAGGCTTTTCGGCCCCAACGG  
TCGCCAGCAGTTGGCGCAGCTCTTCTCGCCCGGGCGATATGGCGGCGGACAAAATCGGTTTTTTTGTCTC  
GAGTTCAAACAGTACTGGGTCAATTTCCCTATTTCTGATAAAATAAGTCTTGGCATGACATCCTGATAAC  
CAAGACCTGATGTTCTGATCGTCGGCTGATACCGACTCCACTCATGTTCTGGGTCCCGCAGACAGGGTG  
CGGCACCAGATGCTACGGCAGCATCAAGAGGGGATCGCCTTGTGCGGACCGGCCCGTTTGGCCCCCTAGG  
CACCTAGGCTGGCAAACGGCAGGCGCGGGCGACTTCACCTTCCACCGGCCGCTGCTTGGCCGGCTGGCT  
GTCATACAAAGGGGCCCTGCTGTGTTGGCAGGGCCCCGGGGCATTACTCTTCGTCCACCACGTTCTGGTA  
GCCTTTCGGCATCCAGCAGGTTGGCCAGCTCGCTCTCGTCATCGAGCTTGTGCGGAACAGCCAGCCAGCG  
CTGTAGGGGTTCGGAGTTGACCAGCTCGGGGCTCCCTTCCAGCTCTTCGTTGACTGCGATGATCTCGCCGC  
TCACCGGGCTGTAGATGTGCGAGGCGCCTTGGCCACTCGGCCACGGCGCAGTTCGTCACCGGCACCTGAC  
CTGCTTGGCCACTTCCGGCAGCTCGACAAAACCATGTCAACCAGCAGCTCCTGGGCGTGTTCGGTGATA  
CCGACCACGGCCTCGCCGTTGGCTTCAACACGGATCCACTCGTGGGAAGTGGCATATTTTCAGTTTCGCTCG

GGATATGGCTCATTTGTGCTTCCTTTGATCTTTGAGTCGCGTTTAAAAACGAATATGAAAAGGGATGGGG  
GAGGCACAGCCCTCCCCAAGACGGTATTAACCAGCTTCTGGCCGTTACGGACGAAAGCGGGCTTGGTG  
ACCTTACGGTGACCAGCTTCTTGC GGATCTCCACCTCGGCCAGCTCACCGATATCGCGGGGCACCCGCG  
CCAGGGCAATACTGTAGCCCAGGGTGGGGGAGAAAGAGCCGGAGGTGATCACACCTTCGCGCTTCTCACC  
GTTTGGCCGAGTGAAGGTGACCGGCATACCGGCACGCAGCACCCCTTTATCTTCCATCACCAGCCCCACC  
AGCTTGGGCTGGTTGCCCCGCGCTTCTTGC GCTTCCAGCACGTCGCGGCCGATGAAGTTACGATCGTTTCG  
GCTCCCAGGGCAGTGGTCCAGGCCATGTTGACGGCCAGCGGAGAGACTGACTCATCCATATCCTGACCAGTA  
GAGGTTTCATCCCCGCTCGAGGGCGAGGGTATCGCGGGCACCGAGGCCGCACGGGGCGACGCCATTATCC  
AGCAGTGCCTGCCACAGCTCGCAGGCTTCTCTTGC GGCACCACGATTTTCATAACCATCTTCGCCGGTGT  
AACCGGTAGTGGCGATAAAAAAGATCGCCAGCCTGCACGCCGAAGAAGGGTTTCATCCCCACCAGCGCGGT  
ACGCTGGGCGGGCTCAGCACGGCTGCGGCTTTGACCTTGGCGTTGGGGCCCTGCACCGCAATCATTTGCA  
AGCTCGGGACGCTCGGTCACTGTGATATCGAAATCGATGGCGTGATGGCGGATCCAGGCCAGATCCTTCT  
CGCGGGTAGCGGAGTTGACCACCAGCCGATAGAAGGTATCGGTGAGGTAATAAGTGATGAGGTCATCGAT  
CACGCCGCTTCCGGGTTGAGCATGCCACTGTAGAGGGCCTTGC CGGGGGCAGTGAGTTTGGCCACGTGCG  
TTGGCCAGCAGGTGTTGCAGAAAGGCTTTGACCCGTTGCGCGGTCAAATCGACGATGGTCATGTGGGAGA  
CATCGAACATAACCGCATCGCTGCGCACCGCGTGGTGTCTTCCAGCTGGGAGCCATAGTTGATGGGCAT  
TTCCCAACCGTGAAGTCCACCATCTTGGCGCCGGCTTCCAGGTGTTTGGGATGCAGTACAGTAGTCTGG  
ATCATCGCATTCTTTTCTTAGCAAAAAGCCTTTTCGCTTTGGCGACCACCCTTGC GACCCGCGCCACC GC  
TCTGACTGCACTGCGTGCAACAAAAAGCGACCGGATCCAAAAGTGTGTGCTCGCTCCTGCCCTTGCCAGG  
CAAGAGGGATTCTTGAACGGAGCGGATTATATGACAAGCAGGCGAGCGTGCCGCTCAAAAAAACTAAT  
CCCCTCCCCTAAAACCTGACTCCAGACACTAAGATAAATGCAGTGATAAAAACAGCCATAAGCCGACTCAG  
GCGAGATTAATAATTTGATTTTTTACCGTTTCGTCACAATTTACAGAAAAACGTTTCGCTCCAGAGCAAAAT  
TAAAGGCTGACACCCAAAACGGGTGCTCAGCCTTGTGCGGATTACTTTTGTGTCAAAAACGGCGAGTAAT  
ATTAGTTTTTTTTTACCCTTGGCCTGCATGGCACTGCCCTTGGTGCAGCAACAGCCCAGTCAGGACGGGC  
CAATGCGGGCAACTCGCCCTCCAGCCCATGGCGGCGGGATCACCCCTCCTTGAAGGGCGTCAGCAGA  
TTGGCCGCGCGCAATCCCACGCCCCGACCAGCTTCTTGAAGCGGGTTGGCCCCGCTGAACAGCCGCTTGA  
GCCCCCTCCATCGCAGCCAGCATGCGAGCCGCTTGCCTTTCGCCAGCGTTTCGTAGCTGCGCAGGTTGTC  
GAGCAGGCCGATATCTCACCCGCGGCATGATTTTGAAGATCTGCTCCGCCAGCGCGCAGCATTCCAG  
AGGCGAGATTGACTCCCTGCCCCGCCAGCGGGTGGATGGTATGGGCGGCATCCCCACCAGCACCAGCC  
GCTCACGGGCAAAGTGC GGGCATAAGCGGGCGGTAAGAGGAATAGCGCTGCGCGGCCCTTCCACCTTGCA  
CAGACCAAGGCGGGCATCGAAGGCGGGTAAAGTGGCGATTGAACTGCTCGTCATCGCAGGTGCAGAGC  
GCCTCGGCGGGGCCGAGGCAGCGACCAGACGATGGAACAGAGGTTCTCCTTCCACAGCGGCAAAAAGG  
CGAGCGGGCCATCCGGGTGAAGATCTGGCGAGCAACAGCTTTCATGGGGTTGCGCGCAGCGCACCGTTCG  
CACAGCGCGTGGTGACCGTAATCCCAGCTGGTAAGCGGGATATCGGCCTGACGGCGCACCCAGGAGTGG  
GCGCCATCGGCGGCTACCACCAGTTTGGCCGAGATGGCCTGACCATCTTCAAGGAGCAGCAGGGCGCCCC  
CCGGGCCGCTCTGCAGGCTCTTGGCTCTGGCGGGGTCAGCAACTGGATATTGCTGGCACCTTCAATCGC  
CTCAAGCAGTGCCAGCTGGATCACCCGATTCTCGACGATGTGGCCGAGATTGGCCTGACGCAGGCTGGCG  
GCATCGAAGTCGATATGGCCGAAGCTGTCTGCTCCACACCGCCATCTTGTCTGAGGCTGCAGGCGAC  
GCGCTTCAATGCCGTCCCAGGCGCCAACATGGCGCAGGATCTGCTGGCTGGCCAGACTCAGGGCGCTGAC  
CCGGTTATCGGCCACCTCCCCAGCTGCGGGTTCGGGCAGTTGTCCCTCCACCACCAGCACCTTGAAGGGCG  
CTATGTTTTAGGGCCGAGCGAGCCCCAACCCACCATGCCGCCACCAGCAATCACCCATCCACATTTTT  
GCATCTGCATCATCTCATCTTTCTGGGCTGACCGGCTGGCCAGCGAGGGGACGCCCGCAGACATCACCT  
CTTTATTCAATAGGTTTTGCTCAACGAATTGCGGTCAACAGGTTCCACTCAACAAGTGTGGCTAGTTGC  
CGCACACATCAGCGACAAAGCCAGGGTGC GCGAGGCAAGCGGCGCCTTGAAGCACAGGAATCGCCCCAT  
CAGGGTGAGCGCCAGATTGCGCCCCGCCACCAGCGGATCGTGACCATTGGAGAAGAGCTGGGCCAGCGAA  
GAGGTGAGCCAGACGGTCTGCTCCTGATCGCGGTGACGCTGCTGCCAGTAGCCACTCAGTACCTGGAAGC  
TGCCGATATCCTCCCCCTCTGCCAACGCCTTGGCTACGGCGCCGTAAGCAGGTCGAGATCCCGCATCCC  
GAGGTTGAAGCCCTGTCCGGCAATCGGGTGCAGGGCGTGGGCGGCATTACCGACCAGCACGGTGC GCTGG  
GCCAGCGGGTAGTCGAGGCGGTGAGAAATGAGCGGATAGACGTTACGCACGCCGCATTGCTCGAAGCGAC  
CAAGCCGCCAGCCAAAGGCTGCTGCAGACGGGCAAGAAAACGCCCTCATCGAGGGCCATCAGCTCATC  
CACCTCATGCTGCCCGACGCTCCACACCAGTGAGGAGAGCCCTCCTGCATCGGCAGCAGGGCCAGCGGC  
CCCCCTTCGGTAAAACGCTCGAAGGCGCGTCCCTCAGGGTCTTGC GCGCTTTTGACCGTGGCGATGATGG  
CGTGTGTTCAAAGTGTGGCGGGTACC GGCAACTTGAAGTGTGACGCACAAAGGAGTTGCCGCCGTC  
TGCTGCCACCAGCAGCGGGTCTCAATCTGTTACC GCGCTCAAGGGTGAGGGTACCTTCTCCTCATCG  
GGCACAATCTCGCTCACCCGGGCCGGACAGCAGACCCGGATATTGGGCGAGGGCCCATCGCCCGTTGCA  
GTTTCATGACCGGCAGCTGCAAGCTCGATCACCTGGCCCAGCGGGGAGACCCTATTCAGCGGGCCAGAC  
GCGAGCCTGACCGAAGTGGCCCCGATCCGAGACATGAATCTGGGTAATGGGAGCGCAATGGGGGGCAAAC  
AGCGGCCAGAGTCCGCGTCGCACCAGCGCATCGCAGGTACCGGCCGAGAGCGCAATGGCGCGGGCGTTCGA  
ACCCTGAATGGGTGTGCTGTTCCGGGACGCTTGCCTCCAGCAGCAGGATCTCGAGGGGGGAGCCATCGGA  
TCGAAGCAGGGCTGCCAGCGAGAGGGCCAGCACGGCGCCGCTCATTCACC GCGCACCGGGTGACATCG  
ACCTGTGCGACATCAGATTGAGACATAAGCAGAGAGGAAGAAGTAAAAAGGTGGCCTCATGCTATCACA

AAGCCGCTGGCCGAATGCGAGGTCACCGGCAAAAAACCGGTTGCGCCTCACAGGGTTAGCCACCACAAGG  
GAATAAAAAAAGAGCGCCATCAGGCGCTCTTGAGATTGAGTAAGGGTCTCGTTGACCCGCCCTCAATG  
AAGGGTCGGCGGCGCGCTCGGGGTATCGGGGCGCTTGCCAAACTCTTCGAAGGCCATCATGACCCCAAGT  
TTGACGTGTTTCGTAGAGCACCAGGAAAGAGGCTTCGTTCTCGTCATCTTCTGATCGAACTCGGCGGAGA  
CCTGAGTGATGCTGGCGATATCCTGGATCATCTCCTGCAGCTCTTCCGACGCACGGGAGAGCTCCTGCTG  
CACCACGCCAAAACCGGCCAGAAAATGCCTGTGACCAGTCCACCAGCGAATCGATGCGCTCATCGAGGGGA  
GCATCATCGCTTGGCAGCAGCAGCTCGACGCCCTTCTGGGCCATCAGGCTCTCGACCACATTTGTGATAAA  
GATCGGTTCATCACCTGGCGCACCGGGGCCGAGGCCGAAACCGTCGTTTACCAGCTCGTTGAAATGGGG  
CAGCCAACTCTTGTCTGTCAGTGCACACCGCCGCACACTAGACCGCAGATCACACCATGGGGCTCTACT  
ACGCTGGCCATCAGCTCATGTTGTTCCATGATGTCGGCCACTGCCGCATATTTAAGGGGGTTTCGTTTTG  
TCATCGAGGATCCGCTCAAAGTTCAGTCAAATTTGAGAAATTAATGTCGCTATATAGTCCCGCCAGTTGTCCACGTGGA  
TTGCAGAGCCAGCAAGGCTTGAACCTTATGCATCTGCGCTATATAGTCCCGCCAGTTGTCCACGTGGA  
TAAAGGCGGAAATCAGCTCCGCCGTATTGAGGAAGGCATGAGCACAGAGGCCGTAGAAATCGTCATTTTTG  
GGACGTCCCTACAAGGTATCCTGTCCCTTGGGACAGCAGGATGCCCTGCGCCAGGCCGCGAGCAGCTGA  
CCGACAAGTTGATCGACCTGCGTCAACGCTCCAAAAGTCTCCAGCAACGAGCAATTTGGCTATCATGGCGGC  
GCTCAATTTCTGTCATGAGCTCTGCCTTGA AAAAGAGAAGAACCAATACTCTGAGACCATGGACAAG  
CGGATCAAGATGCTGCAGCGCACCATCGAAGCGGCCCTGATCGAGCACGGACAATATGGTGATTCCAGCG  
AAGAGGGGCAACAGCCCTAATCGCAAACCGTTTTAAAAATCCCTGGGATGTTTGTGACCCGGTTCAAGTC  
CCCGAGCCGATATTCATACCAAACAGGGGATCTGCCTTCTGGCTATTGCGCATGCTCGGCACGACCGAGA  
AGCCTGCGGTGAGATCCGATCCCCGCCTTGAACCGACGGTTCAAGGGCCCAAACCGGCAACGGCATCTCG  
GGGTACCAACAGCAAAAGCCGTCACCAGCGTGACGGGCTTTTTCTTTGCCGTGATGATCAACGAACTGTC  
CCGTCTGAATATGGTTTTACACCTTTCCCCCAATAAATGGAGAACCCGATGGGACAAGGTGTGAAACGG  
ACACAGCCATAACGACAAAAGCCCGCAAAAAGGCGGGCTTTGTTTTGCAACTGGCAAGCAAATTTAGATGG  
CCATCTGCTCGTGGGGGGAGCCATGGTGGCGTAACCAGACAAAAGCTCAGCGCCACGATCAGCACCATCAG  
GGTCATGATGGCCCCCAGAGTCATCTGCCCGGTTCATCGGGAAACCGGCGGCCAGCAGGGTACCACACCG  
GCCCCAGATTCTGCATCCCGCCGAGAATGGCCCCCGCGGTGCCGGCTGACCCGGGAAGGGTTCGATGG  
CACAGGAAGTGGCGGTGGGTAGAGAATACCGTACCGATGAAGTAGACAGCCGCACCACCGACAGCGA  
GGCGGCACTCACCACCCCGAACAACCCCGCAAGAATGATGAGGGAGCCGAGCGCCAGAAAAGCGGATC  
CCCGACGCATCAGTTTGCCTGAGTCAAACCGAAGCTCAGCTTGGCAGAGAGCCAGCCGCCAAACAGAT  
AGCCGGGACGCGCAGCACGAACAGCACGCTCACGGTACGGGCGCTCAGTTTCAGCACATCGCCAGCAG  
CACACCGGCCGACGCTCGAACACTGCCAAACCGGCAAAAGGTCGCCATCAGGCAGAGCAGGTTGCCCTGA  
AACTTGGGGTTGCCAGCACATGACGATAGGCAGCACCGACGCGCAGTGGCTGACGGGCAGCAGCAGGCA  
GGGTCTCGCAAACAGGCCATGATCGCCAGGGTTGCTACGGCACCAAAAACCGAACAGGAACAGTAACC  
GGCGCGCCAGTTGAACAGCTCGGTGAGCCATCCCCCAGCACCGGTGCCAGCAGCGGGGAGAAGATCACC  
CCCATACTCACCAGACTGTTGGCGCGGTTGAGCTCGGCGCCGTTGTAGCGATCGCGCATCACAGTTCCGGC  
TCATGGCGCCACCGGCACCGGTACCCAGCCCTTGAACAAAAGTGCACCAGCAGGGCGGCAAAAATGGGG  
GATGACCTGAATGATCAGGGTACCCACCAGAAAACCCATCATGCCGACGATCAGCACCGGGCGACGGCCG  
ATGCGATCCGACAACGGCCCGTAGACAAAAGTGGGAGAGCCATAGGGGATCAGGTAACAGGCCATCAGC  
CCTGCAACTGGCCCCGAGGCCACATTGAAAGTCCCCCGCCATCATGGGAATGGAGGGGACATAGAGGGTCTG  
GGTCATCTGGCCACAGCGACCATCAGAATGGTTCAGTAAAAACAACGGATAAAAACTGTGCCGATCCATA  
TCAGTCCCAAAAAATCGAAAAAATGCTGCCGCCCTCTGGCACAAAAATGGCCAGAGGAATCTGATCACA  
GAGGCTGTGATGCAATCAAAAACAGTGTGGAAAACAGTAGGGCGGGTGCCCGCAAGCCACCGCACAGGA  
CGCTTGGTGGTATGGGGGCATCATAGTGATTGAGCTCACAAAAACGAACAAATCTTTATAATCGGCTTG  
CCTTAGTTTTTTCTAATATTACGGGGCGGCACGCCCGTTCAGCAGTTAAAAATCAACGTGTTACCATCTGT  
TGTGCCTGCTGATCAGCTCATCCGGCTGCTCTTTGCGCGCGGTATGGTGATCCCTTCTGGCAGGCAG  
GTTTCTCTGCCATGCGATCCATCCAGGCTTGCAGATGGGGTAACCTTCGATGGAGATGCCGCTCCAGTC  
ATAAATCCGCACCCAGGGCCAGGTGGCGATATCGGGCGATGCTGTACTCGTCCGCCAGATATTCGTGATGA  
GCCAGATGGCTGTGAGCACCTCGAACAGGCGGCGCCCTCCTTCTGGTAGCGTTCGATGGCGGCGGGGA  
TCTTCTCGGGGAAGTAGCGGTAGAAGACGTTGGCCTGCCCATCATGGGTCTTACCCCGCCATCTGGAA  
CATCAGCCACTGGATGGCCTGAGAGCGGCGTTTGGGATCAGCGGGCAACAACCTTGCTTCTTCTCGGCC  
AGATAGATGAGGATGGCCCCGACTCGAATACGGCGAAATCGTCGTTATCCCGATCGACGATGGCCGGAA  
TGCGGCCATTGGGATTGATGGCAAGAAACTCGGGCTTCTTCTGATCCAGTGCCGAGAGATCAAGAGGAAT  
GACCCGATAGGGCAAACCCAGCTCTTCGAGGGCGATCGCCACTTTGAAACCATTTGGGGTTCGCGGCGGTG  
TAAAAGTCGATCATGATTCACCTCTTGTGGTTCATAGCCAGATTGCACGGTTGGAACCTGGGTGCAACACC  
ATAGCCGCTCATCTTGAACAAGTGACCGGCTCCAGACCATTAAAAAGCGGCGCACCGTAGGCCAAACA  
AGGCCACGGTGCGCCGCTGGTGCCTCTGGCAATGGTAGATATTAGTTGATCACGGCGACCGGCTTGCGC  
TGGCGCAGCATGATCAGGCGGGAAAGCAGCGGGAAAGTAGGACTCCAGCTTGCGCAACAGCACCCGGCTGC  
AGGCAGGCTCGGCCAGCTCCGACTCATCCAGCACGATGCCGTTTGGACAAAAATAGAAACGGGGGTACG  
CACATCCGGCCCCGACACCGTTCAGCTCCTTGTCTCCCTTACGGATCAGCAGCGGCAAGACCGGCAACCCG  
ATCGTCTCATCTCTCCCCGGGCAAAATCCGGCATCTGCCAGGGCGCATCGCCGTCGATCAGCAGGATCG  
CCGCTCCGTCTTGGCCGGTTGCCACTGGGCCAGGGGGTTCAGGTCATGTTGGGCAAGTTATCACCATA

CTCGGGTGATGACCGCAAGATGGCCAACAGTCCCTCGCTGGCCGCTGACACGTTCTGACTACTAATGAC  
AAATTCATGGTTACATCCCTATGCTCATGACAGCCTGTATCCGGCTGCTGGGATAAGACTAGCGCAGAT  
CTGGTCTATATTGGAGCCGTCAAATCTGGCAGTGGTAATCAATTGGTCGTAGGGGGATAACAGTTGCCAT  
CGCACAAAATACTGGTATCATACCCGCTCCTTTTATCCCCGTTCTTTAACATCCAGTGGTGAACCTATG  
CATCCGATGCTGAATATCGCCGTGCGCGCTGCGCGCAACGCCGGTCAAGTTGTAGTAAAAGCCTTCTCCC  
AGCCTGAGAACATTGAGGCTATCCAAAAAGGCAGCAATGACTTCGTGACCAACGTTGACCCTGAAGCCGA  
AGCGGCCATCATTACACCCATCAAAAAATCTTACCCGGAGCACAGCATTTGTTGCTGAAGAGTCTGGTGAG  
ATTGCCGGTACCAATCCGACTACCAATGGATCATTGACCCACTGGATGGCACGACCAACCTTGTCAAAG  
GCATTCCGCACTTTGCCGTTTCCATCGCCCTGCGCGTGAAAGGCAAAAACCGAACAGCCGTTGTTTACGA  
TCCCATCCGTGACGAGCTGTTTACTGCTACCCGTGGTAGCGGCGCACAGCTGAACGGCTACCGCATCCGT  
GTCGGCAAAGCCAAAGAGCTGGCTGGCACCCTACTGGCCACCGGTTTCCCCTACAAGCAAAAAGCACCACA  
TCGAGTCTACCTGAAGATGTTCCAGAGCATGTTTCATCGAATGTGCCGACATCCGTCGCTCCGGCTCTGC  
CGCACTGGATCTGGCCTATGTGGCTGCCGGTGCCTGCGCTGACGGTTTCTGGGAAATCGGCCGTGAAACCCTGG  
GATAACCCTGCCGGTGAAGTGTGGCCAAAAGGCTGGTGCCATCGTCACCGACTTCGTAGGTGGTCACA  
ACTACGAAAACCTCCGGCAACATCGTGGTTGCCAACCCGCGCTCCTGAAAAGAGATGCTGGGCAAGATCCG  
CGAAGAGCTGCCGGAGTCCCTGGGCAAAATAAGCCAGCTTCCCTGCATTCACCAATACAAAAAACCGGGC  
AAAGCCGGTTTTTTTTGTTTCTGTTATCCGAACACCAAGGCAGACATCTGCAGCTGATTTAAAAGAGTTAG  
CGATGCATCCCCACTTGCCTCAACATCCACTTCAGTCATTTGCAAACACCCCTCTTGCCCCCCCCCG  
CCTTTGGCTACCGATAAGATTCCCATGTGGTTGCTTGGATAAACTCTTTCCAGATTTTTCAGATAGCGGCA  
ATCGCCTTGCAGGCATGGACAAGGGGCGGCCGAGTCGATGTAATGCCATTATCCGCTTTGCTCACCTTGA  
GGCCATGCCATGGACCATCTCTCAGCTCTTCTCCGTTATCCTGGTCACAGCAACTGCGCAGCCAGATGC  
AAAGTCGCCCCTCACTGCCCTCGGTCTCTTTATCGCGCTGGCTGCCGTCTTGTGGTGCTGTTGCAGAG  
TCTCATCATGCTCGCTACCGGCGAGGTGACCAGCGGGCTGCGCTACGGCCTTGTCCGGTGGTGCTGCCGGG  
TTTGCCGCCACCGCCATCGGGCGCCTGCCCGCTCTGTTTCTGCGCTCGGTACCGCAAAGGTAGAGGACA  
CCATGCTGGGCTTTGCCGAGGCATGATGCTGGCGGCCAGCGCCTTCTCCCTGCTGCTGCCGGGGCTGGA  
GGCCGCCGAGGGGATTACCGCAACGGCTTTAGCGCCGCCCGCTGGTGGTGGTGGCATGGCCCTCGGG  
GTGCTGTTGATGCTGGGACTGGACCAGTTACCCCGCACGAGCATGACAAAACCGGCCCTGCCGCCCGG  
GCCATGAGAGCTGCTCCCGGCTGGCTGTTGCTTTGCCATCGCCCTGCACAACCTGCCGGAGGGGAT  
GGCCATCGGGGTGAGTCTCTCGCAGGGGGATATGTCTGGTGGGGCTGCCGCTCACAACCTGCCATCGCATG  
CAGGATATTCCCGAAGGACTGGCGGTGGCGCTGGCCATGTGCGCCGCCGGTTTTTCGCCCCCTCGGTGGCGG  
TGCTGGTGCCTATCGCCAGCGCCCTGCTCGAACCGATTGGCGCCCTGCTCGGGGTGCGGGCTCTCCAGCGG  
CCTTGCCATCGCCTACCCCATCGGACTTGGGCTCGCCGCCGGCGCCATGCTGTTTGTGGTCTCGCACGAG  
GTAATTCCGGAGACTACCGCAACGGTCACCAGACCTATGCCACCCCTCGGCCATGATGGCAGGCTTTGCC  
TGATGATGACCTCGATAACCGCTCGGCTAAAGACTAGCCCTCTCTCATCAATGCTTTTTTGTACC  
TGCGGCGCTCCCATATGGAGCGCCGCTTTCATCTCTCTCTTTCGCTTGTGCTCTCGGCGCCGACGCCAT  
CTTTTGTATGATCTACAGCAACTTAAATTCAGCCACACGGCTATCAAGACGAGGTGAGCAATGAAAGTA  
GGTATTATCGGCGCCATGGAGCAAGAAGTTGCCCTGCTGCGCAGCCAGATGAGCAACCCACCACCCTGC  
AACTGGGCGGCTGCGAGTTCTATCAAGGGATGCTGGCAGGCAAAAGAGGTGATCCTGACCCGCTCCGGCAT  
CGGTAAGGTGCGCGCCAGCGTGGCCACCAGCCTGCTGCTGGAAAAATTCGCCCTGACTGTGTCATCAAT  
ACCGGCTCTGCCGGCGGCTTTGCCAGGACCTGCATATCGGTGATGTGGTGATCGCCAGCGAGATGCGTT  
TCCACGATGTGGACGTGACAGCCTTTGGTTACGAGATGGGCCAGATGGCACAGCAACCCGCCGCTTCCC  
CTGCGACGAGAAGCTCATCGAGTCGCTCAGGATTGCATCGCCGAACAAGGCAACACCAGACCAAGGTC  
GGCCTTATCTGCACCGGCATCAGTTTCATGTGCAAACCGGACGCCATCGCCAAGGCCCCGCGCCGACTTCC  
CGCAGATGCTGGCGGTGAGATGGAAGGGGCGCCATCGGCCAGGTGTGCCACATGTTCAAGGTGCCCTA  
TCTGGTGGTGCGCGCCATGTCGATATCGCCGGCAAGGAACAGGTTGAATCCTTCGATGCCTTCATCGAA  
GTGGCCGGCAAACACTCCCGGAAATGATCATCAAGATGCTCGGCAAGCTGTGATCGAGAACGGCTCGTT  
TGATTTGATGGCCGACGCCCTCCTATCGACGACGACGGCCATTCTGGTGGGGGCGAGCCCTGCTGGAGGCG  
GTGATCCCGTGGCCATCCCATCTGCGTCTTTTCGGCCGTCACGCCCTGCTGACCCGGCTGGGGCACAAGG  
TGCACAGACCCGATGGTTACCCGGCCAGCAAAATGCAGGCCGGCCTGCTGGCAATGCTGGTAGTCTGGCT  
CCCCTGCGCCGCCGGGCTCTGGTCTTGGCAATTTGGCATTGAGCGAACCGATCTTCGACCTGCTGTTT  
ATGCTGCTGATGCTCGAATCCCGTCCACTGCGGCAACTCGCCATGCCACTCACTCTCTCACCACGCAGG  
AGACTGCTCTGGCGAGATTGCAGTCCGACCCCTGGCTCAAACGGGAGACCGGCAACTCTCGGCCAT  
GGGGCTCGCCAAAGCAGTGACGGAGAGCTGTGCCCTGCGTCTGGTGGCCAAATGGGCTGGCCCCCTGATG  
GGGTACGCTCTCGCGGGGGTACAAGGTGCACTGCTCTGGCGGCTGACTCAGCTGATGAGCCAGGGCTGGA  
GCATGAAGGATCCCGCGTTTTGGCTATTTTGGCCGAGCCACCAGCGCCCTCTATCAGGGGCTCAATGCTCC  
CACCATCCTGCTGTTGGGGCTGCCGCTCCTGCTCCCAGGGCTCAAGCAGGCTGCACAGCTGCTGCGCAAT  
GGTGCCTCTGGCCCTATCCCACCATCGGGATGCTGTTGACGCTACTTGTGACAAAGTCCGGGAGCCGCC  
TTGGCGCCCCCGCTACTATCAGGGAACTTTGCAACGCTGGCCGATACTTGGCAGCGGTGATGACCCCGA  
CGGTGAGTACCGCGCAAGGTGCTCAATATTTGCAAGGAATGGCTGGGGCTGGTTGATGCTGGCGCTG  
CTTGTCACTGTGGCGGGGTTATTTTCATGGTTAGATGGTTGCGATTGCCATATCTGGCTGCCCTGCGTGTG  
CTTGCCCTGGTTGCCCGCTGCGCTGCAGGCCGCCACTCCGAGCCGGTGGTGGAGCGTGGTACCCCATCTTA

CCGAAGTGGCTTTACGACATCGGTGCCGGTGACAAGCTGGTGGCCGTTGATGATGCCTCAGACTATCCCGC  
CGAGGTGAAAACCAAGCCCAAGGTGGCCAATTATCGCAGCATCAATGTCGAGGCACTGCTGGCGCAAAAA  
CCGGACCTGATCCTGGGCTGGCGCTCGGCCAGTCACGCATGCTGGCCCCGCTGGAGCAGCTGGGTATCC  
CGTTTTTCTACTCGGAGCCCAACGATTTTGCCTCGCTGGCGACCGAAATGCGGGCGCTGGGCAAATTTGCT  
TGGGGCGGAGAAGAGTGCCAACGAAGCCGCCGATCGCTATCTGGCGCGTCTGCATTCCCTGCAACAGCGC  
TATGGCCAACCAACCGGCTCAAGGTGTTCTACCAACTCTGGTACCCGCCGCTCACCAGCGTCAGTGGCA  
ATGCCTGGCCGGCTCAGGCCATCGAACTTTGCGGCGGGATCAACATCATGGCGAATGCCAAGACCCCTA  
CCCTCAAGTGGACATGGAACAGGTGATCAGAGCCAACCCACGCTGATCCTGGCCGGTAGTCAAGATCCT  
GACGCCCTGCGTCACTGGCTGAAGTGGCCTAATCTCGACGCGGTGCAGCATCAGCGACTCGATTTGATCA  
ACTCGGATGAGCTGCACCGATTACCCCGAGAGCCCTCAATGCGGTGGAGCAGGTTTGCCGAGCCATTGC  
CCAACCGCAGCAACAATAGCCAAAAACAGCCATTTCAGATCAGCCCTTCCAATTTACGCTCTGCAAAATGGC  
ATAAAAAGTGGCTTTAGAATTCATAGATACCAATCTTCATCATGGGACACCGTCAATGTTAATGGAAAA  
CAATCCTGGTTACCGGTGGCACAGGGTCATTTGGCAAAAAATTCATCGCAACCGTGCATCCCGCTACCA  
ACCGGCACGACTGATCGTCTACTCCCCTGATGAGCTCAAGCAGTTTGAAATGCAGCAGCGTTTCAACCAT  
CCCTGCATGCGCTATTTTATCGGCGATGTTTCGCGATGCCGAGCGCTCGACATGGCGATGCGCGACGTCG  
ACTTTGTGGTGCATGCCGCTGCGCTCAAGCAAGTGCAGCTGCCGAATACAACCCGATGGAGTGCATCAA  
GACCAACGTTGGAGGAGCCGAAAACGTCATCAAGGCCGCTCTCAACAATGGCGTGCAGAAGGTCATTGCA  
CTCTCAACCGACAAGGCTGCCAACCCGATCAACCTATACGGGGCAACCAAGCTCTGTTCTGACAAGCTCT  
TTGTGCTGCAACAATATGGCGGGCAAGAACCCGACTATCTTCTCGTGGTACGTTATGGCAACGTGGT  
CGGCTCAAGGGGCTCCGTTGGTTCCCTTCTTCGACAATCTGATAAAGAGCGGCGCCAGTACGCTGCCTATC  
ACCCACCCCGAGATGACCCGCTTCTGGCTGACCTTCGAGCAAGGCGTAGATTTTGTCTTAGCAACTTCC  
AGCGTATGCGCGGTGGCGAACTGTTTCGTGCCGAAAATCCCCTCGGTCAAGATCACCGATCTGGCGGCAGC  
CATGGCTCCGACCCCTAAGCAGGAGATCATCGGCATCCGTGCGGGGGAGAAAGCTGCACGAGGTGATGTGT  
CCGGCTGACGACTCTTTCCACACTTATGAGTTCAACGATTACTACGTGATTGCCCCAGCATCAGCTTCA  
CCAGCCGCAACAATGATTTACAGCGTTAATGCTCTGGGTGAAAACAGCCACACTGGTTGCACCGGGCTTTGA  
ATACAATTCCTAAATAATCAGCATTTTCTGTGATAGCCGAACACAGAGCATGAACCAGCAGGTATTG  
TCCGAATGATCCCTTATGGCCGCAATCGATCAGCGATGCCGATATAGAAGCCGTCGTTGCCGTACTGAA  
ATCTGATTATCTGACCAAGGCAAGCCGTTCCCGCTTTCGAACAAGGACTGGCAGATTACTGCCAAGT  
CCGCTATGTGGTTGCTTGCAGTAACGGCACCACTCGCTTCATCTGGCCTGCGCAGTATGGATTTGGCG  
CCCAAGATACAGTTTGGGTTTCTGCGGTGAGTTTTGTTGCGTGGCGAACTGCGTTTCGATACTGCAATGC  
CAACGTTGATTTTGTGACGTTGACCCTGCTACCGGTAGCCTCGATGTAGTGGCTCTGGATAAGAACTG  
CAGCAAGCTGTGCGCACCCACTCCCTTCCAAAAGCGCTGATTGCTGTACATCTGGCCGGACAGCCCTGCG  
ATCTCGAAGAGATCGGTGCGCTCTGTGCGCCAGTACGGAAATCGTTCTGATCGAGGATGCCGCGCATGCACT  
GGGTGCCACTATCAGGGGTACCTATCGGTAGTTGCCGTACAGCGATATGACGGTCTTACGCTTTTCAT  
CCGGTCAAACCGATTACGACCCGAGAAGGAGGCGCTGTCACCACCCGGGATCAGGTGCTGGCCGACAAAT  
TGCGACTCTATCGCAGCCATGGAATCACTCGAGATCCGCAAGCGCTGCTCATGCCCTCTCCCGAGAGTG  
GTATTACGAGCAACAACCTTCTGGGCTTCAACTATCGCTTGACCGACATTCAGGCGGCACTAGGGCTGAGT  
CAGTTGAGCCGCTTTGATCAGTTTATTACCCAGCGCTCGTGAACCTTGCCAGGCGATATGACGCGCTGTTAT  
CCCTCTTGCCAGTCCAGCCGTTGCAGCAGAGTAATAATCGCCAGAGCGGTTATCACCTCTATGTCAATCA  
GGTGGCTGAACGCGATCAGGTGTTTGCCCGCTGCGTGCTGCCGGCATTGGCGTCAACGTTCACTATATT  
CCAATCCCAGCCAGCCCTACTACCGTGGGCTGGGACATGACCCAGCAGACTATCCGGGGCGACAAGCCT  
ACTATCAGGGAGCAATCTCTCTTCCACTGTTCCAGCTCTGACACACTCAGAGCAGCAACAGGTCTGATGA  
TGCGCTGGAGCAGGCACTATGCGACTAGCTCTGGGCACAGTGCATTCGGTCTGGATTACGGGATCAGCA  
ATCACGACGGACAAGTCAGCGATGAGGAACTCGACGCGATCATTCGCTTAGCTCGTCAAGCAGGAATCGA  
TACCCTGGATACGGCGCAAGCCTATGGCAATGCCGAGCAGAGGCTGGGGCAAAGAGATATCACCAGCTTC  
ACTCTCATCGACAAGTGGCACAGGGCTACCGCTGTCGATGTCAAGGCAGCGTCAACAACAGCTTGC  
ATTTGCTGGGGCGAAAACGGCTCGATGGTTTGTGCTGCTGCACCGTAGCCAAGATGCCCTCACCTGCCTTGT  
CGAGTTACTCACCGATTTGCAGCAACAGGGCGGATCGGAAAACCTGGGATCTCCGTCTACTCCCCAGAG  
GAGCTCGATACTGGAGCACAGCTGGCTATCCTCTGGAACGGTACAATTACCTGCCAATTTGCTCGATC  
AACGCTTTTTTACGCACTGGATGGCTCGACAAAACCTGGTAGATATGGGGTGTGAAATCCATGTTTCGCTCGCT  
CTTTTTTACAGGGCTGTTATTGATGACGACAGCGCAGCGACTGACTATTTTCAACGTTTTCGCTACCGCA  
CTTGAACGGTTTTGACCACTGGCATCCCTCGGTGGCCCCGCTTGGCAGAGCCCTCCATCATGACAGCTC  
TACCACAGGTGAGCCGCTTTGTTGTCGGTGTGTTGTCATGCCAAGAGCTGGCCGCCATCGTTGCGGCCAG  
TCAAGCGCAGCATGAGTGTGCGAGGCGGATATCGCCATCTGGCGTCTATGGAACAGGAACCTTATCAAC  
CCCGGACTCTGGAGGACACGATGATCTTGGGTATTCTGCAGGCCAGAACAGTTCTTCCCGCTGCCCAA  
CAAGGTACTAAAGGAACTGCTGGGCGAACCATGCTGGCAAGACAGATTGAACGACTGCAACAGAGCAAG  
CTGCTGGACAAACTGTTGGTTGCCACCAGCGATCAGCCGGAAGATCGCGCTATTGCAGAGCTGTGCGAGA  
GGTTGAATATCCCCTGTTTCTGCGGTCTCTTGCAGATGTGTTGCTGCGTTTCTATCTGGCGGGCCCAAC  
CTACAGTCCGACCCATGTTGTGCGTCTCACCGGTGACTGCCCACTGGCTGACCCCTATGGTAATAGACGAG  
CTGATAGCCCTCCATCTCTCGGGCAAGTTGACTACAGCAGCAACTGCGGCCATCCAGTTATCCGGATG  
GGCTGGATGCCGAGATCATGAGTGGAGGCACTCTGGCAACCTTGCAAGAAAAGGCCGCCACGCAAGCCGA



CGGGAAACATGTCACCTATTACGTTTCGCTGTCATTCCGAACAGTTTTCTATCGGCGAACTGCAGCGCTCG  
CCTTCGCTGGCCACCTGCGCTGGACTGTCGATGAGCCTGCCGACTTTGAACTGATAGAGCGAATTTATC  
AGGCTCTCTATCCTGCCAACCCAACTTTACGACCGACGATATCCTCGCCCTGCTGGCGCAGCAGCCGGA  
GCTGACAACACTTAATACCCGGCACAAGCGCAACGAAGGATTGGCTAATTCGCTGGCCAAGGAGAATCAT  
ATATGACCTCACGTTATCAACATTCACCTCGCTCTCTCGGCACGTGCGGAACAGAGCATTCCTACTCGGCTC  
CCAAACCTTCTCCAAAAGTCGCTCTGTTTTCCCTATGGCGCCGCCCTACTTTATCGAGCGCGGCAAT  
GGGGCGCATGTTGGGATGTAGATGGCAACGAGTATCTTGATTTTGCCAGCGGCCCTACTGGCCATCAGTC  
TTGGATATTGCGATCCGGATGTGAATGAAGCGGTAATGGAGCAACTCAGTCTTGTTTCGATCTTCTCCCT  
TCCCCACCGGCTGGAACTGAAGTCGCTGAACAGCTCATTGAGCTCATCCCTGCGCCGAAATGGTTTCGC  
TTTGGCAAAAACGGGACTGATGCCACCTCAGCCTGTATCAGGCTCTCCAGAGCAGTCACAGGCCGCGAGC  
GGGTAGCCGCTGTGGCTATCATGGCTGGCAAGACTGGTACATCGGCTCAACCACCCGCAATTTGGGGGT  
CCCCGAGTGCCTGAGAGAGCTGACCCACAGATTTGACTACAACGATCTTGCCCTCGCTGCAGTGCCTGCTG  
GAAGCTCACCCGGGCGAGTTTGACGCCGTCATTCTGGAACCGATGAATGTAACCTGGCCAACCCCGGATT  
TTCTGCCTGGTCTGCGCAACTCTGCGATGCCATGGCGCACTACTCATCTTTGATGAGACCATTACCGG  
TTTTTCGCTACCCTTGGGCGGGGCACAGAGCCTCTTTGGTGTGACGCCGGATCTTGTGCGTTCGGCAAA  
GGCATGGCCAATGGTTTCCGATTTCCGCCGTTGTTGGCCGCCCAATATATGAAACGGATGGAAGATA  
TCTTCTTCTCCGGCACCTTCGGCGGGGATGTAATTGCCCTCGCTGCGGCCAACGCCGTCATCAAAAAGAT  
GCGGCGACTGGATGTACCAAAGAGGCTTGCAGAGCGGGGACAACAGGTACTGGATGGGTTTCGATAGCTTG  
CTAAAAGAGATCGATGCCCGGACTGGCTGCATACCGCCGGACATCCGAGCTGGAGCTTTCTGCTGGTTG  
CGGATTCAGTAAACCACTCTACCTGGCTTCTCAAGAGCTATCTGATCCAGGAGTTGTGCAAGCGAGGGAT  
CCTCACCTTGGCAGTCACAATATGAATCTGGCCACAGCGAACAGGATGTGGCCGCTTTGCTGGCCGCC  
TATCGCGACATACTGCCAGTGCTCATTTCGTCACGATAGAGATCTGACACTGGCCAGTGCCTTGATGGAG  
AACCTATTCAACCTGTATTCAAGGTGAGATAAATTGCTACCCTATGGATATTTACCGAAGGAGATCTACA  
GCGCGGCATGGGACATATAAGCCGCTGTAGTGCCATGTCATGCGCATGGAAAACAAAGAGGCGGTGACGTC  
TATTGGATAATAGATGGGGATTTCATGTGCGCAGAATTTTATTCAGATGAAAATATCTCCTGGATATGCT  
GGCAAGATAATCCGGGGGTAGTTAATAGCATCACTGGCTTTGCACCTTATTGATAGTTACTATGCATCACC  
ACCTGTTTTAAAAAAGATTTCTGATTGTTTTTTACAACTGTGTATCTTGATGATACTTTCCGATGTAAT  
TATCCAAATGGATTAGTAGTTCACTGTATACAGAGCAAAAACCTGATCATCTTGTGTGATCAAAAATGGC  
TTATTGGGTATTGAGTGGCAACCATTGAGGCCAGCTTTTGAATACTGCTGTGAGGGAAAAATCGACCAG  
CGACATTATTAATATTTTAATTATTATGGGTGCGACGATATCAGGAATCTGACTGGGCGTATATTCAAC  
CTAGTTATTTCCATGTATCCAAATGCACATGTAATAATTTATTTCAAACAATCAAGATGTTGCGTTTTAATA  
AAGAATGCACCATCTACAAAAATATTAATGACATTGAGATGTTGCAATTGATGTCTCAATGTGACCTTGC  
CATTAGCTCGGCGGGACAAACCATGTTTGAACCTTGCTAAAATGTGGCTTACCTAGCATTTTGGTTTTGTGTT  
GTTGACAATCAAGAAAAACAATTTAAATGGAGTCAGGAAAAATAGTTTATTTCCAAATGGGATATATTGGG  
ATGATCCATTTTTTTGATGAAAAGATAGCCACTCAGTTAACGAAAAATGTCATCCCCCATATATAGAGATTC  
AATTGCCAAACATGCACAATCACTCATCGATGGGCAGGGCGTTAACAAATTAATTAATGTGCTGATAGGT  
TCTTAAATGAAGATATCAATAATTTGTTCCGAGAGTAACCACCTGTAAATAGTTTGTATTACACTTGGG  
CGCACAATATAAGTGAACGGCACGAGATCAACATAGTAACTAAATCAAACCAGTTAACCACTGGCAACAT  
TCTCTTTTTAGTTTTCTTGCCATGAAATAATAGATAAAGAAACAAGAGACAATTTTCGATTATACACTAGTC  
CTCCACGCAAGTAATCTGCCTTATGGAAGGGGCATGTCTCCTCATATTTGGCAAAATAGTTGAAGGGAAAA  
ACCGTATTCTCCTAACACTTTTAGATGCAGAAGACAAACTAGATTCTGGAAAAATATGGAACAACAAAAGA  
AATATTATTTGATGGTAGTGAGCTTTTCGATGAAATAAATAAATAAATTTTTTCATCCGAAATAGAGTTG  
ATGTCATGGGCAATAAAAAATATTTACACATCATCTCCATTTGAACAAGTTGGTGAACCAACTTTCTACA  
GAAAGCGAACTCCTGAAGATAGCAGAATTGATATCAAAAAGACCATTGATGAGCAATTTAACCTTGCCTACG  
CGTGGCAGATCCAGAACGCTATCCCGCTTCTTTGAAAGAAATGGTTCACACGTATAAAAATAAAAAATTGAA  
AAAATCATAAAAATAATTTACTTTAGAGTAAGTAATAAATAGCAAAAAGCAATGTAGTCAATTTTTTATGATG  
GTAACCTGTTTATTTGACAGATTGCCTGCAAAAATGAATACTTCAACTATGATCACATGTTAAGCAAGTAG  
GACACCATGTCATATTTTTCTATTGATGGAAGAGAGATTGGGCATCACAAAAAACCTTTCATTATTGCGG  
AGCTATCAGGTAATCATAATGGGAGATTAGAAAAATGCACTAGCGCTCATCGATGCAGCTGCGGATGCTGG  
TGCTGATGCCATAAAAATTACAAACCTATACTGCTGATACAATGACATTGGATATCGATTTGCCAGAGTTT  
CATATTCAAGGTGGATTATGGGATGGGTATACACTGTATGACTTATATAAACAAGCCCATACGCCGTGGG  
AATGGCATCAAGCACTTTTCGAGCGAGCAAAAACCTAGAGGACTAATTTATTTCTCGACACCATTTGATGA  
GAGTGTCTCGATTTTTTTAGAGAGTCTAGGCACACCTGCATACAAGATTGCCCTCATTCGAAATCACAGAT  
CACCTTTTGATAAGGTATGTGGCCAAACAAGGAAAACAGTCATTATTTCTTCAGGAATGTCTAGTGAAA  
CCGAAATAGCCCAAGCTCTGACCATTTTACGTGAGAACGGATGTACACAGATTCATTGCTTCATTGTGT  
AAGCGGCTACCCGACACCACTTGGCGATATCAACCTCAAACGAATCACTCGTTTGGCCGAGACCTTTTCA  
GTACCCGTTGGTCTGTCTGATCATAACATTGGGCAATACCGCCGCTCAGTTGGCTGTGCGCTTGGGCGCTG  
TAGCCATCGAGAAGCATGTGACTCTGGCTCGTGAAGATGGCGGACCTGATGCTGAATTTTCTTTAGAGCC  
AGATGAATTGAAAGCACTATGTGACCAGACCAACCTCTGTTGGCAACATTTGGGAACCGGTGAAAGTGGT  
AACAAACCAAGCTGAAGAATCCAGCTTAATATTTTCGTCGCTCTCTTATTTTGTCTCTGATATACAGGCTG  
GAGAAATCATCAAACCGGAGCATATTCGAAGGATAAGGCCCTGGCTATGGATTGCCACCCGAAGCTTTACC

AAAGATACTGGGAAGAAAAGCTCGTCATGATATTCATCGAGGTAAATCTGTCCATTTTGATGACGTTTTA  
TAATACCTTAAGTGACATTTTCTGATAACTTGCAATAAAGGGGATTTACATGATACAGAAAAGCATCTT  
CATGCAAGAAGAGGCTGATGCATGGTATGAGAGAAAATAAGTTCTGCATCAATCAAAAATCTCTGAGTAAT  
GACCCCATATTCACAGCACTACAAAATATCGGCTACCAACCGAAACGAATCCTTGAAATTGGCTGTGCCA  
ATGGTTGGCGATTAGCACAACTGGCTAACCATTTATCGTGCCACCTGCTATGGTATAGATCCCTCACAAGC  
AGCTATTGAGGATGGAGCCAAGAGCTATCCCGCATTA AACCTAAGTGTGGAACTGCAGATGGTTTACCT  
GACTTTGAACCTGTGACCTGATTATTTTCGGTTTTTGTTTATATCTATGCGATCCACAGGATTTATTTCA  
CAATTGCGGCTAATAGTGACAGATTGCTCGCAGACAAGGGGTAATGGCTATTTACGATTTTTGTCTCC  
GACAGGACACTATCGAAATGACTACCAGCATCATGCCAACCTTTTTAGCCATAAAAATGAATTACAGTAGT  
ATGTTACAGTTGGCACCAGTTATTGTCCGAGTATTTGAGCACGTCATGCATCATGATGGTACTCACGAGC  
TGGAACCAGATGCATTGGTTTTCTGTTCAACTATTGAAAAAGACTCGCAGCTTCTTGATGCAAAAAATCC  
GTATCCCCACCCAAATTAATAATAAAAAAGGGAGGCATTAGCCTCCCACAAAAAGAATAATGCATTATTC  
ACTACATCAGAAACATCATTATTTTCTAAAAAATGACATAATTTCAATTATCAACCATATCAACACTATCG  
AAAGCTCTTGATACATCTCTTTTTATTTTCGCCAAAAAGTCTAACCATAAAGCTGATTGCTGGCCTCATCA  
GCGCCATCGTTTTCTTCCCTCTCCATCAAAAAGATAGAGAATTGAACTCAATATGGTAAACACATAGTTCAT  
TGAGCCAATCATAATTTGAGATATATGTTTTTTCGGAGTTGCTGCAATCTGTGCGAGATAACCAAAATTA  
CGCAACATTAATTGATTAATCTCATTCTAGATGAGAACTTCTGTTGCCACTCACCCATCATTTTATCGA  
TTAAAACATCGAAAACTCAACATCAAGATATGGTTGAAGTCTTCTTTTTGACAGAGGGATCGGGTTGA  
TAGCTGTGTAATTTGGTGAATCAGCTCAGCTTTATCTATGACTCCTGAAAACTGATCTCACTATCAGGA  
AATGGCCGTGCTTTTGCAATTTTAGCCCCGTCGCTGCAGTTAAAACACTGAACATGTTTCATTGCGAGCTA  
ATACTTGCTCAATAACTTTTTCGAGATGTATTAACATGGCGTTACTTATTACAACACCACCAAAATTACC  
TTCATGCTGCCACTGGCTGTCTCCATACATCAACTCACCTAGTACCTCAGCACCTTTTATCACTGTTATAA  
TAAGCGCTAAATTTTCGAGTGATGATGCCCTTTGTCTTTATAACCATTATCGAGGGCCAAATAAATAAAT  
TTTTAAAACCAAGATGAATAGGTGCACTCACCCCGATATTCCCGACTAAAGGGTTTACCCCTCCCAATGC  
AGCATATTTGGGAAGATGAGGGAAGTTTACATGATAGAGGATAACTCCAGGCTCAC TAAGTTTAAACATT  
AATGCTGATTTGTGCAACAGCGTTGAGCAATAGGGGTGAATAACATCCGTGCTTAGGAAAAGTATATCTC  
TAAGATAATCTGGGTCAATCATATTAACCAAGAAATCATAAACAACCTTAGTTCGTTTCAGTCTCAACATG  
AATATCTGGTTTAATACCTACTTTATGCAATGACAGAAATAGCACTACCACATGAAATTA AAAATGCTTTTT  
TCTTTATCTCTTTCAATAACAGGAAGAGATGCATCCAAAGATGGACCATTAGCAATCAAAAAATCGGGG  
TTCTATTATATTCGATGGAATTTTCTTCCCTGCACCAGGAACGGAACAGTTTCGTTCAAGATTATCAAC  
CGTATGAGAAAGAGCTATCAGATTATCATCAAAAAAACCCACCCCATCACCCAGAAGATAGTACTCCCGC  
TGGATTCTCTCAATTAATATTTAATTTTATCATTTTTGGTAAACCCACATGATAAAGGCATTAGCGATAA  
GAAAAGAACCACGGCTATGAATAGCAGATGCAAAAATCATTA AAAATAGTATCTTCATCTTGGCCTAACAG  
GATATGGAGACCAAGGTTCTCTTTATGTAATAATCAAGCAGAGGTGCCAATCAAAAACAAAAAGAGAT  
GCATAAAAAAGATCTAGATCTGGTTCAAAAAGAAATAAGGTGCCAATTTTGCATTGTTTATAAAGATAAC  
CAAGGTGGTAACCCAAACCCCAACCCCAACACAGTGCAGTTCGGAACCTCAGTTGGTACTTTTTTTAATGG  
TTCTTCTCGAGCAGCAAGATCATCAAGATAAGCATTGAGTTTATTAAGATACTCAACGTGCATAAATCCG  
AGTGGGTTGGCTTCTTGACTAAATGAGA ACTTGGATAATCCCCCTTTATCCATGAACTCTTTAACTAAAG  
TCTCACAGATAAGATACGGCTCATCACCATATACCGCGACATCATCATCGATCCAAGCCATATTTGGCTG  
GCCATTTTTCATTACAAAAAAACGAAATGGTTCGGCTTGGTTGATATGACTCATACATATCTGCAATATGG  
GGGATATATTTACGAAATGCAGCAATATTTCTGTGAGAATCGAAGCGGCAAGGCCACCGACATGGCAGCCT  
CTTGCTCTGCACGTTCTTTTAGTCGTAAGCAACACCTTCAGCTTTTTCCAAAATATCATCAATATTTTC  
CGACATCAGAACTCCTTGCTATTCACACTATAAATTTGCTTTGCTTTACTCGCCAACCCAAATCACAGACA  
ACTCATTGAAAATGATTTTACGGTGATCAGATGCCACTTTTTTCATGCTTTCTTCTGTTGAAAAAGTAA  
TG TAGCCAATAAAGTGGCATCTTGTTTTAGTGAAGGCTCACTTTCAACGAGATACAACAAACGGTCAATC  
AAAGAAATCCGATAATCCATAACAGACAGCATCATATAGCTTTTTCTGGCTAATAGATATTGAAGTT  
GCTCGTAATTTTCTGTGAGAGCTTGTGCAAAAGAGGCTAAAGTGGTCATTACAACCTCACCCAGTTGCTGT  
CTCATTTGATAGCCCTGTTGTTTAGCAGAATCTGGTAACTGATCCCAACCAGATTTTATAGTAACCATCA  
AAGCCATGACCTCTTCAATCGGGGCTACATCCAATGCAAGGCTTGCATCCCAAAATTCGCTCGTCCATATA  
GGAATAGAGGCTATATAAATCTTCAGCAATAGCCCTT GACTCATATCAAGTGCATCCTGCAAACCATGT  
AATAACCCCTGAGCTTTGATACAGCGGTAGATTTTGTCTCCATATCACGACGTTCAATTGCACCTTTGG  
CTTGAGCCAAACGTTCAAGTACACCTTGCATCATGAGCTGAATAACACGATGAGGATCGGCAACAGCCAA  
GTCAGCAGCGACACTGGTTGCCCTTATATGCTTTAAGATTACGCTGGTACATAGCCTGCTCCTCGTAATAT  
AAATTTATTTCTTGTTATTAATCTGTAATGATTGCAGTGTGCCGCTGAGTGATTCATTTTCACTAACAA  
GGCGTCTAGGCTACCATATTGAGCACGTAGTGAAGCTTCGTATTTAACCAATTGAGCGTTTGATGTGGCC  
TGCTTCTGGTTCAAGCTACGCAGATCGGCATTCAAAACATCTGTACGTTGATCCAGCATACCGCCAGACT  
TGGAATACTCTTTTAAACCTGTATTCAAGGTTGCAGCAATACCCTTTTCTCCACCGAAAAGCCCAACGAC  
TTGGTCAAAGTTTTTATCAACAGCATCATCAAAATTTGTTTTGTCCAGAGACAACTTGCCTTTTATTATCC  
ATCTTAATGCCTACTTCAAAGATGGTTGAGTAAGTCGTACTGGTACCTGCTTTATTTGTTACAGTATTAG  
CCATAAACTGCTAATGGTACGAGTGTCTGCATCACCAGCGAGCGGCCACCATCATCTTGTCTAACTCC  
ACCAACGATACTATTACGCTTGCCCAACGCGTCCATTTTATCTTGCAGCGGTTATAACCATCAATAAAC

TGCTTGACCATATCCTGAATCGCAGTTTTATCAGTTGTTATGGCAACTTTATTGGATTTTCAGAGTTGTGC  
CATCACTCTCTTTATCGGATACACGTAACACCGTTAATTTTAAGTCCTGAATAGAGTCGTCAAAACACATT  
GGTATCACTTTTAAGTGTATTACCATCAACAGTAATTTTCAGCACTACTAGCGGCTTGCTTTTGGCTCATC  
GCAGAACCAGTAGCACCAGTTGCAAAGATATCCAGCTCAGAATTATTACCAGTGATCAGCAAATCTTTGC  
CATCTCCAGATATCCCAGAGTCAATAACAAATTTTGCCCTTACCATCGGCAGTATTGACAATATTTGCACT  
AAGACCGAAGTTATCTCCGTTGCTATTAATACTTTTACGAATGTCTTGCAGAGTATCCCCTGCCCTTGACA  
TCAACCTTGAATTCCTTGTACCCGGCTTTGAAGGTCAACTGACCATCCTGAGTCACAAGTGGAGTTGTGC  
AACTGGCAAATTCACCTTCAACACGGCTAGTGGTTGCCAATTTATTGACGGTAATATTGTACTGACCATT  
GGAGCCACCACCTTTACTCTCCACCTTCATCACCGGGTTATCTTTATCTTGGGTGATGGTGACGGCTCGC  
TTGTTGAAGCCCTGGTTTGTCAAGGTATCGAGAATATCGGTGAATGCGGTGAGGGATGACTTCAGCT  
GGCCTATACCAGATATGCTGATCTGGGTGCTGTTTGTCTGGTCAAATCGGTGTTTCTGTAGCTGGGCCTT  
CTTGGCCGCTACGCTAACAGCGATGACGCGCTCAAGATCAAGCCAGAGCCCGCCCGCAGAAAGTAATG  
GCCATGTTATCTTCTCCTCATCAATTCGGTTCAAATCTCGCTATCAAACAACAGTCCGCGTTTAGGGTTC  
GCCCCTGCTTACCTTGTGCAACGCCTGGATCCGCTTGTGGATAGCAATCAACTCTTCTGTAGGGATCT  
GGCGGATCACCGAGCGGGTATCAGAGTCCATTACCTTTATTACCACCTGGCCAGACTCCTGCTCCATGCT  
GAAATTAACGGTCCACCCTTGAATTTGCCAAATTCCTGCAAGTTTTGTACCTGTTTTTCAAATCTGCC  
TGGCTCTGCACTTGTGAAGCTCAGTTTTCTTTGCCCTGCTCCTGACTTTTTTGTGTACAGTCCCGGCAT  
CCTTACCCTGCCAGAAAGCAGTTGAGCGGCCACCTGGCCGCTCTTGTCACTTAGCTGTAAGGAAGCGCC  
ATTGGCAGATGACAGATTGCCTATTTTCGGTTGCCATCTTATCTCTCCATCTTAGTCAGCCTAGTCAACC  
CATTACCCAAGCAGGGAAAGAGCAGACTGCGGTCTCTGGTTAGCCTGAGCCAAGACACTGGATGCGGCCCT  
GTTGCAGAATATTCTGCTTGGTTCATGTTAGCAGTCTCGGTTCGAAAATCCGCATCACGGATACGAGAGCG  
AGCGGCACTAACGTTTTTCCGCGATATTAGCTTGGTTACGAATAGTCGAATCTAATCGGTTTTGTACCGCA  
CCAAGCTCGGCTCGTTTTGCTATCAACCCTCCCAACATTGAGTCCACTGCCGCCAATACGTTTTTGAGCGT  
TACTCTGACTACTAATGCTGATAACCACGCACTTCCACCAACAAAAATGGTCGTGACACCAACAGCAGC  
TGCCGTTGTAGCAATAGTTGTGCTGCGGGCAGCAATACCGGAGATGCTAAAACCAGCGGATTGATCA  
AGTGCAAAGCCGATCGTCTGATTGGCGTCAGCACCAGCTGGAAAGTACCTGTATAAGAACCATCAAGTA  
ACTTGGTTCCCGCAAAGTTCGATCTTTTGGAAATGCGATTGATCTCTGACCCAGCTGGTCAACCTCTTT  
CTGCAATGCTTACAGTCTTTGGCTGAGTTGGAACCGTTAGCAGATTGCTGTGCCAACGTACGCTACGCGC  
TGCAACATACCCGCTACTTCCATCCATCGCGCTTACCGCTTTGAGCCAGAGAGATACCGTCTGTTGGCGT  
TACGGTTACCCTGATCCAAACCCTTGGATCTGGGTAGGTCAGACGGTTGAAATCTGCAGACCCGCTGCATC  
ATCTTTTCGCGCTGTTGATGCGCAGACCGGATGCCAGACGCGTGTACGAGGTATCCAGAGATTTGGTGGTA  
TTCATCAAATTACGCTGGGCGTTCAATGATGACGTATTGGTATTAATAAACATGGCCATAATAAATTTCTC  
CCGAAGAACATGCGACTGCGGGTTGCGCTGTCAAAGCTGACAACGGCCACCCTAGAAAGAGGAGTTGAA  
CGAGCCTCTCTTCTGGCGGGTATCTGTTTGAACGGACAGGCTACCCGAGCTATGCAAACGTTGGATT  
CCGAACACCCCTCGATTGCCTCATCTTGGTTAACGGCGGCCAAGTCGCAATCTTTAGGACATTATTGGCA  
AAAACAGAACGCTTTCTCTCATCACTTTTTCAACCAGCCTTGCAGACATAACGCAAGCATTACCCGACTT  
TTCCAGGTTGTATTAGAAAGCTCAATAAAACTCAAGCGCCCTAAGTTGGCCGCTTGAGTTCAAGACT  
GCTACACAAAAGTGAGGAACATTAACCAAGCAGAGATAGTCTGATTGAGGACGTTGATTAGCCTGAGC  
TAAAACGCTTGAGGCCGCTGCTGCAGAATATTCTGCTTCGTCATATTGGCTGTCTCAGTCGCAAAGTCG  
GCATCACGGATGCGCGAACGTGCAGCACTGACGTTTTTCAGAGATGTTTTGCCTGGTTGCGAATGGTTGAGT  
CCAAGCGGTTTTGTACGGCACCAAGCTCAGCTCGTTTTGCTATCCACAACCTCCAGCATGACGCTCTGCAGC  
AGCGAGGACTTGCTGTGCTCCGCTCTGAGTACTGATGCTGATGGAGCTACCTGCAGCAAAAATAGCTGTA  
ACGTTAATCGCGGTACCAATCACGGTGCCTACGTCAACGGTAGTATTCGCCGAGCAGCAATTCAGAGA  
TACTGAAGCCATCAGCTTGAGACAAGCTAAAACCGATGGTCTGGTTGGCGTCAGCACCGACTTGAAAGT  
TCCACCCTAAGTGCCGTCAGTAATTTAGTACCTGCAAACGTAAGTGTCTTTAGAGATACGGTTGATCTCG  
GACCAAGCTGGTTAACCTCTTTCTGCAGAGCCTCAGGTCCTTTGCTGAGTTTGGCCGTTGGCAGATT  
GTTGCGCCAAGGTGCGCATGCGCTGGAGCATGCCGGTCACTTCATCCATTGCGCCTTCAGCCGTTTGTGC  
CAGAGAGATGCCGTCGTTAGCGTTACGGTTACCCTGATCCAGACCATTGATCTGAGAAGTTAAACGGTTG  
GAGATCTGTAAACCCGAGCATCATCTTTTGCCTGTTGATACGCAAACCGGATGCCAAACGGGTATACG  
AGGTATCCAGAGATTTGGTGGTATTCATCAAATTACGCTGGGCGTTCAAGTATGACGTTATTAGTGTAAAT  
GAACATGGCCATAATAAATTTCTCCGAAGAACATGCGACTGCGGGTTGCGTCACCATAACTGAGTGACGA  
CCCACCGTAGAAGAGGAGGTTGAACTGGCCTCTCTTCTTGGCGGGTACCTGTTTTGAACAGACAGACTAC  
CCGAGCTATGCAAACGTTGGATTCCGAACACCCCTCGATTGCGTCATCTTTTTAGCGGCAGAAATTTAGC  
CAAGCTTTAGGAAAATTTGTTGCCGATAGCGGCAAGTCTCCTCCTGTGAGGGGTAACATACTCAATCACC  
CACCTCTATGGGAGAGCCTTCCAGCCATGCCAGAGATGAGCCTGAGGAAATATAATTTTGGCATGATG  
TATGCAGACACTGGGAGGAGTGACGCCAATTTGGCGACACAATAAAAAATGGCCGGAGAACCAGCCTAAA  
AATGAGCATATGCTCAGGAGAATATGACCAAGCGTGACAGAAGTGAACAGCTGGACAACACTTGGCATT  
CTAGTAGAGAATTATATCTCTCCCGATAGAACAGAGTGCGAACCCGAACACCCCTTTGTTCCATCTCTTG  
ACCAGGGCGGCTGAACAACCGCCCTGTTTTCTTTTGTAGCCTTGCAGCAGCTGAAGTGTGACTGAGG  
TCTCTGGTTGGCCTGTGACAGGATACTGGAAGCTGCCTGCTGCAGTATAATCTGTTTGGTCATATTGGCA  
GTTTCGATCGCGAAGTCAGCATCACGGATACGCGAACGAGCTGCACTAACGTTTTCCGAAATGTTGGCTT

GGTTGCGAATAGTCGAATCCATCCGGTTCTGTACTGCACCAAGTTCAGCGGTTTACCATCCACAACCGC  
TAACATCGCATCAGTTGCTGCAAGAACGTTCTGTGCATTACTTTGACTACTGATGCTAATCCCACCAGCA  
CTACCGCCAACAAAGATAGCTGATACCAGAACGGTCCCACCGGTAGCTGTCGTGATAGAAGTTGCAGCCG  
CCTCAGCAATACCCGAAATGCTAAAGCCCGCATTTTACTCAAACCTGAAACTAATGGTTTGGTTGGC  
AGCCCCAACCTGGAAGCTCCCAGTGAAGAACCATCGAGCAACTTGGTCCCCGCAAATGTGGTAGAGGTA  
GAGATACGGTTGATCTCTGCTCCCAGTTGATCCACCTCTTTTTGTCAGTGTTCACGATCCTTGGCAGAGT  
TGGAACCGTTAGCCGACTGTTGTGCCAAAAGTACGCATACGCTGCAGCATGCCGGTCACTTCATCCATGGC  
CCCTTCCGCAGTTTGTGCCAGAGAGATACCATCATTAGCGTTACGGTTACCTTGATCCAGACCCTTGATC  
TGAGAGGTCAAGCGGTTGGAAATTTGCAGACCCGCGGCATCATCTTTGGCGCTGTTGATACGCAAACCAG  
ATGCCAGTTCAGTGTAGGAAGTATCCAGTGATTTGGTGCATTCATCATATTACGCTGAGCGTTGAGTGA  
TGAAACGTTAGTGTGATAAAAAGGCCCATGACTATTCTCCTAAGCTATTAATTTACTCTTCTATTTGC  
TCGAGCTTTATTATTTCTGTGCCGATGCGTCTTATTTAACGGTCTGTTTTGGATGTCTTTAGCATTT  
TTTTCAACGCTTCATCGCATTAAACGCCGCTTACCTTATATATCGGCCGGTTCGGGGGATACTTAAGGAAA  
AAATCGGACCTAAACCTGTGATGGGCTCAACCTTCTGAAGCCCGCAAACGGCGGAGAGCTAAGGGCACGC  
ACGAGCCTCGCCCGTTTATGCCGCGAGAAAAATCCGTCCCAGCTCTCAATTTTGTGAGCAGCTGTTGG  
CGATTGGGCTCACAGCCCTAAAATCGCGCCCCATCAACAATTTGGCGTGAGTTGTTCTCCATGCAGA  
CACTGGTTGAGCAGATTGTTTACATCAGCGACATGTTTGGTACTGCGGTATTCGCGTTTTAGGGGTATT  
GGTGGCTGGCCGACTCAGGATGGACGGGTTTGGCGTCATGGTTTTGGCGGCGGTCACTGCCATCGGCGGC  
GGCACCATCCGTGATATGATCCTGGGAGCCACCCCGTATTCTGGGTGCGCGACCCGCTCTATATCTGGG  
TGGTTCATCGCAACGGCACTGATCGGTATGTGGATGGTCAAACCTGCCCCGAGAAATGCCTTGGTATGTGCT  
GCCGGTGGCGGATGCCTTCGGACTGGCCCTCTTACCGTTATCGGTGCCAGAAAGCCCTCAACTTCGGC  
ACCCCGGGGCTGATTGCCGTGATCATGGGCACCATGACCGGGGTAGCCGGTGGCATGATCCGCGATGTAC  
TGGCGCGGGAGGTCCCCATGGTGTGCAAAAAGAGATCTATGCCACCGCCTGTATCCTCGGCGGCATTCT  
CTATAACCTGGCGCTGGAGGCAAACATGGACAGGGTAACGGCCATGCTCATCTGCATGACGGCCGTGTTT  
GGCCTGCGAGTCCGCGCTATCTACTGGCATCTGTGCTGCCACCTTCTCGCTGCAACGCAATTGAGAGC  
AGGCCACAGCGTCATCATGTGCTGTGGGCCGCGGTTGAACCAAATAGGCTTTTTCTGTTGTCATAGAA  
GCAGTCGTTGTTAGCCGGAACCTTCTCATGCGCAAAAATCGGTATGCTTACCACCTCCTCCTGGCGAACGT  
GACGGCAGCCACGCGCAAGCACAAGTGGTATTTGGACGACTGGCTCGGCGCCGGTGCAGCAGTTCAAC  
CAGCAGATACCCAGGCAAGCCATCAACAGCAAACCTGGTAAATGACTACCGTGAGTTGCTTGCCTGAT  
TCGTGCGTTCATGGTGACACGCCCAGCCGATCCATGCCAGCAGCTGGACAATGATCTGGTACTCTCGGT  
CGCCCTCGACGGCAGCAAGAGCGACATGATCTACATCCTGACCCCTCTATCGCAGCAACAACCTGTGGCAG  
ATGCGGGAGGCGGAAATGGGGTGGCGTTGTGAGGGGCAAGACTCCTTCACTCCGGTTCCTGTCCCTGAT  
AGTCATTACTCACTCTGTGAAATAAAAAAATCCGGCACATAGGCCGGATTTTTTTATTGAAAGTGAAAAAC  
ACGCTTACGGGCGGTACACCTTGACGTTGTCAAAGCCCTTCTCTTTTTCAGATAGAGCGCTGCAGCTTGCT  
CATCACACCGGATCGCAGTAGAGCAGGTAGGTCTTCTCCTTGGGCAGATCGCCAAAGGCGGTAGCCAGC  
TTGAAGAAGGGGATATGCAGCACTTACGATCTTCCACCACAGCGCTTCTCGTCTGTTCTGTCGGCAG  
AGCGGATATCCAGGATCACCTCGTCAGCGCCCAGCACCTGAGTCGTTTCCACCTCTTGTACTTCAGCGGC  
AGTCTCTTACCAGATACGACGGATATCGAGGTAACGGGCCCTCAGAGACCACCTTGTCCAGAATGGCGAAG  
TCGAAGTTGCCCTCTTCTTCAATGCGGGAGAGCTCGGCCCTTACGGTTCGGCTTTTTGGAGATGACCC  
CACAATACTCCGGCATGGTCTCGGCAAACTCCAAAGTGCCGATGCGGCGGGCTTCACTGATGATATCCGG  
CTTGTCCCAGGTGATAAGCGGGCGCAGGATCACCTTATCGGTACCCGGTTCGATGACGTTTCAAGTTGGTG  
AGGGTCTGGCTGGAGACCTGACCCACACACTCACCGGTACCAGCGCCGGATCTGGAATTCATCGGCCA  
CCTTGGCGGCAGCACGCATCATCATCCGCTTGTGACACCACGCCCATCTGACCGTTGTCGATCTTCTCGAG  
GATCTCGGCGACACCGGCTCGAAGTCCACAGCGGTGAAACGCACCCGGTGGGATGAACCGAAGCGGTTT  
CACAGGTGATAGGCCACCTGCTTGACGCCAATTTCTGTTGGCAGCACCCGAGTCAAACCGCCGAGATGAGGCT  
GTACCCGCGCAGCCGCTTGTGAACTGGAACGACGCCACCCGAGTCAAACCGCCGAGATGAGGCT  
CAGCACATCTTCTGAGTGGCGATGGGCATGCCGCTCAGGCCCTGATGGATGGCGCTGACGATGAAGAGC  
TCCTCACCGTTCGATCTCGAGTTGATCTTACATCCGGTTCTTGTGAGGCGCACACCATTGCTTTTGCAGT  
GCTGATTCAATCCACCGCCACATAGCGCTCAACCTCGAGGGAGGAGAACTCATGCTTGCCGTGGCGCTT  
GGCGCGCACGAGAAGTTTTGCCCTTGTGAGCTGGTGCACCCATACGGCTTTTACCTGCTCGAAGATGTG  
TGCAGATCGGTAAACTTGTGCTGGCTTGTACCTCGAGGAAGGCTGAATGCCCGGAATACAGGCCAAAGCTT  
CGATAGCCTGCTCGCGAACTGGTCATTGCGGGAGCTCACGATCAGCTTGTCCCAATCCATCCGTACGCG  
GGCATCGTCTGCAAGCGGCGCAGGACATTGCGGATATTGCCCTGCAGGATCTTGATAAAGCGCTGGCGA  
ACCGACTTGTCTTGTGATGGTGTATTTCCGGGAACAGCTTGTGATAATGAACTTCATGGTAATGACTCGGGTGA  
CCTTGATTTAAGGGCGCAATTATATCAGAATTTGTGCCCAGCGCTACTGGATGAGCGTTTGTCTCACA  
TTACCCACAGCAGTGTGTTGCCGTGCAGCGCCAATCTTGGCTATATTTCCGACCTGCGCCTCGCCAGATT  
TTTTGACAACAGACTGATCCGATGAAGACCTATATCTACTACCCCGGCATGGAGGTACGCGACGAGCTCTG  
GCTCAAATTTGCCCTGCTCTATCTGGAGCGGCTCGCCTTCTGCTTTCACCGTCAAGGAAAGAGCGGCTC  
ACCGCCCTTCTCGATACCTTCAACAGCAGACCGATCTGCTGGCCGAGCGGCCCGATGCCGCTTCTTTG  
CCGCCATTACCCCGCAACTGGAGAACCAGATAAGCGGCTGGTGGCCCCGATTTCTGTCGCCACAAGGT  
GTTTGGCAACAAGGAGCTGATTGGTCTGCTGGCGTCAGGAGGCCAACCACGACTGCTTCTGCCGGATCAG

CGGGACTGGAGCGACTGCACGGCTTTTGCCTGACTCACGGCTTTGCGACCCGGGATGAGGGTGGGATCA  
GAATGGCGCGGGCTTTGCCAATCTGCTCTCCATGCGTCTCGCCGTGAGTGGGCACTCGCCAATGACGG  
GTCGCTTATTACCGATCACGACTATCTCGACCGACTGCTCCATCTGCTCGAATCCCGTACCACAATCGC  
GGTGGTCAGGATTGCTTCCACCTCGAGATCCCGTTGCAAGTGCCCACTCACCTGGCCGACATTCGGTTTG  
CAGAGCTGATTGCCCTGCGCGGGCGCAGCGGCTTTTCGCCAACAGCTGGCCGAATTTTCATCTGGCCATCGA  
CAACCTGCTCGCCATGCTGGGTAGCGGCTATGCCGACCCGGCGGGCCCTGACCCGCTTCGAGCAGGCTCAG  
CAAGGGCTCAATCAACTGCTCGGCCCGAGACCATCAGCATGCCACTTACCACCTGGTCAGCACCAGCC  
TGCCCGCGTAGCCATGCTCCACAGTTAAAGGCGAGCCATCCCGAAAGCCACCTCATCTTCCATCCCAT  
CAAGAAGAGCCACTTTACCAGCGCAAGAGCCAGCACTTCTTACCCGGCTCGGCCATCTGCGCCAACCG  
GGCTGAATGGCGGAATGAAAAAGGGTTGGCAATTTGCCAACCCCTCTCGTTATCTGCGGCCATACCAATC  
ATCACCACGATGATTGGCCTGCTCTTGCCTGTCTGCGCGCTCCATCACCTGTACGGCGGATATTG  
GCAGGGGTACAGGCAAACCTGTTTCTGATAACAACCGTAAAAACCCTCGGAAGCAGGTTTCGAAAGGTGAAT  
AGAACCCGGTACGTTTACGAGAAACATGGTGATCACCATGATTGGTTGTGGCACAACCCGAACCTCATCAG  
CACCAGCAAGGGACACAGAACACGCAGCAAAAAGAGAACTCCCGATTGGATTTGAATGAATTCGTAATTAT  
TCACAAATTAATTCATCCAATCAAATATTGATGCATTTCAAATGGTTAATTACATTCGCCCTCAATGGCTG  
TCGGCAAAACGCTCAACGGGTGATGGTACTGGCATCACCGTCAGGATGCACCACGCGAAACTCGATACGA  
TCGCTGTTTTCTGCTTCATCGACCACCACCAACTGGTAGCTCCCGCCACGCTCAGCACCTGATCCCCGT  
CCCAGCGCAGCCGCTGGCCGTTGAGAAAACAGGCTGGCTTGCCAACACCCGCCAGCACCTTGGGCTGCAA  
CCGGTAACGCTGACTGCGGATAAGGTTGCCCTCCCCAGCGCCATGATGCGAATGGGAGCCTGCAGCTCG  
GCACTCTGCCCTTCCCCTGCACACCCACCTGCCAGCAGCGCTGCCGTGCTCACCAGGTGGCCGCAAG  
GCTCCAGCGACAATGGCCAGAGCGCCCGAAAGCCGGATTGCGCCGCATCGGGGCAACGGGTCAGAGTCGG  
CTTGCCCTTCGGCAGTGAGTGCCACCTGTGCGCAGCGGGCAGGGCCAGTCCATGGGGTCCGGCAAGGTGGGA  
GGATCGCGTCTTCCAGCAACCAGGCGCTCTGACGCTGCAAAACAGGCTTCAGGCAGGGTTCGCGTTTCGCT  
TGCGCCCCAGCGGCCAGCAAATCTCGGCATCGCTCACCGTGTGGGCTGTGCCGGCAGAGGGCTGTTGTC  
CGAGAGCCGCGAGTAGACCGAGAGCAGCAGTGGCACCCTGCGCTCTGGCCGTAAAAACCGGGCATGGGG  
GTGCCGTGGGGCGCCAAAGCCAGACGCCGATGGTCCAGCGACCCGAGACCCCATCGCCAGCTGTCCG  
GATAGCCGTAGCTGGTACCGGCTTCCAGGCCAGTCCGTTAACCCGGCCGGTTCGCTCACTGGCAAAAGG  
CTGATCAGCCCGTCCCCTGCGCGCTCAGGATCTGCCAGATCCAGGCGCTCCCGGGCTCAGCAAGGGG  
CGTGACACCCGCTGCTCCCCCGCCAGACCCGACATGCCACCTGCCCTCCCGTGTGAGCGCATGT  
AGAGCGCAACCAGCTGCTCGAGTCGAATGCCCGCCGCCCCAGCGCGATGGCAGGATTGGGTTTGTGCGGA  
GAGCGCCAGCCGACCCCGCGTGTGTCGAGGCGGCTGACCAGCTTGTGCGGGCCGAGCGCTCCAGCACC  
TGCACCGCCGGCACGTTGAGGGATTGCTGACGCGCTGAGCGAGGGTCACCGGCCCTGAAAGGCGCCGG  
AAAAGTTGGCGGGGCGATAGTCAGACCCGAGCCTTGGCGCGTGGGAGAGCAGGGAGGCGGAGTGCACCAG  
CCCCTCATCCATCGCCAGACCGTAGATAAAAGGGCTTGAAGGTGGATCCCGGGGAGCGGATCGCCTGCACC  
ATGTCCAGATAACCGTGGCGGCGCAAATGCCATACTCGCGCTGCCACATAGGCGCGCACCCGCATGG  
TTTTGTGTCTACCAAGAGCAACGCCGCTGAGGTCTGCTCGGGGAAGCGGCAATGTAGCTCGCCACCCG  
CCCCTCCAGCCAGCGCTGCAGATCGCCATCGATGGTGGTGTGACCAGCGCCCCGGCCTGATGGTTCGGCG  
GCGAGACGGGCAAAGAGCGGCGCCTCCATCGGCGTGAAGTGACCGCGGGCCAGCACCCGGCTCGATACGCC  
CCTCCAGCCACACCTGTTTCGGGCCAGACACCCTGCGCCACCAGCCGCTGCATTACCTTGTACGGGCGGC  
GCGGGCCCGCTCGGGATGCCGGTCCGGCCGGTTGCGGCTGGGAGCCTGCGGCAGCACCCGCCAACAGCGCC  
GCCTCGGCATAGGTGAGCTTGGCCGCGCTTTCGCCAAGGTAGGCAAAACTTGCCGCTGCACCCCTCCA  
GGTTGCCGCCAAACGGCGCCCGTTGAGGTAGACGGTGAGCAGGGTTCGCTTGTGCGTAGTGCCACTCCAG  
CTGCAGCGCACGGGCCATCTGGCGCAACTTGC CGGGCACGCTCCTGTGGTAGGGCTCGATAAGACGCGCC  
ACCTGCATGGTGAGGGTCGAGCCGCCCCGACACGGCGCGCCGTAGCGCAACCACTGCCAGACCCCGCGCA  
CCATGGCCACCGGATTGACCCCGGGATGACGCCAGAAGTAGCGATCCTCGTAGCCCAGCAGCGCTCGAT  
ATAGCGGGGGGAGACCTGCTCCAGAGTCACGGGGTAACGCCACACGCGCTGGTATCGGCAAAGGCGCGC  
AGCGGTGCGCCCTTCATGTCAAGCACCACCCGTGCGTAGGCGGGGTCTAGTGGCGGGCGGGGAAAATGC  
GATCCAGCGCCAGCAATGACAGCAGCAGTGCTACAACCTCCAGCACCCGAAAAGTGCAGCCAGCGCGGCAG  
ACCGCCAAGCCAGCGCCAGCCTGCGCGGCCACTGCGACCCAGGCTCAGCCAACCACGCTGCCAAAAAGTG  
AGCGGGCGAACCCGCTCAAGGGAGGGTTTGTACTCAGAGATACGCACCTCGTGGATATCTCACCACCA  
GCCCCGAGTTCAGGCCGGTACATATCCTCCACCTGGGTGGTGGCACCTGATAGCGACCCGGCGTCACTG  
CACGCATCAGGTAGACCAGTTGCTGGTTGCTCCCCTGCTCAGATCCAGCGCTGCCGTGTAGCGGTTCATC  
GCGAAACTCCTGATGCTTGAAGATAGTCTGTTCCACTCACTCTGCCACGCGGTTTTCCCTCAATGGAGAGC  
TCCTCCAGCTTGTGCTGTTGCCAAGGGCCGGGTTCTCCAGCTCGAAGCCAGCGGGCACCATCTCCACCA  
GCAGGGCATCGGGCACCGCCGACTCGCTGCTGACGTTGAGCCGACCAACCAGATCGCCGACCTTTAC  
CTTGGCGGGATCAAACGGCTGACCATCGCTGTTGAACCAGCTGCGGGTACGCTCATCCCTTGTGATC  
CGTACCGGTGCTGTTTCGGGGTAACCGACCAGAGTGCGCTGCACATAGAGCGATCCCTTGCCTCGTTGG  
TGACGGAGCTCGCGGCCAGTGCTCGGGGGCGACCAGCTGCAAAAGCGGCCGAACCGCTCAGGGATCCACT  
GCCAAGAGAGGAAGTTACCTTGGCCTGCCAGTCGGCGGGCCGGATCGAAGCGGGCGAGTCGCAGCAGGGCG  
AGCCGCTCCTGAGTGTGAGCCACTGACGATGGACTAGGGTATCGGCCACCTTGGCACTGAGGGCTGGCC  
AGCGCTCCGCAGCCAGCTTGTGCTGGCGCAGCAAGGAGAGCTCAAGGGCTTCATCGCGCAGCGGTGAGCC

GTAATCACCCAGATAGTCGTCACCGCGCTCGGTGCGCAATGCCCGACTGAGGGCCCTGGCGGCGTTCTGC  
TCATCCCCCATGGCCGAGAGGGCCAGCGAGAGGTGGAGTAGCGGCAAACCGGAACGGGCGTGATCGGCCCT  
GCTGCTCCCAGATAAGACGCAGGGTAGCGAGCGGTGCCCTGCCACCCGGGCCAGCACATAGGCACGTGTA  
GGCCTGATAGGCCAGCCGGCTGTGCTCGGGGGCAGTCTCCAGCGCTCGCCGTAAGTTGTCGGTGAGA  
TAGCTTTGAGCCGGTTTCACTGCTGATTGAGCATCGCCTCAGGTACGGCGTTCGCCCGCCTCCTTGC  
CCAGCAGGTAGTCGGCGGCATAGGCGGTGAGCCACTGCTCCTCATCGGATCGACCATCCCAGAGGCCAAA  
GCCACCGCTTGGCAGTTGCAACCGCTGCAGTCGTTGAGCAGGGCGCGCTGCACATCCGCCCTACTCGCC  
GCTTTCTTGCCTCTGCGGGTTTGTCCAGGCGGCCGCTCATCCACCGTGGTCAGCAAGTAAGGCCAGG  
CACGGGACAGGGTCTGCTCCAGACAGGCGTAGGGGTAGTCAGCCAGCGCCTGCCACTGGGGTACCGGATC  
CCAGGGCGGAGTACCGGAGAGGCTGAGCAGCCCTGCAGATTGGCGCGATCCAGCCCGCCAGCTCACTT  
TGCGCAAAGCTCATCTGCTGGCCGGGGCCAGCATCTGTTAAGCTGGCGAGTTTCGGCCGGCCAGGGG  
AGCGCAGCGGCAAAGTCCAGTCGCGGCTGATGGCAAATCCTTGCCTGCGCCGCTGCGCCGCAACTGCAGGCTTGC  
CACGCCGCTCGCCCCGGTACGGTGAAGCAGAGGGTACGCCACTGCTCCTCGCCATTTTTAAGGAAAGG  
GTGCCGGGCGAGCTCACCGTTTGTTCAGCCCGCCATTGAGGGTCCAGGCAAGGGAGAGGGTCTGCTCCT  
CGCCGCTCATGTTGCGCAGCTGCACCAGCGCCCGGTCTCATCCCTCTGGCGCCAAAGCGCGGCCAGCC  
AATCTCGGCCACCAAGGGCGCCACCACCTTGAAGTGGGCAAATCGAGCGGGATCACCGCCTTGCCTGCT  
GGTCAAAACTCACCTCGCCACTCCAGAGCGCGGCGATCTCGACCCGGCTCTCCAGCGCACCACCTTTTT  
CAGCGGCGCACGGTCCGCCCCATAGTTGAGGCGGGCCAGCTTGCATCCTGCGGCGGGATCACTTGGCCG  
TAGTTGTCGAACAAATCTAGGGAGAAGCGCTTGGCGCCAAAGAAGATCTCGAACGGTTCGAGAGGCTGGT  
AATCGCTGATGTTTAGCACGCCCCGATCCACCGCCGCCAGCACCACCGCCCTTGGCTATTGGGGATGGA  
GGTGGCGGTCACTTCCAGCCGGGTAAGCGGCACCGCTTTATCAGGCGCGCTCAGGGTGAAGCGGCGAGCGG  
CGCGCTTCCCGATCCAGCGTGAAGCGGCACCAGCCGACCAGCGCAGGCTCTGCCCTGCTGCTTGGCAG  
CCGGTTTGGAGGCGCTGTCTGGCGCGGCGATCTGGGCCGAAATGTGCAGATCATGACGCTGCCACTCGGG  
GCTAACTGGGATCTCGAACTCGCCACGAGCATCCTTGGCATCGCCACCGGCCCTTGGAGCTCGATGCGC  
TGCCACCAGCGCAGACCGTCCGATCTTCCACAGCAGCAACCCCTTGGCGGACGCGGCGCCACCAGCG  
TCACTTTTGCCTTGTCAACCGCCTGATAGGCGCGTGTGTCGAGGGTGAAGCGATCTTGTGCGGGCCGCG  
CTGCTCGCCACCGCGCCGCGTAACCTGCTATTTCCACCGCAGGCTGGATTGATGGCCCTGACTG  
TTCTCCACTTCCAATCGATACAGCCAGCCGCGTTCAGCGTGAAGCGGGTTCGCGCCCTTGCATCCCA  
GCTGCAGGGTCTGCTCCTGCTCCAGATAAGGCTGGTGTGAACTCGTACTTCCACCCCTCGCCATCGGC  
GTAGTGCCAGTAGTAGTCACGGTACTCGTTGATAAGGCGCACCTTCCACCGCCCCCGCCACCGGTTGGCCT  
TGCTCATCGAGGTTGAGGATCTGGAAGGGGAGCGGCTTGGCCCCCTTCCACACGATCGGCCACGAAGTCGG  
CCTTGAGTGCCAGCCACTGACTGCCCCGAGGCCAGCCATACTGGGTGCGGCTGCGATTGACGGCGCGGCC  
ACCGGGCTCGGAGAGCGACACCCGATAGGTCACTCCAGCGGCCGAGGGCTCGCACCCCATCGAGCTCA  
TCAGCAAGCGAAAAGTCCCCTGCCCTGCGCATCGAGGGTGAAGTGCAGCTCGCGCCTCGAGCTCCTTGGCCT  
GCTCGGCGAGCAGCACATCCCCAAAGTGAACCTTGCCTGAGGTAAGGGCATGGTGGCGCGGCTGAT  
CTTACCTCTGCCTTGGCCTTGGTGGCGCTCGCCGGTGCACCGTAGAGATAGTCCCCTTGCAGCGGCAGG  
GTGAGGGAGGCGTCCAGATCCGTCACCTTACCATCCGCCCCCTTGCAGAGTGCAGTTTGAAGCGCTCCG  
GCAAAAACCTCCACCAAAAAGGGCCACTCGAAACGACTACCAGCGGCGGTCTTGAAGTTAATGGTCCA  
GCGCCCCGAGCGGCGCATCGTCCGGCAGGCGCAGACCGTAGTGGGCCGCGCCAAGATTGTCCGGTAGCAGC  
CGCTTTTGTTCGAGCAGCTGACCATCCGGCTGTTTACCTCCAGTTCACCGCCATGCCCGGCAGCAGCT  
GGCCATCCTGCCCTTGAAGCAGGATCTCGCTGTGAGCCGCTCGCCGGGGCGATAGAGATCGCGCCCCGT  
AAAGAGATACTGCTGGGCTGCCAAGGCTGGGTGCCGAGATCGAAGGTGGAGAGATCGAGCGCCGCC  
CCATCGAGGCGCAGCACCGCCAGATGGTTGCCCTGCTCGGCCAGCAGCAAGCGAGCACCCTGCACCTGAT  
CGAAGCGGCGATGGCCCTGTGGATCCGTGGTTTGCACCTGCAGCCGTTGCCCTTCTCGTGCAGCAGGGA  
GAGCTGCACATCCTTGAAGCGGGTCCGCGCTGGCCAGGGAACACGAAACCTCCAGCTGATCGCGGTA  
CGCGGGGCACTGAGCCCCATGTGCTGACCGCAAAATAGGTGGTCTCCTTGCAGCCAGTCAAGTTGCCAA  
GGGGCGACATCACCGCAAAGTAGACGCCAGCCTCCGCCAACTGCGGCTCCTTACATTTGATGAGGCGGGT  
CTCGCGCCGGTTGGCATCAAGCTCCAGGGCGTAGCGGCCGCTGAACACCCGCTTGGCCCCGCTGGGTGATC  
TGCTCAAGCTCCCAGTTCCCATGCCGCGCACCGGGGCGATATCCGCCAGAAAACGGGGCAGATATCCG  
CATCGACCCGAAAGAAATCGATATTGACCTCATCCAGTTGACCGCTGATGGGCAAGCGAAGTTCCCTG  
ACGCAGCGGAATAACATGCCGCTGGCGGTAAGGAGGCTCCCGCTCCAGCGGCCGGGTTTTGAGGGTC  
CAGCTCTGGGGGATGGGCCAGCCCCGCTTGAAGGCTCACCTCATAGCTTTTATCGGGCTGCAGTTTCG  
GGAAATAGAGGGTGCAGCCATCGTCCGGCAGGATCCACTCCCCCTGCACCTGCTTGGCCCCATCGCTGAC  
CCCGAGCCAGCTCTGCCAATTGGCCTTGGGCGCCAAGGGGCGGAGAAGACCAGCGCCAGCGCCGGGGCA  
TCGCGATATTGGCGGGCATTGGCCTGCACTACAGAAGTTGGCGCCCCGGCTCCTGCTGGGCTGTGGATT  
CTGTGGTGCATATTTGGCTGGTGGGCTTGTGAGGGCCGAGCCAGACAGCAAACCGACCACCCCGCAAAG  
CAGCAGGGTTGACCAGCGGCGGCGCAGAGCGCCGGTTTTGAGCGGTAGAGCGGTGAGAAGCAGAGGGAGAG  
TCGAAGAGGGCGCATAGGTTCCATCCCAGTTGGAGCGCTGCAAAACGAGCGTGGCTGGAAACAGGATAAG  
GCATCCTGCTCACCCGACACAAAGCTCATTACCCGAATGGGCACAATTCGCGCCCCCTGCTGCACGAGAA  
CCCCCTTGGCCACTGATCCAGTGGGCAAGGGTGTCTAGTCTGCTGGCTGGTCTCGTTTTTTGCTCCG

CCTTTGAACCAGCGAAACAGGATGGCCATGACGGCCGCCAGAAACAGCACCAGTGAGGTAATCAGCAGGG  
CCCCGGGTCAACAGTTTCGCTGTGGTGGAGAAAGAAGGGGGTATTCATCGCCAGCTTGCCCACCAAACCTGAG  
GCAGAGCGCCACATAAAGGCACTGGCAAAGCTGGCCACGCACATCCGCAGCACGCTCAGGCGGCCAATC  
CCCATCAGCATGGGCGTCAGCACCCGCACGAACGGGATAAAACGGGAGGAGAACATCGCCAGAAAACCGT  
ACTTTTTTTCAGCAGCCGGGTTCGCTTGGGCGAGGCTGTCTGGGAGGCAACATCCGTTTCGATATGCTCCATAAA  
GCGGGTTCGCTGCAGTGCCCGTCCCTGCCAGTAGGCGAGCACGGAACCTATGCCAGCAGCCAACGGCAGA  
TAGACAAGAGTCACTTCGGGGCCAAACACCCCCATGCCACCAACCCACCGGCCAGCAGTACCAGGCTGT  
CCCCCGGCAGGGGCAGGAAGACGAATGCGGACTCCAGCAGCAGTACCAGCATCAGGCAACTGATCAGCAG  
GGGTACCGCCTGCATCTGAACCAGGGCGTCAAAATCCTGATGCCAAATGGCCATCAGCATATCCAGCATG  
TCACTCTCCCTACTACACGGTTTCATCATGAACGAGGCGAGGGGTATAGCACCCATCCCCTGAACAAAACG  
TTAATTTTGTCCGGCACAGGAAATAAAGTGTGTGCGAAATATTGCAGCAACGAGGGAGATGCAAGGAGGGC  
GAAAAGCAGAAACAAAAAGCCCTCATCTTGCACGCACAAGGGAGAGGGGCAAACAGGCACAGAAATAAA  
ACGGTTACTCGGCGGTGGCCATCTGCCAGGTTTTGAAGCCCGCGAGAGATTCTTCACTTTAAAGCCGTG  
CTGACTCAGCAAGCGGCAGGCGACATGGCCGCGCAGCCGACCTGACAGCTGATCAGCAGCTCTTTCTCT  
TTGGGCAGCTCATGGAGGCGGCCACGCAACTCGTTCGAGGGGGATATGCAGCGCCCCGGAAATGCGGCCCA  
GCTTGTTCGAGCTCCGGGCCATTGCGCACATCCACCACAGCTGATGGGGGTACGAGCCTGCACCTCGGC  
CACGTGGCAGAGCAGGGAGTCCCCCTCAGGTGGTTGCTTGCCACAAAAGCCCGCATGTTGATCGCATCC  
TTGGCCGACCCGAACGGCGGCGCATAGGTGAGCTCCAGATCCTGCAGGTCAAACACGGTGAGACCGGCGC  
GTTGGGCCACTGCCAGCACGTGCATGCGCTTGTGCATGCCATCCTTGCCGATGGCCTGGGCACCGTAAAT  
CTTGCCATCCGGGGCAAACAGCAGCTTGAGGCTGACCGGATGGGCACCCGGGTAGTAACCGGCGTGGCTG  
CCCGGGTGGACATAAACCTTCTCGAATGGCAATCCTAGTTGCACCAGTCGCTTCTCGTTGAGGCCGGTGC  
TGGCCACCGCCAGATCGAACAGCTTGCAGATGGCGGTGCCCTTGGGTCTTCTTGTAGGTTTTCGCTTCGGCC  
CAGCATGTTGTTCGGCGGCATGCGCCCCTGCCGGTTGGCGGGGCCCGCCAGCGGGATCAGCACAGATTTCG  
CCTGTGACGAAGTCAATCTTCCACCGCATCCCCACCGCTAGATGAAGGGATCCGAGGTACGCATCC  
CGGCATCCACCTTGATGCCGCCCCGTGGGCCAGCTCCAGCCCCGCTTGGCGGCGAGCAGGGTTTTCCGG  
CTTGACGCCGATGGCGAGGATCAAGAGATCGGTATCAAGATGGGAACCGTCATTGAGGGTCAGGCGCAGG  
CCACCGCTTTTTGGCGGTTCGTTACGGCGGAGGTCTTCTCGTCAGGCAGATCCAGACTCTCGATGGCGGTGA  
GGCCAGGTGCGCAGGCGAAGTTCATCCCCCTTCCCGGATGCGGGCATGGAGCATGTTGGCCATCTCCTT  
GTCCACCGGAGCCATCACCTGATCAGCCAGCTCCAGCAGGGTGACATCCAGCTTGCAGCAGTGCAGCCGC  
TCCATCATCTCCAGCCGATAAAACCGCCGCCACCACAGTGACGTGGCGCGGCTGATCGTGGTGCAGGG  
CCGCCAGAATGCATCCATGTCCGGGATGTTGCGCAGGGTATAAAACATGGGGGCTGTCGATACCGGGGAA  
GGGAGGACGGATCGGCGCCGCCCCGGGCTCAGCAGCAGCACATCGTAATGCTCGCGCTGCTCTTACCAG  
GTTTGCAGGTTGCGCACCAAGGCTTTCGCCGCTTGTTCGATCTCAATCACATCGTGGAAAGACCCGCA  
CATCGACGTTGAAACGGCGCTTGAAGCTCTGGGGAGTCTGCAGCAACAAGGCATCCCGGTTCGGGGATATC  
GCCCCGATGTGATAGGGCAGACCACAGTTGGCGAAGCTGACAAACTCGCCCCGCTCGAACATCACGATC  
TCTGCCTCTTCACTCAAACGACGAGCAGCAGCCGCCCGGATGCGCCCCCGGACACCACCGATAATCA  
GGATCCGTTTTCATCTGCAAGACTCCTCATAATGATAATGGGCGATAAATTAGACTTTTTCTAATTTAGAA  
TTCAATGAAATTTTTGTTTTACACCAATTTTGCAGTATTCTTGAACCCCGACGGTTGCTTAAACAGGATGTT  
GTTTTGTTTCATGTCGTCTACCGCACTCAGTCATCTTCTCCTGCCCTCCAGACGCCACTCTTTTTCCGTCT  
GGATCTGCGCAGTCAACGGCTGGTTCGCCCTGACCGACGTGATGCAAACCCCGCTCTACTGGCTCGATGAG  
CCGCGCGCCCCCTGGCCTGCCAGCTGCCCGATGCCCTGCGCCTGCCCATCGAACAACTGCTGGCCAACG  
GCCATGGCGGCAAGATCACCGTGCCTTTGCCAGCCAGTTGTGGCATATCGCCCTCGCCACGAGCAGGA  
TGGCTTCTGGCTCATCTGTCTGCAGAACCTTCGCCAGGAGCCATCGCCGATCTGGCATTGCAACTGCCG  
CGCCTCAGCCAGATGGCGAGCCAGCAACAGTATGCCCCCTGCTCGAGGCCCTTAAAGAGAGTTTGGGGG  
CCGATCGGCTCATCTCTGGCACTATCAGGCCAACGGCGATCTCGGCAGCGAGCAACTCACCCCGGTGTT  
CACCTTGGGGGTCGAGGCGCTTACCCCATTCGCGGTGACAGCCGCTATATCCGCGCCCTGCGTACCCGC  
AAATCCTTAAGCTTCTCGGAAGCGGCCACCAGCCGATGCTGAGCAATCACCTCTATCTGACCAGTGCCG  
GTGTGCGCTCACGCCTCGATGGTGCCTGCTGGAGCAGGACAAGCTGTTTCGGGGTGTGAGTCTGGAGTA  
TCTCGATCCCACCCCTTAGCGAGGAGATGTTGACAGTGGTGCAGCAGCGCCAGCTGCTCGGCCAC  
TGGCAACCGCAACCGGAAGAGCACCAGCGCCGAGCTGGCCCTCCCGCCGAGCTGCACCAGCAGACCGGCA  
TCGACTACTGCAAGACGCTGGTAAGCTGGGCCATGAGCGCCAGCGGTGCCCGGGTGGGCTGGATCGGCGA  
GTTCCAGCCCCGCGGTGAGGATCTCTGGATCATCCCCGCTGCGTCATCAACGAGGAGATCTGCTCCACC  
CTCAAGCCCATCCAGCTCGATCCCGGCCCGCTCAGGAGCTGTTCCAGCATGGTCAGGCCATCTATGTGG  
AAGATCTGCCCGTGCCTATCCCAAGGCGACCCGGCTGCTGGCCCTCAATGCCAGCGCCTACATCGGCAT  
TCCGCTCCATGGCCAGAGCGGCGCCCCATTGGCCAGATCACCTGCTGCTCGATACCCCTTGGAGGAG  
CCCGAACAGCTTCTGGATCTATTGAGCAGCCAGCAGCGGGCCCGCATCGAACTCAAGCGCCTCGCTA  
CCGACGATGCCCTGCGGCTGGCCGAGGTTGCCCTTCAATACCCACGATGGGCTGATCGTGTGATGGATCACA  
CGGCATCATCCTCAAGGTCAACCACTCCTTTCAGCCGGATCACCGGATTTGGCGAGGTAGAGGTGATCGGT  
CACTCCATTGCAAGCTGCGTCCCACCTACTACGGGGATCATCTCAAAGAAGATGTCAGCCGCACCGTCA  
ACGAGCAGGAGTTCTGGCTTGGGGAAGAGCGCTGCCGCAAGGATGGTCACTCTTTCGGGTGCGCTT  
GATGGTGAACGGCGTCAAGGATGAGCAGGGGGAGCTCAGCCACTTATCTGCAGCTTCTACGACATCACC

CAGGAAAAAGAGGGCCAGACATATCGAGCAGCTCGCCTACTACGACGATCTCTGCGGTCTGCACAACC  
GGCGCAGCCTCAACCATATTTTGCAGCAGACCCTGAGCGCCTCCAACGGCCAGTGGGGCGCCCTGCTGCT  
GGTGGATCTCGACAACCTCAAGTCGATCAACGACTCCCTCGGTACGCTGCGGCGATCTGCTGCTGCAG  
GCCGTGGTGCAGCGTTTCAGGGAGCTGCCCCAGGACAATCTGGTGCAGGCGCGCATCTCGGGGGATGAGT  
TTGCCCTGCTCTTTACCCAGCTCGGACAAGGCGAGGTCACCGCCAAAATTTCTGGCAGAGCACTTCGCCCG  
CGAGCTGATGGGGCTGTTTTCGCACCCCGTTCGACATCGGGCGATCACAAGCTGCACTGCAGCGCCTCGGTG  
GGGATCAGCCTCTTCTCCGGCAACGAGACGGATCATCTGGTCTGATGCAACAGGCGGACACCGCAACCC  
ACATGGCCAAGCGCGCCGGTCAGGGCCACTACGTCTTCTTTACCGAGGCGATGGCCAGCATGAGAAGAA  
CCGGCTGACCCTTACCAATGAGCTGCGCGATGCCCTGCGTCATCACGAGCTGCAACTCCACTATCAACCG  
CAATAACGGGTCGACAATGGCTCGCTGTCGGGTATCGAGGCGCTGCTGCGCTGGCAGCGCAGCGACGGCA  
CCATGGTGGCGCCCGGGAGTTTATCCCCATCGCCGAAGAGACCAGCCTGATCCTCGAAAATCGGCTACTG  
GGTGAATGAAGACCGCCTGTGCCAATACAGCTTCTGGCTCAACCATGGCCTGCAGATCCCCCATCTGTGCG  
GTCAACGTGAGCGCTCGCCAGTTCCACACTCAGGGCTTCGTACAACAGGTGGAGTACATCTTGCGCGACA  
CCGGTGTGCCCCCTTCCCGCCTGCTGCTGGAGGTGACCGAATCGGTAGTCTTGGAGAATCGGCAGGAGAG  
TATTGCCAGAATGCGCCAGCTCAAGGAGCTCGGCATCCTCATCTCCATCGATGACTTCGGCACC GGCTAC  
TCGTGCTGGCCTATCTGCGGGATCTGCCCGCGACGAGGTGAAACTGGACAGAAGCTTCATTCAGACCC  
TGGTACACAGCGAACAGGACAGAGCCATCGTCAAGGCGATACTCGATCTGGCCAGGTCTTCCGTTTTAC  
CGTACCGCCGAAGGGGTGGAAGAGGAGGCGCAGCTGGCCATCCTCAAAGCGCTGGGATGCCAGCATTAT  
CAAGGGTTTTCTCACCAGTCGGCCGCTCACCGTCAAGGGGCTGGAGCAGCTGCTTGGCAGCCGGGCGCCGG  
ACTAAAGGTGTAGGATCAATAGGGGTTTTATGTAATAAAAATAACGGCCTGCTCGAATCGTTGGAGTTGTTT  
ATGTCTGTCAATTAATCGGATCCCTGCCGTTGAAATCAGCCAGCCAGCCGGAGCTCACGGCACCGTTGGCC  
GGATCCATTCCGTCGAAACCTGCGGCACTGTGATGGCCCGGGAATACGCTTTATCGTATTTCATGCAAGG  
CTGCCTGATGCGCTGCAAGTACTGCCACAACCGCGATACCTGGGATACCGAAGGTGGCCGCGAAGTGACC  
GTACCGGAGTTGATGAGTGACATCACCAGCTATCGCCACTTCATGAATGCCTCCGGCGGTGGTGTGACAG  
CGTCCGGCGGTGAAGCCATGCTGCAACCCGCTTTCAATACCGAACTCTTTACCGCCTGCAAAGAGAAAAGG  
GATCCACACCTGTCTCGACACCAACGGCTTCGTCCGTATCTCGACGAACAGGTGGACAAGCTGCTCGAC  
CAGACCAGTATGGTACTGCTCGACATCAAACAGATCAATGACGAGAAAACATTTCCGCTGACCCACGTCA  
GCAACAGATACACCTTGGAGTTTTGCCCGTACTCTGGCAGCCAAAGGCAAGACCATGTGGATCCGCTACGT  
GGTGGTACCAGCTGGAGCGATGACGACGAGAGCCCGCAAGGGCTGGGTCAAGTTTATCGCCAGCTGGGGC  
GAGAGCGTGGAGAAGGTGGAGCTGCTCCCTACCATGAGCTCGGCAAAACACAAGTGGGATGTGCTGGGGC  
ACCCGTACGAGCTGAGCGGGATCAAGCCCCCAGCAAGGAGACCATGGAGCGGGTCAAGGGCATCCTCGG  
CAAGTACCACAACAACGTCAAATATTGATGGTAAAAAGCAGGCTGACTCGTCAGCCTGCTCTGCTATGGGG  
CGGTCCGGGAAGGCCCGCCCGGACTCTACTGCATAAATGGACGACAAGATGAGTGAAGGACAACCTCGCCGCC  
CTCCTGATCTGGCTGGTACTGCTGGCCTTACGCTGCGCCGCTCCCTGTGGCAGACCCCTCCGTGACAACC  
CCCTCTATCAGCACCTGTTGCTGGGTAGTGCCATCGCGCTGGTGCCGCTCTGGTATCTAAGGGCCGGTCT  
GCATGAGGGGCTGGAGGTCCATTTTTCTCGGGCTCACCTCCCTCACCTGCTGCTTGGCTGGCGGCTGGCA  
CTGCTCGCCCCCTTGCTGACCCTGCTGGTGTCTCGGTTACTTTGGTGTACCAATCTGGCCGATTTTTGGCT  
GGCAAGCGCTGGTGGGCATCGCCCTGCCGGTAGCCACCAGCTGGGTGCTGTTTCTGGCCAGCTGGGCCTG  
GCTGCCGCGCCACCTCTTTGTCTATATCTTCGTGGCCGCTTTCTCGGCGGGCGCCATCACCATCTCGGT  
AAGGTGGCCGCCAGTGCCTTGTGATGGGGCTGAGTCACAGCTACCCCTGGCACACCATCACGGCGGATT  
ACCTCTCCATCTGGCCACTGCTGCTATTCCCCGAAGCCCTGCTCAACGGCATGGCGATGACGGTGTGCGC  
CATCTACCGCCCTCACTGGGTCAATACCTTCTTCGACCGTACCTATCTGGGCAAGTAACGCTCTCTTTCC  
TGATCTGCGCCATAAAAAAGGAGAGGCCATCGCCTCTCCTTTTGGTATTCAACATGTTGCCAAATCCCG  
GCTTAGTGCAGCTTCAGGGTCGGGCGCAGTACCCGGTTGATGCGACCCACCAGCATGATGAGCCGGTCT  
TGACCTAGCCGTGCAGGGCGATCTGGTGCATCCGGTAGAGAGAGATGTAACCAGACGGGCGATGTAACC  
TTCCACCATCATGGAGCCGCGCATCAGGTTGCCATCAGGCTGCCACGCTGGACAAGCGGCTGAGGGAG  
ACCAGCGAACCGTGGTCTGGTAGAGGTAGGGCTTCATCTCGCCCGCTTCATCTTGGCCAGAATGTTCT  
TGAACGCTGGCTGGCCATCTGGTGGGCAGACTGGGCGCGCGGCGGCACGAACTTGCCATCCGGCTGCGG  
GCAGGCGGCGCAGTACCAGATAACGAAGATGTTCTCATCACGGGTAGTCTGCAGGGTCTCTTTACCACC  
AGCTGGTTGATGCGGTTGGTCTCAAGGCCCGCGATATCCTTCATGAAGTCAGGTGCCCTTGATACCGGCCG  
CCCACACCATCAGGTCAGCTTCAATCAGCTCGCCATCCTTGGTGTGCAGACCTTCGGCAGTCGCTTCGGT  
GATCATGGTGGCGGTACGCACGTCCACACCCAGCTTGACCAACTCCTGATGGGCGGCGCCGCTGATGCGC  
TCCGGCAGAGCCGGCAGAATGCGCGGGCCCGCTTCCACCAGGGTCACCTTCAGGCTGTCCGTGGTGGT  
TCTTGAAGCCGTAGGCGTAGAGCTGCTCGACCGCGTTGTAGAGCTCGGCAGAGAGCTCGACGCCGGTGGC  
GCCGCCGCGACGATGGCAATCTTACCTTGTGCCCCGCTTATATTCGGTGGCGAACTGCAGGAAGCGG  
TTCATCATGCTGTTGTGGAAGCGATGCGCCTGGGAGGGGCTATCGAGGAAAATACAGTTATCCTTGATGC  
CCTTGGTGTGGAAGTCGTTGGAGACAGAACCAGTGGCCATCACAGATAGTCGTAGGGCAGCTCGCGCTC  
GTTGACCACGATGTGCGCCATTGTGCTGCTGGATCGGGGCAAGCACGATGCGTTTTATCGTCCAGCTTGTG  
TCGGTCAGGGTGGCGAGCTGGAAGTCGAAACCGTGGTCTTGGCGTGAGACTGGTAGCTCAGGGCATCGA  
TGCCCGCTCCATGGAGCCGGTGGCCACTTCGTGACAGGGGTTTCCACAGGTGGGTGCGGTTGCGATC  
GACCAGAGTATCTTGGCCTTGTCTTCTTCCAAAGCTTGCAGCCAGACTGGTGGCCAGCTCCAGGCCA



CCGGCGCCGCGCCTACAACGACAATATTCATCATGATGATTTTCTCGGTTCTCAAACGAAAGGGAG  
CCATTGGCTCCCTAAAACGAAATCGGTGCGAGTGGATCAGGCTTCTTTGAAGCCTTCATCCGCTGC  
AGATGATGCGAGATATTTTTGAAGCTTATGAGTCTCGCGCTCATCCACACGATGTCGTAATAGTTCTTCA  
ATTCACGTTTCAAGTGTCCCGATTATCGCGCACTTCATCCTGAACGGAAAGGATACACAGGCAGTTTCTTGA  
ATTTTTTCTTACGAAATTCAGTTACACACTTGGTACCGATATCGTCATATTTCTTCCGGCCGGTTCGATCTTG  
CCCTGCATGTTTCTTCCGGATGGAGGTTGGGGTTGAAGATCACCTGGCGAATGCCGCACAGAAAGCCGA  
TCCGCTCGCTCCAGTAGCCACCAAGACCCACGCCGAGATCAGCGGTTTGGGATCGGTACTCATATCGAG  
CTGTTTTTTTCACTTCTTGGAGCAGATGGCTCATATCATGACGGGGTGAACCGTGTGTAGTGCACGAAA  
CGCACATCATCAATAAACTGCAACTGCAGCACTTCTCGTGATTGCCTGGGCTGGTGGCATCAAAGC  
CATGCAGATAGATGATCATGGATAAGACCTCAGGATCTGTGTGCGTTTTATCGAAACTACCCAGCGGGC  
GCCCGTGCAGCACCAAAACATCCAACCTTCTTCTTGGATCAGCCCCCGCCCCGATTACGCCCAGC  
AGCCCCGAGCGCAGTACATGCTGAGGGGCGCATTGCGAGCAACGTTATGGTGCCCGGCTATCAAAGTG  
AGATCGCCAGACCAATAATGATAAAACCCCTTACCAATCTGAGATGCCCTCACCTCTTCCCCTGCCAGCA  
GCCGGACACTTATCTGGCCGGTATGTGACTCATCCCCGAAAAACAAGGCGTTATCGCCAAACGTTTTTCTC  
TCGTGAGCGGGTGTGTCATGTTTTGTGCACTGACCCGTGCTGCACCGGATCCCTCTCACTACTGCCGAG  
GGATCTGGCACCTCTGTCAATACAGAGATCAATGACCGGGAAAAGCTGCGGCTTTCACATCTTGCCTGT  
AGCAGTTGCGCGGGCTTCAAGGAGTGTCTGTTTATGAGCGAGACCAATCCCCCTCCCCCGACCGGGT  
GCGCGCAAGCGCCCGGTGGATGAAGTGGAGCGCATGCTCCCATGGGCCAACTCTTTACCCTGGGCTGC  
AACATGTGCTGGTGTGTACGCCGGCGCCGTGGCGGTGCCGTGGTATTGGCGGCAGTCTGGGGCTGCC  
CAAGGAGCAGATCTCTACCTTATCAGTTCCGATCTCTTCTGCTGCGGCATCGTCACCTGTGCAATGT  
GTCGGGATTGGCCGCTTTGCCGGGATCCGGCTGCCGGTTCATCATGTCGGTACCCTTGGCCCGCTGATGC  
CGATGCTGGCCATCGGAGCAACCCGGATCTGGGGCTGACGGGCATCTTCGGCGCCACCATCGCAGCCGG  
TATCATCTCGACCCTGCTGGTGCCGTGATAGGTAGGTTGATGCCGCTCTTCCCCACCGTAGTGACCGGG  
GTGGTTATCACCTCCATCGGGATCAGCATTATGCAGGTGGGGATCGACTGGATGGCGGGGGCAAGGGCA  
ATCCGGAATATGGCAGCCTGCGCTATATCGGCACCAGCTTTCTGGTGCTCGTCTTTATCCTGCTGGTGAC  
CCGCTTACCAAGGGCTTTTTTTCAGCAATATCTCGGTGCTGCTCGGGATCATCTTCGGTTTTCTGGTGGCC  
ATCGCCATGGGCGAAGTGAAGCTCGATGGCCTCGGCGAGGCAGCCTGGTTTTGCCCCATAGTGCCCTTCG  
CCTTCCGGCTGGCTACCTTTCGATCCCATCTCCATCGCCACCTGACGGTGTATCATGCTCATCAGCTTTAT  
CGAGTCGATGGGGATTTTTCTGGCCCTTGGCGACATCGTCCGGCCATCCGGCCAGGCGGTTGATATCGTA  
CGCGGGCTGCGGGTGGATGGCATCGGCACCATTATTGGTGGGATATTCAACAGCTTCCCCCACACCTCCT  
TCTCCCAGAATATCGGTCTGGTGAAGCTGACCGGGGTATCGAGTCGCTGGGTCTGCGTGTATGTCGGGGGG  
GATCCTGCTAGCCTTTGGCCTCATCCCCAAGATGTGCGGTGCTGGTGCCTCCATCCCGCCCTTCGTACTG  
GGGGGCGCCGGCATCGTGTATGTTCCGGCATGGTGTGGCAACCGGGATCCGCATCCTGGCGCGCACCGATT  
ACAACAGCAACCGCCACAACCTCTATATCGTCGCATCAGTCTCGGAATTGGCATGATCCCGACGGTCTC  
CGGGAATTTTTTCCAACAGCTTCCGGCGCAGCTACAACCGCTTTTTTCATAGCGGTATCCTGCTGGCCACC  
ATCAGTTCCGGTGTGCTCAACCTCTTCTTCAACGGCTATCAACCTGACCTGACTCACCAGACCCGTCCTC  
TGTTTCGTTGGTCCCATCAAACCGCAACAAAAGCAGGCATAACAACTGGCCCCGACAGCGAGACTGTC  
CGGGGGCTGTTGTTTATATCACCGCTGACCAATCAGGCAGGCAACTGCGCGAAGCGTTCTATCGCCTG  
CGCTACTTGTGCCAGACTCCCCCTGCCAGAAGGCGGCCTCACGGATATCCTGCCCCAAATGCTTGGCTACC  
AGATCTTCCGGCGCTCATCCGGCCGGTATCGCGCAACAAGGCACGATACGCCTCGGGCCAGCCCTCTTCCC  
CCGCGCCTTGGCGCTCATCAACTGCTGATAGACCCCGAGGCTGAACAGATAACCGAACAGATAGGGGTA  
GTTGTAAAAGCCAAACCCGGCGATGGAGAAGTGCGCCTTGGCCGCCAGAACATGGGGTGATAGCGGGTC  
AGACTCCCCTCATACCAACGCCCCATGCCTCGTCAGTCAGCGCCTTGAAGCCGCTGCGCGCACATAAC  
CCTGCGCCCGCTCTGCCACCAGCGCCCGCTCGAAATCGAAGCGGGCCGGGATATTGACCAGGAAGGTGGC  
TGCGCCATCGGCCCTCCGCCAGGCGATGGCCAGCTGCTCTTCCGGGCTTTGCGCCTGCTCGAACAGGGCG  
CTGCGCACCAAGGTTTTCAGCGAAGATGGAGGCGGTCTCCGCCAGCTCATGGGGTAGTGCCTGCTGCAACAGGTC  
TCGGCAGATCGCGAATGACCCAGTTGTGCCAGGCGTGGCCAGCTCATGGGCCAGAGTGTATGACGTTATC  
CATGGTGCAGCATAGGTGACGAAGACCCGCGGTTTCGACCGGTTTCGGCAAACCTTGGTGCAGTAGGCGCCG  
GTGCGGCGATTTGGCGTGGGCGCCGCATCAATCCACCCCTTCTCGGCCATCATGCGGGCAAATGCCCCCA  
TCTCGGGATCGAATCGGCTAAAGGCATCGGCAATCAACTCGATCGCCTCATCAAAGGAATGTCGCGGCT  
GCTGGAAGCTGGCGGCGGCGCAAAGAGATCCTCCGGCCCCAGATCGTCGAGACCAAGGCGCTCGGCCATC  
AGCCCCAGGGCGCGCTGACCCAACCCACGGGCTCGCCAGGTTTCGCTCATCAGAGCATCGAGGGTGGCGC  
GTTTCGATGTGACTCTGATGGCAGGAGAGATCCAGCGCATCGAGTACACGGGTTTTGCGCGCTGACGGGC  
CAGCTCCAGCCGCCAGCGTTAAGGGCATTGAGGATAGCGGCAACCGTCTCCTGCTCCCCTTCCCAACCG  
GCGCTGATGGCATCAAAGGCTTCTAAACGCAGCGCACGTATCGGGCTGGAGAGCAGATTGCTTGCCTCGG  
CCAGCCCCATCTCGCGCCATCAATGGTTAACCAGGATCTTGGCCACCAGATCGTTATAGAGGTTGCCCCCA  
GGCGTGCAGACCATCGGTGCCAGACCAATCACAGCTGCTCCGCCGCCACCGGCAAGCGCTGATCCTGC  
AAGCGACGCTCGTGGCGCAGGCGGTACGCCTTCTCACCGAGCAGCGGATCCACCATCAGCGCGGCGAATT  
CCTCTTCCGGCAACGCCAGCATCAGATCTTCCACCGGCGCCAGGGTCTTGAACAGATCGGCATTAAGGGC  
GCGAGCACGGGACGCCAGCTGTTTGGCCTGCGGATCCCGCGCATCTGACTGCCACGGCAGGCGGCCAGA  
ATGGCGACGTTCCAGCCGACATGGCGAATATCGCGGGCGCGCAACCGCACTTCCCGCAAGAAATCCAGCA

GCCTGCGTCATCGCCGCGCACCCCGTCCAGACCTGCCATATAGCTGGCCAGCTCTTCCAGCGCGTGGCG  
GGCAGCACGCATGTCCGCTTCCAGCTCCGGGCTGTCGAGGCCCGGTAGATATGGTCGTTATTCACCTGT  
TGTTGATACATAGCTTCTCGCAAAGGCCCTTTATCGGGAGGCGCAGCAGACCTGCGGGCAGCAAGTCAGAG  
AGCGAGCAACCCGAAGGCCAAAAAATGAAGAGAGGAAAAAGAGAACATAGCCCGCAAGCTCGCTTATCCC  
TTGGCCGGGGCAAGACGGCTCACCAGCGTCATCACGGCAACCAGCAGCAGACCCGCCACCACACCGGCCA  
CGGCGTTGAGCAGCGTCGGCGTCACCGCCGCCAGTACGGCCCCCTACTGTTGGCAGGGTGGCGACAACAGC  
GGCTGCGCCTTCAATCAGGTGATGGGCAAAAGGCCAGCCATGCACCAGAAATGCCACCACCACCATAAAC  
ATGGCAATGGTGCCGACCAGTGCCAGCAGGTGCATCAGACGAGGAGCCGTACCAGCAGTCCCTGCCCCA  
CCGCGCGGGCGCAGGGCGCTGCCATCGGTTTTTTCAGCAGATGCAGACCGATGTCATCGAGCTTGACGAT  
CAGCCCCACCAACCCGTAGACCCCGATGGTCATCAGCAGGGCGATGCCCGCCACTACCAGAGCTGCAGG  
GCGATGCTTGGCTCCCTTACCTTCTGCTGCTCAAACGCCACCAGATCATCGGGAATAGGAGCAGTGTGTGCCTC  
ACCCTCACTCGCCTCATGGGGCAGGAACCTGTGGGCCAGCTTCTCGGCCCTCAAAGCAGAGGTAGGCG  
CCTCCCAGCATCAAGAGTGGCGTGACAAGCCAGGGCACCAGGGCACTGATGGCGATGGCGGGCGGCCACCA  
GAATCAGCTTGTGCGAAATGACCCCTTGGCCACCGCCACACCACCAGGCGAGCTCCCGCTCGGCACGCAC  
TCCGGAACCTGCTCCGCGTTGAGGGCCAGATCATCCCCAACACCCCGGCAGTCTTCTTCGCGGCCATC  
TTGGTCATCAGTGCCACGTCATCAAGCAGCTGGCGATATCATCGAGCAGGGCCAACAACTGGTTCCAG  
CCATATCAAAGATCCCTTATATCAGTGAGAAACGCTTCCCGAAAAATGTCTCACGCTTGTTCACCACGA  
CCTTGGTCATCAGCGCCACGTCATCAAGCAGCTGGCGATATCATCGAGCAGGGCCAACAACTGGTTCC  
GGCCATATCAAAGATCCCTTATATCAGTGAGAAACGCTTCCCGAAAAATGTCTCGCGCTTGTTCACCAC  
GACCTTGGTCATCAGCGCCACGTCATCAAGCAGCTGGCGATATCATCGAGCAGGGCCAACAACTGGTT  
CCGGCCATATCAAAGATCCCTTATATCAGTGAGAAACGCTTACCCGAAAAATGTCTCGCGCTTGTTCACC  
ACGACCGTGGTGATCAGCGCCACGTCATCAAGCAGCTGGCGATATCATCAAGCAGGGCCAACACACTGG  
TTCCTGCCATATCAAACATCCCTTATATCAGTGAGAAACGCTTACCCGAAAAATGTCTCGCGCTTGTTCAC  
CCACGACCTTGGTCATCAGCGCCACGTCATCAAGCAGCTGGCGATATCATCGAGCAGGGCCAACAACT  
GGTTCGGCCATATCAAAGATCCCTTATATCAATGAGAACAACCCCGGGAGGGTGGCGTACGTCCCGATA  
ACCACCAGGGTCAACAGGACCACCTCATGGCGATCGCAGGCCATCATCGGCCAGCCAAGAATTCGGCGC  
TCACCATCGGGGGTACGCTTTTCGGGCAAAAAGATGGCAGAGTGAACGAGAAGCCGCCCTTTCGGCAG  
CACCCCTGAGCCATTTGTTTCTGCTTCCCTTCCCTGAATCAAGGAGTTCATGCAACCTGCAACCTGGCAACC  
TCTGCTCGATCTCTGGTTTGGCGACGAAGCCGATGACGTCCTGCGGGCCACACGGCAAGCCCCCTCTGG  
TGGGGGAAAAGCAGCGAAACGGATGCCCTGCTGGCCAAGCAATTTGGCGCGCAAGCAGAGGCGGCCGCA  
ACGGGGAGCTGGCCGACTGGGCCGATCTACACCACGGCAGGCTGGCGCTGATCCTGCTGCTCGACCAGCT  
GCCCCGCAATATCCATCGCGGCACGCTGCGGCCCTTTGCCAGGATCCGCTGGCAAGGGATCTCTGCCTG  
AAAGGGCTATCCATCGGGGACAGACAAATCCCTCTCGCCACTGGAGCGGGTCTTCTTCTATCTGCCGCTGG  
AGCATGCCGAATCCCGGAACAACAGGCCAGAAGTGTGGCGCTGTTGAGGCACTCGCTGCCGAGCAGGC  
TGGCACACCGGTGCAGGCGACCTTTGCCGGATTTGCCGACTTTGCCGACTTTGCCGCTGCTCATCAGGTG  
ATCATCGAACGCTTTGGCCGCTTCCCCACCGCAACGACATACTCGGTGCGACCAGCACACCGGAAGAGG  
CGGTATTTTTGCGAGCAACCGGGCTCAGGCTTCTAAGCAAGCCATCCGCAATCCCGCCAGCTGGCGGGGA  
TTGCGGATGGATAACAACCTCTCGGCGTTACTGAATACGATAGCGGGATATCTGCTGGTGGATGCTCTCGG  
TGGTGACATTGAGCTCCTCGGCGGGCGGTGAGGTCTCCTCCGCTGTGCTGCTGGTTTGTGTCACGACCTG  
AGCAATCTGCTCTACCTGATGAGCGATCGACTCGGCGGCCGAACTCTGCTCGCGGATGGCATTAGTGATC  
TCGCCCACCTGATCCATCACCCGGTGCAGCAGTGCAGGATCTCGGCAATAATGGCGCCACTCTCGGTG  
CCATGGTGACCCCTGACTCACCTTCTCCTCCACCAGATGCATGCGGGAGACCGTATTGTTGACTCCTG  
CTGGATCGCCTTACCGTGGCGGAGATCTCCTGGGTGATTTGCGCCGTCCGCTCTGCCAGTTTGGCCACC  
TCATCCGACCACCGCAAAGCCACGGCCGACTCCCCGGCCCTCGCCGCTTCAATGGCCGCGTTCAAGG  
CCAGCAAGTTGGTCTGCCCGCGACATCAGGATCAGTTGACCACACCGCCAATGCGCGAAATGCCCTC  
ACCCAGCGCAATGACCTCGGCCGAGGCTGCCGAATGGAGTCGGCGATCTCGTTGATGGCATGAACGGTG  
CGCTCGATGGTCCGGCCCCCTTCCGGTCCGAGTTGCCCCGACTCGTTGGTGATGCGGGCTCGTCTCCTGAG  
TACGCTGGGAGATATCGGTGATGCTGACCGTCATCTTCCACACCAGGCGGGGATCAGACTGGTGGCATC  
ATTGGCCTGACTGGCCGAGCTGGCCAGGTGTTGCGCTGCTGAGAGAGGGATTCGGCAGTGTCTTGTGATC  
TGCAAGCTGCCTACGGAATAATCGGTAATGTCTGTTGACGCGTATCGAGCAGCCGGTTGACCGCATTGA  
GGGTGAGACCAATCTCATCTGCTGTTTACATCTGCTCTCAGGGTAAAGTTGAGGTGCGGCTGGATCCG  
GGTCAGGATATCCATGGCAGTGCAGAGGGGATTTGCCACCTGATTTGAACAACCAGACAAACAACCCCAAC  
GTCAGCACTGTGGTACCACCGGCGATAAACAACAGGGTTTGCAGGCTGTTGTGCTAGTTCTCCTGACCC  
GCTTCTTGAGCGCCAGTCCCAAATCCATATTGAAGTTGACGTGAAGCTCGATTGCCCTTGGCAAACCTGCTG  
GAACAATCCGATGCTCTCCCGACAGCATGTCTTGGCTTCATCGTTCTGTTTTGGCGGGAGAGCTGC  
AGAACCTTGTCTATCTCCTGATAATATTGCGCGACAATACGTTGATCATCGTCCGGTCCAGGCGCCGATCTT  
CATCATTGGAGAGCATCTCAGCTTTGTATTTGTGTCGAGCAGTGAAGTGTCTGTCCCTGTATCTCGGTGAT  
ACCCGTTTTCAATCTGCTGCATCCTGCTTGTGAGTCGGTATTGAGCAGATGTGTCTGCACCAGCGAGTGCAAT  
TCATAGAAATCAGCCTGCACTTCTTAATCAGCGAAATACTGGGCACCATTTGTCCGTACATAGCCTA  
AATCCCGGTTGGCCGAATCGAGGCGGTTGATACTGAACCAGCTGAGAAAAATGAGCGCAAGGATAACCAG

CAGGGCTATCAGTTGCAGTCGGCGAGCAATATTCATAACCGTACACTCCAGATGGAAACTATCTAGCAGT  
GTAGACGAGCCATAAACAACAACGGCCCCGATTGGCGGGCCGTTGTTGTTTATTTTTTCATGGCGTTGTGA  
TCAGGCTTTGGCTGGCTCACTCTCGCCCAGCGCGACGGTTTCACCCAGACTGTCTTCGGTCTTGGCGACC  
ACGCTGGCGGGCGATGGCGTTGCCAGCACGTTGGTGGCTGAGCGGCCCATGTCGAGGAAGTGGTGCATCC  
CCAGCAGCAGCAGGATGCCCCGCTTCCGGAATATGGAAGTGGTTCAGGGTAGCGGCAATCACCACCAGAGA  
AGCGCGCGGCACCCCGGCCATCCCCCTGGAGGTGACCATCAACAGCAGCAGCATGGTGATCTGCTGGGCC  
ATGGAGAGCTCGATAACCATACGCTGGGCGATGAACATCACCCGGAAGGTGCAGTACATCATGGAGCCGT  
CGAGGTTGAAGGAGTACCCCATCGGCAGCACGAAGCTGGCGATGCGCTTGTACAAACCGAACTTCTCCAG  
ACGATCCAGGGTCTTCGGATAGGCCGCTTCGGAGCTGGCGGTGAGAAAGGCGAGCAGGATGGGTTCGCGG  
ATCATCACCCAGCAGCTGTGATGACACGGCCACGCAGGAAGACGCTGCCATGGCGATCAGCAGCAGCCAGA  
GGCAGGCCAGCGGATATAGAACTGGGCCATAAAAATGCCGTAGGTAACCAGAATACCCAGCCCCCTTTT  
GGCTACCATGGCGGGCGATGGCGCCAAACACCCGGAACGGCGCAAAGTTCATCACATAACCAGTCACTTTC  
AGCATGATCTCGGCAGCGCTGGCCATCAGCACCCTACCGGCTTGGCCAGATCGCCGAGTGGCGGGCGAG  
CCAGACCGAAGAAGAGGGAGAAGACCACGATCTGCAGGATCTCGTTGGTGGCCATCGCCTCTACGACGCT  
CTTGGGAATGGCGTGGGTACGAAATCTTTCAGGGTAATGGCACCAGCAGCAATGCCCGAGCTGGCGGTG  
TCATTGGGCAGGGAGAGCGAAAGCCCCACACCCGGCTGCATCAGGGTCACCATCACCAGACCCAGGCTCA  
GGGACATCAGGGAGGCCAGCATGAACCAGCCGAGGGTCTTGGCACCGATACGACCCACGGTGGCGGTGTC  
GCCATCTTGGCGATAACCACCACAGGGTGGTGAAGACCAGGGGAGCGATGATCATCTTGATCAGTCCG  
AGGAAGATATCGGTCAGGATCGTGATGTTATTGGCGAAATCCGCAGCTGATCTGCGGCAAACATCCGAT  
AGCCCTGGCCGGTGAGGATGCCAAACATCATGGAGATGAGGATGGCGACCGTCAGTTTATTCATTTTCAT  
GGGGGAGTCCCGGTTTTGATTGGTGAAGCCGTAAACAGTGGCGTGGGAGCCACTACAGTCCGTTTTTGT  
GATCCGAGCCGTTGATTCTGGCGGCTGGTATGCTGGGAGAAATGCCAAAAGCAGGGGGTAAATCTAGAG  
GCTTTATCCAGAATTTTATCCTGCCATTAGGTGTATGTGATATGAATCTTGCAAACCACCAATATTAATC  
ACTGTTTATTTTGATTTCCGGCGAGATGGTATGCTGCACCTGCATCTGGGCCATAAAGAGATCCGGTTCAT  
CCTCGTCAAAGCCAAAGATCGGCCGATGGGGGCACCCCTGACGGCATCGCGGTTAATGGTCAGCTCATC  
GACCTTGAGCCAGGAGTAACCCCTGCCAGTGCCAGCGCCCTGCCCGCTTGGAGCATAATTTGCGGGCG  
GTCTCCCTGTCCACCAGATCGTTGCCGACAAACTCCAGCTGCCACTTGTCCGGGCCAAGCCGAGTCTGGG  
AGAAACCGGTCTGGCCGTTCCAGAATGACTTTTACTCTCGTAAGGGGTGGCGCAGCCACCAGCAGCAG  
GGTGAGCATCAGCAGACAACAGGGTTTAGATACGGATCGAGACACGAGAGGCCCTCGCCAGCAAATGAGC  
AACAGAGTTGTTACTACACCATAAAGCGCGGTGGCTGCACAATCTGCTCACGCCAGCAGCGACCAGCGTG  
CATCACCCTGGCTTACGCCTGTGCGGCAAATCGCAGGCAAAGAAAAGGCCCTTGTCTGTTTGACAAGGC  
CTTTACCGGGGAATTTGGTGGTGTGAGAGGATTCGAACCTCCGACCCCTTACACCCCATGCAGATGCGC  
TACCTGGCTGCGCTACACACCGACGGAGTCAGCTCGGCTGACGGGGCAGAGTTTATGGAGATGACCCCTG  
CCCTGTCAACAGGGAAACGCCGCAATTCCTCGGCCACGGTGGCTTGCCTGCTTTGCGAACAATCAGCG  
GTTAAAGGTCAGCCGCTTGGCCAGGATCTGGTCAGTCACCTGCCCGTTTTGCCAGGCGATCTGGCCATTC  
ACCAACGTATCTCCACCGTGTGTGAAAGCGGTAGCCGTTGAAGGGCGACCAGCCACAGTGGTAGAGGA  
TGTTGTATCGTTGACCACATAGGGCTTGGCCAGATCCAGCAGCACCAAATCGGCGAAATACCCCTCGCG  
GATATAACCGCGATCCTGCACCTGGAAGCGCTCGGCCACCGCATGGGAGGTCCTTCTTGACGATAGTCTCC  
AGGGTAAACACGCCGTTGTGGTAGAGCTCCAGCAGCGCCTGCAAAGAGTGCTGCACCAGCGGCACACCGG  
ACGGCGCCTTGAAGTAGCTGTTCTGCTTCTTCCCAGGTGTGGGGAGCGTGGTCCGGTGGCGATGATATC  
GAGCACGTCGTTACGTACCGCATCCAGCAGTGCTGCTGGTGGCGGCACTCTTCACCCGAGGGTTGCAC  
TTGATCAGGCTGCCCTGGGTCTCGTAATCGGCATCATTTGAAGAAGAGGTGGTGCACACACACCTCGGCTG  
TGATGTTCTTGTCTTACGCTCGCTCAGGTCATGGCTGGCGGTAAAGAGCGACAGCTCCTTGGCCGAGGT  
CAGATGCAGCACGTCAGCTTGGCACCCTATTTTTTCGCCAGCGCCACCGCCATGCTGGAGGATTTGTAG  
CACGCTCGTCTGCGAATGCGGCCGCTGCTCGCCATCGGCACATTTCTGCCCCACTTGGCACGCGCCG  
CCTCTTCCGGCCTTGGCGATGGTGGAGTGTCTTCGAGTGGGTGACGATCATCACCGGGCTTTTCGCGGAA  
GATGGCCGCCAGGGTCTCCTGATTGTCCACCAGCATGTTGCCGGTGGAGGAGCCATAAACACCTTGACC  
CCGCAGGACTGCTTGGGGTCGAGACGCTTGTATCTCTTCAAGGTTGTCTGTTGGTGGCGCCGAGATAGAAGC  
TGTAGTTGGCGACGGAGGAGTTGGCGGCATCTGGTATTTGGCTTCGAGGGCGTGGAGGGTGGTTGTCTG  
GGGATTGACGTTGGGCATTTCCATGAAACTGGTGGTGGCACCAGGCGACGGCGGCGGGGATTTCGCTGGCG  
ATAGTCCCCTTGTGGGTCAATCCCGGCTCCCGAAGTGGACCTGATCATCGATCATTCGGGGGATGAGAT  
GGCGACCTGCGGCATCGATCACCAGCGCATCGGGCGCTCGATATCCGGGGCGATGCGGGCAATCCGTTTC  
CCCCTCGATCAACACATCGGAGGCATAGATACGGCCTTCGTTGACCAAGGTGGCATTTCTTGATAAGCAGT  
TTGTTTCATGGGGGTTCCAGTTCCTTTGCCGATAATCGCGGGTCATAAATAGCGCAAACCTGCCCTTTCTC  
TGTAGCAAGGCCTGACTGATGAAGTTATTTGTAAGAGATTTGACCGTGATCGACTCCAGCTACCTGTGCG  
AACGCCGCGGCATGGTGGGTGAGAGCTGGCTGGTAGATATCGAAATGAGCGGTGAGCTCAACGAAATGAG  
CATGCTGCTGGACTTTGGCCGGGTAAAGAAGCTGATCAAGTCGATCATTTGATGAAGAGGTGGACCACAAG  
CTGCTGGTGGCGACCGAGTGCCACTGATCCACGTTGAGGCTCTGGATGGTGACGAAAGCACAGTGGATC  
TGCTGCGCCCGGGTTCGCTCCATCCATCTGCGCTGCCATCCCAGGGCTTCGCTTTATCCCGGCTCCGCA  
AGTTGATAAAGAGTCAGTGACCCGCTACCTGCTGGCGGTAAGTGGCCAAACGGCTGCCGGGCAATATCAAG  
GATCTCTCCCTGACCCTGCGTCAGGAGGCGATCACCGGCGCTTCTACCCTACAGCCACGGCTGAAAA

AGCACGATGGCAACTGCCAGCGCATCGCCACGGCCACCGCTCTCCATCGAGATCCACGTCGATGGCGA  
GCGCGACCAGGAGCTTGAGCTCAACTGGGCCGAGCGCTGGGGCGATATCTACCTTGGCACCGAGGAGGAC  
AAGGTGGCGCTGACCGAGCTCGCTTTGAGCCCTCGCGCCAATGCCAGCTTGGTGAGCATCACTGCGGCT  
TCAAATATGTGGCGCCCCAGGGGCTGTTCCAGCTGGCCATCCCCAGCGCCGAGGTGGAGATGATCAACAC  
TGACACCACAGTTGAGCTGCTGGCCTGCTATATCGCCCCGGAAGTGAAGAAGATGGTGGGCGACAAGTTC  
GTCAAGATTGTGCCTATGAAGGGGTGCGCAAGGGTGCATTGCCTACGCCTGATCCCCCTTGTGCTGCC  
GTAATTAAGAGAAGGCCCGCATCTGCGGGGCTTGTGTTTCATCTTTCGACCATCAGGCGCTGAGGC  
GGAAGCGCTTGACCAGGCTCTCCTGCTGCTCGGCGAGGGAGTCCAGCTGCTGGCTGGTCTCGGCTACCCG  
CTCGATCCCCCTGATAGTTGAGATCCGAGATATCGGAAATGCGGTTGAGGTTGGTGGCGATATCGGCGCTG  
GTGGCCTGCTGCTCGGCGGAGAGGCGATCTGGCTGCACATGTCGCTGATCAGCACCACAATCCCTGCA  
CCTCCTCCATGGCGTTGTTGGCGTGAGAGCTGATCTACGCAACTGTCCATCTCGCGAGAGCACTCTG  
CATCACGGTCACCGCTTGGCGACCCCTGCTGCAGGTTCTCGATCATGGTCTGGATCTCGCTGGTGGAC  
TGGGCGGTACGGCCCGCAGACTGCGCACCTCATCCGCCACCACCGCAAATCCGCGCCCCCTGCTCGCCGG  
CCCCGCGCCGCTTCGATGGCGGCGTTGAGGGCCAGCAGGTTGGTCTGCTCGGCAATGCCGCGAATGACATC  
GAGGATGTTGCCGATCTGGCTGCTCATGGCACTCACATCACCAATCACCATGCCGGTCTGTTGCAGCTTG  
CCCGCCAGTTGATGAGTGGTGGTATATTGCCCTGCCATCACCTTGCGCCCATCTCGGAGGCCCTTCTCCA  
CATCCTGCACCCGCTCCAGGGTCTGGTTGGCAGCCTGCGCCACCTCGCGCACCGAGGCCCTCCATCTGGGT  
CATGGCGGCGGCGACCGAGGCGGTCTCCTGCCGCTGTTTTTCCAGATCCGCCCGCACCGATTCCGGTGGTG  
TGGCGGTTGCCGTGGGCGGCATCGTTAAGCTGGGCGAGCGCTTGTGAAAGCTGTGCCAGCACCTCCCCA  
TCTGGGCAATCAGCAGGTTGATCTGGCTGCCAGCTGGCCGAATTCGTTCTTACTCTGAAAACCGATGCG  
CTGGGTATGTCGCCCTGGGTCACTTCGGTTCAGCACCCCGCAGCAACTCCCTGAGCGGACGGCGAATGGCC  
TTGCCAGGGTATAAGCCACCAGCATGGCGATCAGGATGGCGACTACGATGCTGGTGGCCTGGGTCAAGG  
TGCTCTGGCTCTGTGTGGCTTTGGCGTGCACAATGCTTTGACTCATCATCTGCTGACTCTGGCCGGTAT  
CCGCTCAAGCCGGTCTGGATCTCGACGATCAGGGCGCTCGCCTGCTTGTCTTCTCCCGCATCTGTTCC  
TGCTGCTTCATCAGCGCCAGATACTGGGAGAGCACGCTTCGCTTGCGGTGGTGTACAGTACAAAGCCGT  
GAACATAGTGGCCCATGTCGTTTTTCGAAGTTTTTCAGCTCCCCCTGCAGATCCTTGATGGTGTGTTGAA  
CCCCCTCGATCTGCATCTTGTGCGCTTGGCGCCCTTCGATGGGTGCCGGAATGGTCTGATTGAGGGCG  
TCCATGGTGGAGATTCATATGGCGGAGAGCTTGGTGTCTCAGGGTCTCGGAGAGCATCTTGATAAAGCTG  
CGTCGATGGTGGACCATGTCAACCCAGACTTCTTGAACCTGGGGCAGACTGACCTGAAACTGCCCCCTT  
GGCCAGATTGACCTTGTGCAGTCGGGTGAGCAGCGCCTCATGTTTCGCCGGGCGAGGTTATCGGTGAGTTC  
AGGTAGCTGTGCACCTGCTGGCTGAGGCTGCTCATCTCCCCTTGCAGTTCGGGGTGGTGGGCCACCTGCT  
GGCGCAAGACGTCAAGGCTCTTGCCACCAGCCTTGGCCCGTTTCAGTTCGGCCACTTCGGCTGGCAG  
CTGTTTGGGGTCTGCTCGGTGAGCACATCCCCAGCCACTTGTGGCACTGAGCAGGGTATCTGGGTG  
TGGCTGCTAGCAATCACAGCGGCATAGACTGCTGGGTAACCTGCTCCAGTGCCTTCCCAGAGTCTCCT  
GACTACGAAATGTGAGCAGTGAACCTGGCCACCATCACGGCCACCAGGATCGCGAAGCCAAGGTAGACTCG  
CTGCAAGATGGAGAGATCCGACATTGTTGTTTATTATTGTCCTGCTGATATGCAAAAGTCCCTTGCC  
TGAGTACCCCGCTCCTTTTGATACCCCTGCAGACCACCTGAACAGGCGCTGCAGATGACGTCCCTCTGGCT  
ATCGGTATTTTTAACAATAACTGAAGGGAATGGGACATCAGCTCTGTCAAATGTGCGGCTTGTGTCACACT  
TGGCGTGTGCTCGCCCCCTTTCCGGGAGCCGCTTGGGGTCTAGTTCATTTTCTGTTTATATAAGGG  
AGTTAGCCATGGCGCAAGAAACCATTTTTAGCAAAAATCATCCGTAAGAGATCCCCGCGGACATCCTTTA  
TCAAGACGATCTGGTCACCGCATTCGGGGATATCCAGCCCAAGGCCAAGACCCATATTTCTGATCATCCCC  
AATGTACTGATCCCCACCGTCAATGACGTGGAAGCCGAACATGAACTGGCCCTTGGCCGGATGTTACCCG  
TGGCCCGCAAACCTGGCCGCGGAGGCTGGCATCGCCGAAGATGGCTACCGCCTCATCATGAACTGCAACCG  
CCACGGCGGGCAGGAGGTCTACCACATCCACATGCATCTGGTGGTGGCCAGCCGCTGGGACCGCTGCTC  
AGCCTGTAATGAATCGCCACGCTCAACCTGCCGAGCGCCCTGTTGCTCTGCGGCGCCCTGCTGTTGCT  
GGGAGGCTGTGCCTCCCGCTGGCAGGATATGTTGCTTCTTACTCCGATCAGATGGTGGCCCTGCGCAAC  
CAACTGCTGTTGGGCCATGCCGCGAGGCGCTGCCCGAGGTGCGCGACTCCACCTTGGGGATGACACCT  
TTGTGCTGGATCGGCTCGAACAGGGGCGCATTGCCTGGCTCGCCGGTCCAGGATGCGGGCAGCAAGCAGGC  
GTTACCGCCCGGACAGTGCCTTCACTGGGAAGACAATCAGGCCGAATACCGGCTGAGTCACGGTCTG  
GATCAGGTGGGAGTCTGCTCACCAACGATCAGTCGATGGCCTATCGTACTCCCGATTACGAACGCACCA  
TGCTGCACCACTATCTGGCCCTCAACTACCTGCAACGGGGTATGCCGATGGTGGCCTGGTGGAGGTACG  
CCGGGCCAATCAGGTGCATGAGCAGGCCCTGAAACGGCGAGCCGATGAGGTGCGCAAGGCCAAGGATGAG  
AGCGAAGAGGCCGAAGCAGAAGGCGAGATGCGCCAGCTGATGTCGCGCGGCGCACCGGATCTCGACCGGT  
TGATCGGCAAGGTCAAAAATGGTTTTTCAGAACGCTACACCTTCTATTTTTCCGCCGTGCTCTATGAGGC  
GGCCGGGGATCTCAACGATGCCTGGGTGACTATCAGCGCGGCTACCAGATAGCACCGGACAACCGCAGC  
CTGCAAGATGCCTTGTGCTGCTGCGCGGCTGCGTGGCTCACCGGACGAGATCCGCGAGACCGAGAAAA  
AGATAGGCCGCAAGCACCGCCGCTTGCAAAAAGATCAAGGCCAACTGGTGGTGTGTTTTGAAGATGGTTT  
GATCCCCGACCGGCGCAACTGTTCTGCGGCTCCCCATCTCCACCTCCCGCGGGGATTTTTGCGACCTTT  
ACCGTGCACATCCCCTATTACGATAATCGGGCCAGCGATACGGGGCCGCTCACGGTACCGCTCGGCAAGC  
GGGTGAGCAGACCGAGGCTGGTGCAGCTGGAAGCGCTGGCAGCCAAAGATCTGCAAGAGCGGCTGCC  
CGGTATGCTGACCCGCCAGGCACTGCGACTGGTGGCCAAGGAGCAGATGCGCCGACCGCCGCCAAAGAG

GGGGGCGATGTGAGCAATATTCTGGTGGGGATCTTCAACACCCTCTCGGAGCGGGCCGATACCCGCAGCT  
GGCTGACGCTGCCAGCTCAGGCATCGAGCTGGCAGGGGATGGGGCCGGCAGGTGACATCAACCTCACCT  
GAGCGCGGGGGCAGCGCAGCGGCAATTGCCGCTCACTATCCACAAGGGACGCACCACCCTGGTCTGGGTA  
CAGCGCCTCGGGCCGGTCTGACCACCCGGGTGATGCCGCTCTGAGCAGATGGCGAAGAGAGATGAGCAA  
GACAATTAACCGGGCAGGCACACACCGCGCCGCACTCACCCCGATTAAGGAGAGCAAGATGAAAGCATA  
GGGTTGGCCCTCGGGCTCGCGCTGCTGCTGACCGGCTGCGCCACCAACACCTCCGGCGTGGCGCTCTATG  
GCCCCGGGGCGGTGCCCCACGCTGGAGCAGCATCAAAAAGTCAACGTCACCCGACCGAGCTGAGCCG  
CCGCCAGCAAAATGGCCTGCTGCAAGTCAATGTGGCCGCCGCCAGCACCAGCGCGGCATAACAAGCTG  
CAATATATCTTCTATTGGTATGATGAGGCCGGTCAGGAGGTGCCCAGCGATGGCCGCGGCTGGACCCCA  
TCAAGCTGCATGGCTATCAGACCCGCCCCCTCTCGGCCCTGGCGCCAGCCCGCGGCGCAGGGTTACCG  
GATTTACGTACGCGAAGTGAATTGAGGAATCCTACTGATGAAAAATGAATCATGCCCTGTGATATTGACCT  
CTGCATTGCTCTTGGGGCGGCTGCTCCAGCACCACCGTCAGCTATGGCGATCCGACCGAAAACCGAAACCGT  
CACCGTCGATTACGGCTCAAGCGACCTGCAGGCCATCGCCGACAAGATGGCGGACTCCATGCTCGCCTCC  
CCCGCCACCAGCGAGATCACCGCTGGCGGTCGTCCGGTGTATGTTTATGGACTCTATCCGCAACAAGACCT  
CCGAGCACATCGATAACCGAAGCCATCACCGACACCATCCGCACCAAGTTGCTGCGGGCCGGCAAATTCGG  
CTTTCGTTGACATGAGCAAGGTGGCCGCCGTCAAGCAGCAGCTCGAATACCAGCAGAGCAGCGGCATGGTA  
GACCCGGCCTCCATGGTACGTCTGGGCAAGCAGACCGGTGCCCGCTACATGGTCTATGGCAACCTCAGCA  
GCATCGTCAAGGACAATGGCAAGGTGAAGGATGTCTACTACCAGATGACCATGAACCTGATGGATCTGCA  
AAACGGCGAACTGCTGTGGGCCGATCAGAAAGAGATCCGCAAACAGGCGAAGAAATCCACCTTTGGCTGG  
TAACCGGCTCCTGGTGACGGGCAACTGTGATCCGCTGCTGGCCAGCCTGCCAGCCCCCTGGCGGGAGGGG  
CAGCTGGAACCACTCGGGTTAGGCCTGACCAACTGCAACTATCGACTGCGCCTCCCTCGGGGCGCAGTT  
ACTTTTTGCGTCAGGGCCACTCCGACCCACTGCGCTTGGGCATCGACCCTCCACCGAGTGGCAGCTTTA  
TCAGGGGGCGATGGCAGAAGGGTTGGCGCTGCCCTGCCACTATGGCGATCCCGCCAGCGGCCTGATGCTG  
CTGGAGTGGTGCGATGAGCCAACTGGGTGCACGCGGCGCCACCAGGCGATCAGCCCCGTCTGCTGG  
CTGAGGTGCTGCGCAAGCTCCATCGCCTGCCGCTGCTGCGGTGGTGTGATGGCGGTCGAGCCACGCGC  
AGGCTATCGCGCCCGACTGGCCCGAATTCCTCCTGGCTGCCCGCCTGGAGCGGAGCTTGTCTGCCAGC  
AGTGAGCCAAATGATTGCTGGCGCCCTTGCCACCATGATCTCAATCCGGCTAACTTGTGGGAAGCAAAC  
CCTGGGCTACGACTGGGAGTATGGCGCGGCGAGGTCAACCCGGCTTTGAGCTCGCCAGCATCCAGCCAC  
CCATGAGTGGCCCGCGAGCGGCGCGCAGCTGGAAGTGCACATATCTGCAGGCGCTGCCCGCCACCAG  
TGGCCCGATTTTCAGAGCGAGGCATTTTTACCCTGGGTGCGACTATATCGGCCGTGCTCTGGGCCCTGTGA  
TGGCAGAGCAACAGCCCTCACTCGACTATGACACCCTGATCGCCATCAACCGGCAACGACTGGAGTAACA  
GATGATAAAACAAGGTGCGCTGGCACAAGCCGAAAACTGGGGTCTGCTGCTGATCGGCCCTGCTGCTGACC  
GGCTGCTCCACCCGGGTGATCTACTACTGGCTCGATAACCGCCATCATCTGGCAGCTGGATGACTACTTTG  
CCCTCTCCTATTTCGAGAAGGATCTGCTCAGCCGCGAAGTGAAGGGGCTGATGGCCTGGCACCGCCAGCA  
CGAGCTGCCGCGCTACGCCAGGGATCTCGATGCACTGGCCAAGGCGGTGGCCAGCCCCATGACGCCGGAG  
CAGATCTCGACCAACCTAGATGCGGTGCAGCAGAGCCTGACCCGCACGCTGGAAAATACTATCCCCCGG  
CGGTGAGGCTGGCGCGCACCCCTGACCGACGAGCAGGTGGCCCGCTTTATGACCGATCGGGTCAAGCGGCA  
ACAGGAGCGGCAAAAGGACTTTGCCACTGAGCCCAAAGAGCAGATGCTGGCGGAGTTTCGCGACAAGATG  
AACAAGCGGCTCGAGTTCTGGATTGGTGAGGTGAAACCGGCACAGGCGCCACTGGTGGCCAGTGGGCCG  
AATGGCAATACGAGCTGATGCCCCCTGGCTCGAGTTTTAGGAGTCTGGACCCAGGAGCTGGACAGGCT  
GATGAAGCAGCGCCAGAGTCCCAGACTTTACCCGCGAGCTGACCAACCTGCTGGCCGAGGGGGATGGGCTG  
ATGGATGGCCGCTTTACCGGCTATAACCGAGCAGTACGCCAGCGTACCGTCAACTGGCTGAGCGCCATGA  
GTCAGTCACTGGATATCTCCAGCGGGCCATCTCTACTCCCTGCTCAAGGGCTACGCCCGGACTTCAA  
GCAGATGAGCGGCAGCTGACGAGCGGCACCGAATGGTGCCATTCGCCCAGCAACCTTGTTCAAACCGGG  
CGCTTATGGTAGTTTGCCTTCTATTTTATCGGGAATTAACCTTTTTCGCGCTTATCGACAAAAGTAAAA  
TGGTGTGGTAACCTCTGGTTATCGCCCTCACCCCTGCTTTGTTTCCATCGCCGAATGGAAGGCCCGCTGCT  
ACCCGCATCTCCCAGAGTGAACAGCAGCAGACTCAGGTGTTCAATCAGCTTAGCGACAGCGATGATGGC  
ATCATCAAGTTTTGTCGGCAGCCATCAGAATCACCTGCTGCGTCTCGAACAATCCCTGCGCAGTGACAACC  
AGCCCAAGAGTGTGGTCTACGAGCTGATCCAGAGCTGGTCGGCCAGGCCATCCTGATGTTGCTGCTCGG  
CTGGCTAATGCTGGCACCCGAGCTCTATCACAAGCAGAGTTTTTCGCGATCGCTTTGGCGCGATCCACCGG  
CGCCATCTACAGCGCAACATCTGCAATACCGCTTACCCAGAGCTATCTGAGCGCCTGACCCCGGAGGG  
GCTGGCACATCCACTGTTTGTCTCATCTCCTCTTCTGACGGATCCGGCGGCTGCCTGATCCGCATCCGAT  
GCATCCATTTTTTTCGCGCTTCCGAGCCTTGTGCTATCGGCCCGGGCACCATTCTCCTGACAGAGGCT  
TGTTTTGCCATGAGAAAGAGCAATCGCACCGTCTCAACCGCATGAGCAAGTGGCAGTACGCACTGCTGCT  
GTTGATGCTGTTGACCTTTACCTTTTACTCCCTGCCACCTTTTTTCGGTGAGCAGCCCTCCCTCGGCCTG  
CACGGACAGCAGCGCCTGACCACCCAGCAACAGATGTTGCTGAGCGACAAGCACCTGACACCGGTCAAGG  
TGATCGAGCAACCTGAGCGGGTCGAGCTGGTCTTTGCCAGTCAGGGCGAGCAGCAGCGAGCCAAGCAGTT  
GCTGGAGCAGCAAGGGGTCGACAGTGTGCCCTGACCCTGGAGTTTCACTCCAACCGCACCCGGCCTGGATC  
ACCCGCCTCGGGCGCGACCCCATCAAGCTGGGGCTCGATCTGCGTGGCGGCTCCAGCTGCTTATCGGGG  
TGGACGTGGACTTTGTCTATCGACAATCAGACCAAGAATCTGGTGGATAACCTGCGCACCCCGCTTCCGTGA  
AGCCAATCTGCGCGGCGCCAGCGTACCGCGCAGCGCACAGGGCGCCGTAGCCGTACCCCTGCCGGAGGTG

CCCCAACAGGAGAGCTGGCTCGCCATCATCAAGGAGAGTGCCGGTACCCGTCCGGATCAGTGAAGCTGA  
CCCCGCTCCGGCAATGATCTGAAACTGGTGTGAGCGAGGCGGAGCGTACCCTGTGGTCAACAACGCCGT  
GACCCAGAACCTGTTCGATCCTGAAAAACGGATCAACGAGCTAGGCATCGTCGAAGCCTCGGTGGTGCCT  
CAGGGGCAGGATGGCATCCGTATCGAACTGCCCGGGGTACATAACCCCAAGCAGGCAGAAAGAGGTGATCG  
GCGCCACCGCCTCGCTGGCCTTCTACGAGGCCAAAGCCGACAGCCACTTCTATATCGCCGATCGCAACGG  
TCAGGCCGTTGGCATGGCGCGCAAGCCGGTGTGACCGGCGAGCACATCGTCGATGCCCGCGCCAACATG  
GGCGAGATGGGGCAACCCAGGTCAATATCGTGTCTGCACACCCTGGGTGGCAGCAAGATGAACCAGTTCA  
GCCGCCAGCATGTGGGCAAGCCGATGGCGACCGTCTTCACCGAGTACAAGACCAACGCTCAGGGCAAAC  
GCGCGCCCAGAGCGAGGTGATCAACGTGCCCACCATCCAGACCGCCCTTGGCAACCAGTTCCGCATCACC  
GGCATTGGCAGTCTGCCGAAGCTCAGGAGCTGGCCATGTGTCTGCGTGGCGGCCCTCACCGCCCTC  
TCAAGATCCTGGAAGAACGCAGTATTGGCCCGACGCTGGGGATGCAGAATATCGAGGCGGGCTTACCCGC  
GCTGGCCTTCGGCATGGCAGGCATGATGCTGTTTCATGATGGCCTGGTACCACAAATTCGGCTGGGTGGC  
ATCACGGCGCTGGTTCGCCAACCTGTTGATGCAGGTTCGGCATGCTTGCAGTGTGCCGGGCGCCGTGTGA  
CCCTGCCGGGGATCGCCGGTCTGGTGTGACGGTGGGCATGGCGGTGGATACCCATGTGTGATCTTCGA  
GCGGATCAGAGACCGTCTGCGAGAAGGGGGCTCACTGGCCAACGCCATCGACTTTGGCTATCGCTCGGCC  
TTCCACACCATTTTTGATGCAACATCACCACCCTCATCTGCGCCGTGGTGTCTACTCCATCGGCTCCG  
GGCCGCTGCAGGGCTTCTCCATCACCCTCATTCTGGGTCTGTCTCCAGCATGATCACCGGGATCTGGGG  
GACGCGCGCCATCATCAACCCCTCTGGGGACGCAGCAGCGAGCGCACGCTGAAGGTGTAACGGGACAGC  
AGTCCCTCTGATGAGCGGCTTTGGCTGCGCCATCGCCATGGATATGGCCGGGCGGCCAAAGCAGAAACA  
CTATTTCCCGCGGTGTGCGGACACGTCGTGATAGCCAACAGTCTGGTGTGGATGGCCAAGGAGAAAAT  
TATGTTGAGAATGATCGTTGCAATGGGGTTGACCCGTGGCGCTATATCGGCCGTGGGGCTTCCATCCTG  
CTGACCGTGGCCAGCGTGCACATCTTGTGGTGAACGGCCTGACCCTGGGGCTCGATTTTACCGGCGGGA  
TCCTGTGGAGTTTTCATATCCAGACCCTGAAAAGAGGCCCATGAGCTCAATGCCATGCTGGTCTCCCGCT  
GGCAGGTGCTGTGGAGCTCAGCTCGGCCGGCATTCCCGGCGAGTGGCTGATCAAGCTGCCCGCCACGAA  
CTTCCCTGGCCCGCGGGCGGATCTCGCCACCATGCTGACCAACAGCTGGGGATGCCGGTCGAGTTGCTGC  
GCACCACCATCGTCGGCCCTCAGGTGGGTGCCAACTGTTCCAGCAGGGTATGCTGGCGGTGCTGGTCCG  
TTCGCTGGCGATGTCGGCCTATCTGGCGTTTCGCTTCGAGTGGCGTCAGGCCATCGGCATCCTGCTCTCG  
GTGGTTTCATGACGCCATCGTGGCGCTGGGGCTGCTGTACTCTTTCAGATCGAATTCGATCTGAACATCA  
TCGGCCGTTTGTATGGCGGTGATCGGCTACTCCCTCAACGACAGCATCGTCATCTCGACAGTTGCGGGGA  
TCTGCTGAGTTTCGCGTACCCAGATGGGGATCCACGAGTGTCCGATGTGGCCATCAAGGCGACCTTCAGT  
CGCACCATGATCACCTCGGGCACCCCTGTTTACCCTGGGCGCTCTGTTGCTGTTTGGCGGTGACGCTC  
TCTACGGCTTCTCCTTACCCTGTTTGGCCGGATCCTGGTGGGCACCGTCTCCTCCATTACCCTCGCCTC  
GACCGTGCAGGAGCTGCTTGGGCTCACCCCTCAGGCCTACCAGAAAGAGCGAGGAGCCACTGGCCAAC  
GCAGCTTGAACCTTATTAATCAGGCCCGGCTCACCGGTCTCAACGAACCGGGCCCTGCCAACCATTTGG  
CAGGGGCTTTTTCCATCCCTCCTCTCGGTCTCTCGCCGCCCTTTTATTGCTCGGCTCGCCTCAATTGAC  
AACTGACCATATTTGAAAGCAATGACGGATCAACCCGTCATTTTTAATAACAAAAAGGTCATTTTATTACG  
TCAGAAACCATAAAATGTGACTGAAAGCACTTCTTTCGAGGGCTCAAAGGAGGCAACATTGTAGTGATTTA  
TCTACAAAGGGATATGAGATGTTGTTACAACCTGCCAATACAGCAAAATCCAGACAGTTGCTGAACGAGA  
CCATGGCTTTGGTACTCGCAGGAGGGCGGGGTAGTCGCCTCAAACAGTTAACCGACAACCGTGCAAAACC  
TGCCGTTTCAATTTCCGGCGGCAAAATCCGCATCATCGATTTTCGTGCTCTCCAACGATCAACTCCGGCATC  
CGTCCGGTTCGGTGTGCTGACCCAGTACAAAATCCACAGCCTGTTGCGCCACCTCCAATCGGGCTGGTCTT  
TCCTGCGCTACCAGATGAACGAGTTTATCGATCTGCTCCCTGCCAGCAGCGGGTGGATGAGGTGAACTG  
GTATCGGGGTACCGCCGATGCGGTCTACCAGAATCTGGATATCATCCGCGATCACGCCCCAAATATGTG  
GTGGTGTGTCGAGGCGATCACATCTACAAGATGGATTACGCCGCCATGCTGCTCGACCACGTCAATATGG  
GCGCCAAGGTGACCGTTGCCTGCATCGAGGTGCCACGCAGTGAAGCAAGCGCCTTCGGGGTAATGGCGGT  
GGATGATGATCGCAAGATCAACGCCTTCGTGCAAAAAGCCCGCAACCCGCCAGCCATGCCAGGCAAGCC  
GACACCGCGCTGGCCTCCATGGGCGTCTATATCTTCGATGCAGAGTATCTCTATCAGTTGTGGAAGAGG  
ACATTGCCAACGAGCAGTCTCACCCAGATTTTCGGCATGGACGTGATCCCCCGGTGGTGAAGAGGGGCAC  
CGCATTCGCTCACCCGTTTGGCATGTCTGTGTCGGCTGCTGTCCGGATCGCCGCCCTACTGGCGCGAT  
GTGGGCACTGTGGACTCCTTCTGGGAGGCCAATATGGATCTCGCTTCCGTCACGCCCTGAGCTGGATATCT  
ACGATCAGGACTGGCCATCTGGACCAGTCAAGACATGACTCCTCCCGCAAGTTTCGTGACAGGACCGAAA  
CGGCCAGCACGGCATGACCATCAACTCCATGTTTGGCCGGGGCACCATCGTCAGTGGCTCTTTTCATCCTG  
AGTTCGGTGTCTTTTACCAATGTGCGGGTGCAGTCTCTTCTGCACCTGGATCAGGCCGTTATCTTCCCGG  
GTGTGGAGATTGGTGGCGGTTGCCGACTGCGCCGGGTGGTGTGATCGACAAGGGGTGCAAACTGCCGGAAGG  
CACGGTGTAGGTGAAAACGCCGATGAAGATGCACGTGCTTCCACCGCTCCGAGCAGGGCATTGTGCTG  
GTCACCCAGGGGATGCTCACTCGCCTGAACAAAAGAGCAGCAGGGAAAACAAAAGCGCTGATCCGCAGCCA  
GACGGGATCCCCCTTCTACCGCAAAGGGAGCCATGATGGCTCTCTCTTTCTATGGCTGACCAGATAGCC  
ACCTCACACCATCATTTGCCATCGCGTGCAGTCTCCCAGAGATACCATTTACTGTGGGTAAACAGCTGGGC  
AACGCAACCTTACGCCCTCAAGCCGTAAACATTAATAACACCAAAAACCTTAATCCTCCGAAAAACCC  
TCTGTATTATTCTGTTTCGCGCTATATAGCAGCTCCTTTATCTGACTTTTTAGCGGTAAACCCACTAGTT  
TCACTTGATTGTTTTGTTTTCTTGGTAAGGTGATGGCGGTTGCGTAACAAAGCAGGTACCAGTGTAAAT

ATATAGGTACAACCGCTTTTGGCTTAATACAGTAGAGAGAATGAAATCATGCAAAGAGACCCCTGAACA  
ACATCCATATCCAGTCCGAACAAGTGATGATCACGCCTGCCAGCTCAAGGAGAAGTTACCCATCTCCGA  
CAAGGCGCTGGCATTTCGTGCAAGGGGCCCCGAATACCATCGCCGATATCATTACCAGCCGATACCCGG  
CTGCTGGTGATCTGTGGTCCCTGCTCCATCCACGACATGGACGCCCAAAGAGTACGCAACCAGACTCA  
AAGCGCTGCATGATGCCTATCAGGACTCTCTTACATTGTTCATGCGGGTCTACTTTGAGAAAACCGCGCAC  
CACGGTTCGGCTGGAAAAGGCTTTATCAACGACCCCAATCTGGATGGCACCTTCGATGTAGAGCTGGGGCTG  
CACCGTGGCCGCGAGCTGCTCTGCTGGCTGGCGGAGCTGGAGTTGCCGCTGGCCACCGAAGCGCTCGACC  
CCATCAGCCCCGAATACCTGGCCGAGCTCTTCTCCTGGTCAGCCATCGGCGCCCGCACCACCGAATCCCA  
GACCCACAGGGAGATGGCGTCCGGTCTCTCCATGCCGGTCCGGCTTCAAGAACGGCACCGACGGCAACTTG  
GGGACTGCCATCAATGCGCTGCAGGCGGCCCTCTCCCTCACGCCTTTATGGGGATCAACCAGCAGGGCC  
AGGTTGCGCTGCTGCAGACCCAGGGCAACCCGGATGGCCAGTGTATCTGCGCGGCGGCAAAACATCCCAA  
CTATGACTCGGTCAACGTGTGCTGCTGGCGGAAGAGGCTGGAGAAAAGCGCGCCTGCTGCCGAGCCTTGTG  
GTGGATTGCAGCCACGGCAACTCCAGCAAGGATCACCATTTGCAACCCAAAGGTGGCCGATAACGTATCC  
ACCAGATCCAGGAGGGCAACCGCTCCATCATCGGGGTGATGCTCGAATCCAACTGTTTGGAGGGTAACCA  
GTCCAGCGAGCAGCCCAAGGAGCAGATGCGCTACGGGGTCTCCATCACAGATGCCTGCATCGACTGGGAC  
ACCACCGCCACCCTGCTGGCCCGCTGCCACAACCAGCTGGCTGACCCCTCAAGGGCAGAACCTGCACGAT  
AAGCCGTGGTATCTTGTGCTAACCTATTGAACAATCTGGGTATCACCCTGGTGGCATCAAACCGCTCAT  
GCCGTGATACCTTGTTCATCTTGATTTTACGGGCGCCCGCTGCGGCGCCAGCAGGGACTGGATATGG  
CTGAAGAGTTGAATGTACTCAGGGACAAGATAGATGCGGTGGACAAGCAGCTGATCGATCTGCTGGCCGC  
CCGTCTGGCCCTGGTGGGAGAAGTGGGTGAGGTAAGAGCCGCCACGCTGCCATCTATGCACCGGAT  
CGGGAAGCGAGCATGCTGGCCCGCCGTCGCGCCGAGGCCGAGCAGTTGGGGGTGCCGCGGATCTCATCG  
AAGACGTAAGTGCAGCGGGTGGTATGCGCGAATCTTACGCCAGCGAGAAAAGATACCGGCTTCAAATGCATAAA  
GCCGGACCTTGGCAAAGTGGTCATCATCGGTGGTCAGGGCCAGCTTGGCCGCTTGTTCGGCCATATGTTT  
AGCCTCTCAGACTATCGGGTTCGAGACGCTGGAAACAAGCCGACTGGCCGCTGCTGACGAGATCCTCGCCG  
GAGCCGGTCTGGTGGTGGTGGCGGTGCCATCGATATCACCCTGCCAGATCATCGACCGCTCGGCAACCT  
GCCCGCCACTGCCTGCTGGTGCATGTCACCAGCGTGAAGCGGCGCCGCTCGAACATATGCTGACGGTG  
CACCAAGGGCCGCTACTGGGACTGCACCCCATGTTCCGGCCGGATGTGGCAAGCCTCGCCAAGCAGGTGA  
TCGTTCTGTGTCAGGGTCTGACCCCGCAGCCAGCAATGGTTGCTGGATCAGATGACTATCTGGGCGCGC  
CCGCTTGAACAGGTAAGCAAGCCACGGCCACGATGACCCCTCATTCAGGCCATGCGTCACTTTC  
GCCACCTTTGCTATGGCTGGCACCTCTCCCGGGAGGCCAATCTGGATCGCCTGCTGAGTTTGGACT  
CCCCCATCTACCGGCTGGAGCTCGCCATGGTGGGGCGGCTGTTTCGCTCAGGATCCCCACCTCTATGCCGA  
CATCATTTTTGCTGTCACCGCAGAATCTGGCGATGATCCGTCGCTACTACCAAACTTCGGCGACGCGCTG  
GGGCTCTTGGAGCGAGGGGACAGGGACGGTTTTATCGAGGGCTTCTCGCAAGTCTCCGGTTTTCTCGGCG  
AGCATGCCGACAGTTCTGCGTGAAGCCGCATGCTGCTGGCCAGGCCAACGACCGCCGCAACACGG  
CTAATCCTGCAAAAGCCGCTAACTCATATCGCCAGAATGGGAAGATGCCTGGGCATCTTCCATTTTTATT  
TGTTACCGATTTAAACTGACGTCAGTCACGCTCGGCCTTACGTCGCCCCCTGACTGGCTTCAATA  
TCCTACTCTAGCGCGGCTCACATCCAGCAAGTATGCCTCCTCAATATCCACACAATCCGCGCAAATAGC  
ACCGCCCTTGAAGGGCAGCCAGATACTCACGGTCAAACCAAGCTGCTACGAGCAATTGCTGTATGACG  
CAAAGGAGAGCAGTGCCTCCCATCAAAGAGATAAGCAGGAAGCAGGAAGCAGGAAGCAGGAAGCAGGAAG  
CAGGAAGCAGGAAGCAGGAAGCAGGAAGCAGGAGAGATTAATCGAGACAGATGGTTTGGCAAACATCACG  
TAACACAGCAATCCGGCGATTTATCATGGCGCCAATCCGCTGTCGCCAAAAAAGAAAAATGGCCGAGAAAT  
TATCTCGGCCATTCGTAGCTTGGTCAAAGACTCAAGCCTGGATATTAATCATGTGCAACTTATTAGAAGT  
TGTAAGTGCAGAGCAACAGTCCACTCGTCTGCTTGTGCTGATGCCCTGGATCTTGTACTCGGTGTAAGC  
TTTTAGCTTCCGAGTGAAGGCATACTGAACACCCAGCAGGGTCTCGTCAACCAAGTCCCTGTAAGTAGAA  
CCGGCAGCTTGAGCGTTAGCCTTGCCTTCTTTGAAGTTGTAGCCAGCCAGGAAGGTCCAAGCGTCTACGT  
TGTAAGAAGCAGCCAGCTCGTAACCACGGCCGTCATCTTTCATGCCAGGCTCTTGTCTTCACTTCCGCT  
TTCAGTGTAAACACCAGCGAAGTAGAAACCATTGATAGCGTAGTGGCGGCCACAGCCCACTCGTCTTTC  
TTACCAGTCTGACCATTAACCTTTGTTTTGCAGGTTCGGAGTAGGCATAACCGGCATTGAAGCCCAGACCGA  
AGTCAAAGTCATAACCAGCAGCTACGCCGTAAGCTTTCTTACGCTTAACTGCTTTTACCCCAAATAGCGTC  
TTCTTTGATCTTCTGACCAACGTCAGTGATTTGACCGCTACGTCATCGTTGGTTTGGTAGGAACTTTA  
CCTTTGAAACCACCGAAGGTGTTGGAGTAGATGATTTGACCTTCTTACGACCGTCATAGAAGTTACCGG  
CATCGCCCCACTCGTTGAAAATATCGGTCCGCTCGAGTACGTCGTAGAAAAGCGGTATCGGTCTGACCGAA  
GATGATTTTACCCTACTGGGAACCATCAAACCGGCATAGATGTGACGCGGATCGATGTCGCTGGTGTG  
CTACCAGAGTTTTTACGAGCTACTTGGCACTCGGTTTTAGCAATGGCAGACCAAGTGTGTTTACAGAGCTA  
CTTTACCAGACCAGCCAGACGGGTTGCACCAACCAGTCTGCTGATTTGTCGTTAGCTTTCGCCGTAGTA  
GTTAGCCTGTACACGGCCGTATACGTCGAAAAGTGGTACCGTCTTTGTCATAGATCACTGCGGCGTTAGCG  
GCGGATGCAAAACAGAGCCGGAATAGCAATAGCCAGAATTGCTTTTTTCATAGTTTCCAATGCCTACTGTA  
ATTAACACTAAGTTGTTGTTATTTCCCTGTGTTAGCGATGTTCTTTGCATCACTATGCCGCCGAGACTAG  
CACCGGATTTTTTGAACCGCAATGAAAAAATTTGGAACTTTTTACGGAAACCATAGTCATGGAGGCAAAA  
ATGTGAGCCAAGTCTCACCTAACGGCAAGGCAAAAGGAAAACGTTTACAATGAATCCTGCTGATTTTGG  
GACTCAAATAGTCTATTTTTGCATGCAATAACGCTAACTACCTGATAAAACAACCAAAGTGGTCTGATCAG

CGTAAAACAGCCGTGATAATAGCAGTTGCCTCGACCTACCAAGGGGTTGCGGGTATCCTTGTCCCTTCGA  
TTAACCCCTAACTGGCCTTCTCTTCATGCTCTCTACTCGCCTTAAAGCCACCATTTCGTCAAACCTATCGC  
CAGATTTTCGGATGGATTACCCGGTTTTTGTGCCGCGCAAAGAGCAGAACCTTCTGGTGGCAGAGATAGCCA  
AAACCTGACCGGCGAGTACGACAAACAGCGCCGAATTCTGGTTGCCGAAGCAGGAACCGGTATCGGC  
ATCTCTTTCTTATGCGCAAGGCGCCATTCCGGTGGCGCGGCTCACCCAGAAGAAGCTGGTGTCTCCACC  
GCCACCGTGGCCCTGCAAGAGCAGTTGATCCACAAAAGACCTTCCTTTTTACCATCGCCACAGCGAGCTGC  
CATTTTCGCTTTATGCTGGTCAAGGGGCGTCAGCGCTACTGCTGCGAGCATCTGCTGGAGCAGGCAGCCAG  
TGGCGCCGAGATGGCCAACTTCGAGCTCGACTTTGGCAGCCTGAGCAAATCCAAACCTCTGACAGCGAC  
AAAGATCGCTACCAGGCTCTGTGGCAGGCCTACACCAATGGCAAGTGGGACGGGGATCGGGACAACCTGGC  
CGGAGCCCCATTCCCAGCCTTGTCTGGGATCGCATCGCCGCGACCGCCACACCTGCAACAAGGCGCTGAG  
CCATCACACAGCACTGCCCTTTTCATCGCGCCCGCAACGACATGGAGAGCGCCGATGTGGTGGTGGTGAAC  
CATGCACTGCTGCTCTCCGATCTCACCATGGGCGGCGGCATCATTTCTGCCCCCCCGCATGAGTGCATCT  
ATGTGCTGGATGAGGCCCATCACCTACCCACCATCGCCCGGGATCACGGCGCAGCATCGGCCAGCGTCAA  
AGGCTCGCGCCGCTGGCTGGAGAAGCTGGTACAAAAGTGCAGGCAAGCTGGCGCGGACGCTTAATAAGGAG  
AGCCTGCTCGACCCCCAACTCAAAGTGCAGGATGCACTGGCCTCCATCCAGCCCGACCTGAAGGCGGTGCG  
AGCAGTGGCTCAGCGCCAACGATCGGCTGTTTTGGCAGGAAACCCACTACCGCTTCGCCGAAGGGGTACT  
GCCGGATCCCCTGCCATGCTGGCGGAGAATCTCAAGGAGTCGAGCAAGAAGGCGCTGCGAGCGCTGGAT  
CGGATGCAAGGGGCCATAGGTGAAGCGCTGAAAGATGGCGAGATCCGCCACAAGGAGGCCGAACCCCTGC  
TGGCAGAGAGCGGTTTTTCATCTGCAGCGGCTGGAGAGTTTTCTGCGCCTGTGGGAGATGCTGGGGCGCCA  
TGTGCCGACCGGTAAAACCCACTCGCCCGCTGGATGGCAAGAGCGATGACGGCGATATCTGGCTGCAC  
GCCTCACCGATTGAGGTAGGCTATCTGCTGGAGGAGTGGCTCTGGTCGAAATGTCTGGGAGCCGTGCTGG  
TCTCCGCGACCCCTACCGCCCTCTCTTCCCTTTAGCTATTTTTCGCCATCAGGTGGGGCTCAAGGAGCACGA  
CGGTACCCGCTATCTGCGCCTGCGCTCCCCCTTTGATTATCAGAGAGCCGAGCTCTATCTGCCAAGATG  
GAGCACGAACCCAACTCGCCGGCCTTTACCAACGAACTCATCAGCGTGTGCCACGCATTTTGGCGGGCA  
AGGAGGCGAGTCTGGTGTCTTCTCCTCCTACCGCCAGATGAATGAGGTGGCTGTTGGCTTTCGAGCCAA  
GGGACTGTCACTGCTGGTGCAGGGGGAAGCCTCCCGCAATGCCCTGCTCACCTGCACAAACAAAAGTGC  
GATGGCGGTCAGGCCAGCATCTGTTTTGGTACCGCAGCTTCTCGGAGGGGCTGGATCTGCCGGGTCACT  
ACCTTACCAACTTGTGTCATCAACAAAGCTCCCCCTTTGCGGTGCCAACTCGCCGGTCGAGGAGCCACTGC  
CGAGTGGGTGGAGCAGCGAGGGGGAACCCGTTTTCTGCAACTGACCGTTCGCGGAGGCTCGCGCAAACCTG  
ATCCAGGCCTGTGGCCGCTCATCCGCAAAGAGGCGAGATCGGGGGCGGGTACCATTCTGGACCGCGCTC  
TGCTGACCAAGCGTTATGGCAAGGGGTTGCTTGATGCCCTCCCCCGTTACACGTCGGGTGAGTAAAT  
CAGTCGGCCGCTATTGATAAAACAACTGACAGCGGCGGAACGTTGACCACCAGAAAGAGCCATTGCCGC  
AGTAGGCCAAACCTGTAAAATGAGCCCTGTTTTCAGTGGGCAATCGCCTGACTGTTCAAGGAGATGAA  
ATGAAACTGACTGTTCTGGTACCGGCGCTGGCTGGTCTGTTGTGGGCCGTTAGCGCCCTTGCTGATGCC  
AATTGGAAGTGACCACCCCGTATGTGCTCCAGCTGATCGATGGTCAATCCATCAACCCCAAGCTGCTCGA  
CAAACCCAGCACCTTCCCCCTCTCTGCCGGCAAACACCAGTTGGTGTGCTCGCCTTTGAAGGCAACTACTCC  
AGCCGTAACGAAATCAAGCTGGTCACCGCAGAGCCGCTGGTGTGAACTTACCAGCCGCGACAATCAGA  
AGCTGGTGTGGACTATAAAAAGCCCCGCAACGAAGCCGAAGCAAGCAGTTTGTCAAAGAGCAGAAAGT  
GGCGCTGAAAGACAAGGTCAAGTGGTCAGCAAGTGAAGTACGCAACAGTTCGTGATGCCGAAAGTAGAGGGC  
TTCCAGCTGACCCGTGACTATCAGCAAGAGCTGATCAACATGGGCAAAGCCTTCAACCAGCCCAAAGCGG  
TTGCCGTCTCCTCTGCTGCCGTGATGGCTGCCGCCAGCGCACCGGTTACGGTTGCCCCAGCAAGGCTCA  
AAGCAATCCGGAAGCGCTGACCCAGTTGCAAACTGGTACAACAAGGCCGATGCGGAAACCCGCAAAGCC  
TTCCAGATCTGGGTTATCCAGCAGCAATAAGCCGGGCTGAGTGAATGACTGAAAGGGGAGCCAAGCTCCC  
CTTTTCCATATCCTGCGGTCTCACTCACGACGCGTCTTGATTATGCGCTGCCACTTCCCCTTTATATAG  
GGAGTACATATATGATTATCATCTGCTGATTTATATACAGAAAGCGCCACCTTGCCAGGGAGAATGGCAC  
CATGTGCTTGCATTTTTCTATCACCCCTCTACTCCTCCTGACGCTACCCGAGCGCCATCGCTTCCC  
CTGGCCAAGTATCAGGGGCTGTTTGAACGCCTGCAGGTGCAGGGTTACCCCTTGGCGAAGCGCCCGCCG  
CTACCCGGGAGCAAATCTGTGCGATTACGATGCCGATTATGTGCGCAGCGGCCCTGAACGGCCAGCTGGC  
AGATCGCGCCATCCGCAAGATCGGTTTTCCCTGGTCACCCATGCTGATAGAGCGCACCTTGCCTCGGTG  
GGTGCCACCGTTGCCGCCAGCCGCATGCTCTTGGAGCAGGGATGCGGCTTGCAGATCTCCGGCGGCTATC  
ACCACGCCCATCGCGATCACGGCAGCGGTTTTTGTCTGTTCAACGATCTGGTGAATGCCGCCAGGCTTG  
CCTCGACGAGGGGCACTGTGAACAGGTGCTGATCGTGCATCTCGATGTGCATCAGGGGGATGGCAGTGGC  
GCCCTGTGCGCCGGACGGCGGATATCATCACCTCTCCCTCCATGGGGAGCACAACCTTCCCATCACA  
AAGCCGCTCTCACCTCGACTTTCCGCTGCCAAGCGGCATGACGGACGATGCCTATCTACCACACTGCA  
ACAGGCACTCTCACTGGCACTGCGCCTCTATTCCCGGATCTCATCCTCTATCAGGCGGGCGTGCATGTG  
CATCATGCCGACGAGCTTGGCTATCTCTCCCTGAGCGATGAAGGGGTGCGCCTGCGCGATGCCATGGTAT  
TTGACTGTGCAATCAAGCATGGGTTGCCCTGTGCGCGCTGTACCCGGTGGCGGCTATCGCCGCGACTGGCA  
GCAGCTGATCCCCTTCATATGTGCTGTTTTGAAGCGGCACGCCACCGTTTTGGCTGATGGCATTGCTTG  
AGAGCGCGGACACCCCATCAGAGTCGGGCGTACACTTACCAAAATAAAACAGAAGAGGGGACCCCTGGGGC  
CGCCTCTTCGTGTTTTGCTCATCTGGGTACACAAGCTCGCTCGTTGTCAGGCAAGCTCGGGACACCTGAG  
GATAATTATTTCTGACGCTTGGCGGCGTACTTGCAGCGGGCGGGGCTGACGCTCCTCTCCCCTCGG



CCTTCTCTTTGGCTTTTTGCTCGGCTTCTGCGGGGCTTCGACAATCTCGACGCTCACCATCTCCGGCGT  
CTCCAGCGAGATGCGGCCAAGCAAGCCGGAGCGGAACCTCGTTGATCAGGATCTCGGACGCCTTGTGCAGG  
TCGGCCAGCCCCCTTTGCGCATAAAGGCCCGCTGGCGGGCGATCATCTCCAGCAGCTCGATCTCGGTCT  
CGGGCAGCTCGTCAATTTGGTAGCGCGCCTTGATCCGCTCCGGATAGGCCCTGATGAAGTAATCGGCGGC  
GAACATGGCGATATCGGCATAGTCGAACACCGTGTCTTTAATGGCCGCTGTGATGGCCAGACGATAACCA  
CAGGAGGGCGGGTTAAGTTTGGGCCAGAGAAAAACCCGGGGTATCGGTCAGGATGACGTTGTTATCCAGCT  
TGATCCGCTGCTGGGACTTGGTCACCCCCGCTCGTTGCCGGTGGCGGGCGATGATGCGCCCCGCCAGGGT  
ATTGATCAGAGTGGACTTGGCCACGTTGGGGATCCCCATGATCATCGCCCGCACGCCGCGCAGCTCAAAA  
TTGCGCTCCGGCAGCATCTCGTGGCAGAGAGTCAGCAGTTGCTTGATCTTCTCCGGCTCTTGTGCGTCA  
GCGGCAGCGCCTTGATCCCCTTCTCTTTTCCATGTGCGCCACCCACAGATCGGTGATCGCCGGATCGGC  
CAGGTCCGCTTGTTCAGCACCTTGATCACCGGGTATCACACGCAGCTCGGGCACCAGCGGGTCTCTCG  
CTGGAGAAGGGGATGCGGGCATCGAGCATCTCGATGATCACATCGACCTGGGGCATGACCTCGGCAATCT  
CTTTGCGGGCCTTGTGCATGTGACCGGGGAACAGTTGATGGACATATCCGTTACTCTCTGTGGGGGCTG  
CGGGCGGGCGCATGGAACAACAGGCGCTCTGCCGCGGGCATCGAACGAAGGGGGCGCATTTTTACCTGCTG  
CGGGCCTCTTTTGACAGGTCAATTCTAACCATCACCTCCTCAAATCAGCAAACCGCCGAGGCGGAGCAACC  
TTGCCGGAAGCGACCGGACCAACTGGCTCAATTGATAGATAACACATTTGATATATTGTAACATTTTCATC  
ACTTTTTACACAACCGTCACCGATAGTCAGTAAAAGTGTCACTCGCCCCCTCTAGGCTGCGCTCAGGTT  
TTACAAGGAGCGAACCCCAATGAGAAAAATGCGAGGACTTGCAGTGATGATCGGGCGCCGCTGGCTGCC  
GGCTGCAAATCAGACAATGACACGGTGGCGACCAAGCCCGCAGCCCAACCCACCAACGTCATCTTCTTCC  
TCGGTGACGGCATGGGCCTCAACACCCTGACGGCAGCCCGCATCTACGGTGTGCGCGAAGAGGGTGTACT  
CACCATCGATAACCTGCCAGAGACGGCCTTTATCAAGACCTTCTCCACGATGCCAGGTCACTGACTCG  
GCCCCCTCCATGGCGGCCTACATGACCGGGTCAAGAGCAACAACGGCGTCAATCAGCATGGACGGCGACG  
CCACCTATGAGAGCGACTGCAGCAAGAGCGCCGGCAAGCCGGTGACTACCCTGCTGGAGCTGGCCAAAGC  
CGATGGCCGCGGTACCGGCGTGGTAACCAGTACCCGGGTGACCCACGCCACCCCGGCGGCTACCTATGCC  
CATATCTGCAACCGGGATCTGGAGGCAGATATCGCCGTCCAGCTGGTACCGGGCGGCAAAGGCTACAACA  
GCGCCCTCAAGGAGGGGCTGGATGTGGTGTCTCGGTGGCGGCAGCAGTTTCTTCTGCCAAAGCCGACAA  
GGGCAAGCGGGGAGGATGGCCGCAACCTCATCAGCGAAATGCAGGCCAAGGGCTACCAGTTTGGCAGCAAT  
CTGGATGAGCTGACAACAGCCGATGCGGGCAAGCTGCTGGTCTGTTTGGTTCCAGCCACATGAAAT  
ATGACCTGGACCGTCCCGCCAGCGAGCCGTCACCTGCCCCAGATGACCCCTGGCCGCCATCAAGCAGCTCAA  
GGGCAAAGAGAAGGGTTACTTCTGATGGTGGAAAGGGGGTTCGCATCGACCCAGCCCTGCGACACCAAC  
GCCAAGCGGGCGCTGCAGGACACCATCGCCTTCGACAACGCCATCAAGGCCGCCATCGACGAGGTGAAAA  
AGAGCGACCCCGAGCTGAAAAACACCCTGATCGTGGTCAACCGCCGACCACGACCACACGCTAGTGCTCAA  
CGGCTATGCCAAGCGCACCGGCAAGACCACCGCCGACAACCCCGGCTACTCGGGCTGGTGAAGAACTAC  
GAGACTGGCGAGCCAAGCAAGGATAGCGAGGGCATGCCCTACACCATCATAGGTTTTGGCAACGGCTACA  
ACCGGGTGGATGGCCCGCGCAGCAGCGTCCGCCGCTCGACGATGCCACCGTATCCGCCAATGACTACCA  
CCAGGAAGTGGTGGTCAAGGTGGGCGAGATCGGCAACGAGACCCACGGCGGCACAGATGTATTCCTCGGC  
GCCATCGGCAAGGGGGCTGACAGCTTCCATGGCTCACTCGATAACACCGCCGTGTTTCGGCAAGATCAAGG  
CTGCGGCCAAGCTGTAAGGAGCACTTTCATGAGCAAACAGATGAACACATCCATCAAGCACACGCTGGTC  
TGCGCCGCCCTGTTCAAGTGCCTGGGCGCAACCTCCAGGCACAGGCCGGTGATGCCAAAAACGTCATTC  
TCTTTATCGGTGATGGCATGGGGCCTACCGTGCTCACCGCCACCCGCTGTTCAAGGTGGGAGAAGATGG  
CAATCTGGAGATGATGAAACTGCCGCGCAGTGCCCGCATCAAGACCTTCTCCAACGATGCCCAGACCACC  
GACTCGGCCCTCCATGGCGGCCTACACCACCGGGTCAAGATGAACAACGAGGTGATCGCCATGAGCA  
GCGACACCAAAGCCGTCGCCCCGGCAAAGACGTCAATGGCAACAAAACCGTCAACAATTCAGCAGCGGA  
CAACGGCAAGCCGGTGCACCACCTCTGGAGCTGGCCAAGGGCGGAGGCAAAATCGGTGCGGGCCGTCACC  
ACTACCGAGCTGACCCACGCTACCCCGGCGGCTACCTACGCCACATCTGCCATCGGGATGCCGCTTATG  
ACATCGCCGCACAAGCTGTTCCGGGAGGAACTGGTTTCAACCAGGCGCTGGGGGATGGGGTTCGATGTACT  
GATGGGCGGTGGTGCCAACCACTGGACCCCTACAGCGCCAGCAACAAGGGCGGTGCGAATGCAACCCG  
GACCTGACCGCCGAGATGAAGGCGCAGGGATACAGCTATGTCAACCACTCAAAGTGAACCTGGCCAAGGTCA  
CCAGCGCAAGGTGCTCGGTCTATTGAGCAGCAAATCCACCTCGACTACGAGCTGGATCGGGTGCACAA  
GGGGCAGCCAATACCCAGCCGTCCCTCTCCGAAATGACCGCCAAGGCGATCGACCTGCTGAGCAAGAAC  
AGTCAGGGTTATTTCTGATGGTAGAAGGGCGCCGGATCGATCATGCCCTGCACGGCACCAACGCCAAGC  
GCTCGCTCACCGACGAGTGGCTCTGGATGAGGCGGTCAAGACGGCGCTGGGTAAAGTGGACCTCAGCAA  
TACCCTGATCGTGGTCAACCGCCGACCATGACCACACCATGACCATTAACGGTACTCCGCCAAGGGCAAT  
CCGGTGTGATCTGGTGA AAAATGGCGATGGCTCGACCCAGAACGACGTGGATGGCAAGCCCTTACCA  
CCTTGGTGTTCGGTAACGGCCCCAATCGTGCGGCCGTGCGCCCGTCTCACCAGCGATCAGGTGATGGC  
CAATGACTACCTGCAGGAGACCGGCGTCAAACCTGACATCGGAAACCCACGGCGGCGGCGATGTGATGCTG  
TTTGCCGATGGCGCCGGCAGCAACCGCTTCAAAGGCACGCTGGATAACACCAAGGTGTTTGGCAAACCTGC  
GGGAGGCGCTCGGCCTGTAAGCAGCAGGGGGCCGGGCGCATCTGAGCAATCGACTCAGCGGCCCGGGCC  
CGGCTCTTTGAGCGACAGATGATGATGCGACTTTTGTCTTTCGTTATGGCTGCTTGGCAGCACCCCTCGCC  
TTCCCCCTGCATGCTGACGACACGCCCCGGACCTCGCCGCCCGGATCAGCTATCACGACCGGAACACCG  
GCAGCGATGGCATCGCCAGAGAGAGTGTCTGGCAAGAGAAGTGGCTGCGCGTGGGCAATCAGGTGTGGAG

CCAGCGGCTCATTCCCCTCCCCCTTGCCCGTGCCATACGCGCACTCACGACGCCACCCCGGCCACAAG  
CACTTTACCCACCAGATGGCGGCCCGCTGGGTGAGTCGAGTGATGAGGGTGAAATTCAGCTGCGCTATG  
CCGACAGCTGGCACAACCAGCTGGTTGAGGTGCCGGTGGAAGAGTATGGCCAGGTGGCCTTCAAACCCGA  
CTGGCTGCGGATCCGCCATCTCGTCAACCCACGCTGATCGAGGGGATGACACTGCTGGATGAGGCCGCC  
CCCGAGCAGGCCCGCTGGTATGAAAAGCGCGAAGGGCTGCAACGAACCCGGATTCTCTGGTCGAGTCAGT  
GGCAGATCCCCTGGTGGTTCGAGTCGGCCAGTCTCGACGGCTATCGCAGCTACCCGGATGGAGGTGACCCT  
GCGCAAGCTGCCTGCTCAGCTCCCCTGGCAGCAACTCGCTGATTACGAAGTGCGCGATCTGCGCGATTTC  
TTCGACTGAGATCTCAACCCCTCAGCGAGCCCAACGACAACGCAGGCAGGAATGTTACACTCTGCTCATT  
CGACTCTGACTCACGACCTTGATGCACACTCTCTGCCTGCCTTTTTTGACCCTGCTGTTGTTGCTGGTGA  
ACACCCGGTGCCAGGCTATTGTGCTGGTGAACACCCGGTGCCAGGCTATTGTGCTGGTGGCGGCCGAGTT  
GCCCCCTTACGTCATTCAGTCCCTCCCATGGTAAACCCAGCGGGGTGGGTATCGAGATCATGGAGGAAGCA  
GCCCGCCGTCTAGGTGAGCCGCTTACCATCGAGCTGATGCCACTTCCACGCTGCACACTGACCAGACAATTC  
ACCGTCCCAGTGTATTGATGATAACCGCCGTGCGAAGCAGTCAGCGAGAGCACCTATATCAGTGGGTAAC  
GCCCATCCTCGATGAGCAATTTTTGATCGTCAGCGATCGCCGATTTCAACCAAAAGCACTGAAAAGCAGC  
GATTTGAAGAACCTTGATGTGGGCGTGTGCGCTACTCGTTTTGGTCAACATCTACTCAAGCAACGCATCG  
GGATCCGGGGAGAGACAGTGGCAGATGAGCAACTCAACGCTCATAAACTCCATCGCGGTGCGATTGATGC  
CTGGGTGCGCCGATGGAATGTCATCCTGTATGCCAACAACAAGACAAACGCTCATCACTACAGCTGGTT  
CGCGGTGAAGTGTGATGAACACCCAACCTGTTCTGGCCGCTCACAAGGATTTCCCCTTCAAACAGGCCG  
AGCGCTGGCAAGCCGTAATCGACGAGATGCGCCGTGATGGCTCGCTCACGCGGATCATCCGTCAGTACAA  
CTATCAGGTTCTGAGTAGTCACTCAATCACGGTTGCCAAGGCCGCCAGAATGGTTATGGTAGCCCAT  
GAAAATACTCGCTATTTCCCTCGCATTTGCTCACACCCTGCTGAGCCCCCGCTCGTCCCTCGGCCGCGA  
GTCGCTTGGGGGCATGGCATTTTTCAATCGATTGAACCTGTTGAATCCATTTTTGTAAACACCCTGTGTGAT  
GGCAACCTGCACCCGCCGGTATGGGCTATCCGCTATTGATAAGGAATATCTTATGAAACAACCTCATC  
TGTTTATCTCCAGCCTTGATCTGGACCGTATCGAACAACCTGCTCGGCAACCACCCGCGAGCATCTGGCCCT  
GCAAGAGGAGCTGGACCGCGCCGAGATCCGCGAACCCGGCCGAGATGCCGCCGGACGTGGTCACCATGAAC  
AGCAAGGTTTCGCTTCAAGATGCAGAGCAGCGGCAACGAATTTCTGCCTCACCTGGCCACCCGCGCGATG  
CCAAAGGCAGCAGAGCAACATCTCGGTACTGGCGCCGGTAGGCAGCGCCCTGCTCGGCCGAAAGTGGG  
CGACAGCATCGCTGGCCGGCCGGCCGGTGCACCATCGAGGTCGAAATTTCTGGAAGTGGTTTATCAG  
CCGGAACGCGCCGGGAGCTGCACCCGCTGAGTCCCTGGCTGTTGATCATCCCCCTGTTGATCAGCCGCCCT  
GCTCGCCCTTGCCAGCTGATCCCGATCAAGCTTTGCGCACCTTGCCCCCGGTTTTTAGCCCTTTTTCT  
GCTGCTGCTTGAGCCTGACTCGGGGGCAGGTATCTTGTGGCCGCGTCATGGTCATGACGCACCGAATT  
TCAGGCTGACATCATGATAAAAAATTGCCCTCATCGACGATCACCAGATCGTCCGATCCGGTTTTGCCCCA  
CTGCTCAATCTGGAACCAGACCTGCAGGTGGTCGCCGAATTCGGCTCCGCCAGCGACGCCCTTGCCGGCT  
TGCCCGGAGCGGGGCGCGGGTCTGCGTCTGCGACATCTCGATGCCCGACAGTCGGGGCTGGAGCTGCT  
CAAGCAGCTCCCCTCCGGTCTGGCGGTGGTGTGCTCTCGGTACACGACAGCCCCGCCCTCATCGAGCAG  
GCACTGCAGACCCGTGCCAAGGGATTTCTCTCAAGCGCTGCAGTCCGGACGAGCTGATCGCCGCTGTGC  
GTACCGCCGCCCAGGGGGGTGTTATCTTACGCCGACATCGCCAGAAGCTGGCCAGCAGCAGCCGGGA  
TCCCCTTACCAATCGGGAGCGGGGAGATTGCCAGTTGCTGGCACAGGGGTGGAGGTGAAGGCCATCGCC  
GAGCAGCTTGGCCTCTCCCCAAAACCGTCCACGTCATCGCGCCAACCTGATGGACAAGCTCAAGGTCA  
GCAACAACGTCGAGCTGGCCACCCGATGCTGGATAGCTGGTGTATTTCCCGTTTTGCCAGCTATGTGCC  
ATCGCGCTGGCGGCCTGCTTCATCTTTGCCGCCGGCTGGTTTTGCTCTGGAGCATCAGCTGCATCTGG  
CGGGCGGCCCGCGCTGGCTGTGCTGCTGTTCCCTTCGGCTGCGCTCGGCTTGTGCTGCAAAGCCC  
GGGCCACTACTGGCCGCCGCTGTTGCTGTGCGAAGGACTGCTGCTACTGGCTCAATCTGGAGGTGGGG  
CTGCCCCACTGGCCTTGGCTGGTCGCGGGCAGTCTGCTGACCCTGCTACCGCTGCTCATTGCCCGTCCG  
AACAGGTGCGCAACGACTGGCAGCAACTGTTGCTGCTGCTCGCCACCGTCACGGCGCGCGGCTGCTGCA  
AGCCCTGCTCTGGCATCTGGCGGGGAAGATGGCCCTCGGCCCTGCTGCTCAGCTGACCCGGGCTGCTG  
ACCCTCACCTCCACCTGCATGCTGATCTGGCACTACCTCACCCGCGCCACCTGGGTGCGCTGGGGCCTG  
CGCTGGTGGATCAGCCGGTGGAGTGGCGCTTTTCGCCATCTGGTCTGGTATCTGCTGCTGTTCTGATTGAG  
CCTCTGGCTGCAACTGGGATTGCCCAACTCGCTGGTACGCTTACACCCGTTTTGCTGGCCATCCCCATC  
ATCGCCATGGCGTGGCGCTACGGCTGGCAAGGGGCGCTGCTCGCCACCCTGATGAACACCATCGCCCTGC  
TGGCCAGTCAGGCCTGGCACGATCACCCCTCGACCTGCTGCTCTCCCTGCTGGCCAGAGCTCACCCG  
CCTGCTGCTCGGCGCCGGATCCAGCGCCAGCGCAACTCAATCAGGCGCTGACCCGCCAGCTCGCCCAT  
AATCGCCAACCTACCGAGCGGCTGCTGGAGACCGAGGAGCATCCGCAAGGAGGTGGCGCGGAGCTGC  
ACGACGATATCGGCCAGACCATCACAGCCATTCGAACCCAGGCAGGGATCGTGCGCCGCTCGCCCCGA  
CAACGCCGGGGTAGGCCAGAGCAGCGCCCTCATCGACACACTGTCGCTCGGGATCTACGACGCGGTGCGC  
GGCCTGCTCGGGCGGCTGCGCCCGGCCAGCTCGACGACATGACTCTTGAACAGGCGGTACGGGCACTGC  
TCAGAGAGCTGGAGCTGGAGCGTCACGGCATCGTCAACCGTCTGGAGTGGCAGCTGGCGGATGGGGATCT  
CTCCGATGCCAGCGGGTACCCTGTTTTCGGGTCTGTGAGGAGGGGCTCAACAATGTGGTCAAACATGCC  
AACGCCACTCGGTACCATTCGCGCCCGGGCCAGCGGGGAGCAGTTGCAACTGGTGTGGAAGACGATG  
GCCCGGGCCTGCCGGAGAGTCGCCCGCAGCAGGGCTATGGCTGCTCGGCATTCGCGAACGGGTACAGGC  
GCTCGGGGGCAGTCTGCAACTCTCCTGCATCCACGGCACCCAGCTGACGGTCAACCTGCCAGTCGCAGA

CGGGAGGAGAGTCATGGCTAATCACCACCAGAGGGCCTGCCTGTGCTGAGTTTTATGAGAAGCGCGCCG  
CCCCGGCCCCCTTATCCGGGATCAGGCCGAGATCGACGCCACCTATCGCCACTGGCGGCTGCACCTGCTGCT  
GACCATGTATCTGGGCTACGCGGTCTTCTACTTCACCCGCAAGAGCTTCAACTTCGCCATGCCGGACATG  
CTGGCGAGCGGCATGCTGGACAAGTCCGACATCGGCATGCTCTGGACTCTGTTCTACATCACCTACGGCT  
GCTCCAAGTTCTTCTCCGGCATCATCAGTGACCGGCCAACCCACGCTACTTTATGGGTGTGCGACTGAT  
GGCCACCGGGCTTATCAATATCCTGTTTCGGCCTCTCGTTCGGCACTCTGGATGTTTGCCGCCCTCTGGGT  
GCCAACGCCTTCTTCCAGGGCTGGGGCTGGCCCCCTGCTCCAAGCTGCTTACCAGCTGGTATTCGCGCA  
CCGAGCGCGGCGTCTGGTGGTTCGGCCTGGAACACTGCCACAACGTCGGCGGCGCGCTCATCCCCCTTAT  
CGTCAGCACCATCGCCCTGCAACATGGCTGGCGCTACGGCATGATAGTGGCCGGCCTTATCGCCATCATC  
GCGGATTGTTCTCTGCTGGCGGCTGCGGGATACCCCGAGTGCATGGGACTGCCGACAGTAGGCGAGT  
GGCGTAAGGATGCCATGGAGCTGGCCCCAGCAGACCCAGGATGCGGGGCTCTCCCATCGCCAGATCCTGCG  
CAAATATGTGCTCGGCAACCCTATATCTGGCTGCTCGCTGCTGTTACGTACTGGTCTATGTGGTGCCT  
ACCGCCATCAATGACTGGGGCAACCTCTACATGACCGAGCAGCGCGGCTTCAATCTGATGAGCGCCAAC  
CGGCCATCTCCATGTTTCGAGGTGGGGGGCTTTATCGGTGCTCTGGTGGCGGGCTGGGGATCGGACAAGCT  
GTTCAACGGCAACCCTGGCCCGATGAACCTCATCTTTGCGGTGGGGATCCTGCTGGCGGTGGGGTTCGCTC  
TGGATGATGCCCTTCTTACGCTATGTGATGCAGGCGGCTGCTTCTTTACTATCGGCTTCTTCGTGTTTG  
GCCCCAGATGCTGATCGGCATGGCGGCGGCGAGTGTCCACAAAAATTCGGCGGGGGCGGCCACCGG  
CTTTGTGCGGGCTGTTTCGCTACATGGGGGCGCGCTGTCAGGCTATCCGCTGGCCAAGGTGATGGAGATC  
TGGCACTGGAACGGCTTCTTCGTGGTGTATCTCGGTGGCGGCGGGCTCTCGGCCCTGCTGCTGCCCT  
TCCTCAAGGCGCAGGCACCGCGCCCCAGCCTGCCGAGATAACGTAATACCGGACTGAACGGGAGTTACA  
CCTCCCGACCAGCCTGACAGACCCGGTCTTTCGCTTGGCGCTTGGCGCTGTAGAGCGCATGGTTCGGCCTG  
AGTGAACAGAGGGTCAAAGTGCACCTCCCCCTTGGCAGTGGGAGAGTCCCATGCTGACCGTGTATGTAGAGC  
CCCCCATGTTCGCGGTTTCGCGACCTCCTCCAGCAATCCCTCGCAGCGCTGCAGGGCCAGCACGCGGGGCT  
GCGAGAAGAGCAGCACAACTCCTCGCCACCGAAAACGACTGCACACCAGATCTGGCTGACTACCCAGATA  
GGCACCGAGCTCAGCCAGCACCCGATCACCCACCTCATGGCCATGCTGGTCATTTGATCTGCTTGAATCA  
TCGATGTGAGCAGCGCCAGCGCGCCGCTGTCACCCACTTTTGTGCTGCTTCAGCTGCTCCATAAAGCCAC  
GCCGTTGAGCAGGCCGGTGAAGGGGTCGTGGCTAGCCTGCTGGCGCAGCGCCAGGGCACGATACTGGGT  
ACAGAGCAGCAGCACCCGAAAGGTGGAGAGATAGTCCCCATCAGCATGGAGAGGAAGGGCAGCACAATTG  
ACCCCGCTCTTATCCATCAGCATCTGTACGTTGTCTTCCAGAGGAACCCAGAGCCGCATCAGGTAGAAGG  
CGTAAAGCAGCACGTTGACCAGCGTAAAGACCATCACCCCGGCAGATAGTGGGGGTAGCCGTGGCGCCA  
GACCAGATAGACGATCACCGCACCCAGCACCATGTAACCTCAGGCAAGCAAGCAACACCCGGGACGCCATC  
CCCCCTCCACAATGCACCAGCTCAGAAGCAGCAGATAGACCAACATGAAGAGCCCCCGGCACGCCAGT  
TCGGGGGCTGTCCGAAAAGCGCTGCTGCGCCGGCGGCATCAACACAATGCAGAGCGTGATCAGGGTATT  
GGCCAGCCAGATGCCGAGGGGCTGGGGAATAATGCCTGTAACGAGAAAAGTATCTGGGCCACCAGCGCA  
CAGAGACTGGACCACCACCATAACCCGATGCCTGGGATCTCCCGGTGGGTGACAGATAATGGAGAGCG  
TGATAAACCCGAGGCTATATCCCCCAATGCCATCACCATCAGGGTAAATACATCCAGCTTACAGCAACAA  
CGAGACATCCATATCAAACCAGGCAGAGGGAGGTAAGTGTATATGAGAACCCTTTGCCAAGACCCAG  
AGACCCTGACTGTTTTTACAATAAAAAACATATTGTTTCGCTGTTTTTTCACTCCACCAGATAACTCACACC  
ATTCCGCTATGGCAGGTTTGAGATATGCAAGAAAAGATAAGCCCAACCAGACTCAAGCCACATACGAGCCC  
CTCTCTATGTAACAAAATATCTTGGGGATAATTTGGGCTTGAACCCACTCAATTAGATAGATATGTTGTT  
TTCGTGTGATTTTTATGAATGAAGCCATGAGCAATAAATGTCTCTAACCTGTTGAGTCTTCTGACACAATC  
TGTTTTTGGTACATTTTTCACTCAACCACTATTCATAGCATCTCATATGGGGCTTTTGTCCCGCTCAAGA  
CATTATCCTGTCTTGCCTGTTGCCGGATGCAGCAGTCTCTTGTGCCACGGAGTCGCACGGGATCAGGTT  
CAAGGCCGAACACACCACCGACAGAGACGTCACCTATGATCAAAAACTGATTCTTTTACCCTGCTGTT  
TTGCGGGATCGCCACCGCAGCCCCGACCCCTGCCCCACCTCCGCCCTGGATGCCGTGCTCGAACCGGGC  
GTGCTGCGAGTCGGCTTCGATGCCGGCTATCAACCCCTTCGAGATGACCAACAAGCAGGGCCAAATACATCG  
GCTTTGACGTGGATCTCGCCAAGATGGTCGCCAAAGAGATGGGGGTGAAGGTCGAGTTGCTCAACCCGC  
CTGGGATGGCATCATTCCGGCGCTGCTGACCAACAAGTTTCGACGTCATCATGGGCGGCATGACCGTCACT  
CCCCAGCGCAATCTCGGGTCAACTTCGCCGATCCTTACATCGTGGTCGGCCAGACCATCGTCTGCGCA  
AAGAGAAGGGCGGCAAAATCAAATCCTTACCAGCCTCAACGACCCGAAATACAAGATCGCGGTCAAGCT  
CGGCACCACCGGCGAGCAGGCAGTCAAGCGCTGATCCCCAAAGCCACCTGCTGCAGTTTGAACCCAG  
GATGACGCCAAGCTGGAAGTGTCAACGGCAAGGTGATGCGTTCGCTATGACCTGCCCTACAACGCTA  
TTTTTCGCTCCAGAATCAGGGCGCCGTGGTGCACCTCGACAAGCCGTTACCTTCGAGCCGCTGGCCTG  
GGCCATCCGCAAAGGGGATCAGGACACCCTCAACTGGTTCAACAACCTACCTGCGCCAGATCAAGGGCGAT  
GGCAGCTACGACCGTCTCTACAAGAAGTGGTTCGAATCCAACGCTGGCTGAATCAGTCAAATAACCTC  
CGGGGGGCGGCACATGCCGCCCTGCACCACGCGACTCCCCACACAATAACGAGAAGAGGTTGTGACTGT  
GCACACACCCAAACCGACAAGACAGATGGAAAAACAACCCAAATCAGCTGCTCTGGCATGGGGTTTTTCTG  
CTGATGCTGCTGGTTGCCGATTTCCGGCATCTACAAGGCTGTCCAGTCAGTGGATTACACCTGGCGCTGGG  
AACGCATTTCCCAATACATCGCCTATCAGGCGGAGCAGAAGAATCTGGCCGAATTTGACGGCACCGTGT  
CGCGGGTACCAGTGAGGCAGAGAAGGGCAAGCTGTTCTGCAAGACGATCTCGACCCCAATGTGCGGCAA  
GCCATCGCCAGCACTGGCGTACAAGTCCGCGAAGGGGATACCGTTTTTTCGTGGCGATACCTTCGACACCC

AACTGAGCTGGACCGCAGGCCCCATCGCCTGGGGCGTCTGGGTCACCGTCAAGCTCTCGCTGGTAGCAGG  
CATCTTCGCCATCCTGCTCGGCACCCTGGCCGGGCTGGCGCGCTCTCCCCAATCCCGCCTGCGCAAT  
CTGGCGGTACCTACGTTGAGCTCATCCGCGGCACGCCGCTGCTGGTGCAGATCTTCATCGTCTACTTCT  
TTATCGGCACCGTGCTGAACCTCGATCGCTTCACCGCCGGGGTCGCCGCGCTGGCGGTCTTTACCGGCGC  
CTATGTGGCGGAGATCGTCCGCGCCGGTATCAGCTCCATCCACAAGGGGCGAGATGGAGGCGGGCCGAGC  
CTGGGTATGACCTCCGCCCAGACCATGCGCTACGTCATCCTGCCGAGGCGTTCAAGCGGGTGCTGCCAC  
CGCTGGCGGGCAATTCATCAACCTCATCAAGGACTCCTCGCTAGTCTCGGTCATCTCCATCACCAGTCT  
GACCAAGGCGGGGCGGAGGTGGTGGTGGTGGTGGTGGTGGTGGTGGTGGTGGTGGTGGTGGTGGTGGTGGT  
CTCTATCTGTTGCTGACCGGCACCCTCTCCTTCTTCTGGTACGCCGCTTAGAGGTGAAATATGCACGCAGTA  
ACTGATCCCATCATCAAGGTGCAACGGGCGTCGATAAGTGCAGCCATCACCAGGCCCCCTTCGCCTTCC  
CGTTTCGTTTTCTGGAGGTGAAATATGCGCGCAGCACTGATCCCATCATCAAAGCGACCGGCGTAGAGA  
AGTTCTACGGCAGCGAAGTGCACGCCCTTGAAAAATGTGACACCCAGGTGGCCGAAGGGGAAGTGGTGGT  
GATCGTCGGCCCCAGCGGCTCCGGCAAATCCACCTTCTGCGCACCTCAACCAGCTGGAGACCATCAAC  
GACGGCAAACATCGTGGTGCAGGCATCTGCCTGACCGAGCCGGGCGATGTCAACAAGCTGCGGGAAGAGG  
TGGGCATGGTGTTCAGTCTTCAACCTCTTCCCCACCTGACGGTGTGGATAACATCTGCCTCGCTCC  
GCAGAAGGTGCGTGGCCTGTGCGCGCGTGGAGCCGAAGACAGAGCCAAGGCGCTGCTGCTGAAAGTGGGG  
CTGTGCGGTGAAAGCGGCCAGCTATCCCTCCAACTCTCCGGCGGTGAGCAACAGCGGGTGGCCATTGCC  
GGGCACTCGCCATGCAGCCACGCATCATGCTGTTGACGAGCCGACCAGTGCCTGGACCCGAGATGGT  
GGGGGAAGTGTGGATGTGATGAAGGGACTCGCCCGGAAGGGATGACCATGGTGGTGGTGGTGGTGGTGGT  
ATGGGCTTTGCCCGGAGGTGGCTGATCGGGTGTCTTTATGGAGAGTGGCGAACTGCTGGTGGATGAAA  
AACCCGAGACTTCTTCGACAATCCCCCTCCCCGCGTCTGCGCCAGTTCCTGAGTCAAGTGTGTAGCC  
AACATGCTCTGCTGGATAAACGAAGAGGGACCGCAAGGTCCCTCTTCTTGTCTGTACGCTGAGCAGACT  
CAACCCAGCTGAACCCGAGCGCCCCCTCTCATCGGCTCAGCGCGGGGACTTTCCCAGATAGCGCTCCACGA  
TCACTTTCACCCCGTACGTTTTTTGAGCTGATATAGCTCCTTGTCAAACCTGGTCGATAAAGCCCTGTTT  
GTAGGGGTACTCCCCCTTGGCGGTGTAGCCGAGAAACCCCTGCTCCTTGTGAGCACCCGACCCGTGTTG  
AGCAGGGACATATCGGCCACCGCCAGCTGATCGGCCCTTATCATGTTGAGCAACTCATAGAGCAGGGAGA  
GGCATCATTTGATGGTGAATCGACCCGGCCGCGGACAATCTTGAGCAGGTTCTCCCGATTGCTTTTTAC  
CTCCTCCACCTGATGCTGCTTCTTCTTTACCGCTGACCCAGGCAAGGCATCGCCGCCAACGGCAAAGCCAGCG  
TTCATGCCAAAGCGCAAACCTGATAGTGCAGCGGAAACCTGGACTGCGGGGTATTGGTGTCCACACTGG  
CGCCGCACATCACCACCAGCTCTTCATCCAGCATCGGCTGGGAGTAGGGCCACATATAAGGGCGGGTATC  
GGGCATGTAGTAAGGTGGAATAATAGCGAAGGCGGTCCCTGTTCACCATGCTCAGACCGCGCCGCCAC  
GGCATAGGCTTGAGTACCACCTCATAGTCAGGCATGGCAGAGGTCACCTCGCGGATGATGTGCGCATAGA  
TCCCCCTGACCTCCTCCCCCTCCTGCCAGGAGTAGGGGGGATAGGCGGCATCCGCCAGGATCTCGACCCG  
GGTCTTGGCGTGCGCCATCATGCACAACCCAGCAACAAGCAACACCAGACGCGCATAAGCCAGCACCTC  
CTGAAAAAGCCTGCATCAAGCATAGCCATCCAGCGCGCCTTCTCTGCTGCCGCGCCATATTTTCATGCCA  
TCTCTTCGTTGGCAGAAAAATGTTAATGAATTATTAACCCATCCTTTATGCTGGAGAGCAATTGCTCTG  
AATGGATGGCCGTATATGGATGTGCAACTGCTTTTGTCTTACCTCTCCCCGATTTTTCTGGCCTTTATCG  
GCTGGGAGATGCTTTACCTGCGCAAACATGGCGCTGACTTTCCACCGCCACCTACCAGTGGCGGGATCT  
GTTCCGCAACGCCGCCCTGGCCCTGATGCACCAAGGGGGCGATGCGCTGGCGGCCATCGCCATTGCTTAT  
CTGTATGACACCCTCTGGGGCTGGCGACTGTTGACATCGAGCTCACCTTCTGGAGCGTATTGCTGCTGT  
TCCTGTTGAGGATCTCTGTTACTGGCTGTTCCACTTCACCAGCCACCATGTGCGCTGGCTGTGGGCCTC  
CCATGTGGTGCATCACAGCTCGGAGCGGCTCAATCTCTCCACTGCCTTTCGCCAGAGCCTGATGTACCC  
ATCTCCGGCATGTGGCTGTTCTGGATCCCGATGATTGTATCGGCTTCCGCCCCGAGGACGTCATCGCCA  
CCGTGCTGCTGAGCCTCGGTTTTCCAGTCTTTCGTCCACACCAGGTGGTGGGCAAACCTCGGCTGGCTTGA  
ATGGGTCTTCAACACCCCTCCACCCAGGGTGCACCAGCCAGCAACGCCAAATACATAGACCGCAAC  
TTCGCCGGGGTGTGATCATCTGGGATCGGCTGTTCCGGCACCTTGTGGAAGAAGACCCGCGGAGCCGT  
GTCGCTTTGGCATCACCAGCCTATCCACAGCTTCAACCCCTCACCTCACCTTCCATGAGTGGCGCGGA  
CATGCTGCGTGACGCCCGTGGCCTACCCTGGCGCAAAAACTCGCCGTGCTGTTTGGCAAACCGGCCGGA  
CCTGCCAGCCGCTGAGCCTTCGTCCCGGATAGCAAGTCCCTGATAACCAGTCCCTGATAACAAGAGAGCG  
CCATGGTGGCGCTCTCTTTTATGGTCACTATCTTCGATATCAGAGATGGGCAAACGACCAGACGGCG  
GGGATCAGGCTCAGCAAGGTCACTCCGGCAAACAGCCGCTCGCGGCCACTCAGGCAAAGACCAGCCCCCA  
GCTGACGGCGACTGTAGAGAAACAGCAGCAGACCCGGCCCGTAGAGCAGAAGCGACAGCAGCAGATACTC  
CACCCCGGCGGCATAGAGCAGCCAGAAGCCGTAACCGCTCGACACCAGTGCCACCAGCCCGCATCAGGCCT  
TGGCCCTGCCCGCTCTCCCCCTTCTGCTGAACAAGAGCTTGAGCAAAAACAGGCCGATCAGCAGGTAGG  
GCACCAGGATCATCGAGGTAGAGATAAGCAGCAGGCTGGTGTAGCCCTTGCCGAGCAACCACACCAGCAG  
CAGGCATGTCTGCACCGTCAAGTGGTGGTGGTGGTGGTGGTGGTGGTGGTGGTGGTGGTGGTGGTGGTGGT  
CGGAAGATGGCAGGAAAGGCGCCGTGTCGGGCCGCGCTGAACGGCACCTCGGCCGAGAACAGGGTCCAGC  
TCACATAGGAGGCGAGCACAGAGACGATAAGGCCGACGCTGATGAGCAGCTTGCCCCATGAGCCGGTCA  
CTTGGCCATCAGCCCTGCCATGGAGGGGTGGGCGAGCGCCGACGCTCGGGTCCGGTCAATATTTCCGAGC  
GCCAGCACCGAGATAAGCACATAGAGCAGCAACGCCAATACCACGCCAAGCACAGTGGCCGTGCCACAT  
CTCGCCGGTTTTCTGGCGCGGGCCGACAGCACCGCTGCCCCCTCGATACCGGTGAAGACCCAGAGGGTGT

CAGCATGGTGTTCGCGACCTGCTCGGAAACCGGCACCGCCAGGCTACTACCCTGCTGATCCGCCACGAAG  
GTGACCCGGATCGAACAGTAGCAGGCCAAACAGAATAAACAGCAGCAGCGGCAGGCTCTTGGCCAGGGTCCG  
CCACCAGATTGAATAGCGCCGCCTGCTGCACACCTCGAGCCACCAGCAGGTGCACCGCCAAAGGATGCA  
GGACTCGCCGACAAACGCCGCCAGGGTATTGCCGTCACCAAACCAGATCTGCTCCGGCGTATCGACAAAG  
CTGCCCAGCGCCGCAAATGCGATCACCAGATAGCCCACCACGCCGATGGTGGCACAGAGCCAGTATCCCC  
AGGCAGAGAAGAAGCCCACCAGCTCGCCAAAACCGGCGCGGGCGTAGCTGTAGATGCCGCCGTGAGATC  
CGGCCTTAACCGCGACAGATAGAGAAAACACTCATGGCGAGCGCCAGGATGCCCACCCCCGTACAGCCCCAG  
CCGATCAGCACGGCGCGGGCGCCTGCCACCTCGGCCATGTTCTGGGGCAGGCTGAAAAATCCCCGCCCCCA  
CCATGGAGCTGAATACCAGCGCGGTGAGGGACCAGAGCCCAGTCTTGTCTCTTTTCATGGGTGCTCCTTA  
GCGAACCCGGCGGCTCAGCGCCTGAATATGCTCGGGCCGATACCGCAGCAACCGCCGATCAAATTCGCC  
CCGGCCCGCGCCAGCGCTCGGCCAGCGAGATAATCCAGCGGCCCCAGATCGGGCGGGATCTCGTCCA  
GCCCATCGTTGGCGGTGGCCTCTTTGGGCTGCGGGCAACCTCGAGAGCCCCCTCGATCACCTCGGGCTGACAG  
CAGTTGAACAGGATGGCATCGACTCCAGCCGCCACCAGCGCGGTCAACGCATCGGGCGACTCGCTCGCCGG  
AGCGCAGTCGCGGCTCGTTGCCCGGCCTCATCTTCCAGCGTGAAGGAGACCCAGAACGGCTTGCCATC  
GTCAGGCAACAGCGCTTTTCAAGGCCAGTGGCTCGGCAATCAGGCTCATGGTCTCGGCCAGCCAGATATCC  
ACATGGGGAGATAGCGCCCGATAAGCGCGCTCGCCAGCTCGCTCACCCGGTCCGCCCTTGAACAGGTCCG  
CACGGTAGGAGCCAAACAGCGGTGGCAGAGAACCAGCCACCTGCACGGCGCCCTTCTGCTCGTCAGCCAC  
CTCACGGGCCAGCTGACCGGCCAGCGCTGCCAACCCCTCCCCGTGCGCAAAGAAACGCTCATCGCCGATA  
TGAAACGGCACCAGCGCATAGCTGTTGGTGGTAATGACCCGGGCACCGCTAGCCACATAGCCCTGATGCA  
CGTCACGCACCGTCTCTGGCGCCTCCATCAAGGCCAGCGCCGACCCTCGGGTTGACGAAACGGTGGCCC  
CCGCCGTGCCAACTCGCGCCCCATGCCCCATCCAGCACCCACAATTCCTTGGTTTTTCATCTGTGCTGTC  
TCTTTGTTATATGCGTTGTTTATTTGCGTATTTATCTGTTTGTGTTTGTGATCTGCGGTTTCACGCTGAA  
TCGCTGCAGATCGTCCCGCTTCATCTTGGGAAGCCCTTTTATTTATGTAGCCATAAAAAATATGGATGTT  
TAGATGGCCAAAACAAGATAAAAACAAAGTGCCACGGGCGGCAATCAGTATCAGCAGAAATCAGCGTGCAA  
ACGGCGAGGCAAACGCAGAAATGCAAGAGGCCACCCGAAGGTGGCTCATCAAACTTTGATCCGCTGGC  
GGCTTAACGCCCGCCAGCACTCGCTTATCTGCTTGAACCGAGTCGGAGACCCGACCCTGCTGCGGCAAG  
CCGCGCCAGATCTGCTCCCAGTGGCAGGGCTGAGCGGACGACCGGAGGCGACGCTGCACACCCGATAGA  
GGTAGTCATGGGCGGTGGCTGGCCGATGCTCGGAGTGAGGAATTTGGAGACCGGATCGTCAACCGCAC  
ATCCCGCATGCCGAGCAGCGGATAGTCGTTGTGCACCGCCGCCAGCATGGTCTCGCGCATGGCGGACTCG  
ATGTAGCCACGAGCAAACAGGGCGGTCAACGACTCCAGCGACCCCTGATCCGGGGCGGTGATACTGCTCGT  
CAAAGACCGGGCTCGGCTCGGCCATGCCGCTTTGTACCACCGAATCGGGATCAGGCTGCGGCACGACCAC  
AGCAGGCTTGGGGGCAACCGGCTTGGCTGCTACTGTGGCTTTGCGCGGCGCACTCTGGCTACAGGCACCC  
AGTGCCAGGGCGAGCGGACACAGGCCAGCGCACGGGAATGAGACTGCATCTTCATGACTCTTATGTCCG  
TCCTTTTACGATTCTGAGCTGGCTTCTCGGCCACAGCCGGTTCGACCCGGGTAACCAGCAGCTGATCAA  
TCTTTGTAACCTGTGATATCGACCACTTCAACTTGTAAACCGGCGTATTTGACCGAGTCAGTGCCTTGGG  
GATCTTGGCGCAGCATATACATGATAAAGCCGGCGATGGTCTCGTAGTTCTGGTTCTCGGGGAACCTTTCG  
ATATCGAAGGCGCGCATCACGTGCGGAGATGGGGGTGACCCCGTCCACCAGCCAGGAGTTCTCGTCCGCT  
GGACGATCTGCTCTTCCACCACGTGAGTCGCCCACCTCGCCATGACGGTGCTCATCAGGTGCTTATGGT  
GACAATCCCCACCACCAGCGCTACTCGTTTCATCACCACGGCAAAGTCACCACGATGATTTCTTGAAGTAC  
TCCATCGCCTCATAGAGGTTTCAAGGATCGGGGATGATGATGACGTTCTGCACCAGGTTGCCACCAATCA  
GGTGCATGCTCTGGCCGCCGATAACCGGGATCAGCAGCTCTTTGGCATCGACAAAGCCCTTGATGCTGTC  
GAGGTTGTGGTACAGACCAGAACTTGTGTGGGGATGTTTCGGCGATCTTCGCCTTGATGCTCTCTTCA  
CTCTCTTGCAGGGTGAAGTAGATGAGGCTCTCGCGGGCCGTCATGGCAGAGGTGACACCAAGGGACTGCA  
ACTCGAACACGTTCTCGATGAGCTGATGCTCCTCGCGCTGGATAACCCCCGCTCGGCACCCGGCATCCAT  
CACCGCATAGATATCGTCCGAGGTGATCTCGTCTGTTACGCACGGTGGAGACGCGCATCAGACGGAACAGG  
GAGTTGGCCAGCCGTTGAAAACCCACACCAGCGGCATCAACACAGTGACGAAGAAGAGCATCGGGCGCA  
CCACCACCACGGCAATCTGCTCGGGCATGGTTCATGGCCAGACGCTTGGGCATCAGGTGCGGCATCAGGAT  
AAACATGCCGGTGACGAACACGAAGGAGGCACCGGAGCTGATCTCGCCAAGCCAGGGGCCCCGTTAGAAC  
TGGGAGACAATCCCCTTGATGGCGGGGTTGAGGGCAGACTCCCCAGGATACCGCCCAGAATGGCGACGG  
TATTGAGGCCAATCTGCACCACGGTGAAGAAAGTTGCCCGGCTGGGCTGCAAGGCCAGCACCTTTTCGGC  
CTGGCGATTACCTTCATCCGCCATCACCTGCAATTTGATTTTGCAGACGCGGCGAGAGATCTCGGAG  
AGGGAGAAGAACACACTGCCGCCAACAGCAGCATTAAGAAAGAACAACTATCGGCAAACCTCATGATTA  
ACCTATTGCTACACCCGCCTTAGCACAAGACGGCAAACCTGGGCCCGGGAGACCGGACCGTGAGCCCATCC  
GGGACTCACACAGGGGGAGTATTCTATCAGAAAACAGCCAGTTGGGGGCTTTATCTTACTCCGACCAGTT  
ATGCAACAAAAAAGGCGCTTACAGCGCCTTTTTATTCACTTCCGGTTAGCCCTTGCCAGCAGGGTGGCC  
AAATCGTCCGCTTGGTGTGGCGCACATCCTTGCCTTTTACGTTAGTAGACGATGTAICTCGCAGATGTGCT  
GGCAACGATCGCCGACCCGCTCGATGGCCCCGTGCCGCCACAGGACGTTGAGAACCTGGGGGATGGTGGC  
GGGATCTTCCATCATATAGGTCATCAGCTCGCGGATGATGGACTCGTACTCACGGTCTACCTTGTCTATCT  
TCCTTGTAGACAGCCAGCGCCGATCCAGATCCATGCGGGCGAAGGCGTCGAGCACATCGTGCAGCATCT  
TGATAGTGCAGCGCCCATGTTCTCCAGCGACACCAGCGGGCGGCTGCGGCTTGTGGCGTTGTCGGTCCAG

CATGCGGGCGATCTTGTGCGCCACGTCGCCAATACGCTCCAGATCGGTGATGGTCTTGATGATGGCCATC  
ACCAGTCGCAGGTTCGGAGGCTGTCGGCTGACGCTTGGCGATGATGCGGGTGCACCTCTCGTCGATCGCCA  
CTTCCATGGCGTTGACCTTGTGGTCGTTGGCCACGATCTTGGCGGGCCGATCGAGATCCTGATCGTGGAT  
CGCCGCAATGGCGTCGGTGTGCTGCTTACCAGACCGCCATCACCAGCACCTGGTTGCGCACGCTC  
TCTAGCTCGGCATTGAACTGACCGGAGATGTGTTTATTGAGGTTTCATATTGTCCATACAAATAATCCTTG  
ATTGCTCCGATTATGCCTTAGCCGTTGAACCGACTGCCAATCTGTTTGGCTGAGATTCATCCTCTCCTCTC  
CTTAGCCGTAACGACCGGTAATGTAATCTTCGGTCTTTTTCTTGGCCGGGGTGGTGAAAAATGGTGTGGT  
ATCCGAGTACTCGATAAGCTCGCCATATACATGAAGGCGGTCTGATCCGACACTCGCGCAGCCTGTTGC  
ATGTTGTGGGTACGATCACCACGGTGAACCTGGCTCTTGTGCTGATCAGCTCCTCGATGGTGAGGG  
TGGAGATGGGGTCGAGCGCCGAGGTCGGTTCATCGAGCAGCAACTTCCGGCTCGATGGCAATGGCCGG  
GGCAATCACCAGACGCTGCTGCTGACTGACCACGAGAGACCGAAGGCGTTGTCGTGCAGACGATCCTTACC  
TCGTCCCACAGGGCCGACCACGCAAGGAGCGCTCGGCCGTTTCATCCAGAGTGCAGCGATCGTTGATCC  
CCTGCAGGCGCAGACCATAGACCAGTTCCTCGTAGATGGACTTGGGGAACGGGTTAGGGCGCTGGAACAC  
CATGCCCACCTGACGGCGCAGGGCGGAAACATCGACGCTCTTGTTCATATATGTTATGGCCGTGCAGTTGG  
ATTTCTCCCTCGATGCGGCAGATCTCCACCAGATCGTTCATCCGGTTGATGCAGCGCAGCAGGGTCGATT  
TACCACAGCCTGACGGGCCGATAAAGGCGGTACCTGCCCTTTGGGGATCTTCATGTTGACGTTGAACAA  
CGCCTGCTTGTGCTGCCGTAGTACAGGTTGAGATCCTTCACTCCAGCGCGGTCTGCTCCGGGGTCAGGTTG  
AGCAGGTCCAGCGCGGTATGCTGGGTAGACGTGGTCTTACGTTGATCATCTGTTACCTCAAATCTATC  
TGGAGTGGCCGGACAGCTGCCGGCGCCCTCACGTATTGGTGCAGAAAGATGGCGGCTCGCGCTCGGCCG  
CCCCTCTGTTATCTCACTCTTGTATCACTCAAAGGCGCCGATTAATGCTCCAGCGACCGGAATTTCTC  
GCGCAAGTGGTTACGAATACCGATAGCGGTTCAGGTTTCAGACCCACGATCACCCTCACCAGCAGGAAGGAG  
GTGGCGTAGACCAGCGGGCGGGCAGCCTCAACGTTGGGGCTCTGGAAGCCGACGTCATAGATGTGGAAGC  
CCAGGTGCATGAACTTGCCTCCACATGCAGATACGGGAAGTTGCCATCCATCGGCAGGGTCGGTGCCAG  
TTTTACCACCCCCACCAGCATCAGCGGCCCACTTACCAGGCTGCACGGGCAATCGCCAGAATAAGGCCG  
GTCATGATGGCCGGACTCGCCATCGGCAGCAGATGCGCCAGAGGGTTTCGGCTGGGTCGCGCCAGTG  
CCAGCGAGCCCTGACGGATGGTGTCTCGGGATCCGCGCCAGCCCTCTTCGGTGGAGACAATCACCACCGG  
CAGGGTCAGGATGGCCAGGGTCAGCGCCGACCAGATCACGCCGGGTGAACCAAAGGTTGGGCTCGGCAGC  
GCTTCCGGGTAGAAAGGCGGGTCGATGCTGCCCCCAAGGTTGTAACGAAGAAGCCAGACAAACAGC  
CGTAGACGATGGAGGGCAGCCCGCCAGGTTGATCACCAGCAATGCGGATGATCTTGGTCAGACTGTTCTT  
GCCCCGCTATTTCGTGCAGGTAGACTGCCGCCACCACCCCAAGCGGGTTCACGATGATCGCCATCAGGAAG  
ACCATGAACACAGTGCAGAAAGATAGCCGGGAACACCCCGCCCTCGGTGTTGGCTTCACGGGGATCGTCAG  
AGACGAACTTGGCGATCTGGTGAACAGTGAACCACTTGGCCAGCAGGCTCATGTCGTTGGGCCATAC  
CACGTCCAGTACCTTGGACATCGGCATGGTACCAGCTCGCCACGCATATCCTTGACGGTAATGGCGTCG  
CGGTCCGCTTGGCTACGCAGGGAGAAGAGCTCTTTTTCCAGCACTTGATAGCGATCGTTGAGGGCCTGAC  
GCTCGCTGGCCAGTTTCGGCTTTGAGCTGATCGGTGAGCTTGTTCATCCAGCTCGGCCCTTGCCTCTTTTCAG  
GCGCAGCCGCTCCAGTTGATAGTTGATGCTGCCGATGTCCCTTTTTGTCAGATCGTTGGCCTGTTCTGAA  
AGGGCATTGGCTCGCGCCAGCACCCGCTGCAGGGCAGGATGCAGATCAGAGGTGAGCTCGCGGCCATCCT  
CTTTACCCCCGACGATATAGCCATAGAAGTTGCCGTTGGTGGCAGCTCAACCATGGCCAGCTCAGCCGG  
CTGGCTCTGGGACTTGATGTCCGTCTCCAGCACCCAGCGAAAATCGAGGTC AACGAACTCACGGTTGCCG  
GTCTTGACCAGATAGCGGGTCAGCAGCTCGCGCTCTTCCCCTTCCAGTGGCAGACCTGCGGCACGCAGTC  
GCTCCACCGGAACCTGCTCGCGATCGTTGATCTCGCCGATCAGTACGCTCTTGTGTCGCTGGCATCTTC  
CAGCTGCCACTCATAGATGGGGTTCGGCCAGAAGTAGACCAGACCAGCCAGCCGATCAGCAGCAGCAGA  
CCCAGTACCGCCACCAGACTCAGGCTGACGGCACCCGCGTTCATCCAGATCCAGGGGGCCCTGATTTAA  
ACCCTTACCCATTGTGATTCCTTGTCCATTACAGAGTGCCTTACATCGAGCTGATTTTTTTCACGC  
AACCGCTGACGGACAAACTCGGCCAGGGTGTGAAACAAAAGGTGAACACAAACAGGACGAAGGCCGCGA  
GGAACAGTACCCGATAGTGGGAGCTGCCACTTCCGATTCGGCATCTCCACCGCATGTTGGCGGCGAG  
GGTGCAGCCCTGGAACATGGAGAAGTCCATGATGGGGGTGTGCGCGTAGCCATCAGCACGATCATG  
GTCTCGCCACGGCGCGGCCAAGGCCATCATCACCAGAGAAAGATGCCCGGGCTGGCGGTGAGGATCA  
CCACCCGGCTCAGGGTCTGCCACGGGGTGGCCCCAGCGCCAGCGAGCCCTGGGTGAGGTGCTTGGGCAC  
CGAGAAGACTGCATCTTACGCGATGGAGAAGATGGTGGGGATGACCGCGAAGCCCATGGCGATACCGACC  
ACCAGCGAGTTGCGCTGGTCAAACCTTGTGATGCCATTTCTGTGAGTACGCCAGATGCGCGAATCGCCGTGCA  
TAAAGGCATTCTCGATGAGCGGGCTCAGGGCGAAGGCCCCAGCCAATCAGCAGCAGCACCAGGGATCAG  
CAGGATGGCGTGCCACCTTTCAGGCAGCCAGGACTTGGCCGCTCCGGCAGATAGTTCCAGAGCAGTGC  
GTCAGCAGCATCCCCATCGGCAGCAATATCAGCAGCAGGATCACCCGGGCAACGCACCCTCGATGATGG  
GCGCCAGCCACAGACCCGCCAGGAAGCCAGGATAACGGTTCGGCAGCGCCGCTGATCTCGACCGTCCG  
CTTGACGATTTTGCAGCCCGCCGACATGAAGTAGGCGGTATAGATGGCACCGGCCACCGCCAGCGGC  
ACAGCAAACACCATGGCGTAGAAAGAGGCTTTTCAGCGTACCAGAAATACCAGCGGCACCAAACCTCAGCTTGG  
CTTCAAAGTGGTTGCTGGCGGAGGTGGATTGCCACACATACTGGGGCTCCGGATAGCCTTCATACCACAC  
CTGTTGCCAGAGGGCAGACCAGGTCACCTTCGGGGTGTTCGTTCTCCACCGAGAAGAGCTTGAAGCTGTT  
CCTTGCTGCATCAGCAACAGGTTGTGACGGGGGAGATGGCCAGGGCAGAGAGTTCCGCCCCCTTCCACCG  
TCTCGGTGAGCAGCTTGGTCTCGCCGGTGGCGTGAAGAAGCTGATGATGCCATCCTTGTCCGCACTGAT

GAAGCCTTTGCGAAAGTGCTCGGGAGTCAGCAGGTCTACCGGCCATCGCCCTTGAAGTCACGAATTTGG  
GTGAAGTGGCGTTTGGCCATCCTTCGCCACTTCGAACCACTGGGAAATCACGCCGTTGTCATTACCCACCA  
GCAGTGAAGAGGGCGCCGGAGAGCAGCTGAACCCGGGTACATTGGCGTTGGGGGCATTGATCTCCAACAC  
GTTACGCAGGGAGATTTTCGCTCAGGTTATGAATGTCATAGACGGAGAGGCCGATTGCCCTCGCGCACGAAC  
AGGATCCGCAGATTGGGGGTGAGCAACATCTGATCCACATGGCGCGGCAGGGAGGGAATCGTGTAGTTTT  
CACTGCTCCACTCAATCTCCCCGGAGATGAAGTTCTCCTCACCAGCTCATCACCAGTCAACACCACGACC  
ATCTTCCGGTACGGCGGGTTCGCCATCTTGTCTTGGTGGCTTCGAACACCATCAGTTGCAGCGCCTTC  
CCTTGGCGGGTCGATCACCACCGGCTCTTCGCCGAAGGGATATTCAGGCTGGGCTCAATCACCACGCACAT  
CGTTGGGATAGGAGACCTTGAACGCTGGCTGGACGACCTGCGCCTTGCATCGGCAAAGCCGTAAGCGAT  
CAGCCGATGGCCGGTTCGCCGGGTTCGCTACCGTGGTGTATGTCACCAGCAACCTGAGCCTGACCCAGTGAC  
TGGCCGACCTTGATCTTGTCTATCTCCCTGCACCCGAAAGTTCAGCTGCCCTTTATCGCTGAAGCGAT  
AGCCGATCTCGTTCTGCTCTTCCACGCCGAGCCAGCGGCTCTTCCCTGCGGCAGGCAGGGTAAACGAGGC  
GGTTCGGCTCCATGGAGGCGCCATTGAAGATGGGTTTCACCACATAGAGCAGATAAAAAGAAGATAAGCAGC  
AGCGCCACCAGTACCAGGGCTCCGCTGTGGTGCAGCCATATTTGGCCAAATTTATCCTTGATCCGGCGTT  
TTCTACTGCCCGCCATGACCAGGTTTAAACGATTCCGATGACATGCAAGACCTCAATGTAAGCTAGGCTTC  
GCGGCATTATATGGCGGTTGCATGACAGTTTTGTACATCGAGAACGCTTTAACTGAGGTTGTTAACGGA  
AGAATGGGCGGGGATCCCCTCGAAGGAGGTCGATCGTAATATATGTTTATAAAGGGATATTTATGCTGA  
TAATCAGCAAGGGCAGCCTGCGCTGCCCCGAATGATTCAGGAAAGGGTATCGTTTGATTGTTGCAGCGC  
CAGTTTGGCCGCTTTTTCTCGGCGCGACGGCGCTTGAAGAAGGCCGACAACCTGGGCCGAGCAGGCATCG  
GCCAGCACACCCGCGGTGAGCTCGACGCTGTGATTGTGGCGGGTCTTCAAGATCTCGAACACCGACC  
CCGCGGCACCGGTCTTGAGATCTCGGGCGCCGTAAACCACCCGCTTGACCCTGCTATGGATCAGCGCACC  
GGCACACATACAGCAGGGCTCCAGCGTCACATAAAGAGTGGTGTGAGCAGCCGGTAGTTCGCCAGCTGC  
TTGCCCGCCGCCCCGATTGCCATCACCTCGGCATGGGCACAGGCATCGTGTTCGCTGATGGAGCGGTTCC  
ACCCCTCTCCACCACCTGACCATCCAGCACCAGTACGGCACCGACCGGGATCTCGCCAAATCCCTTCGGC  
CCGGGCGGCCAATGCCATGGCATGGCGCATCCACTGTTCTGCTCCTGCTCGGTCTGACTCGGTATTTCTGGG  
ACCTCTGATGGTTTTACGCCCATCCCCTCTTATATTTGTTCAATTTGTGCTGTTTGCATTCTCGCTATTTCA  
TACCTGTCAAGTGAATCCATAGATAGCAGGCATGATCGCTCGCAGTGACAGCGGCGATTATGCCAAATCT  
GCACGTCAGACCCAAAGCCGATCCCAGTACGAGCAATAAAGAAGCAATCGGCATCTCTATGATAAAAAAGG  
AGTTGCACCCGTTTGGTTCATGCTATTAGACTTCCCTCCCGTACGCCGAGTCTGACTCCGTCGGTGTGTAG  
CGCAGCCAGGTAGCGCATCTGCATGGGGTGTAGAGGGTTCGAAATCCCTTCACACCGACCATTT  
TCCCCGAGGATAGCCAGTCAAAGGACTGGGCTATTTTTTTTGCCTCCGATTTATCCTCCTGACAACGCCA  
GTCTACCAAGAACAACAAAAACTCAGAACCCTTGAATCTTTTTTGGCGAACTCATTAAGATGCGCAACTT  
TCCGCGGTAGACAACACAGGGAGGTGGAAACACGAGTGAAGGGATCACTGTCCGGCTTGCCTGCAACAC  
AGGACCAGGCATGAACCAGAACACCGATTTTCGACCCGCCATTACGCTTTATTCGGTTCCCTCACGACACC  
CCTTGCCACACCGAAAGCGAAAATGAACAGGTCAATCAGCTGGATGTGATCGATCTGGCCGAACCGGATG  
ATGACTATTGAGCCCGCCAGATGGCCGCTCAATCACTGGGGCATCGCCTGTACAACACACTCAGTTTCA  
CACCTTGGCGAGAAATCTGCAAAAAACGACAACTGCTAATTTCTATCAAGGATGGCAGTATTATTGACT  
GATGCGTCTCCCCCTTCCCTCTCCAGCATCTCCCCGACAATTGATACAAACCTACGTTATTGCGCTTCA  
CTTTTCATCGTTGCAACCGCTGGTGCACACAGAGCCTGCATCACCACACCAAGTTTAAAACGCACGTTCA  
CCAAGTGGTCCAGCAATAGCAAAACATTCATTGCCACATTCAAAACGCAATTTATACGGCTGTTTTGGCA  
AAGCCTGGAGTTAGGTTCGGGATTTGTTTTTGCATTTGTAATTTTATTACGTAATAAGTTACAAAATGAGG  
GGCAGGGTAACGGCCCAAATTAGCCGTTGTCCGATGGGAAAAAGCAGGAGCATAACCATCTGCGTAGAGC  
TTTTACACCAACCAATAAAGCAATAAAAAACATAAGCTTAACCATATCGAAAAACAGGCGTTTAAAAA  
AAACTGTTGACGTAATCAACAATATTTTCGACCTTATCAATCGTGTATCCCGTTGTTGCGGGAACGTTT  
CAGGAACAGGGATTGACTTTAGTCGTAGTTAGTAAGTTCAAAATGTAATTTCTCAAAGGAGTGAACCTTA  
TGTCCGACCCGGTTCAGACCCACTGCAGCGCCGCTTCGCATCCAGGGCGAGATGCTGCCCGAATACGC  
GCAAATCTGACGCCGACGCGGTGGCTCTAGTCTCCGAACTGGTGGAAACGTTTGTCTCCCAAAGAGGG  
GAATTGCTGAAACAACGTGTGGCACGCCAGGCCCGTATCGATGGCGGCGAGCTGCCGGACTTCCCTGCCGG  
AAACCGCCACATCCGTGAAGGTGACTGGACCATTTCGCGGCATTTCCCGCCGACCTGCAAGACCGCGGTGT  
GGAGATCACAGGCCCGGTTCGAGCGCAAGATGGTGTGATCAACGCCCTCAACGCCAACGTCAAGGTGTTTCATG  
GCAGATTTTGGAGATTTCGCTGGCACCCGCTGGAATAAGGTGATCGAGGGCCAAATCAACCTGCGCGATG  
CGGTCAACGGCACCATCTCTTACACCAGTCCGGAAGGAAAGGCTTATACCCTGAACCCCAATCCGGCTGT  
GCTCATCTGCCGAGTTTCGTTGCTGACCTGCCGAAAAACATGTCACCTTCGATGGCGAGCCATCCCC  
GGCGGTCTGTTTCGATTTTGCCTCTACTTCCCTGCACAACATATCAGGCGCTGCTGGCCAAAGGCTCCGGCC  
CCTACTTCTACGTCCCCAAGCTGCAGAGCCATCTGGAAGGGCGCTGGTGGAGCGAGGTGTTTCGCTGGAC  
CGAGGACAAGTTTCGGCCTGCCCCGCGGCACCATCAAGGCCACCGTGCTTATTGAAACCTGCGCGCCGTG  
TTCGAGATGGATGAGCTGCTCTATCAGATGAAAGATCAGATCGTTGCGCTGAACTGCGGCGCGTGGGACT  
ACATCTTACGCTATATCAAAACCTTGAAGAACCATCCGGATCGGGTACTGCCTGATCGTCAAGTGGTGC  
CATGGACAAGCCGTTCCCTCTCCGCTACTCGCGGCTGCTGATCAAGACCTGCCACAAGCGCGGTGCGCTG  
GCGATGGGTGGCATGGCCGCTTTATTCCGGCCAAGGACGCGGCCGTCAACGAGCAGGCTTTCGCCAAGG  
TCAAGGCCGACAAGGAGCGCGAAGCCAACAACGGCCACGACGGTACCTGGGTCGCCACCCTGGCTGGC

CGATACCGCCATGGCGGTGTTCAACGCCACCATTGCGGCTGGTGCCAAGAACCAGATCGGCGTGCTGCGT  
GAGCAGGATGCCCCCATCACCGCCGCCGACCTGCTGGCACCCTGTGAGGGCGAGCGCACCGAGGCAGGGA  
TGCGCACCAATATCCGGGTTGCCCTGCAATATCTGGAGCCCTGGATCAACGGCAACGGCTGCGTGCCCAT  
CTACGGTCTGATGGAAGATGCCGCCACCGCCGAGATCTCCCGTACCTCCATCTGGCAGTGGATCCGCCAC  
GGCAAGAGCCTGTGCAATGGCAAGGTGGTGACCAAGGCCTGTTCCGCCAGATGCTGGCCGAGGAGCTGG  
AGGTGGTCAAAGCCGAGGTGGGCACCACGCGCTGGCAGGCAGGACGCTTTGCCGAGGCAGGCAGCTGAT  
GGAAGAGATCACCTGCGCCGACACCCTGATCGATTTTCTGACGCTGCCCGGTTACGAGCGGCTCTGAATC  
ACGGGCCCCCAGCGGGGCTCGCCAATAACAAGTCAATGGAAACGTGAAATCAATGAAAAGAGGGAACCTGAT  
ATGGCACTGACCCGTGAGCAACAGATCCAGGCTATCGAGAAAAGACTGGGCGGAAAACCCCCGCTGGAAAG  
GGATCAAGCGCGGCTACAGGGCCGAAGATGTGGTGAACCTGCGCGGCAGCTTGCAGCCGCTGCACACTCT  
GGCCCCAACGTGGTGCCGACAAGCTGTGGGGCTGATCCACGGCGACGCCAAGAAAGGCTACGTAACTGC  
CTCGGCGCTCTGACCGCGGTCAGGCGGTGCAGCAGGCCAAGGCGGGGATCGAGGCGATCTACCTCTCCG  
GCTGGCAGGTGGCGGCGACAACAACCTTGTCTCCACCATGTATCCGGATCAGTCCCTCTACCCGGCCAA  
CTCGGTACCGTCCGTGGTGGAGCGCATCAACAACCTCTTCGCCCGTGGCCGACCAGATCCAGTGGGCCAAC  
AAGGTAGGACCTCAGGATGAGGGCTTTATCGACTACTTCTGCCGATCGTGGCCGATGCTGAAGCCGGTT  
TCGGCGGCGTGCTGAACGCCCTTCGAACTGATGAAGGGGATGATTGAAGCGGGCGCCGCTGGCGTGCACCT  
CGAAGATCAGCTGGCATCAGTCAAGAAGTGCGGTCATATGGGCGCAAGGTGCTGGTACCGACTCAGGAA  
GCGGTGCAGAAGCTGGTTGCCGCTCGTCTGGCAGCCGATGTATGCGGCACCACCACCCTGGTGCATCGCC  
GTACCGATGCCAACGCCGCTGACCTGCTGACCACCGACGCCGACCCGTACGATGCAGACTTCTGACTGG  
CGAGCGCACTGCTGAAGGGTTCTACAAGGTACGTGCCGGTATCGATCAGGCCATCGCTCGCGGTCTGGCT  
TACGCCCCCTACGCAGACATGGTGTGGTGTGAAACCGCCAAGCCGGATCTGGACGAAGCGCGTAAATTTG  
CCGAAGCAATCAAGGCCAAGTTCCCGGACCCGCATCTGGCCTACAACCTGCTCCCGGAGCTTCAACTGGAA  
GAAGAATCTGGACGATGCCACCATCGCCCGCTTCCAGCAGGAGCTCTCCGACATGGGCTACAAGTACCAG  
TTCATCACCTCGCGGGTATCCACAACATGTGGTTCCACATGTACGAGCTTGCCACCAGTACGCCCGTG  
GCGAAGGGATGAAGCACTACGTCGAGATGGTGCAGGAGCCGGAATTTGCCGCCGCCAGCCGTGGCTACAC  
CTTCGTGGCACACCAGCAGGAGGTTGGTACCGGTTACTTCGACAAGGTGACCACCGTCATTCAGGGTGGC  
CAATCTCGGTGACCCGACTGACCGGCTCCACCGAAGAAGATCAGTTCACCTAATAAGAGAGCTGCCCTG  
AAATAGCAAAACCCCGCCTGATGCCGGGGTTCTTTTATCTGCCATTCAAACGAAAGTCAAGCCACAA  
CCGCACACCAGCAGAGAGGATCAGAGCTCGAGGATCTCTTTGACAAAAGGGAATGGTGAAGTTCGCGT  
GCGAAATGAGGCGTTGTGAGCTGATTGAGGGTGGTGCAGGAGGTCGCGCATATCGCGGGAGAGTTCGGTTG  
AGCAGGAAGCGGCCACATCGATGGGCAATTTGAAGCCCCGAGCTCGGCACGCAGCTGCAGGGCACTGA  
GCTTGCCTTTCATCATCCAGCTCTTCGAGATGGAAACTGACACCCAGTCGAGGCGGAAGCGAGATCCGG  
CAGTTGCAGTCCAGTTTTCGCGGTGCGCTGCAGCCGGTGACCACCAGCGTCCCTCGCCCTTCTCTGC  
CAGCGGTTGTAGAAATCGAACAGCGCCCGCTCCACACGGCATTCGCGGCGATCGCCTCAAGGCTGTGCA  
GACAGACCAGCGGCAGGCTTTCGAGGGCATCGAGCATGCTGGGATCGAGCTGTTCAAATGATCGAGGGA  
AAGATAGGCCCGCCCGCATCGCGGGCGTTGACCTCGGCACAGGTGGCGTGGAGCAGATGAGAGCGTCCG  
GATCCCTTGGCTCCCCAGAAATAGAGGAAAGGCGATCCCTGACCGATGGCCGCTTTTTGAGGGCGGTGA  
TCAGATGAGCATTGTTGCCGGGATAAAAACCTGACGAAGTTTCATCATCCGGTAGTTGTACGGCTAAAGA  
CAGTTGGGCCGGTTGCTTCACTCGTTGGGCTTTGACTGTGACATTTGTGGCTAAGTGTATCATCGAAAG  
GCAGATAGAGAACCGCCCGGACAAGCCGGGCGGTCTACAAAAGCCTTATAAAATCAGGGCTGCGACCATT  
GGTAACGCAAACCGCTGCCATTATCGTCAACCTTGCGCAAACGACTCTCAAGTTGCAGCGCCCGCACCAA  
TTCGGCCTGCTCCCCTTGCAAGGTAAGTTGAAGGTGACCTGGTCCCCCTCCAGCTTGCCGATCGCCACC  
TTGCTGACGTTGGCCATCCCCTGCAGCATCTTCTGCACGGCGATCATGCTGTCCACTTCGGAGAGGCCAT  
CTACCACCAGGCTTGGCTGGTTGCCGGACAGAAATGCGGGCACCGTAGTTTTTCACTAGCCAAGCCGC  
CAAGGTATCGGCAAAACCTTGCGCCACTTCGGCCTGAGTGCCGGTGTATTGCCACGGGTGAGCTCGGCC  
ACTTCACCGGCGCTTTGGGGCCGTAGAGTCCCAATCGATGCTCCACTTGTACCTTCAGGATCAGCT  
TGCCCAACACCACCATCTCGGCGCCATAGCGCTGGCTTGCTGCAAAAATCGGGTTCGGCAAAGCGTCCCA  
GACGTCGGTGGCACTGACAGCCATGTTGTTCATCGAGATCCATCAGCGGAATGCTGATGGGTAGCCCCAGC  
GTCTGGGCTGCTCGCGCAAGGCTTTCGCCCCAACCATCGCTGGATTGATCCGCCAGCAAGCGACGCTCAC  
CCTGATCCACCACCAGCCAGATGGCCATTTGGGGACCGCCGGGCCAAGCAGGGCAAACCTGGCTCTCGGA  
GACCAAGCTGTTAACCTTGTCACTCTTGAACCTCGGCTTTCAGATACTTGACGGAGTCCCTGATCCTGATAA  
CCATAGCTTTTACATAGTCGCCCGGGGCCAGCGCCTTGACCACCACCAGGCTGGGTGAGGATGTCCG  
GATTGCCGGTCACTTGTATCAGCACCTGACCCAGTGCTGCCCTTGAGCGGCCACCATGTGCCACTGGT  
CGGGGCTTGCCTGATAGAGGTGGTACCTGAGCGGCCGAGGCCATGAATGACAAGCCGAGCAGAGG  
GCGGTACACAACACGTTTGAACATGAACAGAGTCTCGAAATGGGAGAGTGTGCTTATGGTAGCGGCAAGGC  
GCATCCTGCGGCAAGGCTGGCACAAGCGGCCACAACAGCAGAGCCGGCGATGCGCCGGCTCCGATCACC  
CCTTCCACATGGGAAGCAGGTCAAGGCATAAACTTATTTGGTACCAGGATCTTGTGCGCTGCATCGCCC  
AGACCCGGCACGATGTAGCCTTTCTCGTTTACGCCCTGGTTCGACAGAAGCGCAATAGAGCTCTACGTCAG  
GGTGAGCGGCTTCCAGCGCTTGTATCCCTTCCGGCGCGGCAACCAGTACCAACACCTTGTATGGATTGGCA  
GCCTTTCTTCTCAGCAGATCGATGGTGGCGATCATGGAACCACCAGGTGGCCAGCATCGGATCGATGACC  
AGCGCCAGACGCTCTTCGATATTGCTGACGATCTTCTCGAAATAGGGAACCGGTTGCAGGGTCTCTTCAT



CGCGGTAGATACCGACCACGCTGACACGGGCACTCGGCATGTGCTCCAGCACGCCATCCATCATGCCAAG  
GCCGGCACGCAGGATAGGTACGACGGTTACCTTCTTGCCTTTGATCTGGTCAACTTCTACTGGCCATTC  
CAGCCATCGATGATAACCTTCTCGGTTTTCGAAGTCAGAGGTCGCTTCATAGGTCAACAACTGCCCACTT  
CTTTGGCCAGTTACCGAAACGCTTGGTGTGATATCGCCTTCGCGCATCAGACCGATCTTGTGTTTGAC  
CAGGGGGTGTGTTGACTTCAACGACTTTTATTATTATCTCTCTAACCTGCCGCAAAAAATCGCGGAATC  
ATACAACAAAAGCCACCGCTTGTAGAGCATTTCCGCGCAAAAAACGCGCAAAACGATTTCCCTTTCTGGTTTT  
TCACCGCCACTGTTAGAATACGCCCCGAATTTTACCCTCCACTTCTTTACATGACGGGGAATACTCGTGA  
CTGACAAAACCTCACTGAGCTACAAGGATGCTGGCGTAGATATCGATGCCGGCAATGCACTGGTTGAACG  
TATCAAGGGCGTGTCAAAGCGCACTCGTCTGCTGAAGTCTTGGTGGTCTTGGCGGCTTTGGGGCCTTG  
TGTCAAATCCCTGCGGGCTACAAGGAGCCGGTACTGGTCTCCGGTACCGATGGTGTGGGCACCAAGTGC  
GGCTGGCCATCGACCTGAAGAAGCAGCACTGTGGCATCGATCTGGTGGCCATGTGCGTCAATGACCT  
GATCGTACAGGGCGCCGAGCCGCTGTTCTTCTCTCGACTACTATGCAACCGGCAAGCTGGACGTGGACACC  
GCGGCCGCGGTGGTACCGGGATCGGTGCCGGTTGCGAGCAGTCAGGCTGTGCCCTGGTGGCGGCGAGA  
CCGCCGAGATGCCGGGTATGTATGAAGGGGAAGACTACGACATCGCCGGTTTTCTGCGTGGTGTGGTGA  
GAAGAGCGAAATCATCGACGGCAGCAAGGTGGTGAAGGGGATGCCCTGATCGCGCTGGCCGCCAGCGGC  
CCTCACTCCAACGGCTTCTCCCTGATCCGTAATAATCTGGAAGTCTCCAAAGCCGACGTGCATCAACCGT  
TGGGTGACCGCACCTCGCAGATGCCTTGTGAGCCGACCCGCATCTATGTGAAACCTGTGCTCAAGCT  
GATCAAGGAGTGCAGATCCACGCCCTCTCCACATCACCGGTGGTGGCTTCTGGGAGAACATCCCGCGC  
GTATTGCCAGCCAACACTCAAGCGGTAATCGACGAGCAGAGCTGGCAGTGGCCGGCGGTGTTTACGCTGGC  
TGCAGCAGGCTGGCAACGTCAACCGTCAAGAGATGTATCGCACCTTCAACTGCGGCGTGGCATGATCAT  
CGCCCTGCCCGCAACAGCTGGAGAAGGCGCTGACCCTGCTCAAAGCGGAAGGCGAGAACGCATGGCAC  
ATCGGTCATATCGCCAAGGCAGCAGACGGTGGAGGAGCAGGTCGTCATCAAATGATGCGGATCCTCGTCT  
AATCTCCGGCAGCGGCAGCAACCTGCAGGCGATCCTCGACCACTGCGCCAGCGGCAAGATTGCCGGTGAA  
GTGGTGGCGTTATCAGCAACAAGGCCGATGCCTATGGTCTGGTTCGCGCCAAAGAAGCTGGCGTGGCGA  
CCTCCATTCTGGCCAGCAGCAGTTTGCAGCCGGGAGGAGTATGACGCCGCCCTGCTGGCGCTGATGGC  
AGATTATCAGCCGGATCTGGTGGTGTGCGCGGTTTATGCGGATATTGAGCGGCGATCTGGTGGCCAT  
TTCGCCGGGCGGATGATCAATATCCACCCCTCCCTGCTGCCAAGTATCAGGGCCTGCACACCACCAGC  
GCGCCATGATGCGGCTGACAGTGAACACGCGCCACTGTCCACTTTGTACCCGAAGAGCTGGACGGGGG  
CCCGGTGATCCTGCAGGCCGCGTGGCCATCTTTGAAGGGACACGTTGGACGAGGTAGCGGACGAGTA  
CAGGCGCAGGAGCACAGCATCTACCCGCTGGTGGTACGCTGGTTCGCGAAGGCAGGCTGCAGATGGTAG  
ATGGCGCCGTGCAACTGGATGGCGCCCTGCTGGGCCCCGCTGGCTACGCTGCGAGTAACCGCCAACAAC  
TGCATGTGAGATAACAAGAAGGGAGGCTTAAGCCTCCTTTTTTGTATCTATAAATTTGTTGTTTTTTATGGC  
TTTTGTTTTTTGTTGATCCACTTTTTGTCCGCGGTGGGGCAACGGTGTGGCCAGATTCCCCATTAGCATA  
GTGGAAAACTTTTGTCTGCTTGTGCTAGTGTTCCTCCCTTCAAACAAGATCTTTCCCTTCACTTTTTGA  
AATTCTTGATCCTTGTAAAACCTTGCTCCTTTTTTGTATCTATAAATTTGTTGTTTTTTATGGCTTTTGT  
TTTTTGTGATCCACTTTTTGTCCGCGGTGGGGCAACGGTGTGGCCAGATTCCCCATTAGCATAAGTGAA  
AACTTTTTGTCTGCTTGTGCTAGTGTTCCTCCCTTCAAACAAGATCTTTCCCTTCACTTTTTGAAATCT  
TGATCCTTGTAAAACCTTCCCGCAAGCCTTGCGCCATAAGGCTTACCCTTTTTTTTCTCGTGGTGC  
CCAGATCCACCGTACCAACTCAGATCCTCACGGAAAGTAACCACAATCCTTTTACCATCAATCACTTACG  
CTTTTTTGCACCGCTTGTGGTGTGATCAAACCACCCCAAAACGATCATCGAATGACGTTTTTGTGAAATT  
CTGAATTTTTCCCAAGAACCAGCCACGGCGCGGGTGTAGACGATTGATTTGCACCATTTTATTTGTGCAA  
AAAATGCCACATTTTTAGCCCGAAGGTGGGGGGGAGGAGTGCGGATTCGCTGAGCGGTGCGTTTTCTCC  
GTCGCCACTGGGCTGCAGGGCAGGGGGCTGGCCACAAAAAAGCGACGCTGGTGGTGGTGGTGGTGGT  
GGGTGATAGTCGGCGGTTACTGGCCGGCGCCCATCCATCTTCTTGAATGCCCTGGCGGCGATGGCCA  
GCAGTTCGTCGTTGTTGGCCTGGGGGAGCATGGGGCGGGCGGGAGTCTTACCCTCAGCGGTTCTTCT  
GGTCTCTCCAGTGGTGGTCTGATCAGGATGGCAGCCCGGTAACACTGACGTGTTCCCGTATCCACTTG  
AGGGAGGGTTTTGCGGTAGCGGCGGCGAGCGCCCGGTCTGACAGCACCTTGTACCCCGAGCGCCGAGAC  
GCTGTGCTGGCTACGGGTGCAAGGGCTATCTGTTGGCTTGAAGGGTTCTTCTTCTTGGCCCTGTTCTGA  
CTTCTCGGTTGTGCTGGCTTGGGCGGCGCTGCAGTGAATGGCTGTGACATCCCCCTGGTGGTCTGGTTG  
GCGATCATCCCCGAAAGCGGGAGTCAAAGTCGATGATGGCCGCATCCTCGGTACCAGGAGAGCGCAGAC  
GCTTGGAGAGGCCCGCAGCTGCTTGTGCTTGGTCTTGGTGGTGGTGGTGGTGGTGGTGGTGGTGGT  
TGCTTTGCCGGCACGGATGCGCTGGCGGTTCACTTTGGCCACCTCGCGCCTATCTGCTGGGTGATGCGC  
CGGCGTTTTCGCAGGTGGTAGCGACGCCGCATCCAGACGCTCCAGCACGTTGAGCATGGAGCTCTGATTGA  
TGGTGGAGTGGATCATCTGTGTATCCCTATTGATGATGGGCGAGAGGTTGGTGGCCAACCTGGCCGGCCT  
GCTTGTCTGGCTGCTGAATGCGTTGGCATAATGGTGGGACAGGTTGGCGGGCCCGCTGATCATGGTTAGC  
AGCAGAGGCGGCCAGCTGCTCCACCACGTTTATCAGTTGTAGCAACAGGCGGAATATGTTACGCCTTCCG  
GTACCCATCCACGAACGGGGTGCATCGTAGTGCTGGAGCTCACCGGCCACACTGCGCCGCGAGTTGCCCAA  
TCACCTCCACCATATCCCCCGCAGCGGTCTGGCTCATGTTGCCAGGCACCCAGCACCATGTCATCACC  
TGCCAGCAGCTCGATGGCCCCGAGCGCTCGATGCGCTTCACTTGGCCCGATCTGCTCCACGCTGTGCTGC  
AGGGTGGTGGAGCTGGTGTGGCCAAACTCGCCAGGATTCGTCAGCTCGCGGTGCATCTGCATCGCCT  
TGTCATGCTGAGTGGGTGGTATGGCGGCTCTGGTTGCCACGGTGTGGTACGGCTGAACACTTCCGC

CCGCTGCTGCTGGAGCTGTTTCGCCCGGGGCGATATCCGGCAGTGGCCAGCCGGTACCCAGCACGGTGCGA  
ATAAATGGCCTGTCAGCGCGGCCGAAGGCAAACCCAGCTCGACGATGGTCCCCTCGATGGGGAACCTGCA  
GCAGCCCCTGCTCGTGTCCGCCGAACATCACCCGGCAGCGGCACGGCGCGATAGAGTGGGGTTGCCCTTGTC  
CGGTTGGCCATCTTACCCAGCAGTTGCACGTCCACCGCATAGCGCGGGCGAAACGGATCATTTAGCTGG  
CCGGCGGCCGCACTGTGCTGATGGCCTCGACCCGCCCTAACTTGGGCAGGTGCATATTTGTCGGCCAGCT  
CCGGGAACCTCCCCTCCATCTTGGCCCGTTCCGGCGACTTCACCCGGTTTGGCCGGGTGTTGCCGTGGTGA  
GGTCATCTCGTGCCTTTGAGGGCGACCCGACACCCCGCTTGGCGTTGACGAGTGCGCCCGGGCGCATA  
GCCGGGATCGGCGCCGTGGTGAAGGTATTGCCGTGCTTGGCGGCTGGAGAAAGCTGGATCCAGCTCTACCG  
CCCCATCGGCCCATCTGCTGTGGGCGTACTGCCACGAAGATGGCGCCATCCGGTTGCTGATGCCAGAT  
GAAGTCCGGCACAGCAAAGGCGCGCCCGCGTGTTCAGCAGCTGATAGCCGGTACCAGCGCTGGTGAAG  
TTGGGGATCGGCTTGTGCGGTGTAGTGCACCCCATCTGGCAGCAAAAAGGTGAGTTTGGTCTGGTTGCTCA  
ACCATGCCAGCAGGCTGCGCAAGGTTGCATGCTGGATGCTGACCGGGAAGGCACTGCCCAGAATACCGGC  
CAGCTCGCGGCACAGCAGCTTGGTGGCACCATTGGTGGCGGGTGCACGTCATACACGTAACCGGTAAAC  
CAGCGGCGCAGCTCGCCGTTGTAGCCGAGATCCACGGTTCAGGGTTTTTCCCCTTATCGGCGCCCCCTCGA  
TGGTCAGTGCAGCACGGCCGCCCGCGCAGAGATCCAGCACGATATCGTGGTGCATGAGGTTGGCAGGCTG  
GCCGCCAGGGTGGGTTGGTGCAGAGTTTTACGCCATCAGGTTCTCCAGTATGTTATCCCACCTCCTTGG  
CCGCACGCTCCCAGCCGGCCAGCTGCTCCTGCTCGGAAGCGGGCGCCCTTCTGACGGCTTGGCCGGTTT  
GGCGTTGCTGTGCCCTGGCCACGGTGGCCGGTGTCTTTGGCATCCGCTGCTCCCCTTCTCCGGTACC  
GAGTTGTGTTTCGCGCAGGGTGAAGTGCACCTTGCACGCCAGCAGCCCTCCTGCTCGCTGGCGGTGATAC  
GGCCGGCGAACTTGGCCTGGCGCACCTTACCCGACTTGGCCAAGAGCGACCCGACCCGGTAGATATGGCG  
CTTGGCCGCATCGCCCTTGGCATCGGCCAGCTCAAACAGCCGGCTCAGGGTCTGTTTCATCCTTGAAGGG  
ACAAGGCCCGAGATATCGAGCTCCTTGGCCTTCTCGCCCTGCTCCGAGCTGCTGGTTCGAGCTGGTTTGGC  
CGCTGCTGTCCCTTGTCCGAAACTGCATCGATACAGAGATCCGCATCGACTTCATCACAATCGGCTCACC  
GTCCAGGGTGAGCATGGCTGTTCTGCTCATCGGGTTAACTCCTGCCAGAAAGTGAGCGGGGAGGGGGAGA  
TCAGCAGCGCGCCGACCGTATGCTATGGTATGATCTGGCGGGTGTCTTGGCCAGTTGGGCGGGCAT  
GCTTGTGCTGCATCGCCTTGGCCCTGCCAGTGCACAACCTGGCCGCTGATGGAGGCCAGTTGGTTGAGTGT  
TTCTCCATCGCCGCCAGCCGTTCTCGCGCCGGGCGCCAGTGAAGCCAGCTTGGCGATCGGGGTGGTAC  
CGTCTTGGCGCAGACTCTCCAGCTGGGCCAGCTCGGCCCCAGTGCATGCTGGCAGGGCGAGCGGATC  
CCAACTCAGCGGTTGCTGCTTTCCAGCGTGGCAGCTTGGCGCGGTGGGCTGGTTCATGGTTCGTTG  
TGGGCGGTGAGGCGGCGCAGAGTGGCGCACCACTCCGGCAGGGGAGGATGGCGCAAAGCGGCGCAAACG  
CATCGGCCAGCGCTGTTTTGCTGTTGCCGGTGACCAGCCAGGCGATGGCGTGCAGCTGGCCAGTTGGTAG  
CAGGGGATCGGCCCGTCTTGCAGCTTGGCGGCAAGGGTGCACCACCGCATTGGGGGCGGCCAGGCTGTAC  
TGGTTGCCCTGGTGTGGCCACCCCATGCTGATAGGGGGTACGGTCAAGCAGCGTCCGATAACAAGTA  
GGCGGTCCAGCTCACCCCGTAAACCCTGCCAGCGCGGCGGCGGCTCGCTGAGCGGGTGGGGCCGGTATTG  
AGCCCGCCCCGCCAGTCTTGCAGGCGGTTTACC GCGGCTGACTGGTTGCCGAAATCTGACCCAGCACA  
CTCGCGCACCGCTGATTGATAGCGGTTAGCGATGGCGGATACTTCATAGTGGATGGAGTCCACATCAGTG  
AGTAGTTTTCCATTGACTCGAACACCCCGAGTTCAGCCAGCGCCGACGCGCTGGCGTTACAGGGCTG  
TCCAGATCGGCGATGATGACACGCGCCAAGGCGCTGGTTTCGGCCAGCGCTCCAGCTTTACTCGCTGTT  
CCAGAGAGAGCGTTGAGCGCAGAGAGATAGAGTGTGGAGCTGCGTTCTGGGATCCGGGGCCATCGATAAT  
CACGTAGTCGGAGTCGGCCATTATTTTATCCTCAGATATAAAATTTGGGTGTGAATGATCCGTACCAATAA  
AATCCATCACAGATGTCGTAGCACTAAAATTTTTATTTGTGCTGACTGACAGCGCAACAAATGTTCCGTT  
GCCGAATGCGATGGAGCTATATGAATGCTGCGTGGTGGAGAGAGACCAATTAATGCCATCTGTTGATGTG  
TGAACCTTATCTCCTGAAATCACCAAAAAACACCAGCGCCGAAAAATAGTTGACCAGCCGACAGTGTG  
GGGCGCTACGTTTACCATGCGTAACCATCCTCTGATACAGCTGATACCGCGGAGGTTTCCGGCCACATA  
AACGCCATTTCCATAGGAGATGGAGGCTGGTGTCAAAGGTAGCGTTAGTTTTGTCCATGTGACTCCATCG  
GGTGTGACGAGACAGATATTGGCGAGCCAGTCCGTGCACAAAAAACGATCACCGCAAAAAACTACGG  
TCAGATTTGTGGCAGCCGTGGCCAGTCCGCTGACTGGGACAACCTGTTTCGTCCATGTGATTTCCGTCAGG  
TGATGTTGCTAACACAGCGACGCTGCCAGCCCCACACCAACGGCAACAAATTTTTCCGTTGCCGTAGGCG  
ATTGCACTCCAGTTAGCACTCTCAACGATTAGGCGGCGGGACCATGTAACCTCCACCATCGGTAGACGTGG  
CCACATCATTTGTGCTTGTCAATGCAACAAATGTTCCGTTACCGAATGCGATAGATGTCACCCCTCCAGT  
GACATTCATGGGGCGACGTGTCCACGCAATACCATCGCTGGATATGTCGGCGAAGCTATTTAAAGTTAACA  
ACCCCTACAGCAACAAATGTTCCGTTGCCGAATGCAATGCCTCTCCAGCTATTGAATATTGCTGTTGGCG  
GATGTGCTTGCCAACTCTTGATTGTCTTCCCCTGCAGCCATGCTGGGAAATCACTGTAGTCTACTGCCGG  
CATGATCACCCCGCTGCGTAAAACTCCAGGCCTACGTTTTTTAGCAACGGCCTAGAGCTCGGTAGAAAC  
ATCATCTCACCGACCTGACTGCTGGCCGCTGCGCCTAAATCGATCATTAGCTGACCCCTCCATGTTCCGTT  
GATTTTTTCAAATACAAATTCGCGACCCGGTTCGATAATCCGAACTAGCTGATCAGCTCCCTGTGGCGTG  
CTGATGGAGCCTGTGATAGCCGGATGATGCAATCCCCTGCCGCCATATCCACGCGGTGATCGACAATCA  
CGCCGAGGCGGCTACCGTCCGGCCATGTTTTCATCCAGGGTTCACAGCGGCGGGTTTCATAAAATCTCAGGTG  
TGACGGGTATTTCCGTTGGCGGGCAGCGAACTGTGGCGAGTGCATCGCCGATGCACTGAACCCGGTGGCG  
AGCCCATCGCTGATCGCGGTGTTGATGTAGTCAAGTCAAATGCCATGCTCCGGCGGTGATGGTCA  
CATCCAGCGCGGCGCTGGCGGGGCGAAGGCCAGAATGAAGTTGCGGATCAGGGTATCCCCTGGCTGGTT

GGCATCCTTGGCCACCTTGACCGTATCAGGCAAATAGGAGACCGCGACCAGGGTGCCATCGCGGGCTTCC  
AGTCCCATCCAGTTGAAAGTAAACGGCCCCACGGTCGGTTCCAGCAGCAGGGAATAGACCACCTTGTCCG  
GCGAGATCGCGGAGGCCCTGGTGACCGGTCCCCGATATTTGATTTCTCCCGGTGCGGGATCCGGTTCATC  
CGGATTCACCGGGTCGGTGTAGTTCAACCCCGCTTGTAGGCCAGCACCATCTTGTGATGTGGGTGGCC  
ACGTTACAGGGCGAGATTCTGGGTGATGAGCATCATCCCCGATTACAGGATTTCCGGCCATTTAGCCTCCGT  
AGTTACATAGCTGGCAGAGATCGGCTGGGCAGCTCTCACGCAATGCCCCAGACCGAACCAGGCCAGCTCG  
ACATCCGTTGATGCGGTGATGGTTTATAGCTGGCCGAAAACTCGGCGCAGCCCAACTGCTGCTGGTCCG  
TGAACGCGGTACGCCCACGTCATAGCGGCGACAGGTGCGGCGGTACTGCTTACCAGCTCGTGGGCCAG  
CCGCTCCGTCAGTTGGTTCGCTGTGCTCATCGAGCAACAACAGGATGATGTCCCAATCCATGCCGTTGATG  
CGCTCCATCTGGGCGCGCAGGGGGATATCGAACCGGCCAAAGATATCGACAAAGCCTGCGGTACCGCCCG  
CATCTCTGGCGTTGATGAAGGCGAACTTCAACCGTTTGCAGAAACAGGTCGAGCGGCTCACCTTGAAGCG  
CGTGATATCCCGCTCCAGGCGAGCAGTGCACAGCAGGACTCGGAGCAGGTCAGCGGGTCTTGTGCGCC  
AGCGGCTGCACCAGCCAGCCGCGCAGGCGGCCACAGGGCCATGATGCCCGGGCCAAAAAGCGGGCT  
CCTGCACCCCGTCCCGATGCTCTTGGCATCTTCCCACCACGGGGCGGTGCTTTCGGGCAGCTGGGGCGC  
GGCGCTCAGATGGTCGATGCCGGTGGTTTTATTTCATGGAGCGTCACCTCCAGCCCCGAGAGGCGCGGGAT  
GGCGAGCCCCGAGAGGATATCCAGCTCGGTGAAGTGCAGGCTCCTGATCTCGGGGAATGCCGTATGCAGC  
TCGCGGCCAGCTGGCTTAAGGAGAAAACGGGACTGCGGCCATGTGCGGGTCACGGTCGGATAGTCAGCCG  
ACAGCCGGAACGCCGATTGACCAGCAGCCTGACCCCGCGACCAGGGCGGCCCGCTGGGGCTCGCTAAG  
ATTATCGACGGGCCACAGTTCAAGGTGCAGGGAGTGTGCTGGTTTCCGGCATCGCCATCACCTGCAGATCA  
TCGCCATGGCCGTGGTTGCCCTGGTTGGTACGTAAGCTTGTGATGAGGCTGGCCGGTGTGG  
TCCCTACTTCCAGCAGGATGTAGGCATTGGCGGTACCTGGCCCCGCGGGGCATAGTGTGTCGAAGAAGAT  
ATGATCAGCGCAATACCCGCGACGCTGGCCAGCATCGAGCGATAGACGGCATCGATGTGATAGCGCCCC  
ACTGCCGAGAACTGGTTCTTGTATGCGCAGGCCAGCGCATCGTTGCTCTCGGCATCGGCGCCCCGGGTGG  
TGATCCACTCCTTGTTCATCGTTGCGAGCCGAGAGGATGCCGGTCAACGGTTCACCTCAGCAGGTTGTAATA  
GCCCGGGGCCAGATTCCAGGCAGCGCCGGCGAACTCGGCCCTGCACACCACGCGGGCCACCGCTTACCAG  
GCAGGGTACCATTGCCTGTACCGGCTTCATCCGGTAGATGGTGCCTGATGCGCTCGGTGCTGATCC  
AGATATCGGCCGGGATGGCGGTGGCTTCGCTCGGGTTCACCTTGACGAAGTTGATCACCCCTCGGGTCTT  
CTGGTCCGCTTTGCGGTTGAGATCCACATCCCAGCTTTGAGGTCGAGATAAGTATCTTGGGCATGCGCG  
GCAAAAGGTGTTGGGCGACGATGACCAGCCAAAGGGTTCGGGACAAGCCAGAGCGCGGCTGATGCCA  
CGCCGCGCACCAGTCGCCAGAAGGGGCTCACATCAGAGTCATTGGTGATAAGGGAGCCGGCGGCTCGAC  
CTCTTTTTTAAAGCTCGGCCTCCATGGCCTGCTCGGTGGTTCGGGATGCCGGTCTCTGCCAGCAGGGCCATA  
AAGTCCACGTTTCGGGCGCAGGTTTACAGGGTTACCTCCAAATCGCCGAATTCATAGGTGCGGGCGGTGAC  
CAGCACCCGCTCGGGGGCCTCTTCCGGGATCACGATGGTGCCGGTACCAGTCGCTCGTCTCGTCTCGACC  
AGCAGCTCAATCTCGGTTCATCACATCGGCGCGCAAGGTAGGGTTCGCTCGCCGATGAGCTTGGGGCCA  
GCCCCGACTCCATGATCCGGTTCGTTGATGTCTGGCCGATGCTGTGGCGGTCTGGGTGTAACGGGGCTG  
GCCACCGGCATCGAGTTGCCAGGCTCCGTTAACACCAAAAATGTCGATGTACTTTGGTTCGCTCATCCGC  
GGGTTGTCATCCATAGCTCTTGGCTCTAGTTCGCTGGTGTAGCGGGTTTTGCACATTCATATACACATC  
GCCGGTGGTGAGGCTCCTCGATGGTTTTTGGTTGGCGCTGGTTCGCGACGGCATTTGGCCTGGATCAATTGT  
TGACCCAGACCGCCAGCGGGTACCTTGTCTGGTTCTGCTGACGATAGCTGCTCAGCGGCGGTTGATAC  
CCCCGGCGTTTTGGTAGGGCCAAAGCAGGCGTAGATCCCATCTCGATATTGACGCCGGGGATCATGTTGAG  
CTTGTGATCAGCCAATCCACCGCATTGCCAGTAGCTGAAAATGGGCTCAGATTAATCATGAAGTCCATA  
AAGCTGGCCCAGCCGGCTTTGAGGCCATCAATGGCCGCTGTCATCAGTTTGAACACTCCCATGTCCGGCCA  
TGGCCGCTTTGATCTCGTCCCAGTAGTAGATGCCAAGGACGATGGCAGCGATCAACCGGATGATCCCCAT  
CACAAATCAAGATGACAGGGTTGGCCAGCATCACGGCATTGACTGCCAGCATGACACCACGAAGCAGAGTC  
AGCGTTCCCTTGAGGACCACGAGCGCCGCTTGAAGGCAAAAATGGTCATTTTGTCTAACAGCACCACGG  
CGCCCCATGCCAGCCAGCCCGATCCCCAGCGCCAGCTTGACCACCCACAGCAGGCACTGACGGCCCA  
AAGTGCCGCGAGTAAAGGCAAACCGGTTGATCTTGGCCAGCACACACAATGACCCAGCAGCACCATTGGCG  
GCGGTGCTCAGAATGGTGCCATTCGGGCTAGTAATGAGGCAATCTTCAATCTGCCAGCGTCAAGTGCCC  
ACGCCAGCGTACCAGCTTGGCAATCCCGGCCAGTACCATCCAGGCTCCAGTGACCACACCAAGGCCCGC  
AATCGCCAGCATGGTGTAGCTGATGACCTTGGTTCAGATGAGGAAAACAACCTAGTCCAGCGCAACACGAGA  
GCACCACCATCGGCGAATACACCCACTACCTTATTGATGGTTGGCAGCACGGCACCAAAGGCCGGCGGCC  
GGATCGCGAACCAAGCCGATTGACCCGCTGCCACTGGTCTGTCATGTCTGCGGCCATTTTCTCCGCCTT  
GCCATAACCGGTGGTGTGCTGCCCAATGCGTTGATATTGCCCTTGAGCTGGTCAAGTTTTTCCAGCAGGTTT  
AAAATGACCGGGTTGCTGTTTTACCGAAGGCTGCGCTGATCTTGGCGATGTCTTCCCTCCAGATCGC  
CAAATTTCCCTTTGATCTGCTCCAGGATATCCACCATCGGCAACATGGCCCCAGAGGCATCGTAAAAGCT  
CAAACCCAACCTTTCCCTGCTTTGGGAATAGCGGACAAGAATGACTTGTACGCCGTACCCGCCACGGCA  
CCACCCATGGTGGATTGCAACATACCCAATACGGCAAAATGTTTCATCCATCGACACCCCTAGCGAGGTGG  
CAGTGGACTGCACGCCCTGGAAGGCATCCGCCATTCCTGGCCGGTGGTCTTAAACATCTGAACCGCAGT  
AGCGGTTTTGCTGCGACCGCTCGACCCAGTCGGCCTTGCCATGGCCACTGCTTGTGTTCAAAAATG  
CCGTACATGGTGGCCATGTAACCTGGTGTGATGGTACCTGTATCGGCTTTGGTGGCTGCGGCCAGCAGGCGG  
AGGCTCGGGTAAAGGCGGGCAATTCGCTTTCAGACAAGCCCGCATGGCGGACTGAATGTCGTAAGACGC

CCGCACAAACTCGGTGGCGGATTTGCCGTATTCCACGCTGAACTTGAGCGCTTCGTCACTGAGGGCCTTG  
AGTCCGGATTGTGCTACATCAAGCGAGGCCACTTCGCCAAGGCGCGTCCATCTCGATGGCGGGCATCA  
GCGCATTCTGGATAGCCATGCCGCCTGCCAGCATGGCGCCCCCGCTGCAATACTGGCAAAGCCACT  
CTGCGCGGTGTTTTTACCCTTTTCAGCTGGTTGTTGATGCCCTGCAACGGCCGAGTGATGGCATCGACC  
AGGGCAATTCTCATGATCAGTTGTTCCGGTCGCTGAGGCCATGATTTATCCATTGAAAGCGGTGGCGATCC  
CCTCTGCGACGGCGTGGGCGAGGCGTTGGGTGTGGTACTTGTCTAACCAGATGGCGCGAGCCAGGGTGT  
GAGCTCGTCATCCTCATGGGGCAGGTAGTGGCGCCGAGCGCCAGTACCTGCTCCAGTTGGTTGTGCTCG  
ATGGCCTCGGCACGCGCAGTTAGTTTTTACTTTCGATATCCAAGTCAGGGGCGTACTGCTCGTTGACCTT  
GGCGGGCATCTGCAGGGCCGACCCGGGCGGGCCAGCAGGCCATCCAGCGCTCTTTGCTATCAGCATCG  
ACGATCGCCTTGAGGTACTGATGGGACGGCGCCACTTTGTGCGTCATCGACAGCCCGTTGATGTAGCTGT  
TGTAGGCCACCATTGGTGGGCACAAAGCGGATGTCAGTGCCTGCGATAGTCAGGGTGTAGTTGGTGGT  
CATGGGGTGGTTTTCTCTTGTTCATCCACTGGTTCAGGGTGTGAGTTGGGTTTGGCAGCGCGCAGCG  
CCGTCTGCAGGGTGGGGATAAACCACGCGCCCTCGCCGTAGGTGCTCCCCGTAAAGTCAGGCTCCGGGCA  
GTGGGGCACCAGCCCGGGCGGGCAGTCGCTTCACTACCTTGGTTTGCACCACCGTGGTGGGCTGGCTG  
GAGCAGGCGCAAAGCGCCAGCAGGCGAGGCTCGCGAGCACAGTCCGGACGGCCGACCGGGCGGCGTGGCC  
AAGGCTTCTTGCAGTTCATCGGCGGTCTTCTGTCTGTTTGTGCGAGCTCTGTCAGTGCCTCGTTCTGAT  
TGGCGAGCAGCAGACGTAACCCCTTTCCTGTATCAGCAGTTCCTGGAAGGCGGTGCTTGTGGGTGTT  
GGCAGCCTGCAGGATGTTGATGGTGTCAATTGGCGCTGGCCAGTTCCTTGGTGCCTGCGTGCCTGAGCCGTT  
CCTTGGGTAAACAACAGGGTGGCCAGTACAAACCCGATGATGGCCGGCAGGAATCGGATGAGCGTGTCTCA  
TGCAAGTACCCCGCCGAACCTCGGTGAACTTGGTTCAGCAGGTCAGCCAGCTTGTGCTCGCGCTGGCCGTAG  
CCGGCACCAGGCGAGGCTGGCCAGATGTTGGCGCACTTAGCCACCGCTGGGGGATGCGCCCTTGATCA  
CATCGTCCAGCGCTTTCGCTCGCGGATCAGCTGGATGGCCCAGGCGTCTTGCAGCGCGGGACCGAAGTC  
CGGCAGGCCGAGCTGGTTCGCGGTAATGCGGCCAGTGCCTGGACAGGTGCTGATAGCGGCCGGCGGGCGGT  
CTGCTCAGGGTCTTGTGACCTGTACCAGCACGTTCCGGTGGGTGCGGTAGTCGGTGAAGAACCCCGCCG  
GATTGACCAGCTTGTGTAACCGTCATCCCCAAGCCCTTGGTGCCTTCGGCATAGGCGAGTAGGTCGAG  
AAAGGCGGCCACTTGTGGGTGGCAGTTACTGCGCGGCATTTGTTGCTCCCTTCTTGTGTAACACGGTCTT  
GGCCCGCTCGCGGATGATGTCGATCCCAGCAGTCCACCATGCCGCTAGCAACGGGGTGGCTTCCGTGT  
GGGATCCCCGAGCAACTGGGTGCGGGTGGCGGCGCTAGGGTGAATTAGGCCGCACAGCAGGATTCGATCA  
GCCGGCGGGCAGCCCGCCACCGCATAGGTGATGCGCAGGAAGGCGATGGCCAGCGCCAGCAGTGCCTT  
ATAGACGGTGGGCCAGTTGTCCATCAACCAGGCCAGCAGGGCGGCCAGAGGGTGGGGTCTTTGTTTGGC  
ATAGGGTTCATGTCCGTTGCTCTGATTAGCGACCCAGCCGCTCAAGGCGGGTCTGACAGGGGACGCACAG  
GCGCACCCCGGGGATGTGGCGGGCGGCTCCTTCCGGGATGTGGTTCGTCGACTCTTCGCGAGTGGTGCAGG  
CTCTCCCCCTGGTAACGCCCTTGGCCACCTGATTGGCCAGCTGGGCCGCCAGCATGTGGGCGGCGTGTAT  
GGTTGGCGGGTTCGATGTCGTCGAAGGCGCGCCCTTAATCCATCAGGTGGCGGGTGTGCTCCTTGGAGA  
GGTACGGCACGCCATCGAGGTGGATGAAATCGGGAGATGTGACGATGCCTTTCACCTTGTGTACGGCCTT  
ACTGCCGCCCTTGGGATCGATGTCGAGCAGGTGCGCCACGTTACGCTTGACGCCAAGGCTTCCACCTTG  
ATTTCTCTGCTGCCGTTACTGGCGTAGAACAGCACATCGTCCGGTCCATCCCGCGCCAGCTGCCGGCC  
GTTTGGCGGGCGGATCAGCTGCTTGGGTTCTTGGTGTGAGCTCGAATTCACACTCGGCGGCGACATC  
CCCATCCACATAGCCATCGGGAATGCCCCGGGTTTGCGCCACCGCGCTGTTGTCGGTGTGAGAGGGCTG  
GCCTTTTTCGACGTGGACCATGGCCCCATCAGGGTGGTGTGGAAGTTGATACCGGAAAAGCGTTTGGTCA  
CGGGTTAACCTCCCCGTTGTTGAGGCTCAGATCGAGCAGGATGTTGACGGTGTATCCCTTGGGGCAGTC  
CACGGTACGCACCACCACAAACACCGAGACCAGATTCCTTGGCAGTCCACTGGATACGGATGTACCATCC  
TGGGGGGACGCGATGTACCGGGGAACAGCTGGCCGTTGATGGTGGTGCCTTGGCCATGGCGCGCAGAT  
CTTTGCCAAAGTAGGTGATGGCCGCGGGTGTGCTGCCCGGGTGGAGTTGAACGAGCGATCCCCGATACG  
GGCGATGGCGCGCAGGCGCATCCGGCGCGCCACCTTGTAGGCAATGCGCAGGTTTTTCGATCACCTGGTAG  
TCGCCACCCTCGGCATCCAGGGTGCAGGGTGCAGGGTGGCCAGTGGCAGCGGGATCCCGTCTTGTCCAC  
CGGCTTGTGTTGCCAAGGCCGACCAGGGCGCCGCTTTCACCCGGCAGGGGCTGTGCGCGATGCTCACTGCC  
CGGTTGCACAGGCGCCCCGCATAGGCGCCGGCGAGGTTTCGGCCACAGCTGCGGTACCAAAGACACCGAAT  
CGGCTCGGATGCCATCTTGCAGGGCAGCCAGCGCCCCCTCGTACTCGCTCCAGTCTTGACCCCCCTCGGC  
GGTGCAGACGATGCCCGGCACGGCCAGCAGCATGAACTGCCAGCGCCCCATTTGGCGATGAGCTCCTGG  
TTGAGGGCGTGGGACGCTTGTATTTTCGCTCGTCCACGCTTGCCTTCCAGTACCACGACCCCTCAAACG  
ACTGGGTTTTCTGGGCATCACGTACCGCGCTTTTCCAGTCCATTTTCAGCGGGCAGCACGTAGGCGCCGGC  
GCTCCAGTTCTGGCCGGCGTTGGCCATGGCGGCTGCAGGTTGGCTTTCAGTTCGCTGGCGGCATCACCC  
AGCAGCTTGTGCAAGTCGCTCTGGGTGTTGAGGGAGAGCAGCTTGCCTGGCGTTGTTGGCGGCGTGGCCGA  
TGAACAGCAGGTGGCGTTCGACCTCGGTCACCGGCCCTGCATCTGGTTCAAGTTGTTGATCTGTACATA  
AGGCCACATGGTGCGGGCTCCTTAAGTCTCGGGGTTAGCGGGGTAGACAGGGTGGGCGCTGCCCTGCCACC  
GACAGGGTAATTTTCATCGGCCACCCACACTTCAAAGGGGGCCACGGTCCAGGTTTATCCAGCCAGCGGA  
CTGCACCGGCCGGGTTTCCACGATGCGCAGGGGCTCGGGCAATTTCACTTCCAGATCCAGGTCGGCGCT  
GTGCTCATCATTGGGACACCGTCATAGGTGGGATCGGGCAGGGCGAAGCGTTTCGCGAAAGGGTCGTTT  
TCCTGTATCCAGCTGGCGATCACCGCCAGCAGGGTCTCGGTGCGGCATTTCCGAAACGGCAGGCTTTCCA

GGGAAAACACGGCGGTGTATTTGAGCCAGGCCAGATCCATCCCGGTGATCCCCATGTCCTTGGGTTCCAG  
GCTGATGGCATCAGTCATGTCAATTTACTTCCCTGGTTGTTGTTAGTCAAAGCCCCGACGCTTGCCTGCGGC  
GGCGATCTCTTTTATGGCGTTTCGTTGCTCTCTTTCATAGCCTGCAGACGGGCTTTTGTCTCCCGCTGCA  
TGCAGTGGCTCCTCGGCAGGCCCTGCCCCGGTACGCAGCCGCTCAAGCTGGAGGCGAGCCACCTCGGCAT  
CCCCATCCCCCAGGGCATCAAGCAGCGTCAGCGAGTCATCGGTGCCGGCGGCCGTCATCGATGCCAGCCA  
TGCTCGCGGGTCTCCTGATTCGAGCAGTAGCCCGCGCACTTCATCGAGCGCAGCACTGCGGGCGCTCCTCT  
CGCCGCCTGGCTTCCATCTCCAAATGGAATGCGCTCGGCTCATCCAGTGATGCGTATGGGTGCTTTTCTG  
ACACCTTCAGGTACCATTTGAAACGCATATGAACCTGTCTCCGGCTTTCACAATCAGGCCACGCTGGAT  
CATTGCCACGTCTTCCCCGTTTAGCCCCAAATGGAATAGATTCATCCCCTAAATGGATCCTTCTTAGAT  
CCTCCGAGATCGTCCCCTACAGTTGTTGCCAGAGCTCCAAGGGGGTAAAGATGCTCGCTTCGCTCGAAAC  
CCTTTAAGTCGCTGCGCTCGCCACACCCCCAAACCCCGCTCCTTGGCTCCAGTGGTACCTGTGACCC  
GCATTTGCGCAGCTCCCACTCCCCGGAGCGTGTCTGGATGTGGCCGTACAGCGCGCGCAGCCACG  
AGCTTGGTGGTGGCTCGCCGACTGATTTGGCTTGGCAAAGGCTGTGCGGTGGATACTCAAAGGGCGTT  
CATCACGACGGCAGCAGGGGCCCGCCATGGCCTGGGTGAAAGTTCTTCCAGTCCACGGCATCGGCATAGCG  
CCGGCACTCTTCCATGATGGGGCTGGCCAAGGGGGCCACGACGATCCCTTTTGCCTCCTGCAGGCGACCC  
GGTAACTTGGCAGCTCCCGCCAGATCCCGACCGGTGGGCCTTTCAAAGGTTGGAATGGCGCAGGCCCC  
AGAGGGAGGCCAGGCTCTTACTCGGCGGGCTCCCTCTGTGCGCTGTCTCTGCTTCCAGATCACCTTG  
GTCGCGGACGCGGTGGCCGTCGATGTTCTTGGCGATGTACTTGACGATGTAGCCGACTGCGCCGCTTTT  
TCTTTGTCCATCTCCTTCCAGTTAAAACGGGGGTTGATGTGCTATAGGGGCACTTGTCTCTGGGTGGC  
GCTTGGCGCTCCAGATCGCCTTTGTCTATGGCTCAGGGCATAGCGTGCAGGATGCCGATCAGGCGGTGCTT  
GTGCTCTGGTTTGAACAGATCAACAGGTGCCAGTGGGGCGTACCGTCTGATGCGGCTCGACTACCCGA  
AAGCCGAAATAGTTGATGGGGTCATCATAGGGGCGCGGGGTGTTGGCGAGGTGCTGCCGGAATGTGTCC  
AGCCCCCGCAAGGTGCCAGCGAGCGGGGCCGTGATGTGCGGCTGGATTGCGCGAAAACCTTCTGCAGCG  
AAGCGGCTTGCAGGGTACTGGCAACCCTGGCGCCATGGATATGTTGCGGTCCAATGCCGATCGGCAGCGC  
TCCCACAGCTTGGCGATGTAGCGCTGTGAATCGGTGGGGGATGAACCGTCTACTTGGGGTTTTCTTCTG  
TGGAGTCGGCCTTGCTGGCTGGGAAGCCTTACCCTTTTCCATGGGTGAAAGCGGCTCGGTGCTGTCCA  
TGTGAAGAAGATACCCACATAGCCATTTGCTCGGCTATGTGAGAAAATCCCCGAGCGCGCACCACAAGT  
TCGTTGGCGCGGTTTGTGGGGTTGGCGATGCTTGGACAGCCTCCTCCAGGCTGATGACCAATATCTT  
CCTGGGCGTTTATAGGCTTCCATGTCTTGGACAGCGGCTGCCATTGCTGGCGTTCGACAAAGCCCTG  
CAGCCCCTGACTGGAGACGTAGGCAGAGACGCCCTTGCCTACTTTGCCGAGCAGGATGGCGAGTGTTCG  
TTGTACTGATCCCAGATCTTGGCAGGCGTCTTTCCACCCTTGGGGTCAAGCCAGCGGACAATACGGG  
AGATAATGAAACTGTGCGCCCCCTCGGTGGTTCTAAACTTTGGCAGGCGGGGCAGCATGCCCCATGCGTC  
GACTGGCTGTCCGCACATATTCCACAGGTGGATCGGCGGCACCTGCTGCTTGCTGAAATCGGTGGCAGCA  
TCACGCAGCCGACAACGCGCTCGACGTAGTTGACGGCTAGGCGCTCGCGGCTCCTTGGTGGCAGCT  
GCTCGAGGGGCTCGGGGATAATGTTCTGCACCTGGCGCAGGGTGTGATGCGGCTCGAGAGCCAGCGGTT  
GGCATCCTTGGTGTGGAATCCCCTTGGACAGCTCAGGGGCGCGGCGGCAATAGCCCACGAACAGC  
TCAGCACAGAGGTCTTTTGGCAACTCCACCCTGGCCCACCGTTGGCTCGGGGAATGGGGCGAGCGAGCA  
AGTCTAGCGCCCAGTCCAGGGCATAGGCCCCGTGGATCCCGCGAAGTAGGAGCGGATGGCTGCAATCTG  
GCTATCGAGATCCAGCGCAGATGGCGCTCGGGCAGCCGGCGGCGGAGCGTGAATCAGCCAAAGAGCACAGC  
GCCACGCGGCGCGTGTTCATGATGCTCTTTGCCATGGTTTTGACAGATGCAGCCAGCTTCCAGGCAGAAG  
GCTGCCTGGGCTGGACGGGTTTTGCATCAAATAGCGAGGCGTGGTGGTGCAGGTGCATCAGAACGGCAGG  
GGCTCTTCGCAACGCAGGTTGGCGAGCTGGAACCTTGGGCGGCGGACGTTGCTAACAGAGACCCGGTAAA  
GGTGTGATACAGGCTGCAGCGCTGCCTCAGAAGGACGCAAGCGTAGTCCCGACGATGGCAACTTGGCAG  
TGCAGCTCTCAGCTGTTGGCGGCATTGGTTCAGTGGCGCCAGGTCTATTTGTGCCGTCGATTTCAAAGCC  
GCAATTTAGCGACAAGCTGTGCCTCACGTTACGAAAAATCGGGGTGTTTTTCAATTTAGGTGGCCTTCC  
TGCTTGCAGCATCTGGGGGATGCCAGTGTGTCGAGCAACTGCCGGCACTGGATGCGGTACCCCTCGAT  
CACGTTGGTGGCATGGTTGCGGGTGTCTTGGCACGGCGGACGCTTTAGCAGATCTGGCAAATCGACC  
TCTGGATAACCGATGGAGTAGCGGTTACGGCGCAGGGATAGCAGCTCGTTCTGGAGCGTTCTCAGGCGGA  
TATCGTCAGACCGCATGATTTGCGACCAGTAATCTAACC GGCGCTGTTGTTGCAGTAGCTCGGCCATGGC  
GATGATCTGCTTATTGCTCATTGGATCACCTCGCCCAAGCCATGCAGGGGAGCGCACTCTTCCCACCATT  
CCCCGATCTCAGCAGCCAGCACGACATCGTTTTGTCCCAACGCAGCCAGTAGATGGCACGAATTGAGCC  
AAGGTGTAGGTACCTGGCTTCGACAGTCCCATAGGCGGCGGAGAAAAGCGCTGATGCAGCTAGCCCCGATA  
TCCTGCCAATGCAGCCACAGCCGCTTCTCGGCTGGCTGGCTCTGTGGTACCTGACTCGTCATCGTAC  
CACTGTCTATCATCGAGCAGCGCATCTGGGCGACTGGTAACAACCAGCTGGATCTGGATGTGTTGCGGGCC  
AGACTGGACGCATCCCATGCATACGCGGTTGTCTATCAGCGGGCGGCGAACATGTGCGCCAGCATCCCC  
TCTACCAGCTTGGGGGCTTGGGCGGCTATCTTGATTGCGTCTGCTCATGCTGCACCGCCTGACATATCGGA  
TGGCTGACGGCGCATCTTGGCTCAAGAGCACGTTTTGCTTGGCTTGGCCCCGAAGTGCCACACCAAGTGA  
CCGAAAATGCCAAGCTCCCATGGCTTATCTCTCACCCCCGAAAAGAACCACCATTGGCCAACCAAGCT  
CTACATTTGTCGCGCTCTGCTGTGTAGCACCTGAATTCAGGCGTGAAGTCATACAAATAGTGGCCCTTGA  
CTCCCATTCGCCCCGCTTCTATCTGCTCGATGATGGCCATGGCGTTGCGGTACTGCTGGCGCAGGCTTTG  
ATCATGAGGACCTCCCTTCCAGGCTGACAGGCATAGTGGCAAGTAGGGCGTGGATCGCATTGATAGTCTG

AGCCCTGTGCTATCAGGGACAGGAAGAGTCCGAATGGCTGCTTCCATATGGCGCAGCTCCGCTTCTGTT  
TCAACACCGATAATGCCGATCAGTGCAGAGCGCAGAATGGCTACATTCTTAATTGCATCGCTCATCAAGT  
GTTTCCTCGCAGTGGTTATCGATGAGCCCCACGCATAGGGGCTCAGCGATAAGGCCGGCGAACCGGCCA  
AGTGGTGGTTACTCGACGTTGATGAGCGGGGATCTCTGGGTACCGGTCATCAGCCAGAATGCGTGTTCGT  
TGAGCTCGTTGTGGTTGGCGATTGCCAGAAAGAAACCGCCACCGATCTCGCGATAGCCGAGCTCGTAGTT  
TTTGAGAGTGGTCGGCTGGTCGAGTCAGACCGCATCGAGTGGGATCAGGAAGACATCGAGATCCCCGTGG  
CCTTCATGAGTATCAAGCGCAGCACTACCGGGCGGCGCCAGCTGACGTTCCGGGGCTCGCGCAGCAGTGA  
GACCGGACACGCTGATGTGTTCTTTGCCATTGCTCATGCGGTAGACAACGAACCGCTCGACACATCACGC  
CGCCGTAATCCACCTGGGCCATCAGTAAACGAGGAAAACATGAGCCGCAAACAGCGCTTTCACCCGCGG  
GCCGAGCGGCCACCCAGTACAACAGCAACCGGCCACGGTCAGCTTTTCCATTGCCGAACCCATCG  
ACCCATACAGCCTGGATGACCGATTACACGGACGTGTTCTACAGCCCCCTGGGGCGAGTATTACATGCCGCC  
AATCGACAGGCAGGGGCTGGCCAAAGTCGCCCGCCAATGCGCACCATGGGGCCATCTGATGGCGCGG  
CGCAACATGGTATCGGGCCGGTTTATCAGCAGCGAGGGCGTGCCAGGGAGGTGATCACCGCCTTTGTGC  
ATAACCTGCTCCAGTTCGGGGATGCAGCCCTGCTGAAAATTGCGCAACGGGTTTGGCCAGGTGGTGGGGCT  
CTATCCCCTGTCGAGCCTGTATCTGCGCCGCTGTGAGGATGGCAATTTCTGATGTTGCAGCGGGACGGC  
AGTTACAAACACTACCGAGCCGAGGACATCATCTGGCTGGCCCAATATGACCCGGTGC AACAGGTTTATG  
GTCAGCCTGACTACTTGGGTGGCTTGAGTCTGCCCTGCTCAACCAGGATGCAACCATGTTTCGGCGTAA  
ATACTTCTCAACGGGGCGCACATGGGGTTCATCTTCTACGCCACTGACCCGAACATGGACGATGACCAG  
GAAGCGGAAATGAAGGAGATGATCGCGAGCTCCAAGGGGTTGGGAACCTCCGTTCGATGTTTCGTCAATA  
TCCC GGCGGCAAGCCCGATGGCATCAAGCTGATCCCGGTGGGGACATCGCGACCAAGGACGAGTTTGC  
GGCCATCAAAGCGATCACCGCCAGGATGTGCTTACCGCACACCGGTTCCCCGCCGACTCGCCGGCATC  
ATCCCCGCCAACGGCAGCGGGGGCCTCGGAAACCCAGAGCAGTACGACCGGACTTATGCCCGCAATGAGA  
CGATCCCGATGTGTGAGCTTATCCAGGATGCAATCAATGGGGCCAACTTCCGCGCCGGCTGCAGGTGGA  
TTTCAATCGGTCTTTGGAGGCTAGCGCTACTGTATAGAGATCCAGCGTTAGGATATAATCGGACGGTTTT  
TCATCGACGGTATCAGGGGGGATTTATGCGGGTATTTTGTGCGGAATGTGGGGAGCTGGGGCGCATCACC  
AAGACGCACCGCCTGAGCCGCGACACCGCCGATCTGTA CTGCCAGTGCACGGATGCGGAATGCGGACACA  
TCTGGGTGTGCGAGATGTCATACAGCCATCCTCTGAGCCACTCTGGGCGCACGACCAGCCAACCTGGCCTT  
GAGCCTTATAA ACTCGCTTAGCCAAAGAGGGACGGCAGGCCCTGCAGCGGGA ACTCAACCTGGGATAATGA  
AAAAGGGGCGCATGATGCGCCCTTCTGATATATATCATCCGATCAACTTCAAGTCCGCTTTGCGGGTCT  
TTAAGAGAATCATAGAAGTTCTCATGGGGACCGACTCAGTAGGTAGAGCTGCAGCTCCGCGTCTTTCC  
AAGAGTAGCCAAGCAGTACGAGTTGTCCCTTGAGCTTGAATTTGTGCACCCGCGAGGTACGATAAATCCCC  
CTTCTTTTGTTCGCGATCTCGGGGTCGTAATGACCCGCTCGATTTTCGTCTTCCACTACTTTCAGGTCT  
TTCGAGGAAGCTTTTTGAGTTGCTTGGTGAACAGGCTTGACTCAAAAACCTCAATCTCGTTTTTGTCTT  
CTGACATAGCGGGTACTTGGCCTTCTTTGACTTGTCTGCTGCGAGCATCACATCTTTGATGAAGCTGA  
AAGGCAGGTCCGGGTTGTCTTCGACCATGCGACCAATCTTGACCAGTACTCAATTTGCTTCGGCAAGGA  
ACGATGGGCGGCAGACCGGTGGATCTTACATCGGCATGAAGTCATCGTCTAAGCGTACTGTTTGTGCC  
ATATCTATTGCTGTTTTGTTTTGGGCTGGAGTGGACTATGAGTATATGTCACACGCCAATAAATGCAACA  
AATTGTTGCATTTTCGCTACCTGCCAGAGCTGCCGCGCTTCGCTTGCCGGCCACAAAAACGGTGTGACAG  
ACTGCGCTAGTCACGCCGTTTTTTGAGCTGTTATCTATCAACTAATCGTCTTGGTTACTTGAGCTCCGG  
TGTTTTGCATCTGCATTGCGTCCCTGATGCAGTCATGGAGCGAGTTGTGGGAAACGAACCAATCCGGAGC  
CTGCCAGTTTTTCAGGTATCCCTTGGTACCACCTGACAGCGCATCGATGTAGGTCCGCACATCGCGCACC  
TGTTAAAGCGCCAGGGTACCGGCAAGCCGAAGTCTCAAACAGGCTTGCCAAGATAGGGGGATCAAAGT  
CGGTACCGCGGGCGAACATCTGCGCGCCCTGGACAAAGCCTGAAAACAGGGCAAGCGCCTCGCGGGTCTGA  
TACTGAGTGGCCGTTGATGATGCTGGCCCTGGCCGCGTGCCTCTGCCGTTCCACCACTTCACTGTCCCC  
GGATCCACAGTTCGGCCAGCCAGGAGCTGCTCGGTGACATTTAGTTTGGAGGTGCAGCGTCTCTCCAT  
CCATGAATGGCTCACCGTTATCAAACGAGAGACCGTGCAGCAACGTGTTCTCCA ACTACGTGGAGCTCATC  
GAGAGCAAGCACGACTGGCAGGCTCCGAGGGTACTCGGGATCGATGAAACACATTTTCAGCCAAAAAATGC  
ACCTTGTACTGACGGATATCGAGCGCAAGACCCTTCTCGACCTCCGGCGAGATCGCTCTCAGGAGGCCGC  
CAAAAACGCCATCGTTCCGCTGCGTGGATGGGCTGGCATTGAGATTGTCTGCATGGACATGTGGCGACCC  
TACAGGAACCGGGTGCAGACATCCTGCCAAATGCGGTGGTGGTATAGACAGGTTCCACGTTGCCAGGA  
TGGCGAACGAGGCAATGGAGGCGGCCGTAAGGTTCTGCGAGCATCGCTGTGCGAAGAAGGAGCGGCTCCG  
GCTTAAAGACGACAGAAAGATCTTGTCAAGCGCCGAGACAACATCACAGGACTGAATGAGCTCGCCAGC  
TTCCATTTCTGGACTGAGGAGTATCCAGAGCTGATGTCTGTCTATAACGCCAAGGAAGGGTTTTCTTGACC  
TGTGGCTCATGCCAACCAGGGATGACGCTATCAAGTATTGGGATAACTGGCTGCGCATCACTGACAGCGA  
AACCAAAAGGCATTTCTCCCAGGCATCACGGCGATGCGGA ACTGGCATGAGGAGATCTTCAATGGTGG  
GACTTCCGGTACACGAACGCTCTGACTGAAAGCCTGAAACAACCTGATCAAGGCAGCGTTTCAGATCTGGTC  
GTGGTTACAGTTTTGAGGTGCTCAGGGCCAAGTTACTGTTACCAAAGGTGGCTTGGAGACCACAGCAGA  
ATCACTCAACAAGCCTCGGCCTGAACCCACTGAGATGATCCTGATCGAGGAGCCTGAGCTGTTTCTCCAT  
GGCACCAGAATTGACATGCCAGTGCCTGCTTTTGGAGCTGGTTGCGGATCATAAGATAACACAACCAGA  
GTTAATCTGACAAGAGCATTGATTTGATTGATTTAATCAATGCTCACTCTAATCCGTATACCCCATCA  
GTCATGTCATTTACTTCTGGTTGTTGTTAGTCAAAGCCCCGACGCTTGGCTGCGGCGGCATCTCTTCT

TTATGGCGTTCGTTGCTCTCTTTTCATAGCCTGCAGACGGGCTTTTGCTCCCCTGCATGCAGTGGCTCCT  
CGGCAGGCCCTGCCCGGTACGCAGCCGCTCAAGCTGGAGGCGAGCCACCTCGGCATCCCCATCCCCAG  
GGCATCAAGCAGCGTCAGCGAGTCATCGGTGCCGGCGGCCGTCATCGATGCCAGCCATGCTCGCGGGTCT  
CCTGATTTCGAGCAGTAGCCCCGCGCACTTCATCGAGCGCAGCACTGCGGGCCTCCTCTCGCCGCCTGGCTT  
CCATCTCCAAATGGAATGCGCTCGGCTCATCCAGTGATGCGTATGGGTGCTTTTCTGACACCTTCAGGTC  
ACCATTTTGAACGCATATGAACCTGTCTCCGGCTTTTACAATCAGGCCACGCTGGATCATTTGCCACGTCT  
TCCCCGTTTAGCCCCAAATGGAATAGATTTCATCCCGCTAAATGGATCCTTCTTAGATCCTCCGAGATCGT  
CCCGTACAGTTGTTGCCAGAGCTCCAAGGGGTAAAGATGCTCGCTTCGCTCGAAACCAAACCCCTTACT  
GCGCTCGCCACACCCCAAACCCGCGCTCCTTGGCTCCAGTGGTAGCCTGTGACCCGCATTTTGGCAGC  
TCCCCTCCCCGGAGCGTGTCTGTGGATGTGGCCGCTCCCGTCCCGTGTGTGCCAGAGCTCCAAGGGGT  
AAAGATGCTCGCTTCGCTCGAAACCCCTTAACTCGTTCGCTCGCCACACCCCAAACCCGCGCTCCTT  
GGCTCCTAGCCTGTGATGTGAGGGCCCTTTCAAAGGTTGGAACCTGGCGCAGGCCCCAGAGGGAGGCCAGG  
CTCTTACTCGCGGGCTCCCTCTGTTGCCGCTGTCTCTGCTTCCAGATCACCTTGGTTCGCCAGCGGGT  
GCCGTCGATGTTCTTGGCGATGTACTTGGAGATGTAGCCGACTGCGCCGCTTTCTCTTTGTCCATCTCC  
TTCCAGTTAAACGGGGGTTGATGTGCTATAGGGGCACCTTGGCTCTCTGGGTGGCGCTTGGCTCCAGAT  
CGCCTTTGTCATGGCTCAGGGCATAGCGCTGCAGGATGCCGATCAGGCGGTGCTTGTGCTCTGGTTTGC  
CCAGATCAACAGGTGCCAGTGGGGCGTACCGTGTGATGCGGCTCGACTACCCGAAAGCCGAAATAGTTG  
ATGGGGTCATCATAGGGGCGCGGGGTGTTGGCGAGGTGCTGCCGAATGTGTCCAGCCCCCGCAAGGT  
GCCAGCGAGCGGGGCGCTCGATGTGCGGCTGGATTGCGGAAAACCTTCTGCAGCGAAGCGGCTTGCAGGG  
TACTGGCAACCCTGGCGCCATGGATATGTTGCGGTCCAATGCCGATCGGCAGCGCTCCCACAGCTTGGCG  
ATGTAGCGCTGTGAATCGGTGGGGGATGAACCGTCTGACTTGGGGTTTTCTTCTGTGGAGTCGGCCTTGC  
CTGGCTGGGAAGCCTTACCGTTTTTCCATGGGTGAAAGCGGCTCGGTGCTGTCCATGTGAAGAAGATACC  
CACATAGCCCATTTTCGTCGGCTATGTGAGAAAATCCCCGAGCGCGCACCACAAGTTCTGGCGGGGTTT  
GTGGGGTTGGCGATGGATGCTTGGACAGCCTCCTCCAGGCTGATGACGATATCTTCTTGGGCGTTATAGG  
CTTCCATGTCTTGGAGCCAGGCGGCTGCCATTCGCTGGCGTTCGACAAAAGCCCTGCAGCCCCGACTGGA  
GACGTAGGCAGAGACGCCCTTGGCTACTTTGCCGAGCAGGATGGCGCAGTGTTCGTTGTACTGATCCCAG  
ATCTTGGCGCAGCGCTTTTCCCACCACTTGGGGTCAAGCCAGCGGACAATACGGGAGATAATGAAACTGT  
CGCGCCCCCTCGTGGTTCTAAACTTTGGCAGGCGGGGAGCATGCCCATGCGTCGATGGCTGGCTCGCA  
CATATTTCCACAGGTGGATCGGCGGCACCTGCTGCTTGCCTGAATCGGTGGCAGCATCACGAGCCGGACA  
ACGCGCTCGACGTAGTTGACGGCTAGGCGCTCGCGGCTCTCCTTGGTGCGCAGCTGCTCGAGGGGCTCGG  
GGATAATGTTCTGCACCTGGCGCAGGGTGTGATGCGGCTCGAGAGCCAGCGGTTGGCATCCTTGGTGAT  
GGCAATCCCCTTGGACAGCTCAGGGGCGCGGCGGCAATAGCCCACGAACAGCTCAGCACAGAGGTCT  
TTTGGCAACTCCACCCTGGCCACCCTTGGCTCGGGGAATGGGGCGAGCGAGCAAGTCTAGCGCCCAGT  
CCAGGGCATAGGCCCGTGGATCCCGGCAAGTAGGAGCGGATGGCTGCAATCTGGCTATCGAGATCCAG  
CGCAGATGGCGCTCGGCGAGCCGGCGGAGGCGTGAATCAGCCAAAGAGCACAGCGCCACGCGGCGCGTG  
TTCATGATGCTCTTTGCCATGGTTTTGACAGATGCAGCCAGCTTCCAGGCAGAAGGCTGCCTGGGCTGGA  
CGGGTTTTGCATCAAATAGCGAGGCGTGGTGGTGCAGGTGCATCAGAACGGCAGGGGCTCTTCGCAACGC  
AGGTTGGCGAGCTGGAACCTTGGGCGGCGGACGTTGCTAACAGAGACCCGTTAAAGGTGTGCATACAGGC  
TGCAGCGCTGCCTCAGAAGGACGCAAGCGTAGTCCCAGCAGATGGCAACTTCCGAGTGCAGCTCTCAGCTG  
TTGGCGGCATTGGTTTTCAGTGCAGGCGGCTATTTTGTGCCGTCGCATTTCCAAGCCGCAATTTTTCAGCGACA  
AGCTGTGCCTCACGTTTCAGCAAAAATCGGGGGTGTTTTTTCAATTTAGGTGGCCTTCTTGCCTGGCAGCATCT  
GGGGGATGCCAGTGTGTCGAGCAACTGCCGGCACTGGATGCGGTACCCCTCGATCACGTTGGTGGCATG  
GTTGCGGGTGTCTTGGCACGGCGGAGCGCTTTAGCAGATCTGGCAAATCGACCTCTGGATAACCCGATG  
GAGTAGCGGTTACGGCGCAGGGATAGCAGCTCGTCTGAGGCGTCTCAGGCGGATATCGTCAGACCAGCA  
TGATTTTCGACACAGTAATCTAACCGGCGCTGTTGTTGCAGTAGCTCGGCCATGGCGATGATCTGCTTATT  
GCTCATTGGATCACCTCGCCAAAGCCATGCAGGGGAGCGCACTCTTCCACCAATCCCAGGATCTCAGCAG  
CCAGCACGACATCGTTTTGTCCCAACGCAGCCAGTAGATGGCACGAATTGAGCCAAGGTGTAGGTACCT  
GGCTTGCACAGTCCCATAGGCGGCGGAGAAAGCGCTGATGCAGCTAGCCCCGATACTCCTGCCAATGCAGC  
CACAGCCCCTTCTCGGCTGGCCTGGCTCTGTGGTACCTGACTCGTTCATCGTACCACCTGTCATCATCGA  
GCAGCGCATCTGGGCGACTGGTAACAACAGCTGGATCTGGATGTGTTGCGGGCCAGACTGGACGCATCC  
CATGCATACGCGGTTGTCATCAGCGCGGGCGGCAACATGTCGGCCAGCATCCCCCTTACCAGCTTGGGG  
GCTTGGGCGGCTATCTTGATTGCGTCTCATGCTGCACCGCCTGACATATCGGATGGCTGACGGCGCAT  
CTTGGCTCAAGAGCACGTTTTGCTTGGCTTGGCCCCGAAGTGCCACACCAAGTGACCGAAAATGCCAAGC  
TCCCATGGCTTATCTCTACCCCGCAAAGAACCACCATTTGGCCAACCAAAGCTCTACATTTGTCGCGCT  
CTGCTGTGTAGCACCTGAATTCAGGCGTGAAGTCATACAAATAGTGCCCTTGAACCTCCATTCGCCCCG  
CTTCATCTGCTCGATGATGGCCATGGCGTTCGCGTACTGCTGGCGCAGGCTTTTGATCATGAGGACCTCC  
CTTCCAGGCTGACAGGCATAGTGGCAAGTAGGGCGTGGATCGCATTGATAGTTCGTAGCCCTGTCGCTATC  
AGGGACAGGAAGAGTCCGAATGGCTGCTTCCATATGGCGCAGCTCCGCTTCTGTTTTCAACACCGATAATG  
CCGATCAGTGCAGAGCGCAGAATGGCTACATTTCTAATTCATCGCTCATCAAGTGTTCCTCGCAGTGG  
TTATCGATGAGCCCCACGCATAGGGGCTCAGCGATAAGGCCGGCGAACCGGCCAAGTGGTGGTTACTCG  
ACGTTGATGAGCGGGGATCTCTGGGTACCGGTCATCAGCCAGAATGCGTGTTCGTTGAGCTCGTTGTGGT

TGGCGATTGCCAGAAAGAAACCGCCACCGATCTCGCGATAGCCGAGCTCGTAGTTTTTTGAGCGTGGTGGG  
CGGGATACCCAGTTTTCTCGGCGAACTTGGGGCGGCTTAGCCCAATGCTTCACGCAACTTGCAGGCGG  
CGACGAGCTTCATGGTTGAGGTGACCCATGGACGGCAGATTGATAGGTTGCATGGTTAGGCTCCTTGATG  
GGCATTGAGACGATTGATGTGACCAAACAGAGAAGCCCAGACCAGGGCGTTAGCTCGCTGGCTCAGGATC  
GTCAGGTGCTTTTTCCGAGTAGCGGGCGGCATATGGGCTGCAATGCGGCTGTCTGGATCTTGCGGTTGC  
GCAGCGCGCAGGGGATTGCTAAAAGTTGGCATGTCAACTTTCCCTTAGTAAGTGGTTGATAAAGAGCCCCGT  
TAGGTGTTTGCAGCACCAGTGATCGGGGTTTTTTCTTGCCCGCAATTTGCGGTTTGTGGGTTGTTGACCA  
GTGTCATCAACAGTCCCTTGCTCTGTGCCAGCCGTTGCGCTGATCTGCTTACCTCTGGTTTTTCTTCTGG  
CGGTGGTATCAAACCGGATCGCCACTCTTCGAGGGTGACCGCGCCGTGAAACAGGTGTTGGTATCCGAGC  
CGACGCATGGCAAACAAACGATTTCTCGGTCGATTTCTCCGAGTGAAACTCAGGTTTAGCCAGCGAGA  
TGGGCAACTTGGCGTTGTAACAAATGGCCTCAGCTGATCTTGTTGAGTGCTCCCCAATACTTCGCAAC  
CCTGCAATTGGCGTGGTAAATCGCCTGACGCATTTCTGCCAGCGCTCTCTCGGCTGCACCTCGTTGTAAC  
GTGTTTCATCATTTCTCTCTTACATCGCTAGTGCCGAAGGGGCGACACCCTTGAAAGCGCTGCTCTA  
CGTCATTGATCAGCAGTGCAACCGAGCCATCGCTGCAGTAGCGATGCTCATGAACGTGCGGTGCTCGTG  
GCTGGTGATTCGGCCGCTTCTGTTAGCTCCAGGGTGTGCAGACCGATGTTTGTATCTGGGAATTCAGG  
TTGATCACCTGATGGGTGAGAGACGGGGCGGTTCCCTTTTTGGAATGGCGACAGCCGTCAGGCCACAGC  
AGAGCAGGGCGCCATCAAACAGGGTTTTGCTCTTGGTGGCGTGGTAGAGGGAGATCATTTAGCCACGGT  
AAGTTCGTGTTCTTGTCTGGGTTCAACTTGTGCTCAAGGTCTGCGGGTGTTCATGCCGATGGTTCGG  
CCAAGGTGAGCAACCTTCCCTCTGTTGTTATCCGCAAAATAGCTGGCAGGCCTGGTGCCAGTTCAGATGTA  
TGTCATGGCGTTCAACAAACATGACCAACTCCTTTTACTCAATAATCTGGGTTGAGCTGGCAACCGTCA  
TGGTCACGAAACGTTGCGCCTGATAGCGAGCTTGTAGATAGAGGGCATAGAGATTGACGCGCGCATGACC  
GCGACGGCCGTTTGAAGACGGGGAGCTGACCACGGTCGGCACGTTTTTCGGATGGTGTGATCTTCTCG  
CCCTGACGCTGGGCGTAGTCGGCCAGGCTTTCAGTATGCGGTCGCCGAATGGATAGTTCGCTCGGTAAC  
CACTGACATCGCTGGGAATATGGATGCGTTTTGGATTTAGAGGCCATTTGTTGTTACCTCTGGTTGTTTGTG  
TGTTTTGTGGTGCTTTGTGGTAGTTGGTAGCTACCTATGGCTTTGATGTTGCATGGTTTTCTATGCATG  
TAAACATCCATTGCATGGAATCTATGTTTTGATAGCTGATAGATTAAAAAGTGAGCGAAAGCGATTGGG  
GCTCATTGAGGAATCGCTTGCAGGATCGGCAGGCATTAAGCGGATTAAGTCTGCGGTTTGGGAAAGAGGG  
CTTTACTATCAGCTCCAGCATCGCTCTAAGTGCCTTGGTCTGTAGGAATGGATGCTTGTGTTGTTCTCA  
CTGGTGAACGTGAGCAGACTGGGATGGTGAGGAGCGGCTGCATCAGGCGGTACTGGATGCTGATCT  
GCTATCGCTTGAAGACAAAGTAAATGCGGCCCAACTGCCAAAGCGGTGGTAAAGTCAATTGCCAAGTCCG  
GTCCCGGATACTCAACCAGTGGCGGGCAGGTCATCAATACCAACAGCGGTGACGGCGCACAGCAGA  
TTGTGAATTTCCCGATTGGTAATCTCACGACAGGGCAGCTCATTATCGGGAAAGGACACCAGAAAACGATG  
AGGGATGGTCAACCTCCTCTCGAACCGATGACAAAATAATGTGCGGCAAAATGTTGAGGAACCCAGTCAATA  
ACGTGGCTGGCCGTGATGTGGTGTACAACCAGGTGGTGCCGAGCGCCGTTTAGTAATGGTGAGCGCAG  
GCAGCTTGGTGATTTGATCAGGCCGTTGGCGATCGAGAACCAGACCTCCGAAAAGGAAGAGTGGCGAGCG  
CTGCACTTCCCGTTTGGCGTTAATAACCATCGATGAGATGGACCGTTGCAATTCGAATCAGCCCGGCAAC  
TCTTGGCTGCAAAGCTGGATGCTGCACAGTTGCGTCGTGAGCTGTGCGAACAGCAAGAGGAAACAGAGCG  
CTATAAGGTCTCGGTGCGCAAGACGTCAACCAGAAAAGTGGCGGCTGGGAGCAAGAGCGCATGAAGTTG  
CTCCAGCAATCTAATCTGCTGGTCAGGCAAAAAGCGGAGCTGGAAAACCGCTGGCAGAACGGACCCGAA  
CAATCGAGGAGCTGACTACCCGTCAACAACCGATTGAGCCAGCAGCACAAAGAACTGTCCAAGCCAAAAAG  
CAGGCCTTGGAGGACGCTGATCACCTGGGGGATGGGGGCCCACTGGCCATTTGTGGGAACCCCTGGTGTG  
CAGCCAGCCTTTGAAAGGGAACCTGCTGGCCGAGAAGAACAAGTCTGCGATGCTCACGCGGGAAGATATCT  
GCCTGTTCAACGGGCAACCCCTTCAAGTGGGGCACCCTGGATTAAAGACCGCTACAGGGATGCAAAAGTGGT  
GAAGAGTCGCACCGGTCAATACCTGTGGCAGCCAAATTAACAATCGAATGGATTCTATGAACATGAAC  
CATATTGAGTCATCGTATCACTCCTTAGCTCTATGCTATTGGTGGTTGTGGCTCTGACAAAAACAGTCT  
TAATGAGCCATTGCCTTAATTATGGTATCGGATGGTTTTGCGCTTGGGTGAAAAACAGCAGCGTCTATT  
TATTTGCGGAAAAACGATCAAGATAGCTTTTGGGATATAACTATACAGAAAGTCAAGTATAGCACCCCAAT  
CAGAATTATCATCAGTAGAAAAGAAAACAATCCCAGCAATCAATGCAAGTTGTAACCTGGGATAACAAAAATTA  
CGTACTGTATCAAAAACACCAACAAAGTTGTCAATTGAAGTTTGGCGAAGTCGACTCAAGCAAAATCGAG  
CTGAATGTTTCTTACTGTTGTTGATGTAATAATCGCTTGGGACTATATGGCGGTAGAAAATATTGCAC  
TTAAAATTGATAACCTGACGATCTTAAAAAGTTATTAATAATTTTCCGGAGGCAGGATGCTGCGC  
CAGTATCTTAAGGTCGTTACTATCGGGCTATTGGTGTGATAACCCACGCAGCTGAGGCCGAGGGCGGC  
AGCCATGCTCAGGCAGTAAAGGCGGGATCTCGCATTGTGATGGCGGGCGTTTTTGTATGCAATGATGGTTC  
CTATAGTGCCAGTAAGCGCACTTGTTCAGGATACTCTAATCAGTCTTACCACCACCTCTATCAGCAGT  
GAAAATGACGTTGATTTTAGAGAGCAGTGCGCAGTTGCAAAAAAATAGATACCTCATTTGAAAGTGCAG  
TGGAGCAATACAGCACCACGGCCGATATTGAAAAAATCATGGATGGAACAGTTAGTGGCGATGATGTTT  
TAAATCCAGAGCCGTAATAATTGAACCTGCGATAGAACAAGCCAATAACATGTTAGCTCCTTATGTAGGA  
GCCAGGTAACGAATCACTGATTATACCCATCATGTTTTTCAACAAGTTCAGGAGTTTGGCATTTCACCC  
AAAATTTTTGTAACATGGCGAAGATTGGTGCAGGATAAAAAACAAATTAAGGCTGAATGGAAGATTGCCCG  
CCCTCATGTAATTAAGCTTATTGAAGACAGCAAAAAAGTGAAGCGTTGTGCAAAATCATAGATGAGCATT  
AAATCTACCCCGAAGTTATCTGGTGCATATCCGCCCGCAAGGTGCTGACGGCAAGCGGATCCGCAAGC



GCTTCAAACCAAATCCGAAGCCCAGCAGTTTGAACGCTGGGTGATTGCCACCGAGCATAATAAGGGGTG  
GGTTGATCGCCCCGAGACAACCGGCCGCTCTCTGAGCTCATCGAACTCTGGTGGCGTTACCATGGTCAG  
ACCCTGAAAGCAGGGGAAGCGGTACGCAAGAACTGCACAATATCGATGCGGCGTTGCGCCATCCACAGG  
CTAGACAGGTGACCAGAGCGCTGTTCTCCGAGTACCGGGCACAGCGACTGCATGCTGGCCGGCAGCCAAA  
GACCGTCAACCGTGATCAAGAGATGCTGGGCGGGGTGTTCTCGGTACTCATCGATCTTGGTCATTACCAT  
CATGAGCATCCGCTCAAGGAGATGAAGAAGGTCAAGCTGGTTGAGCGGTGCGATGGGTTACCTCACTCAGG  
ATGAAATCAGTGAAGTCTTGGCCGCTATCTGGGGACAACCTGAAAGTGGTCAAGCTCTGCCCTGGCAAC  
AGGGTCTCGATGGAGTGAAGCTGCGAATTTACGCCGGAAGATGTACTGGCTGGGCGGGTGACTTACATC  
AACACCAAGAACGGCAAGAATCGCACCGTGCCGATCTCTGACGAACTGTGTAAAGAAAATAACAGCCGGGG  
TGAACCGCGGCGCGCTGTTCCGTGACCTGGACTATTACTTGGTGCCTGCTGTGCTCAAGACTGTGGCGCC  
AGATTTACCAGCAGGGCAGGGTGCATGTCTTCCGTCACTACTTTTGCATCACATTTTATGATGTCGGC  
GGCAACATCCTCGCGCTGCAAAAAATCCTGGGGCATCACAAATATCCATCAAACGATGACCTATGCCCACT  
TTGCACCGGACTACCTCAGCGATGCCGTGCGTTTCAATCCTCTGAAAAATCCACTGCCAGCAGCCTGATG  
ATGTGTCCACAAATTGCCCAACTGGTGTGCTACTACGTGTTTTTTCGTCCTAGTTGGTGGTATGTAAGT  
AATTGATGTGCATATAACTAATTGTTTTTATTGACCATAATAAGGCGGCTTAAGCCTCCCTTGTCAATTC  
TACCTACCACACGATGGCTTAGGCCAGGTCCGATTACGCCGCTACGCGGCCAAGCGACCCACACCGGAT  
TGTCGATATCGATAAAGGTGACATCCAGCCATGCACGGTCCGACGCACTCCCCAGCGCCTTGACGCC  
GTAACGCTCGGTGGCGTGATGGCCCGCGCGTAGAAGTGCATCCCCATCTCGCGGGCGGTGTGAATGGTC  
TGTTTCAAGCCTCGCCAGAGATAAAGGCATCGATGCCTTGTCTCCGCCAGATTGATGTAGCTCTGAC  
CGCCGCGGTTGCACCGGCCACGGAACGGATAAGCTCGGGCGGTATCGCCACAATAGAGTGGTTCGCG  
ACCAAGGCGCTCGGCAATCAGCTTGGCAAGTCCGGCACCCTCATCGGCTGCTCCAGCTTGCCACCATG  
GCGACGCTCTTGCTGTTCCACGGCTCCAGACCGCGACGCACCTTGATGTGCGAGCAGCTTGGCAAGCTGGG  
CGTTGTTACCCACCTCGGGATGGACATCCAGCGGCAAAATGGTAGGCAAAACAGGTTGATATCGTGGGTGAG  
CAGGGTCTTGAGCCGACGCTGCTTCATGCCGGTGATCTGGGCCGGTTCACCGCTCCAGAAGTAGCCGTGA  
TGGACCAGGATGGCATCGGCCTCGGCAGCCACGGCGGCTGATAAGCGCCTGACTGGCGGTGACACCGG  
TCACCACCTTGCGAATACGCTCACGCCCTCCACTTGAAGCCGTTGGGGCAGTAATCCTTGATGGCGTG  
CGGTTCCAGCAGATGGTTTCAATACGGTTTTCAGTACGGTTTTCGATGAGAGATCATAGGGGTCCCTTATTAAGG  
TCGGTCCCTCAGCTTTACCAATAAAAAACAGGGCCAGGCTCAAAACGCCAAGGGCCCCATGATAAATCGAGC  
CGGGCCGTCGAAGACCATGACAGCCCCACACAGTCCGGTTCCTTCCCTCTCGGCCCTCAGGTGACAGGTCGAT  
CCCCGCTCCCGCATCTGGGCCAGCTTGTAGCGCAGGGTTCGCGGGCTGATGCCAGCCGATCGGCCACC  
GCCTTGCGGCTGCCGTTACAATCTTGCAGGGTGTGCGAGGATGATCTGGTGCTCCTGCTGCTTGAGCTCGC  
TGCCGAGGCGATCGCCGCATAGCTGCGCTCGACGCTGACAAAATCCATCTCCTGCTCGTCCAGCTCCTC  
CAGAATGAGGTGGTACAATCAATGACCCCGTCCGGGCTGAGGATCAGGGCAGCTGTACCACGTTATCT  
AGCTCCCGCACATTGCCGGGCCAGGGTGGGCCAGCAACCCTCCCGCAGGCGTCCGTCAACTGTGGTG  
TCGGTAGCCCTGCTGACTGGCATGAAGTGCCAGCAGGTGCTCCGCCAGCGGCAGAATGTGCGCCGGGCCG  
CTCACAGAGGGCAGACCAGCGCAGCGGAAAGACGTTGAGGCGATAGTAGAGATCTTCGCGGAACAGGCCA  
TCCTGCACCGCTTTTTTCAAATCCCGGTTGCTGGTGGCGATGACCCGCACATCCAGCGGGATCATCTTGC  
GACTGCCGAGCCGCTCCACCTCTTCTCCTGCAGTACCCGCAGCAATTTGGCTTGCAGCCCCGTATCCAT  
CTCGGTGATCTCGTGCAGCAGCAGGGTGCCTCCCTGCGCTTGTTCGAACTTGCCCGGGCACCCCTGTACC  
GCACCGGTGAAGGCGCCCTTCTCGTAGCCAAAACAGGGTGCCTCCAGCATGTTTTCCGGAATGGCGGCGC  
AGTTGATGGCGACGAAGGGCTGCTCGGCGCGGCTGGAGTTGTGATGAATGTAACGGGGCCAGCACCTCTTT  
ACCCGTCCTCGCTCGGGCCGGTACCATCACGGTGCCTTCGCTTCTGGCAACACGGGTCGCCAGCTGGAAC  
AGCTCGGCAGTTTTGGGATCCCCGTAGACCACGGCGGCTTCTCCACCTTCTGGGCGGGCACATAGCGGC  
TGACCTGATTAAGCAGCACCTCCGGGGAGAACGGCTTGGCCAGATAGTCGATGGCCCCCTCACGCATGGC  
GCGCACCGCGCCATCGATATTGGCGTAGGCGGTTCATCAGCAGCACAGGTATCTGTGGATATTGCTGGCGG  
ATGGTAGCCAACAGGGTGAAGCCGTCATTTCCCCCATCTGGATATCGGAGATCACCATGTCAAACGGCT  
GACGGGAGAGGGCCAGCAAAGCCCGCTCGCCGCTGTCCGCTTACGGCACTCATAACCGCCGAGCAAAG  
GGTATCCACCAGCGCTTCCGCGCAGGCCATTGTGATCTTCAAACACCAGGATCCTGGCCTGTGTCATGCTA  
CACCTCCAAGCTGCACCGGTTGCTGGTGCAGGGGGAACGACAGAGTAAAGCAGGTGCCCTTACCGGGAAC  
CGAGGCCACACCGACCTCCCCCTGATGGGCACGCACTACAGATTGCACCACCGCCAGCCGAGACCAGTG  
CCCTGGGAGCGAGTGGTAAAGAAGGGTTCGAATACCTGACCGAGCTGATGGGAAGGGATCCCCCTTGCCAT  
TATCAATGACCCGCATCTCCACCCGGCACCGCTGCGCACCGGCTGACCAGCAGCGAGGTGGCCCCCGC  
CTGCTGGGCATTGGCAATCAGATTGTTGATGGCTCCCGCAACCGGCTGCTGTTGGCCAGCAGACAGAGA  
TCGGGCTCTGGCGCCTCCATGTGCAGCTCGCAGCCCTGTTGCTGACAGAAGGCTTCGGCACCGGCTGCA  
CTTCGGCCAGCAGCCCTTGTACCGAGATGGGGGTGACCACCTGATTGTGCGCATTCGCGGCAAACAGCAG  
GATGTCAATTGATCTGCTTCTCCAGATCCTGCAAACGGGCCATCAGCTTTTGTGAAACTGAGTGCGGGAT  
TCCGGCTTGAGGGTGCGGTTGGCTAGATTGGCGGCATAGAGCATGGCAGCGGAGAGCGGCGTGCGGATCT  
GGTGGGCGAGCGAGGCCGCCATATTGCCAGCGCCGACAGTGCCTTCATGTGGTTGATGCGGTCTTGCAG  
TTTACGGGTTTTGGTCAAGTCAATTGATAAAGACCAGCTGGCCGGGCTGATCCGGCAGCGGTTGGGTGCGAG  
AGCTGCACCCGGCGCCGTCGCGCAGGGAGATCTCGTGCCATCATCTCGCGGGCTCGAAGCAGCGGG  
CAATGATGTGGCGCCAGAGCTCCCTTCCAGCGGCTCCCCAGCAGGGAGATGGCCCGGGATTCCGCGC

TGTGACCACCCCTGCCCATCAAGCAGCAACACCCCGGTGGGGAGCGCCTTGAAGATGGCATAGAGCTGG  
CTCACTTCGTGGGACTGGAGTGGCATGTCCTGCTGCTGGATTGTCATAAACCTGACCTCAAACCTGGCTAT  
TGGGTCAGGTTATTCAATTTCCATGCCACTAAATTATATGAACTAAAACAATGGATTGCGTATTGGCGTC  
AAGGCTTTGACCCTTAGACGCCCTTGCTCATCCCGTACTTTTTTCATCTTCTCCACCAGGGTAGTACGGCG  
CATGCCAAGCAGATCGGGCGCGGGCCACGACCCCGTCTTGAGACTCCAGCGCCTGACGGATCAGCTCC  
ACTTCAAGGTCGGCCAGCATCTCTTTGAGGTTGACCCCTCTCCGGCAGCTGCATGGTGGGGCCGAGG  
CGAGGGCGTGATCCAGCTCGGGCGGATCCTGGAACACCGCCGACGCGCATCCCGTTCATCCATCTCGGT  
CAGCCGCTCATCCCGCGGCTCGCTCGGCAGCAGGCGATAACGGCTCGGCAGATCGGCCACATCGACAATC  
TGGTGGGGTAGAGGATCAGCAGCCGCTCCAGCAGGTTGGAGAGCTCGCGCACGTTGCCGGGCCAGGGGT  
ACTGCATCAGCGACTCCAGCGCCCCGCTGGGTTAGCCGGATAAAGCCGTGGTGCTGCTCGGCATGGCGGTT  
GAGCAGCTCCTGCAGCAGCGGGATGTCGTCGATGCGATCCCGCAGCGGGCGCTCAATGGGGAAG  
ACGTTGAGGCGGTAGTAGAGATCTTACGAAAACCCCTGGGTGCGGATCATCGCCTCCAGATCCCTGTGGG  
TCGCCGCTATGATGCGCACATCGGCCTGAATGGGCTTGCCGCCACCAACCCGGTGAACAACCGCTCCTG  
CAATACCCGCAGCAGTTTGCACCTGCATCGGCATCGGCATATCGCCGATCTCGTCGAGAAAACAGGGTGCCC  
CCCTGCGCCAGCTCGAAGCGACCGCGACGAGCCGCGATGGCACCCGTAACCGCCCCCTTCTCGTGCCAA  
ACAGTTCGCTCTCCAGCAATTCGGCGGGAATAGCGCCGAGTTGATGGGCACGAAGGGGCCACTGCTGCG  
GGAAGAGAGTTTCGTGGATAGCGCGAGCCACCACCTCTTTACCGGTGCCGACTCCCGGAGGATCAGCAG  
TTGGCATCGGTCTCGGCCACCTGGCTGATGAGGCGGCGTACCTCCTGGATCCCTTCCCTTTACCCACCA  
GCAAACGCAGCAGGGCCTGCCCTTGTGTCATGGGTCTGCTGACGGGGATGCAAGGAGACGAACGCCTGACA  
GAAGTGCAATGACGGGTAAGGGATTATAGGTAAGGGCGAGAGCGCGACCCCGATAAAGTTGCTGTTG  
GGCAGATCGGCCTCAACCAGCGAGAGGAAGGGGTACGGGGGAAGGCTGCCAGCAGCTCTGACAAGGGAC  
GGTCCGTCAGCTCACCCACCAGCACCCCTTGCAGCGGTCCGGAGGATTCGATGGCCACATCCAGATCGCT  
TTGTGCCACCTCCTGCCACGGGATCCCATAAACGAGAGCACGGTTCCCAACTGTTGGCGCCGCTGCGCA  
TCGGCATCAACAATCAACACGCCCATCTCCACCATATCCATTCTCGCGATGTCCTGAACTAECTTATTG  
TTTTATTTGATGATAAAAACAGCTACCGACTGTCTTTTTGCTGGCACACAAAGTGCCAAAATTCGGACACA  
TTGTCAAAAATTGTCGATTCAGGCTAAGTGTATCGACAGAAAACGAGAGATTAGATAAAATTTTGGCGAGG  
AATTTTCTGCATTTGGCGCCGTTAACAAAACGCAGCCAAAAGCGGAAAGAAAACCTGCCCTCGTCAGAGGGCA  
GCATGGGACAGCTGAAGCGCATTTCAGTGGCGATTATGGTGGTGTGGCGCCGCGTAACGACACTCGGGAA  
AACGGCTGCAAGCCAGAAAGAGTCTACCGCGTGGGGCTTTTTTCGCCCTCCCGTCCACACAGCGCGC  
ATCGCAACGGGGCAGTGGTGTACCTCGTGCTCTTCATCATCTCTACATCGGGCAACAAACCATCGACC  
AGTTCACCCCTCACTCTGCGGCGTCTCCACCACCCCTTGGACTGGATGACGGGCTCGTGAATGGCGCGG  
GCGAGATGGCCTCGGTATGAGCAGTGCGGCCACGCATCCCGGCACCGACATCCACGCCGTCAGCAGCAG  
AGGGTTGAAGGTGGGCTCGCGGCGGCTCCGTGCGGCAGATCGTTCGCTCAATGGTTCGCTCGTTTTGACC  
AGCAGTGGCAAGATCTGTTTCGCGCAGCTCTTCCACCAGATAGCTGGCACTTGCCTGGATCTGCAGCAACG  
GCAGTCCGGCGCTGTGCGAGGCGGTTTTAGAAAAGAGATCCCGCGCCTTGCCTTCTGGTGACGGTGGGA  
GCTGTGATCGAGTTCGATGGCGCAGATAAAGGAGAGATCCCGGGGTGGCAAAGCAGATAGTCGAAATGC  
TTGGCACTGATCTTGTGAAGTGTGCTGCCATTTGCTTTTTGCGGATCCCGCCTGCGGCGTACGACAT  
CGGCCACCCGCACCTTGGCAAAGACCCGGGCTTGTACCCACCAGCAGATCCAGCACCCCGAGGAAGGA  
TCGCTCGGCGGGACTGAACAGGGTCTCCTGCATATCTTAGGGCAGGCGCTTTTGTGTCTGCCTCTGCTC  
CAGAAGATCGCCAGCACAAGCAGCGCCAGCAACAACAATCCCGATAGGACAAGGGTATTTCATGAGAGCAC  
GATCCAGTTCAGCAGCAGAAAGGGGAATTACTTTACCACAGCCGCCACGGAGCAAGGCAGCAGACCCGTG  
TATAGAAAGTGAAAAGTCCCGTCTTTTTATCTATTTGTCAGCAGGCGGGGGTTCATATGACCAGCCCCAG  
CAGGCACAATAGGCATAGAGCAAGAAATCCATTTCAAGGAGAGCAGGATGCAAAAGCAATTTGGTGGTCA  
CCGTGATCGGTGCAGACAAACCCGGGATCGTCGAGAGTCTGGCAGCAGTCATCAGCCGCGAGCAGGGCAA  
CTGGCTGGGACGCGCATGAGCGAACTGGCGGGCCAGTTTGGCGGTATCTCCATGTCCTGTCCCCGAT  
GAGCACTATCGCAGCTGTGCGAAGCAGTGGCCCTGCTACCGGTTGACCATCAGCTTTGCCGAAGGGA  
CACCTACCACCGAGCCAGCCATCAAGTCATGATGACAGTGAACGGTAACGACCAGCCCGGCATCGTCCA  
TGAAGTAGCCAGCATCCTGCGCCAGCTCGAGATCAACGTGGCCGATCTCACCCACGGGCTGTGAACCGGCT  
CCCCACTCCGGCGCCCCGCTCTTCTACGCCATGCCCTAGTTGCCCTGCCCGACGGGCTCGCGATGGATA  
CGCTTATCACCGCGCTGGAATCCCTCTCCGACGATCTGGTGGTGCACATCGACGAAGGGTTCAGCGAGCA  
GTAACAATACTGTCATTTATTTGTCATATATTAACGCCATAACTGCCGCGCAGACGCGACCTGAAACAGA  
GGCACAAGATGAGCACCGACAAGCAGTATGAAGAGAAAAGCTGAGCTGGCTCTCATTTCAATGAACGGGT  
GTTGCAAGAGGCAATGGACAAGACGGTGCCCTCATCGAGCGGGTTCGTTTTCTGGGGATCTTCTCCTCC  
AACCAGGATGAGTCTTCAAGGTACGGGTATCGGACGTCAGCGTGCATCCTCATCAATGAAGTACATG  
GTGGCGACGATGAAGCGAAAGTGTGCTGCTGCGGCCATCCAGCAAAAAGTATGGCGCTCGGTGAAGCGTT  
CGACAACACCTATAAAGAGCTGTTGATTGCGCTGGCCCCGCCACAACATCTTCTGGTCAACGAGAACCAG  
CTCTCCGATGCCATTCAGAAGTGGCTGCGGGTCTTCTTCAAGGAGAAGGTGCTGCGTCCATCATCCCGA  
TCCTGCTCAACAAAAGAGGTCAATCCGGTCAAATTCCTCAAGGATGAGTACACCTATCTGGCCATCGAGAT  
GAAGAAGAACGGTCAGGTGATCCAGTACGCCCTGGTTGAAGTGGCGACCGACGACCTGCCCGCTTCTTC  
CAGCTGCCCGCGAAGGGACCCGCGCAAGAAGCAGATCATCATCTGGATAACGTCATCCGCTTCTGCC  
TCGACGAGATCTTCAAAGGCTTCTTCGACTACGACGAGATTGCCGCTATGCGGTGAAGCTGACCCGGGA

TGCCGAATATGATCTCTCCGACCAGCTGGACTTGAGCCTGGTGGACAAGATGAGTGACGGCTTGAAGCAG  
CGCCTCACCGCCATGCCGGTGCCTTCGTCTACGAGCGGGAGATGCCCGTGCCATGATAAGCTTCCCTCA  
AGCTCAAGCTGCAGATCAGCTCCTACGACGCCATCATGCCGGCGGGCGTTACCACAACCTTCAAGGATTT  
CATCGGCTTCCCCAACGTGGGCCGTGACTATCTGGAAAACCCCAAGCTGCCGGCCCTCGATTGCCGCGAT  
TTTGACGGCTTCGTCAACGCCTTCGATGCGATTACCAAGCAGGATATCCTGCTCTACTACCCATATCACA  
AGTTCCACCACCTTACCAGGCTGGTGCGCCAGGCAGCGTTCGATCCGGCGGTGAGCGCCATTCGCATCAA  
TATCTACCGGGTCGCCAAGAAGTCGCGGATCATCCACTCCCTCATTTGATGCCGCCAACACGGCAAGAAG  
GTGACCGTGGTGGTTCGAGCTGCGCGCCCGTTTCGACGAAGCGGCCAACATCGACTGGGCCAACATCCTTA  
CCGATGCCGGGGTCAAGGTGGTGTTCGGGGTGCCGAGCCTCAAGATCCACTCCAAGCTCTGCCTCATCAC  
CCGCCACGAAAATGGCAGGGCGGTGCGCTACGCCCATATCGGTACCAGCAACTTCAACGAGAAGACCGCC  
AAGATCTACACCGACTTCTCGTGTCTACCCGCAATCCGGATATCACCGCCGAAGTGGAAAGGGGTATTTG  
AATACATCGAGTACCCCTATAAGCGTTACAAAATCAACCACCTGCTGGTCTCCCCATCAACAGCCCGCG  
TCAGCTCTATCGCCTCATCGACAACGAGCTCTCCAACGCCAAGCGGGCCAGCCGAGCGGTATCATCCTC  
AAGATCAACAATCTGGTGGACAAGGATCTCATCAACCGCCTCTATGCCCGCGGTGAGGCCGGGGTGCCGA  
TCCAGATGATCATCCGCGGCATGTGCGCCCTGCGTCCGGGCGTGCCAGGCCTCAGTGACAACATCAAGGT  
GATCAGCATCATCGACCGCTTCTCGAGCACCCGCGGGTGATGGTGTTCACACAACAGGGCAACCCCCAG  
CTCTATATCTCCAGCGCCGACTGGATGAGCCGCAATATCGACGGCCGATTTGAAGTGGGTACCCCCATTT  
ATGACGAGCGGCTCAAGCAGCGCATCATGGACATTTCTGAGCTACAACAGTGTGATACCTGCAAGGCGCG  
GGTCATTGATGCCGACCAGCAGAACGAATATGTGAAGCGGGGCAACCGCCGCAAGATCCGCTCTCAGGTG  
GCGATTTACGACTATCTCAAACGTATCGAGTCAAACAATGGACAATAGTCTCTATGCCCGCGTAGATCTC  
GGCTCCAACAGTTTTTCATATGGTGTATCGCCCATCTGAGCGAAGGGCGTTTTTCGCATCGTGTGATCGCA  
AGGAGCGAGTGCAGGCTGGCGGAAGGGATGGATGAGCAAAAACGCATGAGCCCGGAGGCGATGGAACGCGG  
TCTCGCCTGCCTGTGCGTGTTCGCGAGCGGCTCACCAACATCAAGCCGGATCAGATCCGCATCGCAGGT  
ACCTATACCCTGCGCCGCGCCAGCAACGCCCGCAATTTGTGAGTGAAGCAGCCAAGGTGCTCAACCACC  
CCATCGAGATCATCAGCGGGCAGGAAGAAGCACGGCTCATCTATCAGGGGGTTGCCCATACCCAGCATAT  
CGAGGGTCAAGTACTGGTGTATCGATATCGCGCGGCGCAGCACCGAACTCATCATCGGTGAAGGGTTTGAA  
CACAAGGCCCTCACAGCCGCAAGATGGGCTGCGTCAGCTTTACCCAAAGCTTCTTCGCCAGCGGCAAGC  
TGAGCGACAAGCACTTACCAATGCCGTGCTGGAGGCGCAGCACCAACTCGTCCCATCGTCAACCAGTA  
CCGCAAGCTGGGCTGGCAGACTGCCCTTGGCAGCTCAGGCTCCATTCGTACCGTGCAGCGAGTGTGCAA  
GGGAAGGGCTGACTGACGGCAGCATTACGCTGGAGGGGCTGGAGCGGCTCAAGGCGCTGATGATTGAGC  
GCAAGCGAGTCGATAAACCCTCAAACCTGACAGGGCTTACCAGAGGCGTCAGGAGGTGTTTTGCCGCGCAGT  
GGCCATCCTGCTCGGGCTGTTTACCTCGTTGCCCATCGAGCGGCTCGACTACTCCGATGGTGTCTGCGC  
GAAGGATTGCTGTATGAGTTCGAGGAGCGCTTGCAGCACACGATATTCGCGAACGCACCGCACAGGCGC  
TCGGTACCCACTACCGGATGGACAAAAAACAGGCAGCCCGGGTGGAGCAGAGCGTGTGACGCTGTTTTGA  
TGCCCTGCAAGAGCCCTGGCAGATGGAAGTAGAGCCCTATCGAGCCATCCTCGGCTGGGCGGCCCGGCTT  
CACGAAATTTGCCCTTGCATCAACTACAGCGGCATTCATCGTCACTCCGCTATATCCTGCAACACACCG  
ACCTGCCCCGCTTCAACCAGGACGATCAGGCCCTGCTGGCGGCGCTGGTACGCTTTCAGCGCAAGGGGCT  
CAAGCTCTCCGAGCTGCCGCCCTGCCCAACCACGACATGCAGACGGTGTGCGCTGCATCCGCATCCTG  
CGCCTCGCGGTGCGCGCTCACCAACAGCGCCAGGACAACCTGCTGCCTGAGTGGAAAGTCGCAGTGAAG  
GCGATCAGCTGGTGTGACCCCTGCCGATCGACTGGTGCAGGAGAACCGTCTCCTGATGCAGAACTCTGGA  
GAAGGAGCATCGTTATTGCCAGGAGCAGGGCTGGCCACTGTTGTTCCAGCTCGGCTAAACCGGAAAGATA  
AATACAAAAGGCAGCCTAATGGCTGCCTTTTTTCATATCAATCTACCCGTTACTGCAACTCGGGCAACAAC  
CACTTGGCCATCTCGAAGTAGATGATAAGACCGGTACCATCCACCAGCGTCGCGATGAATGGCGCAGAGA  
CCACCGCCGGATCGATGCGGAAACGACGCAGCACCATGGGAATAATGGATGCGACCGTGGCACTCCAGAG  
CACGATAGCGATGATGGTAAAGGTACCACCATGCCAATCTGGGGACCAGCCGAGACTCCATGCCCGT  
ACCCAGGCCGATGGCAATGGCACCCGAGATGAGCAAAACCGGTGGAAAGCTCCTTTTTTCAGCACGGTAC  
CGAGATTGCGCAGACTCACCTCTCCGACCGCCATGGCACGTACTATGGTGGTGGTGTATCTGGGTGCCGCT  
GTTACCACCAGTACCGATCAGGAGCGGAATAAAGAAGGCCAGCGCAATGGCCGCTTCCAACCTGCTCCTCG  
AATGCCCGCAACACGGTGCCGGTGTAGGCTTCCGCCACAAAACAGGATAAAGCAGCCAGCCACCCGTTTGC  
GCCACAGCTGCCAGGGCGTGCCTGCAAGTAAGGGGTATCGAGCGGTGATGAGCCCCCTTGCATCTCGGC  
ATCCTCGGTAGATTGAGCTCCAGAATATCCGCCGATCATCGACGTGGAAAATACCGACCAGTCCGCCCC  
TGATCCTCGACCGCAATAACCGACAGGTGCGGGTGCATCAGCAGGCGCGCTGCCAGCTCCTGATCGGCTC  
GTGCGTTGATCCGCACCGTCTCCCGATCCATCAGGGTGCAGACTGGCCAACGGGTGCGGATCAGCAA  
GGTCTTGAGGGAGAGGCTTCCCTTGCAGACGACCATCCCCGTTGACCACATAGATATGGCGAAACAGCTGG  
GCATTGTCCAGGCATCGTGGATCAGCTGTTTTGGCGTGACCGACCGTGTCTCCTCCCGCACCGCCAGAT  
ATTCGTGGCGCATGTTGGCCCCACCGACTCGGTGGGCCAATCCAACAGGGAGTAGTAGATGGCTGGGC  
CTGGGTGCGGAAGCGAGCCAGCAACATGGTGCATCCTGACGACTCAGTTTGGCAGGAGGGGCGACCATC  
TCGCGGGCGGGGAATGGCCTCCTGCAACACGCTGACGATGCTGCCATGGAGCCGAGCAACAGGCGCCCCG  
CACTCTCGGCCGATAGTGAACCGAGCAGTTTCGGCCCCCTTGCAGGATGGCAGGGTATCAAAGATGCAGTT  
GAGCTCTTCCGGACGCAGGGTACGAGTTGATCGGCGCGCTGAACCGGATCCAGATTATGTTCCAGCCAA  
CTCTGCAGGGCGGCCAGATCGAGCAGTTGGTACGGTTAAGAATGGTATGTGTTTTCTTCATCACAGATA

TCCTCATGTGATTTTCAGGCGAGCCTGAATGCCTCCGAAATAGCCGGATGCAACGACAAGAAAACAGCAA  
TTTGATTGACGAGTAATAGGCAGGAAATGACGCCGTTCCGGCGTGCATCATCCCCACGTACCAGCTTTAG  
CACTGTATAACGTATCCGGCATGCCGGAAGCCACTTGGGTTTACACCTTAATCCGATGAAAACGTGCTCTG  
ATCTTGGGCGTCTCTGGACGTCTGTGAGATCAGTGGCCTGTGTTTATACAGGAGCCTCGCCTAACGAGATG  
CTGCAAATAAATTCGCACAACCCCTCTGTTGTGCGGGCGGCATGATTATCCAATCCCAGGAGGTC AACC  
CCGCAACCACCATTAATGGGCAACGGCAACAGCTTGTTC AATTTGGCAGGAGATGACACGGAACCAATT  
TTCATAGTCTGGACAAAAGAAAAGGCCCCAAAGGGGCCCTTCTTTAATTAGCGAATATAGTCAAATAGCG  
TCAAACGACTTATTTTGTGAAAGAGAGTTGCGAGGCACTCAATGCCGCATCCTCTTTTGACAGCGCGGA  
AATCACTTCATAGAGATCCGCTTCCGACACCTTGGCTCTCGCCTCGGCGTTGAGGGTACTCAACCCCTCG  
TTAGAATCCATGACTGCCTCGAGACTGTTTATCCTGCCACCAACTCCCCAATCCATGATCGATATTCA  
GGCGAGCATTCTTCATATGGACGGTAGCATCGGCTACTTCCAGCGCAAAGTTGTCAGCGGTAATAGCAG  
ATCACGCAAAGCGGTAATAAAAATCCGACATACCATTCAATATGTTGTCAATCTTCGTTGGATTAAGGTCA  
AACTGCTGAGCCGACACCTGCAGGC AATCAAGGGTCAACTCCAGACCATTGAAGGGGATCTTGGTGC  
CAGCAGTGTAGTTACCCGTTTGCAGGGTAGTACCACCGACATCCTTGATATCATAGGTATCAGGCGGACC  
GATGGTGGTTGATACGGTATAGGTGTTGCTGGGCAGTGCCGAGTTATAATTGGACTTATAGAAATTATCA  
AAGTTACCCTGATCGCCGACCCGACCTTGATATTTGCAGTGGTTGCACTGGCAGTTCCTCTGGTCGCCA  
CGATTTCAAACAGATCCTGCCCGGAATCATTGGCAGCAATTTGTACTGTGGGTGAGACCTGAATATTTTCG  
CTGACCTGGGTCTCCCTGATAAATATATTTTCCGTTAGCGTCTTTGATATATGGCTGGGTCTTGCTCTGA  
TTGCCCGCCGAATATAAATTCACCCGAGGAGTTTTTGTATTCATCAGGTCAAATATCTGCTGCTGCAACC  
CTTCCAGCTCGCTGGCGATGGCCTTGCATCATCCATGCTGATCGCGCCATTATTTGACTTCTGGATCAG  
GGTCTGGGCACCTAAGCATCGCATTATTAATCGACGTTAATACCGTCTCCTCATGTCCCAGGCTGTTTTCC  
AACAAGCTACCATTGACACTGTACTGCTTGAACAGGTCAATCTCCTTGGTCAGTGCCATCTTCTGGCTCA  
TCCCTGCGGGATCTTCTCCAGCAGTCTGAAATTTATTGCCGGTTTGCAGCTGTTGATAGGCAGTATTC A  
CCGCTCGTTGGCACTGTTGAGGG AATTGATATTCGGTTCGTAGATCATGTTGGTGGTGATGCGCATGACG  
TTACCTCACGGAAGAGAGCAGTGTATCGAAAATGGTTTTGGCCGTGCTGACGATTTGCGCCGATGCCGCA  
TAGGATTGCTGGAAGCGGATCAGATTGGCCGCTCCTCCTCCAGATTGACCCAGACACGCTTTCAAAAA  
TGCCGGTGTCTGGATAAGCTTGGACTCATTGGCCTT GAGCAGCGTTTTTGCCTGACTGGTATTGTTACC  
CACTTCCATACCAACCCGAATAGGCCTGATTGAAGGTCACTTGTGCTTGGTTCGTCGCCAAAGGGTG  
CTCTTTCGCGACACAGATCCTTGTTTTTGCAGCTCGGCCAGAACCCAGGCCATTGCTGTTTACCCGCAATG  
TGCTGTTGTAAGTGTGAGCTTGAAGCTGTACCCGGCATCCACCGTTCAGTGATGCTGAACTCGTAGCCGG  
CGCCTGTTTTCGGGTTGGCATAGACTACAGCTCCGGCGGGGAAAGGGTTAACGATAGCCGACATCAGGTTT  
TGCCCTTGCTGCTCGCGGGGGCCGTGCCAATCAAGGTAGTGCCATCGGCTTGAACACCTGATAGTTAC  
CACTGCCATCGATTTT GACCACCTGAGGCGCTGTCCGGCTCAGACTATTGGTACCAAACCTGACCCCGC  
ACCTGTATTGAATACGCCACCCAGTTT GATATCCGCCCCGCCCATTATTGGTGGTCTTTTCCGCTTTA  
AGCGGAGAGGCCAGGGCAAATCTTCCGGTCCGGTGATCAGCTGACCCAGACCCGGCGCCGACTTTTGG  
TTGGTTGCAGCAACAGTTTGTACCCGCGAGCCGGCGTGCCGGTGAGATCGATCGAGATCCCCTGCCAGT  
CAGCTCAAAGGTTGTTGGTGGGGTAGCCCCGCTGTGATCAAGGTACGATTGCCAGACTTGTCCAGCGAG  
AACACCTCATAACCGGTGGCGCTGCTAAATTGCACCTCGTAATCAAACGGGGTCACTGATGTCCCCTTAC  
CCGGCACGAAGCTGACATTGCCCCCGCCGTCCCCGTGTTATTGCTGTAGGGTAAGCCCTTGCTGGTAGG  
CAGGGTGAAGATATCGCCGCAATCTCGTTATCCAGATCCATCCCAGGCGGTTCTGCTGGTTCATCGCA  
TCCGCCATCGCCACGGCCAGTTGCCCCAGTTCCGCGCTTGGTCCGGCTCAAGGTCTGTACGCGCCTTGAACA  
GCCCGCCCATGGCGCCACCAAACGTATCGTGATCGATGGTTGCCCTTGTTCGCCCCCAGGGTCAGTTGCAG  
CTCCTGATCTCGGGAGTCAGGATCTCCTGCAATCACCTGAACTGGGCGACGTCCCCATCGAGGATCAGC  
GAATGGCCAGTGTCTCATATTGACCAGCATGCTACCGTTGGGTTGGGCTACGGTGCGAATATCCATCTTCT  
CGGACAGCTGGCCGATCGCCTCATCCCGCTGATCAAACAGCATCAGGTTCTCTTCGGGTGACCCCTGGGT  
GCGGATGATGGCCTGATTAAGATCATTGATGCTGGTAGGCTGTTGACCTGCTTGGTTTTCATCTTCA  
ATGCGGGTGTGAGGGTATAGCTCTGCTTGTGCGAGCTGCGCCGAGAGGGTATGAAAACGGTTGACCATAC  
CACTCAACTCCGTATCACCACCTTGCGCCCGCCGATCTCGGCAGGCGATTCAATTGGCAGAGTGAAATGA  
CTTGAAGTAGGAGGTGATGGCCGCCCCACGCTGTTGCTGGTATCCCCAAGCAAGCTGTCAACGCCAGCA  
AGCTGTTTATAATGGGTGAGGGAGGCATGATAGGCAGAGGTATCACGGCGCACCTCCCCCTGCATATAGT  
CGTTGATTACCCGCTGGGTCTTGATGTCACCGGTCCCAGACCGATGGTATTGGTATACACCAGCGTACG  
CTCACGCACATAGCCCTGGCTATTGACGTTCACTATGTTGTTACTGGTGGTCTGCAGCAGGCGTTGCTGT  
GCCAGCACGCCCGATGAACCAATCCCAAGCAGGTGCTTGCATACGTTACAGTCCATCTCGTTGTATT  
GGGCAATAGCATCACTGCGCAATACCTGTTTCAATTTTCTGGCGTAGTGCGGGTTCGGTGGCATAACCTGC  
CTGTTGCAGCGCCTCGAAGTAGCGATCAGGGCTATCCACCTTCGCCAGGGCCCCCTTGTAGCGAGAGCCG  
GAAGTGAGGAAGTCCACATAGTCTGTTGAAGCTCTCTCAAACGACTCATAGGAGCGAAATGCCGCTTTCT  
GGCGGGAGGCGACGCTTGTCTATACTCGAGCGTGTGACCACCGCCTTTGGCCCTTCCAGCGTGGATC  
GGCCTTGATGCCAAACAGGTTATGGGTACCTGCCCTCGCCATCCTTGATCACCCGCTTGCSCCAACCG  
CTCTCCAGTGCCGCTGAGCGACCACTACCGCCGGGCTTAACCCCAACTTGTTCGGCCGCTTTCTTGGCCA  
GCGGCATCAGGCGATTGACGAACTCTTCCGGTGTATCGAACTCTTTGCCCCACTACCGGTGGCACTGCC  
CTCTTCGCTGGCCATGCGCCCCATGGGCGGAATGCTGCGGTGAGGACGACGGGGCATAGTGAGTGCCTGA

CTCTCATTGCCCCCTCGGTCATCTCTTTCTCAGCAAAATCTTTGCCAACTTTTGATGCTGCGATCAAAT  
CATCGGCAGCCGCCGTGGGTGGCTGATAGGGTTTGTAGGTCCGTTCCGTTGCGCTGGGGCATCTTGAGCAC  
CCGTCCATCCTGATGGGTAAAGGTCTCGGGAGAGAGCTGCTTGCCACCATGTCAGCCAATCCCAGCCCC  
CCCTTGCTGGACATGTCGGCGACTCGCTGCTCATCCAGCATCCCTTCATAGAACTGGGTATAGCTGCTGT  
TCATCAGGTTGTCTGAGTCAACACCCCGTTGGCCTGACGCATGCTCTGAAACAGCATCTGGGTAAAGAT  
TGACTCGAACTGGCGTGACGCACTCTTGAGCGCTTCGGCCTGCCCTCTTTGCTTTGGCTCATCTGGCGC  
AGGGCGTCCAGGTTCTTGATGTCTGTACCATCCCGAGATTCATGCCGCTGTTGCTGTCAAACCTCCGCCA  
TTTTGCTTACCTCATTGCCACCCGTGGCAACCACTTGCCGCTTGTACAATATGACCAGTTGCCCTCGA  
TGGCGCCTGCCTGCTGCAGCGCCTCAAGGATGGCCATCAAATCACCGGGGGCGACCCCGACCTGATTGAC  
CGCCCCGACAGATCGTCCAGGGTCGCACCGGTATCAAACCTGAAACATCCGCCCGGCTCCTGCTGGACA  
TTGATGGTCGAGTTGTTGGTCACCGTCAGCTCTCTCTCCCTGCCAGCGGGTTGGGCTGGGAGACCTGCTGGT  
TTTCGGCGATGGTCACCGTCAACCCGCCGTGGCTGATGGCCGCTTGTAGCTTGACCTGACTGCCGAT  
CACTATGGTGCCAGTGCGGGAGTTAACGATGATCTTGCCCGCCTCGTTGGCCGGATCCACCTCCAGATTC  
TCGATGGTGGCGAGATAGGAGACGCGCTGACCCGGATCCCGCGGGGCATAGACCTTGACCGAGGTGGCAT  
CGAGCGCCTGAGCGGTATTGGGCCCCACCAGATCGTTGACCACATCGGCCAGACGGCGCGCAGTGGTAAA  
GTCGGGTGGTTAAGGTTGAAAGTGTATGGTATCCCCCTGACTGAAGGAGTTGGGTACCTCCCGCTCCACG  
GTCGCACCGTTGGCAATCCGCCCGACGGTCGGGGTATTGATCACTACCTTGGAAACATCAGCCCCCTCGG  
CCCCCAGACCACCGACCAGACTGCCCTGCGCGACCGCATAAAACCCGCCATCGAGCCCTTTCAGGAA  
GCTCTGCAGCAGAGTGCAGCCCCGAGGCTCTTGCCCTCGCCAATGGCAGAGACCGTTACGTCGATGGTC  
TGGCCCCGCTTGGAGAAGGGGGCAGGTCGGCATGGATCGCCACCGCGCCACATCCTTGATCTTGGGCT  
TGATATTATCCGGCACCTTGATGCCGAAGTTGTTGAGCATGGTACGGAAGGTCGTCGGTGAAGGCGTT  
GTTCTTCTCGCCAGTGCAGGGCAACCCACCAGACCGTAACCAATCAGCTGGTTGTTACGCACCCCT  
TCAACCGAGCTGATGTCTTGATCCGGGCCGATTGGCCACGCCAAGGGCAGCAGACAGCAGAGCAGTG  
TGACAAGACGGAGTGACTTCATAACATCTCCTAGAGCGGCCACCAGGGACCATGAAAAAGCTGGTAAGC  
CACCTTGCTCCTGGCTATTGGCCAGATCGCCGTTACCACCGTAGTAAATGCGGGCATTGGCCACTTCT  
GGGACGAAACGCTGTTATCAGACGTCACGTCCTCCGGGCGAATAAGGCCGGTATCCGGATATATTCATT  
GCCATTGTTGAGCATGATCCACTTCTCGCCGCGCACCACAGATTGCCGTTGGGCAGCACCTGGCCACG  
CTGACCGAAATATTGCCCTGCAGGCTGTTGCTCTGTTGCTCGCTTTGGCTGCCCTTGAACGCGCTGTTCT  
GACCAATGGAAGCCGAAAGATCATAGGGACTGGCCGTCAGCCGGCACGCCACCCAGCTGACCGGATCCAG  
ATTGAACTTATTGCTCTTGCCTTGGGATTTGGCCTTTTTTCGAGGCGGAGGTCGACTCCGACAACCTCG  
ATGGTAATGATGTCGCTACCTTGTGTGCCCTTGATATCCGAATAGATGCCATTGACCTGATCCGGCTGGA  
AAATCGCCCCGTGCGGTGCGACCGACACCGGCTCCGACTCCCCGTAGACGGGGGAAAACCTCGGGATCATC  
AGGCTTGGGCGTATTGGGAGTGTCTACACCCTCCAGCACCAGCAATCCCAGCATCCATACGGCTTTC  
ATCATGCACCTCCTAATTAGGTACGCTGGATCAGGAAGGACATCATGCCGTCACGGCGGAGAGCACCTT  
GGAGTTCATCTCGTAGACCCGCTGAGCCTGAATGAGGTTACCAGCTCTTCGGTACGTTGACGTTGGAA  
GTCTCCAGCATCCCCTGTTTGATCACCCCAAGCCATCGGCACCGGCAGTCCCCTGGGCGGCAGCACCAC  
TGGATTGGGTCTCGACGAACATGTTCTCCCCATCGGCTGCAAGCCGCTGGCATTAAACGAAGTCGGAGAT  
GTTGATCTGACCGACGACCTGAGAAGCGCCATCGCCCTTGAGCTGCACCGAGACCTGGCCATCTTACCC  
ACCGTAACGCTCTGGGCGTTTTCCGGGATCTGGATTTCCGGTTGCAGCGGGTAGCCATTACCCGGGGTCA  
CTATGGTCCCTTCATCGTTGAGGGTGAACCTGACCGTTACGGGTATAGGCAGCACTGCCATCCGGCAGCTG  
AATTTCAAAGTAGCCACGACCACTGATCATCAAATCGAGCGAGTTGTCGGTGGTTTGCACGTTGCCCTGG  
CTGTGGTTTTTCTGGGTGCGCACCACTTGGCACCCGCCCAACATCAGGCCGGAAGGAAGCTCGGTAT  
CGGCAGAGGAGCGGCCACCGGGCTGATTGATGTTTTGATAAAGCAGATCTTCAAAGATGGCCCGTGACTT  
TTTAAAGCCCACGGTGTGGCGTTCGCCAGGTTGTTGAGGTTGACCGAAATATTGGTCTGCTGTGCATCC  
AACCCGGTCTTGCTGATCCAGAGTGCGGGATTCATAGGTAACCTCTTGATTAGCTGATTCGCAGCAGTTG  
GGTTTGAGCTTTCATCATTCTCTCGCCGCTTTCATGATTTGACCTGGGTTTGAACCTGGCGTTGCAGC  
CGGATCAGGTTGGTTCATCTCATCCACCACATTGACGTTGCTCCCCCTCAAGGGAGCCGGCAATCAGGCCGA  
CATTGGCAGAGGCGGGTTCACTTGGCCATCCTTGGCGGAAACAGACCATCTTGCCCCCTTCTCCACCGC  
ATCGGCGGCGGATTGACCAACTTGATCCGCTGAAAAATCTTCCGGCAAGTTGGCGGCAGCCCCCTCCGGC  
CGACCGCTGATGGTGCATCCCGATTGATCTCGAGTTTCTCCATCGGCATAGGCAATACGATGGGCTGAC  
CACCGTCATCCACCACATTAGTCCGGTCGAGGTTGCAAGTTGCCGTCGCATTGACCTGCAAATTTCC  
CATGCGGGTATAGGCCTCACCGCCCTTGGGATCTGCACGGCAATCCAGCCCGACCATCCACCGCCACG  
TCCAGATCCCCTCCGGTGGTTCATCAACATGCCATGCTGCAGGTTCTGACCCGGCGCTCAGCCATGGCAA  
ACACCCGGCTTGGCAAGCCCTCACCGAACGCTGCATGCTTCTGGCCTGCTCGAAATCGGACTTGAAGCC  
GGTGGTATTGGCATTGGCGAGGTTGTTGCCGCGAACAGCCAAGCTGTTTCATGGTCTCTTTGGCACCGGAC  
ATGGCGATATAAAGCAGGTGATCCATGGAATTCTCCGTCAAACAGATGACTCTGACAGGAGAAATGCAAT  
TAGAGTGCCAACAGCAGAAATATGGGGGGATAAGGATGGGAATGCGACAGAAACAGAGCGGGGGCCAAGC  
CCCCTCTCATTATCATTATTTATGCGCGATTAAACGGATCTGCAGGATGGTCTGCTGCAGCGAACTGTTGACC  
TCCAGAGAACGGGAGTTGGCTTGGAAAGTTACGCTGGGCAGTGATCAGGTCACCAGCTCGGATGTCAAAT  
CCACGTTGGACTGCTCCAGCGCTGAAGATTTTATGCTACCAAACGTACCTGAATTAGGAGTACCAGGCAA  
TGCATCCCCTGAGAGCAGGGACTGCCGCAAGATGTGTACCAACCTGAGTCAATCCTTGGGAGTTCCGA

AACTTGGCCAGCGCAACCATAGCCACTTTTAAACGTCGTAGCATTACTGTACGTGGCAGAAACAACACCGT  
CCGGCGTAATTTCAACCTTTGTTAGACGGCCCACTGTGACCATCCTGAGTCAATTTGTTGACTTCAAA  
AGGTGAGTTGTATTGGGTAACAGTCCCAAGACGAATTTCCAACGTCGGGTGCGATCTGCACCATTGTTG  
ATAATCCCTGCACCACCAGCGCCATTGCCCAACGCAACAGTCTTGATAGGCGCAACCGGTATTGTTGTAT  
CCAGCTTACCCGAAGGAGTAAATGTCATCTGCAGACCAGTGGGAATACCTGCTCCTGGACTCGCAGTACC  
ACCATTAATATTTATAGGCTTGTCCCCTTCATACATGAACATACTCCAAGTTCCCGGGTTCAGAGGCTGC  
CCCGCATTGGCCGGATCTTCATGGCGGACAAAATATTTGGTGATTGTATGGGGAGCACCAGCAATCAT  
AAATAGTTACTGATGTTGAATGAGCATATGTTGACGAGTTAGTGCATCAAAAATTAGCGGGCAAAGTAGG  
CTTTGTTTTACTATCGATACTCAAGTTAAAACCTTGCCCTCCACCAATGAAGTCATTTTAGGCTCACCAGCC  
CTATCAGGTAATTTGAATAGGCTTGGTTGCATTAATACTGACTGCCTTGGGCGTACCATCAGGATTAATTT  
CATAGCCTTGACGTAATGGCCCTGATTGTTGACCATATAGCTGTTTTTCAATTAGCTTAAAGGCGCCGGC  
ACGGGTATAGGTGCGATCCAGGTTGGTCAGGCCATCGAAGTCAAAAAGAAATCCATTTCCCTGAATCGCC  
AAGTCCAGCGGTTATTGGTAAATTGCAGCGCCCCCTGGTGGAACTGCTGGGCAACCGCACCGGTGCGCA  
CACCGTTACCGACCTGAGTCTTGGCATTGACAAAAGATGGAGTTGGCGTAGACATCCGCAAACCTCGGCACG  
GGACTCTTTAAAGCCCATGGTGTAAACGTTGGCAATATTGTTGGCGGTGACGTTCAAGTCTTTTTGTGCC  
GCGTTGACACCGCTCAAGGCATTGTTAAATGACATATCCAGCTCCTTAGATCGATGCTGTGCGACGTGGTT  
TTTTGACGGTGAACCGTCGGATTTGAATTGGTGCCTGAAATTTGCAGAATATTGTTGAGATATTCGCTCC  
CCAGCCCTCTCAAGTTGAGGCGAGTCGGGTTAGTTGCATTTGCCAAGGCAACGCTATCCACTTTGGCATA  
AGCGTATGAAGCAATATTTTCCGACTTGCCATCAAGAGTACCGTAGCTTTGACGACATACTTGCCCTGCA  
GAAACTCGGTTACCAGCCTTGTCTGTACCATCCCAAGCAACTTCAACGTTACCTTTTTGCTCTCCTTCCA  
GAGGAACTCTTTGATAACTTGTCTTTTTTCGTCTTCGATAGTGATTTTGATATTCGCATATTTATTAGT  
AGTACCAACCGCTACAACCTGCTGATAGTGGCCCCCTTTTGTCTAAATAGCTTATATTGCTTGGCAGTAGC  
ACATTTTGACCTACCAAAGAGGATGCTTGCAGGGCTTGACTAGAAAATCATCTGGTCATTGAGTTTCCCCA  
TCTGGGTAGACAGACTACTGATCCCCTCCGACGTAGACATGGAGGCCATCTGTGAGAGCATCTGGGCATT  
GTCGACCGGCTTGAAGGGGCTTGTGATACGACAATTGCATTTGTTAGCAGCTTCATAAACGAAGCCTGATCC  
AGCTCTTTCTTCGGCGCCGTTGTGCTGCCTGTGCTGCTGGGTGCTGGTACGGCTGATGCCGTTACGTTAT  
TGGTTGTATCGACCATGCTGCATCCCTCCTATCAGGATTTGCCAAGCTGGAGCGTCTGCTGCAGCATCTT  
TTTTGGCCGAATCTGCAACCTGTACGTTGGTCTGGTAGCTGCGCGAGGCGTTGATCATGTCCGCCATCTCT  
TCAACCATGTTGACGTTTGGCTTGAAGATAAAAACCGCTTTTATCCGCCATCGGGTGGTTGGGGTTGTACT  
CCTTGAGCAGTGGCGCCTTGCTCTCAACAATCCCCTTCACCTCAACCCGACCGAGCCCTGCTTGTGAGA  
CATCGCCTGATCGAGCTGGGCGGCAAGACTGGCCGCTGGCGTGGTAAGTATTTTCCACACTGGAGCTG  
ACGCTGTCCGCTTGGCCATGTTGCTGGCAACTGTGTTGAGGCGCACTGACTGTGCACTCATAGCCGAGC  
CTGCTATGTCAAAGACCTTGAACAAACTCATCACTGCTCTCCTTTTCAAGTGCCTTGAGCAGGCCACTGATC  
TTGCTATTCATAAATTCAAGGGAGGTTTGTACTCGAGGCTATTTGCGCAGAAAATTCGCTGCGCTCCTGCT  
GCACATCGACTGTATTACCGTCACCGGTATCCGGTTCAGCGGGTTCGATATTTGCACGGTACCCGGGGC  
GTCCATATTTCAAGGCAAAGTGTCTTTTCGCTGGTGGTTCGCAAACCAAACCTGATGCGACTGGCCCTCC  
TGCAATGCCTGAGCAAAATTGATATCCCTGGCTTTGAAGCCCGGGTATCTGCGTTGGCAATATTGCTGG  
AAAGCACCTCAGCACGCTTGGCGCGAACGCTTATGGTGTGTTGATGACACCCGAATGCCCTTGTCAAATGA  
AAGAGCCATAGCACACCTCCTGCTTGGTTTTATTTGTTTGAAGAGGTGTGCCATAAGCAAATCACTCAG  
TTCGATGGTTTTGGGTATGAGCACATTGCAGACCGAAAACGGCAGGAGCATCTCGAGCCTTGAGTCAGACG  
GCATCATTTGGCCACCTTAAGGTTGCAACCACTTTTGCAGTGGCGAGATATGGTAGGTAATAGAAAGAC  
TGAGCTGTAGATTAAGAAAGAGGGAAGCTCGTAGCTTCCCTCTTTGCATGAACTAGCAATATTCGGCAGA  
CCCCGAATATCAAGGCCATCAGGCCTATTTGACCTTGTAGACAATCCCCGGATTACAGCGGATCATCTCG  
AACCGGTCGGTCAACCCGGCCAGTGAATCCGACGCGCCCAACATCAGATATCCACCGGGGTTGAGACTGG  
CAGCAAACTGGTTGAGGATCTTCGACTTCACTTCCGGCGCAAAATAGATGAGCACGTTACGGCAAAAAGAT  
AATGTCAAACCTTGGCAGCAGACTATAACTTCCAGCAAGTTGAGTGGCCGGAAGGTGGTCAATTTTTCTG  
ACTCGCTCGGCAACCCGCATCTTGTGTGTCACCGTAAGGCTCAAAAAACATCTTCTTGGCGTCCGGTGACA  
AACCGCGCGCCAGAGCAAGGCTATCGTAAACGCTTCCCTTACACTGATTGAGCATGGTCTCGAAATATC  
CGTCCCACAATCTGTACGCCACCAGGCAAGGTCCCCGGCTTTTTTTCATCTGCTGCTCCAGTGCCGTCATG  
GCAATGGAATAGGGTCTGACCTGACGAGGATGCAGCCGACCAGATCTTGTATGGGGCGGCCACTTTTTCC  
CCAACCTCGGGGAAAATCTTGTGCGTAAGAAGCTGAAACGGATAAGTATCACGAAACCAGAGGGTCTCGTT  
GGTCTCATAGCATCCACCACGGCCATTTTTCAGATCACGCTCTCGCACACTCATTGCACGGGTAACCAGA  
TCAGACAGACTCTCGATGCCAAACTGAGCCATCAAAGGTGAAAGACGGCTCTTACCAGATACTGTTTGT  
TATCCCCCAGCACAATTCGCTCTGTACCGCCAGAAAGTTGCTGAACTGTTTGTATAAGTCTGCCGAAAG  
TGTCTTCATGCAGCTGTTCTTTTATTAGAGTGCCTTTTGTACGGCTTGGCCAATTCATCAGGCTGGA  
ACTTGGCGATAAAAATTGTTGCGACCAACTTTCTGCACCATTGCTGGTTGAATACTCCACTGAGCGAGGT  
ATGCAGAATAACATGCAAATCCTTGAGATTGGGATTATTCCGGATCTCGGCAGTGAAGGTATAGCCATCC  
ATTTCCGGCATTTTCGATATCCGAAATAACCAGCGCAACCTGATCCTTGATAGGACCATTTTTTGGTCATTT  
CCAGCAGCATGTTCAATGCTTTCGCGGCCATCTTTTGGCAACACGCACTCGACACCGATAGCCTCAAGCGC  
ACGTTGTACCTGTTTGGTGGCCACTGAGGAGTCATCCGCAACAAGAACAGGACGCCCCAGAGTCGGGTGG  
TCGACACTGGCCTGAACCAACTCCTCACTAACATCCGTTGCAACCGGAGAAAATTTGTTCAATATCCGCT

CAACATCAAGAATTTTCGACCAACTCGCCGTCGACTTCAGTCACGGCTGTCATGTAGTTGATGCGACCCGC  
ACCTTTGGGCGGAGGCAGGATGGATTCCCAGTTCATATTGATGATGCGCTCGACCGAATGCACCAGAAAT  
CCCTGAATAGAGCGGTTGTACTIONGAGATGATAATGAAGCATTGCTCAGATCATCAATCGGGCGTTTAC  
CAACTGCCATGCTGAGATCGATGACCGAGATCGTCTGGCCACGAATATGTGCGACCCCGCGGATGCAGGA  
GTTTCAAGTTTGGGCATCACGGTCAAGGGGGGACACTGCAACACTTTCACGCACTTTGAATACGTTGATGCCA  
AATCTTTGACGTCCATTGAGACGAAAACAACAACACTCCAGCCGGTTTTGCCCCACTAGCTGGGTACGTT  
GGTTGACCGAGTCCAGGATACTGGCCATAAACTCCCTAAAAACGCTTGGCATTAAATCATGCATGCGTG  
ATGGATTGCGTCAGACTATCGATGTGACAACGAACAGATTTCTGAAGCAATCATAGTTAAATATGGTGATA  
TGCGTGAACAACCTTATCGACCAACGAGCGAAAATGATTAACCGACTTTTACTCATCAGCCTCTTTTTTGG  
CAGCATATCTTCCAGTACGCTCGGACTCGGACGCTACTACTTATCTGCAAGAAAAGGCACAAGAGTTTCGTTTAC  
AGCCAGCTAGATATTTCCGTTGGATGCCAGAGCCGAGGTCACCTCTGCCACGCTGGATGAACGGCTCCAC  
TGACCCGCTGCGAAGATCTGCTCACTATCAGCTTACCAGCAAAAAATGGAAAATTCGCGTAATAACAACAGT  
TTACCTTAAGTGTGAGGAGGAGAGGCCCTGGGACGCTCTATCTCCCGGTGCGGGTCAGCATTCAAAGGCC  
TATGTCACTGTGACCAACCCCATCGCCAAGGGGGACCTGCTGAGTGAAAGCCAGCTGGTGTGGCCTATC  
AGGATCAGACCCTGATCCGCGGCGACTACCTGACTGACACAGCCCTCTTGTGCGGAGTACGCAGCAAGCG  
GGAGCTAAAACCTGGGCAACCCATCCGTTTGGAGTCAAGTTTGTGTCGTGTGCAAAGGGGATCAGGTCACC  
CTGACGGCAGAAAATAGCAACTTCCAGATCAAAACCATGGCCGAGCCTTGAAGATGGCAGCTTCGGAG  
AGATCATCAAACCTCGTCAATATTCGCTCCGGCAAAAACCGTTGAGGGTAAAGTCAGTTCCGGTAGGTGCCGT  
ATCGGTCACCTTTTTAAATCCGGATTCTTGACAACCTTTTTTCTAAAGTTTTGATCTGCCGACCGATAAAC  
AGGTAAGCAAACCTTAAAGCAGACGAAGGTAACATAAAATGGCCATCAATAATATCAACAACCTTGGCGAAT  
AATCGGTTGCAAAAATACCGCTAATAGCCAGGGGACAGGCAGCAAGTCAGTCACCTCATCGCCGAAAACA  
AAGCGGCTACTGTCAAGCTGGACTCCGCTCTCCTTGACCAGTGAGGCGCAACAATTGCAAAAGATGCAACA  
AAACCTCAATACCGCCTCGACCCGCAATGAGAGCAAGGTCGAACGGCTGAAAAAGCCGTCGCGAGTGGT  
GAATATCAGGTTAACAGCGACGCTGTGGCCAAGAAGATGTTTCAAGTTTCGAGGCTAATCTGGACAAAGTTC  
TGGGATGATGGATTTACCTTCGTTACTGCACACCCAAGATGATTACCTCAGCCAGATGCAAGGCATTCG  
GAAGAGGAGTTTCAAGCTTGCCTCGAACAGCATCAGGCACTGGCCCTGCCGCACTGACCGAGCGCAAACAGC  
AGTTGCTTGTGTCGATAGAACTCTGGACAAGCAACTGGCAGAGATGCCGGAACGGCACTGCAGCTGGC  
AGCCTATCCCGATGAGATGAGCGCAACTTCCGCAAACTGGATGCTTGGCAGGCACAAAATGATATCAAC  
GGTCGCTTGTGATGAAATGAGCATCGTCTCCAACCGCTCGTCTGGCAACCTTTCTGAGTCAGTCGCGCATC  
GCAACAGCCTGACCTATGACGCCAAGGGCAACACTCGCTCTGGCACCCGCTCCTACGGTATCAAGGCCTG  
ACATCTCTTATCAGGCCTTGCATTTTTGCTGTCCGTTTTTAAAGCTCCAGTCGCAACAGCTCTCGCCCGTC  
CTCACACGCATTGACGCGCAGTACCCCGTTCTCATAGCACCCGTAACCTGGCAGGCAACTCGCCGCGCGGG  
AAACAGATTGACCCCGGTTTCAATCAATACCCGCTCCCCCTGCCACTCCAGCACCCGGCACATGGGTGTGGC  
CGCTCAGGAACAGACTACCCGGCGGTAGCTGTACCTCGTCCGGGCGATAAAGATGGCCATGGCTGACAAA  
CCAGCGCCGCTCATCGATCAGCAACTGGTTGTAGGGGGCTGTGATGGGAAAGCGCAACAGCATCTGATCC  
ACTTCGGAATCGCAATTGCCCGCACCCGCGATGATCTGTGGCGCCAGCTCGTTGAGCCGATCGGCCACCG  
CGCCCGGGTTATACCTTCCGGCAGAGGATTGCGCGGGCCATGGTTGAGCAGATCGCCGAGCAGCAGATA  
GTGGTCCGGCTGCCAGGGCTCAAGTTGGGTCCGCACCCGCTCCAGCGCAATGATGCTGCCGTGGATGTCCG  
GAAATGATGGCAAGTTTCAATGAAATGCTCCTCACTGCGGGCTGAAATAGAGATCCTTGGTGGCAATCGTC  
CCTTTCAAATTTGCTGGCTGGGCAGCCCTCGCAGCGCAGGATCGACCAGTCTCATCTGATTGTAATGATACA  
CGGGGAGGATCGGGCCTCCTCAAGCAGCAACTGTTCCGGCATGCCGGTAGAGTTCAACCCGGCTCGCGCT  
GTCCAGCGTATTGGCTGCCTGCTCCAGCAGCAGATCAAAGTCGGGATTCAGTAGCCGCTCTCGTTGCGC  
AGATCCTGACAACGGAAGCTGCCAGCATGGCTGATGGCTCCACATAATCGCCAAACAGGAAGCTTCTGG  
CCACCTGGAATCACCGCTATCCTTGGCCACCTGATAGGCACCCCACTCCAGACTGTTGAGGGTGACCTG  
CACCCCTCAGCTTCTGCCACATGGCAATGGCCATCGCCATCTGCTTGTGGGTTTTCTGCGCTGTTGTAG  
GTAATGCTCAGCTTGAAGTGATTTCGCACTGTTATACCCGGCGCTGACAACAACGCTGCCGCTTTGGCCT  
GGCGGGTCGGCATATCCTCAAGCGCCACAGGCAATATCTCCCGGGGTAACCCGGCATCTCCGGCAACAG  
CGACCATGCCGCTGTTTCACTCTGCCGCTCACCGATCCAATGAGCTGCTGTGATCAACCGCCATGGAG  
AGCGCCTGACGCACCCGCACATCCTGCAGTTTCGGGGCGCTTCAAGTTGAACGCATAGAGATAGGTGCCAA  
ACAGCGGAAGCCCCAGAGCCGCTCCGGAGATTGCGGCTTCACTTCTGGTAATAGCCGAGGGAGACCTT  
GTTGGTGAAGTGGATTTACCAGCCTCATAGCGCAGCCGTTCCGGCATGTTGCGAGGTGATAGGCAGATAG  
GTGACCCGTCGATAACGGGTGTGAAGGTCATCCAGTAGTGGATATTGCGCTCGGCTTCGATCCGCTCGT  
TCGGCGTCCAGCTTGCCAACCGATAAGCACCATTGCTCACCAGCTTGCCGGGCTCGGTCCACTGCTTGCC  
AAATTTGGCTATCGCCTTCTGATTGAGTGGCACAAGGGGGCGCTGACTGATGAGCTGCAGGAAATAGGGA  
GCCGGCCGCTCCAGAGTGATTTTCCAGGATCTGATCGCTTTGCGCTTCAATGCCAAGATTGCCGAGCTCCA  
GCGCACCCGCATAGATGGATTGCGCATTGTTGATCCCGCTCGCCAGCAGCAATCCGGCAGAAGGGGAGTT  
GATGGCCGGATCGAGCAGACGGCGCCAGGCATAGACAAAATCAGCGGCCACCAGCGGCTCGCCATTGGAC  
CATTTCAAGTTGAGGGCGCAGGAAAAAACGCCACTCCAGCCATCGTCACTCACCTCCCAGCGCAGTGCCT  
GAGCGGGGACGATATGCCCTGCCGTCATCGCTGACCAGCCCTTCAAACAGATCGACCAGTACCGCCCTC  
CCCCGAAAACCGGATCGCACAGTGCCTGGTCCAGCGACTCCGGCTCGGCACCGTTGCCCTTACCAGG  
GTTTGGCGATCGGCCAGCAGAGGCTGCTGCTCAACGGTGGTGGCATGGGCCAGGGGCCCTGCCAGCACGG

CAAGCAATAGCGGGGAGAGCCAGCGTTGCGCCAGCTTGGGGAAAAAACCATACCTCATGACAAAACCTCG  
AATAAAACCACTGCAGGAGGGGAAGGCCGACGGCGGCCTGATGAATGCCTGATGCCGCTCTTGTATACC  
CCGAAAACGCCCGTATTGTATCGGGCTTGCCCGGAGATGGAGTCTTTCGGGTTAATTTTTTCAGGAGT  
TTTTATGGGTTATGAGTGGCTGGCCCTCGCGTCGGCCAGTTTATGGGCAATTGCAGCGCTAATTTTCGGTC  
AAACCAGCCCCGTATCTCGGGCGCATTTGCTACAGCCGCTGGCGCATGTTTCTGGTCAGCCTGATGCTCG  
GCACCATGAGTCTGCTCACCGGTGGCTGGCAAACCTCACCGCAAGCGTCTTGGCCCTGCTCGCCATCTC  
GGGGCTGGTCGGCATCTTCGTGGGCGATACCGCGCTGTTTGCCTGCATGAATCGGCTGGGGCCAAGACGC  
AGTGCCTGCTTTTTCTGCCATGCGCTGTTTTCCGCCCTGCTTGGGCTCTGGCTCTTTAATGAACAGC  
TGACGGGCTGGGCACTGCTGGGGGCCATGCTGGTCTTTGCCGGCGTGATGCTGGCGATCCTGTTTTGGCAG  
ACCGAGTAGCAACAGAGTGGGAGCAGATCCGCGGCAATCTGGCGCTGGGGATTGGCCTGGCCTGACG  
CGGGCACTGTGTAGAGCGTGGGAGCCATCATCGCCAAGCCGTTGATGATGAGTGGTGAGTGGATGACG  
TGAGTGCATCGGGTATCCGGATGGGCACTGCCCTGCTGGCCACTGCGTCCCTGCGGCTGGGGCGCTTGCC  
GCTGGCGATGCCGCTCAAACCGGTCAATCGCCAGATCCTCGCCATGATTGCCACCAACGGTTTTCTGGCG  
ATGGGGCTGGGCATGACGCTGATCCTGATGGCGCTGCGGCAGGGCGAGGTGGGCATGGTGGCCATTCTCT  
CCTCCACCACGCCGTTACTGCTGCTGCCGCTATTGTGGTGGCACTCGGGGGAGCGGCCATCCGTTGCCGC  
CTGGGCGGGTGCATGATTGCCACCTGGGCACGGCGCTGGTGTGGGTTTCAGCACTCACTGACACCCG  
GCACCATCCCTGATTAGAACAGGGCAATCTCCTCAGCGGTGAGTCTCGGGTATTACCGGGGGCCAGATC  
TTCATCCAGCGTCAGGCCACCCACCCGCTCGCGATGCAAGCCAACGACCTTGTGCGGATGGAGGCCAAC  
ATCCGCTTGACCTGATGGTACTTGCCTTCGTGAATGGTCAAGCGGGCTCGCACTCGCCGAGAATTTCCA  
GCTGGGCAGGACGGGTTTTATCGGTCTCGTTACGCAAGTAGACCCCTTCGGCGAACAGCGCGATTGCATC  
CGGGCTTACCGGATCGGCCAGCCAGACGTGATAGGTCTTGGCACACTCGTGGCGCGGGCAGGTGATGCGG  
TGGGACCATTGACCATCGTCCGTCACCAGCACCAGACCCGTTGGTATCGAGGTCGAGGGCGCCCCACTACAT  
GCAGCTTGCCCATCGCCGGTTTCATCCATCAGGAAGAAGACGGTCCGGTGATCCGGATCCTCGTTGGAGCA  
GACGTAACCTTCCGGTTTTGTGCAGCATGAAATAGCGGTTGCGCTGCTCCAGCGTCAGCAGCACGCCGTC  
AACTCGATCTGGCTCTGCTCATTGATATGAAAGGCGGGCTGCTTGACCACAATGCCATCCACCATGACCT  
CGCCCTGACGGATCAGTTTTGCCTGCCAGCGAGCGGGTCAAATCGGAACAATCGCACAGAAATTTATCAAG  
CCGCAATTCACAACCTCGGAGTCCAACAAGTAAAGGGGCGTCAATATATCGGGCGGGGGCACAACGCCAC  
TGTTAAGGGGTTGCCAATTATGACGAACCTGGTCACTCCGATGTTACACTTCTCCGGTGTGACCCATCCGAA  
CGATACTCATAATAATAAGAGTCAGGAAGCCCTCATGAAGTCTCAAGCATCCTATCCCGTCAATCCCGT  
AACCAGCTGAAACCCGCGATGTATGTCATTGCTATCGCCAGCCAGACAGGTGGGATGGAGATCGCCAGAG  
TGGGCTTGGTGACCAGCGTGGCGCAAATTGCCAATCTGGTGCCTCAGGGGGTGTCTCACGGTACGTATCGA  
TCTGGCCCGCAGCAAGCTGGGCAGTGCCGAAAGTATGATGCCGTTACCTCCCCCGATCTCAATGCCAACAGC  
GCCCTGGTAGGGCGCCGAGCCAGTGCCAACGGCGAAGGACGGGAGCTTAAAAATCCGCCGCTCTATCAGG  
AAGCGCGCAGCTGCAAGGCAAGTTTATTGCCACCTCAAAGCGGGTGAGCCATCGACATCACCCCGCT  
GGCCGAAGTTGCCGAAGAGATGGTGGACACCATGTTCAACCACGGCGATGCCATGCTCTGTCTGGCCCGT  
ATTCGCGCCAAGGATGCCTACCTGATGGAGCACTCCATGAACGTGGCCATTCTGCTGGCCAACCTCGGCC  
GCTATCTGGGGCTTGAGCGCAGCGTGTCAAGGAGTTGACCCCTGGGTGGCCTGCTGCACGACGTGGGCAA  
GATCATGACCCCGGACGAGGTGCTCCACAAACCGGGCAAGCTGACCGACGAGGAGTTCGCCATCATGCGC  
CAGCATGTGGTGACAGTTACGAGATCCTCAGCAATACCCCGGGCATCACCCCCACCATGCTGGAGGTGG  
CCGCCAACCACCACGAGCGGCTCGATGGCACCGGCTACCCCGCAGCGACTCAAGGGGGGAGCAGCTCTCCCT  
CTATACCCGGATGAGCGGCATCGTTCGATGTCTATGACGCCATCACTGCAGATCGGGTCTACAAAGCAGGT  
ATGCAGCCGACCCAGGCTTCCGCATTCTGCTCAAGGGGATCAATCAGCACTTTGATGCCGAACGGTTA  
CCAAGTTCATCAAGTGCATGGGAGTCTATCCGGTGGGCACTCTGGTACAGCTCTCAAACCAGCGCCTGGC  
TATCGTGCATGCAGCGCAACGAGCAGCAGCCGCTCAAGCCGGTGGTCAAGGTGATCTATCAGCCACCCAG  
CGTCACTACCTCGACGTGCACTGGCTGGATCTGGCCAAGTCAAGGGTGCAGGAGAGCATCGAAAAACAGG  
TCGACCCCAAAGAGTTTGGCATCAACCTCGCCAACCTCTTCTAATCCCTCACCTCGGATCTTCATGATTG  
GCGCTGGCTGTGAGCCAGTGCCGGATCAGAAACTCCTCATCCAGCGGGCAGAGATCAAACCGCAGGCTG  
GCCTCTTCAATGGCGGCGAGATCGTGCTGGTGGTGTCTCACTGAGCCAACGCAACCGCACGACGCAAATCTT  
CACCATGGGGGAGTAGCAGATGGTTCGCTCATGGGATACCTCCGGTAGACTGCAGGGCGGGCCGCAACGT  
GGCCACCTCTTTCCAGTCTAGTCCGGTCAATCCCCATCACCCGCGCTTCTTCAACCTCCCCCTCTCAATCA  
CGGCAATCAGCTTGTACCGGGATCAGCGACCGAAGGCGCGCTGCCAATCCTGATCAAACCTCGCCAATG  
CCGCATCCACCGCAGGCACATTCAGCAACTGCTCGGCCACATCGAGCGGCAAGGTGATGGACTGGCAACC  
CGCCAGCAGGCAGTCAAGCGCCTGACGGGGTGTGCGGAATGACGCCGCCAGCACCTTGTGTTCCGGCGG  
TGCAGCGCAAGCAGCTGTTGCAGCTCCTGCACGGTGGCGATGCCATCGCCCCCTGAGCATCCAGCCGGT  
TAACGTAGGGCGCGACATATTCCGCCCCCGCCACCGCCGCCAGCCAGCTTGCAACGGAGTGTATACCGC  
AGTTCCAGAGTCGGCACACCGTTGGCGGTGAGGCTCTTGATGGCCGCCAGCCCTCTGCGCACACCGGG  
ATTTTGATCACAGATCCGGGTCCAGCTCACGCAGGGCGAACGCCTCACGCACCATCTCGGTTTTCGGTTTT  
TGGCCATCACCTGGGCAAACAGGCGCGCCTTGGGGCCCAGCACGTCGCGCAGGGCGGGCAGCAGCTCACA  
GAGCGGCAATCCACAGGCCGCGGTAATGGAAGGATTGGTGGTGACACCGGCCAACGGCAGGATCCGTGAC  
CAGCGACGCACTGCCGCCACATCGGGGATCGAGATACAGCTCCATCTCTGACTCCTTAACGGGATGTT  
CAATATGTCGCCATTCTAGCGAAAAACATCTGCAAATAGCTTGATCGAAATCAAATAAACTTTCCGAATG



AAAGCAAATAGAATGAAAAAACAAAAGGAGGCGGTATGATTTTCGACCTGCAACGATATTCAACTCACGA  
TGGCCCCGGCATTTCGCACCCTGGTGTCTCAAGGGGTGCTCGTGGCCTGTCTGTGGTGTCAAACCCG  
GAAAGCCGCTCTCCAAGCCGGACATACTACTCGACCGGCCAGTGCATCGAGGGATGCCAGCTCTGCA  
GCCAGGCTTGTCCGGCAATCTTGCCTGACAGCGAGGGCATCCAGCTCAGCCGTTCTGCCCTCAAGGCCGA  
TGATATGGAACGGCTGCGCGGCCTCTGTCCGAGCGAAGCGCTGCAGGTGTGCGGCCGCGATGAAACCCTG  
GACACCCTGATGGACACCATACTGCGGGATCGCCCTTCTTCGAGCGCAGCGGCCGTGGCGTCACCCTCT  
CCGGTGGCGAGCCGTTTATGCAGCCCCGAATTTGCTGCCAATCTGCTGGCCCGCTGCAAGGCCGAAGGGCT  
GCACACCGCGGTGAGAGCTGCCTCCATGTACCCTGGCACCAGATTGAGCCAAGCCTCCCATCACTGGAT  
CTGCTGCTGGCGGATCTCAAACACGTGGATAAAGAACGTTTCTTCCACTGGACCCGCGGCAAGGTGGAGC  
TACCCATCGCGAACCTCAAACGCCTCGCCGAGCAGCGCGTGGCGATGCAGATCCGGGTGCCGCTCATGCC  
CGGCTTCAATGCCGACCCGCGCATCGATCAGCGCCATCACCAGACCCGCCAGCCTCGGCACGGTGCAG  
GAGATCCACTTCCCTCCCTACCACACCCTGGGGATGGGCAAAATATGCCCTGCTGGATCTGCCCTATCAGG  
CGCCGGAGACACCGCTCGACGATCCCGATTTACTCAGCTTTGCCACGCATACGCCAACGTCAGGGGCT  
GACCCCTGTGACCAGAGGATAAGATCATGACCAGCTCGACCTCAATACCCTCAGCCCGCGGATCCGCGC  
CCACAAAGAGAGCCTGATCCACATCGTTAGCCACCCTGCTGCACCAGCGTGGCCGCCACTACACCGAG  
GCCTATCGGGCTCATCTCGCCCGCCGCTGCCGGTGCGCCGCGCTCTTGCCTGGCTCATCACCTCAAGG  
CGCGCACCATCTGGATCAAGCACGACGAGCTTATCGTCGGCAATCAGGCCAGTCAGGTACGGGCGGGCC  
ACTGTTTCTGAGTACACGGTGGAGCTGGATTGAGAAGGAGATCGACGAGCTGGTGACCGCCCCGGCGCC  
GGCTTTGCGGTGACGAAACCGACAAAGATATCATCCACACCCTCACCCCTTCTGGCGCGCCAGACGG  
TGCAGGATCGCTGCTTCGGCCTCTTTACCGACGAACAGAAAGCACTGCTGGAGAGCGGCATCATCAAGGC  
CGAGGGCAACATGACCTCGGGGGATGCCACCTCGCGGTCAACTATGAGGAGCTGCTCAGCTGGGTCTC  
GATGGCTTCAAGGCCAAGGTGGCCGAGCGGCGCAGTCGGCTGGATCTGGCGGATTTGGGCCGATCTGCAGC  
GCGAGCAGTTCTTGACCGCCGTCGCCATCACTCTGGATGCGGTGACGCTCACATCGCGCGCTACGCCGC  
ACTTGCCCATGATATGGCAGCACAAGAATCTCGCCCCGAGCGCCGAAACGAGCTTGAGACCATCGCGCTC  
AACTGCGCCACATCGCCACCAGTCCCCCGAGACCTTCTGGCAGGCGCTGCAGCTCTGCTACTTTTATCC  
AGCTCATTCTGCAGATCGAATCCAACGGCCACTCGGTGTCTTTCGGCCGGATGGATCAGTACCTCTACCC  
CTGGTATCGCCCGAGGTGGAATTGTGGAATCCCTGCCTCGGACGCGCGCCATCGAGCTGTGCAAGGG  
TGCTGGCTCAAACCTGAGGTTAAACAAGATCCGCTCCGGCACCCACTCCAAAGCCTCCCGCCGACGCG  
CGCTCTATCAAACGCTCACCATCGCCGCGGAGAGATGGCAGATGGCACTGCCATGACGCGAGTCAATGG  
CCTCTCCTACGCGATTCTGGAGTCTGCGGCCAGCTGCGATCCACCCAGCCAACTCTCGGTGCGCTAC  
CACGCCGGGATGAGCGAGGATTTCTCGACGCCTGCATTAGGTGATCCGCTGCGGCTTCGGCATGCCCG  
CCTTCAACAACGACGAGGTGGTGTATCCCGAGTTTATCAAGCTCGGGGTAAAGCGTGGAGGATGCCACCA  
CTACGCCGATCGGCTGCATCGAGACCGCAGTGCCAGGCAAGTGGGGTACCGCTGCACCGGCATGAGC  
TTTATCAACTTCGCCCGCATCTGCTGGCTCCCTTGTATGGCGGCCGATGCCACCACCGGCAAGGTAT  
TCCTGCCCCAACCCAGTCACTGCGGGAAGGGAGCTTTGGCAACTTTGACGAGGTGATGGCCCGCTGGGA  
TGAGCAGGTGCGCTACTTCAACCGCAAATCCATCGAGATCGACTGCGTGGTGCACAGCGTGTGGAGGCG  
CAGGCCCACGACATTCTCTGCAGCACCTTGGTAGATGACTGCATCGAACGCGGCAAGACCATCAAGGAGG  
GGGGCGCGTCTATGACTGGGTCTCCGGTCTGCAGGTGGGAATTGCCAACCTCGGTAACAGCCTGGCAGC  
CCTGAAGAAACTGGTGTTCGAACAGGGGGTGGTGGATCAGCAAGAGCTGGCCGCGCAGTGGAGCAGGAT  
TTTGCCGGGTGGCGGGGGAGCAGCTGCGCCAGCGCCTCACCAACGCCGCCCCCAAATATGGCAACGATC  
TGGACGAGGTTGACCTGCTGCTGGTGCAGGCTACCAGAGCTACATCGACGAGCTCAAGGGACTGCACAA  
CACCCGCTTCGGGCGCGGCCCATCGGTGGCACCTACTATGCCGGCACCTCCTCCATCTCCGCCAACGTG  
CCCTTCCGTGCGGCCACCATGGCCACCCCGGATGGTCTGTCACGCCACACGCCGCTGGCAGAAGGGGCCA  
GCCCCTCCTCGGGTTCGGATCGTCTCGGCCGACGGCGGTGTCAACTCCATCGGCAAGCTGCCACGGC  
GGCCATCCTCGGGGGTGTGTCTCAACCAGAAGCTGAGTCCGGCGAGCCTTGAGAACGAGAGGGACAAA  
GCCAAGCTGATGAGCTGCTACGCACCTTCTTCGAGGTGCACAAGGGGTGGCACGTGCAGTACAACATCG  
TCTCGCGGGAGACCCTGCTGGCGGCCAAGGCCAATCCGGATCAGTACCGGGATCTGGTGGTACGGGTGGC  
GGGCTATTGACGCTTCTTACCAGCCTTATCCCCGGATGCGCAAGATGATATCATCGCCCGCACCGAGCAC  
AGTCTCTGACGGGGCGACCCATGGCGCCAGTGCATCATATGATTGGCAAGCCACCCACGGGTGGCTT  
GCCGCTATCCACTACCTTGCATGTGAGCGCACCATGAATCCACGCCACCAACTGATCCTCACTCTGGTCC  
ATCAGGCTCGCAAGATGAGCGTGAAGTGAACCTCAGACACACAGGCGTGTCTGAGGTGACGGTGGCGAA  
CGACCTCACCGCGCTGGAGAAACAGGGACTGCTCAGACGGGTACACGGCTCGGCCATGGCGCTGGAAACC  
GATGACCCGGATGCCCGGATGAACATCAATTACCTGCTCAAGGAGCGCCTCGCCGAGCGGGCCGCCAGC  
TGGTGGAAAGATGGCGAGACGGTCTTTATCGAAGGGGGCAGCGCCAACGCCATGCTGGCGCGCCATCTGGC  
CCTGCACAAACGGGTACCATCATCACCATCAGCAGCTATATCGCCATCTGCTCAAAGATACCCCGGCT  
CAGGTGGTGTCTGCTCGCGGGCTGTTCCAGCATCAGAGCGAGAGCGTGGTGGGGCCGCTCACTCGCCTCT  
GCATCGAGCAGGTGCACTTCTCAAGGCCTTTATCGGGGTGACGGTTTTTCATCCCGAGATGGGTTTTAC  
CGGCCGCGACATGATGCGGGCCGACGTGGTCAACAGCGTGTGGCCAAGGGGATGACCAATGTGGTCACT  
ACCGACAGCAGCAAGTTCCGGCGCCATCCACCCGAGCCAGCTTGGCGCGCCGGGCCAGATCAACGTGCTGG  
TTACCGACGATGCCCTGCCCGCCCTATGCGGGCAGCCATCGCGGCCAAGGGGATCATCTGCACTGCGT  
TGCGGCCTAGGCCGCGCCGTAATTCACGCTATTTCAATTGACCTGACAGGATAAAATTTCCATGATGAGCC

AGTCCCCATCGGGACTGACGTCATCAGAGCGTGATCTGCAGGAAGCAGATTTTCAGGAGAGCAAGGACAT  
GCCATCGACCATCACAGCCGGGGAGCGCCGACTCCCCCTATCATTCGCGCCACCGCCATCACCTGACC  
CTGTGCTGGAGCTCGTTTTGGCTGGAGTGCCACGCTGCCGACTTGAAGTGGGAGAGCAACAACCAGG  
ATCCTCTCTATGCCGATCCGGCCGCCAAACGCGGGCGGCACCTTTCGCACCTTTATGACCAGCTTCCCCCT  
GACCCTGCGCAAATATGGCCCCGACTCCAACGGTGGCTTTGCCGGTTACGTGCGGGAAACCAACCTGCCA  
CTGCTGAGCACTCATCCCCTCACCGGCAACCCCATGCCGATGCTGGCAAACGAGTGGGCTTCGGCGCCG  
ACAACAAGACCCTCTATTTTCGCATCAATCCCAAGGCGCGCTGGTCAGACGGCCAACCGGTCACCGCCGA  
TGACTGGCTCTTTACCCTCAAGATGATGCGCAGCAAAGAGATCAACGACCCTGGTACAACAACACTACTAC  
AGCGCCAGATAGCAGACATAACCAAGTTTGTATGATCACACCCTGGCCATCACCAGCGGCACCGAAAAGA  
GCCCGCAGGATCTGCTCGAGTCACTGCCATCAGCCCGGAGCCGAGCCACGCCATCAAGCTCACCGCCAA  
CTGGGTCAAGGAGTACAACCTGAAGGTGTTGCCAGTCAACCGCCCTATCAGATCGATCAGGTGAAAAAG  
GGTAAATCGGTCACCTTCAAGCGGATTGAAAACCTGGTGGGGGATGACGAGCGTACTTCCAGCATCGCT  
TCAATCCTGCGCGGATCGAGATCAAGGTGCTCAGGGATCTGAACATCGCCTGGCAGCACTTCCCTACGCGG  
CGATCTCGACACCTTCCCCTGGTGTATGCCAACTGGTGGCAGACAAGACCAAACCGCCGAGTTTCGAG  
AAGGGGTATATCGCGCGCACCTGGTCTTCAACCAGACCCCGCAATCGCCGATGGGGCTCTATCTCAACA  
CCGCCGATCCGCTGTTGAATAATCTCGATGTGCGGCTCGGGGTCCAGCATGCCCTCAACCTCGACAAAAT  
GCTCACCACTCTGCTACGGGGGATTACCAGCGACTCAACAGTTATGGCTCAGGTCAGGGTGTAGTTTACC  
AACAGCGAGATCAAGGCCCGTCCGTTTCGATCCAAACTGGCACGGGAATACTTTGCCAAGGCAGGCTTTA  
ACAAAGTGGGGCCACAGGGGATTTTGCAAAACGACAAGGGGCAGTCACTGACCCTCGCCATCACCTACAC  
CACCGCGGAGCACGCCAGCGGCTCACGCTGTTGCGGGAAGAGGCCAAGAAGGCGGGGCTTAATCTGGAG  
CTCAACCTGATGGATGCCTCGGCCGGTTTCAAATCGATGCTGGAGAAAAAACACCAGAGCGCTGGATGG  
CCTGGGCGGGTAGCCGCTATCCCGCTATTGGGAGTTCTTCCACAAGGTCAACGCCAACAACCCAGAC  
CAACAACATCATGAACATCGATGATGACGCCATCACGGCTTGGTGGAGCAGTATGACAAGGAGTTTCGAC  
TTTGCCAAAAGGCGGCCCTGTACGGCAAATCCAGCAGCGGCTCTATGAGCTGGCGAGCTTCGTCCCCG  
CCTATCAGGTGCCCTATACCCGGGAAGGAGCCTGGCGCTGGATAAACTGCCAAAAGTACCTGCAACGCC  
CAAGAGCGAGCAACTTTACTGGCCCCCTCGGTGGCGACAACAGCGGTTACAGCTATGGCGGTCTGCTATGG  
ATTGATGAAGAGCTAAAATCCGAGACCAGGGCAGCCATCAAGAGTGGCAAGACTTTCCCGCCGAGCCTA  
TCATCGACACCACTTATCGCCAGCCCTGATTGCATCAGCCCATCGGCCAAAAGTCTTAAAAACAAAAGAC  
CCGCCAGATAGCGGGGCTTTTGTGGCAACCGGTGTTGCGAATAGCTCGGTGATCAGCCGCTTTGGCCCT  
GCTTCTCGGCAATGGCGTCAGCCACGTACGCCGGCTCCAGTACGATGCCTTCCGTATCCGGGGTTCGGGAA  
CACGGCAACACACAGCTCGTCTGCTCCATAACCTCAACCCAGCGCTCCAGCCACACCTTGAGGGTGATG  
GACTGCGGCTTGCAATCGGCCCACTCGCCTTCGGCCACGCTTGGCGTACTCCGGGTGCGGCCATACCG  
GGATGCAATCTTCATCGTTCGGTAGTCAGCATCATGACGCCATGCTCGTCAGTCAGGACGAACAGCTCTTC  
ATGCTCGACCAGCTTGCTGATGAAGTGATCGTAACGGTAATCAGCGTTCAGTTGCAGCGCGGCATTGCGC  
TCGGTGTGCTCAGTTCATAGCTCATTGGCCAAGTCTCTCTCTCGATAAAGGGCGCCATGTTACATCTT  
GTCGTGAGCTTGTCCAGCTTACAGCCCCCTTGGCACCGGATGGGGAGGACAATGACGCAAAATAAGGATAGA  
GCAGCCTCCTCGATAGCGAGACCGCCAGCCATCATATTGCCCTTTTACAGCGCAGGAGTGATCAGCTCC  
ACATCAGGTTGCTCGCTCAGCTTTTGCCGCAGCCAGTAGGCGGACTCCACTTCGACAAAAGCAGAGCAGAT  
CCTGGCCATTGGCCGCCATCGCCATCAGCTGCTCAAAACGCAGCTGTTGTTGCTGCTCCCAGGCGGCAGC  
GAGTTTGGCACCGTGGGCTCATCCACCACTTCGCGGGCGAACTCGAACAGGTTATCGGTGATCGGGCTG  
TTGATCTTGGCGGCGCTGTGCCAGTACATCAGCAGGTTATCCATCATCTCGCTGTCGTAGTTGGCCAGTG  
CATCCAGCTCGGGTGTATCACCGCTGTGCTGGCGGCAAAATCACACCAGCCCGCATCGAGTGACGCCAG  
CTCATGAGCCTCCTTGGCATGCTTGCCTAACAGCGCAATGTCGGCCCCCTTGCCTGCAGGTAACACACC  
TCGCCCTGATGGGCATCCAGCAGGGAGGTCAACGAAGCAGCGGGTAAACCGGAAAGCGGGTACAAAGTG  
AATGCAGCAGGATAACCAGAGTGATCTTGACCATGAGCGATACTTGAACAGGGCGAACAGCCACCAATA  
GACCGTCCGATATAAAGAAGTGCCCTATCCTACCAGTTCGTTGGTCCGGCTCGGCCCTTGGCGAAGCTGTCA  
GCCAACCATCTGATTACGCCGAAAAAAAACAGCATTGAAACGCAGCATCCAGTCAAAGGTCAATAATTT  
GAGCCAGCGCCCACTAAAGTGGATCTGGGGATGCTAGTTTTGCATACATCTTTAGCGTAAGGAGTAAATCC  
ATGATTTGGGATCGACCAGGTTTCTAACGAATTCGTGAACGATTTGAAAATACTGGCATGCTTTGATCCGG  
CCAACATGAGCCTGGGGATTAATAATACGCAGCGATATGTCTGAAGAGTTGTGCCAAGCGGCAGCCCGTCT  
GCATCAACAGGGGCTCATCAGCGCAGAAGATGGCGGCTATCTCACCCCGTTTGGCATGACTATGGTTGAA  
CACCTGCAACATCTGCTGGTTCGCACTCAAACCGCTTTGACCGCTGTGGTGGCCAGAGCGAAAAGTTGAG  
TAGCTCCCAGCGCTCCCCTTGGTGAAGATGACAGGCAAACAGCAAAGGACCTTCGGGTCTTTTACTTTG  
CCATCCACCAGCCACTCCCCCTCCCTTTCAGACATCAGTCGCGCATTCACCTCATCAGGTTGCAGCGCAG  
CGCCTATTCGGACCTGGACAAATTGCTGGCAGATCACTGCGCTCCATCGCGGATTGAACCGGTACCGG  
CGCATCGGACGTGCGAGTCAAGGTGGCAGCAAGCAGGAGCGATAGCAGCATGATTCAGCACATGGGAGTC  
AGTAGCAGAAGCCATATAAAACAAAAAGCCGTGGCACCAGAGGTACCACGGCTTTCTTAAATTTCTGTAAGA  
ATTACAGAGCGGTTACGTTCTCAGCCTGCGGGCTTTCTGACCTTGGGTACAGAGAAGTGTACGCGCTG  
ACCTTCAGCCAGGGTACGGAAACCGTTACCTTGAATGGCGCTGAAGTGAACGAAAACGTCCGGGGCCGTTT  
TCTTGCTGGATGAAGCCAAAACCTTTGGTTTCTGTGAAAACTTAAACGGTACCGGTGATCATGTTAGACA  
TATCTTTTAAACCTGTATTCAAATAATTACTTATGCTTTTCAGCGGGTAAAGCTCAAAAAACGGGATTA

ACTTATGAACAACAGGACAAGATGTGAAACATCGTATTCATTGACATAACTATCGCCCTTTCAAGCTGGT  
TTGGATTATACGTGGCTTTGTAGATTACGCAAACAAATTTGTGCCCTGCCAACGGCAGGGCACAAACCGT  
TATAAGGTGGCCGCTTCCAACGCTTCGACCAGCGCTCTGAGAAAACGAGCCGCTCCCCGCCAGTACAGG  
CTCTGTGGTCAAATGTTCATCGACAGCGGCAATGCCCTGACGGGACGCGCTCACCATGGATGAAAACCAC  
TTTTTTCGAACAGTTTGCCTGCCCTATGATGGCTACCTGCGGGCGCGTGACAATGGGGCTGGCATAGCGG  
CCTGCGATGGCGCCGAAGTTGGTGAGCGTAATGGTCGCCCCCTGCAACATCTCGCGCGGCACGGCGCGCG  
CCTTCACATCGGCGATCATCCGATCCAGCCCCCTGCCGGATATCCGCCCCCTCCCGCTCGGCCACGTTCTC  
CATCACCGGCACATAGAGGCCATGCTTTGAATCCACCGGATGGCTACATTGACCTCTTTGAACAGGCGC  
CGTGACAGGGTGTGCGCATCGAACCAGGCGTTCATCGAGGGCTCGGCGCGGCACGCCACGCCAATGGCTT  
TGATAAAGGCGCACCGTTCACATCCTCATCAGGCGCCAGTGACGCAAATCCACCTCGTCGGTGATGCTGAC  
CGGCACCAAGTCTGATGAGAGAGCTCCATCGCCTTGCCATGGCCATGGCCCTCCGCGACCCCTTTGAGGAATTG  
TTGCCACTGCTCTGCTGTGACTCGAATGCTTGCTGCACATCCAGCTCGGTACCATGCCGCGCTGCCAC  
TTCCCTTGATCCGGTCGATATCCAGACCCAGTTTTTGTGCCAGCAGGCGCACGGCAGGCATGGCTTGAC  
CAGCGCGCCACCCGGGCAATGGCCCCACCACGAAAGTGATCCTCGATATGTTGCTGATGGGCGCTCACC  
TTGCCACCACGGTGCATCATCTCCCCCCCCCTCGAACTCCACCAGCGGCGCACCGATATGGAGGATAT  
CCCCCTCGGCGCCGAGAGACGGGCAATCACCCCGGCTACCGGAGAGGGGACATCCACCAGCGCTTGGC  
CGTTTTCCACCGTCAACAGCACCTGATCGACCGCAACGGTATCACCGGCACTCACCTTCCACTCGACGATC  
TCGGCTTCGGCAACCCTTACCAGATCCGGTAATTTGAAAAATTCATAGCCACTGGTTCTCCATCAG  
CTGGTGAGCGGCATCGGCGATATCCTGCTCGGTGATGAGGTAATACGCCTCGTTGCGATAGTAGGGGACG  
GCGGCATCCACGCCGGTCAGCCGCTTGGGCGGCGCCTTGAGGCAGGGAAGTGCCTGCTCGGTACCCGCG  
CCACAATTTGCGCCCCGACCCCGAAGCTGCCACACGCTCGTGCACCACCAGCAACCGGCCGGTCTTGCG  
CACCGAAGTGAGAATGGTCTCAATATCCAGCGGCTTGATGGTGGCCAGATCCAGCACCTCGCACTGGATA  
TCCTGCTCGGCCAGCAGCGTCGCGCCCGCATCACCTCCTGAATAGAGGCGCCCCATGCCACTACCGTGA  
TATCCCGGCCCGGGCGCAGGGTGAAGCAGACATCCAGCGGCAGGCCGACACCGTCAATCCACCACCTCGGA  
TTTCATCGAGCGATAGATGCGGTCCGGTTCGAAAAACATCACGGGATCCGGATCGCGGATGGCCGAGAGC  
AGCAGGCCATAAGCACGCCTCGGGCTGGAGGGGATCACTACCCGTAGCCCGGGAATATGAGCAAACAGCG  
CCTCGACACTCTCGTGTGATGTTTCAAGCGAATGAATGCCCGCGCCATACGGGGAGCGATAGACGAGGGG  
ACAGGAGAGGGCGCCACGGGTACGGTTTTCGCATCGCGCCGCTGACAGATGATCTGTTCCATCCACGG  
AAGATGAAGCCCTGAAACTGGAACCTCAGCCACCGCTTGAGCCCTGGGTGGCCATACCAGCCCGACCTC  
CGCGCATCAATCCCTCGGCCAGCGGCGTGTCAATCACCCGCTTGAAACCGAACTTGTGCGCGAGGCCAAC  
CGTGGCACGAAACACCCCGCGGTTGACCCCCACATCCTCGCCAGTACCACCACATCCGGGTGCTGCTCC  
ATCTCGTAGTGAAGGGCCATGTTGACCGCTTCCAGCAAACTGATCTCACTCATGGCCAACCTCCTGCTTC  
ATCCCTTGGCAATCACTCGCTCGCGCTGGGGCAAGAGTTCGGCGGGCAGGCTGGCATAAGTATAATCGA  
GCATCGCTCCGGCGGCTGGGGCGCCATCGCTCATAACGGGCGACCGCTGTTGACCTCTCGGGTAGC  
CTCCGCCAGCAGGCTCTGCTCCTGCTTTCATCCACCAGCCCTGGCTGTGCATAAACTGGCGCAGCCGC  
TTGACCGGCTCTTTGCCCCAGGCGGCTCGACCTCGGCCCATCTCGATAGCGCGTGGCATCGTCGGCCG  
TGGTGTGATCGCCGAGGCGATAACTGACCGCTTCTATCAGGGTTCGCCCCCTTGCCGCTGCGGGCCGTT  
GACGGCACTGCGCGCGGCATCGTAGACCGCCACCACATCGTTGCCATCCACCTGCAGGCTGCGCACCCCT  
GCACCAATCCCTTTTGGGCCAGCGTAGGAGCGCTCGATTGCAGCTTGCGTGGCACCGAGATGGCCCACT  
GGTTGTTGTTGACGATGATGACCATCGGCAGGTGCCAGACACCGGCGCAGTTTCCAGCCCTCCAGAAAATC  
CCCCTTGGAGGTGCCACCGTTCGCCGATAGTGACTACGGCGACACGCGGTTGATTACGCAGTTTGAAGGCT  
GAGGCAATGCCACAGGCATGAGTGATCTGGGTGGCGATGGGGACGCAGATGGGAAGATCTTCCAGAGGGAG  
TCCCATCGGGTTTGAGAAAATAACTGCCCGCTCATCACACCCCAATATTGCAAGTTTTTCTCCATCGG  
CACGCCCCGCACATAGAGGGTGGGCATGTCCGATAGTAGGGGACGTAGACATCCTGCGGCTGCATGGCC  
AGACCAATGCCAATCCCTACGGCTTCTGCGCGGAGATGGGAGGGAAAAGTACCAGCTTGGCCGTTTCGTT  
GCAGCGCTATCGCTTTTTTGTGATAGCTGCGCACCATACCATATTGCGGTAAAAGGTGTGCAGTATCGC  
CTTGTCCAGCCAGTTCGGTAAGGTGGCGACCGGGCACCCCTTCCGCATCGAGGTAACGAAGGAAAGGGATG  
TCGACATGGGTGATAAATGGCTCCTTGGCGTTGTAGACGTCACCAGTGTGGCGACTCCTAGATGTAAT  
ACCTTGTAAATAAAAAAGCAAAGGGATTTACTCAGGTAAGACCAGTAGAAACTTCTTTAAAGTGGCGAAG  
GAGCTGAATTTTTCGGCGATGAGTGGCAAGGTATGCCGTAATGGTGCAACTTTGCGAGCGTGAAGACAGG  
ATGCCAAATATTGAAAAGGGGAGCCTTGCTCCCCCTTCTGTTACTCAAGTCAGCGGTTACGCCAACCCAGC  
AGTTACGCCAGCCAGTGTTCAGTTGGCGGGCCATGCCAACTGGCAGCAAGTGAGCGGACTCAGCAAGC  
GGCTGCGCCAGGGTTTCGGCCAGCAAGGTAGGGCAAATTCGCATCTCCCGTCCCCGGTCCAGCCACGCGCAC  
CAATCGATCGATGAGGGTCTCCAGCGGCGGATGCGCCGGCCAGTGAGGATAGAGGTCGGCCGTCGCGATC  
CCGGCCAGCTCGCACACCCGCTCCTCTTCCCCATCTCCCTTCCCATCAACCATTTGGCCAGGGGTGAAGCA  
CCTGCAGCCAACCCGGCCTTGCGGCCTCCAGCAACTGGCCAGCGTCCGGTGCAGCAAGTGGGGATCCCC  
TGCGGCTTTGAGCAGATGACGCGCCCCCTGCCAGCACCAACGCCGCGGGCGGGAAAGTGAAGAAGATAG  
TCGGCCAGCGCTGATCCCGCCCCCTGTTGTGTTGCTGCCAGCGTTCCGGGCTCATCTCTGCCACTCGA  
ATAAGGGCTCGCAAAGATGCACCCGAGCCGCACATGTTCCGGGGCGCGCCAGATTGCTCTGGCGCAGAGC  
GGAAAAGAGAGCCGAAACTCGGGGGCCATCCAGGCAGGAAAGGCGCAGGAGTCGAGCCAGACCCGATAG  
AGCCGTGCCAGCGTCAGCGGCTCACCTGCCAGCTTCTTCCCCGTCAGCCAGGCATCGAGCAAGCTCT

GATGGCGGGCGGTTGCCGCACTCCAGCACCAGATCGGTCATGACTCCCCAGAGCGCCGGATCACACAGCCA  
AGCGTGCTGGCGCCGGATAAAATCCGGGTGCCAATGCGGCTCCCCAGCCCCACCAACTTGCCCGCCAGC  
AAGGCTTCCCGGATGGCGGCAACCGGGGTTCATGCGTCCCCCTCCTGCCGGATGTGCGGTTGTTGCCCGAC  
CCCATCGACCCGCTCACCAATAAGGGCGCCTATCTTTGCCAGCCAGTCGGGATGCACCATCTCCTGATGC  
AGGCAGGGGAAGCGCTCATAGCGGATTTTCGCTTTTGTTCAGCGACGCCACGCCAGCCGATCCATCCAGCCAGG  
GTTGGCGGGAGGCTGACGCTCGATAAAAGATCACCTCCCCGTGGTAGCAATAGTCGACCGGCTGACGGAT  
CAGCCGTTGTTGTGGCAACCAGCTCAATCATGGCGCTCACCACCTGCTCGTCGAGCATGGCCAGCGCA  
CTCCCCCTTGCCCCAGTCGGGCCACCACGTCGTCGCGAGTGAGGGAATCGAGCGCATCGTCCGCAACCG  
CAATGCCTCCCATCCGAGCAACGCATCGAGCATCCGCTGCTCGTCGGCAACGGCTGGGTTTGCACATG  
CTGACAGGGGTAGGCATCGAGCAGCAGCACCATGGCCACCTCCTGTCCCTGCTCTTGACAGCATGGCCGGCC  
ATCCCGGTGCACCAGCATGCCCCGAGCGACCAGCCGAGCAGCCAGTAGGGCCCCCTCGTCTGCTGACGAC  
GCAGCTCGGTTCATAGTCGAGGGCCAGCTCGTCGAAGCTGGCAGGCAGAGGTGCATCCGGCTGGCAGAG  
CGCTCGCGCCTGCAGGGCATAGACCGCCATGTGCGGTGGTAGATGGGGCACCAGCGGCGCATAACACCAG  
CCGAGCCCCGCGGGGGTGGACGCAAAAAGAGAGTGGGGCCTGATGCGCCGACTGCGCACCCGGACGCTC  
GCAGGGGCAACAGCATGGGCATTGCCCTCCCGCTCGCCACCAAGACGGCGCGCCAGCAGGGCAGGGCTCGG  
CGCTTGAACAGGCTGGCCAAGGTGAGAGTCTGTCTATTGATTCCTCAATACGCACCACCAGCTGCGCC  
GCCAGCAGGGAGTGGCCACCGAGGGCAAAGAAGTTATCGTCGGCGCCGACTCGCGCCAGCCCCAGCACCT  
CGGCGAAGAGGGCAGACAGCCGCTCCTCCAGCAGGGTTTTTCGGCAACGCCTGACCCACCGCCGATGTCAT  
ATCAGGCAGCGGCAGCCCCCTTGCATCCAGCTTGCATTGGGGGTGAGTGGCAGCTCGGCCAGGTTTTACC  
AAAAGTCCCGGCACCATGTAATCGGGCAAGGCGGCGCAAGGGTGGGTGTAAGCTCGGCCAGCGTCAACT  
CGCTGCTATCTGCGGCCACCACATAGGCCACCAGACGGCGATCGCCGGGGCAAATTCGGGGCCCTGCAC  
CACCGCCTGCGCCACCCGGGGATGGCGCAGCAGCACCTGCTCGATCTCCTCCAGTTCGATGCGTTGACCA  
CGGATCTTACCTGAAAATCGAGGGCGCCCCAGATACTCGATGGCGCCATCCTCGCGCCAGGCGGCCAGAT  
CGCCGCTGCGATAGAGCCGTCCCGCGCCGAAGGGTTGGCAATAAAGCGCTCGGCGGTGAGCTCGGGCTG  
GCCAAAGTAGCCGTCCGCCACCTGCACGCGCCGATCCAGAGCTCCCCGCCACACCGGGGGGCACCGGC  
TGCAACCGGGGTGAGAATGTGGATGCTGGTATTCAGACCCGATAGCCGATGGGCACGCTGGTCACCG  
CCTCGTCTGCCCGCAGGGATAACCAGGTGACATCCACCGCCGCTCGGTCGGGCCATAGAGGTTGTGCAG  
GGGGCTGAAGATGTTCCATACCAGCGTTGCACCAAGTTCGGCGGGCAGCGCTCGCCGAGCAGAGAAGAC  
TGCCGCAAGGCGTGGCAACGCGCAGGCTCGGCTGTGCGCAGGAAGATCTGCAGCATGGAGGGGCAAAGT  
GCAAGGTGGTATCCCGCCTGCTCAATCAGCTCGGCAAGGTAGCGGGATCCTTGTGGCCACCCGTTTT  
GGCGAGCACAGCCGCGCCCCGGTCAATAAGGGCCAGAAGAACTCCAGATGGAGACATCGAAACCGGCC  
GGGGTCTTTTGCAGCACCCGATCCGCCGGGCGCATGGGATACATGTGCTGCATCCAGAGCAGCCTGTTGA  
CGATGGAACCATGGCTCACACCACCCCTTTGGGCGCAGCGGTGCAACCTGAGGTGTAGATGATGTAGGC  
CGCATCTTCCGGCTTGGGGCTGGCAGATCACAAGGTGCTATCGCCGCCACGCTATCGTCGCCAGCTGC  
TCTGCCACACCGGGGCATCGAGGCAGACAAGTGGCGCGGCCACATCGAGCGGCATCTGAAGCGTACGAC  
TGGTCAGCACCAGCGCAGGATTGCTGCTGGCGAGAATGTAGCCGATCCGCTCCGCCGGGTAGTCCGGGTC  
AACGGGTACATAGACGGCACCCACCGCCATGATGGCCTGTTGGGCAAGATAAGCTCGGGAGCGCGCGGG  
ATCACCACCGCCACCCGGCAACCGGGGCCACTCCCCCTCCCCGCCAGATAGCTGGCCAGCTGGCGGGTGC  
GCTGGCGCAGCTCGGCCACACTCCAGCGCTCGGCGCCACACTCCAGCGGATGGCGCTCTGATCTGCCGC  
CGCCAGCCCCCTCGGCCAGCAGTGCCTCAGAGTGGTGGTCGGCAACGGATGGTCGGTTTGGTTCCAGCGC  
GTCAGCTCAGCCTGCTCGCAGGGCAGCAGCAGCGGCAACGCACCGCCAGGGCTCGTCACCCGCCCTCAC  
TCCAGACCGCCAGATAGGCGACCAGCCGGGCCAGATGACGCTCGCTCTCCTGATGGCTGAAGCGCCCCTG  
ATGTGCTTCGAGGGTCAGGGTCATAGCGCTGCCTCCTCGGCAAGTAGAAGGCGCACTCCTCCACCGGC  
CCCGCCGCCAGCACCTGCACCTCACACGAACCTGGTTGTGTCTTACCAAAGCTGAGGGTGGCGGGCAA  
AGGGCATCAAATTGACCTGAGGGCCAAACAGCGGCTGGCCCGGCTGACGCTGTTGCAACCACTCCTGACG  
GCAGCCCTGATGACGGCAGCAAGGCGGCAAAATTGCCGCTCGACCTGTGCCAGCAACTCCCCTACCCGGCTG  
GTGCCGCTCAGCTCGATGCGCAGGGGCACCACATTGACCTTCATGCAGGGGGTATCGGGCCCGCTGAGC  
CCAGCCGCCCCATCAGCGGAATACCCAGCACCACTCGCCAGCGCCGCTCATCCGCTGCACATAGCTGGC  
CACCGCCGCCAGCAGCAGGCTGTAGGGGTGACAGGCCGTGCGACTCGCTCGCTCTACCAGTGCCTGCCAT  
TGGCGGCCAGCAAGCCGCTGCTCAAGACGATATGTGGGGCCCGGCCCTTGCAACCGGACGGCGGGAGAGCG  
ACGCCGGGTTCTCCACCCCGCCAACCTGCTGCACGAAGAAATCGCGATCCCGCGCGGCGCGTGGCGAATC  
CTGATAGGCCGCTCTTACGCCAGCAACTCCTGCTGGGTGCATAACGACAGGGGGCAGGCTGCTCGCCG  
GCACAGAGCGCTCATAACCAATTTGTACCCGCTGGCAGAGCAGGCTCAGGCCAAAGCCGTCGATGGCGA  
TATGGTGCACGGCGATAAACCAGGCCCCACCGCCCCCTCGCCAAGGCGATAGAGCGTAGTGGCAAACAGCGG  
CCCCCGGCCAGATTGAAGGGGACGGTCAACTGCGCACGCATCTCGGCTGCGCGGCCGCAAGCGGGTGC  
GCTTCGCTGCGCAGATCCCGCTCTGCCAGCTGCCAGCAAGCGGGGTGGCCACCATCTGCGGGCCATCGG  
CAGTAGCCACAAAGGCGCAGTGCAGACCGGGGATCTCGTCGATAGTCTGGCGCACCGCGCGGGTGAAGTG  
ATGGGGAGCCAGCGCCCCCTCCAGCAGCCAGTACTCGCCGGTATTGCAAGCGGGGCTCTGCGGATATTTT  
TGCTGGGCAAACCATATGCCCGCTGAGCGGTGGTAAGCGACCAGCGCGGGGCTCCCCACGTTGATGGG  
TGGCGCGCATCGCCATTGTCTGTTCCATGAAAATGTCTTGCGCAAACATCAAGCGGGCAGTGAAGTGTCT  
CCTGCCCCGATGGCTGAAAAGCGAGGAGGCAAGGCCCTCCTCCATAAAGAGAGTGTACGCTGCCAGACC

GGCAGCGCGGGGCTAGACCCCCAGAGTGGCACCGCCATCGACCACCAGATCCTGCAAGGTGATATGGCT  
GGCCGCATCGGAGGCGAGAAACAGCACGCAGGCAGCCACCTCGTCGGGTGTCCCAACTTGCCAAGGGGG  
ATCCCCAGCTTGAAGTCCCCGGGCAGACCCGCGATAGTGCCTGTTCTCCCTCCCGCTGCTCAGCCTCCC  
CCTCCTGCCACATGCCGTACAGCATCGGGGTACGGGTGAGCCCGGCGACACCAGATTGCAGCGCACTCC  
ATAGGGGGCAAGCTCCAACCCAGCCGTTTGGGTGAGGCTGGTCAGCGCCGCTTGGAGGCGCCATAGATG  
CCCATCCCCAATCGCGGCACCCGACCCGGCATTTGGAGGAGACATTTGACGATGGCGCCCCTGCGCCGTCCCT  
GAAACCAGGGGGTCAAGGGCCCGCATCAGGTAGAAAGGGGGCGAAGGTGTTAATGGCGAAGGTGCGCTGCAA  
GAGGGCGTCATCCACCTCATCGAGCCTGCCGGTCGCCAGTACGCCAGCGACATTTGACCAGCACATCGGGC  
CCCAGCCCCCTCGTCCAGCAGCTGTTTCGAGCAGCGGGTACCGCCTCGCTGTCGCTGACATCGATCACCA  
CCCTCTTACAGTTGCCGGGAGTGCCTCGGCCAGTTGCAGATCGAACGACACCAGCTGGCCCCTGCCCT  
GGCAAAGGTGCCCGCACCCGCATGGCCAATTCCTGCGCCGCGCCGTTACCCAGACGGTTCTGCCTTGC  
CACTCGCTCATGGGGTGCCTCCGGTTCGCTGACGTGCTCTTCGTTGACCTGATAAGCCGTGTCTGACT  
GACATTCAGCTGACGGGAGAGGAGCGCCACCAGTGAAGCCAGGGTGGCGTGGCGCCAGCTCGGCCAGC  
TCCACCACCACTTCTGCTGGCGCCACTCCTCCACCAGCCCCATCACCGCCAGCGAATCGAGACCATAGT  
CGAGCAGGTTGTCATCCTCGGTGGGCTGCTCCTGCTGCATCTCGGCGGGCAGCCGCGCAACACCTGAGC  
ACGCAGCGACTCGCGAGTCAAGGGGGCTTTGCTGGCCGCCATCACCTCGGCCACGGTAATCACCCGACCG  
GCATTTGCGGCTGACGTAGGAGAGCGCCAGCAGATGATCTTCGCGGGAGAGTGGCGATGGCATCAGCCA  
CCAGGAAGGGGGCAATATCGCGCATAAAGGCATCGACCGCCGTCTGCATCACCCGATATGGCCGTAGAT  
GCCCGAGATCACCGCTGATCCCGCCCCATTGGGCCATCAGCTCTGCCAGTGGAGAGCGGCAAAAAGCA  
CTGTAGCGCCACTTGGTCAAGCAGCAGTATCCTGCGGCTCGGGGGCAGCGCCGAAACAATCGGCTGACGCT  
CCGGCGCTCGGGTCAACCCGGGCCCCACATGTCGTTGAGCAGCGCCGATCGGCCGACTCTGCTCGGC  
GGGTTGGGCGGTATAGACCACCGGCATGCCAAGAAGTTCGCGCCTGACGGATCAGGGTGGCGATATGGTGC  
ATAACCTGATTGATCAGCGGATTGCCCGCCCCGTAGAAAATCGACGAAAATAGTGTGCATATCGTGGACCA  
GCAAGGCGGCACGGCCCGGTTTGAAGGGCCAGTTACCCGCCCCGTTGGCAGCTCCTCGGCGGTAGGCAG  
CGGATAGGCGGTGAGGGATTGAATGGTCATGCACACTCCTTGGCGAGCTGCTCGCGCAGCCTCTGTTTGT  
CTATCTTGCAGACCGGGGTGTGGGGCAGTTGCTCCACCAGCACCAGGCATCGGGCAGTTTGAATCGGC  
CACCCCTGCTCGCGCAGGAAACGGCGCAAGCGGGGCAAAATGAGGGGCTCGCGGCACATCAGAAAGGCG  
CAGTTCGCTCCCCGAGCATGGGGTCAAGCATGGCCAGCAGCGCCGCTGCGGTACCTCCGGTGGGTCAG  
GCAACAGCTCTTCAATCTCGAGGGCGTGCATCTTCTCCCGCCCCGTTGATCTGATCCTTGTTCGGCC  
CACCACCATCAGATGGCCGCTGGGCAAGCGGCAGACCAGATCGCCGGTGCAGTAGAAACCGTCCCGGTCA  
AAAGCCCGCTGATTGTGGGCATCGGCCTGGAAGTAGCCGCAAAAGGTGTAGGGGACAGTGTCCAGAGCT  
CGCCGCACTCGCCATCGGGCAAGGGGTGCCCATCGCTATCCCGCACCTCCACCTCGTCACCCGGGCTCAT  
CGGGCAACCTGGGTATTGACGATGTGCCACTGGTCATCCTCGATGCGGCTGTAATTAACCAGCCCCTCG  
GCCATGCCGAACACCTGCTGCAAGCGGCAGCAAGGTGGCTCGCCACCGCCTCGGCGTGAGCCGGACTGA  
GGCGCGCACCTCCCACCTGCACACACTCCAGAGAGGTCTGCGGATAGTGGCTGGCCGCTCCAGCCAGAG  
CGCCAGAGCCGGTGGCACCAGCGCAGCCCAATTGACCCGATGGCGCTGCACCAGCGGCAGACAGGTTGCG  
GCGGAAGGATCCTTTGCCAACACCACGCAGCCACCGGCATAAAAACCCCCAGTGCACCAGGGGGAGCTCA  
GGGGAAGGTTGTGGGGCGCCGGCAGGGCACAGAGATAGATCACCCGCTCATCCCAACCGCACACCGCCAC  
GCTCTGGCGCACGCTATAGCCATAGTCATCGTGGGTACGGGGGATCAGTTTGGGGGTGCCGGTGTGCCG  
CCGGAGAGCTGGAAAAAGGCGACCTGATCGGCCGGGGTTGGAGTTGGCTCAATGGCCGCCAGCGGCGAAC  
CATCAGCACGAGCCATGGTTTTCAGACTGACGCCATGCAAAACCAGACTGAAGGTCTGCGCCTTCAGTCTG  
CTCGAACAGCAGTGTCTGGCAAGAAGGCGATACCAGCTCATCAAGGGCCACGAGGTCCTCCCGCTTCACCG  
GCAAAGCCGGGATGGGAGGGGCTGAGTACCAGCAAGGCGGGCTCAATCTGGCGGGCAAAGGCCACCAGCT  
CGCGCCGCTGATGGCTGTAGAGGGCATGAACCGCCACTACGCCGAGCGGATCAGGGCAAACCAGCAGAT  
ATAGAACTCGGCGCAGTTGGGCAACTGCACCAGCGCGGTATCGCCATGACCCAGCCCGCAGCTGCCAGC  
CACTCCGCCAGCGCATCGACCTCACGCTTTAAGTGGCCATAAATAAGGGTGCCTTCGCGCAGATCAGGG  
CCGTGCGCTCGGGATAACGTGCGGCAGATTTCATCGAGCAGGGCGGTGAGCGGTTGTCCCGGCCACCACCC  
TTGTGCCCGGTAGTGGGCTGCCAGCTCGGCGGGCCAGGGGGTAAAGGGCACCCAGCGGCTTCATGCGGTTA  
CCTCCGGCTCCCGGCTTTTCGAGGCCGAAGGCACGCAACATGGTGCCGAGCTTGGCGGCGGTCTCCTGCCA  
CTCCGCTTCCGGCGAAGAGCCACCACCACCCGGCGCCGGCATAGAGCCGAGCTGTCTGCCGGCAAGC  
ACGCCACAGCGAATGGTACTACCACTCGCCATTTGCCGTCGGCATCCATCCAACCAACGGCGCCGAGT  
AGAAGCGGCGATCGTACCCCTCAAGCCGGGCGATGGCTGACGCGCTGCCGAGAGCGGCGTGGCCGACAC  
CGCCGGTGTGCGGTGCAGTGCCAGTGCCAGAGCCAGCACGGGAGAGGGCTCATGGAGCCGCCGGCGATG  
CGGGTGCAGAGGTGCCACATGGTAGGGGTGCGGATCACCTGCGGCTCCAGGGGGACGTCCAGCTCGCTAC  
AGAAGGGAGCGAGGGCGGCGGCGACCCGCATCGGCCACCAGCGCATGTTTCATAGCGATCCTTCTGCGCCCC  
CAGCAGTTCCGGCACTGGCCGCTGTTGATCGGAAAACCGGTGGCGCGGACGGGATCCCGCCAGCGGATTG  
CTCACACCAGCCATCTCGCTGCGCGATACCAGCAGCTCGGGGCTGGCGCCAAGCAGGGTCTCCCCATCCG  
GCAGCGGGATCTGGAACACATAGGCGCCCGGATTCTGGGCCAGCAGAGGCCATAGGCGTGTGCGGGGGA  
GGTCTGCTCTGCGCTCTGCACGTGATGGCGCGGACAGTACCACCTTCTCGAGCTGCCCCTCGCTAAAC  
TGCTGCAACGCTGCCCGTACCGCCCCCTGATAGTGGGCAGAGCCGGTCACTTCGCTCACCTCGCCATGGA  
GCTGGCAACAGCGGGCGGGTAACAACGCATCCCGTTTACCCACTGCGATTGCGCCGGGATCACAGATG

CCAGGGGGATTGGGTATCAAAAGGGATGGCGCCGATGGCGATGGGATTGACCATCCCCTGCTGGCGCAAC  
TGACGCAGATGGGCGAGCAGCTTCTCCGGCGGGATGCCGGTAAAACTGTCGTGGATACCGGAGGCGACCA  
GTACCCTGTCACCGCTGGCAAACAGCACACTTTATCCAGCCCGACCGCTGTGGCGGGCCACTCTCCTTC  
CAGTGCATGGTCACACATGACGGTGTACTCCTTGGAAATGAATCACTGCCGTGATACGACTTAAAGAAGTG  
AGTCATTTGACTCACCAGATATCAGGGTGAACGGCATCCTAACAAGGAGCGAAAAACGTTCAATACAAA  
TGAGAATCAATTTTCATTAACCTCTTTTTTAGTCAAAAAGAGGGTACGAAACGAACTGAGCTTCGCCGATAA  
AAAAGAGTTGCGATCGGAGCAAATTCAACTTGATAATGATAACGCTTATCATTTGTATATTATGGAAGAT  
GTAAATAATGAAATCCTCAACCTCCCGTTTTATTGCTCCAGCCTGCTGGCTACTACCATCGTCACTCTG  
CTGACCCAGCAAGCGATCGCAGCCAGCAACGCGCCTCAAGCCGATGAGGTGATCACCCTCACCACCACAG  
CGCACAATACCCGCTCGGCACCGGCCCTCTATCTGTGATCAGCGCCGAACAGATCGCCGCCCGCCCGT  
CAATGACCTTGCCGACCTGCTGCGCCACGAAGTGGCATTGAGGCTGAAGCTGACACCAATGGCCGTAGC  
GATATCGGCATTGCGGCATGTCCGGCAAGTACACCCTGGTACTGGTGGATGGCAAACGCTCTCCTCCT  
CCAATGCCCTGTGGCGCGCGGCAACTTCGACAACACCCCGGTCCCCCTGGCATGATCCAGCGGGTTCGA  
GGTGATCCGTGGTCCCATGTGACACTTTACGGCTCCGATGCCATCCGTGGTGTGATCAACATCATCACC  
AAGCAGCCGGGCAAAACCTGGCAAGGGGCGAGCCGATGCCGACTTCAAGGCCATCGAGGGCAAAGATGGCG  
GCGATCAGCACAGAACCAACCTAGGCTTTACCGGCCGCTGACCGACAACCTGCTGATCCGGATGAATGG  
CGAAGTGTACGACCGTCAAGCCTGGACTCCGCCGAAGCGGCCGATGGCATCCCGCTCATCGAAGCCAAA  
CAGACCCGCAACTTCGCTCCACCCTGAGCTGGCTGGTGGATGAGCAGCAGCGCTTCGAGTTTGACTATC  
TCTACAACCAGGATGAGCGGCCTCTCGATATCTTCCGTAACCAAGGTGCACAGCCGCCAGCA  
GCAAAACGATCGCAACCTGTTTGGTCTGACCCACAAGGGGAACTGGAGCTGGGGTGACACCACCGTCATG  
GCCAACTACGAAACCTCCAGATCGACGACTTCAACACCAGCTACTCTGCCCGCAGCAACGGGAGCTGG  
AAGAGAACACCTTGACCCTCAAGGGCTATACCAACCTGGCGCTGGCCAACCACTACCTCACCCTGGGTGG  
TGAATATCTGGACCGGGGAGCTGGTGGATGCCGTGAGCTACAAGGATATCGGCGGCAAAGAGAGTCACTCT  
CAGGAGGCGCTGTTCCGCCAGGATGAAATTTGGCCTGACCGACAGCCTGACCTTCACCTGGGCGGCCGTT  
ACGATCACCACGAGATCTACGGCAGCCACTTCACCCCGCGGGCTATCTGGTCTATGAGATGAACGATGT  
GGTGACCGTAAAAGGCGGTGTGAGCCAGGCCTTCAAGGCACCGGCACCGCACCAGTACTCCAACGGCTAC  
AGCATCGAGAGCTGCGGCGGAGCTGCCGCATCTATGGCAGTGACAAGGTCAAGCCGAAACCAAGCACA  
ACTACGAGCTGGTGTGATCGCAGGAGAAGGATCTGGGAGACCAGCGCCACCCTGTTCTACTCCGACAT  
CGACGACATGCTCACCTTCAAGCAGTTGCCGACCTCCACTGACCGCACCTGGTACAACCTGAGAGAACCC  
ACTACCAAGGGGCTGGAACCTGACCGGCAAGCTCGACTGACCGACGATATCAACCTCGGCGCCAACCTACA  
CCTACCTCAAGGCTGAAGGCATCAGGGCCAGGCTCTGCCCGAGCGGCCTGAGCACAAAGGCCAACGCCAA  
GATCACCTGGCAGGCCACCGAGCGGGTCAATGCATTTGTGCGCACCACTACACCGGCACACAGTTTGCC  
GAGCAGACCGTCAACAAGGTTGTGCTACTGCACAAGCTGCCAGCTATCAGACCTTCGATCTCGGCACCG  
GCTTCAAGGTACCCGAGAACTTTGACCTGCGACTGGGGATCAACAACCTGACCGACGTGCGCCTGCAAGA  
GAAAGACACCGTCTTCCAGAACGTGAAACCGGGTGCAGCTACTACGTCAGCGGCTCAGCCCGCTTCTAA  
GGTAGCCAAGGCCTGTATAACAGAGCGCGGGCCCATGCCCGCCTCTGTTAACCAAGAGAATAAGGGGAA  
GATCCCCACTGGACAGCAAAGAGCATGCAGATTTCCATTTGTGATCAGGATCGTCTATGTTACCTCACT  
TCTGAATGCTTACCCCTTGCCACATTGCCACCCCTGACGAGATGTTAAAGGCCAGACCCTGTCCGGCA  
CGGCTCGCTCGCCAGATCGCACGCAGCCGCCAGCAAGCCCGCCATATCTGCAGGGAGAGGATGATCGCC  
TGCTGCTGGTGTGATCGGCCCTGCTCCATTCACGATCCGGCAGCCGCCCGCGACTATGGTGGCCAGCTGGC  
TGAAGTGAAGACCAATACGGGGAGCAGCTGCAACTGGTGTGATGCGCACCTATTTGAAAAGCCGCGCAGC  
ACCCTCGGCTGGAAAGGATTTATCTTCGATCCCGACCTCGATGGCAGCGATCGACTGGAAAAGGGCCTAT  
CCCAGGCCCGGGAGTTACTGTTGGCGCTTGACAAGAAGGGCTCGCCTGTGCCACCGAATTTCTCGATCT  
CACCAGCATGCTCTATCTGGGGATCTCATGACTGGGGCGCCATCGGTGCCCGCACCAACCGAATCCCAG  
CTCCACCGCCAACCTGGCCTCGGCCCTTCCCTGCCCATTTGGTTTTAAAAACGGCACCGACGGCAATATCC  
GGATCGCGGTGAGGCATCCTCGCCAGCCGGCAGCCACCTCTATACCCAGCCTTCCGGTGTGATGGCCA  
GCTGGCACTGGTGCAGCCATGGCAACCCCGACTGCCACCTGATCCTGCGCGGTGGCCGCCAACCCAAC  
TATCAGAACAATCATGTGACAGAGGCTGGTGTGACTGCTGCGCCAGCATCATCTCTCCCTCGCCTGATGA  
TCGATTGCAGCCACGGCAACAGCCAGAAAACAACATGCCCGCCAGCTACTGGTTGCCCAAGATATTGCCGA  
CCAGCTGGGTGCTGGTAGCCATGCCATCGCCGCCATCATGGTGGAAAAGTTTTATCTGCGAAGGTGCTCAG  
GAGATTGGCAGCAAACCGCTGCGCTACGGCCAGTGTGATCACCATAGCTGCATCGGCTGGGAACAGACAA  
GGCAACTGCTCGATATGGTGGCAGAAGGGGTTGAGGCGCGCCGTGAGCAGCGGGTCCCTGGCGGGATA  
AATGGCGGATTAGAGAGATAACGCAGAAAAGAGTGTGGCCCCGATGGGGCCACCTTGTGTTGCTGTTTT  
GACACTCGTCAGGCGACTGACTCCCGCTCCACCAGCTGGGCTTCAAACCTGAGCTCCAGGCCGTCCACCG  
GCTTGTGATCGAGCAGGCGCAGCGCCAGCTCGGCAGCGCGCTGCCATCTCCTCGATGGGGTAGCGCAC  
CGTGGTGTGACTTGGGATAGATGTAGCGGGCGTAAGGGATATCGTTCGAACCCACCAACCGACACTGCTGC  
GGGATCTTGTAAACCCCGCTCCAGCAGGCAAGAGATGGCGCCGGCCACCATGCCGTGCTTGAACCGGAGCA  
CGGCAGTGAACCTCGACACCACGGGCCAGCAGTTCACTCATCGCCACATAGCCGCCATTTTCGTCCGCAAA  
GGCGCGGCTGACGAGTGCAGGATCAAAGACGATCCCGGCTCTGGCCAGGGTCTGGGTGTAACCGGCCATC  
CGCTGCTGACCATCGACAAACTCTTCATCATCGGAGGTGATAAAGGCAATGTTGCGATGACCGGCATCCA  
GCAAGTGTGGCACGCGGTGGTGTATCGAGCCAGACGCGAGCATCCTCAAAGCCCGG

CACCTGACGGTTGATAAACACGATGGGGGTAGAGCCTGCCGCCAGCTCGCTCAGCTCCTCGTCCGGGAGC  
GCCTTGCTGTGGAGGATCAGCGCATCGCACTGGCGCTGCAGCAGCGCTGAATGGCATGACGCTCGCGCG  
CGATATCGTGGTTGCCAGACATGACGATGGTGAACCTGTTGGCCGATCGACCATGGTTTCGATGCCACG  
CATCATCTGGGCAAAGAAGGGGGCCGCCGAGAGGTCGCCAACCAGCACGCCAATGCAGTTGGAACGCTTG  
CTGACCAGTGCCTGGGCAAACTGTTGGGTCGAAAATTCAGTTCCCTTCATGGCCGCCAGTACGGCCTCAC  
GCTTTTCCGGTGCTACCTGTGCCGTGTTGTTGATAAACC CGCAGACACGGTGGAGATAGACACATTTGCCAG  
CTGAGAAACGTCTTTAATCGTTGCCACTATCCATTCCTTTATTTGTGGGGGAACCTGTCGGTGCCGACGCC  
CGAGTATAACCTGCGGCCTGATGCAATTCCTGGAGCCAGGTCACCAGGCATGTTTCTTTGGTAACAAAA  
CCTTACCCGATGATAACCCGGCAGCAGGGAAATTTGAAAACAGGGGCCGGCTGGCGGCCCTCGACTCAATA  
GGCGTGATTGAGCTCCCGCTCTGACATGAAGCGCAGCGGCTGCTGCAACTTGTGCTGATAGATGAGATCG  
AACGACAACACGTTTTGTACGTAGTTGCGGGTCTCCTGTAGGGAATGCTCTCGACCCACAGTCCATCG  
GCTTGTGTGCTACTCTGCTCTCGCCAGCGTTTTACCCGTCCCGGCCCGCGTTGTAGGCGGCCCGCCAG  
GATCCGGTTGCCGTCATAGACATCCAGCAAGCGCTTGAGATAGGCGCTCCCGAGACGAATATTCATCGTC  
GGATCAAACAGTTGCTGCTCGTTGCGATAGGGCACCCCCAGCTTGCCGGCAGTCTCTTTGGCAGTAGCAG  
GCATCAGCTGCATCAGACCGCGCGCCCCACCGGCGACTGGGCCAGCGGATAGAGAGCACTCTCTGACG  
GGAGATGGCGTAGAGCAAACCTGGTGTTCATGGTGCCTCTTGCGCCATCTGGGAGAAGGTACGTTTGAGC  
GGCAGCGGGAAGCGCAGGTCGAGGGCATCCACGCTTCGGCGCAATGCTGGCGAGAATGGCCAGCTCGT  
GCCACCCCTGATTGAGGGCGATATGACCAAACCTCGATGCGCTGGGCCACCGGATTGCGATCCATATTTGT  
GATCCACTCCGAGCGGGCCCGCCGAATCTCGTTTCATCGACAGCAGCTCGCGTACCCGCAACAGGAAGGGC  
CAGCGCTGGCTGGCAGTGCGCCAGTCCGGTACATGCTTCACCCCTGATTGACCATGCGGTAGGGCACAC  
CGGTACGCTGGGCCCGCCATAAAACCGTAGAAACCGCGCAGGTTGGCGGTCCTCCAGATAGAGATCCCGCGC  
CGGTTTTTGTGCTGCCCTGCACCTCAAGGGAGCGCGCCATCCAGTAGCGCCAGCGATCCTCTTTCTGACGG  
GCCATCGGCATCATCTTACCCAGCCGGAGAGGCCACGCCAATCCTGCTCCAGATGGCCAGTCTGTGCC  
GCAGCTCGGTGATATCGGGATCCGCCAGCTTTTTTACCCGTGCTGTGACCCAGCTGCGCTGGGCTATGGA  
GCGATCCAGCAGCAGGCGGGCGGACAATCGCACGCTTACCCGTTTACCTCGGCCCTGGGTACAGCCGAAA  
CGGCTGCGAAACAGCGCAAGCTGGCGCAGCACCGAGTCCGGCTCCTGATTGGCATAGCGGGTCAAACCGA  
GGGAGAGCAGCTTGCGGGAATAAGGATTGCTGCTGAAATAGGCTGGGTTTCATCGCCTTGGCGGGCTGCTC  
GAACAGGGTACCATTCTGATCGCCATAGCTGCAAGCCGCTACCCAGGGTTCGCGCCAAGATGGCGGATC  
AGATTGGGGTTTTTCCCGCTCGAACCGCAGCGTCACTCCGTCGAGATCTTCTCCTGGGTTTCGCTGACCCG  
ATGCCTGCCACAGCTGGAACAGCGGTGAACAGGATCCGGGACGGGATTGGCCGCTCATCCAGATCTTGCC  
CGCCCCCTGCAACGCTCTTTTCGGCTTGCCGGTGTAAATAGAGCGCCTGATAGTGATGCAGAGCAGGTCG  
GTGGAGCTCGGCTTGCCCGGATAGAAGCGCAGGAACTGCGACCACTGCTGGCTCTGGGCCAGATAGGTCA  
GATAGCTGCGCTCCAGCCGTTGGACTGGGGGGTATCCCCATGCTGGCGGATAAAGCGGGTACATCGTT  
GTAATCCGCCGCCCCCGGACGAAAGGCGAGCTGATAGTAATCGAGGTAAGGGAGCAGGGGTAATGGGTC  
AAACGGGCACGAATTTGCTGGAAACGGGCCTGATCATTTGGCCGTACGGCGTCATACGCCTGACGGTAGA  
GCGTCTGGTCCGCGAGTCTGCGCCATCAGGGTCCGCACAAACAGCGCCGACAAAACAATTTCCCATAACAGC  
TTTTACTGAACATCTCCATTGAGGGCAATACACCGCCCGGTGGCGGTGGGTCTACTGCCTCTCATTCTAC  
CCGTTGCCGGGCAGCGCTACAGCGGGGAGCAGGGACTATTTTTCTGACTCGCTCAGCTGCATTTCCGCGCA  
GTTGCTCCGGTCTGGTCAGACGCTGTACATATTTCTCCAGATAGGGCACCGGCAGCGGCTTGGAGGCGAG  
ATAGCCCTGATAGAACTGCACCCCTGCGCCTTGAGAACTCCAGTTGCTGACGGGACTCCACCCCTTCC  
GCCGTGACGTTGAACCCCATATGTGCGGCCATGGCGATCACCGCCTCGACGATGGCCATGTTGTACCCAT  
CTTTCCGGGATGTCTGAATGAAGGAGCGGTGATCTTGAGCTCATCGGCAGGCAGCCGCTTGGAGTAGCT  
CAGGGAGGAGTAACCGGCACAAAATCGTCGATGGCAAAGCTGATGCCGAGCTCCTTGAGCTCGGTATC  
TTGCTGATGGTGTCTCTGCATGACCCAGCACACCGGATTCGGTGTATCTCCAGATTGAGGACAGCCGGAT  
CCATTGCCGGTTTTGCGCCAACACATCGTGGATCCGCTCGACAAAATCGGTGGCATGGAATGCTTGGCACT  
GACGTTGACCGAGATCTGCGGAATGTGGATCCGCTTCTCCTCCACAGCACATACTGGGCGCACGCCCTCG  
TGCAGCACCCAGTTGCCGATATCGACAATCAGGTCCGCTCTCCTCGGCAATGGGAATAAATTCGGCCGGCG  
AGACCAGCGAGCAGCCGGCTGGCTGCCAGCAATGAGCGCCTCGACACCAATGATATCGCCGCCATCGAC  
CATATGCTGGGGCTGATAATAGAGGGTCACTCTTGCTGACTGAGGGCGTTACGCAGTTCGTTGTGAATG  
AGCAGACGGCGATCCGCTGCTGCTGCATCGAGGCATCGAAGAAGCGACGGGTCTTGGCGCCAGCGGACT  
TGGCCTGATACATGGCTGTATCCGCTGCTTGAGCAGATCATCAACCCCTGCTCCCGATCCGGAAACAG  
GGTAATGCCGACACTGGCGCCGATGTGCAGCACTTGCCCCACATAGGTATAAGGAGCGGCAATCTCGGTG  
ATAAGCCGTTCCGCAATGATATCGGCCTGCATCTCCGCTGGGGCGGGCTGGCCGAGAGCGATGGCAGCA  
ACAGTACAAACTCGTCACCGCCGAGGCGGGCCAGGCAATCTCCTTGCCGCACCAACCGTTTTGAGACGGGC  
GGCGACCTCCTTGAGCAGCCAGTACCCGGTAGCGTGCCGAGGGAGTCGTTGATGGTCTTGAAGTGATCG  
AGATCGATAAAGAGCAGCGCGCCAATCAAGCCATCGCGGGTCGCTCGTTGAAGGTCTGCACCAGAGTCT  
CGTGAGCTGACGGCGATTGGGCAATCCAGTCAGCTCGTCGTAATAGGCGAGATCCTGAATGCGTCGCTC  
GGCCGCTTGCGCTCGGAGATATCCTCGAAGCAGATGACAAAAGTGGCTGATCACCCCTTTTTTCATCCTGC  
ACCGGCGTCACTATCTCCACTGGGGATAGGTGTGACCATCGACATGCCGACGCTGGGTCTCCCCTGCC  
AGCGGCTGAGGGTATTGAGCTCGTAGCCGAGCCCCCAGATTTGGCCAGAGATCCTCTTCAAGATGCAG  
GCCCAGCACCGACTGGCTGTGCAAGCCGGTGTCTGGCTGAAGGCGTTGTTGACCCGAGGATCTTGAAC

CCCGGATCCGTAATGATGATCCCTTCGTGGGTCTCGAATGCAACGGCAGAGAGGGCGCATCTGGGCATCTG  
ATTGCAATCGCTCCAGCTCGGCCACCATCCGTACCGAGAAGGTATTGAGCACCGAGGTGAGGTTGCTGGT  
ATCTGCCGGAGCCGAATAGAGCAGCGCCAGATGGCCAGAAGTTGGCCTCTGGCATCAAACAGCGGCTGA  
CCATAATAAGTCTGCCCGGCCAGCCAGGGTTGATACTCCTGCGACTCGTCGATCACCTCGAAACAGA  
TGGCACCTTGCTTGTAGAGCTCCTGACAGGGGGAGCCCCGCCAGCGGATAGTCCCTTCTGCGCCAGCCCCGTC  
AGCGGCCAGCACTTTGACCCGGTGGGCACCCGCACAACTCACCCACCCAGACCCGCATCCACCTTGAGGATA  
TGTGCCAGCTGGCTGACCAGGGTATTAAGAAATCGAGTCCAGTGGGGCAGAGAGTGCCCTGCGCCAACT  
GGGTGAGCAGGGTGGTTTGCAGCAACGGCAAAGAGAGGTTGAGAGAGGAGACCCGCACTGTTGGCGGTATC  
AAGAGGGGCCAGCCAGCCACAGCAGATCTGCTGGGTGGGCACAACTGGCCACTCCAGAGCACATGGTTG  
AGTGCCCTGATCATCTTTAGATGACCGATGAAGTTCAGGCAGATGTGATTCATGAAGCCGGACGA  
GAAAGTCGGCAAAGCCTGCCTCATCTTCCGGTAACAGGCGAGCGGCCAGGGATGATTGCCCTCCCCTTG  
CCACTGCTGGTAGGCCCTGATCAGAGAGACTCCACTGATCATGTTGCCGATCGAAAAACACATGACT  
TGCGTGGCCTGCTGCTTCAATTTACCCTCCTACCCTCCAACACAACAACCAACCACGTTTGATGTCCAA  
TCAGGCATAGCAACGCCCTGATCCGCTCATCAGATCAGAGGTTGCGAGGGAAGAGTACAAACATGCG  
ATATCAAGCAGTGGAAACCGGACATGAGGTGACACGAAGTGTGCCAAGAAGGGACAGAAACGATCCTA  
TTCCCGTCATACTGCCTGCCAGTTTCATGGAGCTCAAGCTGTTTTTGGCACGAAACCGGAAAAGATCACA  
ATTTATAAGTTGCTGAATAGCCAAGGGAAGGTTATGTGACATGGATCACATTTCAATCTTTACCAATGAG  
TAATCTGAAGGTGAAGACACAAGCAAGTCGACCCGAAGGGGGCAATATGAAAAATCGAAATACCAGCAA  
AATCATCGACATCACCCCGGCTATCCGCGAGCGCATCGAATCCCGTTTTGAAAAGCTCGAACGTCTTCAG  
GTGCCTCTCATCACACCCCATGTGATTGTTTCCAAAGAGCGTCTGATGTTCACTGTCGAAGCCAGTGCTG  
GCATCCCCAACGGCAAACCTGTTGCCAGGCAGAGCATGAGGATCTCTACGCCGCCATCAACGAACTGGG  
GCAAAAACCTGGAGCGCCAACCTCAACCGTCACACCCGAAAAGCCGATTGCCCGTCTGCCAAATGCCGCGCTC  
AAAGAGCAGCCGAACCGGATGAAGCTGACGCTTGATAGCATGCCGCAAGGCTAAAATTTCTAAAGAGCAT  
AAAGGGGGGGTACCCCGCTTTTTGTTGCTGTGATTTGCCGACAAGCATCGCGTTACACCAGTGAACAG  
GCGCCATCAACTGAGCCAGTGAACCGGGTATCCACCCCTCTTGCAAACGATCGAGGATCGGCAGCAAT  
ACCAGCGGATCCTCCTGGCGTGGCATATCGGCCAGCTTTCCTTGCAACCGCTCCCGCGCCAGCGGTGACA  
GGTTGTCGTAGACACCCTCATCCAGCAGCGGCTGTTTACCAGCCAGCGGCGGTGTTTGCAGCGCCAGCCA  
GAGCCGACATCCACCATGCTTCCCCCTGCTGCAGCCGCTCATTTGATGGCACTGCAGTCACTCCCAGCC  
CCTTCCAGCACACCAGACCTCTGCCGCTCAGCGCAAAGTGCATACGCCAGTACCGGTATGGGGAGTGG  
CCGCCGGTTTTGGCATCAAACAGGGCTGCTCCTCCACCGCGTCCGTCAGCAGGGCCAGATGCAACCGGAA  
ATCCGCCCGATCCCCATGCTGCAGGTACCGTTGAGGCGCTGCCCAACTGGCCCTCATCAACGAGCAGG  
TGATTACGGATTGAACTGGGCAGCATGAGATAACTCTCGAAAAATGGCGATTTCACTGGTTATCGGCCACA  
AATCCAATTTCTTTAATGAAAAATCCTGCTTGGGGGTTACAAAAACCGGAAAGATCTGTTAGTATGCGCC  
TCGCACTTGTGGAGGGTTCCCGAGCGGCCAAAGGGATCAGACTGTAAATCTGACGGCTCTGCCTTCGAA  
GGTTGCAATCCTTCTCCCTCCACATTTCAAGTGCACAAATTTGAAAGCAATACCCCGTGGAGGGGTTCC  
CGAGCGGCCAAAGGGATCAGACTGTAAATCTGACGGCTCTGCCTTCGAAGTTTGAATCCTTCTCCCTCC  
ACCATCATTAGAAAACCCGGCCTAGCGCCGGTTTTTCGATTTATAGCCCGCCGCAATTCATTCTCCCA  
CTGCACTGCCAACCTTTATCACCGTTTGCCCGCGCCGATTGCGCAATAAAAAACGGGAGGTCTGCGCCT  
CCCGTTTACGTTTATATCAGCCCTGTTACGGGATGATGCGTTACAGAGTAAAGCGATAGAAGATATCGAC  
CGCCTGAGCCACCCCGCTCATCGCCTGCAGATAGAGCCGTGGCAATACCTCGTAGCGCAGCTTGAATTCG  
GCGATGGGGGTGAAAACCCCGACCCCGTACTGGAAGTGAAGCCCGGCAGCAGATAGGCCGACAGAGTCA  
CCTGGGTGTTGTGCGCACTGCCCGCGTATCGAGGGAGACATCGCTCATCCCGAGCGACTCGCCGATGCT  
CGACACCACGCGGTTGGCCTGACTCACCGCACCGGCCACCAGCAGACCGTTGAAACCGCCATCCTCACCG  
CCAGTCTGCAACCTTTTCCGCGCAGCAGATAGGAGAGCTGTTCCGACTGCGCCATCTGCGGCTCGGAGT  
AGACAGTGAATTCAGGCTTGTGCTGGCAGGGCCTGTACCCCGCACCCCGACCGTCACTGACCTCGATGGT  
ATCGGGATCCCGGTTGGCTTCGATGTTGAGGAACCGCCGATCCAGCGGACCGGAGAAGAGGATACGCCCC  
TCCTTGATGATGAGGTTCTGACCATAGGCCTTGAAGCGGCCGTTGGTCAGCACCGAGTGGCCATTGCCAG  
CCAGCGGCTTCTCGGGATCCTGACGGATATTGAGGCCACCGGAGACATCGGTCTTCAACCCCATGGCATC  
AAGCTTACATCGTTGCCAAGGCGGATCGCCACCTTTCATCGCCAGCGGCAGACTGGCCTGCTTGGGAGCC  
GGGGGACAGATCGTCATAGACCAGGTACATCGTCTGAGACCGCCACCGCCGAATCCGGCAAGCTCTTGA  
CCAGAATGCGCGCCAGGGAATATCCACCTGACCGGTAATGCGGGTCTCCTCCCCCAGCGACACCGCGAT  
ATCGGGCGAGACTCTGACCCGGCCATGCCCGGATATTGTGCTCCAGATCCTTACCCTGAATGGTGAGG  
CTGCCGCTGACCGGCATCTTGGCCAACTGAGCCAGCCGCCAACGCCAGCGGCCCTTGGCCACAAGCA  
TGGAGCCATCGAGCTCGGCGCGGTTGCCCTCGATCTTGGAGCGGGTACCAGCTTGGTACAGGTCACCAT  
GTCGGAGTGGGTCTGCACTTACCGTACCGCAGGTTGAGCTGGCCAAACAGCAGGGGTGCCGCCAGCGTG  
CCGTGCAAGCGGGCATCGGCGGAGATGATCCCTTGCAGGGAGCGCACTCAGGGATGAGCGGCGCAAGG  
TATTGAGCTTGAATCGTCAAACCTGAGCTGACACCGAGCAGACCCGCGACCGGCAGGCTCCCTGATCAG  
CAAATCGGTATCGATATTGCCGATCTGCTTGGAGGCAAAAATCGAGGCGAATGGCCGCTGCTGCCGCTCG  
AAATCCAGGGCCAGAGCCAGCTGCTGATAGTCCGTTTGGAGGCCATCTGCCACAAAAGTGCCGGCGTGG  
TTCGACACCCGATGCAGGGTCCGCTGATTGCCACGCCAGCTGGCACGCCCATCGGCGGAGAGCATCGC  
CTGCCAGCGGAAGTTGTCCGGCAACAGGGGCGCAGCCGCTTGAATCAAACCTGCTTAGGGCAAACTCC



AGAGTCCCCTGTGCAGCGGAAACCTGACTCCCCTTGACGCAGAGGCTGGCCCCCTGGGAGCCGAGGCAGA  
GATCCCCCATCGCCAGCCGCTGACGCGGCAGATCGAGATCCAGTGCCAGGGGGAGCTCAAGTCCCAACG  
GCGCAGCGGGGTTTTCAACTGCAACTCGGAGAGCGCCCCGCGCCAGTGATCCCCGCGCACGCCGCCACCG  
AGCTTGAGGTTGGCCGCAACAGGGTCACCCTTCATGGTCAGGGTCAACAGATGCTGACTGATATCGCCGC  
TGAGGTTTCAGGGCCAGCTGGCTGAGCTTGGTTTTCCCCTGTTTTAGCTGCGCCACCAACAACGCGAGCTC  
ACCGGCCGGTTTTGGCGCCGATCACCGCATTGCCCTTGAGACTAATGCCCTTCAGGTCGGTGCCGGCATA  
TAGAGCCGCTCGGAGGCGAGATCCGCATCGATTTTTGGCGTCTGCTGATTGCCACGGGGCTTCACCTGTC  
CCTTGATATCCCCTTTCAGGCCGGGATAGATACCCCCAGCTGGGGAGCCTGCAGGTTGGCATCGAGCTT  
CCATTGGGCAGTGTGATGCTGCCCTTGGCCTGCAACTGGTTGGGGCCACTTTTCAGCGAGAGCGCAGGG  
ATCTGCCACTCCACTTGTGCGTTGCCGCTGAGCTCCCCCTTGAGGGCCAGCGGGTACTGATTGAGTTTTGC  
CATCCACCTTGAGCTTGGGCAGTTTTAGCTCCCAGTGGCCGCTCGTTTCATCACGAAGCGGGCTCCAG  
CTCACCGGCCAGCGTCCCCTTTCAGCTCGGGCAGCAGCTCGGGCGGATTGATCCCCCTTGAACAGTGTGGT  
CCCTGCCACTCGATCCCCTTGTTCAGGCGAGCTTGCCATCGAGCTTCAGCTCCCCCTTGAGAGCGTTGA  
GCTGCAAAGCGATCTTGTGAGCCGCTCCAGATCCCCCTTGCCGTCACGCGCAAGCTTGAAGGGGGGGAC  
ATCGGTTCCCCTTGGCGGAGGTATTGAGGGCAAACCTGATAGCCGGAGAGCTTGCCCTTGGCGGTGAGGCTC  
CCCTTGTCCAGCCGATAGCTCGGCTCATCTTTGGCGGGCTTGTGAAAGAGGCCAGCCAAGGCTCTTCCAGT  
CGAGGGCCAGATCAAAGGCAGATCCGGGTCGAGAGCGGCCAGCGAGCCCTTGAGATTGGCTACAATCGG  
CCCCTTGGCCGACAACGCCAACCCAGCTTGGCGACCGAACCGCTCAGCGCCAGCGTGGCCTGCTCACCC  
TGCAGCTCGCCATCCAGCAGCCCCCTTGGCGGCTTGGCATCCAGCGTCACTGCCAGCGGGTAGTGTGTAC  
TGAGCTGGATGTGTCCCTTGAGCGCCAGATCGCCATGGCGTGGCGCAGCGAGAGCTCGCGCACCTCGAT  
GCGATCATCGACGGCAGTGGCAGAGAGCATCAGCTTGTGAGCCCTTCGATCAGCTCGCCCTGCTTATAT  
TGCACCCGGGTGCGACTGACCCCTTCCAGCTGGATGGGGAAAGGAAGATGAATGGCGGGCAGGAGAATGG  
GGGCTGCCTTTGCTGCCTTTGCCGCTTCGCGAGCTGGCGTCCCTTTGCCCTGTTTGACGGTCTTGGCGCT  
GGCCTTGTGCGGTACGAGCAACCGCAGTACGGCTTGTCTCGTAAGCGGCCGGCTGCTTGGCGGAATTG  
GCTGTGCTGGCGGGTGCCGCGTTCGACGCTCACCTTCAGGTTATCGAGCACCGGGCCGCGTACAATCA  
GCCCCCTTGGCGTTGAGGGTGGCGCCGATATCAAGCGACCCAGCGTACAGGCCACACCGGGCACAGCCAG  
ATCGAGATCGACACCTTGAGGCTATCGACCTGGATCTTGTAGTGGCAGCGGGCGCCAGACAAAGGGTTG  
GAAGGCTCTTCCCGCAGGCTCGGAGTCGGTACTTGCACCCGATGGGTACCGGATGGGTACCGGATTGTA  
TCCAGAGCTTCCCTGACAGCAACTTCCCAGATCCCAGTCCGAGCACGGCGCGATCCACCTGACATCCAC  
CAGCTCATCTGCCAGCCGGCCCCCTTCCAGAGTCCAGCCATAGCCAAGCTGACCGGCCACCAGCTCCCC  
TTGAGGGAAGGAAGCGCCCCCTTGGCCTGTTGCCACAACCACTTGTGCCCCTGATGGGTAAGCCAGCA  
GGCTGACGCCGATGAGCAGCAGGAACACCAGCCCCATCAGCCAGAGAAAAATACGTTTTAGCCAGATCAC  
AATGCAGACCCCCGCGCAAGATACAGCCGAGCGGCCAAAAGAAAAAGCGTTTAGACAACATCATAATTC  
AGGCCCAATGCGAAATGCAGCCGCAAGGGCTTGTCTCTCCGATAACCCGACTGCCAGATCCAGCCTG  
ACCTGACCGATGGGAGTGACCCAGCGCACACCGACGCGGTACCTATTTTTCCAGGGTTCGCTGTAATCGG  
TGGTGGAGGTGCCGCCATCCACAAACATGGCTCCAGCCACTTCTCGTGAAGCGGTAGTTGTATTCCAG  
ACTGGCCACGCTGGTGTAGCGGCCACCGGTGAGCTTGCATCCGGCCCCGTGGGGGAGATGCTCTCGTAA  
CCAAAGCCGCGCACCGTCTGATCGCCACCGGTAAGAAGCGCAGAGAAGGCGGCACCAGCGAGAAGCTGT  
CACCTATGATGGCCCCCTGCTCGGCCCGCATCAGGAATCTGTGGTTATCGCCAAGAGTTTCGAGCCACTT  
GCTGCGCCCCACACCCGCATAAAGCTGATGTGCGGAACCCATCTGGGGTCGGGAGAACTCCAGCGTCAGC  
TGCTGGCGATCCCCCAATCGGGCACCAGGGTGGCCGCGCACCCGAGTCGGGACCAGGAGACCCCGGGGA  
TCAGCAGCAAGCTGTTCCCCTCGTCCGGCCCTGGGTATAGATCTCGTTCTCCAGCCGGATAAAGACGTC  
CCGATCCCAGCTCTCCGGCCCGCGTCCAGCGGTGCACACCGATGGTAGTGAGATCGGAGCGGGTATCG  
TTGTTGTCTTGTACTGGTAACCGGTCTGGATGGAGTAGTAGTCCCGCAGCGGGTTACCCACCGGGATCT  
GGTAGTCGAAGCTGAGCTCTGCCTCCGGCCCGCACACTTGGCGGTGGCAAACAGGCGGTGGCCGTAGCG  
GTTGACCCAGGGCTTCTCCAGGTGGCACTCATCCCGGGCTACGTCGTTGGCGTAACCGATACCTGTC  
TCGATTTCTGTGATCGACCCGGTTATCCAGCGTACCCGCGATGGGTACCCGATAGTTGCTCGCCTCGCTCA  
ATACCGGCTTGATATCGACCTGACGGAACAGCTTGGTGGAGGAGACATCCTGCGACATCTCGGCCAGACG  
GATAGCGAGATAGGGGTCGCCGCTCTTGATGTTGATAAGCGGGCGAATAAGGTGAAGCGCCTCGGGTGT  
GCGTCTGAGCGGATCTCGCCAAAACGGTAGCGATGGCCGATTCGAAACAGAAATAAAGATCTCCGCCGTC  
CCTTGTCCGGGAACACCTTGACCTGACTCTTGCTCAGCTTGGCATCAAAGTAACCGCGGGCCAGCCCGAG  
GCTGCCCAGATCGGCCTTGATGGATTCAATTTGGCGTGGTTGAGGGGCTCGCCCTCTTTGAGGGGCAAC  
TTGTCCAGCAGGGCGCTGTAAAGTTTCGTCGCTGCCGCATCCCCCTCCAGCAGAATATCGAGGCGGGAGA  
CGATGACCGGCTCCCCCTTGTCCACCTCAATCACCCTTTGGACGGAGTCTTCTTGTGCGACTCAGGGT  
GATTTTCGGCTGGTAGTAGCCATAAACCCTGCAGCGCCTTTTGACGCTCTCGGTAATTTTTGCGCGGGCC  
GGGCGGTATTGCCGCTCTGATAGACCGGCAGGGCATTGAGGTAGGCTTCAACGTTATCCTTGTCTCCC  
CTTTCAACCCCTTGACCTGATAGGTGAGCTTGGCGGCAAACGCGGGCGAAGCCAGCAGCGACAGCAACAG  
GCCACCCCTAGTACCCGAGGCGCGGGCAAACGCGAGGGCCGACAGTGAACGTCCTGCCAGCAGGGAT  
GAAATGCATCCTGTCAAAGGTCAATATTCCTGAATCTGTGGTGAAGGAAACCAGCGCCCTTTCGGGCCAA  
CCCCGAATGCGGCGCAGCAGCTCATGCAATGCATGGCCGCGACACAAAAATGCGCGCCAGAAAAATGGCG  
AACCTTATCTAACATAGGCATCGGCCAGCGACAGCGCGGCCATTGGCAAATTCACCATATCTTTTTAA

GAGGTTGACCACAAATCACACATTTTGGTGACAATGACGCCGCCGCTTTCCCGATGAGGGCGAGCTGCC  
CTGTACATGTTTTCACTTCGTCGTCGCGCCGCTTTGTGCGCTCTCCCCCTCTCATTACCACCAGAAACCC  
ACCACGACAGAGTTTGTGCGCATAGCCCCACCCTCACCGTTTAAACCAGCCCGGCACACGCCAAAGCCCGC  
CGTAGCGGGTGATTAAGAATTGCTCGTTCAGCGCAATCGAATTATCCCGCTGCCCTTGGCAACGTCCCTC  
CCTCACACTTGAACCATCAACTGAAGGAGACACATCATGCATGCACGTAGCGAACAGATGGCTGACTATA  
TTGCCGATCGTCTCGAGTTCATCACCTTTCTCGCCTGTTGACGCGCCCTGCTGGCCCTGCTGACCGGCAT  
GAGTGGCCAACAGGCGCTGGCCTTTACCGCCCTGAACCTGCCGTTTGGCCTCGGCATTCCTGCTGGCGATG  
GCGATGCTGGCCCCCTGCCCGTCCACTGGCGGCTGCCGGGCATCACCTTGTGCTGGCAGGTTGCGCCC  
TGATGACCCTGCAACTGGGGGGTGAGTGGCTCAATCCGCTGGCCATCTGGAGCCTTTACGCCCTGCTCGG  
TCTGGAGATCATCTGGCAAGCGCGTCTCGCGCCATGCTGGCCACCCGCGCTCGCCAATAATACGGCCGA  
TAAAGGGCGGGCTGTGATGGCTGACGCCAGTGGCAAATTTGGGGTACTCTTGGCGCCCGATTTGCTACCAC  
CCTTAGCGTTAAACAACCTTCGCCATCACTCCAGGAGCGCCCGATGAAAAAGCCTGTGCCCAGCACAT  
TCTGGTCAAGACCGAAAAACAGTGTCTGGAGATCAAGGAGAAGATCGAGAAGGGAGCCGACTTCGGCCAG  
ATGGCCAAGCGCTTCTCTACCTGTCCCTCAGGCAAGCGTTTTTGGCGATTTGGGAGAATTTTCCAAGGGAG  
ATATGGTGAAAGCATTTGACGATGCCGCTTCAAGGGTGAACGCTCAAGGTGCTGGGGCCGGTGCAC  
CAAGTTCGGCTTCCATCTGATCAAAGTACTCTATCGCAACTAAGTCATCACAACTGACCATCTTCTCGGT  
GAAGTCCCGTCAGGCGGGCTTACCTCCCTCGCATTTCCCTCGCAAACTGACCAAAACCACGCCAAA  
CTCTCATCAATTTACTAACGTTATCAGGCAATTAAGTTTATCCTTCTCGGCATTTGTCCACATTCGACGAT  
GGATCCCGTGCTATGCCCCGCTCTTGCTTGTGGCCCTGCTGGCCTGGTTACTCCCGCTCGCTGGCGCC  
TCGGCAGCCGCTTTCATCTGCGCCCTGGTGGATCGGTTTTGCGATCTGTCTCATCGGAGCCCTTGTCTC  
CCTGATCTTGCTGGTGCCTGCTGCCCTGGAGCCGGAACCGCTACGCCAGCGGCCCTGGCGCCTTGGCGCTA  
CTGCTGCCGCTGACATTTGTGGCACAGGCGCTGCGCATGCCGCTGATCAACGATGTGAGCACAGATCCCT  
ATAATCCCCCCCAGCTACGCTGGGCGGCAGAGCTTAGAACGGCGCAGGATCTGCCAATAAATAGCGCACC  
GCTGAAAGCAGTTGAGGCAAAACCCGGTCTCTCTTTACCAGGGCTCTCCTGCCGAAGTGTGATTGAA  
GCCAACGAACTGATGCAGGAGCTGGGCTGGCAGGTACGACCCAGCCCCGATGGTCTGGATGCGGTGGTTA  
CCACCGGCTGGTTTCGGCTTTCAGGATGATGTGGCGCAGCGGGTCTTTGCTGGCCCCAAAGAGACCCGCAT  
CGATATGCGATCAGCTCCCGTCAGGGGCAAAGCGATCTGGGCACCAACCGGGCGCGGATCGAGGATTTTC  
CTGACCCGCTGAACGAGCGCTCGGCCAGCCCTACAAACCAATTTGAAACCGTAAGTGTGAAACAACA  
AGAAGGTAAGTGAATGCGCGTTGAGGTCAAACCCGACCGGAATATGCCTGGTTTTATCCGCCCTTTTTCT  
GGCTGCAAAAGCGCAACTATGGTCAGGTGCTTATTCCGGGCAAGTGTGCTGGGGCCGCTCGCGCCGCTCTT  
TGCCGCCGTCGCCACCCTCTACGGGGTCATCAACCGCAAGCGCTCCCCCATCGACCCCGTGTGCGCTCG  
CTGGTGACGGTGCGGGTCTCCAGCTCAACTGGTGTGCTTTTTGCGTCGACATCAACGCCATGACCCTGA  
TCAAACGGGCAGGCTCCAGCGAGAAGGTGGAGGCGCTGGCCAACCTGGCGCGAAAGCCCCTTGTTGACGA  
GCGGGAGAAAGCAGTGTCTGACTACACAGAAGCGATGACTGGCCTAGATGGGGTGAGCGATGAGCAGGCG  
GCCCCACTCAAACCCTGGTTCGATGACGATGCCATGGTGGAGTTGACCGGCTTATCGCCTTCCAGAACA  
TGTCGGCCAAGTTCAACGCCGCCCTAGATATCGCGCCGAGGGCTTCTGTGAGCTGCCGGTGCAGCCGGA  
ACGCCCCGCCCAGCCAGACAGCAAGGACGCCTGATGAACCAGACCCGCTGCTGCTTGCCTGGTGTGAGG  
GGGGCCTTATCGCGCCTTTTTTTGCCCTCGATCTCGGTGCTTACCTCACTCTGGACGCCCTTGCAGGCCCA  
GCAGGCGGCAGTGGCGCAATGGGTGACAGCCACTTTGTCTCGGCCAGCCTGCTGTTCTGCTTATCTAT  
GTGCTGAGCACCGCCCTCTCCCTGCCCGGCCAGCTTGTCTACCCCTGGGTGGCAGCGCTGTGTTTGGCG  
TCGCCTGGGGGCTGCTGCTGGTCTCCTTCGCCAGCACCCCTAGGCGCAACCCTGGCCTTTCAGCGCCCG  
TTTTCTGCTGCGCGACTGGGTACCCGCCGCTTTGGCGACAAGCTGGCCACCTTTCAGTCCGGCATGGCG  
AAGGAGGGGGCCTTCTATCTGCTGAGCCTGCGCCTCATCCCCATCTTCCCTTCTTCTGGTCAATCTAC  
TGATGGGGCTCACCCCATCAGAGTCAGCACCTACTACTGGGTGAGCCAGCTTGGCATGCTGCCCTGGCAC  
CTTCTGCTGTACTGGCGGGGAGCGAGCTTGGCCAGTTAACCAGCACCCGCAATATCCTCTCCCCCGGC  
CTGATGGTTCGCGTTGACCTGCTGGGGCTGATGCCCTGGTCAAGAAATGACCACACACCTCGCGC  
GGCGGCGCCTGCTCGCCCCTTACCGTAAACCCGCTCGCTATGACTACAACCTGCTGGTGTGATCGGTGAGG  
TGCAGGTGGGTTGGTCAACAGCTATATCGCGGCAGCGGTGAAGGCCAAGGTGGCGCTCATCGAGAAACAC  
AAGATGGGGGGCGATTGCCTCAACAGCGGCTGCGTCCCTTCCAAGGCGCTGATCCGAAGCGCCCGCTTTG  
CCGACAGCAGCGTAAAGCCGACGAGCTGGGCTTTAGCCCAAGCCACTCCCGCGCCGATTTTGGCGCCGT  
GATGGAGCGGGTGGCTGAAGTTATCAAGGAGGTGAGCCACACGACTCCATCGAACGCTATCAGGGGCTT  
GGAGTGAATGCATCGAAGGGGAAGCGCGGCTGGTCTCTCCCTGGGAGGTGGAGGTTAACGGCCAGCGCC  
TTGCCAGCCGCATATCGTCATCGCCACCGCGCCCGACCCTGGTGGCCAAAGCTGCCGGGGCTGGATCA  
GGTGCCTTACCTCACCTCGGATAGCCTCTGGCAGCTGCGCACCCCGCCGCGCCGCTGCTGGTGTGGGC  
GGCGGCCCCATCGGCTGCGAGCTGGCCCAGAGCTTCGCCCTGCTCGGCATTTCCGCTGACCTTGGTGGAA  
TCTCGGAGCAACTGCTGCCCCGCGAAAATAGTGAGGTAGCCGACGCCCTTGGCCGGCAAATGAGCCGAGA  
TGGCGTGCAGCTACTCACCGGCTGGCGCGCCGAACGAGCCGACTATCTGCCCGCAGCCAAGGGGGATCTC  
CCCATCCGGCTGCAACTGCGCCGGGGCGATGAGACACAGGTGGTGGAAAGGGGATCAACTGCTGCTGGCTC  
TGGGTGGGTCGCCAATGTGAGCGGCTTCGGGCTCGAGGAGTTGGGGGTCGAGCTTGGCCCCGCGGCAC  
CATCGCAGTGCATGGCTTCTCGCCACCAACTTCCCAGCATACTGGCGGTGGGAGACGTAGCGGGCCCT  
TACCAGTTCACCCACTTCGCCGCCCATCAGGCCTGGTATGCGGCAGTCAATGCCCTGTTTGGCCAGTTCA

AGCGCTTTCGGGCGGACTATCGGGTCATTCCGGCGGCCACCTACACCAGCCAGAGATTGCCCGGGTTCGG  
CCTCAATCGCAAGGAGGCCGAGGCGCAGGGGATCCCCTTCGAGGCGACCCGTTCAAGCTGGCCGAGCTG  
GATCGCGCCATTGCCGATGGCGAGCGCCACGGCTTTGTGCGAGGTGCTGACCGTGCCGGGCAAGGATACTA  
TCCTTGGCGCCACCATAAGTGGGCACTCACGCCGGTGAGCGGATCGCCGAGTTCGTGCTCGCCATGCGTCA  
CCGCCTCGGCCTTGGCAAGATCCTCGGCACCATTACAGCCTATCCCACCCTGATGGAGGGGAACAAATAT  
GTGGCGGGTGAATGGAAACGGGCCCACCAGCCCACCCGGGTGCTGGCGTTGCTGGCCCCGTTATCACCGCT  
GGCGCCGTGGCGCCTGACAATCAGGGAAACGTTTATGATCAAGCCATTCTCACAACTCAACTCACAGCTC  
AAACAGCGGCTAAACGCCCTGCTGTGCGCCCTGCCACTGCTCGCCAGCGGCCCGCTGTTAGCCACTCCTG  
ATGACAACCTGGCAACGGACCCTTGAGGAGGCGAAGGGACAGACCCTACTTCAACGCCTGGGGCGGCAG  
CCCCGAGATCAACGCCTATCTGGTGTGGGCCGGGCAAGGAGCTGGCGCGGACTATCAGGTCAAGCTGGTG  
CAGGTGAAGGTGGATGATATCGCCCAGAGCGTCAGCCAGCTGCTGGCCAACAAGCAGGCGGGCAAGCAAG  
CTGGCGGGCCCATCGACCTGCTCTGGGTCAACGGCGAGAACTTCAAGGCGCTCAAGGAGCAGGGGCTGCT  
CGGTGCTCCCTTTACCGCCGAGCTGCCCAACATGGCACTGGTAGACAGCACCCCTGCCGGTAGTGAGGAC  
TTCACCCTGCCGGTGGAAAGGGCTGGAAGCCCCCTGGGGCATCGGCCAGCTCAATCTGATGGTTCGATACCG  
AAGAGGTGCCAGAGCGCCACCTCTGCAGCAGCTCTGCTGGTGTGGGCCAAGGCCCATCCCAGCGCTT  
CACCTATCCCAAGCCGCCCCAGTTCCATGGCTCCAGTTTTCTCAAGCAGATCCTGCTGGAGTTGACGCCA  
GACCCGGCCCCCTCTATCGGGAGGCGACCGAGAGCGACTTTGCCAACGTGACCGCCCCGCTCTGGGCCCT  
GGCTCGATGAGCTGCATCCGGCACTCTGGCGCAAGGGCAAACCTGTTCCCCACCAGCGCCCGCAAACCCG  
CCAGCTACTCGATGATGGCGAACTGGCCATGGCCATCAGCTTCAATCCGCAGGAGGCGCAGAGCGCCGCC  
CAGATTGGCGCCCTGCCCCCAGTGTGGAAGCCGTCGCCATGGAGAAAGGGGCGCTCACCAACAGCCATT  
TTCTCGCCATCTCCTTTAACGCCAACGCCCGTGCGGGTGCCAAGGTAGTGGCCAACCTCCTGCTGAGCCC  
GGCGGCGCAGGCGCGCAAGGCCAATCCGGCCTTCTGGGGTGATCCCAGCGTGCTGCGGGCCGATACCCTG  
CCTGATTAGCCAAGGGGCAACCGGCACTACGCTTCAAAGCGGTAGCCGAGCCTCACCCAGCTGGCAGC  
TCAAGCTGGAAGCGGCCTGGGCCGAGCGTTATGGTCACTGATGAGTACCGCTGGTCACCCGCATTCCTGC  
TCCCCAGCGTGGCGCCGGTGGACACGCCACCCAGTATGAGTACGGGGATGGAGGTTATTTATCTGGTGC  
TCTTCGTATCCCATGCTGGCGGGGCTGTGGCAACTGCTGGCGGAGGGGATGGCCGCTCTCATCTTGC  
CTTGTGCTGACCCAGCCAGGCTCTGGCACTCCGCTGCGCTGAGCCTGTGGATTGGCGCCGCTCGACC  
CTTGGCAGCTGCTGTTGACCCGCTGCTGCTGACCCACAGCGACAGCCGGGCTTTTCGGCTACTCCGTC  
ACCTGCTCTCGCCATGCTGGCCATGCCCCACGCTCCCTTTGCCATCGGTTTTGCTTTCTGCTCGCCCC  
CTCCGGCTGGCTGCTGCGGCTCGTCTCGCCAGCTCTGACGGGGTTTTGATTTCCCCCCGATTGGCAGACC  
ATCCGCGACCCCTTGGGGGCTCGGGCTGATTGCACTGCTCGTTTTTCAAGGAGACCCCTTTTTTGCTGCTGA  
TGGCGATGGCCGCGCAGCAACCCATCCTGCTGGCACGCCAGCAGTGGCTAGGGGCGAGCCTCGGTTTTAG  
CGCCCCCAGATCTGGTGGCGCCTGCTGCTGCCGGCGCTCTGGCCTGCCCTGCGCCTGCCATCTATGCG  
GTGGCGGCTACGGTGTGGCGGTGGTGGATCTCGCCAACTGCTCGGGCCGATGCCCCGCCCCGCTGG  
CGGTGCGGTTGTGGCTCTGGTATCAGGATCCGGATCTGCTCTGGCGGCGGCCACCGCCAGCGGCGCCCT  
GCTGCTGCTCGCCATCACGGCACTGCTCATCGCCCTGTTTCAAGTACTGGAGTGGCTTTCATCAAGAGGTG  
GGCAAAGGCTGCTGGCTCGATGGCAAACGGGCGGCGCCCCACTCCTTTGCCAACCGGCTAGCAGCAGGCT  
TTGCATTGACCCTGACCATCCTCAATCTGGCGGTGCTGGCGGCCCTGCTACTTTGGTCACTGGCGCGCCG  
CTGGCCCTTTCCCGCCCTCTGGCCCAGCCAGTGGAGCAGTCACTACTGGCTGGATCTGCTGCCAACCCCTG  
CTGCCGCTGCTGGCAACCAGCGCGCTGCTGGCGCTGACGAGCGGCTTGCTGGCACTGATGATGGCGGTGT  
GCAGTCTGGAGGCACAAGCCGGCCGCCCCCTGGCCGCTCTGGCTTATCTGCCTGCCGCTGTTGCTGCC  
GCAAGCGAGCCTGCTGTTTGGTATCCGGCTCGGGCTGGACTGGCTTGCACATGACTCGATAAGCAGCGGC  
ATTTGGCTGGGGCTGGGTGCTCTGGAGCCAGCTGCTGTTTGTCTTTCCCTATGCTATTTGTGCCCTGCACG  
GCCCCATCGCCAGTTCGATCCTCGGATCACCCAAAGCGCCCTGCAGCTGGGGGCTAGGCCGTGGCGAGC  
CTGGTGGCAGGTCAAAGCGCCGCTGCTGGCGCGCCCGCTGCTGTTTGCCTTCGGAGTCGGGGCGGCGGTG  
AGTTTGGCCCAGTATCTGCCGACCCTGCTCTTTGGCGCTTGGCAGGTGGTCAACATCACCCAGGAGCGG  
TAGCCATTGGCAGCGCCCTCAACAGACGGCTGGCGGGACTCTACGGCCTGCTGCAACTGCTGCGCCGCT  
CATTATCTATCTGCTGGCGCTCTGGTTACC GGCGCGGATCAATCCGGCGCTCAAGGGGGGCGGCTCACGA  
TGAACCTCTGATGATGGAAACAGCCATATGCTGAGCACCCACGCTCTTTCGGCTTTACCTTGATGAAAATCT  
GCTGCTTTTCGCTGCCCCCCTGCAGGTGGCCCCGGCGAGGTATTGACCCCTGATGGGGCCCAGCGGTTGC  
GGTAAAAGTTCCCTGCTGGCAGGGCTGGCAGGAGTACTGCCGGCGCGCAGACAGATAGTGGCCCCGATCC  
GGCTGGAGGGGGAGATAAGGCTTGGCGAGCGGCTACTCAACGCCCTACC GCCGAGGCGCGGCGCATCGG  
CATGCTGTTTTAGGATGACCTGCTGTTTACCATCTGACGGTGGCGGAGAACCTGATGTTCCGGTATGCCT  
GCGGCCATCAAGGGAAAACAGCTCGGCGGGAAAAAGCACTGGCCGCAATTGGCACAAGTCGCACTGGCGG  
ATCAGGCTGACAAGCTGCCACAGCTGCTGTGAGGGGGGCGAGCGGCGACGGTCACTGCTGCGGGCGCT  
GTTGGCGGAACCCGATGCCCTGCTGCTGGACGAGCCCTTCTCCCGCTCGACAAGCCACTGCGGGCCGCC  
TTTTCGCGAGCTGGTATTTCGCGCAGATCAAGACGCTGGCCATCCCCGCGATTCTGGTGAACCCAGCAGCAAG  
AGGATGCGCCGGGACCATCAATCTCACCGAATCCTGTTTTTACCAGGAGGATTCACCTGTTTTGAC  
AGCCACCTGATCCCCGTGATCCGCAGCCCCCTCACCCAGCTCGCCAAGCCGCTCTGCCGCGCCGGGATCA  
GTGCCAATCAGGTGAGCCTCACCGCTTTGCCATCGGCATGCTGGCGCTGCCGCTACTGGCCTTTGGCTG  
TTATTCATGGGCGCTTGTGGCCATCCTGCTCAACCGGCTGCTGGACGGGCTCGACGGCGCCGTGGCGCGG

GAAACCGGCATCACCGATTGCGGGCGGCTTTCTCGACATCACGCTCGACTTTATTTTTCTACGCCGCGTGG  
TGCTGGGCTTTGCCCTCGCCACACCGGCAATGCCCTGCCGCGCCACCCTGCTGTTTGCCTTTATGGG  
CACTGGCTCGAGCTTTCTGGCGTTTGCCATCATGGCGGCAAGCGGGGATCGATAATCCGGTCTACCAC  
CACAAATCTCTACTATCTGGGCGGCTCACCGAGGGGAGCGAGACCATCGCGCTCTTTGTGCTGATGT  
GCCTGTGGCCCGCCGCTTTCGCCCCGCTCGCCTACGGCTTTGCCCTGCTCTGCGCCATCACACCCTGAC  
CCGACTCTGGAGCGGCTACCACACCCTGCGCCCCCCCCAGCCATAAACAGCACAGCCCTCACCGGAGGGC  
TAATCCATCGCACGATGAATTGGCGGCAAAACAAGGCGCACGGAACTTGCACGGGGATGACAATGTTTT  
ACCATTGCGACACTTTTATCAGTCTCTTTGAGAACCCTATGCGTCGCCCTGCCTCTCTTCTCACTCTGTC  
ATTATTCCCCCTGCTCGGTGGCTGCAGCAGCGCCCCGCGCCAAAGCCGTGGTTCGTCACCCCAACCAAG  
AGCGCTTTTATCAATCAGGCGCCATCGAGCAAACCCGTTTATACACAAGGGGTTAGCAAGGGGACTTCG  
CCAATCGCCCCAACGTGGACCGGTTTCGTCCAGAAAATGGTCGAGAAGCACGGTTTTTGACAACGCCAGCT  
GCATCAGGTGCTGGCACAGGCAGAGCGTTACGACTGGATCATCCGCCGTGATGGATGCCAGGCACCGACC  
ACCAGCAAACCGACCGCCCCGACCGGCGCCTGGAACCGCTACCGCGCAAGTTCATCACCCCGACAACG  
TACAGAACGGCGTCAACTTCTGGCGCAATACCGGAGCGAACTCAATCGGGCGGAGCAGATCTACGGTGT  
GCCGCCGAAATCATCGTCGGCATTATCGGGGTCGAGACCCGCTGGGGCCGGGTGATGGGCAAGACCCGC  
ATTCTGGATGCGCTGGCCACCCTGGCGTTTGAATTATCCGCGTCGCGCCGAGTTCTTACGAGCGAGCTGG  
AAGCCTTCTGGTGATGACCCGCGACGAGGGGATGGATCCACCGAACCAAGGGCTCCTATGCGGGCGC  
CATGGGCTACGGCCAGTTTATGCCCTCCAGCTTCCAGCGCTATGCGGTGGACTTTGACGGCAACGGCCAC  
ACCAACCTGTGGGATCCGGTGGATGCCATCGGCAGCGTCGCCAACTACTTCAAGGCCACGGCTGGGAAA  
AAGGCCAACCGGTGGCGGTGCGCGGTCAGGGCCAACCTGCCCGCTATGAGCATGGCTTTCAGACCCGCTA  
CCCGGTGCGCCACCCTGCGCCGCGCGGGGCTGACGCCACCAGCACCTCGGCAACCACAGCGAGTCGAGC  
CTGCTGCGCCTCGATGTGCGGCACCGGCTACCAATACTGGTACGGCCTGCCCAACTTCTACACCATCACCC  
GCTACAACCACAGCACCCACTACCGGATGGCGGTATGGCAGCTGGGGCTGGCGGTGAAGGCGGCGCGCTG  
ATAACTCGCTGGCATAAAACAGACAATGAAAAAGGAGCCATCATGGCTCCTTTGTTATATCCAACGTTCC  
ACCTCATCAGGGGCTCAAGGATGGCTACCTGATTTAGACGCTGCTTGGCCAGCGCAGCAGAGACGATC  
TGCTGGGCCTCTTGCTGGATGAGGTGAGGTGCGCGTGCCTTGAAGCTCTCCATATAGATCTTGTAGA  
TGGACTCGGTGCCCGAGGGGCGCGCCGCAACCAGCCGTTCTCGGTACCACCTTGAAGCCCGGATGGC  
GGCATCGTTGCCCGCGCCTTGGTCAACTTGGCGATGAGGGCTCACCGGCCAGGGTTGAGGCTTCCACC  
AGTGCCGGATCCAGCTTGGAGAGCACCGCTTCTGGCGACTGTTGGCCGTTGCGTGCATACGACGATAGC  
TGGAGCGGCCAAACTTGGCTTCCAGTGCCTGCTAGTGGGCTGCGGATCCTTGCCTGTCACCGCCAGAAT  
TTCCGCGCCAGCAGCGCCAGAATGAAACCGTCTTGTGCGGTGGTCCAGACGGTGGCATCTTTGCGCAGG  
AAGGAGGCGCCCGCTCTCCTCGCCGCAAAAGCCGAACTCGCCGCTGTAGAGGCCATCCACGAACCACT  
TGAAGCCGACCGGCACCTCTTTAGGGTGGCGCAATCTCGCCGCAACCCGGTCGATCATCGAGGAGGA  
GACCAGCGTCTTGGCGACGGCCGATCCGCAGACCAGCCGGTACGATGGGTAAACAGATACTGGATCGCC  
ACCGCCAGATAGTGGTTCCGGTTCATCAGGCCTGACTTGGTGACGATGCCGTGACGGTCTAGTCAGGGT  
CATTGCCAAGGGCGATGTGCAACTTGTCTTGGCGGATCAGGCTCGCCATGGCGAACGGGCTGGAGCA  
GTCCATCCGGATCTTGGCGTCTTTATCCAGGGTCATGAAGGAGAAGTTCGGGTCGACCTTGTAGTTCACC  
ACCTCGATATTCAGGCCGTAGGTCTTGGCGATGACGTCCCAGTAGGCGACACCGGAGCCGCCAGCGGAT  
CGACACCGATCTTGATGCCCCGCTTCTTGATGGCATCCATGTCCAGCACGTTCTTCAGATCATCCACATA  
GGGGGTGACATAGTCGTGCTCGACCACGAACGGGCTCTTGGAGCGCTTCGGCGAACGGCATCCGTTTTACG  
CCAGCCAGACCCGCTTCCAGAATGGCGTTGGCACGGTCTCCACCCACTTGGTGATCTCCCCCTCGGCGG  
GGCCACCGTGAGGCGGGTTGTAAGCCACCATCTTCCGGCGGGTGTGGGACGGAGTGATCACCCAC  
GCCGTGACGACGGGCGCGGTTTGCCTGCATTGTGGCGCAGGATGGCGTGAGAGATGACCGGGTTCGGG  
GTAAAGCCGAGGCCAGCCTGAATGCGGGTTTCAACGCGGTTGGCGGCCAGCACTTCGACGGCGCTGGCAA  
AGGCGGATTCGGACAGAGCGTGAGTATCCATGCCGACAAACAGCGGGCCAGTAATGCCGGCTGCTGGCC  
ATACTCCACCAGGGCTGGGTACAGCCAGAATATGGGATTCGGTAAAGGCGCTGTGCAGGGCGCTGCCG  
CGGTGGCCGGAGGTACCGAAGGCAACTCGCTGCTCGGGGCGGCTCATGTCCGGCTTGTGAGGTAGTAGG  
CGCTGACCAGACGGGAATGTTGGTACGGTTCGCTTAAACGGGCGGCTGACCGGCGTGGGAATGCTGAGC  
CATGGCGTTTTTCTTGGTAATGGCGGCTTGGCGGCAAGGCTGAGTCTTGAACCAACCGTTAGATTGC  
GCCGACACCTGCGCTATCACCTCGTCGCCGTAACCCATGCTGCTCATCAGCTGGGCCACCATGTTCTGC  
TTGCGACTGGTGTGGTGTGGTGATTACCCAGAACGGGGTTTCCGGTACCGGCTTGGGCTTGGTGGTGC  
TGCCACTGGCGCGCAGAGCCTCGGGATCCCGCGAGAAATAGACGCGCTTTCGCCCCCTGATTTCCGGTGGC  
CTGGGTAAACCCGAGCGGATCATCCCGGTAGAGGGTACTCAGCACCTGCATGAAACGGTTGATGGACTTC  
TCTTCTGCTGCAGCTCGCCAGAATCAAGCAGGGCTTGCAGCCCTTGCCTGGTGGCTACCGCACTGGGCT  
GCGCGATGGCAACGGGCTCGGCAACCGGCACACCTTGGTTAGCAGGCTGTTCCAGCAGACGGCGCAGGAT  
ATCGGAGGCACTCTACCAATGTGCCGGTCTGGCTGGCGATATAGAAGTAGAGATCGTCATCAAGCTCG  
ATGGTTTTTCATAGGGATGCGCTGGACTCGTCAAATTCGGATGCGGCGATTATACATAGGCAAACCCGAC  
AGCCCAAGCAAGGGGCTGGCAGATGTACATGAATCTCATCGAGAATACGGCATAATAGCGGCCCAAGTGT  
GTGATCAGCCGCACTGATAGCCGATCCGGACGGGATTTTTTAGAAAAAAACCCACATAAAATCCCAATCC  
ATTGGACGAAATCCTTTTCTTCCAGTGCCTTAAATAAAACAGCGATACGCACCCACGACCGACAAGGTG  
TCATTTTGCAACAAAACAGCATATTGAACTTCAAGGAGCAGGGTCAGGGACCGGCGGTCATTCTGATCCA

CGGCCTGTTTTGGCAGCCTCGACAACCTCGGCCTGCTGGCCCGTGCCCTCTGCGAACAGTACCGGGTCATC  
AGCGTGCATCTGCGCAACCACGGAGCCTCCTTTTCATAGCAGCGAGATGAGCTATCCGGCGCAAGCGGCCG  
ACATTCTCGCGCTAATGGATCACCTTGAGCTTGATCAGCGCGGATAGTAGGCCACTCGATGGGGGGCAA  
GGTAGGGATGCAGCTCGCCAAGCTGGCGCCAGAGCGGGTGATCAAGCTGGTGGTGGCCGACATGGCGCCG  
GTCGCCTATCCCCACTCCCGCCACCAGAATGTGTTTCGCCGGACTCAACGCCACACTGCGCACGCCGCCG  
AAAGCCGCAGTGAAGCGGAAGCCATGCTGGCGCAGCATATCGAGATCGCCGGGGTACGCCAGTTCTTGCT  
CAAATCCTTCGCCAAAGGTGAATATGGCTGGGGTTGGCGCTTCAATGTGCCCGCCCTTGAGCAAACTAC  
GCCAACATCATGGGCTGGCCAGAGGATGACCGCCGCTTCGAGGGGCCGGTGTCTTTATCAAGGGGGGGG  
ATTCTGACTATATGCAGCTCCAATACAGCGAGACTGCACTGGCCCAATTCGGCGGGCAAAGGTGCGTGT  
CATCGCGGGTACCGGCCACTGGCTGCATGCGGAAAAACCGGCTCTGTTCAACAAATGGGTTGTGGATTTC  
CTGTGCACAGGCGGTTAACAGTTTCAAATCCTTTGTGATATAGTGCGCCCGTCATAAGGAGTGTGCGCAA  
TCCATGCTAAGTGAACATATCGACCTGATCGAAAGTTTTGGCCTCAAGTTATTTCTTTGTGGCCATTTTCA  
TATTGATTGGCCTGGCCATTTCAGGACGTGCTCAAGCGCGGCAACGTGCCCGTTTCGGTCTTTTTATCGT  
CTGGTTGGTACTGTTTTCTGGGTTGTGCGGGTTTTGTGCGCAAGGGGCTGATCGAACTGGGCTGGGAAGGC  
TCAGGACTCGGCTAACTTATTTTCATCTGTGATGATGGCCAAAACAGCAAACTGATCGAACAACTGGA  
TCTGTTGCAAATGAGAAGCGCCCCGGCAGGCCAAAAGACCAATCCACTCCCCCGGAGACCCAGCTCAAG  
ATCAACAAGCGTAACCAGCTTAAGCGCGATCGGAAAAATGGGCTGAAGCGGGTAGAGTTAAAGGTGGAGG  
CCGAGTTGCTGGAGCGCCTGAACCAACTTGCCTTACAACAGAACATCAGCCGAGCCGAGCTGATCCAATC  
TATCCTGAAACAACAGATTGAGTCCGCTTTGCGGTGACATTCGAGTCTGAGCGTTGAGCATTAACACC  
AAATACGGGTAACATAAAGACTATGGCAAGTGTAGGTCTGTTTTTTGGCAGCGATACCGGTAACACCGAAG  
CTGTGCGCAAGATGATCCAGAAAAGAGCTGGGCAAAAACCTGATTGAAGTCCGTGACATCGCCAAGAGCAG  
CAAGGCCGACATCGAGAGCTTTGATCTGCTGATGTTCCGGCATCCCGACTTGGTACTACGGCGAAGCCAG  
GCCGACTGGGACGACTTCTTCCCCGATCTGGGCGAAAATCGACTTCACCAACAAGCTGGTTCGCCATCTTCG  
GTTGCGGTGATCAGGAAGACTATTCCGAGTACTTCTCGACGCCATGGGCACCCGCGCGACATCGTCGA  
AGCAAAAGGCGCCATCATCATCGGTCACTGGCCGACTGCCGGCTACGAGTTCGAAGCCTCAAGGCACCTG  
GTCGATGACAAGCACTTTGTGCGTCTGGGTATCGATGAAGATCGCCAGCCGGAGCTGACCGCCGAGCGCG  
TCAAGGGCTGGTCAAGCAGCTGCACGAAGAGATGTGCTTGGCGAGCTGGAGTAATCCGCTTCCCCTCA  
TACCTTGCAACAAGGGCCCCGACGGGGCCCTTGTGTATCTGCAAGTGGCGATGCCTGCCTTTATTCT  
CCCTTGTATTACCTCTGTGCTCCGGTTTGGCTCGCATAGAGGGTGCCTTGACCTGCGCCCTTATTCT  
TCGCCGCTCTTGTCTGTACCGTGACCTCGAATTCGGGGAAGTGCTTGTGTCACCTTCAGTCCGCCGCA  
CGATTTTCGGCCAGCTTGCCTTCGGTCAAGTTGAACTCGGCCACCAGCTTGCCTTGCCTGGCTTGATATA  
GTTGATGCTGCCCGCTTGTCCAGACGTAGTAGCGATTCTTGAAGTAGCCCATCAGCATCAGAGGATAG  
ATGGGGTCAGTCATGGCAACATGCTGCCGCCAAACTGGGTGCGGTTGGCATTTCTTGTTCACCAGCGGG  
ATTTTCAGGGTAACCCGACAGTAGCGAAAGTCATCGCTCAGGGTCTCTATCTTGATAACCGCGCCCCAGAA  
AGGGGGCCAGGCGTTGAGTGCAGCGCGCACCCAGGCCGATTTGTCAAAAAGCCAATCCATGGATCTCATC  
CGACCAGAATATGAAAGTTACATCTTATCAACATCTGCCATGCCAGCAAGTCGGACGACACGATTGATTA  
TTTTCAATCCAACCGCCATTTATGGCTAAACCCCTTGAATTGCTGGGTTTATTTTTAGGGAGGCTACGAC  
CTATAATGACAGGCCAAGCGAGTTCAAGGTTGCCATTCCTGCGGCAGTCCATCAGAATAACCCACCTTC  
GAGAATGCGAATAAGTAGAATATGGCAGACAACAACCAAGCGTTAAAAAAGGCCGGGCTCAAGATCACCT  
TGCCCCGGGTCAAAATCCTGGAAAATCCTGCAACAGCCGGACTGCCAGCACACCAGCGCCGAAGATCTCTA  
TAAACGACTGATCGACCTGGGTGAAGAGATTGGTCTCGCTACCGTCTATCGCGTTCTCAACCAGTTTGAT  
GATGCCGGTATCGTTACCCGTCACCACTTCGAAGGTGGCAAGTCGGTATTCGAGCTGGCCACTCAGGAGC  
ACCACGACCACCTGGTTTGCCTCGACTGCGGCAAGGTGATCGAGTTCCTCCGACGAAGTATCGAACAGCG  
CCAGCGCGAGATCGCCAAGAAATCAATATCCGTCTACCAACCACAGCCTCTACCTCTACGGTCAATGT  
GCTACGGGTGAGTGAAGCAGCAGCAATAAGTCCGCCGACTTGCAGATAACCGACAATAAAAAAGCCA  
GCTGATGTTGCTGGCTTTTTTATTGTCGGCGCTGGCAGCACAGGGCAGGGTTTCCCCTGCCCTACTGAGT  
TAGCCTTCTACCTTGCCCCAGGAGTACGCGAGGGCAACGGTGCAGTGAACACCAGATGCTCCGGGCTGG  
AGAGCTTGTGTCGGCGCAGAAAGTAACTTACGCTCGAACTGGTAAGCCTGCTCCGGCTTGGCGTCTTT  
CAGGGAGGCTCGACACGGGCACCCCTCGATGATCACCAGGGATTCCGGATTTCAGGGCAGCTTCGAAGTCA  
TCCTCGGCGCCCGGGTTCCGTACCTTGAACAGACGGTCTGATAGAGACGCACTTCCGCTGGCAGGGAGTGAG  
TAGCGCTGACCCAGTGGATCACCCCTTTCACCTTGCGGCCATCGGCCGGATCCTTGCCCAGAGTCTCGGG  
ATCGTAGGAGCAGTAGATGCAGGTGACTTTGCCATCGGCATCTTTCTCGATACGCTCGGCCCTTGATGACA  
TAGGCATTGCGCAGACGCACTTCTTGGCCAGCACAGACGCTTAAACTGCTTGTTCGCCTCTTCTTTGA  
AGTCCGCTTCATCGATGAAGATCTCGCGGGTGAAGTCAACTCGCGGGTACCATCTCGGCATTGCTCGG  
GTGAGCCGGGGCAGTCAAGCACTTCGTCGGCAGCCAGGTTCTCGATGACCCTTTCACCGGATGCAGCACG  
GCCATGGCGCGCGGCGCATGCTCGTTGAGGTCTTCGCGGATGCAGGCTTCCAGCATACTCATCTCGACGA  
TGTTGTCTGCTTGGTGACGCCGATGCGCTTGCAGAACTCGCGGATGGAGGCCGGTGTGTAACCACGGCG  
ACGCAGACCGGAGACGGTCAGCATGCGGGGGTCTGCCAACCATCGACGTGCTTCTCGGTCAACCAGCAGG  
TTCAGCTTGCCTTGGACATGACGGTGTATTCGAGGTTTCAGACGAGAGAACTCGTACTGACGGGGGTGGC  
AGTGCATGGTGTGTTGTCCAGCACCCAGTCTACAGACGACGGTGTCTTGGAACTCCAGGGTACAAAT  
GGAGTGGGTGATCCCTTCAGCGCGTCCGAGATGCAGTGGGTGAAGTCATACATCGGGTAGATGCACCAC

TTGTCAACGGTCTGGTGGTGGTGGGCAAACCTTGATGCGGTAGATAACCGGATCGCGCATCACCATAAAGG  
GAGATGCCATGTTCGATCTTGGCGCGCAGGCAGGCGGTGCCTTCGGCGAACTCGCCGTTCTTCATCTTGGC  
AAACAGCGCCAGGTTCTCTTCCACGCTGCGATCGCGGAACGGGTGTTCTTGCCAGCTTCAGTCAGGGTG  
CCACGGTACTCGCGCATCTGCTCGGGTGTGAGCTCGTCCACATAGGCCAGACCCCTTTTCAATCAGCTCGA  
TGGCGTAGCCGTGCAGCTTGTGCAAAATAGTCGGAGGAGTAGCAGATCTCGCCGTTCCACTGGAAGCCGAG  
CCACTGTACGTCCTGCTTGTAGGACTCTACGTACTCGATATCTTCCCTTACCAGGATGGTGTATCGAAA  
CGCAGGTTGCACTGGCCCTGATAGTCGCGGGCGATGCCGAAGTTCAGGCAGATGGACTTGGCGTGGCCGA  
TATGGAGATAACCGTTCGGCTCGGGCGGAAAACGGGTATGCACGCTGCTGTGCTTACCCTGGCCAGATC  
TTCATCAATGATCTGACGAATAAAGTTAGTTGGGCTGTTCGCCTGACTCATGGCTCACCTCAAAAAAGCG  
TCACTGGCGGAAGTTGTGCCGGCTGGCACCTCATCCCCCGCCGTCAAGCCGGGTATGATCCCTTATTA  
CGGGCGCTGTCTCAACCTGAATTTGGCACTTCCGGCCATTTCCCGCCATTGCACCCGTTAAAAACGGCG  
TGGCTTGGCACATTGCACACAAAATGCATAAAAAAGCCCCGCACTGGGCGGGGTGAAAGTGATGAAAAA  
CACAAAACAGACAATTACACACAACAAGGCTCACACGCACAGTCAACCTTTCCCAAACCCGATGCGCCA  
TCGCCCTTGGGAAAGGCGGGTCTTGCAGCCACCTCATGTTAACGGTTGACTGCTATCAGTTCAGTTCGG  
TGACGCGGCTGGTGCCTTGGCATCGAAGCTGGTGGTACGCAGGTAGACCTTGGCATTACGCTCGGCTT  
GGCCGCGGCGTCATAGGCACTCCAGTTGGTACCGTCCAGGCTGTACTGGATGGGCAGACCCGGCAGATCC  
ACGTTTCGCTTCCAGCACACCGTTCACTACCTTGGCACCCGGTACGGAGAGGCGGTATTCAACACCAGCCT  
GATCCAGCTTCGGCAGCACGCGCTGACCCAGTACGTGGCAAACGGTTCACCTCTTTGTTGAGGGTGGC  
CTTGTGAGCAACTTGGTCTCGCCGGAGAACTCACGACCTTACATAGTTCAGCTCGAAGCCACCTTTG  
TGCCAGGCACGCTCGGCCACGGAGAAGATACGTGGGTAGACCATGTACTCGTACTGAGCATCAGTACGCA  
CGGTTTTCACTCCACTGCTGACCCGAGATCCCTTGAACCTTGACCCGATCCTGGTACCTTTGGCCACGAA  
GGCGTTGCCGTGCGGGTCAACCGAAGTCTCGGGCTTCTGCGGCAGGTTTTCCGGGGCGAAGGCAAACACC  
TTGCGCGTGTTCGTTGAAACGGGTGGCCAGTAGTAGCCACGCTCGGCCGGGTGACTTTCGTTTCGGGAAGT  
CGAAGTAGAGGTAATCCGGGTGGACAGCACCCTTGGTAACCTTGTGGGCCACTTCATCGCTTCGTT  
GAAGCCACCCAGTAGAGGGTTTTCCAGAAGTTGACACGGGTGTTGTCGGTGGCGAAGTCCTTGGCACCG  
CTGGCGTACTTCAGACCATCTTCCACGCTGCAGGGTAGAGAAGCCGCGGTCTTTGACCATCTGGCCCA  
CTTCTTTGGCAAAGTAAACCGGCAGCTCGCCACTTCTTGTATCTTGCCTTCATCGATCATCTTCTGGCA  
CATCGGGGACTTGCCAAACCGGCTTGTCTGTCTGTGAGTTCGACGTTGCCTTTCCAGGCACGACCTCT  
TCTTTCTGGTGACGGCAGATCTGTATGCCACCCGCTGCATGATGTTCTTCGCCTCATACCACCCGT  
AGTGCCATGCGGTGAGCGGCTGACCGCGGCTGATGCATCTGGGCAACTTCATCCATTACCTTGGCCAC  
GAAGGTGGCAGCACCTGGCTGGCAAGGGTTGATGAAGGACATCTTGTGCTAGAACTGGACGGAGGTGACG  
TTGGAGGTGTGAGCCGGATCAGTCAGACGGAACCTGGTTGGCTCCGCTTCTTTGCCCTTCGCCATCAGAC  
GCTTGTAGCGGCTTCCATGGAGACCACGGCAGCACGAGCGTGGGCCGGCATGTTGATCTCGGGGATCAC  
GGTCACACCGCGGGCTTGGCATAACGCACCAAGTCCACGTAGTCAGACTTGTGTAGAAACCGGAACCC  
TGTTTGTGCTGGTTCGGGCCGGAACCCAGTTGCGGCATCAGGCACCTGGTTTTCGGACTCGTCTGGCAAC  
GCTGGCTACCGACCTGGGTGAGCTCCGGCAGACCCGGGATCTCCAGACGCCAGCCTTCATCGTTGGTCAG  
GCCAAGGTGCAGCACGTTGAGCTTTCATGGCAGACATCTGGTCAACCAGCTTCTTCATGGTATCCAGACTG  
CGGAAGTGACGGGCCACGTCGGTCTGCATGCCACGGTATTCAAAGCGCGGCGCATCCTCGACGGTCATCG  
GGCTCACAGCTTGTTCATCAACACCCAGCAGGGAGATCAGGGATTGTGCACCCAGAAATGCCCCGTGAT  
GTCGCGACCTGGATCACTGTGCCCTTCTGACCGATGGTTCATGTATAGCCTTCAGCCTGCTTGGCTTG  
CTGCCGAGCTTGTGGTACCGGGTAGCCGGTGTGCGGAGAGGGTAACACCCAGCTTGGTCAGTTGAGCCT  
TCAGGGCCTCGGCGGATCGCTCGGCAAGTCCAGGGCATTGAGTTTGTATGGTGGAGAAGTCAACCTGCGG  
ACCAGCTTTGACTACCTGCTTCATCGGGTTCGGCAGGATCTGGTTGTCAATCTTGCAGCCGGCAGCAGG  
GTACTGGTCTGGTTGGCCGCGAAACGGGTCTCGCTGTTTCATCAGGATGTTCTTGTTCATCCTTGGTACGCT  
TCCAGCCATCAGCTGGCATCGGCTTCTCGTAGGTGCTGGCATCATGATGTTGCTCATGCTGGCCAGTAC  
TTTCGGCTCGGCACCTTCGCTGGCGACATACCAGTTCCGCATGATGTCAGATTGCAACAGTACCAGTAT  
TCCACCACCAGGGGCACCTCGACCGTGGCATCCTTGGCAAAGCCCTGGAACCTTCGCTTGGCGTCAAAC  
GATAGAGATCGCCGGTTCAGGTGAGTGTGGTGAACCTGGTTCGTTATCCACACGCTGGATACGACGGATGGA  
AGAGACGTAGATGCTCCAGTCTTTGGAGGTGACGTCAGCACCCGGTATTGGTTCAGGTGCAGCTTGGCAACG  
CCACAGCTCGCCACTCGGAACCGAGTGCCTGGCAATCGAGGCCGTCACCCGGCACCGTTCGTTGGTACCA  
CTTCATACTTGACCACCAGGTTGTTGGCGAGGGAGTTCGACCACGGCCTGCTTGGCGGCATCGGCTGCCTG  
GACCTGGCTGACAAAAACGGTAAACATGGCAATGGCTAACAGAGAATGTTTCAAGTTTCATAACTGCTGCT  
CTCATTTGAAGTAAAGGTTGGATTTTTCTTGGCTTTTTTATATGGGGCCCCGAGCGGGGCCCTTAGTTAT  
GTCAACAATGGACTTAGACTTGGAGGTGAGCGAGTCGCTCGATTAAACGCAGGGCTTTCATCTCACCGGCGA  
TGATTTTCGGCCAATGGGCCAGAAATCACCTGCAGGTTCTGCTCACCGAGTTTGACCACACCGGCCGACC  
CAGGGCTTTCAGCTTGCCTCATCGACGATGCTGCGGTCTTTCAGAGTCAGACGCAGACGGGTGATGCAG  
GCATCGATGGAGACCAGGTTCTTTCGACCACCCAGCACTTCCAGGTATTGCTTGGCCAGCTCGGTACGGT  
TGGTAGATTGAGCGGCAGCCGGAGCAGTATCTTTCGTCATCTTACGACCCGGGGTTTTTCAGGTTTCAGCTT  
GGCAATCACTACGCGGAACACGGTGTAGTAGAGGCCGAAGAAGACCAGACCCGAGGGATCAGCATGTAC  
CAGTTGGTTCGCCAGCGGGTACGGCTGGAGAGCACCATATCCACCAGACCCGGCACTGAAACCGAAACCGG  
CCATCCACTGCATGGAGGCAGCGATGAACACGGAGATACCAGTCACTACGGCGTGGATGACATACAGTAC

CGGCGCCACGAACATGAAGGAGAACTCGAGCGGCTCGGTTACACCGGTGAAGAAGGAGGCAAAGGCAGCT  
GCGATCATGATGGAAGCAACTTTCTCTTTGTTCTCTTTCTTGGCGGAGTGGTAGATGGCCAGAGCGGCAC  
CCGGCAGACCCGAACATCATGATGGGGAAGAAGCCTGCCTGGTACATACCGACCACGCCTTTCACCTGCTC  
CAGGCTCTTGCCAGCGGCCAGAGCGGCATCGATGGTAGCCTGACCACCCAGGAAGTTCGGGATGTCGTTG  
ATACCGGCCACGTTGAACCAGAACACGGAGTTCAGGGCGTGGTGCAGACCGATCGGGATCAGCAGACGGT  
TGAAGAAGGCGTAGATACCGGCACCGGTAGAGCCCAGGCTCACGATGGACTCACCGAAGGAGACCAGACC  
ACCGTAGATTGCCGGCCATACGGCCATCAGGATGAAAGACACGACGATCATCACGACGGAGGTTACGATC  
GGTACCAGACGACGACCTGAGAAGAAGGAGAGTGCCTTGTGCAGCTCGACGCTGCTGAAGCGGTTGTACA  
GCTCAGCGGGGATAACACCACACAGGATAACCCACGAACTGGTTGCTGATCTTGGCAAACGCAGCAGGAAC  
CTGCTCCACCCGGGATGCTCTTGATCTGGGCCACAGCGCCCGGGCTCAGCAGGGTGGTAACGCCAGGAAG  
CCGACCAGACCAGCCAGAGCAGCAGAACCCTTTATCTTGGACATACCGTAGGCGACACCCTGACGCGA  
ACAGTACGGACATGTTATCGATAAATGGCTGCGCCCGCTTTAATCAGGAAGGCAGCCAGCCGACTGTCACC  
ACCCCAACCATTTCGGGTCAATCCAGTAGCCAACCCCATCAGGATCGCTGCGGCAGGCAATACCGCTACC  
GGCACCATCAGTGCACGGCCGATCTTTTTGCAAATAACCGAGAATGTTACGGTTCCTCTCCTTAGTTAAT  
GTTTTTCTAGAAATTAAGTGCTTATCACGTTTACGACATAAGCCATCAAGGCTTGATTGGCAGTCTAGGG  
CTTTTATTTTCGCTGCGCAAATTAATAAACCGATAATCGTGATCGTTATCACCCAAACAAGATAAAGGTGG  
TGGATAGATGTGGCTTAGTTTCGCAATCTTTATTTACGCTATAAAAACAACCTGAATCCGCTCTAGCCAATT  
GCCACCGCCAAACCGGTGCGAACCCGACACAGAGGTATCCATATGCGCCTGATCCCGTTGAAATCTGCC  
AGCCAAGTAGGCCTGTGGTCTGCTCGTTACATCGTTGACCGCATCAACGCGTTCAAGCCGACCAGCGATC  
GCCCTTTCGTAAGTGGGCTGCCCACCGGTGGCACCCCGCTCAACACCTACAAGCGCTGATCGAGTTGCA  
CAAAGCCGGTGAAGTGAGCTTCCAGAACGTGGTCACCTTCAACATGGACGAATACGTCGGCCTGCCGGAA  
GATCACCCGGAGAGCTACCACAGCTTCATGCACAACAACCTTCTTCAGCCACATCGACATTCGTCCCGAGA  
ACATCAACATCCTCAACGGCAATGCCGAGGATCTGGTGGCCGAGTGCAAGCGCTATGAAGACAAGATCAA  
GTCCTACGGCAAGATCCACCTGTTTCATGGGTGGCGTGGGTAACGACGGCCACATCGCATTCACAGAGCCG  
GCTTCTTCCCTCTCCTCCCGCACCCGGGTCAAGACCCTGACCGAAGATAACCCGATTCGCCAACTCCCGCT  
TCTTCGGTGGCGATATGGAGCAGGTGCCAAGCTGGCCCTGACCGTGGGTGTCGGCACCCCTGATGGATGC  
GGAAGAGATCATGATCCTGGTGACCGGCCACGGCAAGGCACTGGCCCTGCAGGCCCGCGTGGAAAGGCAGC  
GTCAACACACATGTGGACATCTCCACCCTGCAACTGACTCTCGAAGGGAATGATGGTGTGCGACGAGCCCT  
CCACCATGGAGCTCAAGGTCAGACCCGTTTCGTAATCTCCAGCAACTGGAAGCCGCCAACCTCGGCCGCTC  
GTAAGGAGTCGTATGTACGCAATTGACCAACTGCACCCTCTACACCGGCAGCTGCGTGCTGACCGGCTAC  
GGGGTGCTTATCGAGGGCGACAAGATTGTCGCCATCTCTCACCTGGCCGAACTGCCTGCGGGCATCGAGC  
AGATTGACCTCAAAGGCGCCAACCTGACCGCCGGTTTTATCGATGTGCAGCTCAACGGCTGTGGCGGGGT  
GATGTTCAACACCGAGATCACGGTCGAGACCCTGGCAACCATGCAGGCGGCCAACCTCAAATCCGGTACC  
ACCAGCTTCTGCGCACCCCTGATCACAGTCCGGATGCGGACATGAAGCAGGCCGTTGCGGTGACCCGTG  
ACTACATGGCAGCACACCCCAACGAGGTGCTGGGCGTCCATCTGGAAGGGCTTACACCAACCTCAAGCG  
CAAGGGGATCCACCCTGCCGCGCAAATTCGCCAGCTGCGGACGAGATGATCGACTTCTTCTGCGCCAAC  
GCGGATGCCATCACCAAGATCACCTGGCACCCGGAACGCAACGAGCCGCCCCATATCCGTGCTGTTGGTGG  
AAGCGGGCATTCTGGTCTCGGCCGGTCAACTGCCGCCAGTTACGATCAGGCCATGGCCGGGTTGATAAA  
CGGTATTGCTTTGCGACCCACCTCTACAACGCCATGACTCCGACCCTCAACGGTTCGCGAGCCGGGGCTC  
GTGGGCGCCATCTACGATCGCAAGGATGTCTACGCGGGCATCATCGTCGATGGCCACCATGTGCACCTGGG  
CCAACGTGCGTCTGGCTCACAAGGCGCTGGGGGAGCGACTGGTGCTGGTCACCGATGCCACCGCGGCAGC  
CGGTGCGCCGGAAGGCTTTGAGAAATTTGATTTTTGTGGCACCACCGTCTTTTTTACCGGATGGTCAGTGT  
GTCGACGAGAATGGTACACTCGGCGGTTCTCCCTCACCATGATTGAGGGGGTGGAAAATCTGGTCAAGC  
AGGTTCGGATTACCGCTCGATGAAGCACTGAGAATGGCCAGCCTCTACCCCGCTCGCGCCATTGGATGGGA  
CTCACGTCTCGGTAGTATCCAGTCCGGTAAAGTAGCCAACCTCACTGTCTTCGATCAGGACTTCACGGTC  
CGTGGGACCGTGGTTAACGGACACTACACACAACAGTGACATCATGACTGGCGGACAAAATAGCAAACGTA  
GATCTTATCAAGCAGGTCAACAGTGCAGCCGTGTATCGGCTCATCGACCTGCAAGGCCCATCTCCCGGG  
TCAAGATTGCCGAGTTGAGTCAGCTGGCCCCGGCCAGCGTGACCAAAAATAACCCGGCAACTGATCGAGCA  
TGGCCTGATCAAGGAGACCTCTCCGCAAGCCTCAACCGCGGGCGGCGTGCCATCTCCCTGACCACCATC  
AAACATCGTTTTAGTTTTGTCTCTGCCAAGCTGGGCCGCGGTACCTGCAACTGAGTCTCTATGACCTAG  
ATGGCAAGGAGCTCGACCAGCACGTCATTACAGGTGACCGAGATCGACCAGCAACCCGTGGTCGACATGCT  
GCTGCGGGAGATTGGCGCCTTTATCGATGCCAACCGGAACGTTGTGCAACCTCATCAGCATCGCGCTG  
ACCATGCCGGTCTGGTCAACCCGGAATCCGGCATGGTCACTACACCCCAAGTATCAGATCCGCAATC  
TGGGACTGGCGAAACTGCTTGAGAACCCTTCAACCTCCCCTGCTACGTGGGCAACGACACCCGCTCGCT  
AGCACTGGCCGAACACTTCTTTCGGCGAGTCCCAGGACTGCATGGACTCCATTCTGGTGAGTGTTCACCAG  
GGGACGGGCTCCGGGATCATACCAAGGGTCAGGTGTTCTCGGTGAGAACCGCAACGTCGGCGAGATCG  
GCCATATCCAGGTGAGCCACTCGGCAACCGCTGCCACTGTGGCAACTTCGGCTGCCTCGAGACCATCGC  
CTCCAACGAAGCGATCATCGACAAGGTGAAGGAGCTCATCAGCCGCGGCCACCAGAGCGCGCTGCAGGAG  
AAGCACATCACCATTCAGGAGGTGTGCAAGGCGGCGCTGGCAGGTGATGAACTGGCCCGCAGCGTCATCG  
AGAACGTGGGTGAGCATCTGGGACGGGCGGTGGCCATCACGGTCAACCTGTTCAACCCGCAAGGTTGCT  
GATCGCCGGTGAATCACCGCCCGCAAGAGATCCTTCTCCCGCCATTCGTGCTGCGTCGAGCATCAA

TCCCTGCCGAGCTTCCACCGTGGCCTGCCCATCGTGAAAGCCCGCTTCCAGAACCAGCCGACCTATGGCG  
GCTTTGCACTGGTCAAGCGCGCCCTGCTGGAGGGAGATCTGCTGCAGATCATCATGGAGCAGAAGTAAGA  
CACTGACCTTGCAGATAACAAAACGGCAGCCACTGGCTGCCGTTTTCTATTGTGTGCTTGTGCGGATT  
TAGCCCCGCCCTACATGGCTTGAACAGATCCAGCTTGTGTGCTACACATTCGCTTGCACATCCATGATCC  
CCAGCATGGAGTGAAAGAGGTTGTTCATGGGAGAAACGCTGGCTGCTCGCCTCCGCCGCCAGGCAACCCAT  
ATCCAGCTGGCGATCGGCCTGCAACTGGGGCGAGAACCAGGTCAGCAGCGGTACCCGGGTCTGATCATCC  
GGCGGAACTTGTATGGCGTGGCTGCGATAGAGCCCCATGGCCCCGAGGGATTCCGCCGTGATCGGAGA  
GATAGACCAGTCCCACATCGTACTGGCTCTCCAGCGACTTGAGCTTGTCTATCAGCAGCCCCACCACCTT  
GTCGGTGTAGCGGATGGTGTTCATAGGTGTTGACCAGCTCTTCGTTGCTGCAGTTTTCAATGTGCTG  
CGCGGCAATCCGGCATAAAGGCGCGCTCGCTGGCAGGGTAACGACGAAAAATAGGTCGGGCCATGGCTG  
CCATCAGATGAAAGGCCACCAGCTTGTGGCCCTTCATGCCGGCAATCTGCTGATCCAGCCCCCAGCAG  
CACCTCGTCATAGCAAGACTCCCCCTGACAGAGCGCAGGATAGGATTTGGGGAGGATCTCGATGGTCGGC  
ACATTGCGGCATAACCCCTTTGCAACCGCCATCGTCTCTTTCCACAATACCGAGACACCGGCATGTTGCA  
GCACATCGAGCAGGCCGTACCGGGAGCTGGCAAGCTGGTCATCGTAGCCACGGCGCGTGAGGTTGGAAAA  
CATGCAGGGCACCGAAACCGCAGTAGCCGTACCGCAGGAGCGCACATCCCTGAACGACACCACCTCCCTGC  
TCTTTTGGCGTAAAGCTGTTGGTCGCCTTGCCATAACCCGTTAAGGGAGTAGTTCTGGCTGCGCGCCGCT  
CCCCACCACCAGGAACATCAGGGTCGGCTTGGCTCCCCGGGCCACCACCCTGGCATCGGTCCCCAAGTG  
TTGGTAGGGGATCGGCGTAGCAAACAGCACATCCCGCCATATTTGTAGAGACCGTGCACATAGTTGGCA  
GGCACAATCTCTTTGGCCAGCGACTTGTGTTGCGCCGACCGAGGCGTAATCTGATAATAAAGTGACG  
CGACGCCCCCGATAAACAGCAGAGAGATAGCCAGTGCACCAGCCGCAACGCCACCCCTGATACCAGCG  
AGCCGGATAGCGGATCCGCGAGTGACCAGAGCACCAGAACAGGCAGCAGCCCGGTCAGCAGAAACCAGAGC  
GCAACCGAGCCATTCAAATAAGCCCCCGCTCACCCTGTTGGTCTCCACTATGTTCTGGATCATGCCTG  
CATCAAAGATGACGCCGATTTTGGAGCATGGCGTAGCTGACGATGGAGCCAGTCAGAATGAGCAGCGTAAA  
AAAGGGCTTGAGCACAACCCGGAACGTGAAGGGGAATAAACACGGCATTGAGCGCCGCGATCAGCACCAGC  
GGGATCGAGATGGCAAATCCGGCTTTGACATGGGTGAGGGCGCTGAGCACCCTATAGAAATGCAAAAAGA  
TTGGCCAATTCAGTACCAGGGCGAAAAAGAGCACCAGCAACAGATTTGGTCTGCAGTACACCGAGGGTTAC  
ACGCTATAAACAACCTCTACATAACCGGCCTGCAGCGCAGCGGGCCGGCAAGCCAACAAAAACGACGGGGC  
CAGCGTAGGAAGTAAACTTAAGCGCAATTAAGAGGAGAAGCAGCGCGCTCGTGTCCCCATCACAGCA  
CGGAGTCCGCGCGCACCGAAATGGATTTTAGTTGTCTATCCATCGGATTTTGTAGCTGTTGTTAGTA  
GGCATTACGAAATGCAGGTTAACCAGTGGCCTGATCCAAGCCTCTATAGAACAGTTGCGGGTAGGCCA  
CTATATCCATCTCCCCACGGGATGGACCAACCACCCGTTTTATGTTCAATACCTTCAAGATCAAGGATCAG  
CAGCAACTCGACATTCTCCGTTCATCTTGATCTCACCCCTACTGATGGTCGACCCCGACAAGAGCGATCTGC  
CCATCGAGCCGCTGCTGCGCGGCGATATCCAGATGCCGGCCTGACCTTGATGAGCTGGAAGAGCTGAT  
TGCCTCGGGCCCCCCCCCTTTGACGAAAAGGCCCTTTCGCGCTCCATGCGCGCCGCGACAAAGCCTTT  
GGCCAATCCATGAGCGAGCTGCGTGATGCACTCGGGGCACTCAACCTCAAACCGGATGAAGGGCTGGCCA  
ATACAGCCCAGATCGTCCGCAATGCCGCTTACCCTCAGTCAGCATGAAGGGCTCTCGGGCTCCACCT  
TATTCGAGCCCCACACCGATATCCTGCTGCAACACAGCCTCAATGTGGCTTTCATTGCCATGCTTATG  
GCCCCGAACTCGGCATGAACCCCATCGAGATTGAGGAGACTGGACTTGCGGGACTTATCCACGATATCG  
GTGAAGTGAAGATCCCTAGCCAGATCACCCAAAAACCGGGGATCTCAACAAGGCCGAGCAGAACTTCCT  
CAATATGCATCCCCAGTACGGGCTGGAGATGCTGACCCAGCTCAACGCCTTTGAACCGAAAATCCGTGAG  
GTCGCCCATCTGCACCACGAGCGGCTCGATGGCAGCGGTTATCCGCTCGGGATCAAGGGCGGGGAGATCC  
CGCCGCTGGCCCCGATTGATCGGACTGGTCGACTTCTACGACGAGCTGCTCCATCCCCGCAACAGCGGCAA  
CCCCGGCCGCGCCGAGTCAGGCCATCAGCCAGCTCTACAAGTTATCCAGAAGAAGTTCGACCAGAATCTG  
GTCAAGTTGCTGATCAAAGTACTGGGAGTCTATCCGCCGGGATCACTGGTGAAACTCTCGGACGAGAGCA  
TTGCGTTGGTGTCTCTACCGAACCACCATGCCCTCAAGCCGAAGATCCTGCCCTATATCAAGGCCCA  
CGCGCCGGAAGCGGTGCGCATGATCGACCTGCGGGAAGACGAGCGTATTATTACCGGAGTATTGAAACAG  
GAAGAAGTGGATGAGGGACAACGGCAGTTCTTCAACCTGACCCCGCGCTTCTGCTACTACTTTGCATTCT  
GAGTTATCCCCAGAAGCTGGGGATAACTCATTGGACAAAACCGGAATAATTGCTCAAACCCCCATCAGAAG  
GTTGCCAACTGACCATGTATAAAAAACGCCAGCCAAGGGGCCGGGCGGAGCATGCCACCTCCGTGTGGC  
GTATCCAGCGGATACATTCATGCTCCATCCATCAATATCAACCCGCTGCCGCTTACACAAAATATCAATTT  
AACATGCTGATTTAATATGGTTTTATCCACTTGTCTGGCAAACCTGACGGCCGTTGCGCCAGTTGGGC  
CAACAGAACAAGATCCTGATCACACTTATTCACGGGCTGGCTATTTTTTTCAGCTGGCTTATGAGGAGCGT  
TTTTTATGCAGTTGGTCTCTCCTTGGTGCACAGATGAGCGTCAGCTGGTGTATCGCTATCTCTTCTC  
GAAAAGCCCGCTGCTGCGCCCGCTTGCCAACTATTCAGTGAGACTACCTCACAAGATACTGATATACATC  
ATCTTTTCCAGCTTTTGTATCCTCGGCACCTATGTGGGCCTCGATATCGACGATGCCATCGCCAACACCC  
GGGCGGTGCGCGCCGCTTTGGGGGGATTATTGGGGGGACCCTGGTGGGCTTCTGGTGGGGCTGACCGG  
CGGCCTGCACCGTTATACGCTGGGGGGATTACCAGTCTCGCCTGCGCCATCTCCACCACCTGCGAGGGA  
TTGCTCGGGGGCATAGTGCAGTGGCGACTGATGCGCTCGGGACGAACGGATGCCCTGTTTGAACCACGCA  
TCGCCTTCTTTACCACCTCTATGCCGAGATCATGCAGATGGTCATCATCCTGCTGGTGGCGACCCCGTT  
CGACAAATCCCTGCTGCTGGTGCACCATCGCCACCCGATGATTTGGCCAACTCCTGCGGCGCGGCG  
CTCTTTATCAGCATGATCCGCGACCAGCAGCGGATGTATGAGAAGTTCTCCCGGCTTCTCCGCCAAGG



CGCTCAATATCGCCAACCGTACAGTGGGGATCATGAGTCAGGGCTTTACCCCGGAGGGGAGCAACAAGAT  
TGCCCGCATCATTAGGAGGAGACCGGCGTGGGGGCGGTGCGCATCACGGACACCGAGCAGATCCTCGCC  
TTTATCGGCACCGGCGAAGATCACCACCTACCGGGCCCCCATTGCGTCAGCCATCACCATACAGGCCA  
TCGCCCAGAACAAGGTGCTGTTTGCCGATGGCAACAGCCAGCCCTATCGCTGCAGCCTCTCCTCCGCATG  
CCAGCTGGGCTCGGTGCTGGTGATCCCGCTGCAGGGGACAAGGGAGTGATCGGCACCATCAAGCTCTAC  
GAGCCGAAGAAGCGGCTGTTTCTCAAGATCAACCACACCCTGGGGGAAGGGATTGCCAACCTGCTGTCAC  
AACAGTTGCTGGCCGGCCGGCTGGAGCAACATCAGCGGCTGCTGGTGCAGTCCGAGTTGAACTTATCCA  
GGCCCAGATCAACCCCCACTTTCTGTTCAACACCCTCAACACCATCAGTGCCATCACCCGGCGCGATCCG  
GACAAGGCGCGGGATCTGCTGCTGCATCTGTGCTGTTCTTTTCGCAAGAACCTCAAGCGCCAGAGTGGCC  
TTGGCACCCCTGCAGGAGGAGCAGGAGCACTGCCAATCTATCTGGAGATCGAGCTGGCCCCGCTTTGGCGA  
TCGGCTGACGGTGATAAACAGAGATCCCGCCCCATCTGGCCACACTGCACCTGCCAGCTTACCCTGCAA  
CCGCTGATCGAGAATGCCATCAAACACGGCGTCTCGACCCCTGCTGGAGCAAGGGCGCATTCGCCTCTATA  
CCGATGAGAATCCCACCAGCGTCACTATCCATATGGAAGATAATGCAGGCACCTGGCAAGCGCACCCCGC  
TGGCGACGGTCTGGGCATGACCATTGTGATCGGCGACTGAAAAAGCGCCTTTGGCGAGCGCTATGGCGTG  
ACTATTGCCTGCGAGCCTGAGCAGTGGACCCGGGTCTCGATCACCATCCCCAAGGAGCAACCATGATCCG  
CACCCCTGATTGTGATGACGAACACTACGCCCGCAAGAGCTGAGGCAGCAGCTGGCCTGCGATCCTGCC  
ATCGAGATCGTGGGGGAAGCGGCCAACGCCATCGAGGCGCTGCCGCTTATTCAGCGCCTCAAGCCCGATG  
TGGTGTTCCTCGATATCCAGATGCCAAGCTGAGCGGCATGGAGCTGGTGCATGCTCGACCCCTGCC  
CCGCATCGTCTTTGTACCCGCTTTGACGAATATGCCATTCAGGCATTTGAAGAGAAGCCTTCGACTAC  
CTGCTCAAACCGGTGGAGCCCGCTCGGCTCGCCAAAACCCCTCGCTCGCCTCAAGCAGGATATCTCCCTC  
AGCCCATCGAGCGGCTGGCCCCACCATAGAACATATTCGGGCTATCTGCACAATCGGGTCAGACTGCT  
GCCCCATCGCGCAGGTGGAGTATGCCTTCTCCGATCTGGGCGGAGTCCATGTGGCCTGTCAGGGCGAGCTG  
TTCCACACCCAGCTCACCCCTCAAATCGCTGGAAGAAAAAGAGTCCGCTGCTGCGCTGCCACCGCCAGTATC  
TGGTCTCCCCAACGCCATCTTCGAGATCCGGCTGCTGGATAACCAGCTGGCAGAGATTGTCACCCCGAG  
CGGCGCCCGGGTGCCGGTCAGTCGTGCTATCTAAAGGAGCTCAAAGATCAGCTGGGGCTGGACTGAGCC  
GCGGAGTGTGCGCCTGATCACAGCCCGCGACCGCTCGGCGCGCCAAAGCGCCGCTCGGGGAGTTTACCT  
GCCAGTCAGGCGCAACCGTTTTAGACTCGCTGCTGCACACTAAAAAATAACAATGCAGGAGCGTAGCAATG  
ATCTGGTCTTCTCTGTGCTGGCTTACTTGTGGCCGCTACTTTCATATACGGCAAATTCATCGAACGGA  
TATTCAGCCCCGAAACCCGAGCTGAAAACCCCGCCCATCACCATGGCTGACGGGGTGGACTATGCTCCCGAT  
GTCGGAACAAGAAAGTCTATCTGGTTCAACTGCTCAACATCGCAGGTGTCGGCCCCATCTTCGGCCCCATC  
CTGGGCGCCCTCTACGGCCCCGTCGCCATGCTCTGGATCGTCTTTGGCTGCATCTTCGCCGGTGGCGTAC  
ATGACTACTTCTCCGGCATGCTGTGCGGTACCGCCAAAGGGGGCTCGGTGCCAACCGTGGTGGTGGAGCA  
TCTGGGCACCGCCGCAAGCACTTCATGAACCTGTTTGCCGTGGTGGTGTGCTGATGCTGGTGGGCGTGGTA  
TTTTGTGCTGAGCCCGCAGGGCTGCTCGCCAACTCACCTCCACCGATCTGGTCTACTGGATCGTGGCAA  
TCTTTGCCTACTACATCCTCGCGACCATAGTGCCATCGACAAGATCATCGGTGCTTCTACCCCATCTT  
CGGCGCCCTGCTGGTCTTCATGTGCGTGGCTCATCGTTGGCTGATCGCTCCGGCAAAGGCTTCTAC  
AACACCGGGATGGACTTCTCCAACCTGCACCCGACCGAACTGCCGCTCTGGCCGCTGCTGTTTCATACCA  
TCGCCTGTGGCGCGGTATCAGGCTTCCACGCCACCCAGTCACCGCTGATGGCGCGTGCATGCAGAACGA  
AAAATCCGGCCGCTTCATCTTCTACGGTGAATGATCGGTGAAGGGATCATCGCCCTTATCTGGTGCACC  
CTGGGTCTCTCTTCTACGACAGCACCGAAGCGCTCAACGCTACCATGGCCAACGGCGGGCCCGGCAGCCG  
TGGTACACGAAGTCTCCACCAGCCTGCTCGGCACAGTCCGGCGCATTTCTGGCCATCCTCGGCGTGGTGT  
CCTGCCCATCACCTCCGGTGACACCGGCTTTCGAGTGCTCGCCTGATCGTGGCGGACTTCTGAAGATG  
ACCCAGAAGCCGCTGGCCAAAGCGTCTGCTGATCGCCATCCCCATGTTTATCCTTGGCTTCATCATCTCCA  
AGGCTGAGTTCGGGGTGTCTGGCGCTACTTCGGCTGGGCCAACCAGACCACCGCCGTCATCATGCTGTG  
GGCCGCTGCCGCCTACCTCATCAAAGAGGGCAAGCTGCATGGATCTGCACCATTCGGCCATGTTTCATG  
ACTGCTGTGGTATCACCTATCTGGCCAACGCCCCCATCGGGTTTCGGGCTGGAGATGGGGACCTCCACCA  
TCATCGGCCTGACTGCAACGGCGGCCATTACCGTGGCCTTCTGATGAAGTTCGGCCAGCCACTGGTTAG  
CAATCCCAGTGAAGGGTGTGCTGACTTGAGGTGGTAAAAAAGGGGCCAAAAGGCCCTTTTAAATTGA  
TAAAAAAACCAATAAAAACAACCTCGTTATTCCTTAAAGCTCCTATACAGCACAAAGCCCTTAAGATTCCGTG  
CGGCCTGACGATAAATGTGTGATTCTTAATTGCTTTAGTGCTTGTGGAACCAATGATTAAGCTGTGCGT  
CATGCCAGTGGAGGTTATAAATGGCCCTGATTATTTTGCACCTGGTCTGCTCGTCTTTGTGCGGCTGGT  
CATTTTTTATGGAGTCATCGTTATCCACGATATTCCTTACGAGATTGCCAAACATCGGAATCACCCCTCAT  
CAGGATGCCATTCACGTGGCAGGTTGGGTGAGCCTGTTTACCCTGCATGTGCTGTGGCCCTTCTCTGGA  
TCTGGGCAACCATCTATCGCCCGGATCGCGGCTGGGGCTTTAGCCAGCAGTGCAAAAAGATGAAGAGGA  
GCTGGCGGCCCTCAAGCAGGAGTTGGCGGATCTGAAGAGCCGTATCAACACTATCGAACAGAGTGAGCAA  
CAGGGATAAACCATGGACCTGCTACTGATCCTGACCTACACGGCGCTGTGTGTCGCCATATTCAAAATTT  
TCCGCATCCCCTCAACAAGTGGACCGTCCCCACCGCAGCACTGGGTGGCGTGTGCTCATCGGCACCCT  
GATCATGCTGATGAACTACAACCACCCCTACTCCGAGATGGCGCGCAACTACTACGCTCTCACCCCCATA  
GTGCCGCTGGTCAAGGGCCGGGTGCTCGAGGTGCCGGTACAAGCCAATCAGCCGGTGAAGAAAGGAGATG  
TGCTGTTTTGCTCGATGACGAGCCGTTCCGCCTGAAAGTGGATAGCCTCACCGCACGGGTGCAATCCAA  
CCGCGAGCACCTCAAGTCCATCGAGGGGAGACTGCGCTCCGCCAGGCTGGACAGAGATCGCGCCAGCGAC

CTGATGCGCCGTGGCGTGGGCAAGCAGCGTGACCTCGACGTCACCCAGGCCAACGTGGATGACATCGTGG  
CCCAGATTGACCAGCAGAAAGCCACCCTGAACGATCTGCAAGCCAGCTGATGGAAGCCAAGTACCAGCA  
GTCCCAAACCGTGGTCTATGCCCGAGCGATGGTTCATGTGGTGCAGCTGGCCCTGCGCCCCGGCATGATC  
GCCACCCCTTCATGTATCGTCCGGTGATGACCTTCATCCACAAGGATGACACCCGCTACGTCGGCTGGT  
TCTGGCAGAACAGCATGCAGCGACTGGCGGTGGGCGATGAGGCCGAAGTGGTGCATCGATGGCGTACCCGG  
CAAAATCTTCAAAGGCAAGGTGACCGCCGTGGTTCGGGCCATTGCCGCTGGTAACGTGCAGGCCAACGCC  
GGTCTGCTGGATCAGACCACGGCGGTGCGTCCGGGTGCGCTGCCGGTAGTCATCTCCATTACCGACCCCG  
AGTGGGCCAAGTATCAGGTAATTGCAGGCTCCAGCGGGCAGGCTGCCATCTATACCCACTACTTCCACCA  
TGTCTCTGTGATGCGCAAAGTGTCTGCTGCGCATGGCAAGCTGGATGAACTACATCTTCCCGTTCATTGA  
TCAGCACCTAGGCACCCCTGCGGGCCGGCATCATGCCGGCCCGCTGTTTTTGTGGCGGCAAGCACCCATA  
ATGGCGCCACCCTGCGCCGTACCATGCCAAAACGCCACCCCTCATGTTTCGTTCTCAGACCCCTACCAGAC  
CGACGCCGTCAACGCCGTTATCAGCCACTTTCGAAAACCCCGGATCCCGCCGTGGTAGTGTGCTGCCACC  
GGGGCCGGCAAGAGTCTGGTGATCGCCGAACCTGGCCCGCAAGGCACGTGGTCCGGTGTGGTGTGGCC  
ACGTCAAGGAGCTGGTGGAGCAGAACCACGCCAAGTACGAGGCGTGGGGGCTCAAGGCCGACATCTTCGC  
CACAGGGCTGGATCGCAAGGAGGCCAAGCGCACAGGTGGTGTTCGGCTCGGTGCAGTCGGTAGCGCGCAAT  
CTGGCTGCCTTCGACGGGGCATTTCGCTGCTCATCATCGACGAGTGCCATCGGGTCTCGCTGGATGACG  
ACAGCCAGTACCATCAGGTGATCGACCATCTCAAGGCTGCCAATCCGGCCCTCAAGATCCTCGGCCCTCAC  
CGCGACCCCTATCGCCTCGGGTTAGGCTGGATCTACCGGCGCCACTACCACGGCATGGTCAAAAGCCAC  
GGCGAGCGGTGTTTCGGCGACTGCGTGTTCGAGCTGCCGCTGCGCTTTATGGTCAAGAACGGCTATCTGA  
CGCCGCGCGCATGGTGGATGCCCCATCGTTCACTACGACTTCAGCAAGCTGGTGGCGCGGGAGAATGG  
CCTCTTCAGCGAGGCGGAACCAACGGCGAGCTCAAGCGGCAGGAGCGGGTTACACCCCATATCCTGAGT  
CAGGTAAGTATGCCGCCGACCGGCAGGGGGTAATGATCTTTGCCGCCACCCTCGAACACGCCCGTG  
AAATCCACGGCCTGCTTGGTGGCCGAGGCCAGCAGGCAGCCCTTATCACCGGTGAGACGCCGGGGCCGGA  
GCGCGATGCCCTCATCAACGCCTTCAAGGCGCGGAGCTCAAGTTTCTGGTCAACGTGGCGGTGCTCACC  
ACCGGCTTCGATGCCCCCATGTGATCTTATCGTGATGCTCAGGCCACCGAGTCGGTCTCCCTCTATC  
AGCAGATCGTCCGGCGGGCTTGCCTCTCGCCGAGCAAGGAGGATTGTCTGGTGTGCTGACTACGCCGG  
CAACAACCTTCAACCTGTTTGCCTCCGAAGTGGGGGAGCCTCGCCCCACGCCGTACCAGCCGGTGCAG  
GTGCCCTGCCCGCTGCGGCTTTGCCAACACCTTCTGGGGCAAGACCAGCAGGATGGCAAGTGATCG  
AGCACTACGGCCCGCTGCTCAGGACTGTTTGAAGATGACGAGGGCAACCAGGCAAGAGTGCAGTACCG  
CTTTTCGCGCAAGATCTGCCCGGCTGCGGTGCGGAGAACGACATCGCCGCCCGCCGCTGCCAGAGCTGC  
GATCAGCTGCTGGTGGACCCTGACGACAAACTCAAAGAGGCGCTCAATCTCAAGGATTGTATGGTGTATCC  
GCTGTGCGGGGCTAACCTCACAGCAGGGCGCGGCAAAACAGGGGGAGCGGCTGGAGGTGACCTACCACGA  
TGAGGATGGATTGACCCTCTGTGAATACTTCGGATTTCACTCCCGGGCGCACGGCGCTTGTTCACAG  
CACTTTGTGCGTCATCATTGGCCCGCCCCGGGCTGGAGCCGAATTTGCCACCCTGGCGAGCGTGTGG  
CTGCGCAAAGCCAGTTCGCTCATCCGGATTTTGTATCGCCGCAAATCGGGTGCCTTCTGGCAGATAAA  
AGAGAAAATTTTTGATTATGAGGGCCGCTATCGTACCGCAAACCTCGATGGCATGATGGCAGCCGGCATA  
ATGGCATGAATTGCGTTATCCCGCTCGATCCCGCATCGGCTGGTTGAATTTATCAGGGTCCGCACCCTGCC  
GGGCCCTTCGTCACGTTAGAGGATGTTATGCAGCGGCTGTTGATTGGTTTTTGTGCTCTTTTTCTTCTC  
TGGCGGCTCATGCCGCCCGCTGACGCCCCCTCAGGGTGGCCAGTACGCCATCATGGTGCAGGGCAATAA  
CGGCGTCGAGTTCGCCCGCCACGCCGATCAGATGATCGCCCCGCTCCACCATGAAGGTGCTCACCGGC  
CTGGCGGCCCGCCTCGAGCTGGGTGCCGACTTCCGCTTCGCCACTGACATTCAGGCCCAACCCGGTGCCA  
AACAGGGTGACACCATCAACGGCGATATCTGGATCAACTTCGTCGGCGACCCACCCCTCTCCCGCATGGA  
TCTGCTGGCCCTGTTCAAACAGCTCGGCGTACCAGCATCAAGGGCAATGTCTACGTCAACACCGGGCGC  
TACAACGGCTACGAGCGCGGCAACGGCTGGTGTGGGGGATCAGACCCTCTGCTTCGCAGCGCCCGTCT  
CCTCGGTTCATCAGACAAGAACTGCGCCTACGGCACCATCACTGCCACCCAGATTGGCAAACCGCGGT  
GGGCAATGTGGCTACCGGCTGCCATCGGCATCGGTGCCGACAACCTGGAGGTGATGAGCTATGGCGAC  
ATGGCGCGCCAGTTCTGTGCGCTGGAAGTGGACATGGCCAAGGGCAACTTCTACGAGCTCAAGGGCTGCA  
TCACCCCGAATAAAGAGCCGAGGGTCTGCGTTTTCGCCATTACAGACGTGGAAGCTGGGGCTGGGACAA  
CATCCGCTGGGCGATGAACCGTGCAGGATCAAGCATGATGGCTGCTGCGGGTCAACCACAAGGCACCT  
GAAGGGGAGAGACGCTGGGTACCCACTACTCGGTCTCCCTGCCGGTGTGCTCGCCAAGATGCTGAAGA  
AATCGGACAACCTCTACGCCGATACCTTCTCAAACCGTGGGTGCTCACTACTACAACAAGCCCGGCAG  
CTATCGCAGCGGCACCATGGCGGTGCGCGCCATCCTGACCAAGAACGGCATCGATCTGGGCAATGCCACC  
CTGGCAGACGGCTCCGGTCTCTCCGCTCACAATCTCATCAGCGCCCGTACAGATGATGTGGTGTGAACT  
TCATCCAGAAAAATGATGCCGAACCTTGGCCTGATCAAGCTGCTGCCAAGCTCTCAGGTGGATGGCACCCT  
GGCGTGGCGGCGCAGTGTACCGCCCCCATGATGAAGAACAAGGTACATGCCAAGACCGGCACCATCACC  
GGCACCTCAATCTGGTGGGCTTTATCGACACGGTAGGCGGCCAGCGCAAGGCGTTTCGTGATGTTCCAGC  
GCGGCCTGTCCCAAGATCCGGCCACCCATGAGCGCTACCGTGCCAGCAAGGCGCGGTGGCCCTGGACTGT  
ATTTCGAGAAGGGGGTGTGGAGAGCATCTATCAACAGCAGCCTATCCAGATCGCCGATGAGAGCTGAGCC  
AATAGGCCCACTCGAATCACGGTATCGATAATTTTCGGCTTCAAGTCGCCACGAGGCAGGGCTATGCTGTT  
GTCTGCCTCATTTCAAACGGCCATACATAAACGGCTTAAAAACGGAGAGAAAAATATGTTTTGCAGTGATTT  
TTGGTCCCGGGGTTGCCCTACTGTGTCCGTGCCGTACAGATCGCCGAGCAGCTGACCGAACAGCGCGA

TGACTTCAAATTCGGCTACGTGGATATCCATGCCGAAGGGATCACCAAAGAAGATCTGGCCAAGAGCGCC  
GGCAAGCCGGTCAATACCGTGCCGACAGATCTTCTGGACGAGCAGCACATCGGTGGCTGCACCGATTTTCG  
AAGCCTACGCCAAAGCGAATCTGGGTCTCTACCAGTAATGCCGCGGGTCAATCCCTAGCGGGTTCGGGTT  
GACCGCCAGAGCGTAAAAAATCCGGCGCCATCAGGCGCCGATTTTTTTATTAGCGGAACCTCGCACCAT  
CCCTTGTCAGGAAGTACAGACTGGGGTCAGGGAGTACAGACTGGGCGGCAAGCGCGCAATGATGGGG  
TTGTGATCCGAAGTGTAGTGGCCGGTGAACCTCACCTCGACCAGGTCCAGATTGCGGTTAGTAGAGGTGAT  
CCAGCGGGCGACCGAAGGCGGTGCGGCGCAAGTACAGGCACCGGCACGGCTCTTGCAGCCCCAGCTCGTC  
CACCAGTTTGCTTAACCAGAACTGGCGCTTGTTCGCTCCAGGTGTTGAAATCACCGGCCAGAATAACCGGC  
CCCTGATGGCGGCGCACCAAGGCAGTCAAATCGTTGAGCTGCTCGCGGAAGGTAGCCATCCCCAGCTCGA  
AATTGACCGCATGGATATTGATGACCATCACACCGTCAAGTACGCTCGCCCTGCAGCGGATAGAGGCTACCAA  
CCCGGATTTGGGGATGCGCAGCAAGGGTTCGGGGGAGCGTACGCCACAGACGAACCGCTCGGGGTTCTTG  
GCCACCGTCATCACCCCGAACGACACGCGCCCTGGGTGAAGGCTTGCAGCTGTTGCCACTGGAAATCAC  
CGGCGCGCAGCCAGTGCAGCATATCGGGACGGGTGGCCGACTCTTGCAGCAGCACCAGATCCTGCCCTTT  
GGCATAACTGTCCATCCCTTCGCGCCAGTTCTTTCGCTGGCCCTTGTAGAGATTCCACACCGTCAACCCG  
AACTCACGGGGCAGCGCCGTGGTTCGCAACCGTACCAGCGGCGGACGCTGGCAGTCGAGTCCCGGCACAA  
TCCCTTGAGCTGTGACCAGATGGTTCTGATCCGGCACCTCAAAAACAGCTACCAACCCAGGGTCCAGCAG  
GGAGGTGCCAAGAATGCGATAACTATTTTTATTGGCTAACAAACCGCCGCTTTGCTTTTTTGTTCGAC  
CATCACAACCGTATCCACGCCGACTAAGCTGATAGTCCCTGTTCCACCAACCAGAAGGACCTTGTCTC  
ATGGCGAAAGAAGTTCGGTACAACGTGACGTTTTATGATCAACAAGGAAATGTCATCAAGTGGAGCTGT  
CCACCGTCTATCAGATAAGACGGGACCCCTCAATGCGATCTCTGCCTGTTTGACACCTGCAATATGTGGG  
CTCGGAAGAGATGCTGGAACGCATGATACGGCAAAAAACCGGGCTTGAGCAGGAAATATCCATCATCAAT  
GCCCGGCTGATTTAATCAGGCACCTCACCGGAACCGGGCGGGATTTGCCCTGTTTCGTTCGATGGCGACATAG  
GTGAAGATCCCTTCGGTACACAGTAGCGCTGGGCGTCATTTTCCCGCAGTACCGGCTTGACCCACACCT  
CCAGCTTGAGCTTCATGGAGCTGCGGCGCATCTTCATGCAGCGGCGTAGCAGCAGACCACATCGCCAC  
CTTGACCGGACTGTGAAAGGTTCATGCCTTCGACGGATACGGTACAAATACGTCCCTTTTGCCAGCTCCTTG  
GCCATGATGCCCCACCTATATCCATCTGGGACATGATCCAGCCACCAAAGATGTCGCCATTGGGGTTGG  
TATCGGCTGGCATTGCCAGGGTTCTCAGCAACAACCTCCCATCGGGGTGACGTTTTGTATCTACCATCAT  
TACCGCTCTCTCTCATGATGGCGGATGATAGGGGGGATCACCACCTTGGAACCACTCAATTTGCCCG  
AGGCGGCAAGCTCGGCAAAACAGTGGGCCGGATCGGGCCAGCGATAGTTGAATCCTATCTGCTGGCAAAT  
CAGCTGACCGTCGATGGGCTGAAATTCACCGGCAGGCTCGATAAAGACCGGCACAGCCCGCTGCTGA  
CGCGCCGCAAAGGGGTAGAACTGCTCGCGGCGCGGATGCACAGGCGCACTCAGGTTGAAAACATCCCCAT  
CCTTGCCCCGCTCCAACAGCAGCATGCAAGCCGCCACCACATCGTCCAGATGGACCAGATTGACCGACTG  
GGCGCCGCATCCAGGGTCTTGCCCGCAAGGAAACGGCCGGGATGGCGATCCGGGGCCATAAAGGCCGGAG  
GGGCGCACTATCATCACCGTCTCGAAACCGCCGCCAGCACCCTGCTCCGCTGCCAGCATCCGCTCGC  
CACGGGCATGGCGGGGTTTGGGCTGTTCCCCCTCCTGCTGCCCGCGCCCCATAACCGAGGTGGCGCTGAC  
AAACAATACCCCGCGGGTGCATTCGCTTTGGCCAACGCGCAGGCTTTTGCCACCGCTGCGGGTAGTCA  
TCGGTCTTGTGGGCGGTACGCAGATAACCAGCGATTTCGAGGGGATAGGCCACGCATCCGACATATGGG  
CAGAAATCGTCAGCGGATGGGCATTGATCCCTCCCCCTGCAGACGGGCTGTCTTCTCGGCGCTGCTGAC  
CGTGACAGCAACCTGCTTGCCCTGCCGCCAGCAGGGCTCGCGCCAGCGGCAACCCGAGCCACCCCGCTCCC  
AGAATGCCGATCGTCCCGGCGATATGTTGCTCTGTCATCATCCCTTCTCCTGCTTGACGCTATTTGCCCC  
GCAGCTTACCTGCCGTGACACAAAAAGAAAGCTATGGCCGCATATCCTACTACCTATAGTTAAGTAAATA  
CCATCAAGGCGACGGTATCTTAGCGCTGTTTGTAGCCAAATCTGGAGCCAGATACTTTTCCTAATGGTT  
TTCTCAACTTACTAACACTCTCTTTGAAAAAGATACGATTAACCTCGAACTACAGCCACGCATCCAAAAT  
TTCAGCTATCTAATGACAAAGACTAAAATGTACCAATTAAGGAATAGACACTTTAGCCCCCTCAAAAAGA  
CTAAGAAAACACATATTAACAAAGCTTATCCAATTAATATCAGATAACTTTTGAACCGAAGAATTGAG  
AATTTATTTTATCTGAATGTTTGAACACATCCACTTCTCAATCTTCAACTACCTGATTAATTAATGAAAT  
TTCTGGTAGGAGTTTAGATACTGCAGGAGCTAATCTAGGGCGCCAGTAGCGATTGTCGTAATAACTGCA  
GCGTTTTGCCATATACGCCCAAAAACGCTTTCGCAACCGGGTGATTTTTCTACAGGTTTAACTAAGTTGTTTT  
TTAGAATAGCGTGACCAAATGTCTCCTCCACAATTTGAACAACCTCCTTAGAACAGTAATTTTATAATC  
ATCAGCAGCTACCAGCAATTTCTTTAATTTGGGTAAGCATATATTGCTTAATCTTCTCTGGTAATTCGGCA  
GCTTCGACCTCATTAATTAATCTCTAGCACCAGAGGAAATTTTATCTACCTCATTAATTTGGTAATATCG  
CCTGAGGTGCACGCAAGGATAAAAAATCAGAAGTCATGTTAAATAATTAACCAATGCTCATTTAGGTG  
TTGTGAAAAGTCCATCCATTTACTGCTGAAATTACTTTTCAGAGAAGGCTCTTTCCACTGGTTGACACCAA  
TGCATATATCGTTCAACATTTATCCCGTCAACTTTCTTTAATTCATCTACGACCTCTGCTGACAAAGCTA  
AAACCTTTCCAAGCTTCCCTAAAAATGTAACCTTTATCATTTGGGGTCTATATCTAAAAGATTGCACCATA  
ACTTCTACAACCTTTGAGCAGGATTTTGTTTTTTTCCAGCTCTAGTATATTTAAAAGTCTCGCAGCAGGA  
TTATTCATAACCATAAGTATTAGCTCTCCTTATTTATCTTATACGGAACCACTTAGTATATCGTTATGTA  
GATAAAATCTACTGAACATGTTGTTACCGCATATCCTGCACAGCTCAGCCAAAGATATCAACATAAATAT  
CATTTACTTCAACATCTTACATATCCTTAACGCAGGATTTATAGCTGATGATGAGGTAATTACTTCCAT  
ATACAACCAAGGTTTTACTATACAAACAAGCGGGCCAATGGCCGCTTGGTTATATTTCACTCACCCAT  
TCTCACACCGGCGGATGGAATGGCTGGCTTCGCGGGTGGCCATCTCCTCGTAAGTGGCCACTTCTGCC

ACGCCACCTTTTGGCTACCTGCATCAGCCGTTTCGGCCTCCTCCGGATGGCTCTGGGCCAGCACCCGATA  
ACGGGTCTCCTCCTGCCGATATTCAGCGAGGGGAATGGAGGGACGCAGGCTGTCGAGGCTGAAGGGTTTC  
TGCCCCGATCTGCGCAATACCGGGTTGTAGCGCATCAACGGCCAGTGACCGGAGGCCACGGCGCTTTTT  
GCTGGGTGAGGCCAAACTCCATGTGATGCCGTGGGCGATACAGTGGCTGTAGGCGATGATAAGCGACGG  
GCCCCGATAGGCCTCCGCTTACAGCAATGCCTGCAGCGCCTGCTGCGGATTTGGCACC GAAGGCGATGCGG  
GCAACATAGACGTTGCCGTAGGAGATGGCCTGCAGCGCCACATCCTTCTTGGCCAGCGTCTTGCCCCCG  
CCGCGAACTTTGGCGACGGCACCGAGCGGGGTGATTTTCGACATCTGGCCGCCAGTGTGGAGTAGACCTC  
GGTATCCATCACCAGCACGTTACATCGCGCCCGGAGGGCAGCACATGATCGAGCCCCGCCGAGCCGATG  
TCATAGGCCAGCCATCGCCGCCGATGATCCAGACCGAGCGGCGCACCACTGATCGATGAGTGACAGCA  
GCTCGCGACTCTTCCGGACTTACCTCTTCCAGCCGCTCGCGCACTTTCGCGACCCGGGTACGCTGGGG  
CGGATCTCCGACTCCAGCCGCTGCGGTGCGCTAATCAGGGTATCGACCAGATCTGTGCCAGCTCCCC  
TTCATCGCTTCAAGGGCCGCCACCGCCTGACCGTGTATGCTGATCGGCGGTGAGACGAAAACCAAAGCCAA  
ACTCGGCGTTGTCTCGAACAGGGAGTTGGACCAGGCGGGCCCCCTCCCTTCGCCATTTTGGCCACGG  
CGTGGTTCGGCAGGTTGCCGCCGTAGATGGAGGAGCAACCGGTGGCGTTGGCCACCAGCATGCGATACCA  
AACAAGTGGGTGAGCAGCTTGGAGTAGGGGGTCTCGCCGAGCCGGCGCAGGCGCCGGAGAAGTCAACA  
GGGGTTCAAGGAAGTGGGCACCGCGCACCGTAGAGAAAATCCACCCGCTCGCGGGCAGGCCAGGGCAGGCT  
CTCGAACAGCGCAGCGCCTGTTTCTGGCCAGCCAGATGGGGCGCCTTGTCCATCATGGTGTATGGCGCGC  
TCGCCCTCGTGTCTCATCGGCTCCGGCCCGCACCGGACAAGCCTGCACGCACTGGCCACAACCGGTGC  
AATCTTCCGGATAGAGCTGCAAGGTGTAGCGGCTGTGGGGAAAGCCCTTGGCGGTGACGGGCACCGACTG  
CGCCGCTCGGGGGCGGTGCGCCAGCCAGTCTGTATGGTAGAACTTGGCCGCGAGCGCCGCTGGGGGCAA  
ACAAAGACGCAGTTGCCGCACTGGATGCAGATATCCGAATGCCAAATCGGGATCTCGCGGGCGATATCGC  
GCTTCTCGAAGCGGCTGGTGGCGGTGGGGTAAAGTACCATCCACCGGCAGCATGGAGACGGGGATCAGATC  
GCCGCGCCCCGCCAGCATCTCGCCGGTGACCCGCTGGACAAAATCGCTGCCACCCGGTGCCAGTGGCAGC  
GGATAGTGCCTGATCTGCTCGTACCAGCCGGGATCGCCACCTTGCAGAGGTGAGCCAGGGTATCGTCCA  
CCGCCGCGAAGTTGCGCGCCACCACCTCGGGCCCCCTTGGGGCATAGCTCTTCTCGATGCTCTCCTTGAT  
CAGCGCAATCGCCTCATCCC GCGGCAAGATGCCAGCCAACGCGAAGAAAACAGGTCTGCATAATGGTGTG  
ATGCGATTGCCCATGCCGTTGCGCTCGGCCACCCGATCCCATCGATGCAGTAGAGGCGGATATCGAGGG  
CACGGATCGGGCGCGCCGCTCGGGCAGCTCGGGCAGACACGATCAGGCTCATAGGGAGCATTGAG  
CAGCAGGGTTCGCCCCCTCGCGCGCATGCTCCAGCAGCTTACCGATTTCGACAAAAGCCCCACTGGTGGCAA  
CCGATAAAGCTCGCCTGCTCGATAAGCCAGGGGGCGTTCGATGGGCTCGGGGCAAAGCGCAGGTGGGAGA  
CGGTGCGCGAGCCCCGACTTCTTGGAGTTCGTAGACGAAGTAGCCCTGGGCGTGGAACCCCTCCAGCTCGCC  
GATGATCTTGATGCTGTTCTTGTGGCGCCACCCTGCCGTCGGCGCCGAGGCCGAAGAAGAGCGCCCGC  
ACCCGGCTGGCGGGCTCAAGATCACCGATGGGGTGCAGGCCAGACTGAGGCCCGACACATCATCGACAA  
TCCCCACGGTAAAGCGCGGGCGCGGCATCGGATGCCAACTCTCGAACACCGCCGCGCACATGGCCGG  
GGTGAATCTTTGGAAGAGAGACCATAGCGCCGCCACTGAGCCAAGGGAGGCGCTTGATAAGACCGCGC  
TGCAAGCCATCGATAAGGGCGCTCTGCACATCCAGCAGCAGCGGCTCGCCACCCGCTCCCGGCTCCTTGG  
TGCGATCCAGCACCGCGATGCGCCGACGCTCGCGGGCAGCGCATCGAGCAGCGCCTGTACCGGGAAGGG  
GCGATAGAGGCGAATGACCAGCACCCCGGCTTTCGATCCTGCCGTTGAGCCAATCCACGGTAGTGC GG  
GCAGTGGCAGCCCCGAGCCCATCAGCACGATAACGTCGGTGGCATCCGCCGACCCGTGATACTCCACCA  
GCCGATAGTGGCGACCGGTGAGCTCGCCGAGGTTGTCCATGCACTGCTGCACCCGGGCGGGTACCCTTC  
GTAGAAGGGGTTGACGCTCTCGCGGGACTGGAAAATAGGTATCCGGGTTCTGGGCGGTACC GCGCATCACC  
GGATGATCCGGGTTGAGCGCCCGCGCACGGTGAGCGGTAACCGATCGTTGTCGATAAAGGGCGCGAATTT  
CATCCCATGACAGGGCGGTGATCTTGTTCACCTCGTGGGAGGTGCGAAAAGCCGTCGAAGAAGTGGATAAA  
GGGCACCCGGCACTGCAGGGTGACGCTGTGGGCAACCAAGGCCAGGTCTTGCCTCTTGCACCCGAGCCA  
GAGGCAAGCATGGCAAAGCCGGTGTGCGCGCCGCCATCACATCCTGATGGTTCGCAAAGATCGACAACC  
CCTGCGCCCGCAGCAGCGAGCGGGCCGACATGGAACACCGCCGAGGTCAATTCACCGCGATCTTGTACAT  
GTTGGGCGAGCATCAGCATCAGCCCCCTGACTGGCGGTGAAGGTGGTGGCGAGCGCCCCCGCTGCAGGGCA  
CCGTGTACCGTACC GCGAGCCCCCTTCACTCTGCATCTCCACTACGGTGGGGATGTTGCCCCACAGGT  
TGGTTTGTCCCTCCGCCGCCAGGCATCGGCCAGTTCGGCCATGGTTCGAGCTCGGGGTAATGGGGTAGAT  
GGCACACACTTCACTCAGCTGGTACGCCACCCGGGCCGCGGCTTCGTTGCCATCGACCATGATCAGTTCA  
TGTTTTCATTGGGACTCCTCCGGTTGGCGCAGCAGGATGGCGTGACAAGGGCACTGGTCATGGCAGGCACC  
ACAGCCGGTGCAGCGCTCGGCATCCACCTGATAGCCTTTGCCCGCCCCAGCTTGGCGATGGCCTGCTCG  
GGGCGACTGCCATAGCAGCCGTCGCACTCGAAGCAGTTGCCGAGGAGTAGCAGCGCGCCGCTCGTAGC  
GGGCGGCCACCTCATCCAGCCCCCGGATGATCTCGCAAAGTCACTCGCGCCACGCGGTTTTGACCGG  
CTGACTGCTGGCGGGCGCGTGTAGTCTGGAACCAGAGTTGCAACTGCTCCGGCCCCACAGCGGGTAGGAG  
ACCATCTTTTGGTAGTGGCGACCGCGCAGCCAGGCATCCATATGGCGCGCCGCTTCTTGGCATGGCCGG  
TGGCGATGGTGCAGGTGCGCTCGGAGGGCACCATGTGCGCCGCCGCAAACAAAACCCGGCACATCCGTCAT  
CAGGTTACCCGCTACCTGCACCACTCCCTCCTTGTGGACCCGACGCGGGGAATGCTCTCCAGCACCGAT  
AGGTCGACCTCCTGACCGAGCGCCAGAATAAGAGAGTCCGCTTCGAGGGTTTCAAACCTTGGCGGTGGGCA  
CCGGCTTGGCCTCGGCATCCAGCGCCATCACCTCTACCTCGATATTTGGTGTGTCGAGCTGGCGGATGCT  
GCGCAGCCAGTTGATCTTGTATCCCCTCCTCCTCGGCTCGTGGCTTCGAAGGCGTGGGCAGGCATATGG

TCCCGGTTCGGCGGGTAGATGATCATTGCTCTTCAACGCCCAAACGGCGGGGGTACGGGCCGCATCCA  
TGGCGGTATTGCCACCCCCATAAATCGCTACCCGTCGTCCAGTTTGGGTGGCGGCAAGCCCTGCTCTTC  
GGCCAGACTGGCCTGCTCGAGGAAGCTCACCGCATCGAGGATCTTGCCCGCTTCCCGGGCCGGAATATCG  
ACCCGCTTGGCCAGATGGGCGCCAATGGCCATAAAGACGGCGTCAAAGCCCCCTCGTCGCGCTCGCGCA  
GCACATCCTCCACCTTGTGGTTAAGAGTGATGGTCAACCCGGCCGCCACGATACGGGCTACCTCCCGATC  
CAGCACATCGCGAGGCAGACGGTAAGCGGGAATACCGAAGCGCAGCATGCCGCCAGCAAGCGGTCCCGCT  
TCACGGATCTCCACCTGATGGCCGAGCCGGTTGAGGTGCCAGGCGCAGGAGAGACCGGAGGGGGCCGGCGC  
CAATGACCAGCACCTTCTTGCCGCTGGCAGGGGCAGGTGGTGCAGGCTGCCAGCCACGGGCCAGCGCCTC  
GTCGCGGAGGAAGCGCTCGATGGCGTGGATGGAGACGGATTCATCCACCTGACCGCGGTTGCAGGCGCTC  
TCGCAGGGGTGGTAGCAGACCCCGCCATGAATGGCGGGCAAGGGGTTCTCTTCGATCAGGGTCCAGG  
CCGCTCAAACCGGCCCGCTGAGCCAAAGAGAGCCAGCCCTGGATATTTCTCCGCGCCGGCAGGCATG  
ATTGCAGGGTGGCAGGGCCGGCCGCCAGCGGTAGCCGGTACGCACCGGGCTGTTCCCGTTTTTCAGG  
GAGAGATCCGGCAATGGGGTTCATGTCCAGTTGTTTGTCTACATATTGCTTTCTTTTGTGTGACAGG  
CCCCACCCGATGGCGCTTGATACCGTGTAGCCGAGGCGGACGGTGGCCGGATGGGGAGAAGCGAAAGCG  
TTAGAAACTGGGAACTGAGTCGATAATGGCCGCTTTTTTGTACTGATTAGCGAATCAGGATCAAAAAATG  
TTGCACTTTATGGTTCATAGAGACCAGAACGTGACTCAAGTAACATCTTCTCCAGCTGACCGCTGGCTTT  
CAGTTTGGCGAGCCCCGATTGAAGGTTTTGACCAGCTCGTCAGCGTTGGCGCGCTTGGCGCTGATCAGC  
AGGTGGCCTTCAACTTTCATCACGGGTTTTGAATGGGTGCAAAGAGATCGACCGTGTGGCCGGGTAGA  
ACTGACGCAGGGAGTAGTAGCCGACATCTATGTTCTCCAGGGTCAGGTCGGCGCGGCCGGAGAGCAGCAG  
ATCGAAACTCTGGCGCAGCCGGGTGACGAAGTGCACCTGCAGCGCACCTGCGCGATGGCTGCAAAAAAA  
TCTGCATTGTAGGTATAGCCACTGACCGCAGCCAGCTTGCAGATCCGCCAGATCCCGATAGCCTTCCATT  
CAAGCGGATCTGACTTGAGATAGAACCAGACGTAGGTTTTCGCTCAGGATGGGATCGCTGTAGAGATGGGT  
TTTTGCGCCGCTCACTCGACTCATACCAGTGGACAGTGCATCCACCCCCCTCCTCCGACAAGCGAAAG  
GCCCGCTTCCAGGGCAGAACTGGAACCTGACGCTCACCCCTTCACTCTTGAATGCCCTCGCTCACCACAT  
GAGGGATCAGCCCCTGATATTTAGTGTCTCGGAGCAGTAAGGGGGATACTCTCCCGTGGTCAGGGTCAG  
CTCCTGCGCCAGAGCCCGTGGCAAAAAAGGCTCCCCGCCAGCAACCAGCTTATTTTCATCCCGATGCC  
TCTTGTCTCTTTTCCAACTATAGACCGCCCTTGAAGGATTTGCCGGATCGTCGGGGAACCGTTATGT  
TCCCCTTTTTCCAGGCGACTCGCGCCGCTCACAAGGATATGAAGATGCCAGGCTAGACAGCATTACCT  
CTACCCCAATCAAATCGACTGCAGGTATGCCGCTCGCGCCGGGTGACCGAAGAGGACTGGCAGGG  
GATCGCCGCTACATGGTGGTCAAACCGGACGGCACCTTTATCACCGCCGGAACCCATCCCCAACTGCAAC  
AGGTCTGGCCACCCCCATCGAAGGGGGCTTGCAACTGCGCTATCCGGGCTTTGAACCGCTCATCCTGCA  
AGAGACCGACTTCAGCCGCACCCCGCAAGCTACCGGAGTCTGGAGCGACCGTTTCACCGCCCTGCACACC  
GACCCCAAAGCCGATGGCTGGCTAAGCCGGGTGGCAGGGGAGACGGTGCAACTGCTCTGGCTGGGTGAAA  
CCTCGGATCGCTTTCGCGAGAAGACCGGCACCCGGGTGAGCTTTGCCGACGGTTATCCGCTGCTGCTGAT  
AAGCCAGGCCTCTCTGGAGGATCTCAATCTGCGCTCCGATGCCCTGCACCAGATGAGCCAGTTCGCGACC  
AATCTGGTGGCAAGCAATACCCAGCCCTTGAAGAGGACAGCTGGGTGCGTATCCGCATCGGCGAAGTGG  
AATTTAAAGTGGTCAAGCCCTGCAGCCGCTGCATCATGACCACGGTGAAGCAGGCACCGATCGTTTTCAA  
CGCCCTGAAAGAGCCGCTGGCCACCCCTACCCGCTACCCGCTGGCGAGGATGGCGAGGTCTACTTCGGC  
CAGAACCTGATCGCCCTGAACGAGGGGTGGATTGAGGCTGGCAGCGAGATCGAGGTAAGGAGCGCACC  
GTCCGGTGGTCTATCCCGCCGCCGACCCGAAGAAAACGGGAGCTGGTCTGCGTGGCCCGCAACCGCTGGC  
GCGGGATCTGGAGACCTTCTGGTTCGAAGCCACCGATGGCGAGCCCTGCCCGACTACCTGCCGGGCCAG  
CATCTGCCCATCAGCCTCGATATCAAAAACGAGAGGATTCACAGACGCTATACCCCTGAGCTCCACACCGG  
ATCACCCGAGCGTTACGGCATCAGCGTCAAAAAGGTGGAGGGTGGCCGCATCTCCCACTGGCTGCACCA  
GCAGTTGCAGGTGGGTGATCGGCTGCTGGCCGCCAACCCCGCTGGCGAGTTTCACTTAGGGTCCGAGCGC  
AATCTACTGTTGCTCTCCGACGGCTCCGGCGTCAACCCATGCTGGCGATAGCCCGCACCTGGCGCTAC  
GCGGGGAGCTGGAAGAGGTTCACTTTATGCACCTATGCCGAGCGAAGCGGACATTTCCCGCCGACCGCA  
ACTGCATGCCATGGCACAGCAGGGGATGACCCTCACCATTATCTGAGCCAGCCGGACAATCACTGGCAG  
GGGCTGCAAGGGCGACTCAATGATGAGCATCTGCAACTGCTCAAAGGGCTGGCCGACAAAGAGGTCTTTA  
TCTGTGGCCCCACGGCTTTATGGCCGATGCTGCCGCCAAAGTGGCGGCCCTCGGGCTACCGACCGCACG  
GATCAGACAGGAGAGTTTTGGCGGCGCCATTCTCTCGGTGGCCCGCCCCATCAGGCGGTGCAACTGCGT  
ATAGGCGCCAAAGCCTTTACCGGCAACAATCAGGGCACCGTGTGGATCAGGCCAACAAAGCAAGGTGTAG  
AGCTGCCATGGAGCTGCCGCGCCGGCATCTGCGGCAGTTGCAAACAGACGCTGATCTCGGGCGAGGTGGA  
TCACCCCGACCCCCGCCATCACCGCCGCCGAGCGGGCCGAGGGCAAGATCCTCACCTGCTGCGCCGTG  
CCGCTCACCGACCTTGAATCCTATGATCGGGTATCGGGCCGATTAACCTCACGCCACCCAGATGACC  
GGGGAATTGACCCCGGTGATCTTTATCCACACTTGTTCACCTGATCCGCCCTTAATTTGTCCCCACGGCC  
TTCATCAGTGAGTTTCCCTTCTATACTCTCAGAGCAAAAAGCCTTGCCAGCCATTGACTTGGCGATGCT  
CCATACGACACTCAGCCATAGGGAAAGGACGCCCATACCATGGAACAGAACAAAGCCCGCCTTTCAGCTCA  
ACCTGCTGCTATCAGTCATCACCTGATCCTGCTGTCACTGGTGTTTTTTCGCTACAGCTGGGCGGGTAA  
ACAACCTGGAAGAGAGTTATCGACAACAATATGTCTCCTACCTGCTGGCCGACGAACTGCGCCAATCCTCC  
GATGATCTGACCCGACTCGGACGCACCTACGTATACCAAGGATCCAGCCTACGAGCAGCAGTACATGC  
GGATCCTGGCCATTGCAACGGCGAGCAGCCGAGGCCGGATGGCTACAACCGTATCTACTGGGACTTTGT

CGCCGCCAACGGCCAGAATCCCCGCCCCGACAGCAATGTTGCGCGTGGCCTGATCGACCTGATGAAAGAT  
GCCGGTTTTACCGACGGCGAACTCGCCAAACTGAACGAGGCCAAAAACAACCTCGGATGCGCTGGTCAACA  
CCGAGGTGCGCCGCTTCAAGCTGGTGCAGCAGACCGATGGCGATCCGGTTGCCAACAGCAAAAAGCCAT  
CGCCATGATGCATGACAAGGCCATCACCAGAACAAGGGGGCGCATCATGTCCCCCATCGATGACTTCTAC  
GTGATGATGGAGCAGCGCAACCACGAGGCAGTCGAGAGCGCCATCGCCAATACCGATATGCTGCGCTATC  
TCTTTATCGCCCTCGGTCTGGTGTGATGTTCTTCTCTGGCGCACCTATCGCTCCCTGCTCGATCTAGT  
GGGCACCTCGGTGCAACAGCTCAAGACAGATCTCCATATGATGGCGGAAGGGGACTTCTCGCGCCCCATC  
AAGGTGCCGGCAGGATCGAAAGAGAGTCTTATCGGTCTGCTTGGCAGCATGCAGACCACCCTCAAGGGGA  
TCATCGCCAAGGTCTCTACTCCACCGAGGAGCTGTCCCACTCTGCTGACAGCATCGCCCAAATTGCCGA  
GCAGATGCCCCAGTTTGTACTCCGATCAGCAAACCAGCACCCAAACCATGGCCGCCGCAATTGAGGAGCTG  
GTAGTGAGCATCAGCCACCTCTCCGACAACGCCACCCATGCCGACGAGCTGAGCAAGGTCTCCGCCAATA  
CCCTGGAGGAAGGCTCAGGGGTCAATTAAGAGACGCTTGGCAGCATCGAGAATATCTCCACCACCTGTGGG  
GGATGCGGCCAGCACCATCTCCGAGCTCAACGGCCATAACCAGCAGATTTCCGAGATCATCGGGGTGATC  
CGCGGTATCGCCGATCAGACCAACCTGCTGGCTCTCAACGCGGCCATCGAGGCAGCGGGGCGGTGAAC  
AGGGTGCGGCTTTGCGGTGGTGGCCGACGAGGTGCGCAATCTGGCCAGCCGCTCGGGCGGCTCAACCCA  
ACAGATCACCGGGATGATCAGCAAGATCCAGAGCGGGGCGGATGCCCTCATCCGCAGCATGGAGAACACG  
GTCAACAACGTCTCCCGCGGGGTACGCTGGCTAACCAGACCGGCGAGGCATCGCCAGCATCCAGAGCC  
ACGCCTCCAACCTCACCGCCTGATGGGAGAGATCAGCCACACCCTGCGCGAGCAGTCCACCGCCGCCAA  
CGAGGTGGTCTCGACCGTCCGCAACATCACCTCCCTCTCCGAGCAATCGGGGGATGCCGCCCGTACAGTG  
TCGCAAGAGGGCGCCAAGCTCAAGCAGCTGTCACGGGTGCTGCGCCAGGAGATGGGGCACTTCAAGCTTT  
AAAGAACGCTGAAAAGCAAAACGGCTGCCCCGAAGGCAGCCGTTTTTTTATTCGGGGTATCCCCGTCATTCA  
GTATCTATCAACCACGCAGGGCGGGGATACGCTGCTCGATGGGCGGGTGGCTCATGAACAGCTCGCTCAT  
GGAGCGCTTGCCGTTGATGCCAAAAGCCATCATGGAGCCTTCCAGCTGCGGCTCGGCACCAGCGGGAGAGG  
CGCTCAAGGGCGGCAATCATTTGTGCGGACCTGCCAGCTTGGCGGCACCGGCATCGGCACGGAACCTCGC  
GCTGACGGCTGAACCACATGACGATGATGGAGGCCAGAATACCGAACAGCATCTCCAGCACGAACACGGT  
GATCATGTAGGCAAAACCACCGGTGCTGCTGCTCTTCTCGTTGTTGGAAGTGAAGAAGTTGCTGATC  
ACGCCAGCCAGATCAAGGGCGAAGAACATCAGCAAGGTGTTCACTACCCCTGGATCAGGGTCAGGGTCA  
CCATGTGCGCATTGGCCAGCTGCGTCACTCGTGGCCAGTACCCTTCCGCTCGTCAAGGCTGATGATC  
GTAGAGCAGGCGGAGGAGACCGCCACCAAGCAATCATCGCGCGGGCACCAGTCCGCAAGGCGCTCATC  
TCGGGAGAGTCGTAGATCCCCACTTCAGGCATCTTGATAACCCGCTTCGCGGGCCTGACGGGCCACAGTAC  
TCACCAGCCAGTGTCTCGGTCTCGTTACGGGGTTGCTCGATGACCTGGACGCCATAGCTGCGCTTGCCAT  
CCACTTGACATCAGCAAGGAGATAAAGGAACCCCCAAAAACCGAACACGGCACAGAACACCAACAGCCCCG  
GAAATGCTGGACTTGTTGATCCCCAGAACCAGAAACAGGATATTGAGTACCACCCCCAGCACAGCATGA  
CGGCCAGGTTGGTACCAAGAATAGCATAAATCGCTTCATATAGACTCCTTGTGAAGATAAGGGACATGA  
CCGGGGATCACTCGGGATCCCCACCTGATCATGTTAATGTCGACATTCAGGGAGATTGATGAATGTTT  
GCTGAATATGCCGTCAAAGTAGCGGCAGATATCGAGACGCCCTTGCAAATCGGCTTCAAGCGGATTGTT  
TATAAACCGGAATTTCCCGGAGGAAGGGGGCTGGCAGCAAGCCCCCAGGGTGTCCAGATTTTCTGATAA  
TGGCTCATGGAACCATGGAGCCGATTAATTACCCACCCCGCTACCGGCAACTGATCATTGCGAATGGCGG  
CAAAGGTGAGCAGCGCATGGTTGAGGCAACCAACTTGGCCCCCACTACCATGATCACCGCCATGTTCTC  
CTGCTTGACCCAGTCCGACAGCAGATGCTTGGCATCGAGCGGCAGATACCAGCCCCCGCCCCCTTCCACT  
ACCGCCAGTTCGGCCCCGGCCTGTTCAATCTTGCCTAGCCCTTCGCTCAACCCCTGCATGGTGTAGGGCT  
GGCGCGCCTCGCTGGCGGCAATGTGGGGCGCAATCGGGCGCTCATAGGCGAACGGATTGACCACCTCATA  
GGGCAGCGGCAGGCTCGCCGCTCCTGCAACAGGACAGCATCAAGGTTGCGCAGCCGTCGGGGTGGCG  
GCACATCCGGCCGAGACCGGCTTGTAAACCGCGCACTTGATTCCTGTGCGCTGAATTCACGCAGCAGGG  
TGCCGCGCCACCAGCGCTTGGCCACATCGGTATCGGTGCCGGTGATAAAGAATGATTTTCATACGGTTCTC  
TCCTTGGCAGGGCCGTTGACTACCCCTGCACACACTGCGATTCGCGGCTCAGCAAGGCTTGTGAGGC  
GGCCGAGGCACACCCGATAAAGTGGCGACCAGCCTGCCATCGGGCTGGCGAAACGCCCTCATACGCCCTGAGT  
CAGCTGCTGCAATCTGGCGCGACCGCTCAGACCGGCCGGGGCGCGCCCCGATTTGTCATTGACCTGA  
TTGGCCCCAATCCCCTTGAGATCGCGCAACAACCTGCGGCAATTCAGATAGGCGAGATCCCAGGTGATAC  
AACGCAGCTCGGGAGCAGAGACCCCGGCTAGCCAGCGCCTGCTCCAATTTGTGGCAGGCTGAGGAAGCG  
ATTGACATGGGCGGACCATCAAGCTGCTGCCAAGCGGCTCGCAACTGCCAGAGCGACTCATCGAGCAGG  
GTCGAGAAAAAGATCTGGCCGCCGTTTACCACCCGACGAGCTCGCCAAAAGCCTGGGCCGGACGCT  
CGCACCACTGCAACGCCAGACTGGAGAAAAACCGAGTCAATGTGTTATCGGCGAAAGGAAGCTGCTCCGC  
ATCGCCGACAGCAGGCGAGCACCGCTGTCACGCAAGGCAGCCTGCGCTAGCATGCCGGGGGCAAGATCC  
AGTCCCACCAGCTGATGACAACGGTTCGCCAGTTGGGGCAAGAAAAAGCCGTTACCGCAGCCCAGATCCA  
GCCCCGCTCACCGTCAGATCAGTGCCAACCAGCCTGTCTGGCATCCATTCAGCAGCGCCTGACCCACCTC  
CTGTTGAAAACGGGCATGGGCATCGTAATGACGAGCGGGCGGGCGGAAACGGCGAGCAAGCTGCGCCTTG  
TCGACCGTTTTGAAAACGCTCAGTCATGGTGAGCCTCCCCAAGCGGTGTAAGTGTGGGCGAGCCCCAAG  
GCATCGAGCAGGCGATCCAGATCTGCTCGCGGTGAGCCGCGCTCAGGGTAATGCGCAGCCGGGCGGTAC  
CGACTGGCACCGTGGGCGGGCGGATGGCGCTCACCCAGACGCCGAGCTCCCGCAGCCGCTCGGCCAGTTG  
CAAAGCAGCAAAGCTCTCCCCACCAGCAGCGGCTGGATCGGGGTGTCGCTCGCCCCAGTTGCCAACCC

TGCGCCTTTGCCCTTGCCGGAAGCGGGCGATCAGCTGGCCAAGATGGGCGGGGCTCATCGGGGGCGG  
GTACCAGTTGGATACTCTTGCTGACCGCGCAGGCCTGGGCGGGGCATATGGGTGCTGTAGACATAGTG  
GCGGGCAAAGTTGACCAGATACTCCACCAGCTCGCGGCTGCCGCCGACAAAGGCACCGGCGACGCCAAGC  
GCCTTACCAAAGTGCCCATCTGGATGTGTACGCTGGCAGAAAGGAACCCCTGCGCCGCCAGAGTGCCGC  
GCCCCCTCGGCTCCCAGCACACCAAGACCGTGGGCATCGTCGATCATCAACCAGTTGCCGCTCTGGGCGGC  
GAGGGTTGCGAGCTCGCGCCAGGGGGCTGATCCCCGTCCATGCTGAACACCCCCCTCCGAGACGATGAGC  
CCGCGATTTGGCTCAAGCTGCCGTTCAAGGGCCGCCATATCGTTGTGGGCAAAACGCTTCATCTTGCAAG  
GGAGCTGGCTGCCATCTCCTGCAAAGAGGCGTGGTTGAGTTTGTCTGCCACAGCAGATGTTCCCTTGCC  
GAGCAGCGCTTTGAGCACCGCTGATTGGCCGAAAAACCGCAGTTGAACAGCAGCACCGCCTCCACCCCG  
AGCCACTCGGCCAGGGTCTCCTCAAGCTGTTGGTGGGACGGCTGTAACCGGTCACCAGTGCGGAGGCGC  
CGGAGCCCGCACCATAGCGCTCAATCCCCGCTTGAAGCGGCTTGATGGCGCCGTGATGGCGCCGTGATCC  
CAGATAGTCGTTGGCGAAAAGTTGAGGTAGTCGCGCCCTGCAACCCCTGAGCCGCCGCCACTCGCCCCG  
TCGGTCGCGATGCGGTTGCGCAGCAGACCCACCTGCTCGCGCTCGGCCAGCGCCGTGCCAACACAAAGG  
GGCCCGTTACTGCAGGGCCCGTCATAACCGCGCAGCCCTGCACGGGGCGGGTGGCGTCATAAAACATC  
TCGGCAGGTTGCTCTGGCGGCTCACCTCGGCCAGCAGCTCCTCTTCTTGAACTGATCCGGTTTCTGGG  
CCCGCTGGGCGGGACGAATACCGAGTCGCTTGAACAGCTGCATATCGCTGTTCTCGTCCGGGTTGGGGGT  
GGTCAGCAACTTGCACCCGTAGAAGATGGAGTTGGCCCCCGCCATAAAGCACATCGCCTGCATCTGCTCG  
TTCATCTTCTCCCGTCCGGCAGAGAGGCGCACATGGGAGGTGGGCATCATGATCCGCGCCACGGCGATGG  
TGCGGATAAATTCGAACGGATCGAGGTTCTCTCGTTCTCCAGCGGCTTCCCTTACCTTGACCAGCAT  
GTTGATGGGCACACTTTCGGGGTGACGCGGCAGGTTGGCGAGCGCCATCAAGAGGCCCGCCGATCTTTG  
GCCTGCTCGCCCATGCCGACGATGCCGCCGGAGCAGACCTTCATGCCGGCGCCGCGCACATGCTCCAGGG  
TATCGAGCCGGTCTGATAGGTGCGGGTGGAGATGATCTCGCCGTAAACTCCGGCGAGGTGTGAGGTT  
GTGGTTGTAGTAATCGAGCCCCGACGCGCAAGACGGGCGCCTGATCGGCGGTGAGCATCCCCAGCGTC  
ATGCAGGTCTCCATACCGAGCCCGCGCACCTCCTCGATCATCCGGATGATGTAGGGCATGTCCTTCTCTT  
TGGGGTTGCGCCAGGCGGGCGCCATGCAGAACGGGACGAGCCGTTGGCCTTGGCTTCGCGGGCCCCGTC  
CAGCACCTTCTCCACCTCCATCAGCCGATCGGCTTCGAGCCCGGTGTGGTAACGGGCGCTCTGGGGGCAA  
TATTTGCAATCTCCGGGACGGCGCCGGTCTTGATGGAGAGCAAAGTACTCACCTGCATTCATTCGGGT  
CAAAGTGGGCGCGGTTGGACGCTTGGCCGTAACAGCAGATCGTTGAACGGCAGGGCAAACAGGGCCCTG  
AACCTCGGCGAGGGTCCAGTCATGACGAAGGCGGTGACCCCGCGGTGAGAGCATTCATACATGGCTTC  
CGGTTGTTATTAGTGGGATCCTCCGCCCGCCATCTTGGGATGGACGGCCACAGAACCSCCGCCGGGCC  
GCGCGCTCAAGGTGATGCGCAGTGCCAAGTGGCTGAAATTTGTTGGCTAGTGTAGAGAGCACGCGTAGACT  
GTCAACACCGACCAGATCAAACAAATGACAATAGAACAACAATGACCAATCAAGAATTCGACCTGCAC  
CACATCTGGCACCCCTATACTCCCTCACTCACCCCTGCCCTGCTATGAAGTGGCCAGCGCCAAAGGGG  
TGAAGATCACTCTCAGCGACGGCCGAAACTGGTGGATGGCATGAGCTCCTGGTGGGCTTGCCTGCACGG  
CTATCAGGTGCCGGAGTTGGACGCCGCCACCGCCAGCTCGGCAAGATGTCCACGTGATGTTTGGC  
GGCCTCACCCACGCCCCGGCGGTGAGCTCTGCCGCAAGCTGGTGGAGTACTCCGAAGGGGCTTGATC  
GGGTATTTCTGGCCGATTCGGGCTCGGTGGCAGTGAAGTGGCGCTCAAGATGGCGCAGCAATACTGGCA  
CGCCAGGGGACGCCAGAGCCAAATTTGTCGCCCTGCGCAGCGGCTATCACGGTGACACCTTTGGCGCC  
ATGAGCGTCTGCGATCCCGATGGCGGCATGCATGAGCTCTACAAGGGCTTCTGCCAGAGCACTACTTTG  
TCGAAGCCCCAGCTGCCGCTTCCACGCCGAGTGGGATGAACAGTGCCTGGTGGAGCTGGCGACGCTCAT  
GGCCGATCATCACGAGGAGATCGCCGCCATCGTGCTTGGAGCCATAGTGCAAGGCGCTGGCGGCATGCGC  
TTCTATCACCCCGCTATCTGCAGTGGGTACGCGACCTGTGCGACGAGTTCGGCGGTGCTGCTCATAGCTG  
ACGAGATTGCCACCGGCTTTGGCCGACCGGCCAGCTGTTTGCCTGCGACTGGGCGGGGATCAGCCCCGA  
CATCATGTGTCTGGGCAAGGCGCTTACCGGCGGCTACCTCACCTCTCTGCGACCTGACCACCGAGCAG  
GTCGCCCCGACCATCTGTGACGGCAAGGCGGGGCTTTTATGCACGGCCCCACTTTTATGGGCAACCCGC  
TCGCTGCGCGGTGGCCAACGCCCTCCATCGAGTTGCTGCTGGCCTCACCGTGGCAGGAGCGGGTGCAC  
CATCGAGCATCAGCTGCGAACAGAACTGGTAGAGCTGACCCTGCACCCGGCGGTGCGGGATGTGCGAGTG  
CTCGGCGCCATCGGGGTGGTGGAAATGAAAAGAGCGGGTGGATGTAGCGCGCATCCAGCGCAAGTTTGTGCG  
AACTGGGCGCCTGGATCCGCCCTTTGGCAAGCTGGTCTACCTGATGCCCCCTTCGTCATCACCCCTGA  
AGAGTTGCGGGTATTGACCGGCGCCATCCGTGAGGCCATCGCCGAGGGCGAGTTTAAATGCATGCAGCGG  
GCGGCCATCGCTGCCGCCGTTTACTACCGGCATTTGATATATAAAGAGGACAACTTTATCCACTTCAG  
TGCAGTTTCACTTGCCGTAATGTGAGCAAAACACCAGACCTGAGGCCCAAGAGGGGTAAACTGCTGCGG  
TTTTTACCATCAAGAAAGACTGCTCATGCGCCTCTCCATTGCTGCCAAAATCAACTTTTTCTGCTCTTCA  
TCTTCTCCATGGTACTGGTCTTCTCCGACGCTATCAGGCGGTGCGCGAGCGGATCTCATCTGACCCT  
CATCAAGGAGCAGAGCCGCGAGCAGACCGAAGCCTATTTGACGCGCCTCAACATGCTGATGCTGACCGGC  
AAGATGGATGCCCGGATACCTGCGCGGCAAGTTTCTCGACCACGCCATGTGGAGGATGCCCGCATCG  
TTCGTGGCGACGCGGTGAGCAAACAGTTCCGGCCCGGGACGGGAGACAGAACAGGTAAAAGATGAGTTTGA  
TGAGCTGGCACTGGCGGGCAAAGGGAGCCTGGAGGTGGTGCACAACGGCATGCACAGCCGTCTGGTGGTG  
ACCCGACCGCTGCTGGCCAAGAAGGATTTTCGCGGCACCGACTGCACCAGCTGTCATCTGGTGGCGGAAA  
ATACCGTGCTTGGTGGGTTGCGCTTTGACTACTCCCTCGATTCGCTGTTTACCCGGGTGAGCAGAACAT  
TCTCACCTCGGCGCTGATCCTCACCGCATCTTCGGGTTGGGACTGCTGCTGACCTCTGGGTCATCCGC

ACCTGGATCGTGCGCCCCCTCAACCAGTTGACCCGCTCCATGGAAGAGGCCACCGACTTGCACGACTTCG  
GCCACCGGCTGGAGGGGGATGACGGCGACGAGATTGGCCGGGTGGCGGTGGCCTACAACCAGATGCTCGA  
CAGTGTGGAGCGCCAGCTCGGCCAAACGCACCAAGGCCAGCAGGCAGGAGCCGGATCAGCCCCGTAAGAC  
GAACGCTTAACCGACGTAGTAGAAAAGCAGACTGGCGATCAGCACCAGTAGCAGGATGGCCAGATTGACA  
TGTCGGGAGTCACTCCTGACGGCGGCTGCGCTTTCGGTTCAGCAGCAACACCGCAAGCGTCAGGGCGCAAC  
AGTCCAGAGCCCGTAGACCAACCAGGGGGTCAAGGGCCGGGTCCCAATAATCGCGCACCTCGATCCCGCC  
ATAGACCAGAAAACCGTAGGCAATTTTCGGGCCGGGCATAGTGGTAAAGGGAGAGCAGCACGATAAAGCCG  
CCCCAGCAGAGCATCACCAGCCCCTGCAACACCCGTGTCAGCCAATCTGGCCATGCCGCGCATCTTTCA  
CCCACCTCTCCTGCGCCCCTGACACTCTTGTGAGTGAACCATGCCGAAAACCCACCAGAGTCCGACAT  
TTTTGCTTGTATTATCAAACCCGCGCGGGTAAGATTGACGGCTTAGTCTGCCATGGTGGGCCATCTGTGCC  
CGGGCCAGACTCCCTAGTGTGGCAAATAGCGCTGCAAGAACAAGCTGGAGACAATATTTTCGATGACGCAC  
GCATCCGTAGTAGATGTGCTGGCCGGTAAGTATCCGGTCGGCACCACCCAACTGTCAAAGGGTGGATCC  
GGACTCGCCGTGATTCCAAGGCGGGGATCTCATTTTTGGCCATTTCCGATGGCTCCTGTTTTCCATCCGGT  
ACAGGCAGTTGTCCCAATACCCTGGCCAATTACGAGAATGAAGTGCTGCGTCTGACCACTGCCTGCTCC  
GTGGAAGTGACCGGCGTGGTTGCCGCTCTCAGGGCAGCGCCAGGCTTTCGAACTGCAGGCGACCGAGG  
TGAAGGTAGTCGGCTGGGTGCAAGATCCGGACACCTACCCGATGGCCGCCAAGCGCCACAGCATCGAATA  
CCTGCGTGAACAGGCCACCTGCGCCCGCGCACCAACATCGTTGGCGCCGTGACCCGCGTTCGTCACCTGC  
CTGGCGCAAGCCATCCACCGCTTCTTCCACGAAGAGGGTTTCTCTGGGTTCGACCCCGCTCATCACC  
CTTCTGACACCGAAGGTGCCGGCGAGATGTTCCGCGTCTCCACCCTGGACATGAAAACCTGCCGCGCAC  
CGACGCCGGCAAGGTGGACTACAACGAAGATTTCTTCGGCAAAGAGGCTTTCCTGACCGTATCCGGCCAG  
CTGAACGCCGAAACCTATGCCTGTGCGCTGTCCAAGGTCTACACCTTCGGCCCGACCTTCCGCGCTGAAA  
ACTCCAACACCAGCCGCCACCTGGCCGAGTTCTGGATGGTTGAGCCGGAAGTGGCCTTCAACGATCTGGA  
AGATAACGCCGCACTGGCCGAAGCCATGCTGAAGTATGTCTTCAACGCCGTAAGTGGAGCGTTCGCGAC  
GATCTGGAGTTCTTCGCCCAGCACGTGGACAAGGATGCCATCGGCCGTCTGGAGCGTTTCGTCCTCCG  
ACTTCGCCCAGATCGACTACACCGACGCCATCGAAGTGCTGAAAAACTGCGGCAAGAAGTTTCGAGTTCC  
GGTCTCCTGGGGTATCGATCTCTCCTCCGAGCACGAGCGCTATCTGGCCGAGGAGCACTTCAAGTCTCC  
GTGGTGGTGAAGAACTACCCGAAAGATATCAAAGCCTTCTACATGCGCCTCAACGACGACGGCAAGACCG  
TTGCGCCGATGAGACGTACTGACACCGGCATCGCGGATCATCGGTGGTTCCGAGCTGAAGAGCGTCT  
GGACGTGCTGGATGCCCGCTGGCCGAGATGGCCGTAACAAGGAAGATTACTGGTGGTATCGCGCTG  
CGTCGCTTCGGTACCGTGCCGCACTCCGGCTTCGGTCTGGGCTTCGAGCGTCTGGTGGTCTACGTGACCG  
GCATGGGCAACGTCCGCGACGTGATCCCGTTCCCGCTACTCCGCGTACCGCCGAGTTCTGATCAGCGGC  
ATCTTGCCACTGCATTGCAAAAAGCCGACCTGTGGGTTCGGCTTTTTTTATTGTCACCGTTATGGGTGATACT  
CAGGATCAACCGGCACAAGGAACTCGTCGCTATGGGATATCGCCTGCTGCTCTCGCTATTGCTGTCTCG  
CATGCCTGTTCAACTGTGGGCGAGCCCGTTCGTCGACACCCCTGGAGTGGCCCCCTACACCAGCCAG  
AGCCTGCCCGATGGCGGCCTTACCGGTATATCGTCAAACGTGCCTTTGCCGAGGCGGGACTGGAGGTGA  
CGTTTCGACTTCTATCCGTGGCAGCGGGCAGTGGCGTGGCGGCCGACCCGACCCAGCCTTACTGCGGCTA  
TTTTCCCGAGTACCTCTCCGACACCCCTGCCACCCCTGTGGCGCAGTCCCCCAGCGTGGGCGACAGTGTG  
CTGGGTATGGCGCAGCGCTCAGGCCCCCCCATCCCTGGCAGCAGCTCACGGATCTCGCCCCCTACCGGA  
TCGGCGTGGTGGAGGGGTACGTCAAACACCCGTGAATTCGATGCCCTGATGGCCAGCAAGCGCCTCAACAC  
TGCCGCGTGCATGCGGACCTGCTCAACCTGCGCAAATTCAGCGCGACCGGCTCGATCTGGCGGTGATC  
GACCGGGATGTCTTTCAGTGGCTCATCAACCATGATCGCAAGCTGAGCAGCGCCGGATTGCAGTTTCCCC  
CGAAGATCCTCGAACACAAGAGCCTGCACATCATGTTTCGTCGCCGACCAGCAGGCGTTGCAGCAACGGGT  
GGCACAGGCCATTGCCAGATTGGATATTGCCAAGCTGAGCGAGGATTATCAGCGCCGCTATCTGCAGCAA  
GCACCTGCGGCCAAGTGAGCCAACCCGCTGAAGTCAGCCCTTGTGGCAAAAATAGCCTGAGCGCTGGCT  
TTTTTACCCTCTTCTGCGCAATCGAGCCCTTTTTATGCCCCCTCCCTGCAGCCCTGCTGCCACTCTGTG  
CAGCCACCATGACCACCCGATGGCTTGGCCCCGAGTGATACCCTTGGTGACAAAAATGATGTTTTTTGTT  
AGTACGTGGTTTTTAAGTGGTTAATCAAAAATTCATCGAGTTATTGAAGTAACTCAATTTTTTTACTTT  
TTCAGGGGAGCAGAATAGCAACTAACCCTTTTTGGGCTAAAATAAAACAGACAATGACAATTCATGGTTTCAG  
GCTACCCGCGGCAATATGGGTTGAATCACACGAGGTAACGGAAATGATCTTGATGGAATTTTTTGGTGGTAC  
TCGGCTGCTTGTGCTGGGTACCCGCTTTGGGGGCATGGGACTCGGTCTCATCAGTGGTATCGGTCTCTT  
CCTGCTGACCTTCGTCCTTCGGCCTGGTGCCGGGCAACCGCTGTTTCAGGTAATGCTGACCATTCTGGCG  
GTGATCGGCTGTGCCGCCACCTGCAGACTGCCGGTGGCCTCAACCTGATGATGCAGGTGGCCGAGCGTC  
TGCTGCGCCGTCACCCGCAATACATCACTATCCTGGCGCCGCTCACGACCTGGACCCTCACCTTCTGTG  
CGGTACCCGGCCACGTGGTCTACACCATGTTCCCCATCATCGCTGATATCGCGCTGCAGAAGAACATCCGT  
CCCGAGCGTCCGATGGCCGTGGCCTCCGTTGCCTCCAGATGGCCATCTGCGCTCCCGGTCTCCGTTG  
CCGTGGTCTCCATGGTCTCCATTCTGGCGGCCGGTACGGTATCGGTACGGCTTACGGCCTGCTCGACAT  
CCTGATGATCGCCATCCCCCTCCTCCCTGACCGGTGTCATCGTGGCTGCCCTGTGGAGCCTGCGTCCGGC  
AAGGATCTGGACAAGGACGAAGAGTTCCAGGCCAAGATCAAAGACCCGGAGCAGCGTGCCCTCATCTACG  
GCGGTGGTGAACCCCTGCTCAACACCAAGTTCCCGAAAAGAGGCCACTGGTCTACCTGGATCTTCTTCGC  
CGCCATCGCTGCCGTGGTATTGCTCGGCGCCAACGAAGGTCTGCGTCCGGTGTTCACCATCAAGGACAAA  
ACCGGCCCGCTCTCCATGAACCTGGTGGTATCCAGATGATGATGCTGATCGCCGGTGGCATCATCTGATGC



GCTGCAAGGTCAAGCCGGGCGAGATCGCCAACGGTGCCGCTTCAAGGCAGGCATGGTCGCCATCTTCTC  
CGTATTCGGGGTTGCTTGGATGAGTGAGACCTTCTTCCAGGCCACATGCCGCTGCTCAAAGAGACCCTG  
GCCCATGTGGTACAGGCCAGCCCTGGACCTACGCCCTGGTGCTGTTCCATCTCCAAGCTGGTGAACA  
GCCAGGCCGCCGCTCACCGCCATCGCCCCCATGGGTCTGGCGCTGGGTGTCGAACCCAAGCTGCTGAT  
CGCCTTCTGCGGGGAGCTACGGCTACTTCGTGCTGCCGACCTACCCGAGCGATCTGGCCTGTATCGGT  
TTCGACCGCTCCGGCACCACCCGCATCGGCAAGTTCATCATCAACCACAGCTTCATCATTCGGGGCTGA  
TCGGGGTGGTGACCTCCTGCTCGCTGGGCTTTATCCTCACCAGCATCCTGCTCTAATCGCAGTCGCGTTT  
AACACATTGCCAGACAGGCCCGCTTCGGGGCCTGCTTTTTTCCCGCTCTGTGACCCCAACCATTTTC  
CCGCCGCATTTCCGGACACAATACCTTTACCTCTGCCCCGCCGCTGGGTAGCATGCCCCCTCGTTTAC  
CATCGGAATCTCATCCATGTCTCGCGTCATCCTGCTCTGGAGCGGTGGCAAAGATGCCATGCTGGCCCTC  
TGTAATGCCCCCAAGCGGGCCATCAGGTGGTGGCACTGGCCACCTTTGCGCCGCCAGAACCCCGATTTTC  
TCGCTCACCCCTTGGCGCTGGTGCACCGTCAGGCGGAAGCCCTCGGGCTGCCCATCTACTGGTACCAT  
AGAAGCGCCGTTTCGATCTCGGTTATGAGCGGGCACTGGCACGGCTCAAGGAGGAGTGGCAACTCGATGGC  
GTAGTCACCGGCGATATCGACAGCGTGGGCGGTGCGCCTAACTGGATCCGCGAACGCTGCCGCCCGCAGG  
GTCTCACCGTCCATAACCCGCTCTGGCAGCAATCTCGTCAAGCCTTGTGGCGGATATGCTGGCCCGCGG  
CATCGTCGCCACCTCTCCTGCGTCGATAACCCGATACTGGCCCCGAGTGGACTGGACGCACCCCTCGAT  
GCCGCCACCCCTGCCGAGTTGCAGCAGCTTGTGCAATACAGGGCTTCGATGCCCTGCCGCGAGCAGGGGG  
AGTACCACACGATGGTGACTGACGGCCCCGGCTTTGCCGCCCGCTGCCCTCGATGGCTGGCAGGTGGC  
GCGGCAGGATCATCTGGCCTATCTGGCCGAGCCACAGGGGTAATGGCTCAAACCATCTGGCCCGCTCAC  
TCAGCGCGGAAAATCGAGATAAAAAACGGGAGGCAACTGCCCTCCGTTTGGATTTGAGCGGACCAGT  
TTTGGAGCGGGCCATGACGACCCGAACAAGGGATAAACCGGCTTATTTCCGCGAGTTGCCAGCACCCGCT  
GCAGCAGGCGGATGCGCGGTTTCGATGCTCTCCAGCAGCAGGAACCCGCTCCGAGTGGAAAGCCGCCGCC  
CATGGGGCCGAAGCCATCCAGCGACGGCACACCCGCCGCGCGGTAAAGTTGGCATCCGAGCCGCCACCG  
GCCTCCAGCCAGTTGAAGGGGATCCCTCCTCTTTGGCTGCCGCTTACCTGCCCATCAGCGCCTCGG  
TGTCACCGCTCGGGCGCATCGCTGGCTTGAAGGTCTGGCGATCCACCTCGACCCGACAGCCCGGAGGAA  
GGGGTTGTTGGCCATAAAGGTGAGCCGGTCTGTCACCGCTGCAGCCTCTTCGTTGCTCCAGAAGCGCAA  
TCCACGATCGCCTCGGCAAAGTCCGGCACACCGTTGACACCGGTGCCGCCCTGTACCACGCCGACGTTCA  
TGGTGGTGCCCGTGGTATGTTGACCTGCTCGTTGAGGCCCGGGTCTTTGACCATGAGTGGACCACCTTC  
CACTGATTGAGGTGCTGATGATGCCGACCAAAAACCGCCCGCTGGCGCGTTTTGGCTATCTGGCGTTTG  
CCCCCTTCTTTTTTCTCCTGCAATAGCGGCTCTTCTCCCGCAATAACCGCCCATCGGGCAGCCAGCC  
CAACTGCTTCTGACCTTGTGCTCAAAAATCGCCGTTTTCAGGTGTGACCAGTTCCGGTAAAACCCGCGAGCCG  
GACCATCGGCGTTGCCATGGGATTTGCCACAATGCCAGAATCGGGCCCTTGCACTCTGTTGATTCGGATTT  
TCGGGCGCGGCCACGGCCAGCGCCACAAGAGAAGGACTCCCATGGCCATCACCCCTATGGCATCAAG  
AACTGCGACACCATCAAGAAAGCCGAAAGTGGCTGGATGAGGCCGGTATCGACTACCGCTTTTACGACC  
ACCGCGCCGACGGCCTGAACCCGGACGATCTGGACAGCTGGCTGGCAAACCTCGGCTGGGAAGCCCTGCT  
CAATAGTCGCGGCACCACCTTCCGCGCCCTGCCGGATGAGGCCAAACAGGGGCTCGACACCCGCAAGGCG  
CGCGCCCTGCTGCTGGAGCACCCGGCCATGATCAAGCGCCCGCTGCTCGACCGTGACGGCGAACTGACTC  
TGGGTTTCAAGGCTGATCACTATCAATCCCTCTTCTCCCGTTAAGGACAACCTAAGGACAACCTGATGTCGG  
ATGTCATCGCACTGGCCAAGGATCTGATCCGCCGCCCTCCGTTACCCCTCGATGAAGGGTGGCAGAC  
CCTGATGACGGAGCGCCTCGCCAAGCTCGGGTTTTGTCATCGAGCCCATGGTGTGTTGAGGACACCACCAAC  
CTCTGGGCCCGTCTGTCAGCGAGGGGGCCGCTGTTCTGCTTCCGCCGCTCACACCGACGTGGTGGCCGCG  
GGCCGCTGGAGAAATGGCACACCCCGCGTTCGAGCCGACCATCAAGGATGGCGTACTCTATGGGCGCGG  
CGCCGCCGACATGAAGGGCTCGCTGGCTTCCATGGTGGTGGCGGTCGAGCGCTTCGTGGCCGAGCATCCG  
GATCACACCGGGTCCATCGCCTTTCTCATACCTCCGATGAGGAGGGGCCCTTTATCAATGGCACCACCC  
GGGTGATCGACACCCTGGAGGCCCGCAACGAGAAGATCCGCTGGTGCATCGTGGTGAACCTCCTCCAC  
CGCCGTGGTTGGGGATGTGGTGAAGAACGGCCCGCGGCTCCATCACCGCGATCTGCTGGTGGCGCGGG  
GTGCAGGGGCATGTGGCCTATCCCATCTGGCTGACAACCCCATTCACAAAGCCGCGCCAGCGCTGGCCG  
AGCTTGCCGCCACCGTGTGGGATGAGGGCAACGCCTACTTCCCCCCCCACCAGCTTCCAGATCGCCAACAT  
CTCGGCCGGCACCGGCGCCTCCAACGTCAATCCGGGCGAGCTGCAGGTCCAGTTCAACTTCCGCTTCACT  
ACCGAACTGACCGACATGGATATCCGTGAGCGGGTGAAGCGCTGCTGGATAAACATGGCCTCGATTATC  
AGCTGAGCTGGACCCTCTCCGGCCAGCGTTTCTCACCGACACCGGCGCGCTGCTCGATGCGGCCGCTTGC  
GGCCATCGAGGCGGTGAACGGTACGCGACCGGCCCTGCTCACCACCGGCGGCACCTCCGACGGGCGCTTT  
ATCGCCCCACCAGCGCGGAGGTGATTGAGCTTGGCCCCGTCAACGCCACTATTACAAGGTGAACGAGT  
GCGTGAAGGCAGACGATCTGGATCTGCTGGCGGACATGTACCAAGGGGTGCTCGAGAGATTGCTGGCATG  
ACGCAGGAACAACCTGCTGGGGCTCGACGAGAGCCACCTTATTTCTGGTGGGGCGCGCCCCCATCGGCTGA  
CTGCCGCCACCGCGCGGCTTCAACGACATGCAGGTGGCAGCCGCTATGAGGGATTCAACCTGCAGGC  
GGCCTCCAGCTGGCGCAGCTTCGAGCGCCAGCTCGCCATCTGGAATGGCAAGTGGCGCGGCGAACGGCCA  
CTGCTCGATGCCAACAGCCAACCCATCGATGCCCTGCAACTAAGCGAGGTGGAGCGGCTGCACGCCATCC  
TGCGCTGGAGTGCCCTGCCCGGCACCAGCCGTCAACCTGGGGGACCGATCTCGATATCTACGACCCGGA  
CTGCCTGCCCGCCGATAACAACTGGCACTGGAGCCCTGGGAGTATGAAGCCGGGGGCTGGTTTGCAGAT  
CTCAGCGAGTGGCTCAGCGACCATATGAGCGACTTCGGCTTCTTCTCCCTTATGCCAAGCCGGTCCGGG

CACAGAGCGGTGTCGCCTACGAGCCCTGGCATATCAGCTTCTCGCTGGAGTCCGACGAGCAGCGGCTCGA  
TCCCCGGGCACTGGCACTTTGCCTGCAACAGGCGGATATTGAAGGCAAGTCGACCATATTGGCCAACCTT  
GATGAAATTTTGGCCCGTTATGTACACCACCTGTCTGACGAAAGGAAAATCCCATGAATCTCTGGCTGTG  
GATAGGGTTGCCGCTGCTGTTTCTGCTCGGGCTGTTTCTCAATGCCATCAAAGACATGAAACGGCTGGAG  
AAGCAGTTGCCCAACTACAAGGACAAGATCCGCGAAGTGAAGGATGACGAGGACGACTGAATCCTGCCCC  
ATCCCGTGGGGAGAGCCCTTGTGCTCCCTCTCCCTCTACTGTGCCGTTTCGCTTTTCCCCACCAGCTCC  
TCCCTACGCATCCTGAAATTGACGCTCCTTTGACTCCGCTTTCGTTGACCCCGTACACAGTCAGAATATGG  
CGCGGCCACGCTGAAAAAAGGGATGAAAAATGTAAGAAAGTGCAAAATTGATGCACAAATAAGCCACACAA  
GGGGGGCCTAACTGCATATAATGTGCCTACTTTGCACATTACCAGGAAGGAGTTCGCCCTTGGATGCCGC  
TACCATCAACAGTTTCTTTTTTGTGCTGCTGCCCTGTTGGTGGGAGCCAGCGTACTGTTGAGCGCCCTCTCT  
TCCCGCTCGGTATTCCCATTCTGGTTATCTTCTCGCCGCTCGGCATGCTGGCCGTTGAGGATGGCCCCG  
GTGGTATCCACTTCGCTGACTACTCCATCGCCTATCTGGTGGGCAACCTGGCGCTTGCCATCATCCTGCT  
CGACGGCGGCATGCGCACCCGGTCTCCTCGTTCCGGGTGGCGCTCTGGCCAGCCCTGTGCTGGCGACG  
GTCGGGGTAGCCATCACCACCGGCTGACGGGGCTCGCCGCCCGCTGGCTGTTTGACCTCAACCTGATGC  
AGGGGATGCTGATCGGCGCCATCGTGGCTCCACAGATGCGGCGGCGGTTTTCTCCCTGCTTGGCGGGCG  
CAGCCTCAACGAGCGGGTGGAGCGGACGCTGGAGATAGAGTGGGCAGCAACGACCCCATGGCGGTGTTT  
CTCACCGTCAACCTGATCGAGGTGCTCGCCACCGCCAGCAAGGGCTGGATGGGGGCTTCTGCTGCTGC  
AACTGGTCAAGCAGTTTGGTCTTGGCGCCGGGATTTGGCTTGGCGGCGGCTGGTGTGTGGCGTCTTAT  
CAACACAGCCCGCTGGCGCCGGGGCTCTATCCGCTGCTCACCGTCAGCGGCGGTCTGCTGATCTTCGCC  
CTCACACGGCGGTGGGTGGCAGCGGCATTCTCGCCATCTATCTCACCGTCTGTTGCTCGGTAACCTCG  
CCCTGCGCAGCCGACGACCACATTGTGCGGTGCTGGACGGTCTGACCTGGCTCAGCCAAATCGGCATGTT  
TCTGGTGTGGGGCTGCTCGCCTCACCCACAAGCTGCTGCCCATCGCCCTGCCCGCGCTGGCGCTGGCG  
ATGTGGATGATCCTGTTTGGCCCGCCGGTGTGGTCTGGATCGGGCTGCTGCCGTTCAAGAACTTCGCC  
CCCGCGAGCGCTGGTTTATCTCCTGGGTGGCTTGGCGGGCGCCGTGCCCATCATCTGGCGGTGTTCCC  
CATGATGGCGGGGCTGCCAACGCCAGCTCTACTTCAACGTCGCCCTTCTTCGTGGTGTGGTCTCGCTG  
ATTTTGCAGGGCAGCTCGCTACCGCTGGCTCAAACTAGCGCGGGTGGAGGTACCGGCACCGCCGTCCC  
CCATCAACCGCTCGGGCTCGAGATCGATCTCGACAGCCAGTGGGAGACCTTCGTCTACCAGCTGGGGGA  
GGAGAAGTGGTGCATCGCTCGCCACTGCGGGATCTGAGATGCCCCCGGCACCCGGATCTGCGCGTCA  
TTTTCGTGGCCGCGAGCTGCTCCACCCCTCGGCCAGTACCTGTCTGCAGGCGGACGATATCCTTTGCGTCA  
TCGGTACGAACGTGACCTCCCCGCCCTCGGCCAGTGTTCAGTCAGGCGCCGGAGCAGGATCTCGGCC  
CCGCTTCTTCGGTGACTTCTGCTGGAAGCAGCCGCGCGGCTGGAGGATCTCGCCCCCTCTTTACGGGCTG  
GATGTGAGCGAAGTGGCGGATCAGACACTGGGCGATTTTATTGCCAGTCAGTTGGGCGATAATCTGGTGG  
TCGGTGACAACATCGAATGGCAGGGCCTGATCTGGACCGTGGCCGAAATGGACGAGAGCGTGCCGAGCAA  
GATCGGGGTGCGCTTTCAGGAAGAGGACCCGGTCTGACTGACCGTCCCGTATCAAGTCCCAGCAAGAAG  
GGAGAGAGTTATGCCATATCAAAGTTTGTGTCGGGCCCTGCCCCCGCTGCCAATCTGGGGGTCAAT  
GAAGGCTTTTTTGGCAAGGGATGGAGCTGGCAGGCCCGCGCCGCTACGCCAGTGGCTGCCACGCCACG  
GCTACGGTTTTCTATATCTACGCCCCGAAAGAGGATGGCTATCTGCGCAAGCACTGGGCCCTCCCCTGGCC  
CGAGCAGCAGTTGGCCGATCTCGCCGAACTGGCGCGCCAGTCCCGCGCAACGGGCTCGCCTTCGGGGTG  
GGCTTGAGCCCCATGGGGGCGCATCACGACTATGAGCGGCAGCGCCCGGCACTGCTTGAGAAAGTGGCC  
TCATCGACGAGATGCTCCAGCCGATATTCTGGCGGTAAGTGTGTTGACGATATGAAGGGGGATACCCCGGA  
CCTGGCCCGTCAACAGCTCACCATCGCCACGATATCGCGGCCACAGCAAGGCAAGCCGCCCTCATCTTC  
TGCCCCAGCTACTACTCGACCGATCCGGTGTGGAGAAGGTGTTTGGCGCCATGCCCTCCCCTGATCTGG  
AGGAGCTTGGCGAGCAGCTCGACCGCCGTTTCGAGATCTTCTGGACCGGCCCAAGGTCTGCTCCAGCGA  
ATATCCAGCCAGTCACTCAAGCAGGTGACCGATCTGCTCGGCCGCAAGCCCTTCTGTGGGACAACCTAC  
CCGGTTAACGATGGCAGCAAGGCGAGCAGCTACCTGCATCTGCGCGCTTCGAGAATCGCCCTGCCGAGC  
TGGCAGAGCTGGTCTCTGGCCACGCGGTCAACCCGATGAAACAGGCAGCACTCTCCGCCCTGCCCTGCG  
TACCCTGCCAATGAGCTACCGGCTCGGCAAGCAGTACGACCCCGACAAGGCGTGCATGCCGCCCTCAAC  
GCCACCTGCGGCCCGCAGATCTCGGGATGATCGAGGCCGACCTGCCGCTGTTTCAGGATCTGGGGCTGG  
CACAGCTCACCCCGAGCAGATTGCCGCCCTCAAGGCGCGCTATCTGCCGTTTCGTGACCAATCTGCGT  
CGACGAAATCGTGGCTGGCTGGACGGGGAGTATGTGTTTCGACCCCGACTGCCTGACCGATTAAACCACC  
CCTGCGGGGGCAGAAAGGAGGTTGTATGGATGCACACCTGCTTTACCAGAATCTGGCGGTGATCGCCGC  
CTTCTTGTGTTTACAGCCTGATCGCGGGCGCTTTGAATCAAACTGGTCAACGGCCCTCTGCTCTTT  
CTGCTGACCGGCTGGCTACTGGGGCCGGAGGGCTGGAGCTGCTCTCCCTCTCTATCGACAGCGCCGGCA  
TCAAGCTGCTGGCCGAGCTGACGCTGGTGTGTTGCTGTTCAACGATGCCGCCAACACCAACTGGCAGGT  
ATTGCTGGCCAACCGCCAACCTCCCATCCGGCTTTTGTGATTGGCTGCCCTCACCTGCTTTGTGGC  
GCCCTGTTTGGCCACTGGATCTTCCCCGACTTGGCACTGCTGGAGATGGCGATCCTCTCGACCATCTTG  
CGCCACCGATGCAGCGCTCGGCAAAGCGGTGGTCAAGTAAACCCCGGGTCCGGGACCGGTGCGTGAAGG  
GCTCAATCAGGAGAGCGGCCCTCAACGACGGCATCTGCGTACCGGTGCTGCTTCTGCTGCTGGCCCTTATC  
GCCCCACCGAGCAGCAGCAGGCACCGCCACGTTGGCTATCACCTGATGCTGGAGGAGATCGGCATTG  
GCCTGCTGGTTCGCTTTGTGCTGACAGCCTCACCATCCGGCTGCTGAAGATCTCCTATCTCAATGGCTG  
GCAACTGCCACTCTGGCGTACGCTCACCATGCCGGGCTGGCCCTGCTCTGCTTTGCGTTGGCACAGAGT

CTGGGGGAAGCGGCTTTATCGCCGCTTTGTGGCGGCTCTTTATCGGCCACCGCCTCGGCGAACACA  
AGCACGCCTATATGGACAGCTGCGAAGGCTACGGCGACCTGCTCTCCGTGGTGTATCTGGATGGTATTTGG  
TGCAACCCTGATGCCCATTTCTGCCGGAGCTGCTGCACTGGCAATACTGGCTCTATGCCATTGCCAGCCTC  
ACCCTGCTGCGGATGGTGCCGGTTTGGCTGAGCCTCATCGGCACCGGCTCAAGCCCAGCTCAAGCTCT  
TTATCGGCTGGTTTCGGCCCGGGGCTTGGCCAGTATCGTCTTTGCGGTGATGGTGTGCAAAACGAGCC  
TGCCCTGATTGGCCAGCGCCCATCATCGCCACCGTGTCTGCACCATCATATTGAGCGTCTCCTGCAC  
GGCCTCACCGCAACCCATGGGTTGAGCGTTTCAAGCCTCGCTGAGCCACTCGGCGCCATAAAAAATGC  
CACCGAGCGGTGGCATTCTTTCTTTGTGGCGAGGGTCACTGACGGCTCTTACCCGAGCGCCAGCCAGACT  
CCCACCCCCAGCATCAGGGTACCGGCGATGCGGTTTATCAGGGTGTGACGTTGCCGCTCTTGGCGAGGAAGT  
GGCGCAGGGTGCAGCCCGCTGGCGTAGAGCAGGAGGAACTCGATGACCAGGATCAGCGCCAC  
CAGCGCGCTGATCTGCGGCGCCATCGGCTTGTCCGAGAGATAAAGGGGGCAGCAGGGAGATCATGAAG  
GCCCACCCTTTGGGGTTGGCGATGGCGGTGACAAAGCCCTGCAGCGCCAACCCCATGGCGCTGGTCTGTT  
GACCGGCCGAGAGATCCGCCGAATGGCCATCTTCCCTTTAGCCTGCCACATCTGGATGCCAAGCCACAC  
CAGATAGGCGCCCCCACATATTTGAAGGCGGCGAAGATCCCCGGATAGTTGAGCATGATGGCTGCCACC  
CCGATCACCGACAGCACCGAGACCAGCCGACCCGATCAGCTCCCCCACATCATGTGCAGGGTTCCGGC  
GCACCCCCAGGCTCATCCCAGGGTTCATCGACAGGGTTCATGCACATGCCGGGGGTCACCGAGACAAAGAA  
AAAGGTCGGGATAAACAGAGCCAGAATGGCCGGATCGATCCAGCTGGACACAACACACCTCCATATGACG  
AGAGCGGAAATCACGAAAACGGGACAGGATTGACACAACCCAGCCAGTTGTACCACATATTCAGGGGAT  
AAAGCGCTCAATCATTCTAAATGGCTCCTTTCTACAAGAAAAACCTTTTCTTCAGCACATTTTCAGCA  
ATAAAAGCCTGTGACAGCTCCTGACGTGCATGTGTAAGATGTCGGCTCCTTCAATCCGGATTAGAGCCA  
CTTATGTCAATGAATAATCTATCAATACGCATCCAGGTCTTGATACCTTTGCTGCTGGCCAGCCTGCTGA  
TGATGGTGTATGATCGCCATCAGCAAACAGGGTTTTGGATGAAGCCATCAATGACATAGATGAGACAACCCA  
GAGCGTGGTCCAAAACAAGGACGATATTGCCAAAATGATCCACGCCACCTACCGGCTACGCACCAGCGCC  
ATCTATGGCCTCTACGATGCCAAGCTGTTTGTCTGCACTGCCCGCAAACCTCAACAGCGCCGAGCAGGAGA  
TCAACGCCATCCTCAGCCGTCTGGTGTCTCCCGGTGCCGAGCAGGATAACCGTCAGGTCGCTGCCGCCCT  
GCAGGCCTACCTTGGCCACACCCGCAACAACATGCTGCCGCTGCTGGCGCAAAAACATCAGGGTGGCGGC  
GATCCGGTGCCTACGAGGCGGCTCGCCTCCATTTCCGCGAGCTGGGTGAACAGCTGATCAAGCAGATAG  
ACAGCATGTCCGCCCACATCAACCAGCTGATCCAGCAAGAGCTGGTTCGAAGAGCAGGCCCATCAGCAGC  
CACCCTGTGCGTACCTGTCTGCTCACCGCCGTACCTGCTGGCGGCGCTGATCTGTGGCTGGGCTCCTC  
TCCGGGCGCATCGTCAGCCCCATCGGTCAGTTGCAAGAGGTGATGCACGCCGTGGCGCAAGGGCGCTTCA  
ACGTGCGCGCAAAGCGGAGGGCAACAACGAACTGACCCGTCTGGCCAAAGATATCAACCTCACCCTTAC  
CCAGCTCGGCAACACCATCGAGAACCTGACCGGGATCAGCAACAGCGTCCGCTCCGCCGCCACCGAGCTG  
GCCGCCGTGATGACCCAGTCCGAGGCCAATGCAAAGCAGCAGCACAGCGAGATCGAACAGGTCCGCTCCG  
CCGTAACCGAACTCTCCAGCACCGCAGACAATGTCAACCACAACGCCGCCATCGCCGACGAGCTGGCGCG  
GGATGCCAATGGCCGGTTCGAACAGGGGCTCGCCCTCTTACCAGAAAGCATCGCCGCCAACAGCCGGATG  
GCGGGCAGTCTGGAAGATGCCGCCGCCATCGTGGCCAGCTCAAATCCAGTCCGAGCAGATCGGCAAGG  
TAATTGAAGTGATTCAGGGGATCTCCGAGCAGACCAACCTGCTGGCGCTCAATGCCGCCATCGAAGCAGC  
CCGTGCCGGTGAAACGGGTGCTGGTTTTGCGGTGGTGGCCGACGAAGTGAGAATGCTGGCAGCCCGTACC  
CAGGACTCCACCAAGGAGATCCAGGCCATCATCGAGCGGCTACAGAGCCAGTCCCAATCCGCCAACACG  
GCGTACAGGAGACTCTGGAGATCCTCAGCCATAACCAGCGCTTGTCCGCTCAGGTACAGGATCTGCTGAG  
CGGCATTACCGGTGCCGTACGCCAGATCAACGACGCCAACGCCACGGTCCGCCACCGCCGCCGAGGAGCAG  
TCCTGCGTCAACCGCACATCAACCGCAATATCACCAATATTCACGAGATCGTGAGCCAGAGCTCCGCCG  
GCATCAGCCAGAGCGCCAGTGCAGCAACGAACTCTCCAGCTCGCCGAGCAGCAACGCAACAGCTGGC  
CCAATTCAGCTGTAAGCGCACAAAAGTGAACCAGACAAAAGGCCCGCAAGGGCCTTTCTTGTGATGGA  
GCAATATCGGTATGGTAGAGCAGTTACTCCCCCTCAGCTGAGCACACCATGAGCCTGAGATTCGAAGTA  
AACCCGCTTTTATCGCCCTGGGGCTCATCGCCCTCATTTCCGCCGCTGGCTCGACTACTACCTGCCGGA  
GCACACCATCGCCACCATCACAGGGGTGAGGTGAAGCGCACCGACAAGGATGGCCCCATCAGCCAGAAA  
AACCCGGCTGACGGCCCCACCACCGACGTCTATTACATCTACACCGAGCGCCCCGGCGAGAAGATCCGGG  
TGTTTTGCAATGAAGATACCGAGTGGGGCTGGCCCTTCTACTTCAAGTTCAACGCCGCCGACGTCCAGGC  
CAAGGCCAAGTCGATGGAGTTTCAGAAAACGCTGGCTATCATTACCTCCTACGGCTGGCGCGTGAACATG  
TTCTCCATGTTCCCCAACGTACCAAGATTGAGAGCACGGAACCTGACGCTCCACCTGGAGCTTCTTCC  
GCTGGTTCTGGTTTCGGCCTCTGGGCACTGGTGTGAGGCAAAGCCGCATCGCAACCTGGCGCTACTTCCG  
TCGTCTCGAGGACGAGCTATGAGTGTGAGCCGAGCAAGACCCGACCAAGTTTCTACCGGCGGCTCTACGTGG  
CCTGGCTGATCAGCCAGGGCACGGATACGGTACCTGCCATCATGGAGGCGACCGGCATGCCCGCCGCAC  
CGCGCAAGATAACCTGAGCGCGCTGGCCGAGCTCGACATCAGCTGCGCCTTCGAGCAGACCGAAGGGCT  
CGCCACCTGCAGGGGCACTACCGCATCAGCGATTGGGGCCCCATCAATCCGGCATGGGTCAAGGCCAGC  
TGCCGCTTATCAAAGAGACGTTGAGCTATCCCTGATCCGAGTGTATGCGCTTACATAAAACAAATCAGC  
TACATCTGCAAAAATTTAAAAGGATGAAAATTTAGCAAGGTGACTCTAAAAGGCTTCAATGTTGTGCCAC  
AAGCTGAGTTAACTGCTGTTATCAATGAGCTAGACAATCATATTCGTTTACCAGATTAGAGGATGGTTG  
TCTGATTTTTGAAGTCACGCAAAAACGAAGAAAACAGTATCGGTTTCGATGTATATGAAGAGTTTAAAGAT

CAAAC TGC TTTT GATAGGCATCAGCTAAGAGTTAAATCGTCTAAGTGGGGTAAAGTTTCTGTTAATGTTG  
AACGTTATTATGAAGTTACTGTGAGTTGAACATAACAAACGCCCTCGAGAAGGAATGCCAACGCGTGCCGT  
GCCAGCCCCCTTAGGCGGGCGAAGGGGAACAAAATAGAGGGGCCAGCCGGCAAGGCTGGCCCCCTTTTTTT  
CAGGCCGAGGGCGTGACAGGTGCCCCACTCGGGCATGGCCGAATCCTCAAGCTCCCCGTGAGATTGCGC  
GCGGGTGCAGTGCATGATGGAGCGCTTGGGGTTGTTGGGATCGCGCAAAAGCAGAGGGGCTGAGCCCTCG  
TTGTGCTTCTGCTCGTTCGCTAAACTCGCTGCCGTAGGCGTTGTGGGTCAGCCGGCGGGCATTGGCGATGG  
GGGTATCGACAAAGAGAGCGTGCACCTTGAAGCTGGAGGCCGGCACGATAAAACCGACCACCGGCAAGCC  
GTGCAGTCTCTCGTGCACCTTGTACCAGGCAAAGCCGTGCTCACCTTGTAGGGGGTGTAGTTGTTGAGC  
TGCAGATTGGCTGGCCGTCCCGTCTCACCGTCGATGTAGAGATCGTTAAAATCACAGGTGCGCAGTCCCT  
GCCACATCCGCTCGAATGGCGTCGCGCAGCCTGTCAAGTTCGCAACCCGGCCAGTAGCGCAACCCGTGCTT  
CCACATTCCCAGCCCCCTTCTTGCAAAAAGTGAATCGGCCCTCAGCCAAAGGCCCGCAGCCGCTCGACCAG  
CAGATCAATAAAGCCTGCCCGATCCAGCCCCAGCAACACCAGCGCATTTGGCTGGTTTGGCGGAGAGACCA  
TAGCGATCCACCACCGTCATCCCCACGGTATGCTCGCCCCGGGTCTCGATATCGACCCGGCACTCCACGC  
CATGGAACAGGGCTGGATTGAGCAACCAGGCAATGGTACAGGGGTCGTGCAGAGGCGCGCCAGCAAATCC  
CCACTTGGGGTCCCAGTGGTAGATCATGAAAAATCGAGCAGACCCGGCCACACACTGGGCCACCGGATTG  
GTGATGGCACGTACCCGCTCGATATCCTCGTCCATCACCTGCGCCTCGTGGGTCACATCGAGGCCGCACA  
TGGTGTATGGGAATGCCCGACTTGAAGACCATATCGGCCGCTTCCGGGTCCACATAAATATTGAATTCCGC  
CGCCGATGTCCAGTTGCCGGCCCCCTGCGGCGCCCCCATCAGCACGATGCGGGCAATCTTGCTCTTTAGC  
TCGGGGTGAGCCGCCAGCAGCAGGGCGATATTGGTGAGCGGGCCGTGCGCACCCAGAGTACGGGCTCCG  
CGCTCTCGCGCAGACATCTGGCCATCAGTTCAATCCCCGTATCCCTGCGGGGCAAAGCGGGATCCGG  
CAGTTTGGGGCCATCAAGACCCGATTGCGCCATGGACGTTGTGCGCGATGATAAGCTCGCGGGCCAGCGGT  
TTCGGCGCCCCCGGCCACCAGGAATATCGTCCCCTCCAGCAAGGTGAGGATGCGCAGGGCATTGTTGA  
GAGTCTTGTCCGGTGTCTGGTTGCCCCGCGTGGTGGTGACCGCCAGCACCTTCAGTTCAGGACTGGCCAG  
CGCCAGAATCAGGGCGATGGCGTGTGTTGGCCGGGATCACAATCGAGAAACCGGGCAGTGCCATGGAG  
AGACTCCTTACAACATCAAAGGGAGCCCTACCTTAGCAAGCTCGCAGCGGCTGAACTCGGGAGGGGGTCA  
CAAATGGTTCTGATTTTTTTTCAATCAGTTACCTTCGCACTGTACAGCCGGCCAGCAGCAGGGCCGCAA  
TGAGGGAATGGTGTGGCGAGCGTATCCGCTACGCCGATTTCGCGCCTTACCCGCCACTTGGGTATGATGGC  
CCCCCGTTTTCTGCGGTGCCCCATATGTCCTGATCGACACCTTTATCGCCCCCCCCCTGCAAGGAC  
GCCATCGAGATCCTGTTGAGGATGAACCCGTTCTGCTCATCAACAAGCCGAGCGGCTGTGAGCCCTCT  
CGGGCAAGAATCCGCAAAACCTCGACTCGGTGCATTATCGACTGGTGCAGGATTACCCCGGTTGTACCCCT  
GGTGCATCGCCTCGACTTCGGCACTTCTGGCATCATGGTGGTGGCCAGAAACAGGGCCATCAATGCCCTG  
CTCTGCCAGCAGTTCAGCCAGCGGGCGGTGAGCAAGGCCTACAGCGCCCTGCTGTGCGGCCATCTGGCTG  
ACGACGAAGGGGTTATCGACGCCCCCATCGCCAAGGATCCGGCCATGTTCCCGCTGATGAAGATCTGCGC  
CGCCAGTGGCAAACCCGCGCTCCCGCTATCAGGTGGTTGAACGGCTGGAGCAGCAGATGCAGGGACAA  
ACCGTGCCTTTGACCCGGGTACGACTGGTGCCGGAGACCGGCCGACCCATCAGCTGCGCATCCACAGCC  
AGCTGCTGGGCCACCCATCCTCGGCTGCGATCTCTATGGCGGTTTGTGTCGCCCCCGGCTGCGAACAAGC  
GCCGCGGCTGATGCTGCATGCCAGCAGCTGGATTTTGTCTCATCCGTTGAGCGGCGAGCCGATGCAGATC  
CGCTGTGCGCCTGCGTTTTAGAGGCAATCAGTAGAGATAACCAGCGGAGTGCAGCGGGATCAGTGGAAAG  
GCGTGACGGGAGAGGAAAAGCGGTAAACGGCGGATAAAGATAGGGGGCCGCGCTTTCGCAACGGCCCCAC  
CCCCACTCTTTGTGGTGCTATCAGATCAACTTTCGGGGCAGCGCCCAGTACGATCTTGATGGCATCAGAT  
TCGGTCTTCGCCATGGTCTCGGCGTTCGGGATCTCTTGTGTTGGTACGGTTGACGATAACGCCAGCCACCA  
TACCGGCACGCAGGCCCTGGCTGGAGCACATGGTCAGCAGGGTTGCGGACTCCATCTCATAGTTCAGCAC  
GCCATGGCTTGCCACTCTTTCATGGAACCCCTGGAACGGCTCACTACACGGCCGGATACGGTGTGCTAA  
CGCTCCTGACCAGGGTAGAAGGTGTGAGAGGAGGAGTACACCCGATGTGCAGCTTGGAGCCATCTCTT  
TGGCGGTTTACCAGCGCTGTGGTGCAGTCGAAGTCGGCAACAGCCGGGAACTCCATCGGTGCAAAGTG  
CAGGCTGGCACCCGTCGAGGCGCACGGAACCGGTGGTCAGATCACGTCACCCACGTTTCAGGTGCGGCTGG  
ATGGCGCCGGTGGTGCCGATACGCAGGAAGGTGCGGATACCCAGCTGGGCCAGCTTCTTACCAGGATGG  
AGGTGGACGGGCCACCGATACCGGTAGAGCAGATGATCACGGCCTTGGCGTCCATCTCGCCGCGCCAGGT  
AGTGAATTCACGATGGCTGGCCAGGTGCACCGGGTTATCCAACAGCTCTGCGATACGCTTCACGCGCTCG  
GGGTACCGGGGACGATCGCCAGGGTGGCGCCTTGCAGATCCGCTTTCTTCAAACCCAAGTGAATACAT  
CAGACATATTGACTCCTGGTTGCCCCCTGCCAGCATGGTCAGGGCACAAGTTAAGATGATTCTTTTATGA  
TACTTTCAAGCCTTTACCCCCCTCTTCGGGGAGGCGCAACTATGGTGCAAAAGCGTTTCCAATTCCTTG  
AAGCGCCTCACACTTCACGCATTGACAGTGACAAAATTTGTGAAAACGTTTGGCAACTCAATGAAATA  
ATTGACAAACGTTTTTCTGCAAATCGAGTTGGATGCGGGAAAAGTCAAGCCTGGTTCAGCGCTTAATTAAC  
GACTCGTGATCGACCCCGTAAAGTTGTAAACAAGATGCTTTTGTATCCCTTTCTAGATGGTAGCCTAGCT  
CTTAAC TACC ACTTAATGGCTAACTATAGGAAGTCCATCATGGCTACATTC AAGTTCTATATCCCGCTA  
TCAACCTGATGGGTGCCGGCTGTCTGCAAGAGGCTGCCGCCGATATCAAGGGTTACGGCTATCGCAAGGC  
GTTGATCGTACCGACAAAATCCTCAACCAGATCGGCGTGGTTCGCCAAGCTCACCACCCCTGCTGGCTGAA  
CATGGCATTGAAAGCGCTGTTTTCGATGAGACAAAACCCCAACCCCACTACCAGCAACGTCGAAGCGGGTC  
TGGCGATGATCAAGGCCAACGGCTGCGACTGCGTCATCTCGCTGGGTGGCGGCTCGCCCCACGACTGCGC  
CAAGGGCATCGCGCTGGTTCGCCCAACGGTGGCAGCATCAAGGATTACGAAGGGGTGGATCGCTCCGCC

AAGCCGAGTTGCCGCTTATCGCCATCAACACCACCGCCGGTACCGCCTCCGAGATGACCCGCTTCTGCA  
TCATCACCCGACGAAGCGCGCCACGTGAAAATGGCCATCATCGACAAGCACCTTACCCCGCTGATGTGGT  
CAACGACCCCGAGCTGATGCTGGCCAAGCCAGCCGGTCTCACCGCCGCCACCGGCATGGATGCCCTGACC  
CACGCCATCGAAGCCTATGTCTCCACCATCGCCACCCCGGTGACCGATGCCAGCGCCGTGATGGCCATCG  
AGCTGATTGCCAAGCACCTGCGCACCCGCTTACCATGGCGATGACCTGCATGCCCGCGAGCAGATGGC  
CTACGCCCAGTTCTGGCCGGCATGGCTTTCAACAACGCAAGCCTGGGCTATGTGCACGCCATGGCCAC  
CAGCTGGGCGGCTTCTATGACCTGCCCCACGGTGTCTGCAACGCCGTGCTGTACCCACGTTTCAGGCGT  
TCAACGCCCAGGTGAGCGCCGCTCGTCTGAAGGATGTGCCCCGTACATGGGTGTTGACGTGAGCGCCAT  
GAACGACGAGCAGGGCGCCGCGCTGCCATTGCTGCCATCAAGCAGCTGGCGCTGGATGTGAAGATCCCG  
GCCGGTCTGGAGCAGCTCGGCGTCAAGGCCGATGACTTCGATACCCCTGGCCAGCAACGCCCTGAAAGATG  
CCTGCGGCTTCAACCAACCCGAAACAGGCGAGCCAGCAAGAGATCGTCGCCATCTTCCGCGCGGCGATGTG  
ACGGCTGCCGGATTGCCAGAAAAGGTCGAGTGCGCCCTTTTATTGGCTGATGGCTCAATGGCTTTTT  
ACTTCCGTGGAGGGAGTCGGTATGATTTGCCGAGCCAAAAAGACTGTATGGATGATCTGAACTCGATATG  
CGGATGAAACACCTGATTGCCGCGGCTTTGACCGCCCTCACCCCTCTCCGGTTGCAGCCTGGTCTATCGTA  
TCGATATTCCCCAGGGCAACTATGTGGAACAAAAACAGGTCGACAAACTGCGCCAGGGGATGACCCGCGA  
GCAGGTGAGCTATGTGCTGGGGACCCCATGCTGCGTGACGGCTTTGACCCCAACACCTGGTACTACCTC  
TATGAATTCCAGCCGGGCCACGGCGACAAGGAGCGCAAAGAGCTCACTGTCACCTTCGCCAACGACAGGC  
TGACCACAGTGACGGGTGACTTCCCGCTGCCAGCAGCTTCAATAACCCGCTCTGATATCCCGCAAAC  
GGCCTCGCGCCGGTTTTGTTTTATCCAGCCCCACGTAATTCATCCTGCCGACAACACTGAGTCATTCCT  
CGCCATTGCAGCTGCTCGAAATTGCCTGATGCTGATGAGCAGCCACCATGGCATCAACACCATCGAATG  
ACACAGGGAGAATCCCCATGAGCCGGATCCTGATTGCCGAGCCAGCGCCCTGATCGGTGCGAACTGGT  
GCAGCAACTGCCTGCCGAACATGAACTGACCCCTGCTCTGTGCGCAAGCCGGGCAAGGAGGCGCACCACTGG  
CTGCCGGTCAATTTTGATAATCTGGCCAGCGTCACCCCTCTCCCGCCGGTCGATATCGCCTTCTGTGCC  
TCGGTACCACCCGCAAGGAGGCGGGCTCTGCCGAGGCGTTTCGCCGGTTCGATCTCGACTATGTGGTTCG  
CTTTGCCGAGCTGGCCCGCCGACCGTTGTCAACGGCTGATCGTGGTCTCGAGCATGGGGCCAGCGCA  
TCGTCCCCGGCTCTCTATCCGCGTACCAAGGGAGAGATGGAGCAGGCCCTGCTGGCCAACTCTGGCCAC  
GGCTCGCCATCGTACGCCCCGCTATGCTGCTCGGAGTGCAGCCACCCGCGCTCTCCGAGCAGATCTT  
TCAGACTCTACCCGCTGTTTTCGGCCACTGCTGGTGGGCAAGCTCGCCCGCTGGCGCGGCTCGAGGCT  
CGTCAGGTGGCCCGCCATGATCGCCCTCTGAAACAGCCCTGCCGGTGCAGATTTGTCGAGAACGAGC  
AACTGCTGGCCCTCTGAACTAGGCCTTCCCCACTACTTACGCACAGTGTGCAAAAACAAAAGAGCAAGC  
CAATTGGCTTGCCTTTGTTTTATCTGTTGGCGAGGTACCCCTGACCGCTCTTGCCATCACAGGCCGTGCT  
CGACTGTCAGGGCAACCGCCATCAACCGCAATATGGTCGATAAAAGGCGTCGATCTGCTCGCGAGTGCAG  
GCGGGGTTATAAAGACGGCCTTCTCCCCGGCGATATAGGAGTATTTGCCGCGGGCGTCATAGTCGGAGT  
GGGCCACCGCCTCCACCCAGTTGGTATAGAGACCCACCTTGCCGCGCCCTTGAACAGGCTGCGGTGATA  
GTCGGTGTGCGCTGCAGCCGCGCCTTGTAGGCAGGATCGCTGGAGCGGGCCAGCTCGAAGGCGAACTCG  
GCCTCCGGATCGCTCACCCACTCGGGGTTGTAGATCTTGAACCGACGCTCGGCCCTGATTCTCCTGCG  
CCACCAGCTTGACGTTGCCAAGCTGACTCAGGCGATAGCGGAAGTAGTTGGCATTTCAGGCACTGGGC  
CAGCACGATGCGATAACCCCTCCACTCCCATGTAGTTGAGCGCCGATAGGCACCGAACAGGCCACTCGCG  
CCACGGGAACACTCGATGGTGGATTGCAGGTGGGTCTGGCCCTGAATGTCCCGCTCGAAGTAGGAGAAGT  
TCTCCGGTCTGTTCTCCATCGCCTTGAGGTCACTCCTGCTCCTTGATCATCACCCAGACTGGAGGTGTAGGG  
CACATAGCCCCACTTCTGGAAGTCGACGGTAAAGGAGTCGGCATAATTTGAGCTCGGCAAGCGCGCCACA  
TTGCGTTGATCCCGGCCAGGGTCGCGGCATTTGATGCCAAGCGGGTTGGCGGCAAGTCGTAATCGAGGA  
AGAAGATCATCGACCAACCGATGGCCGATCGACGTGGATATGCGGTTTACTGCCACTTCGAACTGCTC  
GCAGAGGCGATTGCGCAGCTCGAACACGGGTTTACCTGATCCACCCCGAAGGTGTCGGTGGTGCCCATG  
GTGAGCATGATGGCGGGCACCACGTTTTCAGGGCAAAACAGGCGGTCAGGGTGCCTTCGAGATGGTCGA  
GATCGATGTCGTTGTTCTCGCCGACCTGAATGCGGATGGTCTTGTTCGATGTCGACCCCGAGCAGGGA  
GAGGTTGGTGTGTTGGAGTAGTGACCGCCCTGGGAGTTGATGATGCGGTAATCCTGATAGTGGCCGAGC  
CCCTTGTGCTTGGCCTCCGGCAAGGTTTTGCGAATACCGAGCAGGTAGCCGTAGAGGTTACAGAAGGTCC  
CCCCCTGGGTGAAGATGCCGGTGGCGGAGCCGGTTCGTAACCCGCCAGCAGGGCAATCTGGCGCACCCAC  
CTTCTTCTCCAGCTCCTCGGCCACTCCGGCATAATTCGGAGTAGACCAGATTGGGGTTGGCCAGAATACCC  
ATCTGGGCGCCATAGATAGCGGGATCCGCCGACATGGTGTGACGTTCTCGACGCTGGAGGGGTTCTCCC  
AATCCTTTGACAGCGCTGCGGCAACAGCAGCTCGGCCATCGGCTCGCCCGAGTGCATGGTGGCGGG  
CACCGGCATGGTCTCGCAGAGATCGGCCAGGCGGGCGCGCCATCTGGCCAGGCATTCAAACGGGCATCG  
GGCGCCAGGCCACGGGCCCCGAAATTCATTGAGGGAGGCGAATCCGGGCTCGGAAAAACTGGCCAGAGAT  
CGGGATTGCGCGAGAAAAAGTTGGCTTTGACGGTGGCGAAACGGGCGGAAAAATCGGGATGGACGGCATT  
GACGCTTTTCGTTGTCAGATAAACTAAGTCACTCATTTCATACCATTAGTACAGCAAATGTGCGGCCGT  
TATACCCCTGTACCAGCGGGGCCGACAGCGACAATATCTAATGGCCTACCCCTACTTTTTGTCTATGTATCA  
GCCAGCACAAGGGCTGGCAAAAAGGCGCCTCTTTATATTTTCGTGATCTTGCTCCCATCCTGGCTGACAGC  
GCCCTCACTAACGGACCGCCATCAGTGCAGTGCCCCCTTAACGCAGAGAGGTC AACAGCCACTCGGCA  
AACTCCGCCAGCTCGCTCTGCTGCTGAGGGAAGGCCGCCAGCCAGGGCTGCAGGCGCGGGCAACAGCGT  
CCGGTGCATAGCCGCAACCCGCCAGTTTCGGCCGCCAGCAGATCAAACGGGGCCGGCTCCAGAGTATCGCT

AAAGAGCTGTGCCCCGGGTGATGACCCCTTCTCCACATCAAAGTGCAACTCAACCCACCCAGCTGAAC  
CGCTCCTCCAGCAGATGGCTGAAAGCCGGAGCGTGGCCGTAGTTCCACTCCCAACTGCGCTGACGGGCGA  
AGGTCTCGGCAAAGCCCGGCAGATCCGGCATCTGCTCCGGGAGATATGCTCGGGTCAACTCGCGCACC  
GTAATGGTGGAAAAAGCCTCCTGCAGCGCCTCGCTCACCTGTTGATGGTCGATCCCCGGCAGCAGTTCCG  
CACAGATTGGCCACCCGGCTGCGCACCGAGGTGATCCCCTTGCCCGCCAGCTTCTTGGGGTTCGGGGTTGA  
GGTAGTTGGCAAGGCGGCCGAGATCGGGCTCCAGCAGCAGGGTGCCGTGGTGAAACCCGCGATCCAGAGT  
CTCCCGATAGGCCGACCCGATACTTTCGCTCCCGTCCGGGGTCGCCACCAGCAGATCGTTGCGACCG  
GAGGCAAACGCCTCGATCCCCAATCGCTTAAGCCATCCAGCACGATGGCGGTGGAGACGCTCTTGTCTAT  
ACTCCGGCTTGCCCGCCATGAAGGTGAAGCAGCTGTTGCCAAGGTCGTGGAACACGGCGCCGCCACCCT  
GCTGCGACCGCCAGGGTCACCCCGTCTCTTCCATGCGGGCGGGTATTGCACTCCTTCCACGGATTCTGG  
GCACGGCCAATCACCACGGTATTGGCATTGCGCCAGAGGAACAGCACCCCGCTGGCCGGGGTCCATCTGGC  
GGAAGATGCACTCCTCAACGGCCAGATTGAACAGGGGATCGTGAGAGTCGGAGACAAGCAGACGCAAGCG  
GGACATAAAAAAGACCTTATCCGGAACCTGGGGACAGCATGATAACACTGACGGGGTACCATCACTGAGCCG  
TTGCACATTAACCGGTGCGCAGCAGCCACGACACATTTGCGTCCACCTGACCGCCCCATAAAAAGTATCT  
ATTGATATAACGACACAGCTTGACGTGCAACCACGGAAAAAATGCAGTCAAGCCACAATGACAACGATAA  
AAACGGGAAATAGTGGCTAGAATGCGACCACTTCGATAGGCCATATGACTCTCTTATTGGTCCATAACT  
TGCAAAAAACGGCATGTATCCATCCCGTGTGATGAACGACACAAAAATGACTTTCACCCCCCTATAC  
CCTATTGCAAACGCCTTTTCTCCCTTGAGGTGACACAAAAATGCTTGAATCTAGCCTAGACATCGCTC  
CCGAGAGAAACGTTGTATGACGGAGAACGCAGCCCCCGCCAGCCCTCAGCTGGTTTATGCCAATGCTG  
GTCAGTATGGTTCATCGCGACCCCTGACCTCTCCCCCGTGCAGCCGCGGAGCAGGTTCATCGTCCAGTTGC  
CGTGGAACACCAGTTCCAGTTTCCCGGTTACTACGCGCCATCGCCAAAGGGTTTTATCGGGAGGCCGG  
TCTGCATGTCACCCTGCGCGAAGCGGACTCCCGCACCGATGTGGTCAGCGAGGTGATCTCGGAAAGGCC  
CATTTTGGCATCAGCGGCAGTGATCTGCTGCTGGATCGGGCTGCCGGTTCGCGGTGGTGGTCTCGCCG  
CCCTGCTGCAGCACTCGCCGCTGGTTCTGCTCACGCTGGATAGGCCAGATATTCGCAACCCGGCCGATCT  
GGCCAACAAGCGACTGATGCTGGAGCCTGGCTCCAACGAGCTGCTGACCTACCTTTCTCACCAGACCCGC  
AGCCGCAACTGGGTACCCCTCCCTACAAACAGGGGATAGAGGCACTGCTGGCGGGCAAGGTGGATGCCA  
TCAGCCCTACAGCACTACCGAGCCCTTCTATCTGCAACAAAAAGGGATCCCTATCGGGTCTTCAGTCC  
GCGCACCATCGACTCGACTTCTACGGCGACAACCTGTTTACCTCCGAGCGGGAGCTGATCACCAGCAG  
GATCGGGTCTACGCTTCCAGCAGCCAGCCACCTCAAGGGTGGCGCTATGCGATGGATACCCCAAGAGA  
TGATCAACCTCATCATGGAGCAGTACCCGACCGGGGTGGCCGTGAACAGCTGGAGTTTCAGGGCTCGCGA  
AACCAGAGCGCTGATGCAGCCGGATCTGATCGAACCTGGCTACATGCAACAGGAGCGCTGGCTGCAGATC  
GCCAAAACCTATCTGGAGGCGGGCATGCTCACGGTATTGCCAACCTCGACCGCTTTATCTACGACCCGG  
CGCAGGAGCGGCTGCGCCAGCAATGGCAACTGCTCGACAAGAGCGTGGCGGTAGCCATGCTTATCACCTT  
TACCCTGATGACCCTGCTCGGCATCTTCTTGACCTCTATCTGCGCTGCGCGAGGAGGCGCGGGATCGC  
CAGCGGCTGACCCGTGAACCTGGCCAGAGCGAACAGCACTATCGCTTCGTGGCGGAGAACAGTGCCGATG  
TGATCTGGACCATGGATGCCGCCAGCTTGCCTTTTCGCTATGTCAGCCCGGCCATCGCCCCCTGAGCGG  
CTACGAGGCCCCGAGCTGTTTGCCTGCCCTCAAACAGCTGCTGCCGATGCCTCAAGGAAACTGCTG  
CGTGAGGAGATCTCCGCCACCCTGGAGGCATGGCAGCGGGGAGAGCATGACCAGACCCGCCGGGTCAATC  
GCACCCAACCTGCGCCACAAGGATGGCCATCTGGTGGCAACCGAAACCATCACCCACCTCCATGGCAACCA  
CAATGCCCAGCCGGAGGCGATCCTCGGGGTACCCGGGATATCACCGAGCGGGCAGCGCGGGAGGAGATG  
ATGCGCCGCTCGCCTTCTACGACCCCTCACCGGGTGCCTCAATCGCCGCTTGTGCAGCAACGGCTCA  
AGGAGCTGATGGAGCAGGAGACGCCCCGTCCGCTGGCATTGATGTTTATCGATCTCGATCACTTCAAGCC  
GATCAACGACACCTTCGGCCATGAAATCGGGGATATTTGCTCAATATGGTGGCTGAACGGATGAGCCAC  
TGCGTGCGCAAACAGGATCTGGTGGCACGGCTGGGGGGCAGCAGTTTCGTTATCTTGTGCGGAGACCG  
GCGACGAAGTGTGGCGGTGGCCGACAAGCTGCACCAGCAGCTGCGCCATCCGTTCCAGCTGGAGGGGCA  
GGAGCTGCGCATCTCCAGCAGTATCGGGTTGGCAGCTATCCCGAGCACGGCGAGGATGCCAAGACCTG  
ATGCACCACGCCGATCAGGCCATGTATCAGGCGAAGAATCGCGGCCGCGCGGGTCTGCCTCTATACCG  
AAGGCCTTGATCCCCGAGCAGGGCGCCCTGCTGTGGCAACCCGGCCACGAGTGCGGTACCCGCGCATCGA  
TGCCGAGCATCGCCAGCTCTTCGTATTGACCAACCGGCTGCTGGAGCGGATGAAAGATCAGCACGAGGAT  
CCGGCCCCGTTTCTGGAGAGTCTGGAGAGCCTGTTGACATGGCCCGCCACCACTTCGCCCTTGAAGAGC  
AGATGCTGGCGGAGATCGACTATCGGGAGCTCATCAGCCACCGTCAGGATCACCCAGCGCCTGCTCAACAA  
GGCTGGCCAGCTGCTGCACGCTGCCAAAGCGGGGACGCTGGGCAACGACGAGCTGCTCAACTTCATCATT  
CAGGAGCTGGTAGTCGGCCACATGAGTCAGGCGGATCGCCGCTACTTCCCTCTGTTTTCAGATCTGAGCGCA  
GCCTGTGATTGCGGAGGTGGTTCGCTAGTCCCCCTGTTTTCAGACCCGAGCGTAATGCACCTCTTGCAGAA  
AGGGGCGGCTTAGTACCCGCGCAGGGCTACCACGGGGTTCGAGACGCACCCCGCCGAGCGCAGGAGCGACC  
CCGGCCAATAGGCCGACAGTGCCTGCAACCGAGCGCCAGCAGCAGATAGAGAGGATGGAGGGTGGAGCG  
GCAAGCCGGCCGCGCAGCGGTTGAGCAGCAGCTTGAACCCGCGGAGCAGGGCCAGTCCCATGGCTCCGCC  
CAGCAGCGCCAGCACCCAGGCTTCGAGCAGGAACAGCAATAGAAATGCGCCCGCGGGACACCCAGCGCC  
ATCAGCAAACCCACCTCGGGGATCCGCTCCTGCTGGGCGATGCTCATGATGCTGAAGATGCCGACTGCC  
CGATCAGCAGCGAGATAATGCCGAGCCCGCCGACCGCCAGCTTGATGATGGAGAGTATCTTGTGAGGCT  
GGTCAGCATGTCTGCTGGGAGGTGAGGGTGAAATCCTCGCGCCGTGGCGGGCGATCAGCACCCGCGG

ATCTGGGCTGTGATCTCGGCCTCCGCCTGCCCGGCGGATAGATGACATCGATCTCCTGCAGCCCCCTCT  
TGTTGAACAGCGCCTGGGCGTGAGCGGCGGGCAGATAGATCATGTCTCCAGGTCAAAGCCGAGAAATTG  
CCCCCTGGGGGGCCAGCACGCCGGCCACCCGAAAACGGCGATCACCAGCGCGCAGCAGACTCCCAGGCGCA  
TCGCCACCGGGGAAAACAGCTCAGCCGCCACCGTGGCCCCAGCACCGCATAGGCGCGGGGCATGGCACTGT  
CATCCGCGGGCAGAAAACGTCCCTGCACCAGGGTGAGTCGCCAGCCGGAGAGCGCCGCGGGGCCGGTGCC  
CAGAATGGCGGTACTGCGGGTCACTCCGCGGTGCGCACCTCCCCCTGCCCTGTACCACAGGAAGCGCC  
GCCTCTACCCCTGCCAATCTGGCGAGGGCATCGGCATCCTCCAGCAGCAGAGGACGGCTGCTGGAGAGGA  
TGCCGGGCGCGCCGCGGGCGGTTTTCGGTCTTGCCCGGGTACGGCGATCAGCCGGGTGCCGAATTGGGA  
GAAACTGTGAGCAGATAGAGCCTGAGCCCCCTGCCGATACCGGTGAGCAGGGTCAACCAGGCGATCCCC  
ATGGCGATGCCGAGCGCCGACAGCAGGCTGCGACTGCGCCCTGCCAGCAAGGCGCGCCAGAGCCAGAACA  
GCAGATCGGCGAGGCGCATCAGCCACCCTCCATTGCCCCGTCAGCAGGGCCGCAGGTATGGTGCAGAAAG  
GCCGCCCGGGAGGCGGGCAGCCAGCTAAAAACAGCCCCGTCAGCAGGGCCGCAGGTATGGTGCAGAAAG  
TAGCGAGCAGAGGGACCGCCGCCGAAAATCCGGACCAAATCACTCCGGCGAGGCCAACCAAGGCATAGCC  
CAACACAGTGCCAAACAGCGCGCCACTGCCGCTCAGCAACAGCGCCTCCCACAAAAACAGCTGGCGGATC  
TGGGCGACTGTGCGCCCCCAGCGCCTTGAGCAGGCCGATCTCGCCAGTGCCTGGCGGGTGTGATCAGCG  
CCAGATTCATCATCATGATGCCGAGACCAGCAGGCTGATGGCGCCGATGCCGGCAACGGCCAGGGTGAG  
GGTTCGAGAGAATGGTGGAGAAGGTGGCCAGCATGGCGTACGGCGCACCCTGTACATCGAGCACCCCG  
TGGCGCGCCTGCATCAGCTGCTCCAGTGCCTTGACCAGCGGGGGCACCGCTTGCCCCGCCAGCGGCTGGA  
TCAGCAGGCGAAAACAGCCCCCTCGGTATTGAACAGCCGCATGGCGTACCAGCCGGGATCAGCGCGCCCTC  
GGCCATATCCATCCCCAGATTGCTGCTCTGGCTGGTGAAGACCCCCACAACCCGAAAGCGGCGATTGTCA  
AAACGCAGCCACTGGCCGACCGGATCGGCCTGACCGAACAGCTCACGGGCCACCTTGGCCCCGAGCAGGA  
CGGCCGGGCGATCCTCTGCGGCATCTCCCGGCAGCCAGCGACCGGAGAGCAGTTCAGCCCGTGGGTATC  
GCGCAGCCCGTTGCTGCTGCCAAGCAGCATGGTCTGGCGCAGCCGCGCCCCCTGTTTGGCCTCGGCAAAG  
CCCATCACCAGCGGCCACCAGCCGCACGTTTTGGCTGATGCTGGCCAAGGTAGTGCATATCATCGAGAGTGA  
TCTGCCGCGAGCTGTTGCCGGTGACCGGGCGGACCCCGCGGTGGTCTCCTTGCGGGCCGGGGAACATCAC  
CAGCAGATCCTTGCCAAGGGAGCTGAACTGGTTCGGCCACATAGCGCCTCGCCCCCTCCCCAGCGCGGTG  
AGTAGCAGCACCGAGGTGACGCTCAGACTCACCGCCAGGATCAAGACCAGCGCCCTTGAACGCTGACGCA  
ATAACGCCACCGCGGCAAAGCGGATCACATCGGCGCCGCGCATTCACCCAGCCCGCTATCAATGTTGAT  
GCGGCCATCGTTCATCAGGATCCGCTCGCCCGCCGCTCACCGAGGCGCGGGTCTGAGTACCACACC  
AGCGTGATCCCTGCTCCCGGTTGAGCCCCCTCAAGCAGGGTAATCACCTCCTCCCCGAGCGGGAGTCGA  
GATTGCCGGTGGGCTCGTTCGGCCAGGATCAGTCGCGGCGCCATCGCCATGGCCCCGGGCGATGGCTACCCG  
CTGACGCTGACCGCCGAAAAGCTCGGCAGGGCGGTGTCGGCCCCGGTTCTCCAGCCCCAGCTCTCCCAGC  
AACTGCTGGCTTCGGCGATGGCGCTCGGCGGGGGCGATCCCGCACAGCATCAGCGGCAGCTCGACGTTTT  
CACGGGCGGTGAGGCGGGAGATGAGGTGAAACGACTGGAACACGAAAACCGATGCGATGGCCACGCAGTTG  
GGCCAGCGCCGGTTCTGACAGGGTGGCGGTATCCTCCCCTCCAGCCAGTAACGCCCTCATCGGGCCGA  
TCCAGCAACCCCAGCACATTGAGCAGGGTGCATTTGCCGAGCCGAGGGGCCATCACCGCCAGATACT  
CCCCCTCGGCAACTCGCAGAGAGACGCGATCGAGGGCGGCCACTTCGCTCCCCCCAGAGTGAAACGACG  
GCTGACGGCATCAAGGCGAATGAGATCACTCATCCGTCTGCTCCGTGGCGGCGCTGAAAGGGCCCTCTCC  
GACAATCTGTCCGGGCTGGGCGGCTAGCCGATCACCGGCGGGCAGCCCCCTCGGGCACTTCAATCCAGTTC  
CAGTTCTCCACGCCCAACGGGGCATCACCCGCACCAGCTTATCCCCCTCCAGCCGCAGCAGCTGCCAT  
CGTCAGCCCGGCTACTGGCCGCCACCCGCAACACATCGGTAGCGCGGGTCACTCGACCTCAAGGTCCGGC  
GCTGTAGCCGATAAGCAGGGGGACATCGCTGGGCAGGGCAGTGAGCGCAGCCTCCACCTCGACGGTGCGA  
GCCTGCTTCTCCAGCTCCTTACATAGGGGGCGATGCGGGTACGGTGGCGGCAAAAATCGCGCCCGGGCA  
TGGCGTCGAGCAGTACCCGAGCCTGCTGGCCACCTTGAGGCGGGCGGCATCCACTTCATCGATGGGGGC  
AGAGACATAGAGGCAGTTATCGTCGATAAGATCGATAACGGGGGGCATGGCCACTCCGGGCGGTGAAGGG  
GTCATATATTCGCCAGCTTGCTGTTGACCTCCGCCACCACTCCGGCAAACGGCGCCAGCAGGCGCGCT  
CGCTCAGGCGAGCCTCCACCTGGGCGACCTGCGCCTCGTCTACCCGCTCCTGCTGACGGGATGCGCGGCA  
GACATAGCGGCGGGTATCGGCCAGATTCTGGGCTGCTCGGCGAGGGTGGGGAGGTGAGGTTTTTGGCC  
AGCAAGGTGGCCAGCCGGTTGGCCTCCCCTCGTAGTAGGCGCCTCGCTGCAACGCTCCTCACGCTGGG  
TCTTGCCAAGGGCCTGCTGGGCGGGCACGGGCAAGATCGGCACGAATATCGTCACTCCAGAGGGTCAG  
CAGCAGATCACCTCCGCCACCCTGTCCCCGGCTTGACGGCGATCTGCTCCACCACGCCGCCACCGGGC  
AGACTGAGTCCGGCCCGCTGACACGACTTGATGGTGCCAGCCGGGTGTTGACCACGGTGACCAGCACAT  
CCCCCGCCCCGACCTCAGCCAGCCTGATCGGCGTGGCTGCGGTGCCACCACCATGCCACAGCAGCCAC  
CGCTACCACAGCGCCACTTCCCCACCACAACCAACCTCTTTCATCGCGCATCCTTTCGCTAGTGACTCC  
CGTCATGAGCGTCCGGGAGAGCAGGGCATAATAGAGCAAGGGTATCACCACCAGGGTGAGCAAAGTGGAGA  
CCAGGATCCCCGAAAATCAGGCTGATGGCCAGTCCGTTGAAGATGGGATCATCGAGGATAAACAGAGCCCC  
GATCATCGCCGCCAGCGCCGTGAGCATGATGGGTTTTGGCCCCGACCTGCGCCGCTTCGATCACCGCCCTGC  
TCGAACGCCACCCCGGCGCTGCGCTGCTGCTCGATAAAGTCCACCAGCAGGATGCTGTTGCGTACGATGA  
TCCCGGCCAGGGCGATCATCCCGATCATCGAGGTAGCGGTAACCTGGGCCCCCAGCAGGGCGTGGCCCCG  
CATACCCCTATGATGGTGGAGCGGAATGGGAGCCATGATGATGAGTGGCACCAGATAGGAGCGGAACCTGG  
GCCACCACCAGCAGATAGATGAGGATCATCCCCACCCCGTAGGCTAGCCCCATGTCCGGGAAGGTCTCGT

AGGTAATCTTCCACTCCCCGTCCCACAACAGCGCCACCTCCCCAGCTTGTTCGGGCTGCTGCACGTAATA  
TTGGGGCAGGTGCATATCGGCACCGGCGGCAAACATGCCGTAGAGCGGGCTGTCGGTGTGGCCGCCATG  
TCGGCCACCACCATCACCATGGGCTGCATGTTCTTGTGCATGATATAGCTGGGGGCCACCTCATCACGGC  
GGCTCACCAGCTCGGAGACCCGCACCAGCTGGCCGCTCTGGCTGCGCACCTTGAGGGCCAGTACGCCCGC  
CAGAGCCCCGTTTTGTACCCGGGAGCCAGTTTCGATACGGATCGGCACCCGATACTTGGCGCCATGCCCCGTC  
AGCCAGCTGGCATCCTGATAACCCACCCCGCCATTGAGGGTGTTCACCAGATCCCCGAGATCGACCCCGA  
GCAGGGCCGCCTTGCTGCGATCCACCACCAGCCGCCACTTGGGCTGCGGGTCGGTCAGATAGATATCCAC  
GTCCACCAGATCCGCCGTGGCTACAAAGCGGGCTGTACGGCGCGCGCCGCCGCTTCACGGGCGGCAGGC  
GTCGGGGCATACTTCCGCGACGATGGGAGACCAGACCAGCCGGGCGGGCGGCACCTCAACGACTTTCA  
GGTTGCCCCCTGCCGACTGGCGATGGCCTGCAGCGGCTCCCGAACCAGCTGGGCAATCTGGTGACTGCT  
CGGATCCCCCTCATGCTTGTCCACCAGATTGACCTGAATATCCCCACGTTGGCGCCGTCGGGATAAAG  
TAGTGGCGAACCAGCCGTTGAAATTGATGGGGCTGCGGTGCGCGCTAGACCTGGTAATCCTTCACCT  
CAGGCACTTTGGCAAGCTCTCGCCGACCGCCAGCAGGGTGCCTCGCTCGGTCTGCTCCAGAGTCGCCCCCTC  
CGGCATATCGAGCACCAGCTGGAACCTCCGACTTGTGTCAAACGGGAGCATCTTGAGCACCACCCACTGC  
ACCACCGGCATGGCAGTAGCGGCCCGACCAACAGCAACACCGCCAGCCAGAGCTTGCCTGTCGGCGCCT  
TGGCGCCATCACCGATCAGGAAAGGGTTCATCAGCCGGTGAAAAAGACCCGCCCTTGGCCTCGCCGTGGGC  
ACCGTGCACCTCACCTTGTAGTAAATGGCTCGCCAGCCAGGGGAGAAAGATAAAGGCCACCAGCAGGGAG  
ATAAGCATCCCCATGCTGGCATTGATGGGGATGGGGCTCATGTAGGGGCCATCAGGCCACTGACAAAGG  
CCATCGGCAGCAGGGCCGCGATGACGGTCAGGGTCGCCAGTATGGTCGGCCCCCCCCACCTCATCCACCGC  
CCCCGGAATCAGATCCTTGTAGCGCCCCCTTGGCCAAACCGCGATGGCGGTGGATGTTCTCCACCACGACT  
ATGGCGTCATCCACCAGAATGCCGATGGAGAAGATCAGCGCAAACAACGACACCCCGGTTGAGGGTAAAGC  
CCCAGGCCAGCTGGCGAAGAGAGTACAGCGCCAGGGTGTGACGATGGCAACGCCAACTACCAGCGCCTC  
GCGCAAACCCATGCTCACCAGTACCAGCAGCACCACCGCCGTGGTGGCAAAAAATCAGCTTGCAGATCAGG  
GTGTTGGATTTGGTCTCGGCGGTGACGCCGTAGTCCCGGGTCACCGTCACCTCAACCCCGGCAGGGATCA  
GTCGGTTCTGCAAACCTTCGACCCGCGCCTCCACCCGCTTGGCCACATCAACCCGCTTTCGGCCCGGCTG  
CTTGCAGATGGCCAGGGTACCCGCCGATAACTGGACTGCCCCATCCCCATCCAGCTGCGTTTTGGTTCGGA  
GTCTCCTGACCCAGAGACCCCTGGCCACATCCCCAGATAGACCGGCTTGGCGTCGTGCAGCCCCACTA  
CCAGTCTCGCGGGCCCTCTGCTCGCTTTGCAGAACTGCCACCTGCACCTTGATCTCACTTGTGTCTCTG  
CTCAGATGGCTGTGTGCGGGCCACTTGGCTGGCGCCGCGCAGTGGTGGTTCAGCTCGCCCCAGCTGATG  
CCGTGGGCGCTGAGGGCCCGGATCCGGCATACCCGCAACACGGCACTTGGTTCGCCAGCGTGTAA  
TATCGCGGGTACCGGGAATGCGCTTGTAGCTCGGTCTCCAGCTCATGGGCGACCCGGGTGAGCTCGGGAGC  
CCCCAGTTGCTTGTCCCTCTTTGTCCATAAGGTCAAACCTGACGATGGGGACATCATCGATCCCCCGG  
GGTTTACCAGCGGCTGACCGACTCCGATCCCCTGTGGCAACCAGTCGCGGTTGGAGTCGAGCTGGTTGT  
TGAGATCGACGATGGCCTGTTGCGGGCTCACCCCTACCTTGAATACCACCACCAGCAGGGCGCCATCGGG  
TTGGGAAAAAGAGTAGAGGGTATCAATTCCCTTATCTGGGAAACCACCTGCTCGGCAGGGGTGGTGACG  
AGAGAGGCCACTTCAGCCGAGTGGCTCCCGGGAAGGGAATGTAGACATCGGCGAAGGTGACATCAATCT  
GCGGCTCCTCCTCCTTGGGGTACCAGCACCGCCAAACAGCCGAGCAACAGCCCCACCAGCGCCAGCAG  
CGGCGTGTATGGCCGAGCCCTGAAACAGCGCAGCCAGCCGACCCGGCAGGCCCCAGCCTCCTTGTGTCGCG  
TTCAGCTCGCTACTCATGGGCCACCTCCTGCTGCAGCGCCAGGCATCGGGAGCCAGCTTGTACCCGGCT  
TGCAGCCCCGCCAGGATCTCGCACTGTCTTTCGACGCAATGGCCGACCCGCCACCCGGGCTCAGGGCCCAGC  
CAGCGGGCTGCTGCAGATAGACCGCTTGAACCTACCTTGCCGACGAGGGCGCGATCCGGCACCTGCAA  
CACTTGACGCTCACCTGCTTGTAGCTGCACCTTGTAGCCACATGCCGGGCAATACCCCGGCGGTTTTGCGGC  
GGCAAGTCGAGGCGCAACCTGAAGGCGTGGCTCTGGCTGTGCGCATAGTTGAAGCGGGTCAATTTGACCG  
GGGTAACGGCCCTGCCATCCGGCAGCAGCACTTGCATATCCGAGGCTCACGAGCCAGCGAAAGGGCGGA  
TTGGGGCAACTCCACCTCCACCCGCAAGGTGTGAGGGAGAAGCCGGAGAGCAGCGGGGTACCGGGGGCG  
ACAGTCTCCCCAGCTTACCAGCCGTTTGGTCAACCTCCGCGTAAAGGGCCAGAATGCGGGTATAAC  
CGTAGGCCTCACGGCCCTGAGTGTAGGGCCGCATCGGCAGCGTTCACCTCGGCGCGGGCGCGCATCCGT  
CGCCTGGGCATTGTGAGCTGGGCGCGGGTGTATCACCCCTTGGCAATCAGCGCCTGAAAGCGGGCGAGC  
TGGCGCTCGGCTTCCACCTGCTGGGCTGTGCCCGCGCCAGCCGCGCCTCGGCACCCGTGACGGCGGCAA  
ACTGCTCCTTGGCGCTGATCTCCAGCAGCGGTTGCCCGCCTGCACCTGATCGTTTACATCCACCAGCAT  
GCGGGAGACCCGGCCACTGGTCTGGGCGCCACCGTCCCCTGATGATGGCACTGACAGTGCCATCCAGC  
GTCAGCCAGTCGGTACCCGCTGTGGCGTCACTGTCAACAGGGGCTCTGGATTCCCGTCCGCGGCAAGGG  
CCCCGGGGGATGTCATGGCCTGCGATGTCATACCAACAAGGTGATCCCAGCAACCCGATCTTTTCCAT  
CATCACTCTCCTTCCCTGGCGTAATCTGTCACTTACAGGGATCAGGCGGTATGGGACTGGCGCACCTTAT  
CCACTCCCCGAACTGGCGCCTTGGTCAAGCACCCTGGCCAGCCCTCTGTCAAACAGCAAGATCCCGGCCAC  
CATGGCCGCTATAAACAACATTATCATGGGCTGCCCGCTGGAAATGAGACTCAGAGCAGGCCCTGGGCAG  
ATACCGACCAATCCCCAGCCGATACCAAAACAGCGCGGCCCGCCGATCAGCCGGCGCTCCAGTCTGGGAG  
CCGGTACGGCGACGATGGGCTCCCCCAGCACACTCTGGTGACGGGGTTTACCAGCAGAAAATAACCCGG  
CATAAAGACCAGCAGGGCCCTCCCATCACGAAGGCGAGGCTGGGATCCCAGGCCCGGCCAGATCGAGA  
AAACCGGTGACCCGGGCGGGATCCATCATGCCGAGATGGCCATCCCAGTCCGAACAACACACCCGCAA  
ACAAACTTGTGAGCAACTTTCATGGCAATCAGCCCCCTTACAGCAGATGATGAGTGACGAAGACGGTGATAA



AGCCAGCCGCCATAAAGGTCAGGGTGGCGACGATGGAGCGCAGGGAGAGCCGCCCATGCCACAGATGCC  
GTGGCCGCTGGTGCAGCCATTGCCAAGACGGGTACCGACCCCGACCAGCAGACCGGCCAGTAGCACAACG  
GGCCAGCCGGGCAGCGTGGTGAATGCGGGCATGCGGGCCCAACCCAGAGTCAGCGCCAACCAGGCGCCCC  
CCCCGAGCCCCAGCAGAAATAGCACCCGCCACGGCGCACGGTGTTCAGCGCACCGGCCAGAATGCCGCT  
GATCCCCGGCCACCCGGCCGTTGAACAACATCAGGATCAGGGCCGACAGCCCCGCCAGCATGCCGCCGCC  
AAAGAGAGCAGCCATTGGCTTTCCATCATCAAGATTCCATTATTTCCGAGTGACAAAAATGGGTTTGCAG  
CGCCCCAACACATCGGGCGCCGCTCGCTCACCAGCGAGTAGTAGATCTGCTGGGAGACCTTGCAGCAA  
CGGATAAGGCCGTAGCGCTTCAATACCGAAAGTTGCTGGGAGAAAGGCCACTGCCCAAGTTGGCTATGGG  
CCAGCAGCTCCCCGACCCCTTCTCCCCCTCACCAGCTGGCAGAGCACCATCAGGCGTTCCGGGATGAGC  
CAACGCTTGAGCAGGGAGGGCGGGCTGTGCGATGTCTGTTTTCATCTCGTCGAATTGGCTCATAAGAGTA  
AATTAGCAATTGCTGATATTTGTTCTATTGTATAAAAACAACACTAAATTAGCAACATCTAAAGTAGATAA  
GGAGAAAGACCATGACAGTAGATAACGGAGTCAGAATCGTCGCGGTTGCATGTTGCTGCTCTCGCTTAT  
CCTTACCACCTGGGTTTCATCCGGGCTTTGTCTGGTTGAGTGCCTTTGTTCGGGTTCAACCTGATCCAGAGC  
GCATTACCGGTTTTCTGCCCGGCAGCGATGATCCTCAAACGGATGGGATTTAAATAACAGGGTTCGGATGA  
CCCGGCTCACATGAGCGTGAATAAAACGCAGGAGGCTGAACATGGCAACGGTAATCGTCATCGGCGCGGG  
TCTCGGGGGCATGTCTGCCGCTACGAACTCAAGGCCGAACTGGGCAAGCAGCATGAGGTGATCCTCATC  
AATGACAAGCCGACTTTGAATTTACCCCTCCAACCCCTGGATTGCCGTCCAGTGGCGGGAGCGCAAGG  
AGACCTCGATCCCCATCGAACCCCATGTGAAGAAAAAGGGATCCGCTTTATCCATGCCGCCCTGACCGA  
GCTGCAACCGGGCGGCAGCAGCTCACCTCTCGATGGCCAGACCTGCGTTACGACTTTCTGGCAATC  
TGCACCGGCCCGGCCCTCGCCTTTGACGAGGTGACGGGGGCTGGCCCCGAATCCGTTGGCACCACCAGCG  
TCTGTACCCTCTCCACGCCGAAGAGTGCCGCCACAGTGTACGGCACTGGTTCGATGAGCCCGGCCCTGT  
GATTGTTCGGCGCCATGCCGGGCGCCTCCTGCTTCGGCCCCGCTACGAGTATGCGTTTCATCCTCGATCGC  
CACCTGCGCGACAAGAAGGTGAGGAAAAATGTGCCTATGACCTTTGTCCACCAGCGAGCCCTACATCGGCC  
ATCTGGGTCTCAACGGCGTGGGCGACTCCAAGGGGATGCTGGAGAGCGAACTGCGGATGCGCGACGTGCA  
GTGGATCTGCAATGCCCGCACCGTGGCGGGCAAGATGGCCAGATGACGGTGGAGGAGCTGGACTATGAG  
GGCAACATCAAGCGCACCCACACTCTGCCCTACAAACACGCCATGATGCTGCCCGCCTTTGTTCGGCATTTG  
CACCCTGCGGGGCATCGAGGGGCTGGTCAATCCCCGCGGCTTTGTTCATCGTCGACGAACACCAGCGCAA  
TCCCGCTTCCCGCAGATTTACGCCCGCGGGTTCGATCGCCATTGCTCCGCCGACAAGACCGCCGTA  
CCAACCGGGGTGCCAAGACCGGTTACATGATTGAGCGCATGGTTCGCAACCTGAGCCACAACATCAAG  
CGGAGCTCAGCGGCCAGCCGCCGTTGACCAAGGCAGTGTGGAATGCCATCTGTCTGGCGGACATGGGGGA  
CACAGGTGCCGCTTCGTCGCCATGCCGCGAGATCCCGCGCGCAACGTCGCTGGTTCAAGAAAGGGAAG  
TGGGTCCATCTGGCCAAGATCGCCTTCGAGAAGTACTTCTGCACAAGATGCAGGTGGGGGATAACCGAGC  
CCATCTACGAGAACTGATGCTCAAATACCTCGGCATCGACAAGACCGAATGACCCCGCAGACCCGGCCC  
TCGCCGGGTCTGCTTTTGGCGGCCCTGCGCGGCAAAACGGGGCTTTTCGATTATGTTTCAAGATGTTGCTG  
CGGGCGGCGGGGTTTACCCTGCCTGCCACCTCGGCTATCATTCGAGCCTTTATCAATAGCGGAGACC  
ATCAGTGGGCAACTCATCAAGTGACAGTTGTAGACCGACCCCTCATCGTCGGTACCAAGTTCGCGAGCTAG  
CCGCAGGTCTTTCTCTGCCGATGCTCGCAACCTGCGAGAAGCGGAAATCCACTCCCCTCTTCTCCCTT  
TTTACACTTGACGTCTGGCAACCAGTGGCCAACCGCCACGGTTCGCCATGCCATAGTTTCTGCTTCCC  
ACAAGGAGGCTGCTATGCGTTTTATCTCAATCAAACCGGCTGCGGATCGCGCGATCGCAATAGGTTCTGT  
TGCAACCCGGGCTCACCCCTGCTGAGCAAGCTGGGGCGCGGCATGTTGCCACGCTGGCTGGGCGGCAAA  
CCGCGCCAGCACCCTACCGGCTCCAGATCCGCTGCGAGGATCGCGCCGATATGGAGCAGGTGCTGGATA  
TGGTGAACCACACCCTGCAACCGGCCGGGCTGCAACCGATGCAATCGATGAAGCCGGGTCGAGCGGGCGG  
GCGTGAGCTGGTGTCAACCTGCAGTGCACCCCGCCCCAGCGACGCTATCTGGTGCAGTTTCGTTTCATCAG  
GTCGGAGTAGCACATCCGGTGCCTGGCAACTGCGCCCGCGCATCGACTGCGATCCCGAACTCAACTGAC  
AGCACACTGCGTTAACACAGTGAAGGGGGCCAGCCACGCTGGCCCCGCTTGTTCGCTCCTCTCCGAGC  
GTCAGAGCATCTGATGGTGTCTCGCGCCCCGGGACCGCGTTTTGTTCGCTGCTGGCCATCCCGCAA  
TCATCCCCTGATCCATCCGCCTCCCGGCTTTTCATAATGGATTGCGCCAAGCCAGCGCTTATCAGAAGGA  
GTACGCCATGAAGATGTGGCAACAAATCGACATGATCTCCCTGCTCGACACCCCTGGCCAGCCTGTTGCTC  
GCCTTTGTGCTTGGCAGTCTGGTGGGCTGGAGCGCCAGTACCGCCAACGTACCGCGGGCCTTCGCACCA  
ACGTGCTGGTTCGCCGTAGGGGCCGCCCTGTTTCGTCAGTCTGGCCAGCGCATCTATGACCTGCACGGCGG  
CAACTACAACGTGGTCCATGTGGTGGCTATATCGTCTCCGGCATCGGCTTTCTCGGCGCCGGCGTTCATC  
ATGCGTGAATCCGGCAACATCCCGGCATCAACACCGCGGCCACCTCTGGGGTGTGGCGGGCGTTCGGCG  
CCGCCTGTGGCGCTGGGCTCGCCATGGAGGCAATTTGCGGCCCTGTTTCGTCGCTGGCCGCAACACCCT  
GCTGCGACCGCTGGTCAATCAGATCAACCGCCCGCGGTGGACAATACCGACACCGAAGTGACCTACAAG  
GTGACGGCGCTGACCCAGCGGAGCATCAAAAAGAGGTGCTGCACTGGTTCGAAGAGATGCTGGAGCAGG  
CCAATACCCCTTGAGCGAACTCGATATCGAGCCGTTTGGCGCGGGGGATCTGGAGATCTCGGCGGTGCT  
GCTCGCCACCTCCATCGATGGCGACGAGCTGGATGCCCTGATGCAAAAAGCTGGCCATCCACCCCATATC  
AAGCAGGTGTTCTGGCGCACCAAGTACCACCGACTGAGCCGTTGGTTCAGAGGAACGAGCCATCCGCCCGCA  
GCAAAAAGCCCCGCCAGCAATGGCGGGGCTTTCTCATATGGGATGGGGAAGAGTGGCTAGCGGGCGGCTGC  
GCCAGCGCACCCCTGGGGGTGATCACCTGAGCGGTCTGAGCCGGAGGATTGCCCGCAATCAGTTGCTGCAT  
AAGCTCGAAAGCAGCGAGGGCCAGCGCCGACAATCCTGCGCCACCGAGTCGATGCGCATGGGGATGCAG

TCGAGCAGGTTCGTGATCGTTCGAAGGTGCACAGGGCGCATGCCCGTCTCCATCAGCCCTGCCTCGTTGAGGT  
AGCGCAGCACCCCTTCCAGCAAAGTAAAGGAGGGCTAAAGAGCCCCCTGGGGGGGGCTCCCAGCTCGGC  
CACCAGCTCGGCCATCAGCTGATAACCGGAGCTCGGCTGATAGTTCGCGATGACGCACCCGGGTACATCG  
GCTTCAAACCGGGCGCATGGAGCCCCAGCTCATAGCCCGCCAGCCGGTGACGACTGGGGGAGAGATCCA  
GCAGGCCGCCGAAGTAGTAGATCTCCTCGCCGCACTCGCTGGCCATGTCCCGCACCAGCTCGGCGGTGGC  
CTTGAGGCATCGGAGATCACCATGGGCAGGGCGGACTCGCCAAATATGGCGGTTCGAGCTGCACCACGGC  
AGGCGGTTCGTGAATGCGGGCATAGATGTCATCGCTGTGGCCGCTGGAGGGCACAATCAGCCCATCCACCT  
GGCGGTGATGAGGTTGTCCACCACCCGCTGCTCGAGGGCGGGATCATCCTCGGAGCAGGCGATCAGCAG  
CTGGATAACCCGCTCCCGGCACTGGGCTCGAGGGCACGGGCAATGCGGGCAAACCGAAGTTGGTGAGA  
TCGGGGATCACCAGCCCCAGGTGTAATGCGGGTCTCGCGCAGGGAGCGGGCGTGAAGCTCGGCAGGT  
AGTGACACTCCTCCGCCACCCAGCTGAATGCGCTTGGACACCCCGCCAGTTTCGGCGATCTCCGCACCTT  
CCCGTTGAGCACCAGACTGGCAGTCCGCTTGGACACCCCGCCAGTTTCGGCGATCTGGGCAATCGTGATC  
CGTTTCTTCTTCTCCACCTGGCCTCCCGGCTGACTAGAACCGGGCTATTGTACTAGGCATGCCGACAGCG  
GCCAGTGATTGAGGCAAATTTTGCAGCCATCATCGCCGTTGCCTGATGATAGTTGCGGCTTGTCCCGGG  
GAAGTAGCGCGCCGACAGGCTGTGTGCGCCCTCATCGATGAAGCACTCCAGACTGGAGCGATCACACAGC  
ACGGTGATCCGCCCGCCAGCCATGGGCTGCTGCGGGTCTCCACGCTCCGCTCTGCCAGTTCTGACGCC  
GCAAGATGAGGGCCCCGCTGCCACACCAGCTCGGCCACGGCGCCGAACCAGAGACTCCCCCACCAGCA  
GAGATCCAGATCGAGCCAGGCCGAGTTCGATGGCCAGCCTCGGAAATTCGCCGAGCGTCCCCCAGAAACGG  
GTCAACTCTCCCTTCAATGCCGCAAGCTCCGCCACCGGCCGCTGGCAGAGCCACTCATCCTGCCAGAACA  
GCTCCCGCGGGCAGCTCATCTGGTGGATCCAGCCGTGAGCGACCGTAGGTTGGTTCATCTCGTTCTCCTC  
CGGCAGCCCCAGCAACCGAACAGGAGGGCGGGCAGCCAGACTGTCTCGGGTGGTTTGCGGCGCATAGAAC  
TCGAAGCCCCGATCCAGCTCGTGGAAAGCCCCGTGCTCGAAGCACTCGCCGTCGAAGTTGCCAGAAAGCC  
AGCCGCACTGGTAGAGGTTGCGATAATCCTCGCCTGCCGGAGCAATCCCCGCGGGCAGCTGATCAGCAC  
ATGGCGCTCCCCAACGGGAAGAGATCCGGGCACTCCACATATAGCCAAACTCACCAGCCCCCTCGC  
ACGCTACCGGGCGATGGGGCCACCCGCTGCCAGCTTTGAGGGTGTGCGCCGATAGAGCAGCACTTCGC  
CCTTGTTCATCCAGGGTGGGGCCCCCAGCACCATCAGCCACTGCTGGCCGTCGTGCCACACCTTGGGGTC  
GCGCACATGGCCGCTGTAGCCTTCCGGCAGATCCAACACGGGCCCCAGCTTCTCGAAGCCTCCCTCACCA  
TCGGCGCGGGCAGACTGATAGGCGGTACGACTGCCATCCGGTATTTGACATTTGCCGTTGTAGATAA  
GGGTCAGACGCCCCGCTCGTCCGCTCACCAGCAGCCGAATAGCAGCCGTGGCTCTCATAGGTTTCGGT  
GGGCAACAGCGCCACCGGCTCGTGCTGCCAATGCAGCAGATCGGTGGAGGTGACATGGCCCCAGCCCTTG  
TTGCGGTGCTCGCAGCCAGCGGATTCCACTGGTAGAAAAGGTGGTAGCGCCGTCGTGCTCGATAAAGC  
CGTTGGGATCGTTAAGCAGCCCCACCGGGGCTGCCAGATGCCAGCGGGCCGATGGGGATCGGCCGCCGC  
CTTGAGCTGTCCGGCCAGCAACGACCGGACAATCTGGTTGAGAAAGATCGCTTTCTTTCATCACTCCACCT  
TGTACTTGAGCAGGTAGGAAGCGGGCAAAGCGGGCCAAAGGCGATCGCCAGCCGATGATGTAGTGAAT  
AAGGCTCATCGGCTGGACGATGGCCATGCCGGGAATACCGGTCAGCCCCACCGCGTCATCCCCACCTTG  
GCCGCCACCACGTAGGCGCCGCCGAGGCCCCGCCAAACAGACCGGCGAGGAAGGTTTGTATGTAGCGCA  
AGTTACCCCCAAAGATTGCCGCTTCCGCTGATACCCAGCAGGCAGGACATGGCCGCCGGCACGGTAATGGC  
CTTGATCTTACATCACGGGTCTTGAAGTAGACCGCGAGGCAAGCCCCGCTTGCGCCAGTTGGCCATA  
GCCCAGATGGGCAGCAGGAAGTTGACGCCAATTTGCGGATTGGCCAGCAGCCCCGCTCGATGGCGTGGGA  
AGCTGTGATGGATGCCGGTTCGATGACGATCAGCGAATAGGTGCCGCCAAACACCAGCCCCGCCAGCCAGCC  
CGCCTGCTCATAGAGGGGCTCAGACCGAACGAGATGCCATCCCCCAGCACCCGACCCGCCGGGCCGATA  
AAGAGCAGCGCCACAAAGCCGGTTCGATGATGACGGTGAGAAAACGGCGTGAGGATCAGATCCAGCGCATCCG  
GAATGCGCTTGGCGAGCTGTTTCTCCAGATGGGACATAAACCAGACCGCCAAGAGCACCGGGAAGACGGT  
GCCCTGATAGCCGATCATGGCGACATCCAGCCGAAGAAATCCATGGTCTTGAACACCAGGCCACGCC  
CAGGCGTTGGTCAGCGCAGGTTGGGTGAGGATGCCGCCAAGGTCGCCCCGAGATACGGATTGCCGCCAA  
ACTCCCGCGCCCGCTAAAGCCGATCAGAATGGGCAATATGATAAAGGCCGCCGAGCTGAACATATCGAG  
CATCACAAACAGGGCGCTGTGCGCATTGACCCAACCGTAGGTGCGCACCATGCCGAGCAGCCCCATCAGC  
AAGCCCCAGGCGACGATGGCCGGAATGATAGGCACGAAGATGTTGGAGAGGGTTTCGCGCCAACCGCTGGG  
CCACGTTGAGCTTGGCCGCCGCCATGTGCGTTCAGCTCCGCCTTGCTGGCGGTGCCGGTACCAGGTCAGCGC  
CACAACTCCGCATAGACCTTGTGACCAGACCAGTGGCGAAGATCACCTGAATTTGGCCCCGCTTGCTA  
AAGCACCCCTTGACCCCTCCAGCTTGTGATGGCGCCTTGTTTACCTTGTGTCATCGGCCAGCACCA  
ACCGCAGCCGGGTGGCGCAGTGGCAGCGCTGACGATATTTCTCTTGCCTTGCCTTGCCTTGCCTTGCCTTGCCT  
CTTGCTATCGCACTGATATTCATATTTCTCTTATGACCCGCCACGCTGGCGGGCCTTGTACATG  
AGAGTAGGGGCTGTGAGCCGGGCTTCTAGCCGAGCTCAACAGCCGCTTGCCTGATCGCAAAAAGGC  
ATCCAGTTCTGAGCGGGTCCGCAGCGCCGTCATGGCCCCCTTGGCGGTGGTGGCGAGCGCCCCGCAACCG  
TGGGCTGCGCCAGAATGGCGGACAACCTCGGCCAGCGTCCGCAGCGACGAGCGCCCGCCAGCGCCGCCA  
GCAGACCGGGCAGCAAGGCATCCCCCGCCCCGTTGGTGTGATGGGCGTCACTTTCTGCCCCACCCACTC  
CAGCAACTCGCCATCAAGGGCAGCCACTACCCCGGCCGCCCTTGGTACCAGCACCAGCGCCGGGCCA  
GAGAGAGTTGCAAGCCCGCAGCCAGATCATCCTCGCCGCTCAGCAGTTGCAGCTCCTCGATGGAGAGCT  
TGACCACATCCGCTGCGCAATGGCCTGACGCACCAGCGGCAGCATCTCGGCGGGGTTGCCCCACACCTC  
GGGGCGCAGGTTGGGGTGAAGCAGACCCCGCCGCTTCCGCTTGCCTGATGGCTGCCATGGCTTGCAGGCAG

CTGGTGCACACCGGCTCGTTGGCGAGCGGATGGAGCAGGTGAGCAGCCACTGACCGGCATCGAAGCGAG  
GCAACTCATTTGGGGTGGGAAGTGGTCGGCACTGGGGCGCACCATAAAGGTGAAGCTGCGCTCCCCCTC  
GTCATCCAGTTCTACCAGCACGGTCGAGGTGCGATGGTCAGGATCGAGCCACAGCGCGGCCACATCCACC  
CCCTCCCCGCTCAGGGTATCGGCCATAAAGCGGCCGAACGGATCGGCGCCGACCCGGCCGATAAAGGCCG  
CATCGCCACCCAGCCGTGCCACGCCAACCGCCACATTGGCGGGCGCGCCACCCGGACACTTGAGGTAGTG  
CAACGCCCCCTTCCGGGATCAAGTCCACCACCGCATCCCCATTACCCACACACGATTCGTACACCTTGCTA  
CTCCACTGCTGCATCGGATCCACGGTCAAACCCGAACTCTGTCTGTTGGCTGACATTATCAGCTAAACC  
GTTTTAGCCAACCAACAGATCTCGGCACCGGCTGCCATTTTTGTGATCGGGATAACGAACTAGAACCAGG  
TTTCCATCTGCACACCAAAGTTCCTACTCGCCACCGGCGGTGAAGTTGCTCTGGCCCATGGCATCGTCGCT  
GGCGTAGTTGTGAGCTCGGAGGACCAGTCCATCCAGCTGGCGAACACTCGCAGTTCGGGCCGCTCGAAG  
AAACAGCGGCTCTGCGCTTGAAGGTGGGGCGAAGGTGAGCTTGGTGAAGTTGCCCTCACCGCCTGGC  
GTCCCTGTAGCCCTTGGGATCGAGATCCATGTACTGCCAGGCGCTCGTAGACCAGTTCGACGCTTCTG  
GCTCAGCACCTGCGCTACCCGGTATTGAAGGTGAGCCAGCGGTACTCGTCCCTTTCACGTAACGATCC  
TGACTCTGCTCGGCCAGCAGGGCCGGGGCAAAACGCCAACCGGAGTTGAGATCGGTTGCGCCAAACACGG  
CGACCCGCACCGCATCGGCGTCCGGCAGCAGCTCGCTGTCAGAGCCCAACCCCTTGACCTCGGCCCCAG  
CCCATGACCATAACAACCCGCCCTTGCCAAAACCGGGGTTGAGGCCAAAGAAGCTCTCGCCGTGGTAG  
GCCAGCAGGGTGTGTGCCCTTGTCCGCCCTCGCTGCCCGCCACCTTGTCAATTGATGCGGGCGTCAT  
TGTCCTTGGCCGAGAGGCCGTTACCATCCACTGCCAGTTGCCGACGCGGTTGTTTCATGGTGAGAATGTA  
GCTCTCGATATCGGAGAGGCCACTGGCGCTCATGTGCGGTAATCGCGGCCATAGAGGGAGAAGTTGGCC  
TTCCAGCTGTGCGCCAGCTGCACGTCGTAGACGCCGCCCGGTACCAGCCAGGAACACCACGTCGGAAT  
CGAGCCAGTGGATATCGAAGTTGTGCGGGTCAAAGCGCTTGCCCGCCACAGCACCGCATTCCTGAAAGG  
GCCGTGCAAGCTCGCCAGATTACCGATCTCGGCCAAACACCTGACGGGTATTGAGGCTCGAATCGCTGGCG  
GTCCAGTGGTTGCTGGTCTCCACCCCGTCTGCCAGCATCAGCTTGTAGCGGGCCAGCTGCCATCCTCGA  
AGGTCTGGGTTTTAGCAGGTTGGCCTCCATGTAGGTGTCATCCTCGTTGCCAAGACGACCGACAGCCCC  
GCCACCGAACCAGGCTGGCGTGATGTAGGGCCGCCCGCCGCCCACCGTTGCCATTGCTGTTTACCAACAGG  
CCCGAGCGAGCGTAACCGTGAACCTCGAAGCCTTGGGCACCGGCGGTTCTCATCCACCTTCTGGCTGC  
GGTTGTGCGCCACCTGCGCTGCTCACTCGCCGCGCTCGCCTTCACTTCCGCCTGACTGGCACGGCTCTC  
TGCTCTCGCTCGCTCTCGCTCAGCCGCTGTACCCGCGCTCCAGCGCCGCCAGCGGCCGATACCCG  
CCATCCGCCGCCACAGCGGGTTGCTCATCCCCAATCCAGCGCTACCAGCCAGCGCCAACCTTGCTTGTGA  
ACATCATCATCTTCTCACCTGTCTGTAGCCGAACGGGCGCTGTGTTATCGACAGCCAGAGCATA  
GCTAAACCGCTTTAGCCAACCTCAATACAGCAATTAACCGTTCAGCAACAGTGTGAGCGGGATAACATT  
TGTACAGCAGGAATTGGCGGGAGTTGTGAGGAGGATCCCTCATCAGGATCCACTCAATAGGGCGGATCCT  
GGCTAAACGGCGGGCAAAAAGAGCCGGCACAAGGCCGGCTCTGTTTATTCGGGTCGCTGAAATCAGCT  
GGTCAGATCGTCGAAGAAGCGTTTTACCCCTTCGAAGAAGCCTTCCGATTCGGCTTGTGGGCTTGGCA  
GCGGCACCGCTGAACGACTCGTCCAGCTGGCGCAACAGCTCTTCTGCTGCTCGGTGAGGTTGACCGGAG  
TCTCGATCACCACCTTGCACATCAGATCCCTACCTGACCGGAGCGCACGGACTTGACGCCCTTGGCCGG  
CATGCGGAACATCTTGCCAGTCTGGGTCTCCGGAGTGACCTTAAGCTTGACGCGGCCATCCAGGGTGGC  
ACTTCAATCTCGCCACCCAGCGCAGCTGCGGTGAAGCTGATGGGCACTTCGCAGTAGAGGTTGTTGCCGT  
CACGCACGAAGATCTCGTGCTCTTTGACGTGCACCTGTACGTAGAGATCCCTGCCGGAGCCCCGCTC  
CCCTGCCTCCCCCTTCGCCGGAGAGACGGATGCGATCGCCGGTATCGACGCCCCGCGGAATTTTCACCGAC  
AGGGTCTTGGTGGCTGGTAGCGACCTTACCCGTGACACTTGCGGCACGGATCCTTGATGATCTTGGCCG  
GACCGTGACAGTGGGACACGCCTGTGACCCGAAAGAAGCCCTGACGCATCTGCACCTGACCGGAGCC  
GTGGCAGGTGGGACAGGCTGGGCACTGCTGCCGGTGTGGGCACCGGAGCCGTTACAGACTTCGCAGTGA  
ACCAGAGTCGGCACCTTGATCTCCTTGGAGACCCCGGTACCAGCTTCCAGCGTCAGCTCCATGGTGT  
AACGTCAGTTCGGAGCCACGGGCCGGCCACGAGCGGCCACCACCAGGCCACCGCCGAAGATGTCACCGAA  
TACGTCACCAACATGTCGGCGAAGTCGGCACCGCCCAAGCCACCGTGGCCACCGCCACCTTGGCTC  
GGGTCGACACCGGCATGGCCGACTGGTGTGTAACGGGCACGAGGTTGGCATCGGTGAGGACCTCGTAGG  
CTTCCCTTACCTCTTTGAACTTCTCTTCCGGATGCGGCATCACCCCTGGTTACGATCCGGGTGATACTTCAT  
GGCCAGGCGCTTGTACGCCTTCTTGATCTCGCGATCGTCCGCATCTTTCGCCACACCCAGTACTTCGTAG  
AAATCGCGCTTCGACATACTCATCCTGTGGTTACGCAGACGGGCGTTGGTTACCAACGCCCCGTTGAATTC  
ATTGACCAAGCCGATGGGCGAAGCGGACTTCGCCCATCTGGGTAGGGCTTACTTCTTGTGCTCTTTCACT  
TCTTCGAACTCGGCGTCGACTACGTGCTGCTCAGCCTTGGCAGAAGAGGAGGACTGACCGGCATCAGCAC  
CGGCTGCACCCCTGGGCTGAGCCTGAGCCTGCTGCTGGCAATTTCCATCAGCTTCTGGGACGCTTCCAG  
CAGAGCCTGCTGTTTGGCTTCGATAGCAGCCTTGTGCTCACCCTTGATGGCCGCTTCCAGCTCGCTCAGA  
GCAGCTTCAATCTTGGTCTTGTGCTGCGCAGGCAGGCTTCACCGGCTTCGGTGATCTGCTTGCCTACGG  
AGTGGACAGACCATCAGCCTGGTTGCGAGCCTGTACCAGCTCTCAAACCTTCTTGTCTCGGCCGCGTT  
GGCTTCCGGCTTCGCGTACCATGCGCTCGATCTCGTCATCAGACAGACCTGAGGAGGCTGGATGGTGATC  
TTCTGCTCTTTGTTGGTCTCTTTGTCTTTTCGACAGAGACGTGCAGGATACCGTTGGCATCGATGTGAAGG  
TCACTTCGATCTGCGGCAGACCGCGCGGTGCCGGACGGATGCCTTCCAGGTTGAACTGGCCAGAGACTT  
GTTGTGCTGGCGCGCTTGCCTCACCTGCAGCACGTGAATGGTCACGGCAGACTGGTTGTCTTCGGCA  
GTGGAGAACACCTGGGACTTCTTGGTCCGGATGGTGGTGTCTTCTCGATCAGCGCAGTCATCAGCTGC

CCATGGTTTTCGATACCCAGAGAGAGCGGGGTAACGTCCAGCAGCAGTACGTCCGGTCTTGTACCCGGACAG  
TACGGCACCCCTGGATGGCAGCACCCATGGCCACGGCTTCGTCCGGGTTGACGTCTTTACGCGGCTCTTTG  
CCAAAGAACTCGGCAACGGTCTTCTGAACCAGCGGCATACGGGTCTGACCACCCACCAGGATCACGTCTGT  
CGATCTCGCCAACCTGCCAGACCAGAGTCTTTCAGGGCAACACGAACCGGCTCCAGAGAGTCTTACCAT  
GTCTTCTACCAGGGATTCAAGCTTGGCGCGGGTACCTTGATGTTTCATGTGCTTCGGACCAGTGGCATCT  
GCAGTGATGTACGGCAGGTTGACGTCCGGTCTGCTGGGCAGAAAGAGAGCTCGATCTTGGCTTTCTCGGCGG  
CATCTTTCAGACGCTGCAGAGCCAGCTGGTTCGTTCGCGCAGGTCGATGCCCTGCTCACGCTTGAACCTATC  
TACCAGATAGTTGATGACGCGGTTGTGGAAGTCTTACCACCCAGATGGGTGTTACCGTTGGTCGCCAGT  
ACTTCGAAGGTGGTTTTCGCCTTCAACTTCGTGATCTCGATGATGGAGATATCGAAAGTACCGCCACCCA  
GGTCATATACGGCAACCTTGCCTTCGCCCTTGACCTTGTTCACGCCGTAAGCGAAAGCAGCTGCCGTCGG  
TTCGTTGATGATGTCGTTTAAACATCCAGACCAGGTCGATGCGACCCGGCATCTTGGTGGCCTGACGCTGGGCG  
TCGTTGAAGTAGGCCGGAACAGTGAATAACTGCTTCGGTTACCGGCTCGCCAGGTAGTCTTCGCGCGTCT  
TTTTTCATCTTTTTTACGACTTCGGCAGAGATCTGCGGCGGTGCCATTTTTCTTGCCCTTACCTCAACCCA  
GGCGTACCGTTGTTCGGCCTTGGCGATGGCGTACGGCATGATCTTTCAGGTCACGCTGAACTTCGTCTATCT  
TCAAAACGACGGCCGATCAGACGCTTGTGGCAGAACAGGTTGTTTTTCGGGTTGGTGTGGCTGACGCT  
TGGCCGGCTGACCAACCAGGATCTCGCCATCATCGGCATAGGCAATGATGGACGGAGTAGTACGATCGCC  
TTCTGCGTTCTCGATCACGCGAGCAGTGTGCGCTCCAGAATGGCAACGCAGGAGTTGGTAGTACCCAGG  
TCAATACCGATGATTTTTACCCATTTGAGAAATCTCAAATACTTTGAATAAACTGGCGAGGAACTCGCCT  
TAATGCGTTAACGGCTAGGTGGGGCCTGCCAATCTGGCTTTCAGCTCCCGGCATCAAAAATTTTTGTGCC  
GCCGTGGCCTTGCATCCTATATGGGGTCGCAAGCGGCCACTTCAAGCCCTGCCCGCAAAAACCTACCT  
TTTGTGCTGATCAGTCCATGACAGACCAGACAGATAAAACAAAAAGCCCGCAAGCGGCGGGCTGGGCAT  
CAAGTGCCGACTCAGTCCGGCGGCTTGGATAACCATGACCATGGCCGGACGGATCACCCGACCGTTCAACT  
CATAGCCTTTCTGCATCACGGCAATCACGGTGTTCGGCGCCACATCGGCACCTCGGCACCATGCTCATCGC  
CTGATGGGCATTCGGGTCAAACGGCTGGTGGTTCGGATCCAGCGCAACCAGACCGAACTTGGCCACACCG  
CTCTGCATGGATTTGAGGGTCAGCTCGACACCTTCCACCATCGGCTTGAGGGCGTCGTTCTCCTTGTTCGG  
CGAGCTCGATGGCGCGCTCCAGGTTGTCCAGTACCGGCAGCAGCTCGGCAGCGAACTTCTCCAGCGCGAA  
CTTGTGCGCCTTCTCCAGCTCCAGCTCGGTACGACGACGCAGATTTCTCCATTTTCGGCAGCGGTACGCAGG  
GCACGTTCTCGCTACTTCCCGCCCTTCTGGATGGCGGTCTCCAGCTGCTCTTCCAGTTCGGCGATACGGG  
CCTGCTCGGCTGCTCACTTCACTGTCTACATCGGTTCGCTGACTGGCTGGCTGGGCTTCCACTTCCATCTCCATCGC  
TTCAACCTTTTTGCTCTTTCGTGGTTCATGACATCTCCAGATTCGGGGTTACTTACAGGGCCTTGACGTC  
TGGCTGAGCGACCAGTGACATCAGACCGACTATGTTGGCGCTATTATGGGGATGCATCCCCGGCTTTCAA  
GGGGTAAAGGGCAATCTGGGTTGTGAATAGCCGCAACCGTCCGGTTTATCCGGGTTGCCGCTCACCGTTT  
AACCAGTAGCCTCAAGGGGATAGCCCCCGTCCACACGGGAGAGCGTCAACAAGCGGAGCAAAGCACTGT  
ATACTGGCCCCGAATACCCATCCAGATCTGACTGACTATGGATTTCTCCGTTCAAACCATCGCCCTGAT  
TGGCAAACCCACCATGAGGGGGCCAACCAGACGCTGACCGGCTGCATCAATACCTGACCGCCCGCGGC  
TTTTCGGGTTCTGGTGGAGAGCCGGGTCGCCAGACCCTGAGCATCTCGATGAAAACGTGATGGATCTGG  
TGCAACTGGGCCAGCAGGCCGATCTCGCCATCGTGGTTCGGCGGTGACGGCAACATGCTGGGGGCGGCGCG  
AGTGCTGTTCGCGCTTCGATGTGGCGGTGATCGGGGTGAACCGGGGCAACCTCGGCTTTCTGACCGATCTC  
TCGCCGAGGATTATCTGCTGCCGCTGGAGCAGGTGCTCTCCGGTCACTACAAGAGCGAACACCGCTTCC  
TGCTGGAGGCTTCGGTCTATCGCCACGGCGAGCGCAAGTCGAGCAATCTGGCGGTGAATGAAGCAGTGCT  
GCACCCGGGCAAGATCGCTCATATGATCGAGTTTCAGAGTCTATATCGATGGCAGCTTTATGTACAGCCAG  
CGCTCGGACGGCATCATTGTTCGCCACCCGACCGGCTCGACCGCCTACTCCCTGTCGGCAGGTGGCGCCA  
TCCTCACGCCAAGCTCAACGCCATCACGCTGGTGGCCATGTTCCCGCATAACCTCAGCAGTCGCCCCAT  
CGTACTCGATGCCGACAGCGAAGTACGGCTGCTGGTCTCGCCGATAATCAGGACGATGCCATGCAGGTC  
AGCTGTGACGGTCAGGTGACGCTGGCGGTCCACCCGGGGGACGAAATCCTGATCAAGAAGAGCCACCACC  
AGCTTTCATCTGGTACATCCCTCGACTACAGTACTTCCAGTGTGCGCAACAAGCTCGGCTGGGGCAG  
CAAGCTGTTTTAATCGGCGCTGACCGACAACGGCATTGCCAGAGAGGGCGCTGAATTTGGCGCCTTTCTC  
ATTTCTGTGCTAGCAACGTCCCCTGCACTCTCATATCAGTACCGCATTTTTTCATAGCCATAACCGCACTGGC  
GCGGCTTTCTTTGTTAAAAATGACGGCGCCCTCTTTACTGTATATAAGACCAGTGATACTGGATACAT  
ACACAGTAATGTTGACCTATACAGGATGAGACCATGCTGACCCAGCTGACCGTCAACAACCTTCGCCATCG  
TCAAGTTTTCTCGAACTCGATCTGCAACCGGGCATGACCTGCATCACAGGTGAGACCGGCGCCGGTAAATC  
CATCGCCATCGACGCTCTCGGTCTCTGCCTTGGAGAGCGGGCCGAAGCGGGCATGGTTCGACCCGATAGC  
GACAAAAGCGAGGTACGCGCCCGCTTCTGCTGGACAACAACCCGGCCCGCCGCGCTGGCTCGCCACCA  
ACGAACTGGAAAACGAAAGTGAATGTATCGTGCGGCGAGTCACTCAGCCGAGGGGCTTACGCGAGCTA  
TATCAACGGTGTGCCCGTCCCCCTCACCCAGCTCAAGAATCTGGGCCAGCTGCTGGTCAACGTACACGGT  
CAGCATGCCACCCAGATGCTGCTCAAACCCGACTACCAGCTCGCTCTGCTCGACGGTTATGCCGGTACC  
ATCTGCTGCTCGACGAGGTGCGCCAGCACTATCAGCAGTGGCGCCAACTGCAAAACGAGCTGAACCGGCT  
CAAGGCCGAGCAGCAGCAGCGGGAGGCCCGCCGACGCTTATCGAGTATCAGGTGCAGGAGCTGGACGAA  
TTTTGCCCTGCAGCCGGGGGAGTTTGAAGAGATAGAAGAGGAAACACCAGGCTTCGGCAACGGCACCGAGC  
TGATGCAAGAGTGTGGCGCCTGCCTCGATCTGCTCTATGACAACGAAGAGACCACTATCGCAGGGCTGCT  
GCAATCAGCCGTCGATCGGGCCGAGGGGCTGGTACGATGGACAGTCCGCTCACTCCGGTACTGGAGATG

CTGAACGAAGCCCTGATCGGGGTGCAGGAGAGCCACAGCGAACTGCGCAGCTACCTCGATCGGGCTGGAAC  
TGGATCCCCGAACGTTTTTAACGAGCTGGAGGCCCGCTCTCCAAAGCAATCAATCTGGCCCCGAAGCACCA  
TGTCAAACCGGCAGATCTGGCTCAGTACCATCAGGAGTTGGCCTCTGATCTCGCCCCCTCAACTCCGAT  
GAGGAGCGGTTAGAGGGGATGGAGGATGAGCTGGCCGAGGCCCGTCAGACTTTTGTCCAGGCCGCCGAGG  
CCCTGAGCCAGAGCCGTACGCGTTACGCCCAGGAGCTGGGCGCCAAGGTGACCAGCAGCATGCACGAACT  
GGCGATGCACGATGGCCGCTTTGCCATCGAGGTGCGCCCCGATGCCAGAGTAGCCTCTCTCCGCTGGGT  
ATAGATCGGGTGAATTTATGGTCACCACCAACCCGGGCCAACCGATCCAACCGCTTGGCAAGGTGGCCT  
CAGGCGGTGAAGTGTGCGAATCAGCCTTGCCATCGTGGTGATCAGCGCTCGCAAGGTCTCCACTCCGAC  
CCTGATTTTCGATGAAGTGGATGTGGGGATCAGCGGCCCGACTGCCGCCGTGGTGGGTGCGCTGCTGCGC  
CAGCTCGGCGAGTCCACTCAGGTGATGGTGGTCACTCACTTGCCCTCAGGTGGCAGGCAACGGCCACCAGC  
ATATGGTGGTGAAGCAAGCATAACCGATGGCAAAACCACCGAAACCCGGATGGATTGCTGCTGAGGAAATGC  
CCGTCTCAATGAATTGGCAGCCTGCTCGGTGGCGACCAGATCACTGACAACACCTTGGCCAACGCCCGC  
GAGCTGTTGCGTCGCTGAATCAGGCAATAAAGCCGATTTTCAGCGATGGCGACTGATAGCGCTGACCAAA  
TATGCTGACTGCGGAGGCAAAGGCCGGCGCCATTGCTGCGCAGTCCACAATAGCCAATAACCAATAGCC  
AACTGTGAGAACCGAACTCGCGTCAGGATTACCGACTCAGATCAATAAAAATGGCGAGTTAGGCCAAGCTG  
GCAGCAACATGGGCGTGGATCCGGTTGCCTTCATGTGGCGGATTTGCGCATAGTGTGGCCCCCTTTATGG  
GTATCCAATTGTGAGGCTTTGTCTATGATCCACGTTTTTGGTCACAAGAATCCTGATAGCGACAGTATCT  
GCAGTGCCTGGTTATCACCGACTGGCTCAATGGCCAGGGCCGTGAGGCCACCCATGGCGTCTGGGTGA  
CCTGCGCACCGAAACCCGTTTTATTCTGGAGCAGGCTGGCGTCAGCGAACCCGAGTTGCTGACCAAGAT  
CTGACCGGTGAAGATGTCTGGCTGGTGGATTTCACTGATCTGGAACAGGGCCCTGCCACACTGGCACAAG  
CCAATGTACGGGGCCTGGTGGATCACCACCGTCTCGGTACTCTGGTCACCCAGTCTCCGCTGGATGCCTG  
GATCCGGGCCGTGCGCTGCACCTGCACCATCGCCTTCGATCTGCTGAGTCAGCAAGGCACCGTGACCCGC  
AGCCAGGCTCGCCTGATGCTGGGTGCCATCATGAGCGACACCCTCTGTCTCACCTCGCCGACCACCACCG  
AGCAGGACAAGATCGCCTGTGAGCGTCTGGCACCGCTGGCCGAAGTATCGCTGGCCGAATTCGGCCAACA  
ACTGCTGATGGCGAAAACCGACCTGAGCGGCCCTGACTCCGGCTCAACTGCTGCAGCAGGATGAGAAGACA  
TTCCAGGCCGAAGGTCTGAACCTCATCATGAGCCAGATCGAAGTGGGCAGCGAGCAGCAGCTGGCCGAGC  
ACTTGCCAGCCCTGCAGCAGGAGATGGCCAGCGCGTGGCGAGCGAAGGGCTCGACTTCTTCGTGCTGAT  
GGTACTGACCTGACGGCCGACCCGATCTACTTTACCGAACACGCCAAAAGTACCGCCAGAGTCC  
AGCTACCACCCGGGCTTTGTGTCAGCCGCAAGAAGTACGGTCTGCCCTGGTAAATGGATTGCTGGCCAAGG  
CCTGATCCTCACTCGACATCACCTATGCCAAAGCCCTGCTCTGCGCAGGGCTTTTTTCATTGCCACCGCC  
AGCCGCACTCCCCATCCTTTTTGCTGATCATGTTGCTCACCACTGTGGTCTCTCGCTTACTCCTTTCTCGG  
CTTATTGATAGTTAACCCATAACTTTGCTTACATATTTGCGGCTGTTATTTATCAGGGCTTTGCTGCGAG  
GATAATCGCCGCGCACAACCTTTTCCGTTTCCATTCAGGTGATCGATGAACATAACCCCCAAGCAGAGAA  
CCCTGGCCATCACCATGCTGATCGCCGTGGTGCTCCTCGGCTGGCTACTCTGGCCAGTCAACCACCCAA  
GGCGATGCTGACCGCTCAGGTGACCCGCGAGGATATCGCCAAACCGTACTGGCCAGTGGTGTGCTGCGAG  
GCCGTGGAGCAGGTGGATGTGGGGGCCAGGTCTCCGGTCAGGTTACCAAGCTGGCCGTGAGGCCGGAG  
ATCAGGTCAAGCAGGGAGACCTGCTGGCCGAGATCGATCCCTGATTGCCCAGAACAACCTCAAGACGGC  
CGAGGCCGAGCTTGCCAGCAACCGCGCCAGCTCAAGATCAAGCAGGCACAACTCAAACAGAACGAGCTC  
GCTTGGCGGCGCCAGCAGCAGATGTTCAAGCAGGAGGCGAGTTACGGGCCGATCTGGAGAGTGCCGAGG  
CACTGCTGGCGGTACCCGCGCCGAACTGCAAAAACAGTCAGGCCAATATCGACAACGCCCTGATCAAGGT  
TGATCGGGCCAAGACCGAGCTGGGCTACACCAAGATCCTGGCGCCGATGGATGGCACCGTCAACAGCATT  
GTGACCCGTCAGGGCCAGACCTGGCGGCCAGCCAGACGGTGCCGACCGTGCACAGCTGGCCAACCTCG  
AGACCATGACGGTCAAGGCGCAGATTTCCGAAGCCGATGTCACCAAGGTCAAAGCCGGCATGCCGGTCTA  
CTTACCCTGATCGCGCATCCGGATACCCGCTATCAGGGTACGCTTCGCGCCGTGGAGTTAGCGCCACC  
AACATCAACGATCAGGCCACCACCCGCAACCACCAGCAATGCGGCTGTCTACTACTACGCCTTGTTCG  
ATGTACCAATCCCGCTCATAACCTGCGGGTCGCAATGACCACCCAGGTGACCATAGTGTGCTGGCCGAGC  
CAAGCAGGTGCTCACTGTGCCGCAAACCGCCCTCGGCAAGTCGTTGGGTGACAACGAGTATGAAGTCACC  
GTGATCAAGGACGATGAGACAACCGAAACCCGTCATATCAAGACCGGTATGAAGGACGAGATCCGCATTG  
AGGTGATCAGCGGGCTGAGCGAGAAGGAGGAGGTGCAGCTCAATCACGGTGCSCCCCGCCACAATGATGA  
GATGGCGGTGATGCTATGAGTGAGCCCTGAACCAGCTGCCGTTGATCCAGCTGAAAGGGGTGAGCGGAC  
GCTACCAGAGCGGCGACAGCGAAGTACCGTGCTCCACCTCTTGACCTCACCATCACGGCAGGAGAGAT  
GATCGCCATTGTGCGCGCGTCCGGCTCTGGCAAGTCGACCCTGATGAACCTGTTGGGTGTCTCGATAGC  
CCAAGCAGCGGCCAGTATCTGTTTTGCGGTCAGGACACCGCGACCATGGATGCGTTGGCGCTGGCCCGGC  
TGCGCTGCCACCACTTCGGCTTTATCTTTACGCGCTACCATCTACTGCCCATCTCGATGCCGAGCCAA  
CGTGGAGATCCCGGCCGTCTATGCCGGCACCAAGTCGCCCGGATCGCCAGGCGCGCGGGTCACTGCTG  
GGCAGACTGGGTCTGGCCGATCGCAGCCACCATAACCCGGGCCAACTCTCCGGCGGTGAGCAGCAGCGGG  
TCAGTATCGCCCCGGCGCTGGCCAATGGCGGCGAAGTGATCCTCGCCGATGAACCGACCGGCGCACTGGA  
TAGCCAGAGCGGCAAGGAGGTGATGGCGATCCTCAAGGAGCTGCACGCTCAGGGCCACACCATCATTTCTG  
GTCACCCACGATATGAACGTGGCCAGCCATGCCGACCGTATCATCACTCTCAAAGATGGTGGATTGAAC  
AAGATAGCGGCCCCAGCCAAACGGCCGTGTTGGCGCCAGTCACCGCCCCCCCCCTCAAAAAATAGTGCC  
CACTAAAGGTGCCATGGGCCACGACTGGGATCGTTATCGGGAAGCGGGACGGATGGCGATGCATGCCATG

CTCGCCACCGGATGCGCACCTTCTCACCATGCTCGGCATCATCATCGGCATCGCCGCCGTGGTGGAGCG  
TGGTGGCTCTGGGGCAAGGGGCGCACGCCAAGGTGATCGACCAGATCAATGCGATGGGCACCAACCCAT  
CGAAATCTTCCCGGGCACGGGATGGGGCGATGAGAAGATGGCCAGCATCCAGACCTCAACAAGGGGGAT  
CTCGATGCTCTGCTGGGGCAACCTATCTTGGCGGGCCAGCCCCGAGATTGCCAGCTCAGGCCAGTTGC  
GCTATCGCAACAAGACCAACAGCGGCAATGTGACCGGGTTCGGTAACGACTATTTCAAGGTGAAGGGGAT  
GACACTGGTCACTGGTTCGCTTACTGGAGTGGCAAGATATCCAGCAGCGTGCCGCCGTGCGCCGTGGTGGAC  
AAAAAGAGTATTACCAGCCTGCTTGGCAAGGAGGATCCGGTTCGGCAAGGTGGTACTGGTTCGGCACCTTGC  
CGGTGCGGATTGTGGTGTGGTTTTGCAGGAGACCGGCTTCGGCCCCACCAGCCAGTCCGTTCCATATCTG  
GCTGCCCTACAGCGCGGTGATGAGTCGTCTCATCTCGCAGCACCCTTCAGCCAGATCACTATAACGAGTC  
AAGGACGGGGTACAACCGGCACTGGCCGAGCAGGCGGTGATCGAGCTGATCACCAGCCACCGGGGTGA  
AGGATTTCTTACCTTCAGTAGCAGCATCATCAAATCGGTAGAGAAAACCACCGCCACCATGACCTT  
GATGGTCTCGGCCATCGCGGTGATCTCGCTGATCGTTCGGCGGGTGGGCGTGATGAACATCATGCTGGTG  
TCGGTGGTGGAGCGCACCCGCGAGATCGGCATTTCGCATGGCAGTAGGGCCCCGCCAGTCCGATATTCTGC  
AGCAGTTTCTGATTGAGGCTGTGATGGTGGAGCCTGCTGGGGGGGATCTTCGGCGTCCGGCTCTCGCTTGG  
TATTGGCGCACTTTTTCACTGCTGGTGGACTCCATCAAGATGCAGTTCTCGCTCTTCTCCATCTTGATG  
GCCTTTGGCTGCTCGTCACTCATCGGGATCCTGTTTGGTTACCTGCCGGCACGCAATGCGGGCGGGCTCG  
ACCCTGTTGTGCACTGGCGAGGGAATAACAATGCACAACTCTCTGGCTGGCTCTCTGCATGGCCCTC  
AGCGGCTGCAGTCAGCACAGCACCTATCAAAGACCCGAGCTGGCGATCGCCCCACATGGCAACAAGCAG  
AAGGTGCCCAACTGGCTGCGCAAGCTGGCCCTGGTGGCGGGAATTTTCATGATCCCAACTCGACAAAT  
GGTTCGAGGCGGTACTGGCCGCCAACCCGGACATGCATGTGGCGGCCCTCAAGCTCAAAGCGCCAGACTG  
GGCGCCGAGCAGGCCGATACCAACCTCACCCCTCGGTCAATGGCACTATCGCAGCCAGTGGCAACAAGG  
ATCTGAAAACCGGCAAAGACACCAACAGTCTGGGCCCCCTCGCTGAGCCTCAGTTACGAAGTGGATTTGTG  
GGGCAAGCTTGCCTCGGTGCGGGATCAGGCAAGCTGGGAGGCGGGCGCAAGCGAGCAGGATCTCGCCAGC  
ACCCGACTACTGCTGATCGGCAATACCCTGGAGCAGTATTGGCAGCTTGGCTATCTCGGCTCTGCCATCG  
CGCTCGGAGAACAGCAGTTGGCCAACCTGACCCGAACCGAGCAACTGACCCAGACCAAATACCAGGCAGG  
CGCCATCACCCGGCTCGATCTGGCGCAGGCACGCCAACTGTTGGCAGGAAAACAGGCTGAACGGCCCTCA  
CTCAAGGCGCCGCGGAGCAGGCTCGCAATGCCCTGCGTCTGTTGCTGGGCCGAGCAGCGGGCCACTGG  
AGTATGCAACCCGCTACCCTTGAACCCAGACCACTTCTGAACTTGCAGTGGGTATTCGGGTGATGTGCT  
GGCTCGACGCCCCGATGTCAAAGCGACCGAATTCGGCTCGCAGCAGCGTGGCAAAAGGGGACGAGATC  
CGCACAGCTTCTACCCAGCCTGACCCTGACCGGCGAGTCCAGCAGCAGCCATCCGATAGATTGGCGCAGG  
TGCTGCAAAATCCGGTTCGGCACGCTGGGAGCCAGCCTTGCCTCCCCTTCTTGAATACAACCGCACCCA  
GCTCGCCATCGAAAGCTCAGAGCTGGATTACCAGATCGCTGAAAACCGAGTTTCGCAACATCTCTACACC  
GCACTGGTGAAGTGAAGACAATCTGGCCGCCGCCACTATGGCCAGCAGCGACTCGATTATCTGCAGG  
AGCAGCTGAGTTATGCCCGGGAGGCGCAACGACTGGCCAAGGCTCGCTTCCAGGCGGGTTCGACCCGGCGT  
GCAAGCCTGGCTCGATGAGCAGAACCAGCTGTGGGAAGCCAGCAGAGCCTGTTGGCCCAGCAAAAAGAG  
CAGCTCACACCACCGCCAAAATCTATCGCGCCCTAGGTGGCAGCGATAGCGTGGCGCCCCGATAACGCC  
TCCGGCCATTCCCCTCTGCGGGCAGAGTGGGGAATACCATCGCCATCGACCGCACCGAATTCCTCTGC  
CCACACGGCAGACAAACGCCATTGCTCATCATCAGGAGCAGTTACGGCAGCCCATCCAATTACATGCATC  
GGCGACCCAGAATATCCCAGCTATACCTTGGCGCTATCTCTATCCCTCACGCCCTCTGACCCGGAGATAAC  
GGTTACCGGATATTCCATCAGCTGAGAGCTCGGCTCTTGGCGAGCGGGCGCCCCGTGAATCGTGAGAGACA  
TATCCGAAGCGCATATCTGCACGACGCATGGCGTTGTTTCCCAAATCAGCCAGCAAGTTCATGACTTCCCC  
AGCCCCGGGTGACCGCTACACTCGGGGCTTTCTTACAAGCAGACCAAGGGTGTTCAGTTTGTTCATCGCG  
CTCACATACGCCATCACTTCTCCACTTGACCATTGATTTTCGCAGGGTGAATTTGGCCTGCCATTAAC  
GTTTTGAACCGGAACATCGCTGTCTCTGCCTGCGAAGCAAGGTGATACCCCGACATCTTTTTCCAGTGGC  
CAGCCCTTCTTGCATCACCTGCACCGCCTCATTTCTCGATGGCCCTTTTTCCATAGTCTGCGTTTT  
TTGCGAGCCGGGATACACGCGCTCGCCCCCTTACGCGTAATCAACCGATGGCTGGCTTTGCTGTATAGG  
CGCCATCCGCGTAAACACGCCCCAGCTTGCAGCAGCAGGATTGAGCAAGGTTCGGCAACACCTCTGCGTC  
ATGCACATTCTCCAGCGACACTTCTGCCGCCACGATATCGTGAGTCACCGGGTCTACCGCCAGATGTAAC  
TTGCGCCAGACTCGACGTTTTCTCAGCGCCGTGTTTTCTGACTTTCCACTCGCCTTCGCCAAACACTTTCA  
GACCCGTCGAGTCGATAACCAGGTTCGGTAATACGCCCTTAGGGGGCTGCCGATAGGCCACCTTCACTGT  
GCGTGGCGCTTGTGACACAGCTGTAGTCCGGGGCACACAGCGGCACATTCATCAGCTCGAACAGGGAG  
TCGAGTAGCCCTGAGTGGCTCGCAGCGTGAGGCTGAAAAATCCCTTTGAGCATCAGAAAGGTACAGATGC  
TCTGGTTCGGTGTAGAGCTGGCTGCGTCCCCTTTTCCGTGATGGACTTGGTGAACAGTTATCCATTGC  
CTCGGCATCAACCCAGAAAGTGAAGAGGCCACGGTTGATCAGAGACCTGTTGTATTGAGGCCAATTGGTG  
ATGGGGTGAAGCGCTTTACCCATGATGCAGACTTGAGGGGGATGGTGGTGTGATCAGATCACTGGGTTTTCA  
ATTAGTTCCATTCAAGCTGCATCGATTTAGGAAACAACGCCAGCAGCATACAAAAAGCGATATCACGCA  
GTTAATTCTGCACGACAAAATTAATCGCAAAACAATGAGTGATATTGAGCAAAGTAAACAGTGAAGTAAAC  
GATGGTAAAAAGGATACAAGCGAGGATGTAGATAACAGTGGGGTGAAGTGGCGGATTTGGATAACCACGAG  
TAAAACGGCAAAAATAATGCCGCCAAGGGCGGCATTAATCAATCTCGGAACCTGACGAATTAGATCAGG  
AAATCGTTCCAGGCTTTACCCAGAGCTACTTGAAGCAGCAATGGCTTTTCGGCATAACGGCCTTACCGGTC  
AGGTTTTTTCTGGCCATCTTCTTCGTAATTTAGCCGGACGCGGAGCAGCTTGTCTTGGCAGC

GCCAGTCGCAGCAGCCGGAGCAGCGGCAGTCGCCAGCAGCTCACGAGGATCAATACCAGCCTGCTGCAGC  
ATTTTCGGTGAATTCATTCAGCTTGCCTGACGCTCTTCTGTTTCAGCAGCTCCTGTTCAACAGAATCGG  
CGCGCTCTTGGTAAACCAGGTCAAACCTCTCTTTAGCTTCCAGCAGTTGCTCAAACGGCAGCTCACGAAT  
AGCCGCACGCAAACCTGCGAATGTTTCAGCAGAACTTTTCAGAACTCGTTCATATTTCTCACAACAAAAATC  
GGTTACAGGGATAACCGTTTCAGAATAGCATGGACAATTCGCGAGAACATACAGTTTTTTCTATATTAACGT  
TCTTTTTTTCTTAAATTTACCCATCAAGATCGAATGCTTGGCCACTATCAATAACAACTGGCTGGAATGC  
AGATCTTCTGGGTAGAGTGGTGATTACCATCTTGTGTTCAAGAAACATCAGTATTTCAAGACTCATTAAT  
TTCCAGTTCAGCATCCAACAAAACTAACTCGGTAACCTGCTTTATAAACCTGAGCGCACATTTCTACCAT  
ACGTTCAACATCATGTGACAAGACTATGCCTATCTGTTTAGCAATGGACACATCTAGAACCTGTCCCTTC  
ACCCGATGATGAGGGGATACTCCCAATTGACTATCAACCCATTCGACACCACCAATAAAAAACACAGATTA  
ATCAATTGGTTGAGAGCAAAGCTGACATTTCAAATATGCTTTTTCGTAGCCCGTTTGACAGAGGTATGCC  
TCCGAAAACAGACTGTTTCGGATACTGGCCGTCCAGAAGGTAAACAATAAAAAAGCCAGCCGTTTTTAAGG  
GCTGGCTTTCTATGTAGCCAAATAGCACTATTTATTTTTGGTTATATTTCTTGCTGATTGGTCAACACCG  
GTAATCACTGCCTGTGAAGCGGATCCAGTTAAAAAGGGGCTCGGTTGGATAGAGCTTGAGCGCTTCCGCTC  
GCATCGTATTGGATTCTCTGTACGACCCAATGCATTAAGCGCGATCACCATATTGGCGTATATGTTGGC  
ACGGGGTGTATGGCGTACGAATGCCTGCCCCACTCCAGATAAGCTTCCAGCTCGGCTTGTATTGTTGTC  
TGCAAACCCACCATTAGACGAACCGAGTTCACATCAAACCTGACTCGGGTCAACCAGGCCATGGGATTGA  
CGATATCAAGTAGCAAAGTCCGCTCTTTATAACCCACCCGTTTATATTTGGTGACTATCCATGCGGTGTG  
AATGGCCGTAAGCATAAAGGGAACAACCAGCAACGGGATAGCGATCGCCATAAATCGCAGTAACAGCCAT  
GGGCGGCCTCCATATCCACCATGATGAGAAACCCCTGACTCGCCAGTGTGGTCTCTTCAATTTCCGGTAT  
CGATGATATAAATCAGCGTCAGCAACAGCCACCATAACACGATCGCATGGTAGAGCGGGTATTCGGTCTG  
GGTATGAAGCAAGATCGGTGTAACCAGAGCAAGCAGTCCCATGGCATGTACCCAGCGCACACTCGCCAGA  
CGCCATAATAATGCACCTCCCATGATCACCATGCCGACCATGGGGGCAATACCGCCCTCAACAGCCCAAT  
AGAGAACTCGTGTGGGGGTGGTTCGAGATTGTAATCTGCACCATGGACGGATTTCAGTGCCTTTATC  
AGCCATGTAGTGATGAAGAAAAACAGATTCAAAACCTGCCGTATCCCCAACCACTCCAGGGAGCCTGTGCA  
ATCAGTTTTGCCGCGTAAGGCCAGTAAATAGAGCGCATACCACCGGACTGATAGATCTCTAATCCGCGTT  
TTGCTCCAGCCAGCCATATTGTGATAACAGGCCAATCGCTACAGCCAAAAAACCAGACCCGATATCCG  
CCATCAGCCCGCTGTATGATAAAGCTGAGGCATCAGTACAAAACAGTGTAGAAGACCCGCTAACTGCCCC  
ACTCGGGATTGTAAAACAACGAGCAGAAGTCCCGCAGATAGAATGACGCCATAGCGCAACGCAACATGCA  
ATCGACCACCCTCTCGGCGTAATTCCAGCCAGATAGCAAGGGCAAGGCCGTTGCCATAAATGTCGCCAT  
CACATTTGGCTGTTGAAAGATCCCCTAAGGGCGATTGGCTTTGGTGTGCATAGCCAACTCCAGTTACCTGGC  
GTTAAGAGGTAGAACTGCACCAGACCCAGCAATGCCTCCATCGCGATCGCAATCAGGATGAGATAGAGCA  
AGCGATCAGCTGCGACTTATCAAAGCGCCATTGATAGAGTCCAAAACAAAAACAGCAGACCAGCAAAAAG  
GCCCAGCAGTCGGGGAATGGCATAATCCTTGAGTGCAAAACCTGGATAGAGCATCGGAAGCAGTAGCAAG  
AGAGCCCCAATCCATAAACCCGCTTGTAAATGGAGAAAAGAGCAGACGCTGTCGTAACGTCACCTGCCACA  
ATCCCAATCCAATAACCAGCGAGGCAACACCCATCCCCATGCGTTAAATGGCAGATACAGCCCGGCTCC  
TCCGGGGTGTGCATAAAAAAATGCACTCCAAATAACCAGTATAATGAAGATAAAAATCCAATACAAGCTG  
CTCATATCTTATTTCCGTATACTCAACGAGCCCCAAACCCCTGTCAGCATGTTTTTAATAGTTTTGATTAC  
TATTAATAGATCCAGCCAAAGCGAAACGTTTCTAATATAATAAAAAATCATATTTCTAATTTTATACGAGTA  
CTATCTGTATCAGCTGAGTAGCCATGCATCACCTGAGCCCATCCACTTATACCAGGACGGACCATATGAC  
GATACATATAGAATGGTAATTCAGACTCAAACCTCTCCACAAAAAACGCTGTTTCAGGCGGTGGACCAAT  
CAAGCTCATATCCCCTTTAAGAACATTAAGAATTCGCGGAGCTCATCAATTTCTATATTTACGAATAAAA  
TGACCAACACGAGTAATCCGTTTGTCAACCTCCTGAGCAAAAATATGCATTTGTCTAATGATGAACGTGCAT  
GCATACTACGAACTTATATATTACAAAATCTTTATTTGCCAGCCCACTCTCTTTTGGCTTAAAGAAAAC  
AGGGCCAGGGCTTTCTAGCTTTTATTAATATTACCGCTATAAGTAACACCCGGCATAAAAAAGGGGAGTGCA  
ATTATAACAATCAAAAAGATCCGCAAGTCTTTTTAAATAGAAAATAAAAACATGAGGGAATAGCAGAACCCA  
AGTCATTTTCATATAAATTGCTCAACGCTCACTCGGCCTGTTAATGATGCATATATAGTTTTGTCTGTGATA  
GATTGGTATCCCTAACAAAACGAAATCAGTTAATAAATTTTTGCCATTCCTCGTCAAATCAGATGAGTGA  
AAGTCAGCAACTACGGCATTACCACAAAAACAGAGAAAAATCAGGTTTGTGAAGAATATTCATTCAACAG  
CAGTCAAGGCACACAGTTTCTGATAATTACCAACCGAGATGATAGAATACTTAACCTTGCCAGATCGTGT  
CCCTAAGTAATAAATAAGCCAGCAAGATACTAAAGCTAATATATACGAGCTTATAAATTACTGGCCTACTA  
TACTCAAGACGAAACAGCAGCAACACACCCGAATAATATTCATACACTGCGGTTACTGTTGGAATCATAT  
AAGATAAAGCATTAACCTCCAGGATAGCAAAGCACTCGACTTAGGAAAAAACAGTAGTAATACATGTTAT  
AAAGATGCCTAAAAGTGAATTTATTTTAAACATCATCAAGGAAATTCAAAAGTCCAGCCCCAAAACAAA  
AATGCAGGTAGTAATGTTGATACCAAGGATGTAAAAAGAACATTAATGTTATAAATAAACCGTACAAGGT  
CATACAAACGACCACCATATGGATAATAGCTATTATTTATCATGAAAACTCATTTAGTTATCAAACACA  
GGGGTGAGCGCCATCGATATGCTGAGCCAATATGTCAAAAATATATGCCAATGATTTTTTTCTCATCGAAT  
CTGGCACTGACTAATTGCCTCCAGCATGACCCATCAAGGTTCTTTGAGCTGTAGTCAATTCGTATGAATG  
TCATCATCGCATCAGCCAATGATGAAACATTTCTAGCTTGACAGAGTAACCCGGTTTTCTCATGTAGCAG  
TACATCTCTACATCCAGGAACATCGGTAACAATAATTGGCTTTGCCATTGCAGCAGCTTCGATCATAGTT  
CTTGGAATCCTTCGCGATAAGAAGGTAACACAATAAATCACTTTCCATTATTATAGGCCAATACATCAT

GTGTAGTACCGAGATATTCCAGCACACCTTCATTGATCCATTCATGCAACTGTGAATACCCGATCGCTCG  
TGGGTTATCAGCCTGAATATCGCCTAACAAATTTAAACTTTATATTTGGATGACTAATGTGAATCTGCTTT  
GCAGCAGCTACATATTCTCCACCCCTTATCCCATAACAACCGCGCAATGAGCAAAAACTAACCGAGT  
TATCTTCAGCAAACCTTTTCTGAAGGATAAAAAAACTCAAATCAACGCCCTCACCAGGCAGTAACAAAGT  
CTTTTCGTTTCATCTACCAACTGTCTTGATACAAATTCAGACGATCATCTTCATTTAAGAAAATGACTAGC  
TTAGGATATTTAAAAGCGAATTTATAGAGCAATCTTACTACTTTAGGCACCCCAACCATCATTCATAAAGG  
CATATCCTAACCCAGTGGTTATAGCCAAGGCAGGTGTACGACAAAATATGTGCAGCAAAAAGAACCATATAT  
ATTTGGCTTTACCGTATAATGGATAATTAATCTGCATTAACCTCTCCTATATATCCTCACGAAATCAAAT  
ATTAATTTTAGCTCAATAATTGGGTTGACTCCTTTAGGAGATAGAACCAACGGAATAAATGAACACCCCA  
AATCACAAAAGCGAAAAACTGTATTATCAGGTGGAGCAACAATGGTTATGCGATATCCATGTTGTATAAG  
TGCAGATAAATAATCCGCGGCAAAATTCACCACTTGACCACGCTGTATTGCTCACCATACAAAAGATGTTTG  
CTCATGTGTAGTCTGGTACAAATTTAACCAACCGACAGATAGTCTTATTGAATAAATGGTTAATAAAC  
CCGAGTCCGAGCCTCCTTGGTCATCACCTCTCTCAAGCGGCGAGAGCATCATAGCCTGCTCAATCGCG  
GTAAATAGCTGCTGACTATTTTTAGAGGGGACAAGCAATCCAGCAGAGCCCAACCACTTCCCTCACTCCAC  
CACAATCAGTGGCAACCACTACCCGCTCAGTAGCCATAGCCTCAGCCACAACATAACCAACCCCTCCCA  
GGCTGATGACAACACAAATATATCTGCAGCACTCATCCAATCTTCAACATCATTTGCGCAGCCCCAAGAAA  
TGAACCTCGCTCGCTAATTCCTTGTGCGCTAGCGATTGTGGTTAAGTATTCTTTTTGCTCACCCCTCACCTA  
TAATGACCAACTTAACATTATTGAATTTGAAAGATAACATCGCAAATGCGACAAGCAAATTTGTATAGTC  
CTTGGCAGCGGTGAGTCTACCTACCGAAATTAACAATATATTTATGTCATCAATCCCAAGCTGAGAGCGT  
AATTTATTTCTGACTGTGGCGTTAAAATAAAAAAGCTTCCGTATCAATACCGTTATACATGACTTTTCATTC  
GCCCCGAGATACCGCACCTTGTTTAATAAACGCCTCAACTGCCCTCTTGACTCACATTTGTGTTAAGATC  
ACACAACATTTCCGGTAAACCCGGTATGCCAATATCCGCCACCCCTCTCCCTCATTAACACTATGCGCAGAG  
CAGATAAGCTTCCGAAATGATACAAAATAATCGTAATAACCGAGCAAAAAATATTTGCATGCACCATATGGC  
TATGCACCACATCCGGTTTATATTGATTAAGTAACCTGATCGTCTGCCAGTATGCTTTGAAAACACTAAA  
TGGAGTTTTCTCATCTGCAGTGAAACGATGTCTGCTACAGTCGAATGTGGGCGATTGCTAATTTACCCG  
GTCATCGAGACAATTAATATATGGTGGCCCAACCTAATAAATGATCTGCCAAATCGCACACTTGTCTGTT  
CAGCGCCCCCACTACCAAGCCCTGTGATTACCATCGCAATTTTCATGCTATTTCTTCAACCAACAGTAAA  
GAATACACTGGAGACTTCTGACACATGCTTTGACCTTGGCGAACAATCGAGTATCTCGGATCAGCTGGT  
TCGATAAAAACAAACCAAAACACATGGATTACTTCTTAGAGTTTTTTTAAAATTTGAGGTGTAGCCATCA  
GGAAGATATTACACAAGTATATTACTTGGTCTACATAAAAAACTATCTTACCTATATCGGAAATTTATAT  
TCCATATATATAACTCTGGTACAAACTTTTTCGTACAGGAACTCTGGAAAAGGACACTCACGCATAACATT  
AGTGCGAAAAACATAAGCCAAAGTACCTTTTTAATATATGCCCTGCCATGATAGGCTGCATTACCATTGAC  
TTGCTCCATGCTTTATCGGAGATACCAATATGTGACCAGATAATGTTGCTCTTCTAAAACACATCCCAA  
CAAATTCGAGCCAATATGATTACATAACATCATATAGCTTGGCAACAGCATCACCAGTTAATAAGTCATC  
ACTATCCACAATAATAATCCAATCACCGGTGCGATGAACCACACCTTCATTTATAGCGCGATGCTTCCCT  
CCATTTTCTTTATAAAAATAATTGATTGAAAAGCCAGCTTTAACTCTATAATCAAAAATGAGCTCGGCAG  
TACCATCAGTGCTACCGTCATCGATTACGAGCCATTCAAAGTCCCGCCTTGTCTGCTGACACAAACTGTC  
ATACAACCTTGGTAAAACATATGCTCTGTTATAAGTTGGCGTCATTATTGTTATCATTGCACGACCTTAC  
ACACGCAACCTTTATATTGATGAATGAAGTATATCGACATCGTTCGAGCCATCATCAAAAAGCATTAGT  
TATGTAAACGATGTATATGTCACCCGGAACGAAATACTTTTTAGCAACAACCAATAGTTGAATATGCTTATA  
ATTAATAGAAATAACCACTTGCACATTATCAAAAAATATTTTTTGTACGGTATAATCGTTGCATTAAAA  
CGCTATCCACAGCGAAAAAGAAAGCGCAGGCAACATCATAATGGCTAATTTCTGCAGCTAACATCATAATC  
TTTTCCAAATATAAAATAGACAATTTTATGTAGCCATAACCAACCCATTAATTGCAAGATACATGAACT  
AATAACAGCCCTAACAGACCGTATGATTTTTTTTACTTTGCGCCATATAACATCATTGGCGCTATAG  
ACTGCACAACATACAAAGTACAAGTACGCCCTGCTCTAGCATTTGACTAGCTACACCATACATAGGCTAG  
TTGTTTATACCCCTAAGTAATGCTCGATGAAGAAACGATCAATCCTCATATAAATCAGCATCAGCATTAAT  
GGCACCCAGAGTGCCCCACCTCGACTTAACATTACCATAAAAAACTTTTTTATGCCAGTCCGAGATGCCAC  
CTCTAAAATAAATAACACAACCTCAGAGAAAATAGCTAAAAACATTTGCTTCTATTGCCCTGCTTGAATAGAT  
GATGAAATAAGATGAAAAATAAATAGCGAGGCTTACCAAAAAGCACCCCTTAATAATAAATAAATGCAAGACGA  
ATCGCAACAATAATGCCTATATTTGTGGTAGCTTGTAGTAGTTGGCTATTACTGAAAATGGTTTCAATTA  
AAATGAGCGTCAGTGCCAATAGCATCAGCATTAATCTTACATCTTGATCTGCGACAATAAAAATTTGCGTA  
GACTAATGTGACAAGCAAAGCAACCAAGCGAAAAGTAGACGAAAAACAAATACTGAGGATAGTATCTTC  
CAACGCAAATGAGGATGCCGAACATAATGCCGAAACAACAACCTTCCGAGCCGCAATCAATGTTACTGATG  
ACAATAAATGACGGCATTGAGCGAATATAGCCATTTCCCATATAATGACACACCGAGTAAATGACTAAT  
TACCCCTCGCAAAAAAAACCAACCAATGGTCACCATTTTTTCAAATAATAGAATACTAACATTAGTA  
ATAATTGCGGCATATTCTCGATAAAAATGCCACAACCTGGCCTAATCGCATCCAAGTTGCCTCATTATAGA  
AACAGGTAATCAATTTCTAGCCAGCAAAAAATGAACATTTGTGTACCCGGTAGCTTCACGATGTTCTCCGTT  
ATTTGATGCTGCTTCCGCTAGCCACACCAGATCACAGATACCATCCGTCGGTTCCGAATGCAGCAGGAG  
CATGCATCAGGATCTCGGCAACTTGGCGTTGATCAAAGCGGTGACAGGCATCATCCAGCGAGGCCAGCAA  
GGGGCGCAGTCGAGACCATGGCAGCCAGCTCTCTTGTGCCACCATGATCCTGGGGTGTTCGGTTCCCTCG  
GCATCATACCAATCAGTAACTCTTCGTAGAGCTTTTACCCGGCCGAACCCCGTCACCTCGATGGCAA



TATCACCATCGGGCCGCTGCTCATCACGCAGTGTGACACCACTCAGGCGTATCATGCGCTTCGCCAGCTC  
CATGATCCGTACCGGTTGCCCATATCGAGCACAAAGACGTGCCCCCTCCCCATTGCGCCAGCCTGG  
ATCACCAGCTGGGCAGCCTCAGGTATTGTCATGAAGTAACGGATGATGTCGGGATGAGTCAGGGTAATGG  
GCCCTCCTTTATCTATCTGCTGTCTGAATAACGGCACCACAGAACCCGAAGATCCAAGGACATTACCAAA  
ACGCACCATACAAAAACGGGTTTGATGCTTTTTACGGGTTAAGGCTTGCAAGATCAATTCGGCCATACGC  
TTGCTGGCGCCCATGGTATTGGTCGGCCGTACGGCTTTGTGCGGTGGAGATCAGCACGAATGTCTCCACCC  
CAGCCTCAATGGCAGCCTGTGCCGATACAGAGTTCCAAAATACGTTGTTGCGCACTCCTTCAATGATGTT  
GAACTCGACTAGTGAACATGTTTATAAGCTGCTGCATGGTAGACCGTCTGGATCCGAAAACCTGTCATC  
ACCGTTTTTAGACGATGCTGGCGCTGTACTGAACCAATAACGGCACCAGCTCTGTTTTGATCTGCTCAC  
GCTGCACATGTTTACGCAGATTCTTATTTAAGGCATAGAGACATATTCAGATAGCTCGAACAGAATCAA  
GGTGACCGTTCGGCACCGCAAGATCTGACGACATAACTCAGAACCAATGGAGCCACCGGTTACC  
ATGACCGCTTTCCCTGTGATATTGGCTTCCATTAATTTGTCACCGGCTCTACCGGATCTCTGCCCAACA  
GATCGTCGATGGAAACCTCGTTGAGCTGATCTATGCGAGCCGAGCCATTGACAAGATCGGCCATCCCCGG  
GATGGAGAGCACTTCGCAAGAGAGGGGCTCAAGTGCATTGATCACCTCCTGACGACGCGCTCTGGTGCTG  
CTCGGCATGGCCAGCAAGATCTTCTGTACCCCATGGTGGTCAATCAGGGCTGGCAACTGAGCACTGTGAT  
AAACGGTACAGCCCTGGATCACGCATCCCTGTTTGGCGGGATCGTCATCAATAAAGGGCAGGGGATAAAA  
CTCATTACCTTGCAACAAGGCCATTTGCAGCTGTGACCCGAAGAACC CGGCCATAGATCAACACCTGG  
GTACGAGCCAGACGGGTGGTATTGAGCAGCGCCCGAAAAACAGCCGCACACCACCGACCAGCAACACCA  
AAAAGGAGAGATAGATAACAGATAACCGTTCTGGGCAGAAAAGATATCAAAGTAAAACGCAGAGAGAACAAA  
GAAACAGGTTGAAAGAAATGCCCTAGCGAGATTGTCCATAAGACCCATAAGCTGACATATCGGAGTACT  
GCGCGATAGAGCCCCAGCCGCACAAACAAGCTAATGCTGACGATGATAATTGCGCCAAGCAAAGCCCAGT  
GATGAGGGCTATCAATGGGCCAGTTATGTTCAAGCCGGATCCAGTACGCTCCCCAATAGGTCATTGTGAT  
CAGGATGATATCGACGGTACAGAGACAGCACGTTTGTGTCACGTCGACAAGGAACCCAGACAGGCCAGC  
AGCCAGCTGCCACCGGGTAAAAGCTCATTCTCATTCTGGTACTCCTGCATTCAGGTGATACGCAAGAAA  
CGCTAATGGCAAGTACGCAATGGCCAGACCGATAACACCATCTAGCTGGCTCAATACAATCATGACAGCG  
ATCGGCGCCAGCCATAGGCTATTTATAAGAAGCACAGCCAATGTCACGTTTCGATGACTTTGCCAACGTC  
TCGCCAGATATTGATAGCCATGAGTACGATGCGCCTCGCTAAGACGACATTTGACGAAAAGCGATTAC  
CAAGTCCAGGTAGCATCAACCACAAAGACTCCGAGCATGACGAGCCATGCCACAGGAATTGAGGCGCA  
GAAGCAGCATCCAGCAGCATCAGGGATGCCAGCATCAAGCAAGAAATCCACTGCCACCTACCCCATAA  
AGATCCTGGCGGGCGGAAAATTCCAGCACAAGAAGCCCGCAGCCGAGACCCCAAGTAGCAGGGTACGGCC  
CGCTGATGACCACGCACCTCCAACCAGATAATGCAATAACCGGATGAACAGGCTGACGACAACGGCCTCA  
CCGGCCGCAAGCCATCGATGCCATCCATAAAGTTGTAGAGATTGATAAACCAGATCACTCCCAACCAGG  
CAAGTAGATAACCGAACAGGCAAGATCCAGCTGCCAACCAAAAGAGGTCAGCGCTGGCAAACCATCAAC  
AGCAGAAACCACCAAGCTGCCGCCATGCTCTGCACAATCAGGCGGGTTCGAGGCTTGAGAGAGATGTGG  
TCATCGATAAAAACCAACCAATGCAATGCCAGCGCCGACGCCATATCAATGCGAAGCTGCTCTGGGATA  
TGCCGGCGGGAAGTGGGATCAGGGTGACAAAACACGGGGCTGCCAGCAGAAAAGGTCGCCACGATAGCCAT  
GCCACCGCCTCTCGGGTAGGCACCTGATGCGAACTGCGATGATTGGGTTGGTCAAGCAAGCGGGTCTGG  
GCGTAGCGCTGAGCAGGCCGGTTCATGGTATTGAAAGAAAAAGACAAAATATCGACAACAAAACAAATG  
CCAGCATCAAGACGACTCACTATGGATTGACGCCATCAGAGATAGGGTCTGAGAGAGCGAATAGGGTGC  
GACCATTGTAATCGGCTCTGAGCCTTGCGGGTATCCATTTCCAGAGAGCCATAAATCCGTTGTAGCTTGG  
CATCAATCCCCAAACAGCGTCCAAGCACTCTTATTACTCGTGGTGGGAGATAAAAAGAGCCGACAGCGAAC  
CCCTTCTGCTTCTGCAATCGCCGCAATAACTGCGACGTCGAGACTGCGACAGGATCTGCGACTAAAAAG  
ACCTGATTCACTGCAGCAGGGTGCGCCATCGCATGGGCAATGAAGTCACACAGATTAGGTAACGCCAACA  
GGTACGCGCATTGGTCAAACGGGCAAAAAGGAGCGGGATCCCTTTGCGCACCCACGTCATCATACTGGC  
AAAGTTAGCCTTCACTCCTTCTCCATAGATAAGAGGAGGACGAATGATGGTTACAGCCATACCACACTCT  
TTCGCAATTTCCATCAGCCCCCTGCTCCGCTCATACTTCGAGCGTCCATAGGGATCTTCTGGCGGACTTT  
GCACATGCTCATCAAATGGCTTGCTGGCTCGGTCTGCTCGCCATCACTTTGATCGAACTGATAAAGAT  
GAAGCGCTTACCCCTGCCTCAGCAGCCTGCCGGGCAAAAAGCGAGGGTACCCCTGTATTACCGCTCGA  
AATGCTGCCAGGGGATCTGTGCGGGTATCCAACATCACATGCACTCTGGCAGCACAGTGAACAACCACAT  
CTACCTGTTGCAATTGGGCTGTCCAGTTGGCATCCGCACTCAAAGAGGGGAGCCTGAACATGGTAATAAGC  
CAGCGGGTACTTCGGACAGCTCCTTTAACATTCGCCCCAGCGCCAGCAAGTGTTCACAGACCGCCTTG  
CCTACAAATCCGCTGGCTCCTGTGACCAAGACTGACTTTTGATATCTGCCATTACCACCAACGCCAACC  
GTGAATATTGAAGAAAGTACCATGGAACGCCAAACATCCAGATATGGCGCAACCTTTGCGGGATGCA  
TGCCACCATGATGAACGACCTTACCTGAGGGACATAAGCAATACGGCTGATCTTTCCAGCCCGCAAC  
TGATGTCAAATCTTCAAATAGAGGAAAAAGCGGGGTCAAACCTCCTAGCTGCTGCAGAACATCTGT  
GCGAAACAGCATAAAAACAACCACTGACAATGGGTGGGTCCACAGCACGTCGAAGATTGTTGAGCTGATCT  
GCCATCTCATATTTGCAAAACCGCTCTGGAATAACTTCTTCAAAAATCGGGTGCAAAACCACGCAACA  
GTAAATCAAATACGGTGGGATAGCGTTTACAAAAGCCGTTGTACCTCACCATCTTCCCATGTAGCGAAAGG  
CGTCAACAATCCGCAATCCGGATGTTGCTCCATAAATTCGAGGGCATGTTTCAAGTGCATCTGGAGCAACT  
TCAAGATCTGGATTGAGATAAGATGATATTTAGCATCAGTCTGTAATGCACGGTTATGACCGACACCAA  
ACCCAGGATTTGACTGTGCAACAATCAAGTCATACTCACTGTAAAACACTTGTTTATATCTTCAATTTTT

AATAGCCAGGTCATTGGATGGAGAGTGATCCACAACCATCAAAAACTCACAACTCCAGCATCAGTGACT  
GCTCGCTGTAATTTTTTGAAGCACTCGTTATCATTGACTTTTCAGTGCAATAAGTAACCACTGAAATAG  
ATAAATAAGATTGGCACATGCTATTTAATCCAGTGATCACGCCACAGTAAAAATTTGCGTTCAAAAACGT  
TATAGATAACCGCAGAGACAATTAACGTAGTAAGAATAAAACCAACCAATATAAAATAGCAGTATCCTC  
AGTCACATTTGGCAAATAGAACCCCATAGCACTTAACACTACCAAGTTCACGAGATACGCAGAATATGAC  
CATCTAGCTACTGGCTTTACAAATCTATAGAATAAAATATTAACCTTTAAATCCATACCCAAAACGAGCA  
GACCGGCAGCAGCGACATTTCGCTATTGTAATAAAGAATATCTTAAGGAATTGACTTTTGTCCATCACTGC  
ATCTGGTTGCATCGAAATAATGACAACAGGAATTAACAATAACGATAAGAAAAGGCGATGCCTTGATTATC  
CTATCTCGCCACAATTGACCATGATAATAGAGGTAAGACGTTAACACCCCAATCATAATGGAATCAAGGC  
GTAGTAATGCTGTGCTGACTTGATTGAATGTTAACTCAGGATATGAATACACACTCATTATTCGCAT  
CGTAAACGAAAACCCCTAGCAATATAAAAAGAGTAACCAACAATGACTGTATAGCTGAAGAACGCCAAGTA  
AAGAACATGATCACAGGTATAAATAAATAGAAAATCTCTCAATGACTAAACTCCACGCCTCCCAAAAA  
ATCCAGGATGGGGTGACAACAGACTTTGCGTAAATGTCATATAGCGCCATAACTCCGGCATCGCCTCAGG  
TCGCCAAGAATCGATAACAAAACCAATTTAATAATAAGAACAATAAAATAATTAGGATAAGTTTCGCAAAAA  
CGGCGACCCAAGAAATTGGGGATCCAACACCATTATTACTACGGGAACTTTTCTCGATAATTATTG  
AACCGATTAAAAACCCAGATAATACGAAGAAAATCTCGACTCCGAGAAATCCGCCAACTTGAAAAGTTG  
AGCATCTGGAAAGACAGGAAGTAACAGACGCCTGCCATGCGATAACAAAACAGCAAGATGGCACTGGCT  
CGACAAATGTCGATCCAGTGGATACTTTTCATACTACCAGATTATTTAGAGCTGAATTCATCTAACTTT  
AGCCCCAAAAGCCTTTCACTTTCCGCGATCATTTCACGATATGTACTGTTATTTAAAACCCCAATGTGG  
AATCTAACTCTTCCCTTATGCCCTACTAAAAATTTGGTGTAGTAATGACATGTAGATCACTGCGGCTTTC  
AATATAACGATCTATTGTATTGGTTTTTGCATCATGATTTCTATCATTCAGCCCAAGAGCTTTTCATAG  
AAAGCGCTGGAATAGATATTCATTACAGTACTAGTCATTTTTGTCAATCGTGACATATTTTTGACCATTAT  
ACTCCGTACACGCCAAGATATTAGTATCTTGATGCAAAATAGCTATCAGTCCCGAGAAAAGATCCCAATC  
TTTTCGTTCATTGAGATAATCATTACACTTTCCAGACGAGATAAAAAATGCTCAGGAAATTCATATCA  
TCCTCGCAAATCATTATACGTTCAAGCCCTAGGTCTTTTGACGATGCAAGAGAAAATTTATAACTCAAAC  
CACACCAACCCATCCAAGACGATGTCTTAGACCAGGGAAATATGAATCCATAATGATTATCATTATC  
AAAATCCCGCAGCTCGGGAGACTGTTTCCGGCAGTCTTAAACATACCATATCTGAATCAAAATTAATGGAA  
TCTGCCACAGCAGTATAAAATTTGCTCATACTGATAAAGATCGTGAGCTAAAAATGCTCTCAGAAAATAAT  
ATGAAAAAATATCAGGACTCTGCACACATACTTTCTTAATGAATGCTGCGCTCACTCCGTTTAACTC  
ATCACGAACCCAATGGCGAACTCGCTCTACCATTTTCATCAATATCATTTGATTGGTACAAAATCGACAAGA  
GGCAACAATGCCGAATGCTCATCCATATCTGCACTTTCTTCAGATACAATGATTTTTATTTTTGCGACAAAC  
ACTCGTATATTCTGGTTGTTTCCAGTAGCGCGCTTCATAATAATGAATGTTAACAATCACCTTTGCTTT  
TGACATTTTCAGCATAACAACGCATCACCAAAAAATCATTGATGATTTTCACTGAGAAATGCTTTTTTAGC  
TCCGCAATATAGGCTCTACGTCTATCATTATTAATGTCACCATAAAAAAACAACATCAACCGTCTCAGGAA  
CCGAGTCGGCAAGCTCCCGCGGAAGAAAACCCACTGGCAGATGGTAGATCTGGCGATAGCTCAATCCTTT  
ATCTTGTA AAAACGCAATATTTTTTAAAGAGTAATCAAAGATGGCTAAGGAATTTTGCAAGCAAGCAAGG  
TAATCCTCTGTGAACCAACGAGAGCTAACCGATTGTTCAAGTTGATAAGCGATATACTGCCAGGTAAAA  
CATCAAACATTTGTGGACAGATAACAATGTGCAAAACGTCCAGATAACCCCTTCAGGCCTCTGATATTG  
AACGGCTGCATGAATATTCACTTTCTTCAAGCTTGCACACATTAATTCAGCCAGATAACCACAGTGTGCA  
GTAGTCAAAAATAACTAACTCCGCGAGTATCTTTATCTCCCAATGAAAATAACCTCATGCATTGCATGATGAG  
ATTGGTGACCTAATACATGGCTAATGCGATGTAACGTTTTTTCGAATTCATGATGTCGCAAACCTGCGCCA  
CCCTTTTCATTAATAACGATGGGTCTCTGGCAAGAATAACCATAGGACGCCTAACGGGCGAGTCATTCGC  
GCCAGTTTACCGCGCAGACCGTCTTCAATGCATACTCGTTGCCAACCATACTGTAGTGACACAGTATCAC  
CACGTAATAAACGTCGAATGAGGATCGTTATACGCCATGACAAAACGTTTCGTTATGCATTG  
TTTTTGATGCTCAATTATAGAAAAGTTGGTCAGATGCGATCGCGGCTTGCTTGCGAGCGTCATCAACATTT  
TTCTGCAGTGACTCAATGATTGAAAGACACTCTTGATGTTGGCGTGAATTTCAACTTCGTAGTCAGCCA  
CTTGCTTGGCATGTAATGCAGCTTGTTCGGTAATATAGGTTGTCTGTTCGGCATTACGCTCTTGCCAAAC  
CCTCACATCAACTTGATGCTCGCGAGCAAGATTGGCAAACTTCATAGTAACAGCCGCTTGCGCCGAGGA  
GGGAGACCATCAAATATGTTAGGATCAAGGTGATCTTGTGTCATGTATTTCGCTCACATGACAAAGGATTA  
TATCGTGCTGTTTAGGTTGGCCCAATCGAAAAGCGTAAGTATGCTGGTTTTAATTGCAATGAGAAGGGCAC  
CAAATAGCCAAAAAGATAGAACTGAGCCGTCTTAGCCGTTAGCCCTCATCATGGGCTTCCAGTATAAAA  
TTGTAAGAGTTATCGCCACAAACCTTTAATGGCTTGTCCAGTAACAGCGCCTCTAGGCCAACACTGGAAT  
TAATAGTAAATATCTGTGACACAAGGCAACAAAATATAGACTATTCGGGGAGTTATCGAGACAACTTG  
TGCGGTTTTAAGTGAAATGAGCTCCCCGGATGAGCGCGCACCAACAGATCATCTGCTGCCACTTTCTGC  
CGTGCGGCAGCCAGCAGTGAAGATTGCTCATTCCATTGCCATAAGCAACCAGATTAGAGTCGTCCCTCGA  
CTTGCAATACAACACCACATTACATAAGCGGTTTTGCGTTGGCAATTTCTGGTAGGTTTCGGGATGAGTCAA  
GAAAAATTGCAATAACTCTCGTGTGCTGATTGACCATTGCCAATCATGGCAGAGGGGAATAACGTTGTGCT  
GACTCAGAGTTGCCATTGACACCACGAAAAATCAACATATCCGGTCTCGCGATACAGGGGACCACGCAGTG  
GGCCCAATTCAATATGGATGACGGGAATACCACGGGTAGCACATACCGCTCCAGTGACGCAACATTACA  
AATAGTGACGATGGCTTCAAGTTGAGCCGGAGCTGCATCCAGTAACGCCTCAAGTTACGCTCAAAAGCA  
GCATCGCGCTCGACAAGAAGCGCCGAAACGCCTCTATCGGATTGCCATTGAGTTTTATTGAGCCAATCAT

CAAATCTATTCTCATCCAGCCATGCGTAATGATGTTGCTCAGGCTGGGCGTTAACAGGCAAGGAGTAACC  
TAACCGAGCCTGTACCGCGGGGTCACATTCCCAGCGACCATCCCAATCACAAGCAGCGCGGACATAATCG  
CGCCCGGTGATAAAAAAGCAGATTTCATCCGCCACTCACCCAGCAAACGGTAATAGCACCAAAGATAAG  
GCGCAACTTGAGCACGAAAAGGATAAAGGAGGTAGAAAAGCAGCCAGCATTGATAACTCCGAGATATTCAG  
GCCTGAACGGTAATAGGCGCATGTACGACACCGCCCAGCTCTCTGGAAGACCAGAACTTGATCGCCTGCA  
TCGGCCGACGCTGATCAAGTTCTTACGCTCTCCCCCTTGAGAGAGGGCCAAACCACAGTGAATAAATA  
ATCGCCACTATTGATGGGTAAGGTCACTTGATACGTACAAAATGGCGACCTGGTTTCAATACTATGGGG  
TGACCGGCTGCAATATTGCTATCGCCCCAAATATCACCACCTTGGGCACGGCTCAAAGACAGTCCGAGAG  
CGATATCCTCAATTGTCTCGCTAGAGATAAGTTCAAAGCGTAGCGTCACCGTTTACCTGATTTGACCAG  
GGGCTCTTCATGAAAAGGTGTACCATCTGCCTTGACAATGGTCAGGCTGGCGATAATCGCGCGGGCAGAA  
CCAAATCGCTTCTCACCCAGCCAGATTGGCCTCATTTTGTCTTTCAAGTAGAACTGGCTGTGATG  
GGCAATCGCCATCACTTTCAACTTCTGGCAATGCCAAGGTATCGGCTTGCTCCTGCGACAGGATCATGCC  
TTTTTTCATACGCCATCACCGCAGCCAGCACATCTGTGGTATCAGCAATCAGGCGCCCCCTTCCATCACC  
AGACAACGATCCGCGTATTCCAGAATACTGCCGGTCGAGTGGGTCACCATCAAATGGTTACTCCCTTCG  
CTTTTCAGGGCTTCCATACGCTTGAAAACACTTGATTTGAAAACCGATATCGCCAACTGCCAGCGCTCATC  
GACTATCAAATTTTCAGGATCAATACAGGCCTGTACTGCAACGCAAGACGCACATACATACCCTGGAA  
TAGGTCTTGACCGGTTGCTCCATAAAAATCGCCAATATCAGCGAAATGGGCAATCTCATCAAACCTTGCCT  
CAATATCCTCTTTACTCAACCCCAAGACACTGGCATTGAGATAGACATTATCACGCCCACTGAACCTCCGG  
ATTTAAAACCGCCCCAGCTCAAGCAAAGCGGCAATACGGCCATTGACGTTAACTTCACCATGAGAAGGA  
TTAAGGGGTGCCGCAAATAAGCTGAAGCAGGGTGGATTTACCGGCCCGTTATGGCCGATAATACCGACGG  
TTTTACCCCTTTTTAATCGCGAAATCAATGTCCCGGATCGCCAGAATTCACGAAAATATTGTCTAGCAGC  
ACCGCTACACAAGCGGGATAAGCGAGGAATAATAAACTGCTTGAGTCGATCGACCGGTTGCTCATAAACC  
TGATAACACTTGCTCAAACCACGCACGTCAATCGCGACTTTGTCAGAGCACATCGGGCAAACCCCTTACGT  
GTTTTCTGGAACAATATAAACTCCTGCATACATCACCAACGCACCAGCCAACAAGGAGGCACCGTATTGCC  
CCCAAGAGGGGAACTTGCCCAATAGAGCACATCACGAACCTGGGCAATCACAGGCGTCAGCGGATTAC  
ATTCAACCAGTGACGGTATTGTTTCAGGGAGTGCTCTACGGGATAGAAGATGGGCGAGAGAAACATCAAG  
ACAGTGTGTGATAACACACCAATTTGTGACAGGTGCGCAAGTAGACCCCAAGCGCAGCGAGTGCCCATG  
AAAGACTAGCACACCAGCAGGAGTGGCAATATCATAGTGGGAAAAGCAGCACAGTCACTGGCGGCAC  
TCCGAAGGCCACCCCATAAAATGCAAGCCATATCAAGAGGCTGATGCCAAGATTGACCAGAGCTACCCG  
AGCGCCACCAAGGCAAGATCTCGAGAGGAAATACCACCTTCTTGACGTAATTGACATTATCCAGGATCA  
GGCGTGGCGCACGGTTAAAACATTCAGCGAAGAGGTTAAAACACCATCAAACCGGCAAACAGCACCAGGGC  
AAACTCACTGCGCGAATCGCTACCACCCTCCAGCGCGCTTGAACACCACACTAAAAATAAAGGTGTAA  
ACAGCCAGCATAAAGAGTGGGGTAAACATCGCCAGAGATTACCAACATGGCACCACGGTAACGGGCGG  
CCACTTCACGGCGTACCAGGGTGACAATCAGATGACGCTGGGTAGCAGAAGGAAACAGATTGGCAACATT  
GAGCATCAACACTCCTCAAACAACAGGTAACCTAGCAGAAAACGCGAGGATAATAACACAGCTCACTGCT  
GTTGACTGCCCTTGCTTCGCTTGACCCGCTGAGCCAGAAGCTGTGCGCTCAGGCTGGAACCGCT  
TTCCAAACCGGATGCAATGTTGTTTCGATAAAAACGACACGACAAGTAATCACAGGAGAGCGAGCACAGCTA  
ATGCTTGCTGGCACCCTTGAAGGCCAGCAGATAGAAAACGAGCCATTATTGGACTGAAAAACTATAGAT  
AGGAAAGCCATATAGCATATCGCGTTGCATCAGTAACGCCATCCAGGCCGCTACCAGCATCACGAAATAG  
TCACAGGCGCCATCGTTGGTAGACTACCACGCCACAACATCATTGAGGCAACAACAACATCCAGTCGAGA  
TAACATCTCTCAGAGGATGGAAGAGTGATTGCCTAATATTGAATATGCATTTACGTGATAGACAATCATT  
AACCGGATACGTGTGATCTGCTTATGCTGCATCGCGATAAAAAAGTATAAGTGAACAGGGTGAATAA  
ACCGGAAAGGGGATGATTGGCAACAGCGGAACAACTATGCCGACAAGCCGCATGTTTATTAATCGCTCG  
CCATAATTGGCTCATATGCTAAGACTTGATAAAAAAGGGTGGCTAATGCCACCTTTTTTACAACACTTC  
AACCGATTAGAAACGGGAGAAAGTGGTACCGTCTGTAGACAGAACATAGGTCTGCAGTGTCATGCTGGTA  
ACATTACCTTCTGCTTTGATACGCAGCTTGCCAGCTTGCTTGGTCAGACCAGCTGCAACAGCAGCAGCGT  
GCAGATCTTTTCAGGGAGATCTGAGCGGTAGATGCCTGAGCACCCAGTACATCAGACTCGAAACCTGCAAC  
CTTGTTCAACGGGAAGGAAGCCTTTGAACCATCATCAGCATATACAGTGAATGTGATCTTACCCGCTACG  
TCGCCAGTGTTGGAAACACGAACGAAGGTCTTGTAGGAAGAGTCTGCTGAGAACACCAGATCTTGAGAAG  
CATCAGAACCCTTTTTCTGAATATTGGCAGCGGTGAGAACAACCGGGGCCAGCTCATATTTCTCGGCAGT  
TGCTTTGGAAGGAGTCCAAGTTGCTTTCACTTCGCCGGTCGGGATCTCGGCCCTGTTGTGCGGTTGGCAGT  
ACATAGCTAACCGGAGCTTGGGCGATATCAAATGCCTTGCTCGGATCGGTAACCTTTGGTGCCACCAACAG  
TTGCATCTTTTCAGGAACGGACCTTCCGCTTTCCAAGAACCTGCAACAGAGCCGTTCAAGCCATTACCCTC  
AGAACCCAGCACATTGGCGGTAAACTCAACAACCTGGAACGAAGATAGTGGAGCTGTTAGCACCATCCAAG  
AACTTGGTTGAGTCATAGTTAATCAACAATCTTGCTTTAGAGTCAACTACTTTAACAGCAACACCTT  
GCTTGAAGTTAACAGAGTGTGCTCAGAGAAGCTGCCAGAACGGAGCTTGGGAATGCGGCGATAGCATC  
TGCTTTCGCTAGCATAAATGCCGGCGGTTACGGTGTGGCGCTACCGACTTTGGTGATCACTTTTCAGATCA  
GCTTTATCAGCCAAGGTAAACTTGACTGTGGCAGTAACAGTTTTGTACCACATTAGCAGAGTCTGTTG  
CACCGATAGTCAGATCGCCAGCAACTGCTGGTGTGGCACTGACGTTAGCAACATAGAAGTCAACCCGAC  
GTTAGTGATGGAACACCTTTAGCAAGATCGGTAAAAGTAGCATCTTTTCAGCTGAACACGAACATACTTT  
GCGGTAGCTGCGCGTTAAGTGCAGCCAGAGCAGCATCAGCATTAGCAGCATTAGCAACAGTTGCGCTAA

CTGGCAAAGAGAAGGAGACGCCAGCAAGAGCAACCTTTTCGATCTGCACCTTACCTTCAGCGTTAGCTTT  
GATTTCTTGAGCGTAGGTCTGAATAGCAGCATTGTTGGCGGTCAGATTAACAGCTGCCGCATTAAGCTC  
AGGCCAGCAATAGCCAGTGAATCAGTGTCTTTTTTCATTAAAGTAATTCTCCAAAAATTAAGCTAGTTTA  
ACCCGAGCACCTCAGGTCACTACCAACCTGCTTTTTCCCGCCGACTGCCCTCTTATTCGGACAAGATC  
GCAGTCACTTGAAAAGATGAGGCTCTATCGCTTAAAAGCGTAAGTGATCATATCTATCGCCATAAAATAA  
TCAAGGACTCTGTGAGGCTAATCGCCAAAAAAGCGCCATACGCACCATCTTGTGGGAAAAATCACATAA  
ATAAAAAGCACCCTTGACACCAATTCGCGATAACAGGCTGTTTTTACCCCTACCTTACTTTGACACG  
CCCGCAAAGAGCCCCGTATGGTTCAAGATAATCTGCCCCGCCAGAACACATTAATTAACAGAATTGAC  
ATTTAGCGCACATTACTAAAGCGGTTTCAGCTGGGGTGGAGCAGAAATAGAGCGCTCTGAACAAACAGAG  
CGCCAAATATCAGCAGGGTGGACTGTGCTCACACTGGCACCAGGCTATGGTGTAAGGGCAGCACGGGGCGC  
AGAGGTTACGGAAGCAGCATAAAATGAGAGAGAGCAGGTATAAAAAGCAGGGATATCTGATGCTAGGGC  
TTAAGTAATAGCCGATTGCACCTTGCTCCAGCCAGTAGGAACCGCCAAAAAACCAGCCCGGCAACGT  
CAGCCAGGCGGGGTTATTACAACAGATTTAGCAACCGAATGGGGTCAGCGCAGATAAGTCATTAGCGCA  
AGGTCGTTACTGGCGCAGTTACAAGCTATCGGTGCGCTTTTTGGGGCCATGCCCGGCAAAAAACGGCGC  
TTAAGGGTCGGGGCGTTATTTAGCTGCAACTGCTGCTGATAGCGTTCGGTCAAACCTTTGTGCCCTACTAA  
AATCGCGCATCACATAGGGGATGATCATCACCACCAGTTCGGTGCAGTTTTTCGCTGTTGCTCTTTGACTT  
GAAGAAGTTACCCAACCAGGGGATGTCCCCAACAAATGGCACCCTGGTATCCCTTCGCCTTTTGAAGT  
GAGATCAGACCCGCCAGCATCACCGAGCCACCATCGCGCAGGGTGAGTGCGGTCTCCACCTTGCAGTTCA  
TAATGGTGGGGCTTAACGCCTCACTGCTGGATGAAGTATCTGCTGCTCAGAAAAGTCTTGACTGACCAG  
CAGATCCACCACACCCTGGCTTGACCGTGGGCTTGATAGAGAGGATCACCCTGCTTGCGGTACTGCG  
ACGGTTTTTATTAATGGGGGCATCGGGGTTATCGCTGGCCTGGCTGGTGCTGTGACCACAGGTATTTTCGT  
TACCGACCTCGATGCGGGCTCTTCGCCGCTGCGCACCATCAGCTTGGGGCTGGAGCGGATCACGGCTTG  
CTTGTGTCATAGAAGGCATTGAGGGTCGCACCGCTTGACCCGCACTATTGAGCGCCATATTGAGACCC  
GAGCTGCCCAGGCCGTTGGCAGTGCCCATGACCAGATCTCTGGCCCCAAGTCAGTGCCGATATTTTTTC  
AATCCACCCCAATCCCTCTTTATCATTGAGGGTCACTTCGGCCAGCAGCACATCGATCATCACGGAAG  
GACGGCTTTATCGAGCTGATCGAGCAACGGGCGCAACTTGATCCACTCCTTGCCGCTGCCTTTTAAAGATC  
AGCGCATTGCGGTTGGCGTCCACCACCACAGCGCCCGCTCACCGCTACCGCCGGTGGTTGTACTGCTGG  
TGGCACTCGGTGCTGACCGCTGCGTACCCTGGTAGTGTGTACCGAATCCCTTGGCCAAACCTTATCACC  
GGCACTGCGGTATTGCTGCTATCGATGCCGCTGGCGGTACTGTGGCACTGTACCCGAGGGAGCCAAAGC  
ATAGTAGCGATGGCTGCCGCTGGGTATTTTTAACCTGATAGATAAAGAGACCGTTTTTCGACTTTTTCCCT  
GGGACTCTCGATCCAGGATCTCCACCCAGTCGCGGACATGACTGAGCGTGGTGCCATCGGCGGCAAAAAAT  
GATTAACCGCTGCAGCTCCTTAAGCTTTAGTACCATCACCGACCCCATGGGAGGGGTATCGGAGACGTTA  
TAGCCCTCTGATTGCAACACCTTGATCAAGGCATTGCCAAGCTGATCGGCATCGGAGTAAACCGGGGTAA  
TACTCATGCTATTGCTACTTTTTAAGGGTAGGTTGATCAAACAGACGAATAGCGGCAACGGCCTGCTTAC  
CTGCTCCACCCCCCTCTTAACATGATGGTATTGCAATATAATCAGCCGTGACTTTTTAGCTCAGTGTTA  
TTGGCAAACATCTCTTTAATCCAGATTTCCATCTGGTTGCTATTAACAACCTGCATCGGCATATCTGGA  
ACACTGGCCTATGGGACATAGGTACTTCAGGCAGGGCATCGCCGCTTACCATTAATGGCAAGGCATCATT  
GGCAACTGTGTTGCTGACGGCAAAGTTATAGAGTCCATCGCGCAGCTTGACCTCAACACCATAGTCCGCC  
AGCACATTACGGGCGGTATTGAAGAGAGCAGCCGGCGGTTGCGGCTCGCTCATTGCAAGGTCACCAGAT  
CCGTTTTTTTTCTGTAGCTCCGGACTCAAGGTAAAGGAGAGTCCGAGCTGCTTGCCAAATACCTCGTTAAT  
AAATGCAGGTAAGGGAAAGTTGTTGACGTTGAGGCTGACGGCATCGCCCTGCAGCCCCGCCCCAAGGGC  
TGGCCATCCGGTTCCACTACACGCACTTGTGACGCTGGCTTGGGGTAAGGTTAAAGCGCTGAGCCAAGC  
CTTGACGGGCATCAGGTTCCGCACTGCCCGCTGCAGCGTTTCATCCTGCTCGGTCTGGACTAACGGGGC  
ACGCAGTGGCCCCGGCAGCGGGGTGGGATTGGTGTGATAGCACAGCCAGCCAGCAGGCCAAGGCACCTG  
GCCAGCAGGGTCAGACGAGGAAGCTGCCGATGGATCATGGTCTGTACAGTGTGGTTCAATACTCGTTCT  
TTATGGCCGAGTGGGCGATAAAGTTGAGATGGAAGATGTTGACGAAAAATCACCTGTTGCGGGCAGGGG  
TAGAGATAGAGTATGCCTTCTTTTCTTGCGCATCACGCCACTGCAGGCTGTGCGCATTTATAGCCAACA  
CATCACGTCCATCCGGCAGGGCCATACCGGGACGCAGAGCAAGAGGTTACGCATCAGGGCCAGCAGCAG  
CGCCTGACGCCCCCTACCTTGGGTAATAATGGCGATCAGGATGCCGTTCTGTTGCATGGCTTGCCTTGCA  
GCCTCTTTGCGAGCTGCGTCCATGGTGAATCAGTATCTTTTAGCTGCTTTGGTGCCATCGGCCATA  
GGCTAGCGATCCTTGCCGGCATGGGCGGCAGATCTTGCGCCAATGGCAGATCTGGCCAGTACCAATCTCG  
GGTGTGTCAGGGCGCTCCGTCAAAGAAGGGTGGCTACAGAAGTAACCAAGTAGCATTAAGAGAGGATG  
GACAAAAGGGGTACCCCGATCGTGATCCCCGGCGCTGCAAACCTCAGCTTAGGGACCATCACTTATTCTC  
TCCTTTTTTTCTCCAAAGGGGTGATACCAAACCGTAGCCTGCAGCGTGAAATGAGTTTGTGCTTCATCT  
GATTATTGACAGTCACTGCGTTAACGATGAGCCGGGGTGAATGTTTTTCCAGCTCGTTGACCAGACCGAT  
AACACCATCCCCATTGGTGCGCCCAGTCACCCGCAACTGCAGGGGATCAGACCATTCTGATCAAGCTGT  
TGTGGCGATTTTTGATACCTCAACTTGGGGCTGGCCGACAGCAAAGCGAGTAAAAGGGCTGAGACCCTGC  
TCTGTACTTACAGCACGAGCAAGTGCTTCAATGGGGGCCATGCCAAAGTACTTATCGAGGGCCTTGTTCGC  
AGCCCGAGCTTGGGTTAGTGCCTGCTGCCAACTCTCTCCTTGCAAGCAGACTTTGTTGATCCTGTTGTTGC  
CAGGAGAGCTCTGTAGTTGTTCACTCAGCTGCTGGCGCTGTTCCTTGCCAAAGCAAGTTAACCCAGAACA  
ACAGAATGATAATGATAAGCCACGCCCCCATTCAGGGCAGGATTTGGCTTGCCATTGTTGGCGAGCTTG

TTGCCAATGTGGCTGAATATTGTCGATCAGAGCATTATATCCCGTTTATGACTCCTTGCCGGTTGTCCT  
TTGGACAATCCGAGGCAGTACTTCTATATCTGCTTGCAAGCGCACCAAGGTACCGTTGCCTTCCAGCTTT  
ACTTGGACATTGTGCAGTCGTTGGCCATTGAGGGTTATCCCTCCAACCGCTGACATACTCCCTTGGAT  
CTGGCGCTTTATCCTGTAACAACAATTGCAAACGCAGGGGTTGATAGTCGTATTGCTGAAGTGTGTTGAC  
ACTGGCAGGCAGAAGCGCGATTAAGTGGGGCAGAGTGCAGAGATTGTCCCTGCCAAGTAAAGTGAAGTTCGA  
GCTTCATACTGGCTACGCAAGCCCTCGGCCCGCAATCTCGCATGACGGGCAGTAATAAGCCCTTCGTGAG  
CGGAATCGAGCTCAACCAAAAGCGTATTTGTCTGTTGCTCAAGTCTGAACCAAGACCCCAACTGCCAAGA  
CATGCAGGCGACTAACAGTAACGCTACTACGCCACAGGCAAGATGGCCAAGTAAGTGCAGTCCCTCGGA  
GCCAAGGGACTGGCTTGTCTAAATGAGAGTTGAATCACTGTTGAGGCATCAGGCTGAAGTACAGGCAACC  
AACGGCTATCGATTAATATGCCATTTTGGCAACGTTGCCACTCATAACCGTGCAGTCCGGATAGATAGCG  
CTGCCAATCTGCTGACTGTACTTGTCTCCGGCAGTGGTGTGTTAACGCGCTTTCCGGCACTACCTGTA  
TAGCGTTTTGCTTACGCGACCCGAGCAACCAACGAGCCTGATCCCATATCCAGACTGCCGCTTCCGCTG  
GATGCCAGTTGACATAATATCCCGGTTTCAAGTAAATGGAGTATGTAGGCTGACCTGTTGCTTACGCGCTG  
CTCACGACGAGCCTTGGGTACAGCGCCAAGATCGCAGGAAAATAAAAAATGCAAAGGGAGCGAGCAACAATC  
ACCCTAGGACGCCAACCAGGGTAACTGTGAGAGGTGATTTGTTGGCGCTCAATCAGCCATTGGGGCTGGG  
AATAGCGGCTCCACCACCTTTGCTCAGCTGATTGGCAAGCGCGGTTATGGTTATAGGTAAGGCATAAT  
CAAATTTCCAAGGCGCCCGAAACGAAGAGGGCGACAATGATATCCCAATCCACTGAGCCTGTCTGCATCC  
TGCGGCGCTCGCATCGCTCCAAAGGATGATGCGATGAAAAGCAGATACTATCGACGGAATTTGTTCCCTCG  
GCTATGGGTAGGAGTTGTCCAGCCTCTGATTGGCATCTTGGAGTGAATCAAATGGCTCCATCCACCTTA  
GTCGCACCAGCTCAGCAGCTGTTTCGTTTCAACACCGGCTCGTAGTAATGGCTCCGGCATGGTATTCAA  
ATTAAGTAGCATGCCTGAACGAGCGGTGACCAAGGCATAAGGTCAGGCAACCAGCTCTGCCAAGTTGGT  
GCATCCAGAAGATTATTTAGCTCACCCAGGACCAACCATAAAGCGGTGGCGAGGCAGTGTGAGGCCACGAG  
CAAGGTATTGCGCATCATTTGCTCCATTCAGCGAGATAGATCATCTTGATCCGTGTAGTCAATCCACTAG  
ATCAACAACCTCTATCTATTTGAACAGGAGTAAGCCCAAAACGCGCTAGCAGCGGCTGCCAACGCACGGGA  
TCAGCATCAAGCACACTGAGCAATGGCCCTCATCTTGAATCGAGAAAATCTATTGTCCCTATTCGGTGAT  
AAGCTCTGCCATCTGCTGCAAGTTGTGATCTAACTCTGCCAAAGAGCTAACCGAAGTACGTTCTTGATC  
ATTGGCCGACGCTCAGCTCGAACCCTGATTACCACGGGGGCGGTGGCCACTAAATGGAGTAACGTTGCC  
AGGGTCGCTGCTGACTGATCCAGCTGCTGCCAGCTGTACGAAGTTTCGACAGCCTGTTGCAAGCGCTTT  
CGGCATAGCTACCAATAAAGGCGGCAACCAAGGAGATAACCGGATCAATCTAACACGGCTATAAAGAAC  
GAACCCCTTGGTGGGGGGCGGCACACTCAATAATGAGATACCTCTATTTCTGACTCTGGTTACACTC  
ATAGATCACGATAATCATTTTCGAGGATAAGTTCGTCCCTTTAGGGCTATATACCAGTTCATGTTTCAT  
CGCAGGTGAACTCACCATCAACTGGATTGCTACTGGCATTTCTTCCATCTGGCCGGAGAGATAAGGGTT  
TGCTCCGGTGGCCATTGATTATGGGTGTTACCCTGCTCATCCAGATAGCTGAACGTAACCTGAGTCCCTT  
CAGGCCAGCGAAAAGGGTCCAATTTCTACCAGGCTGGCGATAATCGAGGGTCACGCCACCGGCTCCTCG  
CTGATTAATTGACCAGCGTACCAGGCTGTACTTACCATTCTGGGCAACCAGTGGCTGCTGACTGCTCCCC  
TCAAAATAGAACTGTACCACGGAGCTGGCGAGGAGCATCTAGCTCTGCCTGCATGGACTCGACACTAT  
CATTC AACCATTCATGACCAATAGTTGTGGCACACCTTCATATTTGTCGCTTTGCACACGTTTCATAAAT  
TGCTAACGACTGGGATAATCCTTGCATTAATAAAGCTGTTATCACGGAGAGCAGAACCATGACGACCAGC  
AATTCGAGAAGGGTCATCCCTTGTGCGGTTAATAGATTTTACGGCGCTCTTGCCTCCGGGCTTGAGG  
TGATAGTTAACGACTCGAGTGGTCAGGGGAGGTAAAAGTGGGTTCTTATGAATGATGGTAAGCTCAACCT  
GATAAAGCGAGAGGATGAAATTAAGTCCCATCACGCCATTACGTTCTTTCTCTATAGGTGTCGCATGCCA  
GCTTATAGATATGTTACCCTCTCGAAAAGTACCTTGTGGGTTATTTGCCAAAATCCTTCAGCTTGAGATAA  
TTCACCGCACTTTGCAAGGTGGGAGCAGCGTCAATATAGCTCTCGGCTCTTGTGAGTTGGGCCAAGCTAC  
CACCTATCCAGCCAAATAGAGCCATAGTGGCACCCGCAATATGGTTAATGCTACTATGGCTCCAATAA  
CGAAAAGCCTTGTGACGCATTATGGTATTCCTTGCATTTGGCAATATGGAGATCCAGCTGAATGCTCT  
GCTTGATGACCCACCTGCTAGTATTTGTAATTCACCAACCCAGACAGATCCCGTTGGCAAGGTAGTATAT  
CGGTTGAGGGGCTTAAAGCTGCCAGCCTTGGCGTAAGGGAATATCGTCGGTGTGTGACCCAGCACCCT  
TGAACCTCCCTCTGGCGTACTGTAAAAGGCAACTCATTGATGGCTTGTGTAACAGTTTGGCAATCGTTGC  
GATGCCGAGTTTATCTGCCATCTCGAGAAAACGTTGGACCTACAACCGCCGCGATCATAACCAATCAAAGT  
CAACACCACAAGCAGCTCAAGCAGAGTAAAACCCGTTGTTGCATGCTTACTTCTCCAGTATACCTACCT  
CGGCATCCAGCCCTTCGCCGCCCTCCTTACCATCTGCGCAAGCGAATAGAGAGAAAACCTTGAAGTT  
ACTCACCGGGCTTTTGTAGACATAATCTTTACCCAAAGGGTCTTTAGGTAGTTGATCTTCCAGATAGGGC  
CCCTGCCAGCTTGGCACATCAGCCGGCGCTTTCATCAAAGCCGATAGCCCTGCTCTGTAGTGGGATAGC  
TCCCCACATCCAGGCGATAGGTTTGAAGGCCCGCGCAGCATCTTGACCTGAGTCTCTGCCGTTTTGAC  
TTTTGATTTATCCACGTTGGAGAAGAGGCGCGGGCCGACCAAAACCGGCCAGCATGCCAGAATGACCAGC  
ACGACCAGGAGCTCGATCAGGGTAAAACCGCTTGTGCGGGGCGAAACGTTGCAATTGCATGAAGAGTC  
CTCAGAGTTACTATACGGCCATTTGCTTACACTGGTGATGGCCAGGATGATGCCAAGAATAATGACGCC  
GATGATAGAGCCAATCAGCAGAATGGCAAGGGGTTGATCAACGCAAGCACCTTCTTGACGCGGTTCTTA  
CTGTTCTCTTCATACATGGCGGCCAGCGAAGAGAATCTCGGCAAGGCGGCCACTTCTCTCGCCGACCC  
GCACCAGATTGACCCCGAGCGAGCGATCAATCGCTCTCGGCAAGAGAGTCCGACAGGCTCTTGGCCGA  
GCGCACAGACGGATCACCTCTCCATCCCGCGCTGACGAAAACGGAATGCGAAAAGAGCCGCGGATAGC

TCTAGCGCCTGTAGTAACTCGACCCGGGATCCCAGCATGGCTGCCAGGGTGTAAAGACCAGCTGGCAACAT  
CGCTCTGGTAGAGCCATTCCCCACTACTGGCAGGCGTGACACACCGTTGAGCAGACGCTGCCGCACATC  
GCGCGAGCGCAGCGCCAGGGCCATGCCAGCGATACAGAGGATGAGTGTATAAGCAGCAGATCCCAGTTG  
GCGTTAAACCACTCCCCTGTGAGAGCACCATTTGCGCCAACCAGGGCAACGTCACCTTACCGTGGCCCA  
ACATACCGGTGAATTTAGGCACCACCACGGCAAACATCAGCACAACCGCAGACAAACCTGCGAGACCAA  
TACGATGGGATAGGTCAAAGCATTGCGCAGTTCATTGCCGGTTGCTTGATCAAACCTGCATTTTCTCCAAA  
GCGGACTGAGCGCCTCACCAACTCACCGGTGGCTCACCCGCTCTCACCAGATGAAACAGGTAGTCCG  
GAAGCGTAACCTTGCTTTGGGCAAGAGCTGCGGAAAAACTCTCCCCCTGCTGTAAAGCCCTGCCATGGT  
GCGAAATGCCTGCTCAATTTGAGGATGGTGTCCCCCTCAATCAGGGCATCGATTCCCTCTGAGAGCGTC  
ACCCCGAAATGATCAGGGTGGTCAACTCATGTAGTGCCTGCAGCAACTGGGCACGGGTCAAGCGGGGAG  
TAAACAGGGGAGCAGAGCTACTACCGCTGTTCAAGTTAGTCAATGACGATGATCCCCTTGTCCCTGAG  
CTGGCGTAATGCAGCATGATGATGGACTGCCTCCAACCTCTCCCTTCAGACTGTTACCCTGCGCGTCTACG  
CCTTCATATTGAAAAATCATCAGTCATGTTCCACATAGGCGACCCGCATCACCTCTTCAATACTGGTTAA  
TCCCCCTGCTGGCCTTGATCAGGCCATCTTCAAACAGTGTCCGCTGGCCTTGTGCGGGATCAGCGACTTG  
ATCTCTGAAGGGGAGCTTGTGATTGACCAGCTGTTGCAATGCACCATCTAGGGCAACAAGCTCATAAA  
TCCCCAATCGCCACGATAACCAGTATGATGACAGTGCAGCATCCCATCGCTTTCTTCCAATTAGCGGC  
AGCAAACGCTGGTTGGCTGATTGACCACCCTTGTGGCAAGAGCGGATGGTCGTCATCAACGGCACACTGC  
TCACAGAGGGCAGCAACCAACCTCTGTGCCTGAACACCGCGGACCGACGCCGCCACCAGGAAGGGCTCAA  
GCCCCATGTCAACTAGGCGGGTAAAAGCTGAGGCGGCATCGTTGGTGTGCAACGTTGAGAGCACCAGTG  
ACCGGTAAGGGCTGACTGAATGGCTATCTGCGCCGATCCAAGTCCCGGATCTCACCAGTATGATGGTG  
TCGGGGTCTTGACGCAAGATGGCAGCAGTGCACGGGAAAAGGTGTAACCAATCTCGTTGTGCGCCTGGA  
TCTGGGTACACCCCGAGACTTGATACTCAACAGGATCTTCTACCGTGATGATCTTGTGCTGCCATCGCG  
CATGGCTTCGAGCGCGGCATAGAGCGTGGTGGATTTACCGGAGCCCGTCCGGGCTGTGACCAACACGATC  
CCATTGGGACACGCCAACCAGCTGTGCAGCAAACTGAGATGGTCAGGCTCAAACCCGAGTTTTTCCAGCG  
ACAACGTTCCCCTGTTCTTGGGCGAGCAGCGCATCACGATCGACTCACCATGAACACCCCGGTGCCGTCGA  
GACACGGATATCCATATCCTGACCACTAAGGCGCAAGGTGATACGGCCATCCTGTGGCAAGCGCTTCTCG  
GCAATATCCAATCCGGCAATCAGCTTGATCCGTGACCCTATCGCCGGGTAACGCTCTGCCGGTTGCACCA  
TATGAGTGTGAAGCACCACCATACCCCGCATGCGTACCGTGAAACGAAGCTCTTCGGGTTCCACATGAAT  
GTCTGACGCACCACTGTGACAGCTTGTGCCAGCTTATTGACCAGCTCCACGACCGGAGCCTCTTCG  
ATCAACGCCTGTAGCGAATGCTCGCTGTTACTGAACAGGTCCGGTGACGGCACTCTCACGCTGACTTGGT  
CCACCAGTGTGTCGATGTCTGGGTTGAGCCAGCCAGAACTGCACCGGGCACCCCGCAAACAGGTAGGC  
AATGAGATCCTGCAGCTGCGTCTTAGCGGGTCTTTTGAACACAGATGTAGCTGACCATCCACCTCCAC  
AACAGAGCATCGTTATCGAGCCACCCTCAACCTGACCGGCAGAGGCAGCAGGCACCTTATAGATATCCA  
AGGGAGCAGGCATGTGGGCGAGGCTCGACACAGGGATAGCCCAACTGCTCTGACAGGGCTCTCAATACCGC  
ATCTTCAGATACAGCCCCATTCTGACCAGAATGGAGCCCAAGCGTCCACCGCCTGACGTTGTACTTCC  
AAGGCTCGCTCTAAGTCTTCGCGCCCGATCGCCCTTTGGCGATCAGTATCTACCAATCTTCATGACTC  
GTCCTACAAAACATCGGCAAATCCGGCCTCGGATCTATTACAGCTCTCATCATGCACAATAAACTCTTTT  
GAATCCAAATCATTCTAAGCAAGTGATAGACATGGATTAAAAAATTTAACAGATTGAATATGATTTTTT  
ATTATATTTGCCAAAATGGCTTAACCCAACATTCTTTAATCTGTTTTCCATATAACACACAAGCGCCTTA  
TTTTATCACCAAATTAAGAATAAACGATTTGTGTTCAAGAGAGAATTTGAAGAGCACAATTTATCAGCAGT  
GCTCTGCGTCATTGAACGCTGCAGCAAGCGCATCTTTGGGCGACAAGGTTGGAGAGGTTATCATTTTCAGG  
CCACACAATAGCCAAGGTGGCATCGTTCACACGATGCTGCGTTCAGCGGCGGGTTGATAGTAATCGGTG  
GTCTTGTAGATAAACTCTGCGTGTCACTCAAGGTTAGAAAACCATGGGCAACCCCTCCGGGATCCACA  
ACTGTGCTTGTTTTACCTGACAGGTGAACCCCAACCCACTGCCCGAAGGTCCGGCAGCTTTTGGCGAT  
ATCTACCGCCACATCAAACACTTCACCCACACACAGCGCACCAGCTTGCCCTGGGCATGGGGAGGCAAT  
TGATAATGCAAGCCACGCAATAACCCCTTCGACGATTTGGAGTGATTTATCCTGCACAAAGTTAACCTGAT  
ATCCGACGGCCTCTTCAAATAACTTGTGGTTGAAACTCTCAAAGAAAAAACCGCTCATCACCAAATAC  
TTTTGGTTCAAATAAAGCACATCAGGAATCGCTGTCTTGATTACATTCATCTGTCTATCCACATTTGAT  
TCAATTTTTTATGGGGGAGCATCTTCCCTCCCCCTATATCACATCAGACTTTGGCAACCATTTCTTAACAA  
ATATTGGCCATAGGCATTTCTTGGCAGCGGCAGAGCAAGTTACGAACCTGCTCTGCAGTAATGAATTTT  
TGGCGATAGGCAATCTCTCCGGACACGCAACTTTCAACCCCTGGCGCGTCTCGATGGTCTGAATAAAGT  
TGCTCGCTTCTATCATGCTTTCATGGGTACCGGTATCAAGCCAGGCATAACCACGACCCATCATGGCCAC  
CGACAGATTACCTTGTCCAAGTAGATACGGTTCACATCGGTGATCTCCAGTTCACCACGGGGCGACGGC  
TTCAGACTCTTGGCGATCTCCACCACGCTGTTGTATAGAAAATAGAGGCCGTCACCGCATAGTTGCTCT  
TGGGCTCCAGTGGCTTCTCCTCCAGAGAGATAGCGGCACCCCTCTTTATCAAATTCACCACCCCATACG  
CTCGGGGTGATGCACATGATAGGCAAAGACGGTAGCGCCACTCTCTTTGGCCGCTGCCGCCGCCAACTGT  
TTCTGCAGGTGCTGGCCGTAGAAGATGTTGTCCCCCAGCACCAGCGCACAGGGGTCTGACCCGATAAACT  
CTTACCCAGAATAAAGGCTTGTGCCAACCCGTCCGGGCTTGACTGAACCTTGTACTGCAAGTTTCAGACC  
CCACTGGCTGCCATCACCCAGCAATTGCTCAAAGCGGGGAGTATCTTGGCGGTGCTGATGATCAAATA  
TCGCGAATCCCCGCCAGCATCAGGGTGTGAGCGGGTAGTAGATCATCGGCTTGTATAGATGGGCAGCA  
GCTGCTTGTCTCACCGCCATGGTCAACCGATAGAGACGGGTGCCTGAGCCACCGGCCAGGATGATGCCCTT

ACGTTTGGTCATGATACTTGTTCCTATTTTTAAATGCAAAAGAAAAGGGTGGCTTGTGGCCATACCTT  
TTACGTTTTATCCCTGCCAGCCAGGGACGAGTTCAATCATCCCTGACCAGTGACTTATTTGCCAGAATC  
TCGGTCAACATCCGCTCTACACCGACGGTCCAGTCCGGCAGCACCAGATCGAAGGTACGCTGGAATTTGC  
CGGTATCAAGGCGGGAGTTATGGGGGCGTTTGGCCGGAGTCGGGAAGGCGCTGGTTCGGAAGTGCATTGAG  
CTGCGTACACCGCCAGTTCAACGCCAGCCTCTCTGGCTTTGGCAAACACCAGCTGGGCGTAGTCAAACCAG  
GTGGTGGTACCGGAGGCAATCAGATGGTACAGCCCGGCAGCTCGGGTTTGCAGTGCACCACGCGGAGAG  
CATGGGCAGTACAATCGGCCAGCAACTCGGCCCGGTTCGGAGCGCCGAACTGGTCAATTGATAACCACAT  
CTCGCTACGCTCTTTGCCAAAGCGCAGCATGGTCTTGGCAAAGTTGGCGCCGCGGGCGGCGTAGACCCAG  
CTGGTGCAGGAAGATCAGGTGACGGGAGCAAATAGCGGCGCCTTGTTCCTTCCCTGCCAGCTTGGTTTTCGCCGT  
AGACGTTGAGCGGGCGGTTCGCATCGGCTTCCACCCAGGGGCGCTCACCGCTGCCATCAAACACATAGTC  
GGTGGAGTAATGCACCAGCCAGGCACCAATGCTTCCGCTTCTTTGGCGATAGCGGGCCAGCTGGTTGCG  
TTGAGCAGCTCGGCAAACCTCACGCTCGCTTTCGGCCTTGTTCGACTGCGGTGTGGGCTGCGGCGTTGACAA  
TCACGTCCGGCTTGACCAGACGTACGGTTTTCGGCCACCCTGCCGGATTGCTGAAATCACCGCAATAGTC  
AGTGGAGTCAAAATCAACGGCAGTGATACGGCCAGCGGCGCCAGTGCAGCTTGCAGCTCCCAGCCTACC  
TGGCCGTTCTTGCCAAACAGCAGGATATGCATCAGGCACGCTCCCCGTAATTTCTGCTCAATCCAAGACTG  
GTAGGCACCGCTCTTGACGTTGCTGACCCACTGCTGGTTATCCAGATACCCTGCACGGTTTTTGCGAATG  
CCAGACTCGAAAGTTTTCTGCGGTTGCCAAGCAAGCTCGGCGCTCATCTTGGTGCATCGATGGCATAGC  
GGCGATCGTGACCGGGACGATCCGCCACATAGGTGATTTGATCGCGGTAAGAACCCGCCCTTCGGCACCAT  
CTCGTCCAGCAGATCGCAGATGGTGTGTACCACCTCCAGATTTCTGCTTCTCGTTGTGACCGCCGATGTTG  
TAGGTCTCCCCGACCAAGCCCGTGGTACCACCTTGTAGAGCGCGCGCATGATCTTCTACATAGAGCC  
AGTCACGGATCTGGTGCCTTGGCCATAGACCGGCAGCGGCTTGCCATCCAGTGCATTGAGGATCACCCAG  
CGGGATCAGCTTCTCGGGGAAGTGATAAGGGCCGTAGTTGTTGGAGCAGTTGGTGACAATGGTTCGGCAGG  
CCGTAGGTACGGCGCCAGGCGCGTACCAAGTGGTCACTGGAAGCCTTGGAGGCAGAATAGGGGCTGCTGG  
GGGCGTAGGGGTTGTCTCGGTAAGAGTTGCAATGGCTCACCGGTGGCGACTTCATCCGGATGGGGCAG  
ATCCCCATACACCTCATCGGTGGAGATATGGTGGAAAGCGGAAAGGCCCTTTCGCTACCTCGTTCAGACCG  
TTCCAGTAGGCACGAGCTGCTTCCAGCAACATATAGGTGCCGACGATATTGGTCTCGATAAAGTCAGCCG  
GCCCTGTGATGGAGCGGTCAACATGGCTCTCGGCGCCAGATGCATCACGGCATCCGGCTGGTGCAGGGC  
AAACACCCGATCCAGCTCGGCGCGATTGCAGATATCCACCTGCTCAAACGCATAACGATCGTTGAGCAT  
ACATCGGCCAAGGATTCAGATTGCCGCATAGTAAAGTTTATCAAGATTGATAACGGCATCTTGGGTAT  
CACGGATGATATGGCGCACAAACAGCAGAACCAGATAAAGCCTGCGCCACCGGTAACAGAAATTTTCATAGA  
TATGTTATCTCTTACGAAGAGTTGATATGTGATAGGTGCGGACTGAAATGGAGTAAAACGCTGAAGAGCA  
GAAGAAATGTCTAAAATTTCACTCAACATCCGAGATCCGAGGACTGACATTTTAGACAAAGCAAAAATTTAC  
ATTGATGACAGGTAAACATCATGGCTACCGCCCTGGGTTACAGCCCCAGCTTGTGCTCTTTACCAA  
TTGCTCACGCCTTTGGTCACTACCTCCAGCATCGTTATGTCTTGGCAGCGTTGACGCAACACTCTCTC  
ACTGACACGCCGCGAGTTAGCACACTGCACCAGCCGATTTTATAGGGAATTTCTATCCCGTTTTTCCCAA  
GGATGAACAGTTGAAAGTAATTTGTGATGGGGCAACTTGAGCCTCATCACAACATCAAGAGCGCGAAAC  
GCCTACTCATACTCGCTTTTTCAATTACAACCAGCAATTTTGTCTACATTTTTCACAAAAAACAGGG  
CAACCCATGGGGTTGCCCTGTTTGTGATTGTCAGCCAGACCAAGCTGGCTGGCGATTTATTGAACTCTGTT  
CAAATTAGCTAAACCTGCATGCCATCAGTCACCTTTTACTCAACTGCTGCAGCCATGCGCGACTATTTA  
CTCTTGTGGCTAGTGAAGTAACGCATCACCCAGCACAAAGAAGAGCGGCACGAAGAAGATGGCCAGCACGG  
TGGCACTGATCATCCCCCATCACGCCGTTACCGATGGCGTTACGGCTGCTGGCACCGGCGCCGGAGCT  
GATCACCCAGCGGCAGCACCCCGAGGATAAAGGCGAGCGAGGTCATCAGGATCGGACGCAGACGCAGGCGT  
GCCGCTCCACCACCGCCTACCCAAGCCCATCCCTTTGTCTGATAGACTCTTTGGCAAATTCACGATCA  
AAATCGCGTTTTTTCGCCGACAAGCCGATGGTGGTGGAGCAGACCAACTGGAAGTAGACGTCGTTCTCCAG  
CCCCGGAAGGGTGGCAGCCACAATGGCCCCAGAACCCCGAGCGGTAATACCAGCATCACCGAGAACGGA  
ATGCTCCAGCTCTCGTAGAGGGCAGCCAGACAGAGGAACACCAGCAGCGAGATCGCGTAGAGCGCAG  
GTGCCTGTGAACCGGCTGACGCTCCTGGAAGGAGAGCCCGGTCCTCGATACCCACCCCTTCCGGCAG  
CTGTTTTACCATCTGTTTCGATGGCGGCCATCGCATCACCGGTAATCTTGGCGGGCGCCGCTCACCGACG  
ATCTCCATCGCCGCACGCCGTTGTAACGCTCCAGACGCGGTGAGCCGAAGCTCCACTCGGTGCTGGCAA  
AGGCGGAGAAGGGCACCATCTGACCGGCACTGTTGCGCACATAACCAGAGTTTCAGATCTTCCGGGTTTCAT  
CCGGAAGGGGGCATCCGCTGCATGTAGACCTTCTTGTATCCGGCCACGGTCAACGAAATCATTGACGTAG  
GACGAGCCCCAGGCGGTAGCCAGGGTGTGTTGATATCGGCGATGGATAGCCCTGCGCCAGTGCCTTCT  
CGTAGTCGATCTTGTATATCGAGCTGGGGGGTGTCTTCCATCCCGTTTCGGGCGCACCCGACCCAGAGTGGG  
ATCCTGCGCCGCCATGCCGAGCAGTTGGTTACGCGCCGCCATCAGCTTGTCTGTGACCGATACCGCCGCGA  
TCCTGCAGGAAGAAGTCAAACCGGTCGCCGTACCCAGCTCCGGGATCGGAGGCAGGTTGAAGGCGAACA  
CTTGCCTCCTTGTGATGCTGAACAGATAGCCCATGGCAGACCGATAATGGCATGGCGCTGCGATCCGG  
GCTCTTGCCTCGCTCCAGTCTTGGAGTTGATAAAGGCCATACCCGCGTTCGGCCACTACCGGCGAAG  
CTGAAGCCAGATACGGTCACTACGGAGTCAACGTTATCCTTCTCGTTTTTCAGGAAGTAGTCGCGCATGT  
CTGCCAGCACCACTCGGTGCGCTGCTTGGTGCCTCCACCGGAGTTGCACCATGGACATGATGACCCC  
CTGATCCTCTTCCGGCAGGAAGGAGGTGGGCATCCGCATAAAGAGCACGGCCAACACCGCCAGCATGGCA  
CCGTAGATCAGGCTGTAGCGCACGCCCTGCTTGTATCACCTTGCACAGCCGCTCTGATAGCGGTTGGTAC

CCGCATCAAAGGCGCGGTTGAACCAACCAAAGAAGCCGCGCTTGGCCCCAAACTCGCCATGTTTCATCGG  
CTTGAGCAGGGTGGCACAGAGCGCCGGAGTCAGGATCAACGCCACCAGCACCAGCACCATGGCCGAG  
ACGATGGTCAATGAGAAGTGGCGATAGATGGCACCAGGTCGAGCCGCCGAAGAAGGCCATCGGCACGAACA  
CGGCGGAGAGCACCAACGCTATCCCCACCAGCGCGCCGGTGATCTGGGTCATCGACTTGCGGGTGCGTTC  
CAGCGGGGAGAGATCCTCCTCGCTCATCAGCCGCTCCACGTTCTCCACCACCACGATGGCGTTCATCCACC  
AGCAGGCCGATGGCCAGCACCATAACGAACATGGTGAGAGTGTGATGGAGAAAGCCGAACGCCGCCATCA  
CCCCGAAGGTACCGAGCAGCACCCTGGCACCACGAAATGGTCGGGATCAGGGTGGCGCGGAAGTTCGACAG  
GAACAGATACATGACGCAGAACACCAGTAAGATCGCCTCGATCAGGGTCTGCACCACCTCCTCGATGGAG  
ATCTTACGAACGGCGTAGTGTCTAGGGGTAGACGATCTCCATGTTGGCCGGGAAGTAATCCGACAGCT  
CATTGAGCTTGGCAGCACCCTTCTCGGCGGTATCCAGCGCATTTGGCGCCGGTCGCCAGCTTGATGGCAAC  
CGCGCGGTAGACTGGCCGTTGTAGAGCGCATCGGCGTCATAGCTTTCGCTGCCAGCTCGACCCGGGCC  
ACATCTTTTCAGCCGACCTTGGAGCCATCCTGATTCACCCGACGAGGATATCGTTGAACTGCTCCACGG  
TAGAGAGACGAGTCTGCCCATGATAGTCGCAGTGAAGTCTGATCTTCCACCAGCGAGTACCACCCAG  
CTTGCCGAACCGCAGCTGGGCGTTCTGCGCCTTGATGGCTGCCTGCACATCACCAGGAGTTCATCTGCACC  
CGGTTGAGCTTGTGGGATCGAGCCACACCCGCATCGAGTACTGGCTGCCGAACAAGGTGATATCCCCTA  
CCCCGTCCAGACGACTCAGGGGCTCCTTGATATTGGAGACCACATAGTCCGCCAGATCGTCGTTGTTTCAT  
CGAGCCATCGCTGGAGATGAAGGCAGCGACCATCAGGAAGCTGCTGGAGGTCTTCTGTACCCGGATCCCC  
TGCTGCTGAACTTCTTGGCGCAGCAGCGACATCGCTTGCTGCAGCTTGTCTGCACCTGTACCTGGGCGA  
TATCGGGATCGGTCCCCGGCTGGAAGGTGAGGGTACCAGACACCCGCCCGCGGAGTCAGACTGGGAAGA  
CATGTAGAGCAGGTGATCCAGCCCGGTTCATGTTCTGTTCGATGATCTGGGTACCAGTCTTCCACCGTT  
TTGGCGGATGCGCCCGATAGCTGGCAGAAATACCGACAGCGGGCGGCGCAATGCTCGGATACTGGGCGA  
CCGGCAATTTGATGATGGCCAGGCTACCCGCCAGCATGATCACCAGCGGATCACCAGGCAAAAATGGG  
TCTGTCTATAAAAAATCGAGCCATGAGGCGACTACTCCATCCTACTTGTGGCCGGGGTGTGGACGCAG  
CTTGAGCAGACGGTGCATCAGCACCCTGCTCGGCGGGATTGACCACGGCGCCCGGTGCTACTTTCTGCAA  
GCCAGCCACGATCACCCTCGCCGAGATGAGCCCTGACTCCACCACCCAGTTGCTGCCAATAACCCGG  
CTCAGCTGCACGTTGCGCAGCTCCACCTTGTGTGTCAGCGGTACCACCATCACGGTGGCGCCCGCATTTG  
GGTGCGAGTCAACGGCAGTTTGGCGCACCAGCAGCCCTTGGCGCCGCTCACCTCTTGCAGGGTGGCGCG  
CATAAACATGCCGGCAGCAGCTGATGAGGTTGGGCAACAATCACCAGGAGTACCATCCAGCTTCCAGCT  
GTCTCGTCTACGGTACATCGGAGAACTGCAGCGAGCCCTTTCGCCATAAGTGGAGCAGCTTCCAGCT  
GGAAGGTACCTTGGCCCTTTCTGCTCGTCTGGGTGAGCTTGCCTCGGCGACCAGTCTGTTGAGGCG  
CAGCAGATCGGCAGTGGACTGACGCACATCCACATACATGGGATCGAGCTGCTGAATGGCGGTGAGGCTG  
TCAGCCTGCTGGCAGTACCAGCGCCCCCTCGGTACCAGCGGATTTACCAGTACGACCGCTAATGGGGG  
CGGTGATGCGGGTGAACCGAGATTGATCTCGGCAGTGCAGAGGCGCCCTTGCCTCGCCATGATCTCGGC  
CTTGGCCTGCTTCCAGCTGGCGTGGCGTCTGCTAGTCTGACGGCTGATGGATTTGACTTTGAGCAGC  
TCCTGATAGCGCTGCGCCTTGGAGCGGGCACTCTGCTCGTTGGCCTCGGCCTTGGCCAGATTGGCCTTGG  
CGCTGGCAACCGCCGCTGATAGACAGCCGGATCGATCTGATAGAGCAGATCGCCCGCTTACATCGCT  
CCCCTCGGTAAAGAGGCGCTTGGAGATGATCCGCTCACCTGCGGACGCACTTCGGCCACCCGCAACGGG  
GCGCTGCGGCGGTCAACTCGGTGGTCAACATCAGCGGACCGCTCTGCAGGGTACCACGTTGACCGCCG  
CGGGGGCATGTGCGCCTGTCCCTGGGGTGCGCCCTTTGTACCACAACCTGCCAGCAAGCCTGTAGC  
CAGCAAGGCAAGACCAACTGAACGAGCAAGAATATGTTTATGCATGAAACACCTGAGCCTTTGCCAGTCA  
ATGAACAATCAGGGCCGATGGGCCCTGTTGGTAAATAGTCTAAAGATGAGGCAATATACATACATTCAT  
AAATGTATGTAAGTGACTTTTTACTTGCATGAGGCACAAATTTTCGATGGCCAGACGAACCAAAGAAGAGG  
CGCAGCAAACCCGCTGCCACATCATGAGCAGCGCGCTGGATCTGTTCTGCTCTCAGGGCTGGCCAAGAC  
CAGCCTGACCGACATCGCCAGGGCGGCAGACCTGACCCGCGGGGCCATCTATTGGCACTTCAAGAACAAG  
GATGAACTCTTCAATTTGCTCTGGCAGGAGCTCTGCAGCCCCCTCGCCACCAGCTCGATGCCTGCCTCA  
ATCCAGATGAGCCGATCCGCTGGGGCAACTGCGCCTCTTCTTGAAGGGGTGCTCCACAGCTTCAATCA  
CAATCCGGCCCAACGGCAGATGTTACCATCCTGTTCAATCTCGAATCGCTGGAGGGGGAAGCCATCTCA  
CTGCGCAGCATATCCGAGCCAGTCCGCCAACTTCTTTTCGGGACCTGGAGACCACCTGGCCAATGCGG  
TACGGCGGGGCAACTGCCCGCAACCTCAACCTGCAGCGCGCCGCCACCCTGCTCCACTGCACTCTGGA  
TGGTACATCAACTGGCTCCACTTTCGGGGCGGATCGACTGCAGGGCGAATCCGCTTTTATGATA  
GAGAGCATGTTACCATGCTGGCCAGCCCCACGGGCTGCTGCGGCCGCTAACCGGCTCCGGCAACTT  
CATCACATCAAATCGGGCCTGACTGCGCGCTTGGCAGTACAGCCCCGATTTGTTACCCTGTGCGCCC  
CCTGCTTGGGTAACCCCTGTGCCACACTCTGACGCCATCCCCGCTTCCCGCCATTGAACGACCAGCAC  
GCCCCGCTCGGGTGCCTTTGTGGCGCGTCTCAAACCCGGGGTCACTGCTCAATGGTCAATGCGGTA  
TGGGGGAGGATCTGTGCTGGCTGCGTGCAGAAGGGTATGTGGTACCAGCTGCGAAGCAGTGTGGCTGA  
CGCCAAAGTTGCCTCGCAGCAATCCGGACAAGCAGTGGGGTCTGCCCGCTGGCGAAGATGCACCTCGGTG  
CTCCCTTACGATGGCATCTGGCTAAGCCGCCCGCTTGTGATGACGACGTGGCCACCCTTGTCCCCCTGTTGC  
AACAGCTGGCGACCCTGCTCAAAGCGGGCGCTCCGCTCTGCTTCCCCCTGCCGCCAAGCTGCAAGATAAG  
TCAGCTCAGCTACAACAACCTGGTACCACATCCGGGATAGCGCTGCAACTGGCGCCGATAGAAACCGTA  
CCAGCCAGTACGTGAGATTCTCAAGTCAACACGCCAGCCAGTACGTGATGTTGCTGCGTGGCGATCATC  
AGGCCACCTAACGGGCTAATTCATCACGGATTTTCCCGTTCACGCCAAGCCGACAGCTAGTCGGCGATC



TTGGCTTTTCGACAATATTTAACTCGGCATTAACGCAGAAAAGGCAGACATAACACGGCTTACGTGTTAAA  
AAGTGTGATTAATATCAAAATTTAATAACAAAACAGACAATACAACCAACTCCGGATTTCTTATGAAAC  
TTGTCTGAAACTCATTGCTGGCATCCTTGCCGGTCTCTTGCTCGGTCTCTACGCCCTGAGTGGGTGGC  
GCGCGTGTGTTTACGGCCAAGACAGTGATAGGTCAGCTCATCACCTTACCATTCCGCTCATCATTTCTG  
TTCTTTTATCATGAGCGGCATCGCCAGCCTGCCGAAAACTCCGGCAAGCTGCTGGGCAAAACCGTGGCCC  
TCTCTTACTGCTCCACCATTTCTGGCTGGGCTGTTTCGCCCTTTACCGTGGCGAGCCACCTGATCCCGCAGTT  
CACCACCGCCGCGAGTCCACCACGGCCACGGCTATCAAGCTCGCCTCCTACGTCAATCTGGAGATCCCG  
CCGCTGTTTGGCGTGATGTCAGCACTGGCCGCCGCTTCGTGTTTCGGCATCGGCATCAGCGCCACCAGG  
CCACCGATCTGCGCCGGTTCGCCGATCAGGGTCTGTGACATCATCGACCCTGCTGGCCAAGGTGATCAT  
CCCGCTGCTGCCGTTCTATATCGCAGGGGCTTTTGTGAAATGACAGTAGAAGGCACCGTGTTCGCTACC  
CTGAAAACCTTCGGCGTGGTACTGGTATGCCCATCCTGATGCATCAAGAACATGCTGCCGCTACTGTTCTG  
TGGGTACCGGTCTGGCCCTTGCCCGCTCACCGCCACCTGATCAAGAACATGCTGCCGCTACTTTCAC  
CGCGCTGGGAACCATGTGAGCGCCGCCACCATTCGGTTCGCCGCAATCGAGCAAGAACAACGGCGTG  
AGCGACGGTATCGCCAACCTTACCCTGCGCTGTGTGCCACCATTCACCTCTGTGGCTCCACCATTACCC  
TGGTACCTGTGCCACCGCGGTGATGTTCTCTCCGAGCATCTGGCCATTCCGGGCATCGAGACCATGCT  
CCCCTTCATCATGATGCTGGGGTGTATGATTGCAGCTCCAGGCGCGCCGGGTGGTGGCGTGATGTCG  
GCGCTGGGTCTGCTCACCTCCATGCTCGGCTTTGGTGAAGCTCCATCGCCCTGATGATCGCCCTCTATC  
TGGCGCAGGACAGCTTCGGCACCGCTGCAACGTACCGGTGACGGCGTGATCGCCCTGTGGGCGGATCG  
CTTCGCCAACGGCAGCGAGAGCGCAGCTCCTGTGGCCGAGGCCGAACAGGCATAAGCTCGCCGGGAAGGC  
CCGACCATCCTCTGCAAAAACCGCAGGCCCGAACCTCTGTTTCGGGCTGCGTCGTTTCTGCCCCCTTCAC  
TACTTTTGTACGTATTCTCTCCCCCTCTTTACCCCTATCTAGCGTAAACAGCATTCGCGCAGCTCTCT  
ACACCTGACAAAATTATTGGCATATGCCACATATGAGCGTATAAATGGCTTATGCCAATTAGGAGCCACC  
ATGCCAAGACCCAAGATTGCCCGCCAGATCTGTGGCCGCCCGCCCAACAGCTGCTTCAAACCCAACGGCC  
GCCCATGCATCAGCTGGAACAGGTACCGCTGGCCCTGACGAGTTCGAGGCACTGCGCCTCGTCGACCT  
TCAAGGAATGCAGCAGCAGGAGGCCGCCCTGGTGTATGGGGTCTCCCGCCAGACCTGGCCAATATCCTG  
AAAAAAGGGCGCTACAAGGTGGTGGAGTGTCTGAGTCTGGGCAAGGCATTGATGATGCAACCCGCGGAGC  
CCGACCACCAACAGTGGAGAAGAGCCGACATGAATGCTGTCAACCATGACCACCAACCCCTGCAAC  
AGCGCCCTGAATGATCAGGGCTGTGGCTGGCCACTTTACCCGTGCCGAGCAGCTGCAAAATCTTA  
ACCCCGAAGGGAACGTATCGCCACCCTGCCCAATCCGCGCCGCGCCGAAGGCTGCCACGTAAGCAAGC  
GCTGCTCGACGCTCTACCCATCATCAGGTGGGTGAGTGGTGGTGGCGCAATATCGGCGAGCGGATGCTG  
GGGCGCCTGCTGGCGGCAATATCCGGGTGCTGCAGTGCCGCTCTGCCCGCTGCCGCTGCCGCGCTGC  
TGGCCCCCGCCAATCTGCAACCTCTTACCGATGCAAGCCAGGGCCGTCCGTCTCGCCGTCTCAGAGCAA  
GACGACTATCCGTGCCATCCAGCCGTGGCGCAGGCCAGAGTCATAGCCATTGTCATGGTGGTTGCAAC  
AGTGGCTCCGATCACTGTTGCGCCAGTAGTGGCAATCAGGCAGAGAGCCACTGCAAGGCCATACTTGT  
GCCACGGCAGTGAAGGTGCCAACAGCAGGGTGGTGTGCTGCCATCATCACTGATGCCATCGCTGTGCATG  
TCATCATCAAGGAGAAGAGATCATGTCCATCTGGTGTGAGCCTGCTCGCCTCGTTCGTGTTGATCCTG  
GCCATGGGCACCATCATCTGGTGGCGCAATACCAGCTTGCCAGAAGCGGGAAGATAAAGAGGTGCGCC  
CCTGTGGCTGCTCCAGCGCTTGCGCGGATCACCTCTATCAGATCAGCGAGCCGACGCCAAAAAAGTAACC  
TGACCTCACACGCCATAGCCGAGATAGAAGGTGGGCAAAAATAAGGGCGCATGGAATCGAGAGGCGCATA  
AAAGAGAGGGGGCACCTGTTAGTGCCCCCTCTCTATATTTATTCCTCGTCATGCTTGACCCGCGGTATTG  
CCCCTTAAGCTCATCACACAGCTCAACCCGGCTCGGCGCCGCTGGCCGCCACACTCGGAGTGCAGGCCG  
GATCCTGATACTGCTGATAGATGGCATAAACTCCGCTTGTGTGCAAGGCTGCGGGCAGCGAGGCGGG  
ATCAAACCTGGCTGCCGGCATGCTCCTCCAGATAGGCAAACGCCGTCTCGAACGGCCAAGCCTTCTTGTAG  
GGGCGCTCGCTGGTCAGGGCATCAAACACGTGGCCACCGTCACGATGCGCGCCGCCAGCGGATCGCCT  
CCCCCGCCAGCCCCAGCGGATAGCCGGTGGCGTCAAAGCGCTCGTGATGGCTAGCGATGATATTGGTTCAG  
CATGTCAAGTGTGATGAATGCCATCGAGACCAAACTCGTTGATCATCAGGCTGATCATCTCCCGCCCTTG  
CCGGGGTGGATCTTCATGATCTCGAACTCTTCCGGGGTTCAGCTTGCCCGGCTTGAGCAAAAATGGCGTCCG  
GCACCGGATCTTGCCGATGTGCTGCAGCTCGGAGAAGAGGTAGATAAACTCCACCTCCTCATCGCTCAG  
CCCGCTGGTGGGGCCAGCGTCTTGGCGATCAGCCGGGAGTAGGCCGACATCCGGTGCAGATGGTTGGCG  
GTCTCCTCATCCCGATAGCGGCTAAACTCCCGCGCCGTGGTTCAGCGCGCCGCCAAGGGTCTGGATGGAGA  
AAAACCTCCACCGCAATGATGGCCGAGAGCGCTGTGCATAGGCCGACAGCTCGCTGCGGATCGGCTCCTC  
GAAGTATCCCGGCTCCATGGCATCGCAAAAACAGAAAACCAAACAGCTTGTGTTGAACAGCAGCGGCTCG  
GTATAGCTGGAGGCATAACCCGCTCCAGCACCTTGGCGCTGTGCTCCGACGCCGAGCCACGCAGGGCAT  
CCAGATTGCCGAGCACCCGGGGTGTGTTGTGCTCCGCCAGATAACTCAGGGAGGGGACATCGCTCAGCTT  
CACCTCATACTGCACCAGCGCGAGGGCCCCCTCGGTGCTGTGAGCAAAGTCTTGAGCTGATCGGTATGG  
GGATCGTAAATCGCGATAGCTACCCGACTCAGCTTGTCAAAGCGCTGCCGAGCGTGGCATGTACGCTCT  
GCATTTTTTTCGCCAAATGAACTTTCCATCGCCTTCTCCAACGGGTTCCCGTACCGGGAGTATAGTGACTC  
CCGGTGTCTCCTCTCTGTACCAGATCAATATTGAGAGAAAAATCAACAAAAGCAGCATCCCCCAACAA  
GCCCGCACGGCAGAGGCAATAGCTCCACCAAGTGCACGCCATCAGCGACTGCTGGTGCACCCCAATCTTG  
CCTGGTCCGAGATATTGTTCCGGTCTGCCATGCTGGCTGTATAGTTTTTGGTTAACCATTCGGTAAAAT  
CCGCGCCCTTAAAGAAGAGCCACCTAAGAGTGATTGAGCGATGTCCAACACAAAACAGGCCCCCAAGTA

GGATTTCGTCTCCTTGGGTTGCCCAAAAACCTGGTTCGATTCTGAACGCATCCTGACCCAGCTGCGTACCG  
AAGGGTACGATGTGGTGGCCAGCTATGACGATGCCGAGCTGGTTCGTCTCAACACCTGCGGCTTTATCGA  
CAGCGCGGTGCAAGAGTTCGCTGGAAGCGATCGGCCAAGCGCTGGCCGAGAACGGCAAGGTGATCGTCACC  
GGCTGCCTCGGCGCCAAAGAGAATCAGATCCGCGAGATCCACCCAAAGGTGCTCGAGATCACCGGCCCC  
ACGCCTATGAAGAGGTGCTGGGTACAGTCCACAAATATGTGGAGAAGCCGCGAGCACAACCCCTTACCAG  
CCTGGTACCGGCCACGGCGTCAAGCTGACCCCGCGCCACTACGCCTATCTGAAGATTTCCGAAGGGTGC  
AACCACCGCTGCACCTTCTGCATCATCCCTCCATGCGCGGGGATCTGGTGAGCCGCCCATCGGCGACG  
TGCTGGCAGAAGCCAAGCGCCTGAAAGAGGGCGGGCGTGAAGGAGCTGCTGGTGATCTCCAGGACACCTC  
CGCCTACGGCGTTCGATGTGAAGCACCGCACCGGTTTCTACGACGGCATGCCGGTCAAGACCAGCATGGTC  
GCCCTGTGCGAAGAGCTGGCCAAGCTCGATATCTGGGTGCGCCTGCACTACGTCTACCCCTACCCGACG  
TAGATGACGTTCATCCCGCTGATGCGCGATGGCAAGGTATTGCCCTACCTCGATATTCCATTGCGACACG  
CAGCCCGCGCATCCTGAAACTGATGAAGCGTCCGGTACGGTACGGTCGAGCGCACCCCTGGAGCGGATCCAGAAG  
TGGCGCGAAATCTGCCCGCAGATCACCTGCGCTCCACCTTTATCGTCGGCTTCCCGGGCGAGACCGAGG  
AAGATTTCCAGATGCTGCTGGACTTTATCGACAAGGCGGAGCTGGATCGCGTCGGCTGCTTCAAATACAG  
CCCGGTGCAAGGGGCGCTGGCCAACGAGCTGCCGGATCCGGTACCGGAAGAAATTCAGGAAGAGCGCTTC  
CAGCGCTTTATGGAGCTGCAACAGCAGGTCTCCATCCGCAAGCTGGCCCGCAAAGTGGGTGAGGATGA  
CCGTTATCATCGACGAAGTGGACGAAGAGGGTGCCTACTGGCCGCTCCTTCGCCGATGCGCCAGAGATCGA  
TGGTCTGGTCTACCTCAACGGCGAAACCGGCTCAAGCCGGGGGACATGGTCAAAGTGGGATCGACGAA  
TCCGACGAATATGACCTGTGGGCCAGCCTGATCAGCTAATTGAGGCTCTACCGGCCAAATGAAAAAGCG  
CGTGCGGACTTATACCCTAAACAAGCATAGTTCAGCGGCATATTGACCGGAGGCCTTTCAGATACTGCAT  
TTCCTGCATTTTTGTGATGTATGTAAGAATACATCCTAATACATCAATACTCAAGCGCCGACGGTCTC  
GTTGGCGCTTTTTTATGCCGAATCTCCTAACACCCTACGAATTGCCCAAGCAAACCAACATCGAATATT  
GTGCGACCGCGCTCGTTAACGATTTACCCATGGCTGCCTTCTTTCAAACCTCGATCTTCGAGATAGTCTG  
CCGACACGGCCTTCTGTAATGCCTCACGCTCAGAGGGGGTCAAGTTCGCGCAGATAATTCACCACAGCCAC  
TGGTGCACACGATCGTAGACGTGATTGTTGCCCCAGCGGACGCGGTCACAACCACCTTGTGTATGAGCT  
TTGAGGGTATTGAGCTGCGCCTTGAAGCTTGTACGCTCGGTGACGATGGCCTGCATGATAGAACGAATGG  
CCGGATCCTCGATGCGCATCAGGTAGTTCGTGGCTAGCGTCTTGGTAGGCTTGGGGGTTGCCGGACC  
TGGTAAGCGCCCAAGCCTCGATGAGCGCTTTGTAGTTCGGCGGATTGGGCATTGTAGAGTCTCGGCC  
TTCATGATGCCATCGGCTCAGCCAGACGGCCAATAGTTCGATACAGAGAAGTCTCGTACTCTGCCTCAT  
ACTGCTTTTCGACAAAGTTCGTGCATTCTAGTGAAGTGTGTTTCGACGGTTAGAGCGCTCAGCCTTAGCAAG  
CAGTGACGCCAACACGGTGTGAGGGTGAATATCCGTTGTAATACTCATGATCTATCCCATTTCAAGGTGCG  
AGTGTCCGGACGGGAACGAGGCGGTGTGACAGAGTGCCGGCAACTGCGCGGCAAGGTCGAGATCTAGGTA  
GGCACTGAGGCGTTACCTGCATCCATTAGGCGGATGACTTCACGTTGGCCGAGCGCCGGGTTCAAGTGGG  
TTCATCTGCTGTGCTAGGTAGCGCATAAAGGCGTTACCGGCAAGCAGTTGTTCCCTGTTCACTCAGCAGCA  
TGAACACTGGCGGCAACTTGTGCGGTTAGAGGACGGCATCCAACAACCTGGCTGCGTCGAAACACCGCCTT  
GCCCCGCTCCAAGTCTGGATAGATCTCGACGCTCTCGCAGACACCGGCCAGTTGTAGAAGCTCCGACTCG  
GTTTTCTCAAAGACCGCCTGCACATCGCATAACGTGCCAGCCGCTACCAACTGTGTGCTGTGCGCAGTGT  
GTGTTTCGAATGCAGCTTTGCAGCGTTTCGATGAGTCGCCAACAGGCTACCAAATCTTCTGCTGCGTCACT  
AAAGCGTTTCATAGCGCTCTCCCAAAGCCGCTCAGCTTGCTGTAAGCATCTAGCCGGGTGAATGGCTTG  
CCAGTTGCTTCTGCATCGGCTTTGTCTTTTTTCAGGGCTTGGAGATCGTGTCTCGGGTAAGACAGGTAT  
TACGCGCCTCGTCAAAGTGGTAGGCCAGCGTATTGAAGTGGCCTGCCAGAGCTGGCAGGTGCTGCGGCGC  
AGTCACAAACCAGCGACAGCGTACACAATTGCGGCTGCCACCTGGAACAGGAGCAAACCTGGGGCGTGT  
GTCACTCCAATATTTGGCCCTCCGTTATAGCAGCCGCCACTGCGCCGTTGTCTTCTCTTCGTTGGTGT  
TGCCACCCACTAGGCATAGGCCGTTGGTGCATCAGCATCCAGCCCACGGGGTTACGTGCTGCCGATGCTG  
CGGAATAGCTGCACTCAGAGACGGCACACTGTTGCAGATCGCTTGTTCAGGAGCACCTCATGTTCAAGT  
TCGAGCAGAAAGGTCTGGATGCTCTCTTCTTGGTTCGCTGCCCAACCCTCCACCGCACCAGCAATACAT  
CGCGGATGTGCGTCGCCCCGGCTTGGTGTAGTACAGTGTCAATTAATAGGCGACTGTGCCCGACGAGTTT  
TTGCAGGATAGGGAACGGCACCTGCCCTTCCAGCGCCAACCGGTTGATGAGGGAAACGCGCAGACTATGC  
AGGGGAAAGAGGGTTGTTATTCTGTTGTTCTGCTCCTCTGGCAGAGGAAGAAAGCGAATTGGCGTGCCGT  
TGTGATGAGTCTCCCCCGACCTGCGAGCCGCCATTCCAGCGCTTCCAGCAGGGCAAACCAGCTGGAAAA  
CATAGTTCTATCCGAAAGTGGGAAATAACGTTTCATCCTCGCTGACCTCTGGCAACCGGAGCAGGAAACAC  
GCGTCTGGATAGCTTGCAGTTCGACTTCGCTCTTCGCTATAATGTGACGTCCATCCAGTGCAGACCAAG  
GTGTGCGCCGCGAGATAGGGTGTATTTTTCTTGCCAAATGCGCAGTTTTTCCAGCCAGTAAAACACATC  
CTGATGTACCGGGCCGCGCAGAGGACCACGGCAGGGCGTACCCTTCTCGGGGCTGATTTGGCGATATCG  
GCGGTTTTTATTGGTGTGATGTAGAACACCGCTCGAGACCGCTCGCCATCAGCCAGCGCGGTGCTACGGC  
GAAACACACCTTGTTCAGTGGCCGCCGCTCGCTGCCTTGTGCGAGTCGGCTCGGGCTCAACTCCCAAGC  
GCCGTCTGCGTAGCGCCAAGTATCCGCTTCTCCCGAGTCGAGCATGCGGACCTGAAAAGTGGCGAGTGGC  
AAGATGAGCTTTACCAACAACGCCACCCAGCGCACCGGGCTCCACATTTCCAAGCGTGTCCATTGGCTA  
TTGGGCGTTACGCCACACACAATCCGGATCGTTCGGTCAATCTGCTCTTCGGTTACCTCGAACCAGTC  
GGGGGCGCCGCGGCTCGTTGCCAAATCTCTGCCCCATCGCACTTTGCGCCCAACCAAGTTTTGGAAG  
TGAGGTCCAGCTGCCAACATCTGGCGCAGTTCATCAATGTAGCCATAGGGTAGTGGTGAATGTACGCTCT

CGTCACGCTTAGGCAAGCCGCTGTGGGACATCTGAGGCACGGGGTTACAAAAGGCTGGAGAAATGACGGG  
TTGACCATCATCGCCGGGCGCGCTGAAATCACGCAGCAGAACAAAGTGCAGGAAGGCGTGAATGCAGTTG  
TTGTATCTGATGCCTTTCTCCGAATTCGGGCAGACTGTCTGATAAAAAGTCTGGCAGAACTGTGGTACGCG  
TCAAAGCACTGTTCGGGTCAAGCGGTAGGCCCTGCCGGATGAGGTAACGCTCGAAGAATGACGATAGAGA  
TTCCAGTCTCGCATCAACCCCGCGTGTTCCTTTGAGCCACTCCACTGCTAGGACTCTCCAGGGTTTCG  
AGTTGAGGATACTCCCAGCGACCCAGCCGAGGGATGTGTCCGTGGCGCGTTTTACACCTACCTTTCTTG  
GCACAGGGTGCCTAGATGCAATGGCTACGGTTGTTTTCTTCTATCGGGCATGGAAAATTCCTCAGTCGTT  
AAGTTCAGCGTCTGGTAGCAACAGGTCTGCATGGCGGCAGTTTCCACCTTCGCAACCCGTAACCGCTGC  
GCAGCGGCTTCCAGTACAGCCAAGGCCTCGCGGGTAGAAGCCTGCGTGTAGACATCTTGGCTCTCAAGCG  
ATGCGTGGTGCATGAATCGCCGGATAAGGGACTTGTGATAACCCGCGTTTTTGTAGTCGACGACCGTATGC  
GTGTCGGTACCATGTGGCGTGTGCCAATTTTTGCTCACTGTGAGACCGATGCGCTCGCAGGCGGGCT  
GCGTGGGCTTTGTTGTACTGAGTTAGCGTATACATGGCACCAGATAGGCTCACGTGCGAGGTTGATGAAA  
CAAAGGGGTGATTACGTTCAATTGTGCGCCACTTGCTTTAAGTAGCGATACCAGCAGTGAAGAACCCTC  
GCCGTACTCCGGTTGAAAACCAGTAAGCCTGCTTGTAAATAAGCCCCATCGTGGGTACCGCTTTCCAGCCA  
GCATGTGCGCGGTCCAAGAGGGCAGTGGGGGGACAAGGCCAAAAGTGTGGGAGAGGTATTCAGCTCTAT  
TACCCTTGGGGGTCGTCCTCGTGCCTCACGCCAATCCCTAGGCGCAGCCCCATGGCTTGGATGGTGAAT  
GCGCACTAGGGCCTGATTTGGGTTGGCAGGGTCAGGTAACACATCCTGAATATAGAGGTGGAAAGGCTCC  
GACTCTCGGAAGCCTGCACCGTGCAGCAGCAAGGTGATAAGCATGCCCCGATAATCCTGACGTCGGCGAG  
GGCAGAACCCCTTAACCAGAAGCTCTTCGAAGCGCTCTTCTGAAAAGCTGGCGGCTCGCCACGCTCAAC  
CTTGGGTAGGCGCTGTCTCTGATACGATGTCCGGTCTGGGTTGGTGAAGCATTTGGCTGCCAAGTATGT  
CCCAAGAATGCTTTACTGCGCCGATACTGGTAAGCGATTTTCATCGGCTGCGCGTTCGAAGGCTCCACTGG  
CGTAGCGCGGATTGACCTGTGCCAATGCAGGGCGCATTTTCGCTAACCAATCGAAGAAGTGGAGAGGTG  
GGTAATGATGTGAGAGGCATCTTGTGGCGAACCGGTTGCCCAACAAAGCCAACTAGGGTCAAGTCCAGTC  
TCACGGTCAAAGGTGCCTGTGTAGAGCCGCTGGGCAAAAGTCTTGGAACAAATGATAGGTATTGCGTTTCA  
CAGGGTTGGTCTGGAAATACTCAAGAAACATCCGGACAGAGCGGGTCACTTCAACATCCAAGTGAAGGCT  
GCGGTTCATGGCTGCGATGGAGGCAGTAGTCAAGCAATGGTTCAGCACCCCTGCTGGGGTTCAGCAAAGCA  
GGGAGCTCCGTGTAGACACCCGTGGCATGGCATAAACACGGGCTTTGACTGTTACGAACATTCATCAC  
CTATCTACCAACAGTAACTAATCAAGTGGTACAGCTGTAAAAACAGATGACGAGCCACATGACGCTT  
ATTGGACAACAACGTACTACTCTTCTCAAAGCTCAGTACTTTGGCATCTTCAGTTCAAGCTACCGGT  
TTTTACAGATAACCTGCTGTTACGGTTCCACTCGTTACAGAGGGTTGAGGTTCCAAATGGAGTGAAGACGTA  
CGCTAAGGCCGAGCCCCGTGCAGCACGGTAGCAAAGATAGCCATCCATACGGCTCCCTTTAGAATAAGCA  
CGGCGGTAAACAGTGGCGCTATATGTACGACTTTATTTATTTTCTTCCATGTTGTTGGGTTGAGTTTTTA  
TTTTTACTTTTTAATCCATCTAACAATCAATAAATATGAAAAGTAAAGCGCAGCAAATGAAACCACCGAGC  
CGAAATAAAGAAAGTAAACCATGTGTAACGCCACTGACCAAGCGGCTATACTCAGTGCCAATTAATC  
AAATTCCAAACCATACTTTATATTGACCAGTACGAGAATCAATATAATGCTCATGATTATAAAATGCATT  
ATAAAGGGGGCTGCAACCCCTACTGTTTTAAGGATTTTTTTAATCATTGCTGCTACCTAATGAACCACCA  
AATGTTCTTGGGGAAACGCCGCTTGAAGTGTACCTGCAACACCAAAACTATTGCCAGAGGAACCAAGGG  
TTTTCTCAATAGGCCCTGCACCTTTTCACTGGGGATGAGCCCTCACCGTTTGGTGTGAGGCTTCCATGG  
CCGAAGTCACTTCAACCACAAGCATGTGAGAGCTTGAGGCCCGTTGTGAAAGGTGGCGTTTCGAGCGATGA  
TGGTATGACGAAATCCTCTGTATACGTGTTTCTTAGAGGCCCATTTGGCAGTGAAGGCACTTGTCCCTGCC  
AGCTTCAATGCATCAACAGAAGTGCCTGTGTCAGTTACTACCAGTTAGATCGTATTTATTTATCACCCCTGC  
CAGTTTCTTTTATTTTATTTTTTCTGGCTGGGTGGAAGTGGAAAGCCATTTTTTTTTGGAAGATTGCCAA  
CGTCAAACCTTCATCTACATCCATGATTTTAAATGCTCTCGCACTCATGCTGTATAGCTCGTGTGATAA  
TACTCACGAGCTTTGGCAAAGCTATATTGAATAAGCACACCATCACCTACAGGGGATATAGGATTACCAT  
CAAATCGACCGTAGTGTATACGTGCATACTCCATTCCTTGTGGACTGAAACAAAGGCATGTCCGGTTCC  
CTTTGTTTTAGTCCACAGAAATACACCGTTTGTCTAAAATAATCGCTGGGCTTTTCGCAAACCTTTATCTCT  
ATCCAATCCCCCTTGTCTTTTCAATGGGGGTGATGCTGCCGATCATCTGATCGAAAGTTTGAAGTCT  
TCTCGCTTTCCCATTCGCTTTTCTCCCCAGCGCTGCCATCCACCATTCCACCCTGTCCACTTCTACTCGG  
CTCCACATTTCTCCACAGCCTTGCTTCTCAAAAAAGCATTGTGCCATAGGCTCTCAGCGAATCCGTACC  
TTTTCGTTCTATTGGACTTCAAACCTCTTGCAATTGAATCCACATAACATGACTATTTATGGGATAGCTTC  
ATTAGCTAACAGAAAAGAAAAGCCCCATAAGAGGGGCATTCAAATAGAAATCCAACCGAAAAGCCTTT  
ACGATGTATCTCTAGTTGGGGGAATAACATGCGGGCGCTTTTTTATTGCTTGAATGACGCAGGCAAAAC  
CGCTGGCTTAGCTCAAATCATGGAGCGCCTTGCCAAGGGGCGCGTGAGGCGCAAGTCAGAGAAGCGCAC  
CGCCAACCCCTGCCGCTCCGGCGTGCAGCACATCACCCGATAAAAACCTTTTCGCTTGGCGGGAACGGG  
GCGAGGCGCAGCAGCGGCCACACCTTGCCATCGCTGGAGTATTGCAAACGCAGGCAATCGGCCAGCCGGG  
TCAGCCGACAGCAGAAGCGACGCGGATTACCGGGGAAAATGCCGGTGGCCAGTCAGAGCGCGGATTGGT  
CAGCACGCTGCCGATCATCGGCTGGGCATCGTTGTACTCGATCCCCGCTTTCAGCCAGTGGCCCTCGTCT  
TGCAGCAGCATCAGCCCCGCTGATCGTAGAGGGTGGTGAAGTCCCCCTCGACGCAGACCTGAAAGGTAA  
ACGCCCCCGCCACCTCGCAACCATAGAGATGCCCGCTGTGGCGCTCGAAGCCATACCAGGTACTGCGCCA  
AAAATCGGTCTGCCGGTCTGTCACTACCTGCAAACCGTCTGCTGCTGGTGGCACTGGGCCGGTTTCAATTG  
AGCCAGCGCCACTGCGTCCCTTCCATCATCTCGTTGAACTCCTGTTGTCTCGCCAACCTGCCAGCAGCGA

CCCGCTTACTTGCCCTGCTTGAAGAGGATGGCGGTGAAGTGGCTCTCTTTGGTGCGCGGGAAGTAGCGAT  
CCTTGTAGCACTGCTGCTCGCGGCTCTCGCAATGTACCCCGTTGCTCAGGGTGTAGCTGCCAGGATCGGC  
CCCCTGCAGGTTCTTCTGCAAACGGCTGGCCGCTGCTCCCCGAGATGGGCGCGGGTCAAGCCGATGGAG  
ATCCCTGCGGGTGGCGCAATAGCCGCCCTTCTGTGCGACACCCTTGGCGGGCGGCGAGAACACGG  
CCGGAGCCGCGTGAACGCCCCGATTAGCAGCAGCGCCACCAGCGCAGCCGAGCGTTTGAACATGGTGT  
ACCTTGATAAACCTTGA AAAATCAGGGCGTTAATTTATCACTCCGCTTCCGTGATGGCCAATTGCCAGCCG  
CACTATCAGCAGGTTACTGCGCAAAGCCACATAGAGGCTTGGTGCCAACCGGGCCGCCCCACAGCGGG  
GCTGGCTTATCGGGGGGCAACATGTGTAATAGCCGCTCTACACGTCAGTCAAAGAGTCCGCCATGCAA  
CTCAAACCCCTTCTCAAGGGGCGCTTTCAGCCCCACTGGCAGGCCAGCCACGATCTCATTGAACAGGTGG  
TCATCTCTGTATCAGGAGCGTGCCTGATCCCCGAGGGGGAGCCCTGATGCGTCAGGGGGAGCTATT  
GCGGGATCTGGTGGTGGTGGCAAGCGGGCGCATGCCATGGGCCACACCGCCATGAATGGCCGCGCTTT  
CAGCTCGGCACCCTTGAGTGGCACAACCAGCTCTTTGGCGAGATGGAGTTCTTACCGGCTACCGCTGCC  
AGCTCGACATCATCGCCGAGGAGTGGCTGGAAGTGGCCGCATCGACGGCGAGCAGCTGGAGCTGGCGCT  
GGTGGCCACCCCAAGGTGGCGCTCTTCTTTGCCACCGCCATAGCCATCGACTATCAGGACACGGTGGAT  
ATCTTACCTGCCGCATGCTCTACCCCATCAGCTACAACATCGCCCTCGACCTCTATCACAGCCACTGCC  
ACGACAACCCGGTGAGCGGCTTTTCGAAGGGGTATCAGGAGGGCGGAACGCTTCGGCACACCGACAGGGT  
CTACCGGCGGGCGGTGAAAGAGCTGATGGACAAGGGACTGGTGGAGCGCGGTGAGGAGGGGTTGCAGATC  
CGGATCTGGCGGGGCTCAAGGCCCTTCTGGAGCAACCATAAGTCGCGGGTATCAGTCGCCGCCCTGAACA  
GCAACAAGCTGAACAGCAACAAAAAGAGGGGCGGTTTATACCGCCCTCTTGTGTTTTACTCCCCGCT  
CAGGCCAGACATGGCTGAGGGCGTGCATCCGCGAGCGAGCTACCAGCATGGCGAGGATCACGCCGTAGA  
TAAGCGGGATGGCGTACATCACCGCTGCAAGCCGATCACCTGCTCGAACATGGCGCTGATGGCCGGGCT  
GAACATGGCCCCCGCGCTGCCGCTGATGAGGATATAGGAGACGTTCTTGTCTGACGCCCTGCCGCACAAAC  
GACACCCCGTAGGCGATAAAGGCGTTGTAGAGGGCCGCGCAGACAAAAGCCGTAACCATAGGTGAGGTATG  
GCAGCTGGCTCAGGTTGTGGTGGTGACGATAAGCGCCGTCATCCCCATCGCCAGCGTGATGATCACCAA  
CAGGAAGGTGCGGATCGCAATGCGGGTACGATGGCGGTGAGACCAGCGCGCCGAGCAGGGCCGCGCTC  
CAGTACTGGGTGATGATATTGCCCGCTCCTCGAAGGGGATGCCGAACCTGTTCTTACGAACATGGGGC  
CCCAAGTGAGGAAGGTGTAGAGCGCCAGCATGCCGAGAAAAAGCCCGCCGCGCTGATGATGCCGAG  
GTTCCACTCCGAGTGTGCTGTTGCCGGCGCTCTCGCCCGCCGCTCGCAGCTGCGGAAGTTGGTCAGCAC  
GCCACCAGCATGGTGGCGAGCGCCACCACCCACCCGAGATAGCTCCAGCTCCACGCCATGGCGTGGG  
TCAGGGTGTAGGTGTAGTGATAAGCGGGAATACCACCCCGCCACGTTGAAGGTGGCATCTTGCACCACC  
AGCATGGTGTCTGCATCCGCGCCTGCCAGACGCTCACCACCAGGGTCCCTGCAATGCAGAGCCCCACCC  
CGCCGCACAGGCCGATCACCGTCATGGCCGCCATCACACATAGAGCGAGCCAGTCAGATGGAGCGAAGC  
CGCCGCCAGCGGATCAGGCCGTAGCAGATCAGCGTCATCCGCTTAAGGCCACCTTCTCGATGAGGAAG  
AAGGCGCAATGGTGCCTGCAAGCGCTCCGCGTTGAGCAGGGAGAAGATGGAGGCCACCTGATTGACGT  
CGGCGCCGAACCTGGGCGCGATGGGGTCAATCAGCATGCCGAACGGGTGCAAAAACCGGCCATCACGAA  
GTTGGCCAGGAAGCTGATGGCAGTGAGGGAGAGCTTATTGTTTATATTGGATCTCTTTGGGGTCAAGGT  
GCGTGCAGGGTTGGGCTGGGCTGCGGCGCTTACAATGCGGTGTGCAGCGCCAACTCGATCATCTGGTTGA  
AGGAGAGTTGCCGCTCCTCGGCCGTGGTCTCTTACCAGGTCAGGAGTGGTTCGGAGACAGTCAGGATAGC  
GAGCGCCTCGATCCCCTGCTGATGGGCCAGCCGTAGAGACCAGCCACCTCCATGTGATGCCGAGCAGC  
CCGAACCTTCTCCAGCGCCGGAATGAGGTTTTTCGTCCGGATCGTAATAGAGATCGCCAGTGAAGATATTGC  
CCACCTTGACCGGTATCGCCTTCTCTGCGCCTTGGTAAACGCTTGTGCAGCAGGGCGAAGTCGGCCGA  
GGTGGCCATCTGGTAACCGGCGCTGCGCTTGGCATTTGGTTCGGGGAGTCGGTGCCCGCCGCTGCGCCAGA  
ATGACGTACGCATCTGCACGTGGCGCTGGGTGCCCCAGACTGCCGATACGGATGATCCGCTTGACCC  
CGAAGTCGTTACCAGCTCGTGGGCGTAGAGCACCATGGAGGGGATCCCCATGCCGTGGCCCATCACCGA  
GATGCGCTGGCCGTTGTAGTAGCCGTTAGCCAGCATATTGCGCACATTTGGTCACTCACGCGCATCG  
GTCAGAAAGGTCGCGGATATAGCGGGCCCGAGCGGGTCCCCCGCATGATGACGTTCTCGGCCAAAT  
CGCCCGGGTTGGCATTGATATGAGCGGTCAATTATTGTTGTGCTCCAGTTTACTCGTGTGGATAAGGGCA  
TCCTAGCCCCCGCCCCCTCGCCCCCTTGCAGGACAAAAGTCTGTTGCCCGATCGAGATCCCAGTTCCGG  
CAACTTCTCCGGGGCCGCCAGCTTGCCCCCTTACCAGCGCTTGTCTGCCCTGCGGCAAGCGCCCCG  
TCACCCGCTTAGCGATAACGCCCAAAAAGCGCGGGGGCCTGATGGCCCCCGCAACACACCGGATGA  
GAAAATGCCTTACTTGACGGCGCTATCCTTACGCACTTCTGGACAGAGTTGTTCTTGGCCGCGCCAGCC  
AGCTTCTTGTGCGCCGCGCCTTCTCGCACTTGGCCGCGGATCCACCAGCGCCCCGCTTTCACGCACT  
TCTGGATAAAGCTGTTCTTGGCCGACCGGCCAGCTTCTTGTGCGCGGCCGCTTCTCGCACTCGCCGT  
TGCGGCGCCAGCGGCATCTTTCACGCACTTGGCGACAAAGCTGGTCTTGGCGGCGCCATTAAGCTTTTTG  
GCCGCGCCTGCGCCTCGCACTGCAACTGGGCTGCGTCTTGGCAAAGACCGGATGGCCAGCAGCACGC  
TGCCGCAGAGCAGGCCGAACAGGATGGTACGCTTCATGGGAGATATCCTCTCTATCTGGTGTGTTT  
CATGGTCATATTTGCATGACGGTGTGTTGCAAATGGCAGTGATTGCAACAGCTGATTGTTGCCGCAGATC  
CCCCGCTCGCCAGCTTGGGAGAGGGAGCACAGGGCAACCATCGCCCGCACTATAGCGCCGATTGGCAGA  
GCGGGATTGCCCTGCCAGCAAGTCTTACGCGCAAGCCCGCCGTGTTCTTCCCGCAACACCCGCCAAC  
CCCAATAAAAATCAAGAGCTATGAAAATCCAGTGGCCAGCCTCTGCTGTTTTTTGAGCCAACGCATAAAAC  
GCAGATATTCTGATAGTTACGTCAATTTTTGACTGGTGGATCAGATTCGTTTTGGCTTAACATAGCCAT

CCGGTGCCTATTGCTGCGATAGGTTGCCGCCATCGCTGATTAATAGAGCATTGGAATGCTGTAATCCA  
CGGGCGGTAGCATTGCTTACACCAAACATAACGGCAATCAAGAATGAGAGGCTCAAAAATCCATTAGAT  
GGATTAAATGTGCTTTATTAATATAAACATAGAATTTACAGGGTTAACTTCCATTAATTAAGTTAGC  
AACCTAAGTATTCACCAAACAATAGATATGACAAAATTAAGTAGGGAAAGATGATAATAAACTCAGTTTT  
ATTAGACAAAAAAGATACAAACTCGTAGACAATGAATATTGCAGTGAAGCAAATGCCTTACAGTCATT  
GTCGGGAGCAATGGCACTGGGAAAAGTCCGATATTAAGAAATAACTAACAATGTAAAAACATAGATA  
ACAGAGATCTTAGAATACCATCTAATTACAGTAGGCAGTTAGATGTAGATATTGATGGATTTAAAACAAG  
TTTTTATTCTCCAATAAGTGAATCCAGATCTTTTATTAGCAATGATAAAAATAATGTAGATACTGTAGTG  
GATGGTATTAAAGTCATAGCAGTAACTACAACCTCCATTCGATAAAATTTCCCGTGGAAATATAAAGGGAGAG  
AGGTATATAGATATAATGATGAAGACAGATACACTATATAGTGTCTTAAAGTTTCAAAAATTCACCA  
ATCAATCAAACTACATTAATCTTTTAGCTCGTTCAATGTTAAAGAATGACAACATATTAACAACAAGAA  
ATTATTTTTCTTTATTAATAATAGCTCCCAACGTGGAGTTCTTTTCAAAAACAAAGCTCCCTCCTTACGAA  
CCGATAGTAAGATTATATAACGGAAAAGAAAAGAACATATACTAGTACTGAGTTTAAATTTTGAGTATTTTA  
CTCGACTAATATCTCATCACTACAAAATAATATCCGAAAAACTACACGGTTCTAAAGAACATTTATACAA  
TGCTTACAAGGCTTATGTTGAATGTAGCCCTTATCTTTTATGTATGTTGTCACCAACCAATAATATCCCT  
CGTTCATCGCTACTATACTTATTGGACATTGGCATAATCAATGCGTCAGACATTTGTTTTTTTCAACGAGA  
ATGAATTTGAACCAATAGCAATTTTCCAGACCTTAGTTCAGGTCAGAAATGCATGATCCTAACATTATTA  
TATAGCTGGGTCGATATCAGACAATTCATTGTTTGTATCGATGAACCAGAAAATAAGTCTACATCCAAAA  
TGGCAAAAAGAATTCATGAAAACCTTTGATAGAATTTTTTAGCGAATATAAAAAGTGCCATTTTATTATTG  
CAACACATTTCCCTTAATAATTTCTCAACTATCCATGAAGAAGTCTTCAATTTTAAACATGGATATAGG  
GTTCCGCAAAAAGCTCGTGATTATCAGAACATGTGTCGATATCAATTAGTTGAGATATTTGTGGTG  
ACAGGAAAATAACAATGAATATTTAAATAGAGTTGTTGTGTCACTTCTTTCAAAGTTAAGTTCCAAAGGGG  
AATTAATAAAACAAGAAAAGAACAACACTAGATCATTTAACAAAAATTAACCTTTCAATGAACGATAATGA  
TTCAGTTAAAGATCTTATTAGCATTCTAGAATTAGCATGGGATGAGGTGACCAAAAATGCAATAAGTAG  
TGTCATCTTTAATGATGCAGAGAAAACAAAAATAAAAAGCATTATCGAAAAGAGATGACTTTGGCCCCGAA  
TTCTGGTCAGACAAAGATATTGAAGATCTAAAATCAAAAATAAAGTCTCATTATCTTGCCGAACAAAAAA  
ATACTTGCCCATTTGTCAACAAAAATAAACTCTAACCATGGTCGATATTAGGATATTGAACATATAAT  
TCCACGTTCACTTGCTCCTACTTTATGTTTAGCCACTTAACTTGTGTGTTTCGTGCGTAGACTGCAAT  
AGAGCAAAATCCGACAAAAAAGTAACAAATAGCAAGCCGTAAAAAAAATACCCCCAAGCAGCGCTAGCT  
TTTTTATTGTTTACCCTAATTGACGACTACCACAGCAATATTATTGTCATCAAAGTGGTGGTATTATA  
TTTAGCCAAAAAAGTAAAGGCGAAAAAACCATTGAAGTTTGTAAAGCTAAATAGATTTTATGAGTTTGCA  
GAATTTGGCGCAAGCGTACAAGATGATGACCGTATTTTTTTCATCTATCTGAGGAGTTACGTAAAACCTCAAG  
ATGAAACACATAAAAAAGCAATACGTAATTAATCGCGGAATTAGCGATTAAGGGGGCAGCGTAATGAAA  
TGCCCATGTAGCCGTCTAGTACCTGAACATAGAATAATACGGGGGGATAATCTCGCTGGTTATCTGGCT  
TATCGAGCAACAGCTCGGACTTGAGCCACCTTTCTTCTGCAGAAAACAAAAATCCCCGTTACCGGGGG  
ATTTTTATTTCTATCGGTTATCTCAGCTCGGCGGTTTAAACCACAAAAACGCCCTTAAACGGGCAAACT  
CCGCAGGCAAAATTAACGGAGAGCAGCGGCAGCTCGGCGTGTTTGGCCAGCGGGCCGGGCAGCGGCACATC  
GAGATGCAGGATCTCATCCACCGACTCCTTGAACCTTGGCGGGATGGGCGGTACACAGAAAACACCCCACT  
TCGTCTCGGCCAGCTGTTCCCCCAGCAGATCCCAGGCAATGGCGCCGTGGGGTTCGCACAGGTAATCCA  
GCTGGTGCAAGCGCTTGAGGGCATCGCGAGTCTGGGCGTGCACGCATACCAGAACCAGGGTCTCCAG  
CGCCAGCCTTTGCGACGGCACAGCTCTTCCACCCGCGGCCAGTTGTTGGGGCGGCTGACATCCATGGCA  
TTCGACAGGGTTGCCACTGTCTGGTGC GGCTCCCACTGACCGGTTTTCAGGTAGCGCGGCACGGTATCGT  
TGGCGTTGGTGGCGGCATAAAGCGCTTCAACGGCAGCCCCAGCGCCTTGGCGATCAGGCCTGCGGTACG  
GTTGCCGAAGTTGCCGGACGGCACGCTGATCACCGCCTTGGCACGATCGGCTTTCCGCGAGCTGGGCTACC  
GCTTCGAAGTAGTAGCAAACTTGCGCCAGCAGCGGCTGATATTGATGGAGTTGGCGGAGTTGAGGCCAA  
TGGCCTTTTTTACGACCCCTCGTCAAAGGCTGTTTTACCAGCGCCTGACAGGCATCGAAGTCTCCATC  
GATGGCGATGGTGC GGATATTGCCACCGAGAGTGCAGAAGAGCTTCTCTGCAAGGGGCTGATCTTGCC  
TTGGGATAGAGGATCACACCTCGATCCCCCTCCAGCCCGTAGAAGGCGTGGGCCACGGCGGCGCGGTGT  
CGCCGGAGGTGGCGGTGAGGATAGTAATCTTGTGCTGGTTCTAAAGGCGGCGAGGCACTGGGCCATAAA  
GCGACCGCCGAAATCCTTGAACGCCAGGGTCCGGCCGTGGAACAGCTCAAGGGCATAAGTACCATCTTTG  
AGTTTACCAGCGGCGCCGGGAAGGTGAAGGCGGCTTGTATCAGCTCGCTCACCTTGGCGGCGGGCACTT  
CGTCCCCCAGCAGGTGGCTGATGATGCGGGCAGAGCGTTCCGGCCAGCGGCAGCGCCAGCAGGACATCCAC  
ATCGGCCAGCGGCGCAATCACCTCGGGGAAGAAGAGCCCTGATCGCGGCCAGACCTGACGCACCGCC  
TGCGCGAAGCTCACCTGTTCACTCTTGTCTTGTATTTGTAAGATTTCATAGCTCGCTTCTGTTACCCG  
TGCCCCGGCCATGTCCAGTTTGCAGACCCGGGCAATCCATCTTCTGTTCTGCACAAAATGTGCGTCCATC  
CAATCCTTCATGCGCTCGGCCTGAGCCAGATCCTTCATCACCACAAACACGCTGGGACCGGAGCCGGAGA  
TGCCGGTGGCCAGCGCCCCGTTCTGAGCCGCTGGGCCCCGACCTCGTTAAAGCCTTCAATCAGCGCCGC  
GCGGTAGGGCTCGGCAATCACGTCTTTTCACTACGCTGGCGGCCAGCCCCCTCTGCCCTGTGTAGCTGGCG  
TGAACAAAGGCGGCCAGCCGACGGCCATAGGTGAGGCAATCTTACGGCGATATTGCGCAGGCAGAATGG  
CCCCGGCAGCGGCGGTAGATACCACAGTCCCCGGGTAGCAGACCACCCAGTACCACTGCTCGAACACCGG  
AATGCCCTGGCTGATGACGCCGTCTTCCAGTACCAGCTGCATGCCGCCAGATAGCAGGGAGCCACA

TTGTCTAGTGAACGGAGCCGGAGATGCGACCTTCCATCTCCCCATCAGCAGCAGCATGTCGTGCTCAT  
TGAGCGGCGGCCATGGAAGGCGTTGAGCCCTTCAAGGGCCGCCACCACGCTACAGGCGTGAACCCAG  
ACCCGAGCCGACCGGCAGGTTCTTCTCCAGCACCATTTTCGAGCGGCTGCATGGTCAGGCAGCGCTTCTCC  
AGCGCCTCGCCATAGGCCACCCAGCAGTCGAACAGGATGTTCTTTTTTCGGATCGTCGGGCAGCTTGTGGG  
CATAGCGGCCACGGAAGAGAGGGGCAAACGCCACGTCAGCCGCTTTTACCTGCACCCGATCGCCCAAGAG  
GGAGCCATCCACGGGGGCGAGCGCCGCCCCAGTACATCGAATCCCACGCTCAGGTTGGCGCTGGAGGCG  
GGCGCGTAGGCGACGACGCTGCCGCCGTCCGTCATATAAGAGGGGTACATGTCTGAACTCATGGTTATAG  
CTCCTGCTTCCAGTTCTGGGTGCGCAGCAGCTCGGCAAAGACGCCCGCCGAGTCACCTTCGGTACCGGCG  
CCATAGCCACGCAGCACCAGCGGGATCGGCTGGTAGTAGGTAGAGAAGAAGGCGAGCGGTTCTCCCCGT  
CTTTGACCTTGAACAGCGGCTCGTCGGCGCCGACCGCCTTGATGGCGACCTTGCACCTGCCACCCTCAAT  
CGACCCACATAGCGCAGCACCTTGCCTTACGCTGGGCCGCGGCGAACTGGTCGCGGAACCGCCGTC  
GCTTCGGGCAGACGTGCCATAAAGGCTTCAACGTCGCCACTGGCGTCAAATCCGGGCGGCAGCGCCTGCT  
CGACTTCGACATCGGAGAGCTCCAGCGCCATACCCGCTCAGGAGCCAGAATGAGCAGCTTGCAGCGCCAC  
ATCCATGCCGTTGAGATCGTCGCGGGGATCCGGCTCGGTAAAAGCCGTTGCTGCGAGCGATTTGGGTGCGC  
TCGGAGAAGGCCATCCCCCTCGTCCAGCTTGCCGAAGATAAAGGAGAGGGAGCCGGAGAGAATGCCGTGGA  
AGGCGCGCAGCTTGTACCGGCTTGATGAGGTTCTGCAGGTTCTCGATAACCGGCAGACCGGCGCCGAC  
GTTGGTCTCGTACAGGAACCTGCGGCGAGTCTGGCGGGCGGTGCGGCGCAGCGCTTGTAGTAATCAAGC  
GAGCCGGTGTGGCCTTCTTGTTCGGGGTAACCACATGAAAACCGGCGGCGAGGAAGTCGGCATACTGAA  
CGGCCACCGCCTCGGAGGAGGTACAGTCGACGATACCGGGTTGATGATGTGGTATCTTCCACCAGCTT  
TTTACCCCTTCCAGCGAGAAGCTGTGCGGGCTTCCGCCAGCTGTTTCGCGCCAGTTGGCGAGGTTCCAGG  
CCATCCTTGTGACCGCCATCTGGCGGCTGTTGGCGATGCCGACCACGCGAAGGCCAGTGCCTGCTCGG  
CCAGTACCGGTTGCTGGCGGGCGATCTGATCCACCAGCGCGGCACCGACCGACACCGACCACAAA  
GAGATCGATAAACTGCTGGCTGCCAAAGAAGTTCTGGTGGCACGCTTGTGATGGCTTCCGCCACCTTGCGA  
TCCCGCACCCCGCGAGATGGAGCGCTCGCTCGACCCCTGCGCGATAGCGACGATATTGATGGAGGCTT  
GCGCCAGTGAGGTGAAGAAGCGGGCCGCCATCCCCTTGTGGTGCATGCCGTACCGATGAGGGAGAT  
GATCGCCAGGTCGCTGATGATATCCAGCGGCTCCAGCAGCTGGTTTTTTGAATTCGAGCTCGAACTCGCGC  
TCCAGCACCTTGCGGGTCTTCTCACTGTCTGATGTTGATACAGAAGCTGACGCTGTACTCGGAAGAGG  
ACTGGGTGATCAGCAGTACTGACCCCGCGGGAGAGCTTGAACATGCACATGCCGAGAGATCCGAGATGGCCTCACT  
CATGCCCTTATGCCGGGGCCGGAGAGCTTGAACATGCACATGCCGAGAGATCCGAGATGGCCTCACT  
TTCAGGTTCATCGTCGGGCTCTCGGGGCCGATCAGGGTACCCGGCCCTTGCGGGTTGAAGCTATTCTTGA  
TGAGGCAGGGAATATGAACTGGGCCACCGGCGCGATGGTTTTTCGGGTGCAGCACCTTGGCACCGAAGTA  
GGAGAGCTCCATCGCCTCCTTGTAGGAGAGGGTTTTTCAGCAGGTAGGCGTCCGGTACCAGACGGGGTCA  
CAGCTGTAGCAGCCCTCGACGTCAGTCCAGATCTCGCAGCACTCGGCATCGACGCGAGGCGGCAATACGG  
CTGCGGAGTAGTCGGAGCCGTTGCGACCCAGCAGCACGGTCTCGCCCTTGTGCTGCCACCGGTAAAGCC  
CGGCATCAGGTAAAGACAGTCGCTACGCAGCCCTTGGCGGCAAAACGCAGGCGGGAGGCTTCGATATCG  
ACATGGGCTTCGAGGTAGCCGCGTCCGTTGACCAGCAGCTCTTCCGGTACGATCAGCTCCAGCTCCAGAC  
CGCGCACCCGAGCAGTTCGTGCATAAAGGCGATGGAGAGGTTCTCGCCACGGCTCAGAATGCGCGCCTG  
CACGTTGTCCGGGCAGAGGCCAGCAGACGGATGCCCTGCATCAGCCGCTCCACCTGATCCAGCTCGGCG  
GTGAGACGGGCCAGCAGCGCCTTGTTCATCGAGCGCCGATAGGCCGCTTCAACCCGGCCAGCAGGCGGG  
AGAAGATACCGTTGACTTCAAACAGGGTGGAACTGGCATCCATGCCGCGACTGGTCTGCTCCACCAGCGC  
CACCAGATGATTGGTCACCTTGGCAGGTGCAGAGAGCACCAGGGCTACCTGAGATTGGCCGTGGGTGTTG  
ACCGCGATATCGGCCACCCGTAACAAACGTTCTGCATCGGCCAGTGAAGACCCGCCAAATTTCAACACTC  
TCATCGCTTTCTCTCCCTGTAATCTATGAAATTCATCTAAAACAGTCCAACAAAAAGGCCGCTACT  
GGGTGGGTACGGCCTTTTTTGTATTTCTGTGCTTGTTCGTGACGCGATCAACCGCCCCAGTGCACCTG  
TGGTGGTACCGGTAATAATGGTGGTGGTGTGACGTTGGTGAATAACTGCATGACGAACACTCGTTGACG  
AAGCTGGCTTTTAGCAATACCGCGCGGGCGATGGGCTGTCAACTTAAACCTTTTGCACAGTTTGCAGC  
CAAGGTCTTTGACAGAGCAGGTGGAGCATGTTCAAATCCCGCTGCGGCAGCATGGGTACCCGGTCCATCAC  
CCATTGATGCAGTTTTTTCATCCTGCGAAACTCCGAGTTACCCAGCAATTTCTGCTGTTTTTGCATTTAAGC  
ACCCGAACCTGCCAGCGTTATCAAAAATTTTCTGCTACCGCAGCGGCACCGTCCGGCTTCAGCTCATCCA  
TCAGCTGACTCATCTCGTAGGCGTAGAGCATGATCGCCTGCCCCAGATTGAGAGACGGGTAGCTCACCTT  
GAGGGGCGAGATAGCTGATGAGATCGACCTCGGCCAGCTGCTCGTTGGAGAGCCCCGACTCCTCGCAGCCA  
AAAACGATGGCGACCTTGCCGAGGGAAGGCTTGTGCGGATCTGCTCGCGGATCTCCCCCGCGTGAGGT  
AGTGTGTTAGCGACCGCGCTCACGGGCGGTGGTGGCGATCACCAGATCCATGTCGGCCAGCGCTCGGG  
CAAAGTCTCGAACGCTTCCGCTGAGTCAGGATCTCCTGGGCACCGTGAGCCACCCAGCTCGCCTCCTCC  
TCTTCGTGTACCCGGCTCGCCACCAGTCGCATGGCATCGAATCCCATGGTTTTTCATGGCGCGGGCAGCCG  
CCCCACGTTTCGAGGTGCGGCAGGTGCCACTAGGACAAAATAGAGCTTCATCGGGTTTTCTCACAGGCC  
GGACGGCCTTCAAACAGACAGCAAACAGTCGCTAAACCATCACAAAACAGGGGCGCAATCTACCGTTT  
ATCCCCGAAAATTGCCACTTGAACAGACGTTTTGAATGTTGCGATAGTGCCAGACGTGTGAACAAATTAC  
ACCCAATCCTTCGCGCTATCGGCCCGACAGATCAAAAGGAAGAGAGATGCAGCAGCCATTGGAACAGG  
CCGTGCGCGAGACTATCTTGAACGCTTCGAGTCGTTTTACAGCCGGTTTTCTCGAGATAACCCAGGGCAG  
CAAGAGCCGCTTCGAGAACAGTACTGGCTGGGGGTGCAGCTCGCCGACGGGAGCGCATTCGCCTCTAT

GATCACCATGTGGGGGCCACCGCCAGCTCCATCCGCCAGATGATGGGGGAGCACCAGCCACTCAGGAGC  
TGCTCAAGCGGGTCAAAGCGCCTTCAGCGATCTGCTGCCCGTTGTGACAACTTCGAGGTGGCGGAGTC  
CTTCTTCAACTCCGTCTATCGCCGGATCTTTCGCCATCGCAATATCCGCGACGAGAACCTCTATATCCAC  
CCCTTTGTAGCCGTGGCGAAAAACCGGACCTGAGCGCCCTGCTGCCGATCTATCGCACCGATCTCGCCC  
ACCTGCCGACAGACCTTGAGCCAACTTTTGGGGGATTACAGCTTCACCCCTCCCCTATGAGGACAAGCAGCG  
GGATATTGTCGACATCCACCGCCATCTTGCGGAGAACCGCCCCGAAATACTCCATGATGAGCCGTTTGCC  
ATCGAGCTGCTCAAAGAGGTGTTCTACCGCAACAAGGGGGCTATCTGGTGGGGCTGATCCGGGTAAAAG  
ATCAGGTGTTCCCTTTATCCTGCCCTGCTCAGCACCGGCCACAGCATCTATGTGGACACGGTGATCTT  
CGAGCCGGATCTCGCCTCCATCGTGTTTGGCTTCGCCCAGCCTACTTTATGGTTTATGCCCGGAACCG  
GCACTGTTTGTGCTTCTCCTGCGCCAGATCATGCCCAACAAGCCGATTACGAGATCTACAACGCCATCG  
GCTGACAGAAGCATGGCAAGACCGAGCTTTATCGCCACTACCGCCACCATCTGGCCGAGCCGGGATCA  
GTTTCATCATCGCGCCCGCATCAAGGGGATGGTGATGAGCGTGTTTACCCTCCCCTCCTACGATGTGGTG  
TTCAAGGTGATAAAAGACGAGTTACGCCCCCGAAGGATGTGAGCCACGAGCAGGTGAAGGCGAAGTATC  
GGCTGGTTAAACAGCACGATCGGGTTGGCCGATGGCCGATACCCAGGAGTTCACCAACTTCGAGTTTCC  
GCTGGATCGCATCTCGCCGGAGCTCCTTGCCGAGCTCCAGACGGTGGCACCCTCGGCGCTCACCATCAGC  
GACGACAAGCTGGTGATCAAGCACCTCTATAACCGAGCGCAAGATGATCCCCCTCAACCTCTATCTGGACA  
AGGCAGACGAGCAGCAGACCCGGCTCGCGCTGGAGGAGTACGGCAACGCCATCAAGCAGCTGGCGGGCC  
CAACATCTTCCCGGGGACATGCTGTTCAAGAACTTCGGCGTCACCCGTCACGGCCGGGTGGTCTTCTAC  
GACTACGACGAGATCTGCTACATGACGGAGTGCAACTTCGCCAGATCCCGCCGCCGCTACCCCGAGG  
ATGAGTGGAGCGCCGAGCCCTGGTACTCGGTGCCCCCAACGATATCTTCCCGAGGAGTTCGCCACCTT  
CCTGCTGCAAAAGCCGAGGTGCGGGAGATCATGCTGCAGCTGCACAAGGAGATGTTTCGACGCCAACTAC  
TGGAAGATGCTGCAAAGCAACATCAAGGTAGGGGTGTTTCGAGGATGTCTATCCCTACCGGCGCAAGAAGC  
GCTTCAAATACCAGCGCGGGCTGATCCCGCAGCGCCCGCCACATCGCAGCAACGAAAACGGGGTGGC  
CAAAGCCACCCCGTTTTGCCATCCGCTTTGCGCCTTAACTGCCGCGACGGCGGATCACCCCTCCTGCAT  
GGTGCTCGCCACCAGCACCCCGTTCGCGGGTGAAGAACTGACCACGCACCAGACCCGCGACCCGCTGCTGGCG  
CTCGGGCTGTCTACCACGTAGAGCAGCCAGTCTGTCGAAGCGGAAATCCCGGTGGAACCACATGGAGTGAT  
CGATGGTTCGCAACCTGCATATCCGGCTCCAGTACGACACCCCGTGGGGCTGCAGCAGGTGAGCAGGAA  
GTTGAAGTCGGAGCTAGGCCAGCAGGTATTTGTGCACCCGAGATCGTCCGGCATCTGACCCCTTGGCC  
TTGAACCAGACGTGGCGCACCCGGATCTGCACCTCGCCGAATAGGGTTCGACCAGGTTACCAGGGCGCA  
TCTCGATGGGCTGCTCGCAGAGGATCTTGTCCCGCAGGGAGGCCGGGATCAGGTTCTCGTAGGGGCGCAC  
CAGCTCCAGCTCGCTCTTGAGCTCCTCCGGCGGGGTGATTCCGGTGGGCATCTGCGCCTGATGCTCGAAG  
CCGTGCGCCGGCACCTGAAAACGAGGCGTTGAGATAGAAGATGGGCTTGCCGCCCTGAATCGCCTTGACCC  
GGCGGGTGGAGACGGTCTGGCCGTACCGGATATTTCTCCACGTATAGACAATGGGACGGGTACATCCCC  
CGGACGCAGGAAGTAGGAGTGAAAACCTGTGAACCTGACGGCCGGTCTCGACCGTCTGCTTGGCGGCTGAC  
AAGGCCTGCCCATTAACCTGTCCGCCAAACACGGCCCGCAGACCGAGATCCTGGCTCTGGCCCCGAAACA  
GGCCCTCCTCGATTTTTTCCAGCGCCAGCAACGCCAGCAGCTCATCAAGTACCTTGCTCATCGTTCACTC  
CTCTATCAGAGCCGCACAGGCTAACAAGCTCACCGGAGCAGACAACCGCCACAGCCCTTCCGCCGCC  
AAAGGGAACCTTCAAGGGCCATACGCCGCGACCAACAGCATTTATCGAGTCTGTTTTTCTCTGCCGAAAC  
CGCTACGCTGTACGAATCGATAGAGGTGAGGTACCCGCCATGCACATCCGTTATCCGGTAAACGCCCTC  
TGCCCTTATCGCCTCCGCTCGTCCCTTCGCTTCGTGCCACCCGTGTTGCTCTTTTCGCTGCTCCCGGCC  
GCCACTGTGCAGAGCGCGGTAATTATCACCGGCGAATTGCCCCCTACTCTTCAGCGACGCTGGCCAATG  
GCGGCGAGCTGGCAAGCAAGGTGCTCACCCTCTCAAAGCGGCAGGCCACCCGGATCTGAGGGTCTCCTA  
CCAGCCCTGGCCGAGGGGGCTTAAAAACATCGAGCTGGGCAACGCCATCGCCGCTTCCCCTTTACCTGG  
ACCAACGAGCGCAGCAACTCCCTGTTGTTAGTACCCCATCGCCTTCGATATCCAGTCTTGGTACACCA  
CGCCCGACAAGAAGGGGCTGGAATCCCCGCCCTGGCAGCAGAAAACCGCTGCGTACCCAAGGGGTGGTT  
CTCCAGATGCCATCGAGCGGGTACCATCGAGCAGAAGCTGATCGTCAGAACCACCAACCGCTCAACCAG  
TGCGTTGAGCTGCTGAAAAAGGGCAAAGTCGATCTGGTGGCCATCAACGACACTTCGAAAAAGAACCTCT  
CGGAGGAGGACAACGCCGCTCTCTACCGTCTCTCGCTGTTTCGCCAGAACGTCACCTTCTATCTGGTAC  
CGCCCGCAACGAAGAGGGAGAGATGTTTATACGTGACTTCAACAAAAGAGTGGATGACACCGGCCAACTGA  
GGAGTGTGAGAGCAATCATTGCCACATGACCAGAGCCAGCCTGCAGCTGGAGGTACCCCGCTAGAGATGA  
AAAAGGCCCGCACACAGTTGGTGCGGGCTTTGCTTGCCGACTGCGCACTCTTTGACGGCGCGCAGTTTCG  
CAACGGGTTGTGCGCTTACTTGTGCTGCCGGTACCGGAGTTGCGGGTAGAGGCTTGCGGCTTGCGACGGCG  
GTGGTGGCGCGAGCGCGCGGCTCTTTGCCCTGCATCTCTTTGTGACGCTGCACGGCACGACGGATCTGGG  
CGGCTGCTTGTGACGGCTGGTTTTGCCATCCTGCTGCAGATCGACCTTGGATTTCGGTCTCCGGCGGCAG  
GTTGACCAGACCGCGCAGGTAGTTTACTTCCGGCAGTTTCAGCTCTTGCCAGCCACCGCGCGGGATGCCG  
CGGTCCAGCTTGACGTACCGTAGCGGATACGCATCAGGCGGCTCACTGCACTTCTGGGATTCCCACA  
GGCGGCGCACTTACCGTTGCGACCTTCGGTACGGGTGACGTTGAACCACTGGTTTCAGACCTCACCGCC  
AGCCGGCTTGATCTTGTGAACTTGGCGGTGCCATCTTCCAGCTGCACGCCCTTGCGCAGACGCTGCAGC  
ATGGCTTCGGTGATCTCGCAAAGACACGTACCGGTATTTCCCGCTCCACTTCGTGGCTCGGGTGCATCA  
GACGGTTGGCCAGCTCACCATCGGTGGTGAACAGCAGCAGACCGGAGGTGTTGACGTCGAGGCGGGCGAC  
CGGATCCAGCGGGCACCTTCCATCTTGGGCAGACGATCAAACACGGTGGGACGACCTTCCGGATCGTGA

CGGGTACACATCTCCCCTTCCGGCTTATGGTAAGCCAGTACGCGGCAGATCACTTCTCTGCGGCACGGG  
TCTTGACCTGGTGACCATCCACCCGGATCACGGCGTTCACTTCGACGCGATCCCCAGTGTGGCGACCTT  
GCCATCCACACTGACCCGACCTGCGGTGATCAGGGCCTCCATCTCACGACGGGAGCCGTGACCCGCGCGG  
GCCAACACTTTTTGCAGTTTTTCACTCATCGGGGTACCTGATCGTTGATCGCTGCCACGGGTAAAAGG  
GGCAACGGGGTTAACTGTAACAAACGCCGATTGGAGCGTTTACCACAGTTGAAAAATGTATATCTCGGTG  
ACATCGGCACACTTGGGGCCATTACCCGGGCATCGCTCTCCCCGTCCACCGCAGAGGGCAACAGGGGTT  
GCAGTCCGGATCCAGCTCGGGGAGCTGCTCCAGACTCTGCAAAATAAAGTAATCCAGAAACTCTCTGGT  
AGTGGCGAGCAGTTCGGGGCGACCCGGCCACCTCTTTGTGGCCGATGCTGCGCACCCAGCCACGCTCTTTC  
AGGGTATTCACTATCTGGCTCGACACCCGCCACCCCGCGGATCGCTTCGATCTCGGCCCGGGTGATGGGTT  
GGCGATAGGCGATCAGGGTCAGCGTCTCCATCACGGCGCGGAATAGCGCGGCGCCCGCTCGTCCAGAG  
CCGCGAGAGCTCTTCGGCATACTCCTGACGCGCCTGAAAGCGCCAGCCGAGGGGACCTCTTTGAGCTGG  
ACGCCCCGCGAGCTGTAATCTTGCCTGATCTCGGCCAACAGTAGCTGAACATAGCGACTGTTTACCAGGAT  
AATCCGCCAGCACGCTGCTTTTTCAGTTCGCTGACATTGAGCGGGCGACCCGGCCACAAACAGCGCCGCTTC  
GATCAGGGTCTTGAGTCGTTTTCAGTGGGCAGCGCCACGGTTGCCCTCCTCGCTCTGCTCGGCCAATGCAAA  
ATGGATTGGGCCAAGGGGTTCTGCCTGCAGGATCCAGATCAGTTGCTCCTTGCCACAGCTCCAGCAGGGCC  
AGAAACGTACCAGCACCCCATGCGCCCTCTTCGGCGCGCAGCACCTGCTCAAGGGCGAGGGTCTGCC  
CCAGCGTGAGCATGGCAAGGATCTCCGCCATGCGTACCCGGGTGCGGATCTGTTTCGGCGGATCTGGTG  
ATGTTTCAAATGAGTCGCGCGTTTTTACCACACTTTGCATGTAAAGGGCGAGCTCAACCAGCGAAACATCG  
GGCGCCAGTGGCTTGAGGGCGCCAAAATCGGGGGCAAGGCAGCTGCAATATAAATCTCCCCTCCACCC  
GTGGCAGCTCATTGACCTCTCTGCACCTACCTTGTAGCGCTCGTACTCCTGCAGGCGGCGAATAAGCGT  
CACCCGCGGGTCTTCTCCCTCCTCTTCATCCTCCAGCTCCGGCGCCTTGGGCAGCAGCAGGCGGGATTTG  
ATCTCCGCCAGCCAGGCCGCCATCAGCAGATATTCGGCTGCCAGCTCAAGGTTGAGCCCCGTGCATCAGCT  
CCACGTACTCCATGTACTGGGCGGTGATCTGCAGGATCGGCAGGTTGAGGATATCGAGCTGCTGGCGCCG  
GATCAGATAGAGCAGCAGATCGAGCGGCCCTCGAAGGTATCGAGGAACACCTCCAGCGCATCGGGCGGG  
ATGAACAGGTCTGGGGCAGCTCGTGATAGGGCTGCCCCAGGACTTTCGCGATGGGTAGGGCGGAGCCAG  
CCCCCGTCTCGGCGGAAGGGACTGTCACCGGTTACGCGACATCACTCAAACGGGGTTCGGGTCCCCGGCGC  
CGCGACGACCAATACCCGCTCGTCTGTCAGAGAAATCGACCACTGTGGTGGGCTGCTCGCCAGATAACC  
GCCGTTGACACCAGATCGATCTGCTTGCCAGCTTGTGCAAGATCTCTTCGGGGTCCGAACTCGGCCATC  
TCGGACTCCGCGAGGATGAGTGTGGTGGAGAGCAGCGCTCGCCGAGGGCTTCCAAGAGAGCGCTGAGCAA  
TCTTGTTGTCCGGCACCCGGATGCCGATGCTCTTCTTCTTCTCGTTTCAATCAGGCGGCGGGCACCTCTTT  
GGTCGCCTTGAAGATGAAGGTGTAGGCGCCCCGGGTGTTGTTCTTGATCAGGCGAAACGCGCTGTTGTGCG  
ACCTTGGCGTAGGTGGAGATCTCGGAGAGATCGCGGCACACCAGGGTGAAGTCGTGGTTGGCGTCGAGGC  
GACGGATGCGGCAGATGCGCTCCAGCGCGCCCTTGTACCCATCTGGCAACCCAGCGCATAACCGGAGTC  
GGTCGGATAGACGATAACGCCCGCTTCTGGATGATCTGTACCGCTGACCGATCAGACGGGCCCTGGGGG  
TTTTCCGGATGTACGTA AAAATGCTGACTCATAGCTTGTCTCGCAATGGGGGAGCAATACCTGCCCGC  
TCGTATGGTCACAGGTCAATCACCCATGACACTACCTTAACCTGTTTGTGGCCGCTTCGCTGACGCCGTT  
AGCGACTCGCCAGCAGCTCGGCATGCTGTTTCGGTGGTGGAGCCGAAAGTACCAGGGATAGGCCAACCAGAC  
GGGCATCCCCTCTTTGGGCAGCCAGAGGTGGCGACCCAGCTCGGTCCAGTTGGAGGGGAAGTGA AAATCC  
GATCCCACCGAGATATAGAGGTGATGATCCTTGGCCACTGGCCAGATTGGCCCCGCTCCTGCGGACTCT  
GCTGGGGCAATGAGACCTCCATGGCATCGCCACCCGGCCGCTTGAAAGCCACCAGCAGCCGCTTGATCCA  
CTTGGCGGTGAGATCGTAACGGCTGGGGTGGGCCAGCACCCGCCAGCCCACCGGCGGCATGAATGGCCGCG  
ATAGCTTCGCTCATCTCGGGCCACTCGGCCGGGGCATAGCCTTTATTTGCCACGGCTCAGGTACTTTTTTGA  
ATACCTTCTGCATATTGTGCGCCACTCCGCGCGCCACCAGCACCCGGGCAAAGTGGGCACGGGTACGGC  
GGCGTACCCGGCGAGCGCCTTGGCCTCTTCATAGGTGCCGGGGATGAGGCATTTTTTCCAGACGACGCCCG  
ATTTCCAGCGCGCGCCTCGCGACGGGCCAGCTGACCGGCCAGAAAGTCGTTGAGCTGCGGATTTTTTTT  
CATCCACCCCGCAGCCACAATATGGATCTCGTGATGCTCCAGCCGTTGGAGATCTCGACCCCGCTCAC  
CAGTCGCGAGCGGCAGTTGCTCGGCGTCGATGGTGCGGCGTACTTCAATCAAGCCCGCAAGGGTATCGTGG  
TCAGTAACCGCTAACACCTCGACCTGTTTTTTCGGCAGCGCGGCGCACCCAGTTCGGCGGGGCTCAGCACCC  
CGTCGGAGGCAGTGGTATGGCAGTGAAGATCGAATCTCATCAGGTTATTCGGCTCTCGTGGTCAGGTCAC  
CATTCATGGCAAATCGGTGAAAGAAGGCTAAAAAGCGACTTGACTTGGCCGCGGCTTTATCGTTTTTCTGT  
AGGCACTTCATTGCAAACATCTTTTTACAGGACTTTATCATGCAAACGACTTCCATCCTGACCATCTGGT  
GGTGGCACACTCCCTGACATGCGGGCGTGTGGTCTGTGCTGTACCTGTAATCTGACAGCAAATTAAGAAC  
CCAAAGAAAAGCCCGCTGACCCAGCGGGCTTTTTTATTATCCGGCAAATGGACCTGTGATGAAACCGA  
GAATTCAGACAAGCAAGCTGACCTGGCGATGGCGCCCTGAACCAGCCACCCCGGACCAATTAATTTTTT  
AAGGAATTC AATGTGATGAACATCGGTAACACGCATCACACGCAAGGGAACGCACTATGACAGCCACACA  
TCGCCTTCTCTGGGTGAATTCGATACCCTCAAGCTCAACGCCCTTATGTGGCCGATCCGCTGGCGCTC  
TATACCCGCTCTGTGAGGGCCGCCCCAACAACTGCTGCTGGAATCGGTGGAGATCGACTCCAAGGCAG  
GCAAACAGAGCCTGCTACTGGTAGACGCTGCCTGCGCATCGAGTGCCGTAGCCGCACCGTGGGGTTTCG  
CAGCCTGAACGACAACGGCGCCAGTTGCAGAGCCTGCTGGCCGAGCGGCTGCCGTGGTGGTGGCTCGT  
TCGCTGGTTCGATGGCGAGCTGCAACTCGACTTCCCGCCTCCGATCGGGAGCAGGATGAAGACAGCCGCC  
TCAAGGGGAGCAGCGTGTGACGCTGCTGCGCACCCGCAACGGGAGCTTGATTGCCAGCTCGGTAAGA



AGCCCTGTTTATGGCGGGCAGCTTCGCCTATGACCTCATCGCTCTTTTGAAGATCTGCCCGAAGTTCGG  
GAGGGGAGCAACAACACTGCCCCGACTACTGCTTTTATGTGGCAGAAACCCTGATCACCATCGATCATATTG  
AGCGCACCCTCAACTGCTGGCCTGCATCTTTGGCGGCACAGCGACGAGCCAGGTGGAAGACAGATA  
CACCCGCTGACCGAACGACTCACCAGCTTCAAACAGATTTGCCAGCAACCTCTAAGCGCCGAGCTGACC  
ACCCAGCCCCTGACCGGTGGCATGAGCGTGGACAAGAGCGACAAGCAGTTCTGTGCCGAGGTGGAGAAAC  
TCAAGGGCTTTATCCGCCGTGGCGACATCTTTAGGTGGTGGCGTCCCCTGCTTCTCCCTGCCCTGCC  
GAGCCCCTGAGCCGCTATCGCCGCTCAAGCAGACCAATCCAGCCCCCTACATGTTCTACGTGCAGGAT  
GAGGGCTTCACTCTGTTTGGCGCTCGCCGGAGAGCGCGGTGAAATTTCTGCGCCGACCCGCGACGTGG  
AGATGTACCCCATCGCCGGTACCCGCCGCCGCGGTTCACCCCCGATGGCAGCATCAACCCGGATCTCGA  
CGCCGATATCGAGCTGGAGCTGCGTCAGGACGAGAAAGAGGTGGCCGAACACCTGATGCTGGTGGATCTG  
GGCCGCAACGACATCGCCGCTCTCGAACCCGGTACCCGCTACGTCAAGGAACTGCTGAAAGTGGATC  
GCTACAGCCACGTGATGCATCTGGTCTCCAAGGTGGTTCGCGACCCCTGCGCTCCGACCTTGACGCCCTGCA  
CGCCTATCAGGCCTGCATGAATATGGGCACTCTCACCAGCGCACCGAAGATCCGCGCCAGCGAGCTTATT  
CGCATGGTGGAAAGCAAGCGCCGCGGAGCTACGGCGGCGCGGTTCGGTACATCAACGGTGGCGGCGAGA  
TAGATACCTGCATCGTCAATCCGCTCCGCTTTTCGTGAAAAGATGGCGTGGCCATGTGCAGGCGGGTGGCGG  
GGTGGTCTATGACTCCAAACCGCAAGCAGAAGCGGACGAAACCCGCGCCAAGGCGGCCGCGCTGCTGGCC  
GCCATCGCTGCCAGCCATGGCACCTCCCTGCAAGCCCTGAGCGCCAGCAGGAGCAACATAAGGACGTGA  
GCCATGACTAACATCTTTCTGCTCGATAACTTCGATTCATTTACCTACAACCTCGTCGACCAGTTCCGCT  
CCCTCGGTTATCCGGTGGGATCTACCGCAATAGCCTGCCGGCCAGCCGCATCATGAGCGAAATTTGCCGC  
CTGCGAAGGGGACGCCGCTGCTGGTCTCTCGCCGGGGCCGGGCGCCCCACGAGGCGGGTGCCTGATT  
GATCTGATCAAGCTGGCCCGCTGTGAGGTGCCAATCCTCGGCATCTGCCCTCGGTCAATCAGGCCCTGTGCC  
AAGCCTACGGCGGCACCGTCCGAGCGGCAGGCGAGATCGTCCACGGCAAGCGCTCCCTGATTGAGCACAA  
CGGCCACGGCGCCTTCCGCGGTCTTCCGAGCCCGCTGCCGGTAGCCCGCTATCACTCGTGGTCCGCCACC  
TATGTGCCGGAAGAGCTGACGGTGAATGCCCACTATCAGGGGATGCCCATGGCCATCGAGCAGCAGGATG  
AGCGGGTGTGGGCTTCCAGTTCACCCCGAATCCATCATGACCTCGGAAGGGGGCCGCTGCTAACC  
GGCGCTCGCCATATCACCCTCCAGAAAGCAGTGTGCGGTAAGGAGACCAACATGCATCAACATCTCAA  
CACCTCTATCAGGGTCAGTCTCTGAGCCGTGAAAGTACCCGCGACGCCTTCGGTCAAGTGGTACGTGGC  
GAAGTGCACCCCATCGTCTGCCAGTCTTTGACCCGCTCTCAAGATCAAGGGAGAGACCCCGGAGAGA  
TCCGCGGTGCCGCCGAGGCGCTGCTGGCGGAAGCCGCGCATTTCCCGCTCCGACTACGAGTTTTCGGA  
CATAGTCGGCACCGGTGGCGATGGCCTCAACACCATCAACGTCTCCACCACCTCGGCGCTGGTCCGCCA  
GCCTGCGGCCTGAAAGTGGCCAAGCATGGCAACCCTCGGTCTCGAGCAAGTCCGGTTCGAGCGATCTGC  
TGGACAAGATGGGCATCAAACCTCGACATGAGCCCGGCGCAGGCGCGCCGACCTGGATGAGCTCGGCAT  
CTGCTTCTGTTCCGCCCCAGTATCACGCCGGGTGCGCCACGCCATGCCGGTACGTCAAGCCCTCAA  
ACCCGCACCTGTTCAACGTGCTGGGGCCGCTTATCAACCCCGCTCGCCCCACCTATCAGCTGATGGGG  
TCTATGCCCCGAGCTGGTGGTCCCATCGCAGAAACCCTGCTGGCACTGGGGCTGAAAACCGGTATGGT  
GGTTCACGGCGCCGGGCTCGACGAGATTGCCATCCACGGCCCGACCCAGGTGGCCAGATCCGTGACGGC  
GAAATCCGTGAATTTATGATCACCCCGGCTGACTTTGGCCTGGAGACCTATCCGGTCAAGCGCCATT  
GTGGTGAAGAGAACCGCGCCATCACCGCCGCAATTTGGAAGGGCGTGGCACCCCGGCCACAA  
CGCCGCCATCGCCGCAATGTGGCGCCGCTGCTGCTGATGGCGGGCAAGGCGACAGACCTCAAGAGCGCG  
GCGGCCGAGGTGCTGGCAGTGTGGCGAGCGGCAAGGCTGCGGATCTCGCCGCTCAGCTGGCCACTTTAA  
GCCATCAGGAAGCGGGCCATCAGGAGGCATGATGTGAGCCACCACGTTGCACAGCAGTCAATTCAGAACGC  
CCACAGGGCAAGAGCCAGTTTCGAAGGATAACGAGATGTGAGACCTTATTTGCCCCCATGCATTTCTGA  
ACATGGCCTCCATCAGCCAGACCTTCTCGGCAAGATCGTGGCGGCCAAACAGGAGTGGGTTGCCGCCCG  
CAAGCTGGCCAGCCGCTGGAGAGCTTCCAGAGCACGCTGACCCCAAGCGATCGGGATTTCTGTCGGGGCG  
CTCAAGGCGGGCTCCACCCGCTTATTCTGGAGTGAAGAAGGCTTCCCCCTCAAGGGGTTGATCCGCG  
ACGATTTTCAGCCCGGAGGCCATCGCCGACATCTATGGCAAATACGCTCCGCCATCTCGTGTGCTGACCGA  
CGAGAAGTTCTTTCAGGGGATTTTCGCTTCTGCGCGGGTGGCGAGCCCGCTCAGCCAGCCGCTGCTC  
TGCAAGGATTTTCATGATTGACCCCTATCAGGTCTATCTGGCCCGCCACTATCAGGCAGATGCCATCCTCT  
TGATGCTCTCGGTGCTCACCGACGAGGGCTATCGTGCTCTGTTTCGCGGTGCGCAAGGAGCTGGGCTTGG  
CGTGCTCACCGAGGTGAGCAACGAGGAGGAGCTTACCCGCGCCATCGCGCTGGGGGACCCGGTGAATGGC  
ATCAACAACCGGGATCTGCGGATTTGAGCGTGCATCTCAACCGCACCAAAACAGCTGGTTAAAGATATCC  
CGAGCGATCGGGTGGTATCAGCGAATCCGGCATCAACCACCGCTCAGGTGGCGGATCTGCGCCACCA  
CGCAAGGGCTTTCTGGTGGGCTCATCCCTGATGGCCGAGCCGATCTGGAAGCCGAGTGGCAAGCTC  
ACTCTGGGCCAGAACAAGGTGTGTGGCCTGACCCGTGCCGAGGATGCCCGCCAGCCCATCAGGCGGGCG  
CGGTATTTGGCGGCCTGATTTTTGTGGCGAAAAGCCCGCTATGTGGACATCCCCCGCCCGCCGCGCGT  
GATGGCGGGCGCACCGCTCTCTACGTGCGGGTATTTTCGAACGCCAGCCCGCCACCATCGCCAAGACG  
GTGGATGCGCTGGGGCTCGCCGCGGTGCAGCTGCATGGCGATGAAGATGCCGCCATATCGAGATCCTGC  
GCCACTGCTGCCAGCTGGCTGCCAGATCTGGAAGCAATTTGGCATCTCTCTTGGCAAGGAAAGCGGCGA  
ACCGCTGCCCGACCTCGACTACCCGGCCGATCGCCTGCTGCTGGATAACCAAGTAGGCAGCCAGAGCGGC  
GGTACCGGTCAAGCGTTGACTGGGCCCTGCTGGCCATCTCGATAAAGCCAAGCTGATGCTGGCGGGCG  
GCCTCAATCCCGACAACGCCCTGCAGGCGGCGCAAGTGGGCTGCCTCGGCCTCGATTTCAACCCGGGT

AGAGAGTGCCCCGGGCCAGAAGGATGCGCACAAAGATTGACAGCCGCTTCGGGCGCACTGCGCAACCTGTAA  
CGCAACCCCTTTTTGATATTTTCGATTTAGCTAATACAAGGAAGAAACCATGACCCCTGCTCAACCCGTTTTT  
CGGTGAATTTGGCGGTATGTATGTGCCCCAGATCCTCATCCCGGCCCTGCTCCAGCTGGAGAAGGCCCTTC  
GTCGATGCCAAGGATGATCCGGCCTTTATCGCCGAGTTTCAGTCCCTGCTGACCGAGTATGCCGGTCCGC  
CTACTCCGCTCACCCCTGACCCGTAATCTGACCAAGGGCACCAAGACCCGCTCTATCTGAAGCGTGAAGA  
TCTGCTGCACGGCGGCGCCACAAGACCAACCAGGTGCTGGGTGAGGCGCTGCTGGCCAAACGGATGGGC  
AAGAGCGAGATCATCGCCGAGACCCGGCGCCGGTACGACCGGCGTGGCCACTGCACTGGCCCTGCGCCCTGC  
TCGGCCTCAAGTGCCGGGTCTATATGGGCGCAAGGATTGCGAGCGCCAGAAGCCCAACGTATTTTCGCAT  
GAAGCTGATGGGCGCCACCGTTATTCCGGTGCCTCCGGCTCGTCCACCCTGAAAGATGCCTGCAACGAG  
GCACTGCGGGGACTGGGTGCCAACTACGAGTCGGCCACTACCTGCTCGGCACCCGCGCCGCGCCGACCC  
CCTTCCCCACTATCTGTCGGGAGTTCCAGAAGATGATCGGCGAAGAGGCCAAGGCCAGTGTCTCGAGAA  
AGAGGAGCGGCTGCCCAGCGCAGTGCCTGCGTTCGGCGGCGGTGCAACGCCATCGGCATGTTTTGCC  
GACTTTATCGATGAGCCGTCAGTGCGCCTGATCGGCGTCGAGCCGGGTGGTACGGCATCGAGAGCGGCG  
AACACGGTGCGCCGCTGGGTACGGCAGCAAGGGGTCTTCTTTGGCATGCACTCCTACCTGATGCAGGA  
CAATCAGGGGCAAATTCAGGAGTCTACTCGGTCTCTGCGGGGCTCGACTTCCCTCCGTGCGCCCGCAG  
CACGCCACCTGGCCGCCATCGGCCGTGCCGAGTACCCCTCGGTGACCGACAAGGAGGCGCTGGACGCCCT  
TCCAGGAGCTGGCAAAATCCGAAGGCATCATCCCGCGCTGGAGTCTCCACGCCCTGGCCCATGCCCT  
CAAGATGGCCCGCAGCGAACCCGAGAAAGAGCAGGTGCTCATCGTCAACCTCTCCGGCCGTGGCGACAAA  
GACATCTTACCCTTGGCGACATCTTTGAAAAAGAAGGAACCTTGTATGAATCGTACGCACAACCTCTT  
CTCCCGTCTGGACAAGGCCAATCAGGGCGCCTTCGTGCCGTTTCGTGATGCTGGGTGACCCACCCCGAA  
TTGTGCTGGCCATCGTGCATGCGCTGGTTCGAGGGGGCGCCGATGCCCTCGAACTCGGCATTCCTTCT  
CCGATCCGGTTCGCGGACGGCCCCACCATTACAGGGCGCAGCCCTGCGCGCTTCGAGAGCCACACCACCC  
GGACGACTGCTTCGAGCTGCTCGGCCGCATCCCGCCAAAGTACCCGCGAGCTGCCCATTTGGCCTGCTGGTT  
TACGCCAACCTGGTCTATGTGCGCCAGATCGACGGCTTCTATGAGAAAGTGCCAGCAGGCGGGCGTGGATT  
CGGTGCTGGTGGCCGACGTGCCGGTGCAGATGTGCACCCCTACAAGGCGGCCGCGCCGACAAGTTCGGTAT  
CGACAGCATCTTTATCGCCCCGCCAATGGCGACGCCGAGACTCTCAAGGCAGTTGCCGAGCTTGGCTCT  
GGTTACACCTATCTGGTGAGCCGCGCCGGCGTCAACGGCGCCGAGACCAAGGCTGGCATGCCGGTGGATG  
GCCTGATCAATACCTCGCGGAGTTCAACGCCCCCCCCCCCGCTGCTCGGCTTTGGTATCAGCGAACCGGC  
TCAGGTGCGTGAAGCCATCGCCGCGGGCGCCGCTGGTGCATCTCCGGCTCCGCGAGTGAAGATCATC  
GAGACCCACCACCAGAATCCGGAGCATATGCTCACTCGTCTGAAAGAGTTTGTGGAAGGGATGAAGGCCG  
CGACCAATCGATAAAGTTCGGTTATGGGGTACGCTGGTTGTGACCCTGATCTGCCAGTTTCGCATAACCACG  
CCATAACCATGAGAAAGGGAGCCTGACCGGCTCCCTTTCTATTTCTGCTTGTGCGGCTCCAGCGTCT  
TTTTCCCTCTCCCTTGGGAGAGGGTTGGGGTGGAGGGAAAGCTACAGCAACCGAATTTGCTCAAATGA  
ATACTATTGATGACTAATTTATTGATCCAACACAGATTTCCCGCCAAAACACGCTTCTCAACGCGCCACCA  
GCCCCCTTAAGATAACCGAATGACAATCAACCTCTCGGAAGAACGCCATGAAAGCGATTGTTGCTAGCTC  
ACGGATGAAAGCAGCGAACTGGGGGCTGAAACTCAGGAGCGGTAGCGTAGCCGAAAAATAACACCGGCA  
GGCATTCTGATGAAGATCAATTCATGGTTGTTATTTTCATAGTGACATTAGTTGATTAATAAATAGCAA  
GTTTAAAAAGTATATACTGACGACTGGTCATACAGAAATTAATAAAAAAACCGTGGTTGTTATGAAAATGG  
GTGGAGTTATACAGAAGGCCCCACTATCAGATTTGTGACGCTTCAATCTAATCACTACTATGTAACAGG  
AGTAAATTTTGCATTTTTAGAAATCATCGGCGGAATAAGTAGTGTGCATCTATATCAGGCTTTTCACT  
AAAAGATTTAATTAATTCGTAAATGACCCCTGATAAAAAATGAGCTTGAACGGTATTTTTCTTCTTAGAG  
TCACGCCAGGTTTTAGTTGCTCCCTTTGATCAAGAAGTTACTCAGGCCGTGATCAATAGTCTCGAATCAA  
TAAAAACGAGACCGAACAATGTAGACTAAATCTGAAATCCGAAATGGCCAGTCATTTCTACTTGAAC  
TATCACCTACTCAGTAGAGAACTACGGGTCTTTATAATTTGAAAAGTTCTAGTAATGATTTTCTTTTT  
TATAAACACTTCAAATCATCAGAGTAAATTTGCAAGAGTTTATGTTTTTTGTGTGCCCTGCATAAAA  
TAGATCTATCAGCAAAAACAACTGCACTTGTAGAAATGGTGTGGAACATGCGTATCGTCCAAGATAAAT  
CTACATAACAGAGTATTTGAGAGTGACTATCAATGTTTATACCCCTCCATTCATCGTTGAGTTTCATGTT  
TACGCTGCTATTGCTGAGACTAGGTGTTAGCATTGCTCACACCTTAACTCTGCATTAGGTTTTCTTTTTA  
GGTTTATAACATGGACTTAGAGTTTATTTATAAATTAATTTCTGATTTTCGTGCGGCTCTTTATCAGTAGGT  
AATAAATTTCAACTTATAGAAAGTCTTATTAACACTCCAGCAAAAAAGTCCATGACTATGAAAAGTGGT  
TACAGATTGAATTTGCAATGTTTTTATACCAACGTCAAAAACAGCGACATTTCTGACTGGGGAAAGAGAAAA  
AACTTATTTACTTGATCGACGACTAAAGTCTCGCATAAAAACATAGAAAAACAACAACCTGTTGATTTCTGG  
TTAAAACGAAAATATCAAAAACGTCTCGGCAAAATTAATTTGAGTTTAAAAGAGCAAAAAGTATCAATG  
AGTGTGTAACGAATGATCGATGATGGATCGTTGTTGAGAAAAATAAACAGATCAGACAACATTATTAG  
AAGTTTTTGGATGGTTGGCTTTACCCCTCCGAAACTGAAAGTCATACAGTATTTGACAAAAGCTTTTTAAA  
CAAGAGGCCAGGCTAAACGAGTGGGTTAATGATAGAAAACATAAAAACAGAGAGAAATGAGGGGACAAATC  
TAAGCTTCTCTATATTTACGTTATACGAAATTTAACGATATTTTGAAGTTAACGGTACTTTCATGGGAGA  
CTACATGGGATCGGAGTATATAGCAGGAATTATCGGTGGGCTTCTTGGTGGGATTATAGGTATCGCCGGT  
GCTTGGCTCTCCGATACTGGGGACCACGCAAACTCGAAATGGAGAGGGCAGCCCGAGAAGAAGAAAGAA  
TCTGGGGTCTTAGAAAAATTTATATCAAAGAAATGCTTGACAATGCCATCAGAGAAAAAGGTCCAAGCTT  
TAATACTCTTAAGCGTGAACAGGTACACCCGATGATGATCTCCGACGACTGCTTGTAGAACCTGGCGCT

CGTGGCTTTACCCGAGAAAATGGGGACGAAGCTTGGATATATAAAGAAAATACGTCCTTTTGAACGTCAAT  
TATGAGCCCAACATAGCGTTCGACACAGCTAGCTTAGCTTACAAGGGCGGGTTAAATCCTGCCCTTAAAC  
CAGACGCTATGCATAAAAATAGGGATGTACCATGTTTTGAAAACCTTGATAAAAAGAAAATGGAACGTATGAATG  
GCCAGTCAGTTTTAGTAAAGATTGATTCTGACTAAAAAAAATTTTTTTTTGGACACCCATCTTTCTGAGCA  
ATACGTTACATAGCCAGAACAAGAGATGGGGTCCAAGTCTTTACTTAGCAACGATATATCCAACAACC  
CTTCCCAATCCCGCCACTACCGCTCCCTTCTCCACACCCGCCACCCACCAAGATAAGCATCAGTACAAC  
CCCCGGCAGCCAGACCCAGTAGAGCTCGGAGAGGATCACCGCTTCCCTCGGGCAGTGAGGTAAGCCTCC  
AGCTTGAAGGGGGCAACCCGGATCACCTGCCAGGGGGCGAAGAAGCGCTCGTCACGCCACGGCCAGAGCC  
AGCCTACCCCTTGGCCCGGTGGTGAGGGAATCGAGCAGGCTGTGGGAGAGCAGCGAAACCAGCAGAAA  
CGAACAGACGGTGGTGGCGCTGGCCTTCAACTGGCGGTGAAACAGCATGGCCAGTGTGGGCAAGGCAAAG  
GCAAAACAGCAGTGAAGTGGGTAAAGCCGCGGTGGCCAAAGACATGGCCGTAGGCGACCCCGAATTTGAAGG  
CGAGCACATCGGCATCGGGCAGCATAGCGATAGCAACCCAGCCAGCAGCAGGCGCGCGGAATAATCCG  
GCTGCCAAGCCCAGTCCAAGACAGAGGGGTACGGCGCGGTGGGTGACTATGGTGGGCATAGAATAAAGC  
TCCAAATGAAAACGTGGGCCTACCTTATCCCCGCTCGGTGAAAGTGAAGGTGAAGTGCACCTTTCTTTTGT  
GTTGGATATCCCCCTCGAATCCTTCTCCATCAGCCATAAGAGGCGTCACTCAGAAAAGTGAATAAAGC  
TGTTACACGGGCCCCCTAAGCCGGGGCCGAGCTTCTGTGCTTTGTCCCTCTGTATTGGCTCGTTCGTTGT  
GTGTGCAACGCAGGCCAATCAGCGTTGGCGCTTAACTTGAAGTGTTCATTTAACAGCGGCTGACATGC  
AGAACGGGATCGTGATAAGTAGTCTCTTCGATTACATCACAGGGATAGTGGCAGCGATGAATGTATCAA  
AAAGCATCAGGCTGATTGCGAGCGTTATCAGCCTTTGGTTAATGACAGGGTGCATGGCAGAGGCCGCTC  
TGCGCAGCCGAGCAAGAGCAATACGCGCTGATCTATAACGGGCTGTTTCTGATGGGGATAGCACGAAG  
GCGATTGCGGATGTGGTCAGGCAGGTGGGATTGCCGGTCAGGTATCTCTCCAATATCAGGGAACGTCTG  
CAGAGCTTGATAATGCCAGGGTATTGATCGTAGGCGGCACAGAGGACGATGTTGAGCCGCTCCTCAAGGC  
GTTACCCCGCAAGCGCTTCGGCGTTAAAAACCTATCTGCAAAAACGGTGGCCGCTACCTCGGGATCTGT  
GGGGGTGCCTTTGTGGCATCCACCGGCTGGTCTGAGGATGAAGGCTTTGTGCCGGCGCTGGGCCCTGTTC  
CTGCCACATCCGATGATTATGACGGCGACTTTAGCGCCAGGATCTTCCCGATCAGCTGGCTTGGTGAAGA  
GCGCCAGATGTATTACCAGGCCGGCCCGCAATTTACGCCGGTCCAAGCCCCGAGCAGGTCAAGGTCATC  
GCCCATTTTCAAAACCATCAGATTGCCCGCTGATCAGCTCATAACGGGAAAGGCAAGGTGGCCGTTTCCG  
GGCCACACCCCGAAGACCCCGAATCGTGGAAAGAGAATGCGGTGGATGGCGACAAGATGGAGTCAAGTAT  
TCATCTGGCTGCAGGACTCGTTAACGAGTTGCTCTCCGAAGAGCCCGTCACTTATTCGAAGTAGTCGCGC  
CCCTACGCCCTGGATGCGACCCCATTTGCTCGGCCCGGAAGTGAGGGCAGCCAAATCGGCCGAATCCATA  
AAAAACCACCGACCTTTGAAGGTGGTGGTTTTTTTTATCGGTGGTAGATAACGGGTAGCCGATACAAAGG  
GTTGCTACCTCAACTTTTCGCCCGGAGCGAGCACTACTCTTCTGCTCCTCCGGTTGTCTCTCCTCACC  
CCGTATCTGTAGCAGCTCTTCGACCCCTGGCTTGGCACTTGTCTGTTGGCCTGTTTGGCGTCTGTGCATA  
AATGCTTCTCGCATGGTGTGATTTTTCTGGTCAAGTGTTCATCAGAGTGTCTCCTTGTGTGACCGCGT  
AAAGACTGGCTGACGGCGCTTGGCCAACCTGCTCCCTAATCTGACACCGCTAATGCCGTTACTGCCCA  
ATCAAATAATCGATTGGAAATACCAAAACCAATCTAAAAATCTTTTTCTGTTTATTCACCACGCCAG  
TGCAAGGGAAACAGGCCGCTCAGAGCGGGATAATCCGGCAGCGGCCAACACGTCGTTGAGTGTGGTCTG  
CCCCCTTTTTCAGGGGAATGGGGCACCGTCACTAATCCATCCGTTGAGGAGTACCGGCAGATTTGCGGGG  
TGTTGCTGTGCCATGATCACACAGTAACAACCTCTCGCCCTCCTCTCACCGCGCCCCCGTTTTTATCAT  
CTAGAGTTACCGGGCAGTGCAAAGCTGCTGATTTATATACATTCGCCGCCAAGAGGGATCTTTATTCATG  
ACCGAGCATATCGATCTGCTACCTATCAGCACGGATGATGAGCAGGACGCAGGCAACCGTTACCTCTACT  
ACACCGAAGGGGATCTGGCCCGCATCTTGGCAATCTGGAACAGCTGCGCCACGCGGTGTTTCCGGCCGC  
CATCGGAGAGAGTGAACGGGCGCCCGCTGCCCAACTTTCCGTCCGTCTGTCTGGTGGGGCTGGGA  
CGCTGCGGCTCCAACATCGCGCAGGATGTGGCCTCGCTGGTCTACAACGCCCGCAGTTTTATCTCAATG  
AGTTCAACAGTGAAGAGCAACGCAAGCGGGAGAAGGAGTTTGGCCCTGTGAGCTGGATCCGGCGCAACCT  
GCGACTGCCAAACAACGGGGCCCGGCTTTCTGATCGAACCATGGTGTGATGCTGGGGGATCTGGAC  
AAGGACATCGATGGCCGCATCCGCCACTCCAATCGCAGCGGCGAAGGTGGCTCCTTGCCTGATTACGCCA  
AGATGCGGGTGTGACTTGTGCGGAGATCCACGCGGGTGGCGCGGGTAACGCCCCCATCCTTGGCCAGTA  
TCTGGCCAAGATCATCCTCAACAAGAGCCCCACTACTTCGCCAACTCGGAGTGGCAGGCCATTCATAACC  
TATCTGGTGGACTCCTGCGGCATCAAGGCCAACAGTCCCGCTCTATTTCTACATCTTCAGTGCCGGGG  
GCGGCACCGGCTCCGGCATGGCCTCCGAGTTCCGGCTGGCCAGCAGTACTCCTACATGAGCAAGACCTT  
TTCACCCCGTCAAGAGAGGAGGAGCACCTCTCCCTCGGGGAGCACTTCATGTTTCGACCTATCTTACC  
AGCGGCATCTGCATCCTGCCAATATCTGTGATCGGGGTATCGAGATCTCGGAAGCGCTGCACATCAATG  
CGGGGCGCCTGCTGTGCAAGTACCTGGCCGAGGAGTGAAGTCTCTCTATCACTTCGACAACGAGCAGGC  
GTGCGATGCCAGCATGCTCAAGCGGATCAGGCCCTGGAATGCCATGATGTGATCTCCAACGACATCATG  
CGCTACGCCGAAGAGAGCGACGATGGCGAGATCCAGCATGTTGATGTCAACACCATGGAGAAGTACGCCA  
ACCAGTACATCTCCAGCAGATCTTCAACATCTTACCGCCAGGCCGTCACCACCGACTACGACGAGAA  
CTACTTTTCGCCGGGCGGGCATCGACATCAGCGAGACCATTCGGCTCGATGCCAACGACCTCTTTATGAGT  
CTGGCGGGGCGGGTGGCGGTGGCGTATGCCGAGTCCATCTCGCCCCCGGCGGCTGTTTGACAAGGAGG  
ACGGGCTCAATGTGGACGATCTCTTACCCGTTCCATCGAGCTGCCCACTTCAACAAGATGACCCAGGC  
CATCGAGGGGATCAGTTTTGCTACCCATCGAGGCGGGCAACTATCGGGAGTATCTGGACGACTATGTGAAA

AGCGGCCATGACCCGGCCACCTCAACGAGCTGCACTTCTTCAAGAACTGCTCCTCCGTGGTGTGATCA  
TCTCCCTGCCAAGGAGTACAAGCTCTCCTATATGGATCTCAACCGGCTCAAGTCTCACCTCAACGGGCT  
CTTCCCAATACCACCCTCAAGCGCTATGCGCTGGTCAATCGGGGCGTCGGCGAACATCTCCCTACCACC  
CTGATCGTCAAGAGCCCCTGCCTGAGCGATGACTTCCTGACCCTGATCGTGGCCTTTATCAAGCGCTGCT  
TTGCCAAGGATCACTATCGCTTCGATGAGCATCTGGACAAGGCGGTGATCGAGATGATCTGCAATGAGGA  
GTGGAACGATGCGCTGCTCGACAGCATGCTCAACGAGTTCGAGAACCCGGCCAAGATCCTCGATACCAAC  
TGGTACGCCATCAAGCCCATGTATGAGAAGAAATATCGGGAGCTTATCCGCGAGAAAGAGAAGTTCGTCT  
CCATCAACGATATTCGCTCAGCCGTGAATCGGTGAAAAAGGCGCTGCTCTATCTGCGGGAGATCTATCG  
CCACCGGGTCAGCAAGACCCGATTCTCTCCCTCAACCCAAGGCTGGGGGAAACAAACGCTCGCTAGCAT  
CCTGCCCAATAAAGCAAAGCGCCCGCCAGATGGGGCGGGCGCTTTTTTACTGGCGCAGCTGGCTTTTAT  
CTCATCAGAGGGAGACAAAGATCCCGGCCAGGTGGCGCTCATCAGTTGGCGAGGGTTGCCGCCAGCAC  
CGCCTTGAAGCCCATATTTGGCCACATCGTGACGGCGCTCCGGCGCCATGGTGCCGATGGAGCCAAGCTGC  
ACCGCAATGGAGCCAGATTGGCGAAACCGCAGAGGGCGAAGGTGATGATGATCTGGGTGTGGGCGCTCA  
GATCTGCCTTGATATTGGCAAAGTCCAGATAGGCGACGAACTCGTTCATGATCACCTTCTGACCAATCAG  
GGACCCTGCCGCCATCATCTCGCTGGCCGGCACGCCAATCAGCCAGGCCACCGGGGCAAACAGATAACCC  
AGCAGCTGCTGCAGGGAGAGATCGGCCAACCGAACCCTCACCAGCGGTGGTGAGACCGGGCGTTGATCA  
TGGTGTGACGCTGACAAAGGCGAGCAGGATGGTGCCGATGGCTACGGCGATCTTCATGCCGCCATGGC  
GCCGCCCGCCAGCGCTCGATGGCGTTGCTGTAGTCGCTCTTGTGAGGGTGATCTCGGTCTGATCGCTC  
ACCTGCTGCTGTTCCGGCACCAGCAGTTTGGCCATCAGCAGGCCACCGGGCGCCGCATAAAGGAGGCGG  
CGATCAGGTATTTAGATCCACACCCAGACCGGCGTAACCGCCAGCACCGAGCCCGCCACCAGGCCAT  
GCCACAGGTATCACCCAAAGAGTTCGGAGCGGGTCATACCGCGAGGAAGGGACGAATAAGCAGCGGC  
GACTCCCTTTCGACAGGAAGATATTGCCGGTGGCCACCAGCGACTCGGGCGGGCTGGTGCCGAGCAGGC  
GATGAATAGCGCCGCCAGTACCCGGATCACCCACTGCATGATGCCGAAGTGGTAGAGCACGGCGATCAG  
CGCGCTGATAAAGATCACCAGCGGCAGCACCCGCACGGCGAAGATAAAGCCGTTGCTGGCCAGATCGCCA  
AACACGAAACGGATGCCGCTGTGCGCAAAGCCGAGCAGGGCGGAGACGCCATGCTCATGGCACCCAGCA  
TGATTTGTCCGGGGGGAAATAGAGCACCAGGGCAGCAAACCGGTTTGCAGGGCGAGTGCACCAGCAC  
GGTTCGCCAGCGGATGGCTCGGCGGTTTTACTGGCCAGCCAGGCGATAAACATCAGGGCCAGCATACCC  
ACCAGATCAATAACAGTGTCTACTTGCACCTTGAAGAGAGGAGTTTCATATGGCAAAGTTCAGCAG  
GCGCTCGCGGGCAGTCCGGCGAGAGAAATGCCGACTCAGCGACACGCAGACCACAAACTACAGGTTAGT  
GGCGGGTCCCATCTGGGGTCAATTCAGTTCGGGGTGCAGCATGTATCGGGTGCAGCCAGCGCCGTCGC  
AGGGGGAGATGCGGCCGGGTGGCAGGTGGGGCGGCGATGGTACAGTGATCATCGTCACAGAAAAAGCGGT  
AAAACGATTGGCCGGAATAACTTTTTCAACTTGTTCACACAACGAAACAGGGCCAGCGTGACGCTGGCCC  
TGTTTTCAATCCGTACTTGAGCGTTCAGATGATTACTTGAGGCGCTTGCCGCTCGCATCCACCACCTGCTC  
GCCATCTTCTTGGCGAAGGCCCTTTTTGCTGATCGGGCAGTATATCGAGCACCCTCCGACGGACGG  
CACAGCTTGGTGCCAAAGCGGCGTGACCACGATAGGACGGTTGATGAGGATGGGGTGGGCCAGCATGGCAT  
CGATCAGCTCATCATCGCTGAAACGATCTTCCGCCAGCCGAGCGCTCGTAGGGGGGCAGTTCTTGGC  
CAGCAGATCGAGCACCAGCATGCCATGGCGGCGATCAGCGCCACCAGCTGGTACGGGAGGGGGGCGTC  
TCCAGATAGTGGATGACTGTGGGTTCCACGCCGCTGTTGCGGATCAGCTCCAGGGTGTGCGGGAGGTAC  
CACATTCGGGTTGTGATAGATGGTGATTGCACTCATTTGCGTGCTCTCATTAATCAAGTGAATAGAAA  
ATCGATAGCATCAGTTCGCGGCCAGCTGTTAGCGGCCATCAGTTAACGGTTTTAGCCCCGTTTCGTACCAA  
GGTTTTGCTGGCATTGACGATGCGCACCACCAGCAGCATGACCGGCACCTCGATCAGCACCCCGACCAGG  
TGGCGAGCGCCGCGCCGAGTGAAAGCCGAACAGGCTGATGGCGGCAGCTACCGCCAGTTCAAAGAAGTT  
GGAGGCACCGATCAGGGCGGAAGGACAGGCGACCGAGTGTCTCTCCCCACCTTGCGGTTGAGCCAGTAA  
GCCAATCCCGAGTTGAACAGCACCTGGATCAGGATGGGCACCGCCAACAGGGCGATAACCAGCGGCTGCT  
CGATGATGGCGTTGCCCTGAAAGGCAAACAGCAGCACCAGAGTGAGCAGCAGGGCCGCCACCAGCAGGG  
CTGGATGCGGGTCATAACCGCGTCAAATGGGCTCTCCCTTTTTTCAGCAAAGCCTTGCGCAGCAACTGG  
GCGATGATGACCGGAATGACGATATAGAGCACCACAGAGGTGAGCAGGGTATCCACGGCACTATGATGC  
TGGAGACCCCCGAGCAGCAGCGCCACCAGCGGGGCGAAGGCAAACACCATGATGAGGTCAATCACCGCCAC  
CTGCGACAGGGTAAAGTAGGGATCGCCGTTGGTCAAGGCGACTCCAGACAAACACCATGGCGGTGCAGGGG  
GCCGCCGCCAGCAGGATCAGGCCCGCTACGTAACGTGTCGAGCTGATCAGCCGGCAGCCAGTCGGCAAACA  
GCACGCGGATAAAGAGCCAGCCGAGGAAGGCCATGGAGAAGGGCTTGACCAGCCAGTTGATAAAGAGGGT  
GACCCCAATGCCCTTCATATGGCCCTTACCTGATGCAGGGCGCAAAGTCGATCTTGAGCAGCATGGGG  
ATGATCATCACCCAGATCAGCAGCCCCACCGGCAGGTTGACCTTGGCCACCTCCATGGCACCAGTCCGCT  
TGAAGAGATCCGGCAAACCCCTGCCAAGCCGATCCCCACCAGAATGCAGAGGGCGACCCAGGCGGTGAG  
ATAACGTTCAAAAAAGCCGATGGCAGGCACGGCTTGGCATCACATGTTGCAGACATCACAGCTCCCGAT  
GCGGCGCAATTTTCGATCTTCTATTGGTTCAAACACGGGTTTATAACAAGTAACGGCATATTCAGCCG  
CCCCGGCTGCTGGCCGGGGCGGGCGACTCAATGGTGTGGCAGAGGGCGCGCAGGGCATCGGGCCCCACCG  
GCTCCTCGGGCAGCAGCGGCACCACGGCGTAGCGGCTGGCATGTTGCTGCTCGACCGCCTCGATATGGGG  
CAACTGGCACTCGGCCCGCAGTTGCAGCAGCGGGCAGCTGACCGCGGCTTGTGCAAGCTGTGGTTGATG  
AGCCAGCCCCAGGGCTCGATGCCGGCCCGGCGCAGATCGGATTCGAGATTGGCCGCTCCTGCACTGGCG  
TCGGCTCGGGCAGCGTCACAATCAACACCTGGTCTGCTTGGGATCCTGCAACTGCATCATGGGGTGGT

GAAGTGCAGCCCCCTTGCTTCCCATCTGGCGAGCGATCTCCCTGTGGTAGGCGCCGGTGGCGTCGAGCAGC  
AGCAGGGGTGTGGCCGGTGGGGGCGGTATCCATCACTACGAAGCGCTTGCCCGCCTCGCAATGATGCGCG  
AGAAGGCCTGAAACACAGCGATCTCCTCGGTACAGGGGGAGCGCAAGTCTCCTCCAGCAGTGCCTCC  
CTGCTCGTCCAGGGCCGCCCTTGGTGGCCAGCACCTGGGCGCGGTAACGCTCGGTCTCGGCGTGGGG  
TCGATGCGGCTCACCTCCAGATGGGGCAAAGTACTGCTCCAGCGTCTCGCTCAGATGCGCGGGCGGGATCCG  
AGGTGGTGAGGTGCACCGGCAAACCGCGGCTCGCCAGCTCCACCGCCACGGCGGGCCAGGGTGGTTTT  
GCCCACCCCGCCCTTGCCCATCAGCATGATAAGGCCGTGACCATCGGCGGCCAGCTCGTCCACCAGCGAA  
CTCAACTCGGGCTGGGCTTGTGTTGACAGTGGACGGTACTGTGCGGGATTGAGCGGCTGCTCCCTCTGATT  
GCAGCAACAGCCGAAACTGTGAGCCCCACCAGATTGGTGGCCAGCAGCGGGATATGATCCTGTGCCAG  
CCCCTTTATCCCTTGCGGCATCTGAGCGAGACCTGTTGCTCGCGCTGCCAGAGCGCCATTGCCAGCGGA  
TCTGCGGCAATGGCGCTTCGGGGAAGAGGCCATTGATCACCAGTTGCTGGTTCAACAAGCCGATGGCGG  
CCAGTCTCCTCGTGGGTGCGGGCCACTTCCCGCAGAGTGGATTGCTGGGCCCGCGCCACCAGCAACCG  
GGTGCAGTGGCATCAGCCAGTGCGGCGACCCTCGGCATACTGGCTGCGCTGTTTTCTCCAACCCCGCC  
AGCGGGCCGAGGCAGGAGGCATCCCCCTTGCCCTGCTCCAGAAAATTCGCTCCAGGCGCCCGGCAGTTGCA  
GCAGCCGGATGGTGTGGCCGGTGGCGCCGTATCAAAAAACGATATGGTCATACTCGGCCAGCAGCGTTTG  
GTCAGTCAAGCGGGCGGTGAATTCGTCAAAGCGGGCATCTCGGTGGTGCAGGCGCCGGAGAGCTGCTCC  
TCGATGCTGCGCACACGCTCTCGGGCAACTTGC CGCGCACCCGGCCGACAATCCGCTCCCGATAGGCTT  
TGGCCGCCCGGGGGGATCTATCTCCAGCGCCGACAAAACCGGGCACAGCGGCGATGGCGGTGACGCGATT  
GCCGATCTCGGTGGCAAACACCTGCCCCACGTTGGAGGCAGGATCTGTGCTCACCAGCAGCACCCCGCTTG  
CCAATATCACACAGCGCCACCGCACTGGCGCAGGCCAGCGAAGTCTTGCCACCCCGCCCTTGCCGGTGA  
AAAAGAGAAAACGGCGGTGGATTGGTCAAGAAAATGATACATAGCCTCTCCCGAATGGTGCCTCACACTCA  
GCAGCAACCGCTGCCAGAGCAGCAGCCGCCCTTGACGATCCCCCTTGATGGCCGCTTGTGGCGCAGGCAAC  
CCGGCATAACGGGCCAGCTCGTTGCGGTTCGGGTAACGGCCGGTCAACACCACCTGCCCCCTTACCAGCA  
CCAGTGGCAACCCCTCCTCCCCGGCGTGGGTGAGAAAAGCGCTGACGGCAGGTGCTCGGCAAACCTGCAT  
CGGCTGCTGGGCCAGATTGAAACGCTCGATTGCAACTCCCTGCTCCTTGGCCAGGCAAGGTGGCTGCG  
AAGGTGACCAGTGCCTGATCAACCTCGGTACCGCAGACACCGCTGGAGCAGCAGAGGGCGGGATCAAAAA  
TCTGAATGGAGGACATGGGATTACTCCTTGTGTCAGCAGGGCTGCGCAGGCAGAACATGGGGGGAGCAGG  
CTGACTCGGCACGCATACGCGCCACCGCTCGGGATGACCGCGCAGCACTCCTCGGTGAGGTAGGCGAT  
CACATCCAGCATCAGGGGAATATTGGCGCGGTAGCGCAGAAAAGCGCCCTCCTGCTCCACCAGCAGAGA  
CCGGTGTGAGCATCGCCTTGAGGTGAAACGAGAGGGTATTGGGGGCAATATCGAGCTCGCTGGCCAGTT  
CACCGGCGACCCGCCCTCCAGCCAGCCTTACCAGCAGCCGCCATACATCGAGCCGGATGCCGGATGC  
CAGCGATTCAAAGACCTTGGTGGCCATCTCTTTGTTTCATCTTCACTCCCCCTTGGTGCGACCTTTTTCATTT  
CAACTATAACAAGATTATTGAAATGATCAAGATACGTACCGAAGCGAAGATTGAGGTGCAGGCATCAAA  
CCGGGCAGACTGGAGAATCGACGAGTGAACAACCGTTGCGGACGAGCACACAGGGCTCATCGCAGATAAA  
CAGACGCCCTCCAGAGGGAGGGCGTATCAGAGCGTTTGACCGGCAGCACAGTCAGCACTGTCCGGGCAAT  
CAGACAAACCGGTGCCTTATTTGGCAGCAGGCACAGCGTTAAAGGTGAGCAGGGCCGCCCTTGTGGCAGC  
GCTCAGAGTCACTGTTGCGGTTGATGGAGTAGGTTGCCACCTTCTCCAGCTTTTGCAGGAACTCGGTC  
TCTTTGTTTCATGGCGTCGCCGATGCACATCATGCGAGTGGAGCCATGGCACCCAGCGTCAAGACACCGT  
CACCTGCTTGGTGATAACCGCAAAAATAGCGGTTGCAGCCGCCCTTGCCCGCCACCTTGCCGTCACCCAC  
TTGCAGGGTGAAGGTATCGCCGGTGGCGCCTTGCAGTTGCCAGCTGGATGCTTGCAAGTTGAGCCATGCTG  
GAACCTGTTGCCATTGCGCAGCCTCCAGTGCAGCGCGGCCAGCAGAGTCAGTTTCTTGTTCATGGATT  
CACCTCTTAATGATTAGAGCCATCAATACGGCAGCCTGTTAACATGGCTGGCGCCATGCCAAAGGATT  
TTATTGTGATCTCTCTTCACTTTACTACCAGCTGGCATGTGCCATGCTTAGGCTCAGTTTCAAGACCAGG  
GAGGGGAAACGAATGGTCAAATCGCTCATCATCACTGCTTGAACCTGCGCCAGCATGGCCGTACAGG  
CCGCCGACTGGGCAGTGGTTGAGCCGCAATCAACCCGCTCTCTATGTCAAAAAGTTACTCGGGTGTGCT  
GCTCAATGGCCATAGCCATCACAGCGACAGTTTTGATCTCTGGCTGGTCAATAGCGGCTATCAATATCCG  
GTGGTGGATGATGTGACCCTCTTTCATGGAAGCGGGCCCGCGGTTGGCGGATCAGAATCGCACATCCGGTT  
TCAATATGAGTTGCGGGGTACGCTACCAGCTCTCTCCGGCATTCAATATCGGCAGCCAGATCAAGCATCT  
CGATCTCAACAAGGCCAGCACCTGCTGGAGCTCAACTCCAGCCTGCTGCTGACCCCCAGACTCTCCCTC  
ACCGCAACTACGGCGTCAGCGCCATCACTGCCGATCAGGCACTGAGTCTGGGGGTTGGCTTCAACTTCT  
GATAATCACAACAGCAGCGTGGCGCTCACCACCAGCCGTTGCGATCCGCATAGACGTAATCCCTTCCGT  
GGATGGTCAACCCGCAAAGCTGACCACGGCCCCAACTCTCCCAATCCCCGCTTCTCGGTCTTGACCGG  
ACAGGCCGCCAGCGCCTTGACCCCGAGCGCCAATGTGCGCAGGGTGCCACATCCCGCGCCGCGCCGTGG  
ATCAGGATCCCTCCCACCCCTGCTCCACCGCCTTGACCGCCAGTTGATCGCCAAGCAGCGCACGGCGCA  
GCGAGCCGCCGCGTGCATCACCATCACCTTGCCGTGACCGGGCGGGTACCAGATCCCGCACCCAGACT  
GTTGTCTTATAACAGGAGAGCGTTACGGCGCGACCATAGAAGATGGTCTTGCCCGCAAAAATCCTGAAAC  
ACCGGGTGGCCACTTGCAGCAAGTGCCTATGTTGATCGCAGAGGTGGGGCAGGAGATCCAGCATGATTT  
GATTCCTTTTCAAGATGCATGAAGGTGTTTCACTTTTTCATCAGGCAAGGTTTCTGGCAATCCAGAAGGATTC  
AATATTGCCAGACAAACTGCTGATTTATCCATCAATACAGGTGTCAGCCAGAGCTGGCCATCCTCCACC  
CAGTAGATGGCGTTCTGGCAAAAACGCGCAGCCAGCTGACGGGCTTGTGGCAGGGATAGCGCCACCGCCA  
CGGATGACTCCTGCCAGCGTTGCTCCGGGTGAGATCCCCAAAACGGCCCCACCACAGGCACCTGCAATC

CACGGTCAGATGGCGCCACATCGCCCGTTCCCGCCGATATTGCGTCGTTCTGTGACCCACTGGCTGGCC  
GGATTCCAGGCTGTGACGATGGCAAAAGCAGACCACTCTGGTGGCTCAAATGGCGCGATAAAAGCAGATTT  
TCTTGTAGTTTTCCACAAATTCATGTCAATCACATGTTACATTCCATTACATTTTGTAGGGGCGAAAAC  
CCGGTTCCAGGCCAAGTATGATGCTGCTGTACCAGGGTTGACCTATATCAAATCAGAGTTAAAAAGTTGC  
TATCTGACGGCAAAGAGTGTGTTATGCTCCTGTTAACTGATAAAAAACGGCCACTTTCGTAATGGACGA  
CCTTTCCAGGCTCTGCTCGACCAGACTTGTCTGGGAACCTATAAGTGGCACAGGGATACTTGCCTGACTG  
ATGCCTAATTCGCGATATTCCGACCTGACTCTCATAACCAGGATGACGTAATAAAATTTTCAGGATCAGTC  
AGGAAATCGGTTTGAAACGCCAAAGAGTGTAAATTTAAGATAATTAAGTATAAGAAATCTGGGAATACT  
CATGCAAACACCACACATTCTGATCGTGAAGACGAGCTGGTCACACGCAATACCCTGAAAAGCATTTTT  
GAAGCCGAAGGTACATCGTTCTCGAAGCCAACAACGGCGCAGGATGCATCAGGCCCTCACTTCCACACA  
CCATCAATCTGGTATCATGGACATCAACCTGCCGGCAAGAATGGCTGCTGCTGGCCCGTGGAGCTGCG  
TGAGAACGACAACATCGCCCTGATGTTCTGACCGGTGCGGACAACGAAGTGGACAAGATCTGGGTCTG  
GAAATCGGCGCCGATGATTACATCACCAAGCCCTTCAACCCGCGGAGCTGACCATCCGTGCCCGCAACC  
TGCTGAGCCGCACCATGAACGTGGCAGCTGGTGGCGAAGAGAAGAGCTGGTTGAGCGCTACCTGTTCAA  
CGGCTGGGCGCTGGATATCAACAGCCGCGCACTGGTCAGCCCCACTGGCGATATGTTCAAGCTGCCGCGC  
TCCGAGTTCGCGCCATGCTGCACTTCTGCGAAAACCCGGGCCAGATCCAGACCCGTGCCGAGCTGCTGA  
AGAAGATGACCGCCGTGAGCTCAAGCCGCATGACCGTACCCTGATGTGACCATCCGTGCGATTCGCAA  
GCACTTCGAAAGCGTCAACGATACTCCGAAAATCATCGCCACCATCCACGGCGAAGGCTACCGTTTTCTGT  
GGTGAGCTGGAGCAGGAATAAGCTCCCGCTACGCTGTTGATCTGAAAAGGCGCTCGGGCGCTTTTTCTG  
TCTCTGCGGCTTGCCCTAAAAGCTGAGAAACCGTGAGCGTGACGTCGAACGGCGCACAAGACAGATGAAA  
AACAAAAAGCCCACTCGCAGGAGTGGGCTTTTTGTTTTGAAGCTGGAGCGGGCAGCGGGAATCGAACCCG  
CATCATCAGCTTGAAGGCTGAGGTAATAGCCATTATACGATGCCCGCCTGGCATCCGAAATTTGGAGCG  
GGTGATGGGAATCGAACCCACGTATGCAGCTTGGGAAGCTACCGTTCTACCATTGAACTACACCCGCGTC  
AGGGCTCCTACTATATGCATTTTGGCCCGGAGCGCAATGCCGCTTTGCCACTTTTTTCAATAAAATCAAT  
CTGTTCCGACAAGGATTGAACAGACGGTTGCTTTTTCAATCAAAATTTTCAACACAGATAAATTTACAAG  
GTTGCCAAGGCCAAACGGCAAGGATAGTCTTGCGCCACTCGACGCGAGGATGGTGGTAATGGATAAAAAA  
ACGCAAAAACGCTCTATGGCTGGTTGCGCAAGCAATCGAGTCACGGTCGCCGCTGGATCACGATATCCA  
TCGCTTTTTGGCCTTGGCCAGGCACTTCTGATGGTGGCGCAAGCCTGGCTGCTGGCGACCCTGTTGCACGG  
CTTTATCATCGAAGGCTCAACGCTGAGCAATCCATCAGCTCTTTATTTACCTGCTGGTGGTACGCTT  
GGCAAGGCCGCTCTGGCCTATGGCCGCGAAGTGGCCAGTTTTCAAGCGGGCAGTGCAGTACGCCAGACCA  
TCCGCCAGCTGGTGCTCACACGCTTGAGTCGTCTCGGCCCTGCCTATATCCAGCGCCGTCCGGCCGGTAG  
CTGGGCCAGCCTGCTGCTGGAACAAATGAAAACATGCAGGATTTCTTCTCCCGCTATCTGCCGCGATG  
GCCATCGCCGCTTTTATTCCGGTGGTCATTTCTGGTGGCCGTGTTCCCGGTCAACTGGGCGGCTGGTCTGA  
TCCTGCTGGGCACCGCCCCCTCATCCCATCTTTATGATCCTGGTAGGTGTGGGCGCCGCCGATGCCAA  
CCGCCGCAACTTTCAGGCGCTGGCTCGTCTCTCCGGCACTTCTCGATCGCCTGAAGGGGCTGCGTACC  
CTGCAACTCTTTATGCGTACCCAGGCAGAAGGTGACGCCATTCGCGACGCTCGGAAGATTTTCGCGAGC  
GCACCATGGAGGTGCTGCGCCTGGCATTTTTTGAGCACCGCCGTGCTGGAGTTCTTCGCCGCCATTTTCA  
CGCGCTGGTTCGCCGCTACTTTCGGCTTCTTTATATCGACCATCTGAACTTTGGTAGCTATGGGGTCAAG  
GTCACCCCTCTTTACCGGTCTGTTTCGTGCTGTTTCTCGCCCCGAGTTCTACGCCCCGCTGCGGAACTGG  
GTGCCCACTACCACGCCAAGGCGCAGGCTATCGGCGCTGCCGAGCAGCTGCTTGAATTCCTCGAAGCCGA  
GGTGAGCGAACCGGCCGAGGCACAGCGCCGTTCATGCAGACAACCCGGTCAAGGTAGAAGCAAAAGGC  
CTTGAAGTGCTGAGCGCCGAAGGCAAGGTGCTGGTAGGCCCATCGACTTCACTCTGGAAGCCGGTTTCGC  
GCACCGCCCTCATCGGCGTACGCGGTGCAGGCAAGAGCTCGCTGGTCAACGCCCTGCTCGGCTTTGCACC  
CTATCGCGGTGAGCTCAAGGTCAACGGGCAGGAGCTTGCCACCCTCGACATGAGCCAGTGGCGCCTGCAA  
CTGGGCTGGCTCTCGCAAAACCCGAGCTGTTCCACGCTCTTTCGCGACAACCTGCTGCTGGCCAAGC  
CAACGGCCAGCGATGCCGAGCTGGAAGATGCCCTCAAACGGGCGCAGGCGTGGGAATTTGCCATGGAGAA  
GGGGCTCAACTATCCGGTTCGGCGATCAGGCAGGCGGCCCTCTCGGTTGGTCAAGGCCAGCGCCTCGCACTG  
GCGCGAACCCTGCTCAAATCAACCCAGCTGATGGTGCTCGACGAACCGACCGCCAGTCTGGATCGCCACT  
CCGAACGCGCCATCATGACCACCCTTGAGCAGGTGATGGCTGGCCAGACCCTGCTGATGATCACCACCG  
CCTCGACCAGCTTACCAAGATGGACAAGATAATGGTGTGGCCCGCGGCCAGCTGGTGGAGCAAGGCAGC  
TTCCAGCAACTTAGTTCTGGCAGGGGCTTTTTGCCCGCTGCTCTCCAACGTTCCGGAGGTTCTCTCG  
ATGAGTGATCTGTTGCCGTTTCTGCGCCTCATCGCCAACACTGGCTCAGCCTCACCCTTGGTTTTGCTGC  
TGGCGCTGGTGACCCTGGCCCGGCATGGGGCTGCTCTCCCTCTCCGGCTGGTTCTCTCCGCCCGCCG  
CGTGGCGGGGATGACCGTTGCGACGACCCATGCCTTTAACTACATGACCCCTGCGGGCGGGGTGCGCTTC  
TTCTCCATCGTTTCGACCCGCCGGTTCGCTGGGGTGAGCGGTGGTGGAGCCACGACGCCACCTTCCGGGTAC  
TGACCCGACTGCGGGTCTGGTTCTGGCAGAACTCTCGCCGCTCTCCACCGGTACCCTGGCCGGTTTTCCG  
TCAGGCGGATCTGCTCAACCGACTGGTGGCAGACATCGATGCGATGGACCACGTCTATCTGCGGCTGATC  
ACCCCATAGGCGCGGCCCTGCTCAGCACCCCGGACTGGTCTTCTTCTGTCGTTTTTTCGACAGCCGTC  
TCGCCCTCACCCCTGGGTGCCATTTCTGCTATTTGGCATGATTGCCCTGCCGCTGGTGGTCTACTTCTCGG  
CCGTCGCCCCGGTCAAGGCGCTGATTGCCGAAAAATCAACCCCTGCGTACCCGGATGGTGGACTATCTGGAT  
GGTCAGGCCGAGCTGCAGATGTTTTGCCGCCGCCCAAGGCGCTGGTTGAGCTGCAACAAGCCGAACAGG

CGCTGCTCGTTCGCGCAGGCCCGGATGGCCAAGGTGAGCGGGCTGGCCAACCTTCTCGGTGCAACTGCTGAG  
CGGCTGGACCCTGACCCTGATGCTCTGGCTGGCCGGTCATGGGGTAGCGGGTGCGGCGCCCCGACCCCATC  
ACAGCACTGATGGTCTTTGCCACCCTGGCAAGCTTCGAGGCTCTGATGCCGCTGGCGGGGGCTTTCCAGC  
ACCTCTCCACCAGCCTCACCTCGGCACGCCGCTGAACGAGATCCTGCAAGAGGCAAAAAGCCCCCGTGTG  
GGGCGACGAACAGACCCACGCTACCGCTGGCGCGCTGCAGATCAATGACCTCTATTTTGGCTACCCCGGC  
AACCCCCAGCCGGTGTGCGTGGCTGCACCCTGCAACTGCACGCCGGTGAAGCTGGCGCTGCTGGGCC  
AGACCGGTGCGGCAAATCGACCCTGATGGGGCTGCTGACCCGGGAGTGGAGCCCGCAGGCTGGCAAGAT  
CCTTCTCGATGGCAAGCCGCTCACCGACTACAGCGAAGGGGCGCTGCGCGCTCCATCTCGGTGGTGAGC  
CAGCGGGTGCACCTGTTTTGCCGATAACCTGCGGGGCAACCTCAAGCTGGCCGCCCCGACCCGCACTGACG  
AGCAGCTGATTGCGGTACTGACCCAGGTCGGACTGGCCAATCTGCTGGAAGATGAGGCGGGCCCTCGACGC  
CTGGCTCGGTGACGGCGGCCCTCTCCGGTGGTGAGCGTGCCTGATCGCCGATCGCCGATCGCCCGCGCCCTG  
CTGCACAATGCGCCGCTCTGGCTGCTGGACGACGCCGAGCGAAGGGCTCGATAGCCAGACCGAACGGGAGA  
TCATGGATCTGCTGTTCCGGCTCGGGGACAGATCGCACCTTGTGCTCATCTCCACCCTGCTGCTGGGGAT  
GGAACAGATGGACCGGATTGCCCTGATGGAAGAGGGGACAGATCCGCTCTGCGCCCCCTCACACGAGCTG  
CTGGCGGATGATTACTACCGCAGCCTCTATCAGCGGCTGGCTCCTGTTGATATCAGGCTGATATCAGCC  
TGATGGGGGTACACCCTGACAAACGGGCGCAAAACGGGGCTGGTCGCCGACGGCGGCTGGCCCCATAAA  
TGTCCCCCCTCATTATTCAACAAGATGCCGACATGGAGCGCTGCGCATTTCTACTGTCTCATCACCGAC  
ACAAGATACGAGACGATGAAACGCCTGATCCTGATGATGCCCTGATTGCCTCCGGCTGTGCCAACTACG  
CCTTCAACAGCAATCTGGATAAAGAGAACTTCGACGAATACTTCAAACCCGGTAGCGTGCGCATCTATGA  
ACAAGATGAGCTGGCTGACCTCAACTACCTCTACCTCGGCACCATCGAGGTTGAATCCTGCCAGGCCGAT  
GCCAACCAGCCAGTGCCAACGCCGCTGAAGCGCGCACCCCTAGCCCCGCCGCGCCGCGCCGACATGGGCG  
GCAACGGCGTCAACATCGACAAGTGCGCCGAGTTACAGCGACACCCCGGGCTGCCGAAACAGGTGATCTG  
CTACGGGACAGGCGCTGAAAGTGGCCGAAGAGAAATAACTCGCTGTCATGGCCCTCGCTATCGTTGCGCTT  
GGCAGCCCACGCCTGCCCGATGAGGGGCTGCGGATCGGCACGGTGCGCCGCCCCGCCCGCGGCGTACCCA  
AGAGCGAATTTGCCAGCCAGCATTGGTACGATGTCTGGTTCCCAATCTGGCCCCCAGCAGCGAAACCAT  
GAAGCTGGGGCAGGCAGCCGAAACACCCGCCAGTGGGCAGCGTTTGGCAAACAATACAAGGCCGAGATG  
GCGCAACCTGCCGACAGGATGATCTGGCGCTGCTGGCCGCCCTCTCTCATACCACCAACCTCTCGGTGG  
GCTGTTACTGCGAGCAGGAGTCCCCTGCCATCTTGAGCCCATCTTGAAGAGCTGCTGGTAGCTGCAGGGG  
CGCCCTCCGTAACCTCGGTGAGCGACAGCGATGTGATGGGAATCGCGTACGCTGTATTTCGGCAACCAT  
CAGGCATGGATAGACAGAGAGGGCATCCCGCGGGATGCCCTCTCTCGTTGTATTACACCTGCCGCGCCA  
CGCTCGGTAGCAGCGGCTCGATGCACCTCTCCTATTGCAGACTGGGCTCCAGCAACTGCTGCCGACGCGA  
AGTCTCCTCGGCCTGAGTCATGGCATGTTCCGCCCCCCCGCGCGCAGGCTCGATGGCCAGCCAGTGGGCA  
AGGTGCGCGGGCGGTCTCCTCCAGCGGCCGAAAGTTCAATCCCTTACGATGGCCCCCTCGGCGCTTATAG  
AGCCGTAACCGGCAAACTCCGCTGCGCGCAGGGAAGAGGGTGGGATAGCTCTGCCAGGGCTCGATTCC  
GGCTGCCATCAGGGTCGACCAGGGCAACCATTCGGGCTGGATGGGGCGGGCGGGCTGCAACCGGGCGCTC  
AGCCGCTCCAGCCAGTCGAGAGGGTAATGCCGGTTTGGAGGTTGAAGATGCCGATAGCTGCTGCT  
CGGCCGACGCAACACAACTCGGCACAGTCGCGCACATCGAGATACTGCAAGCGATCCTCGCCACTGCC  
CGGCAGCAACCAGGGCCCCGCTGCTGCACCCGCTTAATCCACCAGGCCATGCGCCCGGTAGGATCATGG  
GGGCCGCAACACGCCCGGGCGCAGGATGCAAGCCGCTCACCCAGCGGGCGCGATACTCCTGCTCGC  
ACAACACCTTGAGCGGGCCATAGTCAGTGGGCATTTCCCTTCGGGGATAGCATGCAGCGGCTCCGACTC  
ATTTCATCCCGGCATTGAGAAATCGCGATAGACGCTGATGGTGGAGATAAAGATCAACCGCGCGCAGCGC  
CCGAGCAAAGCTGCCGAGAGGCTCGCCGCTGCTCGGGGCGATAGCAGCAGGTATCGATGACGAGATCCC  
ACTGCAACCCGGCCCCCTTGACAGGGCGCTCAGGCTCTTGTCCCTGTCGCCGGTGAAGTGCACCAGATCGCG  
CCAGTCCGGATGCTGGTGCAGGCCGCGATTGAACAGGGTCACTTCATGGCCCCAATCCAGCGGAGCGCG  
GTGAGGTGGCGCCCCAAAAGCCGGTGCACCCGATAATCAGCAGTTTCATCCCTCTCCCTCCCCCTTCGG  
CGCAGTACGCACATTTTCATCCTGACACGCCAATGCCTCCACCCCTACGCAACTTGGTGTGCGGGCACAGC  
CCCCGACTGGCCGGGATGGGACAGGGATCACGGCAGCGCCACAGAAAAGGGCGTAGTGAGGCCAAGCCTG  
CGTTTTGGGGCCGCTGTGCTAAATTGCCGAGGTTTTTCAGTCAGGATCCGCCATGAAGTTCGAAATCGAC  
ACCCTCGGGATCATCCGCTCTCCCTACAAGGAGAAGTTCGCCATCCCCCGCCAGCCCGGACTGGTCAAAT  
CGGCCGCGCCCGCCTCGAGCTGCTCCCCCTTACGATCAGCCGGATGTGCTGCGCGGCATCGAGCAGTT  
CTCCCATATGTGGCTAAGCTTCGTCTTTACCAGACCATGGCGCAGGGCTGGCACCCGACGGTGCGCCCG  
CCGCGCCTTGCGGCAACGAGCGGGTCCGGCTCTTGGCACTCGCTCCACCTTCGCCCCAATCCGCTAG  
GCCTCTCGGTGGTGCAGCTGCACGGGATCGGTGCGAGCGGGCAAGCTATGGCTGGAGCTGGGGGCGGT  
GGACCTGCTCGATGGCACCCCATCGTCGATATCAAGCCTTATATTCCTATGCCGACAGCCTGCCAGAT  
GCCCGTGGTGGTTTTGCTCCGATGCGCCCCACCCCGCGCTGGCGGTGAGCTTCAGTGCCGAGGCCGAGC  
AGCAGTTGCAACCTGGCTCAAGGCCACCCCGAGCTGCGCCAGCTGGTGAGCGAAGTGTGGCACAAGA  
TCCGCGCCCCGCTACAAGAAGGGCAAGCCGATGAGAAGGAGTACGGGGTGCAGCTGTTTGAAGTGAAC  
GTCCGTTTTTCGCATCAGCGAGCCGGATTGCGTGGTGGTGGCCATCGAGCCCGCTGAACCTGGACGGGCC  
GACATCACGGATGCTATTTACGCCTTCTTACGTCACAAGGGGCTTAATGAGCCTGTAAATTTGTGTGGC  
ATTGATCAGACTATCCACCCGGTTGCCAGTGATACCATGCAGACAGCAGAGGGCATCTCCTCTCTGACTG  
ATGCCAGCAGCAGGCTATCGATGTATGGCAAGCATGGTAGCTCTGCTGTTGCCGCCAAAGGATCTGGCCT

CGCCCCGACACGCTTGAGTGCGGGGATGCCACACGGATGTGACAACACTTCGAAGGAACAAACCTATGCT  
GATGAACAGTGAACAACGTTATGGCACCCCTGAATATCGGGCTGCACTGGCTGACCCTGTGGGCCATGATC  
GCCGTCTACGCCCTGATCGAATTTTCGCGATATTTTCCCCAAAGGGGACCCGGGTGCGGGATCTGATGAAGG  
AGTGGCACTTTATGCTGGGGCTGCTCATCTTCGCCCTGGTGTGTTGTCAGACTGGCACTGCGCTGGATGAG  
CCCCGACGCCCCGTATCGTGCCCCGAGCTCTCCCCGCTCATGCACAAGCTGGCAAACTGGCCACCTCGCC  
CTCTACGGTTTTCTTATTCTGACCCCCGCTGTTTGGCTGGCTGCTGCTGAGCGCCGCGGGCAAGCCCATCC  
CCTTCTTCGGGCTTGAGCTGCCTGCCCTGCTTTCCCCCAGTCCGGATCTCAAGGGGCTGATCAAGGAGGT  
GCACGAGACGCTGGGTAATATCGGTTACGCCCTGATCGGCCTGCACACGGTGGCGGCCCTCTATCACCAC  
CATATTCTCAAAGACAACACCCTACCAATATGCTGCCGCCGCGCCGAGCTAACGGGTAACGGGGAAAT  
GCAGAGGGGGCCATCGTGGCCCCCTCTCTGTTTTCTGAACAACCGTCATCTGCACCGCTGGCAACGAC  
ATCAGCCCTGCTTGCCAGCTCCTCGGTCGGCTGCTTTTCGGCTCGTGGCGCAGCTTTTTTACATTGCT  
CTTGCTCTCCGGCTGCTTGTCTCCCGGACGAACTGTTTTTCAGACAAGGCTTGCAACACGGGATCGGCCCTG  
CCGGCCACGGTGGGCTGGGACTGGCCAACAAGTTGCCGCCCTTTCAGATGGAGAGACTGCCCCCTTGA  
AGATCCCCTGCATCTTGCCGCTCTCCAGGATCTCCACCTCGGCGGAGGTACAGGTGCCCTCCAGCAGACC  
ATTGATGATCACGTGGGGCGCACTCACCTCTCCCTCAACACTGCCGCCCTGCATGATGCGCAGCACACCA  
CCGATGAGCTGGATGGTGCCATTGATCTGACCGCGCACCTCCAGATCTCCCTCCACCTGCAACTCGCCCT  
TGAAGCGGGCACCGGCTGCAATCACAGTGGCCCCGGCCGACGAGTAGCCGCACCACCTTTGTTTTCTTCC  
AAACATCCGTACTCTCTCCACCAACCACACAAGCAGAACCAGCGGCATCGGCGCCACTGGCCACAGAAAA  
CAGGGCGACCCCAGCACGTAGAGCAGCAAGGCTGCCCCAGCAGAGCCAGACAATATAGAGGAGGTGCG  
TGCGCTCACGCTGTTGAGCTCGCGCCAGCAGCCTCCCGCCATCTCTCTCATCACATCAAACCTTTCACA  
GCATGGCTGCCGACCAGCATGCCATCGACAACCCGGACCATGGTTAAACGACCAGTTGGCGCGAACTCTG  
AAGTCCCCTGATTTCAGTCCCAGATACAGCCGGGATGCATTAGGATTCGAATTGACTCGAAGCGACATACA  
CTTTTCTAATTGACAGCTTGGATCCCTATGACCGCTCACATCATGAAAAATCTGTTAGTTCGAAGACGACAA  
GCTGCTCAATCACCACCTCTCTCTCTGCTGACCGAAGCCGACAATCAGGTCTACAGCACCCGACCAGGCC  
GGGATTGCACTGCACTACGCCGCCGACTATCCCATGATGTGGCCATCATCGACCTCGGTCTGCCCGATA  
TGGACGGCCTGCAACTGATCCGGCAACTGCGCGAACGGCAGATCGCCTTCCCATCATTTGTGTTGACCGC  
CCGTGGCAACTGGCAGGACAAGGTGGAAGGACTGGAAGCAGGTGCTGATGACTATCTGGTCAAACCGTTC  
CAGAAAGATGAGCTGCGCCGACTCAATGCTGCTGCTGCGCCGAGCGCCGGTTTTATCTGCCCAAGG  
TGAAAGCCGGTGATTACGAGCTGGATCTCTCCCGAAGGACTGACCATCGCCGGAGTAAGTGGCGGAGTGT  
CACCAGCTTTGAATACCTCATTCTGGAGTACCTGATGCGCAATGCCCGTACGGTGGTCTCCAAGCAACAA  
CTGCTCGACCAGCTCTACGGCGATGGCGAAGGGGACCCCAACACCATAGAGGTGATGGTGGAGCCGCTGC  
GCAAGAAGCTGGATCCGGAAGGGACGATTCAACCCATCTCCACCATCCGGCGTCAGGGTTACATCTTCAA  
CCTCTCCTGTAAGTATGATGAGTTTTATCTGCCCGCCCCATCAAGATGATCCGCAGCTCACTGCACATCA  
AACTGCTGCTCAGCTCGCTGCTGGTCATCGCGCTGATCATGGGGTTTGCCGCTACGCCCTCTATCTTGG  
CCACGTCGAGGAGCAGACCCAGAAGGCCAGCGCCGGATGCAGGAGAACCCTGGCCAAGTTGTTTTCTTCC  
ACCGAACCCGATGACAAGGGGTGAAACGTCGAGCTGGGGCGGATATCCCGTGGTGGGGGGATCGCAACC  
TCGATACCCTGATCTGCCCGCCGATGGCGATCTGGTCTGGTGGAGCTCCATATGCCGGAGGTGATCAA  
GGCCAAACAGACCATCTGCCGGCGATCTGATGAAGTATCTGGGGGGGATGGATCTCGACTACTTCTTCAAG  
AAGCACACCATCAAGAACGGCGAGAGCTACTTCGTCTACAGCCTGCGGTTTATCCGCAATCCCGGCAGCG  
GCACCACCGCCTACTATGTGGTGGATGATCGACTCGGCCAAACGCTATCACGAAGAGTCCCGCACCTACCT  
CTACCAGACCGCCAAACAGGGCGCTGCTCGCCTATATGCTGCTGGCCGGGTGCTGCTGCTCACCACCTTC  
TGGAGCCTCAGCTCCCTGCGCACCATCGCCGTCAGATCGACGATATCCGGGGCCGGCAAGCGCGATGACC  
TCTCGAGCGATTTTGGAGCGGGAGCTGGCCCCGCTGACCGACTCCATCAACCAGTTGCTGGAGAACGAACG  
GCAGCAGACCCAGCGCTACCAGCACGCCCTCAACGATCTCGCCACAGCCTGAAAACCCGGCTGGCGCTG  
ATCCAGATCACCACCCCGGAAGTGAAGCTGGGGCGGGAGATCCACGACAACATCAACGAGCAGATCCTCA  
CCATGGATCAGATGATCCAGTATCAGCTCAGACGGCCGCTGACCGGCCCGCCAGCGCCTTGGCAGCAAGG  
CACCGAGCCGGTGGCGCTGATTGAAAAACTGCTGGCCAGCCTGACCAAGGTCTATCGCCACAAAAAAGT  
CAAACCCACTTCAAGTTTCGATGATGACGCCCTCTTTTACGGCGAACAGGGGGACCTGATGGAGCTGATGG  
GCAACCTGCTCGACAACGCTGCAAGTTTGCCATCAGCGAAGTGAAGGTGACGGTGGCGGCCATCTCGA  
GCGGCTGCGTATCGAAGTGAAGATGATGGCCCGGGAATCGATCCGGCCAAATCGGAGCAGATCTTCCAG  
CGCGGCTTGGGCTGACAGCTCGCCGGGTGAGGCATAGGTCTGGCGGTGGTACCGAAATCGTCCACA  
GCTACGGTGGCCAGATCCGGGTGGATGAATCCCCCTCGGCGGCCCGCTTTACCCTGGATCTTCCCTG  
ACACCGGATAGGCCCGACACGGGCCCTCTGCCCCCGCTGCACTGCCCTACCCAGGGTTAAAAACTCCT  
GCCTGACACCACCAATTCAGCAATATGCTATCGAGATGCTTGAGATGTGAGGCATCTCGGTTAAGCTAT  
GGCCGACTCGTTTTGTTAACCATTTGATGGACCTGTAATCGCACTATGGAAAACATGTTTTGAAAGATTGAT  
GTACGCATCCCGCTGGATCATGGCCCCATTTATCTTGGGCTCAGCCTCATACTGCTGGCACTGGGAGTG  
AAATTCTTTTTCAGGAGATCCTCCATATCTTCCCAACATACTGGAGATGAAAGAGGTGGATCTGGTGTGG  
TCACACTGTGCTGATCGATATCACCTGGTGGGGGGACTTATCGTGATGGTGGATGTTTTCCGGCTATGA  
GAACTTCGTCTCGCGCCTCGATGTGGGGATGAGAGCGACAACTGGTGTGGCTCGGCAAACTCGATGCC  
GGCTCTCTGAAAAACAAGGTGCGCCCTCCATTGTGCCATCTCATCTATTCACCTGCTCAAGGTGTTTA  
TGAATGCCGAAAATCTCCCCAACGACAAGATCAAGTGGTACCTGCTGATCCACATCACCTTTGTCTCTC



GGCCTTCGCCATGGGCTACCTCGACAAGCTGACCCGCAAATAGTAGCCAGCCTGCGATAGACGATATGCC  
CGATAACACGACATGGATCGGGCATATCGTGCGACCACTCTTCAAAGTCGAGGCCAATATGATCCGCCCA  
TTATCTGCCACCGATCTGGATGCCGCCGTCGAGCTCTGGTATCAGGTATCGGTGCAAGCCCACGACTTTA  
TTCCACCGCCTTTTGGCATGAGCAACGGGCAGCGATGCGGGACATCTATCTGCCCGCCAGCAAGAGCTG  
GGTCTATGAGGAGGATGGACAGCTACTGGGCTTTATCTCTGGTATCAGGGGTCTGTTGCCGCACTGTTT  
ATCTCCCCAGATCACCAAGCACACGGGCTGGGTGCGCAACTGCTCGAACACCTCAAACCCCAATATGATC  
GACTCGAGTTGACGGTCTACGCCGAAAATGAGCAGGCGCGGCGCTTCTATTTCCCGCAACGGTTTCAAAGA  
GGGTGAGCAGCAGTTGTGCGAGCATAGCGGCCACCCGAGTTGGTGATGCATTGGCAACGGGATTAAGCG  
GGTTTCCCATAGCGATGGCGAGCACGCTTTGCCTGTTTTGTGGCCGCTTGAATGCCATGGCGGCATTCT  
CTACAATGACCCACTTTTTTATTCATTTCCGGTTATATCGATGAGCGATACCAGCACCAAGCCAGCTCTGC  
CGGATCACCTCTCTGCAATCCCCGCAGCCCTCACTATGTGGCCGCTGCTTCGAGCACCCGATCGGTAT  
TCGCCTGAACGGTAAAGAGCGCACCCGATGTCTGAGGAGTACTGCATCAGCGAAGGTTGGGTAAAGATCCCC  
TCCCCCAAAGCGCTGGATCGCCGTGGTCAGCCATCCTGATCAAGCTCAAGGGCACCGTTGAAGCCTTCT  
ACAGCTAATCAGCGCGCTGCTGCTTGATAAAACAACAAGGCCACCCTCGCGGTGGCCTTGTGTTTTCCGGT  
ATTGGTGCTGGCGTCAGCGTTATCTAAGCGGTACCCACCAGCCACATTTCTCGCTGGGCAGCTCTTATA  
CCCCAAGCGGTGCGCAGGGTGTACCAGGCAGCGCCGGCGGGTGAAGGGGATACGGAACAGACGGCC  
ACCCGGGAAGGGTAGTGCGGCAGTTTGGCAAAGGCATCGAAGCGCTCCGCTGACCGCTCAGCACCTCG  
GAGAGCAGTTTCCCCGCCAGATGGGTGCAGGTGACGCCGTGGCCGCTGTAGCCCTGCATGTAGTAAATGT  
TGGGGCCGATGCGACCAAACCTGCGGCAGCCGTGACAGGGTGAGCAGGAAGTTGCCGGTCCAGGTGTACTC  
CACTTTGACGTGCGCCAGTTGCGGGAAGGTTTTGAGCATCTTGGGGATGATCAGCCGCTCGATATCCGCC  
GGATCTCGCGCGCCATAGACCACGCCACCCGATAGAGCAGCCGGTGATCGCCGGAGGTACGGTAGTAGT  
CGAGCAGATAGTTGCAATCCTCCAGACAGTAGTTTTGCGGCAAGAGTGAACGGGGCCCGCTCCTCTCCAG  
CACTTCCGGTGGCGATCACCTGGGTGCCACAGGGCATGCTCTTGTGTCAGGTTCCGGGCACCAGATTACCG  
AGGTAGGCATTGCCCGCCACCACCAAAGCGCGCTTCAACGCCCCCTTGGCGGTCTTGACCAGTGC GG  
GCTGACCCGGGGTGATGCTGGTGACGGCGGATTGTTTGAAGATCTGCCACCCCTGGATGCGGATGGCTTC  
CGCCTCCCCAACGCCAGATTGAGGGGGTGGATATGGCCGCCGCTCTTGTGAGCAGGGCGCCGACGTAG  
CGATCGCTCGCCACCACCTCGCGCACCCCTTGGCATCGAGCAGCTCCAGCTGGTTCGTTACCCCACTTCT  
GCCAGCGGGCTATTGGGATTTGAGCTCGTGCAGCTGCTTCTCGGTCTCGGCGGCAAAGACGCCCCCTC  
CTGCAGATCGCATGGATGTTGTAGCGCTTGATCCGCTCACGGATGATCTGTCCCCCTCAAACAACATG  
GAACCGAGCAGCCTGGCCTGATCCGGCGGGCAGTTCGCTTCTATGGTGTCGATGTGCGCGCTGTAGGAGT  
TGACGATCTGGCCGCCGTTGCGGCCGCTGGCGCCAAAGCCGACCCGTGCGGCCTCCAGCACCACTACCTT  
GTAGCCCTTCTCCACCAGATGCAGCGCGCTGGAGAGGCCGGTATAGCCCGCCCCGATGACACAGACATCG  
CACTCCAGCTGCTCGGTCAATGTGCGATAGGGCGGTGTTTATTTGGCGCTGGCTGCGTAGTAACTGTTTA  
CATGTTCCGGTCATGATCCCTGTTTCTTACCAGTTCCGGTTGCCAAACTACTGTCAGGATTAAGCTCGC  
CGGGGTGTGGGCGCTGACGATGCGACAGGTCTCCCCGACGGATTGCTGAAGCTGTGGGGCTCGCCGGTG  
TCGATCACATAGCTGTGCCCCGCTCCAGCTGATAACTCTGGCCGCCACCGTCAGGATCACCGACCCCT  
CCAGCACAGTGCCGACCTCCTCCCCCTGATGGGTCACTGACCGCCGTTGTCGGTGCAGGGGGATAGGT  
CTCCAGCATAAAGCCGAGCTGGCGGGCGTTGTTGCCGTTGTGCACCAGCTTGAGGGAGACCCCTGACTG  
CCCAGCTCGATCAGCTGATCAGCCTTGATCACCACCTCCGGAGTGCGGCTCTCCTCCTCGGCGAAAAGC  
GCGACAACGGCAGGCCATAGATGGTGAGCAGCTTTTGCAGGGAGGCCGACCGAGGGGCTCACCTTGTCTTG  
CTCGATCATGCAGATGGCGCCATGAGTCAGGCCACTCAACTCGGCCGCCCGCGCTGGGAGAGCCCAGC  
TGATGGCGTACCGCCGCGCAGCGTTCTCCCATGGTGCGCGCCCCAGCGTCAGCAGCACTCAACGGTTCGAG  
CCACGCCCTCCCGGCTCTGTGGCCGCTCATGACAGGCCCTTGTGCGCCATGCTGATCCTTGCATC  
ATCAGCCTCTCCTGCTTGC CGGTGATCGCATCGGATCAGGCGCTGCTTGTTTACCCTGCTGGTTAAATA  
GCCAACACAGCTTTCCCTTGGCGTTCACTATGTTACACAGCACAGCCGTTCAATATTTTGCACACCTGATT  
TACCATCTCCCGGTGCTGCCCCACTTACAGCCTGCAAGCGAACCAGGAAAGCGCGCTACACAGCCCAT  
TTTCTAGCATGGTGCCCCCAGCAATTCAAATATATTTAACACTTGAAAAACATTTACAGCTCAAATTTATG  
GTCTTCTGCTGCTTATTATTTTATACGGCAGCGGCGCAGGAAGGGTCCGGTCACTCCGGCAACCAGCTGC  
TCTGACCCACACTCGAGGCTTCTCATGTGAGGAACAACATCCCACTCCAGCTTGATCACATCCCGCGCCT  
ATATAGATGGACAGTGGTGCGAGGCGCCAGCGGCCACCTTCGAGGTCACCAACCCCGCCAGCGGTGC  
CGTCATTACCCAGGTGCCCGACATGGATGCAGAGGATAACCGCCGCGCCATCGCGGCCGCCACGCGGGC  
CAACCCGCTGGGCTGCGCTGACCGCCAAGGAGCGCAGCAACAAGCTCTACGCTGGTTTTGCCGCCATCA  
CCGCCACAGCGACGAACCTGGCCCGCATCATGACCTGCGAGCAGGGCAAGCCGCTGGCGGAAGCAAAGGG  
CGAGGTGGCTTACGGCGCCAGCTTTATCCAGTGGTTCGCCGAGGAGGGCAAGCGCGCTATGGCCGCACC  
ATCCCGGGCTTTAGCGGCGATCGCCGGTTGGCCACCATCAAGCAGCCGTTGGGCGTGGTTCGCCGCCATCA  
CTCCGTGGAACCTTCCCATTTGCCATGATCACCCGCAAGGCGGGCCCGCGCTGGCCGCCGTTGCACCAT  
CGTCATCAAGCCTGCCCGGAGACCCGCTCTGCGCGCTGGCACTGGCGCTGCTTGGCCGAGCAGGCGGGC  
ATCCCGCCGGTGTTCATCAATATCGTTCACCAGCCATAAGGCGAGCGCAGTAGGCAACGAGCTGTGCAGCA  
ATCCGGTGGTGCGAAGCTCTCCTTACCCGGCTTACCCGCATCGGCAAGCTGCTGATGCGCCAGTGC GC  
CGACACCATGAAAAGCTGTGCTGGAGCTGGGTGGCAACGCCCTTTATCGTCTTTGACGACGCCGAC  
CTCGATGCCCGGGTGGCCGGGGCGCTCGCCTCAAATACCGCAACGCCGGGCAGACCTGCGTCTGCCCA

ACCGGATTCTGGTGCAGGCCAGCGTCTATGACGCCTTCGCCGAGAAGCTGACTGCCGCCGTCAAGGCCTT  
CAAGGTGGGAGATGGCATGGCGGAGGGCACCCAGATCGGCCCGCTCATCAACCCGGCTGCCGCCAGCAAG  
GTGGCCGAGCTGGTGCAGCAATCGGTCGCCGCCGGTGCCGAAGTGTGCTGGGGGGCGAAGCTCACCCCG  
CTGGCCCTCTCTTACC GCCCCACCATTCTGGGCAAGGTGGATAAAAACCAACCCCATTTCTGCAGGAGGA  
GATCTTCGGACCCGGTGGCTCCGCTAGTGCCTTCGAGACGGAAAGCCGAAGCCATCGCCATTGCCAACGAC  
ACCCCTTATGGCCTGGCCGCTACTTCTATGGCCCGGATATCGCACGGGTGTGGCGCTCGCCGAGCAGC  
TGGAGTACGGCATGGTCGGCATCAACGAGGGGATCATCTCAACCGAATTGGCCCCCTTTGGCGGCATCAA  
GGAGTCGGGTCTGGGCCGGGAAGGGGCCGCCGAGGGGTGGAGGAGTATCTCGAGACCAAATACCTCTGC  
TTTGGCGCCATTTCGCTAGGGCTGCAACAGAGAGACAAGGCGCCGCCGATCTGGCCCGATGGGCTGATCGG  
CGGTGATGGGCGCCAAAACGCCCTGCCACATTTTCAGGGAATATCGGGGGCTGCGGCCCTCAGGGAGGAA  
AGATGAGCCAGTCAGAATCAAACAAGGCGTGGCAAGCGCCGCCGGAAGCGGCCGTGGTCAACGGCGTGG  
TACCCTGCTGCCGCTCTTTATCGACCCGGGCGCAAAATGCCGAGCTGTGGGATGTGGAGGGCAACCGCTAC  
ATCGACTTTGCCTCCGGCATCGCCGTGCTCAATACCGGCCACAACCAACCCGAAAGTGGTGGCGGCAGTGC  
GTGAACAGCTGGAAAAGTTTCAGCCACACCTGCTTTTCAGGTCACCCCTACCCCGGCTATATCGAGCTTGC  
CGAGAAGCTCAACGCCCTGGTACCCGGCCCGACCCCGAAGCGCACCCCTGTTTCTCTCCACCGGCGCCGAG  
GCGGTGAGAACGCCATCAAGATTGCCCGGCCACACCGGTGCGAGCGGCACCATCGCCTTCAAGGGGG  
GCTTTACGGTGCACCATGATGGGCATGGCGCTCACCGGCAAGGTGGCCCCCTACAAGACCGGCTTTGG  
CCCCCTCCCGGGGAGATCTACCACATCCCCTTCCCGCCGATTATCTCGGGGTGAGTGAAGAGGATGCC  
CTGCACGCCCTCGAGCTCTGCTTCAGCGCCGATATCGAGCCGAGCAGGTTGCCGCCATCATTATCGAGC  
CGGTACAGGGCGAAGGGGGCTTCTATCCCGCTCCCGAGCTTTATGCAGAAGCTGCGCAGCGTCTGCGA  
CCAGCACGGCATTCTGCTGATCTGCGACGAGATCCAGAGCGGTTTTTGGCCGACCGGCAAGACCTTCGCC  
ACCGAGTATGCCGGCATCGAGCCGGACATCATGACGTTGGCCAAGAGTCTGGCGGGTGGCTTCCCCCTCT  
CAGCCGTGGTGGGCAAGGCGGAGATCATGAACTCGGCCAAAACCGGGTGGTCTGGGTGGCACCTATGCCGG  
TTCCCCCATCGCCTGCGCCGCCGCGCTGGCGGTATTGCAGGTGATAGACGAGGAGAAACTCAACCAGAAA  
GCGCTGGATCAGGGGGAGCAGATCAAGGCGGGGTGGAACGCATAGCCGAGCGTTTTGACTGCATAGGTC  
AAATTGCGGGCCCCGGTGCCATGGTGGCCATGGAGCTGGTGAACCGGCGTATGCCAGCCAGCCCGATCC  
CGAATCACAAAACGCTCTGGTGGCCGAGGCGGGCAAACGCGGTCTGGTCTGCTCTCATGCGGGGTGCC  
GCAAATGTCTACCTCGTTTTCTCGCCCCCTGACAGCCCTGCGGCAGTGATTGACGAGGGGTGCAACTCC  
TTGAAAAATCAGCTGGAGCCCGTGGCTGGCCTGACCAGCAGGAAAGTGACCACTACCTGTGCAAATAAATG  
CAATTTTGGCCCCCTTTTTTTCTTGTCAAGGGGGCCCTGCAAAATGCACAATGCGCCGCCACTGAAAGAACC  
GATGTAAAACAATGGCATCGGTTCTTTTTTTAGACAGTGAACAAAACCCATAAACGAGGCGGATCACCCCC  
GGAAAAGATAGCGAGATTGGCAGCAGTCTCCCGACACCAAGTCTAGTGAGGAACAACATGGGGCATCTCA  
ATGCTTTTCAACCGGTGATGACCGGTGTGCGCCGCCCTGGCGCCCTTGATTCCCGGGCTCTCTCCCGGT  
TTCGTTGATGGACCGTGAACCTCTGGCACTGCATGAGGAACATGCATAATGGCGGCCCAGCAGGTTGGTC  
TGAAAAGACCCTCAAACCTGTGGCAGGTGCTGGTTATGGGACTGGCGTACCTCACCCCATGGCGGTGTT  
CGACACCTTCGGCATCGTTACCGAGATCACCGAAGGCCATGTGCCGACCGCTACCTGTTTGCCTCATC  
GGCATGCTGTTCACTGCCCTGAGCTACGGCCATCTGGTGGCAAGTTCCTGTCAGCCGGCTCCGCCTATA  
CCTATGCCCAGAAGGTGTTTTACCCCTATGTGCGCTTTATGGTGGGCTGGACCTCCTTGCTCGACTACAT  
GTTTATGCCGATGATCAACATGCTGCTGGCCAAGATCTATCTCGAAGCCCTCTTCCCGAACGTGGAGCCC  
TGGACCTATATCTTCGGTCTGGCGGCGGTGATGACCGCCCTCAACCTGCGCGGCATCAAGCTGGTGGCCA  
ACTTCAACAGCCTGATCGTGGTGTGAGTTTACGATCATCGCCATCTTTCATCGGCCGTGATCGCCTGGGG  
CGTTTCAACCGGTGAAGGGTTGGGTACCGTGGCCAGCAGCCGTCCCTTCTTCTCCGAGCAGATCCAGGTG  
TCACCGCTGCTGATGGGGGCTCCATCCTCTGTCTGTCTGTTCTCGGTTTTGACGCCATCAGTACCCGTG  
CGGAAGAGACCCCGACCGGATCGGGTATCCCCGCGCCATCGTGTGACGGCGCTGATCGGCGGTGT  
GCTGTTCTGCTACTACCTCCTACTTCTGCTGCTACTTCCCGACATCTCCCGCTTCCAGCATCCGGAT  
GCGGTGCTGCCGAGATCGCCCTATGTGTCGGCGCAAGCTGTTCCAGGCGGTGGTGTGTTGCTGCACTA  
CTGTGGCGGTGCTGGCCTCCGGGCTCGCCTCCACGCGGTTGATCGCGCTGCTTACGTGATGGGTGCG  
CGATCGCGCCCTGCCTGCCCGCTTCTTTCGGCTACATCCATCCGAAGTGGCAAACCCCGGCGTTCAACGTG  
CTGCTGGTGGCCTGCTGGCCCTCTCTGCGGTGTGCTGGATCTGGAGATGGCGCTGGCGCTGATTAACCT  
TCGGCGCCCTGGTGGCCTTACCTTCGTCAATCTGGCGGTGATTGCCCACTTCTATGTGAAGCTGGGCCG  
CAACAAGTGTCTCAAGGATCACCTGATGTACCTGCTGTTGCCGCTCTGTGGCGCCGCTGCATCGGGGTA  
CTGTGGCTCAACCTCGAGCCCTCCTCCTTCGAGCTGGGGCTGATCTGGGCGGCGCTGGGGGCCATCTATC  
TGTTCTGCGCTGACCGTGTTCGCGATCCCGCTGCATACCGCCGACAAGGTGGAGATCGCCAGTAACC  
GCTGGCGCCCTCCCCCGATAGCGAACAAGGAGCCTGCGGGCTCCTTGTGTTTTTGGCGCGCTGAT  
TGCCAGCAGCACGGGTTGCCAGAAACCGGTTTCTGCAGGAAGTGTGACTGATTTCAAATAACTACCCAG  
CCGGACTGCTCGCAATGCCATGGCCCCGAGCCGCTTGCCTTCTATCCTCAGTCATTAATGTGAATGGATA  
TGCAATATATCTTTTTTCCACTTCAACCCCTCCCATCCCCCGCCAGCCGATAAGCTCGCAGGACTCGAGCC  
CGGGGGAACCGCGGCAAAATATGATCAGGATCAATGTTGAGGCGCTATGCACCCCTGCAGCCCCGATTTGCC  
GATTTTTTACATACCCATGACAGGGTCTCTTCCCCCCCCGAAAAAGGGGGAGCGGCTCGGGGACGGCTGCA  
GGGGGCGAGTGACCACTTACCTGCTCCGTGCGTATGCAAAAAATGCGTTAATCTGCCCTTTTTTGTCTG  
TCAAGGGGGCTGACCGAATGCACAATACGCCGCAATAAAGGACCGATGTTCACTGCGACATCGGTTTTTT

GTATTTTTGAAGTGCAGTACAAACCCACCACAAGAGGCCGGAACGTTTCCGGAAGTGATATTCGAGATTG  
ACAAACAATCTCCCCGACGTTGAGAGGATAACAATGGGGCGTTTTGATGCTTTCCTGCCGGTACAGCCCGG  
TATGCGCCTCCCCGGCGCCCTTGATGTACAGGCTTGCGAATCCATCGTATCCCTGCGCTCGTTGCAAGCA  
CGTGCTGCGGCACTGATTGAGGAGAAAGCGTAATGGCATCGCAAAACGCCAAGCTGCTCAAGACCCTTAC  
CCTGACACAAGTGATTGTGATGGGTCTGGCCTATCTGACCCCCATGGCTGTCTTCGACACCTTCGCCATC  
GTCGGTGACATCACCGATGGCCGGGTGCGCCACCGCTATCTGCTGGCTCTGGGTGGCATCCTGCTCACCG  
CTTTCAGCTACGGACATCTGGTACGCAAGTTCCTCTGCGGGCTCTGCCATACCTATGCCCCAGAAGGT  
GTTCAACCCCTACGTCGGTTTTATGGTCGGCTGGTCATCCCTGCTCGATTACATGTTTCATGCCGATGATC  
AATATCCTGCTGGCCAAGATCTACCTGACCGCCATGTTCCCGGGCGTCGAGCCCTGGGTGTTTCATCTTCG  
GTCTGGTGACAGTGAATGACCTTCTGAACTGCGCGGCATCAATCTGGTAGCCAACCTCAATGGTCTGAT  
CGTGGTGATCCAGCTGGCCATCATACCCTCTTTACTCGGCTGATGGCGTGGGGCATCTACCACGGTGAA  
GGGGCTGGCACCTGATGAGCAGCCGTCCTTCCACTTCGAGTCAGCACAGCTGGTACCCTCTTTACC  
GTGCGACCATCCTCTGCTTCTCGTTTCTGGGCTTTGACGGTCTGAGCTCCCTCTCCGAAGAGACTCCGAA  
CGCTGGCAAGGTGATCCCCAAGGCGATCGTGCTGACTGCCCTTATCGGCGGCATCATCTTCGTGGTGGTC  
TCCTACTGCCTGCAGCTCTACTTCCCGAGCCTCGCCCGCTTCCAGCATCCGGACGCGGTACTGCCGGAGA  
TCGCCCTCTACGTTGGCGGCACCTTCTTCCAGTCCGTGGTGTCTGCTGCTGCTGCTGCTGCTGCTGCTGCT  
CTCCGGCATGGCGGCTCACGCCGTGTGTGCGCATCCTCTACGTGATGGGTGCTGACCGCATGATCCCC  
GAGCGGGTGTGGCTACATCCACCCGAAATACCGCACTCCGGCCATCAACGTGCTGATGGTGGGCGGTC  
TGGCCCTCTCCGCCGTGTGTTTTGATCTGGATAACCGCACTGGCGCTGGTCAACTTTGGCGCACTGGTGGC  
GTTTCAGCTTCGTCAACCTGTGCGGTGATCGGTGAGTTCCTGGGTGCGCGAGAAGCGCAACAAGACCCTCAAG  
GATCACGTGATCTACCTGTTGATGCCGTTGCTCGGTGCCGCCACCATCGGTGCGCTGTGGATCAACCTGG  
AGCAGAGCTCGCTGGAGCTGGGCTGATCTGGGCTGGCCTCGGCGCAACCTATCTGTTTCCCTGCGTCTGGC  
GGTGTTCGGTATCCCGTTCGGTCAGTACGAGGAAGCGGCTGACGCTGATCCTTTGCGGATAACGGATAG  
ACAGAAGGGGAGCCATGGCTCCCTTTTTGCTATTTGACGGGCTGAATATGGGGCTCGACTATTGCCACT  
CTGGCGCTGCCTGCCCATCGTGGTCCGCAAAAAACAGCCAGGGCGGATGACGCCACCAGCCATATTTCTC  
GCCATCCCCATCATCTATTGGCGAGCAAACCACCAACGCAAGTCATAAAAACCATCATAAAAGTGTACCT  
TGTCATATTTCTGTCTAATAACCACTGATTAATGCGCGGGTCAACAACCCAAGACGGAACGACCCGTC  
TCAAGAGGCTTTATGCAACCACTCACTCCTTGTACAGCCGCGCCGACCCGCGCCCTGTTCAAGTGA  
TGAGTGTGATGCTGCTGCTACCTGATCCTGTTGCGCTTCCGCTGGGCGCCATCTCCCACGGCTTCAAAGATTT  
CTCCGGCGGCGCGGAGGGCGCAGCCAGATCTTCGCTTTGCCAACCAACCCCTTTGTGCGCCCTGCTGCTG  
GGTATTCTCGCTACCGCGCTGGTGCAATCCTCCAGCACCGTCACCTCGGTGATCGTGGTCTGGTGGCTG  
GCGGCTGCCATCAGCATGGCCATCCCCATGGTGTGATGGGTGCCAACCTCGGTACCACCATCACCACAC  
CATCGTCTCCATGGCCATGTGCGGGATCGCGCCGAGTTCGCGCGCCTTCGCGCGCCACCCTGCGC  
GACTTCTTCAACCTGCTGGCGGTGTTTCATCTTCTGCGCTGGAGCTGATGTTCCGGCTGCTGCAACACA  
GCGCCGAGTGGCTGGCCAACCTGCTGGTAGGCTCCGCCAACATGTCGATGAAGGGCATGGATTTTCATGAA  
GCCGCTGACCGCACCGGCCAGCAGCTGATTGACAGCGCCGTGGCTTCTGCGGGCAAGGGCGCCGCC  
ATCGCGACCATCATCATCGGTATCCTGCTGATCCTCGCTGCGTACGTATCTCGGCAAAGTGTGCAAC  
AGGTACTGGTTGGCCGTGCCAAAGAGGTGCTGCACAAGGCGCTGGGCGGTGGCCCGCTGACCGGCATCAC  
CTCCGGTGCCTGGTGACCATCATGGTGCAGTCTCCTCCACCACCAGCCTGATGATCCCGCTGGCC  
GGCGGCGGCGTGTTCAGCACCCGTCAGCTCTACCCCTTACCCTGGGGGCCAATATCGGCACCACCATCA  
CCGCCCTGCTGGCTGCCACCGCCATCAGCGGAGCCGGTGGCCAGCTGGCCCTGACCATCGCGCTGGTCCA  
CGTGCTGTTCAACCTTTTTGCGGTGGTCATCATCTATGGCATCCCTTCTGCGCGACCTGCCGGTGC  
GCCGCGAGGGGCTGGCCCGGTAGGCAGCGAGAACAAGCTGCTGGCTCTGGGTATGTGGCGGGTCTCT  
TCTTCGCCCTGCCCGCCCTGATGATGGTGGCCGCAAGTAAGCGCCGAGCCATGACAAGGGGCGAGTCA  
CCGACTCGCCCTTTTTGCGTCTGCGTCTCCGAGCTTTGCTGCGCCGCTCACATCTCCCGCCCTGTGGC  
TCGCCATCAGGGGCGGTGCGCGATAAGATGGCTCCTCATTTGACTTTTTACATTTTCATGGAACAGGAAA  
AACCGATGAAATTCATACTGATCGCGCTGCTCATCGCCGGTGGCCTACTACTTCTACTCCAGCAGCAA  
CAACAAGAAGCTGGCGGCCGACAACGTGCGGATTGGCGCCGAGTTCCTCGCCAGCAACAAGGAAAAGCCG  
CTGGTGACCACCACCGCTCCGGCCTGCAGTACGAAAGTGTGACCCCGGGCACCGGCACCGTTCACCCCA  
CCGCCACCAGCAAGGTGAATGTGCATTACGAGGGCAAGCTGCTGGACGGCACCGTCTTTGATAGCTCGGT  
CGCCCGTACGAGCCCATCGAGTTTGGCCTCAATCAGGTGATCGCTGGCTGGACCGAAGGGGTGAGTTG  
ATGGTGAAGGTGAGAAGACCCGTTTTCTACATCCCTGCCAACCTCGCTACGGCGACCGCGCCGCTGGCA  
AAATCCCGCCGGGATCAGTCTGATCTTCGACGTAGAGCTGCTGGGTATCCAGTAAGCGCTCCGTACGC  
TCCATCAACAACAAGGCCAGCATCATGCTGGCCTTGTGCTATGAAACCTCACTCCCTTGGCGATCC  
CTTCCCGGCGCGGATCCGCGAGCGCAAACCAGCCGCCAGCGTTGCGCTCAACCCCTGCAGGCCGAGGT  
CTGCTCGTTCAATAACCACTCGTGTCCCCTCGCCTTCAATCCCTCGACCACCGACATGGGGGTGCGCCCC  
GCTTCCAGCTCGGTGGGACCGTTGCGGCTGCCAAAGTTGGGCAGATTGATGGCCTGTTGCAAGTTCAGGC  
CCCAATCCAGGGTGCCGAGCAGGGTCTTGGCCACGTAGTTGATGATGGCGGAGCCCCCGGAGAGCCAG  
CGTCATGGTCAGCTCGCCGCTTGGCTTGTCAAACACCAGCAGGGGTGACATGGAGGAGCGGGGCGGCTTG  
CCCGGCTCCACCCGTTTCCGACCCGGCAGACCGGCGGCATCTACCGAGGTGAAGGAGAAATCGGTGAGCT  
GGTTGTTGAGCAAGTAGCCGTTGACCATCTGACGCGATCCGAAACCATCCTCGATGGAGCTGGTCATGGA

GATGGCCATCCCTGCCTTGTGCGACGATCGAGACATGGCTGGTAGAGGGGAGTTCCGGAGTGCATCCTTG  
CCGCGCGCCAGCGCCAGTGGCGGCGTACCGGGCTTGGCAATCCCATGGAGTGTGACCGACAAGCTTGC  
CGCGCTCGGCCAGATAGCCCTTGTCCAACAACCCCTGCACCGGCACGCTGACAAAATCGTGTGCGGCGAC  
GTACTGGTTGCGATCGGGCAAGGCGAGACGCGCCGCTTCGCTGTAGAGGTGGATAGCCTCGCTGGAGGCA  
GCCAGCCCCCCTCCTTCGTGGTGATCGGCTTGGAGGGCCGCCATATCGCGGCTCTCCAGCATGCCGAAGA  
TCTGGCCGAGTGCAGAGTGCAGGACGAGGGAGTGGGAAAAGCCGAGATCTTGTCTGGCGATAGTCAAA  
GCAGAGGCCATCCCGCAGTTTGGCCCCGATAGCTGGCCAGATCGGTGGCCGCCAGTACCCCGGGGTGGTG  
GGATGTTGGCGTACCTTGGCCACCATGGCATCCGCCAGCGGCCCCCGATAAAAAGGCATCTGCCCCCTCTG  
TGGCCAGAGTGCGCAACACCATGGCCAGCGCCGGGTGGTTCAGCCGGGTGCCCGCCGTTTTGGGGCTGCC  
ATCAACCTGTAGAGAATAGGCTCGCGCTCGGGATCCCGTGCAGATAGGGATCCTTGGCCAGCAATGTG  
GCCAGTCGTGGACTTATCACAATCCTTGTCTGCCAGCGTGTATGGCGGGCTGGAACAGCACAGCCCAGG  
GCAGCTTGCCATAACGCTGATGGGCCAGTGCCAAAGCGCGCAGGGTACCGGGAACGCCAGCCAGCGGCC  
CCCGACCACCCCGTCATAAAAACGCCAGCGGCTTGGCATCTTGCATAAACAGCTGGTTCGGTGGCGGCAGCC  
GGCGCCGCTCTCGCGGCCATCCACCGCACTCACCTTGGCGCCATCCCACACCAGCAGCAGCTCCCGCCAC  
CGATCCCGGAGGATTGGCGCTCAACCAGCGTTAACACCAGCTGCACCGCAATGGCGGCATCGACGGCACT  
GCCACCGGCTTGTATGATCTGGTAGCCCGCATCCACCGCCAGCGGGTGGCGGCCGCCACCATGAAGTCA  
TGGCCCTGCCAACCCCTGTTTGTGCGGTCCAGCCACTGGCCGCTCCGGCGCGATCAGGGTCTGGGCTGGCG  
GGGTGTAGTGAAAGCCGTTGTCACTGGCACAACCGGCCAGCAGGGCAAGGGCGATAGCGAGCCCCAGAGG  
TTTGGCAACATGACACTCTCCTTGTCTGTTTTATGACCATGAAGAGGGACTATGTCAGATTGGCGCTG  
GTAGCTCAAGTTATTGAACAAGATCAATATCTTACTCATCTATCAATAATGGCTATCCGTAACAGATATA  
AAAAAACCGCCCCGAAGGCGGCTTTTACGATGGGATGGCAGAGGCCAAACAGGCGCAAGTCCGCTTAGATG  
GACTGCTCTTCGCCACCCAGGGCGGCAAAACAGCGCCGGGATAAACTGGGACAGCTCGGCGGTGACCAGCG  
CGAAGTCGGCATCCAGACGGGCGGCGGATCTTCGCTGGTGACGTCGTCGTTCTGCTCGCGCAGCTCTTC  
GCTGAATTTAGGCGCTTGTATGGAGAGATCATCCCCAGCACGAAGCTGACGGTCTCGCCCCAATTAAGG  
GCCAGCTTGGTACCAGCTTGTGCTTGGCCAGGTGGTTCCTGATTTTCATCCGTCATCAGATCCTGCTGCT  
TGCAGCGGATGATGCCCGCGTGTCCATGGCACTGCGCAGCTCGGCTTCATCTTCCAGAGTGAAGGAGGC  
GGGAGGTTGCCCTCGTTAGCCACTCGGTTCATGGTTCATCTCGGGCGGGTTCCTTGGAGGCCACCGGCACC  
ACCGCGAGGGAGCCGATGGATTTGCGCAACAGTGCAGCAGATCGTCCGCCTTCTTGGCAGAACCTCGGT  
CCACCACCATCAAAATTGCGCCGATTGATCCAGCGAAGGTCTGGTGGTACGATAAAAACACCGGGG  
CAGCAGGGTGTGGAGGATCTCCTCTTTTACGCGCTCCTTCTCTTTCTTCTTGAGGGCGCGTCCCTGTTCCG  
AACTCGATCGCCTCTACCTTCTCGGCCAGCATCTCCTTACCACGGTACCGGGCAGCATCTTCTCCTCTT  
TGCGGGCGCAGATGAGGATGTGACCGGAGGCAGAGTGGGTGAGGGTTGAGCCGAATTTGCCAAGGGGCTT  
GACCCACCCGAAACGGGAGATGTCTGACTGCCGCAAGGGGTGAAGGCACAGGCTTCCAGCTGGGTTTCC  
AGCTGATCCACGGTCAGGTCAAAGGGGCGGGTAAAGCGATAAAATCTGCAGGTTTTTAAACCACATGGCGT  
CCTCGGTCTCTAGATTGTCCGGCGGGCATTGTAAGTAGAGAGGCGCTTTGTGATCAGCCAATCATCTCGC  
TAAATAAAGGGCGATCGACCTCACAGGGTCTCATTTATGTCACCAGTTTGTTCATCAAGTTCTCCTAAC  
TGCGAAAGTAAATTTGTTAATAAGGATGAAGGTATGTTGCGGCCAGTCCCGGAAGACATGGAAGAGAT  
CGTCGAAATCTGGTTGCTGGCCTCCCTGCAGGCCACGATTTTCGTCGATGCCCTCTGCTGGTGGCAGGCC  
CAAGAGGATCTGCGTACCCGCTATCTCGATCGCGCCGCCATCTGGGTGTTGAGGAGCGCGGCGATCTGC  
TCGGTTTTATGGCACTGGTGGACAACCTACCTCGCCGCCCTCTTTGTGCGCCCCGACCGTCAGGGCCGCGG  
CGTCGGCCACGCCCTGCTGCAGGAGGCCAAGCGTCAGGGAGCGTCGCTCCACGCCCGGGTCTTCGTGCGAG  
AACGATCAGGCGGTGCGTTTTCTATCGTCGCCACGGTTTTCGTCATGAGGCCGAGGAGTCCGATCCCCTCA  
CCGGCCACCCCAATACCGGATGTGCTGCGAACCTGCCTGAATCGATGCCAGCCCCCTGTTTTACTTTGAA  
AAAAGCAAGGGGCATCCTCATCTTGTCTCCATCGGGTGCCACAGGCACCGTCCCTGCAACCGGGCTGCTT  
TCCAATGAAAATCCTCCATAACCGCCGACTGGCATCTTGGCCATCAGCTCCATGGTCATGACCGCCGTTTT  
GAACACGATGCCTTTTCTCGACTGGCTGAGCGACACCCCTCAAGGCACGCGAGATCGACGCCCTGCTGGTGG  
CGGGCGATCTGTTTTGATAACCGCCAATCCCCCGCCAGCGCTGGCAGCAACTCTACCGTTTTCTGGCGCG  
GCTGCGCGCCGAGATGCCCCACCTCAACATGGTGCTGATCGGCGGCAACCACGACTCCCCCTCCAAGCTC  
GATGCCCCCACGAGCTGCTGCGCGCCTTTGATCTGCATCTGGTGGGCAGCATCAGCCGCGACAGTGAGG  
GCAAGCTCGAGACCGACCGCCTGCTGGTACCGCTGCAAGACAAAAGAAGGCAAGATTGCTGCCCTGGTGGC  
CGCCGTGCCATTCTGCGCAGCAGCGATCTGCGGGTGGAAACAGCTGGCTGAGGGGCAGGACAGACTGATC  
GAAGGGGTACGGCAGGTCTATGCCAGGTGCTGGCCGAAGGGCGCGCCGCTGCGGGGAGTCGCTGCCAC  
TCATCGCCATGGGCCACGCTATCTGGCGGCGGGCCAGCTCTCGGAGCTGTCAGAGCGGCGGGTGTCTGG  
CGGCAACCAGCACGCCCTGCCCGCCGAACCTTTTGGCGGAGCCGACTACACGGCGCTCGGCCACCTACAT  
CTGGCCAGAGCCCGGCCGAGGGGGTGCCTACAGCGGCTCGCCGCTGCCGCTTTCGCTTACCGAAGCGA  
ACTACAACCATCAGGTGCTGGAAGTGACCTTTGCGGAGGGGAAAAGTACCAGGATGGAGCGGATCCCGGT  
GCCCCGCGCGGTGGAGATGATCCGCTGCCCCAGAGCACCCCTCGACGACGCACTCAAAGCCATCGCTTCG  
CTCGAGCTGCCTGCTTGTCCACAAGAGGCAACAACCTTCTCGAAGTGCGGCTGCAGTACCCAAGCCAG  
AGGCCCGCATCCGCGAGCGGATTTCTGCAGCCATCGCAGACAAAACCGGTGCGTCTGGCCCGCATTACGAC  
CAGTTATCAGGGCTCGGGCGAAGGACTGGCCGATGGTTCGCGAGCGGCGCAGGCTCGATGAGCTATCCCC  
ACCGAAGTTTTTTCGCTCTGCTACCAGCGCCAGTTCGAGGGGGAGCCCCAGGCACAGCTGGTTCGCTCGT

TCGAAGAGATCCTGGAGCAGGTGAAGGAGTCAAACCAATGAAAACTTGTCTCTGTCAGGTGAGAATCTG  
GCCAGTCTGACTGGCCCTTACCATCGACTTTACCAGGGGGCGCTCGGCGCCGCGGGTCTGTTTGCCA  
TCACCGGCAACACCGGGCGCCGGCAAGAGCACATTGCTCGACGCCATTTGTCTGGCCTTATACGACGAGAT  
GCCGCGCTTTATCGCCAATCGCAAGAACGTGGCCGAAGTGGGCCGCATGGATGACGAGGAGAAGCTCAAG  
GCCAACGACGTGCGCGGCATCCTCAGTCGCGGCCACGCCAGCGGCTTTGCCGAGGTGCAGTTTCGTGGCT  
GCGATGGTTCGCATCTGGCTGGCCCGCTGGGCGGTGCGCCGGGCGGAAACCGCTCGGAGGGGCGCTTTCA  
GGCGAAGAGCGAACCCCTGACCGATGTGGAGTCCGGGCAGGTATTTCTCCGGCAGCAAGCGGGAGCTGCAG  
GATCGCATCGACGAGCTGGTGGGTCTCTCCTGGGAGCAGTTCCGCCGCGCGGTGATCCTGCCGCAAGGGG  
AATTTGCCGCCTTTCTCAAATCGGATGCCAACGAGCGCTCCGCCCTGCTCGAACGGATGACCGGCACCGA  
GCTCTACTCCGCCATCTCCATCCAGACCTATGAACGGGCGCGGAAGAGCAGCAGAAGCTGGCCACCATC  
GCCCAGCGCCTCGGCGACGTGGCGCTGATGGATGAAGCGACCCGCGAACAGTGGGTAAGCCAGCAGGTGA  
GCCTCTCCACCACCCTCAAGCACGAGCAGCAACAGCAGCAGCTGATGCAGGACTTGCGCGACCTCAATAG  
CCGCATTGCCGCCAGCTGCAGGGCTGCGCCGAGGGGCAAGCGGCGCTCGATGCCGCCCTGCAGGCCAC  
GGCGCCGCGGCCCCGAGCACGAGGAGTTTCGCTCGTGGCGAACAGGCCACAGGTGGCCCCGAGCCGATCAG  
ACGAGCTGGCCCGCCTCACCCCTGAGGTACAGCAGCAGGAGAAGGTGATCGCCGAGCTGGGGCCGAGCT  
TGCCAAACTCGAGGAGCAAACCCAGCAGAGCGCTGACCGAGCAGCAGCTGCTGGCGGAGAAGATCGCC  
GCCGAGCGGGAATGGGGTGCAGTGAACCCGAACTCAAGCGGGCACAGGAGCTCGATAACCCGCATCAGGG  
AGAAAGTGCAGCAGTTGCAGAAGATCCAGCAGGAGGGGGCACAGGAGCGAGAAGTACAACCTAACCCTCGA  
GCAGGGCTGGCGGAGCAGAGCCGACAGGTGGAACCTGCTCAAGCAGCAGCACCAGCAGTGGGGGCTTTGG  
CTCGAAGAGCACAAAGGAGCTGGCACCCGTTGGCCCGCAGTGGCAGCCCTGCTCACCGCCATGCAGGATT  
GGGCCGAGGATGCCGACAAGCTGCAGCAACTGCTCACCCCTGCGGGATCACAAGCTGCGCGCCCTGCAACA  
GTTGCAGCGCCAGCTGGAGCAAGGTGAGCAGGAGCGCGACTACTGGCAACATGAACAAGCTCGGCTGCAA  
CAGCAACAGAACGAGCTGCAGGAGCAGCAGTGGGAGAGCCGCTCGCCAAGGCGCAGGAGCAGTGGCAGC  
AGCAGACCGAACAACCTGGGTGAGCTGCGCCAGTTGCTGGAGCTGGCCGATTATGGCCGCAACCACGGCGA  
ACAGCATGACCGCTTGCAGCAGGAGATTGCCAGCTGGAGCAGGCGCTGGGCAAGCTCGCCACCCTAAGC  
GAAGAGCTGGCGCCAGCCCGGAGCGGCTCGCCCTGCAGCGGGATGAGGCGCGCCACGCGCTGGAGCAGT  
CCCCGCCATCGCCAGCTTTCGAGCAGTATCGCCATATCCTGAGCGATGGCGAACCTTGCCCGCTGTGCGG  
TTCCGGGGAGCACCCCTACAGCCAGAGCCAGCCAGCTGAGTGGCGGGGATCCTGGGTGAGCTGGCGAGCGG  
TCCCAGCAGCTGGAGCTGGAGTGGGAACCGCTCAATCATATATTCAGTGCAGAGCAGGAGCGTGCAGG  
AGCTGGCCCGCAGCTGGCGGTACGCCAGCAGCACCTGCCAGAGCTGGAAACCCGCGCCGAGCAGCTGAC  
CCAGCGCTGGCAACAGCTGGGAGGCGATAACCCCTGCTGGGTGATCCGCTGCGGCTGCGCCAAAGTCCCATT  
GAGTGGAAACGAGCTGATGAGCACCCCTGCTCGGCCATGGCCAGGCGCTGGAGCTGGGGTTGGCCAGAGCC  
AGCAGCAGCTGCGTCAGGCCAGCTCGGTGAGCAACAGCTGCAGGGGGTGCCTCAGCAACTGAGCCAGCT  
GGCGGCCAACACCAGCAGTTTACCAGCAGTGGCAGGAGGCCGACCGCCAGCGCATCGCGCTGGAAGGA  
GAGGTAAAGGGGATGGGCGAGCAGGAAGCGACCCCTGCGCCAGCGCTCGAACAAAGGCGCCACCAGCCTCG  
ACGAGCAGATGGGCGGCCAGCCGTGGCGCCAATGGCTCGGCAGCCAGCAGTGGCACGAGTGGCAGCGAGC  
CTGCGAAGCCTGGCTGCACGGCCAGAGTGGAGTGGGAGCGGCTGGCCAGCGAGATCGCCAGCCTCACCCCG  
GCCCTGAGCGCACAGGAGGCGCGCCTGCAGACCCAGCGGAGCTGCTGCACAACTCGAGCGGGACTACA  
AGGAGCACGAGCAGCAGCGACAGGGACTGCTCACAGCCGACGCGCTTGTCTTGGCGGTGAGGAGATCCC  
GCTGGTTCGAGAGCCGCTGGCAACAGCGACTGCAACAACCTCGCCAGCGAACTGGAGCTGATGCAAAGCGGC  
GCCCGCGTTCTGCACGAACGGCAGACCGAGCTCAAAAACCCGCTCACCCATGTGGAGCAGGAGAAACAGG  
TAAGCAGCCGCGCAAACGGGAGGTGCTGGGGCGCTGGGCCGCCACGCCAGTACCCCTTGGCATTTGCCGA  
GTACGACCTGCGCCGTCTACTCGCCATCAGCCCCGATGAACTCAAGGCTCGCCGCACTGCCCTGCAAGGG  
CTGGAGGATGCGGTTGGCGAGGCGCGCACCCGCTTGGCGAGCGGCAACGGGCGCTGGCACTGGAGGAGA  
GCAAGCGGGATCGTATCGCGAGCACCCCGAGCTGGCCGCCCTGCCGATGCAGAGCTGAGCGAGCA  
GCTGACGGCGCTCGATGCCGTTGTTCGCGCCCTTGAAGAGCAGCTGTTTCAGTGCAGAGCAAGCTGGCA  
CAGGCCGAAGCCGAGCCCTCAAGGCGGGCAGCCTGCAACAGGAGCTGGCTGCCAGCAGGCAATAGCCG  
ATCACTGGCAGCAGCTGTGCGATCTGATCGGGCAGGCCAACGGCGCCAAGTTCCGCACCTTTGCCAGAG  
CCTCACCCCTCGAGCGTCTGCTGCTGGAGGCCAACGCCAGCTCGCCGAGCTATCACCGCGCTACCGGCTG  
GAGCGGGTACCCGGCACCGATCTGGCGCTACAAGTGGTGGATCTCTACATGGGGGACGAGGTGCGTTCCGG  
TGGACTCCCTCTCCGGTGGCGAGAGTTTTCTGGTGTGCTGGCGCTGGCGCTGGCCCTCTCCAGCCTCTC  
GTCACGGCAGACCCAGGTCGAGTGCCTGTTTATCGACGAGGGGTTTGGCACCCCTGGATCCGGACAGCCTG  
GATCTGGCGCTCGCCAGCCTCGACTCCCTGCAGGCCCGGCTCGCCAGATCGGGGTCATCTCCACGTCC  
AGACGCTGGTGGAGCGGATCGGCGTGCAGATCAGGGTGAAGCCCTCGGCGGCGGCGAGAGCCGGGTAGT  
GGTTCCCTGAGAGCCCTCGGCTCCCCCCCCACCCGTAACAACAAGACCCCGCCAATTGGCGGGGTCTTG  
CTGAGAGGCTATCAGCCGAAGCGGTAAGCGCCATATAGAGGCTGCCGCCATCCCAGCTTTTCGTGCAGCC  
GGGTGGGCGCTACACCATCGGCGGCCCCAACGCCACAAAAGAGCGGGCGCAGGTGGTCATCGTGGGGATG  
GGACTCCACGGCTCCGGGGGCTGCCGACGATAGTCGAGCAGTGCCAGCCGATCCTCCTCGGCCATTTTC  
TGCTCCAGCCAGTCGACAAACTGGCTGGCCACTCCGGCACTGGCGAGCCTTCCGGTGGCAACGCCCGCA  
GGTTGTGGGTGATGGCGCCAGAGGCAAGGATGCCAATCCCCTGACTGCGCAGCGCCCCAATACCTCTCC  
CAATTGCCACAACCTGGGCTGGGGTGAAGCTCGCGGGAATGGAGATCTGCACCAGCGGGATCTCGCTGCTT

GGGTCGATCAGGGAGAGCGGGGACCAGACTCCGTGATCCAGCTCGCGCCGACCGGATTGGCGGTGAGTC  
CGGCCAGTGTGAGCTGGTTCGCTCACCCCTTGTTCGACCCACTCGGGGTGCTGGCAGGCCAGCGCATCCG  
GTAGAGGGGGCTCGGGAAAGCCGTAAAAGTCGTACATCAAGGTCGTTTGGGCTCGACATTGATCTGTAGC  
TCGCGGCTGAACCAGTGGGCGGAGATGACCACCAGCCCTTGAGCTCACCCAGACGCAGGGTTTCGAGAA  
AGCGGGTGGCGGGTTGCTCACGCAGCACCAGATCCGGTGCGCCGTGAGAGATAAACAGACGGGGGCGAG  
GGACATAAAGCGGACTCCAACAAAAGTATCAGGGGGCGATACCGGAGGGGATATCGCTGTTGGAATCGATT  
ATCCTCCCACCATGAAAGGTGAACAATCCAGCAAGATAGATAAGCACTATCAACTAATGGTTGATAATTT  
CACGCTTTCACGACCGGTAAACAGCAATAGATATCAAGGCTGCGGCGCTTCCGGCAGCGGTCCGGCTACT  
CGAAGCGCCATACGGGTGCTGCACTGTGATCCTGCCACTCTCGCCACGCCAATCCCTCGGCGGCCACCT  
CCCCTTTCAGTGGGAGGAGAAAATCGCCAGCAGTCGCGCATTTATCAGGCCAGTAGCGGGCTGGCAGCGT  
CTGAACCAGCAGCAGGGCGGGCCAGCAAGAGCAGAGCCCATCCGGTTTCATGGCTGTTTTTTCATCCCT  
GCCTCCTTACCCGTGCGCCAATGAACCTCAACCCGGCCAAACAACCACAGATGGCAACATTTGTATCCCT  
TCAGCCCGAACCTGTGGCCGTATGCTCTAAAATGTGACTCACAGGAAAACGTTATCCCTGAAAAGAAAAC  
GTTATCTGGTCAAAAACGTTGTTTCTGGATCATAAAAAAGATTCCAAAAACTGGTGATATATTGCTCGGCGGA  
AATTCTTAACCATGAAGATTGACATGAAAAAGACAAAATTTGTCTGCACCATCGGTCCGAAGACCGAAT  
CCAAAGAAATGCTGGCCAAAATGCTGGACGCCGGCATGAACGTCATGCGCCTGAACCTTCCACGGTGA  
CTACGCCGAGCACGGCAGCCGCATCAGCAACCTGCGCGCTGTGATGGCCGAGACCGGCAAGCACGCAGCT  
ATCCTGCTGGACACCAAGGGTCCGGAAAATCCGTACCATGAAGCTGGAAGGCGGCAACGACGTCGCGCTGG  
TCGCTGGCCAGACTTTCACCTTACCACCGACCAGACCGTGGTTGGCAACAAAGACAAAGTGGCCGTGAC  
CTATGCAGGTTTTCGCCAACGATCTGCGCGTCGGCAACCGCATTTCTGGTTGATGACGGCTGATCGGTCTG  
GACGTTATCGAAATCACCGAGCGCGAAGTTATCTGTAAAAGTGTGAACAACGGTGACCTGGGCGAGAACA  
AAGGCGTTAACCTGCCGGGCGTCTCCATCAAGCTGCCGGCCCTGGCCGAGAAAAGACAAGCGCGACCTGAT  
CTTCGGTTGCGAGCAAGGCGTTGATTTTCGTTGCTGCTTCTTTCATCCGCAAGAAAAGACGTTCTGGAA  
ATCCGTGAGCACCTGAAAGCCCACGGTGGCGAGAACATCCAGATCATCTCCAAGATCGAAAACCAGGAAG  
GTCTGGACAACCTCGACGAGATCCTGGCTGTTTCGACGGCATCATGGTTGCTCGTGGCGACATGGGTGT  
AGAGATCCCAGTTGAAGAAGTTATCTTCGCCAGAAGATGATCATCGCCAAGTGCAACAAAGCCCGCAAA  
GTGGTTATCACTGCAACCCAGATGCTGGACTCCATGATCAAGAACCCTGGTCCGACCCCGCGCAAGGTA  
GTGACGTGGCCAACCCCATCTGGACGGTACCAGCGCATGCTGTCCGGTGAATCCCGCAAGGTTAA  
GTACCCGCTGGAAGCCGTGACCATCATGGCCACCATCTGCGAGCGTACCAGTGGCGTATGCCGTCCAAC  
CTGTCTGCTGCCAACGACAGCAACAAGCTGCGCATCACCGAAGCCGTATGTAAGGCGCCGTAGAGACCT  
CCGAGAAGCTGGACGCCCCGCTGATCGTGGTTGCTACCGAAGGCGGCAAGTCTGCCAAGGCCATTCGCAA  
GTACTTCCCGAAAGCCTGGATCCTGGCTATCACCAACAAGAAAATGCTGCCAGCTGGTTCTGACC  
AAGGGTGTGGTTGCCACGTTGGTTGACAGCATCGCTCTACCGACGATTTCTATCGCATCGGTAAGAAG  
CCGCGCTGGAAATCGGCATGGGTCTGAAAGGTGACGTGGTTGTGATGGTCTCCGGTGTCTGGTACCGAG  
CGGCACCACCAACACCGCATCTGTTACGTTCTTTAATCAGAGCTGAACGAGTTGAAAACGGCGCCTGCG  
GGCGCCGTTTTTTTTTGTCCCTCCCCCTGCTTACCTGACAAGCCCGGTGTTAGAATCCACGCGAATTTAA  
TCTATGCGGGAAATCTCCCGAATATCGCGTAATAACCCGGAAGTTATATGCCCTCAATACGTTTTAAAAG  
AGTCTCGGCCACCCTGTTGCCGCTGCTCTGTCTCCTCGCCAGCCTCTGCGTCCCGCAAGCCATGGCGCAA  
GATGTCCCCTCTCGCAACGCAGTTCAGCGAGCGCTGGATGGTCTGGGTAATCAGAAAACCCTGACCCTCA  
GTCAGCAAGCGGATCAGAAGTTGCTGACCGAAAACCCTCGCTCTGCTCGACAGCATCGACAAGGAAGAGGC  
AAAGGCCAAGACTCAGGCCAGCGGATCCGCAACCTGCCACCGAACTCAGAGAGATCAGCGCCAAGCTC  
GATGCCCTGACCAAGGGCAAGAGTGCCGAGCAGATCAAGAGCGAATACGCCAGCATGAGTCTGGCAGAGC  
TCGACAGCCGTGAGCCGGAAGTGTGGCCAATATGCAGGCGGCCAGGAGGCCCTCGGCGCCATCGGCAG  
CCAGCTCACCATCTGCAGACCTGCCCAGCGGGCCAGGCCAGCATGAGCCGCGCCTACCAGCGCAGT  
CAGGAGATCCGTACCCGCTCAACGCCGGTAAAAGCGTCTCCAGCGCCGAGAAGATGAAACTCGGTCCG  
AGCTGGCCCTGCTCGACCTGCAGCTGGGCCACCTGCAAAAAGGAGCTGGATAACCGAACCCAGCATGCAGGA  
TCTGGCGATCAAGCAGCGGACTACCAGAGTGCCGCTCTCGCCAGCGAAGAGCAGAAACTGCAGCTGTTG  
CAGGATCAGAGCAGCGCAAGCGCCTCGGCGACACCGAAAAAACCGCCGAGCAGACCGGTGAACTGGTGG  
CGACCGAAGACAGCCCCTGGTGCAAAAAGAACAGGAGCTCAACCACCAGCTCAGCCAGCAGCTGATCGG  
TGCCACCACCAGCCTCAACTCGCTGGTACAGAAAAACCTGCAAGCCAAGAGCTGGCTGGAGCGCGGCATC  
CAGACCGAGCGCAACCTCAATGAACAGGTGCAGATGCTCAAGGGCAATCTGCTGCTGTCACGCATCCTCT  
ATCAGCTCTATCAGCAGCTGGAAGCGGCGCCACCATCGCCGTCAAAAACCTGGAAGAGCAGATCGCCGA  
TCTGCATCTGGCTCAGTTCGAGCTGAGCCAGCAGCGTGACCAACTATTCCAGAAGAACCCTCTATCTGGAC  
AATCTGATCGCCAGCAGCAAGGAACCGGTGAGCGAGGAGACAAGGAGAGCCTTGCCAAGCTGCTCGACA  
CCCGCATCAATCTGCTCGATCAGCTCAACCGCCAACTCGACAGCCAGCTCACCACCGCCATCAGCCTGCA  
GCTGACCCAGCAGCAGCTGGCGCGGGTCTATGCTCTATCGAATTTACCTGCGAGCAACACATCTTCTGG  
GTAAGCAGCAACAAGCCCATCGACAGCAAGTGGTTTATCAGCTGGCCCCGCCAGGCCACAAAACAGGCCCT  
CCGACTGGGTATTGAAACCGGACTGGAAACGCTGGCGCGAAGAGCTGCTGGGGATCTCCCTGCTCGCCTT  
CCCGCTGCTGCTGATCGGCGGCCTGCTGGTCTGGAAACGTCGGCGCTGGTTGAGCGCGAGAAGAAGATC  
ACCAAGGACCTTGGCCGTTTTCCGTGAGGATAGCCAGTGGCACACCCCGCGGCCCTGCTCTATACCGTGC

TGCAACGCCTGCCGGGAGCATGTTTCATTCTGGCTGGCGGTCTGCTGCTCACCTATTGCGGTCTGCTCAG  
TCCCAAGCTGATGTTCCAGATCACCTGAACTCGCCCTCGGTTATCTGGTGTTCAGCGTCTATCTGGCG  
GTGATGCGCCCGGGCGGCATCGCCGAAACCCACTTCCGGATCCCGAAAGCGGAGCTGCAGGCCAAGCGCA  
ACAGCATGCGCTACATCTGGTTGCCACTGCTGCCGCTCATCATGCTCGCAACCAAGGCGGTGGTTGAACC  
CTCTACCTTGGGCAACGACGTGATCGGCCAGGCCATGACCCTGACCCTGCTGGGGCTGGCCGCCTATCTG  
GTGTTCCCCATCTCCCGCGCCCGCATCAAGGGCGAGGCGAGCATGCAGAAAGTCGCTGATCGCCATCGCC  
TGGCGCTGGCACCGGTGGCGCTGATCGTGTGGCCGTGCTCGGTTACTACTACACCGCGCTGAAGCTGAC  
CGGTGCGCTGATCGAATCCTTCTACCTCATCATCATCTGGAGCCTGGTCTACCGCACCGCCCTGCGTGGT  
CTGGAGCTGGCTGCCCGTCGTCTGGCCTACCGCCGTGCGGTGGCCAAGCGTGAGCACAAATCTTCGGAAG  
ATGCGGAAGGTGGCGAGTCTATCGAAGAGCAGCCATGGATCTGGAGGATGTCAGCCAGCAGTCCCTGCC  
TCTGACCCGTACCGTGTGATGATCTTCCGGCTCGCCTTCTACTGGCTCTGGTCCGATCTGGTCCGCG  
GTCTTCTCCTACCTCGACAGCATGGTGTGTGGCACCAGTGAAGGCACCGGCGCCAAACGCGTGTGT  
TCCCCATCAGCCTGAGTGACGTGCTGATCGGCTTCTGCTGCTCGGCGGTGCCGTTACTAGCGCGCAA  
CCTGCCGGGCTTGTGGAGGTGCTGGTGTCTTCCAAGCTCAACCTGGCTCAGGGGACCGCCTACGCCATC  
ACCACCATGCTCAACTACGTGCTGATCGGCTTGGCTCCCTCACCGCTCTCTCCATGATGGGCGTGCAGT  
GGGACAAGCTGCAGTGGGTAGCGGGTGGTCTGTGAGTGGTATCGGTTTCGGCATGAAGGAGATCCTCTC  
TAACTTCGTCTCCGGCATCATCATCTGTTCGAGCGTCCGGTGCAGTGGTACACCGTACCCATCGGC  
TCCTTCTCCGGTACCGTCTCACGGATCCGATTCGCGCCACCACCCTGACCGACTTCGACCGCAAAGAGG  
TGATCATCCCCAACCAGCAGTTGATGACCGAACGGCTCATCAACTGGTCGCTGAGTGACACCGTACCCG  
GGTGATCGTACGGGTGGGCGTGGCGTATGGCTCGGATCTGGAAGTACCCGACCCCTGCTCAAACAGGCC  
GCCGACGAAAACAGCCGCGTGTGAAAGACCCGGCCCCCATCGTCTACTTCTCACCTTTGGCGCCAGCA  
CTCTGGATCACGAGCTGCGCTTCTTCGTGAGCGAACTGGGAGACCGCAACCCGGGCGGTGGACGAGTTAAA  
CCGCAAGATCGACCAGCTGTTCCGCGAGAACGGCATCGAGATCGCCTTCAACCAGATGGATGTCTACATC  
AAGAACATGCAGGGCGAAGAGCAGAAGGTGGAGTCCAACCTCCGCGCTCTGCCGCCCGCCGCGGAAGATG  
GCAAGCAGCCAGCCTGATAGCGAACTGCATTGATCTGATGGCAACAGCCGCTCACCCAGGTGAGCGGCTT  
TTTTATGCCAGCTTATGACGATAGAGACAGTTCCCTATTGCCAGCATGGCTGGCCCGCCATAACAGAC  
AGCCACAACCTTGATAAAAATATAAAGAGAAAATAAAAGTCTAAAAACAAACACTTGCCCCACACCCTAC  
TTACCGCATGGATGAAACCTTCGCCCTTCTCCCTCACCGCTTACCCCATACTGCGCTCACCTGCGCTCC  
CGGATTTTTATAAATTTTTTAATTTTTATTGAGTGTCTCTTCACTGACCATTGCAAAGTGGCGCCA  
TTCCAGCGCCGGCCCTGTGACCACCGCCCGGCTGACACCGACTTGCTCATTTGATAATTGAAAGGATCC  
GAGAGATGAAACACTCCTTGATGGTAATGGGGTTGGCCGCTGTCTGGCATTGAGCGGTGCCAGAATAT  
GGATACCAAGAAAGTCTGATAGGTGCAGCTGCGCTGGGTGCCATCGGCGCCGCTGGCTATTACGCCGGG  
AAAAAGCACAGCGATAACAAACACGAGCATGATGGCCAGCATGACGATAGCGATGACCAGCATATGGCCA  
CCAGCAAGATGCCCCGTTACTGCTCGGGGAAGCAGCCAGCAAATTCATGTCTCCCCGCGGATATCAC  
CACCGAGTCGGCAGAAGAGAGTGGCCACAGATACAAGGTCTATGGCCAGTACGAGACCGATGATGATGCG  
GTCGACTTTACCTGCACCTTCAATCACGACGGTGCCTTCTCTCGGTGCTTCGAGCTGATTGACCATCG  
GGTACAGCCAATTCACCCCATACAGGACACACAGATGAAACAGCAACGCAGCATGATCGCCAGCCTCAT  
TGCGCTGGCCCTGCTTGGCCTCGCCCCATGCGCCGGTGCCGCCAGCGGCCACTCCGGGGTGGATCTGGCC  
AGCATGGATAACAGCGTGCAGCGCGGCGGACGATCTGTTTCGCCACGTCAACGGCAACTGGCTGGCCAGA  
CCCCGATACCGGATGACATGCCGGGGGAGACCATCGGCAATCTGTTGGCGGACAAGTCGCTGGAGGATCG  
CAAGGTGTTGCTAGAGGCGCTGCTCAAGCGCCCGCAACAAACCGGAACCCCTCGCCAGCAGATCGCCGAT  
CTCTACGCCAGCTATCTGGATCAGGCCGGGCGGGATGCCAAAGGGCTGACCCCATTCAGCCACTACGTG  
ACGAGATCATGGCCATCCATGATGGCGCCTCGCTAGCCACCTACTTTGCCCGGGTTAAACAGCTGGGGGG  
CGGAGCTCCCTTTGGTATCGGGTTCATGGCCGACAAGAAACAGCCTGACAGCTACGGGATCTACCTGCAG  
CAATCCGGTCTCGGTCTGCCGGATCGGGACTACTACCTGAAAGAAGATGCCGCCAGCAAGGCTCTGCGGG  
CCAGCTACGAGCAGTTTATTACCGCCCTGCTCAACCATGCCGGCTCGAGGGGCGAGCGAACAGGCCCA  
TCGCATTCTGGCGCTGAAACCCGGCTCGCCAGCCTGCAGTGGGACAGAGTCAAGCGCGGATGACAAC  
CTCACCTACAACAAACTGCCCATCGCCCGCCTCAGTCAGTTGCTGCCACCCCTGGATTGGCAACGCTACC  
TGACAGAGGCCGGTATCGCCGGGGAAACGGAGATCATCGTCACTGAGCCGGACTATCTGGAGAAGCTGGC  
CACCGTGTGAGGAGACCAGCATCGCGCAGTGGCAATCTACTGCCTGTTCCATCTGCTACGTACTTAT  
GCGCCCTATCTCGACAGCCAGAGCAATGCCCTGCACTTCGCTTTCTACGGTACAACCCCTGAGCGGCATCC  
CCCCGAGCGGGAGCCCTGGAAGCAGGCCATGGAGGTGCTGGACGACTATCTGGGTGAGCGGTGGGCAA  
ACTCTACGTGGAGCGCTACTTCCCGCCGAAGCCAAGGCACAGATGGCGACCATGGTGCGAATCTGATC  
GCCGCTATCGCCAGGAGATCGGTGGGCTCGACTGGATGTCTGCCCGACCAAACAGCAGGCGCTGGCAA  
AACTGGCAAGGTACGGGTCAAGATCGGCTATCCCGACAGTGGCTGGATTACAGCGCAATCGAGATCCG  
TCCCGATGATCTGGTCGGCAATGCCAGAGCGCGCCACGGTGCCTTACAACGAGCACCTTGCCCGCCTC  
CATCAACCGGTGGATCGGGAGGAGTGGTTTCGACAATCCGCAGACGGTGAACGCCCTACTACAACCCGAACA  
ACAACGAGATCGTCTTCCCGGCCGCCATCTGCAACCGCCCTACTTCGATCTGAAGGTGGATGATGCGGT  
CAACTATGGCGCCATCGGCGCGGTTCATCGGTACAGGTTGAGCCATGGTTTCGATGATCAGGGGGCCAAA  
TTCGATGGCAACGGTGCCTTGCACAACCTGGTGGGCTCCGGCCGATCTCAAGGAGTTACCGCCAGAGCGC  
AAAAACTGGCGAAACAGTACGACCGTTTCGAGCCCATCAAGGGGGAGCATGTCAACGGCCAGCTGACCCT

TGGCGAGAACATCGGGGATCTCGGTGGCCTGACCATCGCCACAAGGCGTACCAGCTCGCCCTGGGCAAC  
CGCCTGCCAGCGGTGCTCGATGGCTTTACCGGCGAGCAGCGATTCTTTATCGGCTGGGCACAGGTGTGGA  
AAGGGAAGTACCGGCCCCGAGCTCGCTGCCGTTTTGCTCAAGACAGATCCCCACTCGCCGCTGGAGTACCG  
GGTCAATGGCGTCGTCGGAATATGCCGGCCTTCTATCGCGCCTTTGCCATCAAGCCGGGAGACAAGCTC  
TATCTGCCACCTTCCGAGCGCGTGAAGATTTGGTGACCACCAGCAGGGGCCCTGGCCCCAAAAGCTCCAG  
CAGATGGACCACCTCCACCTGAGCTGAAGATGACCGACACAGGGAGTGTCTGTTTTACCTTGCCTGGTTT  
TTCCAGACCCACATGTGCCTGACCATGTGGGTTTTTTTTGACCCTTTTGTCTACCCCTTCTCCTCAGCCT  
GCCCAGCTTTACCCGATACGGCCACGGCACACAACCTCCGCCATTTTCTCGCCTTTGCCTTTGGCTGAAC  
AACCGGGCGGCGGAACCGCTATAAAATCGGTTTACCACCAAACAGGTCTGACCTATGGTAAAGCATGTAAAA  
GATGCATCGTGGAGCCGCTTTTCTATGAATGACCGAGAATGCAACAGATCCTGTTTTCGCTCCTTCGAT  
GTGATCCCGCTGCCTATTCTGGTGTGAGAATCCATTGCCCTCAGCATGGCTGCTCACCAGCATGATCC  
CGCAGCGGCGCCACCGCTTTCTGAATAAAGCCTTTATTGAGCAGCTGGGCTACAACCTTGACGATCTGCC  
GGACATGGCTTCTGGTTTTAGGTCGCCTACCCGGATGAAGGGTATCGCCGCACCATCATCGACTCCTGG  
CACTCCCAAGTGAACAGAGCTTGTGCGAAGGGCTGGAGGTTGCCGAGATGCCTGCGCTGATCCGCTGCA  
AGAGCGGTGAGTCGCGCTGGTTTATCGTCACTGCCCAACTGGGTGCCGATGCCATCCCGGATGGCCATAT  
CGTCACCTTTTCGCGATATCCACGACCTGCAGTGTATGGTGGAAGAGGTGAGCCGCCCTCCTGCACCGAT  
CCGCTCACCGAACTGACCAACCGGCGCGGCCAGCAACAGTTGCAGGCCCTTTGGTTGCAGGGTGAGC  
CCCTCTCGGTGGTACTGGGAGATATCGACCATTTCAAGCAGGTCAATGACCGCTACGGTCACCCCTGCGGG  
TGATGCCGCGCTCTGCGCTGTGCGCCACGCCATGGCTGGCCAGCTGTTGCCGGGGGAGAGTCTGGCCCGT  
TGGGGTGGAGAGGAGTTTCTGTGATCCTGCCTGGTTGCGATATTGACCAAGCAGCACGGCGCGCCGAAC  
AGCTGCGCCAGCATGTGAGTTCCACCCGCTTACCATGGCAGGGGAAGCAGCTATCCCTCACCATCAGTCT  
GGGGTGTGCCAGCATGAAGGGGCAGGAGGGCATCGACTATCTGCTGATGATGGCAGACCAGGGGCCCTTTAT  
CAGGCCAAGGATCAGGGCCGTAACCGGGTTGTCTATCTCGACGGAAATAGAGTGACCACCAGAAAGGGAAAGC  
CGACTCGCGGCCATAAAAAAACCGAAGCACAAAGGCTTTCGGTTTTTTACTACGCAACTGGCGTGAGCCAGC  
CGGGCATTACTTCTTGATACGGATAACCGGGGTCTCGCCACAGTCACGGCACCAGTCATTTTGATCAGC  
TCTTTGATCTCGTCCATGTTGGAGATGACAACCGGAGTCAGGGTAGACTTGGCTTTTCGCTTCCAGAACGG  
CCAGATCGAACTCGATGATGGTGTGCGCCGCGCTTACCTGTTGACCTTCTGAGCGATACGCTTGAAGCC  
TTCCGCTTTTCAGTTCAACGGTGTGATACCGAAGTGAACGAAACAGCTCGATACCGGAGTCGGATCCGAGA  
GAGAACCGCTGGTTGGTCTGAAAATCTTCCGATGATGATGATGATGATGATGATGATGATGATGATGATGAT  
CCGGCTTGATGGCGATAACCGTCACCAACGATCTTCTCGGCGAAGACAACGTCAGGCACATCTTCGATCGG  
CACGATTTTCGCCAGACAGCGGAGCAAAGATTTTCGATGCCGCCGGTGTGAGAGCTATCGTTCGAAAACAGT  
TTCTTTCAGTTTATCAAACAGACCCATATAAAAGCTCCTAGAGATGATTTGTGCGCTGTTTGCAGCCGATCTT  
AGCAGACTGCCTTCTGCTTAATAAAGTTATCTACGCATGCTTCGATTTTCAGCGGCGGTGGCAAAACTCAG  
TGCTTGATCAGCCATTGCCTTACATCTTCAAGTTGGTGTGCGGATAAGCTTCTTGATACGCGGTACA  
GAGATGGCGCTCATGGAGAACTCATCCAGACCCATAACCAGCAGCAGCAGGGTAGCGCGCTCGTCACCAG  
CCAGTTACCCACACATAACCGGTCCACTTGCCTTCGGCGTGGGACGCATCGATAACCATCTTGATCAGGGT  
CAGGACGGAGGGTGACAGCGGGTTGTACATGGCGGAGATCATCTCGTTACCACGATCGACAGCCAGGGTG  
TACTGGGTGAGTTCGTTGGTACCGATACTGAAGAAATCCACTTCCCTTGCCAGATGATGAGCCATCAGCG  
CAGCGGCCGGGGTCTCGATCATGATACCCACTTCGATGGATTTCATCAAAGGCTTTGCCCTTCGGCGCGCAG  
TTCGGCTTTTCAGCGTCTCTACGGTGGCTTTTCAGGCTACGGAACTCTTCGACAGAGATGATCATCGGGAAC  
ATGATGCGCAGTTTTCGGAAGGCAGAGGGCGCGCAGAATGGCCCGCAGCTGAGCGTGATGATGTCTTCGC  
GGTGAAGAAAATACGCACGGCACGCCAGCCAGGAAGGGGTTTCATCTCTTTTCGGGAAATTCATGTACGG  
CAGCTCTTTGTGCGCCCAATGTCCATGGTACGCACGATGATCGGCTGATCCGGCATCGCTTCGGCCACT  
TCTTTGTAGGCTTTGAACTGCTCTTCTTCGGTTCGGCAGCGCTCACGGTCCATAAAAAGGAACTCGGTAC  
GGTACAGACCCACGCCTTCGGCGCCATTGCGGATGGCACCTTCGGTATCCTTGACGGTACCAGATGTTGGC  
GCACACTTCGACCTGGTGACCATCCAGCGTGTGAGCAGCAGATCTTTCAGCTTGCCAGCTCATCTTTC  
TCGGCCTGGAAGTGAAGCTTCTTGGCTTCGGTTCAGTTGTTCTGCGGTTCGGATTGATGATGATCT  
GGTTGTTGATCGCATCCAGCACCAGCATGTCAACATTCTTGACGCGCTCGGTGATGTCGTTGGTGCCTAC  
CACGGCCGGCAGCTCCAGGGAGCGGGCCATGATGGAGGTGTGAGAGGTACGGCCACCAGTGTGCGGTGACG  
AAACCCAGCACATATTTTCAGGTTGATTTGAGCGGTTTCAGACGGGGTCAGGTCTTTGGCGACCAGGATCA  
CCTCTTCGTCGATGGTGTGCTCAGGTTGACAACGGCGATGCCAGTACGTTCTTGACCAGACGGGTACCAGT  
GTCACGGAAGTTCGGTAGCGGTTTCGCGCAGATAAGGGTTCATCCAGCTCGGCCATCATCTTGGCGTACTGT  
TCGATCACCTCATAGATGGCTTTGTGACGGAAGCCTTGTCTCTTTGATGAAGGATTTGATATCCCCTT  
CCAGCTCCTCATCTTCGAGCAGCATGATGTGGCCTTCGAAGATGGCCTCTTTTTCTCACCAGGATGCG  
ACCGGCCATCTCTTTGATGGCTTCCAGCTGGGTAGCTGACTTGGTACGAGCTTCGAGGAAACGGTTGATC  
TCGGCATCAATCTGGTCAGCAGAGATTTTGCCTGATTGATAACGATTTTCATCTTCTTTCAGAAGAAGCG  
CCTTACCGAATGCGATAACCGGGGGACGCAAGAATGCCAGATATCATAATCCTTCCCTATTTAAAACGACTGT  
GGGGGAGGAATCTAAAGCTGGATTACTCCAGCTCGTCCATCAGGGCAACCAGCTTCTCAACAGCTTGCTG  
AGCATCCGGGCCATCAGCCTGGATAGTTACGTTGGTACCCTTGGTCAGGCCCCAGGGTCTGCAGCTTGAAC  
AGGCTCTTGGCGCTGGCGGACTTGCCACCGGAGACCACAGTGTCTCGCTTTGGAATCTTTGGCTTCTT  
TCACGAACTGAGCTGCCGGACGGGTGTGAGGCCGTTTTTCAGCAGTAATAACAACAGACTTCTCGTACAT



GGTTTCACCCCATATTATTGATATTTTTTGGTGGACTGGTCGTTTTTGAAGCAACCTGACCCACCGTGTC  
AGTATGGATATGTTGTAAAGTAACGAAAGCAGACCCGCAATGGTTAATCCAGGTCAAGTTTCTGTGCAG  
TAATCGGGCGCGCTGGTTGGCAATTTTCAGTTATTGGGCTACAAGCCGCATCAGGACTGACCTGAAATTAT  
TTTATAACGAAAAATAACACTTTGTTACTTTGTGATACCCAGCCAGCAAACACCCGCTGACGCCGCACAG  
GATATGAGATTTAGAGCGGAATGTCTGCTTTTTTTCTCACTCCGGAACCTGTTATTTTACCCCAAAAAAT  
AAGGATCAAGTGACACTAACAGGGGTTGAGTCTAGCCCATAAAGAAAGCGGCGCTCCTGGGAGCGCCGCTG  
TTTTGAAAGATTACGATCAGTTACTGCTGCAGCTCCTGCTCGCTGAACACCCCGGCAAACAGGGCGCTGG  
AGAGGTAACGCTCTGCCGCGCTCGGCAGGATGACCACTATGGTTTTGCCTGCAAATTCGGGCAGCTCGGC  
CAGACGGCTGGCTGCCACCACCGCAGCACC GGAGCTGATACCAGCCAGGATCCCCTCCTCCTCCATCAGG  
CGACGGGCATCTCGATGGCTTCATCGCTGGTACCTTCTCCACCCGATCGATAAGGGAGAGGTTCCAGGT  
TGCCAGGGATAAAGCCGGCCGATCCCCCTGGATCTTGTGGGGGCCCGTTTAAATCTCTTCCCGGCCAG  
CTTCTGACTGATGACCGCGACTCGGCCGTTTCGACCCGACAGAGACCACCGCTTGCCTTTAGTCTGC  
TTCAGATAGCGGGAGACACCGGTAATGGTGCCACCGGTACCGACCCCGGCCACGAACACATCCACTTCGC  
CGTCAGTGGCATCCCAAATCTCGGGGCCGTTGGTCTTTTTCGTGGATCTCCGGGTTGGCCGGGTTTTCAA  
CTGTTGCAGCAACACATACTTGCTCGGCTCGGATTTCGAGGATCTCGTTGGCCTTGGCAATGGCTCCCTTC  
ATGCCGAGGGGCCCTTCGGTCAGCACCAGATTGGCGCCGAGCGCCTTGAGCAGCTTGCGGCGCTCCAGGC  
TCATGGTGGCCGGCATGGTCAGGGTATGGGATAGCCGCGAGCTGCCGCGACAAAGGCCAGAGCAATACC  
CGTGTGGCCGCTGGTGGGCTCGATAATCTCCTTACCCTTGGTCAGGATGCCGCGCTTCTCGGCATCCCAG  
ATCAGGTTGGCACCGATACGGCACTTGACGCTGAAGCTGGGGTTGCGGCTCTCGATCTTGGCCAGCACGC  
GGCCTTTGGTAACACGGTTAAGACGAACCAGCGGGGTGTGACCGATAGTCTGGCTGTTGTCTCAAAAAAT  
TTTGCTCATGGCGCTATCCCTGTGTTTGTACGACGATGAAACAAGATTACCCTGTGGTTTTCTGAATGAG  
AAGTGACTATTGTTATAACCATATGGTATTACAACATATAGAGCTTATTCTCTCTGGCCCCGACTCCG  
GGCGCAATCGTCAAAGGAACCGACGTTATGGGATTTTTAGGAAAGCAGCCAGTATCTCGCCTCCGATGCA  
TTGAAGATGGCGGTCAATGCCGCCATCACCTCGAAAAACCGCTGCTAATCAAAGGGGAGCCGGGCACCG  
GCAAGACGGTGTGGCGGAAGCGGTGCGCGACCATCTCGGTACAGACCTCATTGCCGGCATATCAAGTC  
CACCACCAAGGCCAACAGGGACTCTACGAATATGATGCGGTGGCCCGCTGCGGGACTCCCAGCTCGGC  
GACCCAGAGTTGGCCGATATCAGTCACTACATTCGTAAGGCAAGTTGTGGCAGGCCTCAGCGCCGAGC  
AGCGCCCTGTGCTGATCGACGAGATCGACAAAGCCGACATCGAATTCCTCAACGATGCTGTTGGA  
GCTGGATCGGATGGAGTTCGACGCTACGACACCGCGAGTCAAGGGCACGCCAGCTGGCCGGTGGTTC  
ATCATACCTCCAACAACGAAAAAGAGCTGCCGGATGCCTTCTTACGCCGCTGTTTCTTCCACTACATCC  
GCTTCCCCGACAAGGCCGAGATGCAGGCCATCGTCAAACCTCCACTACCCCGACCTCAAGGAGAGCCTGCT  
TGGCGAGGCAATGGAGCTCTTCTTCGAGCTGCGCGAGGTAGAGGGGCTGCGCAAGAAACCTCCACCTCA  
GAGCTGCTGGACTGGATCCGCTGCTCTTGGCCGACGATATCGCCCCGAGGCGATGCGCGCCCGCGAGC  
CCGGCAAGCTGGTGCCTGCGCTATATGGCGCCCTGCTCAAGACCAGCAGGATCTGCATCTCTTCGAGAA  
GCTCGCCTTTATGGCCCGCGCGGCAGCTGACCCATGCTGATCGACTTTTTTACCCACCTGCGCCGCCAC  
AAGCTCCCCTGCAGCCTGCGCGAGCTGCTGGACTTGACGCGCACTGGCAGCCCGGCTGGTGCCTGCCG  
ATATGGACGAGTTCTACCAACTCTCCCGCTGCCTGCTGGTAAAAGACGAGGCCACTACGATCGCTTCGA  
TCGCTCCTTCGCCGAGTACTACGAGGGGCTGGAAGCCATCCCCCTGCCGCGGAGAGCTGCCCGAGGAG  
TGGCTGCGCAAGGAGTTGCAACGGCTGTTGAGCCAGAGGAGAAGGCGCTGCTCAAATCCCTTGGCGGAC  
TCGACAAGCTGATTGAAACCCCTTAACCAGCGATTACCGGAGCAGAAAGAGCGCCACGCCGGCGGCAACAA  
GTGGGTGGGGACTGGTGGCAGCAGCCGTTTGGCCACGGCGGTTTTCACCCCGAGGGGGTGCGCATGGGT  
GGAGAGGGGCAGCACGGCAAGGCGGCCAAGGTATGGGAGGCCCCGCTACTATCGCAACTTCAGCGATGACT  
CACCGCTTGGCCAGCGCGCCATCCAGCTGGCGCTGCGCAAACCTCAGGCGTTGGGTGCGCAGAGGCAATCC  
CGACGAGCTGGATCTCGACGACACCATAAAAAAGTTCTGCCCGCCAGGGCTGGCTCGATGTGAAGCTGCGA  
CCCCAGCGCCACAACGGGGTCAAGCTGTTGGTTTTCTTCGATGTGGGAGGCTCCATGGATGCCACGTGG  
CCGAGGTGACGCGCCTTCTCCGCCCTGCGCCACGAGTTCAAGCATCTGGAGTACTTCTATTTTTCAAA  
CTGCCTCTACGACTTCGTCTGGAAGGATAACGCCCGCCGTTTTGAGGAGCGGTTTCGATACCTTGCAGGCTG  
CTGCGCACCTACGGCAGCGACTACCGGGTATCCTGGTGGGGATGCCACCATGGGCCCCCTACGAGATCA  
CCTGGCCCGCGGCAGCGTCGAGCAGTGAACAGAGGAGTCGGGTGAGGTGTTGGCTCACCCGCTTGCAGCA  
ACACTTTCCCAAACCTGGTGTGGATCAACCCACCCCGCGGGAGTGGCTCTGGCACCTTCGATCAAG  
TTGATGAATGACGTGGTTGGTGGACGGATGCATCCGCTGACTCTCGCGGGTCTCGCTGCGGCGATCGACC  
AGCTCTAACCCCTCTTACCCTATAAACCGACAAGCCGGAAACGCACCCGGCGAGGAGCAAAGATGACCTC  
TATCGTGATCAGTGGCTCAGGCCTCTATAACCCACCCCTTTCGCGTCAGCAATGAAGAGCTGGTGGCCGCC  
TTCAACCAGTATGTGGATCTCTACAACGAGGAGAAGCCTCCGCCATCGACGCCGCGCAGCTCTCCGCCA  
AGCAGCACTCCAGCTGCGAGTTCATCGAGAAGGCATCCGGCATCAAGAGTCTTATCTGGTGGAGCCGAGA  
GGGAGTGTCAACCCCGACATCATGCAGCCTCTGCTGGCGGAACGGCCGATGAGATGCCCTCCATCATG  
GTGGAGATGGCAGTAGCCGCCGCGGAGCAGGCACTGATCGCCGTCGGCCGCGAACCGGGCGAGATCGATC  
TGGTCATCGTCGCCGCTTCAACATGCCGCGCCCTATCCAGCGCTGGCCATCGAGCTGCAGCACTATCT  
CGGGGCGAGCGGCATGGCCTTTGACATGAACGTGGCCTGCTCGTCTGCCACCTTCGGCATCAAGACAGCC  
GCCGATATGCTGGCGGCAGGCACCGCCAAACTGGCGCTGGTAGTCAATCCGGAGATCTGCTCGGGACACC  
TCAATTTCCGGGACAGAGACAGTCACTTTATCTTCGGCGATGCCTGCACCCGGGTGCTGCTGGAGCGGGA

GACCGATTGCAAGGTGGCCAATCCGTGGCAGCTGGTAGCCAGCAAGCTGGTGACCCAATACTCCAACAAC  
ATCCGCAACAACCTTCGGCTTTCTGAACCGACTGAGCCCGGTACCCGCTACGGCGACGACAAGCTGTTTT  
GCCAGCAGGGGGCGCAAGGTGTTCAAGGAGGTGTTGCCGATGGTGTGCGACCAGATAGCCAACCAGCTCGA  
CGAGCAGGGGTGGCCTGCCGAGAGCCTGAGCCGGCTCTGGCTCCATCAGGCCAACCTTACCATGAACCAG  
TTCATCGGTGCGAAGCTGCTGGGCCACGATGCCAGCCAGCAGGAGGCGCCGGTCATTTCTTGATAGCTATG  
GTAATACCAGCTCGGGGGTTCCATCATCGCGTTTCATCTGTACAATCGCGACCTTCCCTGCGGGGGCTCG  
CGGGCTACTGTGCTCCTTTGGCGCTGGCTACTCCATCGGTAGCCTGCTGCTGCTGCGCCTGTAATGGCGG  
GCCTCCCGCCGACATAACAATAACCAGCAACATGGGTGGGAATATGCAGAGGATCACGGGGCGCTGCGCC  
CTGCACTACGGGGTAACCCTGTCACTATTTTGTCTCTATGGCTGGCAGGTTTGCCCGTTTCTCGAGAGTC  
TCACCTGCTCCAGTTGCTGGGGCCAACCCTGGTGACGTTTCGCCATCATGTTTCGCCGTGCGCAATTGGCT  
ACTCTCAAGGCGGGCCCTGCCGCGCAACGGACTGGACGGGTTTGACTGGAGGTCGGTTTTCTACCTGCTA  
GGGGCACTGCTGCTCTCGGGCTACAACGCCCTTGCCACGACTTCCCGCTGGAGAGTCACCTCAAGGTGC  
TGCTGGGGATGACTACCCTCGGCTTTCTGGTGGCGGCCGATCTGACCTGGAGCGGGATTGGAATCGGGC  
CAGAACACGGCAAGCCGAGCAGAGCCAGGCACTGAGCCACCCGCTGGCCATGCCGCTGCCACGCAAGTTC  
ACCCTCTTTACCCTGGCGACCTCACCTGCTGGGGGGCTCTTCTTCTTGTGTTCAACAAGGATCTGG  
AGTGGCTGGTGACGGTGGAGCGCAGTCTGCCGAGGGTCGATGCCAGCACTACATCCTGTGGGAGATCGC  
CTTCGTAATGACGGTGACCTTCTGTTATCTCGCCCTCATCATCCACGGTTATGGTCGCAATCTCGGCCTC  
TCCCTGCGCCAGCAGACCCGACCATGGCCAGAGTGCAGTGGGTGACTTCGACGCCCCGGGTGCCGGTCA  
CCCCGGGATGACGAGTTTGGCCTTATCGCCGCCAGCACAATCAGATGATCGGTGAGCTGAAATCCCGCAG  
CGACGAGCTCAACCTGACCCGCGACGTGGCCATCCTTGCCCTCGCTCGCTGGCGGAGACCCGGGACAAC  
GAGACCGGGCGCCATATCATTTCGCACCCAGCACTACGTCAAAGCGCTGGCGCAATACCTCAGTCGCAGTG  
ATTGGGATCGCTATCCGCTCGATGACGCCACCATCGACCTGCTGTTCAAGTCGGCTCCCCTGCACGATGT  
GGGCAAGGTGGGCATTCCCGATGCCATCCTGCTCAAACCGGGCAAGCTGACCGACGAGGAGTTCGCCATC  
ATGAAGCGCCACCCGAGATCGGGCCGATGCGCTGGCGAGTGGCAGGCGCAGCTGGGCTCCAATCCT  
TCTTGCGGGCTGGCCCGGAGATCTCCCTCACCCACCAGAAAAGTGGGATGGCAGCGGCTATCCGGCTGG  
GCTGGCGGGTGAGAATATTCCTCTCTCGGGCGGCTGATGGCGGTGGCAGATGTCTACGATGCCCTCATC  
TCGAAACGGGTCTACAACCCCGCCTTCAGCCATGAGGAAGCGAAGGAGATCATCGTGAAGGGGAGCGGCA  
GCCATTTTGTATCCCGCATTTGTCGCGGGCTTTCTCGCCTGTGAGGCGCAGTTCAGGGAGATTCCCGACA  
GTTTTCAAGATCACCACTGAGCAAGTACATCCCGACCTTGCCCTGATGGCTGACAGGGCACTCCGCGT  
CATAAATTGTACACAAACAGGTCTGGCCATCGCCGATTTCAGCGCCATGCTAGCGGTATTTGCCAAGCCGC  
GCCCATATTGATATTTCCCTTTATTTACAGCTGTTTTTTTGTCAATTTTGTGATCCGGGTTCTGTGCCAATGA  
CGCAACCGGGATCACAAGATGGCAGGAAAAGACCGCAATTTGCCCTCCGGCGCCAATGATGGCTTCCAAT  
GAAAGCGAGGTTTGTATCATCCGAGACATTTTTTCATCTGTGTCGGCTACAAAAGAATACCTCATGT  
ACACACAGTTCTTCGGCCTTTTCGGAACACCCGTTTTTCATCTCGCCCAATCCCAAGTACCTCTATATGAG  
CGAGCGCCACGGCGAAGCCCTTGTCTATCTCAACTATGGATTGCAGGATGGCGGGCGGCTTTGTGCTGCTG  
ACCGGGCAAGTGGGCACCGGCAAAAACCACCGTCTCCGCTGCCTGCTGCAACAGCTGCCCGCCGAGACCG  
AGATCGCCTATATCCTCAACCCCTCTCTGACCGAACGGGATCTGCTGGCCGCCATCTGTGACGAGTTTCA  
ACTCCCCTATCCCGAAGATGCCGGGATCAAGCGGCTGTTTCGACCTTATTCGCGATCACCTGCTGGCCAAC  
CTGGCGGCAGGCAAGCGCAGCGTGGTACTGGTGGATGAGGCGCAGCACCTGCTGCCCGGTGTACTGGAGC  
AGCTGCGTCTGCTCACCAACCTCGAAAACCGACGAACGGAAACTGCTGCAGGTGGTGTGATCGGTGAGCC  
CGAGCTGCAAGAGATACTGCGTCAACCCCTGCTGCGCCAGCTGGCCAGCGCATTACCGCCCGCTATCAC  
CTGCTGCCGCTCTCCACAGCGATGTGGATGCCTACGTCCGCTTCCGGCTGCAAGTGGCGGGGTGTGTGC  
AACCCATTTTTTACCCCGCGCGCCATCAAGGCGCTCCATCGCCTGAGTGGCGGCATCCCCGTTTCATCAA  
TCTCATCTGCGACCGCGCCCTGATCGCCGCTTCGCCCGTGGCAGCTACAAGATTGTCCACAGCGATATC  
AGCCAGGCGCCCTTCGAGGTCAATGGCGTTCGGGACGAAGGAAGCTGGGCTCCGGTCTGATGGTGATGC  
TGGCAGGCGCCCTGCTGGTGACCGCAGGCTGGTGGGTTGGCAATTTTTCGGCGTGTCCCCACCCGTC  
GGTAGTCAAGGTGAGGTCGAGGTGCCGGTACCATCGACGAGACCCGAGCAGCAGGAGCAGTACCCGAGGCG  
ATCAATCAGGCCATCGACCCCGAGAGCGCCATGCAGAATCTCTATCGGGTCTGGGGTTATGAACCGGAAC  
CGTTTCGAGGCAACCTGTGACAACGCCCCCGTGGCGGTCTGCGCTGCCAGGAGGGAGAGGCAAGCCTTGA  
CGAGCTGCGCGCCCTGAGTATCCCGCCATGATCACGCTCACTGACCAGACTGGCGGGCTCTACTACGCG  
ACCCTGGTCAATCTGGGACCGAACAAGGCCAGCCTGATGATCGGTGACCAAAGCTGGCAGGTGGATCGCC  
AGTGGCTCAGCGACAACCTGGGGCGCAGCTACACCCTGCTCTGGCGTATGCCGAAAGGGGTGTGAGCCT  
GATCGCCAGCAATGCCGGTACAGCCAGATCCAGTGGCTCGACAATGCCCTCAGCCGCGCTGCAACAG  
CCCCGAGCGCAAGGTGCGCCGCTTCGATGGCGAGCTCAAGAACAACCTGCAGCAGTTCAGCGGGATCAGG  
GGCTCAACCCCTGACGGCATCGCCGGCAGCAATAACCCTGCTGCGCCTCAACGCCCTCTCCGGTGAACCCAT  
GCCAGACTGGAGGAGGCTCCTGATGTCTACCCTGCTCAAGGCGCTGCGCCGTGCGCAGCAACCGCAAC  
TCTCCGCCCATATTTCCGGCCATGGGCTTGCCCATGCCCCGGGAAGAGGAGCGCAGCCACGCCGATCGG  
CTGGCTGCTGGCTCCCCTGGCCCTGTTGCTGGGGGGCGGGCGCCAATATGGCTGGCATCTGCTCCACCTG  
CGCCCCATCGAGGAGAAGGTGGAGGTGAAAAGAGGTGATCACCCCGCCCTTCGTGCGGGTTGAACCCAAGG  
CAATGGTGACCCGTCCGCTGCCCGGCCCTGCCGGAGCCGGTGGTCCAACCCAGAGCAGTGGCCAAAAA  
CGAGGGGACCAGTCAGGGAATAACCCCGCGCTGAGTCTGGCCGAGCAACTGATGATAGCCCTCAATGAA

ACCCCATTCAGGAGACGCCACACGCCACCGGCCAGAACAAACGTGCAACCGGCCAGTTGATGGCGCTGG  
GCTCGGCACCCCAATCGGTGCGCCAGCAGGTACCGCAATTTAGCTATGGCTCTCATGTATTCTCTCCAA  
CCCCGCCAAGCGGGCCGTGGTGCTCAATGGCCGGGAATACCGGGAGGGGAGCGAAATCGCCCCGGGAGTC  
GTGCTCGCGACCATCGACCAGCAATACATAGTGTGTCAGGTCGCCGGACAGAGCGTGACCCTCAAGGCGC  
TGCAGGATTGGCGAGGGTGAGTACGCACCGTACCCTGATGTTGCTGGCAAGCAGGATGCACCTCACCTG  
AGTGCCACTTTTTGTGAGCATTCAAAGGTTTACGGTGTGATGAAAATATCCATTTTTACGGTTTTGGCGCGCC  
CGGACCCGTTGTGTACAGCCACCGGCCGTACACAATACGCAGCCGCCCCAGAACCTGGAATTTGTTGAT  
TAATATGACGCTACGATTACAGGGATGACATTTTGACCATACTGCTGGCCAGTGCCGGCGGCTTCCCATG  
ACCAGAGTCACCCAGGTGGCCTTTCTGGTGCTGTTGATCATGCTGGCCAGCAGAGCGCCGCCCTCACCT  
GGCTGTGCTCACCTGGCAAGCCCGCAAACAGTCAACCGTGGCAACCTCCGCCGTGGCGGTCAACGG  
CCAGAACAACCCCGCCCTTGAACCTGGGCGAGGTGAGCCGACTGGCGCTGTTTGGCAAGGCGATCCCCAAG  
GCGCAGGCCAAAGCCGCGCTGGCCGCCAATGCCCGCTACCCAGCTCAATGGCCAGTCAACGGAGTGT  
TGGCAAGCTCGGATCCCGCCAAATCCATCGCCATCATCGCCATGTCCGGCATCCAGAACTCCTACGGGGT  
CGGTGACATGATTGACGGCACCCAGGCGCGGATCCGGCAGGTCTATCCGGATCGGGTGATCATAGAGCGG  
GATGGCCGCGACGAGACCCTGATGCTGGATGGCGAGGAGTATGGCAAGCAGCTGCCGCAGACCAACGCCG  
CCTCCCTTGGCTCCCTGCACAGCGAGCTGATGGCCGATCCGGGCAAGATCACCGATTACCTCAATATTTT  
ACCGGTTTACGGTGGATGGCCGCATGACCGGCTATCGCTCAATCCGGGCAGCAATCCTGAGTTTTTCAAC  
CAGAGCGGGCTGCAGGCCAATGACCTGGCCATCAGCATCAACGGGCTGGATTTACGGGACAACATGCAAG  
CCATGCAGGCAATGCAGCAGATGGCTGGCGCAACGGAAATGACAGTGACCGTCGAGCGACAGGGCGAACA  
GTTTCGACATCTATGTGCGCTTGTGAGAATAATGATTTGGAGTCGTACCAATAATGACCACTAAAGGGAAA  
AGCTGGCGTCTGGCCACTATCGCAGCGGCAGTGTGATGGCGGGCTCAGCTGGGCCACCGAATACTCTG  
CCAGTTTTCAAGAACGCCGACATTGAAGAGTTTCATCAATACGGTGGGCAAGAACCCTCAATAAAACCATCAT  
CATAGAGCCATCGGTGCGCGGCAAGATCAACGTGCGCAGCTACGACCTGCTCAATGAGGAGCAGTACTAC  
CAGTTCTTCTGAGCGTGCTCGACGTCTACGGCTTTGCCGTGGTGGCAGTGGACAACGGGGTGCTCAAGG  
TGCTGCGCTCGCGGGATGCCAAGACCTCCGCCATTCGGTGGTGGATGGCAGCAACCCGGGCTCCGGCGA  
CGAGATGGTGACCCGGGTCGTTCCGGTGCAGCAACGTCTCGGTCCGTGAACTGGCGCCACTGCTGCGCCAG  
CTCAACGACAACCGCGGTGGTGGCAACGTGGTGCCTACGAGCCCTCCAATGTGCTGCTCATCACCGGCC  
GCGCGCCGCTGGTCAACCGCTTGGTGGAGGTTGGTGAACCGGGTCGACCGCGCAGGCGATCAGGATGTGGA  
CATCATCAAGCTCAAATTCGCTCGCCGCGGGAAATGGTGCAGGCTGGTGGCAACCTCAACAAAGGATGGC  
AACCCCGAGGGGGCACCGCTTCCCTGCTGCTCTCCCCAAGGTGGTGGCCGACGAGCGACCAACTCTG  
TGGTGGTGAGTGGTGAGCCGAAAGCGCGCGCCGCATCATCCAGATGGTGCGCCAGCTCGACCGCGACCT  
GCAAAGCCAGGGCAACACCCGGGCTTCTACCTCAAATATGGCAAGGCCAAAGATATGGTTCGAGGTGCTC  
AAGGGGGTCAGCTCCAGCATTGAGGCCGACAAGAAGGGCGGCGCAACCACAGGTGGCGCCAGCATCG  
GCGGTGGCAAGCTGGCCATCTCCGCTGACGAGACCACCAATGCGCTGGTTCATCACCGCCAGCCGGACGT  
GATGTCCGAACTGGAGCAGGTGGTGGCAAGCTCGATATCCGCCGCGCCAAAGTGTGGTGGAGGCGATC  
ATCGTTCGAGATGCAGGATGGCGACGGCCTCACCTTGGCGTCCAGTGGGGCAATGCCAACGGCGGTGGCA  
CCCAGTTACCAACTCAGGTCTGCCTCTCGGCAGCGCCATTGCGGCGGGCAAGGATTACCAGAATGGCAA  
GACCGACACCGCTGCCGGTCTGCTGAAAGAGTTCAACGGCATGGCCGCGGTTTTCTATCACGGCGACTGG  
GCCATGCTGGCCACGGCGCTGGCCTCCAATACCAAGAACGATATTTCTCTCCACCCCGAGTATCGTACCA  
TGGATAACAAGGAGGCCTCCTTCAACGTGCGGTGAGGAGGTCCCGGTTTCAGAGCGGTTTCGCAAAGCTCCAC  
CACCAGCGATCAGGTGTTCAACACCATCGAGCGCAAGACGGTGGGCACCAAGCTGGTGGTGACCCCGCAG  
ATCAACGAAGGGGATTCGGTGTGCTCAATATCGAGCAGGAGGTCTCCAGCGTCGCCAGACCCAGGCGA  
CCGGTACTGCCAACCTTGGCCCCACTTTCGATACCCGTACCGTCAAGAACCGGGTGTGGTCAAAGCGG  
CGAAACAGTGGTGTGGGCGGTTTTGATGGACGAACAGACCAAGGAGCAGGTCTCCAAGGTGCCCTTGTG  
GGCGATATCCCGGTGCTGGGCTATCTGTTCCGCTCTACCTCCAACACCACCTCCAAGCGCAACCTGATGG  
TCTTTATCCGGCCAACCATCTTGGTGTGATGCGGACGTCTATACCGGTGTCTCCAGCAACAAATACAGCCT  
GTTCCGCGCCGAGCAGCTCAATGCCGCTCGCAGGAGGGGTATCTCACCTCCCCCGCCGCTCAGGTATTG  
CCTGCCTATGGCCAGGATGTGATGGTGTGCGCCGAGCTGCAAAAAAGAGATCCAGAAGCAGATCAACGAGA  
TGCGGAGCAGACAGCAGAACACTGTGAGACCACCACCCCGTTTTGTGCAGAGTAAGCCCTGATGAGTGCC  
TACCATCTGGATGGAAGCGTCCGGCCTGCGCCACTGCCCGAGCTCCCCTTTGTCTTTGCCCCGAATTTTCG  
GGGTGATCCTGATTGAGCGGGACGGCGCCCCGCTGCTGCAGTGGCGCCCCGGCGTCACCCCGCAAGCCCT  
GCTGGAAGTGCGGCGAGTAGCGGGTTGCAGCTTCGCGGTGGAGCAACTCGACAACGAGGCCCTTCGAAGAG  
CTGCTGATGGCTCACTACCAGCGAGACTCCTCCGAAGCGCGCCAGCTGATGGAAGATCTCGGCAACGAGA  
TGGACTTCTTCGCCCTGGCCGAAGAGCTGCCCCAGAGCGAAGATCTGCTGGATGCCGATGACGACGCCCC  
CATCATTGCGCTCATCAACGCCATGTTGAGCGAGGCGATCAAGGAGGAGGCTCCGATATCCATATCGAG  
ACCTTCGAGCGGGCACTGGTGTATCCGTTTTTCGCATCGATGGGGTACTGCGGGAGATCCTGCGCCCCATC  
GCAAGCTAGCCTCACTCCTGGTCTCCCGGATCAAGGTGATGTGCGGGATGGATATCGCCGAGAAGCGAGT  
GCCCGAGGATGGCCGTATCTCGTTGCGTATCGGCGGTGCGGCCGTGACGTGCGTGTCTCCACCATGCCG  
TCCAGCTACGGCGAGCGGGTGGTACTGCGTCTGCTCGACAAGAAACAGTGGCGCTCGAGCTCAAGCAGC  
TGGGGATGACCGCGGCCAACCGCACCATCATCAGCGAACTCATTCGCAAGCCTCACGGCATTATTTCTGGT  
TACCGGGCCGACCGGTTCCGGTAAATCCACCACCTCTATGCGGCGCTCTCCGAAATCAACTCGCGGGAT

CGCAACATCCTGACGGTGAAGACCCCATCGAATATGACCTCGAAGGGGTGGGCCAGACCAGGTCAACA  
CCAAGGTGGATATGACCTTCGCCCCGGGCTTGC GCGCCATCTTGC GTCAGGATCCGGATGTGGTGTATGGT  
GGGGGAAATTCGAGATCTGGAAACCGCCAGATTGCGGTGCAGGCGTCCCTCACCGGTACCTGGTGTATG  
TCGACCCTGCACACCAACACCGCCATCGGCGCCATCACCCGGATGCGGGACATGGGGATCGAGCCCTTCC  
TGCTCTCCTCGTTCGCTCTTGGCGGTGCTGGCCAGCGGCTGGTGCGCACCCCTCTGCCCCGATTGCCGCGC  
CCCCGCGCCCATCACCGAGCAGGAGCGCCTCGCCATGGGCATCGAGCTGGCCCCGATCAGCAGGTGTGG  
CGCCCGGTTCGGTTCGAGCTGTGCAACCACACCGGCTACCGTGGCCGACCGGCATCCACGAGCTGGTAG  
TGATCGACGAAGCGGTGCGTGAAGCCATTACAGTGCCAGCGGCGAGCTCGCCATCGAGCGGCTGATCCG  
CGGCCACACCCCAAGCATCCGCCGTGACGGCATCGACAAGGTCTCAAGGGGCGAGACCAGCCTCGAAGAG  
GTGCTTCGCGCTGACCCGGGAAGATTGAGATGGCGGCATTGCAATACAAGGCCCTCGACAACAAGGGGCGC  
AGCAAGAGCGGCGTGTATGGAGGGGGATTCCGCCCTCAGTACGCCAGCTGCTGCGCGAACAGGGGCTCA  
CCCCCTCGAGGTGAACGAGACCACCGAGAAGGCGAAACGGGAAGCGACCCGCTTCGCCCTGTTTCGGCG  
CGGTGCCAGCACTGCCGAGCTGGCCCTGATCACTCGCCAGCTGGCCACTCTGGTGGGCGCCGGTCTCACC  
ATCGAAGAGGCGCTCAAAGCGGTAGCCGAGCAGTGCGAAAAAGCCCACTTGC GCTCTCTGGTGGCGACCG  
TGCGCAGCAAAGTGGTGAAGGCTATTTCGCTGGCCGACTCGCTGGGGGCTTTCGCCATGTATTGACCA  
GCTGTTTCGCTCCATGGTGGCGCCGGTGA AAAATCGGGCCATCTGGAAAAAGTGC TCAACCGCCTCGCC  
GACTACACCGAGCAGCGCCAGCATATGCGCACCAAGCTGCTGCAGGCGATGATCTACCCTATCGTGTCTA  
CCTGTGTGCCATCGGGGTTATCTCGATCCTGCTCACCGCCGTGGTACCCAAGGTAGTGGCCCAGTTTGA  
ACACATGGGCCAGCAGCTGCCGGGCACCACCGTTTTCTCATCGGCACCAGCGAACTGATGCAGGCCTAC  
GGCCTCTGGTTTCTGCTGCTGATCTTCTTGGCAGCTTTGCTGCGCTGGTGGCTCACCGATGAAAAGC  
GTCGCGGACGCTGGCATCAGGTGCTGCTCGGCCTGCCGGTGGTGGCCGGTTCAGTTCGCGGTCTCAACAC  
CGCCCGCTTCGCCCGTACTTTAAGCATCCTCAACGCCAGCGCGGTGCCGCTGCTGGAGGGGATGAAGATC  
TCCGGCGAAGTGCTCTCCAACGACTTTGCCAGAATGCGCATTTCTCGAGGCCGCCGAACGGGTGCGCGAAG  
GGACCAGTCTGCGCAAGTCGCTGACCGAGACCAAGATTTTCCCGCCATGATGCTGCACATGATCGCCTC  
CGGCGAGCAGAGCGGTGAGCTCGACAGCATGCTGGAGCGGGCGGGCACAACCAGGATCGGGAGTTTGAA  
TCCCAGGTCAATATCGCCCTCGGGGTGTTGCAACCCATGCTGGTGGTCTCCATGGCCGGGGTGGTGTGT  
TTATTGTGATGTGCATCCTGCAGCCGATCCTCGAGCTCAACAATATGGTGAATATGTAAGTTTCCGGCGT  
TCGGTGGCCCGCTGGCGCCCATCGAACCCACCGATGATCACTCTCTGATGGGCCATCCCATGCTCAT  
CGTTACGGAGCAACTCATGAACAAACGTCGCAACTCCGTTTTTACCCTGCTGGAAGTCATGATGTCTATC  
GTGATCCTCGGCATTCTGGCCAGTCTGGTGGTGGCCAACTGATGGGCAACAAGGAGAAAAGCTGACCAGC  
AGAAAGCGGTCTCCGATATCGTGGCGCTGGAAAACGCCCTCGACATGTACAAGCTGGACAACAACCGCTA  
CCCGACCACAGAACAGGGGCTGGATGCGCTGGTGACCAAGCCTTCTATCGATCCGGCGCCGCGCAGCTAC  
CGCGATGGCGGCTACATCAAGCGCCTGCCGCAAGATCCCTGGGGCAACCCGTACCAGCTGCTGAGCCCGG  
GCCAGTTCCGCAAGATCGACATCTTCTCCATGGGTCTGGATGGTGAAGCCGGTACCAGTACGACATCGG  
CAACTGGAACCTGAAGGATTTCCAATAAGTGATATGTGCCACCAGCACTCCTTGTGAGCTGACTGCATGA  
AGCGATCTCTCTCTTTTCATCGCCAATCCGGCTTTACTCTGTGGAAGTGTGCTGGTTCGCCATGCTGAT  
GGGACTGGTGGCCACCGCCGTCACCCCTCAGCATGGGAGGCGCCAGAGGAGATCGGGAGCTGGACAAGCAG  
GCGCGCCCGCTGATGGCGACCCTGCAGCTGGCGCAGGAGTATGCGGTGATGGATGGTTCGGCTGGTGGGCA  
TTCGTATCGAGGATAACGGCTGGCAGTTTATGCAGCGTCAGGCCAAGGATCGCAAGTGGCTGGCCCTGAC  
TGGCGACAAGCAACTTGGGCCGGTACAACCTGGCCGAGAACATGACGCTGGCACTGGAGCTGGAAGGCTTT  
GGCTGGCAGCCCGATCCCGACGAGAAAACCGAACAGAAAGCGCGACGAGAAGGAGCGCTCGCCGCAAGTAC  
TCATCTTTCCGGGCGGCGAGCTGAGCCCGTTTCGTGCTCACCTTACCCAGCAGGATGACGATGCCCGCTA  
CACCCGCATCGTCAAGGGGACGAGTTTCGGCCGCTCACCTTCTCACCCAGCAGGATGACGATGCCCGCTA  
AGCGAATGAACGCTCGCGGCATGACGTTGTTTGAAGAGGTGTGATGGTGGCGCTACTGCTGTGCCAACC  
ACACCCTCAACAGGTGGCAGCATGAACGCCCCGGGCATGACCTTACTCGAAGTGTGATGGTGGCGCTGGCAG  
TCTTTGCCATCGCGGGTCTCGCGGTAATGAAAACCGCCAGCGAACACCTCTCGGCCCTCAACTATCTGGA  
GCAGAAGACACTCGCCACCTGGGTGGTGGAGAACCAGTTGGTGC AACAGAAAGCTCGAGAACAAGTGGCCC  
GGCGACAGCTGGGTGGAAGGGGATGAGCAGATGGCGGGCAGCACCTGGTACTGGCGCTATCGCGGCGTTG  
CCACCGCCGACAACA ACTTCCGGGCACTCGATATGGAGGTGCGCACCGAGGCCAAGGCCGAGAACC CGGT  
CGCCATGATGCGGACCTATATCAGCCGATGACCCAGCACGTTGCCCGCACGCTCGCCCCGTCCGTACAG  
CCGGTTTACCCCTGCTCGAAATGCTGGTGGCCATCGCCATCTTCGCCAGCCTCAGCATGGGCGCCTATCA  
GGTGTGCAAGGGGTGCTCACAGCGACGAGGTGGCCAAACGCAAGGAGGCCCGCTCAACGAACCTGCAG  
CTCGCCTTACCCCTGCTGGAGCGAGACATCACCCAGATGGTGCCGCGCAGCGGTGCGATCGAGGGGAGAG  
ACAACAAGGTGCTGCTGGCGGCTTCCCGCTTCGGCCAGCAGAGCGATGACTGGGGCATGGCCTTTATGCG  
CAGCGGCTGGCTCAACCCGGACGGTATGCTGCCCCGCTCCCATCTGCAACGGGTGCGGTGGCGCCTCAAG  
GATCAGAAGCTGGAGCGCCTGAGCTACCTCTATCCGGATCCGGTGTGCGGACCGAGCCGCGCATCCAGC  
CGGTGCTGACAGGGGTACCGGCTTTCGCCCTTACTTCTTCGACAAGGGCAACTGGAAAGAGGAGTGGAG  
CCAGCGCAGCGTGTGCCCCACGGGTGGCAGTGGAGCTGGATCTGGAAGATTACGGCACCAATTCGCCGT  
CAATTCCTGATTGGCGCCGGCGGCCAGCGCGCCGAAGAGAAACAGCCAGAGCAGCAACCCCGACCGGGG  
GCGGCAACAACAGCAATAACGGGAACAACGGCGGCAACGGCAATACCAATGGCGGTAATGGTGACAGCCA  
GAACGGAGGGGGCGCAATGCGGGCTAATCTCGCCGCTCCCGGTGCCAGCGCGCATGGCGCTGCTGGT

GGTGCTGCTGATCCTCTCGGTGATGGTGATCATCGCCAGCAATATGAGCGGCCGCCTGCAGCTTGAGCTG  
CGCCGCACCGCCAACATCACCACAGGCAAACAGGCGTGGTGGTATGCCCTCTCGGCAGAAGCGCTGGTGA  
GCAAGGTGCTGACGCAGGATTTCAAGGACAACCCCGAGGTGGTCAACCTCAGCCAGAAGTGGGCCCGCAA  
GAACACTGTGTTTTCCGGTGGACGATGGCCAGCTCAAGGGCGAGGTGACCGACCTGCAATCCTGCTTCAAC  
CTCAACAGCCTGAGCGTGGCCTCCAAGGCGGGGAGCGGGCAGGAGCTGGCGCAGCAGCCCTATCCGGTGC  
AGGTGTTTTCGGAACTGCTCAAAACAGCTGGCGATGGATGATTACGAGGCAGCCCAGCTCACCAGTGCCAT  
CCGTGACTGGACCGACAAGGATACTGTGCTGGTCTCCAGCCTTGGCGCCGAGGACGCCATTACGAGGGG  
CTCAAGCCACCCTACCTCACCGCCAACAGTGGATGCTGGGCAAGGATGAGCTGAGGGCGGTGCGCGGGG  
TGACGGCCAAGGTCTATGCCAAGCTGGCCCCCTACGTCTGCACCCTGCCAACGACAAGTTGAAGATCAA  
TATCAATAACCTTGGCCCCCAGCGCCCCGAGCTGCTGGTTGCCCTCTATCTGGGCATATCGGGCTGGAT  
GACGCCAAGCGGGTCTGAACGAGCGGCCACAGAAGGATGAAAAGAGAGCAAGCTGATGACGGACATGC  
TCGCTCCGGTTCGATTTCGGTGAAGGACTGAAAGATGGCTGGTGGTCAAGAGCGACTTCTTCGAAGCCCC  
AGTCGTGGCCGAGGTTCGGCGACAACCGGGCCGGGCTCGAAACCTGTTCCAGCGGGGCAAGGACAATAAA  
CTGGTGATGCTGCGCCGCTCAGTAGCGGCGCCGAATAAACAGCGCATCTGCGGGCCCTCGCCCGGGGT  
ACGAGAGATGTTGGATGCAGCCTGCGGGCTGCGCACCAGTGGCCAGGGCGCACAAACGCCCTTTGCAAACC  
GGTATCGCAGGAGAGAGATGCGTGAGCGAAAAGTCTGGTTCATCCGACTGGGGACCAATAAAACAACAACCCG  
TGGCCTGGCTGGTCTGGTCGAGTCAGGAGCAAGAGATCATCGCTCCGGCACCCCTGCCCTCGGCCGATGC  
CCTGGGCGAGCTGCAGGAGCGGGCCGGTGGCCGCCCGTGGTACCCTGGTGCCGGGCAGCGATCTGATC  
TTCCGGCGCGTACCCTGCCGGTTCGCTACAACCGCCAGTACGCGCGGCTCTCCCTACCTGTTGGAGG  
AGCAGATCGCCTCCGACGTGGACGAGCTCCATCTGGTGGTGTGGCCACGAAGGGCAGCAGGTGATCT  
GATGGCGGTGGATCGGCAGAAGATGGCCGAGTGGCTCGGCTGGCTCGATGCCGCAGGCCCTCAAGAGCCTG  
CAACTGCTGCCCCGATGTGCTGGCGCTGCCACAGGCCGCTGATGGCTGGTCTGCGCTGCAACTCGGCAATG  
AGTGGCTGGTACGCCAAGGCCCTGTTCAGGGGATCGTCGCCGACGAGCCACTGCTGGCCATCTTGCTGGC  
AACCGAAGCCGAGCCGGTACCATCCACAGCCACACCCCGGTGCCCGCCATTGCCCGCCGCAACTGGCAG  
GCAGCGGAGCCCGAGCTCCCCATGCTGCTGCTGGCCAAAGGGGCGCTCACCTGCCGGGCAACCTGCTGA  
CCGGCCCCCTACCGGCCCCAGACCGAATATGCCCGCTACTGGTTGCAGTGGCGCAAGGTGGCCATCACCGC  
CGCCTGTGCTGCTGGTGGCCCTCGGCCAGCGCGGGGTGCAGCTCTATCAGCTCACCAGCAGGACAAG  
GCGCTGAAACCGGATCCGCGCCCTATACCCGCATCTTCCGAGTGAGAGCCGCATCGTGAACGTGC  
GCAGCTCAGATGACCCAGCATCTGCAACAGATGGGACAAGCCCGCAAAACGGCGTACTGCTGATGCTCAC  
CGAGCTGGCCCCACCTTTGCCGAAGTACCCGGTCTGAAACCACAGGTGATGCGCTTTGATGCCAGTTCG  
CGCGAGCTGAGGCTGCAGGTGACCGCTCCCGGCTTTGCCGAGATCGAGCGGTTCCGCGAGCTGGCTGGCA  
AGCAATTCAGAGTACAGCAAGGCGAGGTGCGCAGCACCCGAGGGCAAGGTAGAGGGCGCACTGGTGTCAA  
GGGTAAATCATCATGATGGAAAAACTGCAGAGCTGGTGGCACGGCATCACAGCACGGGAACAGCGGCTGG  
TGGTTCGAGGCGGCTTTGCTGCTGGTGGTCTCTTCTACTGGAGCGTCTGGCAGCCATCGCCAACCG  
CATCGCGGAGCGGGAGCGGCAGGTGCAGAACAGCAGCAGACCCCTCACCTGGCTCAAGGAGAAGGGTGAA  
GAGGTGCTGGCCATGCAGGGTGGCTCGGGTTCGCCAGATCGATAACAGCGGCACCCTGGAAGGGGTGGTCA  
ACCGCACCGCCTTCAACCACAAGATCAAGATTGCCCGGCTGCAACCCAGGCGCAGGAGCTGCAAGTGTG  
GATCGACACGGTCCAGTTCGATGACTTGGCTGCTTGGCTCTCCACGCTGGTGGAGCAGCACGGCATTCAG  
GTTCAAATCATCGAGATCGCCCCGAGGATCTGGCCCCGGTCTGGTCAAGGTGAGACGTTTGCAGTTGA  
GTCGTCCACAATGAAAAACGCATCCTGATTGCCAGCCTGTTTCTGGCCGCTATCTGGTATTCCTGCTG  
GCCACCCTGCCTGCAGCACTGGTGGCTCGCCATCTGCCGCTGCCGCTGCCAACATTGCCAACCTGCTGAAAC  
TGGAAAGGGGTGAGCGGCACGCTCTGGAGTGGCCAGATTGCCCGACTGCAATATGCCAGCGAATCGGTGAA  
CCAGCTGCGCTGGGATCTCAACGGCTGGTTCGCTGCTGCGCTTCGCCCCGAAAGTGGCCATTCGCTTTGGC  
GATCGCAACGGGCTCAATGGTCAGGGCGTGTGCGGCTGGAATGGCTCCGCCTTCGGCCGTGACCTGACCC  
TTAATGCCCCCGCCCCCTGGTTGCTAAGCCGGGTGCCGATGCGCCAGCCGATCCCGCTTACCCTACCCGG  
CCAGCTGCAGCTCAAAGTGGAGCAATTTGCCAGGCAACCCCTGGTGTGACAACCTTACGGCAACCTC  
GACTGGTACAACGCCAGTCCGATACCCCGGGCAAGCTGGATCTGGCTGACCCCGAGTGAACCTCA  
CCTGCCTCGACTCCAAACTGGTGGCCGAACTCAAACAGGGCTCCGATGCGGTGCAGACCATGGGTGCGCT  
CGAGCTGCAACCCAATGGCCAATACCTGTTCCAGGGCACCCCTGAAACCAGGGCCAGAACTGCCACCGCAG  
ATGCAACAGGGGCTCCCTTCTCGGCCAGCCGACAGTACAGGGCCGCTTCCCCCTGCGCTATCAGGGGC  
GGATCTAAGCCATCATTCAAGGTGAAAATGGCTCAGGGACAACCCGAGCCATTTTTATCGTCTATGTGAC  
GTGTCCGTTGAAATGCCAAATACGGCAGATACAAAAAGCCCAAGCTATTGAATCGCTTGGGCTTTCTCT  
TTGAATATGGCGGAGGAGGTGGGATTTGAACCCACGGATGGTTCGCCATCGCCGTTTTTCAAGACCGGTG  
CATTCAGCCGCTCTGCCACCCCTCCGAACGGCGTGAATACTACGCTAAGCCCTTGTTCATATGCAATACA  
TATTTCTGTGGGATAGTGTGCGGGAGCAAAATGGCAGGTGGCTTGAATTTGTTCCCTCGTCAATCCCTATT  
TGTTCTACATACAATGCGTAAACATGCAGTAACAAACAGCGATCACGAGGGCGGTGCTCGCCGTCTCACC  
CGGACATCAAGAGGACACCCAAGATGGATACCCGTTCTATCTACACTGGCACCCAAAGTGGCGTACGCGA  
TACCAACAAGGTGCTGCGTAAACACCTATATGCTGCTCTCCCTCACTCTGGGCTTCTCTGCCGTGGTGGCG  
GGTGTGCTACCGTGTGAACATGCCCGGCTGCACTGGGCGGTGTTCCCTGATCGGTGCTACGGTCTGA  
TGTTCTGACCGAGAAGAATCGCAATAACGGCATGGGGCTGGTCTTACCCTTCGCCCTGACCGGTCTGCT  
GGGCTATAGCCTGGGCCCATCATCAACATGTACATGAACAATGGTGGTGGCGAGATCGTGTGACCGCC

CTTGGCGGCACCGCGCTCACCTTCTTCGGTCTGTGCGCCTATGCCCTGACCACCAAGCGTGACCTCTCTT  
TCATCGGCGGCATGCTGTTTCGTCGGTTTTCTGGGTACTGCTGGTGCCATGATTGCCAACATCTTCCTGCA  
GATGAGCGCCCTGAGCCTGGCTCTGTCCGCCATGTTTCATGCTCTTCTCCTCCGGGGCCATCCTGCTGACT  
ACCCAGCAGATCGTGCGCGGCGGCGAGACCAACTACATCTCTGCCACCGTACCCTGTATGTCTCCATCT  
ACAACATCTTCTGAGCTTGCTGAGCCTGCTTGGCGGCAACCACAATAATCAGAAACCCCGCTTCGGCG  
GGGTTTTTATTGGCGCCGATTTTTGTGTCAGGATAAGTTGTAAATCAAGGATATGAAGCGAAGTGGCCCTGA  
TTTGGATCAGGGCCACTTCGCGCTTGGCGGGTACTATCTCGCTCTCGTTTCGATCAAGGGTTTTACCTG  
TCTCATGCCGATGGATCTCTCTGGCCTGCTGCGCCGACTGCTGACCGATAGTCACATCTACTTCGCTCTC  
AAAGTGCTGCTGGCCATTCTCGGTCTGCTCGCCTTACCCTGGCCACCGGCAATATCCAGCTCACCGTGC  
TGCTCTCCCTCGGGTAGTGGCGGGCGCCATCGCCGAAACCGACGACAGCCTGTGGGGACGGCTCAAAAA  
CCTCGCAATGACGCTGATTTGTTTCATGTTTCGTCCTTCTGATGGTGCAGTATCTTACCCACCCCTGG  
CTGTTTGCCATCGGGCTTCCAGCTCCACCTTTATCTTCTGATGGTGGGGGCGCTCGGTGCCCGCTACG  
CCACCATCAGTTTCGGCTCGCTGCTGATCGCCATCTACACCATGCTGGGTGCCGCAAGGCACCGGTCT  
CTTCTACCAGCCGCTGGCCCTCGGCGCTGGCGCCCTCTGGTACGGGCTGGTCTCGTTTTATCTGGCTCTGG  
CTGCTGCCATACAAAAACCTGCACGAGCAGCTGGCCAGAGCTACTTCGCCCTTGGCCGTTACCTGCTGG  
AAAAGTCCCGCTTCTTCCCGCGGACGAGCAGCGCCAGGCCATTCGCCACAATCTGGCCCAGCTCAA  
TATCAATCTGGTGAAGCGCTGACCTCACCAATCGGCCCTCAACGCCCGCTGAGCCGTCGCCATCCG  
GCCAGCCCCGAGCTGGCCAGCCTGCTGCGCCTTACCTGCTGGCACTGGAGATTCACGAGCGCGCCACCT  
CCAGCCACTACCCCTACAGCCGACTGGAAGCGGAGCTCAAGCAGGGCATACTACTGGAAGGATTTTCAGGA  
GGTGTTCCTGCAACTCTCCGAGGCGTGTGACGGCTCGGTTACGCCATCTGGTGCACAAGCCCTACGCC  
CATAACAAGCGCATCCACTGGACGCTAGAGGCCCTCGGCGATCAGCTGGAGTTCACCAATCTCAAGCAGC  
ACTACCCGAAAACCTGCTGACGCCGATGAAGTTCTGCGCCGCAATCTGGCCAGCATCAACCAGTTGCT  
CGGTAGCGCCGAAGTGTGCAAAAACCCCGAGCAACCAGAGCAGGAGCTGCCCCGCGTGGCGCGCCCGCC  
CGCCTGCCGCTGCTGACCCAGCTCAAGCAGCACCTCACCTTGCACTCAATGGTGTTCGCCATGCGCTGC  
GCCTATCCTTGGGGCTGGTGATCGGCTACGGCATACTGCAAGCCTTTGATCTGGAAAAGGGCTACTGGAT  
TTTGCTGACCGTGTGTTTGTCTGCCAGCCAGCTACAGCGCCACCCGCCCGACTGGTGCAGCGGATG  
CTCGGACCTTCGCCGATTCTGGTGGGCATTCGGGTGCTCTGGCTCTTCCCCGAGCTGCACATTCAGC  
TGGTGGTGATGGGGCTGGCCGCCTTCTCTTCCACCCAGGTGCGCAACAATACTACAGCGCCGCGGCTCTG  
CTTTATCACCTCTACGCTGATGGCCTTCAACCTCCTCGATGGGATCGGCTTTGCCATCTGGGGCCA  
CGGCTGCTCGATAACCTGCTCGGCTGCCTCATCTCTACGGGCTGGTGGCTGGTCTGGCCGACTGGC  
AGTACAAGCGGCTGCCGACCCTGATCGCCAATTCGCTCTCGGCCAACGCCCGCTATCTCTCGGCGGTGCT  
GGCGAGCCTCAAGCAGCAGCGGGACGAGTCCATCGACTATCGGGTGGCGCGCAAGAGCGCCCATCTGGCG  
GACAGCGAGCTGGCCACCGCCTGGCAGAGCATGCTGGTGGAGCCGCAAAAACGCCCGCCGCTTCTCGATC  
TCTGCTTTACCTCACCTGGCGCAACCAGCCCTGCTCTCTACATCTCGGCGTGGGGGCCCATCGCGA  
CAAGCTGGAGGCCATCAGCGGGCTCGATGAGGTGCGCCACCACATCTGCCACACCCTGGAGCAGGCCGCC  
GGCCATCTGGCGGGCAATCCCTCCAGCTCCATCGGAGGTCAGTGCCAGTGATAAGTCCGGACAGCAGCG  
AGGAGCAGCTGATGCTGACCCAGCAGCTCAACCTGATCAGCGAGCTGGCGGATCAGCTGCTGCATCTGGC  
CAACGAGAGCCGGTTGCTCACCGGGGATCAAGGCGCTACCATGCCCGCCCAATCCTGATAGCCCATTAG  
CGAGGAACCTCATGTCTGCGTCCGAAAAACATCAGCTGGAATTC AACGGCCAACTCATCGAGACCGATG  
CCAAGGGCTACCTGCTCAACAGCAACGACTGGAGCGAGGACCTGGCGCTGGTGTGGCCGCGCAGGAGGG  
GATCACGCTTGAGGAGCCGCACTGGGAAGTGGTGCCTTTGTGCGCGCCTTCTATCTGGAGTTC AACACC  
TCCCCCGCCATCCGTGCTCTGGTCAAGGCGATGGAGAAGCAGTACGGCCCCGAGAAGGGCAACAGCCGCT  
AATCTTACAAGCTGTTCCCGAAGGGCCCGCAAGCAGGCGACCAAGATTGGCGCCCTGCCCAAACCGGT  
GAAGTGCATCTGATCCCATGCATCTCATCCATAACAACGGGGGCCCAACTGCGGCCCCGTTGTGTTTT  
GGTGCCTATCTTCGCGCACCTCGTATTATATCTCTCAGGCTTCCAGCCAGCCTTAAATCCGCTTATCA  
GCCAGCGCCACCAGCTGCTCTGCCAGCCGGTGACCATGCAGGTAGGAGTAATCAGCTCGCTATCTGCCT  
TGCCGATTGCAATCTGCTGATAACCAGTACTCCAGCATGGCGGCAAAAGCCGCGCTGGGCCAGCACCGGCTG  
CCAGTCTGTTGGGGCTAAGCATCTGCACCTGCTTGTGCGGGCGATGCTGCCGCGAGTGCAGTTCTCAAGG  
TGCAGGGAGAGATTGTGCCATAGGCATCGATGCGCTCCTCGGTGATCCCGGCGCTGCGGTTTCATGCTGC  
CGCTGATGGCGGATCGCCGCTCTGCCAGCTGACGCTTACCCCGCCAAACAGGCTGCTGTCTTTCGCATC  
CGGTGCAATAACCGCATGAAAGTGCCTCGCCCGCCGACGCCCATAGAAGCAGAGGCTGTCGAGCACATGG  
ATAAAGTTCGTCGAACATAAAAATCCCGCGCCAGCCCCGCGAGGGCGAAGCGGTGTTTTCTGCCAGTTAAGCT  
CGGTGAGCGGCTGGGCCCGTGCCTCGCCATGGCGGGCAGATAGCGGCGGTTAAAGCCGTTAAAGAGGGG  
GCAATCTTGCAGGATGGCGAGGTTGGCCAGCGCCTCGGCTCGGCCAGATTGTGCGCACAGGGGCTTGTCA  
ACAAAGGTGGGGATGCCTGCCCCGAGGCACTGCTCGGCCAGCTCGCGGTGAACGGCGGTGGCGGCGTGGGA  
TCATCACGGCGTGGGGCGGCTGGCCAGCATGGCCGCCACATCGGTAAGCACTCGGCGACCCGATACTG  
GCGGGCCAGCTTCCCCAGCACCGCTGGATTACGGGTGCAGAGCAGCGGGGTGATCCGCTCATCGCTGGCA  
AGCAGCGGCAGATAGGCTTTTTGGGGCATATCCCCAGACCAATCATGGCAATGCGCATCTCAACTCTTT  
TTCACTCGATAACGGGACAAGCGGATAACTGCCCGCACCATCGCAGGATTTCTCCCCGAGATCCAGCCTG  
CCGTTAGCGCACTGGCTGGCGTGTGCAGCTCTCGGCAAAACGGCGGCTTATCCGGGTATGGCAAGATCGC  
AGACCGACTTGATCACCTCGGCCAGCCACTCGATGGCGAGATTGCCCTGACTTTTGGGTGTCTGCCGAC

CACCACCTCGAACGGCTGGGGCGCCCCAGCCATCGCCACGGTGCGAAAATCCCCAAGGGCGGCGATGGCC  
GACGGAATGCAGGCCGCCACGTCAATTGACCGACATAAAGGCTTGCAGCGAGGTGTAACAGGGGAGCGTGC  
CCACCGCCGCGCTGGCAACCTGCTGAGGGCTCATCTGCCCTTCGAAATTGCCGACGCTGTTGGCGAACTG  
CACAAAGGGGATGGCCGCCAGATCCTGCGGGGCGTGTGCCGGAAGATATCGGGAGTTCGCGGCGCAGCACG  
CAACAGTAGTGATCCCCGGCGCAGGGTGGCACGCAGCAACCCCCGGTTCGAGATAGGCATCAAAGCCAATCA  
CCAGATCGACCTCGCCGCTGGCCAGCGCCTCCAGATGCTGCTCGGCCTGAAAAGTCCACCACATCGAGCCG  
GATGGAGGGGCGCTGAGTGCAGGGGCGCTCGCCAGCCTTGGGATAATGGCGAGCTGGGCATATTCGTTG  
GCCATCACCTGAAGGTGCGCTCGCTGCTGGCGGGGTCGAAAGGGGGCAGCCACAAAAGACCCCGTCAATAT  
CGGCCAGGATCTGCTCGAACTTGTGAGCCAGCTCGCAGGCGTAGTCGGTTGGCTGCAATCCGGCGCTCTG  
CGCGATAAAAAGCTCGGCGGGAAAGAGATCGCGCAGCTTTTTTCAGATGGCTGCTCACCCCTGTTGGGAG  
ATCTCCAGCAGCTCGGCAACCCCGCAGACACTCTGTATCTCACCAGCAGCACCAGCACCCCTCATCTGCC  
TGATATCGATCTTCTCCACCCTCACCTCACCAATTTTCAGTTGTATCACAATACAACTACCCATTATTTAC  
ATTGTATCACTGGCTATCTAACCTTGCAGCTCTTCCAGCAAAGCGAGGTTAACGATGAAAAGTGTCAATC  
TGATTGGTGTCTAGGGGAAAATGGGGCAAGCCGCCCTCAGTGGTCTGGGCAAGCACAAAGGTGATCACCGC  
CAGCCGATCCGGCGAGGGGTGTGATTTTCAGGTGGATATCACCCAGCCGAGAGTCCATAGAGCGACTCTAC  
CAAAACGTGGGCTCCTTCGATGCGGTGGTCAATACCGCAGGATTTTTCGAAATACGCCCCCTTGGCGAGA  
TGAGCGACGAGCAGTGGCAAACCACCATCCAGAGCAAGCTGATGGGGCAGATCAATCTGGTCAATATCGG  
CCTCAACTACATCAATCAGGGGGGCTCCTTACCCTGATCTCCGGCATCCTCAATATCAAGCCGATCCCG  
CTGGCCATTGCCGATGCCACCACAGCGGCGCCATCGATACTTTGTCCAGTGCCTGGCCACGAGCTGC  
CCCGTGGCATTGCGATCAATGTGGTCAACCCGACCGTACTGGAAGAGGCGTGGGACGTATATGGCGAGAT  
GATGCCTGGCTTCCAGCCGGTGCAGGAGCTCTGGTTCGGCAAGGCGTTTGGAGCGCTCCGTCGATGGCTTT  
ATTAGCGGTGAGGTGCTCTATGTGCGATGCTGATCCGGTTCAGGTGTGACCCCAATGCCTTTGTAATTCC  
TTGTGCGATGTTTTTCTCTTCCCCGAAAAGCTCTGCTCTCGGGGCTTTTTGCATAGAGGAACCGGAGTAGC  
GACAAAATATGATTTCAATTCGACGGCGGCACACAGATTTATGTATCCGGGTCACTGTCAGAGTGGCCT  
CGTTTGGCTTACTATGGCGCTCTTCTCCCTGTTGCCGAGCAAAGGGACTATTTTCAGGCTATTTGCCGGAA  
TGAATTACCGCTGACCAACGCTCTATTTGGCCGAGCTTATTTGGCGCGGCCACTATTTGCTGTGCGCTAT  
CGGCATTTATAAAACGCGTTATTTATGGATGTATAACGATGAAATCATCAATTGCACTCAAAGCCTTGTG  
GCCCTATATATTCGAAATATTGTCAGTTGGGCTGATGTCCAGCGGATATCATGCGCTGCCGATATTGTC  
GGCCTGGCCATTTGTCGTCTATCCGGTGTGGTGTGCCATGAGGCGGACGAGTGGGAAAAACAGGGGCTGG  
TCTATCGCGAATCGACCCAGGTTGAGGTTGATGTCAATGTGCGCGGGATCCTTATCAAGGAGCAGAGACG  
GCATCTGGAGAATCTCTATTTTTGTCTCGCCGAAAGTGTGCAAAACCAAGCTCACCCACCTCGCCCGCCTC  
AAACTGCTGCTCTGCGGCACCATGTTTGCCGTGTCACTCTATGAACTCGCGCAGCAAGCCGAGGCACAAT  
TTGCCCTGCCACCGTCAATCTGATGGATATCAATCTGCTGGATATATCCGGCCTGATGCTCGGCCTGG  
TGGGGTGTGTTTTCTCGGCCACTGTGCGAGAAAAAGCCTCTCCCTCTACGGGACCTGTAGCCATAAAAAAC  
TATCTGGTGCAGAGTCATAACGAACCCGGCGTCCAGCTCTATAGCGCAGCCATTTCTACCAAAGCGGCAA  
ACCTGCAAGTGACCCATAACCCGATGTTGATGCCTTATTGGCGTGGTATTGAGCAAGCTTTACCTCGAA  
TAACAACGACTTGGGATAACGACCTTGCGGGTTTTTCTCATCCCCAAAGCGCCCTGCTCTCGGGGCT  
TTTTGTATGGCGGGGCAAACCCGTACAGAAGATAGAAAAAAGGAAGGAAGTCGAGACTTCCCTTCTTTTG  
GCTTGTGCGAGCGCCTGTGACTCAGTTTATCTTGCCATTTCAACGGCAAAGCTGGTTCGCCAGCTGGGCA  
AAGTTGAGAGCGTGGCCAGCCGAGGGATCCGAGTTTTGCAACGTATCCTGCGCCGTGTGGATCCTGGGGT  
TGTATTCGCTGAAGCGTGACTCGAACGGCATGGCGGGGGATAGCCCTGATTTGTGCCAGGAGGCGTGATC  
CGAGCAGCCATAGCCACAGCTGTATAGCCATAGCTGACTTGCGGCAAATAGGCATCGATCAGCTGGGTG  
AGGTAGCCGGTACGCCCTTGTGCGGTGTAGTCAGTCATAAAAAACGATGTCGTTCCGGAGCCCTTGTAGT  
TGGTCATGTCCAGCTGGAGCGCGGCCAATACCTTGGTGTGGCCGCTTGTAGCGGCTGGCGATATCCTT  
GGAGCCTCGCAAGCCACCTCCTCTGCCGATAGCCGATAAATTCAGGGTGCCTCCGGCTGGCGGCC  
TGCTCGGCATGACCCGACACCTCGGTCAGGTTGGCGATGCGGAGGCGTCATCATCGCGCCGGGG  
CCAGCGTCTTGTGTTGGGGCCGAGCCTGCAGTGGAGTCGAGATGGCCACCCGAGCACCACCCTCGT  
CGGATAGCGGCTCCCTTGGAGGTCAGCACCACGGATTGTTGCGGGTAGCCGCTATGTTTGACCCGGCTG  
ACGCTGGCCCATGGCAGGGCGCTGCCGAGGCTCTGCCACTGGCTGGCCACCCAGTCCGGCGGATTGTGTG  
CGGTGGGGGTGGTGTAGTAGCGGTTGCGCCAGCCGATAGCTTGTGATAGTGTGGCGATATTGCCCTG  
ATCCAGATGAGGCAGCAGCCGGTTGACACTGGCCCCCTGGGTCAACGGCGGTGCGCTGAACAGGTTTTGG  
CTGAGGGGCTGGCCATGCTCTGCAGCGCATCGGCCAGGGTCTGTGTCACCACATAGCCACCGCAGCGCT  
GGTGCCTTTCGTGCATCAGATGCGAGAGGGAGCCAAGCTCGCTTGCCTCAATCTGGGCCAGCTGGATAGG  
CGCCCCGCTGGCACTGAACAGGGGGGAGAGCTTGGCATTGACCTGCTTGAAGTTCAACCCGCTATCGGCC  
CCAATGGTGTATCCACACGGGCGCCCCCGCTGAACGGCAAAGGGGAATCAGGGGGAGCAAAGGGCTGCAG  
TCATCGCTTTTATGTGCGATCCTTCCGGTTATGGTCAACAGTGAACAGATTTAATGGGTCTCATAAGAAG  
ACCAAGCTAGTTTAGGTACTCACTGCTGTCAAAAAGGTGGATGCCCCGAAAAGGGCGCTTATTAGCGAC  
CAAGTGTCTATGTGATGCTGATCCGGTTTCAGGTGTGAACCAATGCCTTTGTAACGCCCTTGTGATG  
TTTTTCTCTTCCCCGACAGTGCAGCTCTCGGGGCTTTTTGCATGGCGGGGGCCAAAGCTGCAACAGAAT  
GGGTTTTCGTATTGAGCCTATTTTGGCTAACATGCCGCACTTACGAAGCGACAAGGGCAAGGACCGGATG  
AGCAACAAGACACTGCAATCTCTTTTCACTACAAACGCTGGGCCGATGGCGAACTGCTGGATGCCATCG

CCACACTCGATGCACAGCAATATGGCGAGGCACACCACACCTGCCTCAGGATCTTCAACCATATCCATGT  
GGTTCGATGCCATCTTCAAGGCCAATCTGCTGGGGGAACGCCACGTTTTTACCGCCACCAATACGCCGGAG  
ACACCGACCCCTCAGCGCCCTGCGCAGCGCAGTCAACGAACCTGGATAACTGGCTGGTGAATTACGTCGCGG  
CGCTGAGCCCCGAAGAGGGGGCAACCCCCGCTCTCGTTTTGCTTTGTCGATGGTGACAAGGGGCAGATGAG  
CCGCGATGAAATGCTGCTCCATCTGGTAACTCATGGCGGCTATCACAGGGGAGCCATCGGGCGGATTCTG  
GTGCAGTGTGGCATCACGCCGCCGCGGATACCCTGACCACCTTTTTGTCATCGCAGCGAACCCGGGCGGA  
GGGGTGATGCGCCTCTGGCAGAGGGCGGGACCCGCCATGATACGCGCCTGCCTGCGGCTCACACCGCTG  
CTGCTGATTTGGCTACTAAGCGGCTGTGCCGCCGCATCGATCACTACGCGGGGCGCTTTCGCAACACCC  
TTGTATCGGGGAAACCCGCGCACCATTGCGCGGAGCTGGGCGAGCCCCAGCATTGCCAGCAGGCGCG  
CTTTCTGACCGAGGATAAGGTGCAGGGCTGCGATCGCTTTACCGTGCTCGGCAAGATCCACAAGCGCGCT  
GACGGCAATGGCCAGGCCACGGCAGCGGCTGACATTTGGGGCTGGGGGAGCTGATCCCTAGTGCCGATGA  
CAGTAGCCGGGGTCGCGCGGACTACACCCAGCGCCACACCATTACCGTCTATTACGATCGGGACGATCA  
CTACCTGTTTTACACCCTGCAGAACGCCAAGGGGCAGGAGGTAAGACAATAAGCCCCATCCCAAACCGG  
CTCACTGACCACTCAGCCGTGACAGGCACAGTGGTTGGTTGAGCCTCTATTGCCCTTCCCTATAGCCATCT  
CCTGCCCTCCCCTTGCTTACTGCTTTATCAGAACTCATCAGCCTGTCATCTGGCTGACATCCCGCGGTC  
ATTTTCAAGCCATAGAGTTTTTCACTTATTTTTCATATGGATAGATAAGGAACATCATGACTTTCCCGCG  
CTCTTCTTATGTGGCTTTGGCCGTCTCGCTGGTCTTGCTTGGCGGCTGCCAGTCAGAGAACGAATCGTCT  
ACCGACAGCCAGGGCAAACCGCCTATCAATACAGCACCAAAGCGGTCTACAGCCCGCAGCAGCAGGCGG  
AGAGCTACGAGCCAGCGCCTCAGGGGTTAGCCCGGCTTTTACCGAGATGGTGGCGGCCACGGCTCGCG  
CTCCCTCTCCAGCCGAAATATGACGTGCTGACCAAGCTGGTCTGGGAAGAGGCGCAGGTCAGGGGGCG  
CTACCCCCCTTGGGCAGGGGCTGGGAGGCAAGGTGATCTGGTGACGGCCGCCAACCAGAACTGGGCT  
ACGGCCTGCTCTCGGCGCTGGGCAAGGAGGAGCACGCCAATCTCGCCACCCGGCTGGCGGCGGGCTGCC  
GACCCTGCTCAACAGCAGCGAGCCCCACTGCATCAAGGTGGTCACTCGGGCAAGGACAGGGCCAACGAA  
AGCGCCTTCTACTTTATGGAGAGTCTCAAGCGCAACGTGAACTATGTCAGCGACTCGGGCGCAGTGTACC  
TCACGCAGGATGACCCCTCGAAGATCGACAAAAAGCTGGTCAACAAATTCGAGCTCTACTTCCACAAGAC  
CACGCCCCGAGGGGATTACGCCCCGCTACCTGCCCGCCTATGAGAGCTACCAGCGCTTTATCGGGCAGCAA  
GATGCGCGAATCGCCCCGCCCCGAGCTGGCCAGAGCGCTGGATCAGCTTAAAAACCTGAGCAAGACCA  
AAGAGTGGCCCCGAGCATGCTGGAGCGTATCTACAGCAAGGGCTTTGTGACTATCTGGCGGGCGGCGCT  
CGAGTTTGTGCGCATCAACCCGGAAGATGGCGGCATGACCTATGTGCGCGACGAAGTGGATGCCGCCCTG  
ATGCTCTACAACCTCTTTATCATCGGCCCGGCATGATCCGCGAAGCGCAGGCACAGGGCAGCGAACCCT  
GGGCGCTGGAGCAGTTCTGACCCACAGAAGTCTGCCTGGTTCTCCTACCTCTCCGATGCGGAAGATTT  
CTACGAGAAGGGGCGAGCTTTGCCAACCAGAGCGCCCCCTACGCCATTGCCAGCCACTGCTCGACGGC  
CTGTTTTGGCGAGGTGCAACGTCAGGTGGTGGAGGGTGGAGCAGAGCCGACGGGCCACCCGCGCTTTGCC  
ACGCCGAAGCCATTATCCCCCTCGCCGCCCTGATGAAGCTGGAAGGGAGCCGTACAGGGGGCCAGCCCGGA  
TCAGCTGTTTACGCCAGCAGAACAACGAGTGGCGCGGCGGCTGGGTCTCCCCCTATACCGCCAATATTCAG  
TGGGATATCTACCAGAACGGGCAGCGGCAGGTGCTGGTCAAGATGCTCTACAACGAAAAGGAGATCGCCT  
TTAAAACCGGCTGCCAGCCCTACCAGAGCGGCAGCCACTACTACGACTTCGAGGAGCTCAAGCGCTGCTA  
CGGCTATAACGGCTAACCCCTCGCACGCCGGATATGGCAATCACAAGGGGGCACCAGCAGGTGCCCCAA  
TCCACTCCCCCTTCCCTGCTTGCCAAAGCGGGATATGGCTGTAAAGCCGCTTCCGGCTCCATTTGCTGAT  
CAAGCTCTAAAAACGATTAATTTCTGATAGTTAAGTCACTTTAAGGCTCGCCTCGACAGTTTTGTTTTGGC  
TTACCATAGCCATCCAGAACCTGTTGAACTGCGATAGGTTGCTGCCAGCGCAGGTCAAGGGAGCATATTG  
GAAGCTGTAATCCACGGGCGGTAGCGTGAGATTTCGGAGGCGTTAAGCTTTGCTCAAAAAGATGGGTGTCC  
CAGATTCGCTCACAAAAGTGGGTATCCAGAATCTCACTAGATTTATTTTAGAAAACCTCCCAATATTC  
GTTTTGAAATTACAAAATTTGGATGTTTATGTGAAGCTCACAAAAATACGAATTGAGAAATTTAAAAAA  
TAGATGAAATAGATATTGAACTGGCTCAATAAATATCTTGGTTGGTTCAAAATGGTTCTGGAAAATCATC  
TATACTTCAGGCAGCCATCTCGCATCCTGCTTACTCCGTCAAGCTGACCGAATAAGAACGAGTACATCG  
ACTGTAGCAGTCATGGACCTTGATTATCTTCCAACCAATGATTACATGAGACTTGGCCATGGGGAAAAC  
GGGGAATAAAAAGCAACACTCCAAGTTCAAAAATAACATTTTACATTTTTGTGACAGTGCAGGTAACGAACA  
TAATGCTATTTGTGAGGCTAGAGCAGCAAGAAATGCTGGGATATCTGTAACAGGACAGCTACCAGAAGAA  
ATAAGAAGCTTATTTAGAGGGCAAAAATACATATTTTAGTGGGTTTATTCTGGTATATCTGGCGTACCCA  
ACAGTGAACAAAACAGTCCAAACGAGTTGTATTAAGGCTTGTTCATTTGGTGATTCAAATGTGTATCT  
TAGAAATGTTTTGAACTTGTGTAACCCAGTGACTTAAGGCAGTTAGAGGTTTGGCTTAGTCGCTTATG  
GGGATGTTTTCCATTCAACTTGATTTCCAAGAAGACCGAGATTTATTTATAAAAAGCTGAAGTAACTGTTG  
GCGGAATTTCTCATCCAATAGAGTTACTAGGAACAGGGTACATCCAACATAATAAAAATTTTTGCTATGT  
ACTATTATTTGCCCCAAGATATTGCTCATTGATGAACCTGACATTCACCTGCACCCAAATATACAAGAA  
CGGCTTACAACGTCATTGGCCGACATAGCACAAAGAAAGAGATTTGTCTGTAATTTTAACAACCTCACTCTC  
CATTTATATTAAGAGGGGCGCCATTACATGCAAAATATCTATTGGATTGATAATGGAATCTTAGTAAATGA  
AAACCGCCAAGCCGAGAAATGCTTTGGGATGGGGTGCAATTTGGTAAGAAAATCATTATTGTATCTGAA  
GATAAAAACATTTCCCTCTTGAAGAAATAGTTTCTCAGTGGCCGGCTATAGATAAAC TAGTAACATATC  
ATCCTGGTCAAGGTTATAAAAATATAATGAAGAAGGAACAGGCAACTGAACTTTATGAGGCTCTTGGTAG  
AAAATACAATATTTTAGTCCACAGAGATAGAGACTCATTGACTGATGATGAAATGGAAAGATTGCGAAGC



GAATATAATAGTGACTCTATCAAACCTCTGGTTTCTGAACCATCTGATATTGAAGCATATTTCTGCTCGG  
CAGAGTTAATTTCTAGTTTGGCCAGCAAAAAGTATTGATGAAAGCCAAGAGTATATAAACAGCATACTAAC  
TCGCTTAGTTGTTCCAGCAAGAGAGCAATTTAATGGACAACGGCAAGCTCATAATCAAGAGTTATATGCA  
CAAGGTGGTAGTCCAACAAATGATGACGTATGGCAACAACCTGCAAAATAGACCATTGAAAGGGTTTAAAG  
GAAAGTTTCGTTTTTAATCAATTAAAAAACGAGGTACCAAACAGACTTTTTTTCAGAAAGTAATATTTCTTCA  
ACACGATATTCAAACCTGAATTGGCAACATCTCTAAAACTCGAACTTGAAAAGATTAGTTAATCATCAATAA  
ATAGTAATAGCTCGGTCATGTAACGTTCAACCATTAATAACCGATAAGTTTACTAACAAAGAAATAAAAG  
GCGACCATATGGTCGCCTTTTATTTCTATCGTTTTCCAATCAGGAACACTTACCGCGCCGGTCTCTTGGC  
ACTATTTCCCTTTTGCCGAGATATTACTCTGATAAGGGCGGTTTAGCAAAAATATGGGGGGCTGATTTTCC  
ACGTATAACACTATCTATAACCTTTTATTTTAAATACTGCCCCGATATGCTTTCCATTCTAAAATAAG  
TAAGTTCTTCTTTTCTTATTTTACCTTGTACTCAAAACAGCAAAAACATTCTCACCATAAAATTTCTAAC  
AACTGCGTACTCTTTCCACCATTATAAAAAGTTTTATATTCATCTTATTAATTGAGCCATAACCAAGA  
AGGACAAATGTGAATGCAAAAAGAAATAAAAATGCATATATTAACCTATCTTGATACCACATTCCCATA  
TCTTGTTTTCTATCTTATTTTCTTGGTCTATTTGCGTATCCAATGGCATCCACTGATTTAAAAGGTGTAA  
AATAACTCCTGCGTTTATCAAAAATAACCATCCAGCTATTTTTTTCACTCATATAATACAACGCAAACATG  
TATATAGTAATTACACCTAAAAAGATATTGATTGTTTTAATTTACTTCCCTTTCCCATAACAATAGAC  
ATATTGATATCGACATTACCGGTAACAAAAAAGATAAAAAACCTATGAAGTCATCACTTATTATCGCTAC  
GTTAATAGAAATAGCGTCTAAGGGTATATTTAGTGCTATAGCAACTCCTCTCTCATAAAAAATATACGGCT  
GCATATAGCATGAATGTAAGTATTGCAATTAATAACCTTCTCTCTCAAAAACATTCTTTATCATATCAA  
CCCTATTGTTAAGTAGCACAATGTATTTTCATCAAAAAACAACTAACTATTTAATGCTATTAATCGTAA  
TATGCAACATTTAAATGAGTCATTCTCATAGAAATAAAAAGCGACCATTGCTGCGCTTTATTATTTTC  
TATCGATTTCCAATCAGGAAAACCTTACCGCGCCGGTTCGCTTGGCACCATTTCCTTTTCGCTGCTGGCTTGC  
CGCCCTGAGCGGGCGGGTTTGGCGCCCGGCTTGGCGGAGCCTGCGCGGGTCGGTGCCCTTGCTTTTATGGGC  
GGGTTTTCCGGCAGGTTTGTCTTTACCAGCATTCTGGCCCGCACTCTTGCCCTCACCCTGTGCGGCCGGT  
TTGCCGTTAGCCGCCCTTTGTGCAGCTGGGAACCCACCGCTTGC CGCGGTTCGGCTTGTGCGCTGTGC  
CATTGCCACGCTGGTGACTGATGTTGCTGTGACGGGTGAGGGCCGGTTTCAGCCCTTGC CGCTGGCGGC  
GCGCTCGTTGCGACCTCCGCGCGCACAGCAGCCGGGACCGTTGCCAATCAGGTGGCCCTTGCCCATG  
GCGAGCAGGCTTCGCGGATCATCGGCCAGCCTGCGGGTCTGTGTTAGCGCAGCAGCGCTTGTGTCAGGC  
GGCGACGGCGCTCGCCCTTGCAACAACACATCGCCACCGGTGCGGCTCACCTTGTTTAACGGGTTTTT  
CTCCGTGTAATACATGGTGGTGGCGTTGGCGAGCGGGCAGGGTAGAAGTTCTGCACCTGATCGAGCTTG  
AAGCGGTTCTCTTTGACCCAGAGCGCCAGATTGATCATGTCTTCATCGGTGGTGCCCGGGTGGGCGGAGA  
TAAAGTAGGGGATCAGGTAAGTACTGCTGCTTGGCCGCTCTTTGGAGTATTTGTGCAACAGCTCCTTGAAC  
GTAGTAGCTGCCCATGCCCGCTTCATCATCTTGGAGAGCGGCCCTCCTCGGTGTGTTCCGGCGCGATC  
TTGAGGTAGCCGCCGACGTGGTACTTGGCCAGCTCCTTGATATAGCGGGGATCTTCCACCGCGATGTCGT  
AACGCACGCCGAGGCGATGAGGATCTTCTTGATCCCTTGAGGTGCGCGCCTTGC GATAGAGGTTGAT  
GGTGGGCTGTGGTTCGGTGTCCATGTGCGGGCAGATGGTGGGCCAGACACAGGAGGCGCAGCGCAGGTC  
TGCTCGGCCTTGGGGCTCTTGCAACGCAGCTTGTACATGTTGGCGGTGGGGCCGCTAGATCCGAGATGA  
CCCCGGTAAAGCCCGCACCTTGTGCGGGATATCTTCGATCTCTTTGAGGATCGACTCTTCCGAGCGGCT  
CTGGATGATGCGCCCTTCGTGCTCGGTGATGGAGCAAAAGGAGCAGCCGCCAAAGCAGCCACGCATGATG  
TTGACCGAGGTTGATCATCTCGAAGGCGGGGATCTTCTCGTTGCCATAGGCGGGATGCGGCACCCGCT  
GGTAGGGCAGGCCGAATACGCCGTCCATCTCCTCGGTTTCCAGCGGGAAGGCGGGCGGGTTGACCCAGAC  
GATGCGATCGCCGTGAGCCTGCGACAGGGCACGGGCACAGCCGGGTTGGTCTCGTGGTGCAGAATGCGC  
GAGGCGTGGGCGTAGAGCACCTTGTCTCTTTACCCGCTCGAACGCCGGTAGCTTACATAGGTTTTTTT  
CCCACGGCTTGGGCTTGGGCGGCTGCACCAGCACAGGCTGGGCTTCTTGC CGCGCAGGGGCCGATTCGGT  
GGCGTCACTCGGCGCAGGGCGCCCTTCCATATAGGGGTTTCATGATGGGATCGATGCGGCCAATCTGGTGC  
AGCTTGCTCGAATCTACCCCTTTCCAGCCCGCAGCGCTCCTTGC GGATGACGGCGGTCCCGCGAATAT  
CCTGCATGGTCTCGATGGTCTCCCCCGCCGATGCGGTGAGCCACTTCCACCGCGCGCTCGGCGTT  
GCCGTAAATCAGGATATCGGCCTTGGCATCGAGCAGGATGGAGCGGCGGATGGTCTCGGACCAGTAGTGC  
TAGTGGGCGATGCGGCGCAGGGAAGCCTCGATGCCGCCGATAACGACGGGGACCTCCTTGAAGGCTCCT  
TGCAGCGCTGGGTATAGACCAGGGTGGCGCGATCCGGCCGCTTGCCACCCACATCCCCGGGGTGTAGGC  
GTCGTGCTGGCGCAGCTTTTTGTGCGAGGTGTAGCGGTTGATCATGGAGTCCATGTTGCCCGCGGTGACC  
CCGAAGAAGAGGTTTCGGTTTTGCCAGACGCATAAAAGTCATCTTTGATGACCAGTCCGGCTGGGCGATGA  
TGCCGACCCGAAAGCCCTGCGCCTCCAGCATGCGGCCGATGACCGCCATACCGAAGCTCGGGTGTATCCAC  
GTAGGCATCCCCGTCACCAGAATGACGTGCGAGCTGTCCAACCCAGCTTGTCCATCTCTTTGCGGGAC  
ATGGGCAGGAAGGGCGCCGTGCCGTAGCACTCGGCCAATAGCGGGGATAGGAGAAAAGGTTGGGTACCG  
GCTGCATTTTGAACACCTGGAAAAATTCGGGTGCGGCATTATACCGGTTGCGGCCAAGGGGAGCGATGGC  
TTTTTTGTCCCTATAGATCCC CGGAAATAGGCCGCCCGCCGCAATAGCAAGGGCGCCCGCAGGCGCCCTTG  
TGATGATGAGGCTGATAACTGGCCCCGTCAGGATTGAGGTGAGAGCGCCGGAGGCTGCGACTCCCCTGC  
CCCCTTGGCGGCCAGCGCTTCGTCTACCTGTTGATCCC CGCCCTGTTCATGCCGGGTGACGGGCGATC  
AGATGGTAGATGGCGGGCACACCAGCAGGGTACCAGGGTGCACAGCGACAGTCCGAAGAAGACCACCTG  
TCCCCACCGCCATCCGGCTCTCGTAACCCGCTCCCATGGAGAGCATCAGCGGCACCGCACCGATAATGGC

GGTGAGCGAGGTCATCAGGATAGGGCGCAAGCGGCGCACCGAGCCTGCGATGATCGCCTCCTCGAATCCT  
TCCCCGCGCTGGCGCAGCTGGTTGATGAACTCGACGATGAGGATGCCGTTCTTGGTCACCATGCCGATCA  
GCATGATCATCCCGATCTGGCTGTAGATGCTCATCTCTGCCCGTCAGCCAGAGGCCAAGCAGGCCGCC  
GAAGATGCCGAGTGGCACCGTCACCATCACCACCGCCGGGGTCAGGGTGCCTCGAACTGGGCCACCAGC  
ACCAGATAGACCACCAGCAGGGCGAGGCCAAAGACCAGCACCATCTCCCCCTGATTGTGCGGGTAATCCT  
TGGAAATCACCGGCGTAATCCACCGTCATGCCGGTGGGCAGGTTGGCGTTGGCCCAGCCATCGAGGAAATC  
GAGGGCCTCACCCAGGGTGTGGTCGGGGTGACATCGGCGGTCAGGGAGATCGCCTTCTGCCGCTGGTAG  
TGGTTGAGGCGGTTGGCAGTCGCCACCTGCTTGACGGTCGCCAGAGTCGAGAGACTGACCATTTCCGCCGT  
TGGCCGCTTCAGGTAGATGCGACCGAGATCCGAGATGCCGTTGAACTCGGTCTGGTTGCCGCGCAGGTA  
GACGTCATACTCTCGCCCTGTCCACATAGGTGGTCTTGCTCGCCCCGCCAACAGGGTCTGCAAGCTG  
TTGGCCACTGTGGAGACCGGAATGCCAAGCTGGCTGGCATGTCGCGATTGATGGTCACCTGCAGCTCGG  
GAGTCTTCTCGGCGTAGTCGAGATCCGGGCTCAGCATCAGGCCGTCGCCCTGCGCCGCTGTTGCAGCGC  
CAACCTTGTGGTAGAGCTCGGCATAGTCGTTACCCTGCAGCACGAACTGCACCGGCGCGGTTGGAACCA  
CCCCGGAAGCCGGGCTGGAAGGTGCGGATCATCACATCGGGAATGCCGGAGAGCTTGGCACCCAGCGAGC  
GGGAGAATCGGTGGCGGTGACGTGCGGCTCGGCCAGTCGGTGAGCTGGATGATCACCATAACCGTCTG  
ATCGCCGCCACGGCCAAAAGCGGGGTAAGCTGAGCGCCTGCACCACCCCTTTGCCAGCATCGGC  
ATGATGGCGGACTCCACCTGCTGCATGTTGCGCTTCATCCGCTCGATGCTGGTCCCCTCTGCCCTTGA  
CGAAGACATAGATGACCCGCGATCCTCGGTGCGAGTAAGACTGGTCGGCAGTTGGGTAAACAGGGCCCC  
GATAACCACCCAGACAGAGCAGCAGCACCAGCGGCGTCCAGCGGGAGCGACGCAGCACCACGCCAACAGG  
TGGCGATAGTGGCCCTCCAGCCAGCCGAGCCCGCATCGAGCCCGCGGTTGAGCCGTTGCGTTTATCCA  
GCGGGCGCATCAACCAGGAGCCATGGCCGGAGTCAGGGTCAGCGCCACCAGCGAGGAGCAGAGCACCGC  
AAGCGAAAGCAATATCGCAAACCTCGGTAAAGAGCCGCCCCACCATGCCATCCATAAAGGCGATGGGGACA  
AACACCATCACAGCACGGCGGTGGTAGCAATGACCCGAAAAGCCCACTTCGCGGGTGGCGTGCCAGGCGG  
CCAGCAGCGGCGGTTACCCCGCTGCAGATGGTGGTGGATGTTCTCCACCACCAGATGGCATCATCCAC  
CACCAGGCCGATGGCGAGAATAAGGGCCAGCAAGGTGATGAGGTTGATGGAAAAGCCGAAATACCAGGCG  
CCGATAAAGGCGGAGATGAGCGATAACCGCACCGTAATGGCCGGAATCAGCGTGGTGGCCCCCTGCCGA  
GGAACAGATAGAGACCCGCCACCACCAGCACGGCGCAGATGGCCAGGGTCTCGTACACCTCGTCGATGGC  
CTGCTTGATAAAGATGTTGGAGTCGTAATCCACCTCGAGCTTGGCCCCCTCCGGCAGGAGCGATGCATC  
TCGGCAGTCTTCTTCGATCCCTCGCCACTGCCAGCGGTTGGCGGTGGACTGGGCGACGATGCCGA  
TACCCAGACTCTCTTTGCCGTTGCGCTGATAGGCGCTGTCTTCGTTCTTGGCTCCCACCTCCACGTGCGC  
GATATCGGCCAGATAGACGCTCTGGCCGTTGGCGGCGGTGGTGACTTGCAGTTGCTGGAAATCTTCCGCT  
GTGTGGTAGAGACGGGCGATCTGCACCGCCATGGTCATGGAGTTGTTGCGGATCTCGCCCCCGGCAGTT  
CGATGTTCTCGCGCTTGGAGGCATCTTCCACATCGCTCACCCTGATGCCACGGGCGCCATGTCGGCCGG  
GCGCAGCCGCACATAACATCACCTGGGTGAGATCGCCGAGAGCGCCACTTCGCTCACCCCGTCCACCAGA  
CTCAGGGGGTTCGACCAGCACCCGTTGGCGTAGTCGGTCATGGCGGTGCGATCCATCTGGCTGCTGCTGA  
AGTTGAGCCAGATCGCCACATCGCCGTTGCCGCTGTCTTAGTCACCAGCGGCTCGTCCACATCATCGGG  
CAGCCGGGGCCGCGCGGGAGAGGGCATCGCGCACATCGGAGATCCCTCCACCATGTTCCAGCCGAGC  
TTGAACTCGACGGTGCATCGAGCGTCCCTTGGCGGTCATGGAGTTGATGTTCTTGGATGCCGCTGATGC  
CGGAGAGCTGATCCTCGATGGGCTTGGTGACCTGACTCTCCATCACCAGGGGGCCGCCCTCATAGGT  
GGTGGTGCATGGAGACCGGACGGGATCTGCACATCGGGCATCTCCCGCACCGTCAACTTGTGAAGGCGACC  
AGACCAAACACGGTCAGCAGGGCGCTGAGCACCACCGCCACCAGCGGGCGACGTAAGATATCGGAGA  
GCCACATCAGCCGTTACCTCGGCCAGATCAGCACCTGCACCCATCAGCAGATTGACCAGCCCCCTCG  
ACCACGATGCGATCGCCGACCTTGGCCCTCGGTGACCCAGACGGTCTCCCTTGGTTTCGCCGAGCA  
CCACAGGACCCCGCTTGACCCGGCCATCGGCCCTCGAGACGGTAAACAAAAGCGCTGCTCACCAGCGTACTC  
TACCGACTGGGCTGGGATCAGGGTGGAGTGTGGGAGGATCATCACCAGCGCTTGGATGTTCTGGGTATCGTTGGAGACG  
GGCGCAACTGGCCGTTGCCATTGGGGATCATCACCAGCGCTTGGATGTTCTGGGTATCGTTGGAGACGCG  
GGCTATCTAGGGTGGTCAAAGTGCCGTTGAATTGCTGATCCGGCCAGGCGGTACTGGTGGCGGTGACCGC  
CATGCCCGGTGCGCAGCAGGGAGAGGTAACGCTCCGGCACCGCCAGATCGAGGCGCAGTTTGTGAGTTCA  
TCGAGATGCGCAGGGTATCGCCGCTGTTGACCAGCGCCCTTCACTCAAGTCAATCAGACTCACGGTAC  
CGGCAAAGGGCGCCTGCGAGGTTACGAGGGAGAGCTCGTAACGGGCAGCATCGAGGCGTGCCGTCACCTG  
GGCCACGGTGGCCTCCTGCCCTCCAGCTCGGATTGGGTACGGCGCCACGGGCCACCAGCTTGGCGATA  
TCCCCAGCTTGGGTTCTCGTCGCGCAGACTGGCACTCTGCTCGGCCAGCTCCGCTGCTGCTTGGCCG  
CATCGAGCGCGATCAGGGTCTCCCCCTTCGCCAGCTCTGACCCGACTGCACCAGCAATCTTGGAGATGCG  
ACCGGTCACCTTCGGGGCTGATGATAACTGAGCGATTGGCTGCCAGCTTGGCCACCAGCTTGGGGTGGC  
TCGGCCAGACTCTGTTTGGAGGTTTGGAGTGGGATATTGACCTGCTGGTGGTGGTGGTGGGCGGGGTT  
CGCTGTGACGCGAGCGCCAGACCGCCGCAACCACGATTAGAAGAAGGCCAAGCCGAGCCAGATACGCAT  
TTTCATCGAACAGTCCATGAAGAGTGAGAGGGTAAATCCAGATTGGGGCCATTTTAGCCCCAGACTATGC  
CGTACTATGTATAAATGTGACAAAACGTAACAAGAGCGGGATAAGCTCACTCTGTTTTCAGGTGCGCGCG  
TTTGTTTTTCACGCCACATCGCATACACTAACGACAATTTCTTTCGCAACCCGACTGACTGCCATGCCCCA  
AAATGTCTGACCACCGCTTCTCACACGCTGACCTGGCTCCTGTTGCGCGTGGTCATCCTGCTGATTGG  
TCTGACCTTGGCGCAAAGCCTGAAACAGATAGAACGCTTACCAGAGCGATACCCTCAACAGCGCCATC

TACCTGCGGGATCGTTTCAAACAGACCGAAGTGTTCCTGGAGGCGATGCGCGGTCAGGCCGAAGAGCGAC  
TGCGCAGCGACCCCCAGTCGGTGTACCCGCCAGCTCTATGGCCATATCGAGGCGCTGCCAGAGGGGCT  
GGCTCTCGACAAGCTCCCCGGTGATTTACCAGCCGGACTGGCGGGCAACCTCACTGGTGACGGCCCGCTG  
CCGCCCCCGGCAGTGCGCGGGAGGCGCAACTTCATTTGGCCCTGAGCCTCTCCCCCTTGCTGGCCACCG  
CCAGCCAGCGCCTGGGCAGCGAGATCGCCTGGGCCTACTTCACCGGGGTGGACAACTTTATCTACCTCTA  
TCCCTGGATCCCCTCCAGCCAGTTTCGTTTTGTCCGAGCATCTATGACAAGCACTACTGGCAGGATGCG  
CTGATGTACCCAAACCCAGCCGGGACACCATTCTCTCCCGCCCTTACGAAGATTTTGCCGGACTGGGCA  
CCATGGTCACCATGTCCCAGCCTCTCTACAAGGACGGCTCGCTGGTAGGGATGATCAGCATGGACATCCT  
GCTCTCACGCTTGCAATCGCAGCTCAATCAGCTGGCACC GGCGCTGGGTGAGTATCTGCTGCTCAATCAG  
TACCATCAGGTGCTGGCCAGCAGCGCACACCAGCCCGTGGTGCCGCAAGACCCCGAGCCGACCAGCAAT  
ACCAGTGGCGGCAAGGGGCATTGCAGCTGACCATGGCAATCCAGATACCCCGTTGCGACTGGTGCACAA  
CGTCACCCTGCTGCCGCTGGTGTGGGCCATGCTCTGCCAGTCCACGCGCCAGCCCTGCTCGCCATCCTCTTT  
ATGCTGCTGGCCGCCCTCTCCAACCTGAGGTCCCATCGCCTCAACCAGCGGCTCAATTATCTCTCCTGCC  
ACGATGCCCTCACCGGCGCCTTCAACCGCCACTATCTGGTGTGCTGGAGCAGGCGGGGCGATCTGGCCCG  
GCTGCAAGCGGGGATCCTGATGTTGATGCGGATCACTTCAAACGGGTCAATGACAACCTCGGCCATGCC  
GTCGGCGATATCGTGTGATCCGGCTGGTGCAGATCTGCCAGCAGCAGCTTAGGCCACTGATCGCCTGA  
TCCGCTGGGGGGGCGAAGAGTTTCTGCTGCTGATTGGCCGCGCTGATGCAACGCAGCTCGGCGAGCTGGC  
GGAGCGGCTGAGAAAGGCGGTGGCAGATCACGACTGGGCCGCATCGAACC CGGGCTGGAGGTCACCATC  
AGCCTCGGCTATCTGCCCCACCAGGAGAACCTTCCCCTGCACGAAGCGGTGCGCCGCGCCGATGTGGCGC  
TCTATCAGGCCAAGGCCAATGGTCGCAACCGCAGCGAAAGATGGCAGGTTGACGCTCCTGACTCTCGGA  
GTAAGCTGACCCCTCAACCCCTTTTTTGGAGGACTGTCGTGCCACGTAAACCCCGCGTAGGGCTCGCTCT  
CGGGAGCGGCGCCGAGAGGATGGGCCCATATCGGCGTCATCCGCGCCCTTGAACGTCTCGGCATCAAA  
CCGGATTTGATCGCTGGCTGCTCCATCGGCAGCTTTGTGCGGTGCCGCTATGCCGCGGAGAACTGGATC  
GGCTGGAAACCTGGGTGCGCGGCTTTACCCGCTGCAGGTGGTCAGCCTGCTCGACCCGGCCCTCTCCGG  
CGGTCTGTTTTCGCGGCGAAAAGGTATTTGGCCTTGGCGCCAGCCATCTGGGGGATCCCGATCTCGAGAAT  
CTGCCCATCCCCTTCGCTGCATCGCCACCGAGCTCGATAACCGCCGCGAGATCTGGCTACAACAGGGCC  
CGCTGCGCCAGTCGGTGCGCGCCTCCTGCGGATGCCGGGGATCCTCACCCCGACCCGGATCAACGACCG  
CTGGCTGGTCGATGGCCGCTGGTCAATCCGGTGCCACTCTCACTGGCCCGGCCATGGGGCCCGAGGTG  
GTGATTGCGGTCAACCTCAACACCGGATATGCACCAACCTTGACCCGACGAGCCGGATCAACCCGCGAGCG  
GCGGCTGCTCAGCCAGTGGCTCAATCGCGGTGAATCCGCGCCAGCCACCCCGGTCTGTGGAGCGTGAT  
GAGTGGCTCCATCAACATCATGCAGGAGCGGATCACCCGCGCCCGGATGGCCGGTGACCCGCGGAGATC  
CAGCTCTGCCCGCGCCTTGGCAGCTTCTCCATCATGGATTTTTCATTGCGCCAGCGATGCCATCAACGAGG  
GGGAAGCCTGTGTGAGCGCAATCTCGATCAGCTCAAGGATGAACTGGGCCGCTCGGGTTGCTGGGCAG  
TTAGTTGTGACATGCTGTGGTTTTACACATGAAAAAAGCGGTGCGGACTTATACCCTAAACAAGCATAG  
TTCAGCGGCATATTGACCGGAGGCCTTTAGATACTGCATTTCTGCATTTTTGTGATGTATGTAAGAAT  
ACATCCTAATACATCATAACTCTCAAGCGCCGACGGTCTGTGGCGCTTTTTTATGCCGAATCTCCTAA  
CACCTACGAATTGCCAAGCAAAACCAACATCGAATATTGTGCGACCGCGCTCGTTAACGATTTACCA  
TGGCTGCCTTCTTTCAAACCTCGATCTTCGAGATAGTCTGCCGACACGGCCTTCTGTAATGCCTCACGCT  
CAGAGGGGGTCAGTTGCGCAGATAATTCAACCACAGCCACTGGTGCACCAGTCGTAGACGTGATTGTTGC  
CCCCAGCGGACGCGGTCCACAACCACTTGTGTATGAGCTTTGAGGGTATTGAGCTGCGCCTTGAGCTTG  
TCACGCTCGGTGACGATGGCCTGCATGATAGAACGAATGGCCGGATCCTCGATGCGCATCAGGTAGTCGT  
GGCTGGCTAGCGTCTTGGTAGGCTTGGGGGTGCGCGACCTGCGTAAGCCGCCCCAAGCCTCGATGAGCGC  
TTTGTAGTCGGCGGATTGGGCATTGTAGAGTGCTCGGCCCTTCATGATGCCATCGGCTTCAGCCAGACGG  
CCAATAGTTGGTACAGAGAAGTCTCGTACTCTGCCTCATACTGCTTTGACAAAAGTTCGTGCATTTCTAG  
TGAGGTTGTTTTGACGCGTTAGAGCGCTCAGCCTTAGCAAGCAGTGACGCCAACACGGTGTGAGGTTGAAT  
ATCCGTTGTACTACTCATGATCTATCCATTTCAAGTTCGAGTGTCCGGACGGGAACGAGGCGGTGTGAC  
AGAGTGCCGGCAACTGCGCGGCAAGGTCGAGATCTAGGTAGGCACTGAGGCGTTACCTGCATCCATTAG  
GCGGATGACTTCACGTTGGCCGAGCGCCGGTTTCACTGGGTTTCACTGCTGTGCTAGGTAGCGCATAAAG  
GCGTTACCGGCAAGCAGTTGTTCTGTTCACTCAGCAGCATGAACACTGGCGGCAACTTGTGCGGGTAGA  
GGACGGCATCCAACAACCTGGCTGCGTCAAAAACCCGCTTGGCCGGCTCCAAGTCTGGATAGATCTCGAC  
GCTCTCGCAGACACCGCCAGTTGTAGAAGCTCCGACTCGGTTTCTTCAAAGACCGCTGCACATCGCAT  
AACGTGCCAGCCGCTACCAACTGTGTGCTGTGCCAGTGTGTGTTTGAATGCAGCTTTGCAGCGTTTCGA  
TGAGTCGCCAACAGGCTACCAAATCTTCTGCTGCGTCACTAAAGCGTTTCATAGCGCTCTCCAAAGCCG  
CTCAGCTTGCCCTGTAAGCATCTAGCCGGGTGAATGGCTTGCCAGTTGCTTCTGCATCGGCTTTGTCCTTT  
TTCAGGGCTTGGAGATCGTGTCTCGGGTAAGACAGGTATTACGCGCCTCGTCAAAGTGGTAGGCCAGCG  
TATTGAAGTGGCCTGCCAGAGCTGGCAGGTGCTGCGGCGCAGTCACAAACCAGCGACAGCGTACACAATT  
GCGGCTGCCACCTGGAACAGGAGCAAACCTTGGGGTGGGGTGTCACTCCAATATTTGGCCCTCCGTTATAG  
CAGCCGCCCCTGCGCCGTTGTCTTCTCTTTCGCTGGTGTGGCCACCCACTAGGCATAGGCCGTGGTGCC  
ATCCAGCCCAGCCCACCGTTGTCTTCTCTTTCGCTGGTGTGGCCACCCACTAGGCATAGGCCGTGGTGCA  
TCAGCATCCAGCCCACGGGTTACGTGCTGCCGGATGCTGCGGAAGCACTCAGAGCAGAGTAGGCCAGCG  
TATTGAAGTGGCCTGCCAGAGCTGGCAGGTGCTGCGGCGCAGTCACAAACCAGCGACAGCGTACACAATT

CGGGCTGCCACCTGGAACAGGAGCAAACCTTGGGGCGTGATGTCACTCCAATATTTGGCCCTCCGTTATAG  
CAGCCGCCCCTGCGCCGTTGTCTTCTCCTCCTCGCTGGTGTGCCACCCACTAGGCATAGGCCGTGGTGA  
TCAGCATCCAGCCCACGGGGTTACGTGCTGCCGGATGCTGCGGAATAGCTGCACTCAGAGACGGCACACT  
GTTGACGATCGCTTGTTC AAGGAGCACCTCATGTT CAGTGTG CAGCAGAAAGGTC TGGATGCTCTCTTCC  
TTTGCTGCCGCCAACCGCTCCACCCGACCGAGCAATACATCGCGGATGTGCGTCGCCCCCGGCTTGGTGT  
AGTACAGTGTCAATTAATAGGCGACTGTGCCCGACGAGTTTTTGCAGGATAGGGAACGGCACCTGCCCTTC  
CAGCGCCAACGCGGTGATGAGGGAAACGCGCAGACTATGCAGGGGAAAAGAGGGTTGTTATTCCTGTTGTTT  
TGCTCCTCTGGCAGAGGAAGAAAGCGAATTGGCGTGCCGTTGTGATGAGTCTCCCCCGACCTGCGAGCC  
GCCATTCCAGCGCTTCCAGCAGGGCAAACAGCTGGAAAACATAGTTCTATCCGAAAAGTGGGAAATAACG  
TTCATCCTCGCTGACCTCTGGCAACCCGGAGCAGAAACACGCGTCTGGATAGCTTGCAGTTGCACCTCG  
CTCTTCGCTATAATGTGACGTCCATCCAGTGCAGACCAAGGTGTGCGCCGCGAGATAGGGTTGTATTTTT  
CTTGCCAATTGCGCAGTTTTTCCAGCCAGTAAAACACATCCTGATGTACCGGGCCGCCAGAGGACCACGG  
CAGGGCGTACCCTTTCTCGGGCCCTGATTTGGCGATATCGGCGGTTTTATTTGGTGTGATGTAGAACC  
GTCGAGACCGCTCGCCATCAGCCAGCGCGGTGCTACGGCGAAAACACACCTTGTGTCAGTGGCCGCGCT  
CGCTGCCTTGTGCGAGTCGGCTCGGGCTCAACTCCCAAGCGCCGCTGCGTAGCGCCAAGTATCCGCTTC  
TCCCCGAGTCGAGCATGCGGACCTGAAAAGTGCAGTGGCAAGATGAGCTTTACCAACAACGCCACCCAG  
CGCACCGGGCTCCACATTTCCAAGCGTGTCCATTGGCTATTTGGGCGTTCACGCCACACACAATCCGGAT  
CGTTCGGTCAATCTGCTCTTCGGTTACCTCGAACAGTGCAGGGGCGCCGCGGCTCGTTGCCAATCTC  
TGCCCCCATCGCACTTTGCGCCACAACCAGTTTTGAAAGTGAGGTCCAGCTGCCAACATCTGGCGCAGT  
TCATCAATGTAGCCATAGGGTAGTGGTGAATGTACGCTCTCGTCACGTTAGGCAAGCCGCTGTGGGACA  
TCTGAGGCACGGGGTTACAAAAGGCTGGAGAAATGACGGGTTGACCATCATCGCCGGGCGCGCTGAAATC  
ACGCAGCAGAAACAAAGTGCAGGAAGGCGTGAATGCAGTTGTTGTATCTGATGCCCTTCTCCGAATTCGGG  
CAGACTGTCTGATAAAAAGTCTGGCAGAACTGTGGTACGCGTCAAAAAGCACTGTCCGGTCAAGCGGTAGGC  
CCTGCCGGATGAGGTAACGCTCGAAGAATGACGATAGAGATTCCAGTCTCGCATCAACCCCGCGTGTTC  
CCCTTTGAGCCACTCCACTGCTAGGACTCTCCAGGGTTCGAGTTGAGGATACTCCCCGAGCGACCCAGCCG  
AGGGATGTGTCCGTGGCGCGTTTTACACCTACCTTCTTGGCACAGGGTGCGTAGATGCAATGGCTACGG  
TTGTTTTCTTCTATCGGGCATGGAAAATCTCAGTCGTTAAGTTCAGCGTCTGGTAGCAACAGGTCCCTG  
CATGGCGGCAGTTTTCCACCTTCGCAACCCGTAACCGCTGCGCAGCGGCTTCCAGTACAGCCAAGGCCCTCG  
CGGGTAGAAGCTTCCGCTGTAGACATCTTGGCTCTCAAGCATGCGTGGTGCATGAATCGCCGGATAAGGG  
ACTTGTGATAACCCGCGTTTTTGTAGTTCGACGACCGTATGCGTGTGCGGTGACCATGTGGCGTCTGCCCCA  
TTTTTTGCTCACTGTGAGACCGATGCGCTCGCAGGCGGCTGCGTGGGCTTTGTTGTACTGAGTTAGCGTA  
TACATGGCACCGATAGGCTCACGTGCGAGGTTGATGAAAAGCAAAGGGGTGATTACGTTCAATGTGCGCCA  
CTTGCTTTAAGTAGCGATAACCAGCAGTGAAGAACCCTCGCCGTACTCCGGTTGAAACCAGTAAGCCTG  
CTTGTAATAAGCCCCATCGTGGTACCGCTTTCAGCCAGCATGTCGGCGGTCCAAGAGGGCAGTGGCG  
GGGACAAGGCCAAACTGCTGGGAGAGGTATTAGCTCTATTACCCTTGCGGGGTCTCCTCGTGGCTCAC  
GCCAATCCCTAGGCGCAGCCCCATGGCTTGGATGGTGAATGCGCACTAGGGCCTGATTTGGGTTGGCAGG  
GTCAGGTAACACATCCTGAATATAGAGGTGGAAAAGGCTCCGACTCTCGGAAGCCTGCACCGTGCAGCAGC  
AAGGTGATAAAGCATGCCCCGATAATCCTGACGTCCGGCAGGGCAGAACCCCTTAACCAGAAGCTCTTCGA  
AGCGCTCTTCTGAAAAGCTGGCGGCTCGCCACGCTCAACCTTGGGTAGGCGCTGTCTCTGATACGATG  
TCCGGTCTGGGTTGGTGGAGGCATTGGCTGCCCAAGTATGTCCCAAGAAATGCTTTACTGCGCCGATACTGG  
TAAGCGATTTTCATCGGTCTGCCGGTGAAGGCTCCACTGGCGTAGCGCGGATTGACCTGTGCCAATGCAG  
GGCGCATTTTCGCTAACCAATCGAAGAAGTCGGAGAGGTGGGTAATGATGTGAGAGGCATCTTGTGGCGA  
ACGCGGTGCCCAACAAAGCCAACTAGGGTCAAGTCCAGTCTCACGGTCAAAGGTGCCTGTGTAGAGCCGC  
TGGGCAAAGTTCTGGAACAAATGATAGGTATTGCGTTCAGCAGGGTTGGTCTGGAATACTCAAGAAACA  
TCCGGACAGAGCGGGTACCTTCAACATCCAAGTGAAGGCTGCGGTGATGGCTGCGATGGAGCCGATGATC  
AAGCAATGGTTCCAGCACCCTGCTGGGGTCAGCAAAGCAGGGAGCTCCGTGTAGACACCCGTCGCATCG  
GCATAAACACGGGCTTTGACTGTTACGAACATTCCATCACCTATCTACCCAAGTAACGTAATCAAGTGGT  
CACAGCTGTA AAAACAGATGACGAGCCACATTAGACGCTTATTGGACAACAACGTACATACTCTTCCTCA  
AACCTCAGTACTTTGGCATCTTCAGTTCAAGCGACTCGGTTTTTCACAGATAACCTGCTGTTACGGTTCCA  
CTCGTTACAGAGGGTTGAGGTCCAATGGAGTGAAGACGTACGCTAAGGCCGAGCCCCGTGCAGCACGGTA  
GCAAAGATAGCCATCCATACGGCTCCCTTTAGAATAAGCACGGCGGTA AACAGTGCCTGCTATATGTCAG  
ACTTTATTTATTTTCTTCCATGTTGTTGGGTTGAGTTTTATTTCTACTTTTTAATCCATCTAACAAATCAAT  
AAATATGAAAAGTAAAGCGCAGCAAATGAAACCACCGAGCCGAAATAAAGAAAAGTAAACCATGTCGTAAA  
CGCCACTGACCAAGCGGCTATACTCAGTGCCAATTAATCAAATTCCAAACCATACTTTATATTGACCAG  
TACGAGAATCAATATAATGCTCATGATTATAAAATGCATTATAAAGGGGGCTGCAACCCCTACTGTTTTTA  
AGGATTTTTTTAATCATTGCTGCTACCTAATGAACCACCAAATGTTCTGGGGAAAACGCCGCTTGAACCTG  
CTACCTGCAACACCAAAAATATTGCCAGAGGAACCAAGGGTTTCTCCAATAGGCCCTGCACTTTTCACTG  
GGGATGAGCCCTCACCGTTTTGGTGATGGCTGCCTTCATGGCCGAAGTCACTTCAACCACAAGCATGTCAG  
AGCTTGAGGCCCGTTGTGAAAGGTGGCGTTCGAGCGATGATGGTATGACGAAATCCTCTGTATACGTGTT  
TCCTAGAGGCCCATTTGGCAGTGAAGGCACTTGTCCCTGCCAGCTTCAATGCATCAACAGAAGTCGTTGTG  
CAGTTACTACCAGTTAGATCGTATTTATTTATCACCCCTGCCAGTTTCTTTTATTTTATTTTTTCTGGCT

GGGTGGAAGCTGGAAAGCCATTTTTTTTTGGAAGATTGCCAACGTCAAACCTTCATCTACATCCATGATTTT  
AAATGCTCTCGACTCATGCTGTATAGCTCGTGTGATAAATACTCACGAGCTTTGGCAAAGCTATATTGA  
ATAAGCACACCATCACCTACAGGGGATATAGGATTACCATCAAATCGACCGTAGGTGTATACGTGCATAC  
TCCATTCCCTTGTGGACTGAAACAAAGGCATGTCCGGTTCCTTTGTTTCAGTCCACAGAAATACACCGTT  
TGCTAAAATATCGCTGGGCTTTTTTCGCAAACCTTTATTCTCTATCCAATCCCCCTTGTTCCTTTTCAATGGGG  
GTGATGCTGCCGCGATCATCTGATCGAAAAGTTTGAAGTCTTCTCGCTTTCCCATTTCGCTTTCTCCCCAGC  
GCTGCCATCCACCATTCCACCCTGTCCACTTCTACTCGGCTCCACATTTCTCCACAGCCTTGCTTCTC  
AAAAAAGCATTGTGCCATAGGCTCTCAGCGAATCCGTACCTTTTCGTTCTATTGGACTTCAAACCTCTTG  
CATTGAATCCACATAACATGACTATTTATGGGATAGCTTCATTAGCTAACAGAAAAAGAAAAGCCCCAC  
AAGAGGGGCATTCAATAGAAAATCCAACCGAAAAGCCTTTACGATGTATCTCTAGTTGGGGGGAATAACC  
ATTCGGCGCTTTTTTTTTTCAACTTACTTACCCGGTCACTCCTTACGGTAGAAGAGCAACCCGAGCAGAA  
TCACCCCCACAGAGACCAGCAGATAGAGCCCCAGACTGGGATTGGTGATACCGCCATACAGAATGATGAG  
CGCGCCAGGGTGGCACAGGTTCGGGATCACAAACCGCTTTATCCAGCCCAACTCGGTAAAGGTGCGCATG  
TACCAGACATAGAGGAACAGATAGAGGCCATAAATCAGCACGATCGGCATCTCGTCCAGGGCGATGTAAC  
GACCGAATGTCTCGTTGATGCTGCAGTACCACAGCACTGAGTAGATCACCGACAACAGCGCTGCTGCGAG  
GGCCGAGTTGATTGGCATGTGGTATGCGGTTTCGATACGGCTCATCCACTTGGGGGCGAGCCCCGATTTG  
CGGATCGCCAGCGAGTAGGGAATGCGCATGGTTCGCAACACCAGACCATTGAGGGTTCGAGGCAGGAGA  
TAATCACGAACACGGTCAAATAAGTCGAGGCAGTCCCGCAAACAGGCTGGTTGTCGCGAGATTTACCGC  
GTTATCCCCTTTCGCCACTATCTCGTCCGTTCGGCAAGACGCTGGCGATCCCAGAAAATAGGTGACATAG  
ACCACAAAGACTATCAGGGTCCAATCACCAGCGCTCTGGGAGATTCTTCTTGAATCGCGAATTTTCGC  
TGTTGATGGTTCACAGCGGCAATCCACCCCTCATAAGCAAAGCGGTGGCAACCACGGCCGTGGCCAGAGT  
GCCTCCGGTGCTTCCATCCCATCCATTGCCTGCACAAAGTTGGTACGGTGACACCATTGAGCAAGCCT  
GAAATGGTGGCCACAATGGCAACCAGGATCAGCGGGATCAACTTGATCAAGGTAGAGCCACTTGCAGCT  
TGCCCGCCAGGACCGGGGTATAGAAGTTGATCAGATAGGTGACCGTCAATAGACAGCCGCCAGTATCCA  
GGTTCGACACAGAGTTGGTTCGGATTATCACTGCCGAGCAAGATCATGGTGTACAGAGCGGCGACCCAGGCA  
AGGATGGCGGAAAGAGGGGCGTAATAGAGTACGCCTTTGAACCACCCACCAGATAACCAAACATTTTTCG  
CGTATGCCGCTTCGGCATAATCGACGATACCGTTCGACTTTTCGATCCGCTGGGCAAACCTGGCAAACAC  
CAGCGCGCCGAAGATCATCGAAAATGCCCCAGCGCCCATGCCAGCAGCGCAATGGCCAGATTACCGCCA  
GTCAGACGCAGTACATCATCGGCCCTTGAAGAAGACTCCGGAGCCGATCACCACGCCGACCATTACGCAA  
TGGCAGTCATCAGGCCATAGCGTTTATCCAACCTACTTACTGCTCATAACCATACTCCATACGATTGCTCA  
TATCATCTGAATGTAATAGTGTTCAGGTGGCCAGATACCACCAGGGGGCCACTTTTCGGGGCCGCTTAT  
TCTCGTTGGCCTGCATGGATAAATCAAAGCGTGTAGATCAAAAATATCGATCGGCAACCCAAAAAATAC  
CGCCCGAAGGCGGCATTTCTATTACATCGATGATCACGCCTTGGCGAGGTTCATCCGGGGCAATCTGGCC  
GATTTTCGGCGACTTTCTTGTCTGCCAGCAGCCAGAGGGTGAACCTTGTGCAGATCCGGGTGGTGCGCCAGG  
GCAACCAGGAAGGCGCCCCCAACTTCACGGTAACCCAGCTCGTAGTTTTTTCAGCGTGGTGGGAGGAACAC  
CCAGCAAATCTGCAAACCTTCGGACGGCTCAAACCGACCCTTCACGGATCTGACGGATCTTCTTGCCAAC  
AGTGACGATATTTGAATTCATAATGTTCCATACTCCGTTTGGCGGATTTACTCCGCCTTTTTATTTTTTCGC  
GACGACTCGTAGTCAAGTGTATCAGTTTTGTTTCGGACTCGTTATGGTTCGAGCCTCTATCTTATGAGCGCC  
TTTTCGGCGACAACCCCTTGCTTCAAGGGGGGATGGTAATCGCTCAGCCGCCCTCAGGTAAACAGTCTCGAA  
AAGAAACCTTTATTGTGGCCCCCAATAAATCGTATAATCCGCCGGATACCCATTAAGAGGAATAAGTA  
TGGCGTTTTCCCGGCATTATCTCTCGCCTGCACCCCGTATCCAGCACAGAAGAACTGGCACAAACAGCGCCT  
GCAAGGTGAACAATATCGCGCCGAAGCATTCTGGCTTCCGGCCTTGATGTCCAGCCACACCAGCGAACTG  
CTGGCCGCCCTGCCGAGAGCTGCAGCCTGTTTCTTGAACAGGCATGCCCGGACCTGGCCTTGCAGCAGC  
ACGACGGCACCCCTGCATAACAATGAGCAGCTCATCACGGTAAATGGCCAGTCTATTGCGCTGGCAACCAC  
CCCGGGTGTATGGTGGTCTGGTGCCTGAAATCGGGCATGTGCGAGATGGTTCGACTGGCTGGAGCGGGACAC  
CGCCACTTCATCTGTTTCAGCTGCTGTTTCAGCCTGTGGCTCGCGCCATCCTCAACATCTGGCCCCCTTGACC  
CCTATCTGGCCCGACATTTTTTGTATGACATTTGCCCCCTGCTGCAGAGCGCAACCCAGGCAGATTACCT  
TGCGGTCTTTGCCGCCAGAGCGAATCCTGCCAGCCCGCATAGCGACTGGGTTTCAGGCTTATATGAAGCTG  
GAGAAGAACTGCACAGGGCCTATCTGGATCACTAATTAATCAAAAATAAACAGCAATTTAAGGTACAGAC  
ACAATTTGCCACAAGGCTCATTTGTGAGCTTGATCATGTTTTAAAAATCGGCATAGAGTGCAGCCTCGTCAT  
CGGAATGACATCAGTTGCCTGGCAGTGGTTTCTCACGCATTCGCTGCCATGCCAGCGCACTCGACACACC  
AGGAGAGTGTGCAACCCGGTTATACCGGGTTCATCTGCCAGACTCGACGCCAGCCGTACGGCGGAGCCTGC  
AGCTTACATAAATTAACAAAGTGTGAAGCACGTGAATAACGTGCGATCTCAACAGGATTTTTTTTTATGATG  
AAAATGGCTCCTTCCATGATCGCCATCGCCATGGCTGCTCTGGGTGCTACCCTGCTCAGCCGCTGACG  
ACATCTACTTCGGTGCAGGTGCTGGTACTCACTTCAACGGCCTGAACAAGTGGAAAAGTACCAATGT  
AGGCCAGGAAGACGCGGCTGCTGCCAACGCCTTCATGGGTACAACCTTCAACGAGAATTCGGTACCGAA  
CTGGGCTACCAGTACACCGGTGCTGGCAACACTGACGGCAACCGTTACGAGAGCCAGGGTGGCACCCTGT  
CCGGTATCGCCCGTATGCCGGTTGGCAACGACTTCTCCCTGTTTCGCTGAAGGCGGCGCCTACTGGGGTCA  
CACCGATGGTCTGGGCACCAGCGACACTAAAAGTTTCCCGCTGGCCGGTGTGGTGTGACTTACAAGGTA  
AATGACGCGCTGGATCTGCAAGCTCGCTACCGCTACATGTGGGACGTGGCTGACCTGCACGCCAACGGTG  
AGCGTTACAAAGCCAACCAGAGCATCGCTACTCTGGAAGCGGTATACCACCCGTTCCGTACTTCTACGT

AGCGCCGGTAGCTGCTCCGGTTGTTGAAGAAGCGCCGGCTCCTGCTCCGCAAGTGGTAGAGAAGAACTTC  
GCCCTGAACTCAGACGTGCTGTTTTGCCTTCGGCAAAGACACCCTGAAGCCGGAAGGCGTTGCAGCCCTGA  
ACGGTCTGTATCAGCAAATCGTTGAGTTCAGCCGAAAGATGGCAACGCTGTTGTTGTTGGTTACACCGA  
CCGTATCGGTTCCGACGCTTACAACCAGAAGCTGTCTGAAGCCCGTGCCCGCACCCGTTGCCAACTTCCTG  
GTAAGCAAAGGTATGGCTGCCAGCAAAGTTGCCATTGAAGGTCGTGGCGAAGCCAACCCGGTTACCGGCA  
CCAAGTGCAACGGCGTAACTGCTAAAAGTCAACTGATCTCCTGCCTGGCTCCGGATCGTCGCGTAGAAGT  
TCGCGTATCTGGCGTACAAGAAGTTCAGCAATAATCTGACCTCGTTCAGATAGTGGCAAAAAAAGGGATG  
CTGGCGCATCCCTTTTTGTTTGTCTCGTTCCTCGCTTGCATCCCTCACTCCCGCTCCCTGCCCTTGCCTG  
CCTCGTCTCGAAAGCATAAAGTAGTTGCGCCTGTAAGGTATTGGATAAGCACTAAAAAGCGCTTCTTGTG  
CGGTCTGTTGTCCATGACGCCAATGCATCATGAGAGTCCAAGCCTTCGCTATCCACTTTGTGCGGATTT  
TTTCGAGCAATAAAAAACAAGTGCATTGCCCGCATGGGCTAACACAACGAGGATAAACCGATGAAACTC  
AAAATGGCTCCTACCCTGATTGCACTGGCGCTCGCAGCCGACGTTACCACAGCTCAGGCTGCCGAGGACT  
GGTACACCGGTGTTGGTGCAGGTTGGGCTTATGCCACCGTCTGGATGATTTTGGCAAAGACACTGACAA  
AGATGCCACTGCGCTGAGCCTGTTCCGGCGTTACAACCTTCAACGACTACTACGCAGCTGAGCTGGGCTAC  
CTCTACGCCGGTAAAGCGGGCGTTGACGGTGCCGATTTCAAAAACCCAGGGTGCCACCCCTCCTCCGGTATCG  
CCCGCTGCCGCTCGGCGATATCTTCTCGGTGTTTGTGTAAGGCGGTGCCACTTCAATCACGTCAACGG  
CAATGGCAATGGCAACAGCGACAACGGCACTGCGCCGCTGGCGGGTCTGGGCTGACTGCCAAGCTCTCC  
GACCTTATCGATGTGCAGGCACGCTACCGCTATCTGTGGAGTCTGGGTGACGAGCAGAAAACCTGGGAGA  
GCGACATGAGCGTCCGACCCCTGGAGCTGGTATGCACCCGAACCGTACCTTTTATGTTGCCCGGTTGC  
CGCCCTGCCGCTGAGCCGGTTCGAGCCGGTACTGGTGCACAAGAACTTCGCCCTGAGCTCTGACGTG  
CTGTTTGCCTTTGGCAAATCCACCCTCAAGCCAGAAGGTGTGCGAGCGCTCAACACCCTGTATCAGCAGA  
TCGTTGATGTTTACGCCGAAAGATGGCAGCGCCGTGGTTCGCTCGGTTACACCGACCCGTATCGGCTCTGACGC  
CTACAACCAGAACTCTCCGAAGCGCGTGCCTGACCGTAGCCGACTTCTGGTTGGCAAAGGTCTTCCG  
GCCGGCAAAGTTGCCATCGAAGGTGCGGGTGAAGCCAATCCGGTTACCGGTACCCAGTCAACAGCGTCA  
AGGGCAAGGCTCAGCTGATCTCCTGCCTAGCACCGGATCGCCGTGTAGAAGTACGCGTCAACCGCGTGA  
GCAAGTGACCCAGTAACACATCTGACAACACCAAGGGGATGAAGCTGCATCCCTCAGAATGAAAAAAG  
GGATGCCATGGCATCCCTTGTTTTTACGGCTATTTAACGCTGAGCTGTATCAGAACGAGGTGCGGCGGTA  
GCGGCGATATTCGGATGCCAGAAGTTGGCGTCGATGGCTGATCGATCACCTCGTCCGGGGTCTGCAC  
GCCTTGCCTGCAGCATGGCGGCTTGGCCACCATCTTGGCGATGTAGCGGGAGACCTGATGGATATCCG  
CCAGATCCGGCAGCAGAGATCCCTCCTCCCTTTTACCAGCGGTGAACACTCCGCCAGCGCGACTGGC  
CGACATCAGCATGGCGTCCGTTACCCGGGTGGCGCCGGAGGCGATGACGCCAAGGCCGATCCCGGGAAG  
ATGAAGGAGTTGTTGCACTGGGCGATGACGTAGCGCTTGCCTTGTGCTCCACCGGTGCAAACGGACTGC  
CGGTGGCTACCAGCGCCTGACCGTCCGCTCAGCGGATAAGGTCTGCCGGCGTCCCTCGACCCGGGAGGT  
GGGGTTGGAGAGCGGGAAGATGATGGACGGGCACAGTGTCTGTGCATGGTCTTGACCACCTCTTCGGTG  
AACAGCCCCGGCTGACCGGATAACCCGATCAGGATATCCGGGCGGCCGTGCTCCATCACCTCCAGCAGGG  
AGATGTTGTCCCCACCGCCAGTCCGGCGATGCGCTTACCAGTGGGAGAGACGGCGCTGGAAGTGCAG  
CTGGTTGGGGATCTTGTGCGGTGATAAGACCAAAGCGGTCCACCATAAAGACACGGCTGCGGGCCTGGGCA  
TCGGTACAGCCCTCGGCTTCATCTGTGCCACGATCTGCTCGGCGATACCGCAACCGGCGCTGCCCGCAC  
CGAGGAAGGCAACCCGCTTCTCGGAGAGCTTGGCGCCGGAGGCTTGCAGGCAGCGATGAGGCTGCCAG  
CGTACGGCAGCAGTACCCTGAATATCGTTCGTTGAAGCAGCAGAGCTCGTTCCTGTAGCGGTTGAGCAGC  
GGCATGGCGTTGTTCTGGGCGAAATCCTCAAACCTGCAGCAGGATATCGGGCCAGCGGCGCTTGACCGCT  
GAATGAAGGCATCGACAACTCGGCGTACTCATCCCCGAGATACGCGGATTCGCGCACCCCATATAGAA  
GGGGTCATTACAGCAGTTGCTGGTTGTTGGTGGCCACATCCAGCACACCAGGCGAGTGGCGGGCGAG  
ATGCCGCCACAGGCGGTGTAAGCGCAGCTTGGCGATGGGAATGCCATGCCGCCGATACCCTGGTAC  
CCAGACCCAGGATCCGCTCGCCATCGGTACACGATCACCTGACGTTCTGCTTGGTAGCGTTTTGTCAG  
CATGTATCGATCCTGTCTTGTCCGGATAGGAGATAAACAGGCCACGGGCGCGCGATAGATGTTGGAG  
AACTCCTCGCACGCTTGCACCCTCGGGGTGTAGATGATGGGCGAGCATCTCGGTGAGGTGGTTGTGCA  
GCAGACGGTAGAACAGCGTCTCGTTGGTATCCTGGATGTTGCGCAGATAGATGTGCTTGTCCATGTGCTT  
GCCAAACGCCATGAACTGGCGATAGGCGCGCTCGGCTGCTCTTCGATGGTCTCGATATTTGCGGCAAC  
AGACCTTCAGGTTGAAGTTGCTGCGCTCTTCGCTGGTGAAGGCGCTGCCCTTGTGAGCAAAGGGTCT  
CCAGCAGGGCGGGACCGGCTAGGGAATGTAGAGAGGACGTTTCTGGTTATTATCTTCAAACATGGATCT  
TGGTACCTAAACGGTTAGCTAGACGAGGACCCGCGATCCTAGGGGCTTGTCTCATTAATTTCAAAGA  
GTTTGCACATCCGTTGCAAAGGTTTGCACCCAGTGCAGCAAAGGCGCCGGGGTCTGACCAGTGCAGC  
GACGAAAGCGGTTGGCAAAGTTGGCCCCATCGCTGTAACCGACCCGGGCGCCAGCTCGCAAGTGGCCA  
GTTGGTATAGAGCAGCAGCTGGCGCGCTTGTTCATCTGAGCTCGGTCACTCTCGCCATCGGCCCCATA  
CCGAACGCTTGTGACAGAGGCGGTGAGATGGGGAACGGAGCAAGCCATCTGTCCGGCCAGCAGGGCGA  
CACTCCAGGGTTCTGTCAGGCGCGCTCCACCCGGCGAAACAGAGCCTGCAATCTGAGTTTACGGGGTGC  
GCGCACCTCCCTTGCAGGGTCCGCTCCAGCAGCGCCAGCAACAGGCTGAGCAGTTGGGGTTGCAGCGAA  
GAGCGAACCCTTCCCCCTGCATCAGGCTGAGCAGATGGTAGAGCTGATCGCCGCCATCCCCTTGCCAGA  
TACGGTGACCAAGGCGATGCAGGTGCTGCCAGCGCGCACGTCACTGAGCAAAAATCCAGCTGATCTGCCA  
GCTTTCGCCAATCAGTTTGTAGACCACCGGGCACGGCGGGCGGGCAGGAAAATCAGCGACCCGGCCGAATG

GCTTGCTCCTCCTCGTTCGGTGAGCAGCGCCCCCTCATCGTACTCACCATCAGGATGTGAAACTCGG  
GGCGATTGCGGCGGATGAGGTAGTGATCCCCGACCCGGGAGAGGCCGTCAGGAAGATCCCTGCCTCACC  
GAGCAGGGGCGAGCCCTTACGTCACGATCTGCTCTTACAGGCTGGCGCTATCTCCAGACACTCGCTG  
GCAAATGGCATAACACCTCAACAGGATAGTTTTACACAAGAAAACCGAGAGCTACTCACAGTGAGAAGAG  
CCTCGTCAGCCCCCTATCATACCCCTGACAAACCTTGCTTTTTCTCATAACCCGGTTAAACACTATGAATTAT  
TGGCAAGCGATTTTTAAACAAACCACCGATCGCGAGTTCATGACCCGATTTGTGGCGGCTGGCTCTGCCTG  
TCTCGCTGCAATCCATGATGTTCTCCCTGCTCGGCCATCATGATATCATGATGGTGAGCCAGCTTGGCAC  
CACGGCTGTGGCGGCGGTTCGGCTTGGGTAACCGGGTTTTCTTTTTCAATCTGCTGGTGATAGCGGGCCTC  
GCGGGCGGGGTCTCGGTATTGGCAGCACAATACTTCGGGCGCGGGGAGATGGCCGGGGTACGCCGCTCCC  
TGGCGTGGCCATAGTGGGTGCCCTGCTGGTCACCTGCCCTTTCCTTTCATCTATGTGTTATCACCGGG  
CAGCGTACTGGGTTTTGCCAGTCAGGATCCGGCGCTCGGGCACTGGCGGATCAATTTGATGATCACC  
GGCGCCACCATCCTCTGTACCGCTATCGTATGCGCCGCTGGAATCAGCCCTGCGCTCGGTCGGCAATGCCG  
CCGCGCCGACTCGCATCGGCATTATCGCCATCATCGCCAACGTCATCTCAACTACGCCCTCATCTTCGG  
TCACTTTCGGCTTCGAGGCGATGGGGGTTCGGCTTCGGCCGACCCACTTTCCCGGCTGCTGCAG  
ACAGCCCTGCTACTGCTTACGTAAGCGTTATGAAAGCGCGCCTGATCCCGCGCGCACCAGACTGGCTGG  
CCGCCTTCAAGCGCAAGGAGGTGGTTCGTTTTACCTGATCGCCCTGCCGCTGCTGTTCCATGACGGCCT  
CTGGGCCTTCGGCATGCTGATTTACGGCTTCTCTACGCCATCTTGGCACCATTGCTGGCCATCATG  
ACCACCCTCGGCACCCTGGAGAGCATCCTTATCTCCCTCTTCTTCGGACTGGCGGTAGCCTGCTCCACCC  
TGCTCGGCCACCGGCTCGGGCCGAGGAGTACGAGGTGCCTGGCAGCACTCCAGCTGTTCCCTGCTGCT  
CGCCCCCATCGGCGCGCTACTGGTGGGGATCATCGTCTGGCTGCTGCAAGCCAACCTGTTGCAGTGGGT  
GGCAACCTGCCCCCGAGCTGATGACGGAAGCGGGTCAGGTGCTCGGCATCATGTGCCCTCGGGATGCTGC  
TCAAGGTGTTCAACATGGTGGGGATCATCGGAGTGTGCGCTCTGGCGGTGATGTGAACTACAGCATCTT  
TATCGACATCGTTCGGCATGTGGTGCATCGGCATCCCGCTCGCCTGGGTGGCGGTACAGCTGCTCGGCTGG  
CCCCTCTCCTGGGTGGTGGCGGTGGTCTTGCTGGAGGAGCTCAGCAAGGTGTTGCTGGTGCAGCGCCGTA  
TTCGCCAACGCTGCTGGTTGAAGAATCTGGTATCGGATAAACAGCCACAAAATCGGGGTCATATCAATGA  
CAGAAAAACCTGTTTGCAGTATGCTGGGCGCCTCTTCAATCAGAGACAGGGATCCACTGTTTCCCTGTC  
CAGTAGTCGTTTAAAGAGACGAGCATGCAACCACAGAAAGAGCTGATCACCGAGACGGCCCTGCTTGAGA  
TGGCAACAAGATCATCAAAGAGCATGAAGACTTCCATGCCGATGCGCGCCGACTCGGTGGAGCAGAA  
GGGGGATATTTCTGGTGTTCGAGGGGAGTATTTCTGCGCGAAGATGGCACCCCGAGCCGAAAGACCATG  
GCGGTCTTCAACATGTTCAAGCTGCTGGCCAGCAGCTCTCCGGCAAGTACAAGCTGGCCTGATTTACC  
AGCACATTGCCAACAGGATGCCGCCCTCAGGCGGCATCTGTTTTTTCGCGGTTCTGCCCTCGACCACCA  
CGCAGTTGCGTCCC GCCATCTTGGCCTGATAGAGGCACTCGTTCGGCACGGTTGATCAGAATATCGATGGT  
GTCATCGGAACGGGCCATGGCAATCCCGATACTCACCGTCACCTCCAGCAATTCGTCCGAGGTGGGACTC  
TTCACCAGCCGCGCCTCGACGGCAATGCGCAGCCGCTCGGCCATTTTACTCGCCAGCGCCGGATCGGCGC  
AGTTGTGCATCAGGATGGCAAACCTCTTCGCCGCATAACGCCCCAGCACCATGTCAGGCTCCAGCTGCTC  
CCCCAGGGTGGTAGCCACCTCCTTGGACCCGATCCCCCGCCAGATGGCCGTAGATATCGTTGATCCGC  
TTGAAGCGATCGAGATCCAGCAGCATCACCGCAAAGTCTTCTTCTTGTAGTTGCAGCCGATTCTGGCCT  
GCTCCAGCTGCTTCATCAGCAAGCGGCGGTTTCATCATGCCGTCAGCTCATCGGTGGTTCGATTCCCGATA  
TAGCCGAGCAGCATGTTGAGTTGGCCGCACTGCACCCAGCAACTAGCCATGGTAAACATGCCGAGCACC  
CACACCTGATTACGGGTGGCCTGACTCCAGATGCTCTGCCCCACCAGCAGCCAGTGGCCAGCAGCATGG  
TCACCAGTACCACGCCTGCCAGTTGCAAGCCGAGGGGAGAGGGGATGGGAAAAGATGGCAAACAGGGTGT  
CAGCAGATAGGGAAAGGCCGATAGCCCGCCTGCAACTCCTGTCCGGCGCCAAAGCTGTTTCCAGACAGAAG  
AGGGAGAAGAGCATCATCACGGCCATCAGGTAGCCAAGGGCCAGCTTCATCCGTTCCCGCTTGAAGTGA  
TGAGGTACGAGAGCGGAATAAGTGGCGAGAGCGCCAAGGTGCAGAAGATCCTGGCCTGAAACAGCTGCTC  
GAAATGAACGGCGGGCAAGGTCAACCAATCCACCAGGCCAGGCGGGCAACCCGAGCATCAGCAGACAG  
GTCAGCAGGCGCAAACCGTCAATAAGCCCATGCGAGTACGAGTAAAGTCTTCGGAGTGAACCCCTCG  
CACTCCAGAACTCTGACAACCTTGAGCATCCAGAGTCTCCACGATGAATACTGAGGGCTCATTCTACACCT  
ACAAAGTGGTAAAATTGTCAATTAGCGGGGAGAATAAAAAAGGAGAGGTTCGGTCACACAAACCGACAGATGA  
TAATCGCAGCGCGCAAACGTTTTCAACCCATCAAAAAATAAACCTTTTTTTTGCATAAATTAGCGCTGGTCAG  
CCTCATTTTCAATCACTACAATAGCGCCCAATTTTTCTCCCCCTCCCCACACAATTCGAGGTACTTATGGAA  
CAGGCTGCTGTCACACGCGCAATCGAGAGGCACATCCACCAGGCGAGCCCATAGCGAACTGGTCTATG  
GCATAGAGGATGTCCCGCCTCTGCCCCAGACGCTGTTTCGCCGCCCTGCAGCATATGCTCGCCATGTTTGT  
CGCCATCATTACCCCGCCCTGATTATCGCCAATGCACTCGGCCCTCCCTGCCGCCGACACCCGTTATATC  
GTCTCCATGTGCTGGTTCATGTCCGGCATCGCCTCCTTCAATCAAACCCGCCGCTTCGGCCCCATCGGTT  
CCGGCCTGCTCTCGGTACAGGGCACCAGCTTCAACTTCCCTCGGCCCATCATCGCCTCAGGTCTCGCCCT  
CAAGCAGGCCGCGCATGCCACCAGGATCTGTTGGGCACATTTGTTGGCACCATGATGGTTGCTGCACCTC  
ACTATCGTGGTGATGAGCCGCTTCCCTCCATCTGGTGAACCGGATCATCACCCCGCTGGTCACCCGGCATAG  
TGGTGTGCTGATCGGTCTGACCCCTGATCAAAGTGGGCCTGATCAGCATGGGCGGCGGCTATGCAGCCCT  
CTCTGATGGCAGCTTCGCCAGTCACACCAACCTCTTCTCTCCCTGCTGGTGTCTCGGCCCTTATCGTGTG  
CTGCAGCGCAGTCGCAACCCCTGGTTGCGCCTCTCCGCTATCATGATCGCCATGCTGGCGGGCTATGCCG  
TGGCCCTGCTGTTGGGCAAAGTGAAGCGCCCCACCTTCGACGGCCCCCTGGTGTGGTGGCCATTCGGCT

CCACTACGGCCTCGGCTTTGACTGGCAGCTGTTTCGTGCCGCTCGCCATCATCTTCGTGGTGACGGCGCTC  
GAAGCGATCGGGCAGATGACCGCCACCTCGGATATCTCCGGCGAGCCACTGGAAGGGCCTGTCTATATGG  
AGCGGATCAAAGGCGGGCTGCTGGCCGATGGTGCCAACCTCCATGCTGGCGGCTGTTTTCTCCACCTTCCC  
CATGTCCACCTTCGCCCAGAATAACGGCGTCATTCAGCTGACCGGCGTCGCCAGCCGCCATGTCGGGGCTC  
TTTATCGCCGCCATGCTGGCCCTGCTCGGCCTGTTCCCGGGCGGTGCCAGTCTGGTGCAGCAGATCCCCG  
AGCCCGTGCTGGGGGGCGCCACTATCGTGATGTTTCGGCACCATCGCCGCCGCTGGCGTGCGCATCATTCG  
CCGCGAGGAGCTGGATCGCCGCGCCCTGATGATCCTGGCAGTGTGCTGGCCATGGGGCTGGGAGTCGCA  
CAGGTGCCGGAAGTGTGCAACACCTGCCGGAGCTGGCCAAGAGCGTGTCTCTCTACGGCGTCGCCACCG  
GTGGCATACCGCCATCGTGCTCAACCTGCTGCTACCCAAGCGCGAAGCGCGCCACTCCTGAGACACAGC  
CTACTGATAGCAAACAGCCCCGCACTGCGGGGCTTTACCTTACCAGTCGCCACGGGTAGTGTGCTGGGCA  
GCCTTTTTTGGAGATGCCGTCATGCCCTATCGCCTGCTCTCTCCCTCCCCGATACCGGTTTTACCCGCA  
AGATACTGGCGCAAGAGCAGTGTGGTTGCACGACTGTGCCCATGACCGCCAGCCCGCGCTCACCTATG  
GCAGGCGCCCAATGCCTGATTGTCACTCGCAAGGATACTGCTCCCTCCCCATTACGAAGCCGCTGCAAA  
CAGCTGGCAGACGAAGGCTGGCCGGTACATGTGCGCAACAGCGGTGGCACCAGCCGCTGCCCCACGGGGCGG  
GGATCCTCAACCTATCCCTGCTGCTGCTCGCACCACCACAGATCTCGCCCACTACTACCGACTGCTGGG  
GACGCGCTGCTGACCCTGTTGGCGGAGTACGGCCTTGAGGGAAAGCTATGACTTCGTGCCGGCTCCTTT  
TGCGATGGCCAGTACAATCTGGTGATCGGGGACGCAAGATCACCGGCACCGCCAGCGCTGGCTGGCGC  
CGGGGACAGGATCACAGGGGCGCCGTGCTGGCGCAAGCCATGCTGCTGGTGGCGGGTGTGTTGGATGAGGG  
AACCAGGCTGGCGAGCCGCTTCTACGAGCTGGCGGGCGCGAGCTGCGTTTTATGGCGGGAACCTCCATT  
ACGCTGGCAAGCTGCATCGATTGGCGCGGTAGCGATCAGGCACTGGTGGATAAGGTGCGAGCACGTCTGG  
ATAGCCTGCTGAGCGAGGGGCTATCCCCCTCATTCTGACCTTATCCCGAAGGGAGAGGGAAAATACCCGA  
CCATAGACACAGCGCACAAAAAGCCACGACCCGGAGTCGTGGCTTGTCTTTTTCAAGGGGAGCGTGAAAC  
GGGCTGAGGCGTTTACGGCCGTCTGCGGCTCCGGCTCGGCTTCGCTATCCAGCTCCCGGCTAAAGTAGGGC  
CGGGTCTCGGCGATCACACATGGCGCAGGCCAATCAGGCCGATGAGGTTGGGCACCGCCATCAGGCCGT  
TAACGATATCGGCCAGCAGCCAAATCATATCCAGATGGAGGAAGGCGCCGCTCGCCACCAGCGCCAGATA  
GACCAGACGATAGGGCTTGATCGCCTTAACCCGAAACAGGTATTCGGTGCAGCGCTCGCCGTAGTAGTTC  
CAGCCAAAGGATGGTGGTAAAGGCGAAGAACAGCAGGCCAATGCTCACAGATACTGGCCGACATGAGCAT  
CGAGCCCTTGGGCAAAGGCGAGACTGGTTCATGGCCGCGCCGCTTGCATCGCCGCTCCACACCGCCGTCAC  
CACCAGGGTACAGCCGCTCATGGTGCAGATGATGGTGTGATGAAGGTACCTGTCTCATGGAGACCAGC  
CCCTGCTCCACGCACGAATCGGTCTTGGCTGCCGCCGCCGCGATGGGCGCAGAGCCCAGCCCTGACTCAT  
TGGAGAAGACCCCGCTGCCACCCCGGACTGGATTGCCAGCATGATGCTGGCACCAGCAAGCCGCGCGGT  
CGCCGCATGGCCGGTGAAGGCACTCTCGATCACAGCATGACTGCATCGGGCAGGGCGCTGGCGTTGTTT  
ACCAGCACACCCAGACAGGCGACGATGTAGAAGATGGCCATGAAGGGCACCACCTTGCCTCGACACGCTGG  
AGATAGATTTGATCCCTCCCTGGGTACCAGCGCCACGATCAGGGTACAGCACCAGGCGGTGCTTCCAG  
GGGCACCAGAGAAGGAGAGGCTCATGGCGTGGAGATGGCATTGACCTGCGGGAAGGTACCGATCCCGAAG  
AAAGCTACGCCGATGCCAAACAGGGCAAACAGCTTGGCCAGCGGCTTGGAGCCAGCCCTTCTCCAGAT  
AGTACATGGGGCCACCAGCCATCTGGCCGTTGGCATCCTGCTCGCGATATTTACCGCCAGCAGACACTC  
GGCGTACTTGGTGGCCATGCCGAACAGCGCCGCCATCCACATCCAGAACAGGGCACCAGGGGCGCCGAGC  
TTGATGGCGGTGGCAACCCCGACGATGTTGCCGGTACCGATGGTGGCAGAGAGGGCGGTACAGAGGGCGC  
CGAAGCTGGAGACATCTCCCTGCTTGGCCAGCCCTGATCGCGACCAAAGACCAGCCGCAGAGCGAGCGG  
CAAGCGCACGACCTGAAGCAGACCCAGACGCAGGGTGAAGATAGATACCGGTCCCGACCAGCAGGATCAGC  
AGGGGCGGCCCCAGATAAAGCTATCGATGGCGGTTAACGCCGATTTGAATTGATGACATGCATCCTCCTT  
AAGAAACAGAAATTAAGGAGGAGAAGGATGATCTTCCATAGGTGTGCGGATCGGCCAGAGGCGATCGGA  
TGCGGGCCAAGCCCAGGTACAACCATCCCATCCCTCTGTCTTTTGCCTGAGAGTTTCCGGCGCCAGCC  
TGCCCTTGGCGGTAGTCATGGTGCCTTGTCTCTTCCGCGCCGATTTAACGGGTCTCTCCAGAGTATCGT  
CCAGTAGCAGTCCACACCGGTTGCCCGGTACCTGAAAGATTCACTTCTTCGGTGGATGGTGGTCCCATCGC  
TCTCCTGCTACCTTCATCCGAACCTAGTTTGGATTAGGAAGTCCGGCATGTTAATCCAAAAAATGTGAGCTG  
TCTCGCACTTGGCCGCCCCCATTTATATTTTTTTTAGTGACCACCAGAAATCGCAGCAAGAATGTTAAATGT  
TAGTTAACTATCAACAAGTTAGGCTCTCACGGATCAAATGTGGCCCAAACGGGAAAAATGGCGGATAGAG  
AACCCTGATCCCTCTCGTTTTCGCCAAGAAAAATCTTGCCGACATATCCAATCAAAATGCTTGCACACAGAA  
TCAATAAGCCGATAATCCGCTGCATAACCAAGCACTTTATATCAATTTATGCACTGTGTTCCGGTTGGTC  
CCACCGGACCGCTCGCCTGACCCGGCCGTGCGCGGTTCAATCGCATATGGCTTGGGCATATCACGCCCC  
TAAGGATGACCAAAGAGAATGAACGAGACCCCTGGTTGCAAAAGATGTGGTGCACAAGATTACCGTCAG  
CTGGTTGAACAATTCGGCTCCCTCTGCTGCTGCTGCTGCAAGGACCCGTCGCAAAACAGTATCGGGCC  
TGGCCGCGCCCTGCCCCGATGTACGATTGCACTATGCACTCAAACCCCTGCCCCATGAGGCGGTGGTCTC  
TGTCTTGAAGGAAGAGGGGGCTGTTTCGATCTGGCCACCAATGGCGAAGTGGATCTGGTGCAGATCAG  
GGGGTTCCGCCGGGACGTTGCATTCATACCCATCCCATCAAGCGCGACAGCGATATCCGTTACGCGCTGG  
AGTTTGGCTGCACCGTGTGTTGTCTACGACAACCCGCTGGAGCTGGAAAAGTTCATTCCCTACAAGGACGA  
AGTGAAACTGCTGCTGCGGGTACGCTTCCCCAACCCGAGACCAAGGTCGATCTCTCCAAGAAGTTCGGC  
TGCACCTCCGGAGCAGGCGCTGCCGCTGTTGCAACTGGCCCACGCCAAGGGGATCAAGGTGATGGGGCTGT  
CGTTCCACGTCCGCTCCCAGGTACCCACGCCCGTCCCATGTGCAGGCCATCGACGCTGCCGCGAGAT



CATGGAGCAGGCCTGGGCGCTCGGGCTCAAGCCCTGGGTGCTGGATATCGGCGGCGGTTTCCCGGTGGAT  
TATGAAGGGGGCGAGTTTCGATATCGACGGCTTCTGCGCGCGATCCGCGAAGCGCTGGCCAAGTTGCCCG  
CTACCGTGCAGAAGATTGCCGAACCGGGCCGCTTTATCAGCGCACCGGCCATGACTTCGGTTTCAAGCGT  
GATGGGCAAGGCCACCGCGGCGACAAGATCTGGTACTACCTGGATGACGGTCTCTACGGCAGCTACAAC  
GGCCAGCTCTATGACCACGTACCTATCCGGTGAGCACGCCTTATGCCAGTGGCGAGCAACACAACCTCGG  
TGCTCTCCGGCCCGACCTGCGACAGCGTGGATGTGATCCGCGATGGCATCATGCTGCCGGACCTGGCTAT  
CGGCGAGTTGGTGGTTGGCAAGGTGATGGGCGCTACACCTGGGCTCCGCTCCACCTTCAACTTCTTC  
CCCAAGGCCAGCATCCTCATTCTGGACAGCAGCCAGAAGGGGCGAGAAGCTGGTGGCAGTAGCCTGAGCAC  
ACCGCTCGCTCGCCAACAGGTTCACTGGGCAAAAACAAGAGGGGGGAAGCTTGAGCTTCCCCCTCTCTCAT  
TTCACCAACCCCTATTAGATAAACTGACTGGTCAGCAGCCAGCCGGTGTAGGCGACGAAGCAGGTGAGCA  
GCACGCCCCCTCCACCGGTTGATACGGCCTTGTCCTTTCGGGCCAGACACATCACCAGCAGCAGCAGCA  
GGTCAGCCCCATCATGATGCTCCAGTCACGGGTGAGCACCTCCGGCGCCACATCGAGCGGGTGAATGCCT  
GCCGCAATCCCCACCACCAGGCTGTTGAACAGGTTGGAGCCAAGCACGTTGCCAAGGGCCAGATCAT  
GCTCGTTCTTTCGAATGGCGATGAGGGACGAGGCCAGCTCCGGCAGGGAGGTCCCCACCGCGACTATGGT  
GAGACCAATCACCAGATCGCTGATACCGAGCGCTGAGCGATGGTCACCGCCCCCACACCAGCAGGCGG  
GAAGCGCCGATCAGCAGCACCAGCCCAGCACCAGCCAGAAAGATGGCACTCTTGAGGGACATCCCCTCGC  
TCTCGATATCCTCGGCGGTCTCGGTATCCAGCGCATCTCCCTTGCCATTCATGCCAGCCAGATGGACCA  
GCCCATCAGGGCAACGAAGACGGCCCCCAGAATGACCGCATCCATCCGGCCCAGATGACCATCGATCAGC  
AGGGCGCCGGAGAGCAGGGTAATACTGAGCAGAATGGGGATCTCCTTGCGCACCCACTGAGAGGCCACCG  
CGATAGGGCTGATCAGTGCCGTCAGACCCAGGATCAGCGCGATATTGGTGTGTTGGAGCCATAGGCATT  
ACCAAGCGCAACCCGGGATTGCCCTGGGACGCCGCCAGCGCCGAGACCACCATCTCCGGGGCCGAGGTA  
CCAAAACCGATGATCACCATGCCGATCAGCAGCGGCGGCATCCCCGCATAACGGGCAGTGGCGGGCGCAC  
CGTGCACAAACTTGTCTGCACTCCAGACCAGCAGCGCCAGTCCGGCAATCAGGGCAACAAAAGCCAGGGT  
CATAGGATCTTCATCTCTTGTATCAGCAACGAAGCGCCAGCCAAAACGGGCAGGCACCATGGGAAAGTG  
GCGCCAGTGTAGCTGTGCCACCTCCATTTCAAGGGGAAAATCAAACCGTGATTAACATTTACAGTGCAG  
CCAGCAGGCTCGCGCATCGGAGACCTCAAACCTTGCCTGGCGCCTCCACAAAACAGCTGCTCGACCACACC  
ATCGTTGGCGATCAACGCAAAAGCGCTGGGCACGGATGCCGCCAAAGGCGCCGGTATCCTTGCCAGATCC  
AGCCCCGGTCCAGTCCATCGCCATCCGACAGATGGTGTGATCGCTCGGCATTTCTGGGCCATCTGCC  
AGGGCCCGCATCAGAAAGCATCGTTGACCCAGACACAACAGATGGCATCCACCCCTTTGGCCATAAACTG  
ATCGGCCAGCACACATAACCGGGCAGATGAGCATTGGAGCAGGTGGGAGTAAAGGCGCCGGGTACCGCA  
AACAGCACCACTTTTTTACC GGCGAACAGCGTCTGGCTATCCCGCAGCTGCTTGCCCTCGGCGGTGATAA  
AGGTAAATTCGCCCCAGGCAGGGGGTGTCTTACAGCAATCATGATTTCTCGTCTGAGTGTGATGGGA  
AGTGCAGGTTTATCCAGAGTGACGATGCCGCTAACAGCGGCTCTGAGCCTGACCATGGATAGCGGCA  
GGCATTTTTCCCTTGGGCAGACTACTCTTGTGCTGGTTTACGGCGCCAGGAGGCCCATGCAACACTAT  
TACGATGGTCTGGAAATTCGTCCCCCGCCATGCGCGAACAGCAGCAACTGGACCAGCTCAATCATCAGC  
TTACCCATGTCAATATTGCGCCGGTTACTCCAGCGCCTATCGCCAGTGCCGCTCGAGGATCTGGC  
AGATCTGGCCACCCTGCCACTGCTCGACAGCAAAGAACTCTTTGCGGCCAGCAGGCTCATCCCCCTTT  
GCCGGTCTCACCGGCCGCCCGCCAGTCAGGCGCTGCGGGTATTCTCCTGTCCGGGCCAGCTGGCCATCC  
CCGAGTATGCGGGAGCAGACTGGTGGGGCGCCGCCCGGGCGCTGTTTGCCGCCGGTTTCAAGGCGGGGA  
AGTGATGCTCAACGGCCACGACTATCATGCTGGCCCCACCGCCTTTATCTTCGATAACGGCGCCCGCCAG  
CTGGGGGCTCCCGTGGTACCCTGCGGGCCCCACGATAACCAGCGCCAGCTGGAGGCACTGCTGCGCTATC  
AACCCACCGGCTACGTCCGTCCGCTGGTGACCCTGCTCGACCTGCTGGAAGCGGCCGAAGCAGCGGAGAT  
CCCGAGCGACTCGCTGCGCCGCGCCCTATTGTGCGAAGCCACCCATCCTGAAACCGCGCCACTGCGCGCC  
ATTCACGGCATTGCGGCCCTCAACTGTCTGGTGTGGCAGGATGTGGGGTGGTGGCCTACGAGAGTCAGC  
CCGGTCAGGGCTTTATCGTCAACGAGAGTTGCATCGTGAATCATCGATCCCGCCAGCGGCAATCCCGT  
GAGTGGAGATGAAACGGGCCAGCTGGTGGTGAACCGGCTCGATCTGGAGTATCCCGTGTGCGCGTAGCC  
ACCGACTGGCAAGGTCACTGGCTCGCCAAGCCGAGCGCTTGCGGGCGCACCAACCGGCGCCTCAAGCTGG  
TGTAGCAGACCAACTAAATGCACAAAAGCAGACGGGCGACCATCAGGCTGCCCGTCTTGTCTCTGAACTG  
GAAAAGAAAATATCTAAAGAGAGACGTTAGCGTCTCGCCTGCCAGGTGGCGATGGCGAGCAGGGAGTCAG  
GGGTAAATTCGCTGGCACGCTCGGCAATCTCGGCCAGGCTCATCCAGTGCACCGCGCTCACCTCTTCGGC  
CTGCAACTGCAGCGGCCCTGATAACGGCAACTGAAGAGGCCACCCAGACCCGGTAGCCCTCCCCCTTCT  
GCATAAAAGCTGCCAAAGCCCTGCAGAGGAACATCCATAATCCCAGCTCCTCGGCCAGCTCGCGGGCGG  
CGGAGCGCTCCATCTCCTCACCGGTAGTGACCACGCCACCGGCGCAGGCATCCAGCATGCCGGGGCAGAA  
ATCCTTGTGAGGGTGCCTGCTGCACCAGGATCCGATCCGCGTCTGTCGAGCACCAGAATATAGCTGGCG  
CGATGGCAGAGATTCTCCCGCCGACCTTGGCTCGCTCGGCCACGCCAATCACCCGGTTGTTCCCGTCCA  
CCACATCAACCCATTCCACGCACAGGCCCTTTTATTTGTTCCATTCAAGCCCGCAGTATATCGGTGCGGT  
GGTTTGCCATGGCACAACCTTTTTCGCTGACGCCGTCAATTTGCCGAGCTCACTGGCAAAAATAAGGATTCA  
TGCAAACTTTTATAAACCGTCATATCAGTGTGATCGACCGACACCATAGTGTGCCCTGTCCAGGCAATCA  
GGGAACCGTGTGATGAAGGTATTCAAGCAGTTATCCCCACGGCAGATCGCTCGCTACATCAAGAGCTTTC  
ATCGAGGCTATTTTGCATCGAGTCGCTGGGGACATTTGAATTCACGCGGGCAGGATCAGCCTCCATGG  
CCTGACCTGCCGCCAGCGGCTAAGACTGGCTCGCCAGATCAATCTGGCTGTCAGACAACCTGGTACC

GACCCCTTGCCGGACATGTGAGTCAAAGGGTCTTGCCCTACTGTCTGTTGTGCATCCATGCTTTGCCCGC  
CGGCTACTGGCCGCGCGGGCCGTTTTTCGATATCGGTAATGATGCCGTTGCGCACCGTCACAAAGCGCATG  
AACTCGTTCTTGCCGAAGTTGTAGGTCCAGCGTTCACCATATTTGACCTGTACCATGTTGCCAAACTGGT  
TCTCCTCGTAGCGGTTGAGCTCTTCACGCAACATCGGCTCACC GCACTTGAGCAGCATCTCGGCGGTGGT  
GTCTCCCTCTGTGATCAGGGCGTTCTTGACGCGCATGGCATCGGCACTGGCCGGAATGCTCAGCAGCAAC  
AGGGCCAGCCCCGCTACTTTCTTCATCTTCTTGCTCATCGGGTCTCCTTATCCTCTCTAATGAGTCGCA  
GTATGCCTGTTTCGCGTTTCTGAAAAAACCAGTCAAAAAGCGCAAAAAGTGCCGCCCTTTCTGCTCTCCAGC  
CCGCTGGTCGCGACAAATGCTGTCTATCACATAACCCAAAAACAAACGGCGACCCGAGGGTCGCCGTTTG  
CATCAAGCCAGCAGGATCACAGGATGTCCAGCAGCTCGACTTCAAATACCAGTGCAGAGTAAGGCGGGAT  
GGAGCCCGCGCCACGGGACCCGTAGGCCAGATCGTGGGGGATGTAGAGCTTCCACTTGAACCAACC GGC  
ATCAGCTGCAGCGCTTCAACCCAACCCAGCAGTACCGCGGTACCCGGGAATTCAGCCGGCTGGCCGCGAG  
CGACGGAGCTGTGAATACGCCACCCGTGGGTGAAGGTACCGTGGTAGTGCACACGCACGACTGACCGGC  
TACCGGAACGGCACCGTTGCCTTCTACCAGCACTTCGTA CTGCAGACCCGAGTCCGTCACCTTCACTTCA  
GCGCGCTTGGCGTTATCAGCCAGGAAGGCTTTCGCCGT CAGCAGCGGGCCCTTGGCGGGCTTTCCTGCT  
CTTCTTGCCATACGCGCAGTGATCACCTGGAAGGCATCATTGATATCGTACCGGTGACCGCGAACTCCAG  
ACCATT CAGGGCATCTGCCAGACCTTGTTCAGAGGCCGGGATATCCAGACCCGGCGAAGGCTTGTGCGCC  
AGCTGATCACCCATGTTGCGGCCGATGCCATAGCTGGCCTTCTGTTTCGATAGAGTCGTATTGGGACATTG  
AGATGTTGCTCCAGATCCATGTAGTAAAGAGGGCGGATAATATCAGACTTTTGGCCGGGGTGTGCGGGG  
GGTGGCCCTGATTTCCCGCTCAGTGGGAGGAACTTACACAAGATGCGGATGAACGCCGCCAACGGCGG  
CGATCTGCTTAACCGCGATCCAGCAAGGCTCTGACCGCAGCCACCTTGGCGCCATCGGTGATATTGACCC  
GACCATCGTCCGAAGTGCCCATATTCACTCCGTGCGGCACCATGCCACCCGCGCCAGCCCATGCCGGACAT  
ATGCACTTCGCTCACCCCGGTGAACTCGATTATGGTACGCACGTTGTCCGGCATTGACCCCGGCCCCCGGC  
ATCAGGCTGGCACGCCCCGCCAGCGCCTGCTGCATCTCCTGCAGGGTTTCCAACCCCGCCAACGCGGTGCG  
GCGCATGGCCAGAGCTAAGAATGCGCTCGCAACCGGCAGCAACTATGGTCTCCAGATCGAGGCGCCAGTC  
GGAAGAGAGGTGCGATGGCGCGATGGAAGGTGACCCCAACGGTCTGCAGCATCCACCAGCTGTTTGAGT  
GTGGCTGCAGGCACCCGCCCTCCTCATCCAGCAAACCGACCACCACCCCTTGAACCCCGCAGAGCGGG  
CCGCCCGCATATCTTGAGCATCATCTCGAATCGCCGTCA TTGAAGCAAAAATCCCGGCACGCGGGCGG  
GATCATGGCATAAAACCGCACGCTGGCGTGGCGGGTGCCTGCTGCATAAAACCGTAGGAGGGGTGAGC  
CCCCCAGACCAGCGCAGAGCAGAGCTCGATCGCATCCGCCCCGGATTGCTGGGCGGTGAACAGGATT  
CCAGGTTGTCGATACAGATTTCAAGACGGGTGATGAGGACTCCTTTTTTCGGGGAGATCAGACCCACATC  
TGATCTCATAGATTGAGCAAGGCTGCGCCGCGCACACCACCGGCACCCGCGAAGCGGGCTGGCGGATCT  
CGGGCAGGGCGACCCCGGCAGCAAGTGACCGGGCAGACGCAGCGGCAGCTGTTCATAGAGGGCGGGCAG  
GCCGCTCAGGCCGCCCCCAACACCACCTCGGGATCAATCACC GAAATGGCGGTGGCAAGCCCGGGC  
GCCATGATCTCCAACAGCAGTCGACCGTCTCGACCGCATGGGGTTCATGGGCTCGAAGCGTCCCACAA  
TCTGGTGACCCGTGGCGCGCTGGCCATGGAATGGT GATAGAGACGCTCCAGACCGGTGCCGGAGGCATA  
GGTTTTCAAACAGACTAGACGGCCGAGCCGCAACGGGGACGGGGCAACTCGGGGTACTTTCATCAGCATG  
GTCGCGGGCAAGGGGTAGTGACCAATCTCGCCAGCCAGCCAGTTGCGCCCTGAATAAGCTTGCCCGCCA  
GATAGACGGCGCCCGCCGATGCCGGTGCCGATGGTGACGCCGAGCGCACTGCCTGCACCGTCCGCTGCC  
TTGATGCACTTCGGACCAGAGGAAGCAGTTGGCGTCTTATCCACTTTGACCGGCCGCTCCAGCAGCTCG  
GCCAGATCAGCGCCAAATGGCGACCATTTGATGGAGGGCAGATTTGGCCGCCACTATGCTGTGATCGTGGC  
TGTTGATGACACCGGGGAAACCGATGCCGACCGAGCCCCGTGCGCTGAAGCGGGCATCCGCCCTGCTCGAC  
CCGGGAGCGGATCAGCTGCTGCAGCCCTCATAATCGTTGCCCGGGTACTCATGCGCTCCTCGTGGCAG  
AGGTTCAATGCACCGTCATAAACCGCGAAGGGCATCTTGGTGCCACCGATATCAAAGCCGTAATACATGC  
CAGCACTCCCTTGTGAGCCCGTGTATCAACTCTGTTTCAAGGGGGACATTGTATTAATTCGCAAAAA  
AAATAAAGTGACCGAAGGCGAAAAACGGGAGAGTGATCAGAGCAAACGGCTCATTTGTGCTGCAGGCAG  
GGCTGCCGAGGCTTATCAGGGTGCCTCTGCACCATCAAAGACGAAGCCGCGCGCAGGTAGAACCCT  
CGCCGATGTGGTTGCCATCAAGCAGCCACAATTTGACGCTATGGCAGCCGGCGCGGCATCTGCATCGC  
CACCGCCTGCCACAGCCGTTTGCCATAGCCTTGTGCGCCAGTGGTCCGGATGGAGGTAAAAAGCGCGGATC  
AGGGCATGGCTCTGCCCGCTTCTGCTGTGGTTGCCAGTAGAGCAGGCCAATCACTACCTCATCGAGAC  
AAAGTAGCATGGCCTTGGGCCCGCTCGGCCAGACGGCTCTGCCAGATTTGCAGATGAGCGGTGACGTC  
CAGCTGTTCCAGCAGGTCCGCACCGAGCACCTGGCCATAGGCAGCGAGCCAGCTGGCTCGCTGCATCACC  
GTCATGGCGGGCGCATCATCGCTGCGGCCATGCGCAGGCTTATGCCTTGCAATGGGGCACCGACCGTT  
GGCGGAGCCTGCTCATAGAGCGGCAGCACTTGCCTGTGCGCTGCAACTCGGCGATCCGGTTCTCG  
TTGCTCGGGTGGGTGGAGAGCAGTTGCGGGGGGTGTTGCCACCGCGCGGCGCACTCATGTTTTGCCACA  
GGGGGATCGCCTCGGCCGATTGAACCCGGCACGCGCCATCAGCTCAAGTCCGAGCCGATCCGCTTCGCT  
CTCCTGAGTGCGGCCATAGGGGAGCATCACCCCACTCGACCCGAGGCCAAGGGCGGCCATGGTGGCG  
CCGCGATACTCGCTGGTGCCCATGGCAATGTCCGGCGGCCAGACCGATCCCCGCCAGCTGGCTGCGCG  
AGAGTCGTTGCTTGGAGTGCTGAGCCAGCACGTGAGTCAGCTCGTGACCGATGACGGTCCGCAACTGATC  
CTGATTCTTGGCCACCTT GAGCAGGCCGCTGTAGACCCGATCTTGCCCGGGCAAGGCGAAGGCGTTG  
ACCTGTTTGGAGTCAAACACCACCACTTCCAGTTGGTGATGCCATAGCTGGCCGGCACCTGAGCGGTCA  
CCGCCTTGGCAACACAGGAGACATAGGCGTTGAGTTGGCATCATTGCTCACCTTCTCCTGCTTCTTCAT

CTGCTCGAAGGAGTCGGCGCCCAGCTGGTTTCATCTGCTGGGGAGAGTAGAGCAGCATCTGGCTGCGGCCG  
GTCGGCGACTGGGCGCAAGCGACCAACAGGGAACACAGAGGGCTACCAGGCCAAACTTGGTGAGGGACG  
CAATCATGAAGGGATCCTTTTGCATAACGTTGCCCTATTCTCGGAAATGCCGCCGGCTACGCAAGGGAG  
CCAGCCCCCGGCTGGCGGAAAAATATCCATCCTGCGCTATTAACAAAACCTGACAGCCGCCAAAAACAAAA  
CGAGCCCCGCTTGGGGCTCGTTTTATCAGGGCATGCTGACTGCAGGCAGTTACATGATACCCAGCTTTTTTC  
AGGTCAGCCTGTACCACCTTGGCCGGCACCCGGCACGTAGCCATCTTTGGCAACGATGTTCTGGCCCTGCTT  
TGGAGAGCATCATCTTGACGAACTCTTGCTCCATCGGGGAGAGCGGCTTGTTCGGATGCTTGTTCACGTA  
AACGTACAGGAAGCGTGACAGCGGATACTTGCAGTGATGGCGTTATCGGAGGTCGCTTCGATGAAGGTC  
TTGCCATCTTTGGAGAGCGGTACTGCACGCACGCCGGAGGTGACATAACCGATAACCGAATAGCCGATGC  
CGTTCAGGGAGGCAGAGACAGACTGCACACGGAGGCAGAACCCGGCTGCTCGTTCACGCCGCTCTTGAA  
GTCGCGGTTACACAGGGCGTCTCCTTGAAGTAACCGTAGGTACCGGATACGGAGTTGCGACCGAACAGT  
TGCAGATCCTTGCTGGACCAGTTGCCGTCAGACCCAGATCAGACCACTTGGTGGCAGCTTGGCTTCGC  
CGCACTTGAGGGTGCTGGAGAAGATGGCGTCGATCTGCGGCATGGTCAGCCCCCTTGATGGGGTTGTCTTT  
GTTGACGAACACTGCCAAGGCATCGACTGCAACCGGGATGGCAGTCGGCTTGTAGCCGTAACGCTTCTCG  
AATGCTTCTCTTACCAGCCTTTCATGGCACGGCTCATCGGACCGAACTGGGCAACACCTTCGGTCAGGG  
CAGTCGGGGCGGTAGAAGAACCAGCGGCTGGATCTGCACGTTGACGTTGGGGTACAAACGCTTAAATTC  
TTCGGCCCCACAGGGTCATCATGTTGGCCAGGGTGTCCGAGCCGACAGAGGACAGGTTGCCGAAATGCCG  
CTGGTCGGTGTGTAATCCGGCAGGTCTTTATCCACACCGGCAGCCAGAGCGCTGACAGAAAACAGGGTTG  
CTGCGGTGAATCCGATTACACCAGCCAGTTTGTGAGTTTTCATCCAATCTCTCAAAGTTACAGAAGGTC  
CGTTCCTTAAGACGGCGCCAGTATCTGACCTGGCAGTGACAAAATTTATGGATTTAATGTGACACTTTAATG  
ACATGTCGGCAGATTTGAACAAATGAAAAGAGGGCCCGTTCAAAGGCCCTCTTTTTGCAGCTAACTAATT  
GCCATAAAAGACTATTTAATCACCACCATACGGCTCGGGATGAGAAAAGCTGAAGCGGGCTGCCAAGGCCGA  
CCCCGGCTCTCGATATCGAGCTGGCAGTCGTGATGACTGAGGGCATGCTTGACGATGGCAAGGCCAAGCC  
TGAGCCGCCGGTGTGGCGGAGCGTGCCTTGTGACCCGATAGAACCCTCGGTCAGCCGCGCCAGATGC  
TCGGGGGCAATCCCCTCCCCTTCATCGCTCACGGCAACAGCGCCATCGCCCCCTGCTTGCGCCATTTCA  
CGGTAATTTTTCGCCCCCGCGGGGTGTAGTGAATGGCGTTATAGACCAGATTGGAGACGGCACTGCGCAG  
CTGCTCCTGATCCCCCGCTACCAGCAGATTGGGCTGCACCACAAATTCGAGCTGGTGGGCCCGCTCCCC  
GAGAGCGCCCGCCCTCCTGCTCCAGACGCCCCAGCATGGCCGGCATGTCCACCAGATGGGAGAGATCCA  
CGGTCGGAGCCACCTCGATACGGGAGAGGGTGAGCAGTGAATTAACCAGATTATCCATCCGGATGGTCTG  
CTCCATCATACCCGATGCGCCTTGGCCACATGGCGGGCGGGGCGGCTCCTCGGTCATCTCCAGATAA  
CCCTTGAGCACGGTCAGCGGGGTACGCAGCTCGTGGGAGACGTTGGAAACGAAGTGCTTGCAGTTTTTCT  
CGAGACTGCGCAACGGGTGACATCCCGCACCACCAGCATCGCCTGATCCGAGGCGTAGGGCATGATGCG  
AAACTCGAGAAACTTCTCCTCATTGACCGGGGAGTGATCTCGAGGGGCTCGTCATATGCCCCCTTGCCC  
AGATAGGCGTTAAAGGCCGATTGCGAATGAGGTTGCCGATATGCTGGCCGGCATCCTCCGGCCAGCGAA  
AACCGAGCAGTTGCTCCGCCAGCCGGTTGCACCAGAGGATGCTGCCATCGGTGCGAAATACCACGGCGGC  
ATCGGGCAGCGCCTCGGCACCCTCCCGGAAGCGGCGGATCAGCCCCGCCAGCTCGCGGCGCCGGGCGCGG  
TGACGCTGCTGCAGCTTGTAGATACCGTTGAAGATGTAATCCAGCTGCCATTGCCGCTGGGGGGCACCA  
GGCTGCGGTCGTGCCACAGCCAGTCAGAGAGCCGCTTCTGGAAGCGATAGTGCCAGCCAGATGCAACAC  
CGCCGCCACCAGCAGGCAGAGAGCAAGGTGATCAACCAACCAGCCAACCAATGCCAAGGGGGCGTAAAAA  
AACGCCATTCGCCACAACCTGTGCGCCGAGGCGTAAGGTTGCAACATAACTGCCCTTAGAGACGGGTTGA  
GAAGCGGTATCCGGCTCCACGCACCGTCTGGATCAATCTGTGCTGCCCTGTCTCTTCAATCGCCTTGCGC  
AGGCGACGAATATGCACATCCACGGTCTGTCTCGACGTACACATTTGGTACCCAGACATTATTGAGCA  
GCTGTTACGGCTGTAGACCCGCTCGGGGTGAGTCATAAAGAAGTGAAGCAGCTTGAATTCGGTTCGGCCC  
CATGTGAGCGCCTTCTCTTCGGCACTGACCCGGTGGGAGACAGGATCGAGTTTCAGCCCCGTCACCTCG  
ATCACCTCATCTACCGAGTTGGGCGACACGCGGCGCATCACAGCATGGAGGCGAGCGGTCAGCTCCTTGG  
GCGAGAACGGCTTGGTGTAGTGTAGTCGTGCGCACCCGCTCCAGACCACGCACCTTGTCTCCTCTTCCAC  
ACGAGCGGTGAGCATCACCACCGGATCTGGCGCGTACCTCATCTGCTTGAGCTGCTTGATAAACTGG  
ATGCCACTGCCGCCCGGCATCATCCAGTCGAGCACGATGAGTTTCGGGGTAGGGTTCGCGCACCTTCGCCA  
GTCCATCGGGTAATCTTCCGCTTCAATCGTCTCATATCCCTTCTGCTCCAACACGAAGCAGAGCATTTTC  
GCGGATCGGTGCTTCGTCTCGACCACCAGAATTCGCTTAGCCATTCCCTTCTCTCTCTCTGTGAAGAT  
GGGTGCGCCAATTATTAGAATTTTCTGTGACACTTTTATGACTTTATGACAGGCGGGATGATAAACGTTT  
TCAGATTCAGTTGGCAGCAGTACGTTGCAACAAGTCCACCGGTTGCCGCTGATATCCTCAAATACCACC  
ACGGTGCCATAAGGCTCGTCGCGGGGCTGTTCAAAAAATGAACACCGTACGCTGCATGCGCTGGTAAT  
CCCCCAGAAATCAGTGGTCTCGAGGAACAGAAATACCCGGCCACCGCCTGCTGGCCGATGGCGGCCTG  
CTGCTGCGCATTGGCCGCTTGTGCCAGCAGCAGTGCAGAACCAGGACCTTTGGGGGCAACCCGCACC  
CAGCGCTTGGCCGTTTGGCCGTTTCATCGAGCCGAGAGTCTCCAAAAGCGCAAAGCCAAGACCCCTCGG  
TAAAAAAGCGAATGGCCTGATCGTAATCAGCCACCAGCAGGGTCAGCGCCCCATATGTGTTGTGACATGGC  
AGAAAACTCTCAACGGATGAGTCAACGGGCGCAATGCCCCGGCCAGGGCGCATCATAGCTGCTGGATGGG  
CAGGGCTCCAGCCGTCATGTGCGTCTTGAACAACCGGAGAGGGGGAGTGAGCACTCAAGGCGCTTCGC  
GCAGCGTCCGGTAGAGGGTGGTACGGCTGATCCCAGCTGGCGCGGGCTCGCTCACATTTGCCGCCGA  
TGCCGCCAGCGTTTTGCTGTACCTGCCGCCGGGTTTGTTCACGCAAGCTGGTGCCTCCCCATCGGCAAG

CGCTGGGCTCTGTGGCCACACTGGGCAGATGCAGGTGGTCGGGCTCAATCCAGCCCAGCCCCTCAGCCA  
GCACACAGGCCACTTCCAGTGCCTGCTTGAGCTGACGCACGTTGCCGGCAGCGGATGGGCCAGCAGTTG  
CTGCTCCGCATCGCGGGTCAGACGCAGGGTCGGGTCCATCTCCGCCAACAGTCGCTGGATCAGCTCCAGA  
CGCTCAGCGGCAGGCCAACGGCGCAGCGGCATCAGCTGCTGGCGCCAGCCGAGATCCGGTAATAGAGGT  
CTTCGCGAAATGCGCCACTCTGCACCATGGCCGCCAGATCCCCTGGCTGGCACTGACCAGCCAGAAATC  
CACCGCCTCCGGCTTGTGACTGCCAACCGGCGTCACGCTGCGCTCCTGCAATACCCGCAGCAGTCGGGTT  
TGTGCCTGCAGCGGCAGTTTCGCAATTTTCATCGAGCATCAGCATGCCGCCGTGGGCTGCACGCAGATAAC  
CTTGACTGCCCTGGCTGCGGGCACCGCTGAAGGCCCCGCCACATACCCAAACAGCTCGGCTTCCACCAG  
ATCTGCTGGTAACGCGCCACAGTTGACACACACCAGTGGCTGATCCCGCCACTGGACGCCCCGGTGCAGG  
GCCCCGTACCAGATGCTCCTTGCCGCTGCCGGTCTCCCCCTCGATAAGCAGCGAAATGCCGCGCTCCAGCA  
TCTTGAGCGGCACCTGCCGGCCGTGCGAGCCCGGCATCGGCCGGCAAGCCGGGATAGCCAGCGG  
ATGAGCCTCCGGCACAGCCGCAAGCCGCGTCGATCCCGCAGCAGCTGCTTGCCGTCGAAGGGGTGCTGA  
CCGAGCCAGAGTCGGCCTGCCCGGTTGGCGCCGAGCAGTTCCCCCTCCTCTCCAGCAACAGGCGAGCGG  
ACCAGAGGCTCTGGGGATCGAGATCCACCAGCCAGCCCGGCTGACGCGCCAATAGTGCATTTTCGAGGGT  
CATGGCCAGCAGCCGCACCGTGCCAGCATGTCGCCATCGTGATGGGCCGCATCGGTGGAGATATCGAGC  
ACCCCGAACAAATGCCCATCCGGCCCCGAGCAACGGGCAAGCACTGCAACTGAGGAAGCTGTGCTGGGCGA  
AGAAGTGTGATTGCCGAGCACCTGCACTTCGCTCTGCTCGGCCAGCGGGTACCAGTGGCGTTGGTACC  
CTTGCTCGCCTCCCCCAGCGGGCGCCACTGCGCAAAAAGATACGCTCGGCATGGCGGGCGAACCCCTCA  
TCACCCTGGCGCCAGAATGGCCCCCTCACCGTACACAACAACAGGCGACAGGGGCGACCCGCCAGCA  
ACTGGGCAACAGCGGCAGCACAAAGCGCTGGAAGCAGGCGATCAGCGCCCTGTGCTGCTCCTGACGGGC  
CGACAGCTCCCTTGGGGCAGCAAGTCCAGATCGGCCTCTGCTGGCGGCTCAGCCCCGATGCAGGCCAA  
CGCTGCCAGGAACGCTGGATCGGACCGGGACCGGGTTGAAGTGACTCACTCATCACGCCTCCTGTTTACA  
AACAGCACAACTGTCTCGGCCACTGTCCAGAAAACGGTACAGTTTTTATCGCAATAGCCGTGGTCAATGGTT  
AACCAAGATACGCTGCCACACCCCATTTGATAACGTTTTTGTAACTTCTGTCTGCTGGTCAGACCCTTT  
GGCACGCCCCCTTGCATATCAGCTGGCAACCGGTCTGTTCAGCCAGTCCGGTCAGGATCACACACATAAAG  
GATGATGAGATGATTTATACCGCTCCCGGTTCAGGCAGGTGCCCTGGTCAGCTTCAAGTCCCGTTACGACA  
ACTTTCATCGGTGGTGGTGGGTCACCTCGCGCCGGTCTGCTACTTTGAAAACATCTCGCCGGTGGATGG  
CAAAGTATTCTCGAGCTGCCCGCTTCCGACCCGCGCATATCGAGCTGGCGCTGGATGCCGCCACAAG  
GCGTTTACCCTGAGGAGCAAGACCAGCTACCCGAGCAGCAATCTGCTGCTGCGCATCGCCGATCGCA  
TCGAGCAGAACATCGAGCGACTCGCCATCGCCGAAACCTGGGAGAACGGCAAGGCGGTGCGCGAAACCT  
AGCGGCAGACCTGCCGCTGGTGGTGGATCACTTCCGCTACTTCGCTGGCTGCATTCGCGCTCAGGAGGGC  
TCGGCCCGGAGCTGGATCAGAACACCGTACGCTACCCTTCAAGGAGCCCATCGGCGTGGTGGCCAGA  
TCATCCCGTGGAACTTCCCGCTGCTGATGGCTGCCTGGAAGCTGGCCCCCTGTGCTGGCGGCGGTTGCTG  
CAGCGTGTCAAGCCCCGCGAGCAGACCCCGGTACCATTTATACTGATGATGGATCTCATCAAGGACATC  
CTGCCCCCGGCGTAGTCAACGTGGTCAACGGCTTCGGCGCCGAGGCAGGTCAGGCGCTCGCCACCAGCA  
GCCGGATCCAGAACTGGCCTTTACCGGTTTCGACCGAAGTGGGCGCCATATCCTGCGCTGCGCAGCCGA  
CAAGCTAATCCCCTCCACCGTGGAGCTGGGGGGCAAATCTCCAATATCTACTTCGCCGACGTGATGCAG  
CACGAGAGCAGCTACATCGACAAGGCGGTAGAAGGGATGCTGATGACCTTCTTCAACCAGGGGGAAGTGT  
GTACCTGCCCTCCCGCGCGCTGGTGCAGGCCAGCATCTATGACGACTTCATGGACCGAGTGTGGCCCCG  
TGCCCGCACCATAGTGCAGGGCAACCCCTCGATAACCGCCACTCAGGTGGGAGCACAGGCGTCTCGCGAG  
CAGTTTCGACAAGATCCTGGGCTACATGGAGATCGGCCGCGGCAAGGGGCCAAGATGCTGATCGGCGGCG  
GCCCGGCCAAGGTGAGCGGACTGGAGGGGGGATTTACATCCAGCCCACCATCTTCTCCGGCCAGAACAA  
GATGAGGGTGTTCAGGAGGAGATCTTCGGCCAGCACTCGGGGTCACCACCTTCAAGGACGAGGCGGAT  
GCTCTGGCCATTGCCAACGACACCCAGTACGGGTTGGGGGCGAGGCTGTGGACCCGCGACAGCAATCTGG  
CCTGGCGCATGGGGCGTGGCATTACGGCTGGCCGGGCTGGGTCAACTGCTACCACGCCTACCCGGCACA  
CGCCGCTTTGGCGGTTACAAGAAGTCGGGGATCGGCCGTGAGACCCACAAGATGATGCTGGACCACCTAC  
CAGAACACCAAGAACCTGCTGGTAAGTCACGACATCAACCCGCTCGGCTTCTTCTAGCGCAAGCAGATGT  
CATAAGAAAGGGCGCCTGCGGGCGCCCTTCTTGTTTTTGCTTCATCAGATGACATGTCCGGCAATTTGTTA  
TCTGCCTGACTGTAGGCGATAACGCTGGGGGAGCAGCCAGCTCCCGGTTGAACATGGCGATAAAGGCC  
GAGGTGGAGCCGTAACCGAGCCGCCAGCTGATCTCCTGAATGGGCATGTCCCCCTTGAGCCAGGCCAGCG  
CCTTGAGCAACCGCAGCCGCGCCGCCACTGGCCGAAACTCATCCCCAACTCCCGCAGGCAGCGCCGCGC  
CAGGGTGCCTCTGTGGTGTGCAGTTGTCCGGCCACTGGGCCAGAGTTCGGGGATCGGCAGGATCGCTG  
TGTAACGCCGCCAGCATGGGAGCCAGCAGCTTGTCTGACTCATCGGCAGGTAGCTCTCCTGACAGCGGG  
TGCGCGCAAGTGCCTCCACCAGCAACTCGGCCTGACGCTGATCCCACTCATCCACCATATGGCCTACCCG  
CCGTTTCGCAAAAATCGCTCAGCAGGGCGCGAATAAGTGGGTAAGCAGCAGCAATCTGGGCTCTGGCGGC  
AGCTTGGCCGCCAGCTCGTGGCTGACGTAGATGGAGGTATAGTCGAGGGTCTGCTCGTTGTAGGAGGTGT  
GGTCGAGACCCCGCGGTACCCAGATAAGGTAGTCGGCAGGGGCCACCAGTCGCTGATCCCCAGCTCTAT  
CTCCATGATCCCCAGGCTGATCATGTTGAGCTGGCCCCAGGGGTGGGAGTGCAGCACGGTTCGCGCTGTG  
GCCAGCATCTGCTGGTAACTGAAATAGAGCGGATTTGGGAGCGGGCAGAACGCATCTACCGGCTGAAAGT  
GGTGAGTGGCCATCAGCGCCCTTGTGAGTGAAGAGAGAGGAGCAGGCGTATGCAACGCCCTGTTGGCTC  
GGTCTCCGGCACAGGTCAAAGCAGCAATCAGTTGCGGGCAGACGCAGCCGTTGGGGCCGAATAAGGT

GCATCAGAAAGAGTTGTCTTTTCTGCTGGGTCATCTGTCTTTTTTACGCTACTTGATAATATAAAGACAA  
GGGTAGACTTGGCCCCCTGTTAATAAGGAGCCTCTGATGCGAATCTTTTCCCCTCTTCTCTTTCCGCTGA  
TGGCGGTGCTGATCTGGGCTACCAATACCGTGGTGTCCAAGGCGGCCGCCAGCGTGCTCGACCCCGCGGC  
TATCTCCTTCTATCGCTGGGTGATCGCCGCTCTGGCACTGACCCCTTCTGCCTGCCGCAGCTGTGGCGC  
CGCCGTAGCGAGGTTTCGCCCTGGCTCGGCAAGCTGCTGGTGCTGGCGGCCCTCGGTATGGTGCTCTACC  
AGTGCCCTCGCTTACTACGCTGCTCACAGCACCTCGGCTACCAATATGGGGGTGATCGGCTCCCTCATTC  
GCTGCTTACCCTGTTGCAAGGGGCGCTCTTCTTCGGCCAGCGTCCCAGGCAACAGGCACTGCTCGGCATG  
AGTATCTCCCTGTTTCGGGGTGTCTGGCTGCTTGGCAAGGGCGAACCCTTGCCTGCTCCATAACGGCA  
TCAACCCGGGGGATGGCATGATGCTGCTGGGGTCCGCCAGCTACGCCCTTTACGGCCTCTTGATCCGCCG  
CTGGCACCTGCCGTTTGGCCCCCTGGCTAAACCTCTACATGCAGATCCTGCTGGCGGTACTGCTGCTGGT  
CCGCTCCTCTCAGTCCGACTCGATGGCGGTGCCGCGCAAGGGTGGGGACTGGTGCTTTCGCCGGGC  
TCGCCTCCTCTGCTGGCGGCTTACTGCTGGATGCGCGGCCCTCGCTGCATGGGCGCCGAGCGCACCTC  
GGTCTTTATGAACCTGATGCCGCTCTGTACGGCGCTGATCGCCGTCGTCGGCTGGGCGAGCCGATCCAC  
GGCTATCACCTGCTGGGTGGCGGGCTGATCCTGGGCGGGGTGATGACCTCCCAGCTGAAGGGGCATGCGC  
CGGTAGCCGAACGGGAAACCGCCTGAGAACCAACATCGTCCGGAAAACAAGGGAGCCCATGGCTCCCT  
TGTTGTTTCTGCAATGCACTCCAGTGCAGTCTCAACCGGCCCGGCCAGCGGTAGCGCCGCTCCGGCC  
GCCCCCGCTGACCATAGTTGAGATCCACATCGACCCGGTCTTCCGACTCCAGATACTCCAGATAGCGGCG  
CGCCGTGGTGCGGCTGAGGGAGAGTGCAGCGCCACCGTGTCCGTGGAGAAGACGTTCTCCGGCTCGCC  
GCCAGCAGATCCAGCACCTGACGCAGGGTGTGCTGTGATCCCTTGGGAGTGACACGCATCTCCTTGA  
GCTGGGAGCGTCCCCCTTCCCCAGCAGCTTGTGAGATCTTCTGCTCCAGCCAGCCCGCTCGCAGAG  
GCGGCTGTGCAGTTGCAGGATCTCGTCCAGACTCTGCTGGATGCGAAACAGCCGCAATGGTTTGATGACG  
TAGTCATGAACCCCCAGATTGAGGGCCTGCTGGATGGTCTCCACATCCCAGGAGGCGGTACCATGATGA  
CATAGGCTTTCGGGTTGTGGCTGCGCAGGCGGCTCACCCACTCAAGGCCGGAGCCATCGGGCAGGGAGAC  
ATCCACCAGCAGCAGCTGGGGCACCACACCGGCCATCATGGCATCGGCTTGGGCCAGGGTGCAGGCCCCG  
CCCAGCAGGGAGAAACCGGGTGTGCGGCCACCGTCTTGACAAGATGGCACCGATCCGATCGTCACTT  
CAATAACAAGCGTGATTATTGGGTCCATGGCTCACATTAATTTGGTTTTTATTCAAATAGATAACAAACAG  
GGTGGTCTGCTCGGCGGTTTCGCCGCACTTATACACCCCTCGTGCCGACCCACGGTCTCCTTGACCAGG  
AACAGACCCACCCCGTATCGCCGCTCTGGCGACTCACCCGTAATCGAACAGATGATCGGCTCCCT  
CGTCGACCCCTCGCCGCTATCCTCCACCTCGATCACCGTCCGCGCCCAATCGCACAGAGAGAGCAG  
CACCCGGGGCGGCCGCTGCTGGCGGTTGCGCCAGGCCGCTGCAAGCCGTTGTCCAGCAGGTTGCCAATG  
AGGGTAATGAGATCGGCCGAGACCGAGGCCGATACTCCGCCAGCGCCGAGTCAAGGATCGAGCTCCAGGG  
TCACCCCCAGCTCGCGGGCCCGGCTGAACTTGCCGAGAATAAGCCCCGCCACCGGCTTGTGTGATCAG  
CCGACAGCAGCTCCTGCAGCATGGTCTGGCACGCTTCGTTCTCCTGCTGGATCAGCTCCACCGCTGATCC  
ACATGGCCAGCTGCAACAAGCCGGAGAGGCTGCTCAGCTTGTGGCAAACCTCGTGGCTCTGCATCCGCA  
GCATCTCGGCATACTGGCGCAGATGGGTCACTTGACCCCCAGACTGGCGGCCACCTCCGGACGGCTGAA  
GATCAGCAGCCGCCCCGGCGCTTGCCTGCACCGCTGCCAGCAGCCGACAAAGGACTCCCCCTGAATG  
GTGAAGCTCACTTCCCCACCTCCTGCTCCAGACAGGGAGCAAGGGGCGGCACCAGCTCCGCCAGCGACT  
GTCCTTGCAGGGCGTGGCGCCCGGTGACCGGCAGCCGAGCTGATAGCTGGCGGTGCTGTTGATCATATT  
GATATTGCCGCGCCATCGAGGGCAATAACCCCTTCGGTGATGTGCTCCAGCACCAGATCCTGCAGGGTG  
AAGCGGCGCACGATCGCCTCCGGCTCCAGATCGAGCAGGGTCTTGCAGCAGGATATTGCACCCAGAGTG  
CCAGCAGCAGGCCGACCCAGCACCACCGCAACGATGGCGCTGATGAGCAGGGCCACCCGCTCCATGTAGAT  
GCCCTCCACCTGCTGCATCAGGTAGCCACACCACCGCACCCATGACGCGCCCATCCCCGCAACCACC  
GGGGAGAAGCAGCGGATCGCCGGCCCCATGGTGGCCGATCCTTGGAGCAGTAGCTGCGCCGCTCCTGCA  
GTGCGGGCCAGATATCCTCACCGCGGAACTTTCGCCACCCAGCTCGGGGTTGGGGTGGCTGAGGCGGCG  
ACCATGCTCGTCCGTTACCACCATATAGGTGGCGTCCGTTGCGGTTGCAGACGGCTCCACGTAGTCCGCG  
AGGGTAGGATCACTGCCCTGACGCAGAGCTTCGACACCCGGTATCCGCCGCAATGACCCGCTGCTAGAT  
CGCTCCCCTTATCCTGCAGATTGCTCTCCAGCAGATGGCGGATAAAGAGGGCCAGTAGGCTGCCAGAAT  
GAGGATCAGCAGCAGGGAAAGCCCAAGAGAGAGGGTGACCAACTGGTGGCGAAGTTTCATGCACATACCT  
TAAAACGTCAGGACGCTGCCCAATAGTGCGGATGCCACCAGGTCTGGCCAATCAAAGGTGCCGGATCGCC  
AACAAAATCGGCCAATCCTTCTCGCGGCACAGAGCGCCACCGCTCTGGCGACGGCGGGGCCACCTCT  
CCCACCTGTTGATGGAGGGCAACAGCCGGCCCGCCACCGGATAGGCGCCGACAGCCCGCACCGCGG  
CCAGCAACATGCCATCGCTGATGCGGCGCGCTTGACCGCGCAGGCCCCGAGACCAATCCCCGGGAAGAC  
ATAGACATTGTTGCACTGGGAGACTACCCGCGCTCCCCGGCCACCGTTACCGGCGCAAAGGGGCTGCCG  
GTGGCCAGCAGAGCGCGGCCATCTGTGGCAGCCACACCTGCTCGGGGTAGCCTCGGCACTGCGGGTGC  
GGTTGGAGAGCGGCAGGATCACCGCTGATCGCACACCTCCCCATCGCTGCAGCACCTCGCCAGTAAA  
GAGGCCACCTGCCGCTCACGCCAATCAAGACCGCCGGGCGCACTGACGGATGGTCTCCAGCAGCGAA  
CTGTTCCCCTCCTCCACGGCGCGGGCAAACGGCTGTTGGGCACGAGTCAAGTTGGGACGATCGGCGCAGA  
CCACCCGTCCTGATCAAACAGCCAGACGCCATCGTGGCTCCCCGCCAGCTGGGCAACATGGCGGGCAT  
GCCGCAACCGGCAGAACCCGCGCCGACGATCAGCACCGGGGCATCGCACAGGGCGGTACCCGCTGCTGC  
AACCCGGCCAGCACGCAGGCAAGCCACTGCCGCGTGCCTGAATATCGTCTGTTGAACATGCAGAGCT  
CATCGCGATAACGGGTGAGCAAGTTGGCGGCATGCTTGCCGGCAAAGTCTTCAAATGCAGCACCACTG

GGGCCAGCGCTTGCGAATGGCGGCCACCACCTTGTCATGAAGTGGTAATAGCTCTCGCCGTCGATGCGC  
GGGGATTGCCAGCCGAGGTAGGAGTCATCCTCCAGCAGCTCGGGTTGTTGGTGCCACATCGACGCAGA  
GCGGCAGGGTACGCGCCGGATTGATGCCACCCGCGCGGAGTAGAGCGCCAGCTTGCCGATACAGATCCC  
CATGCCGCCGATACCGAGATCGCCAAGCCCCAGCACCCTCGCCGTCGGAGATGACGATCACGTCCACC  
TCCTGCTCCACCGACTCGAGGATGTCATCGAGATCGTCCCTGTCATGCCAGGAGAGATAGAGCCCCGTGGC  
TGCGCAGATAGAGATCGCTGTGGCGCTGACACGCCTCCCCACCACCGGGGTGTAGATGATCGGCAGCAG  
CTCCGGCAGGTGGTGGCGCACCAGATCGTAGAAGAGCACAGGGTTGTCTCTGACAGCTGGCGCAGCAGC  
AGATGCTGGTCAAACGGACTCTGCATGGCGCTGACCAGTCGGTAGATCCGGCGCCGCTGCTGGGAGAGGG  
ACTCCTCCTTGTGGGGCATAACGGCCCCGACGCCCTGACGCTTGCCTCGGCATAGGGCAGGCTGGTGCC  
CATCATGATGTCGTTTTCATCTTGTGTTTCTCAATCCGGTATCAGGCGAGCAGGGAGATAAGGGCCGTGG  
CCAAGATCAGCATCACGGCCCGCCAAGGCGAGAGGAGATCTGGGCAAAGGGCATCAGCTTCATCCGCTG  
GGCCGCCGAGAGCACGGCTACGTCGCCGGTCCCGCCATGTTGGCCATACAAAGTCCGCCGGTGTATGGCC  
GCCTCGATGGGATAGAAACCGATCATCCGGCCCCACCAGCGCCGCGCCGAGGGCGCCACCAGTACCGGTGA  
CCATGACCAGCACGAAGTAGCTGATGGAGAAGGCGCTGATCAGTTCCGGAATACTGGTATAGGGCAGCC  
GATCCCCACCAGCAGGGAGGGAGTGAGGTTGCTCACCACAAAATGATACCAGTCGGCCGCCGCTGCTCA  
TAACGGCGCGCAGCAGGCCGCTCACCTTGATAAAGGCGACCGCCAAAATCATCAGGGCGAAGGGGTGCA  
TCGGGATAAAGTTGCCAAGCAGGGAGCCAGCACAAAATGCTGGAGCTGATGAAAAGGCCCATACCCAG  
ACTCTGCAGGGTCGGCGCCTCAGCCTGCTCCTCGGCATACTCTGGCTACTTTCCTTGACCATCAACTTG  
CCGTTACCAGTCAGGGAGGGGTAGCGGCGGCGGAGCCGTGCCAGCAGGGAGCCCACCAGAATGGCCAGGG  
TATTGGCGATCACACCGCCGGTACCATGCGCGACAAGAGATCCGCACTGGACATCTGCATCGGGCCGGA  
GAGGATCTCCACCAACGGCACCCGCTCCAGCCCCCATGCCACCGCCATGATCGGCAGGCCGATCAGCAGC  
ACCGCATTCCTGAAGCCATACCCCATCAGGGAGCCGACCAGCCCCACGCTCAGCAGCGCCAGTGTGACGC  
CGCCAAGAATGACCGGCAGATAGCGCATGGCGGCATTTTTTCAGCAAAGCGCCGCTCATGCCGAACACGGA  
GCCAGTCACCAGACTGGCGATAAAGAAGTTGAGAAAAGCCTCCCTCCTTCATGAAAGTTGGTGTATGACCTGC  
CCCGCCTGCACCGGCAGCAGCTGATATTCAAACAGGGCGGCGCCGCCAAAAGATGGCGAGGATGGTGCCG  
CACCCAGATATTCAGGATCGGCATGATCCGCTCACCCAGCTCGGTCAGCAGGGTGCCAGCACGAACAT  
CAGCCCCAGCGCACCCAGCATGCCAGCGGCAACGAGCCATTCAGCCGAAAAGAGAACACAGGTCGCC  
AACCCAGAAATATAAGAGAGCGGCATACCCGGTATTTGTTGGCCGCCATAAAGCGCCCTTTTTCTTGTG  
TGGTTTGTAGGGGTAGAGAGGTTTTTCATTGTTATGTTACTCTGCGTGTGATTGTGGCCACTACTTTATGTA  
TCCCCCTCTCCCCTGTGCGTTAGCCAGACTGCAAAGCCATATAAAAAACATTAAAAACTTAAACATCATGG  
TGCTCCAACGTGCGCTGCACAATAGAACACCAGACATAACGATACCCGACCAAGTCAGGAAATTTGGGCGA  
TAAAACGAGCGAGCCCAATGGCGGATATTTTGGTGTATCAGCAGTAATAACGATGCGATGATCTCTTCCCC  
TTAGGGGAAATAACAGAGCCAGATGACAAGCTCTGCGACCATTTATCGCCACAGATCCTGTGAGTGATAA  
TCAGCGGGCAGTGTATCGCCATGACGCGAGTGCACGGCATGCCACATCAGGGTTTGTAGTCGGCGTGCA  
GGAAGCACCCACGATGAAAAATGGTGAGAAGAAAGATGCAAAAAGGGGAGATTGAAATAGTGATGAGTCA  
AGCCAGCGAATAACAGAGCACTGGCTTGAACCTACAAGGATCACACACGGTCAGGTCTATTCTGCCAACA  
GCAATGGAATATTGGCGGGGTCAAATCATGACTGATATCGGTACTTCTGATAGCGCCTTCCCATTAC  
GCCATGGTGTGACTCTGCACCATATTCCCCATCACTCAACAGCACTTCAATTGCCAGATACACACATCCA  
CTGTATATCCATCCACAACCCGTTTTCCCCCTTGTTTTATAACCCCATCAATATTAGCGGATAAAAAAAG  
AGCTGCTCGCTGAAGCTGAAAATTTTCATGAAAATAACCACCGGATATCCTCCATTCACGGCGCAATATCC  
GAAGCGGCAAGAGAGCCTCGAGTGGATCAGCCCCGAGAATAATATCAGGGGCTCGAATGCTGCTCGCCCT  
CACCAACGAAAGATCCGACCAGAAACATGATCAGCATCACGCTATTTACTTAGCATGCTAAACAAGTATG  
ATAGTTAGCATGCTAAGTACATTGAGGATGAGAAGATGACGGATCTGGAAAGGTTGCGCGAGCTGTGCT  
CGCCGAGCAGATAGCGCGGATGCACCGGCTATGGCGTACTGCCGCCGACCTGGAGCTGGCTCCCCTTGGC  
CTCACCCATCCCCGCTGGACCGCGCTGTGGAACCTCTCCCGCATGGGGAGCCATGTCAGCCAGAAGACCC  
TGGCCGAAGCCCTCGAGATAGACTCCCCCTCCCTGATGCGCACCCCTGGGCCAGCTGGAAGAGCAGGGTCT  
GATTGAGCGCCACTGCTGCAGTCAGGACAAGCGGGCCCGCATCGTCTGCGTGACCCCGCTGGCCAGACC  
CTGCTCGATCAGATCGCCGACCGCATCATGAATATCCGCCGGGAGCTGCTGGGGGGCATCGACGAGCAGA  
CCCTGCAGCTGTTTGAAGCCACGGTGCAGCGGATCTCGGCCAACGCCCTCAGCAAAATGAAACAACCCA  
CGACCGACAAGCCGGAGGCGATAACAAGCCCTCCCGAGACCGACACAGAGAGAGAATAAGATGACCCCGGA  
TCAACAATTTACCCGCTGGATCAAATGGTCCATGGCTGGCTTTGCCACCCGTTTTGCCATATTTTTTGTATA  
GCCGACCTGCTGATGCCCTCACCCCTCAGGCGATGGCGACCCGGGTGGTCACCAAGCTGGCCCCCAGG  
TGAGCGGCAAGGTGATCGAGGTGCGCGTTCACAACAACCAGCAGGTCAAGAAGGGGGATCTGCTGTTTCAG  
GCTGGATCCGGCCCCCTTTTGAACCTGGCAGTGGAGCAGGCCCGCTTGCCTGGCGCAGGCAGAGCAGCAG  
AACAGTGAACCTGGATGCCGCCCTGACCGCCGCCGTTGCCGAGATCAACGCCAAGGAGACCCCTGGCCAGCC  
AGAAGTGGCGCGAGGCTGAGCGGATCGATGCACTGTACCAACGTACATGGTTTCGCTGCAACAAAAAGA  
TGAGGCTGACAGCGCCCTGCGCAGCGCTCAGGCCAACCTGCGCGCCAGTCAGGCCAAACTGGCCCAGATC  
AAGGCCAGTCTGGCGTGACCGGTGAGGATAATCTGTTGCTGCGCCAAGCCCACAACAAGCTGGCGCAAG  
CGCAGCTGGCCCTCTCTTACAGCCGTGTCCACGCAGATCAGGATGGCACCATCACCACCTGCAGCTCAA  
GCCAGGCAGTATCGCCAGCGCGGCGAGCCCGCTGCTGGCGCTGGTGTGCGAACAGGTGGACGTCATTTGCC  
GATTTTCGGGAGAAGAGCCTGCGCCATGTTGGCGAGCAAACCCGCGCACTGGTGGCCTTCGATGGCCGAGC

CGGGTCAGCTATATCCTGCTCGGGTGAGCAGTCTGGATGCCGGGGTGAGTGCGGGTCAATTTGATGCCAA  
CGGTCGACTGGCGGGCGCCGGTGGAGTCGGATCGCTGGGTACGGGATGCCAGCGGATGCTACTGCACCTC  
GAGCTGGAGCAGCTCCCCGACCATCTGCCAGCCGGGGCGCGGGCCACGGTACAACCTGCTGCCGGACAATG  
CCCTGACCGCCATGCTGGCACGGGGCCAGATCCACCTGCTCAGCCTGCTCCATTATGTCTACTAACCACG  
CCACTCACCCGTCGGCCAATACCGCCCCAGCCCACCCCGCCGGTGGTGCTGCCACCCACCTCTGGTATCG  
GCCCCTCACCGGCAACGAGCTGCGCCAGTGCTTGGCATCGCCTTTGGCTGCACCACGGGCTTTCTGCTC  
TGCAAGCTGTTTGGCTGGAGTTATGGGGTCTTCTATACGGTCACACCGGTGCTACTGCTGGGGATGGTGC  
CTGTAATGAATGGTCATGCCGCGGCCAGCTGATCGCGGCGGGTGGTCTGTGGGGTGGAGGTCGGGCT  
GCTGGGTGGGCTGTTTGGCAGCCATCCGGCGCTGATGACCCCCATCGCCTTCATGCTGTTTCTCTACCGT  
TTCGCCGCCATGTCGCGGGGCAGCCTGTTTCTGTTTCGGGGCAACGGGGTGTGAGCCTCAGCATCATGC  
TGCATTTTGGCAGTATCCGCAGACCCGACCTCAACGACCTGATCCTCAACAATATCTGGCCAGCGTGCT  
GTCGGTGTGATCGCTTACCTGATGACCATGCTGATCCCGGATGTGGAGACCAGACCCAAGCCCGCTCG  
CCCCCAAGGCACCGCACCGGATGCGCCATGAAGCCCTGCTGGGTGCCACGGTGGCCACCCGTGTCGTTTT  
TGGTATTTTCAAGTGTTTGACCTGCGCGACTCCATGTCTGCCAGGCCACAACCCGTGCTGGTGTGTTCCC  
CATGCACTGGAACGGCGCGCTGAGCTATGCCCGCAAACGGGCGATGGGCACCTTGTGGGTGTACCTTC  
GGCTTGCTCGGCCAGCTGCTGCTCTATGACTGGTCAGGGCAACTGCTGCTTGTGCGCCCCGTTACTGTGGC  
TCGGCGCCATGCTGTTAGCCATGCCACGTCAAGGAGGCGGGTGGTTCGGGTGTAGGCTTTGGCGCCCT  
CACTACCCCTCGGCATCCTGTTTGGCCAGTACCTCACTCCGGGCAACGATCTGGTGTTCAGCGCCCTCTAC  
CGGGTGAGCAGCATCCTGTTTGCATTGTGGTCACCCCTGTTGGCTGCTACCTCGTCCACCGGTTGCTCA  
ATCGCTTCGAGGCGACCCGCTTCGGTTATTGATTTCCTGTTGTAAGCACTGTTGTCAGCCCATGGATGAG  
CTCTCTTTGCGCCCGTTCGCTGCGGGGGCGTTTTTCTCTCCCTCGTGTTCCTCCCTTGTGATCCCCCA  
CCACCACAGCTCAGCGCAGAAGTACGGCTATGCTTGTAAAGGCTGCTGTGATGAGGTGTACCTATGGTGC  
CGTTGTTAAAAAAATGGCTGGTGTGTCTGATGCTGTTGGCTACCAGCCCGCTCGGGGGCCACCCCGCTTGT  
CATTGGTGCCGAAGATGACTGGGCCCCCTACTGCGAGCGCGACAAGGACAATGAGGATGACCAGCCCCAC  
GGACTGGCGCCTGAGCTGGTCAAGGCGGTGTTTCGCCCGCAAGGGATCGAGATTGCTTTTCGCACCCCTCC  
CCTTCGCCCCGCTGCATGCACGATGCGAAAAGCGGCAAACTTCGCGGGTGTTC AACGCCACCATCACCGA  
AGAGAACCCTTACCAGTACCATGGCAGCATACCCCATGTTTCGAGGAGGATCTCGCCATCTTCGCCCTT  
GCCAGCGAGCCGCAACGGGATCTCAAGCTCACCTCGCTGGAGGGCAAGCGGGTGGGCATCACCTCCGCT  
ACACCTAGCCACCAGCTTTTATGGAGAACCAGGATCACCCGCTTTCAGGCCAAATCCGATGCCAGAT  
CCTTGAGATGCTGGTACGTGGCCGGGTCGACTACATCCTGATGAACGGCATGCCCTGGCTACCTCAAGATC  
CAGCAGAAGCAGCTGACCGGCAAGGTGGTCAAGGTTGGCAAACTCTCCACCGATGGCTTCTGGCTCGCCT  
TCTCCCGCCACCACCCGCAAGGGGAAGCGCTGGCCAAAACAGTTTCGAGCAGGGGCTGCAGAAGATCAAGAA  
CAACGGCATCTATGAGACGCTGATCCGCCAGTTTGAACCAGACTTGGCTCTACTGATTGACGATTCCT  
TCCTGATAGCGCCCCCTCATACTCGCGCGGTATGCCGGACAGCCAGCGACGCACCGAATGGCCCCGAGA  
TTGCACAATAACGGCAACCTGTTAGGCTCACGCCGATGACACCAATGGAGCTGTAATCATGAATAAAG  
TACATATGATGGCCGCTGGTGCCTGGCCCTCGCCCTGCTCGCTGGCTGCAATCAGGGCAATACCCTCTC  
AGTCACTGGTGGCGAACCGGTCAGTTACCAGTGCAGCAGGGCAAAAAGGTGCAGGTGCGCTACTTCTCC  
CTCTCAGACGAGAGCCTCAACTTTATCAAGCTGTCACTGCCGAACGGCAAGGATTACACCCTGCCCCAGG  
CCATTTTCGGCCTCCGGCGCCCGCTATACGGACGAACATGAGGCCGCTCTGGTGGAAACAAGGGGATGAGGG  
CTTTGTGCGAGCTTCGGGATCAGGATGGCGAGTGGCAGACCCGCTACAACGACTGCAAACAGCAATAAAGC  
TGACCCCGGCTAGCCGGGCTCTCTTTCTCTGGCATCAGAGTGGTGGGGGATCAGTTGATCTCGATCT  
CGAAGCGGTTGGTACCTCGACCGGAATGGCATCCGGGTTGCCCTCTGCCGGGCTGTAACGGATCCGCGA  
AAGGGTCGCCAGCGCGCTCTGCTCCAGCTCGCCGGGGGGCTCGGCCGCCACCACTTCCGGCTTGACCGGC  
GTGCCGCTGGCGTCGATTTGATAGCGTACTTCCACATAACCCCTTGACCGGTTTGGCTGGCAGGGCTGGCT  
CGTCGTTGCCAAGCCATGACCACTGCTTCTCTGAAACCAGTAGCTGGACAACCTGCTCGAGAGGGATAGC  
GATCGGAGCGCGCTCGTGCGCCACCTCCTGACGGGATGAGCACCCAGCAGCAGTGTCACTGCCAGACCT  
GACCATACTGCGACTTTCACCTTCATGTAACGCTCCTTGTCTTTGCCGGTGTGTTGCGGACTGCGG  
GACGCTCAATGCGCCCCCTTGGTCAGTGACCCATCCTAACGAAAAAGTATTGATGAACATGAACAAAAG  
GGCAACCCCGAGAGGTTGGCCCTTTTATCATCAATAAACTCATTAACCAGCCAATCAGCCGCGCTTGTG  
GCTCACCAACAGCCAGAGCGCATGCACCATGCCCGGCAAACCGCCAGCAGGGTCAAGCAGATGTTGATT  
AAAAAGTGCAGGCTAAAGCCACCTGGATAAAGGCGCACACAGGGGGCAGGAAAATGGCCAACAGGATCT  
TGAGCAGATTGTTTCTCGCTCTCCTCTTCAAGAATGTCGTCAGGATTTGGGGTGGGCTAACCATAAAC  
ATCCCGGACTTCAACTGCAAACAGACAGGGGATCCGCTCACCCGCATCACGCCAGGCGTTGAGGTGCTG  
GATCTGCTGATTGCTGCTGCCACGCCAGAGCAGGCGGGGCTGCCAACTCCTTTTCAAACCTTGCATCC  
ACCAGCACATCCAGCAAGACCACAGCTCGCGCTGGACCTCTGACAGCTCGCCGAGCAGATAGCCGGTCC  
AGCACCAGATATCCTTGGCCGGACACTCGGCGCGCACCCGTTTACCAGCTCCAGCACGTGGGGCACGTT  
GGCAGGGTGGAGCGGATCGCCGCGGAGAGCGACAGACCTCGCCGTTTGTGATGCGGGTGTCAATTGAGATCC  
GCAATGATGCGATCGCTCATAGCCTCATCGAACGGCTTGGCCCATCGAGCCGCCAGGTGCTCTGGTTGT  
AGCAACCCGGGCACTGGTGTCAACAACGGAGACAAAACAGGGTGGCACGGGTGCCGGGGCCGTTGATCAC  
ATCGACCGGGTAGTATTGGTGGTAGTGCATCGCTTGTTCCTGCTTCACTGGACAGCGGCATAACT  
GCCGCCCTCCAATGAAAATGGCACCTTGAGTCAGGGGCCAGCTTTCATCGCCTGTGCGCTTACATATGT

TTGACGCGGGCCTTACCTCTTCTGCTTGCCCGCATTGAAGGGGCGCGCATCCGGGCTGCCGAGGTAGC  
CGCAGACACGGCGGGTACCCGACACCTTGGCCGGGTCGTGGTTACCGCAGCGGGCAGGTAAAGCCCTT  
GGAGGTGCACTCGAACTCGCCGGTAAAGCCGAGTCGTAGCACTCGTCGATGGGGGTGTTGGTACCGTAG  
TAGGGCACCTTGTATAGCTGTAATCCCAGACGTTTTTCGAGCGCTTCCAGATTGTGCTGGATATTGGGGT  
ACTCGCCGTAGCAGATGAAGCCGCCGCTGGCGATGGGCGGATAGGGCGCCTCGAAGTCCAGCTTGTGCTA  
CGGGTTGACCTGCTTTTCCACATCGAGGTGGAAGCTGTTGGTGTAGTAACCCCTTGTCCGGTACACCCGGAT  
ACCACGCCAAACTCCTTGGCATCGATGCGGCAGAAACGGGTGCGAGAGTTCTCGCTCGGGGTGGAGTAGA  
GGCTGAAGCCGTAGCCAGTCTCCTCTTCCACTCATCGATGGCCGCCCTGAGACGGGGCGATGATGGCGAT  
GGCCTTCTGTTGCAGCTCGGCGCTGTCAAACAGGTGCACCTTGTCAACAAACAGGGCGTTGATGGTCTCG  
TGTACCCCGATATAACCGAGGGAAATGGAGGCGGACCGTCTTGAAGATCTCGCTGACGTTGTCTCGTCCG  
CCTTCAGCCGCACACCGCAAGCCCTTCCATATAGAGGATCGGAGCAACCCGCGCTTTCACCCCGTCCAG  
ACGGGTGATGCGGTACATCAGCGCCTTCTTGGCGACCCGACGGGAGGCATCGAGACGATCCCAGAAATCC  
GCTTCGTACAGGGATTTACAGGGCAATGCGCGGAGGTTGAGGCTCACACACCCAGGTTGTTGCGACCTT  
CGTGGATCAGCTCGCCATTCTCCTCGTAGGCACCCGAGGAAGGAGCGGCAACCCATGGGGGTCTTGAAGGA  
GCCGGTACCTTGACCACCTGGTGTAGTTGAGGATGTCCGGATACATCCGCTTGGAGGCACACTCCAGC  
GCCAGCTGCTTGTGTCGTAGTTGGGATCGCCCTGCTTGTGGTTGAGGCCATCCTTGTATGGCGAACACCA  
GTTTTCGGGAACACAGCGGTCTTCTTGTCTTGGCAAGACCAGCGATACGGTTGCTGAGGATGGCGCGCTG  
GATCATCCGCGACTCCAGCTGTCCCCAAGCCAAAGCCAAAGGTGACAAACGGGGTCTGACCGTTGGCG  
GTGTGCAGGGTGTGACCTCGTACTCCAGCGACTGGAAGGCGTCTGACTACTCTTCTCGGTGCGGGCCA  
TGGCGTAGGCTTCTACGTCGGCAATGCCCCACTCTTCGGCCACTTCACGTTGCTTCTGCCAGCTGATGGT  
CACATAGGGGGCCAGCACTTCGTGCGATGCGGTTGATGGTGGTCCACCATAGATGTGGTTCGCCACCTGG  
GCGATGATCTGGGCGGTACAGGCCGTGGCGGTGCTGATGGATTTTCGGAGTATCGATCTCCGCATTGCCCA  
TCTTGAAGCCGTGAGTCAGCATCCCTTTTCAGATCGATCAACATGCAGTTGAACATCGGGAAGAAAGGCGA  
GTAATCGAGATCGTGAAGTGCAGATCACCGCTCTCATGAGCCTGAACCACATCACGGGGCAGCATGTGG  
CTGGTGGCATAAGTGTGTTGGCGACGATAACCGCCAGCAAGTCGCGCTGGGTTCGGGATCACCTTGGAGTCTT  
TGTTGGCATTCTCGTTGAGCAGGGCGGCGTGGTCTGCTCGACCAGACCAGCGGATCTCCTGCGCCAGACG  
GCCGCGCCCTCGAGGCTGATCCCTGTGCTGGCGATATTCGATATAGGCACGGGCGATGGCCTTGTCTG  
TCGGAAGCACTCAGTGTTTTTCGACCCGGTCTGGATCTCGTGATATCAACTTCACCACGCCCTTCCCA  
GCTCCTGACTCACGCATTTGGCAATGCGGGAGGCGAGTCCGGATTGGCCTGATTGACCGCTTCCGCGCG  
ACGGCTGACCGCCTCTGCAATCAGCTGGGCATTGAATGGTGGCGGACATCCGTCACGTTTGTATACAACC  
GGTTTCATGGATTTTCCCCGTTAAAGGCCAGGCATTTGCCTCTGGCTCACCCCTTGTGGGCCCCCTCC  
CGGCATCTCGTCTGGACGCAAATAAATTCAGCCGAGGCTTGACAAGCCTGGGCTGAAGATAGGAGGGGA  
ACAGCTTATACAGCTTAATAACACAACATATAGGGATTAATAAACGAATGCATCCCTATATGTGGTGTCT  
TATTAGGCACCAAAGTGCAGCCTCACTTCTTGTATCCAGAACAGGTTTTTTCAGCGAGCGGGACAGTTCCAG  
ACCAACCCAAAAGAGCCCCATTCAAATCCAACCTCAAGCAGGGTGGCGGCTGGCGTCCGATCCGCCACC  
CGAAAAAATCGCCCCCGCCGACCCGGTTTCGAGATGACAGCGCAACCAAAACCGCCATACTGAACA  
AGAACTCTCTCCCCCTCGACAAGGGACAACCCATGCGCACCTCCATGTTGTTGCTACTGTTATCCACCCT  
CTCACTGCCGCTCTGGGCTGCCAACATTCTGGTGTATCAGCAGCTACCATCCCGAATACCTGTGGGACCAA  
AGCTACAACAAAGGGCTGCTCGATGGTTTACAGGGGGAGCACAAGATCACTCACTTCTATATGGACACCA  
AACGCCATCCACGGGAGAAAGTTCGACGAGATCGCCCAGCAAGCCATCGCCTTTTATCTGAAGAGCAAACC  
GGATTTAGTTGTACTGGGGGATGACAATGCCATCAACTATCTGGCCAACGAGATCGCCTCGCTGGGCACT  
CCAGTGGTCTTTCTCGGCATGAACGAGAACCCCGGCTCAAGGGCTTTGTTCGGCCACCCCAAGATCACCG  
GCGTGTGGAGCGCCCCCTGCTCAAACGCAACATCAGCGAAATAAGCCAGATGATGGGAGGGCTCGACAA  
GGCACTGGTGTGTTTATTCCAGCAATGTGGCCCTCACCGCCATCGAGGATGAATTCAGACCCAGACC  
GAGTTCGGGCTCGGCCAGACCCGGATCAACAGCAGCTGATGGGGGATTACAGCCTCTGGCAGGAGGCAG  
TGCTCAACGCCAAGAAGAACGGCTATCAGGCAATCTTCCCTCGGCTTACCACACGTTGGTGTATGACAA  
TGGCAAGCATGTGAGCGAAAAGACGGTGTGGAGTGGACCAGCGCAACACGCGGTTGCCGCTCTTCTGT  
TTCTGGGAGTTTACCGTCGGCAAGGGGATGGCCATCGGCGGGCTGGTGTGGACGGCCACGATCAGGGGA  
TACAGGCAGCCAGCCTCATCAATACCATTCTAGCGGGCACCCCTGCCCGTACCATCTCCCCGCGAGCGGC  
CCTGCGCGGCAATATGTCTTACGCAAGAGCGAGCTGGCCCGCTGGCAGCTCACCGTGCCCCGACAAATGG  
CGCCACAAGATCCTCTGGCGTGTGAGTACCGCCGAAACAAAAAAGAGAACCCGGCCATGCCGGGTTCTCT  
TTTATCGGGTGTGCGGTTAGCAGGCTTGGTGTGGGCTATCAGCCTGCAACGCCTGTTGCAGCTCCTCT  
TCGGTCCAGATGGTAATGCCGAGCTCCTGCGCCTTGGTGTGAGTGGAAACCGGCCCTTCCCCCGGACCA  
GCACATCGGTCTTGGCAGATAACCGAACCCGCCACCTTGGCCCCAGCGCCTGCAGTGCCGCCTTGGCAGT  
GTTGCGCGACAGGGTGGTGTAGCAGTACCGGTGAGCAGCAAGGTTCTTGGCGCAAAGGGTGTGTCAGCCGCT  
TCCTTCTCTCGATGGCAGGCCAGTGGATACCGGCGGCCAGCAGGGCTCCAGCACCTCCACGTTGTGTG  
GCTGACGTAGGAAGTAGTAGACATGCTTGGCCACCACCTCGCCACATCGGCCACCGTTCAGCAGTTGCTC  
CACCGAGGCAGCGCGCAGGGCATCCAGGGTGTAGGAAGTGGTTGGCCAGATTGAGGGCGGTGCGCTCCCCG  
ACTTCGCGGATCCCCAGGGCAAACAGGAAGCGCGCAGGGTGGTACTGCGAGCCGCATCGATGGCGGGCA  
CCAGATTGAGGGCCGATTTTTGCCCATCCGCTCAAGACCGGCCAGCTGGATGGCGTTAAGGCTGAACAG  
ATCGGCCGGGCTTTCACCAGCCCTTGTCCACCAACTGCTCGACAATCTTGTACCAAGGCCATCCACG



TCCATGGCGCGACGGGGCGGCAAAGTGCTTGATCGCCTCCTTGGCTGCGCCTCGCAGAACAGGCCGCGG  
AGCAACGGGCAACAGCCTCCCTTCCAACCGCTCGACCGCGAGCCACAAACAGGACACTCGGTTGGGAA  
GAGGATCGCGCGGGCACTGCTTGGGGCGCTGCGCCTCCACCACGGCGACGATCTGCGGGATCACATCCCC  
GCCCCGGCGACGATCACGGTATCGCCAATCATCACGCCGAGGCGCTCAATCTCGTCAGCATTGTGCAAAG  
TGGCGTTGGAGACGGTGACGCCGCAACAAACACAGTTTTGAGCTTGGCGACCGGGGTACGGCGCGCGGT  
GCGGCCGACCTGAAACTCGACGTTCTCAAGCTCTGTTCATCTCCTCCTGCGCCGGGAACTTGTGGGCGGTC  
GCCCAGCGCGGGGCGCGGGCCACAAAGCCCAGCTCTTCTGACGGGGGATGGCATCCACCTTGTAGACCA  
CGCCGTCGATCTCATAAGGGAGCTCGCCACGACGGGCCAGAATGTCGTCATGGAACGCCTGACAACCGGC  
GGCCCCCTCTTTGAGCTTACCTCGGGACTGAGCGGCAGCCCCACTCCTTGGCTGGGTGAGACGGCCA  
AAGTGGGAGTCGCCCAGTTGCTCGCCGCAACACGACACCGTAAGCGTAAAAGCTCAGGGGACGGCTGG  
CGGTGATACGTGAATCGAGTTGACGCAAGCTGCCAGCAGCGCATTTGCGCGGGTTGACAAAATACCTTCTC  
GCCCCGGGCAATGCCTTGGCGTTTCATCGCCTCAAACCGGCTTGGGCATAAAGACTTCGCCACGCACC  
TCCAGCCGATCGGGCCAGCCAGAGCCCCGCAATGCGAGCGGAATGGCCTTGATGGTACGCACGTTCTCGG  
TGATCTCCTCACCGGTGGCGCCATCGCCCCGGGTGGCCGCTGCACCAGCTGACCATCCACATAGAGCAG  
GCTCACCGCAAGCCGTCGAGCTTGGGCTCGCAGCAAACTCGAAAACGCACGTCACGCTTGAGGCGATCG  
CTCATCCGTTGTTCAAACGCCAGCAGCTCTTCTGCTGCTAAAAGACGTTATCCAGACTGAGCATGGGGATCT  
CATGACGCACCTGACTGAACGCCGTCAGCGGCTGGCCGCCGACCCGCACGCTGGGTGACGCCGTTGTTTT  
CAGCTCGGGATGCTCGGCCTCCAGCGCAATCAGTTGCGGCATCAGGCGATCGTATTCGGCATCCGGCACT  
GTGGGGTTATCCAGCACATAGTACTGGTGACCATATTCGTAAGCAGTTCACACAATTGACGGTGGCGGG  
AGAGGATATCGCTCATGAAAAAGTCTCGAAGTGTGATTGAACATACGCGCGGGGTAGAAAACAAAATGCG  
GTACCAGGGTACCGCACTTTTTCTTCACTCGACCCGCATGGCGTATTAGTCGCGGGTGGCCTCGTAGGCA  
GCCAGCTCGTGACGGTAACGGGCAATGGTCTCGTCGCTCAGCGGGCTGCGATCCATATCGGTGACGATGG  
CATCGAGATCGCTGGCCAGCTGATCGGCAGCCTGCAGCATATCCTCGAAGGCAAACGCGGCATTGCTGCG  
CAGCGGCAGTTGCATAAACAGGGAGACACCCGGCGTGGTGAACGTTCCATCCGGTACGGATTGAAGGTA  
CCCCGGCTTGACCATGTTGATCATGGAGAAGAGCACTTACCCTTACCGTTGGGATCTTCGTGACGGTGG  
AAATATCCATCTCGCCAACTTGAAACCCAGCGCCATCAGGGATGAGAGCAGGGTTGCACCTTGAAGTC  
GTGACCCGGACGGCCATCAGGTTGATGACATAGACATCTGCCAGATCTTCTCGACCGGCTGGGGCGCC  
ATGCGCGGCTCTTCAACACAGGTCAGGTCACATAGCCAGGCTCTTTCATAAACAGGCTCGGGAGCCA  
CATGACGGGGCTCGCGGTGATATTCCGGCTCGGGAGCAGCACCAGTTCTGCACGCACGGTGTGCGCGGT  
ACGGACTGTCTCTGCACGGGCACCAAAAAGTTGGAGCGGTTCGCGTAAGCGGGCTCAACCAGCGGCTCGTCA  
TCCAGCGACTGCATCATGGGCTCGCGCTGGGGACGGGAACGGTAGACCGGGGTACGACGATTGACCTGAG  
CAGGTTTACGCACCGGCGCGGGCGCCCTCGTCGATCTCCTCGGGCAGCGGTTGTCGAACGCTTCCCTC  
CTCTTCATAGACAGGAGGCGGCGGAACCGGGCGGGCAGCAGGCTTGCAGACTACGGGCGGGCGGAGATCG  
TCCTCGTCATCTTCATCATCAAAGGCGGGGACGGCAGGGCGACGACCGAGTTCCGGCTGGCGGCTCTCTT  
CACTGCGCAGCTTGGGCTCGGCACGACGGCCACCACTGACCACGCTACCTGGCCGATGCCATCGCTGTC  
GAAGGCATCGTTATCACGATCCCGGACTTGGAGTCCATCCGTCCAATCGGTTTCTCTTTGATCGGTGCC  
TGACGATTCTTTTTGTTGCTCCACAACCCGTGAATGAGCAATGCCGCAATAGCAATACCGCCCAGGGCAA  
CCAAGATGTAACGCAATTCCTGCATTAGCTGCTTCTCTTTCTAGTTTGTCTCAGCCAAAGCGACGGCTTC  
ACCGATATCGACCGACACAATGCGAGAACTCCCGGCTCTTGCATCGTGACGCCAACAGCTGCTCAGCC  
ATCTCCATGGAGACCTTATTATGACTGATGTAACGAACTGTACTGTGCTCGACATCTCTTTGACAAGAG  
AACAGAAGCGACCGACGTTCACTTCATCGAGCGGTGCATCCACCTCATCCAGCAGACAAAAAGGTGCTGG  
GTTGAGTCTGAAGATGGCAAAAACAGCGCAAGCGCGGTTAACGCCCTTCTCCCCCGGAAAGCAGGGCA  
ATGGTAGCATTCTTCTTACCCGGAGGTCTCGCCATGATGCTCACTCCGGCCTCCAAAAGATCATCGGAGG  
TGAGCTCAAGCCAGGCACTGCCCCACCGAACACTTTTGGAAACAGGGATTTTAAATCTTCGTTGACCTT  
ATCGAAAGTGTCCCGGAACCGTATTTGTGTCTCTTATCAATCTTTTAAATGGCTTGCTCAAGGTTTCC  
AGCGCTTGCTCGAGATCCTGACACTGATTTTCAAGATAGGTGGCCCGGGTTTTCGCCTCTTCATACTCCT  
CCAGCGCCGCGAGGTTGATGGCGCCGAGCGCCTCCACTTGGCCCTCCAGAGTCTGGATCTCCTGCCGAG  
CTTGCCGCGATCAGCGGCGATCAGCACCGCCTGATCGAGATCCACCAGTCGAATCCCCAGCTCTTCTGAAC  
TGCTCGTGACGCCCTGTGACGGGTGAGGTTGCGTTGCGCTCAAGGCGCAGGGTCGCCAGCTTCTCTT  
GCAGAGTACCAGCTGCTTGTGATCGGCACTTCTGGCCTGCTCCAGCTCACCGAGCTGGCGCTCCAGCTC  
CGCAAGCCGTTGATGACAGGCGAGCTGCTGCGCCTCCAGATTGCGTTGCTCGGCCAGCAGGGGCGCCAGG  
TCCGGCACCGCTTCGCGATCCGGCCCTTTCAGCCCGCCAGCTCCAGCCGAGCCTCGCCAACCTCCTCTT  
CACCCAAGGTAATGAGTTGGCGCAGATTGCCAGCTCCAGTTGCAAACGCAGGCAGGCCGCTTGTGCTG  
CTCGCGGCGCACACGGCCTCGTCAACCGCCCGCTCGCAGCGGGTCAGCTGATCCTGAGCGACCTGCAGC  
GCTTGTGTGACGCGCTCCCCCTGCTCCTGCAACTCGGCAAGGCGCGCCTCATCGAGTTCCAGTTGTTTAC  
GGGCGCTGGCCAGCCGCTCTGCCTCTTCGGCCTGCTCCTGATCGAGCCGGATCAGCTCTTACCAGGCTG  
ACCGAGCCGCTGCAACCGCTCCTGCCGCTGACCTGTTGACGGCTCCAGGCTTCGCGCAGTTGTTGCCAT  
TTCTGCTCTTGTGCTGCGCAAGGTTGCTGCGCAACTCCTGCGCACTGGCAATCTGGGCGCGCCGGGCAT  
CGGCTGAGACAAGTTGCTCGCTCAGCTGTGCCAGCCCCCTCGGCAACCTCTCCTGCTCGGTATGCAACCG  
CTCACGCTCACCGAGCAGTGCCATAGTGCCGAGCGCCGCGCCTGCCCCAGATCTGCCAGTTTGGCCCC  
AGCCAGTCGCCAGCAGGAGTCAGTACCGACTCACCGCCGCAAGGCTTGGCTGGCGGGCAATGCGGCCT

CCCCGGCTCTCGACCAGCCAGATGGCATTGAGGAAGGCGGGAATATGCTCGCCGCCAGTTGCGCCGCCAG  
CGTACCGGCAACCGCCGGTTGCGCCGGGCAATCCAGAGCCCCTCTTGCGCCAGATCGCACTCGTCCGCC  
GGCGTTGCGGTGAGCCAGCGACCCAGCACTTTGTGCGAGTGCCGTGCCCATTCGGGAGCAACCTGCAGTC  
GGTCGGCCAGGGTCGCCCCCTCCATCTGCTCGCCGAGGATCTGATCCAGGGTCGCCAGCCGCGCCTCCAG  
CTCCCCGCTGCAGGCTCAACTGCTGGCCATGCTGCTGCTTGAGTTGTTTCATGGATGTGACCCGCCTGCGCC  
AGCTGTTCCGGTCAGCTCACCATTGGCCGCCCGGTCAGCTCCAGCTCACCCTCAGGGCATCGAGGGCCG  
GTTGCAGATCGTCCGCCTCTGTGCCGAGGGGGCCAGCGGTTTCATCTTCCAGCTTGAGGCGGGCCAGCCG  
GGTCTTGGCTTGACGCTCCTGCAGGCCACCAACCGGGTGCGGGTCTGGTTGAGCTGGCCCTGCAACCCG  
GCCAACTGTTGCTGCCACTGCTGCTGGCGCAAGCGAGCCTGTTCAGCTGCTCGCTGGCGTGTGGCGGG  
CCTCCTGCTGCTCGGTGAGCAACTGCTCACACTGCTCCAGCCGGGCGCTCTCCTGCTCGGCGCGCAATAC  
CCCTTCGGTCAACTGATCCTGCTGGCTGGCAAGCTGCGCCTTGCGGGTAGCAATCCGCTCGCCAGTGC  
TGAGCTCGGGCCTGCCAGTCGCGCCCCAGTTCACTCTGGTGCAGTTGCTGTTGCTCGAGACGGCGCATGG  
CCTGCCCGCCGAGAAAAATCTGTTGCTGGCGGCTCGCCTGCTCGGCTGCGCCTCTTGTCTGGCGACCGA  
CAGGGTGACGTGGCGCCCCCTCATCGGCGGTGCGCTTGGCATCGAGCGCCGCCAGCGCCTGCTCGGCCCTGC  
GCCAGCTCGGTTTTGGCCTCGCCAAGGCGGCTCTCCAGCGCCACAACCTGGAGCCAATCAGCTCGGCGC  
GAGCTGCGCGCAACGACTCTTGAGCTGTTTGTAGCGCTCGGCGGTCTCGGCCGTTGGAGGTGGTC  
AAGGCGGAGCCAGCTCGCCGCAATATCGCCGAGGCGCTCCAGATTCTCCTGAGTATGGCGAATGCGC  
TGCTCGGTCTCGCGGCGCCGCTCCTTGTAGCGGGAGACCCGCGGCTCTTCCATAAAGAGCTTGAGAT  
CGGCCGGACGTGACTCCACCAGTCGGCTGACGGTGCCCTGCTCGATGATGGCGTAGCTGCGGGGGCAAG  
ACCGGTGCGGAGGAAGAGGTCGGTCACATCCTTGCGGCGGCACTTCTGGCCGTTGATCTGATAGTGGTTG  
GAGCCGTGCGCGCAGCACTTGCGGCGCACCCGAGATCTCGGTAAAGCGGCCAAATCGCCGGGCACCCGGT  
TGTGGGGATTGTGCAACACCAGCTCGACCAGGCGCGCCCGTGCACACTGCGATTGATAGAGCCGTTGAA  
GATGACATCGGTCATGTTCTCACCGCGCAGATGGCGAGCGGAACTCTCCCCCAGCACCCAGCGCACCCGCG  
TCGATGACGTTGGATTTGCCACAGCCATTGGGGCCCACCACGGCGGTTCATGTCTGCCGACAGTTTCGATGC  
GGGTTCGGCTCGACGAACGACTTGAAGCCGGCGAGTTTTCATGAGTTTCAGACGCATGGCGACCTGTATCAG  
TGGCTAAATAAAGAGGATGCGGGCAGGTGACTTTACCAAAATCCAGACCCGGCTTTGTTTGAATATGCAG  
GCATCATCCCCATTCATGCCCCGATTTTTGGTGCACCGGCACGAAATAAGGAATAGTCGGCGACTTTACC  
AAATCAAAGGCTTGTTTGTAATATGCTGGCAGTCTTCCATGCATAGATGGAGCTCACATGAGCCAATCA  
CCCCATAGGTCAAAGATCAATCAGCGGTGACAGTCACTTTCCCTGCGCGGGTTTTCCCTTATTCGCCAAC  
CGGGCATCCGCACCTTTGTGCTGATCCCCCTGCTGGTCAACTTCGTGCTGTTTGGCCGGCCTTCTATGC  
CCTGTTGCTGCAACTGGACGGCCTGTTTCGCATGGCTCCATCAGCAGATCCCCGCTGGCTCGACTGGCTG  
GACTATCTGCTGTGGCCCATCGCCCTCATCACCATACTGGTGGTCTTCTCCTTTATCTTCAGCTCGGTTG  
CCAACTGGGTAGCCGCTCCCTTCAACGGTTTGTGCTGGCGGAGAAGGTGGAGCAGATCCTCACCGGTGAGCC  
CGCCAATGACAGCGGCATGCTGGATATCGTCAAGGATGTGCCACGCACCTTCGGCCGCAATGGACCAAG  
CTGAATTATTACCTGCCCAAGGCCATCGGCTGCCTGATCCTGTTCTGATCCCTGTGGTGGGCCAGACCC  
TGGCGCCGGTGTCTGTTTCTGTTTTCAGCGCTGGATGATGGCGATCCAGTATGTGGATTATCCGTTTCGA  
CAACCACAAGATCGACTTCATCACCATGCGCGATGCCTTGAAGCAGCGCCGCGGCAAGTGCCTCAGCTTC  
GGCGCTTTGGTGACCCTCTTCTCCGCCATTCCGGTGGTGAACCTCTTCGTGATGCCAGTCGCCATCTGTG  
GTGCCACCGCCATGTGGGTGATCACTACCGGCAAGAGCAGTTGGGGCGCTAACCCTTGAACATTTATTA  
GAAAAAGGCACCCGAAACGGTGCCTTTTTTCGTATTTAGCATGAATTAATTAATGCATGCATTCGATAGC  
TTGTCCCATATGACACGAGTTGGTAGGATTCTGGCCTTTCTCGTTCCCTGGGATATCTCATGTTACATGC  
ACTCTTCTTGGTGGGCCTGGTGGCCGAAGGGATGACCGGCGCGCTGGCCGCGGGTCGGCGACGGATGGAT  
CTGTTTGGTGTGGTGTATCATCGCCTCGGCGACGGCCATCGGTGGTGGCACCATCCGCGATGTGCTGCTCG  
GCCACTATCCGCTGCTCTGGATTGAGCATCCGGAATACGTGCTGCTGGTTGCCGACGAGCGATGGCAGG  
TGTGGTCTCCGCCCCCTGATGCGCTACCTCGGCAAGCTGTTTCATGGCCCTCGATGCCCTGGGACTGGTG  
GTCTTCTCTATCTTCGGTGCGGCCGAGCGCTGGATATGGGCCACGGCGCCGTTATTGCCCTGCATCATGG  
CGGTAGTGACCGGGTCTTTGGCGGGGTGCTGCGGGATCTGCTCTGCCAGCGGATTCCTACTGGTATTTCCG  
TCGCGAGCTCTATGACGCCATTTTCGCTGATCACCGCAGCCCTCTACTGTCTGGCGCTGGATCAGGGATTG  
CCGACCAACTGGGCCGCTTCGGTTCCATCGGGATCGGCTTTGTACTGCGGCTGCTGGCGGTTTCGCTTCA  
AGTGGGGTCTGCCACCTTCAACTACCAGTACCGGACCCACTGAGTGCGCCAGCTTCTGGCGAGGCGGGT  
TGGATTACGAACAACAAAAAGCGCCGATTGGCGCTTTTTTTCATGGACGTTCTGCGGCTCAGTTAATCC  
CTTCCGAGCTGAAGAAGGTGCCTTGTGCGGATAAAGCGGATCTTGATGTTCTTCCCTTCCCCGCCCCA  
GAGGCAGCTGGTAGTGCCAGCGCATCATCACAGCGCTCCGCTTGTCCAGAATGGTGTGGCCTCGGCG  
TAACTCATCCCCATCTTCAACTGGTGCATAATTTTCAGGTTGAGCTTGTGCAACCGGTCAACAACAGGG  
CGATCAGGCCGCCAATCACTATCTTTTTTCATCGCTATCTCCTCTCTGGTGGGAAGAGCTTGGCAGCTTGC  
CAACCCCTTTACCAGCTGCGCACCGGGCCGGTATCGAGGTGAACGAAGTTATCACGGGGATAGTAACCAA  
CCCCACCCACCTTGAGCTGGAGCGCCGCTTTCGCGAGATGAGCCAGCTGTACGCCGGGGATCCGCACATC  
CACCGCCTGCCCAAGGGTGTGGTAGCTGTGCTTGGCCACGCCGCGGCTCTTGTGGCGCTTCTGACGATTG  
GTTGCCGGGGCGGATAGCCGGAGATCAGCTGAATTTCACTGCGCCGACCCAGCTTGTGCTGCAACAGAA  
ACAGTTGATCAAACAGCTTCTTGTGATGTTGAACACTTCATGCGCCGGTAATCGCGGAAGATGTGATT  
GAGCTCGGCCAACCCGTCGCTCAGATAGTGCCATTTTCCAATAGCTGGCGCGCACCCGCTCGCCGGTA

TTGAGATTGAAGAACTGAGTTCACGCCCGGTGGTACTGCGGCTGGCCAGTGCAGGGAAGGAGATCAGCG  
AGCTGCCCAGCAGGCAACTGGCTCCCAACAACAGGCGACGTGACTTATCTTGTTCAGCATAAGGGG  
TTCGTCCATCGCAGATTCAAGCGAAAACAGTTGAATAAGATCACTAACTGAATGTGATACAGGCGCTTGA  
AACTACCCTCCGGCGGGGGGGCCTGTCAAACCTCAATCGCCCATAGAAAAGCCCGGCACAGGCCGGGCTT  
TTCACTCTGTGGCAGGGATCACAGCAGGCGGCTCTGGAAGCTGACCCGATCAAAATCCGTAGATGTCGTTA  
CGCAATTGCTGGCGACCATTTTCGTGCGATCCAGCTGCTCCAGTAGACGGTAAAGACCGGGATCGGCGTGG  
TGAGCGGCAACCATTTGGTCTGGCTCTCCTTGAGGATATTGGCCACCTTGTCCGGCTGATAGCGGGAATC  
TGCCAGCAACAGCTCGGCCAGATCGTCCGCATGTTCCACCCGGATGCAGCCCCGAGCTGAAGGCGCGCGCC  
CCCTGTTTGAACAGCGCCTTGCAGCGGGTGGAGTGCAGATAGATGGCGTCATTGTTGGGCAGGTAGAACT  
TGTAGCGCCCCAGGGCATTGTGATCCCCCGCTTTTGCAGCGGATAGGGGAAACCGGCGGCCAGCGC  
CTGATGCCACCCCTTTCGGTGAACCTGGACCCGATTGCCCTCGCTGTCGATCACCTCGAACTGCTCACGA  
CTCAGATAGGCGGGATCGCGACCCAGCTTGGGCAGGATGTCCCTTGTCTCAGGATCGAGCCGCGGCACATGCC  
AGGAGGGGTTGAGCACGATGGAGCGAATTTGCTGGCCAGAATGGGGTGGCCCGTGTCTTGGCCGAC  
GATGACCCGGCTGGTAAACACCTCGTTGCCGACTCCACCACGCTCAGACGGTAGTCGGGAATATTGACC  
AGCACGTAGCGGCCACCGGCGAGTTGATCCACCAGATCGCGACGCCACAGGTTGCGCAGCAGCAGGCTGG  
CGCGCACTTGCAGGCGCGTATTGAGCCAGGAGCGGGTCTGACGGCCGATGATGCCGTCGCGGTTGAGACC  
GTGACGACGCTGGAAGTCTTGTGATGGCCTGCTCGGTATCACCATCGTAGATCTGATCACCATGGCTCGGG  
GCGCTGTGCGCCAGCTCGTTGAGCATGGCGGGATCTGGCCAAGCTCGGCGGAGCTCTCTCCGGCACGCA  
GGGTTCGGCATATCGAGGGTTCGGCCACTTGTGGCCATCGGCATTGCCAGCAGTTTGTGCACTTTGGCCCG  
CACCGCCTCGTATTCGCCACCTGGGGGCGCAGAGGTTTACCTGGGTGAGCAGGTATCATCGCTGGGT  
TGGGTACCACAGGGCGGTTCAAATCGAGCTTAAGGGTCTTCATCTGCTCGCGAGAGACCAGATCCATCC  
CCCGCCAGGCGTGTGGAACCGGCTCAGCTTGGCAAAAATGTCTCATAGATGGCACCACGCTTGTCTGC  
AGGGGTGGCCTGCAGACGCTTCCACAGCGTGAAAAAATCGGGGTGCAGCTGGGCAAGCACAGCCTCTTGC  
AACTGCTGCTCCAGCTCGACACGGGCTGTTCGGCTGACTGCCCTGATACCAGTCGTGTCCGGTTTTCAC  
TGGCCGCCACACGACTTGTGCTTCGGTTCGATGTACCGCGCCAGCGGGCAAACATCCAGCCACACCAG  
ATTTGGCAAGGGCCAGCCAATACTTCATCCCATGGGTACCTCAAACCGGTTTGTTCACCTCTGTCAGGCT  
GACAAGCAGACCCGATGCTCAGGCCGCTCATGATGCGTGAACGGCCAATACTTTGTAGCGCCCGGGGGC  
ATAACGCTGCCAGATAATGTACATCGCATCTGTCTCCTTGAACCGCGCCAACGCCTGATGAATTTGTG  
AAGAATTGCGGCGAAAAGCTTCCCTTGCCTAACATAAAGAAGCTCGGCGATTGAGATACCACCATGGGGT  
GACTGGTGAACAGACCGCTCATCCCTCCTTGTTAAGGGCGCTGGGGGTAGCCAGCATGTCACCAAGGAA  
ACCGTGCATCCGGCCGCGGGCCAGTTTCTCATAATTCTGCTGGTTCGCTCACCGCACTCACCTGTTTGGCA  
TAGCGAGCGAGCAGCGACATCACTTCCATACAGAGTACTCTTTGGTAAACGCCGAGGGAGTAACCAC  
TGGCCAGCCAGCTCGCCAGATCCTGCTCGGGGTAGTGGCTACCCCTTGCAGCCACAGCAAGGTGCGACC  
CGGATTGTAGGAGTCGGAACCAAGCATAACGAGCGCGCTCATCATGATATTCGCCCTCCATCGCCATG  
TCTATCTCGCCATGCTCCATCTCGTGAAGTACCCGCTTCCAGGGCAGCTCCACATAGTGGACCTTGCAGT  
GCATGGAAATGAGCACAGCCGTCAGCACCTCGGCGGCATAACCGCGCACCTCTTGCAGTGAATCGGCTTC  
GTAATAATGGTAGGGGGGCCAGTTATCGTAACCGACCTGAATTTGGTTCGGGACACAGGGCCCTGGCCAAT  
GCCATTGGCGCCATAATCCAAGCAGCAGACAGCAAGAGATCCACTTCATATGTCATCCTTGACGAATAA  
GTGAGTCATCATAAATCGCCCCCTGCAAAAATGGCGATAGAGGCCAGATGACTATCGCATCCGCTAGAAAA  
TGACGCAGCAAAGCACATCTATTTGCCAAAATACCTTGGCCGAGCGCCAGTGGCAACCTGCGCCCCGCCAG  
ACCTGTTTAAACCGGGAAACAGCAACGTTTGGAAACAGGGGTAAAAAGGGGTTAATATGTGACCAAATATTT  
TTTTGTGATCCACTATGCTTTTTTTGCAATTGGATTAGCATATGCGCGACATCGGCCATCCCATTTCTGTC  
AGGCATAGAGAGTGATATGACGTACAAAAAGTTTCGGTTTTTTGACTGCCATTCTGGCGTTAAGCGTTTTT  
TATCTTTACACCCCTCTATCTGGCTGCTCACCCCAACGTGAGCCTGGCTACAAACTCTATTTATCTGGAAG  
GCAAAACCCGCTTCTGGGAACACAACCTCCAGCATGACCTATCAGCCTGGTAACGAACTCAATCTGACCAA  
GCCAGCCGCTTCTCTCCAGCGAAGGCTGGGCCAAGAAGCCGAGCGACGAAGGTACCCTGCTCAGCGGT  
CAGGGCGGCTCTATTTTGTGCTGCCCAAGCAGGCGGCCAATCCGGATCAGCTGACCGTACAGGCCCGCA  
TCAACAGCCCCGAAGCCGGAGCCCTGTTGAAAAGTAGCGCTGGGTACGACTTCACCACCACGGTGAAGT  
GGCAAAGCGGGCATCAACGAAATCCGCCTCAGTCTGCCCGGTGACTCGCTCACGGCAGATCCCAAGCGC  
CCCAATTTTCTGGCGCTCTCGGCACCAACTCCCATCAATGTGCAGTCGGTACGTTTGACCGTAGCCAGT  
GATCCTTGCCCCGAATACCATTTTATAAAAACAACTATCCAAAATAAGGACGTTCTTATGTCGCATCCAG  
ATTTTCGACTCTCTCTGGTCTGTTCCCGTTTACAACGAGGAAGAGAGCATCGATGCCCTTATCAACCGGAT  
AGACAACGAACTGGCCCCGCTGAAAGACCAGCTTGAATTTGTATTCGTCAACGATGGCAGCCGTGACCGC  
ACCCGTGAAGTGGTCGAGCAGGCCATCGCCCGTGACCCGCGCGTGACCCTGGTCAACCTGGCACGCAACT  
TCGGTAAAGAAGCGGCCCTGACCGCCGGTCTGCATCAGGCCAAAGGGGATGCCATCGTGCCGATGGACGT  
GGATCTGCAAGACCCGCCCGCCCTGATCCTGGAGTTCGTCAAACGTGGCAGACCGGTGACTATGACACC  
GTCTACGGCATCCGCGTGCATCGCAGCGCCGATACCCCGATGAAGCGTCTGACTGCCGGCGGCTTCTACC  
GCTTCTTCAACGCCCTCTCCACCAGCACCAAGCTGCCGGAAAAACGCCGGTACTTCCGCTGATCGACCG  
TCGCGTGGTTCGAGGCGATCAAGCTGCTGCCGGAACGCAACCGCTTCATGAAGGGTCTGTTTGGCTGGGCC  
GGTTTCCGTGCCGTTGGCGTCCCCTACGAGCGCCCGGCCGTCACGCCGTTGAAACCAAATTCACCTACT  
GGAAACTGTGGAACCTCGCGCTCGACGGTCTGCTCAGCTTCTCCAGCTGGCCGCTCGGGTCTGGAGCTA

TGTGGGTGTCGGCGTCTCCTTCGTGCGCTTCTCTACATCCTCAAGATCGTGACCCAGGTGGTCTTCTTC  
GGCATCGACGTGCCCGTTACGCCCTCCCTGATGTCTGTAGTGCTGTTCCCTCGGCGGTATCCAGTTGCTGT  
CGCTCGGCATCATCGGTGAGTACATCGGCCCGCATGTTTCGTGGAAGTGAACAGCGCCCGGTCTACCTCAT  
TGAAGGGGTCTATGGCCAGTATGCCAAGCAGGATGCGGGCAAACCGCAGAGCGCTGACAGCAACCCGCAA  
GAGCAGCAGGAGCAAGCGCTCAATGATCTCCCGCAGGAATTCTGGCGGCTGGTACGTTTCGGTTTTGT  
CGGCGGGGGGGTACCCTCGTGCATCTGGGCACCTTCCATCGCACTGTTTCATACCTGGCCCACCATCTCG  
GAGCACCTGGTTACCACGCTGGCTTTTGCCATCGCGTCTGGTTCCTTCTTTGGTCACCGCTACATCA  
CCTTCCAGAAGCAGGGAGCCGCCAGCAAGTTTCTGCTGGTTGCCCTCTTCTCGCTGGCGGTGCGTAACCT  
GATCCTGAGCGGCTGCTGTTTGGGGGCTCTCCGGTCTGCTGCCGGTGGTCATCGCCACCCTGACCGTT  
ACCGTCTCACTTACGTTCTCTCTCGCGTCTGGGTTTTTGCTGATGAATGATATGACCAATACTGCCCC  
GCTCACCGGGGCTGCACCTCCCTATCGCCCGTCACTGCGCATCAGCGGTCTGACTGGCTGATGATCATC  
GCCGCTTCATGCTGAGCCGGGTGGCCCTGTATGGCATGGGCTACTTCGGTGTCCAGCTCATGATGGCTCCC  
CCGACATAGGCCCGCTGCAGGCCTATTGTGAGTTCGACTGCGTCTGGTTCAGCGCATCATCGAAAATGG  
ATACGACCTTACCCGCGCTGGCTGAGCAAGGGCAATGCGGCCAACTGGGCCTTTATGCCGCTCTATCCG  
ATGGTCTCCGGTGCCATCTCCAACCTGTTCAATGTGAGAGCCTGATCGGCCCATCATTTGTTACCAACC  
TCTCCTTCTTCGCCAGTTTGCCGCTGATGTTGCTGGTGTTCGCTCAGCTCAAGCTGGGGGACGATAACCG  
ACGCTTCGGCGTCTGGCTGCTCGCCTTCTCCCCCTTCTCCGCTACTTCGCTCCGGTTATACCGAGTCG  
ACTTTTATGGCGCTGATGCTGGGGATGTTCTGTTCGCTACCGGGAGCAGTGGCTGATGGTGGCCGTGC  
TGGGGGTCTGTATCTCCGCTACCCGCAACCTGGGGGTGATGATGGTCTTCCCGGTGCTGATCCTGGCGCT  
GCAGGCTTACGGCTGGCGGGAATTTTTCCGCTTTACCGAGCGGCTTTCAAGGTGGTGTTCACCTCTGG  
ATGATCCCGTTTTGGCCTGTTTGCTACATGGTCTACCTCTATCACTGACCGGCGATGCCTTTGCCTTCA  
AGCACATTCAGGTGGCATGGGGTGCCTACATGGACAGCCCCTGGACTGGTGGCTGAGCGGTTTTCGAGCT  
GGGCGGCCGCAAGGCTTACCTCTCCATCATGGTGATCTTCGGCTGGTGCTGAACGGCTACCTGTTTCAGC  
CAGAAGCGCTGGGCTGAAGCGACACTGATGTTTATCTGCTGCACCATCCCGCTGATGACCGGCTCAACG  
CCATGCCGCGCTATATGTTCCGGCTTACCCGACCTGCTGGCCATCATTCGCTGACCCATCGCTGGCC  
AGCCATCCGCGCGGCTGCTCTGCATCAGCGCATGGTGGCCTCCTTCATCGCGGTGGCTTTTCGTCAAC  
TTCAAGTTCTTACCCTGATGTGACGACGATGCCTGATACACCAATGCCGGTACCTGACCGGTATTT  
TTTTTATGGCCGCTATTTTTATCGACGAGCCTCCCATCTCCTCTCCGTCACACTTTCTCCGGCTTGA  
ACGTAACCATTTGAAGTCAAGTCAAAATCGGCATTTTCCGATCCAAGGCGCGCTTTGCTGCTGTAGTA  
ATGGGCCCTTGTCCGAAGTCCCTGCTCAAGGAATGGCTTATGCGTCTGCTCATTACTTATCCCTCTC  
TGGGTGCGCCTGCTGGCCGCTCCCTCTGTTTACCCAAACAGGCGATGGCCGCCCCGAAGTTTCGCTCTATG  
TGGATGGTCAACCGGTGCGGACCCCGATCGCGCTGGACAAGGGGGCGGTGCGAGCTAACCCACACCTCAC  
CAAGGGGAGCCACCAGATCCGCATCAGCGACGCGGGCAACAGTTGCGGCACCAGCTTTGGCCCAAGCGAG  
AGCAAGCCTCTCCCTTCGGCACCGCCAGCCATGGACAAGTGCAGCAAGGGGCGAGCTTTAACCTGC  
GAGTGATGCTGGCCGGGAGTATCAGTTCACCTTCAACCCGATACTCCAGCTCAAGGTGTTGCGGGC  
GACCAAGAAGAGCGAATTCAAACGCCAGCCACCAGAAGAGCCCTGCATCAGCTGGGATAGCGGCCCGGT  
ACTGTATCGCTGAAAGGGTCTGGCCCGACGGTACCCGACTGAGGGATGCCTACTCGAAAACAAGAGGCGG  
TGGTCAAACAGGGCAAACCTGACCCGAGTAAAGAGAGCGGCGGCTGCTGCTGCTCGAGCCAAT  
CAAGGCGGCCAAGCCAGCACCGTTCAGCTGGGATCAGGCGAGTGTCTATTTCTGCTGACCGACCGCTTC  
CACAACGGCGATCCCGCCAATGACCACAGTTTTCGGACGCCAAAAGGATGGTCAAGGACGAGGTGGCCACCT  
GGCACGGTGGTGACTTCAAGGGGCTGACCGAGAACTCGACTACATCAAGCAACTCGGCATCAACGCCAT  
CTGGATCACCCCATGGTGGAGCAGGTGCACGGCTTCATTTGGCGGCGGCGAGCAGGGCAACTTCCCTTC  
TACGCTATCACGGCTACTGGGCGCTCGACTTACCAAAAATGACCCCAACTACGGCGACGAGGAGAGCC  
TGAAAACCTTGGTGGACGAGGCGCACAAAGCGCGGCATGCGGATCATCTCGACGTGGTTATGAACCACGC  
CGTTTACGCCACCTCGCCGACCTGCAAGATCTGGGGCTCACCGAGCTAACTCAGAACAGCAGCAAACTG  
CCGACCGTCTGGAACCAAGTGGCGCCGAGCGGTGGCCTCAACTGGCATGGTTACAACCAAGTTCATCGACT  
ATCAATCGTCAAGTGAACAAGTGGTGGAGTGGTGGTGGTGGTGGTGGTGGTGGTGGTGGTGGTGGTGGT  
GCCCCGACACCGATGTCACCGGCTCGGTGGCGGGGCTGCCGGACTTTCTGACCGAATCGACCAAACCG  
GTAGGGCTGCCGCGTTGTTGGCCGCAAAAAAGACACCCTCGCCAAGGCGCTGCCGATGCTACCGTGA  
GCGACTACCTGATCGCCTGGCACACCGACTGGGTGCGCCGCTTTGGCATCGACGGCTTCCGCGCCGACAC  
CGTCAAGCATCTGGAGCCGAGGTGTGGCCAAAGCTCAAGCAGGCGGGCACCGCTGCGCTCAAGGAGTGG  
AAGACCAACAACCCGGCAAGGCCCTCGACGATCTGCCCTTCTACATGGTGGGCGAGGTGTGGGATCAGG  
GGGTGGCCAAGGATTTCTGGTATCAGAACGGTTTTGATTCCTGATCAACTTCGACTATCAGCGCGAGTT  
CGCACTGTACAGGCCAGTGCATGGCCAGCGCCGAGCCACCTATGCCAGCTACGCCAGCCGCATCAAT  
CAGGATCCCGAGTTCAACGTGTTGAGCTACATCAGCTCCCACGACCAAGCTGTTCTTTGGAGACTATC  
AGGATGTGCCGCTACAGCGCCGGGTGCGCAACAGCTTTATGCTGCTGCCAGGCGGCATCCAGCTCTACTA  
CGGCGACGAGTCCGGCCGCGGGCTGGCCAAGGATGGCGGAGTGTTCGATCAAGGCTTGGCGCTCGGACATG  
AACTGGCAGGAGCTGGCCAGCGGAGACAAGGCTGAGCTGGTCAAGCACTGGCAGCAACTGGGCCAGTTCC  
GCGCCGCCCATCCTGCCATTGCGGCAGGCAGTCAACAGAACTCTCGGATGCACCCACGCTTTCGTGCG  
GGAGAAGGGGGATGACAAGGTGGTGGTGGTCTTTGCCGGTGGCAGAACTACTTTGGGTCATATATTC  
CAGCAACAGAGAGGGGAGCCACTGGCTCCCTCTCTCGTTTATCTATCTGCCACGGTTCCTGTGACTGG

CGCGCTGCCGCCGGCCACTGCAGGGCGCGCCTTGACCAACATCTCTTGCCACAGGGGCCAGGCCAGCAGCG  
CCTGCTGATAGGCTCCGGCCTGACCGGGCAACAGGATGCCGTAGCTGGCCAGTCGATAGGCCATCACGGC  
ATAGAAGGCATCGACAATGCCCCCCTCGCCAAAGTAGAAGGGGCCCTGCGCCTGCGACCAGATCTCCTGC  
AAACGGGGCAGCTCGCCGACCACCTCCACCGGGGGATCGATACGGGTGGCGCCCCAAGAAAGAAGGGGA  
GTAGGGAACGGATCTGCCGAAATCCGGCGTGTAACTCGGCACAGAGGCTGCGAGCCAGTGTCCGCTCGGC  
CAGCGAAACGGGATAGAGCTGGCTGTGCGGGACAGAGCTCGTGAACATATTCGGCGATGGCCAGCGAGTCG  
TGAACCCGCACGCCATCGTGTTCGAGCCAGGGCACCAGACCGGCCGGGGCAAGCCGCTTGAGTCTCGCCA  
GCGACTTGGCATCCTCCAGATCGAACACCTGCTCCTGCCACGTCAACCCGCTCATGGCGAGCACCAGTGC  
CGCCCGCATCGCCAGGTGGAGCCGGTGCCACCGCCAATACCAAGGATCCCATCTGTTGCCCTCCTGCAT  
GAGTTGCCTGCGACCCGGCATCTGCCCTGATGGCAAAACATCCGATGGTCGCTTACATTTGCGCACC  
CGGGTTTTGACCTCTTTGGTGAGCGATGCTAGTTTGTATTTTCAAAACAATCAGTTAGCAACAATGTGAG  
CCATTAACCGAAATATGGACAGCCAATTTACCATCGTCATCGCAGATGACCACCCCTGTTTCGGGGCGC  
CCTATAACCAAGCGGTGCACATGGCCATCAACGACGCTCAATTGCTGGAAGCGGACTCCATCGACAGCCTG  
ACCAGCCTGCTCGGCGAGCACCCCGAAGTTGACCTGTTGCTGCTCGATCTCAAGATGCCGGGGGCCAATG  
GCTTCGAGGGGCTGGCCACCTGCGCGGCCAATATCCCGACCAGCCTATCGTGGTGGTCTCCGCTCGGA  
AGATACTGCCATCATCCAGCAGGTGTTGCGGCTCGGGGCGCTCGGCTTTATTTCCCAAATCGGTGCCGATG  
AAGGAGCTGGTCAACGCCCTCAATACGGTGATCGGGGGGATAACTGGGTGCCGGAAGGCATCTCGCTCC  
ATCCCGAATCGGAAGATGGCCCCGATTTGCCAGCAAGCTGGCCAGCCTCACCCCCAGCAATACAAGGT  
GCTGATCATGCTGCGCGATGGCAGCCTCAACAAAACAGATCGCTGGGAGCTCAACGTCTCCGAGGCCACC  
ATCAAGGCCCATATCACCGCAATCTTCAGAAAACCTGGGCGTCAAGAACCGAACCTCAGGCGGTTATCGCC  
TGCAACAGCTCGATATCAAGGAGAGCTGACCCCGCGCGCAGTGACACGCGGGAGACGACATAGCCAGCC  
ATGCTGGCTATTTGTTGCTCGACAATTAGCACGATCGTACTTTATGCTGCCAGCGCCAACGAGGAGAGAG  
TGATGAGCAAGGGGGCGCTGACCCGGGAAAAACATTTTGAGACTGCCTTTGAGCAGGCGAGCCAGCAAGG  
GCTCGAGAGCCTGACCATCGGCTCGCTGGCCAGCGCCTGCGAGATGTCGAAAAGCGGCCGTGTTTGCCAC  
TTTTAATCCCAGACAATCTGCAGATCGCCGTGCTGGAGTACGCCGCCGAGGTGTTTCGGCTACGGGTGA  
TCCAGCCGGTACGCCAGCAGGAGCACCAGAGCCAGCACGACAAGCTGATCGCCCTGCTGCGCTCCTGGCA  
GGCGTAAGAACCACTGCTTTGCCGACGCTGCATGTTCTCGATGCTGACCTCGGTGCAGGATAGCCAT  
GAGGAGAGAGACCCTGTGCAACAAGCCCGCCGCAACTGGTGCGCTTCTGGCTCGACTATGCCCCGTC  
AGGTAGTGAGGGTTCAGGCCGACGGCGAGTGGCGAGGAGATGGATCCCTGGCGCGCCGTTTACCSCCT  
CTATGGCCTCTATCTGGCGGATCAGGTGTTCAACGATCTCGAACTGTGTCAGGATCCGGCCCGCCACTTC  
TGGCCCCAAGTGACGCTCTGCTGAGCAGCTGGCGCTGATGTTTTGGCATCCGTTCAACACGAATTTTTTA  
AAAACCGACAAAAAAGCACGACCGTTTCGCACATAAAAAACCACAGGATGACCATGAGCAGCAAGATCTACT  
TCAACACCCCGCGCTTCAGCCCCGAGCAAATGGCTGCTGGGGATCGGCACCCCGGTTGCACCACAGACTCGC  
CCCCAGTCATGCCAAGCGCACCCGCCAGCAAGTTGCTGCTCACCCCCAGCGCAACCAGCGGGATGGCAGC  
GAACCTGCCGGTCTGGTGAAGCAGGCCGTCATACAAGCGAAGGGGTATTGATGAGCTATCGGCTCGGTC  
AGGGACCACTGTGGCTGCTGATGCACGGCTGGTCCGGCAGCGCCAGCCAGTTCTATCCGCTGATGAGCCA  
TATCGCCGCGCAGGGTTTTACCGCCATTGCCTACGATCATCCGGCCCACGGCCAGAGCGCAGGCAACACT  
GGCCACCTGCCCCGTTTTCGTGCGCGCCTTCGACGAGCTGGCAGCAAAATGGCCAGCGAAGCAGGTCCGC  
TGCACGGGGTTATCGCCACAGCATGGGGGGCGCCGTCACCCCTCCAGCCGTCAGCCGGGTATCGATAC  
CCTGCCGCTGCTGTTGATTTTCGCCAGTGCTCGACTATGTGCCCCAGCTCTACGGCATGGTGGCGCGCTCC  
GGTACTCCATCCGGTTGTTTCGATGCGGTGGTCAAGGAGATTGAGCAGGAGTACCAGCACCCCTTGAGTA  
CGGTTCGACCCGCTGGGTTGCCTCGCCAGTCGCAGCGGCGCGGCGATGATAGTGCACGACGAGGAGGACAG  
ATTTGCTCCGCACGGGATTCCTTGCGGGCCAGTCAGGATGGTCATAACCCGGCTGGTGAGCACCCGAGGT  
CTGGGCCACGGTCGCATCCTCGCCAGCGCCCCGGTATTCGCCGCTTCGATCAGCTGGCTCGACCGGAAA  
ATCCTCACCCGCGCCCTTTGACATGGGGCCATGAAAAAACGGGCAAGCGCCCGTTTTTTATATTTGATA  
CGCCTTATAGTTAATTTGTCAGTGGGAACATTTCTGTGAGACACAATAAGGCGCCAGCATATGGCCAG  
ACCCAATACAGCGTTGTTGCTCACCGGTGGCGGTGCTCGCGCCGCTATCAGGTGCGTGGCTCAAGGCG  
ATTGCGGAGCTCTACCCGCGCAATCTCGGCATCCCTTTTTCCCATCCTGTGTGGCACCTCGGCGGGGGCTA  
TCAATGTCACCGCACTGGCCTGCTACGCTTCTGCTTCCATCTGGGGGTGCGCAAGCTGGAGTGGGTCTG  
GCGCCGCTTCGAGACTCACACATCTTTGATTTTACCCTGGGGCGCCTGCTGTGGCGGTTGATGTATGAA  
GGGTGCGCAGGGCTGATCAATCCCCACACCAACCACGCTTTTACCCTTTTACCAACGCGCCGCTGCACC  
GCCTGCTGGATCAGCTCATCGACTATCACCGCATCGATGACAACATCCTCTACGGCAGTCTGGAGGCGCT  
GGCTATCACGGCGTCGGATTACGATGACGGCCTCTCCACCACCTTCTTTTACGGGGCGGGCCGAACACCAT  
CCGTGGGAGCGGGCCAGACGGCGCGGGGTGCGCACCGTGTACATCTGAGCATCTGCTCGCCTCCTCGG  
CTCTCCCTTCGTCTTTCCAGCCACCCGGATCGGCGAGAAGTTCTACGGCGACGTTCCATCCACCAGCT  
GAGCCCGCTCAGCCCCGCCATCCATCTGGGTGCGGAGCGGATCCTGTTGATCACCCGGATCCGCCGGCG  
CACTCGGCGCCGACCCATCACACGGCCATCTCACAGTTCCAATATCGCCAGCCATCTGCTCGATACGG  
TCTTTACCAGACCCCTCAACTCCGATCTGGAGCGGCTGTGGCGCATCAACCAGACTCTGGATCTTATCCC  
TGAGCGGGAGCGTAATCGCCTCAAGCTGAAACGGGTGGAGACCTGCGTGTGAAACCGAGTCAGGATCTC  
GACACCATCGCACTGGCCTACCTGCGAAAACCTGCCGCTAAAGTTGCGCCGGCTGTTGCGGGTGTGGGGC  
TGAAGGGGGATGAGACCAGCAGTCTGGCGAGCTTTTTGATGTTCTATCCGGGTTATTGCCAGCAGCTGAT

CAAGCTGGGCTATCAGGACACCCTGAGGGAGCGGGAGCGGGTCTGCTGCCTTCCTCGATATCGAAGGGCTA  
CCAAAAGAGCGGGAATAAAGGGCGCGCCGATGAGTCCGAGGGAACACAGCGCCCTCCAGCAAACGCTG  
CTCAGCCTGTTCCATTGCCACCACGGTACCAAACAGGATCAGCCGATCCCAGCCGCCAGCACCAGCTCG  
GGTCTGGGTTCCAGACTTTGATCGCCACGCTGCACCTCCTTGATCCGCACCTCATCGAGCGGCAGCTCGC  
GCACTTTCACGGCCTACCGCCACGCTGATCGTGCAGCAACAGCGGATGGAGGGCTTCAAGCAGCTGATC  
TGCCTCCAGATTGCTGGCGCTTTGATCCCCCAGTAGAAGCCGTGCAGGAAGCGATATTGACTGCTGCGC  
TCCAGCTCCATCCGGCGGATCACCCGACCGATGGGGATATCGCAATTGAGCAGCAGGTGGGAGACCAGCA  
TCAGGGCCCCCTCCTGGGATTGGGGATCACCTCGAAGGCCCCCGCTGCTTGTACTGCTCCAGAAAAC  
GTCATCCCCGGGTACGCACCAGCACTTTGAGATCCCCCGCAATTCGCGGATCAGTGCCAGCATCGCCTCC  
ACCCGCTTACGATCATCGAAGGTGATGATCACCAGCCGCGCCGCAACAGCCGGCGGCCAGCAGAAATAT  
CGCGGGCTGGCATCGCGAAGGCCACCTGCTCCCCGCCAGCTTGGCTCGCTCACCCGCTCGGGGTC  
GAGATCGAGGGCCAGAAAAGGGGATCTCTTCGATTTTGAGGAAGCGGGCGCAGGTCTGCCCGCCCGGCCA  
AACCCGCAATGATGACATGCTGGTTTTTGGCTCAGGCCGACTGGGCGACTTCGGAGCGGGTCAGCAGCG  
CCGGATCGGTGAGGCTGCGGGCCAGCAATGGGCTGGGTACCAGCCAGGGGGTCATGGCGATGGAGAT  
GATGCCGATGCCGATGAGCAGGGAGACCAGTTGCTGATCCAGCAAGCCGTGGTGGAGCGCCAGCGCCAGC  
AGCACGAAGCCGAACTCCCCACCTGACTGAGCATGATGCCGGCGGCCATGCTGTGCGCTTTTCGCTCCC  
CCATCAGCCGCCCCGCCAGCAGCACCAGCAGGGATTTGCACAGCACCAGCAACACCACGCAGATCAGTAC  
CTGCCACCAAGTCCGCGCCACCAGCTCCACTCCATAGCCATGCCGATGGTGATAAAGAAGAGCCCCATC  
AGCACGTGCGGAAAGGGCTTGATGTCCACCTCCAGCTGATGACGGTAGTGGGACTCCCCCAGCATCATCC  
CCGCCAGAAAACGCCCCAGCGCCATCGACAGCCCCGAGTGAATGGGTGATGTAGGCAGCCAGCAGCGCCAC  
CAGCAGGGCACTCAGCACGAACAACCTCGTCGGAGCGGGCTCGCGCCACCTCGTGAAACAGCAGCGGCAGC  
AACCACTTGCCCCACCGCCAGTAGAGTGAAAGAGAGCAAACAGCCCCCTTGAGGGTGGCCAGGCGATCTCGG  
CGGCCAGCGCACTCCCCTGCACTTCCGGCTGGGCGAGGATCGGGATCATCACCAGCAGGGGCACCACCGC  
CAGATCCTGAAAACAGCAGCAGCTCACCCCCAGCTGGGCGCGGCGGGTATGGAGCTGCTTCTGCTCGCCG  
AGCTGCTTGATCACCACCGCCGTCGAGGAGAGTGCCAACGTTCCCGCCACCACCAGCGACTGGGCCAGAC  
CCAGCCCCACCACCAGCCGATGGCGAAGAAGAGCAGTGACGTGAGCAGCACCTGCAACATCCCCACCCC  
CAGCACCAACCGGCGCATCGCCAGCAATTTGCGCAGGGAGAATCCAACCCAGCGAGAACATCAGAAAAG  
ACGATCCCCAGCTCGCAATGGTCTGCATGATGCATGCGCTGGCCGGTATCACCGCCAGCCCGTGGGGCCGA  
GCAAGACCCCGCAATCAGGTAGGCAAGGATGACCCGCAAGCCGAGGCGCCGAAAAGTTGCCACCAGCAG  
AACGGCGGCGAACAGCAGGATCAACAGGTCGGTGTACAAAATTTTCTCTCCTTTTATCGACTTAAGCTTA  
GTCAGCCGATCTGGCGGGCAGGAAAAGATATATTGGGCATGCCAATTCAGGGAGGAGACAGTAGTCAGGT  
GTTACAGGTGGAAGACCATGGAATAACGTCGTCACTTAATGGCTTTAGCCATGGCATCGAGCAGTGGGT  
TCGCCAGATGGAGCGGCTAACGCCGTTGCCAGCGTTGAACGCAACCAGTTGCTCGAGCAGTTGTTGGGG  
CAGAGCGATCTCGGCGGTCTGCTGACAACCTTTTGGCGATCGTGGCGCAAGAAATGTCAGGATCCACAGTC  
TCTACCTCGATTGTGGCCAGCCCCATGTGCTGATCCAGCACCCGCGCTGGCCACCCTCAACCTGCACAA  
CTATCCGTTTCGAGCTGCGCGGTGAGCATGGCCAGCTGCTCGGCCAGCTTCACTACGAGCTGGAACATCCG  
CTGAGCGGCAGCCAGCAACGGGTACTGATGCAATACCATCAGCTGCTCTGCCTGCTGCTGCCCTCTATC  
TGCGGCTGGAAAAACTGGATCAGCTGGTCAGGCTCGATCACCTGACCGGCCCTGGCAACCGCTCCTACTT  
TGACGAAGCCATTGGCCGCGCCATCGAGCAGCACAGCCGCGAGCCTCACGGTCTGGTGCTGGTGCTGCTG  
GATCTCGATCGCTTCAAGCAGATCAATGACACTTTGGGGCCATCCGGTGGGGGATCTGGTGCTGAGTCGCT  
TCGCCAGCTGCTCAAGGGGTGATCCGCAGCACGGATCAAGCCTTCCGGCTTGGGGGAGATGAATTTGC  
CCTGCTGCTGCAACCGGCCGAACCCGAGGCGTGGCGCCCGGTCTGGCTGCGACTGCAGCACATGCTGATG  
ACCAACAAGGAGCTCAGCACCTTCTCGGTGGATGCAGCCTTGGCGCCGCCAGCTGGCAATCCGGGGTCCG  
ATGTGCCGAGCCTTACGAGGCGGCGGACAGCCACCTTACGCCCGCAAGAAAAGCCGGCAAGGCCAGCCC  
TAACGAATAATCCGAACTCTTCTTTGCTCCGGCACATGCGAGCCATGTGACCGGAGCTTCTTTTTTTGG  
GGCTAATCCCCCTCACACCGAGATCACCTCAGGCAAGATCCTGCTCGGGCAGAACCAGGGGCTGCACCG  
CTCCCCTGCCAGCGACAGACCAGCCCCGGCCCCCTGCGCCATAAAAACCGTCGCAGACAAAAGAGCCCCACCA  
CCGCCGCCACCTGCTCGCCATAGTAGAGGATGGGGATGCGCCCCGCTGCCACGAAGGCACGCCATACTC  
CTGCAGCAGCTTCTTCATCCGCCGACTACCGCTTCGCCCCACCGGTTTGAGGGGGATCCCGGGCGCTACC  
TGAAAACGCACCGAGAGGGGCTCGTCCGCTCGGGGGAAACGCAGCAGATCCTCGCCGTGCTCCGCCATAC  
GCACCACCAGCTCGCCAAACCGTCCGGCAGGGTCAGCGGCTCACCCACGGTCAGCGGCAACACCTGATG  
GCAAGGTTGCAGGTGAGGCTCACCAGATAGAGCCGCTCCTGAAAACGGCGGCAGCTCTGGCGACCCAG  
TTGAGCTGGGGATTGGCATCGCCGCGCGCAACGCCACCTCCTGCCAGAGCCGGGCAAGCTGCTCGCGGG  
ATGGCATCTCCCCCCCCTGACGGCGGATCCAGTAGCGCAGCAGGTTATTGCGCCGGGTGGGTGAAAGGGC  
GTGCAGCGGGCCGATATGGAGCGCCTCCCCCTCGCCCGCCAGCTGCCAGTCGCTCTCGGCAAGCTCCTCC  
AGCAGCGCTTCTGCTCGGCGCACAGGGCCATGCTGCGCGCCGAGCTGGGGCCATGGCGGGCCAGCGCG  
CCTTGAGCTGGGGGATAAGCGTCTGGCGCAAAAAGTTGCGGTCATAGCTCACATCCTGATTGCTCTCATC  
CTCCACCAGCCAAAGGGGAGGCTCGCCGCGCCTCGGCCAGCTCGGCGCGACTCATATCTAGCAGCGGC  
CGCAGCAACAGGCCACCGGCAAAAGGGCTGGCTTGGAAGATCCCCGCCAGCCCGCGCAGACCGGCGCCG  
GCTTGAGGGCCAGCAGCAGGGTCTCCAGCTGATCGTCTGATGGTGGGCGGTGAGCAGCCACTCCCCCTC  
CCGATCCGGGCGGTGAGCCGCTGGTAACGGGCTATGCGAGCCTGCGCCTCCAGACTCTCGCCATTGCCA

CGGGCCAGAGTCACCCGCTCGATCAGCAGCTCCACCGCAATTGCTGACACACGACTTCACAATGAGCGA  
CCCCTCATCGGCATGGGGACTGAGGCCGTGGTGACGTGCAGGGCGCGAAGTGGCAGGCTGTGCTCGCG  
AGCATACTGCGCCGCCAGCACCAGCAGCAGGGTGGAGTCGAGGGCCGCACTGAAGGCAACCAGCAGACCG  
GTGGAACCTTCCGGCGCAGGCATAGTCAGACAAAAGCGAGAATAAAGATGAGAAAATCATAGGCTTCCCCA  
AAACGGACCGGCCGATCTTAGCAGAGTCGGGCTTATCAAGCTGCAACCCTGCTGCTAGAGTGAGGCTCGC  
CCGCCCTCTCCACCAGGCTGGCCGCAAGGCGGTGCGACCACCGGTTGGAGCAAGGAAGATGGGCAGGGAA  
GCAAACAATCGGAATTGGAATCAAACAAGATGAACAATAAGAAAAAGCTTACTGGCCGGCTGATTGGACT  
GGCCCTGCTGGCTGGCTGCAGTCAGGCGCCGCAAGACTCCCCAAAACACTCCGGGCTTGCCTGGCCAAT  
ATGGACACCCAGGTCAAACCCGGCGATGACTTCTTCCGCTACGTCAATGGCAAGTGGCTCGCCACCGCCA  
AGATTCTTGACGATCGCCCCGCGATGGCGCCTTCTACATGCTGCGGGACAAATCCCTCGCCGATGTGCG  
GGTGTGGTTCGAGGGGCTGGCCAAGCAGGAGCCGCCACCGGCACGCGACTCAGCAGATCCGCGATCTC  
TACGCCAGCTATCTGGATCAGGCTAGCCGTGACGCCAAAGGGGCTCACCCCGCTGGCCCCCGCTTGGCC  
ATATCGACCAAATCCGTGATCAGGCCGCGCTGGCCCGTGCCTTTGCCAGTCGGGCGCATGGGCGGCGG  
CGCACCGTTTTGGCATCTGGATCGACGCCGATGCCAAGTCCCCGACCCTATGCGGTCTACCTCTATCAA  
GGTGGACTGGGGCTGCCGGATCGGGACTACTACCTCAAGCAGGATACCGAGAGTCAGGCCCCGCGCCAGA  
AGTACCAGCAGCATATCGCCGCATGCTGAGCCGCTCGGGGAATCTGACCCGAGCGGCAAGGCCAAACG  
GATTCTGGCCCTCGAAACCCGGCTCGCCACCATCCAGTGGGACAACGTCGCCCTCGGGGATCGGGAGAAG  
AACTACAACAAGCGCCCCGCCAGCAGCAACTGGCACGGCTCGCCCCCATCTCGACTGGCAGGCTTATCTCA  
ATGCCGCGGGCATTGCTGGCCAGCCGGAGCTCATCATCGGCCAACCGACCTATCTGAGCGCGCTGGATCA  
GGTGATGGCCAGACTCCCATCGCCGACTGGCAGGCCTACCTCAAGTGGCAACTGCTGACCGACTACGCC  
CCCTATCTCGATAGCGAGACCGACCGCGCAACTTCGCCTTCTACGGCACCACATTTAGCGGCACGCCCA  
AGCAGCGCGCCAGCTGGGAGCGGGCGCTCGGGGTGCTGAACGATCATCTGGGTGAAGCGGTGCGCCAGCT  
CTATGTGGCCCGCTACTTCCCGCCAGCGGCCAAGGAGCGGATGGAGCAGCTGGTGGAGAACCCTGCGCACC  
GCCTACGGCCAGAGCATCAAGGAACTCGACTGGATGTGCCCCGAGACCAAGGCGCAGGCCCCGAGAAGC  
TGGCCAAGTTCGCCCCAAGATCGGCTACCCCGACAAGTGGAAAGGATTACAGCGCCATCACCATCAAACC  
GGATGATCTGGTGGGCAACCTGCAACGCTCGCAAGCCTTTGAATACGCAGACAGTCTGGCGCGCTCGGC  
AAGCCGGTGCACCGGGACGAATGGCACATGTGCGCGAAACGGTGAACGCCTACTACAACCCGAGCAACA  
ACGAGATCGTCTTCCCGCGGCCATTTTGCAGACCCCCCTTCTTCGACATGACGGCGGATGATGCAATCA  
CTACGGCGCCATCGCGGGGCTATTGGTCACGAGATGGGCCACCGTTTTGATGATCAGGGGGCAAATCC  
GACGGCGACGGCATGATGCGCGACTGGTGGACACCGCAGGATCTCAAGGAGTTTCGCTTTTCGACCAGCC  
GTCTGGTGGCCAGTACAACCGCTTTCGAGCCCATCAACGGCCAGTTCACCCTGGGGGAGAACATCGGCGA  
TCTGGGCGGCCTAACCATAGCCACAAGGCCTACGAGCTGTGCGAGGGTGGCAAGGAGGCGCCGGTGTG  
GATGGCTTACCGGCGAACAGCGCTTCTTCTCGGCTGGGCGCAGGTGTGGAAAGGGATGTATCGTCCCG  
AGCTGATGCAGATGCTGCTGCGCTCCGACCCCCACTCGCCCCCGAGTACCGGGTCAACGGCGTGGTGC  
GAACATTTCCGCTTCTACGAGGCATTCAACATCCAGCCGGGGGACAACTCTATCTGCCGCCCCAGAAA  
CGGGTGAAGATCTGGTAATGATAAAAAAGCAGGGCCCAATCATGGGCCCTGATACAAAAGAGAAAAATAT  
GAACAAGACGCTTCTGGCTATGGGACTTCTTTCCCTATATGCAAGTGTACTGAAGCTTGGGCTAGTACC  
ATCAAACAGCGAGAGTGTATCCCTCACAGGATCTTCGTATTTGTCTGTATCAGGATTTCTCGCTTGCAT  
CGGATCCAAATGCGGGTTTTTATTCTGAAGCAGAAGGCCCTTGGGAACCACCTCTGGTCAACGCAGAAAT  
ACGCATTTTTTGGCACAAACAATGAACAACCTTGCTCGATTGAAAGTATTTTCGTTTAGCAAAAATCAGTCC  
ACCAAGTTGGTAGATCAAACAAAACCAGTATTTCTTCTGGATGAAGATCGCTCTATGGGAGCCGGAGGAT  
TTAATGGTGTGGAATCACGACCTTTTACTGCATCACCCAAAAGGCATCCATTTTTTACCCTAAAAGGATC  
TGAGATAAACAACAAACATGGACACTTTTATCAGCACTCAGGGCTAATTTGGCGGAAGTTCCCTCCGTTTT  
TTGGTAGTAAGTTCTTTCCCTGATATCCCTAAACAAGGTGAGTGGGATGGCGAGTCGACCAAAACCACAT  
TTAGCAGACTAACTCTCGACAAAGGCATATTTACTATTTCAAGTAGAAGCGAACCACATATATTTGGGAAAG  
TGAAAGTGATTTTCCAGAAGAACAGTTGTTTCCAAAGTAGTGAACCTCAAGAAACAATGAATACCTTTTCA  
TCCAAATAGCCAACACATGACAGGAGCTGCCATGAACCGAGCATTATTTATTTCTTTTGGTTATTGGTACA  
TCAGTTCAAGCCGAAGAGGGATTTAGCAAGCAACTGACCCTCCCCCTCTGGGCAGGTGATCCGGGTAGCGC  
AGGGGGCCGGTGAGCCCGCTCCATCGGCAGCTATGACGTGCGGCTCTATTCGGGCCAGAACGCCCAATT  
TCCACTGGATGAGTTTTAGGATGGCAAGGTGATGGCTCGCAACGGCTTTATCCGGGAGCTGAAACTGGTC  
GATTTGAATGGCGACAAGCAGCCGCAACTGGTGGTCATCATCGAGAGCGCTGGCAGCGGCAGCTATCAGG  
ATGCCGATGCCTACACTGTCAGTCCGCAAGGGGAGCTGGAGATCTTCAATCAGGTCAAGGAGCTGGAGCC  
CAAAGAGGATGTGGTCAAGGCGCTCAAAAAGCCACAAGACTAAGCCATCTCCGGAATCTGAAATATAAA  
AAGCCCTGATGATCAGGGCTTTGTTGTTTCTTCTGTGCGGTAACCAGCTCAGAGGCGGGTCGCCCGGAT  
GGAGACCTGCGGCAGCGCCATCTCGTGTGAGCCGCCACTAGTTGAAGCTCGTAGGCCCCCGCCAGCCAG  
GTCCGGGACAGCACGGCATCAACGCTGGCGTTGGTAAGCTCGAACGCCGCTACCGGGGTACAACCCGCCA  
GCAGATAGGCCAGCATGGTGGCGCTCAGCAGATCCCCCACCCGATGGGGTGGCGAGCAAAGGGTAGAG  
CGGGCGGGATAGGTGAAAATCCCCCTCTCGCACACCAGCAGCATTTTCAAGCGGTCCATGGCAAAGCCG  
GCCTTGCCAGATGCTTGACCATCACCAGCTTGACCCTTGGCGCGCAGCTGCTGGCACGCCCTCGATGG  
CCTCCGGCACATTTGCGGATATCGCGGCCGGTGGAGCTGTTCCAGCTCCAGCAGATTTGGGGCCAGCATATC  
GGCACAGGCCAGTGCCCGATGTTTTAGAAAATCGGGCAGCCGGGTGCCACTATGCACCCCTTGTCCGGG

TGACCCATCACGGGGTCACAAAAATAGAGGGCGGCCGATTGAGCGCCTTGAGCCGGGCCACCGCCGCCA  
GGATCTCCTCCCCCTGTTTCGGCCGAGCCGAGGTAGCCGCTCAGCAGCGCATCGCACTCGGCCAGCAGCC  
GATCTCCGCCAGGCCGTTTACCAGCTGACGGATATGCCCAGGCATCACCATCCCCGCCAGCCTTCG  
CGGTATTGGGTGTGGTTGGAGAAGTGCACCGTGTTCATCGGCCACACCTCGATCCCCGAGGCGACGCATGG  
GAAAAACGGCGGGCGCTGTTGCCGGCACAGCCAAAGACTACGTGGGATTGAATGGAGAGCACTCGCTTCAT  
GGTTGGCGACTCACGCAATAAGAACAGGAATTCGGGAGGGAAAAACGGGCCCTTGCGGCCCGTTGTTGTCA  
CTTTTCGACTGTTGTCACTGTTCGATTAACGCAGCACCTTGACGGTGTAGCTGCCATCGGCCGACGATAGA  
GGCCGTGGATGTCGGTCTCGAAACCCGGGTAGTGGGCACCGATCTCGCACAAACATCTCGAGGAACCTCGAG  
CACCGGCAGAGAATCCTGGGTACCATCTCGCCCGGCAGAACCAACGGAACTCCCGGCCGGTACGGCAGG  
ATCATGTTGGCGCTGATGCGGTCAACCATGTACGCAGCGGCCTTCCACCAGTTGCCGGCCAGCTCTT  
GCTGCCATGCGCGGTGCGGAGTCATCTTCAATTCGCGCAGTACGTTCGAACGCCTTGAACATCAGCTCCGG  
CAGACGGTACTTGTGGTTCAGCTCGTGAATGCGCTGCGCCAGCTCCTGAATGCGCATCCCTTCGTAGAAG  
CTCGGATCTTACGATAGAGGCTCGGCAGGATGTTTTGATGGTCAGGTTACAGTTCATAGCCACGCTTGA  
ACTCGGTTCAGGGCGCGCAGCAGCTGCATCGCCTTGGACTGATCGATACCGATGGAGAAGAGGAACAGCAT  
GTTGTAAGGGCCGGTCTTCTCGACCAGATGCCGCGCTCGTCCAGGAACTTGGAGACCAGTGAAGCAGGA  
ATGCCCTTCTCCAGCAGCTTGCATCACGACCATAACCGGGTTCAGCAGGGTGACCTTGATCGGATCCA  
GGTACATGTGGTTGTCATCGATGTCTTGAAGCCGTGCCAGTTCATCTTTCGGATCCAGCTTCCAGCACTC  
GACGGTGTTCGATGTTGTCCGGCTGCCATACGTTCGAAGAACCAGCCTTCGCTCTGATCACGCAGACGCTTG  
ATCTCTTTGCGGAAGGAGATAGCGCGATCGATGGAGTCTTTCGATCAGACGCTTGCCGGTGTGTCACGCA  
TCATGGCAGCGGAGATCTCGGTTCGATGCCACGATGCCGACTGCGGCGAGGTGGAGGTGTGCATCATAAA  
GGCTTCGTTGAAGGTCTCTTCTCCACGTCACCTTGATGTGGATCATCGAGGCCGTTGGGAGAAGGCCGCC  
AGCAGCTTGTGGGTGGACTGGGTTTCATAGAACACCTTGCCCGGCATGGCTTCGCCACTCATGCCGCACT  
TGCCTTCATAGATCGGGCTGAAGTTGGTGTAAAGGCACCCAGGCATGTCGAAGTGGATGTAAGGGGTATC  
CAGACTCTCCTTGATGAAGCCGGTGTGTAGAGCAGGCCATCATAGGTGGAGTTGGTGACGACGGCGTAA  
CGGGGAGCCTGGGCACCCGGTGTTCGCGCAACCTTGGCAGCGATGGTGTCTCGGCTGAATTCGCTCTGCG  
GGATAACACCCAGAATGCCGTAGGCGTTCGCGGTGGACGGAAGTAGATCGGCGTCACGTCGTTTCATCAT  
CATCAGGTGAGTGTAGCGACTTGTGGCAGTTGCGGTCAACCAGCACTGTGCTGCCGGCCGGCGCGGAGTAC  
ATGCCAGCAGTCTTGTGGCAGTGGAGGTGCCGTGGTAAACGATATAGGAGCGATCGGCGTTGAAGGTAC  
GGGCGATGTACTCTTCGGCTTCTTGTGCGGACTGAGTGCATCCAGCAGGGAGCCAGTCCCGGGTGGGA  
GATGGAGACGTCAGCCTTGAACGCGTTCGGGCCATAGAAGTCATAGAAGATGCTGCCGGCCGGGCTCATC  
TGGAAAGCGGTACCGCCCATGTGACCCGGAGTACAGAAGGTGTATTTACCCTCTTCCACGTACTTGAACA  
GTGCCTTGGTGAACGGCGGCAGGATGGCGTCTGATACTCCTGAGTGGCCTGACCCATCTTGAGGGCGAT  
GTCATCAGCCATGCCGAGACGGTACTCGAAGAAAATGGACGTTTCAGACGCAGGTCCGGTTCAGGTGAATGTCC  
AGGGTGGACTGGTTCGTTGGCGAAGGCGAAGATCGGCAGCTTCTCGTTGCGATCGTGGATCTCCTTGCACA  
GACCCAGAGAGTATTTGTCCAGTTCGAAGATGGCGCCGCAAACGCGCGGGTCTTCTCAATCAGTTTCAG  
CAGGTCCGGCAGCTCGACCGGATAAACAACCTCGAAACCTTGCCTCGAGGGAGGCTTGCAGCTGGCGA  
ATGGGTTCTTCTTTAAAGAAAACGCCGAGGTGGTTGAGGATGGCAATGATATTCATCGTAATGCTCCACA  
CGTAAAGGGGGCGCTCTCCATCAGGGATGGTGTAGTGAAGAGCGCTCGGAAGATAAAAAGGGGAAATCAGTTG  
CTGGGTTGTTTCGTTTCAGCAGGGCATCGTGTGACGCAGACCCAGTTTTTTGGCGTAGAACATCAGGATGA  
TGAGCGACACCACGAAGGTAGCTGTGAGGTTGGAACCTTGGCACCCATCAGGGCTACCAGACAGAAGAC  
GCAGGCCACACCGGAGAAGATCATGGCGCCGATGCTGCGGGAGGTTCATGCCTTCAAAAACGGATCAGGTTA  
ATGCTGGAGTAGAAGTAGGGCAGCATGGTTCAGCAGCACCGCATCTGTGGTTCAGCACGTTGAAGAGATCAG  
CTGCGTGTAGCGGACTGGGAGGTGAAGGCGGTTCAGGCCAATCATCAGGGCAGTTCATCTTTCAGGGAGCCAG  
GATCAGCCCCCTTCTTGGCCACGCGTCTTGTCCACTTACCCTAGATTTTCGGGAAGTTGCCGTGCTTG  
GCGGCAGCTTGCCTGCCTACCAGCATCCAGGAACCGAGCGAGGTGAAGCAGGCCAAAAGCGG  
TGAAGGCAGAAAACAAACGGCGCAGACCAGTACCGAAGATGGCGGAAGAGGCCATGGCAAACGGGGCGCC  
GGAAGCTGCCACTTACCAGCGCCGGGAACATGCCGCTGATCACCTGGGTAGAGAGGATGTAGATAACACCC  
GCGATAACCGGTACCCAGCATGGTAGCGAGCGGTACGGTGCCTTGGGGTCTTCCACCATGCCGGAAGAGA  
CGGCGGCAGATTCAACACCGACGAAGGACCAGAGGCAGATCAGCACGGCGCTGATGACCGCATGCAGGTC  
GCTGCCGCTGGTGGTGTTCAGTTCTGGCTGTAGACGGTGACATCAAAAATGACCCAGCCCATCACCGCCA  
GTACCGACAACCGGCAGCAGGATCAGCACAGACCAGAGTACAGAGTCCGGTTCACCCAGCTACCGCCAA  
GCAGGTTGACGAAGGTGAAGATCCAGACGGCAGCGATGGTGGCTGCGGCGGCCGGAATTTGGGCTATTGAG  
AATGGGGAAGAAGACCGAGAGGTAGGAGACGCTGTAATGGCGATGGCCAGGTTACCGATCCAGTTGGCG  
TGGAATAGAGCACACCGGTCTGGAAACCGAACCGGAGAGATCTCGCCAGCGTAAGCAATGGGGCCAC  
CCTCTTGCGGGTTCTTGGTAGCAAGGCGGGCGAAGACAAAAGGCGAGGCCATGGCGCTTACCAGACAGAT  
TGCCAGCTAAAGACAGAGATGGAGCCGATGGTGGCCAGTGGCGAAGGCGAGCAGCGCATGCCACTCCCC  
ATCATGTTGCCGGCCACCACACCTGTACAGGCGATAAGGCCAATCTTCTTGTCTGTATCTAGGGACATAA  
GATCTCCGGTCTATAAAAAGGTTCGGGTGCTCACATACACATTTGGCGGAACGCCCCGCCAAAGAATGGGC  
ACAGACTAGGCCTCTCATCCCCGAAAACATAAAGACCAGCTAACGGATAAAAAATAGAGGCAACTTTTTT  
TCGCCGCTCGTCACTTTTGATAAAAACCATTTAAAAACAGTTAATGACATCACATCACACAGCCGCTCT  
TGATAAAAACCTTGATATCCTTCCGCCAATTTTTTCCCCTTGATAAACCCCTTATCTCGCCGCTTGTGATA



TTTTTGGCCAGATAAACCCGGGATAAAGCAGCTCCCATTTGCGCCCCCTGCCCTTGGCGCCATTTAGAAGC  
CCTGCGGATCATCACCCCTGAGTGGCCGCTCACCTCCTGTTGCCCCCTCCGCTCGGCTCATCACAATCCAG  
GCTCAGAGGTAAAACCTCAACGGCGATAAACCCTAAGCAATGAGAAATGGGTCGAGACAGACAGCTTATCC  
CGCCGCCAACCATGAGCAGATGTCACAAGCTGCGCGCGGGCGAAAAGCCGGGCAAACCTCGAGTGCAGCGAA  
TGCCGTGTGCAAGACAAAGGCAAGTGGGAATAGTGGGGAGCTGCGGGGGATAAATCATGACTCACCAGAG  
CGACTATCCCCAATAGCAGGCAGCAGGATTGAGACGAGCAGAAAACCGCACAGGCCGCTCGAAGGCAGCCT  
GTGGATGGGGTCGGCAACCGCACCCGACCCGGGGGAAAAACAAAACTGCGGAGTTAGAAGAGCTTACCTTG  
CTCTGGCCCAGCGCATTGAACAGAGCCGGGGTTAGGCTCTCCATATTGCTGTAGAAACCGAGCTGCTGGC  
AGAGCAGATAGGTCTGCTCGGTGCGCTCCATCAGGAAGGCCTGACTGTAGGCATCCCCCGCCGCTCGGG  
GCGACCTCCAGCTCCGCCAGCTTGCCTGCAGTATGTAGTAGAGCACCGAGCGGCCGACTCGCCGCC  
TTCTCCAGCAGATAGTTGGCCTGCTGTTGCTGGCCGTTGAGGATCGCCTGTAGGGTCAACGCCTCCACA  
CCCCGGGCTGGCAGGGCGCCGCTGTTTTGCACCACGCTGGCGAGATGGGTGCCAATCCCCTGACGTCGCTC  
GCTCTCGGATTTGCCCGCCAGGGTGGCCAGCGCTCGCCCCCAGATAGCGCTCCGCCAACAGCAGCGGC  
TGATCCGGATGGGAAATCAGCGCCTGCTCCAGCAGATCGATAACCCGCTTGAGGGCGACCGGATCCCCGGC  
TGTTGATGTAGTACTGCGCCTCCATCATCGCCATCAGGGAGGCATCATCGGTGCGCCAGCCCATCCCCGG  
CTCGGCATCGGGCTGGTCGAGGGCACGCAGCAGATCCTGGCTGCTCGCTGCAACACGCCGTGCACACTG  
TGGCGACTGAGCTGGTACTGATGGCTGAACAGCACCCGGTTGGTGTGATATTGCGATACTCCAGATCGA  
GATAGGTGCCACGGGGCTGGCGGGTGACCCGCACACTCAGCTCCTTGCCGGGCATGATGCCCCCATCAG  
AGTGGTGGCGCCGACTGACCCCGTAGCGGGCTGCGCGCCGACCTCGGCCATCAGGGCGCGGGTAATG  
CCATCGGGCAGGGCGCACGTTCTCGTTGTTGTCATCCATGCCGGAGTGAAGCGGAACACCAGCAGATTGG  
GATCCAGCATGGCGTGTACCTGGGGACTGGTGTGCTGGTAGCTGAGCATGCTGACAATGGCGATCAGCAC  
GATGGCAACGAAGATATCGAAAACCTACCATCTTCCAGCGGCTACGGGCATCCTTGGCATGGGTGGAGATG  
GCGCGGGTCAGGGGCCCCGGCGGGAAAAAGGGGCGACATTTGGGCTGTGCATCATCATCCTGCTCAGCCACGG  
GCGGGCTCAGATCGGAGAGCGTTCGGGTTGTGCGGAGAGAGCGGTAATTGACCGCAGGAGCAGGCTGCTCGTC  
CGCCATCACACGGAAACCACTGCAGCGGCTTACCGGTGCCACCAGCTTGTAGCCGCGCTTGGGCACG  
GTGACGATATAGTCGGTCGCATCGGTGCGACCATCTTTGAGGATCTTGCGCAGTTTGAAGATGGACTGGG  
TCACCACCTGTGAGTCCAGCTCGGCGCCATCCACACCTCATTTGATCAGGGCATCGCGCCAAAACACGGT  
GCCGGCATTTGTAGGTCAGAAACCGCAACAGATTGACCACTTGGGTTTCGAGGTAGACCTCGCGCTCGGGG  
CGACACAACATGTTGTCGTAACGCTCAGGGTCCAGTCTGATCTCAAAAACCGATTTCGCTCATGATTC  
ACTCGCTGCAGATGGTGACAATGCACGATGAGAGAGACGCAAAAACCCGGGCTGACTGAACCGAACAAGGC  
GCTATCACACAGGTGACAGATAAAAAAGAGAACC GAAGCAGTCACATCTCTGAGAGTCAGTCTGGCCAGG  
CCATCCTGTTTACGTCTAAAGGGCATCCTTGCGGGCATTTCCGACCACCGGGATCGGAAGGGATCACTTTA  
AGCAAAACGGGAGCTGGATCCCCTTTTTTTGGCTATAAAATCGCCGTTGAGTTGATCCGACACCGCACTT  
TTCGGCAAATAGCGTGCCAACTAGTATTATGAAATCCCATATGCCGGAATCAAAAAGCCCTGAACA  
TCAGGGCTTTCTCATTTCTTCGACCATCGGGGAGACGTTACTTTCGCTACCGGAAGCGCATCCTGCTGACG  
ACTGCGGCGCAGATGACGCCGCCACAACGAGAAGCCGCGTAGCCAAGACTGAGCACCACCGCATAGAGC  
ACCTGAGTGGCGAGCGCCACCAGCACCAGAGCGCAGAGCAGCAGCTTATCCCCGCCAGCCCTTACCCA  
CCCCGCCGAGCAGACGCCAGCCCGCCGCATGCAGAGCAGGTAGACCAGCACGAAATGCGGTCGCGCGTA  
GCGGATCAGCTCATCGAGCGGCAGTCGCAGCCAGATGATGAGGGTGATGCAGAGCAGACAGATAGCGAGC  
ACCAGAGTGAGCGCCCCGAGCGGCGCGCCGCGCGGTTGAGCACGGCCAGCGAGGGGGGCAACTTGCCCTT  
CCCGTGCCATGCTCCAGATCAGCCGGGCAAAGCCCTGAATGTAGATGTTGATGCTGGCAAAACAGGAGAG  
GTAGCCGAGCACCGCCACCAGCCACTTGGCGGTGGGGCCGAACAGCAGCGCCAGCAGGGAGGGGATGGCG  
GTGGCGTTTTTTCGCTCATCGCCGTAGAGGCCATATTTGAGCACCACCAGCGAGTGCACCAGTAGATAA  
GTCCCGCCAGCAGCACCOCGCCGAGCAGGGCGATGGGGTAGTCCCGCTCCGCGCGCTTGAACCTCCTCCC  
CATGTGGGCGAAGGCTTCCAGCCCCGACAAAACACCAGAATCACCGCCAGCGCGGTGGCCATAGGGGGC  
CACTCGTCCGCTAGGCAATGGCCGGGCTGCATCGCCAGCTCACCTCCCCCTTGAACAGATAAGCA  
GGGTGAGCCCCAAAATGGCGAGCGCAATCAGCAGTTGCAGATTGCCGGAGGAGCGCGCCCGCAGGCC  
CAGCAGAAAGACCCGAGCAGGGTTCAGCAGCTGGATGGCCAGAGGGTCCACTCCCCCATCTCGAACAGG  
GCATGCCAGAAGCCGGCGGCAATCATCAGGGCGGCAGGCAGCCCCACCGGCAGCACAGCCAGAAACAGGA  
AGGGCGAGAAGCGCTCGGCGCCGTTGCCAAAAGGCGAGGGCAATCAGGTGCGGCGCGCCCGCCGATGGGG  
ATAGCGACGGCCGAGGCGAGCAAAGGTAAAGGCGATGGGCAGCACCAGCGCAATCAGCAGCAACCAGGCC  
CAGAGCGAGGCCCCACCCGCCAGCAGGGCGGCGGTGCGCGGTACCACGAAGATCCCGGTGCCGAGCAGCG  
AGGTGGCGAGCAGCCCCATCCCCTGCCAGAGCCCGAGATCCTTTTTCAACCCAGACATATCCTTTTTGTCC  
CGACTAGAAAAACATCCCGCCATGTTAGGCCTGCTCCGCCCTTTGTTAAGCACGATGGTTAAGCGCGGC  
TGCGAGAATATGCAGCCTTTTATTTCGGGCTCGGGCCAACTTGCAGGGATTTCGGCCAGAAAATCCCCAG  
CAGGGTGTCTTGTAGCACCTGCCGCCGCGCCGCCGATAGATGAAGTAGAGGGTCTTGGCCGGGCTCTGA  
TAGCGACCAAGCAGCGGCAGCAAACGCCCCGAGCGATATGGTCACTCACCTGTTCCGGCGGGCTGCAAGG  
TGATGCCAGCCCCGAAAGTGGCCCGCTCAGCAGCGCCGGCCAGTGGTTTTATGCGCAAGCGCGAGGGCAG  
CCGCACCTCCTCGCTCTGACCATCCTCGCCAACAAAATGCCAACGCTCGTGTGCGCCAGTTGCCGTG  
AGACTGTTGGCGGGCGAGATCGGCCGATGACGGGGCACGCCGTGGCGATTGAGGTAGTCGGGGGCGAG  
CGCAGAGGCGGTAGTGCTGGGTGAGCAACGGACGGGCGATCAACGCCTCATCCTGCGGGCGCAGGGTGGC

GATGGCGGCGTCTGAACCCCTCCTCCACCAGATCGACCCAGCGGGAGTGAGCTGCAGATCCAGATCCAGC  
TTGGGGTAGCGGTTCGATAAAAAGCGGGCAGCAGCGGCACCAGCCGATGGTGGCCAAAACCTGAGGGGGGCGG  
CGATGCGCAGCCGGCCGGCCGGCTCAGCCAACAGATTCTGGGTGAGCGATTCGGTCAATGCCAGCTCCTC  
CAGTACCCGCTGGCAGCGAGCCAAAAACAGCTGGCCAGTTCGGTGAGAGTCTGCTGGCGGGTGGTCTTG  
TGAAACAGCTTGCCCCCAGCCACTGCTCCAGTCCCAGCACATGCTTGCCCACCATCTGGGCGCTGATCC  
CCTCTTCGCTCGCCACGGCGCTGTAGGAGCCGAGATCCACCACCCGGGTGAAGATACGCATGCTGGTCAA  
TCGGTCCACAACCCCTCCTTTTTGCCCGTTTCAAGGCCGTTTGGCCCGCAGCCAGGGCCCTGATTAACAA  
CCATAAGTTTAGTAAGAAATGGATTTTAGCCAATTTATTTCAACTTTTAGTTACCAATACAGTGATGCCAT  
CCCTCCCCACAGGATAAATTTCCATGAAAAGCACCTATCTGGCCGATTACTGGTTCGGTCTGCTGGCCA  
GCGGCGCCAGTCAGGCCGCCGAGAGCAGCTTTATCAGCAACCACGACCATGCCCTGCCTCAGCAACTCA  
AGCCCAGCCGATATCTTTTCGGGTACGCTGCTCGCCACCGGCACTCCGGTACCCAGATCAGCCGGGGT  
GGTTACAGCACCCCTGGTTCGAAGCGGGCAACCAAGTGGTGTTCGATTTTGCCCGCAACTCCGCCACTC  
GCCTGTGGCAGCTGCATATCCCCATCGGCCGGGTCAACGCCTTCTTCTCACCCACTTTCACTCAGACCA  
CACCAACGGGCTGGCGGATCTCTGGCTGACCGGCTGGCTGCAACCGGCCTATGGCCAGCGCCACGCGCCG  
ATGGAACTCTACGGCCCCAAAGGCACCACAGCTCTCGCCCGTGGCTTGCAGCAGGCCACGCCACCGACA  
TCGCCACCCGGGTCAAGGATGAGGGAACGCAGCTGGACGGGGTGGAGATCAACAGCCACGAGGTACCCGC  
CGGGGTGGTCTACAACCATGACGGGGTCAAGGTGACTGCCTTTGACAACGACCACGGGGTCAACATCAAG  
CCGTCAATTCGGCTATCGCATCGACTACCACGGCCACAGCGTGGTGTCTCCGGCGATACCCGCTACAGCC  
CCGAAGTAGTGAAGCAGGCCAAAGGGGCCGATCTGCTGGTGCCTGCTGCTCTCCATGACCTCTGCCGAGCA  
GATGAAGGCCAACCCCGGCTACAAGGCGATCGCCGGTCACTCGCTCCCTGAGCAGGCGGCCGGGTA  
ATGAACGAAGCCAAACCGGCGCTGACCGTGTTCAGCCATATCGGCCCAACGGCAAGATCAGGGTGAAGG  
ATCTGGCGCAGGATCTGCGCGCCCCGCTACTCGGGCCCTTTGTCATCGGCAACGACCTGATGCAGATTGA  
TCTGCCTACCACGGCCTCCGGCAAGGGCTATGCCCTCTGGCAGTCGGAGAATATCGACAACAAATAGAGG  
CACGGATGCCGGTACGCCATGGTTCGGCATCCGCAATCGACACCCGGGGCTATCTTTAAGGGGTGTTTGAC  
CACAAGGAGTTATCTCTATGAGCCTGAAATGGAAGCACCTCGCCCTGGCCACTCTTCCCTTGTTCGGCAT  
GTCGGTTCGCTCAGGCGGCGGTGTTGACCAGCCTTGAATGGCCCCCTTACACCAGCGCCAGCCTGCCTGAA  
CAGGGCAAGAGCAGTCAGTGGTGGTGACCGCAGCCTTTGCCCTGGCTGGCGACCCGCTGACCATCAAGTTCT  
ATCCTTGGCAACGGGCCGTGGACGAGGCCAACCAACCCGAGGTAAGTACTGGGTTATTTCCCCGAGTATCT  
CGACCCCAAGAGCAGCTGCCTCTTCTCTGACCCCAATAGTTAACGGCCCTCTTGGGTTTTCGCCAGGACC  
GATCAGCCGGTACCTGGCAGAGCCTTGATGACCTCAAGGGCAAGAAAATGGTGTCTGTCACCGGCTATG  
TGAATAACCACCGAGTTCGACGAAAAAGTCGCCAGCAAGGCGCTCTCGGCTGACGCCACCAGCTCGGACAG  
CCAGAACCTGCTCAAGCTCGGCAACGGTTCGGCTCGATCTGGCGGTTCATCGACCAGAATGTGATGACCTAT  
CTGCTGGAGAGCGATCCCCAACTCAAGGACGTTGCCGCCAACCTCGGCTTCAACGGCAAGATCCTCGAGG  
ACAAGTCCCTCCACGTCTGCTTTACCAACTCCGCCAAGGGGAAAAGAGGCGCGGGACAAATTCACAAGGC  
ACTGGCCAGCGACGAGGTGAAGAAGCTGATGAAATAGCGATAACCGCATCCGCTCGCCGCCCAAACAGCC  
ATAAAAAAAGCCGCTCTTTCGAGGGCGCTTCTTCAATTTGTTAACCAGGTTATCAGGCAATCAG  
CTTGTAGATGATAACCGGACATGGCGATCAGGCCGATGATGGTACGAAGCCGTTGCTGATGTTGCCAGCG  
TATTTGCGCATGGCCGGAACCTTGGTGTGCGGTACATCGGCATCAGGAACAGCAGCATGCGATGATCG  
GGCCGCCCAAGTCTTCAATCATGCCGAGGATGCTCGGGTTGATGGTAGCGATGGCCCAAGTGGTCAAGGAT  
CATGAACACGGCAGTGACTTTGTTTCAGTTGCTTGGTGTCAACGTTCTTGCCTTCTCGCGCAGCGCCTTG  
GCCATCAGGCCGTTTCATGCCCTCTTTCGCGACCCAAAGTAGTGACCCAGGAAGGATTTGCTGATGGCAACCA  
TGGCGATCAGCGGAGCCACAGTACCGATAACCGGGTTATCGAAGTGGTTGGCCAGGTAGGACAGGATGGA  
GATGTTCTGTTCTTTGGCTGCAGCCAGGTACGCCGGGAGAGGCTCAGTACGCAGCTGAATACGAAGAAC  
ATAACGGTCATCACCATCATGACGTGGGCGCCAGCAGGATGTTGCTGCCTTCTTCTCGGCACCTTAC  
CGGATAGCCAGCCACAGGGTCTTGTGATGAAGTCAACGTTGAAGGCGTTCGGACAGGGCCGAGCTTCAGTG  
ATGATGGCACCGTTCAGTTCGGGATCAGGTAGAACGCCAGACCATCAGGGTGAGTACGAACGGGAATA  
CCAGCACGCTCATCGCTTTGACGATAACCTGGCCGCCAGACGAACAACCGCCATCAGACCGAGGATCAG  
GGCCAGTGACAGAACGGCACGGGGAGGTGCAGACATGCCAGCTGGTGAACAATCAGCTCTCGACGGTG  
TTGGTGATAGCGACTGAATACATCAGCACGATCGGGTAGATGGCAAAGAAGTAGAGCAGGGTGTGAATTT  
TGCCTGCGGTCTTGCCGAAGTGTCTTCTACTACTTTCAGTGATGTCGCCATCAGGGTAGAGCCGGACAG  
CACGAAGCGGGTACAGCACGGTGCAGCAAGAAAGTTCAGCGGCAGCGCCAGGATCAACATGGCAACCAGC  
GGCCACAGGCCACCTACACCGGCGTTGATTGGCAGGAAGAGCACACCGGCACCGATCGCGGTACCGTACA  
GACCCAGCATCCAGACCACATCGGCCCTTGTGACGCCGCGGGAGGTGTTGCTGGCTAAACGACCATCAGC  
TGCAATATTCATGTGACACATACGTTGTTTCTGTCTATAGGAAAATGGGATTTCTGTTTGGTTCGGGCCCT  
TGGCCCGGTTCCATCTCCCTGGAACGCCTGCTGTCCGTCCTTGTATTTAACCTCTCGCCCCCGGCAACC  
TGGCCATCACTCCTTGTGACAACAGGATTGCAACAAAACAACAGTGCGAGATTTTGACCCGTGAGGGTTCGGC  
GCCCGTCTCACTTAAACAACCGATTAAACGTGCGCCACTCTTGTATGGGCTGACTTTAATTAATGCCCTTAT  
TAATCACAGCGTTTTTTTTGAATTAATCAACCAAAGTTTTGATTTTGGTTCGCTTTTCGGACGACCAAGATCA  
CACTCAAAGCGCCTTATTGTGAGTTTTTTTTTAAACAATTTCAACTTAGTTTCACTGGAATCAATGGCATGCG  
AGCAGATACATATTTGCAACAAGCCACCCATTTAGCGCGGATTTGTGTGCAGCACGGCCTTGGCGTACCCT

TGTGACTCACGCCTTTTTGTTGATTGATGATGACCATTACCCGTACCGATCTCGCCGAACTGGCGGTATT  
TGCCGCCGTGCGTCTGTCACCCGAGTTTCAGCAAGGCCGCCCTCGAGCTCGGGGTCTCCGCATCCGCCCTC  
AGCCATAGCCTGAAGGGGCTGGAAGCCCGTCTGGGGGTACGACTGCTCAACCGAAGCACCCGCGCCGTGG  
TGCCGACCGAAGCGGGCCAGCGGCTGCTCAAGCAGCTGCTCCCCACCTCAATAACCTGGAAGAGGCGCT  
TTACGAGCTGGCCCCGAACAGCGACGAGCCGGTAGGGCGACTCAAGCTCTGCGCTCCGCGCGGGCCATC  
GACAGCCTGCTGGCACCTGTGCTGATCGACTATCTGGCCCCGCTATCCGCGGATGCAGGTGGAGGTAGTGG  
AGCAGGAGCTGATGCCCGGCTGATTGAAGATGGTTACGATGCCGCACTCTTTTATGGGGATCTGCTGCC  
CAAGGAGATGATCGGCATCCCCCTCGGCCCGCCTCAGCGTTATCTGGTGGTGGGCTCCCCGGCCTATCTG  
GCGGAGCACGGCACGCCGAGACCCCGAGCGAGCTGAGCCGCCACGCTGCATCGGCTATCGCCTCACCC  
CGCACCACCCTACTCGTGGGCTTTGCGCCGATGGCACCATGCTGGAGATCGAAGTGACCGGGCCGCT  
CACTACCAGCACCCCGCCTCTATCTGGGCGCCGCGAAGCGGGACTGGGGCTCGCTACTGCTGGAA  
GAGGAGGTGAGCCAGAAGGTCGCGGAGGGGAACTGCTCACCGTGTGGAGCCCTGGTGCCACCTTTG  
CCGGCTTCTACCTCTTCTATCCAGTCGGCATCAGCTGGGCAGCGGCTGCGCATCTGATCGACATGCT  
CAAGGCGCACTACCAAAAATCCCGGATTAGTGAGTAATACTCAGCAATTCATCAAGTAAAACCTGATTAT  
CACCAAATTAGTATTAATCTAGACTAGCTGTTGATAATCGAACTCCCCGAGAGAACAGATATGCTGCTGCC  
TATTTAACTGCGGCAACGGGCCATGACCCGTGCTTCTGGGCTTACGCCCTCCCCCCTCATTTCTTGCCA  
TGCTGGTCTCGGGGGCCTACTACCTCATCGACGGCATCTTCTGTCGGCCACTATGTCGGTGCCGCTGGCCT  
CGCCGGGATCAACCTGGTCTATCCGGTCATCATGGTGTGATCGGCTGGCCGCCATGATCAGCATGGGG  
GCGGCCACTGCCATCTCCTTCCAGCAAGGGGCGAAAAACGACAAGCTGGCCCGTCAGGCGCTGGTCAACG  
CCCTCTGGCTGCTGGCCGGACTCGGGGGCGTTGCGCCGGTTCTGCTCTATTACCCACACCGATATCCT  
GCTTGGGCTGGGGATTGAACAGGGCACCGACACCTGGAAACAGGCGAGCGACTACCTCACATGGATTGGC  
GGCGGTACCCTGCTGCTGGCCAGCAATCTGGCGGTCCCCTATCTGCTGCGCAACGATGGCCGCCGAAGC  
TGGCCATGGTGTGGTGGAGCAGCGGCGCCGTGCTCAATATCATCCTCAACTACATCATGGTGGGTGCGGT  
GGGGCTGGGATTAATCGGTACCGCGCAAGCCACCCTGATGGCAGAGGGTGTGGTGGAGCTGATCGGCCTT  
GGTACTTCTTTACCCCTGGGCGCGGCTTCGCTCAGCTGGCGGGATCTGGTGCCCAACCTTCCCGCCA  
TGCCGCACCTGCTCTTTACCGGTCTGCCGAGCCTGATTGCCAGTTCAACCTCGGCCTGCTCTTGATGCT  
GCACAACAGCCAGCTGATGGTGTACGGCAATGTGAAGGATCTGGCGGGCTTTACCGTGGCCGGTTACACC  
GAAGCGGTCTTTATCGTACCTGCAAGGGCTGGCCTTCGGCATTCAACCGCTGATCAGCAAGGCGCGG  
GGGCAAGCGCACTCGCAACCTCAAGTACCTGATGGAGATGGGGCTCAAGTTACCTTTATCTACGGCAT  
GCTGGTGTGGCTCACCATCCAGCTGCTGCCGGGACAGGTCGCCATGCTCTATAACCGGACAAAGGATCCC  
GAACTGCTGGCCGCCCATCAGCAGCCTGACCCTCAACCTCGGCGCCATTCGCTGGAGGGGATCATCA  
TGTTGCGCATCGTGCTGCTGCAATCCATGGCGGTACCCGTCAGGCGCTGGTCACTCCATCGCCAAAAC  
CGTGTGCTGCTGCCGCTCATCTTCTGCTGCCACAACGTGGGGTCTGATGGCGTGTGATGGCCAG  
CCCGCCACCGTGTGCTGCTCACCTGCCGCTCTGCTGGTGTGTTGGCGGAGTGGCTGCGCCTGAAGA  
TGGCCTGCGCGCCAAAAGCCAAAACAGCGCCACAACCGGCCCGCGCACGCGCCCGCTCCAGCTGGCCCG  
TTAAGGCCACCCATCCCGAAAACAATAAAAAACCGGCTCCATTGATGCCGGTTTTTGTATATGGGCG  
GGTCTGCCCTGCCCTTACACAAGGATTCAGGCCAGCACTTGTGCCCCACTTATGCCAATACTTCTGGCC  
TGAGCTGGGCCATCAGCCCCGGGTTGTGCGGAGTAATCCACCGGATCGCCACCACAGCAGGCCCTCCAC  
CGCCAGTGCGGCCCGCAGGGTGGCGCGCAGCTCGTCCGCCGAACGCACCGCGAAACCGGCCGCCCGAAC  
GATTCGGCATAGCGTTTTGAAGTCGATGGGACAAAAGAGACGCCGGAGGTGCGGCAATACTTCTGCTGCT  
CCTGCATCGCGACCATGTTGTAGCCGTTATCGACCCAGATGATGTGAACGATATTGCTCTTGAGCCGCAC  
CGCCGTCTCCAGCTCCATGCTCGACTGCATAAAGCTGCCATCCCCCGATAACCGAGATCACCTTCTCACCC  
GGCCGCACCGAGCGCCGACCGATTGCCACGGCAGTGCCACCCCATGGTCTGCTGACCGTTGGAGATCA  
ACACCTGACGAGCAGCGGAAGCTGTAGAGGTAGCGGGCAATCCAGATGTGGAAGCTGCCATGTGACGCA  
GAGGGTCAATGTGCTCGCGCACACAGATCCTGCAGCTCGCGCACGATACGCAAGGGGTGAACCGGATTGCC  
TGCAGATCGTCCGCCCCGATTGCCAGTCGCAACCGCTGCTGGCGTACCCCTTGCCAGCAGCCGATCCACCT  
CGGGGGGGCGGATTTTTCGGATTGCCCATGATGCGGGTCAGCTGCAACAGGTTGGCGCGGATCGACCCAC  
CAGCTCGGCGGTGCGGCGAGTAGCTGCTGTGATATCGGCAGGCAGCACGTCGATATGGAGGATGCGCCGC  
TCCCTGTACCATTTCCACAGCACGGGGTCTGACTCGATGGGGCTGTAGCCGATGCAGATCACAGATCGG  
CCCCTGCCAGCAGCTGATCCCCGGCTGGTTGTTAAAGAGCCCCACCCGTCCGGCAAAGTCAATCGAAGTG  
GCAGCTGTCCACCACCCCGCGGCTGATAGGTACCGGTACCGGCAGCCGCGCCTTGTGAGGAAGGCA  
CGCACTGCCTCGGCATTCTCCGGCCGACTGGCCATCAGGCCGAGCAGCACCCCGGATTCTCGGCGTTCC  
TCAGCAGGGTCAATACTGCTCCATATTCTGCTCATCGGCGCAGCCGGCTCAGGCACCTCCCGGGGCAC  
CAGCACATTGCCCTGCACCGGCTTGTGATGATATCCATCGGCAGGCTGACAAAATGCCGCCCGCGGCT  
CCCAGCTCGGCGGCGGAAAGGCGTTGGCCATCACTTCCGAAATCGCCGCCCGCTGTTGACCTGGGCAC  
TGAACTTGGTGAACCGGACGGCAGAGGTTGACCGTATCCATGCTCTGATGAGTGAGCTTGAGGCCGTGGC  
ACGGCGCACCGCACCGCCAGCGCCACCATGGGGTCCCCCTCCGAGGTGGCAGTCGCCAACCCGGTAATG  
AGGTTGGAGCAGCCGGGGCCGAGGTGACCAGCGCCACCCCGCCTTGCCGGTGGAGCGCCACGGCGG  
CCGCCATAAAGGCGGCTTCGCTCGTGGCGCACCCTATGGTCTCGATGGGAGAGTCTCCAGCGCATC  
GAACACCCGGTCAATCTTGGCACCCGGGATCCCGAACACCTGCTTAACCCCTTGGCCCTCAGATGACGA  
ACCACAGCTCGGCACCGCACTTCCACTGTCTGTTTTCCATGATATTGCTCCTTGTCTATCAGCCTTCGG

CGGCCTGAATGGCGCGATCGAGATCGGCAGGGTTGAGGTGGCCTGACGAAAAGCGGGATCCGATGGCAG  
GGCCAGATTGAGGTGACGCACCACAGAAAGTCGCAGGGTGCCGTGGGCCATGGTGTAGTCGAGCAGATGG  
CCGCCCCCTTGCATCGGCAGGTCATGTGTTCTGTAAGCCCGCCACATTGACCCCTGCACGAACG  
GCGGGCAGCGAAAGCCACCAGGGTTCCCGCCACCAGCGCAAAGCGAAACAGCGGTTGCTGTTTCGATGGC  
TTCCAGCATGGGGCGATAGGGGGGCTCCTGACCGGCACGGTACGTACCTTGGCCGTCTCAAACCTGGCCG  
TCGAGGGCGAGGGCGACGAAGACGTTGTTCGGAGCCCACCAGCCGATCCACCCACTGGTGGATCTCGTAC  
GGCTCAGGGGGTGCATGAAGCGACGCTCCAGACAGGGGGGAAAAATGGGTGCATCACCCGCAAAGGGGGTCTT  
CTGATCGGCGCGGGCGGGCCGGCCGAGCCATCGGAGCGCAACTGGTGGATCTGGCGCTCGAAGGCGATC  
AGCTCGCCATCGAGGTGATTGAAGGTGCCGAGGCCAAAGTCGCCGTGGCGCAGCAGCTCGCTCATGGTGG  
TCTCCCCCTTCGTAGACCCCCGCCAGCAGGGCGCTCATCAGGGAACTCTGGTAGATCTCGCCACCCTCATG  
CTGCTGCGCCAGCGGGAAAACTGCTGGCTCACTTCAAGGGCACAGCTACACCCGGCAGTGTGAGATGTT  
GCAATATGTTCCATTTCGGGTTTACCTCCACCCTGAATCCTGTTAGCGTTTCGGATCCCAATGGTACTTGG  
TTCACATTTCAACACCAATACGCTGATCCCATGACTTTGAGACTCAATCGATATGGAACCTTCGTACGCTC  
CGCTACTTTCATGGCCGTTGTTGAAAAGCAGAATTTACCCCGCGCAGCCGAATCACTCAACATGGCCGAGC  
CGCCGCTGAGCCAGCAGATCCGCAAGCTGGAAGAGACCCTGGGCACCCCGCTACTGCGCCGTTTGACCCG  
CAGTGTGAGCTGACCGAGGCGGGCGAGAGCCTCTATCGGGATGCGGCGCAGATCCTGGCGCTGGCCGAT  
GCGGCAAAGCAGAAGGTAAAGCGGATTGCCCGGGCGAGCAGGGGGCACTGCGGATCGGCTTTGCCGGCT  
CCACCGTGCTCCACCCCGGGTGTGACCCTGCTGCACGACTATCGGGAGCGCTACCCCGAGGTGGCCCT  
CAGCCCGCAGGAGGGCACCATGCCGTCACTGGTGGAGGCGCTGCGCAACGATCGGCTGGATGCGGCCATC  
TTGCGGCTCCCTGCCCGCGCAGCAGGGCTTTGCCACCACCTTATCGAGCAGGAGCCGCTGCTGATCG  
CCCTGCCACCAGCCATCCCAAGGCCAAGCCGGGCCCTTGGCCACTGGCCAGCTGAAGGACGAGAGTTT  
TATTCTGTTCCCCCACGCCATCGGGCCCCGGCTCTATGACGGAATAGTGGGTCTCTGCCGGGAGGCTGGG  
TTCGAGCCGATATTGGGGCCGAATGCCCGCAGGTGATCTCTACCATCGGCATGGTGCAGGCGGGTTTTG  
GCGTGACTCTGGTGCCAGCTCGGTGGCGGCGCTGCGCCCGCTCGGGGTCAGTTATCACCCCATGAGGG  
CAACGGCATGATGACCAGCATCAGTCTGGCGACACGGCCACACCCAAGCAGTGGCGTGTGCGGCACTTC  
ATTGCCAGATCCGTGCTGCCAGATACGACAAGGCTCCCAAAGGAGGCCCTGTTGAACAAGCTTGAAC  
CGGCCTGATGGCCGGCTTGCTGATGCGACGGCTTATTTGACAGTCACCCGGCAAACCTGCGCTTGCCG  
ACCTGATAGACGGCGGTACCCGACCCGATGAGTGCCTTGCATCTTCCAGCTTCTCGCCATCCACCTGA  
CCGCGCCCTGCTGATCATCCGACGCGCTCGGAGGTTGGCCACCAGATCGGCTCTTTTCAGCAGATTT  
GGCAATGGCCAGCCCTTCGCTTCCAGTGCCAGCTCGATTTCCGGCATCTCGTCCGGAATGGCGTTCTTG  
GAGAAGCGCTGGGTGAAATCTTCGTGAGCCGCTTCGGCCCGCCGCTTCGTGATGATAACGGGCGATGATCT  
CTTTGGCCAGCCAGATCTTACATCACGCGGGTTGAGAGTACCAGCCGCGATACCAGCCCTGAACTCTTC  
GATTTAGCCAGCGGACGGAAGGAGAGCAGCTCGTAGTAGTTCACATCAGATCGTCCGGTGTGGACATG  
ATCTTGCCGAACATCTCGCCGAGCGTCTGTGACGCGCATGTAGTTGCCGTGCGGACTTGGACATCTTCT  
TGACGCCATCCAGACCCACCAGCAGCGGCATCATCAGCACGCACTGGGTGCGCATGCCGGCATCTTTTTG  
CAGCTCGCGGCCCATCAGCAGGTTGAACTTCTGGTGGTACCACCAGCTCGACATCCGCTTCAGCGCG  
ACCGAGTCATAGCCTTGCAGCAGCGGATAGAGGAATTCGTGAATCGCGATGGATTGGCCGCCGGTGTAGC  
GCTTTTTGAAGTCGTCACGCTCCATCATGCGGGCCACGGTCTGCTTAGCCGCCAGCTTGATCATGCCGGT  
CGCACCCAGCTCGCTCAGCCAGGTCGAGTTGTACTCGATGCGGGTCTTAGCCGGGTCGAGGATCTTGAAC  
GCCTGCTCGGCATAGGTGAGGGCGTTGTGCTTGTATGGCCTCTTCGGAGAGCGGCGGACGAGTGGCGTTCT  
TGCCGGAGGGGTACCCACCATGGCAGTGAAGTACCAGTGCAGGATCACTTTCATGGCCAGATCCTG  
GAAGGTCTTTCAGCTTGTGAGGATCACGGTATGACCAGGTGAATGTCGGGGGCGGTCGGGTCCATGCC  
AACTTGATGCGCAGCGGGCGCCCTTCTTCAACTTGGCGACAAGTCTTCTTCAACCAGAATTTCTTCCG  
CTCCGCGCTTGCATCTCGGCTAGCGCCACCTCGAGCTGGGACATTTTTTACTCTCCATCACGATTCACA  
GGGCAAACATATTACTGGAATGGCGGGCAATTTGAAAAGGCTGTAAAATCCGTCCATTTCTGCCGACTT  
CATCTGCTTCTCATGGTTATTTGGCAGCCCTTCAACGCACTCCCCACTGGCACCGCAAGATGGTGTGA  
TCTTGAGCATCATGATCATGATGCTGGCTGCCTGGCCAAGCGAACAGGCAAGTAGCAACACGGGTGATGA  
AAACGGCAACGAAATTTGCCCTGCGGGAACCGGCCAACGACAACGCGCTAAACGACGAGCTGCCAGCCGAG  
GCCGCCAGCCCGTTACCCCGCCAAACCGCGCTATATCACCAAGCAGGTGAAGGTGCGCCGTGGCGACA  
ACATGGGGGTGATCTTCCAGCGCATTGGCCTGAGCACCACGGATCTGCACCTGATCGACCAGCTCGAGGG  
CAGCGATCCCCTGCGGATGCTGCAACCTGGGCAGGAGCTCACCTTCAAGCTGACCGAAGATGGCCAGTTG  
CACAGCCTCTATTACCCCCACAGTCTGGAGCAGGCGCTCAAGGTGAGCCGCAAGGAGGAGACCTTTGTG  
CTCGCAACGTCAAGATCGCCCTCGACACCCGCAACAGGTGAGCAAAGGGGAGATCCGCTCCAGCTTCTG  
GGGCGCCGCGGTGGATGCGGGGATGACCGAAGATCAGATCATGGACTTGGCCGCCATCTTCGGCTGGGAC  
ATCGACTTTGCCAGGACTTGCAGCCGGGGACAGCTTCCGGGTGGTCTATGAAGACAAGTTCCGCGACG  
ACGAGCGGGTTCGCTCCGGCGATATTCTGGCGGGGAGTTCGTCAACCAGGGCACCGCTACCGCGCCGT  
GCTCAATGAAGATGGCAACTACTACACCCCGGAAGGCAAAGCGATGCGCAAGAGCTTCTGCGCGCGCCG  
GTCAACTTCAAATACATCAGCTCCAACCTTCAACCCGCGCCGCTCCATCCTGTGACCGGCAAGATCCGCC  
CCCATAACGGCATCGACTATGTGGCGCCGGTGGGCACCCCATCATGGCAGCGGGTCCGGCAGCGTGGT  
GGCTGCCGGTTACAACCAGTTCAACGGCAACTACGTCTTATCAAGCATGCCGGCAACTATGTGACCAAG  
TACCTGCACCTCTCAAAGCGCACCGTCAACAAGGGACAGCGGGTGAAGCAGGGGCAGACCATCGGCATC

TGGGTGGCACC GGTCGCGTCACTGGCCCCGATCTGCACTACGAATTCGTGGTGGGCGGCATT CACAAGAA  
CCCCGCGCACCCCTCACCCCTGCCGCGAGGCAGAGACCCCTGAGCGGACGCGAGCTGGCCAAC T TCAAAAAGCTG  
GCGATGCCGCAACTGGCCAAACTCGACAACCCCGAGCTGCAGCTGGCCCAGAACAAGCGGGATAGT CGCG  
GCAACTAAGCCATCAGGGCTGGCAGGGTGAAGGCCCTGCCAGCCCTTTTATTGAACCCGCGCCAGGAAA  
CCAGATTGAAATGAGTCCAATTTCCGGACATAAGATGAGATGGAACACTGGGAGCGGCATGTGGCACGGAA  
GTAAGGGCTTATCTATCTGTCTCTCACTCTTTTTCCGGTCCGCATTGAGGATGCAACATGGTTGAGC  
GTTATATCGGTCTGATGTCAAAAACCACGCTATGTGGCATGGGATGAAAGCCGTACCCCTCTTCACCCTC  
TCTGCACACCCGATTTTCAAGCAGCAATGTAAGGAGACACCATGGCTGAGCGCTATATCGGTCTGATGTC  
GGGAACCAGCATGGACGGCATTGATGCCGTGCTGGTGTATGATCGCCGGGGATGAACTGCGGGT CGAAGCG  
GCGCTTTGTCAACCCCTGGCCGCAAGAGACCCGACGCACGCTGCATGCCCTCTGCACCCCGGGCGACAAC  
AAATCGACCCGATGGGGTGGCCGATAATCTGGTGGCGGAGAGTTTGGCCGCCACCCATCGCGTGT  
GGCCAAGGCGAAGCTTGAGCCCCAAAGATATTCGCGCCATCGGCAGCCACGCGCCAGACCATCGCCACCGT  
CCCCAGCTCGGCTTTACCCTGCAGATCGGCAATGCCGCCCTGCTGGCCGCCAGACAGGCATCGACGTTA  
TCGCCGATTTTTCGACCATGGATATGGCCCTCGGCGGTGAGGGGGCGCCGCTGGTGCCCGCCTTCCATCA  
AGCGCTGTTTGC AAGCCCGCGCCCTGCGGGTGGTGTGAACCTCGGCGGCATCGCCAATATCTCGGTG  
TTGCCGGGTACGCCAACGGGTCTATGGCTTCGATACCGGCCCGCCAACACCCCTGCTCGATGGCTGGT  
ATCGCCGCCATCACCCCAAGGGGGCGGTTACGATGCTGGCGCAAGTGGGCAGCCAGCGGCCAGCTCAT  
TCCCCAAGCTGTTGGAACAGCTCTTGGCTCACCCCTACTTCGCGCTCCCCATCCCAAGAGCACCGGGCGG  
GAGATGTTTACCCTAGCGTGGCTCGATGGTGTGAGCTGGCTTGGCCGCCCTATGCTCCGGCGGATGTGCAGC  
GCACCCCTGCAGGCGCTCACTTGGCACAGCATCGCCCGCCAAC TGCCTGCCCGGCCGAGTCAGTCCGGTAC  
CAGCCAGCCGAAAGCCGAGCTGTTTGTCTGCGGCGGTGGAGCCCATACACCCCTTGTGTAAGGAGCTG  
GCCAGCCTGCTGCCCGCATGGCGCATCGCCAACACTGCCGAGCTGGGGATTGCTCCCGACTGGATGGAAG  
GCGCAGCCTTTGCTTGGCTGGCCATGTGCTTTGTTTACC CGCAAACCGGGCAACCTGCCCGCCGTCACCGG  
TGCCAGCCGTCGGCTGTGCTGGGGGCACTTTATCCCGCTGAGTGATGACAAGGGGGCTGCGGATCAGT  
GTGCCCCCTTGAACAGACGCACAACCTGTTGCCGGATCGGTGCAAAACAGCGGGGGCTTTGGCGGCTCCAG  
ATTGATATGGCGCCCGCCCGCACGGGTTTACAGCGAAGCAGATTTCTGGATGTAGTGATGGTGGGAGCGA  
TGGATCAGTGTGAAGCTGTATACGCCCACTGTCTGGGCACGCCCCATAGGGTGCTGGCAATCGCCCCGA  
CGATGCAGAAGAAAGCGGGCTCCTGAATTTCCATCCCGCTGGCATTTCTCCAGCGCTCCTTGAGCGAGTT  
GGAGTGAGCAATAACAGTTCATGATATTGACCATGAAGCGCTGTAATCATCTCCACCCCTTGGCCAAACA  
CGCACCGTCAGGGTTCGCCGCGGGCTGATAACCAAAGTATGACCGATATTTTCCAACACCGTATTCCGCT  
GGCGGATCACCTTGCCATAAAAACATCAGCATCACCATGCAGTCGATCGCCTTGACAGCGCCTCGTAGTG  
GGAATGGCTCTTCTTGGGACCGCGCGCCGTGGCGAGGGCCAGCTCTTCAGAGATGGCCAAGAGGCCACA  
GGTACGGCGGTGCTGACAAACGAGAGGTCAATCGACAGCTCCAGCCCTCCTCCCTTCCATGCGGGCCA  
CAATCACATGTTCCGCAAACAGCCGACGCTGGCGCTCGATAAAGGCGCCAAAGACCAGATCACGAAACTG  
CTTTTGGGATAAGGGGTATCGAGCAGGCTCTCGATGGTCATGATGGCGGCGGATAACCGGCCGCGCAGT  
CGGTAATCGGCAGGAATGGGAAAGCTCTTTCCAGGCGAGGAGGTAACCGCTGCCAGATGTTTGACAAT  
ACATATCGCCAGAACGAAACCCAGCATAAATCCTCCACAGTCAGGTAATGATGATCGCGACGCGATCTC  
GTTTGGCAATCCTGGGCAATGGCCTGCCGGTGTTCGATGCTCTCCGT CAGGGCTCCTTGACTACCTTAT  
TAATCATACGATTAATAGCGAGTAAAAAAGCGACCTGACTCGCAATCACGCCACTAATTAACAGTTTCA  
TCAAGAAACCATAAAAAGCGGTGATAAATCCATTTTTTTGACACATTTCCCTTTAAAACAGCACATTGA  
ACTTTATTCTCGCAAATCATCTGAACTGTTCCCGAGCCCTGAAAACCATCCCAATCATCACAAACCAGCC  
ACAGATAAGAGGGAGATCAGACAAAGCCACAAAAAGTGGAGAAAAGCGATGAGGCGGGGCAACCCCAACCA  
TCGGAGGATGCAACCGGCGTGAAGATAAGCGGATTGCCACCACCGCCCTCATCCAACGCCACCTCTCAT  
CCAGCACACAGCTCCCGCACACCGTCACGCCAACGCCAACGCCAATGCCATGCTCCCACTCCTGTGCA  
GCAGTGGCAGATCCGCGGTGCAAATTCATGGCATAGAATTTTATGCCGTTAATAACAGATCCCGGCTGCC  
AGCAAAGCATCATCGAGTATGCCCGAATAATCATTAACAGAGAAGATGCAAAAGCCGTGAATTTATATTC  
CAGAGGTATCTTTAATAAGGTGGATATGCATATTAACGGGAATTTTCATAGCCCTTAAAAGAGCTGAAA  
ACAGATATCCATGCACCATAATATGCATTATTTGCACATCGACACATAATATTAACCCCTTTATTACACG  
CCAATATCCCGAAGAGGGAGAGAGCAAACCCAGTCAGGGCAAGGCTGTTCCGCCGGTTCGGCACCATTTGC  
GCACGGATTGGCTGCAATTTCCGGTGAATTTGAATAGCAATATGATTAATTTGCACCCATTGAGCCATCT  
CATAGAAATGCAATCAGCGGTTTGCAACCCCTGATAGCCACTCATAGAATCGCAGCGTCTGAAATATCTA  
CCCTGTCTCTTCTCCCTTATTCTCTCAGTAATTGAGTGGATAACAAATAATAACCGGGGATGCCGCCG  
CTGGCGCAGTGGCCTTGGCGCACAAACAAGATGGGGTAAACCTGTACCTGAATGAACAACAAATATTA  
AGAGGCATATCTATGAGTGGCACCATCATCAAGTCGGCAAGAAATACCCCCATGCACCCAGGATCTGG  
GCCCTGCACCCAAACGGTGGCGTTTTCTCATTACAACAATATCTCCGCCAGCTGCCGGTTCGATCCCGC  
CACCGGCAAGATGATGAGTGGCGATGTCACCGCGCAGGCCAGACAGTGCTGAGCAACCTCAAGGCGATC  
ATCGAGAGCATCGGCCATGTGATGGACGATATGGTCAAAGCGACCATCTTCTCAAAGAGATGGCGGATC  
TGGAGGCGGTCAACGCCGTCTATCGCGAATTTCTTCCCGGGCTATCTGCCGACCCGCACCCCTCGCCGT  
CGCCGCCCTGCCGCTGGGCGCGCTGGTGCAGATCGATGCCATCATCTCCAACGGCGAAGGCACCTTCCCG  
CAAGATCCTTGGCCGCTAGTGAAGCTCGCCGCAATAGCGACAAGGCGCCGACAATCCGCTCTCCACCC  
ATACCGTGGCCTTCTCCACTACAACAATATCGGCGCCAGCTGCCGGTTCGAGGCGGCTCGGGCCAACT

GGTCGCCGGTGGCATCAAGGAGCAGGCGGGCCAGTGCCTGCGCAATATCAAGGCGGTGCTGGAGAGCATC  
GACGTGCCGTTTTGACGATATCGTCAAGGTCACCGTCTATCTGACCGATCTGGCCGATCTGGAGGCCGTCA  
ACGAGGTCTACACCACCTTCTTCCCCGACTCTGCCATTGCCCGCGCCGTGCGGTATCTGCCCGCCGCTC  
GGTAGTCTGTGCCGCCGCTCTGCCCATGGGGGCGCGGGTGCAGATGGATGCGGTATCTCCCACGGTGAC  
GGCACCCCGCCACAACCTGGTGGAAAGATCGTCACAATCTGGTGATCCGTGCCCGCAATACCGACAAGGCAC  
CGCGTAGCCCGCTCCATTGCCAGACCGTGCCTTCTCCCACTACAACCATCTCTCTGCGCAGCTGCCGAT  
TGACCCCGCCACCGGAAGATCCTGGCTGGCTGCATCAAGGAGCAGACCGCCAGTGCCTGAGCAATATC  
AAGGCAATTGTGGAGAGCATCGGCCATGTGATGGACGATATCGTCAAGGTCAATATCCAGCTCACCATA  
TCGCGGATCTGGCCGAGGTTGATGCCATCTATAACAAATACTTCCCAGGCTATCTGCCTGCCCGCACCGT  
AATCGGGGTAAAGTGAACCTGCCCGCCGGTGCCTGGTGCAGATGGATGCGGTGATGTCCAACGCGGAAAGC  
ACCCCGCCGAGGCGTAAGGTTACGCTCAATAAAAAATGAGACCGGCTGATGGCCGGTCTCTTTTTTACA  
TGCCAGACAAAGGGATGGCCCTCAGCCCTCGATATCGCGGTTCTGAGCGCCACTCTGACCCGCTCTGCG  
GGTAGTGGCCACCCAGTCGACGGCGAGCACTGCGCAGATGGTTCTCGACCGTGCACCGAAAGCTTC  
AGGGTGGTGGCGATATCGGCATGGCGCAACCCCGGGAGACCCACTCCAGCACTTCGCGCTCGCGCCAG  
TGAGGCCACGCTCGTGACCCGCTACCGGCATCTCCATCAGCCGACGGGCAGCATGAAAAGCCGCGCCGCG  
GATCAGCGCAAGGCCAACCCGAGCGGGAGCGCTGGCATCAATCTGATCACCGCCAAAACCTCATCGCCCT  
TCCAGCCCCAGCGGCCATAGACGGGTACCTGCAAGCCATGTCGGCCCGGCCCTCAGGCTGGCGAACGA  
TACGGTACTGCTCGCAACGGCGCAACCGTTTTGTCCAGAAGAAGGGCTGGTCTCGCTCCCTGATATG  
CATCGCCATCGGGCACTCGCGCATATAGGCATGCAGGTGACCGCTCGCCACTCTCCAGCCACTCCCC  
TCCAGCCAGTAGAGGTGCTCGACCACCCCTCCTCGCTGGCACTGATGGAGAAGAGTGCAAAGCGGTGAT  
ACCCAGCGGAGTGGCAAAGGCGCGCACCAGTTGCTGGATCTCCTCCAGCCGTGACACCTTCCAGCGC  
CACCGCGACCTGCAACGCATTGCTGGCGATGACGACAACCTCATCGCTTGGCAACCGCCTCCAGCAAGG  
TGGTAGCGGCCAGCTTGCCGAGGTTATTGCCCGCCAGCGGGCTGTCACCGGTCAGCAGATTGCGATCCCG  
GCACACCTCTCCCGAGATGCCGTTGTTGACGATCTCAAAGCCAACTCTTTGAGCTTCTCGCCAAACTTC  
CAGGTAAGGTGGCCAGGCATATAGCCAATTGCCGGGGTCTGGGCATCCAGCTCATCGGGAAAAGCGCAGA  
TCTTGTAGCCCGGAAGGTCTCTGGATTGGCCACCGCCAGCAGCGCAGCAGGCCCCGTGACAGAGGGAGAT  
GATGAAGCGATCGTTGGCCATCGCCACTCCAGCAGCGCTTTCACCTCGGCACCTTTCGCGCAGCCCCATC  
AGGGCCCGCTGCCCGCCGAATAAAGACGCGCATATAGTCCGAGTCGGCAGCCAGCGCATCTTTTCAGCA  
GATCAGCCAGCTTGGCCGGTTGGCGAACTCGCCATGATATTTGGCATAGAGCCCCAGCCTTCTTCATC  
TTCGCGGGCATGGCCACCCTCGAACTTGACCGGATTTGCCGGAGAGGGTGGCCACGTCAAAGGCAAAG  
CCCCGCTTGTGAGGTGATACATGGGCAGCAGGGTTTCGACCGGATGGTTGCCGGTGGAAAACAGGGTGC  
CGTTGTGCGGTGGGCAGATAACGCTCATCGGCCCGATCAGCAGGATCTTCCAGCGCCCTCCCGATAGGG  
AGCGGGATAGTCGGCCCTGGCAAGGTGAGATTTGCGCGAGGTGAACTGGCTCAGGGAGTAGGGCGACGGG  
AAGAAGGCATTCTGCTCTGCCGATCCGGGGTGGTTGTTTATCGTCAACAAGCATATCGGTGATGGGTC  
AGGCTCCAGTAGTGGTGGACTCGGTCTCACAGTATTGACTGTCAGAGACCAAGTAAATGAGGGTTTTTCCC  
TCAACCGCCATGACTATGGCAAGGGATGTGACCACGCTGCGACAAAACCTGAACAGAATCCCCGCCAGAC  
TTAGGCCATCGCGGCAAATGCCCTGACGATGGCATCCATGACGGCCCTGACCCGCGCGGCATGCTGCACA  
TCCTGATGGGTACCCAGCCACACATCGTAGGATTGCTGTAACCTGCGCTCGGGCCAGACCCGCACCAACC  
CGGCTTGTGTCGGCGAGCGGAATCGCCACCTCGCCAAGCCCCAACCCCATCAACAGGGCCCTGACGCAGCAT  
CAGGCTGGTATTGACCCCCGCGGCACCGTGGCCCCCTCGGCCGCTCTTCGAGCATCATTTGGCGAGCGA  
GCGCTCTGCCAATGGGGCTCATAACACCAGCGAATGGCCCCGAAAACCGGTGCCCGCTTCGGGAATGC  
CATGGCGAGCCAGATAGTCGGCGGAGGCATACAACCCGACCGGCCAGGAGGCCAGCTTGCGAATAATCAG  
GTCGGGATTGTCCGGCTTACCGTCCGGATCGCGATATCCGCTTCCCGCAGGGACAGATTGACCACCTGG  
GTCGAGGTATTGAGGATGACCCTGATATCTGGATAACGCTGATGCAGCTCGGTGAGAGCAGGTATCAAAA  
AATCCATCCCCAGGGTGTCTGTGGTCGCCACGCTGACCTCCCCAACCAGGCGGTTATCGACCCCTTGCGC  
CGCCCGCACAAAATCAATGGCCGCGAATCCATCTGCTGGGCGCTGGCCAGCACTATCTCTCCGACATGA  
GTCAGCACATAACCTTTGGATGTGCGGAGAAAACAGCGTGGCCCGCCAGACGATGCTCCAGTGGCAATCC  
GCCTGCCAATGGTGGCCTGATCGACCCCGACCACACGGGCGGCCCTCAGGCTCCCTCCCGATGCAA  
CGCCAGAAAAATTTTCGCATCATCCCAGTTCATCACGACTCCCGGTTGAAATGCATTTTTTGCATTACAGA  
TGAGGGATAAATACTGCGTTCATTTCATCAGCAATCTCCACTATCTTGGTGTCTATCCCACTCGGGGAACCT  
CATATCACCTCGTTACAAGGAGCCGCTGATGCATAACGCTATTTCCATTTCCCGCCACCATGAGCGCGGTA  
GAAATTACCCAGCCCGGTGGCCCCGATGTCTTGAACCTGACCACCCGCGCCACACCGGCGCCCAAGCCCG  
ATGAGGTTTTGATCCGGCACTATGCAACCGGTATCAATGGGCCGGATGTGATGCAGCGCAAAGGGCTCTA  
CCCCCTCCGGCAGGGGCATCGGATATTTCCCGGGCTGGAGGTGCGCGGGTCTGGTTCGCAAGGGGGAG  
CTGGTGGACCATCTCAAGGTTGGCGACAAGGTCGCCCGCTGATTTCCGGTGGCGGCTATGCCGAGTACA  
GCGTCGCCACCAGAGCAATGTCTGCCCTGCCCGCCGATTAAGCTTTGTGCAAGCCGCGGCACCTGCC  
GGAAACCTTTATGACGGTCTGGTCAAATATGTTTTGAACGGGGCCAGTTAAAAAAGGCGACATCATTTG  
ATCCATGGCGGCGCCTCCGGTATCGGCACGACCGCCACCATGCTGGCCAAGGCATTTGGCGCCGCCAAAA  
TCATCACACGGTGGCTCACCCGAGCAGCAGGCCGCCAGCACAAGCTGGGCGCGGATGTGGCCGTGCT  
CTACAAGGAGGAGGATTTTGTGAGGCAGTGCATGCAGCCACCGATGGCCATGGCGCCGACATCATTTCTC  
GATATCATTGGCGGGGAGTATGTGCGCGCAACTATGCGGCGGCCCATCAATGGCCGATAGTCCAGA

TCGGCATTATTGCGGGCGCAGCCCCAATCTGGATCTGTTTCCCATGCTGCAAAAAGCGGCTGACCCATAT  
CGGCTCTACCCTGCGCTCGCGTACTCCGCAAGAAAAAGCCGAGCTGATTGCCAGTTGCAAACTCATGTC  
TGGCCATTTATCGAACGCGGTGAGGTCAAACCCGAGTTTACCAGACCTTCCCCTGCATGAGGCCGCCG  
CCGCCACCATTTGCTGGATTACAGGCCGTACATATCGGCAAGCTGGTGTAAACCATGGCACCCCTTGTCGTC  
AGATTGATAAAGGCCATAGTGGAGCAGGCCGAGGTGGATGCGGTGATATCCAACGCGGAAAGTACCCCGC  
AGCAGGCGTAAGGGTTGCAGAAAATAAAAAAGAGACCCGGCTATATGCCGGTCTCTTTTTAGGTAAAAGGGA  
GGAATATTATTTTTATGACATCGAAAATAAATACCGGAACGTCCGATTACGCTTCGCTAATCGAACCTAC  
AGGCTGTGGTGATTTTTCTTGATTGCTCTTCGCTTTTAACTTTGCATTGCGTGCAGATATAAAATTTCTA  
GCGATTTTTATTTGCTTTTTAGACATTGGAATTTTATCTTTACTGGCAACTGCATTTATTTTAACTTCTA  
AAATCTCTTCAAATATAGTTAAATTAGGTTTAGTAAATCCTTGGCTAAGGATCAACTCTTGAAAAACCA  
TGGACTCGATAAGTAGATTTTTTAACATATTTATTGTCACCATATACAACCTGCCTGATAAAAATAAATTTT  
TACCTCATATAGCTGTTAGCTGCGATGCTAAAATTTCTCCAGTAAGTTTCTTTAATTAGTGGAGCCCTTACAC  
TCCTCATCTATAAGGGTAAGGATACTATAGAAAAGTACCGATATATCGACTTTGCTTAATAAAAAACAGACT  
TAATAGACCGAATTAGTTCATATTTATAGGCAAGTAGAGCATTCTCTTCACTTGGGAAGGGAACGATATCC  
TTGTGAAGCCACAATTTATCAAACCTTAAAGATTAAGAATCGCAATGCCTCGACACCACAAGCCGAGTT  
GATTGCTCTTGGGTTCTGATAGATAAAATCTTTAAGATTTTCTTTATATAAATTTTAGTAACTGATAAAAAG  
AATCTTCAAATCTCTGCCTTGCAAAAGTCTGACTCTGTGAAAACATTTCTTTTCTTGTTCATCAGCTC  
TTCTCTCGTTAATTTAAGATCTTCTCTTTGCATAAAGAGAGTCGCTAATATTCAGAGAATGCAATACCA  
GTAAAAAATTAAGTTAATACTCCAAAGCTATCCCCAAATGTTCCAGCTTTAGTAAATTGAAAGTTCAGAAA  
TTGGCCACACAATCCAAAGTAATGCCGCACCATAGAGAGCAAAAATTAAAAAATTAATAAATGATAT  
ATAAAATGGCTTTTCGTAACATTCATATTCGAAGCGTCTCGTTAGAATGAATTGTCAAATGTTACTACT  
GGGCTCCATAATGACAATAGTATTACTTGGGTATTTTTCATGGCTCGAAAAATTAATTAAAAAATAGTTTA  
TATATATCCATAATTAAGTAAATCTTCCCTTGAACCTCCATAAAAAACGCCCCCATCTTGGCATGGAGGG  
CGTTTTATTTTCCGGCTATTGGGCCAGAGTGGCCCAATAGTCAGCGATTACAGGGATTACAGCGGTGCGAA  
CCACGTTTTTCCACGGTAAAGCCAAATTCCTTGAACAGCAGCTCGGCCGGTGCAGGACTCACCGAAGGTGGT  
CATAACCGATGATCTTCCGCCGAAACCGACGACTTGTACCAGTAGTCGGCGATGCCAGCTTCGATGGCC  
ACACGCTTGGTGACGGAGGACCGGCAGGACCGACTCTTTGTACTCGGCAGACTGGGCGTCGAACACGTCGG  
TAGACGGCAGAGACCCAGCCGACGGCAGGCTCTGGCAGTACAGCTGCTCATAGGCGGCAACGGCCAG  
TTCCACTTCCGAACCGGTGGCGATCAGGATCAGCTCCCTGGAGTACCGGCGCAATCCTTCAGCACGTCGCCA  
CCCTTGGCGGTGTCGGCCAGCTGCTGGGCAGTACGATCCATCTGGGCCAGGTTCTGACGAGAGAAGATCA  
GAGAGGTGCGGCCGTCGGTACGCTCGATGGCGTGTTCAGGCGATGGCAGATTCAACCTGGTACACGG  
ACGCCAGGTGCTCATGTTCCGAGTCAGACGCAGGGAGGCGATCTGCTCAACCGGCTGGTGGTTCGGGCCA  
TCTTACACCAGACCGATAGAGTCGTGGGTGTAACGAAGATGGCACGCTGCTTCATCAGGGCGGCCATGC  
GCAGGGCGTTGCGAGCGTACTCCATAAACATCAGGAAGGTGGCGCCGTAGGGGATGAAACCACCGTGCAG  
GGCGATAACCGTTCATGATGGCGGACATGCCGAACCTCGCTACACCGTAGTGGATGTAGTTGCCGGAGGCA  
TCGTCGTTGGTCAGAGACTTGGAGCCGGACCACATGGTCAGGTTGGACGGAGCCAGGTCGGCAGAGCCAC  
CCATGAACCTCCGGCAGCAGCTTGGCCGAACGCTTCCAGTGCCTTTTGGGACGCTTTACGGGTGCAATCTT  
GGCCGGGTTGGCTTGCAGGGTTTCGATGATCTTGGCGGATTCGGCAGCCAGTTGGCCGGCAGTTCGCCA  
GCGGTGCGGGCTTGAATTCGGCAGCCAGCGTTCGGGTGAGCGGCTTCATAGGCAGCGAACTTGGCAGCCC  
AGTCCGCTTCCAGTGCAGCACCCCTTCTCCTGAGCGTTCCACTCGGCAGCGATATCGGCCGGGATAACGAA  
CGGAGCGTGGTCCCCTTCCAGGAAGGCACGAGCAGCGGCGATCTCGTCGTTGCCAGCGGTGAGCCGTGG  
CAGTCGTGAGAACCAGGATTTGTTCCGGGAGCCGTAACCGATGATGGTGCAGCAGCAGATCAGGGTCCGGCT  
TGCCGGTCTCGGCCTTGGCGGCTTCGATGGCTGCATTGATGGCTTCCGGGCTGTGACCGTCAACAGCCGG  
GATTACGTGCCAGCCGTAGGCTTCCGAAACGCTTACCGGTGTCGTGGTGAACCAGCCTTCTACGTGACCG  
TCGATGGAGATAACCGTGTGATCCAGAACGCGATCAGTTTGGCCAGTTGCAGGGTACCTGCCAGGGAGC  
AAGCTTCGTGGGAGATACCTTCCATCAGGCAGCCGTCGCCATAAAGGCGTAGGTGTAGTGGTCAACGAT  
GTCGTGGCCCGGCTGGTTGAACCTGCTCAGCCATGGCTTTCTCGGCGATCGCCATACCAACGGCGTTGGT  
ATGCCCTGACCCAGCGGGCCAGTGGTGGTTTTCCACGCCCGGTGCATAGCCGTACTCCGGGTGACCCGGGG  
TGCGAGAGTGCAGTTGGCGGAAGTTTTTTCAGATCGTCGATGGAGAGGTCATAACCGGAGAGGTGCAGCAG  
GGAGTACAGCAGCATGGAGCCGTGGCCGTGGAGAGAATGAAACGGTCGCGGTGCGGCCACTTGGGGTTG  
TTCGGGTTATGTCTGAGGTGGCTACGCCACAGCACTTCGGCGATATCCGCCATTCCTATGGGGGCGCCCC  
GATGACCGGAGTTGGCTTTTTTGAACGGCATCCATACTCAATGCACGAATGGCATTTGGCAAGCTCTTTACG  
AGAAGGCATCTGAATCTCCTGCGATTGCTTCATTTGATGGCCAAGATTAAGGCGGTTATTGTCCCAGCA  
GGGCGCGCGGCGTGCAAATATTATCTAGATGAATAAAGTGGCTTTGGGAGGACAATCGCTTTTTCTTGCC  
TCTATTGACCAAAGCAACCAGAGAAAAACGTTTGTATTCCATCCCTTTCGGGATAGGAGAGCACCGCTTG  
TGACCCATTGGACACTGCGCGACAAAATAGTGTGGCAATCACGGGGGGCGCTAATTAATAAATAGACGTCC  
AGATGTAGATACTTACACCATCCTATTTCATCCGGTTATTGCTGTGGCGATAACCCAGACAAGCTGAGA  
CTCTTATCATGGCAAAGCTGTTTACTTCCGAGTCCGTCTCCGAAGGCCATCCCGACAAGATTGCGGACCA  
GATCTCCGATGCGGTACTGGACGCCATCCTCAAGCAAGATACCAAGGCCCGTGTGCGCTGCGAGACCCCTG  
GTCAAGACCGGTATGGTCATGGTGGCCGGCGAAGTAACCACCTCTGCTGGGTTGATATCGAAGAGATCG  
TGCGTGATAACCGTACGTGAAATCGGTTACACCCACTCCGACATGGGCTTCGACGCAGACTCCTGCGCCGT

GCTGAACGCCATCGGCAAACAGTCTCCGGACATCAACCAGGGCGTTGACCGCAGCGATCCGCTGGAGCAG  
GGCGCTGGCGACCAGGGCCTGATGTTCCGGCTACGCCACCAACGAAACCGACGTGCTGATGCCGGCCCCCA  
TCACCTACTCTCACCTGTTGGTGAAGCGTCAGGCTGAAGTGCAGCAAGAACGGCACCCCTGCCGTGGCTGCC  
TCCGGATGCCAAGAGCCAGCTGACCTTTGCCTACGACGACGCAGGCAAGATCATCGGTGTGGATGCCGTT  
GTACTGTCTACCCAGCACGCTGAATCCATCAGCCACAAGGATCTGGTTGAAGCGGTACGCGAAGAGATCA  
TCAAGCCGGTGTGCCGGCCGAGTGGGTCAACAAGGACACCAATACTTCATCAACCCGACCGGCCGTTT  
CGTTATCGGGCCCGATGGGTGACTGCGGTCTGACCGGTGCGAAGATCATCGTTCGACACCTACGGCGGC  
ATGGCCCGTACGGTGGTGGCGCCTTCTCCGGTAAGGATCCGTCCAAGGTTGACCGCTCCGCTGCTTACG  
CCGCCCGCTACGTTGCCAAAAACATCGTTGCTGCCGGTCTGGCCGATCGCTGTGAAATCCAGATCTCCTA  
CGCCATCGGTGTGGCCGAGCCGACCTCCATCAGCGTGGAAACTTTCGGTACTGCCAAGGTCGCCGAAGAT  
CTGCTGGTCAAGCTGGTACGCGAGCACTTCAACTGCGCCCGTATGGCCTGATCGAAATCGTGGACTGA  
AGCGCCCGATCTACCAGGCTACCGCAGCCTACGGTCACTTCGGTTCGCGACGAGTTCCTCCGTGGGAGCAGAC  
CGACAAGGCCGAAGTGTGCGTTCCGCCCGTGGCCTGTAAGGCTCGCTGTTGTGATAAAAAGGGGAGCCTG  
GCTCCCCTTTTGCTTATCCGCTATCTGACGAGATGTTGATGTCTGCCACTCCTGCCAGCTTGTGCCCT  
GCTGCAACAACGCGTAGAAGCCTGCTTTGTGCAGGCCGAGGCGCGCCTTGGCCGCACCTTCCCCGCCCG  
CGGATCTACTGCAATATGCGGGCCGGGCGGCGGGATCGGCGCGGCTGCAAACCTGGGAGCTGCGCTTAA  
ATCCCGCCCTCTATCAGGCCAACAGCAGGCGTTTCTGGATGAGGTGGTGCCCCACGAGGTGGCCCATCT  
GCTGGTCTATGCCCTGTGGGGTGAAGGGCGTGGCAAAAACCGGGTCTTGCCTCACGGCCGCCAGTGGCAG  
TCAGTGATGCGGGAGGTGTTCCGGCCTTGAAGCCAGAACTACCCACAGCTTCGATCTGGCAGTATTGGCC  
AGCGCACCGTGCCTTATCGCTGTCACTGCCAGCAGCATCAACTGTCGATACGCCGCCACAACAAGGTGGT  
GCGCGGCGAGGCCCGCTATCACTGCCGCCGCTGCAAGCAACCCTGGAGCGGGAACGGCCGAGCCAGAG  
CAGTAAGCCAGCGTGTGTGCGGCCCTGTGGTAGGGTGCCCGCCATCGTTCGTCAATCACCCCGTTTTGC  
AAGGAATCCCATGCGTTTTCATCTCCTCCCTCGCCCTGACCCTGCTGGCCGGTTTTGCCGTGCTCAGCGCG  
CCCCTGCACGCCCAGACCTTTTCGTGAAGCCAAGCAAGATCTGGTGAAGCTCTATCGCAGCCAACCTGCGG  
TCACCACCTTCTACTGCGGCTGTGACATCGACTATCAGGGCAAGAAAAATGAGCCCGGATCTCGCCAGTTG  
CGGCTATGAGCCGCGCAAGCAGGCCAAGCGCGCCCGCCGCATCGAGTGGGAACACGTGGTCCCCGCTTGG  
GAGTTCGGCCACGAGTTGCAGTGTCTGGCAGGATGGCGGTGCGAAGAACTGCGAAAAAGCGAGCCCCGAGT  
TCAACAAGATGAGGGGGATATGCACAACCTTCCCGCCATTTGGCGAGGTGAACGGCGATCGGGCCAA  
CTACCGCTTCTCCGACTGGAACGGCAAGCCGATCAGTACGGCCAGTCCCGGATGCTGGTGGATTTTCAAG  
GATCGTCCGGTGCAGCCGCCAAGGGGCCGGTACGGGGCCAGATTGCCCGCGCTACCTCTACATGAGCC  
AGCAGTATGGGCTGCGTCTGGCAGCGCAACAGCGTAAACTGTTTTGAAGCTTGGGATCGCCAGTACCCGGC  
AGAGGGCTGGGAGTGCAGAGCGCAATCGCCGCATCGGCAAGCTGCAGGGCAATACCAATCCCTTTATTGAA  
AAGCAGTGCCAATAACCCATTTGACCAGGGAGGGGGAGCGCCCTCCTTCCATGAAACCTTCCCCACT  
GCCGCGTGAGCATTGCTCGCCGAGGATATGAAGGGTTTCCAAGCAAGAGACTGACAAGCAGCCATGCGC  
ATTCCACGTATCTATGAACCGGCCACCCTGCAAGTTGGCCAGACCATCGCCCTGTCCGAAGACGGCGCCA  
ACCATATCGGCCGGGTACTGCGCATGCAGCCGGGCCAGCAGCTCGAGCTGTTCAATGGCGATGGCAATCA  
ATACCCCGCCACCATCGCCAACGTCCGCAAGAAGTCGGTGAAGTGACCATCGACAGCTGCGACGTCCAA  
TCAGTGGAGTCAACCGCTGGCCATTCTATCTGGGTGAGGTGATCAGCCGTGGCGACAAGATGGACTTCACCA  
TCCAGAAATCGGTGGAGCTGGGCGTACCTGCATCACCCCACTCTTCTCCGAGCGCTGCGGCGTCAAGCT  
GCCGGCCGATCGGCTGGAGAAGAAGCGCGCAACAGTGGCAGAAAGTGGTGTGATCAGCGCTGCGAACAGTGC  
GGCCGCAACGTGGTGGCAGAGGTGCGCATGCCGATGGAGCTGGACGCTGGCTGGCGGAAGAGACCAAG  
AGCTCAAGCTCAACCTGCACCCGCGCGCCGAGTACAGCATCAACACCCCTGCCCGTTCCCGAGCACGGCGT  
GCGCCTGCTGATTGGCCCGGAAGGAGGCTTGTGAGCGACGAGATCGCCCGTACCGTGCAGGAAGATTTT  
AAAGAGATGCTGCTGGGGCCCGGGTGTGCGCACCGAAACCGCCGCCCTGACTGCGATTACTGCGCTGC  
AGTGCCGTTTTTGGCGATCTCGCTTGATACTATCGGCCGATCATGCATCGACGCAGCCTCAAGCGGGCGA  
TTACGCTGCGCTAATCGACCCTACAACCTATCGAGCCATTAAGAAAGGAACAGCGGATGACCATTAAACT  
CGGCATCGTGATGGACCCCATCTCGGCCATCAACATCAAGAAAGATTCCAGCTTTGCCATGCTCGAAGAG  
GCGCAAAAGCGCGGCTATGAGCTCTTCTATCTGGAGATGAAGGATCTCTACATGGAAGCCGGTTCGCGCCT  
TTGGACCATGCGCCCGCTCACCGTCAAATATGACTATGCCGACTGGTACACGCTGGGCGAGGTGGTGGGA  
TCAGCCCTATCCAACCTCGATGTGATCCTGATGCGCAAGGATCCGCCGTTTCGATACCGAATTTATCTAC  
GCCACCTACATGCTGGAGCGGGCCGAGGATGAGGGTTGCCCTTATCGTCAACAAGCCGAGAGCCTGCGTG  
ACGCCAACGAGAAGCTCTACACCGCCTGGTTTTGCCGAACACACCCCGACCACGCTGGTGACCCGCCGCGC  
CGACAAGCTGCGCGCCTTCCACGCGAAGCACAAAGACGTGATCCTCAAACCGCTGGACGGCATGGGCGGC  
GCCTCCATCTTCCGATGAAGGAGGATGACGCCAACGTAGGCGTGATTATCGAGACCCTGACCGCCACG  
GCAGCCAGTACTGCATGGCGCAGACCTATCTGCCCGCCATCAAGGATGGCGACAAGCGGGTACTGGTGGT  
GGACGGTGAACCGGTACCCTACTGCCTGGCAGCATTCCGGCGCAAGGTGAGACCCGTGGCAATCTGGCG  
GCCGGTGGCCGTGGTGAAGCGCGTCCCTGAGCGAAGCCGACTGGGCCATCGCCCGCGCGGTGGGCCCCGA  
CGTTGAAAGAGAAGGGCCTTATCTTCGTTGGCCTCGATATCATCGGCGATCGGCTGACCGAGATTAACGT  
CACCAGCCCGACCTGCATTTCGCGAGATTGAAGCCGCTTCGACGTGCACATCACCGGCATGCTGATGGAT  
GCCATCGAGCGTGCAGTGGGCAATAATCGCCAGGCAGGCTAACCGCCTGTTTCAGGGGTAACCGCCCC  
GACAAGCCCGAAACAGAGAGGGTGGCCCGGCGCCACCTCTCTGTTTTCAAGACAATCCGGAAAGAGGTG



GGATCTCGCCCAGTCCAAAAAGCGGTTTTTCCCATGGGGATCAACTGCCATAATTGACCTCAAATACCTT  
TGC ACTATTTGGCCTCTATGCAAACACTGCAAATCACTTCTGCTTGCCATGCCAAGCCTGACGGATCC  
CTACTTCGAGCGTTGCTGGTCTATCTGTGCGAGCACAACGAAGAGGGCGCCATGGGGCTGGTCGTCAAC  
ATTCCGGTGGAGATGTGCTGGAAACCATGCTGACCCAGCTCCAGCTCAATCCGCCCAACAACCCGGAAC  
TCAAGCAGCCGGTGTGCAAGGGGGGGCCGGTTCACGCCGATCGCGGCTTCGTGCTGCACAGCTTCCGCC  
CGGTTTTCAACTCCACCCTGCAGGTGGGGGATGAGATGATGGTGACCACCTCCAAGGATATTCTGAAAAC  
CTGGGTACGAGCGAAGCCCTGCCATTGGCTGGTGGCCCTTGGCTATGCCGGCTGGAGCGCCGGGCAGC  
TGGAGCAGGAGCTGGTGGACGGCGCTGGCTGGTGATCCCCCAATCCGGCTCTGGTGTCAAGACCC  
CATTACAAACGTTGGCAGCAAGCTGCCGCCAGCATAGGGGTGAACCCGGTTCACCTCTCCAGCGATATC  
GGCCACAGCTGATCGGCTGGCCCGCTCCGCTCTCTATTTGAGGATTTATCAGTTATGTCATCAGCGAC  
ATCATGGGCTTTGACTATGGCACCACAGAGCATGGCGTCGCCATCGGTCAGGAGCTGACTGGCCTGCC  
AGCCTCTGCGCGCCCTCAAGGCCAACGACGGCATTCCCCAATGGGACGAGATTGAGAAGTGTCTCAAGGA  
GTGGCAACCGGACCTGCTGGTGGTGGTCTGCCGCTGAACATGGATGGCACCATCAGGAGATAACAGTA  
CGAGCCCGCAAATTCGGCAACCGGCTGCATGGCCGCTTCGGCAAGCCGGTGGAGTTCAAGGATGAGCGAC  
TCACCACCACAGATGCCCGCGCCCGGCTGTTTTGAGCGAGGCGGCTATCGCGCGCTGGAAAAAGGCAGTGT  
GGACGGGGTATCGGCGCAGCTGATCGTCGAAGCCTGGATGGAAAGAGCAGTACAAC TAAGCCATCAACAGC  
AAGGCAAGGGTGCAGCCCTTGCTTGCCTTGTCTCGCACTATCCCCCTATTACGCCTGTGATTGTCCCG  
CGACCAGCCCTTCGGCCTCTGTGCGCGTGCATTCATCATCCGGTTGAGCCAGGGCACCATTAGCCCAT  
CACTACCGCAATCAGCAAGGTGCTATCCCAGTCTTGCCAAATACGCCGTTGTAATGGGCAAAGTTTGC  
AGCGGATCCGTCATCCCTTGCGGCACGGCGGTAAAGGTCGCCACATAGCCACCAGCAGGGACGCCATCG  
CCTGAGTCAGGAACCACATTCGAGAAATGAAGCCATCAGGCGTTGTGGCACCAGCGCGGACCATAGC  
CAGCCCCAGCGCACTGATCATCAGCTCGCCAGACTCTGGAACAGATAGATAAGCACCATAAACAGGGG  
GAGGTGAGCCCTGCTCATCGGCAAACACCAGCCGGATGCTGCCGCTGTCAGAAAGCCAGCGAGCAGA  
AGAACATCCCAGGGTGAACCTTGAGCGGCATGGTGAGATCCCGCCCTTGCTGCCCATCCGGGTATAGAT  
CATCGCGAGTACCGGGCTACCCACCACCACCAGAAGGGGTTGAGCGCCTGGAAGCTGACCGGGTTAACG  
CTCATGCCAGCATCTCATGGTGCATGTTGTTGATGGCAAAGAAATTCAGAGACGTCGGCATCTGGGCGT  
AAAGCACATAGAAGAGCACCAGCCTCCAGCATCAGCACGAAGGCCACATACATCTTGTGCGGCCACTGT  
GTCGAGCCTGAACGCCTACGAAAGAAGAAGATCACCACGGCGATGGTTACCGTCATCAGCACCATTGTTG  
GCGATCACCAGCTGGTGCATCAGCCAGGCGAGAAGAACCATGGTACCAGAACCAATATAACAGCA  
GCAGCTTGCTGTAATTAAGTGGCAGGTGATCCGGCTCGGAGCCAATATCCTTGACCATATTGCGGCAGGC  
AAAGAAGGTGAGCAGCGCAATAATCAACCCACCCCGCACAGGTTATAGGTCACGGTATAGCCGTAGTGA  
TCGGCAATCACCGGCGGAGCGAGAGGGAAATAAGGGAGCCAATATTGATCGACATATAGAACAGGGTAA  
ACGCCCCATCCAGCCGCGGATCTTTTGGCTGGTAGCATTTTGACAGCAGGCTGGCCGGATTGGCCTTGAA  
CAGGCAGTTACCGACCGCGATGGTGCCTAGCGCATAGAAAATCAGGTCGGGATTGTAGATAGAGAGGCCG  
GTCATAAAGTAGCCTATACCAACACGATAGCCCCGAGCACCATGGTGCCTTGGTGCCGAGCACATGGT  
CGCCGACATAGCCGCCGACCGAGATCAGGCCATATACCAGCGCCGAGAAGGCACCAGAAAGTAATAAAGGA  
TTGCTCTTGGGAAAATCCAGTTGTTGCACAAAGAAAACCGCAATATCCCCTGCAGCCGTAATAACCG  
AAGCGCTCCCAGAGTTCGACGAAAAATATCATAAAGAAGGGTTTGGGTTGTTGTAACAACCCTGTGGGTG  
CTGTTGCTGGACGCATATCAACCTGCCTTTATTGAGGTTTATTTTTATTAATCTGGTGGTGGCTGCCGCA  
CTATTTTTTGGCCGCCATTGCCATAACGGGGAGCACAGTCAGCCTGCCAATCTGGCTATTTTTCGGGTGA  
CGCGCCCGTTTCGATGAAAGGTGTTTTTTCATCTAGCCGGTTTTCAATTACGGGTTATCGGGGGATGGTGAG  
TGGCGTCTCCAGTACAGTTGCCGGCTCCGGGTTCTACCTTTGCTGCATCCCTTTACTCAAGCCGGTTTA  
TCAACCTTGATACTTATTCCTCTGCTCCGTCATCATGGCTGGTGGCCAGATAGCCGGGGCATGGCGC  
GGCCACAGACGACCTGTGGGGCTGGCTCACGCCGACTCTACTGGCAGTCATCTACGCAGGCGCTATCTA  
ACCCCGCCATTCCAAGGGGAGTCATGCTATATCACTGCAAATACAGGAACCTTAATGGTCGATCACACTTT  
AAAAGTGACCATCAGTGAAGTTTTCTAATGAAACCACATGAATTTTTTTCGTGAAAAGAGCTTCACACGA  
GACGTGCAACCAAGACCAATCTGTGCATAAAGAGAGTTGAATGGCACACAACCTTGACCCCGTCCCGCCG  
GGCGCGCACTTCAGTCGTGCAAAAAGCCACTCATCCGGGCGATACAACAACAAAAAGCCGAAGCTGATG  
GCTCCGGCTGATCGATGGGCACAGTCACGGCCACATTAGCGTGGCGATTTCGTGCTTGTAGAGTCGCCGGA  
TCTCGTTGCGCAGCCACATCACCTTGGCATCCTGATTGTGCCGTTTGTGCCACAGCAGGATGAAGGCGAT  
CTCCAGCTGGGCGTAGAGCTTTTTCGGTAGCGGCAGCGCATGGCGATCAGATTGCCGTGATGCCGACTG  
GCATAACCACCGCAGTAGGAAGGAACCACCGCAATCAGTTCGTGGCTCGACTGGGAAGCAATATGCAGCG  
CCTGCTCGAAGCTGGAGACCATGATGGGCACCTCCCGCTTCAGCCCTCGTCTCCAGCAGACTGTGCGAG  
AGCCAGGTATCGTTGCTTCCACACCATGCTGATCTGGGGCAGGCCAAAAAGTTCTCCAGCGACCAC  
TTCTGCTGCAGCAAGGGGTGATCCTTGCAGGAAACACCACCGGGCGATCGGTGAACAACACCTCGTGAT  
CGATGTAGTAGGGCAAGCGGTTGACCTTGGCCAGAGAGCGCCATGGGTCTCGCGGGCGCAGAAGCCGAG  
ATCCGCATCGCCATTGACGATGTGCTTGGAGGAGTGGTGATCCCCACCCAGCATCCTGACCACAGAGTTG  
GGTACTTCTGGTAGATGGTTCATGGGCAGATCGCTCAGGAAGCTGATGTAGAAGGGGGACTCCATACCA  
GCGTGAAGCGGGCACCGTCTGGGATCGCCTCGCTATTGAGCGAGGTGATGCTGTCCGTGAGCTGGAACCA  
GACCTTCAGCTCCTCCTCCAGGGTCTGGGAGAGGTTGGTGGGCTGCAACCCCTGCCGTACCCGCACAAAC  
AGGGGATCGTCAAACCACTCCCGCAATTTGGCCAGAGACTTGCTCACCGCCAGCGAGTGACACAGAGCT

TTTTGGCCGCCCTGCCACACTGCGCTCCTGCATCAGGTA CTTGAACACCACCAGCAGGTTCAAATCGAG  
TTCACCCAGATTGCGCATATCCCCTCTCATCTTCCATCAGCCCTGCGACC GCGCTTCACGAAGCGCGAGC  
CATGGTACCAGCCCTTTGACAGCCAGGTA ACTGAACAGAGCCAGCATCAGGGCATAGATCAGCATCTCGG  
ACGGAGTAAAGCCAAGTTGACCCAGCAGCCAGATATAGAGGCCGGAGAGGCTGATCTGCATGATGCAGAG  
CACCGCGCTGGCAAAGGCCACGTTATGCTGACAACCATCGAGCGCCTCCCCCATCGCCACCCCGAAGCCA  
CAGGAGAAGCCGACACAGACCAGCGCAAACCCCGGCAGCAGCAGATGGATATCGCCCCCGTCTGCCAGC  
TGCCGATCAGTGAGCACGCCGCCAGCAGATAGGAGAGATGAGACACCGCCAGCACCTTCTGTTTTGCCAG  
CCAGCGCAACAGCAACGGCGTCAGGAAGGAGGTGGACATACTCACGCCAGCCATCACCATCATCACGATG  
GAGTACTGCTCGGTAGTGAAGCCAAACTCCTTCATCAGGATCAGCGGCAGACGCTGACATAGACCAGAA  
TGGCGGTACAGCTGGCATGGTCAGCAGGGAGAGCAGCATAAAGCGCGGCAGCGCAGGGCAAAGG  
CAGCGCCGCGCCACTGCCCGGTTGCCGCGCCGGCGGTTCTCCTTGAGCAGAAGCAAGTTACCAGACCG  
CTAACGGCCGCCACCAGCGCCATCGCCACGAAGATCCC GCGCCAATCAAAATGTGACAGGATGAGGTAAC  
CGAGCACCGGCGCCAGCACCGGGATCACGCAGATGACCCCGTTGATCATCGAGAGCGCCATCGCCAGCCG  
CTCCTGACACAGCACGTCCC GCGCAGCACGGTAAAGGTCATGATATAGAGCGCACCGGCCCAACCCCTGC  
CAGAAACGACCGAAATAGA ACTGACTTATCCCCTCTGCGCTGCCTGCCACCAGCGAGGCGAGGACAAAA  
TCAGCGCGCCCCGAGCACACCAGCGCCCGCCGAAGCGATCGGCAATCATCCCGCCAGCAGCACGGT  
CGCCGCCATGCCGAACAGATAGATGGAGAAGGCGGTGTGGATCTGCGCCTCGCTCGCCTGCAGGGCATCG  
GCAATCTGGGGCACAGCGACCAGATAGAGATCGATCCCGACCGGATAGAGGATGATCATCAGAAAAGTGC  
ACAACAGGAAAACAGGCATGGATGCTCCATTACAGAGTGGCGGGCCGATGCCAGCCAGATCACAGCGACA  
GGCGAACAGTGGCGGGGCCAAGGTGGTGACAAAGCTAGCAACGCAGCGCTCGCAATGGGGGCAACTATA  
TGGGCGCCAGCGCCCTCACCTAGTGAAGAGATGGCGATCGGTACATTC CAATCAGGAAATATTTTATTG  
AGTTACGTGCCTGGGCGGCCATATTGAATCGACTAGAGGCCGTAATAAACCGGGTCACCTCCC GCTCATA  
GCCATCCCTGCGCTGCACTTTTACCGCCCGTCTGTTATCCGCCTTCGCCCCTTGGCGGGCTATAAGCTGTA  
GGTGGCAGCGCAATACAGAAATGTGTATGACTGGTATGAAAAAAGAAAGAGCAGATTGCCGGGCTGCTGGCA  
GCACTGGAGCAAGTCATTCTGGGCAAGCCGCTGCAACTGAAAAATCGCGCTGGTGACCCCTGCTGGCACGCG  
GTCATCTGCTGATCGAGGATCTGCCCGGTATGGGCAAACACCCTGGCCACGCGCTGTCACAGGTACT  
GGGGCTGGCATCGCGCGGATGCAGTTCACCGCCGATCTGCTCCC GCGACCTGCTGGGGTTGCAGATC  
TTTGACCCCGCAGCAAAACATTTCCGTTTACCCCGCCCATCTTACCAGGTGTGTGCTGGCGGACG  
AGATCAACCGTGCCAGCCCCAAAGTGACAGACGCCCTGCTGGAGGCGATGGCCGAAGGCAAGGTGAGCAT  
TGAGGGCCACACGCACCCACTCCCCGATCCGTTTTTCGTCATCGCCACCAGAAATCCGGCGGATCAGGGC  
GGCACCTATCCACTGCCGGAATCC CAGCTCGACCGCTTCGCCGTCGCACTCTCGCTGGGTTTTCCGCCGC  
GAGAGGCGGAGCGCCAGTTGCTGCGCGGCCACCAGCCGAGCGGCCCATTACCCGCCATGCTGGATGCAGC  
CGGACTCGCCACCTTGCAAAGCGAAGGTGATGCTATCCATGTTTCCGATGCCACCCCTCGATTACCTGCTG  
GCGCTGGTGCACCAGAGCCGCTTTGATGGGGATCTGCCACAGCCCTCTCCCCCGGGCAGCCAGACCT  
TGCTGGCGGTGAGCCGGGCTGGGCGCTGGTGGCGGGGCGGCGCTTTGTCACGGTGGAGGATGTGCAGGC  
AGTCTTTCCCTATGTGGCCGAGCATCGGCTGCGGGGTAGCTTTGGCGTGCAACACGGCGAAGCCTGTCCC  
CTGAGCCAGCGGTTACTGGCCAGGGTCGATCCGGACAATCCCTGATGAGCAAATGCTAAACCGTTGGCA  
GCAGTGGCGAGCCCGCTGGCAGCGACGCTGGCTCGACCGCCGATTC CCCC GCGCCGAGATCACGCTG  
GGTACCCGCGACCTCTTTATCTCCCCACCCGCATAGGGCTGCTCTATCTGCTGGTGTGCTCGCCATCT  
ATCTGCTAGGCACCAACTACCAGAACAATCTGGTGTGCTGCTGGCCTACTGCCTCGGCAGCCTGTTTTAT  
GGCAGCCATGTGGCTCACCCACCGCAACCTGCTGGGGCTGGAGCTGCTGGGTGGGCGCTGGTGTGGGG  
GAAGCGGGTAGCCAGCTTCTATCCGTATCTTGGTGCAGAGCCCGCGCCCGATACAGGCACTCAGCTTTA  
GCCTCAACGAAGGCACCTCTGGCTGGCACAGGCCGACGCTGTGTCCGCACTGTTATCCTGCCGATC  
GGGCTCTCGCCGCGGGCCACTGCCCTTGGCCGATTGCAGGTGAGAGCCGCTACCCCTCGGTCTGTTT  
CGCTGCTGGTCCCTGCTGGACTTGCAACTGGAGGGCTGGCTCGCCCCAAACCGATGTTCCGGGGCGCTAA  
GAGGGGAACATGCGACCGAAAGCGAAGGACATCAGGGCCAGCCCGCTCCGCCACTCTCGTGACTTTGA  
TACCCTACGGACACATCAGGCCGTTGAACCACTGAGCCGAGTCGCCCTGGAAGCAGCTTGCCAGGGGCGC  
GGCTTGCTGACCAAACAGTTCCATGAACCACAGCAGGATGACAGCCACCTCACCTTACAGCGGGTTCGCGG  
GTGGGGATCTGGAGCAGCGGCTGGCAGTGTGGCCTGGTGGTGGCAGATTACGGCAAGCGGGGCATCCC  
CTTTACCCTGACACTGACAAACAGACGCTGGGACCCGATAGCGGCGCCGCTTTGTG CAGCGCTGCCTG  
CTGGCACTGGCCCAATTTCGATGCAACACCACCGAAGAGCACGCCGATGCTGCTCGATAACCGCCGCTG  
TTACCCTCATCGCCCTGCAACAGCTGCTGCTGGTGC GCGGCTCTGGCCACAGTTGCAGCTCTGGGTGA  
TGGCAGTAGGCGCCATGACCCTCGGCGTCCGGCCATGATGCTGTGGCGGCTGGCCGCCCTGCCTGC  
CCGCAGGTTGGCGCTGCTGGCCATCACCACTGTGCTGTTGCTGGGACTACAGTGGCGTGGCTTGGGCACC  
CTGCCCGCCCTGATCAATCTGCTCTGGCTCGGCTATAGCCTCAAGATGATCGAGGTACGGCGCAGCGGG  
ATATCGAGCTGGTGCTTCTGCTCGCCTTCTTTCTTATCGCGCTGGCGCTGGTGCAGCGACAGAACATCGG  
CTGGACGGCCGAATGACAGTAGCGCTCTGGCTGGCAGTGACCGCGCTGGTGGCCGCCCTCGCCCCGAA  
CAGAAAAGGCCATGGCGCAGTGGGGCGGTGCCCTGCTGCTGGCGCTTCCCCTGCTTATCACTCTATTTA  
TGCTGCTGCCAAGGCTCCCGCCCTCTGGCAGATGCCACCACCAGCCGCGCCCTGTCGGGGCTCTCGGA  
AGAGCTGGCCCCCGGCATATCAGCGAACTGGTCAACTCTCGGAACTGGCGTTTCGGGTCACTTTTGCC  
GATGGCCCCGCCCTGTCCGCGAGCGCTATTTTCCGGTGATGCGCCAAGAAGTTTTTCGATGGTCAGCGCT

GGTTGCTGAGCCCCGAGGTCAAAGCATGGCAGCAGACAGCGCCGGTGCAGACCGGGCTGACCCTTCTGGC  
ATCCTCTTCACTGGCCAACACTCAACTGGCAGATAGTCCGTTGCCCGCCGGGAGCTACGAGGTGATCGCC  
GAGCCCCAGCGCCACCGCTGGGCCCTTTGCCCTGAGTGAACCGCGCTGCTGGCGGGTCCGGTGTGCTTA  
CCCCTCTCGACACCCTCTATCGTCAGGGAAGCGGGCAGGTGGCGATCCGCTATCGCATTTGGCAGTGGCGA  
AGCGCTGCCCCGAGGATGACCACCAAGCCGCCAGCGCAACCTGCAACTGCCAGCCGGAGGCAACCCGAGA  
GCGCGAGCTCACGGCCAAGGGCTGGCTGTGCGCTATCCAGAACCGCGCAAAGCTGGTCCGCCCTGCTCG  
CGCAGTTTCGAGCCAATCTATTACTACACCCTGACCCCGCCACGACTTGACCGTGACGGGGTGGATGA  
GTTTCTGTTTCGATACCAAGCAGGGCTTTTGGCGCCACTACGCCATGGCGACCGCTTTCGTGCTGCGCGCC  
GCCGGTATTCCGGCACGGCTGGTCACCGGTTATCTCGGTGGCGAGTGGAAATCCCAGAGGCAACTATCTGG  
CGGTACACCAGTTCGATGCTCACGCCCTGGGTGGAGTATCTCGATGAAGGAGGAACATGGCGCGGAATCGA  
CCCCACGGCGGCAGTGGCGCCGGAGCGCATTGAAGACGGCGTGAGGGAAGCACTGAACGACGAGTTTACC  
GCCGCCGACCCCTCGCTTTGACAGCGTTATCGCAACTGGGCTCTGCTCAATCAGCTGCGCTGGTGGGGCA  
ACAATATCGACTACCAGTGGAGTCGCTGGGTGATTGGTTACGATGCGGGCCAGCTCTGGCAGCAAATTGG  
CCTGCGCTGGCCTGCACTGGCGGGGCACACACCCTGGTTGATCCTCGCCAGCCTGATGCTGGTTCGCCCTG  
CTGGTGAGCCTGCCCTGCTGTTGCCCGCCGCTGCCGCCAGAGCGGCGCATCTGGCAGCCCCTGTCTCA  
AACGGGGCAAACGCAGTGGCTATCCCCAGAGCCCGCCGAGAGCATGGAGGCATGGTGGCAGCGGCTGGC  
ACGGCTGCGTCCCGACCTTGCCCACTCCCTGCTAAAGAGTGGTGGCTCTATCGACTCTGGCGTTATGCC  
CCCCTCAGCGAACGGCAACAAGGGCGCTGCTGGCGCCAGTTGCGACGGCGTATCAGGCAACTCGTTCCGGC  
GCTGGGATCAACAGCCAACGAGTGCACCGTAAAAGAAGGGGAGCCACCGCTCCCCCTCAGGTTTTAA  
TCAAGAGGTTTGACTCACCGCTTGTTATTTTTTGGTCGGATTGTCCAAATTCCTCTTCCAGCAGGGAG  
CGGATCTCGGGGTATTTGTTGGCATCGAAGGTGGGCACCTTGCCAGCCGGAGCTGGTGGTGTAAATCCT  
TCGCCAGCTTGATGGCAACGCTGGAGAGCAGCAGGATCGCCACCAAGTTGACGATGGCCATCAGACCCAT  
GGAGACATCCGCCATCGCCACACGATCGGCAACTCACCCACGGCGCCGAACATCACCATCCCCAGTACG  
AACACCCGGAACAGCATCAGGCCGCCCTTGTGGTTGTGCTCGAGGAACACCAGATTGGTCTCGGCATAGG  
AGTAGTTCCGCACGATAGAGGTGAAGGCGAAGAAGAAGATGGCCGCCGAATGAAGATGTTGCCACCGCT  
GCCAATCTGGGAGGAGAGCGCCCGCTGGGTGAGCTCGACACCGGTCACGCCGGAGCCCGGCTCAAACCTGA  
CCGGACATACAGGATGATGGCGGGCGGTACAGTGCAGATGACGATAGTGTCCATAAAGACCCCCAACATCT  
GCACATAACCCCTGGGAGCCGGGTGCGCGGATGAGGAGTGGCAGTGGCCGCAGCGTTGGGCGAGAGCC  
CATCCCCGCTTCGTTGGAGAAGAGACCCGCGCTTGATACCGTTGATCATCGCTGGGAGATGGCATAACCG  
AGCGCACCCGAGCCGGCCTGCTCAATCCCGAAGGCGGACTTGATGATCAGCATGAAGACATGGGGCAACT  
CGGTGATGTTTCATCGCCACGATCACCAGCGCCAGCAGGATGTAGGCCAGTGCCATAAAGGGCACCACCAG  
CTCGGCAAAAACGGGCGATGCCACGAATGCCACCGAAGATAATCAGGCCGGAGAGCGCCACCAGCGCCAGA  
CCGCTGACCCAGTCAGGAATGCCAAACGCCACCTTCATCGCCAGACTGATGGAGTTGGCTGCACCGCGT  
TGAACACCAGACCAAATGCCAGGATCAGGCAGAGCGAGAAGACCACCCCATCCAGCGCATGCCAAGGCC  
TTTTCTCCATGTAGTAGGCCGGCCACCACGGTAGTTGCCATCCTCATCCTTGACCTTGTAGAGCTGGGCC  
AGAGTGCTTTTCGACGAATGCGGTGCGCATGCCGATAAAGGCGATCAGCCACATCCAGAAGATGGCGCCGG  
GGCCACCCAGATAGATGGCGACAGCCACACCGGCAAGGTTGCCGTTGCCGACACGGGCGGCAAGGCTGGT  
ACAGAGGGCCTGGAAGGAGGAGATGCCCCGCTTGTCCGATTTACGGCTGTTTTTTCAGCACGGAAAACATG  
TGGCCAAAGTGACGGATCTGGATAAAAACCCAGGCGGAAGGTGAAAAAGATACCGACCCCGATGAGCAGGT  
AGATGAGCACGGCTCCCCACATCAGGTGCTTTAGCATCGCAATCAAGGTGTCCATAATTTCTCTCGTTGTT  
ATTCACATCCATGGCCAGTCTGCGCTGACCGTTTTTCTGTCTGTGCTTTAATTAGCGTTTCGCTAAAGGGG  
CGGAATCTAGCACAGCGGGAGAGCCCGGAATAGTGATCCCGGTCACGCGAGACACAAAAACGAACGGTA  
AAAGCCCATAAAGCTCCATTTAAATCGCAAACCTTTCAACAAACTCAATAATTCATCAGACAGGCCACCA  
TTAAGCCCCATAAGAGAACCATTTTATATATCCCTGATGAGCTATCCGAAAACGCAAACGCTTGCATGA  
AATGGCTTTCAAATGGCGACATTTTCGCCAAACGTTTTTCGCTGTAATTTAAATTTCAAGTACGTAGCGAGAT  
AATTTATGTGATCAACGACACAAATATGGATATTGGCTAAAAAAGTTCAGCTGAAAGCAAACCGGAGCGA  
GGTCGGGAGGAAATGTAAAAAACCTTACTAATCATATAGTTTCAAGCCATAAAACGGGATAACTCAACAG  
CCTGAATGTTTAAACAACCAAGCGCCCTTATTGAGGATGCAGCACATCAGTATTAATTTAGGCAGGCAATG  
ACGATGGGCGCCCCCATCGCGCTTTTCTGAGCCTGAGGCACCAAGATCCTGTAATTTTATTTTCAGAACC  
ACCGTCTCAAGCCCGCAACCCAGGGATTACTCCCTCATTAAGAGATGATATTCGCTATGGCCGATAAATT  
AACCCAGCTGAAAGCCCTGACCACTGTTGTTGCCGACACCGGTGATATCGAAGCCATCAAACGCTATCAG  
CCCATCGATGCCACCACCAACCCCTCTCTGGTTCTGAAGGCCCTCCGAGATCCCCGAGTACGCTCCGCTGA  
TCGAAGACGCCATCAAGTGGGCCAAAGCCCAGAGCCAGGACAAGGCACAGCAAATCATCGACGCGGGCGA  
CAAGCTGGCCGTCAACATCGGTCTGGAAGTGCTAAAGATCGTTCCGGGCCGATCTCTACCGAAGTGGAT  
GCCCGCCTCTCCTTCGATACCGAAGCCAGCATCGCCAAGGCCCGCAAGCTGATCCGCTTTTACAACGAAG  
CGGGTATCAGCAACGACCGCATTCTGATCAAGCTGGCCTCCACCTGGGAAGGGATCCGTGCCGCCGAGGT  
TCTGGAGAAAGAGGGCATCCAGTGCAACCTGACCCCTGCTGTTCTCCTTCGCCAGGCCCGTGCCTGTGCC  
GAAGCCGGTGCCTTCTGATCTCCCCGTTTCGTGGGTGCGATCCTCGACTGGTACAAGGCTAAAAATGGCC  
GTGATTACACCGCCAGCGAAGATCCGGGCGTGGTCTCCGTCACTCCATCTACAACACTACAAGCAGCA  
CGACTACCCGACCGTGGTGTGGGCGCCAGCTTCCGCAATACCGGCGAGATCCTGGAACCTGGCCGGTTGC  
GACCGCCTGACCAATTGGCCCGGCCCTGCTGGAAGAGCTGAGCAAGACCGAAGGCCCGTGGTACGCAAAC

TGGACTACACCGGTGAGCGCAAGGCCAAACCGACTCCGATGACCGAAGCCGAATTCGGCTGGGAAC TGAA  
CCAGGATGCCATGGCTCACGAGAAGCTGGGCGAAGGTATCCGCATGTTCCGCATCGACCAGGGCAAGCTG  
GAAACCATGCTGGCAAGCCGCTGTAATCAGTTCTTTTTCTGATAAAAACCGGGCCCTACCAAGGGGC  
CCGGTTTTTTTTTCATGGGCTTTTTTAGCGCTGTCATAGAGTCGACACGAAAACGTTTTAATTTCAAATTC  
GTTATGTTATACGGGTGGTGAAAACGATAAAAACCAAGGAGGGAGCCATGGATATGTTCAACTTCGATTA  
TGACGAGGTGGTTGAACTCGGTTTCGCGTAGCCGCGGGACAACGGGAAAAAACGTAATGGCGTGAATC  
GAGGCGTTGAAAGACAAACATCGCCTGCAGAAGGAGCTGCAATCCATCGATATCGCCTATGAAGGTCTTA  
CAGACGAGATTGAACTGTAATACCGCCAGACCCCTGTA AAAAGCGCTCCGCACAGCCGGGGCGCTTTTTTA  
TGCCGCAATCGGATGATCAAGCGGCTTGTGCTGCCATCGCCAGCAATACCAAAGGATACTGTAGGCTACT  
GACAGCCATCACCAATAACATGGCATAACCAACCTGCCCTCACCCGCGAAGACTGAGCTGTGCCGTATC  
AGGGCGTGTGGGGCACTCACCTGAATGGCAGATCAACCGCAATAAAAAGCCCCCGTTCGTCGACGGGGC  
CTGAATACTCGGGGCTGACGGCTGCGCTTAGCAGTAGCCGTAGCCAGCAGACGCTGGTAACGCTGCTCC  
AGCAGTTGCTCGGTATCGAGCGGACGCAAGGCGTCCAGATCCTGCTTGATGCGGGCCTTGAGGTTTTTGG  
CCATCTTCTCCACATCGCGGTGGGCACCGCCGAGGGGCTCGTCGATCACGTGGTCGATCAGCTTGAGCTC  
TTTTAGACGCTGGGCAGTGATCCCCATCGCATCAGCCGCCACAGAAGCCTTGCTGCGCTCTTCCACAGG  
ATGGAGGCACACCCTTCCGGCGAGATGACGGAGTAGGTGGAGTACTGCAGCATGTTGACGCGGTACCCCA  
CACCGATTGCCAACGCGCCACCGGAGCCACCCTCACCGATCACGGTGCAGACCACCGGCACGGTCAGACC  
GGCCATCACTTTCAGGTTGCGGGCAATCGCTTCGGACTGACCACGCTCTTCGGCACCGACGCCGGGGTAA  
GCGCCAGGGGTGTCGATAAAGGTGATGATCGGCATCTTGAAGCGCTCGGCCATCTCCATCAGACGCAGGG  
CCTTGCGGTATCCTTCCGGACGCGGCATGCCGAAATGCGCTTGATCTTCTCTTTGGTCTCGCGACCCTT  
CTGGTGACCAATCACCATCACAGGCTCACCGTCGAGACGGGCGATGCCGCGACGATAGCCTTGTCATCG  
GCATAGGCGCGATCGCCAGCCAACCTCGTCGAAATCGGTGAAGATATGCTCGATATAGTCAAAGGTGTAGG  
GGCGCTGGGGATGACGCGCCATCTGGGATACCTGCCAGGCACCCAGATCACCGAAGATCTTCTTGGTGAG  
CTCTTCGTTTTTCTTCTCCAGCCGGCGGATCTCGTCTTTCAGATCCACGGCGTGATTGCCCTTCACTACA  
TGTTTGAGTTCATCAATCTGCGCCTGCAACTCGGCAATCGGCTGTTCAAAAATCCAGAAAAAGACTCATAG  
GGCCTTAGAACCTTAATCAAAAACCAATTCAACCCGCTCTCGTCCAAGCAGGACTCGCAAGTCATCTAT  
CAGTTGATCGGTGGGCGTACCCGCCACTCGGTACCGAGCGTCAATCGCACCCGGGAGCCGGGGCGACGA  
TAGTTTACCTGAACCGGACAGACTCCGGCAGCGGGCTCCAAAATCTCGCACAAACGCGGGAAAAAGC  
GATCATCAATCCGCTGTTCATCGAGGGAGATGCGGATGCTCTGGCAAAAACGCTCCCTCGCATCTTGAT  
ATCCAGTAATTTCTCGAGCCGACATTTTAAGGCCACCGGAGAAGTCATCAAAGCTGACCTGTCCAGAAACC  
ACAAAATGCGGTCTTTTTGTCATCAATTTCTTCATATTTTTCCAGCGCTTCACTGAACAGGGTACATCGA  
GGCGACCGGAACGGTTCGTCAGGGTGAAGATCCCCATCTTGTGTCACGCTTGGTACCATGCTGCGGGC  
CGCGATCACAGCCCCGCGCCGTGGTCACCGTATCGCGGGAAGTGGGATGCAGATCGCACAGGGCACCC  
GAGGTATAACGACGCAATTCGCTGCTGTACTGGTTGATGGGGTGGCCGGTGAGATAGAGCCGAGGGTCT  
CGCGCTCCCCTTCCAGCCACACCTTGTGAGGCCAGTGCGGCACATTTGGCAAACGCTTCTTGACGTGCTC  
AATCTCTTCGGTGAGCACGCCGAACATGTGACCTGCCCCACCGCTGCGCTTGGCGTGTGCTCGGGC  
GCCCCATCGCCTCCTCCAGGGTCGCCATCAGGGCGGCACGGTGCGGGCCGAGCCGATCCATGGCGCCGG  
AGAGGATCAGCTTCTCCATCACCCGCTTGTTTCAGCTTCTTGATATCGACCCGGTTGCAGAAGTCGAACAG  
ATCGCGGAACGGGCCGTCTGATCCC GGCGCTCAAGATCGCATCGATGGGGCCTTACCAGCCCCCTT  
ACCGCCCCGATCCCCTAGACGATATGGCCATCTTCGTTGACCGAGAAGCGATAGCGGCCGGTGTTCACAT  
CCGGCGGGATCACGGTGAGCCCCATCCGCTGGCACTCGTCCACCAGGGTCACGATCTTGTGCGGTGTTGTC  
CATATCGGCGGTATCACCGCCGCATGAACTCGGCCGGGAAGTGGGTCTTGAGCCAGAGGGTCTGGTAG  
GAGACCAGCGCATAGGCGGCGGAGTGGGACTTGTGAAAGCCGTAGCCCGCAAACCTTCTCCACCAGATCGA  
AGATCTTCATCGCCAGTTCGCGCTGACGCCATCTTGACGGCGCCCTCCTCGAAACCGGCCGCTGCTT  
GGCCATCTCCTCGGGCTTTTTCTTGGCCATCGCCGCGCAGCATATCCGCGCCACCAGCGTATAACCC  
GCCAGGTCTGGGCGATTCGATCACCTGCTCCTGATAGAGGATGATGCCGTAGGTGGGCTCCAGAATCG  
GTTTCAGGCTCTCGTGTGTCACCTTCTCGTCCGGATAGGAGATCGCTTCAATACCCTGCTTGGCGTCGAT  
GAAGTTATCCACCATGCCAGACTGGAGCGGGCCCGGTGCGGAACAGGGCCACCAGAGCGATCATGTCTTCG  
AAGCAGTCGGGGCGCAGCCGCTTGATGAGATCCTTCATGCCGCGGGATTCGAGCTGGAATACCCTGTGG  
TCTCGTAGCGCTGCAGCAGGTGCAACGACTTCTTGTGTCATCGATGGGGATGGCGGGGATATCCACTGGCGG  
CTTGCCCTCTTTGGCAAGACGCGGGTTTATCATGCCGAGCGCCAGTCGATGATGGTGAGGGTGGCGAGA  
CCCAGGAAGTCGAACTTACCAGACCGGCGTATTCACATCGTCTTGTGCGAACTGGGTGACTGGGTGAT  
GGCCTTCGTCATCGCAGTAGAGCGGCGCAAAGTGGTGATCTTGGTGGGCGCGATCACACGCCACCTGC  
GTGTTTACCGGCGTTGCGCACACCCCTTCCAGGCGGCGGGCCATATCGATGAGGTCTTTGACCTCCTCA  
TCCTGCTCGTAGAGCTCGGGCAGCTTGGGCTCGGCCTCGAATGCCTTGGCGAGCGTCATCCCCGATCCG  
GCGGGATTAGCTTGAGATGCGATCCACAAAAGCCGTAGGCATGGCCAGCACCCGGCCACGTCGCCGAC  
CACCGCCTTGGCCGCCATGCTGCCGAAGGTGATGATCTGGGAGACCGCATCCCGACCATAACATGTCGGAG  
ACGTGTTCAATCACCTCGTCGCGCCTGTCCATGCAGAAGTCGACGTCGAAGTCGGGCATGGATAACCCGCT  
CGGGGTTACAGGAAACGTTGCAACAGCAGGTCAAATTCAGCGGGTCGAGGTGAGTCTTGAGAGCGTA  
CGCCACCAGAGAACCTGCACCCGAGCCCCGGCCCCGGGCAACGGGAATGCCGTTGTCCCTTGACCACTGG  
ATAAACTCCATCACGATGAGGAAGTAACCCGGGAAGCCATCTGGTTGATCACTTTCAGCTCGATGTCGA

GACGCTCGTCATACTCGGGACGACGCTCGGCACGCACCGCCGGATCCGGGAACAGGAACTCAAGACGCTC  
CTCCAGACCCTCTTTTCGATTTGGCCACCAGAAAATCTTCGGTAGTCATGTCGCCGGTCGGGAAGTTGGGC  
AGGAAGTATTCGCCGAGACGCACCGTTCACGTTGCAGCGCTTGGCTATCTCCACCGTGTTCCTCCAGCGCTT  
CGGGAATGTCGGCAAACAGCTCCGCCATCTCCTCCTGACTGCGCAGGTACTGCTGGGGGCTGTAGCGACG  
GGGGCGGCGTTTTGTCCATCAAGGTATAGCCATCGTGGATGGCGACCCGGATCTCGTGGGCGTCAAGTCA  
TCGGCGTTGAGGAACACCACCTCGTTGGTGGCGACCACCGGCAGCTCGAACTCGGTGGCGATGGCCACCG  
CCATGTGCAGGTAGACCTCTTCGTGGGTGACCGGTACGCAGCAGTTCGAGGTAGTAGGCATCGGGGAA  
GTGGGTCTGATAAAAGGCGACACACTGTTCCGTTCATCTGCCGGTTACCCCTTGAGCAGGAACCTTGCCACA  
TCCCCCTCGCGGCCCGCCGGAGAGGACGATCACCCCTTGGCATGCTCGGCAGCCAGCTCTTGTGATAA  
CCGGCCGCCCTTGACAGTGGCCGCGCTGGTAACCGCGGGAAATAAGCAGGGTGTATGTTCTGGTAGCCGTC  
GTTATCCATGGCTAGCAGGTTGAGACGGAACCTGCTCGTCCGAGCTCATCGCTCTGCACCCAGAAGTTCG  
GCACCGACGATGGGTTTGATCCCTTGGCGTGGCTGCGCCATAGAAGCGCACCCAGACCACACATGTTCA  
TCTGATCGGTTCAGCGCCAGCGCCGGCATGTTGTTGGCCGACGCCGCCGACAATGGGGTTGATCTTCTG  
CAGGCCATCGACCATGGAGAAGTTCGGAGTGGACTCGCAGGTGGATAAAAACGGGGGTTCAGCCATCGTCATC  
TCCTCTCGCTGCTCAAACATAATGACATGGTCTACTCGATCCCCAGTGCAGCGCGCACCCGGTTTGAAGCT  
CTTGGGATATTCTGGCAACGGGCCACGCTCGGCCAGAATGGCGAGGTGCTCCGCAGTCGGATAACCCCTTG  
TGACGGGCAAAACCATATTCGGGATGACGGCTGTCCAGCTCGGTTCATCTCGCCGTCGCGGGTACCTTGG  
CGAGGATAGAGGCGGCGCTGATGGCGGCCACCAGGCTATCGCCCTTGACCACGGCACGCGCTTCCATCGG  
CAATGCCGGGCAACGGTTGCCATCGATAAAGACCAGCTCGGGGTGACCTTCAACCCCGCCACGGCTCGC  
TGCATCGCCAGCATGGTGGCATGCAGGATGTTGAGCTCGTCGATCTCCTCCGAGTGGCGCGACCGATGG  
ACCAGGCGAGCGCTTCTCTTTGATCTCGTCAAACAGGGCGAGGCGCTTCTTCTCGGAGAGCTTCTTGG  
GTCGTTGAGCCCCGCGATCGGATTGGCGGGATCGAGAATGACCCGACGGGTGACCACGTCACCCACCAGG  
GGGCCACGACCCACCTCGTCCACACCGGCAACCAGCTTGTGCTCAGGAATATCGATCATCATCTTGTAGC  
CTTGAATCAAAAACAGGCCCGCTGGGGCTGACAGGGGTGACTGGCGCGGCATCACCGCTCGGAAAACGG  
ATTAACGGGCTGCGCGGCGCAATCGACGGTCCGAAATAGCGTTATCTGCCGAGCAGATCCGCCACCGCAT  
CGGCGGCTGCGAGTCCGATTCAGCGGATCAGCTGGTGCAGCTCGGTGAAGGTGTTGACCAGCGCACT  
GTTGTGCTGCTCGAAACTACTTGTCTACCTCTTCCACCAGATCTCCTGGGGTGCACCTCGTGTGATGAGT  
TCCGGCCAGCATGACAGCCGCGAGCAGGTTGGCCAGAGAGACAAAATTCGGTCTTACCAGTGCCTGGG  
CCAGCCAGTAGCTGAAGGGCTTGAAGCTTGTAAACCCAGACCATCGGCTTTTTCACCAGCATGGCCTCGAG  
CGCCGCTGTGCCGAGGCCAGCATCACACGTCAGCGGCGATCATCGCTCGCGGCCCTGCCCTTCCAGC  
AGCACCATCTCGAGACCCGCGCTACCTCGGCCTTGATGGCCATAAACTGCTCGCGCCGTTTTCTGGTTGA  
CCAGCGCACGATGAAGCCGAGATCCGGATAGCGCACCGTTCAGGTGTTTGCACGCTTCGAGAAAACAGGGG  
AGACATAAAGCCACTTCTGCGGTGCGGCTGCCCGGACGACCCGCCAGCCAGCGGCGATTGGCATCGATA  
CCGAGATTGCGACGCACGGCGGCTGATCCGGCACAGCGGAATATCATCCGCCATGGTGTGACCGACAA  
AACGGCAAGGGGCGTCAAGCGGTGCTAGAAGGCTTCTCGAATGGCAGGAAGGCGAGCACCATGTCCGT  
GGCGGCTTGTATCTTGTGAATGCGGTTCTGGCGCCAGGCCACACAGAGGGGCTGACATAGTGAACCGTC  
TTGATACCGGCGCGGCGCAGTTTTCAGCTCCACTCCGATATTGAAATCCGGTGCATCCACGCCGATAAAGA  
TATCGGGCGGATTGGCAATAAAGTAGTGCAGCAGTTCGCGACGAACCTTGAGGATGCGCGGCAGACGGCC  
AAGCACCTCGGTGATCCCCATGACGGAGAGCTCTTCCATCTCGAACAGGGCCTTGACGCCGAGGGCCTGC  
ATCCGCGGCCCGGCGATCCCTTCAAACCTGCGCATCCGGGTAGCGGGCTTGCAGCTCGCGCACCCAGACCGG  
CAGCCAGAATGTCGCCGAGACCTCTCCGGCGACGATACCGATACGAACCGGATCAGGCACGGATGATCC  
CGCGCTCGTTATCTTTGAGGAAGTCCACATAGAGCTGGACGGCCGGTTCGGCTTGCGCCATCTCGATCAG  
CACCGGCAGCACCTCTTCGATGGTCTTCCCGGAGCGGAAGATCTCTTTATAGGCACGCTTGCAGGCAGAG  
ATAGCCTCGGCGCTGAAACCGCGGCGACGCAGACCTTCAGAGTTGACCCCGAACGGCTTGGCATAAGTTGC  
CGGAGCCATCACGTAAGCGGCGACATCCTTGTTCAGGGCGGCGCAGCCACCAGCAAGGCGTGGGAACC  
GACGCGGCCGAACCTGGTGAATGGCGGAGAGACCAAAAGATCACGAAGTACCGATCACCACTGAGGCCC  
GCCAGGGTTCGCTTGTGGCGAAGATGCAGTTGTACCCGATGATGCAGTTCGTTGGGCAACGTGAACGTTGA  
CCATGAACAGGTTGCCGCTGCCACCTTGGTTCAGGGATTGATCCTGAATGGTGGCACGGTGGAAAGGTGCA  
GTTCTCGCAATGACGTTGTTGTGCGCAATCTCGAGGAAGGTGCGCTCACCGGCGTACTTCTTGTCTG  
CAATCTCACCGATGGAGGTGTGCTGGAAGATCTTGTGGCGGACCAATCTTGGTTCGGGCCCTTGTATCA  
CCACATGGGAACCTACCCAGGTGTTGTACCGATTTCCACCTCGGCGCCGATGACAGAAAAGGGGCCGAT  
TTCAACCCCTTTACCAATCACGGCAGACTCATGGACGATGGCAGTATCGTGAATGATGGCAGTCTGGTGC  
ATCACGTGTGTTAAACCTCGCGTTTGGCGCACATCAGCTCGGCGGTACAGACCACTTACCGTCGACGGT  
GGCGACACCGGTGAACTTGGCAATAACCGCGACGCTCTTTCAGGAACTCCACGTCCAGCACCAGTTGGTCA  
CCGGGGCCGACCGGACGCTTGAAGCGAGCGTTGTGATGAGGCAAAATAGTAGAGTTGCTTGGGAGACG  
GCTTGGCCACCATGGTAAAGGCCAGGATACCGGTGGCTGTGCCATCGCTTCCAGGATCAGTACGCCCGG  
GAACACCGGCTTGGCCGGGAAGTGCCCTGGAAGATCGGCTCGTTGAACGAGACGTTCTTGTATGGCACGC  
AGGGTTTTGCGCTCATCGCTGATCTCGTAGTCTACACGATCCACCATCAGAAAACGGATAACGGTGGG  
GCAGCAGATCCATGATTTCTGGATAACCCAGGCTCTTCTTTTCAGTAGTCAAAAACAGTACCCATATACCA  
TCGTGATTATTCTTGTATCCAGCTTCTTCTCAAGCTTGTCTAACCGCTTGTGCATCTCTTCGATACGCATC  
ACCCGGGCGGCGGTCTTGGCCACTCTTTATTGGTTTGCAGAGGGATGCCGGAAGAGTAGACACCGGGCT

CGGTAATGGGTGCGCATCACCATGGCCATAACGGTGACGGTGGCTTGGTTCGCAGATCTCCATATGCCCGTT  
AAAGACGGAAGCGCCGCAATGATACAGTATTTGCCGACCTTGAGACTACCAGCCATCACGGTAGAGCCC  
GCCACGGCGGTGCCGTAACCGATCTCCACGTTGTGGGCGATCTGGCACTGGTTGTCGATGATGACGTTGT  
CAGCGATGCGGGTATCTTCCAGTGCACCGCGGTCAATGGTGGTACAGGGACCCGATCTCGACCCGGTTGCC  
AATGGTTCACACCGCCGAGCTGGGGGATCTTGATCCACTCGCCACGTTTCATTTGGCATAACCGAAACCATCG  
GCGCCGATCACTGTGCCGGATTGAACCAGACAGTCGGTACCCATGGTCACATTTGTGATAGAGGGTGACGT  
TGGCCACAGCCGGGAGCGGGCTCCCAGCCGGGTATTTTGGCAACAAAACAGCCCGGGCAATGCGTAC  
ATCGTCACCCAGCACGACGCCGGATTGATCACTGCATTTGGCGCCGATGGCCACTCTCTCGCCAGTTGC  
ACGTACAGCCGCGATAACGGCACTCGGATGAATATCCGTGGCCGGCTGCGGGGTAGTGTCCAGCAGTTGGG  
CCACCCGGGCAAGCCACATAGGGGTCTTTGAGCACCAGGGCATTGGTGGGACAAAATGGCAGATCCCG  
TTCCGGTAATGAGCAGCGCGGTGCGCTTGTCTGCTCCAGATAGTGGCGTACTTCTTTGGACAGGAAG  
GTGATATCCCCCTCCCCGGCCTTTTCCAGTGTGCTACCTTGGCGATTTCAGGGTTCCCGGCTCCGATGGA  
CCTGGGCCCCCAATTGCTGGGCCAGCTGTGCGAGAGTGAATGCCATCAATTAGTTGCTCTTGCTTACCTG  
AGAAATAACCTGGCCGGAGATGTCCAGCTTGTGCGGCATACGGGGCGGCATTGCGCTCCAACACCAGA  
TCGTAACCATTGCTCTTGGCGATGGAATCGATGGCAGCCTGCACCTTGGTCAGGATCTTGTGCGCTCTT  
CGGACTGACGGCGACCGTTGTCTGCTCAAAGCTTGCAGCTTCTGGTTGAACTCCATCTGCAGCTTGGC  
CAGCTTCTCTGGTTCTGCTTCTTCTGCTCGGCGCTCATGAAGGCTTCATCCTTGGCGAACTTCTCGACC  
AGCTTCTGGCCTTCTGTTCCAGCTTCTGCAGCTCACGCATGCGCGGCTCGAATTCGCCCTTTCAGCTTGG  
CTGCAACGGCTTTCAGCTGGGGCAGCTTTTGAAGACTTCGCCATATCCACCAGGCGATCTTGGTCTC  
AGCGAAGGCAGAACCCATGCCGGCAGCCATCAGTGCAAAGCTCAAACCAGCTACTTTCAACGCTTTATTC  
ACACTTACTCCTTGTTCCTCATGATGAGGGCTACCTGATTTACCCGATTATGCAAGCGGCTTAGGACC  
GTCTTGTACCTGGTGAGGCACGCATACCGCGCTCCCATCATTGAAGACCCCCACCGCATGGGTGGGGG  
CGAAACTCTGCTTAGAAAAGTACGACCGATATTGAAGGAGAAGACTTCGGTGGGATCCCCCTTCGTATTTCT  
TGATCGGCTTGGCCAAGGCGAACACCAGCGGCCCCATCGGCGAGAGCCACTGCAGGGAGACACCGGCAGA  
GACCCGGATATTGCCCGGGTTGGAGTAGTCTTGGCTCAGATAGTTGCAATCAGAACCAGCGGCGCAAGGA  
TATGCTCCGTTGGCAAAAATCGGTGCTCCAGACGGTACCTGCGTCCATAAAGACGGTGGAACGGATCTGCG  
GACGATAGGTTCTCGAAACAAACGGGGTCGGGAAGACCAGCTCCAGTGAGGCGACGGCCAGAGCGTTACC  
GCCTACCGAGGTCGGAACCTTCATAGTAGCCAGTTTACACCGGCTGAGAACCCTGCAACTGCCAGCA  
CCCGGCTTGTGTAGGTTGTAGATCGCTTGGGACCAATGGTATTGCTCTTGAACCACGCACCGAT  
CGAAACCACCCGCATAGTAGTTCTCGAAGAACGGCAGCATGGAGTCAATCGCCATAGCCGTTACCGTAGGA  
GACACGACCTTTGCCGATCATTACCCAACCTGTGATCCGCATCGAGCGGGAAGTAGTGGGCATCCTCGGCA  
GAGAGCTTGTAGTACTGCAGCTCCATGCCCGGCACGGTACCTTGGCGTTGATACGTTGACGATCACCGG  
CGGTGCGGAACATCCCCCTTGTTCAGGGTAGAGCGGGTCCAGCCAGCGGTGACATCGACGGTCAAAAATC  
GAGGTTGGAACCATCCTGTGAGTAAGCATTCCAGAACTGATCCATCTGTACCAGCTGGCGGTTATCATTC  
CACTGATCCCAGCAGTAGGTATTGCCATCAGTATCCGGATTGTCTTTCAGACACTCCTGATAGTTCTGGG  
CATTGAAGGACGGACGGCTCAGCTTGGTGTCTCGATACCGGTAAGTTCGAGACGGTTGAACTCGTT  
GACCGGGAAGCCGCTGGAGAGACGGAAACCGATGGTTTTCGTTCTCGTAATCAACGATATCGGCATCATCG  
GCGCGGAACTGGTTGTAGTAGACCCGACCACCCAGGCTGACACCATCCACGGTGAAGTAGGGGTGCTTGT  
AGCTCAGGTCAACGTTCTTGGAGTAGTGTGGTGTGCGGTTGATGGAGACCTTTTTTACCGGTACCCAT  
AAAGTTGTCTGGGATATCCCCGCCTGCAGGCTCAGACCCGATTCGGTACCGTAACCGATACCGGCGTTG  
ATGGAGCCTGCTGGCTGCTCCTTGACCTTGAAGTCGAGGTCAACCAGGTCAATCGTTGCCCGGCACCCGCT  
TGGTGTCCACTTCGACGCTCTCAAAGTAGCCAAGGCGGTTGAGACGGCTCTTGGACTGCTCGATGTTGTC  
GGAGGAGAGCCAGGTGCCCTCCATCTGGCGCATCTCGCGACGCAGCACCTGATCTTCGGTGGTGGCGTTA  
CCGCTGAAGTTGATGTTGCGCACATAGACCGGGGGCCAGGCTCAACGTTGACGATCAGCTCCACTTCT  
TGGTCTTGTGATTAACCTGTGGGAAAGTGACCACTTTGGGATAGGCATAACCGTAACGGCCGAGAAAAT  
GGAGAGCACCTCTTCGGTATGAGTCACTGACTAGCAGAGTAGGTGCTGCCGGCAGCGATCGGGATCAAC  
CCCTTCACTCTCGCCACCGGTCGATCAGGTACCCCTTGAGCTGGACACCGGAGACCTTGTACTGATCCC  
CTTCTTGTGATGTTGAGGGTGACGTAGACGCCCTTCTTGTGCGGAGTCAATGGAGACCTGGGTAGACTCCTG  
CTGGAAGCGGATATAGCCCGGTCATGTAGTAGGAGCGCAGGGTCTCGATATCACCGGCCAGTTTCTGCT  
TTCTGATAGCGCTGGTCCGGGTAAGTTCCACCAGGGCACTTCGTCGCGCAGGGAGAGCTGGGCAATCA  
GCTTCTCTTACGGGAAGACGCTGTTGCCGACAATGTTGATCTGCTGGATCTTGGCCGCTTCCCCCTCCAC  
GAAGGTGAACTTGAAGTCGACCCGGTTGCGCGGCAACGGGGTGACGATGGCCTTGACCTTGGCTGAGTAT  
TTACCCACGCCATAGTAGAAATCTTCCAGTCCCTTCTCGAGGGAAAGTACGTTGCGATCCAGCGGAT  
CACCCACACGGATACCGGAGGACTCCAGACTCTGGGTGAGTTGCTCCTCTTTGATATCCTTGTGCGGCG  
AAACTCGATGCTGGAGATGGTCCGACGCTCCTTGACCATCACCTGCAGCACCTGGCCGTCACGGTAAACC  
TTCACATCCTCGAAGTTACCCGAGGCATAGAGCTTCTTGTGATGGCGCTGGCCAGAGCCACGGAGTCGACGG  
TATCACCGACCCGGATCGGCAGGTTCAACAGTGCGGCACCCAGGGTCAACCGTTGCAGGCCCTTCGACCTG  
GATATCTTGCACCACAAAAGAGGCAGGGGCCGCTGGGCCAGGAAACTGGCACCCAGCAGGCAACTCAAC  
ACCAATGCTTTTTTAACAGCCATTTTGTCTTATGTGCTCTTGTGATGCTCTGGCCTCAGAGGCGAGCG  
AAATCGTTAAACAGCGCAATGCCATCAATAACATCAGAATGGCGGCGCCGATCCTGAAACCCACTTCT  
GTATTTTCTCTGATACCGCTTGGCGGTGACCGCTTCGATCAGGAAATAGACCAGATGGCCACCATCGAG

CACCGGCAGGGGGAACAGATTGATAATCCCCAGGTTGACGCTGATCAGCGCCAGAAACTCAAGAAATAG  
ACCAGACCATAGTCGGCACTGCTGCCGGCGCCCTTGGAATGGAGATGGGGCCGCTCAGGTTGTCCAGCG  
ACACGATGCCACCGATCAACTTGCCAATCATGTCAAAGGTGAGCGTGATCAGGCTCCAAGTCTTGTCCGC  
GCCATGCCACAGCGCTGCAAAGGCCATACTGTAACAGAATTCGATATTCATCCGGTAATGGAACCAGT  
TGCGGCGAGAGACCGACGAATCCTACCAGCTTGCCCTGCACCTTGCGGCTATCCGGGGTCAGGGTCACGT  
TGAGATCACTGTTGTTGCGCTCAACCACCACTTGACAGGGGTTGCCCCGGTGCCTGCTGCACCAGCTCGAC  
AAACTGGGCCCACGCGGTAATGGGCTGATCGCCGACCTGTTTGATACGGTCACCGACCTGCAGCCCCGCC  
TTTTCACTGGCACTCTTGCCACCACGACAGCCACGACTGGCAGCACTTTGCCACTCAAGGGGACGATCC  
CCAGACTACCGATGGGCGACTCTTTATCCGGATCGAAGGTCCAGCCGGTCAGCAACAAGGTTTTATCGGT  
GGCATAGCTGGTATTGGGTGCCTGCACCTTGAGAGTCACAGCATCGTCACCCAGATGGCTGATAAGGGCG  
TAAGTGACGCTCTCCAGTACCCGGTCTGCTCATCGCCGACCCCGACAATCTCCATCCCCGGCAGCACAC  
CCGCCTCGGCCACGATGGATGCCGGACGCACTTCACCGATCACCGGCTTGACGCTCGGCACCCCGATGAT  
AAACATCAGCCAGAGGGCAAACAGGGCAAAGACGAAGTTGGCCATGGGACCTGCGGCGACAATCGCCATC  
CGCGCCCAGACACTCTTGTGGTTGAAGGCATACTGCTCGTCACCGGGCTTGAGTTCATCGACCCGGCCAT  
CGAGCATCTTGACGTAGCCACCGAGCGGGATCAGCGCCAGCACATATTCGGTGCATCTTTACCCATCCG  
GCGCCAGATCGCCTTGCCAAAACCGATGGAGAAGCGCTCAACCTTGACGCCACAACGACGGGCCACCCAG  
AAGTGACCAAACCTCGTGCACCGCGACCAGCAGGCCAGCGCAACAACAAGGCACCGATATTCACAACA  
CACCGCCCATCAGCCAAGCTCCTCAATCAAAGTGTGAGCACGGGCTCTTGCCGACCGTCCAGGGCAAAC  
AGATCATCGAGCGAGCCGACTGCGCTGCTCTCCAGCGCCAGCATCACGGTCTCGTTGACTCGGGCAATAT  
CCATAAAGCCGATGCGCCCGGCCAGGAAGGCGGCAACCGCCTCCTCGTTGGCCGATTTGAGCGCAGTGGT  
CGCCGCTTGTCCCTTCTGGCAGGCATTGATGGCCAACGCCAGACAGGGGTAGCGATCATAATCAGGCCGG  
ATAAAGCTGAACTCTCCGACACTGAAGAAATCCAAAAGTTCCACACTGGAGGGGATGCGATTGGGATAAG  
CCAGCGCATGGGCGATGGGGGTACACATATCCGGATTGCCAAGCTGAGCCAGCACGGAGCCATCCTTGTA  
CTGCACCATGGAGTGGATCACCGACTGGGGGTGGATCACACCTGGATCTGCTCGGGGGCCGCATTGAA  
AACCAGCGCGCCTCGATGTACTCCAGCCCTTGTAAATCATGGTGGCGGAGTCGACCGAAATCTTGGCCC  
CCATCGACAGTTGGGATGAGCGATGGCCTGCGCCGGCGTCACTTGCCAGCTCGCTGATCTCGGTGTA  
ACGGAACGGGGCCGAGAACCAGGTCAGCAAAATCTTGTGATCCCCGCCGCCGATCGCAAAAACCG  
GGCTGGCGCTGCACCGCAGTCGGCAGACACTGGAAGATGGCATTGTGTTGCTGTCGATGGCGCAGCT  
CGGCGCCATGCTCGCGCAGGCTTCCATGAAGAAAGCACCAGCATCACAGCGCCTCCTTGTGGCCAG  
CAAAATACGCTTGCCGGCACGTACCGCGGCCATGGTTCGGGGCCAGTCCGGCCGACCGCATGGCGGCC  
ATCACGCTATGGGCATCGGGGTGAGCGGCCACATCGCAAAAGGCGCGGCCACCAGACATGACCCGGGTGCG  
CACAGCCGTGCGCTTTAGACGGGCAGCCAGTTTACGGGCGGCATCCTCATCGACCATCACGGCAAAACG  
TGGGGAGAATTGAGGCGAGTCCCGCAACATGGCCTCCACGTTGCGGGCGGCGGTCAACGCCAACACTTGC  
CAACTGCCCGGGTTATGGCGCAGCACTTTCAAGGTACTCTGACCGATGGAGCCGGAGGCTCCCAGAATAA  
CCAGTGACTTGTGCATCAAACTCCTGACTGAGTAGCAGATAACTGAGCAGAAATACCGGCAGGGCGGGC  
GTCAGGCTGTGATCCGGTCGAGAATAACCGCATGACCCGGCAGCAGGGTGC CGGAATCCTTGATGCCCC  
CCTCGCGCTTGAACATGCTTTTCGGTCAGATCGCCGAGTACGGAGGCAAGCACCGCCAGCAGAGAGCAAAA  
CAGCACGGTGATCATCTTGGCAGGAACAAATCCCATCGACCAGGTGACACCGATGGCCAGCAGGCTGGCG  
GTAAAGAGGCCCGCCGACATCCCTTCGATGGTTTTGCCCCGACTCACAGCCGGTGCCAGCTTGTGCTTAC  
CGAACGCCTTGCCGAAAAAATACGCGCCAGAATCTGCCGCCAGACCAGTCCCATCACGAACAACAGGAT  
CCAGGCGCCCATCATGGGGTCATGGTAAAAGTTGTAACCACGGATGGCGACCAGCGACCAGAAGAAGGGA  
ACCAGAGTACCAGACCAACAGTGACTTGAGCCAGATAGACTCTTTCCACAGTTTGGCGCTCTGGGGAT  
AACTCAGCACCAGCAGCAGACCCAGCAACCACCGACTTACCGCTGTCCAGAGCACGCCATCACGAGGGG  
GTGCAGGTGGGGCGTCCAGAGTTGCTCCACCGGCAGCCAAAAGAGGCTGGCACCGAGCAACAGACAAAAT  
ACGATGGGCAACCATTGCTGCGGAGCAGCAGAGACAAAACCACTCCATTCGCGACTGGCCAACAAAAACA  
CCAGCGCAGCCAACAGGGCAAAAAATTTCAATGGCAGAAAAGAGCGCCCCAACACCAAGGGGATCAA  
CATCAAAGCAGTAATAAATTCGTTGTTTTAGCAAAAAGAAACCTCTCTCTTGGGAGCGGGGTTTAGCCGGT  
TGCTGCTCGGCGATCAATTTCCGATCTGTTTACCCGTCGAACCAGGACGCTCGCGGGCAACGAAAG  
AGGCGACCGCCTCACTGAACTCGGCCTCGTTGAAATCGGGCCACAATACCGGGGTAAAATAGAGCTCGGC  
ATAGGCGAGCTGCCATAACACAAAGTTGCTGATGCGATGATCGCCACCGGTGCGGATCAACAGGTCCACG  
GGTGGCAGATCGCCATGCAAACTCGCGGGTCAGCATGGATTCATCAATGTCGTCAGCGGCCAGTTCAC  
CGGCCGCCACTGCTTTAGCCAGCTTGGGGCCGCTGAGCGATATCCCACTGGCCGCCATAGTTGGCCGC  
AATGTTCAAGGTCACCCCTTGTATTGGCGGTCAAGGCTTCCGCTTGGCGATTTTGGCCTGCAACCGC  
TCACTAAAGCGAGCAGTATCGCCAATCACCTTGAGCCGGATCCGTTGTTGTGAGTTTCTGCACCTCAC  
GACCCAGCACTGTGATGAACAGTTCCATCAAGGCACTGACCTCCCTTCCGGGCGGCGCCAGTTCTCGCT  
GGAGAATGCAACAGGGTCAATGCCTCGATCTTGGCAGCGCAGCAAAGGTAACGGCCTCGCGCACTGAC  
TTGACGCCCGCCTTGTGGCCATAAACCCGCATCTTGCTCGGTTCTGGGCCAGCGACCGTTACCATCCA  
TGATGATGGCGACGTGACGGGGTAAAGACGAGTTGGCACAATCACCCAACGCAGCCAAAAGCGACATGTA  
ATTCTCCACAAAAGACAAAAGCGCCGTGACGGGGCACTACACGGCGCTCGTAATATACCTTTAGACGGT  
TAGATTTCCATTAGCTCCTTCTCCTTTACGGCAAAGGGCCTCATCGACCAGCTTGTAGGAGTCCGGTCA  
GTTTCTGGATCTTCTCCTGGGCGGACGGTCTGCTCTCGGAAATCTCTTTGCTTTTACGACGCGCTT

CAGGTCGGCGTTGGCGTCACGACGGATGTTGCGCACGGCAACACGGGCATTTTCCGCTTCGGCACGGACG  
ATCTTGGTCAGGTCACGACGACGCTCTTCGGTCAGCGGCGGCAGCGGCACGCGCAGGGTCTGGCCATTGC  
TGGACGGGTTTCAGGCCAGATCGGAGGTCAGGATCGCCTTCTCTACCGCCTGGATCATGGAGCGGTCAA  
AATGGAGATGGAGAGGGTGCAGCATCTTCTGCCACGACGTTGGCCAACTGTTTCAGCGGAGTGGCAGCA  
CCGTAATACTCAACCTGGATGCCGTCGAGCAGGCTCGGGTGAGCGCGGCCGGTACGGATCTTGGACATTT  
GAGTCTTGAGCGCTTCTACGCTCTTGCCCATACGGTCTTGGCGTCGTTTTTAATCTCGTTGATCACAGT  
GGTTTTCTTTTGGCGAACGAGCCGCTACACGGCCCCGTGTCTATCTTATTTACTGACGTGATGGATAGGA  
TAAGAGCGCCAAGTGGCTCACTTTTATCTTATTTACCAACGTGGTGGATCAGAGTGCCCTCCGGTTCACC  
CATGACAACCCGGCGCAGGGCACCCGGTTTGTTCATGTTGAACACGCGGATCGGCAGATCATGGTCACGT  
GCCAGGGTAAAGGCAGCAAGATCCATCACCTTGAGCTCTTTTTCAAGAACTTCATCATAACTCAGTTTCA  
GATACAGCACGGCATCCGATCTCGATCCCAGGATCTTGGTGTATACACCATCAACCTTGGTGGCTTTGAG  
CACCACGTGACGTTTCGATCTCGATCCCAGCAGACAAGCCGAGAATCGGTAGTGAAGAAGGGGTTGCCG  
GTACCGGCAGAGAAGATAACGACTTTGCCAGCACGACGCTGGCTGATTGCCCTCGGCCAGCTGTAGGAGT  
CGCAGACGCTTGCAGGGAGATGGCAGACATCAGACGGGCATTCACATAAGCACGATGCAGGGCATCACG  
CATGGCCAGACCGTTCATCACGGTTGCCAGCATACCCATGTGGTCCGCCACCACGCGGTTTCATGCCCGCT  
TTGGCAAGACCGGCACCACGGAACAGGTTGCCGCCACCGATGACCAGACCGACCTGAACACCCAACCTCAA  
CCAGTTCTTTGATCTCTTGGGCCATCCGCTCCAGCACCGCCGGATCAATGCCGAAACCCCTCGGATCCCTG  
CAGGGCTTCACTCAACTTCAGAAGAACACGTCTGTATGCAGGTTTGGGATTGGTACTCATGTCACCTG  
ATTCCTGGTCATATAAAGACCGCGACATAAGTCGCGGTCTGGGGAAACGAAAAACCGGTTTCGATTAGGC  
CTTTTGAGCGGCCGCGATTTGGGCTGCAACTTCAGCAGCGAAATCGGTCTCTTGCTTCTCGATGCCTTCG  
CCCCTTCGAAACGGGTGAAGGAGACAACGTCAGCGCCTTCTTCTTCAGCAGCTCGGCAACGGTCATGG  
AAGGATCTTTACGAACGGTTGACCAGTCAGGGAAACCTCACCGGTGAACTTCTTCATGCGGCCTTCAAC  
CATCTTCTCGGGCATCTCTTTCGGCTTGCCGGAGTTGATGGCGATGTCGATCTGGATTTCGCGCTCTTTG  
GCAACGACTTCAGCAGACACGCTCTTTCAGGCTTGACGAATTGCCGGCTGTTGGCAGCAACGTGCATGGCCA  
GATCTTTGGCCAGCTCGGCAGAACCACCGGTCAGCTTGGTGATAACACCAATGCCGGAACCGTGAACGTA  
GGTACCCAAGTTGTACCTTCAACCAGCATCACGCGACGACGAGTTTCATGTTCTCACCGATCTTGGCGATC  
AGGTTGGTGTGATGGTCAGCTCGACGGATTCCCGGTTACCGAAGTCAGCGGCTTTCAGCGGTCACACGTCAG  
CAATTTTCTGGTTCGACGCGATGTCAGCGATCTTCTGACCCATTCGCATGAAGCTGGCATCTTTGGCGAC  
GAAGTCGGTTTCGCTGTTCAGCTCGATCATGACGACCTTGCCTTCGGTTCGCGAGCAAAGATAACGCCCT  
TCAGCGGCATACGCCAGCTTTCTTGGCGGCTTTGGCCTGACCGGATTTGCGCATGTTCTCAATTGCCA  
GCTCGATATACACCAGCAGCTTCTTCCAGTGCTTTTTTTGCAATCCATCATGCCAGCGGCAGTGGCTCGCG  
CAGTTCTTTTACCAGGGCGGCAGTAACGTTAGCCATGTCCAGTATCCTCGGTCTTGAATTGACAAGAAAC  
AGGGGCCACAAGGGCCCTGCTAACCAATTACATCAGCTTGGTTAATAAGGGCTTTACAGTCTTTATCAA  
TTACTCAGCTTCAACGAAGCCATCTTGTTCGGCTTGAACAACGATGTCTTGAGCGGAGCTTCCAGTACG  
GTGTCAGCAGCAGCATTACGGTACAGCTGTACGGCACGGATAGCGTCGTCGTTACCCGGGATGACATAGT  
CAACGCCGTCCGGGTTGGAGTTGGTATCAACGATGGAACTACCGGATACCCAGGTTATTGGCTTCTTT  
GATAGCGATATGCTCGTGGTCCGCATCGACAACGAACAGAACGTCAGGCAGGCCGCCATGTTCTTGATA  
CCACCAGGCTCTTCTCCAGCTTTTCCATTTCCGCGAGTACGCATCAGCGCCTCTTCTTGGTTCAGCTTGT  
CGAAGGTACCGTCTTGGCTCTGGGTTTCCAGATCTTTCAGGCGCTTGATAGACTGACGAACGGTTTTTCCA  
GTTGGTTCAGCATAACCGCCAGCCAGCGGTGGTTTTACATAGAACTGGTCGCAACGCTCAGCGGCTTCTTTT  
ACGGCTTCAGACGCGGCACGCTTGGTACCAACGAACAGTACCTTGCCCTTCTTGGCAGCTACGGAGCTGA  
TGAAGTTCATGGCATCGTCAAACATCGGAACGGTTTTTTCCAGGTTGATGATGTGAACTTTGTGCGGGC  
ACCGAAGATGTAGGATTTCAATTTTCGGGTTCCAGTAACGAGTCTGGTGACCGAAGTGAACGCCGGCTTGC  
AGCATGTGCGCATAGAACTTTAGCCATTTTATACCTCTGTATTTGGGTTAGGCCCTCCACACATCCCAT  
ATAACCGACCCGTTAAGGCACCCCGGCATATGTGTGATGTGTGTGTGTTGTTTAAAGTAAGGGTGTATGAA  
ATCGGGACGCAAGTTCCCATTTCCGCGCGCTTTATACCATAACTTTGTTTCAGGACACCACCGGCCGACA  
CCCTAAACAGGTGTAATAATGGATCCCAGGAGGATGCTGCGACGCTGATTTGACGTTGTGATGACAAT  
CACACTGGAAGTACGAGGGGGTTGCGGATAAAAATTTTGCCTGATTGCAAACGCATCTATTTTTTTCATTAC  
CTGTCTGTCTGCCCTCGCAGGCCAGCGGCAGGCCGCAAGAGAGATCCCATGTCCATTAATAAATCAAGGC  
ACCGGAAGAGATTGAAAAGATGCGCGTTGCCGGCCAATTGGCCGCCGATGTGCTGGTCATGATTGCGCCC  
CATGTCAAAGCTGGCGTCACTGACGAACTGAACACCTCTGCCACGACTATATTGTCGACGTACAAC  
AGGCGGTTCCAGCTCCGCTCAATTACCATGGCTTCCCAAATCCATCTGCACCTCGGTGAACGATGTGAT  
CTGCCACGGTATCCCGAATCACAAGAAGCTGCGCGATGGCGACATCATCAACCTGGATATACCCGTTATC  
AAGGATGGCTACCACGGCGATACCTCGGCCATGTTTATCGTGGGTGAAACCACCCCGCTGCGCCGCCAGC  
TCTGCAAGGTTGCGCAAGAGAGCCTCTACGCCCATCAAGAAGGTGCGTCCGGGTGCCGTCATACCCGA  
GATTGGCGCTGTCTACAGCCCATCGTCGAGAAGGCCGGTTTTCTCCGTGGTGCCTGACTACTGCGGTCAC  
GGCATCGGTGCCGAGTTCCACGAAGAGCCGAGATCCTCCACTACCGCAACAGCGGCAAGCTGGAGCTGA  
AAGCGGGCATGTGCTTACCATCGAGCCGATGGTCAACAGCAAGAAGTATCACTGCAAGGTCAATCCGAA  
GGATGGCTGGACCGTGACCACCAAGGATGGCGGGGACTCCGCCAGTGGGAACACACCCCTGCTGGTGACC  
GAGGATGGCTGCGAGGTGCTCACCTTGCGCCCGATGACACTATCGACCGCTTCATCAAACACAGCTAAC  
ATCGAACCCCGGCCCTGAACTTCAAAGCGCCGGGTTTTTACTTCTGTTTCAGCCGTTTGCCTGCCACT



GTGTGTGAGATGCCATGGACGCCAGCCTGCTTTCCCCCATTGTTACCCGATGACCAGCTCACTCGCGA  
CAACTGCAAAGAGTACCTGAGCCGCTTTCTCGGCTGGCTGCACGCCGTTTTGATGCCGGCGACAACATC  
ATCGAGCTGGTGCACCACCCGCTCCGAATACATGGATCAGCTGCTCTGCCGATTGTGGCAGAAGTTCGGCT  
TCGACAAGAGCGACCTCACCTCATCGCGGTAGGCGGTTATGGCCGTGGCGAGCTGCACCCCACTCCGA  
CATCGACCTGCTGATCCTCTATGACGGCGACGAACTGGACGAGGTGTTGGGACTGCGGATCGGCGAGTTC  
ATCACCTTGCTGTGGGATCTCAAGCTGGAGGTGGGTGAGGCGGTGCGCAACGTGGCGGAGTGTCTCGAGC  
AGGGGCGTGGCGATATTACGGTGCACCAACCTCATTTAGGGCCGCTACATCACAGGTCGCCAGGAGGG  
CTTCCAGCAACTGAAAGAGGCCACCGCCCCAGCACTTCTGGCCAAGCGAAGCCTTCTTTTCGCGCCAAG  
CGCCAGGAGCAGGCGGAGCGTCATCAACAGTTCCTCGGCACCGCCTACAAGCTGGAGCCCGATCTCAAGA  
GCAATCCGGGCGGTCTGCGGGATATTAGACCTTGCCTGGGTGCCCCGCCCACTTTGGCGCCACTAC  
CTTGTTCCGAGATGACCAGCCAGGCTTCTCAACCGCGCGAGTATCGCGAACTGCTCGACTGCCAGAAT  
TTTCTCTGGAAGGTGCGCTTTGCCCTGCACATGGCGATCAACAAGGGAGATAACCGCTGCTGTTTCGATC  
GCCAGCGACCGTAGCCAGATGCTGGGATTGAGGGGGAAAGCAACACTCCGGTCGAGCAGATGATGAA  
GCGCTTCTACCAGACGGTGCGGCGGGTCTCCGAGCTCAACGAGATGCTGCTGCAGCTGTTTGACGAAGCG  
ATCCTCGGCAACACCGCCATGGATGTGCGCCGCTCTCCGACGAGTTCAGCTCCGTGGCCGCCCTCATCG  
ATGCAGTGGATGCGGAGCTGTTTAGCCGTGAACCGGCCCATCTTGCGCTCTTCTATCAGATGGCCCA  
ACATCCCGAGATTGCCGGCATCCACTCGCAACCTGCGCAACTGCGCGAGGCACGCCGCAAACTCAAC  
TGCTGGCTGCAGGACTTGCTGACTGCCGTGCTCTTTATGGCGTGTGCGCCACCCCAACGGCATCG  
GCCTGCCGCTCACCTGATGCACAAGTACGGCATTCTGGCGGCTATCTGCCCCAGTGAACCTGATCGT  
CGGCCAGATGCAGTTCGACATGTTCCACGCCTACACGGTGGATGAGCACACCCATCGGCTACTCAAGAAC  
ATTACCCAGTTTCCCAATCCGGCCAGTCGCCAGAGCCACCCGCTCTGCCACGAGGTTCACCCCGCTAC  
GCAAACCGGAGCTGCTCAGCATCGCCGCCCTGTTCCACGATATCGCCAAGGGGCGGCGGGCGATCACTC  
GGAACCTCGGCGCCGTGATGCGCTGGAGTTCGCCAGCTGCACGGTCTGGATCGCTACGAGAGTGCAGT  
GTCGCTGGCTGGTACGCCACCATCTGCTGATGTGCGGTACCCGCCAGCGCCGCGACATCTACGATCCCG  
ACGTGGTACCCGATTTTGCCAGAAGGTGCGCGACGAGCAGCATCTCGACCTGCTCTACTGCCCTACCCGT  
GGCCGATATCTGCGCCACCAACGATACCCTGTGGAACGACTGGAAGGGCACCTGCTGCGGGAGCTCTAC  
TTCGCGACCCAGAAGCGCTGCGCCAGGGGCTGGAGAACC CGCCGACATGCGGCTGCGGATTCGCGAAA  
ACCAGCGTCAAGCAAGCAACTGCTTTCGCGCAACGGGATGTATCGGAAGAAGCGATCAACCAGTCTGGGC  
CGATTTCAAGCCGACTACTTCTGCGTCACAGCCGAGCAGATCGCCTGGCACTGCCGCCACATCATC  
GAGCATGGCGACAATCCGGCACCGCTGGTGATCATCGGCAAAACACCCGACCCGCGGGCAGCGAGGTAT  
TTATCTACTGCCGATACCCCGAATCTGTTTGCACCGCTCGCTCGGCGCTGGATCAGAAGAACCCTCAA  
CATCCACGACGCCAGATCATGAACTCGCGCAGCAACTTCGTGCTCGATACCTTCGTGGTGTGGAGCCG  
AGCGGCAACCCATCAGCCCCAACCGCACCGCCACCATCAAGAAAAGCGCTGGAGAAGGGCGTGCAGGAGC  
CGGGCAAGCTGGTGTGCGCAACAAGCCGCTGTGCGGGCGCCACCGCCAGTTCAGCGTACCGACCCGGGT  
GGTCTTCTGCCCGCTCTTCGTCCACTAAAGGGGAGAGCCGTCATACCTTATGGAGCTGACTGCCCTC  
GATACCCCGGCTGCTGGCGCGGATCGGTGCCGTTTTCCAGCAATGCGGGCTGTGCTGCACGCCGCCA  
AAATTGCCACTTTCGGTGAGAGGGTGCAGGACTTTTTCCAGCTGACCAGCTCGATGGCGAGCCATTGAC  
CGCCGAGCAGCAAAAACAGCTGGAAGAGCGACTGGTGCACCAGCTCAACCCCAAGCAGTCCGGTACTGGAT  
TAAGCGAAGAGTGATTGAAAGAGGCTGGTTGTCGGGCGTTTTTTGCCATGCCAAAACACTGGTTGACGC  
ACACAGGATGAAGAAAATGGCCACTGGCCGGAAGAATTCGGTCAACCCCTTAAAAACAGTCCGAAAAGTG  
TGATACAACAACAGAAATTTTTTAAAGGAAACCTGTGATGACCGAGTTGCAACAGATCATTGAAGCGGCC  
TTCGAGCGCCGACACCATTAATCCGGGCTCCGTGGATAGCGCCACCAAGTCCGCCATCCTGCAAGCCA  
TCGACCTGCTGGACTCCGGCAAGGCGCGGGTTCGCGAGAAGATCGCCGGTGGTGGGTTGCCATCAGTG  
GTTGAAGAAAGCGGTACTGCTCTACTTCCGATCAACGACAACGGCATCATCAAGGGCGACGATGCCAG  
TACTACGACAAGGTTCCCTCAAGTTCCTCAACTACACCGCCGAGCAGTTCAGGAAGCGGGTGTACGCG  
TGGTGCCGCGGCAACAGCCCGCAAAGGCTCCTTTATCGCCCCAATACCGTGTGATGCCCTCCTATGT  
CAACATCGGCGCCTTCGTTGACGAAGGTACCATGGTGCATACCTGGGCCACTGTCGGCTCTTGCGCCAA  
ATCGGTAAGAACGTCCACCTCTCCGGCGGCGTCCGCATCGGCGGCGTACTGGAACCGCTGCAGGCCAACC  
CGACCATCATCGAAGACAACCTGCTTTATCGGCGCCCGCTCCGAAAGTGGTTGAAGGGGTGATCGTCCGAGGA  
AGGTTCCGTGATCTCCATGGGCGTCTTCATCGGCCAGTCCACCCGCATCTATGACCGCGAAACCGGCGAG  
ATCCACTACGGCCGCTACCGGCTGGCTCCGTGGTCTGCTCCGGCTCCCTGCCCTCCAAATGCGGCAAGT  
ACAGCCTCTATGCGGCGGTGATCGTCAAGAAGGTGGATGCCAAGACTCGCGCCAAAGTCCGGCATCAACGC  
CCTTCTGCGCTCCATCGACGAGTAATCAGCATTGCTGTGACCCAAAAGGGCGCTGATGGCGCCCTTTTG  
ATTTTGGCGCCCTGTACAGGCAAGCCATGAGGCATCGGTTAAGATGGATGGGACAGGATCGTTTCAA  
CCGAGGAAGCCTGATGTACGAGAATCTGAAGAGCCTGGGGATCCAGGATCCCGCTCCGTGATAGCTAC  
ACCCTGCGCCAGGAGGCCAACACGACATCCTCAAGATCTACTTCAAGAGCAGAAGGGCGAGTTCCTTCG  
CCAAGAGTGTCAAATTCAGTATCCCCGCCAGCGCAAGACCATGCTGGTGCAGTCCGGTACCCATGAGTA  
CAAGGATGTCACCGAGATCAACGCCAACCTCAAATATGTGGTGGATGAGCTGGATAACCTGACCCAAAGGC  
GTCCATCAGCAGGCGACCCGGACATCAAGCAGAAGATCTGCGCGACCTGCGCCATCTGGA AAAAGTGG  
TACAGAACAAGATCAGCGAAATCGAACGGGATCTGGAGAACTCTAACCTCCCCCTTGTCTTTAAGAG  
CGCCCGATGTGGCGCTCTTTTTATTGGCTGACTTTATATAGGTTTATCAGGTGATGACATACGATAAGTC

GAGCGAGGCACACCAGCGGTTGTGCCGACATAGGGCATCCGCTATATATCGCCCCTTGGGCAACGAGAC  
TCCTGCCGAGCTCGACCTGCTGTGACTCGCAGCATCCATAACCAGAAATAGCAAGAGGGAGGCTTTTCGCC  
TCCCTCTTCAAACACGCTGATATTCAGGCAACAGTATTAGTTGCTCTTCATCCAGATGTCCATGTCGGTT  
TTCAGGTTGTTCGACTTGGTGGCCGAAGATGGCTTGAACGCCGGAACCAGCCACTACCACACCGGCAGCAC  
CCAGTTTCTTCAGACCAGCCTGGTCAACCTTGGCAACATCTTTACGCCAACACGCAGACGGGTGATGCA  
GGCATCCAGAGAAGCGATGTTCTCTTTACCACCGAAGGCGGCAACCAGAGCAGCAGACATCTCGTCTTTA  
CCTTGGCCAACGGCCTCTTCAGCAGTCTCGTCTTCACGGCCCCGGGTTTTCAGGTTTCATGGCACGGATAA  
CGAAGCTGAATACCACGTAGTAGATAGCCGCTAAACCAGACCAGACCAACCAGCAGCAGCATGTTGTC  
GGCACGCGGAGATTGCACCACGAAGTCGATGAAGCCGTTGGAGAAGGTGTGACCGTGTACGATAACCAGA  
GAGTTGGTCAGTACATAAGCCAGACCAGCCAGTACCGCTGGATGGCGTACAGAACCAGGAGCGATGAACA  
GGAAGGAGAATTCAATCGGCTCGGTGATACCGGTGAGCAATGGCGAACGCAGCAGCAGGAGCCATGATACC  
AACGATCTTGGCACGGTTTTCCGGCTTGGCAGCGTGGCAATGGCGAACGCAGCAGCAGGAGCCATGATACC  
ATTTTGAACAGGTAGCCACCAGCCAGCTGACCAAAGCCGTTACCGGCAGCGCGGGACCGTTCATCAGCAG  
TCAGGAAGCAGGTCATGATACCGTGAACAGTTTTACCGGCACCGTTAACGCAGGTACCAGCCTGATAGAA  
GAACGGTACGTTCCAGATGTGGTGCAGACCGAACGGGATCAGGGAGCGCTCAACCACGCCGTAGATACCG  
AAGGCCAGTACCGGTTCTGGTTGGCAGCCAGTCAGAGAAGGCACCGATGGCGCCACCCACTGGCGGCC  
AAATCACGGACAGGATCACACCCAGACCAGTGGAGAGGAAACCGGTGATGATGGGTACGGCACGTTTTGCC  
CGCGAAGAAGCCCAAGTACTCTGGCAGCTGGATCTTGTAGAAAACGGTTGAACGCCCCAGGCAGCGATACCA  
CCGGCCAGGATACCACCCAGCACGCCGTTTTCGATGGTTTTCAACACCCATCACAGGTGCCATGACCTTCA  
GGGTTGCGACCATGATGCCGTAGCCAACGATGGCTGACAGACCGGATACCCGTCGTTATTGGTAAAGCC  
CAGAGCAACACCCACTGCGAACAGCAGGGCCATCTGGCCAAATACGGAAACCACCGGTTGCTCCATCAAT  
TGGGAGACAATTTCCGGCATCCAGCTGAAGTGGGCAGCACCCACCCCCAGCAGAATACCTGCGACTGGCA  
AGACTGATACTGGCAGCATCAGCGCCTTACCAACCTTTTTGCAGATTAGAAAAAGCATTTTTTGAACATTGT  
GTGCGCTCCTGAATGGATTGTGCTCCCTGAACGATCTATCTGGATGAAATAAGCACTGATTCATTCAGAT  
ATCTTCGAGTCGGGCTTGTATTTTTGACCATCAGAATATAACCAGCGGGTCATAAATTGCTGCTTTTCG  
AAGGCGGGGAATATTGAATTTGGAGGAAAGATCACAACCTGTTTAGCAGCTAAAAACAACACTAATAT  
AATTTAATAATCTGCATTATCACTCTATTACAAAAATATATAAATGTCAGTTTTACTTTGTATTTTTAACA  
ATGCCATTTATATCAAACAGAAACCCACTGCAACCAATGTAACCAATGTAACCAATGTAACCAATGT  
AACGGTATGTTTTTATTATTACAGTCTACCGATTAAAAAGGCTTCAACAAGGGAGGCTCAACAAAT  
ATATCTGACCAACAAAGGGTCGTATTACTCTATTTTTGCGAGCGCTTGACCGCATCAATAAACACGCTTT  
TTGCCTTGGTTGAACCAGCCGCTCGGCCTCGTTACCAGCTTCATCGCCTTGTGATATCCCCGCCTT  
GACCGCTTTTTTCGATCTGGCTCTGGTAGAAGGCTTCTGTTTCACTCAGCATGGCAGGAGCAGGTTTGGCT  
GCGACCGCAGCTGTTGCAGTTGTGGTAACGGCTGCGGTAGTCGCTATCGCTGCAACCTGCTGACCCGTC  
TCATGGCAACCTTGTGCGCATATTCGGGTTTGAATAACCGCTTCAAGACCACTTCCACGGGCCATATCTTT  
GACTTTGATCTGCACCAAACCCACGGGGAGTGCGGGATCACCGGATCCTTGATATCAGGCTCAACGGTA  
CCATTAGCGCGAGCAAATGCTTTTTGATGGATGCAGGATTGTTGTGCTGCCAGAGGCTTATCCGCGGGCG  
CATAAACGATCATGTATGTTTCGCTGGCCGGGTTGCCAGGCATGCTGCGGTCAACAAAAACAGTCCCTC  
GATACGGTCGTTATCGAGCAAGTGAGCAGGCTGATAGCTGAATACTGACTCACCCAGGACCCGAGTCACC  
TTGAACTCGGCATCCAGCATAATGACCTTGGGCACCATCACGGTTTTACTCACCTGTGATGCCAGGCTGA  
TCGCCAGATTGCCGGTGTGGTTCGGCAAGCGATAAGCAGCAAAGTAACTCATCCCCCTCATCAAACCTGAAA  
AGTGGGTTGCTTGGCATCAATGGCCAGCAAGGTCTCACCTTACGGCAAGGGGGCATAACGGAAATCTTTA  
AACGCCACACAGCAGCTTGGAGCTTTGGCCAACGCTTGGCTTGGCTTGCATCGCTCAAGATCGAGC  
CATGTTCTTGCAGAGGAACAACCATGTTTCCGGCACAACCGGTTAATAGCGCAGTGATTACGGCTGCAAT  
AGACATCTTTACCCGTTTCATTTTTCTTATCTCCATAATCCGGTGGCCGTGATCCGGCGAAACAAAACCTG  
CCCCATAAGGGGGCAGTCACTAACTTAACTTAACTTTTGTCTTACCACCAAGCTTCTGCTTGAACACCA  
AATTTGGTAGGTGCTTTTGGAGGTATTGCCTTCAAGACTTCTTGTCTTTCGTCGTTAGCCAGATAGGAGG  
CGAACACACGGATTTCCGGACGGGCCAGAAAGCTGGAACCGGCAGACCAAGCTTGTGCCAGGTCAGCTT  
GTAGCCAGCATCTTTGTCTTCGCTACCATTGGTAGACTTGTGTTGTGCTTGAAGTAGCCGCTTCAAAG  
ATGGTCTTGTGAAAGTCATCCCACTTGTACATCGGGCGGATAACAGCGGACATGGTTTTCGTACTTGTGCT  
TGCCATCCACATTTGCTTGCCTACACCGTAGACCAACTGGTGACCCATCTCCCAGGAGTTGCCCATCGG  
AACAAACGCCCCAGTTGATGATACGGAAACCATCGGCACCGTCTTTGGCTTCAGCACCGTACCAGGAACCA  
TCGCCATAGAAAGCCATAGTCTTGGAGTAACCTTCCGGTACCGTATTGCAGCACGGTTTTTGTGAAACCA  
CGAGGATGCCTGCGGTGAGTTCAGCAGTCAGCATGACGCCATCTTGCAGGATCTTCTTTCAGTGCTTTCTG  
ATCATTGGTTTTCATTTACCAGAGCGTAATCCACGCCAGTTCAGAGAGGCATCGGTCCACAGCGGGATG  
CCGGCATAACGCAGATCCAGAGTATTGACGTTGATCTTTCGTTCTTACGTTAGTTGGAGCTGCACCTGG  
TACCGGTATTGGTGTACTCGCCGAACACGCTTTTTGCGCTACGGTTCGTTACGTTACCCATGCGAAAGAGAC  
TTTACCCGGACAGCCTGGATGCCTTCGATACCCAGCACCAGCACCAGGAGATGTTCCAGTAGTAGAAGTCG  
GAGATGTGGATGTCATGGCGTTGATAGTAACGCTTACCAGCCACAGGGTTGCTTCCAGGAGCAAAGTTCA  
GCAAGCCTTTGGCTTGTACGTTGAACTGACGCAGAGCGAAGTCAGAATCACCATTGCACCTGCTTGGCATC  
GAAGTTACAAACAGTACCGGTACCTTCCAGTCATTTGAACCGTTGGAAGCCATGGCAACATGGAATCA  
ACATAGAAAGTCTTGGCATCTTTGTTGAATACTTCTGACCCAGTTGCACTTACCAGTAGGTATCATTTTT

CGTTACCCAGACGGCCAACCTTTATTGACGTTGTATTTAACCATGTCACCGTCGCCGAAACACCGACACC  
GGAACGGAAGTAACCGTGGAAATCTACGGCAAAGCGGCTTGGGAAGCCAGGGCGGCAGTAACAGCTGCT  
GCAATCGGGAGCCACTTCATTTTCATTGTGCATATTCCTTATTTCCCGCAGTGAGGAGTGTGATCCTGAAT  
ATTCAACTTCTTATCACCATGTAATCCTGTTGGTGATAACCGAGGTTGATTATAGGGAGCGTATTTACG  
ACAAATATGAAGCGACTCACAAAATGGCGACAAAATCGCTCGGCCAACACAAGCAGGTA  
AAAAACAACCAAGAGGCAATATGTGACCAACAAGACCACAAAAGCTAGCAATTAACAACAACCTGAAAG  
CGTTACCGCAATTAATTCGCGATTGAACCAAAAGTCATTATTTTACGTTTCAATGACAAAAACATGACTG  
AGATCGCTTTCAAGATTGAACTTTTATTTGGACGACGGGTCTGCGGTGCGCTTGAAACCATTACGCCGAT  
GGAATGCCAAAAGGGGAAAATATCCCTCCGCCACTATCGACAATAAGAGTGGGAAAATATGCTTGCTGAGT  
GAGATGACATTTGTGCAAATAACAATCCCTGCGGTTAAGGATCAGGGGATTGATATGGCTCTATTTCA  
GAGAATATTCAGGGCTGAATATCCCACTTTTTCAGCCAGCTGAGTGCCACCTGTTGCGGTTTCATCGTGCA  
CGGTAGCATCTAGCTCCAGCGGGGGAATCACTCGCGTGGCGCCAGCTCTTGCAAGCAATCCGTCAGCCG  
ACGGCCCGCGCCACAAAATGGTCATAGCTGCTGTGCGCCATGGCAATCAGGGCATACCGCAGCCCTTG  
AGCCAGGGCGCCTTGTGACCCAGCTCGCTGGCAAAGGGCTGCAGATTGGGAGGAATGTCCCCCTGTCTG  
TAGTGGCACTTACCAGCAATAAAAAACGGCCGGGTCATGTCCGCCAGCCGTGCTTCTTCGTGCAGAGA  
ACAGTGATGCCCTTTCGTTCCAGCTCATCTGCCAAAGTCTCGGCCACCAGCATGGCTGCGCCATAGACA  
GTTTCTACCACGATATCGATCTGCGCCATTCTCTCTCCCTGCTTGAGTCACTCTTTTAGCAACTCTATC  
AGCAAGCTGGCGTCAGATGCCACCGGTTCAAGGCTGAGGATCAGGCGCTTAGTAGTCGCTCTCGCTGGCG  
GGCCAGCCAGCTCGGCAAACAGGCGCAGCACATCTGACCGAGCGGAGCCTGGATCCGCATCGGCACCT  
TGAGCACCGGATGGGTAAAGCTCAGGGTGCGGGCCACCAGCAGCAGCCGTTTCGCAGCCAAAGTGTCTCGC  
AAAGAAACGGTTGTGACGACCATCCCCATGGGTGGTATCCCCGACGATAGGGTGGAAACAGGTGATCCATA  
TGGCGGCGCAGCTGATGCTTGCGGGCCGGTCTTCGGGAACAATCTGACCAGACTGTAGCGACTGGTGGGGT  
GCTTCTTGAGACCGCGTGGGGCAGCTCGACCTGATGCAGGCGCCGGAAGGTGGTGACGGCATCCTGCGC  
CGGACGATCCGGGTTGCTCATGGCATCGGCAATCTTGTCCAGCTGCTCCTTGAGGGGGTAGTCGATCACC  
CCCTGCTCGGGCGCCCAACCGCGCACCAATGCCAGATACTCCTTGTACACCTGACGTTGGGTGAAGGCTT  
CGGTGAGTGCAGCGGCAATCACCAGATCGAGCGCAAACAGCAGCACACCGGAGGTGGGTGCGTCGAGGCG  
ATGCACCGGATAGACATGGCGACACCAGATGAGATCCCGGTCATCTGCATGGCAAACGGGTCTCGCC  
TTGTGCGAGCCAAGTTCGCTGACCAAGTAGACAGCGGCTGTTGACCACCAGCCACTCATCTTGTG  
AGAGCAGGGTCACTTCAAGTCACTCTCTCTCGGGTTTGTATCTGGCATCATTTGTTTCGATCACTTTGCCG  
GAAAGCAGCAGATCGAAGCGGGCGATCAGGCGCAGCAGCGCTTCTGCTTCGGCCAGATCTTCTTTGTAGA  
CTTTCGCTGGCCATGGGATAAAGGGAGACGCTGGTGGGCAGTGGCGCCTGCAACATCACCAGCTGCTCCAT  
GCGCGGGATCAGCACGAACTGCAGCCACTGATCAAAGCTCAGGGTATCGACACAAAAAGGCAGGGTGTCT  
GCTAGGGCTTCGTCACCGGGATGGTCAGCTTGCCAGCGCTCAAGGCGCTGCAACTCGGGCGGTGAGTTCCC  
CCAACAGGCCAGCTACCAGCAAATATTGATTATCTCGCTCTCTTCTCATAACCACAGATTGATCCGCT  
GACCCGACAGGGTACGCCAGGATGCCGGTACATTCAGTCGCACAGCACCAGGAGTTACGCCAGCTCGTGC  
ACATAACGGCAGCCAGTGCAGGCTGCGGCTTTAAAAAAGGGCGATACTATACACCTCCCCCGCATGG  
CTGCCATGTTGATATCTGCCGCAACACGCGTCTGCTGCCACTGGCTATCCTCGGCAAGGGCCTTATAATC  
GGCCCGCATCACCATTAGCCGGATCTCACCATGTCTGTGACGCCACTGCCATCAATACCTTGACCGAAT  
TTCTGACTCAGGCTGGCACCCAGTTCCAGCTGTTTACATGGGCCGCCAGGTGCGGCCACTGGCAAGCGA  
CACCTTTGTGCGCATCGAACAGCAGCAGGAGCCCTACCCCTGGCCGCTGCAACAGCATGCCTGGCTCGGT  
GTGCACTTCTTCCAGCCGAGCGAGTCTCGCCACTACCTCTGGTTCTCAAGTTTGCCTCGATGAGCGCG  
GCCTGCTGATGTCAAATGGCCCCAAGCTGTTTTCATGGATCAGGTGGTGGAGACCCCTGGGCTACAAGCTCAC  
CGGCGATCTGGATGAAGAGAAAGCCAGCGCTTGGCCGACAATCCCTACACCTTCCGCCCCGGCGGAGGCA  
AAAATGGCCAGTCTGCATGCCAAGCTGGCGCGACAATGGAGCAGGCCCTTCTGCCTATTACGATGCC  
TCTGCCACTATCTGCCACCCCCAACGACACCGGTTGGCAGACTCTGGGGCTGCAGGGCTTTGCCGACCT  
TGCGGAGCGGCTGCATGATGAGCGCAATCTGGCGCTGATCTGCAAGGCGCTGCCAAACTGCCGCAAGAG  
CCGCTCTATGCCCTCTGCCAGAGCCTTGAAAACGCCCGCAGCCGCCAGCAGTACAAGGCGCCCTGTCTG  
AGCGGATCGGCAAGGAGCAGGAGTGCAGCGCCCCCAACCCGAGACCCCTGGCCTATCTCTGCCGCGCCAT  
GGCCTCCTGCCCTGGCAGCACGCTGCGCACCAACAAGCTGCTGACGCTGCTGCAAACCCAGCCGAGCCCT  
GCGCTGCTGCTGCCATTGCGGGCCGACTCTGGCCCGATCTGAAAAGATGCCAATCTGCTCAGCCACTATC  
TGGAACAACCTGGCGCTACAACCGACCCAGTTCTTCAATCAGGTTTTTTGCCGAGTTGGTCACTTTACCGGC  
CCTGCGCAATGATATGCTGGCCAGACTGCGCGACCCGAGCGCAGCGATGCGCTGGGCAAGGCCATCGGC  
CGTCTGTTTGCCTCGGCTGATCCCTCGCTCCCCCTCACGCCACGAGGCAACACGGCGGAAATAGAAA  
AGGAGATCGGGAGTGGCAGCAGGACTCCCGGTTATCGACATCACGATAAGGAAGCCCGCTATGGGAGA  
GATGCTCGGAATTTTGTGCTGATTGCGATTGCCGGCTGTTCTGGCTGCAACGCCAACAGGCAGAAGTG  
GCCTGGCAATACATGCGCCGCTACTGCCAGCACCATGACCTGCAACTGCTGTCACTGGCTCGCCATCAGC  
GGGAGCTGGCGCATAATCCCTGCGGCTGCTGACCCACTATCAGTTTGAATTTTCCAGCGATGGCGAGAG  
CCACTATCAGGGCACCTCAAGATGCAGGGGCTGCACGTCGTGGGCGTTGATCTGCCACCCCATCGAATC  
CCCTCAGCCTGATCCCAATCTCGTCTCTGCGCCGATGGCTGTGCTGTCTATAATCTCAGGGATTA  
CAAAGGGAGAGACGAGATGAAACCCCTTGTCCACGATCTGCCAGCCCTGTTTGGCCAGCTCGGGATGGCC  
AACGACGAGCTGAGCCTGCACCGCTTTGTGCACGACCATCACCTCGACAATGAGACCTGCTGCCGGAGG

CCGGTTTCTGGAACGCCGCCAGGCCAGCTTTCTGCGGACGCCCTGTGGAACGACTCCGACTGGTGTGA  
AGCGATCGACCAGCTCGATGTGATGCTGCGCCAGCCCCGCTAAGCCGCCCTTTCCTCCCCTGCCGGCTTT  
GGTTAAGATCCCCCCCCGATGTGATCCCCCTTCTCACCCAGAGCATGCTTATGTCCGCCACGAGATC  
ATCCGAATTGCCAACGAGCTGGCCGCCAAGGGCCTGACGCCACCACCGCCATGATCAAGGCCCGCTTA  
CCCAGCCCCGTGCCGATGGCCGAGCTGCTGAAAAGTGTGAGCCAGTGGAAAGCAGCAACCCGTCGTGACCGC  
CGAAAGCCTGCCAGAGGCTGTGCTCAGCCAGCGCCGGCGCCACCCTGCAGCAACTCGCAGAACAGCTC  
GCGCGCATCGAACAGAAGGTGGATCGCTGACCGACCTGCTCCTCCAGCAGGGGCAAGGCTGAACCATGT  
ATATCGTGAACCTCTGCTTTGAGTGTACCGCGATACCTCCCTTGGCGACGCCGAGCGGGCCATCGTCAA  
CTACCTCGACATGCTGCGTTATCAGGGTCAGATCCTCGGGCGGGAGTTTCCACCAGCATGCATGACGGC  
TATTTTCGTAGTCGGGTGGTCTGTCCGGAGCAGGATAGCCTGCACCCCGACAACCAGAGCGAGGATCA  
AACTGGCTGAGCAGCAGATCAATCAAGCCGGCTGTGCGGCCAAACTCCATTTGCAAGGGGCGGATCT  
GCTCTCCGACAGCAGATCCTTGCGCCAGCAGGGCGAGCGCCAAAGCTGGATGATGCTCTACACCAGC  
TTCCTGCACACCTGCTCGCCGCTGCGCTGTGGCGACCACTTCGCCCCCATTCGGCTCTACCAACTGCCCG  
CGGTGCGCAACGGCGATCAGAAGCAGATCATCAAGTGGCAGGAGGATTGGGAGGCGTGCGATCAGTTGCA  
GATGAACGGCTCCATCGCCGAACATGCGGCGCTGCACGAAATCGGCGAAGTGGGCAGCCGCCCTTACCGG  
CGCGGCAGCGATCTGGCCAAACGGCTGGAAGTGTGAGCGGCATCCCCACCTACTACTACCTTACCGGG  
TGGGCGGGCTGAGCGCCGCTGACGAGAAGGCGCGCCCTGTCCAGCTGTGGCGGTGAGTGGGCGCTGGC  
AGAGCCATTGCACGAGATCTTCGACTTCAAGTGCACAGCTGCCGTCTGGTCTCCAACCTCTCCTGGGAT  
TTCAAGGATTAAGCGCGTTCCCTGTACGCAACCCATAAAAAAGAGCCTTGCCGCATGGCAAGGCTCTTT  
TCGTTCCGATGAGTAACCTTGGCTCGAACAGGTGCTATTGCGGCAACGTCTCAAGCCGTTCCAGAAACGT  
TGGCAAAGAGGGCGCCAGCGGCAGACGGCGGCCGGAGTCGAGCCACTCCAGCCACACCTGACCCTCTCG  
TTATCCAGCGAGATGAGCGTCATCTCGTTGCGGGTGGTGGCAATAAAGATGGAGGGGGGGCGTTTTAGCT  
TGCGCAGCATCAGCAGGTGGCCGATGAGGTTCTCCCTGAGCAGGTGCGAGATCCGCGTCGTTCCACGGCAG  
GATCAATTAAGGGCGAGCCCTTGAAAAGGCAGGGGATGGGGCGGCTGAACCAGTGCAGCAACAGGGCG  
ATGGCGCCGGGATGAATCGTCAGCTCAAGAGCATCGGCCATAGCCGTAAAAATCGGCGGGTTCCGAGCGAT  
GGTGAGGACGCCAGGCAACCCGACCATCGGCAGGCTCACCAAGTTGGCAGGGGGAACGCCAGTCCGCCCTC  
CCACTCGCACAGGGCAGGCGCTCGTCTGGCCTCGCCATCCCGTTGCCAGCGGGCAAAAAAGTGTCCAGG  
GCAGCAAAAACCTGATCCGACATCGAAAATCCCCACAATTTGCTGGCAAAAGTCCGCTATTGCAGACCAAA  
CCCGGTAACAGACAAGTTGCCAGCCGACCTTGCAGCCGGGAAACAGAACCCGGGATACAGAGAGGCCCG  
ACACCCAAGCCAAACGGCTGCAACCATCCGGCCAGCAATGGCCCGTTTCATTCCTACTCATATGAGCAC  
ATTACGTGAGCAACCTGTGAGCAAAACAAGATAGATACGCCGGGGCCAGCGCCCTGACCAGGCTGAGCCT  
GGGCCAGCAATCCGATTACATCAGCCAGTACACCCCTCCCTGCTGCAGCCGGTTCCACGTAGCCTGAAC  
CGGGATGATCTCAAGCTGGGCGATGACCTGCCCTTTAGCGGTTGCGATGTCTGGACCCCTATGAGCTCT  
CCTGGCTCAATGCCAAGGGCAAGCCGATGGTGGCGGTGGGGGAAGTGACCATTCTGCCACCAGTGCGAA  
CCTGATCGAATCCAAATCCTTCAAGCTCTACCTCAACTCCTTCAACCAGACCCGTTGCGACTCTATCGAG  
GCAGTCGCCGCCATGCTGACCAAGGATCTGAGCGCTGTGCCGGGAGACCGTCAAGGTGACCCTGTTC  
CCCTCGACAAGGCGCCGACCCAGATTGCCAGTTGCCCGGCGAGTGCATCGACGAGCAGGATATCGAGGT  
AGACAATTACGAGTTTGTGATGCGTCCCTGCTGCAAGGGGCGGCAGGCAGCGAGCTGGTTCGAGGAGACCCTG  
CACAGCCACCTGCTCAAATCCAACCTGTCTGGTCAACCAGCCAGCCGACTGGGGCTCTGTGGTATCCGCT  
ACAAGGGGCCGAAACTCGATCGGGAGAAGCTGCTGCGCTATCTCATCTCGTTCCGCCAGCACAAAGGTT  
CCACGAGCAGTGCATCGAGCGGATCTTTATCGACCTCAAGCACTATTGCCAGCCTGAGCAGTTGACCGTC  
TATGCCCGCTATACCCGCCGCGGGCCCTCGACATCAACCCGTTCCGCTCCGATTTGCAAGCCGTGCCCG  
CCAACCTTGGCTCTGATCCGCCAATAAAGTGCAGTTGCGACAGAGAGGGCAGGCACACTGCCCTCCATGAC  
TTGCAAAAAGGTTTCAATCGATGCCTTACGCAGCAGGAATAAGGGGGCTGGATAATAAAAATCCAGACGAA  
AACCACTTGGCGGCCACCAGCAAACACAGTAAACGCTGGACTCGCAGGGGGGGGCTTGATAAATGCAATGCC  
AGCTCCAAATCTGGATCTGGACAAGGAGCAACTCTCAATCGATCTGCAACAAGCGCAATCGATGGTACTG  
ACCGATCCTGCCAGATGCGTCCAGATCACCAACCGCTTCTGACGCGCGCAGCCAATAATCCCCAGCAAA  
TCATCAGCAATCGCCAGGAGTTCGGTTATCGCGAACCTATCCTGAGCTACAGCACGGCGGCCAGACCAT  
AGGGCGCCACTTGCTCAAAGGGGAGTGTCTGCTGCAACTGGGCAATATCAGGCCACCCAGCAAGCGCTC  
GACAAGGCGATGGCGCTGGCAGACAAAGAGCGGCAACCGGAACTCAAGGCCACGGCTCTATCTCAAGA  
TCCGCGAGTCAGGCCCTCAAACCGGATAACCAGAGCACCAACCGCGCCCTGATGGATCAACTGGACGAGCA  
GCTGGCCGTCCCCACGCTCAAGCAGAGCCAGTTGCGATCTATGGCCGCTGCAACGCACCAGCTACGAC  
ATCGAGAACCAGCACTTCGATGATGCCAAGGCCATCTGGCAGACGCGCGGATCTGGGCCGCCAAGACCC  
CCAATCCCCTCGCCAGTGCTTGGGTCAGCGCCATCAGCGCGATCTTTATCGCGCACTGCAGCAACCACA  
GCTGGCGCTGGGGGAATATATCGATGCCAGCAACAGGCCAAAAGCCTCAATGACCCGCTCTTTCTCGGC  
CTGCTGTGCAACCAGATAGTAAACTCTACCAGCAGGAGCAGGAGCCACAGAAAGCGCTGCAGTATGCCA  
ATGAGGGCGGCAACTACTTCCACTCCATCGGCAACCCCTCCTTGCTGTGCGACTCCCTGATGGTGTGCTGGC  
GCGACTCAACCGCGAGCAGGGCGACCTCAATATGGCGCTGGTCTACTTCTTAAATGCGCTGGATCTGCTC  
GATGAAGGGAGCAACCGACCGCAAGCCTCCCTGCTCAAATATGAAATTTGGCAAAACCTACCTGCAAAGCG  
GCAACCTCTCGCTGGCCAGCAACTACCTCAATGCGGCCGTCAGTCTCACGAACTGAGCGATGCCAAAGA

GCCGCTGATCGATAACCTGCTGCTGCTCGGCGAGCTCTATCTGAAGAAACAGGAGGCCGCCATCGCCATC  
CTGCAATTGGAGAACGCCCCGCGCACTGGCCAATCAGCTCGGCGATAACCGCCGTCAGTACGAGGTATTCC  
GCCTGTTGTCGCTGGCCTATGAGCAGAAGGGGTATCTGCGTCAGGCTCTCGACAGCTACAAGCGCTTCCA  
CCGTCTTGGCGAGGAGGTGCGCCAGCAGGAGCAGGCCATGGAGCAGGCGGGATCCGCGACAACCTATGTT  
CAGGTGCGAGCGGGTGAACATATCAAGGAGCTGGAGCAGCGACTTAACAACAGCCAGCATCAGCAGGAGC  
GCTATCTCTGGTCGAGTATCACCACCAGCCTGCTGCTGGCGCTCTTTATCTACCTCTTCTTCACCCCTCG  
GCTCAAGCTGCGTACTGCCCCCTGCAACTGAAACGGACCAATGAGGCCCTGCTGATCGAGCCACGCTCG  
GGGCTGGCCAACCTGGCAGCGGCTGATGAACCGCTGGCCGCGGGAGATGGCAAAGCGCCAGCTGAAATCGG  
ATCGCTGGTACCTCAGCGAACAGCCCTCCAGCGAGTTCGATGACAACTGCACTATCTGCTGTTCCGAGT  
ACCTTTCTCTGGTCAATACGCTGGAGCGCCACGGCTATCAGGCCAGCAGAGAAATCGAGCAGGCCCTTCGGT  
GCCTATATGGACACCCTGACCCCGCAAGATGGCCGTATCTATGACTTGCCTGAAGGACACATGCTCTATG  
TAGTGCCACAGCGCCACGTACCAACCTGCATCAACTGGCCGGAGACCTGCTGACCGCCATCGCCGCCCTT  
CCCTTGACGCTATCCGCTGGATCGCCAGATCAGCCTCGGGATTGTCAGTACCCCTTCCCTGCCGAAAGCG  
GCGACCGCGCTCGATCACAATGGCCTGTTTTGACCTCTGCTATCTCGCCCTGTCGGGAGCCATTCAGCTCA  
GTGAAAAATGCCAGCAAAACGCCTGGTTGGAGCTCGCGGCATCGATTGCCAACAAAGCGGCATTTTTTAA  
TGGAGATGTGTGGCAATGCGGCCTGATGGCAATTGACAAGGGACTGGTAAAAGTCAATTCCTTCTCATGAA  
AAGCAATGGGTAAATTGGCCAGCCTTGCAAGGAAGCCGGCAGCCGATAACCACCAGGAAATAATGTAGA  
TAACAGGCGAGGATCGAAACCAAGTCCGACCCTGTTGCTATCCAACACCAAAAAACAATAATGACAACAG  
GGCGACCTGATAATGAATGACATCGCTGCCGTAGCAGGACAATTGGCAAGACTCAGGGAATCCCTTCAGC  
AGAAACAGCTGGAACCTCGACGGCGTACTGTCGTTTTCCGATGCGAGCGTGGCCGTGGTATCCAGTTTTAT  
CAACAAGTTGATGCTCTCCTGCCGTGGCTTCGACCGCGAGCTGGACAATCGCTTCGCCAAGCTCAAGCAG  
AAACTGGATAACAACCCCGCATTTACCGCGCTAGACGAGGATCTACTGGCCATTGAAAACTGCTGCAGC  
AGCACAGCAATGCGCTGGAAGAGTCGATCACCCCTGACCCAGACCGCCATCGAGCTTGGTTCCAAACAGCT  
GAAAAACATCAAGGGCTTCCCGGAAGAGACCCGCAAGTCCCTCAAGGAATTTCTGGCAAGTCCCGCCGGT  
TACGGCATTGCCGATCACAAAAGAAGGTGATCAAGCTGCTGGAGTTCTACCAGCAGGCGATCAAGATCC  
AGCTGCTGCCAAGCCAACCCCTGTTGGCACCTCAGGTGCAACTCAACAAGAAAAGTGATACTGCCAGCAA  
CGATGGCCAGCCGATGTCGACCCGTTTTGATCTCAAGGATCACGCTCGCATCGCCGATGAGCTGCAGCGA  
CTTATCACCGAACCTCGACTTTGCCCGGCCATCGCGAGACCTGAGCGATATTCGCCCGCAACTGCCTGA  
TCGGGATCAACCCTGCCCTGCTGGCGGAAACATGCCTGCAGGTGATCGAGTCACTCAACGAAAGCACC  
TGAGGAGCGCAAAGCCTCCCGCGCCTTCCTCAGCTCCCTCAACGAGAGCCTGTCCCGGTACATGTCCGG  
TTTTACGAATCCCTCGATGAGGGGCGTGCCTGCAAAACGAAACCCCGGAGACCCGCGAGGCGCTGGTCA  
ATGAGTTGCAGGCGATCGATCACTCTCTGGCCAGCCATAACTCCATCGATGCGCTCAAGCGCGCCATCTC  
CGGCCATATGGGCGCCATCAACCTGCTGCTGCAGGAGCGTGACAGCACGGCGGGCGGGAGCGTACCTG  
CTCACCCGCTCTCAACCATGGAGTCCAAGCTGCGCTTGATGAAGGAGGAGACCCCGGAGTACAAGAAGC  
GGCTGACCATTCAAAAACACAAGCTGTTCTCGACAGCCTGACCCAGGTACACAACCGGGCCGCCCTCGA  
TGAACGGCTGGAGCAGGAGTACAAACGTTGGCTTCGTTACCGCACTCCGCTCTGCATGGCGATCATCGAC  
ATCGATCACTTCAAGAACATCAATGACAACCTACGGCCATATGGCGGGTGACAAGGCGTTGAAAGTGGTGC  
CCAAGGCGCTGCAGAGTGCCTGCGTGCACCCGACTTCATCGCCGTTTTTGGTGGGGAAGAGTTCGTGGT  
GTTGTTGCCAACATTAACCCGGACAAGTTCAGAAAGCCGCTGGAGACCCCTGCGCCAGACCATCAAGAGC  
ATCCCGTTCCGTTTTTCGCGATGCCAAGGTGGAGATCACCATCTCCATCGGCGCAACCCGTTTCAAGGATG  
GGGACAACCCGTCAGATGTGTTTGAACGGGCGGACAAGGCGCTCTATCACTCCAAGCACACCCGGTCGGGA  
TCAAGTGACACTGGCCTGACAAGCGGCTAAAAAACAGCGAACAGTCGTCGCCCTATTTCCCTCCACCCT  
CTGTTACCACTACTATCGATCTCAGGGGATGCAACATAGCGTCCCTTTTCTCCCAGGGAAAAACACAA  
CGATAACAAGTGAGTAAAGGGGAACCTATGATTACGCACATCAATCCCGTCGGCAGCATGGATTTGCTGT  
CACAGCTTGAGGTGATCGCCTCAAGCAGACTGCCTCCAGCGATATCTATCAACTGTTTCGCAACTGCTC  
GCTGGCAGTGCTCAATTCGGTAGCCATACCGACAGCTCCAAGGAGATCCTGGAGCGCTTCAAATCGTTC  
GATATTCATGTGATCCGGCGGAGCGGGGTCAAGCTGGAAGTGTCAATGCCCCGAGCACGCCTTTG  
TCGATGGCGAAATCATTGCGGCGATTGAGGAGCACCCTTCTCGGTGCTGCGCGACATTTCTCTATGTCTC  
CAATCAGCTCGAGTCCAACCGCCAGGTCAATCTGACCAACTCCACTCACATCTCCAACGTGGTGTTCGCC  
ATTCTGCGCAACGCCAAGGTGATCCTGCCCGGCGCCGATCCCAACCTGATCGTCTGCTGGGGTGGCCACT  
CCATCAACGAGATCGAATACCAGTACACCCGCGCCGTGGGCAGCGAGCTGGGCTTGGCTGAGCTGAACAT  
CTGTACCGGCTGTGGCCCTGGCGCCATGGAGGGCCCGATGAAAGGGGCCGCGCTCGGCCATGCCAAACAG  
CGGGTGCGCAACGGGCGCTACATCGCCCTGACCGAGCCCTCCATTCGCGGCCGAACCGCCCAACCCCA  
TCGTCAACGAGCTGGTATCCTGCCGGATATCGAGAAGCGACTTGAAGCCTTCGTGCGCCTCGGCCACGG  
CATCATCATCTTCCCGGGCGGGTTCGGCACCGCCGAAGAGCTGCTCTATCTGCTCGGCATCATGATGCAT  
CCGGCCAACGAGCGGCAGCCGATGCCCATCATCTGACCGGCCCGAAAGAGAGTGCCGACTACTTCCGTG  
CCATCGACGACTTCATCAAGGCGACCCCTCGGTGAACCGGCGACCAAGCTCTACCGGATCATTTGTGGCGA  
TGCGCCGGAAGTGGCCCGGTGATGAAAGAGGGCGATGCCGAAAAATCCGCGAATACCGCAAATCGGTGGC  
GATGCCTACTCCTTCAACTGGTCCCTCAAGATTGAGCCGGAGTTCAGCTCCCTTCGAACCGGATCACG  
CCAGCATGGCCAGTCTGGATCTTACCAGCAACCGCCCGCCAGTTGCTGGCCGCCAACCTGCGTCCGAGC  
CTTCTCCGGTATCGTCGCCGGCAACGTCAAGGAAGGGGGCATTCGCGCCATCGAGAAGAAGGGCCCCCTC

AAGTTGCACGGCGACAAGGAGCTGATGCACCTGATGGACAAACTGCTGGAGAGCTTCGTCAAGCAGCAGC  
GGATGAAGCTGCCGGGCAGTCAGTATGTGCCTTGCTACGAAATCGTCCGCTAGGGGACAGATACATCATC  
GACAGAGGGGGCGCAGCGGGCGCCCTCTTTATTGGCGCTATGCCTTCCCAACCGCCATCAATCCCCATAA  
GGCGAGCGGTTTTGTTACAATGGGGCGTCCCAGCCGCAAGAGTGCCCCATGTCAACTATCCGGCCACATC  
TGCTAATCATCGATGCCCTCAACCTCATTTCGCCGTCTGCACGCGGTACAGGCCCAGCAGGCACTGACCCC  
TGCCAGGGCGCTGGTTGCAACCCGCGCAACCTTATCAATACCTGCCGCAAGCTGCTGGCCAATAGCGAG  
CCGACCCATGTCAATTGCGATCTTTGACGGAGAGAGCGATGGCGAAAATGCATAGCTGGCGCAAAGAGGTCT  
ATCCGGCCTACAAGGAGGGGGCGAACTCCCATGCCCCCGAACTGCGTGAAGGGCTGGCGACCCTGCAGGA  
TGCCTTTTGGGAGTGCGGGGTGCATGCCCTGCTCTCCGAGACCGATGAAGCGGATGACCTTATCGCCACT  
CTCGCCTGCCGATCGCCAGCCATGGCCATCAGGCGACCATCATCTCCACCGACAAGGGCTTCTGCCAAC  
TGATCTGCCAGCAGATCCGGGTGCGCGACTACTTCAACAAGCGCTGGCTGGATGCCGCTTCGTCCAGCA  
GCAATATGGGGTAGCCCTGCTCAGCTGGTCTGACTTCTGGGCCCTGACCGGTATCAGCGGTTCCAATATC  
AAGGGGGTTCCGGGGATTGGCCCCAAGACCGCCACCCAGCTGTTGCAGCAATATGGCAATCTGGCAGCCA  
TGCTCGAAGCCTGTGAGCAAGAGGACGCCGCAAGCCCTGATCAAGCTGCGCCAACATCAGGATGAGGC  
CCTGCTGGCCAGCGGCTGGTGCCTTGCAGCGCGATATTCCGCTGGGATTCAACCTGCGGGACATCCGC  
TACCCGCCCCAGCCAGACTAAAGTGCCGAACAAAAATGCAGGCAAGGGCGTGAACCATGACGAGACTCAC  
CCTCGCTGTTGATAAAAGTGAGTAGAATGTAAAGGAATGTGGTTGGTTTGTGAGTAAATGCTATAAAGC  
AGCCCCATCTCCCTATAACCTGGAAGTGAAACCTCTCATGTCCAAAAGAAAAATTACCGTGATCCCC  
GGCGACGGCATCGGCCCCAGCATCATTGAATCAGCCATCCAGATCTGACCCATGCGGGCTGTGACTTTG  
AGTACGAATACGCTGATGCGGGTCTGGTTGCCCTCGAGAAGCATGGCGAGCTGCTGCCCCAGGCTACCCT  
GGATCTGATTGAGAAGAACAAGGTGAGCCTGAAAGGGCCATTGACCACACCGGTGCGCGCGGTTTTACC  
TCCATCAACGTCTCCCTGCGCAAGAAGTTCAACCTCTACGCCAACGTGCGCCCGGTTCATCTCCTTCAAGG  
GCACCAGAAGCCGTTACGACAACATCGACATCATCACGGTGCGTGAAAAACCCGAAGGAATGTACTCGGG  
TGCAGGTCAGAAGCGTAGCGATGACAACAAGAGTGCCGAGGCGATGAGCATCATCACCCGCGAAGGGGCC  
GAGCGCATCGTCAAGTTTTGCCTTCGAGCTGGCTCGTCAGGAAGGGCGCAAGAAGGTCACCATCATCCACA  
AGGCGAACATCTCAAGTCGACCTCCGGCCTGTTCTCGAAGTAGCCCGTGAAATCGCCAGCCACTACCC  
GGATATCCAGAGCGAAGAGATGATCGTCGATGCCGCTGCATGAACCTGGTGATGTACCCGGAGCGTTTC  
GATGTCATGGTCACCAACCTGTTTCGGCGACATCCTCTCGGATCTTTGCGCCGGTCTGGTTGGCGCC  
TTGGCATGGCGCCCGCCCAACATCGGCGATGGCGCGCCATCTTCAAGCGGTCCACGGCTCTGCGCC  
TGACATAGCTGGCAAGAACATTGCCAACCCGACCTCGGTGATCTCGCTCCATCCAATGCTGGAGTAC  
CTCGGCATGCAGGATAAAGCAGAGCGGATCCGCGAGGCGGTACGAGCCACCATCGAATCCGGTGATCGGG  
TCACCCGCGATCTGGGTGGCACGGCTTCCACCAGCGAATTCACCCAGGCCATCATCGATCGCCTGTGAGT  
TAATTCATTGATTTTTAAAAGGGAGCTTCGGCTCCCTTTTTTATGTTTCCGAATCCTTTGCCACTCCCCAA  
ACAGCAACTATGTTCAATAGAGAAGAAGAACAGGGAGTGTTTTTTTCATGAAGGGATACGGGTGCTATCTGG  
TTTTCGGGTCTGCTGCTGGTGTGTGGCACTGCCAGTGCTTTCGAGCAGGATCAACAGACCCAAACCGCCAA  
ACTGCCGACGAGGAAAAACGGACTGCCACCGAGGTATGGCGCTCGAGCTGAATACCAACGACCTGCTC  
AAAGCCCCAAACCCCTGTCGTTTTGGTATTGAAGTCTCCACCGACAACCTTTGGCAATCAAAAGATCACCT  
CCTACCCGACGCTTAATCTGACCCCGAAAAGAGCGTCAGTCTGTGCGTTGAACGCTTCAGACCCAAGGT  
CAAGTTCAAGGCTGGCGGAATGAACACCGCCCTCAGGCTGAGAGGAGACGGGATAAAGATGCAATTCAT  
CCGGTGCACAAAACCATCCCCTGCAGATAGAGATCAAGGTGACCGACGACGAATCCTCCCTGCGCCTCG  
ATTACCGTTTTCTGATATTTTTCCGGCAGCCGAATAGCAAAAAGGCCGACAGGTTTCCCTGTCCGGCCTTGGA  
TTTATCGTACGGGCAGAACTGCTACATCACGCCTTGGGCTCGAGTTTGGAGACCCAGTACTTGTGTA  
CATGCACGGTGATCTCTTCCCGATCGTGATAGAGCTGCTTGGCTGGATCACGAACCGGTTGTCGATCTC  
CTTGAGCATCTCGCGCAATACCTCGATATTGTGCACCGACTCGGCATAACGCTTCTTCATCGGCAGCTTG  
AGGTTGAACATCGCCTCCTGACAGTGCCTCAGGAAACAGTCTGCAATCATGTGAACGACCCGCGCCG  
GTTTTATCGACCATGTCGCACACCCAGCCAGTAGGTGTTCTTCTTGCTCGACGCCAGACGAAACCGTCATC  
CCGATATGCTTGACCTGACCGGTATCCATCAGGGATTGGGCCATCATGCCGTTGTGACCGCGGTACC  
ATCATGCCACGACGACACCAGCTGATAGGTCCAGCCACCCGGGAGGCGCCAGATCCACCGCCTTCATGC  
CTGAGCAGAGACGCACATCCCACTCTTCCCGCGGCACGAAACGTTAAAACGCTCCTCCAGCTTGAGGCT  
GGAGCGGCTCGGCGCATCGGCCGGGAAGCGCAGGCGGGGATCCCCATGTGGAAATCCGGAGTTGTTGAAC  
GAATAGGAGTAGCCAGCAACACGTGATCATTGGCCATGAAGAAGGCGTGGAAACACCGGACGGTTTTGGCG  
TCTCCTTCTTGGTCAAGATCTCGTTGCTGCGCAGCGCTGACGCAGCGGCACGGTGAACCTTGGCGCAGAA  
GGCCGACAGCTCTTTCGTTTCGTTGGTATCCGCGGTTTCGACCCGACGATCACCGCAAATGGTGTAGTCA  
CTCACCGCCTCAAGTATGGGGGAGATCCTGTCCGCGACATCCAGATCCTTCAGCTCATGGGTGACCACCA  
GCATCTGGCGGATAAAGATGAGCTCCCGGAACGGCAGCTTGCAGAGCCAGCAGGTCCGCTGCTCCTCGTC  
ATACAGTTGGAAGATCACATAACCGCTGTGCTCCTTGACCCGGGCGAAACCGTAGCACTGCATGTTACCG  
GCACGCTCGGTGATCTCTGCAGCCGCTCTTTCTCAAAAACGGGGCGGCAATAAAGCAGCAGATTTATCA  
TTTTTTCTTCCAAGACGACAGCCAGCCAGATCAGGGCCGCCATCCCAACATAAAAACAGAGGCCACCGG  
CCGGAGTAATCAACCCAGCCCTTGTGCTGCCAAGCAGCACCATGGCGTAAATACTGCCGGAGAATCCGAT  
GATCCCCAGCACAAAAGCGGTGCCAGCCAGGTGGATCACCTGCTGCGCACACCACACCAGCCAGAACC  
AGCAGGGCCAATGCGTGAAAAAACTGATATTGCACGGCCGTAACGCGCCAGACGCTCGGGCGTAA

TGCCGGTTCGCCGCCAATCCATGGGCGCCATAAGCCCCAGCATGGTGGCCGTCAACCCGAAGAGACCGGC  
CAGTATCAGCCAATGTCGATGGATCTGCATCCTCACTCTCCCTCTTTCATCGAGGCTGGCAATAAAACCA  
ACCCTCCCCTGCTATCCGTGCCGGACCACAAAATGGCTGATGGCCGCCGTGCATGCTGCATATTATCCT  
GCTCACTCACGCCACTGGCTTTTCGCGGTTTGAAACCATGATCACCATCGGTCAACCAATGGACCGATAC  
GGCGGGTGAGAAGGGGAAATCGGCCAGTTTCGGCGGACTACCGAAGGTATCGCGCTCACCCCTGCAACAGC  
AGGGTTGGCACTGCAATATGTTTGGAGTACCTCGCCTCGCCAGCTGTCGGGCTTGGCCGGAGGGTGGAAAG  
GATACCCGAGAATGAGCAATCCTGCAGCATTCATCTCACCCCTCGCCTTCACGATAGAGTTCCGCCGCCAT  
CCGCCCGCCCATCGACTTGCCCGCCAGAAACAGCCGTGGATGGGCAAACTCACGGATCATGTCCGCCAA  
TGGGCGAGCAGCACAGGTGCTCTGTCCGGCGGGCGGCGCTTGCCATCCTGTGCTCGCTTGGTCATGTAGG  
GAAAGTTGAAGCGCACCACTTCGATGTCGGGGCCAGCCAGAGGCGTGACAACTCGGCAAGAAAAGACATG  
ATCCATCCCCGCACCTGCCCCGTGGCCAGCAAAATGCGAACGGGGGCATCAACAGCCCCCTCGCGGATC  
ACATCAGGCATCGGCGAGCCTTGCCCTACGGCGGGCCTCTTCTGCTCCACCAGCTCCAGCATCCAGTCCG  
CGGAAGGCTACGATCTTGCCCTGATCAGACTGCTGCTCCTGACAAAACAGATAGAAGGCATTTTTGCTCA  
CCAGCACCTGCTCGAACGGACAGATGAGGCGGCCGGCCTCAATCTCGGGCTGAGCCAGCACGCTGTGACC  
AAGCGCCACCCCCTGGCCGTGGATCGCCGCTGGATCACCATGGTGGAGTGGCTGAAGATGGGCCCTTGA  
TTGACGTTGGGTGCATCGATATCGAGCTGGCGGAACCAGGCCCTTCCAGTCGCGACGGGAGGTATCGTGCA  
GCAGGGTATGAAGAGTCAAATCTTGGCGGTACGCAGCGGTTTGGGCCGGTTCAGCAGCAAGGGGGAGCA  
GACCGGGATCAGGTATTCCGTATGCAGCTTGTCCGAGCGCAGACCCGGCCAGTTGCCGCGCCCGTAATAG  
ATAGCCACATCCACATCATCGGTAAGCGACCCCTTCGTGAGATCGACCGCCTTGATCCGCACGTCGATAT  
CGGGGTGGCGCTCGCTGAACTTGACCAACCGCGGCACCAGCCACTGGATGGCGAACTCGGCTGCAAACT  
GACAGTCAACGCCCCCTTGGCACTGCGGGCCAGCAGCTTGTGCGTCCCTCAGAGATGGAGGCAAAGATG  
TCTTTGATATCCAGGAAATAGCCCTGCCCTCTTCGGTCAACAACAAGGAGCGATTTTTGCGGCGGAACA  
GCTTGATGCCAAGATACTCCTCCAGCGCCTTGATCTGGTGACTGATGGCAGCCTGAGTCACAAAACAACCTC  
TTCTGCTGCGCGGGTAAAGCTTAAGTGACGAGCCGCTGCTTCAAAGGCCCTTGAGGGCATTGAGCGGGGT  
AAACGACGAGACATGACACCAGCCGACGATGAGTTTTTCTAATGGGGCGCATTATAATTTGTTGGTTGCG  
GGTCGACCAAGTGAATAAACATAATTCCGCCAGCAATCAGTCGTCATATGGCTCACATTTTCTACTACGTG  
TTGGTTTACATGTGTTTTTAGTGAGTCTTTCGACTGCGATTGTGGTGTGTGTTTTCTTCTGCGGGAA  
GAGGGGCTCAAATCTCACCCGTTTGACCCAGTCTGTATCTGAATGTGTTTGGCGCCTCCAGCTGGATG  
CGCTTTTTTTCATCCCTTCTATACCTTGAACCTGCCACCAGCTGCTGTGCTTGTCCGACGCGCAGAG  
AGCTCGCGACCATTTTTCGGCGGAGGTGCGCCGCTCGGCCCGAATGGTGTGGCTCACATCGCGAATGTTGC  
TGACGTTGCGGTTGATCTCGTCCGCCACCCGGCTCTGCTCCTGCGCCGCCCGGGCAATCTGCTCATTTCAT  
CTGATGGATGGTGGAGACTGAATGGATAATCTGCTCCAGCACCTGCACCGAGAGATCCACCTTGGCGAGG  
GTCTCGTCAGCCTGTCCATGACCATCGCGGATCGCCTTGACCACGGCGCCGGTACCGGATTGCAGTTGGC  
TGATCAGAGTCTGGATCTCGACGATGGCATTCTGGGTGCGACCGCCAGATTACGCACCTCATCGGCCAC  
CACGGCAAAGCCACGGCCCTGCTCACCGCCCGCGCCGCTTCAATAGCCGCATTACGCGCCAGCAAGTTG  
GTCTGCTCGGCAATTCCTGGATCACGGTGAGAATGTCATTGATGTTGTGCTGTTGGCGGAGAGTCGCT  
CCACCACCGGCTGGGCATCGTTGATGATGGTCATCAGCTTGCGCATCGCCTCCTGGGTGTGCGCAACGAC  
ATATTTGCCCTCTTGCGCCGCGGCATCAGTGGTGTGGCGGCAGCCACCGCCGAGCCGGCATTACCGGAG  
ACCTGCAACGCCGTGGCGCTCAGCTCTTCAAATGCCGTGCCACCAGATCGATCTCCTGATACTGGGCCCT  
GCATGCCACTGCTGGTGCCTCGGCCACTTGC CGGGCTCGCTCGGCACTGTTGCGCGTACCGGAGACGGT  
ATCAATCACCTGACTGATGGTGGATTGCAACTTGTGAGGAAAGCTGTTGAACCACTTGGCCAGCTCGCCG  
ATCTCGTCTTGGCGCTGGATCTCGATACGCTGGGTCAAATCCCCCTCGCCGCTGGCGATATCCTTGAGAC  
GGGCAACTACGGCGCGGATGGGTGCCACAATCTGGCGCGCCATCAACCAGATAAACTCAGGGCAACCAG  
CGAGATCAGCACTCCGATCGACAGCTGCGAGACCACGCTGCGATTGGCCTCACTGGCCAGCTCATCTTGC  
AGTTGCTGGGCCGAGGCGAGTACTACGGCCCGTGGCAATTC AATGTAGATGCCCCATTTACGGTCCGGTGC  
CACGATGGATAACCGGGACAAAGGCTGCAACAGGGCGCCGCTCGCTGCTCCAGCGAGTCACTCCTGCC  
CTGACTGAGCCAGCCTTTCAGCTCGCTGGCCAGCCCTTGATACTTCTGATCCAGCCCGCGCCCATGGTC  
ACATCGAACTCATCGGCTCCCGCCACGCGCCCTCGTGACTGACCAGCAAGATTCTGCCCTTGCCGTCAT  
AGAGCTCTTTGTCCATGGTACTGACCAGACTCTGCAAAAGTGGCCAGCGAGATATCGACCCCGACCATCCC  
CAGCAAGGTCTCCTGCTCCAGCAGCGGGACCGTACCAGGTCATCAATATCTGTTTATCGCCACATCG  
TCCAGATAGGGCTCCAGCAGGACAGGGCACGGGTGCGAATGCTGCAGCGATAACCACTCGTTTTTCGATGC  
CACCAGCCTCGGTGGGCTCTCATCGGCCAGTACATCCTCATCTGCACTTCCGGTTCTATCTTGCCGTT  
GTCATAGGCCAGTAACCTGGAAAAACGCCCTTGTGCTTGGAAACCAGCGCCGTTGAGCCCTGATAGTTG  
CTGTCTTCCCCATCCAGCTGGTCAGGCTCGAACACCGCATAGACACCAAGCAGATTGGTCGATGAGGCAA  
CGGCATCGTGCAGTTGCTGATTGACGGCGCTGCGCAGCGCCTCCGAATGGACAAAGTTCTCAGCCGCATT  
CTTGGCGCTGGAACAACACGCTCTCCGCCAGCAAACCTGGCGCGGAAATAGGCTTCATCGAGATAGCTGGTC  
ACCTTGGCCGCTGCTCCGAGCCCATCGCCTTCATCCAGTTCTCGGCAGACTGCTGCGCCTCGTGCATGG  
TGGCTTGGCCGACCTGCTGTTGCATCTTGTTCGCGTTGTAATCGAAGAGGCAACCAGAGCGGCGGCTGT  
CACCAACAGACAGCAACCGGCGATCAGGGTAATCCGACCCTGGACAGAAAAGAGCGCTCATGCCAATATTC  
CTACGTCATACAGATATGGATAGATTATCGACTTTATAAAACAAAACTTAACTCTCTCACAGCAAATCCA  
GCGAGAGTTGATTAACCTCACCCCTCTTTTGCAAACCCACCACCAAGCCCAGCAGGCGAACCGAACGCC

TTGCGCCCGCTGTAGCCCTCTTTGAGCAGGGGAACGAACAAGGTTGGCTGATAGCCACCCTGACTGCGA  
TAGACGGTGGTCTGGTGGAAATCGGCCAACTTGGAGCTTGATTCCCTGCCCATCACCTGCTCGGCAGGGC  
ACGCCAGCTGAAATCGCCGCTCCAGCTCCGGCAGCAGTTGCTGCAATACCGTCAGGCAGGCGGCTTCGTC  
ACAAACATCGCTCGCCAAAGTGGTCTCCACCCGATGGTTTTGCGGATCCGGTGC GCCTGCACCGGCTGT  
TCATCCAGCCCCAGATCCGGGTGCTCAACATCTCCCCAGCTTGCCAAAACGGGCTGCACAGCTCTTGTG  
CCGACAAGGCCCGCGCATCTCACAGGTGTAAAGCCCTGTGCCCTCCAGCCGCTCGGCAGTCTTGCGCCC  
CACCCCGGGCAGTTTTGCCAAGTGGCAACTGGCAGACAAATTCGGCCACTTCGTGCGGGACGAATGACAAAC  
AGACCATCAGGCTTGCCTGCTCCGAGGCGAGCTTGGCGAGAAACTTGTGGGGGCCACTCCGGCCGAGG  
CGGTCAATCCCAGTTCCGTGACGATGGCTTGCCGGATCTCTTGCGCCATCAGGGTGGCGCTACCGCCACA  
ACAGCGACTGTGGGTACGCTCGAGGTAAGCCTCGTCCAGCGACAGTGGTTCAACCTGATCGGTATAGCGC  
AGGAAAATGGCCCTGAGCTGACGGGAGATATCCTTGTACACCGCCATTCGCCCCGGGATGAGTACCAGCG  
GCGGGCAGAGTTTTTTCGCCAGTGCCTCGGCTCGGCATGGCGAGCGCACCCCGAACCCGGCGACATAGTT  
GCAGGTGAGATGACACCACGCCGCTCGGAGGACCCACCGATGGCAAGCGGCACCTCCCGCAACGCCGGA  
TTGTCCCGCATCTCCACCGCGGCAAAAAGCAGTCCATGTCGATATGGATGATCTTGCGCATATCACTGT  
ATAAATAAACAGACATGGCATCATCTTACCCCAAGGATAAACCAGCTCTATCTCTCTCGTTGCGGCTAA  
AATAGTAGACTCCAAGGAGACCTTTACTACCACAATGACAAGGAGCGTTCGGGATGAAATATCTTTGGCT  
GGGACTCTGTTTTGCTGCCGTTGACCGGCATCGGCAAGAACAACCCGACGGCAGAGTGCCTGGCTGTAC  
GACCGGATTGAGATACTGGAACAGGCCATCAAGAAAGGGGACAAGCTCGGCACAGAGCAAGAGTTGTCAC  
GCTGGAAAAGTGTAGTACAACAAAACAGTGTCTCACAGTACGACTACTGAGCCGACAAAGATGGCGTGACC  
GACAACGGCAGATAACAAACGGGCCCCGATCAAGATGATCAGGGCCGTTTTTCAAAGCATGGCCAGCTT  
GATTCTGCAGCAGAGTGCCTCAAGGCAGCACCATAGGGCCAGCCACGGCGATAGCCACGTCATCCCCGC  
GCAGCACCCGAACAGTTCGAGCGCAAACTCAATGGCACTGCCCGGCCCTGACTGGTGATAAGGCGATG  
AGCCTCATCCCTGACTACCCGCTCACGTGACAGCTGCGATGTCGGCAGTTGGGACTTAAAACGGGGATGA  
CAGGTGACGATGGCATCACCCAGCAGACAGTATGTTGCAACACCACCACAGGGGCGGCAGATGGCAG  
CGCGCCAGCGACCAAGAGCGGCCTGCTCTTTGAGCAGACCAATGGCCAGCGGGGTATCGCGGATCACTTC  
GCTGCCGGGCAGACCACCGGGTACCACGATGGCTTCAAAGTCCCAGCGGTCAACTCGCCGATATGACAA  
TCGGCCACAGTGTACCCCGCGCGATGCCCTCACCTGCCGGATCCGGCTGGGCAACAAGAGGCCAGCA  
CCACCTCGATGCTGGCGCGCACAGGGTATCGCAACTCGCAACCGTCTCTATCTCTTCCGACCCGGCGC  
CACCAGCACCAGTACACTACGTTCCGCTCCTGTGCTGTCTGCTGCTGCTGCTGCTGCTGCTGCTGCTGCTG  
ACTCTTCTCTTTGATCGCCTGATAGAGACCCTGATTGACCGGTACGGCAATGCCATGCCGGGACGCTTG  
GCCAACAGGAAGCCGGTGATGGCCTCAATCTCGGTCTCGCGTCCAGCTCCATATCCTGATGCATGGAGG  
AGTAATTGTCAGCGGTGAGTTCCACCCTGTATCACCCGGCGTTGCAACTCCTCTGCCGTGGTTGCAAT  
CCCTTCCGCACACATCACATCCGCCACTTCCACGCAGATCTGCTGCAGGGCATCGGCAAAACGGGGGCCA  
GCCAGCTCGCCATTTTTAGCTTGTAGAGAGCAGTACAGGGATGATGGCACAGTTGATGGCCAGCTTTT  
GCCACTGGCGCTCAATACCTGCTCATCCCAACCAGCCTGACCCAGTGCCAGCGCAAGCCCGTCCGCGAG  
CGCGGCATGGGCCTTGGCGGCATCGTTGATCGGGCAAGCCAGGTTTACCCCTGCCAGTATGACGGAAG  
ACAAAATGGCCGCACTGCATGGCGCCATGGCTGGTGACACTGGCAATCACCGGATTTGTTGCGGAACATCT  
CGACCACCTGCTCGGCAATGCCATCCCCTGTGTCAGCAGCAGATCGGCACGCGGCATCCAGATTGCC  
CACCAGCGGTGTGATGCGGCAATCACCTGACTGGCCTTGGTCATCACCCAGCAGACGCTGGATCTTGCCG  
GGTTTTGCTGACAAACCCGCGCTCGATATTGAGCAGTTGGACATGCCCTCCAGCGAGGTGAAATCGATCC  
CCGGATGGAGCGTGGACTTATGATGTTGCGGCAACAAGACACGGGTGGATTGACCGCTCTGGGTGAGCAG  
GGAGGCAAAAACGCCCGCGAGGGCGCCACAACCAACAGTGACCACTTCGGAGTAACGGGTGGAATAACG  
AGCTGTGCGGAATTTTTTAATCCGCTTGGCATGGTGTGACTCTGTCAGGGTAAGGGTTGCAATCCTCTCA  
ACCTGTTACCGGGGATAAGTGAAGATGTCGCTGATGGACACTAACGGGTCCACCCGTCCTGTGCGCAGGG  
GATTCTAGCAGAGAACCCCATCAAAATCAGCAAAATTTGCCCGTTTTCTGTTAGATTTGCCCCCCGATAA  
CGCAACATGAGGAGCTCCGGCTATGCCGTCATTCGATATTTGCTCTGAAAGTCAAAATGAACGAGGTGTTG  
AACGCTGTGACAACGCCAATCGTGAAGTGGCCACCCGTTTCGATTTTCGTGGGGTAGAAGCCAGCTTCG  
AGTTGAATAAGGAAGAGGTAAAAGTGGAAAGCCGATGCCGATTTCCAGCTCAAGCAGATGGTCAAATCCT  
GCGCGGTGCCCTGCTCAAGCGCAACATCGAAAACAGCTCCATGGAAGTGGGTGACTCAGTTCACCTCCGGC  
AAACGCTTCCACCTGACCGTCAAGTTCAAACAGGGGATCGAGAAAAGAGATCGCCAAAGACTGGTCAAGC  
TGATCAAGGACTCCAAGATCAAGGTACAGGTGCGCATCCAGGGTGTGAAAGTACGTGTCACCGGCAAGAA  
GCGTGACGATCTGCAAGAGACCATGGCACTGGTCCGTGGCGCCGAAGTGGGTCAACCGATGCAGTTCCAG  
AACTTCCGCGACTGATTTATCCACTCAGCCGTGGCGCACTTGTGACTCGCGCCACGCTATCTAAATCGC  
GGCCATAAAAAAACCAGGAGCAGATGCTCCGGTTTTTTGTACCCCAAGTTTTTATTAGAACTTGTAGGTAAC  
AGAGAAGTAGTGGCTGAAGCCAGTGTCTTCCAAGGAGTACCATCGTATGCAGTGAACCGTCTTTGGTA  
CCATAAGCATCCATAAAGTACTTTCAGGCCGTAACCGACGGCGTAGCGGTCCGAGTGCCAGTAGATACCGT  
GGAAGGTAGCCAAGTTGTGCTGCTGGTACGGTTCAGCACGGTTGTGAGTGTCCAGATCGAAGGCGTAGTCCAA  
GTAACCTTGGTAGGAGACAAAGCTGCCGTTGCTGAAAGGTATAGAAAAGGCTTGAACCAAGTTTCATGGCGAAC  
CAGTAACCGTTCCACTCACCTCTTCTTCGGCGAAGAAGTGGTTTTTCAGTTGCGTGGCGAGCATAACAGGT  
TCATGCCCACTTTACCGAACCAAGGCACCTGAACATCAGCACCCAGACCGATCATGTTCTCCATCTGGTG  
GTCGCGGACGTTGTTTACAGAGAGGGCATGTAGAGCTCTTGCACAGGACCAAAGGAGAGATCTTTACCGTTC



AGAGCATCCAGAGACATGCGCGGGCGAAACTTCATGAACAGGTTCTGATCACGGTGCTTGTGCTGTGGC  
GGGAGTTCGAAGATATCGAAGACGTCGACGTAACCGTAAAGGTCAAACAGGCCGGAGCGACCACCGAATTC  
CATTTTCGAAGTAGGTGTCGTTGTAATCTTCAGCACCGGTGGTGAAAGGACGTTGGTCGATGGTGTGCATG  
ACGTTGAACTGCATCCACTTGTAGTCATTCTTGTGGATATCGCCGCTGTAGTCAGCAGCGAAGGCCGGG  
TAGCGGCAGCAGCCAGCAGACCGGCAGCGATCAGAGTCTTGGTAAATTTGGCCATTTTATTGGTCTCTTG  
TGCGTTAGTTGAGGTTTTCCGTAGCCTGCCCACAAGGAGCGAGATGGATTCTAATCAAATAAAATTTGGGG  
GTGAAACAACCTTCTCGGGAACCTTATCCGGAAGTGTGAATCTAATCACCCTCGACTCTACGCAAACGTTT  
GCTATTTGTCAGCCGTTGAGAGCAACTCACTCCCTTTTCTGGCGACCAGCACAAATCAACAACAACACGGG  
CAAGCCCAATAAACTGGTTCCGACAAAAGAAGGCACTGTAGCCAATCTGCTCCACAACCTGTCCGGAAAAA  
CCGGCAAGCAACTTGGGTAGCAGCAACATTACCGAGCTGAACAGGGCGTACTGAGTGGCCGAAAATGCCA  
CATTGGTCAAGGCTGGAGAGATAGGTCACGAAGCCGAGTAGCGATACCGGCACTGAGGTTATCCAGCGA  
GATGATCAGGGTCAGCAGTTCCAGGTTGTGACCAACCTGGTTGAGCAGGGCAAACAGCAGGTTGGTGTCTG  
GCGGTGAGCAGCGCCCCAAGAACAGGATGCGCAGCGTGCCGAAGCGCATCACCAGCAGCCCCCTAGCG  
CAGCCCCACTAGCGTCATGATGACGCCAAAACACCTTGGTAATAGTCGCAACCTCGGTCTTGTGTAACCTG  
CATATCCACATAGAAGCTGTTGGACATCACCCTCATCACCACATCGGCAACCCGATAGCAGGCGATCAGA  
GCCAAGATCAGCAGCGCCGAGCTGCCATATCGACGAAAAGAAATCGGCAAAACGGACACCAGACCGCCTCAT  
AGCCCCAGGCCCGCAGCTCGCCAGCAGAGCTGGCCACCCTTTTCCAGGAGCTGCTCCTTGCCTTCCGGC  
CTGTTGTTTTGCCCTGCTCGGCCAGATCGATATCCGGCTCGTGGCAAAACAGCGTGGTGATAACCCCGAGT  
GACATCAGACCCGCCATCACCAGATAGGTAATCTGCCAGCCAGATAGTCATAGCCGCTGTTGCTGCCAA  
ACCACGCGCCAGCGCCAGCGCACCCGGCGCCCGCCATGATCATCGCCAGTCGTTAACCGTCTGTAGGA  
GGCCGCCATCGCCGCTGTAGCCGCTCGGGAGCAGATTCGATGCGATAGGCGTCGATGACGATATCCTGC  
GTGGCCGAGGCAAAGGCCACCAGCAGGGCAAACATCGCCAGCTGGGCCAGCTCGGTCTTGGGATCGCAGA  
ACGCCATGCCGACCAGCGCGGGCGCAATCAGCAGCTGGGAGAAGAACATCCAGCTACGGCGACGCCCCAG  
CAGCGTGGAGAGCAACGGCAGCGGCATGCGATCCACCAGCGGGCACCACAACCATTTAAAGCCATAGGCG  
AGCGCCACCCAGCTCATATAGCCGATATCGGTGAGGCTGACATCGGCCACGCAACCAGAATGAGAGGG  
TACCGAACACCAGCAGCAGCGGCAGACCCGATGAAAAACCCATGGCAAAGAGAATAAACACCCGAAATTC  
GAGATAGCAGCGGAGGACTCTCTCCAGCTTGGTTTGGCGATCATGTTCAACTACCTGACGACTTTGGAA  
AAGTGCCTCATTTTTGGCAGTTGATGGCAGATAGCCAAAGGCGAGCAAAGAGATAGGCAAAGAAGCCCGG  
ATAGAGAAAAGGCCCATCCCCGAACGGGATGAGCCTGTATCGTGACCTGACGAGGCGAGGTGACGAACCG  
CTTCCGGCGAGAGTTACTTGCCTGCTTTCTTGTGCTGACTTTCTTGTCTGCGGAGTTTCTGCCAGCAAGAC  
CACCTTCTTCCAGAATGATGGGACTGGTCGGCACATCGTTGGCACGCAAAATGGGACTGTAACCGGTCTGT  
ACCTGAGCCAGCTTGTCCAACACCTCCATCCCCTGCACCACCTGACCGAACACGGTATAACCCGCGGGCGC  
CACCGGCGTTGAGGTTATTGTTGTGACAGATTGAAGTAGAACTGGCGAGTAGCGCTGTGACCCGCTG  
GGTGCGGGCCATGGCGATGGAGCCACGCTTGTGGGCAGACCGCCGCGGACTCGTTGACCACAGGCTCA  
TAGGTTGGCAGTTGCTGGAACCTGCTGGTTGTAGCCCCACCCTGCACCACGAAATCCTGGATCACC CGT  
GGAAGATGCTGCCGTCATAGCTGCCATCAGCCACGTAACGCAGGAAGTTCTTACCCTGCTGGGGCGCCTG  
CTTGGACGCCAGCTCCACCACGATATTGCCGTGGTTGGTCTCCATTTCTGACTTTCCGGCCCGCAACGCC  
AGCGGGGCGATCAGCATGGCCAGCAACCAGAGTTTTTTTCATCATCAGACCCCTGCGCCGTTCCGTTGACC  
TTTAAGGTAACCGCGCAGCGCCTCATCGCCATGATCTGCTGCAGCACGCTACCCAGTTGCAGGTTGAGT  
GTAGACTCCAGGTCGGCCATGCTTGGCTCGCTCGGGCTCTCCTTGTGAGGACATGTTGAACTGCTTGG  
TCAGACGGTTGCCCTGGAAATCGGCGATCACCTGCAGGCTGACGCGGGATTTGGTGACATAGGTAAGGT  
CTTCTCTTCCACATTGACTGCGGCGTTGGAAATCACCAGCGTCAGGTTGGTGGTGCCACTGTTGCCACT  
TCCAGACCCTGGCTGCGCAGCCCTTCGGCCAGCCGCTCGGCCATCAGCAGGTTGAGCGGACGCTCGCTGT  
TGACCAGCACAGGGGCTTTCTCTTTATGCTTGATGGAGAAGACGTAGGCAGCCTCACGCTTGTCTACCC  
TTCCATGGTGATGCGATTGCCAGAGTAGTATTGCTGGTTGGCGGGGATCACCTGCGGATTGAGCAGCGCC  
GTCTCCGGCCAATGAGTGGCAACCCGCCCAGCATCAGGGCGCCAGCAGCAAGAGTGACTTTTTTCATCA  
TGGTTTTCTTTGGCTTTAGCGTTTTGATGGCTTTCAAATAAACGAATTTGCTGTTGACGCAACGACTTGT  
GCGTTGGCAAACAAGCGCTTGAGTTTTGTTGTGATAGTCCAGATGACGGTTGCCTACTATCCAGAGTTCAC  
CCCCTTGGAGCAACACCCGGTGCGCATCGCTGAACATCTGCCAGGCGATATGATCGGTGATCGCTGCGAG  
CTGATGGAAAGGAGGTTGCAGAGGATCCGATCCGCCGAGCCGACCGCCACCCCGTCGAGACAGTTATTG  
ACCATAAAGCGGGCACGCGGCAGTGCATCAGGCAGATTGTGCTCGACGTTGAGCTGTGCCGAGGCGACCG  
CCATATAGGATTCATCGATAAAGGTCACCTCCACCTCGCTGTCTTTGGCGAGCAACGACAGACCAGCAC  
CCCGTTGCCACAGCCAGATCGATCACCTTCCGGGCACTGTGGATGGGCAGGTTGTCCAGCATAAAGCGG  
GCACCGATATCGAGACTGGTGCAGGAGAAGACGTTGGCATGGTTGTGGATGAGCATGCCACTCCCCTCCA  
GCGGCCAGACCGTCGGGAAGGGGTTGGCAAGCGCGGGACGTTCTGCCTGCGGCTCGCAGTGAATGAGGCG  
CGCCTTCTTCCAGGCCAGCGAGGTACGGGTAGGTCCAGATACTTCTCGAACAACTTGGGGTGGAGGTA  
TGAATATCCTTGCCTTGCCTGCGGCGAGGATAACCGGGTTGCCGGTGTCAACACCTCCCGCAGCGCAAGCA  
GTTGCTGCTCCAGCAGTGCCTGATATTTGGAGACCTTGTGATCACCACCAGCGCAGGGGCATCGGGCAGCGG  
CGCCAGCGCATCCTGCAAGCGGATCCCGCTGCATCCAGTCCATTTTCCGGCCAGATTGGCCAGGGTCCGC  
CGCTCACTGATGTAGGAGTCCGTGACGCAGCAGGGGGAGTGGGATGCAGATAGGCGGCCAGCGCGCCAA  
AACCATCATTGATGATAACGGGGCCCGCTGCTCGAGGGGAGACTCCGCCAGGTTATTGATCAGATA

TTTCGTCAGCCGCATCCCAGGCTTGCAGGGTCTCCTGACTCAGGCGGGATAGCGGTAGAGCGTAAGCTGG  
CAATGGGGAGTGTGCGAGAAGGGTTTGCATAGGAAGAGTCCAACCTCGGCTTGATTCGTGTATACAGGCGC  
CAGGGGCGACGCAAAGTGGCGCTATTCTAGCGAGGAGCAGGAATTTACCAGTTCGATGCGCATGAAGGG  
GGCAACTGACGGGTGATTTCCCTCTTACGGGGGCTTATTCCATCCCCGCGACTGCCGATAGAATGACCCGA  
CATTCACTCTGGAAGCCGATCCGATGACCATCCAACAACCTGATTGAAGCCAAGCTGACCGCCGCCCTCTC  
CCCCACCGTGCTGGAGGTGATCAACGAGAGCCACATGCACCGTGTGGAACCGGGATCTGAGAGCCACTTC  
AAGGTGGTGTGATCGTCAGCGAGCAATTTGCAGGGCAGCGGCTGCTGGCCCGTCATCGTCAGGTCAATGCGG  
TGCTGGCCGACGAGCTGGCTGGTGCCGTTTCATGCACTGGCGCTGCATACCTACACAGAGAGCGAGTGGCA  
GGAAAAAGGCCACGCCCCGCGCACCCCGAGCTGCGTTGGCAAACCGTCACTCTCCTGAAACCGGTTGTAC  
CACTGGATTCCCCCTCGAGAACCTGCCAACAAAAATTAACATATTTCCCCATTGGCCCCGAAAAGGCTA  
CATCCAAGGGGGTATATTTCCGCATCAAGGCTTTTGTGTAGTAGTGAGACACAGGCAAATACCCCCATC  
GAGGTATCGAAATAAAAAAACCTTTAAAACCACTACTTACAGGGTGTGCGGGGCTTATTCAATTGCAGGTT  
AATTTTGTGATGGCACGGGGATTTTGCCATTTGGCATGGCAGAAAAATGCACCTTAAGTGGTAAACTCAA  
GCGCTTTTGTAGTGAGCCTGCATGTTGAATAATTGTTGAGCCTGCCACCTGGCACAAACCACAACATCGAC  
TCATTCAACCACCGTGTGATGATTTTCTCGGCGCTAACCAACCTCTCCCGTAACGGTAGTGCAAGTAA  
GTATGATTACAATCAAAAGAGGACTGGACATCCCCGTGCTGGGTGCGCCAGAGCAAGTAATCTACGATGG  
CCCCGCCATCACCGTGTGCGACACTGGGCGAGGAGTTTGTGGGGATGCGACCTACTATGTTTCGTCAA  
GTAGGTGATCGCGTCATCAAAGGTCAGGATCTTTTTGAAGACAAGAAGATCCGGGCGTTAAATTCACAG  
CTCCTGCCACCGGTGTGGTTTTCAGAGATCAACCGTGGAGCCAAACGTGTTCTCCAGTCTGTGGTCATCGA  
CCTCGACGGTTCCGATGAACAGGTGACGTTTGTGAGCATTTTGCCTCTGCCGAGCTGGCCAAGCTCGAGCGC  
AGCAAGGTGCAAGAGATCCTGGTCGCATCAGGTGAGTGGACTGCGTTGCGTACCCGTCGGTTCAGCAAAG  
TCCCCGCGGTAGCGTCTGCCCGCGCGCCATCTTTGTGACTGCAATGGACACCAACCCGCTGGCAGCCGA  
TGCCGAGCTGATTATCAAGGAACAGCCGAGGCTTCTTCGATGGTCTGGCCGTAACGACCCGCTGACC  
GATGGCGCCGTCTACGTCTGTAAAGGCGAAGGCAGTCTGCCCCACTCTCCGCTGGCTCAGGTCAAGGAAG  
AGATCTTCGTTGGTCCGCACCCCTGCCGGTCTGCCGGTACCCATATCCACTTCTCCGATCCGGTCAGCAG  
CACCAAGGTGCAGTGGCACATCAACTATCAGGATGTGATCGCATTCGGCAAGCTGTTCAACACCGGTGAG  
ATCTTCACTGACAAGGTGATCGCGCTGGCTGGCCGAACGTGCTCAAGCCGCTGCTGCTGCGTACCCGTC  
TGGGCGCTGCATCAGGTCAGCTACCAACAATGAGCTGCGTGCCGACGAAAACCGTATCATCTCCGGTTC  
TATCCCTGAGTGGTGCCAAAGCCGAAGGTGTTTACGACTACCTGGGCGCTACCACAATCAGGTTTGGCGT  
CTGGGTGAAGGGCGCGAGAAAGAGTTCTGGGTGGATCAACCCAGCGCCAAACAAGTTCTCTATCACCC  
GTACCACCTCTCTCATCTGATGAAGGGCAAGCTGATCAACTTCACCACCACTACCAACGGTAGTGACCG  
TTCCATGGTGCCTATCGGCAACTATGAGCGGGTATGCCACTCGACATCTGCCGACCCCTGCTGCTGCGG  
GACATGGTCTCCGGCGATAACCGACGGTGCAGCAAGCACTGGGCTGCCGAGCTGGATGAGGAAGATTTGG  
CGCTCTGTACCTTTGTCTGCCCGGCAAGACAGAGTACGGCCGATCTTGCCTGAGTGCCGACCAAGAT  
TGAAGTGAAGGTTAAGCGATGAGTTTCAAGCAACTTCTTGAATAATGGAACACCCTTCGAACCCGGGT  
GGAAAGTACGCCAAGTACTATGCCCTGTTTGAAGCGGCTACACCCTGTTCTACACCCCGGGTAGCGTTA  
CCCGCAACGCCTCCACGTTTCGTGATGCGCTCGATCTGAAGCGCATGATGATCATGGTGTGGCTGGCCGT  
GTTCCCGGCCATGTTCTGGGGCATGTACAACGTTGGTAACCAGGCGATTGCCGCCATTGCCACATGGGC  
TCGGCTGCTGGTGCCAGCAGCTGGCAATATGCCCTGGCTACCATGCTGGGCGCCTCCCTCGATCCGGCTG  
TTGCCGGTATCGGCAGCAAGATGCTGATTGGCGCCACCCACTTCTTCCCAATCTATATCACCGTCTTCTT  
TGTCGGTGGTTTCTGGGAAGTGTGTTTCGCCATGGTGCAGCAACACGAGATCAACGAAGGCTTCTTCGTG  
ACCTCCATCCTGTTTGCCTGATCGTGCCGCCCAGCTGCCCTGTGGCAAGCTGCGCTGGGTATCACCT  
TCGGTGTGGTGTGATGGCCAAAGAGGTGTTTCGGTGGTACCGGCAAGAACTTCTGAACCCGGCGCTCGCTGG  
TCGTGCGTTTCTGTTCTTCGCTACCCGGGCGAGATCTCCGGTGACGCCGTGTGGGTTGCCGTTGACGGC  
TTCTCCGGCGCGACTGCCCTGAGCCAGTGGGCCAAAGGCGGCCAGATGGCGCTGATCAACGGTGCAACCC  
GCCAGGTATCAGTGGATGGACGCTTTCTGGGTAACCTGCCGGTTCCATCGGTGAAGTCTCAACCCCT  
GATGATCCTGCTGGGTGCCGCCATGATCGTCTACATGCGCATCGCCTCCTGGCGCATCATCGCCGGTGTG  
ATGATCGGTATGATCGCCACCTCCCTGCTGTTCAACGTCATCGGTTCCGATACCAACCCCATGTTCAACA  
TGCCGTGGCACTGGCATCTGGTACTGGGTGGCTTCGCTTCGGTATGGCCTTCATGGCGACCGACCCGTG  
CTCCGCCGCTTTACCAACAAAGGCAAGTGGTGGTATGGCGCCCTGATCGGCGTAATGGTCTGCTGGTT  
CGCGTGGTCAACCCCTGCGTTCCCGGAAGGCATGATGCTGGCCATTTCTGTTTGCAGAACCTGTTTGC  
TGTTTGACCACTTCGTGCTCAGGCAAACATCAAGCGGAGGATTTGCTCGTGGCGTTTAAATAAAGATTCAA  
CCCTCGGCACCGTCAGCGTGGTCAACCGCCTGTGCTGGCCTGTTCCATCGTGGTATCCGTTGCCGCTGT  
GGGCTGCGTTCTACCCAGCAGGAAAACAAGGCGCTGGACAAGCAGAGCAACATTTCTCGCCGTAGCCGGT  
GTGGATGTAAGCGAAGTGGCCAAGCGCGACCTGGCCAACTGTACGGCGAGAAGATCGAAGCGCGTCTGG  
TGGATCTGGCGACCGGTGACTTTGTTGACGGCGATGCCGACAACCTCGACACCAAGCAGGCTGCCAAAGA  
TCCGGCCCCGAGCATCCGTCTTGTGCGCGTACGACAAAGGCCAGCCTGCGTCAGATCTCCAAGCAGATC  
CCGGTATTCTTCGCAAGGATGCCGAAGGCAAGATCGACAGCATCATCCTGCCCATCTACGGTCAGGGTC  
TGTGGTTCGACCATGTATGCCTTCGTGCGCGTTGCCGCTGATGGCCAGACCATCAAGGGCATCACCTACTA  
TGACCACGGTGAACACCGGGTCTGGGTGGCGAGATCGAAAACCCGGCCTGGCAGGCGCTGTTCAAGGAC  
AAGAAACTGTTTCGACCAAAATGGCATGCCGGCGCTGCGCGTCATCAAGGGCCATGCTCCGGCGGGCTCCG

AGCACGAGATCGATGGTCTCTCCGGTGCCACCCTGACCGGTAACGGCGTACAGCATAACCTTCGACTTCTG  
GATGGGTCCCAAGGGCTTCGGTCCCTTTCCTGGCCAAGGTTCTGTGCAGGAGAAATCAACAATGGCTGACAA  
GAGCGAAATGAAGAAGTTGCTGTTGACGCTGTGCTGGGCAACAACCCCATCGCCTTGCAGGTGCTGGGT  
GTCTGTTCTGCACTGGCGGTTACCAGCCAGATGAAAACCTGCGTGTGTAATGACCCTCGCGGTCATGGCGG  
TCACCGCCTTCTCAAACCTGTTTCATCTCCCTGATCCGCAACCAGATCCCGAACAGCGTCCGGATCATCGT  
ACAGATGGCGATCATCGCCTCACTGGTTATCGTGGTTGACCAGGTGCTCAAGGCGTACGCCTATGACATC  
TCCAAGCAACTGTGGTCTTCGTGGGTCTGATCATCACCAACTGTATCGTAATGGGCGCGCCGAAGCGT  
ACGCCATGAAGAGTGCCCCGCTGCCCTCCTTCCTGGATGGTATCGGCAACGGTCTGGGCTATGGCGCCAT  
TCTGCTGAGCGTTGCAACCGTGCGTGAACCTGCTGGGCTCCGGCACCTGGTTCGGCATCGAGCTGCTGCCG  
CTGGTGAACAACCGTGGCTGGTATGTGCCAACGGCTGCTGCTGCTGCCCGAGTGCATTCCTTCATCA  
TTGGTCTGATCATTGGGGCTTCGCACCAAGGATCCCAAGCAGGTGGAGGCGAAGGATTAAGGTATGGA  
ACACTATCTGAGTCTGTTGATTAATAATCGATCTTCATCGAAAACCTGGCACTCTCCTTCTTCCTAGGGATG  
TGTACCTTCTGGCGGTGTCCAAGAAGGTAAAGACCTCCATGGGTCTGGGTATTGCCGTTATTGTGGTGC  
AGACCATCGCGGTTCTGCAACAACCTGATCTACAACCTACGTGCTTAAAGATGGCGCTCTGGTATCCGG  
TCTGGATCTGAGCTTCTGAGCTTCATCACCTTCATCGGTGTGATTGCAGCACTGGTACAGATCCTGGAG  
ATGGCGCTGGACAAGTACTTCCCGGCACTCTACAACCGCTGGGTATCTTCTGCCGCTCATCACCGTGA  
ACTGCGCCATCTTCGGTGGCGTCTCCTTCATGGTGCAGCGTACTACAACCTTCATGGAGTCTGTGGTCTA  
CGGTGTGGGTTACAGGGCAGGCTGGATGCTGGCGATCGTTGCGCTGGCAGGTATCCGCGAGAAGATGAAG  
TATTCGGATGTTCCGGAAGGCTGCGCGGTCTGGGCATCACCTTCATCACCGCCGGTCTGATGGCGCTGG  
GCTTCATGTCTTCTCTGGTATCTCCCTGTAATCGGCTTTCCTGCAATCAGAAAGGAACGATAGATGGAA  
ATTATTTTGGGTGTGGTTCATGTTTACCGTGATCCTGCTGGCACTGGTGGCAGTCAATTATGTTCCGCAAGT  
CCAAGCTGGTGACCGCGGGGCGACGTGACAATCAGCATCAATGGTGACCCGGCCAAAGGCTGTGACCAGCC  
GGCCGGTGGCAAGCTGCTCGGCGTGTGGCTGGCAGCGGTATCTTCGTCTCCTCCGCCGTGTGGCGGCGGT  
GGCTCCTGCGGCCAGTGCAAGGTACGGGTGAAATCCGGTGGCGGCGACATTCGCGGACCAGAACTGGATC  
ACATCAGCAAGGGCGAAGCCCGTTCATGGCGAGCGTCTGGCCTGTGAGGTTACCGTTCGCTCCGACATGGA  
TATCGAACTGCCGGAAGAGATCTTCGGGGTGAAGAAGTGGGAATGTAAGTGTATCTCCAACGATAACAAG  
GCCACCTTCATCAAGGAGCTCAAGCTGCAGATCCCCGATGGCGAGAGCGTACCCTTCCGCGCCGGTGGTT  
ATATCCAGATTGAAGCCCGCTCACACCGTGCATCAAGAAGTTCGATATTCGAGAGTATCCGAGGATATCGCGG  
TGACTGGGATCGCTCAAGATTTTTGAGCTGGAGTCCAAGGTCGATGAGCCAATCATCCGAGCTACTCC  
ATGGCAACTATCCGGAAGAGTTCCGGCATCATCATGCTGAACGTGCGTATCGCGACCCCGCCCCGAGCA  
ACTGGACTGCCCTCCGGGACAGATGTCTCTATATCTTCAGCCTGAAGGCTGGCGACAAGGTCACTAT  
CTCCGGTCCGTTCCGGTGGTTCCTTCGCCAAAAGACACCGATGCCGAAATGGTATTTCATCGGTGGTGGTGA  
GGTATGGCGCCCATGCGTTCCCATATCTTTGACCAGCTGCGTTCGCTGAAAGTCCAAGCGCAAAATGAGCT  
TCTGGTACGGTGCCGTTCCAAGCGCAAAATGTTCTATGTGAAAGACTTTGACATGCTCGCCGCGGAGAA  
CGAGAACTTCACCTGGAACGTGCGCCTGTCTGATCCACAACCGGAAGACAACCTGGGACGGCTACACCGGC  
TTCATCCACAACGTGCTCTACGAGAACTATCTCAAGAACCACGAAGCACCGGAAGATTGCGAGTTCATACA  
TGTGTGGACCTCCGGTGTGAAACGCTGCCGTCATCAACATGCTCAAAGACTTGGGCGTTGAAGACGAAAA  
CATCCTGTTGGATGACTTTGGTGGTTAATCCATGCACAGTGTGTAAGACCTGGCTAGCCTTCGGGCTA  
GCCTTTTTCTTGACTGGGTGCGGTGAGGAGACGGTTCATCCAAACCGGAGATCCACATCACCGGTAGCA  
CCATGGGCACTTACTACTCCATCAAGGTGGCGGACAGCGCCATCAGCGATCCGGCCAAAGCTTCAAGCTGA  
GGTGGATGTGTTGCTGGAGCGGGTCAACGATCAGATGTGACATATCGCCCCGATTCGGAACGTGTCGCGC  
TTCACATTGGCCGTGAGAGCCAGGGGGCGCTGGACGTACCGTTCGCCCCCTGGTCAATCTGTGGGGCTT  
TGGCCCCGACAAGAAGCCGACCAAGGTCCCTCCGACGAGCTGATCACCCAGACTCGCCAGAAGACCGGT  
CTGGGCAACCTGCACGTATCACCTCGGTGGATGCCGATACCTGCAAAAAGACATTCGGATCTTTACG  
TCGATCTCTGCCATCGCAAGGCTTTGGTGTGGACAAGGTAGCCGAGTATCTGGAGTCACTGGGTGC  
GCGTAACTATCTGGTGGAGATTGGCGGCGAGCTGCGGATCAATGGCGTCAACGGCAAGGGGACCCCTGG  
CGCGTGGCCATCGAGAAGCCACCGCAGGCACCGGCACGGTGCAAGAGGTGATCGTGCCCGGTGACAACG  
GGGTGGCCACCTCCGGCGATTACCGCAACTACTATGAACTGGATGGTTCAGCGCTTCTCCACACCATAGA  
TCCGCGCAGCGGCAAGCCGATCCAGCACCGTCTGGTATCGGTACCGGTGATCCACCTTCTGTCATGACC  
GCAGACGGGTTGGCCACAGTGTATGGTATGGGGACCGAGAAGAGCCTGGCCTATGCCAACGAGCGCG  
GCCTGGCAATCTTCGTGATCACCAAGACGGACAACGGCTTTGAAGAGGCTTACTCCGATGCCTTCAAGCC  
CTATCTGGCCAAGAAGTAAGAGGTAGAGATGCAGATTTTTCTGATCACCTTCGGGGTATTTCATGCTGGTG  
ATAGCCGCCATGGCTATCGGTTACATCTTCAGAAGAAGACCATCTCCGGCTCCTGCGGCGGTCTGGGTA  
GCGTCCGGCATCGAGAAAGAGTGCAGATTGCCCGGAACCTGCGACAACCGCAAGAAGAAGATGGCCAAGGA  
AGAAGCCCGTTCGCAAGATGCTGGAAGAGAACCAGCATCATCTGATGACTCTGGTTTTTCGGTAAACAAAAG  
CGCGCCATCGGCGCGCTTTTTACTGGCCGTATCTTGCCTAACGGTTCAGGGCTGACGTTTCGATATAGAG  
GATCACTTCGCCAAGATGGATACCGAACTTGTGATCTCGGCACGATTGATCAGACGATCTTCGTCCAGC  
AGGTACATCCAGTTCATCGAAGCTCACCCGACCACTCGCCATCCGGCAGCGCCAGATCGAGCTGATAAC  
GCCAGTTGAGGGCAACCCCTTCGCTTTTACCCACCGCTCCCCACCAATCGGAAGCTGTACCTCGCCA  
GTGATCGTCAACCCCTTGTCTAGATAACAGGTACGGGTCTGCTGGCGCCATCATCAAAGTAGAACTGC

TCGAACAACACTCTCCCTTGCCATCCTTCCAACGACCCACCATCTCGACCCGAAAGCGACTGGTCACTTCGC  
CGCTGCGGGTTCGGTTACCAAGCCGTGAGCCACTAATTTACCGTTGAAGAAACGGGCGAGATCCCAGTTTGG  
CACCTGCCCCCGATAGTCATCGAGACTGGCACCACAGCCGCTCAGCAGCAAAAAAGGGAGCAACAGCAAC  
CAGCGGTATGCACGATAGAAAAACATTGGAAACTCCATGTTTCAGGGTTGGCCACGCAGGCGGGGTCAG  
GGCGGGATCGCGGCTGTTGTTCAGCCAGCCAGATGGCGAGAAAAAGCGGCCGAGAATTGCGGATCGGCCAGG  
GTGCCGAGGGGTTTTCTCTGCCACCAGAAAGTGGCCTGCCCCGCCCTTGTTCGACATAGAAGGTGAGCTTGT  
CGCTGCTGCACATCGGGCCAGAGTGCAGCGAGCTGGCCGAGCCAGCGCTGACGTTTCGGCGTCAGAGCC  
AAGACCGAGTCGCTGCCACTCGGCGGCAGTGGCGCTCAGCAGATCTTCCCGCTCGATGGCTCTGGCATA  
GTGAGGGTTCAGGGCCTGCGGATAGTGACCGGGCTGATAGCGCCCGCTCGCACTGTAGAGGGTGGCACCGT  
AGAGCTTGAACAGAGCCAGTTTCATCTCCCCCTGCCCCAGCCGGGCGCAACTGCTGCCAGGGGCGGCAGA  
AGCCTGCACCTGCGGTTGCAGCCAAAGAGCGTAAACGCCAGCAGTAGCGGGTTAATTCCACCCCATATGCCA  
GTGGTTGGGGTCTTCCAGTTCATGCCAGTCCATCTCCTGTTCTTCAGGGTGTGTGATATCCTGCATCACC  
ACCTGCACCAGCTGCCCTGCGCATCCCCTGGCAGGCAACCACCAGATAGAAGCGATCAGTGAGCTCAT  
GCTGGCTCTCTTTGGTCCATTTGGAAAAAGCAACGAGTCGGTTCGAAAAGGTGTTTGTTCATGACTCACCC  
TCCAGCTTGACCATTACCCACAGGAGTACGGGTAACCACCACATCCAGATCACAGCCAGCAGCGCCGTGC  
TAATCCAGATGCCCCAGGGTAAGTTTACTGCCCCATGGCAGCCCCGCCACATAGGAGGAGGCACCGCC  
AAACACGCCAAACAGCGCCTGCTGCCAGCGAGGCAAGCGCAGCAGCCAGCGCATAACCGTGGGCCAGCGTC  
AGGGCAAACCGAGCCAGAGCAGCACCAGCCAGAGGGGAAAAACCGGACGGGAAACGGAAACAGGCCGAGCA  
GCCAGAGCAGGGCATCCAGCAGACAGCCGACGACCGGATAGGGAGCAGCCGCCAGTCACGCTGGCGGCT  
GGGTGAGAAGAGAAAGTGCAGCAGCAACATTGCCAGCAGCGGGCCCGCTGCTGCCACTTCACCGCCAGC  
AACCAGTAGAGGTTGAACCCAGCAGGTGAGCCCACTGCCACATGGTCAGTGACCGCTTACTGGCACATC  
ACCCGACCAGCCAGCGGGCCCCGGCTTGGCGGCTCCAGCTGCACCAGACTGATGGTGCCTCCCAGAAT  
CCCCCTTCGCAATAGGCAAAGTAGAAGTGCACAACCGGATGAAATCCTGGCTGTAACCGAGCTTGGGCA  
GCTCGGGCGCCAACGCCAGAAAGCGATCGCACCAGTGAAGCCAGGGTTCGGGCATAGTGATGGCCGTGATC  
GTGCAACCGTACCAGCTGCATGTCCGTCTCCCGGCCAGCAACCCCGCCATCTGGGAGACGCTCGGCAGG  
CAACCGCCGGGAAGATGTAGCGCTGGATGAAATCGACCCCGCGCAGATACTGGGCATGGCGCTGATCGG  
CGATGGTGTATGGCCTGAATGAGCAGACGGCCACCGGGTTTGAAGCAGCCGTGACAACTGGCGGAAATAGTC  
GGGCAAGAGGCGCTGACCTACCGCCTCGATCATCTCGATGGAGACCAGCTTGTTCATAGTCCCTCCAGC  
TTGCGGTAATCCTCCAGCAGCAAGGTGATGCGATCCCCAGCCCTCCCGCGCAATCCACTCCTTGGCAT  
AGTCATGCTGGGCCCCGGGAGATAGTCGTGGTAGTCAACCGGCGCCGTAAGTGGCGGGCGGCATAGACGGC  
GAGGCCGCCCCAGCCGGTGGCGATCTCCAGCAGATGATCATCAGGTCCCAGCTCCAGTTCGCTCGCAGATG  
GTGCGCAGCTTGGCCTGCTGCCCTCTTCGAGGGTGGCCTCGGCGCTCGGATAGATGGCGCTCGAGTACT  
GCATATGGCTGTGAGAAACCCCTGATAGAGGGTATTGCCGAGATCGTAGTGGGCGGGGATGTTGGAGCG  
CGAACCTGTTAGAGTATTGCGGTTGAGCCAGTGGCGCACCTTGTGTAAGGGGAAACTGAGCCAGCCAAGG  
CGCCGCTCGAGGGAGTCGAGCAGGGTCAGATTGCGGGCCAGCAGCCGACCAGCGCCACCGGATCCGGGC  
TGGTCCAGAGCCCCCTCCACCCAGGTTTCTCCGGCGGCAATGCTGCCCCCAGCAACAGGCGACGATAGAA  
GGCAGGATCCTGCACCACCAGTTCCGGCATGCAGATCGGTGCCAGCGACGCCAAAGCTGTGGCGCTCACCG  
CCATCCCGCAGCAGCAGCTGGCCATGTTTCGAGGCGACCCAGCAGATTGAGCAGCAGTTGTCTTGGCCCCCT  
TGTTCGATGAAAGAGGCAGAGAGGGTTGATTGAGCAAGTTCATTAGCGGCTCTCCGGATGGGTAATAATC  
GGGGTTCGTTTTGATAAATAGACGCAGGGCCTGCCAGTAGATCCCAGCAGCACCTTTCATGGTTCATCCAGG  
GCCAGCGGGCCAGCAGGGCCGCCAGCCCCCTTGCAGGCAAGGGTTCGCGAGTGAAGCCAGGGTGGCGTC  
AAACAGCTTGGCTTACCCGGATACGGGATGACTCTCGATATGGATCAGAGTCTCCTGCGCGGGCGGGCCTG  
ATCCGCCAGTGATAACGCATCGCCAGCCCCATAAAGGGGGATACGTGAAAATCCTTGTTCATGGGGTGGCA  
GCGCCGCCAAATCCAGCAGGTAGTAGTGACGCTCGTTCAGGGGGTGTTCGACACCTCTGCCAGCAGATA  
GCGCTCCTCACCTGCTGGTAGCAGAAGTAGAAGTTGACCGGGCTGAAGTAGAACCCAGACAGCGCACACA  
TTGCCGAGCAGCAGTACCCGCCCTCGGGCTCGGCATCGCCACCCAGTTTCGCTCACCTTCTGCCACACCG  
CCTGCTTGAGGCTCCCCCTCACTCCCCCTTGAGATAGTCATGGCGGTGAAACGAGAGCAGCCCCGAACGCTC  
AACCCCGAACCCAGCGCCCCCTGATCGAGCTGCGGCAGCTCGTCGAGATCCAGTCCCAGCATAAAGAGGCTG  
TAGGAGAAGGCGTGGGGCCGCGGGGCGAAACGGCGGTGGCGCACCGAACCCAGCCAAATGGCGCTGGTAA  
CACCGGCCAGTTCGTTCGGCACGCTCATGTTCCGTGGCCACAGTGGCGCCGTTTCATAGCTCGGCCCGAAG  
CGCCTGGCGACATCCAGCGCGCTGCGCACCCCATCTCGTGGAAAGCCGTTGTACCAGTAGGCACCACAGA  
AATGGGTGTGCTGCTGGCCGAGATCTCCGCGCGCCGCTGCTGAGCGGCGATGGAGGCTGATTGAACAC  
CGGATGGTGGTAGACGAAGCGGCGCAGTACCTTGTCTCATCCACTTGCCTTGGGGTTGAGGCTGACG  
CAGAAGGGCTCCGGCGAGTTACCCCCCTGCAGGATGTTTCATGTTGTAGCTCACAGCGGCCGCGCCTCGT  
CATTGCCATCGAGCTGATAGTTCCAGCTGGCCATGCCCTTGCAGCGGGTGGGCAGGCAGCGAGCATCGGT  
ATGGAGCCAGACATCGTTGGCCTGATAGGGTATGTCGCCGAGAATGGCCTGCTCCCGCTCGCCGGGATCT  
GCCAGCAGCGCCAGCGCCTGATCGCTGTGGCAGGCGAAGATCACCTCGTCAAACCGCTCCTCACCGTAAC  
TGCTCTGGATTACCACGCCGTCCGCGTCCCGCCGTACGCTCTGCACCAGGACAGGCGAGGCGGATCTGCGA  
CTGCCAACCCGCGGTAAGGGGGCCGATATATTCCCGCGAGCCACCCGGGATCACGTACCCTGGGGGCGA  
TTGGCCACATCCAGCAGGCGGTGGTTGGCAAAAAAGCGCAGAAAGCAAGGGGGGAAGGCGCGCATAT  
CGGCCAGGGTTCGATGACCAGATCGCCGCTCCATCGGCAAGATGTAGTGTGGGCGAAGTAGTTCGCTAAA

CTCCCCGCCAGCAGAAAGTCCCCAGGGTTCAGCTCGGGGCCAGCCCCCTGATGCTGACCATCCGCCAGC  
CAGGCCCCGCGCCTCCCGGTTGAACCGCAAGATCTCGGCGACAAAAGCCATAGAAGCGCGGACTCAGCAGAT  
TGCTGCGCTGGGCAAATAGGGTATCGAGATTGTGGCCGTTGTACTCCAGCCCCCTCCGGGCTCTTTACCGA  
GAAGCTCATCTCGGCCGGTTGGCGCGCCATGCCGATCCGCGCCAGCAACTTCAAGAAGTTGGGGTAGGTA  
CGATCGTTGAAGACGATAAAGCCGGTGTGATGGCATAAGCTGCGGCCAGCCTGATTCACATCGACGGTGG  
CGGTGTGACCGCCCAGGGTTCGGCGCCGCTTCGAACAGGGTGTATGTCATGGAGTTTGTGGAGCAGAAAACC  
GGCGGTGAGCCCCGAGATCCCTGAACCGACGATGGCGATCTTTTCTTCATGAATGGCTTCCTTTTCGATA  
CGAGTGCAGCGGCAAGGCGCAGCCAGAGCCCCACCGGCAGCGCACCAAGCAGGCGCAGCAACCAGATGAA  
ACGGCGGGGAAAGTGGATCTGGTGACGACCAGCGGTTCAGCCCCGTCCATGATGGCACGGGAGGCCCTGCTCC  
ACCGTACCAGACAGGGCATGGGAAAATCATTTTTGGCGGTGAGCGGCTCTGGACAAAAGCCGGGGCGGA  
TCAGGGTACACCGATCCCTTTGCTGGCCAAATCGAGGCGCAAGGTATCCGCCAGATAGTTCAGGGCCCG  
CTTGAGAGCACCATACGCTCGGCTCGCGCGCAGCGCAGCTACCCGACGAGTACGATGGCCAGC  
CGAGATCCCGCACCGAGCAACGGCAAGAAGGCGGCCAGCGCATGACCGTGGCGGTGAGATTGGTTTTCAA  
TCACCCGGGCAAACAGCTCGCTGTCAAACCCCTCGCCGACATCCATGTACTCGCAGTTGCCTGCGTTGAG  
GATCAGCAGATCGAGGGATGGCAGCGTAGCAGCCACCCCGCTCATTGCGGCCAGATCCCGGGCATCGAAC  
TGCAGCGGCGTGACGCTGCCAGCCCCAGTGCCTGCAGCCGTTTCGCCATCGCGACCACAACCCACACCT  
GCCAGCCTGAGCGCCGTAATCCAGCGCCAACTGGCGACCGATACCGGAGGTCGCCCCGGTGTGAGCAC  
CCGGCCGCTCATGCGCCGAGTCTCCCTTGATGGCGCGCACACGGGCCGAGCAGCGGCAACTGCTCGT  
AGAGCATGGCGCCCAGGTCAAATAGTCCCGGTGCTGGCACACCTTGCCCGCTCGTCAACTCGAGGCG  
GGTGGCCCCCTCCACCGTCCACCGCTCACCCACCGCAATCTGGGGTGCAGAAAAGTTCATGGTCCAGCCG  
AGCCAGGCCTGCGGCCCTTGTGCTGCTGACTGGTGATGACGAAGCGACAGTAGGCGAGGCGCTGATAGA  
GAGCGGCAAATAGTGCACAAGGGCCGCCAGCCCCCTCGATACGGTGGGCGGATCGGTAAGACCACCTG  
TTCGGCATAGACTTCGGGCAAACGGTGCAACTGCTGTTTGTCCAGTTGCTGATAGAGGCCAATAAAGCGG  
GCCAGCGGCTCGTTCATCCTATTTCTCCAGAGAGCGAAAACATCTCGATGGCTCTCACCCGGGCAACGGCG  
TGATCCACCATGGGTGCCGGATAATCCTGTGCCCCCTTGACCCGCGAGCCAGTTCGTTGGGGTGTGACAT  
AAGCGGCGGGAATATCGGCAAGTTCAGTTACCCAGGTACGGATAAACTCCCTTGTGGATCAAATCGTTG  
CCCCTGAGTGGTGGGGTTGAAGACCCGAAAATAGGGCGCCGATCGGCGCCGGTACCCGACGCCACTGCG  
CAGCCGCTGTTGTTGGCCAGATCGCCATCGATGACCGACTCATGAAGTAATCTCCCCGAGCCCGC  
AGTGGATGTGGAGATCCTTGGTGAGAAAAGTTCGCCATCATTCGCGAGCCGGTTGTGCTACCCAGCCGCT  
GGTGTGAGACAGCGCATCGCCGATCGACAATGGGGTAGCCGGTACGTCCCTCGCACCCAGGCGGCAAG  
GCATCCGGATCCCAACTCCACGGCAAGTCCGCCGCTCGGGCTTGAAGGGGCGATTTCATGGAGAGGGTTCG  
GGATCAGTACCAGCAGGTGGCGATAGAACTCGCGCCAGATGAGCTCATTGAGCCAGACAAAGCCGGGCTG  
GGCTTTGACTGGGGTCGATAGCCAGCCGCTGCTGGAGCGCCGCCACGCACTGACGCGGGCTGATGATG  
CCCGCCGCGAGATAGGGGGAGAGCACGGACGTGCCTGCGATGGCAGGAAAATCCCGGGTCTCGCCATAGT  
CGAGCACCGCCTGCTCCAGAAAATCGTTCAAACGACGCGGGCTTCCGCTCCCCACCGGCCAACGGGG  
GTCTGCCGTCAGCTCGCCGAGCGCCTCATCAACCCACGCCCCGCTCGGCCAGCGGCTGCCACGGCAGCGGC  
TCGCCACGAGGCGCAGGGGCGCGGTGAATGACAAAACCCCTCCTCATCGAGTCTTTGAGCCAGGCTCGAC  
TGAAAGGAGTGAATACCTTGAACATCTCCCCGAGCCGGTTCAGCACCCGCCCCGGCGGCAATACGCAACA  
GCCGTTGAGCCAGTGGCAACCCACCGCCTGCTCTGCCAGCGCAGCGCTGACGGCATGGTTCGCGACGCTGC  
TCGTCGATCTCGATAGCCTGATTGGCGTAGAGCTGGGTACCCCCCTGCTCGCGGCAGAGGTCTGCCAACG  
CAGCGGGCGCCTCGACAAAAGTCTCCACTCGCAGCAGATGGAGCGGGATGCCAAGGGCCGCCAGCTCGCG  
GCCAACACATCGACCTGCGCAACATAAAGCGTTGACGAATGGGGGCCATTTTGTGCTGCTGCCACTGG  
GTGGGGGAGATGATAAAGAGCGCGGCTACCGGTTTCATCACCGGCGCAGGCATGCCGACGCGGGGTTGT  
CGGCAAGGCGCAGATCATTGCGCAACCAGACCAGCTTCATGATTTTTCTCCCGCTCCGCTGGCGCCA  
GCCGACGAGGTGCGTCCACCATCAGCTCGGCAAGGCTCGCTGCCAACCGTGGGCTTTAAGCCACTCAT  
CATCGTAGAGGCGCCCCAACTCGCCAAACAGGCGCGTGCCTACGGGCCACCCGGCGGCCAGCTCCTGTTT  
GCCAAGCCCGCCCCCAGCAGCACCCAGCCAGGGAGTGGCTGCACGTCTTCCAGCAGGCTGGCATGGCGC  
GGCTCCACCGCCCCCAGCAGTTGCACCTCATAGCCCTGACCGATCAGCTCGTAGGCGGCCAGACCAGAT  
CGAGGGGGCAAACCTGTCCCCAGCTCGCCATCGTGATCGGCACGCCCTTCTCCTGCTCGATCAGGTGGCG  
GGCGAAGCGGGTATGCAGCCAGCCAGCCACACCTGTTGCAGCAGCTCGCCATCGGGCCGCTCGCGCCAC  
AGCCCCAGCAGCCGCTCCACCGCGGTTGCAGTATCCGGCTGCGCACCCAGCTCGAACGGGTAGCTCGCCA  
GCAGATCGTTGAGTTACGCTCCGCTTGCCTGGTTGAAGGCGAGCAGCGCTGACTGAACTGCTCCAG  
GGTTTGTGCTGCCAGTGTGCTCACTGGCTCGGAATGGGGTTCGCTCAAGAGCCCCCTTACCTGCCCGATA  
CTCACTCCCCGCTCCAGCCAGCTCAGGATCTCGCCGATTTGGCGGATATCCTGCTCGCTGTAGAGGCGGT  
GGCCCTTTTTCGGTGCGGGCCGGTTGCACCAGACCGTAGCGGCGCTGCCAGGCGCGCAGGGTACGGCGTT  
GACGCCGGTGGAGACGGGAGACCTCGCGAATGGGGTAGATCCCCCTCATCAGCCAGAGGAGCAACTTCTTGC  
GATAAATCAGACATGACAACGTCCATCAAACAAAAGGAGTAAGGCTACCCGGCGCAAACCATGCGCCGGGG  
CAACAGAACGGATTAGAGCCCCGTAACGCAATTTAGCGTATCGGGGTGCGGATGAGATAAACCCTGCTC  
GGCGAGATAGGGATTGGGGTACTCGCGCAGGTAGTGACGGATCAGGGTGGAGCGGCACCAGCAAGGGGAAG  
ATACCGGTGCGGTACTTGTGATGGTATCGGCAAGCTCCTGCTTCTGGGCCGGGGTACGACCCCGTTGA  
AGTAGCCCTGCAGGTGCATCAGCACATTTGGTGTGGCTGCGACGGTTGGCCCGAGGGTACGCGCCGTCAT

CAATCCCTTGATGTAGTTGTTCGGCCACCTCCTGCAAATTTGGTGGACTTGCCAGATTGCCGAGCAGCTTG  
CCAAGCGCCCCGGTAGTGGGTGGTGGCGTGGGAAAGCACCAGATACTTGTAGCGGGAGTGGAAGCGGATTA  
GCGCAGAGGGCGGTAATGCCGCGGGCGCAGAGTTGCTGCCAGTCATGGTAGGCGAAGACCCGCAGCAGCAA  
GTTTCTCCCGCAGGATGGGGTTCGCACAGGCGGCCATCCTCTCAACCGGCAGCAGGGGGTTGGCCTCCATC  
AACGCCTTGGCAAACAGGCCGCTCCCCTCCTTGGCGCTCCCCTCGTTGTTGGCGCCATAGACCTTGACCC  
GCTCCATACCGCAGCTGGGTGATTTGGCACAGAGGATATAACCGGAGATGAAGTCGAGCTGGCGTGCCTT  
CTGCTCGCTGAAGGCAATCAGCTTTTCGGTGACATCGAAACTACCGTTGCTCGCCTCGGCACGGATCTCG  
CCGTTGCGCTTGACCAGCCGGATGGCGGGCGGAGGCGCCCTAGACCAATGGCCATCTCGGGACAGACGG  
GGTGATAGTCAAAGTGAGCGCAAGATCCCGTTCGCAGAAGCTGGAGCGCTTGTGGCCCCATCGAAACG  
TACCTCTTGTCCCAGCAGGCACTGATACCCGACTTTAATCTTGTACATGATGACACTCCTTGTATAA  
GCATTGATTCAGTTATAGCAGTTATACAAAAAATGAAAGTTGTATAACTATTTGCGACTAATACGCAC  
AAGGAGAAAAAGAGGATCACCGGAAAAAAGAAAAAACCCTAGGCGAACGCCATGGGTAAAAATCAAGACAC  
TACGGACTACGGGAAGGGGATTAGAAGCTGTACTTCACACCCAGGCTGGAGATGGAACCTTTTTGTCAGA  
TCCCAGTTGCGATAGGTGTAATCGGCAGTCAGCGCCAGTTCTGGTTGAGCTTGTAGGCACCGCCACCT  
TGAAGTCGTGCATATCGTCCGGTTCATGTTGGCGTAGCGATAAGCAGTGGAGAGCTCGACATTGCCGATGTC  
GTAGCGCAGACCCACTTCACCGTACATGCTGCCGCTATCTTTGCGAGCAACAGCATCCCACCTTTGTTA  
GCGATATCGCTGGCAAGTTACAGCTCCAGCATGTAGCCGGTTCACACCGGTTTCACCATAGAGGTTCCAGAC  
CCGTGCTCAGCGGAGTAAAGACACCAACCCGATGCTGGAGATCGACATGCTGTCGTTGCCGTTGCTGCG  
AGAGGTGTATTAGTGTGCTGCCGCGACCATAGAAATTTGGAGCCGAAGCTCTTGGAGAGATCCAGGCTCAGA  
CCGCCAAAATCACGGGTTCCCTTTGCTGTCAATTGCTGAAGGTACCGCTGAGATAGTCGGATTTGGTGTGCG  
CCCAGGTGGCGGAACCCTTGGCGTAGCTGAAGGCATCCTGCGCCATGACGGAAAGTAGAGGCAAACCCGGC  
CAGAACCAGAAGAGAGACAGTTGCTTTTTTTCATGATGATAACTCCATGTGATTGGGCCCCGTTGCTAGCGA  
GCTGGTATGGAGTCATTGTGCGGTTCAGGTTCCCGGCTTGGCGAGCTGCAAGCTGTTGCAGAACCATGTCA  
GATGTAAGCAGATATTGCAGGGGGTGTGACGGCAACAAGTTGCCGACCCAAGCAGTTTGCATGGGCCCCG  
AACAAACGCCAAATCAGCGGAAGACCACCTCGTCAATTTGACCCGCACCAGCGGCTGACCGGTCAATCCG  
GCAGGACGGGGGATCTCGAGGGCCAGTGACGGGCGGGCTTGGCCCTTGCGCAGATAGGTTCCGGCAGGC  
GATTTCTCGGCAACCCGAAAGCGGGCCTCCTGACGGCTCAGCTGCACTCCTTCAGCACTGAACAGGGTCA  
CATGCCACGCACCCGACTACATTGCGGGTACCGGTATTGCTCACCATAAAGGTCAGCACCGGGTCA  
GATCCCTCGATCTTGTCCAGCTTGACCACCAACCCGTCACCGCCATCTGGGCAAGCAGTTCCGGATTGG  
CCTTGGCCTGATCGGTTCAGCACCAGGAGCAGCGACGGCCACCACGGCCCCAGCCTTCCCATCAGCAGCCAC  
GCCCTGTACGGACTCGGCCGGTTTTGACCACCAGATACTCCAGGTGAAGTCGTCGTTGAGCTGAACCTGC  
CGACCATCGGGCAACGTCACCTGAGAAAAGAGGGGCGACCTGCGCCAATACGGGGGAGAGGCACAGGGCAA  
TCAGCAGACGGGAGAAGGGTTTTATTGGGCGAAGCTCGGTAACGGGTGAAAGGGCAACAGTATAAACAGT  
CCCGTGCGCCCTTGCCATGACAGCACTCACGTTCTGGCACCCGCATCGCTTGGCCGAGGCTAGATGGC  
GAGATCGTGCCGCTCTTTCTGTGCCATATCCAGGGTACCAGATCGAACTTGTCCCTTGAGGGCGGAC  
AAAATATCCGATTGCATATCAAAGGCCTGCGCACGCTGATGCTCGGGCAGACGCACCCGGGCCAGGGTGG  
TGGAGCAGTCGCACAGGGTATGGAAAAAGACCTGTGCTCGTCCAGCCCCATGTCGGCCAGCATCTGCTC  
TGCCTGATCCACCATTGCAAATAACGCTGCTCAAGCTGCCGTGGATTGGTGAAGCGATTGCTGAGGCAA  
CCATTGCTCCCTTGGCCCAACGACCCGAGCTGACGCTTGTGTAAGCCGTAACGATAATCGCGACGCATCA  
ATCCGTTGTCGGCAAAAAACCAGATTGAGTTGGCAGGCAGAGACCCGAACTGGGCAAGATAATCATCACG  
CTCCTCCACCGCTGCCGGAACCAGCAACGGCAGATGAGTCCACTCCGGACGAGTCTGCACATACTACCA  
ATGCGGGCAACCGGGTCGATCAGTCTTCAATATTTGGTAGGCGATCGCAAAAGACGATCTCGTCACTCT  
TGATGACCCAGTGCATGATGCCATAACGCTGGCAATAACGGTGGGCTCGGGCCACTTCGCTGCGACTGCG  
GGTCCGATTATCGAGGGTAATTGCGTGGATTTTACACCCGGCAGCGCGGCACAGCTCGATGCTGTAGCAG  
GATTTCAACCGTCCCGAAAAAGAGACAACAGCTCGTCAAAACTTGCCAGTCGCTCAATCAGCAGCTGTT  
CCCTGGCTTGAAAGAGTGCATATATCCCTGATTCACTACAATAATTGGCACCCATTAACAGACTCCG  
GATGATGAACTGGTGCAGTATTGTGCGGCAAAACAACTGAATAGACCCCTTAAAGAGTCTGGTTAAAAATTA  
AAACTTGATGATTATTTTCTGTGATTCTGCTGCTAAATCTTCAATTTTGGGCGTCATAAATTCGTAATCTT  
GCTTGGTGAACCCGATGGGCTCGCAAGAAAACCTGCGCCTGATCCAGCGAGGTGAAAGTCAGGCGCCCTC  
CCTCACTGTCCGTCAGGCAGAGGCACTCCCCTTCTGCTCAACACAGAGCTGATAACCGCTGCCATCCTT  
GCAGGCGATGATCAGGGTTCGCTCGGGATAGTACTGAGCCAATGCGAAACCGGCCATGCTCCATAGTG  
CTCCTACAGGGGCATCACCCCTTGTGCGGGCGGGCAAACAGCCAGCTCACCCAGTTGCTGGCGGCAAC  
TCGCCGCGTCCGTAAGACGATCCCCCTGATACCGAGGGCCTCGGCGACCCGAATGTTGGCGGGACTGTC  
ATCGATGAAGAGGCACTCTGCCGGTTTTCAGATCGAACGACACCAGCAGATAGCGGTAGATATCCGGCTCC  
GGCTTCATCATCCGTACCCGCGCCGACACCACCTTGCCGCTGAAGAAGCGCCAGAAATCCTGATGCTGCT  
CCAGCCAGTGCATGCTGGCATGACCCATGTTGGAGAGGGCATAACAAGGTATGCCCCGCCCGTGCAGCTC  
GGCTATCAGGGTTAGCATAGCGGGATCTGGCAGCAGGGAGGCGGGAACGCTGTAAAATGGCCAGATTC  
TGTGCCGCGGAGAGGCTGTGCGCGCTTGGCGCTTCCCGGGCCATGGTGTGGAGCGACATGGTGCCTCTAT  
CTACCTCCAGCCAGTCCGGGTGGTTAAAGAGCTGCTCGGCCAACTGTTTCAGCCCCCTTGGGGCCACGCAC  
CGAACGCACTATGCCTACCGGATCCCAGCTCACACCACCCGTTCCAGATCGAAAAATAATCGCCATCGTC  
TTTACCTCCCCACTGGGTGTGAGTCATAAAAAACAGAGTCAATAGAACATCGCTCATACGCCATTTTCTT

AACCGGATACCTGCCCCATCCCCGCTGCGGGCAAGTTTTACTTGCATCAGACCGACAAATCCCTTAA  
TGGTTATGACGTTACTTCAAGGACACACCTATGCACGCACCATTTCTTCTTTGCTTTCTCGTTTTATCCGGC  
CCGCTTGAGGGAAGGCCTGTCTGTCGTGTGAACAGAAAGCAAAGACGAATCGAGCCTCCCCTAGCGGAGGC  
TTTTTTTTTGTGGTTCATTAATATCAATCGATTACTTGGATAGGGAACAATCATGGCAACGCTCGACGAG  
ATCAGACAAGACATCACCCGGTTGGATCAGGAGCTGCTTGGCCCTGCTGGCGAAACGCAAGACCCCTCAGCA  
TCGAGGTGCGCCGTGCCAAGCAAGCAACCCGCGCCCCATTCGTGACCACCAGCGGGAGCAGGAGCTGCT  
GGTCCGCTGATCCAGAAAGGGCGCGTGTGGGTGGATGCCAGTACATCACTCGCATCTATCACACC  
ATCATCGAAGACTCTGTGCTCTCCAGCAGGCCTATCTGCAGAGCCTGCTCAACCCGGAGCAGCAGGAGC  
CGATGACCAGCGTCGCCTATCTGGGGCCGCGCGGTTCCTACTCCAGCCTGGCCGCCGCAAATATCTGGC  
GCGCTACAAGGATCAGGTGATCGAAGTAAACTGCCAGAACTTCCGTGAAGTACTGGATGCGGTGGAGTCG  
GGTCGCGCCGCTTTGGCGTCTGCCATCGAGAACACCAGCTCGGGTCCATCAACGAAGTCTATGACG  
TGATGCAGCATAACCAGCCTCTCCATCGTCGGCGAGCTCACCTACCCCATCGAACACTGCATCTCACCGC  
CGTCCCGACCGAGCTGAGCCGCATCAAGACCTTCTATGCCACCCGCGAGGTGTCCAGCAGTGTCCAC  
TATCTGAGCAAGCTGGAAGGGGCGCGTCACGAGATCTGCGACTCCTCCTCCAGTGCCATGATGAAGGTGA  
AAGAAGTGGCCAGCCCGGAGGCCGCCCATCGGCAGCGCTGCCGGTGGTGAAGTGTATGGTCTGGACGT  
GCTGGCCGAGCAGCTCGCCAACCAGAAAGAGAATAACAGACCGCTTTATCGTGGTGGCGCGCAAGCCCATC  
GACGTGGCGCCGAGATCCCGGCCAAGACCACCTCATCATGTCCACCTCCAGAAGCCGGGTTCCGCTGG  
TCGAGGGCGCTGCTGGTACTGCGCAGCCACGAGATAAACATGACCAAGCTAGAATCCCGTCCGGTGCAGGG  
CAACCCGTTGGGAAGAGATGTTCTATCTGGATGTCTCCGCCAACCTGCAGACCCCGCGATGCAGGCCGCA  
CTGGTGGAGCTGACCAAGATCACCCGCTATATCAAGGTGCTTGGCTGCTACCCGAGCGAGGATGTAAAC  
CCACCGCAGTCCCGCCGGTGTGATGGGGAGCTAACCAGCCACAACGACAAAAGGCGAGCACCCCTGCTC  
GCCTTTTTGTTTTGATGCCGGTTTTTCACGGCAAGCCCATCAACTCAGAAGTACCAGGCCATCAGCTGGTTG  
ATGTTGTAGAGGGCACGGGTATCGAGCTCCATCTCGGTGGCGTAGGTATTGCCGCGCGGATAAGAGGGCAA  
CCACCCGGGCACCACGCACCACACCCGGCGACCGACACATCCAGCGAGTTGGAGGTCTGGGTCTAGGTCACG  
ATAGCTGCTCTGGCCGCGCACCTGCTGACCATTGAGCTGCTCTGCCAGCTCGCGATAAGCATCCATCTTG  
GAAGCGCAATGGCTTGCAGCATCTTCTCCGACTGGGAGGGGCGGGCTGGATGTGCATCACCGCATAACC  
CCACCCGCTTGCAGCAGGAAAATCATCGGGCTTGCACCCCTGGGTGTAATCCACCACCCGGTTGTAGCT  
GCAACCCGTTGAGCAAGAGTGCACAACAGGCAACCAACAGGATCTTTCATGACTCGCTCCTCAGGGGTCAG  
GTTGACCAGATGACCCGCGCCGGCCGCTGACTGTACGCATCAGATAACCCGCGATTGATCGATGCCCGA  
CCAAACGAGTTGTTGGCACCGAACAGATATTTTTGCGGGATCAGGCTCTGGGCGGTGGTCTCCACCATCT  
TGGTGCATGTGATAACCGCGGGCGTTGACCAGGATCCCCTTGCTATTGCGGCTGAAGGTGCCAACCAG  
AATGCGGGAGATCGGCAAACGGGAAGAGAGCTCCTTGTAGTTTCGGCTCAGCACGAAGTCCCCCTGTGGC  
GTCACCTTGATGCTGCCGGTCTAGCTTGAAGTCCACCACCCTCGCCACGACGGTTGAGCTCGTAGATAA  
AGCTCTCCTCAATCTGCTGCCCCATCCAGTTGGTATCTTGCAGGGTATCGAGATCGACGAAAGAGGCCAC  
CGCGATGGGCTCGGTCCAGGTGGTCCAGGATTTGCGCTCCATCAGCTGATCGGTCTGCGCGCCACCAGC  
CAGTTGAGCTCCATCCCCTGCGCCGCTGGCGGGGTCACCTGATCCCGATTGATAGGGTCGGAGCCGC  
ACCCGGTCAATGCCAGGGCAAGCGCCAACCGCGTATGAGTTTGTTCATGGATACCTTTCTGTATCTGC  
ACCTGACTTATTATCGGACGCGCCGGACAAGCTTGGAGCCGGAATGAGGCATGATTTCTTGCTTTTTAAT  
GGACATCGTCAGCGCAACGTGCGCTGCCACTTGGAACGTGTTGTGATCCATGTCCGGCCAGCGGGCGCCA  
TTTTCTCAAAATGGCGCGGCTGCCCGCAACTCAAGGTATCTGCTATGAAATTACCGTGTGTTGACCC  
TGCTGCTGGCCAGCCTGAGCGCCCGCGCCGAGCTTATCGAAGCGCAGGGCAGCGCCGCAATCTGGGGAG  
CGATGAAGTATATGCCCGGAGCAGGGCAGCCCGGACGCTGCGTCCAGGCGCTGCTGGCCAGCGGGCGCG  
GCCGTTTCCAGCGTCCAGCGTCTGGAAAATGGCAGCCTGCGCTCCGAGCAGATCCAGATCCGCTCCGGCG  
GCGACATTCGCCAATATCGGCTCAAGCGGGAAGAGGTGCGCAACGGCCGCATGTATATCACCTTGGTGGC  
CGACATTCAGGCGGAGCGCCAGATCTGCCAGACCCAGCACTTCGCCAAGGATTTGACACTGGTCAGGCTG  
CGGATGCGTTATCCGGACCAAGCCAGCTACGGCGCCATGGACGACATGCCGAAAACCTCTCGCGACGAC  
TGTTTCGAGACTCTCGCCAACGCGCCGCAAGGGGTGCGGGTGCAGTGGCTGGATGAAAATCTGCGCAT  
CGATCCGCTCCATCTGCAACAGGGGGATCGCAGTGCCTTCGAGGAGATCAAGGCGCTCAGCCTGCGTACC  
GACAGTCAGTATCTGGTACTCGGCAGCATCGATGATCTCTCCATCGAGCCGAGGGCAACCAGCTGACCA  
GCTGGTATGAGGATCCCGTACGCAACTTTCGCATGCAGCTCTACCTGTTTCGATGGCATCAACGGCAGTCT  
GGTAAACCGAAAGGTCTACGAAGGGCGCGCCACCTGGACCTTTGGCAAGCGGGAGCAAGTGGGCAGCAGC  
AGCGGCCAGTTCTGGCAATCGAGCTATGGCCAGGAGGTCAACTACCAGTTGCAGCAGGCGGCTCAGGATC  
TGGTAGCCAGCTCACCTGCGCCCCGGTACCGCCCGGGTGGTCCGCCAGAACGAACGCGGCCCTTACAT  
CAATCTGGGACGGCGCAACGGCGTCAAGCTTGGCGACCAGTTCCGCATCCAGCACAACGCCGACTTTCATC  
GACCCCTACGGCAAGTCGCGCATGATGCGCAACCCGCGGATGGCTGTTTCGAGGTGGTGCAGGTATTTCG  
ACGATGGCGCCATCATCAGCAGCCAGAACAATATTCGCCGTTTAAACATCCAGAATGGGGATTTGGCAGT  
ATTGGAATAAGAATCAAGGGTTTTAAAAGGGAGTTGCTTCTTGTATAATGCCCCGCCACACAGCTCCCGTAG  
CTCAGCAGGATAGAGCGGTCCCCTCCTAAGGGACAGGCCACTGGTTCGACTCCAGTCCGGGAGCGCCATAT  
AAAACAAGGGGTTGGCATCATCACGATGCCAACCCCTTGGTTCGTTTTTGGCTGGGGTACCACACGGGGT  
ACCACAGCGCGCATTCCATAGCTACAAACCACAGAGTCAAACGAGTCTCATTTCAATTGATTTTCAGATAT  
ATATTATCTCCATGAACCTACCCAAGGGACTGCTCTGTGCAGTCCCTTTTTTCATTGGAGATTTCTCATGG

CTCACCTGATCGATACGATGGCCTACACCGGCCAAACCCCTTGGCATGGCCTTGGCAATGTTTTGCCCC  
GCAACAATCTCTCGATATCTGGCTGCAGGCAGCCGGGATGGATTGGACCATCGAGCAGAGTGACGTGATG  
TTTAACGTGCGCTCCGATGCGTTGCATATTCGCCCTACAGCGATAGCAAGGTACTTTATCGCTCCGATA  
CCCTTGCCCCCTGTGCGTGGTCTCAAGTCGCTACAACGTGGTACAGCCTCATGAGGTGCTGCACTTCTA  
TCAAGACCTGGTGGAAAGCCGGTGGCTTTGAGCTGGAAACAGCAGGCTCGCTCAAAGGTGGCCGCAAGCTG  
TGGGCACTCGCTAAGACCCGGCCAGGATCTAAAACTCAAAGGCAATGACTTGGTAAAGTCCATCTGCTGC  
TGGCGACCAGTTGCGACGGCACACTCTGCACCACGGCGCAGTTACCTCGCTGCGAGTAGTCTGCAACAA  
CACCTGCAGATGGCACTGCGCGGCGCTACCGGCGCCATCAAGGTGCCCACTCCACTCAGTTCGATGCG  
GCGACCGTCAAAGAGTCGCTCGGGCTGGGGCTCTCCATTTGGGATGAGTTCAAGGCACAGACCAAGGCGC  
TGGCAGAGCGGCCCGTCCGCCCCGAAGAGGCGCTACGCTTTTTAGCGATCTGTTGGCGCAACCGCTCGA  
TGAGGAGAACATCATTCTCACCAAGCCGGTACAACGACTGCATGAGCTCTATCAGGGCGCAGGCATGGGC  
TCAGAACTTGCAGCTCCCGCAATACCGCTGGGGCTGGTCAATGCGGTCACTGAATACGTGGATCACC  
ACCGCGTGCAGCCAGGATCACCAGCTCGATTCCGCTGGTTGGTCAAGGCTCCCAACTCAAATC  
CCAAGCCCTGAATCAGGCACTCACTCTGCTGCAGTAATTCCTCGTCCCCATTCAAACCGCATAACGACCT  
CACCCGACTGGCGCAAGCCAATCCGGACGTAGCCATTTATGCCGTCAACAAGGAGTCGTATGAAAGCA  
AAAGCCAAATATGGCCAAGCCCTGCGGCTGGCCTCTACTACCCAGTTAACCCGCGAGCAGTGGCTCGCTA  
TCCGTAAACTCGGCATTGGTTCCCTCCGATGCCGCGTGCAGTGGGGCTATCCCCCTACAAATGCCCACT  
CAGCCTGTGGCTGGAGAAGACCGGTCGAAGGAGCCGGAGGATATCTCCATAAGGAAGCGGTGCTGTGG  
GGCATCGAGCTCGAACCAGGCTGGCACAGGCTATGCCAAGCGCACAGGCTACAAGGTGCGCCGGTCA  
ATGCAGTGTGCAACACCCTGAGCACCCCTTCATGCTCGCAATCTCGACCGGGAGGTGGTTCGGCCATCC  
CGATGGTCCGGGCATTCTGGAGATCAAGACTGCCAGCTATCACAGCGCCCTCAGTGGGAGGAAGGGGTG  
CCGGTGGCTTACCAGTGTGAGGTGCTGCATCAGCTGGCCGTCACCGCCATGCTTGGGCGAAGTGGCAG  
TGCTCATCGGCGGCCAGGATTTTCGGATTTACCGCATCGAGCGTGACGAAGAGAAGATCCAGGATCTCAT  
CGAGCGGGAAGCGCAGTTCTGGCAGATGGTGAACAAGACCAGCAGCCGAGCCTGACGGTCCAGTGAT  
GCCGCCATGCCCTGAGCTGGCTGTTTCGCGTGACGATGGCCAGACGGTGGATCTCTCCGATTCTCCCG  
AGTTCAACCAGCTGTTTGGCGAGCTGCTGCGCTTGCCTCAGCAAAAAGGAAGCCGTCGAGCTGCAGGAGTC  
ACAACCTCAAACAGCGGCTGCAAGCGACCTTGGGTGAAGCGACAGCCGGGCTGTTTGCCGATGGCAAGATC  
ACCTGGAAGCGCAGTAAGACCCGGCTAGCACCCGGATCTGGATAAGCTCGGTCAGGATCATCCCGACCTGC  
TCACCCGTTACGTCAAACCGGTACCCCGCGCTGCGCCGTTTACCATTCAACCCCTGAGGCAAAACCATG  
ATCAAAGGACTGGCGATCACCCTCGCCGTGATTGGGCGGATCTGCATCGGCAAGCTGGTGA AAAACAGG  
ATAAGTGGGTACCGGAGAAGGACGACAGCTTACCCTCACCACCCAGATACAGCAAAAGGGGGATGGTT  
GCTCCATCCCCTGCATCAACACTACTCATCACAGAAAAGTGGCCAAGGGCAGGAGCAAACCAAGATCCGC  
GCCATTCGGGTGCGGGTGTGTTCAACGACAGCGACTTGAATTTGCGGGCGGAATACAGCGCTTTGACC  
GGCAAACCGGCAGGCCGCTGTGTGTCGGGAATGGGGATGTGGCTAGACGTGTGGGCGCGCAAGGCATGGA  
GGAGGTGAGCTGCCCTGGACCAGAGCGCTGCGCCTTTCAGGACAACAGGGCTGCAAGCTGTACGGGCGA  
CTGAACCTGTTTGTGGAGGGGCAAGGGGATGAGCTGGGCAGCTTTATCTTCCGACCACCGGCTACAACT  
CGGTACGCACCCTGGCTGCACGGCTGAAGTACCTAGAGGCTGTGAGCGGCGCCATACCCGCTACCTGCC  
GCTCACTCTGCGATTGCGAGCAAGAGCACCACCCAGTCTACCGCACACCGGTCTACTACGTGGATTTG  
ACCTTGCGGGAAGAGACCAACCTGACTGAGGCAGTCAGACTGGCACAAGAGGGCCGCCAGCGTGACCAAG  
AAGCAGGCTTGGCCATCGAGCAGATGGAGCAGGCTGCTCGCGAGTTGCTGCGTAACGGCCAGTTTGAGGA  
TATCGATGAAGAGGTGCCGATGCTGCTGGAAGAGTTCTATCCCGAAGCCAACAGCGACGAAACGGCTAAT  
GGTAACGCTGGTGTGGAGGCGACTGCCTCGCATGCCGACCCGAGAGGCCGCAACCAAGAAGGAGTCCGC  
TCACCAGCAAATTTGGGGAAGGGACCCCATCCCCTTCCCAGTAAATGGTGGATGATCAGCGGGGACCGC  
CCAACCGCTCCACCAACCGTTCTACCGTTTCCAGCAACAGGGTTCGGTCAGCATCATCGAGCCGAGCCAG  
TTGCTGGCTCAGCACAATGCCCTGCTCGGTCCGGCGGTTACTGGTCTCGCGCAGAAAAGTCCCGCAGCTCA  
CAACCAACAGTTGAGCGAGCTCCGCCAGCCGACCCAGTCCGGCACCACAATCCCCGCTCCATCCGGG  
AGACGGCTCCATCCCGATATTGAGGTGTTACGCCACCTGCTCCTGGGTAAACCCGGCCTGGTTACGCTG  
ACGCCAATCGCCTTACCACGTTCTTGGCTAACTGCTCAAAGTTGATATCTGTATAAGTCCCTCCAACC  
AACCCCTATAGTTGAGGGTGGACTCGTTGACATGAAGAACCACAAAAGGCGAGTATCAACCCGAAAGGTT  
GTTATTGGGCATTTTCTGCCTATTTAACCGAATTAGGGTTATCCCCCTTCTCCACGACTTACTACCAACAG  
GAGTTCTCATGAAACGACTCGTTCCATTGCTCACACTGGCAGTCACAGCACCGATTGTCATGGCCAGCAA  
CACCAATGACATCTGGTCCATCAAGACAGTGATGGCACCACCTTGGCTCAAGCGTGTAAATAACAAACGT  
ACCTGTGAGCTGATCTACAAAACAGCCACTACCTTGCCTTAGTCAACAACCGCTCCCAAACGGGCTGTG  
CCACTGGCGATCTGCTGGTTGCCGAACACGCCAGTCGCAGCCTTAAGAAACTGGATACCGGCACCTGCAG  
CGCCTCCGCCAGTATCGAGGTCAATACCTACAATCGACTGAACAACGTCGATGTCATGATCGGTGACCGA  
CTCATCAAACGCTATCCGCTAGATGCCTGGATGTGGGGAGAAAATACGTAAAGCGGGTAAGGGGGCATCTT  
GGAGCAAGGCGGAAGAAAATGCCCAGAACCCCCGAAAACCTGGACACGCCGAAAGGCCCTCCGGCACAGTG  
GATTGTGCAAGAAGATAAAATATGGCCTTAGCTACATTTTACTCAAGGCAAGGACTATTCGCCGTATGTG  
CTGGAGATCAAATGCGCCTATCAAATGCCGGGTGGAGTACCTGCACTCCAACCTCCGATATACCAGAG  
CTTATGACGCCTCAGCGACCGTCCATGAAATTAAGTGCATGGTAAACGCCTCTCTGGGACTGTGAGAAA  
TCAAACAGAATGGACCCAACCTCGTTAACGCCATTTCTTCCGCATCAACCTGAGCGTCTACAACGTCTAC



GGCAAGCCGGGCCAAGAAGCCATATGGACAGCGAAACCCATGAAGTTGACCTCCACTTGTGACTATTACA  
ACGGGTGAACCATGAACATCGTTAGAATAAATGCTCTATAGCTGCCCTGATAACTTGTGGATTGCTGTG  
GGCAAATACCAGCCATGCAGAAGAACAGCGATACCTCGCGATCCAACACACCCGACACCGTCTACGCCAAT  
CAAGGCGTCTGTGCGTACCCTTCTCCCTCGATAGCGGTGGAGCCGATGAGTTTGGTCACTTGTACATCT  
CGCTGCAATTTAATGACAAAAAGGGCAAAGCCCTAGCCGAATCAACGCTGGAAGTTGAACCGTTTCGGCGG  
GAGCTCAGCCACTCGCTATGGCGGTGGCTTTACAGAAAGTGGATTGCGCCCAGGTAGAGCAGGCCAAGTCC  
ATCGCCATTATTACAGGCGACCGAGGTACTCGCTCACAACCAAGTCAACCGACTGCCAGTCTCGACCTTCA  
CCCCTGAGTTTCATCAACCACTGAAGATCACCGTGAGCGGTAAGTAACCCGCTCAGGAAAAACAAAGCCA  
AAGGGCGTCACCATTACGGTGACGCCCTTTTTTCAATTTCCAACCTTTGATGAGGAACCAACCCCATGACACG  
ACATTTTCAATATCGGCGATCACTTGGTAACACCGCTGCCTGAGGGCCACCATCACGGCATCTTTGTGGC  
CATGACCAGGTCATTCAATGTCTTCCATCCCTACAGGAGGACTCAGGCCAAGTGGCGCGGACATCCC  
TGACTGAATTCAGCCAACACGGCGCTCATTGAGGTCAAGCCCATGCCAACCGGCTGTTTCACTGAGAGGA  
GTGTCTGACGCGGGCTACGCACGGCTCAGCGAAGGTGCACAAGGCCAGCCATTTGCCAATGGCGAGCAA  
TTTTGTTACCTGGTGCATCGAAGGACTTGCCCGTCCCCCAAGTTGCTGCAGACCGCGGTTGCAACCGTCA  
TGGCAGCCGAAGTGGCTCGCCATATGCTGGGGAAAGCGGCCACCAGTGCAACCGCAGGACTTGCTGCCAG  
CACGCTGGCCACCCTGCTGGCAGTAGTGGCGCCGCTGCGACAGTGGTGTCCGTTACCGGTATTGCCGCT  
GCCCCGCTGTTAGCCCCCTTGCCGTGGGCGTGTGCTGCTGCTATGGCGTCAGCAAACCTATGGGATTGGT  
TAAACGACTGATCCATCACTTCAAAGCAAAGCAGGGGGAACCCCTGCTTTGAACTTAATGAGGAAACA  
CCATGACTATTCCCTTTTCCCGGACGGTTTTTGCCTGTCCGTTGACCAAGCATGCTGGTTCTGCTCGA  
CCAAGAAATAGCTAAAACCGAGCTCAATATTGAGCGCTTAACCAACTGACCTTCAACTTTCGCAACCC  
GGCTACAGCGTCGAACAAGGCGGTGTGCACCCAGTTGAGATCCGCTGATCCGTGGGCTCGATGGCTGGC  
TGTTTCGATTACGTCACCGACTTCAGCTACCTGGGGCAGGGCCAAAACGCTGAGCTCTGCAAGGAGCTCGA  
TTTTCAACTTCCCTCGATGGGGAACACACCATGTTGGGCTGGGGACCGTTGCGACTGGCCGAAGCGCGGGAG  
TTGTTTCGATATCTGGCAACGCAACTTCATTGCATACTGCCGTTGGAATGCTTCAGCGTCACGGTCGCAG  
GAGATTAGGAGGATACAATGATCCAAGAATTAGCGCTTTCCCACTACTCCCGTCAGTGGCTGGGACACGT  
CGCGGCGAGCGCCAAGTTAACCCCCACCCACATTTGGTCAACGTTGGCTACTTCACCTGACACCGGATCGC  
CCACATACCCGCACAGTCACCTTACAAGTGCCTGGTCTGGGGCGCAGTGGCAGTTGCTCACCTCACCA  
ATGCGGAGGACTCGCACACCATGAACCAACCGAGAGATGAGATCTGCATCGACCCAAACGCAATGCTTT  
CTGGCATTGCAAAGCAGGGCCAGTGCCTGACCGAGCAACCCCGCTACTGGCAAGCTTCTGGCTGAC  
CTACAGCGCATCTGCATCCACCGCGGCTATGCCGTGGAAAGTGACCCCATCCCGGACAAGGAGAGCGAAG  
ATGATTAACGCCGTGATCGCCATCGAGCTGGAGGTTTTATCTTGAGCACGATGGTCAGATTGAAGCTGTGC  
ATGACCGAGACAAGCCGGTGGACGGTTATGCCCTTACCTGCGCTATGAAAACGAACAGGGCGATGCACT  
GGCACAATGGCTGTGCGACCACCCGGATCACCACTGGCTAACCCAGTTCGGCACCCCTACTAGCCACCAGT  
TACCACATTCCACTGCACGACTACACCACGCACACCTTGGCGGCTGAACACCGCCAACCAAGCCTGCGT  
TCACACCCCATGCAGTAACCTATTAACCAACTACCTCGCTACCTGCCGATCCCACGCGGTGGGGCGA  
TAGCGTATGGAGCCTAATCATGTTGCATCAAACTGATCGCCGGGAGCAACCCGGTACTTATCTCGTC  
ACCGATCTGGTTAACGAAGATGATTTGTTAAATATCGCCAACCAGATTGCTCGCCAGAACTGGCCAAGG  
GCGTCGCGATTACAGACAAACACTTGGCACAACAGGCGCTGCAAACCCATTTGCAGAGTAGGGAGCACGA  
AGTATTTGCCATGCTGTTTTTTGGATAACCAGCATCGGATCCTGGCATAATGAGGAACTGTTTCGTGGCAG  
CTCAGCTGTGCTCCGTGTATCCAAGGGAAGTCGTCAAACGCTGCTCTTGGCATCAATGCGGGCTGCATTGA  
TGCTGGTGCATAACCACCCGTCAGGTCAACCGGAACCAAGTGCAGCAGACATCGAGATCACACAGCGTCT  
GCAGAGTGCCTGGAGCTGGTGCATATCCGGCTCCTAGATCATCTAGTGGTAGGTAGTGAAGGCGCTGTA  
TCTCTTGTGAGCGTGGCCTCTTATGACAGTAAATTTAGATAACCGTACTCTAACACAGAAAATGCCCTT  
CAAATGAAGGGCATTCTTGTACATATAGTTCTAGATTTTTTTGCTTCATAGCGACTAAATGCACCATGG  
AACTAACCCATACTGTAGCAACTACTTTACCTTCGAAATGCTGTTTCACTGTGGTGAACCTTGCCAACG  
GATGCAGTGTGAGAATGTGCCGGAGCAAGAAGCCAGCTGGCTCGCTATCAAGCATTTGGCGCAAAGCTA  
CTCGATCCCTTGGTTCGAGCAATTTGGCATGCCGCTCCTGACCTTTGGTTTTTGGCGACATCGATTACGAC  
GCGCCATACAGGGTAAGCCTCAACCTCGCATTTGCCCTCGGCTAGATCAACACGCTGCCTGTGAGCTCAA  
CCGACACGGCCAATTGATCTGTACCCGCCAGGGAGCAGCCATCGATCTAATTTATCCGGCTCGCAGCAGC  
GCCAGATCGCTATTGGCTTGCTGCCACACACCGTTTGATCGCTCTACTTCTATGGATCGGAAAGGC  
CGCTACACCTGACTCACGGCCCCGAGCAATCCCGCACTATGACCAACTCATCGAGACCAAGGCAGACG  
ACTGCCGCGTCAACTCTCCCTCTCGATTCTGCAAGGATGGCTTTGATGCTGACCCCGTCCCGTTTTTACG  
AGCTCGTTGCAGCCCTCCCTTATAAAAAAGAACTGCCCGAGGAGTCTATCTGCACAGAGAAACGCTGCA  
GCACACTTGGCCGACCCCTGAGTCAATTTGTTTGGCGGTGGCCAAGGCCCTCAAACCTGGCCGACGAAGAG  
TGGCATCTGGTCAAACCTGGCCAAGCGGACTTTTCGCTCTCGCTGCTTTGCTACCCACCTTCTTCGAAG  
AACCTTACCCAGCCTGAACCAAGCGTGACGGTTCGATCTGACCAACTCAAACACACGGTGACCCGCTA  
TGAGGAGCACGACAATCTCCATACTGCACCCGAAAGAGGTGATGCTGGCTCCGCATCACCCGATGGCG  
GAGCAGTGTGCCAGATCACCGAAGAGGGGGAACTTGGCCGCTTTTATGAACAGCCGCGGATGATCGGCT  
TTAAACAATCTTGGCTGCGCCTAATCGCCCGTACCGCTATGCTCTGGTGGATGGGGCGCTCTTCCGACA  
AAGCGCACTCCCCGACCTTGAACACTCGCCACAGATAGATCGCCATAAGACAGCCCTCACCCGTTACCAA  
CTCTCAGCCCCCATGAAGATGCTGGCCCGCCATGGCTATCTCAACGGCGACTATTCTCTCTTCGATTATG

GCTGTGGCAGAGGGGATGACCTGCGTGAGCTAGAGGGCGCACGGAATTGCAGCCCTGGGGTGGGATCCCAA  
TTTCCGCCCCGATGCCGAGAAGGTGAGCTCTCATCTGGTGAACCTGGGTTATGTCATCAACGTAATTGAA  
GATAGAGACGAGCGAACCGATGCACTGCTAGGAGCTTGGGAGCTCACCCAGACCCTGTTGGTAGTGTGAG  
CCATGCTGGCCGGCGACAACCTTTATTGCTCAGTTCACCCCTATCGAGATGGGGTGATCACCTCCCGCAA  
CACCTTTTCAAGTACTACAACCAAAGCGAGCTGCGTGGCTTTATCGCGCGAACCCCTCGACGAGCAGCCA  
CTCGCCATGGGGCTGGGCTCTTTTACGTCTTTAAAAGATAAGGAAGAGGAGCAGCGCTTCTTAAGTGAGC  
GGCAACGCCGCCACCATGGCTGGCGCCAGCTCAGCCGCCCTCCCTTCGAGCGAGTCAGCAAGGCGCAACA  
TTTACTGCAAACCTACCAGGCCTTGTTTGTGACTTCTGGCAAATGACCCTGAGCCTGGGACGCCTACCC  
ACCGACGACGAATTTGAGCAGATGGCGAGCCTGCGCGAGCTGATCGGCTCACCATCGCGCGCCTTACGCC  
TCATAGAGACACAGGAAGAGATCGCTATGCTTGGCAAGCCCGTCAGGAGCGCATCGAAGACTTAAGCGT  
CTATCTGTAGTGGTCAACTAAATCCGGACACTTGGTTAGGCCGATCCTCGGCTTTTGTGCGGTTATCCC  
GTCATTGTGGTGATGTGGACGCCCGCAGTTGTAGTAATCCATCAGGTAATAACTGATATCCCGCTTGGC  
TCCCGCACGCTCATGTATCCCATAGCCGGAACCCACTCCGTTTTAAGACTTCTGAACAATCGCTCCATCG  
GGCATTATCCCAGCAGTTGCCACGCCGACTCATGCTCTGGGTCATGCGATAGCGCCACAGTCGTTGCCG  
AAATGCCCTACTGCCATATTGGCTGCCCTGGTCAGAGTGAAAACAGCACACCAGATGGGCAACCACGCTGC  
TGATAGGCCATCTCCAGTGCTTTGATTGCCAATCTGCATCAGGTTTATCAGACATCGCCCAGCCCACGA  
CCCGCCGAGTGTGCAGGTCAAGCACCGCTGCCAGGTAATGCCAACGGCCACCAGCCCAGACGTAGGTGAT  
ATCGCCACACCACACCTGATTGGGTTGCTGGACATCAAATTCGCGGGCCAGCAGATTGGGGATATCCGGT  
CGCTCAGACTGGGCGACCTGATAACGATGAGCGCCCGGCTGTTTGGATACCAGCCCAGCTTCTTTCATCA  
GGTTACGTACTTTGAATCGACCAATCTGATACCCCAACTCCCGCATCATCGACATCAAGGCGCGGCTGCC  
TGCAGAGCTCCTGCTCTCTTTGAACAACCGGCGCAACTCACTGCGTTGCTGTATCCGCTCACGGTTAATC  
GCCCCGTCTGCGGGCCAGATAGTCGTAAGCAGGATGTTGGAACATCGAAAGCGCAGCAGACCAAGGTGA  
TGGGGGCTTGCTCCCTTAATCGGTTCTATCAGCGCGTACGTGTGAACTCGTCCGCCATCAAGAGAGCAGTA  
GCCTAATGGGATGGTCTGCTCCACCCACCCCGCTATGCTGTAGCCAGCATCAAGGAGGCTCATCATGACT  
CAAGCGCAGATTTACATTTACGGGATCGATTTAGGCAAAAAATGGTFTTACCTGGTGGCGATGGATCGCA  
TGGGGCATGTATTGACCAAGCAAAAGCTCACGCGTTCACAACTGAAACAGTTCATTAGCACGACCCACCC  
CTGTCTGGGTCGCCTTCGAGGCATGTCTGGTTCGCAACTACTGGGGGCGCCTGTTTCAACAGGCGGGGTTT  
GAACCCAAAGATTATCCCTGCCAATTTGTGAAGCCCTACCTCAAATCAAACAAGAATGACTTCAACGATG  
CTACCCGCAATTCGCCAGGCTGGTAGCAGGTAAGTACTATCGCTGTGTCCCGTTGAAATCTCATGAGCAACT  
GGCATTGCAAGCGACTCATCGCGTCCGTCAGCGTTTTCATCGTCGAACGTACCGCCACTGTCAATCAGATG  
CGAGCGTTGCTGCTGGAATATGGGCTCACCGTGCAGTCGGCAGAAAAGTCTTCGAGCGCTCTCTGCCGA  
CGATCCTTGAAGATGCCGAGAATGGCTTGCCCTGACTTTATCCGCGCCCTGGTATTACGCCCTGAGAAAACG  
GTGGCAACAGCTGGATATTAGATTGATGACATGAGCCTCATGCTCGGACAAGCCTCAAGCGCATCAGGT  
TTGTGCCAAAAAATCAGTACCGTCCCGGCATTGGACCGATTGTCTCAACCGCGTTGATTGCCGCGATTG  
GCAATGGCTCACAAATCAAGAAAGCCCGGACCTGTGAGCTTGGTTGGGGCTGGTCCCAGGCAATACTC  
AACGGGCGGCAAAATCTTCGCTCGGCGGGATCAGTAAGCGTGGCAATAGCTATTTAAGGCAAAATGGTTATT  
CAAGGCGCCAAAGCGCTAAAAATTCACATGAAGCGTGACAAAATCATCGTTAGGCGAATGGGTGCTAGGC  
TGGAGGCTGGCCATCACCATCATGTGGTTCTTATCGCCTTGCCAAACAAGATAATGCGAATTTGCTGGAA  
AGTACTGACATCCGGCAGGGATTACCAACCCCTATCCCAACGCAAGCGCAGCCGTTTAAACAGATATAACTC  
ATACCCGGTTTTTGGCAGCCAAAAACAGATGACAGAAGCGTTTACCCACGACGTTGCAGCCTGGCTAAAA  
AAGCAGTCTCTCATGACTGGTAGCTTTATTAGGACGATGACGTGCGGATCCCATCAAGGCCAGAGCCGGA  
AAACGGCTCACAGACAGGCCGGATACATTGACGCAAAACGACTTCTGGAAAATCAGTTCAAGCTTGCAGATA  
AGGAGCAGACCATACATTTTTTAGAATGTCTTTTACGTTTCGAGCCGGTTGATACGGGCTTCCAGCTCC  
TGAATTTTTTGTGCTCCGGAGTCAGTGCTTTGCCGATTGGGGTTGTGCCAGTTCGTTCCGATTGCAGTT  
GCTGAACCCAGCGGCGAAGTACGGTTTACCCGACATCCAGTGAACGGCTGGCTTCAGGGACAGAATATCC  
CTGGTTCGAGCACCAGGATGCGGCTTCGAGTTTGAATTCGGCAGTAAATGAGCGACGTAATCTTGTCAAT  
GAACACCTCAGGTGATGGTGGCGACTGTACCACCTAAAAATGGTGTCCGAGATGATTAGACCACATCAATC  
TCGCCCTCACCCCTCTTTGAGAAGCGTCCGCCCTATAGCCGCTCAACGAAGCGCTAAGACGCGACATCAA  
AGCCTTTTTTCGGGATTATCGCTCCGCCCTAGAGCAGGCCAAGACGCTGCTCTATACCATCGCCGAGCGG  
CAAAAGATTGAAGACGCTGCAAAGCGGCTCATGCGACCCTGCCGGCTCTCTGCTCTATACCGGTCACT  
CCCTTATTCTGCACAAGGCACACCTGACCCAGCTCCCGCTCTGCTGCGGGTCTATGTAGGTGCCGCGAC  
CCAATCTATGGAGAGCTCGAAGAGATAGACCTTATCAAGGTCCATATCACCTCCGGTAAGGTGAGCCTG  
ATGGGGTATGACGATTTTGCAAAACCCATCCCCTATCTGGTGAACGGGTAAAAATCAAGATGGCTGAGC  
AGGAGGTGGACTTCTTTGACTACATAGATGAACACACAAGGCCACCCTGCTCAATAAGAGTTATCTGAT  
GGCACCAGATGCCCCAGCTTTAAGGCACAGCGCACTCTGGAGCAACAATTAAGCAAGTTGTTAGGGGTC  
GACTTGCACACAAACCACAATCTCAGCCGCCAAAGATATGATTTCGGCCCTCAATGAGCAAAAAAATGTG  
TTGTTGGCCTTTCAGTTTGAACGTTGAAAGGGTAGAATATCGCGCCTTAAATGACGTACAAACCTCAATA  
AAAACCTCCCATCTCGCTATTTTTTTCGTGATTTATTTCAATTTTAAACGTAATCTACGTTAAAAAATAACG  
AACAAAACAGTGATATGGATTAGCAAGGAGTCCCATCATGAACCACTTTGACGCTGACTACTGCTACTCA  
TTCCCCGCCGTGCGCGGGATACAGGCAGGTCCGCTTTCTACATCGCGACCTGCCCGATGCGTATCATCC  
CCAAGATTTTTTAGTTTTGATGAGAGCGAAGTGCCACCAGAGTTGAGAGCGCAACGCACGTTGAATAAATC

TCGGATCCCGGAAATGGTGGCTACCTCTTGAAAAATCCCAAAGATTACGTCTTTTCTGCCTTAACTGCG  
TCAATAGCTGTTGATGTCCGATTTGTTGAGCACCCAGGCTCAAACAACCTGGGTACTTTACGTGTCCCA  
TGGATGCGCAGATTTTAATTAACGATGGTCAACACCCGCCAAGGCTATTGAAGAGGCCCTGATAGAGCG  
ACCAGAGTTAGGCCAAGACAACATTCCGGTACTGTTTTTTGTGCGATGAAGGGTTAACCCGCAGCCAGCAG  
ATGTTTTGCTGATCTCAACAAATATGCCGTGAAGCCCAGCCCTTCTTTATCCACTCTCTATGACCATAGGG  
ATCAAGTTTCTGAACTTGCTCGCCATCTTGCGAGCAATATGGAACCCCTTTGTGCGGACTAACCGAGATGGA  
AAAGTCCAGTATCGCCAACTCTCCAGCAAGCTGTTCACTTAAGCAGTATCAAACAAGCTACCCGTGCC  
TTGCTGGGTAAAGGCTCGAAAGAGGGCTGTACAGAAGAAGAGGCTGAGCTGGCTGCTCTCTATTGGCAGA  
CCGTGTATCGCCATATGCCAGATTGGCAGATGGCTAGACGAAAAGAGGTTTCCCCTGCCAGCTCAGACA  
GGAATATGTTTCATGCCACGGTGTGGTCTACACGCCTAGGGATGCTTGGGCGATACCTTATCAGTGAG  
AATCCTGATACTTGGCAAACCGACCTCATAAACTCAAACCTCGATTGGCGTAAGACCAATCCTGAAT  
GGATTTCGAGAACCATGTGCGATGGCAAGCTAAGCAAATCAACCACTGCTCTTACGTTTACCTGCAACGC  
ACTAAAAACATCGCTGAACCTTTCCCTCACTCCAGAGGAAAAGGTGCTAGAAGCCCAGGTTGTTACTCAA  
TGAGCACCTTAATACAGGCCACGATCTGGCCGATTATGAAGACTTTATCAATGCAGAACTATTTGCTGG  
CCGCCACTGGCAGATTACGTGGCGGAAAGTTCAACGTATCTACTGCGCCGACAAACGTCCTTGGGTCAAT  
GGCTATAGCGGCGTAAAGACTCCTCTGCTGTTCTGACCTTGATCTATTTGGCTCTGTTAGGACTACCGC  
CTGAGATGAGACACAAGGATGTCTTTGTGGTTTCGTGACACGCTGGTGAAAACCTCTGTGGTCTGCGA  
CCTGATCATCCGTACCATGGAGCAAATGAAAAAGGAGCCAAAAGAGACAAAACCTCCAATCACATCTCAC  
CCAGTAGTCCCAAAAACCCACGAGACGTTTTGGGTCAACCTTCTCGGTAAGGGTACCCAGCCCTACCC  
GCAGCTTCCGCTGGTGCACCGAGCGGATGAAGATCAACCCGCTCAGTGACTTTATCAAAGACAAGGTCAG  
CCAGTTTGAAGAGGTGATCGTGGTACTCGGCTCACGCAGTAGCGAAAAGCGCTCTCGTGCCAGGTCATT  
GCCAAACATAAAATTGATGGCTCTCGTCTCGCCCCGCATACCACGCTGGCCAATGCCTTCATCTACACCC  
CCATCGACACCTGGGATGTGGAAGATGTCTGGAAGCTACTGCGTGGCGCCTTCAAATACGCCTCTGATGA  
CGTGGAAGAGTGGGAAAATCCTTGGGGAGGCAATAACCGGCCTTTGTGGACTCTGTATATGGACTCCTCC  
GGTCAGGGGGAATGCCCTCTGGTGATCGACGACAGCACTCCTTCTGTGGTAACTCACGTTTTGGTTGCT  
GGACCTGTACTGTGCTACCAAAGACAGGGCCATGGAAGCCTTATCCAAAATGGTGAGGACTGGATGCT  
GCCCTTACTCAAGTTCGAAATCAGCTGGCGCTAACCAACCGACCCGCCCAGAAGGATACCTATCGGAAC  
TACAAGCTCGTACCGCTAAGGTGAGCTATCAGTACGCCAAAAGAGGGGGAGGACATCAGCCCGGAGCA  
AACATGTGCCTACGCCCTACTGGTTAAAATATCGCAAGGATGGATCCAAGAACTGCTGGAGATGGAACG  
AGACCTCAACCTGAGTGGTACACCATCACCTAATCACTAAGCCAGAGCTGCATGCCATTCTGTCAGAA  
TGGCTCACCGATCCTAACGAGCCAGATTGGAATGATTCACTGCCAGCCATCTACCGCGAAGTATATGGCC  
AGGATCTCGACTGGCTGATAGATGATCAATCCCGCTTCAATGCCAGCGATGCCGAGTTGTTAGCACAGAT  
CACTCAAACCTATGAAGTCGAACCCGAAATGGTGATGAAGCTGATTGAGCTTGAGATCTCGCTCGAAGGG  
CTGAGTCGGCGCCAAGGGGTGTTTGACAAGATAGGCTCGATCTTGAAGCAAGACTGGGGCTCACCTCGAAG  
CAATCGAGCAAAGCAGGCCAGTTACAAAAGCGTAATGAGCGAGACCTCTATCAAGAAGAAGTCGATAG  
CATTGAAAACGCGCTGTTTGAAGTTACAAAGCAATTAGTACAAGCCGATGATATAGCGGCGCTGTTTAGT  
GAGGCAGTACAAGAATGATCATCAAGAAATGGTCTTGATAACTATCGGGTATTTCTGTTGGCAACCATGA  
AATAGAGTTAACCCCGCAAAGGCGTGAAGGTGAAGCACATGATAGGCCAATCGTACTTTTCTGGTGGCCTC  
AATGGCGCTGGTAAAACCTCCATCCTCTCAGCTATTCTGTTTACTGCTTTATGGTTCGCTTGGCATTGATA  
ATCTGCCTCACAACCAAGACTATATCGAGCAGCTAACCGCCCTTATTCATAATGGCGTTAGCCAAACGAT  
GCAGCCACAGGATGCCTCCATTGAGTTGATATTTACCTATAACCAGGGTGGCGTCGAGTCAGAAATTTACC  
GTCATCCGTAGCTGGAAGCGCCATAAAAAAGATCGACTTAAGCTACTGCAAAAATGGCACTCAGCTGGATG  
AGCTCAACTATGACCAATGCCAAGGTTTTCTAAATGAGTTGATCCCCACGGCATCGCTGATCTGTTCTT  
CTTTGATGGGGAAAAAATCGCGTCATTGGCAGAAGATGAATCCGGGAAAAATCTACAGACTGCGGTAAGG  
CGTCTGCTTGGGCTGGATCTTATTTCAAACCTGCGTAATGACCTCAGCATCTATCTAAAAGCGCCAAGGTG  
CAAAAGAGCTAGGCGCTCAACAGCAGCAGAAGCAAAAACAGCTGGAAGAAGACAAGAAAATGTTTGCAAA  
GAAAGCTGAACACTATCGATTTGAAGCTGACTTGGTGGTGGCTCGAATAGGATTAATAACTCGAGATATC  
CAAAAATATGAGGCAGTGCTCGCGGCACAAGGTGGAGCCTTTGCTCTCACCAAAAACCAAGAGCAACAGA  
GAGTCGCTGAGCTTATCAAAGAGAAAAGACTACTTGAAAAAAGTCTGCGCCATGAATGTGATGGCACTTT  
ACCCTTTTCAATTGGCTCCCAAGACCATGGCTAAGTTGCAACAACAGCTGACTACAGAAGCCGAGATAAAA  
CGAGCCCGCAGTTTCAACCAAGAGCTCAATCTCTTCTTGAACAGTTAAAAACCAATATCGGCTTTAAAG  
GCAAAGAAACGCTGGCTATCGCCACACAGGCGATAGAAGAGCAACTCGATTCTTATATGGGTAGCAAACC  
CCAAGGCAAGGTGCTGTTGATATCTCTGAGCGGAAAACCTGCCATCATTCAACTAGCCATCGGGCAGGAT  
TGCCAACGTGCTTGGGCCAGATTTGTAGACCATCGCCAAGCACTGGCCAAGTTGAACAACAACCTGGAGC  
AAGCAGCAAGTAATATCGAGCGCGCCCCAGAGGATGAGCAGCTGATGGGACTCTTCCAGGCGCTGAGGAA  
ACTGGATGCCAAGCGACAAAATGAGCGCCATGAATATAAGGTTCTACTTGAACAAGCAAAAACAGGCTGTG  
ATGAATCAACTAGACTGCGCCCGTCAAGTCCAAAAGCTGCATGACAAAAGCTCGCGATCAATACGGTGTG  
TCAGTGGGTTACAATATGCAGATGAGACTATCAGCTTACTCGATGAATATAGCGATGTATTAACGCAAGC  
CCGTGTCAAACGCTGGAGCAAAAATTTTGAAGTGGCTTACCGCAAAATGGCCCGCAAAGAAGATCTGCAG  
ATAACCGCCAGGATCAACCTCATACTTTGATGTGGAGCTGGTTCGATGAAGCCGGATGACTATTAACC  
GTAAATCCCTATCGGCTGGTGAAGAAGCAGATCTATGCCATCGCCATCTTGAAGCCTTGGCAAAAACCTC

TGGTCGACAGCTACCGGTGATTATCGACACCCCACTTGGTCGCCTGGATTCCCATCACAGAGACAAGTTG  
ATTAACCACTATTTCCCTTTGCTAGTCATCAGGTAGTACTACTCTCAACCGATACCGAGGTGGATGAGC  
GCTATTTTGGCAGCGCCTTGTGCGGATGATATTTCCCATGCCTATCAAATTCGGTTTGATGCGTTGACCAA  
GTCTTCAGTCCTGACCAAAGGTTATTTCTGGAAAGACACTCATGCACAAGCCAAGGAGGTGTGCTAATGC  
TCCCTAATCGCATGCAGTTGACCCGTCAAACGGGAAGAGCAGCTTAAACGGCTGAAGGCCAATACAGGAGT  
TACTCCCAATGTGCTGCGCTTTGGCTTTCTTTGCTCGCTTGAGAGCGATTTTCGTTACCACCCAGAT  
AATAAAAAGTTAGACGGCAGTCTAGTGCTAGATAAAAATAACTTGGCTTGGTGAAACCCGACCATTACCG  
AGTTGGCACTAAGAATGGAATATCCTGACTTAGATCAAAAAGAGTTGATTAAAGCTTGGGCCGCCATGT  
GGAGGATGGAATCGCTGCGCTACGCAACTATAAACTCTATGTGATTTTTCTCAAGGAGTATAGATGGCA  
TATTTAGATAACTAAACAATACATAAAATCAAATTGATATATAAAATAGCCCCATCAGATTTTCTGATG  
GGGGTATAATAACAAATCAATAAAATAAAACCTTTTATCTCTTTATATATTAACCAGCTTTTATAGATA  
CTGCATCAACTTCATTAAGTAGCTATCTTGAATGTTAACACGACGAAGAGTCTGAGAAATATATTTTTTC  
CTCAACGATGTGCGCATATTTAATGGCTCCATCATCTACCAATTGGTTGTAGATATCCCTCAATACTCTA  
ATCAAAGAAATAAACCCAACTGTTTTATTTAAAACAGATGTTCTATTTTTTATAACTCCAGCTTTTCAGGCC  
ATTTTTTTTTCAACTGCAGAGAAATAGTTATAAAATGTTTCATAGCAATTATAGAACTTTTATCTTCTATAAA  
GCTTTTCCGGAAGGCAGTTTTCTATAACTATCCTCATTATATCTGGTAGTGTTTTTGTTTTTTATCCCA  
ATAAAGTTTTTCTTTCTGCCAAGCAATATATCTCTATCTAATCCAGGTTGCTTGGATATCGTCCACTTGA  
CAATATTATCAACAAAGGCGCTTGGGTAATAAGCTCAGTTGACACACCAGGAGTCTTACACCAAGACG  
TTTAATTTCTTTTATAAAATGGAGAGCCAGCTTTTGGAGTTAATAAACTGCTATTTGATGTGCAGTTTTA  
GATGGATTTCTAGCTAAAGCTAGTGATTCAAGATCATAAACCAAACTTTTATTCACTTTAGTTTGGTTTT  
GATTAACCATAGTAAACACTTGAGACTGTGTATGTAGATCAGCTTCAACGAATATAGTAACTAAAACCTC  
AAAATCCTTTTTCTCATTGCTCTGAGAAATAAAACAAAAATCTGTTTTTTCAAATCCTGCCAACCGATGC  
TGACCATCCAATATTTTCGCAATTTTCCCTTTATCTTTGCTCTTATATTTTATAGAAAAGATACCATCAT  
CTAAAGAAACATATTTCCCATCAACGGCAACTATTAATTGAATTAGGAAATGTCGCATCAACAGACTTTAT  
ATATTCAGAGATTTTCTTCACTCGCGCTATTTAATTCACGCTGTATGCCAAGATAAGATTCAAAGTCA  
TCATCTTTTTGTTCACTCTCCATACGCTCACATCAGAGTAGGATATTTTCATAAAGTTCTTTTTGCTTTCA  
TCACACAGCAATAGAACTCACCAATAGGCTGGGAGACTTTTAAAATATCTTGTGATATATTTAACTCTTT  
ACTATCTATTTGGTTTCATTATTTTCTTACCCTACCATCAATGCATCAAAGCTCGTGCTAAGATTCTCTGCT  
GAGCTTTATTAATCGTAAGGGCATCTCGTCCAAAACCATGATCCCCCAACACTATAAATACCAGCTAG  
TAACGTTAAAATAACGACTACCCACCCAGTGTACGGTACTGCAGATTCAGGTATGTTCAATTTCTTGAGAT  
AGAATTTTTTCCAACCTAACAAAGCTAAACACTAACGCCCCAATAACAATGAGGAAATTGCAAAAAAAC  
CAATAATCTTACTTGGCAAAACATCCTTTTTTACACAGCTTTTTTATGAGCATAAGGAGCTAAAAAAGCTGA  
GGTGTACAGGAATACTTCTCCATAGCTGAAGTTTGATATAAAATGAATCTAATAACTTTTTTATCAGACCAA  
CAAGTAGTAACTATCGCACCTAATAGAATGGGAAAAACGATGCTGCAGCAGTAATTGCCAACTCAATAG  
TTGCCCGAAAACAATGTTTTACCCCTCTACAAAAAGACTCACATGTCCACATCACTTATCTAGCTCCCAA  
AACGCCCTATCCCGCATCATAGACATTTTTTTTATCCCATCAATATAGAGACTAAAGTGTGTCCAGCT  
TACGGATTTGCTCCATTAACCTTCTCCTGCTCACCCCTATCATCTTTATTAAGATGGCCTTGATATCGGC  
ATTCTTTATCTCGGCGACACGGTGCACAACCCAGGTCAAGATATAAGATCCGTAGTTGTTTTCCCGGTT  
TTAAAGTGGCTCAAGTCTTGGGTTGAGAGGATCACCCCTACCCCGTATTCACGCCCTCTTTTCAGGATTT  
TGCGCAGGCTAGGAAAGTCTTGGCAGATAAAAATTGTGCGCCTCGTCGACCAGGATCATCTTGGTGATCTG  
GCGATAGTCCCCCGAACCTTCCGTTTACCAGCTTTTGCATCTGCGAATAGAAGAGATCCAGGGTCAGG  
GCCACTACCAGGCTCTGGATCTGGGGGGAGTAGCCCGCCAGCTCGATCACTGTCACTCCCTCGAGCAGTT  
CATAGAGCGAGCTCACCCATCGGGTTTGGTCTCGAAAATCTCGTAAGTGACCAGGGAGTCGAGGGCCG  
ATAGAGGGAGTCTTCATCGACCTTCTCTTGTCTCATATAGAGATCCCATACCTGGGCCAGGGTCGAGCC  
GATTTTGACCAGGTGCTAGCGTCTGATTTGCTGATCCCAGCCAACCTCATAGGCATCGAGGATCAACTTGC  
GCAGTCGCAACTGCTGCTTGGGGCCAAAGGCCAAAAGCTTTAGCGAGAGTCTCAGAAAAACCCGTTGCCGT  
GTGCACCGGCAGCATCGGCATATCCCCATAGAGGGAGAGAGGGTTATAGGGCAAACGGTGCAGCTTCAGC  
TTCCGGCTCTGGTTTGCCTCGCTAAAAGCCTCATCCACATAGTCCGACTTGTAGTCAAAGATAAGCAGAC  
CGATCCGTGCACCTCGACGTTGTATCCTGCTGGCGCATCAACTGGGTGATCAGCGACTTAGTAAACTG  
GGTCTTGCCGGTGCCCATGGTGCCAATGATACCGGTATTTGGTATTCATAAAGCGCGCCGTGTTGGTGGGT  
TCCCAATAAAGCGGGGTCTTATGGAAGGCATCGTGACCAAAGAGCACCTTCAAGGGCTCACTCACCTGAG  
GCGGTGAGACGGGCTCTGTGATGGCACAGGGGGCGCCACTGGCGGCTCAGCCGGCTCAACGGTCACTGG  
TTTTGGCAACATTCGCTTGTAGTGGCGGGCGCCCTCAACCTCGCTGCGGCATCAGGCAAAATTGACTC  
GGCACCTGGCACTGCTCGACCAAGGTCTGGATCGATGCATCCATCTTGTGGCAATCAAGGCCGGCAGCA  
GTGAATAGGGCAGCTCAATTTGCAACACATTTTGTATCTGTGGTCTGTTAACTCGGCTTAAAGCAGCTGTC  
GTTTTCCACATGGGCCACCACCATGGCCTCCACATAATCGGGCAAGGTGCCAACTGATAGTCCCTCGC  
ATCCACCCTCTCGCTTATCGAGCAGCGGCTGCAACTGGGCACGCTCTAGCACCCCATAGAGACAGAGCT  
TATCAACCTGCATCAATACCTGGCGGATAAAAAAGACCCCGATAGAGGGCGGCTGGCCAAGGTGTCTTGCC  
CAGCACCTCTTCTGCTCAGGTAGCGCTTGGAGCTCCACCGCTGCTTGCCTGCATAGGCATAATCGGGGCGC  
ACTCCCGTCTTCACTCGAGGGGCATCAGGTAGAGGTGCCCATCTTAAATCCGACGAAGAGCACATCAT  
CAGAGATGGCCCCCTTACGATAGCCCTGCACCTGACGGGAGAATCGCTATCGCTCATCTTGGTCCCAC

ATTGCCCGACACCCTGATCATCTCGGCCACCGACAGGGGCACCCAGCAGATATCGGATTGACGCAGCAAG  
GCCGAGGCCAAACTTATAAGCCCCCTATAATGCCGTTCTTCTCTTTACGCTCCTTGGGGTTTTGCGGTCAGCA  
TCTTAAGCAGCCACTCCCCGTTAAAGGCATTAAATTCGGTCAGTAGTACTTCACCTGCCCATGACCCTC  
TTTTTGCAGCAGACGCTGAAAGAGCTCCACTTGCTTGGTCACAGTAATGGCGTCATAGCCGGCAGCACTG  
GTGTATTGATCCGAATAGTGGATCAGCACCACATCCTGTTGGTTGGCAAAGAAGTCGAGGGTAACCTTGG  
GATCAATGATGGTTCGTCACAAAGGCGCTCTTATAAGAGCACTGCAGCAAAGATTGAAAATCGGCACCTGAC  
GGCCAGTCCCAGGCTGGTCTCAAGATATTGCGTGTACTCTGGTGAGCAGGCTTCCACAGGTTTTGCCATT  
CTGTGGGCCAGTCGCAGGTGCTGATGAGGCTGGAAAATCGACCCACGCAACCCAAAGGCGGTGAAATAGG  
CGCCATTTTGGATCTCTGCCGCTTCGCCAGCGATCAATCCATCGCACAAACACCCCGCTCATCGCCATATC  
GCTCTTGATATACCGCACTCTACCGGCTCTTTATTGCGGAAAAATGCCAGATGGGCATAGGCGAAGACA  
TCACCCCTTATAGGTAGGGTGAACCTTGCTATAGGTGAGACGGCTTCTGATGAGATCTATCAGCATATCGG  
CCTCGGCGCGTAGTGCCCCGCTATTTAACCCAGCCAACTCTTAAGCTGGTCATAGGCCCTGCGTCTCGGC  
GAAGCGATCGAAGTCGTTAAATTGCAGTCGCTCGTCATAACAGTTGACGTTGGATGGCAATAGCCTGATCT  
TTGTGCTGTTTTAAAGTGTCTGACCAAGCCTAAGAAGATCTCGCCACTCGCCCCCTGATTAATGGAATTA  
TAATAAGGCTACTCTTGGCCCCGCACTAAAGAGACGGGCATAGGCCTGCGTGAACCTCAGCCAGTTTTGTC  
GCGCACAGGCGCTTGATGTAGTCAAAGCTTCTCTGCTTTTGGCGCACAAACATTGAGCCAAAAACAGTTT  
TCCCCGACAACCTGAAGATGGGCATAACCGGAGTCGTTGTATAGACAAAGGGCAAGAGTCCAGAGGGCA  
CCAGGCGCTCTCGGGTCACATCGGGCAGCTCAGCAAAGCTGTTGCCCCCTTCGCTCTCAGGCTCACTCAA  
GATGGCACTGACCAGCGCTAGGTGATAGGCCAACACCAGAGGATGCAGTGGGGTGAATCTCAGCATCCCC  
TCATGGCGGCATACCCCTACCCGCATCAGCCTCTTCTGCTCCGGGGACAAAACACTATTGGGGGCAATCG  
CGGCGAGCTCCTCTCATAGGCATTACCACCTCCCTGTACCAGAACGCGATAAATCTGACCCCAAGCCAC  
TAGGCTAGGCAGACTTTTTCTCTGGGACAGGTAGGCAAAGAGGGAGGTATACGCCGCAAATAGCGCGGGC  
GAGATCTCGTCCATCTCGGCCAGCGTGAGGGTATCGTCATCGCTTAGATAGAGCAGTTGCTCGTCCACCA  
TGCGCGCCTCGAGATTGAGCAGTTGCTGGCGAATGCCACCACCCCACTCTCGGGCTTATCAAAGACGAT  
GCGCCCCCTTGGCACGGTTATATTGGCATTGCGATCATCATTAATAATCCGGCCAAAACGGCTCTTATCG  
AAGAGCAAAGGGACGGTCATCCCATCATCTGCGGCAGGCCCTTCCACATTGATAGCAAGCTGGCGCTCAC  
CATTTCTGATAGTAAAGAGGGTTTTGCTCATTGACTCGGCCAATCGCTCAAAAATCGGCCAACCAACCGC  
TAGACAATCGACTCGACCTCATCTCACCAAGGTGCTGACGCCCTCTTGTGAGCGTTGACGCGCAGT  
CGGTTCTCTTCAAGCTGAAGAGTCAACCAAGCTTTACCAGGCTCGACCCGATAGCGGTGCAAAAATCTCGT  
CGAGATAAAAGTCCCCCTCTTCGAGCACCAGACAACGGAGCTTGTACTCTTCAGCCCGATTATCTCGCTT  
GAGCTCGATGCTAAAGAAGGTTGGGTCAACCAGTCACCGGAAGCACCAAATGGGCCCTTGCAACGTTTTTCCA  
CCGGCTCTGGCTCTGCTCACGGCAATAGTAGCCAATTTACTCAAGGCTCGATTGTGCTTTAGCTGTAACCT  
GCTGCGTCTCAAGATCGTTGCCGATAAAGTCAAGCAAGAGGTCACACTGGGTGGCCCCTTTTGGCATGAC  
CAGCAGCAGGCTCAGCTCACGTTGACCGCCTTAGTCTGGGCCTTGGCCCGTTGATGCACCACCCCATCT  
TTCAGCGTAATTTGCTCAAGCAGCAGCTTTTGGCCCTTATTGGCCGCGATCTCTTGCAACAGGGTCTCGA  
AGGTGAGCTGACGCCAACGGTCATCTTGAATAATGCTCGGAATAAAGCGGGAGCTGAACCTTAAAGGAC  
ATTTTCCAGTTGATCGAGACCATAGTGTCTGACCGCCTCTTCGATATCCCGACGCAGATCGCGTTTTGT  
TCCAGACGCTTGCCAATCTGCTCGCGCTTACCACCTCCAATTTAGCAAGAGCGGATCGTTAAAGAGCTGCA  
GCTCGTCAAAATCGAGCACTCCATCTTTCTCCAAAGCGCTAAAGAGGGGGGCAAACCCAAAGACGGTCTGA  
GCCGTCGGCCTTGATCAACTTAAGCTGCTCTTCGAGCAGACAGCTTGAGAGCTCGCGACGGGGGTGACCG  
ATATCGATCAGCTTAGAGAGCTTCTCTGAGAGCAGCTCAGGGTGCCAGATCGCCCCTTTTCTCTCTAAAT  
CAAACGCACTATTGATCAGGGTGTGAGCAGGCTGTTATGGATGATCAAGAGCGCAGCATTGTTAAAGAC  
ACCACCCCGACCCGCCACCAGATCGCGCAGGTGAGAGATGTAGTTTTACTAAACCCCTCCCTTCTCCA  
TGCAAGACAGGTAAGAGTGCACACCATTGCAGTGCAGTATAGGTAAGGTGACCCCATCATGGACAAGTG  
AGTCACTCGGAGTGATCCAAGAGTGCATGAAAGAGTGCCAGGCCGTTTTTCGGCGCTGGGGGATTTGAACTG  
ATAACGGGCGCCCGCCTCAAGCTGACCTGCATCCATTCGATCAAAGACTGTACCAAAAACCTGTTCAAAG  
GGTCTTGGCGACATACTACTGCGTCTCCACTATCACTCATTTCGCTCGACATTGCCCATGCGTCTATAGAAG  
GCAACCAGCACTTCTAGGGTCTGGTTATCAAGATAAAAAACCTCGCTGCTCGAACCCCTTACACAGCTCGT  
GCAACCGCAGCTTCTCAGCCTTCCCTATGGTCAGGTTGGTTCAGCAGCAGTAGCTGATCCTGATTCAGCAC  
CAGAGTGGCGCCCGCGGCGCGGGCTTGGATAAAGTCAACCAGCAGACTGTCTTCCAACGCCTTGACG  
TACTTTTTGTTAAACAACACCAGGTTTTTGGGTCATTTGAAAACCTGTTCAATAGCTAGCGTTTTCAACT  
GCTCAAAGGCCTCTGCGGTATTCCCCGCTCTGGGTCTTTCCACCAATTTTCGGTTTCGCAATAAAGGCCTG  
CAGATAGTCATTGAGGGTATCGAGTAATTTAGTCTGCTCGGGATAGTCCATCGCATCTTGATAGACCTGC  
CAGAGCGGGCGTGGGGCACTCTCCACTTGCAGCGCATCGAGGGCAGATAGCAGCGGGAAGACATCTTAC  
AAGCCAATGCGAGCAGCTTATAACCCGAGCGTTTTGACACTGGTGCCTCGGAACCTTGCCCTCTCAGAGTC  
GAGAATAAAGTAGAGGGGACGGCTCTTTGGCTCCTCCCAATCGGTGATATTGAGGGCAAGTTGAGCACAA  
TAGGAGAAGGCGTAGAGCTTGAGCATCTTGGGCAAAGCTTGCAGCAGATACTGGGGATGCTCAGACAGAA  
ACTGGATATCCTCGCGAAACACCTTATTGAGAAAATGGCAGATAGGGCTGTTTCATCATCTTTCAGCGCAGT  
ACCAGGCTGAAGGTTTTTCGCGCAATACCCCTAACATCTCCCGCTCAACAAAATTTGAGGTGGTTCATCGAGC  
GCATCAGATAAGAAGAAATTTCCCAGCAAGCCAGCAAAGAGTTTACAGAGCCGCTGATCCGATGCACTGA  
TATCGAGGCTACCACCTTTGGCGCCCTTTGGCCTTAAAAAGTAAAAACAGAGGCGAGATGTTATACAAAGA

ATCACTGGCGAAATAGGCTCTTTCCAGCACGGACCAAAACGCAGCATCATCAAGCCGTGAAAGAAAGCGC  
TGCTTACACTCCTCCTGATAAGCAGCCAGCTCATATGTTTTTACCTGTTTACGCAGGGCTAGACTCAGTA  
CAACCCCTGTGACTGTATCCCAGTTAAACTCATTGCCCTTATTACGAATAGGCCAGTAGTTAGACAGCTT  
GTTCTTTTTCTGCTGGCTCAAGCATTTCGGGGATCGGAAAGGTCGTCATTATTAAGCTCTCCCTCAACGG  
TAATAACCTCATCATCGAGCTCGAGGCGATAGGAGTGCGCCCTTCGTAGTAACTCAGACGCGGGCTGGT  
TTTTGCCAAGGTGCGAATTTGTTCCACCATCTCGTCGAGCAGAACGATGGCGTTTTTATCATAACGGTTG  
GGGCGATAGCCGAGTTAGTTTGCCAATCAACTCGAATAGATTGAGCCCAATCACCATGGGGTTGAGCT  
CTGACTCACCCACCTTGAGATAGGCACAGAAGTGATCGTGCTTTTCAGCATGCTCATATTGAATGCGCTT  
ATAATCGGCTTTGAGCTCCAAGGGGGCTGCGACCTTAATTTCCCCAAATTTCCCTAAGAAGAGCTCACGC  
TTGCCAGCTCAGGGGCATGCCGATTGGCATAGGTGAAAATGGCGGGGATCAATGCCTTGGTATAAAACT  
GCCGCAAGCCATTTTGCATATCGTATCTCTCCATATTGCCCATGCTGCATCCACACGAGGCATAGCT  
CTCTAACAGCTGCTCATCGAAATCCCCCTTGAACATGATGGTGGTAGTCATTACCAAACGAGCAATGTTTA  
AAGAGATAAAAGAGACGCAGCAAGGATGCCGCTGCCCTCTCGGGGCTCAGAGAAGTAGACGCTTATCT  
CGGCGAGGGATTGCAAAAATCCTGCGAGGGTGGGTGAGGTAACGCCAGCTCATAGCGCAATACAAATTG  
GTCGATCGCATGGGTGTCGAGCAGAGCTGGATCAAACCTCTGCAATCTTCTGTGCTAGCTCATTACTACCG  
CCCATAAAGAGGTTATCGAAGAGATAACCTTCGCCGGTGAGCAACTGGTGCAGCAATCGAGCAATGCTC  
GTGTCGTGATGAACTGATCCTTGAAGAGGCGTGTTTTAAAGAGAGTGGTAATGATAGCCTCTTGCACCTC  
TTCACGACCTAACAAACGAAAATTCGCAATCAACTTAGCATCTAGTTGGCACAGCTCATCGCTCTGTGAA  
ATAAAATTGAAAAGGTTGTTATCGGAAGGCTCGGTCAACCGACGTAGCAGTTGACGCATAAAGGCAGAGT  
AGCCGCTACCTCATCATTAAAACGAAACTTGGGGTAGGCTTCAAAATCTATAAAGCGATAAGCCCTTC  
TGCTCTGAGTCCCTCACTCAAAAACGCTCGATCACTGCTCTGAGTTCGGCATGTCTTTCAGCCCCCTCT  
TTGGCGTAGTTGGCCAACATCCCGATATTGACCCCCACCACCAGAGGTTGGCTGCTAGCCTCGCGCTCAT  
CGAAGAGTTTTATTGAGTGCCCTCAATAGCCGATTGATGGGGTGAAAACTATGGGTGGCGTCTAAGTGA  
TCGATATTGCTGCTTATAACGCTCATAGCTACGGGAAAAGAAATTCGGATTTACCATCCCCGCTACTGCCA  
CAGAGAAAAACAAATCTCCAGTTGCAGAGAGCTCAATACACGCTCAAAGTCGAGCTCAATATCAGGTT  
TGACGTAGAGGTACTCTTTGAGTTCGTCATACACGCTCTCTGGTCTTTCTGAAGTAGTTTTTACGGAAAA  
CGGCGATGATTTAGCCAAGACCCCGAGAGCCTTGCGAAGGGAGATTGTGCTCACGATATAACCTGTGCT  
TCCATATCTGACAGATAGTAACTGATTGAATCATTGGGACTACTAGAAAGGATCGTATTTATATGACT  
CTTTGATGTTGTCATATCACTGCCCCCCCATATATGGGTTTTTTGTGCTGATGTGCCAGACTGAATGAGCC  
CAAATGTAAGGCCAACCAGCTAGACAACGTACTTTTTTCCAACCGCATTTCTAATCAACGTCACATCAA  
CATTGGTCATCACTGGCATGCGGGACTTGCCTGGTTCAAAGGTGGTGCCTATAATGCCTGTATATAAA  
TACAGGCGTTATTACCATGAAGCTGTTAACCCAGACCCATCACCCGCCGAGGTGACCATCCCGCTGTTT  
TTGCACCGCGCTCTTGTGGCTTTCCAGCCAGCCAGCGACTATCTGGAAGGGAGTTGGACCTCAACA  
CCCCTGCGTGGCGCACCTGCAGCAACCTTCTATCTGCGTGCCGAGGGGGAGAGCATGACCGGAGTCGG  
CATCTTTCCCGGTGACATGTTGGTGGTCGATAAGAGCCTGACCCCTCGCCATGGTGATGTGGTGATTGCA  
CTGCTCGATGGCGGCTTACGGTCAAGACCTTGCAGCTCAAGCCGAGGCTGCGGCTGTTGCCAGCCAATC  
CGGCGTTGCGCCTATCGACCTTGCATGAGCCTCTCCCTGGAGCTGTTTGGAGTGGTCACCCATGTGAT  
TGGCAATCTGAGGCAGCGTATGGCCATAGCGCTCGTTGATGTAAACAACCTTCTACGCCAGCTGTGAGCG  
GCTGTTTTGCCCTGAGCTGCGTGGCCACCCGATCGTGGTGCTCTCAACAACGATGGATGCGTGGTGTGCG  
CGCAGCCCCGAAGCCAAGGCGCTGGGTATCAAGATGGCCGGGCCCTACTTCAAGATCCGCGAGCAGTTGCG  
AGGCGCATGGCGGTGTGGCATTAGCTCCAACCTACGCGCTCTACGGCGATATGTCTGGCAGGGTGATGAG  
CACGTTGGAGACCATGGCCCCGAGCTGGAGGTCTACTCCATCGATGAAGCGTTCATGGCGTTGTCGGAG  
TCGTTTGGCGGGACCTGACAGCCTATGGGCAACAGATCCGGCAGCGAGTGTGGCAGTGGACCGGCCATA  
CGGTAGGGGTTGGGATCGGCCCTTCAAGACCTTGCCTAAGCTGGCCAACCTATGCAGCCAAGAAGTGGCC  
TGCCACTGGCGGCGTGTGGACTTGCCTGACGAGCTGTGCCGTGCCCGCTGATGGCTATACCCCGGTG  
GATGAGTGTGGGCATAGGGCTGCGCTTGGGGGCAAGTTGGTGGCGCAAGGCATCAACACCGTGGCTG  
ACCTGGTGGCCAGTGATGCCAAAGGGTTGCGAGCCCAATACGGCGTGGTGGTTCGAGCGGATCGTACAGGA  
GCTGCGTGGCCTGCCTTGCAGAGCTGACCGTTGAACCGCGGCGAAGCAGCAGATCCTCTCAAGCCGT  
TCCTTTGGGGAGCGGTGACTGACCGTGGAGAAAATGGCCCAAGCGTTGTCAGGCTTTATGGCTCGCGCAG  
CCGAGAAACTGCGGGCCGAGGGGATGTGTTGCCAGCGGGTGCACCTGTTTCGTGCGAACCCAGCCCCTTTGA  
CGAACGAGCGCCTTACTACAGTGAGCAGGCTGGCGTCCGGCTGGTCTGCCCTAGCGATGATACCCGGTTG  
CTGCTGCAGCAAGTGAACGTGCTGCTAGCGCTGATTTGGCGCAGCGTTACCCTATCAGAAGGGGGCG  
TAATGCTGAGTGAGTTACCCCCAAGGGGAGCAACAGGCAGATCTGTTTGGCCGCTCTCCGCTCAATC  
GGACGCGCTGATGGCAGTGATGGACCAGATCAAAGCCAAGGGATTGGGGCGAGTAGGCTTTGCCAGCCAA  
GGTACGGGGTCAGCCGAGTGGATGATGCGACAAGCGCACCTGAGCCCTGTTACACCACCCGCTGGGAAG  
ATCTGCCAGTGGCGAGATAGAATACATTACAGCTCAAACATCATACGGCCGAGGATATACCTATAAA  
AACACGCATATTCGCTACAGATAAAAATACCCCTTACGCAAAATCTCGCCGTAGATTATACAAGCAACGGCTG  
TCGCTGGGTGACCGGCTCACTGTCAAAGTCAGCAGCCCATCAGGGCTGGTCAGCCGCCATGTTTACCAC  
CATTTTGAAGGCCACCCCTGACGAATCAGTTGGCGGATCAACTGATCGATATCTTTATTTGTACAGTA  
CTTCATACGCCACATCCGATTTGGTCTGGATATAGCGTGCGCAAAATCGCTTATAGTCAAAGCTCATTT  
CGCTAAAGGCCATCCCTGCCCAACCTCGAGGATTGGCCGACTGTAGGTATAACCTGACCAACAGCAGG

CAACAGAGGGGTGTTCTGAAAAAGCGCCCGTATGGATCAACCATCAGATATGACTCATGCATGTCTAGG  
TTGTCCCTCGATACAAAGGATTTGAGAGAAAGGATTATGACGAGAGACAAACGAGGCAAACCTGTTTCGTCAT  
TAACAGCCAGGTGCTGACTCACCACCGGCAACATGCGTAGGACTTTCCACTTATCAGGTGCAAGACTCAC  
GATCAGTGCACCGAGCTCTTCGTGATGATTAAGCTGGTTAACTACGGTATTAAGCTTGATACGCAGATCT  
GGGTTTTAGCTGGCGAGCCACATTCAGACTGGCGACCAACTCATTCAAAATCAAGTTGTTCGGCCAAGGCGAT  
CAACTCGCCCAATTGCGTGATTTGTTGCGGCGGATGCTGAATCAATGCTGATACCGAGCCAAACCAGTTG  
TGGTGCGAGGCTGTTTAGCATCCCATCGTTGAGATAGCTACCGTTAGTTATTAACGAGACCTCGAAGCCG  
AGGTCTCGTGCTTGAGCGACGATGGATGGAAGTTTGCTGCATGCAACAATGGCTCCCCACCCGCCAGAT  
TGAGCCGTATTGAACGCCATTCTAATTGGCCAGCTAATGGGTTTGCACGGTTCTCCGGTTCGAAAGAAATG  
GTACAGCTCGGCCAGGAACCTAGCGGTTTCGTTCCGGATCTCGGATCAACTCTCGCTGGTAAGTCATTTTA  
TGCCACGTGCGATAACAGTAATGGCAACGATAGTTACAAGCTTCCGTTAAGTGCCAATTGATAACGATTT  
GAACGGGTAGCGACATGATTAGGCTCTCTTTGGTCAAGGATACGCAAAGGGTGCCTATGGATTGGCTTAA  
ACGATATGAAACACCGTGTATCCCCAGTTTTACGGCTGTGAGGGGGGGGTACAGGGCATTTCAGTGA  
TCTGATAGATAAACATTGCCAGAATGGTCGAGACATCAGACAACCTCAGGATGAGACACAACATGAGCAC  
CTTGCCACTGCCGAAGCTATCTTGCTGGAAATTCATCAAAGCCTTGCTGCCAAAGCTATCCGACAACC  
AAGAAAACCAATTTGCGACTGGTCAGATAAGTCTTAAAGCTCACAAAAATATGGGCGAAGAAGTCTTTG  
ACAATATCCTCAGGGCGCTAGGAATGGACCCACTGGCACAATTAGATTCTCTCGACAACCTCATGGAATT  
TGCAGGGAAATACAAGCTTCTCGAGCTCAATACTTGACATTCGCCGAGATCAACGCCAGGTTCTCTGG  
GCGTTGTTGACACATTTCTACATACCTGGTCTGGCAGACATGCAGGGTTCTGGCAACTTGAACAAGCAC  
TGGATACTGGTATGCCGGGGGGCGTTTCTGGTATCTGCCGAGCCCTGCGAGGTGAATGGCACGTCATG  
CCTATATATGCCAGTTGCCCAAGTAGTCGATTGGCTGTGGACCTGCTGGGTATGCCTATAGAGGCATTC  
GCAGATCAACATAGTGAATTGATCGAGGATGGCAATGATGGCCTACGCCGATCCTTATATAACTGGCGTA  
GTGGAACCACGATTCGTCCAGAAAGCATCGAGAAGTACTTCTCCGACGAGACAAAACCTACGTTTTGACGG  
CGCGATATCACTCCACAACGATGACAGCCCTTCTACACAATTCAAACAACGTTCTGAATTTTTTGA  
AAGGGGCTGACTGCCGATCAGCTACGATTGGAAATCCCATGACTCAACCTGGTCGCATAGAGTCAATTC  
TGGCCGGGCGAGGCTGATGAAGACGAGCAAGCCACCTTCGTGAAATGCATCGCTGAGCGTTATGCAGCACC  
TTTACCAAAAATTATCCGTCAACGCTTGTACTTGTCTCGGACGGTGCAGGATGGTTATGTACGGCTACTC  
AAATACCTATTTCCCAATGTTGACAAGTTGTGTGCTGATCCCCAGCAAAATAAATTGCTTCAACTTCC  
CCATCTATAAGGCTGTCTACAACCTGACTATCGATCGATACCGATATTCGCGGGGAGCAAGTGAAGTGC  
TGAAAATGCGTGGTTTCAGGGCACATCTGCCTGAATGGGACAAACAAGGCATATTCCTTTCAATCCTTCT  
TCTCGTGTGAAACTGCAAACCTAGAACTCGCTCAGTTATTGACTCGTCATTTCTACCCTTGCAGCCTG  
GGCAATGCTTGAGGATCACTTTGCACTCGACGAGCATCCGCTGACCCCATCATTCGAAAAAAGTTGGG  
ACTCCTCAAGGCTCATGCTGATGAGACACAAGCTATCTATCAGTTGATTGACAGGGTTAGGACCTCATCA  
CCTTGGCGCGCCTTGCAGACCGAGCATCGATATTGGGTGCTCAGTCAGGTCGCGCAGCATCGATCCCTAA  
CTCCACGAGCCAAAGAGGCGCTATCCAGCGTTTGCATGAGATAGTAGCAACACCAGCTGAAACCATCCA  
AGCAATTTCTGTTCCGGGCTGGATGGCTACCTGAATGGTGATCGCAAACAAGGCCAAAAGACACAAAAAC  
AAGGTACAAGTTCTACTCGATGAAGCTGAAGCCAGCTCAGGATATGAGTTATGGAAAGCACCATTGTC  
AATACAAAGCCAAGCACCTGCTGGCCAGTAATAATTTTGAAGGGGAGCCAAACTGTTTCAGAGAGGCGCT  
GGACGCTGCTTCGGAACGTAATTATGGTCTTATACGTGGGGAGATCGCGCGGGATGGTCTGGCCTTAGAA  
GTTGCCAACCCAGAACTAATCACCAATAACCACGAAAAGTACTATCGGGAAATGCTGGCCGGAGGAATGA  
TGGCCGAGTGCTATACGATTCCATCTATCGAGGAAATTCACGCTGGGCATCAGATTACTTTTGGGATGA  
CCTGTACAAACCCTATCCAGGTATCGAGGCCGAAATCCGTAGCATACAAAGTACGATGGATACGTTACTT  
AACGACCTGCTGCCATTGTTCCAAGCTGGCGATGAAGAGGGATTGCAAAAATGGATCAAAGCCAATCGTT  
CATTGTTGAAATCTAGCCTGCCTGATGTCGATGGAATAACCGTATTGATGGCTCTTCTCAAGATGCATTC  
TTCTTTTACACAGATAATGCCATCAATGAAGCTAATTTGTTCCACTCGAGCTGCAAAGTGAACACGTCGG  
TTCGAAGCCATGTTGGCGCATTGGCGCTCGTTTATCGGCCAACTGGCACAAGAGAGCCCTAAACAACCTAA  
ATATCCCCGATATTAAGGGCAAACCCCTTGATGCTGATGGCTGAGAAAGGAGATACCGAGTTAGTAAC  
CATCATGCTCAACGCTGGCGCGGATCCAGAAATACAAAGCAGTAGCGGAATGACTGCTCTACATTCGGCG  
ATCAAGTCTGGGGTAGAGAGTTGTGTGGATGTAATCCTCGATCACCCCTGCAACCGAGACAATCTCACGG  
ATGACGGGCAATCAACCTGCACACGGCGAGTTGGACTGCCAATTTGCATGCCGTCAGGCGCTTACTACA  
ACTATCCCCAAACTCGCACGGCAGCGCAATTTCTCAGGGAATGACCCCTTAGAACGAATTAACCACTTG  
ATCGACAACCCCGAAGCGTTAAGCCTCTTAGCTAACCAGCGAGCTCAAAATGGGCAACGTTGTGCCACCA  
AACAAGAGTTGCTCGCAACTGCAGACTTGTTCGACAAGCAACTCCAATGTTACAGAAATAGATAGCAAC  
TCATGTGAAGCCAATAAGAGATACTGATATCAGTATCTCTTATTTTATTACCTTTGTGATATGCCGTATG  
GACGGAGATACTAATTGGATATTGAAGCGGGTATCAGGATCCAATACCTCCCAACGTCCGCTCTTACGCG  
GTCCAACAAAGCGTAATCGCCCGTCTTTGACCAGCACGGCAACCGCTCTCTCCACTGTACTGGTCGACTT  
CCCAATCCGCTCTGCGACTTGTCTTGAGCGTTATGGTTCGGCTCAGCCGCCAATTCGGCCAAGATGGCCTGC  
GGTGTTTTTACCCGTTTTTCTACCTGCGTTTTCAACCGTCATTTCTACCTGCATTTTCTCCTGATGAGGTG  
ATACGGCTGCTGGTTGAATCGCAATCGCTTGAGCCAGTGCATCGCGCAGCGCTGCCAGTAAAAAGAGGAT  
GAACTCGGTACAATCACAGCGACTATCAGCCTGACTTAGCTGCTGATAGTAGTCTTGGCCGAGCCTTG  
ATCACCGTCTCCACTGGTAAGAAGGCCATTACAGGTTGCCAGCGACTCAATATCACCGTCTGCCATAAAC

GTCCCATCCGACCATTTCCATCCGCAAAGGGATGAATAAACTCCAACCTCGTAATGCAAGGCACAGGAAGC  
GATCAGCGGATGAGCCTCGGTCTCAGCCAGCCAAGTCAATAGCTGTCCCATCAGACGAGGGACCTGGTTC  
GCAGGGGGAGCCATATGCACCAACTGCTCACCTCGATAGATACCTACACCACCGCTACGCCAGTGACCCG  
CATCATCACAGAGTCCACGCATCAGGAGTCCATGAGCACCAAGTAAATCTTCCGCTGAAGCAGGATCCCA  
ATCAGGCATTGCTTCATAGGCCGCAAACGCATTACGAACCTCTTGGATTTCCCGTGGAAGCCCAAGCACC  
GTCTTCCCCTCAATCACTGCCGTACCTGCTCGACACTCAGGGTATTATGCTCTATAGCCAAGGAGGCTT  
GGATGGTGCGGATCCGATTCTCTCGACGCAGCATCGGCACCTGAGAACTCTGAGCAAACCGCCACTGCC  
CACCAACTCAGCGATCTCCGCCACCCGGCTCAACATGGCGTGGGTGAGGGTGAAGGGAGGGGAATAGGCT  
GCCATGGGTACTCCAACCTGATGCGATAACAAATGAGGGTTAGCTTAAACAGATCCGGGAGCAGAACTCC  
CGGATCAGATGCCATGTAAGCTGCAGTAAAAGTCTTTTATCAACACCAATAAGCCTCAAATGTTACT  
CCCCCGAAACAGCGGTACCCCTTCTCCGCGCTCTTGTCTCGTCTTTAGCCAGATAGGCTGCCCGCACA  
AGCATCTTCTTGAGTGACTCGGTATCATTCCGCTCAATGAGATACTCAGCATTCTCGGGGAAATGCACCA  
GTCCCATTTTTTTACAATCTTGAGATTGATATTTTCATCATATACAGCGCTATACCACGCCACTCTTAT  
TTTTATTGGCAAGGTTCAATCTTTCCGATTTCATAATTTCCCTAATTTGTAGTAAGCATCCCTATTCAAAAA  
ATCATCATGTGATAGTGAGGACTGGGAGCATCGGCTGTTTGTCTCTTAGCCCAAACGTATCTAATCTCAG  
TCGAATGAACCTCTTGCCCTTCATAACGTGTTCTGACTCATCGCGCTCAATGAGCCATTTAAGCCTTGA  
AAAGAACTCCTTAATTATCCTTGAGCCCGACTCAGGCTTAAATGCTAAATACATTCAAAAGCAGGGTCC  
TGTTGAAAACGGAGATCAACTCGAAAGGCAAATACTCTGGAGTAATGCTTAAAGAGCGCTCTCCGATACAG  
AGAGAATTTTCTCTAAATTATCCACATTAAGCCATAGTTCCGACCTCCGTAGAACTGCTGAGCAAGCAG  
GGCATACTCTTCTATAGAAATTGACATTTGAACTCTCCAATAGATTGTTGATAGACATTGAAGGTTTAA  
ATAATGATGTGTGATTTTTGTGGATATAGCCGTAGTGTTTTTCAAACACGGTCTATTAAGTAAATC  
ACCAGAATAATTTGTTTATAGGTGCGACCAACACCTTCTTTGAATACGAAACACAGCAATTAAGTGTCA  
TGACAAACGATGACCATTATTTAGAATGGTTCAAACAGGCAGATTCATAGACTATCAATGTACTCCCGAT  
GAAGAGCCATTGGATTTAAACACACTCACCTGGTTAACTTAAAAATATATTTACTATTACCTACACCAAT  
GCATTGAATATCAAACCAACCTGATAACTCTAATCCCTGACAGGACAATACTTCTAGCCTCAGCAACAAG  
CTAATTTATTTCAATTGCTCGTCAGAAATTAGCCCTAGCGAAGATTTCTTTTTCTCTCAATCCATGACTC  
TATTTCAGAGCTAACCAAGCAACAGATCTTGGGCCGATCTTACTGATGCTGGAAATTTCCCGTCATTC  
ATCTGACGATATACTTATGATCCCTTAGAGAGTGATGTTATTGCGATGACATCTTTCAATTTAAGTATTTCA  
TTATGAGCTCCTTTATCATCCATAGGACGTGGCGCTCGTGTAAAAAAGTAAGTAATGCTCTTCAGAAATG  
TCGTAGAAACTGAGGCATGTCACAAGAGAAATAACAAGCGTCTCTTACGATTTCTGCGCCGACGCTAAC  
AAGTTGTAAGACTGGAGAATCACCTCTATCCAACCTTCTACGTTAAATTGACCCAGCTAGAGATCATGATA  
TTTTAAATGGCATCCTCACTAAATGCCGGGAAAAATCTAACGATAACCTCTATCACAGCTTAGGTGAGCGA  
GGCCCCATGTACTAAGCATCTGCACACACTAAATACGTGAGGCAAAGCAAATTTATCGACAACAAGCGGT  
TGAAAAACACTCAAAAATCACTCATAAAATGACACCTAAACATCAAAAAAACTCACTAAATGACTAAGTC  
ATATATCTGAAGTGAAGGAGGTTTATATGCCAGAGGTCGTAGAGTCAATTTATTTAGATCAGAGAGGGGT  
GAGATTTATATCCAAGTTGCTTGACTTATCCATTAATCCTTCAAGCGCGAAATATATTTCTTGGAAATG  
ATTAATAAAGAGAAGCAACATATTTTTAAATAGACTCTCATTCAATAGCCTCGGTTTAGATCGCGACAGCG  
ACATTGACGAGGAGCGGATTATTAATTGGGTTAGTAATGAGTGTATAGACATTTCTCTGTTTGGATGGAT  
TGACACTAAAAATAACAGGCTGTGTATCTATGCTTGGTCTTATATTAGATTATTAACGAATCATCATTT  
GAAAATATACTAAGCACTCCATCATTAATAAGAGCGACATACTTAAACACAAAAGCATTTTCTTTAGGTG  
GGCAATATCTTTACGAAAGATTGAACATAGAGTCACTACCGAAAAGATAATAAAAAAAGAAAAGAAAACAT  
CATTGATTTTTTTGATTTAATAAAATCTCAATGCCTTACAAAAAAAAGAACTACTAGCTCAGCTTAAATTA  
AAATGGATGCATAGCACAGAAAAAAATGACATTTCAACTGGGCAAATAAAAAAACAATCAACAATGGGCAT  
GGAATTATTTATTTAAAGACAGTACCCTATATGGTTTATCAATAACAACCAACCAGACAACACTTAAA  
AAGTCTGCTTGGTCTCAAAAAGCATATCGCGATAAAAAAATGTTAAAAAGGCGGTAAGTATTGTGCTAT  
CCGAAGATATTATTTCAAAGCTAGACTTTGTATGTGAAAAACACAGATAGGAGAAAAAATGAGGTAGTCAC  
AAGACTGATTTCGAGAAGAATACGACAAAAATAAAAAAAGGCGGACACTAGTCCGCCTTTTCATTTTACTTT  
TCTTACAAACTCAATAACATTTCCATGAGGATTAGATTTTTGAGGCTCATTTGCAACTTCCAGCTCAACC  
AACTCGCCCCAGCGTTGCCATAGCATTTTTTTCTTATCGTCATGTCGCGACCGATGATAGGTTCTAACCA  
ACTTATTGAGTGGGAGATGATTAAGACATAATTCAATCACTCTCTCTTCTGCATCTAATCTCTCAGCCCA  
ATTTGTTGCAGCACTACGCCGTAATCATGTACGGTAAATGGTTCATGTCAGATAAAGAGCGAGAAATA  
AATCGCCTTAAAGCTCTGGTTATCGAGTCAACTAAAAATGGTTCGATTACGTCATTTTAGGTCATCTG  
ATTCAAAACGAAGTACCCTTTACATATAGTGCCTGTTTCAATCAATCAGTGTCTTCGCTGTGAGATAA  
GAATACCGAATGTGGCTTTCCATTCTTAGTATCAGGGATCGTCCAGATATCATCTCTAATATGTGAAAAT  
CGCATATTAGCGACTTACCTCTACGACATCCGGTCAAGTATCAATAGCTTGATCGCATTCGCTGCTGGTA  
GAGAAATAGTGGCATGGCGAGAAACGCCACGCCCTCCAGCCGCAAGCTACCACCACTGCCAAGATCCTC  
ATCAATCGCTTTCCATAGCCTGCGCAATTCGGGGACTGTCAGCCATCTCTCTCTTGGCGAACAGCAGCTG  
GCACCAAAATCCTTGGGCCGCAACAGTCTCGCAGGGTTGGCTCGATAAGGCAGTGAACCACCGCATAAT  
CCAACATCTGGTTACAGCTTCCAACCCCTTACGGGTTTCGTCTTTTGTGTCACGCGAGTTATCTCTAA  
CGCTTGTGCCAGGTGTGCACGAGTCAGATCGATTAAACGAATATTGCCGAGGGTCTTCTTGAGATGACGA



TTCCAACGATCCTGATGACATTGGAGGGTCTTGGGTTTGACGACCTGAGCAATACGTTGTGCATCGAGCC  
ATCGCCCAAGTAACTCATCCATCGTCAGGGCGGTTTCATTTTTAGCCTTTTCAATAGCAACATGCTTGCG  
TGGATCTATCCCTTTCTTTACTAAGGCAGCCAGCTCTGCATGCTCAAGCCTGGCTCGCGCCAACGACAAC  
GCCGGGTAATTACCCAGAACAACCTGTGCGCTGAGTACCAGCAATCCGATAACGATAGACAAAACCGCTTGC  
TTTTTCTGCCCCTAACCTCAATAGCTAATCCACCGCCATGGGGAGATTTACCCGCATAGCGGGTAATCGA  
AGCCTCCCCTTGCAAAATCAATGAGGGGATCTCTCGATCCTGCGTTACCGGTTTTCTTGCCATAGCATTC  
TCTCCCCCTGTTTTGGGGTACCACTTGGGGTACCACAGCAAAATGATATAGGGTGAGACTTCATGAAAC  
TAGCTGAAACCCACAACAAGAAAAATAAACATTA AAAACAATAGGTTGCCATCAAAAATTCAACTTTATA  
AAACCTTCTGAAACACTACCTACCTTGGCTCCTAAGGGACAGGCCACTGGTTCGACTCCAGTCGGGAGCG  
CCATATAAAAACAAGGGGTTGGCATCATCAGATGCCAACCCCTTGGTCGTTTTTGGCCCTGGCGTGCTTG  
TGAGCGTCGTATTACCCCATCATGCGCTCAAAACCCAGGGGCTATGGGATAACACAGTGGCCCTGAAGGG  
CCACTTGCCTGTCAAGCTATCAGCCTTTTTGCCAGGTAGTGGCGATCTTGCCAAACCAGTGGCTCCGAGAG  
TTTTCTGCGCCTGTTAACTTCCGGTTTTGGTCATCGCTGCTTCCAGCTCATCGCGAGCCTGCACGGCTTCT  
GGCATCCCCTTCTGTTGCCGCCATAGATAACCAGGCATAGGCATGTACTCGGTTGCGCGGAGCCCCAGTC  
CCTCTTACGCATGGTCCCCATACGGTATTGAGCCATCCGGTACCCTGCTGGGCAGCCAGACGATACTG  
CTTGAGTGCCAGCACATAGTCTCTTTACCGCCAAAACCTGCCGCAGCATCTCGCCATAAGCATATTGA  
GCCTGGGTATGACCTTGTCCAGCAGCTTTGGCATAGCTGGCTCTGGCTTGGCTCCAACCTACCCTGCTCTT  
GCTGCAACTGCGCCAGCTCGAAACTGGCCTTGGTGATCCCGCTTCCGCAGCCAGAGTCAACCAATGCTG  
CCTGGCTACGCCATCTGTTTGTGCAAGCTCAGTTGGTACTCCGCTCATGCGAGCCATGAGTACCGCC  
ACCTCCAGCCAATATCTTCCAACGCAGGATCAGCTTGACCTGCTCTCCCGCCAGATAAGCAACACCCA  
GCCATAGTTAGCTTCCGCAGAACCCGCATTGGCAGCCCGCTGATAAGCCGCGAAAGCATCAGTTGGTGT  
AGCCTGACGAGCCAGCAACAACAAGGCATCCGGCTGCTGCTGGGCGGCAGCCTTCTCAAACCAGCGCTGG  
GCAATATCCGGGCGTTTTGCTCACCCCTCTCCCCTGTTTACATAACGCTTGCCCAGCTGATACTGAGCGTAC  
GATTGCCAGCTCTGCCGTTTTTCCAACCACTTACCGGCATCCTCATCCGCCCCCTGCTGCTTGGCATA  
CCACTGCCCAAGGATCAATTGCGCCTCTGCATGATCCTGTTTGGCGGCTTCTCGAACCAGTCGAGGCAT  
TCACTGACCAACTTGCCTGATGCTGCTCCTGACACATCAGGCCAGCTGATAGCTGGCATTGCTGTTGC  
CAAGCGAGCAGACCGCTGCCACCCTGGGTAGCGAGCGTCGGGTTTTTGGGCTCCCCGAGTCCGGCCTG  
ATACAGCTCACCACTTGCCAAGCAGCATTTGGCGGGATCTGTTTATCGGCGGCCAAGGGCCAGACTG  
TCTGCCGCTTGTGCATCCAGTGCATTGCAATGGGGTAACTCGGGCTGACTGGCCAGACGTTTTGGCCAAC  
CATATTGAGCCTTGCCATTGCCCTGAGTGGCGGCTTGGGATAACTCGGCGTCAGTGAAGTTGTGGA  
AGAGCAGGCTGCGAGCAGGCCGATCGCCAGCGTCAGCCATAAGAGTCGATGGGTGATGAGAAAATTCTTC  
GTAGAGTTAAAAGGAACGGATGAGGTGCTGCTGATTGCGGACTAATCCGTTATGCTACGCAGCCACCT  
GATTGAGCATAACAGTTGATGCGGCACCTTCCCTAGCCATTAGCCTTGCTGTCAGGTGGTTTTTGCAGTT  
ATAATAAGCTCTGTTACATTCCGAATTCTAGGAAGTAACTTCTAACTTGATGCGTTTTTATCCATTTCGTT  
AGCCCAAGATTTAGCCTCTTCAATTTCTGTTCTCAGAGAGTTTTTTTTTCAAGAAGACTGAGTTCTTTAACA  
GAACGAGAATAGGCTGACTCCTCAGTTTTCTGGCGGTAGTTGATGGGTTAATACATATAACCAACCGTAAG  
CTTTTTTATTGCTTTGCATATCAGCAGGAATTGGAATGGTAACTCATCGCCTCCCATCAGATAAGTGCT  
ATAGATCCTTATCGAGTTAATATTTCTGATTGGCGGCTTGTCTGTCCAATAACGTTTACGCTTTATCA  
CGGGAGCCAGGGATAAGGTACCAACCCGAGCCACTTCGGATGTCATTTGCTAAATTTGAACTGAGCTCCTG  
CATCCCCTTTTTTGGGCTGCCTTCTCAAGCCATTTACATGCACCATTATCATCATTTTTTTAATGATAGGAC  
GAAAGAATATGTCTTACCCCTCAATATCGCCTTCTTACGCCAGTTGCTTAGATTTCTTAATCAGCTTG  
TCAGACCAACCACCATCACCTTGATGTTAGCTAATGTTGAGTCAAGCATGACATTTTACCCGATATTAG  
AAAGGGCTAGCATCCCACAAAGCCCCCTAACTCAGCTGCTTTTTTAAAGTATTTTTGTGCATCAGCGTT  
AACAAATCAAAGATGTGCCTTGATAGCCGCTGGCAATGGTACATAGCGCTTTAGTACTGCCCGCATTAGCT  
GCTTGCCACATCAGGCTTAGCCCTTATCCCACCTTGTTCATAGGGGATAACCGCTTGTGATAAAAGCT  
CATCTGCTGTACCACCTTATTTGCAAGTACGCTTTCAAATGAGACCGAGATCAACAAACCAACACAGG  
CATTGAAAATTTATTAACCTTAAACATTCACCCGTCCTGAATCTGAGAACGACCATACGTATTAGAGAT  
CTTGATGTTAGGTTGTGCATTTTTCCCAACGCATATTTGATAACACATTTGCGAGCTCGTGCATACTTTATT  
AATGTTGACTTAAGGTCATCATTTCTACTGTCCGAGGCAAAAGCCATATATTTATCTAGTGTACTAAGGT  
TACGCTTATAAGCACCAATCTGATCTTGACATTTGATATCGGTCATGCGGCTTATCGCCTCTTGAAACTT  
ATGGCAATTATCAGTAGTAGCTTTACCCTATAGAGCCAATCAACCAAGCGCGCAATGGTCATTTGCTGC  
AACACATGGGTCTCTTTATCCGATAAAATTGACAGGGGGATTGTTGAGCCTCAGTACTTTGGAGTTTGCCA  
CCAAGGTACCCAATAACGAGCCCAATGCCTCCGGCAGTAGACCGTTGGCCCAGCTTTAAGCTTGGCTTC  
CGTTGCTGCATTGGCCCTAGTATCGCCAGCCGATCCGGGCGTAAAGCCGATTTGGGATTACGTGGTTTTA  
GGCAGCAAGTGACCCGACAACGTCCACGCCACCAGACCCGCATTCTGGCTGCGATTACGCTTGCCGTAGA  
GGCGATCAACAAAGTCTTTCTCTGCCGCCACTATCTGACCAATATTGACCCCAACAGCAGTGCAAGCTG  
ACTGGCCCTGGAGAGCCGCTGATAGCTCTCCTCATCGGCGAAGACTTCGACCCGCTCGTAGTTGCAGCGG  
CGCAGCAGCTCCTGAAACATGGCCACCACATAACCGGTAGATTGCCAGTCTACTTCAAACCTCGAAATACC  
CTCTGGCCTTGGCGCTGCCCCAGTACCCCGCCTTAACTCCCAACCCGCATCCGGTTATTGCGCCAGCT  
CAGGATAAAGGGGAACCTCGCTCAGCGTGTCTTGATTTGCGCCTTCAACCCGGTGGTGGCCTTGCATAGC  
TGCAGCGGCAGCTTAGCCTCTTCCGCCACGATTCCTAGACGCTTGATCATGCTGCTATCTGGACGCCAAA

GCAGGCGTCTTGACAGACTGCAGCCCACCTCAGCCCCAACCTCGGCGGTAAATCCCCCTTCTCTTCAGC  
CTTGACCGCCACATCGAGCCCCTGAGGCTAATTCACCGACGCTGGCATTGAGCGATGCCTCGCGGCC  
GCTTTGAGCATGGCGCCCCGCTTTGCCCCACGCCTTGGCGTGGACATCTACGCCCAGGTGCCCAGATTGA  
TCTGGTATTTGTTGCCACTCTTGGGGGCGATCAGGGTTGCTATCGTGGGTTTTGCGCCTCGTGGCAAGGT  
GATCCTGAACAGATCGATCTCGCCGCGCAGAGGATAAACTCTGCAGTGACCGACAAGCTGGCGCTCGGC  
CCAAGCATGGAGACGGTGCCGCTCTGATAGGTGAGTGTATCGGCGGGGGTCTATCTTGCCGGAGCTGC  
TGAGTTTGCCCTTCCAGTCGCTGTAACCTCATCATCCGCATCAACTGTGCTTGGGGAGATTTCATCAAAGGG  
ACCAAACCTCCACCTGCTTGTGAGAGCGATAGAGCAGTGTGCCAAGGTGCCCGCAAAGCGGCTACGCCAC  
GCGTCGAGAGCCTTACCTTGATGTTCTTCTGCTCCAGGTAGTCGGCCACCTTGTCAAAATTTGAGGGCGC  
CGCTCTCTTTGTAAAACAGCCCTTTTGCAGAGGGGAGAGGGGTAATGCCATCTTGCGCCAGCAGGGCGAA  
CAGACAGGATCCTGCTCCAGTTTGGCAGATCACCCGCGCTCCTTGACCTTGTCTACTGGCAACTGC  
CAGAGGCTGAAGTAGCTGAGTGGCTCTACCGATAACCGCCGAGCATATCTACGCACTGGATAATCCC  
CCTTGGTCAATACGTCCATGGGTTGGCGCTGATATTCCCCCTCCCATGCCAATACCCGAGGAGGGACTTG  
GCGGGAGCAGGCCAACAGAGCCTTTTTCGTACAGCTCGTTAGCTTGTTTGTGGGCAGTATTAATCGCATCG  
AGCTGACGCTGAAACATCTGCTGGGGTGGCAACAAGGGATTCTCTTTGTCGCTGCTGGCGGCATAACCGC  
TATCGAGCGCGGTCAAGAAGGCCTTGGTGGTCTTCTCCAGTTCTTCTTCGGCCTGCTTTTTCTGGGCCAG  
ATAGGCGTACCAACTGGCATAGCACTTATCACCGCCACACACCCCTCTATGCCGCTCAGAGCAAACCTCC  
GGCACGGCGACCCCGAGCGCACCAAGCTCGCTGATGCAGCGATTGAGGGTCTGCTGGGCGCAGTCATCT  
TGGCCAGGTTTTCTGACGATGGCTAAACCAATCGTCACTCGGCCACATCAGATCGTTGCTGTGCTCCTG  
CATCAGGGTCTGGGTTTTTCAGCACCGCTTGTGCGAGCAATTCAACTGCTCTGCCGGGGGCTTTTTCTGCC  
ACAAACGTGGCACGGGCTTGTGTATTGCGCCAGCAATTTGCCGATTTTGACCTGACGCGGGTCAATAGT  
AGTGGCCATTTTTATCGACTTCATACCCCTTGGCCTTGGCTTGTCAATCCCTTGGCGTTTGTAGCTGTTT  
CAGTTGCTCAATACACTTGGCATCCTCAGCAGCCAGATTGATAAAATGCTTGTGTACTGCAGCCTGACTG  
TTATCTCCGTAGGGCAAAAAGGTGGGGTGGCAGGCCTGCTCGCCTGAATGTTGCTCCATTTCTTGCTGTT  
GGGCCGGGGTCAAGAAGCTGTATGGGGTGGGCTAATCATCAGGCTATCGAGTTGAATACCCGTGCGCGC  
CAGCGCTTGCAGCTTGTGGATGAACCAAGCACCTTGGCCTCAAACCTCACTGACCACCATTTTTATCTTC  
TTGAAGGCTTTTTCTGACCCAGCCAGAAGCAGTTGGAGCCGCTGACGTAGAAGATGTCTTCAAACCTTT  
TTGCCGAGCAGGGGATTTGACCCGAGCGAATGACTCATTTGATGCAGCCTCGGGCAACAAAGG  
CAACATAGTCGGGACTGACAGAGCCCTTCATCAATGACATTTGTTAACTACAGGTGACGTAGCTAGGTT  
GGTGCAGCATCTATAACGCCTCCACTGGCTGATGGGTCTGACCTGCCAAAAACGGTTTGGCCACAGCCA  
GCGGCTCATGGCACTCAATATCGAAGGTGGCCAACCACTGGGCCATGCGGCCATCCAACACGGGAGCAGG  
ATAATCATTAAGCAGGGTGGCCAAAGGCATAAGCTCCCCTGCTCGGTCAAGCCTTTCTCAATCAGGCAT  
GCAAGCGAAGATGCAAGACCATAACACAAAGCAGGGTCAATCCGGGCTGCTTGCAGCTATAAAGCAGAC  
GGGTTTTCTGGGCCATCACAGCAATTCGAACTCAAACACACCGGTTGCTCAAAGGCGGCTTCGTGCTC  
AGCGCTGACAATTTACACCAGGTTGCAGAGCACCAGTCAGGCAAGTACACCGCCTCCAACACTGAGCCC  
ACCAAGGGGGCATCATACTGGCAGGCATAGATAGCCAGCCAAATGGCCGATCGTAAAAGCGCAGATAGC  
TTTTGCCCTTCCCATCTGGCACCGTCAGGAAGTGTCTGAAATGGTTGGCTAGCTCTTCGCAAAAGAGCGA  
TGCGCGCAGCGCAACGCCTGCGCGCCTCTCTCGCACTTCCGTGAGCAACGTTTCCCTGACAGTGCCTCG  
GAAGGGAGGCGGAGCAAAAGGGGGCTCACTTCCAATAAGGCTTGGTGGTGCCTACCAGCAAACAGCAGCG  
TTAATTCGGGCTGCTCAATGAGCTGATAGATCACCTCTTGGCCTCTTCCCAACGTGCTACATCAATCAG  
CAAATAGTTGATTGGTAAGCTATCAGGAGATAACCGATGCAGAAAACGTTAACTGTTCCCATCGAGTTTGC  
ATGTGCAGTCTCCCCGTTACATGTGCCATTAGAGCGCTTGGCACACATGGGCATTGCTACCACACCGGC  
TTTTGCGCGACCAACATGGCCGGGATCATCTCTGGGGTTGGCGGTACAACATAAGGCGCTAATGCTACC  
CCCATCGGCAGGCGGGCATCTGACCCGCCACCCCTGAGCCTGAGCCGGGACTGCCACCAGAGTTTCTATCT  
TGATGGTGGGGCGACCAAGGTGACGCCGCTTGGATCGACCTTCAAAAACTGCCACCAGCTTTTCAAGGT  
GATCTCCGACCCGGCTTCAACACAATTTTTTGGCCCGAGTCGAGATGAATCTCTGTACAGCATCAACC  
AGCAACGACTGGCCTAGCTTCTGATGCAGGGAGGTATCAACTGTCAGCGAATAGTCCGCCTTGATGTGGT  
CGCGTTTTTTCACCTTCAACTGTGAGGTGGTCAATTGCCGAGGCTGGGCGGAGCGCCATCCTTGGCCGGCAC  
TTTTCTGATGCGAGTGACCCGCTCGTTGTGATATCCCGATGCTCGTCTGCTTGTATATGCCAAGCGGCA  
TCGTTCTCGATGAGAACATTCAGGTCTTTCTGACCATGGATATAAAATCTCTTCTTCCAGCCAGCTGGTCTT  
CGAAACGCAGTTTCAATTGAAGCCCTCGCCCTTGTGGGTTTCGGTGGCAGCACGGTGGGAGTCTTGTGGC  
TGGCAGCTCATAACGGCGCCGGTGGTGGCGTGGTAGGTGCGACCCGTCACGATAGGCTGGTGGGGTCA  
CCTTCGAGGAATGAGACGATAACCTCATGGCCGATGCGCGGGATGGCCATCATGCCGTACTGGCCACCGG  
CCCAGCCCTGACTCACCCGCACCCAGCAGGAGCTCTGGTCTTGGAACTGCCGTAGCGGTCCCACGGGAA  
CTGCAGCTTACCCTGCCATGCTCGTGCAGTAAATCTCTCCCCCTCGGGGCCAGCCTATCGCGATT  
TGCGGGCCGTCCACCATCGGCTTGTAAAGGTGCCTCGGGGCTGCCGATGCGGGCACACCAGGTAGTGCCTG  
CTTTCACTACGCCAAATTCGTTGTGGTAGACGGTGGGGCCGCTGCCCCCTCTTCTTCCAGGGCTTGGCG  
CTGCTCACCGGTGTGGCGGATATGAACGATTTGCCAGTCGGTGTGAGGCTGGCGTTGGGATGTTCCGGT  
AGTGAGAAGTGTGGCCCGCAGCAACCGCGCGCTGTTGGATTTGCCGCTGCCTGCTACCGCGTCAATG  
GCAGCGCATCGAGCCGGTGTGGGCAACCGCTTGGCGCTCGGGTCTGCTTGTAGCGACCCGGGTAGT  
GAAGTGTGGTAGGTGTCCCGTTGATGCTCAAGTTCGCTACCTGCTTTTTATGGGAGAGGCCATAAGCC

GGGGTCTTGAAGCTGTAATCTTTTCAGCTCCACATCCGAGGGGCGCACCGCCTCGCGGTAGTGAACCTGGC  
GCACGTAAGGACCTTGTTCAGCGAGCGGTTGCCGAGGTTGAAGAAGAGCTCGGGGCCGGCAGTCAGGGC  
TGCCGCATCGTCAGCAAAGACGATGCGGTGCTTGCCCTGCTTCAAACCTCGTGGAAGTAGAACAGCCCTCT  
TCGGCAGCAAGGCGGTTTCATGAAATCGAGGTCGGTCTCGCGGTACTGCACGCAGTATTTCCCGCTGGGCGT  
GTTTCGTTTTTTCAGGGCAAAGGCGTAGTCGGTGATGCCGTGCTCTTGCAGCAGGATACTGAGGATTTTCATC  
GGGCTTTTTGCGCCTGAAAAATGCGGGAGTTCTGGCGCAGGCCAGTCGCCACAGGGCCGGTTTGACTTGC  
AGGCTGTAACGGGTACGGCGAAAGCCGCTGTCCCCTTGGGCAAACCTCGCTCACAACCCCGCAGACCCGGC  
GCTGCAGCTCGCCGTTGTACCACACCATCAGCTCGCATGGCTGGTCCAGCACGGCGCCAAAGTCGACATC  
GGGCTGGCTGCTGGCCAACTCCAGCTGCAGGTTGAACGGCCGGTTCAGCCCTCATCCAGCTGGAAACTG  
GCCACCACAAGGTGCTCTCGGGCAATGCCCCACCTTGACGGTAAATTGCAATCCGGTTTGATTAGCCA  
TGGCTTTCCCTCTTGTACGGCCAAAGCAGTGCCTGAGCCCTTGCCAACTCTCGCGCCCATACAGCCCT  
CACCGCGCAGCCACGCTACCGCCCTCTCCGGTCCGCGCAAGGGCCACCAAAGATAAGGGGGTTAACAGGTT  
ACGAGCGGTTTCGGTCTGCATCACAGGACACCCTTTAGTGCTTTGCCATCCCTCCGCACTCACCGGCAGG  
GCATCAAACCCCGCAGGGGGATGGCAAAAACAGAAAAGCTCCAGCCAAACCGTTGGCCAGGCTGGAGAAA  
ATGCACAGTACAAGAAGCCGGTTGAACCACCGGCTCAAAGACACATTACTACTTACAACGAATACCAAAG  
TACCGAAGCAAGGCTTACGCCTCGATGGGCGCGCCAGTCGTCGCACCGGAAGTACCGGCAACGGTGT  
GCTCCCAGTCAATCTTGGCGTAAGCCATGGAGACCTGGATAAGCTGGGTGAAGTCAGCCTTCGCCGGGTC  
CTGGCAGTGGGGCATCTGGCAGTCGATGTCAACGATGGTGGCATCGGTCAGCACGGTAGAGAAGAAGTGC  
TCCTGCTTGCCCTCAACGGAGGTGCGGTACCACTTACGGGTCACTTTCGGCAGCATCTCGCCGGAAGCCA  
GGGAGTTGTACATCAGCGGCACGGCTTTGTTTACGCGCAACGGTGAACCTGAACGGCTTGTGGACACGCTG  
ACCAGCCGGCTGACCGGATTGCGGGTTCGGTTCGGGACGGTGACGACGTGCTGGAACCTTGTACCAGCATC  
TCGTCTTCGTGGCCTTGTACGAAGATGTTGCCGACGGAGTCAGAGGTGAAGGCACCGGCGGTGATATTGC  
CCTGGGTTTTACCTTCGATGCTGATATAACATGGAGTTGGCATGGGTATGCTCCTAAATAGATTGGTTAA  
ACGAGATAGCACTCGACCAACCTTTAGCAGCGTCCATGCCATTTTTTATTCCTTACTTATCAAATAATTA  
CATTCCGCCAGTTCTCGCCCAACGCACAAGCACGCAATAAGTTGCCGAGAGCAGTGAATTTAATCGTGAT  
TACTTGCCTAATCCGTATAAATCACCAGTTAGTGAGCAAGAAGTTGCTCTATATAGATCATTTCTTCTTT  
TCAGGGCAAACCTTCAAATCCCTTTGCCAGTGCTAACTTTCACCTGGCTAAGCCGATCGGACAGAACAACC  
AGCTTGCAAGTAATCGCCCGCTCGCAACTGTTTGCATTTGTCATCTGCTAGACTGCACCTTTTTCTG  
TTGCTCATTACTCTTGCAAAAGGAGTGTGGATGTTCCGATGTTCTGTTGGGATAGATACCACCGGTTTTG  
CACTGCTGACCATTGTGCTGTGGGCCTCGCTGGCGGCGCTGACGTACGGGTCACCAGCGTGTACCACCT  
GGTGCTGGTTCGGGCTGGTGTGTTTTTCTGCGGGTTCGGGCGCTTGGCGCTTTTGGCGCCAATGGCGCGCT  
CGTCCTATTACCTGGCTGGTGCAGGTTACGGCATTGCTGCTCTACCATCTGCTGCTCTTTATGAGCTTTC  
GCCATGCCCGGTGCTGGAGGCCAACCTCATCAACTACCTCTGGCCGCTCTGCATCATTTCTGTTACCCCC  
GCTGTTGTTGCCCGCCATCCACTCCATGCCCGTCACTGCTGGCTGGCGCCTTTGGTCTGGCGGGTTCC  
ATGCTGGTGTGTTCAATGGCGAGCTGCAACTGCAGCAGGCTATCTGCCGGGATACCTGTTGGCGCTCG  
GTGCAGCTGTGCTGTTGGGGGCTTATTCGGTGCTATCACGCCGCTCTGCCGCCAGCCCTGCCGTGGTAC  
TGCGGCAGCCTGCCTGCCCGCTGGTTTTGCTGGCTCTGCTGCTCGCCGCTCTGCTGGAGGGGCCCTGCCA  
CTCGCGCAGATCCCCACCAGTGACTGGTGGCTGATCATCGGGCTGGCGCTGGGCCCAGTGGGGCGCGCCT  
TTGTGACCTGGTATCTGGCACTGCGAGACGGCGATCCACGCCGATCGGTGCCCTTGCCCTACCTGACACC  
GCTGCTGAGTACTTTGCTGTTAGTGGCATTGAACGGAGAAGAGCTGACCTCGCGCCATCTGCTGGCCGGG  
GCACTTATCATGGGAGGCGCCCTGCTCGGTATGCTTGGCCAAACGCAACAGCGCTCAGGTATCCCCAGCCA  
GTTAAGCCGGCAAGATAGGGCTACCTGACCATGCTGTCAAAAAACGCCATCATCCCTGTTTAGGCTCTG  
GCCACGCTCCCCATGGTCTGTGCTGACAGGAATTACCCCGTGAAAAATCGCCATTACGCCACCCCTATCC  
TCTCTTGTGCTGTTACTGGTTGCGGGAGGACAGGCGCTGGCCCTCTACCACGGCTGGCAACAGCTTGGCC  
ATACCAACTCAGGCCACAGCATCAGCACGAGACGCTGCAACAACCTGGTACAGTGACCCTGCAAAAACAGCCT  
GCGTGACTACCTCAACAGCGGCGATCCGCAACAACCTGACAGCAGCGGAGAAGGTCGCCAGCAAGCGCTC  
TCCTCACTGGCCGCTCAGGATGATAACCGTGGCAGCCCCGCTCAGGCAGCAACTCGAAAAGATGGCGCAGC  
GCATCGCGCACGACTATCAGGCCGAGGCAAGCTCTCGGGCAACAGCCAGCTGCTGCTGCAAAAATGCGGA  
GAGTGAGCTGGGCGAGCCAGGCCATGGCGCTGATCCGCTATGGGGAGCAAGGCGCCAGCACGGAACAATCT  
GCCGCGGCACAACAATATCGCCCGGTGCGGCCGAGATCCTGGCTGGCCTGCCGCGCTCGCCATTTTAC  
GCCAAGGCTATATGGAGCAGGGCAATGAAAAGCTGCTCGAAGGGATCCGCTTCGAGCTGGAGGCATGCA  
AAAACAGGCGCAAGCGCTGCAAGCCTTGCCACTGCTCGGCCTGTATGAAGAGGCACCCCGCGATGAGTTC  
ACGCTGGGGGAGCCGGTGCAGCAAGGAACTGGGAGATCAACCGCGCAGCGAATTACGCTCGCTGCTGAGCC  
GCTATCCACAGGAGCTGGCCAAACAGCCGACGGCGCTACAACAGCAACAGGCTGGCCGCCAGACCGTGC  
GCAAGACATCATGGCCATGTTGCAAGCGACCAGACAGATGGGGGAACAACCTGCCCCGCAACGGCAAGCC  
GTCAATCAGGAGCTGGCCACCATCCTCGGCACGCTGGCGCTCTGCTGGTGATAGTTCGCCCTGCTGTTTG  
CGCTGGTGCAACGACGTTGGCTGCTCACCCCTTGTTCGACTGCGTGGAGCTTTTTATGCAACTCGATCA  
GACGGGGCAGGCCGAGCCGTTGCCCTACCGGGCGCGATCGCAACGAGCTGGCCGATATTGTTGCCAGCTAC  
AATCGGCTGATCGGTGCTGCTGCAACTGGACCAACAGCAAAAAGAGGGGCGAGCTGTCAGCGGTATCCCTCA  
GTCTGCAAGGGATGGTCAGTCAGGTTGACGAGATCCACCACAGCACCCCGCACCACCGAACAGGTGGTCCA  
CGAGAGCGGTCAGATGATGGATGAGCTGAACCAGCTGGCCGGAGAGGTTCCATCAGGTCGCCCGCCACATC

CCCCAGCATGCCACCATAACGAACAGGGGATGAGCCAGAGCGAAGATCTGGTGGGGAGCATGCTGCACG  
CCACTCATCAGACAGGACTGGCGATTGACGAGAGCGATGAGGCACTGCAAGCCCTCACCCGCTCGGTTGC  
CGATGTGACGGCCATTGTGCGATGTGATCGGTTCATATCGCTCAGCAGACCAACTTGTGGCCCTCAACGCC  
GCCATCGAAGCGGCCCCGCGCAGGGGAACAGGGACGCGGCTTTGCCGTGGTCGCCGATGAAGTACGCCACC  
TCTCGGCCAATACCCAGCAATCCCTCAACCAGATCACCGATATTTCTGGGGCGCTGACCCAATCCGGCGA  
ACAACCTGGCACTGTACTGAACCGGATCACCCAGCGAATCAAGCCGCCAGCGGGCGCAGGCGGAACAACCTG  
CGCCAGACTACCTAGGCAGTGGCGGAGATAGCCCCGCAACACCCGAGTGATCGCCCTGCAGGGCGCCGACA  
ACGCCAAAAGTCAGGAACACAAGCTGGCCAGTTTTGCGGATCTGATCGCCCGTATCCATCAGCATGCCCG  
TCAGGTGAGTCAGCTCTCGGTGCAGGTCTCGTCCCATATCCACCATCAGGCGCAGCAGATCCCCCGCATC  
CTCGGCCAGCAAGGCTGATCCCTATTCGCCCGCTCTCCACCAGATCACTTTCCCTCAATGAGAGGGAA  
AGTTTTTTTTGTAGCACAAAATTATCTGTTATCGGCAGGTTAACTGACACCTCTTTCCCCGTACCGGATGA  
AAACCCGCACTGGCGCTGGCCGCGAGCTCAAGAAAACGTTCTCATCACCGTGATACCTGCCATGAGGCTG  
TTTTACGACCTTGCCCATGATTATTTGCACTCGGTCACTACTTTTGAAACGTTGAGGGAACTTTTCATTTGAT  
ATTTTCGACCCGCAACGTACTCTTGAGGTTGTCCGATAGCCAAAGAAATCGGAACATAAAAAACAACATGT  
GATGATCAGGACTGCCAACTACAGATGTGCCAAGACATCCGGGTTTGCAGGAAGCCAAGACAAGATTTTTT  
TGCCCTTCGGGGTTTTGATTGCAATGCCAATACCGAGCGGTAGGCCCGATGCCAACTGCCGGAACAAAAA  
GCTAAGTCCATAAAATCAGGAGCAATAAAAAATGAAAAAGTGATCTTCAAGCGCGCCGCTTTGAGTGCCG  
CTGTGGTAGCCGCTCTGGTCGCCCCCGGTATGGCGTTGGCAGCTCAGGATATGATGAGCCCGGAATACGG  
CCAGTCCATGAAACCTTCGTTAAAGACTCCAACTGACCGCGGTCTGTTCTACTTCCAGCGTGATCGT  
CAGCGCATCGATGGTGACCCGACTGCAGCCAAGAAAAGGCAAATACCAGTCCAACCTGAGCCATTCCA  
CCGTTCAAGCCGCTCTTAACTTCAACTCCGGTTATGCTGGGACACCGTAGGTCTGGATCTGGGCGGCTT  
CGGTGCCTATGACCTGGCCGTTACCGAAAATCACCCGGTCAACCAGGAAAACGAATTTCTCTTCGCTGGC  
CGTTCTTGGGGCAACAACGCCAAAAGATGGCTCCCCGTGAAGGTGGTTTCAGCCTCTCCAACGCAGCGATGA  
AGCTGAAATTCCTGGACGGCGGCATCACTGCCAAGGGTGGTTATACCCAGCTGTATGTCCCTGGCCAAAT  
CGGTGTTAACTGGTCTTATCAGCCGGGTACCTATCGTGGTGGTCAAGTTGAAGGTAACCTCGGTGGCCTC  
TACCTGACCTACGCCATCGCTGACGAGTACAAGGCCCCCTGGTACAAAAGAGACTCAGGTATTTCTCCCGTG  
CCAAAGCGTGGATGGATCCGTTTCGCTGATGAAAACGTCATCGACTACATCCACGGTATTGCAGCCCGTTA  
CACCTTCGAAAATGGCATTCTGTGACCGGTTCTTTTCGGTCACTCCGAAAGGCTACATGGACACTACCAC  
TTCAAACCTGGCTCACAAGTTTGACGTTACTGGGCGCCTTCCACCAGCTACCAGTTCTACGGTTCCGAGA  
CCGAGACCTACACCAAGGGCGCTTCCCAGATCGAGACTTATGACGGTCTGGCATGGCAACAAGCTCTGAC  
AGCTGCCTGGGGCATGGGCCCCGTACGGCTTCCGTCTGGAAGGTCTGTGGACCAAGGCTGAAGGTGCGGAA  
GGCAACTACCTGCCCCGTCTGACCCGTGGCTACGCCAACTCTCAGGGTGCCAACGAAATTTGGTGGGACT  
CCCGCTCTGACTGGAACGCCAACAGAGAAAAGCGCTGTTCTTCGGCGTGACCCGTTCTCTGGATGATCT  
GGTTGGTGCTCCTGGCTGGTCCGTCCGTGTATCCGGTGCTTACGGTTGGGATATCGAAACCGGTCAAGGC  
AAGAAAGCGGCCAACGGTGAAGATAACGAATGGGCAGCCAACCTTCGATGTCACCTATACCGTGCAGGATG  
GCAAGCTGAAAGGCACCCCTGTTCAAACCTGCACTACACCGACTACAACAACGACATCAGCCAGGGCGGCGG  
TTGGACCGATTACCCCAACATCTTCGCTCCGAGCAGCAGCTCAAGTTCCACATCATCATGCCGCTTACC  
TTCATGTAATCAGGCAATACGATGTCAGCAAACCGGGCCACTTGGCCCGTTTTCTTTTTTACCAGTTGGC  
AGGCTAACATGCGAGCCGGATAAGGATTTTTATCCGCTCACCCAGCCCGCACGCTTTTGTGTCAGCAGTCAAA  
GGACGCCATCATGCCCCGTTTTGTTCTCATCACCGGTTGTTCCAGCGGTATTGGCCTCGCCGCCGCACAG  
GCGCTCGGGCAGCACGGTTTTTACCCTGATCGCCTCGGGCGCAAGGCGGAAGATGTGGCCGTTTTGCAGC  
AACAGGGATTGCTGGCAGTTTCAGCTGGATCTGGCGGACCCCGCTCCATCGAGCTGGGTGCCAGTGGCGC  
GCTCCATCTGGCAGGCGGGCGCCTCTATGGCCTGTTCAACAATGGCGCTTATGGCCAACCCGGGGCGCTA  
GAAGATCTGCCCACCGAGGCACTCAGGGAACAATTCATACCAACCTGTTTGGCTGGCACCATCTGATCC  
GTCAGGTGCTGCCGCCGATGCTGGAGGCCAAAGAGGGGCGGATAGTGCAGAACAGCTCGGTTCTGGGACT  
GGTTGCCATGAAGTATCGCGGCGCTACAACGCCAGCAAAATTTGCGCTGGAAGGTTATAGCGACACTCTG  
CGCTCGAACTGGCGGGCAGCGGGGTACATATCAGCCTGATTGAACCGGGCCCCATCGATACCCGTTTTTC  
GTGCTAATGCCCCGAGCGCCTTCTTTCGCTCACATCGACCCGGCCAGAGCCGTCATCAGTGGCCCTACCG  
CCAGACCCTGACCGGGCTGGAAAAAGAGGGGGCCACCAGCGGCTTTACCCTCCCAAGCGAAGCCTGCATC  
CCGCCGCTGCTCCATGCGCTGACCCACGCCCATCCCAAGGCACGCTATCCGGTGACCACTCCGACCCGGC  
TGTTTTGCCTTCTTTCGACGGGATTTGCCACTCGCTGGCTCGATAAACTGCTGGTAAAATCGGCCCTGATC  
CCGTAATTGACGGTGGGCATCAGGTGGCCCATGTAGAGTTAGCTGCGTAACGGCATCACCCGTCGCCCA  
ACCTGGTTTTGTCCCTCTCTTCAATAGTGCTCGCCATTGCTGTAGTAGGCGCTCTTGACCAAGGGAATTAC  
CTGCACCACTACATAGGTCTGCTCCCCAGCACCCGTTTCAAATGGCGCTGATAAGGCGCACGGCGGCG  
TCCTGCATCTCCTGCGGCCGTTTCGAACCAGTGCAACTCGACAAAACGGAATCCCGCTCTGGCTCGCCGT  
TGCGGATCCAGCAGCTCTCCACCAGCTCCATGGTGACAAACTCCGGCTTGCCCGCGGTACAGCTCGAAAG  
CTCGGCCAGCAGCGGGCCGCTCACCTGTTGCAGGGTCTCGAACGCCACGGCGGAAAACGAAGATGGGGC  
ATGGCAAACCTCTTGGTTATCTGAAATGAGGACTTATCATAGGGGTTATTGTCAGCAAGAGAAGTCAACC  
GGCGCATATTAAGGATCCCATGAGTTTTTCATCGCACCTCTTTGCCTTCTGCTGCTGCTGCTGCTACC  
GCTGCACGCTTTTGGCGATCCCGCATTTTTATCGGGTGGCAAGGGCAACCAGCAACACTGGCTGCTGGGC  
TCCATCCATGCGGGCAAGCCTGCCCTCTATCCGCTGCCCGAGCCGGTGGAGCGCGCTGGCTGCAGAGTC

CGGCACTGGTGTAGGAGGTAGACATGAACAGCATCACGCCGATCAGTGGCAACAGACCGGCTCCCTCAC  
CCGGCTGGTGGATGGCAAACCGCTCAAGGATCATCTGCCTGCCGAACCTATCAACGCACCCTGATGGCG  
GGTGGCCGCTATGGCATCGACGAGGCGACCCCTCGCCACCCTGCGCCCTGGTTTGGCCCATTACCCTGA  
CCCAGGCCGCCATGGCCCCGCTCCGACTTCAAGAGTGAACCTCGGGATAGACCAGCACCTTGGCCACCCGGG  
CGCCAAAGAGGGCAAACCGGTAGTGGGTTTTGAAACCTGCTGGAGCAGCTCGGTTATCTGGCCAGCGTA  
GGTGACAACCAGACCCTGATGCTTGGCAGCACCCTGGATGAGCTACCAATGCTGGAGAGTGGTTTCGCCG  
CCGTGATGAAGGCGTGGCAGCAGGGGGATGAGGCGACGCTGATCAATCTGCTCAAGGAGGAGATGGCCCC  
GCCCCGCTACAAAGCTGGATGGAGCAGACCTTGGCTGGCCGAGCGCAACCACAACCTGGCTGAAAAAATGG  
TCCACCCTGCCAACGAGAGCTTTATCGTGGTAGGCGCCCTGCACCTTTACGGCGAACAGGGGTTGCTGG  
CGTTGCTGGAGCAGCAAGGGTGGCGCATTACCCCGCTCACCACACCGGGCCCTGTGCAGGCTCGGTAGCA  
AGGAGTCCAGTGAGAACGATCACAGATCGCGCTGCTTATTAACAACCTGCAAGGGAGTTGATCCGGATC  
ATCCCGGACGGGGCAAAGAGGTATTTATCATGCTGCTGCATCAACCGGTTGACAGGAGCAATAAAAATGGAC  
TTTTGGCTGGACCTGATGTTTGGCAACAGCGTGGGATTGATGTCGATGCTGGTGATTATCGGCACCTTCT  
TTCTCATCAGCTCTTACGCGCCTACTTTCATCTACAAGGTGATGCACTCGCAACCACCTCATTCACAGCA  
ACCCATTCTCAACAGCCCAAAGAGGGAAAAATAATCCTCTGACCACAGGCGGCAGCTCACACTGACCGCC  
TGTACTGTTTTATGGTTTCGCGACTGTGCTTCCCGGGCCAGGCTGCACCAGCGTCCATGCTGGGCACCCCT  
TATCCCCTCCCCCTTTCCCGTTTTCTGTGCCGTTGCGGCCGTTATAATGGCCCCACTTTTTTTTTATG  
GGGAGCCTGCCGTGTCTCATAACGACGAACCTCTCGTATTCATGAATGAAGTGGCCGACGTGCGGCCCAT  
TCGCAGCGACAATATCCATCCCCATGCGGCTAAATCCGCCCCGACCAGGCGCAGCTCGCTCGCCGTCAG  
GCTGCCACCGCGCAGCAACTCGCCCTCGACCACCTCACCATGGAGGCCATCGAGATGCTAGATCCGCAGC  
AAATCGTCGGTTTCAAGCGCGATGGGGTGCAGGAGGGTGTCTACAAGAAGCTGCGGCTCGGCAAATACGA  
GCTGCAGGCCAGCCTGGACTTGCACCAGAAAACCTCAACGAAGCGCGCCAGACGCTGGTGCAGTTCATT  
GCGGATTGTGAAGTCCGGGATATCCGCTGCCTGCTGATCCTGCACGGCAAGGGGGAGCGCAGCACCCCGC  
GTGCCCTGCTGAAAAGCTATGTGAGCGCCTGGTTGCCGCAACTGCCCGCCGTCATGGCGATCCACAGCGC  
CGAGCGTCCACCGGCGCAGCGGTGCTCTATACGTGCTGCTGCGCAAAAAGCGAACGCAAAAAGCGGAA  
AACCGCGAACGGCACAGAAAGCGGCTCGGCTAATCCGCCTCTCGCCACTACGCCCTTTGGCCCCCTGCAT  
GATGGTGGTCAACTATAACAGCGCGGTGTTAGCATCGAACGGCCCCGAGCATGCCAGGTACGGGGCGGCA  
TACCATTCCAGGACGATAACAAGGACAATCCCATGTCAATATCAAAAAGCTTGAACAACATCAGCAACAGATC  
CACCGCTTTAGCCACTCGCCGCCATCTGCGGCTGGGATCAGGCGGCCATGATGCCCTGAGGGGGGCAACG  
ATGCTCGCGCCGAAGCGATGGCCGAACCTCGGTCTGCTGATCCACCAGAAGCGTACCCTCCCGAGCTGGG  
TGACTGGATTGCCAGCGCCGAGAGTGAGCCGCTCGATGAAGTGAACGGGGCAACCTCGGCGAGATCAAG  
CGCCAGTGGCAAGATGCCAGCCTGCTGCCCGGTGAGCTGGTGCAGGCGCTGTCGCTCGCTGGCAGCAAGT  
GCGAACACACCTGGCGCAGCCAGCGCAAGAACAACGACTGGGCGGTTTGGCCCCAATCTCGAGGAAGT  
GGTGAACCTCTCCCGTGAAGTGGCGCAACTGCGGGCCGATGCGCTTGGCGTACGCCCTACGACGCCATG  
CTGGCCCTCTATGAGCCGGGCATGACCAGCGCGCGGCTCGATCAGATCTTCGGCGATCTCGCCAGCTGGC  
TGCCGGCTCTTATCCAGACCGTGAGTGAACAGCAGAAGGGCGATGCCCTGTTGCTGCCGCAAGGCCCTT  
CCCCATACCGACCCAGCAAGCGCTCGGTCAGGAGGTAATGGGACTGCTCGGCTTTGATTTGCCCCACGGC  
CGTCTCGATGTGAGCAGTCAACCCTTCTGTGGCGGCTACCGACCGACGTGCGGATCACCACCCGCTACA  
ACGAGCAGGAGTTTGTCTCCAGCATGATGGGCATAGTGCACGAAACCGGTACGCCCCGTTACGAGCAGGG  
GCTGCCCGCTCATCTGCTGGGCCAGCCGGTGGCCGAAGCACGCTCCATGGCGATCCACGAGAGCCAGAGC  
CTGTTTTGCGAGATGCAGCTGGGCCATCATCCGGCCTTCTCGCGCTGCTGGCACCACGCATTCGTACC  
ACTTCGGCGAACAGGCGGCGTTTTGCGCCGACAATCTGGCCAAGCTCTACAGCCGGGTCAAGCCGGGCTT  
TATCCGGGTGATGCGGACGAGGTGACCTATCCGGCCCACGTTATCTGCGCTACGAGCTGGAGCGCGAT  
CTGGTGAAGGGAAGATCGAGGTGGCCGACATCCCCGAGCAGTGGGATGCCAAGATGCAGCAGTGGCTGG  
GGCTCTCCACCGAGGGCAACTACCGCAATGGCTGCATGCAGGATATTAACCTGACCAGCGGCTCGTTTGG  
CTACTTCCCAGACTACACCCTGGCGCCATGTATGCCGCCAGTTGCGTTTTGCCCCGAAAAAGAGCTG  
GGCAGCATGGGTGAGGTGATCGCGGCGGGCCGCTGCCGGAGATCTTCGGCTGGCTCGGACGCAATATCT  
GGTACAGGGGAGCCTGCACAGCACCGACGAGCTGGTGCGCCGCGCCACCGGTGAAGCGCTCAACCCGCA  
CTGGCTGCGCCAGCATCTGGAACAGCGCTACCTGAAGTAATGAGCGCAGTAAGCTAACAGCAGAACGGGG  
CCTTTTTTAGTTGACCACTACAGGGCCCCGTTTTTTATGGCGGTGCATGGCACAGCACGCCGTCACGGCAA  
TGCTGTAAAAGAGAGAGTTTCAAGGGGGTCCGGGGAACCCAGCAACTCGCGCAGTTGCAGGATATTGCC  
TCCGGGTGCAAGGCGTTGCGCACCAAAAGCCGGGCCCTCCACTGCTGTGGCAGCAGGCCCGCCCGCA  
GATCCGCCGCTTTCGCTTCTGCCAGGCGAGGCTGGAGACGGTGAAGAACAGCTTGTATGGCCCCCTCTTC  
CCGAGTGCTGGCGGCCGCTTGATAACGACTTGGCCGCATAAGGCTCAGGAATGGCATGGATCAGCAGC  
TGGATATCGCTGTTTTCCAGCACCACCAGCTGCTCATCCTGACTGCAGACCACCATCTGCAGCAGGGTAC  
GGTAAAAGTGGGTGAGCAGGCCCGGATCCTTGGCATAGATCAGGGCACCGGCACGAGCGGCGCTGGCAT  
GAAACACTCCTCAACAGTGAACGGCTGGGTGGACAGATCTCCACCTTCTCACAGTTGCGCGCCCCGTTTCG  
ATCCTTTTTTAGCGGCTCGCCAGCCTCACTGCACAAAAGTGGCACTGCCGACGCGCCAGTGTGGCGGGCGG  
CCCTGATCTTCGCCCATATCCGCCATGCCAGCGCCTCGTCATAGTGCACCCCGCCCGCACCGCTCTCGG  
TCAGGTGCTTGGCACGACCGCCCCGTACAGCCCGCCACTACCGCTGATCTTCATCTCGGTGAGCGGGG  
ATAGAGGGCGGCATAGAGCGGGTATTGCCCGACAGCTTATCCATCCTTGCCGCTATACGCGGAATAG

AGGGAGATAGCAGGCGTACCGCCAGTGGTCAGCCCCGCTTGGCTGCCGTACCTCGGCACCGCCCCGA  
GATCGACCTTGGCGCTGACGATCAGGGTCAGACTGCTCCCCTCGCTCACCGTCAACTGGTTGCTGCCAGT  
CATGGTGAATCATTGTGATCAGCAGCACCACATCCCCCTTGATGGTGTGAGTGTGGCATCGCCCCCATA  
TTGAGACTGTCAAGCTGATAAATGGTCTGATCCTTGCCAAACAGCTCCCCCTTGCCGGGGAGCGGCAGCC  
CGGGCTTGTGCTGGTTGCTGCTGGTGACCGAGCCGGTGGCGGGATCCGTGGTCAGCACCATCTGCTGGGT  
GGCGTCCAGCGTCAGGGGACCATTGATGGGCAGTGTTCAGGGGGGAACGATTTGGGCAACGCGGCCACA  
TTGAGCGGGTCACACACCTGCCCGCCACAGGTGGCAGCTTGGGATCATTTGCGATACTCGGGATCCAGAT  
ACTTCTGGTTCGCCTGATCTTTAAAAAAACCAGCGCCACCATAATTGAGTTTGGCGCTGTGATACTGGT  
ACCCAGTCCATGGAGACATTGCCATTGACCGCCACCTGACCACCGATGCGCCCCCTTTTCAGGGTCAAA  
CTGCCGCCCCCTTTACATTGCCGGAGACCCGACAATCTTGTCCGAAGAGGGGGAGATAATGACGTCCG  
TCCCAGCATTACGTTGCCGGAGATGGGAGAAGATCCGTTTTCAGGGTACCGGTACCTGTTGCCCGCACATC  
GCCCCAAATTGGCGAATTACCGTCGAGCACTACATTGGCCCTTGTCACTGACCGTTCGCCACCTTGGCATT  
TGTTAATGTTGGTGCCGCCATATTTGCCCTTGCAGGAGTCGTAGCTGTGATAAAAACCGCTACCGGAGA  
GGCTTAGCCCTTCGCATGCCACCACCGAATCCTGAAAGATGAGATTGCCGGGCTCGCGCTTAAGGGCAAA  
CAGCGCTTGAAGGCTGGCATTACCCTCCAGATAGCGGCCATGGCTCTGCAACGCCAGCTTGCTGCCGGT  
GCGGCATCCAACGTTTCGATGCTAAAGCGGCTGCCCGCCATGGCTCCTTCCCCCTTGGCAGGCACCTTCT  
GCACCAGTTGAGCCACTCTATCCGTGGTTCGGCGCCAAGGGCTGATGCAGGGCAGATAACTCTCGTT  
CATCCCCTGCTCGGCACTGAGCTGCGCATTGATCTTCTTGTGAAAAATTGCCGCTCAGGCGAGTCTGCAAC  
TGTTTCTCCTGAATGCTGGTAAACACCAGCAGACTCGACAGCAGGCTCACCACCAACACCACCAGCAGTA  
CGGCTCCCCGCTGCCCTGCAATCCCTTGTTCATCCCGCTCCCCCTGCTGTGGCGTTGGCACCGGATGTG  
GCCAGCGCTGCCGCCAGACCGCTTGCAGCGGGCCACCTGCACCTCTACCCCAGGCGCCAGATAGCTCG  
GCAGCCCTTCCGGCAAAAATGCGGATATTGACCAACGCACCCTGCTGGCCGAATTCAGATCCTGAAGATG  
GGCCAGCAACAGGCGCGGGCCATCTCCGTTCATCGCAACTGAGTACCGGCGGGCTGAAGCGGTACTGCTCG  
GTAAAATCGGCGGTTTTCTGGTTGCCAAGGCAGGAGAGCACCTGATTGCCCCCCCTCCACCTTGAAGCCA  
GCGTCAGGCGATCAGGGGTGACGGCTATCAGCTGATCCGCTGCTTGTGATGCTGTTGGTAAAGGTGAGAGT  
GGCAAAGCGCAGCACTTCGTTTCGCTGCTCCAGCGCCTTGTCTGTTCGACCGTGTCTTGTATTGGGGCG  
TAACCGGCAAAAATCGCAGCATCAGCATCAGACCGAGCACCATGGAGATCATCAGCTCGACGAGACTGA  
CGCTCGTTGCGGTGAGGGGACGCTCAGCATAAAGCGGAAATCCTGCGTTCAGCTCCACCCGCTTGGCG  
CCGGAGACCCGCTCATCTGCCACTCGATAGCGACCAAAAGTTGTGCTATAACGGTTCGCTAGCACCA  
GCCGGTGGCCATCCTGCAGGGTGAACCGGGCAAGAAAATCGGCCCTGGGTGAACCGCTCGGGCTTGCCTG  
CACTTCGCACAGTGAACCTCCAGATCTGCTCCACGCTGTTGCTCGCCTCGATCGTGGCCAGCGTGTCTGC  
AAGCTGTAGTGGCCTGCTGCAACGAGACCACCTGCCCTTGGCGAGACCAGAAAACACCATCACCGCCA  
ACACCATGGAGACCATGATCTCCACCAGATTGAAGCCCTGCTGGCGGGCAAGTGGCGGTGTCTCATGAG  
CAGCTCCCTTGCAGCAGCTGGCCGCTCGGGCCACGCAGAGCACCCTGCTCACCGAGGCGATTGGCCA  
GAATGATCTCGGCGTGGCTGCTTCTGCCGTTGGCGGATCTGGATGGGGTCAAACGGCTTGTATCACCAC  
GCCGCCACCGGGAGCTGATGCTGACGCAACCGCTGGCTGTGGCCATCACCTCCCAGCCACCGTTCTCG  
GTGCCCTGCAGCACCACCGGCAGGGTCAGCTTACCCTTCACTGCGGGCAAAACGGTAGGCAGACGCGA  
GTTCCGGTGCAGCAGGATCGAGCCGTTCCGGCCGCGAGGCGCTGACTCATGGAGGGCAACCCGACCAATAG  
CAAGATGGCGGCGATGCCGACCGTGTATCAACTCAATCAGAGTAAATCCACGCACATTCATCTTATGA  
TCCCCAGCAGTCATGGCGATTGGCCGCGGATAAACCCTGCTGATCGAGGGTCAGAGTGCCGCACTCATCC  
TGTTGTGCGGTGCTTGAATGGCTTTGAGCAGGTAGTACCAGCATCTTGGCTGGCTGTAGCTGAACTGGT  
AGAAATCCGTGTTGGAAGGAGTGGCAAACGTGTCCGGATAACGGCCCTGTTGGGTATAGATACTTCCGAG  
GGCGAGCGCCTGCTCCAGCAATTGCTGCTGCGCTTCGTAACGACGTCCCTGTTGAGATAACCCGTGATC  
GCTGGCAACCGGATGGCCGCGAGAATGCTGACAACCGTTCATGGCGATCAACAACCTGATCAGACTAAACC  
CCCGGTAATGGGGCCATGCCTTACAGTCTTCACTTATCATCTTGGCAAGTGTGTTGTTATTGGTCCG  
CCCTGGGCCGCAAAATGCGATAAATTAATAATCATCAAAAATTAACCTGACTCGATTGAACAACAAAAATC  
GTCACACTCAATGTAAGAAAAGATAGTTATGTGATCTGTTATTAATTTTAAAGCAGTTTTTCGCCCGCCACTA  
ATCTCGCTAAGCAAATAAAGCCAGGCCAATCGTGCCGACGACCCGTCCTTATGCCCCCTTCTGCCGAGC  
CGGATAACATGGACAACAACGGAGCGAAGAGTGAACCCGGCCGTGCAATGAAAGAGCAAAAAACCTTT  
GGCAATTTTTGCTATCCCTGTCCGTTTCTGGCTAGTACGGCCCCGAGCCCCCTTACTCTTTTGCCAT  
CTATTCCAGCAAAGCCGCAACACCATGAATGCAAAGCCAAGCCAGAGTCGTCACAAGATGAGGTGATC  
AACACCCTCAGCCGTGAGCAGTGCCATGCCGACGGCTCGCTCGCGACGCTCGCTTTGATGGCCGCTTCT  
TTACCGGCGTGTCTCGACCGGCATCTACTGCCGGCAGTCTGCCCGGCACGGCCACCCACGAGCACAA  
TGTGCGCTACTTCCAAAGCGCCGAGCTGCCGAGCAGTATGGGTGCGACCTGCCTGCGCTGCCGCCCT  
GAGCTGGCCCCCGCCGCCCCGTGGCGATCTGCCGTTGAACTGGCTCGTCTGCTGGCGGTATCGATCGCG  
GCAAGCTGGCAGACAGCAGCTCGCCGAACTGGCGGGCGGAGAGCGGTATCAGTGAGCGCACCCCTGCCGCC  
CCAGTTTCGAGGCATACCTTGGCGCCTCACCAAAAACAGGTGGAGCAGACCGCGCCGCTGCTGCTCGCGAAA  
CGACTGCTGACCGAAACCGGGCTGTCCATCACCGACATCGCGTTTGGCCCGGGCTTTGCCAGCATCCGCC  
GCTTCAACGACGCTGGCTCAACGCTACGGACTGGCCCCGCGACCCCTGCGCCAACAAGAGGCACACGG  
TAACGCGCCAGAACACATGAGCGATCAACCGCGCGGCGCAATCCTGACGCTGCAACTGCCCTACCGCCCC  
CCGTATGACGTAGCGGCCATGCTGGCGTTTACCAGGCTGCGGGCAATCCCGGGGCTGGAGCGGGTAGATG

CGGAGGTGTATGAGCGGGCTACCGGGTCGGCGATCAGGTCGCGCTGGTGCGCATCGCGCAGGGCAAGGG  
GCACAGCCTGCAACTCACCGTCCATGATCTGCCGCTCGTTGCGCTGCCGATCTGCTCTATAGGGTGCGC  
CGGATGTGGGATCTCGATGCCGACATGCAGCGGATCGGTGATCTGCTCGGTCAGGATCCGCTGCTCGCC  
GTTTGCAGGCGCGCTGGCCCCGGCTACGGCTGCCGGGTGGCTGGGACGAATACGAGGTGATGCTGCGTGC  
CATCGTTCGGCCAGCAGGTGTCAAGGGGGCCATCACCATACTCGGGCGGCTGGTAGCCCGTACCAG  
GCGCAATTCGGGGTGGCGCAACTACCGACCCCCGCCAGTTGTGCGAACTCGATCTCGACGGCATCGGCA  
TGCCCGGACAGCCGATTCGTACCCTGCGTGGCGTGGCGCAGGTGCTGGCCAGCGGGAGCTGACCCCTCAC  
TACAGCCAGTGTGAGCAGTTGCTGGCACTACCGGGCATAGGCCCTGGACGGTCTCTTACTGGCGGCTG  
CGCTGCGGGATGGATAACCGATGCCTTCCCCGCTTCCGATCTGGTGTGCAAAAAGGCACTCGGAGGCGGCA  
CCAAGCTGCCGGTGAAGGAGGTGTTGACGCAAAGCGCAGCATGGCAGCCATGGCGCAGTATGCGGCCAG  
CTGGCTGTGGCAGCCATGAGCGAAGCGCCGATTTGCTGCTCCGTGCCACTGGCAACGAACAACAGCCA  
GATACCCAACAACAGGAGATAACACCATGATCCGCTACGATATCCTGCCAACCCGCTGCGGGCAGCTGCT  
GGTTGCCCTCAATGAATCTGGTCTGGTACACGTAGACTTTGTGGCGGGCTGCGAGCACTGCCCGATATG  
AGTGGCTGGCAGCAAGATCACGAGACTCTGGCCCCCTTCCCTCGCCGAGTTTGACGCTATTTTTGCCGGT  
GCTTGCAGCGCTTCTCCCTGCCCTTGGCGCCGTGGCACCCTTTCAGCAGGCGGTGTGGCAAGCGCT  
GTGCGACATCCCCTACGGCGAGACCCGAGCTACAGCGATATGCTCGCACCATCGGTAAACCCGATGCG  
GTGCGGGCTGTAGGCACAGCAAACGGCCGCAATCCGCTCTCGATCATCGTTCCCTGCCATCGGGTGTGCG  
GCCAAAACGGCAGCCTGACCGGCTATGCGGGAGGATTTGAGATTAATAAAGCGCTGCTGGCGCTGGAGAG  
GGGCAATTAAGGAGTCTGAGTAGAGCGCTGCGATAAAAAATTGCCCTTCCCTGATGGAGAAAGGGGC  
TGTTTGATCAGCGTTTCAGGCTGCCCATCACATGCATTTTCGAGCGGTTACAGTCAAAACGCAGGCGGAA  
GGTGTCTTTACCCATCTTGAGTTCCAGCGGCTCGGCCTTGAGACCGGGCACCTCGTTCGGGCAGAGGTT  
TGGCTATAACGGATGCAATGCTTGGTGTATCATCAGCACCCTTCCCGCTCCTCCTTGTTCGCCTCATAAG  
CGGGCGCGATGCGCTCCACCCCGTGTCTCGCGGAAGAACTGTTGCGCCGCGCTGTTTCAGCACGTTGCCAAG  
GTAGGAGAGACGGTGTGGGGATAGTGGATATCCCGCAGGGCGATACGTCGCTCGGGGCGCTGGTAGCTC  
GCCACCCGCGCCGCTCCAGCGCGGCGATGCCCTCCCGGCGCAAACCGTTGAGCTGTGATGCGGGCATAA  
ATAGCGGGTGAGTAAATGCCAACTCAATCTTGCAGCGCCACAAACAGGGTATTGCCGAGCTTGCCAAAGTTG  
ATCCCGCGCTGTTGCAGCGCCCGCTCCGGATTTGTCGGCAGGCTGTTTATCGCAAGACAGCGTCACCGCG  
GCGCTGATGCCCTGCTCGTGTGAGCGTGAGGCTCAGCCCTCATCGCACTCTGCCAGCACCATAACG  
CCCGATGCGGGCAGCTCCGCGCTCGCTTCTCCAGCATCTTGTGTAACCGCTGATCGTGGTTGCGGTAAAT  
TTCTGTCCCCACCTTACGCCCCGGCATGCGTTCTGACAGGAGTAACTGCTTACCTTCGATTTTGTGAGG  
CGCATTTCCACCAGCTCGTTATTTCGGCTTGAAGAAGCCAGACCATCGCCGTTGTTAAGGCTGACCTGCT  
TGCCGTCGATCTCGATGCCGTACGGGTACCTTGGTGACCCGCCCCAGCGGTTCCCCCACATATTTCCGG  
GCTCTTGGTGGAGTCGATCCCCTGCTGGCGACCATGGAGGAAGTAATCGGTGCTGCCGCGGTTGAAGCTC  
TTTTTGGGGTCAGGCGTGAAGCTGTAGCTGCAACGGCCAGCAGAGGCAGCCACCAGATCGGAGCGGCTAT  
CCAGAATGGCGTCCAGCTTCTGCCGATAACAGGCGGTGACGTTTTTTCAGTGTGAGCGCCCTTGGAGCG  
CCCTTCAATCTTGAAGGAGCGGATCCCCGCTCGATCAAGGCTCCAGGTTGTCGGTCTGATCCATATCC  
TTGAGGGACAACAGGTGGCTGTGCGCCACCAGCACTTCGCCATCCGGCTTTTGCAGCGAGCAGGGCAGAC  
GGCAGAGCTGGGCACACTCACCGCGGTTGGCGCTGCGACCGGTGCGGGCATGGCTGATGTTGCACTGGCC  
ACTGTAGGAAACGCAGAGAGCGCCGTGGATAAAGAACTCCAGCTGCACATGGTTCGCCGCACTGATCTCG  
CGGATCTGCGCAAGAGACAGTTTCGCGCGCCAGCACCACCTGAGAGAAAGCCACATCCTGCAGAAACTTCA  
CCTTCTCCGGCGTGCGGTTGTGCGTCTGGGTACTAGCATGAAGGGCGATGGGTGGCAGATCGAGCGCCAG  
CAGCCCCATATCCTGGACGATGAGCGCATCGGCACCGGCTTCGTAATTTGGTGGGTCAGGCGCCGGGCT  
TGCTCCAGCTCGTGTGATCGTGCAGCAGGGTGTGAAGGGCACAAGACCTGGGCACCGAAACGATGGGCGT  
GACGTGCCAGCGCTTCGATATCTTCGATGGTGTGCCCCGAGCGCTGCGGGCGCCAAAGGCAGGGCCGCC  
CATGTAGACAGCATCGGCGCCATGGTTGATGGCTTCGATGCCGTAGGCGAGGTTCTTGCCGGAGCCAGC  
AGCTCCAACCGGTTGTTGTGGCTTAACGGGTGCTTGTCTGTTGATGGTCTCGGGATCAGGGCGGACAG  
CAAATGGGCGCTACTCTAGCCCATTACACCACCCACATGCCTTGATCCCGCTTAAGATATCTGCGAAATAC  
AGAATTACATAAACCACCTTGAGTGCCAGCCCCAGCAGCACCAGCCGCTCACCTTATCGATCACAAAGGA  
TTTTGGCTTTAAGCCACGCCAGCACAGGCCCGCGGAGAGCACCAGCGCCACCAGCACGTACCAGACTGCG  
TCGATCCCGCCAACGGTGAGCATCATGATGCCCCCTTCGCTCCAGCCGGTATCGGGCCGCACAAACTGGC  
TGAACAGGGCGATGAAGAAGACCGCCAGCTGGGGATTGAGGAAGGCCACCATAAAACCTTCAAAGGCACC  
TTGCCGACCGCGCAACTGATGCACCTCTTCACTCGCTTACCCTGGCTGGTTTTTGCAGCAGAGCTTTC  
ATCCCAAGCCAGGCAAGAAACGCGGCACCGCCGTAGCGGATCAGATCAAACAGGATCGGGGTCTGGGTGA  
TCAGAATGGAGAGGCCGAGCGCCGTGACCAGCGCATAGATAACCAACCCGAGGCCGTGTCCGAGCGCGGT  
GGTGACGCCGTGCCCTTGCCCGCCCTGCACCGTGTGCGGATGATCAGCGCCAGACTCGGCCCGGGCTA  
ATGGCGCCCATCACGAGATTGCGGCCAGTGCCAGCCAACTCGTCAGTTCCATGCTTTTCCCTTTTTGTG  
CTCGATATGATGCCCTGCATTCAGGGTACGAGCTGAGCCATTATGCCAGTAGTGAAAGTTATGAATAGAA  
CCCATAACCCATGGCTATAACGCCACACAACCTGACCGAGGCTAACCGCCGAGATCGAGCAGCTTGCAGCT  
CTCGCCGACGGTACGTTGAGGTGATCCCGCAGGAATGGGTAGGCCAGCTCGCGAAACAGCGGTGAGCC  
GGATCCTGATGGTGGCGCTGATGCCACAGCAGATGATACTGCTGATCGCGGGTCGCAAAGGGCAAGTCGA  
CAAAGGTGAGCTCATGGCCGAGGAGAGCTGCCAGGCGATATGAGCCGGAGTGGTCATCAGGCAATCGGT

CGCGAGCAACACCTCTACTGCCGCTGAAAGAAGGGAACCTCTGGCAAACCAGCGCCGACTCAGTCCCTGC  
GGCGCAATACCTGCTCCACCGGGCTGTCTTGTGCGCTCCCCGCTCACCTGCAGGTGAGGCCAGGCGA  
GATAGTCATCGAGATTAAGCGTCTTGCCTGCCAACGGGTGGTGACATCCCATCAGCACCGCCAGCCGATC  
TTCCCCCTGATGCAGACCTCGGATCTGCTCCGGTACCTGCTCGGTGATGGTAGAAACCAGATCCAGCTCG  
GACTGCCACAACCTGCGGCAGCTGACGTTTGTCCCACAGGCTGTAICTCCAGCGCCGCAACGGCGCCTCTT  
TGGCGAGCGCGGCACAGATATCGGGCAGGATATGCTGGGCAACATAATCGGAGGAGGCAAGCCGAAACAC  
CCGCTCGCAGCGGCTCGGGTCAAACCCGGGCGCTCGTAGAGCCGCTCCAGCGCATCGAGAGAATCCGCC  
AGTTGAGCAGCCAGCGCTTCGGCCCGTGGTGTGACGAGCAACGTTGCCCTCCCGCACCAGCAACTCGT  
CATCAAACCTCGCTGCGCAACTGGGCAAGCTGCTTGTGATGGAGGGCTGACTCAGGTGAAGCAGCTCGGC  
GGCGGGCTGATATTGCGGGTCTCCAGCAGCACTTGAAGGTCGGCAACAAGTTGAGATTGGCTCTGAGC  
AAGGAGATACCCTCATCGGTGGTGAACCGCTATCTTAGGGCAGAGGAGTCCCGCGTTTTTAAGCAAAAT  
TCCAGCCATGCTCAGCAGCTTGACGCCCTTTGCGACCAGATGGCACAGCGCGCCCGCCGACATAACCA  
TGACCACAAGATGACAGTGGTTGTCTCGTACGGCATAATTGCACGATTTTCCGCCCGCGGGCGATCCACT  
TTGAGAAGCGGTAACAAGATGAAATACGCCAATATCACCGGCTGGGGCAAATGCCTGCCTCCCTCCGTGC  
TGACCAACGATGACCTCAGCACCATCATGGATACGTGACAGAGTGGATCTATCCGCGCACCGGCATCAA  
GGCCCGCGGATCTCCCATGTCAGCACCTCGGATCTCGCCACCCTGGCCGGTCGCCGCGCGCTAGCCTGC  
GCCGGTCTGGAAGCGAGCGATCTCGATGGCATCATCCTGGCCACCAGCAACCCGGACAACCTGCTGCCAA  
GTGCCGCTCTGCGGTGCAGAAGAAGCTCGGTGCCGTCAATGCAGCCGTGTTTGACCTCAACGCGGCCTG  
CACCGGTTTTGCTCTACTCCCTCTCCGTGCTACCTCGCTGGTGCAGACCGGCATGATGAAGAAGGTGCTG  
GTGATTGGTGGCGAGCGCCTCACCTACCTGCTGGACTGGGCGCGCCGCGATACCGCCGTGCTGTTTGGCG  
ATGGTGCCGGTGCCGTAGTGATCGAGGCGAGCGAGCAGAAGTGTGGCTGATCGCCAACAAGCTGGGCTG  
TGACAGCGAAGCGCGGGAGATCCTGCACGTACCGAACTTCGGTACCGATCGGGTGCCTTTTGCAGATATC  
GATGGGCTGTTTACCTTCAAACCTTCAAGGGCCGGAGATCTTCAAACGCGCCGTGCGCGGCATGGGTGAGG  
CAACCAGCACTGTGCTGGCGCAGGCCGGTATTGCGCCGGAGCAGGTGATCTGATCGTGCCGACCCAGGC  
CAATATCCGCATCATCGAGACCCTCGCAAGCGGATGAATGCGCCGATGGAGAAGGTGATGGTCAACATC  
GAAAACCTACGGCAACACCTCCGCCGCCACTGTGCCATCGCCCTGTGCGAAGCGCTGGAGCAGGGCCGCG  
TCAAGCCGAACCTCTATCTGCTGACCGCCGCTTTTCGGTGGCGCCTGACCTGGGGGGCCGCCATCATCAA  
GTGGGGGATCGCGTCAACCCCATCAAGGCGTGCATGCGCAACTCCCCCATGTGACAAGAGCGCGCTG  
GAAGTATGCCCAGCGCTGGAAGGTTGCCAGAAGGCTCACGCCAACGAGGCTTGATCCTCATCAGGAG  
CCTGAATCCTCAGGCTCCTTCTCTCTCTCTTTTTCATCCCCACCTGGCTCTTCCCCCATTCGCAAGCCGT  
TGATACGGCAATCGCTGATACAAAACCTCCGATTTGCAGCCAATTAATTTTTTTTCCGCTAACCTTATTG  
TGCCAACTATAAATAAAGAAAAGAGCGTCAAGGGGCACTATGACTGTTTCGGTCTGCGCCTTTACCTCT  
TACCAAATAATTGCACAGGGATAAGCTACGTATGGCACAACACAAAAGTGGCGTGAACACACCGCTTTGG  
GAACCGGTTTTGCTGGATTTGCTGCATCGGTCTTGTCTGCTGAGCTGCCTGTTGCTGCAGCTTGCCGATG  
CGCTGTCACTCTCTACCTGCTGCTCAATGTGCTGGTGGTATTGCCGCCGCGCTCTGGACATCGAGTCA  
CTTCCATCAGCACACACTCCGACATCGTGCAGGAGAGGAACAAACCGTCGCAACCGATCCTCTCGCCAC  
TCCATCATCGGGCTCGAACAGGTGTGTGAGAAGGCACTCCCCATCTGGTCCCAGCAAATTGAAAGCTCTC  
GTCAACAAACCGAAGCCGCGATGATTGACCTGACTCAACGCTTCAGCGGCTTGCCAAACAAGCTGGAGGA  
AGCAGTCAATGCTTCTCATCTGGCAGCCGGAGAACTGGGTGATGCCAATTCCTGTCGATGGCTGGAGTC  
TTGAGCGAGAGCCAGCAGCAACTCAATGAGGTAGTGGCCATCCTGCACTCCGCCAGGCCAATCGGGACG  
CCATGCTGGGTGAGATAAAAAGCCTGACCACCTACACCATAGAGCTCAACACCATGGCCATGGATGTGGC  
CAAAATCGCCTCCCAGACCAACCTGCTGGCCCTCAACGCCGCCATTTGAAGCGGCTCGTGCAGGGGAAGCA  
GGCCGTGGCTTTGCTGTGGTGCCTGATGAAGTGCGCAACCTCTCCCGCCTCTCCAGCGAAACCGCCAGA  
AGATGACCGACAAGGTGGATAACATCAATACTGCTATCGGTGCGCCTTCCAGATTGCCGAAAATGCTGC  
CGCACGGGATCACGCCTCGGCGCTCAATTCGGAGCAGACAATCGAACAGGTGCTGGCCCGTTTTTCGCCAT  
GCCACTGACAGCCTGGCGGAATCCGCCCTCCCTGCTGCAAAAACGAGAGCACCAGATATCCATCGCGAAATCT  
CCAGCGTCATTGTCTCGCTGCAATTTCAAGACAGGGTCAGCCAGATCCTCAGCCACGTCAGACAAAACAT  
GGTGAGCCTCTCCAGCCATCTGGTTGCTTTCGGAGCAGAGCAGCAATGCGACAGGGCCAATCCAGATCGAT  
GCCAATCGCTGGCTGGCAGAGATGGAACCTCATAACGCCACCAGCAACAGCGCAATATTCACCATGGTC  
GCACCACCGTCTGTCAACGCGCAACCAAGCAGCGCCGACATCACATTTTTTCTAGGAGAGAGATATGGG  
CAAAACGATCCTGATCGTGGATGACTCGGCAACTATTCGCCAAGTCGTAGGCATGACCCCAAGGGAGCC  
GGTTATGAGGTCATGGAAGCCTCTGACGGCAAAGATGCGCTCAACAAAACCTAGATGGCAATAAGATCAACC  
TGATCATCAGTGACGTCAACATGCCGAACATGGATGGCATCACCTTCGTCAAAGAGGCCAAAAGCTGGC  
CAACTACAAATTTACCCCTGTCATCATGCTAACTACCGAGTCTCAGGACAGCAAGAAGCAGGAGGGACAA  
GCCGCGGGAGCCAAAGCCTGGGTGGTCAAACCCCTCCAGCCGAACAGATGCTGGCCGCGAGTCGCCAAGC  
TCATCATGCCGTGATCCGGAGCGCATCATGCAACTACAGAGTGAGCTACTCGACAACAAGGTAGTGGTGA  
CCATGCCGGATGAGATCACCATTTATACAGTCAGCGAGCTGAAAAGATGCTCTCTCACCCCTTATTGCATCA  
GGGGAACGAACTGGAGCTGAATCTGGCAGCGGTATCCGAGATAGACAGCGCCGGGCTACAACCTGCTGCTG  
GCAGCGAAGAAGACCGCTCTGCAGCAGGGCTCCTCCCTGGCGCTGGTCTGGCACAGCCATGTTGTGCTTG  
AACTGCTGGAGCTCTGCCAGCTCTCGGCCTTTTTTGGCGACCCCAACCTCATCACCCATGGCCGAACGGCC  
CTGAGCCCCCATGACAAGGAGTCAACGTCAGCATCGATCTTATCAGGCTTTACAAACCTATATCGCCGA



GGCACGCGAGTTGCTTGAAGAGATGGAGTCAGCCCTTCTATCACTGGAATCTGACCCTGACAATAGCGAG  
CTGATTGGTGCCATCTTCCGTGCTGCTCATAACCATCAAGGGGTCAGCTGGCCTGTTTGGTCTGCAACCCA  
TCGTCGGGTTTACCCATATCGTCGAGGATCTGCTCGACCAGATCCGCAATCAGCAGCTCACCGTCACCTC  
TCCTCTGATCAAGGATCTGCTGGAGAGCTGTGACCACATCCAGACGCTCATCAGTGTCTGTTGCAGAACAG  
GGCAGTACCTTAAGCGAGGGCGATGCCAACCAGGATGAACGGCTGAGGCTCACCCCTCACCCGTCATCAGT  
GCGTCCCCCATGCCACGCTGCCAGATACTGTACATACGCCGGAACCCAAGATCGAAAAAGAGGGAGGGAT  
TACCAGCTCCGCCTCCCTGTGGCATATATCCCTGCGTFTTGGTCCCAGATGTGCTGCGCAATGGCATGGAT  
CCGGCCGCATTTCTGCGCTATCTCGGCACACTAGGAATCATATGCTCGGTGGAGACCATCCATCAGGCGC  
TACCGGATTGGGAACAGTTCGATCCGGAGAATTGCTACCTCGGCTACGAGATAGACTTCGACTCGCAGGC  
AGATAAAGCAGCCATCAGCGATGTCTTTGAATTTGTAGAGATGACTGCCAGATCACCATCTTGGCCGCC  
CACAGCAAGATCGCCGAGTTTATCAACCTGATCGAGTGTGCTGCTGAAAGATAGTCCATGTTGGGGCAGT  
TGCTGGTCAACACCGCGCCCTGACGGCAGAGGAGTTAGCAAGCGGTCTGCAGGCACAACAAGCGACCCC  
GGCAGAACAAGCGCCCAAACCTCGGGGAGATCCTGATTGCGCAGGGAGCTGTCAACGAAGCCGTCGTCGAT  
GCCGCCCTGAAAAAACAGAACCAGACCAAGGAGAGCAAGAGCAAAAGAGGGCCGTTACGTCAGGGTGCATG  
CCGACAAGCTGGACGATCTAATCAATCTGGTGGGGAGTTGGTAGTCGCCAGTTCAGGAGCCAATCTGCT  
GGCCCAACGCACCCCGCAAAGCCAACCTGCAGGAAGCCACCTCGGTTCATGGCCATGCTGGTGGAAAGAGATC  
CGCGACAGTGCCTGCGCCTGCGAATGGTGCCTATCGGCGATACCTTCAACCGCTTCCAGCGGGTGGTGC  
GCGATGTAGTCAGGAACCTGAACAAGGATATCACTCTGGTGTATCTCCGGAGCCGAGACTGAACTGGACAA  
GTCGGTGGTAGAGAAGATCGGCGATCCGCTGATGCATCTGGTCAGAACTCGATGGATCATGGCATTGAA  
TCGGCAGAGCAACGGCTGCTGGCAGGCAAATCCCCCGTGGCACCTGAATCTTAATGCCTATCACGACT  
CCAACAGTATCGTCATCGAAATTCGGGATGACGGTGCAGGTCTCAACAAAGCCAGGATCCAGCAAAAAGC  
CATCGAGCGCGGTCTGATCAACCCAACCACCACGCTGACGGATCAGGAGATATACAACCTGATCTTCGAG  
CCGGGGTTCTTACC GCCGAGGGCGATAACCAACCTCTCCGGTCCGGGGTTGGCATGGATGTGCTCAAAC  
GCAACATCACAGCCCTGCGCGGCACGGTCGATCTGGACAGCATCCCGGGAAAAGGAACCCGTTGTCAGAT  
CCGCCTGCCGCTTACCCTTGCCATCATCGACGGCTTCTGGTGCAGTCTGCGACACCCACTACGTCAAT  
CCCCTCGATATGGTGTGATCGAGTGCCTTGAATTTGACCCAGAGTGCCTGTCCGATACCCAGGGTCCGAAT  
ACATCAATTTGCGTGGCAGGGTGTGCCCTTTATCCGCCTGCAACACTACTTCGATACCAATGGCAGCAA  
AGGGAGGCGCGACACATTTGCTGCTGGTCAGCCATGCAGGCAAAAAATCCGGACTGGTAGTGGATGAACCT  
CTGGGAGAATTCAGACCCGTCATCAAAACCTTGGGGAAATTTGTTCCAGCGCTGCAGGCGATTAGTGGTT  
CAACCATTCTGGGGGGGGGGAGGTGCGCCTGATCCTCGACATTCCTTCGCTGATCCAGCAGCAATCAC  
TCAGGAATCCTGTGAGCTCAACAGGTTGACAGTGTGCGCAACCTGCCTCAATCCAGCATCAACTGAGGG  
GACCATCATGTTAAAAAATTCACCATCAAATTTGCGTCTTATTGTACTGCTCTGCATGCTCTGCCTGCTG  
CTGCTGGCCGTTGGCAGCCTCGGGTTATAACAATGCAGAGCAGCAATACCGGGTTGCAGCGGCTTTACA  
ACGACAGGGTGGTTCCCTCAAGCAGCTGAAGACCATCTCCGACAGCTATGCCGCTCTGATCATCGACAA  
CCTCAACAAGGCAATGCGGGACTGATCCCGGCAGAAGAGGCTTTGAAGCAGATAACAACAGGCCAGCAG  
ACAATCAAAAACGAGTGGCATCACTACCAGTCCACCCTCTCACACCAGATGAACAGCGTTTGTGAGCCG  
AGGGCACAACCCCTGTTCAACGCGGCCGATACCGATATTGGCAAGCTGGAGAAATACCTAGCCACCCAGCA  
CGGCATGATTACTGGCATGCTGAACAATTTTACGGTGCCTCTATGGCTCCATCGACCCGATAGGCAAC  
AAAATCACCGAGCTGGTCAACCTGCAGCTCAATGTGGCCAAGTCGGAATATACCGCAGCGCAATCCTGGT  
ATGACGTGATGCTGCTAACCATGGCGGTGGTTATCGCGGTGGCATCGCACTCGCAGCCTGGTTTGGCAC  
CCTGCTGATCAAAAAGCATCATCACCCCATCGAACAGGCTCTACGCGTGGCCAATAGTCTGGCCGATGGC  
AATCTGGATGTATCGATCCAGATAGAGTCCAACGATGAAGCGGGTCAGCTCTTGATGGCGATGGATAACA  
TGGTCAAGAACTGGGGCCCTTGTACGGATATCGAAACGCTGGTTCACAGCAGCTGTGCAACAGGGCGA  
CTTCAGCCACAAGATTGCGCTGGAGGATCGTCAAGGATATATCAAGCGGGTATCCGAACTGCTGAATCGC  
CTCTCCCATGTGACAGATAACGACCTGGAAGATGTGATGCGCATTTGCCACCGGCTCTCCAAGGGGGATC  
TGACCCAGCGGATCGATGAGCCCTACCCAGGTATTTTCGGCCAGACCAAGACGCGCTCAACCGGACCAT  
CACTGCGCTGACCAATATCATCGAAGAGGTACGCAACGCCGCGACAACCTGACCAATGCTTCCAATCAG  
GTGAGCAACACTGCGCAGGCATTGAGCCAGGCCACCAGTGAGCAAGCAGCCAGCGTTGAAGAGACCAGCG  
CCTCTATCGAGCAGATGAGCGCCAGCATCAATCAGAACACCCGAGAACGCCAAGATCACCGACAGCATGGC  
CAGCAACTCGGTGCTGGAGGCCACTGAAGGGGGCCAATCCGTTCAACAGACGGTGACCGCCATGCAGCAA  
ATCGCCAAGAAAGTCAGCATCATCGACGACATTGCTTACCAGACCAACCTGCTTGCCTCAACGCCGCAA  
TTGAGGCGGCTCGCGCCGGAGAGCATGGCAAAGGCTTCGCGGTGGTTGCTGCCGAGGTGAGAAAGCTGGC  
AGAGCGCAGCCAGATCGCTGCGCAGGAGATTGGCGAGCTCTCCTCCGACAGCGTCAGCAAGGCAGAGCGG  
GCTGGCAACCTGCTGGAGAGGATCGTCCCTCCATTCGCAAGACCTCTGACCAGGTACAAGAGATCAATG  
CCGCCTCAGGTGAACAGGCCAGCGCAGCCAACCAGATCAGTCTGGCCATGAACCAGCTTAACCAGGTGAC  
ACAGCAAAATGCGGCCAGCAGCGAGGAGCTGGCGGCCACGGCCGAGAGATGAGCTCACAAGCCAGCGAA  
CTGCAGCAAAACCATGGCCTTTTTTGTCTTGAAAAAAGTGACAGCTTAACACCAGGCCCCATGAAACCG  
GCCACAAGGGCATGCCTCCCAGAGGCAGTTTCATCGCCCCCCACAACGGGCCAGCCAGCCCAATCAACC  
ATCATCCCATTCCATTGATGACCGGATTTTGTCCGCTTTTAACCGGAGGCGACCATGCATACATCCACC  
GACATCACGGTGCATCAGCGGCCGCTGACGAGAGCAGTGGCGATGCCAGTACCTGACATTTCTGATCA  
ACAACGAGATGTTCCGCATCAATATTCTGGGGGTCAAAGAGATCATCGAATACGGCAATATCACTCCGGT

TCCGATGATGCCGGGTTTTATTTCGCGGGCTAATCAACCTCAGAGGAGCGGTAGTGTCCGGTTCGTAGACTTG  
AATGCCCCGCTTTGGCAATGCACCTTCGGTCATTACTCGCCGAGTTGCATCGTCATTATTGAGGGGGTGG  
CCCCGCAGGGCGATGAACCTGTAGGTCAGGATATTGGCGTTGTGGTGGATTCCGTATCGGAAGTACTGGG  
TATCCACAAGCAGATATCGAGCCCCACCCAGTTTTGGTGCCCCGATCCGGGCCGATTTTCATCAGCGGC  
ATGGGCAAGGTCAACGGCAAATTCGTCATCCTCATCGATAACGGGAAAGTGTGTCACTCGATGAGATGG  
CTCAACTCAACGAACTGGCCCAGCCACAGGCAAGGTTGCCACAAGGCAACCTGCAACCCCTCCTGAAAAGG  
CCTCCATACTCCACGACATGCAGCATAAGGAAACGCTCATGACCCAATCACTCTTAGGAAAACCTCTTCGG  
AGACAATGCCACCGAAGTGAGGCAGCGGACCCAGTTACTCGACGCAATCGGCCAGCTGCAACACGCAGTC  
CTGGCAGAGCAGGTTCCAGCACCCTCGATCTTTCCGGTATGGACAGTCCCTTTCGTGAAGTAGGACATG  
CCATCAACAGGTTGGTCACCTTGCTCAGTGACAAGCTGGAACAGAGCCGCAACGACATTAAGAAAGAACCA  
GGTATTGCTCCATGAGAACCAGCTGGTTTCGAAAGCCCTCGACTGCGCCAGCACCAACGTTGATTGCC  
GATACCAACCTCGACATTATCTATATGAACGAGGCTGTGACCGGCATGCTCAATCAGGCCGAGACCGACA  
TCAAGAAAGAGCTATACAGCTTCAACGCCAATCAGCTGATGGGCGCCAACATCGACAGCTTTCATAAAAA  
TCCCCGGCCATCAGCGCGCCATGCTGGCCAAACTCAACAGCACCTACCGTACCCAGATTTCAGCTGGGGGGG  
CGCACCTTCTCCCTGATCGCCAATCCGGTCTTCAACGATACCGGTGAACGGTTGGGATCCGTGGTCAAT  
GGGCCGACAGAACCAAGGAGGTAATGATAGAGAAAGAGATGTCCGACATTTGTGCAGGCCGTGATCAATGG  
CGAGCTGCACCGCAGGATGGAACCTTGCTGGCAAGAGCGGCTTCTTTTCAGGCGATGGGAGAAGGGATCAAC  
CAGATTGCCGAAGTGATCGACAGCACCCCTCAACGACGTCATCCGGGTTCGTGCAATGTCTGGCAAAGGTTG  
ACCTGACCCAACAGATTGAGGCGGACTACCCCGGCGTGTTCGGCACCACCAAGGATGCGCTCAACAAGAC  
CATCGCTTCGCTCACCAACATCGTCCAGCAAGTGCGCGCGCCTCTGACAACCTCTCCAGTGCCGCCGAG  
CAGGTAAGCGCGACCGCCAGTCGATCAGCCAATCCAGCAGTGAACAGGCCCTCCAGCATGGAGGAGACCA  
GCGCCTCCATCGAACAGATGAGCGCCAGCATCAACCAGAATACCGACAATGCCAGGTCACCGATGGCAT  
GGCCAGCAAGGCAGCCAAAGAGGCCGTAGAGGGAGGAGAAAGCGGTCAAACCTAAGTGTGGATGCCATGAAG  
CAGATCGCCAGACGGATTGGCATCATCGATGACATCGCCTACCAGACCAATCTGTTGGCACTCAACGCAG  
CGATCGAAGCGGCGCGGGCTGGCGATCACGGCAAAGGCTTTGCTGTAGTGGCGGCGGAGGTGCGCAAAC  
GGCCGAACGCAGCCAGGTGGCAGCACAGGAGATTGGTGAGCTGGCCTCCAGCAGTGTGAGATGGCCGAA  
AAAGCAGGTCGTTTGTGGATCAGATGGTTCTTCAATCAACAAGACCTCGGATCTGGTGCAGGAGATCA  
GTGCCGCTTCGTTGAGCAATCCACCGGTGTCAGCCAGATCAACCAGGCCATGAACCAGCTGAGTCAGGT  
TACCCAGCAGAACGCTTCTTGCAGCGAAGAGCTGGCTGCCACAGCAGAAGAGATGAGCAGCTGAGGCTGAA  
CAGCTGCAACTGGCCATGGAGTTCTTTACCCTGGAGGTCCACGCCAAAGAGGTAAGCAGCCACCTCGC  
ATCTTACCCCAATACCCGAGGTTCGCTTTATGAACGAGAGCACTGCCAACAGTCCGGGAACGAGCCGCCAC  
AGCCCAACGCCCCATCGGTGATGGCGATTTTGTCCGGTTCTAGTCACGGGAGAGGCGTTGCCTCTCCCAT  
CTCCGACAACACAGGTAGAGGGACAGTTTTTTGTATCAAACCCAGCTGCATGATGATGAGTTCTCCCGTT  
TCCAACGCTGGCTTCATCAAACGGCGGGGATAGAGCTGTCTCCGGCCAAGAAGGCGCTGGTGGCCAGCCG  
CCTGGCGAAACGGCTCTGCCACTATGAGCTTGATAGTTATGACGACTATTTCCAGCTCATCATGAACGAT  
CGCAGCAGCGAACTGCAGCTGGCGCTTGATCTCCTTACCACCAACGAAACCTACTTTTTTCAGGGAACCCA  
AACACTTCGAGTTTCTGACGCGGGAGATAGTCTCAGCGCTCCCGCCGAGCAACCACTGCGGGTCTGGAG  
CGCTGCCAGCTCATCCGGCGAGGAGCCCTACAGTCTGGCCATGACCCTCGCGGAAAAACGCAGCACCTTC  
AACTGGGAGATCCTGGCTTCCGATATCTCGTCCCGGGTGTGGAACAGGCGATGAGCGGTTCGTACCCCA  
TCGAGCGGGCGCAAAATATTCCACTGCCCTTTTTTGATGAAATATTGCCCTCAAGGGTGTGGGCTGCAGGA  
GGGCATCTTCATCATCGATCGCAAGTTGCGGGACAAGGTGCAGTTTCATGCAGATCAACCTCAATCAGGAT  
CTGCCGGACATCGGCATGTTTACGTCATCTTCATCAGAAAACGTGATGATCTACTTCAACAAGGAGACCA  
AAGGGCAAGTATTGCAGCGGCTGGTACCCAGACTCAAACCCGGTGGCTACCTGCTGGTGGTGCAGCCAGCCGA  
GAGCCTGCATGGCCTGCACCACGGCCTGCAGCTTGTCTCTCCTTCCATCTATCAGAAGAGATAAGTCATG  
ACTCGGGAGGTGATCCTGCAACCGGGAGAACTCTTTTTTGGCAAGGAGGATGTGGTGGTGCAGAACCCGAT  
TGGGCTCCTGTATTGCCATCACCTTGTGGCATCCGGAGCAGAAAACAGGGAGGAATGTGTCACACTACATGCT  
GCCAAGTCGGCGCAATCCCTCTGCCAAGCTGGATGGGCGCTATGCCGATGAGGCCCTCGCCTTGTGCTG  
CAAGCGGCCAGTCACTATCCCGCCCCATCCATGAATATGAGGCCAAGTTGTTCCGGGGGTGGCAACATGT  
TTACCGAGCCTCAATACGCACAGAGCGACAACAATGTGCGCCGCAAAAAATATTCAGGCAGCCTGGCAGCT  
GACCCGACACCTTGGCCTTGATATCAAGGCTCATCATCTTGGCCATAGCGGCCACCGAAGCTTGTCTTTT  
GAGCTCAGCAACGGCAGTGTCTGGCTCCGCCATCATCGTCTGCCACATCAACGGGAGTCCGCGAGAATGAA  
GCAGATCCGGGTTCATGCTGGTGGATGATTCCGCCGTGGTCAGACAGGTATTGCAAGCGGTGCTGGAGCAG  
GAGCCTGATATCCGGGTGATCGCCACAGCATCGGATCCCTGTTTGGCCAGGAAAAACTGAAGAAAGAGT  
GGCCTGACGTCATCGTCTGATGTGGAGATGCCCCGAATGGATGGCATCACCTTTCTACCAAGATCAT  
GGCGGAGCATCCACCCCGGTGGTGTGCTCTCCTCCCTCACCGAAAAGGGGGCCGAGACCACCTTGCAG  
GCAATGGCTGCCGGCGCGGTGGACATCATCACCAGCCGACCATGGGGATAAAAAGCTTTCTGCAAGAAT  
CTGCCACGACCTGGCCATGGCAGTACGTGCTGCGGCCAGGCCAATCTCAAGCGCGTGGGCAAGCCCTC  
ATCTGTGCCGGTTCAGCACCAAACTCAACCGGGATGCCATGCTGGCGCCCAACCAGCACGCCATGGCACAA  
ACCACAGAGCGGCTCATCGCCATCGGCACCTCGACCGGCGGCACCCAGGCCCTGGAAGCCGTGCTGACTG  
CCTTGCCTCGGGTCAGCCCCGGCATTGTTCATCGTGCAGCAGATGCCGGAGAAAATTTACCGCCATGTTTGC  
AGAACGCCTGAACGGGGTCTGCCAGATAGAAGTGCGGGAGGCGAGGAACAATGACCGGGTGTATCCCGGGG

CTGGCGCTGATTGCCCCGGAGGCAAGCATATGCTGCTCAAGCGCAGCGGTGCCTACTATCACGTCGAGG  
TAGTCGACGGGCTCTTATCAACCGCCATCGCCCCCTCGGTAGATGTGCTGTTTCGCTCCGTCGCCAAATA  
TGCCGGCAAGAATGCCACCGGCATCATCATGACCGGAATGGGGGATGACGGAGCCCGGGATGCGCGAG  
ATGCTGGATGCGGGTGCCAACACCTATGCCAGGATGAGGCCCTCCTGCGTGGTCTTCGGCATGCCAAGG  
AGGGCATCAAGCTGGGAGCAGCCCCGCCATGTGCTCCCTTGCAAGAGATGCAGTACGCCATCCTCGGCAA  
GTAATTCCTTATCGCGCGTTTTGCCCATAAAAAAGTCCGGCCCCCAAGGGGAGCCGGACTTTTTACATC  
AACCGGAACCAATCCGGTATCAGGCGAGCAGATTACTCTGCAGCAGGCGCTTCTTCAGCGGCCGGAGCGG  
CGTCAGCAGCAGGTGCAGCTGCTTCGGTCGGGGCGTTCGCTTCTTGATGGAGAGACGTACGCGGCCCTG  
ACGGTCCACTTCCAGTACCTTACCTTGACCACGTACCGATGGTCAGGTGGTCAGCCACGTTCTGCACG  
CGAGCTCGGTGATCTGGGAGATGTGTACCAGACCATTTTGCCCGCAGAATGTTGACGAATGCACCGA  
AATCGGCCAGACGAACAACCTTACCTTCATAGATGCGGTTCACTTCGATCTCGGCGGTGATAGCCTCGAT  
GCGACGGATCGCTTCCATGGCGGCTTCGTTGGCCACGGCGGAGATACGTACAGTACCGTACATCACCAGC  
TCGATGTTGGTGCCGCTCTTCGGTCAGCGCACGGATCACGGAACCACCTTACCGATCACGTCCTTGA  
TCTTCTCAGGATTGATCTTGATGGTGTGGATACGCGGTGCAAAAATCGGAGATCTGGGCACGGGGAGCCTG  
GATAGCTTCGTCCATCACTTTCAGGATGTGCAGACGAGCGCCACGAGCTTGCTTCAGAGCAATCTCCATG  
ATCTCTTTGGTGATGCCTTCGATCTTGATGTCCATCTGCAGCGCGGTACACCTTCGGTGGTACCGGCTA  
CTTTGAAGTCCATGTGCGCCAGGTGATCTTCGTCACCCAGAATGTCGGACAGCAGACGAAACCTTCTTC  
TTCCTTACCAGACCCATGGCGATAACGGCAACGGAGGCCCTTGATCGGCACACCGGCATCCATCAGCGCC  
AGAGAGGAACACAGACAGACGCCATGGAGGAGGAACCGTTGGATTCGGTAATTTTCAGAGACCACGCGCA  
CCACGTACGGGAACCTCGGCGGCGCTCGGCATCACGGCAGCAACGCCGCGCTTGCCAGACGGCCGTGACC  
GATTTACGACGCTTCGGGCTACCCATCATGCCGGTCTCACCGACACAGTATGGCGGGAAGTTGTAGTGC  
AGCATGAAGCGATCGGCACGGTTGCCGGTCAGCTCGTCGATGTTCTGGGCATCACGCTCGGTCCCCAGAG  
TGGCGACCACGATGGCCTGAGTTTTACCACGGGTGAACAGGGCAGAACCCTGGGCACGGGGCAGAATACC  
GGTACCTACGCTCAGAGCGCGGATCATTTACAGGATCGCGACCATCGATACGCGGCTCACCCAGTACTACG  
CGACCACGAACGATGCGGCTTTCTAGGCTGTGGAACCTTCGCGCATCTTCTTGGCATCTTCTTCCACAC  
CGGAAGCGATAAATTGCTCAACCACACGACCCCTTGATGGCTGCGATGGTTTTCGTAACGGACAGCCTTCTC  
GGTGTAGCGGTAGGCTTACCCAGTTTCGGCGCTCGCCAGCTCGGCAACCTTGGCTTTCAGCGCTTCGTTG  
ACGGCAGGCGGAGTCCAGTCCCACGGCTTGGTGCCGACGGCAGCGGCAAACTCGTTGATCGCATCGATTA  
CGGCTCGCATCTGCTCATGACCGTATACCACGGCAGCCAGCATCACTTCTTCAGAGAGGATGGCCGTTCTC  
GGACTCAACCATCAGCACGGCATTGGCAGTACCGGCAACCACCAGATCCAGATCACTCTGCGGCAGTTCCG  
GTAGTGGTTCGGGTTACGACATACTGACCGTTTCATGTAACCCACGCGAGCAGCACCGATCGGGCCGCCAA  
ACGGGATAACGGAGATGGCCAGTGCGGCAGAGGCACCGATCATGGCAACGATGTCGGGGGATACGGCCGG  
ATTCACGGACATTACGGTCGCAACGACCTGAACCTCATTTAGGAAAGCCTTCCGGGAACAGCGGACGAATA  
GGACGGTCGATCAGACGGGAGATGAGGGTCTCGCCTTCGCTCGGACGGCTTTCAGACGGAAGAAACCAC  
CCGGGATACGACCAGCAGCATAGGTACGCTCCTGGTAGTTGACGGTCAGCGGGAAGAAATCACGGCCGTG  
ATCGGCCTCTTTCTTCCGACTACGGTCACAAATACGCAGGTATCGTCCATGCTGACCATAACGGCCGCA  
GTGGCTTGACGGCCATCACACCGGTTTTCCAGAGTGACGGTGTGTTGACCGTACTGGAATGACTTTACAA  
TAGGATTCACGTGAATTTCTTTTTACAATTTGGCTCTTTAAATTCGCGCACAAAGTATACTTGATTGAT  
GCAAAAGGTAAGCGGCTACGCGAATTCTGTGAGGCAGGCAACGGCTTGAAAGCAATAAAAAAGGGGAAC  
CTGACGGTTCCCTTTTTTCGCGAAATCTGATGGTCGATTAACGACGACAGCCAGCTTGGCGATCAGAGC  
AGCATAACGCTCGGAATCTTTACGCTTACGGTAGTCCAGCAGCTTACGACGCTGGGAAACCATGCGCAGC  
AGACCGGACGACCGTGGTGGTCTTTGGAGTGCTCTTTGAAGTGACCTTCGAGATGGTTGATCTGGGCAG  
TCAGCAGGGCAACTTGCACCTTCGGGGGAACCGGTGTCTGTTGGCGCAACGAGCGTTGTCAGCAACGATTTG  
AGCTTTGATCTCAGCATTTAGAGACATGGTAATACTCCAGTAGAGTGTTTAAAGGTTTCACAGCCAATCTC  
TAATTCAGCCGTGAAATGAGGGCGGTATCATAATCGTCCACGCCCTTTTCGCAACGATAAAGAGCGGAA  
ACGGGAAAGACACCTGATACCGCCTGAGGATCACTCCTCGTGTGATAACGCACCAGTCGCTTGGGAGC  
GACGCGGCCATCATCAATCTCGCCAACCCCGATGAACCTCGCGCTCCGGGGCCGACCGTTCATGCGAACC  
TGACCGCTTTGCGGCGCCCCGCTGCCTGCACGGCCTGGCCCTGATTAACATAGGCAGCCACAACAGCCA  
GCATGTTACCTCGGGCAAGCTTGCTACGGCGGTGTCCATCGGCAGCAACAGCGGATCCAGCTGCTCGCG  
CGGCGGGATGCTCTCGGCCTTGGCCTGCTCGAAGATGCACTCGAGTTGCTCCAGAGTCAGCATCCGCTCA  
TACGGATAGCTGGCCACCTGGGTACGGCGCAACTGAGTCACGTGGGCGCCACAACCCAGCACTTACCCCA  
GATCATCCACCAGAGAGCGGATATAGGTGCCCTTGTGTCAGTGCACCTTCAAGGCGCACTTTCATCACCTTC  
AAAGCTCAGCAGTTTGAAGCTCGAATACGGTGTGAGGACGGCTTTCAGCTCAATCTCGATGCCTTCGCGG  
GCATATTCGTAGAGCGGACGGCCGTTGTGCTTGAAGCGGAGTACATGGACGGCACCTGCATGATGGGGC  
CACGGAACCTGGTCCAGCGCCTCGATCAGGGTACCAGACGCCAGTTACCGGACGGGTGGAGACCACCTC  
ACCATCGGAGTCGCTGGTGTGGTGCCTCGCCAGTTTGGCGGTACCTCATAGCGTTTTGTCCGCTTCC  
AGCAGATACTGGGAGAACTTGGTGGCCTCGCCGAGGCAGATCGGCAGCATGCCGGTTCGCCAGCGGATCCA  
GTGCGCCGGTGTGACCGGCCCTTGGCGGCGTTGTAGATGCGCTTGACCTTCTGCAACACATCGTTGGAGGT  
CAGGCGGGTGGCTTGTCCAGCAGCAGAATGCCGTGCACATCACGGCCCTTGAAACGACGTCCTTCGGGTC  
ATCTCAGGCTTTATCCTCAGTGTGTCATCCGGTGCAGTTTCAGCTTCTTCGTCACGGCCGGATTCGGCC  
ATGCGACGCTTGTCTTACGCACAGTGTGGTACCAGGTTGGAGAGACGCATCCCCTCGACCAGGGTCT

GGTCGTAGTAGAAACGCAGCTCGGGCACCACGCGCAGACGCATGGCACTGCCAGCAGACTACGGATATA  
TCCGGCTGCTTCGGTCAGACCCTGCAAGCCTTCTTGATACGTTTCGGCATCATTTTCCAGCTGCAAGAAG  
GTGACGTAAATCTTGGCATAGTTGAGGTCACGGGACACTTCCACATCGGAAACAGTCACCATGCCGATGC  
GCGGGTCTTTACCTCGCGCTGCAGGATCAGCGCGATTTACGCTGGATCTGCTGTCCGACCCGACGGGT  
CCGGCTGAATTCTCTGGCCATATTCTATCTTGCATAAAAAGGGGGCCGCGGCCCTATTTTGTCTAACT  
CTCGGCTTACAGAGTCCGTTGGATTTCAACAGTCTCGTAAACTTCGATCTGGTCGCCCTTCGCGCACGTGC  
TTGTAGTTCTTGACCGGATACCACACTCGTAGCCGTTGCGAACTTCGTTGACGTCATCCTTGAAGCGGC  
GCAGGGATTCCAGCTCGCCTTCATAGATAACCACGTTGTCACGCAGAACGCGGATACGGTTGGAACGCTT  
GACCACACCTTCGGTAACCATAACAGCCGGCAACGGCGCCGAACCTTCGGAGACTTGAAGACGCTACGCACT  
TCAGCCAGACCGATGATTTCTGACGATACTCAGGGGCCAGCTTGGCGCTCATGGCCTGCTTCACTTCCGT  
CGATCAGGTCATAGATGACGGAGTAGTAACGCAGATCCAGGCTCTCGGATTCGATGACCTTGCAGCAGAG  
TGCGTCGGCACGGACGTTGAAACCAACCAGGATGGCGCTGGAAGCAGCAGCCAGGTCGCGTCTGTTTCG  
GTGATACCACCTACGCCGGAACCCACGATCTTACCTTCACTTCGTCGGTGGAGAGTTTGACCAGCGCAT  
CGCAGATCGCTTCCACAGAACCTTGTACGTCGGCCTTGATCACCACGTTCACTTCGGACACTTCGCCCTC  
GGTCATGTTGGCGAACATGTTTTCCAGCTTGGCCTTCTGCTGGCGAGCCAGCTTGACTTCGCGGAACTTG  
CCCTGACGATAGAGCGCCACTTACGGGCTTTCTTCTGTCACGGACAACGGTGGCTTCGTCACCGGCAG  
AGGGAACGCCGACAGACCCAGGATTTCCACCGGCAGGGACGGACCTGCTTCTTGATCTCGCGACCCAG  
TTCGTCACGCATGGCGGAACACGGCCGTACTCGAGACCACACAGAACGATGTCGCCCTGACGCAGAGTA  
CCTTCTTGTACCAGTACGGTAGCAACCGGACCACGACCTTTATCCAGGAAGGATTCGATCAGCAGCCGT  
TGGCCATGCCGTCACCCAGCTTTCAGCTCCAGTACTTCAGCTGGATCAGGATGGCTTCCAGCAGGTC  
GTCGATGCCTTCGCCAGACTTGGCGGACACGTCACGAACTGGCAGTCTCCACCCCAATCTTCGGACATG  
ACGTTGTAACGGGCCAGTTTCGGTCTTGACGCGATCCGGATCCGCTTCAGGCTTGTGATCTTGTGACCG  
CAACAACCAGCGGCACACCGGCCGCTTGGCGTGCTGGATAGCTTCGATGGTTTGCGGCATCACGCCGTC  
GTCAGCTGCAACAACCAGAACACGATATCGGTGCCTTGGCACCACGAGCACGCATGGAGGTAACGCC  
GCGTGACCCGGAGTATCCAGGAAGGTGATCATGCCACTGTCAGTCTGGACGTGGTAAGCACCAGATGCT  
GGGTAATACCACCGGCTTCGCCAGCAGCAACCTTGGCTTTACGAATGTAGTCGAGCAGCGAGGCTTACC  
GTGGTCAACGTCACCCATGATGGTAACGACCGGTGCGCGCGGCTTGGCTTCGGAGGTCGTCACGATCG  
GACAGCACCCGCTTCCAGCTCGTTCTCAGCAGCAGCAACCTTGTGACCCATCTCCTCGGCCACCA  
GCTGAGCGGTCTCCTGGTCGATCACCCTGGTGTGATGGTGGCCATGGCACCCATCTCATCATCACCTTGT  
GACTTCAACGCCCTTGACGGCCATCTTGTGGCCAGCTCGGCCACAGTGATGGTCTCGCCGATGACGACG  
TCGCGGTTACCACGGCAGCCGGCTTGTGTAAGCCGTGCTTCATGGCGTTCGGCATGGCAACCTTGGCGC  
GCTTGCCTTTACGGGCACGCGGGTTGCGAGAGTCGCGATCATCTTACGACGACCGGCTTCTTTCGGTGC  
CTTGGCAGCTGCGGCAGTGCGGCGGCTGGTCTCTTCTTCCGATCCAACCTCGTCTTTCGCGGCTTGGCGA  
TGCTTGTGGTGGTTCAGATGGTAGTCGCTGCTCTTGGCGGAGCGGCTTCTTTCAGCCAGCGGG  
CTGCGTCTGTTCCGCCATGAGACGAGCCTTTCGGCTTCTTCGCGGCGAGTCTTTCAGCTTTTTTCAA  
AGCTGTTTGTTCCTGTTGGCGCTTTCAGTCTTCTGCTTCGCGCTTGGCCATCTTTTCTGCCTCTTGCTGA  
GCTGTGCTACTGGCTGCTTTGGCGGGCTGTGAAGCCTGTCGAGCCTTTGATTGTGCCTCGATCCGCGCCT  
TTTTCTCAGCTTTCAGCAGGAGCTTGTCTAGCCTCACGGCGAGCCTTCTTTCAGCTTCGAGGCGAGCCTT  
ATCTTCCGGCTTCGCGACGAGCTTTTTCTTCTGCTTCCAAACGCGCTGTTTCTCGGCTTCCGCCTGACGC  
TGTTTCATCTTCCAGCGCCGAGCGTCTTACATAGGTGCGAGACTTTCGCACTTCTACCTGCATTTCTTGT  
TCTTGGCCAGTACCCTGAACACTGATGGTGCTTTCGGTCTTTCGCTGCAAGGTCATGCGGGCAGGAGC  
GGCGACCTCGTCACCTCCATGCTGTTTCTTTCAGGTGTGCCAGCAGGGCCTGTTTCTCAGACTCGCTGACC  
ATGTCGTCGGCCTTGTCTTGTGATAACGGCATCGACAACTGCTGGAGAAGACGATCAACCGGTGTGT  
CGATGTCAGTGGCAAGTTGTTTACTGATACTTCTGCCATTCATTTTCTCCGTTTGTATCTTACTCGGAC  
TGCTCTTCTCCGAACCAACAGATATTGCGAGCAGCCATAATGAGCTCACCTGCCCTTCTCGGCAGTCAGCC  
CTTCAATATCAGCAAGGTCATCGATAACCTTGTCTCAGCCAAATCTTCCAGGGTGGCCACGCCACGGCCGC  
CAGAGCGTAAGCCAGTTTCGCGGCTCAGACCGTTCAGATTGAGCAGCTCTTCGGACGGCTCAACGCCATCG  
AAAGACTCTTCTTTGGCCAGTGCTTGGTAGTCAGGGCATCTTTGGCGCGCTTGGCGAGCTCTTCGACCA  
TGCTTTCATCCAGACCATCGATAGCCAGCAGCTCGTTGACCGGTACAAAGGCGATCTTTCAGGGTAGA  
GAAGCCCTCTTCCATCAGCAGACCGGGCGAAATCGTCGTCGATATCCAGAGTGTGGTGAACAGGTTTCATG  
ATGCGGTGCTTTTTCGGCCTGGTGTGTTGGCACGCATGTCCTCAACGGTCATCACGTTTCAGTCCCAACCGG  
TCAGCTGGGAGGCCAGACGCAGTTCGACCATTCGACCGATGGCCTGAGCCAGGTTGGCAGCTTCCAC  
GGCGATATCCATGGTGTGGTTGTCTTTCATCAACGATGATGGAGGCCACATCGGCAGGTGCCATGGCATG  
ATCACGTAAGTGGCCGGGTTGTCTATCGTACAGCAGATGTCGACGCTCACCGCTCAGCTCGGCGGAGA  
CAGCTTGCACACGGGCACCACGCATACCGATAACAGCCAGGATCGGGTTCGATACGACGATCGTTGGTCTT  
CACCGCGATCTTGGCGCGGGAACCCGGATCACGGGCAGCGCCATGATTTTCGATCATCTTTCACCGATC  
TCCGGTACTTTCGATACGGAACAGCTCTTTCAGGAAGTCCGGGCTGGAACGGCTGACAAACAGCTGGGAAC  
CACGGGCTTCCGGGCTACTGCGTAGAGCAGGCCACGGACACGGTCGCCCCGGGCGGAAGGTTTCACGCGG  
CAGCATGTCATCACGGAAGATCACGGCTTTCAGCATGCTGCCAGATCCAGGATGACGTTGTGCGGGTTG  
CTCTTCTTACCACACCACTGATGATGGTGCCTTCTTTATCTTTAACTGATCAACTACTTGTGAACGCT  
CGGCTTCGCGCACTTTTTGCACGATAACCTGCTTGGCGGTCTGGGTAGTGATACGGTCAAGGTTACAGA

GTCGATCTGGTCTTCAACATACTCACCGATCTGGATTTCCGGCTGATCAATTTGTGCCGCTTCCAGGGTG  
ATTTTCAGCATAGGGGTTCTCCATCGCAGCTTGATCCGCAATGACTACCCAGCGGCGATAAGTGTGCTAGT  
CACCGGTCTTGCATCGATTTTCGACCCGAACCTCAATCTCGCCTTCATATTTCTTCTTGGTTCGAGTCGC  
CAGCGCGGTTTCCAGAGCCTGGAAGATCTTCTCGCGGGGTACCGCTTTCTCGTTGGATACTGCGTCAACG  
ACCAGCAAAATCTCTTTATTTCATATCCGATAGCCTCGTTAACC AAAAGTTTCGGCACTATGTTTCGCTTTTTG  
GATATTGGTGAAAGCCAACACGTGCTCCTTACCATCTACTGTGTCAGGGTGATCATGTGCGCCTTGCACAGCT  
TTGATTACGCCTTTGAACTTTCGCGGCGGTTGTTTGTGTCATCCGAAAGCGTTACCGCCGCCCTTTGGCCAA  
CGTATTTTTTCGAAATGGGCAACCTTGAACAGGGGACGATCCAGGCCTGGGGAGGACACCTCGAGGTAGTA  
CTCCTCGGTGATGGGATCTTCGACGTCCATGATGGCGCCAACCTGATGGCTGACCTCAGCACAGTTCTCG  
ACAGTACACCCCTGCTCGCCGTGATATAGACAGCAAGGTGGAGTGTTTACCCGCACGGATAAACTCAA  
TACCCCAAAGTTCAAACCCCAAGGCAACGACCCGAGCCTCGAGCAGATCGGTCAAACGTTGTTCCAACGT  
AGCCAAAGTCACCCTCCGAAAAACAAAAAAGGGCATAAAGCCAGATAGATATCGATTTCAGAGTAAATTT  
GCACATAACAAAAAGCCCCGATGTCAAATCGGGGCTTGGCGCTTTACCTGATTGTGCGCCTCGCAGCGAC  
CGCCTTCTGAGCGTAGGAAATGCGTGAAATTTGGTTGCGGGGGCCGGATTTGAACCGACGACCTTCGGG  
TTATGAGCCCCGACGAGCTACCATGCTGCTCCACCCCGCGTCCGAAATCGTGCGAGATTATAGCCACTTCA  
CTCTCTGGATAACAAGACTGACTGGCTATAATACACTCGGCTTCCCGAGCTCACTGCTTAATTGGTGCCGT  
GGGCGGGACTCGAACCCGCACACCCTAGAGCACTACCCCTCAAGATAGCGTGTCTACCAATTCACCAC  
CACGGCAAAACTCTTACTCGGGAACGTGAGTATCTTCTTCACTGGCGCTTTGGTCTGCTCAACCTGTTG  
GGTTTGTGTCAGATTTTCCACTCACTACCCTCCTTGACCTTGTGCTGGACATAGAACCAGCACCAG  
CTGATAACGAAAAACAGAGTAGCCAAAATTGCTGTTGTTTCGGGTCAGGAACTGCCTGAACCACCGGAGC  
CGAATACTGTGTTTCGATGCCCTGCGCCGAAGGAGGCGCCATATCAGCCCTTTACCTTGCTGAATCAT  
CACCAGACCAATCAGAGCCAGTGAAACCAGCAGATAAACGACTAAAAGAATCTCGTACATTTAACTTGCA  
CCCTTTGCCGCTTCAACAATTTCTAAAAACGCATCGCTATCGAGGCTTGTCCGCCAATCAGTCCGCCAT  
CAATGTTCGGGCTGTGCAAAACAAATCTCTCGCGTTGCTCGGCGTTACGCTCCCACCATAGATGATTCTAAC  
TTTCTCACCTATTACCGGAGTATCCTCCGCCAAGCGACCACGTATAAAGGAATGAACCTCTTGTGCCCTGC  
TCGGGTGTGGCGCATTTACCTGTACCTACAGCCCAAATCGGCTCGTAGGCGATGATAGCATTATCGAAAG  
CCATCGCGCCATTTTCTCTATGACGATATCCAGCTCTTTCAGCGATCACCTCGAAGGCTCTTCTCGCCTG  
CCTCGCCGACCTGATTCGCCTAAACAGAGGATGGGAATCAAGCTGCCGCTCTGGCTACCGCAAACTTC  
TCTGCGCAGATAAAAATGGTCTCACCAAAGAGACGCCCTCGGCTCGGAGTGCCCTACCAATCAGTAAACGGC  
AGCCTGCCTCAACCAGCATCTGACACGAGATTTCTCCGGTGTAAGCGCCAGTAACGTGCTGACTCACATT  
CTGAGCCCCCAACTTTATTACCTTCTGCTCATTGAGCAGTGAAAGCGCTAAAGTCGAGATGCACATGGGAA  
GGACATAGAACCACATCTACTTTTCCGTCAACGCCCTTTAGGCACTGACTCGTAAACTGCTCTAACTGCG  
ACCTACTACCGTGCAACTTCCAGTTGGCTGCTACAAACGGCTTGGCATGTCCCATCGGCAACTCCCTTGC  
GAAAGCGGGGCTGATAATATCCAGAGGATGCTCAGCTGACAAGTGCTATTTTTAAATTTTTGAATCGTTT  
GAACAAGATAACAACCAGGGCGGCTAAAAAGCCGCCCTGGTTGTTTCAATAAAACGCCGATTCAACCTGCTT  
GGCGATGCGCTGAGCCATGTCACGCACCTGCTGTTTATGCTCCCTTCGACCATGACCCGGATCAGCGGT  
TCGGTACCTGATTTACGCAATAGTACGCGACCACGACCAGCCTCCTGTTCCACCTTGGCAACCTCAG  
CCATGACAGCATCAGCGGCCAGCGGATCCTTGCCCTTCGGCAAAGCGAACATTCACCAGCACCTGCGGGAA  
CTTGCTCATGCCGAGCGCAGCTTGGCCAGCGGCATCTCGGCACTGCGCATGGCGGTAAGCACCTGCAAG  
GCGGCTACGATGCCATCACCCGTAGTGGTTTGGATCAAGACAGATAATGTGGCCGGAGTTCTCGCCACCGA  
TACGCCAGCCCTTCTTCCATCATCTCCAGCACATAGCGGTACCCACCTTGGCACGGGCAAACGGAAAT  
GCCCAGGGTTTGCAGCGCCAGCTCCAGACCCATGTTGGCCATCAGGGTGCCGACTACGCCCCCTTGAGG  
CGACCATTGCGCAGAGCATCGCGTGCGATGATATAGAGCACTTATCACCGTCGATGAGATAGCCTGTAT  
GGTTCGACCATAATCAGACGGTACCATCACCATCAAAGGCAACCCCGATCAGCCTTGCACCTCCAGTAC  
CTTGGCAACCAACCGCTCAGGCGCAGTCAAGCCGACACCATCGTTGATATTGAGACCATCCGGGGCACAG  
CCCATGGTGATCAACTTACGCGCCAGCTCGCGGAAAACCGACGGCGCAATGTGGTAAGTAGCGCCGTGGC  
CACAGTCGACCACCATTTTACCCCATCCAGATTCATGTGAGAGGGGAAGGTGCTCTTGCAAGATTTCGAT  
ATAGCGACCGGCGGCATCATCAATGCGCACCGCTTTGCCAAGTTTCGGCTGACTCGACACACTTGAAGCTCG  
TGATCCAGCTCGGCTTCGATAGCCAGCTCGACATCATCAGGCAGCTTGGTGCCATCGGCGGAGAAGAAT  
TGATGCCGTTGTGCTAGAAGGGGTTGTGGGAAGCGCTGATGACGATGCCAGCTTCGGCACGGAAAGTGCG  
AGTCAGGTAGGCAACCGCCGGCGTGGCATGGGTCCATCAGAAATGGCCTTGAGGCCCTGCCGACAGAGC  
CCCGCTTCCAGCGCGGATTCCAGCATGTAGCCGAGATGCGGGTATCTTTTCCAATCAGCACCTTTTTTGG  
TGCCCTTCTTGGAGAGCACCTTGC CGGACGCCAACCTAATTTTCAATAAAAATCAGGAGTGATCGGGTA  
TTCGCCAACCTTGCACGCACACCATCGGTACCGAAATACTTTCTTGCATTTGTCTGTTCTTTTATTAT  
CTGGAAATAAAATCTTGTCCCGTCATTGCCAGCCAACCGACGCGCAATGCGTCCATGGTCTCCCTTACAT  
CGTGTACCCTGATGATGCGAGCCCCATGCTGCATAACCGATAAGGGCGCATGCCAGACTGCCCGCCAGACG  
CTCATCCACCGGACGGCCAGCAAGTTGCCATATAGACTTTTCGCGACATCCCCACCAATAGCGGCAAG  
CCATAATCAAGCAACTCCTGTTGAGCCGCCAACAGCTGATAGTTGTGTGCGAGGGTCTTGCCAAAGCCAT  
ATCCCGGATCCAGCAACAGCTCTTACGCGGATCCCGACCGCCAGACAAGCCGCAATGCGCTCATCAAA  
AAAGGCGCAACCTCCCCGACAGATCGTCATAGTGGGGCTCGACCTGCATGGTTCTCGGCTGCCCTTGC  
ATATGCATCAGACAGACCGGAACCTGCGCTTACGCCGACGCTGCAGTGTCCAGGTGCTTGCAGTGGCC

GCACATCGTTGATCAGATGGGCACCCGCCTTGCAACCCCTCCGCATCACAGCCGCTTTGGAGGTATCGAG  
GGAGATCATCACATCCAGCTCACGGACCATCTGTTCCACGACAGGAATGACCCTGTCCAGCTCCTCCTGC  
TCGTTACACATCGGGCGCACCAGGGCGGGTTGACTCGCCACCGATGTCGATGAGGGTCGCACCGTCAGAGA  
CCATCTGGCGCGCATGGGCCATTGCCCGTTCAAACCTGGTTGAAATTACCGCCATCGGAGAAGGAGTCGGG  
CGTCACATTGAGGATCCCCATCACATGGGGACGATCGAGGGAGAGGCTGAGCCCCCTTGCTGGTTAACTGC  
ATTTTACATCCATCTGATAAAAGAAAAACCCCGGGCAAGCCCCGGGGTTTGAGAGTCACAATTTATTTGGC  
CGGGCGGTCGTTGGCTTTGTGCGATAGTGACATCCGCCACCGGTGCAGCCTCATCGGCAGGCTTGGCCTCG  
GCAGCCTCGGTGGAACCGCCTTGCGGGGTATCACCGTGCTCGTCATGCCAGTTGCTCGGAGCACGAACCT  
CGCGACGCGCCATCAGATCATCGATCTGTTTGGCGTCGATGGTCTCGTACTTCATCAGCGCATCTTTCAT  
GCTGTGCAACACGTCCATATTATCCAGCAGGATCTGCTTGGAACGGGCGTAGTTGCGGTGCGATGACCTGC  
TTGACCTCTGCATCGATCACCGGAGCTGTATCGTCGGACATGTGCTTGGCCTTGGCCATGCTCGGACCGA  
GGAACACTTCACCATCTTCTTCCGCGTAGAGCATCGGACCGAGACGCTCGGACATACCCCACTGGGTAC  
CATCTTGCCTGCAATGTGCGTGCCTCGCTCGATGTCGTTGGAAGCACCAGTAGAAACCTTCTCGGCACCG  
TAGATCAGCTCTTCTGCCAGACGACCGCCATACAGGCTGGAGATCATCGACTCCAGATGCTGCTTGGAGT  
GGCTCCAGCGATCCTGCTCCGGCAGATACATGGTACACCCAGCGCACGACCGCGCGGAATGATGGAGAC  
CTTGTAACCGGGTCATGATCCGGAACCAGACGACCAATGATGGCGTGACCGGCTTCATGATATGCAGTC  
ATCTCTTTCTCGGACTCTTTCATCACCATGGAGCGGCGTTCGCGACCCATCATGATCTTGTCTTGGCCT  
TCTCGAACTCGGCCATGGAGACCACTCGGCGGCTCTCACGAGCAGAGAAGAGGGCTGCTTCTGTTGACCAG  
GTTGGCCAAGTCCGCACCGGAGAAACCGGGGTACCACGGGCAATCAGCGCCGATTCACGTCATCCGCC  
AACGGAACCTTTCGCGATGTGCACTTTTCAGGATCTGCTCGCGACCACGACATCCGGCAGACCGACCACAA  
CCTGACGGTCGAAACCGCCCCGACGGAGCAGTGCCGGATCCAGTACGTCAGGACGGTTGGTTCGAGCGAT  
GACAATGATGCCTTCGTTGCCTTCAAAGCCATCCATCTCGACCAGCATCTGGTTAAGGGTCTGCTCACGT  
TCATCATGACCACCACCCAGACCGGCGCCACGCTGGCGACCGACCGCATCAATTTTCATCGATGAAGATGA  
TGCAGGGGGGAAGATTTCTTGGCCTGCTCGAACATGTACGTAACCGTGAGGCACCGACACCGACGAACAT  
CTCCACGAAATCGGAACCTGAGATGGTGAAGAACGGCACCTTGGCCTCGCCCCGCAATGGCCTTGGCCAGC  
AAGGTCTTACCGGTACCGGGAGGACCAACCAGCAGCACACCGGTGCGGATCTTGCCGCCAGTTTCTGGA  
ATTTGCTCGGGTCGCGCAGATAGTCGACCAGCTCCTTACCTCTTCTTGGCTTCATCGCAACCTGCAAC  
GTCAGCAAAGGTGGTCTTGATCTGATCTTTCGCTCATCAGGCGAGCCTTGCTCTTGCCAAACGACATGGCA  
CCTTTGCAACCGCGCCCTGCATCTGACGCATGAAGAAGACCCAGACACCGATCAGAAGCAGCATCGGGA  
ACCAGGAGATGAAGATAGAGGTCAACAGAGACGACTCTTCCGGCTTCTCGCCCATCACTTTGACATTGTG  
ATTGAGCATGTGCTTGAGCAGCTGGGGATCCGGCGCCGGGATGATGGTGGTGAATCGTTCACCAGTACGC  
TTGACGCCATTAATGACCTTACCGTCCATCCGCACTTACCGGATCTGCTCTTGGGTACCTCTTTAAACGA  
AGCTGGAATAGTCCAGCTGGCGACTGGTGGTATCGCTGGGGCTGAAGCTATTGAACACCGACATCAAAAC  
GACGGCGATGACCAGCCACAGGATTAAGTTTTTTCGCATGTCACTCAAATCAGTAACCTCGCAGACTGAC  
AGTTAACGATGAAGTTAGGGTACTACAGTTTTAAAACCGGTAGCCACAATGTAGACTTCCCCTGATCTGG  
CGCGGGATGAGTCTGGTTTACGAATTTTACAGCGGAGAAAAGTTTACGAATTTTATTGAGATAGGCATC  
AAAGCCCTCTCCCTGAAACACCTTCACTACGAAACTGCCGTCACTACGCAATACCTGATTGCACATGTCC  
AGCGCCAGCTCGACCAGATACATGGCGCGAGCCTGATCCACCTGCTGGGTACCGTTCATGTTGGGCGCCA  
TATCAGACATCACGACATCGACCTTGTCGGGACCCACTCGCTCCAGCAAAGCGCCGAGTACAGTTTCCCTC  
CCGAAAGTCCCCTTGCAGGAAATCGACACCAGCAATGGGATCCATCGGCAAAATGTACATGCGATGACG  
CGACCCGAATCACCAACCTGTTCAACCGGAACTGGGACCAACCACCGGGGGCAGTCCCAAATCCACTA  
CGGTCATGCCATGTTTTCAGCAAGCGATCCTTGGCCTGGATCTCGTCAATCTTGAAAACAGCACGAGAACG  
CAGGCCCATTTTGTGGGCTTTTTTTCAGTATTGATCGTCGAAATGTTCTTTTAAACCAGCGAGTTGAACGT  
GGGGAACGTTTTTTCTGGGTGATGATAATCGACTTTAAAAAACCAAGGGTTATTAGTATTAAGGGCCA  
AGTGGGGGTAGAATACGCCCTTTCAACCTGACTTATGAAGAAATTCGATGATTTCAACAATAAAACA  
GAAACGTACCTCAAGGGCCTTGCCCATAGCCTCAAGCCTGTCGTCCTGCTGGGTGAGCATGGTCTGACC  
GAAGGTGTAAGTGGCCGAGATCGATCTGGCACTGAACCATCACGAGCTGATCAAGGTTAAGGTTGCCTCTG  
AAGATCGCGAAATGAAACAACCTGGTTATGGATGCTATCGTCCGTGAAAACCGGTTCAATCAAGGTGCAAAG  
CATGGGTGATGTGCTGACCATTTATCGTCAAGCCAACGAACCCAAAATCCAGCTGCCCGCAAGTAAAAG  
GAAAGAGCATCGCTCTTCTTATTCCACTTCTTCCCGAGTCGCTTGCCAAAGTAGTCGCAAAGCCCTTA  
ACCTGCGATGAATACTTCCGGACACGCATTATGGCTCACCATCTTATCTGACCGACGATGAGCTGGCCA  
TGCTGCGGGACTTGGGGAGCAATCAGGACACCCATGTTCTGAGTGGTACCTCGATGCCCCATGCTTGG  
CTTGCTGCAAAAAGCCGAACACCTTGTACTCGAAGCCCGCTTCGCTGGCCATCAGCTGCGTTTTTCCCCTG  
AGCTTTACCCAAGGGGAAGATGGCTTCGTCGAGCCCCGCTTATCTGCACCGGTCATCAGGGAGCTGGGGT  
TTGCCAACCCGCGCGCCTGGCGTCTCACCCAAAAGCCAAGCTATGCAGCGAACTGGGCCTGTTTCAGGT  
ACTCAGCCTCTCCCTCAACGGCCTCATCGTGGAAAATTTGCCAATCGACATGGTGGCCGATACCCCATC  
AACGGCGAGCTCTGCATCGAGCAAGAGGACCTCTTCCACTGCTGGGACGACTGGTAAGGGCGCATCAAAG  
CCAATGCCGACCATGCCACCTGGGCACTGAGCTTTTTCAGATGAGCGAAAACAACATCGAACGGCTGCGCCA  
CTGGTTGTTTTCAGCGCCATCAGGACGCTTTTACCGAAGCGTATCTGTCTGATTTTTTATCAATAATCATA  
TAGATAAAGACAAACAGGGGAGCACCAGCCCCCTGTTTTCATCGTCTGTAGCATTCGCTTAGATATAAGC  
GACTTCCAGTACTTCGTATTCCACATCACCGCCCGGGCTTTCAGGATAGCGACATCGTCCACTTCCCTTG

CCAATCAGGGCGCGGGCAATGGGGGAGTTGACAGAGATGAGGTTCTGTTTGATATCAGCCTCATCGTCAC  
CCACGATGCGGTAACCACCTCTTCTCTGTCTCGCTCTTGAGCAAAGTCACAGTCGCGCCAAAAATAAC  
GCGGCCGTTGTTGGTCATCTTGGTGACATCGATCACCTGCGCATTGGAGAGCTTGGCTTCAATCTCCTGA  
ATGCGGCCCTTACAGAACCCTGCTGCTCGCGAGCGGCATGGTATTCGGCGTTTTCCTTCAGATCACCGT  
GCTCACGGGCATCGGCAATCGCTTCGATAATCTGGGGACGAAGCTCGGTCTTGAGATAATCGAGCTCTTC  
GCGCAGCTTCTCAGCGCCGGAACAGTCATCGGAGTATGATTCATAGTCGAAACCTGGGTGCTTGAAAA  
TAGAAACTGCGGCCATCTGCAAGGATGGCCGACGAATCGGTTCGGATGAGGCATCTTAATATGAAGCCA  
ACACAAAATCCACGCCAGCCCCCTGATGCAGATCCCACTTGCCTCATCGACATTCCTTCGCTTACTTCC  
CTTCCGGTACGGAATGGGGGCCGAAACGGTCGGTTGCCCTGCATGATGGCAATCTCCACCCGCGGATT  
CATCCGACGATTTTCCGGGTGGTATTGGGCACCAATGGCTGGGAATCCGCCATCCCTGCACCACAGT  
CGCCCTGATCAAAACCGGGGACCTTCAGCATCTGGTGCCGACCCGCCACCGCCCTTGGCAGCACAAT  
CCCAGTTGGACTGGAACAGCTCATCTTCGGTCGCCACGTTGTGCGGTGTGACCGGAGATGGTGATTTACC  
CGGCACATCCTTGAGCAGGGTCGCGACCTTGCGAATGACCGGCCAAAACTGTGGCTGCAGAAATGCCGAA  
CCGGCCGGGAAAGATGCTTTTTTCCCTGATCCGGATGATGATCTGCTGGCCCAGCGCCTCAATTTTCGATGG  
CGCCATCCTGGATCTGATCTTTTTCATCTGCTCTGCGAGGGCTTTGGCCAGGGTATTGGACTGTTCTTGC  
CTTCTTCGCATCCTGCGCGGTATCGCCCCCGTCTGCTTGCCATCACTCTTGTCTGACCACCGGCCCTGA  
TCCGACTCGCCGGGCAGAACTCCAGTTCTGTCTGGGTGAGATCGATAGTCTGCTGCATCACAGTATCAA  
TTGGCGTGGGTTCCGGGCGACCGGGCCTGAACTCCTGGGCAATCACCGAGGTTCCCTTGGGAATATCTTT  
CACCTCAAGGATGTTCTGTACCCCGAATGCCTTGTCCATGGAACCGGCTATCTGTTTGAACCTTCTGCACA  
TCCATCTCGGCAAAGGAGAGCAACAGCACGAAGAAGCACATCAACAGCGACATCAGGTCGGCAAAGGTTT  
CCATGTAACCAGGGAGACCTGGTGGCGGGCACTTGCATCAGACATAGCGCCCCCTATTCGGTGCCGGTA  
TTACGTTTGGACTGGTTTTCAGATAGTTTTTGCAGCATGGACTGGATCACCCGCGGGTTCTGGCCATCCTGAA  
TCCCCATAATGGCATCAAGGATCAGGGTACGACTGAGCTTCTCCTCCCCGCTGCGCAGCTCCAGCTTGT  
GGCAATCGGGATCGCCAACATATTGGCCTCTATCGCACCGTACAGGGTGGTAAGCAAGGCCACCGCCATC  
GCCGGCCCCGATCGACTTGGGGTCACTCATGTTGGCCAGCATGGCCACCAGACCCACCAACGTACCTATCA  
TCCCCATGGCAGGGCCAGATCCCCAAGGGTACGGAAGACCTTGATGGCAATGACATGGCGCTCGGCTGT  
CAGGTCGATATCTTTTCCATCACGGCGCGCACCACTTCGGCATCGTGACCATCCACCAGCATGTCGATC  
CCTTTTTTTCATAAATGCATTTGGGATCTCTGCGGCTCCAGCGCAAGAAAGCCCCCTTTGGCAGCGGCT  
CAGCGAGTTCAACGGCTTTGGTAATCAGGCTTCAAGCTTGTCTCCCTGTACATAAAGGCTTTGCCCCG  
CACCTTGAATGCCATCAGGAACGGCCAAAGGTTGAACTTCATCATGGCGATGAAGATTGAGCCCAATACA  
GTGATGTAGACCGATGGCATATCAACATACATGCTCATGGGGCCACCCAGCAGCATGCCGTACACCACCA  
CCCCGAAACCCAGCACTATCCCTATCAGACTGCCTAGATCCACGTCCCTACTCCTGTCACCGGTTCTTAT  
GTCTATTTATAGTCTGTTGAATTTTCTGCTATTGCGACCCATGCGGCAAGCATGCATCCACTGAGAATGA  
TGGCTCATTATCGGCCAGTTTAGCGAGAGTTTGGAGGGGCAATGCTTTTTCTGCCTCCCCCTGTGGACGG  
TCGATGTTAATAATAAGCCGTTTTTTTTCAATCCCCGAGGATGGACATGGCCAGTAAAAAATCGACCGTCT  
GAGTTTTGATGCCACTCTGGAAGAGCTGGAAACCATCGTTTATCAGCTGGAACAAGGTTCCCTACCCCTG  
GAAGAGGCACTCAAGCAGTTTCGAGCAGGGCGTTCATCTGGTTCGGGCCGTCAGCAGAAGCTGGAACCTG  
CCGAACAGAAGATCCAGATCCTGCTCAGTCAAGCCGATGGCAGTGATCAGCTCGCCCCCTTCCAGCCAGA  
ACAAGGAGAGGAGTGAGTGGCGCTGGACCATTTTTTCCCGTCTGCATCGTCAGCGTATTGACGACTGTCTG  
TCAGCACAACCTTGAATCCTTGGCCGCCATGGCGCCACGCTGCACGATGCCATGAGTTATGGCCTGCTGC  
TGGGCGGCAAGCGGGTTTCGCCCCGTTCTGGTCTACGCGGTTCGGCGAGATGCTGGGCGTCAAGAGCGAACT  
GCTGGATGGCCCCGCGGCTGCCGTGGAGTGCATCCACGCTACTCCCTGCTGCACGATGACCTGCCCGCC  
ATGGATAACGACGACTTGGCTCGTGGTCAGCCAACCGTTTACAAGGCGTTTACGAAGGAACCGCCATTC  
TGGCCGGTGCATGCGCTGCAGACCCTGGCGTTCCTCATCTGGCCGATCACCCATGCCGACTCCTTGAT  
GGCCAACCGGGTGCAGGATGCTGAGTACCCTCGCCGCGCTCCGGCTATCTCGGTATGTTGGCGGCCAG  
GCGCTGGATCTGCAGGCCGAAGGGCGCCAGATACGCTTTCGCGAACTGGAGCAGGTACACCCGCCACAAGA  
CCGGTGCCTGATTGAATGCGCCGTGGCGCTCGCGCCCTGTGCAAAGCCGATGTCGATGACGCCACGCT  
GGCTGCCCTGCAAACCTATGCCGCCGCGATTGGCCTCGCCTTTTTCAGGTGCAGGATGACATCCTCGACATC  
ACAGGTGATACCGCCACCTTGGGCAAGCCGCAAGGTTTCTGACCTGGCGCTGGAAAAAGTACCTATCCGG  
CCCTGCTCGGACTCGAAAATGCCCGTGGAGTGGCTCGCGAACTGCATGGGAAAGCCTTAACAGCCCTGCA  
ATCCTTGGCCTACAATACCGACATTCTGGAAGCGTTTGGCGATTACATCATCGAGCGAACCCACTAAACG  
CTGGATAACAGTAACAATATGAGCGTTGATATTAGCAATTTCCCAACCTGGCCCTCGCGGACACTCCGG  
TCGAGCTGCGTTCTTGGCCAAAGATCGGCTGCCGGTGTGTGCAACGAGCTGCGCGAATATCTGCTGCG  
CTCTGTGACCCGCTCCAGCGGACACTTTGCCTCCGGTCTCGGTACGGTTCGAACTGACCGTGGCCCTGCAC  
TACGTCTACAACACCCCGTTTCGATCGGCTGATCTGGGACGTGGGCCATCAGGCTATCCCCACAAGATCC  
TGACCGGGCGCCGTGATCAGATCCATAACCATCCGGCAGAAGGATGGCTGCACCCCTTCCCTGGCGCGG  
CGAAAGCGAGTACGACGTGCTCTCCGTGGCCACTCCAGCACCTCCATCGGTGCGGCGCTTGGCATGGCC  
GTCGCGCCGAGAGCGAAGGGCTGGGTGCGAAAGTTCGAGTGCATCGGTGATGGTGCCATTACCGCAG  
GGATGGCCTTTGAAGCGCTCAACCACGCCGGCGATGTTCAACAAGGACATGCTGGTGATCCTCAACGACAA  
CGAGATGTCCATCTCCGAGAATGTGCGCGCGCTCAACAACCATCTGGCCCGGGTTCATGTCGGCAAGCTC  
TACACCACCATCCGCGAAGGGCGCAAGAAGGTTGCTGGCCGGTCTGCCCGGGTCAAGGAGCTGGCCAAGC

GGGCCGAAGAGCACCTCAAGGGAATGGTGGTGCCCGGCACCCTGTTTCGAGGAGTTCGGCTTCAACTATAT  
CGGCCCCATCGACGGTACAGATATCGAGGCGCTGGTTCGAGACCCTGCGCAACATGCGCAACCTCAAGGGC  
CCGCAGCTGCTGCACGTCAAGACCAAGAAGGGCAAGGGTTACGAGCCGGCGGAGAAAGACCCCATCGGTT  
ATCACGCCGTGCCCAAGTTCAATCCTGACGATTGCTCCCTGCCCAAGGCGAGCGGTGCCAAACCCACCTT  
CTCCGCCATCTTTGGCCAGTGGCTGTGCGACATGGCGGCCAAAGACGAGAAGCTGGTTCGGTATCACCCCC  
GCCATGCGCGAAGGCTCGGGGCTGGTAAAAATTCAGCCAGCAATATCCGGATCGCTACTTTCGATGTGGCCA  
TTGCAGAGCAGCATGCGGTCACTTTTCGCCGCGGGTCTTGCCATCGCCGACAAGAAGCCGGTGGTTCGCCAT  
CTATTCGAGCTTCTGACGCGCCTACGATCAGGTGATCCACGACGTAGCGCTGCAAGATCTGCCGGTG  
CTATTCGCCATCGACCGGGCCGGTCTGGTGGGCGCCGATGGCCCCACCATCAGGGGGCGTTCGACATCA  
GCTTCTCTGCGCACCGTGCCCAACATGGTGGTGTGATGACGCCATCTGACGAGAACGAGTGCCGCCAGATGCT  
CTATACCGGCTATCTCCATCAGGGCCCTGCCGAGTACGCTATCCGCGCGGCAGCAGTCTGAGCGATGCT  
CCCATCTCGTCAGAGATGACAGGCGCTGGAGCTTGCAAGGGGCGTATCCTGCGAGAGGGCAAAGGTACAG  
CTATTCTGGCCTTTGGTACTCTGCTGCACCACGCGAAAAGCGGCCGAGAGGCACTGGATGCCACTCTGGT  
GGACATGCGCTTCGTCAAACCGATGGATGAGTCACTGGTGCTATCACTGGCGGCCAGCCACGATCACTTC  
GTCACCATCGAAGACAACGCCATCATGGGCGGCGCCGGTTCAGCGGTGAACGAACTGCTGATGCGCAGCA  
AACAGTGCAAGCCGGTGTCAACCTCGGCCGTCGCCGATCGCTTCGTCGAAACAGGGCACCCAGCAGGAGAT  
CTATGCCAGCTCGGTCTGGACGATGACGGCATCCAGCGCAGCATCGAAAAGCTGGCTGCAAGCCTGATAA  
CGTGTTAACGCTATCAAACAAAAGAAGGGCGCCTCACTGGCGCCCTTCTTATTTTTCGCTTTCTGACTTGG  
ATTACCCTTTGTAGATCTTGGGGTTAAACACATCCCGCAACCAGTCGCCAGCAGGTTGATGACCAGCAC  
CAGCACCACCAGACAGATGCCCGGGAAGGCGGTGATCCACCAAGAGCCGGAGAAGATGTAGTTGAAGCCG  
ACGCTGATAAGCGAACCAGCGAGGGGCTGATCAACCGGCATCCCCAGACCAGGAAGGAGAGCGCCGCT  
CGCTCATGATGGCGTTGGCCACCTGCACGGTGGAGATCACCAGAATGGGCGACAGGCAGTTGGGCAGAAT  
GTGGCGGAACATGATGCGCGGGGCGCGGAAACCCATCACCTTGGCCGCTTCCACATACTCCTTCTTCTTC  
TCCGCCAGCACAGAGGGCGCGCACAGTACGGGCGTACTGCGGCCACTCGGGCATAACCGATGATCACCACCA  
GCATCATGATGGCAAACCTTCAGTAAAACTCGGAGCCAAATGTTGCCTGAAAAGATAGCGGAGATGATGAT  
CGCCACCATCATGGTGGAGAACGACAGCTGCACATCGGCAAAGCGCATCAGCAGGTTGTCGATACGACCA  
CCGAAATAACCGCAATCAGACCGATGACGATAACGAGCACCAGCTGCAACGCCACCAGCAAACAGGGCCGA  
TGGTGAAGGAGATACGGGCGCCATAGAGAATGGTGGTCCGATATCCCGCCCTGGTTGTCGTTACCGAG  
CCAGAACCGCTCTCGCCGCTTCGAGCCAGGAGGGGCAACTCGGCATCCATCAGTCAAAAACGGTTC  
TGGTTCATAGACGTTGTGCGGGGCGAGCCAGGGCGCCAGCAGCGCCGCGCAGCAAAAATACCACGAACACCG  
CAAAGCTGAACATTGCTACCTTGTCCCGCAGGAAGTAGTAGACGATGTCTGAGTTCTTGAATCGTGCCCA  
ACGGCTTGGGCTTGCAGTTACAGCGTTACTCATGCTTACCCTTGGCAGTCAGGTTAACGGTTCGGGTTAA  
TCAACCCGTAGAGCAGGTCGACCAGGGTATTTGGTACCACGAAGATCAGTCCCACGAAGATGACGTAGGC  
GGTGTAGAGGGGCGTATCGACCCGGTGGATCGCTCAAGGAACAGGAAGCCGGTGCCTGGCCACTGGAAC  
ACGCTCTCGGTGAGAATGGTGTAGGCCACCATGGTGCCGATCTGCACCCCGCCGACGGTAATGACCGGCA  
GCATGGTGTCTTCAGAGCGTGTGATAGTAGACCTTGTGTGTGTCAGCCCTTGGCGCGGGCGAATTT  
GACGTACTCGGAGGAGAGCTGCTCCAGCATCTCGGAGCGCACCAGCCGGATAAACAGCGGCAACATGATG  
GAAGAGAGGGACACCGCCGCGCAGGATCAGATGCAGGATGCCATCCCAGGTAAAGAAGCCGACTCCCAGC  
CCAGCAGGTTACGGGTCTCGCCGCGGCCATAGGCAGGCAGCCAGCCAGCTGGATGGAGAAGAGGTACAT  
CAGCATGATGGCGGTCAAAAATACCGGGATCGAGATAACCGATACTGCTCCCTGCCATGATGATTTTGGTG  
GGAATGCTGCGCGGGGCGGATCGCCGAATAGACACCGAGTGGAAATGGAGACCACCACGATGATGAGCGCG  
CGGCAAACACCAGCTCAAGGGTTCGCCACCAGCTTGTTCGAGGATCACCTCGAGAGCGGGTTCGCTTGAAGAA  
ATAGGAGGTGCCAAATCCCCATGCACCGCATTTTTCAGAAAAGCGGCTGTATTTGATGAGGAAGGGATCG  
TTAAGGCCCATCTTCTCGCGCAACTCGTGACGCTGGGCTTCGGAGACGGATTGTCCACCAGCTCGCGCA  
ACGGGTCAACCCAGGTTATCCTGGATGGAGAAGGCGACACAGGCTGATGACGAACATCACTATCACGGCCTG  
ATAGAACCCTTTCAGCAGGAATGTAACATGCTTGTCTTCTACGTGGCTGTGTCGTGGCACAGGCTTCT  
TGTTAGTGGGCGGAGTGGCCAGCAGACCACCCGCCCCGCTCCTTCTTAGCGCTTCTTACTTGGCTGAC  
CACCAGGTCAACCCAGGTAAGGGAAGTTTCATCACGTTGACCACCGGCTTGATATCGACGTTCTTCTTGGCG  
CCATAGGCCAGATCTTCCAGTGAACCGGCACGTAGGCAGCATCTTCGATCAGCATGGCTTCGACCTTCT  
TGAGCATCTCGGCACGCTTGGCCGGATCGGTCTCGGCGTTGGCATCCATCACCAGCTTGTGAGCTTCGGC  
GTTGGCGTAACCGGCGCAGTTGACTGGCCATAACGGTCTTGGCGTCTTGGTGAAGGTGAGGAACCTCG  
AAGAAGTTCGCGGTATCTTCGGTGTGCGAGTGCCAGCCGATCAGCTGCATGTCTGCGGCGCACTTGTCAA  
ACTCGGGCCAGTACTGGGCCACCGGCATGGTCTTCAGATCCACCTTGTGATGTTGATCTTGGCCAGCATGGC  
GGAGACAGCCTGGGCAATCTTGACGTGCTTACGTAGCGGGCAGCCGGGAGATGAAGGTGATCTTGAAG  
CCTTCTCGTAACCGGCTCCTTCATCAGCTCCTTGGCCTTGGCCAGATCATACTGGGGCACAGCGCCT  
CGTTGTGACCGGCATAGCCTTTTCGGGCTCAGCTGACCAGCAGGGGTACCGAAGCCCTTGTGATCTTCTC  
GACGATAACCCACCTGGTTGATGGCGTAGTTGATCGCCTGACGCACTCGCTTGTCTTTCAGTGGCGGGTTG  
GTGTTCTGGTTTCAGCTCGATGATGATGGCGCGGGTACCGGACAGGGTGACCAGCTGGGAGTCTTACCAT  
TCTTTCACGCGCTCCAGATCGTTTCGGCGCAACCGGATAGATCATGTCCACGTGCGCACCCAGCAGGGCTGC  
AACACGGGTGCGATCTTCTTGTGATCGGCACCACGGTCAGGTTCTCGACGTTACCCTTGGAGGCTTTATCC  
CAGTAGTTGGCGTTGCGGGCATAATCCAGCTTACACCCCTGCTCGCGGAACCTTGACGGTGAACGGGCCAG



TACCGGAGACGTGGGTAGAGGCATAGGAGTCGCCGTTTTTACGATCTCGGCCTTGTCTTTGCCCGCTTC  
GGTCTTGCCGGTATAGAACTTGGAGTCCATCGGGAAGATGTAGGTGACGGTCTGCAGCACCAGCGGGAAC  
GGCTTGGCGGTGACGAGATCCACGGTGTAGTCATCGACCTTCTTCACTTCGCTGATGGGATCGAAGATCG  
CCTTAAAGTCGACGGAGGATTTTCAGGCGGTTGACGGTCCACACCACGTCGTCGGCGGTGAAGTCGTTACC  
GGAGTGGAACTTGACCCCTTTGCGCAGGTGGAAGCGGACGGTCTTGTTCATCGACACGCTCGAACTTCTCG  
GCCAGACGGGGCTCGAACTGCAGGTCTTGGGTGTAACGCATCAGGGGATCGAATACCAGGTGCGACATCT  
CCAGGGTCTGACCGGAGAGCTGCTCCTGCGGATCCAGCGAAGTGGCGTCAGAAGCGACACCCACCTTGAT  
ATCAGCGGCTGAGACACTGAAGGCGAAACCGGCGGCAACAGCGCCAGGGCAATCTTGGACAATCCTTTTC  
TTCATCTTGTCTCCATGCTTTTGGCTTTCTTATGACACTTTTTTTGACAAGCAGACCCGGCGCACCGGCG  
CTCTCCTAGCTTGCAGATTTCCAGCCCCCTCGCGGGACATTCCTTGAACCTCCGGCATGAGGGAGATCAGCT  
TGCGGCTGTACTCATGCTCGGCATTGGTAAAGAGTTTCTCGGTCTCGGCCACCTCCACCAGATGACCGTG  
CTGCATCACCCCGATGCGGTCGCACATCTGGCGGATCACCGGCAGATCGTGGCTGATAAACAGCATGGTG  
AGCTTGAGCTCCTGCTGCAGATCCTTGAGCAGGTTGAGGATCTGGGCTGCACCGACACATCCAGCGCCG  
AGGTGCGCTCGTGCAGATGAGGAAGCGCGGGCAGTGGCCAGGGCGCGGGCAATGGAGATACGCTGGCG  
CTGACCGCCTGAGAACTCGTGGGGATACTTGACCCCGGCACCACGACCGAGACCCACGTGATCCAGCAGA  
TCCCCGACAATCCCCTCAATCTGGCTCTCGCTGCTCGCCAGCTGATGGAAGCGGATCGGCTCGGCAATGA  
TGTCGCGCACCTTCATCCGCGGTTTCATCGACGAATAGGGGTTCTGGAACACCATCTGCATCTGGCGACG  
CAGCGGGCGACGCTCGCGCTCGCTCTTGAGAGCGGTGAGATCGATCCCCTCGAAGAAAATCTTGCCGGTA  
TCAGGCGGATAGAGACCGGTGATAGCACGGGCAATGGTCGATTTACCGGAGCCCGACTCCCCACCAGAC  
CGAAGGTTTACCCTCGAAGATCTCGAAGCTGATGTTGTTGCAGGCGGTACATACTGGCGGCGGCTCGG  
GAAGATGGAGTCCTTGGTGACGAACCTTCAGATCGACGTTCTCCACCCGCGAGCAGCGCCCCCTCATAGGCA  
CGCTCGTCTGACTCTGGCCGAGCCAGTGGGTCTTGAGGTCGATATTGGTATCCGGCGCACTGGCATCCT  
CGATATAGGAGACCAGCGGGAAGCGCACCCAGCTTCACATCGGAACGGGGGACCGCCGAGATGAGGCTGCG  
GGTATAGGGGTGATTGGGGCTGCCAGCACCTGTTCCGGTCAGGCCGAACTCCACCAGATCGCCGCGATAC  
ATCACCGCCACCTTGTTCGGTAACTTGGAGACCACGCCCATGTCGTGGGTACCAGCATGCAGCCACCT  
GACGCTCTTTGCAGAGGGCGCGGATAAGCTGGAGGATCTGATCCTGAATGGAGACGTCACGCGCGTGGT  
CGGCTCGAGCGCATGATCAGCTCCGGATCGCAGGAGAGCGCGATGGCGATAACCACCCGCTGACGCATG  
CCACCCTGATACCTGGTTCGGGTACTGCTTGTGATGCGAGGTCGCGCTCCGGTGCAGGAAATACCACCGCCCATCA  
GCTCCAATGCCTTGGCAAAAGCGGCTTCGCGAGAGAGTCCGGTATTGGCCAGAATGGTCTCCACCACGCTG  
ATGCTCAACGGTGAACAGCGGTTGAGGGAGGTCATGGGGTCTGGAAGATGAACCCGATACGGGAGCCA  
CGGATGGCCCGCATCTCATTCTGGCTCTTGCCGAGATCAGCTCGCCATTGAGATAGATATCACCACGGG  
CGATGCGACCCGCGGGCTCAGGAGATCGATAACGGCGTTGCCGATGGTGGACTTGCCGGCGCCGGATTC  
ACCGACCACCCCGACAATCTCACCTTTTCGATAGAGAAAAGAGATCCTTCACCGCGGCCAGCACCCCG  
TAGCGGGAGGGGTACTCGATCCGCAAGTTCTTTACTTCGAGCAAGGACATGTTTACCTCTGCGGGGGACA  
TCCGTCCCAAATAAATTCGTCGTAATCAGCCGAGATGCCGTTGTTACCTTGGGCAATATTTGCTCAA  
TCCATGAGGCAGCTAAACCAGCGATCCGGGCGGGTTTTTTGCATTTTTTTTGAATAACCCGCGAGTAACT  
TAGACGGTTTTGACCACGGGTGTAATGATTGAGTTATACAATTCGCAATGTTTTTGTGCAGATAACCACC  
AATTCGGCAGAGATAAATGATGATTTTCATCACACAAATGGCCGGTGCCTCCGTACATCTATTGGTATCA  
TTACTTTAATTTCAACAACAACGCAACAAGCAGCATTATCACTATTTCCAAAACAATCACCAGCCCCGA  
ATGAGTAGTGAATATTTATGTGAAATGGATGATAAACGGCAGCATATGCCGATGAATGAAAATTAAGCAG  
ATATAAATCGGGGGATGCCAGAACGGTCATCCCCGGAAGGTGGCTCTCAACCGAGCCAGAATGCCAGTA  
ATTGCATACAAAACAGGGCGAACAGGCCGGCGATCAGATCGTCCAGCATGATGCCAGGCCACCGTGGAT  
CCGGCGATCAAACCAGGAGATGGGCCAGGGCTTGAGCACGTCAAACAACCGGAACAGCGCAAAGCCCGCC  
ACCACCCACTCCCAACCGGCTGGCGCGGGCGATCATGGTGCAGCCAAAACCGATCACCTCGTCCAGACGA  
TGGCACCCGTGATCCGGCATGCCGATGGCATCGGTGGCGCTCTGGCAGATACGAATACCAGTACAAAACC  
CACCGCCAGCAAGGCATGAACCAGTGGGTCCGACCCAGCTCACCAGCAGATAGAGCGGAATGGCCCGC  
AGGGTGCCCATGGTGCCTCGGCTTTGGGGCTGAGACCGGAACCAACCCACCGCCAAAAAATGAAGCG  
GATTTTTTTCAGATCCAGTCTGTGTCAGCTCGGGCTTTATCCTGAACAAACTCATGCGAAGTGATCCCACCT  
TTCAGTTGCAACTCGACCGCTTGGTGCACCACGAGGTAGTCGATGCCCGGCTCGCCCGCCACGATGCGGC  
CGATGCGGCTGAACTTGACCCCGCTGTGAGCCAGCGCCGATCGAGCGCGCCGCGATGCTCCTCCGGTAC  
GGTAAAGCAGAGCTCGTAGTCATCGCCACCGGCCAGCGCCAGTTGCCACGCCCTCTGCTCGCTCACCGCA  
TCCTGCAGCACCGCGAGAGTGGCAGCAGATCGAGATCGATCTGGGCCCCGACACCCGAGGCCCTTGAGGA  
TATGGCCGAGATCCGATGCCAGCCATCGGAGAGATCCAACGCACTACCCGCCAGCCCGCGCAGCGCCTG  
ACCGGCCAGAATGCGGGGATGGGGGTGGTCGAGCCGTGGCAGCACCCGAGCCAGCTGGTTCTCGTTGAGG  
GTGCGTTTTGCCAGCAGGTGGGAAAGCGCCAGCGCGCATCCCCAAAGTGCCTGGTACATAGATGCCGT  
CACCGACTTTGGCACCGCTGCGCATCAGAGCGCGCCCGGAGCAACGATCCCTTCACCGAGATGGTGT  
GGAGAGCGGCCCCGCGGGTTCATGTCTCCGCCACCAGCGCCACATTTGTAGTACTCTGCCAGCTCCAGAAAC  
CCTTCGGCAAAACCCGGCGACCCAACCTTCGTTGATGGCAGGCAGAGTCAGCGCCAGCGACACCCAGCGCG  
GCTCGGCCCCCATGGCGGCGAGATCGGAGAGATTGACCGCCAGCGCCTTGTAGCCGAGATCCACCGGATC  
CATGTGCGGAAAGAAGTGTACCGCTCACCAGAGTGTCCGGTGTCCACCGCAGTTGGGTATCGGGGGGCG  
AGGGTCAGCAGGGCACAGTCATCTCAGGGCCATCACCACGTCCTTGCGGGCGTGGGGGACCTTGAAGT

ACTTATCAATCAGCTCAAATTCACCCATACAGTAAAAAGCCAGCAATAAGCTGGCTCCTCTCTTAGATGC  
TGACGGACAGCAGGATCAACGCTTGTTCAGCGACTTGATCACCTGTCCAGTACACCGTTGACAAAACCTTG  
TGGCTGTCATCGGCAGCAAAAGCTTTGGCCAGCTCGATCGCTTCGTTGATGACCACGCGCGGGTACAT  
CATCACGACGGGTGAGCTCGTAGGTCGCCAGACGAGGATCGCCTTGCCACCATGTCCACCTCTCCAG  
CGGACGGGAGAGGAAAGGTGCAAACACCTTGTCCAGCTCGCTGCAGTGGAGGGCTACCCCGAACAGCAGA  
TCGCGGAAATAGTTTCAAGTCTACACCTTGGTGTCTGATCGATCTTGAAGTGTCTTTCGATGTCACCCA  
CGTTAGCCTTGGTTCATCTGCCACTGGTAGATGGCCTGGGTGGCGCAATGGCGGGCTTTACGGCGCTCGGA  
CGGTTTCAATGTACTTCTCCTCGTTACACGTCCAGTCTTTTTCAGGACGTTGATCATTTTCGAGCGCTGCCA  
GTGCAGCCTCTGCACCTTGTACCCGCCTTGGTACCTGCACGCTCGATGGCTTGTTCATGTTTTTTCAGT  
GGTCAACACCGAAGGCAACGGGAATTTTCATATCCATCATTACCTGGGCCATGCCCTTGCTGTTCTCG  
TTTTGCCACCAGTCAAGTGGTAGGTGCCGCCAGGATGACAGTACCGACCGCCACGATGGCGTGTATTT  
GACCACCTTGGCCAGCTTCTTGTATGACCAATGGCATTTCACCCGCGCCCGGCACCTTTTACCAGTGTGAG  
GTTGCTGTCTGCACCTTGACCTTGACGCTTCAGTACGTCCACCGCGCGTTTACCAGACTGTGCTTGATG  
AAGCTGTTGAAACGGGCAACAACAATAGCAACGCGCGCCTCAGGAGCGCGATATTTTCTTCGATAACCT  
TCATTGGAAATCCTGTATCTGTGCAATCAAAAAGGGCCGGAGTCAAAAAGTGCAGCACATTTAGCACAAACAG  
ACCCACGACAAAAACTAGCTTCATAACTCCGACAAAATTCATCTATTAACTTTTTTCACAGCCAGCCAAT  
AAGACCCATAATACTCCCCCCCCCACAACCGCATCGTTCAGTGCAGTAAAAAATAAAACACACTGAAA  
GGAGTTCGAAATGTTGTATTTAAAACGTGCGGCATTTGATATCTGCAATCATCGCAGCTATATCGCCTCAC  
GCAAATAGCACACCACGCATTATTGGCGGCAGTGGTACTACCGCTCCAAGCTGGATGGTTGCCATTGGGG  
AAAATGTTAACGGAACATGGTTCAACTACTGTGGCGGTACTCTTATCGATCGTGAGTGGGTGCTCACAGC  
AGCCCATGCGTAGAAAACCCGCAAGTAGGCAAGATGGAAGTCTCATCGGCGTAACTGACTTGAGCAAA  
TCCCATCAACGGACTTCGATTGATCAAGTTTTGATGAATACCGAATATCTGGTCAATCGCCTGAAATCCC  
TCGGTTTTGATATTTCAACCTTTGAAAAAGATATTGCCCTGCTGCACCTTGCCAACACCCACAGCCAATGC  
TCCTATCACTGTGGCGCCATTAATAACAAAAGACACATGGGGTGGGCCAACTCAACTACGAACCTACGGT  
TATGGCGGCATCAATCCGAGGCCACTATTGACAGTCCAGTACTGCAGACTATTGACCTCCCTTATCAAG  
GCGACAGGGACAGATGGTATGGAGACACAACCTGAGCCATATCTTTGCCGGGACAGCCGTGATGCAGGA  
CTCCTGCAAGGCGATAGCGGGGGGCCATTGGTTTATATGGGACAGCTGGTCCGCATCACTAGCTATGGG  
GCCTTTCCATGTGCTTCCGGAGCCGAGGGGATACACTTATGCACCTGCTTTGGCTGATGGATGGATAAACG  
AACAAAAACACAACATTACCATTACATCACTACCGGACTGAATGTTCCGGCAAAATCAGAGCCGCTGGGC  
AGAATATAGACTAGTCAACCCGACCATGTTTACGCGCAACCTGAGTGATCTGGTAACTACTGCACCTGGA  
ATAGCCAATAACTGTAATGTTGAACTAAAACCGGGCCAAGATTGCACAATTCGCGTTTCGTTTCGATGGCA  
AATACGCTGTTGACTCTATTTCGTGCCGAAATCATTTAGTATGAAAAGTACCATTGCTGGACGAGCTTCAAC  
ACTTGAAGCAGCACTTATAGGTATCACAACAAAAGAAACCAGCCCCATCCCTGAACCGACACCGCAA  
CCCGCCCAACCTCCCAGCCGACAACCACATCAGGTAGTGGCGGTGGCGGCGGTGGTTCTATCGGTCTAG  
CAGCCCTGTTACTAATAACCAATAGCCTGGCTGCGGCGTTCGCGTTGAAACCAACGAAAAAAGATGACGC  
CATGGCGTCATCTTTTTTATCCTACAAAGATTAATTACTCGCCGATGTACTCAACCACTTCCAGACCGAA  
ACCACCGAGGGCATGGTACTTCTTCGGTGGAGCTCAACAGGCGCATCTTGCTTACGCCAAGGGCCTTGAGG  
ATCTGGGAACCCACACCAACCCGGCGGAGGTGCCCTGCCACTTGGCTCCTTCCGGTGCACACCCCTTGT  
CGGCGGCTTCAAACCTTGACCCTAGCCAGCAGCTCGGCGCCATGGGATTCGCCCCCAAAATCACCAA  
CACGCCGCCCTCGTCAGCGATGCGGGCCATGGATTTGGGCAGTGGCCAGCTTCGGGGTGCATGGCGGTGCG  
GTCAGCAGCAGATCGCTCAGCACATCGTGCAGATGAACCCGACCCAGCGTCCGGTGGTCCGGCCTGTACCT  
CACCTTTTTTCAGGGCGAAGTGAACCTGATTGTGCGATGGTGTGCGGGAAGGTGATGAGGTGCAACTCGCC  
AAACTCGGTGGGCAGCTTGCACCTCGGCCACTTCTCGACCGTGGTCTCGTGCTGGTTGCGGTACTCGATA  
AGGTCCGGCGATGGTGGCAGCTTGTGATGCCGTGCTCCTCGGCGAACACCTCCAGATCCGGACGGCGCGCA  
TGGTGCCATCTTCGTTGAGGATCTCGACGATGACGGCCGAGGCTCGAAACCAGCCAGACGGGCCAGATC  
GCAACCCGCTTCGGTGTGACCCGCGGGTTCAGCAGCCGCCATCCTGTGCCATCAGCGGGAAGATGTGG  
CCCGGCTGCACCAGATCGGCCGCTTGGCATTGGGCGCCACAGCCGCTGCACGGTCCACCGCACGATCGG  
CGGCGGAGATACTGTGGTACCCCTTCAGCCGCTCGATGGAGACGGTAAAGGCGGTGGAGAACTGGGC  
ATTGTTGCGATCCACCATCAGCGGCAGCGCCAATTGCTTGCAGCGATCCCGGGTCCAGGTCCAGGCAGATG  
AGGCCACGGCCGTAGCGGGCCATGAAGTTGATATCCTCCGGACGGACGCAGGAGGCGGCCATGATGAGGT  
CCCCTTCGTTCTCCCTGTCTTCGTATCCATCAGGATCACCATCTTGCCAGCCTTGATGTCCGCAATGAT  
TTCCTGGGTTGTGCTCAGCGCCATGGGCTACTCCATCAGTGTGCTTGGGGTTGAGCCCGCAGGCTCAAC  
GCAAATGCGTGTGTATGTTGCTCTAGATTGGGGCTAGCGGCTCCATTTCAATCAGAGCGGGATCACAGAA  
AATCGTTTTTGGTGGGCCGATATAGCGCACACCGTCAGAGAAAACCGGCTTGGCCAGCGTCTCCATGGTC  
AGGGTCCAGGGCGCTGCTCTCCTGACTTTTCCCCATCATCAGCCGCTCCAGATAGCGGGCGATCTGATCCA  
CCTCGAGGTTGACCTTGTGACCCGGCTTCCAGCTGGCGATGGTGGTCTCCTGCGCGGTGTGGGGCACGAT  
AGTCAGACGGAAAAGGTCCCCCTGCACCCGCTTACGGTGGAGGCTGATGCCATCCACCGCAATGGAGCCT  
TTCTCGGCGATGTAGCGGGAGAGTTCCCCCGGCGCCTTGTATCCAGTACTCGATGGCGCGGCGCTGCTGG  
AGACGCTTTTACCTCCCCTACCCCATCCACATGGCCGGAGACCAGATGGCCCGGAGGCGGGAGGTGGG  
CATCAGCGCCTTCTCGAGGTTGACCCGATCGCCACTCTGGCGGCGGCAAAACCGGTACGGGAGAGGGTT  
TCCAGCGACACGTGGCGATATAACTCTTGTGCGCCAGCGCCACCACGGTGGAGCAGACCGCTTGGTGG

CGATGGAGTCGCCAGTTTGACGTCGCTAAAAATCCAGGCTCGGGCGTGGACGGTGAGGGCCATGTCATC  
GCCCTGACGGCGCAGCTCGGCCAGGGTCCCACCGCTTCGATAAATCCGGTAAACATGCAGATCACCTTG  
CTGATGACGGGGCAGACTATGCCCCCTTTAACATTGATAAATCAGGCTATTTTGGCGGTAATGCGAATA  
TCCTGGCCAACCATGCGCACATCCTTGATGTTGAGCTTGGGTGCCTGGAACAAGCGGGTCAGACCGGGCA  
GATGGAACAGACCACGCCCTCATCACCCATCAATTTGGGCGCTGATAGAGCACCAGCTCATCCACCAG  
CCCCTTATCCAGCAGGGCGCCGACAAACCGCGGGCCCGCTCAATCAGTACCGAGTTGACGTTCTGCTTG  
GCCAGCAGCATGAACAGGCTGACCAGATCGAGCTTGCCATCGAGCAGCGGCAGCTCCAGCTGCTGCACCC  
ATGCGGGCCACTCGCCGACGCCTTGTGCCGAGCCAGCAGCACCGGGCTCTCGCTCTGGAACAGCGGCAA  
GTCGGGTGTGAGGCGGTTTTGCGAATCGACGATGACCCGACGCGGTGGCGCAGGGTCTCTTTGGGATAA  
CTTGCCCTTGACCGAGGGGGAAAGCTCGTCCCAGCGCAGGTCAGGGAAGCACCATCGGCCAGCAGGTTTT  
CGGCGCTGGAGAGCACCAGCATCGTGACGGGCCCGCAGCCGCTGCACGTCGCGGGCGCATCGGGGAGGT  
GATCCACTGGCTCTCGCCGCTCGCCATGGCGGTGCGGCCATCGAGGCTGGCCCCAGCTTGACGGTCACC  
CGCGGAAAGCGGTACGCATCCGCTTGAAAAAGCCCGGGTTGAGCGCTTCGGCTTCGCTCGCCAGCAGGC  
CGAAATCGGTCTTGATCCCCGCTTCGGAGAGCATCCGACGGCCACGCCCGCCACCTGGGGATTGGGGTC  
AACCATGGCCGCCACCACCGGGCTACACCGGCTTGATCAAGGCTTCAGCGCAGGGGGGAGTACGGCCG  
TGGTGGGAACAGGGTTCGAGGGTACATAAGCGGTGGCGCCACGGGCGTTGTCACCGGGCGGCGCAGGG  
CGTAGACCTCAGCATGGGGCTCGCCCGCTTCTGATGCCACCTTCGCCAACACCACGCCATCTTTGAC  
CAGCACGGCGCCGACGAGGGGTTGGGGCCGTGGTGTAGCGCCGCGGGCCAGTTTCGAGGGCCCGA  
CTCATCCATTGGTAATCCTCTTGACTAAACATTCCGGCTCCTGTTTTCAACAACATCCAAGCCGTATCGC  
ATCAGGTAAGTGGCTGCGTTACCGCATCCGATGACGCTTCGCTAATCGAGCCAGCTTCGGGAAGATTTA  
TTTTTCCAGCTTGGCGATCTCTTCGCCGAACCTCGCGAATATCTTCGAAGCTGCGATAGACGGAGGCAAAG  
CGAATATAGGCCACCTTGTCCAGACTCTTGAGCTCATCCATCACCAGATTGCCCTACCAGCTCGGAGGCGA  
CTTCACGCTCGCCGGTGGCACGCAGGCGGGATTTGATATGGTTGACCGCTTTTCGATGGCCTCCATGCT  
CACCGGCCGCTTCTCCAGCGCCCGCAGGATGCCGGCACGCAGCTTGCTTTCATTGAACGGCTCGCGGGAG  
CCGTTGGACTTGATGACCGGGGCATCACCAGCTCGGCCATCTCGAAGGTGGTAAAACGCTCGTGACAGA  
GCAGACACTCACGACGGCGGCGCACCTGATGGCCTTCTGCCACCAGACGGGAATCGATCACCTTGGTATC  
AACCGCACACAGAATGGGCAATGCATCGGACCTCCGGCGTTAATGGAACAGGGACCGCCCCGGCGGGCC  
AGGATCTAGGTGGCCAGGTAGCACGGCCATCCAAAACCGGTAAAAGCCAGAAAAACAATGCCACCCG  
AAGGTGGCATTTGGTCTCAAACCGGATGGTCTGACTTATCAGCCATAAACCGGGAAGCGGCGCAGATATC  
CAGCACCTTCTCACGCACGGTGGCCAGCACGGCATCGTTGTGCTGGTTGTCCAGTACGCTCGCAGATCCAG  
TGGGTGAGCTCGATGGACTCGGCTTCCCTTGAAACCACGGCGGGTGTGGCCGGGGTACCAGTCCGCACAC  
CGGAGGTGACGAACGGGGAGCGGGTCTTGGGCACGGAGTTCTTGTGACGGTGATGTTGGCTTTGCC  
CAGTGCAGCGTCAGCATCCTTACCGTACGCTCGCGCCGATCAGGTCAACCAGCATCAGATGGTTGTGCG  
GTACCGCCGGAGACGATCTTGTAAACCGCTCGATAAAGGTGGCAGCCATCGCCTTGGCGTTTTTTCACGA  
CCTGAGCCTGATAGGTCTTGAACCTCCGGCTCCAGCGCTCTTTGAAGGCCACGGCTTTACCGCGGATGAC  
GTGCATCAGCGGGCCACCCTGACCACCGGGAAGACGGCAGAGTTGAGCTTCTTGTAGAGCTCCTCGTGC  
TCAGCGGCGGAGAGGATCAGACCACCGCGCGGACCGGCCAGGGTCTTGTGAGTGGTGGAGGTGACCACGT  
GAGCGTGGGGAACCGGGTTCGGGTAGACGCCAGCGGCGATCAGGCCAGCCACGTGGGCCATGTCGACAAA  
CAGGTAGGCACCGACCTTGTGCGCGATTCGCGCATCGGGCCAGTCAACGATGCCGGAGTAGGCGGAG  
AAGCCACCGATCATCATCTTCGGCTTGTGCTCGACAGCCTGACGTTCCATGTCGTCGTAGTCGATCTTGC  
CGGACTCATCGATACCGTAAGGCACGATGTTGTATAGCTTGGCCGAGAAGTTGACCGGAGAGCCGTGGGT  
CAGGTGACCGCCGTGGGCCAGGTTTCATGCCAGTACGGTATCGCCCGGCTGCAGCAGTGCATGTAACG  
GCGCTGTTGGCCTGGGAGCCGGAGTGCGGCTGCACGTTGGCGTAAGTGGCACCAGAACAGCTCTTTGGCGC  
GCTCGATAGCCAGGGTTTTCGACCACATCCACATACTCGCAACCACCGTAGTAACGCTTGGAGGGGTAACC  
TTCAGCGTACTTGTGTTGCTCAGCTGGGAGCCCTGGGCTTCCATGACACGGGGGCTGGTGTAGTTCTCAGAC  
GCAATCAGCTCGATATGCTCTTCCGTGACGACGGGTTTCGCTGTGATGGCCTGCCACAATTCGGGATCAT  
AATTGGCGATGGTTCATGTCACGTTTCAACATCCGTTTCTCTCCTGAAAATCGTTTGC CGCGCTAGGTGAAG  
TGGGCGCGGGCATTGTAACGTGAGCTGGATCAAAGAGACAGTCCAACCACCTAAAAAATGTTGAATTTA  
TGTTGTAAAAAACAAGATTCCCTCCCCGTTCAATACCCTGGCCGCTCCGTCAAACGGCACATTTTTTCATC  
CCGCTGCGGGCGGGCAAACCCGAAGGGGATCACAACGCCCTCTTTATCCTTCTGTAAACATATTCATTC  
GAAACAAATTTAATGATGATGGAGCTGATTGCAGCCATGCATCCGAGGGGCTGCACCTAACCGGAGGAGT  
TCAAGATGGACCATCTGCTGACATTCGTGATCCTGGCTGTCTTTTTTCTGTTCTACTGGGTCTACTACAC  
CAGCCAACGCAAACATCTCCCCACCACCTCGTGGGATCAACTCCCACCAAAGCCGACTATCTGGCGGCC  
CACCTGAATCAGTCGATGGCGACATCATCTTCTGTTATCACTGCGGCCACCACGAGTTGCTGGAGGTGG  
GCATGGTGCACCTGACCGATTTTCGCCGGGAATGGGTCTGTGCCAAGTGAAGCAGGTGCTGTTTCGCGA  
GAGCGAATAACGGCGCAGGGGCTGGCCCCCTCTGAACGTTGTGCATCGCCAGCTGGGATCAGGGCTGCGC  
ATCCCTGTTTTGCCGTACGCCACTGCTGCAACCCGCTCACCGCCGCTTCAAATTCGCGCCCCGATTGTGCGA  
GGCTCCCCGCCTCCCGCTCAAGGGCTGCGCAATGGCTGGCAAAATTCGCTCAACCCCAGCGCCAGCGCAC  
TCCCCTTGAGCTTGTGCGCCAGCTGACGTTGCTCACTCCCCTCACCTGAGCCAACCTTACTACTAACAC  
CCGCCCTTGCGACTCAAACAGGGCGACCAGCTGGCGGATCCGCGCCATAACGAGCAGGGGCGAGATCAGCA  
TCCAGCACCGGATTGGTCCACTCGGGCTGGTTAGTTGGGGCACGGCTGCTGATAAATGCACTCGCGGCT

CAATAGCGGGCCCTCTTGCCGAAACAGCTGATCGATGGCGTTTCGCCAGCACCGCCAGCCGACCGGCTT  
GCCGACAAAATCGACAAAACCCGGCGGCAAGGCAGTGGCGGATATCTCCGGATACATCTGGGCCGAGATG  
GCGATGGCGGGCAGCGGCCGCTCATGCATCTCTTCACTGATGGCGGCCAGATCCTCGCGCAGGGTCATGC  
CGTCCATATCGGGCAGATTGATATCGAGCAGCGCCAGCTCGAAGGGACGCTCGGTACCAGCGCCAGCGC  
ACTGCGACCATCCTCCTCCAGGGTGACGCGATGGCCGAGGCGGGTCAGCATGCCGTGCGCCACCAGCCGG  
TTGATCTCGTTATCCTCCACCAGCAGGATGTGCGGGGACTGGCCAAGGTGCAGCGGTTGCGCTTCGGCGG  
GCAGCTGGGCACTCGAGCGTTGCAAGGGCAGGCTGAAGCTGAATTCACTCCCCAGGCCCGGTTGCGTGGC  
AAGGTTAGCTCGCCCCCATGGCGGCCACCAGCTTGC GGCTGATCGCCAGTCCCAACCCGGTGCCGCC  
TGATGGCCTATATCACGCTTGCCTGGCGAAACGCTCGAACACCGCTCCTGCTCATCGGCCGGAATGC  
CGGGCCGGTATCGCGCACCCACGAAGCGGATGCAGGGCTCGGCGCAAGGGCTTGGCAGGCAAGAGCCGC  
CACCGTCAGGGTAATCTGGCCACGGCGGTAACCTTGACCGCATTGCCGAGCAAGTTGCCGAGTACCTGG  
CGCAGCTTGCCAGATCCCCCTCGACCACAGGCGCCAGCTCGGGCGCATACTCCAGCGCCAGGGTGACCC  
CCTTGCCCGCAACCTTTGGCCGGAACATCGAGCTGAGCTCATCCACCAGCTGGAACAGGGGGAAGGTTTC  
GCGGCGCGCCTCCACATGGCCCCGCTCGATCTTGAGTAGTCGAGAATGTCGTTGAGGATCTCCAGCAGG  
GATTCGCCACTGTGCTCGATGGCGGCCAGATAGCGCTGCTGGGTATCGCTCAGGTGGGTATCTTCCAGCA  
GTGTCAGGCCACCCAGAATGCCGTTTATGGGGTGC GGATCTCGTGGCTCATGGTGGCGAGAAAACCCGA  
CTTGCCCGGTTGGCTGTTCTGCCTCGGCGGGCCTGCCGCTGCTTCTCCACCTCCTCATTGAGCCGC  
TCGTTGGCGTGGCTGAGCTGGCCAGTGCCTCCTCGACCCGCGACTCAAGCTCGCGCTGATAGCGGCCCA  
GCTCCACCGCATTGTACGAAACACCTGAAGGGCCCGCCAGCTCCGCCAGCTCATCGCGCCCGTCC  
TGCGATCGGCTCAAGGGGAGCCAGATCCCCGCGGCCAACC GGCTCATCCCCGCCACCGCCGTTGCAGC  
GGCCAGACGATCCGGCCATAGACCATGCGCCACATCAGCAGCATCAGCAGTAGCAGGGTGAGCAGGCCAA  
TGCCCATCAACGCTGCTCCAGCAGCCTGAGGCGCTGACTTAGCGCCTGCTGGCTCTGCCCCAGCGAATC  
GCGGGCACGGCTGACCAGCTCACCGACCTGCTGGTTGAGGCTGCTCATCAAGGCTTCAATTGGCATTGGCC  
AGCACCCGCGAGCGCCTCCCCCTTGCCGAGCCAGTCGCTGCGCAGTTGCACCAGCTTGTCACTCTGCGCCA  
GCACGGTCAGCGCCTGCTCCACCGCTGCCGACGAGCCGGATCGGTACC GCCCCGGCTCGCAGTTGCAA  
GATGGCCAGCTCTCGCTGCCCTCTTGAATAGCGTTTGAACCTGTTCTGCCGTTGCTGCGCCACATC  
TCCTCGATACGCTGCTGCTGCATCAGGGTGCATGACGCAGCTCGGTTCATCTGCTCCAGCCAGTCGAGAT  
CCTGCTCCAGCAGCGGTCCAGCGTCCGGCCGCTGCGCACCTTGCTGTTGGTAGAGGGAACCCAAATCC  
CGCCACCATCACGGTTTCGGCGTTCTCCATCTGACTGCGCGCCAGCTCGGCGATCTGCCCCAGCCCGCC  
ACCAGACGGGCCCCGCTGCGCCTCCCCCTGCGCCATCAGGGTCAATCTTTCTCCCACCAGCCAGCCCTGCT  
GGCCAGATTGCCGATGATGCTCTGACTGAGCTGATCGAGGCTTGTGTAACCTGCCACGACCAAGTTG  
CGCCAGCACCTGTTGCAGCTGTTGCCCTGCAGAGTGAGCAAGCGCCCTGATGCTCCCGCTCCTGCTCG  
CTGGTTCGGTGGCCAGCAGTCGCGACGCGCTCTGGATCTCGCCGCTGAGACGAGAGAGCGTGC GGCCCA  
GCTCCTGATCGGCCAGAGTCTGCTGCACCCCTGCTCCAGCTGGCGCAGATGGCTAAGCCCCACCCAACC  
CAGCAGGGAGGCACTCAGTGTGAGTAATGCCATCAAGGAGAAGGCCAGCAGCAACTTGCCACCCAGGCCG  
GAAAAGATTCTCACGGGAAGTCCCTTGGTTGTGGTGGCTTTGACCGGATAATATGGCCAACTTTAA  
CAAAACCCCTGACCATGCGAAGCGTCTATCTCTCCCCGTTGTTGCTGATCTGGTTGCTAATGCTTCCCCG  
AGCCGCCCTCGCCTTTGCGGTTCGATATCTGGCCCCGGCGGCAATTCAGCGGCCAACC GCTGCGCCAGCAG  
TGGCAGAAACCCGCTGCCGCAACCAAAACCGCTGACCCTCTGTGCCCTCTACCCCATCTGCGCGACGCT  
ACTGGCTTTTCGGTCAATCAGGGCATGGTTGACGAGGCGAAGCGGCTGGGAATCAAGTTGCAGATCCACGA  
AGCGGGGGGCTATGGCGCCCTCGCCGAGCAGCGCCAGCAGTTGCTGCGCTGCGTGCAGGAAGGGAGCGAC  
GCAATCTTGCTCGGCGCGGTGAGCTATCAGGGCTTGC GCGAGGCCATCAAGGTCACGCCGTTGCCGCTCT  
TTGGTCTGGTCAACGATCTGCCAGCGGTCTGGTGCACGCCAAAGTGGGGGGCTCCTGGTACCAGATGGG  
CTGGCAGATTGGCCACTGGCTGGCGCAGCGCCACCCGCGGTAGCAAACCGGTCTCGGTTGCCCTCTTC  
CCCCGGCCCGCAGGCGAGCGCGGCAACAACCTTCGTAGAGCCGGGCTTTGCCGATGCCATCAAGGGGAGCG  
CCATCAAGCTGGTTCACCACCGAGCGCGGCAACAGCCGGGAAATCCAGCGCACGCTGGTGCAGCAGAC  
GCTGGCCCGCTATCCCGACCTCGACTATCTGGTGGGCGGTGCCATCGCCGCCGAAGTGGCGGTCAACGAG  
CTGGCGCAGCGCCATCTCGACAGGCCCCAGGTGCTGAGCACCTATTTTCAGCCACGGGGTACAGCGGGGCC  
TGCGCCGGGGCAAGATCTTGCCGCAACAGCGATCAGATGCGGCTGCAGGGGCGCCTTGCGGTGCTCA  
GGCTGTCTGCCTGCTACAACACCCCTGATGCCAATACCGAGCAGTCCCCGCGGGTATGGGGCCACCCATT  
CTGACGCTCTCTGCACCGCTGGCCGACCCCGCAGATTCCTCTCGGATGGCGCTTTTCGTCCCCTCTATC  
GGGTGCAATAGCCGTTCCAAATCCGATTAGCCACTCAAGGAGAAGAGATGAAAGAGTTACATGCCAGCT  
GCCTGTGCGGCGCCGCTCGCCCTGACCCTGCCGGATCAGTTCGACTATATGGGGAACGCCACTGCAGCGA  
ATGTCGCAAGTTTTTCAGGGGGAGATTACGCTCGGTGCGCGACTGGATGGCAACAAGGTCACCATAGTG  
AAGGGGGAAGAGGCCATCGGCCGCTACCGGAAATCGGCAGAGACCACCTGGCTTCTGTGCTCACTGCG  
GCTCCAGCCTGTTTCAGCCAGAAGAGCAGCAGCGGCAAGATCAACCTGCGCCTCGGGGTACTGGACGATGT  
GCCGAGCCAGCGGCCCGGTTTACATCTTTGTCGGCTCCAAGGCGCCCTGGCACCAGATTGGCGACGAC  
TGCCCGCAATTTGATACCCGCCCGCCGGTCTGATACCCGGTCAAACAGGTC AAGGCCACCGCAACGGGCT  
CAGGAGGCTATCTACCGGCAAACAGATAGCCTTCAACATGGACGGTGACAAAACAGCTGGGGATCCCCGCG  
GATCCGCTTCCATCTTGCCGCGCAGCCGCGGATCAACACGCTCTATGGTGCATCGCTCGGGCCATCGCC  
CGGATGGCTGATGAGGGTCAGGATCCGCTCCCGGCTCAGCACCCGCCCGCATGGGCGACAAAGGCCACC

AGCACTTCATATTCGGCCTTGGTCAGACGCACCGGCACTCCGTCCTTGCTGAGCTGGCGGGGGGAATAT  
CAAAACGCCAAGGGCCGAAGCGCACCGCATCGTCAGCCACCGAGGCTCGCTCGGGCGGGCGGCCAG  
CGAGATCCGCCACAGCAGATTCTTGACCCGCACCAGCAGTTCCCTGAGCTCGAACGGCTTGGTGACATAG  
TCATCGGGCCCCATCTCGAGGCCGACAATCCGGTCCACCGCATCGCTGCGGGCCGGTGACAAGAATGATCC  
CCACCGTGCTGCGCGCCCCGAGTTACAGGGTACAGCAGACCATCTTCCCCGGCAGGTTGATATCCAG  
CATCACCAGATCGACCGTTTTGTTCCGCCAGCACGGCGCGCATCTCCTGGCCGTTTTTCGACCGCCGTCACC  
CGATAGCCCTCCCGATCGAAATAGCCGGTCAGCTTCTCGCGGGTAACCGCATCATCTTCAACAACCAGAA  
TGTGGTAGCTCATGGGCAGGGTTCACGATGGTCGACAAGGGAGGATTATTTCTATTACATTTTTTTCATAA  
ATACCCCTATTTTCAATATTTGTGGCGGCAGCCCTGTTACAACGCCTCCCTATCATGGCTCCCATCAAA  
AAAGCGATGTGAGAGAGCATGATGAAAAACTGTGGCACTTCTGCGCACCCCGAGCCGCCGTTGGTCCG  
TACTTGGCGCTGCTTCTGGTGGCGTCCGGCTCACCTAGCGGGCACCGTCCGCTGCATACGGCTTTGA  
GAAAACCAGCAGCCTCGAATTCTGTATCTCCTGCCACTCCATGAAAGACACCGTCTATCCGGAGTACAAG  
GAGTCCATCCACTTCAAGAATGCCTCAGGGGTACAGGCGGTCTGTACCGACTGTACCAGCCGAAGGATT  
TTGTGCGCAAGGTGGCCCCGAAGATGGAGGCGGCCAACGACCTCTATCAGGAGTACATAGGCCACAGCAT  
CGACACCCAGGAGAAGTTCGAGGACCGGCGTCTGCATCTGGCCGAGAAGGTGTGGGCACGGATGAGCAGC  
CAGAACTCCAAGACCTGCAAGTCTGCCACAGCTACGACAACATGGATCACGCCAAGCAGTCCCCGGCGG  
CAGCGCTGGCGATGAAAGATGCGGGCGGCAAGAACATGAACTGCATCGAGTGCCACAAGGGCATCGCCCA  
CGAACTGCCCAATATGGCGGGCGGCTTCCGGGCCACCTACGCCACCCTGGCCAGCGAAGCCCAAGAGGCG  
CCAGCCCGGAGACCCTCTACAACCTGGGTGAGAAAGATCTCTATGCCAGCGAGCAGAGCAGCGAGCCGG  
TCGGCAAGCTGCTGCCAGCCTCCCGCATCGACGTGACGGCCCGCAGCGCGATCGTCTACAGGTGACCAT  
CGAAGGGTGGCGCGAGAGCGAAGGCAAGGGCCGGGTGCTGAGCGAATACATGGGCAAGCGGGTCTTCGTC  
GCCACCATCCGTGACGAACTGAAAGCGAGCGAGAAAGTGTCTCAAGCAGGAGACCGACAGCGCCACCCATA  
TCAAGTGGGAGCAGGTTTCCAGGTGCAGGCTGGGTGATGGCAAGGGCTTTGAGTCCCTCGCTCAAGCCGAT  
CTGGGATTACGCCGGCGAGATGTACAAATCCACCTGCAACTCCTGCCACGGCGCGCCGGATCCCGCTCAC  
TTCACTGCCAACGGCTGGATTTTCGGGACTCAAGGCGATGTCTGCCTACTATCGCCTGAGCAAGGAAGAG  
AGCGCACCCCTGCTCAAATACCTGCAGAACCATGCCGCCGATACCGGTGGTCAGGGCAGCCACTAATTCGG  
GATTCGAGTTCGGATCCGAGAGAGGAATAACAAGATGATCAATATTTCCCGTCGTGGTTTTCTGGGTGG  
CTTGTGGTGGTGGCGGTGCTTCCGCCCTGATCGGCCCTCCCTGCTCGGTGCTGCGGTGATGGCCCGCAG  
TCTGGCGACAAGTGGTGGTCAATCTGGCTCCCACCTGGGCGCCCTTCCGCGCTCGGGTGGTGCATGGTTCGCT  
GGGTGATAACCCTGCCGTTCCAGCATGACAAGCACCCACCGACATGCTCAAGGCCCTTGAGCGAAGTGGT  
TTATAACCCGTTCTCGTATTCGCTACCCCATGGTGGGACTGGACTGGCTGCGCAAGGGCCACCAGTCCGAC  
ACCAGCGAACCGGCCAGAACCGCTTCGTGCGGGTACCTGGTCTCAGGCGCTGGACTTCTTCTATCACG  
AGCTGGAACGGGTGCAGAAGACCTATGGCCGAGCGCCCTCTATGCCGGTCACTCCGGCTGGCAGTCCGT  
GGGCAAGCAGCACTCCGCTGGCGCCATGCTGGGACGCGCCATGAACCTGCACGGCACCTATCTGGCCAAG  
GCCGGTGACTACTCCACCGGTGCCGCCAGGTGATCCTGCCCCAGTGGCGGGCGCCATGGAGGTGTATG  
AACAGCAGACCTCCTGGCCGCTGGTGTGGAGCACAGCAAAACCATCGTTATCTGGGGTCCGATCCCAT  
CAAGAATCTGCAGGTGGGCTGGCTGGTGGCGGATCACAGCGTCTACGACTACTGGGCGCAGCTCAAAGAG  
AAGGTGGCCAAGGGCGAGATCCGGGTGATCAGTGTGATCCGGTCAAATCCAAGACCCAGAAGTACCTCA  
ATTGCGATCAGGTGACCCTGAATCCGCAGACCGACGTGCCGCTGATGCTGGGCATCGCCACACCCCTCTA  
CAGCGAGAAGCGCCACGACGAGGCGTTCCCTGAAGAACTACACCACCGGCTTTGACAAGTTCTGCCCTAC  
CTGCTGGGCACCTGCGATGGTCAAGGTGCGGAGTGGGCCCGCCCATCTGCGGGCTACCAGCCG  
AGACCATCCGCGAGCTGGCCCGGCTATGAGCAGCGGCCGACCCAGCTTATCGGGCGGTGGTGTGTGCA  
GCGCATGCACCACGGCGAGCAGTACGCTGGATGCTGGTGGTACTGGCCTCAATGATTGGCCAGATCGGC  
CTGCCGGGGGGCGGTTACGGCTTTGGCTGGCACTACAACGGAGCGGGCACCATCACCTCCAGCGGCCCA  
TCATGTCCGGTTTTCAGTCCGCTCATTTCCGGCGTTAAACCACTCCATGACGGCGACTGGAAGGGCTACTC  
CAAATTCATTTCCGGTGGCCCGCTTCTGTCGACTGCATCCTCAATCCGGGCAAGCAGATCGCCTTCAACGGC  
CAGACCATCACCTACCCCCACATGAAGATGGCGGTGTTCTGCGGCAACAACCCGTTCCACCACCGCAGG  
ATCGCAACAAGATGGTTCGCCGCTGGCGCAAGCTGGAAACCGTGGTTCAGCATCGATCACCAATGGACCGC  
CAGCTGCCGCTTCGCCGATATCGTGTACCCGCCACCACCACCTATGAGCGGGACGACATCGAGCAGTGG  
GGCTCCCACTCCAACCGGGCATTCTGGCAATGTACAAGGTGGTGGAGCCGCTGTTTCGAGGGCGGGGATG  
ACTATGACATCTTCGCCGATCTTTGCCGTCGTTTCGGTTCGCGAGGCCGAGTTCACCGGTGGCAAGAGCAA  
GCTGGAGTGGATCCAGAGCATCTATGACGACGCCCGCTGCAGGGTTCGCGGCATCGGCATTCGACTGCC  
CGTTTCAGCCAGTTCTGGCACGGCGAAGGCTTCGTCACCTTCCCGCGGGCCAACCCTGGGTGCGCCACG  
AGTCCGTTCCGTCAGGAGCCGGATCTGGAGCCACTGGGTACCCGCTGCGCCTTATCGAGATCTACTCCAA  
GACCATTGCCGACTACGGCTATGGGGATTGCCCGGGCCACCCGCTGATCGAACCCTACGAGCGCTCC  
CACGGCGGGCCGGGCGAGCAAAACAGTACCCGCTGCACTTGAATCCTGCCACCCGGACAAGCGGCTGCACA  
GCCAGCTCTGCTCCTCCGACAACCTATCGCGCCACCTACACGGTGCAGGGTTCGCGAACCTGTCTACATGAA  
TCCGCAAGATGCCAAATCCCGCGGCTCCAGAACGGCGATCTGGTGGGGTGTTC AACGGTTCGCGGTGAG  
GTATTGGCCGGGCTGGTGGTGGAGGATGACTACGCCCTGGGGTGGTGGCGATTCAGGAAGGAGCCTGGT  
ATGGCCCGCAAGAGGGTGGCAAGGTAGGGACTCTCTGTACCTACGGCGATCCAACGTGCTGACCGCCGA  
CATCGGCTCTTCCAGCCTGGCGCAGGCCACCACGGCCCATACCGGCTGGTGGAGATCGAGAAGTTCCGC

GGACAGGCACCGGCAGTCACTGCCTTCGGCGCGCCGGAATCGGCCAAGGGCATCGACCCCATGTTCCCGG  
CACTCTGACCCCCGGGGGACGAAAGCGCCCCCTTGAGTTTCCCTTTATTTTTAAAGTCGTTAGAATCGGGA  
GCCATCAAGGCTCCCGATTGCCATCCACGGAGGAAAAATGCAGGAATTTATGGCTACCAGCGAACGCCGG  
GCCGAACTCTACTGGTGGTTCTCCACCCTGTTTCGCCCGCAGACTCAGTGATGAGCAGATCGCCGAATATG  
ACACCTATGATGTGCGAAGCTTCTGAAAAGCCTCTCCACCCTGGATCCGATGCGCGAAGCCGTGGCCGA  
GCTCAACGATGCCATCGCCCCGCTGCTGGTGCGCCCGGATCGCCAGCTGGAGCTTGCCGCGGACTTTCGCC  
GGCCTGTTTCTGGTGGATCCCAAACAGGGCGCCCTGCCCTATGAATCGCTCTACCGCGGCGATGCCAAGC  
TACTGATGCAGGCCCCGATGGCCGAGATGCAGGCCCGCCTCGATCGCTCGGCATCAATGTCAGCGATAA  
ATACAAAGAGCCTGCCGACCATCTGGCCATCGAGCTGGATCTGATGGGCAATCTCATCATCCGCGCGGCG  
GAAACCAAGAGCGCGCCGAGCGGGAAACGCTGGCTGCAGGAGCAGGAAGCGCTGCTGCACGGCCACCTGC  
TGGCTGGTTTCGACAAGTTTCGAGACGGCCTGTCCGCGAGCCGACCGGTTTGGCTTCTACGGCGCCAGTGC  
CCGTCTGCTGGGGGTATTCTCAAGATGGATGCCAACTACCTCTCTCTGGTCAAACCCGGCACCGTCTGCC  
GACTGAGGCCGCGATGAAGACAGCCCTGCTTCTGATTGCATGCTGGCTGCTGGCCCTGATCCCGCTGGAT  
CAGGGCATTACTCCCCTGATCGCGCTGCTGTTCAACCCGGATCGCGAGCTCTACGGCACCGCCAGCTCA  
CCGGCTTTGCGGCATCTGCTCACCTCTACCTTGCCAATCTCGGCGTCGAGGTGGTGTGCGCCGCCG  
CTTCCAGATCGCCGGCATGCTGGCGCTGCTGGCCGCTGGATCGACTTCATCAACAGCAGTGGCAGCGAG  
TCGCACTTCTGCTGCTCTATCTGCTTGCCTCCCGTTCATCTGCTCGGCTGGCTGGTACTGGTGC  
GCATTCAAGCGTTTTGGTCGCCAGAAGGGATAAACCCTCGCCCTTTTTCCATCTTTTTATCAGGTTTTT  
CTGCCTATTCTTGGCGTCAAAAACAACCAGATAACTCCGCTTGACTCCCGGCCAAACAGTTTCGTGCCATAC  
TGACAACCTGATGCAAGTGATAAAAACAATCAATGCCGAGGTCATCATGGATGGGAAGCTTTTCAACGCCGA  
CACCGAGGCAATGTTGACCCAGCTGTGAGATCACACCGTCTGGAACAGCTGATGGATAATGCCCTCTG  
GGCATCGGCGTCTTTGACTGCGAATTTGCTACCGTAAAGTCAATCAGGTGCTAGCCGACATCAATGGCA  
AAAGCATCGAGGAGCATCAGGGCAAGCACCTCAGAGAGGTGGTTCCCAAGCTGGCCCCGACCCTGGAGCC  
CATGTTTTCAGCAGATCATGCGCAGCGGCTGCCCTACGTGGATATCGCCATCACGGGCCAAACCGCAGCG  
TACGACAACAGCTCCCGCCGCTTTTCAGGCCACCTACAGCCCTATGCGTGATGAGAAGGGGGAGCTGAACG  
GTATCTCGCCATCGTGCGGGACATCACCGAGCAGTACGAAACCGAGCAACGGCTGCAACTGGCAATGCG  
AGCGGCCCAAATCGGGGTGTGGGAGTGGCACGTGGCGGAGGACAGATTACTGTTTCGACGGCCAGATTGAG  
CCGCTGCTGGGCTGAGGCCAAACCAATTCCACGGCGGCTGCAAGCGTTTCGTCGACTGTTTTGAACCGG  
AATCCGGCAGCCAGCTCAAGACCCCTGCAAGTGCATGACCCCATCCATCTCACCTGAGCTACCTAC  
CGCTCTCAACGAGCGCCACTGGGTGATATTATGCGGACCATGTCCCGCCACCGAGTCCGGTTCGGCCAC  
CGGGTCATGGGAGTCATTACAATGCCACCGCCCGCCGCTCAGGAGGAGCGGCTCCATCAGGCCAACG  
TGGTATTGATACCACGGCCGAGGGGATCATCATCTCGACAGCGAGCACCATATTCTGTGCGTCAACCC  
GGCCTTACCATGCTGACCCAATAACAATGCCGAGGAGGTGATAGGCCGCACCCCGGATATCATCATGCAT  
CCCAGGCGCTACACCGACCTCGACTATCCCTGGTATCACCTTCGCCCGGCAACAACGCCCTGGCATGGCG  
AGATGGTTTTGTCTGCGCAAGGATGGCAGCTACTTCTCTCTGGCAGCAGATCAGCGCTGTCTACGACAA  
CTTCAACAACACCCTCACTATGTGATCGCCCTCTCCGACATCAGCGCCATTCGCAAGGTGGAGGCCGAG  
CTGAATCACCTTGCCTATCACGATCCCCTGACCGAGCTGGGCAATCGCCATCTGTTGCAGGAGCGGCTGG  
CCCTTGAGCTGAAAACCGCGCAGCTCAATCGCAAACGGTTGGGGTGTCTTTATCGATCTGGATGGCTT  
CAAGCTGATCAACGACAGCCTGGGCCACGGGTTCGGCGATGAGCTGCTCAAGCGGCTGGCAGAGCGGATC  
CGCGGCTGCCTGCAACACAACGATTTGGCGACCCGCTCGGGGGAGACGAGTTTCTGGTGTGATCCCTT  
ATCTGGAGGAGCCTGACGAGCTGGCAACCCTTGCCAATACCCTGCTGACCGTGTGCGTGAACCGGTTGA  
GCTGGCCCATGAGCTGGTGGCAATCTCGGCAAGTATCGGTATCGCCATCTATCCGGATCATGCTGACAGC  
CCGGAACCCCTGGTCAGTGCCGCCGACAGCGCCATGTACGAGGCGAAAAGTCAGGGGCGCAACGGATTCC  
AGTTCTATAACCCCTGCATGGCGGCTCGAGCCCGGAGCGAATGCAGATTGAGCAGGGTCTGCTCAAGGC  
CTTGGAGCTCGAACAGCTCTGCATTTTCTATCAACCCATGACCAATCTGGCCAACGGCCACCTGAGCGGA  
CTGGAAGCCCTGCTGCGCTGGCAGCATCCGAATGAGGGAATGATAGCGCCGACCCGTTTTATCCGGTGG  
CGGAGGAGTGCGGCCTGATCGAGAAAATTGGGGAGTGGGTGATGCGCAACGCTGCGAGCAGGACAAAA  
CTGGCTGGCCCGGCTGCGGCTGCCCCGCTTGTGCGTCAATGTGTGCGGTGCGGGAGATGCGCTCCCCG  
GGCTACGTTGAACGGGTGCGCGCTATTCTGGCCGAGACCGGATTTCCGCCAGAACGGCTGGAGATTGAAG  
TGACTGAGAGCATCATCCAGCGGGTGAACAGAGTCTGGATCTCTTTACCCGCTGAAAAATCTCGGCGT  
GCAGATTGCCATCGATGACTTTGGTACCGGCTTCTCGTCACTGAGTCTGCTCAAGACCTGCCGATCGAT  
CGCATCAAGATCGACCGGGCGTTTTGTGAGGCATTACCGGAAGACAAGAAGTCCGGGAGCTCTGCCGCA  
CCATCATCAATCTGGCCGACAGTCTGGATATGGAGGTCACCGCCGAAGGATTGAAACCAAGGCACAACA  
CGCCTTTTTGCGAGTCACTCAACTGCGGCGAAGGACAGGGTTATCTGTTTCAGCAAACCACTGCATGTGAA  
CATATGGGAGATCGCCTGCATCAACGCTACGTCTCATAGCGGAGGCAATCATCATACCAGCCGGGAGG  
CATCCGCTCCTGGCTGCCGACCGGATTACCACTCGATCTGCAAGCGGGATTCCCAACCATCATACGAT  
CATTGAGCATGCGCGTCAACGGTGATTTCGCCAGCATAACGGGGAGCTGGCTCGCTGAAGGTAAGTCTGGT  
ACCAGGCTCTTTGGCCTGCCATGCATGACCAAGCTGATCGGCCACCCGATCCCGCAGCGCGGGTGGAGCC  
TCCTGATGGGTGATCGAAACTCTTTTCGGAGGTTCCGAGCGGGCACTGGCGCATCAAACCTGCCAGAGGG  
ATGCACAGAGCAACAGAGAAAACATCATGACCTCCAATTAATCGACACGGCCCCCTTTTACTCAACCACC  
AATTAATTGTACCCCTTTGTCTGTAAACCAACTGTTGCCGCTATCCAAAAGTCTAATTGCCCCCCGCAA

CCAAAGGTATAAGTTGTTAAGAAACCATTAAAAGATCTATTCAAAGGAGTGAGTGATGAGCGAGAGCAAG  
GTCTACCCGGTCAAACCCACATCAGCAGCAATGCACTGCTAGACAAGGGCGACTACGCCGCCATGTATC  
AGGCCTCCGTCGAGGATCCCAGATACCTTCTGGGGAGAGCAGGGAAAAATTCGACTGGATGAAACCCTA  
TACCAAGGTCAAGAACACCTCCTACGATCCGGGCCATGTTTCCATCAAATGGTTTGAAGATGGCCAGCTC  
AACGTCTCGGCCAACTGTCTCGATCGCCATCTCGCCGAACGGGGTGACAAGGTCGCCATCATCTGGGAAG  
GGGACAACCCCGCCGAAGATCGCAAACCTCACCTATCGCGAATTGCACAGCGAAGTATGCAAGTTTGCCAA  
CGTCTTGAAAGCCCAAGGGGTTACCCGCGGCGACGTGGTCTGCTCTATATGCCCATGGTGGCCGAAGCT  
GCCATCGCCATGCTGGCCTGTACCCGCATCGGCGCGGTACACAGCATTTGCTTTCGGCGGCTTCTCACCGG  
AAGCGCTGGCCGGCCGCATCATCGACTCGGGCTCGCGCATCGTGATCACCGCCGACGAGGGACTGCGTGG  
CGGCCGTCGGTGCCACTCAAGAAGAATGTGGATGAAGCGCTCACCAACCCGGATACCCAGGTCAGCAAG  
GTGATCGTGCTCAAGCGCACCCGCGCAATGTCGCTGGCACAACCACCGCGACATCTGGTGGCACGAAG  
CGACCGGACCGCCACCGTCAGCAGCGACTGCCCGCCGAGGCGATGAACGCCGAAGATCCGCTCTTTAT  
CCTCTATACCTCCGGCTCCACCGGCAAACCCAAAGGGGTGCTCCACACCACCGCGGCTATCTGGTTTAC  
GCCACCCTCACCTTCAAATATGTGTTTCGACTACCACGAAGAGGATATCTACTGGTGTACCGCCGATGTGG  
GCTGGGTACCCGGTCACTCTATCTGGTCTACGGGCCGCTTGCCAACGGCGCCACCACCATCATGTTGGA  
AGGGGTGCCAACTACCCGGCCACCAACCGCATGAGTCAGGTGGTGGACAAGCACCAGGTCACCATCCTC  
TATACCGCCCCTACCGCCATCCGCGCCCTGATGGCCAAGGGTAAACGAAGCGGTACCGGCACGTCACGCC  
AGAGCCTGCGCATCATGGGTTCCGGTGGGTGAACCCATCAACCCGGAAGCTGGGAGTGGTACTACCGCAC  
CATTGGTGACGAGCGCTGCCCATTTGTCGATACTGGTGGCAAACCGAAACCGGCGGCATCCTGATTACG  
CCGCTGCCCGGCGTCACCGACCTGAAACCGGGCTCGGCGACTCGTCCCTTCTTCGGGGTGAACCTGCGC  
TGGTGGACAACATGGGCGAGCCGCTGGAGGGAGCCACCGAGGGCAACCTGGTGTACTGACTCCTGGCC  
GGGCCAGATGCGCACCGTGTTCGGCGATCACGAGCGGTTTCGAGCAGACCTACTTCTCCACCTTCCCGGGC  
CGTACTTTCACCGGCGACGGTGCCCGTTCGCGACGAGGACGGCTACTACTGGATTACCGGTTCGGGTGGATG  
ATGTACTGAACGTCTCCGGCCACCGCATGGGTACCGCCGAAATTTGAATCGGCGCTGGTGGCCCATCCCAA  
GATTGCTGAAGCTGCAGTGGTGGGGTTCTCACGAGATCAAGGGTCAGGGTATCTATGCCATATGTCACC  
CTGATCGCCGGGGAAGAGCCGAGCCGCGAGCTGCACAAAGAGGTGAAGGAGTGGGTGCGCAAGGAGATTG  
GCGCCATCGTACGCGGACGTCATCCACTGGGCGGAGGGGCTGCCGAAGACCCGTTCCGGCAAGATCAT  
GCGCCGATCTTGCGCAAGATCGCCACCGGTGAGACCGCAGCCCTGGGGGATATCTCCACCCTGGCGGAT  
CCGGGCGTAGTAGACAAACTCATTTCGCGAGAAGTCGGAAGCAGCCCTGATCCCGCTTCGTTTGTGCCCAA  
CAAAGCCGGCCCTGTGCCGGCTTTATCGTTTCTCATCCGCCAGCAAACAGCAAGTTGGCAGCCACGGAGC  
CTTGTGACCGAAACGAGCAATAAATAGCCAGATGTAGAGATTAGACCAGTAAAATGCTGCTAATTTTTCA  
CGAAATCAATATAAATTGCGAAATCTGTGTGCCAGGGCACACCGATTTGCGCAGAAAATGGCTAGATTTCT  
GGTAGTCCACAAGATAGCTGATAGATAGCAGCATTATCATCGAGGATGTACTCAATATGTCGCAAAATCA  
CCGATTTCTCCTGCTCAACGGACCGAACCTGAATCTGCTGGGCAAACGGGAACCGGGTATCTACGGCAGC  
AAGACGCTTGATGAGATCGTCGCCGATCTGAAGCTTAACGCCAGCGAACTCGGTGTCACTCTGGAACATC  
TGCAATCCAATGCCGAACATGAGTTGGTTCGGCCGATCCATCAGGCCATGGGCCAGGTGGATTTTATCAT  
CATCAATCCAGCCGCTTACCCACACCAGCGTCGCCATTCGCGATGCGCTGCTGGGTGTCGCCATCCCT  
TTTATCGAGGTTACCTGTCAAACGTCCATGCCAGGGAGCCGTTCCGTCTACTCCTATCTGTCTGATG  
TCGCCAAAGGGGTCAATTTGTGGTCTGGGGGCCGATGGCTACCAATTCGCTTTAACCGCGGCCGTCACCA  
TCTGCGCGCGGCTTGATAATCACTGATCAGATAAAGAAAGAAAGAAATGCTAATGGATATCCGCAAAATC  
AAGAAGCTGATTGAACTGGTTGAAGAGTCCGGCATCGCCGAACTGGAGATCTCCGAAGGTGAAGAGTCCG  
TTCGCATCAGCCGCAACTTCTCCGGTCAGGTGACCACCGCCATGCCGAGATGATGATGCAGCAAGCCGC  
TCCGGTTGCCGCCGACCCGGCCGAGATGCCGCCCAAGCGGTACCTGATGCGCTCCCCGATGGTTGGC  
TCCTTCTACCGCTCCTCCAGCCCGGATGCCAAGCCGTTTCGCGGAAGTGGGTGAGCAAGTCAATGTCGGCG  
ACACCCTGTGCATCGTCGAAGCCATGAAAATGATGAACCAAAATCGAGTCTGACAAGGCCGGTGTGATCAA  
AGCGATCCTGGTTGAAAATGGTCAGGCCGTCGAATTTGACGAGCCGCTGTTTCATCATCGAATAAGGGAAA  
TCGCCACCCATGTTGGACAAAGTAGTCATCGCCAACCGCGGTGAAATTGCCCTGCGGATCCTGCGCGCCT  
GTAAAGAGCTCGGGATCAAGACAGTGGCCGTTCACTCCACCGCCGACCGGGAGCTCAAACATGTGCTGCT  
GGCCGACGAATCCATCTGTATCGGCAGACCGGCCAGTACTGAATCCTACCTCAACGTCCCGGCCATCATC  
GCCGCCCGGAGGTAACCGGTGCCGTGGCCATCCACCCGGGTTACGGCTTCTCTCCGAGAACGCCGATT  
TCGCCGAAGTGGTGCAAAATCCGGCTTCTATCTTTCATCGGCCCGCGCGCCGAGACCATTCCGCTGATGGG  
TGACAAGGTCTCCGCCATCGAAGCGATGAAGAAAGCGGGCGTACCGTGTGTACCGGGCTCTGACGGCCCC  
GTCGACAACGACGCCAAGCACAACGCCCATTTGCCAAGCGCATCGGCTATCCGGTGTATCAAGGCCG  
CCGGTGGCGGTGGTGGTTCGCGGTATGCGCGTGGTGCGAATGAAGCGGAACTGGCGGGCGCCATCGCCCT  
GACCAAATCCGAAGCAGGCCAGTTCTTCAAGAACGACATGGTCTACATGGAGAAGTACCTGGAAAACCCG  
CGCCACATCGAAATTCAGGTGTTGGCAGACGGCCAGGGCAACGCCCTCTATCTGGGCGAGCGTGACTGCT  
CCATGCAGCGTCGCCACCAGAAAGTGGTGGAAAGAGGGCGCCGGCACCGGGCATCACCGCCGAAATGCGCAA  
GTTTCATCGGGCAACGCTGTGTGCGCGCTGTATCGAGATCGGCTACCGCGGTGCGGGTACTTTCGAGTTC  
CTGTACGAGAACGGCGAGTTCTATTTTCATCGAAATGAACACCCGATTCAGGTTGAGCATCCGGTCACCG  
AGATGGTCACCGGTATCGATCTGATCAAGGAGCAGCTGCGCATCGCCGCCGGCCAGCCCCGTGCGATCAC  
CCAGCAGGATATCCGCATCCGTGGCCATGCCATCGAGTGCCGGATCAACGCCGAAGATCCGGCCACCTTC

ATGCCCTCGCCGGGTCTGGTGCAGCGCTTCCACGCGCCGGGTGGTCTGGGCGTGCGTTGGGACTCCCACA  
TCTATGCCGGTTACAAGGTACCGCCCCACTACGATTCGATGATCGGCAAGCTGATCTGCTACGGCGAGAA  
TCGTGACATTGCCATCGCCCCGATGCGCCATGCGCTGGACGAGCTGGTGGTGGAAAGGGATCAAGACCAAC  
GTACCGTTGCAAAAAGAGATCATGAAAAGACGAAAATTTCCAGCACGGTGGCACCAATATCCACTACCTGC  
ACAAGAAGCTAGGTCTGTAAGGATCGCTGATAGAGACCCGATGACATTGCACGGTGGCAGTACCAACGCC  
CACTATCTGCACAAGAAGTTGGGTCTGTAAGGATCGCTGATAGAGACCCGACTTCCGGTGGAAAGTCTGCT  
CCGCAAGGAGCCTCTGCTGAAAAAGGGCCATGGCGACATGGCCCTTTTTTGTATCCTTGCGCCCCCTCAA  
ATTTGTTCGGAGGCCAAGGTGAACCGTTTTGCTCTCGCCCGCCGGGAAGCAGCTTTCTGCCTGCTGCTGAC  
CCTGTTCTACTTCTTTGCCTGGTATGGCACCOCCTATTTTATCCCGCTCCAGCTGGAGTTGTGGGGGCTG  
CCGCTGTGGTTCCCTGCTCAGTTGCATGGTGTATGCGCTGCTGTTCAATTCTGCTCTGCGCCCTGATGGTGA  
ACCGGCTGTTTGTGGAGATCCCCCTCGATACCCACTCCCCTTCCGGCAAGGAGTCATCCCATGAATCTTG  
AGTTGATGCTGCCGCTTGTATCTATCTGTTGCTGGTCTGGTCTGGGGTGGGTTTTTGGGCGAGCCGCATCG  
AGCAGAAGGCAACTTCGTGCAGGAGTACTTCATCGGCAACCGCAGCATGGGGGGGCTGGTGTGGCGATG  
ACGCTAGTGGCCACCTACACCTCGGCCTCCTCCTTTATCGGTGGGCCGGGCGGGCCTACAAGATCGGTC  
TGGGCTGGGTGTTGCTGGCGATGATCCAGCTACCCACCGTCTGGCTCACTCTGGGGGTGCTTGGCAAGAA  
GTTTCGCCATCATCGCCCGCCGGTCAATGCGGTGACCATCAACGACATGCTGTGGGGCCCGCTACCAGAGC  
AAGGCGGTGGTGTATCCTCGGCTCCATTACTATCATCCTCGCCTTTATCGCGACCATGGTGGTGCAGTTTA  
TCGGCGGCGCTCGCCTGCTAGAGACTGCCACCGGCCTCCTACCAGCAGGGGTTGATGCTGTTTTGCCAG  
CTGCGTACTGCTCTACACCATCATCGGCGGCTTCCGCGCCGTGGTGTATGACCGATGCCCTGCAGGGGATC  
ATCATGCTGATCGGCACCGGCGCCCTGCTGGCAGGAATTCGATTGCCCGTGACGGCCTGCCGAACCTTA  
TCCACCAGCTCAGGGAGATCGATCCCAAGCTGGTAAGCCCCGAAGGGGCTGGCGACATGTTGACCCAGCC  
CTTTATGCTGAGCTTCTGGATCCTGGTCTGTGTGCGGGTGGTGGGGCTGCCCCACTCGGCGCTGCGCTGC  
TTTTGGTTATCGCGACAGCAAGGCGCTCCATCGCGGCATTCTGATCGGCACTGTGGTCAAGCGCCCTGCTGA  
TGTTTCGGCATGCATCTGGCGGGAGCCCTTGGCCGCGCCATCCTGCCCGCATGGACAGCCCGGACAAGAT  
CATGCCCTCCCTGATGATGGAAGTGTGCCCCCTGGCTGGCCGGGGTCTTTCTGGCGGCGCCGATGGCG  
GCCATCATGTCCACCATCGACTCCCAGCTGATCCAGGCTTCCGCCACTCTGGTGAAGGATCTCTATCTCA  
ACTATCTGAGTCCAAAGCAGGAGAAGCTGGAGGTGCGCATCCCCGCTCCTCCTGCTCTGCACCCGTAT  
CCTCGGCTGCTGTTGCTGCTGGCGGCTTGCAGCCCCGAGATGATCATCTGGCTCAACCTGCTGCC  
TTTTGGCGGTCTGCGAGGCGGTTCCTCTGGCCGCTGGTCTCGGCTCTACTGGTTCGCGGGCCAACGGCC  
CGGGCGCACTGGCCAGCATGGTTCAGCGGCATCGTTCAGCTATGGGATACTGAGTCAAGTGGGGGATCAAGCT  
GGCTGGCCTGCACGCCATCGTGCCAAGCCTTACGCTGGCGCTGGTGGTCTTTATCACGGTCAAGCCTGCTG  
ACGGCACCGCCCTCGCGGGAAGTGCAGGAGCTTTTCGGGCAGAAAATAATAAAAAATATAAATTAGGGGTTT  
CAAAACTATCCCCAAATAGGTGTTTTCCGGTTAAACTGTGCGCCAAGTACAGAACGTAGCCGCTGTATG  
CCCGTTAAAGCCACTCGACAAGTCTGTTACTCAAGCCCTGCAGCGGCTCGGTTATGCCCTGCTGCTGCCCG  
TCTCCATCCTGCCGATGGCGGCGTTGATCTACCGCTTGGGCAACCCGACGTGCTCGATTTAGCGGTGCT  
CTCCCTCACCGGTCAAGCGATCTTCAGCCAAATGCCGCTTATCTATGCGGTGGCGATCGCCTTTGGCCTG  
AGTCCGCGAGGAGCTGGGCGGACAGACGCTGGCGGGTGGGTTCAACTTCCTGCTGCTCAGCACCGCCTTCA  
ATACGCTAGCCCCAACCTGCACGCCGACATGATCTGCGGCTGCTGGCGGGACTCACACCAGCCATTAT  
CTATCCCTGGGTTACACCAGCAAACCTGCCCGCTGGCTGCAGATCGCCAGGGGGGAGTTTCCCAGCCTG  
CTGGTGTGGCCTTGGCCTGCCTGCTGATCGCCATCCCCCTTTTCGCTGCTGTGGCCGCCACTGGAGCGCG  
GGCTGACCCTACTCACCTCCGAGCTGCTCACACGCGCTTTGGCGCCTTCTGCTACGGCACTCTCAACCG  
ACTGCTGATCCCGCTTGGGCTCCATCAGGTATTTGGGCGAGCTCATCGGCTTGGCGAGAGCAACCTGCAG  
GCGCTGGCCACCGCCCAACCCCTTCATGAAGGGTATGTGGCCGGTCTTTACCCCATCATCATGTTCCGGC  
TGCCGGGCGCCTGTTTTGCCATCTGGCTGCACCGCCAGCGGATGCAGCGGCTGCCACAGGGCGGGCTGCT  
GCTCACCCCTGGGCTCACCTCGGCACTGGTGGGATACAGAGCCTATCGAATTTCTGTTGCTCTTTACC  
GCCCCCTGGCTGTTTTCTGCCACCGCCTTGTGACCGGGCTATCGCTCGCTGCTGTAGCGGGCTGGGGA  
TCAAGGTGGGCGAGTTACTTCTCCGCGGCTGCTGGATCTGGTCTGAGCTATCAGGCGAGGAGCACAG  
CTTCTGGCTCATCCCGGTCGGTATCCTGTTTTTTCGTCGCTTACACCCTGCTGTTCTATCAGCTGCTGGAG  
CGTGCCCCCTCAGCATGCCGAGCAAGCCCATCGCAGTGGAGCATCCGCGCCTTGCCAGCGTTGCCCCCT  
CAGACCCGAGATGCTGGCGATCCAGTACCTCAAGGTGCTGGGCGGGATGGACAATCTGGTGGCGATGAG  
TGTCTGTATACCCGCTCAGCCTGCGGGTGCAGATATTTCACTGGTGGATGAATCTCGCCTGCTGGGC  
CTGGGCTGCCTCCTGGATCCAGCTCAACGACCACCAGCTGGTGTGGTGTGGGCCCCAGTGCCAGCC  
TGATTGAAGGGCAGATCCGATGCTGGCGGAGCGCCAGTCCGTTCCCTCGGCTCAAACCCAATCAGGA  
GTCGGCCAGCCAGAGCAGCTGGTAACTCAGGCAAACGGCAACCGCTCGGCCACGAAATCCATCAGGGTGC  
GCAGGGCGGGGGCCAGATGCTCCCAGCTCGGATAGATTAGGTAGAACGGGTTGGCCGGAATGGGCTGATC  
CGGCAACACCTTCTGCAGCCGCCCGCCGCAAAATCCCCTTCGAGACATGGTGGGGCAACAGTGCAATC  
CCCCCGTCATGGAGCGCCATCTCCCGCAGCGCCAGCAAGCTGTTGCTGACACAGGCCCCCCCTGCGGCGGCC  
AGCCACCCTCCTGCAATGGCCACACCGGCATGGCCGAGTGCACCAGACAGGCATAACGGGCCAGCTCGCT  
CAACTGTTGCGGCATGCCGTGGGCCGCCAGATAGGCGGGCGCTGCCACTAGATGACGCGCCACCTGACCG  
ATACGCCGACAGATGAGGCTGGAGTCTTTCAGCGGCGCCGCCCGCAGCGCCAAATCATAACCTTCCCCCA  
CCAGATCGAGCTGTTTCGCTCACTCAGGGTCACTTCAGCACCCTTCGGGATAGAGGGCGGAAACTCGGC



GAGGATCCGGCCAAGCAGCAGGGTGCCGGTGCCTCGGGGGCGGTGATCCGTACCCGCCCGCCGGGGCC  
GAGCGCAGCCGTGCCATCGCCAGATTGGCGCTGCGGGCCAGTGCCAGCAGCCCTGACAGTGCTCCACAT  
AGAGCTCCCCCTGCGGCGTCAGGCTCAACCTGCGGGTGGTGCCTGCAACAGCCGCACCCCGAGCTGGGA  
TTCGAGCCGCGAGATCTTCTGGCTCACCGATGACTTGGGCATACCGAGCAGCTCGGCGGGCCGGTAAAG  
CTCCCCTGCTCCACCACGGTAGCAAACAGCCCCATCAACTCCAGATCGACATTTGTTTCATATATTCAAACA  
GTCTTTACCGATTACCCATCTTAATCTTGATAATCAACCAGACTAGAGTGAGTGGCAATCCCGAACACAG  
CGATTTGAAAGGAAAAACCATGAAAGCCATTGCCCTGACTCACTATCTGCCAAGCGACCACCCCGACTGC  
TTCATCGCCGCCAACCTGCCGATCCGGTTCGGGTCCGCGGGATCTGCTGGTGCGGGTACAGCCACCT  
CCGTC AATCCGGTGGATAACCAAGGTGCGTTCCCCCAAGGCCAAAAATTGAAAGCTCGCCCCGGGTACTGGG  
CTGGGATGCGGTGGGGGAAGTGATCGCCACCGGCAGCGAAGTACCCTGTTCAAAGCGGGCGACCGGGTC  
TGGTATGCCCCGCGATATCAGCCGCCCGCAGCAACAGCGCCCTGCAACTGGTGGATGAGCGCATCGCCG  
CGATCGCCCCACCAGCTTGAGCGATGTGGAGGCCCGCCCTGCCCTCACCGCATACCAGCTGGGA  
GACCCTGTTTCGAGCGCTTCGCTCTTACCCGCGAAAGCCGTGGCAAACCTGCTGATCATCGGCGGCGCCGT  
GGCGTGGGCTCCATCGCCATCCAGCTGGCCCGCCAGCTCACCGACATGGAGGTGATTGCGACAGCCTCCC  
GCCCCGAGAGCCGCGAGTGGTGCCTCGAGATGGGCGCCCATCAGGTCGTAACCACCACAAGTTGCAGGA  
GGAGCTGACCGCCCTTGGCATCACCCAGGTCGATGCCATCTTCTGCACCAACGCCACCGCCGAACACTGG  
GCCACCATGGCCGGGTGATCCGTCCGTTTGGCCATATCTGCACCATCGCAGAAATCGAGCGAGCCGTGGG  
ATCTCTCCCTGCTCAAGAGCAAGAGCGTCACTTCAGCCAGGAGTTCATGTTACCCACTCCCTGTTCCA  
GACGCCGGACATGATCGAACAGCACCGCCTGCTCGGCCGGTGGCGGCACTGGTCGATGAAGGGTATTG  
CAGACCACCTGACCAGAACCATCCCCTCGCTGACCCCGATCACGCTGGCTCAGGCCATGCCGAGGTGG  
AAGCGGGCCGTATGGTTGGCAAGCTGGTGCATGACATGAGCGACTTTGCCAACTAAGCCCTCCAACGCAC  
CATGATGGGATAAGTTACCAAGGAGATGCCCCAAACGGGCACAATCAGCGGCACTCATGACAGCCTGTG  
GCAGGCCAACGTCCGACAATCAGCCAAAAAAGAGGCCATTTCCGCGAGAAAATGGCCTGAATACCTGAACAT  
TGGGGTAACAATCACACACATATCCTTATGCAGGACATATTAGTCTTTGCATCTGGCGTGCCAACAGCAG  
CATGAATGCGCCAAAACGGCGTCAGCCCGTCTTTCAGCAAGGTGCCGACCTTGCTCTTTTTTTTATCTGGC  
AGACTGTTTACCAGGCAAACAAGTGCAGATAAAAAAATGCCACCCGAGGGTGGCAGTGAAAGATGACGGA  
ACTTGAGCAAAGCGTTTCAGCGAAAACCGGTGCTCTTCGCTGCATAGAGCAATACAGGAACCGTGCCAAAT  
CCGGCAAAGAAACCCCGTATCCCTCCACGTCATGGGCAAAACACGACAGCACTGCCCCATGATGCTAGAAT  
CTCGCGGTTTTCACATTTATGAAGAGTCGACGCCATCGCCCTGGATACAAATTCGAATCAAGCCACTGCCA  
AGACCGCAGACAAGGTGAGCAACATGCTGCTGGGGCGTGGAGCCAGGCGGTGACCTTTTATGGATGCCAA  
GGATGTGCCCGTCTACGAACCCATGCCCGGTGAAACCCGCTCTGGGGCGAGACCGAAGTGATGGGTCTG  
TTCGATGCCGAAACCGACCCGGCTCCCACCATCGCCTTCTTCCAGCAGATCTTCGGCGAAAACGTCCGGCT  
ACAAGGTGAGCAGCTGGAAGACAAGGATTGGGTGCGCGAGTGGATGGATCACTTCCACCCGATGCAGTT  
TGGCGAGCGCCTCTGGATCTGCCCGAGCTGGCGCGATGTGCCGAACCCCGATGCAGTCAACGTCATGCTG  
GATCCGGGTCTGGCCTTCGGTACCGGTACCCACCCACCACCGCCCTCTGCCTGCAGTGGCTGGACGGCC  
TCGATCTGACCGGTAACACCGTGGTGCATTTGGTTGCGGCTCCGGCATCTCGGCATCGCCGCCCTGAA  
ACTGGGTGCCGCCCGCGTCATCGGCATCGACATCGACCCGCGAGGCCATTCAGGCCAGCCGCGACAACGCC  
GCGCGCAACGGTGTGCGCCAGCAGATTGAGCTCTATCTGCCAGCCGACCAGCCGAAGATGTGCAAGCGG  
ACGTGGTGGTTGCCAACATCCTGGCCGGCCCGCTGCGCGAACTGGCTCCACTTATCGCCGGCCACGGCAA  
GCCGGGCAGCCTGATGGCTCTCTCCGGCGTGTGGAGAGCCAGGCTCCGGAGCTGGAAACTATCTACGGT  
CAGTGGTTCGAGATGGACCCGACCACCGTCAAGGAAGAGTGGTGCCGCTCTCCGGCCGCAAGCAGCGCT  
AAACACAGCTCCCGCTCTCAAGGCGGCAAGTCAAGCATCTTTATCAAACAAGAGCACCCGCGGGTGTCTTT  
GTTGTTTCTCCCTCCTTTCCACTCTGGGGACGGTTCACGCTTCTCTGGCCAAATGAGGGATTAACATCG  
TTCTTCCACATCATTGGGGCCCTGCCATGATCGAATACCAGAAGATGATTTGCAGCCAACCGTACAACCTG  
CATGACACCCGAGTTGGCCAGTTGCGCCGGGAGGCGGCACGGCGCTATCGCCGTTTCAATCAGGCGGAA  
GAGGAAGCAGAGCAGCGGCACTACTGGCGGAGCTGATTGGCGAATTGGCTGAGAATGCCTTTTATCTGCC  
CGCCCTCTACTGCACCTATGGCCGCCACATCCACCTGGGCAAGGACTCCTACATCAATATGGGGGCCAC  
CCTGCTGGACAATGCCCCATCCGCATCGGCGCCCATGTGATGATTGGGCCAAATGTGCAGATCTATAACC  
GCAGCCCATGCGCTGGAGGCCGACAAACGGATTACAGGGCACAGAGACGGCGCTGCCGGTACCATTGAAG  
ACAAGGTCTGGATTGGGGGCGGCGCCATCTTGCTGCCCGGCGTACCATAGGGCGGGAGGCGATCATCGG  
CGCGGGCGCCGTAGTACCAAAGATGTACCGGCCGAGCTCGGGTAGTCGGCAATCCAGCCCGGATCCTG  
CCAGCCAAAACAGGGCATAAGGCTGCCAACCTGGCTGCATCTTGATACCGCCATCAACTACAACAGCC  
CCGACACCCCATAAAAATAAAGCCCAATGTACGAAGACGTTGGGCTGTTAAAAGGTGCTACGGAATTG  
CGACTCTCATCGCAGAAAAATTAGAAGGAGTGCCCTTCTAAACTGGCAGGGAGATATTAGCGAATGCGCA  
AACGTTTTACATAGTGAATAACAACAGGATTGCGAGGTACATCGCACTATTTAAATAATTACCTGCTATG  
GCGTGCGAAGCCTCTTTGAGCCATTTATTTTCCCAATTTCTCTGGTTACTATTACGGTTAAACAGAAA  
AGCCCCGATTTCTCGAGGCTTTACTTCTCTCAACCGCAACGTGGCCGAAAAGTCAGAAACGGCGGACAAA  
CTCATCGAGCGGCAGCTCGCGCAGTTTGGTGCCTTCCAGCATGGGAGTGCCGAGATAGAGGAAACCCACC  
AGCTGATCCTCTGCCCCAGTCCCAGTCCCTTGTTAATCTGCTCATCGAAGATAAACCAGCCAGAGCGCC  
AGATAACCGTTGAAACCCCTGCGCCTGTGCCGCCATCTGCATCGCCATCAGGGCGCAACCGGCAGAGAGCTC  
CTGCTCCAGCTTCGGCACCTTGGGGTGTCTCTGATAACGGGTGCCACCGGATGACCAGCGGTGCCCGC

AGCGGTGCCTCGCTGCACTTCTTGATGCTCTCTTCATCCTCGCCGCGGGCACGGGCCGCCTCAGCCAGCA  
GCTTGCCCAGCCGCTCGCGGCCCTCCCCTTCAAACAGAATGAACTGCCAGGGAGTCAGGGTACCGTGATC  
CGGCGCGCGCAGCCCCGCCTTCAAATATTGTGCGAGCACCTCACCGCTCGGGGCGGGATCGGCGAGACGG  
CCACAGGAGTGGCGATTGAGCAACAGGGTGAGGGCATCCATGGGCAATTCCTTCTCTGGGGCAATGATGG  
CGCTACCTTAGCACAGCACCGAATGAAGAAAACCCCTGAGGCTCAGGGGTTTATCGCACTAAAAAGGGCA  
AGAGGACGCTGCTTGCTAGATGATCGCAGCCAGCTCGGCCCTTGCCGGATGGCGCGCTTGGCATCCAGC  
TCTGCGGCCACGTGGCTCCGCCGATGATGTGCACCGGCTTGCTGCAGCCTGCAACCCGGCCTGCAGTT  
CTTTAAGGGGCTCCTGCCC GGCGCAGACGATCACCTGATCTACCGGCAGACACTGCTTGGTCTCGCCAC  
CTGAATGTGCAAGCCCTCGTCATCGATCCCCAAATATTGCACCCCGGAGAGCATCTGCACTTTGCGGTTT  
TTGAGCACGGTACGGTGGATCCAGCCGGTGGTCTTGCCAAGGCCGTCAACCACCTTGCTCTCCTTACGCT  
GGAGCAGCCAGATCTGGCGCTCGGGGGCATGATTTGAGGAGCCGTGAGGCCACCGCCTCGCAAAGCTG  
TTTGTGCGATGCCCACTCCTTGAGCCAGTATCACGGTGCCCATCGGCATCCATCTCCACCTTCTTCTCG  
ACCAGATACTCGGCCACATCGAAGCCGATGCCGCCGGCGCCGATCACCGCCACCTTCTGGCCGACCGGTT  
TGTGATCCCGCAATACGTGAGATAACTCATCACCTTGGGATGTTTCGATGCCCGGAATATTGGGGGTGCG  
CGGACGAATACCGGTAGCGAGGATCACCTCGTCAAAAACCGCCCGGAGCAGGCTCTCGGCACCTTGCGCG  
TGGCCGAGATAGAGCTCGACGCCGACTTCTCCAACCGCTTGGCGAAATAGCGCAGGGTTTCGTGAAACT  
CCTCCTTGCCCGGATCTGCTTGGCGAAGTTGAACTGGCCCGGATTTGCTGGCTGATCGAACAGGCT  
CACCTGATGACCGCGCTCGGCAGCGTAGCAGGCAAACGCCAGCCCGGCCGGGCCCGCCCCACGACCGCC  
AGCTTCTTGGGCTGGGGCACGCGGCCAAAGGTCAGCTCGGTCTCGAAGCAGGCGCGGGGATTACCAGAC  
AGGAGGCGCGCTTCTGCTTGAACACATGGTCAAGGCAAGCTTGATTGCAGGCGATGCAGGTGTTGATCTC  
GTCCGCCCGGTTCTCGGCAGCCTTGATGACAAATTCGGGATCCGCCAGGAAGGGGCGCGCCATGGAGACC  
ATATCCGCCTCGCCACCCGCCAGAATGCGTTTCGGCCACCTCGGGGGTGTGATACGGTTGGTGGTAATGA  
GGGGCACCTTGAGGTGTTTTTTTTCAGCTCGGCGGTCAACCAGCTGAAGGCGCCGCGCGGCACACTGGTGGC  
GATGGTGGGAATGCGCGCCTCGTGCCAACCGATGCCAGTGTGATCAGGGTCACCCCCACCGCTCCAGC  
GCTTTGCCAAGGGCAATCACCTCTTCCAGGGTCGAACCTGTTCACCAGATCCAGCATGGAGAGGGCGGA  
AGATAATGATGAAGTCGGTGCCGACCCGCTCGCGGATGGCGCGGACAATCTCCACCGGAAGCGCATCCG  
GTTTTACTGCTGCCGCCCAACCATCGGTGCGCTTGTGGTGCCTCGCAAATGAACTGGTTGATGAGA  
TAACCTTCCGAGCCCATCACCTCGACCCGCTATAACCGCCGCTTGGCCAGCGCTGTGATGGGGCCTT  
AGTCGCGAATAGTCCCGGATCTGCCGCTCGCTCATGGCGCGGTTTGAACGGAGAGATGGGGCCCTT  
GAGGGCGCTCGGCGCCAGACTGAACGGATGATAGCGTAACGACCGGCATGGAGGATCTGCAGCGCTATC  
TTGCCCCCTCCTGATGCACGGCGCTGGTCACCTTCTTGTGCTTGTCTACCTGCCAGGGGAAGCTCAGCT  
GGGAGCCGTGAGGTACCAGCCGACCGCGCAGATTGGGGCAATGCCGCCGGTGACGATAAGACCGACGCC  
ACCGCGGGCAGCTCGGCGTAAAAGGCGGCCAGCTTGTCAAAAACCGCCCTTCTCCTCTTCGAGGCGGGTG  
TGCATGGAGCCCATCAACACACGGTTGCGCAGCTGGGTAAAACCGAGGTCAAGGGGCGTCAGCAGATGGG  
GATAGCGACTCATGATGCCTTCTCTTTAAGGCCAGGGTGCATGGAACAACGCCAACACCCGGTTGCGC  
AGCTGGGTAAAACCAAGATCGAGCGGGATCAGCAGGGTCCGATAGCGGCTCACGATGCCTCCAGTTAATT  
TTTTGTATTCAAACCTGAGGCTAGAGTAAAGAATCGAAAATTTCTTTTCAAACAAATGTTTGGACAATTTT  
TCAGCGAACAGCCGTGCCCTGAACGAAGATAGGCGGGATCCGCCAGTCGGAAATGGCAATTTGCCCCGA  
ACTGGTTAATAATGGCTCTTCTCTACCCATTAACAGGGCGATAACCGGACTATGTCTATTTTCAAAGGTC  
TGGGTTGGTTGTTCCCGCAGCCTGTGGCGCCTGCTCAATTTTCAACCGGCTGATGCTGGTCAATCTGCTGTT  
TCTCATCGTAGTGCTGGTCATCGTCTTACGCGTCAGCCAGAAAAGAGGCCCCCAAGGCGCCCATCGAAGGG  
GCGCTGACCCTCAATCTCAACGGCGTGTGGTGGAGCAACGCTCCCAGACAGATCCCACCGTACAACCTGC  
GAGTGCCAAGGATGACGAGCGCATCAAGGCACTGGTGTGATCAAGCCACAAGGGCTGCAGGGAGCCAACCTC  
ACCAAACCTGCAGGAGGTGGCGAGTGCCATCGACTCCTTCCGGGAGAGCGGCAAACCGGTGATCGCCATGG  
CCGACTTCTACACTCAGGGCCAATACTTGTGCTGCTGCCCCAGCCGATCACGTGCTGCTCAACCGAGCGG  
CGCCGTGGTGTGATCGAGGGGCTTGGGGTCTACCAGACCTACTTCAAGTCGGCGCTGGAGAAGCTCAGCATC  
ACCCCGCATGTATTCAAGGTCGGCACCTACAAATCCTTCGTGCAACCCATATACCCGCGACGAGATGTCCC  
CCGAGAGCAAAGAGGCGAACCAGCGCTGGCTGGATCAGCTGTGGCAATCCTATGTGGCTGACGTAGCCGA  
GCAGCGGGAGATCGAACCCGAGGCGGTGCGGCCGGGCAAGGAGCGCTTCTCGAGCTGCTGCGCAAGGCC  
GGTGGCAATGCCGCCAACTACGCCCTCGACAACGGGCTGGTGGATCAGCTGGCCACCCGCGACGAGATGA  
CCCAGGCGGTCAATAAGAGGTGGGTGAAGCTGACGATCACGGCTGGAAAAGGGTTCGGCTGAAAGAGTA  
TCTGGCTGCCATTCGGAAACAATATCCCCAGAGCGGCAAGGATGAGGTGGGTCTGGTGGTCCGAGCGGC  
GCCATCATGGATGGCGTACAGCCTGCCGGTACCATAGGCGGTGATAGCTCTCCGACCTGCTGGCCGATG  
CCCGCCCGATGACAAGGTCAAAGCCGTGGTCTGCGGGTGCACAGCCCCGCGCGCAGCGCCTTCGCCCGC  
CGAGCAGATCCGCGCCGAGCTGCTGGCCCTGAAAACAGGCTGGCAAGCCGTTAGTGGTCTCCATGGGCAGC  
TATGCCGCATCCGGTGGCTACTGGATCTCCGCCGATGCGGACAAGATCTTCGCCCTCCCGACCACCCCTCA  
CCGGCTCCATCGGGGTGTTTCGGCATGTTTGCCACCATCGACAAGGCGTTGGCCCAGTTCGGTGTCCATAC  
CGACGGGGTGGCACCACAGATTACGTTGGCGTGGGCCGACCCGCGCCCTGCCGGATCACGTCCGTCAG  
GCAATCCAGCTGAGCGTGGAGGATACCTACCAGCGCTTCATCGGTCTGGTCAGCAAGGGCCGCGCCCTGA  
GCCCCGAAGAGGCCGAGAAGGCGGCCGAAGGTCGGGTCTGGACTGGTGGATGCCAAGGCCCTGGGGCT

GGTGGACGAGTTCGGCAATCTGGATGACGCCATCAAGGCCGCCGCGAACTGGCCAACCTCAAAGAGTGG  
CAGGTGACCCCATCGAGCAGGAGGAGTCCACCAAGGACAAGTTCCTGCGCCAGCTGTTTGACAGCAGTG  
CCCAAGTGCTGGCCCCCAGTTGCAAAGCTGGCTGCCGGCAGGATTTGGCAAGGCATTGGTGGAAAGTGAA  
CCGCAGTCTCGACCCGCTCACCCGCTTCAACGATCCGCAAGGCACCTACGCCCTTCTGCCCGGTCTGCGTG  
CAGTAAGCAAGCGGAGAATACCCCATAAAAAACGGCGACCATCTGGTCGCCGTTTTCTTTATTACGCCA  
GTGCGCGCGGCACCCGCAACTTGCTCAATCAGGGATTGAGGCGGGTCGGCATAACCGGTACGCTGTTCCAG  
CACCTGCTTGACCACGTTGGAGTCAGACTCGGCGTGAGCGATGAAGCGGGTGATAGCCGGTGTTCATCGGG  
AGCGGCACGGAGGCGGTGGAGTTGAACTCCTCCTCGGTGCGCGACAGCGGCTCATGTACTTCCATGTAGC  
GACCGCCATCCGGCTCGACCGTGGTCTTGACCGGCTGGTTGACGAACTGGACGCGGGTGCCGACCCGGCAC  
GTTGTGCAACAGATACTTGATGTTCATCAGCGCGCAGACGCAGCCGCTGCTCACCCGACACCCGATA  
CCGAAAGTGGCATTGGTGCCGTGGATGGCATAAGAGTTGCCAATGTAGAGGGCGTGCAGACCCATGGGGT  
TATCCGGACCGGCTGGCCATACTGCCGGCAGAGCTTGCCCTGGGCGGCATAGCGCGACCGATGTTCTC  
GGTCGGGGTCCAGGTGCGGTTGGCGCGCTTGCGCTCTACCTTGGTGATCCAGTTCCTGCGGGTGTTCACC  
CCCAGCTGACCGATGCCGATGGGCAGCACTTCCACCAGCTTCTTCCCTTTCGGGTAGTAGTAGAGACGCA  
TCTCGGCAACGTTGATGACGATCCCTTCGCGGGGCGCGTTGGGCAGGATCAGCTGGTGGGGGATGATCAG  
GGTGCTACCCGCTTTCGGCAGATAGGGATCAACGCCCGGGTGGCTTCCATGATGTTGGTCAGACCCAGC  
TGGAAGTCAGCAGCGATCTGCTCCAGCGGACGGTGTCCGCAGGCACCACGTATTCCTGATTTTTACCGA  
TCAGGCGGCTGTTGGCCGAGGCAGACGGTACTCGACGGCGGCAGCCTGCTGGCTGACCAGCGCAAATGT  
GCATAAAAGGGCCGAAGCGGCAGTGCGAAGGGGATTCAAAAATTCCTGTGTGGTTTCTGTACCAAATG  
GGCCGGGGGCGCTCATCCTCGGTCTGCCGGTGGCGGGTCAACCTGCCCCACGACGCCAATAACCGAGC  
GCGCATTTCTTCTGAGTCGGCCAAAATTTCAACTTCCATATGTGCTTTCTTGTAAAAGTAGCCGTT  
TTCGATGTGACGCTTATCAACAGGGCAAAAGCCACACTGGCAAGTCGCAGCAAAGAGAAAAGATGAATGGC  
ACTGCCCGCTGGCAGCGAGCCACCCGAGCCCTCGTCAACCACAACGCTGCGCCACGTACGGTTGCAGC  
CCTAGCTAAAACGTTTGTGCGCATCGGGGGAGATAAGCCAATGTGCGGGGAGGCTTTGTATTGGCATGAAG  
AGGGATAAAACCGTGCCTCGGCCACCCGCGGTGCCGGTTTTCAGCTATAAAAAAACCGCTCCGAAGAGCG  
GTTAATGGAGCCACCAGGCAACCATAAAAGGGACTACAGGTAGTTGTTCATTGGAATTAAGTGGACGGCTGC  
CTCTCCGGTGCCTACTGTCTCTTTGAGGAAGCTGATCCACGGAGATGCCCCACCGCTGACGTTACCATTC  
TGAGCCTTGAGTGGTGAAGCGCTTGAGGGCTCTCTCGGCTTTTGTGTGCTCAAAAATAGGCGACCCCGTCA  
GGAACCTTGAGATCAGCAGCTGTTTACCATTGGCATTTGGCTGCCGGTTTGGCGGCCAGGCCACCAGATC  
CTGATAGCGTTTTGCTCTGGATCATCATGCGTGCCATTTTCAGCTGCAATTCAGCGCTCGGGGCCAGCTGG  
TAAGATTTGGCCAGGGTGTGATGGCCGGATCCAGCTCCTTGGCCTGATGCCAGTAGTTGGCCAGGGTCT  
TGATGTTGCTGGCGCTCGGCTCAATCACCCCGTCTTTCATCCCTTCTCCATCACCCGTGCGGCGCGATG  
GGGAATGCCGGTGAAGGCGAGGTAGTTGGCGAGGCGCTGCAGCTCGGCGGCTCGGTCAGCATGCCGAGG  
TTGTAGGCCGACTCCAGCGCCGCGCAGCGCTTGGCATCGTTGCTGCTGCATATGCATGGCCGACAGCT  
GGGTCCAGTACTTTTTCTTCTCCGGGAACATATTGACCAGAGAGGTCAGCACCTCGGTTGCCGTTTTGTA  
CTGTTTCAGCTCGTAGTGAGCGCCATCTTCAGCAGATAACCAGGACTCCGGCGCTTTACCTGCCGACAGC  
TTGATCGCCTGATCCACCGCCGGGATCGCGTCACGGTACTGCTTGAGCTGCAGGTGTGCGTTGGCCAGCG  
TGATATAGGCATGGGAGTTGGGCTTGTTCATCCTTACCCTGATTTGGCAAACCACTCCTTCATGGTCTTGAT  
CGAGCCCTGATAATTACCCTCAGCCATATAGAGCTGGGCCAGGTTGTAGCGCACCTGCTGGGCCACCGGT  
GGCGGCAGGCCGCTGTGCGGATGGCATCAGCAAAGTACTTGGTCGCCCTGACCGTATTTCTCCTGCTGGG  
CGGCTACGAAACCGAGAGTCTGCAATATGACCCCTTGTGCTAGACCCGATCACCCACGCTGGAGAGTGC  
CTCCTGCAATCTGGCATTGCGCCAGACCGTATTGCTTGTGAGTGCATCAGATCCTGCGCCTTGTGACAGCC  
CGATAAGCCCAGTCCGACAGGGCCGGCTGCTCGGCGGCCAACTGGCGGTGCTAAGCAGCACCCGCATGG  
CGACCCGGGGCGAGGATCATCTTGTGTAACCTGTTTCATCGCCACCTTCTTAGTTGACCGCAAACTCGATC  
TCTTGTGTCATACGGCTCGCCTGCGGCTTGGCATCCACCATGGCCGGTTTGAACGTCCACTTGGCGATGG  
TTTTGCGCGCTCTTTGCGGAGGTCATAGCTACGCGGCTTCTTCTTACGATCCGCACGTTGCTGACGGT  
GCCGCGCTCGGTGACGGTGAACCTCCACCAGCACCTTGGCGGAGGCCAGCCCCGCCAGCGCCGCTTGC  
GGCATCATGGGCTCGAAGGTTGCCAGCGGAATGGCGCCGTTGTTGCCACCGACTCCGCCACCACCGCCGC  
CGGTGCTGTAAGCACCCAGCGGTTGCCACCACCGATGTTGACCGGGATGTCGAGCTTGGGCATGTCCAT  
CGGCGCGCTCTCCATCTTAGGCCGATCCGTGCTGGCCACTTCCATCTCGGGAGGCGGTGGCGGACGCTTG  
GGCGGCGGCGGTTTTGGGCAGCTCTCGCTGTTTCTTCTTGACGGTCTCCTGGGGCTTGAGGCGGATGAAAT  
CGGTGATGCTGACGTCCTCCTTCTCCACCAGCTCCCGGTGATCCGGTGTGATCAGCTTGTTCATTTCCAG  
AAACAGAAAGAACACCACACAGGAGACCGCAAACGATATCAGGTATCTCATAGGTCTCTCTCCGGCA  
TCAGCTGCTCTTGTCTGCCGCGATGGAGATGTTCTGGACACCGGCCATGCGGATCTGATCCATGACCTGC  
ACCACCAGACCGGAACGGGATTCGTTATCGGCCTGGATCACACGGCGCTCTCCGGTTTTTCGGCCCCGA  
GCCGCTCGATGTTGGCGCGTACCGCCCCACCTCGACCACCCGCTTGTGACCCAGACCTGACCGTTTTTC  
GCGCACCGCGACCATGATATTGCCCTTCTTACCGTCTCGGCCGTGCTGGCACTGGGACGGTTGATCTCG  
ACACCGGACTCCTTGACGAAGGAGGTGGTGACGATGAAGAAGATCAGCATGATGAACACTATGTCCAGCA  
TGGGGGTCAAATCGATAGCCGCTCGTCAGCACCGCTGTGCTGTAACGTTTTCTCATAGCAGAACTCC  
TTGCTTGTCTGTGCCCCGGCAGGCCATGCCTCGCCGGGGGATGCATCCTGCATCAACCGTGTTCAG  
GTTGTCTTCCAGTTTTTGACCCGCGAGTTTGGCCTTGTGATCGAGCTGGTTGACAAAAACAGGCCGGAA

AGGGCGGGGATCATGCCCCGCATGGTTCGGTACCGTTGCCTTGGAGATCCCCGATGCCATCGCCCCGGGG  
AACCGGTGCCGGTATGGCCAAAGTGTCAAACACCTGCACCATCCCCACCACGGTGCCGAGCAGCCCCAT  
CAACGGGCAGAGAGCGATCAGCACCTTGATGACCGGCATCCCCCTTGTCCACCGCCATGGCAACCCGTGAG  
ACCAGCTCGCGCCGGATCTGCTTGGCAGACCAGGAGAGATGATCGGTGCGAGCCAGCCAGGTGGCCTTGG  
TCTGCTTACCTGCTTGGGGTAGACCGCCATGAAGTAGAACAGCGCTCCAGCAACAGGGCCCCACATCAT  
CAGGGTCAGGAAGAACAGGGCGACCAGTACATCGCCCCCAATCCCCAAAACCGGGCGGACCAGTCTGACT  
TCTTCAATCAACCAGAACCACATGGGTGACTCCTTACGCTGCGGGCTTGGAGGGGTGCAGACGTTCTCTGA  
TAACGGGGCAGCAAACCGGGCTCTGCTCTTCCAGCACCTGGATCAGACGACGGCTCTGGGTCTGCACAA  
TGGTGTAGAGGAACAGCATGGGCACCGCGACGACCAGACCCTGCATGGTGGTCACCAGCGCCTCCGAGAT  
ACCGCCCCCATCAGCTTGGGATCGCCGGTACCGAACAGGGTATGGCCTGGAAGGTGGCGATCATCCCC  
ACTACCTTGGCGAGCAGGCCAGCCAGGGGTGCGACGGGAGGATCAGCTTGTATGAGGTGATGCCCTTCT  
CGAAGTTGGGCACGTTGCGCAGGATGATCTCGTCGAGCTTGGACTCCAGATCCTCGATGTTGTACCAGCG  
ATGGTTCTGGTAGGCCCCCCAGCATGTACCAATGGGGTTGCCCTTGATGATCTGATCGGATTTAGCTGC  
TTGCGCATGGACGAACCGCTCAGCGACAGACGGATACCGCAGAAGATGGCCAGCAGGGTACCGATTACCC  
CCAATGCCAGGATCACATAACCCACGGAAACCACCTGATCGATACGCTCCTTGAGGGTCCGGTACTGCAC  
CAACAGGGAGAGGATCAGCCCGGAGACGGGTGATAAAGATGGGCTTGACCCCGTCACCGCCCTGTTC  
AACTCGGCATGGGAGCCAGCACGCTCTTCTCCGGTTGACGGGAGAGCTGCTCGAAGTTGCCGGTCTCCG  
GCACGAAGGTGAGGTACTTGCCTTCGGAGACAGTGTGAAGTCCGCGATCTGGGTGACGGTCTTCTCGGC  
CTGGTTGCCCTCACCGTAAACCACGGTCGCCGGGATCTGGCTCACCTTGCCACCATCAACCATGCGGCTG  
AGGGTGGTGGTCCAGAACGCTTCCAGATCGTCGCTGGAGGGGAGCTTTTACTCTCGCCAGACGGGTCA  
ACAGGGCCGATTGCTCCGGATGCTCGACCCGACGGGCGGAGGCATTAAGATCCCCTTGAAGTACCAGCG  
GAACTGACGCAGCACACCAAACATCTCGCCATGTTGCCGGAACGCTGGCGCAGGGTTTCAGTCAATTCA  
GTCAGCTGCTTGTCAATGGCATCAAAGGTGCCTTGAGCTGCTCGCCCTTGGCGGTTTTCGGCAGCCAGCT  
CGGCCTTGGCCTTGGCCAGCAGCGCCCCCTGCTCGTCTTGTGTCAGCCAGGAAGCGGGCTTCCCGCTCCTT  
GTTGAGTTGGGATTCGCTCAGGCTGTAGGCCTTGACCTGGTTGACGAGCGCATTGAGATCCACCGTTTT  
TCGGCGGGCGGTACCCGGCAGGGTGACCAGGGTTGCTCCCGCAATCAGGGAGGCAATAGCAAGTTGATTC  
CTTTCATGATGCTTTCTCCGAGTTTGAACCGGCAGCTTATCAGCGCGGGAGGCGCTGCTTCTTGGCG  
ATGCGAAGGCCCTGTTCAACCGCACTGCGATACTCTGAGGCAACTCTTCCACTGGCGGGTGGCTTGT  
TCCCATACCCGGTCTCCTGACCATCCGGGGATGATAGACGACGCGCATGCGGCCAACACGCAGGAACTC  
GTAGGTCTTCTCGCTGCCATCCTTGTCCAGGCTCGCCTTGTAGGCCCTCGATGGTGCAGGTTGAAGCCCTC  
TCGATCTGGTAGGCTTCCAGGATCTTGCGGTATTTCTCGGAGATGGTGACATCGGCACGGTTTCATCAGGT  
CGGTGAGAGCCGCCACCGATCCTCGCGCTCGACCTTCTGGAACGGCAGATCCAGTGACACAAACTGCTC  
GAGGGAGTCGATCATCTTGAAGCATCAAGGGCACCACTTCCGGTGTGGTCTGGTTCGATCTGGGCGATCTGC  
TTTTGCATCGACGCCAGCTCGGCACCTTGGGACTCGACCATCTTGTCTCACCTGCTCGTGTAGGTGCGCA  
GACTGTGACCTGACGCAGGGCGGCCTTGTACTGGGCCAATGCGGATTCGGCAGATTCGGCATAGCTGTC  
GATCTTCTGCTGGGAACTTTGGATGCGTGTGCGGTGGCGGCTTGAGCGTCCACGGCCTGACCGGCAGTG  
GCGGCACCTCAGATTGAAGCTGGTCAACAAGGCGGCCGAAACCAGGCTGCCAAGGAGCGCTTTCTTCATTG  
TAATGGTCCCTTGTCTTCATAGGATTACCCTATCTCCGTAACCTTCCCTTGGACGTTGGGCACAGCCGGCCCC  
ACCGGGCCGGCTGAGGTTGTATATCAACAGGGTTGATTAGAAGTCTTGGGTGTAGTTCGATGTAGTAGACG  
CGACCGTCGATGCCGTAGAGGTCTTCTTCATAGGTGAAGCCATCGTTGGACAGAGAAGGCCCGCGGTTGA  
ACATGTTCTTACACCCGGTCTGGATCTTGGCATTCAGCTGGTATCGACCGCCACGTTCCAGTTCCAGAT  
GGTGTGGAAGCGATATGGCCCTCTTCTTGTTCATCCACATAGTCTTACTCTGGGAGTCGATATAGTTG  
GTGCTCAGGTAGGTATCCAGATTCCACAGCTGCGGGAAGTTGGCACCGATCCCGGAGTTGAAACGGAAGT  
CAGGTTTGCCATTCCAGCCCTTCTTGTGACCATTTGGGCCGCCAGCAAACAGACCCCTTTCATACTTCCAG  
GATGTAAGTGTGCCAAAGTCATAACGCAGGGTGAAGGAGTTGAAGTCGACTTGTAGTCCGCTTGAAG  
TCGATACCACTGGTCTTGGAGCTGCCCCAGGTTGACCATGCCGGCATAGACCTTCTCGACATGCCCTTGG  
CATCACGAATAACGTTTGGGTTGCTGCCGGTATTGAGCTCCTGATAGAACTGGGTCTGGGTGGTAGCCAA  
CTGGATCACGTCATCAATCTTGTATGTAGTAGTAATCGAGCGACAGATTCAGATTGTCCAGCGGGTTGTAG  
GCAGTACCGATAGTGAAGGTATTGGCGGTCTCTTCTTCCAGGTTCTTGTGGATTGACGGGTGGTCATGT  
ACTGCTCTTCCGAGCAGTTGGCCACACCATTGGCCTGGCAATAGACATAGTCTTGGCAAAGTCCGCTGA  
CTGGGCATCAGCCGCTAGAGATCGTTCAGACCCGGCGCGGAAACGACTGGGACCAAGAGGTACGGAAC  
ATCAGCTGGTCGAGCGGCTGATAACGCAGACTCGCTTGGGCGAGAAGGCGTGCCAAAATCGCTGTACT  
TGTACATAACGACCCGCCAGGTTTCAGTTTCATCTGCTCGGTGATGGGGATCAGGCTCTCGATATAGGTGGC  
GAACACATCGCGCACACCACCACCGGAGTTACCGGATGAACCCAGTACGTTACCCGCTTCGGACTGGCTG  
TCATAGGTATCGGAGTAAACCAATCGTTTACTCGCCCCAAGATACCAGCTGACCGGGCCAGCGGGCA  
GTTTCGCCCATATCCCAACCTACACCGCCGTACCCTGGAAGAAGTCCATCTTGGAAATGCGGGTGGTGGT  
ATAGGAGAGATCCTTGGTTCGCCGCATCAGAGAAGCTGCCATTAACAAAATTTGCCGGTATTGACCTGAGTT  
TCCACAGCGGGTGGCAAGACATAACCAATGCGGGTGTCTGGTTATCTGTTTTGGAATACATGTAACCGG  
CATTCCATTCCAGATCGCCTACCGCTTCGGTCCGCACCACCCCTTCAAAAACCGGTTCCAGGGTACCGGT  
CAAGTCAGTCACATCGTTGTACGGGGACCGACGTTGTGAAAGCGGTAGTAAACGGTCCGAGCCTTGGCG  
GTGCTGAAGTTGTTGGCAGACAGAAGTGTGCGCTTTCAGGGGTGGAACCATCTACGGTGAAGGCACCGG

CAGCTGGCGCGAAACGACCAAACTGGTGACGCGAGAACCAATCATCTGTGGCAGAAATCCACATTGTC  
GTTGATATGGTAGCGACCGTTGAGGTAGACGGTGTGCGGGTACGAGAGGCAGTCTTGGCAGCGACCTGG  
GCAAAGTCGAAGCGGCAAGCCGTGCCCTTGGTGACGAAACCGGTGCCGGTACCTTCACAGTCAACTCCCT  
TCAGGGTACGGGTAACCGTCTTGCCGGTAGTGGCATCCACTCCCTTGATATTGCGGCCATAGAGACTCGG  
AGCAGTTGCCCCCTCTTTTCGCCAGATAGTCGCGATCCTTGTAATAGATCTCGTCTTTCACATCGTGCTCG  
TAGACCATCATCAGGGAGCCTTTCTCACCCGAGATGCCGCTAACGATGGAGCCACTCTGCTCGTACCAC  
CCTCTTCGGTTCGGTGAACCAATACGTCCCAGGAAAGTCAGCCCTTCGAAACCCCTCTTTGAGGATCACGTT  
GATAACGCCCGCGATAGCATCAGAGCCATAGAGTGGCGAGCCACCATCCAGGTTCACTTCACCCGCTCA  
ACCGCCGCGCATGGGGATGGTGTGAGGTTGATGGCAGTGCCGCCATGGAGGGAGAACCGGCGATACGCT  
TGCCATTAAGCAGCACCAGCGTGCATCTTCACCAAGACCACGCAGCCCTACTGTGGCTTGTGATTTGGGC  
GGAATACCGGAGGATGGGGAGAAACCAAAAGGAGTTATAGGAGGCTGTTTCAGATAAATCGGCCACA  
GTCTGTGACCAGACTGTTCAATTTGGGCTTGTCTGACAGAGACGACCGGAGTCGCCCTCAACATCAA  
CACGGGAGATACGGGAGCCAGTGACTTTGATTTTCTGCAGTTTTTCGACGTTCTGCCCTTCTCGGCAGA  
TACGGATGGGGCCGCTGCAAGGCTCGCCAAGGCGAACGCAATCGCAGCAGAGATTCTGCTCTTCCTAAGC  
ATCGCTTATATCCTTCCCTGGTTGTTTATTGTTTGGCTTCCCTGATACCGCCCTCTTTGGAGCGATGTGTAAG  
GCTTATCAATCTTTGACTAGCGACGTCAATGGAGCAGGGGTGTGGCGAGGTCAGGCGTAGAATAAGCGGA  
GTGTATTAATTTTGACCGCATAAATTAGTGAATAATTCTACCAAAAAACAACCAGCGCAATGTAAAAACAT  
TGTTAAATGGCGTAAATGGCGCTGAATTAATAATTTGATGAACTTATTAGTTAACGTGCTGTCCGTTTATA  
TCTTATTTTGGATTTATTGGCATTAAATAAGAATAAAAACACTAACTTCATGAGGATTGAACCTGACCGCTCC  
CATGGAGATAACAGTTAAAGTCGTCGAGATGATATCGTTTTCTTCAATTTACCACCCAGACAAAATCA  
TTATAAATCAACATCTTAAAAACACTAAAACTCAAACAAACAGCTGTTTATATTTTTTAAATAATGTT  
GAGCAGTAGCGTTTTGTTTTGATTTTTCACTTTTCAGATAAAAAACGTCATTTTTTCGGTGCTTTTGGTCTC  
AGCGGGTCATTTGTCCAGTTTTCCATTTCCCTTGTACTTGATTTTTGTTGTCAGAGCTTTTACAGTGGCCA  
AGCGGATTGTCTGCTGTTTGGCAACCAATCCAGCGCGTAATGCCAGGAAGGACAGGCCCCGTACCAGGATT  
TGACTGGCCGCAAAAAAGAACAACAAGGACGAGGTTCCACCATGCTGTCGTATTTCCCTACGCCGGATGCT  
TTTGATCATCCCAGCTTTCTCGGTATCACCTGCTCGTCTTCACCATCACCCGTTTCGTGCCGGGCGGA  
CCGGTCAAGCAGCATGCTGCTGCAAGCCCAGGTTTCCAGAATGAATCTGGCCGCTCCAGCGGCAGCAAGG  
GGCACAGGCCCTCTCCGATGAACAGATCGAGAGCTCAAGGCCCTTCTATGGCCTCGACAAGCCCATGCT  
GGTCGCTACTGGGATGGCTGCAGAAGCTGGCAGTGTGATCTGGGCGAATCGACCCGCTACTACGAG  
CCGGTGTGGGATCTCATCAAGGAGCGGCTCCCGGTCACCGCTTCTTCGGGCTGGCGACCTTTCTGCTGA  
GCTATGCGGTCTCCATTCCGCTGGGGGTGGCGAAGGCGCTCAGGCACAACAGCCGCTTCGATTTCGTTGAG  
CTCCATGCTCATCTACATGGCCTATGCCCTGCCCGCTTACGTGGTGGGGATCTTCCCTCATCACCGTGTTC  
GCCTTCCATCTGGAGTGGCTGCCGATGGGCGGTTTTCCGGGGATGACTTTGAATACATGGAGAGCAGCT  
GGGATCAGATCCGCACCGTCTTTGCCACGCCCTGCTGCCGCTTATCGCCTACGCCATCGGCGATTTCCG  
CATCCTCACCATGACGATGAAAAACAGCCTGATGGAGAACCTGTGCGCCGATTATGTGCGTACCGCCGTG  
GCCAAAGGGTTGCCGTTTCGCAAGGCGGTACCAGCACGCGATGCGCAACAGCCTGATCCCCATCGCCA  
GTCACCTGGGGTCTGTGCTCACCGTTTTCTTTGGCGCTCCTTCCCTCATCGAGACCATCTTCAACATCGA  
CGGCATCGGCCTGCTCGGTTACGAGGCGATCGTCGAGCGGGATTACCCACCGTTATGGGCATTCTGGCC  
ATCACCTCCATGCTGATGCTGATTGGCAATATCGTCTCCGATATCTGTGTTGCCCTCGTTGATCCCCGCG  
TGCGGTTTTGGAGACTGACCATGAAGCTCAATCCGGTTACCTTGAAAAACTCAAGCGCTTCAAGTCGATC  
AAGCGCGGTTACTACTCCTTCATCATCTTACCACCCTGGTGCTGCTCTCCCTGCTGGCGGAGCTGCTGG  
TCAACAGCCGGGCGCTGATAGTGAGCTATCAGGGCCAGCTGCACTTCCCCACCTATGGCGATGTGATCCC  
CGGTCAGCAGTTCGGGCTCGATTACGAATACGAGACCAACTACCGCCAGCTCAAGGCCAAATTTGCCGCA  
GAGGGCCAGGGCGACTGGGTGCTGCTGCCGCCGGTGCCCTGGAACCCCTACGAGCAGGATTTCAAGGAGG  
ATGCCTACCCACCCTACGCCCCAGCGCGGCGAGCGCCACTTCCCTCGGCACCGACACCAGCGGCCGCGA  
CGTGCTGGCTCGACTGGTTTTACGGCTTTTCGCAATCGCCATCGGCTTTGCCCTTATCGCGTGGCGGCCAGT  
TACGCCATCGGAGTCACCATCGGCTGTCTGATGGGCTTTCTCGGCGGCCGCTTGATCTCATCTGCAAC  
GCTTTATCGAGATCTGGTCCCAGGTGCCGTTTTCTCTACGTCATCATGATCCTGGTGTGCTGGCCAAGCC  
CAACTTCGGCCTGTTTGTGCGCCATCAACGTGCTGTTTGGCTGGATGGGGATCACCTGGTATATGCGCACC  
CTCACCTACAAGGAGCGGGCGGGACTATGTGATGGCGGCGGGCGCAAGGGGGGACACCAGCGGGA  
TCATCTTCAACCACATCCTGCCAACACCCTGATGATGATCGTCACCTGGCGCCGTTCCGCCGTGGTGGG  
CAATATCTCGACCCTGACGGCACTCGATTATCTGGGCTTCGGGCTGGCACCTCCGACCCCGAGCTGGGGG  
GAGCTGCTCTCCAGGGCATCAACAATCTGGATGCCATCTGGATCGTCAGCTCAGTGGTGGCAGCGGTGA  
GTCTGGTGTGATCATGGTCTCCTTTATCGGTGAGGCGATCCGCGAGGCGTTTCGATCCGCGCAAATTTAC  
CCGTTACCAATGAGCCAGCCGATGCCAGCGCATCAGCAGGCGCCGGTAACGAACTGTGATTAATGAAGG  
ACGGGCCGCCCATCGGCGGTTCCCGGGAGCAAGGGATAATCCCGTTATCAATCAAGACCCCGAGTGCAG  
GGGCCAGACCTGGAAGTCAAACATGAAAAATAAAATCAAATGGATAGGTGCTCTCTTTGTGCTGGTAAAC  
GGATCCTGGGTCTGGGCGGCCAGCCTGCCCGCGGATCTCAAATGGGAGACCAATGAAACGGATCCGGTGT  
TCGCCTCCACCAAGGCGCTGCCGGGCGGCGAGCCTCAATATGTTTGTGGAGAGCTTTCCGCTGACGTTCCG  
CACCGTGGGGCTGACTCCAACGGATCGTTCGCTCCTTTATCTCGATAACCAACTACGGCTCATCAGC  
TTCCACCCCAATACCGGTAACCCCATTCCTCGCTGGCGACCCACTGGGCCATCGGCCAGACAGCCAGA

CCGTCTACTTCAAGCTGGATCCGCGAGCCAAATGGTCCGATGGCAAACCGGTCAATGCCGATGACTACAC  
CTTCCGGCTACGAGATGATGCGCTCCAAACACATCAAGGGGCCCTGGTTCAACAATACTACTACACCCTGAA  
GTGGTAGCGGTAGAGAAGATCGATGATCACACCATTATGGTCAAAGCGGGCAACCGCAAGGCCAAGATGG  
ACCTGCTCAACACCACCGAGCTGTGGCCACAGCCCAAGCACTACTACAAGCTGACCCCAATTGGGTGAA  
GCAGTACAACCTGGGCCGTGGTGGCCACCACAGGTCCCTACGTGATCAGCGACGTCAAGAAGGGCAAGTCCG  
GTTACCTTCAGCAAGCAGAAGGATTGGTGGGCAAAAAGACGATCGCTATAACCAGCACAGATTCAACATCG  
ACACCATCAAGGTGCAGGTGATCCGCGACCACAACATCGCCTTCCGCCACTTCTGAAAGGGGAGATCGA  
TACCTTCGAGATGATCCTGCCCAACTGGTGGCATGAAAAAGCGGTACCCCGGAGTACAAAAAAGGCTAC  
GTGCAAAAAGTAATGGCCATGACCAATACCAAAACAGGGCGGTCAAGGGGTTACCTCAATGTGGCCAACC  
CCAAGCTGGCGGACGTAACCGTGCCTCGGCATCCAGCACGCTTCAACATCGACAAGATGATCGAGAC  
CGTGTGCGCGGACTATGACATTGGCAAGGCGGGAGTACTTTGCCAAGGGCGGCTACAACAAGCCGG  
GGCCTGACGGCATCCTGCAAAATGAGAAGGGGGAGCGGCTGACGCTGGCACTCACCTACACCAGTCAGGA  
GCACTCCAAGCGCCTGACCGTGTGAAAAGAGGAGGCCAAGAAGGCGGGTCTGGATCTGGAGCTCAATCTG  
GTGGATGGCGCCACCGCTTTAAGGTGATGCTGGAGAAGAAAACAGAGGCGGCTGGCTCGGTTGGGGCG  
GCGGCGGTCTCTATCCGCAATATTGGGAATTTTTTCCACTCCGCCAACGCCAACAAACCGCAAACCAACAA  
CCTGTTCAACGTGGCTGACAAGGAGCTGGACGCGCTGATAGATGCCTACAACGTGAAATTCGACATGGCC  
AAGCGGGCCAAACTCTCCAGCAGATCCAGCAGCGTATCTATGACCTCGCCATCTTCGTGCCCGGGTGC  
AGCTCAACTATGTGCGGGCCAGCAGCTGGCGTTATGTGATGCTGCCGGAAGTGCCTGCCACCAAGAACAC  
GCCGGATCTGCTCTACTGGCCGATGGACGGTTATCCTCACAGTAGTGGCGGTCTGCTCTGGCTCGATCCC  
AAGGTGAAGGAAGAGACCCGCAACGCCAAGGAGGCAGGGGAGGCGCTGGCGCCATCAACCTGCTCGACA  
AGACCTATGCACGTCAATTGATATTCAGGCCATTGCGAAGGGAGCAGCCGTTATGCCAACACTCAGGCC  
CCATTCTTGACGTACCGGATAACGGGGGGGAGTTCGCCGTTGATAACGGCCAGCACCCAGCCCCAATCCT  
CGAAGTACCGATCTCGAGGTGGAGTTCGCCGTGATGACGGCAAGATCAAGGTGCTCGACGGGGTCCAGC  
TTCAAGGTGGCCCCGGGTGAGACGCTGGGGATCGTCGGCGAGTCTGGCTGTGGCAAGAGCGTTACCTCAC  
TCGCCATCATGGGGCTCTTGCCCAAGCCCCATGGTCAAGTGGTAGCAGGCTCCATCCGCTTTCAGGGGA  
GGAGTGTGTGCTGTGACCCAGATCAGATGTACAAGGTGCGCGCAACCGCATCTCGATGATCTTTTCAG  
GAGCCGATGACGGCCCTCAACCCGGTGCAGACGGTTCGGTGCAGCAGCTGATGGAGGTGTTTCGCTCCACC  
GCCCGAGTATGACAAGGCCAGCGCAAAGCCGACGATCGCCATGCTGCAGAAGGTGGGTATCCCGGA  
ACCGGCCAGCGCTTTGCGGTCTATCCCCACAACCTCTCCGGCGGTATGCGCCAACGGGTGATGATCGCC  
ATGGCGCTCTCTGCGAGCCTGACCTGCTTATCTGCGACGAGCCGACCACGGCGCTGGATGTCACCATT  
AGGCCAGATCCTCGAACTGATGAAAAGAGCTGCAAGCCAGACCGGGATGGCCATCATCTTTATCACCCA  
CGATCTGGGGGTGGTGGCAGAGCTGTGCGACGAAAGTGGTGGTGTGATGTACGCCGGCCGCGCGGTGGAGCAG  
GCCGACGTGTTGAGCTGTTTGACCACCCCGTACCCCTATAACCACGGCTTGATGAGCTCGATCCCTC  
GCCTCGAGGATGAGCCCAAGAGCCTGCTCAAGACCATCAAGGGACAGGTACCAGCCCTGCACGAAATGCC  
CGCTGGCTGCCGTTTCTCCAACCGTTGCCCCATGCGACCGATCTCTGTGTCAGCGCCATTCGGCGGGT  
GAGCAACTCAATCCGCGCCACCATGTCGCTGCTACTACTGGAAGGAGTTGACCGTATGAGCACTCTGTT  
ATCGGTGAGGATCTGAAACAGCACTTCCGGCTGGGAGGCGGGTTCTGCGCAAGCAATATACGGTTCAT  
GCGGTGGATGGCATCAGCTTCGATCTCAAGCAGGGGGAGACGCTGGGGCTGGTGGGTGAGTCCGGCTGCG  
GCAAGTCCACCCTCGGGCGCAGCCTGCTCAAGCTGTTTCGAGCCGACCGCAGGCACCATCACCTTCGAGGG  
GCGCGACATCACCGCCCTCAGCCCCAAGGAGATGCGCTCCCTGCGTCAAGGATGCAGATGGTGTTCAG  
GACCCTGCAGAATCCCTCAACAGCCGCCACACCGTGGGCCAGATCCTGGAGGAGCCCTTTATCATCCACG  
GTAAAGGCAACACTGAGCAGCGCGCGGCTGGGTGCAAGAGCTGCTGGCAAAAGTGGGCCCTGCCGGCCAG  
CGCTGTGGATCGCTACCCCCACGAGTTTTCCGGCGGTGAGCGCCAGCGGATCGGCATCGCCCGCGCCATC  
GCCCTCAAGCCCAAGCTGCTGGTGTGCGACGAGGCAGTCTCGGCCCTCGATGTCTCGGTGCAGTGCAGA  
TTGTCAACCTGTGCTCAGCCTGCAGCGGGAGATGAACCTCTCCATCATCTTCATCGCCACGATCTGTC  
GGTGGTCAAACATATCTCGGATCGCATCGCAATGATGTATCTGGGACGGATCGTTCGAGCTGGCGGATGCC  
CAGTCGCTCTATCTGGCGCCGCGCCACCCCTTACACTCAGGCGCTGATCTCCGCCATTCCGGTGGCGGACC  
CGCGCAGGCGCAGCCAGCGCATTTGCTGACCGGCGATGTGCCCTCCCCCATCTCGCCGCCAAGCGGCTG  
TCACTTCCACCAGCGCTGCCCCATGCGACCGAGCTGTGCAAAAAGCAAGGCGCCAAGGCTTGAGGCGTGT  
GATGAGTCCCATCATCAGGTGGCCTGTACACCCCGCTCGCCGTGGTAGTCACGCCATCAGCGGCAACG  
CTATAAGCGGCGACAGCAGGCTGGAGCAGGCGAGCTAGGCGCAGCGAACAAACACCAGGGTAGAAACAGA  
CGAGGCGGCCATCAGGCCGCTCGTGTATCGGGTACTCTTGCATTATCGCGTCACGGCCGCTGCTCGT  
CAGGCAATCTGGTAGCGGCCCGCTTGTGGTTGAGTGTCAACACCAGATTACAGATAACCGCCGCCACGA  
TGGAGAGCGCCAGGATCCAGGGCTGCACCACAAAAACAGAGGCGACAACAATGGCGCAATCGAGCCCCAT  
CTGCAGCTTGCCCGCCGGATGCCAAAGCGATCCTGAATAAAGAGCGCCAGAAATGTTGAAGCCCCAAGA  
CTCGACTTGTGGCGAAACATGATGAGCAGCCCCATGCCGATCAGGGTGCCCGGATCAGCGCCGCATAGA  
GGGGCTCTATCTTGCCGATCTGCAACACCCCGTTGAGGTGATCGGTCATGTAGGAGACCGCCGCCACCGA  
GACGAAGGTGTTGAAGGTAACCGTGGCCCCATCCGCGACCATGCCAGCGCATAGAAGGGCAGGTTTTATG  
CCGAAGAAGAGCAGGCCGAAGCTGATGCCGGTCACTTTTGCAGCAGCAGCGCCAGCCGGCAGTCCCGC  
CGGTGAGCAGACCAACTGATGAAACAGAAAGATGCCGAGGGAAACAAAGCCGGCCCGCTCAGCAGGGC

CAGCACATCCTCATAAATAGGATGAGCAGTGCGAATCGAGGTGTTGTCCATAACCTGTATCCAAGCGAAG  
TAAAGAGAGAGTGTCTGTGCGCTGCCGTTGCGGGCGGGCTGCGAGCCCTGTCCACAGGGCTTCGTTATGG  
GGTCCAGTCTATTTTTTGTGAAAAGGATCACAACAGTCAGGCTGAACGCCCCATTCTGGTGCCTGTCATC  
TGGCATTGACACTCGCTGCACCAAGATGCAGCATGCCGCCCTCTGACACCCCGCATCCCATCCGCAGCAA  
GAGGCGTTTTTCCATGAAGGTCACCATTTTTTGGCACAGGCTATGTCGGGCTGGTTCAGGCCGCGCTTCTGG  
CCGAGGTGGGCCATCAGGTCTGCTGCGTGGATGTGGATGACGAGCGGATCGCCGCCCTCAGGCTGGGGCA  
GATCCCCTTCTATGAACCGGGGCTGGCCCCGCTGGTCGAGAGTCATCTGGCCAGCGGCCGCTGAGCTTC  
ACGGTCGATCCCGCCATTGGCGTGGCACACGCCGACCTGCTGCTGATCGCCGTGGGCACCCCGGCTGACG  
AGGATGGCTCGGCCGATCTGCAACATGTGCTGGCGGTGGCCGACACCATAGGCCGACTGATGAGCCGCC  
CAAGTCTGGTGGTGACCAAGAGCAGTACCGGTGCGCACGGCGCAGCAAGTAAGAGAACACATTGAGCTG  
CAGTTGGCCGAACGGGGCTGACCTCGCTGCGAGGTGGCGCCAATCCCGAGTTTCTCAAGGAGGGGG  
CGGCGGTCAACGACTGCATGCGGCCGGATCGCATCATCATCGGCGGTGACAGCGAGCGGGCTCTTGAGCA  
GTTGCGCGCCCTCTACGCCCCCTTTAACCCTAATCAGACCGGATCGTGGTGGATCTGCGCAGCGCC  
GAGCTACCAAATACGCCGCCAACGCCATGCTGGCCACCAAGATCTCTTTTATGAACGAGATGGCTGCC  
TCGCCGAGCAGCTGGGTGCCGATATCGAGGCGGTGCGCCAGGGGATGGGTGCCGATCCCCGCATCGGTTA  
CCACTTTATCTACCCGGGCTGCGGCTACGGCGGCTCCTGCTTCCCTAAGGATATCAAGTCGTTGCGCCAT  
ACCGCGGCGAGTGTGCGCTGCGACGCCCCGCTTTTAGCGGCGGTGAGCAGGTCAACCAGCGCCAGCAAC  
AGAAGATGGCGCAAACCTGCTGACCCGCTTCGGCCGGATCTGCGTGGCCGCACCTTCGCCCTGTGGGG  
GCTGGCGTTCAAACCCGGCACCGACGATATGCGCGATGCACCGAGCCGCCGCTGCTGGCCGCCATCTGG  
GCTGCCGGTGGCCGGGTGCAGGCCCTTTGATCCCAAGGCGATGGAGCGTGGCCGCCAGATCTACGGCCAGC  
GGCCGGATCTGCTGCTCTGCCCGACTCAGGAAGCGGCACTGGAAGGGGGCCGATGCCCTGCTCATCTGCAC  
CGAGTGGCAGGCGTTTTCTGTCGCCCGGATTTCCAGCAGTTGAAGGCCCTGCTCAACCAGCCCGCCATCATC  
GATGGCCGCAACCTCTATGATCCGCGCCAGCTCAGCGAGCTCGGGTTTTGACTATCACGCCATCGGGCGGC  
CACATCTTCCCGCAAAAAGCAGCCTGCCAACACCAGCTGCAACCCGGAGACTCAACCATGATCTATCTG  
GTCACCGGCGTGCCTGGTTTTATCGGCTTTACGTTGGCCAGCCAGCTGTGCGCCGAGGTATCAGGTGG  
TGGGGATCGACAACCTCAACGACTACTACGAGGTGAGTCTGAAAAGAGGCGCGGCTGGCCCAACTGGCCAG  
TTTTCCCCATTTTTCGCTTCGAGTGGCTGGATCTGGCGGATCGCGAAGCGATGGCGGCTCTCTTTGCCCGC  
CATCGTTTTCGAACGGGTGATCCATCTGGGGGCGCAGGCGGGGTGCGTTACTCCATCGACAATCCGTTCCG  
CCTATCCGACAGCAACCTCACCGGCATGCTGAGCGGTGCTGGAGGGGTGTCGTCACCACGGGATTCAGCA  
TCTGCTCTACGCTCCTCCAGCTCGGTCTATGGCATGGGGGATCAGATGCCCTACTCCACCGCGCAGCAG  
GTGGATCACCCCGTCTCCCTCTACGCCGCCACCAAGAAGAGCGGCGAGCTGATGGCCACGCCTACTCGA  
CGCTCTATGGCCTGCCACCACAGGGCTGCGCTTCTTTACCGTCTACGGCCCCCTGGGGCCGCCCGACAT  
GGCCATCATCAAGTTACCCCGCCATCCTCGCGGGAGAACCTATCGACGCTATAACAACGGCGATCTC  
AGCCGCGACTTACCTACATAGACGATATCGTTCGCGGGGATCCTCGCCGTGGCTGACCAGCCGCCCGCC  
CCAATTCCGATTGGCACGCCAGCGAGCAGAGCGCGGCGGAGAGCGCCGCCCTACCGCATCCTCAATAT  
CGGCAACGGCCAGCCGGTGCCTGCTCGATTTTATCGAGGCGTGGAGGATTCATCGGCAAGCCCGCC  
ATCAAGCGGATGCTGCCGATGCAGGCAGGCAGATGCACGCAACCTGGGCCGACAGCGAGCCGCTGCACA  
CCCTCACCGGTCTGCGCCCCGCCACGCCCTCAAGCAGGGGGTTGTCGAGTTTGTCCGCTGGTATCTCGA  
CTACTACCGGCCCGCCGCTGACGAGCGCGGGTAGCCCTCGGTCATTGATGAGTTAATCAGATACCACT  
GATGCCCGCGGGTTTTAGGATGGCTAAACGCACTGTCTGCGCACCATAGCGAGGATTTGAGATGCAATC  
ACAGGAACAGGGTCTGATCGATGGACTGTTGACCCGCTCAAGCAAGCCAGGGATAGCAAGCGAGACCAA  
CAAGCGGATCAGCTGATCCGCCAGCATCTGGCCAGCAGCCCGATGCCCTACTACATGGTCCAGGCGC  
TGCTAATTACAGCAGGCTGCCCTTACTCGCTCAACGAGCGGGTCAAGGAGCTGGAAGCCAGCCAGAGCGC  
CCCAATGGTGGCAGTTTTCTCTCCGGCCTGTTTGGTAGCGAAAGCAGCCGCCCCACGCTTTACGCCG  
CCACCGGCAACCGCGCTGCCAGCCCGCTCCCGTCCGAGCTCCTTTTTAGGGGGCGCCCTGCAAACCG  
CCGCCGGTGTGGCCGGTGGCGTGTGATGCTGGCCGATATGATCGGCGGACTGTTTCAACAACAATCGGCCGA  
GGAGATCATCGACATCATAGAGCCAGCACCCATCGCCAATCCGGTCGATGCGGAACCGGTGCGCTGGGAC  
GGCTGGGATTACCTCCCGATGCTGGCAGCAATTTTTCTCGACGACGATAGCCAGAGTAGCGGCTGGGCCG  
ACAGTGACGATAACAACGGCGGTTTTCTTCTAACCGTCAAACCATTACTGGCCCCGCATCTGGCGGGGCTC  
AACTCGATACGAAACCCATGACTATGGAAAAGTGTGATGACACCAGGATCGGCAGCGGCATGACGCGATA  
TACTCAGCGCGCTTCGTGCCACCCGGAAACAACCTCCCGCCCCAGGCGCTCTGTCCGTGGCCACGCAACA  
CCCCCATGACGACAAGGAGCCACCTCATGATCCGAACCTGCTTTTGACCGGTGCCGCCATTGCGGCCTA  
TGCCCTGACCCAGAGCCACTCTCTGCTTCCCTGCTCAGCTGCTGGCCCTGCTTTGCTCTGGGTTGTC  
AGCGAAATTGGACTGATATATCGCCAGTTACCAGCCGCCAACAGACGAATCTGCCTACCCTTGGATG  
TCTGAGTTTGTAAAGAAATCCTTATGCCAACGCTTCTTCACTAACAAGCTCGATATCATGAACTCAACT  
TCCCCACTTTATTCGAGCCTGATACTACTTGTCTGCTGCAAAGTGTCTCGCTGTGGGCGCAATCCCCAT  
GCCAACAGGGGATGACTGCTCAACACTTAGTAACAACCAACCAGTCTCCGTAAGGGTAGCAACGGTGG  
TAACGGTGGTAACGATGGTAACGGCGGCAACGGCGGCAACGGCGGCAACGGCGGCAACGGCGGCAACGG  
GGCAACGGCGGCAACGGCGGCAACGGCGGCAACGGCGGCAACGGCGGCAACGGCGGCAACGGCGGCAACGG  
GCGGTGATGGAGCTGATGGAGCTGATGGAGCTGATGGAGCTGATGGAGCTGATGGAGCTGATGGAGCTCA  
GCCTGACCAATAATACGTCCCTTGCAATCTATTTTTAGATTGAGGGCACAATTGGCTAGCCTATAAGTTT

CATACCGTTTTGCTCTCTGAAATCAACCGGCTATAACAACAGGATCCACTGGGTTCGTGGCGATAGCAGC  
CATGTTCTCTATATCTTCTGTACTCAAACAGGAGATAACCCATGAGGCACATCAGCGAAAAACGGATTGT  
TTTTGCTGCTTTTTTTTGTGCTTGTACTGGCAGGTACGCCGCGGGCGATGGCACAGGGCAGGGATTTTCAG  
ACAGGCCCCCAAGGCGCTAACGGCGATCAAGCAGGGTCAAGTGGCCAGCAACACGGCAATCTGCAAAAAG  
GCCATCGCCCTCTACTGTGTGCGCCGCCAGCACTGGCAACCCTGAAGGATATTTCCGGATCGGCCGCTGC  
TCGCCACCGGCCCTGCCTCGGTGCGCAGCGCCAAGCTGGCCAACAGTTATCTCGCCATGGCGATGCGCCT  
GGGCAACCAACAGGCTGCCCGCTACTACAACGCCCGTATCGGCAATGCCCTATGGGAGAGCGGTGTGGC  
ATCGGGATCCGTGGCGGTGAGGGTGGCTATCTGGCCGGGCTCCCTTCCCCCTTCAATGTCGACTCCTG  
GGTTGCCCCGACGCCCCCGCAAGCAAAAAGCTGGTCACCATGCTGCGTCACGCCGCCAAACACCATAAG  
GTGGATGCCCGTTGGTGTGCTGGCGATTGCCATCGCCGAATCCAATCTCAACAGCCGCGCCGTTTCACCCA  
AGAATGCTCAGGGGCTGATGCAACTCATCCCCGAAAACCAAGCAGCGTTTTGGTGTCACTCAACCCTTTGA  
TCCGGCACAGAACATCAAGGGTGGCGTCAGTTATCTCAAATGGCTGGCTGCGCCGTTTCGATGGCGACTGG  
GTACTGATCTCGGCAGCCTACAATGCCGGGGAAAATGCGGTGGAGCGCTATGGCGGTATCCACCCCTATG  
ACGAGACGCAGGAGTATGTGAAACGGGTGCTCTACTTTCGCTGGCCACAAGCAGCCCTGAGCGGGAGGTCA  
GGAGCTCGCCCGCTCGGAAGGAGGCACACACCTCTTTCTGCGGCCACAGTGGCGGCCACGCCCCCAATAA  
TCGAAGCCATAGTGGCGGTAGTAACCCACCAGATTGCTGATCAGAAAACAGCCCCCCTCAGCAGCGCCA  
CCGGTGAGCCACCAGCAAGTTGTTACCCAGCCAGCAGAGGGTGCCGAGCAGCATCCAGCGCTGCAACAG  
GCGATCATCCGGGCAAAAACGCGGCCCGGGTTTGCAGCAAGCTCGCCAGCAGCCCGATCCATGAGAGCAGG  
CCCTGATAGGTGCGCAGCGCCGCGCACAGGCCAACCCATGAAAAACCACATCAAGATGCGGCGAACCA  
GCCAGATGCTGACCAGAAAGCGCATGCTGGCCAGCAGCAACAGGCTGGCGGCCGACCCTGCCCGAGCAG  
GGCAAAGTGACCGGCATTGAGGGCGCAGGAGAGGGCCAGACAGGCCAGGATCCTGCGGCGATCCCGCAAC  
TGAAACGACAACAGATCGAGCAACAAGGCCAGGCTCACCACCAGCTGCGACCACAGAAAACAGCGACATCA  
TCCACACCTCATCCGTCATTTGGATGGCGCAGCATGAGGGGATGGTCGGAGAGCGGCATTAACCCGTGTT  
AATGCGCCTGCGGATCCGTGACAGGGTGACCGGGCTGATGCCGATGTAGTTGGCGAGCTGCACCTGAGTG  
AGCCGCGCAGGCCAGTGAGGGAAGGTGTGGCAGAGCTCCCGATAACGCTCCTCGGGAGAGTGGAGCAGCA  
AAAATGCCTCCTTGCCTCCTTGTAAACCGAGCTGCTGGCGTAGTAGGGCCATGCAGACTGGCTGCCAGGC  
GGGCTCTCCAGCAGGGCGAGCGGCACCCGAACTACCTGCAACTCCGTCAGCGCCTCCAGCTGGTAGCCG  
GCGGGCGACCCAGTGACCCAGCTGTCTATAGACAGGCAGAGCTCCCTTTCGAAGTAGAATCCTTGCAGC  
GCTCCTGTCCGTCGCCGGTGTAGTGGCAGGCGCAGCGATGCCCCGTTTCGATATAGAAGGCAGCTTCCCTG  
CTCTGACCCTGCGCAACAGCACCTGACCGGCGCGCAGTGTCTGCCGTGGCAAGCGCAGGCTGATGGCT  
TCGCTCAGCGCGGCGTCCAATCCCATTGTGTCAGAGAAAAGCGGCCAGTGAGGGGGCTTGAGGAGATAGTT  
TCATGACGGCTCCGGAACAAAACGGCAGCCACATCATGCCCAAATTCACGGCTGATGCAGCAAGGCGT  
GACCGCTGCGGCAAAGGGGGACATAGCCGGGTGCCACCTTTGCCCCCCCTCGTCCGTTGGTTTACAATC  
GACGGGTTTTTTTGAACCCGGTTGACCTGTGTGACCTGGCCCCACCACGACATCAGTCTGTTAATGCCA  
AGACATTAACCTGCTGAAAAGGAAGAGAATTAGCCAATGGCTCAATTTATTTACACCATGAACCGGGTGC  
GCAAGGTAGTGCCGCCAAGCGTCATATTCTCAAGAACATCTCCTTGAGCTTCTTCCCGGGCGCCAAGAT  
CGGCGTGCTGGGTCTGAACGGCGCCGGTAAATCGACCCTGCTGCGCATCATGGCGGGCATCGACACCGAG  
ATCGAAGGGGAAGCCCGTCCGCAGCCCGCATCAAGATCGGCTACCTGCCACAGGAGCCGAAGCTGGAGC  
CGGAGCAGACCGTACGTGAAGCGGTGCAAGAGGCCGTTGGCGAGGTGAAGCGCGCCATGGCCCGTCTGGA  
CGAGGTCTATGCGGCCTACGCCGACCCGGATGCCGACTTTGACAAGCTGGCCCGGCAACAGGGCGAGCTG  
GAAGCCATCATCCAGGCCAGGGCGGCCACAACATGGAAAACAGCTGGAGCGTGCCGGCCGATGCCCTGC  
GCCTGCCGGCCTGGGATGCCAAGATCAAACACCTCTCCGGTGGTGAGCGCCGCGGTGTGGCGCTCTGCCG  
TCTGCTGCTGGAAGCCGGACATGCTGCTGCTGGACGAACCGACCAACCACCTGGATGCGGAATCCGTG  
GCCTGGCTGGAGCGCTTCTGACGACTATGAAGGCACTGTTGTGGCCATCACCCACGACCGTTACTTCC  
TCGACAATGTGGCAGGCTGGATCCTGGAGCTGGACCGCGGGCAGGGTATCCCGTGGGAAGGCAACTACTC  
CTCCTGGCTGGAGCAGAAGGACGCCCGTCTGGCGAGGAAGCCAGTTCCGAAGCGGCCGTCGCAAGTCC  
ATCGAGAAAGAGCTGGAGTGGGTTTCGTCAAACCCGAAAGGGCGTCAGGCCAAGTCCAAGGCCGTATGG  
CTCGCTTCGAAGAGCTCAACACCAACGACTACCAGAAGCGCAACGAGACCAACGAGCTGTTCAATCCGCC  
CGGACCGCGCCTCGGCGACAAGGTGGTGAAGTGGCCAACCTGCGCAAATCCTACGGTGATCGGGTGTG  
ATCGACGATCTGTGTTTTGCCATTCCGAAGGGTGCCATCGTCGGCATCATCGGCCCGAACGGTGCCGGTA  
AGTCGACCCTGTTCCGCATGATGTGCGGTGAGGAGCAGCCGATTCGGCGCCATCACCCGGGTGAAAC  
CGTGGTGTGTCCTCTGTGATCAGTTCCGCGACAGCATGGATGACAAGAAGACGGTCTTCGAAGAGGTC  
GCTGACGGTCAGGATATCCTGCGCATCGGCAACTACGAGTTCGGAGCCGCGCTATATCGGCCGCTTCA  
ACTTCAAGGGTTCGGACCAACAGAAGCGGGTTGGCGAACTCTCCGGTGGTGAGCGCGGTCTGCTGCATCT  
GGCCAAGCTGCTGCAGACCGCGGCAACGTAAGTACTGCTGCTGGATGAACCGACCAACGATCTGGATATCGAA  
ACCCTGCGCGCCCTCGAGAACGCCCTGCTGGAGTTCCCGGGTGTGCCATGGTCACTCCCACGACCGCT  
GGTTCCCTCGACCGTATCGCCACTCACATCCTCGACTATCAGGATGAGGGCAAGATCGAGTTCTTTCGAAGG  
TAACTTTACCGAATACGAAGAGTGAAGAAGAAGACCTACGGCGCCGAGGCCATCCAGCCCCATCGCGCC  
AAGTACAAGCGCATCGCCAAATAAGGCTGACTGCGTGTGAGGGGAGCTTCGGCTCCCCCTTCTCTTGCC  
TTTTGACTTACAATCCTAGACGGATGCCTTTGCATGGATGTAGCACGATGACGACCCCCATAGAGAAAAA  
ACTCACCATCCAGATCCGGGTTGAACCGGGTTGCCTCGGGCCGATGGCAAGGAGCACATAGAGACCTTC



TGTGCTGCTGCCACCAAGATTTTTGCCGCCGTGGAGCCGAGCTGGTGAGCTGGGTGCTGATCCCCCGCT  
ACGACAAGCAACTACCGGAGCAGGAGTTCTTTATCGAGGGGCGCAAGCTGACCGAAGAGCAGGCGAGCCT  
TTTTCTGCGCCGCTTCGGCCGCGAACTGGGTGAGGTTCAAGATCGGCTCGACTCGGTGCTGGCCCAGCTG  
GTCGAGCGCTACTTCAAAACCTCTAAGCCCCAATTTTCGATAAAAAGGTTCTCTGCTGAGAACCTTTTT  
TCACGCTCAAAAAGCAAACGTTTGAATTTTTACTCTATTTCATTGATCTGCTTCGCAGATCCGGGGTTTTGT  
AAACGGCGCCGCTGTGTAATAAATGTGCGCGCTGTCACGGTATCAGGACGAGTCTGGTTACTTAACCGCC  
AGAAACAGGGCAATTTACCCCGCATGGATGGGATAGCCGTTCCCTGCTGCTTATTTACAGTACCTAT  
TGGAATCCAACATGAATCAACAACACCAAGCTGCCAATCAGGCCGCCGGGCAAGGATTGCTTGAGCGCCT  
GTTTGGCCCTGCAAGGCCATGGCACTACCGCCCGCACCGAAGTGATCGCCGGTATCACCACCTTCCTGACC  
ATGGTCTACATCGTGTTCGTCACCCCGCAGATCCTCTCTGCGCGGGCATGGACACCAGGCCGTGTTCCG  
TCACCACCTGCCTCATCGCCGGTATCGGCAGCATCTGATGGCCCTGTTGGCCAACCTGCCGATCGCGCT  
GGCCCCGCCATGGGCCTCAACGCCTTCTTCGCCTTCGTGGTGGTTCGCGGGCATGGGTTACTCCTGGCAA  
GTGGGCATGGGCACCATCTTCTGGGGTGCCATGGGTCTGTTGATCCTCACCTGCTGCGGGTGCCTTATT  
GGCTGATCGGCAACATCCCGCTCACCTGCGGGTTCGGCATCACCGCGGTATCGGTCTGCTGATCGCCCT  
GCTCGGCCTGCACAACCGGGGATCGTGGTGGCCAGCCCCGCGACTATGGTGACCGTGGGCAATCTCACC  
TCCCTGCCCTGCCTGCTGGGTCTGCTCGGTTTTCTTCTGATCTGCATCTTCTCCGCCCGCGGCGTCCACT  
CCGCCGTGCTGATCGCCATCGTGGTACCACGGGTCTGGGCTGGCTGTTTGGCGATGTCACCTTCAAGGG  
CTTCGTCTCCATGCCCCCAGCATCGAGCCAGTGTTCGGCCAGCTGGATCTGATGGGATCGCTCGATATC  
AGCCTCGCCGGGATCATCTTCTCCTTTATGCTGGTCAACCTGTTGACTCTTCCGGCACCTGATCGGCG  
TCACCAACCGCGCAAGCTGGCCGATGACAAGGGCCACTTCCCGCGCATGAAACAGGCGCTGATGGTCTGA  
TAGCGTCAGCTCCGTGCGCGGCGCCTTTATGGGCACCTCCTCGGTACCGCCTTTATCGAGAGCAGCTCC  
GGCGTCGCCGTGCGCGGCCGTACCGGTCTGACCGCCATCGTGGTTCGGCCTGCTGTTCCCTGCTGGCGATCT  
TCTTCTCTCCGGTTCGCCGCCATGGTGCCGGCTACGCCCGCGCTGGCGCCCTTATCTATGTGGGCGTGCT  
GATGTGCTCCGAGCTGACCCGGGTGAAGTGGGAAGATCTGACCGAAGCAGTACCGGCCCTTTATGACCGCG  
GTGATGATGCCGTTACGCTTCTCCATCACCGAGGGGATCGCCGTGGGCTTTATCTCCTACTGCGTGATGA  
AGGCAGGACCCGGCCGCTGGCGCGAGATCAACCCCTGCGTGTGGTGGTGGCCCTGCTGTTTCGTCCTCAA  
GTTTCGTCTGGGTGCAGCCACTAAGCGGCATCTGTCCCAATAAAAAATGCCAGTCAGTTGACTGGCATT  
TTTTTATTCCGGCGTGTCTATAGACCTATGCGCTGGCCATAAAAAATCCGAAACCAGTGGTTTTCGGATT  
TTTTGATTATCAGCATGTGGCAGAGCGGGGTAATCCCTCGTCTGCCACCTCGGCAGCATCTTACCGGCAG  
CCATAACGACTTCGATGTAAGCCAGTGCAGCGGTTCGATACGCGCCAGTACGCGCTCCTTGGACCAGCGC  
CATTACGGCGTTCGATGGCAGGGGGGATTTACCCAGAACGGTGATGACGACCGGCAACGTACAGGCTTACTC  
AGCAGCCATACGGGCTTCGATGTAAGCCAGTGCAGCGGTCAATACGCGCCAGTACGCGCTCTTTGCCGACC  
AGCGCCATCACGGCATCGATGGCGGGGATTTGGCCAGACCGGTGACGGCTACGCGCAGCGGCATACCAA  
CCTTGGCCATAACCTGACCCAGCTCGGCAGCGGTTCGCTTCAATCAGCTCGTGCAGCGCTTCGGTGGTCCA  
GCTGTCCAGTGCAGCCAGCTTGGTTTTGGCCAGTGCAGCGGCTCGGCCGCAACGCCACGCAGGTGCTTC  
TTGGCAGCCGCTTCGTGATCGCCTCAAAATCTTCGAACAGATAGCGACTCTGCGCGGCCATCTCGACCA  
GGGTGTTGCGAGCGCTCGGCCAGCAGGGTACTACCTCGGCCAGTGCAGGGTCAATTGCTGGTGTGATCTT  
CTGGTTTTCCATGTGCCAGGCCAGGTGCTTGGCCACATAGGTTCGGATCCAGGCTGCGCATGTAGTGGTTG  
TTCAGCCACAAGAGCTTGTGGTGTGAAGGCAGAGGCGGACTTGGAGATAGCATCCAGACTGAACAGCT  
TGATCATCTCGTCCAGGCTGAAGATCTCCTGATCGCCGTGGGACCAGCCCAGACGTACCAGATAGTTTCAG  
CAGCGCTTCCGGTAGGTAGCCGTATCGCGGTACTGCATCACGGAGACAGCACCGTGGCGCTTGGAGAGC  
TTGGCGCCGTCGTACCCAGGATCATGGAGACGTGGGCAAAATTCGGCACCGGCGGCTTCAGCGCCTTGT  
AGATGTTGATCTGGCGGGGTGTTGTTGATGTGGTCTTCGCCACGCACCACGTGGGTGATCTCCATATC  
CCAGTCATCGACCACTACGCAGAAGTTGTAGGTTCGGCGCGCCGTCCGTACGGCGGATGATCAGATCGTCC  
AGCTCGGTGTTGGCGAACTCGATGCGGCCACGGACGTGGTTCATCGAACACCACGGAACCTTCGGTCCGGT  
TGCGGAAGCGGATCACGTGCGGCCATCGGCAGGGTATCGTGGGCGTGGTTCGCGGCACCTTCCGTCGATA  
ACGGGGCTTCTCGCCGTTGGCCATCTGGCCTTCACGCAGCGCTTCCAGACGCTCTTTGGAGCAGTAGCAC  
TTGTAGGCGCGGCCATCGGCCAGCATCTCGTTCGATCAGACCGTTGTAGCGATCGAAGCGCTTGGTCTGGT  
AGTAGGGGCCCTCATCCCAGTTCAGCTCCAGCCATTCCATGCCCTCAATGATGGCGTCGATTGCCCTCCTG  
AGTGGAACGTTCCAGATCGGTATCCTCAATACGCAGCACGAACTCACCGCCCTGGTTCCTTTGCAAACAAC  
CAGGAATAGAGTGCAGTACGGGACCGCCGACATGCAAAAAGCCGGTTCGGGCTGGGAGCAAAACGGGTTT  
TGACTTTCATCTTTAAGCCTTGTGTAGAGGGCCTTGGGCCAATTCGTTAGAAAAAACCGTCGCATTTTAG  
CACCGACAATCACGGATGGGAAAACCATGACGCCATTGCGGGCTAAAGTAGGGGGTTAAATCTGTCCGCA  
TTTTGCATCTGTAGCCCAGATTTTGAAGAGGATCGCAAAAACAGAAGCCCCGTTTCCGATTTGCTATGCACA  
ATGCTGGAGAGCTGCCTCCTCCGGTTCGATACCCAAATAACGCTCACACACTTCTCACGAACAAGGAAGA  
GACGATGCAGTTCGGTTCATCCAGAATCGCATTCTAGTGATGGCCGGGATCGCCATGACCGCAGCCCTG  
GTCATCCTGATCCTGCTCAACCAATACTCCGGCCAACAGACCCAAACAACCTCACCATCAGCTCCAGCCGTG  
AAGCGCTGCAGCAGGAGGCATGGCAGAAGGTTCAGCGCCAATGCCCGCGCCGAGGCGGCAACCATCACCCA  
ACTGTTGCAAAAGGGGCTCTCCTACACCCAGCAGATGGCCAGCGCCCTCGCCCTGCAACAGCAAGGCAAA  
CTGCCGCTGGATCGCCAGCAGGCCACCGACCTGCTCAAGGCACAACCTGGCGTTGGAGCCCCAGCTCTATG  
CGCCTTTGCCGGCTTCGAACCCAACGGTTTTGACGGTTCAGGATGCTAGCTTTGCCGGTTCAGACCGCGCT

CGGTAGCGACAGCAAGGGGCGCTTTGTCCCCTACTTCTATCGCGACAAGGATCAAATCGGCACCGATCTG  
CTGCTCTCCATCGAAAAAACCAACCCGGACGAATTCGGCAATCCCGCCAACGACTACTACGCCTGCCCGA  
AGCGGGAAGGACGCTCTTGTCTGATCGATCCCTTCAAGGTGGATATCAACGGCCAACAGGTGCTGGTGAG  
CACGATCACCACCCCATCATGGTGAATGGTCAAGGGGATCGCCGCGCTGGATCTGGCGGTGGAC  
TCCATCAGCCGTGAGGCAAGAGCCTCAACAGCAATATCTATGACGGCAAGGGCGAAACCCTGATCGTCA  
GCGCCGCGGTGTCATCACCGGCACCAGCGGTGATGCCAGCCTGCTCGGCAGCAGCGCAAGTAAGGTGCT  
GGGCAACCAGTGGCAGCAGTACCTGAAACCCGGAAGTTCAGCGTCAGGAGCTGGACGAGTCATTCGGTATT  
TCCGTCCCCATCATGGTGCCGGGAATGAGCCGCAACTGGGCCATCATCGTCAACCCTGCCCTACAAGGTGG  
TACTGGCGGGCGCCGATCAACTGGAAAACCAGCTCAATGAGATGAACCGGGCCGCGGTGACCCAGCAATT  
GGTAGGCGCCGTTATCGTACTGGCGCTGGCGCTGGCCACCATGCTGGTGAATTGCCCCGACCATCACTGGC  
CCCATCCGTCAGATGGTCACTGGTGGATGACATCGCCGATGGTGAAGGGGATCTCAGCAAAACGCTCA  
CAACCCGCTCGGTGGATGAGCTGGGGGATCTGCCAAGGGGATCAACCCGCTTTATCGACAAGCTGCAAGG  
GCTGCTCGGGGATGTGCTCAAGACTGCCAGCGAGGTGAACCGCTACGCTGGTGACACCGATCGCATCGCC  
GGTCAGACCGACAACAACCTGCAGCACCATCAGGCGGAGATGGAGCAGATGCTGACCGCGGTACAGGAGA  
TGTCTACGTGAGTCAAGGAGTCCGCCACCCACGCCAACAACACCGCCGACTCGGCCAAACAGGCACAAAG  
CGCGGGGATCAGGGCAAGGAGCGCTTCCAGCAGGTGATCCAGTCGATGCACAAGGTGCGGGCAGAAGCC  
GGTAAAGGGGCTGAAGTGGTGAAGGGCTGGCTCACGACAGCGCCAGATCACCAGCATCCTCACCCTCA  
TTCAGGGGATTGCCGATCAGACCAACCTGCTGGCTCTCAACGCTGCCATCGAGGCTGCCCGGGCTGGCGA  
ACAGGGCCGCGGCTTTGCGGTAGTAGCCGACGAGGTGCGCAAACCTTGCGGGCAATACCCAGCAGGCGGTG  
CAGAACACTCAGGAGTTGATCGAGAAGATCCGCCCTCAGCTCCACCAATGCAGTCAACGCCATCACCAGA  
GCCAGCAGCTGACCCATCAGGCAGTGAGCGAAGCGGATCTGGCGGAAGAGGGCGTCCGGCAGCATCTACCA  
GGCCATCTCCACCATCAACGACATGACCTATCAGATCGCTTCCGCCCGCGAAGAGCAGAGCTCGGTCTCA  
GAAACCGTCTCCGGCAACCTGTCAAAAAACCAACGCACTGGCCAACGACATCGCTCAGGATGCGACCGAAA  
CGGCCAAAGCCAGTCAGGCATTGCGTCAAGGCGGCCGACAAATTGCAGCAATTATTTGGTCAATTTTCGTCT  
CAGCTGATAATTTTCCGCCTCAGGACTCTCCCCCTCGGGGGCGAGTCCGTTTACCATAGGCGACGATTTG  
CCTGATGGCAGGCAATGTAGTGAGAGGTAATGCCGTGCCACCCCGGACCGTCCGCCACGAGGCCATAA  
CAGACGAGCCAGCAGCGTTCGCCAAGACGAATCACAAGGATCCCTGCTCCATCGCATCAATGCCCGGACC  
CTGTCCCTGCGCAACGTTTTGGCCAAGGGATGAGCAACCTCGGTCAACGCCGCCAGGATGCCAAAGCAG  
GCAAATTCAGCTTCAGCCCGCTGCCCGCGAAAAACCAACCATAGGTCTGCTGATCCTGATCCTCCGCTCTG  
GTTGCTGGTACTGGCCTGGGAGCCGGCACCATCCGCCCCAAAGCCGCCCTTCCGGCTCACTGGAAGTG  
CCGCTGGCCGTGCTGCTCAAGCTCTAACTGTGCGTAATGCCCGGGCAGGCGGTGCGCCCGCAGCAGCCA  
AGCCGGTGAAGAGAAGGTCAACGGTACTTGGCTGCAACACGATGTGCAGGCGGGTGAGACCCCTACTCT  
CATCTGGCGTAAATTCAGATTGCCGGGTGCCGAGCTGAGCCGCTGATCGCCATCGAGGGGCGGATCGT  
CCCTTGACCCGCTGCAATCGGGCCGCTCTATCTTATCTTGGTGGACGACACCCCGCCGATCCAGCGGG  
TGGAGATCCGCTCCTACGGTCAAGGCTGTCTACCGCTACGACCGGCAGGGCGAAGGGTTCCGCCCTCAAGGA  
ATAACAAAAACGGGAGGCGCTGGCCTCCCGTTTTTTTTCAGTCAAATATCTTCAAATAAGCTACTGACTTC  
ACAATATTTTTAGCTTGTTCAAAAACGAAAGGGGTCAAATTCAGCAAGGATCGGGCTAACGTACAATCG  
TTTTGTGCTTTAGACAGGGATTGTTCTACGTGCTACTGGGACAAAGAGACGTGGTCAAGTATGAGCCAACC  
CCTGCTTGCAAGGCAAATGCAGCCAGCACGGGCTTAGTTTCAATTTGTTATTGATAGGATTTAGCAT  
GTCTGACATTCGCACCGGCCAGGTAATAATGGTTCAACGAAAACCAAGGGTTTTTGGCTTTATTGAACAATCC  
CAGGGTCCGGACGTATTGCTTCACTTCTCCTCCATCCAGAGCACCAGGTTTTCAAAAACCCCTGGCTGAAGGTC  
AAAAAGTCCAGTTCAGTGTGACCCAGGGCAAAAAAGGTCTCAGGCTGAGAACGTTACTCTGGTCTAAGC  
CCGCGCCAGTGAATCATGCAGGAGGAGCCAAGGCCCTCCTCTTTTTTGGCCGCAATTCCTCGCCTTCCAC  
CACCTGTACAAACCGCTTGCCTCGTACAATCCGCACCATGAGCCACATCCCTTCCCTGTTGGCAGGAGG  
TGGTAGAGACGCGCTGAGTAAACGCCAGATACGACAAAGCATCGCAGCGCGATATGAGGGGCAATTCAAA  
GGGATCATGAAAACCTCGAAGAGAGATTGGAGCGGGAAACGAGACTCGAACTCGGACCCCGACCTTGGC  
AAGGTGCTGCTTACCAACTGAGCTATTCCCGCAACAGAATGTCATTTACAAGTGATTGGAGCGGGAAAC  
GAGACTCGAACTCGGACCCCGACCTTGGCAAGGTGCTGCTCTACCAACTGAGCTATTCCCGCAACGGAA  
TGTAATTTTACAAATGTTTGGAGCGGGAAACGAGACTCGAACTCGGACCCCGACCTTGGCAAGGTGCTGC  
TCTACCAACTGAGCTATTCCCGCAACAGAATGTCATCTGCAAGTGAATTGGAGCGGGAAACGAGACTCGAA  
CTCGGACCCCGACCTTGGCAAGGTGCTGCTCTACCAACTGAGCTATTCCCGCATCGGAATATCACTTAC  
AAATTTTTTGGAGCGGGAAACGAGACTCGAACTCGGACCCCGACCTTGGCAAGGTGCTGCTCTACCAAC  
TGAGCTATTCCCGCAACAATTTGGTTGTCTTGGAGCTGGCTGATGATTGGAGCGGGAAACGAGACTCGAA  
CTCGGACCCCGACCTTGGCAAGGTGCTGCTCTACCAACTGAGCTATTCCCGCATCGGGCTGGTTTTGCAC  
CAGTGTGATCATCAGATTTTTTGGAGCGGGAAACGAGACTCGAACTCGGACCCCGACCTTGGCAAGGTGCTG  
TGCTCTACCAACTGAGCTATTCCCGCAACTACCTTAAAACAGCCGTACAGCATTTGGTTGCTTGCAGTA  
CTGTACGGGAGCCGAATTATAAGAGCAGTCATTTCAATTTGCAAGGGCTTTTTTGTCTGGTTGCGCGGCTT  
CGCTCAAAAAGCTGGCCGAACTGTGATTTTTAGCAGCCAGCGCATGACAACCCCTTGCCGGGGAAATCAGAT  
CTTGAAGACGTGGCTGCGATAGAATGCAGCTCGGGCATGGATTCGCGGATGTCGTCAGCGCTGATGG  
GTGCCGCTCTTCTTGAAGTATCCAGCAACTCCGGCTGCCAGCGGCTACCAGCTCCTTGATGGTGTGTA  
CATCGACGTTGCGGTAGTGGAAGAAGGCTTCCAGATCGCTCATGTGCTTGACCATGAAGCGGGCATCTG

ACCGATGCTGTTGCCGCAAAGCGGGCTGGTGGCTCCGGCACCCACTGGCGAATGAAGTCGAGGGTCTCG  
GCAATGGCTTTTCGCTCATCGTGGCTCGCCTTGACCCGGGCCACCAGACCGCTCTTGGTATGGGTGT  
TGACGTTCCACTCGTCCATCTTGGCCAGCTCTTCATCACTCTGATGAATGGCGATGACCGGCCCTTCGGC  
CAGTACGTTTCCAGATCCTTGTGCGGTGACTATGGTGGCGATCTCCAGTACCACGTTCTCTTCGGGGTCGAGA  
CCCGTCATCTCCATGTGATCCATAACCAGGTTCTGCGCGCTGACTGTGATGATTGCTCTCTCTATTGGGA  
GGAATGGCGGAATTTTGGCAATTTGCATGTATCATACTGGCTTTGGATCTGTTCATAAACTGGCGAATCG  
AGTGGCAAAGAAAGCAAACCTCAATCTGGGTCAACAAAAGGCGCGTCCAGGCCAACCGCGAACGGCGGCTG  
CAAAAAGATCACACCACAGTGGTGGATGACACCCTGTTTGGCCCCGCCATCGAAGGGGTGGTGTACAGCC  
GTTTTGGTCCAGCACGACAGCTGGAAGCGGTGATGGCACCATCCACCGCAGCAACCTGCGGCGCAGCAG  
CATCAGCAGTCTGGTGTGCGGGCACAAGGTAGTGTGGCGTCCCGGCTCAATGCCGCGACAGCGGGCTC  
ATCGAGGCGGTGCATCCGCGCACTCGGTACTGACCCGGCCGACTTCTACGACGGGGTCAAACCCATCG  
CCGCCAACATCGACCAGATCATCATCGTCTCGGCGGTGATGCCCGAGTTCTCCACCAACATCGTCGACCG  
CTACCTGGTGGCCGCCGAGGATGTGGAGATCCGCCCTCATCGTGTGAAACAAGTTCGACATGCTCGAT  
GATGCCGCCAGAGCGCGCATCGAAAAGCCAGCTCGAAAACCTACCGCAAACCTCAATTACGAGGTGCTGCTGG  
TGAGCTGCGAGAGCGGCGAAGGGCTGGATGAGCTTAAAAGTGTCTGACCGACAAGATCAGCATCTTCGT  
CGGCCAGTCCGGGGTGGGCAAGTGTGCTGCTCACCAACGCCCTGATGCCGGGGCTGGATGTGCTCACCGGC  
GAGATCTCAGAAAACCTCGGGCTCGGCCAGCACACCCTACCACGGCGCGGCTTACCCTTCCCAGCG  
GTGGCGATCTGATCGACTCCCCGGGATCCGCGAGTTCGCCCTCTGGCATCTGGAAGCCGACCGCATCAC  
CTGGTGTCTTCGTGAGTTCGCGACTATCTGGGTGGCTGCAAGTTCGCGACTGTACCACAAGGATGAT  
CCCGGCTGCGCCCTGCGCGCCGCGGTGACGCGGGCGCTATCAGCGCCGATCGTTCCACAACCTATCACC  
GCATCCTGGAACCATGCAGGAAGCCGTCACGGTCGCCAGCAAGCGCGCTGTGACCCTAATAAACCTA  
CGTTGATGATGAACATGAGCATTACTGACAACCTGAAAATTGCCGGTCAATACTGTCTGCCAAGCACGC  
CCTCTCCCGTCTGATCGGCAAGTTTGGCCGCCGCGAAGCGGGCAACATCACTACCAAAGTGTGATCGAGGCT  
TTTATCAAGCAGTACAAGGTGACATGAGCGAGGCGCTGCACGAGAGCCCGGCCACTACAAGAGCTTCA  
ACGAGTTCCTCACCCGCGAGCTCAAACCCGGTATCCGCCCGTGGTAGAAGATGACATGACCCTGGCGCT  
GCCGGTGGATGGCACCGTCAAGCAGCTCGGCCCATCCAGCAAGGTGCGATCATTCAGGCCAAGGGCCAC  
GACTACAGCGCCCGAACTACTGGGCGGTATGAGGATCTGGTGGCGCCGTTCAAGGATGGCGACTTCG  
CCACCATCTATCTGGCGCCCAAGGATTACCACCGCATCCACATGCCGCTGGACGGCTACTGGAGAGCAT  
GGTGTTCGTGCGGGGGATCTTCTCCGTCAACCCGCTACCCGCGGAGAACGTGCCAACCTGTTTGGC  
CGCAACGAGCGGGTGGTGGCCACCTTCCGCAACCCACACGGCCCATGGCACTGGTGTGGTGGTGGCA  
CTATCGTGGCCAGCATCGAGACCATCTGGGCCGGCAACATTGCGCCGACCAAAGAGAAGAAGGTAGTGGC  
CCGGGATTACACCGGCGACGAGGCCATTACCCTGCAAAAAGGGGCCGAGATGGGCCGTTTCAAGCTGGGC  
AGCACCGTGGTCTGCCTGTTTGGCCCGGCATGCTGGCCGGTTCGAAACCGCATCTTGCCAACGGGGTCA  
CCACCCGATGGGTGAGCCCTTTGCCAAGCTGGCGGAGCAGGCATGAGCGAGCAACCGAACGCCCTCGCAG  
AAGAACAACCCGCTGCACGGGTGACGCTGGAAGCCATCGTCACCGCGCTGGTGAATACTACGGCTGGG  
AAGAGCTGGGGCAACAGATCAATATCCGCTGCTTACCAGATAATCCAGCATCAAGTCCAGCCTGAAGTT  
CTTGCGCAAGACCCCTGGGCTCGAGAGAAGGTGCAAAAGCCTTACCTTACGTCCAGCGCAAGCAAGCC  
AAATCGAAGAAGGAAGGGCAAGATGGCCTTTAAGATTACGTACACCTATAAAAAACAGGCCAAAGAGATC  
GGCTACGCGAACGACAAGTTCGCGCAGCATCTACGACCCATCGCAGCTGCCGAAGGGCTGGATCTACCA  
GTTTTACGCTATGGAGGCCAGCTGGCTCAGGTTTGTGCGCCGTGACAAGAAAAGCGTGAAGGATTACCA  
GGAGAACTACTTCAAAGAGTTGGGATTCTCCAACATCGTCATCGAACGGGATCTTCAGGAGTAACCATGC  
GCACCTTGACCCTGATGGCCGCTCTCTGCTGCTGGCGGCATGCAGTACACCGGAACAACATCTGGTGGG  
CGGCATCGCGACAGCCACGGCTGTATCGGCAGTGGCGGCTATCAGTGGTCAGCGCTGACTGGCAAATGT  
GTGCGCCTGTTTGAAGAGGGTGTCCGGCTCAATCCGACCGATGCCAGCCAGACCAGCAGCCCTTCGTGA  
TGTTCATGCCGACAGACGACAGGCCGAATTGCATCTGCCAAGCGGCGAGCAGCACCTGCTGACCCGTCA  
AGGTGCGGAGGGTAACCTGGTCTGTGGCAGGGCAGCGGCTACACCTCTTTATCTGGAAGGGTTATGTGCTC  
AAGCACGGTGACAAGGCGCTCTATCACGGGGAATAACCCGAGGAATAGCGCACGGCGTGGTATCGGCAC  
GATACCCGCGAAAAAATGCCGACCCAAGGGGTGCGCATTTTTTGTTTTTTGC AACAGCCTGTTATCAGGCA  
CGGCTGAGGTAATCGGCCTGTCTTACCCTTGTAGCTGGTGGAGCTCGGTCAGCCCCATGGGGCCACGGG  
CATGCAGCATCTGAGTCGACACCGCCACCTCGGCGCCAGACCAAACCTGGCCACCATCGGTGAAACGGGT  
GGAGGCGTTGACATAGACAGCCGCCGAACCGGCGCCATTGACGAAACGCTCGGCATTGGCCAGATCGTTG  
GTCAGGATGGCATCGGAGTGGCCGGCATTATGCTCGCGCATATGGGCCAGCGCCTCGTTCACATCCGCCA  
CCAACCTGACCCCGAGCTCAGCCGAGCCACTCGGTATCGAAAATCCTCCGGCCCTGCCTCGCACAAAGTT  
GTCGGCGCCAGTCAGCAACGCCATGGCATTGGGCGCGGCCACCAGCGTCACCTTGCCTCGTTCATCAGC  
GTCACCAGTTGCGGCAGGAAGGTGGCTGCCACCTTCTCGTGTACCAGCAGGGTATCGAGGGCGTTGCAGG  
CGGAGGGGCGTTGCACCTTGGCGTTGTGATAACCGCCAGAGAGCGCACCCAGATCAGCACTCTCGTCGAC  
GAAGATATGGCTGATACCGAACCCCGGATGATGACCGGGATGGAGCTGTTCTCCTTGCACATCTTGTGC  
AGGCCGGCACCGCCACGGGGGATGATCATGTCCACATAGCGGTGCGAGACGCAGCAACTCGCCGACCAGCG  
CCCGATCCGGGTTGTGATGTACTGCACCGCCGCTCGGGCAGACCGGAGGCCGCAAGGCATGCTGGAT  
CACCCGACACAGCTCCAGATTGGAGTGAAGGTCTCGCGCCCGCCACGCAATATGCTGGCGTTGCCAGTC  
TTGAGGCAGAGGCTGGCGATATCGATGGTACGTTGGGGCGCGCCTCGTAGATGACGCCGATAACCCCGA

TGGGCACCCGACGACGGGAGAGGGCGCAGGCCATTCTCCAGCACTCGGCTATCCATTTTCGGCGCCGACCGG  
ATCATCCAGCGTGATCACCTTGCGCACATCCGCCACAATCCCGCCAGCCGGGCGGATTGAGCAGCAGG  
CGATCCAGCATGGCTTCTGACAAGCCTGCCTCACGACCGCGGCAATATCTTTCGCGTTGGCTACGAGGA  
TCTGCTCACAGCGCGCCTCAAGCTCGTCAGCGATGGCGGCCAGCGCCCGTTCTTCTGCGCCGTGCTGAT  
GGTAGCCAGCTGATAGGCGGCTTCTCGGGCCGCTGCCCATTTTCTCCAGACTCATCTCATTTCCCTTT  
GTTTCATGCCATGCCGCCCTGATTAGAGCAGCACCATGTCTGTCGATGGATGGCCACAGAGCCGTAGCCA  
TAGCCCAATACCTGTTCAATCTGATCAGAGTGGACGCCGCGCAGCTTCTCCAGCTCCAGATGGTTCGTAAC  
GGCAGATGCCACGGGCCAGCTCGGCGCCCTTGGGATCAAGAATGCGCACACATCGCCCCGAATAAAGTC  
GCCCTTGACGGGCGACAATCCCTTGGGCAGCAGGCTGGAGCCTTTATCCTTCATGGCGGGCAGAGCCCC  
TGATCCACATGCACCTTCGCCGTGAGGGGGCGGGCTGCCAGGATCCAGCTCTTGCGCCCTCCAGCGGGG  
AGGCCAGCGCCGGAACAGGGTGCCAATACGCTCGCCCTTGGCAAGACGGCCAATCACCTCCGGCATCTG  
GCCGGTCGCGATCACACGTTGACACCAGCTCGACGGCCACATCGGCGGCCCTGCAGTTTGGTGGCCATG  
CCGCCGGTGCAGAGCCGCTGACACTGTCAACCGCCAGCGAGCGCAAGGTATCGTCGATGGTCTGCACCT  
CTTCAATCAACTGGGCATCGGGATTGGTGCAGGATCGGCAGTAAAGAGCCCTTCTGATCGGTTAGCAG  
GATCAGCAGATCCGCATCCGCCAGAATGGCGGCCCGCGGGAGAGGTTGTCGTTGTCGCCGACCTTGATC  
TCGGCGGTGCCACCGCGTCTTTTTCTGTTGATGACCGGAATAATGCGGTGATCAAGCAGGGTGCAGTGG  
TGTCGCGGGCGTTGAGGTAGCGCTCCCGATCTTCCAGATCGGCGCGGGTCCAGCAGCATCTGGCCGATATG  
CAGACCGTAGAGGTTGAACAGATCTTGCCATAACCGAATAAGCTGGGTCTGACCAACCGCCGCCAGCATC  
TGCTTGTGGGCAGGGTTGGCGCCAGTGGCGGGTGAACAGATGTTTACGCCCGCGCGGATAGCCCTG  
ATGTGACGACCACGACCCGATGGCCGTGACGGTGAAGCCGCACACTGTCTGACCAGCTCGACCATATG  
GGCACGATTGAGCTGGGAAGACCCCTGTGAGCAGCTGGTGCCCAACTGACGACTATGGTCTGTGTTT  
TCCATGGGAGCATAAAGGCTAAAAAAGTAAGGAATATCTTTATACCCACGGCCATGGTGCCTGCAAGGC  
AATTAACGCCGGGGTGAGGAGATGAAGCAAAGGCCCGGATGATTGCGGGCGGAAGGGGAGATGGCTGACT  
GATGCCCGGCAAACAGCGGGATGCTGCTCGCCGGGCATCAGGGATCAAGCAGCGGTACGGTCAACTCAT  
TGGTGACCTGATCCGCTGGCGCTAACTGACACTCCAGAGCCGTCAGTTTGTGCTGATGAGCTTGTAGAA  
ACGGTTGAGGGTCCGCTCCACTTCTACCTGGTCTTCTTGGGGATCGGCTTGTCCAGCCACTCACCATCA  
GCATTGTAGAAACCGAGCTGATAGTGGTAACGAAATGGTGTGTCCTGCTCCAGCACCAGCCACCAGC  
CCCAGAACTCCCGTTGTCCGGCGCAGGCTTGGCGCTGACACAGACCAGGCAGTCGAAACGATAACG  
CCCCTCTTCGAGAGATCTTCGCGCAAATAGGGCCCAATTGCAGCAAACCTGCCTCAGCATCGCTTGTAG  
GTCACTCTTTTTCAGACATGTTAACTCCCTGTTAAACAAGCCCGCCACCTCGGGATGGCGTCAGTTCTTT  
AGCGCAATGTGAGGTACACAAATGCTGTTTTAGCCACTCGACGATTTTCGTCCAGTGCCTTGTACATACCC  
TCCAGCAAAGGCTGTTTGTGCAATACGATGGCCTTGCCGTTTACGACTGGCCGCCGCAATGCCCGTACAT  
CCTGCTCGGGACAAATAAAATCTCGCTTGTGTCCAATACTTAATATCGGCACAGAGGTGCGAGTCCCCAG  
TAATCCTTGCCTTTTAAAGTGAATAACCTGGCACTTGGTACGCATGCCGTCCACTGCGCCGCATCCGCC  
CCCAACCGGTTGGCCAGACTATCCCGCATCATGCGCGGACACTTGGCAAACAGCTCCTGATTGGTAAACA  
CCTGATTGACCCCGCGCCGACACAGACCAGGTGCGCAGCTTGAACGGTTCGATAAAGGCCAGTCTGGC  
TGCGATATTGCCCGCCAGACGCATTTCCACCATGGCGATACGCTGATGATCGACCCAGGCCACCTCGGAG  
AGGTAATGGAGCACCAGCTGATGGAGACGGCTGGTATCCTGCACCAGCGCCAATGTCGCGCATAGCCGA  
CCCCGGGCATATCGAGGGAGAGCATGCCGATACCGTTGGGCTCGAGCCGTTTGAGATAGAAGTTGAGGAA  
ATCGAGCTGCAGGGAGTGCATCCCAGCGCTGATGATCACAGCGGCACCGGTTTTTTCGGTTCGTCGGCTGG  
TGGAGATAACCTGAATATGCTTGCCGCGAAAAGGCACCTGGATCTCTTTGAGCGGCACCTTGAACAGGC  
GACCCGCTCGCGATAGGCCATGTTACCGAGCAACTGGGCTGATCCGCCAGCTCGTCATCCTTGAGATG  
GGGATAGCTGGCGATGGAGTAGTAGCGCACCGCCTTGGAGCAGCTGTTTCAAGGCGCCAGAAGGATCACCC  
TTCTCGCGCAGTTTCGCGGCCAGCTTGAATAAGTTGCCAGCCACTGACTCCATTCGTAGATCCAATTGC  
CGGCACCATAGCCCTTGTATGGTATCGAGATAGCAATCGTGGGTGCGCTCGCCAGTCCAGTGGCGATACG  
GGCCAGGGTCTGCTCCACTTCGATGGGGTCTGCCCTTCCAGGTCCAGGAGGGACGGCGCAGCAAGCGA  
TACCAGCTCTTTGACATGGATCCGTCGATAAACATCTCGTCTGACTCGGCTTGCGCCAGATCAGCCGCAC  
TGGAGTTGGAGATCTCGGATGTTTTCCAATACCTTCTTGACCGGGTAAAGAGCTGTTTCGGTTCAGGTTT  
GTCTTCGTTCAAGTCCAAGATAGTGTCCCATTCATATCAGGTAATAGCTCATCTTAACCACTTTTACTGC  
CCATCAGCCACCCTGCAACAGATTGATACACAAAAAACAGGGCTCCAAATGGAGCCCTGTGAAACCAT  
TATTGCCGGTTCGCGACCAATGGACGCAGTGGAGCTCACATCCCGCTCCCGTTACTTTTTCTGCGCAGATCG  
GTGTGGCGAACTCCAGTGCCATATCCACGGCTGTTTCGATCCAGGTATCCTGCGGGATCGCCACTTCGAA  
ATCATCCAACAGCGCTTCTCCCATCGGCTTGGCGAAAATCGCGATGAACTTGGCTTTCGGGTAGAGCTCG  
CGGATCGCCTTGGCGGTAGTGGCGGTGTCCACCAGATCTTCCACCACCAGCCAGCTTCCGCCGTCACCGG  
CGGTGGTGGCAGCCTTTCAGACCACCAACTCGCGCTGGCTGTCATGGTTCATAGCTGGAGATGCAGAGGGT  
TTCCACATTACGAATGCCAAGTTTCAGGGCCATCAGGGCTGCGGGCACCAGGCCACCACGGCTGACCGCG  
ATGATACCTTTTCCACTGGCTGACAGGCAGCTGACGACGGGCCAGACGGCGAGCTTCCAGTTGCAGGTTGT  
CCCACGACACATAGAACTTTTTTCGGCATGTTATCGATCTCGAATAGTTATTTAAAAACAATCACTTAAAA  
TAACAACATCCGCAATTATCCCTGCGGATGCCAGTAAATGGCGGCCCTTGCCCGACTGAATTCAGATTGC  
ACTTCGGCTGCCTCAGGGCTAAGCCTCGGCAGCAAATCTGATAACAATGGAAGCAAGATGGGCTTATCCG  
CGCATCGGTTAGATGATGTGTCCAAACCGCGGACAGGCTGTTGGGCCGATATGATAGCACCGTTTGCAGA

GAAAATGCCTGGCAAACGTATGCCAAAAACAGGAAAAATCGGCATCACCTCTCCATTGGGCACATCTCG  
AGCGCCAAACGACTAACCTGCCGTCCCTGCTGCCGAGTTCAAATGGGCTGTGCGGCAAATCGCAGATAAA  
AAAATAGCAGGGGGAGGATTTACCTCACGCACCTGCTGCTTTCTCGCCTCTGCCTGGTTGGGCAGCTCGT  
CTTAGCGACGAGTGACGAAGGGTTAGGGTAGCTGAAACCTGGGTATACAAAGAAGGGGCAAACCAATA  
GGTTGAGTTGCTGCCTGGCATATTGAAACTCCTGATTGCTTAACAAGTTACGTACCTTAATGCGGGCTCA  
AATCCTTGAACGAACACTCGGTTCCATGGAGGCGCACTTGCTTTGCTTCGGTTCCCTGGAGGCTTTTCATC  
GTCATCCTGACGGGTGGCGAACCACGGGAGCTAATTTACCAGTCGGTGCATTAATTTCAATATTTTTGTG  
AGATCGGTACACATTTTCTTTTCTATCGGTACGGTTCGTAACCTGACGATCGTACTGCCTGGTTGC  
CATCAGCCAGCACAAAGCCGCTGCGATTTGCGCTGATTGCTCACATTTTTGTGTGATTGACTGTATTATC  
GTTATCCTCTTCCCCGGCCCCGCTGATGGGGCCCTGTTAATTCGTGCTGGTAAGGAGTCCCGACGTGGCA  
CAGCTTAGCTCTCTCTCTCCCAAACCTGATTTGGCATTCTTGAACAGATCTGCTCCATCCCCACCCTT  
CCAAACATGAAGCCAAACTGAGTGCCTGGATCATCCAATGGGCTCAAGGGGAAGGTCTGGCGGTCAAGCA  
GGACAAGGTGCGCAACATCATCATCAAGAAACCGCCACCCCGGGGATGGAAAACCGCAAAGCCGTGGTA  
CTGCAGGCCACATCGACATGGTGCCGACGGCCAACGCCGACACCAAACACGACTTCGCGACCGACCCCA  
TCGATGCCTATGTGATGGCGAGTGGGTCACTGCCCGTGGCACCACTCTGGGTGCCGACAACGGCATCGG  
CATGGCCGGTTGCTGGCTGTGCTGGCTGACAAGACCATCAAGCACGGCCCGCTGGAAAGTGTGCTGACC  
ACAGACGAAGAAACCGGCATGACCGGCGCTTTCGGTCTGGAAGCGGGCTGGCTGGAGGGCGAAATTTTGC  
TCAACACCGACTCCGAAGAGGATGGCGAAGTCTATATGGGCTGCGCTGGCGGTGTGGATGCCAATATCCG  
CTTCCCCTCGAGCTGGTTGATGCTGCTGAAGGTGAAGCGTTCGAACTGGCCGTAAAAGGGCTGCGTGGC  
GGTCACTCCGGTTGCGATATCCATCGCGGTGCTGGCAACGCCAACAAGCTGCTGGTGCCTGCTCAAAG  
TAGCCGAGCCGCTGGGCGTTCGTCTGGCCGAGATCCACGGCGCACTCTGCGCAACGCCATCCCGCGCGA  
AGCCCGTGCCACCCTGCTGGTGCTGCTGCCAGCGTAAACGAGTTCAAGGCGCTGGTTGACCGCTACACC  
GGGATCTACCAGACCGAACTGGCCGCCACCGAGCCAAACCTGACCGTGTGGTCAACAGCGCCGCCAAAC  
CGGCCAAGCTGATGAGCGTTTCCCTGCAGCAGCGCTGCTGGATGCCCTGATGGCTGCCGAAACGGCGT  
GATGCGCATGAGCGATGCCATGCCCGCGTGACCGAAACCTCTACCAACCTGGGGGTCATCAAGACTCAG  
GATGGCGAAGTGTACGTCCAGTGCCTGATCCGCTCCCTGATTGACTCCGCGCCGAGAACATCGAGCAGA  
TGACCCGCTCCCTGTTTACCCTCGCAGGCGCCAGCTGCGAATTCACCGGTGCTACCCGGGTTGGGCACC  
GAACGTGGACTCCCCGCTCATGGCGCTGGTTGCGAACAGTACCAGACTCTGTTTGGCACCATGCCCAAC  
GTGATGGTGTATCCACGCGCCGCTCGAGTGCCTGTTTCAAGAGCGCTATCCGGAGTGGGACATGGTCT  
CCTTCGGCCCCGACCATCCGCGGTGCCACTCCCCTGACGAGAAGGTACATATCCCGCGGTCGAGCGTTT  
CTGGCAACTGCTGGTGACGTGCTGGAAGCGATTCCGGCCAAATAACCAGGCTGCGCCACACAGTAAAA  
CAAAGCCCCGACTGCTGCGGGGCTTTTTATTGTCTGTTCCAACCTGACGTTGGCGCTTACCGGATGCCG  
CGGGCCTCGCGGATCCACTCCAGGCTTGCTGGATCTCCTGGGTCTTCTCCTTGGCCATCTCCATCATCT  
CCGGCGGACGCCCTTTGGCGCCAGCTTGTCCGGGTGATGCTTGTCTCATCTCCTTGGGTTAGGCGCGCTT  
GATATCCTGATCGCTGTGCTCTCGCTCACTCCAGCAACTGGTAGGCATTTTTGAGGCGATCCGCAGAG  
GGTGCCGCTGCCGATACTGCTGGCCACCGGAATGGCCCCCTGATACTGGCCATGGCCTGATTGAAGA  
AGTTCATCTGCGCTTCGGCCATCGCCAGAATGCGGGCCAACCTCGATGCGACTGAACCCAGCTCGTGGC  
AATGGTGTGAGAATGGCGCGCTCGCCCTCCTCCACCCGCCCGTTCGGCAAAGGCGCCTGCAGTTGTACC  
TCGAGGAAGAAGCGCAGAATGTGCGGCTGCCCCAGACTGGCACGGCGGAACTCGGCCAGGTTCTCGCGCA  
GCGGGAAGTGGCCTCTTTACCGAGACGAAACGACTCCTGCGCCCGGGCACGCTGTTGCGCCGCCAGCCG  
CATCCGATCCATCAGGTTGGAGGCAACCCGGATCTCCTGTTTCGGTACCTGGCCGCTGGACTTGGCGATG  
TGACCCATCACCGAGAAAGTGGCATGGAAGAAGACGGCTTGTGCTCCTGACTCGGACCGCGACGAAACG  
CCCCCTGCAGCCCCATGCCACGGTCGAAACGGTGGCCGATCCAGAGGCCAATCAGGGCGCCGATGATATT  
GCCGAGCAGAAAACCGAAGAAGGCGCCAGCACCTTACCCAAAATACGCATGGTTCAAGACCTCTTGAAG  
TTAATGAGTGCGGGCTGGAGCTGGTCATCCAGCTCGCGCAGTGCATCGACCGTGGCAGATCGCCGCCAC  
TCGCCAACGAGCAGGCTGCCGCCACCCGCCCTTGCGCCATCCAGTACGAGGAGCAGGGGCGCCAGTTTGC  
GGGCGCCGCCCGGAGACCGGCAAAGGCGCCGGATCATATAGTCCAACCCCGCTGAAGGTAAACGCTGG  
CGTATCCACGACTCGCCCTTCTTTCAGAGGCAAAGTCCCCGCTCGGGTGTGGGGCGGATTGGGCACCAGC  
CAAAGGTGGGCAAATCATCGCCAAGGGGCTGGCTGACCAGAGTGTGATAATCGAGATCGAGCCAGGTAT  
CGCCGTTGATCACCAAAAAGGCTTCAGAGCCAGCAGCGGCAGCGCTGCACAATGCCGCCCGCGGTCTC  
CAGTGCCTCTCCTCGGCTGACCAGTGGATGGTACGCCAAGCGCACTGCCATCACCAGGCTCTCAACC  
AGCTTGTGACCGAGCCAGGCGTATTGATGACCAACTCGGTACCCCGCGGCTTTGAGTTTTTTCGATGT  
GATGAACGATGAGCGGCTTGCCCCCACCGCCAGCAGCGGCTTGGGCAGCAGGTCAGTACGCGGGCGCAT  
CCGCTCGCCACGGCCAGCGCCAGGATCATCGCTTCATGATTTAACTCCAGCATTTGGCGATCCCCGGCA  
ACACCACCTGCTCCAACCACTGACCAAAAACGGGCAATACCGGATAGGCACTACCATGAGTGCACAGAC  
ATCCACCACGTAGCCGAGGGTACGGGGAATATCCTTGAGATAGCCGGACTTGCCGTGCGGATGATAGAGC  
CGGGTGAAGATTCCGGCCGCTTTGAGGTGTGCTGCATGCCGGTTCAGGTCGGCATCACGACGGAACCTGG  
CATAATCGAGCTCGCAAGCAGACCCGCTGTTGAGGGTGGCAAAGCCGTGGCGCATCCCTTCATCGAT  
CACCTCGTCAGGCCAGCGTATGTAGCAATCTTTAAGCAAGGAGACCAGGTCATAGGTAAGCGGCCCCGATG  
ACCATATCCTGAAAATCGATGATGGCCAGCCGGCTGCTCTCGGGGTATCACCGCCACACACCATCAGGT  
TGCGACTGTGAAAATCTCTATGCATACCCCTGCGGCTGGGCCAGATTGCAGGCGGTGAGGCAGGCAAA

GGTCTCATCGAGCAACTGCTGCTCTTCATGGCTCAGGGTCAGCTGCAGATGCTGGCCCAGCAGCCACTCG  
GGGAAAATGCTGTTCTCCCGGCCATAAAAAGCCGCATCGAAGGGTTCAAGCGCCAGTTCAACCGCCCCCA  
GGCGGGGCAGCAAATCAATCGCCTTGTTCATACCAGGCCATGCACATTGTGTTTCGTTTCAGGCAGCTGATCAG  
CTGGGTATCGCCAGGTCACTGACCGCCAGCAGACCCTGTTCGTAGTCCACCGCCTTCACCTCTGGCGCC  
AACAGCTGACGCGCCTGCAAGGCGGCCGCGTTACGAACAACTCATGATTTTTTTTCGGTTTTTCGGATTGG  
CATCCACCCAAAACCAGACCACCACCACGAGAGTAGCGGGCGGAAGCTGGCATCACCAGGAAATGAGGGTCAA  
CTGAAGATTGGCATCACCAGGAAATACGGCGTGCCCACTGCAATAGCAGGGAAATCGCGATCGTGCATAAGT  
AGAGGACCAAGGTGGAAAGCAGCACTTGGCTGTTAGCCCTGGCCGCAATAATGCTTTATCATTGCCGGCT  
AACATAAAGCAATGACATGCAATGTCAACTCGATGAAACCTGTCGTAATAATGCATGCCCTTGGATCAACCG  
TATCTATCAGGATGACAGGATCTTTACATGACAAAAATGGACTGGGGTACCAGTATCCCATCGCCC  
TGACTATCAGCCTGGCCCCGCACTCACCTCTATGATGGTGCAGGCGGCTCCGTTGCAAGCGCCGCGCAGC  
CACCGGCATTCTCGATAGTCTCTGCTATGACTATGTTCCCAAGATAGAGAAGCCTGCATCGGATCAGGAT  
GCCAACGCACAGCCGGTCGAGGTTGATGCTGACCGTCTCGAGGCCAAAACAGGGCGGCACCGCCGTCTATG  
AAGGCGACGTCAAGGTTTCGTGAGGGTGTTCGCAAGTTTTGACTCCGACTATGCCAGCTCGACCAGAAGAG  
CCGGGATGTCATCGCCATCGGCAACATCTATTACAACGACGGTCAGGTGACCGTCACCAGCGAAAAGACC  
CTCAAATCCAACCTGGATAACCAAGAACTCCGAACTGGAAGAGGGCAAGTATCAGGTGCATGGCTCACCAG  
TGCGCGGCTTTGCCAAGCGCGTGGTGTGATGACCAACAACAACCAGAACATCACCATGGAGGGTGGCCAGTA  
CACCACCTGCCCCCGGTCAGGAAGTGTGGACCCTCAAGGCGGGCAGTATCGACATCGACCAGAAAGAG  
GTGTTTCGGCGAAGCCTGGAACGCCAGCCTCTGGCTCTATGACTACCCGGTGTCTACTTCCCCTATATCA  
ACTTCCCCTCAAGGATGAGCGGAAGACCGGTCTGCTTTACCCGGTTACAAGCAAAGCTCCAGCAACGG  
CATGGATATCACCAGCCCTTCTACTGGAACATTGCCCCCAACTATGATGCCACCATCACCCTCCGTTTT  
ATGGACAAACGCGGCCCTGATGGAGCAGGTGGAGTTCCGCTATATGCCGGACCCTGCCACACCGGTACCC  
TCTATTTTTGAAAATCTGGCGGATGACAAGCAGTACAGCCCCGAGCAATCCGAGTCTGGCGGGCCTGTCCGA  
TGGCCATCGCTACCTGATGAACGTCCGTACCGCTCCGCCCTGATGGATGGCAGCCTGCGTTTTTGGCATC  
GACTACACCCAGGTGCGCGACAAGGATTACAACACTTCAACGACTTCAGCCCGCAAGTGGGCACTCAGG  
TCGACAGCCAGTTGCAGCAATCCTTTACCGCCGGCTATTACCAGCCTAACTGGAACCTCACCTCCGAGGT  
GCGCCGCTACCCAGATCCTGAGCCCATATGCGCTGCTGCCCCACGAGATGCTGCCCGTATCGACTACAAC  
TACTATCAGCAAGGCAAGTGGTTCGATCTGGCCTGGAACAGTGAAGTGAACCAAGTTTGGTATGACAGTG  
GCAGTGCAGCCACTCTGCAAGCAGGTGAGCGCTATACCGCCACCCGCTGCATCTGGCGCCAACCTGAC  
CGTGCCCTGGTGGATGCACCGGGTTACTACCTGACCAGTCAAGTACAAGCTGATGTTTACCTCCTACAAC  
CAGGAGGTACCCGATAATCTGGTTAGCCAAGACCCGAGCCGCTTACCAGTGCAGACAGCAAACAGCTGA  
CCCTGAAAAGAGGGCACCATTACCCGTACTCTGCCGTCTTCCGCCCTCAAGGGGGGCGTCAACTTCGATCG  
GCCGCTCGACTGGTATGATGGCAAGGGCACCAGACCCTGGAACCCGAGTTCAGTACCTCTATATCCCT  
TACAAAAATCAGGACGAGATCGGGATCTACGACTCCACCACCACCCGTCAGGACTACTACAGCCTGTTCA  
GTGACCGCCGCTTTGCCGGTCTCGACCGCATCAGCGATGCCAATCGGGTCACCGTTGGCCTGACCAGCCG  
GGTCTATGACAATGTGGGTGATGAACGGTTGCGTCTGGCGGTGGCCAGGCCCTCGAAATGACGCCACCC  
AAGGTGCGCCTTACCCTTCAAATCCGGAAAGCACTAACGCCGCTCCCTGCTCTCGTTCGAGGGGGATG  
CCCGGATCACCAGTGAAGTGGTTTTGCCCATGCAGGAACCCAGTACGATACCTCCGAGGGTGAATTTACGGC  
TGGCAACGGTGCAGTGCAGTACCGGACCCGCAAGCTGACCACTCAGGTCAACTACCGCTACATCAAGGAT  
GGCAACCTGGACTATCGCTATCCGACCAACACGGCGCTGGCAGAAAGATCTGAGCCAAGCGGGCCTGGTGA  
TGATGGCGCCGATCGCCGATCAGTGGCAGATGTATGGCGGTTACTACCGTGCATCAAGCAGGATGTGAA  
CATTGACCGCAAGATCGGTGTCAAATACGACTCCTGCTGCTGGAGCATCAACATGAGCCTGGAGTGGCAC  
AATCAGCCGGACAACGTAACCCTGAAGCCACTTCGAAAAAGTCAATTGGTCTGCAGTTTGAATGAAGG  
GACTTGGCAGCGTGGGTACCGGTGGCCGACGCTCACACTGGATACCGAGCTGTTGCCCTATGTTCCGCC  
GTTTAATCTGAAAGGCCAGCAATGATGCTGGTCCAGCCTTGAGAGATGGATATGAAAAAGACCTGATTG  
CCCTGCTGACCGCGGGAATGTTCCGGTGCCATGAGCCAGCCGCACTGGCTGCGCCCGAGCTGATGGACAA  
GGTGCTGGCCGTGGTCAACAAGGACGTGGTGTGCTGCCAGCCAACAGGACGCACTGGTCAACAAGGTA  
CTCTCCGCTCAGGAGAGCGGCCAGTCCCTGCTGACGATGCCACCCTGCGCAAACAGGCGCTGGATCGCC  
TGATCCAGGAGAGCCTGCAGTTGCAACTGGCGGAGCGCCAGGGGCTGAAGATCAGCGACACCAGCTGGA  
ACAGGCTATTAGGGCAGTGCCTGCCGACAACAAGATGACCCTGGATCAGCTGCGGGCCCAGCTCGCCCGT  
GAAGGGATGACCTATGCCAATATCGGGAAGAGGTTCCGCCGAGATCCTTATGAACGAGGTGCGCCGCA  
ATCAGGTGCGCCCGCTATCAACATCTCCGAGCAGGAGGTGAAGCAGGTGGTGGAGATCCTGAAGAAACA  
GGGTCAACAGCAGAACGAATACCACGTAGGCCATATCCAGATTGCCCTGCCGGACAACCCCACTGCCGCC  
CAGCTGGATGCCGCAAGAGCAAGATCGAGCGCATCTGCGCCGCTCAAGCAGGGTGGCAGCTTCCGCA  
AACTGGCCATTGCCGAGAGTAATGGTCCCAAGGCGCTGGAAGGGGGTACTGGGGTGGATGAGCCCGCA  
AGAGATGCCGACCCTGATGGCGGAAGCGGTACAGGGTGCCAGAGGGCGATATCGTCCGGCCACTGCGC  
TCCGGCGCCGGCCTGCACATCGTCAAGGTGTTGACACCAAGGGTCAAGCAGCAAGTGCAGACCCGAGG  
TGAAGGCTCGTCATATCCTGATCAAGCCCTCCATCATCCTGAGCGAAGAGAAAGCCAAGGGGATGCTGGA  
TGGCATTCTGCACGACATCAAGAGCGGCAAGGCAAGCTTCGCCAGCATGGCGGAGAAGTACTCCGAAGAT  
CCGGGCTCTGCGGTGCAGGGTGGCGAACTGGGCTGGTCTGATCCCAACGCTATGTCCCCGAGTTCCGGC  
ACATGGTCAACCGTCTGCAACCGGGCCAGATCAGTGCCCCGTCCGTACCAGCCACGGCTGGCACATCGT

GCAGGTGGAAGATCGCCGCAGCCAGGATGCGACCGACAAGGCTCAGGAGCAGCGGCCTACCAGCTGATC  
TACAATCGCCGCTTCGTGGAAGAGTCCCAGGCGTGGCTGGATGAGCTGCGTGACGAGGCCTACATCCAGA  
TCGAAGGAGCCGGTAGCTGATGAGCTGCCGTCGCCTTGCCGTTACCCCGGGCGAACCGGCCGGGATCGGC  
CCGGACCTGGTGCTGCAGATTGCCAGCAGGATTGGCCCCACCAGTTGGTGGTGATCGCCGATCCGGCGC  
TGCTGCGCGAGCGGGCAACCCTGCTTGGTCTGCCATTGAGCTTGAGCCCTACGATGCCGCCGCCCTGC  
CCGCCCCCAGCGGGCGGGCACTCTGACCGTCTGTCCGGTCATCCTCGGGCGCCTCTGTGGTGCCGGGTGAG  
CTGAACGAAGGCAATGGCGCCTATGTGCTGGCAACCCTGCAGCGCGCCTGTGATGGCAACATGAGCGGGC  
AATTTGCCGCCGTGGTGACCGGGCCGGTGCACAAGGGGATCATCAACCAGGCCGGGGTCTCGTTCAGCGG  
CCACACCGAGTTCCTTTGCCAGCAATCCAACACCGCCGATGTGGTGATGATGCTGGCAACCAGGGGGCTG  
CGGGTCGCACTGGCGACCACCATATTCCGCTGGCCTATGTGGCGATGGCCATCACCAGGATCGCCTCG  
GCAAGGTGATCCGGATCCTCAACGAGGATCTCGCCACCAAGTTTGGCATCGCCAAACCCTGATTTACGT  
CTGCGGCCTCAACCCCCATGCAGGGGAAGGTGCCATCTTGGACGTGAAGAGATTGATGTGATCGAACCC  
GCTCTGGCCACGCTGCGCCAGGAAGGGATCGATCTGGTGGCCCCGTGGCCGCCGACACCCTGTTCCAGG  
AGAAATACCTCAAGGATGCGGATGCGGTACTCGCCATGTACCACGACCAGGGGGTGCCTGTGCTCAAATA  
CAAGGGCTTCGGCAGTTCCGGTCAATATCACCCCTGGGGCTTCCCTTCATCCGCACTTCGGTGGATCACGGC  
ACCGCGCTGGATCTGGCAGGCAAGGGCTGGCCGATCCGGGCAGCCTTGTACCAGCGATTAACCACGCCA  
TCAAGATGGTAGAGAAAAAAGATATGAGCAGTAAGGTGCACATGGGCCACACGGCCCCGTAAGCGTTTCG  
GTCAGAACTTCTTGACAGCCGGTATGTGATCGATCAGATCGTCGCCGCCATCAACCCGCAGCCGGGTCA  
GAATCTGGTGGAGATCGGTCCGGGTCTGGCCGCGCTGACCGAGCCGGTTGCCGCCAGATGGACAAAATG  
ACCGTGGTTCGAGCTTGACCGGGACCTGGCAGCTCGCCTGCGCGAGCACCCGACCCTCAAAGACAAGCTGA  
CCGTTCATCGAAGCGGATGCCATGCGTTTTCGACTTCGGCACCCCTGATGGGTGAAGGCAAGAGCCGCTGCC  
CATCTTCGGCAACCTGCCCTACAACATCTCCACCCCGCTCATCTTCCACCTGTGCGAATTTGCCGACCGG  
GTTGAAGACATGCACTTCATGCTGCAAAAAGGAAGTGGTGTTCGCTCTGGCCGCCGGCCCGGGCAGCAAGG  
CTTATGGCCGTCTGAGCGTGATGACCCAGTACTACTGCCAGGTGGTGGCCGGTGTGGAAGTGGGCCGGG  
CGCCTTCAAACCGGGCGCCGAAAGTGGACTCTGCCGTGGTTCGCCCTGATCCCGCACAAAGATCCGACCATA  
GTCGCAAAAGACATTCGTTGTCTGAATCGCGTCTGTACCAGGGGCTTTGGCCAGCGTCGCAAGACCATCC  
GCAACAGCTTCTCCAACCTTCATCACCGACGCCAGCTGACCGAGCTTGGTATCGATGGCAACCTGCGCCC  
GGAGAATCTCTCCCTCGAGCAGTTTTGTCAATGATCGCCAACTGGCTGGCGGATCAGCAACAGCCCTGATCC  
TGTGGCACTCCCGCACATCGAGATCCGCCATACCCCGTGTATGTGGCGGGCTCCAAAGACCCTTACCAG  
TTTTACTATCTGATCGAGATTGAGAATCTGGGGCCCGCCCGGTGCAACTGCTGCATCGCGCGTGGCTCA  
TCACCGATGCCAATGGCAAGATGCAGGAAGTGGCAGGCCCGGGCGTGGTGGGGAAACAACCCGTCATTGC  
CGAAGGTGAGACCTACCGCTACCAGAACGGCGTGCCGCTGGCGACCCCGCTTGGGGTGATGGAAGGGAGC  
TATACCCTGCAAGATGGCTCTGGTTCAGCAGTTTGGAGCGCCCATCGCCCCCTTCACGCTGGCCATCCCCA  
ATATTATCAACTGAGGTTTCATGGCGAACTTTTTTGTGCGTGACATCCAGGGCTGTTACGACGACTTGCG  
CCGTCTGCTGGATCTTGCCGCGTTCGATCCCGACCAAGACGTGCTCTGGCTCTGCGGCGATCTGGTCCGC  
CGCGGCCCGGACTCCCTCAATAACCTGCGTTTTGTCAAAGGGCTGGGCAACCGCGCCGTTACCCTGCTCG  
GCAACCACGACCTGCACCTGCTGGCGGTGCGCGATGGCGTTGCACCGCTCAAGAAGAAAGACAAGCTGCA  
AAGCCTGATGGATGCCCTGATCGGGATGAACTGCTGGAGTGGCTGCGCCACCGCCCGCTACTGGCCGAA  
CATCCGGATCTCCCCATCATGATGGTGCATGCCGGGATCTCCCCCGCATGGGATGTCCGCACCGCGCGCA  
ACTGCGCCCGGAGGTAGAGAGCCTGCTGCGCGGTGACCAGTACAGCTGGCTGCTGCACAACATGTACGG  
TGACCAGCCCGATGGCTGGAAAGATGATCTGGTCCGGATCGACCCGCTACCGCTACATCATCAACACCTTC  
ACCCGGATGCGCTTCTGCTATTTGACCGGTGCTCTGCACTTCAAATGCAAGAAGGGGGCCAAAGGAGTCGA  
CCCCGGGGCTGCGTCCCTGGTTCGAACAGCGCGAACACCACGTGGATGACCCCATCTGGTGTTCGGCCA  
CTGGGCGGCCCTGATGGGCAACACCGGCAAGAGCGATATCAAGGCGCTCGATACCGGCTGTGCTGGGGC  
AACAGCCTCACCTGTGGCGCTACGAGGATGATGCCCTGATCACCACCCCTGCCCGGTTACGCCAGCT  
AGGGGGGACACAGCAATCTGGCGGTGCTGCGCACTGATGGCCACAACCCGTTCCAATAACAAAGCCCG  
GCTGGTTGCCGGGCTTGCTGTTTTGTGTTCTCTGTTTTCCGGCGAATGAAGTTACAACCTGCGCCCCAGC  
CGCTTCTCGATCTGGCGCCTCTCCCACTCGGGGCCAAAACAGCTTGAAGGGCTGAAATACCCGAACAGCAT  
GGGAAGCAAGTCCCAGCCCCATCCCAGGGTTGGCCACCAGGCCAGATGTACTCCGGATTGCTCAGGTA  
GTTGATGACAAAACAGCCCGCAGATCACACCACGTAGCTGGCGACATGGTGATAGAAGCCCTTGAGCTCC  
TCCACATAGCGCATTGCCGCCGCTCCTCTGCCGATACCTCCACCGCATCCTGACCATAGTGTCACTTC  
CTCTCATCTCGCGCTCCTGTTGCTCTGACCCATCCAGTTGAGCCACATCGAGTTCAAAGACGGCGGCCAG  
GGCCTTGAGAGATTCCAGTCCGGGTTGCTGCCCTGCTCGATCCGCTGGATAGTGGGACACTCAAACCA  
GTCAACGTTGCCAACTGATCCTGAGACCAACCCCGTTGCAATCTCAACTCCTGACGATCATCTCGAACT  
CCTTGTGGTAATAGACAGGGCCAGCATAGGGCTTGCGCCGCGAAAGGTGACACGACAGATAGCCGACATA  
CATCTGACAGTCTTTAAATCAGATGGTTAAGATTTTTTATCTTGTGATCAGCCGCTCGTTCCCCCAGA  
TATTGCACAAACCGTAACAGATAACCATCGGGATCCTGCAGCAAAAAATTCGCGCTGCCGGCCAGCATCT  
CGCCACTGGATACCAGACCTCAGTGGGCTGCCGGAAAAAGTGCAATCCCGGCCGGCTGCAAGCGATCGAG  
TAGCGGCTGGATCTCGGTGAGTTCCATCTGCAGATTGATTTCCCCGACCGAACGGTGGCTCCAGCGCCCCG  
ACCTGCCAACCCGCCGGATGTACCTGCTCCAGCATCAGTTGTACCTGTTGCTGCTCAAGATAAGCAAAAG  
GAGGGTCATCGCGCCGATAGCGGACCGAGAAGCCCAACAAACCGGTATAGAAAACCAGAGCTCGAGCCAG

ATCGGTAACCAACAGCTCCGGTACCATGGGATTCCAATACACCTCATCCACCGCGACAGTAGGGTTTCGTC  
ATGGCTTACAGGCTCTGCATCAGCTTGGCGGCAATTTCAAAGGAGCGCAGTCGGGCCTGATGATCGACGA  
TGGGCCCATTTGAACATCAGCTCATCGGCACGGGTTTCCGCCAGCAGCGCCTTGAGTCCATGACGAACCTG  
CTCCGGGTTGCCACTAGCGAGCGGGCCAAGGTCTGCTCCATCGCCATCAGCTCACGGGGCGCCACTCG  
TCGCCAAGCTGGACGACCGGGCGGGCAGTTTTGCCCGCATCACCGCGATGAAGGCGCAAGAACTGCTGCT  
GCACGGTAGTGAAGTGAAGCGTGCCTCCCCTCGCTGTCGGCGGGCAGTATGTTGATGCAGACCACCGC  
ATGGGGCTTGGGCCAGCGAGCAGAGGGGGGATACTGGCTACGATAGATCTCCAGCGCCTGCAGCAACATG  
GCGGGAGCAAAATGGGAGGCAAACCCGAACGGCAAACCCATCGCCGCGCCAGTTGCGCGCTGTAAAGGC  
TGAACCCAGCAGCCAGATGGGCAGATGCAGCCCCTGACCGGGCACCAGCTGTACCAGCGCCGATCTCGTC  
GCCAAAATAACTCATAGCTCGCGCACATCGGGCGGAAATCATCCACCTCGCCACTGCGCATACGCCGT  
AGCGCCCGCATGGTGCCTGATCGGTACCGGGGGCGCGCCAAAGGCCAAATCGATGCGGTGCGGATAGA  
GAGAAGCCAAAGTGCCAAACTGTTTCGGCAATCACCAGCGCGAGTGGTTTCGGCAACATGATGCCACCCGC  
CCCGATCCGCAGGGTGGTGGTGGCTTCGGCCAGATGGCCGATCAGCACCGAGGTGGCGGCACTGGCAATG  
CCCGGCATGTTGTGATGTTTCGGCCAGCCAGTAGCGCTGGTAACCCCAACCCCTCGGCATGGCGGGCAAGAT  
CCCGCAACCGGCAAAATGACTCGGCAGGCACGGAAACCTTCGGCAACAGGCACCAGATCGAGCACGGAAATA  
GGGGATGGCAGACATGGGTACTCCATTGATTTACAGGCCAGTAACAAGTGGGGCAATGTAGCACGGGAT  
ACCTGAATGAATCACTATCTCTGCCACACTCTGCCTGCCAAGCGGCAGCAATCGAACGGAAACAAATCTC  
AGGCAAGTATTGTTTGAACGCTAATCCTGCTGGCCGCGCATGCACGGGGGTGGATCATAATTTTCTTACAT  
TTGCGGGCTGGCCTGAGCGCCCCGGGCTGGTTATAACGGTGGCCCTATAGCGAAGGGGGAGCAATAGACT  
CCCCCTCACTCTTTGTACACCACACTGTTTCAGGTTATCTATGTCAAACATCTCGTCTGCTGGCGCG  
CTGACGCTCTCCGGCTGCACCCTGTTGTCTCCCCCGCCCCACTGTCACCCCGGTGCACCTTGCCGATA  
CCAGCCAGCGCGGCTTCTACATCGAATGCAGCAGCATGAAAGCCTGCTTCCAGCAGGCCAACCCAGACCTG  
CCCGCAAGGTTACAAGGAGACCGACCGCCGCGCAGCAGACGCTCTACAGCACCCAGTATCTGGGGGGAAGC  
TATGACGACGAGAAGAAGGTCTACAAGGCAGCCAAGCCCTATCGCATCGCCAACACAATCCACTCGCTGA  
CTATCCAGTGTCCCCTCACTACAGGCTGAGCCAACCGAAGGGTACTCTCTCCCATTACTGCGAAAAAGA  
AAACGGTCAACCGAGGTTGACCGTTTTTCACTGCGCTGCGCCCTTAGAACAGCAGGTGTGCCACCCCGGC  
AATAACCGGCAAGGTAACCCAGAGTGCAGCAGGAAGATAACGAACAGCTCCACAACCTGACCCGGGATC  
TTGCTGCCACAGCAGGCGCCACTTCCGACATAGATCAGCTGAGTTACCGACATGGCGGCAATCA  
CGAAGCGGGTTCATGTCACTCTCGATGGTTCGAGGCCAGACTGCCGGAATGAACATGTGCGGAAAACCGAC  
CATGATGGTCTTGAAGCCGCTTCCGCTCCGGCAGTTGCAGCAGCTCCAGCAAGGGGACAAACGGGGCG  
CCAAGCCAGTTGAAGATAGGGGTATGTTTCGGCCAGTATCAGGGCACAGGTACCGATCGCCATCACCACCG  
GCAGCACGCCAAACACCATATCCAGTGCATTTCTTACCCCTTCCCGTGCGACGGCGCCGAGATCAGTCAT  
GCTGTACGCTTGGTCAGGGCAGCTCGAAACCATAGCTCATCACGCTGTGCTGGTGCGGCACTGCTTCC  
TGCTTGCGGCACAGGGGAGTGCCATCGGCATAGATGTCTTCTTCCAGCAAAGTGGCGGCAACCGCGCA  
CCACGATGGCGGCAACACCCCGCCAGACAGACGGTACGGTAGAAGGGGACGAACATGTGCTCCAGCTT  
CACCTGGGAGATCACACCAGACAGAAGGTGATGGAGACGGCAGAGAAAGTGGTGCCAATCACCGCGGCT  
TCACGCTGGGTATAGAACTTCCCTTCGTAAGTGTGCTGGTTCAGCAGGATGCCAGCCTGCCATCGCCAA  
GCCAGGAGGCAAAGCAGTCCACAGCCGAACGACCCGGCAACCGGAACACCGGACGCATGATGCGGGTCAT  
CATGGTGGCGACAAATTCAGCAACCCGAAATCGAGCAGCAACGGCAGCAGGCGGCAAAAATGAAG  
ACTGAAAACAGCACCGGCAGCAGATCGTTGAGCACCAAGTCCACCGGTTGCGCCGGAGTAAAGCACCTCAG  
GCCCCACCTGGAAGAAGGTGAGCAGCACGAAGATAACCGCCCAATACCCGCACGCAGGCCAGAAAGGGGA  
TACATTTGAACAAACTGTTGAGGAAAGGACGACGCACCAGAATCGCTGGCTTGAACAGCCAGGCAATCAGC  
GTCATCAGCATGGTGGTGGTGCATACCGCACTGACCATGGCGACCAGATAATCGGCAAAAACCGCGTGT  
CCAGCTTGGCCAGCACGGCCACCGGGATGGTGACGTTACCGTCATAGACGACCGGCGTCATGAACAGCAG  
GATCCCCGATAAGTGACGGAACAGAAACATCAACAAATTCAGGCGAGTATTGACCGCAGGTGCTTCGAGA  
CTCTTTTCCAACATGATATGACTGCCCTAATGTTACTTTTCCCTAGCCCGGCCAACCCTGCGTATTCATGC  
ATTAACCAGCAAAAACGGGCGCAAGAATACTCTAAAAAATGCACAAACAAGCCCCCAAGGCAGAAATCTG  
CGCATAAATATTTCCACAGGTAAACCTTCCATTAATAAATAAGATACAGCGGGCGCATATCGATTTCAATC  
GACATCGCCAGATGATTGTTTTCGTTATTGTTAATTTTTTGTGGGCAGTATAATCGGTTATCAGTAGCAGGC  
AATAAGTAGCATCAAAATATACCTAATAAGTGTCTGCTCGATAGACATAAAAAAACCGGAGCCTGTTCA  
GGCTCCGGTTTTTCAATGAGAATGACGGGGATCAGTCTCGGACGTAGATGACTTCAACGCCATCATCTTCG  
TCGTCATCCCAATCGTCATCATCAAGCCCTTCATCGAAGGCAAGAGAGGCAGCCAGTGCCTCCGCTTCAG  
CCTTGGCCAGCTGGTTCTTGTGGTAGTCATCCACTTGAACCTCCACCTTCTCGATGGCGTCTTTGGCATC  
TTCCGCCAGCTGACGGGGCATGGTATCCAGCAGATCCAGAATGTGCTAGCAGACCTTCTTGGTACCTTCC  
TTGCTGATGGCAGTGCATGGCATAGACCGGCCCTTCGTGGTTCAGAGCCGCTTGACGCGATCCATCACCT  
CCTGGGCTTCTTCTCCAGGATCAGGTCCATCTTGTAAACACCAACCAGCGCGGCTTGCCAGCCAGTTC  
CGGGCTGTACTTCTCCAGCTCCTTGACAATGGTCACGGCATTTTTCAGCAGGATCGGAGCCATCAACCGGG  
CAGATATCCACCAGGTGGATTAGCACGCGGCAACGCTCGAGGTGTTTCAGGAAGCGGATACCCAGACCTG  
CACCTCGGCAGCACCTTCGATCAGACCCGGGATATCGGGCATCACGAAGGAGCGGGAGTTCACCCAGC  
CACACACCCAGGTTCCGTACCAGGGTAGTGAAGGGTAATCAGCCACTTTCGGGCGAGCCGCAGAAACG  
GCGCAATAAAGGTAGACTTGCTGCGTTGGGCAGACCCAGCATGCCGACATCGGCCAGCAGCAGCAGCT



CCAGCTTCAGGGTACGCACTTCACCCGGAGTACCGTTACTCTTCTGGCGGGGAGCACGGTTGACGGAGCT  
CTTGAAGCGGGTGTGGCCAGACCATGGAAACCACCTTTGGCAACCAGCAGTTTCTGCTCGTGGTGGGTC  
AGATCCCCCAGCAGTTACCCGGTATCTTCATCGGTTCGCTCGGGTACCGACCGGCACACGCAGGATCTTGT  
CCTTGCCGCGGGCAGCCGGTACAGTTGGCGCTCTGGCCATTCTCACCCGCGCTCGGCAGCATGGAAACGCTC  
GAAACGGTAGTTCGATCAGGGTATTGAGGTTCTCGTTCGGCGATCAGATATACGTCGCCACCCTCACCCGG  
TCACCCGGTCCGGACCACCGTTGGGAATATATTTTTTACGGCGAAAAGCTTACACAACCCTTACCACCGT  
CACCCGGCATCGACTCGAATCTGGACTTCATCAACAACTTCATAGGTAACGTACCTTAATTCGAAAAA  
CCGATACGCAATTATAGTGGTACAGACCCCTGCGGGCGATACGCATCTTGCCAATCATGCCCGTCAGAGC  
CAAAGTCAGCTGCGTTCGGTTTTTTTCGTCAACGACATCAGAAAAGACGTACAAAAACAAAAGCCCCGCCT  
GTTGGCGGGGCTTCGGATCCTTGGCGTCCGTAATTACTCAGCAACGATGCTAACGTACTTACGATTACG  
GGACCTTTAACTTCGAACAGGATTTTACCAGTTCGCGGTAGCGAACAGGGTGTGATCCTTGCCAGACCAA  
CGTTGGTGGCAGCGTGAACCTTGGTACCAGTTCGCGAATGATGCTGCCAGCCAGAACTGTTTCGCC  
GCCGAAACGCTTCACGCCAGCGTTTAGCTTCAGAATCGCGACCGTTGCGGGATGAACCGCCAGCTTTT  
TTGTGTGCCATTTATCGGACTCCTCTAATTAAGCGCTGATGCCAGTGATTTTGAAGTTCAGTGAACCACTG  
ACGGTGGCCCCGCTTGCTTACGATGGTGTCTACGACGACGGAACCTGACGATAGTCACTTTCTCGCCACGG  
CCGTGAGCCACAACCTCAGCTACAACCTTGCCACCTTCAACGAAAAGGACACCTACTTTAAAAGTGTGCG  
CTGCAGCAACCATCAGAACCTCGTTGAAGTCGATGGTAGCGCCAGTCTCAACGTTACGCTTTTCCAGACG  
AACGATTTGACCTTCGGCCACACGGTGTGTTTTCCGCCGCTTTGGAATACCGCGTACATTTGATTAAC  
CCGTAAAGGCATGTCTTTTGTCAAGGCTAGACATGCGCAAAAACCTATAACAATGGGCGGGCATTCTAC  
GCAAATCGATCTGCTCAGGCAAGGCCAATTTAGCAAAAAGTTTATTTTGTGCGCATATCTGCCGCCGTGG  
ATAAACGCCTAACTGTAACCCATTGTGAAATCGTGTAGAATCCCTGCCATTACTAAAATCGCAGTTATTG  
CTGCTGTACGTTACGAGACTTATGGACCAACAGACTATCCGTGCGCTCTGTGCCGCCGACATGACGGCG  
GTCAATGAACTGATCCTGGCCCCGACTCCAGTCCGACGTTAGTCTGATTAATCAGCTGGGTTTCTACATTG  
TCAGCGCCGGCGGGAAACGGATGCGCCCCATGCTGACCGTGATGGCTGCGCGTGCGCTGGGCTATGAGGG  
TGAGGATCACCTGAAACTGGCCGCCATCATCGAATTCATTCACACCTTACCCTGCTGCACGACGACGTG  
GTCGACGAATCCGACCTGCGCCGTGGCCGGGAGACCGCCAACGCCATGTTTGGAATGCCGCCAGCGTGC  
TGGTTCGGTCACTACCTCTATAGCCGCTCCTTCCAGATGATGGCCGAACCTTCCAACCTGCGGGTGTGGA  
GATCCTTCGATGACCAACCAACCATCGCCGAAGGGGAAGTGTGTCAGCTGATGAACGTCAACGATCCG  
GATACCACCGAAGAGACTACATGACGGTCACTACTGCAAGACCGCCAAGCTGTTTCGAGGCCGCTACCC  
GACTCGCCGCCGTGCTGACCCACCAGCCCGCCGTCGAACAGGCGATGACCGATTACGGCAAGTATCT  
GGGCACCGCTTCCAGATCATTGATGACGTGATGGACTACTGCTCCCAGAGCGAAGAGATGGGCAAGAAC  
GTCGGCGACGATCTGGCCGAAGGCAAACCGACCCTGCCGCTGCTGCGCGCCATGGAAGTGGGCACGCCGG  
AAGAGCGCCAGCTGGTACCGGATGCCATCGAGCACCGCAACGGCATGGAGCATCTTGAGCAGATCCTTGG  
CATTCTCGACCGCACTGGCGCGCTGGAGTACTCCCGCATGCGTGCCAGGGAAGAGGCCGACAAGGCCATT  
GCCGCCCTCGCCATCCTGCCTGACTCCCCACACAAGCACGCACTGGAAACACTGGCCCACATGGCCGTGC  
AGCGCAGTGCCTGAGTAAACGGGATGCATGAAAAAAGAGGCCCTTCGGCCTCTTTTTTATTGTCTGCTATC  
TGCTGAACTGTGCATTGCGCCAGACTCAGCGACTCAGCATCCAGAGGATCACGCTACCCGCAACCCTAA  
CGAGCCGCCGATACGGCGCAACTGCTCCGGTGGCTGATCGCTCAGCAGCCGTAACATCTGCTGCCATGCC  
CTGGGCATCAACAGCGGGCCAAGCCCCCTCGAACAACAGCAGCAATCCCAACCCCATCAGCATGGATGTCA  
GCATCCGACCTCCTTGAATGCAACCAGCCCCCTGGGTTCGGCGGCTGGCGTTGGCACCAAAAACAAAAGGG  
TCTGACAATGCAGACCCCTTTGAATGTGACCTCGTGGCGATTACTGCTTGGTGCCGTGAGGAGACTTGAGG  
TAACGGAAGAACTCGCTGTCCGGCTTGAGCACCATCAGGTCGTTGCCACCGGCAAAAGCTCTTGCGATAGG  
CCTCCATGCTACGCACGAAGCTGAAAAACTCGGGTCTTTCTTGTAGCTGTCGGCATAGATCTTGCGGGC  
TTCCGCATCCCTTCACCCGCGCAGCTGGCGAGCGTTACTCTCGGCGTCAGCGATCATGACGGTTACCTTG  
CGTTCGATATCGGCACGACGAGATTTACGCTTCTCGCGACCTGAGAGCGGTGCTCACGGGCGACTGCGG  
TACGCTCGGCGCGCATCCGCTGGTAGATGGAGTTGAGACTTCCACCGGCAGGTTGATCTGCTTGTGATCCG  
CACATCCACCACCTTGATAACCGAGCTCGGAGGAGCGCGCCATCTTCTCAGGGCATCTTCCATCAGGTA  
CTGCGCTCACCGGAGACGATGTCTTGTGATGGTTCGGGTTACCGATCTCGGAACGCAGACCGTTATTGATCT  
TGCGTTTTGAGCAGATCTTACGCTGCAGCTTGTGTCACCACCAGGTTGCCAGGTAGTACTTGGAGAAGTC  
CTCGATCTTCCACTTACGTAGGAGTCGATGATCAGGTCCTTTCTTCTCGGAGGTGACAAAACGGTTCGGCC  
TGGCTGTCAATGGTCTGGATGCGGGCATCCATCTTGCGAACCTGGTTCGATGAGCGGCACCTTGAAGTGCA  
GGCCCCGGCTCATAGAGGCGGGGTTACCCGGAGTCAACCCGCTTACCTTGCCAAACTGCACCACAATCCC  
CTTCTGACCTTTCATCAACGATAAAGACAGAGGAGAAGCAGACCATGGCCGCGACAGCGATTGCACCAATA  
GCTAGCTTTTTTTCATCTATCAGTTTTCTCCCTGAGCTGAAGCGGTACCCGCTACGCAGCGGCATTGTCGGCG  
TAGAGTTGGCACCCCTCGTTGGAAACGGGGACCTGCTCTGTGACCGGGGCGACAGTGGCACGATCAGACTG  
GGCAGCCTTCGGCTTGCCAGACAGCTTGTGCGAGCGGCAGGTAGATCATGCTGTTGTTGCCAGCCGGCATG  
TCGACCACCACCTTGTGGCCTGCTGATAGAGCTCTTCCATGGTTTTCCAGATAGATACGCTCACGGGTCA  
GCTCGGGGGCTGCCAGATACTGGGGCAGCAGCTCGTTGAAAGCGAGCGACTTACCCCTGGGCTTTCAACAC  
GATCTGGGATTTGTAAGCTTCCGCTTCTGCTCCAGACGCTTACCTGGCCACGGGGCTTGGGCTCCACT  
TCACGAGCATAGGCTTCTGCTTACGAATGAAGCGCTGTTTCTTCTGAGCGGAGATGGCGTCATCAA  
ACCGCTCTTTACCTCTTCCGGCGGACGCGCCGGCAGGAAGTTGACGTCGACGATCTGCAGACCATCTG

GTAAGGCTCGATGATGCCATCGATCACCTGCCAAGTCTCCTGACGCACCTTCTCAGACCGGTAGTCAGG  
ACGTCATCCATCCGGGTATGACCCACCACGTAGCGCAGGGCGCTATCGGTGGCCTGACCCAGACTCTCGT  
CGGCATTGGTCACGCTGAACAGATACTGCTCGGGATTGACCACACGGTACTGCACGTCCATCTCGACCCG  
TACCACGTTCTCATCTGAGTCAGCATGAAACCGGAGGCAGGCAGGGAGCGCACGGACTCGACGTCCACC  
GGGATCACCTGATCGATAAAGGTTCGGCTTCCAGCGCAGGCCCGGCTCGACAATATGGGAAAACCTTGCCAA  
ACCGCAGCACGGCACCACGCTCCGCTTCGCGAATGGTGTAGAAAGCCGCTGACGACCCACACCACCACAGC  
CACAACCAGCGCGATGGAGATACCAAAGCGACCTACATCGCCGCCAGATTTGCCGCCACCAAACAAGCCA  
CCGAAACGGGCGACTCACTTTGCGCAGCATTTTCATCCAGATCAGGGGGTCCCTGATTCCTTGCCGTTATTC  
CCCAAGGGTCACGGTCTTTGCCGTTGTTACCAGGCTCATTTCCAAGCCATCAGCGTCTCCATTAATACATG  
CGGATGGATATCATCTCTATCGGGCCATCATACTGAGAAAGCCCTAAGGGTTCATCTTCATCGACGAA  
TCAATGCCTGATAAAGCGTTGTAAACTCTCACCTCTCTGTTTCACGAGGCGGTTCCAGTCGGCCACTTG  
AAGCGGACTTCCAGCACGAAATCACCTCCTCGCTAAAACCTTCTGCTCAATCCCTTTTCAGCTGATAGA  
GCGCACTGCGCAATCTCGCGGCAGAAGGAGGCAACTGCAGGGTGTGATGCACCATGGAGCCAGCCAGCAA  
TTCGGTCAGCGCCGTAAACAGATGCTCACAACCTTACCAGGCTCTGGCCGACAAACCAGACGCGCAACGGG  
CGCCCTCGTCATCTCGCTCCAGACCTGCCGACGATCCGCCAGCTTGTCGATCTTGTTCAGATCATCA  
GCTGGGGCCTGTATCGGCTTCAATCTCGGCCAATACCTGCTGCACGGAGTCGATATTCTCCTGCATCTG  
CTCATCGGCACAGTCCACGACATGCAGCAGCAGATCCGCTTACGGGTCTCCTGCAGGGTCGCCCTGAAG  
GCCGCGACCAGATCATGGGGCAAGTGTGAATAAATCCAATGTATCCGCCAAAATCACATCACCCACAT  
CCCGAATCACCGATTTACGACGGGTGGGATCCAGAGTTGCGAACAATTTGGTCGGCAGCATAACAGCTGGC  
AGCTGTAAGTTGGTTGAACAAAGTGGACTTTCCGGCGTTGGTATAACCAACCAGTGACACCGTCGGCACT  
TCGTTGCGGTTGCGGGCGCGCGCTCCCTGCTCCCCTGCTTGCCACCTTGTTCGAGCCAGCGAAAATCG  
CCTTGATGCGTTCCCGCAGCAGACGTCGGTCAGTTTTCAAGCTGGGTTTTCACTGGGCCACGCAGACCGAT  
CCCGCCCTTTTGACGCTCAAGGTGGGTCCAGCCTCGCACAAAACGAGTGGAAAGATGGCGCAACTGAGCC  
AGTTCGACCTGCAGTTTACCTTCGTGGGTTCGGGCGCGCTGGGCAAAAGATATCGAGGATCAGGCCGGTTC  
GATCCACCACCCGGCACTGGAACAGACGCTCCAGGTTGCGCTCCTGGGCAGGGGTCCAGGGCATGGTTGAA  
GATGACGACGTCGGCATCCAGCATCTGGACTTGGGACGCGATCTCTTCAGCCTTGCCACTGCCGACAAAA  
AATTTGGCACTGGGCGCACTGCGACTGGTGGTAATTAACCCACAGCGCATTGACTCCGGCCGAGCTCACCA  
ACATCTTGAGCTCTTCCAGACTCCTCCCGCTCACCTCATCATGAAAGTTGACATGCACAGAACGGCCCTG  
TTCGCGAGCTTCAATAACGGTCAAACAAGCGCTGCTCCTTAACAGGAATCATGATGAATCTGAGTTGGCG  
AGTCGACTCGCCAGGGATATCACGCCTCGGCATCACCTGTTTCATCAGCCGCGCCACCCGGAGTGGGCT  
GGTGATGATTGACGGCACGGGCCGGTACGACAGTCGAGATGGCGTGCTTGTAACCATCTGGCTCACGGT  
GTTTTTTCAGCAGGATAACAAAACCTGGTCAAAAAGACTCGATCTGACCTTGTAGTTTGATGCCGTTACCAA  
TAGATAGAAAACAGGAATCCGCTCACGGCGCAGCGCATTAACAAAACGGGCTTGGAGAGATTGCCCTTAG  
CCATTTTTCTTTTCTTATAGTTTTGTTGTTTTTAAACACCGAATATCAATATAACAACCTGATTATACAG  
GGAGTGTCAAGCCGACACGCGAGCAAGCAGCGGTTCGAGATTGCCAGACTCACAGATTCCAACCAG  
GTCACATCGGGCCAGCCGCGCAACCAGGTATCTGTGTTTTGCCAATTTGGCGTGTGGCAACAATGCCAC  
GATAACGCATCTCATCATACCCCACTTACCAGCAGGTTAGTCCACATTTGGCGATAACCCACACAGCG  
AATGGAGGGGAGATCCGGGTGCAGATCGCCGCGGCCATCAGCGCACGAACCTCCTGTTCAAAGCCGCT  
TGCAGCATCTTGTCAAAGCGCTGTTTCGATCCGCTGATGCAGCACGGCGCGATCGCTCGGGGCGATGGCAA  
ACTGCTGCACCCGATAGGGCAAGCCCTCCCCCTGCACCTGCGTCAGCTCGGTAAGGGTCTTGCCGCTGAT  
GCGGTAGACCTCCAGCGCCCGGGAGAGTCGTTGCGGGTCATTGGGGTGGATCCGCGCACCCGGCCACCGGG  
TCGATGCGCACACAGCTCATCGTGCAGCGCTGCCAACCGAGGGCGGGCAGCCTCTTCTCAATCCCGGCAC  
GAATGGCGGGATCGGCAGAGGGCAGCGGGGACAATCCCTCCAGCAGCGCCTTGAATAGAGCATTTGTGCC  
GCCCACCAGCAACGGAATGCGGCCACGGTCGGCGATCTCTTCATCTCCCGCAGGGCATCCTTGCAAAAA  
TCGGCTGCCGAATAACTCACTGCGGGATCAAGAATATCGATCAGCCGTTGCGGGGACAGTCCAGTTTCT  
CGGCGGTCGGCTTGCCGTACCTATATCCATGCCCGGATAGATCAGCGCCGAATCGACGCTGATGATGTC  
GCAAGGCAGTGCCTGACACAGTTCAATGGCGAGATCCGCTTGGCGAGGCGCTCGGCCCCATCAGAAAA  
ATTGCGGTTCGGCAAGTCACTCGCCATGTTCAAACCTCCAGCACGGTCGCCAGCGAAAGCGGGCGTACC  
ATGCGAATATCTGTGAGTTGGTCAGCGTAAGCGGCCACAAGTTCCGTCAGCAGACGACTGGCAGTTGAAA  
AATCGTATATCTTCTCGCGGCTTATCCCCTGCTCCACCAGCCATTGGCATAATACTTCAGCTGCTGACC  
AGCATCACTGTGAGATCCGCCCTCAATAATTTGCAGCAATTCGGGTAACAGACGCACCAGATCGGTCTGG  
CGCAGCAGAGCCGGCACCCGAGTCAGGATCATGGTGTGCGCCCCCGCTTTTCAACTCCAGCCCCATCC  
GTTTTAGCAAACGTTCTGCTCGGTACCCAGCAGATCAAATTTCTCGGCAATTTGAAGGAGACCGGCAG  
CAACAGTGGCTGAGCCGCCAGTCCCTGGCCCCAGGTTCCAGCAGCCAGTGGCGCAGCAGCACCCGCTCG  
GCGCGTACCAGCAGAGACGAGCGCCAGCTGATTATCCCCTCGATCAACAGGTAGGCTGATCCACCAGTG  
TCAGGGCGCGACATCCCCCTGTTTTGGGTGACGGCACCGTGTGCGGTGGACTGTGCGGGAGCAGCCTCAGC  
CGCAGTTGCGATAGGCAGCGTAGTGAGCAGAGCGCCATGCCCGCATCGCCTCCCGGCTTGGGAGCTCG  
GGCGGTTGATAGTTGCTGACCCGGCTGCACCACCACCGTTCCCTTCCCGCACCTGTGCAGGTGCCGGT  
AGCTGTGCTCGGCACCGTACCCTCCGGGCGTGGCGCTGACCGGGATATTCGATCTGCGGACTGACCGG  
CAACTCGACCAGAGTTTCGGCCAGCGGAGTGTCTGATGAGCGGTGCTCACCCCTTCGCGGGCGCAGCGCA  
GTAAACAGCGCCTGAAAGATAAAGTTCGTGGATCAGTCGCGCTGATGGAAGCGCACCTCATGCTTGGCCG

GGTGGACGTTGACATCTACCTGACGGGGATCCAGCTCGATATAGAGCACATAAGCGACGAAGCGGTTCGGG  
AGGCAGCAGCTCGTCATAGGCCTGACGAATGGCGTGTTGATGAGCTTGTTCGCGCATCATCCGGCCGTTG  
ACATAGGTGTATTGCAGGTTCGCTCTGCGGTCTTGCCCCCTCCGGAGTCGCCAGCCAGCCCCACAGCCGCA  
CGTTCGCTATGCTCGCTCTCCACCGCCAGCGCATGGTGCATAAAGGGGGTGCCGCAAACGGCGGCGAGGCC  
ACGCTCCTGCTCCGGCACGGTATTGGCGGCCTTGTACTGGCGCACACCTTGCCGTTGTGGCGCAGGATC  
AGGGTGGCATCGAAGCGGGAGAGCGCGATGCGGGCGACCAGCTCGTTCGATGTGGGCAAACCTCGGTCTTTT  
CGCTGCGCATGAACTTGCGCCGCGCCGGGTATTGAAGAAGAGATCCACCACCTCCACCGTGGTGGCCAC  
CGGATGGGCGCCCGGCTTGATGGTGACGCTCATTTCGCGCCCTTCCGCCTGGGCTTGCCAGGCTTCGGAC  
TGCTCGGCGGTACGGGAGGTGAAGGTGAGACGGGAGACCGAGCTGATGGAGGCGAGCGCTCGCCACGAA  
AACCAGGCTGTGTGATCCCTTCCAGATCGTCCAGCGTGGCCACCTTGGAGGTCGCATGACGCGACAGCGC  
CAGCACCAACTCGTCTTTGGCGACGCCACAGCCATTGTCTCGGATGCGGATCAGCTTGGCTCCCCCTTG  
TCGATGTTCGATCTCGACCCGGTTCGGCCCCGTCATCCAGGCTGTTTTCCACCAGCTCTTTCACCACAGAAG  
AGGGCCGCTCCACCACCTCTCCGGCTGCAATCTGGTTAGCCAGAATGGGTGGCAAATAACGGATCGGCAT  
CATTTACTCCTGAATTTCTATCTTTCGCTATGGTTCAGTCTCTTAAAGGCTCCAGGAGGGCCGCTCCACCAC  
TCTCCACCAACCGGAATCTGGTTGGCAAAGGATAGGGGGCAATATACGGATCGGCATCACTTGCTCCTGAA  
TTTTAATCTTGCTGATGGTATTTCGCTAACAGCGGGAGCGGCATCGCTCGCTCCCGCGCGTCACTTTTGGC  
GAATGTAGAGCACCTGCCCTACCTGAATATTCCGCGACTTGAGCTTGTGATCTCTACCAGCCGAGCCTG  
ACTCACCCCATGTTTCTCGGCAAGGCGGGAGAGACTCTCGCCCCGTTGACCACATGGCGGATCATCTGC  
GACTTGTTCGCTACTGCGAACGGGAGCAGCAGCGCGGCTCTGCCCTGCTGGGGAATATAGATGGTCTGAC  
CAATCTGAATATCCCGGCTGCGCAGCTGGTTGATCTCCACCAGAGTGGACTGACTCACCCCATGCTTCTC  
GGCAAGGCGAGAGAGGCTCTCGCCCCGTTTGACCACATGGCGGAGCATCCGCGATTTGTCATAGTCGCC  
ACACTGCTGACCGGGCGCACCGCTCTCTTTCGCTGCGCCGAGTAAGGCTTGATCACCCGGCGCCAGAGC  
CGCTCCCAGCACCGCCGTCGCGGGCAGTGGCGGGCATCTTGTGGTCACTACCGGCTGCGACTGTGTCTG  
CCTGGGCTGGCTCACCGGCTGCGGGGCTACCGGTGCAGGGCGAGTAGCGGCAGGTTGGTCACTGCCCC  
TTGCCGGTCAGCATGGCCCCCTTGGTTCGGGTGGGCGCGGTAGTAGTTGCGGATCCCCTCGAAGATGGCGC  
GGGCCAGCTGGTCTGATAGCTGGCGGTGGCCAGCAGCTTCTCTCCGATGGTTGGAGATAAAACCGGT  
CTCCACCAGCACCGAGGAATATCCGGCGCCTTCAGCACCGCCAGACTGGCGTGTTCGGCGCCTTCTTA  
TGCATCGGGCAACTTTGCCCATGGAGCGAGGATCTGGCGGCTGACGTCATACCCTTCGCGCAGGGACT  
TGTCCATGGAGAGGTCGAGGAAGGTCTGTGCAGATAGGGGTTGGGATCAGATTCGCGCAACACCTTGCC  
GACACCGCCCAGCAGCTCGCCCTGCTTCTCCTGCTTCTCCAGCCAGCTGCCCATCTCGCGGTTGGCACGG  
TTGGTCGAGAGGACCCAGACCGAGGCACCACGCGGGGTGGAGTTATGAAAACGTCTGCATGGATAGAGA  
CCAGCAGATCCGCCCTTGGCCTTTCGCGGGCATCTCGGAGCGCTTGTGAGATCGACGAAGTAGTCGCCACG  
ACGGGTATCACGGCGCGCATCCCCGGCTCGCGGTGCATCAGTGCAGCCAGCTTCTGGGAGACCGCCAGC  
GTGACCCGCTTCTCGTAGGTACGACGCGGGCCGATGGATCCCGGCTCTTCCCCGCGTGGCCCCGGTTCGA  
TGGCAATCACCAACCCCTTGCCCTTACCACCGACAGGCGTGGACTGCACCGCAGCCCGGAGCGCTTTTTC  
TTCATAAAGGCAGATCGATGACCAGACGGTGGCCATAGGGCCCCGCTGGCGCCAGCGAAAAGACCACCGGC  
TTGATGGCGGAGCTGAGATCCATCACCGCCGAGACCGCCCTTCTCCAGCGGAGTGTCTGGCGGATCT  
TGCGCACAGTTCGCTGTTGTTCTCGATCCGCGCCAGATTGGCGGGCTTGCTCGCCCCTTTCAGGTTCGAT  
CACAGCCGATCCGGGCGGTTGAGGGTGAATAAGTTGAAGTTGGGGGCGCTGCTCATATCGAGCAAC  
CGGGTGTATCCGGTGATGGCCAGATTTCGTACGCTCTTTCGAGCTGATTCGCCCAGGAGGGTAACGCCATCA  
AAGAGAGAGCAATAACAAGGATCAAGCGCACGTAGATGACAACCGTTCCAGAATGGCTTCGCCAATAGCA  
GTGCGGGCCTCTATCAGAACCTCGCGCTGCTCGCCTACATAAGTGAAGGTAAATTTCCAGGTTCGGGAGCCG  
GTAACCAGCCCTCGCCCTTCTCGGACCACTCCACCAGACAGAGAGTGTGGCGGCAAATAAGTCCCGAAT  
GCCCATGAATTCAGCTCTTCCGGATCAGCCAGGCGATAGAGATCGAAATGGTAGACTTGCCAGCCATCG  
AGCTCATAGGGTTCGACCAGGGTGAAGTTCGGGCTTTTTACCTTGCCCTGATGGCCAAGGCCCTGCACCC  
AGCCCGGGTTCAGGGTGGTTTTTACCAGCGCAAAGCGTGCCATGCAAAAACACTGTGGTTCGCTGCTGGCA  
GGCCTGTGCCAGACGGCCACCCAGAGCCACGGTTGCTGCCTCGTCCGGCAGTGTATCATCACTGTTTTT  
GCCATGTTCTTCTTTTTAACTTGTAAATGGTGTTCGGGATTAACCAGTTTTCGGGATCAGCGGCAGCAGATCT  
GACGCCAGCATGCCCGCTCGCCGTGAGCGGCGGCTGATCTGCAGCCTCGCCGTGGATCACGGCGCCCA  
GCCAGCTTGCCATGGTGGCAGACCAGCCCTGGGCCAAAAGGGCGGCGATTATACCAGATAACAGATCGCC  
CATGCCGCCACTTGCCATGCCTGGGTTGCCTTCAACAACAGAGAGCGACCCGCTCGCCGTCATAAATAAGT  
GTTCCCGCCCCCTTTTAAACAACACCACCCGCCATAACGCCGCTGCAGTGCCTGCACGGCGGCAAACCGGT  
CGGTTTTCAATCTCGGCAATGGAGCATCCAGCAGGCGCGCTGCTTCGCCGGGATGGGGCGTGAGCACCCA  
ATTATCCTGATGGCAGGGAGATTGCGCCAGCCAATTCATCCATCGGCGTCCAAAACCAATGGCAGCCGT  
GCGGTGAGATAACGGGTGATTTGTGCTCTTCCCCACTCATCTGACCGAGCCCGGGGCAATGACCCGCA  
CCGACGCCCACCCCTCGTCATCAGCGGTAGTGAGACTCATCAGTTTCGGGTTGATAGAGGCTGACCGGTGG  
ATGATCCGGATGCTGACACACCCGACCCAGCCCGCCCCCGCCGAGGCGGCGGGCCGCCAGCACG  
ATGGCCCCCTGCATGCCGCGATTGCCCCCCACCAGCAGTACCTTGCATAAAGAGCCCTTGTGGGAAGCGC  
GCGGGCGCGGGGTCAACTGCGTGTCTCAGCTGCGGATAATCGATACGCCAGGCGGGCGGCGAGCATAGTGT  
ATCAGGCGTACGCCAAGGGGATCACAATCGAGCTGACCGACACAATCCACCCCGTCCCGGTGAGCATC  
CCCAGCTTGATACCGATAAAAGTGAAGTGCAGTAGCCTGCACCACGGACCCCATGGCACGGCCGGTAT

CGCCGTTGAGGCCGGAGGGGAGATCCACCGCCAGCACGGGCACAGCCAAGCCATTGATTGTTGCGACGAT  
CTTTGTAGTAGTGGCGAGAGGGAGGTGTTGACGCCGGTGCCAAGCAGGGCATCGACCACCAGATCCGGG  
GTGGAGTGTGGTCCCTTATCAAATGCTCGGCCAGCCAGACCCGGCCACCGCCAGCCACTCATCGG  
CGGCCCGTCTGGCATCCCCCTTCAGCTGGTTCGGGTGCCCTGGCGGCAATCACCACCACCTCGATGCCAAT  
CTGGCGGGCAAGGCGGGCCAGCACATAGCCATCACCGCCGTTATTACCGGGGCGACGAAAATCCACCAG  
CAGCGACTGTGCGGCCAATGCAGGGTGGCATAAGTACGCAGCGCGGCACCGGGCTCGCTCCATCAGGGCAT  
AGAGAGGTTGCCCTCACGCGCGGCCAGTTGCGCTCCAGTGCGCGGATCTGTTTCAGTCTGCCACAGCCC  
CTGTGGTAAACTGCCCCCTCTTTTGTGCCAACGCGCCCTGATGATCTCTACCATGACGGCTCCCGCC  
TCTTATCAATCGACCCACGCCAGCAAACGCCAGCCAGGCCAAGCCGCATGAGCGCTCCTGACTTCCACCA  
GCTGGCCCCACGATATCAAGCTCTGGGCACGGGAGCTAGGATTTGACCAGGCGGGCATCACCGACACCGAC  
CTGCGTATCGAAGAGCCGAGATTCAGGCTGGCTGGTGGATGCTGCGGGTATCACGGCAGCATGGATTACATGG  
CGCGCCACGGCATGATGCGCGCGCGCGCCACGAGCTGCTGCGGGCACGGTGCGGGTGTTGTGCGGTGCG  
GATGAACTACCTGCCGTTTCGAGGCGGGCTTCGCCGCTACCCTGCGCGATCCGACTCTCGGCTATATCAGC  
CGCTATGCTCTCGGTGCGGACTACCACAAGGTGCTGCGCAACCGGCTCAAACAGCTGGGTGATCGCATTG  
AAGCGCGCTGCGCCGAGCTGTTTCAAGGCACTGAAGAGACCTTGGGTGAGTGGCGCCCCCTTCGTGACTC  
CGCCCCATCCTCGAGCGGCCACTGGCAGCCAAGGCGGGCCTAGGCTGGGTGGCAAACACTCACTGCTG  
CTCAACGAATCGGCCGCTCCTTCTTCTTTCTCGGTGAGCTGTTGCTCAACCTGCCGCTGCCACTCGACC  
AGCCAGTGGAGAAGGAGCAGTGCGGCAAGTGTGTCGCTGCATCAACATCTGCCCGACCGGGCGCCATTGT  
CGCCCCCTATGTGGTAGATGGCCGCCGCTGCATCTCCTATCTCACCATCGAGAACGACGGTCTTATCCG  
GAAGAGTTCAGACCCCTGATGGGCAACCGCATCTACGGCTGCGACGACTGCCAGTTATCTGCCCTGGA  
ACCGCTACGCCGATGCCAGCCCCGAACCCGATTTACGCCCCCCGCCAGCCTGCACCGACCGCCCCGTGCT  
GGCGCTGTGGTGCTGGAGCGAGAGCGATTTCTCAAACAAACCGAAGGGAGCCCCGATCCGCCGATCGGT  
TACCAGCGCTGGCGCCGAATCTGGCAGTGCCTTGGCAATGGTCCGGCGATCCCCGAGGTAATCGCCG  
CCCTGCAACTGGGGCTGACCACCGCCGATCCCATGGTGGCCGAACATATCGAATGGGGCGTGGCCACCCT  
TGCCCGGCGTGGGATGAAGAGAACAAGAAGACCCGTTTGTGATCCGCTGCATCGAAAAAGGTCTGTGCG  
GATCACGCATAAGTATCTGCCCTTGGCGGATTCAGCACTTTTTTTCATGCTCTGCCGACCTGCCGCTGC  
CCATAACAGCGTGGTCACTGCAAACCTGGTGGCACACAACAAGGACAACACAGATGCATATGTTGGGAGT  
GGATATTGGAGCTCAGGCTCAAGGGCTGCTGGTCGATACCAAAAACCGGCGAATTGATTGGCGAGCGC  
CATCGCATGGCCACACCGCAACCGCCACCCCGCCGATCGCCCATACCTTAAAGGCGCTGGTGCGAAC  
ACTTCGACTGGAAAGGACCGGTGGGCTGCGGCTTTCCCGCCACCATCCACAACGGGGTTGCCAAGAGTGC  
CGCCAATATCGACAAGAGCTGGATAGAAAACCGATGCCGAGCATCTGTTTGGCGATGTCACCGGCAAGCCC  
TGCTATGTGCTGAATGATGCCGATGCCGCGGTCTGGCCGAGATGCGCTTTGGCGCCGGCAAGGATCGCA  
AGGGGGTCATCATCCTCATCACGGTGGTACCGGCATCGGCACCGCCATCTTCGTCAACGGCCATCTGCT  
GCCAACACCGAGCTGGGCCATCTGATGCTGGAAGGAATGGTTCGCCGAGCACTACTGCTCCGATGCGGCA  
CGCAAACGGGAAGATCTCTCCTGGAACCGCTGGGGCAAGCGCTTCAACAAGTATCTGGCGCGCCTCGAGT  
TTCTCTTCTCCCCCGACCTCTTCATTCTGGGGGGCGCAGCGCAGCCAAGCTGGATAAGTTTGTGATCG  
CATCGAGACCCGGGCGCCGCTGATTCCGGCGGCCAGCCTCAATCAGGCAGGGATTATCGGGGCTGCACCTC  
TACGCGGCCGAGCAGCAGGGCTGACCGACGCTCACTGCAAGTCAGCAGATACCAATTGAAAGGGCCCCGGC  
ACTGCTGCCGGGCCCTTTTTGTTTTGCGGTTCATCTTGCCTGTTTGGTGTATACCCGTTACATGTGCTC  
GAGTCGGTGCCTCCGTGCACACAGTCCGGTTCAGGCGGGTCTGCTCCAGCCTGGCCAGATTCTCGAGCAAG  
GCGGTGGTGGCCGGTGTGCGGCACTCCCGGGCCAGATGACTCAGTTCGCCCACCAGCTGCTCTTCCCAAC  
GGCATACTGAGTGACGATATCCTGGGTCTGGACTGATGCCGGCAGCTCGAAGCGGGTAATGGCAGGCAA  
CATATCCTCGCTGAAACTCTGGTTCAGCCAGGTCTCCCTGACCGCTCTCCAGCTGAGCAGCATATTCG  
TGCAAATGGGCACTGGCCGCATCCTCACGCCCTTGCAGATAGACCAGCAACATCCGGCTGCGTTGCGTGT  
CCACCTGGTTGCTCAAACGCTGGTAACAAAGGCCGAGCTGGTGTGACCTGCTCAAGATAGTGCAGCAA  
CTCTTTGATCTGTTGGAATCTCATCGTACTGCCCTCCATGCTTGTGACATCATCAGTATAAAAAACCGG  
CGCCACCGACCAATCCCTATCCGAGCCCCCTTGCCTGCATCAAGGTTGACGCCGACAAAGTGGCGAT  
CAGGTGATCCGGTACGAATAGGGAACGATTTGTGCAAGATTTGTGTAACGATGGAGGAGCATCAGGCT  
CGACAGCAGATGTGAACAGAAAACGGGCTGACACACTAATAAAAACAGCATTTACCCGATATTACCATCTT  
TAATTCCGTTATCTGCCGAGGGACGAAAACAGGATCTGAAAAGAGCAACAATACCATCCTGATCGTTATCC  
GCCTGACAGAAAATCCTTATCACTTTTTTAGACGTCTAGACGTAAAAACATGCGTTGACATGGCCATCCAG  
ACATCTTAGCATCATCCTCCATGATGACAGAGTAACCCAGTGAACCTCTGCCCAATTTCCCCGCTGTA  
GCGCCCTGTGCTTTAAGGCTGTTAGCACGGAAGAATCCATGATTAAGTTGATCGGTCTCAACAAAGTCTA  
CGGTACAGGCAGTGACCCGTGCACGCCCTGCGTGTGAGTCTGCATGTACCCCAAGGCAAAAATTTTC  
GGGGTGATCGGTGCTCCGGTGCAGGCAAGAGTACCCTCATTCGTTGTGTCAACCTGCTGGAGCGCCCGA  
CAGAGGGCCAGGTGATTGTGATGGCCAGGATCTGGTGCCTGAGCGAACGGGATCTGACCCAGGCTCG  
CCGCCAGATCGGGATGATTTTCCAGCACTTCAACCTGCTGGCCTCCCGCACCGGTGTTTGCCAACATAGCC  
TTTCCACTGGAGCTGGCGGGCTGGAGCAAAGAGAAGATCCAGCAACGGGTTGCCGAGCTGTTGGCGCTGG  
TCGGGCTGGAAGCCCGTGCCAGGCTATCCATCCGAGCTTTCCGGCGGTTCAGAAAACAGCGCTCGCCAT  
TGCCCGCGCACTGGCACCGGCCCCCAAGGTAAGTCTGCTGCGACGAGGCCACCTCGGCCCTCGACCCGCA  
ACCACCCGCTCGATCCTGACCCTGCTCAAGGAGATCAACGTCAAGCTGGGGCTCACCATCCTGCTCATCA

CTCACGAAATGGATGTGGTGAAGGGGATCTGTGACGAAGTGGCCATCATCAGCGACGGCAGCCTGATCGA  
ACAGGGCGAAGTGGCCTGGTTCTTCAGCAATGCCAAGACCCAGCTGGCCCGGATTTTCATTCGCTCCACC  
ATCCATCTCGAGGTACCGCAGGAGTATCAGGATCGGATGAGCAACGAGCGGGTGCCGGGCAGCTACCCAC  
TGGTGAAGCTTGGCTTTACCGGCAGCACGGTCGATACGCCGCTGATCTCCGAGGCGAGCCGCCGTTTCAA  
TATCGACATCAGCATTCTGAGCGCAGACATCGAATACGCCGGAGGCGTCAAATTCGGTTTTCTGCTGGCC  
GAGCTGTTCCGGGGATGAAGCCCAGTGCAGGGCGACCCAGCAGTTCCTTATCGACAACCACATTCAGCTGG  
AGGTAATGGGTTATGTCCGAAGCCATGATTAATCTGCTCATCACGGCCCTGGGGCAGACCCCTGATCATGG  
TGTTTGCCCTCCGCCCTGTTTGGCTGCCTGCTCGGTCTGCCGCTCGGCGTGGCGCTGCATGTGACCAAAGC  
TGGCCAGATCCTGGCCAACCCGCTGCTCAACCGCACCTTGGGCATGGTGGTCAACGTGGGTTCGCTCGGTG  
CCCTTTATCATCCTGCTGGTGCATCATTCCGCTGACCCGGCTGATTGTCCGGCACCAGTATCGGCACCA  
TCGTTGCCATCGTGCCTGACTGTCGGTTGCATCCCTTTCATCGCCCGTCTGGTGGAAAGGGCCCTGAT  
GGAAGTCCCGGACGGCCTGCTGGAAGCGGCCAAGGCGATGGGCGCCAAGCCGTTGCAAATCATACCAAG  
GTGCTGCTGCCCAGGCCCTGCCCGGCATCCTCAACAGCGTCACCATTACCCTCGTCACTCTGGTGAAC  
ACTCGGCCATGGCCGGGGCCATCGGTGGCGGGCTTGGGGGATGTGGGTATTTCGTTATGGTTATCAGCG  
CTTTGACCCGACCGTCATGCTGGTACCCTGGTTATCCTGGTAGTACTGGTTCAACTTATCCAGAGCGCG  
GGTGAGCGCCTGGTCAACAAATGTGATCATCGTTAATCGTCGATTTCTGACAGGAGGTTTTATGAAATTT  
GGCATCAAATCCGTTGCGGCTGCCCTGCTTGTGGTCTGGTCTGGCCGGTTGCGGTCAAAAAGAAGAGA  
GCAAGGTTCTGAAAGTGGGTGCTATTGCCGGCCCCGAGACCGAACTGGTTGAAGTGGCTGCCAAGGTAGC  
CAAAGAGAAATACGGTCTGACAGTCGAGGTGGTCAACTTCTCCGACTATGTCACCCCGAACGTAGCGCTG  
AACGATGGCAGCATCGACGTCACGCCTTCCAGCACAAACCCATCTGGATGCGCAGGTGCGTGATCGCG  
GCTTCAAGCTGGTGCCGGTTGGCAACACCTTCGCTTACCCGATCGCCGGTTACTCCAAGAAGGTCAAGGC  
GCTGAGCGAGCTGCAAGATGGCGCCCAGATCGCGGTACCGAACGATCCGACCAACCTGGGTTCGTTCCCTG  
ATCCTGCTGGCCAAGCAGGGTCTGATCACCCCTGAAAAGATGGTGGCCGGTCTGGAAGCCACCCTACTGGATA  
TCGCCAGCAACCCGCGCAACTTCAAGATTGTGGAAGTGGAAAGCTGCACAGCTGCCCCGTTTCGCTGGAAGA  
TGTGGATCTCGCTATCATCAACAACACCTTCGCCGGTCAGATTGGTTTGACCCCGACTGAAAACGGCCTG  
TTTGTGTAAGACAAAGAGTCCCCCTACGTCAACCTGATCGTCGCCCGCGACAACAACAAGGATGACGAGA  
AGGTCAAACAGTTTCGTACAAGCTTTCCAGACCGATGATGTCTACAAGAAAGGTCTCGAGCTGTTCAAAG  
CGCCCTGGTAAAGTTGGTAATTGGTCACTACTCGGCAAAAAGGCCACGCAATGCGTGGCCTTTTTTATTG  
GCGCCGCTCATCATATCCGCGAGCACGCACAACACTACTATAACATGAAAAAATGGTATGTCGCCCT  
ACTGCAAGCCAAAAGAAGAGGCCCGCGCCCGCCACCTCGATGCCCAGGGTATCGAATCCTATTACCC  
CATGGTGGAGATCGAGAAGCTGCGCCGGGGCAAAAAGAGTTCCGGTACGGGAACCCATGTTCCCCAACTAT  
CTGTTTATCTTTGTCGATCTGGAAGAGGTGACACCGGTACCCTGAAAATCGACCCGCGGCATCAGCAGAA  
TCATCCACTTTGGCAGTGAATGGACCCCATCAGCAGCAAGCTGGTCTATCAGCTGATGAGCCGCGATGA  
CAGCGATGAGGCGAGAGCCAGCTACGCCAGCCTGCCGTGCTCGGGCGACAAGGTGCTGATTGAAGAGGGG  
CCGTTGGCAGGCTTCGAAGCCATCTATATGGAGCCGGATGGAGAGAAAACGGGCGATTTTGTGGTCAGCC  
TGCTCAACCGGGAGACCACCAGCAGCTTCGACAACCACACCTTCAGGCGTCTGGACTAAACCCACGGGCC  
AGACGGCTCGGTGCATGGCAATAGCAATGGCGGGATGATCCCGCCATCTCATGCATCAAGATCAAAGCGG  
GCGATGACCGCCTTCAGCTTGCCGGTATCACCAGCCAGTCTGGCTACGATCTCCTCCCCCTGCTGACTGC  
GCTGACAGGATTGCCGACTGAGCGCGGCAATGTGCTCGACCGTCCCGGATACCTCGGGCGCCACCCGCGA  
CTGCTGCTCGGTTGCCACAGAAATGGCCTCCAGCTGGCCCCGACAGCGACTGTACCAGCTGGTTCATGGCA  
CTCAGGGTATCGGTACCAATCCAACAGCATCCCGCCCTTGTCCACCAACCCGGGTACCCTGCTGACGG  
TACTCACCGTCTGGCGAGTCTGCTGGGAGATGGCCGCAATAGTCTGGTCTGATCTCGGGCGTGGATTGATG  
GGTGGCGGTCGCCAGCTGGCGTACCTCGTCGGCCACCACCGCAAAAACCGCGCCCTGCTCGCCTGCCCGC  
GCAGCTTCTATCGCCGATTGAGTGCCAGCAGATTGGTCTGCTCGGCTATAGTGGCGATCACCTCGGTGA  
TCTGCCCCACCTGTTCACTCTGATGCTCCAACAGCCCCATGGCTTCGTTGGCCTGTCCAATCATGGCGGC  
AATCTGCTGCATGGTATCGCTCATTTCGTGCCAGCGCGCCTTCCTTGACGGGTCTGCCGCCGCACCTGA  
TGGGCACCATCCGCCACACCGGCAATGTTGCCAGCCACATCAGAGCACTCACCGACATCTGATCGATAG  
CCGCCGCCACCGCATCGACCCGCTGATCCTGCTCCGTCAGATCCGCAACTATGGCTCTGGTAGTGCTGCC  
CACATCGAGACAGGCCACCTCGACCTGCCCCACTGCGCCCTGCAACTCCCCGACCAGATGATGTAACCTGG  
ACAGACATCCGGTTGATGGAACCGGTCAACTCTCCCAACTCATCCTGCCCTGTGATTGGCAAGGGCTCGG  
CCGCCAGCCGGCCATCCGCAACCAGCCCCGCCGAGTACCAGACAGGCAATGTCACGGGTGAGACGGCG  
ACTAAAGAGCCATGCGACCACCATGCCAAGCAGATGGCGCTGCTGGTAGCCAACAGCAGTGTCTGGTTG  
ATGGCCCTCCCGCTCCGGTTCATCTGCGCCGAAATCTGATCCACCTCGGCACGGGTTTTTCCCACCTGCT  
GGACCAGCTGCTCGCTGAGGCTGGACTGCATCGGCTCGATGTGCTGGCCATCAGGTAGTTTGCCTGATC  
CCAATCCGGTGCCTGGCGCTTCTCGATCACCTGCCCCACCAGCTCGGAGAAGGGGGTAGCCATCTCTTCA  
AACAGCTGCCAGAGGCTCTGCTGAGTATCGGTAAGAGCGCGGCTTGTGTTTAACTCAGCCACCCGCT  
GCTGGTGAACCTGATAGTAATCCTGATATTTGCTGCGGTATTTCGGGATCGCCTGAGATAAGAAAATCCCG  
CAGGGCAGAGAGGGCGTTGGCGAGGCTGTTATAAGCATCTCCCACCTGTTGAGCAGCATGCGGGCATCG  
CCGGAGAGTTGATCCTGCGGAGTGCCAACCTTCTTCATTGGCAAAAGGATTGCAACTGATCGAGCGCCGCT  
CCGCCAGCGGACCCGCTCCTGCAGCATCAGGGTGTGAGCGGGCAGATTCTCTTCACTCTGGGCGATGGT  
CCACACCTTCTCCTGATGGCTTTTGAAGGTCTCGAGAGACTTGGCGAGCGCCGACTGAAGGCATGATGG

CGGATGGCCTGCCAGGCCGACTCCCCTCTGCTTGGGCGGGAGGCCTGAGCCGGATCCTTGCCGAGGA  
TCAGATAGCCACGCAGGGCAGAAACGGTGGCCACCAGCGCCTTCTGGCTCGTTTCATCCCGCTGCAGAGT  
GGGCAGCGCCTGCTCCAACAGGGTGTGTTGGGCTGATTGATCTGGGTCAGCCGTAATAGACCAGCGTG  
GAGGAGAGCAGGATCAGCAGGTTGATAAAACCGAAGCTGAGCAGCAACTGCTTGAGATTTTCATGAACA  
TCCTTGTTCAAACGGAGGGATCCAGCCAACAGAATCAGATAGATATCAGTGTAGGCAATCTATCTTGCCA  
AGTCCGGTGCCAATTAGCCAATTAAGTGGTGGCCAGATCGCCG  
TGCATAGAATAACGACACAGCAATTAACCTCAACGTTTATCCTTACTGCCCCACAGGGACCAACAAA  
AATGGCAGACCGAAGTCTGCCATCAATGCCAAGAAAGGGGCCAAACAAGCCCCCTTGATCAGGTTATTCG  
ATTCCCCGAGGCGGAAGCCGGTTTGATACTCCCCTCGCGAACGTTGAGCGATTTGACCCTGATATCCTTCC  
AGCCCCGATATCCCTGAGCAGGGCGGGTGACAGATTGACCTGCACGAGACGACGCTCGACCCGGGCAATCC  
TTCTCTGGACCAAGGATTCAACACTGCGCAGTAAAACAGTTCGATAGACATGACATTTCCAGTTGAAAC  
ATGCGGTTCTCCCGGAGAAAGTGGATATCACCTGCGGGACGAACCGCGGGTGATAAAAAAGACAGGGGTT  
ACCTGTTTACGCCACGCGGTAAAAGAGCACGAGATTTACGCCGACGCGAGTGCCGCGAGAGAATGCAAT  
ATTAAGCATCAGATGTTGCATATTCGTCTCCTTACC GGATAAAAAGTTGAACAGGTTGCAGAAGTCTAAAA  
AATATCCGAATTTAAAAACAAGCCTCTTGCGACTCCTTTTTAAACGTTTTTACGGCATTTTTATGCTGCCCG  
AAAGGAACTTGGGACATCAGATCCCCGAGAGTAGCCGGTACTCTTCCAGTACATAGGTATCCGTCATGC  
CGCTGACATAATCGAGCAGCAACCGCACCCGGTAATACCCTCTGCTCGTTTTGGCAGGCAAAACGCGG  
ATCCGGGGTGCGATCGCAATCGATAGGCCTTGAGATGGCGGGCCGAGAGGCGGTGATAGAGGCGGCGC  
GCAAAGAAAAGCGCCTGACTCCCCTCCGCGGCCAGCAGACGGGCAACTGTGGCGCTGGCAGTGCCAATA  
GACAGGCATAACTGGTCAGCACCCCGCGCAGCGCCGATACCCTTCCAGTTCGAGAGCCTCGACTTCGGG  
GCGCATAAAGACCAGCTCGCGGGCCACCCGCTTGAGAATATCGAGCACCCGCGCCCGCGCCTGGCCA  
TGCAGCAGCGCTTGCGGATAGGAGCCCTGCAAAATGGCCTGATGTTGCTGACATAGCTCTGCGCCGCCA  
ACGCCACCAGATCCCAGGTCAGCTGCTGGCGAAAATGGGGGAAAAAGCCCCGACCAGAAGCCAGCGCCTC  
ATCCAGCAAGGTGCCCATGTAGTCACTCTGGTCAGCGGCCCGCAGCGCCGAGCAGTTACCCCTGAGTC  
AGGATCCGCGGATCTACCGCATCTTCAGATCGGCGATGCAGTAGGAGATGTCATCAGCCGCTCCATGA  
TGTAGACCAGCGGATGACGACAGCCGGGGGCAATCCAGACTCTGGCCGAGGGCACGGTAGAGCGGCTG  
CTCGCTAAAGAAGATGCCTCGTTTGTCTCCAGCCATGATGCTGGCCATAGCTCACGCCGGTTGCGGC  
TGCTGCGGGTATTTGCAGAGTGCAGGCGCCGAGCTGCCCCAGCGTAAGGTTAAGCTCGTGAAGGCTGTGCACCA  
GCCGAGACTCTGGGCGATTGCCATCAAACAGTTGAGGCTTCCAGTCTGACGCAATTCAGCCCACTGGGCGAGGG  
TGCTGCGCCAGCGCTGCTGATAGAGGGGATCGAGCATCTCGCCGAGCCACTGGCTCATCACCTGCTCG  
CCAAAGTGCCAAACGGCGGGTTACCCACGTCGTGGAGCAGGCAGGACATCTCCACCAGATTGATAAAAG  
CCCCTTACAGACCATCCCAGGCAAGGCAGCCAGAATGCGGCGGCTGATCTGGCGGGCGGTCTCCTG  
CACCTCCAGCGAGTGGGTGAGGCGGCTGCGCACCGAAGCCTTACATCGAGCGGAAAGACCTGGGTCTTC  
TGTTGCAACCGGCGCACTGGCGGGCCTGCACGATACGGGCGGATCCTGCTCGGTGCGCTCCAGCAGCT  
CCTCATCCCCCAGGAGTGGATGCGCGGGGGTAATCAAACGGCTATACATCTTGCAGCTCCTTGCCAA  
CAACGTCCCTCAGACTCAAGACAACCTCCAGCCTCAAGACAACAACCAGCGCCGACAGCGGGGATGTCG  
CCCCGATATTCGCGGCGCAGCGTCTCAATCCAGTCTTCCAGTTTTCCCACCAGGCGGGATGATCTGGGC  
TCTGGATCAGCTGTGCCGTCTGCTGCAATCGGCGCAGACCAATGGAGCCTGCCGCCCTTTTATCTTGTG  
TGCTCTTCCACCACCCCGCTTGATCCTTGGAATCATGTTGGAGTCGAGCACCGCCATGTAGTCCGGC  
ATCATCTTCTCGAACAGATCGACGCTGGAGAGCAGCACCGGCTTGCCACGGTATCGGGCTAATCGGTGA  
GGAAGGGGATATCCAGCAGGGCATCCTGATTGCCCGCATCAGCCTGCTCGTCCGCTTCATCCTCGGCCAG  
ATCGGCAAAACAGGTGACCAATCACCTCCCGCACCGCTTTGGAGCCAAGCGGCTTGTAAATGACATCCTGC  
ATGCCGTGATCCCAGTAGTACTGGCGATCACCGGTGGAGTTGGCGGTGAGTGCCACCATGGGTGGCAGGC  
TGTCGCCATAACGCTCCAGCAGGGTTTTCGCCACATCGAAGCCGGTCATGTCCGGCAGCTGGATATCGAG  
CAAAATGAGGTCGAAATCATCCGGGTTGGCCATCGCCAACGCTGGGTGCCATCCCGTGCCACCTGCACC  
TGATGACCCAGCTTGCCAGCAGGGCGCAGGCCACCGTCAAGTTAAGCTCCACATCCTCCACCAGCAGGA  
TATCGAGGGAGGGCATCTCCTCCTCCTGCTCTGGCAACACTGGCTCTGCGCAAGCTACCTCCAGCTCGGC  
GGTAAAGCAGGAGCCTTCGCCCCGATCGCTGTCCACATAGAGCTGGCCGCCATCGCCTGCACCAGCTGA  
CGGGAGACCGCAACCCAATGCCGGTGCAGGTGGCGTGCTTCTTGCCCTGCACCTGATAGTACATGGCGA  
AGATCTTCTCCTGATGGGCGCGGGGATGCCGATGCCGGTATCCTCCACCTCGAAGTGCAGGGCCAGCTT  
ACCCGGCTCATCGGCGGGATGGGAGAGACAACGCACGGTGACGCCCCCTCATCGGTAAACTTGACCGCCA  
TTGCCACCAGATTCACAGCACCTGGCGCAGGCGGGTGCATCAGCCATCACGAATTGCGGCATGTCCG  
CATCGCGATCGAAATGGAGATAGAGCCCCTTCTGCTCCGCTGAATGCGCGACAGGGTCTCCAGCTCGTC  
GAGGAAGGCGGGCAGATCGATACGGGTGCGCGCAATTCGAGACGACGGCGATCCAGTTTGTCCAAGTGC  
ATGATGTGCTTGAAGATATTGCCAAGGGTACCAGCCTCAGGTTAAGTGGTCTTGAGCTGCTGATGCTGCT  
TGGGATCGAGGGGAGTATCCATCAGCATCCGACTCAGCCCCAGATGCCGTTGAGCGGGGTGCGCAACTC  
GTGGCTGATGGTGGAGATAAAGGTCGTCTTGTGCGGGCTCGCCTTCTCCAGCTTGTCTGATACTGCTTG  
CGCTCGGTGATGTGCGGGCCAAAGCCGAGCAGGCCGAGTGCCTTGCCGAAGCGGTGCAAGAAGGGCACCT  
TGCGCAGCTCGAAGTAGGCTTTACGGCCATCGGGATACTCCAGCCACTGCTCGTAGGTGAGCGGCTCGTT  
GCTGGCAAAAACCTGCTTGTGCGGTCTCCACCACCTTGTGGCGATCTCCTGCTTGTAGACATCGAACGGG  
GTCAGACCGATCAGCTCGGCCTCCACCTTGCCGGTCACTCCTCATGGCGGGTTGCAACCGGAAAACT

GCTCATCCTCGTTGCGGTAGTAGACCAGATCGGGGAGCAGTCGATAAAGGAGCGCAGCAGGGCAGTACG  
CTCCCCAGATGAAGCTGGGCTTTCTCTCGCTGGAACACCTCATTTCTCGAGATCCTCGATGGCCTGCAGA  
CGCAGACTCTCGGCCCGGTTGGTCTCGGCAATCTGGGCGTTGAGGCGGCTGATGTTCTCCTGCAGCTGGG  
TATTGAGCTCCAGATCCCCTCGCGCATATCTTGAGCTTGCACCATCCGGCTCAGTCGCTGACGGGA  
ATCCTCCAGCTGATCCACCACGATGGAGAGAAAATAGACCGCCAGGGGGTCACCAGCAGGCCAAAAAAC  
ACCGAGCGAACGAAGTCGATCACATCGATATTGCCACGCAGGAACAGGGGTCACCCCATCTGGATGGCGA  
CCGCCAGCAGATAATGCCCGCCGAGGAACATGCTGAAGCGCACCATCCAGCTTGGTCATCAGATC  
GACATAATATTGCGCCAGGATTTAATCTGTTTCATCTTATTGTTTTCCCGCATATTCGCGGTACAGAA  
TACCAGCACAACCGAGTGAACCTTCTTAATCTCGCACAATTAATTAACGATTTCGCGGAATGAAATGAGT  
GGGTTAGGATAAATTGACAATATTGAGTCAGTTGCCATTAAGGTTTTTTCTTTATACTCACCGCCGAAAA  
AATTCACCACCATTTAATTTAGGAGTTATCCGATGCGCAATACCACCTTGCTGGGCTGGGCTGCTGGT  
CGCAAATAGTGCTTATGCTGATTTGGGTGAAATTTCCCAAGGAGTCTGGCTGGTCCGGTTTTCTGCTCGGC  
GGGGTCAGTGTCATCAATTACGAATCAAATTTTTATAGCGGTGATGATGAAAACCGCCGCTGAGCGGAC  
TGGGCAGTGCCGAGAGCAGCTCCGCCGTTGCCCGCTGCTCAACGCCGATATCCGCTACACCTTTGCCGA  
TACCCGCACCCAGGTCTTCTCGGTAACCTGATCCAGGATGCCATCCGTTTCGACTTCACCCAGCAGCTC  
GGTATCCGTCAGGAGATGAGCGACAAGGGCATTGTAGCTGGCTCCGTGGTCTTTAATGCCATGCCGACCG  
AGCAGTGGAGCGATCCCTTCGCCGTAGGCGTTGATCGCCAGTCGACCGATATCAAGTCAAAGGGGTTCG  
CTTCGCTGGGACAGCATCTGGGGTAGCAACTTCAATGGCAGCTGACCACCCGCAACATCGAGGTGGAT  
GAGGAGCGCAGCGGCAGTCAGTACGGCGCCGATACTGCCGCAAGCTGGATCGCAACGGCAAGATCCACG  
CCCTCGACCTCTCTACAAATGGCAGCTGGCACCCGGTCAGATGCTGGAGCCAGCTTTATCTACCGCCA  
AGCCGATCTGGATGGCAGCGCCAAAGCTACAAGAGCAACGGCTGCAGTTGACCTACGGCATGCCGCT  
TCCCAGTGGTCTTTTCGTCAGCAACGCCTATCTGGGCCAGACCAAATATGATGAGGCCAACCCCATCTTTG  
GCCAAAACGCCGACTCCGACGAGTTTGCCTGACCGGTACCTTCTTCTGGCACCGCCTGTTCCGGTATTGC  
GCCGCTCTCGGGACCTTTACCGCTGGCTACGCCAAGTCCGATTCGGACATCAACTTCTACGATTCGAA  
TCGGTGATGTTCAACACCGGCTGCTCTACAACCTTCAACAACGGTTGTTTCGACCCGATAACAAGGCC  
ACCCGAAGGTGGCCTTGTGCTATCCGGCGATTGACTCAAATACCAGGGAGTCGAGCAAATCGTCGTGA  
TCGTTGGCTACCGGGGACAGCAGCTGAGCCGGCTTGGCGGCATCCTGCTTGGCTGTGCGATCAGCGCAT  
CGGGATCCAGCTCTTTCAGTCTCCATCCCTCATTTGATGCGGATGAACTCGGTTTTGTCCATGCCAG  
CTCCAGATAGAAGATGTTGTTGCGGGCGGTGAAGAAGTGACGCGGCGGGACTCCGCGCTGTCGAGATTG  
GTATCGACGCTCAGCATCACCTGCTTGTGAGGGCCAGCATCTTCGGCTGGTTTTGGGTTATGTGGGTCT  
GCAGATCCCGGCCACCTTGACGGTGAAGCTGCCGACGATCTGGTTCATCAGCTCGCCCATCACGTTGCT  
CACCTCATCAGAGGTGTGGGAGATGGCGAGATCCTCCTTGAGAGACCCCATGCTCAGCATGTAGCTCTCG  
TACAGCTCCATGGCGGCGGCGGAGAAAGTTGATCACCACCAGACCGGAAAAACCGCCATCGAACAGCA  
CGAAACAACCGATATCCGGCTTGAGGCAGGTCTTGCTGATCCGCTGCACCATGCCGAAAACCGCACCTG  
ACTCATGGTTCGCGGCACTCAAACGTCGGTCAACGAGTTGCACAGGCTGAGCAGCACATCCTCTGTGGTC  
AATACGGCATCGTCATCGGATCTTGTCACTATCATGGGACCTTCTTGAACATCGAAAATGGGATTATCTA  
TACCATAACTCTAACAGATGGCGCGGCCCGGAGACTGAAATAGCGACACGCCTCTCAGTTGACTCCGTTA  
TCAGCAGCCACAGGGGTGAAACCGCTCAGCTTGGCGAGCCGGGCACGCCATATATCGGCCTGCTGGGCCA  
AACTTGTGACTCATAAGGTACGACCCGATGAGCTCCCCATATGGGACCGGGCCAGGCGGATCCGTCCG  
AAAGCGGGCGACATGGTGAAGGTGGAGTTGCGGCACCATATTGCCAGCGCCCTATATTGATTTTGTCC  
GGACTGAGGGCTGTTCCATCAGGGCGGCGACGGCGCAGGACTCCTGCATCAGCTGTTGCTGCTGCTCCG  
GCGCCAGATGGTGAATTTCCCGCAGGTTGGCTACTCGCGGTACCAGGATCAGCCAGGGATACTGGCTGTC  
TTTTGGCCAGCAAGACCCGGCAGAGGGGAGATCCCCGAGCCACCGGGTATCTGCCTGCAGGCGTGAATGC  
AATTCAAACATGAAAACCTCGTTGAGTACGATGAACAGAGCGCTGAAAAAGGAGTGTCCACGTTACTGC  
AACGGGCGAAAACTTAAAGCTGTGGCACGGCCCAACCGATAAAGCGCTTGCGAAGGGCCGGTCCGGCCT  
GGAGGAACAACACTGCTCAACTGCCCTTCCAGCTCGTTGGTTGCCATAACGGGTTGCGCCCCACCGGAG  
CGTAGCCGTTGGTTGTGTAGTACAGCGACGGCCGTCAGCGCCGCTTGCAGCCGCTGCGCGCTGCTGATTCA  
GCCAGTTTGGCGTTCCAATCCACCCCAAGCAGCATGCCACTGGTCCACCAGCGCTCCTGCTGGATGGCAA  
GCGCGCGGCCATTCTCCTGCAATGCCACCACCGGATCCTTGGCATAGGCTGCATCCCCCGCTCGTCCCC  
CGGTACGCTGGCCATCAACTGCAAATGCTGATGGCTGCCTTGGTAGCGCACCACTGCGGCTCGGAGCGT  
ACCTGCCGATCATTCTCGCTGCTGCTGCGACTGGGGATCACCCCTCGAAGCGCACCAAGCTGCTGCT  
CGCCATCCGCCAGAGTGGCATGCTGCTCATCTGCAAGGTGCCGTTGCTCACCGGAGGATGCGGAAAT  
CTCCGGCACCTTACAGTCCACCATGGCCTGCACACTGCCAGCCCCAACACTGCACAGAGCAGCACAAAC  
CCGGTCAACCTCTATTACTCTTCACTCCCGCTGATCTTCTGATGCCGATGATGGGCGCAGGGTAGCAG  
CCGAAGATGACAGAAAAATAACGCCGCTCAGAACAGGTAGTGGGGCCGCTCAGCAAACCACTGGGCCAGC  
ACCTGCTTGAACAGCCGATCTTGCGCGGCACCCGCCGCTGCTGGGCATGCAGTACATGGAGCTGATGCA  
GCCCGCTCTGCCACTCATCTAGCACGGTACCAGCTCCCTGCCGTCAGCAGCGACTCCACCAGCATCAG  
CGGACACTTGGCATAGCCCATACCGGCACGCGCAATTTGCAACACGGTACTGTAAGTGGTTGGCCCGCACC  
TTGCCCTGCACCAGAATGTGGGCTCTTCCCCCTCACGGATAAAGTGCCACTGCTCCCAGGCCGATTTGT  
GCCCTGCAACAGGCAGCTGCGCCGCTCAGCTCATAGGGAGTAGCTGGACGCCCCCTCCCGCTACAAG  
CGCGGGCTCGCCACCACCATCCTTGAGCCGCCAGCGGCAGGGCCACCAGATTGTCCGGCACCTCG

TTCATGGCGCGCAGGGCGATGTTCGTTCTCCCCCTGACTCATGTGACCATCTGGTTGGTGA AATTGAGTT  
CCACCTCCACTCCC GGGCAGAGCGCGCAAAGCTGGTCAGCAGTTTCGCTCACCATGCGGTCGCCGGTGC T  
GACCGGGCAGGTAAAGCGCAGTCGTCCGCAATCTCTTCGGTCAGCGCCTGAATATCCTGCTCCGCC TGC  
CGAGCCAGCGCAAGATCTCCCCCGCTGCTGGTAGAGGGTCTTGCCCGCCTCGGTGAGGCTGAGGCGGC  
GGGTGGTGCCTGCAACAGTTGTGCATTGAGGGAGGTCTCCAACGCGCTGACATGGCGGCTCAGCATCCC  
CTTGCTGACCCCCAGCGTATCGGCAGCAGCCGAGAAAAGTCCCGCGCAGCACCCTTCGTA AAAAGCTGGCC  
AGATGGGCGATATCCATCATTAGCTCCAATATGGAAA CAATGGGTTTATTTTACGCGCTTTTTCGCATTT  
TCTGTTGCGCTAGAATCGATCCATCCAACCAGGAGTGATGCAGATGAAAAATGTGATTGTGGGTGCCTC  
CGGACCCGTGCGCTCCGCGGTGAGTGAAC TGTTCGCAAGATCATCAGGTGATCCGGGTGCGCCACAGT  
CGTGGCGATGCCACGGTGCAGATGCGCGATCCC GCTCCATCAAGGCGCTGTTTCCCAGGTGGGCCAGT  
TTGATGCAC TGGTTGTGCGCAGCGGCGGTGCCCTTCAACGGTCTGACCGAGATGACCCAGCAGCAGT  
GCAGGTGGGAGTGGAGAGCAAGCTGATGGGCGAGATCAACCTGACCCGCGCCCATTTCCCATCTGAAT  
GACAAGGGCTCCATCACCTGATCAGCGGCATCTGAGCGAGGAGCCGATCAACTGGGGCGTGAGCGCCA  
GCACCGTCAACGCGCCATCGATCACTTTGTGAAAAGCGGCCGCTGCGAGCTGCCAGAGGCCCTTCGCAT  
CAACGTGGTGAGCCCTACCGTGCTGGCGGAGT CGATGGACAAAATACGCCGACTTCTTCCCGGGTTTCGTG  
CCGGTGCCCGCCCAAGGTGGCGCAGGCTTACAAGAA GTCGGTGTGGGCATCCAGACCGGTGAGGTGT  
TCAGAGTGAACGGCTGAGCGCCGCTCGCTTGC CGCCAGACCAGCAATAAAAAAGGGCCCCGCTGAGGGGC  
CCGTCTGTTTTCTCTGCCTATCTCCTTTGCTG CCGCAAACGTTTGTGTTTGGCGACAAAAAAGAGCGC  
AACTCTTAGTCGATCAGACCGTACTGATCACGCAGCACCTCGATGATCTCCTGCTTGGGATTGGCAGAAC  
GCGCCAAC TTTGTGGCCGATAATCTTCTCGGCGATCCCGACGTAGGTGTTGGAGATATCCATCATCACTTC  
GGTCGGCAGCTTGTGTGCGCGGCCAGGGCAAACGTTCCGGCATGCGGTTCTTGTGAGCAGGATGTCC  
GGATCCGGGAAGTGGTTGAGCAGCCACTGGCGGAAAC CCTCTTTGGACTTCTCGACAATCTGACCGTCCG  
GCAGGGCCGCGCCATCCCAGATACGGGAGCTGTGCGGGGTGCCACTTCATCCATGTAGATCAGCTTCTC  
GTTGCCGGCGGCATCGTGACGTAACCAAAC TCGAACTGGTATCGACGAAGATCTGATCCAGCCCGGCC  
AGCGCATCGCTGATGACGTTGAAGCCCTCTTTGAGCAGCACTTCGTAGCGGTGATGTCCGGCCGGTTTGC  
TGAAGTTGAAGCCTTTATAGTGGCGCTCGATATCGGCACGGGAGACGTTGACGTCATCGGCTTCCGGCAC  
GCCATCCAGCCCTTTCCGCACGCCCCTTGGTGGAGGGAGTGATGAGGATCTCCGGCAGCTTCTGATCC TTT  
TTGAGCCCTTCCGGCAGGGTATGCCCGAGA ACTCGCGCTGCCATCCTTGTAGGCACGCCACATGGAGC  
CTGTGATGTACTGGCGGCAATCGCCTCGATCATCACTGGACGGGCTTTTGTGACAGATCCAGACGAAGGG  
GTGCGGAATATCCAGAATGTGGCTGTGCGCCAGTCCCTTCTCCTTGAACAGCTTGAACCAGTGGCTGGAG  
ATGGCGTTAAGCGCAGCCCTTTGCCCGGCACG CCGTTTCAAGCCATCCACACCTTGCCAGATGCAATCGA  
AGGCCGAGATGCGATCGCTGATCACCATGAGGGGCGAGGGGCGCATCGGCCGGTACATCATAGCCTTTCTC  
TTTTATGAGCCGGGCACTGTCTTCCGGGGTCAACCAGTAGACGCTGCGCACTTTGCCGGAATGGACAGGT  
TTATCGGTACGGATCGGCAAATCGTCATTCA CCGCCAATACTTGATCTGCAAGACTCATAGCTAATAACA  
CTTCTGTTTTGTGGGGGTAAACATCGCGAGTTCCTCACCTGCGCGCTCTGTTTTGCAACGAGCTGGCAAG  
GGGGCTCGCATCATCGAAAACCGCTTGGAA TCCCCGCTTTTTCAGGGGGATTAGATAACAAAACAGGGG  
CACAAGGCCCTGTATTTATTCTGCTTTTGTGCTGCTGCTGATCGGCCAGCCCTTGGCGAACGCTCGGA  
CAGGCTGATATACATCTGGGAGATAACCCCGGACGATACCGGCTTCTTGTCCCTGTGCAACAGGGTGATG  
GAGGTCTTGCCTCCCGCCATTTGCGCAAAGCTGGAAGCGGTATTTCTCCTCCTCCAGTTTGAACGGCTCGC  
TCCCTTTTCGCTTCCAGAACTCGGCACCCGGCTCTTCGTA CTGACGTCGATCCAGCCCAGTGACTGCTG  
GGTATCCTTGATGGTGA AACCGTAAGCAGGCAGTACCTGGTTGAGACGACGCCACACCTGATCAAAGGAG  
CCTTCGGCAATCCAGGCGCTCAGCTCGTTGTTGTCCAGACCCAGTTGCAGACCCATGCCATCGTTGGACT  
TGTGCTGCTCGCGGGCTTTCAGCTGGCTGT CGTAATAGAGAGAGAACTGGTTCAGCACTCGCGCAGCATA  
GCGCTGGGCATCGGCAGGGGTGAGCTTGTGCTGGTCTCGCCATCGATGGTCTCTTCGTGATCCAGCACC  
CGGACCGACATGTTGACGGCGTGGCGCTGGGCGT CGTTACGCACGGTGAAC TGGTAACGCTGACGGATTT  
TGAAGTCTTCGTATCTTCAACCCAGCCATCGAGGGCGACTGTGTTGTCAAACCAGCCGGTCTGCAATAC  
GCCATCCTGCTGATCCAGCTTCTCGGTGGTGACCTTGTATTTGGCCAGGAAGTTCATCAGGAACGACCAG  
GTATCGAGCTCCACGCTCTGGCTGGTGTCA GGGCATAGAAGGCAACGGTCGGTTCCGGTTGCGCTCTGCA  
CCACCTGACTGCCCGGTACCACGGTCAGCAGTTGAGCGGGTGGGCGCACATCAACCTGGGCGCCGAGGGC  
ACCTTACGGCTGCTCTCGGGAAGCGGCGGGATGTGCTACTGGCTGTTGAAGGTGGGTGCACTCAATCCT  
GCGGGGATCAAGAACGCGCGGCCCTCGAGGCGGGCATCTTCATAACCGAAGTCGCGGTTGGCCATTTTGC  
GATCCTGGGGGTGCTGCAACCGGCCAATACGGCCACAGTCGCAACGCTCAGCACCAGACGGGCTCTATT  
TCCCTTTCCATTAGATTTAAACTCGCCATCAACTCCGCTGTGGTCA GTGCTCGCGCCATCAGCTGTTTC  
GCCCTCGGGGGTGAAGTCAACCAGCGGCAGGCGCAAGGTGGCTGTTGCAATCAACCCAGTTGGGCACAG  
GCCATTTTACCGGGGTGGGGCTCGGTTCCGAGAACAGAGTCTTGTGCAACGGCATCAAGAGATGTTTGA  
TGTCATGCGCCTGCCCGGCATCACCGGCCAGCGCAGCAGCACATGTCCGGCCATCTGGGCCGCTGCAAT  
ATTGGTGGTGACCGAAATCACGCCATCGCCACCTTG CAGCATAAAAATCACAAACAGTGGCATCGTCGCCA  
CTGTAGAGAGCAAACTCCGGCCCGCACAGCTCGCGCAACAGCGGGGTGCGGCTCAAATCGCCGGTTGCCT  
CTTTCAAACCGATAATGCCGGGAACCTTGGCCAGACGGGCCACGGTCTCCGGTTTGAAGATCGCAACAAGT  
GCGACCGGGCACATTATAAAGAATTTGGGGCAGACCACTAGCCTCGGCATCGCACAATAGTGGCGATAG  
AGACCTTCTGAGTGGGCTTGTGTAGTAAGGAGTCA CCGAGAGGCCCGCCACCACGCGGTTTTGGCCA



AGCGTTTGCTCAGTTCGATGGCGTGAGCGGTATTGTTGGAGCCGCAACCAGCGATGACGGGAATGCGTCC  
GGCGGCATACTCAACGCTCTTTTCAACGACGGCGATATGCTCCTGCTCGCTCAGGGTCACCGATTCCCCT  
GTGGTACCCACCGCAACAATGGCGCTGGTCCCAGCGCTGACATGATAGTCAACCAGTTTGGCCAGACTGG  
CCCAATCGACTTCACCTGAAGCCAGCATGGGGGTAACGAGCGCAACAATACTACCGCGTAACATGGACTT  
TTCTCCCGATTTTTCAGGGGCGTAATGGTAAAGCTGACCCCTTTGAAAAACAAGGGAGAGAGGGGGCAAGC  
CGTGATAACCATCCGGAACAAAAAGTAATGGACGAAAAGTCGGCAACGTCCCCTCAGGGAGTGGCCATCAGGG  
CCGGAGGGTTGGCTTGCCAGCGCGGCTTTTCGCAACGAAAATAACGGACGAGAGAAGATTTATGACTCACTA  
CCTGGTCGTAACGGCCATCGGCACGGACAGGCCTGGCATCGTCAATGAAGTGACCCGCCACGTGAGTGGC  
TGTGGTTGCAACATTGTAGACAGCCGCTTGGCATCTTCGGCAATGAATTTACCTTTATCATGCTGCTCT  
CGGGCGACTGGAACAGCATGATGCAACTCGAAATCAGCCTGCCCTGCGTAGCCAGGAGTGGGATCTCAT  
CACCATGATGAAACGCACCGAAGCCAGTCCCTGCAGTATGACATCCGCGCCAGTGGCCGACCTGTTG  
ATCCGCGACGAGCCCGGCATCGTAAGCCAGTGCACCCAGTCTTCAGCGAACATGGCTGGAACATTTCAGG  
CGATGCAATCCATGACCCTGGAGCAGCAGCCGTTCAACCTGCTGAAGATCAGTTTTTCAGCTCAATCTGGC  
CAGAGAGGGTGAAGTGGAAGTTTCGCAAACCGCCTTCGCCGAATTTCTGTCGTCAACTGGGTGCCGAATCG  
TTCGAGTTTATCGTCAATCGCAAACACGCTGAGAGCGTTTTTACCCGAGGAGACCCCATGCAACCCTAC  
AAGCTGGCAGCCCCGCCCGATTTCTCCCTGCCGACCAGAATGGCAATCAGGTCAGCCTCGCTGGCCT  
GCGCGGCAAGAAGGTGCTGGTCTATTTCTACCCCAAGGCAATGACCCCGGCTGCACCACCCAGGCCTGC  
AGCCTGCGCGATGTGAACGCCGAGCTGGCCGCTCAATGTGGTGGTACTTGGCATCAGCCCGACCCGG  
CCAAACGGCTGAAAAAGTTTCGAAGAGCGGGACAGCTCAACTTCACTCTGCTGGCCGATGAGGACCACGC  
CGTCGCGGATGCCTTTGGCGTCTGGGGCCCCGAAGAAGTTTCATGGGCAAAGAGTATGACGGCATTACCGT  
CAGAGCTTCTGATCGACGAAGAGGGCAAGATTGCCACCCTTCGACAAAGTTCAAACCAGCGATCACC  
ATCAGGTGGTACTGGATTTCCCTCAAGGGGTAACCCCTCCCCTGCGTCATTGAAAGGCTGCCATGCAGGCC  
TTTTTTTGTCTGGTCAACCGCCCTTGCCAGCGGATTTTTTCTCACCCTCCCGCCAGATCAAAAAAT  
TCATTTTATATATGGGTAAACGTGACCCAGAAATCATCTTCCAGCGAGATATCCCATGAACATGAGCAAC  
ACTGAGCGTTTATCCTGAGCAACCAGTACGAAATTTCTGGCGAAACTCAATCCGGAGAAAAGCGGACGTCT  
ACCAGCGCGCCAGCACCATCATCGAGCGCGGCTACTGCCTGCAGATCCTCGAGTTGGAGAAGAGCTTCGG  
CCATCTGGATCTGGCGACCTGCCAGGAGGTGATCGACACCCTGGAGCTGCACCACGCATGGCCATCTCA  
TGGGGTAATCTGGATCCCGCCGATCAGGGCGAGATCAACGCCAGCCGTCTGGAGTTCAATGGCTACAGCC  
GCAGGCAAGGAGCGTGGCTGGCCGACTACGTCTGCTTCCCTGCTGGAGGTGGACAAGCGCTTCCCGAGCT  
CAAGTGCCCGTGCAGCAGCTCTCCAGCGACATCGCCATGCGCGACAAATACCAGCGGATGCTGACTGTA  
TGGCGTCAGTGCCCTCGTCAGTACAAGCTCTCCATCCAGGAGATCCGCAAGGTGCTGGCGGCTGATCCG  
CACACCGACCGTAACAAAAAAGGCGCCACTGGCGCTTTTTTGCATCTGAAACGGGTTATTCGTAGAGAAA  
GGATTTATCGAGCTGCTGGAAGGCGGCTTGAGGGTATCGGCCAGCTCTTCATAGCGCGGCTGAGACACC  
AGCTGGCGGCGGCTCCCTGCTCGTTCATCTTGCCGTTGATCTCCCGATACCAGCTCGCCAGCGACGGGG  
GTAAACGGGTGTCGGCACGCTGGCCGAGCCAGTAGTAACCTTGCAGCGCAAACCTGAGCAGAAACAGCAC  
CGAGGTGATGACGGAAGGCCAGTAGTGCAGCTCGCCAACTGGAATGCAGCATCAGCTCAACACCGCC  
AGCGCGGGGATCACCTTGAGGGCGAACTCGGTGCGCTTGCATACCCGATTTTTCAGGAAACATCGAATTGA  
GCTCGGGACGGCGCGGCCAAAGCGTCATATAATGGCGGCTTGTGTAACCTTAGTTCCAAAAATGTTTCAT  
GCTCATACTACCTCCGAGCGCTTTTTTGAACGTAACCGGCAAAAACCTCGACAAAATTTGATGCAAAGTA  
ACAAAGGTTGAGGATGACTTTGTTATTTTTCAACAATCGGGTTATCCTTTGTACGCCATTTTTTGCCTCA  
AAAGCTTCTTGCTATTGACCTGTCAGGGACGTCTGGATTTTCGGGTCTTGTATCACTATACAAGGGGCAAG  
CAACAGATTGCCAACCCCTCATAAGGATAAGTTGAAAAGTTTTTGGCCGCACCCGCTCCAACGCATCCGCCT  
ACACAACCCAATCTGCGATAGGATTTATTCATGAGTAAGCTGGTTCCTGTTCTTAACTGTGGCAGCTCTT  
CCCTGAAGTTTGCCGTCATTGACGCAACCACCGGTGATGACCTGCTGTCCGGCTGGCCGAGTGCCTCAA  
CCTCGACGACGCCCCGCATCAAGTGGAAACTGAATGGCGAGAAAGGCAGTGCCGATCTGGGCGCGGGTGCC  
GCTCACCAGGAAGCGCTGGAATTCATCGTCAACAAGATCCTGCGCTCAATCCGGAACGTCCAAGAACC  
TGATCGCCATCGGTACCGTGTGTTTACGGTGGCGAGCGCTTACCTCTTCCGTTGTCATCTGCGAAGA  
CGTGATCGCCGCATCGAAGCTGCTGTTCCGTACGCTCCGCTGCACAACCCGGCTCACCTGATCGGTATC  
CGTGAAGCTCGCCGCTATTCCCGGCACTGGCTGACAAGAACGTGGCCGTATTTCGATACCGCGTTCCACC  
AGACCATGCCGGAAGAAGCCTTCTGTACGCCCTGCCGTACAAGCTCTACAAAGAGAACGGCATCCGTGCG  
CTACGGCGCTCACGGCACCCAGCCACTACTACATCAGCCTGGAAGCTGCCAAGCAGCTGAACAAGCCGGTT  
GAAGAGCTGAACATCATCAACTGCCACCTGGGCAACGGCGGTTCCGTCTGCGCCATCAAGAACGGCAAT  
CTGTGGATACTCCATGGGTCTGACCCCGCTGGAAGGTCTGGTGTGATGGGTACCCGCTCCGGCGATCTGGA  
CCCGGCCATCATCTTCTTCTGACGACAAGCTGGGCATGAGCGTGGCCGATATCAACACCATGCTGACC  
AAAGAGTCCGGCCTGCAGGGTCTGACTGAAGTGAACCTCCGACTGCCGTTTTGTTGAAGACAACCTACGACA  
GCAAAGAAGAAGCAAGCGTGTATGGACGTTTTACTGCTATCGCCTGGCCAAGTACATCGGCGCCTACGC  
TGCCGCCATGGACGGTCTGTCGACGCCGTTGTTTTTACCAGGTGGTATCGGTGAAAACCTGCCCCGATC  
CGTGAATCACCCCTGAACAAGCTGGGTCTGCTGGGCTTTGACGTCGATCACGACGCCAACCTTAAGGCTC  
GTTTTCGGCAAGGGTGGCGAGATCACCAGGCTGGTCTTACCAAGGCCCTGGTTATCCCGACCAACGAAGA  
GTGGGTTATCGCCACGACGCGCTGGAACCTGGTGGCGCTTAATGACGCAGTAACTCGAGGCGCCAC  
AGGGCGGCTTTTTCTGATCCCAAAAAATGAACAAGGGGTATAAAGTGGCACGCACTATTATGCTTATCC

CGGTTCGGCACTGGTGTTCGGCGTAACTTCCGTGAGTCTGGGCGTTGTTTCGGCCATGGAGCGTCACGGTGT  
CAATGTTCAGCTTCTTCAAACCGGTTGCCAGCCGCTCCGGGTGAAACCGGTGCCGAGCGCTCAACCGCC  
GTTATCCGCGCTGCTGCCAACATCAACCCGCCGAGCCGTTACCCCTCCTTACGCCGAGAACATGATCA  
GCTCCAGCAACACCGACATCCTGCTGGAAGAGATCGTTGCCCGCTTCGAAGAGCACGTGAAATCCAGTGG  
TGCCGAAGTGCTGGTTGTTCGAAGGTATGGTGGCCGACCGACAAGCAGCCCTTTGCCAACAAAGCTTAACTAC  
GACGTGGCCAAGGCGCTGGATGCCGACATGGTATTCGTGACCCACCCGGGCCATGACTCCAGCCAGAAGC  
TGAAAGAGCGCATCGAGCTGGCCTGCTCCAACCTTCGGTGGTGTCAACAACCCCCGCATCGTTGGTTGCGT  
GATCAACAAGGTGGGCGCGCCGGTTGACGAGCATGGCGTAACCCGCCCTGACCTGACCGAAAATGTTTCGAA  
GCCCCATCACCACGCTTCTGACGCGGCTCACGACCTGGAAGTGCTGCAAGTGTTTCGGCAAGAGCCCCGCTGC  
GCATCCTGGGTTGCATCCCCTGGAACACCCAGCTGATCGCCCCGCGGCCAAGGATCTCGCCAAGCATCT  
GGCCGCCAAGATCCTGCACAAGGGTGAGCTGGACAGCCGCTCGCCTGCAGACCCGTGACCTTCTGCGCCCGC  
TCCATCCACAACATGGTTCGAGCACTTCCGTCCGGGAGCCCTGCTGGTAACCTCCGCGCACCGCTCTGACG  
TCATCGTCTCTGCTGCTTCCGCCATGAATGGCGTCAAGCTGGGCGCCCTGCTGCTGACCGGTAACATA  
TCATCCGGAGCCGACAGGTAATGGCGCTGTGCCAACAGGCTATGGCCACCGGCCCTGCCGATCATGATGACC  
GGTACCAATACCTGGCAGACCGCAGTCAACCTGCAGAACTTCAACGTCGATATTCGGGAAGATGACCGCG  
AGCGTATCGAACTGGTACAGGACTATGTGGCTGGTACATCGACAAGCACTGGATCGAGTCGCTGACCGT  
CAGCTTACCCGTTCCCGTCTGAGCCCGCCGGCATTCGGTTATCAGCTGACCGAGCTGGCCCCGTCAG  
GCCAACAAAGCGTGTCTGCTGCCGGAAGGCGACGAGCCGCGCACCATCAAGGCTGCCGCCATCTGTGCCG  
AGCGTGGCATTGCCCGTCCGGTACTGCTGGGTAACCCGGAAGAGATCCGTGCGGTTGCGGAGCAGCAGGG  
CGTGGTACTGACCGATCGCGTCGAGATCATCGATCCGGCCGTTGTTTCGCGAGCGCTATGTACCGCGCCTG  
GTCGAGCTGCGCAAGAACAAGGGCATGACCGAAGTGGTTGCCCGGAGCAGCTGGAAGACAACGTGGTAC  
TGGGAACCATGATGCTGGAGCGCAACGAAGTTGACGGCCTGGTATCCGGCGCGGTGCACACCCTGCCAA  
CACCATCCGTCCGCCGATGCAGATCATCAAGACCGCTCCGGGCTCTTCCCTGATCTCCTCCATCTTCTTC  
ATGCTGCTGCCTGACAGGTGCTGGTCTACGGTGACTGCGCGATCAACCCGGATCCGACTGCCGAGCAGC  
TGGCCGAGATCGCCATCCAGTCCGCCGACTCTGCTGCCCGGTTCCGCATCGAGCCGCGCGTAGCCATGAT  
CTCCTACTCCACCGGTACCTCTGGCGCCGGTGCCGATGTAGAGAAAAGTGCCTGAAGCGACCGAGCTGGCC  
AAGGCCAAGCGCCCCGACCTCATCATCGACGGCCCGCTGCAGTACGACGCGGCCATCATGGAGAACGTGG  
CCAAGTCCAAGGCCACCGAACTCACCGGTTGCCGTTAAAGCCACCGTGTTCGTCTTCCCTGACCTGAAAC  
AGGTAAACCACTTACAAAGCGGTACAGCGCTCCGCTGACCTGGTCTCCATCGGCCCGATGCATCAAGGC  
ATGCGCAAGCCGGTCAACGACCTCTCCCGTGGCGCCCTGGTTGACGACATCGTCTACACCATCGCCCTGA  
CCGGTATCCAGGCTGCCCAGGCTGACGAACAAGCCTAATCAATGCCTGTCTGAAAAAACCGATCACAAAG  
GCTGCTCACCCAGGTGAGCAGCCTTTTTTATTGGTTCTCTTTTTGAAGACCAGTGAAACATGCCATCAGC  
GCAGTGTTCACAGAATAATGTATGTTAAGTGCCAGAAAATGTCTCGAGCGTAGCGCCGCGGAAAGAGT  
GCCCGCCACCTTAAAGATGTATTTAAAATAGATTCAAGATCATAACGGTTGGATATATGAGGGCATTTCATA  
GCTAAGCGCTTATAGCAAATATTTCCGCATCGGCATGAGGATTTGACCTGTTAGAAAATAGCAGTGAAAA  
GACCCGTTTCGATACGCTATTCATCAATGTGCCACTCGGCAATATCCACATCATGGAGGAATGGAATGCT  
GATGAAGAAGCTCTCTGCAATCATGCTGTTAGCCTGCTTGCCCTGTTTCAGCCAACCCGCGTTGGCCGCA  
GATAAGGCAGCGCCCAAGCAAACAACCACAACCCGCGGTTGCCAAGGAGTCCGGCAAGCTGAATATCAATA  
CGGCCACCCCTTGCCGAACTCACCAGCCTGAAAAGGATTGGCGACAAGAAGGCACAAGCCATCGTGCAGTA  
TCGGGAAAAACAGGGAAAAGTTACCTCGGTGATCAGCTGGCAGATGTCAATGGCATTGGCCCCGGCCAG  
CTGGAAGCCAACCGTGACATGATCATCGTCAAATAACGTCCGAGCTCTGCATATACGAATGGGGTAGCCT  
GTGGCTGCCCCATTTTTCTTGGAGTATCATGGCCGCACTTTAATCCCGCTGGATAGTTTTCCATGAAAA  
GACTCCTCTGACAGTTCGCAAGGCCGTGCTCCCGGTAGCCGGTCTGGGTACCCGTATGCTGCCAGCCACC  
AAGGCCATCCCGAAAGAGATGTTGCCGGTGGTCGACAAACCGCTGATCCAGTACGTAGTGCGCGAAGCCA  
TCGCGCCCGGTATCAAAGAGATCGTGTGGTACCCACTCGAGCAAGAACTCCATCGAAAAACCACTTCGA  
CAAGAGTTTCGAACTGGAAGCGACCCCTCGAGAAGCGAGTCAAGCGTCAGCTGCTGGAAGAGGTGCAACAG  
ATCTGCCCGAAAGACGTACCCATCATGCAGTCCGCCAGGGCGAGGCCAAAGGTCTGGGCCATGCTGTGC  
TGTGTGCCCGTCCGCTGATCGGTGACAACCCGTTTTGCCGTGCTGCTGCCTGATGTAAGTGTGATGAAGT  
GGCCAGCGACCCGAAAAAAGACAACCTGGCCGAAATGGTGCACATGTTTCGAAGAGAACCAGATCAGCCAG  
ATCATGGTGGAAAGCGGTTCCCGAGAGCGAAGTGGACAAGTACGGCATCGCCGACATCAAGGGCGAGGCC  
TGAGCGAGGGGATGTCCCTGCCGATGCAGGCCATTGTTCGAGAAGCCGCCCGTGACGAAGCCCCCTCCAA  
TCTGGCGGTGGTGGGTCGTTACGTCTCTCCTCCAATATCTGGCCGCTGCTGGAGAAAACCCCGCCGGT  
GCAGGTGACGAGATCCAGCTGACCGATGCCATCGCCATGCTGATGGAGCAGGAGCAAGTCAACGCCCTACT  
TTATGAAGGGCAAGAGCCACGATTGCGGCAGCAAGCTGGGCTACATGAAAGCCAATGTGGAATATGGTGT  
GCGCCATCACGAGCTGAACGGTGAATTCATCGGCTGGCTGAAGCAGTTCGTCAAGCAGTTGTAATCGCTG  
ATAAATCTGTTTTTATAGACGTATCTAAGGGGCATCAAATGATGCTCCTTTTTTCATTTTTGCAACAAAA  
ATCAATCAAAAAGTAAATAAACTCTCAGCAAATCATAATGTTGTAATTTATTCACACATGCTCTATAAGGA  
TTGAGGCGTGTTCGCCCCCTTGCCATAAAAAACTCAAAAAAATAAAGACACAGGTGGAAGTTCCAATGA  
ATAACCCGTCAAAGGGACCTTTTTAGGTACCCCTAAAGGGCTTTTTTTGCTCTTTTAGTACCGAACTGTG  
GGAGAGATTCTCCTATTACGGCATGCGTGCCGTGCTGGTGTCTATCTGACCGACCTGACTGCCAACGGC  
GGTCTGGGCTGGAGTCAGGCAGATGCCCTCAAACCTTACGGTATCTATAACCGGCTGGTTTATATCACTC

CGCTGATCGGGCGGCTGGCTGGCTGACACCTTCTGGGTCAACGTCGCGCCATCCTGATCGGTGCCGTGCT  
GATGGCCCGCAGGTCAGTTCACTCTGGCACTGCCCCACGCCATGTTCCCGGATATGGTCAACACCATGTTT  
TACGCGGGCCTCGCGCTGCTGATCGTGGGTAACGGCCTGTTCAAACCGAACATCTCCACCATGGTGGGTG  
ACCTCTATGAAGAGGGCGATCACCGCCGTGATGGTGCTTTACCATCTTCTACATGGGTATCAACCTGGG  
TTCCCTGCTGGCAGGCGTGATCTGTGGTGTGTCAGCCACCGCCTACGGCTGGCAAGCTGCCTTCGTGCGG  
GCCGGTATCGGTATGCTGCTCTCTGGTGATCCAAGCTACCATGGCCCAGCGTTTCTGGGTGATATCG  
GTCGCGTCACTGCCGCCAGCGCGCAGCCGCCCTGCGTACTACCAGCAGAAAGCACCCTAACCAAGCA  
GGAAGTGGATCGCATCAAGGTTATCTGGTACTGGGTCTGTTACCATCATCTTCTGGGCCGGTTTTCGAG  
CAGGCCGGTGGTCTGATGAACCTCTACACCCAGGAGTATACCGACCGCATGATCGGCAGCTTCGAAGTAC  
CGACTGCCTGGTTCAGTCCCTGAACCCCTTCTTCAATTACTCTGGCACCCTGCTGCTGCCATCTG  
GATCAAGCTCGGCAAGAAAGAGCCGAACCTCCGGTGAAATTCGCTATGGGTCTGCTGTTCTGGCTATC  
GGCTTCTGTTTTCATGGTCCGTTGCCGTGCTGCAGCAGGGGGTGACAACACCGTCAAGACCTCCATGTTCT  
GGCTGGTTGGCGCATACCTGTTCCACACCCTGGGCGAGCTCTGCCTCTCCCCGATCGGCCTCTCCATGGT  
GACCAAACCTGGCTCCGCTGCGTCTGGCTTCCCTGATGATGGGTGCTGGTGGTGGCTTCGTTGCCCTGGCC  
AACTACGCTGCGGGCTTTATCGGCTCCTTCGTAGGTGAAGCCGGTCCGATCGCCATCTTCGGTGGCATCG  
CCCTGGCTGCGATACTGAGCGCCCTGATCCTGCTGACCATGGCCAACCGCCTGGTTTACTGGATGCACGG  
TGCCGAAGGCCCGGCCAAAGAGCCGCAAGCGCAAGAGAAGAACTGCACTCCACCACCGTCTAAACGGTC  
AGGATTGTAAACAACAACAGGGCGCCCATCGGCGCCCTGTTTGTTTTAGCTTATTGCCATGCGGCATCA  
GTGATGACGAACCTGCACATCCAGCGAGCCGCCGCTGTGCTGCGAACTGCAGGGCGAACGGTTCATGC  
CAGCTGCGTTTTGTGCAGGGCGTAGTGGCTGCTGCGCATCAGGCCAAGGGGTAGGCCGCTGAGCGCATCA  
GCCAGTGGGGAGAGGTAAGCCCCGGCGTTGGCAAACCAACCCATCATGCTGATCAAACAGCAGCGCCGC  
CATGGCAAAGAGTGGCGAAACCCGGACGCCATCAACTGATGGTTGAGGTAGTCGAGCAACCGGTGCGGC  
TGGCTCAGCAACCGGCTCTCGTTCTGCTGAAACTGGCGGTAGGGGACGTTTCATCAAGGATCGCACCAGCG  
CACCACAAAATGCCGCATCCGTCCCCATGATCGGCAGCTCCATCACCAGCACCAGCAGCTTGTCTTCCAC  
CTTGAAGGTATCGGGAATAAACTGCCCCAGCCCTTGAACGTGACCTGCCAGGGGCCCACTCCTGC  
AAGCCCCGGCGGCTTGAGCCCCGCCAGCAGGCGGCTGGCCGCTTGTGCTGGGCACTGAAATAGTCGATGT  
GATCCATCAGTCCAGTGGTGTGCGCCCGGTTGGCGCTGCCGTTGAGACACTGTTGATACTGCGCTCGAC  
CAGCGCATAATCTCGAGGGGTTTGGAGCAGATAGTCCCGCGCACCGGCACGCAAGGGCAGCTGGCGACC  
TCCATGGTACTCTGGGCCGAAATGACGATAAACGGAATATGGGGATAGCGCGCAGAGAGGCGAGGATCA  
CCTCGTGGCCATCCATATTGGGCATATTGAGATCGCAGAGCACCACATCGGGATGGTAGAGGGCCCGCG  
CGATAGCCCTCAATAACCATCTTCGGCCTGAAACACCGTTGCCCGTCCCGTGCAGGTAACCTCACTAAC  
GAGTGGCGAAAAACGGCCTCGTCTCCACCACCAGGATCCGTAGCCCGGCTTTTGACATCTTGATAAAGC  
TCTTATTAGTCAATTGGTTATTTAGGTATTAAGACTAGCTCAAAAAGTGCGGTCAGCGCGGAAACCTGCG  
TCAAAGTAGACCTCGATCATAACGAAGGCATCAAGAGAAGCCATCTGTTGCGCAGCTCTATTCACTCG  
GGAGGCCCGCGACTGCGACCGCCATCCGAATTGTGCAAGTGGGCGCCATAAGGGATAATGCCCCCACT  
CCAGCTCGTGAAGAAGACCATGACCCAGCCGAATACAGCGCCCTTGCCACCCAGATTGTCCCATCCG  
GCCCCGAGTCTCTATACCCTGCAGCTGCGCCGACTGGTGTGAAAATCAGCAGGCCCGGCTCAACTATC  
CCGAGCTGGGTGCGGCGCTGGCAGTGGTTCGATCCGGGTGATCCCTGCGGCTTTTCGTTTCAGGTCAATGC  
CCGCCAGCTCACCGAGCTGTTTCGATGAACTGATGGAGGCGGGCCTGCTGCAGGTGAGGCACAGCCCGAG  
AGTGAGCACTACCATCAGTGCCCGTTTTCAGTTGCCACTGCTGACCCAGAAATTCGCGCAGCCCGCTGCCGG  
AACGCCCTTCCAGATGCATCTGCAATGGCGTCCGGACGAAGAGCTGCCCGCCCTCGCCCGTCTGTGCGG  
GGTATCGATGCCAGCTATAGCGAAGAGGATCTGGGGGAGTTTATCGCCTACTGGCTGGGGCGCCCCGAG  
GTGTTGCACTCCAGCATCAATGGATGCTTAAGTTTATTCGCGCCCTCAAGACCCGCGCTATAACCGTC  
GCAAACCGATGGAGGTGCAGGGCTACCAGCAGGTGACGCCGGCCCCGGCAGAGTCGGGCCCCAGCAAACG  
GGCCCAACAGATGATTGAAGAGGCCAAGCGACTGGCCCAACAGCAGACGCAAGAACCCGACGCGCAGCAG  
GAGCCGGATAATGATTGATAGAGCCGCCCCCGCTGCAGCAGAATCAACCCCTTGTCTACCCATCCCTGAT  
CGAGCAGAAGGAGCATTCATGACTGACCCGCAAGATCCCTGCGCCAGGAGCTGGAAGAGATCGAAGCC  
AAGCGCCAGAAGATCGCCAAGGCCAAGCAGGATCACCGCATTCACGACCCGGAATTGAGCCGCCATGTGG  
GTGGCCTGCTGGAGCGCATTCGTCGCTGCAACAAGAGACCGGCGGCGGTCAGTATGACTACGAGACCC  
GCGCAAGGACTACGACGCCAAGGCCAAGCCGAGGTGCGCGAGCTGCAGAAGGCGGCCCCGTCAGGAGCGG  
ATCCAGAAGCTGATCGCCAGGCCGACCTCAACCTGACTGGGTATTTGACAAGATGGATGCCGGTGACC  
CGGCGCTGCAATAACCCATCGAAACAGCCCGTTACTTTATCAGCGGCTTCGAGCACTGGGAGAAGAGCGG  
TGGCGGCTGCATGCTGCTCTACGGCGACTACGGCACCGGCAAGTCAACGCTGGCGGGAGCGGTGGCGCAT  
GAGCTGATCGCCGTCACCAGAAATCGGTGATCTTCCAGCAGTGGGCTCCATCGTGCATCGGCTGTTCT  
TCAACGTGATCCCCGATCAGGACGAGCGCAACCAGTACCGCCGCGCGCTGGAAGAGGTGGATCTGCTGAT  
CATCGACGAGGTATCGGCCAACCGCGCCAAGATGGCGGAGAGTCAGTCAAGCTTCTCGGCCACCTGCTG  
CGCCCGCTGCAACCTGTCAAAGAGCGTCATCATCATCAACCAACACACGCCCCAGAGCCTGCATCAGG  
CAATCGGTGATTTTCAGCTATGAGGCGATCAAGGCGTTCAATCCGGTGGATATCCACCTGAGCGGCCCCAG  
CCGTGCGCCCCAGCATCGGCAACTACAACGGCTGATCCCTCTCAAAGAGTGCAGTGCCTGACGGCTCGCA  
CCTTCTCCTCCTTGCTGACTCACAATAAGAACTCTCATTTACAGCAGGCGAACAAAGCCACTAGGCT  
AGCCCCTTTTGCCAAGGGAGCTCATCTATGCCAACCACTGATTTTCGGAGCCAGCCGCGGCTGGGCC

CGCCTTTACTCATCACGCCCTGAACCAGGGTCACCGGGTCGTTGCGCTGGTGCAGCCCCGAGATGGC  
CACGGAAGTGGGTGCTCTGGGGGTCGAAGTGATCGAAGGAGATGCGCTGGACTCAGCGGCAGTACAGCAG  
GCCTGCCTTGTGGCAGGGCAAGATGCACAGGTCGCTCCACCCCTCGGCAGCTTTCGCCAAACAGTGCCAG  
TGGACTATCAGGGCAACCGCCATGTGATCGATGCCATGGAGCAGGCAGGCCGTAACCGGCTGCTGCTGGT  
CACCTCCCTCGGCTGTGGCGACAGCTGGCAGTATCTGCCGGAGCGGGCCCCGCGCCGCTTTCGGTACAGAG  
GTACGTCTCAAGAGTCTGGCGGAGAGCTGGCTGCAGACCAGCGCCCTCGCATGGACCATTCTTCGCCCTG  
CGGGCCTGCAGGATGGCGACACCACCGGCCGCGCCGAACTGAGTCAGGGCAAGGAGGTTTCATGGACTGGT  
ACGCCGTGCCGATGTGGCCGCCAAGGGCTGCGTCTGCTGGCGGATGAGACGGCGGTGGGGCAGATCTAC  
GCCATCGGGGATCCCACGCTCCAGCGTGGCTAAAGCAGCAGTAAAAATCGCTCATAACCACCACATAACAA  
AACGGTCAGCCCAAGGGCTGACCGTTTTTCGCTATAACCGCACACGCCATCTCACGCGCGCTTGACATATCC  
CGCTTAACCGGGCTGTTTTACCCCTGCACGACTGACGGACGAGCAATCGGCAACGACTGCTGCCGCTGG  
CGCAGCAGCAGGCAGGCACGCCGCTAGAGCAGCGCCAGTCCCCATAACTGCCACCAGTAAACGGGAAA  
CCTGCGAAAAGTCGCCCCCATCTGGTTAAGGCGCAGAAAAACCCCTCGATGGCCGGGATAGTGGGCACCCA  
CTGAGCCAGCCAGTTGAGAGGCGCCGGGATCAGCTCGAGCGGCCAGATAAAAGCCCACCAGAAAGACCAGC  
GGCAGAGAGGAGATCAACACCACCTGAGTCGGCAGATCCCAGCGGGTAAAGATCGCCCCCAGCACAAATCC  
CGAACAGCAGGTGCCAGCAGGAACGGCAGGGCGAACAACACAGCTCCAGCGGATCGGCATGACGGGC  
GATATTGTAGTGATCGAAGCAGAAGCCGAGGAAGTAGCTCACCGGCAGCAGGAACAACCCCGCCAGCACC  
AGGGTTCTGGCCAGCAGCAGCGGCAACACCGGCGCGCTTTGCCAATAACCATGCTCGCCGCGGCAACTGC  
GCTGGTTCTGGGTGCCCCCAGGATCCCCGCCCCATCAGCAACACCTGATGGAGGATCAGCACGAACAC  
CGCCGGCACCACGTAATTCACATAGCCCATGGTGGGGTTGAACACCGGCACCACGTTGAGGGCCACCGBA  
TTCCAGCCCATGGCCGCTTGTGGCAGCGCCTCGCCGTGGCTCAACAGCCGCGCCACCTTCACCTGCGCGG  
CGAGAGTGCCCGCCGCTGCGCCAGCCCCCTCGGCAATGGTACCGTAGACCAGAAAGTAGGAGGCATCACC  
GGCATAGCTCAGGGTGACGCTCTTGCCCAGCATCACGTCCCGATAGAAGTGGTTGGGGATGTGCAGGATC  
CCGCTCGCCTCCCCGGCCATCATCAGCTGGCGCGCCTCGACCAGCGAATGGCTCGCGCAACCAGCTTCA  
CCTGCGGGCTAGCATCGGCCATAAACTCCAGCTGACGCGCAACTGACTGCCATCCTCGTTGACCACCAC  
CACCGCCTCTTCCCGCGGCAGCTGATGCAGATAGGGCTGGGGATAGAGAAATGAGTAGAAGATCACCCCG  
CCAAACAGGGTGAGCATGATGGCGCGATCCGCCAGCAGGGTGCAGCTCTAGGCGCAACAGATCGACAA  
ATCCCTGCATCAGCTCAGGCTCCTTTTCGGCGCTGCCACTGCGGCTGATTGACGGGGCAGCTCGCCCTGC  
TGCTTGTAAACGGCGTACCACCAGCAGCGGGGAGCAGAAACAGCAACAGCGCCCCCAGTTGCGCGCAGGG  
CGGATGCGAACGGCAGACCGTAGTTGCTCTGACCAATCTGCAGCTCGACATAGTGAGAGACCGGCAACAG  
GCTGCGCCAGAAGCGGGCGAAATCCCCCATGGCACTCACCGGAAAGGTGACCCCCATAAAAGGCAAAACCG  
GGCGCAGTGTAAGCCCCCGCCAGCGACAGGGCGCGGGCCGGATCCCGAATGATGCCGTAGAAAAAAGCCC  
CCATGGTGACGCAGGCTGCCGAGGCGAGCCCCAGCCCCACCAGCAATACCAGCCAGCTACCGTGATGGG  
GTAGGAGAAGCCCTTGAACAGCAGCAGCGTCCAGACTATCCCCAACCCCAGCCAATCAACACGTGGGGC  
AGCAGGCTGCGCCAGAGGCCAAACCAGACACCGCGAGTGGTCCAGTCCAGTCCAGTCCAGCCGATCGGTACGGG  
CCAGCGCATTGAGGCCGAACAGCACCACCAGGATCTGCCACACCGCGGGCAGAAATGGCACTCAGCAGAAA  
CTGGGCGTAGCTGGAGTTGAGGTTATAGAGCGCAGTCACTGACTGCTGATGGGCACCGACTGCCCGAGT  
GCGCCGGGCAGCGCCTTGCCGTAGCCATCGCCTCCAGCAGCCAACCTGACCATTGAGAGTCCCAGCCA  
CCTGCGCCAGCGCCGAGTTGACCAGCTTGGCGATCAGGATGAACTGGCCGTTGTTGAACACCGTACCTG  
CGGCTGGGTGCCCTGACGGGCATCCCCTTCCAGATGGTTGGGGATCACCACCAGCGCATAGATGTCGCCA  
CCGCGCAGGGCTCGGGCACCGACATCGATGGAGTCAAACCTGTTGCGCGACCTTGAGCCCGGGCCGAGCCAT  
CCAGCGAGAAGGCGAGCTGGCGGAGAGCAGCTGTGGTGCAGATCCACCAGCCCCACCTTGAGGTGCGG  
GGCCAATCCAGCCGAGAAGATCCAGCAGAGGATCCCCATCAGCAGCAGCGGCACCCAGCTCATCAGGGCA  
CGACTGAAGGGATCCTGCCACAGCAGCCGAAATTCACGTCCCATCAGAGTTCAACCAGCACACTCATGCC  
AACCCGCAGCCCCCTCAACCGGTTGCAGCGGGCGAGCCTCCACCTGGAAGCTCTTCATATCGAAACCCCTGA  
CGGGTATCGGTGGCGCCAGGTGGCAAAATCCCCCATCAGCGCCACATGGGTACCTTGAAGCGCACCA  
TTTGATCGCCAAGGCCCGGGATGCGGGCATCGAACTCGGTACCGGACCGGGAAGCGGGGCAGCAGATCCTC  
GCGCACGTGGAACCTGGGCCCAGGCATCACTCATATCGAGCAGGGTCACAACCGGGAAGCCTTGCGGCGCC  
AGCTCGCCGCTACGCAGCAACACCTGACTCACTTACCATTGTGGGGACTGGTGATGCGGGTGTGCGCCA  
GATAGGCCTCAACCTCGGCAACAGAACCCGCCCATTTTGGCCTTCTCGCGGGCGGGCATCTTGGTCTC  
TTCCCTCGCCCCCTTCAACGCCATCTGGTACTGCTGCCACGCCATCCCCTCGCTGTAGCGAGCTGCTTGC  
CAGGCAGTCCAGGCCTCATCGCTTTTTGCAGCGGCATCACGCCGTCGCGGTGCAGGCTGGCCACCCGCT  
CATAGGTCTTGCCACGCAGCTGGGCGGCAGCCTTGGCTTTTTGCCACTGATCCTTGGCTGCGGCGATCTG  
TTGGGCACGGGCCCTTTCTCCGCTCTTGCGCCAACGCACCCGCGAGCCCTTACCCGCTTGGCCTGG  
CTCAGCTTGGCTTCAATCTCGGGGCTCGCCAGGGTAAAGACCAACTGATCCTTGGTCACTGATCACCCCT  
TTTTAACAGCACTTCGTGATGCGACCCGGCACCTTGAGAGGACCGAATATGCTGCGCTTCAATCTG  
CCCTTGAGATGCACCGGCTCCGGCTGATAGGCCAGCCAGAAACGCCAGCCGAGCCACACCACCAGGATC  
ACCAGCGCCAATGGCAACAACAGCGGTTTACCCTGGCTCATCTTCTTTTTGATGGGGGGATGGCTCATCA  
CTTACCTCGACAAACGGGCGACCCCTTGACGGTGGGAAAAGACATGAAAAAAGGAACAGACAGGACCGGG  
ATCATGAGTTACCTCGATCACCTGACCGTGTGATATTGATTGAAACTGTTTCACTGCGCGGAGAGCGC  
CAGCAGGCGGGCCAGCGACACTACATATTGATAGGCCGCCGCTGCGCGCTGGGTCTTGACCCCCGCCAGC

TGGTTTTGGGCGTCCACCACATCAAGGGAGGTAGAGAGCCCCTGCCGAAGGCCTTGTCCCGCAGCAGCA  
CGTTCTCCTCGGCCAGCGCCTGGGTGGAAGAGAGGGATTGATACTCCTCCAGCCCCTGCGCCGCTTCGCG  
CCAGGTCTTCTCTACCAGCAACTCCAGATCCTGGCGGGTCTTGGCTTGCAGCAGATTGACCTGCAGCTCG  
GCGCTCTTGGCGGCCTGCACCGTCTCGGAGCGGCCATCGCGGCTCACCAGCGGCATGCTGACACCCACTC  
CCACCAGCCAGTCCGGCGCAGTCTTGGAAAGCGAGCGAATCATCTTCATAGAGGTTGTAGTTGCCGAACAG  
GAACACCTCGGGGGCATATTTGCCCTGCTCGACCCGGATCAGCCCCCTTGGCCTGCTCCTTCTTGGCAGTG  
AGCAGCTTGAGACCGGGGTGCACCTCCAGGGTCTGGCTTACCAACCCCTCGAGGGCGCGGCAGCTCCTTGT  
TGACGAACAGGCCGCTGCCCGGCTGGGCATTTGGCAACTTCAGCATGCGGCCGAGGGCCAGCTCGGCGAT  
CTCGAGGCTGCGGCGCGCCTTCTGGGTATCGATGCGCGCTCTGTTCATAGGCCGACTGGGCGGAGAGGGCG  
TCCACCCCTGGCGATCTGGCCCTGCGCTTCGAGCTTCTTGGCGTGATCCAGATGGTGGGCGAGCCCCCTT  
CGATCTCCTGTTTGGTCTGCACCACTGAGCAGCCAGCACCAGCCGAAATAGGTCTGGGAGAGGCTCTC  
GAAGGTGGATTGCTGCTTGAGACACCAGCAGTCTGCGCCTCGCTCACCTGCGCTTGGCGGATATCCTGC  
GCCGCATCGATACGACCACCGGCAAACAGCGGCCAGAGCATCTTGACCGAGCTGGTCACCACATTTCTGTT  
TGGTCAGGGGGGTGACAAATGCGTTGGCCCCGACCCCGAACAGGCTGCCGAGCGCCAGGATCAGATCTTT  
CTGCTTGGCCAGCGGATTGAGATCGAGGGCATCAAGTTC AATCGGCTGATCAAGATGGGTATAGCTGGCC  
CCCAGATCCACCTTGGGCAGATACATGTCTTGGCCGCTCGCGCAGCTGCTTGGCCCGATCGACCCCGG  
CCTGCTCGGCAGCCAGCCCTTCATCCTGCTGGATGACCCGGGTCCAGGCTTCACCGAAGCTGATAGTTTG  
CGCCTGCGCCGACCCAGCACGGCCCCCATCAGACACGGCCAGAGTGATTTAATGAACCTTGACGTCATA  
GATCCCCAATCCGCTTTTGTTCATAAATGTTTGGAGCTTTTGTCTGCATAAGCCCGCCATCATAACGCA  
AACGAGGCCTGCAAGTGGACTGACAATTATGCAGGCGTCCGACCCGAATGGTACAGCGCTCACTCTCCGG  
CAATCTGGCCGTTTTTCAATAACTCCAGAATTTGCAAGCCTTGGCGCGACGTTTTTTTTTCAGAAAAAATG  
GCTGACGCTCAAATACTAACCTTTTTCTCCTGCCTAAAAAATGCGTAATATACGCCGCCCTAAGCCGATGG  
TAACCGTGAATGCAGATAGGTCCCCACACGCTTGAAACTCCCTTGATTGTGGCTCCCATGGCCGGTGT  
ACTGACCGACCATTCGGTGAACCTTTGTTTGGGATTGGGGGCTGGCATGGCCGTTTCCGAGATGCTGCTGG  
CCAACCCGGATGTCTGGGATACCCAGAAAACCCGGATGAGGATGGATCACTCTGCAGAAGGCCGATGGC  
ATCGGTCCAGATTGCCGGAGCCGACCCCGAGATGATGGCGTTTGTCTGCCCGCTACAACGTGGAGCAGGGC  
GCACAGATCGTCGACATCAACATGGGATGTCCGGCAAAAAAAGTGAATAAGAAGCTGGCAGGTTCCGCC  
TGCTCGCTGCCCCGATCAGGTCAAAGCAATTTCCCGGGCCGTTGGTGGATGCAGTGGAGGTGCCCTGTAC  
CTTGAAGATCCCGACAGGATGGGATCCGGATAAACCAGATGGCGTGGAGATCGCCCCGAATCGCCGAAGAT  
TGCGGTATCGCGGCCCTTTCGCGTGCATGGTTCGTAACCGTGCCTGCCTTACAAGGGCGAAGCGGAGTACG  
ACACGATCAGGGCGATTAAGCAGGCCGTATCGATTCTGTGTTGTCGCCAATGGTGACATCAACAGTCCGGA  
AAAAGCCCGGTATGTCTCGACTATAACCGGTGTGACGCGCGTGATGATCGGCCGAGCTGCGCAAGGACGA  
CCCTGGATTTTCCGGGAAATCCGTCATTTTCTTGGAGACGGGCACCAAGCTGCCGCCCTCCCGAGAGGGAAG  
AGGTTTCGACCCCTGATGAACGAGCATGTAACCAACCTGCACCGGTTTTATGGTGCATATCTGGGAGCGCG  
CATAGCCCCTAAACACGTGGGCTGGTATCTGGATGAAGAAGAGACGGGCCGAGAATTCGGTAAGCACTTC  
AATGCCCTGGATTGCGCAGACGCGCAACTTGGAGCACTCGAAGCGTATTTTCGATGGATTAGGTTAACAAG  
ATAACTAAAGAGCCGACCGAATATGTTTGAACAAACCCCTGACTTCTGATGCATTTGGTAACAACACTAC  
AATCACGCTGCCGAGCCGACCCAGCGCCCCCTGCGTGACTCTGTGCAACAGGCCCTGCGTAACCTACCTGG  
CCCAGTTGAACGGTCAGGAAGTGATTGATCTGTACGATATGGTTCTCTCCGAAGTCGAAGCGCCGATGCT  
GGACGTGATCATGCAGTACACCCGTGGTAACCAGACTCGCGCTGCCGTGATGATGGGTATCAACCGTGGC  
ACCCTGCGCAAGAAGCTCAAGCGTTACGGCATGAACTGATTGCTGGCCGCGAGCCGCGACGGCGGTTCAA  
GGCAGATGCGAAAGGCCGCCAGGTAGCAATACCTGGCGCCTTTCTTTATGCTCTCCCATCCATTTACCA  
TGGCGACCCCGATGAACCGCACTCCCCTGCTGCTGATGGTACTGGTCAACCTGCTGGCCGCCGCTGGCTG  
GCTCTTCTCGAAAGAGGCGATCCGCGAACTGCCCCCTGCCGCTTTATCGGCAGCCGCTTTCTGCTGGCC  
GCGCTGCTGTTGCTCCCCCTTGGCCTGGTTGCGCGAGCCACCGCCGACTCGCGCCAGCTGGTGCAGCTG  
CCGGTTGCGGCACCCCTCCTCGCGCCAGCCTGCTACTGTGGTCAACCGCATCAGCCAGAGCGATGCGCT  
CGGCAGCGCGCCTTTATCATGAGCGTCGCCACCCTGATGGCCCCGCTGGCCGCTGGGCGCCTTTTCGG  
GCCAAACCCGGCCGCACTACTGGCTCACCCCTGCCCATCGCTATCGCCGGTTTGTGCTGCTCTCCAGCA  
GCACCCACTGGGGCGTGTGCTCTCGCTGTTCTGGTTTTCTGGCGGCGGCCACCCTCTCGGCATCCAGCT  
TGCAGTCCATCGCCACTTCGCCCAATCCATTGCCCCACCTGGCTCACCTGCATCCAGCTGGCGATGACC  
GGCCTGCTCGGCACTCTGCTCTCCCTGCTGACCGAACAGTGGCCGAGGCTGGAGCCAGCCACGGCATCT  
GGGGCTGGTTTTGCGCAAGCGTGTCTCATTGCCACCACATTTGCGTACTGGCTGCTCACCCACGATTTGAG  
CAAGATGACTACCGCCACGCGCCCTGATGATGCTGCTGGAACCGGTCTGGACTTACTGCTGAGCACC  
CTCTTCTACAGCGAACCCTCGGGCGGCCAACTGGCCGGTGGCGACTGGTACTCGGGCGCCTGGTGC  
TCTACCAGCTTCCCCTGCTGTTGCGCAGTCGCATGCTGAAACCGGCACGCTAGATGCCACGGCAAACAC  
CTCAGCGCGGATGAAACAACCAACGAAAAGGGCCTGCAGTTGCAAGCCCTTTTGTGCTTGCACCGA  
CACGGCTGATCACTCCAGCAAGACAATAAGCCAATGACCCTAGTGCATCACGTTTCATCGTCAATCAATCA  
TCACGGTGGCGATATCAGGCCATTTTTTTCATCATGTAACGATAGAGCTGGGGATGATTTTTAAGATGCGT  
CCCTGCAACTGGCGTTGCTTTTTTCTCCGGGTAGAGGGGTTTGGCATCAGCGACAAAATGTTCAACACCA  
CGCAAGGCAAACCTTTTTGCCATTTCTGTAAGCAAAAATTTTACATCACCGGGATCGAGCCACCGCGAC  
AGGCCATTGAATAAGAGAGCAGCAATAATAATCCCCCTTGGCGGTGAGCTCGACGACCTCAAATCCGGC

GGGGTTGATATTGATGAACATATCAAGGTTGCAGTTGGTGACGCTGTCATACAGGACCCATTCCCTGCTCA  
CCATTCCAGGGTGCCCAATCCGGTAATAGCCAGAGAGCGACTATCTTCCCTCCGTTGCCGGGATCTCATCTA  
CCGACAGAATAACCTCATGCTTGCCTTGTATCAAGCCACAGCGCCTTGTATAGCTGTTGACTGCTATA  
AGCCGGTGCGGCACCAAGCAACCCGACAAGCACTATCCATTTTCATAGCCACTTACCTTCTGTATTTATTA  
TTGTTTTCTGTCTTGGAAAGCCCAAAAGGCACATCATCGACAAAACAAGAAGGAATCGACAAGCATCCAAA  
TCTCCATTTCCGAGCTTATTGATGATGACGATCAACATTGGCGCACTTCATAGTCAGTCCGGATTTAGTT  
GACCACTACATTTCCCGCTTTGGTTGCTCGATTAGTCCGAATTTGAGCAGATAGGCCCTGGCCCAGCCAAC  
TCGGTTACGCAGCGTGGTTTTGGCTGCCACTGGGCAGGGTTTCTTTCATCAGGCAACCAGATCGAGATAAA  
ACAGGGGCTTATCTTGCCACAGCGACCTGCTTGGGGCCATGTTCTCGGCTCGACCCTGTGCGTCAGATCC  
CTTCTTGAACGTCTCTCGCCGCGCAGTTAGCGGCTTGAAAAAGCCAGCTTGATCCCAGCCCCGACAAAACA  
GGGTGCCAATGCCCCGGTTGAGCCAGCAACCGAGGCGCTGCGACAACCGTACCTTGTGGCTGGCATAGAC  
GGTGGTAAAGACCAGCAGGTGACACCAGATGATACCGCCAGATTGAAGATGCAACCCGAGCAAGATAAAG  
GCGAGCGCCTTGTGCGGGGCATCCGGTGCATGAACTGGGGCACGAAGGCGAGAAAAAGAGCGCTACTT  
TGGGATTGAGCACATTGGTCAGCACACCCTGCCGGTAAATCTGGCCATAGGAGAGGGCTGGCAGGGTGGC  
CCCTCCCTCCATTGCACCCGTTGCCTGCTGGCGCAGCAGGGAGAACCCAGATAGATGAGGTAGATGGCA  
CCAGCCAGCTTGATAAGGGCAAACAACCTCGGCCGACGCGCTGAGCAGGGCCGACAGACCCGAGGGCTGCCG  
CCAGCACATGCACCATGACACCTGTGCCGATGCCAACGTCTGACTGAACCGGCACGCCACCTTGCGA  
GCCGCTGCGCAGCATAACCAGCAGGGAATCCGGCCCCGGCATGATGTTGAGCAGCAGCCCCGAGACCATA  
AACAGTGCAAGATCATGAATACCGAACATCACACCTACCTCGTAAAGCAAAACCAAACAAGAGGGCTC  
CGCAGAGCCCTCTTTCCTTTCCTTACTCTGCGGCAGCTGACGAGTTCATCAGCTGTCCCAGCCATCAGGGC  
CGCAGCGCCTTATCCGCCCGGGAGATACCGCAGACACCGGAGCGCACCACTTCGATGATCTCGTTGGTCT  
GGGCTGCGGTCTTGATGAAAGCATCCAGCTTCTCGCTGGTGGCCACCAGCTGTACCCTGTACTGCTCGGG  
GGTAACGTCGACGATCTGGCCGCGGAAGATATCTGCCAGCCGTTTCAGCTCGTCACGGGCCCCACCGGCG  
GCGCGCGCCTTGACCAGCGCGATCTCCCGCTCGATATGCTCCCTTCGCTCAGGTGCGCACACCTTGAGCA  
CATCCACCAGCTTGTGCAGTTGCTTCTGGATCTGTTCCAGTACCCGCTCGTCACCCATGGTGACTATGGT  
CATGCGTGACAGGGTGGGATCCTCAGTGGGCGCCACCGTCAGGGTCTCGATGTTGTAGCCGCGCTGGGAG  
AAGAGGCCCAACACCCGGCTCAGGGCGCCGGAATTCGTTCTCCAGCAGAACGGAATTAATATGTCATCA  
GGTTCTTCCGCTTGTGCTCAGCCACATCTCGTCCATGGCACAAACTTGATCTGCATCGGATAGACGTGC  
TCATCCGGGTGCGACGAGATATCCATGAACACCAGCCATCCTTCATGGCGAAGGCCCTTCTCCATGGCGC  
TCTCCAGCTCGGCCGGATCACTCACCGAATGCCGACGTGGCCGTAGGCTTCCGCCAGTTTTCAGCAAGTC  
CGGCAGGGACTCCATGTAGGAGTGGCTGTGACGGCCCGGTAGAACATCTTCTGCCACTGCTTGACCATG  
CCCAGCGCACGGTTGTTGATGGAGATGATCTTGATGGGCACCCCGTACTGCATGCAGGTGAGAGCTCCT  
GAATGTTTCATCTGCACCGAGCCATCGCCGGTGACGCAGCAGACCACCGCATCCGGGTTGGCAAACCTGGGC  
CCCCATGGCGGCCGAATGCCGAAGCCATAGTGCCGAGGCCCTGAGTTGATCCACTGGCGCGGTTTTG  
GCAAACGGGTAGTAGAGGGCAGCAAACATCTGGTGTGGCCGACGTCGGAGGCAACGAACGCCCTGACCCT  
GAGTCACCTTGTAGAGGGTCTCGATAACCTGTTGCGGCTTGATCTGGGTGGCCGACTTTTTCGTAGGCCAG  
ACAGTGACGGGAGCGCCACTGGTTGATCTGGCTCCACCAGTCCGCCAGCGCCTCCTTGTGCTTATCGAAG  
CCACACTCGCGGATCACTTCCAGCATCTGCTCCAGCACGGTTTCCACCAGCCGACGATGGGCACATGGG  
CCTGCACCGTCTTGAGATGGAGGTGGGGTGCATATCGATATGAACCACGGTTCGCATTTGGGGCAGAACTT  
GGCCACGTTGTTGGTGACACGGTCATCGAAGCGGGCACCCACGGCGAAGATGAGATCCGCGTTGTGCATG  
GTCTTGTGGCTTTCGAAGGTGCCGTGCATCCCCAGCATGCCGATAAAATTGCGGATGGACACCCGGAGAAAG  
CCCCAGCCCCATCAGGGTGGTGGTCACCGGCAGGTTTCAGCAGCTCCGCCAGTTTGGTCCACCAGATGGTC  
CGCATTGGCGTTGATGGCGCCACCGCCACGTACATCACCGGGCGCTGGGCTTCTACCAGCAGCTTGGCA  
GCCCCGCTTGCATCTGCCCTTATGGCCAGACTTGGTGGGTTGTAGGAGCGCAGGGAGACCGTCTCGGGAT  
ACTGGTAGGGGAATTTTTCTTTCGGGTTCTGCACATCTTGGGCAGATCCACCACCACCGCCCCGGGGC  
GCCGCTGGCTGCAATGTAGTAGGCCTTCTTGTATGGCCTCAGGGATATCGCTCGCCTTCTTGCACAGGAAG  
CTGTGCTTACCACCGGGCGGGAGATACCGATCATGTGCGTCTCCTGGAACGCATCCTCACCAGTATGC  
TGGTTCGGCACCTGGCCGGAGAGGATCACCAGCGGAATGGAATCCATATAGGCGGTGGCAATACCGGTAAT  
GCAGTTGGTTCGCTCCCGGGCCTGACGTTACCAGCACAGTCCCCACCTTGGCCGGTGGAACGGGCGTAACCG  
TCAGCCATGTGAACCGCGCCTGCTCGTGCCGCACCAAGACATGCTCCATCTTGCCGTTTTTCGAAGAGAG  
CGTCATAGATGTGAGCACTGAGCCACCAGGGTAGCCGAAGACGTGCTCAACTCCCTGATCTTCCAGCGC  
TCTAACCACCATCTGGGCGCCTGATAACATCTCCATGATAAAGCCCTCCAGGCTTTGCTCCGTTTTAGCGA  
ATCCCGCCGACGATGCCGTGCTTCCCGGCACGGCCCGATCCGTTTCTTGTGTTTATCTGAATGCAGATCG  
GTCCAATTCAGCCCCGTCGACAGTAGAAAAAAGGATTTTTCCGTCATTCACCCGAAAAATAGGGTGAAAA  
ACCAACTTAACCCGCTTACATAACGCTTGTCCACGGCTTTATCTGACCAGAACAGTCATACATTTCAACCG  
GCTATTAACATTCATGACTTGCCGCAGCGACCATGAGACAAAAGGGAAGGAAGTCGGGGAAATGGCCAGC  
GGATCATTCGCGAGAGGGGAAAAACAGCCACAAAAAAGCCACCCTCAGCGGTGGGCTTGATGCCGAAT  
GATGACTCAGTTCTCTGATCCGGCTCCGCCAGCCAGATCTGCTGATCCGGATCGGCTCTTCTACTGACC  
GAGATGCTGACACCCATATCGAGCAACTCGTGAGGGTGGAGATTATCAGCCAGATTCATGACTTCGCCGT  
TTTTATTGGTAAAGCGCATTTGCTCCGTCTCTCTTGGTGGGATCGCCTTTCAGTCTAGTCAACAACGC  
TCACTTGCGATAACCAGCAACTGGATAAACAGTCGCCCCCATCCAGCTCGCTCAGGCGATCACTAACCTC

CTCCGAAACAGGGTGGAGCCCAGAGCCGCCGCGACAGAGAGGCCACGCTCTCGTCAGCGCCCGCAGCC  
AACCAGCGGGCCAGCTCCCCGCTACATCGGGGTAACAGACTGCCCCGCGAGGCGCTGTGAGCCAGC  
TGCGTACCAGATTGGCATCGAGCACATCCATCAGAGTTGCCAGCCCCATCATCTCCAGAGTCTTGCCATT  
GGTCAGCTGCTCGAACTGACCACCGAGGGGTTAACCAGCAGCTTCTTGCCGAGGGTGAGCGCCTCGGAA  
GCCAGCTCGAAACCCGCGTTGGATATAACGCCGCGACAACCGGCCAGTACGGCGATAAACCCGTGCCGCG  
ATGGCGGTTTGAAGCGCAGGTTGCGCCATTGGCTGGAGGTACGAATGGCGGGGTGAAAGCAGACGAAGCG  
CTGCTGACCAAAGCGCGACAACAGGGCGGGCATCGCCTCGGTCTGCTCGAATGGCAGATAGACCAGGATC  
TCGCCGTTATCCGGCGCAGCGGGCATAGGGTCGATCACCGGCGGCAGCAAGGGATGACCGAAGTAAAACC  
AGTGCAGCCCCGAGCGGCTGATCCACAGGAGCAAAGTGGCGCATCAGCTGGCGGCTGACCCCATCCTCCCC  
CCAGCGCGGGATGGGCCAGTTGAAGCTGGCCTGATGGCTGACGGTGAGGCTCGGCTTGCCATAGCGGGCG  
GCGGCTGGGGCGGTGAGCGGCTCAAATCGCTCACCACAGATCGTATTTCGCTGCAATCGAGAGCCCCGCA  
GATCCCCGCCAGAAGGTGAGCGGCGAGGGCGGCTTGACAGGTGCGCCACGAGAAACTCGCCCCCTCGTGACT  
GACAAAAGTGAGGCCGGGAAAGGCGCGGTAGGGGCCAAACTCCTCCATGTCGAAGTAGCGGTGAGCGGGG  
CGACCGCTGAAGAGATAATCCACCTCGACCCCTGCCGTGCGCAGCGCCCCGCGCCAGAGTGCGACTGCGAC  
TGATATGACCGTTGCCGGTGCTTGACCCCCAAAACAGTATCCTCATGAGTGGCTCCAGCCGAGCGCCAGC  
ACGGCGCAACCGCCACCCAGCAGGGCACCGGCAACCAGATCGCTCAGGTAGTGTACCCCGAGCAGCAACC  
GGGATGCCCCACCAGCGCCCGCCAGCCAAAACAGCAGGGGCGCCAGAGCGGAAAGCCGGTGGCCAGTAT  
GGTGGCCATCAGAAAAGCGGCAGCGGTGTGACCGGAGGGGAGGCTGTAACGATCGGAAGGAGTGATAAAG  
ACTGGCAAGCCGACTGGCCGTTGCCGTTTTCAGGCTGTTTTTTCAGAAGCAGATAGAGGGGCAGTTCGATGG  
CGAAGGCAAGCAGCGCCAGTCTCACCAGCTCCCGCTGCTGCCCTCCCCCTGCCACCAGAGCAGGGCGGCCAA  
CACGGCGTAAAGCGGGCCATCGCCGGTGCGGGAAATGAGACGACTCACCCCTCGCTGCTGCCGTTGTAG  
CCGTGAAGCAGGCAGACCCGGCACACCTGCAGGTCCCATTTGCTGGATCTTGTTCATATCCCCCTCCTTCCC  
TGAATTCTGCTTGCAGAGTAAGAAAAGCGGGATGACGTTACGTTGAACAAGGGATAACAGATTTTATGAAAA  
TAGGGCCGAATGGCCCTTTTTAATCTCGATGTTGCGGCAAAAATCAGTGGCTGCCGCGCAGACCCGGTCTCC  
ATCAGACGGCAGTTGTGGTCCGCCAGACGGGCCATGAAGTGCTCATCCACTTTCAGGCCAAAACACCTGCT  
CGTAGAGATCTTTCATCACGAATGGCTGCCACATCATGCTGAGGAAGGAGATCTTCAGCATGTCGGGATC  
CAGGTTGTACCCAGCTCGCCGTTGGACTTCATGGTTTTCCAGCAGGGCATCGAACTGCGGCAGCTGACGC  
TCCAGCAGGGCGGTTCAGCACAAAATCCCCGGCCCGGCTCTTCTCGTGCACAATGCGCTGGAGATGGCAG  
AGGTCAGCTCGCTGTTGGCGCCATCACCTGATAGTGTGTTGAGCAGCTCGTTGAGGCTGTGATGTGCT  
GTGTTTCTTCCAGGCATGGTGCAGGGGCTCGGCGACATCGCCAGCACCCCTTGTAAAGACCCCTCT  
TTACTGCCGAAGTAGTAGTGATCATTGCCAGATTGGAGCCAGCAAGCTCCGCGATTTTCGCGTGTAGTTA  
CCTTGCTATAGGGAGTATTGAGAAAACGCTCACGGGCGGCAGCAAGCAACTTGTACAGAAATGTCAGAACG  
TCCGACCGGACGACCAGGTCTACGTTTTTCCATTTAACACCTCAGATAAATTCAGCCAATGCTGATAAGTC  
GATCTGGTTGTGCAGAGAATAGAGCACAGCAGGAATGACCAGATAATCGGTCATGGGCCGAATATGGGAC  
AAGGAAATTTGCAATCCTTTACAATCCGATTAATAACGTCAGCAGATTGCCCTGACCTTCCGTGTTGAC  
ACAGCATAAAAATCTCGATATTGGTAAAAGCGTTATCGACTGGAAGGAATAACAACGTCATGCGTATCGC  
CACCCCGCTACTACTAATCTCCCTAATCGCGTTAACTCGCGCGGGATCCTTGTAGCCGGGCTAAGGCATA  
GCCGGAATTTACAAAACCCGTCACCCCTGCACGGGTTTTTTTTATGCCGCCGCGAGGATGCACGTTACCGA  
ACTTAGGAAGAGGGAAGTCACATGTCAGATCGGGTCATCATATTCGACACCACCTTGCCTGATGGTGAGC  
AGGCCCTGGCGGCCAGTTTGCAGTCAAGGAGAAGCTGCAGATCGCCCAGGCACTGGAGCGGCTCGGTGT  
CGACGTCATGGAGGTGGGCTTCCCGGTATCTTCTCCCGGCGATTTTCACTCGGTGCAGACCATCGCCCGC  
CACATCAAAAACAGCCGGTCTGCGCCCTCGCCCGGCCCTGCCAAGGATATCGACGCGCCGGCGGAAG  
CCTTGCGGGTTCGCCGAGGCGTTTGCATCCACACCTTATCTCCACCTCCTCCATCCATGTGGAGAGCAA  
GCTGAAAAGAGCTTCGAGGATGTGCTGGAGATGGGGGTGCGGCCATCAAGCACGCCCTGCGCTACACC  
GATGATGTGGAGTTCTCCTGCGAGGATGCAGGCGCCAGCCGATCGATAATCTTCCGCGATGTTGGAGG  
CCGCCATCAGGGCCGGCCGCCACCATCAATATCCCGGATACCGTGGGCTACACGTTACCAACCGAGTT  
CTCCGGCATCATCCACACCCCTGTTCAACCGGGTCCCCAACATCGACAAGGCGATCATCTCGGTCCACTGC  
CACGATGATCTGGGGCTCTCGGTGGCCAACCTCATCGGCGCGGTGCAGATGGGAGCCCGCCAGATCGAGT  
GCACCATCAACGGCATCGGTGAACGGGCGGGCAACTGCTCGCTGGAAGAGGTGGCGATGATCCTCAAAAC  
CCGCGCCGACCTGCTCGGGGTGCAAACCAATATCCGCCACAACGAAATTCATCGCACCCAGCAGCTGGTC  
AGCCAGCTGTGCAATATGCCGGTGCAGCCCAACAAGGCGATCGTTCGGGGCCAACGCCTTTTTCCCACAGCT  
CCGGCATCCATCAGGATGGAGTACTCAAGGCGAAAAATACCTACGAAATCATCACTCCCAGAGCATCGG  
CCTGACCCAGAACAACCTCAACATGACCTCCCGCTCCGGCCGCCACGTCATCAAGCACCGGATGGAGTCC  
ATGGGCTACGCCGAGAGCAGCTACGACCTCGACCACCTTACGGCAAGTTCTGACCTGGCCGACAAGA  
AGGGGCAGGTATTCGACTACGACCTCGAAGCGCTGGCCTTCTTCAGCCAGATCCACGAAGAGCCGGAGCA  
CTTCAAGCTGGAGTACCTCGGGGTACAGAGCGGCAGCTCGGTGCTGGCCACCGCTCGGTCAAATGAAAG  
GTGGGACAGGATCTGATCTGTGAAGCGGCCACCGGCAATGGCCCCGTGGATGCGGTTTACCAGTGCATCA  
ACCGCATCACCGGCTATGAGATCCGCATCGACAAAATATGCCCTCAAGAGCAAGGGCGAAGGGGAAGATGC  
CCTCGGTGAGGTCGATATCGTGCAGGAGTACAAGGGGCGCAAATTCACGGCATGGGACTGGCCACCGAC  
ATCATCGAATCCTCGGCCATGCCCTGCTCCATGTGATCAACAGCATCTGGCGCGCGGATCAGGTGGCCG  
AACAGATGGAACGCAATAACACAATCAAGACGGAGACAGTATGAGCAGTTATCGGATCGCAGTATTGCCG

GGTGACGGCATTGGCCCGGAAGTGATGGCCGAGGCCGTCAAGGTTACTGGCAAAAAGTACAGGCCAAATTCG  
GCTTCTCCCTCGACTATCAGCACTTTGATGTGGGCGGCATTGCCATCGACAACCATGGCACCCCGCTGCC  
GCAGAGCACCATCGCGGGTTGTGAAGCATCCGATGCAGTGCTGTTCGGCTCGGTGGGCCAAAATGG  
GAGCATCTGCCGCCAACGATCAGCCGGAGCGTGGCGCCCTGCTGCCCTGCGCGCTCACTTCAAACGT  
TCTGCAACCTGCGTCCGGCCCGCATCTACACCGGTCTGGAGCAGTTCTCGCCGCTGCGCGCCGATATCTC  
CGATCGCGGTTTTGACATCGCCTGTGTGCGTGAGCTGACCGGGCGGCATCTACTTCGGCCAGCCCAAAGGG  
CGCGAGGGAGAAGGAGCGAACGAAAAGGCATTCGACACCGAGGTGTACCACCGCTTTGAAATCGAGCGCA  
TCGCCAAGATTGCGTTCGAGTCGGCTCGTGTGCGCCGTGGCAAGGTCACTCCATCGACAAGGCCAACGT  
GCTCGCCTCCTCCATTCTGTGGCGGAGGTGGTGACCGAAGTCGCCAAATCCTACCCGGACGTGGCGCTG  
AACCATATGTATATCGACAACGCCACCATCGAGCTCATCAAGGATCCCTCCCAGTTCGACGTGCTGCTCT  
GCTCCAACCTGTTTGGTGACATCCTCTCCGACGAGTGCGCCATGATCACCGGCTCCATGGGACTGCTTCC  
CTCCGCCAGCCTCAACGAATCGGGTTTCGGCCTGTTCGAACCGGCCGCTGGCTCGGCCCCGGATATTGCC  
GGCAAGGGTATTGCGAATCCATTGCCAGATCCTCTCCGCCCCCTGATGCTGCGCTACAGCTTAGGGA  
TGGAGGCTGCCGCCAGGCCATTGAGCAGGCCGTGGCCAGACCCTGGCCGAGGGTTACTTCACCGCCGA  
CCTGCATCAGGCCAGCGCCCGCCATCCGGTGCAGAGCACGTCCGAGATGGGTAGCCAGATCGCCGCCCGG  
ATCTGAGCCGCATAACAGAGAACAAGGAAGAGAGAAGCAATGGCCAAGACCCCTATCAGAAAAGTATTTCG  
ACGCCCACGTGGTACGGGAAGTGGAGGGGGAGACCCCTCATCTACATCGACCGCCATCTGGTACATGA  
AGTGACCAGCCCGCAGGCATTTCGACGGCCTGCGCGCCATGAACCGCCAACGCGCCCGCCGACCTGGCC  
TGGGCCACCATGGATCACAACGTCTCCACCACCACCAAGGACATCGCCGCTCCGGCGAGATGGCTCGCA  
TCCAGATGGAGACGCTGGCCGACAACGTAAAGAGTTTCGGGGTTTCGCTCTACGATCTCAACCACAAATA  
TCAGGGGATCGTCCATGTGATGGGCCCGGAGCTCGGCATTACCTGCCCAGCCACCACCATCGTCTGCGGT  
GACTCCACACCCGCCACCCACGGCGCCTTCGGCTCGCTGGCCTTCGGCATCGGCACTTCGGAAGTGGAAAC  
ATGTGATGGCGACCCAAACCCCTGAAAACAGGGCCGGGCCAAGACCATGCGCATTTTCGGTCAACGGCAAGCT  
GGCGGAGGGGATCAGCGCCAAAGACGTGGTGTGGCCATTATCGGCAAGGTTCGGCCACGCCGGTGGTACC  
GGCTACGTGGTGAATTCGCTGGCGAGGCCATTGCGAGCCTCTCCATGGAAGGGCGGATGACGGTGTGCA  
ACATGGCCATCGAGCTCGCGCCAAAGGCGGGCATGATAGCCCCGACCAGACCACCATCGACTACATTCG  
CGGAAGGAATTCGCCCCAAGGGCGAGGTGCTGGAGCAGGCCATCGCCTACTGGCAGAGCCTCAAGAGC  
GATGAAGGTGCCACTTCGATGTGCAAGTGGTGTGAGCAGCCGCGATATCGCCCCGACGTACCTACCTGGG  
GTACCAATCCGGGGCAGGTGATTGCCGTCAATGAGCCGATTCGGCGCCGGAATCCTCAGCGCATCTGAT  
GGAGCAGCAATCAGCCCGCAAGGCTCTGGCCTACATGGACTTGAACCGGGCCAGAAGCTCTCCGACGTT  
GCCATCGACAAGGTGTTTATCGGTTTCTGCACCAACAGCCGATTCGAGGATCTGCGCGCTGCCGCCGCCA  
TCGCCCCGGTTCGCAAGGTAGCCGCTGGCGTGCAGGCGCTGGTGGTGCCTGGCTCCGAGCAGGTGAAGGC  
ACAAGCCGAAGCCGAGGGGCTGGACAAGATCTTCATCGAGGCCGGTTTTGAGTGGCGCTGCCGGGGTGC  
TCCATGTGTCTGGCGATGAACAACGACCGGCTGCAACCGGGAGAGCGCTGCGCCTCCACCAGCAACCGCA  
ACTTCGAAGGGCGTCAGGGCCGCGCAGGCCGACCCATCTGGTGTAGCCGGCCATGGCCGCCGCTGCCGC  
CGTACCCGGCCGCTTCGCCGACATTCGCGCACTGTAAGAGGACATTTTCGATGACAGGATTCAAACAGCAT  
AAAGGGATCGTCTGTCGCCCTCGACAGCGCAACGTGCACACCGACGCCATCATTCCCAAGCAATTTCTGC  
AGAAGGTCAACCGCATCGGTTTTGGCAAGCACCTGTTCCATGACTGGCGCTTCTTCGACGATGCTGGCCA  
GCAGCCCAACCCGAGTTCTGTGCTCAACCAACCGCAATTCGCCGGTGGCAGCATCCTGCTGGCGCGGGAG  
AACTTCGGTTGCGGCTCGAGTCGCGAGCACGCCCTTTGGCGCTGGCCGACTACGGCTTCAAGACCATCA  
TAGCCCCGAGCTTTGCCGACATTTTCTACGGCAACGCCATCAACAATGGCATGGTGCCGGTGTCTTGAA  
GGAGGAGGAGGTTCGATGCCCTGTTCCAGCTGGTGGCCGCCAAACCGGGCATCGAGATCGAGGTGGATCTG  
GAGGCCAATCAGGTACGAGCAGGTAGCCTCTGCTTCGGTTTCGAGATCGATGAATTCGCCGTTACTGTC  
TGCTCAACGGCTTCGATGCCATCGGTCTGACCTGCAGCACGAGGCCGCCATCAGCGCTTTTGAGGGCAA  
GCAGCCGAGCTGGATTTAACGCGCCAGTTGCAAAAAACGAGTAGAATCAACAGGGAGCTTCGGCTCCCT  
GTTTTACTGTCCCGCACACGTCCCCTTTGGGCCACCGAACTGGCCCGTGGCCACAGGAAAGGATGATGA  
AGAGACCGACGGCAATTCCTCTGCTCTGTGCCCTGCTGCTTGCCCTGCCCTGCGGGGGCCAGCCAAACAG  
CTTCAACAACAGCCTCGGCCAGATCAGCGTTCGGCTGGCAGGATAGCGAAGGCAAACCCCAACAGCTCACC  
TACCGGCTCGAACAGGGCAAGTTGCCGCCCTTATCGCCTATCGTCCGGCGAGAATGCAGGAGGAGGTGT  
TGCAGGTGTTGCTGCGGGAAGTGCGCCAGAATAACCCGAGGTGCAGTTACCCCTCGCTCGTCCCTCGCT  
GGAGCTGCATCTGAAAAGCCGCAATCAGGACAAGGCGCGGAGGCGATGGCCTTTCTGCAGTCCAAGCGG  
AGCAAAGAGGAGCAGGCGTGGCTGACCAAACTACTTCCAGTACTTCAACACCCCGACGGGCAGCTGG  
CGGTGAAGCAGGATCATGTGCGCATCGCGCTGGAGAGTGCAGTGGGCTGGCTCCGCTGGCGGATCAACT  
CAAGCAGCAGGGCAGCACCGAAACGGAAGCGCGCCAGAAAACCGTGGCCATATGCTCACCTTTATCCAG  
AGCATCCCCTATCAGCAGCTCGACAGCCTGAACGGCAGGCAAGGGATTTCTATCTCCCCGTCAGG  
TGCTGGAGCAGAACCGGGGTGATTGCGACAGCAAGGTAACCTGATGGCCGCCATGCTGGCTCAGCTCTT  
TCCCAGCTGAAAACAAGCCATGGTGTTCGTCCCCGGCCATGCCCTGCTGGCCGTTGACCTGCCCGCCAAG  
CCGGGGGATGTGACCTCAACTGGCAGGGGCAGAACTACCTGCTGCTCGAACCTACCGGTCCCGCCACCT  
TGCCTGCAGGCCAAATAGCATCGACCAGCAAAACCGTGGTTCGATAGCAAGCAGTTGAGTGTGCAGCCGGT  
TCAGGAAAAGGCTAATCCCCTCCCTCTGCCGATGGGGAGAGAGGATTAACCTGAGGCAGAACTCTAC  
CGCCAGCAGCAACCCGCTCTCCTCCTCCAGCACCCGGATAATGCGGGCATGGGCTTCAAAGGGAGGCAAC



AGGTTGTTGTTGGTAGCAAGACTGATCCGGATGGGCTGATTGATGTCGAGCTGGTGTTCAGAGACCGCAA  
TCCCCATGCCGTTGGCACTGAGATCCCGGCAGATCCCCTCCAGCACCAGCTGCTGCTGATAGACGGTGAC  
CGGAGCATTGATGACCATGCGCGCAAAGGCACGCCTTTCCCTGGTATTGGTAAGCACGCAACATCCTCT  
GTTGGGTGGGCGTCATCTCATGGGTATTGCACAATTGTGCTGGTCTACCCAAAAGAACGTTAATACAATG  
CGGTTTCGTTTTCTCAAACGGGGTGCGGTTTTACCCTGAGATTATACCCGTGTACCTGATCCAGATAATGCT  
GGCGGAGGAATTTGAGGCATGGCGCTCATTTTTTTCGCCCTCACCCGCTGGCACCTCGTTATTAACAAGT  
AATAGGGAGTGCCACCCATGAAGACCCTGCTGCTGGTCACCACCGGCTGCTGTCGGCCAATGTGTTTCGC  
CGCCGACACCCTCACCGTCTACACCTACAGCTCCTTCACTGCCGAGTGGGGGCCGGGGCCAAAGATCAAA  
CAGGCCTTCGAGAAAGCGTGCAGCTGCACCCTCAATCTGGTTCCTTCGAAGATGGGGTCGCCATCCTCA  
ACCGGCTGCAGCTGGAGGGCAACCACAGCAAGGCCGATCTGGTGTGGGGCTTACGATGCCCTCATCAG  
CGAAGCCAAACAGAGCGGCCTGTTTCGCCCCCATCCCGCCAAAGCTGGATGGCATCAAGGTCCGGGTGGC  
TGGCAGGATGACACCTTCGTCGCCCTACGACTACGGCTACTTCGCCCTTGTCTATGACAAGGACAAACTCA  
AGCAGCCGCCAAGAGCCTGAAAGAGCTGGTAGAGCGCCCCGACCTCAAAGTGATCTATCAGGATCCCCG  
CACCTTACCCCCGGGGCAGGGGCTGATGCTGTGGATGAAGTCTGTTTATGGCGACAAGGCGCCTGCCGCC  
TGGGCCGAGCTTGCCAAAAAGACGGTACCCTCACCAAGGGGTGGTCAGAGGCTATGGCATGTTCTCTCG  
ATGGCGAAGCGGACATGGTGTCTCTACACCACCTCTCCGGCTATCACCTGATTGCCGAGAACAAGCC  
CCAGTATCAGGCTGCCGCTTCGAGGAGGGTCACTACCCTCAGGTAGAAGTGGCCGCCAAGCTGAAGAGC  
GCCAAACAGGAGAAGCTGGCTGACCAGTTCCTGCAGTTTATGGTGAAGCCCGCTTCCAGCAGGAAATCC  
CGACCGGCAACTGGATGTATCCGGTTATCGACACGCCGCGGCCAAAGGATTCGAGCAGATGATACCCT  
AGCCAAGCCGCTCGCCTTCAGCAGCGATGAGGTGGCCACCAATCGCAAAGGGTGGATCCGCGAGTGGCTG  
CAAGCCGTACCCAGTGAGCCGTTATCTAAAACCACAGGCTCGTCCCCTCTGGTGGTTACCGGGCAGTGC  
AGCCACCCTGTTGATCCTGCTGTTATCCCTCGGGCCGCTCGCGGCCCTATTGTGGCAGGCGGTTTCGCTG  
GCACCCCGCACCCCTGCTCGCAGATCCTTACCTGCGTCATGTGCTGGGCTTCAGTCTGGGGCAGGCACTGC  
TCTCCACCCTGCTCAGTCTCGGGCTGGCCATTCCGGTGGCCCGCGCACTGGCGCGGGCGCTTTCATTGG  
CCGAACCCTGCTGATCAAGTTGTTTGGTCTCTCGCTGGTGTGCCGGTCAATCATCGCCATCTTCGGCATA  
GTAGCGGTACACGGCAAACAGGGGTGGCTGCCGCAACTGTTGCGCTCAATGGGGCTAGATCCCGGCAATT  
ATCTCTACGGCCTGTTTCGGTATCCTGCTGGCCACGCTTCTTCAATATGCCACTGGCGGCACGCCGTAT  
GCTGCAGAGCATAGAGACATCCCCGAATCGAGCTGGCGCCTCGCCAGCCAGCTCGGCATGCGCTCATCC  
CACATCTTCGGCTGCTGGAGTGGCCGCTTATTCGGGCATATTGCCGGGGCTGGCCAGCCATCATCTTTA  
TGCTCTGCTTACCAGCTTCACTACCCTGCTGGCGCTGGGGGGCGGGCCGAAATCGACCACCCTGGAGGT  
GGCAGTCTATCAAGCACTGCGCTTTGACTTCGATCTCGCCACCAGCGGGCGGATGGCGCTGGTGCAGCTG  
ATCCTGACTGCCGCCCTGCTCGCCCTGCAGCACAAGCTGCAGAGTACCCCGGCCAGCAGGGTGACACCC  
GTCGCCCTGCTGCGGCCGGATCGTCATCAACCGGGCACGGCCGTGGTGGACCTGCTCTCACTCTGCAT  
CGGGCTCGCCATCTTTCTGCCACCGTTGCTGGCCATCGTGGTGGCAGGCTTACCCCGGCCCTGCTGACG  
GCGCTCACTTCCGCCAAACTGTGGCAGGCGAGCGCCAGTCTGCTGATTGCACTGGCGGGCGGGCACAC  
TGGCGACCCTGCTTGGCAGCGGCCTGCTACTACCAGCCGTACCTCAAGGTACGCACCCGCCAGCGGGC  
AGCTGCCGCCCTGTGGGAGGCCAGCGGTTCCGGTATCCTTATGATCCCGGCCGTGGTGTCTCTACCAGT  
CTTTTCATCCTGTTTATGCCGTTCCGCCGACGTGTTCCGCCCTCGGCCCTGGCTGGTAGTACTGGTCAACG  
CCCTGATGGCGCTGCCCTATGTGATGCGCACCCCTCTCCGCCCCCATGCAACTGGTGGTGCGCCAGTATGA  
CCGGCTGGCCGACAGTCTGGGGGTACCGGCTGTCATCGCCTGCGGCTGGTAGAGTGGCCCCCTGCTGCGC  
CGCCCGCTGGCACTGGCGATGGCGCTGTGATGATCCTCTCGCTCGGGGATCTCGGCGCCATCGCCATGT  
TTGGCAGTCAGGAGCTCACCACCCTGCCCTGGCTGCTCTATCAGCAGCTCGGCAGTTACCGGCTAACC  
GGCGGCCGCCACCGCCCTGCTGCTGCTCAGCTCTGTTTCTCCCTATTCTGGCTGGTGGAACGGGGGCTA  
GGAGGAAAAAATGGCGAGCATCATTGAGATACAAAAGCCTGGCGCCACTGCGCTAGCGTTTTCTGCGGCT  
GTTTTGGCTGGTTCGAACGGACCCCTTGGAGGAGAAAAACATGCTGAACATTGATACGCTTGCTACCAGCTA  
CCCCGACTGGCGCTCAGCTTACGCGGACCCCTGCCCAAGGGGAGATCACCGCGCTGATTGGCCCAAGC  
GGTGCAGGCAAGTCGACCCTGCTCGGGATGATCGCCGGCTTCGTGCCGGTGGAAATCTGGCCGCTCAGTT  
TCGATGGTGAAGATCTGCTGCAGCTGGGCCCCCGGAGCGACCGGTCACCACCCTATTTTCAGGATCACAA  
CCTCTTCTCCATCTGTGGTGTTCGACAATATCGCCATCGGTTTGCACCCGGGGCTGCGCCTGAGCGCC  
GCCAGCGGTACAGGTGATCGATGCGGCCGGGGGGTGGTCTTGGCGAGATGCTAAGCCGCCCTACCTG  
AACAGCTCTCCAGTGGCCAGCAGCAGCGGTGGGCTGGCTCGCGCTGGTGCAGCGGCAACCCGCTGCT  
GCTGCTGGATGAGCCCTTCTCTGCCCTCGATCCCGCCCTGCGCCGGGAGATGCTGGCGGAAGTGGCGAGG  
CTAGCCTGCGAACAGGGCATTACCGTACTGATGGTCTCCACAATCCGGAAGATGCCAGCTGATTGCCG  
ATCAGGTGCTCTTTGTGACGAGGGCCGCATCGCCCTGCAAGGCAAGCCGATATTCTGCAAAAATAGCGG  
CCACCCGGGGCTGCTGCGCTACCTTGGCCAATAGCCCTTGGGAGTAAAGACTGCGCCATGATCAAAAAGG  
GAGGCCGATTGGCCTCCCTTTGCATCTGGAAATATTCAATTTAAATCAGAGGTTTTCTCGGCGAACGAAG  
CCAGTCCGGCTGCGCACCCACGCCATTGAGGAAGATGTTGGCACTGCCGTCAAAAATCCTTGAACGCTCGAC  
GATGTAGGTGAGCCCCGAAGTCACCGGGCTCAGGTAGTTGGAGTCGATCTGTGCCAGGTTACCGGAGCAG  
ACGATCTTGGTTCCTCGCCACAGCGGGTATGATGGTCTTGGTCTGGGACGCGGTCAGGTTCTGGCACT  
CATCCAGCAGCAGAAAGGTGTTCTGGATACTGCGCCCGCGCATGAAGTTGACCGATTTGAATGGATGTT  
GGCCTTCTCCATGATGTAGCTGAGCGAGCCGCTCATGTTCTCGTCTGCTTGTGCAGTACCTCCAGGGTG

TCGGTACCCGCCGCCAGCCAGGGCATCATCTTCTCCTCCTCGGTGCCGGGCAGGAAGCCGATGCTTTTCGG  
CAATTTCCGGGGTATTCCGGGTGACGATCACCTTCTCGTAAATGCCCTTCTCAATCACCAACTCCAGAGC  
AGCAGCCATGGCCAACAAGGTCTTGCCGCAACCGGCCGGGCGGTGAGGATCACCAGATCGATGTGCGGA  
TCGAGCAGTGCATCCAGCGCCATCCCCTGATAGACATTCTGGGATGGACACCCACGCCTTTCGAGACA  
TCAGTCGCTCGCGGCCAGATCCTTGATGCGGATCTTGCTGCCATCGTGGCTGAGCACCCGGGCGGCGAA  
GAAATTCTCTTCCATCCACCAGATACTGGTTTACATGAACCCCTTCCAGCAGATTGGCATCGATCACATGG  
ATGGTGTGCGGGCCATGGGTCTCGCTCTCGCACTCGCAACCCGCTCCAAAAGCTGCCGGGCACAACCT  
GAAAGCCTTTAGCCAGCAGGCGGATATCATCGATCAGCTGGTTCGCTACGGTAATCTTCAACGTGAGCAAG  
CCCCGGCCCCCTTGGCCTTGAGGGCGCATGTTGATGTCTTTGGTGACCAGCACCACTGACGCTTCAACTCG  
TGCTTTTGCAGATAGAGGGCCGCTTGATGATGCGGTTGTGCGCCTCCTTGTGCGTAAACACCTCGGCAT  
CCTGCGGCAGATGGTGCATCGCTGAAGATGCAGATATTGCCGCTCGCTTCGCCAGCCGGAACGCCTTG  
GGTGATCTGATCTGGGGTTGCATCGCGGAACACATCTTCCAGCGCACGGATGGCGACCTCGCGTTCGCGG  
CTGACATCCTTGTTGCGATCCTTGATGTTATCGAGCTCTTCCAGCACCGTCATGGGGATGAGCACATCGT  
GCTCTTTGAAGGAGTAGATAGCGAGGGGTTCTGTAAGCAGAACGTTGGTATCCAGGATAAACAGCTTTTCG  
GTCCGATTGTCCATAAGCATCCTCCTTGGCACTGAAGGGCCACGTGTGTGAATCTCAGATGTCATTTGAA  
ACCACACGGCCGTGACAGTTTTATTACCCTCAACGCTACGCCGATTTTACTATCGCGCAACAAATCACT  
TGGCCGCTGATGTGATTGCGCATAAAAAACAGCAATAAAAAAGACCGGCACTGTGGCCGGTCTTTTCTCTA  
TCGTTCAACTACTTGGCCTGTCTGTGACCCGCACTTGGAGTCGCCGAGTTGAGGCAGGTCATGCAGCC  
ATCCTTCAGCACCGCCCTTGGTGTGGCACTTGTAGCAGAGCGCGCATTTGCCGGAAAACCACTGCTC  
GCCTGTGCTCTTTCAGCCTCCTGAGCGGCTTTCAACTCGCCTGCTTCTCGCCAGAAATGCCTGCTGAT  
GCTCGTCCAACCCCGCGCCTTGAGCATGCCTATCTCGGTGAGATGGCTCTCGATCACGTTCCCAATCTC  
GGCGATCAGCGACGGCACATACTTGCCTTGTTCCAGTAACCTCCCTTGGGATCGAATACGGAACGCAGC  
TCCTCCACCAGGAAGGTGACATCCCCACCTTGCGGAAATACCGCCGAGATGATGCGGGTTAGCGCCACGA  
TCCACTGATAGTGCTCCAGGCTCTTGGAGTTGATGAAAAATCTCGAACGGACGGCGAGTTTCGTGAACCGT  
GCCCTCGTTGAGAATGATGTGTTGATGGTGTGAAACAGTGAGTGTCTCGGAGACATGCTCCGGCGTCTTC  
AACTTGTAGGTGGTTCATCAGCCGCTCCGGGCGCAGCACGGTTCGTGCATATGCACTACGTATCCT  
GCACAGAGAGATCTTCTTGGCCTCATCCTTGGTACGCACCTTGTAGGCGACGATTTTCTTGTGATCTT  
CTTGACCATAAATGCTTCTCAGAATTTACCGTAATAGCCCTTCTTTCAAGGCGTCGTAGAGTTGGCGGC  
CGTATGCAGATCGCCATCGTATTCGATCTCTTCTTCCCTTACCGGAGATGACGAGCCATCCTCCAGG  
GTGAAATCGTACAGGGTGTCTCCAGATCCTTCTCCTTACCAGCACGCCCTGGAAGGCTCCGGATTGA  
AGCGGAAGGTGGTGCAGCCCTTGAAGCCAGAATCCGAGGCATACATGTAGATGTCCTTGAACGCTCGAA  
CGGGAATCGGTTGGCACGTTGGCAGTCTTGGAGATGGAGGAGTCGATCCAGCGCTGGGCGCAGCCTGA  
ATGTCCACATGCTGCGCCGGGTGATGTATCAGCAGTAATGAAAGTAGTCGGCAGACGGCTCGCCTCAT  
CATCGGCATAGGGCATGGCGGACAGACTACCAGCTCACGATAGGCCAGCAGCTCGAAGGAGTAGACATC  
CACGCTCTCCTTGTCTTCTTGCCCGCTTGATAACGTTGCGGCTGTAGTGGTGGGCAAAGCTCGGCTCG  
ATGCCGTTGCTGGCGTTGTTGGCCAGAGACAGCGAGATAGTGCCGTTGGGTGCAATACTGCTGTGGTGGG  
TGAAACGCCCACCCACTTCGGCCAGCTCGGCGACCAGCGCAGGATCCACTTCGGCAACCTGCTGCATATA  
GCGGCTGTAGCGCGCATGCAGCACCTTGCCCTTACCTTGTGCCCCACCTTGATGCCATCAGCCGCCATT  
TCCGGGCGCAGACGCAGCATCTTGCCGGTCACCTCGAACTCCTGCTCCATGATGGGAGCAGAGCCCTTCT  
CCTTGGCCAGACGCAGGGACTCCTGCCAGCCGGTCATCGCCAGCTCCTGGGATACCTGCTCGGTAAAGGC  
TACGGATGCCGCAGAGCCGTAATTGATCTGCAGCATGGTGAGGGTCGAACCAAGACCCAGGAAACCCATA  
CCGTGACGGCGTTTGGCAGTGTCTCCTCGCGCTGTTTGGCTAGCGGCAGCTGGTTGATCTCCACCACGT  
TGTCGAGCATGCGGGTGAAGATAGCCACCACCTTGCGAAACGCCGCAATCGAAAGCCGCTTTTTCAGT  
AAAGGGGTACGCACAAACTTGGTCAGATTGACCGAGCCGAGCAGGCAGGCGCCATAAGGCGGCAAAGGC  
TGCTCGCCACAGGGGTTGGTTCGCGCGGATCTTTCACAGAACCAGTTGTTGTTTTCATCTGGTTGACCTTGT  
CGATCAGGATGAAGCCGGCTCTGCATAGTCTATAGGTGAGGTCATGATGACATTCCACAGCTTGCGGC  
GGCATGGTCTTGTAGACCTTGACGGCGACCTGCCCAACTCGTTGAATACAACCCCTTCTTGTGGGGC  
CAGTCGGCCCATAGCACCTGAGCGGGATCGTCCAGCGCAATGCCATCCTGCTCCACCTCTTTGGCGGTGT  
AGGGGAAGATCAGCGACCAGGGTGCATCCTCTTTCACTGCCTTAAACGAAATCTTCGGTGATCAGGAGAGA  
GAGGTTGAACTGGCGCAGACGGCCATCTTACGCTTGGCCTGAATAAACTCGATCACATCAGGATGACGG  
ATATCCATGGTGCCCATCTGGGCGCCACGGCGCCACCGGCTGACGAGACGGTGAAACACATCTTGTCTGT  
AGATATCCATGAACGAGAGCGGGCCTGAGGTGTAAGCACCTGCACCGGAGACAAAAGCACCGCTGGGGC  
CAGGGTCGAGAAGTCATAGCCGATAACCACAACCGGCTTTCAGGGTCAGGCCAGCCTCGTGCACCTTGCCA  
AGGATATCGTCCATCGAATCTTCGATGGTACCGGAAACAGTACAGTTGATGGTTGAAGTAGCAGGCTTGT  
GCTCAAACGCCCCGCATTGGAGGTGATGCGCCCCGCCGAATGGCACCATTTGCGCAGCGCCCACAGGAA  
CGGCTCATAACCAGACCTCCGGTTCCAGCTCCTGCTCTGCCAACGCACGGGCTACCCGCTGGTAGGTCTCA  
TCGATAGAGCTGTGATGGGAGTGCCATCCTTGTCTTGGAGCGATACTTGTATCCCAGATCTCGAGGG  
ACGTTTTCTGGAGGGGAATGAGGCGGGAGCCAGCTTCGCTCTCCAGCACCGGGTTGGATTAGCCATTTT  
CAATCAACCTTATATGAATGCATCAACGTCATGACAGTAGTAGAAAAACACAACCAATAGCGCCATTA  
AAAAACAACACAATATATAGTGATGATGCTGCCATGAGGGCGCAGATTCTATCTAAAAAAATGCCCTGG  
CCAGCAGGTTTCTGCGCCAGGGCACTTAACTGATTAATTTACTGAGAGATTTAACACTCAGAGATAGATC

AGGGCTTCTTGACGTAAACCGTCGGTGTTTACCCGCCATATTCAGATAGAACTCGTAGACGCCATCGGC  
ATCCGGTGAGAACTTCATGTCTCATACTTGGAAACAGGGGTTGACCGGCACAGCCTCACCACCCAGTACG  
GCAACACCATCACTCGGGCTCTTGTAGCCAAAGTTGGTACCGCAGCTCCAGCCTGAATCAGCAAACCTGA  
ACTTGTAGGGGGCCACTCTTTCTTGAGGGTGCCCTTTGGCCATATAGAGCTTGTTCGGCCACCTTGACTAC  
CTTGCTTTTCATCAGTCGCCATCCAGTCGTTTCATCTCCCCGCGCAGGTAGATGGACTTGCCACCGAAGTCG  
CTGTTGTCTGCAGCTGCCTGCTCTGCGCCACCATTGGATGCGCAACCGCATAATACCAGGGTTCGCCGCC  
CCAGCATCATCGTTACTGTTCTTTTGAACATGGGTCTATTCCTTAAATTTATTGTGATTCCTTGGTCCATC  
AATATGGACTGAAGAATTAACCAGAGCAGGCATCACAAGAAAGGTAGAGGCATCAGATTCTGTACTTTTT  
TGTATCCAACACATTGAACTGGTGAGCAAATATCGAACAGGAAAAGAGGTCTTTTTTGGGGCTTTAGAAGG  
GTAATCAATGAATGACAAGAAGGGGAAAGTCTAATAATCCGGTGACGTGCTGAATTGCAGGCAATAAAAA  
ACCCCGCTCGATGAGCGGGGTTTCTTGTATTGGGTGCCCTGGCAGTGTCTACTCTCGCATGGCGAATGCC  
ACACTACCATCGGCGCTACCGCGTTTCACTTCTGAGTTCGGCATGGGATCAGGTGGTTCCACGGCGCTAT  
GGCCGCCAGGCAAATTCCTCAATCTGAGAAAAGCTGACGTAAGTAATTCGTTTCGTATTTTGCTACAAGCCTT  
AGAACACTTCTTGGGTGTTGTATGGTTAAGCCTCACGGGTAATTAGTATGGGTAGCTCAACACGTCGCC  
GCGCTTACACACCCACCTATCAACGTTGTGGTCTCCAACGGCCCTTTAGGACCCCTCAAGGGGTCAGGGA  
TGACTCATCTCAGGGCTCGCTTCCCGCTTAGATGCTTTCAGCGGTTATCGATTCCGAACCTTAGCTACCGG  
GCAGTGCCACTGGCGTGACAACCCGAACACCAGAGGTTCTGTTCACTCCGGTCTCTCGTACTAGGAGCAA  
CTCCCTTCAATCATCCAACGCCACCGCAGATAGGGACCGAACTGTCTCACGACGTTCTGAACCCAGCTC  
GCGTACCACCTTTAAATGGCGAACAGCCATACCCTTGGGACCGACTTCAGCCCAGGATGTGATGAGCCGA  
CATCGAGGTGCCAAACACCGCCGTCGATATGAACTCTTGGGCGGTATCAGCCTGTTATCCCCGGAGTACC  
TTTTATCCGTTGAGCGATGGCCCTTCCATTTCAGAACCACCGGATCACTATGACCTACTTTTCGTACCTGCT  
CGACCTGTCCGTCTCGCAGTTAAGCTGGCTTATGCCATTGCCTAACCTCCTGATGTCCGACCAGGATTA  
GCCAACCTTCGTGCTCCTCCGTTACTCTTTGGGAGGAGACCGCCCCAGTCAAACCTACCACCCAGGCACTG  
TCCGCGAGCCCGATTACGGGCCCTGCGTTAGAACATCAAACATACAAGGGTGGTATTTCAAGGACGGCTC  
CAGCGCAACTGGCGTCACGCCTTCAAAGCCTCCACCTATCTACACATGTAGGTTCAATGTTTCAGTGCC  
AAGCTGTAGTAAAGGTTACGGGGTCTTTCCGTCTAGCCGCGGGTACACCGCATCTTCACGGCGAATTCG  
ATTTCACTGAGTCTCGGGTGGAGACAGCATGGCCATGGTTACACCATTCGTGCAGGTCGGAACCTACCCG  
ACAAGGAATTTTCGTAACCTTAGGACCGTTATAGTTACGGCCGCGCTTTACCGGGGCTTCGATCAAGAGCT  
TCGTTGCGCTAACCCCACTCAATTAACCTTCCGGCACCGGGCAGGTGTACACCCCTATACGTCACCTTTC  
GTGTTTGCAGAGTGCTGTGTTTTTGTATAAACAGTCCCAGCCATCTGGTCACTGCGACTCCCAACTGCTCC  
ATCCGCAAGGGACTTCACTGTCAAGAGCGAACCTTCTCCCGAAGTTACGGTTCATTTTTGCCTAGTTCCT  
TCACCCGAGTTCTCTCAAGCGCCTTGGTATTCTCTACCCGACCACCTGTGTTCGGTTCGGGGTACGATGAC  
TTGTAATCTGAAGCTTAGAGGCTTTTCTTGGAAAGCAGGGCATCAATGGCTTCCACACCGTAGTGTGTTTCG  
TCTCGTGTCTCAGTGTGTGTCTCCGATTGCTTAGAAAACACCACCTACGCACCTTTCACCAGGACAACC  
GTCGCCTGGCCCACCTAGCCTTCTCCGTCCCCCATCGCAATTACAAGTCGTGCAGGAATATTAACCTGC  
TTCCCATCGACTACGCCTTTCGGCCTCGCCTTAGGGGTCGACTCACCTGCCCCGATTAACGTTGGACAG  
GAACCCCTTGGTCTTCCGGCGAGGAGGCTTTTACCCCTTTATCGTTACTTACGTCAGCATTCGCACCTC  
TGATATCTCCAGCATAACCTCTCGATACACCTTCGCAGACTTACAGAACGCTCCCTACCACCTCACACATA  
AGTGTGAATCCGCGGCTTCGGTGCCTGGTTTTGAGCCCCGTTACATCTTCCGCGCAGGCCGACTCGACTAG  
TGAGCTATTACGCTTTCTTTAAATGATGGCTGCTTCTAAGCCAACATCCTAGCTGTCTGAGCCTTCCCAC  
ATCGTTTCCCCTTAAACCAGAACTTTGGGACCTTAGCCGGCGGTCTGGGTGTTTCCCTCTTCACGACGG  
ACGTTAGCACCCGCGTGTGTCTCCCGGATATTACTTACTGGTATTCGGAGTTTGCATGGGGTTGGTAAG  
TCGGGATGACCCCTAGCCCAAACAGTGTCTTACCCCAAGTAGTATTCGTCCGAGGCGCTACCTAAATAG  
CTTTCCGGGAGAACAGCTATCTCCGAGTTTGATTGGCCTTTCACCCCAAGCCACAGGTCATCCCTAAC  
TTTTGCAACGTTAGTGGGTTCCGTCCTCCAGTTGATGTTACTCAACCTTCAACCTGCCCATGGCTAGATCA  
CCCGGTTTCCGGTCTACACCTTGAACCTAGACGCCAGTTAAGACTCGGTTTCCCTACGGCTCCCTATA  
CGGTTAACCTCGCTACAAAATGTAAGTCGCTGACCCATTATACAAAAGGTACGCGAGTACCCCAAGGGC  
TCCCCTGCTTGTACGTACACGGTTTTAGGTTCTATTTCACTCCCTCACAGGGGTTCTTTTCGCCTTTC  
CCTCACGGTACTGGTTCACTATCGGTGAGTCAGGAGTATTTAGCCTTGGAGGATGGTCCCCCATATTCA  
GACAGGATGTACGTGTCCCGCCCTACTCGATTTACATCAAGGTTGTTTTTCGTGTACGGGGCTATCACC  
CTGTATCGCCGGCCTTTCAGGACCGTTCCACTAACTTCCAAGATGCTTAAGGGCTAATCCCGGTTTCGCT  
CGCCGCTACTGAGGGAATCTCGGTTGATTTCTTTTCTCGGGTACTTAGATGTTTTCAGTCTCCCGGTT  
CGCCTCTGTTACCTATGTATTAGTAACAGATAACCCAGTTATCTCGGGTGGGTTTTCCCATTCGGAAT  
CTGTGAGTAATAGCGTCTCTTACCAGCTTCTCACAGCTTATCGCAGTTAGTACGTCCTTTCATCGCCTCT  
GACTGCCAAGGCATCCACCATGTACGCTTAGTCACTTAACCATAACAACCCCAAGAAAGTGTGCTCGAAACA  
ACGCTTGTGTTGTGCTACAACAAGGACCAAAATAAAATTTGGTTTTTCGCCAAGAAAGTTTCCAAAGCACT  
TGTAACAAATGTTTGTAGAATACTTTTTAAATCAGCTTTCAGATTGTTAAAGAGCATGTTTGTCAACAGC  
ACAAGGCTGAAGAAAACAGAGTTAAGAATCAGCTTCTTAACTCTGCATTCTTGTAGCAAGAAGAGAAGT  
GGCGTCCCCTAGGGGATTTCGAACCCCTGTTACCGCCGTGAAAAGGGCGGTGTCCTAGGCCCTTAGACGAAG  
GGGACCCCGAGTCTGCTTTGAGTGTCTGCGCACTGAGACAACAGGTAGCAGTAAACTGCTATTCACATC  
CCGTTATCCGGCAGAAGAGGTTTTCTCTCATCCATCCCGAGGGCTGGACAACAGAAGCTGATGCATCTCT

GCACCAGGTCTTTGCTCTAACTACTTTGAATCAAGACAATCTGTGTGAACACTCAACAACCTTCGACATCT  
TAAGGTAAGGAGGTGATCCAACCCAGGTTCCCTTAGGGTTACCTTGTTACGACTTCACCCAGTCATGA  
ATCACACCGTGGTAAACGCCCTCCCGAAGGTTAAGCTATCTACTTCTGGTGAACCCACTCCCATGGTGT  
GACGGGCGGTGTGTACAAGGCCCGGAACGTATTACCCGCAACATTTCTGATTTGCGATTACTAGCGATTC  
CGACTTCACGGAGTCGAGTTGCAGACTCTGATCCGGACTACGACGCGCTTTTTGGGATTTCGCTCACTATC  
GCTAGTTTTGCAGCCCTCTGTACGCGCCATTGTAGCACGTGTGTAGCCCTGGCCGTAAGGGCCATGATGAC  
TTGACGTCATCCCCACCTTCCCTCCGGTTTATCACCGGCAGTCTCCCTTGAGTTCCCACCATTTACGTGCTG  
GCAACAAAGGACAGGGGTTGCGCTCGTTGCGGGACTTAACCCAACATCTCACGACACGAGCTGACGACAG  
CCATGCAGCACCTGTGTTCTGATTCCCGAAGGCACTCCCGTATCTCTACAGGATTCCAGACATGTCAAGG  
CCAGGTAAGGTTCTTCGCGTTGCATCGAATTAACCCCATGTCCACCGCTTGTGCGGGCCCCCGTCAAT  
TCATTTGAGTTTTAACCTTGCAGCCGACTCCCGAGCGGTGATTTAACGCGTTAGCTCCGGAAGCCAC  
GACTCAAGGACACAGCCTCCAAATCGACATCGTTTTACGGCGTGGACTACCAGGGTATCTAATCCTGTTTG  
CTCCCCACGCTCTCGCACCTGAGCGTCAGTCTTTGTCCAGGGGCGCCTTCGCCACCGGTATTCCCTCCA  
GACCTCTACGCATTTACCGCTACACCTGGAATTTCTACCCCCCTCTACAAGACTCTAGCCGGACAGTTTTT  
AAATGCAATTTCCAGGTTGAGCCCCGGGCTTTACATCTAACTTATCCATCCGCCTGCGTGCGCTTTACG  
CCCAGTAATTTCCGATTAACGCTTGACCCCTCCGTATTACC GCGGCTGCTGGCAGCAGTTAGCCGGTGCT  
TCTTCTGCGAGTAACGTCACAGCTGGCAGTTATTAGCTACCAACCTTTCCTCCTCGCTGAGAGTGCTTTA  
CAACCCGAAGGCCTTCTTACACACGCGGCATGGCTGCATCAGGGTTTCCCCCTTGTGCAATATTTCCCA  
CTGCTGCCTCCCCTAGGAGTCTGGACCGTGTCTCAGTTCAGTGTGGCTGTTTATCCTCTCAGACCAGCT  
AGGGATCGTGCCTTGGTGAGCCATTACCTCACCAACTAGCTAATCCCACCTGGGTTTATCCAATCGCGC  
AAGGCCCGAAGGTCCCCTGCTTTCCCCCGTAGGGCGTATGCGGTATTAGCTACCGTTTCCTGTAGTTATC  
CCCCCTCGACTGGGCAGATCCCCAGGCATTACTCACCCGTCCGCCGCTCGCCGGCAAAGTAGCAAGCTAC  
TTTTCCCGCTGCCGCTCGTCTTGATGTGTTAGGCCTGCCGCCAGCGTTCAATCTGAGCCATGATCAAAC  
CTTCAATTTAAGTCTGGTTGCTTTCGAAAAGCGGCTCAATGAAATGCTGAAAATAAACTGTTTCGACTTCTTA  
TTGCTAAGAAATCGTCTTGGTCACTTCGCCAGACATGAAAATCAAAAATGTTTTTTGATGTTTCGATGCT  
GTGAGTGCCACACAGATTGCTTGATTCAAATGTTAAAGAGCGACGCAACAGTGTGTTGCTGCGGGAGT  
GGAATTTACTACTCAACCCCTTCTCGAGTCAAGCCTTATTTCAAAGGCTTTTTGAGGTTATCGACGAGGT  
TGTTTTGCGCTTCCGCTTGCCTTGCATGGAGCGCATATATAGGGAACAGATTCTTTCTGCAAGGCTAA  
ATTGCTATGTTTTTTTTGATAAAAACCGCACACCGCTTCAAACAACAAAATGAAGAAAAGTTCGAGCTAA  
ATCACACATTCTGGAGGAGATGACAGGCAAGCCCCCTCTCAACTCATATAAGCTATTTTCGATTGTTGA  
CGCGCCAGCCAAAGCTCCTCCATCTCCAACAAGGTCTGATAGATTTTTCTCCGCTGCTCCGGTTCGGCTGA  
ACAGATAACCCTGTCCATACAAGTGGATATCGGTGAGGATCGCAGCACATCCAACCTGGGCCCTGTGTCTC  
AATCCCTTACACACCAGACTCTTGCCAGCATGGACCCCATCCGGCAAATATTTGGCGACCAGTTCCGGAT  
GCCTCCATTGAGGTATCAATGCCCTGTATAAAGGAGCGGTGATCTTCACCTTGTGACCGGCAGTTTTTT  
GCAGATAACTCAAAGAGGAATAACCAGTCCAAAATCGTCCAATGCCAACAGCACCCCTGCTGATTGAG  
ATCCTGCATCAGTTGCAGCGAGTTCTTCACTTCCCGCATGGTGGTATCTTCCGTGACCTCCAGGACCAGA  
CTACGGGCAGGCAAATGGTGCTCCATCAATGCCCTTGCCACCAGTTTGAGCAAATTACGCTGGTACATGC  
CTGGCGAGATATTCACACACATTTGCAGATCAACCATAACCAAGCTGGTGCCACTGATAGAGCTGCTCGCA  
AGCTGTGTTTTAGCACCCAGCTGCCAACCCGTTCCGGCAAGCTGGAACTCCTCGGCCACCATGATCACTTCG  
TTTTGGCGGAATAAAACCGAGCTCCGGATGCCGCCAGCGCAGCAGAGCCTCGACAGCTTTCGACGCGGCCAC  
TCTCGAGATTGACGATGGGTTGGTAATAGAGTTCCAGCGCATTGTGTTCCAGCGCCATGATCATGTCCGA  
CGCCAGATGTTTTGCGCCGCGCCGTCTCGTTGAGCAGGGAATATCGTAAATCACATAGGGGACATGGGTC  
TTGCGACTATGGAACAGGGCCTGTTCCGCCGACTCAACAACCTTCTGAGTCTTGTGCTGTCCATCCGAT  
AGAAGGCAATTCGATCCCGACTTCGAGCCGGAAGGGATAGTTGTGCATAGACGATATCTTGTCTCAGAGC  
ATGCAGCAATCGCGCTACCAGCTCCCTGACCTGACGCAGATCGCTGCTGCCACGCTGAATAATGGCAAAT  
TGATCTCCCCCAGACGTCGCTCCACTCGCCCTTTCACAGAGCACTCTGATCCGGGTGGCAAACCTCAC  
AAAGCAGATAATCACAGTGTGCATAGCCAAACTTGCTGTTGATATCCCTGAAGTCGTTGATATCAACCAG  
CACCAGCCCAAACGGCACTTCTGTGTGGCGTACAGTTCCATCCGCTCCAGCAAGGCAACCCGATTGGAC  
AACCCGGTCAGCGGATCCCGTCTGGCCGCTCTGAAAATGGCGACGCCCTTCATATATAAGCAGCATGCTGA  
GTAGCAGCACTGACATGACCAGACCGGAGACCATCAGCAACAAGGCATTGCGCAACTGCCCAAAATGACG  
ATCGTTCTCGGAATAGACGTTGATGTTCTTCTGCATCACAGAAGCGAGGGAGTAGGAGAGCGGCTCTTGC  
AGCGGGGCAAGGCGCATCATGATCTGCTGATAGTCAGATGCCCGCTTTGCAACTTGGTGATGTGCGGCT  
CTATTTGGCGAATATTGGTTTTCAATCAACTGCACCAGACGCAAGGTTTTCTGCTTGTCTGCATGCTCTT  
GCGCAGCTGGCCGCTCAACAGGATGGGCGTCTGCTCCAGAGAATGTCATAACGCAACATCAAGGTGTCA  
TGATCAATCCCGCCATAGTGATAGACCTCTACCGCATTGAGGAAACGCCCAGCTCCAGCTGCAACTGCA  
TCAGCGCCAGGAGACATCATAGGTGATTTCTCCATCGCTCTGGTTCGATTTCTGGATCTGCATCAGGCA  
ATAGAGGGTGCTCCCGGTAAACGACAGGATGGATACATACAGAAATGACGAGCAGTGGCCACGCCCTGGTC  
TTTTCTTTTACCCCATGCTCCCGTGTGTTTTTATCAGTGCTGAATGTCTATCAAAATCCAGCTGCCAAAT  
CATCATGTCCGGTATATTAGATCGCTTCAATTTCCGGATATTGATCAAGAGGCGACATAAACCAGACCGGC  
CCCTTGTACGCACCCGCATGACAGCCCCATTGTCTTCCATGCAAGAATGGGCTCGTATTTGGCAACCT  
TGTCCCATTCAATGCGGATCTGGAAACTGTTTCAAGTCCGCTCAACGTAATGGTCTTGCCATCCGCACCGAC

TGCAGTCAATACATCGGCCAGTTTTGGGCCCTCTGTAGGTGTGCGGCTTATCCACCACGGGTTGCCGGTC  
ACTATCTCATGTTGCGGCAGAGCCTGTAGTTTTGCCAGATCAAACAACACCTTGCCATCAACTTCGTCTG  
CCGACCTGATGTTGCCACCCACTTTCAGGATCACCGGCCAGTCAGCGCCTCAGCAGCCATCACGGGCAT  
GATGACCAATGAACACACTAGTGTGACCCAACCAACATTTTTCATATCACCCCAAATTTGCTGTCTCAA  
CAGACTCAGTTTAGCCAGATATAAAAAAACGGCTCGCCTTGAGCGAGCCGTTTGTCAAACAGAGCAAGGG  
GGGATGATTACATCATGCCCATGCCACCCATGCCGCCATGTCAGGCATTGCAGGGGTATCTTTCTTCGG  
CAGTTCGGTGACCATGCACTCGGTGGTGATCATCAGACCGGCATGGAAGAGGCCAACTGCAGGGCGGAA  
CGGGTTACCTTGGTCGGATCCAGGATACCCATGGCCAGCATGTCGCCATACTGTTTCGTGTAAGCGTTGT  
AACCGAAGTTGCCTTCGCCGTTCTTCACTGCGTTGGCAATGACGGAGGCTTCTTACCAGGCTTGATGAC  
GATTTGACGCAGCGGGGCTTCCATGGCGCGCAGGGCAACCTTGATACCGACGTTCTGGTCTTCGTTGTCA  
CCACGCAGACCCGCGAGTTTGGCTGCAACCGCAACCAACCGCAACACCACCCAGGCAACACACCTTCTT  
CAACCGCGCGCGGGTAGCGTGCAGGGCATCTTCCACGCGTCTTCTTCTCTTTCATCTCGACTTCGGT  
GGCTGCGCCAACCTTGATCACGGCAACACCGCCAGCCAGCTTGGCTACACGCTCTTGCAGCTTCTCACGG  
TCGTAGTTCGGAAGAGGTCTCTTCGATCTGCTGACGGATCTGGGCAACACGGCCTTCGATCACATCGGCAT  
CACCCACGCCATCGATGATGGTGGTGTCTCTTTGGTGATAACGATGCGCTTGGCACGGCCAGATCTTC  
CAGCGTCGCTTTTTCCAGCTCCATGCCAACTTCTTCAGAGATGACGGTGCCGCCAGTCAGTACAGCGATA  
TCCTGCAGCATGGCCTTGCAGCGGTACCCGAAGCCAGGCGCCTTGACGGCAGCCACTTTCACGATACCGC  
GCATGGTGTAAACCACCAGAGTCGCCAGGGCTTCGCCTTCTACGTCTTCAGCAACAATCAGCAGCGGCTT  
GCCAGCTTTGGCAACGCCTTCCAGCACCGGCAGCATTTTCGCGGATGTTGGAGACTTCTTGTCAACCAGC  
AGGATGAACGGGTGCTCCAGTTCAACAGAACCAGTCTTCTGCTTGTGATGAAGTAGGGGGACAGGTAGC  
CGCGGTGCAACTGCATACCTTCGACAACGCCAGCTCATCTTCCAGACCCGACCATCTTCAACGGTAAT  
GACGCCATCGCGACCCACTTTGTCCATGGCTTCAGCAATCAGCTTGCCCACTTCTCTCGTCGGAGTTTGGC  
GAGATGGTGGCCACCTGAGCGATGGCATTGCTGTGCGGCGCACGGCTGGGACAGTGGCTTGACGTTTCAGCAA  
CAGCAGCCACAACGGCCTTGTCGATACCGCGCTTCAGATCCATCGGGTTTCATACCGGGCGGCAACGGCTTT  
CAGACCTTCGTTGACGATAGCCTGAGCCAGAACAGTTGCAGTAGTGGTACCGTCCACCGGCGGCATCGTTC  
GCCTTGGAAAGCCACTTCTTACCATCTGGGCGCCATGTCTGGAACCTGTCTTCCAGCTCGATTTTCGC  
GCGCAACAGAAACACCATCTTATGATGGTTCGGGCGCCGAAGGACTTGTCCAGCACACGTTGCCGGCC  
TTTTCGGGCCAGAGTACCTTGCAGGCATCAGCCAGGATGTTTACGCTTCTTGCATCTTGATGATGGGCT  
TCGTTACCAAACCTTAACGTCTTATAGCTGCCATTTTTCTCAATCTTAAATCAATTCGGGAAAAGGAGG  
ATGGATTACTCTTCGACAATCGCCAGGATGTCGGTTTTCGGAGAGGATCAGGACGTCCTGACCATCCAGCT  
TCTCGGTCTTACACCGTAGCCTTCGTTGAAGATAACCTTGTACCAACCTTTCACGGCCAGCGCTTTGAC  
TTCGCCATTATCCAGGATGCGACCAGTCCCCACGGCAAGCACTTACCACGGGTGGACTTCTGGGCCGCA  
GTACCAGTCAAGACGATACCGCCGGCAGATTTGGCTTCAGCTTCGATGCGCTTGATGATGACGCGGTCTG  
GCAGTGGACGAATTTTCATCGATAACTCTCCAAAATGAGTCTCATTTGTTGCTTTGAGGAATGGCCGTTTC  
CAGGCCAAATTAGGTATGTCCCTGATGTGGGGCAGAGTTGCTAACCTTCAAGGGCAAATACAAAAAAA  
AATTTTTACGTACTATAAACATCTTCGATGGTTCAGCCATGTCCGCACCTGGAGTAAGGTGGTTCAA  
GCCGCCCGTTTTTCGATGCCAGAACCTTCAAAGCCAGCTGTAGAGACGAGCCCTTGACCCGCACCAACCC  
ATGTTGACAGCCCTATTCCGGTCTACTGCGCCAGATGACGGGGCCCATGATCTTCGGCATCATCGCCA  
TTCTGGCCTTCAATCTGGTGCATACCTTTTTTATCGGTATGCTGGGCACCGAAGCTCTGGCCGCCATCAG  
TTTTACCTTTCTGTCACTTTTTGTGGTTACCTCGCTGGCGATGGGATTGGGCGCCGGATTGTACAGCGGTG  
ATCGGTCAACTCTGGGGCAGGGCAAACACGATGAGGCGGCCCATCTCGCCACCGACAGCTGTTTCTGG  
CGGTGATCATGGTGGCCCTGCTCTCCGCTGGGGGGGCTCTCACCATCAAGCCTCTGTTACTCTGCTGGG  
GGCCAGTGGCAGCTTATCTCCCTCATCCATGACTACATGCTGATCTGGTATCTCACCGTCCCCATGCTG  
GTGCTGCCCATGGTGGGCAATGCCGCCATCCGGGCGACCGGCATACCAAAACCCCGAGCCTGGTGATGG  
CAGTAGCCGGGCTGGTCAACGGGGTACTGGATCCTCTGTTGATCTTCGGTATCGGCCCTTTCCAGAATG  
GGGATCCGCGGGGACGCCATCGCCACCTCTATCTCTGGTTGATGGCGATGCTGGTCAGCCCTATATC  
CTGCGTCACTCGGGAGGCTTGCTGCTGTGGCGCCTCTCGCCGCGGGCCGGTTGCTGTGCCACTGGCGGG  
CGTTACTCCATGTGCGCGTCCCCGCTCTTTTTACCAATATGCTCAACCCCTGGCCAACGCAGTGCTGAT  
GACGATTTTCGCCGGTCTGGGTACCGAGGTGGTGGCCGCTTACGGCGCCGCATCGCGGGTTCGAGGCCTG  
CTGCTGATTGTGATGATGGCCCTCGCCTCGGTGCTGGCCCTTTTTCATCTCGCAAACTGCGGGCGTGGCA  
ATCCGGCCCGGCCAAGGCTGCGCTGCAAAGCTGCATGAGGTTTTCGCTTGTCTGTTCCAGCTCGCCATCTA  
TGGCCTGACCTGGTTACTGGCGCCACTCATCGCAACCTGTTACGCGATCATCCGAGGTATTCGCCCTC  
ATCATTCTCTATCTGCATCTGGTGCCGATCGGTTACGGCTTTCAGGGCATGGTATGCTGCTGGCCCTCGG  
CACTCAATGGCGTGAGGGCATCCAGTATCTCGTCTTGTTC AACGGATTGCGGCTTTTTGGTTTTCTGTT  
GCCAGGAGCCTGGCTGGGGGCAAAGCTGGGGGGAGAACAGGGGATCTATCTAGGAATACTGCTGGCCAAT  
CTGGCGGGCGGCCACCTCGCATGGTGGTATGCCCAGACCGCTTCGAGGCCCTGTGCCATCAGGGCAAAC  
CCTGATTACAGTCACTCGCCTCGGGTTTTTCGTCTCGTCGATTACTCTTTACGCTCAAATTCGCCTTCGATA  
GTGGTGCCGCCCTGCTTGGCGTTCCCCAGATGATCATCGGACGGTTCGCTTGCCAAACGGCGATTGAGTAC  
GCTGGAAACCGCCCATCTGCATCCGGAACCTGGTTGCTGCCGATCAGCTTGTTCGGCCAGTTTGTTCGCGAG  
CCAGGGCTGCAGCAGCAGGATCCCAGAAAAGTCGGTGACAAAACCCGGAATGATCAGCAGCAGACCGGCC  
AACGCCAGCATCATGCCCCCATACCTCGCGGCCCGGCATCTCGCCATCTGCATCTTTTGTGGGGCGC

TGAACAGGGTCTTGATCCCTTCACTGCGCACCAGCGAGGAGCCCAATACCGTTGTCAGGATGAGCAAGCC  
GACAGTCGGCAGCGCCCCGATTAACGAGCCGACCTCGATCATCACGGTGAGCTCCAGCACAACCAGACCC  
ACCAACAACAAAAACAACCTTGGCCATATCCACTCCAGCACCAGGTACATTGAGAAAAAGTGGCGCCCATCC  
AACGATGGTCAGAGGCGATTTTTGCCGCCCCGTCATCACCACCTTCTGCTCTGAATAAATGGGGGCAGCC  
CCCTATTTTTCAAGTTGGCCAACCTGACACCTACGCCATCAGCAATCTAAAAAACAGCAAAAAGTCACAAA  
AATTTATAAAAAATCATAATGATAAAAACTTCATAACATATGTGTACTTTTTCTCAAAGTAATTTGAAAATG  
TCGCAAATTTAGTGATCCACCTCTAATAACCGATACCTCAATTGGAGTAGTATATTGATTAGTTTTTCGG  
GAGGTCATTCTCCCAACCGCCCCACTCGATGTGTGGTGCTTCAGGATGAGCTGTGCGCAAGGAACCTCGCG  
ACCACTCGGTGAGGATTTTTCCATTTATCTGATTTCTGAGGCATTACAATGAGCGACATCAAGAACGTCC  
GCATTGAAGAAGACCTGCTGGGCACCAAGAAGTTTCCAATGATCTCTACTACGGTGTGCACACCCTGCG  
CGTGTGAGAACTTCAAGATCAGCTCTCAGAAGATTTCTGACGTTCCGGAAATTCGTCGCGGTATGGTG  
CTGACCAAGAAGGCGCTGCGCTGGCAAACGGTGAACCTGGGTACCATCCGTCCTGAAATTGCTGACAAGA  
TCGTAGAAGCCTGCGACCTGATGCTGAACACCGGCAAAATGCTTCGACCAGTTCCCGGTGACGTTTTACCA  
GGGTGGTGCCGCACCTCCGTCAACATGAACACCAACGAAAGTACTGGCCAACATCGCCCTGGAAATCATG  
GGTCTGGAGAAAGGCCGTTACGACGTCATCAACCCGAACGACCACGTCAACAAGTGCCAGTCCACCAACG  
ATGCCTACCCGACCGGTTTTCCGCGTTGCTGTGGTCAACAGCACTGACGTGACTCTGCACGCGCTGGAGCA  
CCTGATCGCGGCAATTCGATGCCAAAGCGAAAGAGTTCAAAAACATCCTGAAGATGGGTGTCACCCAGCTG  
CAAGATGCGGTTCCGATGACCCTGGGTGAGGATTCACGCGTTCGCCGTGACCCTGCGTGAAGAGATCA  
AGTCCATCAAGCGTTGCCAGGAGCTGCTGCTGGAAGTGAACCTGGGCGCGACCGCCATCGGTACCGGTCT  
GAACACTCCGCCCAGTACTCTGCTCTGGCCATCAAGCGTCTGGCCGAGATCACCGGTGCTGCCTATGTG  
CCGGCAGAAGACCTGATCGAAGCGACCTCAGACTGTGGCGCCTACGTCATGCTGCACGGCGCCATCAAGC  
GTCTGGCCATGAAGCTGTCCAAGATCTGTAATGACCTGCGTCTGCTCTCCTCCGGCCCCGCGCACTGCACT  
GAAAGAGATCAACCTGCCGAAAATGCAGGCGGGTTCCCTCCATCATGCCGGCCAAGGTCAACCCGGTTATC  
CCGGAAGTGGTCAACCAATCCTGCTTCAAGGTATTCGGTAACGACATCACCATCACCTTCGCCGCCGAAG  
CCGGTCAGCTGCAGCTGAACGTCATGGAGCCGGTGATTTGGTCAGGCGATGTTGGAATCCCTGAGCCTGAT  
GGAAAAGCCTGTATTTCCCTGCGCGAGAAGTGGTGGAAAGGTATCACCGCCAACCCGAAAATCTGCATG  
AATCACGTGACTGAACCTCCATCGGTATCGTGACCTATCTGAACCCCTTCATCGGCCACCACGAAGGGGATA  
TCGTCGGGAAGATCTGTGCCAGACCCGCAAGAAGTCCGCGAAGTCTTCTTGAGCCTGGCCTGCTGAG  
CGCCGAGCAGCTGGACGAAATTTCTCCATCGAGAACCTGATGAACCCGCAATACAAAGCCAAGCAGCTTTC  
ACCCGCAAGCTGCCGTATAAGCGAGAGTGGGCCGGGATCTTCCCGGCCATAAAGTCAGTTCCCGATTG  
GTCTTTATCCCCAGCCGATCGGGAATTGGCTTTTTTGCAAAATAAAAAACAAAAACTAAAAAATGGAGTT  
ATCGCTATGATTGGAATCGAGTTACTTGTGCTGCTCGCCGCTATCTATCTGGGGGCCCGGATAGGCAGCA  
TCGGCATCGGCTTTGCCGGTGGTCTGGGGGTAAGTATTGACGTGGGGTCTGGGCATGCCCATCCCGAG  
CGATCAACTGGTCAGCTACATCCCTTGGGATGTGATCATGATCATCGCGTCCGTCATCTGCGCCATCGCC  
TGTATGCAACTGGCTGGCGGGATGGACTACCTGGTTCTTTGGCTGAAAAAGCGCTGCGCAAGAACCCCA  
AATACATCACCTTCGCCGCCCGGTTGGTCACTACCTGATGACCATGCTGGCCGGTACCGGTACATACCGC  
CTTCTCCACCCTGCCGGTGTGCTGAAGTGGCCAAAGAACAAGGGATCCGCCATCTCGTCCGCTCTCC  
ATCGCGGTTGTGCGCTCCAGATCGCCATCACAGCCTCCCCGATCTCTGCCGCTGTGGTTGCCTTCTCCG  
GCATGCTCGAGCCATTTGGTGTGACTACCTGACCCTGCTGGCCATCTGCATCCCCCTCCACCTTCCTGGC  
CTGTATCCTGGGCGCCTTCATTGCCAACATGATGGGCAAGCCGCTGGAGCAGGACGAAGTCTATCTGGAG  
CGTAAAGCCAAGGGCCTGATCAAACCTGCGTGGCACTACCAAGCTCGAGATCAAACCGTACGCCAAACTGT  
CTGTCTGGATCTTCATCGCCGCATCGTTGCTGTGATGGCTTATGCCACTGCCATCTCCGGTAAAGTGGG  
TCTGATACCAACCCGCCGATCCCCCGTGACGGCGCCATCATGGGCATCATGCTGGCCGCGGCCACCATC  
ATGACTCTGGTGTGAAACTGGACGCCACTCAAGTGACCAACATGCCGACCTTCAAGTCCGGTATGTCCG  
CCTGTATCTGCGTACTGGGTGTGGCCTGGCTGGGTAACGCTTTCGTGAAAGGCAACATGGACACCATCCA  
GCTGATCGCTGGCGACCTGCTGAACCAAGTACTCCTGGCTGCTGGCCGTTGGTGTGCTGTTCTTCGCCCATG  
CTGCTCTATTACAAAGGTGCCACCACCAAGGCCCTGATGCCTGCCGCACTGGCGCTGGGTGTCAGCCCGC  
TGACTGCGATTGCCTCCTTCGCAGCCGTGAGCGCCCTGTTGCTACTGCCAACCTACCCGACCCTGCTGGC  
CGCGGTAGAGATGGACGACACCGGCTCCACCCGTATCGGTAAGGCTGTCTTCAACCACCCCTTCTTCGTA  
CCGGGCACCGCCACCATCGCCATCGCCGTGGCACTGGGCTTCTTCTTCGGCGGCATCCTGCTGTAATCCA  
TCGCCTGCCGATACCAAACAATAAATCCCCGCCAGTTGGCGGGGATTTTTTTTTATCTCTTAACCTGTGTC  
TTTTGTTGTCTACCAGCAAGAGGGCTGACCTCTTATCCGGATGGCTCAACCACGGCAACAGCAGACACCAC  
AACAACGTGCCAGCAGCACTATAACCAACGCTGCCGGATTGAAGGAGCTGTAGGCCACCATGGTACTCAC  
CACCACGCCAGAAGGCGGGATCCTTTGGCTCAGACCGGATCCAGGGTATCCAGCGGCCAGCGCGGCACGG  
CTTTGACCACCAGAGGCTCGAACACGCCCGCTTTCAGTCGCTGCATACCGGCGTAAGCGATCATGGCGCC  
GTTATCAGTGCAATATTAGTGCGCGGATAGAACACCTCGCCCTTGAGGCTCTCCATCAGCTCGGCCAGC  
TGGGCACGCAGATGACGGTTGGCACTGACGCCACCGGCGACCACCAGACGCGTGAGACCGGTCTCTTTCA  
AAGCACGACGGCACTTGATGGCCAAGGTATCGACCACCGCATCTTCAAACGCCCCGAGCGATATCGGCACG  
GGTCTGCTCATCATACCATTGGCGGCGATGGTGTGGCTGTGAAGGTCTTGAGGCCGGAGAAGCTCATG  
TCGAGCCCTGGGCGATCAGTCATGGGACGGGGGAAGTGAAGCGCCCTTAGTGCCCTTCTCGGCCAGAC  
GGGAGAGCAACGGACCACCCGGATAGTCCAGCCCCATCAGCTTGGCGGTCTTGTGCAACGCTTCGCCAGC

GGCATCGTTCGATGGATTTCGCCAACAGCTGATAACTACCGATGCCGTCAACCCGTACCAGCATGGAGTGA  
CCACCAGAGACCAGCAGCGCCACGAAGGGGAACTCTGGAGCTTTCTCTTCCAGCATGGGGGCCAGCAGGT  
GCCCTTCCATATGGTGGACGGCGATAGCAGGCTTGTTCATGCCATCGCCAGCGAACGACCAATAGTGGC  
GCCACCAGAATGGCGCCAACCAGACCCGGACCCGCGGTATACGCGATGCCGTTCGATGTCATCTTTGCC  
AGTCCCGCCTCTTGCAATGCGGCCTGGATCAACGGGATCGTCTTGCGAACATGATCCCGGCTGGCGAGTT  
CGGGGACGACGCCACCGTAGTCCGCATGCAGCTTGACCTGGCTGTATAACTGATGGGAAAGGATCCCTTT  
TTGATCGTTCGAAGATCGCGATCCCGGTTTCGTACAGGATGTCTCTATGCCCAATACACGCATTGCTAAA  
AAATTTCACTGCTAAAATGAGACGGCTATGGTAACTTCGCGGGTTTTTTAAACCAGAGCGATCTCTGCC  
GGTTTACTTTTATTCCCTGTCCAGAGTATAATTTGCACCATTTTAAGACATGCTGATCGATTGAAGTC  
AGCTAACAAATTTACTACTGAGGTGAAAGGCACATGCCAGTAATCAAAGTCCGTGAAAATGAGCCGTTTGA  
CGTTGCTCTGCGTCGTTTCAAGCGTTCTTTCGAAAAAGCCGGTATCCTGTCCGAAAGTTCGTAGCCGTGAG  
TTCTACGAGAAGCCGACTACCATTTCGTAAGCGCGCCAAAGCGTCTGCTGTCAAGCGTCAAGCAAGAAGC  
TGCTCGCGAAAACGCACGTTCGATCCCGCTGTACTAATCGGGAGATATGCGGTGTCTCTGAAGGATCA  
ACTCAAGGATCATCAAAAAGCTCGCCATGCTTGCCAAAAGATAAAGCACGCTCTGGGAGCGATCCGCTTGTG  
ATGGCAGAAATCAAGCAACGTGAAGTCGATACCCGTATCGAGCTGAATGATGAGGATATCCTCGCTGTG  
TGACCAAAATGGTCAAACAGCGCCGCGATTCCATCAGCCAATTTGAAGCTGCCGGTCGCCAGGATCTCGC  
CGACAAAGAGTCCGCCGAGATCGTTGTGTTGCAGGAATTCCTGCCGCAACAGCTGACCGCAGATGAAATT  
GCTGCCCTGATCGAGCAAGCCATCACTGAAAGTGGTGTGCCGTTCATGGCTGATATGGGCAAGGTCATGG  
CTGTCTTGAAGCCGAAAATTCAGGGGCGTGCCGATGTGCGCGCCGTCACTGCTCAGGTGAAAACCCGCTT  
GGCGTAACAGGCAACTCTCTTGTGTTGGTTCGAAGAAGCCGTGCTTCCCTTGAATGCGCGGCTTTTTTATT  
TTCTCCGCAATGAAACAGGACGGTTATGGCAGGCAGGATCCCCCAATCCTTTATCGACGATCTGCTCGTA  
CGCACAGACATAGTCGAGCTGATCGACTCGCGAGTGCGGCTGAAAAAAGCCGGTAAGAACTACCAGGCTT  
GCTGCCCTTTTTCATAACGAAAAAGCCCTCTTTTACCCTGAGCCAGGAGAAAGCAGTTCTACCCTGTTT  
CGGTTGTGGCGCCCATGGCAACGCCATCGGCTTTGTTCATGGAGTACGACGGTCTCGAATTTCCCGATGCC  
ATCGAAGAGCTCGCCAGCATGCAAGGCATGCAGGTACCTCGCGAGCAGAGCATCGGCGGCTCGGCCAATA  
GCCAGCCCGCCGTACGCAAGGATCTGTTTCGAGCTGATGAACCAGATTGCCCGCTTCTACGAGAGCAATCT  
CAAGAGTGTCTTCCATGCGGTGGAGTACCTCAAGGGACGTGGCTGACCGGCGAAGTAGTCAAGCGCTTC  
AATATCGTTTACCCACCGCAGCTGGGATCAGGTGCGCCGCGCTTTGGTGCCAGCCGATCAGCAGC  
AGTTGCTTATCTCGGGCGCATGCTGATCACCCGTGACAATGGCCCGGGCAGTTATGAGGTTTCCGCGA  
TCGCATCATGTTCCCGATCCCGCACAAGCGTGGCCGGGTATCGGTTTCGGTGGCCGGGTGCTGGGTGAT  
GGCACCCCAAGTACCTGAACTCGCCGAAACCTCCATCTTCCATAAAGGGAGGGAGCTGTTTCGGTCTCT  
ACGAGGTGAAGCAGGCACACAAGGATCCACGCAGGATCCTGGTGGTGGAAAGGCTACATGGATGTGGTGGC  
ACTCGGTACAGTACGACATCGACTATGCGGTGGCGGCGCTGGGTACTGCAACGACCAGCGACCATATCCAC  
ACCCTGTTTTCGCACACCACCGGAGGTAGTCTGCTGCTACGACGGTGAACGCGGTCGTGAAGCCGCT  
GGCGCGGCTGGATAATGCCCTCCCTCATCTGCAGGATGGCCGCGAGCTGAAGTTTCGTGTTCTGCCCGA  
TGGCGAGGATCCCGACTCGCTGGTTCGTGATCGGCAAGGAGGGCTTCGAAGCCCTGCTCGATGAAGCC  
CAGCCATTCGCCGACTTCATGTTTCGAGCGTCTCGGGCAGATGCAGCCCTCTCCGGTGAGGCAGGCAAGT  
TTGAAGTGGCCAACAAGGCCGCCGAACCTTATTCGCCCGGTACCGGAAGGGTTTACC CGCGAAGGGCTGAT  
CACCCGCTATCCAGCATGATGCGTTGGGGCGAGAACAACAACGCATCGCCGAGCTCTTTGCCCGCAAC  
AGTCAACCCAAAGGCCGAGGTAACAACAACCAAGGCAGCCAAAGCTGACGCCACTGCGGGCTGCTCTGGCAC  
TGATGGTGAATATCCGGCAGTAACGGCTGAGCTTCCCCCATGCCGGAATTGGCCGGACTACGCGTACA  
GGGCATCAAGTTCTGCTGCAACTGCACCAGCAGATCCTGGCACAGCCGGTATCACAACCCGGTATCCTG  
CTGGAACACTGGCGTGGTACCAAGGAGGGAGAGATCCTTGTCTCAACTGGCCATGCACGACCTGTTTCGAGG  
AGATCAAACCTCGATCAAGAGCCGGATATTCTGGGAGAATTCAGGACACCTTCGTTCGGCTTCATCAACCA  
GTTTCTGAAACAGCGGATCGAAGAATTCAGGCCAAAAGTGGCTCAGGAAGGACTAAGCTCCGAAGAAACC  
CAAGAGCTGATGATGCTGATAAGAGAGGTGCAAAATGAGAAAAGAAATGAGAGTGGGGCTTGATATTTGA  
GTGATTAGTCCCAATATGGATAGCGTTGCCCGAATCGACGGGATGAAAAGCAAAATTTTTATAACCGCT  
GGCCCCGACAATACTGCGGGCAGGGGTTTTCTCATGACCAGCCGCAACCAGACATAGCATGTCTGGCGG  
TTTTCTATTAGAATTGGCTATTTGCGCAGCAGCGCACTGTACGCGCAACCTAGCAACACCAACCGGATGA  
GTTCTATGGAGCAAACCCCGCAGTCTCAGCTTAAACTCCTCGTTGCCAAAAGGTAAGAAGAGGGCTACCT  
GACCTATGCCGAGGTGAACGATCACCTCCCGAAGACATTTGTGATTCAGACCAGATCGAAGACATCATT  
CAGATGATCAACGATATGGGCATTCAGTGGTTGAAAACGCTCCGGATGCCGATGACCTTATCATGGCTG  
AAGGTGGTACCGCGATGAGGACGCTGCCGAAGCAGCGGCCAGGCTCTGGCATCTGTTGAATCTGAGAT  
TGGTTCGCACGACCGATCCCGTCCGCATGTACATGCGGGAAATGGGTACCGTCAACTGCTGACCCGTGAA  
GGCGAAATCGACATCGCCAAGCGGATCGAAGACGGTATCAACCAGGTACAAAGCTCCGTAGCCGAGTACC  
CCGAAGCAATTACTTACCTGCTCGAACAGTACGACAAGTACGAAGCCGAGCAGCTGCGTCTCTGACAT  
CATCTCTGGCTTTATTGACCCGAACGAAACCGAAGACATGGCACCTACCGCCACACATATCGGTTCCGAA  
CTCGGCGAAGACGATCTGGCCGACGAAGATGAAGAAGACGAAGAAGACGAAGACGAAGATGGCGACAGCT  
CTGACGACGACGGTACGGTGGTCCGGATCCGGAAGTTCGCTCGCGAGAAGTTCCGGCGAACGCTGCCGCA  
GTATGAAGTGACCCGCTCTCCATTGAGAAGATGGTTCGCGCGCACGAAGATACGCAGGCCGCCATCGCC  
CAGCTGGCCGATGTATTCCGTCAATTCCGCCTGATGCCAAGCAGTTTCGATCGCTGGTCAACAACATGC

GTGAAATGATGGAGCGCGTCCGCGTGCAGGAACGCATCATTATGAAGCTCTGCGTTGAGCAGGCCAAGAT  
GCCGAAGAAAACCTTCGTCGCGGCCTTCACCAACAACGAGTGTGAAACTGCCTGGTTTCGAATACCAGAAG  
CAGGCAGGCAAAGCCTGGTCTCCCCGTCTGGTTGAAATGGACGAGGATATCCAGCGGCCATCGGCAAGC  
TGCAGCAGATTGAAGAAGAGACCGGTCTGTGCGATTGCCAGATCAAGGATATCAACCGTCGCATGAGCAT  
CGGTGAGGCCAAGGCCCGCGTGCAGAAAGAGATGGTTGAGGCCAACTTGCGTCTGGTTATCTCTATC  
GCCAAGAAGTACACCAACCGAGGTCTGCAGTTCTGGATCTGATCCAGGAAGGCAACATCGGTCTGATGA  
AGGCGGTAGACAAGTTTGAATACCGTCTGGCTACAAGTTCTCGACCTATGCTACCTGGTGGATCCGTCA  
GGCCATTACCCGCTCCATCGCGGATCAGGCCCGTACCATCCGTATCCCGGTACATATGATCGAGACCATC  
AACAAGCTCAACCGTATCTCCCGTCAGATGCTGCAGGAGATGGGTGCGAACCAGAACCCGGAAGAGCTGG  
CCATGCGCATGGGCATGCCGGAAGACAAGATCCGCAAGGTACTGAAAATCGCCAAAAGAGCCTATCTCCAT  
GGAGACGCCCATCGGTGATGATGAAGATTTCCACTTGGCGACTTTATCGAAGATACCACCTGGCTCTG  
CCAGCGGATGCGGCGACCAGCGAAAGCCTGCGCAACGCCACCCGCGAAGTGTGGCTGGCCTGACCGCCC  
GCGAAGCCAAGGTAAGTGCAGTTCGGTATCGACATGAACACTGACCACACCCCTCGAGGAAGTGGG  
CAAGCAGTTGACGTTACCCGTGAGCGTATTTCGTGAGATCGAAGCCAAGGCACTGCGCAAACCTGCGCCAC  
CCGAGCCGCTCGGAAGTGTGCGCAGCTTCTGGACGAATAGTCTGACCCTGTGTCAAACCTACTCTGCC  
AAAGCCCCGCCATGCGGGGCTTTGTTTTGTCTGGCATTTACCCTTGCAACCCCTCTTTGCGCCCTCAATCA  
AGCTGGACAATTAGTCGCAAGTGGTTGATATGCCTATAGACTGCCCTTCTCTTCCCTATAATCCAC  
GCCGCTAAACGCACAATTTGGCCCCCTTAGCTCAGTTGGTCAGAGCAGTCGACTCATAATCGATTGGTCGT  
GGGTTCAAGTCCCCAGGGGCCACCAAATTAGAAAAGGCCGCTCATCATGAGCGCCCTTTTTGTCATCTGC  
TGATCGGGCAATGTCCCGTGTGAGCTGGATGAGGTCATAGAAAAGACCCGCCATGGGCGGGTCTGGGCA  
GGGTCCGGATCAGGCGCCTCACTCAGAGACAAGGAGCCTAATGCTGAGCCTCAGGTTTGCTCGTTGCTGC  
CGCTCTGGATGGATGAGCGACGCCCCGGCGGGTAGCATCCGAGTAACCAGATTGCTGCGCTGACGCCAGGA  
GGTGAAGACGATGGCCAGCAGGTGCAGACCAATCAGTCCCTGCAGCGCCACCACGCACCACTCATGCCAC  
TCGTGAGCCCCCAGTTCAAATCCCGTCTCGGTATTTTGAACCCAGCCGCTGCCAGCGGTGGCCAGCACA  
CCAGCCAGAGCGCCACACGGCCAGCTTGCCGCTGCCGTGATGACCCGGTGCCGGAGGCTGCCGCTCACG  
CATCTCGCGCGCTTGCTGGCGAAAATCCTCACCCTGGGGATGAGAGCACCAAGGCGAGCGTAGCCACGG  
GCAAAAGTAAGCCCCCAGAGCAGAGCAAGGAGACCAGCCCAATGGCAGCGTAACCCAGCCACTCGTGCC  
ACTCTCTCCCGCTCGTTAACCCAGAGATTGCTGATGAGACCGCCACCAAGCCCCAGTGGGTCTAGGCG  
AACCAGCGGATCCCAGCGAAAGGGCTCACCCCTTTTGTCTGGCATATTTGTGTTACTCTCTTTCAGGTC  
GTTGACCTTGCCAGATGTTTCGCGCGCCTTGGCCTCATCACCCGCTTGAGTGCGGCCAGGCTGGCGTCC  
AGCTCGGTCTGTACCTCGTTCATCCCTTCAAGGAATTTCTCTTTCTTGGCGGCCGGCATGTTCTTCTGCT  
TGGCCACATCCAGCTGGGCCTTCATCTCGTTGATGTGCTTCTCCATGGTGGCTGCATCATCAGCCTTGAC  
GGCCTGCTTGTAGTTGAAGCCAATCTTCTTCATCGGCTGTTCAGATCACCCGCCACGGCAGGCGAGGTC  
ATCAGGCCAAACATCAGGGGCAGCAGCAGGGGGCGGACGGTTTTCAACATGGGATTTCTTATATAACGA  
CATGCTCGAATTGTTAGGGGTACTTATGAATCCAAACAAGAAATTCATCACCAGCATGATGCCATGACTCA  
TGGTGAACGTTTTGTGAAAATGCTGTTTTTTGTGGCAAATAGTGACAGATATGCCGCGCTTGTGTTGCGC  
TTGGTAACTGACTGAACGCCGGTGACGCGCACCATGGGGATGGTTGAAAGCGGTAAACAGGGACAAAAAA  
CCCCGCAGTAGCGGGGTCTGAATCAGCTGGCCATTTGCTGGCGTCAGTTACTCCTGTTTCGCGAGCAATGG  
CGCGCCAGCCGATATCCTTGCGGTAGAAGACGCCATCCCACTTGATGCGGCCAGCGAGCTGATAGGCACG  
CTGCTGGGCTTCTGCCACAGTGTGGCCGAGGGCGGTGGCGCACAGTACACGACCAGCCAGCGGTGAGGCTG  
GTATCGCCCTCCAGGCGGGTACCGGCATGGAACACCTTCTCGCCCGCCACTTCATCCACCGGCAAGCCGC  
TGATGGGGTGATTGGTACTGTAATCGCCGGATAGCCTCCCGCCGCCAGCACCACGCCGATAGCGGCGCG  
GGGATCATAGATGGCCTCTTTCTGATCCAGCTTGCTGCGCAAGCGGCCAGACAGAGCTCCACCAGATCG  
GACTGCATCCGCAGCATGATGGGCTGGGTCTCGGGATCGCCGAAACGGCAGTTGAACTCGATCACCTTGG  
GATTGCCTGCGCCGTCGATCATCAGACCGGCGTAGAGGAAACCGGTGTAGACGTTGCCCTCGGCCCAT  
GCCGCGCACGGTCGGCATGATCACCTGCTCCATCAGCGTCGATGTACCTCGGCGGTCACTACCGGCGCC  
GGGGAGTAAGCCCCCATAACCGCCGGTGTGAGGCCGGTATCACCGTCGCCAACCCTTGTGATCCTGAC  
TGGTGGCCATCGGCAGCACGTGCTCGCCATCGACCATGACGATGAAGCTCGCCTCTTCACCCTCCAGAAA  
CTCCTCGATCACCACCCGGGAGCCGCTTCGCCAAAAGGCATTGCCGGAGAGCATGTGCGCGCACCGAGTCT  
TCCGCTTCTGCAAGGTGATGGCAACAATCACCCCTTGCCCGCCGCCAGACCATCGGCCCTGATGACGA  
TGGGGGCGCCCTTCTCGCGCAAGTAGGCGAGTGCAGGCTCCACTTCGGTGAAGTTCTGGTACTCGGCAGT  
CGGGATGGCGTGACGGCCAGGAAATCCTTGGTGAAGGCCCTTGAGCCTTCCAGCTGGGCAGCGGCAGCA  
GTCGGGCCAAAGATGGGCTGACCGGCGGCGGAAAGGCATCCACCACCCCTTTCACCAGCGGCGCTTCCG  
GCCCCAGCATGGTGAAGGCCGACCTGCTTCTCTTTGGCAAAGGCCAGCAGCCCTTCGATATCGGTGCGGCC  
GATGGCAACGTTCTCGACACCCGGCTCAAGCTGGGTGCCCGCATTGCCCGGAGCCACAAAAACGTGACGT  
ACCAGTGGGGAGTGTGTTAGCCTTCCAGGCCAGGGCGTTCGCGGCCACCGTTGCCAATGATCAGTACTT  
TCATCGTATCGCTCGCTTCTATTTGTGGTCACTGGACGGCCACCCGGGCCGTGAGTCAGCGGAAATAGTC  
AGTTGAAAAGAGACAACAAGGGCCGCCATCGGCAGCCCTGACCCATCAATGACGGAAATGGCGCATG  
TTGGTGAAGACCATGCACATACCGTGTTCGTGCGGCGCATCGATCACCTCCTGATCGCGCATCGAGCCAC  
CCGGCTGGATCACGAGGAGATAACCAGCCTGAGCGGCAGCATCGATAACCGTCGCGGAACGGGAAGAAGGC  
ATCGGAGGCCATCACGGAGCCCGCCACAGTCAACCTTCGTCCGCGCCTTGATACCGGCGATTTTGGCC



GAATAAACACGGCTCATCTGGCCTGCGCCGACGCCGATGGTCTGGCCATCTTTGGCGTAGACAATGGCGT  
TGGATTTGACGAACCTTGGCCACTTTCCAGCAGAACAGCAGATCCTGCAGCTCTGCCTCGGTGCGCTGACG  
CTTGCTGACCACGGTCAGGTCGCCCAGCGTACCATGCCGAGATCTCGCTCCTGTACCAGCAGGCCGCCG  
TTGACGCGCTTGAGGTCAAAGCCTTGGCGCCGGTGCCGTCCACTGACCGCATTCGAGCAGACGCACGTTCT  
GCTTGGCGGGCAGCCGACGCGGGCCCTCCTGGCTGACGGTGGGGGCGATGATCACCTCGACGAACCTGACG  
CTCGACGATGGCAGCGGCAGTGGCGCCATCCAGCTCACGGTTGAAGGCGATGATGCCGCCGAAGGCAGAG  
GTAGGATCAGTTTGGTAAGCCCGGTTCGTAGGCACTCAGCAGGTCGTTACCGACGGCCACGCCACACGGGT  
TGGCATGCTTGACGATGACGCAGGCTGGCTCGTGAACCTCTTACACACTCCAGCGCCGCATCGGTATC  
GGCGATGTTGTTGTAGGAGAGCGCCTTGCCCTGCAGCTGGATAGCGCTGGAGACAGAACC CGGAGCGGCA  
TGCTCTTCGGCGTAGAAGCGGCTGCCTGATGGCTGTTTTCGCCGTAACGCATGTCCTGCTTCTTGATGA  
ACTGGCTGTTGAAGGTGCGCGGGAAGCGGACTCCTGTCACCTCCTTGTGTCACCGTAAGAAGGAAC  
CATTGTGCCAAAGTAGTTGGCGATCATGCCGTCTAGCAGCGGTGTGCTCGAAGGCTGCGATGGCCAGA  
TCGAAACGGGTGCGCAGCTTCAGGCTGTTGCCGTTGGCATCCATTCGCGAATAACCCGATCATAGTCGG  
CAGCTTTGACGACGATAGCGACATCTTTATGGTTTTTTGGCGGCAGAACGCACCATGGTCGGGCCGCCGAT  
GTCGATGTTCTCGACCGCATCGGCCAGGGTGCAGCCCGCTTTGGCCACGGTGGCGGCGAAGGGGTAGAGG  
TTGACGACAACCATGTCGATGGGGGAGATAGCGTGTGGGCCATGATGGCGTCATCCTGATCCCGACGGC  
CGAGGATGCCGCCATGAACCTTGGGATGCAGGGTCTTGACCCGGCCATCCATCATTTTCAGGGAAACCCGT  
GTAGTCGGAGACCTCGGTACC GG CAGACCCGCTCGCCAAGCAGCTTGGCGGTACC GCCCGTGGAGAGC  
AGGGCAACACCACGCTCGTTGAGTGCCTTGGCAAATTCAGAATGCCAGTTTTTGTGACACACTCAGCA  
GTGCACGGCGAATGGGTGCGAGCTTGTTCATCACACTATCGTCTCAACATAACGGGGACCGTTCATGG  
GAGGCGAGGCTCAACACAGAGAGTCCCCAAATAAATGGAAGTGGGGGATTCGCAAACCACTCTCGCCCC  
GACATCCGGCAAAGCGTTTTTAGGAAATGCCCGCTTGGTGCGGCGCTCTGTTATGGGCGCGTATTCTACA  
CAAAAAATGTGACCTGTGGTGGATTTTTTGAACAGCAAAGCCTTATTTGGCGCGGCGTTAAACGTTTTTC  
CACTCGATCTGCTCGAAACGTTTGCACTTTAGTGTTTTATGGGAAAAAGGGTCGCCAGGAGATGTTTTAT  
CTGCCCTTTTTATGCCCTTGGCTGGCAATCCATGGGCAAAGGGGTGATAGTGGAATCCGGTTTTTTGTGGC  
GGCATAATTCAAGGGGAGAGAGAGCATGTATCGGATCGGTGAACTGGCCAAGGCGTGCGGGGTCAAGGC  
AGATAACCTGCGTTTTTACGAGAAGAACGGGCTTATCTCACCGGGGATCCGCAACGAATCCGGCTACCGC  
CTCTACAGCGAACAGGACAAGCGACGGCTGGAGTTCATCATTCGCGCCAAGTCGGTGGGATTTCTCGCTGG  
CCGATCTCGGCGAACTCGACCTCGATACCAACAACGAAAGTCACTGCCAGGAGGTGAAAGCAGT  
GGCCGACACCAAGCTGGCCAGGTGGAGAAGAAGATCATCGAACTGACCCGCTTTCGCGACAATCTGCGC  
GAGCTCTCCAATATCTGCTGCGGCGGGCCGCGCTCGGCGGAGCACTGCGCCATCCTCGAGACGCTGGAAT  
CTGGCGCCCCGGCCATCACGAGCATCACAGCCACGACCAGCATGACCCGGTTCACGGCTGACGTGGTAT  
GTCTGACTGAGCGTGCCTGGCTCAGTGTGACTGACTCGGCGCGCCGACGCATTCGCTCCTGCGGCGATTT  
GGTGACAAAATCGCCGCGTTTTTAAACGGTGCAGTGCATCCGGTTGCCGGGAGCTCAGCTGAACAGGCG  
CTCGCAGCGAAAACCACCATCCAGACACAAGAATCAACACACCAAGAGCAAAGAAGAGGAGCCATCATGG  
CCAAAATTCGGGTGACCAACCCGCCCTCCCCGTGAGGAAAATGCGCAAGGGGGCAACTATGCCCATCA  
GCGCGGCGAGATAAAGGATAACCATCTGCATGCCCTGCTCTCCGATCCCTGTTTTGCGAGCCGGGTGCGAG  
CGCAACAAGAAGGGCAAGGGGAGTTACCAGCGCAAGGCCAAATTTGGCAAGCGGTGGGAGCCCGGCCAAC  
AGCAGATGATCCGCGTCTGCTGCTGAGCGGGTTTTCTACCGACCATAAACAATCAGGGCGCCATGGGCGCC  
CTGATTGTTTTATGTTCTCTGGTGTGATAGCTCCCAATACTGGGGCTAGAAGGCTGCCAGATAGTAACCAT  
TTATTTTTCTGTTGAATGCCACACCAATCGAGGCTGGACTGTTTACCTTGGATAATCAGCTCGTTCTTACC  
ATCATCGCGCAGGTAGAAATGGTGGTTTTTACCACGTCGGTCCACAGCTTGAAAGTAATAGTCACTTTGC  
CAACCGAGCTGCTCGTTACGCCACAAAAGGAACTCACCTTGTCTATAGGTCACTGTCACTGACTTGGCCT  
TGGCTATCGCTGGACATAGCAGTGCCAGCTGGCCAAACCTCTGTTTAACTGCATCAGTACGATCGACTCC  
GTCATTATTGCCACGACGCTGATATTAACCTGCTGCTTGGTTCGGCATAGCTAAATAGGCAACACCCGTA  
CCAATAAGCGGATCACCCCAATACAGCCCAACAAAGCCGTTTATCTTTGTCATCTCCGCTCTCTTTT  
GCTGTAACCTCACTGGTGTACTGCCTTCAAGGTAATGACACATATCAGCCTCAAATAGAAGAAGTTTCGCC  
AACCACCGCTCACTCATCCATAAAGAGTTTCGAGCAATACGTTTCAGATAGCGATGACCGAGGGAGGTAAGC  
TGCCAGCTATCCCCAGATCCTCGATAAGCTCCTTGCTTTGGGCGATGGCGAGCACTGTCTCGACCCGCT  
CCAGTGGCAAGCCGGTATAGGCTCGAACTCCGCCTTGGGGGCGGTTCAAACAGGGCGGAAGCGGTTTCAT  
AAAGTATTCGAGCGGCAGATCGTCTGCCGTCACTGCCACTGCTCGTCCAGATAGGGGCGGCTCTTGTC  
AGATAACCTTTTCGGATGCTTACCTTGGCTGTGCGCAGGATCTGCTGATCCGCAAGATCAGTCACCTTGC  
CATGGGCGCCACAGCCGATCCCCAGATAGTCGCCAAAGCGCCAGTAGTTGAGGTTGTGATGGCACTGGTA  
GCCCTCTTTGGCATAAGCCGAGATCTCGTACTGGCGATAACCGCTGGCGGTGAGCATGGCGTGGCCCTGC  
TCGTAGATGTCCACAGGGTGTCTATCTTCCGGCAGCTTGGGTGGTTTTGGAGGCAAATGCCGTGTTTCGGCT  
CTATGGTGAGCTGATACCAGGATAGGTGCGGCGGGGCGCAGTCGATAGCCTGCTGCAGGTCAATAAAGGGC  
ATCATCCAGACTCTGATCCGGCAGACCATGCATCAGATCCAGATTTGAAGGTAGGCAACTTGATGGCGTGG  
GCCAGTGCCGCCGCTTGGCGCCTCTTCCGGGCGGTGAATGCGACCGAGGCGGGTTCAGCTTCTCCTGCT  
GGAAGCTCTGCACCCCGATGGAGATGCGGTTAATAACCGGCGCGCTGGAAACCGGGCAACTTGTCCGCCCTC  
TACCGTGCCCGGGTTGGCCTCCATGGTGATCTCGCAATCTGCGGTGAGCGGAATGCGGGCCCGCACCCCG  
TCCAGCAAGGTTTTGCATCGCCTCCACCGTCAGCAGGCTGGGGGTGCCGCCCGGATAAAGATCGAGGAGA

CGGGCCGCCCTTGTGCCACTTCAGATCCTGATCCAGATCCTCCAGCAGGGCAGCGACATATTCTAGGTG  
AGGCAATTCCCCCTTCTGGGCATGGGAGTTGAAGTCACAGTAAGGGCACTTCTGGACGCACCAGGGCACA  
TGAATATAGAGAGAGAGCGGGCGGCAGTTGCAGCATGGGGCTTCCAATAAAACGGGGGCTCAAGCCCCCA  
TTGTAGATGACTATGTGTAATTGACCGTGTGTAACCGACAAGGTGGCGAAGTGACTCAGTGCGCCGCAGC  
CAGCGCCGCTTTGAGCTTGGCCAGCGCTGACCGGATGGCTGAGCTGGTTCTTCAGCTCGGCGGGCATT  
TGGGCGGGGTGCAGTCGTGCTCCGGCACGAAGAATACCGGGTCATAGCCAAAACCGTGTGACCGCGTG  
GCTCGTCGATGATCATCCCTTCCAGCTCGCTGACAGATGATGGGGTGGGATCGTCGGCGTGGCGCAT  
ATAGACCAGCACACACCAGAAGCGAGCGCTCTTAGATACTCGGGGGCACCTTGCAGCTCACCAGCAGC  
TTCTCGATGTTGGCCTTGTACCGGCACCCACACCGGCAAAACGGGCGGAGTAAACGCCGGGGCGCCCTT  
GCAGAGATCGACTTCCAGACCGGAGTCATCGGCCACGGCGGGCAAACCGGTAATGCGGGCGGCGTGGCG  
GGCCTTGATGATGGCATTCTCGACGAAGGTGGTCCGGTCTCATCGGCATCGGAGACCGCAAACCTCGCTC  
TGTGGGATCACCTGGATCTTCATATCGGCCAGCATGGCGGCAATTCCTTCACCTTTTTCTGGTTACCTG  
TTGCCAGGACAAGCTTGTTCATCGAGCACCTCCGCAAAAATAATCTGCGCATTCATGCGGCGCAAGCGT  
TTAGTAAAAGCGTCAATTACACCCGCTGTGATGGGGTTACGGGGGATTTGCCGCCATCGAATAACCAGCT  
TTTTAATACATGTTTCCATAATGGAATAACCAAAGTGATTAATAACCATTTCTATTCATTACTGTGAGTC  
AGTAGACTCGCGCCCCAATTCATTAACCTGGCTGACTAAAAGAGGTGACAGATGCCATTGATACTTTTACT  
CGTACTACTGGTGTGTTTCACTCCGCTGGCTATCGACATCTACCTGCCCGCCATTCGCGAGATGGCCGAG  
CAGCTAGGCGCCGAAGTAACCTGATGCAGGGCACCATCACCTGGTTTCTGTTTTCAGCATGGGACTGGGGC  
AACTGCTTGTGGCCCGCTGGCCGATCGTTACGGTCGCAAGCCTATCGCTCTGGGCGGCGTGTGCTCTA  
TGGCCTGAGCGCGCTGGGGGCGGTTTTGCGCGAGCCTCGGCGAATTGATGCTGGCCCGGGTGTGTCAG  
GGCTTCGGCGCCTGCGCTACCTCGGTGCGCCGCTTCTCGGTGGTACGTGACAGCTACGGCCCGAAAAGA  
GCGGTGAGATGATCTCCTATCTCAATGGCGCCATCTGCTTTATTCTGCGCTGGCGCCCCCTGCTCGGTGG  
CTGGCTCACCGCCAAGGCGGGTTGGTCTGCCAACTTCTGGTTTATGGCCGGTTATGCGCTCATCGTCGGC  
AGCTGGCTGATGTGGCGGATGCCGGAGACCCGCCCGGAGGAGACCCGCGAGCGAAGGGGCTCTCATCAGCT  
GGTCTCGCTACAGCCCGGTGCTGCGCTCCCCAGCTTCTGTTCAACGCGGCGCTGTGTCATGCTGGCGAT  
GGCGGTGATCCTCGCTATGTACCGCCGACCGGTGACGCTAATGGTGAAACTGGGGCTGGATATGAGC  
GGCTTATGCTACTGGTTTACCGCCAACGCCGCGCTCAACATTTCTGGCTGCTTCATGGCGCCGCTTTTA  
TCGCCAAAGGTAGGGCAAGACGCACCCCTGCGCATAGCCCTGCTGGTGTGATGCTCTCGGCCATCACTCT  
GACTTTGGCCATGCACATCGAGCATCCGCTGGCGATGATGGGGCCGTTATTCCTTCCAGCATCGGCTTT  
GCCATGATTCTGGGCTCGGCCGCCGGGATGGCGCTGGCACCGTTTCGGTCACTGCGCGGTACCGCCGCCG  
CCCTGCTCGGCTGTTCCAGATGAGCGGCTCCGGCGCCCTGGTTGGTCTGACCGGGCGCCCTGATGCACGA  
CCCGCTCAGCCAGCTGGCACTGCATATGTGGTACTGCTGCCGCTCTGGTGATGCTGATGACCCGCCG  
GGCCGCCGCTTGTGTTTGAATAAATCCTGTGCTCTGATGGGCACATTCGGGGGGCCATCGGCCCCCTTCT  
CGTTTGTATCGCCTTTACAGCATATGGCCATCCGGCAGAGAGCTGCGATGGCAACCCCACTCACTCGAT  
GTCAGCGGAGAACTCCAATGAGCCACACTCTCAACGCAGCCCTGGTGGGCTATGGCTTTGCAGGCAAGA  
CCTTTCACGCCCCCTTCTCTCCACCACGCCGGGCTTGTCCCTCAGTTGGGTAGTGAGCCGCGATGCCGC  
CAAGGTGCAGGCCGATCTGCCCGGCTGCCGGGTCCGTTCACTGGAGGAGTACTGAGCGATGAGACCGTC  
GATCTGGTGGTGTGATCGCCACCCCAACGACACCCATGCTCCCCCTCGCCCGCCAGGCGCTGCTGGCAGGCA  
AACATGTGGTGTGATAAGCCCTTTGCTCTGGATCTGGCAGAAGCGCAAGCACTGGTTCGAAGTGGCCGA  
AAAGCAGCAGCGGCTGCTCAGCATCTTCCACAACCGCCGTTGGGACGGGGATTTTCTCACCGTGCGCCGT  
TTGATTGCCGAGGGGACGCTGGGACAGATCGCCCAGTTCGAATCCCACTTCGATCGCTATCGCCCCGAAG  
TGCGCCAGCGCTGGCGCGAAGCGGGTGGCCCGGTTCCGGCTCTGGTTCGATCTCGGCCCTCACGTGCT  
GGATCAGGCATTGCAGCTGTTCCGCCAACCGGACTGGTTGCAGGCCGATCTGGCCGAGCAGCGCCCCGGC  
GCACTGGCGGACGACTACTTCCATGTGGTACTGGGTTACGGTGTCTGCGGGTTATTCTGCATGGCAGCT  
GTCTGGTTTTCAGCCACCATGCCGCGCTTGTGATTCACGGCAGCCAGGGTTCGTTTCGTGAAATTCGGTAT  
GGATGTGCAGGAAGATCAGCTCAAGCTGGGCAAGCGGCCACCAGCAGCTGATTGGGGCATGGATAGCGAA  
CCCGGTGAGCTCAGCCGATTTGTGATGGTTCAGTTACAGCAGCAGAGCGTGGTGGGTGAGGCGGGGATT  
ATGGCGCCTACTATCGCGGTGTCTGCGCCGCCATCAAGGACGAGGGAAGCAACCCGGTGGCAGCAAGTGA  
AGCGCTGGCGGTGATGGCACTGCTGGATCTGGCCGTCAGAGCCACCTTGAGGGAAAACGGCTGCCCTGT  
CAGAAGCTGTCTGACTAAGGTGCGGGTTCATCGGCCGCTATTGACCAACCTTGACCTTGTAAATCGCCAC  
AAGATGGCAGCAAAGTGGTGTTTTATTGTGCAATTAGTGTGATTTAACGGCATCTTGTATTGATATCAGT  
CGTTGCAGTGGAGCTTTTTATCCACGGCACGAAAAAATGTGATTTGTGATATCCGTTTTTTCATCGGTAAC  
ATGGGGCTATATTGCGCCCGCTGCTGCCTCCCGCTTCTTGTTCATAACCGGCAACGGTGGGCGCTG  
TGATGGTTGCACAGACCATCTCTCCATATTTATTTGAGGGAATGCACATGAACAAAGTACTGGTAGCCGG  
TATCCTGGGTCTGATGTTGACTGCTTGCGGTCAGAAAAGAAGAAAAAGCTGCCGCTCCTGCTGCTGCCG  
GCCGCCGAAGTTGCTGCCACTGTAGAAAAAGCCGCTAGCGAAGCCACCTTACCCTAGAGAAGGCCACCT  
CCGAAGCGACTGCAACCGTAGAAAAAGCTGCTACCGAAGCCGCTACCAAGGTTGAAGCTGCAGTGAAGCA  
TGCCAAGGCCAACTAAGCCTGCACCTCATTCGAAGACGGGTCCGAAGGCAACTTCGGGGCCGTTTTTTTTA  
TCTGTGCTCAGGGCGCCGATTAATCAGCGAGGTGAGGATGTGATCCTCCCAACGGCCATTGATCATCA  
GATACGCCCGCTCGAATCCCTCACGCTCGAAGCCGAGCCGCTCCAGCAAGGCGCCACTGCGCTGATTGGC  
TGGCATATAGCAAGCCATGATGCGATGCAGATCGTGCTCCGAAACAGGTAGTGCATGGCGGCTGACAGC

ACCTCTCTCATCACCCCTGCCCTGATGCTGCTGGTCGATGGC ATAGCCAGATGACACGCCTTGAAGA  
CCCCCATCAGGATATTGCTGAAGTTGCAGGTGGCGATCACCCGCTCGCCAGCCGGATCGAGGGCCACCAG  
ATTGACGCCGGTGCCGTTGAAGAACTGGCTGTAGCTGTCTGCAGCCGGGCATGCCAGTAAGAGAGGGTG  
TAAAACTGCTCGTCCCGAAGCGGCTCCCAGGGGGCGAGATGGGCGCGGTTGCGCCGGTAGAAGTCGAGCA  
TCATGGAGGCCCGATCCGGCGACAGTATGGTCAGGTGGGTACGGGCCGTCTTGATATGTGGCAGCGACAT  
CAGGACTCCCTCTGTCTTAGCCACTCATCGCGCAGCAAGCTGTAGTGGGCATGGTCCACAATCCGGTTGC  
CCAGCCGCTCTGCGCGCCGGGTACCCCTCTTGCTGCATCCCTAGCCGCTCACAGACGGCTCTGCTGGG  
CTCGTTATCGGTGGCGGCGCTGATCTCCACCTTCTCCATCCCCATCTCCTCGAAGGCGTGGTGGATCAGG  
GCCTGACAGGCACGGGTGATGATGCCGTTACCCTGCCATCGCTCCGCCAGCCAGTAGCCGATGACCACCT  
TGCCAAGGTCGTGATCGATGCTGTTGTAACCTATGACCCCCACCACCTCCCCCTGATACTCGATGGCGGT  
GGTGAGCCCTCGCCGCGGCAACTTCTCGATGGCATACTGCGAATGAAGAGGGCGCTGTGACGGGGCGC  
TGGATCAGTGGCGGCCAGGCGAGCCACTGGGAGAGTACTCCCGTTGTCAATTGCAGAGGGCAAACAGTT  
CGCTCGCCATATCGGGCTGCAAGAAGAGCAGCGCAAGCTCGTCTGTCCTGCAAGGCGTGGTGGATCAGG  
CTCCTTTCAAATCAGTGATCAAATCGCGAACCCAGCACCCAATGTAGCCAATCGCCACTGGCCGCGCCAGC  
CACTTTTACGGCCCTCATCCAGCAGGCTTCGCGAGGGGTGACTGCGCACGATCTCTCTCCCTCAAAGA  
GGAGGGTGGGTGTCTGAAACCGGATAATGCTCTCCACATGGCGCCGACGAATGCCCAAAACGGCACTTT  
GGCAGATCCTGCTACCCCTTTGTGCTGCGCTGTCACTTTTGACAGGGGGCACTTTCCCCACCAGGCACTA  
GCTTCAAACGCCCGACCTTCGGTCCGTTTATCAACCTCATCGATTTAAGGAAAGAAGAGATGAATAAAA  
TTTATCTGGCCGTTGCGCTGGCTTGTGCGGGAAGCGCCGCACTGGCGGCGCAAGAGGTAGAGATCAACGT  
AACGGCAAACGGCATCCGGGCCATGACAGGCCCTCAGTGCCGCGAGTGGTACCTTGCAGCTGGAAGATGGC  
GAGTTTCGTCAGGTGCGGGTGGTCAAGCTGCCCAACGGCCAGCAGCGGATCCGCTACGAGCAGGTCTGGA  
ACGGCATCCCCGTAATGGGTGAGGTGCTGCGTGGCTGACAAGAGCCTGAACGGCCAGCTGCAACAGGCCAG  
CGGGCGCATGCTGCGCCAGATCGATCAGGATGTGGCAAGCCCCGGCCGCCACCCTCTCGCCACAGGATGCC  
GCCAGCAAGGCCAAGGCGGGTAGCAAGGGGAGCAACGAGCAGGTCAAACCTCTACGTGATGCAGGATGAGA  
ACGGGCTGGCCCGGCTGGTTTATCAGGTCTCCTTCATCGCCGAAGGTGACAAGCCAAGCCGCCCTTCGT  
CATTCTTGATGCCAGAGCGGTGAGGAGCTCAAACGCTGGGAGGGGATCAACCACAAGGACGCCACCAGGC  
CCCCGGGGCAACATCAAGACCGGCAAATACTTTACGGCGCCGACTTTGGCCCGCTCATCGTGGATGACA  
ACTGCGGGATGACCAACCGTCAACCTCAACCTCAACCAACCGCCACCTCAGGCGGTGCCATCCA  
CCAGTTCACCTGCCCGGAGAACCAGGCTCAAGGAGATCAACGGCGCTACTCGCCCTCAACGACGCCAC  
TACTTCGGCAACGTGGTGTTCGACATGTACCGCAACTGGTACAACACGGCGCCCTCACCTTCAAACGTA  
AGATGCGGGTTCACTACAGCAAGAATTACGAGAACCGCTTCTGGGATGGCAGCCAGATGACCTTTGGTGA  
CGGCGCCACCACCTTCCACCCGCTGGTGAGCCTCGATGTGGCGGCCACGAGGTGAGCCACGGCTTCACC  
GAGCAGAACTCCGGGCTGATCTATTAGGGCAATCCGGCGGCATCAACGAGGCCCTTCTCCGATATGGCCG  
GGGAAGCGGCCGAGTTCTACATGAAGGGGAGCAACGACTGGCTGGTCCGGGCGCAGATATTCAAGGGAAA  
CGGCTCCCTGCGCTACTTCGAGGATCCGACCCGGGATGGCAGATCCATCGGCCATGCGGCGGATTATCAG  
GAGGGGATGGATGTACACCACAGCTCAGGGGTCTATAACCGCGCTTCTACCTGCTCGCCACCAGCAGTG  
GCTGGAACACCCGCAAGGCATTTGAAGTGTCTTGTGTCGCAACCGCTTACTGGGGCGCCAACACCAA  
CTACCAGCAAGGGCCCTGCGGCGTCAGCCGGGCGACCGCCGACTGGGTACAGTCAGGCGGATGTGGCA  
CGGGCCTTCCAGACCGTCCGGGTCGATGCCAGCTGCGGCACCACCGCCACCAGCGACAACGTACTGC  
AAAACGGCGTGCCTGGTGAACAACCTCGCCGCCAGCAAGGGTGGCAAGCTCAAACCTACACCTGAACGTACC  
GGCGGGCACCAGGTGCTGCGATCAGCAGCAGTGGCGGTACCGGTGATGCCGACCTCTACGTCCGCTTT  
GGCAGCGCCCCACCAGCAGCAGTTACGACTGCCGTCCCTACAAGGGGGGCAATAACGAAAGCTGCTCGT  
TCACCAATCCCAAGGTGGGCACCTGGCATGTGCAGCTGTCAGGGTTGCAGCGTTCAGCGGCGTGACCCT  
CAAGGCCAACTACTGATCCACCCGATGCGGGCCTTGTCCCGCATCGCTTACTCATTGCGCCACCCTTTC  
GCCAGCGTGGGGCGGTGGCCAAACCGGTTTCCGGGGCGGGTTGGGGCGCTTGCCACCTCGCCACGCCA  
TCATCAGATCCCAATGCTCCTGCGGCAGATTGCGCACATCGAGCCTGACCAACCGCCACCTCCAGATC  
CCGCTTGATGGCCAGCTCCGGCATCAGAGTGATAAAACCGTGTTCAGCGCCAGATCCCGCGTGCACCTG  
GCAGGCTGCACCGCATGCAGGGGGCTGGCGGCCCGCCGACCGCCGCAACTGCTGGATAAAGACGTAC  
ACCCCGCCCCCATACTGGGGCGCCAGCCGCTGGTCCGGCAATATCCTCTAGGGTGAGGCCGTGACAACC  
GGCCAGCGGATGCAATGGCGAGGCGATAGCGATAATGGGAGAGCAGCAAAGCAGCTCCATCTGCAGGCCA  
GCAACCGGGCGGGCGCTTGAGCACAAAGCCGATATCGGCCTCGCCGGTCCAGCAGCGACTGCATGATCTCGC  
CGGAGTGATCCGTGGTGCAGCGGATTTGCAACGGCTCATCCACCAGCTCCATCAATAGCGAGCCAAACAC  
CACCGAAGTGAGGGATGGCAGGCTGGAGAGACGGATAACAAGGCAGCGCAGGCGCCCCCTGCAGTGCCAGC  
CGCCCTTCGCTCAGGATCGCCAGCGCAGAGCGGGCCGATGGCAGAACTCCTCGCAGGCACGGGTGCGCG  
TCACCCCGCTGATGACGCTGAAACAGCGGCGCCCCGAGGCTTCTCTCCAGCTGGGCAATCCGCTGGCT  
CACCAGCGGCTGTGACCAGCCACGAATGGCCGCGACCTGACTAAAACCTGCCAGCTCGGCCACATCCAGC  
AACAGTTGCAGATCGTCCAGATCCATAGACATAAAATAATCCTGATATGAAATATAGGTAGTTGTGCTCTA  
CCACTATATCTAAACCTCTCCAGAATGAAGTTATCTGTAATGAGAGGGCGTTATGGTCGATAGGGCGA  
GGTTTTGGGGACGCTGGTTTTCTGGCGCTGGATAACCACACTGGTGATCCTGGGTTTCTTTGTGGTGTGTC  
GATGATCAGCCTGCGCTTCGTCGATCAACTCGGCTGGGCGGCCGGTCTGGTGGGGCTGGCCCTCGGCC  
CGCCAGCTGACCCAGCAGGGACTGGGGATCTTCGGCGGCTCCCTCGCTGACCCTTTGGCGCCCGCTGC

TCATCGTCACCGGCATGCTGTTGCGCGCCGTCGGCTTTGCCACCCTGGCCTGGGCGACAGCGGGCCAT  
GCTGATTTTCTCCTGCTTCTCCTCCGGACTGGGCGGTTGCCTGTTGACCCGCCACGGGCGGCACTGGTG  
ATCAAATTTACCCGTCCCCATGAGCGGGGCCGCTTTATCTCCCTGCTGATGATGCTGGAGAGCGCAGGCG  
CCGTACCCGGTGCCCTGCTCGGCAGCTGGCTGCTGCGCTTTGACTTCACCTACGTCTGCCTGCTGGGGG  
CGGACTCTTACCCCTGGCGGCTCTCTGCAACTGGACCCTGTTGCCCGCCTACCGCCTCTCGGTCAAACCG  
ACTCCGATGCGGGAAGGGTTGGGGCAGGTGCTGGCGGATCGCGCCTTCTGCCGACTGGTGCTGATCTTAA  
GCGGCTACTACATGCTGTGGGTACAGGTGATGCTGATTTTCCCCATTTCTGGTCAAGCAGCTCTCCGGCAC  
AACCACTGCAGTGGGCTGGATGTACAGCCTGGAACGGCGCTGTCACTGGCGCTGCTCTACCCTATCGCC  
CGTTTCAGCGAGCGGCGCTATCGGCTGGAGAGCCGGCTGATGGCAGGTATCCTGCTGATGACAGTGGGGA  
TCGGGCTGGTTCGCTTTTCGTACAGCACCTCTCCGGCATCTTCGTACTGCTGGCCTGCTTCTATCTGGGGAT  
CATCATCTGTGAACCCGCGCCGGGAGACCCTGATGACCCGGCTGGCCAACCCACAGCCCGCGCAGCTAC  
ATGGGCTTCAGCCGCTCGGACTGGCGCTGGGGGCATGACCCGGCTACGTGGGCGGCGCTCCCTCTATG  
ACTTCTCGCTGCAACAGGGACAACCTGCCCTCCCCTGGCTGGTGCTGGGCACCATAGGCGTCGCCACCAT  
GTTGCTGCTCGCCCGCTGCTTCTCCCCTGGGAGCTGGCTATCAGAGCCGCGCCTGACGACCGCC  
CACCTGCGGCAGCCCAATCAACGGGGCTGCCGCTCACCCCAAATTTCTGCAAGCCATCACAGCAAAGGTT  
GCGAATTACAACCTTTTACGCTATTTTAGTTGTGATGCACAATAAAAAAGGAAACCAGCATGGATCCCC  
GTCCCCTGCGCGCCTGTGCGCGATCTGGTTCGCGAACTCGGCATGCTCTCCAGCAGTGGCGCAACCT  
GGCCCTCACCCCATCGAGGCTCACCTGCTGATCGAGCTGGAACCGCCCGGCCACCAATCAGCAGCTG  
GCAGAAAAGCTGCACATCGACAAATCCAACGCCAGCCGCCGCTTGCGCGCTCGCCGAGCGGGATCTCA  
TCAGCTGGCACCCCGCACCCCTCCGACGGCCGAGCAAGGAGCCCGCCTCACCGTCAACGGTCAAGGGAT  
GCTGCTGGAGTGCACCGGGAGATGGACGGGGCGATGGAAGAGATGCTGGCGCAGTTGAGCCTGCCCGAG  
CGGGAGCAGCTATGGCAAGGGCTGCAGCTCTATCGCAGCGCCCTCTCCCCTGGCGCCGCTCGCCAGCGTGGTT  
ACCGGATCCGCCCATCACGGCGGGCGGACAATGCCAGATCGCCTTGGTGATCCGCGCGGCTCTCGGCCGA  
ATATGGCCTCACCGCAGACAAGGGGTATGGGGTCTCGGATCCCAATCTCGACACCCCTCTCCAGAGCTAT  
CAGGGGGAGAAGAGCCGCTACTGGGTCAAGGGGCGGACGGTCCATCCTCGGCGGTGGTGGTATCG  
CGCCATTGGCGGGAGAAGAGGGAGTCTGCGAGCTGCAGAAGATGTACTTTATGCCCGCCCTGCGCGGACT  
GGGCTTTGGCAAACGGCTGGTATTGCAGGCACTGGATGCCGCTCGTGGTTGGGCTATCGCCGCTGCTAT  
CTGGAGACCCTGAGGTACTGCGAGAAGCCACCGACTCTACGAATCCCTCGGGTTTGAACATACCCCG  
GCCCCCTTGGCTGCACCTGCCACGGGGATTGCGAGATTCGCATGCTGACTCTGGGTAACCCCCCTC  
ATCCCCAACCCCTTCTCCCGCAAGGGGAGAAGGGGGCAAAACACTTTTCGCGATCTTTAGGCAGACCTCTG  
ATGGTTCCCTCTCCCTCTGGGAGAGGGCTAGGGTGAAGGCTGCTTGCGACTGGTATATGCTGAACAATTT  
CCCCCTGCATCCCTCCTTAAACAGGCACAACCGGCACAAAACAAGAGACCCCGCCGAAGCGGGGTCTCTTT  
GATTATCTGCCAACAGGCAAACAAACCGTTATCAGTGTCTCGGAGTCTGGCGGAACCCACGTCCGGGGTG  
ACGCTCCTGTGCCAGGCGCAGGTTGACCATGGTGGTGGGATATAGGTGAGGTTGTCACCGCCATCGAGG  
GCCAGGTTGACCTCGTTCTTTCGCTTGAACCTTCTGAACTTCTTGACGTCCGTCCTTCCACCCAGCGGG  
CGGTGGAGACGTTGACCGCCTCGTAGATGGCCTCGACGTTGTACTCGCTCTTCAGACGAGAAACCACCAC  
GTCAAACCTGCAGCACACCGACCCGACCGACGATGAGATCGTTGCTGATCAGCGGACGGAACACCTGCACC  
GCGCCCTCTTCGGAGAGCTGGACCAACCCCTTGAGCAGCTGCTTCTGCTTGAGCGGGTTCGCGCAGGCGGA  
TGCGACGGAACAGTTCCGGTGCGAAGTTCGGGATGCCGGTGAACCTGAGATCTTACCCTGGGTGAAGGT  
GTCGCCGATCTGGATGGTGGCTGGTGTGTCAGACCGATGATGTACCAGGCGAAGGCGTCTTCCGCTGC  
TCACGGTACCCGGCCATAAAGGTACCGGCGTGGGAGATGTTTACATCCTTGGCGATACGCACGTGGCGCA  
TCTTCATGCCCTTGCTGTAAGTACCTGACACGATACGCATAAAAAGCGATACGGTACCGGTGCTTCCGATC  
CATGTTGCGCTGGATCTTGAATACGAAACCGGAGAACTTCTCCTCGGTCGCCACCACTTCGCGGCTCTCG  
GCCTTGGCTGGCATGGGAGACGGCGCCAGTCCGTCAGGCCGTCACGATGTGGTCAACACCGAAGTTAC  
CCAGTGCAGTACCGAAGAAGACCGGGGTATCTCGCCAGCGATAAAGGCATCGTATCGAATCGGGAGA  
GGCGCCCTGCACCACTCCAGCTCGTCCGCGAGTTGCTGGGCGAGATCTTCGCCGACAGCGGCATCCAGA  
TCCGGGTTGTTTACGCCCTTGACCACCCGCTTCTCCTGGATGGTGTGGCCCTGACCGCTCTGATAGAGAT  
AGGTCTCATCCTTGTAGAGGTGATAGACACCCCTTGAAGGATTTTACCGCAGCCGATAGGCCAGGTGATGGG  
GGCACACATGATCTTACGCTCGCGCTCCACCTCGTCCATCACTTCCATCGGATCGCGCACTTTCGCGGTTCC  
AGCTTGTTCATGAAGGTGAGGATGGGGGTATCACGCAGACGGGTGACTTCCATCAGCTTGGGGTCCGGT  
CTTCAACACCCTTGGCGGCATCGATGACCATCAGGCAGCAGTCCGACCGCCTCAGGGTACGGTAGGTATC  
TTCGGAGAAGTCTCGTGACCCGGAGTGTGAGCAGGTTGACCAGACAATCGGCATAGGGGAACCTGCATC  
ACCGAGGTAGTATGAGATAACCAGCTGCTTCTCCATCTCCATCCAGTCCGATTTGGCGTGTGGCCCCG  
AGCCACGGCCCTTACGGTACCGGCGCGCTGAATGGCCTGTCCGAACAGCAGGACTTTCTCGGTGATGGT  
GGTTTTTACCCGCATCCGGGTGCGAAATGATCGAAAAGTGCCTCTCTTGGAGACTTCACTCAGAAATTC  
GCTGACATAAATCAACGTTCTTCTATTGAGCGGTGGCATCAGCCACCGTGGGAATAAATCCGGAATGCCG  
CTCACGGCACATGTATACGCAACGAAAGCCACGCCAGCTGGCGTGTGGCCAACCTGGTGGAGAGAGGGAG  
GAGGGTTGCGTTACATGGGTCTTCTCGCCTGAGTCAAAGCAAAAATGCGCGACATTATACCCGCGCGAGT  
GAAAAATACCCAGCCTGACAAGAGATGATAATTTGGCCGCTCCTTCGCTCCACAGGTTCCAACCTGAACAG  
AAAATCAAACACTCCGAATCGGATGGCAGCATCCGGACCAGTGGACTTGGCCCCCTCCTCATGCCAGCA  
ACAACCACTCTTGATAAATTTTCATACTTGACTTCCCTATCCAGCTACAAATATGTAAATCGTATCTA

CATAATGGAGAGGTCAATTACATGAAACATTCCACCCTGCACAATCAACAGATCGTCATTATCGGTGGTAC  
CTCGGGTCTTGGCCTGGCCACTGCCCAACAAGCGATCGAGCAAGGCGCCAAGGTCAATTATCGGCGGTTCC  
AGCCGTGAGCAGCTTGGCCACTGCGCTGGCTGAACTGGGCCAAGTGCCAGTGGCCATCAACTGGATATTC  
TCGACGTGCACTCCGTCAATCACTTTTTCAACCAGCTGGATTTCGCTTGATCATCTCGTCATCACCGCCGC  
AGTCATACGACCAGGCAGCTTTCTCACCGCTGCCATCGAGGATTTGAAAAATCAACATGGACAGCCGCTTC  
TGGGGAAGTGTTTCATGCGATCCGCGCCGAGCACCACAACTGTCCGAACGCGGGTCCATCGTGCTCACGT  
CCGGGATGGTGACGCGCCGCCACAACCTGGGTAAGCACTCCCTGCCGTTGCAGCTGGCGCGGTTGAAAC  
GCTGGCTCACAGTCTGGTTACCGAGCTGACCCCCGTCGGATCAACGTCATCAACCCGGGCCCCATGCGC  
ACTCCCATGCTGCTTAAAGCACTGGGCAATGACCACAAAAAGTGGCGCCGTGGCGCAAAGCCTGCCGT  
TGAAGCGCTTGGGAGAGGGAGAGGATTATGCGCAGGCCGCGCTGTTCTGATGAGCAACAACAACATGAA  
TGGTGAGGTGCTTCATCTCAATGGTGGCAGCGCCTGGGCATAACGCCCTTCTGACGCTCTTCTGACGCTC  
TTCTGCGCTCGCGCTTGGCAATCTGTCAATCGCAGGCAAGAACGAGCGCAGGGGGCGAGCATCATCGCCGT  
ATCAGAGTGTCCCCAATGGCAATAACCCCCCTGGTGAGTGACAATAACCAGCCCGTCACTCGTCTGTCTC  
CACCCGGTTGGCGCCCCGCTCTTTTCGCACGATAACAGCGCATTGTGACGACGCTGGATCAAGGCCGCCAGA  
TCCTGATCATCGTCTCGCAGAGAGGCACACCCGATACTGATGGTTACCGGGTACGACATGCCGGGCAGCG  
CCCGGTTGGCGACCGAGTAACGGATCCGCTCAGCCACCCGGCACGCTCTTCAAGGCTGGTATCCGGCAG  
CAGGATCAAGAACTCCTCTCCGCGGTACGTCCCAACTGATCCTGGTGCCGAGCTGACGATCTGCCGCC  
CGAGAGACCCATTGCAGCACCCCTGTCTCCTTGATGATGTCCAGGGTATCGTTGATCCGCTTGAAGTGAT  
CGATATCGAACACCAGCAGACAAAATGGCGTGCCCTGCCTGCGAGCCAGCGCCAACATATCGCTGCCCTG  
CCGCAGCACCCGACGGCGGTTGTTGATGCCGGTACGCTCATCGTAAAGGCCAGACGACGCATCCGACGG  
TTGCGATCAAGCAGCCACCCCATCGTCAAGCAGCGCCAGTCCCCCGCAGAGCACCATCACCACCAGCAGCC  
AGAAACGACGCTCCTTGACCTGCTCCAGCTCCTGCTGCTGCAACTGCTGTTTCGACTCGCAGTGCCTGTT  
CTCCCCCTCCTGACGGGCCAGCTCGAACTCGCCGCGAAACCCAGGCCGTGCTCTGTTCCCGTAACAGCTGA  
TCGAGCCGCTGCTCCTGCACCAGATGCTCCCGCAATGCGGCCAGTGCCGCCGGATAGTCGCCCTTGAACCT  
CGAGCGCCCGACTGCGTACCCAGTAGAGCTCGAGCAAAAAGCGCACGTGCCCTTCCACCTTCAAAATCGG  
CTCAATCTTCTCAAGCGCACGCAAGGCTGGCGCCGGTTTCTGCTCTTCGACTCTCAACCTCGCCCCCACC  
AGCTCGAGATGCGCATGGAGGATGGGGTCAACGTCGGGAGAGAGCACCTTCGCCGCTTGTGCCAGCAAGC  
GTCCGGCATCAGCGGGGCCAGTCCAGCCCGAGCAGCTCGCCCTGCGCTGCATCACCATGCGTTCGGCATC  
AATCAGATATTTAGGCTGATTATAAAAAGCCGCGCTCGCTTCAAGCTCGCCCAGCGCATCCTGATAACGC  
CCGGTCTGCAGATAGACCATCGCCAGTTGATCACTTAGCCTTGCCGAGCCAAATCCATCGTGGCTCCTGG  
CAAAATGCTCGCTCAACCGGTTGAGGGTGGCGAGCGCTTCGGCATAGAGGCCATACGACGAAATGTGGC  
TGCAATCTCGAGCTGCGCCTGGTGATAACCAAGTGGGCAACCCAGCTGCTCATAGATACTGTGAGCCTTG  
GTGAGATCCATCAGCCCTGGCCTGAGACCCCTGAAAAGACAGCATGGCCCCCGGGCGGGCCAGCGCCA  
GCGCCTCCAGCTTTGGCACGGCGGCTCTCTTGCCAGCCGACGCCCTCATCGTAATCGTGACGAGCCTT  
CGCTACCTCGCCGAGCAGCTGATTGAACCAGCCGCGGCAAAATCGTCAGCTCCGCCACGGCGGCTCATCG  
CCCTGCTCGCGCGCAATGGCCAGCATCCGCTCCGCAATTGGCGATGGCGGTACGGGACTCCTGCATGTCAT  
CGGCCGATTGGGCCAGCAAGCCAGACGACTGATCCGCATCTGCTGCGACGGCGGATAGGCGTTGCCGTC  
CCGCTGCAAACGGGCAACGCGCTCCCGCAGCAACTCGATCGGCTGGTAGACCCGCTCCATTCCTCCCAGT  
TCATTTTTCAACTGCTCGGGGGACAAGGGTTTTGGCTGCCAGCCCGAACACCCGCCAGCAACAGCAGCAAGG  
CAAGTCGGCTCATACATACTCCGGATCAATGGGAAAAGATCATCGGGCAAGCCGATGCCGGAAAATCATCA  
TCTTTTCCCCTGTAACAATGGTTGTAAAGGCTATCACCCGGACAGAGAGCCCCGAATGGCAGACTAGTCAC  
ATTTTACTGCGATATCATCGCGTTGGAATGAAAGCGGGGATGCACAGCGAAAAAGAGGAGCGGGATAACA  
ACTCAAGAGGGGTTGCCCCCTCCCGGTCCTAGTGTGCTGCCAGCGCCGACGAGCCGGCCGCGCAGGC  
CGCAATCGAGCAGCCAGCTGTTGTCAAAGACCCGACGAGCGCCTGCTTGGCGTGGCGGGACATGGCGAC  
GGCGTAAAAACGGGCTTGGCGCTGGCGATAGCGGTTTCATCTGATCGAGCAGGGGATGGGGCAGACTCTGG  
GCGATAAAGTCGGAGATGACCAGCACATCCGCTTGGCAAAAAGCGGGATCATCGAGCTTGGCCAGCGCTT  
TTTCCAGACAAGGCACCAGATCGGTACCGCCGTGAAAACCTCATGGAGAGGAAGCGTTCCGCTTGTCCAG  
CCCGGTATCGGCGGTGATCTCGAGGGTGCACCCTCGGTGGAGAAGAGCATCAGGTAGCAGCCGCGCTTC  
TCATCCATCGCCACCTTGAGCAACGCCAGAAAAGAGTGCCTTGGCACACTCCTCGGGATAACCGCCCATGG  
AGCCCGAAGTATCGACACAGACGATAAAAGGGGCTCGCTGCTGCAACTGCTGCCCCCTGCTCCGGAGT  
ACGCAACATGATGCGCTGGCGCGGCAAGGTGCCACGTGACTGATAGCTGAGCAGACGCCGCTCCAGATAG  
TGGCGGTAGAACTCCAGCTCCAGCTCGGGCAGGCCAGCATCACCGCCCTCGCTTGGCAGCAGCCGCATCA  
GATCGCTCGCCTGATGGATGCCACCAGATCGTCCGGCACATCGTCTGTTGGAGCGGGCTCCAGCTCCAG  
CACCTGAACCGGCGGCACAGGTTGCTCCTGCGCCCGCGATCCCGCTCGCTGCGCCCGAGCAGACCGGCA  
ATCTCCGCCAGCAAAGGCTCGCGCTGCAACATGCGGGCGTATTGCTTGACCAGCACTAGACTGCGCTTGT  
GCCAGTGCCCCTGTGCCAGATCCCACAAACCACCGCGGAGATCTGGTTGGGGTTCGAGGGCATCGGCCAG  
GGTGCGGCTCGCCAGCAGCTGGTCTTCAATCTCCTGACGTTGCTTCTCCCGCTCCGCTTCGGCGATCTGC  
TGCTGTAACCTGCAGCAGGCTACCCACCAGACTGGCGCGCCACTTGTGCGATAAAGAGCTGGCGCAGCCCC  
CGGTGGGGTGAGCCGTGAGCTGACGCACCAAGGATCTGCCCTCACCGGCGAAGGGGCTGTACTGCTCCAG  
CGACTCCAGCAGGCTCGGCAGGCGACCAATCAGCTCGGTTCATCGGCAGTTGCCGGTGCGCCGTGATAGAGC  
AGGTACTCCTGCTCCAGCGCCACCGGCACCGGCTTATGACGGATCTCCTCACCAAGTTGCTCGCCCCAGC

TCTGCAGGCGCTTTTTTCAGCAGCTTGCCCTGTAGCGGGGAGCGTTTGATAAAATTCGGAAATCTTGGGCGA  
GGCCGCCAGCAGCGCCACCACCTCTCCC GCCAGCTCACCTCTCCCATGAGAAGGCCAGATCCAGCATG  
CCGATCTCAAGCATGAGCGCTCCTTACTCGTCCAGCCTTGGCAACCGCTCGCGCCACTGGGTGAGCTCGT  
TGCGCAGCAGTTTCGAGATCCCGGTTTCAGCACAAAGAAGCTGTCTCCACCTGCTGCAGCCAGCGCTGGGC  
GATAAAGAGGTTGTTGCTGGTGACGTTTCGAACAGGCTGCGCTGCTGTTTAAAGCTCCTGCATCACCTTGCCG  
ACCTGAACCAGCAGCTCGTTCGAGCGACTGCAACCAGGGGCGCCAGCACCACCTCGGGGATGGCGTTGCGCT  
CCATCAAAAACCAGCGGGATCTGCTGGCGCTGGATATCGAGCACCTGCAGCCGCAGCTCATCGTCCAGTAC  
CAGCTCGTAATGGCCCTCTTTTCGGGTTGCCGAACCTCATAGCCACTAGCACCTCACCGGTGGGATGCCAA  
TGGGAGAGCAGGGTGCATCGAACACCAGGGTGC GGTAAGACGCTCGGGATCGCTGCCATCCAGCGGCG  
CCGGGGTGAGCAGATGAAATGCACCTGCTTGCCAAAGGGTCTGGCATTGGCAAGCGGGATCTCGATACC  
CCGGGCCCCGGCCAAACCAGCTGCTTGCGTTGGCGGGCCTTTGTGCAAAGGCGCTGGGCCACACTCTGT  
TTAAGCTGTTTGAAGTATCCCGCAACGCCAGCAGCTGACGGGTCATCGCCAGTTGCTGATAGCCGTAGA  
GACGGGAGAATTCGGTCATCATCTCCAGCAGGGCGGTGCGGGACTCTTCGTCATGCCAGAGACAATCCTT  
GAACAGCAGCAGATCTACCGGTGCGACCTCATCGCGGCCATTGAAGAAGGCGCTCGCCTTGATAAGCCGT  
ACCGCCTTCTTCCAGCGACGATCCGACACATAACAGCGATGGGCCAGCTGGCTGTCGAGCTGCTGGCGCA  
GCTGATAGATGAGCTCGAAACAGGCATCCGGCAGGGCGCACCTGTTCAATCTGGCCCTGCCACTGCTCGTA  
CTCATCCCCCGTATCTGCAGGGATTCCGGCAAGTTCTGGTGGGGTGGCCATCGCTGGCCAGCATGGAT  
TGAAAGTTGGCTTTCTCCTGCACCCGGTCCATCCAGATCCGCACCAGCATCCGGTCGTAGAGCGCTTCCA  
GCCCCGTGTCCGGCGCCGGCAGCTCGTTGGAGGCAGTACCAGCAAGCGCATCGGGATGGGGTGTGGCT  
GTCGCGGTTGCGAAACTGCCGCTCGTTGATGGCGGTGAGCAGGTTGTTGAGGATGGCAGGGCCCGCTTC  
CAGATCTCGTCGAGGAACACCACCTCGGCCTCTGGCAGATAACCTGTGGTGAGGCGCAGGTATTTGCCAT  
CCTCTTTTCAGTGCCTGAATGGAGAGGGGGCCGAACACCTCCTCCGGCGTACTGAAACGGGTCTATCAGGTA  
TTCAAAGTGGCGGGCGTTCGTGAAAGGCCAGCTTGAGGCGGGCGGGCAATCAGGCTCTTGGCAATACCGGGT  
GGCCCCAGCAAGAAGACACTCTCACCGCTGAGGGCAGCCAGCAGACCAGGCGCAGAGCATCCTGCCGTT  
CGTAAAGTCCCTCACCGAGGGCGGCCAGCAGCCGGGGCAGCCGCTCCTGGATGGGAATAAGACGCGCAGG  
GTTCTGGGCTTGAAGACGACATAGAGAGTGTTCGAAGCTGGGATGATGTTAGCCCCAAGGCGCG  
ATATCCATTTGCTCGGCCCTTGGGTTTTGTCTTGTATGATGTTTATCTGGTATCTCTTGCCGCACAATT  
CCCCCTTGGCAGGGAAGAAACGCAAGGGCAGTGCATACCGTATCGGCAGCGTGCTGCGCCATGCATA  
GCCAGTGTCTGATGAGTACCATGCCCGCATACGCCAGATGATGCGTTGCAAAGGGTGCAGCAAAAGCGG  
TTCGAGTGTACCCTGCGCAACACAATTTTCCCAATGCAGATCAAGAGTGAGTCGCTCAAATGCAAGAT  
CCCCGTTTCGTACAGAGCATGTTGGCCCGCATGGGCATTCAAAGCTGGCAACTGCGTCGTCCGGCATTTGCTGG  
GCGCAGCTCCCGCTCCCGAGCTTAAGCAAAAACGCCACACAGCCGGGCCACACGGCACCGGCCACCCGCGC  
TCCGCTACCCAGCGGCAAACTCTGGCTGCTGGCGCCTCAGCTGCCTGCCACCACGCTGCTGGCGGATATC  
TGCCAGTTGCTCGGCATGACCCCGACGAGGTCTCACTGCTCAGCGAGCTGCCGCTGCCGATCTGCAAA  
CGGCGGGCGCCTCCCTCTGCTCTGGCTGACGGAGGCCAACCCCGCGCGGCCAAATGCGCTGATCTGCC  
GCTCACCCCGAGCGCAGCGCAAAAGCGCGCCCTGTGGCAACAGCTGCGCCAACACCTTGC GGCCAACGCG  
GCGTGACCCTGCATCATGCCGCCAAGACCCACTGTGATGCTGCTTTTTTACCTGATTTTACAAATGCCG  
CCTCTGCCAACCCAGTGCCCAACATCTTGCCATCCGGAGCCCCAATGCCGTAGTTTCGTCCCCTGCTCG  
AGAGCGATTTTCGACCTTGTCTACCCCATCGAGCAAGCCGCTCACAAGGAGCCATGGAGTGAGGCCAACCT  
GCTCTCCTGCTTCGGTTCTCGCTATCTCAACGGTTTTGATGCTGGTTCGATGGTTCGCCGGCGGGCTTCTAT  
ATCTCGGATCTGGTGGCCGGTGACAGCTCGCTGATGAATATCTGCGTGCATCCGGCGTTTTCAAGGCAAGG  
GGTTGGGACGGGCGCTGTTGAGGCTATCTGGCGCGCAGCAAGCAAGCCGGAGCAGAGGCTGGTTTTCT  
CGAGGTGCGGGCCGGTAACCAGACCGCCATCAACCTCTACGAGAGCGCCGGTTTTGCCGAGTATTGCCCG  
CGCGCCGACTACTACGGCACCGGCAATGACAGGGAAGATGCGGTGCTGATGTCGCGACTGTTTCGATTTCC  
GCTGATCCAGCCTGTTTCGTCGCGCCCAAGCCTTTTGTCCCCCTCAATCGAGGGGGCGTTGTCCAGCGC  
GGGATCTCGAAGGCCAGGGTGGTATGCACTACCGCTCGAATCCGGCACCGGAGAGCGGCATATAGAAG  
CCACGCTGCCAGGTTTTTCCCGCATCCAGATCTGATCGATATCCACCACTATCTTGATGGGTCTGAGGG  
GCTGCCCGGCTGCTGGATATAGATGCCGGGCGGTGTTGGCGACTTTGGGAAAGCGGCGCAGGATCTGCTC  
GCTGCCATCCCCCTTGCCGGGTTGAGCCGCACCTTACCAGCCGGGCAAGCGGACCAGCCATCTCCTTG  
CTCTGCCAGAATTTCTTCCAGATCGCCCGCAGCGGGCGCACTTGGGGTCTCCAGCACATAGAGCAGCG  
GATAGCCCAACGCCAGCGCTGTTGCTGCGCTGCTGATAACCTCGGCCCTTGATAACCAGGGATTGGC  
GGGCCCTGTGATGACGTTCCAGCAAAGAACAAAACGCAGCGCCCCCACCACCATCAGCCCGACCGCG  
GCCAACGCCCTTTACCCACAGATTCATATCGTTAACCTCTCTCTGCTCCTAGCAGTATCGGCCAGT  
CTGCACAAAGGGAGAGCTATTTGCGCTCTTTGTGATCCAAGACAAAACAGCGCACACTTGTAAAGCTGTAAT  
GTTGGAGTTTTAAACTCTAGCCCGATTTTTAGTGCCCTCGCGGGCGTACAACGTAATTAAGGATGTTTA  
ACTGATGCCGAAGCTTCATCTGGTTTCGACTGATGCGTGAACGTATTGCCAGCTTGGCAACAAGGCTGCC  
CTGCGGGTTTCAGCAAGATGGCCAGTGGCGCGCCATCGGCTGGCGTACTCTGGGCCTGGCCATGGACTACT  
GCGCACAGGCGCTGATCCGTGCCGGCCACCAGCCAACCGAAATGGTCCGCATCTATGCCCGCAACATGCC  
GGAGTGGACCCAGGCCGATCTGGGCATCCTTGCCGCCCGGGCGTACGCTCCCTATCTACCCACCAGC  
ACGCTCGATCAGCTGCGCTACATCGTCAAAGATGCCGGCATCAAGGTAAGTTCGTTGGCGAACAACCC  
AGTTTCGATCAGGCGCTGACCCTGCTGCAAAAACGGCGAAATTCGTGATCGTCTCGCTCTCGATGGCAACGT

CAATCTGCGGGCTGCGAGCAGGGCAGCCACTTCCAGACATTTCTGGTCTCCGGCAACCATCAGCCCAGC  
GAGCAGGAAGTGCAGTACGGGAAACCCAGTACCGGATGGATGATCTGCTGACCCTGATCTACACCTCAG  
GCACCACAGGCGAGCCCAAGGGGGTATGCTCGACTTCAGCAACATCGCCGCTGTTTCGAGATGCACAA  
CAGCCGCTCGACCTCAATCAGCAGGATGTGTGCTCTGCATGCTGCCACTCAGCCACGTGTTTCGAGCGG  
GCATGGAGCTACTACGTGCTCTACTGCGGTGCCGAGAACGTCTATATCCGCGATCCGCAGAAGGTGATGG  
ATGTGATTGGCGAAGTGCAGCCGACCGTGTGTGCGCCGTGCCGCGCTCTACGAGAAGGTCTACGCCAT  
GATCCAGGCCAAGGTGGCTCAGGCTCCTGCTCTGCGTGCGCCCTGTTTGGCTGGGCAACCCGGTTCGGC  
AAGCAGATGGTTGCCACCCGTGAGGCTGGCAAGTCCGCCTCCCCCTGCTCTACGGCCAGCTCTGGCTCG  
CCGAGCGACTGGTGTTCGCAAGCTGCGCGCCCGTTCGCGGGTTCGTACCCGCTTCCTGCCGGTGGCGGG  
CGCCCGTCTGGCCGACGATGTGAACCTCTTCTTCAGGCGATGGGGCTCAACCTCAAGTACGGCTACGGC  
ATGACCCGAGACCACCGCCACCGTCTGCTGCTACGAGGATGACCGAGTTCAAGCTGGGCTCCATCGGCACGG  
CACTGAACGGCATCGAGGTGAAGCTGGGTGAGAACAACGAACGTGCTGGTGCCTCCCCACCGTGTATGCG  
CGGCTACTACAACAAGCCGGAGGCGACCGCCGAAGTGTGACCGAGGATGGCTTCCTGCGTACCGGCGAT  
GCCGGTGAGCTCGACAGCCAGGGCAATATCTACTTCACCGAACGTCTCAAGGAGCTGATGAAGACCTCCA  
ACGGCAAGTACGTGGCCCCGCAACTGGTGGAAAGGGACCATCGGCAAGGATCGCTTTATCGAGCAGATCGC  
CATCGTGCAGGATGCTCGCCACTTCGTCTCGGCACTGATCGTGCCCTGCTTCGAGTCGCTGGAGGAGTAC  
GCCCGCTCCATCAACCTGCAGTACCAGTGAAGACCGAGCTGCTGCGCCACTCCCGGGTAATGGAGTTCT  
TCGAAGCCCGCATCGCCGACTTGCAAAAAGAGCTGGCCAAGTTCGAGCAGGTGAAGAAGTTCACCCCTGCT  
GCCGAGCGCTTCTCCATGGAGCTGGGTGAGCTGACCCCAACATGAAGCTGCGCCGCAAGATCATCGAG  
GCCAAGTACCAGAGTGAATCGAGGCCATGTACAACCACGTCTGATATCGCTCAGGTTTCAGAGAAATCAA  
AAAGCCGCTCACTCGAGCGGCTTTTTGTTGGCACTTTGGTTGGTACGAAGCCGCTTCAGGCCGTAGTGG  
TACTGGTTCCGAAGTAGTCAGCCAGGAAGTCATCGAACGACAGGCTGTGCGTGCCTGCGGTTTCGCGCTG  
CTTGGCCAAGGAATCCTTCGCTCACCGGCAAAAGTAGGCCATCCAGTACTGCAGCTCCCTGCCAGC  
AGCTCCTCGCGATAGCGGGTTCGCCAGCTTGTACCGTAGCAGCCGTTGTCTTTGCCGCTCTCCAGCAGCT  
CCCTGAGCATGCGGGCGGAGTAGGTGAGCTCGGGGTTGAGCAGCTTCTCGCGGTGCATCGCCAGCGTCTC  
GCGATAGCGGTTGCGGCCACAGCAGCGATCCAGCAGATCGGCCACCTGAGCCAGCTCGTCAACAGTTTG  
AGTCCGTACTCTTTGAGGCCAATGGCATTGCCCTGCTCATCTTCAGCGTCAGGCCGGGACGACGTCCTT  
CCAGCACCACTTGTCTGTTGCGCGGTTGCGGGCAATCTCTCGTCACTCAACACCGGAGAGGGGGCG  
CAGCAGGACACCAGAGCAAGGAACAGGTCAAGAAGCGGATCTGGTCTGCGTCGATGCCAGCGGGGTAAG  
GGGTTGACGTCCACGGTACGCAGCTCGATGTATTTCGATGCCGCGCTGATCCAGCGCATCCGAGGGCTTCT  
CGCCGCTGCGCGGGGTGCGCTTGGGGCGGATCGGGGCGTAGAGCTCGTTCTCCAGCTGCAACACGTTGTC  
GTTAAGCTGACGATACTCCCATCCACTTGACCCCGATCTTGGCAAAGTCGGGATTGTGGGTGTTGATG  
GCGCGGCGCAGGCTGCTGACATAGGCCGGCAGATTGTCGTGGCTGATCTTGAGCCAGCTGGGCGCTGT  
TGGTGTAAACGAGATCGGAGAGACGCAGCGGTTGGCGTAAGGCAGATAGAGGGTGCCCTTGCCGGTCTT  
CTCGAACGGCAGGTTGCTCTTGCGCCCTTTGAGGAAGGATTCGCAGATGGCCGGGAGGCGCCGAACAGA  
TAGGGCACCCAGCCAGCCGAAGCGGTAGACGTTGCGAATAAGCCCATGTACTTGTGCGAGATAAAGCGCT  
GGCTGCAGCATCCTTCGCACACCAGATCCTGCCACTCGCTCCAGAAGCTGTCTGGCATGGAGAAGTTGAA  
GTGCACCCCGGCGATCACCTGCATCAGGCTGCCGTAGCGGTTCTTCAAGCCCTGACGGTAGAGAGTCTTC  
ATTTTGCCGATGTTGGAGCTGCCGTAAGTGGCCAGCCGGATGCTCTCTCCCCGCCGACGAAGCAGGGCA  
TGGAGAGCGGCCAAATCCGCTCGTCAACCAGATGCTGAATCACATGGTGTGGATGTCGCGGAGCTGCTC  
CATCAGGCTGTGATGGAGTGGTGGCCGGGTGATGAACTCCAGCAGGCTCTCCGAGTAGTCCGTTGGTG  
ATATTGGGATGGGTGAGGCCGAGCCAGCACCCGGGGATGGTCACTCTGGGCGAGTCGGCCATCCGGCG  
TGATGCGCAGGCATTACGTTTCGATCCCGCGCCGGATCCCTTGAGCGCGGTGAGGCGCTCCGGTGTACC  
CAACGCATTACGCAACTCGGTGAGCGACAAGCTTGTGTAGTCATATTACGGCTCATGTGAGGCCGCCC  
CATCCGGGGCGGCTCTTGATTTTTATAAAGCGTCAGTTACGGCAACTGCAGCGGATAGATGGGAAGATGA  
AGCTCCTTCAGGGGTTTTCAAGCTTTTGTCTGCTCTCCACCACCGATCACCATGTGCGCCGGATTGA  
GCCAACGGGCGGCACTGGCCTTCAGCGCCTCGGGCGACACCGTTTTGATCAGGTTGTTCTGGGCGCTGCAC  
ATAGTCCGGTTTTAGGTCATACATCACCATCTGCAGCAGGAAGCCCGCTTCTGGCCGAGGGTCTCGTAG  
GAGAGGGCATCCTGCTGGGAGACCGCGCTGCGCATATAGGCCAGCTCGACCGGCGTGGGCGGCTCTTGC  
GGTAGTTGTCCATCTCCTTGAGGAACTGGCGGATGGCATCCACAGTCGCATCGGCCCGCACATTGGCGCC  
GGTGGCGAAGGTACCCACCTCGCGGTTGGCAGAGAAACCCGAGCTGGCGCCATAGGTGTAACCCCTGTCT  
TCCCGCAGGTTGAGGTTGATGCGGCTGTTGAAGTTGCCACCCAGGTTGAAGTTCATCAGTCCGGCGGTGA  
AGTAATCCCCCGTGGTATCGAACGGCATGGCGGACGACCGATGCGGATCACCGACTGGGGTGCSCCCGG  
TTTGTCCACCAGATAGATGCCCCGCTTGGCCTGCTCACCTTTGAGCTTGAGATCTCCAGGGTTGGCGTG  
GCCCCCTTCCACTCGGTGAGGAAGCAAGTTGCTCCTCGATCTGCTTCTGGCCACATCACCGACCACCA  
CCACTTTGGCGTTGGTGGGGTGTAGTAGGCTGATAGAAGTGTTCACGTCCGCCAGGGTCAGCTTGGC  
CACATCGGCCGCAACCCCGTGGTAGGTTGACCGAGGCGGTTCTGCTTGGCGTAGACCAGCTCGCGGAAC  
GCCTGCCCGGCCAGCCATTCCGGGCTGTTGCTGGGCTGTTGCATCCCTTGACGAGCTGCGCCTTGACCC  
GCTCGAAGTCCGCTCCCGCATGCCCGGGCGCTCCAGCACCTCGCGCACCGAGCGCCAGGGTCTGGGGCAA  
CTTGTCCGCCAGCGAGCTGACGGTGTGAGGTTGTTGTACTGGGCGCTGGAGACATCGATGGAAGATCCC  
AGCTTTTGCAGCTCGTGCCTCAGCTGAGCCTCGGTGAGGCGACCGTGCCTGCCCATCATGGCGGCGG

TCAGATTGGCCAGTCCAAGCTGCCCTTATCTTCGGCACGAATGCCGCTGGCAGGGCGATCATAATGGA  
GACGGCCGGGATCTCGTCACTCTTGGTGCCGATGATCTCGATGTTCTTGTGAGCTTGCCGTGCCAGATG  
GCGGGCACCTTGACGCTCACAGCCTCGCTCGCCTTGGGCTGCACGCTGCGATCGAAATTGCTTTTTACCG  
GTCGTTTCGGCCAGCGCCTCGTCACTGCTTGTGTAATCCGGCAGCTCGCGCTTGGCGGGGGTAAAGTTCGG  
GGTGGCAACCTGCCACTCTGTCTTGGCCCTTGGGCACCACGCTCAGCACCACCGCAGGCTTGTGCGCGATG  
AACTTGTGCTAGGCGGCCCTTACCTGCTCCGGTGTACCTTGCCGATGGCATCGAGGGTCTTGAACACAT  
AGTTGGGATCCTGGGCAAACACCTGACCCATGGCGAGCTGGCTCACCTTGCCGGAGACGCTATCCAGACC  
CCAGATGGCGGAGGCGGATACTTGGCGATCGCCTTCTCCAGATCTTCCGGCTTGAGGGCCGCGCTGGGGC  
AACTCGCCGATCACCTTGTCCACCTCCCCCTTGAAGGCTCTTGAAGGCTGCCATCTCGACGCGATTGGGAT  
AGGCTTAGACGGTCAGGGTACAGGCCAGCTCTTACAGTAGTGAGACGCCCCACATCGATCGCCTTGCC  
GGTTTTACACGACTGGTGTAGAGCATGGAGTGGCGGAGCCGCCAGCACGTCGGCAAACATGTCGAGT  
GCCGGCTCCTGCGGATCGCCAAGAGAGACGGTGGGGTAGCTGATATAGAGCAGCGGCAAGTGCACCTTGT  
CCTGCAGCGTACGTAGCGGGTCTCGGGCAGAGTACC GGCTTTGGCGTCGGCTCGGCCAGTCCGGGCC  
GCGCGGGATGGAGCCGAAGTACTTCTCGATCCATTTCGAGGGCCTGCTTGTGTCAAAGTCGCCGCCAGAG  
GTCAGGGTGGCGTTGTTGGGGCCATAACCAGCGCAGGAAGAACTGCTTGAAGTGTTCACATCGACCCGGT  
CGAGATCTTCCACGTAACCGATAGGCTGCCAGGAGTAGGGGTGAGTACGCGGATAGAGCGCCTCCCCAC  
CTTCTCGCTCACCAGCCCGTACGGCTGGTGTGACCCGCTGGGCCGCTCGTTCTTACGGTGGCACGC  
TGGATTTGCAACTTCTTCTGGCTCACCGCATCGAGCAGAAAGCCATCCGATCCGCTCCAGCCAGAGCA  
CTTTTTCCAGCTGGTGGCAGGCACAGTCTCGTAGTAGTTGGTACGATCCTTGTGGTGGTGGCCTTCAT  
GTCGCCACCGCCTCGTTGATGATCCGCATATGCTCCTGATCACCGACGTGTTTCGAGCCCTGGAACATC  
ATGTGCTCGAAGAAGTGGGGCAAACCGGACTTGCCGACCGTCTCGCGGGATGAACCGACGTGATAGGTCA  
CATCGAGGTGTACCAGCGGATCGGAGCGATCGGGGGCCAGGATCACGGTCAGGCCGTTGTCCAGCTTGTA  
CATCTGGTAGGGGATGGCGAGCTTGCCCTCCTCCTTGGCCGTTCGGCGATCAGGGTCGGTGGCGCCAGC  
ACCGGCAGGGTGAAGCCCAGCAGAATCGTTAAAGGTATGACTTTGTTACGGTAACCTCGTGAGTGACAA  
AAACAGGCTAGAAAATGTGACTGGCCAGCAGAAAAACCAGGGCATAACGGAAACAATTTGCCGAGCCCGAT  
CAGGATAAGAGAGCGCCAGAAGGAGAGGGCGAGCCAACCGGCCAACAGACAGAGACCATCACCGACCACC  
GGCGTCCAGGCAAGCAGCAGACACCAGTGACCATGTTGTTTGAAGCCAGCCTAAGGCTTTTTGTTCCCCAC  
GGCCTTGAAAATCTTCCGGTTTTTTTTCTGAAGGTGGCGAGCCAGCCAGCCAGCCAGGTCATGGAGCC  
GAGGGTATTGCCAGCTCGCCACAGCCAGCAGGCTCGCCATGCTCCACTCCCCCTTGGCCGCCATGGCC  
CCCAGCAGCACTTCGGAGCTGCCGGGCAGCAGGGTGGCGGAGGTGAAGGCGCTTAAAAAGAGCCACCCCA  
GCCCCATCTCGGTAATGCCATTTCATCCGGGCAGGCCATCGGCCGCAGGCATCCGCAGCAGCAACTTGCCG  
CGCACATGGCCCCCTTCGATGGCCTGATGGGCCAGCGCCCCCTCGGCAAGGGGGAAATTCACCGCGAGGG  
TCACCTTACCTCCCCCTGACGCAGCAGCATCAACATCTGCCCCAGCTGCTTCTGGTCAGGGTGAACCAG  
CATGCCGACCACCTCGATAACCGCCGAGCCCCAGTATCCTTGTATCTGCTGGGCGGTAATGGTAGGCACA  
GTCACCAGACGGCCACCGGCTTACGCAGGCCAGCGCCGCTTGGCGCTCTCGCCGCCACCAGATCCA  
GCACCAGATCGACCTGGCCGGCCTCTGCCACCACCGTGGGGCCAGTTTCGCATCGTGGTAATCCACCAT  
CCAGCGCGCCCCAGAGCGTGCAGGAAGCCATGGTGTGCGGGCTTGGCGTAGCTACCACCTCGGCGCCA  
TAGGCGCTGGCAAACCTGCACCGCCAGATGGCCGACCCACCGGCACCGGCGAGGATCAAGACCCGCTGAC  
CACTCTGGAGGCCCGCGTGTCAAGCAGCCCCGTCAGGCGGTGAGACC GGCCAGTGGCAGCGCCGCACC  
CTGCTGCAGGCTCACTCCGTCGAGCTTGACCAGCTCGCCTTTCGCTTGGCCACCACAGACTCCCCGTAGCCA  
CCTGCGGTAAGGGGAAACCCAAACCATAACCGCACACCCGATCCCCCTCGACCAGCGAGGTACGCGGGGGC  
CGACCTTCTCCACCACGCCGGAGATGTCATAACCCGGTGTCCAGGGCAGCTTGTCCCTTGTCTGGGCCG  
CGCCAGCCAAGACCGGCACGGTTTTTGGCATCGATGGGGTTACCCCCGCAAAGCAGATGCGCACCCGC  
ACTTCGCCATCGCAGGCACCTTATCGAGGGAAGGGTTGAGCTTGTAGTACCGAGGGTACCGAATGCGG  
TAATCTGTAGTTGCGTCATTGCACAATCCATCCTGTTGATTGATCAAGGGTCAACAGAATAACAGCGAGG  
GCACCATGGCTCGAATGTTTCTTATTCTCTGTTGCTGGCACTGGGGTGGTGGGCATTTCTGCTCACTT  
CCGCATCCCGCTCAAACAGGGGGCCAAGGGTTTTACTGGATCATCGGCATCGGTGGCGACTGGCCGCC  
TTCCTCAGCCTGATGATGGTGTGACTCACTGAGTGCAACAGCCACTCGATAACGAAAAAGGCCACCGAG  
TTTTGGTGGCCTTCTCACTATCCGGGTGCTGCTCCAGCGCCGATTGAGGTAGTAGTGTGATTTGCTCC  
CCTGCCCCAGCACCCCTTGCACAGCAGATGGTGAACACCCGGTCCACCTCCTCCAGCGAGAGTGACAG  
CGCCTGTGCCACCGAGCGCTTGTGCACTTGTGACTCACCGCTCACAGCGCACCGCGCACCTGCGCCAGC  
ACTTCGGGGGGCGGGCTCGGGGGCATGATGGGCTCTGGCTGGGCTGCCATCGCTAACGACTCCTGCGCCT  
CTCTGCGAGCTTGTCTCTGCTGCCAGCGCCACATCCGGCGAAAGCGGTTCTCCTCGCCGATCAGACTGAC  
GAAAAAGGCACCGAACACATCGAGCAACACCGAGAGGAAGCAGACCAGCAGGAAGTGCACCTGACTGATG  
CTCATCCCCACCCCGTCCGCCAGACTGCTCATCAGCCCCAACATGGAGGATTTGTTTCGTTGACCGGCTTGG  
CATCGCGCTGCTGGCGCAGCTCATCCTGCTGCAAGCGCAGCTTGGTGTGGCGTGCTGCAACGAGGAGAC  
GCCACTGGAAATGCGCTCCAGCTCGATGTATTTGCGGGCTGCCTCCTCGTTGAGCTGGATCTGCCGCTCG  
ATGCTGGCGATCTGCTCGTGAACCGGGCCAGTTCCCGTTCGTTGGCGCGCCTGCTGGCTCAATACCGTGT  
TGGTGGCGCTGTTGATGCCACCAATACTGCCGCCGATGGAGATGGCCGCCAGCACGCTGTAGAACAGCAG  
CGACCAGAAAGCACCACCTCAAATCCCGCCGCGCCTTGGCTCGCCGTACTCGTACCAGACGTAAAACCTTG  
CCCAGTTGCAAGATGATGGCCAAGCCGCCGAACAGCCACTTCATCAGCGGGTGTTCATCGATGGAGAGGA



ACAGCAGCAGGGAGAAGATAATGGAAGCCAGAATGGCCAACCCGGTGAAACTGTATACCGTCGTCAGAGC  
AAACCACCCCTTGGGGTAGCGCAATGTGGAGGAGTCTGTGTGGTCATGATGAAGGGGTGTGCTGTGCAG  
GAAAAGTTGGCTGCCGATTATAGTCGCCAGACTCGCCCAGAGAAGGGCAAATGACTGAATTCCTTCAGAT  
TGGCAACCAGCTGCCAGAGTGCAGACAAAACGGACAAATCGGCAGCAGAAAAGCGATACAATCCCTCCC  
TGACTTGATCATGTAGTGAGATGGGGAACAGTTCCGCCCGGGTTCAGCTCCGGTCTGTACACTCATCCAC  
CGTTGCAATTATCCGAGGCCATCATGAACAGTAAGACCACTTTGCTACTCTCCCTTCTTCTGGTTACCGG  
CAGCGCCGAGCGACCCAGCAATATCAAGAGAGCAGTGGCTCCGAATTCCTCCGTCGATGAGCTTAAATTC  
AACCTGGACTGGGATGACAAGCAGTTCGGCTGGACCCAGAACGACTGTCTCGACTTGGGGGTCCGGCGAAA  
CCGCCCCGGCCGACTGCAGGGCGGTCAAATTCATCTGGAAGATGAAGAGAACCAGCAACCAGCCGCCGCA  
AACCACCCAGATCCCTGCCAATCGCAGAGTGGCCAATAACGACAGGAGTCCCTTGCATGACCCAAGC  
CAAACACAACCCCGTTATCCAGCGTGGCGCCCTGCTCTCTCTTGCTGATGGCGCATGGCATCGCGGTT  
GCAGCACCCGAGGCAAAAATAGCGATGGCATCAAGATCTCCGGTGTGACATCAAGATCAATCTCGACT  
GGGATGACAAAGAGTACGACTGGTGGCAGGACAACCTGCCTGGATCTTGGCATTGGCGACAGCCGGATCAA  
ACTCAACTGCGACAAGATGGATGGCAAGTACCGGGATCACTACAACCAGCAGCATCCACAGCGGCAATAAC  
CCCGGGCAAGGTACGACAAAACAGAAAATATAAAAAACAAGGGCAACGGCAAGAAGAACTGAACGCCCTCTC  
CTGATGCAGCAGGGCCTGGTGCCCTGTGCTGATTGTTTTTACCAATAATTCCTCCGCACTGATATTGCC  
GGCGCCCGCCGAGGTTCTTGGCCAACCCAGTGCCAGCAAGGTTTGTGGTCTCTTTTACCATCTCCG  
GATTGCCACAGATAAGCACCTGACTCAGCTCGGGTGAGAACTCCAACCCTACCCGCTGCTGCAACTGGCC  
GTTGGCAATCGCCGCCGGGATCCTGCCAGCCATTGCATCGGGCCATTCCTCTCGGCTGACAAAGGGCACA  
TAGCGAAAGCGCTCACCATGCTGCTCGGCAAACTGGCTATCAAATCCTGATAGCTCAGCTCTTCGCCTT  
TGCGCACCCCGTGTACCAGCACCAGATTCTCGAAACGGTTGAAGGCCCTCGCCCTCGGCCAGCATGGAGAG  
GAAGGGGCCGATGGCAGTGCCGGTTCGAGAGCAGCCAGAGATCGCGCCCGGGCGGGCACCTCATCCAGCGTC  
AGAAAGCCGGTGCCTGGGATTCACCAGCAGGGTATCGCCTGCTTGCAGCGAGCCGAGCGAGGGGAGTCA  
GCTCACCGCTCGGGATCTCGACCAGATAGAACTCGTGGTATGGCGCAGAGGGGGGATTGACGAAAGAGTA  
GGCGCGCTGAATGCGGCGATCGCCCTGCTCGAGGGCCAGCTTGGTGAATTTGGCTGCCCTTGTAGGGGGCC  
AGCTCGGCCGCTACCCGACAGGGAGAACAGGGTGGGTGTCCATTCGATGCGTTTCGATGACGCGACCTTCGA  
CCCAAGCATAGGGATCTCCTCCAGTGGAAACAGAGCTTCACTTACCCCGGGCCGGAAAAATAAAAAACC  
CGCGCAAGTGCAGCGGGTTTTCTCTGCAAAAAGCGAATCGCTATTACAGGGCAACAACCTGGATCTGTACGG  
TTGCTTTAACGTGACGCTGACAGTGAACAGCAACTCGTAGTCACCGGTGTTACGCGAGAAGTTCGCCAT  
GCGGACTTCGCTCTTGGCAACGGCTACGCCGGCAGCAGTGTGGCTTCAGCCACGTCACGGGTACCGATG  
GAACCGAACAGCTTGCCTTCGTCGCCAGACTTGGAAAGCGATAACCACGGTAGCCAGTTTCGGCCAGCTTGG  
CAGCACGCTCTTCAGCAGCAGCTTTGTTGGCAGCCAGTTTGGCTTCCAGCTCAGCGCGACGAGCACCAGAA  
AGCTTCGATGTTGGCCTTGGTGGCCATAACAGCTTTGCCTTTCGGGATCAGGTAGTTACGGGCATAACCA  
GATTTACGGAAACTTGGTCACCCAGACCCGCTTGGCGATTTTGTGTCGAGCAGGATAACTTGCATTA  
CCTTTCTCTATAAATTTGTTGAGTTAGGCTTAAGTGCCGGCCGATTCTTACTTGTGTGCAGATCGG  
TGTACGGCAGCAGAGCCAGGTAACGAGCAGCTTGTGTCGCGTGCAGCTGACGCTGATACTTGGCGCG  
GGTACCGGTGATACGGCTCGGTACGATCTTGCAGATTCAGTGTAGTTTTTTCAGAGTAACGATATCT  
TTGTAGTCGATCTCGGTAACGTTCTCGGCGGTGAAGCGGCAGAACTTACGACGACGAAATAACGTGCCA  
TGGCCTTTATCCTCTAGTCAGTGTATCCAGAATTACTCTTCGGAAGCAGCTTCAGTAGCTTCTTCGCGGGC  
CTCGTGCCTACGACGGGTGAAGCGCTCTTCTTTGGCCTTGGCCATCGGAGAACTTCAGTCACGGCGTGC  
TTGGTGGCGATGATCATGTTGGCGATAACGGCATCGTTGAAGCGGAAGTTGGTTTCCAGCTCATCGATAA  
CGGCTTGTCTGCTTCTACGTTTCATCAGAACGTAGTGGGCTTTGTGCGATTTGTGCGATCGGGTAAGCCAG  
CTGACGACGGCCCAATCTTCCAGGCATGAATGGTACCACCGGAGGTGGTGTGATGGCGCCGGTGTAAACG  
TCGATCATGCCGGAACTTGTCTGCTCTGGTCCGGATGAACCATGAAGACGATTTTCGTAATGACGCATTT  
TAGCTCCTTACGGATTAATTCAGCCTCCGCCAGGTGCAGCCAGACCTCGGAGGCAAGGAACATAAAGGT  
GTTTAGTCGCTGCTTTTCTAGGGCGCGTATTGTACGAAATCACATCCCTCACTGCAACTGACTGCCTTA  
AATGTTTTTCCCGATGGAAATCATCAGAAACAACAATTGATAAATAATATCATTTAGGTCTATTCTTTCT  
CCATATCCTTATGGAGGGTGTATGCCATGCAACCCGCACTGACGACTACGATTCCAGCCCGCAAATTCAAA  
CTGACCCTGCTCGGGCCTGCCTTTATCGCCGCCATCGGCTATATCGACCCGGGCAACTTCGCCACCAATA  
TTCAGGCGGGCTCTACCTTTGGCTACCAGTTGCTCTGGGTGGTGTATGGGCCAACTTGTATGGCCATGCT  
GGTGCAAACCCTCTCGCCAAGCTCGGTATCGTCACCGCAAGAATCTGGCGGAGCACATCCGCGACCGA  
CTGCCAAAACCGCGGTCTGGGCTACTGGGTGCAGGCAGAGGTCATCGCCATGGCCACCGATCTCGCCG  
AATTTATCGGCGCCGAGTGGGCTTCAAGCTGCTGCTTGGCGTGACCTTGTGTAAGGGGCTGTATCAC  
CGCCGTGGTGACCTGGGGATCCTGATGCTGCAATCCCGTGGTGCAGAAACCCTGGAGTTCTGTGGTGGT  
GGCCTGCTGCTGTTTGTGCGGGCGCCTATATCGTCGAGCTGATCTTCTCCCGCCCCATCTGCCAGCC  
TGCTAGAGGGCGCCCTCTTCCCGGTTTTGCCAACAGCGATGCCGCTATCTGGCCGCGGTTACTCGG  
TGCTACCGTGATGCCCCACGTTATCTACCTGCACTCGGCACTGACCCAGCACACGCAGGATCAAGGTTCA  
GTCAGCCAGCGGCTGCACACCACCCGGGTGCATGTGGCGATTGCCATGACTATCGCCGGCTTCGTCAATC  
TGGCGATGATGGCGATGGCGGCCGCGGCTTCCACAGCTCGGGCCACCAGCAGGTGGCGGAGCTGGAATC  
CGCCTATCAGACCCTCACTCCGCTGCTGGGTGAGGCTGCCGCCACCCTGTTTGGCTCTCGCTGGTCCG  
TCCGGTATCAGCTCTACCGTGGTGGGCACCCCTGGCCGGCAAGTGGTGTATGCAGGGCTTTGTCCGCTTA

CCATCCCGCTCTGGTTGCGTTCGCGCCATCACCATGGCTCCCGCCTTCGTGGTGATCGCCATGGGGCTCAA  
CACCACCGAAATTCTGGTACTGAGTCAGGTGATACTGAGTTTTGGCATCGCGCTGGCCCTGATCCCGCTG  
TTGATGCTGACCGGCGATCGGGCGCTGATGGGGCAACATCGCAACCACCCCGTCACCCAGGCGGTAGGCC  
GCCTTATCGTTGCGCTGGTGATTGGCCTCAACGCCTATCTGCTGGTCGCCATGATCTAGCGAACCGTAAA  
ACCGAGAAGAGAGGCTCATTAACTCTGGTTAATGAGCCTCTTCGCACTTTGGCGTATGCTGCCGCTTTCT  
CTTCTCATTTTATCGTTGCGGGAGCCTTGCCATGGAACATAACCCGAGCCAGCTTCGTAAGTGGCCATCATC  
AAGAGCAGGCCAGCGTGGTCTGCTGCCAGCGCGGTGACACCACGCTGCTGGTCACCGACCTCACCCCTT  
TCATCCCCAGAGCCACCTCTGGCCGATCAGCCGGGGGACGTGGGCCATGCTCGCTGGGAAGGGGGCGAA  
GCCGCCATTGGCCCTTGCCGGATGGGGGCTATCAGCCCGGATGGCGAGCTATTTGTCGATACTGCGATTC  
CGGTAACACCGGGAGCTGAAGGGTGGCGTTTCGTGGTGGTGCATCCGCTGACCGGAGACCACGCGTAGC  
CGTTGGCAGCCAGGTCGAATTCGAAGTAGATAGCTGCCCCGCCACGCCCTGAGTCTGGGCCATAGCGGC  
TGCCATCTGGCCGCGCTGGCGCTCAATCGAGTACTAATCCCTACTGGCGCAAGGAGGTAAGCGAGCGTG  
ATGCACTGGGCCAGCCGACTTCGACCGTCTGGCTATTCAAAGCTCTCGGGTCGAGCCTTGGCGATCGCG  
GGAGCAGTACCGCATCGGCAAGAGCCTGCGCAAGAAGGGGGTCAACAGCGAGGCGCTGCTGGCAGATCTG  
GCGCTGATTGAAGAGAAAGCCAACAGCAACTGGCCGACTGGATCGCAGCCGGGAGCGAGATCCGCCGCA  
GCCGCTCTGGCGAGGCGATCATCGATTCCCGTTACTGGCACTGCATGCTGGAAGGCCAGGAGGTGACCAT  
TCCCTGTGGTGGCACCCATGTTGCCTCGCTCGCCGAGTTGGGAGAGGTCAAGGTACAGCTCACTCAAGTG  
GAAGAGGGCTTTGCCATGCTGACCCGGGTACGCCAACCGACGCCTGAGTCGCAGACTTGACCACTCAGG  
GCTAACGCCCAAATTGGCAATAGAGAAGTATCGCAAAGAGGGCGCATCATGCCCCCTCAACGCCCGTC  
ATGACGGGCCGATGCTTCTCTTTTAACTACTCCCTGATTAGAATGCGCCTCCCACAGGAGGCACATCACC  
CATGAGTAGTACCCAACACTACGCACCACCCCGGATCGACTTCGTTATCTGGTTCTCTACGAAGGCATCGGG  
CTGGCACTGGTTCGCACCGCTGATCAGCCAGCTGTTTCGGTCAGGGCGTCGCCGAGGTTCGGTTCGCTGGCCA  
TCTTCTTCTCCATCGTCGCCACCGCCTGGACCTATGGCTGGAACCTGTTGTTTCGACAAGGGGTTGCTCAA  
ACTGTGCGGGCGCACCAACAAGCGACCACTGGACCGCTTCCCTACACGCGTTTGGCTATGAGGCGAGCTTT  
ATGATGCTCTCCCTCCCTGCGTCATGTTCTGGCTCGATCTGGGGGTCGGGACGCCCCGATGCTGGATC  
TCGGCTTCGTGCGCTTCTACCTCGTCTACATCATGGTCTTTACCTGGGCCATGAGCGGATCTGGCCGCT  
GCCATCCACTCCGCAACCGCATAAGGCCTCAGCCGCAATGAGGCCGACAGAAGGAAAAGTCTGGAAGGA  
CGAATAGGAAGGATGGGAGAATCCCATAAAAACAATGCCAGTCAGCGAGCTGACTGGCATTTGGACAAAAC  
AGACTTTTCGGACTTACTTGACGGCGCTTTTCAGAGCCTTGCCAGCCACGAATGAAGGCACGTTGGCGACA  
GCAATCTGGATCTCTTTACCAGTTTTCGGGTTTACGACCGGTGCGGCCCTGCGCGGTGGGTGACCTTGAAGG  
TGCCAAAACCGACAGTTGCACAGCATCGCCTTCTTTCAAGCTCTGGGTAATACCATTGATGATCTCTTTC  
CAGAGCCACTTTGGCCTGAGCTTTGCTCAGATCTGCTTTGGCGGCAATCGCATCGACAAGTTGAGCTTTG  
TTCATAACATTTCTTTTATGATCGGGCATTTAGCGCTGGGTCACTCTATGCAAAAAAAAAACGCACAGGCA  
AAGCCTTTATCGAGCCGAACGCGTCAAACGCTGGGGTTTTTCATCAAGATCTGCGGAAATAGTCACATTC  
ACACGCGAAAAACCGTGGGCAGGCCTGAAACCTGCTAGCACGCAGACACAATCCGCTGACTATTTCTTTCG  
CCACTTAACATTATCCCCCATGGCTATTGACGCTTGCCAGATTTTCCCTAGTTATAGGTTGTGTCACT  
GCTCAAACGGCTCGGAATACCGAACAATCGGCCAGCCTTTGCCACGGAGGGATAGGGATTATGTTGAC  
GAAACTGGAACAGACCAAGCAGGCGCTGGCAGGCAAGCATAAAGGCTATCGACGACTGGCTGGATGCAAGG  
CAAGCGTTGCTGGTCGGATACATGCAGCTGGCAGGCCTCACTCCGGCGCGGACCAAGCAACGCAGCCTGC  
CCAAAACAGAAGAGCTGCATCAGTTTTGCGACCGGCTGGTCGACTATGTCAGTGCAGGCCATTTTCGAGAT  
CTACCACCACGTCGTCACCGCCTTCGAGCAAGCCAGCGGCGAAAACACTGGAGCTGGCCAAGCGCATCTAT  
CCCCATATTGCAACAGCACTGAATTCGCCCTCGAGTTCAACGACAAAATACAGTATGCCGACGAGGCC  
AATTGCTGCTACTGGATGATGATCTCAATGAGTTGGGTCCGGTCTGGAAGAGCGGTTCAAGCAGGAAGA  
CCGCTTGGTCAAGGCGCTACATGTAGTGAATCCTTGAGTACCAGCAAGCCTGAATGCCATTTTCGGAG  
CAAGTTCAGATACTGGCAACCAAGGTGGATTACTCAGAGCAATGACCCTAGCGTCCACACTTATTGCA  
ATACAGGAGATGAGCATGCTGAGCGCCCGCTTTTGACGGATCCTCTACTTGACCATGGCAGAACTTA  
CCCAGGGGGAACAGAAGTGGCAGACCCAGCTTGTGACGCTCTCCTTGCAGGGAGCACTGCTGATCCGCC  
CGACGACTGGGAGAGCCGTGACAACAAGGAGTACCAGCTCAGCTTTATCCTGAGCGGTAGCGATATCGAG  
ATCAAAATGCAGGTCGAGCTGACCCACGAAGCCAGCAAAAAGCTGGGTTTCTACTGCCACCACATCGATA  
TCGACAGCGCCACCCATCTCAAGCGGATGATCGAGCTTAACGTCGGCGACGAAGAGCTGCTCCACCGCGA  
GCTGGAACAACCTGCTGAGCGAGCATCTGGAACACAGCCAGCCTGATGGCAGGTTCCAGCCATAAAAAA  
GAGCGCCGAGGCGCTCTTTTTTATGGGCTGTTGTATCGATTGCAATGCTGAGGGATTACAGCGCCTCGAG  
TGCCTCAGACAGCTTCTTGACCGGCACCACTTCCATCCCTTCGATGGGATGCTTGGGGGCATTGGCGTGC  
GGCACGATGGCACGACGAAAACCGTGGCTTGCCCGCCTCCTGCAGCCGCTCCTGACCGGACGGCACAGGGC  
GAATTTACCCGAAAGGCCCACTTCGCCGAACACCACAGATCCTTGGGCAGCGCTTGGTCCCAGGAGCT  
GGAGACCATCGCCAGCAGCAGCGCCAAGTCCGCACTGGTCTCCTCGACCTTGACCCCGCCGACCACGTTG  
ATGAAGACATCCTGATCCGCCATCTGCAGCCCCCGGTGACGGTGCAGCACCGCCAGCAACATGGCGAGCC  
GGTTGTGATCCATCCCCACCGCCACCCGGCGCGGGTTGGAGAGCTGGGAGTAGTCCACCAGCGCCTGCAA  
CTCCACCAGCAGCGGTTCGGGTACCCTCCAGATAACCATGACGATGGAACCGGGCGCCTGCTCCTGCCCC  
CGACTGAGGAAGATGGCGGAGGGATTGCTCACCTCGCGCATTCCTGTTTCGGTCATGGCAAAGACCCCA  
GCTCGTTGACCGCACCAAGCGGTTTTTGTGAGAGCGCAGGGTACGAAAACGGGAGTCATGGCCGCCATC

TAGCAGCACAGAGCAGTCGATGCAGTGCTCCAGTACCTTGGGGCCCGCCAGACTGCCATCCTTGGTCACA  
TGGCCCACCATAAAGATGGCCACATGATTCTGCTTGGCGTAGCGGGTCAGCAGTGCAGCCGCTTCGCGCA  
CCTGTGAGACAGAACCAGGGGGACGATTGCACATCCGCCACATGCATCACCTGAATGGAGTCAATCACCAT  
GATCTGCGGCTGCTCCTGCTGGGCAATCAGGCAGATCTGCTCGACGCTGGTCTCGGAGAGCATCCGCAGC  
TTGTTCGGTGGGTAGCCCAAGGCGGTGGCCCCGATCGCAACTTGGTGGAGCGACTCCTCGCCGGTGACAT  
AGAGGGTTTTTCATCCGCTCTGCGAGACCACACATGGTCTGCAGCAGCAGGGTGGACTTGGCCGCCCCCGG  
GTTGCCGCGGATCAGAATGGCCGAGCCGGGCACCACCCGCCACCAAGCACCCGATCCAGCTCCTTGA  
CCTGAGGTAACACGAGGAATTCGGTGGTGGCGATCTCTGCCAGTGTCTGTACCTGACTGCCGACCGCGC  
CGGCATAACCGCTGTAACGGGCACTCTTGCAGCGGGACTCACCGAACCGAGGCGCACCTCGGTAATGGT  
ATTCCACTCCTTGCACCTCGCTGCATTGACCTTGCACGCGTGTGAAGTCGGCACCACATTCGGAACAAACA  
TAAGAAGTTTTTATTTTTGGCCATTGATAACTCGGGACAGGATGAATTCCTGCTTGATATACTTGTTCG  
GACCGACAGATCAAACCCAGAATCGGAAAAGTGAATTTCCGTGGCAGGAACAAATGGATTTCAGAACACCA  
GCAACATCTGATTGAACAACCTGTCCTCCCTTGTGCGGGAGAAAAGATTTTCGAGGAGATCTTCAACCGCATG  
ACCCAGGAGGAAAACAGCAACAGCCGTTTTCTGATCAAGATGGAGCTCAAGCGCAAGTGTCTCCCCCTGCC  
GCAGGGTCATCGACATGCGCGATGAGCTGGAGGATGAGTGCCCTGGTGCATGAGTTCGACGGCATCACTCA  
CTTCATGCCCCCGATGCGATAGCCCTGTTCCAGTCCAGTGCTATCTCTACCGGATATCTATAACCTC  
GGTGTCTACGAGGCGCTGCAACAGTGGCAAAAACAGCACCACAACGCCCGGTGGATGGTCACTGTTCGC  
CACCGGCCAGCCCCCTCCGGCAATATGATGTCAACACCATTGCTTTTGCAGCTACTACGGCCCGCTCA  
GGAGCGGATGCACCTCAGCTCGCCGGTGTGATCAAGTTTCAGGATGGTGAGAAGCTGTTCCGCAAGAGT  
TCAGATCTCTCGCTGGGTGGCATGCGGGTCTCGGTTCCCTATCTGCCGAGCTATCACACCGGCGCCCAAG  
TGGAGGTCTTCTTTACCGGACTGGAGCGGGACACCCCAATCCTGTGTGCATCAGCCGGTTCGGCTATCA  
GATCCTCGGGCAAGAGAGCAAAGAGGGGAAATACTGGCTGCGACTGGTGGCTCCGGCGAACAGCCAGCC  
TTTTGATGCCTTCCCTCAGCGACTTTATCGACGCCAACAAGATCCGCTATCGGGTCAGCGTCGACTATCTGC  
TCTCCGCGCCATCATCAAGGGGTATGAGCAGTTCTACCTGCCGCGGATGACCGGCATGCCGCTCTTCTT  
CGGCACCGGCGACAGCCCCAATCTCGAGATAGCCCTGCGTACGGAAAACAACCAGCACCTGCTGGAGTAT  
TGGCGCGATGAAAAAATCGCGATGCCCTCGCGGGGCTTTTCAGCGCAGAGCGGATGAAACGGCTCTGCC  
CGGCCCCCGGACCCAGGAGACCATCATCTACTGCTTTACCCACACGGTGGCAGCCACATCTACTT  
CTTCTCCGCCACCCAGAGACTGCGCCAGAGTGGCTCACCGCCCTCTTCTTCCAGGTGGGCGACTCAGC  
CGGCCAGCTGGCGTGTCTACAAGTTACAGCTGGAGGCATGCGATCTGGTTCGAGGCGGATGTGGGGCAAC  
TGCAGGGGCGAGACAACCCGAGTTGCAAGATATCTTGTGCTCGAGCGGCTCAAGCAGATCGGCTATTG  
CGGCCTACTGCAGGAGATCGGCCTGGAGTCCCAGCGGGAAGAGTTCCATCAGGAAGGGGTGAGCAACAAC  
GCCAACGAGCTGCAGCGCTTTGGTACAGAGCAGGGGGTTGCCCGTTTCGAGATCGAGACCCCTGCATATG  
TTCAGCTTCGTAAGGAGTCGCGCTACATCCACAAGACCGCGGTGCGCATCCATCACAACGGCAAATCCTG  
GATCGGCTGGACCCGCGACATCTCGACTCACGGCCTGCAAAATCGAGCTGGAAGATGCCTTTATCGGCGAG  
AAGAACGATGTGGTACCATCGCCCTGCCCCGCTTGCAGGAGCTCTCCAAGAGCATGGATCTGCAGCGTC  
TCTCCTACCGGCTGGTCACTCTCAACATGACCCGACCGTGTGCACCTCTGCATCGAAGGGGATTCGGA  
TCGCCATACCGGCCGCAATTTCTTACGCTGCTGATCGAGAGCAACCAGAACAAGCTCAAGGCGGCGCAG  
GAGCAGCGCCGCTATCGCGGGCTGGCGCGGGCCCTGCGCAACATCTATAACCCACCACCTGTTCAACTCAC  
CGGTCTACGTCAACAAGCTGAAAGGCGCGCCCAACCGGCTCCATCGGCAAAATCCCTGCAACCGCGCAG  
TCTGCAGCGGCTGCTGCAAGCCTGTGCTGAGCTGCCGGAGCAGGAGAACCTCTACCCGCTGTTTTAGGGG  
GAGCTGCTCAAGGAGCTGCTGATGAACCCGCTGCGCGCCATCGAGCGGGAGGACAAACCGAGAGAAGATG  
AGGTCTATATCGCCAGCATCCAGACCAAGGCCGGCTGCCATCTTCAGCAGCCGGTGGCCAGCAGCTT  
TGCCAATGTCAAAGAGAAGCGTCAGTTTCATCGAGCTGGCGCAGCAACAGGGGGAGTTCTACTCGGTGCTG  
GTCGGTATCTCCCGTACCGGACGGCCCGACCAACTTCATCGCCAACGAGCTGGACTACATCGCCAAGT  
TTGCCATCCACAAGGACGCAAGCTGGAAGAGGAGCTGTGGAGCGTGGTGGGGGTGGGGGAACTGACCGA  
TACCACCAGGCGCCCTGTTCCGCTTTGGCATCACGCCACCACTGAACTGATGATCCGGAACAGACAA  
AAATGAAACAGGGCGCTTGATGCGCCCTGTTTTTTGTTCATGCCGCGTGGGGTTGAGCAGCCAGTCGAGG  
ATCTGGGGGAAGTGATCCTCCTGCGCCTGCGGGGCGGTGAGCATATTGATGTGGTCAATCGAGGCGGT  
TGCCGTTGTCCCGCCCAATCGGGTGTGACGAGTTGCCGAACCCATCTCGTCGCTGAAGCGGCGCACATC  
GGTGGGTGACCCAGCACCTTGTCCGCTTTGGCCGAAATCATCCAGAGCGGTGGCCAGTTGACCCGTGCC  
GCCGCTCGTCATAGGCAAAACCGTGTGAGGATCTGCCAAGGACCGCACTTGACCCAGGGGATGGTCT  
CCTGCAGATAGCGCAGCGCTCGTCTGACACCGATCTTCAGAGTGCAGCAGCCAGAAAACCACGGCG  
GCGGGCCAGCGAGGGGGCCAGCCGATTCCAGATCAGATCCACCTTCAGCCAGCGCTCGGGATTGTGCACC  
GACACGCCGCGCTTGGTGCCAAAAACAGCAGACTGGCCACCTGCTCCGCCAGCTCGGGGAAGCGCACCA  
GGGTTCGAGGCCATGATGACACCGCCCCAGGAGTGGGCCACCCAGTGCACCTTGAAGCCATGATGGCGCTC  
GGCAATCCAGTGCTGCAGGGCGGGCAGATCCTCGGTGATCAGCTCATGCTGACCGTGTCTGCCTGCTCG  
GCGATGGCAGGAGTGTGAGCCCCGCCCCGCAAAATCAGCCACATAGACCTGATAGCCGTGACGGGCCA  
GAAAGCAGGCCAGCCCTTGGCAGATTCGGTATAGAAGATCCGCCCCGTTCTCGATGGCGCCATGCACCAT  
CAGGATCGGCTCTCCATGCACGGCGACCCGGGGTTTTGATGTGGCGCACATGCAATTTGATGGCCACCACAG  
GGGATAAACAGAGACTGCTGCGACAATTCATTTTTATTTGGTTTCTCCTTGAACACTGTCAGCGCTGG  
TCCCAACGTTGCTCGCTGCAGGCCCCGCGCCGACAGGCAGATCACCCCTCCAGATCGTGATGATTGA

GGGTGGCCGCGCCTGCGCCCGCACCAGTGGTTTGGCGTGAATGGCAATGCCAAGGCCCGGACCCCCAT  
CATTTTGTAGATCGTTGGCACCATCGCCGATGGCCACGGTCTGGTCGGCAGCAATGCCGTACTCCTGAGCA  
AGCTGCTGCAACACCTCGGCCTTGACGCTGGCATCAACGATGCGCCCGCTCACCTTGCCGCTCAGCTGGC  
CCCCCTCCACCGCCAGCTCGTTGGCGAAGATGGCATCGAGCCCCAGCTCGCGCTGCAACTGGCCAGCAAA  
ACGGGTAAAACCACCGGAGGCGATGGCCACCTTCCAACCCGCCCTTTGAGGGTATCGACCATCAGCTGC  
AAGCCCCGCATCCAGGGCATCCATGCCGCCACCTCGTCGAGAATGGTGACCGGGCGCCCTGCCAGCAGGG  
CAACCCGATTGCGCAGGCTGTGGAAAACTCCAGCTTGCCCTGCATGGCTGCGGGCGTTACTGCCGCCAC  
CTGCTCGCCGACCCCGGAAGCCGGGCAATCTCGTCGATACACTCGATGCGGATCGCGGTGGAGTCCATG  
TCCATCACCAGCAGGCCGGGCTCGTTCAAGGTTCGGCAGGGCGGGCAGATGGCAGAGATCGATCTCCCACT  
CACCGCTCTTGAGCTCGGCCACCAGCTCGGAAGAGAAGCGATCGCAGCCAAGCAGCAGCAACGGCAGCC  
CGCCACCTCGGTGGGAGGATAGAGGGTGGCCGCAACTCTGTACAGCCAACAGTGACGACAGACGCGCC  
AGATGGGAGGCGCCAGTCCCTTGCCAAACAGCACCACAGCCGCGCCAGCTGCGGAGTCTCTGTGCGTT  
GCAACGCATCTGCGCTGAGCTGCCAACAGGGTGGACCGGACAACAACGCGGGCCAATCGGATAACAGAGG  
GGGGAGCCGGGACAACAACATAAGGGATACGCCTTCCCTGGTGATCAGGGGGTTAACAGTGTGGCCAG  
AGTAGCGTATTGCTTTTTGTACAGGCAAGCGCCAAGATCCCGCCACTCCTTGTTACCATGAGGTCTCGCG  
CTTGACGCGTCATCTTCCCATCAAACGTGTTCTCAGCCTGGGTGCCGGTATCCTGCTCGGATGCTGGGTG  
CTCGGTGTGCTCATCCATATGCAGGGTGAAGCCAGGCCTCGCTGCACAGCGAAGCGCGCAACCGGGCAC  
AGGCGCTGGTCGCTATGCCGCCCGGACATGAAACGCTGGATCAAGGAGGAGAAGAGCAGCGAGCTGGA  
GCGGCTGGCGCGGGATCTGGCGGGGAGCCGGAGATCTCGATGCCACCTCTACGACGGACGCGGCATT  
CCCCTCGCCCAATCGGAGCAGGCGGTGCCGCTGGAGAGCCTGCTGCCCATCGGCAGCGATAACAAGTCAC  
TGCCGGAGCAGGGCAAAGGACGGATCCAGTTCGTGCAGGAGATCCGGGATGGCGAGCAGACCATCGGCTT  
CCTGCGTATCACTCTGGAAGAGCAGCAGATGCTGGCAGACAAGGACACCCGGCTCAAGGTGGTGCAGGAG  
AAACAGCGACTGATGCTGCTGGTCGCCCTGCTGGCCGGGGTGGTTCATCTCCTATGGCGTGGCCGCAACT  
ACATGCGGGTACGCAAGCACAAGAAAAAGAGTACGCCCCCTCGCCACCTCCGGAAAACTGATGGCGCAA  
CCAGAGAGTAGATACAAAAACGGCGGCCAGAAGGCCGCGCTTCTTATTCGCAAGGGAATTACTTGTGCG  
CCAGCAGGACGGAATCCAGTGCATTTGATCATGTCTGTAAGGTCAGCTGACGCTCTTCAGAGGTGGT  
CTGCTCACCGGTACGGATATGGTCGGAGACGGTGCAGATGGTCAGCGCCTTGGCACCGTACTCTCGGGCC  
ACGCCGTAGATACCGCGGCTTCCATCTCGACACCCAGATGCGGTATTTTCCATGACATCGAACAATGG  
AGGGGTTCGGGGTGTAGAACAGGTTCGGCGGAGAAGATGTTACCGACGCGCACGGCAACGCCCTTGTCTT  
GGCGCCTGTACGGCATTGGCAACCAGGTGCAAGTTCGGCGATGGCAGCGAAGTTCGTATCTTTGAAGCGC  
AGACGGTTTACTTTGGAATCGGTGCAGGCACCCATACCGATCACCACGTCACGCAGTTTCACGCTTTCAC  
GCACAGCGCCACAGGAGCCACGCGGATCAGGGTCTTACACCCGTAATCGGTGATCAGCTCTTTTGCCTA  
GATGGAGCAGGACGGGATACCCATGCCGTGACCCATGACGGAGATACGACGGCCCTTGTTAGGTACCGGTG  
AAGCCGAACATGTTGCGCACGTGCGAGATCTGCTCAACGTTCTCCAGGAAAGTTTCAGCGATGTACTTGG  
CGCGCAGGGGGTCGCCCCGCATCAGCACGGTATCAGCAAAGGCGCCATCTTTCGCATTGATATGAGGAGT  
TGCCATTCTCTTGATTCTTTCACACTAGGTTGAGTTTATTTATTTATAAATGCCCCGCCGCAAGTGG  
CGGGCGGGTAAATTACAGGAAGCTGGTACCGTACGCCAGTTTCGGCAGGCCATGGTAAGCCGCGATGCTC  
TGGCCGATATCGGCAAAGGTCTCGCGACGACCGGAGCCGGCCTTGACCGGCTTGCCGAAGAACAGCA  
CCGGAATGTATTGCGGGTGTGGTTCGGTGCACCCCCAGGTTCGGGTCACAGCCGTGATCGGCAGTCAGCAC  
CACCACGTCGCCATCTTGCAGCAGATCAAACAGCTCCGGCAGGCGGGAAATCGAAATACTCCAGCGCACCG  
GCATAACCGGCAACATCACGGCGGTGGCCGTAGGAGGAGTCGAAAGTCGACGAAAGTTGGTGAAGACGATGG  
TGTTGTACCGGCCGCTTTCACCTCTTCCAGCGTGCATCCACAACCTCGGTGACACCGGTCCCTTTCAC  
CTGCTTGGTGATAACCTGTTGGGCATAGATGTCGGCAATCTTGGCGATGGAGACCCTGACCGCCGCT  
TCCTTCATGTAATCCAGCACGGTTCGGCGCCGGCGGCAGCACTGAGTAGTCGTGACGGTTGCCGGTACGCT  
TGAAGTTGCCCTTGCCAGTACCTACGAACGGACGCGCAATCACGCGGCCGATGTTGTAGGGTCCAGCAG  
CTCGCGCACGATGTGGCACAGCTCATAGAGCTTCTCGAGGCCGTAGGTCTCTTCTGTCAGGCAATCTGG  
AACACGGAGTCGGCAGAGGTGTAGAGGATCGGCTTGGCGGCTTTCATGTGCTCTTCGCCAGATCGTCCA  
GCACCTGGGTACCGGAAGCGTGGCAGTTGCCAGATAGCCCCGGCAGACCGGCCTTCTCGACGATGGCGTC  
CAGCAGCTCCTGCGGGAAGCTGTTGTGGTGATCCTTGAAGTAGCCCCACTCGAACAGAACGGGCACACCG  
GCGATCTCCAGTGACCGGACGGGGTGTCTTGGCGGAGGAAAGCTCCTGAGCAAAGCCGTAGGCACCGA  
CCACCTCGATATCTTCTTCCAGCCCTTCCGGGAAGTAGCCGGAGGCCTGCTCGCAGGCATGGCCAGACC  
CAGCTTGTGAGGTTGGGCAGATTGAGGGCGCCACGGCCTTCAATTTACCTGCCGCACACGCCCTTGGCG  
ATATGGCCAAGGGTGTGGCGCCACATCTCCGAACCTGTCGGCGTCGGCAGCAGCGCAATACCGAAAG  
AGTCCATCATCAGAATAAAGGTACGTTTTCATGGGTCTTCCCTTGTACAAAATCGGCCAGGGTGATACGG  
CGGTACACTTCAGGCAGTGCCTCCGGCCGCTCGCCACCAATCCGGACAGCCGCTGCACCATGCTGGCAG  
CCTGAGCATATTGCTCTTCACTGAGCGTGGATCATCGCGATCGGCTTGTGAGCATCAACGCTTTGACC  
CAAGCGGATAAAGTCGGTCAGACCGACCGCATAATCAAGTTTGTACCAGCTGCACGGCGCCACCAGCC  
ATGGCGACCACGGCCAGACCCAGCTCGCGGGTATCCATGGCGGTACGAAACCGCTGTTGGCCGCGAAGA  
CCGGGCGCACGATGGCTGCCTTGGGCAGGTAACCGTCATATCGCTCCATGAAATCGGGCGGGCCACCCAG  
GCCAGTACCATGTGACCGAAGATCTCGGCCGCTTGGCGTTATCCAGCACCGCTTGCAACTTGGCGCGC  
GCATCGCGCTCGTCGCTGGCCAAGCCTGCAGAGATCAGCATCTCGGCACACAGGCCATGGTCACTTCGT

GGATCCGCGGGTTGCGGTATTCACCGGTCAGGTAACGCACCGCTTCACGTA TCCACCGGTTACCGGC  
GCTGGAGGCCAGCACCTGGTTCATATCGGTCAAGAGCGCAGAGGTGCGGCAGCCGGCACC GTTGCCACG  
GCCACAATGCTCTTGGCCAGCTCTTCGGAGGCTTCAAAAGTCGGCATAAAGGCGCCGAGCCACTTTCA  
CATCCATCACCAGCGCTTCCAGCCCGGAGGCGAGCTTCTTGAGAGGATGGAGCCGGTGATCATGGCGAT  
GGATTCAACGGTGGCGGTGATGTCCCCTACTGCATAGATACGCTTGTTCAGCGGGGGCCAGATCGCCGGTC  
TGGCCGATGATGGCGACACCCGCTCTTTCACCACTTTTCAGGAAAACGGTCGTTGTTCGACCGAGGTCTGGT  
AGCCGGGAATGGCATCCAGTTTATCGAGGGTACCGCCGGTGTGGCCAAAACACGACCGGAGATCATCGG  
CACGAAACCGCCGACGGCGGCCACCATCGGGCCAAGCATCAGAGAGACCACATCACCACACCGCCGGTG  
GAGTGTTTGTCAACAATCGGGCCACCCAGATTGAGGTGATCCAGGTGATCCAGGTGATCCAGGTGATCCAGGTG  
TGGCGCAGGTGACGGCTACCCGCTCATCCATGGTCATGTCTTTGAAGTAGACCGCCATCGCCAGCGCGGC  
GATCTGCCCTCGCCGATGGTGTGGTGGTAATGCCCTGAACGAAAGAAATTTGAATTTCTGGGTACTGAGC  
GCTTACCGTTGCGCTTCTTGCGAATAATTTCTTGAGGCAAAAACATCTTTCATTCCTCCCGCCATTGCT  
GGCGTTACACAAGCCTGAATCCTTGCCTGCACACCGCATGGTGGGGCTAACAGGGCGGACAGCCGTCGG  
CCCTCTCATCAACCTATTAGTAACCGCTGGTGTGGCCGGCTTGTTCGCCATGCCCCAGAGTGGCCAGCAG  
GCTGGCTAGCAGGCTGGATGCACCAAAGCGAAAGGTACGGGCAGATACCCAGTCGTTGCCGAGGATCTCT  
TCGGCCATGGCCAGGTACTGACCGGCAACGGCTGCATCTTTCACGCCACCAGCTGGCTTGAAGCCGACTT  
TCAGATTCTTGGCCTTGATCACTTCCATCATGATGCGTGGCGCTTCCGGAGTCGCATTGACCGGCACCTT  
GCCGGTGGAGGTCTTGATGAAGTCGGCACCGGCATCGATACAGATTTTCGGAAGCGCGACGGATCAGCGCC  
TCTTCTTTTCAGCTCGCCGGTTTCGATGATCACTTTCAGCAGCAGCTTGGCACCGCAGGCCTCTTTACAGG  
CTTTTACCAGATCAAACCAATCTGTTTATTACCGGCCATGAAGGCGCGGTACGGGAACACCACGTCCAC  
TTCGTCGGCACCGTAGGCGACAGCGGCACGGGTCTCGGCCACGGCGATCTCGATGTGCTGTTGCCGTGG  
GGGAAGTTGGTCACGGTGCGAATGCGTACGTTCGGCAGCGCCGATCTCACGCAGGGTCTTGCAGCGATAG  
GGATAAAACGGGGGTAGATGCAGACGGCGGGCGGCCAGGCCAGCCGGTGACTTGGCCCTTATGGCACAGGT  
GATCACCTTCTGATCGGTGTGTCATCGTTTTCAGGGTGGTCAGGTCCATCAGGTTCAGGGCGCGCTGAGCG  
GCCACTTTTCAGATCAGTCATTCTGTTCTCAAAGTCTCGATTTAATCCAGATAACCGGGCACACCATA  
CATCCAGCGATGGATGCACAGGCAGTAATCCCAGCTATACGGGAATGGAAATACAGTGGGAAGGCACCG  
GCACTATCGGGATGCTATTCAAACACCCCTGCAGGCACTGCGACTGTAATAAGGCAAGAGCCCTGTGTC  
TTTTTACAAAAGTGCAGCTTGGTTCATGAAGACTTGAGAAAAGGCCGACAACATCTGACCCGATCTCC  
CAATCAATTCATTTGACCGCCAAACCCGATTTTCATCGAGTATTAGTCATTGCCAGCACCTGCTGGCA  
ACGCCTATTTTCAGCCGAGATAACCCCTGTTTGAAGCCGGATTTGCCAATTTTCAGAGGTACCTCACATCT  
GGCAAATCCAGGTCTAAAAAAGCCTTACGAAAAAGAAACGAGTCAGGATCCAGGAGTAGGCCAATCCCCC  
AGATAGACCCCGACGATCCCCATTACCCCGGACAAAAACGGGAGGCGCCGGGATCGGCAATTTGAGGAAAG  
AAAACAACAAACCAACTATAAAGCCGGCCACCATCGCCAGTAGCACTTCATTCATATAAACCCTCCGATTTG  
ACTCATTATTTATTATTAGTTTAGATAGGAAAACGGTGTACCCTCCATACACGAACGCCACGGCAGATG  
CCGTGGCGTTCGTGTTTATACCCTGTGAGTCAGGCGGGCATTACATGCCGGACAGTGCCAGGAAGAAGCC  
TGCGATAGTGGCAGACATCAGGTTGGACAGAGAGCCAGCCAGTACGGCTTTCAGACCAAAGCGTGAATG  
GTGCCGCGGGCTTCGGCGCCATGGACCCCGACCCAGCAGGATGGCAACAGAGGAGAGGTTGGCAA  
AACCACACAGCGGAAGGAGATGATCGCCTTGGTGTGATCGGACATGGCCACACCGTTGATCAGCACTTC  
GTCTTTAAGGTACGGAGCGAAGTTTCAGGTAAGCCACGAACTCGTTCACTACCAGCTTCTGACCGATGAAG  
GAACCAGCAACCACTGCTTTCATTCCAAGGCACACCGATCAGGAAGGCCAGCGGGGAGAAGATCCAGCCCA  
GCAGCAGTTCCAGAGAGAGTTGCGGATAACCGAACCCAGCCACCCACACCGGAGAAGATGCCGTTGATCAT  
GGCGATCAGACCGATGAAGGCCAGCAGCATGGCACCGACGTTTCAGGGCCAGTTGCATACCGGCAGAGGCG  
CCAGCTGCAGCAGCGTCAATGACGTTGGCAGGCTTGTTCATCCAGCTCGGCATCGGCAGAGCTTTCGTGCT  
AGTTCGGGGTCTCGGTTTCGGGAACACAGCAGCTTGGCGAACAGCAGACCACCCGGTGCAGCCATGAAGGA  
GGCAGCAATCAGGTACTCCATCTTACGCCCCATGGAGGCGTAACCGGCCAGTACGGAACCGGCAACGGAA  
GCAAGAACACCACACATGACGGCAAACAGCTCGGAGTCAGTCATCTTGGCGATGTAGGGACGAACCACCA  
GCGGCGCTTCGGTCTGACCGACGAAGATGTTGGCAGTTGCAGACAGGGATTCGGTGCGGGAAGTACCCAG  
TACTTTCTGCAGACCGCCCGCCAGCAACTTGATGACCATCTGCATGATGCCCCAGGTAGTAGAGCACTGCA  
ATCAGGGAAAGAGAAGAAGATGATGACCGGCAGAACACGGAAAGGCAAAGACAAAGCCCGCCACCAGAAC  
CTTCAAACATCTTGTGCTGACCAGACCGCCAAAACAGGAAGTCGATCCCGTTCTGGCCGTAGCTGATCAC  
GCTGGATAACCGCTCGGACACGCCAGGATATCGCGACCAACCGGAACATAGAGAACAAACGCCCC  
AGACCGGCTTGAATTCGAACGCACCGACAACGGTACGGACGTTGATTGCCTTTCGATTTGCTGGAGAACA  
GCACCGGATAAAGACGAGCGTACCATCCCTACCAGACCCATGAACAAATTCATTATTATCTTCTCTTA  
GTAGCACCTGGCTTGTAGCGAGTTGTTATTAACCCAACTAATCAAGGGGAGCGCATTATACTAATTA  
AGTCCGATAAAAATAGAATGCTGGTCACATTTTATCGTTATCAAAATGTCCAAGTGTACAAAAATTAGACA  
GCAAACGATTTTTACGCTCATTTTTTTCTGACAATAAATCAGGTGTTGCCAATTTGTTTCATGGCTA  
TTGGTGTGATGGAAAATATGCCGGGCAGTTTCAAATAACACCTTGGTAACATCTATCGATGGTTCCCTCC  
CGAAAGTCATCAATATTTCTGCTATTTTCGGCAGCGCTTCCGGGGTATTCCGGGTGCCTTGTGCGCCTT  
GCAACGGCATATCGGGCGAATCGGTTTCAGCACCAGAGCCTCGAGCGGCATGGCCCGAAATACCTCTCG  
CGTCTTGTTCGCCGTTCAAACACTGATTACCCCGCCACCCCGAGTCGAAAGCCAGTTGCCAGAAGGCC  
TCCGCTGTGCAACGAACCGCTGAAAGCATGGATCACCCCGCCACGTGGCGGCTTGAAGCGGCGCAACA

GCTTGGCCACAGTGTTCATTGGCGCGCACCGAGTGGATCATCAGGGGGAGCCCGGCATCTGCAGCCAGCCG  
GATCTGAGCCTCAAACAGCGCAAGCTGCCCTCCTGCGGCACGTGAGAACGGAGGTCCAGCCACACTCG  
CCTATGGCCACCAGCCCGGCAGGCTGGCTCATTACCAGCGTTTCGTAGCCGCTCCATCACCCCTCCCCTG  
GTTACCCGGCATAACCAGGGATGAATGCCAGACCGTAAAAGAGGCCGTCATGTTGCTCTGCCAGTGCCAT  
CACACGAGTCCAGTTATCCTCTGCGATGGCAGGAATGATATACTCCGTCACCCCTAATGCCCGACAACGG  
GCCAGCAGCGCCTCCCTGTCTGGTGAACACCCGGAAAAGTCGAGATGGCAATGGGTATCTATCAGCTGCA  
TATCACTCACACCTGTTTGGCGTATTTAATGGGTCAATTGAACATGATGAACAACAGAAACAACGGCTTTA  
CCCTGATTGAAGTGGTGTGGTATCATAGTGTGGGGATCCTGGCCGTCACCGCCCTGCCCGCTTTTAT  
CAATATCAAGGATGATGCCCTGAAAAGCACGGTCTCGGCGACCCGAGGCAGCTTTGCCAGTGCAGTTTCCAG  
CTGGCTCATGTGGTGGGCGGTGAAAAGTCAGGGGCAAGCGATCGCGCTCTACAACCTAAGCAGCTTTG  
GTAAAGCGCATGTGGATATCAATCGATATGGTTGGCCGCGAGGACAAAAGAGGATTACTACAAAACCGGC  
AGACACACCCCTATAAGACCCGGCGCAGGCAACCATATCTCGGTCAATAATACTGAGGATTGCGAGTTGCTA  
TTTACTAACCTGCTAGATAGCAGTCAGAGCGTTGCTTCCACAGATCGGCCGTCACGCTGTTCAAAAAGCAGG  
CTGATTACCTCACACCATGATTGGCCCCGAGCCATCCGGATGAAGATGAAGGTAACGAGGCACACAATAA  
CTGCAGCTATATTCTTCGCGATTCTATCGGCCGCTTCCCGGATCACCCCAACGGCCCTGGCTTCGAGTAC  
AACAGTGTACCAGCGCCGTCACCCGCAATTTTGGATTGAGCTCAGCCTCTTCTGCGCAAGCTCGCTCTTT  
GCTTGAATCATCATATAACGAACCGGCGTGCAGCAGCGCCGGTTCCTGAGTGAGCCCCACTCCTCG  
CACCATGCATCGTAACGGGCCAGCCAACGCAGCAATATCCCTTTCATCGTCACACCTCCGCCAACAGGTT  
CAGGTCAAAAACCATCCTAATCAGAGTTGGCAAGGGGAGCAAGTCATCCCAATAACCGCGATCAGGCGGA  
ATAAAAAGAGCCGGTACAGATGGCTGACCGGCTCTTTTAACATTCCTTAAAGAGGTTATCCGATGAGCGA  
CAGCTCATCAGCCTCACAGACTCTTACGCTTCTTCCGGCAGGGCCAGCTCGTCTGTTGTGGTTAACGCC  
GATACCGCGCTCCAGCACATGACGGGCGATGGCGTGCGCCCTTCCAGCGAGTGATGCTGTAGGTGCCG  
CACTGATACTCGTTCAGCTCGGGGATCTTGGCCTGATCCTGCACGGTCAGCACGTCGCTCATGGCTGCCT  
GCCAAGCTGCGCCAACACGGGCTTCGTCCGGCGCGCCGATCAGGCTCATGTAGAAGCCGGTACGGCAACC  
CATGGGGGAGATGTGATGATCTCCACGCGTTCGCGTTCAGGTGGTCACGCATAAAAACCGGCCAACAGG  
TGTTCCAGCGTATGGATACCGCGCTCGGAGAGGATCTCCTGGTTAGGCACACAGAAACGCAGGTCGAACA  
CGGTAATAGTGTCTTGTTCGGGGTCTGCATGGTCTTGGCCACACGCACCGCTGGCGCTTCCATACGGGT  
GTGGTCAACCGGTAACAGTGTCCAATAACGGCATTTCTGACTCCTGATTTGGTTACCAGAACCACGCCCCG  
CGGGAGAGCTGACCTTGCATTGACGGTACTGGCGGCTAGCGCTGGGCGCGAGCTTACCTTACCTTGCAG  
AGGTTTTTCATCAACCACCCCTTGTGCGATAGCTGCCACGCCGTTAGCCACCCACCCCTTCGTGATAGTT  
GAGGTAAGTGGCCATAGGCATCCCACTTGGAGGTGCCATTGAGCCGCTGGGCTTGTAGTGTACCAACCC  
ATAAAATCGATGGCGTCGGCAAAAATCATCGCGGTCACCTCCAGCTGTTGCCGGTTCGCCGCTGGTAATCCG  
CCCAGGTTTCATCTTTGACCTGAGCATAACCATAAGCCGAACTGGCCCGCCCGGTCGGGATGAAGAGGAA  
ATACTGCATCGGCGGCTGAGCATCATGTACGTACGAGGATTCCTGATACATCATGGCCATCACACATGG  
ATCGGCGTCCCCACTTCTCATTCTTTCATCTTTCGAGCGCGCCTTGTGCCAGTCAGGCTTCTCGGAAAGATCT  
GGCACAGATTCTCCGGCTGGGCCGGTGGACGGGACTGCAGGCGGTCAGACCGGCCAGCAGGCCGGCCAC  
CGCAACGAGACGCATCCAGGACATCAGCGGGATCGAGTCTCCATTCGTTGGCTCATCACGAGGCACGGCA  
ATCTCATCAGATCGCGTCTTCGTTCTTTCGCCGGTACGGATACGAATGACACGCTCCACCTCGCAGACG  
AAGATCTTGCATACCAATCTTGCCTGACGGGCGGTGTTCGGATCGCTTCCAGGCAGGCATCGAGAT  
CCTCGTCTGCACCACCAGCTCCACCTTCACTTTCGGCAGAAAAGTCGACCATATATTCGGCACCCGCGATA  
GAGTTCCGGTATGGCCCTTCTGGCGGCCGAAGCCTTTGACTTCAGATACGGTCATGCCGTTGATGCCGATC  
TCGGCCAGGGCCTCGCGCACATCGTCCAGCTTGAACGGTTCGATGATGGCTTCAATCTTCTTCATGGTGA  
CTCCTTACCAGTTCGTTTGGCGAACC CGGATGTAATGGGGTAACGGCGATCCTTACCAAAGTTGCGAGC  
CGTAATGCGGGGCCCCGACCGCCGCTGACGGCGCTTGTATTTCGTTGAGATCCACCAGGCGGATCACCTTG  
CGCACACCGCTTCCCTCGAACCCCTTTCGCCACCATGTGCGCCACGGACGCATCCTCTTCCACGTAACGCT  
TGAGGATGGCATCCAAGATGTCTGATGGCGGAGGCTGTCTGATCCACCTGATCCGGTGGCAGCTGCTGC  
TGAAGGGGGGCGGTGATAAACCCTGCGGGATCACATAGTTCGACCGAGTTGCGATATTTCGCACAATTTG  
AATAACAGCGTCTTGGGCACATCTTTTCAGCACGTGAAAACCGCCCGCATGTCACCGTACAGGGTGGCAT  
AACCGACCGCATTTTCGCTCTTGTTCGCCGTTAGTCAGCACGATACGACGACGTTTGTGGAGAGCGCCAT  
CAGCAACACACCGCGGCAGCGGGCCTGCAGGTTCTCTTCGGTAGTATCACGGGCAGTGCCCTCAAACAGC  
GGCGTAGCTGGGCCATAAACCCCTTGAACATAGGCTCGATGGAGATGATGTTGAACTCAACCCCATCC  
GCTCTGCCTGCTCCTTGGCATCCTCCACGCTCATCTGGGCGGTATAGCGGAACGGCATCATACCCGCTG  
CACCTTGTGCGCCCCGATGGCATCGGCCGCGATGGCCAACGTCAGCGCCGAGTCGATGCCGCCGATAGG  
CCCAGCACAGCGCCGTGGAAGCCGTTCTTGGTAACGTAGTCGCGCACTGCCAGCACAGCGCCTGATAGG  
TCTCTGCCAACGGCTCAAGCGGCGCAGCCGGTTCACACTCTTTCACCGGCTGGCCATCAGCAAAAACGTAC  
CAGCGCCAGCTCTTCGGCAAACGGGGCCAGCTTGTGAGTCAACTCGCCCTGGCTACTGAACACCTTGGAG  
CAGCCGTCGAAAATCAGCTCGTCTGACCCGAGACCTGATTGAGGTAGACCAGCGGCAGACCGGCTGAT  
CGCAGCGCTCCGCCATCAGCTCGCGGCGGATCCAGGGTTTCTCCTGATCATAGGGCGAGGCGTTGATGGT  
GAGCAGCAGTTCCGGCCCCGCTGCCTTGGCGGCTAGCGCCGGGCCCGGTTGCCACAGGTTCTCGCAGATG  
AGCAGCCCTAGCTGGTGAACACGGAACGGCACACGCAGGTTCTCGGTTGCAGCGGTGAAGTAGCGCTTCT  
CATCGAACACGCCGTAGTTGGGCAGGTCCTGCTTGAAGTAGCGGGCAACCAGCTTGCCCTGCTCATAGAG

GGAAGCCGCATTGTAGAGCGCCTCCCCATCGCGCCAAGGGTGACCCACCAAATGGCACAGTTGCCCTGC  
CATTTCGGCGACACGAGCCAACGCAGCTTCGACCCGGATCATCAGATCGGCACGCAGCAACAGATCTTCCG  
GTGGATAGCCGGTCAGGGCCAGCTCGGAACAGACCAGCAGATCAGCGCCTTGCTGCTCGGCCTGAGCCGC  
CGCAGCGAGCACTTTGTCACTGTTATCTTCGATAGCGCCTACCGTCAGATCAACTGGGCAAGCATCAGA  
GAGAGGGCTTTTTGCCATGGCGATGCATCTTGAATTCGAAAATGATGGGGAATGATAAAGAAAAGGGGGG  
AATCTGCCAGTTCAAGACAGGCGTAACCGTGTGACAGCAACCAGCGGGAAGGATAAGCTGTAGATAGTCA  
CGGAACGACAGGCCTTCGAGATATGAAAAACGCCGGATTTACCCTGATGGAGTTGATGATAGCCATTGC  
ACTGGGCGTCATTCTCTTGGGGATTGGTATTCCTTCTTTAGGCTCTCTGCTCAAAGACAGCACGGCTAAC  
TATGAAAGCGAGCGGTTGATTAAGCTCCTGCGCTTTGCCCGCACCCAAGCTATCAGTGACCAGCAAACCG  
TCACCGCATGCCTAATAAACAACAATAACGAGTGTGTTGAACAGGATCCGGTTCAATTATTGGTTTTTCAT  
CGATGATGACGGTAATGCCGAGCTGGGCGAAGGGGAAGTAGAACTCGCACGCACACCAGCTTTTACTCCT  
GATGCCACCATCAGTTCAACCAGACCAGAGTCTTGTGTTGCCGCTGATGGAACCAGCCTAGGTACCAATA  
TGACCGTAAGGGTCTGCATCAGCGAAGAACCAGAGTTGATGTTGTAATCGCAGCATCAGGTGCGAGCAG  
TAAATCCGAAACCACCAGCATTTGCCCTTGACCACTATCTTGCTGCGAGTTTCTCTTGCCGTTGCGCAGC  
CTCAAGATTAATGGCTGTTCCGGTTGACTGACACTCGATAACTCTCTTACCATCAGGAGTTGCCCATTC  
AGTTCAAACCCTTTCTTTTGAAGACGATTTTACGACTCTGGCTATCCTTTATCGTTCCCTGAATAACGA  
CATAGGTATCATTGCAACTCGACATAGCATTCTTATCCAGCAGCATAGACATTGGCCGATTTGA  
CAACGCCATCAGCCAGAGGATCATTTCATTGTGGCTCATCTCATAACAGGTATATTTTCTTGGGCGTCA  
TATCCATTTACGCTCCTCCGCACCTTCGAACTCCCTCGCCGTTACAACGCTCAGGAACCCCTTC  
TCCTTCGCTCTTTGAGAATCACCTCTTCAACCGGGCACCACCAATAATCCGGATCTTTGAATCATACCA  
GCATGGATCACCAGATCATCGGCCACCTTGTATTTACTTCCACATAGCGTTCCGGGATTTCAATTACCAT  
CCTGATCCACCACATATTTGAAAGAGGTACCGTAATGCATGTCGACCATATACTGCCGCATGGGCGCTAT  
CGACTGGATCGTACACTCCTCGAATGACTGAACTGCGGCAAAAAAGAGGTGAAATAGAGCTTGCCCTGC  
AGCACAACCCAGACCCCATCGACTTCTCTCTGACTCGGCTAGCCAATATTTCCAACCCAAATTTACTGG  
TAATGGCAGCTCTCAAATAAGCAGGTCATTGGTGTCCGTGACACCAGCCAGAGGATCCACCGATACGTC  
ATACAAGTCCGTCATCGTGATAGGGGCTGGAGCAGCAGTGTATAACTCTTGGTAACCTACCCCGTAGTCA  
CGCAACATAAAATAGCGTTTTTGCACGGTAGACTCGGACGATGGGCGGTTTCGATCACCAGAACCAATCA  
ACACTGCATCGAATGGCTATCTTTGAACGAGAAATAATCTTCGCCACTAATTTACTGTCTGGTCACTTG  
CTTGTTTATAGTACGTACCAATAACAGCTGAGTGAAAAAGCGGCGGTCATTAGCCTGTACATCATCAGAC  
CCAAGACTGGCAAACCTTGAATAACTCCAGGAGCTAGTACTGGTTGAAGGCATATCCAGGCGCCAGATAT  
TGCCGCTGTATCACCAGCATAAATTCGGTTCAGTTTTTCCCATCACCATCACTGTCTAGAGTGGAACCTGA  
CCCCGGCATGCTATCAACCATCGCAGTCACCTGCTTGTGGTACTGGAGCCAGCTCCAGGTGTTGCGCTG  
AACACAAGAGCACCCTATCGGCATCGACCATGTAGACGCCCATACCCCTGCTGTCAGAGCTACCTATCC  
CGACTTTACTCTTATTGGCATCGTAACCACCGAAAAAACCATCACCAATCGCTTGTGCTCGGAGGAGC  
ATCCCAAGGAATATAAGCCACCTCCGGTACTGACCAGGTTTCCCCAGTAATGAGAAGCCCGCAGTCTGA  
CTATTGATCGTCCATTTCAAGCTGGGGGCATCTGGATTGGTAATATCGAGTGCATAGTAGCTACTACCAC  
CCCCTCGCAAACCGAAAAGCAGCCAGACAAAGTCTCCCTCGGATGCCTTGATAACACCATTCTGTTGGC  
ATCCTTGATCAACGCAACCGGTGAAGCATCAACACCGTAGATATGATCGCCAGACTCGGCATTGAGACGT  
AGAGCTTCTTGCTGGGCAACAGTTTCATAGGGGATCATGGCCAGCTTTCATCAACCGTACTACCGAGAT  
CTTTGAACATATGCAGGAAACCAGCATTGGTTCCCATAAAGGATCCGCAATCAGGGGTACAGGTACTCTG  
GCCTGAAGCAATGGAGCAACCATAATTGACCACCAATGGACGAGAGTGCAGGGGGTCTCCCACTATGTAT  
GGCCGAATGGTGGTACTGGCATCATAATCTTCATCGTCCACATCGACACCTTTTGTCCAGTCGATCTGTC  
CGTCAAGCTCGGTGGCACTGGCCAACCGCATGTAAGTACCAAGTTGTCGGCAGAGCCTGCGATCGACAC  
CAAATTTGGCTTTGTTAAAAGCATCCAATCGCTTGGGCGATGCAACCGTATTGATCATAAAGATTGCGA  
TTGGTCTTCTGTCAGCATGGCCTGCACGCCGCCCTTGGCAACCAGATTGCCATCCCGTTCCGATGACC  
AATAGGCTGAGCCTGATCCAGAATGGAACCATACCTTGATGGCGGGCAAACCGTTAACATCTGCCAC  
ATACCCATCACCAGACAAAATACTTCTTCAGGTTACCTTCCAGCGCGGCCCTGTATCAGGCTCGAAC  
ATGGCGTAATAGATATTATTGAGGCTGCGAGTCCGGTCAAAGTTGTTAGTGGTAATAGCTGGCGACACCA  
GAGAGGTGTTTATCCGCAAAATGGCTAACAGGGAAAGATCGCAACGCCTGAGTGAGCGCTTCAGCACTGAC  
CGCAGGGTAATATTGACCGCCTCCACGTCTCGCCGTTTCTGCCAGCAGATTGCCCGCCCCAGAGATCGCG  
TCATCACCAAACCCACGGTAAACGTGGTAAACAGTCTGCTTGCCGGGCGATGAAGTATTTACATCCTTGT  
TCTTCATGTAGCCAGCCATCGCTGCCAGATAGCTCTTGAAGTGCCGGAACCATATCCCACTGTTGAGCC  
GTAGGCAGCCGTTTCATCTGGGCTTAGCGAATCCGTCAACGCTTTTACTGCACTATCAGCAGCCGTATCG  
CTGGTCCGAGCACCATCAGTGACATAGATGACATAGCCATTATTTGAACATTTGTCATAAGGCGAGGTGT  
AAGTACCTTCCGGATCTTCAGCAAGCTTGTCCCGCTACCACCTTGCTTGCCATAAAGCACGGATTGCC  
TCCGTAGAAACGGTAGGCTTCATAGAGGGTTTTACATAATGGCGTATTGGTCTGATGCCGACAGGTCTTCC  
ACAGTATTGAGCAAGTCTGTTCCGGCAGTAATGGTGCCGACAATATCGTCTGTTACTGAGGATGCGACGCA  
CCACTCTGCCACCATTTGGTGTGGTACTATTGTTGGTATTGAAGATGGCCAAGCCGAAATCAACCCAGG  
AGTGGAGGAGATCACCGACTTGACTGCATCCTTGGCGATACGTAAGCGGATTCACCGGCATAACCCGTC  
GGCCCGTAATACCAGCGGATATAGTTGGCAGTGTAGAGAGTTACTGTTGTTGCTACCCGATGTGGCAT  
TATTCGATTAGCTGTGTAATACCACTCGCCGCGAGTGTGCTGGTTTTGTCGACCCGATAACCATCGCC

GACCGCCCCACCACCAGCGTTCCGTTGAAAGGATTGGCAGGATTGCGGTTCTGAATATCCTGCTTGCG  
TCGACAATGGTGATGTCATCTTCGTACTTGCCAGAGATGGTCTCCCAATCCCCCTGACGAGGTAATCCAT  
TGCGATAACTTGAATAGACATACGTCCAGACTTGGGACTGAAAAAACCAGCCGTGCTTAGGGGGTCTT  
TGATGAGGCGCATGCATTGATGCTGTGCGGAAAACGCCGAGAACTATTGATGGCGGGCACAGAACCATCG  
GTCGAGTAATAGATATAAATTACGCGAATTACTGGTATCAGGATCCCCGGCTCAGCGCTGGATAGACAGTGG  
CAGGATTATACTTTTCCCCTCCAGCTCCATGGTTTTCGGCCATACTGCCAGAGTTGTGAAAAATGATCAG  
CACCTTGGGCCGATAATCTCCCCTTTGAAAAAGTCATAGATGAACAGTTCGGTATCATCCGAGTAAGCA  
TCGCTGGCAACAGCTGGCACACTAAGTGCACACAGGGCCATCAGCCACAGTTTTCCATGATGTAACATCG  
CTGTGCTCCTATTACGCCGTCTTTAACAATGGCTGTTGACTCCAACCGTCCACGTCATAGGACGCCCC  
TGTTTTCCGTACGCTTGGCTTGCCCTCGAGCTCTACATAACGGCAGGCTGGTATGACGTTCTTGCTGGTCCG  
CGTCAAATCGGCGCTTGACACTGTTTCACTTCTATATTGCATGGTGGCGTTACCCATAGAGCCACTCAC  
TGTTGATGTTGCCGTCGAAACCGAAGGCATCTGAGCAATCTGGGTAGCAAGCCCTGCTTGCTGCATGGCG  
CCACCTATGATGCCCTCTACTCTGTGTTGACTTGTGTAACCGTGCCGCCCTCCACTAGCACGTAAT  
CCATGCCCCCAGATTGCATCAACACCACGGCAATCAAAGTCAAAGGGGCCAGAATCACCAGCGCCACGAT  
CAATGCCACACCAGTGAATGCTTCACTACCCACCTCCCACCATCACCATGGGATTACGCAGTACCACAG  
TACTTTCCAGCAACAAGCGTCGAAACCCATCCCATTGCCAGCCACGCTGATATCTCCCAGTTGATAGAC  
ATTGTTGTTGGTATAGCGACTGGATGCCTGCAGCGAGCGCACAAGCAAAAAAACAGGACTGCGATGACC  
CGCCCCCTCGCCCCACTCTTGGGAGGTGACTGCATCTATGGCGAAAACTTGTCTACACGACCATCCGGCA  
CATTGCTGGTATCGACCCCAAACAACAGCACCATGCGTTCAATACCATCAACCAAAGCCCCAGATATCAA  
CCAAGAACCGCCATCAGCAGTGAGGATACGCTTGGCGAGTTCAAACCCACCAGCACCATTAGGCGAGAGG  
TAATAGACATGATGCTGGTACTCCCAAATCTGACGCATCGGCATGGCCGCTCGGAAGGCGCAGTCTCAT  
TACCTCTGAATAAATGAGCCTGTTGAGTATTGGTGGCCATATAGAAACGATTGGCATCTAGTCTCTCTGT  
CACCGGATTGCCAATCAGGCGCTTGATACTGATAACATCCGAGCCAGCAACGCGAGTAGAAGATGAGATA  
CAGGCAAAACCACTCATGGTGCCTGCAGCACTGATATGAGTAACCCACAGCGGGCGTACTGGAAAAAGGT  
TGGAGGGTAGACTCCCTTCATTTCTCTCATCCAGACAGTCATTTGTCACGGTAGCATCAGCAGACAAAAGT  
GAGCTCATCACCCGCAATCAGAGCCCCCCCCGTGAAATCCCCCAAAACCCGGCCCAGCGTAAATCCTGA  
GTGATGAGACGCATGGCAATTCGACCATTTTCGAGCAGCTCACTCTGATCGAAGGACTCATTGGTGGTTG  
CGCGGGAGGCCACAAAAATACTCATCACCACCCGAGTAGAAAAACACCAATCACCATTGTGATGAGCCA  
TTCAACCAGCGTAAATCCATGATGTTTCACTAGCCGCTGCTCATCAGAACGAACTGACGCCCTGTTAAATCAA  
CACCTGCAATTCACATGCCGTCGTAATCGTTGACGCAACGCCATTTGCCCATCATGAGATGATTCACG  
TCCAGCCCCAAAAAATTGAGACCGTCAATGCATTACTGGCTCCCTTGATAATACAGCCGGTGGGATTTTGT  
AATGTTGCTCCGGCCCCGAAGCAGCACTTCCAATTAATGACTGTGCGCAATAATAAAGATCGAGATCCC  
GTAACTGAGCATCGCTACAGCTGCTCATAGTGCCATTTTCATTAGCGCAGGATGGCAATGATGAAGTTCC  
GGCGCTGACAATCCAGGTATTGTTAGCTTGGACTCCAGACTCCACGGTTGACTCTGAGCCTCTCGACC  
ATATCGTTAGCCAACCAGCTGGCAATTTGTTGTTGTCGGGCTTCATATCCGGAAAACTTCGACTGAGCCT  
GCATAGCAACCAGTCCCAGCAAGCCAAATGACAACACTACTGCCGCTATCATCACCTCCAGCAGGCTGAA  
TCCCCTCTCATGTGATGAAACATGAATGGCCATGGCTATTCCCAACAGCTATTGCTAGCTGCACCAGAGG  
CACTTTTGACGCCCAACTGATTAATGGAAAACACCGTGCAATCGGTATCTTTGGCTTGGGCCGTGCTCGC  
GCCAGCACTGGCTGACAAGGTGTAGGTGTTACCTGATACGGCAATTGATAATTGATACAGGCCATTCTCA  
GATGCACTACTGATACCAAGAGCAGCAGCAGAGGATGCATACTGATTGAAATCCATAAAAATAGTTTTCTT  
GCCGATTGGCTGCATTGAGCAGCATGGCCTTGGCTTCGACACGATGACTGGTCAGCACATATTGCTGATA  
GGCGGGATAAGCGATGGTGCCAAGAATCGCCACGATGGCGATGACAATCATCAACTCAATAAGAGAAAAG  
CCACGAAAGTATCCAATCATATCCCATCCTTGGTGACAGACTGCTTCATAAGTTTAAACGCCGAGCCTGTC  
TCTTGAACAAACCCGGCGTCATTATCAACACACTTATTCTTAAAGCCTTCTGGCTGCACTCAAATTAAT  
CTAAGTTCGGGAGGAACCTCAAAGACTACGTTCTCTTACGGCCAGGATGCTCGGCCACCACCTTGGCCAC  
CCAGCTCCCGCAGACGGGCAATCACGTTTTGCAACAGCACCCTCGGGGGCGGATGCGCCAGCAGTGCACCC  
GATCGCCTTACGCTTCCAGCCAGCTCGCCTCGATCATCGACGCATCGTTCGATAAGATAAGTTCGGGCG  
CCCACCTTCTCGGCCAGCTCGCGCAGACGGTTGGAGTTGGAGGAGTTGCGAGACCCCACCACCAACATGG  
CGTCCACCAGCCCTGCCATCTCCCGCACCAGCATCCTGACGGTTCTGGGTGGCGTAGCAGATATCATCCTT  
GCGCGGCCCTGGATCTTGGGGAAGTGCTTGCACAACGCATCGATGACGTCAGAGGTCATCCACGCTC  
AGGGTGGTCTGGGTGACAAAGCAGAGGTCATCCGGATTCTTACCTTGAGCTTGGCCACATCTTACGGCG  
TCTCCACCAGATACATGCCGCTTCGCGATTCTCGTACTGCCCCATGGTCCCGATCACCTCGGGGTGACC  
GGCGTGGCCGATGAGCACCAGCCTCGGAGCCCTTGGGCTGGCACGATGCACCTCCATGTGCACCTTGGTC  
ACCAGCGGACAGGTGGCATCGAATACTTGGAGGGCGGGACTTGGCCATCTCGCGCACTGTTTTGGCCA  
CGCCGTGAGCAGAAAAGATGACGATGCTGTGTCGGCACCTCGTCCAGCTCCTCGACGAAGACAGCGCC  
CGCATCTTTAGCTTGTTCACCACATAGCGGTTATGCACAACCTTCGTGGCGGACATAGATGGGGAAACCG  
AACTTCTCCAGCGCGCTCTCGACAATGCTGATAGCGGATCGACACCGGCGCAAAACCGCGAGGGTTAG  
CGAGCAGAATATCCATTAATGCACCTTCTCCTCATCATCAACGCCCAAGATCTCCACCTCGAAGGTGACG  
GTATGACCGGCCAGCGGGTGGTTGAAATCGACCGTCACCGACATCCCGGCTACCGCCCGGATGATGCCCC  
GCAGCTCGCTGCCATTGGGCTGATCGAACAGGATGATGGTGGCGACTTTTGGCTCCACATCGGCGCCAAA  
TTTGGCACGGTCGAGATGGTAGATATTGTGCGGATTGGAGAGACCAAAGGCCCTTCCGGCGCCAGAGTA



AAACTCTTGCTCTCCCCTTCGCACAGGCCAGCAGACACTGCTCGAAGGTGGGGGTCAGGCTGCCATCGC  
CCATCCGCAGGCGGGCTGGTTTTGCCGTGCAGCGCCGTGCTGTCGGCAACCGAGCCATCTTCCAGCTTGAT  
GGAGAAGTGGAAACAGCACGCTGCTGTTAGCGGTGATCTGCTGGCTCATGCCTGTTCCTTTTTCTCACCAC  
GGAAACCGTCCAGCACAAATCATGGCGGCCCGGATAAAGATAAAGCTGTCGGCCAGATTGAATGCCGGCCA  
GTGCGCACGCTGCCAGTAGAAGTCGAGGAAATCGACCACATGGCCCAACACCAGTCGATCAAAGACGTTG  
CCGAGGGCGCCGCCGATGATGAGTGAATAGGCGATACCGCTCCAACGCTGGGTACCGACTGCTTGCGCA  
GCCAGTGGATCAGCAATCCACAGATGGCAAAAAGCCAGCACCGCGAAGAACCAGCGCTGCCAGCCCCCTG  
ATCAGCCAGGAAGCTGAATGCGGCGCCCTTGTGTAGACGTGAACCAGATTGAAGAAGGGGGTGATCTCC  
ACCCCCGGGTAACCAAATGGCAGCAACTTGACCACGGCGAGCTTGTCTGCCTGGTCCAGTACAAAGGCCA  
GCATGCCAGCCACAGCCAACGCAGGCCGCTTTTATGTTGAGTCATGTTTCATCAGGCAAATTGACGAGTT  
TCGCCGTCACCCCTCAACGTTGGTCCACAGCAGCAGCAGCAGATCTCTTCGTGACCCGCGATAGTCCCACAT  
CTTCTACATGGTCCAGCAGCGGTGCACACTTGGCGGCTGCAGACTGGGCCACGCTCAGCCACAGGTCATC  
ACGCTCGGTGCGCACAGAGCCTTCCGGCGCAGTGTACGCTCCACAACCTTGGCTTTGGAGGTGAGCAGC  
ACAAAGCGCAGCTCATCAGCCAGGGCATTAGGGCTGCAGCCAGCTCCGGCTTGGCGAACAGGGTCAGTT  
CGGCCTGCAGGGAACCGCCGATACGCTTCTCGCCACGGGCCACTTCCAGCGCCTTGTTCACTTACCACG  
CACGGTGAAGATCTCGGCCAGAAATCGTCATTGAGGGTTTACCCGCTTCCAGCCGAACAGGCCGTCG  
TACCACTCTTCGGTGAAGACGAACCTCGCCGCGCTCACCCGGCAGCAGTGTCCAGATTTTCATCGGCGGTGA  
AGCTCATGATCGGCGCCATCCAGCGCACCATGGCCTCGGCATGTGATAGAGGGCGGTCTGGCAGGAGCG  
ACGGGCCAGGCTGTACGCTTGGCGGTGTAAGTGGCGATCCTTGTGACGTCAGATAGAAGGAGCCCATC  
TCGATGGAGCAGAAGTGCATCAGCTTCTGGGTTACGCCGTGGAAGTTGTACTCGTGAACGCTGCCATGA  
TCTCGGCCTGTACCGCTTTGGCACGACCAGCCAGCGATCCACTACCACCATGTCCGGCAGGCGCCAC  
CATGTCCGGTCCCGGATTGAAGCCGTTCAAGTTGGCCAGCAGGAAGCGGGCTGTGTTGCGAATACGGCGA  
TAAGCATCGGCAGAGCGCTTGAGGATCTCGTCCGAGACAGTCATCTCGCCGGTGTAGTCAGTGTCTCGCTA  
CCCACAGACGCAGGATGTCTGCCCCAGCTTGTTCATTACGTCTTCCGGGCTCACCCAGTTGCCGATGGA  
CTTGACATCTTGCGACCCTGACCATCAACAGTGAACCGTGAGTCAGCACCTGGTTGTAGGGAGCCTTG  
TCTTTCATGGCCACGCCGATCATCAGGGAGGACATGAACCAGCCACGGTGTGGTCCAGAACCTTCCAGAT  
ACATGTCCGGCCGGCTTGGCGTTGAACTCGGGACGGGCATCAACCACGGAAGCGTGGGTAGAACCAGGATC  
AAACCAAACCGCCAGAGTGTACGGCACCTTGTCTACATGTCGCGCATCGTACCCAGCAGCTCGGCCCTTG  
TCCAGATCCCACCATGCATGAATGCCGGACTCTCGACCCGCTTGGTACTTTCATGCATCAGGCGCACGG  
ATTCCGGATGCAGTTTCTGGGTCTCTTTATGGACGAACAGGGAGATGGGACACACCCAGGTACGCTGACG  
GGAGATGCACCAGTCAGGACGGTCTCGACCATCGCCTGAATGCGGTTTTTTACCCAGGCCGGTACCCAG  
CCGCTCTGGCCTTGCTGGGCAATACCGTCTTTCTCGATGCGCTCGATCTCTTCCAGCGCGCGCTTGCGCA  
GACCCTTCTGCTCCATGCTGATGAACCACTGCGGGGTGGCACGGAAGATGATCGGGGTCTTGTGACGCCA  
GCAGTGCAGGATAGGAGTGGTTGAACACCTTGTGGTGCAGCAGGGCGCCGCGCTCGGTCCAGCACTTCGATC  
ACGGAGGCATTGGCCTTGAACACATGCTGGCCGGCAAACAGTTTCGGTATCCGGCAGGTAAACACCGTTGC  
TGCCAACCGGGTTGGCCACTTCCAGACCGTACTTCTGACCGACCAGAAAGTCTTCTGACCGTGGCCAGG  
TGCGGTGTGAACGGCACCGGTACCGGCATCCAGGGTACGTCGATCACCCAGTACCACCGGCAGTCGAAG  
CTGTAGAAGGGGTGGTTGAAGCGCAGCAGCTCAAGCGCGGCCCTTGGCGTAACCCAGATTGTGGAAC  
TCTCGATACCGGCGCGATCCATTACATCCTTGACCAGCTCGGCGGCCAGGATCAGACGCTCGGGGTTCTC  
CCCTTCAACTTGACCAACGCATAGTCGAGGTGCGCGTGCATGGCGATGGCGCGGTTGGCTGGCAGGGTC  
CACGGAGTGGTGGTCCAGATCACCCGAGAGATCGGGCCCTTGCCGGTGTGGCCTTCCGGCGCAGTCAAAC  
TGGCGGCAACGGTGCCTCATCAACAGCCTTGAAGCGCACATCGATGGAGGGGGAGTTCTTGTCTGTAGTA  
CTCAACCTCGGCTTCCAGCAGTGCAGGACCAATCGGTACACCAGTGCACCGGCTTGGAGCCTTTGTGC  
AGGTGGCCGTTTTCAACGATCTTGGCCATGGAGCGGATGATGTTGGCTTCGGTGCCAAAATCCATGGTCA  
GGTAGGGATGTTCCAGTCGCCCAGCACACCCAGACGGATGAAGTCGGTCTTCTGCGCTTCGATCTGGGT  
CTTGGCGTATTTGCGGCACTCGGCGCGGAATTCGGCAGCGGAAACCTTCTCGCCCGGTTGCCGACCATG  
CCTTCCACTTTCAGTTCGATAGGCAGACCGTGGCAATCCCAACCCGGCACATAGGGGGAAATCGAAACCGG  
AGAGGCCCTTGGACTTGATGATGATGTCTTTGAGGATCTTGTGACCGAGTGACCGATGTGAATGTTGCC  
GTTTCGATAGGGGGGCCATCATGCAGAATGAAAGAAGGCTTGGCCGCTTGGCGCGGCAATAGCGCCG  
TAGAGATCCTGATCGTACCAACGTTTTCAGCATGTTGGGTTTCGCGCTTGGCCAGATCGCCACGCATCGGAA  
ACTCGGTTTTCCGGAAGATTAGGGTGTGTTTATAGTCGCTCATCAGTCTGGGTTCCCTTCTTTTCTAA  
AGAGTGTGGTAAATTGAATTGTGGCAGCCCGAACCAGGCTCGGGCCGCAAGGCATCTCGTTCGATCT  
GCTCTTTCAAGGCAGTGAAGAGGCAAACCTTCTGCTCTTCGCGCAGCTTGTGGCGAAGCAGCACCTTGC  
CTGCTGACCATATAGATCACCGAAAAATCAAATAGATGTAATCTTCCAATCTGGCTTGTGTACCCTCAAG  
GTCGGCCGTACACCCACATTGGCTACACCGGGGAAGGCTTTCGCGGAACATATCACTTCCACCGCAAACA  
CGCCACCGACCGGGATCACCTGGCGCTTGAAGGGCCAGATTGGCGGTGGGAAAACCTATGGTGCGCCCCAG  
CTTGTGCGCGTGGGCCACCCGGCCGCTGATGGTGTAGGGACGGCCAAGCATCAGCTCCACCTCCGCCATC  
CTGCCCGCTTTCAAGGACTCGCGTACGAGTGTGCTGCTGACCCGCTGCCGTTCCGAGCTGGAAGCTCTGGG  
TACTGATCACCTCAAAGCCGAAGCGATGACCCGCTCTCCAGCAGGTGGAAAGTCCCCTTCCCGCCCCCT  
GCCGAAGCGAAAATCGTCGCCGACCACAGATAGCGCACCCCGAGCTTCTCGACCAGCAACAGCTCGATG  
AAGGTCAGGGCCGCTGCTCGGCAAAGCGGTGACTGAAGCGCACGCAGAGCATGCGGTGATATGCAGCC

CCTGCAGCGCTTCGTACTTTTTCCCGCAACCGGCTCAGCCGGGCGGGCGCTGCCGTGCCGGCAAACAGTTC  
CAGCGGCTGCGGCTCAAACAGCATGACGCAGGCGGGCAATCCAGCTGGGCCGCTTTCTCCTTGAGACGT  
GCCAATACCGCATGGTGACCCCTGATGAACCCCATCAAAGTTGCCAATGGTTAATACACATCCCCGGTGAC  
GGGGCTTGAGATTGTGAATGCCGCGAATAAGCTCCATCAGTGCCCTGTGCGTTGCTGCCATGGAAATCGG  
CGGATTATATATCAGGCAGCAAGCAGGGTCAGCCCTCATAGCCTGATTTCAACTATCCGGGCCAATCCC  
GCCCATCTGCGGCGTCATGAGGCACTATCCCCATGGCGCCGAGGATCACGGCTACTGCTGCCCCGATTT  
AAGGTGACGCGGCCGAATGCCCAGCAGCAACACCACGGCATAGACCGCAGCCCCAGCGATAGCAGC  
ATGGTCAGCTGCAAACCTGGCCTTGCCCATGCTCCATGCGCCCCACTGGGTCAGATCCGGCGACAGATAGG  
CGAGCACGCCCCCATCAGCACGCTGGCGACCAGCAACTTGAGGCAGAACACGCCGGTATGGCGGGAGGG  
ACGATAGACACTCTGCTGGTACAACCCCTTTGAACAGCAAAGCCGCATTCAGGGTACCCGAGCAGCGGTC  
GAGAGCGCCACCCACGTAACCGAGCGGGTAGATGAAGATGAGGTTGCAAACCATGTTGGCAATCATCG  
ACATCACCCCGATCCGCAACCGCGTTTTGGTGTCTTGACGGCGTAGTAACCGGGCGCCAGCACCTTGAT  
CAGCATCAGGGAGAGCAGACCGGTAGTGGAGGCCAGCAGGCTGGCGCTCGACATGCTCACTTCATGCAGG  
CCAAATTCGCGCGCATGAACAGCACTCGCAAAAATGGGCTCGCGCATGACCGCAATGCCATCATGGCAG  
GCAGGCCGAGCAGCATCACCATCCGCACCCCCAATCCATGGTGCGGGAGAAAGTCCGCCGGATCGGCATC  
CACATGCTTCTTAGCCAGCGCAGGAGGATCACGGTACTGATGGCCACCGCAAAGAGGGCCGAGGGGAAAC  
TCCAGCAGGCGATCCGAGTAGTAGAGGTAAGTATGATGGCACCGGTCGCCAGGAAAGGCCAGCATGGTGT  
TGACCAGCAGATTGATCTGGCTGACCGAAACCCCGAACAGGGCGGGGATCATCAGGGTGGGATCTTCAC  
CACCCAGGGTGATTCCATCCCCACTTGGGCCATACCAGCATGTTGATTTGGCGCAAAAAGGGTACTGG  
AACAAAACTGCACCAACCGCCCAAAAAGACACCAATTGCCAGCGAGATCTCAGGTTTGTCCATCAGTG  
GCGCAATCCACCAGGCCCGCCGAATCATGGTGTGTTGAGAAACACCGGCGTAAACGACGAGACCGCAA  
GCGGCCGAAGGTGTTGAGGATAGCCCCCGCCATGGCGGTAAAGGTGATGAACCATAGGTAAGGGAAGGTG  
ATTTTGAGCATCAGACTGGCGAGCTCGAACTTCTCGGCCGAGGGCCCGCGTGCAGCCAGTCCCAGAACC  
AGCCCCAGCCAAACAGCGCGGTGAGCACACCCGACCCAGCACACCGAGCAGGGTGACCACAGTTACTAT  
CCCCCCCAGCGTGCCCGCAACCGCCGCGCAGCAATTCACGCACTTCCCCCTCGTCGCCATTTTTCTTGTA  
TCCGTCATCACGGGAACAAAGGCCTGGTTGAAGGCACCTTCGGCGAACAGGGCAGCGAGAAAGTTGGGAA  
TGCGATTGGCAAAAAGAAGACGTCGGCGGCCACCCCGCACCGAGCAGATTTGCGATGACTACATCGCG  
AACCAAGCCCATACCGCGGATGCCAGCTCATCCGGAACACTATCATGCCGGATTTGATCAATTTCTTA  
CTCAAGACGAGGCTCTGGAACGTGCAAGTGAAGAAGATGCTGCTAGAATCGGCCGACAGTTTAAACCGT  
CTCCCTACTGACACACCACCGGGAGGCGGTGTTTTATTTGCACAAATCATTTGACAAATATGTGGTTGGAAG  
GGCATATTTCCGGGCTTTTTCAATACACTCGCTAAGACAGTTTTTAGGAGTTTTTACCTTGGCTAACATCAA  
ATCTGCTAAGAAGCGCGCTCTTCAGTCAGAAAAACGCCGTCAGCACAAACGCCAGCCGTCGTTCCATGACC  
CGTACCTACCTGAAGAAAGTCATTGCTGCTATCGCCTCTGGCGACAAAAGCTGCTGCGACTGCCGCTTTCG  
CTGTTGCTCAGCCGATCATGGATCGTATGGCGACAAAGGCCTGATCCACAAGAACAAGCTGCTCGTCA  
CAAGAGCCGCTGTCTGCCAGATCAAAGCTATGGCTTAATCAGCTTCTGCTGATCAAAGCTGAAAAAC  
CGGCCTTAGTGCCGGTTTTTTATTTATCTGCGCTGCAATAAAGTCGATGCAGCAAACCTGATCATTTACG  
CACCTCATGGCTGCGCAGCGAATAGTAGACCGTCTGGGCTCTTTGCGCGTCGTCACCAGCTCATCCCGC  
CGCAGCAGCGCCAGGTGCTGTGACAAGGCCGACTGACTCAATCCAATCGTTCGTTGAGCTCCCCACTG  
ACAGTTTCGCGCTCCAGCAACTGGCACAGAATAAACAGCCGCCGCTCGTTGGCCAGCGCCTTGAGCAAGGC  
CACCGCTTTACTCGCATTGGCTTCCATCTCTTCAAGTTGCATCACATCTCTCCTCTACCACTCATCGCCG  
ATGATACGTGTTGACGGGCCGTTTTTAAAACGACAGGGTGGCCGGCTGGATGGCGGAGAAGTTCTCCTGCC  
CGGAAAAGAGAAAGGTAATAATCGCTCTCGCAGACCCGCTTCACCGCCGGATGCTGGATCATCCGCTCGGC  
GAAGATGACGTAATACTCCTCCATCAGATCCTGAGTTTCCCCGATCAGCATCACCCCTCCCCCTCGAGG  
ATCTCCTCCCGATAGATGGTGGGAGCCATGAAGATAACCTGATTGAAGAAGCCAAACGCCCTTCATCAAGG  
CGGCATCATCAAACCTCGCAAGAATGCTGGGAGAAAACCCCTGCTGCTCGAACCCTGGGTCAGCTGACG  
CCCCATGGCGGTACGGCGACCCGGGATCAGCAGCTTGCCTCTTCCAGACAGGCGGGAAAGGGCTTTTCA  
GGCAGCGGCGCTTGCAGAAGAAGCTGACGCCACAGCCGCCCAACCGCTTGGAGAGCAGCCCCGCATGCT  
GGCTGGAGTCCACTGGACAGTCGGAGAGGATCATATCGAGCTTGTGTTGCTCAGCTGCTCCAGCAGCAG  
TTCGTGGGTGATTCGAAACAGCGCAGATGGATGGAACCATCATTTGGGGATGACAGAGAGCAGCACGCGG  
CTGGCAAGACGCTTGGAGAGGGCATCGGCGATGCCGACGTCGAAACAGGATCTGGCTCTCCTTGGCGTAGT  
TGACGATATCGAGCATCTCGTAGGAGAGGCTGAACATCTTGTGCGCATAGCGAAACACCAGCTGGCCAG  
CTCGGTGCGCTCAAGAGAGCGCCCCCTTGGCTTTGAGCAGCTTGCCTCCGAGGCGCTGCTCCAGCAGCTTG  
ATCTGACCGGTGACGGTTTTGCGGGTCAAAAAAGGGCTTCCGCTGCTGGGTAACGGAGCCCTTCTTCT  
GAGTCATCCAGAAATAGTAGAGATGGTTGTAGTTAAGGTGTGACATCCGATGGGGTTCCCGCTTGACGCG  
GACTCCGGTAGCAGCTGAGTTCAACCGCCAGAATGTCATACATGTCGTAACCGAGTCAACCTTGTTCGC  
GCCAAACTGCTCCATCAGACTGGCCTTGAGGCGTGCTTGTCCGGCATCCGGTCAGCGCAATAACGCTTG  
TTGGAGCGCTTGACCATCTCGCCAGCCCCGGCTGCTCAGCGCCCGCTCGGAGAAGGTCTCGCCAAAGCGCG  
CCTTGGCCTGCTTGTCCCCCAGCAGCAGGGCACTGTCTACCACTCCGTTTCCAGATAGGCAGAGCAGTTTCGC  
CGAAGTGGCGTCTGCTTGAATCCTCCAGCCCGCCGGCCAGGCCGCGGGGCTCAACAACAGCATCAAC  
AACCTGTATGCAGCTTCATAGTCCCTCCGTAATCTGTTCCTTACCCTTGGGAAGGGCCATGCGCAA  
GGCCAGATAGCCGACTACCGCCGCATGGTGGAGCCACCAGGATCCCAGGCGAGAGTAGCTGCCGTA

TCCAGCCCACCGTGCTCGAAGGCGAGAGACGCGATAAACATCGACATGGTGAATCCGATGCCACAGAGGA  
TGCTGACCCGCAAAAATCTGCTTGAAGTTGACCCCGGGCGGCAACTGGGCGATGCCAGCTTGACCGACAG  
CCAGCTGATGGTGAACACCCCGAGCGGCTTGCCGATAAACAGCCCCAGCATGATCCCCATAGGTACCGGA  
CTCAGCAGGGAGGAGAGACCAATCCCCTCCAGCGATAACCCAGCGTTGGCAAAGGCAAACAGCGGCAGGA  
TCAGATAGGCACTCCAGGGGTGCAACTTGTGCTCCAGATACTTGAGCGGCGAGGCATAACGCTTGCCGTT  
AAGCGGAACCATAAAGCCCACCACCACCCGCCAGGGTGCATGGACACCAGACTTGAGCACCAGCAACC  
CAGAGCACCAGACCGACAGCATGTAGAGGCTGATCCTGTCTCACCACGACGATTCATCCAAAGCAGGG  
TGAGGGTTGCCAGAATACCGATGGCCAGCGCCTCCAGCGACAGCTGCTGGGTATAGAAAAGCGCGATGAT  
GATGATAACACCCAAGTCATCCATGATGGCCAGCGCCAACAGGAATACCTTGAGGCTCACCGGCACCCGC  
TTGCCGAGCAGCGCCATACCCCGAGGGCAAAGGCGATGTGCGTGCAGCCGGGATCGCCACCCAGCGC  
GCGCCACTTCATCCGAATAGTTGAAAAAGGCGTAGATCAAGGCCGAGCCAGCATGCCGCCACCAGCGC  
GATGGCCGGAAAAGTCGCTTGACCCGAGAGGAGAGCGCCCTTCCAGCATTTACGCTTCACTTCCAGA  
CCAACCAGCAGGAAGAAGATCGCCATAAAGCCATCGTTGATCCAGAGCAGCAGCGGCTTGTGATGTCGA  
GGGCCGCGATGCGCACCTGCACCGGCGTGTGAGAAAACGCTGATAACCCGCCAGCCAGCGCGGTATTGGC  
TAAAATCATTGCCAGCATGGCAGCCATGATCAGAAATAATTCCGGAGGCGGCTCCAGCTTCCAGAACTTT  
TTGATTACGTCACTCATGGTTAAATTTTCCACCGTATTGCTTTGGTTTGGTCTATCTCCGCAACAACC  
AATGGAAAATCGTTTCTTGTGCTCAATACAACGAAAAAACCGAAGGCAAAAATAGAACATAACCTGCTATA  
AGCAGGTTTTTCTCGTCTCTGGCTACCGTCTTATTAATCAATAAAAATGAATTTTCAATTATTTAACTGC  
ATAAAAAAGGCGCCCTGAGGCGCCTTGTATCAGATGGCGACGGGCGCCTTGATACCGGGGTGGGGATCA  
TAACCCCTCGATCTCGAAATCCTCGAACTTGTAGTCGAAGATGGAGTCAGTTTTCGCTTGATCACCAGGG  
TCGGCAGCGGGCGCGGCTCGCGGGAGAGCTGCAGGGCTGTCTGCTCCATGTGGTTGGAGTAGAGGTGCAC  
ATCACCGCCAGTCCAGACGAAGTCACCCACTTCCAGATTGCACTGCTGGGCCATCATGTGGGTGAGCAGG  
GCGTAGCTGGCGATGTTGAACGGCAGGCCGAGGAACACATCACAACCTGCGCTGGTAGAGCTGGCAGGAGA  
GCTTGCCGTCGCCACATAAAAATGGAAGAAGGCGTGGCAGGGAGCCAGCGCCATCTTGTCCAGTTCACC  
CACGTTCCAGGCGGATACGATGATGCGGCGGAATCGGGGTTGTGCTTGATGTCATCCACCGCCTTCTGG  
ATCTGGTCGATAACAGACCCGTCAGCCGAGGCCAGGAGCGCCACTGAGCGCCGTAACCCGGCCCCAGAT  
CGCCATTCTCATCGGCCACTCATCCAGATGCTGACGCCATTTTCTTCCAGATAGGCGGTATTGGTATC  
GCCATTGAGGAACAGAGCAGCTCGTGAATGATGGAGCGCAGGTGGCACTTCTTGGTGGTACCAGCGGG  
AAACCTTCGCGCCATGGAAGCGCATCTGATGGCCGAACAGAGAGACAGTACCAGTACCAGTACCAGTACC  
ACTTGACGGTGCCTCATCAAGGATTTTCTGCATCAGGTTCGAGATAAGCTCGCATTTATTTTCGCTCCTTC  
ACGGCATTACCGAACAACTGCGGACGCTTGTAGGCGGCCCAAATCATCAAGGCACCGGCGATAATCATCG  
GAGTGGAGAGGATCTGGCCCATGCTGATCTCTGGAAGTAGAGACCGAGCTGGCTGTCCGGCTGGCGCAC  
AAACTCCACCAGGAAACGGAACAGGCCGTAGAACAGCAGGAACATGCCAGAGATTGCGCCGCGCGGGGA  
TTCTTGGCCAGAACAGGTTGAGGATGATGAACAGCACCACCCCTTCCAGCGGAACTGATAGAGCTGGG  
AGGGATGACGCGGCTCGGGGCGGCTTCCGGGAAGATGATGGCCAGGGCACATCGGTGACCCGGCCCCA  
CAGTTCCGCGTTGAGGAAGTTGCCGATCCGGCCAACACCGAGACCAAACGGAATGAGCGGTGCCACAAAG  
TCGGCCACGGTGAAGAAGTGGCGCTTGGTCTTGTGGCAAACCAGATCATCGCGGTGATCACCCCGATCA  
GACCACCGTGAACGACATGCCGCCGGTCCAGATCTTGAACAGGTAGGTGGGATCCGCGAGGAAGAGATC  
GAAGTTGTAGAACAGCACGTAACCGACACGGCCACCGAGGATCACCCCGAGGAAACCGTAGAACAAACAGA  
TCCGACACCTCGTTGCGGGTCCAGCCGCTGTTCCGGCGCATCGGCGCGACGGCCGGCAAGCCACATGGCAA  
AAGCGAAACCGAACAGGTACATGAGACCATAACCAGCGTACCGATAGTGGTCCCAAACCTGAATGCTACGGG  
ATCAATCTGCGAGAAAACCAATATCCATCGTGTGCATATGCGGCCCCAGTCAAAAATAAAGCCGCATT  
TTCCGATCATTTCGTAGCAGGGACAAGGCATGATTATCAATCACTCTGTTTCGATTTATGACCGGCTCGC  
AGCAAACCGCCCAAACCATGCTCCTCCAGATAGCGGGCAAACAGGCCGCGCAGTACATGGGGTTGTGAT  
GTTTGGAGGCCATCGGCCATCAATTCGGTCAACTCGCTCAGGGTGGATTGACGCAGCACGTACTTGATCCG  
GGCGATGTTGTGGGTGTTTACTACTGAAGCGGCGATAGCCCATGGCAAGCAACAGCAGCACACCAGCCGGA  
TCACCGGCCAACTCGCCACACACCGACACCGGCTTCTGGTAGCGATGGGAAGCATCAACCAGCTGTTGCA  
GGGCGCGGATCACGGCAGGATGGAAGGCATCATAGATGTTGGCAACCCGGGAATTGTTGCGATCTACCGC  
CAGCAGGTATTGGGTGAGGTCGTTACTGCCACCGACAGAAATCGATGAGCGGCGCCATCTCCGGCAAG  
ATAAAGAGTGCTGAGGGCACCTCGATCATCACCCGAGGCTGGGGTAGCGGATCACCGCATCGCGGCTCG  
CCGCTCTTCCGACACCTCTCGCCACGCTGATCCAGCAGACGACGGGAGGCTTTGATTTCACTGACGCT  
GCTGATCATCGGCAGCATGATGGCCAGATTGTCCAGCCCTTCGCTGGCCCTCAGCATCGCCTTGAGCTGC  
ACCAGAAACAGTTCCGGGTGATCCAGGGTATCCGAATCCCCGCCAGCCAAGGAAGGGATTTTCTCGA  
CGATGGGGAAATAGGGTAACGGCTTGTCTCCGCCACATCCAGCGTCCGCATGCAGACCGGCCGGTTGCG  
GTAGGTCTCCAGAATGCCGCGATAACGGGCAGTCTGCTCCCACTCGGAGGGGAAACTCTCTGCAGCATA  
AAGGGGATCTCGGTGCGATAGAGACCGACCCCATCCGCCAGCTGATTGAGGGAGATCTCGGTATCGGCAC  
TGAGACCGGCTTGAGCAGCAGGGAGACCTTGGTGCCATCGGCGGTTTCCGGATGGCAGGTTGTGACGCT  
GCGCACCGGGTATCGAGCGCCGCTCTTTCGCTCAGCAGCTGACGATACTCTGTGAGGATCACCTGATTG  
GGCTCGATGAAGAGATCACCGCTGTAGCCATCGACGACCAGCATGCGACCGCCTATGTCAACCAAGGGGCA  
GATCAACCCCATGATGGCGGCCACCCCATGGCGCGGGCCAGAATGGCCGCGTGGGAGTTGGTCCCCC  
CTTGAGCGAGACCACCCCGGTGAGATACTCCCGAGGCACTTCCGCCAGAATGGTGGCGGTACCTCGTCCG

GCAACCAGCACCACCGGCTCACCGATGGAGATATGTTCCGGTTCATTCTGCACCAGTCGGCTGATCAGCC  
GCTGGGCAATATCCTTCACGTCGGTGGAGCGCTCCTGCAGGTAGGGATCCTTCATCCCCTTGAAGTGCCTC  
GATCAAACGATCGCTGATGAGCTTGACCGCCGAGACCGCAGTCCAGTGTCTCTTGTCCACCTTGTTCGCG  
ATCGGCTTGATATAACCGGGATCGTTTCAGCAGATGGAGGTAGATATCGAAGATCGCCACCGAATCCTGGC  
TGTAGCTCTCGCGAAAACGCAGCGCCAGACTCTCCAGGTTCGTGCCGCACTTCCCAACCGCCAGCTCCAG  
CCGCGCCAGCTGGCTGGCATGGTCTTCATCCTTTCGCGGGGTAATGGACGAGAGCGCCTTTCGCGGGCCGC  
CACACCCAGGCTTGGCCATGGCGATGCCGCTGGCACCGGCAATACCACGCAGTGGCTTGTCCAGTCCG  
TCTTCTGCAACCACACCTTGGCCTGCGCCTGGGCAATCCGCGCCGCCAGCTGGGCCCGCCAGGGTACCAT  
GAAGGACTCTTCCCCCTCATCGAAGCGGCGGCTCTCCTTCTGCTGCACCACCAGAAATGCCGACCACCTGA  
CGCTGGTGCATGATGGGAGCGCCGAGGAAGGAGCGGAACGCTCTTCGGCCACATCGGGCAGGAATTTGA  
AACTGGGATGCGCGGGGCATCAGCCAGGTTGATCAGCTCTTCCGCTGACCCACCAGACCAGCGATGCC  
CTGCTCGTAGGGCAGGGTACCTTGGCGACTGCGGACGGGGCCAAAGCCGTCCGTTAGCAGCCAGCGGATAG  
CGGCGCACCTCGGGTTCGAGACATAGACGGAGCAGCAGTCCACTGCCATGGCGTGGCGGGTCTGGCTCA  
CCAATGCTTGAAGGCTGCTCGAGGGTATTGGCCTCGGCCATGCTCTCGACGATACGTCTCAGTTCCGT  
TAAACAATACTGTGCTCCTTAAACGGGCGCGGTTGCGCCGCCATCCTTCTTGTGACTGCACTGCCG  
GCACTGGCATCGCCAGCGGGCAAACCTTTTCATGACCCGGCGATAAACTCCCCTTGAACGAGACGAC  
CTGACGCACCGGGTACCAGAAGCTGACCCAACGCCAGTCTCAAATTCGGGATGGCCATGACAGCCGAAC  
TGGATCCGCGACTCCTTGCCGAATTCAGCTGTAACAGGAACCAATTTTTGTTTTTGGCCAATACAGACCG  
GTGAAGTGTCCCAGCGGACAAGACGTTTTGGGTAAACGGTACTTTAGCCAGTTACGACTGGTGGCCATGAT  
GGTCACATCTTCGGGCTTGAGGCCAATCTCCTCATAAAGCTCTCGATACATGGCCTGCTCTGGCGTTTCA  
CCATCATCAACCCCCCTGCGGAAACTGCCAGGAGTGTGCCCATAGCGTTTAGCCACAACACTTGTCT  
CTTACGGTTACAGATCACGATACCGACATTGGGACGAAATCCGTCGCCATCAATCACGTGATCACCTTA  
TAAAGGCTGAATCTATAAGGAGATTGTTCCACATTCCTCCGTGGCAGCAAACAAGGAGTGAATCCCCTG  
TTTCATGAATAACTTTCAATTTCAAACATACTTATAAAACAAATCCAAGGATCCGCGCCCCAAGTTGCC  
ACCCAGGCTGTGCATAAAGCTGTTAGCAAACGGGTATATACAGTACTTTTTAACTGTACGCGAAAAGTAC  
CTCTCCGTATCACACGCGACATAAAATATAAAAAATCATTAATTTTTTATAAGCTTGAGATAAAACAAC  
GGATCTAGATCCATGTTCCACCAAGAGCCAGATCCATGATCCTGATGTGAACAAGTTCAACTGCTCAAA  
GATCCACCGCGCGCAATATCCACAGGAGTGGCACAATATCTACCCCGTTTACCCTGTAAAAATGGGGT  
GGCATTACAATTTTTTTAATCATATCAGCGACTCAACCCACTTTCATCCACTTATCCAAGATTTCTGTG  
GATAACTGTGTGAACATCATGCACAAACCCTTGGACAACATTTTCGAGGTCAAACCAGACTGGCTTAC  
TGCTCGATAAAACAGACAAAATCCTTTAAAATCATAATGATGAACTGATAACCCCCAAATTTCTCTGCATT  
TGATCTTATCCACTCAGGATCGGTTATAAAAAACAGCGATCCTTCTAGGGATCCTCCCCTGTTAGAATATG  
GCGAGCAAGATGGAGCCAATATGCCAAGCAATCCCAATCCGAGCAGGAGTTATTGAGCAGCGCTTATG  
CCATGGCCGGCTTACGCTGGCGCAGCTGGCCCGGAGGCTGGTGTTCGGGTGCCCAAAGACCTTCGCGG  
TGACAAGGGGTGGGTTCGGTTCAGTTGATCGAGCTGCAACTGGGAGCCAGCGCAGGGAGCAAGCCGGAGCAG  
GACTTCCCAGGCTGGGGATCGAACTCAAGACGATCCCGTGGATCCTCAAGGCAAACCGCTGGAGACCA  
CCTTCGTCTGCGTTGCCCCGCTGATCGGCGTCAGCGCCAGCACTGGGAGGAGTCCAACGTACGCAACAA  
GCTCTCCCAGGCTGCTTGGATCCCGGTGGAAGGCAGTCCGCGAGATCCCGGTTGGCGAGCGACGGGTCCGC  
ATGCCGCTCATGTGGAGCCCCGAATGAAGAGGAAGATCGGCTACTGCGTCAGGACTGGGAGGAGCTAATGG  
ACATGATAGTGTGGGAGAAGTGGAGCAGATCAGCGCACGCCACGGCCAGGTGATGCAACTGCGGCCCAA  
GGCGGCAACAACAAGGCGCTGACTCGCGCCATCGGCCCGGATGGTCAACCCATCATGACCCCTGCCCGC  
GGCTTCTATCTCAAGATCGACTTCACCCACAGTTTGTGCAACGCTATTTTTGCCCTTGGCGACTTGATCTG  
CCTTATCAACATCTTTGTATATGGTGGTATAAAAAATAGACAGGAGCCATTTTTAACTCACAGACAAGGA  
GGCGTTCATGCCACTGAGCAAACAGTTTTTTGAAGTCCAAGCCGAGGTCAAGGTGACCTTTGCCGTAGAGA  
AAGAGGCGGCTGCAGGGGCGGAACAGGTGATGCTGATCGGCGAGTTCAACCCAGTGGCAACCGGTCGAGCT  
GAAACGCATGAAGAGCGGCGAGTTCAAAGCCACCCCTCAATCTGCCGACCGACGGCCCGGGTACTTTGAA  
TATTGCTACCAGCTCATCACCCCGGAGGGGAGACCCTCTACGAGAATGACTGGGCAGCGGATGACTATG  
TGCCAGGCCCCCTTCGGGCGAGACAACCTCGGTGGTACGGGTTCATCCAGTAACGGCAACCAGAGAGCCAATA  
GACGGATACAAAAAAGGCTCGCCATTGGCGAGCCTTTTTCACTACCTGTCGAGCTATTTGCCGACATATCG  
ACACCAATTCGAATCGAATTAGTTGAGCTTCTCTTTGATACGAGCAGCTTTGCCGGACAGGTTGCGCAGG  
TAGTACAGTTTGGCGCGGCAACATCACACGACGCTTCAGTTCTACACTGTGGATCAGCGGAGAGTGAG  
TCTGGAATACACGCTCAACACCTTCGCCGTGGAGATCTTGCGAACGGTGAAAGCAGAGTGCAGACCGCG  
GTTACGCTTGGCAATAACGATGCCTTCGAAAGCCTGCAGACGCTCTTTACCACCTTCTTTAACACGAACT  
TGAACACGTACAGTGTCCCTGGGCAAAAGCCGGGATGTCGGTACGCAGTTGCTCTTGTTCAGCTGCT  
GAATAATCTTGTCTATTGTCTTTTCTTACCTAGGATAAACTGAAAACCTTACTTAACGCTGTCACGCACT  
TCGCGGACATACTCGGCAAGAAGTGATTCTTGTCTCAGTCAGAGCTAGGTTGTTAATAAGTTCCGGCC  
TTCTTTGCCAGGTTTCGTCCGAGCGACTGCTTGGAGACGCCAGCGTCGAATCACTTCGTGATTGCCGCTTGT  
CAGCGCCTCGGGCACCGCCAATCCATCCAACACCTCCGGCCGAGTGTAGTGGGGATGATCCAGCAAGCCA  
TCCGTAAAGGAGTCTTGTCTGGCACTGGCCTGATCACCCAAAACCCCGGGGACCAGACGCGAAAACCGCAT  
CGATCAGGGTTCATGGCAGGCAACTCGCCACCCTTAAACACATAATCCCGGATAGACCCTTCTCGTCCGAC  
TTCGGTTTTGTATCACCGGTTTCATCAATACCTTCGTATCGACCGGCTACCAGAATCAGTTTTCTGATTCGTC

GCCAACCTCGGTTACGCCCGCTTGAGTCAGCTTGGCTCCCTGAGGAGAGAGATAGATGACTTTTCGCCCCGT  
CTCCCGCTGCTTGGCTTGGCTGCATGAATCGCGTCACGCAGCGGCTGAACCATCATTAACATGCCGGGCC  
ACCACCATAAGGACGATCATCGACCGTACGGTGTGGTGTGGTAAACTCCCAGGACTCA  
ATCTGCAGCAGGCCACTCTTGACGGCCCCGACCGTTACCCCGTGGCTCGGTAATGGCTCGGAACATTTAG  
GGAAGAGGCTAATAACCCCAATCCACATAAGAAACCTCCGGCACCCTGTTAGCGCGGAAACTAGAAAC  
CAGGATCCCAATCAACTTCGATTGTTTCGAGCAGTCAGATCAATATTTCTTGATCACCTGCTCTTCCAGGAA  
CGGAATCAACCGCTCCTTTGCACCAAAGGCATCTTTTACATTTGGCTCAACCACCAACACATCGTTGGAG  
CCGGTTTCCATCAATTCGGTCACCTTGCTAGGTGCTATCCCTTGGTGGTCACCACGGAGCAACCAATCA  
GGTCACGCCAGTAGAACTCACCTTCAGGCAACGCAGGCAACAGATCGGCGGGTACGCCAATCTCGACATT  
GGTCAATGCCAGGCATCTTCGCGCACATCGATACCATCGAGTTTGCAGATCAGACCTTGTGTGACGT  
TTCCAGGATGAAACCCGAATTTACGCCACGCCCCCTTCTGATTAATCAGCCAGGGTGTAAATCGAAAA  
TCGCTTCGGCAACATCGGTGAAGGAGTTCACTTTAAGCCAGCCCTTGATGCCATAAACCGTACCCAGGGT  
GCCAGAACTACAGTTTTTCCACCTTAACTCCTTACCCTGGGCTGATTAAGCAGCTTTTTTGTAGCTCT  
TTGATCAGCTTGGCAACGCGGTGAGAAACAGCGGCACCAGTAGCAACCCCAATGCTCGATACGAGCCAGGT  
CCAGGTTTACGCTTTTACGCTTGACCAGCAGCAACCGGGTTGAAGAAACCAACGCGCTCGATGAAGCGACC  
GTCACGGGCGCAACGGCTGTGAGAACTACTACCTGGTAGAACGGACGCTTTTTTCGCGCCACCACGTTGT  
AAACGAATGGTTACCATATCGTCTCATTAACATCTAATGAACAAGGCCCGCAAACACGCGGACCCTAGC  
TTAAATAAGCCGCTAATTTCTACTTGGATTGTAATAATTTGCAACCAAGCCAGCCATTTTTTGTGCGAGA  
GCGGCAATGAAAAGGGCCTGCAACTGCAGACCCCCATCAACACGCAGGCCGATCAGAACGGGCCGCG  
ACCGCCACCGAACCCGGGGGGCATCATGTTCTTTCATCTGGCTCATCATCTTGCATGCGCCCTTGCCG  
GACATTTTTCTTTCATCATGCGCTGCATCTCGGTGAAGTGGTGGAGCAGCTTGTTCACATCCTGCACCTGCA  
TGCCGGAGCCTGCTGCGATACGGCGTTTTGCGGGAACCCCTTGATGAGATCGGGGTGGGCGCGCTCCTTCGG  
CGTCATGGAGCTGATGATGGCCTCCATCCGTACGGTGGAGCTTGTTCATCCATCTGATCTTTTACGTTATCC  
GGCAGCCCGGACATGCCGGGCGAGCTTGTTCGAGCATCCCCATCATGCCGCCATGTTGCGCATCTGGGCCA  
GCTGCTCGCGGAAATCTTCCAGATCGAAGCCTTTGCCACTCTTGACCTTGGTGGCCAGCTTGGCCGCTTT  
CTCTTTATCGACGTTGCGCTCGACTTCTTCGATCAGAGAGAGCACATCGCCATAACCGAGGATGCGGGAG  
GCAAGACGATCCGGGTGGAACGGCTCCAGCGCATCGGTTTTTTTCGCCATAACCGATAAACCTTGACCGGCT  
TGCCGGTGGATGTTGGCGCACCGCAGTGCAGCACCCACCGGGCGTCCGCATCCGCTTGGTGAGGATCAC  
ACCGGTAAGCGCGCAGCGCTTCGTTGAACGCTTACCAGGCTTGGCGGCTTGGCGGCATCCTGACCGGCTATGGCATCG  
ACCACGAACAGGGTCTCGACCGGCTTGATGGTGGCATGCAGATCCTGAATCTCGGCCATCATCTCGCTAT  
CGACGTGCAGACGACCGGCGGTATCGACGATCACCACGTCATAGAATTTCTTGCAGCGCTGATCGATGGC  
TGCGGTGGCGATGTGACCGGCTTCTGGCTGGCATCGCTCGGGAAAAAGTCGACGCGGATGTGCTGGCC  
AGGGTCTCCAGCTGCTTGGATCGCTGCTGGGCGATAAACGTCAGCACTGACCACCAGCACCTTCTTCTTGC  
TGCGCTCTTTGAGCAGCTTGGCCAGTTTGCCTAAGTGTGGTGGTCTTACCAGCCCCCTGCAGACCGGCCAT  
CAGGATGATCGCAGGCGGCTGGGCAGCCAGGTTGAGCTGTTGCTTGGCCTCCCCATCACGGTGACCAGT  
TCACCATGCACAATCTTGGATGAATGCCTGGCCGGGCTCAGGGATTTGGCCACTTCTTCCCGACTGCGC  
GCTCTTTGACACGCGCCACGAAATCACGCACTACCGGCAGGGCGACATCCGCTCGAGCAGCGCCATGCG  
GACTTCACGCAGGGTTTTCTTGGATATTGCTTTCGGTTCAGGCGACCACGGCCACTGACATTGCGCAAGGTG  
CGCGAGAGTGGTTAGTCAAATTTCTCAAACATGACGGATTCCGGTCTTGGCGTAATAAATTTGGGGGCAT  
TATAACCCAGAGCGGGCGGAGGACGATTATTACCCGACCCGACGAGCAGGAGCCCTTCTCCCTATATAT  
GGGCAGATCGGCCGTTGCACAACCTGGCGAGCACTTCTCGTGAAGGTATACTGCCCTCTTACCCTCAAA  
AGCTTGTGCAACAACGACCTGGTTATGATCGTAATCTCTGTTCTGGCCCTGGCGTTTTATCTGCTGGCCA  
TCATCGCCTCCCTGCATCTGTTACTGAGCGCAAGCCGGTGGGACAGCGCTCCCTGTTTGCCTGTATCGG  
ATTGGCCCTGATCGCCACGCCAGCGCCCTCGGTTTCAGAGGATTTGCAGAGTTACGGCCAGAACCTGAGC  
ATGCTCAACGTTGCCTCGCTGGTTCAGCCTCATCATCAGTTGCTTTCATGACCTGCGTGACCCGCCGCTTCA  
ACGGTGGATCCTGCTGCGGTTGGTCTACAGCTTCTCGGCCCTTACTGGCTGCCAGCGCCTTGATCCC  
GGGTCGCTACATAACCCATCTGGAGGCCATCCCCAGCTGTTGCTGCACATCGGCCCTCGCCCTGATGGCC  
TACTCGGTATTGATGATCGCCTGTCTGTTTTGCGCTGCAGCTCGCCTGTCTGGACAAGCAGCTTAAATCTC  
GAAAAATCAGCAACCTGCCAGCCATGCCGCCACTGATGACAGTGGAGAAACGGCTGTTTTCAGTTGATCTC  
TGCAGGGGTGCTGCTACTGACACTTTCCATCGCTTCCGGCCTCTTCTTCTCGAAGATATGTTCCGCCAG  
GGCAATCCCACAAGGCAGTGTCTCCATCCTGGCATGGTGTGTCTACGTGTTGCTGTTGTGGGGTTCATC  
ACACCTATGGCTGGCGCGGCCGAAAGTCATCACGCTCAGTCTGATCGGCAGCTTCTCCTGACTCTTGC  
CTACTTTGGCAGTGCCTTTGTCAAAGAAGTGTGTTGAGCTGACACCTATACTCTTTTAGCCATACCATC  
CAACAGGAGCCCTTTTTGGACAGCATCTCAACGAGTACATTACTGATTGTTCTCGTTATCTTGATCCTTC  
TTTTCCGCTTTTTTCTCCAGTGCAGAAACCGGCTTGGATGTCATCAACCCTACAAACTTCGGCATCTGGC  
ACAGACCAACACAAAGCCGACGTCGCGTCGAGCAACTGCTCGCCCGCCCCGATCGCCTGCTGGGGCTG  
ATCCTGATCGGCAACAATCTGGTCAATATCCTCGCCTCCGCCATCGCCACCATCGTCTGTATCCGGCTGT  
TTGGTGGATCTCGGGGTGCCATCGCCACCTTCGGGCTGACCTGGTGGTACTGGTATTCCGGTGAAGTGAC  
CCCCAAGACCCTGGCCGCATGTTTCCGGAGAAGATCGCCTATCCCGCCTCCTGGATCCTCAAGGGGCTG  
ATGGTGGCGCTCTACCGCTGGTCTGGCTGATCAACGGCATCACCAGCGGCCCTGCTCAAGATGCTGAAGA  
TCAATCCCAACAAGGATGACTCCCTCAACACCGAGGAGCTGCGCACCATCGTCAATGAGGCGGGTAACCT

GATCCCCCAGCGTCATCAGGAGATGCTGCTGAGCATTCTGGATCTCGACAAGATGCTGGTCGAGGACATC  
ATGGTGCCACGCAGCGATATCTACGCCATCGACATCAACGATGACTGGAAGAGCATCCAGCGCCAGCTGG  
CCCCTGCGCTCACACCAAGATCCTGCTCTATCGCGACAATATCGACGACGTTGTGCGCTTTTTGCACGC  
GCGCGATGCCCTGCGGCTGGTAGCCAGGGACCAGTTCAACAAATCGAGTCTGTTGCGGGAAGTGGACGAG  
ATCTACTTTCATTCCGGAAGGAACGCCGCTCAACGTGCAGCTGGCCAAATTCAGCGCAACAAGGAGCGAA  
TTGGCCTGATCGTCGACGAATACGGCGATATTCGAAGGTCTAATCACTCTGGACGACATTCCTGGAAGAGAT  
CGTGGGCGACTTACCACCTCCATGACGCCAGCGCCGAGCGACGAGATCCACCCCCAGTCAGATGGTTCT  
TATCTGGTTCGAAGGCTCAGCCAATATTCGTGAGCTGAACAAGGAGATGAACTGGCACCTGCCATCGACG  
GCCCCGCTACCCTCAACGGTCTGATCCTCGAATATCTGGAGGAGATACCCAGCCCAACATCGGGATCCG  
GTTGGCCGGTTATCCTATCGAGATCCTCGATGTGGAGAACAACATGGTGAAGATGGCGCGGATCATGCCA  
GCATCGTATCGGGCGGAGTCGGATTTCGCAAGATTGAAAAAGGGCTGCCAGTGGCAGCCCTTTTTCTATTGA  
TCATCTTCATCATCCGGCTCCAGCACCAGCGTCGGGATCAACTCGCCAAACACCCGTTGCAACTCGTTCGC  
GGTTGGCCAGCAGGTCTTGCAGCGTATAGCTGTCCATCACCGCCAGAAACGCATCCATCGCCTTTTTAG  
CGCACTCTTGAGCAAACAGACAGAGACGATGTGGCAAGCGGGCGAGCCGAGTCAATGCCGTCCAGATTA  
CCTTCCAGCGCCCTGATCACCTGCCCGATATTGATGGTGGCGGGATCGCAAGCCATGCGAATACCACCAT  
TCTTGGCCCGCTGGGATTGCAGATAGCCAGCTTACCAGCTGATTGACCACCTTACCATGTGGTTGCG  
GGAAACACCATAACAGGGCTGATACCTTGCAACGCTCGACAACCTCCCTTCCGGCAGGGTGGCAAGATAG  
AGCAGGGCTCTCAATCCGAAATCTGTATAACTGGTGTAGTCTCATAAAAACCTGATTAGCGCGATGCGAAAA  
GTGGAGTATTGATTCAAATCAAATAAACATCTAGGATGCCACTTATTAATGACATTTTATATGTTCAAT  
TAGAACGAGGGCCCTATGCTAGATCAAACCACCGTTGCCGTATCAAAGCACCATTCCGCTGCTCGAAT  
CGGCAGGTCTGCCCTCACCCAGCACTTCTACCAACGGATGTTTCAGCCATAACCCGGAGCTGAAAGATAT  
CTTCAACCTGGCCCATCAACGCAGTGGCGGCCAGCCGCTGGCCCTGTTCAATGCGGTTCGAGCTTATGCC  
AAGAATATCGACAATCTGGGGGCACTCGCTGGTGCAGTCGAGCGGATTCGCGCAAAACATAACCGGATTC  
TGATCCAGCCGGAACAATATCACATTGTAGGTAGTCATCTCTTGGCCACGCTCAAAGAATTGGGCGGAAG  
TGCGGTACCCGACGAAGTGTGGAAGCATGGGGCAAGGCGTATGGCGTGTGGCCGACATCTTCATCGGC  
CGCGAGCGGGAGATCTATCAGGAAAAGGCCAATCAGGATGGCGGCTGGCAAGGTACCCGTACCTTCATCA  
TCAAAGAGAAGCGGGCCGAAAGCGCCCTCATCACCTCCTTCTGCTGGCGCCGGAAGATGGCAAGCCGGT  
ACTGACCTTCAAACCCGGCCAATACCTCAGCATCAAGCTGGTGCACCCGAGCTCGAACATCAGAAATC  
CGCAGTATTCACTCTCGGATGCACCCGACCGCCGACTATCGCATCAGCGTCAAGCGCAGCAGCAGG  
GTCAGGTCTCCAACCTGCTGCACGATCACTGCAGGCGGGTGACAAGATCGAGGTAATGCCCCCCACCGG  
CGATTTCTACCTGAAAGCCGACAGCCAGACCCGGTCTACTGCTCTCCGCTGGTGTGCGGCTGACGCCG  
ATGATGAGCATGCTCAACCAGCTGCTGGCGAACGGCCATCAGGGTGATGTCACCTGGCTACACGCCTGCG  
AACAGGGCGCTGTACACGCCTTCCGGAAGGATATTCAGCAAAAAATCCCGCCAGCATCCCAACTTGCTGAG  
CCGGGTCTGGTATCGGGAGCCGAGGCCAGCGATGTACAGGGTGAAGATTACGACCTGGTCCGCACCATG  
GATCTGACTGCCGTGAAGGAGCGCATCACACCAGAGGCCACTACTACTTCTGTGGCCCCATCGGCTTCA  
TGCAGGAGATCAAGCGGCAGCTGCTGGCGGCTGGGGTGCCAGCCGGCAGCTCCATTACGAAGTTTTTTGG  
CCCCATCAAGATCTCTAAGGCGCGGGCAGCCATATAACAGAGGGAGGTTCCGGCCTGTCATGGCAGGGC  
GGCTGGAACCCGACCCACAGGTGCAGACCTGTGGGTCATTTTTTTTGGATCAGTGCATCGCCTTGGCGCGG  
GCCACCACGTTGGCCGGCATCCGGTTGCCAAGACGGTTGAGCAGAGTCGCCGCCCTTCTGGTGCAGCGCT  
TGTACCGATGACGGAGCCATGGAGCCAGCGATAGGCGTCTCATAATCGAGCGGACTGCCCATCCCCCTG  
CAACAGCATCTCGACCCACTCGATGCGAGCCCGCAGAAAAACCGAGGCTGGCCGCCCTCGCGCATCAGGGTC  
TCGGCTCGCACCAAAATCCTTCTGCACCAAGTTTCTTTCCAGTAGTAGCGGCCAACTGCTCCAGCGCCG  
GCGCCAACCCCTGATTGGCCGCCTCCACATATATTGCACCCGAGCTCGGCGTTGGACTTGGTACAGAC  
CCCCACGCGAGCATATCCCCCAGAGGAATTGATAGGCGGGATCTTCATCACCGAGGCGCGTGTCTCG  
ATATCCTGAGTCAGCTGACAGCGATCCTGCTTCACTGAGTGAAGATGGCGCCCTGCTCAATCCAGTTGA  
GCAGCTCGTCTGACGATAGAGCGGCACCGCCTGCAACTCGCCAGCGGCCAGAGGTGTGGGAGGCGTAC  
CACAGCGGCAGGCTCAGCCGGTTTTTGGCAGCGGCGCGGCCCTCGCCACTGCTGGCAACGGGTGTGACC  
GGCTCGGCCGGAAGCAAGACGGGGACTGCCTCAGAGGGCGCTGACGTAGCAGCAGAGACAGGGGCCGTTG  
CCACCGCAGCACTGCTTGGGTCAGTGGCGATGCAGTTGCTGCAGGCGCATCGCTCGATACGGCAGCCGA  
TACCGCCTCGGCACCATAGAGGGGCGCGGTGAATGCACCGACAAGAACGAGAAGGGTAAGGGTTTTTCATC  
ATAAGGATCTCCTGCTGCACTCTGTTATCGGCACCAAGCCCCATCCCTTAGCCTGCCGGGCGGATCTCA  
TCAATACAAAAGGGAGCCGAAGCTCCCTTGTGGCAGGTTGACCCGTTACTTGACGAAATCGACACCC  
AGCTGGATATCGGCTTTCAGGGTAGCCAGCATGCCTTCCATCGCTTCTGCTCGAAGGCGCTCAGCTTGC  
CGTAATCCAGTACGGTTTTCGACGCCATTCTTGCCAGCAGTACCGGCTGCGCGAAGAAGGTGGCGTGTCTC  
GCCATTGCCTTCCACATAGGCGCACTCGATGACGTTGGCTTCGCCCTGCAGACCTTGATGAGGGAGAGA  
CCAAAACGGCAAGCCGCTGACCCATGGAGAGGGTGGCGGAACCGCCACCGGCCCTGGCTTCTACCACCT  
CGGTACCGGCATTCTGGATGCGCTTGGTTCATGGCAGCCACTTCTTCAGCGGTGAAGGAGGCGCCTTCAAT  
CTGGGAGAGCAGCGGCAGGATAGTGACGCCACTGTGGCCACCGATCACGTTGACGCGAACCTTATCCACG  
TTCAACCTTTGGCGGCGGCCACGAAGGTCTCGGCGCGGATCACGTCCAGGGTGGTGACACCGAACAGAC  
GACGCTTGTATAGACACCGGCTTTCTTTCAGCACTTCGGCGGCGATGGCCACAGTAGTGTGACCGGGTT  
GGTGATGATGCCGATCAGTGCTTTCCGGCAAGTGGCCGCGCACTTCTCGACCAGATTTTTGACGATACCA

CGTTGATATTGAACAGGTTCGGAGCGATCCATCCCCGGCTTGCCTGCCACACCGGGCGGAGATCAGCACCA  
CATCGGCCCAACCAGCGCAGGAGTCGGATCTTACCAGCAGAAGCCCTTGATGGCGACGTGGTAGGAAT  
ATGACTGAGGTCAACGGCCACACCCGGGGTGACCGGGCGATGTCATACAGGCTCAGCTCGGAGCCAGCC  
GGCAGACGGTTTTTCAACAGCAGAGCGAGGGCTTGACCGATGCCACCAGCGGCACCCAGAACGGCAACTT  
TCATGATCAACTCCATGTTTTAAGCGTAGGTTTTAAGGTTGTTTTGTTGTTGTGCGCCCAACCTTAATGGATC  
CCCCATAAAAAACAATCTGATAACAGTTGCAGTCACGGGTTCTGTGAGCCACGAAACATGCGGGAGCAA  
AAATTGGAGGGAAATACAGAAAGTTGGAGGAGAAGCACAGTTTTTCTGCACTTCTCCTTACCATAAAGAG  
GTAGTTCTGAAGGTCTCAGGATTGGAATGCCAACGCCCGTTTTTACACCAGCGAAAACCAATTGTTAAC  
AATCCGTTTCATCGCCAGATAAAGCCCCGCCAGCCACCCCGAACACCGCCAGGGTATCGTAGGTCTGGGCGT  
TCAACCCCTCGCCAGCCCATGATGTCCATGATGGTACTGGCGAGGGAGCTCCCCTTGAGCAC  
CAGGATCACCTCGTTGGAGTAGGCAGGCACCCAGTACCGGGCGGCGTGGCGCACCTTCATCCACAAGGTC  
TGGCGGCCGTTAAAGCCAAGCGCACGACGCCCTTACCTACCGGCCGGGATGGCATCAAGCGCCCCCT  
TGAACAACCGGGTGGAGTAAGCCGCTGTGTTGAGACCCAGCGCCAGTACGGCGCAGAACCAGGGCTGCTT  
GAGCAGCGGCCAGAGCGGGCTGGCTTTCAGCCACTCGAACTGACCCGGCCGTAAGTAGATGAGGAAGATC  
TGGATAAGCAGCGGGCTGCCGGTAAAGAGCAGCACCCACAGCTGCACCAGCTGGGTGCTACCGGCAGGC  
GTAGCTCCAGCACCCAGGTCATCAGGGCTGCCAACACAATCCCCAGCAGCAGGCTGAACAGGGTCAGCTC  
CAGCGTGGTAACCAGACCCAGCAACGTAACGAGATACTCTTGCATCAGTTAGCCTCCGTAGCGGGCGG  
GTGTAGCGGGCAGCCAGCCCGAGGGCCGTAATCGCTCACCAGACTGATGGCCAGATAGATGAGGGCCGAG  
CGGCATAACCAAGTAAAAGGTTTCATAGGTAAGTGGCCGAGGCCATCTGGGCTGACGCATCATCTCGTTTAC  
CCCGATAAGCGCACACCAGCGCGGTATCTTTCAGCAGCACCAGCCACTGGTTGCCGAGGCCCGGCAGGGCG  
TGACGCCACGCTCGCGCAACACGATGCGAAAGAAGATGTGGCTCTTGCTCAACCCCAACGCCAGCGCCG  
CCAGCCGTTGACCTGAAGGCACCGCATTGAGCGCCGCCCGCAGGGTCTGGGTGCGATAGCTGGCGAACAG  
CAGGGAGAGCGCCAGCACGCCACAGGCGAACCGGACTGAACTCCACATACTCGCCAGTGAGGAGGAACAGC  
ACCTGGGTGAGCCGAAGTAGATAAAACAGCACCACCAGCAACTCGGGCAGGCCACGGATCAGCGTGGTCA  
GGGTGGCCACAGGCCACACCAATGCACGCTGCTTGTGAGCTCGGCGGCACTGAACGCCAGTGCCAATAC  
CATGCCCCCAACCAGTGATGCCAAGGCCAGCCGAGGGTTCATCCAGGCTGCATCCAACAACAGGCTCAAC  
ATGGCTTACTGCGCAAGTATTTGTGCAAGATTTTCTGATAGGTGCCGTTGGCTTGATCTCGGCCAGCC  
CCTTGTTCAGCTGAGTACGAGCTCCTGATTCGCTTGGCAACCGCGATGCCAAAGCCGGTACCGCAAGTA  
CTTGGCATCCGTCAGTGGCGTACCCACCAGCCACTCTTATGCTGCTTCAGCCAGCTCGGCTGCGACA  
GCAGTATCGGCAAGACACCGTCCGTTACGGCCATTTCATCATGTCGAGGAAGGCGCTCTGGTAGCTGGCGT  
ACGGCACGGTTCAGCAGGCCCTTGTCTACCCAGTTATCCACCAGATAGGACTGGTGAGAGGTACCGTTCTG  
CACGCCGACTGTCTTGTCTACCATCTCTTCCGGCCCCCTTGAAGGCCCTTCTTGGCGACGAATACTGCC  
GAGTTCTCGTAGTAGATGTGAGAGAAATCGACCTGCGCGGAGCGCTCAGGGGTTACGTCCATGGCGGCAA  
TGGCGGCATCATAGCGACGGAATTTGAGGCTGGGGATCAGGCTGTCAAAGCCCTGGTTGTGGAAGCTGCA  
CTCCAGCTTGGCCTGTTTCGAGATGGCACGGGCCAGATCGATGTCAAACCCCTGAAACTCGTTCTTGTCA  
TCCAGGTATTGCAACGGCGCGTAGGTGGCCTCGGTGGCGAACTTGATCTCTTTGGCCATGACGGAGGTAC  
TCAACAGGCCCATGGCAGCAACCAACAACAGACTCTTTTTCATGACAGCTTCTTATCGATTCAATATCA  
ATGCATCAAGAATTCGGCAAAACCGGCTGGTTTTGCGGGGATTTGAAAATGGCAGCGGTGCCGATTCGATG  
ATCCGCCCTTCTCCAGATAAATCACCTGGCTGGCCACCTTGCGGGCAAAGTCGACCTCGTGGGTACCA  
CCACCTGGGTAATGCCGCTGCTGGCTCAGGTTGCGGATGATCTCGGCCACCTCCTTGGTGATCTCGGGATC  
GAGGGCAGCTGTGCGCTCGTCAAACAGCAGCACTTCCGGGTCCATCATCAGGGTACGGGCAATGGCCACC  
CGCTGCTGCTGACCGCCGGAGAGACGGGCAGGCCAGGCATCGCGCTTGTGCGCCAGTTGCAGCTGGGCCA  
GCAGGTAGGCCCCCTTCTCGATGGCGGCTCCTTGTCTCATGCCGAGCACCTTGACCGGCGCTTCAATCAG  
ATTCTCCATCACAGTGAGATGTGGCCAGAGATTGACTGCTGGAACACCATCCCCACCTTGCAGCGCAGC  
AGTTGGGACTGGCGGTTGAATTCGGCAGCAGAGAGGGAGTTGCGGAAAGAAAAATCACTTTCGCCAATCC  
GCAGAACACCCGATCCGGGTATCCAGCAGGTTTCATCATCCGTAGCAGGGAACCTTACCAGCACCGCT  
CGGGCCCAGCAACACCAAGGTTTACCAGGGGATGTCCGAAAGCTGACCTGTTGCAGAACCAGGCACCTTG  
TGCCAGGACTTCTCGATACCTATTAATTCAAATACCCATACAGCCCAATTGAATAAGTTTTCAAAATTTCA  
TCCCATTCTATCCCTAATAAAGGTTGATGCAAGCCATTTTTGAATCAATATGCAGAACAAGCGCCGCTT  
CCTTGCAAAAAACGGCATATGAATGCAAAATGGCCCCGCTGTTGCTATCTGCCGCTGTATCGCACAGGC  
CGCCACACCTCCTCATTGCTGAGACCAAGATGAAACACAACGACAAGCAAGAAAAACTGGCCAAGGCCTT  
TAAAGCCTTGCTGAAAGAAGAGCGCTTTGGCTCCAGGCAGAAAATCGTCACCGCCCTGCAAGAGCTGGGC  
TTCGAGAACATCAACCAGTCCAAGGTATCGCGCATGCTGAGCCGCTTCCGGCGCGTTTCGCACTCGCAATG  
CCAAGATGGAGATGGTCTACTGCCTGCCAGTGGAACTGGGCGTGCCACCACCTCCAGCCCGCTCAAGAA  
TCTGGTGTGAGCGTCGATCACAACGGCGCACTGGTGGTGTATCCACACCAGCCCGGAGCAGCCAGCTG  
ATCGCCCGCTGCTCGACTCCCTCGGCAAGGCAGAGGGGATCCTCGGCACCATCGCCGGTGTGACACCA  
TCTTCATCACCCCGACCAGCGACACCGATATCGAAGAGCTCTACCTCTCCGCCCTCGAGCTGTTGCAACA  
GACGCCGTAATGGCCGCTACCGGCTCATCGCGGTCAAGCCAGAACGAAAAATCCCCGGCAAGGCCGGGAT  
TTTTGTTTTCTGTAGCTTCATCAGGCAGGCTTATTTGCCCTGCGCCATCAGAAAACCTTCCGATGGGGCG  
AAGAAAGCCCGCGCGGTACCCGCTTGGTGAAGCGCAGCAGGTGGTGAAGTGGCTGCCCTCCCCCTTGT  
ACATGCTGGCCAGCATGGCGTTGAAGTGTGCGGAGTGCAGCAGGAGATGAAGTAGAGCCCTGCTC

GGTCATGGTGCCCCAGGGCATGCTCTGGCGCAGGATCTCCATGGATTCCCCTTTCGGCGTCTTGAGGTTG  
ACCCGCTTGATGTGGGCGGTTCAGCGGCTTGGCAGCAGACTCATATTCGATGTTGTCAGGCTTGGTGCAC  
CGATAATGTCTTCTGCTCTTTTTGCGCCAGCTTCTCCAGTCGCTCATGGCGTGGACCCAGCGCTGGAC  
GTGAATGTAGGAGCCACCGGCAAACCTCGCCATCGGCCAGCAGCGCCACTTCGGCACGGTGTTCATCCTGC  
GGGTTCTCGGTGCCATCAACGAAACCGGTTCAGGTTCACGGAAATCCAGGTTGCGGAAACCGCGCACCTCTT  
CGGCCAGCTCGACCAGTCCGGCCAGCAGCGCCATCACACGGTGACCGGCGTGGTGCAGCACATCCACCCG  
ATCGGCGCGCAGCTGAATAAAGAGATCAAACGGGGTGTGGGGGCTTCCCTGACCGTTGGCGAATTGCGCC  
ATAAAGCTGCGGAACTGGGGCGGACGGGCGGCAGGGTAGAGACCATCCAGGCATCGGCGCCAACGGCAA  
CCAGACCGCTGAAACCGGCATCGGGGAAATCGGCGGTGACCGCTGCCAAAGGGCGGGCAGTTTGGCCAG  
ACAGCCGACCAAGTTCCGGCGGCATCGCCGGTACGATTGAACATCAGATAGAGGGCGTGCAGATTCGGCTCT  
GCGCAGATCCCAGCTTGGGCTTTCATATATCTCTCCCTGAGTAGGCGTTAGCGTTACGGGCTATTTGCG  
TTGCGCGATTATAAACAGAGTGGATCCAGTCTTTGATTTCACGACGATATCACGCGTTCAGGGCAAAG  
GGTCAAACAACACCAATCCATGGGGAGCGACCTTGATCCGTGCCCGCATCCCATCAAGGGGCTCGCCAAT  
GCTCGCCTCCAGCTGCAGATCGCCACACTCGAACAGCACCCGACAGTGGTGGCCGAGGAACTGCTGCTCC  
ACCACCTTGAGCTCCCCATCTGCGGCGCTCTCCAGCAGCAGTTGCTGGGGCGGAGCATCAGCTGCAACT  
TCTCGCCCACCGCGCGCCATGAGGCTCGCTGCCACAAATGACCCCGAGCGCCGCTGCACGCAGTGGCT  
GTCCACCACCTCGGCAGCCAGATAGTTGACCCCGCGAGAAACTCCGCCACGAAACGGTTTTTGGGGCGG  
CGATAGAGCTGCTCCGGCTGGCCACCTGCTCGATGTGACCGGCGGAAACAGCGCCAGCCGATCGGCGA  
AGGCGAACGCCTCCTCCTTGCTGTGGCTGACGAAGATGGCGCCGATCCCTGCTGCTTGAGCAGGGCGCG  
GATCTCGAGGATCAACTTCATCCGCACCTGGGTATCGATGTTGAAAAAGGTTTCATCCAGTAGCATCAGC  
CGCGGCTTGACACACCAGCGCCCGGGCGATGGCCACCCGCTGCTGCTGACACCCGAGAGCTGGTGCGGAT  
AGCGCTCCCCCAGCCCCCTGCAGATTGACCAGCGCCAGCGCCTCGTCCACCTGCTGCTGGCGGGCAGTGC  
GTCGAGTTTGGTCAGCCCCGAAGCCGACGTTGTTCGGCCACCGTCAGGTGGGGAAAAGAGGGCGTAATCCTGA  
AAGATCATGCCGATGTTGCGCGCCTCGGGCGGCACGCTGGCACCCGGCCCGTCGAGCAGGGTATCACCGA  
GGCGAATTGAGCCCTTGCCAACGGCAGCAGCCCGGCGATGGCCTTGAGCAGCGTGGTTTTGCCCGAGCC  
ACTGGCCCCCAGCAGGCAGACGATCTCGTTGTCTGCCACCGTCAGGGAGAGCTGTTCCAGCACATTTGCGG  
CCGTTGTAACGGCAGCTGACATTTTCAACCTGCAAACAGGACAAGGCTGACTTCCTCTCGTTTTCTGGCG  
CGCGCTGCTTTCGGTTGAGTTGACACACCCGATGCAATTTTCATGACCGACGCGGCGACTCAGTGCCTCC  
CGGACTGCTTACCTAGCTCGGTTGACCCAGATCAGCGGCAACAGCCACCAGCACAATGACGATAGCCCC  
AGCGCGCCACGCTCCAGCATCTCGTCCGAGACAACTGATAGACGTGGGTTCGCCAGAGTATCGAAGTTGA  
ACGGCCGACAGCAGCGGGCGGCGGCGAGCTCCTTCATGGATTTCGATAAACACCAGCATGGCACCCGGCAA  
CAGACCGCGGCGCACACCAGCGGCAGATGGACCCGCGCAGCATGCCGCCATCCCCCTGCCCCAGGGAGCGG  
GCAGCCATGTCGAGACTGGGGGAGATCTTGCCCATGCTGCTCTCCACCCAGCCGATGGCGATGGCCACGA  
AGCGCACCAAATAGCCGAACACGATGGCGGTGATGGTACCGGTCAGCAGCAAGCCCGGCCCTGACGCCC  
GAGCCACTCGGCCAAATCGTTGATGGCAAAGTCGAGGGCGGTGAGCGGCACCAGCACCCCGATGGCGAGC  
ACGGTACCCGGCATGGCGTAACCCATGGCGGCAATGCGCAGGGGCAACAACTCTTTATCCCGCCATCGA  
GGCGACGGAAGAATCCGAGCAGCAGGGCGATGCCCATCGCAATAGTGCCGTCAGCGCCGAGATAGCCAA  
GCTGTTGCGGGCGAAGCGGACAAACTCCGGCGTCCACGACAATTCGAAGTAGCGCACCCCGTAGTCGAGC  
AGGATGACGAATGGCAGGCCGAAACCGGCCAGCACCCAGCCCCAGCACCAGAAAGCGGCCAGCCAGCGAC  
TCATCCCCTTAAGCGGATAGCGCAGCGGCTGCTCATGGCCATGGACTTCTGGAACACCTGCTGCCGACT  
GCGCGAGCGACGCTCCAGCGGATCAGCAGCACCACTGCCAGCAACATCAGGCAGGAGAGTTTGGCCGCG  
GTGGCCAGACTACCGTAGCCGAGCCAGGTGTCATAGACCGCCGTGGTCAGGGTGTGATGGCAAAGAAGT  
GGACTGTGGCGAAATCGGCCAGCGTCTCCATGGCCACCAGCGATACAGCCACCATGATGGCGGGGCGCG  
CAGCGGCAGACTGAGACGACGAAAGCTCTGCCACGGGTACAGCCGAGCAGGCGGCTGGAGTGGATCAGG  
CTGACTGACTGCTCGAGAAAAGAGGCGCGGGTCAGCAGATAGACATAGGGGAACAGCACCCAGCGCCAGCA  
CCCAGGCGGCGCCCAAGGGAGCGAATGGCCGGAACCAAGTAATCGGCAGGGCTGTTCCAGCCAAAGAG  
AGCTCGCAGCCCGCCTGCAGCGGGCCCGAATAGTCGAGCAGGTCCGTATAGACGTAGGCAACGATATAG  
GAGGGCATCGCCATCGGCAGCATCAAGGCCACTGCAAAGCGCGCCCGCCCGGCACCTGACACATGGCCA  
CCAGCCAGGCGGTGGGCACGCCAAAACAGCAGGCTGAGCAGCACCCAGCCGACCACCAGCCCCAGGGTATT  
GCCAGATAATCGAGCAGCACGGTATCGGCGAGGTGGCGAAAAGAGATCTCCCTCAGCCGAGAAGGCAGAG  
AAAAGCAGGGCTATAACCGGTAAACCCAGCAGCAGGGCGATGGCCAGCTGCCGGTTCATCCATCCAAAAT  
TTTTTCATGAGACCACAGATGTTGATGGGGCCGTTGGCCCCATCTGATTACAAGTCGAACTTCACCTCATC  
CAGCAACTGCAAGGCGTCTTTCGGTGTGCTGGCGTAATCGCTGACCGGTAGTGCCTCAGACTTGAAACTG  
CCCCAGGACTTGACCATGGCGGAAGGCTCGACTCCGGCCTTGACCGGATATTCGGCGTTCACATCCGCAT  
ACATGTGCTGGGCGGTATCACCCAGCCAGAACTCCATCAGCTTCTGGGCTCGGCTTGTCTTGGCATA  
CTTGGTTCATGGCCACGCCGCTCACGTTGACGTGGGCACCGCGGTGACCTGGTTTCGGGAAGTTGATATAG  
ACCGCATCCGCCAGGACTTCTGCGACGGATCTTTCAACATGGCGCCCAGATAGTAGCTGTTGCCGAGCG  
ACACGTACAGATAACCATCTTGATCGCCTTGACCTGATCCCGGTGCTTGGCCCTGCGGCTTGCAGCGCCAG  
GTTGGCCTTGACCCCTTCAGCCAGGTTTTGGTCTCGGCCATGCCGTGATGGGCAATCATGGAGGAGACC  
AGCGCCACATTGTAATCATGCTTGCCTGCGGTCAGATTTTCCCTTTGAATTCGGTTTTGGCCAGAT  
CTTCGTAGCTGATGGTATCGAGCTTCCGAGGGCGCTCCTTGTGGAGTAGATGGCGGAACCCGGGTGGT



CAGGGCGAACCAGCGATTCTCCGGATCACGATAGATGGCGGGGATGTTCTCCTGCAGGATCTTGCTGTCC  
ACCGGCTGCACCAGCCCCTTGTCCACCAGATCGGTGACACGGCTGATGTCGACGGTCAGCATCAGGTCGG  
CCGGAGAGAGTTTGCCTTCCCGCTCCAGACGCTCGTTCAGCCCCCTTTGGCGAACACCAGTTCACCTT  
GATGCCAGATTCTTCTCGAACTGCTGGATGATGGGCTTGATCAGCTCATCTGCCGGTTGGAGTAGACA  
TTCACCTTCCCCGGCCGCAATGCCGACTGAGCTGCCAACGCAGAGAAAAGCCAGTGCCAACATCTTCATTT  
TCATCATCCATTCTTGTATTAGCTATACAGAGTGATAACGATTTCCGTTTGCATTCTGCATACATCTTAT  
AAGCGGATCAAGAAAGCTCGCCGTCGCCACATCACATATTTAATCGCCATAAATGAAAAGGGCCGGATG  
GAATCCCATTTCGGCCTCTTCTGAGCAAAACGTTATGTTGATCAGGCTTCAATAAGCGCTCACGCCATCGG  
GAATTCCCAGACATCGGGAGGTCAACAGATCTGTACGTCACGGATGCGGCTCATCACAGTGCCCTCGTCGTC  
ACTTTTCGCCGCTCGGATACGCACCCGCTTGCAGCAAGTCGTAGACAAAAGATCTTGCCGTCGCCGATCTTG  
CCGGTATAGGCGCCTTGCAGATCGCTGATCACCCTTCCACGTTATCATCGGCGGTGGCAATCTCCA  
GCTTACCTTGGGCAGGAAGTCGACCTGATACTCGCTCCCGGTATAAATTCGTTGTGTCCCTTCTGGCG  
GCCAAATCCCTTGCCTCGGACACGGTCAGCCCTTCCACCCCCAGGTTGGCAATAGCCTCGCGGACATCG  
TCCAACCTTGAACGGTTTGTATAATCGCACTAATCAGCTTTCATCTGGTTGCTCCCAATCCATGGTGTGT  
GAATCGGGTTTCAATTCTTATGCCAAGTATTTTTATTGTTTTATTTTCATATAGATAGAGTTTAAATGCCTG  
CGCCATTTCGCCAGGCACATCCCCATAACCGGCCAGCACGCCCCATAATGAGGCACCATGCTGCAGCGGTC  
AGCGGGTATGCACCAAACAAGAGCAAAACAGCATGTTAGTTATCTCCAACAGCGTCACGATTCCTTGCCA  
TGAGCTGCAATTTAGACCATGCGGGCACAGGGCAACGGCGGACAGCATGTCAACAAGACCGACTCCGCC  
GTCTGGCTGCGCTTCGATTACCGTAACTCTCCAGCCTGACGCCCTTACAAGGAGGTTCTCGACAAGC  
TGAGCGACAGCCGGGTACACGATGGCTTTATCCTGATCCGGGTCGAGAGCCATCGCAGCCAGGACATGAA  
CCGCAAGGAGGCGATGAGCCGCTGTTGGTGGAGTTGCTGAAGAAAAGCAGCCTGGCGCCCCAAGGCTCGCCAT  
GCCACCAAGCCGACCCGCAGCTCCCAGCGCAAACGGGTCGATGCCAAAAAGCGCAAGGGGGATATCAAGT  
CCGCCCCGGCAAACCGGTTCTGGACTGAGCCAACCCCCAGCCCCCAAAGGATGTCAGCCGATGAGATAC  
AGTTTTTTCGACAGCGCCCGCGCCCCCTGCTGGTCGCCATCGATCAGGATGGACTGCGCCACGTGGAGT  
TCATGCACGGGGAGCGCCCGTTCATGCCGAAACTGACTGGCAACGGGATGACAAGGCGCTGGCCCCCTA  
TCTTGGCCAGTTCACCGCCTATTTCCGCGAAAAGTTGCAGCAGTTCGATCTGCCATGGCAGCGAAGGGC  
ACTCCGTTTTCAGCAAACGGTATGGAACGCTTTGTGCGATATCCCTATGGCGAGACCGTGAGCTATCTCG  
AGATTGCCCAGGCGATAGGCAATCCCAAGGCGGTGCGGGCGGTAGGCGCTGCCAATGGGCGCAATCCGCT  
GAGCATCATAGTCCCTGCCATCGGCTGATCGGACGAGCGGGGAGCTGACCGGCTATGCTGGCGCGCATT  
CCCATCAAGCGCTGGTTGCTGGCACTAGAACAGGCAGCCACAACATTCGAGCTGGCCCCATGAGACGATG  
ACCGCCCCGAAAGGAACGGGACAATATCGCGACCAGAATGAAAAGGATTTCAATCAGTGGCCACGCTTT  
GCTGACAAGATGAACAGAAAATGAAGAATCGCCTCAGAACTACTTCAGATTGAGCTTGGCATGATGGTTC  
CATACTTGAATGGCACGGCTCATTGCTGATTCAAGTAGCACCCATGTGACGCTTCCAATCTGTCTTTTT  
CCCCGCGCCTCTCTGAGGCGCTTTTTTTGTGCCAACACAACAGGCTACCACCCGGGTTGAGTGGCCTGA  
GCGCCACAAAATCTGCACCAGCCCCAAAACCAAGAGGCGAAGGATCATCCTTCGCCTCTGACGTAACAGC  
GGGCTACTCGCTCTGGGGCAGGAACTGCAGTTCGGCGCCGAGGAGGTCAGCACATCGGCACAATAATCC  
CAGGTCGAGATGCGATAGTGTGCTGCAGATCTTCATCCAGATGCAGGCCGTCCGACTCCTGATGGAACCAGC  
TGGCAAAACGGGATGGGGTGTGAGCTGGATCTGCTCTTCGATAGCGTACTATCCTTCCCCCTCGGCCAG  
ATCGCAATCCTCGATGACCCGCAGGGCATAGATATGGCGAAAATAGACCCGGCAGAGGATTTGCGGGGGC  
AAATCGATGCTGCGTGCCCGACCCAGCATGATGGTCAGGGAGTCGCTCCAGATATCCTGATGCAGCTCGG  
CAACGACCAGCCCGGTGGGAGCTGGCGGGACGGAGCCCAAGGTACGGCAACCTGCCGAATGGCATTTTT  
CTGTTCCATATTCACCTCACGACGACTCGCTCCCTGTCTTGTGATCTATCTGAACCACATAGTCCCGGCGA  
AGGCAATCGATGGACAATAAAAACGGCAATAAAAAGCCGACGTATCAAACGTCGGCGAATAAAAAGTGC  
TTACAACAGAGGATTCACATATTCAGACCCGCGGGTCGAAAGATTGGTTCCCTCTTTTTGTAAATTAATTT  
TCGGCGCGTTTTAAACATCAGGGTATTGGCGTCCGACTCTTCCGGTACGAAAGTAGTAGCCCTCGGCGTTGA  
AACCGGTCAGCTGTTCCACCTCGGTGAGCGGTGCTTGTGATGATGTGGCGAGCCATCATCCCGCGCCCTT  
CTTGGCGTAGAAACTGATGATCTTGAACCTGGCCGTTCTTCTCATCCTTGAACACCGGCGTGACGATCCCG  
CCTTTTCAGGCTCTTGGGTGCTACCGACTTGAATACTCGTTCGGAGGCCAAATGATCAGCACCTCATCCC  
CCTGGGCTGCCAGCGCGTTCGTTGAGGTGGTGTGATCACCTCGCCCCAGAACTGGTAGAGATCCTTGCC  
GCGATCATTGTGAGCCTGGTCCCCATCTCCAGCCGATAGGGCATCATGAGATCGAGCGGACGCAGCACG  
CCATAGAGGCGGAGAGCATCCGCAGGTGTGCTGAGCGAAGTCAAAAATCGGCCCTCGCTGAAATCCTCCA  
CCGCCAAACCGGTGTAGACATCCCCCTTGAAGGCCAGCAGCGCTGACGGGCATTGGCGGGGGTGAATC  
TGGCTGCCACTCGGCAAACCGGGCGGCATTGAGACCGGCCAGCTTGTCACTGATCTTCATCAGTGTGGCG  
ATCTGGTCAGGGCTCAGTTGGCGGGCACGACTAATCAGTTCGGCAGAGTATCCAGCAGCTCGGGTTGGG  
TGAAACGGGGGGTACCAGCGGTGACTCGTAATCCAGCGTCTTGGCCGGGGAAACCACAATCAGCATAAC  
GTTCTTTTATGGCGAGGGGCCGAACGGCAGAGCGGCCCATGATTCATTCATCCAGCGTCACATTTGTCCA  
GCGTGCCGGTACCGAGCCGCTCGCGACCCGGAGAGCTTGATCAGCAGTCGCAGGTCGTTGGCCGAGTCAGC  
GTGGGCGAGTGCCTCACTGTAGCCAATCTGGCCGGCGCAGAACAGGCTGAAGAGCGCCTGATCGAATGTC  
TGCATACCCAGCTCGGTGGATTTGGTCATCACCTCCTTGGAGCGATGCATCTCTCCCTTGGCGATGATGT  
CGGTGATGAGCGGGGATTGAGCAGGATCTCGAACCGGGCGCAGCGCCGCTTGCATCCATACTCGGCAC  
CAACTGCTGGGCGACGATGGCCTTGGAGTTGAAAGAGAGATCGAACAGGAACGGCGGTGTTTGTCTTGC

GGCACCAGATGGAGAATGCGATCCAGCGCCTGGTTGGCATTGTTGGCATGCAAAGTAGCGAGACAAAGAT  
GGCCCGTCTCGGCAAACCTGCAGGGCAAACCTCCATGGTCTCCTGACTTCGGATCTCGCCGATCAGGATCAC  
GTCCGGCGCCTGACGCAGCGAGCTTTTTAGCGCCACATCGAATGACTCGGTGTCGATCCCCACCTCTCGC  
TGGGTACCAGACTGCGACCATGCTGATGGACGAACTCCACCGGATCTCCACCGTCAGAATGTGACCAT  
CGGCATGCTGGTTGCGATAGCCGATCATCGCCGCCTGAGTAGTCGATTTGCCCGCCCCGGTGGCGCCGAC  
AAACAGCACCAGCCCCGCTTGGCCATCGCCACCTCTTGCAGGATCTTGGGTAGCTGCAGATCTTCAAAG  
GTGGGAATGCGGGTCTCGATACGCCGACCACCATGCCGGCAGCTCCTGCTGCCAGAAGGCACCTGACCC  
GAAAACGGCCAAGCGCTTCGCGATAGATCGCGTAGTTGGCCTCCTTGGTGCGGATATAGCGCTCGAAGTG  
ATCGCTGCTGAGGGTATCCCTGACCAGCGTCAGTGGCCCTCTTGTGTCGAGCGCTCCCCCCCCAGCGAC  
ACAAGATGGCCATTACCTTGAGGGTGGGCGGCGAGCCACCGTCAAAAACAGATCCGATCCCTTTTCGCT  
CGACCAGTCTGCTCAGCAGATCATCCAGATTCATCATCTATCCCTCCCTGGGTGCGAGTCTTAAATGC  
TGTTGGGATCGACGGCCTTGGCCTTGGCATCGAGGGATGCCACCACGCCACGACTCACCAGCTGCTTGA  
GCTCTGATCCATGGTCTGCATGCCGTGGGTTCATCCCGGTCTGGATCACCGAGTAGAGCTGGGCAATCTTG  
TCCTCCCGAATGAGGTTACGCACCCGCCGAATGCCCATCATGATCTCGTGAGCCGCCACCCGACCGCCAC  
CGATACGCTTGAGCAGGGTCTGGGAGATAACCGCCCGCAGGGATTCCGAGAGCATGGAGCGCACCATGTC  
CTTCTCCGCACCTGGGAAGACGTCGATGATACGGTTCGATGGTCTTGGCCGCCGACGAGGTGTGCAGGGTG  
CCAAACACCAGATGGCCAGTTTCGGCGGCGGTTCATGGCCAAACGAATGGTCTCAAGGTCGCGCATCTCGC  
CCACCAGAATGATGTCCGGGTCTTCCCGCAGTGGCAGCGCAGGGCGTTGCTGAAGCTCTTGGTATCTCG  
ATGTACTTCCCGCTGGTTCACCAGACAGCGCTTGTCTCGTGACGAATTCGATGGGATCCTCGATGGTG  
AGGATGTGGTGTGGAAGTTCTCGTTGATGTAGTTGACCATGGCCGCCAAAGTGGTGCAGTTACCCGAGC  
CGGTCCGGCCCGGTACCAACACCAGACCACGCGGGAACCTCGGCGATCTTGCAGGAAGATCTCCGGCGCATC  
GAGATCCTCGAGGCTCAGCACAGTGTGGGGATGGTACGAAATACCGCGCCCGAACCAGCGCGCCTGCTGG  
AAGGCATTGACCCGAAACGGGCCAGATTGGGCACCTCGAACGAGAAGTCGACCTCGAAGTTCTCCTCCA  
GCTCCTTGGCGCTGATGGTTCATGATGTTCGTAATGAGGGCATGCACTTCCCGGTGTTCCAGGGCGGG  
CAAATTGATCTTGCGAACCTCACCATCAACCTGATCATCGGGGGAAACCCCGGCCGAGAGGTGTAGATCC  
GAGGCTTTATGCTTTACACTGAAAGCCAATAACTCTGTGATATCCATAGACTTGTCAATCTCCCATCACA  
AGTACTACTAACGAAATATGAACCAGATTGCCAGCACCTGTTTCAGGTAAGGAACGTATTGCCAGGCC  
GCCGAACGGGCGAGCCGCAACCTGCAGCAGATCCGCTTGTGCGCAATCCTACGCTCAGGAACAGCGCCAA  
CCATCATAGGGCCGCCATCCCGCAGGTTCAGCTGCTTTGGCGAATCCTACGCTCAGGAACAGCGCCAA  
GATCGATACCTTGCGCCAGCAGCCGGAATATAGCGACATAGAGTGGCACTTTATCGGCCCTTTCGAATCG  
AACAAATCCAAACTGGTTCGCCGAACGGTTTTGACTGGGTGCAGAGCGTGGATCGGGACAAGCTGATCGACC  
GCCTCAGCAACCAGCGCCCAACTACAATGGCACCGCTAAATGTTTGTCTACAAATCAATATTAGCGGAGA  
GAGCAGTAAATCCGGAACGTTCGGAACAAGAGATTTTCCGCCTTGCCGAGCAGGTCTCCCACAGTGACCGA  
CTGGTGTGCGGGGGCTGATGGCAATTCGGAACACACCAGTGACGAGAGCGTACTGGCCGCCCAAATGA  
CCCGTATGCAGACTCTGTTACCGAGCTTGCAGCACAATACCCACGGTGGATAACCCTCTCGATGGGGAT  
GACCGAGGATCTTGAACCTGGCGATAGCCACGGCAGCACCATGGTGCGGGTGCGCACCGCCATCTTCGGC  
GCCCGTACTACTCATAGGCAAGGCCAGCGGATAACCAATACGTCCACCTCTTGCAGGACTTTCATCAAC  
AGGAGCGTTTTGATGGAACACCGAATCTTGGCGTTCAGGTGGTGCAGGCAGCACCCACCCCGCCGACCCC  
ATGTGCTACAGGAGCATCTGATGCAGCATAGAACGCTGGCCTTTATCGGCCGCGGGCAACATGAGCCGAG  
CATCATCGCCGACTGGTCAAGGCGGGTTATCCCGCCGGGCAGATCACTGCTGCCAACCCAGTCTGCC  
AAGCTGGAGGCTCTGGCCAGCGAACATGGCATTTCGCATCACCCAGAGTAATGCCGAGGCGGGCCGCAACG  
CAGAGGTGATCGTGCTGGCGGTCAAACCGCAGCTGATGGCCGGCATGCTGTCAGCACTGGTTGAAGAGCT  
GGGATCCCTTGAGGGCAAGCTGCTCATCTCCATCGCGGCCGGTATCAAGGTGGCGCGCCTTGGCGAGATG  
GCCGGTGGCCATGACCGCATCATACGCACCATGCCAATAACCCCTGCCCTGCTGGGTCTGGGCATGACCG  
GTCTCTACGCGCCCGTGCATATTGGAGCCAGTGCATCGCAACTTTGCCGAGCAGATGATGCAGGCGTCCGG  
CAAGACCTCTGGGTGGAGCAGGAGTCCGGCATCAACGGCGTTCATCGCCGAGCGGGCAGTGTCCCGCC  
TACTTCTTCTCTTTATGCAGGCAATCGCCGAAGAGGCGGAGCGATGGGTTTCTCGCCCGATCAGGCAC  
GCCTGCTGGTGCAGCAGACCGCGCTGGGCGCAGCCGCCATGGTGGAGCAAAAACCCGGAGCTGGCGCTGCA  
GACCCTGCGTGAGCAGGTGACCAGCAAGGGCGGCACCACAGCCGAAGCCATCAAGACATTCAGCAGCAG  
GGGCTGATGCCGCTGACTGCGCAAGCCATGCAGGCGGCCGTTGCTCGCGCCACCGAAATGGAAACCCCTCT  
TCTAACAGGAGCCCAGATGAACACTGCTTACTTTCTGATTAACACCGTTTTTCGATCTCTACCTGATGGTG  
ATCCTGCTGCGCGTCTGGCTGCAGTGGGCCCGTGCCGACTTCTACAACCCGATGAGCCAGATGGTGGTCA  
AGCTGACCAATCCGCTGGTGCATCCCGCTGCGCCGCTTATCCCGGGCTTTGGCGGCATCGATCTCGCCTC  
CGTGGTGTGCGCGTGGCTGTGCCTTCCCTCAAGCTGGCCCTGCTCAAGAGCATGAACGTACTGCTGGCG  
GACTGGCTCAGCATCAGCCTGTTTTGCCGCGCTGACCGTGTGAAAAAGCGGGTTCGATGATCTTCTGGG  
TACTGCTGATCCGCGCCATCCTGAGCTGGGTGAGCCAGGGCCGAACCCCATCGAATACGTGATGCATCA  
GCTGACCGAGCCGTTTCTCGCCCTATCCGCCGCTACTGCCGGCACTGGGCGGGCTGGATCTCTCGGTG  
CTGGTGCCTTTATCGGCCTGCAAGCCATCAACTACCTGCTGGGTGACCTGTTCGGCCAGCTGTGGTGGGA  
TGATTTGATGCCAGCCGCTCTGCAACAAGGGGATGAACTGGTATTCATCTGGTGCATCCAGCCCAAGGCG  
AGTCCGGATCAGATCATCGGATTGCATGGCGAAGAGCTGAAAGTGGCCATCACGGCGCCGCCGCTCGATG  
GCCAAGCCAACAGCCATCTGATCAAGTTTCTGGCCAAGCAGTTCAAAGTGGCCAAGGGCCAGGTAACCAT

AGTGC GGGGCGAGCTGGGGCGGCACAAAACCGTCGCCATCGACAGCCCCAAACAGTTGCCGCAAGAAGTG  
AGTGCACTGCTGAATGACACGCAAGGCTGAATGAATCGGCCTGCGCAACCGTAGATATGAGAGGGATGA  
CAGATGAAAACAGCCTGGATGAGTGGCCTGCTGGCACTGCTGATGACCCTGCCGCTCAAGGCAGAACAGA  
TGAAGGAGCTGGGGCCCTGGTTGGTGCAC TACAACGCTTCAACTCCAGCTTCCCTACCCCCGAGGTCGC  
CAAGGCGTATGGACTGGAGCGCAGCCGCTACAACGCCATCATCAATATCGCGGTACAGGACAAGCAGAAA  
GTGGCGCAAGCCGTGGGGATCACCGGTGAGGCCAAGAACCTGACCGGCACCATCCGCACCCTGAAC TTTC  
AGGAGGTAAAAGAGGGGCGATGCTATCTACTATCTGGCGACCCTCCCTACCGCAACGAAGATACCTATCA  
GTTACCCCTGAAGATCATGGGCGGCGGGCAGCAACAGAACCTCAGCTTCCAGCAGACCTTCTACGTCGAC  
TGAGCAGCAACAAGAAGCCCCGACCAAGGTAGGGGCTTCATTTTATCCATATGACAAGGGCGCCATCAGG  
GCGCCCTTGTTACATCTATTCCGTACCGCGACTGTTACAGGGCGAGGAACAGACC GGCCAGACAGGCGCT  
CATCAGGTTCCGCCAGCAGCCGGAGAGAATGGCGCGCATGCCGTAACGGGCGATGAAGGATTTGCGCTCC  
GGCACCATGGAGCCAGACCCGGGATCAGGATCGCCATTGAGGAGATGTTGGCAAAGCCGCACAGGGCGA  
AGGTCACGATGGCCTTGCTCGACTCGCTCAGGGTCTGATCCTGCACCAGACCGATAAAAGGCGACGAACCTC  
GTTGACCACGATCTTGGTACCGATCAGGGCGCCAGCGGCTTGCGCCTGATCCCAGGGCACACCGATCAGC  
CAGGAGACGGGGCAAACAGCCAGCCAGAATGATCTGGAAGCTCAGGTCCAGTCTACCAGACCGCCAG  
CCCAGCCGAGCAGGCCATT CAGCATGGCAATCACACCAACGAAAAGCCAGCAAGGTGGCACCGACCGCCAC  
CGCGATATTGAGGCCGACATGGCGCCATCGGCCCGGCTTCAATCACGTTGGTGGCGCGGGGGATCTCG  
ACATCCTGATGGTGATCGACCTCTCAGCTCCCGCGGCACCAGGATTTTGGCCATCGCCAGACCGGCAG  
GGGCCGACATGAAGGCTGCCCGCATCAGGTATTT CAGTTCAACCCCGAGGCTGGCATAGCCACCAGGGT  
GCCACCGGCGACAGAGGCGAGACCACAGCTCATCACAGCGAAGAATTGGGAGTCGGACATCTTGGAGAGG  
TAGGGTTTGACCACCAGCGGCGCTTCCACCATGCCGACGAAGATATTGGCTGTGCGGAGAGGCTCTCGG  
CACGACCGGTGCCCAGCAGCTTCTGCAAGCCACCACCAGCAGGGCGATCACC CGAGGCATGATGCCGAT  
GTGGTAGAGGATGGCGATCACCGCGGAGAAGAAGATTATGACC GGCAATACGTTGAAGGCAAAGATGAAG  
CCCAGCTTGAAC TTGGCCAGATCACCGAACAGGAAAAGCGATCCCTCCTGACCATAACCGATCACGCTGC  
TTACGCTCTCGCTGACCCCGTTCAGCACATGCTGACC GG CAGGCAGCCAGAGCACCAGACCGGCAAACAT  
GATTTGCAGGCAGAGGGCAAAGGCCAACTGTTGCGAGCGGGATACGACGACGATTATCAGAGCAGATGACG  
GCAAGCGCCAGGATACTCAAGATGCCGAGCAGGGCAATCATAGGGACTCCATCAGGTGGGGCAAAGATG  
GGCGCGGATTCTGCGCCTCTCACCCCGCTCACTGCAAGTCCGCTTGTTGTTACAGCTCTGTTAGAAAAACGT  
TTGCACGATATCGGTTGCGCCAAC TGGCTGATTTGGTTCGATTTTAGTATCAAAGAAATCAAGAGTTCT  
TGTATGAAACAATCATTCTCACC GCGGACAATTTACCCCGAGCCAGGGGGCCAGTCGCTGCTCCCA  
ATAGGGTTGCGGGCAAAGCGGGCCTTGAGGAAATCGATGAAGAGACGGATCTTGGGATCCAGATGTTGCG  
CGACGGGCATAAACGGCGTGTACCGCCATCTGCTGGTTGGTTCGCCACCCTGGCAACACCGGGATCAGCT  
TGCCGCTCTGTAACCTTGTCCAGCAAGTAGTTGGCAATATAGGCGATGCCGAGACCGGCCAGCGCCGC  
ATCCCGCACCGCCTCCGCCATATCCACCCGATAGTTACCCGCTACCTGCACCCTGCGCGCTCCTTGCCC  
TGGCAAACGACCACTGGTGATAGCGCCGCTCCCGACTCTGGTAAGTGATGCAGTTGTGCTGGGCCAGAT  
CCTTGGGATGGAGCGGCGTGCCGTGGCTCAGCAGGTAATCCGGCGAAGCCGCCACCACGAAGCCAATGTC  
GGCCAGCCGCTGTCCCACCAGCCCTTCCGGCTTGTCCTCATAGGTGGTGAGCCAGAGATCCAGCCCTCA  
TCCACCAGATTGGTTCTGTGGTTCGAACAGCGAGACTTCCAGCTCGAGCTCGGGATAGCGATCCTGAAACG  
CCTTGAGATGGGGAATGACGTGCAGACGGCCAAAAGATTGGCCCCACCCGAGATGGAGCACGCCGCTCAC  
CTTGCCGCGCCGCTCGGGCATCATGGAGTCAGCCTCCTGCGCCACC GCCACCAGCGCATGACAGTGACGG  
GCATACTCCTGACCCAGCTCGGT CAGGACGAAGCGGGCGGGTGGTGCCTGCACCAGCTGGGCGCCAAGGG  
TGGTCTCCAGCAGCGCCAGCTGCTTGCTGATATGGGATTTGGAGACCCCGAGACGACGGGCGGCGGCAGA  
GATCCCCTGCTCGCGCACCCAGCGCATCGAAGATCACCATTTGAGGAAGACGTTGCAGCACAGGATAACCG  
GATTGAGTGGCGGGAGCCATTATTCCAGAGCCGCCCGCAAAGGGGTAGGGTCAGAGCCCCAGCGCCCGG  
GTGATCTGCAGTTTGAGGGGGTCTGTCAGCCGGATTCTGGTTGGCGCCGTAGCTGGCGATCAACTTGCCAT  
CGCGCCCCACCAGATACTTGTGGAAGTTCCAGTTTCGGTTCATCCCATCAGCGGCCGCGCCAAACCCCTT  
GAACAGTGGCACAGCATCGGAGCCCCGACCGCTACCCGATTGAACATGGGGAAGGTGACGCCATAGTCG  
CGGCGACACACCTCGGCGGTCTTGGTCTCGTTGCCCGCCTCCTGCCAGAAGTCGTTGGAGGGGAAAACCGA  
GAATAATCAGCCCTTATCCTTGTAGCTCTGGTAGAGCTTCTCCAGATCGCGGAACTGGCCGCTGTAGCC  
GCAGTAGGAGGCGGTATTGACCACCAGCACCACCTTGCCCTCGGT CAGCTGACAGAGGTTGTGGCGCTGA  
GAGTTGTTTAGCTCCCGCATCTCCACATTGAAATAATCGGGGCACGCCGACAGAGCCGCGCCAGCCCCCA  
ATAACAGCAACAGAGTGAACCATTT CATCGCCAAGACTCCTTTTGT TTTGTCCATCATAACGCGTTACCA  
GAGCCGAGTTCACTCTCAATGCAATGGAATGCCGGT CAGCCAGCCGTGGCCCCAGAACACCAGCAGCGC  
GGTGGCAGCCAGGCCCGCCCCGACGCTGATGCCGGT GCCGTC CAGTTGGCCG CAGGACGGGGATATCGC  
TGCCAGTCCCGCACCGAAATCCAAACCATGCTCACCAGCACCCAGAGCCCGATGCCGCCAAACAACACCA  
GAGATCGCGCCTCGCTGTTGACCAGCAGATGAGCCACC GCCCAGAGCAGGGTACCAGCAGTTGGGGATG  
CACCAGCCAGCGGCGCAGATGGTTGGGCCCTTGCCGGAGAAAAAGAGGATCAGCGCAAAGGGCATCATC  
ACCGTCATGGTCATCGGCCCCCAATCCGGCAGGAAGTAGAGCGGCAGCGAGCTGGCCGAGCGCCAACCGG  
CGATGATGCAGGCAATGGCGACAAACACCAGCAGGGAGAAAGAGCCCTTGTAGCGATTCTCACCCAGCCG  
TTCTCTCAGTCGCGCCCGATGGGCCACC GCAAAAACAGGGGTAGAGATGGATCAGGGTAAACAGCGCAACC  
CCCAGGGTCAGCAGGAACATGAGTCTCTCCTTGTACTTGGTACGACC ACTATGCCGTAAGGGAGATTTG

CGCCTATCAAAAACCGCGCTTACCCATGGAGTCAAAAAGTGTGGCCAGACAAAGGAACGGAAAGAAAAGAGC  
CGATCACGATGGATCGGCAAATAAGTGCCAAGGCAGCCAGACATCTCGCGGGATGAGAGATGCCCCATAC  
GGGAATATTGGGTGGCCGATGGCGCCCATCGGCCGAACCGGATCAACCCTTGAGCTGATAGAGTGCCGCG  
ACGTTGCGCGCGGTTCAGCTGAATGTTGGTGTGGCGGTCTCCAGCGCTTCCGGCAGGGACATGGCACGGT  
TGACCACGGCGAACACCGCATCCAGCCCCGTGTTTCATGCACCACACCGCAATCATCGGTTCAGACAGCCGGA  
GATACCGATCACCGGCTTGGCGAACTGCTTGGCGCAACGTGCGACACCGATTGGCGTCTTGCCATGGATG  
GTCTGGCTGTGATGCGCCCTTCGCCGGTGATAACCAGGTCCGCATCGGCCACTTCTCGGCCAGCTTCA  
GGGCTTCAATCACGATCTGAATGCCAGGCTTGAGTTCGGCACCAAGCAGACCGACCAGTGGCGCCCCCAT  
GCCACCGGCAGCGCCCCGCCCCGGAATATCCTTACCTGCTTGGCAAGGGCTGCTCAATGCAGTCGGCA  
TAACGGGAGAGGTTGGCATCGAGCTGCGCCACCATCTCGGGGTTCGCCCTTTTTCGGGGCAAACACCG  
CAGAGGCGCCTTTCGGGCCGAGAGCGGGTGTTCACATCGCACGCTACCTCGATAACCAGATCGCTCAG  
ACGCGGATCCAGACTGCTCAGATCGATGGTTCGCGAGCTCAGTACCTGAGACCTGCGCCACCCAGAGCAATAGGC  
GCACCATCCGCTTTGAGCAGCTTGGCCGCGAGCGCTGGATCATGCCGGCACCGCGTCAATTGGTGGCGC  
TGCCGCGGATACCGAGGATCAGATGCTTACCCCCATCTCCAGCGCGGCCAGGATCAGCTCACCAGTGCC  
GAAGCTGGAGGTGAGCAGTGGATTGCGCTGCTCGGGCGCCACCAGATGGATACCGGAGGCAGCGGCCATC  
TCGATGACGGCGCGCTCGCCATAACCAGCAGGCCGACGAAGCCCTGCACCTTGTGGCAAGAGGCGCGG  
TCACTTCGACCGGCAGGATCCGGCCACCGGTGGCATCGACCAGCGATTGCACCGTGCTTACCGCCATC  
GGCCATCGGCAATTTGACGTAAGTAGCGTTTGGCAACACCTGTTTGAACCAGCCTCGATGGCATCAGAC  
ACCGCCATGGCGCTCAGACTCTCCTTGAATGAATCGGGGCAATAACAATTTTCATATCAATTCCTTAGG  
CGAGGCCAAACACGCCAAACATCAGGGTGGAGACAGTGGCAATGGTCAGACCGACTGCAGTTTCGTAAGG  
GATAAGTTTCAGGCGCTCACCTACCCCCATGTGGACGCTGCCACCGGTGGCATGGAAAAAGAGCCGTGG  
GGCATGTGGTCAAACACGGTGGCACCGGCATGGATCATCGCCGCCCGGCCAGACTGCTGATCCCCAGTT  
CAATCAGGGTGGAGCTGAATACGTTGGAGGCCACCACGGTACCGGCGGTGGTCGAGGCAGTCGCCAGTGA  
CATCAGGGCACCGGAGATGGGCGCCAGCAGGTAAGAAGGCAGACCGGAGGCTGTCAGGCGCTGATCAGC  
ACATCTTTCAGGCCGGAGTTGGCAATGATGCCCGCCAGGGTACCGGTACCCAGCAGCATGATGGCAACCG  
GCGCCATGCGGGCGAGGCCGAGACCGCAAACCTGGTTCACCTTGCTAAATTTACCCATCATCAGGGCACC  
GACCAGACACCGGACCGGCAGCGCAATCAGCGGATCCACCACGATACCGGCGACCGGCCGAGGGCCAGC  
AGCAGGATGGCGACCGGTCAGCTGATGGCGGGCAAGCCCGGCAACTTGGCACCGCCAAAGCTCA  
CCACCTCGTCGGCGCAACCTTGTGCCCTTGTGTGTTAAGACGCTTGGCCAACCAGTAGGCCATCACCAG  
ACCGAACAGGCCCGGAATGATGCCCGCCGCATCACAGGTTGAGGGGCGAGATGGAAGGCATCAGCCGCG  
GCAATGGCGTTGGGGTTGGGGGACATCACGTTGCCCGCCTTGGCCGCGCGATCATCGCCAGCAGGATGG  
CCGCTTGGAGAGATCGGCACGGCGGGCGATGGCCAGCGCGATGGGCGCAACAGTGATGACTGCCACATC  
CACGAATACGCCGACCGCAGTCAGGATCAGGGTTGCCAGCGCCAGCGCCAGCAGGGCGCGGGTTTACCC  
AGCTTCTTGACGATGGTCTCGGCGATAGTGGTGGCGGCGCCGATTCGATCAGCACGCCCCGCGAGTACAC  
CGGCCGCCAGGATCCGCATCACAGCTGTGGTATCCCTGGGCACCGCCGATCATCAGGGCGACGGTCTG  
GGTCAGATCGGCACCGCAATCAGGCCACCGGCCAAAGCCCCACGATCATGCCGTAAGCGGGCGGCACC  
TTCTTCAAATGAGGATGATGGCGATGGAGAGCGCTGCGATGGCGCAAGGGCTGTAACCGGGATCATGA  
CGGACACCTTCAATGGGAGTGAATGGCCGCCATTATGGAGATCTGCAATCAGAATGCTTTGGCTTATAAA  
CCAAAATTTGCGTCATGTAAGAGTGGTTTTTTTGTCCAACCTTCACAATCACAAGTCGAGATTAAGGCCGAG  
ATAGAGCAAAAATTTGTCGTCTAACTTATTGAAATTC AACCCGGTTATCTGCTCTATCCGCCCCAGCCGA  
TAGCGCAGGGTATTGGGGTGAATGAACAGCGCTTCGGCACAGCGATGCAGATCACAATCCTGCAAGAAAT  
AGTGGCGCAGGGTCTTCTGCAGCGCCCCCTTGCCATCTTCCCGGGCCAGTTTCTGCAGCGGTGTGCGCAG  
CTGATCCGCTGCCAGGAGTCCGCCAGACTGCCAGCAGCACTGGCAAACGGTAGTCTCAAAGAAGTAG  
ACCTGTTTTCGCGGGCGCCTGCCGCATGCCACGGCGCAGGGTATCTCGCGCCGTCTGGTAAGAGCGGCCA  
GCCCGTCGATCCCGGCGAAGTAATCGCCACCGCGATATGCACCTTGAAGTGGGGAATGCGCGCCAGCAA  
CTGCTTGCATCCGGCTGCGCTCCTGCGCCGATTGCCAGAGCCATCACTCAATTGCGCCGTTTTCAGCACC  
ACTATCTCGTCGAGCCGTTGATGGCGACCAGATTGTCCCGCTCCGGATTTTCCAGCTGATGGACCAGCT  
CCCCGAGACGCGCCGATCCGCCTCCTCCAGCGCAAGCACGGCCACCACCCGAGGCTGGGCCAACTCCAG  
TCCGAGAAAGCGGGCCGCTGCTGCAATTGATCGACTCGTCCCTCACCACGAATAAGCTGCAACACCAGC  
TCCTCCTTGTGGCGCTTGTCCACTGCAACTGCTCGGTGAGCGCCGCTGCTCCAGGATCAGTTCTGCCG  
TCATTCGCACCAGCTCGGCGTAAGCACGCACTTCTCCGGATCGCCGAAATGCCGATCACCCCGATCAG  
CTCCCCCTGATAGGAGATGGGCAAATTGATGCCGGGCGCACTCCCTTGAGCTGCAAGGCTGTGCTTCCG  
CTGATCTCCACCACCGGTTTTTCGGTGGAGCGCCAGCACAGCCCCCTCGTGGCGCTGATGGATCCGCTCCG  
GATTGCCGGACGCAATGATGAGACCGTGTTCGTCCATCACGTTGACCGAGAACGACAGGATCTTTCATCGC  
CCGTGCGACGATCTGGCGGGCAAGATTATCGTTTAGCTGCATAACATCTCCGGACAAGGAACGATCTGA  
GAGCGCCACTACGGGCCGATTACAGGGCACATGGGCGCAAAGATGCCACATCATCAAGACAAGCGAGAGGG  
GGATCGCTAGAATAGGCCACTTTACCCGATGTGTGCCCGCCATGGAGCAGGAATTGCGTGTGTCACCC  
GCCTGCCCGTGTGATGGCCATCCCTCCGATTTGGACTGTGCTATGGATTATGAATTTCCGCCGCGACCCGTT  
TGGTGGCTATCGCGCCGTTTCTCCATGGGCCATGAAGCCATCGGTCAGTGGCTGATCGACGAGGTTGGC  
AAGGATGAGGAGAAGCTCGACGAGCTCTTCTCCATCATGATCAGCTTTCCAACCGCACCCGAGTCGAAT  
ACCGGCTCAACGGCGGTGACTACTCCCTGCTGCTGACCCATGAAGAGGCGGAGGTGAAAGCCAACGCCCT

CAATATCGAGCTGGGTGAGGATCTTGACGATCTCGCCTACTACGATGATGAACAGCTGGCCATGTGCGGG  
CTGGAAGATTTTGGCCAGGTGCTCGGCTCCTGGCGCGCCTTTATCCGTAACGAGGATATGGGCTGATTGA  
CCCAATATCGGATTACTATGTGCGGGCAAACGTGCCCTTTTGCCTAACTCAACAGGATTGACTATGTCTAT  
TTACGATTTTGTGACGAAGTCCCGGAAGACGAAGAACAGGAATCCACCAAGAAAGCGGGCTGCACCTGCC  
AAGAAGAAAGGCAAGCAGGTGATGAACACTCAGGTCAACCTGAGCCCGCGGATGCCAGCCGTCTGAACG  
GCATGCACGTTGAAGCGATCGCCACACTGGACGACGTCAGCCTGCCGAAGAACGTCATCTTCAAGGCTGG  
CCTTATCGCCCTGGGCGAACTGGAAGCCGGCAAGCGCGCCGATATCATCGCCCGGTGATTGCCGAATCA  
GGCCGCTAAGCGTCCCTGAAGGCAAATAGAAAGCCGGAGCCACTGCTCCGGCTTTTTGTTTTCCGGCCGT  
GCACTCTCAACGGCAATCGATCCCCTTTCCGGCTCGGGAGATCAGTTGGTCATAGCGGCCATCGGCACGG  
GCGGCAGCCAGGGCATGATTGAAGCGCTCAAGCAGGTTGCGGGCTCCGGTACTGCCGTGAAATTATCA  
GGTAAAAAGTGTGCTCTGACGAAAGTGGGCAAGCCCTGCAGATGGCAGGGTTCGCCAAACAGCTGAC  
GCTGGCATCCCGGTACCGTCTCGTTTCATCGGCAGCAGATCGATCCGTTTGCATCCAGCAGTTGCAGA  
CATTGTGCCAGGGTCTTGGGGCGCTGCAGATCCAGCCCGAAACGCTTGATCACCCCGTCCGGCATGGCTGG  
TGCTCCACCCAGCGGAATACAGACACGCAACCCTTGCCAGCGGCCAGCCTGAATGGCCTCGCTCCCCCG  
ATAGGTAACCAAGAGAGGGCGATCAATATGAATGGGAGCGCTGTAGTGGAAGAGCTTGGCCCGCTCGGCA  
GTCCAGGCGTAGGGGAAGGTGGCCGAGACCAACCCATTGCGGGTCAACTGATAGCCGCGGGGCCAGGGCA  
GGTAGTCGACCTGGATCTCCCGATAACCGGCTCTTGCAGCAGGGTCGTCACCAGCCGGGTGCTCTCGCC  
GCCTTCAGGCAGGGCCTTGCCGGTATAGGGGTGAACTCACCGGTCACCAGCAGTAAGGGTGGCGCCTGC  
AGCCAGACACACCAACAACAACAACAACACAGACAGTGCCTTCATCAGCTGCTCTCCCTTTACCCTGTTGA  
TGAGTATAGAGAAGGGATCCGACCACCTCCTGCGCGGTTGTCCTGCTGGCGCCACTTGTAAAGTTGCC  
GCCTGCCTCGATCAAGGAGATCCAATGTTCCCCCTCCCGACTCATTTATCTGGGGCGCGCTGGCGCTGG  
CCGTGCTGCTTGGCCCTTTCCGCCAACGTCCTTCCCGCCTTTGCCCTGCTGGGACTCTCCCTGCTGCTAGC  
ACTGTGGCTTGACCGAATGACGCTACCCGCCCTGCTGATCTCGGTGCGCAGGATTACTGCTGGCGTGGCGT  
ACGCCAGCCCTCCCCGCCCCGGGGCGATGGCGGCCAGAGTGGTGTGATCCTCTGGGCGATTGCGCTGA  
CCCTGCACCTGATCCCCGGCTTCAACAATCTCAAGGTGCTGGATCAGGCGCTGGCAGGCCCCGCCAGCGT  
GCCGTTCAACATGTATCTGAACCTAGACAAGCCGCTGCTGCTCTTCGGCTTGCTGCTGGCCTGCCCGATG  
CTGCTGGGCAAGGGGGCGCAATCCGCTGGCGCCCGCTGGCCCTGTTACTGCTGCCGCTGGGTACCCTGC  
TGGTCACTCGCTGGCAATTTGGGAGCAGTGAACCCGGAAGTGGTCTGCCCCACTGGTGGTGGTTTGC  
ACTCAACAATCTGCTGTTTACCTGCGTGGCGGAAGAGCGCTGTTTCGCGCGCGCATCCAGCAGGGGCTG  
ACCGAACGTTACCGCCCCAGGATTGGCATCGTCTGGCCGCGCTACTATTCCGGAGCCATCCACCTGCCCG  
GTGGCCCACTGCTGGCGCTGTTTTCGACCCCTGGCAGGCTGCTGCTATGGCCTGGCATTCACAGCTCAGCGG  
GCGACTCTCCGTGGCCATCCTGATCCACTTCGCTTCAACTTCGCCCATCTGGCGCTCTTACCTACCCG  
CTGGCCACCCTAAGCTCCTGAAGGCGCTGACACGGGCGCTTCCCTCGCTCCTCCCCCTCTCTTTTA  
AGCGTGCTGCCTCGCTCGCTTTACACCTCCACAAAGCTCCAAACAAAACCAATTCATTTACTTGTAAACCA  
AAATGTAAACAACTGACCTCTGCATTGCCATAACAGTCACTTTCCATTGCCCTGCAACCAAAAGGATC  
CTGTGATGCAGAAAACCTCAGTTATGCCGCCCTGCTGCTGGTCAGCCAGTTCCCGCAACTGGCACTGGC  
CGATACCGATGTCTATCTCACCAACAACAGTCCCTGAACCGCTTCAGATCGACATCCGCCAAAGCGGCAGC  
GGCCAACTGCAGCCCGCAGTCAAGTGGAGCCAGCACCAGCAGCTGGGCCCCGTGGGAGAGCGCCATGG  
TACTCAGCTTCAATCGCTATGAGGGGGTAAAAGCGGGCAAGAGCTATCTGTTGAAACCCCGCTGACCAC  
AGCGGGTGGCGACGCTATCGGCTCAACCAGCTGATGGAGGGAACTGGTGGAAACACCACCTTGCAGCAC  
GGTGGCGAAACGCCAACCCGGCGCATCCGGCTGGCAAAACGATCGGGCGATCCATCGCGTTGCGGGGCCAC  
AAGAGCTGGCCTTTGCCGCCAAGTTACCCGGCCGCTACGACGATCTGCACTATATGATCACGCCCCCCCCA  
AAAACGGGAGCAACCGGAACCGGCAGAACACAGGCTCAAGGTGGCCAGCTACAACGTCCTGGGCGCTGCCG  
GTCATCGCCTCCAGCATCGGCGAGCGGTTGACCTTGCTGCCTGATTATCTCAAGGGTTATGACGCCCTGC  
TGCTGCAAGAGGTTGTCGATGGCCGCGCGAAGGCTTTTTGCAGGCGCTGGCGAAAAGTACCCTTACCA  
GACCAAGGTGCTGGACAAGCCCGGGTCAACATTCATGACGGCGGCTGGTGATCGTCAGCCGCTATCCC  
ATAGTGCGGGAGGCCAGCTGGTCTATCCCCAATGCTCCGGCACCAGCTGCTTCGCCGCAAGGGGTGA  
TGTACGCCGAGGTGATCAAGGGGGCAAGGCGTGGCACCTGTTTCGCCACCCACAACGCCAGCTTGCACAC  
CGACGAAGCGCGCAAGCTGCGGCAGATCCAGTTCCGGTCAGATCCGCTCTCTGGCAGCCAGCCTCAAGATC  
CCCGCCAGCGACACCGTCATCTACGGCGGTGACTTCAACGTCACAAAACGCAAGTTTGGCCGATGACTACG  
CCAATATGCTGGCCAATCTGAACGCCCATGAACCCGCTATGGCGGCTATACCGAAGCCACCTTCGATCC  
CAGGATCAACCCCTATGCCGGTGGCCCGCTCTCCGGTGGCGCAACGTCGAGTATCTGGACTATCTGGTA  
GTGAGTCGGGAATACGGCAGCGCCAGCCACAACCTCAACACGATCTGGATCCCGCGCAGCAGCGATGGCA  
GCCTCTGGCCACCAGCAACCTCTCAGACCACTTCCCGGTGAAGGGAGAGATCAACCGATGACTCGCCGT  
TACGGGATACTGGCGCTGGCTATCCTGACCCCTTTTGTGTTGAATCTGGGCTGGCAGGAAGAGCCGTCCC  
CGATATCACCAAGACGGTCCGGCTACGCCCTCTCTGGCCGATGTGCAGTTGCCAACAGAACCAGGGGAGCCC  
GCCTCCCCGCATGCCAAACGCTGAGGGGATAGATGGCAAAAAGCAAAGAAGTGCCAGCAGCTGGCAGGGC  
ATGCCGGATGAACTGATCAATCAGCTTGCCAGCGAGATCAGCGACAGCGAGTTGCCGCTGGCGCAGCGTG  
TGAGCAATCTGGAAGCAACAGAGGCGGGTGGCTGAGCGAGGGGGAGAGTCTGATCCGGTTACAGGGGCG  
CTATGCCCTGGCGCTGGATCAGTTGGCGCAGGAGAGCGAGCAGTTACCCTGGCAGAGCGGCTGGACGCC  
CTCAGCCGCTTGCAGGATCCGTGGGCGAGCGGATCATCCGGATTTGGCGGTGGAGCTATTCAACCCGGATG

CCCGCCTGCAGCAAGCCCGTCAGCTGTGGGGAGATGAGGAGCTGGCCACCCTGGCCCATCACTTCCTGCC  
CGCAGAGAAGGCCGAAGCCACGCTGGCGTTTGCCGGGGCGCGCCAGCAACAGCTCGATCAACGCAGTCGC  
TACCAGCGAGAAGTGGCCGAGCTGGAGCAGCAACTGGCCGCCAGCCAACAGCAGATGGATCCTGCCCTGT  
GGCAACAACACAAGGAGGAGGTGTTGAGCCAGTGGCGTCGTGACTTCTTCGCGCGGGAGCAAGGCAAACC  
CTGAGGTGAGCGCTTGCCCTTGAAGTGTGTTGACGCTGCGTTTTGGCCTGAGTACGGCGATTGGCCTGCTTG  
TCACGAGGGGGGGCGCTTGCCCTCCCCGCTGGCAGGCTGGTTCGGTAACCGGGAATCCAGCCAGATCGCCCA  
ACGGCAGCTCGCGGGCCGGTCAGGGTGCAGGATAGCTTGCAGCATGTCACTCTCGCCATGACAAACCAGCGA  
GATGGCCAGCCCCCTCGCGGCCAGCCCGGGCGGTACGACCGATGCGGTGTACATAGACGGGGGGCGCTGGCG  
GGCAAGTCCAGATTGATCACCACCGGCAGCGCCTCCACATGGATGCCACGCGCCATCAGGTCCGTGGCCA  
CCAGCACCCGAATTTTGCCCTCTTTGAAATCGCCGAGCGCCTGCTCACGCACTGCCTGCTCCTTCTCGCC  
ATGGAGGGCGGCCACCCGAATGCCCCGCTTGGCCAGCTTCTGAGCAAGCAGATAAGCGCCGGGACCTTGCTGC  
CTGATAAAGACCAGCACCTGCGGCCACGCTGCTCCTTGAGCAAGCAGATAAGCGCCGGGACCTTGCTGC  
TCTTGTTGACCAGATAGAGCCGCTCTTCGATCTCGTTACCACGCTGTTGAGGGGGGTGGCCTCGATACG  
GGTAGGCTCACGCAGCAGGCCGTTGGCCAGCGCCTCCAGCTCGGCAGGCAAGGTGGCGGAGAAGAGCAGG  
GTTTGGCGATCCGCCGAATAAAGCCGAGCAGCGCCTTGATGTGCGGAGCAAAGCCCATCTCCAGCAAGC  
GATCCGCTTCATCCAGCACCAGCAGTTGCAAACCATCCAGCCCCAACAGTTGCTGAGTCAGCAGATCCCG  
CAGCCGCCCCGGCGTGGCGACCAGCAGCTGTGGCCCCAGCGCCAGCTCGGCCGTTGCCGCTCCTGCGCA  
ACGCCCCCACACAACGTACGATGCGCAGCCCCAGCACCTCGGCGCCCTCTTTTAGCGCGGCAGTGACCT  
GAGTCGCCAGCTCGCGAGTTGGCACCAGCACCAGACCCTGCACCTGACTGGAGGCAGGATCCAGCCGTTG  
CAGCAGCGGCAAGCCAAACGCCAGGGTCTTGCCGCTGCCGTTTGGGCCAGCGCCAGCAGATCCTGCCCC  
GCCAGCGCCGCGGAATGGCCAGCTGCTGGATGCGGGTTCGGCGTCTGCAAGGTGGCGGGCAAAGAGGCAA  
GCAGAGCGGGATGGAGGGCAAGTTCGCTAAAGGTTCATGGCGCTACGTCAACAAGAAGTGGGAGGCGAAG  
TCTAGTGAGCGGGGGCCGAGAAGTAAACCCCTATCCATGATGGCCTGGCCGAGGGGGCGCTGGCGACGGGC  
TGACTACACTTGAGCTGACCCATCACCAAGAGAGACACGCCATGACCAGACACATCCCCCTTCTGCTGCT  
CGTGGTCACCCTGCTCGGCAGCGGACTCTCGGCCTGTGCGAGACTCCGGAAAACGACGCCACCCCCGAG  
CCGCCGAAACAGGTGCGCATCCTCAATGCCACCTTGGCGAGCTGCCAGGGCTGATCAATGCCGACAAGA  
CAGGCCCTTTGTGATCTGGTACACGCCATCGATGATCTTACCCCGATGTAACCATCAAGATCACCAT  
CTACCCCATCGCCCGTCCATGGCTGGGGTGCATCTCCGCAAGGCTGACCTGGGGCTGCCGCCATCCGC  
AACCTCAAGGATATCGATATGCTGGCTTATCGTTTACGACCCCGAGTTTGGCAAGTGTGCCCATGTGA  
TTTACAGCAATACCGCCTATCCGGTACCACGGATGGCCCTATGGCATAAGTGGCCACCAAACGGGACCT  
GCTGATTGAAGCCGTTCCCGACTATATGCCCTTCCCGGTGCGAGCCTCGATGAGTATCGAGCAGTCACTG  
CGCAAGCTCTCACGCGGCCGATCGACGCTTTGTCTGGGCGCAAGAGGAGGCTGACCTGATGCTCAAGC  
AGCTGGGGCTGACCAATATCAGGCGAGAATTTTTCGGAGATTTTCGAGGATGTCTTCATCATCCAGAAAGG  
GACAGCTGGTGTGAGATGGACGAATTTCTCCGCAAGCCATGATCAGCTGGCCGCCACCGGCAAACCTG  
GCCGAGATCTACGAGAAGATCCACCGCCCTATGTGGAGTGGCAACCCTCCCCACCGCCAAGGCTGAAC  
CGGCAACCACCCCGCCAGCTACGCCCTGAACAGACAATTCCCGCATAAAAAATCCCGCCGAAGCGGGATT  
TTTTATGGCTTGACGCTTACAGCACGGCCAGCGCCGAGCGTAGTTTCGGCTCGTCCGCCACTTCGGCGA  
CCAGCTCGCTGTGACGACCTTGTGTGTCACCATCCAGCACCACGATGGCGCGAGCGGTGACACCGACCAG  
CGGGCCAGAAGAGAAGGCCACGCCGTAATCTTCCATGAAGGCCGACCGCGCAGGGTGGAGAGGGTCACT  
ACCTTGTCCAGACCTTCGGCGCCGCGAGAAGCGGGACTGGGCGAACGGCAGATCGGCGGAGATGCACAGCA  
CGACAGTGTCTCCAGCGCGCTGGCCTGCTCGTTGAACTTGCAGCAGAGGTCGCGCAGGTCCGGGGTATC  
GACGCTCGGGAAGATGTTTCAGGATTTTTCGCTGACCGGCAAAAGCTTGCAGGGTACGTCGGAGAGATCC  
TTGGCCACCAGAGAGAAGGGCTTGGCTTGTCAACGGCGACCGGGAAGTGACCTGCGACGGAACCCGGT  
TGCCTTGCAGAGTACTGAGTTGCTCATGTGTATGTCTTATTTATTTAGGTGTAGTAAAAATCTGTGCT  
CCAGTATAAGCCTGTACGCTCCTCACAAACACCCGACAACATCAGGGGAATAAAAGGGGTTGACCTTGA  
CTTAACACCAAGGTTTACTCCTTCTCGGTAATCAGGGATCTCGCAGGGGCGGGATCCATCAAGAGGGA  
CTCATCATGAGCAAATCCTGCTGCAATCATCAGCACGCCGCCCCCATCAAGGCCGTCAGCAAGGCCGCC  
TCGGCCAGAGTGAGCATCACCAATAGCCACTGCTGCGACAACACCACGCCCGTCAAGTGGCTGTTTCAGC  
CACGACGCTCATGAGCACGCATCCCATGACGGCAATGAATCCCCCGGGGATGATGAGCTCCCCGAGGA  
GGTTGCCACGATCAAGCGTGTGTCAGTGCCCCCTTATCGCCAGCTCACGATCATAAGCATGAGCATGAGC  
ACGATATGCCCCCTGCCGACCCGCTGGTTGCGCCGAGCAAGGCAACAGTCGCCACAGCTGGCAGGTGTT  
GGGGATGGATTGCCCCAGCTGCGCCCGCAAGATCGAGACCGCCGTCAGCCGGGTGAGCGGCGTGCAGCAG  
GCGCGCGTGTGTTTGGCACCGAGAAGCTGGTAGTGGATCTGGCCCCGGGCTCTCCCCGATCCCGTCA  
CCGCCCGCGTGTGCGCCCGGTTTCCAGCTCAAGGGTGTCTAGGCCAATACAGCCACACAATCACAAA  
GGAAGCAACACGCCAAAGCCCGCTGCTGACCACCTGGGCAAATATTGGCAGCCCTGTCACTGGCCAGC  
CTGATGCTGGTGGCGGCCCTGCTGCCGAGCGAGTTCGGTCAGCCGCTCTTTACTCTGGCGACCCCTGCGG  
GCCTGTGGCCCATCTCCCGAAGGCGTGGGCGCTGACCAAAAAGCGGCTCTCCTTTCGCCATCGAGACCCT  
GATGACGGTCCCGCCGCTGGGGGCCCTGTTCTCGGCGAAAACCGCCGAAGCGGCCATGGTGTGCTGCTC  
TTTATGCTGGGTGAGCATCTGGAGGCTACGCCGCCGACGTGCCCGGGCCGGAGTGACCGCCCTGATGG  
CGCTGGTGGCCGACAAGGCGCTGCGGATCCGTACCACTGCCGAGGGCGAGGTGAGGGAAGAGGTAGCTGC  
CGATGAGCTGCGTCCCGCGATATTATCGAAATCGCCCCGGGTGCCCGCTGCTGCCGACGCCCGCTG

CTCGATGCACTTGGCGGTTTTGACGAGAGCGCCCTGACCGGTGAATCCATTCCGGTGGAAACGCCGTCAGG  
GTGACAAGGTGCCCGCTGGTAGTCTGGCGGCCGATCGGGTGTGCGTCTTGAGGTGGTGTCCGAACCCGG  
CAACAACGCCATCGACCGCATCCTGCACCTCATCGAGGAGCCGAAAGCCAGCGCGGCCCATCGAGCGC  
TTTATCGACCGCTTCAGCCGCTGGTATAACCCCGGCCATGATGCTGGTCGCCCTGCTGGTGGTGTGGTGC  
CGCCCCCTTGCCCTTCGGCCAGAGCTGGGACGAGTGGATCTATCGCGGGCTGGCGCTGCTGCTCATCGGCTG  
CCCCTGCGCGCTGGTCATCTCCACCCCGGCAGCGGTTACTTTCGGCGCTGGCCGCGAGCCACCCGTCAGGGG  
GCCCTGATCAAGGGTGGTGGCCACTGGAGCGATTGGCCCATATCGATAACCGTCGCCCTTTGACAAGACCG  
GCACCCTGACCCTGGGCAAGCCGCAGCTGACCGAGCTGGTGGAGCTCAATGGCCAACCCGAAACCGAACT  
GCTGGCACTGGCGGCTGCCATCGAGCAGGGCTCCACCACCCGCTGGCCCGCGCCGTGGTTCGCCAACGCG  
ACCGAACAGGGATTGACGCTGGCGGAGGCCCGCGACCTGCGAGCCCTGCCGGCATGGGGGTTGAGGGAC  
GCATCAACGGCGAACTGTGGCAACTGCTGGCACCGGAGCCGGTGGCGACCCCTGAATGTGGAACAGCAGAC  
CCGGATTGCTTCGCTGGAGCGGCAGGGCAAGACCGTTGTGGTGTCTGCCAGAGCAGCGATGCTCAGGGC  
TTGCCGGTTCGCCCTGCTGGCGCTGCGGGATCAGATCCGGCCGGAGGCGGCGGCTGCGCTGCAAGAGCTCA  
ACCGGCTCGGGCTCAACAGCATTATGTTGACCGGCGATAAACCCCGCGCAGCTGAGGGCATCGCCACCGA  
GCTGAGCATGGGCTGGCGCGCCGGCTGTTGCCGGAGGGAAAAGTTCGATGAGATTGCCAAACTCGCCAGC  
TCGCAGAAAGTCGCGATGATCGGTGATGGCATCAACGATGCCCCCGCCATGAAGCGGGCCAGTATCGGCA  
TCGCCATGGGCGGCGCACCGATGTGGCGCTGGAGACCGCCGATGCGGCGCTGACCACAACCAGCTCGG  
CGGTATTGCCCGCATGATCCGGCTGTGCGGGCGGCACTGGCCAATATTCACCAGAATATCGCGCTGGCA  
CTGGGACTGAAGGCCATCTTTCTGGTACCAGCCTGCTCGGCATCACCGCCTGTGGATTGCGGTGCTGG  
CCGATACCGGGCGCCACCGCGCTGGTGACCGCCAACCGCTTTCGGCTGCTGCGCAAGCGTTAAGCCAGCCA  
ATGGCATCCCAGCCAAAAGCCGTCCCCCAACCGGGACGGCTTTTCTTTTCTCTCACGGCCCCCGTAA  
AAGAAAAGCGCGCCTGCCGGTTCGGCAGTCGCGCTTTGCTTACTCTCTCGGAGTTATCCCACCCCTGGCA  
AGGTGGAATTC AACCCGGGGGCGCCGAGCCATCCCCGGACTCAATGGCTTGCTTACTTGACGCTGCACT  
CCTGAATGACGGCAGTACCCGCTTGACGCCAGCCGGGTCAACCTTCACCAGCACACTCCACAGCCCCTG  
CGGCAGGGTGTGCTGTTATTGGCACTGCCACCCTTGGAGAAGGCGAACGAATAGCCGGTTTTACGCGTTC  
ACCGCGCCACCACCGTTGAGCAGGTACTCCTTGTCCAGTCTCGTTGGCGACCTTGAATCGGTGCTGC  
CGACGTAGTTGAACCGCCCTGATAGATGGCGAGATCGCCGTCCATCCCCTTGTAGCTCAGCTGGGTACTG  
GGGCTGGGCTCCCCAGCCGGAGAGCTCACCCCTTGACGAACAGGTTGTAGCCTAGCGGATTGCCCGCCACC  
GTCTCCAGCACCTTGACGCTCTGCACCGGCTCGGTGAAGCTGACGCTCAGGGTTCGTTTGTCTTGTTC  
TGGCGGTAAAGACAAACTTGTAGCTGCCTGCCTTGGCCAGATCGACACCGATATTTGCCGGTTTTCCCCC  
CTTGCAAAGGGTTCAGCGGAGTGCCGACCACCAGCTTGTACCCTCGTTGCAGCTGCCGTAGTTGACCGGC  
CCCCAGCTGGCGTCAGCGATCTTGACGTTGGTGGTACCCAACTTGTGCGGTGTTACCTCGGTAGTGA  
CGTACATAAAGTTGCCGCTGAAGGTTCATCTGGTTGGTGTGTCGCCACTCATCGAGAAACCCCTTCAGATA  
AACATCGGTGTTGCCAAACGGTGGCAAGGTGCTCAGGTGGTCTTCTTGTGCTGACCGGCAGGCCCGCGCC  
TGTGCACCTGACTGCGGCTTGACGAACACGGCGGCAGACCAGGCCCCAGCGTCAGCTGGCCATTATCAT  
AGGGCGCGCCGCTGGCGATGCTGTGACAGCGGATGCTTGTGCTTAGCACCATACCGCTCAGATCGAT  
CGGCTGATCGTTGCCGTCGCCGAAGTCGCCGATACTCTGGCTCTGGTTGCTGGCGTTGATCATACCACC  
AGACCGTCGATTGCCGGATCCAGATCCGCCCCGGCACTGACGCCATCATCCACCGTCATGACGATAAGGC  
CGGGCACCTGATCCGGGCCGGTATTGCGGAAGTCGACCCGCTTGATCACCTCGGCGCCGCTGCCAGACG  
CAGCAGGCGGGAGGAGTTGCGCAGTTCGCCAGCTCCTGATAGAAGCTCACCATCTGCGCCATCTCGGCC  
GAGCCCGGCTTGGCATGCTTGGCGAGCACCTGCTCAATCAGCGGATAGTTGTGCGCCATCCTTGTCTTAC  
GCGGCAACCCCTTGTGCAAGTTGTTGTGCGCCAGGGTGTAGTCGACCTTGTGTACCAGTCGCCCGAGTC  
ATAGCTGTCCCGCTCCATGGATTTGGAACGCAGCAGCTCGACACCAGCGTGGGTGAAGGGAATGCCCTGA  
CCCAGCATGGCTGTGCGCAGCGATAACCCCTGCATCCGACCAGATCGGCTCCGGCAGGCGCCTTGTAGA  
TCAGTTGTGCAACAGGGTCTGGTTGTGCTGCTTGTGACATAGTTCTGCACTTCCACCGGATCCTGGGC  
ATAACCGGCGCTCTGACCGTTGTAGTCGATCTCGGCGCCTTCTTTCGGCATGCCATCCTTGTGCTCAGC  
ACGAACCTCTGAGGTTACCCGCCATGCCGAGCCGTACCAGATCGGACTGGTGCAAGGCCGTTGCCAGCT  
CCACCTTGCTCATTTGCTTAGGATCGACGAAGGCACCGTTGCCAAAAGCCCTGGGTCTTGCGAATGGTATC  
GCCACCGTCGAACGGACTGCCGCCGCGCACCGCATCGCGCAAGCGGTTCGGAGAAGGAGCCGATAACCGGTA  
CCGCCAGATGCTTCTGGGTAGCCTGCACGAAGCGCTTGTTCATCCTGCACTTCGCCGAAGTTCCACCCCT  
CGCCGTAGAAGTACATCTCGGGATTGACCTTCTTACCAGCGGCCAGCGCTGCACCATCTGATCTTTCCG  
ATGGTGGCCCATCAGGTGCAAGCGGAAGGCGTCAATCTTGTAGTCACGCGCCAGGTAACCAGCGAGTCA  
TCCATCAGCTTGGCGAACATGGCGTGTCCGGCGCCGTGTTGGAACAGCAGGTGGAATTCGACCGAGC  
CGGTCTCCGGATTGAGGCGCTGATAGTACCAGGGCACTATCTTGTGACAGCACCAGCTTGGGGCCGAGCC  
GGATTGCTGGTATGGTTGTAGACCACATCCATCACCACGTTTCATGCCGATGTTCTGCTTGTGATGGCCTTG  
ACCATCTCGCGGAACTCCAGAATACGTTTGGTGCCTCGGCGTTGGTGGCGTAGGAGCCTTCCGGCGTGG  
TGTAGTGGTAGGGATCATAACCCAGTTGAAGGAGTCGACGCCGCGCAGATAGCCGGAGAGCTCCTGCAC  
CTGCGGATTATCCTTGCTGTGCCCCCTTGCAGGTTCGGCCAGCACATCTCCCACGGTCTGACCGCCACCG  
CAATAGCCACCAATCTGGATGTTTTACATCCGGATTGACCTGACAGAGCTTGTGAAGTCATCGCCGA  
GATTGGCTACCTTGGCCGGATCCTCGTTGACGGTAGCGATATCGAACACCGGCAGCAGGTGCAGGTGGCT  
GACGCCGCTTTTTGCCAGCGCTTTCAGATGGTTGACCGGTACAGAGTCGGGCTGGGTTCAGACCGACAAAC

TTGCCGCGCTTCTCTTCATCGGTGGAGGCATCGTTACCGGTCAGGTCGCGAATATGGGCCTCATAGATGG  
TGATGTCGGCGGGGTTCTGCTGGCTGTGTGGCGCCTTGAGGCTGTCCCATCCTTCCGGTTTCAGGGCCGG  
ATCGTCGAGATCCACTACCTGACTGAACTCGGAGTTCATCGCCAGACTCAGGGAGTAGGGATCGGTCACC  
TCATAGTGCTCAACCTTGC GGCTCAGCGGATGGTAAACCTCCATGTCGTAGCGGTAGAATTGGCCGATCA  
GCTCGCTGCCCCCTTCGTAACCTCCAGCTGCCGCTGGCGCTGTGCGAAGATCATGGCCACTTCACCACCTCT  
CTGGTGGCTGGCGTTGTAGAGGGCCAGCTTGACCGACTTGCGGTCGGCGCCAGAGGCGGAAGGTCACC  
CGGTTGCCCTCTACCACTGCGCCATAGCTGAGCTTGGTCGCTCTGGGGCATAGAGCGCATCGAGGGCGC  
CGGCGCTCTGCACCAGGGTCGCTCCTTG CAGGATAACCGTCAGCATCGGTGCCGATAGCCACCAGTTCCCC  
CTTGAGCAGGGGCTTGAGATCTTTACCGGCAGGCAGGGCAAAGGCGGCGGCATCCTTGAGATGCGGATAT  
TTGGCTGCTGCTCGGCAGTGAGGCTGGTCGCGGTCAGGCTGATATAGGGGAAATCGAACACCCCATCGG  
CATTAGCCTTGATAGTGC GGAGTCGGTGTAAATATAGCGAACGTCGGGCTTGTCTTGCCCCCTTGCCA  
AATCAGGGTATTGCCATCGATAAGATGAGCGCTGGCCCCCGCCACGCCAAAGGCGGCGTAAAGGCTTCG  
GCACGGCTGCCAAACAGATCTTTCTTGCCCCGCGACAATAGCCACGGTGCGATCCGGATGCTCACTGAAGC  
TCACCTTCATATCGCTGCCGGTCAGGTTGGCCAGATCGCCGTTGCGAGCGATAAAGTTGATGCACCCTTC  
CACATTTTTGAGCGGAACAACCCAGGCCGACCAAAGCTGTGCGCAGTGGCAGGAGTCTTGCTCTTGTC  
TCCCACCCGGTATTAGGCCACTATCAGCCGTTGCCGAGGCGTCGTTGTTCCAAAGGTGCAGGCTGT  
GGCTGTCAAATGGTGCCTTGCCCCCTTTGGCTGCCGACTGGGTATCCACCAGCGCAATGACTACCTGATT  
CTCCCCGGCAACCAGCAACTCTTTG GGGGATCCATTTGGGCAGACGAGCGACAGGCCCATCGGTGACT  
TCAGGTGTAGGCGGTGTAGGGGGGACGGGGTTCACACCGAGGCATCAGAGCTGTTGTCATTACAGCCAG  
ACAAAAGCGCGAGCAGTGAGGCTGTTACCAGCGCCACTTTGGTCTTTTTCATATCCATATTTTTATAATT  
CCCGCTGTAGTTAGTCTCGATAGTCGAGCACCCGGTCATTGCCAGGCGGTGCCATATTAATCAGCGGCAA  
TCGATTCAAATGTGAGCGGAAGGGCAAAAAACCATCCAGTTTCAACAAGATAACGTTTTTCAGATTGAAA  
CTTCGATCCGGCTCACAGACCTCGCGCCATTTGGCCTCATATCTGGAAAACGGCAGTCACGGGGTCAGA  
AAAGCAATGTCTGATCAAGTGGATAGACAAGGAGTAAACAATGAAAACGGATTGAAGAGCAGGCAAGACGA  
CTCGATCAGGAGTATCAGGCGATCGGGCAGCTGTTGACCAATCTGCCAGCAGGCTGGCGCCCTGGCCG  
AACAGTATCACTTCTTCAACTGGCCCCGATTATGAAGACTCGCCCCGCTGAGCCGCGCCTTACCCTGCT  
GGGGGAACCCCGGAGCTGCGGCTGCGCTGTGAGCCGGTGAGCGCTCCGCCCTCCATGGCCTGATCCAG  
GTGGTCTCGGAGGATGGCACCATAGATGCCAGCTCGGTTTCGCGCCGATGGTCAGCTGCTGCTGAGAT  
CCGCTCAAGCTGAGCAACCCCGCCACTGCTGCTCAAGCTGCTGCTCGCGCTGCTGCGCGCTGTGCGCAACAA  
GCCCCAGGAGGAGATCACCGGGCAGCCGCACTGACATCAGAATGCCAACGGCACTGAAACCAAGAGGGCC  
AACGGCCCCCGTTATTTATCCTGTTGCTGCGGATCTCGATGGTCACATGCACCAGCTCTTCATGGAGCG  
CCAACCGTTGCGGGATCTGCTGCGCCGGTAGCGGATTGACCATCAGCAAAGAGAGCACGCAGGCATACTG  
CTGCTGCCCTACCCTCCAGACGTGGAGATCGCGGATATCGGTACCCGGCAGCTCGGGGATGACCTCACGG  
ATCTCCGCCACCAGCGGGCATCCATCTCAGCATCCAGCAGCACCCGACCGGAGTCGCGCAACAGGCCCC  
AAGCCCATAACCGGACCAGTCCGGCACCCACTATGCCATCAGCGGATCCAGCCAGTCAGCGCCCCACAG  
CATGCCCCCTACCAGCGCCAGAATCGCCAGCACGGAAGTGGCCGATCCGCCAGCACGTGGATATAGGCG  
GCGCGCAGATTGAGGTCCTGATGGCCGTGGTGATCGTCATGGTCATGATGGTGGCCATGGCCGTGGTGT  
GGTGGCCGTGATCATCCTTGAGCAACCAGGCACAGGCGAGGTTACACCAGCAGCCCCACCAGCGGATAGC  
GATCGCCTGTTGATAGTGGATCGGGCTGGGATCGAGAAGCCGGAACACCGACTCGAACAGCATCAACCCG  
GCCACTCCCACCAGCAAGAGAGCGCTGGTGAAGCCACCCAGCACCTCGATCTTCCAGGTGCCGAAGCTGA  
ATCTGTGGTTCGGGGCAAAATGGCGGGCGGCGGATAGGCCAGCACCGAGAGGCGGAGCGCCAGCGCGTG  
GGAGCTCATGTGCCAGCCATCAGCCAGCAGCGCCATGGAGTTGTAGAACCAGCCCGCCCAATCTCCGCC  
ACCATCATGATGACGGTCAACAATACGGCCAGCGGGTCTTCTGTTTCGGCCAGCGGATTGCCCTCATGGA  
TGACGGGTTGATGGCAGTGGGATTGAGCGAGGGATGACATGGATTTCTCCTGAGAGCGATGATGCAATAT  
ACTATACCCACAGTATAGTTTTATTGATCGAGAGGATCCGTCATGTCCACACCATTCACGACAAAAAGAA  
GTTGCTGGCACGGGTGCGCCGATCAAGGGACAGACAGGTGCGCTGGAGAGCGCGCTGGAGAGCGGATGAGAGC  
GACTGCGCCGCCATTTTGCAGCAGATCGCCGCCATCCGCGGCGCCGTCAACGGCTTGATGCTGGAGGTGC  
TGGAGGGGCATATGTGCGAGCATCTCGGCGCCCCGATGCCACCCCGCGGAGCGGCTGGAGGATCTGGA  
TCAGGTGGTCAGCGTCTGCGATCCTATTTGAAGTAAGCAGGATCGCGGCGACATCCCTTCAGGCTCGAC  
CAGCGTCGGGCTTGAGCCACCGCCAGCTTTGCGCCATGATGTCCAGCCGGCTGACCGCCGGTTTTACTG  
GACAGTCAATTTCAAGGATCCCCATGTTTGAACACGTCGATGCCTATGCTGGCGACCCCATCTGACGC  
TAGTCGAGACCTTCCACAAAGACACCCGCGAGCAGAAGGTGAACCTGGGGATCGGCCTCTACTACGACGA  
GCAGGGGCGCATTCCGCTGCTGCCGTCGGTGCAGCAGGCCGAAGCCAGCGCGCCGCCAGCGCCG  
CGCCCCCTACCAGCCGATGGAAGGCGCCGCAACTACCGCACCGCAGTGCAACACCTGCTGTTTGGTGGCC  
ACCATGAAGCGGTCAAGGCGGGACGTATCGCCACCATCCAGACCATCGGCGGCTCCGGCGCGCTGAAGAT  
CGGCGCCGATCTGCTCAAGCGCTACTTCCCACCTCCGAGGTGTGGGTCAGCAATCCGACCTGGGACAAC  
CACAAGGCGATGTTGAGGGAGCCGGCATCAAGGTGCACGACTACCCCTACTACGATGCGGGCCACCGGCG  
GCGTGCAGTTCGATGCGATGATCGACTGCCTGAGCAGCCTGCCGGCGAAGAGCATCGTGTGCTGCACCC  
CTGCTGCCACAACCCGACCGGGTGGATCTCTCCCGGCCAGTGGGATCGGGTGTGCGCTGGTGGTCT  
GAGAAGAACCTGATCCCCTTTATGGATATCGCCTATCAGGGCTTCGGTGACGGGCTGGAAGAGGATGCCT  
ACGCCATTCGCGCCATGGTGGCCGCGGCGTACGCTTCTCGTCAGCAACTCGTTTTCCAAGAACCCTC



CTTCTACGGCGAGCGCTGCGGTGGTCTGTTCGGTTCATCTGTCAGGATGCCGAAGAGGCCAGCCGTGTGCTG  
GGCCAGATGAAGGCCACCGTGCCTCGCACTACTCAAGCCCTCCCACCCACGGTGGCCAGATCACC GCGG  
CGGTGATGAGCCAACCCGAGCTGCACGCCATGTGGGTTCGATGAAGTGACCGAGATGCGCACCCGCATCAA  
GGCGATGCGCCAGAAGCTCTACGAGGTGTTGAGCGCCAAGGTGCCGGGGCCGCGATTTTCAGCTACTTCATC  
AACCAGCGCGGTATGTTTCAGCTACACCGGCTTACCCCCGAGCAGGTTGACAGACTGCGCGAAGAGTTTCG  
CCGTCTATCTGGTGCCTCTGGCCGCATGTGTGTGGCGGGCTCAACAGCCGCAACGTCGACTATGTGGC  
CGACGCCATGGCGGGCGGTGCTCAAGGGCTAATCCGCATCAGCCCCGCTTTGGCGGGGCTTTTTTGTCTGT  
TGGCTTCGCAGTCACTCTTGAGGAGTCTGCTCACCCCTCCCCCTGCTGTGAGAGAATGCCAGCAGGTCAC  
GCTGTATCGTACTGATTACAGAGCCTGTCTTTTCATCCGCTTATCTTTATCCACTTCAGGAGCCACTATGG  
ATCTGATCGCTCTCTCTCGGCTGGGAGGTCGCCATCTGGTCAACCTGCACCTGCTGCTCGACAACCAGAG  
CGTCAACCCGACCCGCGAGCGGCTCTGCACCCAGCCTTCCACCGTTCAGCAAACCCCTCAACCAACTGCGA  
GATCTGCTGGGGGATCAACTGCTCTACCGTCAGGGAAACCAGCTGTTGCTCACCCCATGGCCGAGCGAC  
TGGCTCCCCCCTGCACCGGCTGCTGGGGGAGCTGAACGGCCCTCACTCGCCAGAACGCTTCAACCCGCA  
GCAGTGGCAGGGCACATTGCGGCTGGGATTGCGCGAGAGCGTGATGACCTGGCCGGTGGGCCCCATTCTG  
GGCCAGCTGATGCAGGAGGTGCCGGGCATGGTGCCGGAGATCTGGAACAAGGATGAACAGGGGCTGGAGG  
CGCTGGCAGCGGGCAAACCTCGACTTCGTGATCCTGCCCATGACCAGAGCCAGCCGTTGCCGCGCCAGCC  
CGGGCTGGTGTGGGAGACCCTGCGGGAAGAAAACTGGTCTGCCTGCTACGCAAAGACCACCCCGCGCTG  
GCCAAACCCCTGGGATCTCGATGCCTACCTGAGCTGGCGCCATATAGCCATCCGGGATCAGGAGCTGGCCA  
ACCCCTTCTTCGAACAGAGCCTGGCCCAGCAGCAGGTGCGTCGCCAGATTGGCGCTACCCTGCCCGATTT  
TGCCAGCGCGGCGGCCCTGCTGCCCCAGACCGATCTGATCCTCACCGCCATCGGTGGGTGGGCGGCCCTGC  
ATGGCCAGTCAGCCGGATCTGGTGATGCGTCCGGCACCGTTCGATTACGGCAAGGTGAGTCACAGTCTGG  
TCTGGTATGGCCCGGCCGGTGGATGGCTCGGCCCGTCACTGGTTCGCCAGCGGATCCTGCAACTGGGTGCG  
CGAATTGATTGAGCCCTGAGCCGGACGACAACGAGCAGAGATTGATGTTTCACCGCGGGCGAAACATCAAC  
GGCAAGTAGGGACTAGGGACGTTTTGGTATAGATGGGGCTGGGGAAAGGAGGCGACGTTGCTGCCAGATCC  
GTGATGCGGGCGGCCCTGCTTTTTTCACTGATCGATGCGCAGCACCTGATGCATGGGAATAAGAGTCT  
GGCGCACATCGGCAAATTCATCTTTCAGCTTCTCGTGACTGGGATCGACGATAAGCGCCGTATGGTTATC  
CCAGACAAAATCGGCAATTTTCGATGAAACCGAACAGCTGACCCTGATTGACTTCGCGCACATAACACTTCG  
TAGCGCTCGCTGTGGCAAATAAACTGAACCCGATATAACGCTTGTCTTTCATCATGATTATCTGTCATT  
GAGGGGTAAAGAAGATGGCCATTATTCTAGCCCGCTTCTCGCCCCACCAATAGACAGAAATCACAGTTG  
CGGCCTTTCCATGCCGCACCTCACGCCATGACGGTCCAGCGATGACGCAACCACTCAGCCCATCAAGGCA  
GGCAGTGAGACCGGCCCAAATCCCCTGTCACGCAAACGGCTGGCCAGCTGTTCCAGCTCGGTTTTGACTAG  
CCTGCGGCCATTGCGCCGCTCCCCCGCACCCCGTGGTGGCGAAAAGCCGTTGAGGCGAATGGGCACAGG  
CCCCAGCCGCTGCAAGAAGGCGGCAAGATCCGCGTCAAGCTCACCATTCATATCAAGAAAATCGCTCTTG  
CCCCGCACATGGAGCAGCCGAGTTCCGTCAGCTTGCCGTGGCGTGCCAGTAGTTGCAGCGATCCCAGCA  
CCCCGCTCGCGACCATAGCCGGTCAGGGAGTGATACACCGAGTCACGCCAGCCCTTGAGATCGAGCATGGC  
GCCGTCGAGCACCGGCAGCAGCCGCTGCCAGCCGTTTTCGGCCAGCGAGCCGTTGCTGTCGAGCAGGCAA  
GTGAGATGGGCCAGATCCGGTGCAGCCCTTGATGGCGGCAAACAGCGCAACCACAAAGGGGAGCTGGGTGG  
TCGCCTCACACCGGAAACGGTAATTCGCTCAGCAGTGGGCCGTAGCGGCGCAACAGGGCCAGCACCTC  
GACCACCGTCATGGTAGCGGTCTTGGGATTGGCACTGCGCGGGCAGACATCCAGACAGGCGTTCGCAATCG  
GTACAGAGCGCCGCTGCCATTGTATCTTTCGCTTTCGCTCAAGGTGAGGGCACCGCTTGGGCAGACCGCAA  
GGCAGTCACCGCAATCGTTCGCACAGCCCTATGGTGTGCGGATTGTGGCAGCCGGGGCAGCGAAAGTTGCA  
CCCTTGCAAGAACAGCACCGCCGTTGCCCGGCCGTCGACACAGGAGAACGGCAGCACCCCTGCTCACC  
AAGGCGCTGCGTGTGGCAAGGCGTCAGCCATCAGGTTTCGAGCTCAATACTCGCAGATGGTCGATTTCGTG  
GGCGACACCCCGGTTGCCCGCTGACGAATGGCGGTCACTTCACTCGCCTCGGCACCGAGACTGGTGGTC  
TGCAAGCGCGACCCCTCCTCTGCGAAGCGGGCCACGTCGCTCTTTCGCGATCATGTAGCCGGTTCACCCGCA  
CCAGATCGCTGTCGGCCACGTTGGCGGTGAACTCGCGCATACCGATAGCGAGCGCCCCCTTGACAGAGCTG  
CAACAGCGCCTGCGGGTTCTGGCGGATGGTGGGATCCAGCGTCAGGATCTCGCTGATCCCCGAATGGTAA  
TAGGTGTGGTGGCGGCCAGCGCCAGCACATGGCTGGTTCGGATCCGGCTCATGCCCGTAGGGAAATGCGCA  
CCCCGGGGGTGACAGCCACATCGATGCTGAGGCCACCTTGCGAATGCAACAAAGCGCGGCCACCCAGGC  
ATGAGTTTTCGGCGTTCGAGTGACATATTCGAGAGCTGGGCCGAGATGCGATAGCCAAGCTGGTTTCGCC  
TCCTCGCCATGGCCATAGCGATCCGGAAGATTCTCTTTATCCATCAGGATATTGACCGCTTCCGCCATGC  
CGTAGATGCCGAACATGGGGACAAAGCGATCCTCATCCAGCAGCCCTCTTTTACCAGGAAGCTGTGCGAA  
GAAACCGGACTCATCGTGAGGAATGCGGCCCGCGCTTCGATCAGCTGAGAGGCCAAGCGGCAGTAGTGG  
GGCAGCAGGCAGCCGAGGAAGTCGTCGATCCCCCTGACACTGCTCGGCGACCCGTTGAGGGAGATGCGCA  
CCAGGGTATTGGCGCCACCGCCCTGCGGCAGGGCGTTGTAGCAGCTGACGATACCAAACACAGAGTGTG  
GAAGGTATCGCGGTGGATCGGGTAGTTGGCGATGTGCGGCTTGTGCACTCGGCGATGTTCTTACCAGCC  
TGCAGCAGCAGGCTGTCCGGGTCTGCTCCGGATCGTGGAAGAAGGTAAGGTTCCGGCGCCACCTGCTTGA  
GCTCGTTGTGATGCGCAGGATCAGGCGGCAGATGCGGTTGTTCATCCGGCCCCGATGTTGACGTGCATGAA  
GGCGTCCGGCAGCACCCGATCCAGATAGACCCAGAACCCTTTCAGCTTTCGATAGAGGGTCTCGTCATCC  
AGTTTCGCCGACAAACGGCAACAGCAGATGGTTCAGCCGCCCCAGCCAGACCGGCATGCCGGTAACGGAGG  
GGACATGGTGTAGAGGATGCGCAGGGCGTTGAGCGCTCGTTCGAAATCCTGCGGCGCCGCCAGCTCCAG

CCAGGCAGAGCCCTGAGTCAGGAATTTTTTCATAGTCCGGCAGCACATAACGCGGCTTGTAGGGGGCATGC  
CCTTCGAACATGTGCGAGATAAATCCCAGCTCCATCGCTCGGCGACTGCGGCAGGCAGGTCGGGGTAGG  
GCAACGCATTCTCGGCGGCCAGCGCCAGCGCTGGCTCTTCTGGGCGGCGGAGAGATGGGGATCGCGCAC  
GATACGCTGACAGGTTTCGATCAAAGACATGGGACACTCCTTCACGGACAGAGCCCATATCCTCACCATT  
TGCAGGCTTTTTTTGAAGTGACATTCATGACATGACGGATGTGCAATAATGACATCCATTACACAAGATCA  
CGGCTCGCGCTTACCAAGGTAAGAGCTCGGCTATGCCTCCCAGCCAGCGCAGTAGAAAGAAGCCCCCA  
TTCCGCCCACCACACAACCAGAGTCGGCAGCCGCAACAGGGTCAAGAGCATCACCCACAGGGTGGCAGT  
CAGGTAGTCAGGATCCCCTCAAGACCTATCCCCGGCTCGTAGCTAAAGACGATGGGCAACCAGATTGCA  
GTCAGCACCGACTGGGCCGAGAAGCCGAGAAACGCCCCATCTCGGCACCCGGCTGATATCGGGTCAACC  
GAGAAAAGAAGGCGAAGCGGTTGAAAAAGGTGATCAGGGCCAGCAGGCCAATCATCAGCCAGCTCAGCT  
ACCTCCTCATCCGGTGCAGCATAGCCACCACCATGCCAGCCAGAGCCGAGACGATGATGTGGATCTC  
CGCCAGCAGCGGCTTGGTAATCAACGCTGTGCCCGCTCACCAGAGTGGCCGCCACCATTGGGCAAGTTT  
TTCATGGCGGGAATGGTTCATGGCGATGAAGGTGGCCGCGATGGCAAAATCCAGCCCCATGCTGTCCAGTC  
CATCGATGTACTGGCCGGCCGCGATGCCGACCAGGGTCGCCAGATTCCAGAACAGATAGAAGACGAATCC  
CGCGATGAGCGCGTAGGCCGGATCAAAGTGGCCGCTGCGCTCCCAGTCTTTCAGCGCCACAGCGAACATC  
TCATCAGTCAGGAAAAAGCAAGGCTGGCCCGCAGCGCAGGGAGAGCGGCAATACGTCACGGCGGAAGG  
TGAAGCCGTATAGCAGATGCTGGGAAGTGTACCCATGGTGGAGCCATGATGGGCAGCAGGGGCGTGCC  
CGCCCCGAACAGGGTTCGTGGCAGAGAGCTGGGCGCTCCGGCTAGACCAGCAACGACATCAGTTGAGCC  
TGAAGCGGACTCAGCCCTGCCTGCAACGCCAAAGCGCCACACAGGATCCCCAGGGGATCACAGAAATGG  
AGAGCGGGAGCATATCCAGTGTGGCACGCCACCAGAGCATCCCCGTTGCTCGGGCAGCTCGTTACTGA  
CATCATGTGATCTTCTTGTACAGCCAAAGCGAGCCGAAAAAACTAGCACGGGACAGCAAGCGCTGTCA  
CGTCATCACTGGCGGGAAATAAAACGCCCGGGAGTGCAGGGCTGCACAAGGGGATCAGGGCTCGATGA  
CGATGGGCGTACCCGGATCAATCGCGTCCCACACCTCATCCAGTTTCGTGATTGAGCATGGCGATGCAGCC  
ATTGGTCCAGTTGGAAGGCTGAACCTGCGGTTGCCAATGCTGTTGCGCTGGCCGTGGATCATGATCATG  
CCACCCGGACGAACACCAGCTCATTGGCGGCTTGTGTCATCCAGGTTTCGGATAGTTGATATGGATGG  
CTTTGTAGTAGCCGGAATTTGGTCTTCTTGTAGTCGAGGGTGTAGCGCCCTTCGGCGTACGCTGATCCCC  
TTCCTGTCTGCTTGTGCCCTTTGGGCGCCGGGCCAGAGCAATCCAGTAGCGCTTCAGTTCTTTGCCATCC  
TTCATCAGGGTCAGGCTATAGGTCGACTTCTTGACCACCCAAATCGGCTTTTTTCGGTCAAGGCCAAAAC  
TCAATGCGGGGCCAAGCCCCAACAAACACAGTGAATACCGCTCTCATTTCCATCCCTCGACAAGGCTCTGGT  
GCGGGCTTTTTCTTGTACCAGATCATCTGAACGATGCCCGCCGAGCGGCGAGCGGCCATGATATTGG  
ATCGCCATCAATACTCAATATGCCCGGCAAAACATATCTTGGCCGACGAAGGCCATCTTCTTGAACGCC  
GTCATTTGGCATTGGTAATTAACAGTTAAAAACAACAAGATACAAAAATATCGCGCTGGCACCCGGGACA  
ATGATCGGCGAAGATAAACTCCACTCCCCGACAGGATCATGCCATGCGCTCTTCGTGCCGCTCGCCAC  
CCTGCTGTTCTCGCCACTCCTGCTCTGGCTGCCCGCAGTGTGCGCCGCGATGCACTCTGGCTGCGCGAG  
CCCCGCTCTCCCCGATGGCAAGCAGCTTGCCCTCACCTGGCAGGGGCGCATTTTTTGTGCGCCAGTGCCG  
AGGGTGGCCCCGCCACGGCGCTCACCGGCAGCGACTACCTGAGCCAGCGGCCAATCTGGTGCCTGGATGG  
CAAACAACCTCGCCTTTGCCGCCAATCTCTACGGCAACGAAGATGTGTTGTTGTTACCCGCCAACGGCGGC  
GAGATGGTGCCTCACTCGCGATTTCGCGCACCGATCTGCCGCAAGCCTTCAGCGCCGATGGCAAACGGC  
TGTTGCTGAGCAGCCAGCGCCTGGGGGCGCCCGATGCCGACCATTTTGTGCGGGAAGGCTACCAATGGGG  
CGAGCTCTACTGGACCCCGATCACCGGCGGCACCTTGCAGGCCGATCTGCCGCTGCCGACCCCTCGCC  
CGCCCCACGGGGAGCTGCTCGCCTATCAGATGCCCGCGGGGATCAACCCTTTCGCAAGCATCAGCACT  
CGTTTGGCGTACCCCGCTCTGGTTGTTTGTGATGGCAAGCAGCACAAGCAGCTGACCGAAGATCGGGTGGC  
GGCCACCGATCCGGTCTGGAGCGACAAGGGGGATACCCTCTTTTACCTGAGCGAGCGCAGCGGCGATTT  
AACGTTTGGCGCCGGGATCTCGCCAGCGGCAAGGAGCAACAGCTGACCCACTATCAGGGCCATCCGGTGC  
GGGGCTCAGCGCTCTCGCAATGGCGATCTGGTCTGGTTCATGGCTGGGCGAGCTCTATCGCCTCGATGC  
CGGTAGCAGCAAGCCAGCAAGCTGACCCCTCGCACCGCAAGTGGCCAGCACGCCGGATGAGCGAGCGAG  
GCCCTGACCCTGGCAGACGAAGCGCTGGTTCAGCGAAGAGGCGGACGAGCTGATCCTGGTGAAGCGAGGCA  
ACCTGTTTTGCCGTCGACCCCGAGCGGGAGCGGGTGCCTGACCTGACCCCGATCCGAGCGAGCAGTCCAG  
CCCTCTCTTTGCCGAGCAGGGGCGCGCCCTCATCTATCTGTGCGGAGCAGCAGGGGACGCTGCCCTCTAT  
CGCCTGCGCAAGGGGGATCCGGATCTGCTGTTTACGCGATCCCGGCACTCTGACCGAGAGCCTGCTGCTGG  
CGATTCCCAGCAAGGGGATCAGCCGTCGGTCTCTCCCCAACGGCAAGCAGCTCGCCTTCGTGGTGGGA  
TGGCCAGGCCATCCACTGCTCGATCTGGCGAGCAACAAGCAGCGGGAGCTGGTGCCTGCCAGCTTCAAC  
CCGTCGCGCCACGAGGTACATCTCGCCTTTGCCCGACTCCCGCATCTGGCGCTCACCTTCCGCCCCG  
ATGCAGCAGAGCAGGAGATCGCAGTGTGACACGGCCAATCCAAGGCCAAACGGTCAATGTCAGCCT  
CAACGGCTATCAGGATGGGCAACCGGGCTGGAGCCAGGATGGCGCCATTTCTACTGGCAATCGACCCGG  
TTTTGGTGCATGGGGCCGATGGCGAGCCCCCTCGTCACCAACTGCTCGGCATTTACAGCAGCCGACCG  
CCAGAGCCGATGCGATTGCCGAGCTGGAGCCGCCGAAAGGGGGATACGGCTTTGAGAGCGATCGTCTCAA  
CCATCGAGAAGCACTGCTGCTGCAACCCACCGGGACCTGCTCGCCAGCCGCATCATCGGTGACCAGCTG  
ATCTATCTGGTGGAGGAGATGGGGTCAACAGCGAGAGCGAGATCAAGGGCTACAGCCAGGATCTGCGCA  
AGGGCAAACAGCGAACTGTTTGGTGAACAGCCCGGCCAGCGCTGGCAAGCCTCAACCAGCAGGGCAC  
CCTGGCGACCCCTGGTGCAGATGGGGAGATCACCCGGATCCACTCGACTCCGACGAAGCCACCAGCGCC

CCCTTCGCCTTGCAACCCACCAGCCGCTGGCAGGAACGCATGACCGCCGCTTCGATCAGATCGCCCCG  
TCACCCGGGACGAGTTCTATCTGGACGATATGAACGGGGTGAACCTGGATAGCTATGTGCGCCGTTATCG  
CCGCCTGCTGCCGGGCATCGGCAACCCGCGGGACTTTGGCAACCTGTTGGCGGAGCTGGCTGGCGAGCTC  
AATGTCTCCACACCTGGGGCAACGGCCCCGCCCTTCCCCCGCATGGCGGACGAGACCGCCAGCCTGG  
GCGGCTACTGGCAGGATAGCGAGCAGGGGTGATGCTCACAGCCCTGCTCTCTGGCGGCCGCTGGATCA  
GGAGAGCGATATCGCCCCGGGCGCCCGCTGCTCGCCATCAACGGCGTCCCGATTGCCAATCTGGCCGAG  
CTGGATCAAGCCCTCAACCATCAGGCCGGTGGCCGGCTCGCCCTCACCTTCCAGCAGGAGGGCAACAAGC  
AACTGACGAGGTAGTGTACCCGCCATCAACAAGCAGCAGGAGTACCAGCTGCAACAGGATCGCTGGAT  
TGAGAAACGGCGGGAGCTGGTGGCCAGCCTGAGCGGAGGACGGGTGCGCTACGTCTATCTGCCGGCAATG  
AATAGCGAGGTCTACGATGCGGTGGTGGCGGATGCCCTCGGCAGACAGCGCAATCGCGATGCGCTGATCG  
TCGATGTCGGCTTCAACAGCGGGCTATCTCGCCAATACCTTGGTGGAGTTTCTGACCCGGCAGCGGGC  
ACCAAGGGGATGGCCAGCAGCTGGCCCCGTCAGGGCAAGGGGAAACCGATGCCGCCACTCGCCAGTGG  
ACCAAGCCTTCGGTGGTGTGGTCAACGCTGGCAGCTACTCGGAAGGCTCCGCCCTCCCCGAGTACTACC  
GCACCCCTCAAGGTGGGCCCATCGTCGGCGATCCGGTGCCCGCACCGGCACCATGGTCTACAGCCACGA  
CTCCCGGCTGATCCCGGGCTCTCCTACGGCATTCGGACCCTGGGGCTGCGCAAACCGGACGGCACCTTC  
TACGAGAATCAGGAGCTGATCCCGGACCTGCAGGTGCCCTCACCCCCGCGACATGGTGGCCGGGCGCG  
ACCCGCAACTGGAGGCGGCGGTACAAGCCGCCCTCAAGCAGTTGTCAGCCAGCGCAAATAACGGCCCC  
ATCGAGCTCAACGAAAGCGGAACAGCTCGCGATGCAGATGCCCGTCCGGCAACAGCCGGTCCAGGGC  
TGCCATCCCCCTCCGGCCCCGAAAACACACCTGCTCGGGCGCATCTGCGCGATGCGGGCCAGATCCAGC  
CGACCGGCCGCTTGTCCAGATGCAACTGATAACGCACACCGGTGCGATGACAGAGCTCGGCCAACCGTT  
GGTGTAGACAGCCCCACTAGGTCCGGCGCGCACTGGATCAGGATGATCCCTCGCCCCGCTCCCCACG  
GGCAGCCAGCCCCCTCCAGCCAGGCGACGAACGGCGTGATACCGATCCCAGCCCCAGCCAGAGGGCTCGG  
CCTCCCCCTTGCGGCGCAACAAAGGCGCCATAGGGGGCCGGTACCACCACCTCATCCCCGACGCGCGCCT  
CTGCCACCAGCTGGCGGGTATGATCCCCGAGCGCCCGCACCGCGATCACCAACTGGCGCCGATCCGCTGA  
CACCCGCACCAGGGTAAAGGGGTGCGGCCCTCCTTGGCGTCAAACTCGAAGAAGGCAAACCTGACCCGGG  
CGGTAATGGGCGAGCGGCCGCTCCAGCTCCATGGTCAGCTCGCAGGTGTGATCCGCCAGCGCGCGCACCG  
CAATGACCCGGCCGGATGGCGATCCCGCGCCCCACTTGTCCAGCAGGGAGTAGAGGGCCCCGATAGC  
ACCGATCCCCCGCATCAACAGATCGCTACCCCAACCGCGCATGAGGCTCCACCTGAGGCGAGGAGCAG  
AGCCCGTGGCCCCAACCCGCCAGATAGATGAGCGGCCAGTCGATGGATCAGCCGAAAACGGCCATAAC  
TCACCAGCGCCAGCAAGCTCACTACCACCAGCGCAATCAGCAGATAGAAACTCCACTCACCAGGGTATT  
GCCAAGGGCATGGAGCGAGATGCCATTACCTGCACCAGCTCCAGCTGCACTGGCCCCACGCCGGGCGGGA  
CGACTCAGCCAACCCGCGGAGACTGCCCACTTCGGCATCTCCACCAGCAGCCAGTGGGCAGTCAGCGCCA  
ATGCGCCACCAGTGGCCGTCTGACGGTGAATCGCAACATCCGGTCCAGACCGCCACACCACACCTCCAG  
CTGCGGCAGGCGCAACGCCAGCAACAGCGAAATCGCCATATAGGTTCATCCCAGCAGGCGGTCAGCAAT  
AACATTTTCATGGCGCCAGGGCCACACCCCGTTGGCATCCCCGCATAACCGAGCCACCAGACCCCGACCG  
CCAGCAGTGGCAACAGCCACCAAACCCGTTTATCCGTCATAACATGCTCCCTGGTTCCATCGCGGCAGGG  
CCTCATCTCCCTGCTCATGGCACCATTTGCACACCCGTCGGTCAACAAGACTTTGCCAGAGGGGGAAGCTT  
GTGTGGCAATGTGTGACAAACGGAAACAAAAGAGGGGCCGACTGGCCCCCTCGTGATCACCTTGTGGCT  
CGCCCCCTTTCACAGGAGATGGCGCACAATCCACCTCCGCTGTGATGACGATCTGCCAGAAAAAGGAAT  
CAAATGGGGATGTTACATATCTGCGGCGGAAAAACCTGCTGCCCACTCTTCTGGACAAGGAGATCCCCCTT  
GCTTTCATCCACCGAACAACCGCTGTCGCCAGCTGTCAACGCGAGACCAACCATGTCGTGGTGTGGTC  
GACAAATCATTGGCAACAGCCGACACCGAAGCAAAAAACGCACAGCCTTTATCAAGGACTTCATTACCG  
GCTGGGCTGCCGGCCCCCTTTCTAGCCAACATGGATCGCTTTGAACGCCACGCCATCTGTGAAAAATTGCGG  
AAATAAAGTTATTGATGAATGAAAAATTAGGGGCAAAACGACTGGTTTTGGGAATGTGCGGCACATCGCT  
ATGGCAAACCGGCCGAAAAAACGCTCCGGGTACCCCGCCCGCTTCGCAAGTGTGATCGGTGATAAAA  
AGTGAGGGGTGACCGGCCCTCATGATTACGGCGCTTTTGAGGCCGTTTCGCTTGGCCACCAACCGGTGC  
AGCAGCCTGTTGTATTTTGCCCAAGAGTGGATCAGCAGGAAGATGCCGAACAGCAGGGCCAGAAACAGTT  
GCCCCACTTCGATGGCATCCAGCGAGCCGATAAAGCTCTCATCCTCCTCCGCCCTCCAGATAGTTGAGCCA  
GGGTTGAGGGCCAGAAAAATCCAGCCGACCCAGGTACCAGCAGGATCAGCAGATCCCGCAGCCGATAC  
TTCCAGCTGCGCCGGGTACCGTTGCTGATGATCATCTCGTTCCGCAACTTATGTTTTGTACGGAACGAC  
TCCCCCTGTGAGGACTCTCCACACCGCAACTGGCCACGACGACGACGAGGATCGCCTTGGGCACCGCCA  
CCACCACGGTACCAGATTGAGCAGCCAGTAGATGAGCGGATAACCAGACGACCCAGATAAAGCTGCGGGC  
CATGCTCTTGTGCTAGTGGTTGTCGATAAAGATGCTGACCCGAACTGCACCAGACAAATCGCGGTTCATC  
ATCACCCCGGTCCACTGGAACAGATGACCCACCGCCAGTCCGCTCACGTCAGGCTCAATCAGCCAGATCA  
GTGCCAGCAGCAACATGCTGTAGCACCAGGCCACGCTGGAGAGATACTCCAGCAGCAGCAGCCAGAAGCG  
TCGGTTGCGCCAGCGCATCGCCTGCAACCCGTAGCGCAGAAACACCTCGGGCGCCCCCTGTGCCAGCGC  
AACCGCTGCTTGTAGAGACCGCGTACCGTCTCCGGCATCAGCACCCAGCAGAGCGCCTGGGGCTGATAGT  
GGATGAGCCAGCCGGCCAGCTGCAGCTTCCAGCTGATGTCGATATCCTCGGTACCATGTCAATTGCTCCA  
GCCACCGACCGCCTCGACCGCTGCTTGGCAAAGGCCACCACCACCCCGGAGACGGTGAAGACGGTACCG  
TAGATCCGCTGGGCCGCTTGTGAGGCCGATGATGGAGCTGAACTCGCCAGTCTGGATCTTGGCCGATGA  
TGGTGGAGCGGGTGGTACCCGCGGATTGCCGGTACCAGCCCCGACTCTCGGGCTCTCGATGAAGTGTCT

CACCATCCAGCGCACCGCGTCATAGTCGAGCACCGCATCCCCGTCGATGCCAACCAGGATCTCCCCGCTG  
GCCACCGCCAGCCCCGTTGTTGAGCGCCATCGCCTTGCCCTGGTTGTGCTGGTGGAGCACGGTCAGGCGCG  
GATCCTGCTGTGCCAACCGATCCAGCCGCGCGCCTGTGTCTGCTCCTTGTGCTGCCGTCGTTGATGGCCAGCAC  
CTCGAAATCGGGATAGCGCTGGCGCAGCAGGTGGCCGATGGTCTCCTCGACGTTGGCCCCCTCGTTGTAG  
CAGGGCACCATCAGGGTCACTCTGGGGTAATAGGGAAAGCTCCAGCCCCGCTTGGCCAGCGGATATCCC  
TTCGCTCCCCTGGAAGTAGTAATAGAGACCACCACAAAACCCACACCATGGCCATCAGACTGGGATAGGC  
CAACGTAAGATGGCTATCCCTTCCAGAAGATCCTTACCCGCATCGCCTCCCCCTGGGGTGGCTTTAGCTG  
CACTGACTGCGACCGGCGTCACCGGCAGCTGGGTGCGCTGAGGCTGGGTCTGCACCGAGAAGACCGGCTT  
GAGCACCGCCGGATCCGGCTGGTTGTTGTGAAAATCATCCGGGTAGTAGCCAAAAGTTGGTCACCCCCCTG  
CGCTGGATGATCTGCATCCAGCGTACCAGCTCGGCATCGGGGATAGGCTGGTGGTGCGCCAGTTGCGGC  
TCTGCAGTTCGAACACCAGCCGATTGGCCGCGACCTGTGACGATGAATCCTCCGCCAGCCTGGCCAGCCA  
CTCATCGGGGTTTTCTGCCTGCTCCATATAGGGCATCGCCATCACGGCGGTGTAGTCATAGGCCTTGCCA  
AACGCCGCCATGCTCTGGGCAAACCACTGCTGGGATTGCGGCTCTGTACCAACGCCGCATAGATGTTGC  
GGGAGTCTTGAGACCGTCGGCGCCCCCTTGGCCGTAACGAGCGCGGCATCACGCAGCGCCATGGTGAA  
GTCGATCAGCAGATCGGTCTTCTGCTCTCCCTGCGCCTGCAACGCATTCGGGGTGCAGCCAGCGACATC  
GGCCCCCTCGTAGTCGCTGAGGAACGCATCGTCATGGAACAGCAGACCATCGAACCTGGTGTA AAAAACC  
GATCCTCGTAGATATCCAGCAGCAGCTGACGAGTGGCAGGATCCAGGGCGAAAGCGTAGATACTGCC  
CTTGGCGGGGGCGCCGGTACGGCTGTGCGGTGACATAGGCGTGGTTCGGCCCCATGTCGTAGGCCATCACC  
GGCATCCAGGCGAACACCTTGACCCCCGCGACGGGTCTTGAGCTGCCAGGCCACCCGGTTGAAGAGATCCG  
CCTTGACCGGCATATGACGGTTGGGGAAATAGAGCGCCTCCGCCACCCCGTCGCCGTTGTTCATCGGCATA  
GGCCTGCAGATAGACGGTGGTGATGCCATACCCCTTGATCCGATCCAGCAGCATGTCGATGTTCTTGTTC  
ATCTGCTGCGGATCCTTGTGCTAGACATAGTCCAGATCCACGTGCACCAAGCGCTCCACCTGCCGCTCCC  
AGGTATTGCCCCCATGATCTCATCCAGGGTTTCGAGGCTGGTGTCTCCTCCAGCAGATAACGGCGCAC  
CGTGCTGCCCCGAGTCACTCAGCTTGTGAGCCCTTCCGCTAGGGTGAAGGTGTAGGGCATCCCCGCCGCA  
CTGGCCAGCTCCAGCGCCGTCTGGTTGAAGGCGCCGTAGGGCCAGACCAGGATCCGTGGTGGCCGACCGG  
TCTGCTCCCTGAGCTGGCTGGCTGATGCGTCGAAGTCCGCTTTTATCCGGGCCGATAGTCGGCCATGCT  
CTCGTAGCCATTTGGCTCCAGCCTGCGGTGGTACCAGCGGCTGCACGTTGCCCTGCGGGTTGGCGAGC  
AGCCCCGTAGTTGGAGGTTGAAAGTGTGGGAGGCCAGTCCACCAAGTCCGGAGTCCCGGATCCTGCATCTCGGCATC  
GAGGCCAGCCGACGAAGTAGCTGCGTGGTAGCTGTGTCATTGCCGTACGGGACCATCTTGTTCATCGGCAAC  
ATCCAGCCAGCTGCCACCAACGCAAAGACCGCCGATAGTTGTAGAGCTTGAGCAGCGGATAGACCAGC  
CGGTAGAAGCTCTCGTAGCCGTGCTCGAAGCTGAGCAGGATCGCCTTCTCCGGCAGCTGTGCTTTGCCCG  
CTTTGGCATCCAGGATCTGCTGGAAGCTGACCGGGTGATAACCCCTGCTGCTTGATCCAGTTGAAGTGGCG  
GATCAGGGTGTGCGCCGGATGGTCTGGGGATAGAGCTTGAGGTGGGGTCAATTTAGATCGACGATA  
TCGTGGTAGCAGAGCACACATAGTCATCGGGTTGCCGGGCTGCCTGCGTCAGCGAAGGCAGCAGTGCAA  
GCAGCAAACGAAAGGAGCAAGCCAGCGTCTCATCACATGAAACTCCATTGCAGATTGGCGAAGATGAAA  
TTTTCCGAACTCGGGATTGCCGTATAGATGGCCTGACGGCGGCCAAGGCCATAGCCCAGGCTGAGGGCGG  
GAGAGAGGATCCAGTCGTGGCGATAGCTGAGCTGCCACCCCTGATCGCTGCCATAGCCTTGCTGCCAGTA  
GTGGTTGCCACTCATGGTCAGGCTCTGTAGTAAAGAGCGCGCCCATCCAGCGGCAGCCGTTAGCGCCCC  
GCCAGCTCCAGCTCCAGATTGCGATCCTGCAAGGGGTTGAAGTAGTCGACCTCCAACGCCTCGTTGCGGG  
AGGTGGCGCCGCGCAAGGTGGTATCGAACCACCAGCGATCCCAGCGCCAGAGATCCTGACGCAGCCAGCC  
GGAGGCGGTGACCCGCGGTTGCCGTGCTGATATCCATCCGCTCCAGCCGAGCGCGCCCTCGCGGGTC  
TCATCCTGACGCCAGCCAGATCGAACTGGTATTGATCGGCGTAGTTGCCGCGCGCAATGCCCGCAGCG  
GGGTGTGCGCACTGTTGAGATTGATGGCTGCACCAATGTCCAGTGATCATCCAGCCGCAATCGAGGCG  
ACTCCAGAGATAGCCTTTGTGGTTGAGCTGCTGCCCCGTGCCCCCTCCAGCGTCAGTTTCAGCGGGTAG  
AAAAAGATCTCGGCCCCAGCCCGGTATAGGCGCGCGCTCGGGCTGCTGGTCAACTCGCCAAAGCTGC  
CCTGACGACGGACAAACAGCCGATCACCGCCATCAGTGCAGCGCTGTAGAGCGGCTGTAGAGCGGCTGTCTAGCTCCA  
GTCACGGCTGGCCTGCACCGAGCCCCCTTCGTTGCGGCCATGGGTGAGGTCGGTAACAAATTTGTGGCGCC  
TGCTCCAGAGTCAGCCGCTGCTGTAACCTCCTGACGATCCCAGGTCAGGTTGCCAAGGGTGCACGCGCCCT  
GTGGCGTGCCCTGCCAGTCCCCCTTGTGAGCCGGGCGTTGAGGCGACCCGGCTCGGCCAGCACGGTGGC  
TCCTGCTGGCAGCCAGCGCACGGCCTGCCGATACGCTGCTCGGCCCGTCGGGATGACCCCGCCAGCGG  
CGAATATCCCCAGTTGCAGCCAGAGCCAGGGATTGGCAGGCGCACTCTTCAGCCACCCCTCCAGCTGCT  
GCTCTGCCGACCCGCTCACCACGCCAAGCCTGCAGCAAGGTTTTTCAGCTGCAATACCTTCTCGTAGTC  
GTCATTGGCCATCCGCATGTTGCCAGTGAATCCAGCGAGCCGGTGGCTCCTGCCAACCAGCCAGCAGA  
CCCTGTGCCGACCATAGCGCTCGCCATCCGAATAGGCGTAGAAGCGCTTCTCCAGCAGGCGCTTGTCTT  
TGGCCCCGTGCAGGGGTCGCCAGTTGCTGGTAAATCACGGAGGCTCATCCACCCGCCAGCCCGGCCAG  
TGCATCGGCGCGCCTCCAGCACATAGTCAGGCAATGGCCCCCTCGGCTGCAGCGTAGCGGACTCCCGT  
TCGGCTCGGGCAAACCTCGCCGAGGGTACCAGCGTACCACTACATCTCGGCGGGCACTGATATAGAGCA  
CATGATCGTGGGGCGCGGGCCAGGATCCGTTCTTGCAGCGCAAGAGTGCGGGTGAGGGAGCGGGCGGGC  
CAGCACCGGATCCTCGGTCTGGGCCGAGATCCGCAGCAGATTAACCGCCTGGTAGTAGTCGAGCCAGAGC  
CGGTGCACCGGTTTTGAACAGCTTGGGGTAAACGGCCCATCAGGTCGCTGCCGAGGCCAGCCCCAGGC  
TCACGGCTACCCGATAGAGTGCCAGCACCTGCTCGGGGTTGTCCGGCTCCAGGTCCAGCCACTGCTGACG

GGCCAGCAGCTCACCCATGGGATCTTACCCTGGCGGGCGGCATAGATGCGGGCTTCGAGGATCGCTTGG  
TCGCGGGCCGAAACGGGCTTCATAATCAGCCGCTGCGCTGCGGGCAAGCTCGCGGTTGCCCTGATCACTGG  
CAGTGAGAAACAGCCCCGAGCCAGCCATTGCGGTTGGCGGGATCGCGTCCCTGCAGGATGCGGTAATAGCT  
GATCGCCTCGGAGTAGCGCTTCTCGTTCGCGGGCGGCACGGGCCACCCCTTCCAGCGTACTGTTGCTGATG  
GGGCTGAGCTCGCACGGTTTACAGGCGGCCAACGCCCCCTTTCGATCACCCCGCCACAGCTGCACGGCGA  
TCAGATCATCGAGCACCTTGCCATCACCACTTTGTGCGATAGAGAGCATCCAGCCCATGCGCTGCAGCATC  
CAGCTTCCCCGGCCGGCCTTGATCACCCAGGCTTTCGCGTGCCTGTCACCTCACTGGCACACACCAGC  
AGGGGCAACAGCGCCAACATCAAAAAGATGCGATTCATTCGCAACATACCACCATAACAAACGCTGGTC  
ATATCGTCCCTGCACGACCATACGGATATACACACCCGTCGCTCCTGCTGATGAGCAAGAGGGCTTCC  
TGACTTGTGTGCTGATTTTCGAGGGTGAAAGACGGGCAACGGCCACACCTTTTCTATGTGCGGCCAGCCA  
TCTCCGGGCGGAGATCTGAGGCTTTCCGAACCCGATTCACATCGGGAGTGGCAAGGTGGGCGATTTTGCA  
GCTGTGGACAATTTAGTCAATCCGACAAGATGGGAATGGTTCTCAAAACGATGAATAGATCAATCTTTAT  
GCACAAAGGTGAGTGCAAAAAACACTATTAACAAAACAGACATAACAGCGTGAATCACGAATCTATTAC  
CTTGCCGCTCACTGTTACGCTAATCTTCATATGAATACATATTTGATGAAAAAATCGCGGACACTATTG  
CCAAAGCGACACCTGGTGTGCTACCCATCCCTAGTGAGGTATCCCCACTACAGCTGTAACAAGGGATAG  
CCATAAGGCGCCGTGCTCCCGCATGCTCACCGGGAGCACTGTGGTTTACGCGGCTGACGCTCGTCGGTA  
ATGGTTAACGATCCAAACATTGATATCGACGCTCATAACGAACATTCACGCATGTCAGCCATTCAGGCA  
AGTAACGTAGTGAAAAGAACCAGCGTTGGCTACCACATGAACTCGGAGAGACTATAAGTGCCCCGCTGTTG  
TCGCTCAGCCAAGGGCTCTGCATGAAAACCTTTCGCGTTCCTTCTGAAACGAACAACCTCATGAATCAA  
CCAGTCACACGACCCTCGCAGGGAGAAAAGAGCATCCAGATAGAGCTCACGCTCCGGCTTGTCTCAGCACTG  
TGTTCCACTTCCATCCTGAACCATCAGATTCCTTATCTGACAGGCGGGTCCAGAGCTCCCGATA  
GGCTTGTGGACTCATTTTGCAGTAAAGAAGCTGCTGATATAGACGGGTTCCGGACTCACTTCGCGCAAC  
GCCTTGGCAGAGCTGGCCAGATGCCTAGATAGCAGTGTTCGCGTTCGGGGTCGCGCCAATTGAAATCGT  
CCAATCTGCAGGTAGGTACCAACCTGCAATACTTCCCTCACCCAGAAAGATTTAACCACTCTTCGGCTAG  
AAGATGGTTGTGACTTTCTGCTGCTCAAGATAGCGAGCAAGAGAACCTGCATTTGATCCTGGCGTTGA  
AAAAATGCAGGGTCCGCGTAAAGCCCCAGAACCAGCTTCAACCCCGCGCATGAGCTCTTTTTAGCCTGG  
CTGCCAACCAAGCGCTTTCCTCTGGCTTTGCGAAAGCATCACCGTAGCGAGTCCACTGAACGACTAGCGT  
ATCGAACCCCTTCTGCTTACCTGAGCAACTATCTCATCCAGCGCAACTCTCCGAGGGTGGCATCCCGC  
AACTGGGGCTGATAGAAGATGCCCCGGCTAGCTGGGCAAGCAGCAATTCAGCAGAGATGAGTAGCA  
AACCTTGAACCAATATCTCATTACCATCTCAATCCCATCGTCATCATCAGGGTGCCTTTGTCTAGTCA  
TTACCGGATTTAATGTCTTGTGATGACGGGATCACTCTTCAACCGGTGCTGATATTCGATCCCCAGGCTCA  
ATTTATGGGGCAAGCATCGTATTGAGTCTCTCCGAACAGTGGTTCCAGCGTAGCCCAACGCCCCCAT  
CAGCAGAGTGTAATCGTCAGAGCCGACACATACTCCACTATGCCATTCCTTGCCACTGTAGTAACCTCGA  
TCCGGACTCTTGTGCTTCCAATATTGGCGTCCCTGAACATGCGCATAAGGCTCTACAGTGTACCCCCACC  
TAATTTTGTGGTGGTAGCTGACCCGATAATCAGCCACCAGACTGGTCTGCTGTGAACGCAGGTAACGAGC  
TACATCCAGATAGAGGTTCTGTGCCACCAGCCACTATCACCGACATGCCACTCATCACTATATTTGCCA  
CCATTCAGGAAAGAAGCACTGGCACGGATCAGGGTATCGTGTTCACCCCTTACTGCTGTTGAGTGGCA  
GTAACTCTTCGCGCCGGAAGAAAAACGACTGACTTCCGAATGGTTTCCAGCGCAGCCCTATCCCCAGGGT  
AGGCTCCCCGAAATCAAGCGGGTGTGCTGCCAGTATTCTCCATATAGGTGCCGTCAATTCGGGTGCCCCCA  
TCTAAATGGTAAAGCCGCTGGCTCTGACTGCTGCCATAGAGACGGCCATACAAGGAGAGCGTCTTGCCAT  
CACGGACGGTCTCTTCTCCCAAACGGTACTCCAATCTGTCTGGGCATAGCTCTGAGCCACGGCATTACC  
GCCGATGCCACTGACCGTGCCTGACCATTCCCGGTCCACGCATCAAACTGTAAGTCCAGCGCCGCCCC  
AGATCTTCATGCAATCGTCTCAAGTCGTAACGTAATTGCGCCGGTTGATCGCCATCAATGGCTTTGGTGG  
CATACTTCGCGCTTTCCGGTGTGAGCTAGAGATTGATTGATATAAACAAGCTGTTCCGCCAACTCGGT  
ATCCCCCTCCCGATATAGGGACTCCAACCAGTCACTGGCCGCTGTTTCTCACCATTGTTGAGAAGGGCA  
TAGCCCTAGGCCAGCTGGTATTCCCATTATTCGCTCAAGGCGGTTGCTACCTTCAATGCCGTATCCG  
CCTGCGACGTTTGTCCACGTTTTTGAATAATGATCCGCCACCTGGGCATAGTCAGCAGCTTGCAGTATCAA  
GGCAATAGCCTGCTCAAGGCTTGAATCGCTTGTTCATCCTGCTGGGTCTTGGCCAAAGTTCGCCAGTAT  
TCAGCATCCTGAGGCAACCTGACTGCAGATATTGCTCAAGCCACCGCCGAGCTTGAACAATATCTCCGG  
CAGCGAGGGCTGAACGAATTGCAGCCATTTGCTCTTGTGATCAGAGGCCAGCGTAACCTGCTGCCAGGC  
CTTGAGCGCTGCATCGTAGTGATGATTTTACATACGCTGATAGGCAAAATGACGTACATCACAGGCAAT  
CCAAAACCTGGCGGTCCGAGAAAAGGCATATTAGCCAAGCCCGGCTTGTGCTGTGCGATAACAACCTCCGA  
GAGCACGCCAGCTGTCAGCATCATAACGGGCTGAGAGATCACCCAGCACCCGCATAACCCCGTCACATTG  
ACCAGACAGTGCCAACAGATTGGCCTGCAGAGTGCAGCAGCGCCGATCGCTCAATGGTTTCAGATAGGTGA  
TCGGGCAATGTGCCAGACCCCTTATCCTCTTGCAGCAGAGTCAAACGCCGAATCAACGTCTCTCGATCCG  
ACAAGTTGGCTCCCTGATAGGGCAATATTGATGAGCAGCTCACGAGCCGCCGTCATAAAACCTGCACG  
CTGCAACTGGTAAGTAAGCCGATCCAATGCCTCATTGGTTGTCCAGAGTCCCGGATCAACCTGCGCCCC  
TCTCTGATCAGTTTTCGCCATTTGGCGCTGATGCAAGGCCGATTCGAATGCCAACTCAGCACTTTCTGTG  
ACGGCACACTCACAGCCATTTATCCAGCTCCGCCAACGCCCTTCTGGCGTAATACAGGCAACATTA  
GTTGGCATAAAAGCGCTGATTCTCAGCAAATTCGAACACCTCGTTCGCCCTCAGAAATCCGTATTGGCT  
GAGAGCTGCAACCATTCACGCTCCTGAGCTGCCTTGGCAAAATGTGGTGAATGAGACCCGAGATAACGCC

TTAACGCTGCACTATCCGGCTCCTTGCCAAGGGCAAGTGCATGGCCAAATCCACTTCACCATCTTGACT  
CGGCAAACGGCGACGCAATACAACAGCTTGGGTGACATCCCCTTGTGTGTCAGTAGCATATTGAACCACTGC  
TTCAGCTCTCCTAGGCTCAGTTTTCTGCTTTATCGAGCCAGGAAAGCTGCCAGCAGCCAAGCCCCAAT  
TCCGTTACCCAGTGAGCGGGCAAGAAGGTCATGCCGCAGTGTCAACCCCTGTGGGGTGACTGCAAGTTC  
GGGGTCATCCAGTAAAGTAGCCAACCCCTTGCAAGTCCGCATCCAACAACCTTTCGCTCGGCCCTTGCGACC  
TTGCACTCGAGCAAATTACAGTCAGGATCGAATGGTTTTTTACGCTGCAACCCCTTCAGCGAAGGTTAATA  
GCTCGGCATCCTGTGGCGTGATAGCTAACTGCTGGCGCACCAGCGCCATAGCCTGCTTGTCTTGACCAAA  
ATGCTCATAACGCTCGGGCAAGATAGAGGGCTATAACCGGGTTTTTAGGTTGCAGCTTGCAGCCTGTTCCG  
AACTCGGAAATTGCGCGATCACGATGTCCCCGCTCAATGGCAGAGAACCCTTTCTGCAAAATGAGGATAAA  
GCACGAAACGCTGATAACTACTACTCCGGGCCAGTTTCATATTCCTGGGGAGCAGCCATAACTCCCTG  
ACCAAGCAACAGCCCTGACAAAAGCAAAAATTCGGGACGCATCAGGTAGTCACTCCGAGCGTTGCGCCA  
ACCAGCTATCATTAACTCCCGCTTCCCGCAGCAGTTCGTACAGGTTTCAGTTGATAAGCCCTTGCAACGT  
CAGGGCTTGAGCCAACACCTGCTCACAGATCACTTCCTGGTCGACCAGAAAATGGGCGAGTGTCAATTCCG  
CTTTCGCTCATGTGCGCAGCAACAAGGAACGCAACGCCGCTTCATCTATATGGCCGAGCGTGATCAGCAGTT  
CGGGCAACATCACCTGACTGGCCAGATATCGGTTCCAGATCGTAATTGATTGCTCTTCACTAACCCAGACC  
ATCCGTCAGTGTGCTGCGTGCAGCAATGCTTTTTGGGTGATACGCTGACCACGGGCATACCAGCGACGAAG  
CCCACGGTCACTTCTCCTCTGCAGGCGATCACATAGGTAACGGGTGACCGGAGTTTGCAGATAGCGCGC  
CAAGAGAGACAGGGTCTAAATAAACCTCACATGCAAGCACCAGCACCCCATCCTCAATACGTAGCGGTAA  
GACCCCATAGTGCATAGCAACGTTGGGCGGAACCTTGTGCAGCAGATATCGCTCCAGACCATAGGCATCG  
ACATGTTCCCAATTCACCCCACTCTGCTCAGCCACCCCTGCAGCCAGCTGTTCACTGGTTAGTAACCCTT  
GTTGCACCAGGTTGCTGCCCAAGCGCAAACCGGGCAATCGGTTTCATTAATACCTGTTCAAGCTGCTCCTT  
GGTCAGTGCGCCCTGATCAATCAGGATCTGGCCTAACGGTTCGCCGTCGCCGTTTCTTCTCCCAAGCTT  
GGGAAGTCGTGGGTAGTTTTGTCCCAAGCAACCCGACGCGGATCCCCTTGTGCAATGATTTGGGAAAGCG  
CACGCCAGTTGGCCATGAAGTTGATTACATTCCCCCAGAAAAGGCGGGGAATGGACATAAAATCCTTGAC  
TATGCCGTAGTAGCGTGTACGAAAATCAAGCGCTGCAACATTCGATTAAGCATAAGAAAACAGGTTGATC  
CAAAGCAGGGTGTCCAACCAGTTGTCACCTTCGAAGATAGATAGAAAAGTAGTAGGGATCCTCGGCAAGCC  
ACTGATAACACAAGAGAGCAAGTAACCTGGAGCAAAAATAAGACTGGCAGTAAAATGAGAAAATTTGGTCCAG  
AGCCCCCTTGCATTCGCAACAGGAAAGTAGTTAAGCTTCCAGTTGCGGCTCCATTTGTGAGTCTTAAAA  
CCTTGATAGCTATACCAATGATCCAGCTGACTTTTGGCGCACAGCCGCTGGAAGATATCGGGAATAA  
ACTCCCTTACACAGATGACATTTGGTATCCCGCTCATGATACCAAGTCGCCAACGTTTTATTCCGGGTACT  
TCTGACCTCACGAATGACTGGGAAACGGACGAATATCTCTTCCATCCCCTTTTCTTAAAGACGGAACCT  
ATGTCGTAGTCTTCAGTCAGACTTTGCACATCAAAAAGCGATACCGTCCCCATCTTCCAACAGCGCGATGA  
CGGCGCGGCGGCTGAAACAGGTACCAACGCCAGCGCTGGGTACCTGACCTGACACAGCCTCACGCACCGG  
AACATCCTTGCTATGCAATTCGGCAAACCTCGTCCAGATAATGCAAGCTGGTAAAATTTGAACCAACTACGT  
TCAAAGGGATAGACAGGAATCTGGATAAGATCCTTGCGGCCTACCAAGTAGTTGAAAAGCCTCAACTCCA  
TGTCCGAAATAACATCTTCGGCATCGTGAAGAATGAAACCTGCGAAAAGAGAGTTGGCCTTACGTTTCGAA  
CTGGAATAATGGCATCAAGCACATTTGTTGAGACAGTCCGCTTGTGTTGCGGCCAGGACGAGCACACACA  
ACTTTGTGCACATTAGGAAAACGGGCACAAACTTCATCCACATCCTTCTGAGTATCCGGATCATTTGGGGT  
AGGTACCGACGAAGATCTGATAGTTTTTCATAGTCAAAAACGGGTTCGAGCCAACCTCCGCCATCTGACCAAT  
TACGCCCCGTTTCATGCCAGGCTGGCACCATAAATGGCGAGAGGTTGCTCCTCCCGTTTCATAAAGCGCCAGA  
TAATTCAGCCGATCGTGTGTCGATAAACCGTTCAGCCGCCGCAAGCACTTCGGAGCCAATAAACGACAT  
CGATGAAAAGGTCATCCAGTCCACTCACCAGCATGGCTATTTGCCACTACGATAGCGATCAGCTTCAGACC  
ATATAGATAGGTAGCAAAACCATCCACCAACCAATATTCGGGCATCCCGATTACCTCAGCAGAGTGTCTG  
CCATGATAGCCACGATGCGGGAACAGGCCTGGCCATCCCCAAACGGATTGGCCATCTCTCGTGGCTCAA  
GTCCCCGGCTTGCATAGCTCACTGACTCGCTGGACGATGAGTTCTCATCCGTTCCCATCAGTTGTGCG  
TAACCGGAATCGACAGCCTCGGGGCGTTCCGTTTTCTTACGCAATACCAGCAGTGGCACCCCATAGTTG  
GCGCCTCTTCTGCAAACCTCCAGAATCCGTCATAACCAACCATGCATCAGCGATAGCCTGTTGCATCGC  
CAGATAATCCAGAGGCTCAGTCAACGTGACATTGGATAAAATGACCAAGCAGTGGGTAGACAACCTGCTTG  
ATGACGGGGTTTTAGGTGTACCGGAAAAGCACTCGCATGCCGGGATTGGCGGTAGCAAGCCGCGCGATGG  
CACGGCAGATTTCCGCAACTTCATTGCCCAATTTTCGCGCTGTGTACCGTACCAGCAGATGTCCCGG  
TTGATCTCCTTTACGTTTGATAACCGTACGTTTGTGCTGGCCATAACTGGGCATCAATGACAGTATTGCCA  
GTCACATGTACCCTCTCTGTGCGTACCTGTTTCAGCCAACAGGCTATCACGCGCGGATCCGTCGGCGCCA  
TATGTAATTTGGCCAGACGCCCAATCATCTGGCGAAGACCCTCTTCAGGAAAAGGGCGATCGAGGCGATA  
AGTACGCAATCCGGCCTCAACATGAGTAATGGGAACCTGATGATAGAAGGCGGTCAAGGCCCCCAAAAAG  
GCGCTTTCTGTATCCCCCTGGACAATCACCATGTCCCACTCGACTTGCACCATCAATGACTCGAGTTGAG  
CACGACACCCCTGACTGAAATCAAACAAGCTGGAACCATGACGAAGCAGAGCTTAATTTGGGGGTAATATC  
AAAATAATCAAGCACTTGAACAGCCATACTATCATGCTGACCGGTATGCACCCAGCATACTATCGGCCCAT  
GGCTTCTGCTTGAGAGCATGGTAGAGAGGGGCAAGCTTGATTATTTCCGGGCGGGTACCCGACACAATCA  
TGATCTTTTTTCATCACAAGCAACTCCATTCAAAAAATCCGAGATCACTTCAGTCCGGTTGAACAAATCAGT  
TATTAGCTGCCCTGTATGACTGTTCAAGTACTTCAATAATTAATAATGCTGGAGAGGATGAGAACGCAG  
GAGAGAACCCCACTGACGACAGACCCAAAATACAGTGTGTATACAAAAACAGCAGTCCCTATCTGCAC

CACGAGGGTTCAGGAACGGGCCAAATTGTGCAGATATCTTGCATGAACCAGACCGGGAGCTACCTGTATC  
TTGTGGTGTAGTCATCTAAACCTCACGAAAAGGCAGCCCAGCCATCTCTAAAGAGATCTGTAACCTTTCCGG  
ACCCGGTTCACATCGGGGGTGGCAAGGTCTCCAATTCTGTCCAAAGGATAATAATTAGTCAACTCTATAG  
TGTGACAACCTTATTACTTCATCCATTGCACTATCAACATCATTAAAATACTGAAACATTGGGTTTACACG  
GATTTTTTCTGCAAAATCATTACGCTAATATGATATAGCCCTGCACGGGTTGCAGGACTATATCCACATAA  
ATGGCTCAACCTAAGGAGCCGCATCCTGCGTCAATGCTTGATGCGCTGGGCTACCCACGCTTCGAAATCG  
GCCAGCATGCGGGTTTCCGACTCGCTGTTGTGCGCAATAAGCTCGGCGCCGTGTACCACCCGGATATGGG  
CGTCGAGCGGGCTTCCCTCGCCAGCCGCGGGGCGCTGCTGGGCGGCGGCCATGCAGGCTTGCGCCTGTTG  
CCACGCTTCGGCGGGCGCTCAGGTTGCATGCCTCGGCCAGCGGCACCGCGTTGAATCCCTCGCCGGTCAGG  
CTGCGCAGGGTCTCATCGTGACTCATGCCGTTGCCCGGCCCCAGTAGTGGGCGGCCAGATCCGGCCCCGA  
TACGCGGGTTGTCCGTGAGGTAGCCATCACGCTTGAGGAAATAGGCGCGGGTCTGCTCCACCCGCATCAG  
CGCCAGCAGGTAGCCGTGATAGGCGCAGGCCGACTCCTGATTAAAGGAGGTGCGGAATGGCCAGCAACGGA  
CGCGGGCTCTCGACCCCGACAATCTTGCCTCCACTGGCGGGCCAGCGCCAGCACCCGCTCGGGGCTAC  
GTTGCGCCTCATCCATGGCGTAGAGATCCCCTCGAAGTAGGCCACCAGCGGATCTGGCGTTCGTTAAA  
CGCGCGAAACGGCTGACGCGCTTCAATCATCTCCTTGATAAGAGCGTCGGGAACAGCCTCTCCCGCCGCA  
TTTTCTGGCGTAGCGTTTGGAGCCAGTCGGTATCGTCCAGCAGGCTGTCGCAGAACATCGACTGGGTCTCGG  
CATAAGCCATGGAGGTGGGCGGAAACTCCTGTGAGAAGCAGGGGGCGTTGCCGGTGACATTGGCAAAATG  
CGCGGCATGCCACCCCTCGTGGAACAGGGTGTGAGGCCACTCCAGCCGCTACCCACCTGCGCCGGGTGCG  
GCCAGGCTGGTGAAGTTGACCACAGCCGGCACCCACTCCCCCTGCTGGAAGAAGCTCGGTACCAGGGCCGT  
GGCAGAAGCCGTTCTCGTACTTCCCCCTCCCTGGTCAGCAAGTCCAGCGTCAGGGTCGCCCCGCGATACTG  
GATGCCGAGCCGGCGGAAGCTCTCAACCCAATCCCGCAGCGCCCGCGAGAAGGGCACGTAAGGATCTAGC  
TGACGGGTACATCGCCGCTCACGCTGTAACGCAGGTTGTGAGGCAGCAGGGCCGCATCGCCCTTGGCGG  
CCTTCAGCTCGGCCAGGCTCTGCTGCACCCGAGCATCGGTGCGGGCAATAAAGTCGTCGAGGATGGCGAA  
CAGCTGCTCCGGGCCATCTGCTCGTTCCTTGCACCTTGTAGTCGAAAGTAGTCGCGATAGCCCATGGCG  
CGGGCAAAGCGGTTGCGGATCGCCACCACCTCGAGAAAACCGTTGCCGACCACCCACTGCTCCAGGGTGT  
GGAACATGGCGAGCGCGCTCTGGCGCACTGCCTCGTTCGGACTGGCGGCGAGCGAGGTACTGGCGGCAGG  
CAGGCTGCCAGCGACCTGCTGACCCTGCTCATCCAGCAGGGTCAGTTTCAGCCCCCTGCGCGGGCGAAC  
AGCTCCCGCTCGGCACTACCAGCTCATCCATCAGGCGCGCAGCGGCGGGATCTTCAATCACATTGCAT  
CGAAGAAGGCGATCCAGCCTTGACAGCCGCTTGAGATCATCTCGTTCGCGCTGCACCAACATCTCCCG  
CAATTCCGGGCGAGCGGGCCGATTGGCACAAAAGCCCTTGTAGGTCTGCTCGGCCGCGGTGAAACCGGCC  
TGATCGTTCGTTGCCCATATAGGTGGACCAGAAGAGATCCTCCTTGCGCCTGTGCACCTGCAGGTAGT  
CGGCGTTGAGCTGGTTGAAGTAATTCCTGGCAATGGAACCTCATAAAATCCCTCTTGTATGGGGTACCC  
GCAGCGGGGCCACTCCTTTTTTTAGTGAAATGCCAAATGATTCACACTCTTTGGCAAAAATGCGCAGG  
GATGCGCCTGAACACGCTACCAAAAAGTGGGGTTGCTGTCTGCTGACTATACTGATGTTAAAACGCTCA  
TTTTGAGAAAGCTCGGCAAGAGACTGAAAGTAAATGAGTTGTTAACTCTTACGAACTGGCTGCCGCAGTAC  
AGAGCCACATAAAATCAACAGGGAAATGAGGGTTAGTCATGTTCAAGCTCGGTGATATTACCGTGAGCC  
GCAAATTTGATTTTGTCTGCTCGCACTGGCGTTTGTGCGTTTTGCTCGCTGCTGCTTATCTCGGCCAATGC  
GCTCCAGCGCAATCTGATGAGTGAGCGAGAGGCGCGGCTCAATGCGGTACTGGAGCAGGCCATGAGCCAG  
ATCCAGTTTCTGGCCAGCACCCCTGCCAGCAGAGCAGGCCAGCAGGAGGCGCGCAAGTTGCTGACCAACA  
CCCGCTTTGATGGCAACAACCTACCTGTTCTGTCATCGACGAGAACCAGCCATGGTGGTTACCCCATCCG  
TCCCGAACTGGTTCGGCCAGAAGATGGGTGAAGGGGGCGCCGCCACCCGCGGGCAGTTCTGGTATCAGATG  
GTGGATATCGCCAAAGGGGGCAAACAGGGCACTCTGCAATATGTGTGGGTTCGGCCCGTTCGGGTGAAACCG  
CCGACAAGCTCTCCATGGTCTCCGGCTATCAGCCCTGGGGCTGGATCCTCGGTTCCGGCATGCTGCTGCA  
GGATATTACAGCAGACCATCTGGGCCAGTACATGAAGATGGGTACCGCCACCCCATCGTGATCCTGCTG  
ATGGGGCTGCTGGGCTGGCGCATACCCACTCCATCGTCTCCCCCTCAGCCAGATCAACCAGCCATGTC  
AACGGGTTCGCAAGGGGGATCTGGTGGTGAGCATCCCGGTACAGGGCAAGGATGAGCTGGGAGTGGTGC  
CCGCTGCACCAACCAGAGTCTCGATGCCATCCGTCACGCCCTGCTGGAGGCCAGCCAGGGGGCCGCAAC  
GTGGCGGATGCAGCCCTGCGCATCGCCGCTCTGCCGAGCAGACCAATCAGGCGGTGACCAGCCAGCGGG  
ATCAGCTGGCCAGCTCGCGACCGCCATGAACGAGATGAGCGCCACCATCTCCGATGTGGCCGGACACGC  
CGAAAATACCGCGCGGGATACCCAGGAAGCGACCGGTGAAGCCGGGCTCGGCAACCAGCGACGTTACAGCC  
AGCGTGCACGGTATCAAGGCGCTGGCCACCGAGGTGGAGCAAGCCACCCAGCAGGTCAACCAGCTCAAGG  
AGGGAGTGATGCAGATCAGCGAAGTGACCGCGTATCAGCGCCATTTCCGAGCAGACCAACCTGCTGGC  
CCTCAACCGCCCATCGAAGCAGCACGGGCTGGCGAGCAGGGCCGCGGCTTTGCCGTGGTGGCCGACGAG  
GTGCGCCAGCTGGCCAGCCGCACTCGCCAATCCACGAAGAGATCCAGAGCACCATTGCCAGCTGCAGC  
AACGGGCCGTCACCGCCGCCAACGCCATGGATAACCAGCCGCAAACTGGCAGAGAGCAGCGTCAACCAGTC  
CCAGCAGGCGGGCAGGATCTCACCTGATCGTCAACCACATCCAGCATGTAAGCGATATGGCGACCCAG  
ATCGCGACCGCCGCGAGCAGAGCATGGTGGCCGAGGATATGAACCGCAACGTCAGCGGCATCAACG  
ACTCGGCGCTGGAGATGTCCAGTCCGCCTCGCAACTAGCGCAGGAGAGCGAGCTGCTGGCCGGTCTCTC  
CCGAGTCTGGATGAGCGGCTTGCCTGTTCAAACTGGGCAAAAGAGTCTCCACTGCGCCAATTTATGGCT  
CCCGTATCTCCCCCTCCGGAGAACAGCGCGCCCGTCAATTGATGGCGTCAACCCGTGTCGCCTTGTACC  
CAACCTGCCAGCCAAGCTGGCAGGTTTTTTTTACGTCAGCAATACGCAATCAACATGCATCTTATCGACAT

ATTCAACGTTAATCGACGCCATTACAAAATAAGAGAACAATTTAAAAACAGCCAGTTAGAATGATTTACG  
CGCCATTGGATGATGCGTTTTAAACATTTAACTTCAAATAATTAATCAATGCGGTGCACAATGCTGATGGC  
CGAACATTTGGCCCATCACTAACCATCTAGTCATTTGGCAAACCTGACCGAAAGGTCGGGACGCAAAGCCT  
CCGGTCTACAGACGTTTTGTCCAGGATAGCGGGGTTGCCACACGCAAGTGTGCATCGGGAACTCCCCGG  
CCAATGACTGCCACATCTATCGAACAGAGGAATGTATGGCAGCAAAAATCCAATCAATCACATCGCG  
GCGATGCTGGCCCTGCTGGCCAGCGGCAGCGCCCTGGCTCATGGCTACATCAGCCAACCCGAGAGTGC  
ACTACCTGTGCAAAACCGGTGGCAACAGCCAGTGTGGCGGCGTGCAGTGGGAACCCGAGAGCGTGGAGGG  
GCCATCAGGCTTCCCACAAACCGGCCCGCAGGATGGTCAAATCGCTCGGCGGGCAGCCCTCGCTGGAGC  
GAGCTGAACATCCAGACCAGCGACCGCTGGACCAAGCGTGAAGTACAGCCCGCCCCCTTCGCCATCAGCT  
GGACCTTCACTGCCAACCATGTCACCCGCAACTGGCGCTACTACCTCACCAAGCAGGACTGGAACCCCAA  
CCAGCCGCTCACCCGCGCTCGTTGACCTGACCCCTTCTGCGTCAATCGACGGCAATATGGTGCAGCCG  
CCCAAGCAGGTGACCCACAACACTGTGTCTGCGGAGCGCACCGGTTATCAGGTGATCCTCGGCGTGTGGG  
AAGTGGGCGATACCAGCAACAGCTTCTACAACATCATCGATGCCAAGTTCAAAGATGGCAGCCAGCCGCC  
GCTGGAGTGGAGCCAGGCAGGCACCATCTACCCCTCCATCGACCTCGCGATGGGTGACAAGGCGATGACC  
CGGGTATTCGATGCCAACGGCGAGCGCCCTGATCTGCAAAACCGTGTGACCATCACCACTGCCGAGCAGG  
GCCAGAAGAACAACCTGGGCCATGCTCTCGCCAGCAAGATCAACGCCGAGCAGAGCCTGATCCGCGCCGG  
TCAGCAAGGAGCCGATGGCCAGTTCAATCCGGTCTACGGTATGAACCCGCTCTATCTGCATCGAGACAGC  
AAACTGGATCGAGTGCAGATTGATCTGCAACAGCTGCAGCCGCCGTTAGTGGACAGCATCAGCGTCAGCG  
GTCTGGCCAGCGACTATGTGCTGGACAACGGCAAGGCCACCCCTCGATTTACCGTCCACCGCACAGGGCGA  
TCTGGCCGTCACCAACACCCCTCTATGACCACGGCGGCGTCCGAAGGTTGAAAGCAGTGCAGCATCAAG  
GACAGCAGCCACACCTTTACCATGGCGCTGGAAGGGCTCAAGGCAGGTCACCACCAGCTGGTGATCAAGG  
CCACCCCGAAAGCGGGTGGCGAGACCATCCAGCAGACCATGGATCTGATGTTCAAGGAGCAGAGCAGCGG  
CGAATACGACTTCGTCTTCCCGAACTCGCTCAAATCCTATGCCGCCGGCTCCAAGGTGCAGCAGCCGAAA  
AATGGCAAGGTCTATCAGTGCAAGCCCTTCCCCTACAGCGGCTACTGCCAGCAGTGGACCACCACTGCCA  
CCCAGTACGAGCCGGGTATCGGCTCCCCTGGCAGATGGCGTGGGATGAAGTGAAGTAACTCGCCGCCGG  
ATAGCAGAAGGGGAGCCATTGGCTCCCCTTCTGTGCTCTTCCGATTCAAATCTGGAAGTCGAGGGCGG  
GCTCGCTGCCATGGCGCGGGCCTGAATATCCGCCAGCGCCAGCTCGGGGTTGCAAAGCTGGATAAACTG  
CCAGCAAAGTGTGTGGAACCTGCCCTGTGAGTCCCAAGGTTGAAAGCAGTGCAGCATCAAGCAGATGG  
CTGCCATCAAGTGTACCAGCCCTGATCGCGTGCAGTCCGAACGCCATATCGGCCAGTATGCCAGCC  
CCATCTCCAGCTCGACATAGGTCTTGATGACATCGGAGTCTGCGCCGTCAGCAGGATCTGCGGCTCGAT  
GCCAGCCGAGCAAAGGCTTCATCCACTCGCACCCGCCGGTCAACCCGGCTTGATAGGTGACGATGGGC  
CAGTTGGCCAGCGCCGCCAGCGTCAGATCCCCTCGCCAGCCAGCGGATGTTGCTCGGGCACCACGATAT  
TGTGGTGCCAGCGGTAGTAGGGAAATGCCACTACCCCTTCGCTCTTGTGCGAGCTGCTCGCTGCTGATGCC  
GATATCCACCTCGCCGGTCTGCACCAGCCGCACTATCTCTCCGGGCTGCCCTGACGCAGCTCCAGCTGC  
ACCAGCGGGAACCTGCTCGCGAAACGCCTTACCACCCGCGGCAGGGCATAAGCGGGCCTGGGTATGGGTGG  
TCGCCACCAGTAAACGTCCCAGTCCGCGTTGGCAAAGGTGCTGGCCAGTTTGCAGATGTTGTTGGCGTC  
ATTGAGAATGCGCTCGGCAATCACAGCAACTCCTTCCAGGCTCGGTCAATCCGAGCAGCCGCTTGCCG  
TAGCGGATAAAGAGCTCGATAACCGAGCTCCTCTTCCAGCTCGCGGATATGGCGACTCACCCCGATTGCG  
AGGTA AAAAGGGCGTTGGCCACCTCGGT CAGGTTGTAATCCC GCCGCGCAGCCTCCC GGATAATGCGTAA  
CTGCTGAAAATTCACCTTGTGCGCTCCTGCGAAGAGTGGGCGACACAAGCTACTCGCCCCCTCTATTTTT  
GTTATTTGGCCGGGATCATGCCCGGTGACAGCCTGAACCGGGCGGCCACACCGCCGCAACACAGCATC  
AAATCTGATAGTCGGGATAGA ACTGCGCCTGTCTGGCCACCAGCTTCAACCCCTGACCCGGGGTAAACAG  
TTTGGCCGCTCCTTGCTCAGCTCCGCTCATAGTGGGCCCTTTGGTTTCGCCATCGCCACGCAGCTCC  
ACCCGAATGCGTGGCCCCATGGGCAGCAGGCGGGTAAATGGTGGCGCGGATCCCGCCGCGCATCGGCTG  
GCAAGATCTCCAGTTTATGGGGGCGGACATAGGCGATAGCGGCACTGCCGTGGGCCAGATGAGAAGCCGA  
CGGCCCGCAGCAGTTGCTCGCCGACACCGAATCCTGCTCCGCCACCCGACCGGAACTGGTTACAG  
CTGCCAAGGAAGCTGTGGACGAAGGAGCTGGCGGGCTGGTCTGATAGCTCGGCGGAGCTCGGCGGATCTGCT  
CGACCCGTCGGCATTTCATCAGCACCCCGATCCGCTACCTCCAGCGCCTCTTCTGATCGTGTGATCAC  
GAACAGACTGGTGTGAGTGCAGCTCGTGTGAGCTCGCGCAGCCAGCGACGCAGCTCCTTGCACCTGC  
GCATCGAGGGCCCCGAAGGGCTCGTCCAAGAGCAGTACCTTGGGCTGCACCGCCAGCGCGGAGCCAGCG  
CGACCCGCTGACGCTGACCGCCGAGAGCTGGGTGGATAGCGCTCGGCCACATGGCTGAGCTGCACCAG  
ATCCAGCAGCTCCTTGACCCGGGCGGAATGGCCGCTCGGCCGGGCGCTCACTGCACGGTTTGACCCGC  
AGGCCAAACGCCACGTTCTCGAAGACTGTATATGGCGAAACAGGGCATAAGTGTGGAACACGAAACCGA  
CATTGCGCTCGCGCACGTGCAGATCCGAGGCATCCTCGCCGCGGATGATCACGCTGCCGCTATCGGCCTG  
CTCCAGCCCGGCGATGATCCGCAGCAGGGTGGTCTTGGCCAAACCGGAAGGGCCGAGCAGGGCCACCAGC  
TCACCGTCTGTAAGTTCGAGGTTGATGTCTGCCAGCGCCGCTACTGATGAAATGCTTGTGAGTTGTT  
GAACCTGAATGCTCATGGCTGCCTCTTTAAACCGGTGATTCAGTGTGATTTGGTGGGCTGGGCACGCAGC  
CGGGCCAACAGGGTTTTACCCAGCAGGGTGAAGATCCC GAACAGAGCCAAAAGGCTTGCCACTGCAAAGG  
CGGCGCCGGTCTGGTACTCGTTGTAGAGGATCTCGATATGCAGTGGCAGGGTATTTGGTCTGGCCGCGAAT  
ATGACCGGAAACACCGACACGGCGCCAAACTCCCCGACCGCGGGCGGTACAGAGCAGCAGGCCGTAC  
ATCAGGCTCCAGCGAATGCCGGCAGGGTGACGCGCCAGAACATCTGCAGACCGCTCGCCCCAGCATGA



TGGCCGCTCCTCCTCTTCCGGGCCGCGCGCTCCATCTGGGGCAGCAGCTCGCGCACCACGAAGGGCAC  
GGTAATGAAGGTGGTGGCCAAGATGATCCCCGGGGTGGCGAAGATGATCTTGATGTCGTGTTTCGCTCAGC  
CAGTCACCGAACCAGCCGCGGCTGCCGAACATCAACACCAGCATCAGACCGGCGATCACCGGCGACACCG  
AGAAGGGCAGATCGATGATGGTGTAGAGCAGCTGCCGACCGGGGAAAGCGGAAGCGGGCGATGGCCAGGC  
CGCAGCGATCCCGAACAGCAGATTGAGTGGGACGGCGCAGAGGGTCACCAGCGCGGTGAGGCCAAGGGCA  
CTCAGAGCATCCGGCTCGCTGATGGCGTGCAGAAAAAAGCCAGCCCAGGGCTCAGCGCTGAATAAAGA  
CGGTGGCCAACGGCAGCAGCAACAGGGCGGCAAAACCAGCCAAAACCGACCGTGATGAGCAGCCACTTGAC  
CCACTGGGGTTACGGATCACGACCGGTGCCTTGCGAGCGGGGTGCCTCCACAGAGGCCCGCTCAATG  
GCGATAGCAGATGAACTCATATCCGGCTCCCTCCGATGCGAGACCAGCTCCAGGCCGCAACTTGTGAT  
TAGCAGTAACAAAATGAACGAAATCAGCAGCATACCACGGCGATGGCGGAGGCACCTGCGTAGTCATA  
TCTTCCAGGTGGCTCATGATCATCAGCGGCGCATTTCCGAGACCATCGGCAGGTTGCCGGCGATAAAGA  
TGACCGAACCCTACTCCCCTACCCCGCGGGCAAAACCGCAGCGCAAAGCCGTTGAGCAGGGCCGGGATCAG  
GGTCGGCCAGAGCACCCGGATAAAAGGTCTGCCAGCGATCGGCGCCGAGGCTGGCGGCCGCTCCTCTTGC  
TCGGTTTTAGCCTCCCGCAGCACCCGGCTGCAGGGTACGCACCACAAACGGCAATCCGATAAAGGTGAGTG  
CGATAACGACGCCGATGGGGTTGTAGGCGAGCTGGATGCCGAGCGGCGCCAGCAACTGGCCGATCCAGCC  
GTTGGGGGCGAAGATGGCGCACAGGGCGATGCCGAAAACGGCGGTCCGATGGCAAATGGCAGGTCGATC  
AGCGCATCCACCAGACGACGACCGGGGAAGGTGTAACGCACCAGGATCCAGGCCAGGATCAGGCCAAACA  
GGCTGTTGAGCAGCGCCGCGACAAAGGCCGACCCGAAGCTCAGGCGAAAGGAGGCGAGCACCCGGGGTGA  
ACCGATCACCTGCCAGAACTCTGCGGCGGTGAGGTTGTTGATCGCAAACAGCACCAGGGCCGAGAGCGGC  
AACAGCACCAGCAGGCCCAGATAGAGCAGGCTGAACCCCAAGGTGGGGCCAAAACCGGTTAGGACAGAAT  
AAGAACCAAATCGCATAACACATCCATCTGTTATGAAGAATTTTCGATATGGTGATTCGCTACTCCCC  
TCATCGGCAACAAACACCATTTGCGACTTTGCTAATTACTTTTTTATCTAACAAACGGTGGGACAAGGCTT  
TTAGAGCGATCCAAATAAAAAAAGGTCTTTTATATAAATAAAAGACCTAAGAAATGGAGCAATACGGAGC  
GGAGCATTCAAAGAACGGGGGCATGGAGTAGCCAGCGAACAGCGCGCTCGCCAAACCTCCAACCACTTCA  
CAAATACCTAGCGAAAGCCCAGTACGACCGGCCGGGGCGATGCGGTCTTGACCGGTGCCACCACCAGCTC  
ACCACGGCGATAGAGAGCCCCAGCAAATGCAGCCCCCTGATGCCAGTCCCATGACCGGACTGGGCATTG  
ATATGGCCCCGCTCACCGGCATCGAACAGCGGTATCTGCCACTGGCGACTCCAGTATTCGGCCCCTTCAA  
AGCTCACCAGGGTACGTTGCGGCTGGCCACCAAGCTGGGCGACACCTGCAACGGCCCCGGCAAGACCTC  
ATCCGCAATGCCAAAACGGGGCGGATCGGCGGGCCGCCACCAGAAAAGATCGAGGCAACCTTCTCCGGCTGC  
AAGCGGGCCCGCCGATGGCGGTGAGGGCGCCGAAAGAATGGGCCACCAGATGGACCCGACTGCGGCGAC  
GTTTTAGCTTGCTCGCCAGTTTTGGCACTCCAGACCCTGAGGTCCGGTTTTGTCCACGGTAGCCCGGTCA  
CCGCTGCCATTGGGGAAAATGATCGTGCCAGCGGCTCTGCCAGTGATCCGGCCCCACTGTTGTGCAGACCG  
GGAACCAGGAGGATCTTGTTTATCTTGGTGCTCCTATCGGCTGGCACAGGGGCCAGTTCAGTGATGGATA  
ACGAAGCTATCAACGACCCGGCTGATAGATCTGGTCAAACAGACCGCCCTGGGCGAAGTGTTCCTTCTGG  
GCTTTCTCCCAATCCCCTTCCAGATCCTTGACGGTAAAGAAGGCAAGCTGCGGGAACCTGGGCTGCCGTCT  
CCTTCAGGATCGCCGGTTGCTGGGGCGATAGTGATGTTTGGCGACGATATGCTGCCCTCATCAGAGTA  
GAGATAATCGAGATAGGCCTTGCCACCCTTCGGTACCGTGCTTCTTGCCACCTTGTCCACCACCGCG  
ACCGGCGGCTCCGCCAGAATGGAGACCGAAGGCACCACCAGCTCGAACTTGTGCTGGCACCCGCTGAC  
CAAGCACCAGCAAGGCTTCGTTCTCCACGCTAGCAGCACGTACCAGACCGCGCTCGGTAAGCTGGT  
GGTGGCACCGCGGGCGCCGGAGTCCAGCACCTTACGTTCTTGAATAGATCGCCAAACAACTGCTTGGCC  
CCCTCTTACTGCCGCTCTTCTTACGGGCATAGCCCCAGGCGGCCAGATAGTTCAGCGGGCCCCGCGCG  
AGGTCTTGGGGTTGGGAGTACGATGGCCACATCCTTGCGCACCAAGATCATCCCAATCCTTGATCTGCTT  
GGGATTGCCCTTGCGCACCAAGACAATGGTGGAGGTATAGGGCGAGGCGTTGTTGCCGAGGCGACTC  
TGCCAGTCCGACGCGGTGAGCCCCCTTGGCGATGGCGTTGACATCGTAGGCCAGCGCCAGCGAGACCA  
CGTCGGCCCTCCAGTCCATCCACCACAGCGCGGGCCTGCTTGGCGGAGCCACCCTGAGACTGGCTCACCA  
CACGTCGTCGCCAGTTTTGGCCTTCCACTCCTTGCCAAAAGGCGGCGTTGTACTCCTGAAACAGCTCGCGG  
GTCGGATCGTAAGAGACGTTGAGCAGGCGGATCTCGGCGGCATTGGCCGGCCAAATGCCAGCAGAGAGA  
GCAGGGTTAGGGCGGTCAATTCGAGTTTTCATGGTGATACTCCATATCTTGTGGGTTGAGAACAGCATGC  
CGTGGAGTTGTTATGCCCAGAAGAAAATAACTCTTTGCTTATCTCTTTTGTCTCATATCAGCTCAGCC  
ACCCGCACCGGGAGCCGGACGCACTCTGTGAGCCATGCCCTCTGGCCCCCTGCTCGCTGTGCCATCA  
TGGGAACAAGGCAGGACAGATGACGAAAAGGAAGTCTTATGTGGATCAATGCAGAACCGGTCAACGGTGC  
CCTGGTCTCGCTGGCCATCGGCTCATCATTGACTGGAGCGGGCTGGCAGGTGCGCCAGCTGGGGGAT  
AACCAGCGCATCGCCGGGATGCGTACCTACGGCTCATCGGCTGCTCGGTGGGGTGTGCGGTTTTGCTGC  
TGCCACCCTGGACCCCTGGCTGCCGCTGCTCGGCTGCTGGCGGTGGTGTGATCGGCTGCGGCTCTCGGT  
CTGGCTGGCCAGCGCTGGCAGGGGGAGTTCGGCCTCACCAGCTCGGTGGCCATGTGCTCACCTATTTG  
CTGGGGCTGATGTGCGGTGCTGCTGAGCCGAGCGAGGCGGTGGCCTGCGCCGTGCTGGCCGCCCTGCTGA  
TGGGGCTCAAGGGCAAGATCCAGCAGGGGATGCTGTTTTCTGAGCGAAACCGAATTCACGCCACCCCTGCG  
TTTTCTGCTTATCTCGCTGGTGCTGCTGCCGGTGTGCCAACGAGGAGATGGGCCCCCTCGACGCCCTTC  
AACCCCTTCAAGATCTGGCTGATGGTGGTGGTTATCGCCGGCATCTCGTTTTGTGGCCACTTCGCGGTGC  
GGCTGCTCGGCACTCGCGCCGACTGGTGTCTACCAGCATACTGGCGGGATTGGCCCTCCACCACCCT  
TACCCTGCAGTTCGCTCGCCTCAACAAGGAACAAGGGGGGCTGGAGCGACTGCTGGCTACCGGCATCTG



CTGCTTTGTCAGGGAAGTTGCCCGGGTGATGACCGGAGTGATCCTCTGGTCAAGGCACTCTTGAACAGC  
GTGATACGCTGGCAAAGCGGCAAATGACAGTGAAACATCACAATCGGTGCGGAGAAATGGTGCATTT  
TTCACGTAATTCTGAAAACACCTGATTAGCCAAAATAAAAAAACGAGTGAAGATCAAATTTTGGTTTTA  
TATTTACAAAAACAACCATTGTGAGTTTTGTTGCATTCTGTGATCCAGATTCCATTCCCAATCTCGCTG  
GCTAAACCCCGCAATGGCAGTGATATGTTTTAGTCTCGCCTTTTTGAGAATTAATCCCGATAAACACAA  
TGAACCTCAGATTAAAAACACTAACAAAAAGTGAATTAGTAATGAGTTTATCTGTAGAGGCTACCAAGGAGC  
TATCCGGTTTCTGCTCCACCACTGCCAGCACCACCCGCTGGCGCCGTCACGACACTCACTGGGTTATCAG  
CCTGTTTTGGCACCGCGTTGGCGCCGGTATCCTGTTCTGCCATCAATCTGGGTCTGGGCGGCATCTGG  
CCCCTCGTTATCGTCGCGGTACTGGCAGGCCCATGACCTTCTCGCCACCAGCGGGCTGGCGCGCTTCG  
TGCTCTCCTCGTCACACCCACGCGACTTACCGAAGTGGCGGAGGAGCACTTCGGCAAGATGGCCGG  
TCGCCTCATCTCTGCGCTATTTCTCTCCATCTTCCGATCCTGCTCATCTACGGGTCTGGACTGACC  
AACACGGTGGAGAGCTTTATGGTCAACCAGCTCGGCATGGCGACCCCGGATCGGGTGATGCTCTCCGGCG  
TGCTGGTATTCGCCATGATCGCCGTGATGCTGGCGGGTGAGAAAAGCGATGCTGCGCGCTTCGCCTTTTAT  
GGTCTATCCGCTGGCGGCCATTCTGGCGGCCTCTCCTGCTACCTGATCCCTCAGTGGCAATGGCCGGAA  
GTGACCGCGTTTTGAAGGGGTGAGCTTCTCAACACCGTCTGGCTGGCGCTGCCGGTACCCTGTTCCGCT  
TCAGCCACGCCGAGCCATCTCCGGCTTTGCCAAGTGCAGCGTCTGTAATATGGCGAGCAGGCAGAAGC  
CAAGAGCGCCTGATCCTGCGCAACACCACAGTAATGCTGGTGGGCTTCGTGCTGTTCTCTGCTTCTCC  
TGCGTGCTGAGCCTCTCGCCAGCCAGCTGGCTGAAGCCAAGGCCAGAACGCTCTGTACTCTCCTATC  
TCGCCAACATTACCGACAACCCGGTGATCGTGACTCTGGGGCCGCTCATTGCCTTTATCGCCATCAGCTC  
CTCCTTCTCGGCCACTTCTCGGTGCCCGCAAAGCCTCAAAGCCTGATCGCCAAGCCACCAGCCTG  
CCGCTGGCCAAGGCGGACAAGGTGCGCATCGCCCTGATGTTCTTCTCTATCTGGGGTGCTGCAGTCATCA  
ACCCGGGCATTCTGGGGCTGATGGAGACCTCTCCGGCCCGGTTCATCGCCATGATCCTGTTTCATCATGCC  
GGTGATTGCCATCTACAAGGTGGAGGCGCTGGCCCGCTTCCGTCACGGCTGGACCAACGGCTTTATCCTG  
CTGACCGGTTGCTGGCGGTATCGGCGCTGATCTTACGCTGTTGAAGTAACGACTCGCAACAGAGACAA  
GAGAGGCGACCTTGGGTGCGCTCTCTGTCTCTGTTGCGGTGTGAGCTCAGCCAGCCTGGCGCCGTTCT  
CCACCGCCTGCTCGGGGATGGCCATCACTACGGCGCCATCCGGCCGGTAGAAAACCGGTGAGCAGAAATTC  
AGACTGAAACGACCTATCTGTTTTGGTCGGGAAGTTGACTACGGCGATGATCTGGCGGCCACCAGCTGC  
TCTGGTGGTAGAGAGCGGTGATCTGGCGCTGCTTTCGGAATCCCAAGTTGAGGGCAAATAACCCGCCC  
ATACCTTGTAGGCGGTTGCGCGCCTCGGGGACCGCTCGACCCGACCCAGAGTGCCCAACCCGAGCTC  
CACCATCTCGAAATCCTGCCAGCTAATCGTCTCCATTTCCGCTCCTGTTTATCGTGCACCTTGATGACC  
CGCAGCATGGCCCAAAGAGAGCATCCCGTCTTCGGCGATCAGCCGTTTTGTTGCGGCAGGTGGCCGTTTT  
GCTGGCGCCAGAGGGACGGAGTGAGCCCGGTCTCGGTGAGGAAGCGCTCGCTGAACGCCCCCTGATTCG  
GTAGCCGAGCGGCTGGCAATCTCGCCAACGGGCAGTTGCGTACCGGCAAGCAGGGTACGCGCCCGCGCC  
ATGCGTGCAGTGCGAATGTAGTGGGAGACGCTCACCCACAGTCTGGCGAAAGGCGAGCTTGAACCTGGC  
TCTGGCCAAGGAGGCGATGGCGGCGAGTTGCTGATTGGTACGCGGGGCGGCGAGGTTGGCATCGATATG  
GCGTTGCACCTTGAGGATGCGGGCGGCAAGGCGTGAATGGTGCCTCTGCATCCCTGCCCTTCAGCC  
AGCAGGGAGAGCCACACCTGCTCCATGCCCGCCACCTGCCCGCTCGGCCACCATGCGGTGCAGAAAAGC  
GAGGTAGTGGCGCTGGGGCTCATCCAGCTCGATAAAGGGGCGGACCGCCAAATCGCCGGGTAACCAGTGC  
CTCTCCTGCACCAGAAACAAAAGCGCAGGATCGGCGGCGTAGTCTGCTGCTCACCAGGGGTGATGATGC  
AGGCAGAACCAGGGGCAAGCCGGCGCCCGGCTGCACCTCGATCTCGAGGGGGCCGTCGAGGGGGAT  
CACCAACTGGGCAAAGTTCGTGACTATGGCTGCAGACGTGGTGGTGATAGTGGCGCAGGCTGAAGCGGGAC  
ATGGCTGATAGCAATGACGCGGCCAGGGCCGCTCATTTGGGGTTATTCCTTGTGCGAAATCTTCGATCTC  
TTTGCCAGCGCTTCCATGATGGCGCGCGCTTCGGCCGGGACACTGTCCGGTTGATCCTTGCAGAACTCT  
TCGTGCGAAGGGAGCGGCTGGCCGGTGAAGCGTGCAGGAAGGCTTACAGAGCAGCTCGCTGTTGGTTCG  
CATGACGCAAGTTGTTACCTGACGGCGGGTGCCTCATCGGTCAACACTTTCAACACTTTGAGCGGGAT  
CGAGACGGTAATCTTCTTGACCTGTTGCTCTTCTTACCCTGTTCCGCGTAGGGGCTGACGTAGTCCGCG  
TTCCACTCTGTTCCCATGACTCACCTGTTCTCATTTAGCCGTGAGCGCGGATTTTAACCCCTAAGGAAAT  
TAATGGCAATCCAACAGCAAAGCCATTTAGACGCTCTGGAAGTGTGACGGCTTTTTTTAAGCTGGCGTAGT  
GTGGTTGTCCATGAGCCCGCAGTGGCGGGATGGCGGTGGCAGCAAGATGCCAGCGTGTGAAGAGACATC  
AAGGAGAGTGATATGACCACAAGGCCACCCTGGCGGTTGCGACCGGGATTGAGACAGACCAGCAACACG  
GTGCCGTGGTGGCCCCATCTACCTCTCCAGCAACTACACTTTGCGGACTTTGGCGAGCCCCGTCAATA  
CGATTATGCCCGCTCCGGCAATCCGACCCGACCAATCTGGCGGACGCGCTGGCGGCGCTGGAAGGAGGC  
GCAGGCGCCGTGGTTACCGGCACCGGCATGGGCGCGTCCATCTGGTACCACCACCCTGCTCAAGGCGG  
GGGATCTGCTGATTGCCCTCACGACTGCTACGGGGCACCTGGCGCTGTTTCGAGTATCTGGCGGCCAA  
GGGACACTACCGGGTGCAGTTTTGTCGATCAGGGGGATGAGGCTCTCTGGCCCGCCGACTGGCCCAAG  
CCTGCGCTGGTATGGGTGAGACCCCTCCAACCCGCTGCTGCGGGTGGTGGATATCAGCACCATTGCCA  
GCGCCGCCACGAGGTGGGTGCGCAGGTGGTGGTGGACAACACCTTCTCTCCCCCTTGCTGCAACAACC  
GCTGGCCCTCGGTGCCGACGTGGTGGTGCACCTCCACCACCAAGTACATCAACGGTCACTCAGACGTGGT  
GGCGGAGTGGCGATTGCCAAAGAGGCCACACTGGCCGAGTCTGGTGTGGTGGGCAACTGCTGGGGC  
TTACCTCCGGGGCATTGACTCCTACCTCACCTGCGCGGCTGCGCACTCTGGCCCCAGATTGCGCAC  
CCATCAGGAGAACACCGACCGCATCTCACCTTCTGCAACAGCAGCCGCTGGTGAACGCATCTATCAC

CCCAGCCTGCCGAGCCATCCGGGCCACGATATTGCGCGCCGTCAACAGTCCGGCTTCGGCGCCATGCTAA  
GTTTTGAACTCGATTGCAGCGAGACAGGCATTCGCGCCTTCTCGCGGCCCTCACCTCTTCTCGGTGGC  
CGAGTCCCTCGGCGGGGTAGAGAGTCTGGTGGCCCATCCGGCCAGCATGACCCACAGGGCCATGACCCCG  
GCGGCGCAGCAGGCAGCAGGCATCAGCGCCAACTGCTGCGGTGTGCGGTTCGGTATTGAACACGGTGAAG  
ACCTGGTGGCCGATCTGGCTCAGGCTTTTGAACAGGCGCAGCAGGCAGAACAGGTAGCAGTAATGGAA  
CAGCAGCAACAAGGAGAGATCGCGGTGGCAACAGAAAACAGGCTTGAAGCGACGTACGTCCACAAATTTG  
GTGGCAGCAGTCTGGCGGATCCGGTCTGTTATCGCCGGGTGCCAGTATCGTTGAACAACAGGTGGGCGG  
GGATGAACTGATCGTGGTCTCCGCCGCCGGCAAGACCACCAACCGGCTAATCCAGCTGGTGGAGCTGGCC  
GAAGCGGGGGACGAAGCCGCCGGTGAAGCCATCTCGGCCCTGCAGGCCATCAGCAGAGCCTGATCGACG  
GCCTGTCTGGAGGGCAGCTACAGCTTGATCTGAGCAAGCAGCTGGCCGACGACATGCAGCTGATCGCCAA  
AACGCTGGAGGGACAGTTTGACCGCTTTGCCCGCAACGGACTGCTCGCCTTTGGCGAAGTGTGGTGGCGG  
CGCCTACTGGCAGCCCTGCTCACCAGCCGCGGCGACAAGGCTATCTGGCTCGATGCACGCAGTTCCTGC  
GCGCCGAGGATGGCGCTCTGGTCAAGGTAGATACTGCGCTCTCCAGCGAAGTCTCAAGGCGCGACTGGC  
GGAGCATGCCGGTGCATCGTGGTAAACCGGCTTTATCGCTGCCGACATGGAGGGGCGCTCCCTGCTGCTC  
GGTGCAAATGGATCCGACTACAGCGCCAGCCTGTTGGCGCTGCTGGCGGACGGCGAATCCACCACCATCT  
GGAGCGACGTGGCCGGGTCTACAGCGCCGACCCGCGTGGGTGAAAGAAGCGCGTCTGCTGGAACGCCCT  
GAGCCTCGCGGAAGCAACGAGCTGGCCCGTCTTGGCTCTCGGTGCTGCATTCGCGCACCCCTGCAACCT  
GTGGCCGACAGCCGCCAGCGCCTCACTTTGCGCTGCAGCTACAACCCGGACGAGGGCTGCACCCATATCC  
TGCGCCGCGCCCCCGCTCCGGTGGCGCCCGCATCGTCTCCTCGGTGGATCAGATCGCCCTCATCGAGCT  
GAAGGTGCTGCCGCAACCAACTACGAGCAGACGGTGGCCACCATCGAGGCCATCTGGCTCGTCACCGT  
CTCAACCCGCTCACCTGCAGCGCCAGCCGGATCGCCGGATCCTGCGCCTCGCCTACACCTTGAGGTAG  
CACAGGGCGCCTTCGAGCTGCTGCGGGACTTCCAGCTGCAAGGGAGCTTCACCGGCCCTCATCCAGAAA  
GGGTACAGTCTGGTGGCGCTGGTTCGGCGCCGGTGTACCAGCAACGCAGAACAGTGGCCATCGCTTCTAT  
CAGCTGCTGGCAGATCAACCGCTGGAGTTCGTACAGGTGGCCGAGATGGCCTGAGTCTGGTGGCCGTGC  
TGCGTCAGGTAGTGTGGAGCCGCTGCTCATCGCCCTGCACAGCGCCCTGTTACAGCCGCCGACCCGGGT  
CGGACTGGTGGTGTTCGGCAAGGGCAATATCGCGGCCACTGGCTGAGCCTCTACGCCCGTGAAAAGGCA  
CGGCTGGAACATGAGTCAATCTGGCGCTCACCTCTACGGGGTGTTCAGCTCGGAAGGGGGCTGCTGG  
ATGAAGAGGACTCAACCCCTCAAGGTACAGGACAACCTCAATCCAAACCGCTGATCTGGCCGGAGTT  
GCTCTCCAGCTTGAGCAGCAGGCTTCGATGCGCTGATTCGCGTGGACATGACCGCCAGCGAAAAGGTTG  
AGCCGCTACTATCCGGATTTTGGCCAGCTCGGCATTACATCATCGCCGCCAACAAAGTTTGGCGGTGCCG  
CCGACAGCGAGTTTACCAACGCATCAAGCAGACCTGCCGTGACCATCAGGTGCAGTGGCGCTACAACGC  
CACCGTGGGCGCCGGGCTGCCAATCCAGTCCAGCATCCAGATGCTGCGCCAGAGCGGTGACCGCATTCAG  
GGGTCTCCGGCATCTTCTCCGGCACCCCTCTCCTGGCTGTTCCAGCAGTATGACGGCTCCCGCCCCCTCT  
CCGAGTTGGTGGACGAAGCATGGCAGCACGGCCTGACCGAACCGGATCCCCGGAAGATCTCTCCGGTCA  
GGATGTGCGGCGCAAGCTGCTTATTCTGGCGCGGAAGCGGGCTTCGAGCTCGACTCCGCCGATATCGAG  
CTGGAGAATCTGGTGGCCGTTACGCTGCGCAAGGTGACCGCCGATCAGTTCATGGACAGACTGAAAGAGC  
TGGATGGCCCGATCCAGACCCGCTTCAAGGGGCCAGGCGCCTCGGCAAGGTACTGCGCTACGTGGCCCG  
CTTCGAGCATGACGGCAAGGCGCGGGTTCGGACTGGAGGCGCTGGAGCCCCACCACCGTTTGCCAACCTC  
TTGCCGTGCGACAACATCTTCGCCATCGAGAGCGACAGCTATCGCACCAACCCGCTGGTGATTCAGGGAC  
CGGGGGCGGGTCCGGAAAGTGACCGCCGCCGCTATCCAGTACGATCTGTGGCAGATCTGCGCCAACCTCTA  
AGGCAGATTGCAAAGGGAGCAGCACCTCTCTCCCGCGCACAAATAAAAAAGCCCGAGTCGATGACTCGGGC  
TTTTTGCTGAATGCCGCTTCGATTAGGAGAAGCAGGCCTGCAGCACGTAGAAGATGGCGATAGCCAAAAT  
GGCACCGGCAGGCAGGGTGTATGATCCAGGAGACCAGATATTGCGCAGTACCCCGAGATTCAGCGCCGCA  
ATGCCGCGCGCCAGACCCGACACCCATCACAGCACCAGGAGGCTGTTGGTGGTGGAGATGGGCAGACCGG  
TACCGGAGGCAATCACTACGGTTCGCGGCAGTGCAGCTGGGCGACAAAACCACGGCTCGGGGTGAGGTG  
AGTGATGCCGTTACCGACCGTCCGATCACCTCTCGCCATGGTTCGCCAGACCGATCACGATACCGGATA  
CCGCCAAGGGGCAGGATCCACCAGGCAATGGCAGCCTGACTGGAAATCTCGCCACCGGAAGCCACGATAG  
AGGCCACCGCAGAGAGCGGGCAATGGCGTTGGCCACATCGTTCGGAGCCGTGGGCAAAGGCCATGGCACA  
GGCGGTGATCACCATCAGGATGCCGAACACCTTCTCCACGTTGGCGAAGTGCATCTTGCTGTCTATCTGC  
GGGTTGTACTTCTGGCCGCAATGTAGATCCAGCCGGCAAACGCCACTGCGATGGAGATGGCGATGGAGA  
GCAGAATGCCCTCGCCATCGCTCAGGTGCAGACCGAGCTGGGTGAGCCCTTCTTGATGGTACCAGACA  
GATCACCAGCGCAGTCAGGAACATGTAGAACGGCACATAGCGCTTGGCGTTGTTACAGGGGTGATCGGTG  
TTGAAGATAAGCTTCTGCACGCTGATGAACATGAAGTAGGCGATGACACCTGAGATGGCCGGGGTGTATGA  
CCCAGGAGCCGACGATGCCGCCAACTTGTCTCACTGCACCGCTTCCGGGCCAATGCTCACCACCGCAAA  
ACCGACGATGGCGCCGATGATGGAGTGTAGTGGTAGAGACGGGCCAGCCGAAGTAGGAGGCGAGGATCAAC  
CAGGCGCCGGCCGAAGCAGGGAGGCTATCATGCCGAGCACCAGCAGGTCCGGACTATCGACAAACGCAT  
TGCTGTGATGATGCCGTTACGGATGGTGGCCGCTCACTTCGCCACCGGCCAGATAGGCACCGGCCAAATTC  
GAAGATCATGGCAATGATGATCGCCTGACGGATGGTTCAGGGATTTGGTGGCGACCGATGTCCCCATGGCG  
TTGGCAACGTCATTCGCGCAATACCCCAAGCCATCAAAAAGCCGAACAAGGCCGCCACGAGCACCAGAG  
TGGTGGCGTAATTCGCGATAATGTCCACTAGTAGTGTTCACCGAGTCAGTCGATTACGAACGAGCCAGCA  
TCAGTTCAGACGGGCGCCTACGCGCTCGGCCTGATCTGCCAGGTCACCTACCCATTCGAGGATCTTGTA

AAGGAACATCACATCGATCGGATTGTAATTGTGCTCAACAGCTTGCAGCTGTTGGCGCAGTCCGATCTGC  
ATGGTGTCTGTATCGTCTCGATCAGATCCAGTTGGTGGATCATCTCGGCAACCATTTCCACTTCCCCTC  
CTTTGAAGCCGGTCTCGAGCAGCTCGTGCAGCTCCCCGATCGCTTCTCGGCCTGAGCGGTGCGATCAAT  
ACAACGTTTGAAGTAAGCCATGAAATCCGTCCGCATTTACGCGGGGAACTCCATGCGACGGCCAAGCATG  
CGGCCGGAGATATCCTTGGCACGGTTGGCAATCTTGTCTTGTCTGGGTCAACAGCTCCAGCAGGTGCGTAC  
GTGCAACCCGGCAGGAACAGGCCGCGAGGCAGTTTTCAGACGGATTTTCACGCTTGAGGGTATCTGCCTCTTT  
TTCCAGCTGGGCGATCTGCTGCCGGATCTTCTCGGCATCTTCCCAACGGTCTTCGGCAACGGCGTCAAAG  
AAGGGAACCAACTGCTGGGAGCACTGGTGAACCTTGACGATATGCTTCTGCAGCGGCTTGATGGGGGACT  
TGGCAAAAAGCCCCAAAATAGTATTTACTGGCATGGCCAAACCTGTGTGCGGTGAAAAAACACTCGATACG  
ATTTTATGAGGCGCGCATGGTAACCGAATCTGCCCTCAATTAACCGGAATTAATCTAGTCGTCTCGC  
GGCATTATATATCCCCGCGACCCGAATCCTGCCCCCAAAGTTGCCTGCCAGCCCGAATGACTATGCAAA  
CTGAGATCGAGATAAAGTTTTTTTGTGCGCCCGCAGATTCAACCCGAGTTATCCAACCTGTGAATTCTCT  
TGAGATTAAGAATCATCACAAACAGCAGCTCGGCAACGCTTATTTTCGATACGCCGACCCTGGCTCTGCGC  
CAGCTGGAGATGGGGTTGCGCATTCGCCGCTGCGACACCTTCGCCGAGCAGACCATCAAATGCCGCGGCC  
AGGTGGTGGGCGCCTGCATGCCAGACCTGAGTACAACGCCCTGTGACGCGGCGATCTGCCGACCCTCTC  
GGCCTTTCCCAGTATGAGATTTGGCCGACTCTGACCGAGCGTGACCACATTCAGCAGCAGCTGGTCGCCAG  
TTTTGCGACCGACTTCTGCGCCGCCACTGGCTGATCGCTTCGAGGGGACCGAGATTGAACTGGCCTGGG  
ATCAGGGAGAGATAGTCGGCAGTCAGGGCAGCACCACCATCAACGAACTGGAACGGAGCTCAAATCAGG  
CGCGACCGCGGCGCTGTTTGCCTGGCCCAACGCTCGCAAGCTTGGTGGACTGCGTCTCGGCGCCCAA  
TCCAAGGCCAGCGCGCTATCGACTGGCTGGTCTTGGCAAAACCGTGGCCCTGCAGGCGCAGGTGCAAC  
ATGAAGGTATGGATGGCACAACGGGGTAAGCGATGGGCTGCGCCACTGGCAGCATCACGAGCAGCTCTG  
GCTGGAGCATCTCAGGATAAAGGCATTTCAACAGCAGGCACTCGCAGCCCTGTGCCAGGGGATCGATCTG  
GTCGCCCCGAGTGGCGCCACGCTGCCACAACCCGCGCCCTAGCTACCCGCCCTGACCAACCTGCAAGCCC  
ATCTGCAAGCCCAGTCCGACGAGCATGACGAGTGGCCTGCCGAGCTTGCCGATCTCTTCTCAATCCGGC  
GTATGTGAGTTGCAACTGGCCATCGCTGCCTGGCTGCATCACGCGCCTGAGTGGGGCGATATCGTAAA  
TACAAAGGCCAGAAACAAACGCCGAATGCAAAACGGGTGAGCCTTGGCTCACCCGTTTTTGCAATTACAGCA  
AGTTGAGCTGCTGCATGGCGCTGCGAATGCGCTCGCGAGTAGCCTCCGACAGCGGCATCACCGGCAGACG  
GCATCTCTCGTGCAGAAACCGAGCAGGGAACCGGCATATTTGGCACCAGCCGGGCTCGGCTCGGCAAA  
ATCAGCTGATGGAGCGGAATCAGCTTGTCTTGCAGCTCACGCGCTTCTTGCCACTTGCCAGCCAGCGCCA  
AATTTTTGAACCTCGGCCACCAGCTTGGGGGCCACGTTGGCGGTACAGAGATACAGCCCTGACCGCCGCC  
GATGTTGTAAGCAACCGCAGTGGCATCTCACCAGGAGACCAGGCGAAGGGCTTTTTTGATCAGCTGGCGC  
TCGGTCCAGGGGCGGGCCAGATCGCCGGTGGCATCTTTTACCCTGGCAATGCGCGGCAGCTCGGCCAGAC  
GGGCCAGGGTCCGCCGCTGTACGTCGACAATGGCAGCGGGCGGGATGTTGTAGACGATGATCGGCTTGGT  
GGTGGCATCGTGTACCGCCTTGAAGTGGTGGTAGAGCCCTCCTGATTGGGACGGTTGTAGTAACCGGCC  
ACATGCAGAGTGGCATCAGCCCCACCCGCTCAGCATGGAGGGTGTACTCGATGGCTTCGACCGGGTTGT  
TGGAGCCCCTCCGGCAATCACCGGAATACGGCCAGCGACCTGTTTGACCACCAGCTCCACCCTCGGCA  
GTGCTCATCGTGGGTGAGGGTCCGGCTCTCACCCGTTGATACCGGCACAATGCCGTGAGTACCCTGC  
TCGATATGCCACTCCACCAGACGCAGCAGCGCCTTTCATCCAGCTTTCCTGTGAAACGGGGTATCA  
ACGCAACGATTGAACCTTGAACATGGGATCTCCTTCTCCTAAATGACCGGCATATGGCAATAAAAAACC  
CCGGTACGATGTGCGCAACCGGGGTTTTGAAGCTTCTCAGGGATGAGAGGTTACGCGCGAACGTGCGCAGG  
CCCGAATTTAGGCTTTTTTTGTGCTTTTCGTTTCAACCCGTTGAACCGCATTTTCGTATCTCTGGTCAA  
AAATGGTGTCTGGGCATATTTCCGGAAACACGGCATAAATGTCAAGGCGAAAGGGGCTATGTATAATGGCC  
GCCAAAATTGCGTGGAGAGACCCGATGAGCAGCCCAATCAGTGCCGTGACCCAGATGCTGGAACGAAAC  
CAAGCCCTCTTTGTGCGCAAGCGGCTACTTGTCTGCGGCGCACTGGAGGATGACTACCCCGCCAGCTGG  
CGAGCCTGGCCAGACCCCTGACCGTCTTTACCACCGATTACTGCTACTACCGCAGCCAGCAGCCGCCCT  
CGGCGAGGCTATCCTGTTTCGACCACCAGCTCGGTGGCGCCCGCCCGCTTCGATGCCCTGTTGCTGCTGATG  
CCCAAGGCCAAGCCGAGGCACAATATCTGCTGGCCATGATGACCCCTGCTGGAAGCGGGTGGCCGACC  
TGTTCTCGCCGGTGA AAAACCGCGCGGCATCAATGGCGCCGACAAGCTGCTGGGCCCCATGGCGAAAA  
GCCGGTCAAGCGGATTCGGCGCGCCGCTGCTCCCTCTATCACGGTGAGCTCTGCAAACCGGTGCGCCCCG  
TTCGATCTGGATAGCTGGTTTGGCCGCTACCAGTGAAGGCGGGTGATACCGAGCTGACCGTGTGGCAC  
TGCCCGGCGTCTCAGCGCCCGAGCTGGATCTCGGCACCAGATGCTGCTGGCGGCGCTGCCACCGAT  
GACGGGCGAATTGCTCGATTTCCGGCTGCGGCGCCGGGTGATTGGGTCCGTAAGTGGCCAAGCGCAATCCG  
GATCTGCAAGTCAACATGGTGGATATCAGCGCACTGGCACTCGAATCGAGCCCGCCACCCTGGCGATCA  
ACGGTCTGCAGGGCAAGGTACCGCTTCCGATGTTTACTCGGATGTCTCCACCCGTTTCCAGCACATCGT  
CTCCAACCCGCCATTCCATGCTGGTCTCAAACCTTCTATGCGGCAACCGAGCAGTTCTGGCCAAGGCG  
CCGGAATTTTTGCTGCCAAATGGTTCCGCTGACCATTGTTGCCAACGCTTCTTGCCTACCAGCCTATAC  
TGGAGACACACTTCAAACGGACTGAAGTGATCAGCAGTGTGCCAAATTCAGGCTCTATCTGAGCAAAAT  
GTAAATAAGTGAAGCAGCACAATAAAAACAGCTAGAGAGCGCCATCCGGCATCTGATAAGGTATTAAGCG  
CACGATAAAAACCCCTTTAGGGGTGTTTTTATACCGAACATGAAAACCTTTTCATGTTGTTTCATTC  
AGGGAGAGAAATACGATGGCAGGCATATTGACCATGATCTGGCTGGTGGCGAAGGTACTCGCCTGCAGC  
CTCTGACCACTACCCGAGCAAGCCTTCCGTCCCCTTTGGTGGCAGCTACCGGTGATCGACTTTGTCTCT

CAACAACCTTCGTCAACGCCGACTTTCTGCGCATCTATGTACTGACCAATTCAAATCACAGTCCCTCTAC  
CTGCACATGAAGAAGGGGTGGAATATCGTCGGCATCACCGACCGCTTTATCGATCCCATCCCGGCCAGA  
TGCGGATGGGCAAACGCTGGTATGACGGCACCGCCGACCCATTTACCAGAACCTCGGCTTTATCGAGCG  
GGCCGAACCAGATCACGTCTGCATCTTCGGCTCCGACCACATCTACAAGATGGATGTGAGCCAGATGGTC  
ACCTTCCACAAGCAGAAGAACGCCGCCATGACGGTCGCGGCACTTCGCATGCCATCGAAGAGGCGAGCG  
CCTTCGGGGTGATCGAGGTGGATACCGAAGGGCGGATGATCGGCTTTCAGGAGAAAACAAAACAGCCGAA  
ACACATTCGGGGGATCCGACCCAGGCTCTGGTCTCCATGGGCAACTACATCTTCGAGACCGATGCCCTC  
TGCCGCGAGTTGAAGCGGGATGCCGCCGAGGAGAACTCCAGCCACGACTTTGGCAAGGATGTGATCCCGA  
GCCTCTACCCGCGCGCCCCCGTCTATGTCTATGACTACAGCACCAACGTCATCCCCGGCGAGAAAACCGCA  
CGTCTACTGGCGGGATGTGGGCACCCCTCGACTCTTATTGGCAAGCGCACATGGACCTGGTGGCCGACAAT  
CCCCCTTCTCCCTCTATAACCGCAAGTGGCCCCCTGCACACCCACTATCCGGCGCTGCCCTGCTACCT  
TCATCGACAGCGACGAGTGAAGGTGAAGATCGCCAACCTCCCTGATCTCCGCGGTTGCTTCATTTCAGGG  
CAGCCAGATCCAGCGATCCATCCTTGGTTTCCGCTGCAATATCGGCGCGTGCAGCCATATCAGTGAATCC  
GTGCTGCTGGGGGATGTGAAGATTGGTGAAGGCTGCTCCATCCGGCGCGCCATCATTGATAAAAAACGTTG  
AAATTGCGCCCGCACCGTTATCGGTGAAAATCTGGACCACGATAGAGAGCGATTTACCCTATCCGAAGG  
CGGTATCGTGGTGGTACCTAAGGGAGCAAGAGTTGGCTATTAACCCACTGAAAACTCTGTTTGTTCCTC  
GGAAGTTGAGGGGCTGGTCAAGACCGGGGCTGGCCGATGTCGCCAGAGCCCTGCCGATGTACCTGGCC  
CAGAAGGGACATGATGTCAGGCTCATGTTGCCCTTCTACAAGACGATAAAGCGACGGGATGAGGCCAGAT  
TAGTGGCGTACGCTGGTTGCCAACCCACCCCGGCTGCCGATATCGGTTATCGCATCTACCAGATGGA  
GCTGGATGGCGTCTGCGTCTATCTGCTCGACTGCCCGCAATATTTTCGATCGTCCCAGCTCTACGCCGAG  
AACAATCAGGCCTATCCGGATAATGGCGAGCGCTTTGCCTTCTTCTCGGCGCGGCCCTCCATGCCTGCC  
AGCAGCTCGGCTTTGCCCCGGATATCGCCCACTGCAATGACTGGCACACCCGGCTGCTGCCACTGCTGCT  
GAAAACCCGTCACGCCACAACCCCTTCTTCCAGCAGACCCCGCAGCGTGATCAGCATTACAACGCGGGC  
TTTCAGGGGGTGTGGCCGCGAGCAGTTCTGGGCCATGCCCGAGATCGCCGACTACGAGCGCCGCATCA  
ACTACGACTACGGCCACGTCAATCTGCTCAAATGCGGGGTGCTCTACGCCGACAAGATCAACGCAGTCAG  
CCCCAACTATGCTCAGGAGCTGCTGACTCACCTCGGCGCCACGGCATGGCGCATATCTTCCAGCAGCGG  
GCGGCGGATCTCTGCGGCATCCTCAACGGCTGCGACTACAAGGACTGGGATCCTGAGTTCGACGAATTC  
TGCCTGCGACTACAGCATGACAAACATGGCAGGCAACAGATCTGCAAGCAGAGCCTGCAACGAGGCG  
GGGGTGGCCGTGGCGGACTTGGCCATCTACGGCTAGGTTTGGCCCTGACCGAGCAGAAAGGGGTTCC  
CTGCTGCTCCCTGCGCTGGAGAAAATTCCTCCACCATCAGGTACAAGTGGTATCGTTCGGCTCTGGCGATC  
CTGCGCTCGCCACGCAACTGCAAAACCATGGCCCGGATTATCCGGGCAAGCTCGCCTTTCATCAACACCTA  
TGACGATCGGCTGGCCATCTGGTCAAGCCGGTGGCGACTTCTTCCCTGATGCCCTCTCTGTTTCGAGCCT  
TGCGGCCTCAACCAGATGTACAGTCTCGCCTATGGTACCCTGCCACTGGTGGCGCGCGTGGGTGGTCTGA  
AAGATACCGTGGTGGATTGGGATGCGGATCCCGAGCATGCCACCGGCTTCTGCTTTAACGATCCGACTGC  
CGCCATCCTGCTCGATAACCATGCGCCGAGCCTGCTCTATTTCTGCAGGACAAGGAGCGTTTTTGCCAA  
GTGCAGCGCAATGCCATGAGCACCCGCTTCAACTGGCTGACTCGGTCACCCAGTATGAACGGATGTATC  
AGAGCGCATTGGGCCGTTACTGAATGCCAAACGTGACTAATTTGCTGAAGTTTTGTACCCTTGGCTTCC  
TTTGAGCGTCAACAGCGAAAAAAGTCCCCTTTGGCTGTTGACGCTCCCCAAAACCTCTATAGAATCCCC  
TCCGAGTGATGCGAAGGTGGCGGAATTGGTAGACGCGCTAGCTTCAGGTGTTAGTGTCCCACGGATGTG  
AGGGTTCGAGTCCCTCTCTTCGCACCAATACTGCCATGCTGATTCAGCAGCATGTAATCCAACCTAGAAA  
ACCCGAATGTGCGAAGGTGGCGGAATTGGTAGACGCGCTAGCTTCAGGTGTTAGTGCCCCCGGGTGTGA  
GGGTTTCGAGTCCCTCTCTTCGCACCAATACTGCCATGCTGATTCAGCAGCATGTAATCCAACCTAGAAA  
CCCGAATGTGCGAAGGTGGCGGAATTGGTAGACGCGCTAGCTTCAGGTGTTAGTGCCCCCGGGTGTGAG  
GGTTCGAGTCCCTCTCTTCGCACCATGCTTCTCCAGACAGCATGTAATCAAACTGGTAACACAATGTG  
CGAAGGTGGCGGAATTGGTAGACGCGCTAGCTTCAGGTGTTAGTGTCCACGGATGTGAGGGTTCGAGTC  
CCTCTTTCGCACCATGCTTTATCCAGACAGCATGTAATCCAGACTGGAAACCCGAATGTGCGAAGGTG  
GCGGAATTGGTAGACGCGCTAGCTTCAGGTGTTAGTGCCCCCGGGTGTGAGGGTTCGAGTCCCTCTCTT  
CGCACCATGATTCTGACATGTAACACAGAGCAATGCGCTCCAACCCGATTTAAAAACCAGCTGGGGAAA  
ATCAATGTGCGAAGGTGGCGGAATTGGTAGACGCGCTAGCTTCAGGTGTTAGTGCCCCCGGGTGTGAGG  
GTTTCGAGTCCCTCTCTTCGCACCATGATTCTGACATGTAACACAGAGCAATGCGCTCCAACCCGATTTA  
AAAACCAGCTGGAGAAAATCAGTGTGTGAAGGTGGCGGAATTGGTAGACGCGCTAGCTTCAGGTGTTAGT  
GTCCACGGATGTGAGGGTTCGAGTCCCTCTCTTCGCACCATTCATTACGCAAAAGGCCCATCACGAAAG  
TGATGGGCCTTTTGTTTTTACTCCTTGTATGGCTATGCTTTTACGACTCCCCGCTCATCGTCATGCCA  
AGGAACGCATATGATACTGGATAACCGACATTCACAACCTTTACGAACATCTGGTGTCAAGGAGATTGAG  
AAACAGGGGCTGCAGCAAAAGCTCAACAGCGATCAGATGGCCGACCTCTGCTGCCTCACCTCAACCAGC  
TCCCCGCCCACTATATTCGCCACAATGTGACATGATCTACTTCTGACCGACGCAAGCGCACCGAAAT  
GGAGAACTGGTGGTGAATCACTCAAGGTGGCACAGCAGAAGATCAAGCAGGCTCCCGTCAAAAGCTCA  
TAACCAGGGCTGCTGCCAGAGCAGGGTAACGATACCGGTCAACCCGGCCACTGGCAGCAAGATCAAGGCG  
GGCCGCAATCCGGGCTCCAGCATCACCCAGGCAGCCAGCAGAAAACCTACACTCCAGGTGCCGTACTCTT  
TATCCTGACCCCATGCGAGTACGGCCACCGCCACCAGCAACATCATACCCGCAATATCCAGCGCATTTGT  
TTTCTCCCAATCAACAATTGATAATAATTATCATATTCATCTGCTGGGGATGCAAGTGGCGTCACAGGC

AAGCTTCGTATGTGACCCCTTTGTGTCAACAGGCCGCTCAAAAACGGGTTATGAGATCAACTAATTTGTGA  
TTTTTTCAATCAAATGTGCATTTTTGCCAATTTGATGGGGCTTTAACCCGTCGGGTTTGTGGTAGATTGC  
GGCCTCTTTTTGGGTTGCCTCCTCGGGATCGATGTATCCACAGGACGAGAGGGAGTGACCTTGGCGAGCA  
AGAGTTTAGGAAGTATCTATGCAAAAACAAACAAACACATCCGACTACCGGGCATGGCACAGGTGTTTG  
CCTGTCTGGCCATTTTTCTGGCCCTGGCATTCTCGTTTACCAGCGTGCTCGAGCTGCCGATCCAGCTGGC  
GCTGTTTCATCGCCTGGTTCGTTCATCATGGGACTTGGCATCAAACCTCGGCCACGATTACAAATCCCTGGAG  
CAGGCTGCCGTTGACGGCGTTGCCAAGGGAATGGGGCCATCCTGATCCTGGTCTCCGTCGGTGCCTGG  
TCGGCACCTGGATTGCCGGTGGCATAGTCCCAGCATCATCTACTTCGGCCTCAAGGTGATTACCCCGTC  
CATCTTCTGTGCTGGCAACCCTGATCATCTGCTCCCTGACCTCGCTGGCCACCGGCACCTCCTGGGGCTCT  
GCCGCCACCGCCGGTATCGCCATGATGGGGATCGGCCACAGCCTCGGCGTGCTGCGCCGCTGGTAGCCG  
GTGCCGTGCTCTCCGGCGTCTACTTCGGTGACAAGCTCTCTCGCTCTCCGACTCAGTAGTGTCTGGCTTC  
GACCATGTCCAACGTGCGAGTGGTGGAGCATACAAGGGGATGCTGCCCATCAGCCTCAGCTCTCCTATGTC  
ATCACCGCCGTGCTGTTTACCCTGGTGGGCATGCAGTATTCGGGCAACGTCAGCCTGGAGCAGGTCAATC  
TGGTGATGGAGGCGCTCGACAACCAGTTCAACATTACCCCACTGGCCATAGTGCCGGTGGTGTGGTACT  
GGGCCTGTTGGCCAATCGCAAGCCCGCTTCCCGGTGATCAGCTTCGGCGCCCTGCTTGGCCTGATCTGG  
GCCATCGCCTTCCAGGGCATGGATCCGGTCAAGGCAATGCACTCGGCTTATAGTCCGTTTGGCCATCACCT  
CCGGCATCGATTTTATCGACAACATTCTCGGGCGGGCGGCATGGAGTCCATGCTGGGCTCGGTGCGGGT  
CATCATCTTCGGTCTCGGGTTTTGGCGCCTGCTGGAGAAGGTCGGTATTCTGGAAGTGATCGCCAGCGCC  
TTCGAGAAGCGCATCAATAGCGTCCGCGAGCCTGACCAGCCACACCATCGGCACCGCGTTTTCTGGCCAACG  
TGTTTTGGCTCGGCCATGTATGTATCGCTGATCCTTACCCCAAGATCATGGCAAAGAACTACGACCGACT  
GGGACTGGCGCGCAAGAACCTCTCTCGCAACGCCGAGTTTGGCGGCACCCCTACCTGCGGCATGGTGCC  
TGGAGCGACAACGGCATCTTCATGGCAGGGGTTCTAGGAGTCGCAACCCTCGACTACCTGCCCTACATGT  
GGCTGAGCTTACCTGCATCATTGTGACCATCACCCCTCGCCTACATGGGCAAGGCAGTGAACCGGATCCC  
GCTGGTTCGCGGGCGCAAGCTCCCGCTAAGCCATTCTGCAAAAACAAAGGCGCCATCAAGGCGCCTTTGT  
TGTTTTAGAGAAATGCTGTTTATGGAACACTGAGCACCACAAAACAAAAACAGCCCTCGTTGCCGAGA  
GCCGTTTTCATCAGGCCGATAACGCCGATCAGATGGAGAAGCTGGAGCCACAGCCACAGGTCGTGGTGGCA  
TTGGGGTGGTTCACGGTGAACCGCAACCTTCCAGACCCTCGGTGTAATCCACACTGCCGCTACCAGAT  
ATTTGAGGCTCATGGGATCGATCACCATGGTGCAGCCATCTTCTCGACTACGGTGTCCCCGCTGTGAT  
CTTCTCATCAAAGGTAAGCCATACTGGAACCGGAGCAGCCCAACCCGTCATGTATACCCGCGAGTTTC  
AGCTCGGGATTCTTCTCCTCGGTGATCAGGTTCTTACCTTGTGGCCGCGCATCCGTCATCTGGATGG  
GCAGCGGGGCTTCTGCTACTGCACTCATTACTGACCTCACAACCATTAGATCCACAAACATGGAACCCGC  
GAAATTATCCAATACCCGACCATTGAGTTCAAGTATTACCCACGTTTAAACCGGCAGCGGGAACCGGAGCA  
GGCGGGCGGGCGACCAGCGGCTTATCACCCTCGCCCCACTCAACCAGCAGCTCTTGGCGCGGCTGCCGTC  
CATCCTTGTGATGGTGCACCGATCCGATCCGGCACAAAGCCTTCCGGCAACTGCCAATTTCCCTTCCAG  
CAGCTGGAAATAACGCAGGGCATAGCGCCACTCACTCACCTTCATCCCGAGATCGCGGCGGTTAGCGTC  
TTCGGCTTGTGACCCAGACTCCCTCGACCCGGATCTGCACCTGACCGCGAAACAGCTCCCGCTTCTTGG  
CAGGCTGGGTGAGTGCAGACGGTAGTGGTAGCGACCGGGAATGCTGGTCTCCTGCAGGGTCAGGTTGTC  
GATCACCACCCCCACCTGTTCCGGTGGGGCGCATGATCCGCTCGAAAAGGCCAGCTGGCGCTTGGAGC  
TCCTGCACCTGCGCCTCCTGACTCTTACGGGTGGTCTGCAACTGCTCGAAGGCCGCTTTCTGGGTGCCA  
GCTGGGTATCTTTCACCCCAATTCGGTCTTGGAGCTGGCCGATGGCCTTGCCCTGACGATCCAGCGTCTC  
CTGCTGTACCACCAACAGACTGCTCTGGGCCAGCTCCTGACGGTTACCAGCAAAAGTAAACCAATGAGCCCG  
CCAACGGCTAACACGACCAATAACTTCAATAGATTGGACATAGCCCTCATCCCGTTATCACGCCATTTA  
CGGCAGCGCCTCTCCCTTCACTATAACCGCCTGACCGGGGTCAAAGGCATAAAGGGAAAAATTAAGTGG  
CCGTGGCGCTGCCATCACCCCGCTTTTACGCGCGGCAAGCCGTAAGTTTCGCTCAAGGATCTGGGAATA  
GATGGGACGACCGCCAGCGCTTGCGCCACAAGGGTGGCTCCCACTGTGGTGCATCATCGGCAGGATC  
AGCTGATAGTTGTCGGTTCATCTCGGTGACCAACAGCATACCGGTGATGGGGGCGCGCAGGTGGCAGCAA  
ACAGCGCCCCCATTCGGCGATGGCAAAGGCGCCGGGCTCGATGCCAAGCTCCGAAACGCGCATGAAA  
CAGATGGCCGAACACCACGCCAAAACAGGGTGGCCAAACGCCAGGGTCCGGCGCAAACACCCCGCCGGGCA  
CCGGAGCAGAAGCAGATAAGGGTGCACAACCAGCCGACCGAGAAAGATGAGGAACAGGGTCCGCATCGCAT  
ACTCGTCCCCCATCAGATGGGGAATAAGCTCGGTGCCGCCCCCGTACCAGCGGGAGCAAACAGCGACAG  
CACACCAAACATTCCGGCGACCAGCATGCCGATGGCTACAAAACGGTGGCGCTTGTCTGATGCAGCGCC  
AGATAGCCATCCTGACAGGCCAGCACCAGCTTGTGAAAACAAAGCCCAATACGCCGAAGGTGGCCCCCA  
TAAAGAGAAACAGCCAGAGCGCCTTGGGGCTGGCGCATCGTAGTGCAGGAGGATCACCAGCCCCCTG  
CCCTTTCATGTTCTGCAGCATCAGGGTGCCTATAATGGCGGAGATCCCACCGCCTTGGTGGCCAGAAAG  
GAGTAGCGAAACTGCGGCCGATCTCCTCCATCACAACAGAATGCCCGCCAGCGGCGCATGGAAGGCTG  
CCGCCAGACCGCCCGCCGACCGGCTGCCAACAGGGCGTGGCCATGCTCCTTGGGCAACCGGAAGATATC  
CGCCACCATCTTGGCGAGGTTGCCGCGGATCTGTACCGAAGGCCCTCCCGCCCCAGCACCATACCGGAG  
CTCAGGGTACAGATGCCGCCGAAGAACTTGACCGGCAACACTCGCCACCACCGCACCGGGCGCAGATCGT  
CCATCGCCCCCTCGATCTCGGGAATGCCGGAACCGCCCGCTTCCGGGGCAAAGGTATGAGTGAGGAAATA  
ACCGACAAATCCCAGCAAGGCGCTGAAGCCAAAGCCAAGCAGACCGAGCTGCCACCAGGGACGGTCTGCC  
AGCAAGGCGATACGTTGTTCTGCCAGCCAGTGGACTCCCGATTGCAACAGGCCGCACCAATCCGGCCA

GGGTGCCGACCAGCGCAGCCAGCAGCAACACCAGCAAGGGCATCTTGTCTTGCCGGATAATGCCGGAAAG  
CGGCCCCCGCGAAGCGGTATCGGGTTCAGAGGAGAGAGCTTGTTCGCGCATCTTGTACACCAACTTGGG  
AAAACCACATCGTCAGCTAGCTGAGATCAGGATCACCCGCGCGTTGCTCGGCTGCCAGGGCTGGGGCT  
TTCTGCTATAGTCGGCCCCGTTAAATTTTTGTACAGGGAGCAGACCGAGAGTCCGGGTGGCGAGAGCGCAA  
AGCATACTCCTGATGCTCCGGCCTGCCGAGTCTCAATCGGCTGCAATCCCTTGTGTGACGACCAAAATCC  
CATTAAAGGATGATCCATGTCAAAAATCAGATCAGCTGTTTGAACAGGCCCCGCCAGACCAATTCCGGGTGGCG  
TCAACTCACCGGTCCGCGCCTTCAATGGGGTCCGCGGCACGCCCCGCTTCATCGATCATGCCGATGGCGC  
CTATCTCTATGATGTGGATGGTCAGGCCTACGTGGATTACATCGGCTCCTGGGGCCCCATGCTGCTGGGT  
CACAACCACCCGGCCATCAAAGCCGCCGTCAATCAAGGCCGTTGAGAAGGGGCTGAGCTACGGTGCGCCGA  
CCGAGATCGAAGTGTGATGGCCGAGAAAAGTGCGCCAGATCGTCCCCTCCATGGAGCAGGTGCGGATGGT  
CAACTCCGGCACCGAAGCCACCATGAGCGCCATTTCGTCTGGCCCGTGGCTACACCGGCCGACAAAGATC  
GTCAAATTCGAGGGCTGCTACCACGGCCACGCCACTCCCTGCTGGTCAAGGCCGGTCCGCGCCCTGA  
CCCTGGGTCAACCGAACAGCCCCGGCGTTCCAGCCGATTTCCGCCAAACACACCCCTGACCTGCGTCTTCAA  
CGATCTGGAGTCTGTGCGTGAAGCCTTACCCAGTACGGCAGCGAGATCGCCTGTATCATCGTCGAGCCG  
GTCGCGAGGCAACATGAACTGCATCCCAGCCGGTCCCGGGCTTCCCTGGAAGGGCTGCGCGCCATCTGTGACG  
AGTTCGGTGCCTGCTGATCCTGGACGAGGTGATGACCGGCTTCCGCGTCTCCCTGCGCGGTGCTCAGGG  
TCACTACAACATCGACCCGGATCTCACCCTCTTGGCAAGATCATCGGTGCCGGCATGCCTGTGGGCGCC  
TTCGGCGGCAAGAAGAAGGTGATGCAACACATCGCACCGACCGGCCCTGTCTATCAGGCGGGTACTCTCT  
CCGGCAACCCGGTGGCCATGGCGGCCGGCCTCACCATGCTGGATCTGCTGCTGGAGCCGGCCCTCTATGA  
GCAGCTGAACGCCAAGACAGCTCGTGTTCAGAGGGACTGAAAGCGGCCGAGCCAAGCATGGCATTCGG  
CTCGCCATCAACTATGTGGGCGGCATGTTCCGGCTTCTTCTCACCAGAGAGAACGAAATCACCCGCTACG  
AGCAGGTCACTCGCTGCGATATGGAACGCTTCAAGCGCTTCTACCATCTCATGCTGGAAGAGGGCGTCTA  
TCTGGCGCCGAGCGCCTACGAGGCGGGCTTCCCTGTCATTGGCTCACGGCGACAAAGAGATCGAACATACC  
TTGGCTGCCGCCGAGCGCAGCTTCGCCAAGCTGGCAGGCTGAATCGCCGAGGTTGTCGAGAAAGGGCCC  
GTCATGGGCCCCTTTTCTATTACAGAGACTCCATCACCACACAGGGCGACAATACGCCCATTTCTGGTGCA  
TTACCCCTCGTCATCCACCGATTTGTCAATCTCTGGTGAACCTTGCCCCGCATCCCTGTCTATAAAGCA  
GGCCACTATTTGCACATTCACCACAAGAGCCACGTCACCGAGGTCCATATGGCAGAGATGAGCCCCAT  
CGATGTGCTGCGCGCTCAGGAGTATCAGGAGGATGACCCCGCTACTGCAGGGGCTGCTAAGGCGCC  
CCCCCTGTCTCGCTCAAGGGGTATCCCTTTGTGGTCAAGCTTACCCACTATCAGGGGCGCATGTGCATCC  
AGCCTGCGGCACCGGCCGCCATAACCGGCTGCACCTTATCGTGCAGGGGCAAGGACGAGAGATCACCGT  
CTGTCTGAATCAGCTGATTGGCTGGTTGATGGGAGACAGGGAGCGCCGCCGCAATGCCCTGGTTCAAG  
GCGGTCTATGTGGTGTCTCAGCATGGCACTGTTTTTGGATCGTCGCCACCCTGATCTGGCACGGGCTGGAGC  
AGCTCTACCAGCTGTTGTGCGGCGAGCAGCAGAACCAGCTCGGCGCCTTTAGCGCTATTATCTTCTGAC  
GCTGGCACTGGCGGTGTTGATCTGGCAAGACCATTCTGGAAGAGGAGGTGCTGCTGCATAAGGATATC  
TTCCGCCACAGCGCCATTCGCCGCACCATCACCCGCTTTATCGCCGCCATTCTGATCGCGGTCTCCATCG  
AGGGGTTGTTGCTGCTGTTCAAGGGTTGCTCGGCCAGAGCGAGCTGCTCTGGCCTGCGGTGCGGGTGTGAT  
GGGGTGTGCGGTGGGTTTGTGCTGGCGCTTGGCCTCTATGTTTTTCTGGGGGTAAGTCCGAAGCTGCA  
CTGGTACAGGCTAGCCTGCGCTCTCCACCGTCAGCTGCACAGGGGAGCGACGCGCCGCCAGGAAGC  
GTACATGGTCCAGGAGGTATAGATGACGATAAAGGCAACCAGCCACTTCAGCATCTCCATATCCATGGAT  
TTGACCAGCATGGCTGCCAGCACACCAGATGGGACCAGGATGGCTACCGCCAGCACCGCCTTGGCAT  
CGAACGCCCTTTGCGGATAAAAAGTGCCTGCGGAGAAAACGCTAAGCACGGCGGTGGAGCCCATCATGAT  
GGGAAACGCCGCCAGCGGATTCATCCCAGCAGATAAAACAACGTCATGCAGGGGGCAACAAGCCGATA  
CCGACATTCATCAGCACTCCGAAGATGAAATTTGCCGAGCAGGGCGATCGCCAGCTTGTAGCCGCTGAGCT  
CCATCGCATCGCCGCTACAGGGAAAAGCCCCAGCAGACCGGCAAGATAAGCCCTGCGACGACCAGTAA  
GGAGATAGCCATCACAGCCGATGGTCTGCCGATCAAACGAGGCCACATGGCGAGCCCCCAAGCTGCG  
CCCGCTGCGGCGGCCATCATCATGCTGATCAGCGTCAACGGATCCACCCTACTGCACCCAGCAAGATCA  
GCGACTGAGTACGGTTCGGCAGCACGCACTGCCATTGAGGGTACCCGGCAGCACCCGATCATCGATCAG  
CTTGAACTGCTTGTAGCAGGCGGTCTTTACCGCAAAGCTGCCACCCCCAGGGTATCGAGAAAAGTTGGCA  
ACCCACCGATCAACGCCACCGGCCAGAAGGGGTGCGCTCAAAGGATCCACTCTGCTTCTTCCGCCAGC  
AGGCTTGCACCAGCATAAAGATGAATACGAGGCTCCGGCTATAAAAAACCAGCCGTAAAAATCAACTAA  
CATAGGGGTTTCTCCTGCAACGGGCGGCATTCCTAAGGCAAGCAGCAGAAAAATCTTGACCGGAATTA  
GCAATGCTCACGACACGCTCTGCAAGGTGAAATATTTATCAATAGACTCCGAACGACTCTGCTAATACT  
TGTTACTGAGGCAACAGGCCGGTCTGAGCACGTTGTTATGGTCTTTTCGCGACGACCCTTGTGCCA  
AAGGACATAATAAAAAAGAGGGCCGGTAGTGATACCGACCCTTTTCTGTATCTGGCCGGGGCGCTGGGC  
ACTCGACCATGACAACCGCTTATTGAATGCTCTTCCGGCAGCACGCTCCTTGATAAACCCCTTCAGGCT  
GGCCAGATCACGGGGAGCACCGCGCAGGATCTGATCACCGATGATGAAGGCCGGGGTACCGGAGATACCG  
AGCGCTTACGCCAGCGCACGGTTGGTACCGAGGTTCTGGTCAATGCTGCCATCCTTGATCTTGGCTTCCA  
CCTTGTCTCCAGTCAACACCAGCCGCCACAGCCAACTGCTTGACCTGTGCTTCATCAGCGAGCGGGCCCTG  
ATGGGTATAGAGCTTCTCGTGAACGCTTGGTACTTGTGAGGCTGACCCAGCTGGACCGCCAGCGCAGCA  
CGGGCGGCAAGTAGGAGGACTCGCTCAGAATGGGGAAGTCTTGTAGATGTACCGGATATCTTTGTCTT  
CCGACATCAGCTGCTTGACCAGCGGATGGGCCCCGTTTCAGTAACCGCAGTTGTAATCGAAAACTCCAC



AATGGTCAGCGACGCCTTCGGATTCCCCATCTCGGGATCCTGATTGGCATAAAGCTGCTTGGAGTGAGCC  
TTGATCAGCGCCTTGTCACTCTCGGCCTGCTGGCTCTCCTGCTTGGCAGCAGGGCATTGGACATCTCGA  
CCAGGATCTCGGGATTCTTGACCAGATAGTCGCGAACGATTTGCTCGACATCGCTTTTGGTCAGCTCGCT  
TGCATGTACCGGCGTCGCCAGCAGGGTCACGCCAGCCAGCGCGCAAAACAGGGCATTTTTAAATAGTCATA  
ACGTTATCTTGCAGAGGATATGATAGAGGCTACTATAGTGGTTGAGTCTGTTTTCAAGTCAAGTTATCTG  
GCTAAAAAAGCGCTTGATACGCTCTGATTGCCACTTTTTTCATGTCAATTCGCGCAATTAACCAGCAATCG  
AACCAAGCGGGGATTTACAAGCCGGATCAGCATGGTAATATTCGCCGCACTGCTGCGGAGGGGTGGCAGA  
GCGGCTGAATGCACCGGTCTTGA AAAACCGGCGATGGGCGACCATCCGTGGGTTCAAATCCCACCTCCTCC  
GCCATTTATACCGAGCCCATGCAACCACGTTGCGTGGGCTTTTTATTTGCCTGCGATTTGCCACTCCTCA  
TAGAGCTCAACACATTAGCCTTCTTACGCCCCCATTAATTTTCCCACCTGCAGGCTCAAAGGCCAC  
ACAAGATCCCCTATCAACATCGAACCTCTGCGTTCCCTGCGGGTATCCCTTCCCAATTCCTTATACCCCA  
AACAAACAGACCAACGCAGCGACCACAGCTTCAACATGTTGGCACCGCCAATAAACCCCTCTTCGGAATA  
ACGTCAGGGCCGGTTAACACAGTCTTAGAAAAGCAGGGACTATGGAGCCGCGGCTTAAAAAGAGGGAGCA  
GCTAACTCTGGAAGCAGAGATCCCCAAGCAAGAGATCATGACGTATAGGCGATCATGGGATTCACGGGTTA  
TGGCGATGCTGCCATACAGAGCAATGGCTTTACATGAAGAAAAGAGTAAAAGCGTAACATCAGGCTATTTCG  
TTGAACAGAAAGACAACAGCGAGTAACAATAAAAAACAGAAAGAAATAAGTCAGGTCAAATATCAGAC  
AATTCATAAATTCAGCCAATAAAAAACCCCGCTTGATGAGCGGGTTTCTTGTATTGGGTGCCCTGGCA  
GTGTCTACTCTCGCATGGCGAATGCCACACTACCATCGGCGCTACCGGTTTCACTTCTGAGTTCGGCA  
TGGGATCAGGTGGTTCCACGGCGCTATGGCCGCCAGGCAAATTTCTCAATCTGTGAAAGCTGACGTAAGT  
AATTCGTTTCGTATTTGCTACAAGCCTTAGAACACTTCTTGGGTGTTGTATGGTTAAGCCTCAGGGTAAT  
TAGTATGGGTTAGCTCAACACGTCGCCGCGCTTACACACCCCACTATCAACGTTGTGGTCTCCAACGGC  
CCTTTAGGACCTCAAGGGGTGAGGGATGACTCATCTCAGGGCTCGCTTCCCGCTTAGATGCTTTCAGCG  
GTTATCGATTCCGAACCTAGCTACCGGGCAGTGCCACTGGCGTGACAACCCGAACACCAGAGGTTTCGTTT  
ACTCCGGTCTCTCGTACTAGGAGCAACTCCCTTCAATCATCCAACGCCACGGCAGATAGGGACCGAAC  
TGTCTCAGCAGCTTCTGAACCCAGCTCGCGTACCCTTTAAATGGCGAACAGCCATACCCCTGGGACCGA  
CTTCAGCCCCAGGATGTGATGAGCCGACATCGAGGTGCCAAACACCGCCGTCGATATGAACTCTTGGGCG  
GTATCAGCTGTTATCCCCGGAGTACCTTTTATCCGTTGAGCGATGGCCCTTCCATTGAGAACCACCGGA  
TCACTATGACTACTTTTCGTACTCTGCACACTGTCGCTCTCGCAGTTAAGCTGGCTTATGCCATTGCAC  
TAACCTCCTGATCTCCGACCAGGATTAGCCAACCTTCTGCTCCTCCGTTACTCTTTGGGAGGAGACCGC  
CCCAGTCAAACCTACCACAGGCACTGTCCGCGAGCCCGATTACAGGGCCCTGCGTTAGAACATCAAACAT  
ACAAGGGTGGTATTTCAAGGACGGCTCCAGCGCAACTGGCGTCAACGCTTCAAAGCCTCCCACCTATCCT  
ACACATGTAGGTTCAATGTTCAAGTGCAGTGCAGGCTGTAGTAAAAGGTTACGGGGTCTTTCCGCTTAGCCGCG  
GTACACCGCATCTTACGGCGAATTCGATTTCACTGAGTCTCGGGTGGAGACAGCATGGCCATGGTTACA  
CCATTCGTGCAGGTCGGAACCTACCCGACAAGGAATTTGCTACCTTAGGACCGTTATAGTTACGGCCGC  
CGTTTACCGGGGCTTCGATCAAGAGCTTCGCTTGCCTAACCCCATCAATTAACCTTCCGGCACCGGGCA  
GGTGTACACCCCTATACGTCCACTTTTCGTGTTTGCAGAGTGTGTGTTTTTGATAAACAGTCCCAGCCAT  
CTGGTCACTGCGACTCCCAACTGCTCCATCCGCAAGGGACTTCACTGTCAAGAGCGAACCTTCTCCCGAA  
GTTACGGTTCTATTTTGCCTAGTTCTTCAACCGAGTCTCTCAAGCGCCTTGGTATTCTCTACCCGACC  
ACCTGTGTGCGTTTTGGGGTACGATGACTTGTAACTGTGAAGCTTAGAGGCTTTTCTTGGAAAGCAGGGC  
AATGGCTTCCACACCGTAGTGTGTTTCGTCTCGTGTCTCAGTGTGTTGTGCTCCGGATTTGCCTAGAAAC  
CACCTACGCACTTTACCAGGACAACCGTGCCTGGCCACCTAGCCTTCTCCGTCACCCCATCGCAATT  
ACAAGTCGTGCAGGAATATTAACCTGCTTCCCATCGACTACGCTTTCGGCTCGCTTAGGGGTCGACT  
CACCTGCCCCGATTAACGTTGGACAGGAACCCCTTGGTCTTCCGGCGAGGAGGCTTTTACCCCCCTTAT  
CGTTACTTACGTGACATTTCGACTTCTGATATCTCCAGCATACTCTCGATACACCTTCGACACTTAC  
AGAACGCTCCCCTACCCTCACACATAAGTGTGAATCCGCGGCTTCCGTGCTGTTTGGAGCCCGTTAC  
ATCTTCCGCGCAGGCTCGACTGACTAGTACGCTATTACGCTTTCTTTAAATGATGGCTGCTTCAAGCCA  
ACATCCTAGCTGTCTGAGCCTTCCACATCGTTTCCCACTTAACCAGAACTTGGGACCTTAGCCGCGG  
TCTGGGTTGTTTTCCCTCTTACGACGGACGTTAGCACCCGCGGTGTGCTCCCGGATATTACTTACTGGT  
ATTCGGAGTTTGCATGGGGTTGGTAAGTCGGGATGACCCCTAGCCCAAACAGTGTCTACCCCACTAG  
TATTCGTCCGAGGCGCTACCTAAATAGCTTTCCGGGAGAACAGCTATCTCCGAGTTTGATTGGCCTTTC  
ACCCCAAGCCACAGGTCATCCCCTAACTTTGCAACGTTAGTGGGTTCCGGTCCCTCAGTTGATGTTACTCA  
ACCTTCAACCTGCCATGGCTAGATCACCCGTTTCCGGTCTACACCTTGCAACTAGACGCCAGTTAAG  
ACTCGGTTTTCCCTACGGCTCCCCTATACGGTTAACCTCGCTACAAAATGTAAGTCGCTGACCCATTATAC  
AAAAGGTACGCAGTCAACCCGAAGGGCTCCCCTGCTTGTACGTACACGTTTTCAGGTTCTATTTCACTC  
CCCTCACAGGGGTTCTTTTTCGCTTTCCCTCACGGTACTGGTTCATATCGGTCAGTCAGGAGTATTTAG  
CCTTGGAGGATGGTCCCCCATATTACAGACAGGATGTCAGTGTCCCGCCCTACTCGATTTACATCAAG  
GTCGTTTTTCGTGTACGGGGCTATCACCTGTATCGCCGGCCTTTCCAGGACCGTTCCACTAACTTCCAAG  
ATGCTTAAGGGCTAATCCCCGTTTCGCTCGCCGCTACTGAGGGAACTCCGGTTGATTTCTTTTCTCGGG  
TACTTAGATGTTTTCAGTTCTCCCGTTTCGCTCTGTTACCTATGTATTCAGTAACAGATAACCCGAGTTAT  
CTCGGGTGGGTTTTCCCATTCGAAATCTGTGAGTAATAGCGTCTCTTACCGACTTCTCACAGCTTATCG  
CAGGTTAGTACGTCCTTTCATCGCCTCTGACTGCCAAGGCATCCACCATGTACGCTTAGTCACTTAACCAT

ACAACCCCAAGAAGTGTGTCGTCGAAACAACGCTTGGCTTGTGTCGTACAACAAGGACCAAATAAAATTTGG  
TTTTTCGCCAAGAAGTTTCCAAAGCACTTGTAAACAAATGTTTGAGAACTACTTTTTAAATCAGCTTTCCAG  
ATTGTTAAAGAGCATGTTTGAACGGCGCAAGGCCGAAGAAAACAGAGTTAAGAATCAGTTCCTAACTCT  
GCATTCTTGTAGCAAGAAGAGAAGTGGCGTCCCCTAGGGGATTGGAACCCCTGTTACCGCCGTGAAAGG  
GCGGTGTCTAGGCCTCTAGACGAAGGGGACCCAAAATCATCTTTGCGCTGCGTCAGCAGTGCAGATTTT  
GGGTAATGGCGAGTGGCGAGCCTGCGAGGCCGAGCGCCATTATTACATCCCAAAACCCAATGATAGGGC  
TTCTCTCATCTGACCGAAGCCAGATAAGCACTGACACTTTTCGCATCAGGTCTTTGCTCTAACTACTTTGA  
ATCAAGGCAATCTGTGTGAACACTCAACAACCTTCGACATCTTAAGGTAAGGAGGTGATCCAACCCAGGT  
TCCCCTAGGGTTACCTTGTACGACTTCACCCAGTCATGAATCACACCGTGGTAAACGCCCTCCCGAAG  
GTTAAGCTATCTACTTCTGGTGAACCCACTCCCATTGGTGTGACGGGCGGTGTGTACAAGGCCCGGGAAC  
GTATTCACCGCAACATTTGATTTGCGATTACTAGCATTCGACTTCAGGATTCACGGAGTTCGAGACTCC  
GATCCGGACTACGACGCGCTTTTTGGGATTGCTCACTATCGCTAGCTTGCAGCCCTCTGTACGCGCCAT  
TGTAGCACGTGTGTAGCCCTGGCCGTAAGGGCCATGATGACTTGACGTCATCCCCACCTTCCCTCCGGTTT  
ATCACCGGCAGTCTCCCTTGAGTTCCACCATTACGTGCTGGCAACAAAGGACAGGGGTTGCGCTCGTTG  
CGGGACTTAACCCAACATCTCACGACACGAGCTGACGACAGCCATGCAGCACCTGTGTTCTGATTCCCGA  
AGGCACTCCCGTATCTCTACAGGATTCCAGACATGTCAAGGCCAGGTAAGGTTCTTCGCGTTGCATCGAA  
TTAAACCACATGCTCCACCGCTTGTGCGGGCCCCGTCATTCATTTGAGTTTTAACCTTGCGGCCGTAC  
TCCCCAGGCGGTGATTTAACGCGTTAGCTCCGGAAGCCAGTCTCAAGGACACAGCCTCCAAATCGACA  
TCGTTTTACGGCGTGGACTACCAGGGTATCTAATCCTGTTTGTCTCCCACGCTTTTCGCACCTGAGCGTCAG  
TCTTTGTCCAGGGGGCCGCTTCGCCACCGGATTCCTCCAGATCTCTACGCATTTACCCTACACCTG  
GAATTCACCCCCCTCTACAAGACTCTAGCCGGACAGTTTTAAATGCAATTCACAGGTTGAGCCCGGGGC  
TTTTACATCTAACTTATCCAACCGCTGCGTGGCTTTACGCCAGTAATTCGGATTAACGCTTGCACCC  
TCCGTATTACCGCGGCTGCTGGCACGGAGTTAGCCGGTGTCTTCTGCGAGTAACGTCACAGCTGGCAG  
TTATTAGCTACCAACCTTTCCCTCCTCGCTGAAAGTGCTTTACAACCCGAAGGCCCTTCTCACACACGCGG  
CATGGCTGCATCAGGGTTTCCCCATTGTGCAATATTCCCACTGCTGCCCTCCCGTAGGAGTCTGGACCG  
TGTCTCAGTTCAGTGTGGCTGATCATCCTCTCAGACCAGCTAGGGATCGTCGCCCTGGTGAGCCATTAC  
CTCACCACTAGTAAATCCCACCTGGGTTTCAATCGCGCAAGGCCGAAGGTCCCCTGCTTTCCCC  
GTAGGGCGTATCGGTATTAGTACCGTTTCCAGTAGTTATCCCCCTCGACTGGGCAGATCCCCAGGCAT  
TACTACCCCGTCCGCGCTCGCCGCAAAAGTAGCAAGTACTTTCCCGCTGCCGCTCGACTTGCATGTG  
TTAGGCCTGCCGCCAGCGTTCAATCTGAGCCATGATCAAACTCTTCAATTTAAGTTTGGTTGCTTCGAAA  
AGCGGCTCAATGAATTGCTGAAATAAACTGTTGACTTCTTATTGCTAAGAAATCGTCTTGGTCACTTCA  
CCAGACATTGAAAATCAAAAATGTTTTGATGTTGATGCTGTGAGTGCCACACAGATTGCTTGATTCA  
AATTGTTAAAGAGCGTACGCTTATCGCGTTGAGGAGGCGCATAATTACGCTTCTCACTTCGAAAGTCAAG  
CAATTGTTTTCGCTTTTCTTTCCGGCGCCACTTCGCTAGGAAGCTGGCTCATCAGGTTGGCGTGTTCGCG  
CGTGCTGGTAGGGGCGCATTATAGGGAGCGGCGCTGCGATTACAAGGGCTTTTTTCAGCAAAGAGTTTCGT  
TCGCTCAGATATCAAGCAACCACCTCTTTTTTTGCTCAAAATGGCATCAATCCTGACTATTGCCGATTT  
AAATTGAACATTTGAAAAGCCAATTTATAATTGCCATCTCAAATGTTTAAATTGGAATACCCTCATGCATC  
AAATCCTCGATAGCCATAAGGAAGAGCAAATCGTCCCGCTGTTCCGCTTGGGGTTCCGACCTTCTTCTT  
GTTCCGGGCTCTGTTTGTGCGCTCGCCATGTTGCTCTGGCTGGGGCAGCTCAACGGTTGGCTAACCTTG  
CCAGGGATTGCCAACCCGATCTGGTGGCATGGTCATGAGATGCTGTTTGGTTTCGGGGCTGCCATCGTGC  
CGGGTTTTCTGCTCACCGCGGTGCAGAACTGGACGGCCATCCCGTTGTTCCGGAGCTGGCCATTGGCAAT  
GGTGGTGGGGTGTGGATGTTGCCAAGGACCTTGTACCCTGGCTGGGTGAAGAGAATACGCTTCTGATG  
TTGGCAGACCTGCTCTGGTTGCCGCTTTGCACTTGGTTCCTTGCCAAGCCTATCTTGATAACCCGGCAAT  
GGCGCAACCTCTTCTTCGTGCCCTGTTGTTGATACTGACCTACTCAATGGCGCCAGCTGGTTATGGCA  
GGCCGATTTGGATCACCGTTGAGCACCTATTGATCACCACTGTGCTGTTGTTTACCACCTGATCGCCGTG  
ATGGGTGGAAGGGTATTCCGTTCTTACCAGCCGACCAACCGGTCAGGATAAAGTGCACCTCAGCTCT  
GGCTGGAGCGGGCGGCGCTCGCGACACTGTGGCTTATCTTACTCTGCTGGCTGCTGCTCCCCACCCAATG  
GGTCACCAGCATATATATAGTGCTCTCTATATAGTGGCGGCGAGTTTGCATCTGTGGCGGCAACTGCGT  
TGGCATATGCCATCGACCCCTTGCGCATCCCCTGCTGTGGTCACTCCATCTCGCCTATTTGTTTTATCCCTC  
TTGGCCTGCTCGCCCTTGCGGCACATAGCACGGGTCTGCCCATCACGTTGTCGATGGCCAGTCACCTGCT  
CAGCGCAGGCTGTATGGGCACCATGATCCTGGGCATGATTGCGCGAGTCTCCCTCGGCCATAGCGGTCCG  
GCCTTGCAAGTAGGACGCAGGATCACTGGCGCATTCGCCCTGGTTATCGCTGCCGCTACAATGCGGGTGG  
CGATTCCGCTGCTCTGGCCTGCTTATAACCTGCATGGCTGGAACCTCAGCGCGCTTGCTGGATCGCTGC  
CTATGGTCTGTTTGTCTGGGTCTATAACCCGATACTGCTCCGCCCCAGAGCAGATGGTGCACCGGGTTGA  
TGACTGCGGAACATGTTTCAAGGTGTTGCCACCGGATAGTGGATGAGGTTGTGAAAAATCGCCGGGGCTAT  
GCCAGATTGCGATAACCGTGGGGACGGTGGCGAGCAAAACGCACCGCCTCCCTTGCACCAATGAACGC  
CACTCCCTTCCACCAGCACCTCCATCATGCCGCTGATGACGATGACATGTTCCGGTCACTCCCGGCTCAT  
GGGGCTCGGATTCACGCTGGTAACCCGGCAACAGGGTCAAGCAATTCGAAGCCAAACCGGTTTTTC  
ATAAGGGAAGAGCGGCGCCACTTGCATGCCCTCTCCCGCAGGCTGCTGGCGAATGGCATCGGCGGTGCGA  
TAGAGCACCTCCTCCTGCACGGCTGGTGTGGGCTCAATGAAACTGGAAAAATGAGACTCGAAAACCGGTGG  
CTATCTTCCATAGCATCGCCACCGTGGGCTGGACTCTCCCGCTCAATCTGCCCCAGCATCGCCTTGGCT

GACGCCCCGTTTCGCGCGCGGGCGGCATCCAGGCTCCAGCCGCGCTCGCTGCGCAGCCCCCTTCAGTCGAGCA  
GCCAGATGCTGACTCATCTCTTGCATAACTGCCTCTTTATTACTCTTGCACGATGCGTCTTGTGCGCTAT  
AGCGCACAGCGATATAGTCAAAGCTGTATTGTACGTAATAACGCACAGCGTGTCAACGCCAAGAGGAC  
GAGTCATGCCCTTCGCCATCCCCCATCTGGTCGCAGGATTTATCGCCGTGATGGTCGGCTACACCAGCTC  
CGTCATCCTGATCATCCAGGCCGCCACGGCAGCAGGTGCAGATACAGCTCAAGTCGCCTCTTGGCTCTGG  
ACGCTGGGGATCGGCATGGGGGTGAGCTGCATCGGCCTCTCTCTTATTACCGCATAACCCATACTAACCG  
CCTGGTCCACCCCGGGCGCGGCACTGCTGATCACCACGCTGGGCAACTTCACTCTGGCGGAAGCAATCGG  
CGCCTTTGTGATCTCGTCCCTGCTGATCACTCTGTGTGGCATCAGCGGCTGGTTCGACCGTTTGATGAAA  
CATATCCCGGCTCCACTGGCCGCCGCCATGCTGGCTGGCGAGCTGCTCAAATTCGGGCTGGATCTGTTCA  
AGGTCGCCCCGCAAGACCCCTTGTGTCTGGACCCCTGCTGTGGCTTCCTGCTGGGCCGTCATCTCTG  
GCCCCGTATAACCATGGTGTCTGGTACTGGGAGTGGGGATGCTGATCTGCAGCGTGCGGGGGATTTGCAA  
ATGGGCACCCTTCACTGGCAACTCGCCAGCCCGGTCTGGACATGGCCAGCCTTCTCCCTTGATGTTCTGT  
TTGGTATCGCGCTGCCGCTGTTTCAATTGTACCATGACATCGCAAAACATGCCGGGAATTGCCATCTTGCG  
GGCCCATGGCTATCAGCCTTCCACCTCCTCGCTGATCAGCTGGACTGGCCTGACTGGCCTGCTGCTCGCC  
CCTTTTGGCGGCTATGCCTTCAATCTGGCCGCCATCACTGCCGCCATCTGCATGGGCAAAGAGGTCGACT  
CGGATACCAAGCGCCGCTGGCCAGCTGCGGTATGGGCGGGTGTCTTTATCTCGTGACCGGCTGCTTCGG  
TGCGACCGTGCAGCCCTGTTTAGCGCCTTTCGGCAGCCCTTGTACCTGCGTGCCTGGTTTGGCCCTG  
CTAGGTACCATCGGCAGCAGCCTGCACTCTGCCTTACAAGAGGATGAAGCGCGAGAAGCTGCGCTGCTCA  
CCTTTATCATTACCGCGTCCGGGATCAGCCTGCTCGGCATCGCGCAGCCTGCTGGGGTCTGCTGATTGG  
TCTGGCTATCTATCAGTTCCAATCATATCGACAAAGGAATCAATTGAACCTCAAACCGTGAACCTCTGCA  
CACTATCCACATAAAATGATTACAAAGTGAACCTAATTTCTTCTAGTGGCGTCAGGGCACCAATCTTCC  
CGGACATGGTGCCTGTGAGGTTCCATGCAACGGAGTATAAAAAATGAAAAATCAGGCTGTCTTGTACTA  
CTGGCCATACTGGGTGCTACGAGCGTCCAGGCTGCCGATACGGATCGAGAGCTGGCTCGCCAGCTCGCAC  
TTCAGCAGAAAAACCTGCTGCCCTGCTGAGCAATCAGCAATATCAGAGCCCGCTTCCCAACCTGCTGCA  
GAAGGCCAGTCCACGGCTTAAACGGCAGGCGAGCGATGCCAACAGGCAGCCATCAGCCGACAAGGACTG  
GATGGCGAGGTCAAGCAACTGATGCAGTTGCGGCTGGCCAACACCGATCAGGCCGCAGCACTGCAACAGG  
GCGTCGAAGCCTAGTCGCCTATGTTCCGAGCGGAGATGAGAAGAGCTGGAGCGCCATTGAAGCGTTTCA  
CAGCGCTGGCAATCCCGTCTATCTGGATGTGGCAATGACACCGGCCCGCCGCTTCTGGTATGCAAGCA  
GATCCCGTCAAAGCCAAAGAACGCAAGCTTGAAGATGATGCGCAAAAGCGCTGGCCGATGCGGATCTGCAA  
GCGCTCCACGAGTGGCGGCCAGCACGGCGCCACTCAAGACCAGTATCTGAAAAAGATCAGATTGAAGGA  
TGATCAGGAGCCCTGGCTGCTCGGCGCAGCCGAAGTGTATGCGGTGGTTCGCAGGGTCAATCCCAGCCGG  
GATGAGCCTGTGGTTCGATATTGTGACATGCCCTACCTCGACTATGACAACACAGACTACACCCCCAACC  
AGATCCTGGTTTACTGGGATCGCTATCGCTGGGGTGCCGTCGATGTGGTATGATGGAGCAGGATGACAA  
CGTCAACTACAAGGAGCTGAGCGCCCTGCTGATTGAAGCTCTCAAACCTCGGCTTACTGCGGGTGGCGTG  
CCGGAAGCCCTGCCCTTCCCTCGATCTCGGCGGTGCATCGTCAAGGCGCTGCCCGACTCCTGGATGACCA  
ACAACGACGACTATCTGGATACTTCTACACACTGGAGCAGGATCAGGCTATCGCCAGTATCCGGGGGC  
TGCCGGTAATGCGGTTATCGATCTTGAGCCAAAAGAGATCGCCCGACCAGACCTTGATAATCGGCCATA  
ACGAAAAAGCCAATGAGCAACTCATTGGCTTTTTGCTTTTATCGCGGTGACCACCGGTCAACCTTGGGA  
CGAACCCCCAGAGTATGGCAGATGGCATAAGTCAGCTCGGAGCGGTTACAGGTTATAGAAGTGGAAATCCT  
TCACCCCTTCCCTGACTCAGCACGCGCACCTGATCGATGGCGATGCTAGCCCCCACCAGATTGCGAGTCAT  
CTGATCGTTATCCAACCCCTCGAAACGCTGATGCATCCAGCGCGGGATCTTACGTTGGTAAAACCGGCA  
AACTTGGCCAGGGTCTGATAGTTGGAGACCGGCAGGATCCCCGGCACGATTTCCGGCATCAATACCAATGG  
CGGCGCAGCGATCCCGAAAGCGCAAATACGTTTCCACATCGAAGAAAAACTGGGTGATGGCGCGGTTGGC  
ACCGGCATCAATCTTGCCTTGGGTTGAGGTTGAGCAGGTCGGATTGGGCACCTTGGCCTCCGGGTGCCCTTCC  
GGATAGGCGGCAACCGAGATATCGAAGTCAGCCTCCGACTTGAGCAGGGCAACCAGATCGGTGGCATA  
TATCCGGCTTCTCCAACCCCTGCGGCAAGTCACCGCGCAGAGCCAGATATGACGAATACCGCTATTCCA  
GTAGTCGCGGGCGATGGTGCGCAACTCGTCGCGACTGGCATCGATACAGGTCAGGTGCGGCGCCGCAATC  
AGGCCTGTCCGTTTCCCTTGATGTCTTGTATCACCTTGTGGGTGCGATCACGGGTGCCAGAGTTGGCGCCAT  
AGGTGACGGAGACGAACTTGGGTTCCAGCACTTTTCCAGCCGTTTCGATGGACTGCCAGAGGGTATTTTCCAT  
CCCTTCACTATTGGGCGGAAAAAACTCGAAACTGACCGATATATCGCCATTCAAATCTGCCAAGCTCTGG  
TTGAGCGCCTCAACCTGACGTGCACTGTGAAATCCCATCTGCTCTTCTCCCTGTCTGCAATCCATCTGC  
CTACGTCAAAACGGATGTTTGGACGTCTAAACGTCTTTATATTTATGAGTAAAACGACACAAAGTCAACA  
GGGATTTACCTCACATCCGATCTGACGAACTTCATATTTACAAAATTAACGGTACGTAACCGAAAAGTGC  
CCATCCCAAAATCGCCCCAGTCGAGTTATGATGGGGCAGATCGTCTGGACGTTCTGAATCTGCGTGTG  
ATTGTTTGGCCGGAGGTTTCTCCGGCCCCCTTTTCACTATTTTCCACTCCTGCCGATAACAGAATGAGTC  
TTTGCAGGAGCACCATCATGGATACCCACCCCGGCTTTGCCACCGACTTGTGTTTCGATCGCTATCAGGG  
CGAGGTTGTTTCAGCACGATCAGTTCTGGGCGGTTTCGCACGCCGGATGCTCCCGACTATTACTTCCGGCAAC  
TACCTGCTGCTCCCCACCCCGCCAGCGACCGGACAAAAGGCTGGCTGGAAGCCGCCCTTTGATCAGCTGA  
TCGGCCAGGATCCTCGAGTACGCCATCGCACCTTCCAGTGGCCACTGGCGGCCGGGCAAAACAGCCGGAT  
CGCCGGTTTTGTGCAACGGGTTACCAATATATGGAGTGCCTGGTGGTGGCTGGCGCTGGATGAACAGAGTTGC  
CCGCCCCCTCACGGCGACATAAACAAGGTTGAGGCACGCACCTTCAACACTGCTGATTGGCTGAGTGGC

TCGACTTCGAACTCAATGAACGGGATGAGGGGCACTCGGAACAGAGCTATCTCCCCTATCTGCGATCCCC  
TCAGGCGCTCTATCAGGCCATGATTGCCGATGGTCTCGGAACTGGTGGGGGATCTGGCAAGAGGGGCAA  
CTGGTCGCCAGCTGTGGCCTCTTCTTCTGCGGCACACTTGGGCGCTTCCAGTTGGTACGCACGCACCATG  
CGTGGCGCAACCAGGGTTATGCCGCCAGTTGCTGAGTCAAGTGCTCGCGCTGGATTGTCCCAGCCAA  
ACAGCTCATCATAGTGGCCGACGAGCACTACCATGCCAGCGCATTTACCGCTCTCTGGGGTTTTGCCCG  
GTAGCCCGCATCGGCAGCCTCTGCCGCTGGCCCCACGAAGCACAATAAAGCGATACATGCTGGCCACGAG  
CCATAAAAAAACGGGAGGCTGATGCCTCCCGCTCTTATTGATGCCGATGACCTATTGCTGTGGCTGCTG  
TGGCGCCTCCAGCTCGTTGGAGAGCGCTGCTCCACCTCATCCGACGGCGCCGGTAATGGGGCTGCGGCC  
GCTGATGCGGGTTCTGCGGGAGTACAGCAGGTGACACCACGGCCGATGTTTTCACTGGTCCGCGGAGCTG  
CGGACACCTCAGTCGTGCGCGCTGAAACAGGGGCAAGGAGCAGGAGCAGGGGCAACCGCATCACACTGACA  
ATCCGCGCTCTTGGACTTGTGGCCTGATGAGGGGCATACCAGCTCTTCAAGCCACTTTCAGTCCGATCC  
GCGGCAGCCTTGGGCTCCATCTTGCCAAAGCAGCACTGCCAGTCCCTGACTCACCTCGGCCAGTTCCATCC  
TGGGCGTACCACGGGAGAGGATCTGGGTCGCCACCCGAATGGTCGAGTCACTGATCGCGCCACTCCAT  
CATCTCTTTGGCCGCCGGATTGGTGACATCGAAGAAGTGGTTGGAGAGGGAGAAGAAACCCGGCAACGAG  
TTGGTATAGAGCTCGGCAAATTGCGGCGTGTGAGCCACTGCAGGAAAAGCCATCGCCCCCTCTTTGTTCT  
TGCTGGCAGGGTTCATCCCATACCGATATCGGTGTGATCGGTAAGAAAACAGCCATCACCCGTGTTTGGC  
CACCGGCGGGCGCATGACGCCAAAATCGACCTTGCCGGTGAAGGGGGCAATCTCCAGGAGCCCGCCACG  
TAGAAAGCGGCCCTTGCCCGAGGTGAACAGCTCGTTGCTGGTCGCATAATCGCGGCTCTCGCCACCTTCAC  
CGAGGTAGGAACGCCAGCGGGCCAGCTCGTCGAACACCTTCACATATTGCGGGTTGTCCAACCGCTCCTG  
CCCGCAATCAAAGCCAGACGGCCGCTCCTCTCCCTTCCAGTAGTTGGGGCAATGTTCTGGAACCCAGT  
TCGGAGGCAACCCAGCTCTCGGAACCACTCATGGCCAGCGGCACATAACGCCCGTTCGGCCTTGATCTTGT  
CCAGCACGGCGAAGAAGTGGTCGCGGGTTTTGCGGCAAGGTGAGCCCCAACTCACTGAAGATCTTCTTGT  
ATAGAAGAAGCCATGGATCACCGAGGCCATCGGCACGCAGAAAAGTCTGGGCACCGGAATCGGTCTGCCAC  
GGTGACTGGGCAAACTCGGGAAGTTCTCCATCCCCGCCATTTCCGTCAGCTCGGCCAGATGGCCAGCCT  
TGAACAGGGCGAGCGAGTCATCAAACGGGCGACAGGTAATAAGATCCCCCGCTTGCCCCCTTTCAGGCT  
CTCCACAGAGTGGGCATGTAGTTGACGTTTTGCACCGGATGAAAACCTCACCTTGATGCCGGGATGCGCC  
GCTTCAAACGCCGGGATAATCTTCTGCTCCACAACGCCTTGTTCATCGGTTGCCAGCTTTCAATCACCA  
GCTCGTGGCCATCAGCTGGCCACACAACAGGAGACTCAGGGCTCCAATCCACTTTTATAGACATAAGCC  
TCCTAGACTTTGAAATGTGCGATCAATTGCTGTTTGGCGACCAAGTTCGGCCAGCATTGCTCGTGC  
TGGCGGATTCCCGCGCCTCCCGCTCTGTCTCGTATGCCACATCGGCAATAACGGCGATATGACGAGCGAC  
CCCCTGACTGACGGAGATCTGCTCCTGCGCGGCATGGGCCACCTGATCCGCCATCGACTTGATGGCCCC  
ATCCGCTCGGCAATGGATTGCAGCGCCACATCCATCTCGCGGGTCTGCTCGACACAGCTCTGGGTCTGCT  
CCTGGCTGCACCCCATCACTTCAACCACATGCTTGTGAGGCTCTGCAGGTTCTCAATCATCCCCTGAT  
CTCTTCGGTGAAGTCTGGGTGCGATTGGCCAGCGCCCGCACCTCATCGGCCACCACCGCAAACCCACGA  
CCTGCATCACAGCACGGGCCGCTTCGATGGCGGCGTTCAGGCCAGCAGGTTGGTCTGCTCGCGGATGC  
TGCGGATCACATCGAGAATGCTGCCAATGTTGTTACTGAATTGCCCCAGCTTGTAGGTGATCCCGACCGC  
TTCTCCATGGCGCCAGCCAGCTGCTCGGTGATCCGGCGAGTGGTGGCCACTTTCTGGCGACCATTGCGC  
GCCTCTTCATCGGCCAGGTCCACTTCCCGCTTGGTGCCATCGGTAGAGCGGGCCACCTCGGTGGCGCTCA  
CTTCCAGCTCGGTAATGGCGGGCGGCCACCTGATCGGTCTGGCTCTTCTGCTCTTGACCCGGGACATGGC  
CCGTTTCGCTGATCTCGGCGGGCGGGCTCGCCTCATCCACCAGATGGCGAGAGCCCGCATTTGATTTGAGAT  
AGCAGCTCGCCGGTCTTGCCCGCCAGCGTATCGATGGAGCGAGAGAGGCTGCCAAAATTCGCAACTGCTGC  
GGTAGTTGATGCGGCGGGTTCATGTCACCGGCCGCCATGTAATCGAGCTCCTTGTGATCATCTGCAACGG  
GCGCTGAATGCTGCGCGCCGTGGTATAGCCGATCACCAGCGCGGCAGCGGCCGACATCGCGGCAACCACC  
AGGATCCAGAAGCTGGCGCTACTGACCGCTGCATCGGCATTGATCCGGCTATCGCTGGCGATGGCTCCGG  
CAGACTTGCCATCTCATCGAGCAAATGAGGCTGTTGACCAGACTGGCATCCAGCTGCTGATTTTGCCT  
GGCCAGCGACAGCGCCAGCTGCTGAGCCTGACGCATGTTGCCAGCAAGCCCTGAGCGCCAAGTGGCCAGC  
TCCTGCATCCGATCCAGATTGGAGACAAAGCGCGCTTTCACATCATCGGGCACCGCACCCTCCAAACC  
GCTTGGCGGCCATCTCGATATCCTTGGCTCAACACCTTTTCCAGCTCGTTCCAGGTGCGTTTTTGGCATCGGC  
ACGGCGGATATTCTTCAGATCGCGGGCGATAACCCGAGGTAATAAGCTCCGCCCTTGTGCGCATGGAGCGC  
TTGCTGGCAGTCTGTTGCAACAGCAGATCCGCCGCCACTGGTAGGTATCCTCAAGGCGGATAAAATCCCA  
TCTCCAGTTTGTGTCGCTGCTCCAGCGCACTGACCCACTGCCGATGCTGGGCCAACACCTGATCCGCCAA  
GCCATAAAATTTGGGTGGTAGCACTCTCGACCTGTTGGAAGCGGGCACGAGCATCCGCTACGTCGGTAAAT  
TTCCCCATCTCCTGACTCAGCTGGGCGAAGCGGTTCTGCTGCTCCTTGAAGTATTGGCCAGCTGCGGCA  
ACTGGGCGGCATCTTCACTTGTGCGGTAGACCAGCACCAGCGGTTGCTATCCTGCAGCGCCCCCTTGG  
ACCTGCGACAGCCACTACCAGCGGGGTTGCCCGGCTGATACGGCAGAGAGGCCGTCATTTATAACCCCTG  
ATTTTAAAGGTAAGTACTGATCACACCAAGCAGGATCAGCAGCAGCAGCATCAACACGAATCCGGCGATGATCC  
GCTGCACGATAGATAAAACCCATGGAGACATCCTCACTCATTGGGGGAAGGTAAGTGAACATAGTCACTA  
TCGGCATGGGTGGCGAATAACTGAAAATAAAGCGGCAGGATTTAATTGATTTGTATCGGGTTGGATCACA  
GTCCTGACAAAATCAGCCATATGAAAAAGCCCGGCACAAGCCGGGCTGAAAGAGACGTACTTTGCTATC  
TTCCACGATCCGTTTCAAACCGCAGTCAGAATCATTAGAAGCGGTAGCCAACACCCACCATAAAGGCCAT  
CGGGTCGATATGTGTTTTAAAGTGCCAACGCCATCGACTTTGACATCAGTGTCAATGTCCATAATCCAG

GCAGAACCGTTTCACAAACCAGCGATCTGTAACCGCCATATCAATACCGACCTGACCTGCCAAACCCCAAG  
AGTCGTCAAGGCTGATATTCGCACCATCAAGTCTCCACCCCTTCTCATCAAAGAAGTGGTGTAGTT  
GATACCGACACCAACATAAGGACGAACCTTGTCTTGGCATCGCCAAAATAGTACTGGGCCATCAATGTT  
GGAGGCAGATGTTTTAACCTTGGCAATCTCACCAAGATCGCGAGTACTACTCTATGGGAGAACGGGGTTG  
CAGCCAGCAACTCAACACCCCAAGTTGTTCGGTGATCATATAACCGAGGGTCAGGCCAAGCTGTTGATTGCT  
ATCAATCTGAAACTCACCAGTGTAAAGCACATCATCACTGCTCTCCTGAGGAGAAAAGATGGCCAAACCA  
CCACGAACCAGAATATCGCCAGCCTGATGGGCCATGGCGAAAAGGAGAGGTCACTGCAGCGGCAATCATCA  
GAGGAAGTAATTTTTTCATCACGTAATCCTTTTTTGTTCATTTGATGCTGTAAGCCCGTGACTATA  
TGCCCTTGTAATGCAAAGTTATTGACTTGGAGCAAATGTTGCACAGAAAATAAATCGATTGGTGTGACAT  
CTTTGCGGCCATCCCAATCTCGTTGAGTCCCCAGACAACAAGCCGAAATACCTATTTTCGACAGGTTGTA  
ACTACCCGCATCCAGCGCCAAAAGGCGCAAGCAAACCATCTTATTGCACGGCAGTGGCGCTATTAAT  
GTTGTTTTATATGGGTAAATCAGCGTATTTTTTTCGCCATACAAGTACTGGGAAGTAATGGTTTTATTTAT  
GAAAAATGAGTCGAAATGGCAAAAGGTGGGGGCCCTTCTCGCGCCGTGTGGGGAATCGGATCCTTTCTC  
TTTTATCTTGCTCGGTTTTATTGTGCGCCTGGCCTATCTGGTATTGGTACGGCAGGGTTAATCCGGGTTGA  
CAGAGTGCAGCAGGGTGATATCCCCCCTTCGGCAAGCTGTTCCGGAGTCTGGCCTATTCCTCCGCAGA  
GAGGGTACCAGCGTAGCCACACCAGGATTTTCGCCCGCGACTTTGGCCTGGTACAGCGCCATGTCCGCC  
AGTTTGAAGCTGTGACTCCAGAATGAATCCGGACACTCCGGGTGCAACGGATAGCGGCAGAACCCAGCG  
ACACCGTCAACCAGAGTGGCGCATCCTCTCGCAAAGCGGTGCTGAGCGACACGCTGGCGCAGATATTC  
GACCCGCAACGCCAACTCTTGCTCGTCATCCACCTGCAACAGCAACAAGAACTCCTCCCCGCCAGCCGG  
ATGATCGGCTCGCGCTCTCCTGTCACCACCTTGCAGCAGAGATCCGCCAGCTGTTTCAGCACCAGATCCC  
CGATGTCTATGGCCAAGGCGATCATTGATCCGCTTGAAATGATCCAGATCCAGCAGCAATAACAGACAAGG  
TTTTGGCCCGGTTGGCCTGCAACCAACCATCGAGATAGCGACGATTGAAACAACGGGTCAAGGGTTCGGTG  
AATGCAGCCACCTCCATCTGGCTGGATTTTTTCCAACAAATCATCGTGTGCTGACTGACCTTGCCGGCCA  
TCTCCCTGAACTTGCCGCTCAGGGTGCCTATCTCGGCGCTGCTGTGCATATAGGGGATCAAGGTGGCATC  
TGGCCGATCGCCAAAGCGTTGCAGCGCCGACACCAGCTGCTGCAACGGAGTAAGCACAATGCTGTTGAGC  
CGATACATGGCGATCATGACGCAGATAAAACTGATAAACAGCATGCCGATAAAGGTCCAGAGCGCCCCCT  
CCATGACCGCACTCAAGATCTTTCTCTCCTCCTCAATCACCAGAGTCAGTACCGGCTGGTTATCGCTGTT  
GAGCAGTCGCACCTCTCCCTGAGCCGGGTGAGCCCAAGTTCGATCAGGCATACGTTATTTGCGGTTTT  
AGTGGTTTTGAAGGTAGCGGTGACATCCAGATTTGGCCTGGGAAATCGCCAGAGGCAGCGCTTACGCTCCG  
ATACCTGCTCGAGATAGGCCTTGTTCGAGCCAACGTACAACCAGCAAGAAACCGTTGAACGGTGCACACT  
GTCACTGTTTTCTGATCGGCTGCCACGAGTACATCTGCGGCCCCCACTGGGAAGCACGGATCCCCTGCAGA  
TTGATGCCCCCTTGCGCCACCGAGCGCGCCCTTAACTGCTTTTTTTCAGTTTCATCAAGGAAGTAGGGAACT  
GGTCCGATTGATCCCCGGCGCATCGGGTAGCAGGGTGCAGCTCCAGATTTTCGTAGCCGGTGGATCCAT  
GAAGCTCATCAGGTTGAGACTAAAATCCCGCATCGGCATATCACTGAACAGATTGGATTTCGATGTACGCC  
CTGCTTTTTGTTGTCCATAAAAACGGTGACTGTCATCCAGATGCCCAATCCCAGCTGAATGCATCCAGAG  
CGGCCACATCCGCTGCACCGCCTTGGTACGCGCAGCAGATGCTCCTTCATTCGCTGCTCTTCAATCCG  
GCTGGCAGCCGGGATTTGGGCCCACGCCAGCAGGACCAGCAATAGCAGGATCGCCCCAGCCAGATGGGG  
AACATGGAGTAAGCCAACCTGATGATCAATCGTGCAGGAGCCTGAGCCATAACCCGATATATCCATTACC  
ATGATGCTGAGATGCCAAGCCTGCCACACTTGACGAGCTTCCCCCTATGCTCCCATTTTTTATAACAAA  
AAGGGGCCAAAGGCCCTCGATTATAACGGCTTATCGCGCCAAAAGTGGCCGCAAAAACAGAGCTGTATG  
AGACTCTTTATTGGCGCAAATCTCCTCCGGCGTCCCCGTACCAGAAATGCGGCCACCACCTGCCCTCCC  
TCCGGTCCCAAATCGACGATCCAGTCCGCGAGTTTTTACCACATCAAGGTTGTGCTCGATGATGACGATGG  
GGTCCGCTCATCCAGAATGTATAGAGTCTGACCGGTGTCCCGCTTGAGAGCTCACGCGCAGCTTGACC  
CGCTGCGCCTCACCGCCGACAAGGTAGTAGCAGATGGCCTAGACGGATATAGGAGAGGCCACAGTCCA  
TCAGGGTTCAGCAGTTGCGCGCCACAGCCGACCGGATCGAAGAACTCGCGGGCATCTTCCACCGTCTAT  
CTCGAGGATTTTCGTGGATGTTTTTGGCCCTTGTACTTCACTCCAGCGTCTCGCGGTTGTAGCGCTTGCC  
TTGCAGACGTGCGACGGTACGTAGACATCCGGCAGGAAGTGCATCTCCACCTTGATGACTCCATCCCCTT  
GGCACGCTCGCAGCGGCCCCCTTACGTTGAAGGAGAAGCGGCCCGGCTGGTAGCCGCGCAACGCGC  
CTCCTGGGTGCCGAGAGCAGCTCGCGGATCGGAGTGAACAGACCGGTATAGGTGGCCGGGTTGGAGCGC  
GGGGTACGGCCGATGGGGCTCTGGTGCATATCCACCACCTTGTCCAGATGCTCCAGCCCCTCGACACTGC  
GATAGGGCGCCGGGTTGGATTCCGTTGGCCTTGTTCAGCTCGCGGTGAGCGATGCGGAACAGGGTATCGTT  
GATCAGGGTGCAGTTGCCGAGCCGAAACGCCGTTAACGCAGGTCATCACGCCGATGGGCAGATCCAGG  
TTGACGTTGCGCAGGTTGTTGCCGCTTGCCCCCTTGAGTTTCAGCCACTTGCCGGTGGAGCGGCTGCGCT  
CGGCCGGAATGGCGATCTGCTTGCAGCCGAGAGGTAGTACCAGTACGCGATTCCGGATTGTCGATGAT  
CTGCTGAGGGGTGCCCTGCGCAACAATTTGCCACCGTGCACCCCGGCCCGGGCCGATATCCAGCACG  
TGGTCCGGCAGTCAATGGCATCCTCGTCTGCTCCACCACGATCACCGTGTGCCGAGATCACGCAGAT  
GGGTGAGGGTCTTGAGCAGCCGCTCGTTGTTCGCGCTGATGCAGACCGATGGAAGGCTCATCCAGTACGTA  
CATACCCCCACCAGACCGGCACCGATCTGGCTGGCAAGTCGAATGCGTTGCGCTTCGCCGCTGAGAGA  
GTCTCGGCACTGCGCGACAGGCTCAGGTAGTTGAGGCCACGTTACCAGGAAGCCGAGTCCGCTCAACGA  
TCTCTTTCAAGATCTTCTCGGCAATCTGGGCGCGCTGGCCGGTCAAGTTCAACCTTCGAAGAAGGCGAG

CGCATCACCGATGGACTGCTCGGGGATGGCCGGCAGGTTGCGGTTATCGACGAAGACGTGGCGTGCCCTCC  
TCCCCGAGTCGGCTGCCACCGCAGCTGGCACAGGATTTGTTGGCGATGTATTTGGAGAGCTCTTCGCGCA  
CCGAGTTGGACTCGGTCTCCCGGTAGCGCCGCTCCATGTTGTGCAGGATCCCTTCGAACGGGTGCTTGCG  
CACCACCACGTCACCGCGATCGTTTCATATAACGGAACCTCGATCTCGGTGCGACCGGAGCCGCGCAGGATC  
AACTCCTGGGTCTTGAGCGGCAGATCCTCCCACGGCGCCTCCAGATCGAACTTGTAAGTGTGCTCGGAGAGGG  
ATTTTCAGCATCTGGAAATAGTAGAAGCTGCGCTTGTCCCAACCACGGATAGCGCCATTGGCCAGACTGAT  
GGCCGGATCGCCGATCACCTTGGCCGGGTGCAAAATATTGCTGCACCCCCGAGGCCGTCAACAAGTCGGGCAG  
GCACCGGCCGGGTTGTTGAAGGAGAAGATGCGCGGCTCAAGCTCCGACATGGAGTAGCCGCACTCCGGGC  
AGGCGAAGTTGGCGGAGAAGGTCATCGGGGCAACCCCTCTTACCCTCCATCGGCACTACCAGTACGAT  
GCCACCGGAGAGGGTCAGCGCCGTCTCGAACGACTCGGCCAGACGCAAGGCAAGGTCCTCGCGAACCTTG  
AAGCATCCACCACCTCGATGGTGTGCTTCTTGTGCAACTCCAGAGTCGGAGGATCAGATAGATCGC  
ACACCTCGCCGTCGATGCGGGCAGGATGTAGCCCTGAGCCCGCAGATTTCCAGCAGCTTGGTGTGTTTC  
CCCCTTGCGATCCCGCACCACCGGGGCCAGCAGCATCAGCTTGTCCCTCCCGGTGGGCCAGCACCTGA  
TCCACCATCTGGCTGATGGTCTGGGCGGCGAGCGGAATGGCGTGGGTGCGACAGCGTGGCTCACCGACCC  
GGGCGAACAGCAGACGCGAGGTAGTCGTAGATTTCCGTTGATGGTGCCGACGGTCGAGCGCGGGTTATGGGA  
GGTAGACTTCTGCTCGATGGAAATAGCGGGCGAGAGCCCTCGATATGGTCGACGTCCGGCTTCTCCATC  
AGGGAGAGGAACTGGCGGGCATAGGCGGAGAGGGACTCCACATAGCGGCGCTGCCCTCGGCATAGAGGG  
TATCGAACGCCAGAGAGGATTTGCCGAACCGGAGAGGCGGTGACCACGATCAGCTTGTGCGGGGGCAG  
GGTCAGATTGATGTTCTTGAGGTTGTGGGTGCGAGCACCCCGGACCACGATCTTTTCCATCTTGTGTCAC  
GCTCGATACAGAAACCTGAGCGAGTCAGTATGGCATAGAGACTACTGGATGAATAGACAGTCATGAGATG  
AAATGCGCATCATCCGGCGCACGCCATCTGCTCTTTTTTCTCCACCAGCAACCGCTCGTTTTTGCCATATC  
CGGGCGGTAACCTCGACCCGATAGGGGCAACGCAAAACCAGCCCTATTTTGCCAACCGCCATGACCCTC  
CAGCCTGCAGCGACAGATTACGGCTCTGGCGCTGAGTCGTCTCCCGGCAGCCCTTCGCCATACACCAG  
CAACCTGAAGCTCACCTTCAAGTTGCGCTTGTGAGCAGCGTCGGTGCAAGTGACAGCCCTGTTTCGCTC  
TGCACCATATTGAGGGACAAGCGGATCGACGGATCGGGTCTATCTCGGTTTCCCTTGCAGTTGCTGATG  
AAGGAACGCGATAAACCAGCATCAACCCACAGAGCAGCACCAATAAAAAGAGGGGGCCGAGGCCCTGAA  
TCCGGAGATAACCATCAGTTGCTACCAGAACCCTGATAGACATAGGCCATGTTATCGCTGCCATAGACAG  
TCACATTGGCAGTGTGAGGCTGTGCGTTTGTGCAACGTCGACTTCGTTATTACCACCACCCATGCCGCC  
ATTGACGTAACGTTGGCCACGTGTTTTTCCGAACTGGCTCACGTCACGTCGAGCGTGTGTCCTACCCAGA  
TAGGATTGACCTTGGCATTGTTCAACTCACCATCTGGGTCACTTTGACCACAGAGTCAGAGTGAGACG  
CATCGGCATAAGCCAGTTGTCAGTGCCCTTCTGAGCCACGACCAGCTCGTTGTCCGAGCCCCAGGTCCA  
GGCTCCTTTGCCCTCTACGCCACGAGCGGCGCAACCTGGTTGCCAGTGCCGTTCTGGTCAATATCGACC  
TTGTTGCGACTACCTTCTCTTGCCTGACTGCATTCGCATAGTTGTGCTACCCAACTGATCGATAGTGACAA  
ACCCACCCACGCTGGTGGCCAGCTGATCAACCACTGCCTGGTTATTGCTGCCATTCTGAGTGACCTGTGC  
AGTGTGTCAGACCCCTGCTGGTGGTATCGGCCCTGGTTGCCATTACCAGCTGAGTCACGACCGCCGTT  
TCACCAGTTCCGCTCTGTCTGGCATTGGCGATGTTGTGCTTACCATTCTGGGTGATGGTCAACAGATCCT  
CAGAACCTCTCTGCTCAGAGTCGATCTGGTTACGACTCCCGGTCTGGGTGAGAGGGCGGTTTTACCAGGA  
ACCAGCCTGCTTGGCCAGCAGGTTGTTCCCTTGTCCGGCGGTGCGACCAGACTGCTGGGCTGTACGCTG  
CCAGCGGTCCCGCTTGTCTCCACCGTTGCCACGTTGGCCAGCCCCAGCTGAGTAACCTCGGCAGTGTGTT  
CATTGCCACTTTGCTTGACGACCGCAGAGGTGCCCTCGTTTGGCGCGTAACCGAAGTTGCTTGTACGTTG  
TGCGACTAAGGCCGTGTTATTGCCACCCCTTGTAGCCACGCTGGCAACGGCACCATCGGATTTCGCGTTGA  
TCGACATCCGCAATATGCCACCTTCTCCTGACTGGGTAATGGTCGCGCTGGCATAATCAGACCAGTAGT  
TATTGATCTGCGCGCTGTTACCATCCGCTTGTGCTCAATCACTGAAATGGCGCCGTTACCATCATCCTG  
TTAATGAGAGCATTGTTACTGTACCGAGCTGGCTCACCCGGGCGGTGGCTCACCGTTGTAGTACTGC  
TGGGTAATCGAGGCCCTGTTTCAGCAGCCCGCTGGTATCAATGGTCGCGGTCGATTTATTGGTCAACCCCT  
GCTGTAATACCTCCCTTTCGTTCTGGCCACCGGCTGCTTGTATCAGCAGTGAAGCACCGGTAATTGCG  
CTGCTCGGTGCGAGGCGAGGTTGCCGTTACCCTGCTGATAGATCGCCGCTTGTAGCCGTGCTCTCCTCG  
ACCTGCTGGATGTACGCCAGGTTGCCGCTGGAGAATTGAGCCTGAGTCACCTCAGCCTGATTGCCAGTAG  
ATGCCGCCAAGCGGTGCTGGTGGCCAGAAGAACTGCCGAGGCAATGATGGTACGTTTAAACATGATTTTC  
CCTCTCGTGCTAATGGTTGAGCCTAGGCTCAGTTGGTTTGAACGACATTTACTTGTGATTGGCTCCCGT  
CTGAATAACGGTTGCCGCAATCCGTTACCCTTGTGCTGATGCTGGCCTGATTGCCATCACCCAGCTGG  
ATCGCCCGGGCCTGATTGTCTGCCCTTGTGACTGATCCAGGCTTCATTGCCGCTGCCTTGTGTCAGCA  
GCCAAATCCGGTTATTGATGCCCGCTGATAGAGCTCGGCGTATTGCCCTCGCCAGTTGCGCGCCATT  
GACCCAGTTCTCATCTCCACCTGGGAGAGCGCAACTCATTGGCCCAACCTGTTGCAGCAGGCGCGCC  
TGATTAGCTCCCTTGTGTTGGGTGAGGTGCAGTTGCTGCTCGCTACCGAGTTGCCACAACAGCGCCTGAT  
TCCCATCGTTCTGCAGACCGGAATCCAGCTCGCTTGGCATCGCCAGCTCGTTCGAAGACGGCAGGCTCTGC  
GGCGAGTTGCGGGGCGCCGATATCAGCAGGAAAAAGAGAGCACTCAACAGGTGTTTCATCGCGCCATCG  
CCTTGTGGAAAACGCCACAGTATCCCTGTGAGCCAGAGGGCGGCTATCAGGCACTCCGCTGATTTCGA  
GGATGAAAAGCGCCGCTTGTGCTGAGCAGAAAGTCTTAATTCGTATTCGATGGAGGCCAAAAAAATG  
CCCTCCACCAGGGAGGGCATTGCGCGAGCGGGGAAACTCAAAGCAGCGGGCATTGCTTGCAGGTACTC  
CTGCAGGATCGGATTGTGATATCCCGCTGGTGGCCAGTTGCCACAGATTGTCCCGTACACCATTGGCT

ATCAGCCGGATCACTCCGGACTCGATAGCCGACATGACACACATCTGTACCGGTTTCGTTGGTGTGCTGAAAC  
CGGCCTCGGCCTCCAGCAGGCGCTTGTACTCGACGAAGCGGAATACCCCGGCCTGCATCTGTTGCGACAA  
TACTGTCTTGGAGGTGGTGCACACTGTTTCAGGATCCGGCCTGAACGGATATCGACGGCAGCAGATTGACC  
GTCACCTGATCGACCCGGTACTCCCCGCTGGCGCCGATGCCAAAATACTTGGCCCCCGCCCCGCCGGTTC  
GCACATTGCTGTATAGGCGACGATCCCCCCCCTCGATCAGGATGTTGGCGGCAACCAGCGAGGGCAGTTG  
ATTGGCATTGTTGCCGGGAACATTGGGCTTGTTCGGGCCGCCGCACAATCTTGCCTCGGTGAGCAGG  
TTCTGCAGCCCTTCCCCTCCAGTGGCACAACCATTGGGAATCCCACAAAGCCGTGCTCAGCATTGCCA  
CCCCACCCTGGGTGACCGCCGTGGAGAAGTTGGACGCCGGTGCAGGCAGGTAAGTACCCTGATCGCG  
AAAATCGTAGACGGCCGACAAATTTCCCTTTTGGCTTGGGCAGACTGATCAGCTCCTTGTAAAGAGACG  
GATCGCGGCATCAGGGTTGCCTTCTCATCAGCAACGGGTGAGCCGATATGGGTGCGACAGCCAGCCAGCG  
CAAGCAGGGGCACTATCAATAACAGTTGTCTGTTTCATCGCGCCCTCAGTCGGCAATCAGGCCATTCACTT  
CGATCATGGTGGTCTGGTTGGTCAACCGGTCGGTGCATCGAAACCACAGAGTGCCATCTTTCATCCACCAC  
ATTGATGGCAAAATCATCGGTCAACAGACTGCCGCCCTGGCTGCCATCCTTGCCGATATCGGCCAACAGC  
TGGCTGATCAGGCGGGATTGAGATTGGAGGTGAGGCGATCCAGCGCCGAGGTGCCGCTGCTACCCTGCT  
CACTGGCGGGATCCTTGTAAATCATTCTGCGCATTGGCGGTGCCAAGCAGATGACTGCTGTTGAGAGGGTT  
ACCCCCAAAGCTGGGGTTGACGGGGCGATAGACAAGCTCCGACGCATGGAGCGTTGGCGCTATCAGTGCA  
GCAACTAGCCATAACCGGGCACGCATGAGAAATATCCTTATAGTTTCATCATGTTCCAAATCGAAGGTATC  
CATGAACAGGGTTCGCGATCTTCTGCTGTTTCGAGGGTCTGCCTGACCTGTGACCAAGCCAGTTTGGCGCTC  
TGCTCCTGCTGATTGCGGCCGGGAGAGAGTGCAGTTTAAAAATCACCTTCCGGTTATGGGTGATCCAGA  
TCAGGCTGCCCGAGCAGCAGTCCGGCGCTCATGAATCGTCAGATTCTCTCTGGCATCCGGGTCTTTCATC  
ACTGCGCAACCGGGTAAATTCGTTATAAAAAGCCCTGACCGAAGCGGGTAAAAGTGCATCCAGTACCAGA  
CCATCCACATCCAGCCGATCACTCTCCTGCTCCGGCTGCACCGGCTCCAGCGGTGCATCGGCCTCGGCCG  
CCACAACGGTTCGTGCAGCCCCAGAGCAGCGCAAGGCAACACGCCACAGAGAGCGCTTTTCATCAGTGGGAG  
TCCGGAGCATCGAGATACTCTTTGGCCCAGCTCACCGCCTGGATCCGGTCTTTCACATTCAGCTTTTTTAA  
AGACGTTATAGAGGTGGGATTTGACGGTATGCTCGCTGACAAAACAGGCTGTCGGCGATCTCGACATTGGA  
GGCGCCCGTTCATCAGATAACGGATGATCTCCTGCTCTCTGGCGGTGAGCAGAGTGTCTGTTACGCAGCAGA  
TAATGTTGCCCTGGCGATAGTATTGACACAGCTCGCACAGCAGGTGGCGCGGCATCCAGTACTCGCCCA  
ACAGGATTTTCTGCAACCCGGCAACAAGTCTGTCGAGCGGATCCTGACGGAAAAACAGACCCGAGATCTG  
CGGCCACATCAGCAGCAGGTCGCGATCCGTCGAGTGGGAGCATTGAGCAGCACAGTGGTGCCTGCCATGCCA  
AAGCGTTTCGGAGATCGCCCGGTTCCAGCCCAGTACTGGCCGGAGCGGATATAGTCGAGATCGATGAGAA  
ACAGCGTGCCGTCACTGTTATCTAGCTGATTAATCTCGTGGATTAGCTGGACGGGACGGCTCAAATG  
AGAGATGAGGTATGCAGCAAATGTGCTGGCCTGCACATTATTTTCAGTGACCAGTGCGATCGGGCATGCG  
GCTTTTCATTGTGTGCTCTTCCCTGAACTGTAAACCACCTAATCTGGCCGACTGAGTCTACCAAGGAGGT  
ATGGGAGCACAATATTAAAAAAGTATGAGAATGGATCTCATAAATATCGTAACCATATGTTTTTTAGTCGA  
TTTTAAAAAATATTCCAATTCGCCAATCGGCCAGCATAACAGGAATATATGGCAGAAATGTGATGTCCGA  
CGCGCCGGAAACAGCTGCAACCCGACCATCACTACAGCAGGAGCCAACAGTTGCCTTTGGCACATCAAGC  
CGGTTAAGGATGCTGCCAATCCGCTTCGCAACTGTTACTATGACCGTCACATGCGTCTGCGGGACATTGC  
GCCCCGCACACAGCAACTAATCAGGTATCTAGTCGTGTTGGACCAGGTTTCGACCTGGCCAGTAAATAAG  
GTGGAAGAGAGATTATGGCCAGTCGAGGCATCAATAAAGTCATTCTGATCGGTAACCTCGGGCAAGACCC  
GGAAGTACGCTACATGCCGAGTGGCGGTGCTGTGACCAACATTAATCTGGCTACCTCTGAACTTGGCGC  
GACAAGCAGACCCGGTGGCAGAAAGAGCGTACCGAATGGCATCGTGTGCTCTTCATGGGCAAGTTGGCCG  
AAGTGGCTGGCGAGTACCTGAAGAAGGGCTCCAGGTCTATGTGGAAGGCAAACTGCAGACCCGCAAATG  
GCAAGATCAGAGCGGCCAGGAGCGCTACACCACTGAAGTGTGGTGCACAGCTTCACTGGCGTGATGCAG  
ATGCTGGGTGGCCGTCCGCAAGGCGGTGAGGGCATGGGCCAGAACATGGGTGGCCAATCCAGGGTAGCT  
GGGTCAGCCGAGCAGAGCATGCCTGCCAGCAGCCGATGAATCAGCAGCGCCCGCACCCGGCTCCGCA  
GCAGAATATGCAGCCGCAAGGCGGTTATGGCCGCTCCTGCCAGCAGCCGCAATCTGCGCCGCGGTATAT  
AACGAGCCGCGATGGATTTTCGACGACGATATCCCGTTCTAAGAACAGAATATGAAAAGGCCCTGATAA  
CTCAGGGTCTTTTTTTTATGCACTCAGGCTGAACCTCTCAGCCCCGAAAGGGATATAACGCTTTTTTGGTTGC  
CTCCCCACAGTGTGATGATATTCTCCACAGGAGCGCTTTGTGAAAAGTGCAATGAAACTGCTCACCCCTT  
TATTGCTAATGCTGACCAGCATGCTGTCTGCAATTCAGAGCAACGCCACTCAAGGTCCGGGTGAGCTT  
TGCCATCCCCCTTATGTCATCGAAAGTAATCAGCGTGGCATCGAGCTGGATCTGCTGAAAGCGGCGTTC  
GCTGGCAGCGCTATGAACCCAGCTTTGAATTTCTGCCGCTGGAGCGCACCTTCCGCTGTTTCAATCAG  
GAAAGCTGGATGCCATCATCAACGTGACACCCGGTATGGTTGATCCTCACGTTCTGACCCAGCCGTTAT  
CACCTTCCATAACCGGATCTTACCCTGCGCAGCACCACATCAGCACCTGGACGATCTGCATTCAAAA  
CGGGTACCAGCTTTCAACGGGCAAGGATCATTCTGGGGGGCGGTTTCGCCACCATGGCCAACCAGAATC  
CCCCTATGAGGAGGTAGCCAAGCAGCAGGTGAGGATACATCAGCTAATGCGCGGCGGGTTCGATGCAGT  
CGTACTGGAGGAGCGGGTGTCTACTACTACCTCGACCAGCTGATCGCCACCGCCAGGCAGGCGAGCAC  
TACGAGCGCAATCAGGTGAGGCAAGCAGACCTCTTCCCGCCACCGTCTATCACTTTGCCCTCCGAGCGG  
CCGATGCCCCGTAATCTGTTTGTATAAGCGCTTGGAGCGATGCGCCAGGATGGTTCGTTATCACCAGATTTT  
CGCGGCTTACGGTGCCACGCCGTGAGCCACAAACATAAAAAGCCAGCCGGTAAGGGCTGGCTTTTGTACTGG  
CTCCGAAGGAACAGCAGTAGGGGAGCGTTACTTCATTGCGCTGCCGTTTTTTCAGTTCTGCTTTCTGACGT

TTGGCTTCGCGTTTTCTCTTTTCAGTGACATCTGCGGTTTTTTCTTGGCATCTTTGCCGTTGTGATGTTCTT  
TGTTACTCATCATCAAACCTCCAAAAATGTTACCCAGACAGTTGGTTCCTCATGGGAGCCAGCATGCCATC  
CGAATCATCAACTTCAGTACGCTTGGTGGGATGGTGAAGACCATCACCAGACCAGCATACCTCCAGC  
GGCATCCGGATCCAGCCTCATTCTCGTCCAAAAAATGCTGTGCTCCGCCCTGAGCGGGGAGGCCAAAC  
GACCTCGACAGGAAAGACCAAAAAAGAGTAATTCGCATTATTAATGTTGTCACGCTTATATTAAGCCAT  
CGTAGGCTAGATATTTTCACGGATAAAATATAAATCCCTCTCATTTATTTATGCGCGCAAGAGGCCACCA  
TTTTAATAAGCATTTCGAATATCACCGGAAACATCAGGTTACAACACCGAATAGGTTATTTCCGGTCAGA  
CGGATATAATGCGCGCCGACCCGAAATATCCGTTTTTATTCAGGAAGCTGTGACATGAACAGAAAAACCA  
GAGCCGCCATGGTGTGGTCTGCTCCAATATCAGTCTGATCATCATGAAAAATGGTGGCCGGTTTTCGCCAG  
CGGCTCGGTAGTATCATCTCGGAGGCGATCCACTCCGCCATGGATCTGGTGGCGGCCCTGATCGCCCTG  
TTCGCGGTGAAAAAGTCCGATCTCCCGCCGATGAACGCCACCCCTATGGTACAGCAAGATTGAAAAATG  
TCTCCGGCGTCATCGAAGCACTGCTTATCTTGGCTGGCCCGGGCTGGATCATCTTCGAAGCCGTGACAAA  
GCTGATCACCCCCAGCTCCATCGAGAGCATTGGCTGGGGCGTACTGGTGTGATGTTGATCTCGGCGCTGGTC  
AACAGCGGCGTCTCAGCCTACCTCTACAGGGTGGCCCGGGAAGAAGAGTCAGTTGCATTGGCGGCCGATG  
CGTTTATCTCAAGGCGGATGTGCTCACCTCCACCGGGTTCGCCATCGGTCTTGGCGGGATCTGGCTGGC  
CGGTCTGTTCCGCCATTCACTCGCCATCCTCGACCCGCTGGTTCGCCATTCAGTTCGCCATCTTTATTGTC  
AGAGAGGCGATCAGCATGCTCAATGAGGCCTTCCAGCCGCTGATCGACCAGAGCATGAGCCCGAAGAGC  
TGGCGATGACCAGCCGATCATCACCGAATGCTGCCCTGCCGCCAGCGTTTTTCACGATCTGCGCAGCCG  
TCGTGCCGGTTCGTGCGGCCATATCGACTTCCATCTCACCTGCCCCGAGATGAGCATCGGTGAAGCT  
CACGATATCTGTGATCGCATCGAACACGCCATCATGGCGCAACTGCCCCAGCCATCGTGTGATCCAGC  
TCGAGCCGGAGGAGCAAGAGCTGCCCTCACCGCTCGCCATAAATGAAATGTGGCAAACAGGCGGGAAAG  
TGGCAGCGAAATAACGGAAAGTTGGCACAAACCCGCATTTTTTACTGCCGAAAGCCGATTGCATAAGAAG  
TGATCGGCACAACCTGTGTTAGGGTGTCTAACCCACCTGCCGCAGGAGCGCGCCGTGAAAAAGCTGGAAAT  
GAAAGATCTGACCGAGGCCGAAAAAGCCGAGATAGCCTTGTATTGCAAAAAGGCACAAGCCAATGCAGAC  
CACCAGCTGACCAACGGAGAGCGGAACAAGATCCGCGAAGAGGGTGCCTGAAAAATTGTGGCCGACCCGC  
CCGAAGCGGCCAAGGCAGCCTCCAAACTGGCTCGCGAGAAAGCCAAAGAGCGCGCCAAGAACCAGGTACT  
GCCGAAACTTTTCAGCTGGATTGATTTCGGTCAGCAACAAGTTTCGCAGCAAGCGCTGATCCCTCTTGCA  
AAACGCCACTGGCACTTGTGCTGCGGGCGTTTGCATGCTGGGCGATGCTCGATGAGCCAGATTTGGC  
GCCGCCATTGATTTGCCGCTCAGAAGCTAATCGCAGCAGCAAGAAGTGAATTTACATTTGTGAGTTAGAGA  
GAACGCCAACTGACAATCCCCATCTATCGCCAGCTTTTTCATTTTTTCTCATATTTTTGCCAGAACTGGC  
TACATAGTCAGGACAAAAAAGCCGAATCTGGTTTTGCTACAGGGTGTATGAGTCTGCACTGATTTTTTCTA  
TGCCGTTGAAATGCATCATGTTTACTATAAAAAATGATATTTTTGGCTGTTACAAAACATTAATATCGAG  
ATAAAGTTTGCTTTAAAAATGAGAGCGTGTTTTAACTCTTCTCGATGGTTCGGCAGTTCAGACCTGATTA  
TGTTAGGCAGTCATTTTAGTAAAGCAGTGATTAGCATAAGTGTATCTCCTCGGATAAATCTTATCAAATAA  
TTCTCTTTCTTTAGTGCTCCCCATACGTATTGCTGACGAAAAATCAAAAAATTGCCATTTAGGTGGCATTC  
AACACTATTTAAGGAAATTATTATGTCTAACAAAAATGACTGGTACCCTTAAGTTCTTCAACGCTGAGAAA  
GGTTTTGGTTTTCATCTCCCCGGCTGACGGCAGCAAAGACGTGTTTCGTACACTTCTCCGCTATCCAGTCCA  
CCAGCTTCAAACCCCTGGACGAAGGTGACGCGTTGAGTTACCATCGAGCAAGGCCAGAAAGGCCCGGC  
TGCTGCCAACGTAGTTGGTCTGTAATTCAGCCGGAGCATGCTGCTGATGGCTTATGTCAACTGCTGACA  
GCTCTGCAAGAATTTAAAAAAACCCGCTTAGGCGGGTTTTTGTTTTTTCCCGCTTTTTCTCACAGCTCT  
CCCCTCCCCGACCGCTTGATCCCTGCCTGACACGCTCTCACCGCTTGAGTCTTAAAAATGAGCTCCGAAT  
GGACTCAAAATGTAATAAGTGACGAAAAAGTCCGGTTATCCGCTGTATTTGCCGGAATTCCTTGCTATT  
TTGCGCGCCACCAACGCAAACGATTTCTTCAACTTTCAGGATTAGTTATGGCAAAGCAAGATATGGCC  
GCCAAACAGGGACAGGCGGCTTTCTGGACTCTTATTTTTCCATTTCTGCGCGCGGCAGCAGCGTGGCTC  
AGGAGCTGGTTCGCGGGCTGACCACCTTCTGGCGATGGTCTACAGCATCATTTGTGGTGGCAACATGCT  
GGGCGCAGCCGGCTTTGAGCAGGGCCGGTGTGTGGCCACCTGTTTGTATCGCCGCTTCCGGCTCCCCTG  
CTGATGGGCTGTGGGCCAAGCTGCCGATGGCTATCGGTTGCCCATCTCCCTCACCGCCTTTACCGCCT  
TCAGTCTGGTGTGGGTCAGGGGCTAAGCATTCCGGTCCCGCTGGGCGCCATCTTCTGATGGGTGTGCT  
GTTTACCCTGATCAGTGTACCCGGCTGCGCCAGTGGATCCTGGATAACCTCCCCTCCGGCATCGCTCAC  
GGTACCCTGATCGGTATCGGCTGTTCTGCTGCTGATCGCCACCAACGGCGTCGGCATGGTGTCAAGA  
ACGAAGGGGCCGTTTTGCCGGTGAACCTGGGTGAAGTGACCGCTTCCCGGTCATCATGACTGTGCTGGG  
TCTGGCCGCCATCTTCGGTCTGGAGCGTCAAGGTGCCGGGCGGCATCTGATGGTGTATTCGCCATC  
TCCATCCTCGGCCTTATCTTCGACCCGAAAGTAACCTGGCAGGGCTTCTTCGCCATGCCGAGCCTGACTG  
GCGAGAAGGGCTCGCTGGTAGGCAGCATGGATCTGCTGGGCGCCCTCAATCCTGTAGTCAATCCGACCGT  
GCTGGCACTGGTGTGATGACCGCCGTGTTTTCAGGCCACCGGCACCATCCGTGCCGTGGCCGGTCAGGCGGGC  
CTCATCAACGAACGTGGCCACATCATCAGCGGCGGCAAGGCCCTGACTGCCGACTCCGTGAGCAGCATGG  
TGGCAGGCGCCGTTGGCGGTGCTCCGGCGGCGCTTACATCGAATCCGCCCGCAGGCACCGCGGCGGGTGG  
CAAGACCGGTCTGACCGCCGCGCTGGTGGCGGTGCTGTTTCTGCTGATGATCTTCTCTCCCCGCTCAGC  
TATCTGGTACCAGCTTATGCCACCGCACCGGCCCTGATGTACGTCCGTCTGCTGATGCTGGGCAACGTCA  
CCAAGCTGGACTTCAGCGATTCCGTGATGCGCTCTCCGGCATGCTGTGCGCCGTATTCATCGTGTCTCAC  
CTGCAACATCGTACCCGGCATCATGCTGGGCTTCGTGGCGCTGGTCTGGCCGCATCTTCCGTGCCGAG



TGGAAGAAGCTGAACGTCGGCACCGTCATCATCGCCCTGGCGCTGGTGGTCTTCTACGCCGGTGGCTGGG  
CCATCTAATCCATCCGCATATTCCGGTTGTAGCGAAGGGCCCTGCGGGGCCCTTTTTTCATGGCTGTGAGT  
CAGCTAACAGTTTTCCCGCCCGCCAGCCCTGCGCCGTTTCAGATTGAAACACCCATCCCCCTTCTGCTGTT  
TCAAATCCGAACCAAATCGGCCGTCATTTTTATCCCTTTTTCTGTGCTTAGACTGGCTCCATCAACCATT  
TGCCACCCCGTGCGGTGGCAAGCCAAGGAGTGAGCCATGAAGAACTGATCAATGCCGTCGATGCCGTGG  
TCCGTGAACAACCTGATGGGGATGGCGGCCGCCACCCCGAGCTCAAGGTACGTATCGAACCCCACTACAT  
CACCCGCGCCGACTCCCCGTGATGGGCAAGGTGGCGCTGGTCTCCGGCGGTGGCAGCGGCCACGAGCCG  
ATGCACGGCGGTCTGGTGGGCAAAGGGATGCTGGATGGCGCTGCCCGGCGAGATCTTTACCTCCCCGA  
CGCCTGATCAGATGTACGAGTGCGGTCAGGCCGTTGATGGCGGCGGGCGTGTGTTTCTGGTGAAGAA  
CTACACCCGGCAGCTACTCAACTTCGAGACCCGAGCTGAGCTGCTGCACGGCGATGGAGTCAAGGTGGGC  
TTCGCTCTGATCAGATGACGATGTGGCGGTCAAAGACGCCCTTACACCCCGGTCGCGCTGGCCGTCGCA  
CGACAGTGTGTGCGAGAAGCTGGTCCGTCGCCCGCCGAGCGGGCTACGATCTGGCGCGCTGCGAGGC  
GCTGGCCCGTGCATCAACAACCAGAGCCGCACCATAGGCGTGGCCATGCATGCCTGCACCGTGCCTGCT  
GCTGGCAAGCCCTCCTTCACTCTGGCGGACAACGAGCTGGAGTTCGGCGTCCGGTATCCACGGCGAGCCGG  
GCATCGAGCGTGCCCCTTACCGACCTCAATACCCTGGTGGACGATATGTTACGCGAGCTTGCTGACAA  
CACCCCTATGGCCGCCCTTGCGCCACTGGGATCGCACCAGCGGCAGCTGGCAGGAAGAGCACACCTTC  
ATCGAGCCGCTCAACAAGGGCGATCGGGTTATCGCACTGGTCAACAGCCTGGGCGGCACCCCGATTTTCAG  
AGCTCTACGGTGTCTATGGCCGCTCGCCACCCTGTGCGAAGAGGCGGGCATCCATCTGGTGCACAACCT  
GATTGGCCCTACTGCACCTCCCTCGACATGACCGGCATCTCCATCACCTGCTCAAGGTGGATGACGAG  
CTGATGACCCTGTGGGATGCCCCGTTTACACCCCGCCCTGCGTGCAGGCTGCTAAGGAGTGCCGATAG  
CCATGCTAAGCAAACACCAAATCGTCAACTGGCTGCTCGACTGCGAACACATCTTTACCGAGCAGCGTGA  
CTACCTCACCGCGCTGGATACCGATATCGGCGACGGCGACCACGGCCTCAACATGCAGCGCGGCTTCGCC  
AAGGTGGCCGAGAAGCTGCCGGCGGTAGCAGACAAGGATATCGGTCAGGTGCTGAAAACCACCGGCATGA  
CCCTGCTCTTTCGGTTGGCGGGCGCCAGCGGCCACTCTACGGCACCTTCTTTATCCGGGGCCGCGGCCAG  
CAGCGACGCTGCCAGAGCCTGAGCCTCAGCCAGCTGTGCAAAAATGCTGAGCGACGGGGTTCGAGGGGATC  
GTCTCCCGCGCCGTCGCCGAGCCGGGCGACAAGACCATGTGCGACGCTGGTGGCCGGCACTGGCCGCC  
TGCAACAGGCGCAGCAGCAAGATCTGCCCTCAACGAAGCGCTGGACAAGGCGGTGGCAGCCGCCACAGC  
CGGTACCGAGGCGACCATCCAGATGCAGGCCCGCAAGGGGCGCGCCAGCTATCTTGGCGAGCGCAGCATC  
GGCCATCAGGATGCCGGGGCCACCTCGACCTGCTGCTGACCGCCCTGCGTGACAGAGCGAGGTTGT  
GACATGATCGGAATCGTAGTTGTCTCTCACAGCGCCATGCTGGCGGCGGGCTTGAAGCGCTGGCCGACC  
AGCTCGGTAGCCCGCCAGATTGCTGCTGGCGGCCGGGTCGATGACCCCGACCACCCCATCGGCACCGA  
TGCCATCGCGGTGATGAGTGCATTGAAGAGGCGGACGACGGCAGCGGCGTGTGGTGTGATGGACTTG  
GGCAGCGCCCTCTTGAGTGCAGAAACCGCCCTCGAACTGCTGCCCCGGAGCTGAGCGCGAGGGTGCGGC  
TCTGCCCGGCCCGCTGGTGCAGGGTACCCTGGCCGCGTGGTAGCGGCCGTTCCGGCTGACGCTGGA  
CGAGGTGGCCCGGAGGCGCTCGGTGCCCTTGGCCGAAGCAGGCGATGCTGCCTGCCAGCGCGGCGCAG  
GCCGCCACCGAGACAGCCCCGTTGCGGACGACGGCTGGCTGCGCTGCGAGGTGGTGGTGGACAATCCCC  
ATGGCCTGCATGTGCGCCCCGCGCCCGACTGGTGGCCGCCCTCAAGCCCTTTTCCGCCAACTCAAGCT  
GCAAAAGGGGGATAAAGAGGGCAATCCCCGAGCCTGACCCGGCTCGCCATGCTCAACGTGCGTCAGGGC  
GACCAGCTCACCTGCTGGCGCGCGGGCAGGATGCCACCGCCCTTGGCCTGCTTCCAGCAGCTGGCCG  
ACGAGCGCTTTGGCGACTGACGCCACTGTTTCAAGGGGCTGCACTCGCTCGCTGAGCCAGTGCAGCCTCA  
TTCAAGACGAAGGAGTCCCCGGCACTGCCGCCCTTCGCCCTTTTAGTTTTAAGAGAAGTCTTAATAGA  
TAAAGAGAGGGATAGAATATGGACCGCATTATCATCAGCCCCAGCAAATACGTGCAAGGCAACGGGGCCC  
TCGCCAATATCGGCAACTACGTCAAAGCGCTCGGCAGCAAGCCGCTCATCTGGCCGACGCCCTTCGTCAC  
CAAGCTGGTCCGCGATAACCGTGGCCACCAGCTTCCACGGCGCGGGGATCAAGCCTGAGTTCGACTGCTTC  
AACGGCGAGTGTCCCGCCCCGAGATCGACCGCTGCTGGCCCGCTGCAAACAGACCCCGTTTGACGTCA  
TCACTCGGCATCGGCGGGGCAAAACGCTGGATAACCGCAAGTCCGTCGCTTCTACCAGAAGGTGCCGGT  
GGTTATAGTGCCACCATCGCCTCCACCGATGCCCCACAGCGCGTTGGCGGTCACTACACCCCGGAG  
GGGAGTTTCAGCAATACTGATGATCCCGACCAACCCCAACATGGTCATCATGGATAACCGGCGTGGTCT  
CCCGCGCCCCGGTGCGGCTGCTGGTCTCCGGCATGGGGGATGCGCTCTCCACCTACTTCCAGGCGCGCGC  
CAACAAGGTTTCCGGTTGCCAGACCATGGCCGGTGGCGCTCCACGCTGGCGGCGCAGGCCATCGCCGAG  
CTCTGCTACAAGACTCTGCTGGCCGATGGCTACAAGGCCAAGCTGGCGGTAGAGCAGGGGCTCTGCACCA  
AGGCGGTGGAGAACATCATCGAGGCCAACACCTATCTGAGCGGTATCGGCTTCGAGAGCAGCGGTCTGGC  
CGCCGCCACGCCATCCATAACGGCCTGACCCAGCTCGCCGAGTGTACCACCTCTACCACGGTGGAGAAG  
GTGGCGTTCCGGTACCTTGGTGCAGCTGGTGTGGAGAATGCGCCGATGGCGGAGATCGAAACCGTGTGG  
GTTTCTGCCGCTCGGTGGGCCTGCCGACCAACCTGCATATGATGGGGTCAAGGAGCTGGATATGGCGCG  
CCTGATGGAGGTGGCCAAAGCTTCCACCGCCGAGGGCGAGACCATCCACAATATGCCGTTCAAGGTACC  
GCCGAGGATGTGCTGGCGGCCATCGTCAACGCCACCGAGTTGGGGCTGTAAGCCCGCCACCGCTGAACCT  
GCCATATAAAAACGGCCCCGCAACTGCGGGGCTTTTTCATTTTTCTACGGGCCGGTTTGCACGGCCCTCAAT  
AGCCATCAGCCGTGATAGTCCGGCGGGATCGATCTCGAGCAGCTTTCAGCCGCCCGCAGAGGGTGGTGCGGC  
TGATGCCAAGATGCTGGGCCATCTGGCTCACCTGCCCTTGCAGGCGTGAGCGCAGCGCAAGATGGCTTG  
CCGCTCCAGCTCCGCCAGCGTGAGCAGCGGTTGCCCCACCACCTCGTCTGCCACCCGCTGATAGCCGTGC

CGAATGGCGGGCGGGCAGCGCCTCGGGCGGGATCGGCCCTGACCGGAATGAAGCAGCGCATGCTCGACGG  
CGCTGCGCAGCTCCCCAGATTCCCTGGCCAGGGATAGGCGAGCAGACAGTCGAGGGCCGCCGACTGAA  
CTGGCGCACCGGCTCGCGCCCCTGCGCCGCCAGTTGCTGGCTGATCAGGCTCGGCAGATCCGCCGCGCGC  
TCCCCGAATCTCGGCAGCCACAGCTCGCACGCCTGCAAGGCATAGAGCAGCTGGCGGCCAAACAGTCCCT  
CCTGCACCAGCTGCTCCAGCGGGGGCGCTGCTGGTGGCGATGATCCGCACCTTGAGCGGCAGGATGCGGGC  
CGAATCGAAGCGCTGGATGCGGGCCGGTTTTGAGCAGTTGCAGCAGCGCCGCTGCATGGGGGCAGAGAGG  
CACTCCACCTGCTCCAGTACCAATGTGCCGCCGTGGGCCAGCTCGAACTTGCCCCCGCCGCTCCTGCCCGG  
CCTCGTTCGGAGCCCATCAGCTCCAGCGCCATCCGCTCGCTCGGCAGCGCCTTGACAGTTGAGGGTAATGAG  
CGGCCCGGGCGGCCCGCTCGCTGCCAAAGTGGATCGCCTCCGCCAACTGGGCCCTTGCCACCTCCTCCTCG  
CCACGCAGCAGGATCGGCCCTGACTCTGGGCCGCTGCCGGCGTAGCGCAGCAGCTTGCGCATGGCGC  
TCGACTCCCCACCAGCGCCAGCTCGGGCACCGTCTGGCGCAGCTGATGGATGGCCCCGAGCCGATC  
GACCGGGTGCAGCAGGGCGATAAAGCTGACCCCCCTCCGGCCCCGGCAGCGGCTTGAGGCTCACCAGCGCA  
TTGATAAACTCCCCCTCCTGCGCGCCGAGCCGCTCCAGCGTCACCTCCACATGGCTGAGCGGCGTCTGCC  
CCTTGATGGCCAGCTGCAACCGCTGGGGTAAACAGCAGATGCTGCTCCAGCGGCTGACCGAGACAGAGCGC  
CGGATCGAGCCGAGCCGATTGGCCGCCAGCGGTTGAGGTAGCGCAGCCGCCCTGCGGATCCCAGGCC  
AGCACACCGTCATCCATGCCATCGAGCAGGGCGTAAAGTTCGCTCAGATGGTGTGGGACTCCTGCATCA  
GGGTCTCCATCTGCAGCAGATGGGCCAGCTCGCGCCGGCGCTGACGGTGAGCGCCAGATCGCCCCGCGT  
CGCCTCCTCCACCTTGAGATCAACGCGATGATGGCGACCTGACGGCCATTGCTGTTGTAGACCGGGCTG  
GCGCAACTGTGCCACGGATGGAGGGTCTGGTTGAAGTGTGGGGCCGCTGACGCAGAGCGGTACACCCT  
CCAGCGCCGCCAGATTGATGGCATTGGTGGCGATGCGCCCCCTCGCTGAAAAAGGCGCCGGGGCCAAACCC  
CAGCGCCGCCAGCTCGTGCAGGGTATCCGGGTGGCCGGTTGGGCCAGCAGGCAGCCGCTCTCGTCCGGT  
AGCAGCAGGGCGCAGGGGGCGCCCTCCATAAATTCGTAGAGATCCTCGAGGGCCATCTCGCCGGTGGTGA  
GCAGATCCCGCTTGCGCTGGCGCAGGCTCTGCAAGGTCTGCCCTTGCGGCTGTGGGGCAGATGCCAGAG  
GGTGGCACTGGTCTGGTGGGCGCAGCGCAGCCAGGATGCCTGCAGATAGTCAGGCCAGGCCGAGCAGCGGC  
TGAAGGTGAGATGACATGGTACAGCAATATCCGGCAAGATGTGAGCCGACCATTTAACCACGCCAGCGC  
CCCCGATTGAGTACCTGCCTCAGAGGGTGGCAAGCCCGCTCTGCTCTTGGTGGGTTCCGCTCCGAATT  
TGACGACAAGTTCGTCGCGAGTGGTGGAAATTCGCTGCATCACCCTGCACCAGCCCGCTGACCCTCCCCT  
ACCCACAGATAAACCCGGGGCTTGCACGCCCCGGTTATTTATCCACGTCAATTTTTGTAACTACAAG  
CCCCGACTGACCTGCCACCGTTCCGCATATTTGCCAGCAATACCATAATGGGGTATCACCCGCATCACCTCC  
GAGTTATTCAAGTTGCTGAGACGGGATGGCGCTTTCCATTGCCTCTCCACAAGTGTATTTTTGCTCCTTG  
GTAAAAAGTAGAGCCAAAGGAGAATATTGAACGAGTACGTTTCCAGCACCAGAGTCCGTGGGCAATACTATG  
CTTTAAAAAATTTTTTCTAGGGTATCAGAGCAGACTGGAGTTATATGGAAGGTCTTATTAGCGGATTGG  
TATCGCCCTCCATCTAATTACAGTTAGACCTCGCATCCACCACCGAGGAATCTCATGAGCGAACACAAAA  
ACACATTAGCGGCAATGCTCGCCGCAAGAGGGAGTTCTTCTGTCCTGTAACCTTGCATTTGCTCCTGTC  
ATTTTCTGTAGGTGTTATAGCCAGCCTTGTGCTTCTCAACGGTTGTGCCAAAGATCGCGATTTATCTG  
ACCGCCGTGCTTCTCACTGTAACCTGCATTACTGCTACTTGGCGCCGATATTCGCCAGAAGCTTACCTTTG  
AAGACAAACTCGAAGGTGTCCTCTTCAATTGATAGCGCGAAGAACGAGTTGATTGACGTTGCGGATACGA  
GCTAGCCAAGGATTTGTCCAGAGCGATGGCTGCTGTAAAAGCTGAAAGCCGTGCGATTTATTCAGAGTGG  
GAAAACGATCCATTGGTACAGAAAAAGGAGAAGGTCAAACCCAAATCCCCACCCGCCGACAGTGGACACG  
ATCATCAGTCCCGTGAAGAGACTTCGTACATTAGTGTGTTTCGAGTTGAGCTTGACGAAAATCACCTTAC  
AAATCAAAGAGCATCCTGTCTTTTGGACGAAGCACTTCAGTTTGTCTTTTGGGAAGAACTTCTACACAC  
CTGTGACGATTTTTACCAGCTCCAATAGCGATCAAATFGCCGAACTGAGTCGAGAAGATATTCCCGCAT  
TCCTTCTTCAAATCGCGTCTTAACTTACTCACAAACCGATTGAACAACGAGATGTGTTTCTCAAGGC  
ATTTCCAAGTCAGGAAAAACGGCCTGACGGCGTCTATGCTCCCTTTGGGGTAGCGATGGTTCATGTAC  
TCCCAGATTGACCTGAATTTACCAAAGGAATCCAAGGTATCCTTCTGGGCCGTGGGGCGCTTCGGATCG  
AAACAAAGCGACTTGATCTGGAAATTTCAAGTCTGTTATAAGGGAAGCTCTATCCTGTATCTCGCACCTT  
TATAGAGCACTATATGGGGAGAGCGTGGAAATGAGGTGGATTGCAGAAAGATCGAAGTAATACTGAAAGGA  
CGAGTTAAACCTCTGGCCCTTTTTTCAAATAAAGGATGGGAGCACTATCACTGGCTGGATTTCATTTCGAA  
CAAGATTGAGGAAAAGCGTTGACCTTGATGCCTTCCAAAAATGAAATTCATTGGAGTGCCGTCGAACCGAT  
GCTGTACACGTTACGAGGTCAATTCAAAGCCATACATAAGCATCTGGAACATTTGCACAATGGGGAGCCT  
GTAGGTTGATAGCCGTAAGGCGTAATCGGACGTTGCGTGAAGCAATTCGCCCGGATAACAGCCATC  
CATATTTCCCCTCTGCCAGATGCCGCTGATTCAAGGAAATACCGGAACAGCGGCATCTCGATCGTCCGAT  
TACGCTTCGCCAATCGAACCTACATGGGACGGTAAACAAAGCAAAGAGCCGCCCTTATGGGCGGCTCTTTG  
CATCAGCGATGGTACTGATTCATCTTGTACCAGAACTGCTCTTTTACTGAATCGCTATTGGGCCCTTGGG  
CGCTTCCACTGCGGGCGGTCGCCGGTGGTTCATCTTCCCTGATCCAGGCATCCAGCAGGGTGTAGCCACC  
GCCAACACTACCGGGCCGATAAAGAGGGCCGATGATCCCCATGGTCAGCAAGCCACCGATTACCCCCACCA  
GAATGAGGATGAGCGGCAGGTGCGGCCCGCTTGATCAGGAAGGGGCGCAGGAAGTTGTCCATGGTGCC  
CGCAATCAGTGACCACACCAGCAGGAAGGTGCCCCAGGTGGTGTGCGCCGCTCCAGTAGAGGTAGCCGATA  
CAGGCCAGCAGCACTGGGAAGGGGCCGATCTGGGCGACGATCAGCAGGAACATCACCACCACCAGCACCA  
TGGCGTAGGGGATACCGGCAATCAGCAGGCCGACACCGGCCACCGAGGATTGCACCAGCGCGGTTACCAC  
CACCCCCATCGCCACGGCACGGATCGCCTGTGAAGCGAGCACGGTGGCATTGTGCCCACGCTGGCCCCC

AGCCGGTGGGCGAAGCGGCGAATGCCGGTCGCCACCACTTCACCCGAGTGATAGAGCACACCCGAGATAC  
CGACCGTCAGCAGGAAGTGAACGAACAGCAAGCCAAGATTACCCGCCTGAGAGGCCAGCCAGCGGGCGGT  
CTGGCCAAAATAGGGGGCCAGCTTGGCAAACAGCACCTGACCACCGCTCGCCAGAAATTTGCTGCCAGAAG  
TCATAGAGCTTGTGCGCCATCAGCGGGATCTGTTGCAACCAGAGCAGCTCCGGCGGGCGGTGATTGGCTGA  
TATGGGTACCCAGCTCGATCAGCATGGGCGCCTTCTCCGCCACATTTGGCCAGCGTCATAAAGAGCGGGAT  
AACGAACATCAGCAGCAGTACCAGCGTCATAAAGAGGGGCCGCCAGGGTGCCTTGCCTCCACAACAGGCGC  
TGCACCATCAACATCAGCGGCCAGGTGGCGATGGTGATCATGGTGGCCACACCAGCGCAGGCAGGAAGG  
GCTGCAACACCAGGAAACAGGAGATAATCAGGATGCTGAGAAACAGCACCCCCAGGGTTATCTTGGCCAA  
ATCCACTTTTTTACATTCATAGAGTTCCCTTGTGAGAGCCGTTGCCCTTGGGTCGTGTGTCGCATTTCA  
AGAAAGAGAGTATCCACCAGAGGCCAGCGCTCAACCAGAGCCCCAGCCGAAAAAGAGCACAAACTGACC  
AAGCAGGATAGCCAGCGAAGTCTGGTCAGCAGCGGCAGCGCCAGAGCCCCGCCCCGATCACCAGCGCCC  
CCCGCAGCGTGACCACGCCGGTCAACAATGGGGGGATAACCGCCGCGGTCAGGGTAAGCAAACCGCCAA  
CCCAGAACCCAAAGGGCCGCCAGCCGATCCCGGTGAGATGGGCCGACTGAGTCAGCCCCCGAGCGCCAG  
CGCAGATGCAATCAGCAGCAGCCAAGCCGCCGACTGCCTGTCGGCTAGCCAACAGGGGCGAACCGCCAGC  
AGCAAGGGCCCAATCAGCAGGCCAACCGCCACGTGCGAGATAAAAGTGCACCCCGAGCCAGACCCGCGCCA  
GACCTGTGGTCAGCGCCAGCAGCAAGGCCAGCGAATAGGCCAGTCCCCGCCGGGCAGGCCAGAGCCAGCC  
AAGCAGCGCCCCCAGAACAGCAGGGCCGAGGCGGTGTGGCCGCTCGGCATGCCAAAACCTGAGCGCTG  
TGAGTCGCGAGCAGAGTTGAGATGGAAGGGACGCGGCCAGCCGATCCCCCTCCTTGCCTGCCTGCACCA  
GCAAGCCAAGCCAGAGCATGGCGAACAGCAACTGGCGCAGCCGCGACCACCCAGCAGCGGAAGCAGCAA  
AGGTATCAGGGCAAGCTGAAAGCCGCCTGAACCAAACAGATTGCTGACCGACAGCCACCAGACATCGGGC  
CCCAACCACTGTTGAGGTGAGCATCAGCGGGATCTCGGCCGATGCAGCGCATTTGCCCTGCGCCACAA  
AATCGGCCTGCCAGTGACCTCGCTCTCAGGCACCTGATCAAGCCGGGATTCAGCCAGTCAGGCTGATC  
CGGGAAGCGGGCGCTGCTCGCGGGGGAGCTGGTCAATGGCGATCAGCCGGGCGTTAAGGATCTCTCCCCC  
AGATTGGGGGCTTTCAGCAGCGAGACAAAATCGGAATCTTGTGGGCGACGATGGGTTCCGACGTGCGAC  
AAGCGAAGATAACCGCCCGCTGCCAGCGGCCAACTCCTGCACCACCTCCCCCGCAAGCCGGTCTCCTC  
ATAGAGCTCGCGCAGCGCCGCTGCTGCGGGCTCTCGCCGCCATCTATATAGCCACCGCTCAGGCTATAG  
CGGGAGGAAATGCGATCCTGCACCAGCAGGATTGATCCTGATGGCGGATGGCGCAGGCCGTCGCCGTGG  
GGCAGCCGGTTCGGCGCTCAGAGCTGGCAGCGGCAAAACAGCGCCAGCAAGAGTAAAAAGAGGGTTCT  
CGACATCAATTTGCTTCCCTATGCACAATGGCGCAAGCCATCCAGAAATCAGATAGTTGGGCAACGGTG  
GCGGCCGATCGCCCGCTTCCCGCCGCTGGCGGTGCACGGAAGATTGCGATGAAGCGGGGCACTCCC  
TACTATTGGCGGCTATCTTCAATTTTCATGCAGCAAACGCTGGAGCCCTCCATGAGACAGTTCGGCTTTTT  
CCTCGGCATCGCCATCGGTGTCAATTTGATCCTGTTGCGCAGCATCGTCATCTTCCAGGCGCTCCTGCC  
GCACTGGATGTACTGGAGATGCCAAGCCGCATCCCGTTCGTGCGCGAGGTCTACACCTGGCTGATGACCA  
GCGCCAACGGCCTGACCGCCAGCTGGAGCAGAACTTCTTGAAGCGTTCCAGACCGTGTCAAGCTGAT  
CCTGCTCATCACCTTCATGTGGGTCTGCGTCAAGCTGGTCAACATGGGGGTGCTGATTATCCGCGCCGGG  
GTTGATCTGATCCGCACCGCCATCGCCACAGCGAAGGCCCCACGACCAGAAAAAGCCGGATCAGCAG  
ATCACTTCTGACTGAGCTGTGGTCAACGGATGTGAACGCTGCCGCCCCAAACCGGGGCGGCAGCTTTATA  
TGCGCGGTATGGAGGCCCTTCTCAGCCCCATGGATAACCGATAAAGCAGCGCTTTCCCTTGTGAATCAG  
CAAACCTGCCCATATGTTGCATCACCTTGACATGGTTTTGCGCCCCGCGGGCGGTGCCAGGTTTCTATCC  
CGACCCCGTGTCTGTTATAATCGACCACCTCTTTTTCCCGTTATGGAGCCTGTTTCATGCCCAATCATGC  
AGAAAGTGCCCTCGAGGTTTCGTCTCGACAAGTGGCTGTGGGCGGCCGTTTCTACAAGACCCGCTCCATT  
GCGCGGGATCAGATCGACGGGGCAAGGTGCACTACAATGGTTCAGCGCAGCAAACCGGGCAAACAGGTGG  
AAGTGGGGGCACTGATCCGCTTCTGGCAGGGGCGAGTGAACGCGAAGTGCAGGTTGCTGGCCTTGAGCGA  
GCAGCGCAAATCGGCCCGCTGGCCAGCAGCTCTATGAAGAGACCGCCGAAAGCCTGAAAAACGGGCC  
GAGAACAGCGAGGCGCGCCGCTTCAACAGCCAGTTTGCCTCCAGCCCCGAGCGCCGCCCGACAAGCAGG  
AGCGACGCCAGTTGCTCAAGGTCAAACAGTACTGACCGACCCCGATTGATACCGGGTGGCCTCAACCC  
CAGCCCGCCCGATTTACCTCACCAGAAAAGCCAGGAATACATGATGAGCAACCAAGATCTGCTGTATCGCT  
ATCTGTTTTGAAGAGTACGAAGTGCCTGGCGAGCTGGTCCAGCTGGATCACACCTACCGCCACGTAGTGG  
AGCCAGAACTACCCGGTGCAGGTGCAAAAACTGCTGGGCGAGCTGCTGGTTGCCACCAGCCTGCTGACC  
GCCACCTCAAGTTTGAAGGCTCCATCACGGTGCAGCTGCAGGGCGATGGCCCGGTGCGTCTGGCCGTGA  
TCAACGGTGAACAACACCAGCAGCTGCGCGGCTGGCCGCTATGAAGGCGAGCTGCCGAGCGATGGCAA  
GCTGCAGAGCCTGATTGGCAACGGCCAGCTGATCATCACCATCACCCCGAGCAGGGCGAGCGCTATCAG  
GGCATCATCGCGCTGGACGCCGATACTCTGGCAGGCTGCCTGGAGCACTACTTCGCCCCGCTCCGAACAGC  
TGGCCACCAAGCTGTGGATCCGTACCGGCTACCACGAAGGTGCGCCGCGCGCTGCTGGCATCATGCTGCA  
GGAGCTGCCCGCCAGAGCGAGGATCACAGCAACGATTTGATCACCTGACCCAGCTCACCAGCACCATC  
AAGGATGAAGAGCTGTTCCGCTGAGGCGAAGAGATCCTTACCCTCTTACCATCAGGACAAGGTGC  
GGGTGTTGATCCGCGAGGCGGTGAGTTCCGCTGCACCTGCTCCCGGAGCGCTGTGAAGGGGCTCTGCT  
GCAGATAGAAAAGGAAGAGGTGATGGAGATGGTGCAGGAGCTCGGCAAGATCGACATGCACTGTGATTAT  
TGCGGCGCCAGTACCAATTTAATGGGATCGATGTGAAACCTGTTTCAGCAGGGCTCCCGGCAATGATG  
CAAACAGTTACACTAATTAAGGCGGGCAAAACCCGCTTTAACTTTAATAACAAAAAATACCCATT  
TTATAAAGTTTATGGGATCGCTAAACTCTACCACCTAAGTGATAGGATGACCGTCAGATAGAACCCTA

CCAACCTCTGAACCCAGGAGAATACAATGACAATCGTGGCAGAACCACCCCTGGCCCAACAATTAGGACT  
GGACCAGTACGGCATCAAAAACAGCCAAGAAATCGTTTCGCAACCCCTCTTACGAGCAGCTTTTCGCGGAA  
GAGACACGCCCTGACCTGGAAGGGTTCGAGCGCGGAGTGGTGACCGAGCTGGGCGCCGTCAACGTAAACA  
CCGGTATCTTACCCGGTGCCTCCCCGAAAGATAAATATATCGTCAAAGATGCCACTACCCAGGATACTGT  
GTGGTGGTCTGACCAGGGTAAAAACGATAACAAAAGCCATTACCCCGGAAGTGTGGTACATCTGAAAGGG  
CTGGTACCAAACAGCTCTCCGGCAAGCGCCTGTTTTGTGGTGCACGGTTTTCTGCGGTGCCAACCCGGATA  
CCCGCTTGGCCGTGCGCATCATCACCGAGGTGGCCTGGCAGGCACACTTCGTGAAAAACATGTTTCATCCG  
CCCGAGCGATGAAGAGCTGAAAACCTTCAAGCCTGACTTCGTGGTGATGAACGGTGCCAAGTGCACCAAC  
CCGAACGTGAAGGAGCAGGGTCTCAACTCCGAGAACTTTGTTGCCTTCAACATGACCGAGAAAAATGCAGC  
TCATCCGTTGGCACCTGGTACGGTGGCGAGATGAAGAAGGGCATGTTCTCCATGATGAACTACTTCCCTGCC  
CCTGCGCGGCATTGCCCTCCACTGCCTTCCGCCAACGTGGGTGAGGACGCGCAGCTGCCCATCTTCTTC  
GGCTCTCCGGTACCGCAAGACCACCTCTCCACCAGTCCCAAGCGTCAGCTGATCGGTGATGACGAGC  
ACGGCTGGGATGACCACGGCGTGTTCAACTTCGAAGGGGGCTGCTACGCCAAGACCATCAAGCTCTCCGA  
AGAGGCTGAGCCGGACATCTACCACGCCATCCGTGCGGATGCGCTGCTGGAGAACGTGACCGTTGCTGCC  
GATGGCACCATCGACTTCGATGATGGCTCCAAGACCAGAAACACCCCGCTCTCCTACCCCATCTATCACA  
TCGACAACATCGTCAAGCCGGTCTCCAAGGCTGGTCACGCCACCAAGGTGATCTTCTGACTGCCGACGC  
CTTCCGGCGTGTGCCCGGTCTCCAAGCTGACCAAGGAGCAGACCAAGTACCCTTCCCTGTCTGGCTTC  
ACCGCCAAACTGGCCGGTACCGAGCGCGCATCACAGAGCCGACTCCGACCTTCTCCTCCTGCTTCGGCG  
CAGCCTTCCCTCTCCCTGCACCCGACCAAGTACGGTACGGAGCTGGTAAAACGGATGGAAGCGGCAGGTGC  
AGAGGCCTATCTGGTCAACACAGGCTGGAACGGCACCGCAAGCGCATCTCCATCAAGGATACCCGCGCC  
ATCATCGATGCCATCCTGGATGGCTCCATCGAGAAGCCGAGACCAAGGTGCTGCCGATCTTCAATCTGG  
AGATCCCGACCGCGCTGCACGATGTGAACCCGGCGATCCTCGACCCGCGCGACACTTACGCCGACAAGGC  
CCAGTGGGATGCCAAGGCCGTGATCTGGCAGGGCGCTTCATCAAGAACTTCGAGCGCTTACCCGATAAC  
GATGAAGGCAAACGTCTGGTTGCGGCAGGCCCGCAGCTGTAACAGGCTCGCTTCGTCTCAGTGACATCAT  
GCCGGTCAGCCACGCTGACCGGCATTTTTGTTTTGTGGAGCCCCGAACGCCGCCATCGCCCCGTTAAA  
GGGGCCAAAACCTTGCCTTTGCCTATTGTGACAGGTTAGATTCAGCCAAACTTTATACAATATAACAATTC  
TGTAACGCCAAATCGTGACCCGACCATGACCCACCTACAAGACCCGAACCCAGATGGTGTGAAAAAC  
CTCCGTGGCCGGATCTCCGTGGGGAGTTCGCCGCTGGCGCCCCCTTGCCTCAGGATGCCATTGCCAAAG  
AGCTGGCCGTAAGCCCATCCCGGTGCGCGAAGCCCTGATGCAACTGGAAGCGCAGGGGTGGTCAAATTC  
CGAGGCCCATCGCGGTGCCGTGGTACCATGCTGGACGCCCTCGGCCATTGAAGAGCTTTTTATTTGCGA  
GCGCTGCTGGAAGCCGATAACCTGTTTACGCCGTGACAAAGATGACGGAAGCCACCTTCGCGCAAGCGG  
AGGGCATCCTCGCCAGTTTTGATCACGCCCTGGAGTCAGGCACCCAGATCGAACATTGGGCGGAGTTGAA  
CCACAGCTTTACGCCACCTCTATCAGGCAGCCGGTGCSCCCAGGCACCTGAACTGATCGCCAGATC  
AATCTGAGCTGTGACCGCTATGTCCGCTTCGAGCTGCTGTTTGCACGACGCGGGGTGGACAAGGCGGAGC  
GTGAACACGCCCAATTGCTGGAACGTGCCGCGCCCGCGCAAGCACGAGGCGGTGGTGTCTCAGGCA  
GCATATCGAAGCAGCAGGTGAGTCGATCAAGCGGATCCTGGCCAGCGGCCATAAAAACTGAACACTCATA  
TAGCAACCATCTGGCACTAACGACATGAATAATTTGAGATAAATGAAACCCGCTCGCCCAAGTCAGGG  
CCGAGCTGGCCATGCAGGAGTTGGACGCATTTATCGTCCCCCAGATGATGAGCACCTCGGCGAGTACAT  
CCCCGCCTATGCCGAGCGGCTTACTGGATCACCGGTTTTCAACGGCTCTGCCGGCTCGCCATCATCATG  
GCCAACGGGCAGCCCTCTTTGTGATGGTTCGCTATACGGTGCAGGCGCGGATGCAAACCTCCCGCCGAAC  
TGTTTCGAATTCCTCCACCTCATTGAAAAATCCCATGTGCAGTGGCTGGCCGAACAGCTGCCGTGAGGCTC  
CCGGGTGCGCTTCGATGCCCGCCTGCACAGCCTGACCTGGTACAAGAAATGCCAAAGCCGTGCTGGCTGAT  
CGCGGTATCGAGCTGATCCGCGTGCAGCAGAACCCCATCGACCTGAACTGGAGCGATCGCCCGGAGCCGA  
CCAAGAGCCCCGGTATCCTCTACAGCGAGGAGTTGGCGGGCCAGTCCAGCCAGTCCAAACGTGAACAGCT  
GGCGCCGACCTGCGCAAGCGCGGGCTGGATGCGGTGCTGCTGACCCAGGCCGAGCCCATCAACTGGCTG  
CTCAACCTGCGTGGCCCGACATCGACCGGCTGCCGGTGGTGTGCTGGGCTTTGCCGTGCTACGCCAACA  
CCAGCATGGATTTCTTCGTGATACCGACAAAATTGACTGCTTCGCCTTACCCCAACACGTGGGGCAGGA  
TGTCTCCGTCTACCCCATCGACAAGCTGGGTGACGTGCTGCAGCGCATCGGTGAAGACCAGCAGAAGGTG  
CTGGCCGATCCGGACAGCGCCAACGCCTGGACCCAGCTCGTCATGGAAGAGGCGGGCGCCATTTCTGGTGG  
CAGGGCAAGACCCGACCATGCTGCCGAAAGCGTGCAAGAACGAGATCGAGCTGACGGGTATGCGTGCCGC  
TCACCTGCGTGATGGCGTGGCCATGACCCGCTTCTCGCTGGCTGGATCGGCTGGTCCGCTCCGGCGAG  
TTCGAAGGGGTGGATGAAGGCACCCTGGCCGATCAGGTGGAAGCGTTCGCGCGGAGCAGGAGCACTACG  
TCGAGCCGAGCTTCGATACCATCTCCGCGCTCGGCCCAACGCCCATGTGCCACTACCACCATAACAA  
CGGCACCCCGCTGCGTTTTGGTCAGAACAGCCTCTATCTGCTGGACTCCGGCGCCAGTATATGGATGGC  
ACCACCGACATCACCCGCACCATCAAGGTGGGTGAGGTGAGCGACGAGCAGAAAGCGATGTTTACCCGGG  
TACTGCAGGGCCATATCGCGCTGGATCAGGCCCGCTTCCCCCGTGGCACCGCCGGTATCCAGCTCGACGT  
GCTGGCCCGCATGCCGCTGTGGCAAGCCGGTTACAACATATGACCACGGCACCGGCCACGGCGTCCGGCCAC  
TTCCTGAGTGTCCACGAAGGGCCCCAGCGCATCGCGCCGAAAGGGAGCATGGTTGCCCTGCAACCGGGCA  
TGGTGTCTCCAACGAGCCGGGCTACTACCGTGAAGATGGCTTCGGCATCCGCTGCGGAGAACCCTGGTAGT  
CGTGACAGAGCTGGAACAGGTTGGCGAGCTGCCGATGCTGGGCTTCGAGCGTCTGACCTACGTGCCGTT  
GATACCCGCTGATCGACCGCAGCCTGCTGAGCCCGCCGAATTCGCTGGATCAACGAATACCATGTCCG

AGGTGTTCCGCCGCTGAGCCCGCTGCTCGAAGGCGAGGATCTCGCCTGGCTGGAGCAGGCAACCAGCCT  
CATCTGATGACACAGGGCCTGCGGGCCCTGTTTTTATCCCCCTTTTGACCTGTATCAACACCCAAAGC  
GAGCAGGTGAGGAGAATGGCGGCCATGAAAAGTCATCATGCCAGCCAGCCCGGGGCTCACACGCCGAG  
CCAGCAAAAAGGCGAGTGACCACCCAGACTCATGCGCGAGCAGCAGACGGTCAGCGCCATGATCCGCC  
CTACTGCCAGCACCATCATCAGGATCCCCATTGCCGCCACTGTGCGCAGTTGCGGGATTTGCGCCATCAG  
CGCCTTCGTGCTGCCGTTATGGCCACGGCCACAAAACCCACCTGTGCCAACTGCAATATCCACTGCTACG  
CACCGGCGATGCGCAAACAGATCCAGCAGGTGATGAAGTGGAGCGGCCCGCGCATGTTGCTGCGCCACCC  
CTGGCTCACCCCTCCGCCACCTGCTCGACGGCTTGCGCAAAGCGCCAAACTGCCCCAGAGCCGCCCCCTG  
CCGCCATAACCGCCAATCCCTTGCATCCGGCAGGGGATGACCACTACCCTATGACTCCTTTTTTGGCGTT  
GACCCCAAGGTGAGCGCGCTTGGCGATCCTTTGCTGCCGATGGAGTCTTGATGCACCACAACCCGCCCT  
GCTACGCCCCGCTACCCACCATGACATGCACGCCATCTGGCAGATCGATGCCAAGGTGTTTGGCGAAGAT  
GTCTATCCCGCCTTCTTCTCCGTCAGGCGATGGATTTGTGGCCGAGTTGTTGCTGGTGGCCGAATACG  
AGGGGCGAGCTGGTGGGTTATGTGCTGGGGGGATTGCGTCAAGGAGCGATCGCAAGGCTGGGTGCTCTCGCT  
GGCGGTAAGTGGCCGAGGCGCGGTTTTGGTCTGGCCGAGCGAATGATGCGCCAGATGGAGGCCAACCAG  
CAGGCGCTGCAGATCAGCGAACTGCGGCTCACGGTGCATCCGGCCAATCCGGCCAGCGCTCTACTACC  
GGCTCGGTTACACATTGCAGGCGGAAGTAGCCGACTATTTGCGCCCGGAGAAGACCGTCTGCTGCTGGT  
TAAAACCCCTCTCCGGTACAGCTGCGATTCAAGGACAAAACCGGTTACAGAACGCATAAATTGGTTACATTT  
TGCCGATTTTATGTGTGACGGGGTTGGAGTAAAGTTCACCTCATCAACCGGATTTGTTCAAATTTACGTGCAG  
CCCAGGAGGCCACCATGTTGAAGCGTATGACCCCTTATTGCCCTGCTGGCAGCGACCACCATCACCAGGAT  
GCGCCAACAGTGACGTTTACTCTGGCGATGTTTACACCAAAGACCGCGCCAAACAGGTGCAGACCGTCA  
CTACGGCACCATCATCTCCACCCGCCCCGGTGAAGATCCAGGCCGATGAGAATCCCTGATTGGCACCATT  
GGCGGCGCCGTAGTCGGTGGCCTGCTGGGCAGCACAGTCGGTGGCGGCACCGGACGCGACATCGCAGCCG  
CAGGCGGCGCCATCGCCGGTGGCGGCGCAGGCAACGCCATCGGCAACAAGATGAATCAGGTCGACGGCGT  
CGAGCTGGAGATCAAGAAAGAGAACGGCGAAGCCATCGTGGTGGTGCAGAAAAGCCAGCCCACTTACC  
CCGGGCGCCCGTGTACGCATGACCCAGGGCAATGGCAGCATCAACGTGGCCGTCGTGAACTAAGCGTGTG  
AACTCAGGCTTTGCAGCTTTAGAGTCATAAAAAAAACCGCCGGTTCGGCGGTTTTTTGTTGCTGGCAT  
TCGGGATTACATGCTGTAAGCCTTCTCACCGTGGGAGGTGACATCCAGCCCTTCCCGCTCGGCATCGCCG  
TTCACCCCGCAGACCCACAGCATGTGACCCGCTTGAAGGCAATCGCCGCCACGGCACCGCAGCAGCA  
GAGTGACACCCGACCCAGCATGACCTTGCATCTTCACTGAGTCAGGATGGAGTACCCCTCGGCAACCTGATT  
GGTGACATAGTCCCATACCCGGTACCGCCAGATCCGGGCTGGCAAAAACCGCGTTCAGCAGAGCACCG  
AGAATGCCGCACACCCCGTGCACGCCAAACACGTCCAGACTGTTCATCGGCCCCCAACATGCGCTTGAGAC  
CGTGGACACCCACAGACCCGCCACGCCACTGATAAGGCCATCACCAGACCACCGCCACACCGACGAA  
ACCGGCTGCCGGGTGATCACCACCAGACCGGACACCGCACCGGATGCCGCACCCAGCAGGGAGGGACGT  
CCCTTTCATCACCCACTCGGCCAGCGTCCATGAGAGAGCTGCCGCAGCCGGCGCTACCCAGGTGTTGATAA  
AGGCGAGAGCTGCGATAACCGTTGGCTTCCAGCGCGGAGCCCGGTTGAAACCGAACCAGCCGAACCAGAG  
CAGGGAGGCACCGATCATGGTTCATGGTACGGCTGTGGGGGTCATGGGATCACGACCGTAGCCAGACGC  
TTGCCACCCAGATAGGCCCCACCAGACCCGCCACGGCGGCGTTGATGTGCACCACGGTCCCGCTGCAA  
AATCCAGCGCACCATGCTGGAACAGATAACCGGCAGTGGCGGTCGCGGTTGCTGCGGCTTCGGCGCTGGT  
ATAAGCATCCGGACCCGCCAGTACCACACCATATGAGCCAGCGGGATATAGGCGAAGGTGAACCAGATC  
ACCGAGAAGAGCAGCACGGCGGCGAACTTGATGCGCTCGGCCAAAACGCCCCACGATAAGGCCGCGAGGTGA  
TGGCGGCAAGGCCCCCTGGAACACCACATAGATCAGCTCGCTGATCCCGACCCCTTGTGAAGGTGGC  
GGCGATGGAGTCAGGGGTACCCCTTGGAGCAGCCTTGGTGAAGGAGCCATAGAAAATTGCCCCCTCG  
GTAAAGGCCAGCGAATAACCGTAGATCACCAGAGCACACAGATGAGGCAGAACAGGGTAAAGACCTGCA  
TCAGCACGCTCAGCATGTTTTTGGCCCGCACCAGACCACCGTAGAAGAGGGCGAGACCGGGGATCGACAT  
CAGGATCACCAGCGCCCGGAGAGCAGCATCCAGGTGTTGTCACCCCTGTTGATTGTCATGGCGCAACC  
GGCGCCACCCCGCTGTACCTGAGCGACCTTTCGGCCAACTTGGGGTAACCAGCAAGGCAGGCAACA  
TCGTGACACCCGCCATCATCCATTTTTTGGACATAGAGCACTCTCCTTCCCTGTCGTACCGGTACAAGAC  
CGGCTCCGTTTTCCCTGATTGAATCTGTGGCGAACCAGGTTGCTGCAACCCGCCAGAATCACACCC  
GTGCCCGGCACGGGGATGCTCTTGGCACTTCTCATCACTGCGTCTGCCCGCGATGACCGCAAGATGCC  
GTCTGACATCTAAAAAAGCATAAAAGCGGGCCATAAAATTTAAATCCTTTTTAAATCACTGCATTAGAAAGAC  
CATAATCATCAACGCACCAATTTGGCGCATGAGCTGCGCTAACCTGCCAGGGTCGCCCCTGTACAGGG  
CAGGCGATACTTACGCACACAGAAGTGCCAAACCTGAGCCAGCCACAAGCTGACGTCATCGATATCG  
CGCGCTGCGGGCCCGCTCGTTTTACTGACAGACCAGCCGTTTCTGTTATCCGACCAGGCATGCCATT  
ACACAGCCCTTGTGTTGCAAGCTGATGGCAGGCCAATCCGAGGAACTCCATGCAGTTCGAGCGTCTCGA  
CATCAGCCTCTCCACTACCGTCACTCGACCGGGAGCATCGCGCCACATCGCGTGTGGGGATAGTG  
ATGCTGGCCATCATGGCCCTTTCATCTGTTGCTGCTGCCCACTTCTCTTACGAGCGCTTTTACGCCGTC  
GCTTTGGCTTCGAGGTGATCAACTGGCTCACCATGCTGTTCTGTTCTGGGTGGTACAGTGCGCCACCT  
GCCACCCACACCTACCGCATGCTCTCTGTGGTCTGATGTTGTGGATCATGGGGGCCACCGCCGACATC  
ATGGATGAGCTGGTGGCTCAGCCACTCTGGCTCGCCATCTATGCCGAGGATCTGCTGCGATCCAGCGGCA  
TCCTGCTCAGCAGCATCGGCATCTGAGCACCATGCACCACCTTTCACATCAATACCCAGCTCAGACA  
GCAGGCGCTGTTGACGATCTGACCCGGCTGCCAAAACCGCGCTACTTTCATCAGCAGCTGTTTCTGGAA

CAAGGGATTTGCCACGCCCTCATCCTGCTGGATCTGGATCACTTCAAGGGGATCAATGACAACACGGCC  
ACGATATCGGGGATCGGGTGTTCGAACAGTTTGGCGAACTGTTGCAACAGCACTGCCCCCGGTGCGCT  
GGCGGCCCGTGTTCGGGGTGAAGAGTTTGCCTGCTGCTGCCGTCGCCCACGAAGCCGAGCTGCAGCAA  
CTGGCCAACGCCCTGCTCACTGCGACCCGCGCCATCGCCCCGACCCGGCCCATACCATGACGGTCAGTC  
TGGGAGTGGGAGTCCGCGAGCCCAAGGAGCCGGCAGTCTCGCTGTTCAAACGGGTGGATCAGGCGCTTTA  
TGGCGCCAAGGAGGCGGGCAGAACTGCGCGGTATGGGCGACCCGACTAACAAAGGAGGTATGAAGATCT  
GCAGGTTGATTGCCGATCACAGCGGAAGATTGCTGCTGGAACAGGGGCCAATGGCCCCGTTCATAGG  
GAAAATCCCCCTACCTAAAAGCGGAAGGTAAGACCGATATTGGCCTGCCACTGGGTTACCAGCTCCCCGC  
GCACCTTGGACACGCACTGCTCCGGGTTGCAGAGAACTGGTTGTTGTCGTTAACAGCGAACCATAGCC  
GCGCACCTCGGCCCGCAGGGCCAGATGCTCGGCGAGGCGCGGTTGCACCCCAAGCGCCAGCAGCATGGAA  
GGAGTCACTCGCTGTCTGAGGCGGCAAGCGGGTCAACCCGATCCCCGGCGCCGATATAGGGCGCCATCA  
GGTTGTGAGAGAGAGTCAAGCGCACCCGGCAAGTGCAGGATGTCCACCGTCAAGGCGTCAAGGCTGGTCGGG  
AGAGAGGGTGGTGGACTGATGGCTGTAGAGCAGCTCAATCATGCCGGGATCATCCACCTCCTTGCTGATA  
AAGAAGCCCCAGCTGCCGGAGCTCTGCCCTGCAGTGAATCAAACGATGCAGAAACCGGCACCGGCTGCA  
CCTCATCGATCTTCTCGAAGTCGATAGCTGAGCTGTAACCGAAAAATGGCGTCACCTGCCAACCGGATGT  
GGTCGCGCCCTCGGCACTCCAGACCGCCCCAGTGGCAGCAACAACCCCATCATCACTATCCCCGACTCTC  
TTCATCATCATCCCCTGCTCCCTGTGTGATTGTGCAGAAAGCATAACCAGAGGCGTCTAGGCCCATCCTA  
AACGGCGGCTGTACCGGATCACTTTCATCGCGGGATTTCCCTCTCACCGAACCTCTGCCGAGCCGCCCC  
ACTGGCGCCGCTATGCGCCCCCTGCCACCATTTCATCGACGGTTAACCTCTGCCACGTATGCTGGCGCCAAA  
GCGGGTTCATCGGGGCGGTTATCACTACTCAAAGGACATCAGGGAATGGTTGCCGCGCAACTCAACGAC  
CCCAAACTACCCTCGCGGATACCCTGAGGGCCACCGCGCACGCCATCGACGAGAGCCACATCAGCCTGC  
GCCAGATGCTCGCGCTGGTGGGCGAGCAGGGCATGCTGCTGTTTTGCGTGCTGCTCACAGTCCCCTTCCCT  
GCTGCCGGTCTCCATCCCCGGCGTCAGCACCCCGTTCGGCCTCTTGATCCTCTTTATCGGGATCGGCATC  
ACCCTCAATCGGGTGCCTGGCTGCCCGCCATGCTGATGGAGCGCCGCTTCGCCCGCCGACCAGCTCAAGC  
CGACCCTGCACAAGGGGGCGGATCTGCTGGCCCGGTGATCGCGTTATCCGCCCGCGCTGCTGGTGTCT  
GACCGGCAGCAACACGGTCAACCGCTGCAACGGCCTGCTGATCATGCTGGCCGCCCTGCTGCTGATGCTG  
CCCCTGGGCGCCATCCCCTTACCAACGCCATGCCTGCCTGGCCATCCTGCTGCTGGCCACCGGCATGT  
TGCAGCGGGAGGCTGTTTCACTCGCCAGCGGCTATGCTGTTAAGCGCAACCCTGGTTCAGGTTACGCT  
GCTGGCCATCGGCTTGTGATGGCGGGCCAGCGCCACCAGTTTGTCTCGGCTAAATCCGAGGCAAAGAA  
AAAGGGCGACCGGTTGGTCGCCCTTTTTGACTTGTGCGGGATCCGCCGTTACAGCAGATCGTAGATAAGG  
GCCGAGATGGCCAGCAGCCCGATCACCAGCACGAAGAGGGTACTCGCCCCGCGATAACGCTTGAGGGCGG  
GCAGACGATAGATGGAACAAGCCGGCAGCAGGAACAGGATCACCGCGATGAGCGGCCCGCTCACCTTCTC  
GATGATCTCCAGCACGTTGGGGTTCAGGTAGGTAATCACCCCGTCCACCAGAACAGAATGACTGACGAG  
ACCCGCGCGATGGTCGTTTACGCAGTGAAGACCCAGCCCTGACAGGCACCGCTCACCATGCTCACCG  
TCCCCTCGCTCACCCCATGGAGGTGCCGAGGAAAGATTTGGACATGGCCAGAATGGCGATGAGTGGCC  
CACATAGGCGATCAGCGGGTTGGAGAACTTGTTCGCCAGCGCCGACAGCACGAAATATTGTGGTGGCG  
GCCAGCGCCATCTCGCCCTGACTCAGACTCATCAGCAGCTCACACGAAAAAGAGCAGCTGCCGCAAA  
TCAGCATGCTGCTGCACTTGTGATGATCCGCTTGGCAGCAGGTCGGCACTCTCCTGACAGCGCTTCTTCTG  
CGCCCGCTGAAGGAGGAAATAATGGGCGCATGGCTGAAGGAGAACCCATCACCGGCACGATCAGCCAG  
AGTGATTTCCAGAACGCCGATCACGCCAGTCCACTGGCTGACTCTCTGTGAAATAGGAGAGGCTCCACT  
GGGGCAGCAGATAGATAGAGAGGCCAATCAGAAAGGCGACCATGGGCAGCGCCAGCACGCTGATGGCCGA  
CACACGATCTGCTTGCCCGCCAGCAGCACCAGATGCAGGCCAGCATCACCCCGCAGCAGCAAGCCG  
CGCGGCAGCTCGGCATCCCCAGCTGGTGAACCACGAAGCTCTGGATCGCGTTGGTGTGAGATGCTGT  
AGACCAGAATGATGGGGTAGAAAGCCATCAGATAGACCAGCATCAGCAGCTTGCCCGCCTGACTCCGAA  
GTGCTCCTCCACCACATGGGTGATATCCCCTTCCCGATGGGAGCTGGAGAGCACAAAGCGGCTCAATGCC  
CGGTGGGAATAATAAGAGAGCGGAAAAGCCAGCAATAAAATAAACAGCAAAATAACCGGAGAATTACTGC  
CAACAGTAATAGGTAGAAATAACGTACCGGCACCGACAGCAGTGGCATATAGGCCCATGGTCCATACCGA  
ATCGCTTTTCTCCCATTTCAATTTTGAACAGGGTACTCTTTTTAGCAATAGAAACTCATTGCAATA  
TATACCTTATTAATCTGTCAATATTTTTATTAGCCGAATAACAGGCTGGAGATATGTCGTTGCATA  
TCGCCCTGCACATGAAAAACAACCGCCAGCGCCAAACAGGGCCACCGGAGAGAAACGGAGCTGCCAC  
GCTACCATCGTTGAAATCGCTATCCGGGTCAAGGTTAATAATTCATGACTGTTTGAATCGGAATGTTTCA  
AAAGACAACGGGATGTATCACATTCGTCACCCAAAACCGATTCAGCCTGTTTGAATAACATACCGATAA  
AACCTCATGCTGTTGCCCAACAACAATAAGACCAGCGATCAGGCCGATAATATTAACACCTTAAGCT  
GTGGAATATGAGTTAAATAATACGGCCAACCTTTCTACTAATTGACAGTATGCCAGCCAATTTATTCTG  
GGTAAAAGCGCAGGCTATTTCCGACAGCGACCGGGTGGCACTCTCAACCTGCCGGCAGTGCGCCACCC  
GGTTGCGGCTGCCCGCTTGGCAGCATAGAGCCACTCGTCGGCCCGGGCCAGCGCTGATTGATCTCCTC  
CTCCGGCTGCACCAGAGTTGTGCCAGACTGACCGTGTGGCGACCGGATCGGCAGGCAGCGCTTCGACG  
GCGGCACGGATCTGCTCCGCCATCTGCAGCAAAACCGGCTTCATCGATCCGCGGCAGCAGGATCAGAACT  
CCTCACACCGCTGCGTACAAAGAGGTGCTCCGCCCGCAACAGGGCATCGATACAACCTACTGAAGCGCTG  
CAAGGCCCGATCTCCCTGCTGATGGCCGTAACGATCGTTGAGCTGCTTGAAGTATCGATGTCGAGCATG  
ATAAGACCACAGGGCACCTCCCCTGCCCGCAGCGGCTGACAGTGTTCGAAGAAGAACCAGCGGTTGTAGA

GGCCGGTCAACTGGTCGGTTTTACTCTGGCGCAGCAGTCGCTGCTGCAACTCGTACTGGCGGGTGATATT  
GCGGGTACACCCAGGCCACCGCCCGCTTGCCGTCATAGAGGGAGGGCAGCGGCGCAATCTTGCCCTCGAAA  
CGCTGTATCCCTTGCGGCCTGGCGGCAGCATTGATCCCCCCCACCTCGGCGGCGGAGAGCTCATACTCCA  
CCACTCGCACCTGACCGCTCGCCAGCGACTTGGCTACCTGCGCCTTGACCCACATGGCCATCTCGGGTGG  
CAGCACATCGGCCAGCTGCTTGCCCGCCAGCGGATTGCCGTCGTCATAGGATTGCTGCTCCATACCGCCG  
ATATATTTCCACGTAATAGCCATCTTCACTGAGGATAAAAGACGGGATCTGGCAGCTGGGCCATCACTTCAT  
AAAGCTGGGTTACCGAAAGCGCCACGAAGACTCCTGTACTTCAACGTCAAACAGGGGGGAGATATTCTGC  
CTCAAGAGGACTCACGCGCCCTCATCGGCAGCGCAGAAAAATCTGCGGCCACAGCCAACAATCCTTTACA  
TCTAGCAGCCCGCCAGCCTCTCGGCCACCACAGGTGGCCAGCGCGTTGCTACTCCCGCCACTACGCTCGC  
TCACGGCGGCGAAAGCCCCCTCACCCGGTCGCGCATATCCCATTTGTTTCAACTCACAAGTTTCATTTACGC  
TGGCCGTCCTGAGTCCAGTTTTTCACTCATCAGCCATCAGGGAGCCAGCCACCCGCAACCGCAGGGGCTG  
TACCACGAAAAGGAATCGCCAGATGAAAAACGCCATCGTTACCAGCCGCTTCGACGCTATCAGCACCGA  
AGGGGAACAGCTCACCTCAAGATCGCCATCAAGGCCCCCGAGCCGGATCCCAAGTCCGCCAGCGGTGAC  
TGGCGCTGCAAGGTGAAGCTGGCAGGGCTGAGCGACAAGACCTTTATCTACGGCATCGACAGCCTGCAGG  
CCCTGAGCCTCGCCATCAAGTTTGTGAAAACCGAACTGCGCGCTTTCTCCGATGCGGGCTGGCAGTTCTA  
TCTGCCCAATTGCCCGATCACCCATCGACATGAGCGCCTGCTACTTCCCGGCGCTTAGCCCGGCCAA  
TCGAAGGAGACCAGATGCACGGACCCGATCCCGCCAATCCCACCCATGAACGGCTTTCCCGAGGTGTG  
CTTTATCAAGAACACCATCAAGGGGCCAATATCGAGGTGGGTGACTACACCTATTACGACGACCCGGAA  
GATTCGGCAGGCTTCGAGCGCAACATTCTTACCCTTCCCTTCATCGGCGACAAGCTGATCATCGGCA  
AGTTCTGCGCCATCGCCCGCGGGGTGAAGTTCATCATGAACGGCGCCAACCACCAGACCTCCGGCTTCTC  
CACCTACCCCTTCTTTATCTTCGGCAACGGGTGGGAGCATGCCGCCCCCGCCCCGGGCTGCCTCCCTAC  
AAGGGGGATACCGTGATCGGCAACGATGTCTGGATTGGCTATGACGCCCTGATCATGCCGGGAGTAAAAG  
TCGGCAACGGCGCCATTATCGCCCGCCGCTCCGTGGTCACCGGCGACGTGCCCGCTACGCCGTGGTTGG  
CGGCAACCCCGCCAAGGTGATCCGCTACCGCTTCGACGACGACACCATCGCCCGTCTCAACGCCATCGCC  
TGGTGGGACTGGCCCGTAGAGCAGATCAGCCGCAACCTGCCGCTTATCAGCGGCGGTGAGATAGCCGCGC  
TGGAAGCGGCAACCCGTTAGAGACAACCACCATCAAGCAGGAAGCACTATGCAACTCACCCACCCCAAC  
CACCTCAGGACGATGATGTTGAAGCGCTGCGCATTGGCCTGACGGGCTACAACATAAGTCAGGCTGGCCC  
TCAACTGTACGAACTTCGGCGGAGCGGATCGCCAGCTTTATCAAGGATGAAGAGGGCAAGGTACAGCCG  
GGCATCATCGCCGACATCAAGTGGGGCTGGCTGCACGTCGACTGGCTCTGGATCGACGAAAGCATCCGCC  
GTGACGGCTGGGGCGGCCGCTGCTCGGCGCCATGGAGCAGTACGCCCAAAGCAAGGGCATACCAACTA  
CCATCTGGAACCACCAGTTTTTCAAGCCCTCCCTTCTACCAGAAGCAGGGTTACGAAGTCTTTGGCCAG  
CTGCCCGATATGCCCGGGGCATATCAGTTACTTTCTGAAAAAGCAGGATAAGTGATGACATTCAGCG  
CCTTGCCAACGCTCAACTCGTGATCCGCCGTTGAAACCGGCTGATGCCGACGAGTTTGTCCGTGCGGCC  
CACGAATCGATCGAGACGGTTCGGTAAATGGATGAGCTGGTGTCCCATTCATTTACTCGGGAAAACGCAC  
TGGAGTGGTTTACCAACTGCGAGCAGGATCGCGAAGCGGGACGTGCCCTTTGACATGGGCATTTTCTGCGC  
CACCACCGGCCAGCTCTTGGGTGGCGCAGGAATCAACCAGCTGTGCCCCATCATCGCTACGGCAATATC  
GGCTATTGGGTACGCCAATCCCGCCAAGGATTCGGTATAGCCCGACAGGCGGTGCGCCTGTTGCGTGACT  
TTGGCTTTTCAAGCAGTTGGGTCTATTTTCGGCTGGAGATCGTGATGGGGGTTGGCAACACCGCCAGCGAAGC  
CGTCGCCATCTCCGCCGGGGCTACCTTTGAGTGCCGGGCAAGGAATCGTATCTTTCTACATGGCCAGCCT  
CTTGATGCGCATATCTACTCCCTTATTACAACAAGCTAAAATCCAGTAATAAAAAATGCTAAAACATGAAC  
ATCTACAAATAACAAATCCATACCAGTAATATGATGGAGAAAACAACATCCCACCCCTTTATTTTAACATAAC  
TTACACCAAGAATAATACGTTGCATATTTTATTATTTCCACCAATACGCAACATATAAAAAACATGATCTT  
CGTCACGTATAGGAAGTCTCTTATTTATCACATCCCTCCTTTACGGTATGCTCCTGCTTGGCTTATGGGC  
AGATTTTTTACTTTGTTTCGGAGTCTGTGAAAAATAATGTCCGCTGGACTGCCCCCTAAGCGATATCAGCA  
CCACGCTGAGATGTGCGCGCTTGGCTAGGAGTGCCATAAGCCACTATCTACGGAGGAATCGGTGTCCA  
TTCTTATAAATCTCCAAAATGCCAAAACAAAAAGACTTGGCAGAAATTTTAGATATAAACACATCCACA  
CTAACCAACGCATTGTATAGAAAAGAAAGTTTCCAGCTTATACTCTGAATTTAAAAATCCCTAAAAAGAAAG  
GTGGGGAAAGGACAATTTTCGCGCCTCAACGAGAATTTAAAGATAATACAAAAGAACTATCTTTAATATT  
GCAAGATTGCCTAGAGGAAATGACAAGTGAAGATGAACGCACGCCTAACCTCTCCCATGGATTTATGAGA  
GAGAAATCTATATATACAAAATGCGTCATGTCAAAAAACAAAAAGAAATGTTTTAAATATAGACTTAAAAG  
ATTTTTTTGATAGCTTTAACTTTGGCAGAGTTAGAGGCTTTTTTATTTAAAAATAAAAAATTTGAACCTCA  
TCCGGATATTGCAACCGTAATAGCTCAAATAGCTTGCTATAATAACTCTTTGCTCAGGGTAGTCCCTTGC  
TCACCAATTATAAGTAATTTAATAACACACTCCTTAGATATCAGACTTTTCTCAACTAGCTAGCAGACATT  
CGTGTTTTTTACACCCGATATGCTGATGACATAACATTTTCAACAAGAGAATATATTTTTTCCAACGTCGCT  
AGCCAGAATTGAGAACGATGATTATGTGATAGGAAAAAACTACGACAAGAAATTCGCCGTTCTGGCTTT  
GAGATAAATTCATAAAAAACAAGAATTCATATCATAACATCAGTCAAGATGTCACCGGCCATAAGTTA  
ACAAAAAGTAAATGTAAGAAAAGAGTATTGGAAAAGACGTTAGAGCAAAATGTGAATCTCTATTTAGGAC  
TGGGACTTACTACATACTTGATGACAATGAGAAAACAAAACAGGCACATTATCTCAGTTATATGGACAA  
CTAAACTTTTATTGATCAAATCGACTATTCAAAACAAAATAAGAAAACCTATAAAAAACAAATCCATTATATG  
TGCTAGCAAAACATGGAAGTAATAAGGCGCCACTATTCAGTAGCAGAGAGAAAACCTTCAGTCGGTTTTT  
ATTCTACAAGAATTTTTTATGGCAATGAAAAGACAACATTTATTTGTGAGGGTAAAACCGATATCATATAT

CTTCGTTGTGCGATAAAGTCATTACATAACTTACATCCATCACTAGTTGACAAAAGATGGCCTAGCTAACT  
TTGAGTTTTTCAAATACACAAGAAGAACAAAATATCTTTTATCACTAAATGGAGGAACCCATACTTATC  
TGACTTTTCGAGAGAATTACTCTAGCTATCAAGCACCCGAGCCAAAACGACCAACAATAATCATCCTTGA  
TAACGATGATGGCCTTCCAAAAATAATCGGTAGCCTTCAAAGGAAGGCCAATGTCGACTAGTAAATTCA  
GATGGTGAAACAACCTTTAAATGGCATAACCATCATTGAAAAAAACACTCTATGTGACAGTCTGTTGTA  
TATATCTTCTTATCATTCCAAAACAAAAAGAAAAATGATACATCGATAGAAGATCTATTTCGATGACTCAGT  
TCTCTCGGTAAAACCTTGGAGGAAAAAGCTTTACTACTGAAAAATGATTACTCAAATGAAAAGTTTTATGGC  
AAAAACATATTTGCAACTGCTGTTATCGAGAAGAAAAAAGAAACTATAGACTTCTCTGGCTTCAATGTTA  
TTTTCAACGTCATTGAGGCAATTCAAAAAGATTATTTGAAGCTCTATAAGCAACAGCAAATTAACGACT  
AAAAGCTCGTTTTAAAAAAGCTTAAACGTTAATGTATTATTTTCATAATGTATTTATCAAGCGCCAAA  
TTTTTACTGCCTACCAGGAGGACACACAACATAGGCTCCATAACATTATGTTTGTACCAGTTGCTTGT  
CAAATCCACCGCCTGGAATAAACCAAGGAGTAGCTTTAGGTCCTTCCAAAATCACGATCCCCGGCCGA  
AGGGCGGGCTAACACCTTCGAGGCCAGCGCCTCGCGTCGTACACGGCGTAGCCGTGCCGTTTCCCTCA  
TCACATATCACACGGAGCGGACGATTACGCCTGACGGCTAATCGACCCACGACTGTTTCGCATAAACATG  
TTCTGCATAGTAGCAACCGGCACAAAATCTTACCCCAAAATCGGCCACTGCTTATGGTCGCAATGGCCAT  
CGATAAGCTGAGCAGCAGCTGCGATTTTTGCACTGGCGAAAACGAAATCAAGAGCCATCGTCGCACCAATG  
AAACAATCTTGTGGAGCAAACAAAGCAAAGCGGCAAGCCGTGGCGGGGATCTGCCCTCCGATCTGCTT  
GCCGCTGTCTGTTATCACTGGGGATAAGCCTCTTTAGCGACCCAAGAAGGGTCCCAGTCTTTAAACACC  
GGCTGCAACCCGGCCTGCCGCACGGCGGGCGGCCACTTCCCCACCGGGCGGTGTCGTGGATGGCGAACT  
GCTCCAGCTCCTCTGCATCCCTTCGGCATAGCCCCCGGCTGGGTGCGCGACTCGGCCGACATCTGGGT  
GATGCCAAGGCGCACCGCACCGTTCGCGAAAGGTGGCCGACTCGCGGGTCGAGAGGGACAAGTCCAGCGTC  
GGCGAGAAGAGGGCGCCAGGCGCAGATAAGCTGGGCCAGCTGGCGATCCGACATGACCACGGAAGGCTCCA  
GACCACCGGTGCAAGGGCGCAGGCGCGGGAAGGAGAGCGAATAGCGGCTCTGCCAGTGGTGGCGCTCAAG  
CCAGGCGAGGTGCTCGGCAACAAAATAGCTGTTCGGCGCGCCAGTCCGAGGAGAGGCCGATCAGCGCCCC  
AAGCCGATTTTGTGCATACCGGCGCGGCCAGCCGATCCGGCGTGGCGAGGCGCCATGCGATGTCCCGCT  
TGTTGCCGCGCAGATGGTGGCGGGCGTAGGTGGGGCGTGGTAGGTCTCCTGATAGACCATGACGGCGTC  
GAGACCGAGGCTTTTTCAGTTTCGGCATATTCGGCCTGCGAGAGGGGTGCACCTCCATCCCTACCCTGCTG  
AAGTGGCGCGGATGATGGGCATACCTCGCGAAAATAGGCGAGCCCCACTTTGTGCTCGTGCCTGCCGG  
TCACCAGCAGCAGCTGTCAAACCCGCGCCTTGTATGGCCAGACACTCGTGCTCAATCTCGTCGCTATT  
CAAGGTCTTGCCTTTCAGGCGGTTGCTCATGGAGAAGCCGCGAGTAGGTGCACTCGTTGGCGCAGAGGTT  
GACAGATAGAGCGGCACATAGAAGCCGATGGTGTTCGCAAGCGCTGGCGGGTCAGCCGCTCGGCCTCGG  
CTGCCATCTGCGGCAGATAGGCTTCGGCGGCTGGGGAGATCAGCGCCATAAAAATCGCTCAGGGTGCGGCG  
CGGTGCGCTCAGGGCGCGGGCCACATCGGCGGCGATTTTGGCGGGATCTGCATGCCGATATCGTCCCAA  
TCCAGTTTCGTGCCAGCGGTTCGAGAAAGGTAGGCTCCTTAGCCCTCACCCCGGGCGCCCTCACCCAGCC  
CCTCTCCAGAGGGAGAGGGGGCAAACCTCTGGCTGCCCTTGGGGCAAGGGGGAGATGTTTCATGGTCCG  
CCCTGTTTTCATGACTCATAACGCCCCAGAAAATCGGTGAGCGGGCTGGAGGCTTGGGCTGCAGGGCGC  
GGGCGCCGAGCCCGCTTCATAGGCGCTGCGACCGCGGCTGCGAGCCAGTCAAAGGCGCGGCCATGGC  
GATCGGATCGCCGCTCACCGCATGGCGGTGTGACCAGCACGGCATCGGCCCCAGTTCAAAGGCGGGC  
GCGGCGTGGCTCGGCGCACCGATGCCCGCATCCACCACCACAGGCACATTTGGCTGCTCGATGATGATGG  
CGAGGAAATCCCGGGTACCAGCCCTGATTGGAACCGATGGGGGCGCCAAGCGGCATCACGGCGGGCGCA  
GCCACCTCTTCCAGCCGCTTTCAGCGTCTCGATGGGATCGGGCAAGAGGTAGCGGGTTCGGGGTGGGA  
TCTCCAGCTTCAGCCAGTTTCGTCCCAGCGCTCGCGGGCGAGATGGGCGGCAACACCGCTCGGGCGG  
GGTCTTGGCGCCGGAAGTGTGGGCAGCAGCTTGACCCGAGTTGTAGCAAGGGGTGAGGATATCGTCCG  
TGGGCTTGCCTGGTTTCGAGCCGCTTGTATGGCCATGGTGAACACCGGGAGCCGCTCGCTCGATGGCGG  
CGGCCATCAGATCCGGGCGGGCAAACCTTCCCGTGGCGGTAAGAGGCGCGATGAGAAGGTGTGATCGGC  
AATTTTGCATGTGACCTCCTGCCACTGCGATAAGAAGAGATGAAGTTCTACCGCAAGGCAGAACGCT  
CGAAGATGGGAACGCAAGCATCATGGATCAGCCTCCCGCTATGGCGGTAAAGAGGTGAAGTTTCGTCCCG  
TCATTAAGACGGGTCTCGGCCAGCGGCCACGGGGCAGCACGGCGCCGTTAAGGGCCACCGCCACCCCTT  
GGGGATTGACCCCTTTCGCGCCAGCAGGTTCGGCCACACTCTGCCCTGCCGCCAGCGGCTGCGCTTTATC  
GTTGAGTGAATGGTCAAGGTTCATGGGGTATCTCCTTATCGTGTGTCGCGCATCGGGCGTCCCGCAAA  
CCGGGCAATCGGGATCGGGGGCCAGCGTTCGAGGCTGTCCTGATGGGTCAACGCATCGAAACGGCGCAG  
GGTGCAGCGACCGGGCTTGGCATCCCGAGCAACAGTTTCAATGCCTCCAGCGCTGCAAAGAGCCCATC  
ACCCCGACCAACGGGCGGTTGACGCCGCTGGTCTCACAGCGCTCGGCGATTTTTGTATCCAGCGGATAGA  
GGCAGGCGTAGCAGGCGTTCGCGACCTGTGCGCGCCATCAGCTGCCCTGCCAACCACCTGCAGCGGC  
GGAGATCCAGGGCTTGTCTGAGCCACGAGGCGGCGTTCGATGGCATGGCGGGTGGCGAGGTTGTGCGAG  
CAGTCGATCACAGATCTACCTCGGCCACAAAATCCGGCAGGCTGGCGGCATCGAGTCGCTGGTTAATAG  
CAATCAGCTCCACCAGCGGGTGTGGGGCGGCAAGCGCTCGCGGGCCAGCTCCGCCCTTGGAGTGGTTGAC  
CGCTCGCTATCGAACAGGATCTGGCGCGGCAAGTTGCTGGAATCGACGGTATCCCCATCGGCCAGCCAC  
AAGGTGCCACCCCGGCCCGGCCAGATAGAGGGCGAGCGGCGAGCCGAGCCCGCCAAGCCACGATCA  
GTACGGACTTATCTTTAGCCGTGCTGCCCGCCTCCCCACTTCCGCCAGCATCAGCTGGCGGCCATA



TCTCAGATACTCTTTGTCACCTAAGAGAAGCGGCATCAGAGCGCATGTTCTGCCTCCCGTATAACGGTGGC  
CGAGCGTGGCTCATCCCCGCTCCCACGGCAGCGAGCAGCCGCTCGGTGCGCCCCCTGCCAGTCATCGCTG  
GCCGTGATAGCCGAGACCAGCGGATACTGCCGACCCCGCTTGCCTTGACCGCCGCCACCCGCTCCTCGC  
TGATGCCGCGGATGGCCACCGTTCGGCCACTCCGCCATCAGGGCGCGGTAGCGGTGCAGCCGCCACAGCCC  
CTGCGGGGCGGGAGGGCATCGCCTTGGTGTGGTTCGGGAAGATATGGCCCAGCGCCATATAGGAGGGGGCC  
AGCTCGCGGGCCCGCATCAGCTCGAAGTAGCCGTGGGTAGAGATGCCAAGGCGCAGCCCGGCCGCTGAA  
TGGCGGGGAGATCGGGGCTCCATATCCTCCTGCCCCAGATGCACGCCCCAGGCACCCGCCCTCGATGGC  
CTGCTGCCAGTAGTCGTTGATAAAGAGTTCGCGCCCCATGGCGGCGACCGAGCGCTACGGCCCTCAGCAATT  
GCCGGTGTACCTGAGCGGGCGGCAGATTCTTGATCCGCGAGCTGGATGGTCTTGACCCCGGCACCCAGCA  
GGCGCTTGAGCCACTTGACCGAATCCACCACCGGATAGAGGCCAGATGCTGTTCACTGGCGGCAAGGG  
GCCATCCGGCAGGCGGCGACTGCTTGTCTGATAAAGTCCGAAGCGGCGATCGAGCGTTGAGCCCGCCAA  
ACGGCGCGGGGAAGTGGGCAAGACAGGTTCGGCCAGCCGAGATGGGCGATGGGGCGGCGCTGCCCCCA  
CTCCTTGCGCCCGCCAGCCCTGTTGCGAGGTAGGCGCGAGCGAGGGTGATGGCGTCTCCACCGGATA  
ATCCTGCGCCACCACGGCGGCGATGGCGCTGGCGTAGCAGCAACCTGTGCCGTGGCCGTGGCGGGTGTGCG  
AGGCGCGGCGCCGCAACCAGAATTGCGGGTCTCGTCTGGTAGTAGTCGAGGCAGAGCTCACCGCTCC  
AACCCAGATGGCCGCCCTTGACCAGCACGGCACGGACGCCGAGTTCGCGCAGCCGCTGGGCGGCGAAGCG  
CACCAGCACAGGGCTGGTTCGCGGGAATGCCGGTTCAGGGCTTCCAGTTCGGGGCCGTTGGGGGTGATGAGC  
GACAGACGTGGCAACAGCTGCTCGCGCACTGCCGCCAGCATATTGGGCTCCGCCATCGGGGTGCCGGTGC  
TGGCGATGGCCACCGGGTTCGTAGACCACGAAGGGACTCTCAATAGTTGCCAGTCGGCGGGCCAGCACCTC  
GACGTGGAGCCGGGTTCGGCAGCAGACCGATCTTGATGGCGGCGGGCGGCAGATCGACGCCGAGGGCGTGC  
ATCTGGGCGGTGAAGGTCTGCATCAGCACGGGGTCAACCATCTTCACCGCCACCGAGTTCGGGCGGTGA  
TGGCGGAGATAACCGAACAGCCATGCACACCAAGATCGTGCAATGTGTGCAAGTCGGCCCTGAATGCCGGC  
ACCGCCGCCGGAGTCTGAACCGGGCATGGTCCAGACAACCTGGGCGAGAGTCCGTCACGGGCGCAGCTCG  
GCGGGGCTGACAGCCCCGCTTGGCGTGTCTCACGCCTCCTCCCCTGCGGCCCTGTTTCAGCGCCCGCCCTG  
ATGGTAGATCTCGCCACCGGTCTCCTTGAAGGTTTCCGCCATGCGGGCCATGCCGCTCTCCACCTGAGCC  
ACTACCTGCTCCTGTTGGCCATCCATAACCGACCAGCTTGATCTCCACCGCTTCAAGCTTGGCTGCGTAGT  
CGCGCACATCTCGAGTGATCTTCATGGAGCAGAATTTGGGCCCGCACATGGAGCAGAAGTGAGCCACCTT  
GCCGACTCCTTGAGCAGGGTCTCGTCTGTTAGGACCGGCGGATTCGGGATCCAGCGCCAGATTGAAC  
TGATCCTCCAGCGAAACTCGAAGCGCCCTTGGACATGGCGTGTGTCGCGGATCTGGGCGCCCGGGTGC  
CCTTAGCCAGATCGGCGGCGTGTAGCGGCGATCTTGTAGGTAATCAGCCCTGCTTTCACATCCTCCTTGT  
GGGACAGGCCAGATGCTCCTTGGGGGTGACGTAGCAGAGCATGGCGCAGCCGTACCAGCCGATGAGCGCG  
GCACCGATGCCGGAGGTGAAATGATCGTAACCCGGCGCGATGTCCGGTGGTGAGCGGGCCAGCGTATAGA  
ACGGCGCCTCGTGGCAGTGCTCCAGCTGCTCGGTGATGTTGCGCTCGATCATGTGCATCGGCACGTGACC  
CGGCCCTCGATCATCACCTGCACGTGTAATCCACGCAATTTTTGTGAGCTCGCCAAGAGTGCGCAGC  
TCGGCGAACTGAGCCTCGTCTGGCGTCATAGACGGAGCCCGGACGCAGACCGTCCGCCAGCGACAGGG  
CCACGTATAGGCGGCGCAGATCTCGCAGATTTGCGGAAAGTGTGTTAGAGGAAGTTCTCTTTATGGTG  
GGAGAGGCACCACTTGGCCATGATGCTGCCACCGCGCAGACGATGCCGTTGAGGCGCTTGGCGGTGATG  
GGCACGAAGCGCAGCAAGACGCCGGCGTGGATGGTGAAGTAGTCCACCCCTGCTCGGCCTGCTCCAGCA  
GGGTGTGCGGGAACAGCTCCAGGTGAGCTCTTCGGCGATGCCGTTGGTCTTCTCCAGCGCCTGATAGAT  
GGGCACGGTACCGATGGGCACCGGGCTGTTGCGCAGGATCCACTCGCGGGTCTCGTGGATGTAGCGGCCG  
GTGGAAGATCCATGACGGTGTGCGGCGCCAGCGGGTTCGACCAGACCAGCTTCTCTACCTCCTCTTCGA  
TGCTGGAGGTGACCGCCGAGTTGCCGATGTTGGCGTTGATCTTACCAGAAAATTGCGGCCGATGATCAT  
CGGCTCCGCTTCCGGGTGGTTGATGTTGCTGGGGATGATGGCGCGACCGGCGGCCACCTCATCGCGCACA  
AATTCGGGGGTGATGTTCTGGGGCAAACGGGCACAAAATCGCGGCCGATGCTGGGTGCGCAACAGTT  
CAGAGCGCACCCGCTCACGGCCATGTTTTGCGGAATGGCGATAAATTCATCTCGGGAGTGACGATACC  
GGCACGGGCGTAGTGCAGCTGGGTACCCGCGGACCCGGCTTGGCGCGGCGGGCTTAGGCAGATGTTG  
AAGCGCAGGTGATCCAGCCCTCATCGGCCAGCCGCTCCTGAGTGAAGGTGGAGCTGAGCCCGGCAGTT  
CGTCCGATCATCGCGCTCCAGCACCCAGTTCTCCCGCAGGCGCGCAAGCCGCGGCGCACGTGATGGC  
GACCCCTCCTCCCCGTAACGGCCGAGGTGTGCTAGACCGGCACCGGCTCGTTGGGTTCAAACCTGGGA  
TCGTCTTTGGTGCCCGACGAAGGTGTGCGCCAGCTGGATCTCCCGCAGCGGGACACGGATATCTGCGC  
GGGAGCCTTCGATAAAGATGCGGCGGGAGTTGGGGTGGACCATCCCTTGAGGCTGTCGATAAAGGCTG  
GGCGCTGGAGCGCTGCTCGCGGCGGCTGGATTTGGCGATATCAGATACGGAAGTAGACATAGCAAACTC  
ACATTAACCTGGTTGAAGTTATGGGTGTTTGTCTGCTGAGTTCGAGGAGAAGATGAACCTGCGGCGGGG  
TGTTTATCTCGGGAGGGAGTGCAGCGGGGATGGATCTCCGCGCTGCTGTTCTGCCATTTCCCGCTCTCTG  
CACGCTGTGGGCAAGGCGCCCCACGTGCTGGACAACCGGACGGGACAGACTCCCTCCTGTGCGCCCTGAC  
CCATCAAGGGTATCCCTTCGATGAGCGGAAGAGGCTTGTCCCTCCTCCGGCGCGGTAACCCGCAAGTTA  
CCCTTGTTCCTTTCGAGGTTTTAACCTGATCAGGTTCCACGGATCCCGAATTAACGGTCTCAGCTTCGC  
GTCGTTTCGACGGTACGACTCCGACAAGATGGCGCCAGTATAAGGGGGAAAAATCAAAGCACAAGCCGTT  
AACAATCTGGCAACACGCTCTTGAACAAAATGAGTGAACGATGCTCGCTCACGGGGCCACCCCAAACA  
GAGGTCAAACCTGCGTTGGCATCACCTTGGCACACCACAGGTTCCCGCTGTGCTCACTCAGGGACAAGAG  
GAGAAAAAGAGGGAAAAATCGAGGGGCGCAGGGCAAGTGCATCGTCTTGCGCGGAACAGAAACAGGCCCT

ATGAAAGGGGCTGCGAGTGAGGTTATTGAACCGGCACTATGGTCAGGGATACGTTGCCAAACCCCTTCGT  
TGGCAAGGGCCTCGCTGTCCAGATCCACACCAGTCAGAGCCACACCTTCAGCAGAGGCGTTACGCAACTG  
AGCAGAGGGCCGCGGAACGAGTCTGGGGCTGACCGATTCGATATCGCCGGCAAACCTGGCTCTCGGCATAG  
AAGTCACCGGTCACCGCCGAATGGATCGGGCGCAGCACACGACCCAGGTTATTTGTCATGGTCGACAAAC  
CATACTCGCTGATGGTCCAGTTCAGTCCCACCCTTCACTTCACCCGGGATATAACGCTTGTCCCCTG  
GTAACGGATGCTGCTCGCCTTGTGCGGGAACGGGCGGACGGCAAAGGTGTGCTCCCAGGTCGGACGATTA  
TCAGGATGGGTATACCAGGCATTGCCGCCCCAACGCAGGAAGCCCTTCATGGTCAGGTCATAATTGACCT  
CGGCCTTGAACCTCGTAGGGGTAGGAGATGTTGGACTTGTAGAGGGCAACCCGACCCGGCAGGCTGGAGTG  
AGGCGGCACCGTGGGGCGCGCTTCAACCGAGACGGTCTCGGTGGTCGAGCCCCGCTGTTGGGAAGCCCAG  
CTCTGGCTCGCTCGATCTCGATGGCCAGTTCGGTTCCTCCACCAGCGGCCACTGAAACTTGTTCCTTGG  
TGGTACCTTCTCGCTCAGGCTGAGGTGTCGGTCTTCGACCATTTGGCCGTGATGGTCTTGACCAGTCTGAGG  
CACCACCACCTGCTGAGGCAGGTGCGGTGTAGTTGGTCGATTTGGCCGTGATGGTCTTGACCAGTCTGCTTG  
CCGCTCTCGGTGACCTGACCATGACTGAAGGAGTCGGGTTCAGGTTATATGAGAAGTTGCTTACCTTGA  
TAGAGCTCTTCTCCCCGCAACGATATCCGGAGCAGCCGCCGTCATTATTTCCCTTTATCAGCCAGCCATC  
GCCAACCCGGGTAACATCCATATCCTCCCCGACATAGGGGCTATGATTTCCACCACCAGGCGTATCCC  
AAATAATGGGCGAGATAACTGACTGGCTTGATAAAAATAATCATGGTCGTGGACAAGACGCCATTGCACAT  
CGACCTCATCACCCGCCGAATATTCCAGTCAGAGAGTGTGGTATTTCTCTGAAACCGGTGAATTTGG  
ATAGCACCAGGTTTCTCCGGCAGTGCCCTGTTGATTTGCCATTATATCCCGGCCCCATAATCACCAG  
CGATCAGCCAACCCGGTGTCTGCCACTGCCCCATGCGGCTGACCAGATTACCTTGATACTCATGGCTT  
CATCGCGGGTCAGAGGACGGTAACCACTGGCACAGACGCCCGTGCCAAGACCCGCCACTTGACCTGATC  
AGGGTAGACAGGTTAGCCGCTGCACCTGAGCGAGCATCAATGAAGACGCCAAAAACGCCAGATTGGCG  
GTAATTATTCTATTTCATCATTTATCCCTCTTTTCAGACATACGATAAATGTTATTGTGTAGAAATATCCTT  
TTTCATTTGACAGGTATGGACTCCGACAAAACCTGACACAAAATAAAATAAACCCAAAAAACATCCATG  
ACAAACAAAATAATGGTGATGCAGGAAAATAATAGAGCGATGACTTTATTTGATGGATAAATCATAAATA  
TTGTGGCAGCCATTATTTAATGGCTGCCACAATATGGTGAAACCATATTAATAAGAAGATGCTGAATTA  
CTCTTCCGGATTGATCACTTCAATTCCCTGCAATATTCATTCGCCGAACGGATCAATATCAGCTCGCTC  
CCGGCGTGAGATCGGCGACCCGAGCCGTTGACCCAGCGCACCTGCGGATTGAGTGGCACAGTGGCCAGGG  
TGGCCAACGCTGAGCTGCCGTTCAATCGAAGGATTTGAGCGCATCTTGCGCCCGCTGCCAGGCTGATTTGG  
CAGCTGGGCTCTGGCGGCCAGCTCAATCCGGTGGCAACGCCATCTGCCACCAGCAGGGCGAGCTGG  
TCGCCGGGCTTGAGTGGCTGCGGCCAAATCTCCCCCTGCCGCCAGACGGCGGCACTGCCCTGCTCCACCT  
CGGCCCCCTGAAATTGCAGGCGGATGCCGTGCTGTGCTCCAGCTCCACCAGCCACAATTGCTCGGCTCC  
CGCCTGCGCAGCCCAGAGCGGCACACCAGCATCCATGCACACCCTTTCTCGATTGTTCCATCTTCGTT  
CGTCCCTGAACAAAAGCCCATGCTGGACAAGCATGGGCTTCATTCGGGAGCATTTCTAATCGGAACGCA  
GAGATCGGATCAGTCATCCTCGCGGCAGCGGCTCAGGCGCATGCCGTCAAACCTGCACTCCAGCTCGAGC  
CAGCGCCCTTCGAACGGCGCCAGACTGTTATCCGAGGTGGTGTAGCCCCAGATCCGCCCCCTTCCACCG  
GCCCCCTCCAGATCCATCTCCTCCTTGTATCTTCGTCGAGGGCTTCGACCTTGGCACATAGCGCACGCC  
GTTCTCCACCACCCCTTCATCTCGACCCAGGTACCGCCGAGATCATCCTCGTTGAGCCAATCCTTGAAG  
CGGGTCTGGTTCATCGATCACGAACGGCATGCCGTTGACCATCAACTGGCCAAGCTGCCAGGTAGTGGCG  
CGGTGAGTTTGAATTCCGTGCTGCTGCGGTTGCCAAGTGGCAACAAGATCAGCAACAGGAGGGCGCAGAG  
AGACTTCTTCATCAGGGATCCTCGGGGTTACACTGGCAAACAGGATGCCGAATCCGGTGTGAAAAGAGCG  
TGAAACGCTCGCCAACCAGGAGAGCAAAGCATGAAGATTTTGGTAGTGGAAGACAATCCTCAGGTGGCGG  
AAACCATCATGGATTATCTGGAGCTGGCCGGTCAACGCTCGATTTGTGCTATCACGGTCAGGCGGGCGCT  
GCAACTGCTGGAGGAGCAGCGTTTCGACGTCATCATCATGGATGTGATGATGCCGCGCCTCGATGGCTC  
AGCACGGTAGCGCGCCTGCGCGAGCAGGGGATTGCCACTCCCGTGTGTTTCTACCGCCCGCAGACGCC  
TGAAGACAAGCTGGCAGGCTTCAAGGCGGGAGGGGATGACTATCTGGTCAAACCGTTCCGATGGAGGA  
GCTGGAGGTACGGCTGCAAGCCCTCAGTCTGCGCGGCCCGCGCGGATGTGGGGGCCATCAGCTTTGGC  
GATCTGACGGTTCGATGTGCGCCAGCGGCCCGCCACCCGGGCGGTGAGCCCCCAAGCTCGGCAAAAATCC  
CGTTCCGGATCCTCGCCCTGCTGGCCCCGCGCCCCCGCCATCGTTCAGCCGTCAGGAGGTGCTTGACAC  
CGTCTGGGGGGATGAGGAGCCCGACTCCGATGCCCTGCGCAGCCATATCTATGCCCTGCGCAACGCGCTC  
GACAAACCCTTCCCCACTCCCATGCTGGAGACCCTGCACGGTCAGGGCTACCGACTGGTGGAGCGCATGAG  
CCTGCCGAGCCTGCGCCGCGCCTGATCATGGCGCTCGGCGGCGCCGGGGTGGTGTGCTGATCCTGCTC  
TCCGGCCTGATGCTGGTGGCCGAGGACAAGATGGAAGAGCTGAGCCTGCGCCACTGGCTGGAAGCCGAAG  
TGACCCGCTACAGCGATGACTGGCTGCGACTCGGCCCGGCCGCGCTGCCCCGAGCCCAGACAGTTCTC  
CAGCTACTGGACCGAGCGGGCCGCTGCCGAAATGGCTGAAGCCCTACCAGCCCCCGGCTTTTTTCGAG  
CACCAACTGGGCAAGGAGGACAAACACTTTCTGGTGGCCCGTCAACCCCTCCGGCGAGGGACTGCTCTATC  
TGGTGTTCATGACGACGCCGACGACTACCTCGACCCCTACGAAGACAAGCTGCATCTGGCGACCCGGCT  
GATCGGGGTGACCCCTGCTGCTCGCCTGCCTCGGCTTCGGCATCTGGCTGGTGGCCATATCACGGGGCCG  
CTGCAACGGCTGCAACAGAGGGTTGCCACCTCACCCCGGATCAGGCGGATTTGCAACCCGACGCCCCCT  
GGCAGGAGCTGCGGGATATCGAGCTGGCGCTGCTGGCCGGCAAGCAGGAGGTTAGCGCAGTGTTCGCTCG  
CGAGCAGGAGTTAGCCGCTTCGCCAGCCACGAGCTGCGCACCCCAACATGGTGATCCAGGGCTCGGCC  
CGCTGCTTGGCAAGGTGACAGATCTGCCAGCACCGGCCGCCACCACCAGCATCCGCGCCCGC

CCGACGAGATGGCACTGCTCACCGAGACCTTCTGCTGCTGGGCCGCAAGGAGGCAGTGGAGCGGCCGCT  
GCAACAGGTCACCCCGCTGATCCGTCAGGAGCTGGCCCGCTCGCTCCGCTATTGCAGCGGGAGGCCCTC  
GATATCCGGCTTAATCTGGACGAGAGCAGCGAAGTAAACGCCCCCTCTCCCTGCTCGCCATCGCCCTCG  
GCAACCTGCTGAAAAATGCCCTGAGCTATGCCGAGGGACATATCGACATCGAGCTGTGTGGCCCGGTGCT  
CACCATCAGCAACCCGACGGCGGGCGCCGGATCAGATCCTCGGCTACGGCTGCGGCCCTCACCATCATC  
CAGCGCATCTGCGAGAAGCTGGATTGGCAGATCGACACCCGGCTCGAGGATGGCGTATTTAGCGCAAGGC  
TGGCGATGATCACTGCCGAACAGTTCCCTCTCCCTTTGGGAGAGGGCTAGGGTGAGGGAACGCGGCACC  
GCCAACCCACCAGCCAGATAGCAACAAGGCGCCCGAGGGCGCCCTGTTTCTATCTGACAGATGCAAGCCC  
GCGGCTCACTCCGCCGTTTGTCTTGGCGCTCGCCTTGAGTTCGAGGAACTCGATGATCTTGCCGGCCA  
CATCTTTGCCGGAGGCGGCTTCCACCCCTTGACAGCCGGGGGAGGAGTTGACCTCCAGCACCAGCGGGCC  
ACGGCGCTGCGCAGGATATCCACCCCTGATATCCAGCCCATGATCTTGCGCGGCTGCACCCGCGGT  
GCGCGCTCTTCCGGGTGATCTTGATCGCCTCGCGGTGCCCGCACGGTGCAGGTTGGAGCGAAACTCCC  
CCGGCTGGGCCTGGCGGCGCATGGCGGCAACCACCTTGCCGTTGACCACCAGACAGCGGATATCGGCGCC  
ATTGGCCTCGCGGATATACTCCTGCACCAGAATGTTGTTGTTGGTCTGGATAAAGGCCCTCGATCACGCTC  
TCGGCGGCTTTCTGGGTCTCGCAGAGCACCACGCAATCCCTGGGTTCCTCCAGCAGTTTACCACCA  
GCGGCGCCCCGCCACCATGGTGTGAGGTGGGCACGTCGTGGGTGCTGTGGGCATAGCCGGTGTGGG  
CAGGCCGATGCCGTGGCGGGAGAGCAGTTGCATCGCCCGCAGCTTGTGCGGGAAACGGCTGATGGCAACC  
GAGCTGTTGAGGGCCATGGTGTTCATCATCTCGAACTGGCGCAGCACGGCGGTGCCGTAGGCGGTAATGC  
TGGCCCCGATCCGCGGGATCACGGCGTCATAGCTTCCAGCTCCCACCTCGTAGTGAATGGAGGGGTT  
GTGGGAAGCGATATTCATATAGCAGCGCAGGGTGTGAGCACCTTACCTGATGACCGCGCGCCTGTGCC  
ACCTCGACCAGACGGCGGGTGGAGTAGTTTTTCGGCTCACGGGATAAAATGGCGATCTTCATGACAATTC  
CGCTAGAAGGCTGTGCCTGGGCAGGATGGGGCGGGAGAGTATAAGGTGCCACAGCGCCAAGACAACGCCA  
ATTGTTTATCCTGACAACAAGACAAACCACACCAAAACCACATCACTGTGACCAACAGGTTAAACGGCGGC  
TCTGCGCAGGTTGTTCAACCCGTGCAAGGATGCCGCCGTTTCTCGTTAAAAGATCAACCCGGTGTACGCGG  
GAGTCAGTTCAAGTTTGGCCCCAACAGCGCTCGGCCTCGGCCAGCGTCATCCCTTGCGAACGGCGTAA  
TCCTCCGCCTGATCTTGCTGGATCTGCGCCACCGCAAGTACTTGTCTCGGGGTGAGAGAAGTACCAGC  
CCGACACCCGACCCCGGCCACATGGCGTAGGATTCGGTGTGAGTGCATGCCGATAGCCTGCTCCACCTT  
CAGCAGTTCCAGATCTCCCTTCTCGGTGTGCTCCGGGAGGCGGATAACCGGGAGCATAACCCCAATGTACCT  
CCCTGATAGTTTTGCGGATCAGCTCCTCGTGTGCTGAGGGCCCTGCTCGGGAGCATAACCCCAATGTACCT  
TGCGCACCTGCTCGTGAGATACTCGGCAAAGGCTTACGCCAGACGGTTCGACACCCGCTGAATAAGGAT  
GGCGTTGTAGTGTGCTGCTGCACCTTGTAGGCCTTGGCGATGGCCTCCTCACCGATAACCGCCGGTACC  
GCGAAGGCGCCGATCCAGTCGGGCTTGCCACTCTCTTTGCGCGCCACATAGTCCGCCAGACAGTAGTTGG  
GGAAACCTGCTTCTCGCTCTGCTGGCGCAGGTGATGCAGCACCTTGTGACCTCGGTGCGCGACTCGTC  
GCTGTAAACTTCGATGCTGTCTCTACCGGTTGGCCGGGAACAGGCCGATCACCCGGCGCAGCGCAGC  
CTCTGATCCTTTTCCAGCTGGTCCAGCATGGCGTTGGCGTGGCAAACAGCTTGGTGCCTCCTCGCCAA  
TGATCTCGTCTCGAGGATGCGCGGATACTTGCCCGCAGCTCCCAACTGAGGAAGAACGGCGTCCAGTC  
GATGTAGGGGCGCAACACCGAAATGGGCACATCTTGAACCTTCTGCACCCCGAGCTCGCGGGGCTTGGGT  
GGCTGGTAGCCAACCCAATCCAGCTGATGCCGGTTGGCGCGGCATGGGCCAGACTGACTGGGCGGGAGC  
GCGGCTGCTTGCGGGCATGCTGATCCCGGGCAATCTCGTACTCCTTGTGATGCGGGCGACAAAAGACTC  
CTTCAGATCCGGGCTGAGCAGGCTCTGGGCCACCCCCACCGCGCGGGAGGCGTTGGAGACATAGACCACA  
GGCTCCGAGTAGTTTTGCTCGATCTTACCAGCAGTGTGCGCCTTGGAGGTGGTGGCGCCGCCGATCAGCA  
ACGGCAGCTTGAAGCCCTGACGCTCCATCTCTTTGGCCACGTGCACCATCTCGTCCAGCGACGGAGTGAT  
GAGACCCGACAACCCGATGATATCGGCGCCGACCTCACGCGCAGTCTTGAAGTGGTCTCGCAGGAGACC  
ATGACCCCGAGGTCGACAATCTCGAAGTTGTTGACTGCAGCACCAACCCCGACGATGTTCTTGCCGATGT  
CGTGCACGTCCTTTCACAGTCGCCAGCAGATTTTGCCTGCTGGAGCCGCCGATTTTTCCGCCCTC  
GATATAGGGCTGCAGATAGCCACCCCGCTTTCATACCCGGGCGATTTACCACCTCGCGGACGGAAC  
ATCTTGCCCGCCCCGAACAGGTGCGCCGACCAGTTCATGCCATCCATCAGCGGCCCTTCGATGACATGCA  
GCGGCTTCTCGGCGCCAGCGGTGCTCTTTCGGTATCCTCTTCGATAAAGTCGGTGTATCCCTTGACCAG  
TGCGTGCTCCAGCCGCTTGGCCACCGGCCAGCTGCGCCACTCCTGATCCCGCGGATCCTCGGCTGGGCG  
CCGGCACCGGATACTTCTCGGCGATGGCCAGCAGCTCCTCGGTGGCGTTGTCATTGAGGTTGAGCACCA  
CCGCCTCGACCTTCTCTTTCAGCTCCGCCGAATGTCTTCATAGATGGCGAGCTGACCGGCGTTGACGAT  
CCCCATGTCCATGCCGTTCTTGTGATGGCGTGGTAGAGGAAGACGGCGTGAATGGCTTCCCGCACCGGCTCG  
TTGCCGCGAAACGAAAACGAGACGTTGGAGACGCCGCCGAGATCATGGCGTGGGGCAGGTGTGTCTTGA  
TGTCTTACCAGCTCGATGAAGTCCACCGCGTAGTTGTTGTGCTCGTGCATGCCGCTGCTACCGCGAA  
GATATTGGGGTGAAGATGATGTCTTCCGGCGGAAAACCGACCTGATCCACCAGGATCCGGTAGGCACGC  
TGGCAGATCTCGAACTTGCGGGCGCGGGTGTGCGCCTGCCCGCTTCATCGAACGCCATCACGATAACGG  
CGGCACCGTAGCGGCGCAGCAGTTTCGCTGCTGGATGAACTTCTCCTCCCCCTCTTTCATGGAGATGGA  
GTTGACCACCGGCTTGGCCTGCACGCACTTGGAGCCCGCTCCAGCACCTCCCCTTGGAGGAGTCGATC  
ATCACCGGCACCCGGGCGATATCGGGCTCACCGGCGATGAGGTTAGGAAGCGCACCATGGCCGCTTCGG  
CGTCCAGCATCCCTCGTCCATGTTGATGTGATGATCTGGGCGCCGTTCTCTACCTGCTGCTTGGCAAC  
ATCGAGCGCCTCGTGTAGAGCCCTCCTTGTATCAGCCGCTTGAACCTGGCCGAACCGGTGACGTTGGTG

CGCTCCCCACGTTACGAACATGGATTAGGGGTGATGATAAGGGGCTCGAGGCCGACAGGCGGCAGG  
CCACCGGCAGCTCGGGCAGCACGCGCGGCTTGATGCCCCACGCGCTCCGCCATGGCGCAATATGGGT  
CGGGGTGGTGCCGAGCAACCGCCGACCATGTTGAGGAAGCCGCTTTGGGCCACTCGCGGATATGCTCT  
GCCATCTACCCGCATCGAGGTCGTACTCGCCGAACGCATTGGGCAGACCGGCTTGGGGTGGGCGCTGA  
CGCAGGATTGCTGATGCGAGACAACCTCCACATACTGGCGCAGCTCATCGGGCCCCAACGCACAGTT  
GAGGCCGAACGACACCGGTTTTACGTGGCGCAGCGAGTGGTAGAAGGCTTCGGTGTCTGGCCGGAGAGG  
GTTCCGGCCGGAGGCATCGGTAATGGTGCCGGAGATCATCACCGGCAGGCTGTAGCCCAGCGCCTCGAACA  
CCCCTTCCACCGCAAGGCGGCGGCTTGGCGTTGAGGGTATCGAAGATGGTTTTCAATCAGAATGATGTC  
GGCGCCGCCCTCGATCAGGGCATGGGTGATTCGGTGTAAAGCCGCCACCAGCTGGTCATAGGTGACGTTG  
CGTTGCCCCGGGATCGTTACATCCGGCGAGATGGAGGCGGTACGGTTGGTGGGGCCCAACCCCCGCCA  
CGAAACCGCGCTTGGCGGGATCTTTGCGGTCCTCCTGCTGCCACGGCGCGGGCCAGACGGGCGGCTTC  
ACGGTTAATCTCGGCCGAGAACCTTCCATCTCGTAATCGGCCATGGCGATGCGAGTGGCGTTGAAGGTG  
TTGGTCTCGAGAATGTCGGCCCCGGCAGCGCAATACTGCTCGTGGATCTCGCGGATCACCGCCGACGGG  
TCAGCACAGCAGATCGTTGTTGCCATTGATGTCGGTATGCCAGTCGGCAAACCGCTCACCCCGATAATC  
CGCTCCCCGAGTTTGTAGCCCTGGATCATGGTGCCCATGGCCCCGTCGATGATCAGGATCCGCTCCCTG  
AGGCAGGCTTCCAGCTTCTTTGTTACGTCCGACTGCTTGCTCGGCTCTCTGCTCGACATTACGTTGACA  
CCGCGTGTTCCTCTTACATCCATGCAACTGCGTAAACAGCATCTAACAGCAAACAAAATAAAATGGAAAT  
CTAGCCGTCTATCAGTCCAAATGCGCCGCATATACTCATTTATGGGTAATGAGTAACATAGGGCCCCGAG  
AGTAACCTATGCCCCGCTCTGCATAGGGATACGTGCTTGCTGTCTACCAACGAGAAAAAAATAACTATGAG  
CGTCTACTACACACTCTGTTTTCTGGCAGCGTTGGCGATTTTTATCGCCTTTGCCAACAGTATGTTGTG  
AAGATCCAGACCACCATCGCCATTACTGCGGGCTCCATGCTGATCTCCGCACTGCTGGTGTGTTGGCA  
AACTGGGTTGGTTCAATCTGGAACCTCTTGCCGTCAAGACCATGGAGAGCATCGACTTCCAGAACTTCCT  
GCTGAAGGGGATTCTGGGCTTCTGCTGTTTCGCCGTTGGCCTTGGCATCAACCTCAAGGCACTGCGTAGC  
CAGAAGTGGGAGATCACCATTTGCCCATCATTTGCCACCCTGCTCTCCACCTTCTCATCGGCTACGGCT  
TCTGGTTTTATCGCAAGCTGCTGGGCTGGGAGTTGCCGCTGGTCTACTGCATGCTGTTCCGGCGCGTGT  
CTCCCCACTGACCCGATTGCCGACTGGCCATCGTCAAGAAGATGAAAGCGCCACCCAGATCGCCATC  
CAGATCGAAGGGGAATCCCTGTTCAACGACGGTGTGGCCTCGTCATCTTCGCTACCGTGTTTGCCGTCG  
CCTTTGGCGGGGTTGAACCCACCTTCGGCAGCGCTGGCCGCTTTTTCTGACGAAAGCCCTCGGCGCAT  
CCTGTTGCGGCGCGTGTGGGTCTCATCGCCACGTGATGATGATCAGCGCCACCCAGTACCGTTCATGGAG  
CTGCTGCTGACTCTCTGTATCCCGACCGCGGTTTTGCCTTTGCCAACATGATCGGCGTCTCCGGCGCAC  
TGGCCATGGTGGTCACCGGCATCATGATCGGCAACTGGACCCGTCCTCCGGCTTCTCAGAGCAGAGCAG  
CCATCACCTGGATCACTTCTGGGAGTTGATGGACCAGTTTCTCAACGCCCTGCTGTTCTGCTGATCGGT  
CTGGCGCTGGTACTGCTGGATCTCGCCTGGCGTGACTGGATCCTGCTGGTCAATGCGGTGCCGCTCGCC  
TGGGTGCCCGCTTTATCAGCGTGTGCTGCCCTATGTGGCTTTCCGCCGATTCCGCAATTACAACACCTT  
CTCGGTGCCGATCCTCACCTGGGGTGGCCTGCGCGGTGGTCTGGCGATGGCGATGGCACTGGCACTCCCC  
TCCGGCGTCATGATGATCCCAGCAATGGCGTCGACCTGCGTCAGGTCATCTGGTGTGATGACCTACTCGG  
TGGTGTGTTCTCCATCGTGGTGCAAGGCATGACCATCACCCCAATGATCAGGCTGCCAAAAAGGCCTG  
TGGCGACTACTGAGTCGGTCCACAGTGTGATTGAGAATGAGAGAGGGTCCCGTCCGGAGCCCTCTTT  
TTATGACTGATAGCTGCGGATATTTGCTGCTGATAGCACCTTGATTACACAGAGGAAAAGCGTACTGACT  
TCAACATCGGCAAAATTATTGTTTTGCTTTTTTATTCATTTTCGAGGAGAGAATGCGCGTCCGGCTAGTTAATCA  
GCCTGTTTTATGTTTGCCTGCAATGCTTTACCTCACGATGAATCCTGCCAGTACCCGCATAACCTTCTTC  
TGATTTACTCGCCTTGAGAACCCTCAGGCTGTCTGCCTGCGTTGCCCGGCTCTCACGGTGCAGACCCGAT  
CTGCCACCCAAATTTGATTTATGCATCAGCATATTCCTGAAAGTGCAGACGCCCTTAACCGGGCTGGG  
TATTCCTGCGCGCTTGTGTTACCCAAATCGACCGCGCCCATTGACCTGACATTTGCCAATAACAAGGAGC  
AAACCCATAATTTATATAGAGAAATACCATGATGAAAGCAGTACAAACACACAAGCCCTGCGTCCGAC  
AAGCCCATCAACCTGCCTGTGCAAGAGCAGCAATGATGCGTTTTCTGATCCAGTTCAGCACCCGCTTCA  
GCGGCGGTTTTGCCATCTCCTGTGATGGTATCGCTGGCGAGTTCTCCATCGAAGACCTCAACTGACGTTT  
CACCTCGTCCAAAGAAAACCCGCTTGCCCTCTAAAGCCCCATGATATATAAGGCCAGTGAGAATCATC  
GTCCTATCTTGTGATGGGTTGTGATATCAGTTAGGGATACATATGTGGGGTTTTTTATGGGGTTTAGTGG  
GGTTTTGAAATGGCACTAGGGATCACCTCGCTCAGAAAAATGCTTGGCACCAAGCATGATGGCTCCAAGC  
CAATCCGGAAGGTTGACCGCGGAGATGGGTTAAATGCGTTCTGGCATCCGAGCGGAAAGGTAAGCTTTGT  
CTTTGCTATCGCTTCGATGGCAAAAATCTGGAAGTCAACCTGGGGAAGTTCACCAACAACAACGCAGGG  
ATCGACCTTGAAGAAGCTCGTCGAAAGACAGAACAGTGCAAAGGATGGTTAGCCGCTGGCCACAATCCAG  
CACTGATGCTCAAACCTGGCCAAAGAAGAACGGCTAAAACCAGTGACGTTAAAAGATGCGATTTGTTACTG  
GCTTGATAACTACGCTGCCCAGAACAGGAAGAACGCCCAAAAATCAGGCAACTGTTCCAAAAGTGGCTC  
TTTTCCAAAGATAGGCGATCTCCCCCTAGTCGATTGTGAAGCCAGACACTGGCTGGTGGTCTTTGATGCAT  
GCAACAAGCAGGCGCCTGTTTCTGCTGGCATGCTCTTCCAGATCTCAAAAACAAGCACTGAAGTATTGCCG  
TGTTCCGGCGCTACGCTTCTCTGACGCACTCAATGACCTGACCATTGCCGATGTAGGTAAACGAGGTGGG  
AAAAAGGATCGTGTCTAAGCCTCACGGAAATCCACACTCTCATGGAGTGGATAAAAAGCCCCCTCTCCA  
ACTCCTACTATCGTGCATATCGCTCTTGTACTGACTTTTGGCGCGAGAACGGGAGAAGTACGGGAATC  
TCATATCACGGAGTGGGACTTGTCCGCTGGGATATGGACTGTTCCAATCGAACACTCAAAAACAATCAC

AAGATTGTTTCGCGCCATACCAGAACAGATCAAACCTGTGATAGCCGAACTAATCGCTCAAGCGAAACAGA  
ACAAAACCCACTATCTCCTCGGCTCGCTGAAGAACTGAATACTGTGTCCACCTATGGCCATAAATTATC  
CGTGC GGCTTGGTACACCCCCCTTTTGGACCTTTCACGACCTGCGACGCTCTCTAGCCACCCATCTCACT  
GCAGCAGGCATTGCGCCCCATGTTATCGAGATCATCTCGGGCCATAGCCTTAAAGGTGTAATGAGCCACT  
ACATCCATGATCATCGCCTGTGAGAACAGAAAGTTGCGCTGGAACCTATGGCAGTCAATGATCTGGGATTG  
TCCCACCTGCGATAATGTCAACCCCCCTTCGCCATGCAGGTAGACAATAATCAACTGTATGTAATCCAAC  
AACTTTTTATCGCACTATTTATATTCAAGGGCTCATCCATGGCGACAAGAAAAGAACGAACCCGCCCCC  
CCCAACTTGGTTCAACTAGATTACATACGCGGTTTTACTGGAAGTAACGAACAACCAACTATGTGAAGAA  
GCCTTTTACAGAGCCTATAAGTTGACGCATTTTTGCGATCTATCAAACCTGATTACACGACTAGCTTCTG  
GTCAGATTTGTTTGTTCATGAACCAAGAACCGTGTTTTAGAGGCACAATCCGATGCTCAATGGCCACC  
GTCTCAATCCATTCGGCCCATCTCGATTATGGAGTTGGAACAACATACATCAACTGATGAAAAGCAGTTT  
CCTGCAACGATTCAGGACGAAAAAGATAGGTTTGCTAACGGGAGCCAGCTTTGGTTAACCTGCATGCCA  
GTGTGCGGGCGCAATGCCACATCATGTAACACAAGTGCTGAATAACATTGATCTCAGCGCTGCAGATGA  
GGATATTCTTGGCGACCTGAAGGCATTACTCCCTATATGGCGGGAACAACCTGGTTATCCACAGCCAAAT  
CAATCTAAGCGCAACAGCATCATCAAGAACATCATTGAACAAAAATCATTCCAATGCTGGATCTGATGC  
TCTGGGCTCGCCATAAAGGCTTCCAATACACGGATGAGCAATTAGCTGACATCCTGTACCCAGCCACCT  
GGGCAATCCAGACAATCCGATAACAGCCAAGCACATCAGTGATACTCGGCGCCAAATGCACCTAAATTT  
GCCGAACACGACTATCAAGATGCCATCAGAAGATGGTGTGATCTGGGACATGGAAC TAAGATTGTCAAAC  
ATGAATTAAGTTAAATCAGTAAGTTACAAATCCGCCGCTCACTTTTAAACCAACTTCCC GAAATTTTATC  
TGTCTGTTTTTTCGGAGGTGTA AAAAATCCGCTCTCGTAACATTGCCTCTATCAAATCAAACGAGACGAGG  
TGAGCAATGATTTCTCAAAAAATCCTATCCATTACAGCAGTTTGTGAACCTGTGCGGACGCAATCGCCGAA  
CCCTGTGGGCATGGGTTTCGCGATGGCGTGTTCCTGAACCGATTAAGGTTACGGTAAAACCGTAGGGTG  
GCCTGAATCGGTTTACCAGAAAATGGGTAGCAGAGCTGATGGAGGGGCAATAATGGCTAGAGCTCCATTTA  
GCTATCGCAGTCTAGCCGCTGCAGATAGGGGCACGCTGCAACCAATACTCAAGCATAAAGACCTGCAACG  
AGTACTGGGATGCTCAAGAACGACGATCTATCGCTGGATCGAATTAATCCAACCTTCCCGCACCGCTTAAG  
CATAACAACGGGCGGGT CATGGGATGGACCAGGCAGCAGATTAAGCTTGGTTAACGGCACACTGAGCCA  
CAATAGGAGGCAATCGCCTCCTTTATTTGGCACCTAATGTAACAAACTGGAACATTAAGCCGTTTTTTTC  
TGAATCAGAAAACTCCACAGAAAAGCCGTCGCAACATCAATGACGGGGGTAGCTGTCTTCGGTATTAC  
CCGAACCGCTAGGATTAATAATAATATAGCCCAATTAATAATAACTCGTCTTTAACATTGCCCTCAA  
CTATGAGTATCAAGGCCATGCTTGGGCCGTAATCAATCACATCCATATCAGGGCAGAGATCATGGATGGC  
ATTTTTCAATTACTAGAAAAGTTCTTTCAGCAAAAACCAGCAAGCTTACC GCCATTTCGTATGGAGCTAAAAA  
TGAAGCAGGGGACAATAGACAACCAGCCAATCAGCCATTTCTTCAAACAGCTTAAACCCAAACTGATCCG  
ACATTATGGTCCCTGCTACCACGGCTATATCTGGGTGAGAGAGAAAAGCAAGGTCAAAGTCCAGCACTAC  
CACCTGGCACTGCTACTTGATGGGCAAAAAGGT TAAACACTCAGACAATGTTTACC GTTTAGCCAAAGCGG  
AATGGACATATGGTTATCTTTCACTACCTGAAAACCCGTTTTATCACGTTACCATGACCGTCTAGACGA  
GCATCGGCTGCTGATCTACCGCTTGAGCTATTTGGCCAAGGCAGAAAACAAAAGGAGATCGGCCACCAGCC  
GTCAAGGACTACCAGATCAGCCGACGATCAGGATGCATTAATGCCGCAAGTGTA AAAAGATACGACGCC  
CCCAACTACGCGGGGTATTGAAATTGAGTAATGAGCGAGGATCTTGGATGACAAAGCATGATTGGGAAGA  
ACACAAAAGCGGTATCTAGAGGAGTACCCAGA ACTCACGTTGGCCGCTATGCAGCCCTATTTGGCTTA  
AACCCCTCTACAGCTCGCCGGGCCATGCGTGGAGTAAAAAGCGCAGTTAAAGGTAACGTGGCGCAGCAAT  
CCAAGAGTCAGCGACAAAGTGATCATTCTACAGGGAAATGATCACTTACCAAGCGCTCTCACC GCCACAGA  
GCCCTATGCATCAGTCGGTACAGAAAAAGAATCAAAAAACA AAAATCAAGAAGATACAGAAAAAAGCA  
CTCCGAAATGAAGAGGCTTATACACACAACAGCGATCACTCACACACAACAATACCCTTGGTCGAAAATA  
CAGAAAATGATCACCATGAATGGATAACCGATTTTCGAAAACAAGATGGCCAGTATATGGAGCCTTTGAC  
AGCACAAAACCACTACTGGTGGGTATGTATCATCCATAAACTGGATGATGACCTTCTGAAAGCAGCGATC  
GAATTAGCTGGGGATGATGGAGAGCTGGTACTGGCTTGC GGTCGCTATCTCAGCTTTATCGATGCAAGG  
ACAATACCGTTACAGCAAGTTAAGGACGACTACGCCAATGGGGAGGTGTGGTACTACCCCGGACCCGAAAC  
GCCGATGCCACTCTCAATGGCCATCATGCAGGCTGAAAATGGCCCCGGCACAGCGACTGTGCGAACTGGAG  
CGGATTATTGGAAAATCGTAAGAGCGCTATATGGAGACGCAGGCAAGCCGAACATGAGCGGCATCCTTACA  
ATAAAAATGAACGGATGTA CTTAACCATCAAGATACTGGAGAACC GGAAAAAGAACGCTTGGAGCGCTTT  
AGAAACAGCTCAAGAACTGGAGTTAAAAGGGTTGAAGTTACCCCGATTCCTAGAACTGGAGGTTGCGAGG  
GAAGTTGGCTTTATCGAACCGGTCACCGATAACGATGGTGGAATATCTGAGGCCGAGCTGGAAGCGCAAG  
CCCAAGCTTACATGCTCAAGCAGAAAGAGATCATTGAGGACTGGCTACCCACTCGACGAGCAGAGGTTGC  
AGCGGCATTGGCTGCCGAAATTTGCCAACAGAGCAGTGAGCAGATCGATGAAGATGACTTCAATCCACAG  
CATGACGATGAGATGTCAGCCTGCAGATCTGATAACGAAAAGGGGAGAGTCTTTAGCTGAAGTTACTG  
AGGCCTGGACCTGATGAGGTATATCAAGAGCGACTCGGTATTTTTAAACCTCTCTATTTGGTAACTCAAAAA  
GAAAGCGCTGGTGGCTAAGTCCACCAGCAATCCTCTATTAATGACCTCCCGCACACTCCAGATGCCATC  
CACTGGCCCCAAGCAGGTGCTGTGACAAGATAAGTGCCCTGTTTTGTCTCGCTCAGGTCGCCCGATGAAA  
GAAACCCCTGCCAGCTATGAAGCCATGATGCCTGCCGTGCTCAAGGTATTGTCCGATGGTGTGCGCCGCC  
CTCTACGTGAGGTTTTTCGAGCGGGTTTGCCAGCTCTATGCCTTTACTCCGGAGCAGTTGGCCGACACCTT  
GCCAAGTGGCCGCCAAACCACGTTGCGTAGCCGGGTGCGCTGGGCCAAGACCTATCTGGTCAAGGCAGGG

CTCATCGAACAACCCAAGCGGGGCATTTGCCTTATCACCGAACGGGGTAAGGTGGCACTGGTATCGGGAC  
AGTCAATCGACAACCACTATCTGGCCCAATTCGGCGAGTTTGTTCCTTTACCCAGGCCTCAGGTGAAAG  
CACCGGCTGCCTGCCACCGGCGGTAGCCAATGCCCGAGCCCCGAAAAAACGAGCTAGCCAGCACCCCT  
CAAGAGCAGATTGAGCAGGCACTATCTGCCATCAATCGCTCCCTTGCCGATGACCTGCTGACCGAAATCC  
TGGGCCTTTCCCTCGTTTTTTTTGAACAACCTGGTGGTGCATCTTATGGTGGCCATGGGCTATGGCGGCAG  
CCAGCAGGATGCGGCCCGCACCCTCGCTACAGCAGCGATGGCGGGATCGACGGCATCATCAAGGAAGAC  
CGGCTGGGGCTCGACTCTATCTACCTGCAGGCCAAGCGCTACACCGATAAAAACCGTCGGGGCTCCCGAGA  
TCCAATCTTTTCGAGGTGCCTTGGATCTGCACAAGGCCCGCAAGGGGGTCTTTATTACCACCTCCAGCTT  
TAGCCGTGAGGCACAGGAGTATGTCGGACTGATTGAGAAGCGCATCGTGTGATCGACGGCGCCCGACTC  
GCAGCCCTGATGATCGAATACGGCGTCGGTGTCAACACAGCCAGACCCTCACCATCAAGACCTGGATT  
CGGATTACTTTCTGGAAGATTGACGACCATGCCAAACAAGTCACTGAACTCGAAATGCTGCGCCGAAA  
TGGCCCGAGATAGCCGATCTGGGGCGATGGCGGAGAGATATGTTTACAACGACCCGAGACCTCACTGG  
TAAAACCTGCGCAACATGGTTCGAGTTGATCGTGCCTGGATTACCGGGAAGAGCGTTTGCCCAAGGCTA  
TCGACCCAACCTGTTTCGATCTCATCAAGGACGATGTATTTGTCGACCTGATGCCAAAGCCCATTACGGG  
AAACTCGATATCCTACGCCAATACGGCAACAAAGCCGCTCACGGCGAGAAGTGCAGCAGAAAGCACTCGG  
TCTGGCTGCTCAAAGAGGGGTGGCTGATCGCCGCTGGCTCTATATCCGCTACGACAACGGCAATCAGCA  
GGAATGTGGCAGTTTACCCAGCCAGCGCAGCAACCCGTTGAACTGACAACAGATGCGTTGAAGAAAAAG  
GCACATGAGCTGGAAAAAGCCTGTGCCGCCCTCAAGGCTGCCGAAGAGCGAGAGATCGCTATTCTGCGTG  
ACCTGCAGCAAGCCAAAGAGCAGGCCGACGAGCTCAAAGCTCGCTAGAACAATCCCGTCTGAAGAACCA  
GCAAGCGGTGAGCCTGCTCGACATGAACGAGGCCGAGACTCGCCGCCCTTATCGATGCCCGCTGCTC  
GATGCCAACTGGGATATCTCGGATGATGGCAGCGATAACCGAACAGTCAGTCAGGAAGAAGCCACACTCA  
AGCAGCCCACCAAGACAGGTAAAGGGCGTGTGACTATGTGTTGTGGGATGACAACCACCAGCCGCTGGC  
GGTGATCGAAGCGAAAAAGCACTCAGGTTCGATGCCGAAGCAGGACGCCAACCAAGCCAGCTCTATGCCGAC  
TGGCTGGAGGAGAAATACGGTCAGCGCCCGGTTCATCTTCTACACCAATGGCTACGACATCTTTATCTGGG  
ATGATCATCCCGCTCATGGCTATCCACCAGCCGCTGTTCGGCTTCTACAGCAAGGCGAGCCTGCAACA  
CCTGATCCAGCAGCGCACCAGCAAAAAGGATCTGTTGCAAACCCCATCGACACCAATATTGCCGGGGGC  
GGCACTCGCCTCTATCAGTTGGAATCCATTCGCCGCGTGGCGGAGTCGTTACGCAATAAAAAGCGCAGCG  
CCCTGATCGTCAAGCCACCGGACCCGGCAAGACCCGCTTCCATCGCCCTGACCAAGTTGCTGCTCGA  
TGCCCGCTGGGTGAAACGGGTGCTCTTTCTATGCGCAGCTTAAGGAGCTGCGCAAACAGGCCCAGCAACGCC  
TTCAACGAATTTATCAGCGACCCTCTCTGCGTGGTTCGGTTCCAGTGACAAGGCGACCCAGCAGACCGCCC  
GCATCTTTATCGCCACCTATCCCGGTATGCTCAACATCATGGAGCAGTTCGATGTGGGCTATTTTCGATCT  
CATCGTGGCCGATGAATCCCACCGCTCCATCTACAACGCTTACGGGGATCTGTTCAAATACTTCGACTGC  
CTGCAAGTGGGCTGACCGCGACGCCAGTCGAGATGGTTAGCCGTTCCACCTGCCAGCTATTTCGGTTGTG  
ACTACAAGATGCCACCGCCGAATACTCGCTGGAGAAGGCCATCGAAGATGATCACCTTGTGCCTTACGA  
GGTGGTGACTCACACCACCAATTCCTGCGTGAGGGGATCAAACCGCACAATCTGACCGATGAGCAGATC  
GCTCAACTGGAAGATGACGGCATCGACCCCAACGAGCTCGATTTTCGATGCCAGAGCATCGACAAGGCCA  
TCTACAACAAGCCGACCAATGCCGCCATCATGCGCAACTTGATGGAGAACGGCATCAAGGACAAGGATGG  
CCAGTTGCCGGGCAAAACCATCATATTGCCCCGAACCACCAGCACGCCCTCTTGCTGCAGGCCGTGTTTC  
GATGAGCAATACCCCAATTTGCAGGCAAGTTTTGCCAGGTGATCGATAACTACGACCCCGCTGCCGAGC  
AGCTGATCGACGACTTCAAGGGCGATGGCAAAAACCACGACCTCACCATCGCCATCTCGGTAGACATGCT  
CGATAACCGCATCGACGTGCCCGAAGTGGTCAATCTGGTCTTTGCCAAACCGCTGCGATCCAAGGTGAAG  
TTCTGGCAGATGATCGGGCGCGCACCCGCTGTGCAAAGATCTGTTTCGGGCCGGGCAAGCACAAGGAGA  
AGTTCCGCATCTTCGATCACTGGGGCGTGTTCGACTACTTCGAGCAGGAGCCAGAAGAGGTGGAGCCTGC  
AGTAAGCAAATCCCTCGCCAGCAACGCTTCGAGGCGTGGTTGCAACTTGCCGCTGCGCTCAGAAAAAG  
TTCGCCAAGGATGTGCTCGACAAGGTTGCCATGATGCTGCGGGGTCAGCTCGATGCACTGGATGACAGAT  
CCATCTCGGTACAAGAGCGCTGGAAGAGAAGGCAGCTTGAGCGATCCCAAGGTGCTGCGGCAATTTTC  
ACCGCTACCCAGCAGGCGCTGCTCACCGAAATGGCCCCCTTGATGCAAGTGGCTCGATGACGCGGCCAA  
GGTGATGCTCTGCGCTTTGATATGGACATGATCGCCGCCAGCAGGCGCTCTATGACAACCCGGAGCAGT  
TGATGCAGAGCTACCACAAGGTGGCGGAAAAAGGTGGAACCTGCTGCCGCCCACTTGGCTCAGGTGCAGCA  
ACACGGCGAACTGATCAATCAGTTGCGCGAGTTGCTCTGGTGGCAGCAGGCTGATTTTCGATCAGTTGGAA  
CACGCTCGCATACCCTGCGGATATCATGCACTTATGAGAAAAACCCCACTCCTTCGAGCCCGCCGC  
TGGTACCAACATCAAGGAAGACGAGGGGGAGTATCAGACCGCCAGCGTAAGACCAATATCAAATCAGT  
GGATTTCAAACCTTACCGCAAGCAGGTACAGGGCGTGTGGAACCCCTGTTTGACAGCAACCGGGTGTG  
CAAAAAATCCGCTCGTGGTCAGCCGGTTACCGACCAGGAACCTGGACGAACTGCGCAAACCTGGTGTGGTGC  
AAAACCCCAACGTCGATATCAAGGTAAGTACCGGACTTCTATCCCGAAGCCAGTGCAGGGCTCGACAAGAT  
CCTGCGTACCCTGGTGGGGATGGATGGAGAGGCGGTGGCCGCGCTTTCACCGCTTCGCCGCCGAACAT  
CACCTCAGTGCGGTTCAGATGCGCTTCTTCGATCTGCTGAAAAACCATATCCGCACCTTTGGCACCATCG  
AGATGAAACAACCTATTCGAGCAACCCCTTACCTCGGTCAACAGCCAGGGGGTAACCGGGGTCTTCCCGGA  
TATGGCACAGGTAATGGCCCTCAAGGCCATCGTCGACGGGTTCGCCGTTGAAACCGGAAAGGCTGTGCC  
TAAAAGCGGAAGGGGCATCAATGCCCATCCTGCCAAAAATCGCGGTACAATCGCGGCCATTCCAATCTG  
GCACTGATGGCCCGCCTGTGCGTGCCGCTTTTTCTAGTCTGTTGGCCGCCCACTGACGCGCCAGCAGCC

TCTCAATCTTGTATGGAACAATCATGATCACCGGCGAACTGAAAAGTAATATCGACAAGTTGTGGGAAGC  
CTTCTGGGTGCGCGGCATCACCAACCCGCTGACCGTGATCGAGCAGATCACTTTCCTGATGTATTCGCGC  
ATGCTCGACATGCAAGAGAGTAAGGACGAGCAGCGGGAGATGCTGGCGGGCATTCTTTCAAGCACCGCT  
TTGCCGAGTTCGAGCAGGATTATCGCTTCTCCCGCTACGCCAATCTGGGGGCGGACGAGATGCTGGAGAC  
GGTGCCTGACGGCGTCTTCGATCACTTCCGCGAGCCTCAACCACGAGGGCTCCATCCTCAGCCACTTTATG  
AAGAATGCCCCGGCTGGAGATCGTCAAACCGAGCCTGCTGGTCAGCGCGGTGGAGATGATCAAATCCCTGC  
CCATCGATCAGGGCGATACCAAGGGCGATCTCTACGAATACCTGCTCTCCAAGCTCACCACCGCCGGGAT  
CAACGGCCAGTTCGCGACACCGCGCCACCTCATTCGCGCCATGATCGAGATGATGGAACCCAACCCCGCC  
CGCCATGAACGCATCTGCGATCCTGCCTGCGGCACGGCGGGCTTCTCTCCAACAGCTACGAATACATCG  
TCGAGCGCTACACCAAGTGGCGACAACGTCCACAGCCAGATCGTCACCAACGAACCGCGCGAATGGAGGA  
GCAAAAGGTCTTCGCGGGGATCTGCTCGCCGACTATCGCCATCAGCTCGATACCGACATGTTCCACGGC  
TATGACTTCGACGCCACCATGCTGCGCATCGCCGCCATGAACCTCATCATGCACGGGGTTCGAGCAGCCCC  
ATATCCACTATCAGGACACCCTGAGCCAGGGCTTCAGCGATCGTTTCCCGGACGCCAGCCAGGGCGGTTT  
TCACCTGATCCTCGCCAACCCGCCCTTTACCGGCACCCTGGACGAGGAGGACATCGACCCCAAGCTGCTC  
GGCAAGGTCAAGACCAAGAAGACCGAGCTGCTGTTTATCGCCCGCATCCTGCAAAATGCTCAAAATCGGTG  
GGCGAAGCGCCACCGCTCGTGCCGAAGGGGTGCTGTTTCGGCTCATCCAAGGCCCATGTGCAACTGCGCGA  
GCTGCTGGTGGAGCACAACCAGCTGGAGGCGGTGATCAACCTCCCTCCGGTGTGTTCAAGCCCTATGCC  
GGGGTTCGCCACCGCCATCCTCATCTTACCAAGGGCGGCGCCACCAGCAATGTCTGGTTCACGATCTGC  
AAAACGACGGCTACAGCCTCGATGACAAGCGGAGCCCCATCGCCGCCAACGATCTGCCCCATCTGGTCTC  
AAGCTGGCAGCACTACCGCAAACAGGCTCATATGCCGGTCGGCAACTTTATCGGCCACCAGCTCAGTCGC  
CAGCTCGCCGAGCAGTTCCCAATAACGAGCATCTGAAAGACGAGGGGGGCGTTGAGCGGGACTATCAGG  
ATCGCACCCAGAAAGCTTTTATCGTGCCCAAGGCCGAGATTGCCACCAAAAAATACGATCTCTCCATCAA  
CCGCTATAAAGAGGTGGTCTATCAGGAAGAGAATTATGAAGATCCAAAAAGTTATTTTGGGCAAATTAAG  
GCATTGGAAAATGAAATTTCTGGCGGATTTGAATGAGCTGGAGAAAAATGCTATGACATGGCCGATGGTGAA  
ATTGGGTGATGTTATTGAGTTTATTTCGGGGCATTACCTTTAAGCCAACAGATGTTGTCGCGCCGTTTACT  
CATGACTCAATTGTCTGTTATGAGAACAAAAATGTCCAGGTGGCAGGGTTGGATTGTGCTGACCTGATTT  
CAGTTCACGCACCTTTATGAAACGCGAAGAACAGAAGCTAAAAACATGGAGACTTGTGATATCTAGCGC  
AAATAGCTGGGAGTTGGTTGGCAAGACAAGTTTGTGTGTAATTAGATTACGAGGCTACCCTGGTGGC  
TTTTATCTACTAGTGTAGAGCCAAGAAAAGTAAAAAGAACCTAAATATTTATATTACTGGATTATTTTAC  
CAGATACTCAGCATTCAATTCGCCATTTGGGTAAGCAGACTACAAATATTTCCAAATTTAGATTGTGCTCG  
TTTTAAAGAGCTGGATATTCCACTTCCCCCACTTGAAGAGCAAAAAACGTATTGCCGCGATTCTGGATAAG  
GCCGACGCCATTCGCCAGAAGCGCCAGCAAGCCATCGCCCTCGCCGATGATTTCTGCGCAGCGTCTTCC  
TCGATATGTTTGGTGGCGATATCTTAAGTGAACCAATGTTGTTTCCCTTGGGGATGTTGTGACGTTGGA  
CGCTCCTATGGTTGATCCTAGAGAAGACATGTACGCAGACTTACTTCATATCGGCCCTGATCGAATCGAA  
AAAAATACGGGGCGACTGCTACCTGCGCTCACAGCAAAAAGAAGAAGGATTAATCAGCAAGAAGTTTTTAT  
TTAATGACGAGTATGTCTATATTCAAAAAATCCGACCTTATCTAAAAAAAGTTGCTATTTCTAACTTAC  
TGGATTGTGTTTCGGCTGATATGTACCCAGTAAAACCGATAGATGGTAAAACAACAAAAGAATTTATATGG  
ATGTTATTGCTGTGACACCTTTTTGATTATATGTAAGTCGCTTGCCGAAAGAGCCAATATACCAAAAC  
TTAATAGAAAAGAGTTGGCAGCATTACGATTTGCATTGCTGACTTTAAAAAAATAGAAAAGCTTCACTAA  
TATTGTGAAAAAAACAACAGAGCTAAAGAATAGCAATCAGTCTAGCTATACTAATTTTGAGAAAATATTC  
AATTCATTGTCTAGAAAAGCCTTCGCGGGCCAACTATAAGCAAAATGGAGGTGAGCCCCCTATTTTGGCA  
TGGAGACTTATATGAAAATAGCCTCGCTGACTATTGCTGGTTTTAAGGGGATAGAGCAAAAGGCTACCAT  
CCCTTTGGCACCATCACCTGCTCTTTGGTGCCAACAGTACCGGTAAGAGTACCGTGCTGCAAGCCTTG  
CTCTATCTCTATGAGGTGATCGTTGAGCGCAATTTTGATCCCCAGTACAGCTCCATTACCGGTGAGCAAC  
TCTGGCTTTGGCGGATTTCAACACCTGGTGCATGGCAAGATCTCAACAACACCATTACCTTGGGCGCTAC  
GCTGGACTTTTCGGGATGCTACCCAGATATCTGGCAGATTTCTGACCACCCAGAAAGATTGGCTGCTT  
GAAACCAACTTACACTACGGGCCGGATGCAACCGCGGACATCATCTCATTTGAGCTGGATATCAGCTGGG  
ATGACTTCAAACACAGAGCATTTCGTCAGCCGCTTCGAGTGCTCAAGCCAAAGGCAAACCTTACCTACGGTT  
TGAGGTGCAAGCGGGCAAACCCGATGTGGCCATTACTCACTATGCTCCACTTCCCCATTGGTACATCGAT  
GAGGCCTTTGAGTTAGGAAATGTTTTGCTTCCGGCCAGTGGGAAAACCGTATATATCCGAGGCCAAGATG  
CCCTCCCTCCCGTTACCAGACGAATTGACTTGTCTGGAGCCCAAGTCACATGGGAGGAAATTTATCCTGA  
TCATCCGTTGGCAGCTCGTCTGTTTGTGCAAGCAGCAATATCGCAAGCCGCACTGGCACCACCTTCGACTC  
CTGGGCCAAAAGCTGCTCAACTTGTCTCCATATCGGCCATTGAGAAATGTGCCTGGAAGAGGAACTGTGC  
TTGAAAGCAGGCCAAAGAGTAGCCGCTGGTACGATGGCACGGCAGGCTGGGATCACTTTGCTTTTGGTTC  
TGATGGGTATCGCAAGCAGGTTAATCAGTGCTTCAACCATGTGGATTGTCTCAATTCCAGTTATCACTTC  
AAAGCCAGCTTTCAAGGAGAGGCTCCGCTACAACAGCGTCAGGTGCAATTAACCGAAGCTCATTCAAATA  
CACCACCTGCGCCCTGTGATGTGCGCGTGGGTGTCTCACAAGTATTCCCTTTTATTGCCGCCACCAGTCT  
GGAACAATCTGGCGTGATGGTCTCTTGCGAACAACCCGAGCTGCATATCCACCCAGATGGCAGCTCAGC  
CTCGCCGATATGATGCTGAACGCTTCCGCAAGGATCCAGAGCGGATGTTCTTGGTAGAAAACCCATAGCG  
AGCACCTGATGTTAAGGTTGCTTAAGCGACGCCGCAATCCGAGAGGGTGACATCACGGATAATCACAG  
CAGTTATTGCCGTAAAGAAGATATCCAGATTATTTTCTGCGAGCAGGAGAACGGAAAAACCGCCCTGCTG

CCGATCAAGACAACCTGACGAAGGGGAATTTGATGCCCTTGGCCTAATGGTTTCTTTGCTGAACGCCGGG  
GGGAGCTGTTCTAATGCTGCATCTTGAATTTGCTATATCCCCGAACCAAATCCGAAACATGGCCGATTTG  
ATGCGCTTGGTAGACCGGCTTGGTTTCGAGAGAGGTGCCGTCTATCTCGATTTCCCTAATAGCTGGTTAA  
GCGATGTCTCGAATCATCTTAACGCTACTTTGAATGACCAGCAGATCGACAAAGCCACAGAAATGCTCCG  
CAGAATCCAAGAATCACGTTTAGTGAGTTTTGGCCGCCAATACGTAGGAACTCATGGGGGGAGGCTGCA  
GAAACGAGCCATCGAACCAACCCATTTTCATCGAGTCATTTGATGGCGTCAAAAAATGAACGCCCTCACTATA  
TCTCGGACATTCAGACCTTGATGAGATCGATTTTACTTACAAGACACAGTTTAAACCGTGAAGCTGCATC  
ACTTGCTGGTGCATCAAAGCCATTATTGCTAGATGCAGAAAAAGTTACGATCTACGACAACCTACATCTGC  
CCAACACGCCTTGGCTCTCGAAAAACGCTGCTAGAAGTAATGCGCATTTGCCAAAAGCCGGTTGAGCTCC  
ATGTATTTTCCGAGGAAGAGGGAAAACGCGACAGGATACAGCGAGAACAAGCCTTGGCGCTATTTTCAGAG  
AAACTTCCCGCAAATATCAGGCTATTCTGGTATTGGCTAGATGATGCTGGAAGCGGCTTTTTGCATCAA  
CGAGGATTATTCAGTACCGAGGGGGCTTATCTACGATAGAGGTTTTGACGAACCCAGGGGATCTAGATC  
AACGTAGAACACTAACAACGGTTACCCCGATGCCTCGTGATCTGCTAGAAGACCGTTCTCGCTATTTAA  
TCCTGCGCAGCTTGGTGTGGGCTATCTCTTGTGGTCTGCATGGCAATCACATCCATAGCACGTACAG  
TCACCAACTGAAGCGGCCGACCATTTCTGTTGATTTGAGTGGTCAGGTGATTTAGATCATTACAAACCTAG  
GCACCATCTGGGTTGATCCGGTTGCCACCGCTTCCGAAGCGTTGCCCTCAGGGTTGGCTGCGCGCAGTTG  
TTCATGCTTAGATCAAGAAAATGGATTACCTCATCTGTGTGCAATTGTGTGCGCCAAGCCTAGGTCGGTG  
CACGGTTACTATACACCTAGCATTGTGACTCAGTTGTGCAACACGCCATATCCCTTTGCTCAGCGAGGAA  
AAATCAACCTAACACGAGATGGACGGTTGAAAATCTTCGTGCGCAACTCTCCGAAAGACAGAGTATCGAG  
CCCTAGATAGACTCAAGGCTCCACTGAAACAAGCAGGAGCATCTTATTATGTCAAAGTCTGGAAAAGGCG  
TTCAAAATCAACACAATGCCAACCATCACGCCAATCAGCTTAAACCTAACAGGGGAGCAGTGGCACCAA  
TCCAGCCAATGCCAAGGTACACGGCAACCGCGGCAAAACAACCTGAACCCCAACCAGAAAATAAACGTGGCGC  
CTGGCAAGCCAGGCGCTTATCAGGAGATTCAATATGACGGCCGGTTTTTCCAACCCCTGGGTGAAGTTGTCA  
AATATTCCTTCAGGGCTACAGGGATCATTCCAAGCAAATATGAATATGCTCACTCATTAAGTAACAAGGA  
GAAAAAAAAGTATCAGAAAAGCGCTGGAAAAGGCTTGTACAGAAAGAGGGAAAATATCAATAAGAGCTTTCAA  
GAGCTGGGCGAGGTATTTATTCAAATCTCTCTGCCAGTATAAAAAATCGCAAGGTATTGCAGGTCAATTT  
CAGATGTTATCGGTGACCTTGTCTGGTTTATGGTAATGCCATTACCGATAATGGCACCTATCAGGACAA  
AAAAGGTAGCTGCGCTGGATATTATCGGCCCATTTTCATTTCCAGACTGGTAGTCTCCCTTACAAAGCAT  
CCGGCAGCAGCTCAATCTTCCAGTGAGGCACTTATTTCCCTGCGGAGCCATACTGGTTTTTTGCCACGA  
CTGACGATAAAGCTTACTTGGCCACTCGGCAAGGCGATGACATGGGTATATCAGCTAAGCGGCGTAAA  
TCAGACCCAGTTTTCACTATCCCTCCGAGGGGGCTAAGAACAATGATCACTTGAAGGCCAATCAACTGGAT  
AGTGCCCAAGACTGGATCACCGGCAAAACATATTTCCAGCTGGGAGGCGTTGCAGCGCAATTTTCATGCAAG  
CGCTGGAAGCTTATCCCATCTGGCTGAGCAGAAAAGAGAGCATAATTGTTGACCCGTGTTTGTGGCAAGGGT  
CGCCACCATCATTAGTCAGGACATTGATGAGCTCTATGGCCGCGACTATCTGAATAAGTTGCTTGCACAG  
TTCAAACGTCACACCGACTGGCTCAAAGGTCCAATGGAGACGCTTTCTCGTTTTTTTACGAGATGGCAC  
ATCACCCCAAAATCCCGTCTGAAATGCTGGACAGTATCCATGCTGACTATACAGAGCGTTTTCTGGCTCGA  
AAGAGCCGATATCATGGTTGATGCCGCCAATCACATTCAGTCCATTATTATGGAAGCCCCCATAACTTG  
TCCGCTGAACAACAGGCGTGGTTTTTTGAGCCACTATGGTGAAGATGTAGTGGGGCCTATCTTCGATTTTT  
TTGATAGGCAACAAGAGCAAAGAAAACATATCCCAGGAGGATTCATCGAGTGCCCTTGCCGAATTTCTTGA  
GCTTAAAAAAACCAACTGCGAGCCATCCGAGGTGGAGAGGTTTATCGCAAAGCTAGAGAGCTACCAGTTA  
TCATCTGTCTGTGCCTGGATGGTGCCTGGTTGAGAGCCGAGACCCTTTTTCATGCTAACGATTGGCCTG  
GCATTTATCGGAACTGTGATCGCATTTGATGCAGCGAAAATATGCAGCAGGCCAAAATCAGCGCCCTCT  
GCTCAATCACTATCTGGAGGCATGTGCCAAAATAATAAATGGCGTGAATTTAAAAGGGGGTCCGCTGG  
GCTCAATATCTGGGTATCAAGGTGCGCTTTCTGGACAGGATGAACCTAGCGATGACGATATGCGTTATG  
TCTTCGGCTTGATGCGGAACGCTTATATTGCATGGTGGAGCAGAGCGGTTAGCTTGGCCTCCGCCCTC  
TCCGGGGGCTATAAGCTTCCACATAAGGGTAAGAGTCCACATATATGGGCTGGAACCCACATATAGT  
CATCCTGTGATAGCAGATCGGGGACTGGCGGACCCAGTCCAGCCTTGGGTGATATCCAGAGATTACCC  
ATTGAGCGATGACGGGTATGACCCATGGGAGGAGTACTCCACCAATGTGTTATCAGTACCCCATTAAG  
AAGAAAACAACCATGAGCGATGACAAAAGTCTACTTCCCCACGAAAGTATAGTACTGCAATTCGAGCAAGG  
TCTTTCACTGCGGGCTGCCTGGCGCAACTGCCGGGGCTGAGTCAGACTGATTTGGCTGAGCTGGTGGGT  
ATTTGCTGAGTGGTGGCTTGGAGCAACCTGACTACCAACTCACCCGCCAGCAGCTCGCACGAC  
TGGCAGAGGCTCTCAACATTCAGCACGAACACCTGACCGATTAGCAAAGCAGTTTGGTCTGCTTTACCG  
AGACTATAACTAGCTTGGTTTTTGGTGGGGTTAGCGTGGGAGTTAAAAGAAATTCAGACAAAAA  
TAAAAAACAATAACCATTAATAATCAATTTATAGAAAATACAGAGTTCTCCATCGAAGACCTCAACT  
GATCCTGCCTGCCCTCCGGCAGCGCTCGATGCAGACAGGCCGCAACTCACGGCGGCTCTTTGCTTCTCT  
CACGCTTTTCCGAGACCCGGCCTCTTGGTGTGCTACTCAGCTGACAGCCATCTCGCCATTCGCTTTCC  
GCTCTCTGACCTTGATCACTGCTCCAGCAGCAGGCACTCATCTGCATCTTCGCTCAACTTGACCAGTCGA  
CTGCGCACAGCCCCAGCTTGGCCAGCAGGCCGATGGATCGCTCGTTACCCGGGGTGACGATGGCGACCA  
CCTGCCCGATCCCCAACCGGCTTTTTTCCATCGACGAGGACGGCTTGCGCCGCTTCGATGGCGTAGCCCTG  
ACCGCGATATTGCGGCAGGAAGGCATAACCGATATCGACCTGCTCCAGGGTGTGCGGCTTGTACAGGCCG  
CAGATACCGAGGCTGACACCGTCTCTTTGCGCTCCACCAGATAGAGTCCGTGACCATAGCGGGCATAGC



TGACCGCCGGCCCCCTGCTGGATATACTCCTGCGCCTGCTCCAGGGTGCGAATGCCCCGATCACCGATGTA  
ACGATAAAAAGTGC CGCTCATTGAGCAGCTCAAGGATGAAGGGGGCATCGTGGCGATCATTTTCGCGCAGG  
ATCAGGCGGGAGGAGGCAATCATGGCAAGGGCTCTCAAACGAAAAGTGAAGGGCAAAGAGTGCCCCGTCA  
CTCCCGAGCTGGCAAGCCTGTGGCGCCATCTGCCATGAAAAAGGGGGCCGCTTGGCCCCGTGATGAGATGG  
GATAAACGGCTCAGGCGGCCAGCAACCCGGCATAGCCATTACCCCTGCTCACGCACTGCAGTGAAGTGGGC  
AGCGCAATCGGCCAGCTCAACCCAGCGCATCTGCCACCTTGTGAGGGCCACTCGGGGGGGCGCCTCTTCC  
CCCACATCGGATTGCGCAGCCAGCACTATCGCCAGATGGATCAACCCGGCCCTCGGCGGAGAAGTCCCTTGG  
CCAGCATGGGGTTGTAGTGATACTCCACCGCATTGCTGATGGTCTCGGGGAAGTCCAGTAGCGTGCCAT  
GGCCGCCCCGACCTGGGCATAGTTGAAGCCGACCACCAGCTCTTCCGCCTTGGCCCCGTCCCTTGTGCAAC  
TCCAGATCGTGGATGTGATGGACGGTGTTCCTCGGAGGCTACGTGCATCACCAGTCGGCCAAGATCGT  
AGAGCAGGGCGCAGGTAAGACCTCATCTCCCTTTCATCCCTTCTTACCAGCCAGACGACGCGCCAGCTC  
AGCCACGTTGAAGACGCAACCCAGAAAATGTTTGGAGTCAATACCAGGGCACCACAGTACCAGATTCGGTC  
AGCCCGCAGGCCAGCACCATGTTGCGCACCATCGCCAACCCAGCCGCACTGCGGCTTTCATTGACGGTGC  
CGATCTGACGACTGCTGCCGAATTTGGCCGAGTTGGCCAGGCGCAGCAACTTGGCGGAGATGACAGGGTC  
CTTGTGATCAACTTGGCTGATCTTGGAGCAGATCCGGATCCTTTTCATTGAAGGTCTGGATCAAATCGCGC  
ATCACTTCCGGGATCTGGGGCAGTAGCTTGGGCTCGGCCAGCAGGGAATCTATCGTGGGCATAGGCGTGT  
CCATCCATGTTATCTGTGTTCCAACCTGTTTGCCTTGGCAAACCTCCTCCTAATTATGGGTAACAAATGGC  
CTCCCCATCGGATTGTTTATTGCTGGCCATTCAAGGTGTTAGTACATTCAGGCTATACTGGCCGCCAC  
ATTCAGTGTGCGGATATCCCATGAACGACACTCAGGAATTTTTTGGATGAAGACGCGCTGCTGGAGATGG  
TGGAGAACCAGCTCAACGACGGTCACCCGCCCCATGTGAAGGCGACACTGATGCGGCTGGTAATGAAGGG  
CACCCCGCGGGAAGAGGCGCTGCAATATATCGCCTGCGCCCTCGGGGGCCGAGCTGATAGCGATGGAGGCC  
GATCAGGGCCCCCTTCAATCTGACCCGTTACGGCGAGTTCCTCGACAGCCTGCCCGAGATGCCGTGGGCAG  
ACGACTAACCCGAGCTGGATGACAGATGCAAAAAGGGCGGGTGGCAATGGCCCCGCCCTTTTGCATGGAT  
CCACTCCGGATCAGAACTGGGAGTTGATGATCACCTCTTCCCCAGCGCCCCGCAACGGCAGTGGCCG  
ATAGCTGGAGTTGGCGGCCCGCAGCAGACGAATGCCGGAATGCCGACCTCCTGCGCCGCCCTTGATATCC  
CCGTGCGCGCTCGCCGTAGAACAGCTTCATCTGCTTATCCTTGAGCCATTGCACCTTGGTGTCTTGGCCCC  
GCTGATCACCGGCGAAGATCACCAGATTGAGCTGGTCCGGCAATATTCATGGTCTGCTGCAGAGTCTG  
GCTCACGGTTTCGGTCTTGGTGGCCGAGCGCGGCTGACGAAATAGATGTGGTCTCCGCGCTGAGATGC  
ATGGCGATGAGCGCCTTGCCACCTCTTTCGCGCATGTGAACGCATCCAGCCATTGTTTCATCTTCC  
AGAAGGCGGGTTCTTTCAGATAGCTCTCGTCTGTTGGGTGAGAACTCCTGCTTGC CGGATAAAAACCCGG  
GCTGGAGAAGAGCAGGGTATCGTGCATATCAAACCCGACCCCATCGGGGGCAGGCCATCCAAACTCTTG  
GCAATCTGCTCCACTGATACCCAGTGGATCGGTGCCTGCTGGGCCAGAGTGACGGTGGTACACCGGCAG  
GGATCGGCTGAACGGTAGCGCTTGACCCGCGACGGCAGGCAGAGAGAGGGCGGCAGCCAGCAAGGAGGC  
AAGCAGCGCCGACGAGAGATGTGTTTATAAGGCAGGTTGTCATCTTCAATCAAAAGAGGGGGCCAATA  
GTGCCCCCATCCCGCCTTCAAATCTGTGAAAGCTCCTGCAAAAAGGGAGCATTTGACGCCGATAATTA  
TCTTCGATTGGCAGCAGATCGGTAAGACAAAGCCATCGCGCAGCACTGTCTCACCGACCCGAATGCCAA  
GCGGGCGGGGAAACATGGGGCCATCATAGGCCAGGGTGTGAAACTCGCCGTTCTCGCCGCACGGATCAAC  
CCCCTCCGGCAGCGCCGCCAGCAGTGCCTCGTCAAAGTCATGGCCCCCAGGCTGGCATCCAGCTTGTTC  
GGGTGAGAGCACTGATCCGCGCCTTCAATCCAGCGGCCACCATCTGCGGCGCCAGTTCACGGGTATTGC  
TGCCCCACAGCGGGAACAGTGGTTCGATGCCGGTGCCTGCCAGCTGCTTTTACGGTAGGCGCGCACATC  
CTCGAGGAACAAGTCGCCAAAAGCCATATGGCGGATCCCTGTGACACCACGTCGGCGATAAAGCCGGTC  
ATGATGCGGGCGTAATCCTCGTTGCTGCAGGGCCAGGGCAGATCGATGGTGTGAGGGGCGAGCCCGACGC  
AGGCGGCCTGCTCGGTCAACAGCTGCTTGCACCCCGTGCATCGCCACCCGCTCGAATGCCGTGATTGAG  
GGTGGTAACAGCCCCACCACCTCAATGGCGGGATCTTGGCGCAACTGATGCAGTGCCATGCGCAATCC  
TTGCCGCTGCTCCAGGAGACAGTACCCGTTTCTTTTCATCATTCCTCCGCCAGCGGGGCATTCGGATT  
GCCCCAAAAGATGCAAGACAGTGTGCGAATTGCGGATTTACACACAAGAGGCAGGCAGCATACTCTC  
GAACACCTGTATATGCCCTTGTCCGGGGTGACAATAACTAAAAAAACCGATGGGAAACATACGGATATG  
ACCACGACCACACAACAGCACGATCACACCCGCCCTCAATCGACAGGATTACAAAACCTGAGTCTGG  
CTGCCCTCGGCGGCGCACTGGAGTTTTACGACTTCATCATCTTCTGCTCTTCTCGCCGTGGTTCATCGGCGA  
GCTGTTCTTCCCGCCGATATTCCCGAGTGGCTGCGCCAGTTCAGACCTTCGGCATCTTCCGCCCGCGGT  
TATCTGGCCCCCGCTCGGCGGCATCATATGGCCACTTTGGCGATCTCATCGGTGCGAAGCGGATGT  
TCACCCCTCAGCATCATATGATGGCGCTGCCGACCTGTTGATCGGTCTGCTGCCACCTATGCAGTGTCT  
CGGCATCGGCGCACCCATCGCTCTGCTGGGACTGCGGATCCTGCAAGGCGCCGCATCGGCGGTGAAGTG  
CCCGGCGCCTGGGTGTTTGTGCGCCGAGCAGTCCCTGCCCGTGCAGTCCGGGTCAACAAGAGCCTGACCC  
GGCCGAAGTGAGCGAGTGGGGCTGGCGAGTGCCTTCTGCTCGGTGGTATCTTCCGGCATCGTCCGCATG  
TACCTGCGGCGCTGGTTGCACGAGACCCGGTCTTCCCGGAGATGAAAAGCCAACAAGACCCCTGGCCGATG  
AACTGCCCTCAAGTCCGTGCTGCGCAACCACAAGAGCAGCGTGGTGGTCTCCATGCTGCTCACCTGGCT  
GCTCTCCGCCGGTATCGTGGTGGTGTGATCCTGATGACCCCACTATCTGCAGAAGGTCTATGGCATCAGC  
CCGGCCGACGCCCTGACCGCAACTCGCTGGCCATCGTGGCCCTGACCCCTCGGCTGCATCGTCTATGGTC  
GACTGATCGACCTGCTGGGCAGCGGTCTCACCTTCATGTTCCGCTCCCTGCTGCTAGCGGGCTCCAGCTA

CGCCTTCTATCACGGTCTGGCGGCCGGTACGAGCCAGCTGGTACCGCTCTACATGCTGGCAGGCTTTGCG  
GTCGGGATTGTCCGGTGCCGTGCCTTACGTGATGGTCAACGCCCTTCCCGCCGGTGGTGCCTTCTCCGGTC  
TGTCGTTCTCCTACAACGTGGCCTACGCCATCTTCGGTGGCCTCACCCCGATGGCGGTGACCCCTCTGGAT  
GAAGAGCGACATGCTGGCCCCCTCCCCTATGTGGTGGAGCCTGTCGGTGTGGGTTTCGCCATCGGTCTC  
TGGCTCTGGTTCCAGCAACGGGCCATCCGGCAGCAGCAACCCCAACCCGCTGACCCCGAGCCCCGAATC  
TGATTCCGGGGCTTTTTTGTACTGCTTATGTTTTCAGTTTCGCCAGCATAAGATAGCCCTCCCTCTGGGGCCTG  
CCACCCGCGTTGCCCATGACGTCCAACCTTTTATACGAGGCTCAAGATGTTCTTTTCAGGTCGTATTACT  
CACCTTGCTGGCGCTGCTGCCATGGTCAACCCGCCACCACGGCCACCCTGCAGCTGGGACTGAGCAAG  
GGGATGTGCGCGAACACGTGCGCCGTCAAGTCAATCTGGCCGCCATCTATCTGTTCTGCACCCCTGCA  
TCACCTTCTTTATCGGATCCTCGATCCTGGATCTGTTTCGGGATCTCCATTCGGGGCTTGCCTGGCCGG  
TGGCTCATCATCGGCTTTATCGGCTTTTCGCATGCTGTTCCCGCCCCAGCCAGCAGAGCGGGGTCGAT  
ATCAACCAGAGCATGCTTCCGTACCCTCACCATGCTTCCAGCATGTGCGGGCCAGGTACCATGGCACTGG  
TAATAAGCGGGGAGCCAGATTGCCGAGCTGCCTGACGAGTACAACCCGCTCACCATCTACGCCGGTGT  
AGTAACGGCGTTTGGCCTGATGAGCCTGATCAGCTGGGGGGTATTGAAGCTGGCGGACCCGGTCTGCAAG  
ATCCTGGGCGCCACCGGCATCGATGCCATGACCCGCATCATGGGCTTCTGCTGGTCTGCATGGGTATGC  
AGTTTTGCATCAACGGCATCAAGGAAGTGGCACAGGATCCGGTCTTCCACGGCGGCCAGACCGTGCAAC  
CGCACCGGCGCTACCAAGGCTTCCGGCACATTTGATCAGTTGCCGAGAAAGCCACCGGCTCTGATTGA  
AAACGGTATCAAAAAGTCCCTGACGATCTGCACTGATCTTGTTCCTGATCATGTTATTGACACACAAATG  
AGTTAGTTTTGTTTTTACATACAGACTGTATTGATGACGCTGATAGGTTTTGTTGATGAATACCCACTCA  
ACTTCAGGAGAGTATGCAGATGGACAAGATGCTGACCGAAATAGGGAGCCATAGCCTGTTTTACGAGTAC  
CTGAACGTGGTTGGGATTGCGAGCCCATCCCTCGCCAAGATCGAGCAACCGTGGGAATATAAAGATCAAG  
AGCAGCTGGTTGCCAAAATCCAGATCGACAAAACAGGGTAACGCTCGCTATTTTCATCGACGCCCGCGCCAT  
ATCCGTCAACTGATACCGAATAACCCGCCAGCCCCGGTCCAACGACCGGGGCTTTTTGTTGCCTGTGGTT  
CCCTGAATAGCAAAACCCCGCAAGGGCCGGGGTTTTGAATGCATCGGGTTACGCCGCTGCGCGGCTAACC  
CAAACCTACGAAGTGCCACCTACGGTGGAGCTGATCCAGTTTGGAGGTAGGTTGGCCGACACCGACCGGCA  
CGCTCTGCCCCCTCCTTGGCGAGATGCCGACACCGCGATCCAGCGCAAGATCGCAGCCACCATGGAGAC  
CTGGCTCATCGCTTCGGGGCCGTTACCGATCAGGGTTCGCCCTTGATGGGAGCGGTGATCTTGCCATCC  
TCGATGAGGTAAAGCTCGGAGCGGAGAAGCAAACTTGGCGAGGTGATATCCACCTGACCCGCCCGGA  
AGTTGGGGGCGTAGATCCCTTTTGGACCGAGCGATGATCTCAGCCGGATCGTACTGACCCGCCAGCAT  
GTAAGTGTGGTTCATGCGCGGCATCGGCATGGCTGCGTAGGATTCGCGGGCAGCCGTTGCCGGTGGCGGC  
ACGCCCATCAGGCGGGCATTCTGCTTGTCTGCAAGTAAACCTTGGAAATGCCATTCTCGATCAGCACGT  
TGTAGCCACCCGGTGTCCCTCGTCATCAATGGAGACAGAGCCACGCCGACCCGGCAGGGTGGCGTCATC  
GACGATGGTGCAGTGTGGAGGCCACCTGCTCGCCGATGCGGCCAGCAAAACCGGGAAGAGCCCTTGGCG  
TTGAAGTCCCCCTCCAGACCGTGACCCACCGCCTCATGCAGCAGCACGCCGGGCCAGCCGGCGCCGAGCA  
CCACCGGCATGGTACCGGCTGGCGCGTCGATAGCTTCCAGATTGATCAGCGCCTGACGTACCGCTTCCGG  
CACATAGCCAAAGGCACGACTCTCCAGCCCGTCCAGTTTCGAGGAACAGTCTGTAACCAAAAGCGGCCACCG  
CCACCGGCACTGCCGCGCTCGCGACGATCGCCCTTCTCGCAATCACGGTTCACAGACAGCCGCACCAGCG  
GGCGAATATCGGCAGCCAGGGTACCGTCCGGTCCGAGCCACCAGCACCTCTTCATAGACGCCGCTGATGGA  
GGCCATCACCTGATTGATGGCGGGATCCAGACTTCTGGCGAACTTGTCATCTGCTCCAGCAAGGCGATC  
TTCTGGTGTGTTGTCGAGGGTCTGCAGCGGATCCATGGCCGGATAGAGCAGGTTTCGCTTCCGGTGGGAGCCC  
ACGCCTTACCTTGCCGTGAGCACCGGCTGCGGGCATGCCACGAGCAGCAGTACCAGCTGTTGCAGCGC  
CAGCAGGCTCAGCTCATCCGAGTAGGCGAAGCCGGTCTTCTCGCCGCTGACGGCGCGCACCCCGACCCCT  
TGATCGATGTTGTAGCTGCCATCCTTACGATGCCATCTTCCAGCATCCAGGACTCGTGCCAGCTGCGCT  
GGAAATAGAGATCGCCGAACCTCAACCTGATGGCTCATCAGGCTGCCGAGCAGTGTGTCAGGCGCCCTC  
GTCGAGATCGTTTCGGGGCCAACAGGGAGGCACTAACTGGCTCAATAGACTCAATCTTCTTCTCCACTCT  
CGTAACAGAGCTGTTTTAAATCGTCTTGGCAGCGGTTGGCAACAAACCGCGCCATCACAACAAACGGGCA  
TGCTCCAGCACGGGAAAACGGCTGCGTTTTCAATTTTTTACCACACCATCAGAGCAAACGGGCGTGTGTGA  
GCACTGGCATGGTGCCTTTCAATTCATCGATAAGCCCGGGCTCCATCTTCCGCGCAGCACTGTGCCGACCC  
GGACTCTTTGCTCGCCAGCACCCGACCCAGGGGTGATCACCATGCTGTGGCCCCAGGTTGCGGCCCT  
GTCTCGTGAGTGCCGCCCTGATTGGCAGCGACTACGTAGCACTGGTTTTTCGATGGCGCGAGCCCGCAGCA  
GCGGCTCCCAGTGCCTCGCCGGTACGGCGGTAAGGCGGCAGGCACCAGCAGCACGCGGGCACCCGGC  
ACGGGCCAACTGGCGGTAGAGCTCGGGAAAGCGCAGATCATAACAGATCGAGAGGCCGAGGGGACCAAG  
GGAGAGTCCACCAACACAGGCGCCTCCCCGGGCTGAAGGTCTCCGACTCCCGATAGCGACCGTGTATTGT  
CCGCCACATCCACATCGAACAGGTGGATCTTGTGGTAGTGGCCCTGAGCTCACCGCTTGGATCAAACAC  
CAGCGAGCTGGTGTGGATATGGTCCGAACCGCGATGGAGGTCGGCATGGCACCGGCCACCAACCAGATA  
CCGTAATCTCGGGCCCATGCGGCCAGCTGCTGCTGGATGGGCGCGGCTCCGCCAGATCGGGGCTGGGGT  
CGGGGCCGATTGCCCTCGGCGCCATCCAGATAGCCCTGCCGCTCGCCAAACAGGGCAAAGTTCTCCGGCAA  
CAGCACAGTAGCGGCCGCTCTTTGGGCAAGGCCGCCAGTTCCGGCGGCATCTGCTCCCGGTTATCCTGC  
CAGTGACGGCCAGATAACAGCTGTATTGCGGCTAACCACATGACGTTCTCCTTGTGCTTGGGCCATCAG  
ACGGTGACAGCATCCCCGCCTGCAGGGTGAATCCAGCACTATGATTCGCGCCAGTACCGGGCGGAAGA  
TGGCCTTGAGGGCATCGTGTATCAGGATGGGGCAGATAGCGCTGGCGGGCCGCTTCGTCGGCAAGGTCAT

CAGCACGCTGTGGGTAAACCCCTCGGCTCGCCCCCTCGGGCTGTCATCACGACCCACTCCACGGCGGTC  
ACGCCGCTGACCTGATGGGAATGGCGAGAAAGGCGGTACGCACCGCATCTATCCGGGCAGGCTGGGTGC  
CCGGCTTGAAGGCGATCAGCAGGATATGTCCGATCATGGCTCACTCCTTGTGATGATGCCGGGCCGCTCG  
TTTAGCGCTGAGCGGGCCCTGCGTGTGGGGCTCAGCAGGAAAAGGGTACCTCTTGGGTCCGGCAGGCT  
GGGAGCAACGGCATCTACCGCTCTTTCTGCTGCTGGTTGAGCTTGATGCGCGCGCGATCTCGTCCCGCC  
TCGATCAGCTTGGGTGCGTCGAGCGGGCCCCGAGATGCGAAAAATCGATACGGGTACCCACATCCACCACCG  
GCTCCAGCAGTTTGGAGAGGGCCAGCACATAGAGCCCCGTGACCGGCGTGATGGAGAAAAGCCGCCACCAC  
CGGCAGGGTGCCCCCAGATTTGGAGAAAAGCTCAGCTCGTAGTCGAGCCGCCAGCGCACCAGATCGGGC  
ATCCCCCTCGCCGCGCAGGTTGCCTGCCGCCCTTCATATAGAAAATCATCGTTGCTTACCTGCCCTGCT  
TGATGGTGGCAGAGGCGGACATGGATTGCAAGTAGAAGCCCTTGTGCAACACATCGCGAAAATCGAGCCG  
CAGTTGCGCAGCAGGGAATCGAGGCTGAGCAGGGAGAGCAGTCGCGCCCCCTTGTGTTGACCTCCCGC  
AGGGTGCCGCCCTCCAGCTGATAGTTGGCACTTCCCCCAGGGTCGGCAGACTCGGGCGGTAGGGCACAT  
CCTGCCAGTTCAGATCAAAAAGCGAGGGAGCCGGGGGCATCGCCGATGGGGGAGGTGTAGCCGAGCCGCTT  
GAGCAGCAGCTCGCTGTTGTTGCTGGTCAGCTTGCCACGGGTGCGGGTCTCCATCCGGTTGCCATCGGCC  
AGCCAGTCGACGCTGCCGGTGAGCTGACTCCCCGCCAGCCGCACATCCAGCCCCCTGAGGGTACCTTGT  
TGGCGCCGGGCACCAGCTCCCCCTTCACTTACCAAGAGGTAGCTCGCCAAAAGCGGCAATCGACACAGCT  
CACCTTCAACCAGGGGATGGAGGCCATGATGGCGTTGTCTGCTTGGCATCGGGATCCGGGTGAGATCC  
GAACTCTTGCCAGACCAGTAGATGCGGGCAAATTTGGCATCCACCGGGCGATTGGCCACTGCGGGCAGGC  
GGATCACCCCCATCACGTGCGGGCTGTGATCATCACTCGGTGCGCTGATTGGTTCGGCCCCACGGTGAA  
ACGCGCCCGCTTGGAGGTGGCACTGCCGATATAGGCGCGAGCCAGCTGTCCATCCACCACCACCTCCTGC  
GGCAGGAAGGCCCGGGCCAACCACCGCATTGCCAGTCTGGTTCGCGCTGGCAACCAGCTTGAGTCTGG  
CCAGCCAGCCACCAGACATCGGCCTCCTGCTGGTTGATGGCGAGCAGCATGGGGGCATCGCGCATTACCCG  
GGCGCCCGGCTGACCCACATCGACCCGCACCCGGCTGAGATAAGGTACCCCTTCGCGGTAACCAGTCCG  
GTCAGCATATCCACATCAGCCCCCAGCACGGCGCGAATGTCCGGCGTCCATCCCGGCCACGGGCGATCA  
CCTTGAGCGGCAGCCGGCTGGCGCTGCTCTTGGCCAGAGGCAGCGGCAGATCCAGCCCCATCCCCTGCA  
GTTGGAGTCGAGCGCCAGCTGGAAGCTGAACGGCTTGTCTCGGGCAAGGTCAACCCGAGCTTGGCGCCC  
CAGTTGCTGCGGCCGTTGAGAATGCCGAATGAAGAGATGGCGCGGGTTGGCGGCGGCTATCCACAGTC  
CCTTGAATCGAGGTCGACCTGATAGTCCGGATGCTGGCGCCCCGTGATAATCGAGGGTCAGCGCCGTCG  
GTTCCACAGGCTCGCCTTGAGTTGCTAAAACGGGTCTGTTGCTTGTATATTCGAGGCGCCCCGTCACC  
TTCTCCAGCGGCAGATCCAGACTGGCGACCCGCACCTTGTGTTGCTGAAGGTGGCATCGCCACTCGCCT  
TGACCTCGCTCTCGCCATCGAGAGGAATATCGAGCTTGACCGATCCTGCCATCGGGCCGCGGATCTCGAT  
CTCCCGCAGCGCCTGACCTACCGAACTGCCAGCGGGGAGTCTGCAGGTAGTCGCTGATGGCCTTGCCC  
TCCCCCTGCACCTTGGCATCCACATAGAGGTGGGCGCCGGGGGAGAGATCCGGGATCCAGGCATGCACCG  
AGTCGGAGCTCGCCTTGGCGAGTTTGGTGGATCGGCTGCGCATATCGAGGCCGGCATTCTGGAACAACAG  
GTCGATCTGCAGGTGCGTAAGCGGTTGCCAACCGGGGAAGAACTCGTAGGTGGCCTGCTCCAGCGGCACC  
GCCACCTGGAAGATGCCCTTGGCGTTGTGCTAGGGGAAATCCCGAACTCCCCATACCAGAGCAGGTCCG  
CCCCCTTGGCCTTGCCCCCTTGTATGGCGCCGCTCAGGTAATCCACCAGCCCCCTTGTCCATCGCCTGCAG  
CGGGAAGTAGCGATCCGCATGGCCCCGCACTCTTACATCGATGCGACCCGTCAGGGCCAGGAAAGGATGC  
TCGAACAGATCGAGGCGGAAACGGCTGGACAGGGTCAGATCAGGGTTATCCAGCGCGATATCCTGCCCGT  
AGAGCACCCAGCCCTGTTCTCGCGCCACCAGTCGAGGCGGGCCGAGAAGTGGTCGACCGGGATCGGCAT  
CTTGAAGTGACGGGCGGGATCCACCTTGTGCTTCCGCAGCGCCAATCTGGCGCTACCGCCGGTCGGGGTA  
AGCCAGAACTCGCCGTTGAGATCCTGCATCCCGGGTATATCCTGCCACGCCTTGAGGGCGACCTTGTGTA  
AGCGGCCACTGAGGGAGAGATCCTGCCAGTCGGCATTGGCCAGCAGCGTCAGCTCCTGCACAGAACCCTG  
CGGATTAGTCTGGCGCAGGGTCTCGCAGAGTGTGGGGTAGAGCGCCGATACCAGCTGACTGATCTGGGTG  
ATCTTGTGCAACTCTATGCTGGGCAGATAGCCCTGCACCCGATCCCCGATCCGCTCCAGCTGCAAGCGGC  
TCTGCAACCAGGGTTTCCGCTCCAGCTTGAAGGTGACGTTGTGGCTGGCCAGTTGCCAGTCGGTGCCTC  
ACGGCGCAGCTGGATCTTGGCGCCATCGAGGCCGAAACGGTGCATCTCCCTTCTTGGGATCCTTCCAG  
ATCAGGTAGTTGTTGCCAAACGCCAGCAGGGTATTGCCAGCTTGGCGCTGTCAAACCTCGCTCCAGAGCT  
GGAAGTCGAGCTGACCGGCAACCTTGGGTTCCGCCGATGGATCTTGGCCAGGGTCGGGGTGATATCGAG  
CTGGCGGGCCCCAGATAGAGTTGCCCTTGGAGGCGATCGAGCCGGGCAGTCGGGGCGTCCACATCCAGA  
ATCAGATCGAGGGTGTCTCGCCACCCGTTGATGAGGTAAGCCTTGGCCACCCCTGATGGCGCTTGC  
CACGGTTCTGCCAGCGCAGTTGGGCGATGTGAGGGCGCGCAGATCACCGAGGGAGGTGGTGACGCTGAG  
GCGGGTATTGTGCACATCGAAGGTAGATAGCTGGGTGAGCAGAAAACGCAGCAGGGCGCCCTGCTGGGGA  
TCGCCGGAGGGGCTCTCGTCAGCCGGTTGGCGCAAGTCGATGGTGTATCGCCATCGCTCAGGATCAGCT  
CGCCAAACACCGGCTTTAGCTCGTTAATGGTGCGCCAGAAGTCGAGATGCACCCAGGCTTTGCCGAGCTG  
TACGGTAAAACGCCCGAATCCGGGGCGATGGCGAGTTGCTGCAGTTTCGAGCGCGGGCCCGACTGTGTC  
CAGTCCAGCCCCACTTGTCCACGCTGACCTTGGATTGTGAATCACCCAGCAGAGTGTGGATCAGACTCT  
CCCGATATTGATTAGCAAAGGGCCCCCGACCCGTACCAAGGTGACCAGCATGGCCATCAGTACGAATAG  
GACCCCCAGGGCCAACCAGCCCCGACTCAGCCAGCGATAGACCAATTACATCATCACCCAGTCAACTGC  
TCCTGACCACAGAGGGGTTGCTCACTACCCGCACCTGCTTGGCGATAAACACTTCCAGCTCCGCCAGAC  
TGTGGGACTCCTCGCCATGGAGGTAGTCGGCCACGGCCGGGGCCGCATAGACAGTGAACCTGATCCGCATC

GTAGGCACGATTGACCCGGATGATCTCCCGCAGGATCTCGAAGCAGACCGACTCCACCGTTTTGACCCGG  
CCGCGTCCCTTGCACTCCGGGCACTCGGAGCAGAGCACATGCTCCAGACTCTCGCGGGTGCCTTTGCGGG  
TCATCTCCACCAGACCGAGCTGGGAGAAGCCGTTGACGTTGGTCTTGGCTCTGTCTTGGACAACGCCTG  
CTCCAGACTGTGCAGCACCCGACGGCGGTGATCCTCCGACTGCATGTGATGAAGTCGATAATGATGATG  
CCGCCGAGGTTGCGCAGGCGCAGATGGCGGGCGATGGCCGCCGTTGCCCTCGACGTTGGTGTGAAGATGG  
TCTCTTCCAGATTGCGATGGCCGACAAAGGCGCCGGTGTGATATCCACCGTGGTCATGGCTTCGGTCTG  
GTCGATGATGAGATAGCCGCCGATTTAGCTCCACCTTGGCTCCAGCGCCCGCTGGATCTCGTTCTCC  
ACGTCGTAGAGATCGAAGATCGGCGACTCGCCGGGGTAGTACTCCAGCTTGTGTCGACGCTCAGGCACGT  
ACTCTTCGGTGAAGCGCTTGAGCTGATCGAAGCTCTGGCGGGAATCAACGCGGATCTTGTGAGCTCGGC  
ACCGACGAAGTCGCGCACCACCCGGAATGCCAGATCGGGATCCTCGTAGAGGATCTTGCAGGGGGGTAC  
TTCTGCTTGCCTCGAGGATCTTGCGCCACAGCCGCTTCAGGAAGGCAGCATCCTGCTCCAGCTCCTGCT  
CCCCACCCCTTCAGCGCGGCTGCGGATGATGTAGCCACCCAGCTCGTCCACATAACCCAGCTACGGTGGC  
CTTGAGACGCTCGCGCTCGGCTTCGGACTCGATACGCTGGGAGACACCGACGTGGGCACTGCCCGGCATA  
AAGACCAGATAGCGGGATGGCAGGGTGTATATCGGTAGTGAGACGGGCACCCCTGGTACCCAGCGGATCTT  
TCACCACCTGCACCATAATGTCTTGCCTGACCGCACCAGCTCGGCGATGTTACCGACCTGGAAGTGTCT  
CTTCTCCTTACCAGCCACACTCGGTGTGAGGGACGATATCAGAGGCGTGCAAAAAGGCGCCTTGTC  
ATGCCGATATCGACGAATGCCGCTGCATGCCGGCAGCACCCGACTGATCTTGCCTTGTAGATATTGC  
CGACAATGCCCGCTTTGGCTGACGTTCTACATGCATCTTCTGCAGCAGACCGTTTTTCGACCAGAGCGAC  
CCGGGTTTTCGGAGGGGGTAACGTTAACAGCAGTTCTACCGACATAAGTAACCTTGCCTGTTCCAGTTTT  
GAATTCTATAGAGCCAATCCGGTACAACGCGCGCAAGGGAGAAAACGCAGCAGAGCACAGCTGACAGGAAA  
TTATTTGAGCTGTTCCAGATGATGCTTGATCAGCAAGTCTGTCTCCAGCAGGGGAAGGCCACCACGGCG  
CTATAGCTCCCTTCGATGCGGCTGACAACTTGGCCGCAATACCCTGAATGCCATAAGCCCCGGCCTTGT  
CACAGGGCTCACCGGTCTGCCAGTAGGCCTCGATCTCGGCCTCGTCCAGCTTGGGAAACGCCACGTTGGT  
GGTGACCAGACGCACGTCACAACGATCCTTGTGTCGACGCGCCACTGCCGTATCACCTGATGCACCTTG  
CCGGAGAGGGACTCCAGCATATCTTTGGCATCCAGCAGATCGGACGGTTTTCTCCAGTACCCGGTCCGCCA  
GCACCACTATGGTGTGCGCACCCAGCACCGGCAACGCGCTCGGCGCACACGCCACGCCCGCCATCGCCTT  
GTCACGGGCGAGGCGGCAGCGTAATCCTGCGCTTTTACCCTCTTCCGCTGCTCGGGCAGATCCAGT  
TTACAGCCCTCGAAGCGGTAGCCAATCTGGGTACAGCATTCACGGCGACGGGGAGAAGCCGAGCGAGAT  
AGAGTTGTGGTTCGTTGTTTTTGTTCATATTTACCTGATATTTGAAGCGCGCGCCGACCTTGCAGCAGACC  
AGAAACACCCAGGGCCATATTAGCATCGTCTCAACGTCGACCAAAAAGTAGGAGAAGTTGAGACTGGCCT  
GGCTGAACAGATGCTCGGCCAGAATACCGTCATTTTTACCACCAGCGAGAGGCCACCGATGATCAGTGC  
CTGCTGCCAGAGGGAGAAGTTGCGGATCTTCTGGAAGTGGAAAGGCCCGCCAGGTAGGTGGTGTGATGGCCATC  
GCCATCGCCCGCACGCCGAGGGTGTGCTGCCGAGCAGCACATCCAGCAACAGACCCGCCACCCAGGCGGTGC  
CGACGTTGGTCCGGTGCGGCAAGGCCAGCGCCAGTAAATGAGCACCATGGCCAGCCAGTCCGGACGGAA  
GGGGTCAAATTCGAAAGGAAGCGGCAGGATCGACAGGCTCAAGGCCAGCAGGATCGAGATCCAGATCCAG  
ATCCTGCCGCTGGCGGGTTCTAGCATTAGCGGGTGGCTCCTGCGGCGACGCAACGGGAGCCGCCGTTTC  
GCCATCCTCATCATGTACTTCAGGCTTCTTGTGCGGTCCACAGCAGCAGATAACGCAGTCTGTCCAGC  
TCCACCAGCGGCTTGGCCTCGACCTGGGCAAAGGGCTTGGCCCTCCACATACTCGGAGCGGGTCCAGTCCG  
CCACCGGATAACCTTCCGGGAAACGGCCACCCAGACCGGAGGTGACCAGCAGATCACCCACCTGAATATC  
GGTATTGCGCGGCAGGTTGCGCAGCTCAAGCTTGTGCGAGCTCGCCACTGCCGGAGGCAATGGCGCGCAAG  
TCGTTGCGCAGCACCCGCACCGGAATGCCGTGGCTGGAGTCGGTGTATCAGCAGCACGCGACTGGTGGTGG  
AGCCACGTTGGAGCACCTGACCAATCACCCCTGATCGTTGATCACCGCTGACCGTTGTAGACGCCATC  
CAGCGCCCCCTTGTGATCAGCACCTGATGGCTGAAGGGGTGCGAATCCACCAGCAGCAGCTCGGCCACC  
ATCTTGCGGGACTCTTTGTGCACCGGCGAACAAGCAGCTCACGCAGCCTTTGGTTCTCGTGCTCCAGCT  
GATCCATTTTGTAGCAGACGGGACGCTAGAGTGAACAGTTGCTGCTCCTGCTGCTTGGTCTGCTCGATGAG  
ATCTGCACGGGCTGACCTGGGTGACATGGTGTGCGAGGTTGCCGGGCGCATGGCCATGTATTGC  
AGGGGACTGACTAACGAACCTGAGGTAGACGCGGACATGGGTAAACACACCGAAGCGGGAATCCGCGACGA  
TGGCAGCGATGGAGATGATGACGGCGAGAAAACAACCGTAACTGAAGCGAAGGGCCTTACCAAAAATGGG  
TTTTATGGGTGCTCAAAAAAGAGCCGGCACGCTGGCCGGCTTTGGGTCTTATTCGTAGTGGAACAGATCG  
CCACCGTGCATATCGATCAGCTCCAGCGCCTTGGCCGCCACGGGCCACACAGGTGAGGGGATCTTCGG  
CCACGACGACAGGAATGCCGGTCTCTTCCATCAGCAGACGGTTCGATATCTTTCAGCAGTGCGCCACCACC  
GGTACGACCATGCCGCGCTCGGAGATGTGCGAGGCCAGTTCGGCGGAGACTGTTCCAGCGCAACCATG  
ACGGCAGCCACGATAACCGACAGCGGCTCTTGCAGCGCTTCCAGGATTTCTGTTGGAGTTGAGAGTGAAGC  
TGCGCGGTACACCTTACGCCAGGTTGCGGCCACGGACTTCAATCTCGCGCACCTTTCGCCCGGATAGGC  
GGAGCCGATCTCGTGTGTTGATGCGCTCGGCAGTTCGCTTACCAGTACGGTGGCGTAGTTGCGACGGACG  
TAGCTGATGATCGCTTCTGTCAAACTTGTGCGCCACCGATACGGACTGACTGGGAGTAGACCACACCGTTCA  
GAGAGATGATGGCCACTTCAGTGGTACCACCACCGATATCAACCACCATGGAACCGGTGCGTTTCGGATAC  
CGGCAGGCCGGCACCGATGGCAGCAGCCATAGGCTCGTTCGATCAGGTAGACCTCGCGGGCACCGGGCGCC  
AGTGGCGACTCCTTGTGAGGCGGACGCTCAACCTGAGTTGAACCGCACGGTACACACACCAGCACACGTCG  
GGCTGGGGCGGAAATAGTTGTTGTGCTGAACCTGCTTGTGATGAAGTGTGTCAGCATCTTCTCGGTACGTA  
GAAATCGGCGATCACGCCATCTTTCATCGGGCGGATTCGGGAAATGTTGCCCGGGTACGGCCAGCATC

TGCTTGGCGGCATGACCGACAGCAGCGACCGATTTGGCGTTCCTCCGCGCTCTTGGCGAATGGCGACAAC TG  
AGGGTTCGTTAAGGACGATCCCTTGATCTTTTACATAGATCAGGGTGTGGCAGTTCCCAAATCGATCGA  
CAGATCGTTGGAAAAGACGCCTCTGAGCTTTTTGAACATGGCTACGGGAAATCCTAAGAAATTTGGAGGTG  
CAGAAAACCGGCTAACTTTACCAATGCCACCCCAATGGGCAAGCGCTCAAACGTGTCGCCAATCAATCAG  
GCGCGACAAAAATGCGAGTCATCACTCACTCGCACACGCTTGCAAACACTAATAACAAGGATTTAGGGG  
GATGCTGTTGAGCCAACCCCCCTTACACATCAATTAAGTCAATACTTCGCGCCGATAAAATAATTTCTGTCA  
TTACCCCTGCTGGAGCCGAAAATAGCCTCACCTTGCAGGTTGCCGTCATTGGCACTCGTTGGGTGAGACA  
ACCAGAGGGGCTGCGACGGCTGTTTTGCCAAATCGACCTTGTAGGGAATGCGCACCCGAGATGTCCGGCTT  
GGCAAAGTGGAACAGGATCTCCCATCTTTGCGCAGTGCAGCATCCCACCCGGTGCCGAACGCCCCAAC  
CCCAGCTTGATCTTGCAGCCCGCCCCAGATTCAGCTCGCGAGTCGCCGCATCAAAGGTGTGACTCGGAT  
TAAGAAAAATGAACCCCTGATTTGCCAAAGAGAGCTGGGTACATTTGATCTTCTTGTGTTTTGCAGCGATT  
GCCCCCTTCGTAATATTGCATCTGCAGTGAATGGCCAGCGCGCGAGGCCAAGCCAGCCCGCTACCA  
GCCTGCAGGCGGCCAAAATAGGCTTTTCATAGGCACACTGTCTATCTGACGGGCATTACAGCCGCTGCCAC  
TGCAATTAACCTACCACGGCATCATTGAAATTCGGGCTGGCAATCAGCGTTCTGTCAACCATCGTTATCCCT  
CATATACAGACCAAACAACAAGACTTGTAGGGACCATCCGGTTGCGTGCCAGAGAGGGCGCACAAACTCG  
CTGCTACCGGTAGTCAAGGCCGACGGCCATCGAGCCATGGCAGCGGCTGCAGACTGCGCAAGCGGCTCG  
ACAGGGATTTACCATCCTTATCATTGGCAACCGAGAGATAGGCTTCGCCCTTGGCAAAGGGCCCTGTATA  
GTTTTCGGGTCTGTACACCCGTCGTATTACGAGCCAGCACATCCAGCATGACACCAAAGGGTTGCCCCATA  
TAGGAGAACGCATTGCAAGCCGGCACTATGTGCGCGCTCACCAGATTGAAGTCGGCAGGAATAAAACGCC  
CCACCGGCTGGCTCTGGGCTGATGGGATGGTGTAAATGAAGTAGCCATTGGCTGGTGGCGTCGCCGTCAT  
CCGGAACACACCCACCTCGCTGACTGACTGGGTGACCTTATTGATATTGTTGATGCCCATCCATTAGAG  
TGTTTATAGCTCGCTGTACCGACCTGCGCATTTTTGCCCGGGAATCGGGGCAACCAGTTGAGTAGCAAGAG  
CGATGTTAGTCAAAGCAAAGTTAGGCGTAGTCAGGTTCCCAGCGCAGATATCCCCATCATTTGGCCGACTC  
CCAGGCCATCGCCTTGATATCCACCTGGAACGTTTCCCCTGCTTTTTTGAATACCGGACAACGCTATCA  
CCTGCCGCGCAGACCCCTTGCGGGGGCGGAATGCACAAACCGACCGGGCGCGCCACAAACTGATCCGCGC  
CTAGCATCACAGACCGGCTTCACTGCCGGTGCCATCATAACTGGCATCCAGTTGCACCTTGCCCGCATC  
CGGATAATTAACCGTATGGTGCAGTGCCTGATCATTAAATGCGAGGGAGAGCGGTGTTGCAGCCCCC  
TGACTGGCACCACATCGCATGCTATTGACGCTCATCTGGCTGTTGTAGGGTTACCAGTGGGGGAGATAT  
AGCTGCTCCAGAACTTGACGCTCTTGGTCTGACTGGCAACCCCGGCACACACAGCTTGGTGCACATCGCT  
CTTTTTGATCGCCTTGATAGTCACCGTCTGCGGCTGATTGGAATAGGTATCAGGCACATCAAAGAAGAAG  
CCGCTATCGGCAAAGTTACAGGGTACAGGCTGCGGTAAGTGGGAGTCCCCGCCCGGGCTTGCACAAGGTGG  
AACTGAATGGCTTGGTTCGTCGGAGTCGAACCGGAAACGCTTATGGTCACCGCGGTCGGCGTATTGTTGCG  
CAACTGCACCTTGGTTCGAACCGCCGTAAGGTCACCGTATTGCCGCAATCCAACCATTTGCTGGCAGAA  
GTAGGGGTAAGACTCAGGGTTCGAGTAACCGGCTCTGTGATAAGCGTGGTACAAGCGGCATCGGCGCAGC  
CCTTGACCGTCACTGTCTCGGGATTGCAAGTCAGCGGCTGACCGGAGTATCAAGTTGGAAATGATCAAT  
CTGCACCCCGATCGGGTTGGATCGCAGGGCGCAGATCTGGATATCATCCAGCTCATGGTTATTGTTGGCG  
CCTCCGGTTGACCCTGTAAGCGACAGCAAAAAATCTGCAGGAACCTGCTCCTGCCAGCGGTGCGCCATCG  
CATCGAATGGCGCAACCAGGGTACTAAATCCGGAGCCAGTGTCTTCTATCCAGAGAGACCATGGAGCGGCC  
AGCCACACGTGAATCAATCCTTAACCGATATAGATGGCCGGGCTGGGCGGAACTGGTGCCACTTACATCA  
ATCTTGGGATTAAGATTGGCTGCGCTGCCAAATAGCGATAACTTGAACCGACGCCCCCGGAATCG  
CAATTGCTTGAGCACGGAATCCTGGGCCACCAACTTTTCTTCAATTACCGTTGGAAAAGTTTCCATATTC  
GTCAAGCCCGACGCCAAGCAACCACCGGCAAAACCGGACGTTCCATTAATTACGCTGGGCATAACCGAGC  
GCGCCACCAAAGCTACCAGGCTGCGGGGTTACTGTGCATCAGAAAAGTACACCGTAATCCATCCCCC  
CGGTATTAACCAAGTGGGTGACCATGCATAATAACGAAAAGTTACTTCAACCAAGTTGTTTGCAGCCGG  
GAATAAACGTTGATAAGTTCGCTGAGGTAGCTTGGTTACCCTCGCTTCACTCATCCGTAATCGGCCGCTG  
ACAATCTTCGGGTCAAAGTACCAGAAGTCCGTTTGACAACCCACTTGTCACTCAACACAGTTCAGGAA  
AATTATCTGAAAAACACCCAAGTATGGGAGTGAATGTCTGATCATTGATTACCGAATTTATCCGTCATATT  
CAGGCTACGGCTTGTGCTACGACCACGAATGATGGCTGAATTTGTTAAGCGTCAATTTTTGATCGGAATAC  
ACGTAACCATTTATTTGACTACCGCCATTACAGAGTAATCCCACCATAACCAAATAACAGTAGAGAACCCT  
CACCAGAGGCGTTCAATATAGCATCATTCAACTCAAGAGTATTTTTGACAAAAATACGAACTTACCCCTG  
GATCTGAATTTCTGTCCCCTGATTCATCGTTAATGATTCATCCAGTAATCACCAGATGAAAAATCACT  
TTGGCACCATTTGTTCAATGCCAGCGACTTGATCCGATATTTCTGTAGCAGCACTGGAGAACTTAAACGAAC  
AGCTGGTATTCAATGCGATGGAATTAATTTGGTTGAGGTTGCACTCCCGCACTCAACTGCTGCCCGGC  
TTGGCACTGTGTAATAATCCCCTTGAACCACTACTTGATAAAAAGATATTGCCCGCGGTAATAGATAAC  
CCACGAATTGTATTGCGGGTAATAGTACATAAGCGGCGAGAGCCATCTGCGTTGTACACGCGTCCAACG  
GCATCCCGGAGCCTTGAGTTGAGGCACAGTAATTGAGTGCAGCCCTGCAGTACCGTTACCTTGGAGGA  
GCCATACATTGTCAACGCAGGATTACCAAGGGAATTTGCAATTAACATTTGGTGTCCCCACGATGACCCTGA  
GTCACCGCTGGGAAATAGGTTGCGATATCAATCACCTGAAATGCCTCTGCTGCGCCACTAAATAGCCACA  
CGGCTGCGACGATCCATAAATTTGCGCATCAGGGAGTTTCTCCATCATAAGCTTCGACCATCAGGGTTCCG  
CTCACGGCAAAATCAGGGTTGGCACTGTTAAGGTCCGAGCTGCCACAGGTTCCGACACTCTCGAGACGAT  
AGCCATTGGTCACAGATCCGTTGTAGGTCACCGGCACCGTGGCGCAACGAACCACAGCCTGACAGTTGGT

CAGCCCTGGATTGCTGGCAAAGCTCAGTGGGCTGCTTGCCAGGCAGACCGCAGGTGGGTTCCGGTTGGGCA  
AGCGTGCCTTGGGGAACAACCGATAGAGCGCCACTTCCAGCCCGTCTGGGCGGCCAGCAGAGCCCGCA  
CGCTGCGCACCTCCACCGTATTTTTCTCGCCGCTATCGACCAGAAAACGCCCATGGCAGCCGCCAGCAG  
TGCCATCACCACAATCACAAACAGGGCGATCATCAAGGCACTGCCTCGCATCCGTCCGAAAGCCTGTGGA  
TCAGGGCACATTGAACACCTCTATCTTGTGGTTGAAGGTGACCGACTCCCCCTTGCCTCGAACACAAAA  
CGCATACCAAACCTCCCCTTCCGGCGTTAAACGCCGAGGTTTCCCTATAGAAGGTGCCAATACGAAGGGAAT  
CCGCCATCAACACGCCCTGTGCAGGTAAGGATGCTCCAATGGGGGCAGTGGCACGGGTGAGCGTGTTC  
TTCCACACAGTAGCGAACCTGCTGGTTGGCAAAGTAGACCCGGCTGCCTGGAGAGAGGGCCAGTCAGACTC  
TCGGTGTGGTATAGCGGATGGTTTGCCTCCGGATACGGGCGTCAGCACATCAGTAACCCTGGCTACAC  
AGCGGCCATAATCGCAGCCTGCCGTAAGCGAACCGACATTTTTGTCCGGCACGGGGAAGACGATCAGCTG  
ATCATCTTTTTGACGGCGGTGGCATCCACATCCAGCGGATTGGCAGCAGAAGCCGGGTCCGCATCACC  
AGCTCAAGGGTGGCCGTGCTCCCCGACATGGCGCGTTAAGTGCCAGATAGCGGCTCGAGGTACTGATGG  
GCCAGAACCGCAAACAGGCACCGGTGTCGTCATGTCGCCAGTCTCGATCCGCTCCGAGCCCGG  
CACCGCATCGCGCAGTTTCGGGTTAAGCCGCTCCATGGCGAAGCGGGCATCGCTCATCAGCTGCTCACGG  
CTGCTGGCATCGCCATAAATCTGGGTACCGATAACCGATAAACTGGCTGGTAAAGGTGCGCCATTATCCCGA  
GCAGCAGAATGACCATCACCAGCTCGACCAGGGTAAAGCCACGGTTACCCCGAGGTTTACGGTAGGTTTCG  
ATTGGCCGCCAGGCGTAATCGAACGCCGGAAGTGGTTACAGGCGCGGACATTCGGACAGGCAAGCAACAC  
CCAACAGCGGAGCGATCCATCAGTAGTTCCCCGATAAAAAGGAGAAAATCGAGCACGCTCTGATCCGGTAG  
CTTGATCTGCAGATCAATGCGCTTGCCACAGAGCAGGGGGCGGCACAACTCTTGAAGGTGCCGTGCTG  
AAATCGGCTCCACTCACCGCAATTTTACCTGATAGTTGCGATACTCCTCGCTGCTGACTCCCACCTCAG  
TTTTGGGTGAGGTTGGCATCCACCCAGCTACCTGCGGTATCGAAATCATCCACATCGTTATAGGCATA  
GGATGCGGGCTCGCCATCCGGACCATAAATGGTGGAGCAGGAAGAGATGGTCACCCCTGCCACCTGCTCG  
CCACAACGATAACGACCACCGTTATGATCCGAATGTTTCATCAAAACGACTTTTGCAGATCTCGCCGGAGA  
GGCGCTGGGCCAGCTGGGCGGCGGTACCTGCTGCACCCGGTCTACCGCTGCGGCGCTGATTGATAAG  
CAACCCCAAATGCCGGTCAAAGCCACCGCCAGCAGCACTATGCCAACGATCAGCTCAATCAGGGTGA  
CCACGCTTAAGGGATCTCATGGATATATCCCTCTGACTCAATCTGGATACGACCACTCTCGCGACCATCG  
GTGACTTGCAGCTCGCAGCCACCGGCGCAGTACCGAGCGGGCGGCCATTTGATCAAAGCGGATAACAA  
AAGGGGGCTACCTTGTTCGAGGAGAGGGTGAGCCCGTCAGACAGGGTACCGGACGACCAAGGTGAG  
CTGATTAGCATCCAGCTCGATATGGCCGAGGATGCTACATGGGGATTCTGTGCTGTGGCCAAATGG  
CCAGATTCAACAAGTAGTGAGGTACAACGATTGGCCTGTTGCTGCATATTGACAGTCTGTACCAGCCGA  
GCCGGGTGAGCAGTTTCGTACAGTACGGTTTTGAGTTTTCAAAGCCGCTTTGCCAGCCATTTGGGCACGGC  
AAAGGCGGCCAGAATCCCGAGTAACAGGATCACCAGTACCAGTTCAATCAGGGTAAAGCCCTTAGTTGCA  
GGCATGGAGGTTCTCATTAGGGAAGAGAAAAGCGAGGCGCAAGCCTCGCTCGAACATCAATCAATTACA  
CGCAGTGTGATAGAAATCGTTGGTCGATTGGTATTGCTGGTCAAAGTATTAGCGTAAGTAACGTACAC  
TTGTCATCTTGTGCACTTGCCGCACGGAAGGTGCCTTTGCTGCCAGATACTTCTGACCATCCATCCAAAG  
TTACGGTTTTTGGCAACTTCATCTGTTACTGGATAGCCATAGTTAGTTTTTACAGTATCTGTAGTGTGAT  
TGCCACAGATACGGTTGCACCTGAAGCTGTATTCTCCAGGCCAGCAATAGCAGCCTTGCTATAGATCATT  
TGAGAATGCTCTGCAGTGCAGCCTGCACGCTTGAGCGGCAGAATAACGAGCATCATCCTGCAGATTCA  
GGAACCTGGGTGCAGCGGTAACCGCCAGAATACCCAGAATGATGATCAGGATAACCAAGTTCGATCAGGGT  
AAAACCCGCTGTTTTTTTCAATTTCACTTTTCTCTGTGAGTTAATATTGGTGGTCACCTGACCGGACGCCG  
GACGGTAACTGAAACTCATAAATGCATCAGTCTTGCCCTTGCGGATCCTGATACTTGCCATCACTGCCCTT  
ACTCAAATATTGACCAAATAGTAACGGCAGACCGAATCCAGTCCATTAAGTCTTACTGTGGCAGTAT  
TTCAGGTCAATTGCCGCTACCGCGCACTTCATTGAAGCTGGCCGTAGCCTTGGGCGGGTTTTGCAGTAACC  
CCTCCCAAATATTGAGACAACGTTCCGGCGGTGAGATTGGCCGGATCCACATCGGGATTACCGCTTGAAT  
GGTATCCATCGGATAGCCTGGCGACAGCTCGCCGTTGCTGATCTGGGTATCGGTGAGGTGGTGGTGGTGGT  
AAGCGACTACCGTATAGACACAGTATTGAGGCTGCTGTTTGGCGCGACCTTCCGCTCCCATTTGGC  
CCCGCACCAGTGAACCGCCGGTAGCAAAACCGCCAGAGACTCCCTCCACGCTGGCCTTTTTCGCTTCGTC  
AGTCACATCGAGAAAGCGCGGCAGTGCAGTACCGCCAGGATCCCCAGGATCACGATAACGATCACCAGC  
TCAATGAGGGAAGCGCGCAGACCGTCTTCTCATCCCGTTTTCCGGCATTTGTTGGTGCCATTGGTTTTCA  
TTGTCATGCTCCCTCCGTAATGCCCCACATTATTTTCATGCAGGCCCAAAAAATCATGTAGTTGGTTCAT  
ATGATTAGTTTCAATCAAGGCTTTTTTTCATCACCAGCCCGTTCAGAAAATGATAAACCAGCAATAACCAT  
CCCACCCATCTCGCAACCACTGCCATCAGGACGGGCCAGAACCCTGCAGGGGAGGCACGCCCCCTTCGT  
CTCACCCATCAGTGCCAGCCACAACCTGACGGCAATTTTCCGAAGGAGATTGCAGCGGCACCAGCCCCAAG  
GGCCACCCTCGGGCATCAAACCTGCCACCCCTTGCAGGCGACATGCAGTGTCTGCGGGCGCCGCTCATCGA  
GCCAAATGCCGTGCAAACGCTGTGCCCGCTCGGCAAATGCTCCCCAGCAAGGTGAGAGTGGCTGCTG  
CGCCTCTTCCCGGTGGCCCTGATAGCTACGCACCAACGTAGCAACAATCACCATCAACAGGATGATCAGC  
GCGATCCGCGGATATCCGGTCAGCCAGCGATCATCTTGTGCTGCTGTCTGTTTCATCCAGCCCTCGACTC  
CACCGCTCACTTGCCCTTTACGGCTCGCATCATGTCCACATGGGGGTGAAGATACCCAGTGCCAGGATC  
AATACCATTACTGCCACGATCCCGATCAGGATCGGCTCGATCCGAGCGGTGAGACTTTTGGAGTCAAT  
CCACCTCCCGCTCGTAATACTCGGCCGCTTCGTGCAGCAGGTCATCGACCTGACCTGTCTCCCTCCCCAC  
GGCGATCATCTGCATCACCAGCGGGGTGAACAGGCCGCTGCTGCTGGCGGTGCGCAGCAGGCTCTCGCC

CGCTCGATAACCGGCGGCATATCCCGCACTCGCCCCGCATATAGGCGTTATCCACCGCATCGGCCACCA  
GGGTGAGCGCGGTGTTTCAGCGGCACCCCTGCCTTGAGCATCATGGAAAACTGCGGGCAAACGGGCCAG  
CAGGGAGCGCTCTATGATGGTGCCGATGATCGGCAACTTGAGCTGCCAACGGTGCCAGGTGAGCTTGCCC  
TTGGTGGTGGCAACCCAGCGGCGCAACCGAACACCATCCCCGCCAGAAATAGCGAGCAGCAGCCACCAGT  
AGTTGACAAAAAAGTGCAGGTTGGCAAGCAGAATGCGGGTTCGCCAGCGGCAACTCCACCCCGAATTTGGC  
GAACATGCCGGCAAACACCGGGATCACCATGATATTGAGGATCACCATGGCGATACCGATGGCGATCATC  
ACGAAGCTGGGGTAGCGCATGGCGGTCTTGATCCGCTTGCGGGTCTCCAGCTCCAGCTCGAAATAGTTGG  
CGAGCTGCAAAAAGGCCTCTTCCAGCTGACCTGTGTCTCACCCACATGGATGATGGCAACAAACAGGCT  
GCTGAATACCTTGGGGTGCGCCTGCATCGAGCTCGAAAGCGGGCGACCGTTGCCGAGATCTTCCCCAAGC  
GAATGAAGCGCCCCGCTTGAGCGGCTTGCTGTGAGTGTCTCTCCAGCCCCGCAATGGCACGCAGGATCG  
GGATCCCCGGCCCCGGTCAGGCGATACATCTGGCGGCTGAAGATCACCAGCTCATCCAGCTTGACGCCCC  
TTCCAGCAACAGTGACCAGTCGATGGCAGCGGATTTGGCCTTGCCCCGTTTGAGCTCGGTGCGCATCACG  
CCACGGCGCATCAGCTGTTTCGGCGGCCGCCATCTCGTTGGCCGCTCTACCACGCCACTGGTGGCGTTGC  
CCTGGCTGTACGCCCCCTTGTAGGCAAGTTAGCCATCGCTTACCCCAAATCCTCGGCCAGTGCAGCAC  
CTCATCCACCGAGGTGATCCCCTGACGGGCATAATCGAGGGCAGTGAGGGCCAGCGGCCGGTAGTGTTCG  
TGTTGACGGGCGCCTTGGCGAACCTTCCGCATCGTTGCGGCGCAGAGCATCCATCATCGGCTGATCCA  
GCTCCAGCAGCTCGTAGACCCCCGATACGGCCGGAATAACCGGTAAAGTTGCAGCTCTGGCAACCCCGGCC  
CTTGTGATAGGTGTGTTGGCCAGGCGCCTCGCCGAGAGCACGGTGAGCCAAGTGGCCTGCCCTTCGTGC  
GGCGCCTTCTCCTCGACGCAGTGTCTACATAACCGCCGACCAGCCGTGGGCGACCACAGCCCGCAGGG  
CGCTCGCCACCAGATAGCCGGGCGCCCCATGTGATCAGGCGCAGGGCACTGGTACCAGCATCGTTGGT  
GTGCAAGGTGGTCAGCACCAGGTGACCGGTGATGGCGCCACGCAAGCCGATCTCTACCCTCGTTGTTC  
CGCATCTCACCCACCAGCAGGATGTCCGGATCCTGACGCAGGGTGGAGCGCAGCACGTTGGAGAAGGTGA  
GGCCGATCTTGGGGTTGACCTGCACCTGATTGACCGGGGAGAGACGATACTCCACCGGGTCTTCTACCCT  
GATGATCTTGTGCTGGACTGGTTGAGCTCGGAGAGAGCGCCATAGAGGGTGGTGGTCTTGCCGCTACCG  
GTCGGGCGGGTACCAGAATCATCCCGTGTGGCCGTTTGGAGCTGGCGACGGAAACGGGTGAGGATCTCCG  
GCGGCATCCCGGTCTCGGTCAACGACAGGATGCCGGAGGATGATCCAGCAGACGCATCACCACAGACTC  
GCCATCTGCAACCGGCATGGTGGACATCCGACATCCACATCGCGACCACGCACCTTCATATTGAAACGG  
CCATCCTAGCGCAAGCGCTTCTCGGAGATATCGAGCCAGCCAGCTTGAGGCGCAGCACCAGCCCT  
GGGCGATGCGCACCTCGTTGAGGATGTTCTCGTGGAGGATCCCGTTCGATCCGCTGGCGAATACGCAGCAC  
TTTTTTCGTCGGTTCGATGTGGATATCCGACGCCCCACCTGCACCGCATCCTCGAACAGGGAGCGCAGC  
AGCTTGGCCACCGTTCGCTCCCCCTCGTCAATTGGCCCCAGATTGCTGGAGCCAGCTCGAAGCCGGAGT  
CCTGATACTCCTCCTGCAGCTGTTTCGGCGAAACTTTCAATCTCGCGGGTACGGCGATAGAGGCGGTGCAA  
ATACTCCAGCAGTTGCCCTTCCCGCGCCACCGCCAGCACCATAATGCGCGGGCTGAGCAGGGCAGCGACG  
GCATCCAGTGCCTCAGATCGGCCGATCCGACATCGCCACCGTCACTTGTTCATCGGTAAGGTTGACGG  
CCAGCGCCGATAGCGACGCGCCTGCACTTCGGGCAGCAGCGGCACCGCGGCGGCTCGATGGTGGAGTT  
GTTAAGATCGAAGAAGGGCACATCCAGCTGGCGGGCGAGGAACTGCAACAGCTGCACCTCGCTGATAAAG  
CCGAGGTGATGAGAGTGGTGGCCAGCTTGCGGCCGGTCTGACGCTGCTGCTGCAGGGCAAGCTGCAGCT  
GATCATCAGAGATGATCTGCTCTTGTACCAGCAGGTGCGCCGAGGCGCATTTTCAGTCTGGGTGTGCCAT  
GTTTGTCCGATCTCTGTTACTTACACCCGTTGCCGCATCCGATTCGCTTCGCTAATCGAACCTGCTG  
TTTTATCAAGGGGTTAGTTGGCCAATTCGTTGTTCCAGCCAGTTGGTTCGATGCCCTCGCCGAGGTTGCCGTG  
CAGCAAGGCGTTGCGATAGGCATCGAGCGCCCCGCTGGCTGTGGCCCTGACCATCCTCGGCCACGCCGAGG  
CCAAGCCACCAGCGGCCCTGATCCGGCTGCTGACGCAGCAGCTTCACATAGAGCGCCGCCGATCGGCAT  
TCTGGCCCAGCTCCTGAGTCAGCCCGGCCAGGTGCGTAATAGTCCATGTTGCTGGCGAGATCCGGCTG  
ATAACCGGACAACCAGCCAAGCGCCTGCTGCTGTTGCCCTCGTTCGATGGCAAGGCGGGCCAGCAGCAGA  
CGAAAATCGGCTGTTGGGGATCGAGCCGGATCCCTCTTCCAGCAGCTGACGCGCCTCGGTGACAGCGCC  
CCTCGCCGTAGAGCAGCCCCGACGCTGCTCGCGCCCCCTGATTGTAGGGATCGTGGGCCAGCACCTG  
ATAGTAGTTGTCCTGCGCATCCCGCAGGCTTCCCTTGGCCATGGCGGTAGTCGCCCTGCGCTCCGCCAGT  
GCCGCCAGCTCCTTGGCCGACAGCTCCACCGTCTCGATCTTCAATACGCTCGGTTTGCAGCGGCGGCTGG  
CGACTGCCTGCTGCTGCTGCCCGAGTTCCGGCGTAAAGCTCGGGTGCAGCTCTTCATCGGTGCGCTCCGT  
CTCGTCAACATCGCTGGAGGCATCAAAGGGCGCACCGTCCGGCATGCCATCCGAGTCACTCTCGCTGCC  
TCATCATTACCTCATCTGACTTGGCAACGGCAGCGCGGCCACCTCGACCGGCTCGGGCGGGCTGA  
CCGGCGCGGCGGCCCTTGCCACAACATCGGGAGTACCGCATCGGGGGCGATCACTTCGCTGGCAGCCGT  
CACGGTATGGGTCTGCTGCCAGTAGATCCAGGTTCCGCAACCGAGGATCCCCAGTGCCAGACCGCAGATC  
AGGGTCAACAGCAACATCCACCATCCCTGCTGGCGCGCAGGGCAATATAGACGGCAGTACCTTCGGATC  
CTTGCTGGCGCCGGTCCAGATCTTTCAGCATCTGGTTGATAACGCTCATGGCCAGACTCCATAAGCCAGG  
GCGCACCCAGCAACAGTAACAGGGGCCACCAGCGCCGTGGCGCAAAGCGGTGGCATCGTCCGGTATCAC  
GAATGGCGAGCCGTACCAGACGACTGTGACCTGACGCACACCCCTGACCATAGGCCAGCATCAGGCACCT  
CTGCGCCAGGATATTGATAAGTCTCGGGATCCCTCGCGATGCCCGCCACAACAGACGCATGGCGCGACCT  
GCAAACAGCGGTGCCCGCGGTAACCGGAGACCTGCAATCTGTGCTCCAGATAGGCGCGAGTCTCGTCAA  
AACGCAGCGGCGCAGGCAGTAGGAGAAGCCAATCCGCTGGCGCAGTTGGCGTAGATGCGGCTTGGCCAG  
TCTGGTATCCAGCTCCGGCTGGCCGAACAGCACGATCTGCAGCAGCTTGTCTGATTCGGTCTCGAGATTG

CCGAACAGGCGGATCGCCTCCAGCGTCTCGTCCGGCAGCGCTTGCGCCTCGTCGAGCAGCACCACCACCC  
GGCTGCCCTGCTGGTGCAGGCTGATCAGGTGACGATGGATACGATCGGTCCAGTCCAGCTCGCTCTGATC  
CCGTACCGCCAACCCAGCTCCAGCGCCAGCGGATACGCAGCTCGGCCGGAGTGAGATGGGGATTGGGC  
AACCAGGCAAGCCGACCCGGACGGGCTTCCGAACCCAGCTCGCTGAGCAGCTTGCGGCAGAGCAGGGTCT  
TGCCTGTACCCACCTCGCCGGTACCTTGATAAAAACCTCCCCCTGCGCCAGCGCCAGTTGAGCACCTG  
CAGCGCCTCTTTCGTGAGGCGGCAGGCCGTAGTAGAAGCCGGTATTGGGAGTGAGGCTGAACGGTGCCTCC  
TGCAGGCCGAAGTGGGTACAGGTACATGAGGCCCTCACCTGCCACGGCAAGCAAGCAGCCTGAGCTGGCAAG  
GCAGCACAGGCCGTTTCGGGATAAGGGTGACCGCAACTGGTGTTCATGGGTGAGCCCTTGGCCGGATAACCAC  
TTGTTCGAGCAGCTCGGAGGAGCGTTGCAGCTCGTTTTGCCAGGTATCTTTCTCCACCACGGTTCGGTTTGA  
GCATGATCACCAGCTCCACCTTCTTGGTGTCTCGCGGCGGTTGGTAAAGGCTTCAACCACCAGGGAAT  
ATCCCCCAGCAGCGCCACCTTGTCTGACGATCTCCTGCTTGTTCGGTCTTCATCAGGCCGGATAACGATG  
ATGTCACCGTTATTGGCCTGCACCACGGTATCGGATTCGCGGATCGAGCTCTTGGCGAGCGGCAGTTGCA  
ACTTGCACCCGAGGTACCCATGTTCGATCACCTTGTTCCTTCGGTATCGATAACCGAGGGATGGAT  
ATGCAGCAGCACCTTCCCCTCTTCATCGATCTGCGGCGTTACGTCCAGCGCAATACCGGAGAAGAAGGGG  
GTCAGCTCCACGTTAGGTGTCTTGTCTGTGCCCGTCGAGGTAGTGGTAATGGTGGTGGACGCATTTGGTGA  
CGTAATACTCGTCCGTCCCCACCTTGATCACCGCCTTCTGGTTGTTGGTTCGCGGTGACACGGGGACTGGA  
GAGGGTATTACATCACCTGGGTCTTGTGAGCAGGTTAACCGCTACATTGAAGTTGCCATCAGAGATGGTA  
AAGCCAGCCCCCCCCGAGCGCAGTAAAGATCTGGTTGGGGGTGGAAGGCAACTGGGTATTGGCCAACG  
ACTTGCACCCGGTAATCCCCTTGTGGCATCCAGCTGGCGGAGAGACCGCTCCAGTCCACCCCTGCTC  
ATACCCTTCGTTGAGGGCGACTTCGATGATCCGAGCCTCCAGCACCACTGCCGCTTGTAGGTGACTCTCG  
GACTGAGTCAGGAATTCACGCACCCGCTTGTAGCTCTTTCGGATAGGCGCGGATGGTGACCAGACCCGCT  
GCGGGCTGGTGATCACGGCGCGGCCGTACCGCTGCCGATCAGGGTCTGCAGGGAGTTCGCGCAGATCGGT  
CCAGTAGTCGCTGTTGGTGTTCGGTTTCGATACGGGTACCGTTGTTGTTGTCACCGCTCGAGTTGCTGCTG  
GTTGAGCTGTTGCTGCCGCTGTTGTTGTTTCGATGCACTGTCAAACTGCTGTTCGCTGCTGTTATTGCTGT  
CATTGGCCGTCACCCCGCCGGTGTGACCGAAGTTCGCGGAGAGGCCACGGCGGGACATCATCAGATAGTT  
GACCGGGATGGTTTTCGGTACGCAGACCCGCCGATAGATATGGAAGACATTGCCCTTGCCTGCACGTGC  
AAGCCGTACATATCGCCACACCCGCCAGCACCTCCGGCAGAGTACATCCTTGTAGCTCGACGGAGACCA  
GCCCCCAGCACCAGGGGTGAACCGCCAGCCTGTAGCGGAGCCCTTGAACAAGGAACCCGAAAACCTCCAC  
CGCCTCCACGTTCGTGAGGTCGATACCGGCTCTCCGGCATGCCAGCCGGCATCTGTGGCCGGTTTC  
AGCTGCAGCAATTCACCTTTCACCGATTTGGGCAACCGGTCAGAGGGGACCGCTGTTTTCTGCTGTTTCGT  
TCATGGCCTGTTTTGAGGGCATCCTTTCGCTGGGTTCGGCTCGGGGTGCTGATACGTGGTACAGCCTGCAGC  
CATCATGGCCACGGTATCAGACAGAGACGGTGTTCCTTCATGTAATTAGGGCACCTGACTTGAATTA  
AACTCGATAAAGCCGATTACCTCTCGAGAGGCAAGCAGACTCAAACCCGGATCTTGTGCGCAAACAGT  
GTTACCGCATGGCGTTTTTCCCGCTTTTCCAGCACACGGCATCGGCATTGATGGCCACCAGCGTATAGC  
CGTCCACCTGTTGCCCGACCCGATAACTCTTGCCATTGAGTACCGCCAGTCCCGGGCCATTGCCAAGAC  
GACACTCTGCAGCTTCGGCAAACCGGCACTGCTCTCGCCGGTTCGACGGGGCCAAACCGCCACATCAGCC  
AGCGGGCGGGTGGGATCCTGCAATACCTCGACCTGCTCCGCTGTACCAGCAAGCTGAACAGGCAACAGC  
ACAACGCAAACACTCTAGCCACGGATAAACTCCTTGTGTTACTCAGGGTGTAGATCTCCATCTCCACCA  
CAGCGCCGGGATAGGCTTTGACCTGATAGTCAAACCTGCTTCCAGTAGAAGTGACGCGGCAAGGCTTCCAG  
CGCTTTAAGATATTGATACACATCGAAATAGCCGCTTCAAGCTGAAGCCGGATACCATGCTTGTAGAGA  
TTGACCTTCTGCTCCCCCGCCATCAGCGGGGTTCGGTCCAGCGAACTGAGGGCCAGCATGTGAAGGTTGA  
CGGAGCGGGAGAGCAGCGCCTCCAGCACCGGATCTCGTTCGCGGGGATCAGATCGACGGTCTGTGC  
CTTCAGCTCATCGTTCGATCCGGGCCAGATCCGCTCGACCTGCGCCAGCTGGTTCGCGAACACCCGTATTG  
GGATCCCGCTTGTAGCCGGGCTGCTTTCGCGAGGTTTTTCAGCTCCATGATCTCGAGGTTCGCGCTCGGCCG  
CGCTCAGGGCATGCGATCCTGTTGCAGACGGGTATCTGCACCATCGATCCAGCCGTAATGCCAGCCG  
GCCAGCAGTACCAGACCGATCAGCAGGATCAACACCCGCTCCGCTGGTCAACAGGGCGATACGCTGG  
CCCCATACCTGCCATTGTGCTTTCAGGTTTCATCAGGGTTTTCTCCCGCAATGCCGCTCAACTGGAAGGT  
CAGACGACCCCTCCTTGTACAGGCCGAGGGTTCAGTTACCAAACCTCCTTGCACCAGACTCGGGGTCTGC  
TTGAAGCGGTTGACCCAGGCCGGTACATCCTGACTGCGTCCGGCAAAGCCGGAGAGGTTGATCCGCCCTT  
CGTTGATCTCGATGCGCTGCAACGAGAGGTTGCTGTTGCGAATGCGGGAGAGATCCGCCATCAGCTGGC  
ATAGCCCTGGGATTTTTGCAGGGTTCAGACTGCCCAATTTGGCGCATCAGCCCTGCTTGGCCGTGAGCTCA  
TCCTGCTTGTGACAGTTGCTGTTGCAGCCGGGATCTGCTGATGGCGGCCAGCTCGGCATCGAGCC  
GCTGCGCCTCGCTGCGTTTTGATCTCCAGCTCGGCAGAGCGCTGCGCCAGCGCACGGCTGACCTGCTGCTG  
CTGCCAGCCGTAACCGACACCAGTCAACAGGATCAGCAGCAGCGCAAAGCCCCATACCAGCGCCATCTGA  
TTGAGGCTGGCCACTGCCGCTTGGGGCGAAACTCGGCAGCATAGAGGTTTATCTGACGTTTTATCAGC  
ATCCTCCCCGATGGCGGCTGCGTAGGCCGAGAGGTAACCGCCGGCCAGCACCCGCTTGTGGCCATG  
GCGGAGACGGCAAAGCCGAAGGTCTGCTCCATGTGGCGCACAGGGTACCATAAAAGGCGAGGCGACGG  
CGAACTGCATCTGCCCCAGCTCGGGCAATTTTCAGCTGGCCCGCCAGATAGTCGAGGGAGCGCTGGATCTC  
CAGCGCCAGTGAATCGAGCAGCATGCTGTCCGGCTCATGTTTCGCCAGTTCAGGCTGGTAAAACCGCGCAGC  
TGGCGGGAGAAGCAGAGCCCGCCCTGATGGAAGACCAGCAGTTGCAGATCCTGCCCTTGGGCTGCCACA  
GCAGCATGCGCACCGTCTCATCCGCTCATAGAGAGAGGTCAGCGCCAATTCGTCGCTGATGATGGATTG



CAGGGTCGCGATGCCGTTGATGGCATCGGCCAGCTGTTGCACCCGGCTCTTGGGCAGGCAGATCACATTG  
ATGCGCGGGGCGACCCGGCAGGCGGGGTGGGCAAGTCCACATAATCCATCGCCAGTTGCAGCACGGGTTCCGC  
TGACATAATCCTTGATAGCCAGGGGAGCGCCCCGCCATCTCGGCGTCAGGCACGGCAGGCTTGTGCAT  
CTGGATCTGTTGATAAAGGCTGGCGGGCAGGGGCCACCCGCACCGTAGACTTGGCCAGCCCATGACGGCTG  
AACAGCTCGTTTCATGGCCACTGCCCATTCCTGTGGGCCGTTGATGGTGCGCGTCGCGAAGACGGGGGGAT  
TGCCACCCGAGCCAGCATGATCCTGTCAATGGCCAGCAAGAGCCCGACCTGGCGGGCTTGGCGTCGACCG  
TCTGAACAGTTGTTTCATGTAAGCCCGCCCATCAATAGTGATTAATGTATGAAATATTAACATAAACAG  
CAGATTAGCCTCCAGATTAAGAGACGGACTCACCATTGCAAGCCAACCTTTCGCGGAGTCAGAGGGTCA  
AGCCATCCTCCCTTCCCCCTGCAACGCCTCCACCATCCGTTGCTGACCCGCTATGGCGTCGAGCTGTGG  
TGCAAGCGGGATGATCTGATCCATCCGGCCATCTCCGGCAACAAGTGGCGCAAGCTCAAGTACCACCTGC  
TGCATGCCAAAGAGACGAAACCGGCATCTGCTCTCGTACTACCGGTATCATACGGGGCGAATATGACGCCGT  
GCTGGCGGCAGCGGGGTGCCAATCTGGTCTTCTGACTACCGGTATCATACGGGGCGAATATGACGCCGT  
AGTAACTCTACCCTGCGGGATGCCCTGCGCTGGGGCATGGATCTCGTTTTTGTGCGACCGCCAGAGTTACC  
GGCGACGGCAGGATCCCGACTGGCTGGCCCAATTCGATGCCCCCGATACCCTGATCGTGCCGGAAGGGGG  
TAGCAGCCCGCTGGCCATCCCGGGGTGGCGGAACTGGTCGGCGAAGTGCCCTTCTCGCCGGATCTCTGG  
GTACTGCCCTGCGCCAGCGGCGGCACTCTGGCGGGCTGATCGCTGGCAAACGGGATCGGGAGCAGATCC  
TCGCCATTGCGGTACTGAAAGGAGGGCGGCTTATCGCTGACGAGGTGTGTGCGCTCCATCCCGCCGCTGC  
CAATATCCCGGCTGGCGCATCGCGCTCGATCACCACGATGGTGGCTACGCCAAATTCAGCCCGCCCCCTC  
TGGCAGTGGGTGCAGGATTTAGCGCCACGACCGATCTGCCCTTGAGCCATCTATAGCGGCAAAGCGA  
TGTGGGGTCTGTTTTGCGGAGCTGGCGGCAGGCCGATCGCCCCGGCAGCAAAATCGTCTTTATCCACAC  
CGGCGGTATGCAAGGGCTCGCCGGGCTGCGGGAGCAAGGGCGACTGTGATCCCTGCCCTTACGGCAACCGC  
AAACAGCATCGCAAACAACAGAGGGTCGCCCAAGGGCGACCCCTCTGTTGTTTTATCTCAATCACCAGCCGG  
TTCCAGCACCAGCCGCTGGGGCTCGGCAAACAGGGGCCCTGCCCGCATGCACCCCGAGGTGGCGCAGC  
ATCTTCCACTCATCGCCACTCTCCACCCCACTGCCAGCACCCGGGTGCGGGTATTGGCACAACCCCCAA  
CCAGACTGCGTACCGCCATCTGGTTGACCTGACGGGCATGGATTTCCCGCACCAGACTGGGGTGCAGCTT  
GAGGAAGTTGATCTCGAACTCCTTGATGTACTGGGTGCTCACCACATCCTGACCGGCATGATCGATGGCC  
AGCTGGCAACCCAGCATCCGAGGGAGCGCAGTGGCCGCTTGAGCGCTCGAAGTGACGGGTACCTGGG  
ATTCGGAAAGTTGCAGGATCAGCCGCTCGTTGGTGTCTGCGCGCAGCTGGAACAGGGCGAAGAAGAGCCA  
GCGCTGGAACCTCGCGGTTGAGCAGGCTCTGGGCATGAGGGTCAGGCTGATGGGGCAGCTGTGCGGAT  
CGTTGGCGCAGCAGGGTGGGGTCTGCTCCGCCACCAGCCGATCCAGTTGCGAGCAACAAGCCACCTTCT  
CCGCCATCGGCATGAAGATCCCCGCTGCAAGGGCCCCGCCCTGCTCGTGTGAGATAGGTGAGCAGCTC  
CTGCTGCAACACCACCTGCCCCGATCCTGCTGGATCGGCTGAGTGTAATAATTCGATGCCGTGCTCTTCCG  
AGACGGCGGCTGATCAGGGTACGCCAGCGTACCGTCCCCTTACTGCTCTGCTCCTCATCCAGCTGCTTCT  
CGTAGAGGAACCAGCCGTTGTGGCCCTGAGACGGGCACTCTTGAGGGCCAGCTCCGCCCTCCTCCTGCAC  
CTTGAGCAGGCTGTCTTGTGCTGATAACAGACGGCGCCGAGATAGACCGCAGTCTCCGGGTTGACCTCC  
TGCGGCCAATGCAGCCGTTGAGGCTCTTGAGCAGCTGGCTGGCGTATCCACCATCTCGCTCTCGGACA  
TATTGGGCAGCAGCACCCGCAAAGACCTGACCGGCGTAGCGGGCTGCAGGGCACCGTTATGCTTGCAC  
GAAGGCACCTATGGTGGCGCTCGCCTCCATCATCAAATCGTGCCCCAGCAGCTCGAACTGATCGGCCCTC  
AGCTCCTCCAGACAGGCGAGATCGATCAGCAGCACGCCGCCGCTCATCACGCTCGCCTCCATGATGGCTC  
TCTCCAGCCGTTGTGCAAAAAACAGCCGTTGCCGATGCCGGTCATCTTGTGCGACGAAGGCGTTGCTGCG  
AATGAAGTTGTCAAAGCGGCTGCGCTCCTTGGCGGCATCCGCCAACTCGGGCAGCAGATGATCGAGGGCC  
TGACTGGCGGCCACCGGCCACTCTTGGCGGGGTGATGACTCAGTTTGGAGAGTTTGTTCATCGAGGATCA  
GCTGGGCACGAATGCCAGCAGCTCGCCCCGCGCAACTGCTGGCGCAGCCAGCGGATGGAGTACCAGAG  
ACCGAACACCACGATAAAGATGCCAGCGAGATGCCGGACATTCCTTGTGAGTATTCGCCCTCCTTG  
AAGGGGCGCTCCAGTTTGAAGTTGGCCTGCATGCCGGCTGATGGGGCAGCGGGTGGCTGTATGGCACCA  
GCAGCTGTTTCGTCGACCGGATTGCGCACATCGCGGAACCAAGTAGACCCGCTGGTTATCTGGCGCACCTC  
CAGCTCTACCACATGGGCAGCCCGCAGCAGGGTGGGCAGCCAGTGACTCATATCTTCCATGTCGTGAGCA  
ACATCGAGCTGCTTGTGATCACTTCGACCAGCGCATCGACCTTCTTTTGTGCAACTCCATGCCAGCT  
CGCGAAAGCTGAACACCCCGCCAATCAGCACGGTTCGCCATGGCTGCGATCACGCAAAGGGTGATAAATGA  
GACAAGCTGTGTAGTGAGTTTCATGCGCCTTTCGATGCCCAGCATCATCCATGTCGCCCTCATGGTAGC  
AGCGGCGATCGGGCCACAGCTATGGATGAAGATCCCGCTTCTGCAATTTAAGCGGGCAAGCATAACCCAA  
AGCAGAGGGAGAATAACCAAGGATGACGGGTACAGACGCGGGAAAGGGCGGGATGACAGACAGAAAAATG  
GTCCTCAAAGGGGACCAAAAGGAACACTCATATCAAACTAACACTCTGTGCTACTGACAAAAACAGA  
TACAGGAGCATTGAACACACGGTGAGTCAAACCGCAGGGCTACTCTAATGCAGTTCGGATAAGCTGAGCA  
ATTGTCAATTTATGACAGGTCAGCGATTGAATCTAGCCGAAGTTAATAATAAACACATTTAAAATCATGCA  
TTTTAAAAAATCAATCAACAAGTGTGACAACCTGAACTCAAATGATGCACTAATGCTCTATGATGGCAA  
AGTCCATTTGTGTCTCATGAAACTGGCAGGTACTTCCCTTTCGCTAAATCACCCGCTGGATCGCTCTGTT  
GCTGTTTCGTCCTGCCTGTGCTGGGCAGCCAGTTTCTCGGCCTGTGGTTTGCCAAGCCGATGGCCTTTCAT  
ATGCTGGAAGAGAAGGTTGCCGAGCTCAAGGGAGCCATGGCCGTACGCCACCCGGGAGCTGGATGCTGCCA  
TCAACAAACAACCTGGCACAATTTGAGTTCAACTGCGGCGCCAAAGACATGGAGCTGCTGCGCGATCCGCG  
CTTCTACAGCGCTCATATCCGCCTGCAAGGGTTGGAGCTCGCCTCTGGCAACAGCTGCTCCAGCCTGGGG

GTGGAGATCCCGCTGATCAAAGAGCTCCAGAATAGCGGGCAGAAGTTCGGCAAACCTGGGGATCACCGCCA  
CAGTGGCCAAATACAATACCGAACAGGAGCTGGTGGCCTTTTACCGATCCGGCGGCAACCTCGCCTACTG  
GGTGTGATAACAGCTGGAGCCACGACCTGCTGCAACACCCCTGCAGCCACTGCTTCTATCTGGAGTTC  
AGCCGACAGGATGCCGATGCAAGCACAGTCCACTTTCCCGTGGCGACAAGGAGATCAAGCAGGAAGAGA  
GCAATATCAGCCTGAGTTTCTTCGATCCCAATGAACTAACC AAAACAGACGGTCTGGGCGGGAAAAGCGCT  
GGAGCAATATGCCCATGACCAACTCAATCACTACGGTCTCTGGTTTCGGTATCGCGCTCGGTGCCCTGTTA  
AGCGTCACATACTGGCTGCTGCGCAGCTATCGGGCTCCCTCAAGGGACTGCTGCAAACAGGGTTGATCC  
GCAAGGAATTTATTCCCTCTACCAGCCGATAGTGGATGCCCGTACCCACCAAGTGGTGGGATTCGAGGC  
GCTGCTGCGCTGGCAGCGGGGAAACGAGCTGATCCCTCCGGGCACCTTTATCGAATATGCAGAGGAGCAG  
GGGCTGATCCTGCCGATACCCGAACAGTTGCTGGAGCAGGTGATCACCGACCTGCCGCAGCTGGCGCCAG  
AGCAGTGGGTGAGCGTCAATCTGGTGGCGGCCATATCGAGCAGCCCTGCTGCGCACCTTGCTCGCTCA  
CAGCCAAAACCCCTCACCCACCCGGCTCACCTTCGAGCTGACGGAGCGCAAGCCGATCCTCGACATTAAG  
GCTGCCACCGAGGAGATCACCTGCTGCAACAAAATGGGGTATCACTTCAAGCTGGATGATTTTCGGTACCG  
GCTACGGCGGCTTTGCCTACCTGCAGAGCCTGGGGATCCGCCAGATCAAGATCGACAAGATGTTTCGTGCA  
TACCATAGGCACCAACGACCTCAAGCGCAGCGTGTGGACGCCATCATCGTCTTCGGTCCGGAAATCGGGC  
ATGGAGATGATCGCCGAAGGGGTGAGAGCCAGTTGAGGTCGACTATCTGAGCCAGCACGGCGTCTATC  
TGATCCAGGGCTACTTCTTCGGCAAGCCATGCCGCTGAAGATACTGACCCACTGGCAACGGGAGTGGCA  
GCTGCAACACCAGCAGGCCAGCTAACACAGAGATGGCAGGATTTGGCCGTGAAACGGTTTGGCCAGCGGC  
TCGACATCATCAGGTTGATGCTGGCGGTAGCGCCGTAACCCAGCCCGGCCATCAGGCGGGTAAATCCCC  
TGCAGACCCAGGCCCGGCTCCATGGTGAATCGAACCACCTCCTGCCACCCCTTATTTACATTCAGCAAC  
AAAATGATCTGCCCTGACGGGGATAACAACCTTTATCATAAGGAGCCGGTTATTGCGCAACCGATAACCG  
TGCAGCCTGTTTTATGTCATCCGGTTCGTCAAGACCCCCAATAGAGAACCATTGCCATGAAGACAGTTATC  
CGGCAAGAGATTGCCCTGCCCGTTGGCCTGCTGACCCTGCTCTTTTTCAAGACCCCTGGGCAGTGACCTGC  
TGACAGAGACAACCTCCGCTCGGGATCTATCTTCCGGTTTCGGCGGCACTACTGGCCATCGTCACCTGGGC  
CATCTTCTCGGTGGTGCGCCACTCCGATGCCCTCGCCATCAAGCTGGGCGAGCCCTTCGGCACCCCTGATC  
CTCACCCCTCTCGGTCACTCGCTGGAGGTGGTGTGATCTCCTCGGTGATGCTGACCGGTGAGCCCAACC  
CCACCATGGCCCGCAGTACCATGTTTTGCGGTAGTGTGCTGGTGTGAGTACCGGTCTGGTGGGCTTACCCT  
GCTGTTTTGGCGGCTGGCGCTACCACACCCAGAGCTTCAATCTGGACGGGGTCAAATCCTATCTGGTGGCC  
ATCATCCCAGCTGGCCCTGCTCTGTCTGGTGTGCTGCCAACCTCACCGAGGGTGGTGAATCGGCAGTATGT  
CGCGCGCCATGTGCTGGATGCTGATCATCATCTCGATCCTGCTCTACGGGGTCTTTCTGCTGATCCAGAC  
CCGCAGCCACAGCCACTTCTTCGTGACAGCGATCACGAGGATTACGAGGAGCACCCAGGCCCGCTGCAG  
AGCAACGTCTATCACACCATCCTGCTGCTCGCCTACCTGCTGGTGGTAATTTCTGCTGGCCAAGACCCCTGG  
CCATCCCCATCAACTACGGGGTGCATGTGATGGACGCGCCCGCCGCACTGGGCGGCTTTATCGTGGCCTG  
CATCGTGTGGCCCCGAAGCAGTCCGGTCCATCAAGGCCGCTTCAACAACCAGTTGCAGCGTGAATG  
AACCTCTACTTTCGGCTCTGTGCTGGCCACCATCGCTCTCACCGTACCTGCCGTGCTCTTTATCGGCTCCA  
TGCTGGGTGAGGAGGTACGCTCGCCCTCTCCCCGCGGATATGGTGTGCTGGTACGACCCTGATGGT  
CTGTAAAGTGACCTTACGAGCGGCCGACCAATGTGCTCCATGGTGCAGCCATTTGGTGTGTTTTGTG  
GTCTATCTGTTTCTGATGTTGCAACACGTATAACCGCTTCAACCAACGTGAGAAACGAAAGACCGCCC  
GATTGAGCGGTCTTTTTGTTATCGGCTCCCGGACCTCACCGGCGCCAGTGAAGCGGCTTCCCCCTCATCCC  
CCACCCCTTCTCCCGCCAGGAGAGAAGGGGGATCAAGGCTTACAGGCTGGGCGAGTACCCCGGCCGGGATCA  
GGTGTGTTAGCTGGCACGGCCAGCAGGGCGGGCGCCGCTCGATGTCCGGCGCGAAGTACCTGTCTTT  
GTCGTAGAAGCTCACCTCTGCCCGAGTCCGCCCTTGGCCAGCTCGATCAGCTCGGTACTGCGCAGCGGC  
GCGCGGAAATCGAGCCCTGTGCCCGCCAGCAGTTCAACAGCCAGAATGCCGCGGGTGTCTCCGCCA  
TGTCTGCCAGCCGGCGGCCAGCGAAGGTGCCATGGAGACGTGATCCTCCTGATTGGCGGAAGTGGGCAG  
ACTATCCACCGAGGCGGGATGGGCCAGGGTCTTGTCTCGGAGGCCAGCGCCCGGAGGTGACCTGAGCG  
ATCATAAAGCCCCGAATTCACCCCGCTTGTGACCCAGAAATGCCGCGAGACCGGACATCCGAGAGTCA  
TCAGCAGCGCCATGCGCCGCTCGGAGAGCGAGCCGATTTTCGGCGATGGCCAGCGCCAGATTATCGGCCG  
AAAGGCCACGGGTTCTGCGTGGAAAGTTGCCCGGGAGATGATCTCCTCGTCACTCGGCAAACACCAGCGGG  
TTGTGCGGAGACCGAGTTGGCTTCGCACACCAACACCTCGGCCGCTGACGGATCTGGGTGAGGCAGGCC  
CCATCACCTGCGGCTGGCAGCGCAATGAGTAGGGATCCTGCACCTTCTCGCAATTGTGATGGGACATGCC  
GATCTCGCTGAGATCCCCAGCAGATGGCGATAGCAGGTAGCCGCATCAATCTGGCCACGCTGACCACGT  
ACCGCGTGAATGCGGGCATCGAACGGACGGCGGCTGCCAAGGGCCGCTCCACGCTCATGGCTCCGATGG  
TGATGGCACCGGCGAACAGATCTTCGGCGTGGAAACAACCTTCCAGCGCAAAGCGGTGCTGGCCTGAGT  
GCCGTTGAGCAGCGCCAGCCCTCTTTTGGCGCCAGCGGATGGGCTCAAGCCCGCAATTTTCAGCGCC  
GTGGCGGCGTGCATCAGCTCGCCCTTGTGGCGCGCTTGCCTTACCGATCAGCAGGCAGCTCATATGGG  
CCAGCGGCGCCAGATCGCCAGAGGGCGCCGACGGAGCCCTTCTTCGGCACCCCGGATAGACCTCGGCATT  
GACCAGCGTCATCAGGGCCTCCAGCACCGCCAGCCGGATGCCGGAGAAGCCCCGCGCCAGCGAGTTGAGC  
TTAAGCACCATAAATCAGCCGCACGGTGGCATCATCCATATAGGTGCCAATCCCTGCCGCATGAGAGAGCA  
CGATAGAGCGCTGCAATTCATCGAGCTGCTCCACCGAATGCGGGTGTGGCCAACAGGCCAAAGCCGGT  
GTTGATGCCGTACACCACCCGGTCTGCTCGATCACCTTGGTGTGACCACTGCAGCGGAGGCGTGGATCCCC  
GGCAGGGCAGCCGGATCCAGTGAATATGTACCGGCTCGCGGCTGACGCGACGCAGGGTGGCAAGATCCA

GCTCGCCCGGAGTAATAGTCAATTCAAACATGGTGTACACCTTTCCTTTGACACCGTTGGCGCCGCCTA  
ACATCGGCAGATCCAGTTTCGCCTCGTGGGCACAGTTGATGGCAATCTCGTAGCCCGCATCCGCATGGCG  
CATCACACCGGTGGCCGGATCGTTGCGCAGCACTCGCCAACACGGCGGGCCGCATCATCGGAACCGTCA  
CAGACGATCACCACGCCGGAGTGTGGGAGAAGCCCATAACCACACCACCCTGATGCAGCGACACCC  
AGGTGCGACCCGCCGGGTGTTGAGCAGGGCATTGAGCAGCGGCCAGTCGGAAACGGCATCGGAGCCATC  
CATCATCGACTCGGTCTCGCGGTTTCGGGCTCGCCACCAGCCGGAATCCAGATGGTCGCGGCCAATCAGG  
ATGGGGGCTTTCAGCTCGCCGTTTTTACCATCTCGTTGAAAAGCCAGACCGAGCCGCACCCGATCCTTGA  
CCCCAACCCAGCAGATCCGCGCCGGTAGCCCTGAAACGCGATGCGCTCGCGGGCCATGTCGAGCCAGTT  
GTGCAGATGGGGATCATCGGGGATCAGCTCTTCACTTCTGGTCAGTCTTGTAGATATCTTCCGGATCG  
CCGGAGAGGGCCACCCAGCGGAACGGGCCATCCCTCACAGAACAGCGGGCCGATATAGCGGGGACGA  
AGCCGGGGAAAGTCGAAGGCATTTTTACCCCTCCTCAAGCGCCATCTGACGGATGTTGTTGCCGTAATC  
CAAAGTCGCGCGCCGCTCTTGCAGGGTCAGCATCGCCCTCCACCTGACGGGCCATGGAGCGACGAGCG  
GCCAGATTCACCTCCTGCGGGGCACTCTGTTGCAGCTCGCGCCACTTGGCCACGCTCCAACCCTGCGGCA  
GGTAACCGTGATCGGATCATGGGCGGAGGTCTGGTCGGTCACCACATCCGGGGTGATGCCACGGGCCAC  
CAATTTCGGCAAAGACGTCGGCGCGTTGCCGAGCAGGCCGACGGAGACGGCGCTGCCGCCCTGTTTGGCC  
TCCTCGACCATGGCCAACGCCTCATCCAGGCTGTGAGCCTTCTTGTCCACATAGCGGGTGCGCAGACGAA  
AATCGATGCGGGTCTCGTCGCACTCCACGGCGATCATCGAGAAGCCAGCCATGGTGGCGGCCAGCGGCTG  
GGCACCCGCCATGCCGCCGAGCCCACCGGTGAGGATCCAGCGGCCCGCAGGCCAGCCGTTGAAGTGTGG  
TTGGCCACCGCGAAGAAGTTTTCGTAGGTGCCCTGCAGATCCCTGAGTGGCGATGTAGATCCATGAAC  
CCGCGGTTCATCTGGCCGTACATCATCAGGCCCTTCTTATCGAGCTCGTTGAAATGCTCCAGTTGGCCCA  
GTGCGGCACCAGATTGGAGTTGGCGATCAGCACCCGCGGCGCATCCTTGTGGGTCTGGAACACCCCGACC  
GGCTTGCCGGATTGCACCAGCAGGGTCTGATCCTCCTCGAGCCGGGTGACACCTCGACGATCTTGTCAA  
AGCAGGCCAGTTGCGGGCAGCGCGACCGATGCCGCCATACACCACCAGCGACTGGGGATGCTCGGCCAC  
CTCGGGATCCAGGTTGTTTCATCAGCATCCGCGAGCGGCCCTCGGTGAGCCAGCTCTTGGCGGTGAGTTCA  
GTGCCGCGCGGGGCACGGATCACGCGGTTTCGGATCATGGCGGGGATCCTGCTGTTGCACAGACATAACA  
CTCCTTGTGTATCAATAGGGTGCCTTCGGTGACGGGCGGCCAAAGGGTTAACGGGTCAACAGATGAACC  
AGTCGCGCGGCCACGCGGGCACTGCGATTGTCTGATCCAGCGTTCGGGTTGTAAGTCTCGGCCAGATCGGCAA  
GCCTCAGCTTGGCCGTGCCCCGATATGGGCAATGAGCGGTTGATCACCCGAGCTCCACGCGCACGAGC  
GGCGGGGCACTCACTGCCGATAACGGCCCGGGCGCACACATCAAGATCGATGGTCAGATAGAGGTGA  
TCACAATGGGCGATAAAGGCATCCAGCCCGCTTAGCAAGGCTGGCAGCCCGGTCTGGGTTCATCGCCTCGT  
CCAGCACATGCCACACTCCCAGCGTCTTGGCGCGGGCAAACAGGGCTTGGGTATTGGCGGTCTCGGCCAC  
CCCGAGGCAGGCGTAGTGAAACGGTGTGCCCTGAGCGGCGCACTGCTCGGCGATCTGGAAGAAGGGGGTA  
CCGGAGCTGGCCTGCTCCTGTTTCATGCGCAGGTGGAAGTGGGCGTCGAGGTTGATGATGCCATCTTGC  
CATTGCCGCCAGATGATTGTTAAGGCCGCTCCAGCTACCGAAAAGCCACCTCGTGGCCGCCCCCAGCAC  
CAGCGGGAAGTGGCCAGATCAAGCGCAGCGGCGACCCGCTCGGCCAGATAGCCGTGGGCGGCGTCGAGA  
TTGCCATCGGTACAGCTCACATCCCCACCATCGTAGACGGGGCGACTCAGATGCCAAGCGGTGTTGGCCA  
GCAGCTTGCACCCGCTTGCGGCGCACCGGCGGCGCCGACACGCCCTTGTGCGGCGTACCCCTTCATC  
GCAGGCAAAAACCGAACAGCACTACACCTGCTGCCCTTGTGCTCCGGCGGTCCAGGGCTGCACCTTGTCA  
TGCCAGCGCAGGGCCAACCTCGCCATCTTCCGGATCCTGCCGCCCTGCCAGAGCGACATGTCGATCGGGT  
TGAACCTTATCCATGGAGGGTCTCCTTGGCGTTGAAGATGCGGCTTGCCAGCTGATCGACACCGACCATGT  
AGCTCAGCTCGGCCGGATGGGCGCAGTGCCAGATCAGAAAAATCGGCTGCCATGCCGACCCGAGCTGGCC  
AAGGCGATCCTGCTCGCTGAGCGCTTTGGCGGCGTGACGGGTCACCCCGACCATGGCCGCCACCGGGGTC  
AGGCCAAACAGGGTGCAGGCCATGTTTCATCGCCATCCGCGAGCGAGACGATAGGGGCAGTACCCGGGTTGA  
TGTCGGAGGAGACCGCCATCGCCACACCCGCTTGCAGGGGCGCAACCGGCGGCGAGCTTGGTCTCTTT  
GAGGAAGTAGAAGGCGGTGGGCAGCAGGGTGGCGACCAACCGTGGGCCAGCGCCAGGATCCCTTCC  
GGATCCAGATACTCCAGATGATCCACCGAGAGGGGCGCAAGTTGGCTGCGAGCGTGTGCCACCGAGAT  
TGGAGAGCTGATCCATATGCCCTTACCAGGCGAGCCGTATTGATCCGCGCTAGATAGACCTGCTCGGT  
CTGGGCCAGCGAAAAGCCGATGTGCTCGCAGAAGACATCTACCGCATCGGCCAGACCCGCTCGGCGGCG  
GCCGGAATGATCTCCTGACAGATGGTCTCGACCCAGCTGTGGGATCGTAGCGATACTCCGGCGGCACCG  
CATGGGCCGCCAGCAGAGTGGTTTTGACCCGGATCGGCAACGCCCTCTCCAGTCGGCGGGCCACCCGCG  
CATCTTGAAGTTCGTCATCCAGCGTCAGGCCATAGCCGACTTGTATCTCCACCGTGGTGACCCCTTCGCGG  
ATCAGGGATTTACCCCTCGGCAACGCCAGCTTAAAGAGCTGCTCTTCGCTGGCGGCACGGGTGGCAGCGA  
CCGTGCTGATGATGCCACCGCCCCGACGGGCGATCTCGGCATAGGGCACTCCCTGCTGACGCAGCTCGAA  
CTCTTCGGCACGGCTGCCGGCGAAGACCAGATGGGTGTGACAATCGATAAGGCCGGGAGTGACCAGCTTG  
CCCTGCATATCCTGCCAGTGAGCGGGATACGGCCCTTCAGCTCGGCCATCGGCACCAGCGAGTGGATCT  
TGCCATCCTTACGCGGATGGCGTGGAGCGGCAGCAGGCCGTAGTCGGCCAGCTCATCACTCAGGGTGGC  
GGGTGTACGTTGAGCCAGACCCGCTCGCAGTTCAACAGTTTCTTGTTCATAGCGACCTCAAATGTATAT  
ACATATTCTTATAGTGCATCTCTATGACGAAAAGAAAAGAGCGAAGTTACATCCTGATAACAGCATCAAAC  
TTAGAGTTTAAAGCACAAAAAGCCACCAGGAGGTGGGCTTTGCAAAAATCGAGTTGTATAGACATTTACT  
CCAGCTGAGTCTTGGAGCTGAGCTTGTAGCGGGAACCGGGGAGAGCAAACGGGCGTAGGAGACCAGATG  
CCCCTCCGACCAGGTACGCCGGTGCAACAACAGGCAGGGGGAAATCTACGCGGATCTGCAACAATCCCGCC

TCACCGGCGCTCGGCAGCACGGCTTCCACCACGTGCTCCATCTCGGAGAGGGGGCAAACATCCATCAGAT  
AGCGGTTGGGGTCTGTTGGGTAATAATCCTGCTCACCATAACCCGGCAAGCGCCCGGCATCGACGAAGCG  
TTCTCCAATTGCAACGGCTCCCCATCGGCCTGATGGACGATCAGGCTGTGAAAGATGGGGGCGCCAACC  
CGCAGCCCCAGTTGTACCGCCACCTTCTCGTCAGCGCCAGTCGCTGTAGCCGGATCACCCGGGCGCTGT  
ACTCACCGCCACGCTCGGGGATCTCGTCGGCAATATTGCGAATAGCCAGCAGCGGCGATTTCGGTGCGCCG  
GTCTGCCACGAAGCTGCCGGAACCGGCGGTACGCACCAGCCACCCTTCCGCCACCAGTTCCCGCAGCGCC  
CGGTTGACCGTCATCCGGCTCACGGTGAAGTGTCTCGCACAGGGCCGCTTCGGTCGGGATCCTGTCCCCCG  
CCTGATAGTGGCGTTTCGGGATCCCGTCCAGAATGTGCTGCTTGATCTGCAGATAGAGAGCTGGCGCCAC  
CATGAAGCTCCCTAGCGCCGACGGTGGGGCGGACGCATGTCCGGCCAGGCGGGTAGACATCGGGGATCT  
GATCCGGGGCGCTGATGCAAAGATCGAGATCGTGCAGCAGACCGTCTTTAATCCCGTAGATCCAGCCATG  
CACCCAGCTCCTGCCCTTGCAGCCAGGCTTCTGGATGATGGTGGTGTGGCAGACGTTGGCGACCTGC  
TCGGCCACGTTACGCTCGCACAGGTAGTGAAGCGCTCGTGCATCCTCGATGGCTCGAGCTCTTAC  
CATATTTGAAGTAGACATCCTTGATGTTGCGCAGCCAGTTGTGATGAGACCCAACTCCTGGTTCTGCAT  
CGCGGCTTGACCGCCGCAACCGTAGTGACCGCAGACGATGATGTGCTTACCTTGAGGACTTCTACC  
GCGTATTGCAGCACGGAGAGGACGTTGAAATCGGTATGTACCACCAGATTGGCGACGTTACGGTGGACGA  
AGACATCCCCCGCAGCAACCCCATCAGCTGGTTGGCGGGGACCCGGCTGTCCGGAACAACCAATCCAGAG  
GTATTCCGGGGCCTGCTGGGCAGAAAGAGTGGCAAAGAAATGGGATCTTCGGCTTTGATCCGTTCCGGCC  
CACTCACGGTTGTTGGTAAACAGGTGCTTCAACAGTTTCACTTCTGCTCTCCCTAATGTGGCAGTAGCGG  
CAACATAACACACTCAAGGGTAACCAAAGCAAGGCCGACCAGATCCCTGCGAAACAAAAACAGGGCCATC  
AGGCCCTGTTTTTATGAGAGGAAGCATCAGGCTTCCATGGCATCTTTCAGCTTCTTGAGTGCCTTTTTCT  
CAAGCTGACGCACACGCTCGGCAGAGACACCGTAGGTATCGGCCAGCTCCTGCAGAGTGGTCTTGCTGTC  
ATCATCGAGCCAGCGGGCGCGGATGATGTGCTGGCTGCGCTCATCCAGAGTGGCGAGGGCCGAGCTCAGA  
CGACGGGTGCGGTGATCATCCCAGTTGTGCTTCTCGATGGTGCGGCCAGATCGGAGGATTTGTCTCTCCA  
GATAGTGAACCGGAGCGAAACCGCCCTTCTCTCATCGTCACCCACCAGATCGAACGCCGTGATCGTAGTT  
GGCCATCCGCGCTTCCATTTTCGGTACATCAGCGGCAGAAACCGCGAGATCGGCCGCCACGGCTGAACC  
TCTTCGTGGTTACGCCAGCCAGACGTTTTTTGGATTTGCGCAGGTTAAAGAAGAGCTTGGCTGGGCCCT  
TGTTGGTTCGGACCTTGACCATGCGCCAGTTGCGCAGGACATATTCGTGGATTTTCGGCCTTGATCCAGTG  
CACGGCAAAGGAGACGACGACGCGCCAGCCGCGGTCGAGTGAAGCGCTTGACCGCCTTACGACGATGAG  
TTGCCTTCTGAACAGATCGGCCAGGCTGAGGCAGCTGAAACCGGCATAACTCTTGGCGACATGAACGACAA  
AGCGCAGATGCGACATAACCAGCTGACGAGCAGCCTCGAGATCGCCATCCTGCTGCAAACGCTCAGCCAG  
TTCACGCTCTTCTCTGCGCTCAGCACAGGAATAGAGTTTTACTGCTGGATATAGCCTTCCAGACTACCT  
TGCGGAATCAGAGCCATAGTGCCTGCAATGAAGTTCCCATCTGTTACCTCTTACTTTTCAATCGAATCA  
GTCTAACACCCTGAGAGGGTCTGTCTACTGACCGGATGCCATTTCTGCGGCGTGTATCAAAGAACATGCC  
AGTTTTTAGACCGCTTATCTTAAGCCTGCAGGATGAATCATGAATGAACAGTCAAAAAAGGGGGTACACA  
ATGAAGGACCCCCGAAAAGTAGCATGCTAAGTCCATTTGTTGCGGAGCTCGCAACCTTACATGCTTGCCA  
AGTCTGACGAGCAAGGCAGAGGGGCCACACCCGATAAAATGCTTCAGCTTTAATAGACTGCTTATAAATC  
AGAAGGTTCACTGGATCTAGCGAAGATCCGGAAGATCATTTGTTATTCAGAATACTCTGACTATGGGGCC  
AAGCCAGAAACGGCCCCCTTTTTACTTGATCCGCTCTCAAAATCCAGCGATTTACTTTGATGACAAAAT  
AATCAGGATGGTTTCGATGTGCGCAATGTGGCGATGGACCAGAAACAGGAGGCAATCAGCCCCAGCAGGG  
CGCCAGCAAGATCAGATTGATCCCGTCTACCGCCCCCATGCCAACCAACCGGAAGTTACTGTTATACAA  
GCCCGCCAGCTCCTTACCACCCCTTCGCTCCAGATCACCATCACTTCGGTCAGCCACCAGGCCAGCATG  
CCGCCGATGACCCCGAACCAGATGCCGGTATAGAGGAAAAGGGCGATGAATGAAGGAGTCGGTCCGCCCCA  
CCAGCTTGAGCACTTCAATCTCGGAACGCTGGTTGAGGATGTTGAGACGCAGGGTATTGCCGACAATCAG  
CAACACGGCGGAGAGCAGCAGCACCAGCAATACCGGTAATGGTGTGGCGCAGCAGGTTTCATGATCCCTGC  
AGCCGGGTCAGCCACTGCAGATCCAGCTTGCCTGCTCGACTCCCACTTCGTTGTTAAGCTTGTGCTGAGCA  
GCTCGGCGGCCCTTCCGGGTTCTGCCAGCGTGGATCCGGAATGACGCTCAGCACCAGCGGCAGCGGGTT  
GCTGTCCAGATAATCGAGGGCATCGCCAAAGCCGGAGATCTCGCGAAACTCCCGCAACGCATCGTACGG  
CTCAGGTAGGTGACCGAATCCACCTCGGGATAGAGCAGGATCCGGTGTGCGAGATCGAGAATGCTCTGCT  
CCGGCAGATCCTTTTCGAGGTAAAGGGAGATCTGGGAACTGCTCTGCCAGCTCCCCCTCACCACCTCGGC  
GTTTTTTCAGCAGCACGTGGAAGCAGGATGGCAGCGCCAGACTGACGCCAAGCACCGCCAGCGTCATCAGG  
GAGGCGAGCGGATTGCGCCACAACCTTCCGAGACTGGCAAACGCTTCCCGCACATGGTCAACCCCGTACA  
TCATCAGACGGCGCAGCGCGGTTGTTTATGACGAACGATAGCCATCAGAGCTCCTCCCCGGCCGAATAC  
ATGCGACCCGCTTGGAGGTCAGGGTGCATAGCGCATACGGGCGATCAGCCCCAGATCGTGGGTAGCAA  
TCAGTACCGAGACCCCCAAAATTTGTTGAACTCCTGAAATAGCCGATGATATCCATGGAGAGCTGGGGATC  
CAGGTTGCCGGTTCGTTTCATCCGCCAGCAGCAGCGGCGCTTGTGACGATGGCACGGGCGATGCCGACC  
CGCTGTTGCTCACCACCGGAGAGCATCCGCGGCTGGTAACGCTCCTTGCCGAGCAGCCCCACCTTGTTCCA  
GCGCCGCCGCCACGCGCTTGTGATGTCCGCATGGCTGTAAACCATCGATCACCAGCGGCAGCGCCACATT  
GTCGAACACGGTGCGGTCCATCAGCAGGCGGTGATCCTGAAAAGATCATCCCGATCTGGCGGCGAACATAG  
GGGATCTGGCTGCGCTGGATATGGCTGACATCATCACCATGAAAAGAAGACCGCAGCCATCGGTCCGGCGCT  
CCATCAGCTGATCAGTTTGGAGAGGGTACTCTTGCCCGCCCCGAGTGGCCGGTCAGAAAGGCCATCTC  
TCCCTTGGCGAGGTGAAAGCTGACCTTTTGCAGCGCCTGATGGCCGCCGCTGTATACCTTGTGACCTTG

TCAAAACGAATCATAACGGTTCCCTGAAATTGACAAAACCCCGACCGGAGTCGGGGCATGGAACACTTACT  
CATCACGGCTGAGCTGACTCATCGCGGCCGACTTATTCATCGCGGCTGAAGAGCGCCTCGATGAAGTCG  
TTGGCAACGAAGGGTTCGAGATCGTCGATCCCCCTCGCCACCCCGATATAGCGGATCGGGATCTGGAAC  
TGTCGGCCACCGGAAGATGACGCCGCCCTTGGCAGTACCATCCAGCTTGGTGAGGGTGATGCCGGTCAG  
GCCCACCGCTTTCGCTGAACAGCTTGGCCTGACTCAGGGCGTTCTGGCCAGTGCCCTGCATCCAGGGTCAGC  
ATGATCTCGTGGGGTGCCTCTTCATCCAGCTTCTTCATCACCCGCACGACTTCTTGAGCTCTTCCATCA  
GGTTGCTCTTGTGTTTGCAGGGCAGCCGGCGGTATCGGCAATCAGCACGTCAGCCCCGCGGGAGCGGGCGGC  
CTCGATGGCGTCATAAATGACGGAAGCGGAGTCGGCACCGGTATGTTGGGCAATCACCGGAATGTTGTTG  
CGCTGACCCCATACCTGCAGCTGTTTCGACCGCAGCGGCACGGAAGGTGTCACCCGCGCCAGCATCACGC  
TCTTGCCTTCAGCTGGAACCTGTTTGGCCAGCTTGGCGATGGTAGTGGTCTTGCCGACGCCATTACGCC  
GACCATCAGGATCACGTAAGGCTTCTTGTGCTGATCATCAGCGGTTGCTCGACCTTGGCCAGCATC  
TCGCCCATATCTGTTTGGAGCAAACCGTAGAGCGCCTCGGCATCCTTGAGCTGCTTGCATCCGCGTGCT  
GCACCAGCCCCTCGATGATACGAGTAGTGGTATCCACACCGAGATCGGCGGTGAGCAGCTGGGTTTCCAG  
CTCTTCAAACAGCTCATCGTCGATCTTCTTACCACGGAACAGGCCGAAGAAAACCGGAGCCGATATTCTCC  
TTGGTGCGTACCAGACTGCGCTTGGAGCGAGCAAAGAACCCCTCCCGCTGCGGTTTGTCTGGGTGTCGT  
CGTCCACCTTGGCGGCCAGCGGCAGAGCGGCCAGGGCGGCAGCCTCAGCCTCCATCGCGGGCAGCAGGGC  
CAGATCTTCCGCGGCTTGGGCTCTTGGCGATACGGGCTTCTTCCGACGCTGAGCTTCGGCGGCAATG  
CGAGCTTCTTCCGCGGCGGAGCCTCGGCAGCGATACGGGCTTCTTCCGACGACAGGGCTTCGGCAGCGA  
TGCGAGCCTTCTTCCGACGCGGGCTTCGGCGGCGATGCGGGCTTCTTGCAGCAGGGCTTCGGCAGC  
AATGCGAGATTCTTCCGCGGCGGAGCTTCGGCGGCGATGCGGGCTTCTTGCAGCGCGAGCCTCGGCG  
GCGATACGAGCATCTTCTGCAGCGCGAGCCTCGGCGGCGATACGAGCATCTTCTGCAGCGCGGGCTTCGG  
CGGCGATACGAGCCTTCTTCCGCGGCACGAGCCTCAGCGGCAATACGAGCCTCTTCTGCAGCTTGTGCTTC  
GGCAGCAATACGAGCCTTTCGACTGCCTTGACCTCAGCGGCTTGCGCCTCTGCGGCAGTGCGAGCGGGC  
TCAGCGGCACGCTCCTCTTCCGGGATCAGCGCTTCGTTGACGATCACCGGCTCCAAATCGGAAGCGCACT  
CCTCCACCACCAGTGGGCCGTGGTTCGTCAGCTCGGTTCGGCAGGCAGCAATCATCTTGCAAAACGGGATT  
CTGTGCGCTGGCAGGCACTTCGGGGGCAACAGCCGGCTACTATCGGAAACACTGGTATCGGAAACGGGA  
GCGGGGGTAGCAGTGACCTCGGGCTCAACGGTAACGGGGGTGGCTTGGGGTGTCTGTGGTTGGACAGCCT  
CAGCCTCTTCTTTCGGCGGCAACAGCCAGCAAGAAACAAACCTTTTGGCATCTAAAAATACTACACA  
TCAAAGGCTGACTGATAAGATAGCCGCTCCCTTGGCGGTCGGCATAAAAAATGAACCCGCTTATACCA  
CTTTCTTTTCTGACGATGAAACGCGATGCCAGAGTGAAATCCAGCCGTAGCAACCCGAGCAAAAAGCCCT  
GTCCCGCAAGGAAAATCAGGCTTTGTAAGAATCATCAGCGGCCAGTGGCGAGGCGCAAATTCGCCGTCA  
AGGATGTGGAAGGGCTCAGACCCACCACGGATCGCGTCAAAGAGACCATCTTCAACTGGCTGGCTCCCCA  
CATCCGCGGCACCCGATGCCTCGACCTGTTTGGCGGACGCGGCGCCTTGGTCTGGAGGCGCTGTCGCGC  
TACGCCGAGCAGGTAACCCTGATCGAGATGGACAGAGGGGCGGCAGAGCAGATCAAAAAGAATCTGGCCA  
CTCTCGGCAGCACGAGGGTCAGGTATTCCAGACCGATGCAGTGAGCTGGCTGCAAGGCCCGGCGACACC  
ATTTGACTTGGTGTTCCTCGATCCGCCATTTGTCGGGATCTGCTGCCGCAAGTTTGCGAACGCTGGAA  
CAGCACGGCTGGCTGGCCCCGATGCCCTCATCTATCTGGAGCGGAGAGGAGATGGCCGATCTGGCGC  
TGCCTGCCAGCTGGCAACTACTCAAGGACAAGCAGGCAGGTCAGGTCGTACCAGCTCTATCTGCGGGA  
CACCAAGAATGACGCTGCAGTTTAAAGGGGGGGATGGGCGCAGTGGCCCCCCATCAACTTGGACAATGG  
CTCAAGGACAAGCAGGTGATCAAATCAGGTCTGCTACCAACTCTATCTAAGGGAGGTAAACAATGAAGC  
GGGTCTTTAATCTGTTGGCGATGGGGCTGATATTGTTCTTCTGGTTTGGCGTGCTGATGAGCCTGATTGC  
CCCGCTGCCCGGCAAACTCAACGGCTTCTTGCCTGCTGCGGAGTGATCGTCGCCCCGCTGCACCTGGCTG  
CAGGCCAGCATGATCAAGGCAGCTTCAAACGCTACTTCGCTGTACCAAGGCCGAATTTGTACTGTGC  
TGATATTTGGCGTGTGTTGGCATGGTCGACATTCGTCAGCGCCTGCAAGAGATCGTCAACGCCCGCCAGCG  
CGGCAATCTCTCGGCAAAACATAAAAAGAAAAGGGGACGGCGGTAGCCGTCCCTTAGAGTCGTGTCGTC  
TGTCCGTAGAACTGCAATGCTCCCTGCAATCCCTGACGTTATCTTAATCCTTTGGAATATCCCCTTTCCA  
ATCCGTTGGCGTGTCTGCGCGCTTCTTGGCCTGGCAATTCATCCTGAACTGCTTCACTGTCTCCATCCT  
GGAGGTGTCCATTACCACGTCTGTGGGGTTCTTGGCTCTTCTGACAGATAACCATCCGGGTTATCTC  
ACTTCATCCTGAAGTATTCTCTCGCATCCGGCGAGGTCTGTTCATCCTGAAGAACGAGGTTCCGTTTCG  
TTCTGCTCCCATCCCGAGAGTGTCTTGGCGATCCCGCGGTGTTCTTTATTCATCCGTGACGATAACCA  
TCCTGATTATCGAACTCATCCTGAGGTATCCCTTGTCCACATCTTGCAGGACTATCCATCTTTATGCGCT  
GCCCTGCATCCTGCCGACCAGCTCCGTCTTGTGAGACCATACTAAGGAAATGCGCACCCCGAACAAG  
GGCCATCCGATGATAAAGATCCGATGCAGCTCCATCTCAAAAAACGAACTTAAAAACTAACCTTTAAT  
ATCAGTTAGTTATTTAGTTTACGGGAAAGCTCGATCATCTTGGCATGGCTTCGCGTACGGCTCAAAGCG  
CCAGCCTCTTACAGTCGCTATGGCAGATCTCTTACACGGGTTTCGCCCCAAAAACAGGGCAGGAAAACG  
GTTCAATCCTGACGTTAAGACTTAAAAATTAGTTGAATAAATATGCTTAAAAAAAACGCAAAAAAAGAGC  
CGAGACCTGGCTCGACTCTTCAACATTTCAATTTTTTAATCAGCTCAAGCGGTTGGCCGGATTGAGATAG  
GCCTTGGCGAGCGATTCCGGTGCCAGCACTTCCAGTTTACCAGCGATGTTGTTCAACCAGCTGCGAAACT  
CCGGGGTGTCTGCACTTCGGTCTCCACCACCAGCTGCGCTTGTTCATAGCGGGTCATGCGCGGATTGTT  
GCCGGGGATCTGGTTATCCACCAGCGACTGGCTGTTGGCATCGATCCGGCCGACGAAGCGGATCCGGCCG  
CTCACATCCTGATAGCCCTGATCGCGGATCAGCTTCTGGATATTGAAATCCTTCGGCTGGGTGGCGCTGA

AGTTGGTCAGCTCCACGTTCTTGATATGGTCAAACGGGATGCCGTAGACCTTGGGATCCAGCTCGGACAG  
AGTGCAGAGCAGGATCGGGCCGTCCGGCTGATTGAGAATGCCGAGCGGGTTGATACGGTCGTAGCAGAGC  
CACACGGTGCCTCTTTGATCACCCGCTGGATCTCGGCACTGAACTTGCAGCCAGCCAGAGCGCATCGC  
GGATCAGGGTGTGCGGCGGATCTCCGGGTTGCCGGCAAACGGACGCGGTGACTGGTGGACACTCTCCAG  
CCAGCGTTCCGGCCAGTTCACTCTGGCTGTGCGGGATCACCTGGCTGGCCTTGTGACCCAGCGGGTTCAAT  
TCGGTCAGCACACTCGCCGGCAAACAGTTGGCTCGCCTGATCACTCCAGGTTTTTCAGGGCCACCGCCAGCG  
AGAGCGGCATGATATTGGCAAAGTCGTTGAGGCGGTGGCGCTCGAAGCACCAGCCATGGGGTTTTGCTGCG  
CTCGTCCGAGGTGAGGTGCAACAGTCCCATGCCGGACATCTCCTCCAGGTCCCGTTGCACGGTACGCAGA  
CTGACGTGGATACTTCTCTTCCAGTTTTACCTGGAGTTGGCTGGCGGTCAGCTTGTAAAGGGCGGTGCG  
GGATGCAACCGCCAAAGGTCAGTTGTCTGTAACAGCTTCTTGTCTCATGGTGTCTGCCTTCACTGGTTTTAGC  
GTTGACTGTATGCTAGTCTGACTTGCAGCAATCTATGTCGCAAGTTTTGTCTGCGCAACTCTGCGCCATT  
TTCATACAAAACACACTAAGTGATTGATTTATAAAGACAATGCACCTCAAAAAAGGAGCCGCTAGAGGCTA  
AAATTAGCCAGAAATCCCTCAAATGAAAGTTCTATCTTGCAGTTTATTGTTAGCATAAAACCTCCGATTTAA  
TTAATTCATCACAGAATATGATTTTCAGGGGAGAGCATGACTCTCCCCTTTTTGTCTCACATCAGCCACGACC  
AGGCTGACTTGGTGATGGCCGCACCGACCATGTAGCCAAAACCCGCCAGTGCCGCCACACCGGCCACCGAG  
CTTCTGACCGCGAGCCGGGCGCTTGAACGCCATGACACCCAGACCGATATAGAGCACCAGTGCAATCAGC  
TTGGCCATCAGCCAGGGTTGTTGACCCGGGCTCAACTGCAAGGCCACCGCCAGCAGCACACCAAACAGCA  
GCAGGAAGGTGTCTGTTGATATGCGGCAGGATCTTCAGCCACTTCTGCTGCAACCGATCGCTGCCGGCCAG  
CGCCAGACTCCAGCGATAGATAAAGAGCAGCAGACTGACCAGCGGAGCGTCAATGCAGGTGTTTTGAAC  
ATGGGGTAATAGGCAATCATTTTTGCTTCTTGTCTGTCGTCGGGTAGCCCGCTGTTCCAGTTGTGGGCATG  
GATACGCTCCTGCCCTCCTCGTCTGTCGTCGTTGCAACAGATCGGAGAGGATCTCCCGGTATTGCAGGCTCTTG  
TTGATATAAGTGTGTTCTGTCGTCAGATAGTTGACCTGCTCGCGCAACAACCCAGTTATCGTGTCTGCTTGA  
AGGTCTGCCCCGCCCGCCAGGCTGGTTGGCCCGAAAACCGAGCTGGGTCAGGGCTTCCACCCCCAGATC  
GACCGCAGAGCCGAGGGTTTTCCCGGTGCACGCTCTCGACCCCGTGGCGCAGGATCTCGTGGGCATGGGGT  
CGATCCAGCGCTCGCGCCAGGATCTTCAGGTGAGGGAAGTGTCTTGCACCATCTCGATCACCGCCAGCG  
AGGTGGCCGGATCGTTAATGGAGAGCACCAGCAGCTTCGCCTTGTGCGCCCCAGCGGCATGGAGCAGATC  
GATCCGGCTGGCATGCCATAGAAGACCTGATAGCCATACTTGCACAGGGTCTCTATCTGGCTGGCATCC  
TGCTCGAGGATGGTGTGCCGATGCCGATGCCGATGACGAGCAGCGCCACGATCTGGCCGAAAGCGCCGGA  
AGCCCGGATGATCACCAGGATGCTCCACCAGCTCAGGTTGCTCATGCTGCGGTGCGTCTGCTGTTACG  
GTAATCGAACCAGGGCTGGATCACCAGATCATTGAGGATCAGCAGCAGCGGGGTGAGCGCCATGGAGAGC  
GCCACCACCAGCGTCAAGCAGGAGATGGTCTCGCCGGGCGACACCCGGTTTTTGCAGCGCAAACGAAAAGA  
GCACGAAGGCAAACCTCGCCCCCTGCGCCAACGCCAGTGCGAAGGTCCAACGCTGGCTCGGCGAGATGCG  
GATGATGAAGCCGAGCGCCATCAGCACCAGCCATTTGAGCACCATCAGGCCAACCCAGAGTGGGTATC  
AGGAAGGGGTGCTCGGCAAACAGCCCGAAGTGCATCCCCGCCCCACCGACATAAAGAAGAGGCCGAGCA  
GCAAGCCCTTGAACGGCTCTATGTGCGCCTCCAGCTCGTGGCGATATTCGCTGTGCGCCAGCACCACCC  
GGCGAGGAAAGAGCCAAGAGCGGGCGAGAGCCCCACCGACTCCATCAACACGGCGATAGCGATCACCAGC  
AGCAGGGCGGGCGGCAGCAAGATCTCCCGCATATGGGACTGGGCGATGGCACGAAACACCGGCCGATCA  
GATAGTGGCCACCAGCACTATGCCGGAGATGGCCGCGACCACCAGCAGACCATGCTGCCAACCCGCCAG  
CTCGGAGCCACCCTGCTGGCGACCGGCGCAATGGCCAGCAGCGGCAGCAGCGCCAGGATCGGAATGACG  
GCGATGTCTGAAAACAGCAGTACCGCAAAGGCAGAGCGACCGCTCTCGCTCTGCATCAGCTTGGCGTCTCT  
GCAGGCTCTGCAACACGATGGCGGTGGAAGAGAGCGCCAGAATGAGGCCGATGGCCAGCCCCGTTGTCAG  
CGGCAGACCGATCAGGTGCGCCACGCCGGTTCAGTGGCGCCGATGAGCAGCACCTGCAGGCCGCCGGTG  
CCGAGGATCGGCCCTTTCAGTTGCCACAAGAGGGCCGGACGCAACTCCAGCCGACCAGAAACAGCATCA  
GCACCACGCCAAACTCGGCGAAGTGCATCACGTCCTTCTGCTCCCCACCAGCCCCAGCAGAAAGGGGCC  
ATAACGGCGGGCAGAGATAGATAAAGGCATCAAACAGGATCCCGTGGCCATCAGTCAACCCCTCCGTGT  
GAAATCTGGTCCGGCTCATAAACTCGGCCAAACAAGCTGCCCATGTGTCATCAGAGCACCTCCAGCAAGT  
CGCGCAGATAAAGACGCCCCGGCCAGCTGCTCCGGGGTCAGCTGATCGTCAAGGCGCAAAGCAGCTG  
GCGGTAGTCTGTCCGCGAGCGGCGCAGGGCGGCGGGATCCTTGATCTTGTGAAAGGAGTGCAGCACGAAA  
GGGGGAGCCAGTTCATGCCGACAAGGTGGCAGCCTGCTGAAAATGGCAGCAGAAAATCGAGCAGCGGTCT  
GGCTGTTGTAACCCCTCGCTGCAGTAGGACTCCGGCGCCCCGCGGTGGTAATGGCGCTCAGCCACTGCTT  
GCCCTTGAGGGCGTGGGCTTCCGGGGCCGTAGGCGTAGCCATACTCCAGCACCAGATCCATCCACTCTTTC  
ATGATGGCCGGGCGAGGATACCAGTAAAACGGGTGCTGAAAGACGATAATGTCGTGCTCACAGAGCAGCG  
CCTGCTCCCGCTTACATCGATAAACATGTCGGGATAGTGTGTTAGAGGTCGTGAACCGTGACCCCTC  
CAGCCCTCAATCGCCTGCAACAGCTGCTTGTGGCCCCGAGCTCTGCAGCGCGGGATGGGAAAAAATA  
ACCAGAATGCGTTTTATGACCACATCACCCGAACAAAGCCTTGGCGTGCAAGGCGAGGTAACAGAAAAG  
GGGAGTCTGGGGAGCTGCATCGTAAAGGTGCACAGGAGAGCGACCTTATCAGGAAGCGCCATAGCCTGCC  
AACTCGGGTATCAGCTCCCGCAGCGCCGGATTGAGGGTCTGGTGGGCGGGATAGCAGAGCCCAATCCGGC  
GAAACATCCGCGGCCCGCTCACCGGCAGGGTACAGAGCCCCGCTCATCTCGACCAGCCCGTCCGGCAG  
AAAATGATGCCGACCCCGCCAGCACCAGCGCCATCACAGCCCTTGTCTCGGCCCTGGCCACCAGA  
TTGAGGGTAAGGCGGTACAGGCCAGCAGGCCGATAGTCTGCTGATGGGCTTCGCAGGGCGGGCACTCAA

TAAAATCATAATGTTGCAGCTCGGCCAGCTCGATCCTTTCGCGACTGGCAAGGGGATGGTCGACCGGCAC  
GCAGAGCACGTAATCCTCCTCCCACAGCGGCAGAAAGATCTCGTCTCCCGGCGCAAGGCATCCAGCGTC  
AAGCGGCAGTCGACGGGGGTGGCGTAGTCGGAGAAGGGTGAGATCCAGCTGCGGCAACACGCGCTGTACT  
TGCTGCAGCAGCCCCGGCCACCCGGCGGGGACTCAAGTCCGGCATGATGGCGATAATTGAGCCTCGCACGCC  
TCGCTTTTCTGGCGAAACAGCTCCGGCAGACGGCGCGCCTCCTCCACCAGCTTGACTGCGTGAGGATAGAG  
ATAGTGGGCCGGATCTTTTCGCCACCACCCCTTCTTGGCCCCGACAAAACAGGCTGTCAACGAGCGCCTCT  
TCCAGCTGGCGCAGTCCC GCCGAGAGGGAGGGCTGGCTGACGTGGCAGCGCTCGGCCGCCCGCTGATGT  
TCTTCTCTTCATAGATGGCGATGAAGAAAACGCAGCAATCTCAAGTCCAGCATAAAACCAACCATAGTTTTT  
TCAGATGATAACCAGCGGAAAACAATATTTATCACTTATAGATGCAGTGACTATAGTGATTGGGTTCCGT  
GCTGGCCAGCCACCTGTTTGTCTAAACCGACTCTTGAATCAGAAGGAAAGACCCATGTCCAAATCTCTCG  
TCGTGATCACCGGTGCCTCCGCCGGGATCGGTCGAGCCGATGCAGGCACCTGAACCTGCCCGATACCCCTCTGCATCGGG  
GTCGATGTAACCACACCGCCGCCATGAAAGCCGCCGTCCAGCAGGCAGAAGCCAAATTTGGCCAGTCG  
GCTGCATGGTCAACAACGCCGGCGTCATGCTGCTGGGTGAGGCCGATGTGCAGAATCCGGCCGAGTGGCA  
GCAGATGCTCAACATCAACGTGATGGGGTACTGAACGGCGTCCACGCAGTGTGGCAGGCATGAAGGAG  
CGCCGCAGCGGCACCATCATCAACATCAGCTCCATTGCCGGTCGCAAGACCTTCCCGAACCATGCTGCCT  
ACTGCGCCACCAAGTTCGCCGTGCACGCCCTGACCGAGAACATCCGGGAAGAGGTGGCCGATGTGGCGGT  
GCGGATGGTGACCATAGCTCCGGGTGCGGTGAGACCGAGCTGCTCAGCCACACCCTGACGAGAGCATC  
AAGGCCGGTTACCACGACTGGAAAGATCAGATGGGCGGCGTCAATGCGCCGAAAGTGATCGCCGATGCCG  
TGCTCTACGCCTGGAATCAGCCTGCCAACGTCTGCGTGCGGAGATCGTGCTGGCGGCGACCCGTCAGCA  
ACCTTAATCCGGGTGACTGACACCATGGGGAGGGCTTGACCCTCCCCGGGGCACAGGGTTACCATGTG  
CCCCTTGTTTTTTTCCGAGTCATTCCATGGTTCTCACCCGTCGCCAACTCGCTCACGCCCGTCTGCTGGCTC  
CCCTTGTTGGAGTCTGGTGCTGGTGTGATGTGCTTTGGCAGCCGGGCCCAACCGACCTCTGTACCCTGA  
CCACCCACTGCAGCCAGAGCGAGCGTACCCTGGAAAAAGCGATGCCCTGCGGCAGCTTTACCACCGCCCT  
CTCGATGACGCTGGTAGGCAGCGACAGCCTGACGGTCGCCGTGCTGGAACCGGATACACCCGACTTCGCC  
TCCCCCTCTCTCTTTATGCCGGACGCTCCGTGCGAGCGGCTCGAACGTCCCCACGCCCCAGATCTGAA  
ATGCATCCCGTATCCGGCATCTTTTCTTTCAATCTGAGGTGAGTGATGTACAAAACCCCTGTTACTGGCCA  
TGCTGGCCGGTACCGTACGCTTTTTCGGCTCTCGCGCCGAGAAGATGACCGTCTACAAATCCAAATATTG  
TGGTCTGGTCCAAAGCTGGAACGAGCACATGGAGCAGAATGGCTTCGAACTGGAGGTATCGAAACGAA  
CAGCTCGGCGCAGTGAAGCAGCAATACGGTATCGCGCCGAACTGGCTTCTGCCATACCGGTATCGTAA  
ATGGCTATGTGATCGAGGGGCATGTACCGGCCGCCGATGTGCAGAAGCTGCTCAGGGAAAAACCGGCAT  
CCGTGGCCTGACCATTCCGGGCATGCCCCAGAGTGCGCCGGGCATGGATATTCCGGGCCATCCCTATGAG  
GTACTGAGTATCAGCAACGAGGGCGCGACCAACCGCTGGTCGAGCTACCCAGGCTGACGAAAACCTGGTCA  
TGAGAGGGCACTCCCATATCATGTGAGGCACACCTGAGCGGACTCTTGCCGCTCATGGCCAGAATGAGGG  
CCGCTATCGCGAGATAGCGGCTTTTTTTGATTACATTTCTGCAATAACAAGGGATTGCTTGAACCACC  
GGCAACAAGGGGCAGATTTAACGCCAATTCATGGAGCCGATGCTCAGGTCTACCAACCCCTTTCCAGCGCC  
AAGGATGCGACATGTTTACCTTTTCCCGAGGAGTCTGCTGCTAGCCTTTCTGACAGTTCTCCCCCCAC  
TTATGCCAATGAAGAGCCCGCCATGCTGACAAGCGAACACCAATCCAGCCGCCCGTGGCCGCCAAACAT  
CCCCGCACCCTGAAAAACATGGGGATACCCGCATCGACAACCTACTACTGGCTGCGCGACGACGAGCGGC  
AGAAGCCCCGAGGTATTGGACTATCTCAAGGCCGAGAACGCCTATACCGAGGCCATGCTCAAGCCGACCCA  
ACCCCTGCGCGAACAGCTTTACAAAGAGATGGTCGCCCCGATCCCCAGCAGGATGAGTCGGTGCCCTAT  
GTGAAGAACGGCTACCGCTACCAGACCCGCTATGAGCCGGGCAAGGAGTACGGGATCTATTGCGGCACCA  
AGCTCGGTGAAGAGCAGTCGAGTCTGCTGCTGACAGCAACCTGCGGGCTGAAGGGCACGAGTTCTATGC  
CCTCGGCGCCCTTGAAGTGAGCCGCAACAACCGCTGGCTGGCGGTGGCAGAAGATTTCTCTCCCGCCGT  
CAGTACCAGATCCAGTTCTCTGATCTGGAGAGCGGCCAGTGGGCCACCGACAAAACCTGGAAAAATACCTCCG  
GCAATCTGGTATGGGCCAACGACAACAAGACCGCTCTTCTATGTGCGCAAGCACCCGACAGCCCTGCTTCC  
GTATCAGGTCTATCGCCATACGCTCGGGACGGATCCGGCCACGGACAAGCTGGTCTACGAGGAGAAGGAT  
GACTCCTTCTACATCAGCCTCTACGCCACCACCTCGGAAGATTTTCATCGTCTATCGCCCTCTCCAGCACCA  
CCACCGCGAAGCACGGCTGATCGATGCCAACCAGCCGGAGCACGCCCCACGCCCTGTTCTGCCCGTCA  
GGTGGATCACGAATACAGCCTGGATCACTACCGCGGCCGCTTCTATGTGCGTTCCAACAAGGACGGCAAG  
AACTTCCGCCCTACGAGACCAAGGAGAGCCCGTGCATCGCTGGAAGGCGGTGATTGCCCCCAATCCGG  
ACGTGCTGCTGGAGAGCTACGCCCTGTTCAAGGATTTGGCTGGTACTGGAAGAGCGCAACAAGGGGCTGAC  
CCGACTGCGCCAGATCAACTGGCAGAGCGGCGACGAGAAGGAGATCGCCTTCGACGATCCCGCTTATGTC  
ACCTGGCTCGCCTACAACCCGGAGCCGGATAACCAGCGCCCTGCGCTATGGCTACTCCTCCATGACCACCC  
CCGCCTCCACCTATGAGCTGGATATGGCGAGCGGCAAGCGCACCCCTGCTCAAGCAGCAGCCGGTGGCCGG  
CTTCAAGGCCGACAGTACGCCAGCGAGCGACTCTGGGTGACCGCCCGGACGGCGTATCGGTGCCGGTG  
TCACTGGTCTATCGCAAGGACAAGTTCAAGAAAAGAGCAGGCCGATGCACCCAAGAAATCCGCTGCTGGTCT  
ATGGCTATGGCTCCTACGGCGCCAGCATGGATCCCGACTTCAGCAGCTCGCGCCTGAGCCTGCTCGATCG  
CGGCTTCGTCTACGCAATCGCCATATCCGGGGTGGCGAAGAGCTGGGCCGCTCACTGGTACGAAGATGGC  
AAACTGCTGAAAAAGCAGAACACCTTCAATGACTTTATCGATGTCACCAAGGCGCTGGTGGAGCAAGGCT  
ACGGTGCTAAAGATCAGGTCTACGCCATGGGCGGCAGCGCCGGTGGTCTGCTGATGGGGGCCGTCATCAA

TCAGGCGCCCCGAACCTCTATCGCGGGCGTGGTGGCGCAGGTGCCGTTTCGTCGATGTGGTCACCACCATGCTG  
GACGAGTCCATTCCCCTCACCACCGGGGAGTATGACGAGTGGGGCAACCCGAACCAGAAGCGCTACTACG  
ACTACATGAAGAGCTACAGCCCCCTACGATCAGGTGAAGGAGCAAGCCTATCCCAACCTGCTGGTCACCAC  
CGGACTGCACGACTCGCAAGTGCAGTATTGGGAGCCCGCCAAGTGGGTCGCCAAGCTGCGCGAAGTGAAG  
ACAGATGATAACAAGTTGTTACTAAACACCGACATGGACGCCCGGCCACGGCGGCAAGTGGGCGGATTCA  
AAGCCTACGAGGATATCGCGCTGGAATACGCCTTTATCCTGGATCTGGCCACCCAGCCAACCTGATCTCT  
CATTACTCCGGCCCTTGTCAATCAAGGGCCGATAAGAATCCTCTCGTAGTTTTTCCCCTTCCATTTCC  
CTCCATATCAAATTAATCTTCGGCAAGAAAATGAATGATCGAGGTCATGTTTCTCAAGATTTAACTCCGC  
TATTTTGGCATTTCGTTTGATTTATGTTGGGTGAATGTGCTTAATCGGAGTGCTTGCAACTTTTTTATTTG  
GCCCCACAGGGGGCAATTTATCTTCGACCGACAGGAGGTGCGTAGCCTCACCACAGGATGAGGGTGACTG  
CCGGAAGGGGGTGATCAACTCCCTCGCTTTCGCGCAACGAGAAGAGCGGGCAAGCCCGCGCAGAACGG  
GATTGCCATCAATTTATCCGGGGGATCGGATAAACAATAAACAAGAAAAGGGGAGAAAAAATGAAAGGATTA  
ACTTTGGCATGCGCCCTGTGCGGCGCTCTGGTCGGTGTTCATTTCGGTGGTCCGGTACAAGCGCAGGAGC  
GCTTCGTGACCATAGGCACCGGCGGTGACACCGGCTACTATGTCGCTGGCCAGTCCATCTGCCGCTT  
CCTCAATCGCGGCGCCCGGATCACCAGATCAAGTGCAACGCCCCGGCCAGTGGCGGCGGTGTTGCCAAC  
GTCAACGGCATCCGACGCGGTGAGTTCAACTTCGGCATCATGCAATCCGACCACCAGTTCAAGGCGATGA  
AGGGGCTGCCACCGTTCAGGCCGAAGGGGCTATGGACGACATGCGCGCCGTCTTCTCCCTGCAGAGCGA  
GGTGTTCACCATCCTGGCTCGCCGCGATGCCAAGATCGCCAGCTTCGACGACCTGAAAGGCAAGCGCGTC  
AATATCGGCAACCCGGGCTCCGGCCAGCGTGACACCATGGAAGAGATCATGGCGGTCAAAGGCTGGAAGA  
AGGGTGACTTCGGTCTGGTCTCCGAGCTGAAGCCGGCCGAACAGGCTCCGCCCTCGGTGACAACAACAT  
CGACGCCATGAGCTACTTCGTGCGGTACCCGAACGGCGCCATTTCAGGAAGCTCCACCACCACAGATGCA  
GTTCTGGTACCTGTGACCGGCGCCGACATCGACAAGCTGCTGGCCGAGAAGAGCTACTACAGCAAGGCCG  
AGATCCCGGGCGGCATCTACAAGGGCAGCGACAAAACCGACCCCTCCATCGGTGGCAAAGCGGTGCTCTC  
CACCAGCGCAAAAACCGATCCGGAAGTGGTCTATCAGCTGGTCAAGTCGGTGTTCGACAACCTGGATCGC  
TTCAAGCGCCTGCACCCTGCCTTTGCCGACCTGAAAAGAGGGCCGACATGATCAAGGTGGGTCTCTCTGCAC  
CGCTGCATGAAGGGGCTGCCCCGCTACTACAAAGAGCGCGGCTGGCTCTGATTAAGGCCCCGGGGCCTTT  
GTCACCTCTCTTCGACACCCGCTGCGCCCTGATTGCGGGGGCGGGTGTGCTCTTGTGTACTCGTTGGC  
ACAAGTTAACCCATGCAAGATAAACAACACTCTACCCAGGAACTGATCGCCAGGATGTGGCCGCTCGC  
CTGCCGCTGGGCATCATGGGCTGGCTCATCAGCATCGCGCTGGCGCTGGCTGCTGTTCCAGCTCTGGA  
TCGCCTCGCCACTCCCCTTCATGGTGGGGTTTTGGCGTACTCAATGACACCGAAAACCCCGTCCATTACCT  
CACCTTTGCCCTGTTGCTCGCTTTTTCTGGTGTTCGCCGATTTTCGCTCCTCGCCGCGGGATCGGGTTCCC  
CTCGGCGATATCGCCCTCGGCTGATCGCTGCTGGCGCCGCTTACCTGTTTCGTGATGTATGAAGCAC  
TGGCGCTGCGTCCCGGCACCCCTCACCACCGCCGATCTGGTGACCGCTGCATCGGCATTCGGCTGCTGCT  
GGAAGCGGCGCGCCGCGCTGGGGCCAGCACTGGCGGTTCATCGCCATCATCTTTCTGATCTACAGCCTG  
GCGGGCCCCCTGGATGCCGGGACTGCTGGCACACCGCGGAGTAGGTTTCACCGCGCTGGCCAACCACCAGT  
GGATCACCACCGAAGGGGTGTTCCGCATCGCCCTTGGCGTCTCCACCAGCTTTGTGTTTCTGTTGCTGCT  
GTTTGGCGCCCTACTGGAGCGGGCCGGTGCAGGTCACTACTTTATCCAGCTCGCCTTCAGCCTGCTCGGT  
CACCTGCGCGGCGCCCGGCCAAGGCGGCAGTGGTCGCCCTCCGGCTTGACCGGTCTGATTTCCGGCTCGT  
CGATTGCCAACGTGGTGACTACCGGCACCTTCACCATCCCAGATGATGAAGAAGGTGGGCTTCAGTTTACA  
GAAAGCGGGGGCAGTGAAGTGGCCTCCTCGGTCAACGGCCAGATCATGCCACCCGTGATGGGGGCGGCC  
GCCTTCTGATGGTGGAGTATGTGGGCATCCCCTATGTGGAGATCATCAAGCACGCCCTTCTGCTGCGG  
CCATCTCCTACATAGCGCTGCTCTACATCGTCCATCTGGAGGCGTTGAACTGGGCATGCAGCCCATCGG  
CAACCATCAACCAAGCCCTGGCTGCGCCGCTGACCGGTTTTGCTTTGGCGGGCCCTCATCAGCGGC  
CTGTCACTGGCGGTCTACTATGGCCTCGGCTGGCTCAAACCTGCTTTGGGTGACTACGCCCTGCCGGGA  
TCTCGGTACTGCTGGCTGCCACCTATGTGGCCCTGTTGAAGATCGCCGCCAGCAATGAACCGCTGCCTGC  
CGAAGATCCCGCAAGCCGCTCACCGAGTTGCCCAACACCCCGCGCCGTGCTGCTTCCGGGCTGCTGCT  
CTGCTGCCGGTGGTAGTACTGGTATGGTGCCTGATGGTGGAAACGCCCTCTCGCCGGGGCTGTCGGCCTTCT  
GGGGTACCGTGATGCTGGTGATCATCCTGCTGACTCAGCGCCCGCTGCTCAACTGGCTGCGCAAGGACGG  
CAAGCACGACTACGGAACCGTGCCTGACGGCGTGGTGGATCTGCGGGAAGGGCTGGTCGCAGGTGCCCGC  
AACATGATCGGTATCGGCATTGCCACCGCCACCGCGGGGATATCGTGGGTGCGGTCTCCCAGACCGGGG  
TTGGTCTGGTGTGCTGATCTGGTGGAGTTCTCTCCATGGGCAACCTGCTGCTGATGCTGCTGCTGAC  
CGCCCTGCTGAGCCTGATCCTTGGCATGGGGCTGCCACCACCGCCAACCTACATCGTGGTGTCCAGCCTG  
CTGGCACCGGTGGTGGTGACGCTGGGGCAGCAAAAACGGGCTGATCGTGCCGCTGATCGCGGTGCACCTGT  
TCGTCTTCTACTTCCGCATCATGGCGGATGTGACCGCGCCGGTGGGACTGGCTTCTTCCGCGCAGCCGC  
TGTCTCCAAGGGCGATCCCATCAAGACCGGGATCACCGGTTCTACTACAGCCTGCGTACCAGCAGCGCTG  
CCGTTCTGTTTATCTTCAACACCGATCTGCTGCTGATCGACGTGGACTTCGCCCCACGGGGTGTGATCT  
TCATCGTGGCGACCATCGCCATGCTGATCTTCGCCGCGCCACTCAGGGCTGGTTCTGGTGAAGAGCCG  
CTGGTACGAGAGCGTGCTGCTGTTGCTGGTTCGCTTTACCCTGTTCCGCCCGGGTTTCTGGATGGACATG  
GTGCACGACCCCTATCGCGAGACCCCGCCTGCCAGCTGGCCAAAACCATGGGTGAAGTGGAGGCGGAGA  
GCACCCTGCGGCTGCGGATCCTCGGTGAAGATGCCGTGGGCAAGCCACGCAAGTTTACCCTGCTGGTCCG  
CGTACCAGGATGGGGCAAATGGCGAAGAGCGGCTGGCCAATCTGGGGCTCAGCCTCTATGAGCAGGACGGC



AAGACGCTGATCGACAACGTCGCCTTTGGCAGCCCGGCCACCATGGGGCTGGAGTTCGATCAGGAGA  
TCCTCACCGTCAAGGCGCCGACCGAGCGCTGGACCAAGGAGTGGATGTGGATCCCGGGCTTCTGTGTT  
CGGGGCGATCGTCTGGCTGCAGCGTCGCCGAGCATCAAGGCCGTTAACCACCGGGCAGATGAGACTG  
AGGGCCGCTATTGCGGCCCTCTTTTTATTGCTTGCCTTGCCTTCTGCGGCTCTTGCAGCAGCAACAGTCATGG  
AAAAAGGTAACGGTGGCGAGCGGCCAAAAAAGTGGGGTGACATGTCCATGTCACCCCTCGCAAATAGC  
ATGTTCCATATTGGAGTCCGGCCACGCCGGTCTCTGTTTTCACTTTCCGATAGTTCGCGACCCATCTGAA  
GTGCGCGCAATTGCAGCGATGCAACCAACCAGTACCCGTTACAACCTTCGTCCACACGGCAGACAGGC  
CGCCGTGTTTTGTCTTGAACCTGAAATATTACGCATAAAAAACAAAATAAAAAACGTTTTTATGCTAATTC  
CATTACATCAGAGTACAAAAACAGCCTTATCATCACCGCTAAATTTGTTATAAAACAGTAAGATAGGTT  
CATGCTGGTTATTACCCCGAAAGGGCATCAGCAATGGCTTACAAGGCTTTGCGAGATCTCGCACAAAA  
AATGGCCGCTCACAGCCAACGGCGCAGGGGCAACCAGTCGCTAAGGCGGGCTATCAGTCGCCTTGACCA  
CCCTTCGGGTTTGCAGCGCAATCCACCCGCTTCTGCTGCGAGTGAGCCAGCCACGTTTCGCGAGCCGCTCG  
CAGATCGGCGGGCAGTGCAGATGCAGCATCAGTTCGGTATTGAGAAAAGAGTGAGCGAGGATCGAGGTTGA  
GGCTGCCGAACAGCGCCCGCTCCTCCCCAGCAGGATCAACTTGGCGTGCAGGCTGCCGTAGCCATGGTC  
AAACTCGGCGACCCGGATCCCTTGGCGCAGCAACCAGCCGAGATAACGCTGATAGGCACCATAGACCAGT  
GGCACATCGGTGCTGGCCAGCGAGTTGGTGAGAATGTCGATGGCGACCCCTGCTGGTGTAGCCGCGCCA  
GACGGTGC CGGAACCCGCGAGTAAGGATGAGGTAAGGGGTCACCAACCCAGCGAGCCGGGATTGTCAGC  
CAGCTGGCGCCAGAGCTGACGGCGGTGGTGGACGGGAGATAAGCCCTTGGCCGGACGGTGAACCAC  
ACCTTGC CGCCCGCTCGTGCCACTGCAGCGGTACATCGCTCTCGTCAAACAGCGCCGCGGGCAGATCGT  
AGACCGTGCCTACCGCCGGATCCGTCATGGTGAACAGGAAGTCTGTTGACCACCTTATTTGCGCGGGCAG  
CAACTCGCGGGCAGCAGATGGCGGATGGGGTGA CTCCAGCGGCTGTGCCAGAACTGCTCGAACCCCTGC  
ACCATCTGCTGGCACAGTCCCCCTGACAGGCGAGATCGAGATCCACGAAGGGAGCCTGCGGATCCAGAC  
CGAAGTAGCGATCGCCTATGTTGCGCCCGCGGATCAGCGCCTGCTTGCATCCACCAGCAGCAGCTTGTT  
GTGCATCCGGTGGTTGATGCGGGCAAAGCTGAGCAGCCCTCCAGCAGCAGTGCCAGCGGGCGCCAGCCC  
CGCAGCCAGAAGGGGTTGAACAGCCGCACCTCGATCCCCGGGTAGTGAGCCACCATTTCCAGAAAGCGGT  
TGTCACCGGCATAGAGATCATCCACCAGCAGCTGCACCTTGACGCCGCGCCGAGCGGCGTGAAGCAGCTC  
GCTCAGCAGCAACTTGCCGCTGCTGTCTCTTCCAGCTGTAGTACTGCGCCTGGATCCGCTCGCGGGCA  
TGGGATCCATTGACAACGCACCTTCAGCGCCAGAGGATCGTCGATCAGGGCAAAGGATCCGGGGA  
TCATGGTGTCTCCTGTCTGTCATGGCCGGGTGCATAACGCTGGCGAGCCTTTCACATATTCAAAAGGA  
GTTGCTGATGGAAGTGCATGATACCCCGATGTTGCGCTATCTGGGCCAGCTCAGCCAGCAGATCTCATC  
CCGGCCACCGCCCCCGCCACTGGTTTTTTGCAACACAGGGACGGTGGCTGGCAATTGCCGACCGTGCAGG  
CGACCCTGCCGGTCAACCGGCTCAGGGCTGAGCCGCTTCGATAGCGGCAGCCTTGCCCTCGATCTGGGGC  
AGGCTGAAACGATAGGCTACGTAGTACTTGTAGATGGTGGCGACATAGTTGATCGGGCCCCGTCCGACTT  
CGTTGGCCACCAGCTGATCCACGTTGCCGAACCAGACGTTGGGATCGAGCCCCAGCTTCTCCGCTTGCC  
TCGCAGCGCCTGCACCCGTTTTGGCCCGGCTGTAGGCGGCAGGGCAAACAGGTGGCGGTTGAGCCGA  
TCCAGCTTGGGATCATTGAAGTAGGTATCGAGGATCAACCGCATGTAGCGGCAGGCGCCTCCACATTT  
CCTCCAGCGTGGTGAGTCTGGCGCCGTTGATGCCGACTTCCCGCCCCGTACTGGGCAGCAACTGCATGAG  
GCCCACGGCCCCCTTGGGCGAGCGTGCCTTGGGATTGAGGCCGACTCCTTGTAGCCAAGCGCCGCCAGC  
ATCAACCAGTCGAGATCGTATTGATTGGCGTACTTCTCCAGCACCTTGCGAATGGTTCGCGAGGCGCCCA  
TAGGATCCGGCGCCAGGATATTGCTCATCTGATCGCTGCGAACCCAGCAGCCGGCGCAGGGTCAATGCTACT  
GTAAAGGCTGTTGCGGCTGACACTCGCCAGATAACCATTGACCGCCTTGAGCAGCTCGGGGCTGTTCTTG  
CGCAGCGCCAGGCACTGGTGCCTGCTGCGCAGGGGGATCAACTTGTGGGCCCTTGAGGCGGAGATCA  
TCCCACCCAGCCAGATCCGCCCTTGTAGCTGTCAGTACCGTTCAGGGGAATAATGCCAGCGGCCACCAT  
CTCCAGCAGATCGCCATCCTGCAGGATTTGGGCACCGTTTCGATATAGACGGGGGGCAACCCCAACTCG  
CGAACAACCCAGTTGAGCTGGCGCAGGCTCTCGTAGTAACTGGAGCTGGCGCGCACCCAGACCCGCTGC  
CGGAGAGCTGGGTAATAACGGCTGAAGGCGGGCAGGCTCTGCTGGCTCACCACCCACTCCTCGATGGAAGA  
GATGAGCGGCCGGGAGAAGGCCACCTGTTACGCCGGGTCGGAGTCACCGTTCATGGTTCGCCGCCACCAGA  
TCGCCGCGCCCTCGGTGAGATAGTCCAGCAGCTTGTCTGACGCACCCGGATGTAGACCACCTTGAGTT  
TGACCTTCTCTTTGGCGAGATAGGTCTTGTTTCCAGCCAGCGTTTGAACCCCTTGACGCTGATTGACCAGAAT  
ACCGTACTGGGCGCCGCGATCGAGAAAAGTAGAAGCCGCGCTCATAGACCACCAGAGCCCTGAGTTCGCGC  
TTTTGCAGAATGCTTTGAGGTCCCGGGTTGGGGCAGACGCTGTGGCTTGAGTTCAGCCGCGAGCAGGG  
GAAAACAGCAGAGGGCCAGCAGCGCCAGATCCAGCGTTGCATCACGATGGCTGCCCTGTGCTGAGGTC  
ACACCTGCTGCCTGTTGGCAGCACGGATCACGATAGAGGGTGGGATTGGGGGCAGAGATCCATCGCTGCG  
TCATGATGTTTGCCTTCTGTTGGCCGACTCGCGCCGGGCAAAAACGCTCTGTGGGATAGAGTAACTATA  
GAACGCCGACCCACAGCAGAAGGGTCAACACGGCAGGCAAACCTGCCGCTTATCAGACAACCTCAGATAG  
AGCGGGCCCGCATTTGAAAATCAGTTTTTTCGGCGGTGCAGGTGAATTGCAGGCGGGCTTTCAGGATCAC  
GCCGTTGGCGCCCTGGGTGAGTTTCGCTGCTCACTTGGAGCTTCGGCAGTGACCTGTTTGGCCAGCGCTTCA  
TAGGCAGCCAGCTTGGCGCGGGCATCCGCTCGGCAGCGGCTTCAATAACCAGATCCATCACATCGTTCG  
CTTTCGCCGATGATGGTGGCGATCTCGGCAAAAACAGCCGAGCTGTCACAGGTTTCGTTTCACTTTT  
CTCGTCTACAGACATTTTCTACTCCTACTGCTTATTTTCGGATGATTTGCGTCGTACGCATCGCCTTGGC  
AAAATCTTTGATGGCGGTACCCAGATCCTCACCTGCACTGGCAAGACGCTTGCTGCCGAAGACCAGCACA

ACGACCAGCAAGAGGATCAACATATGCCAGATATGAATTCACCGAGTCCCATAGGGATACTCCCTCACA  
AAGAGATATCTGTTACTTGTATCAAAATAGAGCGCAGGGATTGTTGGGCAAAATCAAGGCAGGTGCAAGT  
GAGCAAATAAATCATAGCCAAAAAATAGGGCGACCTGAGGTCGCCATATTGATTGTGCTACATGTCCCC  
TCAACCGCTACATCCTGTACCAGTGGTTCATGCGAACCTGAGACCATTGAGGATAAGATCGCCAAGATA  
TGAAAACAAATGGTATAAATTCATCTTAGAATTGAAGAGGATTCATATCATGCTGCTGGAACAACCTGGGT  
CGCATCGACCTCAATTTGCTGATTATCCTGCAGGTAAGTCTGGAAGAGCGCAACGGCAGCAAGGCGGCAC  
GCCGCTTCATCTGAGCCAGTCCGCGGTGAGCAAAAGCCCTCGGCCGTCTGCGCGATAACCTTCAATGATCC  
CCTCTTCATCCGCTCTGCCTACGGGCTGGAACCCACCGGCCGCGCCCTTGCGCTGCAACAGCAGTTGCAA  
CCCATCCTGTTGTGCTGGATAACCTGATCCAGCCGCCGAGTTCGACCCGCCAGCTCGGAGCGAGAGT  
TCGTTCATCGCCAGCATGGACAGCGCCTTTACCTGTTTGCCTGCTTACCTGAGCGAGTGAACCGGCA  
GGCACCAGGATCCGCTTGCCTTACGAGGAGTGGACCGAGAACAGTCTGACCGAGATGAGTCAGGGACAG  
GTGGACATCGCCTTCGCGGTGCGAGAGAAGTGCATCAGTCCGATTATCGGCTCGATACCTGCCCGACA  
GCATCTGTGACGAGTGTGGCGGTGATGATCTCACCTGTCTGGTGCAACAGCACCACCCGCGCTGCG  
GGAGCCCAACTGGAATCTGGAGCACTACCTCAGCTATCCCCATGTGCAGACTTACTGCGAGGGGGCGGGAC  
CGCTGGATGCTGGATCACAAGCTGGCAGAGCAGGATCTTACCGACGTATCGAGGCAACCGTGCCCTCCT  
TCGAGGGCGGCTGCGGATGGGGATGCACTCCGACATGATAGTGACGCTATCCCGGCTCTACGCCCGCCA  
CGCCACCCAGGTCTATCCGCTGTTACAGCTGCCGCTGCCATCGGGTTGGACAGCATCTCCATCTGCTC  
ATCTGGCATCAGCGTCACAGCGAGGATCCGGGCCACCGCTGGCTGCGGGAATTGCTGCTCTCCCTCATCA  
TGAGCAAACCTGGAACCCGCTGCGACCACTCACGGGTGACCGCCCCCTTCTCGGCGGCACAAAAACGG  
GGCTCTGCGTAGCCCCGTTTCAATTCACCTCAAGATGTAACCTCTCAGCCCTGACCGGTACAGCCAGAT  
AGTGATGTACCCCGTCCAGCAACATCTGGACCGAGATCATACCAGCAGCATGCCATCAGCCGCTCCAC  
CGCAGTGAGTCCCCGCTCACCCAGCAGCTTGTGTAATACCTCGTAGAACATCAGGATCACCGCGCTGGCA  
GCCCAGGCCAGAAAGAGTGCAGTACCAGTCCACCATCCGGGTGCGCTCCTGATTGGCCAGCAGCATCA  
ACGATGCGAGGATCGAGGGGGCCGCAATCATCGGGATCGCCATTGGCACCAGGAAGGGTCTCTCGCCCGC  
CGCCAGCCCGGTACGCCCCCTCACTGGGGAAGATCATCTTGATGGCGATCAGGAACAGGATAATACCC  
CCCGCAATGCTGACCGCCTCCTGCCGAGGTTGAGGAAACCGAGGATCTGCTGACCGACGAACAGGAACA  
GCATCATGATGGCAGGAGAAGAGCAGCTCGCGCACCATCACCTTGCGACGTCGCTTGGGATCGATATG  
ACGCAGGATAGAGAGGAAGACCCGCGAGTTGCCAGCGGTTCCATGATCAGAAACAGCATGATCGGGCA  
GAGAAAGTATCCATAACAACGCCCGGGCTACGCCCTGAATAGGAAAAGAGAGGGGGGCAAAATATAGCAA  
GGGCGAAGAATTGAGCGAGCGCCATGATGCGCTCGCAGCGGGATTAACCGTGGTTGCAGATCTTGTCGGC  
GCGGGTCTGGAACCTTCGGCCGAGTTCGATGAATTTGCCGCGGGCAGCCAGAAAGTTCGATCAGCGCTTCC  
GCATCCATCTCGCTGGCGCTGCAGGTATGAAAACGGGCTTCGGCACCGAACCGTTCGGCCATCGCCTGTT  
TCAGGCTGGCACGGGTAAATTTGCCCCCTTGCGCCAGCATCATCTCCATCACTTCGTGACCATGAACCGA  
TTGCGACATCTCTACCTCAATAATGAACATATTTAATAACCAATTAATATCTCCCTGCCCGGGGGGATC  
TTGATATAGGCCAATAAATTTGCGCATTTCTGGTCAGGGGAGTGGTCACCGCCACCGCTTTGTGCGATAAT  
GTGGCAACCCGCGTCAGGGATCGCTACACTGGCGCCCTTTTTGGCCATCGCAGACAATGTATAAGGATA  
TTGGCGTCATGCTGTTCCATGGAGAGGCTCTCAAGCCTTGGCAGATCTGGACCCGCCAGCACTCTGGCT  
CAAGACCCTGATCGGCATGCTGACAGGGGTGGGCTGGGTGTCGGCTTTGAAGAGCAAGCCCTGCTGCTC  
AAGCCCCTTGGCGTCTGTTTCGTCACACCATCCAGATGCTGATGGTGCCCTCATTTTCTGTTCCGGTCA  
TCGCCGGCCTCACCTCGCTGCTCAAGGGCAAGGCCCTCGATCGCATCGGCAGCAAGGCGATCTGCCTCTA  
CTTCTGTTTCGACCGCCATCGCCATCTGCATCGGCCTGATGATGGGCTGGCTGCTGGAACCCGGCATGGGT  
GCCGACATGGGCCCTATGAGCGGGTTCGGTATGTCGGAACCAACCCCTGGCCAGCGTGTGAGCCATC  
TGGTGCCGAGCAACCCGGTACAGGCGATGGTGGATGGCAAGATCCTGCAAGTAATTGCTTTGCGGTGGC  
GCTGGCGGTTCGCCCTCAATGCCAGCGGTTCGCCGTGGCCGCCCGCCATCCTCTTCTCACCTCGCTGGCC  
GAGGGGATGTTCAAGCTGACCCAGATGGTGTGATGGCGCTCGCCCTTACGGTGTCTGCGCCCTGATGGCCT  
GGATGACCGGCAAGTACGCCCTCGACCTGCTGCTACCCTGCTCAAGGTGATCGGCGCCGCTACCTCGG  
CTGCCTGCTGCACGTGCTCGGGGTCTACAGCACCCCTGCTGCTCCTGCTGGCACGGCTCAATCCGCTGCAC  
TACTTCAAGAGCATCGTTGATGCACAGGCGGTTGCGTTTACCAGCAGTTCACAGCAACTCCACCCTGCCCA  
TCAGTCTGGCCTGCGCCGAGAAGCGGCTGGGAGTCTCCCCCGCCATCACCGCCAAGGTACTGCCCATCGG  
CGCCACCATCAACATGGATGGCACCGCCCTCTATCAGGGAGTGAAGTGCCTGTTTCGTAGCTCAGGCATTC  
GGTGTAGAGCTGCACATGGTCGATTACCTGACCATCATCAGCATCGCTACCTGGCCAGTATCGGCACCG  
CAGGCACCCCGGGCACCGGGTTGATGCTGCTGACCTGACCTGACGGCGGTGGGCTTGGCGCTGGAAGG  
GGTGGCACTGATTGCAGGCATTGACCGGATCCTCGACATGGCGCGCACCACGGTCAATGTATCGGGGGAT  
ATTCTGGTGTGCGGTGCTGATCGCCCGCAGCGAAAACGAGCTGGATCTGGCGACCTATCACGATGCCAGCG  
CAGGGGAAGATATCGAGTTCCCGCCGCGCTAGCGGAAGAAAGCTCAGCTGTCGTGGGGATCGTGGTGACA  
GCGCCAGCAGACGTGCAAGTTGGCGCCGTTCTCCTCCCCGCACTGACCGCGCAGCCAGCCGTTACCCTGA  
CGCTGCTGGTAACGCTCGATGACCCGTCTGCCTTGCTGCGATCCTCGGCCCGCACCATCAGGGTCACT  
GCAACATGTGACCGGCAGTTTCGCAAGGGCGCCAGACAGCCCTCGCCATTGAGGGCGCACCAGCACTCC  
TTCCGCTCCAGCGCCCTTTCAACCGGTGCGCTCCAGGGTGTGTGAGGCGCGATAGAGATTGATCCAG  
TTATCCATAGCTCCCCCTTACAACAACCTGTGATGCCAACTCGGCGCCGTTCTCAATCATGAAATCGA  
TGAATGCCCCGCAACTTGCAGCGCATCAGTTGCCGCTCCGGAAACAGCAAAATAATCGGCACCCTGGGTTG

CTGCCACTCTGGCAGCAGGATCACCAATTCGCCGCTGGCCAGCTCATCCTGACAGAGCATAGCGGGTAAC  
GAGGCCAACCCAGCCCCGCTTCGCGGCCCTCCCGGGCACAGGTAATATTATTGACCCGAAAACGGGATG  
GGGGGTCAACCAGCACCTCTCTGCCATCCAGCTCGAAGCACCAGTGAGAGGCGAGAAACCCGCTGCTCAC  
CGTACCCCGCTCGTGGTTAGCCAGATCCTCCGGCCGCTCGATGACCCGACTACGGGCCAGATAGTCCGGG  
CTGGCACAGAGCAGCCTCCCGGTGCTCCAGAGTCGGCGCGCAGCCAGATTGGAGTCGCTCATGTCCGCAA  
TCCGCACCACCGCATCCAGCCCTTCGCTGATGGGATCTACCACCCGGTTGGTCAGCTCCAGCTCCACCTG  
CAGGGCGGGATAGGCCTGCAAAAACCTTGGCGACCAAGCGCCCGACCACCAGTTGCCCCGCTCTCGATAGGC  
ACCGCCAGTTTGAGGGTGCCGGTACCTCCTGTTGGCTGGCGCTCAGCATCAGCTCGGCTTCGGTCAGGG  
CATCGACCCGCTTGCTGCAGTGCAGGTAGTACTTCTCCCCCTCCTCGGTCAAAGTGAGCTGACGAGTGGA  
GCGATAGAGCAGACGCACTCCGAGCCGCTGTTCCAGCTCGGCGATGCGGCGGCTGACCATCGCCTTGGTC  
ATCCCCAGCTCGCGGGCAGCCCCCGTAAACGAGCCCTTGTGACGATACGCACCAGAAATTAACGCGGCAT  
TGAGATCCATTGTTGCACCAGTGAACCTGTATATCTCGTGAACCAATACTAATCGAAACAGTTGACCAGT  
GTTAGCCTGCGCCCCTTAAGTTCAGGAATCACAAAAATGAGTCAACACAAGAAAAATTCCCCTGCTGGCAG  
CCATGATATTGGCGCTGCTCGGTCTGCTGTTCCCGGTTACTGGTATCTTACGGCCGCTATTTTTGAAAG  
CACCGACAACGCCTATCTGCAAAAGTGAAGTGACCCGGGATCAGCTCCAAGCTGCCCGGCTATATCCGCGAA  
GTGCTGGTACCGACAACCAGCCGGTCAAAGCGGGCCAACCTGATCGCTCGGTCGATGATCGCGAATACA  
AAACCAGGGTCGCGGAGGCCGAAGCCGACCTGCGCCTCAATCAGGCGACGGCCGAAAAATTTGGCGGCCAC  
CCGCACCAACAACCTGAGCCTGATCCAGCAGGCCGAGGCCAAGGTCGCCTCCGCCAAGGCCGAACAGCTG  
CGCGCCAGCCAGCAGGTCAACCCGGATCAGTCAGCTCAACCAGCGCCACTACAGCTCGCAAGACAGTCTGG  
ACGAGGTGCGTGCCGGCCTGCAGGTCAATCAGGCGCAAGCCCGGAGGCCAAGCCGCCCTGCAAGCGGC  
CCGTGAGCGACTGCTGGTACTGGATGCCGAGCGCAAAACAGAATCTGGCCAAGCTGGCATTGAGCGAAGCG  
CAACTGGAGCAGGCCAAGCTGGAGCTAGGTTATACCGAGCTGCGGGCACCGGCCGATGGCATCATAGGCA  
AACGCAGCCTGCGGGAAGGGCTCTACGTCCAGTCCGGTATGCAGGTCGCCAGCCTGGTGCCGCTGCAGCA  
GGTGTGGGTCGAGGCCAACTTCAAGGAGACCCAGCTCGCCATATGCAGCCGGGCCAGAAGTTCGAAGTG  
GTAATCGATGCCTACCCGGATCAACCCGGTGAAGGGATCATAGACAGCCTGGCCCCGCGACCCGGCGCCA  
AGTTCGCCCTGCTGCCACCGGAGAATGCCACCGGCAACTTCAACAAAAATCGTGCAGCGGGTGCCGGTAAA  
GATCCGCATCCCCAGCCAGGTCCGCTGGCAGGTAAGCTGCTGCCGGGTCTCTCGACCGAAGTGATCGTG  
GATACCCGCACTCCAGATCCCGTGGTGGCTGCCAACTGATGGAACCCATTCACGTCGCAACTGGGATCG  
GGTATCGGGGGCCCTTATCGGTGCCCTTCATGCCACTCCTCGATATCCAGATCACCATGCATCCCTGAAG  
GATATTCAGGGTGCCCTGTGCGCCACCCTGAGCGAAAGCTCCTGGATCTCCACCTCCTATCTGGTGGCGG  
AGATGATCGCCATCCCCCTGAGCGGCTGGTTGAGCCGGGGTTGAGCGTGCGCCGCTACCTGCTCTGGAC  
CACTGGTGCCCTTATCGCCGCTCCGTGCTCTGCTCGTTTACGCTGGAACCTCACCAGCATGATCGTCTTC  
CGGGCGCTGCAGGGCTTACCGGCGGGGCGCTGATCCCGATGGCCTTCTCCCTCATCGTACCCCTGTTGC  
CGCTACAAAAGCGGGCCACCGGCATGGCGCTGTTTGGCCTCTGCGCCACTTTCGCCCCCGCCATCGGTCC  
GACCCTCGGCGGCTGGCTCACCGAGCAGATGTCTGGCACTACATCTTCTATCTCAACGTGCCGCCGGGA  
CTGCTGGTGTATGGCCATGCTGGCCACGGGCTGGATAAAAAACCGGTGGACTGGGCCGTGATCAAGCGGG  
TAGACCTCATCGGGATTGTCACCATGGCGCTCGGCCCTCGGCTTGTGGAGGTGGTACTGGAAGAGGGCAA  
CCGGGAGGACTGGTTCCGGTTCAAGCTTCATCGTGCAGCTGGCGGTCATCTCGGCGGTGGCGCTGGTGTTC  
TTCGTATCAGCCAGCTGATCCGCCGTACCCCGCTGGTCAATCTGCGGCTGCTGCACAACCCGCGCTTCG  
CACTGGCCTGCTTTCGCTATCTGATCCTCGGCATGGCGTTGATGGGATCAATCTATGTACTGCCACTCTA  
CATGACCCAGATCCACAACCTACAACGCGCTGGAGATCGGCGAAGTCTGATGTGGATGGGGCTGCCGCAA  
CTGCTGGTGTACCGCTGGTGCCTTATGAATGTCAACATGAGTGCCGACTACGCCGGGCCGAGCTGAT  
CCATTTCGCTCATCGTGCAGGGCGCTGGGGCAGCCTTTCATCATGGTGCCGCTCTCCCTGGTTCGCTACCGCC  
AGCCTGAGCCACGAGATCCCCCTCCTCCTCGACGCTGCTCAACGTGCTGCGCAACCTCGGTGGTGCCT  
TCGGTATCGCCATCATCGGACCTGCTCGACAACGATAACCCGACCCATGTGCTGCAAAATGGCAGCAC  
TCTGGCCGCAAGCAGTATCGAGGGGCAGAGCTATCTGCTGCAGCTGGCCAGAGCATGATGGCGCAGGGT  
TCAGGCCCCGAGATAGCCAGCAGCAAGCCACGCCATGCTGGCCAATACTATCAACCGGGAAGCGGCCA  
TCATGGCCTACAACCAGGTGTTCTACATCATGGGGATCTTCTTGCTGATCGCCAGCGGCTGATGTTGTT  
GCTCAAATCCCCCGCCCCCGGGCAGCGGATGCCGAACCGCTAGAGGCGTGAAAAACGCCGGGCATAAAA  
ACGAAAAACGGGCCAATGCCCGTTTTTTCGTTATCTGTTACCTGCACTCAACCAGAAAGCGTTATCCCGCC  
AGCGACCCTGCAATCAGGAATTGTGCTGCGAAGTAGCTACTCATCACCCAGGCGGGGCGTGGGGAAAGG  
GGCGGGGAAGCGATCGAGCGCCAGCATGCTGTGCGAGAAGAGGAACATCAGCGCCCCACCAGAGCGGC  
GGCAGAACCAGGAGTGCAGAGAGGCGTCCAGGCACCGGCAGCCACCAGGCCATGCCGATGATACCAGC  
ATGTAGCAGAAGACCGGGATCCGCATCTCCCCAGCTTGGCCACAGCAGACCAAAGACCATGCCGGCGA  
TCAGCAACAGCAGCAAACCATCCACCAGATTGAGCAACAACGGCCCTTGGGGCAAACCGACGATATAGCA  
GAGATGCGCGACAAGAAATGCCGCCAACCCCTGAATGAAGCGATCGCTTGGCAGCATCAGCAGCACATCG  
CCCGCCAGCGAAAGGCAGAGGCCAAGCAGGATCCAGGCGTGTGAGCCATCGTGGTCATAACTCTGGTAGC  
CGAATGCCAACGCGATGATAAGCAACATGGTCAGCGGCTTGTGATATAGAACTGGCGGCTGTCTGGACC  
GTAGGCCGACGGATGTGCCACCAACCTGAAGCGATGATCAAGAAACTCAATAACATGCCCTGCTCCTCA  
CCTGTTGCTCGCAGTCATACGGCAACCGTTTTTATCATGGTGCAGGGTAACAAAATTCCTCCCCAGTGG

CAGGGGTGCTTATCAAATGGGCAGGCTAAGCCTAAAGTCTAATTGCCGCACCGAGTGGTTCAGGGCATAA  
GTAACGGGTCTGGAGGATCACCATGGAAGAAGCTATGAAGAACTATCTGCCCGCCATCGATATCATGATG  
TGCCATCTGGGGATCAGCTTTGAGCAGGCCTGTGAACAACCTGGGTCTTAGCCAGCAGGAGCAACAGGCGC  
TGGATCAGTTGCAGCAACAGCAGAGCCAAGCCAACCTAAGCCCTCTAGTTATTGGATATCATGATGCGCTA  
TCTGGGGATCAGCTTTGAGCAGGCCTGCGAACAACCTGGGTCTCAGCCAGCAGGAGCAACAGGCACTGGAT  
CAGTTGCAGCAACAGCAGAGCCAAACCAACTAGCCCCGTTCAAACACGCATACCAAAGAGAAGACCGCCAG  
CAGGCGGTCTTCTCTTTTAGTCTCTGTGATAACCGGGCGGCATCATGCAATACCTGCCAGCAGGCGACTC  
CAGTTGCGTTTACCTGCGATAAAGCCGTCCCGCAGTGCCCGATACTCCAGTTGCAGCTTGAGGCGGTTCAT  
AGCGCGCCAGCGCCTTGCGCTTGCGCAGCTCCAGCAGCCGCTTGCGACTGGCGTAATAGTGTGCAACTG  
CTGGCTCAGCTTGTCTGACTCCTCCTGCGCAGCGCCTGCCACAGTTGCGGATCTTCTGCTTGCGCAAC  
TTGGCTTGTGCCCGTTTCAGCTGCATCTGCAGCCGGGCTGCTCGATACGCTCCTCCGGCGAAGATCTGA  
GATCTCCCGCCAGACCGCACCAGGAGGCGAGCCGGATCAACCACTTGGTTCGGATCGAATGCCACCAGTG  
AATGCCGTTGCGGTAGTCATTCTCGAACAGGTGGTGAAAGTTGTGGTACCCCTCGCCAAAGGTGAAAAAA  
GCCAGGATGCCGTTATCGCGAGCGGTATTGCGGTTCGGTATAAAGGCTGACTGCCCCAGATGTGGGCCAGCG  
AGTTGATGAAGAAGGTGGTGTGGTGTGAGTCATCACCATCCTCAGCACGCCCGCCAAACAGCAACATGCCGAG  
CAAGTCCCCATGCCACAGGCCAAGCAGCAGCGGCAACCCCAAGATTGGCCGCCAACGCCAACGTGAGATAG  
TGACGGTGCTGAAACGCGACCACCGGGTTATTCTGCAGGTCACGCACATTGCTGTAATCACCATAGCGAT  
CTCCTTGATGCTCCCGCAACATCCAGCCGATGTGGGAATACCAGAAGCCGCGCCCCGCGCTGTAGGGGTC  
TTTATCGTTGTTCATCCACATGACGATGATGACGTCGGTGTATCGGCCAGCAGTGCAGGGCCGAATTCTGA  
AGCGCCAACGCACCGCCGATGGCAAACAACCACTGCAAAGCGGGGTGCGCCTTGTAGGCTTGTGCGACC  
AGAGCCGGTGATAGCCTGCGGTGATGGATAGACCACTCAGGCAGAATAACAACAGGAAACTGGCCCACTG  
CCAGAGATCGTAACCGTGGCTCATGCCGTACCAGGGTACGACAATCAACGCCACTATCCCGGAGAGGGAA  
AACAGCAGGGTATTGGTCAAAAATAATCGGGGGTCTGGCCATCTCATTGCATCCTTTTCAGCGAACAGCTGT  
TAGCCATTTTCTATGGTGATTTCTCCTCACGGTCAATGGTAAAAAAGTAGGATACAAAACCTGATCCTGAGGC  
GCCTTCGGGTATCATTGTCTCGTTAAGCTGAAGGTGACTGATTTTCGTGGGTATTTCGCGCTCAACAAA  
AAGAAAAAACCCGGCGTACATTGATCGATGCTGCATTCAGCCAACCTGTGCGCCAATCGGAGTTTCTCCAA  
TCTCAGCCTGCGGGAAGTTCGCTCGTGAAGCGGGCATCGCCCCAACCTCTTTCTATCGCCACTTTTCGCGAC  
ATGGAGGAGCTGGGCTGACCTGGTTGACGAAGGAGGTTTACCTGCGCCAACCTGATGCGCAGCGCAC  
GCCAGCGCATTGCCGTTGGTGGCAGTGTCTCAGCACTTCGGTGCAGACCTTTATGGAGTTTCGTGAGAA  
CAACCCCAACATCTTTTCGGCTGCTGCTACGGGAACGCTCCGGCACCTCGGCGCCTTTTCGTAGGCGGTG  
GCTCGCGAAATCCAGCACTTTATCGCAGAGCTGACCGATTATCTGGAAGCCACCACCGAAGCACCACGGG  
AAGATGCCTACATCCAGGCAGAAGCCATGGTACCATCGTCTTCAGTGCCGGTGCCGATGCACTCGACAT  
GACCAGCGAAGAGTGCCGTGCACTCTCCGACCGAACAATTCGCCAACTGCGGATGATCGCCATGGGCGCC  
GAGGTACAAAACCAGAAGCGCCGTGAACCTCACCCATGACCACAGGATGGAGAACGATATGACTGAACAG  
CTTATGATCCCGAAAAAACCGCTCGCCATGGCCATGCTGATTGGTATCTGTGGCGATGCCTCTCTGGCCG  
TGCTGACCAACTCGGTTGTGCTTTCTCCTTCTTCCGCTGATTGCCCTCTGGTTGGCGCCTATCAGCT  
GTTCCAGCACTATCGCCATGAACCCATGGTGGGCAACACCCCTATCTGCACCCTGCTCTGCTTCTTTATC  
GGTGTCTTCGGCCACTCCGCGCTGCTCAAAGTGAATACCCGGAGCTTGGCAGCAACTTCTTCTCCCTGA  
TCATGATGCTGCTGCTACTGGCAGCCCTCTCCATCAAGCTCGGCCTGAGCATTGGCAACAAAGAGAAGCC  
CTGATAGATCGACCGAGTGATGGTAATCAGCTGATAGATAAAGCAAAGAGGCCCTTCCCGTCTGGAAGGCC  
TCTTTGCTTGAACGGTACCTGATTAATCCTGCAATCTCGGTATTCCCAACCTAGCCAAGCTGCTGGCCTT  
CAAGATCGACGTGCAAATGGAAGAGGGGGGTGGTCAATATGGAACCTGCCCTGTAGTCAGCAAGCTCAGCA  
AGCGGCAGAAGGCTGATTTGACCACCTGCAGGGTCGTTCAAATTCGTGTGAATGAACTGATAGGGCTCG  
GATATAGCCAGAAAATGATGGAATAAAGTGGCTATCTAGCACTCTTACTTGGCAGGAAAAGCCAGATAT  
TGGTGGTTTAAACGCGCTAAAAATACAAAAGCCCGGTGCTGAAGCCGGGTTTTTGTATTCTGTTCTGGTATG  
CAAACCTGTGGGCTTATGGGCAAAAACCGCCCATAGAAAAAAGGCCTTCCCACATGGGAAGGCCTTAAA  
ATTAGTGGCGGAGCGGACGGGACTCGAACCAGGACCCCGCGGCTGACAGGCGGTTATTCTAACCGACTG  
AACTACCGCTCCGCATTTCGGTTAGCTTGCCTAAATTTGTTTGGCGCTCAGTGAGGTGTCTCCTCGCAG  
CCAGTGATGTGATTTTTACATCGCTGTTTAATTTGGGTGCCTGGCAGTGCTCTACTCTCGCATGGCGAAT  
GCCACACTACCATCGGCGCTACCGGTTTCACTTCTGAGTTTCGGCATGGGATCAGGTGGTTCCACGGCGC  
TATGGCCGCCAGGCAAATTTCAATCTGAGAAAGCTGACGTAAGTAATTCGTTTCGTATTTGCTACAAGC  
CTTAGAACACTTCTTGGGTGTTGTATGGTTAAGCCTCACGGGTAATTAGTATGGGTTAGCTCAACACGTC  
GCCGCGCTTACACACCCACCTATCAACGTTGTGGTCTCCAACGGCCCTTTAGGACCCTCAAGGGGTCAG  
GGATGACTCATCTCAGGGCTCGCTTCCCGCTTAGATGCTTTCAGCGTTATCGATTCCGAACCTTAGCTAC  
CGGGCAGTGCCACTGGCGTGACAACCCGAACACCAGAGGTTTCGTTCACTCCGGTCTCTCGTACTAGGAG  
CAACTCCCTTCAATCATCCAACGCCCACGGCAGATAGGGACCGAAGTGTCTCACGACGTTCTGAACCCAG  
CTCGCGTACCCTTTAAATGGCGAACAGCCATACCCTTGGGACCGACTTCAGCCCCAGGATGTGATGAGC  
CGACATCGAGGTGCCAAACACCGCCGTGATATGAACTCTTGGGCGGTATCAGCCTGTTATCCCCGGAGT  
ACCTTTTATCCGTTGAGCGATGGCCCTTCCATTCAGAACCACCGGATCACTATGACCTACTTTTCGTACCT  
GCTCGACCTGTCCGTCTCGCAGTTAAGCTGGCTTATGCCATTCGACTAACCTCCTGATGTCCGACCAGGA  
TTAGCCAACCTTCGTGCTCCTCCGTTACTCTTTGGGAGGAGACCGCCCCAGTCAAACCTACCACAGGCA

CTGTCCGCGAGCCCCGATTACAGGGCCCTGCGTTAGAACATCAAACATACAAGGGTGGTATTTCAAGGACGG  
CTCCAGCGCAACTGGCGTCACGCCTTCAAAGCCTCCCACCTATCCTACACATGTAGGTTCAATGTTTCAAGT  
GCCAAGCTGTAGTAAAGGTTACAGGGGCTTTTCCGCTTAGCCGCGGGTACACCGCATCTTACAGGCGAAT  
TCGATTTCACTGAGTCTCGGGTGGAGACAGCATGGCCATGGTTACACCATTCGTGCAGGTCGGAACCTTAC  
CCGACAAGGAATTTTCGCTACCTTAGGACCGTTATAGTTACGGCCCGCTTTACCGGGGCTTCGATCAAGA  
GCTTCGCTTTCGCTAACCCCATCAATTAACCTTCCGGCACCAGGGCAGGTGTCACACCCATACGTCCACT  
TTCGTGTTTGCAGAGTGTGTGTTTTGATAAACAGTCCCAGCCATCTGGTCACTGCGACTCCCAACTGC  
TCCATCCGCAAGGGACTTCACTGTCAAGAGCGAACCTTCTCCGAAAGTTACGGTTCTATTTTGCCTAGTT  
CCTTACCCGAGTTCTCTCAAGCGCCTTGGTATTCTTACCCGACCACCTGTGTGCGTTTTGGGGTACGAT  
GACTTGTAACTCTGAAGCTTAGAGGCTTTTCTGGAAGCAGGGCATCAATGGCTTCCACACCGTAGTGTGT  
TCGTCTCGTGTCTCAGTGTGTGTCTCCGGATTTGCTTAGAAACACCACCTACGCACCTTTCACAGGACA  
ACCGTCGCCTGGCCACCTAGCCTTCTCCGTCGCCCATCGCAATTACAAGTCTGTGCAGGAATATTAACC  
TGCTTCCCATCGACTACGCCTTTTCGGCCTCGCCTTAGGGGTCGACTCACCTGCCCCGATTAACGTTGGA  
CAGGAACCCCTTGGTCTTCCGGCAGAGGAGCTTTTTACCCCCCTTTATCGTTACTTACGTACAGATTTCGCAC  
TTCTGATATCTCCAGCATACTCTCGATACACCTTCGCAGACTTACAGAACGCTCCCCTACCCTCACAC  
ATAAGTGTGAATCCGCGGCTTCGGTGCCTGGTTTTGAGCCCCGTTACATCTTCCGCGCAGGCGACTCGAC  
TAGTGAGCTATTACGCTTTCTTTAAATGATGGCTGCTTCTAAGCCAACATCCTAGCTGTCTGAGCCTTCC  
CACATCGTTTTCCACTTAACCAGAACTTTGGGACCTTAGCCGGCGGTCTGGGTTGTTTTCCCTCTTCACGA  
CGGACGTTAGCACCCGCGGTGTGTCTCCGGATATTACTTACTGGTATTTCGGAGTTTGCATGGGGTTGGT  
AAGTCGGGATGACCCCTAGCCCAAACAGTGTCTACCCCAAGTAGTATTTCGTCCGAGGCGCTACCTAAA  
TAGCTTTCCGGGAGAACCAGCTATCTCCGAGTTTGATTGGCCTTTCACCCCAAGCCACAGGTCATCCCTT  
AACTTTGCAACGTTAGTGGGTTTCGGTCTCCAGTTGATGTTACTCAACCTTCAACCTGCCCCATGGCTAGA  
TCACCCGGTTTTCCGGTCTACACCTTGCAACTAGACGCCCAGTTAAGACTCGGTTTCCCTACGGCTCCCTT  
ATACGGTTAACCTCGCTACAAAATGTAAGTCGCTGACCCATTATACAAAAGGTACGCAGTCACCCCGAAG  
GGCTCCCACTGCTTGTACGTACACGGTTTTAGGTTCTATTTCACTCCCTCACAGGGGTTTTTTTCGCCT  
TTCCCTCACGGTACTGGTTCATATCGGTGAGTACAGGATTTAGCCTTGAGGATGGTCCCCCATAT  
TCAGACAGGATGTACGTTGTCGCTCCCGCCTACTCGATTTACATCAAGGTCGTTTTTCGTGTACGGGGCTATC  
ACCTGTATCGCCGCTTTCCAGGACCGTTCCACTAATTTCAAGATGCTTAAGGGCTAATCCCTGCTTTC  
GCTCGCCGCTACTGAGGGAATCTCGGTTGATTTCTTCTCCGCGGTACTTAGATGTTTTAGTCTTCCCT  
GTTTCGCTCTGTTACCTATGTATTAGTAACAGATACCCGAGTTATCTCGGGTGGGTTTTCCCATTCGGA  
AATCTGTGAGTAATAGCTCTCTTACCGACTTCTCACAGCTTATCGCAGGTTAGTACGTCTTTCATCGCC  
TCTGACTGCCAAGGCATCCACCATGTACGCTTAGTCACTTAACCATAACAACCCCAAGAAGTGTGTCGTA  
ACAACGCTTGCTTGTGTCGTACAACAAGGACCAATAAAATTTGGTTTTTCGCCAAGAAGTTTTCAAAGC  
ACTTGTAAACAATGTTTGAAGACTACTTTTTAAATCAGCTTTCCAGATTGTTAAAGAGCATGTTTTGCAAC  
GGCGCAAGGCCGAAGAAAACAGAGTTAAGAATCAGTTCTTAACTCTGCATTCTTGTAGCAAGAAGAGAA  
GTGGCGTCCCCTAGGGGATTGAAACCCCTGTTACCGCCGTGAAAGGGCGGTGTCCTAGGCCTCTAGACGA  
AGGGGACCCAAAATCATCTTTGCGCTGCGTCAGCAGTGCAGATTTTGGGTAATGGCGAGTGCAGGCTG  
CGAGGCCGAGCGCCATTATTACATCCCAAAACCAATGATAGGGCTTCTCTCATCTGACCGAAGCCAGA  
TAAGCACTGACACTTTTCGCATCAGGTCTTTGCTCTAACTACTTTGAATCAAGGCAATCTGTGTGAACACT  
CAACAACCTTGCACATCTTAAGGTAAGGAGGTGATCCAACCCCAAGGTTCCCTTAGGGTTACCTTGTTCAG  
CTTACCCCAAGTCATGAATCACACCGTGGTAAACGCCCTCCCGAAGGTTAAGCTATCTACTTCTGGTGA  
ACCCACTCCCATGGTGTGACGGGCGGTGTGTACAAGGCCCGGGAACGTATTCACCGCAACATTTCTGATTT  
GCGATTACTAGCGATTCCGACTTACGGAGTGCAGTTGCAGACTCCGATCCGGACTACGACGCGCTTTTT  
GGGATTCGCTCACTATCGCTAGCTTGCAGCCCTCTGTACGCGCCATTGTAGCACGTGTGTAGCCCTGGCC  
GTAAGGGCCATGATGACTTGACGTCACTCCCAACCCCTTCTCCGTTTTATCACCGGCACTTCCCTTGA  
CCCACCTTACGTGCTGGCAACAAGGACAGGGGTTGCGCTCGTTGCGGGACTTAACCCAAACATCTCAG  
ACACGAGCTGACGACAGCCATGCAGCACCTGTGTTCTGATTCCCGAAGGCACTCCCGTATCTCTACAGGA  
TTCCAGACATGTCAAGGCCAGGTAAGGTTCTTTCGCGTTGCATCGAATTAACCCACATGCTCCACCGCTTG  
TGCGGGCCCCGTCATTTCAATTTGAGTTTTAACTTTCGCGCCGTTACTCCCCAGGCGGTGATTTAACGCG  
TTAGCTCCGGAAGCCACGTCTCAAGGACACAGCCTCCAAAATCGACATCGTTTACGGCGTGGACTACCAGG  
GTATCTAATCCTGTTTGTCTCCACGCTTTTCGCACCTGAGCGTCACTTGTCCAGGGGGCCGCTTTCG  
CCACCGGATTTCTCCAGATCTCTACGATTTACCGCTACACCTGGAAATTTACCCCTCTACAAGAC  
TCTAGCCGGACAGTTTTAAATGCAATTTCCAGGTTGAGCCGGGGCTTTCACATCTAACTTATCCAACCG  
CCTGCGTGCCTTTACGCCAGTAATTCGATTAACGCTTGCACCTCCGTTATTACCGCGGCTGCTGGCA  
CGGAGTTAGCCGGTGTCTTCTTTCGCGAGTAACGTACAGCTGGCAGTTATTAGCTACCAACCTTTCCCTC  
TCGCTGAAAGTGCTTTACAACCCGAAGGCTTCTTTCACACACGCGGCATGGCTGCATCAGGGTTTTCCCC  
ATTTGTGCAATATTTCCCACTGCTGCCTCCCGTAGGAGTCTGGACCGTGTCTCAGTTCCAGTGTGGCTGAT  
CATCCTCTCAGACCAGCTAGGGATCGTGCCTTGGTGGACCTTACCTCACCAACTAGCTAATCCCACT  
GGGTTTCAATCAATCGCGCAAGGCCCGAAGGTTCCCTGCTTTCCCGTAGGGCGTATGCGGTATTAGCTA  
CCGTTTTCCAGTAGTTATCCCTCAGACTGGGCAGATCCCAGGCATTACTCACCCGTCGCGCTCGCCG  
GCAAAAGTAGCAAGCTACTTTCCCGCTGCCGCTGCACTGCATGTGTTAGGCTGCCGCCAGCGTTCAAT

CTGAGCCATGATCAAACCTCTTCAATTTAAGTTTGGTTGCTTCGAAAAGCGGCTCAATGAATTGCTGAAAT  
AAACTGTTTCGACTTCTTATTGCTAAGAAATCGTCTTGGTCACTTCACCAGACATTGAAAATCAAAAATTG  
TTTTGATGTTTCGATGCTGTGAGTGCCACACAGATTGCTTGATTCAAATGTTAAAGAGCGACGCAACAG  
TGTGTTGCTGCGGGAGTGAATTTCTACTCAACCGCTTCTCGAGTCAAGCCTTATTTTTCAAAGGCTTTTC  
GAGGTTATCGACTTGGCTTTCTGCGTTGCCGCTTGCCTGTGCGATGGAGGCGCATTATAGGGAACAGATT  
CTTTCTGGCAAGCAGATTATTGCAAAAAGATGGCTTTTCGCTGCTTGTTCGCTCACAAAAGCCACCAATTGG  
CATATTAACCGGCGAAATCAGCTCACCGCAGGTACCGCAACGGCAAAATCGTGCGAGATTGTTCATAGAGA  
GCGTCGGCCAGCCACTACCCGTTTCCGGTACCAGGCTTGCAGGTTCTGACCATAATCTTGTGACCAACCC  
CGGCATTGATGGCAGCTTTCAGATCAGAGGGCTTGTCACCCACCATATAGGAACGACTCATGTTCGATCCC  
CAGTTCCTGTTGCGCAACAGCAGCATGCCTGGCTCCGGTTTGCAGCAATCACAGGGGGCGCCGTGATCC  
GGATGATGGGGCCAGAAGTAGATGCCATCGAGTCCACATCCCGATCCCGATCAGCCAGTGACCAATCCATCCATT  
CAGTCAGATTTCATGAAGTTCATCTTCACTGAAGTAGCCGCGGGCGATTCCGGACTGGTTAGTACGACGAC  
CAGCAGATAGCCTTTCTTTTTGAGGAGCTTACAGGCGTCTATGACTCCGGGCAGAAAATGGAATCATCG  
ACCTGACTGACATAGCCAGTGTCTTTCATTGATGACACCGTTCACGATCCAGAAAATGGCGGGGTTGCTCA  
CGAAAACCTCTATCAATGGTTTTGCCCAGTATCTCACAGGCCATAAATAGCCCCAAAAATAAAAGGG  
GTGGCCGAAGCCACCCCTTTTCATGTTTTGTATATAACGAATCGATTAGGCGATTACGCTGGCTACAACAC  
CAGCACCTACGGTACGGCCACCTTACGGATAGCGAAAACGCAGGCGTCCGTCATTGCGATCGGAGCAAT  
CAGGGTAACAACCATCTTGTGTTGTCGCCCCGATACCATCTCTACGCTTCCGGCAGTTCGATGGTA  
CCGGTACGCTCGGTTGTACGGAAGTAGAACTGCGGACGGTAGCCTTTGAAGAACGGGGTATGACGACCAC  
CTTCTTCTTTGGACAGTACGTACACTTCAGATTTCGAAGTTGGTGTGCGGCTTGTATAGAACCAGGCTTGGC  
CAGTACCTGACCACGCTCTACGTCTTACGCTTAACACCACGCAGCAGCGCGCCGATGTTCTCGCCTGCA  
CGACCTTCGTCCAGCAGTTTTCGCGAACAATTTCTACACCGGTACAGGTGGTAGAAACGGTATCTTTGATAC  
CAACGATTTCTACGGTCTCACCTACTTTAACGATACCGCGCTTACACGACCGGTAACCTACGGTACCAG  
GCCAGCGATAGAGAATACGTCTTCGATAGGCATCAGGAACGGCTGGTCAATCGCGCGCTCCGGCTCCGGG  
ATGTAGGTATCCAGGTGGCCAGCCAGCTCGATGATCTTCTTCCCCTGAGCGTCGCCCTCCAGCGCTT  
TCAGTGCAGAACACGAACCTACCGCAGGTTCATCACCCGGGAAGTCGTAATCGGTCAGCAGTTCACGAAC  
TTCCATCTCTACCAAGTTCGAGCAGCTCTTTCGTATCAACCATGTACACTTGTTCATGAACACGATCATG  
TACGGGATACCAACCTGACGACCCAGCAGCATGTCTCAGAGTCTGCGGCATCGGGCCAGTCCAGTCCGCTG  
CTACTACCAGGATCGCGCCCTCCATCTGGGCAGCACCAGGTCATGATGTTTTTAACTAGTTCGCGCTGACC  
CGGGCAATCTACGTGGGCGTAGTGACGGGTAGCGGTGTCGATTTCTACGTGGGAGGTGTTGATGGTGATA  
CCACGCTCACGCTCTTCCGGTGCCTTGTGCGATCTGGTTCGAAGGCAAAAAGCTTTACCACCGAAGTGCCTGG  
CCAGCACGTTGGTGATAGCTGCAGTCAGGGTGGTTTTACCCTGGTCAACGTGGCCGATGGTGCCGACGTT  
TACGTGCGGTTTTATTACGCTCAAATTTTTCTTTAGACACGACGTAGTCCCTTCTAGGTTAAACCCGCTAC  
CGTTCGTAGGCGGGGAATCTTAAATTACTTGGATTTGCGCTCTTCGATCACGGCTTGTGCAACGTTGGTCC  
GTGCATCGTGATACTTGGCGAATTCATGGCGTAGGAAGCACGACCCTGGGTAGCGGAACGCAGTGCAGT  
TGCATAACCGAACATTTCCGCCAGCGGCACCAGAGCACGTACGATCTTCCCGGACGGGCCATCTTCCATA  
CCTTCGATCAGGCCACGACGACGGTTCAGGTACCGGATAACGTCGCCCATGTAATCTTCCGGAGTTTTCAA  
CTTCTACTTTTCATGATCGGTTTCGAGCAGAACCAGGTTGGCTTTTCATGAAGCCAGCTTAAAGGCCATGGA  
AGCAGCGATTTTGAACGCCAGTTCGGAAGAGTTCGACATCGTGGTAAGAACCAGGAGTGCAGACGCACACCC  
AGATCCATAACCGGGTAACCAGCCAGCGGACCAGATTTGAGCTGCTCACGGATACCTTTTATCAACACCCG  
GGATGAATTCACCAGGAATGACACCACCTTTGATGTCGTTGACGAATTCGTAGGCTTTGCCTTCTTCCAG  
CGGGTACATGTCGATAACAACATGACCGTACTGACCGCGACCACCAGACTGCTTGGCATGCTTGCCTTCG  
ATGTCTTTAACGGTGGTACGGATGGTTTTACGGTAGGCAACCTGCGGCTTACCTACGTTGGCTTCAACCT  
TGAACCTCGCGACGCATACGGTCAACGATGATGTCCAGGTGCAGCTCACCCATACCAGCGATGATGGTTG  
ACCTGACTCTTTCGTAGTCCATACGCGGAAGGACGGATCTTCTGAGCCAGACGGCCAGTGCCAGACCC  
ATCTTCTCCTGGTCAGCCTTGGTTTTTCGGCTCAACCCGATAGAAAATTACCAGGCTCCGGGAATTCATAC  
GCTCGAGGATGATCGGTCGTTTCGGGTACACAGGGTGTACCAGTGGTACGCTCTTTCAGACCGATAGC  
AGCAGCGATGTCACCAGCGCTACTTCTTTGATCTCTTTCAGCTTGTGGCATGCATCTGAACGATACGG  
CCAAAACGCTCGCGCTTGTCTTACGGAGTTCAGCACGGTGTACCAGGAGTTGATCACGCCAGAGTAGA  
CACGGAAGAAGGTACGGTTACCAACGAACGGGTCCGGTAGCGATCTTGAACGCCAGAGCAGAGAACGGCTC  
GTCATCGGAAGCGTACGCTCGTCTTTGGTCTCGCCGTCATTTTCAGGCCGTCGATAGCAGCAACGTCG  
GTCGGAGCCGGCAGGTACTCGATCACGGCATCCAGCATGCTGTACGCCCTTGTCTTGAACCGGGAGC  
CACAGGTTACCAGGATGATTTTCGTTGTTTCAGCACGCGTGCAGCAGAGCACCTTTGATCTCTTCTCGGT  
CAGCTCTTCGCCGCCAAGTATTTTTCCATCAGGTCTTCAGACGCTTCTGCAGCGGCTTCAACCAGATTTC  
ATGCGCATTTCTTGCCTGTTCCAGCAACTCGGCCGGGACGCTTTCGTAATCGAAGGATACGCCCTGAT  
CAGCTTCATTCCAGTTGATGGCTTTTCATCTTGACCAGGTCAACAACGCCCTTGAAGTTCTTTCGGCGCC  
GATGTTTCAGCTGAAGGGGAACCGGAGTACCTTTTCAGACGGGCTTGTGATGTGCTCAACGCAACGCAGGAAG  
TTGGCGCCGGTACGGTCCATCTTGTGTTGACGAACCGGATACGGGGAACCTTGTACTTGTAGCCTGACGCC  
ATACGGTTTCAGACTGTGGCTGTACGCCACCTACGGCACAGTACCCATCACGGCACCGTCCAGAACACG  
CATTGAACGCTCTACTTCGATAGTAAAGTCAACGTGGCCCGGGGATCGATGATGTTGATACGGTGGGTT  
TGAACTGTTTACCATAACCGGACCAGAAAAGCGGTGGTTCGCGCGGAGGTGATGGTGATACCACGCTCTT

GTTCTGTTCATCCAGTCCATGGTGGCAGCGCCATCGTGAACCTCACCGATCTTGTGACTTACACCGGT  
GTAAAACAGTACGCGCTCGGTAGTAGTAGTCTTACCGGCGTCAATGTGAGCGGAGATACCGATGTTACGA  
TAACGCTCAATGGGGGTTGTACGAGCCATTGTCATCCTCTTACTAAGGCGCTTGTCCCTAGATAAATAAA  
GGTGCAGAGTCAAAAGACCCTGCGCAAGCGGATTACCAGCGGAAGTGAGCGAAGGCTTTGTTCCGCTTC  
AGCCATACGGTGAACGTCTTACAGTTTCTTGCAGACGAAACCCTTATTGTCAGCGGCATCCAGCAGCTCG  
CCAGCCAGACGCTGAGCCATTGATTTTTTACCACGTTTACGAGCGGCATCAACCAACCAGCGCATTGCCA  
GGGCAATTGCGACGTACCGGACGAACTTACCAGGACCTGATAGGTTGCACCACCGACGCGACGAGATTT  
AACCTCGACCGCCGGACGAATGTTATCCAGAGCTTCTTGAATACGGCCAGGTGCTCTTTGCCAGATTTG  
GTGGCAATGATGTCCAGGGCGCCATAAAACAATGGCTTCTGCAACAGATTTCTTACCCTCAACCATTACTA  
CGTTGACAAATTTAGCCAGCAGCTCTGATCCGAATTTGGGATCTGGCAGGATTTTACGCTGACCAACA  
ACGACGCTTTGGCATTTCAAATTTCTCCGTAACCTCAGGATTTACCCAAAACCTAGAAAGCTATCTAAC  
AAACGAATTAACGTTTGGCCTTACTTAAACGGAGAACCATTAAAGCTTTAGGACGCTTACGCCATACTTGG  
AGCGAGCTGCTTACGGTCTTTAACACCGGCACAGTCCAACGCACCACGAACGGTGTGATAACGAACACC  
TGGCAAGTCTTTTACACGACCGCCACGGATCAGAACAACAGAGTGTCTTGCAGGTTGTGACCTTACC  
CCGATGTAGGAGGTGACTTGAAGCCGTTGGTCAGACGTACACGGCACACTTACGCAGTGCAGAGTTAG  
GCTTCTTCCGGGTGGTGGTATATACAGAGTGCATACGCCACGCTTCTGAGGGCACGCTTCCAGCGCCGG  
CACGTTGCTTTTACAACGAGCTTGTGCGTGGCTTGCGAACCAACTGGTTAATAGTTGCCATCAAAGG  
CTCCTGATAATGACTTCATAAACGTGTGAAAATCTCCCCGCAGATACGGGGACGCGAAATTTTTATGCC  
CTGTTGTCTGGGGAGTCAAGATTTATACAATTTGCGTCACAAAAGGGCAATTCGGATCCGTTTGTCTTCA  
CAACATCGCCTTGAATTTTCTTGAATAATGCTGCTCAGCCACCCAGGTGCGCGGGGAACCTTTTTGCG  
CAATCAGTGCACCAGACCCGCCATATCGAGCACATTGCCACCCGATGCAGCAAACCGCGAGCTTGCAG  
ATCTTCTGCATCACATAAAGCGGGATACCCGCCAGCCGCGCGCTCCACTGGGGAGCCGATGCCGCAATC  
ACGGCATCCTGCATCAGTACCAGCTCATCTCGGGCTGAAGGTATGAGAGCGCCTCTGCCAGAGCCTGAC  
TCTGAAAGGGAGAGTTCAATATCAGATGCAACATGGAGACCTCAAAGCTGATGTGAGCCGAACATTTGTG  
CCCAGCGCCGAGCCAGTTCTTGGCGCGGCAGACTCTCGACGGGGATCAGCAGATCATCCACTGTCACGCC  
ACGCTCTGCCAGCGAGTACAGACAAACATAGACCTCTTCGATGTCTGATAGATTCCAGCATCTTGAAGGTG  
GGCGCGTAGTGGCGCTGCAAAATGGCGGCAGGCTGTGTTCTTGCAGCTGCAGCACGCCGTCGCCAA  
TCAGAAAGAGGGCCAGCTCATCGGTCATGGCCGAGGTGGCCAACAAGGCATCCAGTCTTCCCGCCAGC  
GGCATGGCCATGGGGACCACGACTGCATATAAAGCGATTTTCTTGTCTCATGACTCCCCCTAGAACTGAA  
CCAGTGCATCGGCGGTGAGCGCAGCCTCGGCCAACTGGCCACAGCCGCTCAGGCAAATGGCGCTTGCAG  
ATTGAAGTGCACCTGCCCTGCCCTTGGCCTCTGCTCATCGAGCACACCGCGCCGCATGGCGGCGGGC  
ACACAGACGTCGATACGGATCCCCTGCTCTTCTGCCAGCTCTCGCCACAGACGCACCAGGTGAGTCTCAT  
CGGATGCAGGCAGATGCAAACCGTTGCCGTTGCAGACCCCGTCTGATAGAAGAACAGGTGGGACAAGGT  
ATGTCCCTGCGCCAACAGGGTGGGGCAAACGATAGGCGGTGCTGGCCGATTTGGGTGCCATAGGCAGGC  
CCCCTGACCAGGATGGCAAACCTCAGACTCATAGCAGGACTCCTGTGCTGACCCGGTCTATTTTACGCCA  
AAAACAAAAAAGCCCTGCCAGGAGGGGCTTGATTGATCTGTTGATCAGAGATGGGCAATCGCCTCGAC  
CTCGACCAGCACATCTTTCGGCAGACGGGCCACCTCCACGCAGGAGCGGGCTGGTGTGCATCGCCAAAG  
TAGCGGGCATAGACCTGATTGAAGGCAACGAAGTTGTTTCATGTCACCTCAGGAAACAGGTGGTTTTGACCA  
CTTTGCTGGCATCGGCACCGGCAGCTTGAACACGGCGACCAGATTTCTTCATCACCCGTTTCGGCTGCTC  
TTCGATGCCGCCGGCCACGATCTCCATGGTGGCAGGATCGAGCGGGATCTGCCCGGAGGTGAAGATCATC  
TCGCCAACCTTGGTAGCCTGAACATACGGACCAATCGCGGCAGGCGCCTTGTCCGTTGCAATCACTTCTT  
TAGCCATTCTATCTATCCCCTTCTGGAATGAGTTACTCGTTCTCGTCTTACCCTGCTTGGCGTGTCCGAT  
GTAAAGATAAACGGTATGTTTTGAAATATTGAGTTTGTCCGCCACCAGATTGATCGAATCCTTGATGTGC  
AAAATGCCCTTCTCGAACAGCTGGGTACGATGAAGCGATTCTTGGCATTGTTGGCCACGGTGGGATCGC  
GGTTGATCTCGTCGATGGTGTATCCACCGTCTGGGCAACCAACTCTTCCACGCTATTGGCGAAGGTCTC  
TGGTACTGACGCGCCGCTGCTGGGGCGTCGGGAAAAATTCGGCCACGAACTCGTGGAAAGGCGCATTTG  
ATGTGCAGGTTGATGCAGATAAAGCCCCACTACTTGGCGCTCGCTGTTGCGAATGGCGATGGTGTCTGACT  
TCATCAGCGCGCCGGTACGGCTGCGAGCGAAATAGCTCTGGGTGTAATCCTGGCCGGTGTCTCTGATATC  
CTTGAGCATGCGCAGGGCGAGATCGGTGATGGGCGCCCCGAGGGTGCCTCCGGTATTGAAGCCGTTGGCG  
ATCTTGATCACCGACTCGTGCAGATTTTCCAGGGAGTGGAGTACCCTTCACAATGCTTGCCGAACAGCT  
CGGCCAAACCATCGATGAGCCCATCGTATGAGCGCAACAATTCCTGTCTTCATCTGTAAAAGTGGCGCT  
GATCAGCTGTTCTTCCGGAAGCATGGCTTCTCGATACCGACAGTCATGTTCTACCCTGTAATAACCAT  
TCAACTTTCCGAGTTTTAAATTCAGGGGAGTAAAGTCAACTTTTTTTGATTTTTTACTCTACAACCTT  
GCTCTGGATCATCTGAAACCCGCGCTGCGTCTACCTTTGCCGAGGAATTGGCCAACAAAAAGGGCTCCT  
TGAAGGAGCCCTTTTCAATCACGGATGACGAGTTACTCTTCTGTCGAAGCTACCAGGCTGCGTTACAGCAGAT  
CCGCCAGGTTCTGCTCCGCTTCATCAGCGGTACCTGCGGGGTACCAACAGCACGAGCTGCGGCAGCACG  
CTGGTTGATCCGGCTGTGGTGGTAGGCAAAGCCGGTACCAGCCGGGATCAGACGACCCACGATGACGTTT  
TCTTTCAGACCACGAGTTCATCACGCTTGCCACCTACGGCGGCTTCGGTTCAGAACCGGAGTGGTTTTCT  
GGAAGGAAGCCGCGGAGATGAAGGACTCGGTGCTCAGAGATGCCCTGGTAATACCCATCAGAACATGACG  
GTAGGTGCGAGGGTCTTGCCTCGGCAACCAGCTTACGGTTGGCAATCTTACACGAGCCACTTCAACC  
TGTTCCGCTTCGATCAGATCGGTATCGCCAGCGCTCAGGATCTCGCACTTGGCAGCATCTGACGAACGA

TGACTTCGATGTGCTTGTGCGTTGATCTTAACGCCTTGCAGACGGTAAACGTCCTGCACTTCGTTGGCGAT  
GTAGTTGGCGACCGGGCTGATACCGCGCAGACGCAGGATGTCGTGAGCAGACTCAGGACCGTCCGCCAGC  
ACTTCACCCCTTCTCAACTTTTTTCACCTTCGAACACGTTACAGTTACGCCACTTCGGAATCATCTCTTCGT  
AGACGTTGCCACCATCGGTTCGGGGTATGACCAGACGGCGTTTGCCCTGGTCTCTTTCCCGAAGGAGAT  
GGTACCGGAGATCTCGGCCAGAATTGCCGGTTCCTTCGGTTGACGTGCTTCGAACAGATCCGCAACGCGC  
GGCAGACCACCGGTGATGTCTTGGTACCGCCGGACTCTTGCGGGATACGCGCTACCGCGTCGCCACGC  
CCACGTTGGCACCATCTTCCAGGTTACGATCGCCTTGCCCGCAGGAAGTACTGGGCGGTACATCGGT  
ACCCGGGATCATCACGTCTTTGCCGTTACAGGTCGACCAGTTTAAACGGTTGGACGCATCTCTTTACCGGCG  
CTCGGACGCTCGTTGACGTCCAGTACGACGATAGAAGAGAGACCGGTCAGCTCGTCGGTCTGACGAGTGA  
TGGTACAGCCATCGATCATGTTGTTGAACTGCAGGCGACCTGCCACTTCGGTGTATCGGGTGGGTGTG  
CGGATCCCAGTTGGCAACGGTCTCGCCAGCGCTCACGGCCTGGCCATCCTTCACTTCCAGCACGGAACCG  
TAAGGCAGCTTGTGGCTTTCTTGGTACGGCCCATGTCGTCCATGATGGTCAGTTCCGGTAGAACGTGAGG  
TGATAACCAGTTTGTATCGCTGTTGTGAACGAACTTGGCGTTCTGACGCTTGATGGTACCGGTGTTCTT  
GACCTGGATGCTGCTTTCAGCAGCGGCACGAGATGCAGCACCACCGATGTGGAAAGTACGCATCGTCAGC  
TGGGTACCGGTTACCGATGGACTGGGCGGCATAACACCGACAGCCTCACCCCTGTTAACAGGTGAC  
CACGGGCCAGATCACGGCCGTAGCAGTGAGCACAGTTACCGAAGTCAGTTTACAGGTGATGGCAGAACG  
TACCTTACACGGTCAACGGAGTTACGCTCCAGCAGGTCACACAGCTGCTCATCGAGCAGGGTGTTCGGA  
GCAACCAGGATCTCGTCTCGGTACCGGCTTGTATGACATCTTCTGCCACCACAGACCCAGCACGCGCT  
CACGCAGCGGCTCGACCACGTCGCCACCCTCGATCAGCGGAGTCATCCACAGACCGTCGGTAGTGCCGCA  
ATCGTCTCGGTGATCACCATGTCTTGCGCCACGTCACCAGACGACGAGTCAGGTAACCGGAGTTCGCA  
GTCTTCAAGTGCAGTATCCGCCAGACCCTTACGAGCACCCTGGGTAGAGATAAAGTACTGCAGTACGTTCA  
GACCTTCGCGGAAGTTTCGCGATGATCGGGGTCTCGATGATGGAGCCATCCGGCTTGGCCATCAGGCCACG  
CATAACCGGCCAGCTGACGGATCTGGGCGGCGGAACCACGCGCACCAGAGTCGGCCATCATAAAGATGCTG  
TTGAACGAGGCTGCTCTTCTTCTTACCCAGCGAGTTGACGTTACGCTCTTTGGACAAGTTCTCCATCA  
TGGCCTTGGAGACGCGTTCGTTGGCGCTGGCCAGATATCGATAACCTTGTGTAACGCTCGCCCGCAGT  
TACCAGACCTGACAGGAACCTGGTCTCGGATCTCGGCAACTTCGGCTTCGGCTGCTGCGATGATGCTTTT  
TTGGCATCCGGGATGACCATGTATCGATACCAACCGAAGCACCGGACAGGGCCGCGTAGTGAAACCGG  
TATACATCAGTCAGTCAGCAAGATAACGGTGTCTTACAGCCCTGCTTGCATAGCAGGTTTTCAGCAG  
ACGGGAGATGAGCTTTTTGCCAGCGCTTGTGTGATACACACTTGATCCAGTTCTGCGGATGGCATTCC  
AGATCAGCCTGTTCTGACAGCAGTCAGCACCTTCGGCTCGTCGATCAGGGCGTATTCATGCCTTTCGGCA  
GGATCAGGCTCAGGATCGCACGACCAACGGTGGTGTCTTTCATCTCGGTGTGTTACGCAGAGAACCCTC  
TTCCTGACGCAGGATTTCCGGTAATGCGTACTTTACACAGCAGCATGCAGATCGGCCAGACCGGCGGATAT  
ACTTTCTCGGCTTCTTTCGGGCCGGCCAGCACCATACTTCGCCCTTTGGCGTTGATACGGGCACGGGTCA  
TGATGACAGACCAAGACCACGTCCTGAGAAGGAACGATGATCGGCTCACCGGATGCAGGGCAGAGGAT  
GTTGTTGGTAGACATCATCAGCGCACGCGCTTCCAGCTGGGCTTCCAGGGTCAGCGGTACGTGGACCGCC  
ATCTGGTCACCATCGAAGTCCGCGTTATACGCAGCACAACCAGCGGTCAGCTGGATTGCCTTACCTT  
CGACCAGAGTCGGTTTCAATGCCTGGATAACCCAGACGGTCAGAGTCGGTGCACGGTTCAACAGAACC  
GTGTTACAGGATCACTTCGTCCAGGATATCCCAAACGACAGCTTCTCGCGCTCCACCATCTTCTTGGCG  
GCCTTGATAGTGGTCGCCAGACCGCGGGTTTCCAGCTTGCATAGATGAACGGCTTGAACAGTTCCAGCG  
CCATCTTCTTCGGCAGACCGCACTGATGCAGACGCAGAGTCGGGCTACGGTGATAACCGAAGCAGCCGGA  
GTAGTCGACACGCTTACCGAGCAGGTTCTGACGGAAACGACCCTGCTTACCCCTGATCATGTCCGCCAAG  
GATTTACAGCGGGCGCTTGTGGAACCGGTGATGGCGGACCGCGACGGCCGTTATCCAGCAGCGCATCGA  
CGGACTCTTGCAGCATGCGCTTTTCGTTGCGCACGATGATGTCCGGAGCAGCCAGATCCAGCAGACGCTT  
CAAGCGGTTGTTACGGTTGATCACGCGACGGTACAGATCGTTACAGTCGGAAGTCGCGAAACGGCCCGC  
TCCAGCGGTACCAGCGGACGAGGTCGGCGGCAGCACAGGACGACTGTCATGATCATCCACTCCGGCT  
TGTGTCGGACTGCAGGAAAGCTTCCATCAGCTTCCAGCCTTGGTGGTCTTCTTGCCTTGGTCTCGGA  
GTTGGTTTGTATCCAGCTCCTCACGCATGGTTTTGACTTACCTTCCAGATCGATAGCGCGCAGCAATGCC  
AAGATTGCTTTCGGCACCCATCTTGGCGTCAAATTCGTCGCCCCACTCTTCCAGTGCATCCAGGTACTGCT  
CTTACAGAGAGCATCTGGCTGCGTTCGAGGTTGGTTCATGCCCGGCTCAATTACGACGAAAGATTTCGAAGTA  
GAGCACGCGCTCGATGTGCGCAGGGTCATGTCCAGCAGCAGACCGATACGGGACGGCAGGGACTTCAGG  
AACCAGATGTGGCAGTCGGGCTGGCCAGCTCGATGTGGCCATAACGCTCACGACGGACCTTGGTCTGGG  
TCACTTCAACGCCGCACTTCTCACAGATCACACCAGGTTTTCAGGCGCTTGTACTTGGCCACAGACA  
CTCGTAGTCTTACCGGTCCGAAGATGCGGGCGAGAACCAGACCATCACGCTCCGGCTTGAAGTCCGG  
TAGTTGATGGTCTCAGGCTTTTTGACCTCACCGAATGACCAGGAGCGGATCATGTCAGGAGAGGCCAGAC  
CGATCTTGATACTGTCAAACCTTTCGGTCTTGGTCTGAGCCTTCAAAAACCTGAGTAAGTCTTTCACGTG  
TTTTCCCTGTGAGGAGTCTAACCTCGGGCGCCCCGGCTGCCAAAACAGCGGGGCGCCACGTCATTTCTCG  
AACAATAAGAGCGGAGCTCTTACTCTTCGTCCAGCTCGATGTTGATACCCAGAGAGCGGATTTCTTTCAGC  
AATACGTTGAAGGATTTCGGGCATGCCCGGCTCCATACGGTGGTTCGCCATCCACGATGTTCTTATACATCT  
TGGTACGGCCATTACATCGTCAGACTTACGGTCAGCATTTCTTCGAGGGTATATGCCGCACCGTAAGC  
CTCCAGGGCCACACTTCCATCTCACGAAACGCTGACCACCGAACTGAGCCTTACCACCCAGCGGCTGC  
TGGGTAACCAGGCTGTAAGAACCGGTAGAACGCGGTCATCTTGTGTCGACCAAGTGGTTACGCTTGA



GCATGTACATGTAACCAACGGTTACTTTACGCTCGAAGCGGTTACCAGTACGGCCATCGAACAGATCAAT  
CTGACCCGGACTCTGGCAGATCGGCCAGCTTCAGCAGGGCTTTGATTTTCGCGCTCTTTGGCACCATCAAAC  
ACTGGAGTAGCGACCCGGCAGACCCCTTACGCAGGTTACCCACCAGGGTACGTACGTCTGTCAGACAGTT  
CGGCATGTTCACTTGCTGGGTGTCTTCTCGCCAGGTCATAGACCTGCTGCAGGAAGTTGCGCATCTC  
GTGCAGCTCGCGCTGCTCTTTGACCATGCGATCGATCTTCTCGCCGATACCCTTGGCCGCAAGGCCAGG  
TGAACTTCGAGGATCTGACCGATGTTTCATACGGGATGGTACGCCAACGGGTTTACGTACGATGTGACCG  
GACGGCCGAACTCGTCATGAGGCATATCCTCGACCGGACAGATCTTGGAGATAACACCCCTTGTACCGTG  
ACGGCCCGCCATCTTGTACCCGGCTGGATGCGACGCTTGACTGCCAGATAAACCTTACGATTTTTAGT  
ACGCCCGGTGCCAGATCATCACCTGGATAATCTTGCAGCCTTGTCTCGAATTTCTTGTGCAACTCGG  
CTTTACAGCTCAACGTGCTGTTTACGCGATCTGTTCCAGTTTCGGTCTGCTTGCCTTCGCTTCGATGGCCAG  
TTCAAACCACTTGGAGCGATCGAGCTTGTTCAGACGATCTTTCGCTGTACCGGGCCAGCAGCGAGTTG  
CGGGAGCGGCCGAAAATGCCGTCTTCCAGGATCTTGAACCTTTCGGTCAAGTCCCTTTCGCTTCCTTCA  
GTTGCATCTCTTCGATTTCTTTGGCGCGCTTGTCTTTTTCCACGCCATCGCGGGTAAAGACTTGCACGTC  
AACACCGGTACCGTACACACCGTTTCGGTACACGCAGGGAGGAGTCCCTTACATCGGACGCCTTCTCACCG  
AAGATGGCGCGCAGCAGCTTCTCTTCCGGCGTCAGCTGGGTTTACCTTTCGGGGTTACCTTACCGACCA  
GAATGTCGCCGCCCTTCACTTCCGCACCCACGTAGACGATAACCGGACTCGTCCAGTTTGGACAGAGCGGC  
TTCACCCACGTTCCGGATGTACAGCAGTATCTCTTCCGGACCCAGCTTGGTGTACGGGAGATAACAGGCC  
AGTTCTGGATATGGATGGTGGTACGGCGATCTTCTGAACAACACGCTCGTTCACCAGGATCGAGTCTT  
CGAAGTTGTAACCGTTCCACGGCATGAACGCGACGCGCATGTTCTGACCCAGCGCCAGTTACCCAAGTC  
GGTGGACGGGCCATCAGCCAGTACGTCGCCAGCCATCACCGGCTCACCAACATCAGCAAGGACGCTGG  
TTGATACAGGTGTTCTGGTTGGAACGGGTGTATTTGGTCAGGTTGTAGATGTCGATACCGGCTTCGCCTG  
GCATCAGCTCATCTTCATTGACCTTTCAGGACGATAACGGGAGGCATCGACATAGTCGATTACGCCGCCACG  
CTTGGCCACTACGGTTACACCGGAGTCAACGGCCACAGCGCTTCCATACCGGTACCTACCAGCGGCTTG  
TCAGCACGCAGAGTCGGTACAGCCTGACGTTGCATGTTTGAACCCATCAATGCGCGGTTTCGCGTCATCGT  
GTTCCAGGAACGGGATCAGAGCGGCTGCCACAGATACGATCTGCTGCGGGCTCACGTCCATATACTGGAT  
CTGGTCCGGCTTCATAAAGGTGGATTACCTTTGTGACGGCACGGGATCAATTCATCTTTCAGACGGCCA  
TCTTCGGTGGTTCGCGCGGTTAGCCTGTGCGATCACGTACTTGCCTTCTTCAATAGCAGACAGGTAGTCCA  
CTTCGTCGGTGCATCACACCGTCAATGACCTTACGTTACGGGTTTCGAGGAAACCGTACTCGTTGGTAC  
AGATACACGGACAGAGAGTTGATCAGACCTTACGTTTCGGACCTTTCAGGAGTCTCGATAGGCGTACGCA  
CCGTAGTGAGTCGGGTGTACGTCTCGGACTTCAAAGCCGGCACGCTCACGAGTCAAACCGCCCGGGCCCA  
GCGCGGAGATACGACGCTTGTGGGTCACTTTCGGAGAGCGGGTGTGTTCTGGTCCATAAACTGGGACAGCTG  
GCTGGAACCAAAGAACTCTTTGACTGCGGCGGAGATCGGCTTGGCGTTGATCAGATCCTGCGGCATCAGG  
GTGTCCAGGTGCGCCAGGGAGAGACGCTCCTTGACCGCACGCTCGACACGCACCAGACCGGACGCGGAACT  
GGTTTTTCAGCCATTTACCGACAGAACGGATACGACGGTTACCCAAGTGGTTCGATATCGTCCACTTCGTC  
GTTACCGTTACGGATGTGATCAGGCGCTTTCATCACATCGACGATGTCGCTTTTGGTACGTACACCCGCG  
CCAGTCTCGTCTTACGACCCAGACGGCGGTTGAACTTTCATCCGACCTACGGTAGACAGGTCGTAACGCT  
CGGCGGAGAAGAACAGTTTTTCGAACAGCTGTTCTGACGCTTTCGCGAGTAGGCGGCTCGCCCGACGCAT  
CATGCGATAGATCTCGACCCAGCGCTTCCAAACGGTTGGAGCTGGAGTCGACACGCAGGGTCTCGGACATG  
TAAGCACCGTGATCCAGTTTCGTTGGTGAACAGAACCTCGAAAATGCTTGAAGCCGGCTTGGGACAGGTTGG  
CGATCGCTTCCAGGCTCAGCGCCTGGTTGGCGGTCACGACCATCTCGCCAGTTTGGCGGATGTGCGTAGTC  
CTTGGCAGCAACTTTGCCAACAACTACTCAACCCGGTACCTCAATCTGGGTAAACGGCGCTTTTTTCCAAC  
TGACGGATGTGACGCGCAGTCACACGACGACCGGCTCAACCACCACGGCGCCATTTGGCCACGATGTCAA  
AGGTTCGAGTTTACCACGCAGACGCTCCGGCACCAAATCCATCATCAACTTGCATCTTTTTACTTCAA  
ACCGATGGTCTCGAAGAAGGTGGCCAGGATTTGTTCGGAAGTGAAGTCCAGGGCGCGAGAATAATGGAT  
GCTGGCAGTTTGCAGGACGGTCGATACGGACAAACAGGTTGTCTTTCGCATCGAACTCGAAGTCCAGCC  
AGGAGCCACGGTAGGGGATAACCGCAGCGTTATACAGTACCTTACCGGATGAATGAGTTTTGCCTTTATC  
GTGGTTCGAAGAAGACGCCCGGGCTGCGGTGCAGCTGGGAGACGATAACCCGCTCGGTACCATTGATAACA  
AAGGTGCCGTTCTCGGTTCATGAGCGGAATTTTCGCCCATGTATACTTCTTGTTCCTTGATGTCTTTGACGG  
TGCCGGCAGCTGCTTACGGTTCGTACAGAACCATACGAAGCTTGCACGCAGCGGCGGGAGTAGGTAC  
TCCACGGATCTGGCATTCTTTTACGTCAAATACCGGCTCACCCAGGCGATAGCTGACATACTGAAGCTCA  
GCACTACCGGAGTAACTGGTGTACGGAAAACGCTACGGAAAAGCGGCTCTAGGCCATATTCACCTTCCG  
GGTCAGCCTCGATGAACTGCTTGAAGGAGTCCAGCTGAATGGACAACAGATAAGGCGTGTCCAGTACCTG  
GTCTCGCTTACCGAAGTCTTACGAATGCGTTTTTTTTTCGGTATAAGAGTAAACCATAGGGTTCTCAGC  
TCGCTGATAAGTGACCCACTCTGTCCCGGGACAGCTCTGTCTCAACACCGTTTTTGTGTTGGCCCGGAC  
GAAAGAAGACAGTCCGGATTGCTGGTGCACCGAGAGTCGTAACCGTGTGAAATGCTCTCAGTCTACAGC  
GCAAAAAGGCTGGTGAACAAAATTCACCAGCCCTAGCCTGTTTTATCAGGCTAATCTACATAAATGCAG  
ATTATTTGATCTCAACAGAAGCACCGGCAGCTTCCAGCTCTTTCTTCAGAGCTTCAGCTTTCGCTCTTGG  
CACGCCTTCTTACGGTTAGCCGGAGCAGCTTCTACCAGATCTTTGGCTTCTTTCAGGCCAGACCGGTA  
GCGCCACGAACGGCTTTGATAACGGCAACTTTGTTGGCGCCAGCAGCAGTCAGAATACGTCGAACCTCGG  
TCTTCTCTTACTGCTTTCAGCAGCAGCCGGGCCAGCCATTACGGCAGCAGCGGCGAACAACCGAATTT  
CTCTTCCATAGCTTCGATCAGCTCAACAACCTTCCATTACGGACATGGAAGCAACGGCTTCGATGATTTGG

TCTTTAGTGATAGACATGACAAAAATTCCTGATGTTGAATAAACTCAAACAGCCTAAATAGGCGAGAATC  
AAGCAGCAGCTTGTCTTCTGGTCGCGAACAGCAGCGATAGTACGAACCAGCTTGCCAGCAGAGGCTTCTTT  
CATAGTCGCCATCAACTTCGCAATTGCTTCTTCGTAAGTCGGCAGCGTGGCCAGACGATCAATTTGTGCT  
GCGGCGATAAACTCACCGTTAAAAGCGCCAGCCTTGATTTCGAACTTTTGGTTCGCTTTGGCAAACCTTT  
TGAACAGACGAGCAGCAGCGCCCGGTGTTTCGTTAGAGAAAGCAATCAAGGTAGGACCGGTAATGCGTC  
GTTTACGGCACTCGTATTCGGTACCTTCTACCGCGCGACGCAGCAGGGTGTACGCACAACGCGCATGTAC  
ACACCGGCTTACAGAGCGGTTTTACGCAGGACGGTCATCTTGTCTACAGTTACACCGCGAGAATCGGCAA  
CAACTGCAGAAAGAGCGCCTTTGGCAGCTTCGTTGACTTCAGCAACAATTCGCTTTTTTGTCTTCGAGTCC  
CAATGCCATTGGCTTAACTCCTGGATTGAATCCGGGTCTATTGACCCAGTACTGACACATCCCCCTACC  
TTTACAACAGAGGGGAACGATGCGGTAGCAGGATTCAGAAGAGAAAGAATCTTTCTCGTGGGTTTCCG  
GCACCGTCTACGCAGGAACATTAAGGCTTTGACGCTCCTTCGCGTCTTGACGAGGTCGAAACCCCA  
ACCAATCAAGGCGCAAAATTATAGATTAATTTTGCCTTGTAAAACCCATCAATTAGGCTGAGCTTC  
CAGAGAAGCTTGGTCTACGGCAACACCGGCACCCATGGTGGTGGAGATGCTGACTTTCTTGATGAATTGA  
CCTTTGGCGGAAGAGGGCTTGCCTTTTTTTCAGGGCAACCAGCAGAGCTTCCAAGTTTTCTTTCAGCTGAA  
CTTTCGTTGAAAGAAACCTTACCCAGAGTGGTATGGATGATACCATTTCTTGTTCGTTACGGTAACGAACCTG  
ACCAGCCTTGGCGTCTTTCAGAGCTTCGGCAACGTTAGGAGTTACAGTACCAACTTTCGGGTTTCGGCATC  
AGGCCGCGCGGGCCAGGATTTGACCCAGTTGACCAACAACGCGCATGGCATCCGGGGATGCGATAACTA  
CGTCAAGTTCATCTCGCCTTTCTTAAACAGATCGGCCAGGTCATCCATACCTACCAGGTCAGCACCGGC  
AGCTTTAGCTGCTTCGGCGTTGGCACCTTGGGTAAATACGGCAACGCGTACATCACGACCGGTACCCTGC  
GGCAGTACAGTAGCACCACGTACGTTCTGGTCAGATTTACGAGCGTCGATACCCAGGTTGACAGCAACGT  
CAACGCTTTCAACGAACCTTGGCGGTAGCCAGTCTTTCAGCAGGGCAATGGCTTCGTTGATGGAGTACTC  
TTTTGGTACCGTCAACTTTTTTCGCGAATAACGCGCATAACGCTTGGAAAGTTTAGCCATTGTCTTAATCCTC  
CACTACCAGACCCATGGAACGAGCGGAGCCTGCGATGCAACGTAACCTTTTGCATCCAGATCGGCACCAGTC  
ATATCCGGCTCTTTGGTCTTGGCGATTTCTTGCAGCTGGGCAACGGTCACCTTACCAACCTTGTCTTTGT  
TCGGCTTGGAAAGAACGACTTGATGCCAGCAGCTTTCTTCAGCAGGAAGGAAGCAGGCGGAGTCTTGGT  
TTCGAAGGTGAAGGAACGGTCGCTGTAACCGGTGATCACGACCGGAGTCGGTGAACCTTTTTCCAGCTTC  
TCTGTACGAGCGTTGAACGCCTTACAGAATTCATGATGTTAACACCGTGTGACCCAGTGCAGGACCAA  
CGGGAGGAGACGGGTTGGCTGCACGCAACCTGCAGCTTGATATAAGCTGTGACTTTCTTAGCCAT  
TAGGAAAATACCTCAAAAATGGGTTCTAGCCTCGGACTTGCCTGCAACCGCTCCCAACTAAT  
AAAGGGGCGAGCAATTATAGAGATATTGCTGCCCTGACAACCGTTAAACGTACAGAATTCATCAGCC  
CTTTTTGACCTGACCAAAATCCAGTTC AACAGGAGTAGAACGACCGAAGATCAGTACAGAGACCTTCAGC  
CGGCTCTTCTCATAATCGACCTCTTCAACGGTACCGTTGAAGTCGGCAAACGGACCATCGGCAACCCGCA  
CCATTTACACCGGTTCAAACAGGGTTTTTCGGACGCGGCTTGTTCGTTGGGCATCCTGCAGACGGTTCAGGAT  
GGCATCGGCTCTTTGTTCAGAGATCGGAGCCGGACGGTTCGGAAGTACCGCCAATGAAGCCCATTACACGC  
GGTACGTTACGCACCAGGTGCCATGTGGTTTCATCCATGATCATCTGGACCAGGACATAACCCGGGAAAA  
ACTTGCCTCACTCTTGCCTTCTGGCCAGCAGCATCTCGACCACTTCTTCGGTTCGGGACCAGCACTTC  
ACCGAACATGTCTTCCATGCCATGCATCTTGATATGTTACGCAGGGACTTGGCTACACGGCCTTCATAG  
CCGGAAAAAGCCTGCACGACATAACCATCTCATAACGTTGTTTCAGTTCAGTTCAGTTCAGTTCAGTTCAGT  
CACCGGTAATCAGGTTGACCAACCAGACCAAGGCACCGTCCAGAACGAACAGCAGCAGCCCCATCACGGC  
GGTACCGCCAGCACAATCAGGGTTGTCTGAATGGCTTCTGACGGGTTCGGCCATACGACCTTGCGGACT  
TCCAGGCGAGACTCACGGGCGAATGCCAGTGTTCCTTTCCCTTGGTGGTTTGCAGGGCTACTGCACCAG  
CAGCAGCAATGACAACGACCACACCAGGGCGCGGACGGCAGCGACAACATCGTTGAGCAGGTAATTACC  
CACTACAGCGGCCCGCCAGGATAATGAAAACAGGCCCAAGCAGGGTATCCTTGCCTCCGCCCTGGCTC  
TCAGAACTAACACTCATAACAACCCACCTGTATCTGACGTAACCAAGACACAAAAGCCCCGTACGAGACG  
AGGTATATGGCAGGGGCGGAGGACTCGAACCCGCAACCATCGGTTTTGGAGACCGCTGTCTACCAATT  
CGAACTACGCCCTACACAAGAAAGCCCCCTATTATAGGGCTTTGCTTTATTTATGTAAGCCAAAGATTA  
AGCGATTACGCTGGCTACAACACCGGCACCAACGGTACGGCCACCTTACCGGATAGCGAAACGACGGCCG  
TCGTCCATCGCGATCGGAGCAATCAGGGTAAACAACCATTTTTGATGTTGTTCGCCCCGGCATTACCATCTCTA  
CGCCTTCCGGCAGTTTCGATGGTACCGGTCACGTCGGTTGTACGGAAGTAGAACTGCGGACGGTAGCCTTT  
GAAGAACGGGGTATGACGACCACCTTCTTCTTTGGACAGTACGTACACTTCAGATTCGAACCTTGGTGTGC  
GGCTTGATAGAACCCGGCTTGGCCAGTACCTGACCACGCTCTACGCTTTCACGCTTAACACCACGCAGCA  
GCGCGCCGATGTTCTCGCCTGCACGACCTTCGTCCAGCAGTTTTCGGAACATTTCTACACCGGTACAGGT  
GGTAGAAACGGTATCTTTGATACCAACGATTTCTACGGTCTCACCTACTTTAACGATACCGGCTCTACA  
CGACCGGTAACACTACGGTACCACGGCCAGCGATAGAGAATACGTCTTCGATAGGCATCAGGAACGGCTGGT  
CAATCGCGCGCTCCGGCTCCGGGATGTAGGTATCCAGGTGGCCAGCCAGCTCGATGATCTTCTCTTCCCA  
CTGAGCGTCGCTTCCAGCGCTTTTCAGTGCAGAACACGAACTACCGGCGAGTTCATCACCGGGAAGTCCG  
TACTCGGTTCAGCAGTTACGAACCTTCCATCTCTACCAGTTCGAGCAGCTCTTCGTCATCAACCATGTCCAC  
ACTTGTTCATGAACACGATCATGTACGGGATACCAACCTGACGACCCAGCAGGATGTGCTCACGAGTCTG  
CGGCATCGGGCCGTTCAGTCGCTGCTACTACCAGGATCGCGCCGTCCATCTGGGCAGCACCGGTGATCATG  
TTTTTAAACGTAGTCGGCGTGACCCGGGCAATCTACGTGGGCGTAGTGACGGGTAGCGGTGTCGATTTCTA  
CGTGGGAGGTGTTGATGGTGTATACACGCTCACGCTCTTCCGGTGCCTTGTTCGATCTGGTTCGAAGGCGAA

AGCTTTACCACCGAAGTGCTTGGCCAGCACGTTGGTGATAGCTGCAGTCAGGGTGGTTTTACCGTGGTCA  
ACGTGGCCGATGGTACCCACGTTAACGTGCGGTTTTATTACGCTCAAATTTTTCTTTAGACATGATCGTCC  
CTCTAAACTAACGCTGAGTACGCGGTGGCAAGCTAACACAGAACAGTTTTATATGATGGATTTGAATCTG  
GTGGGAAAGAGAGAGGTAAGTACTGATGGCTGGTTTCGCTTGGCCGAACTCACCTTAGGGTGGCGCTCTGCTAACG  
CCTGAGCCATATCAGCATCTTGGAGCGGGCAGCGGGAATCGAACCCGCATCATCAGCTTGAAGGCTGAG  
GTAATAGCCATTATACGATGCCCGCATTTCTCTAACCCAAAAGAACTCAAACCCGAGAGAAATATGGTGGGA  
GGGAGAAGGATTCGAACCTTCGAAGGCAGAGCCGTGAGATTTACAGTCTGATCCCTTTGGCCGCTCGGGA  
ACCCCTCCAGACGCCAGATTGTCAACCGTAATTTCTGCTTGCACCCGTTGTGTTTTATCGCTTTTGCACG  
GCAAATAGACGACAGACAGTCAAGCGTCGCGCATTTTATTGTAAGGTTTTGGGGGATGCAACCATTTGAAC  
CCGGCAAATATGCTTTATTGCTGGGAAGTTTGCAAAAAACGGGGCAAACAAGCCAATCTGCTGCGT  
CCCTTGTGCTCCCCACCCCTTGGTGTATGGTCGCGCTGCCAAGAAACAGTGTGATGACACCATGACGACA  
GAGCATAACCCCTATCTGCAATTCACCCGGAACAATGGGCGTTATTGCGCGATTTCGCTCCCCCTGACCC  
TGACCGAACACGATCTGCAGACCCTGCGCGGGATCAACGAGAAGGTGTCATTGCGGGAAGTGAAGAGAT  
CTATCTGCCTCTCTCCCGCTGCTCAATCTCTATGTCAAAGCCAAAACAGCGTCGCAGCCGGGTGCTGGAG  
CAGTTCTCGCCAGTCCCGCGGCAAGGGCACCTACATCATCAGCATTGCCGGCAGCGTGGCGGGGGGCA  
AAAGCACACGGCCGATTTCTGCAGGCCCTGCTGGAGCGCTGGCCGGAACATCCGCGGGTGGAGCTGGT  
CACCACCGACGGCTTCTCTATCCCAACAAGGTAAGTGAAGAGCGCGGCTGATGCGCCGAAGGGGTTTC  
CCGGAATCCTACGACATCCGCCATCTGGTGGAGTTTGTGCGCAATATCCGCGCCGGTCACGAGAAGGTGCG  
AAGCGCCGGTTTTACTCCCACCTTATCTACGACATCATTTCCGATGAGAAGAAGTGGTGGAGCAGCCGGA  
CATCCTGATCCTGGAAGGGCTCAATGTGCTGCAAAGCGGCATGGACTACCCTCAGGAGCCCCATCGGGTC  
TTCGTGTCGGACTTCGTGCACTTCTCCATCTATGTGGATGCCGATGCCGAACGCTGCGCACCTGGTATA  
TCGAACGCTTCTGAAATTCGCGACGGCGCCTTCTCGGATCCCAGCTCCTACTTCCATAACTACGCCAA  
GCTGGCGGAGAGTGAGGCGACCCAGATCGCCAGCAACATCTGGCAAGATATCAACTATCTGAATTTGCAA  
GAAAATATCCTGCCAACCGGTGAGCGTGCCAACTGATCATGACCAAGGGCCATGAGCACGCCATCGAAC  
AGATCAAGCTGCGCAAATGATGACTGCAGTTGCCGGATAACGAAGAGGGGGCCACGGGGCCCCCTTCTCT  
TGTTTTGGCATCATGAGCGGCCTTGCTGACCCCTCAGTCGCCCCGGCGCAGGGAGAGTTTACCACCCAGATA  
GAACTTGGTGCCTCCTCCGTATCCAGTCGAGGGCGCCGCGATCGTCGATGCCACGAGCGATGCCCGCG  
ATCTCCTGATCCCCCATCAGCAGGCGCACCCGAGCGCAAAGTGTGATCGAGCCGTTCCACTATCGA  
CAAAGCTTGCCAACCCATGCTGCTCAAAGGTTGATGCAACCCCGCTGCAGATGGACGATATCCGGGGCGC  
CAACTGATTGCGATCGACCAGCTCGGGATTGATGTGGCGCAGCTCGGCCAGGCCGATCAATCTTCTCA  
CCTTCGCGGGCCGGCATCGCCAGATTGAGACCGATGCCGATCACCAGATGACAACCTGGCCCCGGCGCTAC  
CGCTCATCTCCACCAGTATTCCCGCCAGTTTGGCGCCCTGATAGTAGAGGTGCTTCGGCCACTTGAGCTC  
GACGCTTGATAGCCAAGGGACTCCAGCGCTTCAACCACTGCCACGCCGACCGCCAGACTCAGCCCCATG  
GCCGCCGCATACCTTGTTCAGCCGCCAGTACATGCTGAGGATCAGCTGGCAACCAAACGGCGAAATCC  
AGGGTTTTGCCACGACGACCGCGCCCGGGTCTGACACTCGGCTAGACAGCTCTCGCCAGAGCGCAGCTC  
ATTGACCCGATCCAGCAGGTGTTGGTTGGTCGAGCCAATGACCGGAAAACAGTGCACCGGCGCCATCGGG  
GCCAGTGCCTGCAAGGTAGCCTGATCATAGAGCGCCATCGGCACCGCCAGCCGTTAGCCCTTGCCGGTCA  
GGCTAAAGAGATCCAGCCCCAGCTCCTTGAGCGCCGCCATGTGTTTTGCTTACCGCCGCCCGGCTGATGCC  
GAGCTGCTCACCAACTGTTTCGCCGGAGTGAACCTGGCCGTCGCTAAGCAGGGTGTACAGGGTCTGTCTG  
ATGGGAGTCAACGTCATGAGAGCACCTCGTCGAGCCAGGTTTTACCCGTGCGCGCCATAAAGCGCACCTC  
ATGCTCCAGCACACGCCAAACGCTCTGCTCCACGCTGTACGGACATGAGCCGCCAGCGCGATCAGCTCC  
ATGGCACTGGCGCCCCCAGATTGACCAGCACCGCCTGCTCCTGATGAACGGCAGCGCGGCCAATGG  
CGAAACCTTTAGCCCGCACTGATCGATGAGCCAGCCTGCCGCCAGCTTGGCCTGCCCTTCTCCGGCCGG  
ATAGCAGGGCATCTGCGGATAGCGAGCCTTGAAGGACTCCGCCAGCGCGGAGGTACCACCGGATTTTTG  
AAGAAGCTGCCCGCATTGCCGAGCACGGCGGGATCCGGCAGCTTGGCCATGCGGGTGGCACAGACGGTAT  
CGAAGATGGCCTGGGCCGAAGGCGCATCACCGAGCCCGCCAGTGGGCCATAGCCAGCACAGGTTGCCA  
CGCCTTGGGCAGTTTGAAGCCGACGGCGGTGATCAGGTGGGAATCCTGATACCTGTTTGAAGATGCTG  
TCGCGATAAACGAAGCGGCACTCTGCCGCCGCGATCCGTTCAATCTCGCCACTCTGCCAGTTGAACGCCT  
CGACATAGGAACAGAAGTTCGGCCAGCTCAACGCCATAGGCACCGATGTTCTGCACCGGCGCCGACCGAC  
CGTACC GGGAATAAGCGCCAAATTTCTCCAGCCGAACAGCCCTGTTGCAAGGTATGGCGCACCAGCTGA  
TGCCAATCTTACC GGCCGCCACATGGAGCAACAGTGTGATCGCCACCATCTTCAGCGGTAATCCCCTTGA  
GCCGTTGAGCACACAGACCGAGAAAATCGGTGGTGAAGAGCATGTTGCTGCCGCCCGCCAGATTGAG  
GCGAGGCAACTGGTTGAACTGTGGATCAGCACGAGGGTGCAGATCGGCAACCTGCTCCACCTCGGCC  
AGCCAGAGGCAGTACGCATCGAGGGCAAGGGTGTGAGCTTCAACAAGGAGGCGTTGGCATTAGTTTTCA  
TCGGTCTATCCCGGCTTGGTGAAGGGCGCAGTCTACCTCAAGTTACCCCATGACGAAAAACCCGAGCCC  
TTTTTCGGGGGAATAGCAGTGGTTTTAGAGTAGGCGACTTCAACTGCTGAGGAATAAATCATGAACAACCAG  
TTTTGCCGTATCGGCCCTGGGCTGTTTGGCAGCGCGCTGTGCGAAGAGCTGCAACGGCAAGATGCCGAAG  
TACTGGCCATCGATATCGACGAGAGCAAGACCCGGCAAATCGCCGCCCTCTGCAATCACGTTATCGTGGC  
GGATGCCACCGATGAGGCCACCGTGGCCGAGCTGGGACTGGCCAATTTGATATCGTCTTCGTTGCCATC  
GGTGACAACCTGGAGACCAGCATCCTCAACCCCTCGTCTTGAAGAGGCGGGCGTGA AAAAGGTGTGGG  
TCAAGGCGCGGACAAGTTCCACGCCAAGATCCTGCAGAAAAGTGGGCGCCGACAAGGTGATCAACCCGGA

GTGGGACATGGGCCCGGGTTCGCCCAGAGCATGCTGGACAACCGGCTGTTTCTGACTATCTGGAACCTGGGC  
CACGACATGGTGCTGACCGGAGTTTCGTGATCGGCCCTGCAACAGAACGGCCGGGAATTAGGCGACTTCCACC  
TGCTGCAACAGAGCGATTTCCAGCTGCTTGCCATCAAGCGTGGTGTACTGCACAACGTGCTGACCGG  
CAAGATGGAGCTGCAACTGGGCGACATCCTGATCCTGGCGGGCAACAAGCACGCCATCGACCCTGGCTC  
GAAACCCCTATGATCAACTGGCGCAACAGCTACGCCTTCGCCCTCCATCGGGAGCAGGACTCTCGCTGGAG  
CGAAGCCCCGGCTGATCCTCGGCAGCTTTCTGATCATTCTGCTGATTGGCACCATCTTTCTGGTGCAACCC  
TCCAGCCACAATGGCGAGGTACCTTCGTCAACGCCCTGTTTACCGCCACCTCGGCCATCAGCGTGACAG  
GTCTTGGCGTGGTGGATACCGGCACCGCCTTACCCTGCAGGGGCAGATTTTCTGCTGATGCTGATGGA  
GATCGGCCGGTCTGGGCCAGATGACCATGACCTGCTGCTGATCGCCATCTTCAGCAAGCGGGTCGGTCTG  
CGCCAGCAGGTACTGGCCAAGGAGGCGCTGGGACAGGAGGGCTCGGTCAACATCATTACAGTGGTCAAAC  
GCATAGTGCTGTTTCGCTTTATTGCCCCAAGTATGATCGGCACCGGCATCATGGCGATCCGCTGGGTGCCGA  
GATGGGTTGGGTGCACGGCCTCTATGTACGCTTCTTCCACCGGCTCTCGGCCCTTCAACAACCGCGGTTT  
TCGCTCTTTGCCAACAACTCATGGACTATAGGGACGACCCCATCATCAGCCTGACCATCGCCGGCCTTC  
TGATCTTGGGAGGGATCGGCTTTACCCTCATCGTTCGATCTGGTGCGCAACCGCCGCTGGCGCAAGCTCAA  
GCTGCACAGCAAGTTGATGCTGCTGATGACCCCGGCGCTGCTGCTGGCCGGTACCCTGATGTTCTGGCTG  
CTGGAACACAACAACCCCGGCACCCCTCGGCAAGGCGGTATCGGTGGCCAGCTGCTGGCGGCCCTTTTTCC  
AATCTGCCAGTGCCCGTACCAGCGGTTTCAATACCATAGATATCGGGCTGATGACCCCGGCGGCGTTGCT  
GTTCTGATGATGTTGATGTTTATCGGTGCCGGTGCACCTCGACCGGTGGCGGTATCAAAGTACCACC  
TTCGCCGTAGTGCTGCTGGCGACCAAGGCGTTTCTGACCAACGGCCCATGTCACCCTTTTGGCCGCA  
CCCTGTGCCCCAGATCGTGACCCGCTCGCTGGCCATCATCATCGTACGACCATGGTACTGATGCTGGC  
GATGTTCTGCTGATGGTGACCGAGGATCTGCCGTCGACAAAATCATGTTTCGAGACCATCTCGGCATTT  
GCCACCGTTCGGCCTCTCCACCGGCATCACCGCCTCCCTGAGCGAGCCGGGCAAGCTGATCCTGGTGGTGG  
TGATGATCTGCGGCCGCTCGGCCCCCTCACCTGGCCTTTATGCTGGCCCGCCGGTTCGAGACCCGCGAT  
CCGTTATCCGGAAGAGAACGTCTATACCGGCTGACCAGCCATGAACACGGGGCAGCCACTGGCTGCCCGG  
TTTTCTTTATTTCGGCTTGTGCTGCGCCTTGAGCCAGCGCCCGGGCTCATCCCCAGCTCCCGCTCGAATG  
CCCCGACCAAGGCAACACTGCTGCTGTACCCCGCCCCAGCGCCACCTGCGCCATAGGCTCCCCACCCAG  
CAGTTGCTGGCAGGCGCGCCATGCGCCAGCGGGTCAGATAACCCAGCGGCGTTGACCAACCTGCTCC  
TGAACCTCGCGGCAAGACGGGCCCCGCGACATGCCGCTCTCGCGCCAGCGTGGCCACCCTGAGGTT  
CATCCCCACGCTGATGATCACCAGATCGCCTTGCCCTGCCCCAAGTGGGATCGGAAATACCTGCCAGCATCC  
CTGCTGACGCACCCCTTGCTCGACCAGATGACGCAGCAGCAGGATCAACAGTACCCTCAGCAAGCGGGAG  
ATCAGCGGATCCTGCCCGTAGCGGGGGTGAACCGCTCGTCAAAACAGCTGACTCAGCACCGGCGTCAAGG  
CAGGCAACTCACGTAGCGGCAGCACACCAGCGAGCCGGTAATGCCAGTTGCAACGGCGATGCTCCCCCTT  
GCCGAATGCGACATTGGCGCACACCAATCACAACCCCCCAGCGTTCTGGGTTCAAGCTTGTGGGGACGT  
CCCCGAGGGAACAGGATCAGGGTGGCTCCTCGAGCAGCAAGCTGGTTCCCCCTCTTACGCAGCATGA  
CGGCGCCGCTGCGCAGCAGATGAAGATGTCCGCCCTCGGGTAATCATCACTGGAGGAGTTCTGGCACAG  
GTTGCCGGCGAAGAAGATCTTGGCTTCGGGGGAGGCATGAACCAACAGAGCAGAGCGGATCCATATTT  
GAGACGAATAGTGTTTATTTGCAGACGATGAGTGATAAACCGTATCACGAATGACGGCACACTGTCTCAC  
GTACCTTCACTACCACAGGAGAAGATCATGAGCCGTATCCAACCCGTATCCAACCCGCAACCCGCAGCCG  
CCCAGACCCTGACCACCTGCACCGCAATCTGGGCATGGTGGCCAACTCTACGCTACCCTGGCCACTC  
GCCAGCCCTGCTCAATGGCTTCTGGGCTTTGCCGAGGCGCTTGGCAAGGGGGGCTCTCACTGCCCCACAA  
CGGGAGTTGCTGGCACTGGCCATAGGTCAAGCCAACGCCTGCCAATACTGTTTGTCTGCCACACACTAC  
TGGCGGGCAAGGCCGATTCTCGGCTCAGGAGATCCGGGCTGCCCGGCTCGGCCAGGCTCGGCTCCCTT  
TGATCACGCCCTGCTGCAACTGGCAACAGCGCTGGTCACTCAGCGCGGAGTGATCAGTGACGAGCAGCTT  
GCTAGCGCCCGTGCAGGCGTAGATGACGAGCTGCTGCTGGAGGTGCTCGGCCAGGTGGTGGTAAATA  
CCCTGACCAACTATGGCAACACCTGGCGGCGAACGAGATCGACTTCCCGCCGTCACCTGACCCCTTA  
AACAAGGAGCCCCCAGCAGCAACATGACAAAGGCTTCTGGTTCGCCCTGGCGGGCGTGGTATTGACC  
CTGCTCTGGATCGGCGTCTTCAAGTTTACCCCGACAGAGGCGCCGATCAAACCACTGGTAGCCAGCC  
ACCCCTTGATGAGCTGGCTCTATGGCCCCCTGTGCGAACAGAGCGTATCGAACCTGATCGGGGTGGTTCGA  
GATAGTGATCGCCATCGGACTGGTCTGTTGGTCTGTGGCAACCTCGCATCGGTTACTGGTGCAGCATGGGG  
GCTATCGTCACTTCTGGCGACGCTGAGCTTCTGCTGACCCCTGACAGGTGCTTGGAAAGTGGTTGACG  
GCGTGCCAGTACCGAGTTCTTCTGTTCAAGGATCTGGTGTCTTCTCGGTGTGGTTCTGCACTACCAGCA  
CAGGATCCGTGCCAGCTTGTCCACTCAGGCAGCCTGACAACAATGCCTTTGGCGCCCGGGATGGGCGCCT  
TTTTTTCGTATGCCGCCCTGGTCTGGCGCTTGTGGCCGCTTTCGCGGGTTCGGGCCCCGCGAGTCTGCT  
GGCCGCCGGACTCTTGGCCTGGTAAAACGCCGCTTGCAGGACCCGGCGCCTCTTGGGCAGGGCGCTG  
AAGCTGGCACCGGAGTCTGCCGCGCCCCCTCGATCAGGCCGTTGAGCTGCTCGGTGAGCGGCCCCATAA  
ACTGCTGGTAGCTGCCGTGACGCTCGGCGATCTGGCCTAGGCTCTGCTCCACAGCGCAGTCATATCCGG  
CGTGGTGGCCGTGCGAGGCAGCGCCTGTACCAGCGCCCGCCCGGTCGGGGTTCGCTTGTGCTCTTGGCC  
TGACGCACCAGAAAGCGGCGCTTGAACAGCAGGTCGATGATACCGGCACGGGTGCTTCTGTGCCGAGAC  
CATCGGTGTGCGCAGGGTCTTGGCGATCTCGGGATCTGCACATAGCGGGCAATCCCGGTCATGGCCGC  
CAGCAGGGTGGCATCGGTGAACGACTTGGGCGGCTGGGTGATCTTTTCCAGCAGTTCCGCCCGCTCGCAC  
AGCAGTTGCTCTCCCTCTTTAGGGCAGGCAGCGTGCCCGCTTCTTTCGTCGTCATCTCTCCACCC

CGAGCAGCGCCTTCCAGCCCCGCTTGAGAATGCGCCGCGCCTTGGCCTGAAACAGGCCACCAGCGATGCG  
CAGCAGCACCTTGTGTGCTGTTGATTTCGAACGGGGGATAGAACTGCAGCAAATACTGGCGGGCAATCAGG  
CCATAGAGCTTTCGCTCGTTCGGCCCCAGCGTGGCGGGTTGCCCTGCTTCTCGGTGGGGATGATGGCGT  
GGTGGGCATCCACCTTGTGTGCTTCCACGCTTGTGCGGATCTTGCCGTCCGCCCTCGGCAACAGCCTT  
GGCCAGCGCAGGAGCAGTGGCAGCGATGGCGCCGCGCACCTGCTCGGCCCGCTTAAAATGGTTCGGTTCGGC  
AGATAACGGCTGTTCGGAGCGCGGGTAGGTGATGAGCTTGTGGCGCTCGTAGAGGCTCTGGCAGATGTCGA  
GCACCCGCTTGGCATCCATGCCGAACCGCTTGGCGGCATCGATCTGCAGGCTGGAGAGGTTGTAAGGCAG  
CGGCGCCGCTGCTTGGGGGCTGCTCCTCCACCGATTCGACCTGAGCGGGCTGGCCGTTGATCCGGCTC  
ACCACCTTGTTCGGCCAGCACCCGGTTGAGCACCCGCCCTCCTCGTCTGCCATGGCAGACAGGCTTCCG  
ATGGCAGCCACTTGGCGGTGAAGCGCTCGTTGCCATCGGTGAGCAGATGGGCCAGCACCTCGTAAAAGGG  
TTTGGGTACAAAGCCTCGATCTCGAGATCCCCCGCACACCAGCCCCAGCAGCGGGGCTGCACCCCGG  
CCAACCGAGAGCAGCTCGCTGCAACCGGCTTGGCGCCGAGCAGGTTGATAGGCGCGGGTTCATGTTGATAC  
CGTAGAGCCAGTTCGGCCGACTGCGGGCCAATGCGGAGACCGCCAGCGGCACAACTCCTTGTGTCCCT  
CAGCTTCTCGAGGGCACGGCGCACCCGAGGCGGGTTGAGATCGCTGATGAGACAACGCTGCACCCGGCTTG  
GTTTTTCGGATAGCCGAGAAAGTTCGATCACCTCGTCCACCAGCAACTGCCCTTCCCTATCCGGGTCACCGG  
CGTTGACCACACAGTCCGCTGCTTGTGATCAGCCGCTTGTGACGGTGTGAGCTGGGTTTTGGTCTTGGGTTT  
GGCCACCAGCTGCCACTGGGCGGGGACGATGGGGAGATGCTCCATCCGCCACTGCTTGAAGGCGGGCTCA  
TAGGCATCGGGCTCGGCTGCTCCAGCAGATGGCCGATGCACCAGGTGACCACATCCCCCTGGGCTGTTTT  
CGATAAAACCGCTCGCCCTTCTTGTGGGGCTTGGGCAGGCATCGGCAATGGCGCGGCCAGCGTGGGCTT  
CTCGGCAGTAAAGAGTTCGATCGGTGGCTACCTGCAATACTGTATATGCAGACAGTATACTGCCACC  
GCGAAAGCCCAACTGCCCTACTCGTTCGAACGGGTGATCGTGGATGGCGGCAACAGCCGCGCCTGATTG  
AGCAGCGGGCGCATAGTGAAGGCATTTTTCGCCATCTTCCGCCAGCAGATAGTCCGTCAGCTGTTTCGCGCA  
CCGCCTCTTGCAGGGTCTCCAGCTTCCACGGCTTGGCAAGGTAGTAGTGAACCCGCGCGGATGACCGC  
TTCGACGGTGGCCTCCAGCCCCGCTTGTCCGGTTCAGCAGCAATTTGCGGCTGGCCCGGGTGGTGGCTCGC  
CGGTTTCAGCTCCACCAGAAAATCGACCCCAAGGTTCCCGGCATGATGTGGTTCACAGAGGATCAGCGCCA  
GCTTGTTCGCGTTCGCTCTCCACTCCTCCACCACCGCTCGCGCTCATCGACGCTCTCGGCAGCCTCCAG  
CTCGAAGTAGGAACGGAACGGGGCGAGATCATGGATCACCGCATCCAGCACCTCCCGCTCATCGTCCACA  
CACAGGATCAGATAGTGTGTTGTTTCATTGCTCCTCCTTGGCGACATGGTTTTGGCACGCCACGCGATGATG  
CTGGCAACGGCTCAGGCTGCTCCTTGTGTGATGAGGTTTCGCCCCGTAACCGGCTGCCCTCCCTGCTGC  
CGTCCAGCGGCAACAGACCCGATCCGGGTGTAACGGCCGGTTTCGGAGGCCACCTCAATCCGGCCGTG  
GTGCTGCTGAACTATCTGCAGCGAAACGCTCAGACCGATACCGAGGCGGAAATGGCCCTCCCGCTTGGTG  
GTGAAGTTGAGATCGAAGATCCGCTGCCACAGCTCGGGCTCGATGCCGCAACCGCTATCCTCGATCTCTA  
CCATGACCCACTCGGGATCCAGCAACCCGGTTCGAATGGTGTGAGCCGTCGCCGGGCGCTCATGGCATCCAG  
ACTGTTGGCGATCAGGTTGGTCCACACCTGTTGCAGGGCGATGGGGTGACAGCGCACCCAGCGGCAACGGC  
TGGTACTCCTTGCAGAGCTCATGATGCTTGTGAGGCGGTTTTTCGAAAATCATCAGGGTATCTTCCAGCCCT  
CGTGCAGGTCTACCAGCGAGGGCTCGGCCGATCCTGCCGGGCATACTGCTTGTGAGGCTCTTGTACCAGATC  
GCCGATGCGACGGGCGCACACCTCGATATTGCGCAGGAAGCTGCCGGTCTGCTGGAACAGCTCCAGCCGG  
GAGAGCAGCGCCTCCCGCTCGGCGGCAGTGCGGCTGGCAAACAGCGCTGCCAGTTCAGCTCGTCATCCA  
GATTCATCTGCACCGCCAGCCGCGCCTGCTGGCGATCACCAAAGCGCCCTCTGCCCTGCCGGGTCTTGTTC  
ACGGATCTCGCTGGTTCGAGACCGGCTGGGAACTCAACGCTGACAGAGGGTCTGGTTGCCAGCCCTTG  
ATGGAGGCAGGTAGTTCGAGATTGACCAGATCGGGGATGGCGGCCCGTAAGGTCTCGCTGCCACGGATAA  
TGGCCGCCACCGGGTGTTCAGCTCGTGGGCGACACCGGCCACCAGTTGACCCAGCATCGCCATCTTTTC  
GCTCTCCACCAGCTGGGCGTGTGAGCGGCGTTCAGGGAGTTGAGGGTCTGTTGCAGCCGCATCTCGGTGCGG  
ATGCTGTTTTTGCAGACGGCGGTTGAAGTGGCGCAGCAGCAGGTTGGTAAAGGAGGGGAGCAGTTCGCTGC  
GCGCCTGCATCACCCGGGAGAATTGCAGCTTGTGAGCTTGTATCACCTCGGCACCGGTACGGGTACGCC  
GGTGGTGAAGGCGGGTTTCGCCAGTCAAAATGACATGCCCCCCACCAGCGAGCCGTTACGGTAGTGCACC  
ACCTCCTGGTTCGATCCCTGCTCGTCCCGCTTGCAGCAGCACCCCTCCCTTGGCGATAAAACCAGAGGA  
AGCTGTTGGGCTCCCCCTCGCGGGTTCAGCACATGGCCCCGACTGTAGTGGCGGCAGACCCGCTCCTCGTC  
ATTGCCCTCGAAAACTGGTAGAGGCGTTCGATCACCAACCGGGAGAGTTCTTCATCGCTGCAGTGGGTG  
TAATCCATAAAGCCCTGCCGATAGGCTGCCAACTGGCGATCGACGTGGGCTCGCAGCAGCTTCTGGTTGT  
CGAGCACGGCAGCATAGCTCAGCAGGTCCGCTCGGGACGCTGCAATACAAAGTGGCTCGCCTGCTCGAT  
CACCGCCCGGCGCAGGCTGCCATCACGCCAGGGGCGTTCAGGTTAGTAGTCGAGACGACCGAGGTTCACT  
GCCTCGATGATCGATTTTCATCTCCGGCTGGCTGCCAGCAGGATCTTGCGGCACGCTCGTGCAGGCTGC  
CGAGGCGGATCAGAAAATCGGCCCTCGCCATCCCCAGCTCGCTGTACACACCACCACGGCGGGTGG  
CTGCCCTTGCATCCAACTCGTCCAAGGCCAGCTCAGCCGATCCCTGACCGACCACCACCAGCGCG  
AAATGGCCGAGCAGCGGAGCCAACCTCCTGTTTCGAATTCGGCCAGCAGTTGCACGTTGGCGGGCAGACACA  
GCAGTGAGAAAGGGCTCATCAGCGACACTCCGTTGAGGCTCACTGCTCACTATATCAGCGAATCTTGTGG  
GGTTTTTGCAGGGGGCTAACAGCTGTTCGGGAAAGTGCACAAATAGATAAAACAGAAAAAACTGAATTT  
AATTCGATGAATATGTCAATAAAAAAACAAGGACAAAATGTGACAACAATCAAAAAATATAAACCATGAT  
GGAGGTCAACGCCTTATCCCTGTACTACTACTATTTGGACTAGTACTATGTAGGTAATTTATGACCG  
TAGGAAAACCGCCCATGATTGAAAACTGATAAGAAAAACCTGGTTCTGGCTCCTGCTGCTCGGGGCCA

TGCTGGGTGTCGCGGCACTGGGTGTCACCGTGACCGTGCTGCACAAGACCAGCTCCACCGAATTCTGCGT  
CTCCTGCCACTCCATGCAGACTCCGCTCGCCGAGTATCAGGGCAGTGTCCACTTCCAGAACACCAAGGGG  
ATCCGCGCCGAGTGCGCCGACTGCCACATCCCAGGGCAGCCCCACCTCCTACCTGTGGACCAAGATCCGCG  
CCGTGAAGGATATCTATCACGAGGCGATCGGCACGCTCGACACCCCCGAAAAGTATGAAGCCCACAAGCT  
GCGGATGGCTCAGTCCGTCTGGGACGAGCTGAAAAGCCAACGACTCCGCCACCTGCCGCAGCTGCCACAGC  
TACGAGGCGATGGACATTTCTGGCCAGCGCCCCAATGCCCCGCGCGAGCACCCGGTCCGCATCAAGGAGG  
GTCAGACCTGTATCGACTGCCACCGCGGTGTGCGCCACATCATGCTGACATGAGCGGGCTGGCTGCCGC  
CGGTGCCAGCGAGCTGGCGCAGGCTGCGGCCAGACTCCGGCCAACGTAACCTACCCGTTACGCCATCGCC  
ACCACCCCACTGTTCTCGATGCGCGCCGAAGACCGACGAAGGCACCCCTGATGCCCTCCACCAAGGTGG  
AAGTGTCTGGCCAACGAAAACGGCCGCGCCAAAGGTGCAGATCGAAGGCTGGCAACAGGATGGCGTGAGCGA  
AGTGTCTTACGCCGACCCGGCAAACGGATCCTCAGCGTACTGGTTCGGCGATGCCGCAAAGAAAGCGTG  
GTCACCGGCCAGAGCGAAAACCGACAGCGCCACCAACCTACCTGGCATCAGGTCAAGCTGACCGCCTGGG  
TCGACCAGAGCCAGCTCATCGGCGATCAGGGCAAGCTGTGGCAATACGCCCTCCACCTGATGTCCAACAA  
CTGTACCGGCTGCCACGGCCTCACCGCACTGGATCACTTCAACGCCAACCCAGTGGATCGGCGTCAACAG  
GGGATGGAATCTCGTACCTCCCTGACCCCGAAACAGGCTCGCATGTTGACCCAGTATGTCCAGAAACAG  
CCAGTGACATGAGCGCGGCCACTAAGGCTGGCACAGAGGAAAAACCGTTATGACTTTTTTCAATGACAAG  
AAGACCAATCTGTCCCAGCGAACCTGCTCAAGGGGCTCGGCGCTGCGCAGCCCTGCCCTGCTCGGGC  
GCATTTTTTCCAAGAGTGCCTGGCGCAAGCCATCAGCACCGCATTGAGTCAGTTCGCGACCCCTGGTGCC  
CGCCAGAAGGGCATTCTGACCGCGCGCCACTGGGGGGCTTTCGAGGCGATCGTCAAAGATGGCCGCATG  
GTGCGCGTCCAGCCGGTGGCCGATGATCCGGCGCCGAACGATCTCATCGACATGGCGCGCTCCAGGTGC  
ACGCCAAGAACCGCATCAAATACCCCATGGTACGCAAGAGCTGGCTGGAGCATGGCCCGGGCGCAAGCC  
GGAGCTACGCGGTGCCGACGAGTGGGTGCGAGTGAGCTGGGACAAGGCGATCGAACTGGTGGCCGGTGAA  
ATCCAGCGCGTGCAGAGTGACTTCGGCCCGCAGGCGATCCACGCCGGTTCCTACGGCTGGAAGAGTGTGCG  
GCATGTTCCACAACAGCCGCACCCTGCTGCACCGCCTGATGAACCTCTCCGGCGGTTTCACCGGTTATGC  
CGGTGACTACTCCACGGGCGCGGCCAGGTGATCATGTCCACGTGATGGGTCCATCGAGGTGTACGAG  
CAGCAGACCGCCTGGCCGAATGTGGTGGAAAACGCCGAACCTGGTGGTGCTGTGGGGGGTCAACGCTCAAG  
TAACTCTGAAGAACAGCTGGAACATGCCGGATCAGCAAGGTGAGGCCGGCTTCATGGCGTGAAAGAGAA  
GGGCACCCCGCTACAGCATCAGCATCGACCCCATACAACGAGACCCGCAAGCTGGTTCGGTGGCGAGTGGAT  
GCGCCGAAACGCTACACCGACGTGGCCATGATCTGGGTGGCTTCACACCCCTTACAGCGAGAAGAAGC  
ACGATCAGGCCTTCTCGATCGCTACACCGTCCGCTTCGACAAGTTTCTGGACTATCTGCTCGGCAAGGA  
TGACGGCCAACCGAAGAGCGCCGAATGGGCGAGCAGCGTCTGCGGCGTTCGATGCCAAGGTGATCCGCCAG  
CTGGCTCTCGACATGGCCACCAAGCGCACCATGATCATGGCCGGTGGGGCATGCAGCGTCCAGCAGCAG  
GCGAACAGCCGAACCTGGATGCTGGTCACTCTGGCCTCCATGCTGGGCCAGATCGGCCGCGCGGGCGG  
CTACGGCTTACGCTACCACTACTCCTCCGGTGGCAGCCCCACCGCAAGGGTGGCATTTCTGGCGGGTATC  
TCCGCGGCAACGCACCGAAGAACAGCCGGCTCCGATCCCGGTGGCCGCATCGCCGACTGTCTCGCCA  
ACCCGGGCAAGACCATCGACTTCAACGGCCGCAAGGTGACCTATCCGGACATCAAGCTGGTCTACGTGGC  
GGGCGGCAACCCCTTCCACCACCATCAGGACACCAACAATCTGCTGCAAGCGTGGCGCAAGCCGCAGACC  
GTGATCGTGCACGAGCCCTACTGGACGGCGACTGCCAAGCAGCCGATATCGTGTGCCGGTCCACCACA  
GCTACGAGCGCAATGATCTGGAGATGGGTGGGCGACTACTCCAGCGCTATGTGTTCCCGATGCACCAGTG  
CGTGCCGCCCCAGCACGAGTCCCGCAACGACTTCGACATATTCAGCGCCATCGCCGCCAAGCTGGGCGTG  
CTGGAGCAGTACACCGAAGGCAAAGACGAGATGCTGTGGCTCAAGCAGATGTACGACGGCATGGTGGCGC  
AGGCCCGTGGTGCCCGGTGGCGCTGCCGCGTTC AACATGTTCTGGGAGTCCAACAACCTACATCCGCTT  
CCCGATCCCCGAGGCCAACCGCCAGTGGATCCGTACGCGCATTTTCGCGAGAACCCTGCTCAACCCG  
CTCGGTACCCCTCCGGCAAGATCGAGATCTTCTCAACACGGTGGCGGGGATGGGTTACGCCGACTGCG  
CCGGCCATCCCAAGTGGTATGAACCAAGGAGTGGGTGAAGAGCGAGGTGGCGGCGGCTATCCGCTGTC  
GCTCAACACCTCCACCCGACCCAGCGGCTGCCTCCAGCTCGACAACACCCCGCTGCGGGCAAGTTTC  
GCCATCGCCGACCGCGAGGCGATCATGATCCATCCGCTAGATGCCAAGGCCCCGTGGCATCGCCAGGGG  
ATCTGGTGCAGCCTTCAACGAGCGCGGCCAGATCCTGGTGGGCGCCCTGCTCTCCGAAGATGTGCGCCA  
AGGCGTGGTGCAGATCTGCGAAGGAGCCTGGTATGACCCGGCCAAGCCGGGCGAAGCGGGCAGCATCTGC  
AAAAACGGCAACGTCAACTGCCTCACCTTCGACGAAGGCTCGTCCAGTCTGGCGCAAGGCAACTGCGGCC  
ACATGGCCAGCTGCAGATCGAGAAGTACACAGGCCGATGCTGGCCAACACCGCCACGCGGTACCGGC  
CAACGGCTAAGGCTATTGCCACCAATAAAAAACGGCGCCATCAAGGCGCCGTTTCTTTATCTGTCTGCCA  
AAGCGCAGGATGGTGGGACGGGTTTGAAGTCCCTCCTCCATATACTCCTGCGCGCACTCAACCAG  
CTGCGGCCACAGCTCTTCCGGCACCCAGGCGTCCGGTTCATCTTCATCCCGTCTGACTGGCTCCAGAAA  
TAGCGACGCGAGGCCGGAGGCAAACCTCGTTCGCTGATCTCGGCCAGCTCCGAGAGCGGCCCAACCAGGCGA  
TGCGACGCGAGGCCGGAGGCGAGATCGTTGATGGCATCCATCAGGGTGGCATCGTCAAAGCTCTGCTCCAC  
CAGCAGGGTGAAGCGCTCGCGCGCCTGCTCGGTCTGCTCCTCGTCCAGCTCGCCACATCGGCCAGCAGG  
TCGACAAAATCTTCCAGAAGGAACCGGATCAGGCCATCCCTGTCTTCAAACCACTGGATCTGGGCGCCCT  
TGACCCCAAGCAGAGGATCAAACGAATCGTCAAGGTGACACAGTGGCCACGGATCGTCCGGTCAATGCT  
TCTCTTCTCAGGCTAAAACAAATGCCATATGTTATGCCTAGCTCTCGACTCTTGGCACCTTGGGCAACG  
AGAGGGAGGCGAGCCAGACCGCCAGTTCCGGCGGGCCCATGATGAAACTGCCCGATAGGCTTCCGCCAG

ATCGGAGACGATGTTGAGACCCAGGCCCGAGCCCGGCACCTTCTCGTCGAGCCGCACTCCGCGCAGCACA  
GCTTTGGCGATCTGATCTTCGCTCATGCCGGGGCCGTCATCCTCGATACGCAAGGTGATCCAGCCCCCA  
GCTCGGGCGCTGGAGATGCGCAGCTCGCTGGCAGACCACTTGAAGGCGTTCTCCAGCAGGTTGCCACCAT  
CTCGTCGAAATCCTGCTCCTCCACCCCGACCGCCAGATTGGCGGGCACTTGCAGATCCACTGTCTTGCC  
GGATAGAGGGCGGGAGAAGGCGCGGCAGATATACTCCACCCCGCCCCGACCCGGGGTTCGAGACCCCGAGGA  
TCTTGGCGGGCCGGTCAACCCGCGCTTGGCCGAGGTGGTAATCGATATGGCGCTGGATCTGGTCGAGCTG  
CTCGCCGATGGCGGCTGATCCTCCGGCGGCAACTGGGCCACCTGATTGCGCATGATGCTGAGCGGCGTC  
TTGAGGGCGTGGGCCAGATTGCCGGTGTGGGATCGCGCCCGCTGCAGCAGCTCGCCGTAGTGGTGCAGCA  
GCCGGTTGATATCCTCCACAGCGGCTGGATCTCCAGCGGATAGCGCAGCCGGAAGCCCTCCTGATGACC  
CTCGTGAACCCCGCCAGTTCCAGGCGCAGCAGGTGCAGCGGCCGCAAACCGTAGACGATCTGGAACATG  
AAGCCGAGCACCAGACCCGGCGCAGCAAAGCCGAGACCGAGGAACAGGCTGATGCGGGTCTTGTGAGAG  
TCTGGGTGAGGGCGCTGCTGTCTTGGCCATCACCAGAGTGAAGACCCGATCCGAACCCGGCAGCAGCAC  
GGTACGGGTGATGATCAGCAGCGGCTCCTTGTGGGCCCTTGGCGACAAAGAGGTGGGATCGCCAAAC  
GCCGACTTGAGGCCATCGCTCTTCCAGGTTGGTATCCACAGGGAGCGGGAGCGCCCCACCACATCGCGGC  
CCAATTCCAGCTGCCAATAGTAGCCGGAGTAGGGTTGATTGAAGCGGGGATCGGAGAGGGAGCCGGTGC  
CACCGGCAGGCCGGTTTTGGCCACTTCCAGCCGGGAGAGCAGATCATAGAGCTGCAGGCCAAGGCCGTCG  
GCCTCCGCCTCCTGCCAGTAGTTGCGCATCATGGTCTGCAGACTGAAACCGGTGGCGAACAGAAACAGCC  
CGCACACACCAGCGCATGGCGACCAGTCGCCCCGAGGGTCTCACCAGCCTCATTCGTTGATCCGG  
TACCCGAGGCCGCGCACTGTCTCAATCAGATCGGGGTTGGTTTTTTTTGCGGATCCGGCCGATGAACACCT  
CCACGGTATTGGAGTCACGGTCAAATCCTGAGCATAGATGTGGTCGATCAGCTCGCTGCGCGACACCAC  
CTTGCCCCGATGCTGCATCAGGTAACCGAGCACCCGGAACCTCGTGGGCAGTCAGCTTGATGGGGTCCCT  
TCGTACCACACCTGCGACGCTGCCATGTGAGCCGACCCCGCCAATCTCCAGAATGGAGCTGGCGTTGC  
CTGCCGCCCGGCGCACCAGCGCATGGACCCGCGCTACCAGCTCGGCCACCTGGAACGGCTTGGTGAGGTA  
GTCATCGGCACCGCGTGGAGCCCTCGATCTTCTCGTGCAGCTGACCACGGGCAGTCAGCACCAGTACA  
GGGGTATCGATCCCCTTGCTGCGCCACTCCTTACGACGCTCAGGCCATCGCGCCCCGGCAGGCCGAGGT  
CGAGAATGATGGCGTCATAGGGTTCGGTCTCACCAGGAAACCGGCTCGTTGCCATCGTGGCAGAGGTC  
GGTGACAAAGCCGAGAGGGCGCAGCTGTTGGCCAGCTGGCCAGCCAGAATTTTTTCGCTTCAACAATC  
AGAATTCGCATGAACAGGCTTCCACACAGGGGTTATTCATCATTCTCGACCCGGGGGCTTTGGTGGTTG  
ACAACCCGTCAGATGGTGGCCCTTGGCCACACTAGGTCGAGGTTGTCGCCCCGATAGGCTACCTTGAT  
CACGCTGTTTTCCCGATCGATGACTCGCAGTTCATAGAGCCAGATAACCATCCTCTTCCCCAGATCCACC  
CGCAACACCCGACCCGGAATCTGGCCGCCACCTCCATCATTTTCATGGAAGGGCCGAACCCGTCCTCAT  
GGACAGCTTGCTGCAGCATGGCTTCATCAAGCGTGACCGCCTGTGCCAGCAACGGCAGCAATAACCCAAG  
CAGAGGGAGCGCTCTATTTCATGGATGATTCATCTCCAAAAACCTAACATAATGGCTTTTATAGTCTGCCA  
GCCATGAATCCGGAATGAATATGATCCCGCGCAGTTTACTGCTGATCCTTTGCCTGTTGAGTGCCACAAG  
CTGGGCGGCCAGAGCCGCTCGACATGGCCGGGCTGGTCAAATCCTGCTGGCGCAAGGGTATCACGAC  
ATTCGGGAAGTGGAGCTGGAAGGGGACAAATTCGAGGTCAAACCCCTCAATCGCCAGGATCAGAAGGTGC  
ATCTCATCGTCGATGCCTACACCGCGAGATCAAACAACAAGAGGCCGATTAGGCCTTTTTGCAATCCA  
GCGTCCCCGCATGGGGCGCAGCAGCTTCTCCCGCCTCGGCCAGAGCAGGGCGCAGGCCAGCAGCAGGTAG  
ATGAGGGGCTCCCCCAACCACTCTTGAGCGACCACCAGTAATGCACCGGCACCAGCAGGGCGATGGCAT  
AGACCCAGTTGTGCAGCTTCTGCCATGCGGCACCCATGCGGGCGCTGCAATGCGGGCAGCGAGGTGATGCT  
GAGGGCGGCCAGCAGCAACAGGGCCACCATCCCCACCACTATGTAGCTGCGCTTAACCCAGCTCGCCGCCA  
ATCAGCCCCCAGTCAAACCTGCAGATCCAGCCCCAGCCACGCCATGAAGTGGAGCAGCGCCAGGCAAAAC  
ACCAGAGCCCCGAGGGGGCGGCGCAGCTTGTGAGCTGCCCCCTGTGCGCCAGCGCTTGGCCAGCGGCGACAC  
CAGCAGGGTGGAGCAGCAGAGGTTGAGCGCCCCCTTGGCGAGGTAGTGATAAGCTCGGGCACCGGATGC  
CCCCCAGCAGACCTGCCGGAATGGCAAAAACAGCCAGAGCAGGAAACCCAAGGAGCCCAGATGCACCA  
GCACCCGCAAGCCGCTGATATGGACCGGTTTCAATCTCAGTACCATTGGCGCAGATCCATCCCCTGATAG  
AGCGAGGCGACTTCGTACCATAGCCGTTGAACATCAGGGTCCGGCTGACGCTTGGCGCCAAACACTCCGC  
CCTCGCCAATAAAGCGCTCGCTGGCCTGACTCCAGCGCGGGTGTATCCACCTGCGGATTAACGTTGGCGTA  
GAAGCCATATTGTTAGGAGCCAGCAGGTTCCAGGTGGTGGCGGCATCTCCTTACCAGCCGGATCGAG  
ACGATGCTCTTGATGCTCTTGAAGCCATACTTCCACGGCACTACCAACCGGATCGGCGCGCCATCTGGG  
CGGGCAGGGTCTTGCCGTAGAGCCCCATCGCAAGGAAAGAGAGGGTGCATCGCCTCGTCGATACGCAA  
CCCCTCAACGTAGGGATACTCGATGCCGCCCCCAGACTGGAGGCTGACCCGGCAGCTGTTTTCGGATCA  
AACAGGGTTTTGAAAGCAACAACTTGGCGGACTGGTGGGCTCGGCACGGCGGATGATCTCTGCCAGCG  
AGATGCCGTTCCAGGGCAGTACCATGGACCAGGCTTCAACGCAGCGCAGCCGTTAGATCCGCTCCTCCAG  
CTCGCTCTTGTGATGAGGTCCACACATCGAGTGTAAAAGGCTTGGCCACCTCCCCCTCCACCTTGAGG  
GTCCAGGGTTCGGGCTTGGGTAATGGCCGTTGCGAGCCGGGTCGGACTTGTGCGTGGCGAGCTCATAGA  
AGTTGTTGTAAGTGGTGGCCTTCTCTTCCGGTGTGAGCACCAGATTGGCCGGGGCGCTCGGCAGGCTTGT  
GTTAAGCGGCTTGGTGGCTAACTGGGGAGCATCCTCTTTACCAGCGCAGCAGATCGAGTACACCGGCCCGA  
GTGGGAAACGCCAGAGTAGCCGCGCCAGACCCAGCCCTTGAGAAATAAGGCGGGCTTCTGATAGACGG  
CTTCCGGGGTGCATCCTGTTCCGTGAGGGGTTGGCGGTACGACGCTTGATCAACATGAAAACCTCCCG  
GGGCTGAGTGAGGCAGTATGGATAAGACCCGCCCCGCGCAGATTTTTATTTTACACAAATTTACATCATGT

GGTGCAGGGGCAGTGCCTTGCCATGGTGCCGACCAGAAACAGGACTACGAACACCAGCAGGGGAACGAT  
CACATTTAGCGCCATCAGACTCACTCCATGAGCAGGACAGGGCTCTAACTATGGCCGACTGTCAGGTGC  
GTCACCAATGAATTTTTTTCGCGAGCGCAAGCGTATTCTTGAGTTGAAAAGGGTGATGAAGATCACACAC  
AATTCTGCCCCCGCTTGCCGCCCCGATTGCCGGGGGTAGGCTGCCTATTTTGGCAAGCCAACCTGAAGAGT  
CGCCCCATGAGCCCACTGATCGCCATCGCCATCACCCTGGAATTTCTCTCCGCGCTCTGGGGCTGGATTG  
CCGTGCGGTTTCGGCCTTATCTCCTGGGTTCGGCTTTCTCGGCTGCACCAGCTATTTTCGCGTCAAGCGGCGG  
CTACAAGGCGCTGCTGCAGACCATCTTCTGCAACACCAGCGGCATGCTGTGGGCACTGCTGCTGATCCAT  
GGCGACAGTCTGTGGGGGGCGGGCGTGGCGGGTTATGTGATGACGGGGGTGGTTCGCAACCCTGATGTGCG  
TACAGGCCAAGCAGCAGTGGCTCGGCTACATTTCCCGGCACCTTTGCCGGTTGCTGTGCCACCTTCGGAGC  
GGCTGGCGAGTGGCGGCTGATCTGCCCTCCCTCATCATTTGGCGCTTGTTCGGTTACCTGATGAAGGCG  
AGCGCCCTCTGGCTCTCCATAAAAACCCAGAAAGCTGACGCCGCTCCGCGGTTGATCCCGCCTGAT  
TTATCCCTTCGATTTGAAGTTTGCAGCTTCGATACCGTCCGATTCAATAACTTGTAAAAATCGGTACGG  
TTTTCTGCCCGCCATGTTGGCCGCCAGGGTCACGTTGCCCTCGGTGGTGGCAGCAAACGGATCAGATACT  
CCTTCTCGAATTCGGCCCCGCGCTCGTTGAACGAGGGGATGCCGCCACCACCGCCGCTCAGGGCGGACTC  
CACCATGGAGACCCCGATCACCGGGCTGCAACAGAGGCTGGCGAGCTGCTCCACCACGTTGCAGAGCTGG  
CGCACGTTGCCGGGCCAGGCAGCGGCCGCGCAGCATCGCCAGCGACTCGGGCGAAAAACCCATGGCGGCGC  
AGTGCCTGTGGCGGCTACGGTAATCGTCGAGCGCCTGACGGGCCAGCAGGGGGATATCCTCGCTGCGGGC  
ACTGAGAGACGGCAAGGTGATATTGGCAACGTTGAGACGGTAGAAGAGATCTTCCCGAAAGCGCCCCCTCC  
TCCATCGCCTTGACCAGATCCTGATGGCTGGAGCTGAGCACCCGACCTCCGGCGTGCCTGACCATACT  
CCTCCATCACCTGCAGCAGCTTGGCCTGCAGGGATTTCGAGAGGCTGCCAATCTCGTCGAGAAAACAGGGT  
CGCCCCCTTGGCCTGTTTGAACAACCCCTGACTGGCCATCTTCACCAAACAGCTGCAAGTCGAGTGACGCC  
CACGGAATGGCGGCACAGTTGATGGTATGGAGCGGCTTGTTCGCGCCGCTGGCTGGCCTGATGCAGCGCCT  
GCGCCATCGCCCCCTTGCCGGAGCCTGACGGCCCCATGATCAGCACCGGAACCTCCATGGTAGCAATGCT  
GTGAGCCTGGATCAGCAGCTGCTCCAGCTGGGGATTGCGGGTCAGGATCAGCGACTGCCACTCCTGCTGC  
TGTTTTCGGCCGGGTTCAGGCTCAGCGCATGTTTCGATGGTGGCGAACAGCTCATCCTTGTGATGGGTTTGG  
TCAGAAAGCTGAAGACGCCGGAGCGGGTTCGCTGAATGGCGTCCGGGATAGTGCCGTGGGCGGTTCATGAT  
GATCACCGGCAAAACCCACTGGGCTGGATCCGCTCGAACAGCGCCAGACCCTCCATGCCGGCCATC  
CGCAGATCGCTCAGCACAGCATCGGCCCCGCTGCTGACGCAACCGGTCGAGGGCCCCCTCCGACTGTCGG  
CGGATCCACTTCATAACCCCTGACTGCGCAGCCGATCATCAGTTTTCGAGCAGGCTGACGCTCGTCATC  
CACCAACAGGATCCGGCTCATGGTATTACCTCAGGATTCTCGTTTCAGCTTGCCTGGTTGAGCTGGTCTG  
CGATGGCGGTCAGCTGCTCGATCTGGCGGCGCAACCCTGGATCTCCTGACTCTGGTTCATCGCGACGGCT  
GTCGCGGGCCAGCAGCTGCTCGCCGAGGGCGATCCAGCTGCGCAAAAAGGCTGCGCATCGAGACCCAGC  
TCGGGCAGCATCTGCTTCAGGCGCACCAGACCCGGCGGTGCGATTGGCCACAGATTTCAGCGGGGTGGGAGT  
CCACCATCGCCAGACTGACCCGGCTCTCCAGATCGTTCGCCCCCTTTCAGACGCTGACGCTCCTGCACCCG  
TTGCTGGGGGTGACTGGCCAGCAGCCAGTCCGAGTATTGCAGACGCACCTGCATCTCCTTGTGGCAAAC  
TCCATCCGCTTGCCAAAAGCGATATCGGAGGACTCCCGCTGTGCCTGTTGCGGCAGCAAGGAGCAACCCG  
CGAGCAGCCCTGCCATCAGAGCTGGAAATACGCGTTGTATCTTCATAGTCTCATTTC AACGTCAACCTG  
AAACAGACATCAGCCTGTTTCATCCTCTACCAGAACCAGTTCCCCCCCCAGGCTGTTGGCAGACTCGCGGG  
CGATGGAGAGGCCCATGCCCGAGCCTTTCAAGAGACCTTGCCGCACTGTGCTGCCTTGCTCGAAGGGTTC  
AAAAATGCGTTGCTGATCGGCCACGGGGATCTTGGGCCCCCTCGTTGGCCACTTCCAGCCAGCTTATCTGT  
TCATCCTGCCCTGCCCTGATCCAGATATTGCCCCCGCTGGCGCCGTAACCTGACGGCGTTGGAGAAGAGGT  
TATCGAGGATCAGTCGTAGCCGGTAGGGCTCCGCCACAGGGTAACCGGCACGGTCGGCAAGTGTACACG  
GATCTGCTTGGACTCCAATGCCAGCCGGTACTCGGCAGAAAGTTCTGACAACATCGGCAGCAGGGGGACG  
GGCTCCAGTTTCGAATGCCTCCTGCTGACTGAGCCGGTTGAAGTCGAGCAGACGCTCGATCAGGGTCTGCA  
AACCCGACTGTTCTCATCAGCATCTGGCAGATCTCCAGCTGATCCGGCGTCAAAGGCCCGACCAAGCTG  
CTCGCAGAGCAGATCCGCTCCCTCCCTCAGCACCCGCGGGTCTTTCGAGCTCGTGGGAAACATGACGC  
AGGAACTGGTATTTCTGCAGCTCCAGCTCCTTGAGTTTGTGCTGAGCCAGACGATCCGCTCCCCAGCA  
ATACCAGCTCGGCAGGGCCGTC AACCCGGCTTGGGATCGGGTTCGACCCCGGCACCCAGACTCAAGATGCG  
CGACTCAATCTGTGCTACCGGGTGGATGATGAGGTAGGTGAAGATAAAGACCATCAGCAGGCTGAGCGCC  
GCCACCGCTCCGCTCACCCACCAGAGCTCGCTGGTCAATCCGGCGATGGTGAGCTGCACCCGATCCATGT  
GTTGCTCAACCCGGCTGCGGGTACTATTTTCGAGCTGCTTGTGGCATCGTTGAACTGCTCGAGCTTGTG  
CCCCGCTGCCCGCCCGGGCCAGCGCGCATCCTGCAGGCTGTCGAGCCAGGCCAGCCCCGATCGAGC  
CCGCTATAGAGCTGGCCATCGGTGATGGAGTTGCGGTGTTCCGCCAACAAACACCCGATAACCATCGAGTT  
GCTGCTGGTAGCTGGTGCAGACTGCGGGCAGTCCCCAGCACCGCGAAGCGACGCAAGGTGCGTTCGATATC  
GATGGCTTGCGCCGTCAGCAGGGTAGCGCGCGGGTATCCTTGACCGCCCGTCCATCTCGTGCCTGGT  
AGCTGACTGAGGTGGGCAAGGGAGGTGCTGTTGTGCCAGATCATGCCGCCAGCGGCATCAATACCAGCA  
CAAATCCCATCAATACCACCTGCAGCAGGGAGCGTGGGCGAACCTTGGTCATCATCTCTTCTTGCATT  
CTCACCGGTGCGCCAGCATAGCCGCACCCGCCCCAAAAAACAAAAACCGGCCAACAGGCCGGTTTGTATTAT  
CTGGATTGTGGTGATTTCATGCCAACGCGACAGAGGCCAGACAGATAATCATGATCATCGCCAGCGCGCCC  
GAGGCGGTCAACAGCGCCATTTTCAGCTCCACTCATGCAAACCTCCTTTCTGCCAATCAGTGCCGGAT  
CACAATAGATAAGACAATGTTAAGCCATAGTTAATCCGATAACCGTGAGCTGCGTATACATTTTCAGATGA



GCCCAACCCCGGGAAGGTGAGCATGTTCTATCTGTGTAGCATTGGTTCCAATATTGACCCGCATATTCAT  
GTCAGCCGCGCGCTGGCCGAGCTGTTTGCGAACGTCGGCCCCCTGCGGCTGAGTTCGGTGATCCGCACCA  
AGCCGGTGGGAATGCACTCCAGCCACGACTTTCTCAACTGCCCTGCTGGTGGTGGAGAGCCCGCTCGATGC  
CGCCCGCTCAAGCAGCACTTTGTGCGCCCTTGAAGTGGCTCACGGCCGGGATCGCAGTGATCCGCTCTGC  
AAGGTGCACGATCGCCAGCTCGACATCGATATCCTGGCCAGCAACACGCACGGCGACTTCGCCACAGCAG  
AGGTTCGATTCTATCTGGCGGAGCTGCTGGCCGAGCTGTACGGTTCATGGCGAGGTGCATGACCCCAAGGT  
GGCGCTGCAAGTGACGCTCCCCGCCCTGTGGGCAAACTCAAACCCGGCAAGAGCTTGTGACCCGGCAG  
GTCGGGCTGGTGCCGCTGGAGCTCGGCAACCCCTCAGAGGGTGGCCAGCGCACGCCCGCCATCTACCTTG  
ATGCTGGCACCCGTCATATAACTGTTCCCACCAGTAGCTGCACCGCTGCCAGATGGGCTCCAGCCCTC  
CCTCCCAGCCAGCGCGCTTTTCGCCAACACCTGCTGGCGCCATGCCTCGTCATGCTCGTCGAGAAACAG  
GATTGGCCCCGGCTCTATGGTGTGACCCGAACCCGAGCGCCAGCTCCCAGGCAAACTCATGGCCAG  
GAATGGGCTCCCGCTTGGTGGCCACATAGCTGGCAAAACGGGGGGCCAGCGCCCGTTTAGCTGGAAGGG  
TGATATGAATGATGCTGGCGTTGGGATTGCTGGCCAGCCGGGGGGCCAGCGCCCGTTTAGCTGGAAGGG  
GGCCGCCATGTGCACCCGATAGAACTGCTCGAACTGGGCCAGTTGCGCCGCCGGATCAGTTGCCTGCGGC  
TCGAAGGCCGAAGCATTGTGGATCACCAGCGCCAGATCCTGATGGGCAGCCAGCACATCGATCAGCTTGC  
CAACGTCTCTTCCCGACAAAATCCGCTGCACCAATTCGACCCCAATGCAGCCAACGTGGCCAGCTC  
CGGCCGCTCGCTGCGATAACTGCCCGTACCTGCCAGCCCGCTGCCACCAGCTGTTACAGAGATAAAAT  
CCGAGTCGACGGCCGAGCCGTAACCAATGCACGCATACGATCTCCTTTCCCTTTTCATGGTCTTGCATG  
AACGAAGCCCGCCTGCCAGCGGATCACCGCCGATGGCTTGTGCTATCAATCCCTGCGGCACAAGCCATT  
GGTCACGGGCCACTCGCCCGCTCATAGTGGCGACATCCCTCTTGCAGGATCACCACCATGCTGAAAGT  
ACACCACACATGGGTGCGCTGACCCACTCCCTCACTGCCGGACTCGGCTGGCAGAAGCGCTGGATCGC  
CTGCATCAATCGGGTCTTGGCGACCTGCCGGTACTGGATGAGCAGAAACGGCTGATCGGCTTTCTTTCCG  
AACAAGATTGCATCCCCAGCCTGCTCACCGGCAGCTACCCTGCGATACCCGCACCCGGGTGGAGGATCT  
GATGAACCGCTCGCCCTCTCGGTGGGGCCGGATGAGAGCATTCTGGATCTGGCTCGCCAGATGGCCGAT  
GCCAAGCCCAAGATCTACCCGGTGTGCAACAGGGCAAGGTGATCGGCATCATCAGCCCGCTCAGGTGA  
TGCAGGCCCTCAACCAGCAGATGAAGGTGTGCCAGCAGACCTAGATCTGGTAACGCCCTTGTACCCGAT  
ATCGAAGTGCAGGGGCTCCGCCACTTGGCCAGCGCCAGCAAGGTCAACAGGGCCCCGAGAGCCAGCGCC  
ACCAGTGCAGGGCCCACTCCACCCGCAACCCTCCAGCAGCCATAACGCCGGCAGCAATACGCCGGCAGCA  
GCTTGATGCCGGGAATGGCGAAGCAAACTGCTCCTTGAACGCCAGCCCGGAGAGGGTGCAGCAACGCCG  
CCCCAGCACCAGCGCATCCGGTGGCCCCACCGCTGCCAGGGCCAGTGGCGCCCAACCAATCCCTGCAGA  
ATCAGGCGAATCCGCTTGTGCTAGATATGCAGCGAGAAGCCGAGATTGCGCTTGGCCACTGCCAGCAACA  
TCAACCATTGTGCCGACGGAAGCAGTGCATCCCGCTCAGCAGCGCCGCACCCGGCAGCAACAG  
GGCAGCCGCACTAAAGCCAAGGCGGTAGAGCGAGACAGTCAACTTGTGATCCCGTCCAGCGGGCTCTCG  
ATTTTCAGGATTTGCCATAAACAGTCGCTTCTAACGGATCAGGTGCCATCCAATATACTGGAATCAGGTCT  
TGGAATATCTTCAAACGGGCTCAGGAGACGTAGTTTGCCTGTGATCCCCCTGTTTTGGTTGCTGTTTTCCA  
CTCGGATTGCCCCGCAAGAGCTGGTGTCTGCGGCACCATGGAGCCCCGCTCAAGTTTCTCGATGCCG  
ATCAGAAACCCCGCGGACTCGATATCGACATCGTACCGCCATCTTCGACAAGCTGGAGACGCCCTTTTCG  
GATCGAACTGGCCGACTCCGGTGGCCGCTCACCCGCAATGCCGAAACCGGCGCTGCGATCTGGTGATG  
ACCCACTCCTACAAGGCAGAGCGGGAGAGTTATCTCATCTATCCCCAACAGACCCATCTTCGCCACAGCT  
GGCACTTCTTCGTGCGCAAGGCGGACCTGCTGAAGATCCGCTACGAAACGCTGGCCGATCTCAAACCCCTG  
GCGCATCGGCGTGACCAAGGATTTCTCTACACCCCTGAACTGGCGGTGGCGATGACCCGACCCGGCCTAT  
CAGTTTCAGGAGATCACCATGAACCAGCTGCAACTGCGCAAACTGCTGGCCGGACGGATCGATAACCGTGC  
CCATGCCGCTGGTACCCGCTTACCCAGATCAAGGAGGAGGGGCTGACAGGCAAGGTGATACCTGCC  
CAAACCGCTCAAGAGCAGCCCTACTTCAACACCTGGGCCCCGCGCACGAGCGGATACACAGACCCAGCC  
CTGATGGCGGCCTACGATGCCGAACCTGCTACGCATGAAGCGCAACGGCAGCCTCAAGGCCCTCTACGACA  
AGTACGCCATCCCTATATTGAACCCCTGATCAAGGGGTGAGGTTTCGCACGGGAGATGGATCTCTACGC  
CCTCCCCCTTATGCACTCCGACTCAAGGTTTACGCTCCCGCAGGATCGGATTCGACGCGAGATCAGGGT  
TTCAGTGGACTGGATCTCGTTCGATGGTCTGGATCTTGTGATCAGCACTATCTGCAACTCGTTCGATGGAG  
CGGGTCATCACCTTCATGAAGATGCTGTAGTGGCCGGTGGTGTAGTAAGCCTCCACCACCTCGTCTAGCG  
CCTGCAGCTTGGCCAGCGCCGAGGGGTAATCCTTGGCGCTCTTCAGATTGATCCCGATAAAGCAGCAGAC  
GTCATAGCCCAGCTTCTTGGGGTAACTGCACCCGCTCCCTCGATGATCCCGCTGCTTCATCTTC  
TCCACCCGCACATGGATGGTGGCCGGCTGACCGCCAGCTGCTTGGCCAGTTCGGCATAAAGGAATACGG  
CATTCTCCATCAGGGCGGTGAGGATGGCCTGATCGAGATTATCGATCCGGTAATTTTCCGGCATTTTTTT  
GCCCTCCCCTTAGCGATACATCATTAAGCACCCTTATTTTGAAGAAAAAACACACAAAGCCTATTTTC  
CATTATCGAATATTGAATTTAGTTGGCAATCCGTTGAAGAATCACCACATCCAACGGGATTTGAAACAGG  
AATTCAGCATGAAACAGCACTACATTCGCAGCCAGCAACAGATTAGCTTCGTCAAAGAGATGTTCTCCCG  
CCAACCTCGCCAGCAACTGGGTCTGATGGAGGTACAAGCCCCATTCAGACCGGGTTCGGTTCGACT  
CAGGACAACCTCTCTGGCCACGAGAATGCAGTGCAGGTCAAGGTGAAGACCCCTGCCGGAGCACAGCTACG  
AAGTGGTGCATTCACTGGCCAAATGGAAGCGTCAGACTCTCGGTTCGCTTCGGCTTCGGCCCGGGTGAAGG  
GATCTACACCCACATGAAGGCGCTGCGCCCGGATGAAGACAAGCTCACCCCATCCACTCCGCTACGTCG  
GATCAGTGGGACTGGGAGAAGGTGATGCCGAGCGAGCGCCGATCTCGCCTATCTGCAGGAGACCGTGC

CGGGCATCTGGGCCGCCATCAAGGCCACCGAGCGCGGGTCTGCGCCGAGCATGAACTGACACCCTTCTC  
GCCGGCCGAGATCCAGTTCTGCACAGCGAAGAGCTGCTGACCCGCTACCCGGATCTCGATGCCAAGGGG  
CGTGAGCGTGCCATTGCCAAGGAGCTGGGGCCGTGTTCTGATCGGCATCGGCGGTGCCCTCTCCCACG  
GTGAGCGCCACGATGTACGCGCCCCGGACTATGACGACTGGAGCAGCCACAGCGAGCTGGGTCTGGCAGG  
TCTGAACGGCGACATTCTGGTGTGGAACCCGGTACTGCAGGACAGCTTCGAGATCTCCTCCATGGGGATC  
CGGGTGCATGCCGAGGCGCTGCGCCGCCAGCTGGCCATCACCCGGCGACGAGGATCGCCTGCAGTACGACT  
GGCATCAGGATCTGCTGGCCGCACGGATGCCGCAGACCATCGGCGGCGGCATCGGCCAATCCCCTCTGGC  
CATGCTGCTGCTGCAAAAAGAGCACATCGGTTCAGGTGCAGGTTCGGCGTCTGGCCAGCCGAGATGAAAGCT  
GCCGTGCAAGGCATGCTGTAACGAATGAAGGCCATGCCGGCGCCATCTCAGCCGGCATGGCAACAGGCAG  
GTGGCCGTCCGGGGTTGAGCAGCGCATCCCCGGCAGGCTGTAAGACGCAAGGCCGTTAGCGGCTTTGT  
CGAATCGGGGGCTTGCCCCGTGCGACCCGCTCAACCCAGTTCAGGTTCGCTTCACTACATTCCTCCCGGCA  
ATCTTCGGATTGCCGTTTTTTTTTATTTTCCATCGCCAGATATGGCAACGCCAGCCCAAGGGCTGGCGTT  
GCAAACATAGATACGAGACTGGTTACTGGGTTCATGGTGAGGCCGTTGCTGTCGGCTCCCAGCAGCAGTTT  
CTTGCCGGGAACGATGCGGCCGGAGAGCAGCGCCTGCGCCAGCGGGTCTCCACCTTCTGCTGGATCGCC  
CGCTTGAGGGGGCGTGCCCCGTAGACGGGGTGAACCCGGCGTGAACCAGCTTGTGAGCAGCGCTTCGC  
TCACCTCCACCTCGTAACCTGAGCCTCCAGTCGGCCCATCAGGCTCTTGAGCTGGATGCGGGCGATGGA  
CTTGATGTGCTCCTCGCCGAGCGGATGGAACACCACGGTCTCGTCGATCCGGTTGATAAACTCCGGTCGG  
AAACTGCGGGTACGACATCCATCAGCATGGCTTTCATCTCGTCGTAATCCTTCTCGGAGTGGTGCTCCT  
GAATCAGATCCGACCCGAGGTTGGAGGTCATGATCACACCGAGTTGCGGAAATCGACGGTGCACCCCTG  
GCCATCGGTTCAGGCGGCCATCATCGAGCACCTGCAACAGGATGTTGAAGACATCGGGATGCGCCTTCTCC  
ACCTCGTCCAGCAGGATCACCGAGTAGGGACGACGGCGTACCCTCGGTTCAGATAACCGCCCTTTCAT  
AACCCACGTATCCGGGAGGCGCCCCACCAGACGGGCCACGCTGTGTTTCTCCATGAACTCGGACATATC  
GATCCGCACCATGGCATCCTGGGTATCGAACAGGAACTCGGCCAGCGCCTTGACACAGCTCGGTCTTGCCC  
ACCCCGGTGGGCCCCAGGAACAGGAAAGAGCCGATGGGGCGATTCCGGTTCGGAGAGACCGGCACGGGAGC  
GGCGAATGGCGTTGGAGACCGCATCGACCGCTCCTCCTGACCAATCACCCGGCTGTGCAGCTGATCTTC  
CATCCGCAGCAGCTTGTGCGGTTCCCCTTCCAGCATGCGGGCGACCGGAATACCGGTCCAGCGGGCCAAG  
ACGTCTGCGACTCTCCACATCGGTGACCCGGTTGCGCAGCAGACTGGTCTCCTGCATCTCGGCTTGAGTGG  
CGAGATCCAGTCTTCTCCAGCTCGGGGATCGCGCCGATGTCAGCTCGGACATCCGGCCAGGTCGCGC  
TGCCCGGCGCGCACATCGAGATCCTGACGGGCTGCTCCAGGGCCGCTTGATATGCTGGGTGCCCGCG  
AGGGCGGCTTCTCGGCTTCCACACTTCGTCCAGCTCGTTGTATTCCCGATCTTTTTCGCCAATCTCCT  
GATTGATCAGCTCCAGACGCTTTCGGCTGGCGTTCGTCGCTCCTCCTTCATCAGCGCTGCTGCTCCAGCTT  
GAGCTGGATGATGCGCCGCTCGAGACGATCGAGCGCCTCCGGCTTGAGTTCGATCTGCAACCGGATGCTG  
GCCGCCGCTCGTCGATAAGGTTCGATGGCCTTGTCCGGCAGCTGGCGATCCGCAATGTAGCGATGGGACA  
ACTGGGCCCGCCACGATGGCCGGGTTCGGTATCTGCACATGGTGGTGCAGCTCGTAACGCTCCTTCAG  
GCCGCGCAGGATGGCGATGGTGTCTCCACGCTCGGCTCTTCCACCAGCACCTTCTGGAAACGGCGCTCC  
AGCGCGCATCTTTCTCGATGTACTGACGGTACTCATCCAGAGTAGTGGCACCGACGCAGTGCAGGTCGC  
CACGGGCCAGTGCAGGCTTGAGCATGTTGCCCGCATCCATGGCCCCCTCGCCTTGGCCGGCGCCAACCAT  
GGTGTGCAGCTCGTCGATAAAGAGGATGACGTTGCCCTCCTCCTTGCGGAGATCGGTTCAGTACGGCCTTG  
AGCCGCTCTTCAAACCTCGCCGCGATACTTGCCCCGGCCACCAGCGCCCCATGTCCAGCGACAGCACCC  
GCTTGTCTTTCAGCCCTTCCGGCACTTTCGCCGTTGATGATGCGCTGGGCCAGCCCCCTCGACGATGGCGGT  
TTTACCAGACCCGGGAGCACCGATCAGCACGGGGTGTCTTGGTACGGCGTTGCAGTACCTGAATGGTA  
CGGCGGATCTCGTCATCACGGCCGATCACCGGGTCAAGTTTGCCGATCTCGGCCCGCTCGGTTCAGATCGA  
TGGTGTACTTCTCCAGCGCCTGACGGTCTCCTCGGCGTTGGCATCTTCCACCTTCTTGGCCACGCAC  
CTTGTGATGGCCGCTTCCAGTTTCTCTTGGTTCAGCCCTTGGGCGCGCAACAGCTCGCCAGCGTACCC  
TTGTGTCGAGGGCAGCCAGCAGCAACAGTTTCGGAGGAGATGAACTGATCCTTGCCTGCTGGGCCAGTT  
TGTCGCAGACGTTGAGCAGCGCGCCGAGGCCGTTGGAGAGCTGCACGTCCCTTCTACGCCGCTCACGCG  
CGGCAGGCGATCCAGCTCCTCGCCAAGGCGGGAGCGCAGGGCGTTGATATCCATCCCGGTTCAGGTTGAGC  
AGCGGACGGATAGAGCCGCCATCCTGATTGACCAGTGCGGTTCATCAGGTGAACGGGTTTCGATGAATTGGT  
GGTACGACCCAGCGCAAGAGACTGGGCATCGGAAATAGCAATCTGGAATTTGCTGGTAAGGCGATCGAG  
GCGCATTGCACTCCCCCTTCAAACAGGCAGACCGGCTTACGCGGCAAAACAACATAACTTTCTGAGATGA  
AAGATGAGGCCCGTACGGGCTATTTCAAGGGCATGGGCTGGTTATTTTTTCTGCAAAGCGGGGAGAGTGC  
AGGATCACCGCTCTCTCATAACGATCTGTTCTTGGAGAGACGGGCTATTACTTGGCGGGTGGATTGCTT  
AGCGGGCCAACCAGATGAGGGAGGCCATCCGGCCGGTCTGACCATCGCGACGATAGGAGTAAAACCTGCTC  
GCTATCGCTGAAGGTGCAGTATTCACCACCATAGACAGCGGTAACGCCAGCACGGGCAAGGCGCAGCCGG  
GCCAGCTGATAGATATCCGCCAACCATTTGCCGTCGTTGGACGAAGGGACGAATGCCGCGACCGCTTCAG  
CCTGCTCAGCCATAAAGGCCCTCGCGCACCTCTCCCCCACTTCAAACGCTGTGGGGCCGATGGCCGGGCC  
CATCCAGGCCAGGACCTCGTCCGGCTCGCAGCCCATGGCGGCGATGCTCGCCTCCAGCACGCCCTCTTTC  
AGGCCACGCCAGCCAGCATGTGCTGCGGCCACCGCGGTACCAGGCCCGATCGCAGAACAGCACCGGCAGAC  
AGTCAGCAGTCATCACGATACAGGCTGAGCCGCTCATGGGTGCAAGCGGCATCGGCATCCGGTGCCTG  
CTGATAATGGCTGTTGACCTGATGAACCACGGTGCCGTGCACCTGATTAAGCCAGTTAAGGGGCCCCGGG  
ATGGCGGCCGCTGCTGCAAGCGGGCGCGGTTAGACTCGACTCGCGCCGGTTCATCCCCACATGGGGCGC

CCAGATTGAGACCTGCAAAGACCCCGTCACTGACGCCCATCCCGGGTGGTCGACAACGCCCTGACACA  
CGCCGGGGCTGGCCAGTCGGGTTTCGATCCATTTTCATCTGTGACTCCTTCAATTCACCGATATAAAAAACGG  
GGCTCCTGCAAGGGAACCCCGATTGGCATCTATTTCGGGCCGGATGACGCCAGAAACCGACGCAGCAGGCC  
CTATCACATCAGTTCCAGACCAGATCATCCGGATTGGCGAGCGTATCCGCGCGCAGCACTTCCATCAGCT  
CCACCATGTCTTGCGGTGTAGCTGAATGCCACTGCATCACTTCAACCGTGATGGGGTGTAGCCAGTTGCAG  
CATGGTGGCATGCAGCGCCTGACGGTTGAAAGTTGCGCAGTGCCTGAGTCAGCTCGGGGGTTCGCGTTGCGC  
AGCGGGCGCAGACGGCCACCGTAAGCGGGATCGCCCACCAGCGGGTGCCTTGATGTGGGCCATGTGGACAC  
GGATCTGGTGGGTACGGCCGGTCTCCAGACGCAGACGCAGGCGGGTGTGGCCACGGAACCTTCTCGTGAC  
CCGGTAGTGGGTACGGAAGGACGACCATTGGGCACCACGGCCATATGGGTACGCTGGGTTCGGGTGACGG  
CCGATGGGGCCATGCAGCGGTGCCACCTGCGGTATGTGACCGATGGCGATCGCTTCGTACTCACGGGTGA  
TCTGGCGCGCCTGCAGCGCTTCCACCAGATGGGTCTGTGCGGGTACGGTTTTGGCAACCACCATCAAGCC  
TGTGGTGTCTTTATCCAGACGGTGCACGATACCGGCGCAGGTACCTCGGCAATGCCGGGTAGCGGTGC  
AGCAGGGCGTTGAGGATGGTGCATCCGGCGTACCTGCGCCCGGGTGAACCACAGACCGGGCGGTTTGT  
CGATCACAGAATGTGTTTCATCTTCAATAACAATGTTGAGCTCGATATCCTGGGCATCCCAGCGAGTATC  
ATCTTCCAGCTCGACATTCACATGCACCTGCTGCCCGGCCAGAACTTCTCGCGCGGGGTGTTGGCAACC  
TGACCGTCCAGGGTCACTCTGTCTGTAAAATCCACTCCTTGATGCGGGTGCGGGAGTAGTCTGGAAACA  
ATTCGGCCAGGGCCTGGTTCGAGTCGCTGCCGAATTTGGTGATCCTGGAATTCGCTGTCAAGTTCAATATG  
CTGGCTCATGTATGGTCTCTTGAGCGGGGGTATCAATTCGAAATAATCCGGGTATTCTAGCTTTTCTTT  
TAGCCAAGCATAACGGATACTTTGCCAATTTTCGTGAAATGGACCGGATGTTGTTGATGGGAAAGAAGTC  
TCACCTGCTGATGTGCTCGCTCGCCTTGGTCGCTACCTTGATCACAGGCTGTTCCAGCACCAAACCAAGGTA  
CCCGACGAACCGCCGGAGACCCTGTACCAGAAAGCACGCTCAAACCTGGACGTTGGCAATTACGTGCAAG  
CCACTGAATTGCTGGAGGCTTTGGACTCTCGCTACCCGTTTCGGCGCCTACTCCAATCAGGTGCAGCTTGA  
CCTCATCTATGCCTACTACAAGCAGGATGATACCGCTCAGGCGATCGCCAATATCGACCGTTTTATCCGC  
CTCAATCCGGCGCATAAAAAATATCGATTACGTCTTCTATATGCGCGGCTGACCAACATGGCGGGGATT  
ACAATTTCTTCCAGAGCCTGTTTCGGTATCGGTCTGTGACGACAAAAGACCCGGCTTATGCCCGTCAGGCATT  
CCAGGATTTCAAGACTCTGTTGCAGAACTACCCCAACAGCGTCTATGCCGCCGATGCCCGCGCCCGCATG  
ATTGGCCTGAAGAATCGTCTGGCCCGATATGACCTGAGCGTGGCCGAGTATTACGTGAAGCGTGATGCAC  
TGGTCGACAGCCCAACCGGGCAAGCTGATGTGACGACCTACCCGACACAGCCGAAACCGAGAAGGC  
GCTGGAGATCATGGTTCGAGTCTTACGACGCCCTGAAGATCCGCGAGCTGGCCAAGCATGCCCGGAAGTG  
CTGGCCAAGAATAACCGGAGAACCCTCGGCCGTTGGCTGAGTGATACGGATAAAACCGGTAACAAAAA  
CCGATGCCTTGGCATCGGTTTTTTTTATCGCTGCAATTTAGCCACTGATATTACCCGCAGAGGCTCTGCAG  
ACCAGGGGCGAGTGTGACGGCGCCTTCCCAACGCCGTCATCGCAACGCTTACTTCGCGACGTTACCCGCCA  
CGTTCAGGGCATCCCAGGTACGGGAGAAGGGCGGCGCATAGGCAAAAGTCCAGCATGCCAAGCTGATCGGT  
GGTCACTCCCATGGTGTGATGGCCACCGCCAGCGCTCGATGCGGTGGACCGCCCCCTTGCACCGAGGATC  
TGGCCGCCCAGCAGCCGCTTGTGCCCCGATCATAGACCAGCTTGACGTGAATGTCGGACTGACCCGGGC  
AGTAGTTGGTGTGGCACTTGTCTTGTGATCACCACGGTGCATAGTCGATCCCATCGCTTGGCTTCCCTG  
CTCGGAGAGGCCGGTACGGCCCCGCTTCCAGCCCCAGCACCTTGAGCGCCGCAGAGCCAAAGTGCCCGGG  
AACGTCTGCTCGGCTCCGGCCAGGTTCTCGCCCCACCATGCGGCCAGCTTGTGGCGATGGTGGCTAGCG  
GCACATAGACCTGCTGCTGCTTACGCTATGCCAAACGCTGGCACAATCACCGGCCGACCAGACGTTGGC  
CAGCGAGCTGCGCCCCGACGATCCACCTTGATTGCGCCGTTGCCGAGCCGCTCGATGCCGGTGTGCGCC  
AGAAACTCGGTGTTGGGCTTGACCCCGGTGCAGACCACCACGATATCGGCCTCGTACTCGCTCTGGCTGG  
TGCGCACGCCGGTACCCCGCCATCCCCAGCAGTGCCTTCAACTCGCTCACCCAGATGGAGAGAGACCC  
CTGCTCACGCAGTTCGGTTTTCGATGTGCTGGGTGATCTCGCCATCAATGCGTTCGGGGATGACCCGATCC  
GCCAGCTCGATAAGACGCACCTCTTTGCCTTGTGATGGACCAGCGCCTCGACCACCTCCAGCCGATAAAGC  
CGGAGCCAATCACACAGCGCGGCGATTGTTCTTGTCTTGACCCGAGCTTTGAGCGCCAGTCCGTCGGC  
CATCCGGCGCAGACCGAATACCCCTTGTGTCAGCAAAACCGGGATGGGGGGCATCACTTCGCGGGCACCG  
GTGGCGATCATCAGCCGATCGTAGCGATCGGTGAAGGTGTGCGCGTGTGCTCCACCACAGAGTCTGGG  
CAGCCGCATCGACGCTCAGCACCCGATGGCCAATCTTGACCTCGATCCCCCTTGGCGGCGAACTGCTCCGG  
GGTGTACTCGGCCATGTAACCGGGCTCCTGAAACTCGTCAACCGACGAAGTAAGGCAGGCCACAGGCACCG  
AAAGAGATCACTTCGGAGGCTCATAACCACGATCTCCGCTCTTTGGCCAGACGGCGCGCTTGGCCG  
CCGCACTCATAACCGCGGCTTCCGCCACCGATGATCAGAATTTCTCATTTGTTTTCTCTCAATGGCGCAGG  
GAGTGCATGCCCTCCCTGCGGTCTATGACGGGAAAGAGTGCCTTTTCCACGAGCAGATCAACCGACGA  
AAATCAGACGGTGGACTCTTCGCCGTCAGACTCACTTCGTGATCGCTGTTGAACACATGCATGTCGGTC  
TCACCCATCAGGCGGCTGGTGCACGCTCCCTGCGGTGATGGAGCCGAGACGTTAAGCGCGGTACGGCCCA  
TGTCGATCAGCGGCTCGATGGAGATGAGCAGACCGGCCAGCGCCACCGGGAAGTCCAGCGCGGAGAGCAC  
GATCAGCGCGGCAAAAGGTGGCGCCACCGCCAATACCGGCCACCCGAAAGGAGCTGACGGTGTGATGGCG  
ATCAGGGTTCATGATAAAGCCGGGATCCATCGGGTTGACCCCTACGGTTCGGGGCAATCATCACGGCAAGCA  
TGGCCGGATAGATAACGGCCACAGCCGTTCTGGCCGATGGTGGAAACAAAGGAGGCGGCGAAGTTGGCGAT  
CCCCTCAGGAATACCCAGCGACTTGGTCTGGGTCTGCACGTTTCATCGGGATGGAGCCCGCACTGGTGC  
GAGGTGAAGGCAACCGCCAGCACCGGCGTGTCTTTCAGGAAAGCGCAGCGGGTTGATGCCGACCATGC  
TCACCAGCAGCAGGTGCACGACAAACATGATGGCGATGGCGCCGTAAGAGGCCATCACAAAGCTGAGCAG

GTTGAGAATATCTGCATAGTTGGAGCCGGAGACCACCTTGGCCATCAGCGCCAGTACGCCAAACGGGGTC  
AGGCGCAGCACCAGAGTACCATTTCGCATTACGATGGCATGAGCCACGGCCACGAAGTGGCTGAAGCTGG  
CGAAGATCTCCGGCTTCTTTCGGGGCGATGCCGGTAGCGGAGAGGCCGATGAAGATGGAGAAGATCACCAC  
GGCGATGGTGGAGGTCTTTCGCGCCCCGGTTCATGTCGAGGAAGGGGTGGCAGGAATGAACTCCAGCATC  
ATCTTGGCGAACGACATGCTCTCGACGCTGCCGAGGGTGGTCTGCAGCGCGGCCACGAGCGCTCTCGG  
CGGCACCGGAGGTGAGCCCTTACGAGTACAGGCCAAAACAAGTTGGACATCAGGATGCCCGCCCCGGCGGC  
GATGGCGGTGGTGAAGATCAGCACGCCTATGGTCATGGCGCTGATCTTGGCCAGCGCAGTGCCGCCATTG  
AGCTTGAGAATGGCGCTGATGATGGAGACCATGATCAGCGGGATGATGATCATCTGCAGCAGCTTCACAT  
AGCCGCTACCCACAATATCCAGATAGTCGATGGTCTGAACAATGACGGACGAACCAGCACCCTAAAGCAG  
TTGCAACCGCGGCCCGAACAAGATAACCGAGCCCCAGACCGGCAAAATACCCGGCGGGTGAAGCTCACATGT  
TTTTCTGTAAACGGTAGAGAAAGAACAAGATGGCGGGGATGGCCAGATTGCCGATAACGCTAAATG  
TCATGGTATGACTCCCCAAAAGCGGGCTTGGCCCCGAGAAAACAAGAGCAAGCGCCATGCTTGCCCTGGC  
AACCGTGTGACACGGTCTGCGCCGTCGTGACAAGAACAAGGGGTCTATCGCCCCCTTGTACAGATTCA  
CTGCTTCTGCTGTTTTGCTCGCATGATATTGATGATTTTCGATGTCGGTATCCAGCATCCCCCTTTTGGAG  
AGTCGTCCAGATTGGCGATGGTCTGGTCCACATCGTCGGAGACGATCCCCCTCGCTCTGGGGGACATGCA  
GGTTGTTGATAGCCATCAGCGAAGACTTAACCGCCGCCGAGGTGGAGGTGGAGACCTTCATGGAGCAGGC  
GCTGCCCGCGCCGTCGAGATGATGCCGGAGACATCGCCAATCATGTTGTTGATGCAGTGGCTGATCTGC  
TGATACTGGCCACCCAGCAGCCAGGTGATGGCGCACCGGCCCCATGGCGGCGGTACTGGCGGCGCAGA  
GGGCCGACAGCTTGTCTGATAGGTCTTGATGTAGATGGCCACCAGATGGCTCATCACCAGTGGCCGGGT  
CAGCTGCTCGTCGCTCGCCTTGAGGAAGCGGGCAGCCGCGACCACAGGCATGGTGGCGGCAATGCCCTGA  
TTGCCGGAACCGGAGTTAGACATGGCGGGCAGCATGGCGCCATCCATCCGCGCATCGGAGGCAGCAGAGG  
AGAGGCGCATCGCCAGGGTCATCAGGTTCATCGGAGAGCAGCTTGCCTCCACCTGCTCGGTGAGGATCTT  
GCCGATCTTACAGCCGTAACCTTGCAACCTTTCGTCCGCCAGCGCTGATTCATGGTGGCGGCCCTCGCGG  
ATAAAGTCGATCTCCGCCAGCGGCACTTCCAATGCAAAATCGACGATCTCCCGCAGGGTCATGGCCGGTT  
TGGCGGATTTGGCTGGCTGGATCTGCACGCCGGGGGCACTGGCTGCTCCATCAGCACCTCGCCATCCTT  
CTCCATCAGGATGATGCGGGTGTGGTCCGTACAGATCACCACCCGGGCACTATGCCCTCCACTTCGGCC  
AGTACCTCGGCGTAGAGCAGCTCCGGCACATCCTAACATCCACCTTGATCACCGGCAGCAGCGCCTTGG  
CCGCTTCCACCTGTTCTGGTGTGAGGGTCTTGAGCAGCTCCAGCCCCGCATCGGGATTGCCCTGTGAT  
GCCGACCCGACGCGGCCACCCGACCCGATCATGCCGTTGCCCGCACCCCGACCCCGACCCCGCTTGTG  
AACAGATTGCCACTGACCCAGACGCTGATGCGGGTCCGGGTCTCCCCAGCAGCTTGCGGCAGTTGGCCG  
CCGCAAGCGCCACCGACATCGGCTCGGTACAGCCCAGGGCCGGCACCACTTCACGCTTGAGCAGGGTAAT  
AAAGTCGGTCCATTGTGCTTTCATCGCAGTGTCTCATGTTTCAGGGTGGCCGAGGCAGTTATTGCTTG  
TTCAGATCCGCTTGTGGTTGCGGATATGCAGATAAACAGTATGACGGGAGATGCCGAGCATCCGGGCAA  
CCAGCTGGGCGCCTCCTTATCTCGAAGATCCCATGTGCAAGAGCCGGGTCACTATCTCCTTGTGCG  
CACCGTGCAGGAGAGCGAATCGTCCCGATCCACCTTCTCAATCACCTGAGTCACCAGATCGTCCACCGAG  
CTGACAAAGGTCTCGTTGTTGAGCGGAGCCGGTGCCGCGGGCAGCGAAAAGTATCGAGCAGGCTGCCAA  
GGGAGGTATCCAGACTGAAGTTCACGCAGAGCATGCCTATGGGCTTGCCTGCCGTTGCTGATAGTGAT  
GGAGGAGGACTTCATCAGCGTCCCGTCCGCGGTACGGCTGAAGTAACTGCTCCACTGGCTGCCCGCTCC  
CCCTGCAAGCGGTTGAGGGCAAAGTCGGTGACCGGCGCCCCCTCCCGACGACCGGTGACATGGCCGTTGG  
CAATCTTGATAACCGATGCATCCAGCGTATCGAACGCATGCAACACCACCTCGCACCTGCGCCAAACAG  
CGCGGCCAGCGCCTCGACCGCGGGCTCGAAACTGGCGATCAGATGACGTTCTTCATCCGTTAACGAATTG  
CTCTGGTCAAGTGGTGGCTGCTGTGGACATATATGAGTAACTTTGAGTAAACCGCAGTTGATTCCACTATC  
AACAAAGATCAACTAATGTTGAGCAGCATCCCCTTTTTGTTCGCCATTATGCCACCTTTTAAACAAAGTGC  
GACAAATTGTGAAGCCGCGCACAGCAGGGCGGCAACTCAGAGGTGATAGCGGGCCAGCAGCTGCTTGTAG  
GCGGGAGTCTGTTTGAACGCCTTGAGGGCAGAGGAGAAGCGGATAGCCAGCTGGTCTGTTGCCAGGCTTGT  
GGGTAAACCGCAGAAAAGTTGCGGTTGTCGCTGTGTCAGCAGGCGGAGCCGTGGTTCACCTGATCCTGCAA  
CCCCTGAGTGTGCAGCAAGTAGCGACCGACCCGCTCGTTGAGCACCACCCCGTCCAGCCGACCGCCATC  
ATCAGATGCAGCTGTTTATGATGGCATTCCCCCTCCCCGTCATCGGCATCCGGATCACCCCGGGATCGGTCA  
GAAAATCGGGGCTGTAGGCATAATCTTCTGAATACCTATCCCGCAGACCTTGAGGTCCGAGAGCTGCTT  
GAAATCAACCGGACGAGCCGATGGATAGAAGAGCACTTCGCCGCTGTAAGAGAGCGGCTCTTCGGGGTAG  
TGGAGCCAGTGTGGCGGGAAGGTTCAAAGAAGACGTCGACTACCGCATCCCCCTGCTGAGACGGGCCCT  
GCTGCAGAACCCGCTTCCAGGGCAGCACCTGATTTCCGGTGCATAACCCATCTGGCGCAACACGGTACA  
GGCCAGATCGAGATCGGCGCCAGCCAGCTCGCCATTGTCACCACGCATCACATAAGGGGGCCACAGCTCG  
GTCAGCAGCGTCAGAGTCGGCGGCTCGTCCGCCGCTACGGCCGAACCAGCACCAAACAGGGAGGCCAGCA  
GCCAGCCGTACAACCCGATCCTTCGCCAACCTGATAACCACATCATGGAGATCCCTCATGGTCCGTATGG  
ATTGAGGATATACAAGGGATGAGCAATAAAAAAGGAGGCCGAAGCCTCTAATTAATGCCCTTTAAAATCA  
ATGATTTTACAAAAATAACAACAACCTTATGTGTTGCAAAAGTATGCAAGGTATTCGGTGTGTATCAACAA  
AAATGGCAAAATGTGGACACTTGGCAGAATCAGTTTTTCAGAGGATTGAACCGCACTGCATCGCTCAGGT  
AGTCGGGGGCGAAGTGGGCATAGGTCAATGTCTGCTGATTTGAGTATGGCCGAGGATCTTCTGCAGCGC  
CAGAATATTTCCACCGGACATCATAAAGTGGCTGGCAAATGTGTGGCGTAGCACATGCACTGCCCTGACCT  
GCCGGTAAATCTGGCGCCACCGACTTGTGGCACTACGAACAACCAATAATCCGGAGCCTTGAAGAGAG

GGCCGCGGCTGATGCCACTAGTGATCTCTTTATAAAGCGAGTGCGAAATGGGTACCGTCCTGTTCTTACC  
GTTCTTGGTATTGACGAACGTAACCCGACCGGACACAACATCCTCACGGCGCAGCTCAGCGGCCTCCCGC  
CAGCGAGCCCCAGTCGCCAGGCAAACCTTGACCACTCCAAGGTTGTCATCGCTCAGCAACGCAAGTAATT  
CAGGCACCTCAGCACGCGTGAGAAAAGCCCATCTCATGAGCTACCAACCGTACCTTTTTTCATCTCCTTGAG  
CGGGTGCTCGTGATGATAGTGGCCAAGCTCAATCAGCGTGAAAAAGACCCAGCCAGCATCTCCTGATCT  
CGGTTACCGTCTTCGGCTGCCGCCCTGACTCCAGCCGTGCGGGCGGGTACTCGGGCAACTTGGCCTTGG  
TCACGTGACGCGCCTGAGGGTGCTTCAATCTGGCATCGATGTTGTGCAGCTTGCGGCGGGTGTTCACC  
ATCCTTCAATGTCTGACCATGGAGGCGCCACCACAGCTCGATCAGCTCGGAGAGCGGTGCTGTATCAGCT  
GGACGGCCAAGCCACTCCTTATCATGCTGGGTAGCAAGAACCAGCGCTCGTACTGTTGAGCCTCGGACT  
TGTTTTGAATCGCTTGC GGATCCGCTTTCGTCACGACCTTGGGGGCGAATATCGACAAGGTACCCGTC  
AGCAGTGGATTTAATGCTCATAGAGAAGTGCAGCTTAGGCTAGATCGGACTGAAAGAGAGATAAGCCA  
GCCAAGATGATATGCCGATCAAGGCTGGCGAGCGGTATGATGGGCGCTCACGGCAAAAACATTAAGGAAG  
TGCAATGAGTACATAACAAAACCCATCGGGGCGACGGTGTGAGTGCTGCAATGCAATCACATACCAGAC  
AGCGATGACCTAAAGCGCATTGCGCTAGCAGCCAACGACTACCGGGTGGCAACATTGAACCCAACGTTTG  
CACAGGATAATGGTGGTGTGAAGCGCTTCGCCACGACCTGTTTCTGTTTGTGAGCAATGGTTGAATGA  
GCTGGAGATCAAGCCATAAGCTCGCTGACTACCTTCTCTCCCACCCGCTCTTGTGGGAGATCTGAACAC  
GCCCACCGCCATCAATTTTGTGAGCAAGTTTGGCTAGCGCAGTCGCATGCCGATCACTCCAGCCATTAGC  
CACGGCGATGCGATACACATCACCGTGGCTGCAAGAAAACCCGTTGGCACGTAAGGCTTTGAACAGCTCC  
TTAGCGCGGAGTCATCCATCGGATGTGCAAGACCTGTGAAACATTGACGAGGATGCTTAGCTTGGCGA  
TCGCCCCGCTCCAAAACATCGTGACTATTGCTCATGAACTCTCCTGTGGTAAAAGCACGGCAACCATTTGC  
CGCGCAATATGAACTCATTGGCCAGTGGAGGTGCTCGCCTGAGATACGCCGGAGTTAACGCTGTGGAGT  
GTGAAGCGTCGATGTTCAATGGCAACGCCAATGATCTCGATGTGCTGCCGATCTGAGTAGAGCGTGGGGT  
AATCCTCATTGAGCGGCACCAATTCGAAAACCTTCTTTACCGTCTAAGCCTATCCCGCGTGGCCGATATTT  
CTTGAAGGTGGCCTCTTCACTGCCGTTCTTGGCGATCACGTAATCACCTGGGCGTGGCGATTTCATCAGGG  
TCGATGATGACCAGATCGCCCTCATTGAAGATCGGTGCCATTTAGGTTACCCCTGAGCCACAAGCCAAAGG  
CATGCTCGCCGACATCGATACCTGCCAGCACAACTCTGTGTTGCCATCAACGCCAAATGCCGTGGTCGCA  
CATATCACGCCAGTGGCCGGCCTGAACATAGCTGAGGATCGGGATCCGCCGCCGCTAGGGATGACGGCC  
GGCTCCGTTGATAACAGCAGCTCTTGTGCTGCGACTGCTGACTGGCTGGCTGGGGCTGCCAGTTAGCAGC  
ACTCGACTGTAAACGCGAGTCCGCTAGCTAAGTACCCCAAGTATTTTCTCTAGGCGTTGTCTCTCCCTCG  
CTCCCACTGGCTGATGGCGGCCCGGGATACTCCAACAAAACCGCTGAGCTCATCTTGGTCTAGTCCCGTT  
TTTTTTCTGGCTGACTTTATGCGGTGCTAACTTTTATAAAAACCAATTTTACCGCCCTTACGGTAAAAGT  
TTCCTTGGAAAGGCGGAAAGATTAACCTTACCTGGAGGTGTGATGAAAAACAAGATGCGATAGATCGT  
TTTGGCAGCGTCAGGGCGTTGGCCGCTGCACTGGGGTGCTCGACTCAGGCCATTAGCCAATGGGGGGAGG  
ATGTTCCGCCACTGCGGGCCTTTCAGCTGAAAAGAAATGACAGGTGAAAATCAGAAAGAGGGTAAGCAGCA  
ACCGGAGCAGGTAGGGCGCATGAGTAAGCGAATCGCGGGTGCATCAAGCCAAGAACGAGGGAGAGCACC  
CAAAGGGTGCGGCACCGCTAGGTATCGCTGGTCTGATGCCAGACCACCATGATTTGAGTGAGCTCCCA  
GCCGACTATCCGTTCCGGCGGAAGGATCTCCGAAACCGTTAGGCAGTTCGCCGAGCGCCAAGGCGTGAAGC  
TTACAACCATGCGCTCGAGGGTTAATCGTGGGGAGTATCCGATCATTACAGCGCAAGAAGGGCGGCCGGAG  
AGAGATAAACCTGTGGGCGCTTTACCTCGAGGGCAAGCACAAACGCCAAGCGCTACATGGGCATGGTGCAT  
TACGGCGAATCATTAGGGTGGCTCCAATGACAGAAAGCAGCAAAAAAGGCGCTCTCTGAAATCCACGCCCT  
CTTCGAGCACGAAAGAACAATGGTCCCGAGATGTTGGGCCGATCTTGGAGCAGTGCCAGCGCGAGGCAATT  
TGCTTACAGCGCAATTTGCCAATTTCACTGGCAAAGCCTGAATTCCTTGGTTCGCATGGGGTCAAAGATTG  
GCGTGTGACCGGATGCCGCCAGAAGAAAAGCAAAAAGGGGAGAGGCGGAACCAAGTTGACGAGCTGGCA  
CGGAAAAGGAAGGCCTTGAAGAAGCGCTATCAGCGAATAGCGGACAAGAAAAAACCCAGGTACTGGCC  
CCGCAACGCCTAAGTGGGTTTCTATCAATCGCAACCCTACGGAGTAACTGACATGCAAAATACCTACCAA  
CGACCAGCGCCAGCGCAATCTTGGAGCTGCTTTCAGTGCAAGCTCTCCTGGACTTATGGCAGACGCCTTTC  
ACCGGCAGCCAGGGCCGAACCTTATTCGCCGCTCAGCGACATGGTGCTTACCCCGCAAATCAAGGAGGC  
CGCTGATGGCCGATGCAGCTGTTATCACCCGCCGCACTCTCCCCAGCCACAAGGATGCTCACAAGTACCT  
GCAACAGCAGGGTTACTTCTGTATCGGACAAAAGCTGGATGCGTGGTTCAGCGTGGCTATGCCCGCATCGAG  
CCTATGGCCAGCGGTGGCGTAAAAGTTATCGAGGGGGTGGCGTATGGCGCTTTACCTCATCAACACCCG  
AACTGCCAGTCACGGCGTGCACAACACCTTCTCGGCACTGCGCTTGTCTGCGCAGTTGTCTGCGCCTTCC  
AAGGCAACCAGCACAAACACCAATCTGATCCGCAATCAGAGCGCGCAGCTGTTGCTGGCTGGATCTGA  
ATTGCCACCTTAACGCTATCGCTAACCGCCGAGTAATCAGTCATGACCATGCCAATGCAGATCAACGAA  
TCCCCGCTCAATTACGAAGCCAGAAAGCGCCTGCACCTCTTGGCAAGAAGCACTTGAACCTGAGCAGAC  
CCAAGTTTTGCTGCGCTGCTCGATATGCCGCCGACCACTCTCAAAAACCTACGAGCTCGGCTATCGCGAGAT  
CGGTGGCGGTTTTCTTTCTGGCAATCGCCAACCACAACGAGCTCAACGAACACGCATTTCTGGCTGATGACC  
GGTACCCAGAGATCCCCGCTCATCAACGTCGAGTAACCACCACTTGGCCGGTTCGCCGGCCTTATCGCTG  
AGCCCCATGCGTGGGGGCTCATCGATAACCCTGCGAGGAAAACACTTGTGAGCGATGCAATTAAGAAT  
GTAGCCATTCTGCGCTCTGCACTGATCGGCATTATCGGTGTTGAAAACAGAAGCGGAGCTGCCCATATGG  
AAGCAGCCATTCCGACTCTTCTGTCCCTGATAGCGACAGGGCTACGACTATCAATGCGATCCACGCCCT

ACTTGCCACTATGCCTGTCAGCCTGGAAGGGAGGTCCTCATGATCAAAGACCTGCGCCAGCAGTACCGCA  
ACGCCATGGCCATCATCGAGCAGATGAAGCGGGGCGAATGGGAGTTCAAGGGGCACTATTTGTATGACTT  
CACGCCTGAATTCAGGTGCTACACAGCAGAGCGCGACAATGTAGAGCTTTGGTTGGCCAATGGTGGGTTT  
TTTTGCGGGGTGAGAGATAAGCCATGGGAGCTTGGCATTTCGGTCACTTGGTGTGGCACTTCGGGGCCA  
AGCAAGCAAACGTGCTCTTGAGCGCAAGATGCGCCGTGACCCATCCGATATGTCAGGCGGTGCAGCATG  
AGCGACGCAATCAAGATAGCCGCCAAGCCCCAAGCTGGTAGAGGGGATGCTGGCCGACATGTTGCGCG  
CCCGCGCTGATGACAACCGCGTATGCATGGGATGCGTCCAGTCTGGCCCGCAACACATCCAGATCCAGCT  
GGTTGTTACCAGTCGCCAGATGCGCTGCTCGATGATGACAGTGGTGACGATGACGAGTCAGGTACCACA  
GAGCCAGGCCAGCCGAGAAGCGGGCTGTGGCTGCATTGGCAGGAGTATCGGGCTAGCTGCATCAGCGCTT  
TCTCCGCCCTATGGGACTGTCTGAAGCCAGGTACCTACACCTTGGCTCAATTCGTGCCATCTACTGGGC  
TGCGTTGGGACAAAACGATGTCGTGCTGGTGTGATGATCCGGAATGGTGGGAAGAGTGCCTCCCTCCCTG  
CATGGCTTGGGCGAGGTGATCCAATGAGCAATAAGCAGATCATCGCCATGGCCGAGCTACTGCAACAACA  
GCGCCGGTTAGATTACTGGTGCAAAATCATGCGGTCTGACGATATCCGCCGAGAACGCTCCAGAACGAG  
CTGCTATCCCTGCGCCGTAACCGCTACTCCATCGGGTATCCAGAGGTCGATTTGCCAGATCTGCTAAAGC  
GCTGCCGCCGTGCCAGAAAACCCCGCAACCATGCCACCAACGTGATCGAGGGGTACCGCATCCAGTGCCG  
GCAGTTGCTCGACATCACTGGCATCCCCAGATGCTGGCAAGCAGGAAGGCCACCTAAATGAAAAACACC  
CCCGATTTTGTGAACGTGAGGCACAGCTTGTGCTGAAAATTCGGCTTGGAAATGCGACGGCACAAATAG  
ACCTGGCCGCACTGAACCAATGCCGCCAACAGCTGAGAGCTGCACTCGCAAGTTGCCATCGTCGGGACTA  
CGCTTGGCTCCTTCTGAGGCAGCGCTGCAGCCTGTATCGACACCTTTACCGGGTCTCTGTTAGCAACGTC  
CGCCGCCAGAGTTCAGCTCGCCAACCTGCGTTCGGAAGAGCCCTGCCGTTCTGATGCACCTGCACCA  
CCACGCCTCGCTATTTGATGCAAAACCCGTCAGCCAGGCAGCCTTCTGCCGAGGCTGGCTGCATCT  
GTCAAACCATGGCAAAGAGCATCATGAACACGCGCCGCGTGGCGCTGTGCTCTTTGGCTGATTCACGCC  
TGCCGCCGGCTCGCCGAGCGCCATCTGCGCTGGATCTCGATAGCCAGATTGCAGCCATCCGCTCCTACTT  
CGCCGGGATCCACGGGGCCTATGCCCTGGACTGGGCGCTAGACTTGCTCGCTCGCCCCATTCCCCCGAGCC  
AACGGTGGGCCAGGGGTGGAGTTGCCAAAAGACCTCTGTGCTGAGCTGTTTCGTGGGCTATTGCCGCCGCC  
GCGCCCCGTGACGTGCTCAAGGGGATTGCCATACCAAGGATGCCAACCGCTGGCTCTCGAGCCGCATCAA  
CACCTGCGCCAGGTGAGAACATTATCCCCGAGCCCTCGAGCAGCTGCGCACCAAGGAGGCCCGGAG  
CGCTAGCGCTCAACTACCTCGAGCGCGTGTGCTGGCTGCGTATGCTGCCACCGATTGAGCAAGCAGC  
AGGTGCGCCGATCCACTGTGGAATATGTGCGGACAGCCAGTCGACGCATGGGGCATGCTGCCCGCCCT  
GCCAAAGTTTTAGAACCACCGAGGGGCGGACAGTTTTATTATCTCCCGTATTGTCCGCTGGCTTGACCC  
AAGTGGTGGGAAAGACGCTGCGCAAGATCTGGGATCAGTACAACGAACACTGCGCCATCCTGCTCGGCA  
AAGTACGCAAGGGCGTCTCTGCCTACGTCTCCAGTCAGGGGCTGCAGGCCCTTTGTGCAACGCCAGCGAAT  
GGCAGCCGCTGGCTCAAGGACATGGAAGCCTATAACGCCAGGAAGATATCGTCATCAGCCTGGAGGAG  
GCTGTCCAAGCATCCATCGCCAACCCACAAAACCGCCGCCACGAACTTGTGGTGCAGCGCTCGGGGATTTT  
CTGACATAGCCGACGAAATGGGCTATGTGGGTATCTTCTTACATGGACAGCACCGAGCCGCTTTACCC  
ATGGAAAACGGTGAAGGCTTCCAGCCAGGCAAGGCCGACTCCACAGAAGAAAACCCCAAGTACGACGGT  
TCATCCCCCACCATTACAGCGCTACATCGCCAAGCTGTGGGAGCGCTGCCGATCGGCATTGGACCAGCA  
ACATATCCATGGCGCCAGGGTTGCCAGTACCCTGCAAGCCGCTTCGCTGCAGAAAGTTTTTCGCGCAATCCA  
GCCGCACATCGACGGCCCCGCTCGCTGGCACCTTGGCGGGGGCTGGGACACATTCGGGCAGCACCTCGCC  
AACACCCCGCGCCCCCTATGATGACCCCATCAACTATTTTCGGCTTTTCGGGTAGTCGAGCCGCATCACGACG  
GTACGCCCCACTGGCACCTGTTGATCTGGGTCAAACCAGAGCACAAAGCACCGCCTGATCGGCATCCTGCA  
GCGCTATGCCCTGAGCCATGACAAAAGGCGATCTGGAGCGCAAGCGCCACCCAGAGAGCAAGTGGCCCTAT  
AGCGACATCAACCCCGTTTTAACTGGAAGGAGATGGACAAAAGAGAAAGGCGGCGCAGTCGGCTACATCG  
TCAAGTACATCGCCAAGAACATCGACGGCCACCGCTCGGCGACCAAGGTGATCTGGAAGCAGAGACAGC  
GGCAACAGAGGGAGCCCGCCGAGTAAGAGCCTGGGCCTCCCTCTGGGGCTGCGCCAGTTCCAACCTTTG  
AAAGGCCACCGGTTCGGGATCTGGCGGGAGCTGCGCAAGTTACCGGGTCGCTGCAGGAGGCAAAAGGGA  
TCGTGCTGGCCCCCTTGGCCAGCCCCATCATGGAAGAGTGCCGGCGCTATGCCGATGCCGTGGACTGGAA  
GAACTTACCCAGGCCATGGGCGGGCCCCCTGCTGCCGTGCTGATGAACGCCCTTTGAGTATCCACCGCACA  
GCCTTTGCCAAGCCAAATCAGTACGGCGAGCCGACCACCAAGCTCGTGGGCGTGCGCGCCGCTGACGGCC  
ACATCCAGCAGACAGCTCCGGGGAGTGGGAGCTGCGCAAAATGCGGGTACAGGCTACCACTGGAGCCAA  
GGACGGCGGGTTTTGGGGTGTGGGCGAGCGCAGGAGTTAAAGGGTTTTGAGCGAAGCGAGCATCTTTAC  
CCCCTTGGAGCTCTGGCAACAACGTACGGGACGATCTCGGAGGATCTAAGAAGGATCCATTTAGCGGGA  
TGAATCTATTCCATTTGGGGCTAAACGGGGAAGACGTGGCAATGATCCAGCGTGGCCTGATTGTGAAAGC  
CGGAGACAGGTTTCATATGCGTTTCGAAATGGTGACCTGAAGGTGTCAGAAAAGCACCCATACGCATCACTG  
GATGAGCCGAGCGCATTCCATTTGGAGATGGAAGCCAGGCGGAGAGGAGCGCCGAGTGTGCGCTCG  
ATGAAGTGCAGGGGCTACTGCTCGAATCAGGAGACCCGCGAGCATGGCTGGCATCGATGACGGCCGCCG  
CACCGATGACTCGCTGACGCTGCTTGATGCCCTGGGGGATGGGGATGCCGAGGTGGCTCGCCTCCAGCTT  
GAGCGGCTGCGTGACCGGGCAGGGCCTGCCGAGGAGCCACTGCATGCAGCGGGAGCAAAGCCCCGTCTGC  
AGGCTATGAAAGAGAGCAACGAACGCCATAAAGAAGAGATCGCCGCCGACGCAAGCGTCGGGGCTTTGA  
CTAACAACAACCAGGAAGTAAATGACATGACTGATGAAGCTGGTACCAACGAAGTATGATGAAGGGCTG  
TCGGCGTCTGAGCCGTTACATGCCTATCGCCATTAAGCCGCCAAGCTGGAGGCCGAGGGGTTCTGGAT

CCCGCCGAAAGCTGTGGGGGCATGCAGCCGCGGAGGCGGTTAAAGAGGAAAACAGGGCGTGGGCGCTGG  
CGCGCCAGCAGCACTGCGACCCACGATGAGAAAAGCGGGGGTTGCAGCATGAGTAATCAACAACGTGGC  
GGCGACACCGTTCGTAGTGGACACCGAAACACTGGCCACAGACAAGCGAGCGCTGGTGTCCACCTGTCCG  
CCGTCCGCTTTAACAGGTATGCAGCCGAGCTCGGTCTCTCGTTTGATAACGGTGAGCCATTCATGGATGG  
AGAGACGACGCTGCACCTCAAATAAATGTCACCGAGCAGCTCCTGGCTGGCCGAACTGTGGATCCGGGG  
ACAGTGAAGTGGTGGAAACGGCAGAGGGCAGCGGGCCAGGGCCAGCATCATCAACGGCCACTCAGTATCGA  
CCCGCGAGGCGCTTGCCCTGTTTTTCAGGCTTTATGCCGACCGAGACCCCTGCTGGCGGTGATCGCCAGCT  
GGATACAGGAAAACGACCCCTTCCGCGAACGCTTCGCCCTGCCGATCCCACCTATGACGTGGTGGCCAA  
TGATGAGCACAGCGCCGACCTGGATCTGGAAGTGAAATTCGCCGAGCCCTGCGCATCGTGGAAAGACCCG  
GCCGGTGCAGTCCGCTGGCTGGATAAGACCTGGACCGTGGCCCCCTTTGAAGTGTGGGTGGCCGATGAAA  
TTACCCCTGTCGGTGGCAGGCAGCGCCACCCCTGTCTACCCCGCTAACCCCGAGACTTAAGGAGCCCGCAC  
CATGTGGCCTTATGTACAGATCAACAACCTGAACCTAGATGCAGGGGGCCGTTGACCCGAGTGAAGGCCAC  
CTGCTGTTTCATCGGCCACGCCCAACAACGCCGGAAGCTGCTCTCCCTCAACACCCAGAGCGACTTCG  
ACAAGCTGCTGGGTGATGCCGCCAGCGAACTGAAAAGCCAACTGCAGGCCGCCATGGCCAAACGCCGGCCA  
GAACTGGAGCGCCGGCGCCTACGTGCTGCCCGCTGAAATGGACTGGAAAAGACGCGGTACGTGATGCCAG  
AAAACCCAGTCGTTTGGAGGGGTGCTGGTACTGGGGCAAGCGTGGGACGAGGGGAAAATCAACGCTGCC  
ACGCCCTCAACCAGGAGCTCATCGCCAAATGGGGGCGCTGGCAGTTCATGCTGCTGGCCGTGCCGGGCAT  
CGTCTCGACCGCCGAGGGGGGTCAAGACTGGAGCGAGTACGAGGGGGCGCTGGCTGCCCTGCAAGATGGC  
ATCCGAGCCGATTCCGTGTCTTTGGTACCGCAGCTGTGGCCGAACCTCGCCGGCGCCTATGCGGGGCGCC  
TGTGCAACCGGGCAGTGAACATCGCCGACAGCCCTGCCGGTGAAGACCGGCGCCCTGGTTCGGCCTTGG  
CAACAAGCCGGTGGACAAGGACGGGATCCCCTGCCACTGGCCACCCCTGCAGACCCCTGGAGCAAACCCG  
TACTCGGTACCGATGTGGTACCCGGACTTCGACGGTACTTACTGGGCCGACGGCCGCACCCCTGGATGCCG  
AGGGTGGCGACTACCAGGTGATCGAAAACCTGCGCATTCGCTACAAGGTGGCGCGCCGGATGCGCCTGCG  
CGCCATCGCCCGTATCGGGGATCGCTCGTTCAACTCCACCCCGGGCAGCACCCCGCGGGCCATCACCTAC  
TTTGGCAAAGATCTGCGCGCCATGGCCAAGGGCAGCACCATCAACGGCCAGCTGTTCCCGGTGACATCG  
CGTCCCCCAGGATGGTGACATCCGTATCCAGTGGACTGCCAAGAATCTGGTCTCGGTGTTTTGTGGTGGT  
GCTAACCTGGACTGCCCAAGGGGATCACCGTCAACATCCTGCTCGATCTGAGCCTCAACAACGGGGAG  
GGTTACCCGTTGACCAACCGCTTTTCCGGTATCAACTTCGACACCCACCTGATGGGGGCCATGGTCCAGC  
TCGAAAAGCCAGCCTCTCCATCACCGACAACCGCGGTGGCGCAAACCCGGGGCATTCCCGGCGCTA  
TGTGGATGGGGATGTGCGCCCGAGTGTGAATTCGAGCTCGACACCAAGAACCTCAAGCAGCTGATCGCC  
GCCGCCAAACGGGCCGCGAGCTGGCGCGGGATGGAGCCGGACGATGTGCTGTTCTACGCCAGTACCGGCA  
GCGAGGAAATCAAGGTGGAAGCCTTCGGCGTCAAGCTGAACTGGCCGACCTGCTCGACATCGATCCCAA  
GGGCGGCGAGTAAGGCCGTACACAAGGTGAAAGGCATCGTCACATCTCCCGATTTTCATCCACCTCGATGGC  
GTGCCGTACCTCTCCAAGGACGACACCCGCCACCTGATGGATTAAGGGGCGCGCCTTGGACGACATCGAC  
CGCGCCAACCATCACGCCGCCACATGCTGGCGGCCAGCTGGCCAATCAGGTGGGCAAGGGGCGTTACC  
AGGGGGAGAGCCTGCACCACTGCGAAGAGTGCAGCAGCACATCCCGAAGGACGCCGCCGCCACATCCC  
CGGGGTGCGCCTGTGCGTCCCCTGTCAGACCCGCCTTGAGCGGTGGGTGCTAATCAGAGCAACGGACA  
TGAACCCATGCCAAACAAGACCCACCCCTCTGGGCCGCCCTGCTGGCCTGGTTGATGGACAACCTGGCC  
CACCGTCTATGGGGCACTGCTGGCGCTGGCCATCGCCTTCCTGCGCATCACCTATGCCGGTGGGCGGGGT  
CGCCGCCGGCTGATCGAATCCCTGCTGTGCGGCCAATCACCCCTAGCGGCCGCCACCGGCACCCAGTTGC  
TCGGGATCCCACAGGAAGCCACCCGTTGCTAGGCGGCATGGTGGGACTGCTCGGGATCGACATCATCCG  
CGAGCGGGCCAAGACCGTGTTCACAAGAAGGGGAGACAACAATGCCGCGCAGTAATGCCACCCACAAGT  
GGCCGCCTTTCTCGACCTACTCGCCTATGCCGAAGGCACCAAGGGCTTGGGGGATGACGGTTACAACAAG  
CTGGTCAATCCGGCGGGGTTCTTACCAGTACCGCACCCACCCGAACGTGCTGGTACAGGTCAACAAGA  
CCCTGAGCAGCACCGCCCGCCGCGCTATCAGACCTGTCCAAGCACTGGCCGCATTACCAGCAGCAGCT  
CGGCCTGCCGACTTCGGTCCCGCTCGCAAGACCGCTGGGCCATCCAGCTGATCCGCGAGCGCAAGGCG  
CTGGACGATGTGATCAAGGGGCGCATCCCCAGGCGGTGGCTAAGTGCGCCAACATCTGGGCCAGCCTGC  
CCGGTGCCGGCTACGGCCAGCGGAGCACAAGCTGGCTGACCTGCTGACCAAGTTTACCAGGTTTCGGCGG  
GGTACTTGATGAGCAGCTCATCCGATTCTGCGGCCATCATCGGGTTTGTACTGGGCACCCCTGTTGT  
TTACCCAAGGCGAACGGCTCACGCAGCGCACCAAGGAACTGGCCAGCGCCAATGACACCATCAACATCCT  
GCAGGCTGCCAACACCCAGCAAGCGACCGCCTTCAGGAACTGCTGATACAGGCAAAGGGGTTACGTCTG  
CTGCTCGCCAATCAGAACGACGCACTGACAGAGCTCGACAAAACAGAACAGGAAGACCGCCGATGAACTGC  
AAGAAGCCTTGGCCACGCCCGCGGTGCGCCGTCCGGACTGTGCTCGCGAGCCTCTGCCTGCTGGCGCTTT  
GCGCCTGCTCCAGCCAGCCCACCACGGTGGTGCAAACCAAGGTAGTGAAGCGACTGCCGCCGCCGGGCT  
GGTGGCCCACTGCCCGGAGCCTGACTTTACGGGGAGCACCTACGGCGAGGCGGTGCGGTTTTATCCCCACC  
CTGCAGACGGCGCTGCGCCGCTGCCAAACCCAACTCAACACCCCTGAACCAAGTGGATTGAACAAGAGGAAA  
CCACCCCATGAGCAAGCAAACCATCACCCCTGACTATCGCAGGCACTGACATCCGCTTTGTGCCACCATG  
GTGGCCTACAACAGCTACATCAACGGGCTGTGATGACCGACAAAAGTGGCGCCGTCATCAGTACCTCA  
AGCGCATCGTTCGATGCTGATAGCAAAGAGGGCGCTGGATGGCCTGCTGGCCCGCCGGGTGCGGGCCTGCA  
GATCGCCGCCAAGGTCAACGAGCAGTACGCCCTGACTTGGATATCGAAGTAAAAAATAACTGCGCGTG  
CCGAGGCCATCGAGCACAACCAACTGGAGCAGGTACTGGCGCTGCGGCCCACTACCTGCCCCATGAGGA

TGACGAGCTCGACACCCTGGCTCGCGCCATCTGGTTAGACAAGTACCACACCCAACGCCTCGCCCAGCC  
GTCGCAGAGGGGATCGCCACCGCTTTCAATGGATAAATCATGGCCTCAGCGACCGAACAACCTGATCATGA  
GAATTGCCCTGGTGCATGCCATCACTCGGCCGTTGCAGGGCATCAACAACCAGCTGAAAACGGTGAAAA  
CACCGCGCAGAGTGGCTTTGCCAGTATTGCAGGCGGGGGGGCCGCCATGCTGGCAGGCGGCATGGCTATC  
CAGAATGCGCTGATGCCCCGCATCGAGATGGACCAGCCTTGGGCGAAGTGGCCTCGCTTGATGTAGCAC  
AATCCGGACTCAAGGCCCTCAGTGACGAAGCGCTCAAGTTCAGCGTGGAAATACGGCAAATCCGCCACCGA  
GTTTGTGCGGGCGTCTTACGACATTCAGTCCGCCATCGGCGGCTTGTCTGAAAGCGAATTGCCCGCCTTT  
ACCCGAGCCTCCGCCGTGCTGGCCGAGCCACCAAAGCCGATACAGGTACCATCACCAGTTACATGGGCA  
CCATGTACGGCATTGTTGAACAGCAAGCAGTGGCCATGGGCAAGGCCGACTGGGTGCGAGGCGGTGCGCAG  
CAAAACCGCTACTGCGGTTTCAGATGTTAAGACCACCGGCCAGGGAATGGCGGATGCCCTCCAGGGCGTG  
CAGTCCACTGCCACCTCGTACGGGTGTCGATGGATGAACAATTTGCCGTATTGGGTATGTTGCAATCCA  
CCATGGGTGGTGCCGTGGCGGGTACGGCGTACAAGTCAATCTTGTCCGTATTCCCAAAAGCAGGGAAAGG  
GTTGGGTTTGGAGCTTTTACGATGCCTCTGGGGCCATGTTGCCGATGGTGGATATCCTGGAGCAGATCAAA  
GGGAAATTTGGCGATCTGGAGGGGGAAGACATCGGCAAGATCAGCGCAGCCTTCGGTGAAACAGCAACCC  
CGGTCAATTTGAACTGCTGGAAAAAACTGACCAGCTCAAGGGCAATATCAACGCATTGGGCAGCACCAC  
CGGTATGGGCAAGGCGGAGAAAATGGCCGAGACATGACAGACCAGTGGCAGCGGGTCAATCGGCTTGG  
TTCGCGATCCGGGCCGCCCTTTGGTGCCGTGCTGCCAACCATCAATAAGGTAGTGGGTGTATTGCGCCG  
ATGGTGGTGTCTCGTGTGCGCTGGACTAGGTTGTTTCTCATCTGACCAAGGTCATCAGCTACACCAT  
GCTGGCGATTGCGGGCCTTGGTGTGGTCACTGGAGCCTGGATGGTACTGGCCGGGATTGCCAAGCTGGTG  
ACGCTGGCGTGGGCACTGACGCTGGGCAGATTGAAGATTGCCCTACTACTAGCCGAATGGGCACCATTTC  
TGAGCACCGCCGCCATGGTGTCTGGGTCAATGTGTGTGTGCTGGCCAAGATCACCAGCTTTGCCCTTAC  
TGCGGCACTTTGGGCCGTGAGTGGCGTGTGGGTGGTCAAGCTGGCGCTGGGGATCGGGGCCTGGCTG  
GCATGGGCCGCCGTGGTGTGTTGAGCAAAATGACCATTTTTGCTTCAACGCGGGCGCTCGTGGTCTCTCA  
GGGGAACGCTGACTCTGCTTCGTGGTGTGATGCTGGCAGTCAATGCCGTGATGCTGGCCAACCCGTGCAT  
CTTGATTGTGATGGGGATCATCGCGTTGATCGCTGCCATCGTCTTGGCATCTACTACTGGGACGAGATC  
AAAGCGGCCATGGCCGACATGGGAGTGTTCGAACTGATGACAGCGGCCATTGATGGCCTCAAAGCCGGCT  
GGGCCAGCTTTATGCACTTCATGAGTAATCTGAGCCATTTTCAGTACTGGGCAATGCGGTGGATTGGCT  
GATCGACAAGCTCAACATGATCCCCGGCGTCAATATCGAGATGGGATCTACGCTGCTTTGGCCCTACCA  
AACGCGGGGGTATCAACGCGCCGCTGAGCAGTATCGTCAGCAGAACCAGAGCAAGTACCCCGTGGCG  
GTCTGGGTCAACAATTGATCCAGGCCAATGCCGTGCGGACCAGCGCCAACCAAAAACCATCGAGGAGCCT  
CACCACCGCGATGTGTATATGAATGTGCAAAAACCCGCTATCACCAGGCGAACTAGAGCAAGAGCTATGG  
ATGACAACCCGCGGATGAGCGAACCAAAAGTACATCGACATTTTTGGTGGTTAACGGAGCCTGGCAACTCGA  
TGCCGGTGGCCAGCCCCGTTACACCAGGACCGCCACAGCATCGGCCAGGACATCAAGCACC GGATCATG  
GAGTCGGGGCTGGCCCCAAGCTCATCGGCGAGCGCAGCCCTACCTTGC GCGCCGATGTGATGACCGAGA  
TTGAGCTGCTGGTCGAGAACGACGAGCGACTGGTACCCGGCACCATCGTGATCCGCGAAGAGGCCCCCGA  
GCGGGTGTGTTACCCGCCGCACCTATGAATTCGGCGATTTGGAGGTAACCCTGTGAACCTGCGCCCGA  
ACGTGGACTTTATGGCCCTGCTGGCAGAGACCGGCATCCCGACCACCGAGCAGGCCATGGAGGCCGAGCT  
TAAAAAAGAGGTCGAGGCCGCCGGCTCCCTTATCACC AATGACTCTGATGTGAGCCCCCTTGTGGCGACTG  
GTGCGCGGCGTGGTGTATCACC CGCGCTCTGGCTTGTCCGCACCCTCTTGGCTGGTCAATGTGCTGCCCA  
ACACCTTTGCCGCCACTGCCGAAGATACTTATCTCGACCTCAAAGCGTGGGATGTGGATCTCACCCGCAA  
AGGCGACCAGAAGACCCGAGGGGTGATCAACTTTCGTCAAGGTGAACCCGAGCGAAGCCACC GCCATCCCCG  
GCCGATATCTGGATCAGCACCAGCGCATCAACGGCACCATCTACCGGATGAAGCCGGTACAGGCAATGG  
TCAGCCCTGCCGGTGAAGCGGTGGCCCGGTGGTGTGCGAGGCGGAGTTCGCCGGCGCTGCC TGGAACTCT  
GGCCCCGGGCTATTACAACCTGCTGAGTGAACCGGTGACCGGCATCCTCTCGGCTCGCAACGATGACAAG  
GAGTGGATCACCACCCCGGGCGCCGATGCCGAGAGCAACGATGCGCTGGGCTGCGCATCAAGAACCAGT  
TCTCGGCAGTGGGGCGCTATCACATCGATGCCGTCTATCGCTCGATGCTGGCCAGCGTCCGCGGTTATTCG  
CGCTGATCATATCTTCTTCGAGCACTATGCCCCGCGCGGGCCAGGTACCGCCAATGCC TACATCCTGCTG  
GAAGTAGGGACCACACCGGCCAGCCTCATCAGCAAGCTTAAACGACTACGTGACCAACCAGGGCAACCAG  
GCCATGGCGATGATCTGCAGGTGATGGCGATGCCGAAAACCGAGCACTCCCTGCACCTTGA ACTGTGGCC  
CGTCGATAATCTTAGCGAGCCCCAGCGGGCCGCCCTGGTTCGCGGGGGTCAAGGCTGCTGGTCAATGCGGCG  
TTCCGGCTGTGCGCTGACTATCCGACCGTGACCCGCACATGGCCGAGTCCCGTTTCTCCTTAAAGCCAGC  
TGGGCCGCGAGCTGCATCAGGCATTTCCCGAGATCAGGAGCCTGC ACTTCACCGAGCTGGATATCCTCTC  
GGGGCTCGCCATCCCGCGCCTCTCGGGGCTGGAGGTGACGCTCCATGAATAAAACCACCGGCATCGACCA  
TCTGAGCGCCGCGCCCCAGCTGCCGGAAGCACC GCCCCGTGGTGGGAAGATGGCAAGAGCATCGCGGAC  
GGGGTGCAGGAGCCCGCCTTTTTGGCCCCGGGCATCATGGCCCTGTGGCGCCGCTGCGCGGCTGGCTGG  
TGCAGCCGCTGGCGCAACAAGACCCGCTGACCTGCTCCGAGTCCCTGCTGGCACTGCTCGCCTGGGAGCG  
GGATATCACGCGCTTCAAGGGTGAAGCCGCTCGACCTGTTTTCGCAAACGGGTGAAGTTCGCCTTCATCAAC  
GCCAGAGATGCGGGCGGTACCGCAGGCTTTGTGATATCTTTGGCCGGTTCGATATCCCCCTGCGCGCCC  
AGATGGAGCGCATCAACGGCATGGATTGGGACATCATCCTGTTGTTGCTCGATGAGCACAGCGACCAACT  
GACGGAGCGGCTGGCCACGAGCTGGTGAAGCAGTACCGCCGCACCTGTGCGCGCTATGACGTGGGCGTG  
ACCGCGTTCACCGACCAGCAGCAGTGGGCTGCGCCGAGTTTTCGGCCAGCTATCAAACCATCACC GCAT



CAACGGATGTCGAGCTGGCCGGTTTCGGTCTGGGGCATTGCGTGAGAGCTGCCAGCCGATCTCTGCCAG  
CTATGTAACACTACGGAGGCTAAATGGCCGAAATCCTGAATCGGGGGATGATGCTCATCACCAGAATCTCG  
CCCTGAACGTGGCCACCCACATCGACAAGATGGTGTGTCCTACAAGCCGGGGTTGAACTACACCGACCC  
GGTGAATCCGGATGAACCCGATCCCGCACCCGGGAGAAATCAAATATCGGGGACCGGTCACCAGGGCCTCC  
GCGATCTCGCCGGACAAGGTGGTCTATTCCCTGCTGCTGGAACCCGACCGTGGGGCCGTTTACTTTCAACT  
GGATGGGACTGGAAGCCCGCGATGGCACCCCTGGTTCGCGGTCTCCTATTTGCCGTGATACGGTCAAGGTGGC  
CAAGGATGCCAACAGCCAGGGGATACCCTGATCCGCAACTTCATTTCTGGCCCTCGCCCGCGCCAGCGCC  
GCGCTGGATGTGACCATCACGCCGGAGACATGGCAGTTTGATTTCACTGACTACATCAACACCCGCGATCA  
GCGATGGGCTGCGCACCCGGTTTCAGTGCATCGGCATCACTGCCGACAGTTTCGCTGCCCGCAACGGGAA  
ATACCCGTCACACCTGAGATTTATGAAACCCGGCCGCTGTGACCCCTGGATGAAACATGGCCGGACGGTAGC  
CGCCTCGGCGTGATTTGTCGATCACGGCGTGGATATGGCGGACAGGGGATTGCATCATCCGGCTATCGACAG  
GCTCCATCAGCACGCCACAGGGAGCTGATCAGTGTAGTTTCGGATTATCGAACCCGGTTCGCGAATTTGTATT  
TGAAAAAATCAACGGAACATGGAGGGTCAGCTAATGATCGATTTAGGCGCAGCGGCCAGCAGTCAGGTCCG  
GTGAGATGATGTTTTCTACCGAGCTCTAGGCCGTTGCTAAAAAACGTAGGCCCTGGAGTTTTTTACGCAGCGG  
GGTGATCATGCCGGCAGTAGACTACAGTGATTTCCAGCATGGCTGCAGGGGAAAGACAATCAAGAGTTGG  
CAAGCACATCCGCCAACAGCAATATTCAATAGCTGGAGAGGCATTCGATTCGGCAACGGAACATTTGTTG  
CTGTAGGGGTTGTTAACTTTAATAGCTTCGCCGACATATCCAGCGATGGTATTGCGTGGACACGTCGCCC  
CATGAATGTCACTGGAGGGGTGACATCTATCGCATTCGGTAACGGAACATTTGTTGCATTGACAAGCACA  
AATGATGTGGCCACGTCTACCGATGGTGGAGTTACATGGTCCCGCCGCTAATCGTTGAGAGTGCTAACT  
GGAGTGCAATCGCCTACGGCAACGGAAAATTTGTTGCCGTTGGTGTGGGGGCTGGCAGCGTCGCTGTGTT  
AGCAACATCACCTGACGGAATCACATGGACGAAACAAGTTGTCCAGTCAGCGACTGGGCCACGGCTGCC  
ACAAATCTGACCGTAGTTTTTTTTGCGGTGATCGTTTTTTTTGTGCACGGACGTGGCTCGCCAATATCTGTCT  
CGTCATCACCCGATGGAGTCACATGGACAAAACTAACGCTACCTTTGACACCAGCCTCCATCTCCTATGG  
AAATGGCGTTTTATGTGGCCGAAACCTCCGCGGTATCAGCTGTATCAGAGGATGGTTACGCATGGGTCAA  
CGTAGCGCCCCAGCACTGTGCGCTGGTCAACTAATTTTCGGCGCTGGTGTTTTTGTGGTGATTTTCAGGAG  
ATAAGGTTACACATCAACAGATGGCATTAAATGGGTCTCTCTCACCACGCAGCATTCATATAGCTCCAT  
CGCATTCGGCAACGGAACATTTGTTGCGCTGTGAGTCAGCACAAAATAAAAAATTTAGTGCTACGACATCT  
GTGATGGATTTTATTGTTACGGATCAATTCACCCCAATTTATATCTGAGGATAAAAATAATGGCCGACTC  
CGACTACGTGATTATTCGATGGCCCCCGATCCAGAACGCACTCCACACTCTATCTCTCTGCGCTCAACG  
CTCTCTCTGGAACAGCGAGTAAAGCTGGAGGCGCTGGCCGAAACCAGCGCCTTGGCCGCTGTCTATCATCG  
CCGATCTGGACAGCCCTGTAACGCCAGCGCTCTGGCGGCGCTGGCTGAACTGGGGGTGTTTCGAGTCAAT  
GGAAACTACTCACTGATGTGGACTCCATCCACTATGAAGTATCCGCCATCGCTAACCGCTATCAATCAGC  
GGTGCAGGAGTGTGCTGGGTGAGATTTTCAGGCAACCAGTCAGCCGCGGTAACCCGCTGCAAGGACTGGC  
GGGGCGGGCTCAATAACCGCCCCACCCGCTCAGCGAGGCGCCGCGCGCTGGCAGGGTTACGGGGTGAG  
CTGGACCGCTACTTGTATCGGACGCTGCTTGACCGTGACCCCTATCAGCATGGGGTGGGCCAGCACC  
AGGGCAACCAGTACAGCCTGGCCGCCCCAATGCGGTGGCGACCCCTTGCCGCAAGCTGCAAGACGGGGC  
CGATCCCCTGCTACCAACTGGCCAGCTGCACGCCATCGCCTGGCTGGTACCAGGCAACAGCGAAACAGCG  
CTGGCCGATGCGTTGGCGCCGCTTTGCGCCATCCTGCCCTGCCGAGTGGTGCGCCACTCTGCGCCGCC  
TCACCGCCACAACGACACCATGAGCCAGCCCACCGCCGCAAGGTGCCACGCTGGAAAGCAGACGAACC  
GCTGAGTTGGGATCCGCTGCGCCCTGCCAGCATGGCACTGGGGGCCGAGCTGGCCCAGCTGGAGAGTCTG  
GCGCAAGACGGTACCACCCCGATCGCCAAGCTGGCTTCACTGGCGGCCCGGCGGAGGAACGGCTGGCGG  
CGATGGAGAAAGCACTCAACCAACTGGCCTCCATCAGCGGCCAGTTGTGGCACTGGCAGGGGCAAGGCGA  
TGCAGCAAGCATCGCCGCCAACTGGGCCAGAGCAGCCGCCAGATCATAGCCATAGCATGACGGTCCGC  
GCGCTGCTGATCTCCCCCTCCCCGCTCACCTTCTGGCAGGAGTTAACCCGATGAGCAGAACAGCCATGCT  
CACCTGGACGGTGAGCCGATTGTGATGAAGTCGATGCGGATCTCTGTATCGATGCAGTTTCAGGACAAG  
GACAGCAGCGGCCAAACAGCTCGACCAGCAGCTCGGAGCAGGGCGAGAAGGCCAAGGAGCTCGATATCT  
CGGGCCTTGTCCCTTCAAGGATGAACAGACCCTGAGCCGGCTGTTTGAGCTGGCCGATGCCAAGGGCGA  
TGGCGGCAAGCGCCATATCTACCGGGTCGGTCTCTTGCCCAAGTCGGTGAAGGTGCGCCAGGGCAAG  
TTCGCCGCGCGTATCACCGCCAGCGAGCAGGAGGGGCTGCTGGCGTGGCAAGTGCAAGTTACCCCTGCGCG  
AACACAACCTCGGTACCGGAGAAGCGGGAGCAGCGGATGCCAAAAGCACCGGCCACCGTGGGCCAGGGCAC  
AGCGAACGCCAAACCGCCAAGCCGTGAGAAGGGGCGCCGCTTCCGAGCAGGAGCAGCTGGCCGGCTGG  
GAGCGTGCAGCAAGGAGTGGGATAACATACTGGGAGACCTGATGGCGTGAAACTCTCGACCAACCTCAC  
CCTGGGCGGCCAGCCTGCCAACCTCATCGACCAGATATCGTGTGGATCTCTGCGCGGGCGGCCGCTGCT  
GCACTGACCATCGAGGGGGGCGCCGATAAGGGGAAAACCTGACCGTGGATCTCGGCTACAACGGCGAGC  
TGCGCCGCTGGTTTTACCGGTTACGTGTATGACGTGCAACCCGCCAGCAATGGTGGCAGCAAGCTGCTGTG  
CCGCGAGCTGGCCGGTATTCTGGGCAGTGCCTTCCCGGTCAGCATCCAGCATGCAACCTTGCAGCAGCCTG  
CTGGCATGGTTGAGCAACCAGACCAAACTCACCTTTTTGCTGCCAGATGGGGCCGACTACACCGACAAGC  
CGATCCCCAACTTACCAGCGCCGGTACCGGCTATCAGCTGCTGAACAACCGGGGGCGCGCCTTTGCTGT  
GCCGACTTCATCTGGCATCAGCAACCGGATGGCGCCATCTTCGTGGGCGAGTCACGCCACAGCAGATGG  
GCCGATCGGGCGGTAGAGCTGGATCCAGCTTTCTCCAGCCGCAAGCAGGCAATACCTTACCACGGCGC  
CGATCCCCGCTATGCGCCCGGGCGCACTCGTCAACGGCAAGCGGGTGGTGCGGGTGCGCCTCAAGGGCGA

CGAGATGACCCTCACCACGGCAACACCCGGCAAACCCGGTGAAGTCGCCGGAACGGCGCAAGATGGAGGGG  
GAGTTCCTCCGGAGCTGGCCGACAATATGCACCTGCCCAAGTTAGGGCGGGTCGAGGCCATCAGCGACAGTG  
CGGCCCGCCGGCCAGCTCAATGATCCGTTTCGCCCCGCTATGCGGTGGACGTGCAACTGCTGGGTGAAGA  
TGGCCAACCGGACAAGGCAACCCCACTCTATCGCGCCGTGCCGCTGCCGGTGATGTTTCGGCGGACACGAG  
CAGGGGCTGCTGCAGTTCCCCATCGAGGGGACCATCGTTCGAGCTGGGGTTTGCCTTCGGCCGCGCTGACA  
GGCCATTTATTTCGCACCGTGCTGGGTACCGGCTGGCCACTGCCGGATATCGCCCCGGGCGAACAGCTCCA  
GCAGCAGCGGGCGGAAGTGTTTCAGCCGTACCGACACCGTGGGCAACCAGAGCCGCCATACCGACCGCACT  
CAGCATGACAAGGCGATGCAGATGCACCGCGAGGCTGACGAATACCTGGGCGAGTTTGGCCAGCACCAGC  
TCACCACCCTGCAGCACAGCGTGGAGCAGATCGGGGCAATGAAGCGCATCGAGGCGCTCGGGGCCATCGA  
GCTGCTGGCAGGTGATGACATGGTGTGGGGTGCCTGGGCAACATGAGCCAGACCGCTGCGGGGATATG  
GTGGAGGTGATTTGGGCAACTGCGGCGAGTGTGGCCGTTGAGCTCCAGCACTACGATGCACCCCGTTTCGT  
GGATGGGTACCGAAGGCGTGAACATATTCCGCCTGTGCTACAACCTGATGAACGTGGTGGAGCAGCTGGC  
CGCTCTGCTGCTAACCATGATCACGGCGGGCCGCCACCTGTCCACCATATGCCAACGCATTCAGCAGC  
CAGAGCAAGCAGGCCGGCCAGTTGGCCACCACCCTCTCGCCCATCATCGAATAGGGATACACAGATGATC  
TCACTCACCATCAATCAGAGCTCCATGCTCAACGTGCTGGAGCGTCTGGATGCGGGCTCGTACCACCTG  
CGAAACGCCGGCGCATCACCCAGCAGATAGGCCGCGAGGTGGCCAAAAGTGAACCGCCAGCGCATCCGTGC  
CGGCAAAGCACCCGATGGGACAAAAGTGGGCACCCACCAAGAGCAAACGCAAGCACAAGCAGCTCGCGGGC  
CTCTCCAAGCGTCTGCGCTCTCGCGGTACCGAGGATGCGGCCATCATCGACTTTGACTCCCCTTTGCGG  
GGATGATCGCCAACCAGAACCACCAGGGGATGTCACAGCCATTCACTGCAGCGCCGCCAAGCCAGCACA  
ACCGAGGAAGTCAGAACAGGGCAAGAAGAAGGAACCCCTCAAGCCAACAGATAGCCCTTGCACCCGTAGC  
CAGGCACAGCGTCTGCGGGCGCTGGGGTACAAGGTGCTGTGACAGCCGGGGCGCTCGCCGCGCTACC  
AACCCCTCCCTCAAGTGGATACGGGAACACGTCAGTGTACCCCGGCTGCCATCCTGATCAGGACCACCAC  
TGGAGAGACCAGGAAGAACCCTGGACGGTAGAGACTCCCGCCCGCCCCATGCTCCCCCAGGCCAACAAAC  
GACGAACTGCTGGCCATCGCCGCAAGGCATTCAGAAGATGGGATGGGGCGCCGGCCAGTAACCCGCCG  
ACTATCACCCAGCACACGACAGCGACGCACCAGCGTTCGCTTTTTTGTGGCCAGCCCCCTGCCCTGCAGCC  
CAGTGGCGACGGAGGAAACGCACCCTCACGGAATCCGCACTCTCCCCCCCCACCTTCGGGCTAAAAAT  
GTGGCATTTTTTGCACAAATAAAATGGTGCAAATCAATCGTCTAACCCGCGCCGTGGCTGGGTTCTTGGG  
GGGAATTCAGAATTTACAAAACGTCATTCGATGATCGTTTTTGGGGTGGTTTTGATCACACCAACAAGGCG  
GTGCAAAAAGCGTAAGTGATTGATGGTAAAAGATTGTGGTTACTTTCCGTGAGGATCGAGTTGGTACG  
GTGGATCTGGTTTCGACCACGAGGAAAAAAAACGGTAAGCCTTATGGCGCAAGGCTTGGCGGGAAGTTTTA  
GCAAGGATCAAGAATTTCAAAAAGTGAAGGGGAAAAGATCTTGTGTTGAAGGGAGGAACACTAGGCACAAGCA  
GACAAAAGTTTTTCCACTATGCTAATGGGGAATCTGGCCACACCGTTGCCCCACCGCGGACAAAAAGTGGGA  
TCAACAAAAAACAAAAGCCATAAAAAACAACAAATATATAGATACAAAAAAGGAGGCCGAAGCCTCCTTGA  
TATCCAGTCCCTGACGGGCACCTTACAGTGTCTTTCAGGATTCGCTCGACGCTGGCCTTGGCATCGCCAAAC  
AGCATCTGGGCTATGCTAATGGGGAATCTGGCCACACCGTTGCCCCACCGCGGACAAAAAGTGGATCAAC  
AAAAAACAAAAGCCATAAAAAACAACAAATATATAGATACAAAAAAGGAGGCCGAAGCCTCCTTGAATACC  
AGTCCCTGACGGGCACCTTACAGTGTCTTTCAGGATTGCTCGACGCTGGCCTTGGCATCGCCAAACAGCAT  
CTGGGTATTTTTCTTGAAGAACAGCGGGTCTGGACACCGCGTAGCCAGTGTTCATGGAGCGCTTGAAG  
CCGATGACGTTCTGCGCTTTCCATACTTCCAGCACCGGCATACCGGCGATCGGGCTGCCCGGATCTTCCA  
TCGCGGCCCGGGTTGACGGTGTGCTTGGCACCAGATCACCCAGCACGGTGTGCGGTGTGCGGCGAAATCGT  
GATCTCGTCCATTTCCAGCACGATGTCATACGGGACTTTTCGCTTCCGCCAGCAGCACGTTTCATGTGGCCA  
GGCAGACGACCGGCAACCGGGTGGATAACCGAAGCGCACCTTGACGCCGCGATCACGCAGCTTCTGGGTGA  
TTTCAGCCACCGGATACTGGGCCTGCGCCACCGCCATACCGTAGCCCGGGGTGATGATGACGGAGCTCGA  
GTTCTTCAGCAGGTACGCCACTTCTCGGCGCTGGTTTTCGCGGTATTCGCCCATCTCCTGATCAGCCGTG  
GAGGCCACGCCATCGGAGCCGAAGCCACCGCGCATCACGGAGATGAAGGAGCGGTTTCATCGCCTTGACACA  
TGATGTAAGAGAGGATCGCACCGGAGGAACCTACCAGACCGGTGACGATCAGCAGGTCGTTGGAGAG  
CATGAAGCCCGCCGCTGCCGCGCCCAACCGGAGTAGGAGTTTCAGCATGGAGACCACCACCGGCATGTCT  
GCGCCACCGATGGAGGCAACCAATGCCAGCCGAAGGCGAAGGCGATCAGGGTTCATCACCAGCAGGGCGA  
AGGTGGAGCCACCGCGTTGACGAAGTAGACCATCAGCGCCAGAGAAGCGACCACTGCCAGCAGGTTTCAG  
CTTGTGGCGGTGCGGCAGCATCAGCGCTTGGAGGAGATCAGACCGCGCAGTTTGCAGGAGGCAACCACG  
GAACCGGTGAAGGTTACGGCACCGATGAAGACGCCAGGAAGATCTCGACCAGATGGATGTTTCAGCATGG  
TGCCGGTCAGGTGCTCGACCTGGGCAACGCTGTTGGCTGCTCGAACGCCGCACGGGCGGCTGCCAGGGT  
GGCATCCAGATTGGAACCGACGGAGACGACCACCTCAGCAGGTGCAGAGGGGTGCAGATCGATGAAGCTG  
TTGAAGCCCAACACTGCCGCCATAACCCACGAAGCTGTGCAGCACGGCCACCAGCTCGGGCATCTCGG  
TCATCTCGACCTTGAGTGCCAGACGCACGCCGATGGCACCGCGATCACCATGGCCAGAATGATCCAGTG  
AACGCCACTGGTCTCCGGGTTGAATACGGTGGCGAGCAGGGCGATAGCCATACCCGCGATACCGAACAGG  
TTGCCATGCTTGGCCGTTTCTTGTCTTCGACAGTCCCAGGACTGAGGATGAAGAGCACGGCGGCAACGA  
TATAGGATGCTGTTACCAGTCTTGGAGACAGTAAACCCCTTAACTCCTTACGGAACATCTTCAGCATG  
CGCTGAGTGACGGTGAAGCCGCCGAAGATGTTGATACTGGCAATCAGCACGGCGATGAACGCCAGCGCGG  
TGACCAGGGTCGACCCTTGCCCGATCTGCAGCAGGGCACCGACCACGATAATGCCGGAGATGGCATTTGGT  
GACCGACATCAGCGCGTATGCAGGGCGTGCAGACGTTCCACACCACGTAGTAACCGACCACACAGGCC

AGGATGAATACGGTGAAGTGGGAGAGGAAGGCTGCCGGGGCAACGGAGGCGATCCAGCCGAAGGCGGCGA  
TGCCGAGGGCACCGAACACGAACCTTCTTGTGGAGGGCTTGGCTCTTCTTCTTGGCGGCCGTTTTGGC  
GGCGGCCGTTTTCTGCGGAGCGGCAGAGACGGAGATGGCGGGCGCGGAAGGTCACCTTACCAGCCCTGG  
ATCACCGTCATGTTGCGCTGAACCACGTCTTCGAAGTCGATGGCAACGTTGCCGTCTTCTCTTGCACA  
TCAGCTTTCATCAGGTTGACCAGGTTGGTACCGTAGAGCTGGGAGGATTGGGCAGGCAGGCGACCCGGCAG  
ATCGGTGTAACCGATCACCTTGACGCCGTTGGCAGTGACATGCAGTTCGCCCCGGCACTGTGTATTCACAG  
TTACCGCCAGCCTGAGCGGCCATGTCCACAATGACGGAGCCCGGCTTCATGCTGTCGACCATCTCTTTGG  
TGATCAGCTTGGGAGCCGGCTTGGCCGGATCAGGGCGGTGGTGATGATGATGTCCACCTCTTTGGCCTG  
CTGGGCGAACAGCTCCATCTCGGCCTTGATGAACTCATCGGACATGACTTTGGCGTAACCATCGCTGGAT  
GCACCGTCTTCGCCACCAAAGTCCAGCTTGAGGAATCCCCACCCATGGATTCGATCTGCTCGGCCACTT  
CCAGACGGGTATCGAAGGCACGCACGATGGCGCCGAGGGAACCGGCAGTACCGATGGCAGCCAGACCCGGC  
CACACCGGCACCGATCACCAGTACCTTGGCAGGCGGCCTTTACCGGCTGCGGTGATTTGACCAGGTAAG  
AAGCGACCGAACTGGTGCAGCTTCCACCACGGCGGATAGCCACCGATGTTGGCCATGGAGGAGAGGG  
CATCGAGGGACTGGGCACGGGAGATCCGCGGCACCATATCCATCGCCATCACATTGATGTTGCGCTCGGA  
CAGCTTCTTGACCAGCTCAGGGTCTGGGCAGGCCAGATGAAAGCTCACCAGAGTGGCGCCATCTTTAATT  
TGTGCGATCTCGGCATCGGTGCGCGCATTGACCTTGAAGATAAGGTCGGCTTGGCAGACATTCGGCACCA  
CGCTGGCACCGGCAGCCTCGAAGGCGGCATCATCGAAGCTGGCCGACAGGCCGCGCCGGTCTCGATGGC  
GACCTCGAAGCCGAGCTTTTTAGCTGCTCGACGGTAGCCGGGGTCTGCTGCGACCCGGGTCTCACCGGCG  
AGACTCTCTCTCGGTATTCCAATCTGCATGACTATTCCCTGATGGTTAATAAACAATCGCTGCCAGTGT  
CTCACTTCTGACGAAACAAGACATGACCAAAGTGCAGGTCCAGGGCTCTTTGTTATGAAAATCAGTAGGC  
TTTACCTCAACCTCCTGTGATGGTCAGGCCCCCGCTTTTCAGGCGCGAAGGTGATTAGTATCAAATTTTG  
GAGTTTTATTACAACCGCAGTCCCAGCGGCACTCGTACAGAATTCAGCCCATCCCTAGCTACGATTA  
AAAAACAAACCAAATTAGAGGCTTATACCAGTAAAAACGGCTGAAAAAAGTGATCCAACCAAGTCAAAAA  
ATGTTTTACCGGCCCTCTATCTTAGCGTTTTTTGTTCTTACGAAATCCGCTTTCGCTCACTTCTCGCAG  
CGAAACGCCGAAAAGTAACATTTTCCAAACAAAAGCGGGACCGCTCAGCCGCCAGAAGGCGGGAGAGGGC  
CCCGGCAATTCATCGTTTTGCGCCGTTTGGCACCGATTTGGCGGCCCTTACCAGGCGCTTCATAAATATG  
CTGGCTCTGCACAGATCGATATCGCTGTGCTCGCCAGACGGGTTCATACCGTGCTCACCAGCTTGGCG  
ATCAGGGTGTCCGATACCCAGATCTTTAGACCGTAGTCGCGCAGTTCGGGTCTTGACCCCATCCGCTCGA  
AGAAGTCGCGGGTAGCGGGATGGCATCGCTCGCTCCGCTTCGCTGCGGCTGTTGACACCCACAC  
CCGCTCTGCGTATTGACAGCAGCTTGGCATGTTTTCTGTTTTGCGCTTGGCTGCGAGCGGGCAGGCAGCACC  
ACCGCCAGAGTCTGGGCGTGGTTCGAGGCCGTCAGGGCAGTACGCTCGTGACCCAGCATGTGGGTGGCC  
AATCCTGCGGCACACCGGCACCGATCAGGCCGTTCAACGCCATGGTGGCGCTCCACATGATGTTGGCGCG  
TACCTCGTAGTTGTGCGGCTCGGCCAGCGCCTTGGGGCCCTCTTCGATCAGGGTCAGCAGCAAGCCTTCA  
GCGAAGCGATCCTGCACCTTGGCGTTGACCGGATAGGTGAGGTAAGTCTCCACGATGTGGACGAACGCAT  
CCACTACCCCGTTTCGCCACCTGACGCTCGGGCAGGGTGTAGGTGAGCACCGGATCGAGCACGGCAAAGCG  
CGGCATCACGAACGGCGAGAAGAAGTGCACCTTGTGCCACTGCTGCGACGGGTGATGACGGCGCCCATG  
TTCATTTCCGAACCGGTGCGCGCAGGGTCAGCACGGAACCGAGCGGAATGGCGGAACGCACCTTCACTGC  
CGACGGTCTCGAGAATGTGCCAGGGATCCTTGGCCAGATCGTAGTGCGCGGCAGCGGCGATAAACTTGGT  
GCCATCGAGCACCGAGCCACCGCCAACGGCGAGCAGGAAGTCGACCCGCTCGGCACGGGCTGCTCCACG  
GCGCCCATCAGGGTCTCGTAGGCCGGGTTTCGGTTCGATGCCGCCAAATTCAAACAGGGTCATGCCAGCCA  
GCTCGTTACGGATCTGCTCCAGCAAGCCGCTGCGTACCACGCTGCCGCCACCATAGGTGATCATGACGCG  
GGCATCGCTCGGGAGCTGCTCGCGCAACTGGGCGGTCTGCCCTTGGCCGAACAGGATTTTGGTTCGGGGTA  
TGGAGAGTAAAGTTGTTTCATCGACATTGCCTTCTTCTGATAGTCAGGGCGGCTGGCCCGGAAATCGTGA  
TTGCATTTTTCTCCAGAACCACCTACCATCAAGACAACATCCTGCTTGATTCCTTGCCATTTCTACAAA  
GCAGCGAAAACCGGAACTGTGCAATCAAAGAGCGCCCATGCAAAACCGTTACAGCGACCTCGCAACCAGA  
TTGACCCCGCACGTCACCGCCCGGCATCACCCTACCCGTTGAAACAGGTCAACCTCATCTATACCA  
CCGAGCACCATGGCCCGCACCCCGGTGCTCTACCAACCGCGGATGATCGTTATCCTGCGAGGACACAAGGT  
GGGTTATCTGGCGGATCAGGTGTTTTGCTACGACCCCAACCACTATCTGCTGATGACCCGCGCTCCCC  
TGCGAGTGCGAGTGCTTCGCTCCCCGAGCAGCCGCTTATCGGTTTTTACCATCGAGATCGATCTGGTCA  
CCCTGCAAGAGCTGCTGCTGGAGCTTGGCGATGCCCTGCCCGCCCCGCGCCGAAAAGAGCGGGCTCCA  
CTCGGTCCCCCTGTGCGAAACCATGTTTTGCGCCCGGAGCGACTGATCGAGCTGATGGACAACCCGCTG  
CACGCCAGGGTGTGGGGCCGAAAACGGTGCAGGATGCTGTTCCACGCCCTCACCAGGGGGGGCGGCC  
CGGCGCTGCAGGCGCTCGCAATCGCCACAACCATGTGGGCCAGATCGCCGGGTGCTGCGTATGATAGA  
GTCCCGTTATGCCGACAACCTCACCATGGAGGAGCTGGCGCGGAGGTGAACATGAGCGTCTCCGCTTT  
CATCACCACTTCAAGGCGGTACCGCTACCTCGCCGCTGCAGTACATCAAGTCATTTTCGCTGCACAAGG  
CGCGGATGATGATGCTGCACGATGGCATCAAGGCGGGCACCGCGCGGCCAGAGTCGGTTACGAGAGCAA  
CTCCAGTTTACCGGGGAGTACAAGCGCTTCTTTCGGCAGCACGCCGACGGATCAGGCCCTCCCGCTTCCGG  
GATGGCCAGCTGCGCATCATTTAGGGGATAACAAGAGAGGGATTACTTATGCGTTCACTGCTTTGCCTGTT  
CACCGCTTTACTGCTGACGGCTGTACCGGGATTGCCGACGGCATCCGCCCCGTTACCGGCTTCCAGCTC  
GATCGTTATCTTGGCACTTGGTATGAGATTGCCCGCTCGACCACAGCTTCGAGCGGGGGCTGAAGCAGG  
TGAGCGCCACCTACAGCCTGCGGGACGATGGAGGCGTCAAGGTGCTCAACCGGCAAGCAGAGCGATGG

CAGCTGGCGCGAAGCCGAGGGCAAGGCCTACTTCGTGCGCAACCCGGACGAGGCGGGCTCAAGGTAAGT  
TTCTTCGGCCCCCTTCTACGGCGGCTACAACGTCATCGACCTCGACCCCGATTACCAGCTCTCGCTGGTGA  
CCAGCTACAACCACGACTACCTCTGGATCCTCTCCCCTCACCCAACCCGCCAAGGCGAAGGTGGATGC  
GCTGCTCGCCAAGGCGAAGTCGCTGGGCTTTGCCACCGACCAGCTTATCTGGGTCAAACAGACCCCTTAA  
GCCAGTCGTGAAATAACAAAGGGCAGCCCGCGGGCTGCCCTTTCTGTTGCTGGAGTGGCGGGATGTCAGA  
GCCGGAAGCGGCCGATCTCCTGCTCCAGCCGCTCGGTACAGCGACTTGAGCTCGGCCCGCTGCGCCGCCTC  
GTTGCCCGCTGCTCGGCCAGCTCTTGCAGACGTTGGCGGATATCTCGGTATTGCGGGCTGATCTCGCCG  
GTCACCGAGGTCTGCTCCTCGGCCCGCCGCGGATCTGGGTGCGCATGTCGCTGATGGAGCCGATCGCCT  
CGTTGATCCGGGCAAGGCTCTGGTTGGCCGCTTCCGCATCCTCGACGCTGGTACCCGCCAGCTGACGGCT  
GGTCTCCATGCCACCCAGCGCGACGGTGGTCTGCTGCAGGGTCTCGATCATCTGCTGGATCTCGTCTG  
GTGGAGTCGTGAGTGGCGCGACAGCACCCCGACTCGCCACTACCGCGAAGCCGCGCCCTGCT  
CACCGGCCCGGGCCGCTCGATGGCGGCGTTGAGCGCCAGCAGATTGGTCTGCTCGGCGATGCCGCTGAT  
GGTCGCCAGAATGCCGCTGATCTTCTGGGCATGGCTGTGAGCTCATTGATGATCTGGCTGGCATCGGCC  
ACTTCGTCCGCCAGACCGGTAATGCTGCGCTGACTCTGGCCAACCTGGGATTGGCCGGCGACCGCCAGTG  
CGACCGCATCGGTGGCGGTAGTGGCGGCAAACTCGGCGTTGCCGGCGATCTCCTGGGTAGCGGAAGCCAT  
CTCGGTACCGCGGTGCCACCATCACGATCTCGTCTGCTGCTGGCGAACCCGCTGACTGCGGGCCTGC  
GCCCCGGCCGCTGAGCGCGAGACTGTGCCCGAGCTCGACGGTACATCCCGCAACCCGGCTGACGATAC  
CGTGCAGCCGCGCCACAACTGGTTGAAGTTCTGGGCCAGCTGACCCACCTCATCCTTGCTGTGAGTGT  
GATGTGAACGGTGTAGATCCCCCTCGCCGTGGGCAATGTGTCGAGGGCGTGCAGCCGACCGAGATCG  
GCGAACAGGTATTTGAAGGTGGCGGTGAGCAGAGCGCTGAATACCAGCATCAGCACCAGGGTACGCCCA  
CCAGCTCCACAGCAGGCTGCTGAGCGGCGCCTCCAGCACATCGCGATACATCACCATGGCCAGCAGCCA  
GTCGGTGGCCCGCACCGGTTGTACCGCCAGCAGCACATCCCGCCGTCGAGGGTGGCGGGCTGCAGCTCG  
CTGTTTTTCGGGCCCCACTGCTGGAAGGTGGCGGCAGAGAGTCCCGGCCAGCTCGGCGATGGGCTTGA  
GCGCCAGATCCTTCTGCGGATGGCCGACGATGAGGCCGCTGCTGTGAGCAGCATGGCGTAGCCCTCACC  
CTGCACCTTCATCGCCAGCACTTCGTGATCAGCTTGTGAGCGCCAGGTTGGTCCCACGGCACCGACC  
AGCTCCCCCTGATGGCGTACCGGCTCGGAGAGGGTGACCACAGCTTCTGCATGGTGACGCTGACATAGG  
GGCGGTTGACGATCAGCTGCCCCGCTTACCGCATCCTGATACAGGGGCGCTCGCGTGGGTGATAGTT  
GCCGTTGTTGAGGAGGATCCTGCCCCGCTATCACCCTCGCGGAGCCAAAATAGGTGAGCCGCAAC  
CCACCGGAGGTGTAGGCTGCTTTCAGGTGCGCGCACCCGCTCGGCTTGGGGGTTATCGCTCAGGTGTA  
CCAGCGCATGGACGGTGTCTTTCGATCCGTCATCCAGTCGCGGATGGCGACCGAGTAGGCTGGCCATA  
GTTGACCGCTCGCTCTGGATGGCGCTCATGGTGCGGGATTTTAGGGTGTGAAAGGCAACGATGCCGAGC  
AGTGATGCCATCAGCAGCACTACGCCAAAGACTGGTGGCCAGCAGCTTGCCGCGCAGAGAGGGTTCATGA  
CGACGAATCCTTGTGTTGTGTGAGGAGGAAACCCCTGATGTATCAAAGGCTATCGGCCGCAATATGA  
ACAGACTTTAGTGAATCTGTATATTTTCCATCTATCAACAACAGAACCGCTATTCGTGTGAACCAGAT  
CGCCATTCCATGCTACTGACTATTGTAACAACAAAGCAGCAGGCCGCCGAAGGCGGCTGCTACTTACC  
CCTGATATGCACCGCGGAGTAGGTGAGCTCATAGCTGTGGCTGTAGATCTCGACGATATTGCCGAAGGG  
ATCTTCCATGTAGACCATGCGGTAAGGCTTCTCGCCGGTAGTACTCGCGTACCGGCATCCGCTGCTTG  
CCGCCGCTGCGACGATGCGCGCCGCCAGCCCCCTCGACATCCGATCCTGCACGCTGAAGTGGAAACACTC  
CGGTCTTCCAGAATTCGAAGTTGTTTTTCGCGCTGCTCGCTGTTGGGGAACCTCGAACAGCTCGATGCCGAT  
CTTGTGCGCCGGTGGAGAGGTGAGCGATACGGAAAGAACCCCAACCCGGGCCAAACAGTCTGTTGCACATC  
ACGCCGATGGCGGAGTCATCCTCGGTGATGGTGGTGCGCCGATGATGAGATACCAGCCCATCACCTTGG  
TATAGAACTCGACCGCTTTGTGAGGTCAGTACCGTGATGCCGATGTGGGAGAAGTTGCGCGGGTAAGT  
CATAAGTACCTTGAATTTGTGTGTTGGGAAACAGGTGACATGATAGGAAGAGGCGCCATAATTAATAATA  
AGGTCAAACATAATAAGGCATAAATTAATTTATGGTTAATCCACTCTGGCTCCACACCCTGGTGGTGG  
TGCATGAAACCGCAGTTTTACCCGCGCCGCGAGCGGCTGGATCTCACTCAGGCCGCCGTCAGTCAGCA  
TATCTCGCGCTCGAGGCCGAATTTGGCCCCCTGCTGCTGCGCAAGCCTCGTCAGTGGAGCTCACCCCG  
CGCGGGCTGGTGTGCTGCTCGACTTCGCCCCGCGCAGGCGCAGGCCGCGGAACAACTGCGAGCCCGTCTAT  
CTGACGACGATCCTCACACGGCGCCATCACCCCTGTCCACCCCGGTTAGCATCGGTCTGCTGCTCTATCC  
CCTGCTGCTCGACCAGCAACAGGAGCACCCCGGACTCACTATTACAGCACCGCTTTGCCCCCACCCCGAC  
ATAGTGCAGGCGGTAAGTGGCAGGGCGCAGCGATCTGGGGCTGGTGGATCAACCGCCGGAGCACCCAGCA  
TCGCCGCGGAGCCCTTCGCCCCGGAACCCCTCTGTCTGGTGGTGCCCAACGATGGCGAGGAGCCGAGCTG  
GCAGCACCTCTGTGAGCTCGGTTTTATCGACCATCCGATGGCCGACGATGGCTCAGCGCCTGTTGGGA  
CGACGCTACCCCGGCCAGCGGTTGACGAGATCCCCCTGCGCGGCTTTACCAACCAGATCGGCCTGATCC  
TGGAGCCGGTTCGCCCCGCGCCTCGGCTTTACCGTGTGCTGCTGCTTTCGCGGTCACCGCCTTTGCCAACA  
GGAGAAGATCCGGGTGATCCAGAGCAGCATTGAGGTGATCGACACCCTCTGGCTGATCTACCGCGCCGAG  
TGGCCGCTCCCCGCCCCACCAGCGGCTGGTACCATCCTGAAACAGCGGGTTGCTGCACATTGAACGC  
TCTTGCGGCAGACATCGAGATCAATGTGGCCACAGTCAACCGGGCTAGCGGCTAGAAGGAGAAGGGAGAG  
AAGAGAAAGGAGAGAGGGGATAAATTTGGCGAACCCCGGAAATGCGAAAGGCCAGCTCAATGAGCTGGCCTT  
TCTGAAAATGGCAGGGGCGGCGAGGACTCGAACCCGCAACCATCGGTTTTGGAGACCGCTGTTCTACCAAT  
TGGAACTACGCCCTGCAACAAACGAGGCGTAGTATACAAAGTGGAGATCAAAGGTAAAGGCTTTTTTTTA  
CGTTTTCGATGCGATTGCACAAATCCCGAACAAAGTCGCGGTTGTTTTGTGACGAAAGCGGGATAACTTGC

TGTATTTGCAGCCCTGCCGGGTAGGAATGGGACATAAATGGGGTAGGGTAAAATCAGGTACCGGGAGG  
CCACTTATGCTCAATTACCGATTGCTCCAACAACCTGGCGCCCTCAATTTTCAGGGATGAACGCAAGACAG  
AGGCCCTGCCCGCTATCTTGAACGGGTTCGCGCCCTGGTGCCTTTATTCCTGAAAATGTGCTTTCCCA  
GTGGATTTACCGCCATTGGCGCGGTTTTGAGTCCAACCTGGAGCTTTATCGATCTCGCCAGCCATCAGTTC  
ACCTGTGAAAAGCTGGCCCCACCGCGCAACTGGTAGAGCAGGTGGACTCCCGCCATATGGAGGTGATCGAGC  
GCTGGGGCGAGATGCTGCGCAGCAACCGTTATGTCCGCCGCTCCTGGCTCGGGGAGAAGATGCTGAACGA  
CGGCACCTGGCCGAACCTGTCATCGTACTGGCGCCGGAGGGGTGCCAGCTACCCGAACGGCCATCCC  
CTGCCCTACTGCCTGCTGGAAGGGCACCACAGACTCGGTTATTTGCGCGCCATGGCCCCGATGGGGAA  
TCGCTGCAAGAGACGCACAAGGTGTGGATTTGTGCTCACATTCGCCCACTTAAACGTTTTTTCATGCTGA  
AATTAGTATCGTAAATAAAATTTTGACAATTAATAAGCGGCCCTATAATCTGTCCGGTTTTGAAAAAGG  
TCGGGACGAAACGATGCAGTTTTTGTATTGATTGAAAAACAGCCTTGCAGACGGGTGGTGCACCCAGAGCGGC  
CCCGTTGTTTTCCGGTTCCCAACCCCAAGATCCCCAGTTATTTTAAAAAAGCCCTGTTCAGGGGCTT  
TTTTTTGTGCCCGAAAAACCTCCAATGATGTCAAAGGGAATGCAGACGATGACCAATCCACTCTATAAGA  
AACATGTCATCTCCATTTTCGGACCTGACCCGGTCAGAAAATGGAACCTGGTAGTCTCAACCGCACACCGTT  
GAAGGCTGAACCTGACACCAGCCTGTTGAAAGACAAGCTGGTTGCCAGCTGCTTCTTCGAAGCCTCCACC  
CGCACCCGCTCTCGTTTCGAGACCGCGGTACAGCGCCTTGGCGGCAACATCATCGGCTTCGCCGACGGTG  
GCAACACCAGCGCAAGAAAGGCGAGACGCTGGCTGACTCCATCAAGATCATCGGCTCCTACTCGGATGC  
GGTGGTGTATGCGCCACCCGAAAGAGGGCGCGGCCGCTGTCGCTCCGAGTTCTCCCGCTGCCGGTCATC  
AACGGCGGGGACGGCTCCAACCAGCATCCGAGCCAGACCCTGCTCGACCTGTTACCATCCATGAGACCC  
AGGGCCGCTCTGGACAACCTCAACGTTGCCTTCGTCCGGTACCTGAAATATGGCCGACCGTGCACCTCGCT  
GGCCAGGCCCTCAGTCTGTTCAACTGCCGCTTCTTCTCATCTCCCCGGAAGCGTTCGCGATGCCGGAC  
TACATCTGCGAAGAGCTGGAAGAGAAGGGCATCCAGTTCAGCGTCCACCAGACCATGGAAGAGGTGATGC  
CGGAGCTGGACATCCTCTACATGACCCGCTCCAGAAAAGAGCGCTTCGACGAGACTGAATACAAGCACAT  
GGCTGCCAAGTTCATTCTGGAGCTGGCGACTCTGGAAGGGGCAAGCCACCATGAAGATCCTGCATCCC  
CTGCCCGCGTTCGACGAGATCGATGTGGCGGTTCGACAAGACTCCCACGCTTGCTACTTCCAGCAGGCGG  
AGAACGGGGTCTATGCACGCCAGGCGCTGCTGGCACTGGTACTGAACGAAACTGTCTGAGCTTAGGGGAA  
TATCATGTCTGACAAGAACCAACTGCAAGTCAAGCCATCCGTCACGGCTCCGTCATCGATCACATCCCC  
GCTGGCCAGGCTCAAGATCCTCAAGCTGTTCCAGTGGTTCGAAACCCAGGAGCGGATCACCTCGGCT  
TCAACCTGAAATCCGGTTCGCTGGGCAAGAAGGATCTCATCAAGATTGAGAACACCCGTTGACCGAACA  
GCAGGCCAACCAGCTGGCGCTGTTTCGCCCCGAAAGCGACCGTCAACATCATCGAAGACTTCAATGTGGTG  
AAGAAGCACAGCTGGAGCTGCCGGAGTTTCATCGCCGGGTGTTTCCACTGCCCAACTCCAACTGCATCT  
CCCACAACGAGCCGGTAGACAGCTACTTCCGGGTGCGCGAAGTGAAAGGCGTGGTACGGATGAAATGCAA  
ATATTGCGAGAAGTCTTCACTCAGGACATCGTCAGCGAGCGTTACTGATATCTGATTGGGCCCCGCGGG  
GCCCATTTTTTGAACCTGTACATCACCGAATTTCCAGTCACTATAATTTGCCATCGCAAGATGGTAAC  
GCCCGCTCATTCCCTGCATATAGATGGATTATCAGTGTTTTTGCCTGATAACTGACTGCTATGGCAGATA  
TCGCGCGTTTTACCTCCGGTTCATCATCAAAGGAATTCGCGGTGGTCAAACCCCTCAGTCTCCCGTTGCC  
AAGAGCCCCGACCTGGCCCAGCTGGATGCCTGTCGCCAGATCATCGGTCAGCACTGCTACAGCACACAGGA  
AGAGATCCGCCGCGAGCTGTCGGAGCGCGGCTTTGCCGATATCAGCCAGTCCACCATCTCACGCTGCTG  
CGCCGCTCGGCGTGGCCAAGGCGCAGAATGCCAACGGCAAGAAGGTCTACACCTTGGTTCGACGAGCAGC  
TGGAACCCGCGGCAGTACCCGCTCTATCCACGACATGGTTCGCGAAGTGGTACACAACCAGCAGATGGT  
GCTGATCCACACCACTCCGGGGGCCGCCACCGTGGTGGCTCGCCTGCTGGATCGCAACGCCAATCCCAG  
ATCATGGGTGCCGTCGAGGTAATGACGTGGTGTGGTTCGCGCCGCGCCATATCAGCCGTACCCGTCAGG  
CCCATGCCGCCGTTGGTTCGACGCTGGCGCAGGCCCGCTAAGCCATTTCCCTAAATACATCGAGGGCAGC  
CCGCGGGTTCGCTTTTTGTTGCCTGCTACTTTGTGTCCATCACTTCTTGCGCCATAAAAAACGGGAGCC  
CGCAGGCTCCCGCTTTCATCTTGTCTATCCCTCAGGAGACGCGGCCAGACTCAGGCAGACCAG  
ATCAGCACGGTCAGGATACCGAGCAGTGGAGCCACCCACTTCAGCCAGCGCACATAAGGCACCTTGGCGA  
TGGCCAGACCCGATGACCACGGCGGAGGTTCGGGGTACCAGGTTACCAGACCCGAGGAGACTGGTA  
AGCAGTACCACAGATCGCGGCCACGTTGGCGAAGTTCGGCCAGCGCGCCATGATCGGCATGGTCACT  
ACGGCCAGACCCGAGGAGGACGGCACCCAGGAAGGAGAGCACCACTTCCAGCACGAACATCACGTTGATAA  
AGACGATAGTGGAGAGGCGGTCACGATCCCTTCTGCACTGTGCAAAAATGGTGTGAGTGATCATGCCGTT  
ATCCATCACTACCACGATAACCGGGGCGATAACCGATGATCAGCGCCACACCCAGCAGGTCGCGAGCACC  
TCGATAAAGTTGGAGGTCAACTCCTCCTCGCTCATGCGGGAGATGAGGCCAACGATGATGGCGGCAGCCA  
GGAACACGCCGGAGATCTGCGCCATCCACCAGCCAGCACGGCCACACCGTAGATCATCACGGCGAAGGC  
GGCGACGAAGATAACCCAGCACGATTTTACGGGTTCAGGGTGAACCTCCAGCATCTGGTTCGCTCTTATTGCCA  
AGGAAGTGGGCACGGTTCTCTTCCCACTTGTGAGTACCAGGGATTTGCTCGGATCGTTCGCGACCATCT  
TGGCGTAACGCATGACATAGGCAACACAGAGCAGCCAACCGGCGACAGCATGGCGACGCGCAGCCAGAT  
ACCGTCCGGTGAAGGAGATAACCGGCCGCTTGGCGGCAATAACGGTGGCAAACGGGTTGATGGTGGAAACCG  
AGAGTTCGGATACCCGCACCCAGCAATACGGTTGCCCGGGCGACCACAGGGTTCGAAGCGGGCGGCCATCA  
TCACCGGCACCCAGCAGGGTGTAGAACGGCAGCGACTCTTCGGCCATCCCGTAGATGGTGGCCCCGCGGC  
GAACAGCGCCATCAGGATCGGGATCATCCACTCTTCCCGCCGCGCAGGCGGTCGGTACACGTTCAATA  
CCGGCATCGATAGCACCTGTCTTGGTCACAATGCCAAGAAAACACCGATGATCAGGATAAAGAGGGGAGA

CGTCGATGGCGCCTGCCTCATAGGTGTCGTGGTTGTAGAGGCCATCGATAGGTGCCAGCAGCACATCGAC  
GATCCCCTGGGGATTCCCCTCCACCAGTTTGTAGGTACCCGCCACCGGCACTTCTTTGCCGAGGGCTTCG  
TTCATGGTCATCTCATATTTGCCGGCCGGCACTATCCAGCTCAGGGCGGCCACCAGGGCGATCAGCACAA  
ACAGTATCGTGTAGGCTGACGGGAACCTGAATTTGGTCATGGTCCAGCTTCCCTTCTGTGGGTGTGGTATC  
CATGCAGGCTGCGGGTTGTAGGGTTAGAGGTATTATGCCGCTGTCACATGGTTCGAAAAGCCGGGGTTCGC  
CCCCCGGCACCCTACTGCGACCTTAGTCGCCCAGCGTAGCAACCATCACTGCCCTTGATGGTGTGCATCC  
GGTTTTTCGGCCTCGTGAACACGATGCTGTGCTCGGATTCGAACACGTCCCTCGGTTACTTCCAGGCCTTT  
CATGCCATATTTGTCAGCCACTTCCCTTGCCCATGGTGGTCTCGTCTGTTGTGGAACGCCGGCAGGCAGTGC  
ATGAACTTCACATCCGGGTCTTGGTGGCGTTGATGACATCCATGTTGACCTGATACGGGGTTCATCAGTT  
TGACGCGCTGATCCCAGGCTTCTTTTCGCTTCACCATGGATACCCAGACGTCGGTGTAGAGGAAGTCCGC  
ACCCAGCACACCTCTTTACATCTTCGGTCAGGGTGTGCTGCGCCGCTCTTTCGGCGATCTGGCGG  
CACTTGGCAACCAACTCCTCTTCCGGCCAGAAGGCTTTCGGCGGACCCAGACGGATGTCCATGCCATTT  
TGGCGGCACCGACCATCAGGGAGTTACCCATGTTGTTGCGGGCATCACCCAGGTAGGCGAACTTGATTTG  
ATCCAGACGCTTGCCTTGGCGTGCTCCAGCATGGTTCATGAAGTCGGCCAGGATCTGGGTGGGTGGAAT  
TCGTTGGTCAGGCCATTCCAGACCGGGACACCGGCGTAGGCGCCAGCTCTTCCACGATCTCTGACCGT  
AGCCGCGGTATTCGATACCGTCATACATGCGACCCAGTACACGGGCGGTGTCCTTCATGGACTCCTTGTG  
ACCGATTTGGGAACCGCTTGGGCCAAGGTAGGAGACTTGCAGCCCTGGTTCGAAGGCCCACTTCAAAC  
GCACAACGAGTACGGGTGGAGGTCTTCTCGAAAATCAGGGCGATGTTCTTGCAGCCAGATGCTTGCCT  
CGTAGCCACCGTATTTGGCTTTCTTTCAGGTCGATGGCCAGGTCGATCATGTATTGGATTTGCGCGGGGT  
GAAGTCCAGCAGTTTCAGGAAGTTACGGTTACGCAGATTAAGCCATGATGAGTTCTCTATATATGT  
TTCAGACCAGTTCGGGCAGTAGTGTGACTACGCATTCAGTACAGATATCGGTAATTACGCATGTACG  
GTGCGGGTGGCGACGATATTGGTGCCGGCTTACCCTTGGAGATGGCGAGGCCATCTTCCAGCGAGCCGA  
TGCCAACCATGCCGCGGTCGCTTTGACAAAATTCACAGGAGGCTTCGACTTTCGGTCCCATGGAACCTGC  
ATCGAACTTGACCCCGGCCAGCTCGTCCGGGTGGTACTCGCAGCGGACGCTGGGTCCGTTTGGCCAGATAGG  
CGGCAGACATGTCTTGTGATCACCGCTTCGATACCGTTCAGGCTCTGGCCATCCCAAGTCACAGGGAT  
GCCGCCACCCAGGTACAGATGATGAGGTGGCCCTGGGCAATCAGGGTTTCGATGGCGTCGCCCTTCGACG  
ATGCTTGGGGGAGCGGGGATGGCACTACGCGCGGAAGAATTCGCGTCAGCCTTGACCACCCAGCTCT  
TCTCTTTCGCGAGGCTCGGGCTTTCAGCCTCTTCGCTAGACGGGGCCGATAAATTTGGTTCGGTTGGCGAA  
TGCCGGATCCTTGGGATCGACCTGCACCTGAGTCAGCAGCGGGTGACGTTGCGGCTCGGCATCAGGTTT  
TTCAGCTCCTGGATCAGCATGTAGCCGATCATGCCCTGGGACTCGGCACCCAGCACATCCAGCGGATAGG  
GGGATACCTTGGTGTAGGCGCTGTTCTGCAGGGCCAGCAGGCCGACTTGCGGGCCGTTGCCATGCACCAG  
CACCACGTTGACTCCTGAGCGATCAGGGCGATGGTCTTGGCGGAGTTGCAATATTTCTTGCCTGGATA  
TCCGCTTCCAGTGGCTCACACGACGGAGCAGAGCATTGCCACCCAGAGCGACGACGACAGTTGGTTTTT  
TCATAGTGGTTAATCTCGAGTTTGGTTCTGTGTGGCGCCAGCTTCTGCGGCGCCACGCCGCTCATCAG  
ATGCTGTGCGGTTCCATCGGGCAGCTCATGCAGCGGGCGCCGCCGCGGCCACGGCCAGTTTCATACCCG  
GGATGGAGAGAATGTGATACCGGCCCTTGTGATATTTCTCATTTGGTGTAGGTATTGCGCTCGTAACCCAC  
CACCACGCCGGGACGTACAGTCAGCACGTTGTTGGCGTCGTTCCACTGCTCGCGTTCTGCTTCAAGCTG  
TCACCGCCAGTGGTGTGATGATCTTTCAGCTGATCCACGCCAGTGTCTTCTCGATAGCGGTGACGAAGTAGC  
CCTCTTCCCTTGTGATGTTTCATGCCGTTGGCGCCGCCCGGAGTTCAGGCTCCAGCACTGCACATCCTTGGCGAT  
CACTTCCGGATAGACGGAGAAGGTGTGATATCCATGTGGGTTCATCAGGTTATCCAGGTGCATGCAGCTG  
CGGTGTTTTCGGCAGCTCCATGGCGATGACCTGCTTGGCCTGACCATGTTTGAACAGGCTGCGAGCCAGGT  
GCTCGACACCTTGCGGGTGGTGCCTCGGACATGCCGATCAGCACAGCGCCGCGGCCGATAACCAGTAC  
GTCGCCACCCCTCGATGGTGGAGTTGTGCTAGTCAGTTCCTCGTCAACGAAGTACTTGTGATGAAGTCTGA  
CCGGCAAACATCGGTTGCCAGCGGTAGATGGCCTTACATGGTTGGTCTCGCGGCGACGAGCCGGTTGGCAG  
CCATCGGGTTGATGGAGACGCCGCCATAAACCCAGCAGGAGGTGTACGGGTAAGAGGTGGTTGGGCGAG  
CGGCTCGATGATGAAATCGGTCGGAGCGTGCATGCCACTACCATGTTGATGCGCGTGTAGGGCATCTCG  
GAGTAAGTCAGGCCACCGGAGAGAATGCGGGCCAGTTTCGCGGTGCGGCATGTCAGCCAGGAAGCAGCGCA  
CGTCTGTTGGCAAAAAGAAGAGCCGAGGCGGTAGTCGGAGACCTGATGTTGCAGCAGCCAGGTTTTGGCTTC  
CGGCACATCCAGGGTTTCCGCCAGCAGATTGGTTCAGCAGGAAAACTTCGACATTTCTGATCGCGCAGTACC  
TGAGCGAATTTGTGCTGCTCCTGACCGGCACGTTCAACAGACAGGACGTCATCGAACAGCAGATCCTGGC  
AGTTGGAAGGAGTCAGACGCTTTCAGACTGAGGTTGGGGCGGTGCAACATGACACGGCGCAATTTGGCCAAC  
TTCAGAACCTACATAAAAATTTGCTCATGATTATATTTCCGCTTAGCAGTGGTCCCTGCGAGTGATTGAATA  
GATTCCTTCTATTTCATGCTCGTGGCTAAGGCGGGATATTTTATGTAGGGTAATCGGCTTATGTTCTAT  
CCTGCCCTTGCCTTTTCGAGACCGAGGTTAGCCCTGCGAATCAGACAAAATTTAGACATTTGATCACATTTCA  
CTCAGAATGAATATATTTACCATCCAATCTATGACCCCGGTAGCAAATTTGCGCATTTTCCACACAAAAGC  
GCACCGAATAACCATGCAAAAACCCCTGCTATATTTTCAGATTGATTCATTTTTTTTATTCATGCCAGTTCA  
CTGGAGTGATTAATGCAAAATAACAAAAATCGTTAAAAATCATTAATAAAATAACTTTTACAAATATAAT  
TTGAATATTACTCCCTAGGTATTGAATACATCGCCGTGACGGGAGGAACGCGGGAGAAATAAATACTCAC  
ATCTACCACATTACTGCATAAAATCTTTTCTTGTTCAGATCATGGCATTGATGCCAACCCCATCAGGCT  
CGGCCTCATAAGTCATCACCTCTTTGTGCGATTCAACTTAATATGCACAAAAGTCCGCATCAAGGTGGGCA

GCCATCCTCGTCGGTCACCACAACGCCTTTTGATACTTTTTTCATTAATTGAATTTATTCGTCTCACCTT  
GCGCTGGCGCCAACCTCGACTTAACTCAGAAAGTGATCCAGATCACACAGAAATGGCACTACCAAGGAGT  
TGTTATGAAGATGAAACCCATGCTGTTGCTCGCGACTTTGCTGCTCTCTGCGCTCCCCACCTCAGTCAG  
GCTGAAGGAGCCCCTGCCATGCCATGGTGGTATGCCATGTGCGACAAGGCCCCCCAGATGCTGGTGCCTG  
ACTATGTCTGCCGCTGGCAGGGAGGCAGCGTTCACTACTAGTCGAAACAACGAGAGGAGCATCACTCCTC  
TCGCCTTGATGAGACAGGCCCTCCTATACTGAAATCAGCGGTTTTCTCATGGATAGGGGAACGTCAT  
GATCTTGTGGTGGTGGAGAGAAGGGGGGGAGTGGCAAGAGCTGCCTGGCACAAAATCTGGCGGTCTAC  
CTCAGATCCCAATTTAGGGGGAGGTGTTACTGGTCGACTGCGACCCGACGCGACCACCTCTGACTGGA  
TTCAGGAGCGCAACGACAACCCGGAGCTGCCACAAATCAACTGCGTACAGCTCTATGGCAATATTCGCAA  
CGACCTGCTCAGCCTGAAAAACCGCTACGACTACGTATCGTCGATTGCGGCGGGCAAGACAACCCGGCA  
CTGCGCTCCACCATGGCTGTGCCCACCCGCTGATCCCCCTGCGCCCCGAAACGTCGCGACCTCAAGA  
CCCTGCCCCACATGGAAGATCTCATCACCACCTGCAAGATGGTCAACCCGACGCTCAATGCAGCCGTAGT  
GCTGACCCAGTGCCCCGCCCTGCCAATCAGGTAAAACGCATTCTGGAAGCGAAAGAGGTTTTGCTCCTCG  
TTCGGTGTGACGCTCTGAACGCCATCACCTATGGCCGCAACGTCATGACGACAGCGAAGAGAAGGGAC  
TGTCGGTGTGAGATCGAGCCGGATGGCAAAATCCGCCGAAGAGATCCGGGCCATCGCGAAAGAGTTCTT  
GCAAGTGGGGGTGTGAGATGGGTCTGGCCGATCTGAAGAAAAAGCACCAGCTGCATCACCAGAAGAAGTT  
CACCGTCGACGAATTTATCGAAGATGCGGAGTTCTACGCCAAGGGCAAACCCAAAGTGGTTCAGCCTCGAA  
CTGGGCTGCATCGTGATGAGGCCCTTGTGCGGCTGGCCTTTATCGAGAGTGGCGAGCACCTGAAGCCCA  
GCTACAAAAAAGCCACCTTCTCCATGAGCACGGTGGCCATCGACGAGCTGGGTAATCTGACCCAGCAAGA  
TGGCATGAACAAGTCCCTGTTGCTGCGCCTCTTTACCCACTACTTCTCTTCGCTGACTCCTGAGGAGCGC  
CAGACAATCTATGAACGACTCAACCAGCGCTCATAATTTCTCCATTCAGCCGCTCTTTGTGTGCCTCGCC  
AACTCACCCCGAATGACCATCATCAGACTGCAAAATCTGTTTTCTGAAGCAACCAAAACGCCGTGTAAGAG  
ATTTGCCATTCCACATGTAAGCCAACGGCTAAAAAGATCCCCGAGATAATCGGAAGATAAGATCTTAAAA  
CATGAAGACGATATACTTAACTAGCTGTTTATAAAATGAATAAAATCGAAACACACCCTTTCGAAATAGCT  
AATGACAAAAACGTTTTCCAATCTGGCGTTGTAGCCGGTTAGAAAAATCCTTATAGTTACTCATGCACGGA  
CGCAATGAAGTCCGTGAGGAAGACTGGCTGCCAGGGTTGGGCAAAATGGAATCACCACAGGATGTGGTAAA  
GGACACCTCCAGGACGGAGAAAGTGCACGGGACAGGATGACTCGTCAGGCAAGATGGCTAAAGGACA  
CCCCAAAGGATTTGGGAAGGGGAAACCTAAAGGAAGAGGTAACAGTCAAGGATTGCAGGGAGCACTTCG  
TTCAAGGACTGTGAGCGATACGACTACCCGGGGGACGACGTAAGTGCACCCCATCTTTTTATCTGCATTTAAC  
CGCCCCCTTGCTTGGCTCTCAATTGCTTGCCTCAGCGCAGAGACTTCTTACCAGAACCTTCCCGACCCGC  
TGCTTAAGCAAAAATACATATGAAAGGGGCGCCACGATGGCGCCCTTTTCTGTTTTCTCATCGGCAAAACA  
AGCTTATATCACGCGAGAGAACTGTTGCTGGCGCGCCTTGTGCGCAGGTACACGTCGAAGCACATGCAG  
ATATTGCGGATCAGCAGCTGCCCGGTGGAGGAGACCTCCAGACCATCCTTCGTCATACGCACCAATCCAT  
CGTTGATGAAGGTCTGCAGCAGCTTGAATCATCGGCAAAATACTCTCTGAAATGAGACCGTGCAGCCTG  
CTCGACAGACGCAAAGTTCAGACGGAAATCACAGATAAGCCGCTTGATCACCTCACGGCGGATCAGGTCA  
TCCTGATTGAGCGAGCAACCTTTCCACTGGGCATGACCAGCTCTGCAACCTGTGCGTAATACGCCTTGA  
GCTCTTTCTGGTTCTGGGAATAGGCATCACCAGATCATGCTGATGGAGGAGACACCCAGCCCCAGCAGATC  
GCAATCACCTTGAGTGGTATAGCCCTGGAAGTTGCGGTGCAGCTTGCCCTCGCGCTGCGCCACTGCCAGC  
TCGTCATCGGGCTTGGCAAAATGATCCATGCCGATAAACTGGTAACCTGACCAGGTGAGGAAGGCGATGG  
TATCCTGCAGCATGGCCAGCTTCTCCTGCGGCGCAGGCATATCCACCTCTTTCAACTTGCGCTGGGCAGC  
AAAGCGGCTCGGCAGATGGGCATAGTTGAAGATGGAGAGGCGCGCCGGATCCGTCTTGAGCACCTCTTCC  
AGCGTATGGTGAAGCTGGCACGATCCTGATGCGGCAGGCCATAGATAAGGTCGAGGTTGGTCGAGCGGA  
AGCCTAGTTCACGGGCCGTTCCAACATGGCTTTAATAAAGTCGTTGTCTGCTCGCGTTGACCGCAAC  
CTGCACATCCTTGTGAAGTCTGCACCCCGAGGCTGATGCGGTTGAAGCCGACATCTCGCAGCACATCC  
AGCATGGTAATGGCAATCTCGCGCGGATCGACCTCGATGCTGAACTCCCCCTCTTCGCGGAAATGGAAGT  
GCTCACGCAGCATGGCCATCAGACGGCGGCTTTGCGCTTCATCCAGATAGGTGGGTGTACCGCCCCCCCA  
GTGCAGCTGGGTAACCAGACGATGCTTGAAGAGCGGGGCTTGCGCCTTGATCTCCTGCTCCTGCTAGTCCG  
AGGTACTCGTCAGCCTTGTGCTGATGGCGGGTAATGACCTTGTGTCAGCCGAGTAGTAGCAGAGCTTGT  
GACAGAAAGGGATATGCACGTAGAGCGACAGATTGCGCTCGAGATACTGGCCGGCTGCGCGGACAAAATC  
CGGATAGCCGAAGCTCTCGTTGAACTCCAGCGCAGTGGGATAAGAGGTGTAACGCGGGCCACTGTAGTTA  
TATTTTTCGATCAGGGCCTGATCCACACAATCTGTTCTGCTTGCACGCTCGCTTCTCTTGTGTTA  
TTGTTGGCTCACCGACCTAACTGAAAATCCTTCAGCTGGGCCACATCCTTGAGGATCTGAGCCTCCAGCT  
CGGCCTCGTAGCCGCTGCGTTGAGATCCATCTTCATCACTTCATTGCGCTTGAGAGCGTGTCTGGCCTC  
ATGAGTCGGCATATCTTTACCTTCTCATAACAGCCCGTACAGACCCGGAACTCGGCAACAAACGCTCGC  
CCCCCTTGATCTGCAACGCATCCAGCAGATTGGTCAGCCGAATGGCGCCTTCGGAGTAATCGCACTGCC  
CCTCCTGCACCGCATGGGCAATGACCCGACGCTCTCCAGAATTCGTTCAATGCGAGCGGTAATCGCCTG  
CCACTGCATCGCTTGTGTGCTCTCAGCCTGGCCAGCAGCATGCCTGCATAGATGGCCAATCCTGACAAA  
ATCAGGCCGCCCAACAGGGCGGCCAGCATCCATCCACTCATCACTTTTTCTTCGGCTCAGGCTTGGGTTT  
CGGCTTGAATCGACCTGGTTGAAACGGTCCCACAGCTCCTCTTCGGAGGCGGGTTTCTGCTCATCGAAC  
TCGGCGTCATCACCATCATCAAACGGCAGCTCGTCATCTTCATCATCGTCGTTGTGATGATGCCAGCT  
CATCCATCAGCTCCTGATAACGGTCGACACGCTGATCAACCCAGGCTGCTCGGCCGCTTCCAGGGTTT

ACCGGCATCAAGACGATCCAGCAGATCATTCAAGCGGTCATCGTTTTTCGATGGAAGCCAGCTCCTGCTCG  
GGCGTCATCACCAGCTTCTTCTCTTTACCCGCTTGGGTGCTGCCGGCTTCTTCTGTTTTGTCATCCACCA  
CCAGAACTACCGGCTTGCGGGAACCGATACCGGATCTTTGGACTGGCTGTTGCCAGACTTGTCTTCGG  
CTGTTCAACTTGCTGACGAGAACCAGCCTTCAGGCCCTTTTCGCTTGGCAGCCCGTTTACGCTCACGGCCT  
TCCTGAGCACTGACATCAGATTCTTTGCGCTTGCCAGTAGGCTTGGCAGTGGGTGTTTTGGCAGACATGA  
ATGGCTAACTCCGAAAATAACTGGTTTTGACCCGTACCCGGGATGATCTCACCCGGTGGGATACGATGCGA  
GGAACAGTAAGGCTGGAACAAGAGCAGGATCCCGCACCAATCAGGCCCAATCAGGCCACTGAACACCGCA  
GGATCGGTATCCTCTGGGCATGTTGCTGGTATTTTGACACAGAATGGCTGATCGGGTTAATGACCCAAAA  
GAAAAAAGGCAGCCGAAGCTGCCTTGATATGTTTCATGCGTGCGCCATCCTGAATGGCAAAACAATCTGTT  
TCGTCTCTCCGTGACAACCTGTGCGCCGATCATATCGTTGTGTGGTCATCTGACCTTATATTGGTCGT  
TCCTGAATGTGCGTGTGCTGTTTACCCGCTCGACCCGATCCTGACATCCTTCAATCCTTTGGCAGCTCATCCGAGC  
CCGCAACCCCATCCCGCTCCGGAGATGGTCACCATCCTGATCCTTCAATCCTTTGGCAGCTCATCCGAGC  
CCATGGCATCCCGCCACGCCAGCCATCCTCTGCTCACAAACCCCTGTCGTGAAACCGCCACCCAATCCAT  
GGGTGAATCCATTAACCTACTGTACCAACTCTATAAAACGGCTCAATCCACCCAAAACATTTCTCAACAT  
GTCTAAAAATATCAATATTTCATATAATTTATTGATAAAATAATGATTATTTAATATTTTTATGCAATTTTAT  
GAGCCTTGGCCTGCCTTGAGAATGGGAGATCTCTTACAGAATGGGGGGATTAAACCGAGAATTTATCTGAA  
CGCCATAAAAAACAACGGGGAGCCCAGGCTCCCCGTTTCAACTCAAAATCGACCGTATCGACTATATCAGTG  
CAGACCCGCCACATATTTGGAGAGGGCTTCGATATCCTGATCCGTCAGTTTCTTGGCAACGTCCCGCATC  
ATGCCATTCGGATCGTTGTCACGCGTCCCGGCACGGAATGCGGTGAGCTGAGCCTTGATATAGGCAGGAT  
GCTGGCCGGACAGGTTTGGATACTTTCGCTGTTTCGACACCCGAGCCACGGGGACCATGGCAAGCCGTACA  
AGCTGCCAGACCCGCACTCATGTCACCACCCATATAGAGTGCCTTGCCCGCTTCGACCACGTGCTCAGGG  
ACAGCGATAGGGGTAACCTTCAGGCTGGAGAAAATAAGCCGCCAGGTCATCCATGTCCTGTTCCGACAAAG  
GTAACGCCATCGGCCCCATTACTGGCGCAACCCGGCCAATTTGACCAGAAGCGGCAGCCTTCAGTTCAAC  
TAACTGCTTTTTGATATATGATGCGTGCTGACCAGCAATTTTGGGGTACATATCAACCAGGCTGTTTTCCG  
TCCGGTCCATGACAAGCCGCACAAACGGCAGCCTTGGTCTGTCCCGCAGCGGCATCGCCCTTGGCTTGTG  
CCATCCCCGTTACGCCAACCATCAGAGCAAGAGTAATGACTAGGTTCTTCATGGCGTTCCAACTTTTTCGT  
TATTAGGCTTCCAGATCCCATGCGCTGAAGGCATGTTAAAAATAAACCGGTTTAAAGCGACGCTATTTTTAC  
ACCATTTTACAAAAAAGTAACTCTACAACCCCTATCTCCATGGGGAATTTACGTTGGATAACACAAACTC  
TGAATTTCAATAAAGGTGCAATTTTGTGACCAGCCGACCCGACATCCGTCACCTGCCAAATGATGGGGGTGT  
CGAGATCGCGTTTTGCCGGCCGTTCCAACGCCGGTAAAGTCATCTGCATTGAACACCTTAAACCAAACACAAG  
AACCTAGCGCGCACCAAGTAAGACACCCGGTTCGTACCCAGCTGATCAACCTGTTTTGAGCTGGAACCGGGCA  
AGCGTCTGGTCGACTTGCCGGGTATGGTTATGCGCAAGTTCCACTGGAAATGAAGCTCAAGTGGCAAAA  
GTCACTGGCAGAGTATCTGCAGCGCCGTGAGTCATTGAAAAGCCTGGTGATCCTGATGGACATCCGCCAC  
CCGCTCAAAGATAACCGACATGAACATGCTGGAGTGGAGCTCGCACCGTCAGTTGCCCGTCATGCTGCTGC  
TGACCAAGGCTGACAAATTGAGCCCCGGCCCGCAACAACAGGTCATCAAGGTGCGCCAGGCCGTTGC  
CAACCTCGGTTCCAGATCCAGGTCGAAGCATTCTCCTCTCTCACCAATATCGGTGTGGAGAAGCTGGCG  
AAAACCCCTGACCGAATGGTACGTCAGTGGTGACGATACCGACCTGCTGAACGCTGACGAACAGCAACCTG  
CCGAGGAGTAATCTACTCCTCGCTCTCCTTGAATTTGGCGGAGCACTCCTCCGCTGATTGAAAGGGTTTT  
AGATTGCCGCTTTCACCTGCCTCACGACAAATACCCCGCATTTCGCTCCCTCGCTATATCCAATACCGCT  
TAAAGTTTCATATAGATAGATGGTTAATTCACAAAAATAATTAACCTTAAAGTAGGTGTTGGTAGCGTTTTCA  
AATTCGTTCTTTCAAAACGAACAAGAATTACAAAAAGAGACAAAAATGAAATTTAATTACAAGCTCTAAC  
CGAAAGGGATAAAAAATGAGGCCGGACGACAGTATGCCATCCAGCCTGAAATAATAAGTTCAAAAAATTG  
GGAAGAAGCTGAATCTTGAGTACCAGACGACAGGCATTCCTCAAGAAGCAGCCTCATTCTATCAAATGCA  
TCGCCAATTTAAAGCATTACTCTAAATGATGCGCATAAAAAAACACCCCGACGAGAACCCTCATCGGGGC  
AGCTATTACGCCACATTCAATTACGTGAAATAAAAGGTCGAAAGATAGAACATCTTACCTCTGTACCCT  
ACGCAGACAACCTGTACAGCAAAGCAGCAGAAAGTAAATTTATGTAATTTAGTTTCAAACTTACA  
GATTAAGAAAAAATCTTTTATTTTTCATACAGATAAAAAAATCCCCAGTACGAATACCGGGGAGTTATAAA  
GGTGACTAGCTAGCACTTCTCAACTATCTAGTTAGTCAGCGCCATTTCAAAGTAGTTCCGCTACAAAAC  
AAAAAAACTTTGAAAAATCAGAGATAGATAGCGCCATCTTCAGCAAGCTCTTGTCTTCAATGAGTTTTTT  
CAGCCATGTCTTCAATATCAAAACGTACACTTTCGAAGGCTCTGACGATGTCATCTCCCTCGTCAGCGC  
CAGACCTGTCATTCTCTCCAGCCGCGCTGGCTGATGTAACAATCTATCAGCGCCCCATCTGCTGGGCA  
GGAAAACGCACCCGCTGTTTCGTGAGCCTGCCACTCCATCAGGTCAGGAAACAAAATACCCTGGTTTCATAT  
CACCCCAAGTTACGCTTCAACTCTCTCAATACCTGTTTAGTCCCGGACGAATTCGCGCCACACGGTA  
AACGCTTCGGCGGCCTGTTCCACCAGCATGCCGAGTCCATCCATGGTTTACGGGCCCATGCTGTTTTGG  
CCCAACTGATAAACGCCGTATCCGAGGCGCCATACATCATGTCGTAGATGGCAATATCAGTGTGGATCAG  
GGCAGGGGCCAACGGCGGCAGCTCTCCTTGCAGGCTGGCGGAGGTAGAGTTGATGACAAGATCGAATGAC  
CCTGCCAACTGCTCATAGGTCTGGGCAGTCACAGGCCCCAGATCGCAGAATTCGGCAGCCAACCTGTTGCG  
CTTTTGTGTGGGTGCGGTTGGCGATCACCAGCTCGGTGCGGAGCTCTGCCAGCAGCGCGCCAATGCACC  
GCGCGCTGCTCCACCGGCACCCAGCAGCAGGATCCGACTATCCGCCAGCGTCACACCATGGGACTTGAGA  
TCGGCGACCAATCCAGCGCCATCGGTATTATCCCCAGCAACACGCCATCATCGGTGAGCTTGTGATGGTAT  
TGACCGCGCCCGCCGCTTGGCCCTCGGGCTCAAGCGATCGACCAAAGTGAATGCTTGCTCCTTGAAGGG



AACGGTGACATTGCACCCCTTGCCCCCTTGGGCAAAGAAAGCACGCAGAGTTTGGGCAAACCTCGTCGACG  
GGGGGTTTCAGCCAGCCATACTCCAGCTCTTGCTGGGTTTGTCTGGCAAACAGGGTGTGAATAAAGGGGG  
ACTTGCTGTGGCGCACCGGGTGGCCAAAAACCAGATAACGATCCATCAAAGAGTTCCATCAGAGGGCAAT  
ATTCCGATTTAACGGGTTTTTCGCACTCGGGAACAAGCCGAATATCGGCCAGCAAAAAGGGGCCATCAAGG  
CCCCTCGGGTTCACAGCCACTCTCGCGGGCTGAGGTAATCGGTGTAGAGCAAAGCTTCAGGAGTGCCCCGC  
TCCGGTGCAGTCATACTCCCAACGTGCCAGCGGTGGCATCGACATCAGGATCGACTCGGTACGTCCGC  
CGGTCTGCAGCCAAACAGGGTGGCCCGGTTCATACACCAGATTGAACTCCACATAACGACCCGCGACGATA  
GAGCTGGAACCTCCCGCTCCCGCTCGCCATAGGGCAGCGCTTGCCTCGTTCAATGATCGGCAGGTAAGCA  
TCCAGATAACCCCGACCTACCGCTTGATATAAGGCAAAGCAGTCGGTAAAAGGCCAGCGATTTCAGATCGT  
CGAAGAAGAGACCCGATCCCTCGCTCTCGTTGCGGTGCTTGAGGAAGAAGTAGCGATCGCACCAGGA  
TTTGAACCTCGGGTAGATCTCATCAACAAAGGGCAGGCAGAGATCATGGGAGACCTGATGCCAGTGTGC  
ACATCCTCGGCAAACGGGTAGAAGGGCGTCAAATCGAAGCCACCGCCAAACCACCAATGGGCTCTTCAC  
CCTCTTTCTCGGCGATGAAGAAACGGACGTTGGCGTGGCTGGTAGGCACATAGGGGTTGTGCGGATGGAT  
CACCAGCGACACGCCCATCGCCTCAAACCTTGCGACCCGGCCAACTCTGGCCTATGTGCTGTAGCAGAGGCA  
GGCATGGCATCGCCATACACATGGGAGAAGTTGACGCCCCCTGCTCGATCACCGCGCCGTGGCGCAGCA  
CACGGGTGCGACACCGCCACCGCCTTCACGGCTCCAGGCATCTTCCACAAAAGTGTCGGGCACCGTCCGC  
CAGTTCCAGACCACGGCAGATCTCGTCTGCAACTGCAACAGGAAGGCCTTGACCTGGGCCACATCCGGT  
TTGCTCATCTTGTCTCCAGTCAGGCAGGATCGTGAACGCCCTGTCCATTTTTATAGTTAAATCAATCCGA  
TGAGCTCACCGCTCAGTGGATTGATAGCAAATCATGACGTATCCGCCTGCTCAGGAGGGGCGAATAATAG  
CGCCGGTTCGGGCGTCTTGGATCTCGGAGGGGTTGGCTTGACCACCCACTTCACCGGGCAGGATATAGGC  
TAACTTGCTTGCCAGCCGTTACCAATATCGGCCACCCGACGGGCAGGCTCCTCACCGGTCAGGTTGGCG  
CTGGTAGAGACCAGCGGCTTGCCAAAGGCACGACACAACGCCCTGCACCTGAGGATGAGCCGTACGCGTA  
CCGCGAGGGTCTCGAACTGCCCGGTTCAGCCAGGTCGGCGTTCGTTGCACGGGCAGGCATGATCCAGGTA  
GGGGCCGGGCCAGCTGGCTTCAACCCGAGCCAGTTGCTCACCGCTAAGTTGGCTCAGATCGATGTAGTCC  
TGCAATTGCGCAAATCGGCAGCAATCAGGATCAACCCCTTCTCTACCGGACGCTGCTTGATGGCTAGCA  
GTCGCTGCACCGCCACTTCGGAGTCGGGATCACAACCTAGACCAAACACAGCCTCGGTCCATAGGCAAT  
CACCCCTTCTGTGGAGGGCGGCAACCGCCTGTCAAATTCATTTGGCATAGGAAAAATGCGGCAGCCA  
GGTCTCCCGCTCTGCTACTTAGAAGCAAGTTGAACCGATATGTTGGCGATCATGGCGAAGTGACGTTTTT  
CTGTGGCAGAGGGGAAAACGACACATCCGGATCCCGCACCAGGCTCACTTACTTGAGTTGAGCTGCAGGGC  
GGCATCCTTGGCCATCACCTCTTCGGCATTCTTCTGGCGTTCGGCCCGAACCTTGGCCCGCAGTTCATCA  
TCGGCTACTGCCAGCATCTGGGCTGCCAGATAACCTGCGTCTTGGCACCGGCTTTGCCGATCGCCACGG  
TCGCTACCGGTACACCACCCGGCATCTGCACGGTGGAGAGTAGCGCATCCAGCCCTTGAGCGGGCCACC  
ATCGATGGGCACCCGATCACGGGACGAGTCGTGATGCCGGCTACGGCACCCGCCAGATGTGCCGCCAGA  
CCGGCAGCACAGATAAAGACCTTGACGCCACGGGCTCGGCATCGGTACATACTGATGGATCGCAGCCG  
GCGTGCCTGCGCGGAGGTGACTTTGACTTCCACTGCGATATCAAATGACTTGAGCACCTCGAGGGTGGT  
CTGCATCACGGGAAATCAGAATCAGAGCCATCAATACGGCAACAAAGGGTTTATTCATGGTGGGAATT  
TCCTTACTCCAAGTGGGGGTTGAAGTTCACCGAAAACGTTTCAATCCGGTTGCGGCGGCGGGATTATAC  
CCGCTCACTTTGGTGGCCGATTTCTTTTTCGGACAGACCCAACGCAGAGTTCCCTCACTTTTTTCTCA  
ACCATGATGCCCCAGCCACACTCGGGGCAGGGCATGGGGATCGGTTTGTCTTCCACACATATTTGCAGT  
GTGGATAGCCATCACAGGAGTAAAACCTGCTTGCCGTAGCGGGAGGTACGACTCACCCAGATGACCCTTGCC  
GCACTCGGGGCAGAGGATCTGGGTATCATCGCTCTCCTGCAGGGATTCGATGTGCTGACAGGCTGGATAC  
TGGGTACAACCGACAAACAGACCGTAACGCCCTTCTTGCATCGCCAACGGCTCTCCGCAATCGGGACAGG  
CAGAGCCTTCGAGCACCTTTTCGATGTGCGGGCCGGATGGCGTCAGGGAGCGTATGTAATCACAGGCAGG  
ATAGGCAGAACAGCCGAGAAAGGGGCCATGTTTGCCTGGCGGATCACAGCTCGGCCCGCACTGCGGG  
CACGGCTCGCGCTCGAAGGCATGTTCTGTTGGCGGAAAAGAGGTGATGATCGATTTTTGACATGGGCCGCG  
CCTTGAATCCAGATGGCCTGAATTTACCAGCGCGCACCGGACTGTCAGTGAATGACGCCCTGACTGACT  
CATCAAACACCAGCTCTTCCATCTGCTGGTAGGCATTTTCACTGCCCCGTACGTTGAACAGCACCATCAT  
GACGACCCACTTCAGGTCATCCAGCTCGATATCCGGCTTGTCCAGCTCGAGCAGACGCTCGATACAGATC  
TCGCGGGTTTTCGGCATTCAGCACTTGAGCCTGTTCCAGAAAAGAGCAGGAAGCCGCGGCACTCGGTGCTGA  
GGCGCGCCAGCTCTTGAGAGCATAGATACGCATCGAGCCTTGCAGCGTGGCGGTAACATAGACCTCCCG  
CTCGCTATCGTGCAGATTGGCCAGCCGCTCCAGCCAGTCGAGCGCTTGTGATCTCTTCTTTATCGAAA  
CCGGCCCGGCTCAACTCGTGGTGGTGCATCCTGCTCGACCATCACATCTGCATCGCTGTGGATGTAGG  
TCTCGAAAAGGTACATCAATACATCAAACATGATTCGCCCTCCTCGCTCTGACGTATCCACCGGTACCG  
CCATCACTGCACCGGCCAGCTCCAGCTCTACCAACCTGCCAATACCACTTCGACAGGAAGCTGGGCCCG  
CTCGGCAACGGTATCCACGCTCGTGGTCTCATAATCTACGTTATCCAACAAATCGGCATAAGGCAATTTCG  
CTATTATGCGGTTGCTCAGATGGTATGACCGACGAATGTGACCGTGCGACCCACTCTGGCAGCTCTTCCA  
CTATATCGGCCGCACTCAGCACAAGTTTGGCCCCCTGCTGAATTAATCTGTTGCACCCATCGCCTGGGC  
GTTTTGCGGGGCACCGGGTACCGCAAACACTTCACGCCCTGTTCAAGCGCATAGCGAGCGGTGATCAGC  
GAACCGCTCTGCTCGGTGCCTCCACCACAGAGTTCCAGCGACAGACCACTGATAAATACGGTTGCGAC  
GAGGAAAATGTTACGCCAGCGGCCCTTATCCGGTGCCAGCTCGGAGATAAGCAAACCACCACTCTCCAG  
AATCTGGCCTGCCAGCCCTGATGGCGTTTTGGGGTAGAGGCAATCCAGCCCGAACCAACACGGCAAGG

GTGATACCGCCACAAGCCAGCGCTTGCTGATGGCAAACACCATCGATAACCAAGAGCAAGGCCCGAGGTGA  
TAGCTAACCCGCATCCAACCAGCTCGCTACAAAGCGGGAGGCATTATCTTTGCCTGCATAGGTAGGATG  
ACGTGTCCCCACCATTTGCCAGCTGGGGTAGCGACAGCGCAGCAAGATCGCCACGACAGTAGAGCAACAGG  
GGGGCCGCGGAATTTCCCGCAACAAAGGTGGATAAATCGGGTGATCTTGCGGAATAAGGAGATTGTGCA  
GCAAAGCGGCCCAAGCCAGGCTCTGCTCAACCACCTGCGAGGGCCAGCGCAGTCGTTTGATCTGCTCTGA  
CGACAACCCCATACCATACAGTTGCGCTTCATCGCTCTGAAAACAGGGCCTCAATACTTCCCCGGCCCGT  
TCCAACAGACGTGCAGCGGTACCCGGACCGATAACCGGTGACCGCATCGAGAGTTAGCCAGAGCGCCAGAC  
GTGCGTCGGGGTAGTTACGTCAGAAGTGAGTGACCTGATAAACCAGCACTCACCATGTGCTTACTCTGCA  
TGATGAGACCGTAACTCAGCTTGTGATACACCTTGAACAACATGACACGGGCAATCGCTTCAGAGGGCAG  
TGTTGCCTTCTTGTACTGCTGTAAAACACCCGGTTAAAACCGATGAGAGCTCCTTGTACTGTACATCG  
CCATTTCTGGTGACCAGAGCAGCACCCGGCCGCTGACATCCAGTACATCCCCGGGCAGCAGTTGATCGC  
GGCCACCCCGGTTGATCAGTACCACATCAAACCTTACCACCCCGGGTCTTGTTCGGCAAATCGATGAT  
ATAGCCCGCGTGATGGCAGGTGCCGCTTTTCGGTGTGAAGACGGCGGGCATGTTCTCCTGAGCGGGCAGC  
GGCATCACCTTGTGCGCCTGCAGCACTTCGCGCTGGTTATGAGTCAGAGTCACCTCGGTCCGATCGCCAT  
CAAGACGCGCCACGGCCCCGACCACACCCGGCAAAGATCGCCTCCTGGCCCAGCAGTTCACCCGGTTTCGCG  
ATCCTTGTAGACCACTCCGGGGTGATAAATGCCATAAACCTGCCCGCGTCAGGGAGCCCTGTACATAG  
AGGGTGTCCCCCTCCAGCATGCCGATATGCTTCTGATCCGACCCAGCAGATAGGGCAAGGTTTTCTGCT  
TCTGGCTATCAGCCAGAATATGGTCGGTTTTGCAGGAAGGGCCGATCTCGCTGATAGGCAGGGTCGGAAT  
GGGGTTGACTTTGTCTCGTAACGGGTTTTCGGGCCGAGACGGATGACTTGCTTGCCCCCTGCATCGCC  
TTGCCGAGTCGGGGTTCACCATTTGACCCAGCTCAGATGCAGTACATCACCGGGGTAGATCCAGTGAGGAT  
TGGCAATCTGCGGATTGATGTTCCAGAGACGGGGCCAGAGCCAGGGTTCGGAAGATACTTGCCGGAGAT  
ATCCACAGGGTGTGCGCTTTTTGCACTACATAGCTTTTCGGGGTAACCCGCTTTTCAGCCTCAGCTGATCG  
GCCAGTGTGCTGACTCACGGTCACCAGCAGGCAGGCAGGATGGTTTGCTTCAGATAACATAACTCC  
CTGTTACTTCTGTACGAAAGTGTGCTGTTTTTTGTCGGCGTAAATGACTAGAATTACGCCAATATTGA  
CTGCATTTATACGAAACTAAAGAAAAAACTATGGCCATTTAGATGTATTGCGTTTTCCCGATGAGCGCC  
TGCGCACCGTTGCAGCCCCTGTGAGACCTTTACACCCGAGTTACAACAGATTGTAGATGATATGTTGCA  
AACCATGTACGCGGAGGAAGGCATTGGCCTGGCCGCGACTCAGGTCGCATTCACCAGCGCATCATAGTG  
ATCGATGCTCTGAAAACCGTGAAGATCCTCTGGTATTGATCAATCCGGAGGTCATCGAGGCGCCGCA  
GCACCCGGCATGAAGAGGGTTGCCCTCCGTCGCCGCGCAGCGTCTGCTGCTGCTGCTGCTGCTGCTGCTG  
CAAAATCCGCGCCCTGGATCGCAACGGCAAGCCGTTTCGAGCTGGAAGCCGACGATCTGCTCGCCATCTGC  
ATCCAGCATGAGATGGATCATCTGGTCGGCAAGCTGTTTTGTGGATTACTTGTCCCCGCTCAAGCGCCAGC  
GCATTCGCCAGAAGCTGGAAGAGATGGCCCGTGAAGATCGCAAAAGTCTCTGAGGATCTGCCCCATTGAA  
TAAGCTGAAACTGATTTTTGCCGGTACTCCCGACTTCGCCGCCCGTCACTGGCGGGCGTTGTTGTCTTCC  
GACCACGAGGTGCTTGCCGTTTATAACCAGCCTGACAAGCCCGCTGGCCGTGGCCAGAAGCTCACCGCCA  
GCCCCGTCAAAGAGCTGGCACTGGCCACAACCTGCCGGTTTTACCAACCTGCCTCTCTGCGCAAGGAAGA  
GGCGCAAGCCGAAGTGGCCGCACTTGGCGCCGACCTGATGGTGGTGGTGGCCTATGGCCTGATCCTGCC  
AAGGTGGTACTCGATACCCCGCGGCTGGGCTGCATCAACGTCATGGTCCCTGTTGCCCGCTGGCGCG  
GTGCCGACCGATCCAGCGCTCTATCTGGGCGGGCGATGCCGAAACCGGCGTCAACATCATGCAGATGGA  
TGTGGGACTGGATAACGGCGCCATGATCCGCAAGGTAAGCTGCCCCATCGCCGCCGACGAGACCTCCGCC  
AGCCTCTATGACAAGCTGGCCGAGCTGGGCCCCGAGGCTCTGGTCGACACCATCAATGCCATGGCCGCCG  
GTGAAACCGCTGCCGAGGCACAAGATGATGCGCTGGCCAACTACGCCGAGAAGCTCTCCAAGGAAGAGGC  
CCGCATCGACTGGTCGATGGAGGCGGTTGCCATCGAACGCTGCATCCGCTCGTTCAACCCCTGGCCCATC  
AGCTGGTTTTGAAGTGGCTGACCAGACCGTCAAGGTATGGCAAGCCGCCGTCATTGACAGTGACCACGGCC  
AACCCGCCGGCACCCCTGCTCAAGGCCGACAAGCAGGGGATCGATATCGCTACCGGCAAAGGGGTACTGCG  
CCTGCTGACCCCTGCAACCCGCCGCAAGAAGGCGATGTCCGTTTTCGGATCTGCTCAACTCTGCCCGGAC  
TGGTTTTGAACCCGGCAGCAATTGAATTGAACTGGATTGAATTGACACAAGCGGGGCCAGGCCCGACT  
TGCGCATCTAAGGTAACCTCTATGAAAACACGTGCACAGGCCGCTCTCGTTATTCAACAGGTGCTGGATCA  
GGGTCAATCCCTCTCCGCTGTTCTGCCTGCTGCCAGGAGAAAAGTTGCGCCCCGCGATCGCGCTCTCCTG  
CAAGAACTCTGCTACGGCACCCCTGCGCTGGCTGCCCGCCTCGATGCGGCAGTCAACGAGATGATGGACA  
AGCCGCTCAAAAACAAGAGCCGCATTTTCCACTACCTCATCTGGTTCGGTCTCTATCAGCTCATCTACAC  
CCGCATTCGGCTCACGCCGCGGTGGCCGAGACCGTCAATGCCGTCAAACCTGCTCAAGGGCACCTCCCTG  
CGTGGCCTCATCAACGGCGTGTGCGCAACTTCCAGCGCAGCGCCGAAGTCAATTCTGCTGCGTATTGACC  
GTGTTCCCAGCATTGCGCTCGGTGATCCGGAGTGGCTCACCAAGCGCTGCGTCAGGCCTATCACGATGA  
GTGGGAATTCATCATGGAGGCGAACAACCAGCGCCCCCCCATGTGGATCCGCAACAACAGCCAGCGCCAG  
AGCCGCGATGCCATGCTGGCTCGCATGGCCGAAGCCGGCATCAATGCCGTGGCTGGTGAAGAGGGCGAGG  
ATTGCATCCTGCTGGAGCGTCCCTGCGATGTGACCAAGCTGCCCGGCTTCGAGGTCCGGTACTGCTCGGT  
ACAGGATGGTGCAGCACAACAGGCTGCCGCCCTGCTCGACCCGCAACCCGGGTGAGTGGGTGCTGGATGCC  
TGCGCCGCCCGGGCGGCAAGACTGCCACCTGCTGGAGCGTCAAGCCAAAGTGGCTGGCGTGGTTGCCG  
TCGATGCCGACGAAAACCGCCTCAAGCGGGTGCAGGAGAACTGGACCGTATCGGCCCTCACCGCCAAGGT  
GATCCATGGCGATGCGGCGGCGCCGGAACAGTGGTGGCCGGAGGGCCAGTTTCGACCGCATCCTGCTGGAT  
GCTCCCTGCTCCGCCACCGGCGTATCCGCCGCCACCAGACATCAAGTGGCTGCGCCGTGATCAGGACA

TCCGCGAGCTGGCCGAGCTGCAGCGCCGTATTCTGAACGCCCTCTGGGGCAAGCTGAAAAGCGGCGGCAC  
CCTGCTCTACGCCACCTGCTCCGTCTGCCGGAAGAGAACCGCGAACAGATCCGCGCCTTCCTTGCCGCG  
ACCAAAGATGCCAAATTGGTACCGTTGCACGAACAGGACACCCCGACTGCCCGGGTCGCCAGTTCCTGCG  
CGGGTGAAGCCGAAATGGATGGCTTCTACTACGCCAAACTGGTCAAGCTGTGACGCTGACATGTTCTTC  
CGGGGCAATCGCCATGCAGGCGAAATGCCCTTTACTGCCTCAACGTGAGTAGACGTTCCCTATGAAAAT  
CATCATTTTTGGGAGCCGGCCAGGTTCGGCGGCACTCTGGCCGAGAACCTGGCCGGAGAGAACAATGACATC  
ACCATCGTCGATACCGACAGTGCAGCGCTGCGCGAACTGCAGGACAAGTTTGACCTGCGGGTGGTCAACG  
GTCACGGCGCTCACCCCAAGGTGCTGCGCGAAGCGGGTGTCTCAGGATGCCGACATGCTGGTCGCCGTCAC  
CAACAGTGACGAGACCAACATGATCGCTGTGAGGTGGCTACTCCCTGTTCAACACCCCGAATAAAGGTG  
GCACGGTCCCGCTCGCCAGCCTATCTGACCGAGCGGGATCGCTGTTTCTGCCAGAATCGGTACCGGTTG  
ATCACTGATCGCGCCGGAGCAGCTGGTGCAGGACTATGTGCGTGCCTGATCGAATATCCGGGAGCCCT  
GCAAGTGGTTGATTTTTGCAGGTGGACGCGTGGTCTGGTAGCCGTCAAGGCCCTACTACGGTGGCCCGCTG  
GTGGGCAACGCCCTCTCCACCCTGCGCGAGCACATGCCAACATCGAGACCCGGGTAGCGGCCATCTTCC  
GTCAGGGCCGCCGATCCGTCCGCAAGGCACCACCATCATCGAAGCGGATGACGAGGTCTTCTTCTGTCGC  
CGCCGCGGGCCATATCCGGGCCGTGATGTCTGAGCTGCAGCGCTCGAGAGCCCTACCGCCGCATTATG  
ATCGTCGGTGGTGGCAACATCGCGCCGGTCTCGCCGCCAGCTGGAGAAGCGCTACAGCGTCAAGCTTA  
TCGAGCGCAACCAGAAGCGAGCGGAGCAGCTCTCCGAACTGCTGGAGAACACCATCGTCTTCTGTGGCGA  
TGCGGCGGATCAGGAGCTGCTGGCCGAGGAGCACATCGACCAGATCGACGCTTTCATCGCCGTGACCAAC  
GAGGATGAGGCCAACATCATGTGCGCGCTGCTCGCCAAGAAGATGGGCGCCAAGAAGACCATGGTGTGA  
TCCAGCGCGGGCCTACGTGATCTGGTGCAGGGTGGTTCATCGATATCGCCATCTCGCCGACGAGGC  
CACCATCTCGGCCCTGCTGACCCACGTGCGCCGGGCCGATATCGCCAACGTCTACAGCTGCGCCGCGGC  
GCGGCCGAGGCGATCGAGGCGATTGCCACCGGTGATGAGAACACCTCCAAGGTGGTGGCAAGACGGTAG  
GCGAGCTCAAGCTGCCGCCGGGTACCACCATCGGTGCCGTAGTGCAGGAGATGAGGTGCTGATCGCTCA  
CGATCGCACCAAGATCCAGCAGGATGACCACGTGGTTCATGTTCTTGGTGGACAAGAAGTACATCCCGGAA  
GTGGAGCGGCTGTTCCAGCCAAGCCCCTTCTTCTGTAACGTCTTCATGCGCACAGGCTGTCAAACCAGA  
CCCGGCTCAGCTCCCCAAGGGGATGGTCCGGGCTTTTTGTTAATCAACGACCAGGTTATCGAACATGAT  
CAAGTGCCTCCATTATCTTACCCTCGGGCTGGTGTCTCCAAGCTGGCGCTTTCATGTGGCTGCC  
ACCTTGCTGGCACTGCTCACCGGTCAGAGGATTTGTGAGTTTCTCAAGTCCGTGCTGATCACCCAG  
GCGCCGCACTGCTGCTGCCCTCCACTACGCGCCGAAAGCGGAGTTTCATCTGGGGGTGCGGGAGATGTTCCCT  
GCTCACCACTCGGTCTGGGTGGTGGCTGCGCCTTCGCGCCCTGCCCTTTGTTTTTCATACCCACATC  
AACTTTACCGACGCTTACTTCGAAACTATGTGAGGGGTGACCACCACGGGCTCTACCCTGCTCTCCGGCC  
TCGACAACATGGCCACAGCATCTGTTGTGGCGTTCCATCCTGCAGTGGCTGGGGGGGGTCCGGCTTTAT  
CGTGATGGCGGTAGCCGTGCTGCCCTACCTCAACGTCCGGTGGCATGAAGCTGTTCCAGACCGAGAGCTCG  
GACTGGTCAGACAAAAGCGCCCCGCGTGCCAAGACGGTTCGCAACAACATCGTTCGTGGTCTATCTGGTGC  
TCTCCATGCTCTGCTTCATGGCCTACTGGGCCAGCGCATGAACATGTTTGAAGCGATCAACCACGCCAT  
GACCACCCTCAGTACCGGCGGCTACTCCACCTCCGATCAATCCATGTCCACTTCTCCAACCTGGCACAC  
TGGATTGGCACCCCTGTTTCATGTTCCCTCGGCGGCTGCCCTTCTGCTCTATGTGCAGAGCCTCAACCACA  
GGGACAACAGCCTGTTCAAGGATGCCAGGTGCGCGGCTTCTTCTGGCTGGTGGTCTGGGTACCGTCAT  
CATGACCTTCTATCTGTGGGAGAGAGACCTGTTCCGGCTTCTGGGATGCCCTGCGCATCAGCTGTTCAAC  
ATCGTCTCGGTGCTCACACCACCGGCTACGGCCTTGGTGACTTCGGCACCTGGGGGGCGCTCGCCAGCA  
TCGTCTTCATCGTGCTGCTGGCTCTTGGGGCTGTTCAGGCTCCACTGCGGGTGGTCTGAAGATCTTCCG  
GGTGCAGGTGGCGTTTGCCTGTTTCAAGAGCAGATGCGCCAGCTGATGCACCCCTCCGCGGTGTTCCCG  
CAGAAGTACAACGGCCGACAGTCAATGACGCCATCATCCGCTCGATGATCTCATTCGTGCTGGCCTACT  
TCGCCATCATTCTGGTATAGCCGCACTGTTGGGCGCCATCGGGCTTGACCCCTGACGGCTATCTCCAG  
CTCCATCACCGCTGTGCGCAACGCTCGGCCCGGGCATGGGCCCGGTGGTTCGGCCCCAGCACCAACTTTGCC  
AGCTGCGCGAATCGGCCAAATGGCTTTTGTCAATTCGGCATGCTGCTGGGACGACTGGAGATCCTGACGG  
TCGCCGTGCTCTTCTTCCCTCCTTCTGGCGCCAGTAACCCCTTACTGCAAGCCAGCAAAAAGCCGACG  
GTTTCATCCGCTGCGGCTTTTTTATCTCACCCACCCCCACGACCTTTCGCTCAACGCTCATCAGCCCCATTA  
CCGGATGGCCTGAACGAGCTCATCAGGATGGCCAGAGCGGATCACAAGCATAAAAAAACGGACCCAAACC  
AGAGGTTTGGGTCCGTTTATCAGTGAACCGTACGCGCCGCAAGGGCTGCCGAGACTCAGCACATGGCAT  
TAACCACGGCCAGAGCGCTTGCATCCAGCTCGGTGAGCAATTTCTTGCAGGATACGGATGTTCTTCCGGAG  
TCACTTCTACCAGTTTCGTGCTTATCGATGAACTCGAGAGCCTGTTCCAGAGTCATGCGGATCGGCGGAGT  
CAGCACTTGAGCTTCGTGCTTACCGGAGGCACGCATGTTGGTCACTGTTTGCCTTTCAGGCAGTTAACA  
GTCAGGTGCTTGGAACGGGAGTGAATAACCGATCACCTGGCCTTCGTACACTTCGGTTCGCTGACCGATGA  
ACAGACGACCACGGTCTTGCAGACCGAACAGGGCGTAGGTCAGAGCCTTACCGGTTGCGTTGGAGATCAG  
CACGCCATTCTGACGCTCGCCGATGCTGCCACCCTTGTGCGGACCGTAGTGGTCAAGGTGTGGTACAGC  
AGACCGGTACCTGAGGTTCATGGTTCATGAACTCGGTCTGGAAAACCGATCAGGCCACGGCTCGGGATCATGA  
AGTCCAGACGGACACGACCCTTGCATCCGGGGTTCATGTTGGTTCATTTCCGCTTTACGCAGACCCAGTTG  
CTCCATCACGGAACCCCTGGTGCCTTCTTCAACGTCCACAGTTACGGTTTCGAAACGGTTCTGCAAAAACA  
CCATCAACGGTACGAGAATTACTTCCGGACGGGACACAGCCAGTTTCGTAACCTTCGCGACGCATGTTTT  
CGATCAGGATGGAGAGGTGCAGCTCACACGGCCGATACACGGAACCTTGTCCGGATCATCAGTCTCTTC

CACACGCAGAGCTACGTTGTGGACCAGCTCCTGGTTCAGACGCTCCAGAATGTTACGGGAGGTCACGAAC  
TTACCCTCTTTACCGGCGAACGGTGAGGTGTTGACCTGGAAGGTCATGTTACGGTTCGGCTCGTCAACGG  
AGAGCGGCGGCAGGGCTTCAACGGCACCGTGTGCACAGATGGTGTACAGAGATTTTCAGCTCGCCCAGACC  
GGTGATAGCGATGATGTCACCCGCTTGCGCGTCGGTAACTTCAGTACGGGACAGACCCAGGTAACCCAGC  
ACCTGACCGACTTTACCGTTACGGGTCTTGCCGTCAGCACCAACGATGGTGACTTGCTGGTTGGTCTTGA  
CGCGACCACGGGTGATACGGCCGATACCGATAACGCCCACGTAGGAGTTGTAGTCCAGCTGGGAGATCTG  
CATCTGGAAACCACCTTCGGCATCAGCCTTCGGCGCTTCAACGTTGTCAACGATAGCCTGGAACAGCGGC  
TCCATATTCTCGGACTCGACGTCTGATCCATGGTGGCCCAACCGTTCAGTGCAGAGGCGTAAACCACTT  
TGAAGTCCAGCTGTTTCGTGAGTCGCGCCAGGTTGTGCAACAGGTCAAATACCTGATCCATTACCCAGTC  
AGGACGAGCACCCGGACGGTCAACCTTGTGATGACCAGATCGGCTTCAGACCTGAGCGAACGCTTTC  
TGGGTACGAAACGGGTTTTCGGCATCGGGCCGCTCAGGCGTCAACCAGCAGCAGCAGGAGTCAACCA  
TGGACAGTACGCGCTCTACTTCACCACCGAAGTCGCGCTGACCCGGGTATCAACGATGTTGATGCGGTA  
GTCATTCCAGCGGATCGCAGTGTCTTGGCGAGAATGGTGATGCCACGTTCCCGTTCAGATCATTGGAG  
TCCATGATCCGTTTCTGGCCTTCCGTTGGAGCGGTCCAGGGTGCCGGACTGCTGCAGCAGCTTATCAACCA  
GAGTCGTTTTTGGCGTGGTCAACGTTGCGCAATAATCGCAATATTGCGTAAATTTCTCTAACATTTCTCGCCTC  
AATCACCGGGTAAAATTGGGCGCTAATTGTACTCTTGCCTTTGTGATCTGCCTAGCAGAATTGCAGTACA  
TTCGCGCATAACAACAGATCTGGATCATAGACCTCTCTGACAAAACCTGCTTAGATGGGCGGTGACCGTA  
TTTTGCGCACCATTACAGTGCACCAAAACGATCCACCATCGCACTAAATTTGATGCAACGCGAGTCGAGAT  
CGCCTGATTTTTGGGGAGCCTCTTCAGCGAGATTGCCCTGAAATCAAGCTGTCACAACTTGGCAGGATAC  
TGGCTTATGTGAATACGACGACGCATTCACCCAGAGAGTTTAAACACCGGAGGTTACTTAGCATGTCAGC  
CCAGAACGTTTTTGGCCCTGATCCAGGAACACGAAGTCAAGTTTGTGATCTGCGCTTTACCGACACCAAG  
GGTAAAGAGCAGCATGTATCCATCCCTGCTCACCAGGTTGATGAAGATTTCTTTCGAAGACGGCAAGATGT  
TCGATGGTTTCCATCGGCGGCTGGAAGGGCATCAACGAATCCGACATGGTACTGATGCCGGACGCGAGC  
CTCCGCCAAGCTGGACCCGTTACCGAAGAGACCACCTGAACATCGTTTTGTGACGTGCTGGAGCCTGCC  
ACCATGCAGGGCTACGACCGCGATCCGCGCTCCATCGCCAAGCGTGCAGAAGATTTCCGTAAGTCCAGCG  
GCATCGCTGACACCGTGTCTCGGGCCGAGCCGGAATTTCTCATGTTTCGACAACATCACCTTCTCCAA  
CACCATGGGCCAACGCTTTCGTGAAAATCGAATCTGAAGAAGCCGCATGGAACCTCCGGCACTGCCATGAG  
CATGGCAACAAGGTTACCGTCCGTTTCGTGAAAGGAGGTTACTTCCCGTTGCACCGGTGCACCTCC  
AGGATATCCGCGCCGATGTGTCTGGTGTGGAAGAGATGGGCCAGGTCGTTGAAGCTACCACCCAGCA  
AGTGGCCACTGCCGGTTCAGAACGAGATAGCTACCCGCTTCAACACTCTTACGCTGAAAGCTGATGAAGTA  
CAGGTAAGTACGTGATCCACAACGTGGCCACGCCTACAACAAGACCGTTACCTTCATGCCGAAAC  
CCATGTTCCGGTGATAACGGCTCCGGCATGCACTGCCACCAGTCTCTGGCCAAGAACGGCGTCAACCTGTT  
CGCTGGCGACCTGTATGGCGGTCTGTCCGAGATGGCTCTGCACTACATCGGCGGTATCATCAAGCAGGCC  
AAGGCCATCAACGCCTTCGCCAACCCGACCACCAACTCTTACAAGCGTCTGGTTCCGGGTTATGAAGCAC  
CGGTCATGCTGGCTTACTCTGCCCGCAACCGCTCTGCCTCCATCCGATCCCGGTTGGTACCAGCCCGAA  
AGCCCGTTCGATCGAAGTGCCTTCCCGGATCCGGCTGCCAACCCTACTTGGCTTTCGAGCCAGCTG  
ATGGCCGGTCTGGACGGTATCATCAACAAGATCCATCCGGGCGATGCCATGGACAAGAATTGTACGACC  
TGCCCGCGGAAGAAGCCGAGAAAGTGCAGACCGTTGCCGGCTCTCTGGACGAAGCCCTGGCCGCTCTGGA  
TGCTGACCGCGAGTTTCTGACCCGCGGCGGCGTTCAGCGATGACTTCATCAACTCCTATCTGGAACCTG  
AAACAGCAGGATGTTGACCGTGTGCGCATGACCCCGCACCCGCTGGAGTTCGAACTGTACTACTCCGTCT  
AAGTCTCAGCAGACTATCCGTTTAAATCTGGTTCAGCTTGTCTAATCGTGACAAAACCCGCCATCTGGCGG  
GTTTTTTCTCTGATAGGATTAAGCAAAAATACCGTCAAGGAGAGATGGATGAACAACAAGCATGGCATAGG  
GGTGCTCAGCCTCTGTTGCTGACCTCGTTCGCTGCGGACGCGGCCAAGGTTACTCCTGGGTCGATGGC  
AATGGCATCACCCACTACTCGGATGCGCCACCACCCGGCAAAAACGCCAAAGAGGTCGATCTGCGGGTCCG  
CCCCGTGCTGGGCAGCAGCGCCCCCAGATCGGTGCAGGTGGATAACTTCAACAGCCTGACTGGCAGCCGA  
TGCCAAGAAAAGAGAAAGAGGCGGCCAAGCTGACCATCGAATGCTCTCCCCGGAACAGGGCAGCACCCTG  
CGCGACAACACAGGCAACATCGTCTTTCAGGGCACCATCAGCCCCAAACCTCCGACCCAGTATGATGTGC  
GCCTGACCCTGGATGGCAAAGCCGCCCCCATCGTTCAGCAACAGCCTCTCTGTCCGCATCGAAAACGTGCA  
TCGCGGCGCCACGAGGCTCAACTCGAGCTGCTCGCCAAAAGACGGTACGATCCTTGTAAATCCAGTGCA  
GTCACCTTTTACCTGCATAGAGCGAGCGTGACCCGGCTCCCAAACCCACCCCAAGCCGACTAGGGGT  
GATATAGCGCACCGATGCGGGTAAACTCTATGCACCATATCGGTGCATGACAGGTGTGTAGCACCGTTTT  
AGGGAGAAACCTGTGCCAACCCTCGGACAACGCCAAAACACTCTTGGATAAATTTGCTGACCGCCGTGA  
TCCTGATGGATGAGCGGCTCTGCATCCAGTTCGTCAACCCGGCGGCTGAACAGCTGCTCTCTCAGTGA  
ACGCCGGCTGATCGGCATCGAACTGCCCCATCTACTGGAACATATCTCCCTCGATTTGCAGCGGCTCAAG  
CAGTGCCTCGTGTGAGGGCAAGGCTTTACCGATAGCGAAGTACTCTGGTGGTAGAGGGAGAACCAGCGAC  
TGGTGGAGCTGAGCGCCACCCCGATGGCCGACCACGAACAGCGTCTGCTGGTGGTGGAGCTGCGCAAGAT  
CGACCAGCAGAAGAAGATCAGCCAGGAGCAGCAGCAACATGCCAGCAGCTGGCCGGCCAGGAGCTGGTG  
CGCGGGCTGGCCACGAAATCAAGAATCCCTTCGGCGGCTGCGCGGCGCAGCCAGCTGCTGCAAAAAG  
AGCTGCCGGATCCGGCCCTGCGCGAATATACCGGCATCATCATCGAACAGGCTGACAGGCTGCGGGTACT  
GGTGCATCGGCTGCTAGGCCCCAGCGCCCCGGCTCACCAGATGCACAATGTCCATTCCGGTGTGGAG  
CAGGTACGCCGACTGGTGGAGCTCGAACTCCCTCCCTCTGTTTCGATCGAACGGGATTACGACCCAGCA

TCCCCGAATTCGAGATGGAGCCGGATCAACTGCAGCAGGCGTTTCTCAACATAGTGCGCAATGCCGCCGA  
AGCACTCGGGCATCAGACCGGGCTTATCCGTCTCAAGACCCGCACCGCGTTCCAGATCACCATCCACGGC  
CAGCGTTACCGGCTGGCAGCGGAGATCAAGATTATCGACAACGGCCCCGGCATTCCCAGATGCCATTCCGC  
ACACCCTGTTCTACCCGATGATCACCGGCAAAGAGGGGGGAACCGGACTCGGCCCTCCATCGCCAGAA  
CCTGATCGACCAGCACAAAGGGCGGATTGACTGCATCAGCTGGCCGGGTACACCCGAATTCACCATTTTT  
CTACCGCTTCGCAAGTAAGGGAACCCCATGACCGCCAAAAGTGTGGATCGTCGATGACGACAGTTCTATCC  
GCTGGGTGCTGGAGCGCACTCTCGGCAGCGAAGGCTTCAACTGCAGAGCTTTGCCGATGGCGAAGCCCT  
GCTGCACGCCCTTGAGCTGCGCTCGCCCGATGTGATCCTCTCCGATATCCGGATGCCGGGCATCGACGGC  
CTGAGCCTGCTGGAGCAGATCCACCGCGTCAGGCCGATCTGCCATCATCATCATGACCGCCACTCGG  
ATCTCGACAGCGCGGTCAACGCCTACCAGCGCGCGCCTTCGAGTACCTGCCAAGCCGTTTCGACATCGA  
CGAAGCGGTGACCCCTGGTGCGCCGCGCCGAGATCATCGGTGAGGCGTCCGGCATGCAGGAGGTGTTCCGCGCCA  
TCGGTGCCTGTACGCTCCAGCATCTCGGTGCTGATCAACGGCCAGAGCGGTACCGGCAAGGAGCTGGT  
CGCCACGCCCTGCACAAGCACAGCCCGCGCGCCACAAGAACTTTATCGCCCTCAACATGGCGGCTATC  
CCGAAAGATCTCATCGAATCCGAGCTGTTCCGGTCATGAGAAGGGGGCTTTCACCGGCGCCAACAACATCC  
GCCACGGCCGCTTCGAGCAGGCCGACGGCGCACCCCTGTTTCTCGACGAGATCGGGCAGATGCCGCTGGA  
TGTGCAGACCCGGCTGCTGCGGGTCTTGCCGATGGTCAGTTCTATCGAGTCGGCGGCCACCAGCCGGTG  
CAGGTAGACGTGCGGATCATCGCCGCCACCACCAGAATCTGGAAAAGCGGGTGGCCGATGGCGAGTTTC  
GCGAGGATCTGTTTTACCGCCTCAACGTCATTCGCATCCACATCCCCGCCCTCAAGGAGCGCCGTGAGGA  
CATCCCCAGCTGGCCCGTCACTTCTGCTGCGCGCCGCCAAGGAGCTGAACGTCGAGGCCAAGAGCCTG  
CACCTGACACCCAGGCCTATATCAGCCGCCTGCCCTGGCCGGGCAACGTGCGCCAGCTGGAGAACGTCT  
GCCGCTGGCTCACCGTGATGGCCTCGGGGCAAGAAGTGTGGTCCGGCGACCTGCCCTGCCGAGCTGCTCAC  
CCCCATCACCCACAACGCCGAACCGGGTCAACCAGCGTTGCCCGGTTGCTGGCAGCAACAGTTGCAAGAG  
TGGGTGGCCAGCAAGTTGGCGCTGGGAGAGACAGACATCCTGGCCGATGCCATGCCCCAGTTTCGAGCGGA  
TCATGCTGGAGACGGCGCTGGAGCACACCCACGGCCACAAGCAGGAGGCCGCCCGCCCTGCTTGGCTGGGG  
TCGCAATACCCTCACCCGCAAGCTGAAGGAACTCGATCTCTCCTGAGTCCCGGGGAAAAACGATTTCCAT  
CACGCCCTGACAAATCACCGTCCGCCAGAACCCTGTTAACCATAAACGGGGTATCTTTTTTTGAAAGCCC  
CGCTAGAAATGGCAGGCTTTCAAACCTGACTCGACGAGGGCGCCCCATGATTGACAGATCTCTCCCCCT  
GACCGACTGCACCCGCATCTGGACGGCAACATCCGGCGCAAACCATCTCGAGCTGGGTGCGCCAACAC  
AACATTCAGTTGCCCGCTTCGAGCTGGAGGCGCTGCGCCCCACGTACAGATCGTTCGAAAACGAGCCGA  
GTCTGGTTGCCTTCTGAAGAACTCGACTGGGGTGTGGCCGTGCTGGCCGACTATGACGCCTGCCGCCG  
GGTGCCTACGAGAACGTGGAAGATCTGCTGCACGCCGGTATCGATTATGCCGAACTGCGTTTTAGTCCG  
GCCTATATGGCCATGGCACACAAGCTGCACCCGACGGGCGTGGTAGAAGCCATCATCGACGGCGTGGCCG  
CTGGCAGCCGCGATTTCCGCATCAAGACCAACCTGATCGGCATCATGAGCCGACCTTCGGCACCAGCA  
GTGCAATCAGGAGCTGGCCGCTGTCTGGCCCACCGGACAAGCTGGTTGCCATCGATCTGGCCGGTGAC  
GAGCTGGGCTTCCCGGGCGAACTCTTTGTGCACCACTTCCGCAAGGTGCGCGATGCAGGCATGCGCGTCA  
CCGTACACGCCGGTGAAGCCGCTGGTCCCGAGAGCATGTGGCAGGCTATTTCGCGAGCTGGGCGCCGAGCG  
CATCGGCCACGGCGTCAAAGCGATTACAGGATCCGGCCCTGATGGCTATCTGGCTGAGCACCGCATCGGC  
ATCGAATCCTGCCTCACCTCCAACGTCCAGACCACCACAGTGGCGAGCCTGACCGAACACCCGATCCGCC  
AGTTCTGGCTGCCGGTGTACTGGCCTGCCTCAACACCGATGACCCGGCGGTGGAAGGGATCGACCTGCC  
CCACGAATATGAGATGGCTGCCCGGCGCGGGTATGACCGCCAGCGAAAATCCGCACTGCCAGCAGAAC  
GGCCTGACCCTGGCCTTCTGAGCGATAGCGAGAAGGCCGAACTGAGCGCTCGCGCCGCCAGCCGCTGAT  
CCACACCGGCACTGCAATAAAAACGGCCCACTTCGGTGGGCCGTTTGGCTTTCGGATTCTGATGATGG  
GTAAGCATTTCGGCCAGCTGGCAGATAGCAAAAAGGCCAAACCGGGTTTGGGCTTGGCTGATGACGGTGC  
AGGTAAAAACTACTCTCTCTGTCTGCGCTCCAGCGCCGCTCAACCAGCGGCTCGGGCAGGCTCTTG  
GTCACCTCCACCCCTAGCTCGCGGAAACGCTCGACCTGCGCAATCAGGTTGCCACGGCCGTTGACCGCC  
GTCCCATGCTTGTCTGCTAGCTCTCTGCGCCTTGTGACGGCTGCCGCCATCTGCTGCAAACTCCTCCAC  
AAACAGCCGACGCTTTTTCGTAGAGACGACCGGCCCGCTCGGCAATCTGGCGGGCATTCTGGTTCTGCCGC  
TCGTAGCGCCACAGTTCTCGATGGTGCAGCGCCACCATCAGGTTGGTGGGGCTCACCCAGCAGGATGT  
TGTTGTCGAGACCGTAACGTACCAGCGAAGGATCGGCTTCCATGGCAGTGAGGAAAGCGGGCTCCACCGC  
TACGAACATCAGCACATAGTCGAGGGTGCACACCCCGGCAACTGCTGGTAATCCTTGGCGCCAGCTCG  
CGGATATGGTTGCGCACCGAGGGCAGATGCTCCTTGCAGCGCCACCCTTCTCCAGCTCGTCTCGGCGT  
TGTACCAGCGCTCGTAGGCGGTACGCGACACCTTGGCGTCGATGATGATGTCCTTCTCCTGCGGCAGGTG  
GACAATAACGTCGGGCTGGTAGCGCTTGCCTTCTCCACCTCGATATTGACCTGAGTGTGATACTCGTGG  
CCTTCGCGCAGGCCACATTGCTGAGGATCCGCGCCAGCACTTCCCCCAGTTGCCCTGCTGCTTGC  
TGTCGCCCTTGGAGGCGCGGGTACAGCGCCCGCCTCTTCGGTCATGCCGGGCAATTGAGCTCGGCGAGGGC  
CTCCAGCTCGAACTTGAGGCTGTGGCGCTGAGCCGTCTCTTGGGCGTGAGTCTCCCCACCTGACGGCGA  
AAGCCCTCGAGCTGCTCTTTGAGCGGGGTGAGCAGCAGATCGAGGCTGTTCTGGTTCAACTCGCGGAAGT  
TGCCGGAGTTTTGCTCGAAGATCCGGTTGGCGAGGTTCTCGAACTGCTGGCTGAGGGCGTCTCTGCCCTC  
CTGTTGCAGTTGCAGCTTCTCGGCGGCGCCAGCCGTTCTGCTGCGCAGGGTCTGCTTCCGCATCCTTGAGG  
CGGGCGGTGAGCTTGATCAGCAGGGTCTGCTGCTGATCCAGCTTCTGCTGGCCCTGCATCCGCTCATCCT

GCAACTCGTCTGAAGCGATCCTGCAGTGCCTGATAACGCTCCTGCGCCAGCATCAGCTCCTGAGCCTGCGC  
CGTGGCTGCTCGCCGCCGATCAGCCAGCCAAGCCCGAGGGCCAGCACGGCGGGCAGCAAGATCCCC  
CAGAGCCCCGGGGTCGATCATTTCGCGCTCCGCTGACGCAGGAAGAGTTCGAGATAGCGGTTAACAGGAT  
CCAGAGCACCACGTAGATAAAGGTAGGCGGCCAGCACCACCCACTTGTGGGTGTTGACGCCGGTATCAAGC  
TCGGCGAACTCGATATCCTTGATGCGGCAGTAGGCCACATCAGCAGGGGAAAGACATAGAGCAAGGACG  
CACGCCAGAGAAATAGCCACATATGTTTTTCATTCAACCACGTAATAAGACCCGCTTAGCTTACACAAGGG  
CAACTGCGCTTGCGATCCTGACGGCCGCTATTCTCTGGCCTGCTTCCCAGAACTTCGATAAAATTAACCC  
CTAATAGGTATCAGGGGCGAGCATGACTCACTATTTCTCCGTGGCTAACACAAGGTTGGCAAGCTTCC  
CGCAAGCCCGCCGTGGTTTTGCCATGAAGCGCGCCCGCCGTGGGCCATCGAGGAGTCCCAGTACCTCTCC  
TCTGCACCCGCTGTGGCGAGTGTTCAGGCCGTGCCCGCTGGTCTGCTCAAACCGGCCACCCAGGAGGA  
GTACGAGGGGAGCCCCATCGCCGCTACCCCGGTGCTCGATCTCGCTGCGGCCAGTGCAGCTACTGCGGC  
AGCTGCGCCAGAGCCTGTCCACCGGCCCCCTCGACCTGCAACTGGGTGCGGCAGGTGCAGACCCGGGTGC  
AGATTGAAGAGAGCTGTGAGGCACGGCAGGGCTTCTACTGCTGCTGCTGTGAAGATGCCTGCCCGCAACA  
GGCGATCAAGGCCACGGCCGACGGCATCAACGTCAATATGGATGCCTGCAATGGCTGCGGTGCCTGCGGC  
CTCGCTGCTGACGGCGCCATCACCTGATCCGCCAGCCAGGCAGTCGCTAAAAACCACCTGCGTACA  
AAAGCAAAGGGGCCATCAGGCCCTTTACATCTTGTTCGATATTCACGCCCCGTCAGGCCATGGTCA  
CGATAGTCTCTTGTGCTGATACCCAGCAGGTGGCAGAGACGGTTGGGATCGCGCACCGCATCAGCCAGAGT  
GTACTCACCCAGCACTTCAGGAAGGCGTTCATGGCGCGGCAGAAATGCCCTGAATGCGGCAACCACCG  
GAGAGACGGCAGTTCCTCGCGCTTGCAATCGACCGGACAGAGCACATGCTCCATGTCATCACCATCCC  
GCAAATTGATGGAGACCGCCGAGCGACCGAGACGGATGCCACCGTGTGCGCGTACCGTCTCGATGTA  
CCCCTTGATGCCAAGCTGGTGCACAATTTTGACCACGTGGTTGCGAGAGATGCCGAAGGTATCGGCCACT  
TCGGTAATGGTGCACAGACGATCCCCCGCTGAACCGCCAGGAAGGTGAGGGTACGCAGGGCGTAGTCCG  
TAAATCGTGTGATGTCATGGTTCGCACTTGCTTACTACAAGCCAGGAATCAGGACGACAACGTTGAG  
CTAAGAGGCAGGAGACAACCGGTTTACCTCTGTTTGCCAAATGGTTCGCCAGAGGGGGGCTGTCTCTTA  
ATCTGAGTTGCGGAGTGACAGGTTAAGAGCAGCACAAACCGGTTGTCGATGAAGATGCACATAAATCGACA  
CTTTCTTTGATTGATCGCAAACCTTGCCGGGTAGCCCGCGTGTGACCCGCTTTATGGCGGGTAAATCTCC  
CGAATAGTCCCCCTACCAAGCCCCCTCGACCAGCAGCCATATGGCCCGCAAACCGCCCTCAATCGACC  
AGTAGAGAGTTGGTTCAGTGGGGTGTTCAGCCAGTTTTTCAGCGCGACCGAGGGAATGGAGCTCTCGG  
AGGCAGCGCCAAACCGCCAGCCAGTCCACCGCACATGCAACGCATCCTTGATGGCCATACCCCGCCCAA  
TCCGTGTATCAATCCGCCAGCGAAAGCATCTCCCGCCCGTGGTATCGACCACCGAGACGGGCCGAGCG  
GCAACCCGGATCTGCTCATCGCCGTGGATGGCCACTGCGCCCGCCTTCCCTTCGGTTCAGCACCAGCCATT  
CGAGCTGCTCCCCCGCCAGCTGACGGGCATGTTGCCAGGGTTCGCTCACCTCGCCGAGATCGGAGCGGGA  
GGCCACCAGCACGTGGCAGGGACGGCGTGCCTGCCCCCTTGGGATACTGGGCCACTACAAAGCTCTTG  
CCGAGCATCTGGCGATTTAGCTGATGATGGCGGTGCCGGGATAGTTACATAGAGGCAATCCACCCCT  
CCAGCGGCAGGTGCGCCGGCAGATCGGGGCGCCGCGGGCGGCAGTATGGTGCCTCGCCGGTGGAGTC  
CACAGGATCAACAGCTCGCCGGTCTCGCCGCAAAGCGCTCCACATGGCTGCAATCCAGCCCCTAACCG  
GCCGCTGCTCCAGCAGCCAGTCCCGGTCTCGTCCAGCCGATGCGGGAGGCAATGGTACCTCGTGGC  
CCGCCACACCAGCCCAGTACCGGTGTTGGCCGCGCCGCTCCAGCTGCGCCCTGATCCACATATTG  
CAGCCGGGCCCCCGCCACCAGCGGTTGCGGAGAGGAAGAGCACATGATCACAGTTGAGATTGGCAAGCAGC  
AGAATGCGGGACATAGAGACCTCGGACGATGGAGATAGCCAAAAGAGACAGGCTGAACCCGAGTAGAG  
CCCAGCCTGACAGAAGAGACAACCGGCAGCGATCGGGAATCCGATCGGGATCAATAGATGGGCAGCTCCA  
CCCCGGCCAGCAGCTCGTCGATGCGCGCCTGACTCGGCTGCTGCATCACACTCTGGATCACCTCCTTGGT  
GAGATGGGGCGAGAAGGAGCTGATAAAGTCATACATATAGTTCTGCAGCAGGATGCTCTTGTGAAACAG  
ATCTGCGCCGGGCAGGGCTTGAACAGATGCTCCAGATTGATGGAGACCAGCCGGGGCTGTGCGTGTGCT  
TGGCCACCAGCAGGAGATGATGCCGATGCCAAACCCAGCTCCACGTAGCGCTTGCATACCCCGCGCTC  
CATCACCGTCACTAGTAGCTCGGGGTGAGACCCGGCAGATGGAACACCTGCTCCTGCACCTGACGCCCA  
GTGGCGCCACTCTCGTAGCTGAGGATCGGGTAGTGGCAGAGCTGCTCCAGGGTTCGGCTTCTTACCTTGG  
CCAGGGGATGATCCTGCGGCACCACCAGCGAGAGAGTCCAGAGGTAGGCGGGCAGCGGATCAGCTCCTT  
GTCGAAGCCAATCTCGTGGGCAACGATGGAAAAATCGGAGTAACCTTGTGATCTGCTCCTTGTGCGCC  
GACATCACCGGATGGAGGTGGAACGAGATCTTGGGGTACTTCTTGGTGAAGTAGGTAACCGACTTGGGCA  
GCAGGTAGCGGGCGATGGTGTGGGTGGTGTGAATATTGAGGGTGCCACGGTCCGGTCCAGATACTCGCG  
GGAGATCGCCTTGATCTTGTCTCGATATTGAGCATTGCCCTCGGCACACTTGATGATCTCTTCCCCACC  
GGCGTGTGCGGTGCAAGTGCTTGCCACGGCGCTCGAAGATCCGCACCCCGCTCGCTCTCCAGCAGGC  
CAATCTGTTTTGCTGACCCCGGCTGACTGGTGAAGAGCGCATCGGAAGCCACGGACACATTGAGGTTGTG  
GTCCCGGATCGCGATCAAATACTTCAATTGCTGTAGTTTCAAGGCGTCACACTCTCACACTGGTTTTGGCT  
CAGACAGGTTTTGGCTCAGGCCGGGACGGCAATCAAGCCAGACAAACAGGCCGCCACATGGGCGGCCAGTG  
TACCATCCGATCCCAGCATCTCAGCGCTTGATCCTTCATTTTTGCTACAAAATCTAGCATCCGAAGGGGTG  
GCTGACAAAACCGGGCTCAGGCCGCGCCAGCCCGCAGCGGCAGGATCCCCAGAACTGCAGCAGCCACTGC  
ATCATGGTTCGCCAATCCACCTCCCCCTCCAGCGAGGAGAGGCTGCTCTGGTAGCGCTCGTCCGGCAACA  
GGCCGCGGGCGCCGCTCGATCAGCGCCCGGTTGTAATCCACCGAGAACTCCGGATGCCCCGTAATGGCGAC  
GATGTGATCACCTGCAAAAACATGAAGTTGGGGCAAAAATCGTTGCCCGCCAGCCGGGTGCCCCCGGC

GGCAGCAGTGCCACCTGATCCTGATGGCTGGCCAGAATGCGGATCTGATCCC GCGCCGGCGCCATCCAGG  
GCTCATCTGCCAACATGGGATGTACCGACACTCCCAGTCCCACCCCTTGGTAGACTTCACCACCTTCGCC  
ACCCAGTGCCTGGGCGATCACCTGATGACCGAAGCAGACACCGGCCAGCTTGACGTGGCAGTTCGTGGCC  
TGACGGATCCACGCCCCGAGTGCCTGAATCCAGGGGATATCGCTGTAAGCATCGTGGCGGAGCCGGTGA  
TTAGCCAGGCATCGCACTCGTGAGATCCTCCGGCAACTCCCCATCGAGAGCCGACCAGACCTGAAATTC  
CAGCTCGGGGGCCAGGGCCGCAAAGCCCCCTGATAAACATCTCGGAGTAAACGGGGCCAAAACGATCCGCC  
AGATCGGGATCGAGCCGGTCACAATCGAGAATTCCTCAATCGCATCTGTTGTTCCCTTACAGAGTTCGCCC  
CCGCAAATCATTGACCGGGCAGGGCAAGAGGTTAGGCCATGAGCACGCGCCAGCGCGTCACTTCATGGTC  
GGCATGGAGAACTCGGCACCACTGCGCAGACTCTGGGGCCAGCGCGCCGTACCCGTCTTCATCCGAGTAT  
AAAAGCGAACCCCGTCCGGCCCGTGCATGTTGAGCGGCCGAAAGATGGAGCGCTTCAGCCGCCAAAAGCT  
GTGAAACGCCATCGGCACCGGAATGGGGACGTTCACCCCATACCATAACCGACCTGCACCCGCGCCGTGAAG  
TCCC GCGCGGTGTACCATCGCAGGTAAAGATGGCGGTGCCGTTGCCGTACTCGTGTCTGTTGATGAGGC  
GCAGCGCCGTCTCGTAGTCAGGCACCCGACGATGGAGAGCACAGGGCCGAAGATCCTCGCGATAGAT  
ACGCATCTCGGGGGTTACCTCATCAAACAGGCAGCCACCGATGAAGTAACCCCTCATCGTGGCTCAGCGTG  
CGACCATCGACCCGCAACGTGGCCCTTCGGTCACCCCCTGCTCCACGTAGCCACACACCTTGGCCAGAT  
GTTCCCTTGCTGATGAGCGGCCCATCTCGTTCCTCGGGCTCTGGCCAGCCCCGGGGCCACCCGCGAGTTT  
TTCCACCAGCGGTGTCAGCTTGGCCACCAGCGCATCGGCGGTCTCGTCACCCACCACCACTGCCACCGAA  
ATGGCCATGCAGCGCTCGCCCGCTGCCCCATAAGCCGCCCCCATCAGGGCGGAAACCGCCTGCTCGAGGT  
CCGCATCCGGCATCACCACTGTGGTCTTGGCACCGCCAGCGCTGTACCCGTTTGCCGTGGGCCGA  
GGCGGTGGCATAGATGTACTGGGCGATGGGGGTGGAGCCGACAAAACGACACGGCACCCGCGGATCG  
GTCAGCAGCACATCCACCACCTCCTTGTACCGTTACCCACGTTGAGCACGCCATCCGGCAGACCGGCCCT  
CCTTGAGCAGCTCGGCCATCCGCAACGAGAGGGAGGGATCCTTCTCGGAGGGCTTGAGAATGAAGGTGTT  
GCCGCGAGGCGATGGCGACCGGGAACATCCAGAGCGGCACCATGGCCGGGAAGTTGAACGGCGTGATACCG  
GCGCAGACCCCCACCGGTGCATCATGGAGTAGCTGTCTACCCACGGCCGACGTTGAGGGAGTGTCTCC  
CCTTGAGCAGATGGGGAATGCCGACGGCAAACCTCCACCACCTCCAGCCACGGGTCAACTCACCTGCGC  
ATCGGAGAAGACCTTGCCGTGTTGCGGGCTGATCAGCTGGGCAAGCTCGTCCCTGTGCTGCTCCATCAAC  
TCCTTGAAGCGGAAAAAGACCCGGGCCCGCACACAGCGGGGGGGTTTGCAGCAGTCCGCAAAGGCGCGTT  
CGGCGATGGCGCATCGCTCCTGACACTCGGCGCGCTGAAAGCCCCACACTCCCCTGTCTGTTGCCGA  
GGCGGGATGAAGATGGCCCCCTGGCGCTCGCTCGCATCTCCTGCGGCTGGCCGTTGATGAAGTTGCTG  
ACCCTGTATGTATGTATCCTCCGTGATAACTGATGTGGTAAATGCGCTGAGCAAACCAACGCAAGGCC  
CGCAGTGCGGGGCCATCAAATGGGTTAGGGTTGGGCCTGCAGGGCATCCTGCAGCAGGGTGAAGAGATCG  
TCGATCTGGCTGCGCTCGATAATGAGAGGTGGCGACAGAGCGATGATGTCGCCGGTACCCGGATCAGAG  
CCCCCTTCTCGAAACAACGGACAAACACCTCATAGGCGCGCTTGCCCGGCGCATCCGGCATCGATTCCAG  
CTCGATGCCCCCACCAGTCCATAATTGCGCACATCCTTACATGCTTGCAGCCCTTACGGAATGGGCC  
GCCTCCTCCCAGTAGCCTGCCAGATCGGCGGCGGGCTGAGCAGGTTCTCGTTACGATAGATCTCGAGGG  
TCGCGAGACCCGACGAGCAGCCACCGGATGGCCGGAGTAGGTGTAGCCGTGGAACAGCTCGATAGCCCC  
CTTGCCCTGCCGCCATCATGTCTGTCATAAATGTGCTTCTGCACCAGCACCGCGCCCATGGGGATAGCGCCG  
TTGGTCAGCCCTTTGGCGCAAGTATCATGTGCGGGATGACGTCGAACTCCTGTGCGGCGAAGGGGGAGC  
CGAGGCGACCGAAACCGGTGATCACCTCGTCAAAAATCAGCAGGATGCCGTGCTTGGTGCAGATCTCCCG  
CAGCCGCTTGAGGTAGCCTTTGGGCGGCATCAGCACGCCAGTACTGCCAGCGATGGGCTCGACGATCACC  
GCCGCGATATTGCTGGCATCGTGCAGAAAGACGATCTTCTCCAGCTCGTCGGCCAGCGCCACATCCTCCT  
CGGGCAGCCCTTTGGTGAAGGCGTTCTTGGCGATGTTGAGGGTATGGGGCAGATGATCCACCCCGGTGAG  
CAGGGAGCCGAACCACTTGCGGTACCGGGAATGCCCCCACCAGATGCCGCCAAAGCCGACCCCGTGA  
TAGCCACGCTCGCGGCAATCAGCCGGGTGCGGGTGCCCTGACCGCGAGCCCGCTGCCAGGCCAGCGCGA  
TTTTGAGCGCGGTATCGACCGACTCGGAGCCGGAGTTGGTGTAGAAGACGTGGCCAAACCCCTTGGGAGC  
GATCTCCACCAGCCGTTGGCCAGCTCGAACGGCAGCGGGTGGCCCATCTGGAAGTGGGGGCAAAAATCG  
AGGTGGGAAATCTGCTGGGAGACCGCCTCGGCAATCTCGCGCCGACCATGGCCCGCTTGC AACACCAGA  
GTCCGGCTGTGCCATCCAGTATCTTGGCGCCATCCTCTGAGTGATAATACATCCCCCTGCGGACTTCAG  
GATGCGCGGCGCCGCTTGAAGTGTGGTGGCGGTGAACGGCATCCAGAAGGCGGACATGTGCGAGGGC  
GTATTGATGTGCTGATCGGTTTCATGGTACCTCATCCTTAAGGTGTTTAGCAACTGTCGGCCAATGCC  
TATTAATTAACACCTGAATCCATAAAAAAGGGCCGTTATCGCCCTGCCTGGTGCCACCCCTAGCTAG  
ACGCATCAGCAGGGTGGTATAAGATATTTAACACAATTTTAATAATAGTAAACAGTCAAGGAGTGTCTAT  
AGATGGATATCGGTCACCGCCTCAAGGCGGTTGCAACCAAGGCGGCCCTCTCCAGCGGAGCTGGCCAA  
GCGCTCCGGTGTGACCAACGGATTTATCTCCAGATCGAGAAAAATCAGGTGAGCCCTCTGTGCGCTCC  
CTGCGCAAGGTGCTGGAAGGCATCCCCATGTGCTGCGCCAGCTTCTTACCGAAGAGACTGAAATGGGCA  
CCGAAGTATCTTCCGCGCCGCGGATATGCCGGATCTCGGCACGCATCCCATCAGTACCGGCTGGTCCG  
GCACAGCCGTGCCAACCGCGCCATCGGCATGTTGAGGAGGTGCTGCCACCGGGCGCCGACACCGGGCAG  
GACATGCTGAGCCACGAGGGTGAAGAGTGCGGTATCGTTCATCAAGGGCGAGGTTGAAGTGACCGTGGGCG  
AGCAGATCTACCTGCTGGGCGCCGGGGATGGCTACTACTTCGACAGCCGACCCCCCACCCTTTTCGCAA  
TAGCGGCGAGCAGGAGTGCCTGCTGATCTCGGCCAACACCCCGCCAGTTTCTGACATTCAGACGCGCAT  
CGGCAGGGGAGCAATGTTAATGAATTGTTACAGAATGGATTTACAAGCGGCTGGATGTTTAGCATATTG

ATACGCGGAAACTGACTTTTTGCCGGTTCAAGGAGTGAACATGAGTGACCTGACCCAGGCCAGTGGCAAC  
ACAAGGCCGCCCATCTGACCCTGCCCTCGCAAGCCTTTATCAACGGCAGCTATCGGGATGCCGTCAATGG  
CGCCACCTTCGATTGCATCAACCCGGCCAACGGCAAGCTGCTGACCAAGGTGGCAGCCTGCGATGCCGCC  
GATGCCGAAGTGGCGGTACAGGCTGCCCCGTGACGCCCTTCAACGACAAGCGCTGGAGCGGCCCTGCCGCCGA  
AACAGCGCAAGCAGGTCATGCAGCGTTTTCGCCGAGCTGATGCGCCTTAACAAGGTTGAGCTGGCGCTGCT  
GGAATCGCTGGATATGGGTAAACCCATCGGCGACGCCATGGGCTATGACGCCCCCGCTGCCGCCAACTGT  
ATCGCCTGGAACGCCGAAGCGATCGACAAGATCTACGATCAGGTCGCCCCGGTGGAGGAGTCAGCATTTGG  
CGCTGGTGACCCGCGAAGCGCTCGGGGTGGTTGCCGCCATAGTGCCATGGAACCTCCCGCTGGTGATGGC  
CTGCTGGAAGCTGGGCCCGGCGCTCGCTACCGGCAACTCGGTCATTCTCAAGCCTTCCGAGAAAATCTCCG  
CTGACCCGCCCTGCGCATCGCCGGTCTGGCCAAGGAGGCGGGTATTCGGACGGCGTGTTCACAGTGTGCG  
CGGGCTTTGGCCATACCGTGGGCGAGGCGCTGGCCATGCATATGGATGTGGATTGCATCACCTTACC  
CTCCACCAAGATCGGCAAAACATCTGGTGGAGTGCTCCGGCAAGTCCAACCTCAAGCGCGCCTTTATGGAG  
TGCGGCGGCAAGAGCCCCAACATCATACTGGCGGATGCGCCGGATCTGGACGCTGCGGCCAAGAGCGCCG  
CTGGCGCCATCTTCTACAACCAGGGCGAGGTGTGCACCGCAGCCTCCCGCCTGCTGGTGCAAAAACAGCAT  
CAAACCGCAATTTATGGAGCGACTGCTGGCCCATGCCCGCAGTGGATCTCGAGCAACCCGCTCGACCCT  
GCGACCCGATCGGCGCCATGGTGGATCACATCCAGATGGAGCAGGTGCTGCGCTATATCGAGATTGGCA  
AGCAGGAGGGGGCCAAACTGCTGCTGGGCGGCAACCGTACCAATATGGAGAGTGGCGGCTTCTATATCGA  
GCCACCATCTTCGACGGCGTGACTCCGAGATGCGCATCTTCCGCGAGGAGATCTTCGGCCCTGTGCTG  
GCGGTGACCGGCTTCGATACTGGAAGAGGCCATTGCGCTGGGCAATGACACCGACTACGGCCTGGCGG  
CGGCGATCTGGACGGCTGATCTCAACAAGGCGGTGAAAGGTACCCGCGCCCTGCGCGCCGGTACCGTGT  
CGTCAACAAGTGGGACGGCGGTGACATGACCATGCCATTTGGCGGCTTCAACAGTCCGGTAACGGTCGC  
GACAAGTCACTTCATGCGCTGGAGAAGTACACCGAGCTGAAAAGCACCTGGATTTCAGCTGGAATAACACG  
ACAAAGCAGCACTATCGGATCAAAAAGGGGGAGAAAATCCCCCTTTTGCATTTTTTGGCCCTTCCATCACCGG  
GCTCAATCCTTATAATGATAAAAAAGCCAACATGTTAAATATAAAGACAAAAATGCTATTTTTTCTGGGA  
AGCGTACTTTTTCTGGTGATCGGTTTTGCCCTGCTGTTCTTCGTGCTGGGGCACGGCGAGGCCACGTGA  
CCTGGGGCCCCCTGGATCTCCGCCATCGCCCTGATGTTGTGGCTGTTGATGGACGTCGACAAGATCCGCCG  
TGGTAAAGGCTGACCTGCCAGCCACACTCCTCCTATCCCTCAAACCTTCGTTTATTCGTTCTTTCCCGC  
AAAAGGATCGTACACTGATTTTTTTGCGATGTTTTCCCGCATCCAACGCTTCAGTAAAGGTCATCCGCAT  
GCCGAAACAGATCCAGCGTCAGGCGTCATCTACGCCCTGTGCGCCTATACCTTTTGGGGCATAGCCCCC  
ATCTATTTCAAGACCATCTCTGCCGTCCCGGCCCGCCGATCCTGACCCACCGGATGATCTGGTCTGCG  
TGCTGCTGATGGTACTCACCTGGCAGGACGCCAGTGGCACAAGGTGCAGGCGGTGCTGCGCCAGCCAAA  
AGTGTGCTCACCTGGCGTTTACCTCGGTTACCGTTCGGCGGCAACTGGCTGCTGTTTCATCTGGGCCATC  
AACAACGGCCATATGCTGGATGCCAGCCTCGGCTACTACATCAACCCGCTGTTCAACGTACTGTTGGGAA  
TGGTGTCTTCTGAGCGAGAAGCTGCGCCGCTGCAGTGGTGGGCGGTGGCGCTGGCCTTTGCCGGGGTGGC  
CATCCAGCTTATCGCCTTTGGCTCCTTGCCCTGGATTGCGCTGGTGGCTGGCGTCGAGCTTTGCCATCTAT  
GGGCTGGTGGCAGAAAAACTGGCACTCGATGCTCTCACCGGCTGCTGATCGAAACCATGATCATGCTGC  
CGCCAGCAGCCATCTATCTGTGGGGCTTTGCCGACAGCCCCACCAGCCATCTCACCCAGAACGACTGGCA  
CCTCAACCTGCTGCTGATCGCCGCTGGCGCCGTTACCACGGCCCCCTGCTCTGCTTACAGCGGCGGCC  
ACCCGGCTCAAGCTCTCCACCCTGGGTTTTCTTCCAGTACATAGGCCCCAGCATGATGTTTCATCCTGGCCG  
TCACCCTTTACGGTGAGGCGCTGGCAATAGACAAGCTCGTCACTTCGCTGCACTGGAGCGCACTGGT  
GATCTTTACGCTGGATGGGCTGCGCAACGGCAACACCAAGTCTGCACCGACCAAGAGTAAACCCGTGCA  
TCCTGCCCCGGCCGTCGTGCCGGGGCAAACCTCGGCAGCAGAATTTTTCTCGTCATCTCACGCCAGTCA  
GATTGAATCACCTTCTGATAATGAAGCTATGCTATCCATGGACAACACCGCATGGAGGCATCATGTTCA  
GGCAAATTCACGATCGTTCACTGCTCTTTAGCCAGCTGCTTGGGGTGTGGTCAATTATCGTACTGATATC  
AATCAGCTTTTTTTGGCCTCTATTTCAGTCAGAAGTGCCGCGCATCAGACGGGACAAGGCAAGGACGTGGTC  
GCCGATATCCTGCCACCTCCGCTCTACCTCATCGAATCCCAACTGCAGTCTATACCTGCTCCATGCCA  
AACCGGAGGAGCGGGAGGGGTTGCTACAGACTCTCGCTCGCCTGCAAAAAGGAGTTCGAAGAGCGCAACCG  
CTTCTGGCAGGAGAGCAACCTGAACGAGCAACTCAAACGGCTGCTATTGGGGGAACAGAAACAGCAGGGG  
GAGCTGTTCTGGCAGTTGCTCAACGACAAGTTTGTCCCCGCCATCAAGGTGGGGGATCTGGCGCAGGCGG  
GTGCGATTGCTGCACGCTGCGAACCTCTATAACGCCACCAGGATCGGAGTGGATGCTACCGTCACTAG  
CGGCAACAGTATGCCCGGAGCAGATGGCCATCTCGCCAGTACAACCCGGCTCTGCTATGGCCTCTTG  
CTGTGCGCAGCTCTACTGGGCGGCGACTCATCTTCTGGCTGGGGCGACCCACCAGCAGCGCCTGATGG  
CCGCCGGCAAGGCTACCGCCGCCATTGCCGAAGGGGAATTGAACCGTCCCATGCCGGAACCTGGCCTCGA  
TGCCATCGGCGAGCTAATCCGCCAGATCGGAACCATGCGCGATCAGCTTGCCACCCTGGTTCGAGTCGCTG  
CAGCGCAGCGCCAGCACTCTCGATGATCGTGCCACCAACCTGACGTCGATGGCACAACGGTACACCGATG  
ACAGCCAGGCGCAGGTCGGAGCGGCCAACATATCGAACAGGCCATCGAGCAGCTCACCCACTCCATTGA  
ACAGGCGGGTAGCCAGCTGCATCAGGTAGGGGAGCAAACCTGCAGTCAGCAGAGCGGGCACAAAGAGGCG  
ACACTCGCCATCCACACCGTGGAAACAGGTGATCGGGGAGCAAGTCACGGGAGTGAAGCAGGTCTCCATA  
CCATTTTCGGATCTGGCCGGCCTCTCGCAGCAGATTGCCGGGCTGGCGGGCGCCATTCACGATATTGCGGA  
GCAGACGAATCTGCTGGCGCTGAACGCTGCCATTGAAGCGGCACGGGACGGTGAACAGGGACCGGTTTT  
GCCGTGGTGGCCGATGAAGTGCCTGCTGCGGACCCGACCCGGTAGCGCCACCACCGAGATCAACACCA



TCATCGGCAAGATCCAGGATGTCAGCCTGCGCGCCGCCAGCGAGATGGATAACCGAGCTGGCCCCGGTTCGA  
ACAGGCGGTCACTCACACGATGACAGCGCGCCAGAGCGTCGCCCCGATCGCGCAGAGCTGCGAGGAGATC  
AATCAGCGCATCGCTCAGGTCGATCAGTTGATGAGCGATGAGACCCGGCTGATACAAGGGATCCACCATC  
AGGTCGGCGAGATGTCGCGGTTGGCGGCCGAGGCCAACCAGAGCGCCAGTCACGCCGCCGAAGAGGCGAC  
CATGGTCGCCCCAGCACGCCCGCATCCTGACTAGGCAGACTCACCCTTCCATCTCGACACCACCCGCCAT  
TGATCCCCGGCGCTGACGGGAGTCAGCGCCCCCTTTTTCTCTGCACTGGTTAAATGGGTAGCATTAGAC  
TCCATGAGGGAATAGGATCCGCCCTCTGAAAACCAACTGCAAGGATCAACTGACATGACTCGAAAATGG  
TCGCTCCCCATCGTGGTAATCGCGGGGGAGCGTTACTCTGGCTTGGAACACCTTTGGTATGAAATGGG  
CTCTGATGGCCCTGATCGGATTCGGCTTCGGCTTCACCCTCTCCTTCAGTCGCTTCGGCATCGTATTCGG  
TTGGCGCGAAATGCTGACCAACAGCAACAGCTACTACGTGCGGGTTCACTGCTCACCATCGCCATCGAA  
ATTCTGCTGTTACCACTTCCCTCTCCTTTAGCCACGCCCTGTTTGCGGATGCCATGGTGGGTAACGTGA  
TGGCTATCGGCATTCCTTCATCGTCGGTGCCCTTCTGTTTGGCATCGGCATCGAGTCGGCAGGCGTCTG  
CGCCACCGGCACTCTTTACTGCTGCGGCGAGGGACAACCCCGCTTCTGGCTGGTGCTGATCTGCTACGGC  
ATCGGCACCTCATCAGCAACCAGTTCCGCCCGAACTGGAGGCCACCTTCTCCAGCCATGTGGTATTGG  
CCAAGGATCTGACCGGCAATATCTGGAGCGGCATGCTGCTCAACCTGGCGCTGGTTGCTGCGCTGTTCT  
GCTGTTTTCGAAGAGCGAACTCAAGCGCACCGGCGAGCTCAAGCCCTCTTCAGCGGCGGCAATCTGTT  
TGGCGCGATGGCCGCTTACCGTGCTGACCGGCGGCATCATCATAGCTCTGCTCAACTCGTCCGTGGTGC  
CTCTGCACGGCTCGGCTTGGACCATCACCGGCGTATCTATGACATGGCGCTGCGCGGCGCCTCCCTGTT  
CGGCCTGTTTCGAGGGCAACCCCAAGCTGGCCCAGCCACTTTCATCAATCCCATGGTCGGCATGTTCTGG  
CTCGGCATTCTGGGGGCCATGCTGGCGCGCTGTTTGAGCGGTGGCGGCAACTTCGCCCCGATGCGACTCG  
GCAACAGTCTGGCCTCAATCGTCGGCGGTCTGCTGATGGGGATGGGCGCCATGTACGCCGCTGCAACCT  
CGGCGGCTTCTTCGATGGCACCGCCTCTGGCAGCCTGCACGGCTGGGTCTGGATGCTGATGGCCCTCGCG  
GGCAGCCTGATCGGCATTCGCTGCGCCCGCTGTTTCGGGCTCTGAGGCTCAACATCGTAAACACCCATA  
AGAAACGGGAGGCAAGCCTCCCGTTTTTACATTTATCGATCCCGTTGCTCTGCTTATTGGACAGGCTGG  
GAGACCCCTTCCAGATGGATTTCTACCCGGCGATCCGGTGCCAGACAGGCGATCAGCTCCTGCTTGGAGC  
GGCTGGCACAGCTGTTGCCAGTGACCGGATTGGCCTTGCCACGCCCTCGACCCGAACCTTGTCCGCATA  
CAAGCCTTTGGATAACAGATAGCTGGCCACGCTCTGGGCACGCTTCTCGGAGAGGGCCAGGTTGTAGTTG  
TCGGAGCCGATGCGGTCGGTATAACCGATGACAGTTGCGACGCCATCTTTCGGATTGGCCGCCACAATCT  
GGCTGAACAGGGCATCGAGCGCCTGATTGGCAGCCGCTTCAGGGTTCGCTTGTGAACTCGAACGACAC  
ATCGGAACCTCAGACTGAAGGTTTTGGGCTCAACCACGGCTACAGGTGCCGTTTCGGCGGCCGAGCGGGC  
GCCGGTGCTACGACCTCGCCACCTTGGCTGACCGAAGCGATAGAGCATCCCGAACGAAATCAGGCCGTTAT  
CCATCTCGATGCCGGAGCGATCGAGAGAGGCATCCCCAGCGGCGTGGTGTACTGGTACTCCAGACGGGC  
AGCCAGTACGATCGATGGCGTATTCGGCACCCAGCGCACCAACGAAGGCGGCGCCATGCTTTTTGCGG  
GTCTCGCTGCTATTGGCGAAGCTGATCTCGCTATCCGTCCAGGCATAAGCACCGCCAGTCGGCCATAAA  
GATCGAGCACGTTTCGTTGCCGGGAAGCTGATCTTCATGGTGGCTGAATCATCTGGCTCTTGGCTTCGGT  
CTTGAGGGTATTGGCGCCAGTGCCCGAAGTGGTGTGCTATTTGCCAAGCCAGTCATAACCCAGCTCGAAA  
CCCAGGTTGGGGTTGAGCTGGTAACCGGCGAACAGGCCAGACCCAGATCATCCGTGTTCTCGCTGGTAT  
TACCCAACGTCTGGGCAATCGACTCGGCATACTGGTTGTGGTCAACGCCATAGTAATTGGACCAACCGGC  
CTTGCCACCGACATAACCAGGTATTGTCTGAGCGGCGGCTGTACGGCTCCGGCCGCCAGCAAACCACTG  
ACCAATACGGCAAGCATGGATTTATTCATATTTTTCGCCTCTGCAATAAGTCGTTATGGGCGCCTGAGTGC  
GCACTTTCCCTGTGTGAAGCCGTGAGGCGGCTCTCCGCTATTCAGGGTATCCCATCCGAACGCAGCCTC  
AAATGACCAAGCCATCAGGAGTGTGAGCTTGCAGCAATATCCGGCGTAAAAATCACCTGTGTACCTATT  
CACACTGTTTTGCCAGTTAAACCATGACTTTGCGTGTACGGAGTGACCTATCCACACGCAGCAATAAA  
AAAGGGAGGCATAACGCCTCCCTCCCGGTGAGTTGTTGCAGCCCCCTTGCTCAACTAGCCAGGAATAAAC  
GGTAGGCGGGGTCGTCGCTCACCTCTTCCAGCCGTAACCAATCTCGCGCAGGTAGTCGTGGAAGGCGGC  
CAGCTCTTCGCTGAGCTCGAAGGCGCAGAGCACCCCGGCTAGTCGGCGCCGTGGTTGCGGTAGTGG  
AACAGGCTGATGTTCCAGCGACAGCCGAGGGTCTCGAGGAAACGCATCAGGGCGCCCGGCTGCTCCGGAA  
ACTTGAAGCTGTAGAGCCGTTACCGAGGGGCCGGGCGGGCCGCAATCATGTAGCGCACATGATT  
CTTGCCAGCTCGCTCTCGGTGATGTTGACCACCGGATAGCCGTTGCCACCGAGCTGATCGATGATCTGA  
CCCAGCTCCTCGTACCGCCGGTGAGACGCACCGAGACGAACAGCGACGCTGCTCGGCATCGGCGTAGC  
GGTAGTTGAACTCGGTACCATGCGCGGCCGAGCTGACGGCAGAAAGTCGAGGAAGGCTCCCTTGGCGCTC  
GGGGATGGTACCGCCAGCATAACCTCACGCTTCTCGCCAATCTCGCAGCGCTCCGACACGTAGCGCAGG  
CTGTGGAAGTTGACGTTGGCGCCGACAGAATGGCTGCCATCCGCCCCCTTTCACCTGCTCCCGCTCGC  
TGTAAGCCTTGAGACCTGCCAACGACAGGGCGCCGACGGCTCGGCAATGGCGCGCAGTCGTCGAAGAT  
GTCTTTTCAGTGCGGCGCAGATCTGGTCTGTTGGAGACGGTACCACCTCGTCCAGATACTGGTTGCAGAGG  
CGGAAGGTCTCCTCGCCGATGCGCTTGACCGCCACCCCGTCCGCAACAGCGAGACCCGCTCCAGATTGA  
CCGGCTCGCCAGCCGCCAGCGCGGCTTGGAGGAGGCGAGACCCCTCAGCCTCCACCCCGATCACCTTAC  
ATCCGGCAGCAGCTGCTTGATATAGACCGCCACCCCGGCGGCCAACCCGCCCCCCCCACCGGCACGAAT  
ACGTGGGTGAGGTGGGTATCCTGCTCCAACAGCTCCTTGGCGATGGTGCCCTGCCCCGGGATCACCTCAA  
CGTCGTCAAACGGCGGGATCAGGGTGTAGCCCTCAAGCGTGGAGAGGCGGCGACTCTCGCCATAGGCTC  
ATCGAAGCTGTTGCCGAACAGCATGACGTTGCCGCCCTGACGGCGTACCGCATCGATCTTGATGTCGGC

GTGGTCTTGGGCATCACTATGATCGCCTTGATGCCGAGCTTGGCGGCCGACAGGGCGACCCCTGCGCGT  
GGTTGCCAGCAGAGGGCGGATAACGCCGCGCACCTTCTGCTCCTCGGTGAGGGTGGCGATCTTGTGATA  
GGCGCCGCGCAGCTTGAAGGAGTGGACCGGTTGCAGATCCTCCCGCTTCAGGCTGACATGGTTGCCGAGC  
CGCTCGGAAAGTTTCTTACAGGGTTTGCAGGGGGTACCCGCGCCGCTCATAGACGGGGGAGAGCAACA  
CCTTGCGTAGATAATCCGCCGAGAGACCATGATTTATTCCTCCAGCATCGAGCGATCGCGAACCCGCGCC  
TTTATCGGGCGCTGGTGGCGAACATGGCGTAGGCACGCAGGGCAAAGGAGACCTGGCGCTGACGATCGAGC  
GGCTTCCAGCCACGGGCTTCCACGGCGACACGGCGGGCGGCCAGCACGCTGTCGGCCACCTCCAGCACCA  
TGCTGCGGGCCGGGATATTGATGCTGATGATGTCGCCATCCTCCACCAGACCTATGGTGCCGCCGGAAGC  
GGCCTCCGGCGAGACGTGGCCGATGGAGAGGCCCGAGGTACCGCCGGAGAAGCGACCATCGGTGATCAGG  
GCGCACGCTTGGCCGAGACCCCATGGATTTAGATAGGTGGTGGGGTAGAGCATCTCTTGCATGCCCCGGC  
CGCTTTCGGCCCTTCGTAGCGGATCACCACCTACCTGCCCCGCTTAACTGTACCGTCGAGGATGCCGTT  
CACCGCGCTCCTGACTCTCGAACACCCGTGCCGGGCCAGGAAGGTGAGGTTCTCCTCATCCACCCCG  
GCGGTCTTGACAATGGCGCCGTTGACCGCGAGGTTGCCGAAAGCACGGCGAGGCCGCCCTCCTGGCTGT  
ATGCGTTATCCAGCGAGCGGATGCACCCCTTCGGCTCTGTCCAGATCCAGCTCTGGCCAGCGGCAATCCTG  
ACTGAACGCTTGGTGGTGGGATCCCGGCCGGGCCAGCGCGGTAGAAGTCCACCACCTCCTGACTCGGC  
TGGCGGCTGACGTCATATTATTGAGCTGTTGACGAGAGAGCAACCAGCACGGTACGGGTATCCCCAT  
GCACCAGACCCGCTTCTCCAGCTGGCCAGAATGGCCACTACGCCACCGCGCGGTGTACATCTTCCAT  
ATGGTACTTCTGGGTGGAGGGCGCCACCTTGCACAGTTGCGGCACCTTGCGCGACATGCGGTGATATCG  
GCCATGGTGAAGTGCACACCCGCTCCTGCGCCGCGCCAGCAGGTGCAGCACGGTATTGGTGGAGCCGC  
CCATGGCGATATCGAGCGCCATGGCGTTCTCGAACGCTGCCTTGGTAGCGATATTGCGCGGCAGGGCGCT  
CTCGTCATCCTGCTCATACCAGCGTTTGGCTAGGGTACGATGCGCTGACCCGCCAGCTTGAACAGCTGC  
TCGCGATCGGCGTGAGTCGCCAGCATGGAGCCATTGCCCGGCTGGGAGAGGCCAAGCGCCTCGGTACGGC  
AGTTCATGGAGTTGGCGGTAAACATGCCGGAGCAGGAGCCGCAAGTAGGGCAGGCACTGCGCTCAACCTG  
TTCGCTCTGGGAATCCGACACCTTGGGGTGGCGCCCTGGATCATGGCATCCACCAGATCCAGCTTGATG  
ATCTGGTGGAGAGCTTGGTCTTGGCCGCTTCCATCGGGCCGCCGGAGACGAAGATCACCGGGATGTTGA  
TTCGAGGGCGGCCATCAGCATCCCCGGGGTATCTTGTGCGAGTTGGAGATACAGATCATGGCGTCCGC  
GCAGTGGGCTGTACCATGTACTCCACCGAATCGCGCATCAGCTCGCGCATGGCAGGGAGTAGAGCATG  
CCGCGTGGCCCATGGCGTATGCCGATCCACAGCAGCATGGTGTGAACTCCTTGGCCACCCGCCCGCAG  
CTTCAATCTCGCGGCCACCGTGGCCAGATCCTTGAGGTGGACGTGACCCGGCACGAACCTGGGTGAA  
GGAGTTGACCACGGCGATGATGGGTTTGGCGAAATCCTGATCGGTGATTCGGTGGCAGCCACAGGGCG  
CGGGCCCCGGCCATGTTACGTCCGTGGGTGGTGGCGGATCTCAACTTCGGCATGTCTCTACTCCCTG  
AATGCCCATATGGGCTCGATGCGTTATGCGGTGATGATACGAGTGGATCGGAATCGACCCCTGGTGAAGGC  
TCCTCTGGGAAGTTCTACCGGAAGCGACTCGGGGAGGCACAGTGCCTCCCTCTCTCATCAGTCTGTTGA  
CGGGCGTCAGCCAGCCCCACTTGTCTTCCGTCTGGCCATTGAACAGGCCGAAGAAGGCATTCTGCAGCTG  
CTCGGTACCCGGCCACGGCTGCCAGCGCCACCTTCAATCGATCGACGGAGCGCACCGGGGTACCTCG  
GCGGCGGTGCCGGTTCATGAAGATTTCTGCTGCGACATAGAGCGCTCGCGGGCAGCGCCTGCTACGCA  
CCTCGTAACCCAGATCACGGGCCAGCGTCATGATGGTGTGCGGGTATGCCGGGCAGGATGGCGGCAGT  
AGCAGGCGGGGTAAACAGCACGCCATTCTTACCAGAAACAGGTTCTCCCCCGCCCTTCGCTCAGGTAG  
CCGTTACATCCAGCGCCAGCCCCCTCGGCAAGCCGTTGCGCTTGGCCTCGCGGCTGATCAGCTGGGATG  
ACAAATAGTTACCGCCCGCTTGGCGCCGGTGGGAATGGTGTGGGAGCGAGCCGGTTCCATGAGGTGAC  
ACAGACATCCACCCGTTTTTTCAGCCCTCTTCCCCAGATAGGCGCCCCACGGCAGAGCCGCGACCATC  
AGATCTGCCTTGGCATCCAGCGCGGATGCAGCCCCAGCCCCACGTTGCCGACAAAGGCCAGCGGGCGCA  
GGTAGCCGCTCTTACAGCCGTTCTCGCGCACACGGTGCGGCAGGCTTCAATCACTTCGGACTCGCTGTA  
GGGACGTCATCCAGTAGATCTTGGCGGAGTCGAACAGACGGCGGGTGTGCTCCTGCAGACGGAATG  
CAGGTGCCCTTGGGGTATCGTAGGCACGACCCCCCTCGAACACCGAGGAGCCGTAGTGCAGGGCGTGGC  
TCATCACGTGCACCTGGGCATCCTGCCAGGCACCACTTGGCGTTGAACCAGATGTAATGGGGGTGAGT  
GGCGGATTGGGAAGGCTGTGACATTGGCTTGGCTCCTTAAGCTCTGATCCGGGGTTGCTGTTCCAGTGCA  
TCGACCCGGGAGACGTCCACCAGCTTACCAGCTGGCTCCACAACCTGCTGGATGGGACGCACCGACTCGA  
CAGTAACCGTGATCCGCGAGCTGTTGGCAATCCTGCTCCATATTAAGGGCGCAGAGATTGAAACCGCGGTG  
ACGCACACCCGAGCACCCGCTCCATCACTTCGGGTCTGGGCTGGGCATGGATATGCAGGGTGTGTTGT  
GCAAATGCTGGCTGTGCAAGGGGTGCGGGTTCATGGGCGTTGCTCCATCATCTGGTGGTTGGCGACTCC  
CGGCGGAACCAAGGGCCAGACGTTTTCTTCTGAAATAGCCACATGCAGCAGGTAGGCACTCTCGCTT  
GCCAGCAGGCATCGAGGGCGCCGGCTATCTGCTCCTTGCATGTGATGGTCTCGCCCGGATGCCGAAAG  
CAGCAGCCAGGGCGACGAAGTGGGGTGTGCGGAGAGGATGGTCTCGCTGTAGCGGCCGTCGAAAAACAG  
CTCCTGCCACTGGCGCACCATGCCGAGGCGCTGGTTATCCAGCAGCACCATCTTACCTTGAGCTGGGCG  
CGGCGGATGGTGGCGAGCTCCTGCACGTTTCATCATGAAAGAGCCGTCGCCGCTCACAGCACCACTTCAT  
CCTCCGGGCGAGACATCTTGGCGCCGATGGCGGCAGGCAGGCCGAAACCCATGGTGCCGAGACCGGGCGT  
GGAGAGGTGGTTGCGCGGGCTGGTGAAGCGCATGTGCTGGGCCACCCACATCTGGTGTGACCCACGTG  
CAAGCCACACGAGGTCTCTGACAGCCGGCGGAGAGCTGCTTGAAGCAGGGCCGGCGCATAGATGGCCT  
GACCCGGATGGTTCGTAGCGAAACGCATATTCGCGGGCCATGGCGGCACAGTGTTCACGCCAGGGGGCAAT  
GTCGAGAGTCATGGCGAGGCGGGCAACACCTGCTTGAAGTCCGTGGTGTATACCACCTCGGCGGCGCGG

CGCTTGCCGAACCTCGGCGGCATCCACATCGAGATGGATCACCTTGGCCTCGGGGGCAAACCTCCTCCAGCT  
TGCCGGTCACCCGATCATCGAAACGGGCACCCACCACCAGCAAGTCGCACTGCTGCACCGCGTAGTT  
GGCCGCCTTGGTGCCGTGCATGCCGAGCATGCCAGATAAACGGGGCTGTCGGGGTTCGAGCGCGCCGATC  
CCCTTGAGGGTGGTGACCGCTGGCATGCCGGTTGCGGCAGCAAAGTCGCGCAACTGCTGCTCGGCATTGG  
CCATGCCCACTCCACCACCGACGTAGAGCACCCGGACGCTCGGCTGCGGCCAGCAGGGTGCGGGGTGCGGC  
CAGATCCGAGGGGTTGAGCACCTCCGGCTCTTCCACTGCAAAACAGCGGGCTCTGGGCAGGCACCGCGGCC  
AGTTGCACATCCTTGGGGAGATCGATCAGCACAGGGCCGGGGCGACCTTCGGTGGCGATGGCGAAAGCTT  
CTGCCAGCACACGCCCCAGATCGGCGGCATCGGTCAACATGAAGGAGTGCTTGGTACAGGAGAGGGACAT  
GCCGAGCACGTGCACCTCCTGAAACGCATCGGTGCCGATGGCGGAACAGGGCACCTGACCGCTGATGGCC  
ACCAGCGCACCGAATCGAGCAGCGCCTCTGCCAGACCGGTCAACGATTTGGTGGCGCCGGGGCCGGAGG  
TAGCGATGCAGACTCCCAGCTGACCCGGAGCGCGAGCATAACCGACCGCGCCATGGCGCACCTCTGCTC  
GTGGCGGCAGAGCTGATGGGCCAGACCACCGTCATACAGAGCATCGTAGACCGGCATGATGGCCCCGCC  
GGGTAACCAAACACCTGGGTACACCCTGTTTTTTGAGAGCCTGTACCAAAAACCTGCGCGCCATTCATGT  
GGAAAATCCTGTCTTTTGGTTCGAAAAAAAACCCCCGGGCTGTGAGGCTCGGGGGTTCGTTGTTTTCTTCT  
GTCCGGTGGTGGTCTATCCCTTGTTCGGTGCAGCTAAACGAGCCCCGAGCGGTGAGATAATAATCACCA  
CTAGGACCACAATAATGCTGACGAAACGGGAGGCCATGTTTACATAGTTACAACCGGAAATCCTGTGAAATT  
GGGGCGTTTTCTACCGCAATGGCTATTAGAACTAGCACGGTGATTTTTTATTGGGCAAGCTTTTTTCTG  
TGACAACCCACTGATTTTTGGCTATTCCCCAGCCGGAACCTTGGAATAAAAAACCAACAACAAGCAGTTAG  
TCAGAACATATATCAACTCAAGGACGGGATTTATGTCATTAGCTGTGGTTTATAGCCGTGCCAGCCTCGG  
GATCGCGGCCCGCAAGTTACAGTGGAAGTTACCTCTCCAACGGCCTGCCCGCCTTCAACATGGTCCGC  
CTGCCGAAACCTCGGTGAAAGAGTCGCGAGATCGGGTCCGCAGCGCCTGCTCAACGGCAATTTTCGAGT  
TCCCCGAGCAAACACATCACCGTCAATCTGGCCCCCGCCGATCTGCCCAAGGAGGGAGGCCGCTTCGATCT  
GGCTATCGCTATCGGCATTCTCGCCGCTTCCAAGCAGATACCGGCAAAATATCGGCTCGATCACGAATTT  
TTAGGGGAGTTGGCCCTGACAGGCGAAAATTCGTCCCCTACGCGGGTACTGCCTGCCGTACTCGCCTGCC  
GGGATGCGGGACGCACCCTGCTGGTACC CGGAGAGAACGGCCCGAAGCCTCTCTCATT CAGGATGCCGA  
GGTGCACACCGCCCAACTGCTGGCCGTACCGCCTGGCTGGCAGGCCAATACGAGCTGCCGCTGCCG  
GATCCCCAAAGCTCGGAGAGCCTGCCCGATGTACCGGATCTGCAGGATGTGATCGGCCAGTCTCAGGCCA  
AGCGGGCGTGGAGATCGCCGCGCCGGCATTACAACCTGCTGTTTATCGGCCCGCCCGGCACCGGCCAA  
GAGCATGTGCGAGCGCTCTGCCCGCATCTTCCCGCCTGAGCGAGCAGGAGGCCAGCAGACCGCC  
GCCATCCACTCCATCGCGCGCCTCACCCCGCGCGGTCACTGGCACCACAGACCCTATCGCACGCCCC  
ACCACAGTGCCTCAGCGGTGGCGCTGGTGGCGGTGGCTGTCATTTTTTGAAATAGATGAGACTTTCTTG  
AAATAAATGAGACAAAAAATATTA TACTGGGCGGGCGTATGACATCAAAAAATCAGAAAAAAGATAATTA  
ATACTTATAAAAAATTAATTAAGCATTATTGAGAATGCTCACATAAACATTTTTGGGTGTGGCCAATC  
TGTTGAGCAGGAGAAAAACATAATAATTCATGTTTTTTCATCGCTGAAGATCTACACATTC AATCAGGA  
GTTGATAAAAAACAAATCATT CAGTTTATAAAAAAGAGAAATTATAGCCGAAGAGTTACGGATATTGCTCA  
ATAGACAAGACATTAATATAAAAAGAAAAATAGAATTGAGACTGTGGTAGAAGAGTGGCCATTCATGGTT  
TTATAACAAAGAATGGCCCAATATAGTCTGAGTACTGCTAAGCCCAACAGCCCATCTAGCATGACCAT  
AAATAATTCTACAACATTCCTTATCGTAGCAATTTCTTTAGATAGCTATCTTCAGTGCACAGACAGTGCAC  
TCTTCTTATCCCTCTTGTTACAGCTACATAAGCCAATCGTTTTAGCTCATCTCTTCAATCTGGGAAAAT  
GTTGTTTTCTAACCCACTAAAGTGGGGAGATGCCGTGTATATATTA TTTTTCATAACGTTTTCTCTATGGT  
TAAAAAATCATCACAAACGATTGTGACTATTGATTGCAACCCCTTAGCTCGATGACATGTCATAAAGCC  
AATCTCTTTTCTTTCCACTCAATAAAACCCCTTGGCTGCATTTGAATAAATTTGATGCTAAATCGCCACTC  
CTAGTCAAAACAGAACTTTATAATCAGCACCATGATGATCCTTTGCATAATTGAATTTGCTCTTTTAGCA  
ATGCTATAAAATTAGCATATAAAGCATCAGTGGGATTTGAAAAGTCATAACCATAATTTATTATAACTCC  
GTGTTCCGT CAGGGAATGCGCCCCATATAGCTAACCGTTTCTTTATTTGTTTTATTTTTAATGGCAGAACT  
ATCTTTGCTGCATCTTGAACAATAAGGTCATGAGATCTAAAATTTACACCTAGCACTATATTGCTAAATG  
ACCGAGATGAGTTAAATATTGGAAAAGAAATTTTTGAACTAATGAAGAATAAAGGTGAACTGCCTCTCCA  
GCCATATATAGACTGCCAATCATCACCAATTGACATAAATTGATACATGACCCCTCACGCTTACGAAGCTCT  
GTTTGTGCAGCAATAATGAACTCGACAATTTGTGGTGAATGTCTTGAATTCATCAATAAGAAGATGCT  
GCATTTTCATTAAATTAGAAGAATTAACACTGGCAAGATTATATTTTCGTAAAGCTCAAAAAACCAGATT  
GAATGTTATTATTTTTCTTTTGATAAAGTTTCTTCAAAGAAACGCCAGTAAACAGAGAGTAAATTAGAA  
AATACATGTTCTAATGCATTACTATCATGAAATGCATCCATGTTAGTCAAACAGAAATGGGACCTCCATAG  
ACATACTTTCTATAAATGATGCATATTGATAAAAATAACATGTAGAGCGGCTGAGTAGATAGCTCTCCTTT  
TAACCTTACTTCTGGTGAATGATATCGAGATTGCCATCCTTAAAACACTCCTCAGTCAATAAGGAAGAC  
CCCATAAGGTAAATTTTTAAATTTTCCAGATCGGCTCTATTGTGGATGTAATATCATCACTCCCTCTGT  
ACATAGATACAATATTTCTTTTTACGCTGACAGCGCCAATTATAGAAAAGCCCTCAATACGTTCTTTTTTC  
GCTAAAAAAGAATTACCAAAAACCTCTATTGCTAAAAATATACCAGTTGATTTGAGCCTTTAATTTTTCCA  
TTGGAATAAAATGCATGACCATTTACCTCAAATCTAATAGGTTTTAATTC AATGCCCTCAATGCCGGTTA  
ATAACTCCTTGGGGATAATATCTCTTCATTGATTCTAGATACTAGAGCAAAATCTCTTTCACTAGCTTT  
CTGGATAGGTTGGTGTCTTCTCGCGGCTTGGCTGTAGAAAAGCGCTTGTCTAATGAAGTGTAGGCGCACT  
ATATCCATAATGCCCTTTCTAAAATCAGCACTGATTTATATAACTCGACGTAAGCTTGCCTAAGCAGGG

TTATTTGAGCACTCGACATCCTTGTGATGTATGAGTTATCACCATAGGATTTTCTTTGTTTGTTCATC  
AATATTTTCAAATATTTAAATCACATCCCAATATACTATCTCGCCCCCAGCGAAAACATTCAACAAC  
AAACTATGATATGTTCTAACCAGATTTTTACACTCTTTATCTCTTACAATAATTCCGAAATGATCAAATA  
GTCTCTTCAGCTTGGCTTTAATGTCATCACATGATGCAGTCGTAATGAAACTACAGTTATACTGTCCCT  
ATCCACACCAAGACACATTAGCATGTATACGACTCGTAATGCTAATGTGGTCGATTTCCCAGAGCCAGCC  
CCTGCAGCAATACAAGCCGCTGAATTTAGACAGCATATCATTTCAATTTGATCTTTGGTTGGGCTCCCAA  
CCAAGCCTTTTTTAACGGCCTCTGACAATTTATCAAAAAAATGTAATGAACACTGCTCATCTTTTTCAA  
GAGAGTTGGGCCATATATAACCAGAATCAAGTTTTTTAATTTTACCAGAACAGTATCGCCCTGAATAAGA  
AGTACTTTTTTCTCTTTTTGAAGGCATTAGCATAACCCTTTTCATAGCCTTCCCTTATAACCTTCCCTGAA  
GTTTTTCCCTTAGCTTCTCTTTTCAAGTATTAATAAATTAACCTTATGCACGAGAATCATGATAAGATGAGTC  
TATTGATGTTATTTTTTTTTGCAACCAAGCAGAACCTACTCATTACTGCCACCTGATATAAATCGATA  
ATTTTTAGATATAGAAACCTAGCATCGTAATGTGCCATCAAAATGAACCCACTGTTCAATATATATTTTTTA  
TAAAGACTCACTACACAACCACCGTTAGCAACTACAACACAGGTCTAGCGCTCTTATTTAAATCGCGCAG  
TCAATTAACAATCAGGGTTATGTCTATCGTGGGCTAACAACTACAACAAAAAGGGCTTAACATTGAA  
GAAAAACCCTCGTTTCTATTGCATGTATTTTCTTTATCTAGAAGGGATAATTAGGCAGAAGGGCTTTATA  
GTTTTTACAATCCAGCTGATGACCTTTGCTCGGCCCTGGATATTAGAAGGTAACCTCGTGGATCATC  
CACTCGCACACAAGACGAGTTTTAATCGGAAGGTCTCTTTATTTTCTCCGGTTAAGGAATCAAAGAT  
GGAGAACCTCATAACCCTCTTTACGACTAAAGCGATCTGCATCTCAACTCTTTTCGATGGATCATCCCC  
GGGGACTGCAGTCCAGCTATAGTCATCATAATTAAGGTCACTTTTTTTAATTGCAGGCATTTACATCTC  
CAAATAATTATTACGTATCTAACTTAGTGACATTGCAACTCATTGTGAAATGCTGATGATTCTCCACAAG  
AAGATATCTATCACCTGAGCCACTCTCTCACTAAGCTCTATTTGGGTACGTTTTTGTGCTTTCAAGGGC  
AGTCGTTAATAATTTTTCTAAAAATTTCTTTTTCCCGTAACCATTGAGCCACAAGCTCAAGACTACAATTC  
ATTTTTTAGTATTCTCAACGTTTGTGAATAACTGAGATACAACAACCTTCAGAGACCCGACTCCACGGCA  
TAACGTTCTATGAGATGAGGGTTGGATGCATGAATCCATGCGTCATAATCAAGCTATACATAAAGTAATC  
TTTTTAAGTTACTATATGTGCATGAAATCCTCCGAACTCTGAAGCAACTTCGACACTTTGACCAAGAGC  
ACGACTACTGGCTCTACAAGGTGCATGAACTCGCCCTACTCTTTCCGGATGAAAAACCCTCAGCAGCTTAA  
GAATCTCTCGTACGTCAGTGTAAAGCGGAAACTTGCTCAAAGTCGGCGGAGGGTTATATGCCGCGCG  
GACGCCCTCGTCTCCCATATATAGGTTAGAACAATCTCATCCAGCGGCTACGTCCTCGCAACTATACCT  
ATATCAGTCTCGAGTCAGCTTATAGCATGCAGGATGGATATCTCAGATCCCATTGGCAATTAACCGT  
AATGACGACAGGACGGTCGTACCTACAACAGACGGCCTATGGTCTAATTGAATGGACCCATACCGAACAA  
TCAGCTACCACCATTTTTGAACGGCACAGTATGGGACCTATGAGGGGATGCTTAATCGCAAGACCAGTAC  
AGGCATATCGAGACATCAGGCGGATTGGCCGTAACCTTGATCTTGTATATCCACACCAAGAAGAAAATGA  
AGTGAGCGATAAGATATGAAGGGGTGGCATATGGCGGCTCTGATGGCCGTACTTTTCATATTA AAAACGT  
TATTCGAGGATCAACTGAGCTGCTGTTGACTTACTCGGGTTCCATAACGTGCTCCTCTTCAAAGACCA  
GTTCTGGTGGGGGCTGCATCCTGGGCGCAGCTCTCGCCGTTCTGCTGCGCTGGACGCAGCCATAATCT  
TCAAAAACACATGGATAGCATGAAAACCTCATTCACTATTGAAAACTATCAGCACAAGAGGGATCTTGG  
AGAATCGATTGGTTTGGCGATGTGGCCTATCCAGACCTGAACAGACGGCAATCTCAGCCATCCATTGCGG  
TTCAGTTGTCTCGGCACCCACGTCCCCACCCCATGAAAGAAAAGTGACAGGAAAGAGATATGGTTGCCAAT  
TGGAATTCTGCCATTATTGAAGGTAGGCGACATCTGGCAACACGGTCAGGCAACCGGTGAAAATACCGCT  
CCGACAAAAGAGGCGTTTTCTTAAGCTGAAAATAAGCGCTGAAACAACAAGCTTTTATAAAGCTGGCGGAA  
AACCAAATTCGAAAGATATGGAGCGTTACGTTTCAATATACTGGCTACCTATTCATTTGCATCCATG  
GCATAGCTCACATACACATTCGAACTGCATCGTTATCACAGACCGAACCCAACTACAAATCATCATCCCT  
TGATGGAGCTCATAACGCTTTTACTTCGGATCTTCGAGCTCGCTTTTATCTACCTTTTCAAACCAACGC  
TTACCCGAACTGAGTTAGCTAAACAGTACATAAAAACGCTCTGATGAATCTGTATTTCTCCGCTCTCGCTGA  
TGGAATATCTGGTGCTTCCGCCGACAGATTTGCACGAATACTTACTCCCCTGCTGCGTGGAGTGGCGCT  
TCTTTGATCGGAAAAAGTGTCTTTTCTTCTGACCACTAGGCTCTCCAATCTACCCAAAATGCCGGTTTC  
CTTTTGATGGTGCAACAGATCTACACGTTTTCTGGACAATGGCTCAGGCTAGGATGGAGCGCAAGTTGGGAC  
ATTTATTGTCTATGAGATCCTTTTCTGCTCTCATGAGTTTTCCGTTTAAATCCATCCGATATGTTGCTACT  
GGGAATAAAGCCAAATTTAAGCCGTGAGGCTCGGACAATCGGCCTGACCCACAAAAAAGGGAAAGAAAAA  
ACGATGATGCCATCTTATTAAGTATTGATCCAGACGAGAAGAGACAAAATAAATACATTCAGTTTCAT  
CTCACCTAATTCCAGATTTCCCGATCTCGAAACTAAAAACCATTTTTAGAAAACCAAGTTTTTTCGATTTCCA  
AAAGATCAGCCTTACTCCGCTGCACCTCCTGGTGCATTCAGTGTGGTGTACAGGTCAGGTAAGGGCA  
TTACCCCGTAGAAATCGAAAGTGCAGTAACCTCTCAACACTTTGATATTCAGAGTTACCTGAGTTCTT  
CCAGGCTGGGCTATCAACATTGCAGAATGCGCTTTGCTTCACACTCATGATGCCTTACAGCCTAGCAGTA  
TATACGTTCCCGATCCCTATCATCTATGACCCACAAATGAATCCCTACGCTACTTGTCTTACTCAAATG  
GAAGCGAGAAACCAAGACGTGCGATGATAGGGTGGTGAAGTTGAGTACACCGACCGGGTTGAAGGGAC  
TCTCATCCTTGAGCCTATCTGCGGCGATATACCTGAGGTGGTTTTCGTTTGGAGCTCTCTGAGGAGTTTTTT  
GATCTGAACTTGGTGA AAAACAAGCTTGCCACTCATTGGGGAGGGCAGACTTGTATAGTATGAGGATAGT  
ATTCCATCTCTACTCTTCATGATTCTTTAATGCTGATATTGAGAAAAGACGTTATGAAAATAACCGCCAG  
CTAGCTATAGAAGGGACCACTAGGGTAATGCCAGCAACTGGCATTACCCGTTCTAAAACCTCAAGTGTGAC  
TATCATTCTGGAGTAGAAGAATAGCATTTCAATGGCAGATTTTGGTAAAAATCCTTTCTATACCAAATTT

ATGAAATAAGACTATCGCTTAATTTTTATTGATATCAAAAAGCAATTGTATTATTGTAGCTGCTTGCTGCC  
GTTGATTTTTATTAGCTCACTGTATTGATGACCAAAGAACGAGCAGAATCTAGCAACTATTGGGCGCCGTT  
CTCCCATCATTGCCAAGCCATGAGAGTCTTTAGTTATTTGAAGCATAACCACTATTGGAAATAGCATCACT  
CTCAAATGAGACATTAGCATTGGATTATGAAATACATACACCCATCTAATAAAAAATTCAGGATTACTT  
GTATCTACTTTCATGAATTTTATAATGAGGTGCCTCATAATCATAACCTGATGTTTATCACATGAGCAGGAT  
CATGTCCAATAGACTTACTAAGTGACGAGAGCTTTCCAAGGGTAAGAGTATTTGAAAAATTTACAGCTGA  
GACATTTTCGATTCTCTCATCATTAAATATCCCTAATTTTATGTCTGAATCAGATCCCCGGCTTCTTAATA  
GATGATTTCTCTAGGTACGTATTTTTTTCTGGAGAGAAATATAAACCATATAATAATGCCATCATGGAGT  
ATATATATTTCTTTCCATAATTTATTTGATCGTAAGATGCTAGAGCTATTACATAAAGTTTATTTTTATC  
AACCCATGAGTCTTCAACATATCCAGGTTTTCTTCGTTTTTTATTTTTGTTCATAGAATCCTGTGTATTTA  
TCTAGTTTTTTTATTAATGGAATGGAATGGCAACAATGGCCATTAATCAATGTTGAAAACCTTTCGT  
CAGTACTTATAGGGGTAAGCATGCTTAGATAAATCATCAAAAAGACCGTTCAGACTCTGGAACCCCTCCGTT  
TTTTATTTCTGATACAACAGCCTCGACATAAACTGACTGTCCCAGAGATAATGAAATCAGGCCTATTG  
TATTTGACTTCTAGAGGTAATTTTCTAGCTCTTCAAACATCGCGTGAAGATAAAAATTCCCAAAGTGATGAAT  
GAAATGTGGTTTTGAAATTCAGTAACTATCTTATTATCCTTATCATGAAAAGTTTGACGTCCAGCTTTCGAT  
GATTTTTTTAGCACCCTATAGTATGGCTCATCTCGGATAAGTTTGAACTTTTGGTGTAGCTCAGACTCT  
TGAAGTGATTCGACTTTAATAAAGACATCCATAACTAAAACATCCTAACAGTTAGTATCGCAACTATTTA  
TTTTCCATTTTTTTATGTACTGTCTAGGGCTGCCGAAATTTATGTTAATCTTATCATGGTGAAAGCACCA  
ACACCTCTTAACATGAAGCCATTAATTTAAAATCGAAATTTAATCTAAAATTTATTGGAACATTTTTGGG  
ATCCAATAAATCAGTCCCTCATGACGGAAAATCAGCCCGTACCATCGTCTTCAAGCCATTTTTTCGTGA  
TCTGCTGCCTGATACTGACATTTGATAGTCCATGAAAATATGCCAGAGCAGTGATAGCCACATATTTTG  
AAATGCTTTTATCGGACCTAGGCATCTGAACCAGTTCTGTAAGCCGCTTCTCAAGCTCAGCTTTAATCTGA  
CTTTTTATGCTTCTTTTGATGGATCTGCCTCACATCCAGCACGGCATGTTGATCCCAGGTTTTCAGGTACGTAA  
TAAAGCCATGCACAGCAGCCTTTTGTCTGGGTATTGGGAGAGATATGCACACAAGTCCTTTTGGTCCAGG  
GATAGATCGCCCCGCTTTGAGACTTTGCCCCAGTAATTTCTTGGCCGAGTCAACGCTAACCGCACAGAT  
CTCAGCGATAGCCCCCTTGCTGATGCTTGGTACTCAGATATGGTAGTAGCCCAACAATCGGTTGG  
CCAGTGGATCTGAAACCCGAGAAGAAGTCGCTCAATACCCCTTGCCCTCTGAATCTTCAAGCCTCGAAT  
GCCATCTCACCCCATCCATGGCGCTCAATCAGCCAGCAACAGCTAAACGATGACGTCTCAGCATGTCA  
GCACCAAATTGCTTCCCAACTGCTGATAACTCATTGATTTCACTTATATACAGGTGCTGTATGGATTCGA  
AGAATGCCAAATATCGAGCAAGCAAACCTCGATGCTCGGTGGGCACCACAATGCCAAAGCCAGCGCGA  
AAAAGCTTGATACAACCTCCCGCACTGGAGGATGCAGCACTCCCTGATTGAAATGAAGCCGCTGCTCAAAA  
ACCTGCAGCCAGTAAACAATTTGTGCATGTATCCCCTAGACCTGCTGGCATGGGGCCACCACATTTTGAAC  
AGGGTATAGCTCCTAACGCCAAACACCTCGAACATAGCTTTTGTCCATTGGGAGCATCTGCAATCGCCG  
TGACCGGCCACAAGCCTGGCAGCAAGCATGGTCACTTAGCACATCGAGGACAGACGGGTTTATCAAAA  
CCAAGGCGTTGTACCCGAGAAAGGTGGCGTGAAACTGAGCCACACCGGCTACACGCCTTCTCTCAGAAA  
AGTACCTAGCGCATGCCATGCATACAGGCCCATATTTCACTCATTAGCCGAGTCGATACCCCTCCTTGCC  
ACAGCGAACACAGGGTTTACGTTTTTTCGAGCTTGGAGCACTGCGTTAGGATGCCTCTCTGGCAACCGA  
GCCATCTCACCGCATTGAGGACATGGTTTTGCGCTTAAATTCACGCGCATAGCATGTTCCACAGTAGGACT  
CTTTCTTGAAGATCCGGTGTGCTCGCTCCATGAGTCGACCCGAGCCGAAACACTCTCGGGTAGGGATATC  
GTTTATCGCAGCAGGCCATGGCGGGTAACAATCTGGCCCATTACGGCGAACAACTCTTTGGCTTTTCG  
GCCTCGGCCTCCGGATCTGAATGGGATTAGTTCTGATGCGTTGAAACTGTTTGCCGGTAGTTTATCGAT  
CCAGTCCATCACGGTCTCTGATGGCCAAGTCAGTTTATTCATCAACGTATTGCGTGAGACACCATATTTCC  
TTGAGTAAATGGAGCAGTAGGTTGCGCTCAAGGGATAGCATCTGAGCCACCGCTGCCAAGAGGGTTTTTC  
TTTGCTTGAGCGGTAACAGCTCTATTGGTAACTGTGTTGGCGGCAACGGGAGTGAGTGCAAACCAATTC  
AGTGGCTTGGAATAAAATCCCCTAAATGCGAAGGTGCTTTTTGTTCTCTGGATGCCGAGCGTCGGATGAGA  
TTGAGTAAGAGTTTTGGCCAATACAAACAGCTTAGGGATGATATCTGTCGGCCTCCCAGTCTGCTGCC  
CTGTGCCAAAGACATTGGACGCTAGTTTTCTGGAAATCCGGCTGCATCGCCTCAACACGAGCAGAGCCGC  
CGAGCTGAGGTATAGCCACAGTGGAAGCAAATCCCTATGTGAGGTGTCTGTGCTGAAACTCGGTGATAC  
TGAACCGGCATATTGCAGGAAGGGCAGCACTCAATCAGCTCATGATGATGATGATGATGATGATGATGATGAT  
ATGCCAAGCGCCATTGCCACCGAAAATAGGGGTTCATGCATTCGTAAGCAACATGGACAATAGGGTACGCC  
CATCTTGTGCTGACGATTACGACTCCCATTGCGATCACCCAAGGCAAATGGAAAGGCCTTTTTCCCGATT  
AAAAGGATTTTCCATCCAGATGATGAAACAGGGTTCATGTTACTCAGCTCATCAATACTCAAGCCTGATG  
AGCCGCACAGACTCAGTAATCTTGTGTCATCAAGGGTACGATCAATATCGACTGTCCAGGCTCTCCATGT  
TGGCCATACAGCGGATGTGAGAGACATTGGATCACACCCATGAGCCAAGGATGCTCTGACGAGCCAAGAG  
GACAACAGCTCGTCCCTGAGAGGGGATATCTGTACAGGCCAGATAAGGCTCACCTCATGGTTTTCTCTCAG  
GCCGTTGGTGGGACGAAGCCACATGTGCTGTGCAATCAGGTCACGGCTGACTTGCTCCGAACCATCCTTG  
ATTGCTGCGATGGCACATGTGGAAGTAATCGCTGCAGATTGCCAGATTACCTCCTGAGATCGCATGGA  
GAAGCTGGATGCACTCTGCTGTGCGCAATGACGATGGCCGCTTTAGCGGCAAGATACGCTCGAAACTTAG  
CACCAACTTTGCGAACTCGTTGTCCAGCTTCCAAGCTGGCAGGGTTTTGACATCAAAGCGACTGGCATGT  
TGGGGATCTGTGTGAGAACACGAACAGCCTCTGTGCTCCCACCGCCACAATAGGGATCATGAGTTTAT  
TACATAGCAGTTTTAATGGCATTTCATGAGCTCCCGCTGTTTGAATGCAGAGCCAGCCAGCAGCGAGTGA

CTCGTCGATAATCAGCATCTTCACCTTACATACCCGGCAGAGGTGAATAACCTGGTAGCGCAGTTTTACT  
GTTGGATCAGATATTCGATAGGGCGTGAAAAATCGCTCCAGTATCGATACATATAACCCTTTCTCATCAG  
CCGTTGGCGGTGATTCCGCGAGGATGATGGGCTTGAATCCTTCCGGGTGTTTCATCCTCAGTAGCCTTGTA  
ATACTGCTCATGGAAATGACGCACAATTGTAGTCTTGCCGTTGTTGGGTTACCAACCAGTAGCAAATTC  
AACATCCTGGGTTTTCTTAGGCTGTTCAACGAGCTCATTGAGAGCTACCAGTATCTGGTTGGCTGCAGTGT  
AACCAATCCACCTCGGCTGGTTTATGAAGGCCATTTCGCTCTTGGTCCGACAGATTCATCACATGTCGGAA  
GTCGGGATGAAGGTGCGCGAGATCATTTCATGCTATATCTCCATCGTTCGTAAGGCTCTATCTCGCTGAAAT  
CTAGCGCTAATGGCTCAGGTATCGGAGATATGGGTGTGCCGGGACCGGCAAGGGGGTTGCAGGACTAAT  
ACCTTTCTCATGTTACGCTCTGCGTTGTGACTGTGACGCTGCTTTTTTGGTTCGAGCTTTTTGGACTCTTCG  
ACGATCTCACGAGTTGAGTGTGATGGTATTGAGGATCTGGGGTTCAGTCCGGGACACGTATCCCTGCTCTT  
TCAATCGCTTCCAGCTGCTGATACTCCACATGCTCATGTAGTGGTAGTACTGATCTGCCAACGGGAC  
CTTGAAGTATTGCTCTAGCTCTGGGTCAAAGAACCAGATGTAGGAAATATCTCTTGGTCCCGACGAAAA  
ATGAACTGTCTTTTTGTCCCGGTATCCGGATCTGTGGCGTTGAGCCAGAAGCGCAGCGTGTCCGCAAAGT  
AGGTGAGCCCCCTCAATGGTGACACCGAATACCTGCACGGTTTCGCTCTGAATGACGGCAGGAAGTCGAGTAG  
GATCGTCATCCTATCTGCTGGTCTTGGTGGGTAGCCAATCCCGTCAACTTCACTATTTCCATTGATGCCA  
ATATCCCACTTGGCCAGAGGGCTCATGCCAATACCATTGTGGTAGCGTTGGTGATAGATATTGCAGATAA  
ACGTCACCAGCCACTTCTCGAGCTCGTCCTTGGTCATAACGGCCCGCTTGTCCGAGTCGTAGTCCCTTACG  
GTCCCGGATATTCGAAAATGTGGTTCAGGCAAGTCATGTAGCTCTTTGACCAGAGTACCAGGATCCGC  
TCTATGTGTCCGCCATACCTAGGCTGTTTGACCGGTCTGAAGCTGAGATTGATGCCGTACATCTGACAGG  
ATTTGCTGAAGTTGATAGATCGGAAGTCAGCGCCATTATCAACATGGATCGTTTTTAGGGATACCCCATAC  
AGGCCAACTACTTTCCACACGGTGCAATGTATCCACTCCTCCTTGGGAAGGATGGAATGAGCAACACAC  
ATGGCGACAGATGTTTTCGGAAGGCGGATCGAAAAGAGAGGTAATACCCGGTCACCATCCGGCTATAGACAT  
CCATTGCCAATGTAATCCACGGGCGGCGGATGGGTTTACGATGGATGTCGTCGACCAAGATGATGTCGGC  
TGGGGTGTGGTCAATCTGGATGACAGAGAGAGGGTAGTCTGCGCCGGGGAAACTACCAGGAGTAGCAGTA  
AATTTGTTCTTCGCCTTCTCCCTAAAGCCTCGCTCCTCAGCTGCTCTCGCTCTGATATTTGCTCTACTC  
TTGCCCTGATAGCCGAAGCCCCAGGAGGTGGAATGTTTTGCTTCTCGCATTTGGAGAAAAACTTCATTAAC  
AACCTTTTGAATAGAAGAACGCTGAATGGTCAAGTAAATAGATTCAATGGTCTCGTTGATGAGCTGTCTC  
TGCTGTGGAGTCAATCGAGTTGACACCCCTCGCAACCAGGCTCATCGGTATGAGAGCCAGTGTCTCT  
CTACTGCTGATATCTGGATAGCCAGCATAAAGTTCGAGAAGTGCAGAACTGACACCCAGCTTGGAGGCAGCTT  
ATTAACCTCTTCTCGTCCAATACTGGGAGCTTGGTTCGAGCAGGGGTTTTATGGCTTCGAATCGTTCATTC  
GCAACGCGCCAATCTTTATCCTTGATAACCATCAAGGTCAATGCGGGGATCCAGTTTGGCGACCTGCGGAT  
TTGGTGGGGATGAGAGCTCATTAATAGGGAGTAGTTTTTTTGGCGCTGTGATTACGTCACCTCCAAGCAG  
ACTGTTGAAGTCGATTTGCTGCACGATTCGGTATGTCAGCCCTTCATGCTGAACAAACTGACCAACGTCC  
AGAGCCAGCCGCTGGCGGATGGGGACGATGCCACCTTGCGCCCTTGTGGCTTGTTCATTATCCATTTTGA  
TGTGTCCAAAGTATGGTCGAGCCATCAAGCTGCAATGTGATGTCACAGTCGATTCTACGGGTTGCCAGGA  
GATACCAAATGGCAACAGCCAGGGGCGTTCATCTCCTGCTATTACCCACAGTGAGCGAACAGAGCATC  
ACGGCTCAACGGCCCTATTTGATACAGGGCATGCAGTAACGTATCTGTGTGCTTTGGTGTCTGAGCAAAA  
CGTTGGTAGCGTTCAAGGAACCTTGATGTTTTCAAGCGCACGGTTCGCGGATCCGCGACTCGTCATAGATCT  
TGAATGACCATCCTTGATTACGTGCAAAACGCTCTTGCGCCCTTCCACTTGGATGACCATGCCCGCCAGTT  
TTCCATCCATAGATCCCGGGTTTTACTTCCACCAGGACATGTTGCGTGGCTTCACCATCAAGGCGCCGT  
AAGGACATCAGAAAATCAGGGGTATAGGTGTAGGCCCTACCGTTGTCACCCGATGAATGGGATTTCAACGG  
GCTGAGGAGTGATCGAGACAATATTGGGGAAAAATTCGTGGCGAATGAGGAAGTCACGCTCCAGCGTTGA  
TTCATACTGGATCGCATCTTTTCCACGGAACCTGATAGCTACCAGAGACACTTCGGCGGGTAGGGCCAATC  
TTACGAACCTGACGTACCTTCACGTTATCTCTGCCACTTCCATCCATAATGAATCCATTTTTATTGACCA  
AAGAAAAAGCACCACATCAAGTGGACTCACAATAGACCCAATGCTTTCTTATATATTTTTGACCAGTCTCA  
CTAATTTCAATAAATAGCATCAATTTCTGTCAATTTATTGGGCTTACATACGCCATGTAGCTATGCAGGGTT  
AAGCCTGTCTTGATTGTTTTTTGACTAATGTGAGAATTTGATATAAGTTTCTGACATTTGAATGCAAACCT  
GATTGAGTAACAATGAGAACCTTCTCTGAAACGATTCTTTATCACGGCAAGCAACTTCTGAAGGGGGCA  
TACTGACTCCGAAGGAGTTCCCTTCATCTAGGAAGTAGAGCTGCTGTTGATCAGGCGTTTTTACGTTTTGGC  
TAGAGCTGGTTTTGTAGTGGTCTAATCATCTCGGACACCATTTTAGGTGGTACAGTCGCCACCATGACCTG  
AGGTGTTCAATGACAAGATTACGTCGCTCATTTACTGCCGAATTCAAACTCGAAGCCGCATCCCTGGTGC  
TCGACCAGGGATATTCTGTCCCTGAAGCCAGCCGTTCACTGGATGTCGGTGAACCCGTACTTCGCCGCTG  
GGTTCAGCAACTGCAATCCGAACGAACTGGCACAACCCCAATCGGCAAAGCACTGACTCCGGAGCAGCAA  
AAAATTCAGGAGCTGGAAGCCCGTATCAACCGGCTCGAACGTGAAAAGGACATTTCTAAAAAATGTATGGT  
CTGCTCCTTATCTGCAAGCTTGAAGTGAATTTCCAGAAGTCGTTTGCCTCAATGTATCCGGCCTGTCTGTG  
AGCCGTTTTTCCGGCTCTGGCCTTGATGGGATCCGCACGTCATCGTCTAATAAAGCTACCAGTCATGAGA  
GACTGCTTTTTTTAGCCAGGCTGCAACGTCGTGGGGTGAACGCTTCTGTCTATCTGTTTTTGGCTCGCAAAA  
CCGGGTATGAGTTATATCTGTTAAACGGCTGCGCTTGCCTTGGGATAGGGTTGGTAATCCCTGCCGGATG  
TCAGTACTTTCCAGCAAATTCGCATTATCTTGTGGCCAAGGCGATAAGAACCACATGATGGTGTATGGCC  
AGCCTCCAGCCTAGCGACCCATTTCGCTAACGATGATTTGTCACGCTTCATGTGAATTTTTAGCGCTTTG  
GCGCCTTGAATAACCATTTGCCTTAAATAGCTATTGCCACGCTTACTGATCCCGCCGAGCGAAGATTTGC

CGCCCGTTGAGTATTGCCTGGGGACCAGCCCCAACCAAGCTGACAGGTCGCGGGCTTTCTTGAATTGTGA  
GCCATTGCCAATCGCGGCAATCAACGCGGTTGAGACAATCGGTCCAATGCCGGGGACGGTACTGATTTTT  
TGGCACAAACCTGATGCGCTTGAGGCTTGTCCGAGCATGAGGCTCATGTCATCAATCTGAATATCCAGCT  
GTTGCCACCGTTTTCTCAGGCGTAATACCAGGGCGCGGATAAAGTCAGGCAAGCCATTCTCGGCATCTTC  
AAGGATCGTCCGAGAGAGCGCTCGAAGACTTTTTCTGCCGACTGGCACGGTGAGCCCATATTCCAGCAGC  
AACGCTCGCATCTGATTGACAGTGGCGGTACGTTTCGACGATGAAACGCTGACGGACGCGATGAGTCGCTT  
GCAATGCCAGTTGCTCATGAGATTTCAACGGGACACAGCGCATAGTACCTCTGCTACCAGCCTCGGCAAT  
GGCGGTAGCATCGTTGAAGTCATTCTTGTGTTGATTTGAGGTAGGGCTTCACAAATTTGGGCAGGGATAATC  
TTGGGTTTGAACCCCGCTGTTGAAACAGGGCGCCCCAGTATTGCGAACCCAGGACATGCCCTGAAGGCGA  
CCCCAGAGGGTGGGGTCGTGCTAATGAACTGTTTCAGTTGTGAACGCGTGAGCTTTTGCTTGGTCAATAC  
ATGCCCCATGCGATCCATCGCCACCAGGTGAAACCAATTTTGCCTAAATCGATCCCCGTAATGTAAATC  
TGCGCTTGAGTCATGATGAGCCTCCTTGATGCTGGCTACAGCATAGCGGGGTGGGTGGAGCAGACCATCC  
CATTAGGCTACTGCTCTCTTGATGGCGGACGAGTTTACACGTACGCGCTGATAGACCATTAAAGGGAGCA  
AGCCCCCATCACCTTGGTCTGCTGCGCTTTTCGATGTTTCCAACATCCTGCTTTTACGACTATCTGGCCCCG  
AGACGGGCGATTAACCGTGAGCGGATACAGCAACGAGTGTGCGCCGGTTGTTCAAAGAGAGCAGGA  
GCTCTGCAGGCAGCCGCGCTTGTGTCGATGATGCGGGAGTTGGGGTATCAGATTGGTCGATTCAAAGT  
ACGTAACCTGATGAAGGAAGCCGGGCTGGTATCCAACAGCCGGGCGCTCATCGTTATCAGGTCGCCCCAG  
TCTGAGCGACCGGATATCCCCAATCTGCTGGCCCCGGAATTTGATGTCCAGCAACCAATCAGGTGTGGT  
GTGGCGATATCACCTACGCTCTGGGCTGGTGGCCGTTGGCATTACCTGGCAGCGGTGCTTGACCTGCACAC  
TCGGCGGGTTCGTGGGCTGGGCGATGTCTGATAAACCTGATGCAGAATTGGCAATCAAAGCACTGGAGATG  
GCCTATCAGCAGCGTGGTTGCCCATCTGGTGTGCTGTTCACTCTGACCAGGGCAGCCAATATGGCAGTA  
GGGCATTTTCGGCAACGACTGTGGGCGCTATCGCATGACCCAGAGCATGAGTCGGGCGTGGCAACTGCTGGGA  
TAATGCCCCGATGGAGCGATTGTTTCAAGGCTTAAACCGGAGTGGGTTCGGGCTATGGGATACATGAGC  
GTGCGGGAGGCAAAGCGGGATATCAGTTATTACCTGATGGATTACTACAACCTGGCGGGCTCCACATCACC  
ACAATGACGGGATACCGCCAGCAAAAGCCGAGGATCGGCCAACCAAGTGTCCGGATTTAGTTGACCACT  
ACAGTCTTGTGTTGTTGCTATTACTATTTCAACCACGAATTTTCAGTACAGGTAGAGTTGTTCTCTCATTA  
GGGTCACGGCTTGATAAGCCATAAACAAGTTTCTTTCCGAGTGTCTTAGGTACGTCCTCAGGAACCCGTT  
CATGTTGTCATTTTTAGTACTTAGACCTTATCTCATTATTTCCACTAAAAATGGATTATTAATCTCATCT  
ATTGAAGAAAAAATTTGATTTGATTTGAATAAAAAAATGACCTAACTCATTGAACTATAGTTTGGCCCTGT  
CTCATTAATTTCAAAAAATGACAGTGGCAGCCACCCGCGGCCGAAATTTTCGCTGGCCACAACGGG  
GTGCTGTTTTCTCGACGAGCTGCCCCGAATTCGAGCGCAAGGTGCTCGACTCCCTGCGCGAGCCGCTGGAGA  
CGGGCCACATCACCATTAGCCGGGCGCCCGTTCAGGTGGATTTTCCCGCCCGCTTCCAGCTGGTCGGCGC  
CATGAATCCCAGCCCTGCGGCCACTATGGCGACGGCCAGACCCGCTCCAGCCCGGATCAGATCCTGCGC  
TACCTCGGCAAACTCTCCGGCCCTTTCTCGACCCTTTGACCTGACGGTGGAGGTGCCGCTGCTGCCCA  
AGGGGAGCCTGACCGGCAAGGCGGAGCGGGGGAGTCTAGTCAGCAGATCCGCGATCGAGTGTGGCGGC  
ACGGGAGCGCATGCTGAGCCGCAACGGTAAGCTCAACAACCTGCTGGATAGCCGTGAGATAGAGGATATT  
TGCCGCTTATCGGCGCAAGATGCCGAATTTTTGGAGAATGCCATCCAGAAGCTGGGGCTCAGCATCCGGG  
CCTGGCATCGCATCCTGCGGGTGTACGCACCATCGCCGATCTGGCCGACAAACCCGCCATCGGCAAGGA  
GCATCTTATCGAGGCACTCGGTTACAGGGCCATGGACAGGCTGCTGTGCGGACTGCGCAGCAGTTGACAG  
AAGGGAAAGGGTGTAGTCCGACACCGTAACGGCTCTGAATGGTCTCACGGGCAATCGGCTGATATTTATGGC  
CACAGATCTGACCACTTGATGGCCCTTTATCGACAGCAAGACGGACCCGACTCATGCCAACAAGCTGAC  
AGAGCGACTGCGCGGACGCTCTCCACCCTGCTCTATTTTTTCAACACCCCTCTTCTGGTTTGTCCCCATC  
TTCTCGCTGGGTCTGCTCAAGCTCCTGCTCCCCCTCAAGGGGTGGCGCACCCCTCTGCAACTGGCTGCTCG  
ATGGCTGTGCCAGCTGCTGGATCGGTTTCAACAATCTGATCCAGAAAACCATCATCAAAACCCCTTTTCA  
GGTGGTTCGGAGTGGACAAGGGCGCCGGAATGAGTGGTATATGGTGATTGCCAACCATCAATCCTGGGTC  
GACATACTGGTACTGACAGCGGGTTTTTAACCAAAAAATCCCCCTTCTGAAATTTTTCTCAAGAAAAGAGC  
TGATTTGGGTACCTTTTCTCGGTCTGGCATGGTGGGCGCTCGACTTCCCTTCATGCGGCGATATTCCAG  
GAAATTTTCTGAAAAGCATCCCCATCTGAAGGGAAAAAGACATTGAAAACAACCCGTAAGCCCTGTGCCAGG  
TTCCGCCACATTCGGGTGAGTGTGATGAACTTCGTGCAAGGCACCCGCTTCACCAAGGGCAAACATCAGA  
AGCAGGGTTGCCCTATCGTACCTGCTCCACCCGAAAAGCAGGCGGCATCGCCTTTACCTGGCAGCCAT  
GGGTGACAGTTGCATCAACTGGTGGATGTACCATCGCTATCCGGACGGCATTCCCAGCTACTGGGAC  
TTCATGTGTGGCCGGTTCGGCAAATCAAGGTTTCAAGTTCAGGTCCGCTATTTGCCGATCGACCGCAAGCTGGTGG  
GGGATTACTTCAATGACCCCGAGTTCCAACAAGAGTTTCAACAGTGGTTGAACGGGATCTGGCAGAAAA  
GGACCAGACCCTGAGCCAACCTGCTGGCAACCAAGGCGCAGTAAACCTTTCATGCTATCCCTGCTTCCCAGC  
CCGCTGGTGTGATCATCAGCGCGGGCCTGACCATCCTTTTACCCGCTTGTGCGCCAGTCTGATCCTGCTG  
TGGTGTGCTGGCCAAACTGCTGCGGCCGATCCCGGCTTTGGTTCGCGCTGCAGCCGGCTCAACAACCG  
CTTCATGCGCCTGTGGCTGGCCTGCAATGCGCTGGTGTGATCCGCTCACCACCCGTAATTGACTGGCAGGTG  
GAGGACAATACCAAGCTGCGCAAGGATGGTGGTATCTCATCATCAGCAACCACATGAGCTGGACCGATA  
TCGTGGTGTGCTCGGCCACCTGTTCCGCGATAGGCTGCCGGTGGCCAAAGTTCTTTCATGAAGCACGAGCTGAT  
CTACATCCCGCTGCTGGGGCTCGCCTGCTGGGGGCTCGATATGCCCTTTATGCGTCGCGACTCACGGGAG  
TTTTTGTGTAAGAACCCGACCTGCGCGGCAAGGATATCGAGACCACCCGCAACGCTGCGAGAAGTTCC

GCCACATCCCCACTACCGTCATCAACTTCGTGGAAGGGACCCGTTTCACCGAGCAGAAACGGGATGCGGC  
CCGCTCCCCGCTATCGTACCTGATGCCGCCAAGGCGGGGCTGGCCTTTACGCTGGCAGCCATGGGC  
GAGCAGTTCGACAGCCTGATCAACGTACCATCCGCTATCCGGACAACGCCGAGACCCCGTTCAAGGACT  
TCCTGATGGGGCGGGTAAAACCTCATTAGGTGCGGATCGAGGAGCTGCCGGTGGATGAGGCCCTGATAGG  
GGATTACTTCAACGACAAGCAGTTCAAGCGCGTTTTTCAGGAGTGGCTAAACCAGCGCTGGCAGGAGAAG  
GACGAGGTGCTGGAGGGGTGGCATAGCGGTGAGGTGCCGCTGCCAGTTGCCGCCAAATCCGGGGAGGAAT  
CCAAAAGAGCGCAGAAGCCAACCTCGGCCAACTGATCTTCGGAAGAGATAGCAATCCCGTGGCGGCGCAG  
CAGGGCGGTGGTCTTGCCCTCGCCGCCACAGAAACACCTTCAAAGCGGCCGTTATAGATAACGGCCGCTG  
CCACATGAGGGGCTCCCTCTTTTTCAGAAGGGCGAAGCGAATGCCCTGCGTCTGACAGATTTCCAGCGCCA  
GCTCGGCGCCACGGTCAACTCGGCAGTACATCCAGCCACTCGCCGTCCTACTACCCGCTCGCCCTGCCG  
CTCGGACGGGGGCGTGGGGTCGGCAAACGCCAGCCACTTCGGGGCAGAAGGCCAGCACCCGCCCTCG  
GCACCCAGCGCACTCAGCCAGTCCGCTGACGATTCCCTTGCTCTGACCGTCTGTAACGCACCCGCTGACCCA  
GCAGGCAGGCACTCACCAGCACCTTGTGCACGCCGCTGCTCACTCATGCTTCCGCTCCGTCGATCACTTGA  
TCGAACATCACGCAGCAGGGGCTCTCCAGCCGGTAGAGGATGGCAGGACGCTGTTTTGCCGGTGCCTTGC  
GGCCGGTATCCACCAGAATGTGGCGCGATGGATCCGCTTGCAGAAAGGCGGCCGTATTCATGGGTGTTTTG  
CAGGATGATTTCAAGGCACGTTGCACCTCGGAGAGGGTGAACCTCGGGCCCCAGCAGTTGCAGCGGCAGG  
GTGCTGTAGCGGCTCTTGATCCGCAGCCGCTCCAACCCCTTGGCGATGAGCTGGACATGGTCAAGGCGA  
GGCTCAGCCCCGGCAGGTTGGCGAGCGGATGCCAGCAGCCGTGGATCGCTTCCACTTCCGGATCCACCAG  
ACAGAGATAGACCAGGGTTCGTGGACCAGCCGCGGGGATCCCGTTCAGATTGCCGAGGGTGCAGACCTGC  
TCGCTGTAGCAGTGACCGAGCCCCACTCCGCCAGCAGACGGCGCTGGGCGGCATCCAGATCCCGATCCC  
GGGTCTCGTCGATGCGCAGTCCCGGCAGTTGCCAGCAGTGGGCAAAAGGGGGGGCGATCGCGGGTCTCAAG  
CAGCAGCTCGAGCCGCTCCTCATGCAACCGCAGCACCACCATATCCAGACTCATTTCTCAGCATGCCGATC  
GCCCTGCTCGCCTTCCATTAATGTTTTGGTAGATAATATCACACGAATAGTATGTGCAGGAGCCAATCATG  
GGAACCGTCGCCAGCCTGGATATTGATGCACAGAAGGGCTTTACCCCTCTGCCCGAACGAACCTGCCCG  
TCGCGGGCGGTGATGATATTGTGGCTGCGCTAAACGCTCAGGCCACCCTCGCCACGCTGCCGATCGGCAG  
CAAAGACTCTCACCTGCCAATGCTGGCTGGGCCGTTTTCTGACCCCGCAGGCATGCTGTTGCCGCTGGAT  
CTGCCAACCGCCACCTCACTTGGCCGGTGCATGCGTACCAGGTTAGCAAAGGCTTCGAGCTGCTCGACG  
GCCTGCCCCGCTCCCATGCATGACTTCTTCTGTTGAAAGGGGGTCGAGCCTGATCTGCATCCCTACGG  
CACCTGCTTCCACGACCTGGCTGAACGGCCAGCACCAGGACTCATCGAATTCTCTGCAACCCGCCAGGTC  
GATAACCGTACTGGTCGGCGGCCCTTGCCACCGACTACTGTGTCAAACAGCGTGTGCAACTGCGCCGCG  
CCGGTTTTCCGGGTAATCGTCCATCTCGATGCTTCCGCTGGCATTGCACCCCGCAGCGTTGCCAGCGCCCA  
CACCCAGATGATCGAGGCAGGGGCCGAACCTGGCCAGACCCTGATCGATGTACAACGCCCTGCTGGACGCC  
TGATATGCCACCGATTCTTACCAGCCTGCTCGACACCGACGCTGCACGTTACATATGCGGGCAGGGGAGC  
TCCATCGTGTCAACCAGTCTGCGAGGAGCCTGATATGCCCCCAATCCTCACCAGCCTGCTCGACACCGAC  
GCCTACAAGCTGCATATGCAGCAGGCGGTGTTCCATCGCTATCCGGATGCCGAGGTGGTGGCCGAGTTTTC  
ACAGCCGCAATGAAGAGGATCTGCTGCCCATGATGGGGCAGATCGAGGAGCAACTGCGCCTCGCCGGCTC  
CCTGCGACTGACCAAGCCAGAGCTCGATTTTCTGCCGAAACGCCCTTCTTACCCCTGACTATCTCGAC  
CACCTGCGCCGCAAGCCGCTCGATGCCTCCCTGCTCAAGGTGTTTCGAGCAGGATGGCCGCATCAATGTGC  
GGGTGAGGGGCCCTGGCAGGATGTGATCCTGTGGGAGATCCCGGTGCTCGCCATCATCAGCGAGATGCC  
CAACCGCTTCCGCTACCCCCAGTTCGGCGTCAGCCATGCGCTGGATCGGCTCGATCAGAAGATCGACAAG  
CTGGAGAAGGAGCTGAGCCGCGACGAGATGAGCGAGTTCAACCTCATCGACTTCGGCACCCGCCGCGCGCT  
TCTCCCATGCGGTACAGGATGCGGTAGTGGGTGCGCTCAAGGAGCGGCTGCCGGCGTTTCGCGGCACCCAG  
CAACTACATGCTGGCCAGAAGTACAAGCTGCCCGCGGTGCGCACCCAGGCCATGAGTGGTTCAGGGC  
CACCAGCAGCTCGGCTTCCCGCTGGAACACAGCCAGCGTGCAGCCCTCATCAGCTGGCTGGACGAGTTCA  
CTGACCATCTGGGATTGCCCTGACCGACTGCATCACTATGGATGCCTTCCCTGCGGGACTTCGACTTCGA  
GCTGGCCAGCAGTATCAGGCTTGGCCAGCAGCTCCGGCGATCCCGTGGTGTGGGGCAGAGAAGGCATC  
AGCCACTATCAGCGCCTCGGCATCGACCCACCGCAAGACCTGGTCTTCTCCGACGGGCTCAACCTCG  
ACAAGGCGGTGCAGCTGTTCCGTCACCTTCCGTTGGCCGCATCAACACCAGTTTCGGCATCGGTACCAAGCT  
CACCTGCGATCTGCCCGGTGTCAGCCGATGAACATCGTCTTCAAGCTGATCGAGTCAATGGCGGCCCG  
GTCGCCAAGATCTCCGACAGCCGGGCAAGACCTTGCAGGGATGCGGAGTTTATCCGCAACCTCAAAC  
AGGCGTTCCACGTCGGGTCTGATCTTCCGAAACACCAGAAAAACAAAAAGCCCGCCAGTTTCGACCCGGC  
GGCTTTTTTATCGACTCAAGGGGTATCAGTCTTCTTGGCCAGCAGGAACTGCACCAGCTTGTGAACTG  
CTCTTGAGAGGTGATGGATTCAATCTTACCATGTACTTGGCTTACCAGGAAGGCCGGTACACCCGCA  
ATGTTGTAGCTTTCGGTGTGCGATCGAACTGGGAGACCATGCCGGAGACGGCAAAGCTGTCGACGGCAC  
CGTCGAACTCTTACGCCGTTACGCCGTTGTCCACGAAGATCTTCTTACATCGTACGGCTCATCGGCGG  
CTGACGCTGGGTGTGGATCTTGGTGAAGATGGCCGGAGTCAGCTTGGCTTCGGCGTTGAGCAGGCTGGCA  
ACGGCATAGGCACGCTGCATCTCGGGGCCATTTTCGCGGCCGAGGAAGGCAACCGGGTTCTTCTTGAGGG  
GCACACCTTGGCAACCCGGCCTTCAACTGTTCAACGATCGGTTTCGAAGGTAGCGCAGTGCAGGGCAGTA  
GTAGGAGAAAACTCCATCACTTCCGGCTGGGCACTGCCAGTCTGTTTACCACATCGTAGTTGACGCCCT  
TCCTTGAACCTCGGGGGCGCGTGAACCATGGGGATCATCAGCATGGCAGCAAGGAAAAATAGAACTTTTT  
TCATGATGTTTTCTGTTAAGGGATCACTGTGAGGCACGCCGGCGAACCGAAGCAGTGCCAAGCCTATTG



TTTCGCCATGCTGACGTCAATGGTCAGGGCCGGAGATCGAGTCCCCCTTGCCGCGCAAGATCCCCTTCTAT  
TTCACCAGTTTGGCATCAGGCTCAACGGTGGCGCCTTGAGTGTCTCCAGCTGATCGTGCAGTGTGCGTAT  
CTGTTGACGCCAGTAGTGATCGGTATTGAACCAGGGGAAGTGACGGGGGAAGGCGGGATCTTCCCAGCGC  
CGCGCCAGCCACGCCATGTAGTGAACGATGCGCATCGCCCCGCTGCGGCTCGATCAGCGCCAACCTCCCAG  
AGTCGAACCTCCATAAACTCCTCGTAGCCCGCCAGCAGGGTGTGCGAGCTGGATCTGCTGCTCGTGGCGCTC  
GCCGCTCAGCATCATCCAGAGATCCTGAATCGCGGGGCCGGTGCGGCAATCATCGAGGTCGACAAAACATG  
GGGCCATCGCGCCAGAGGATGTTGCCCGGGTGGCAGTCGCCATGCAGGGAGATCTGCGCCACATCCAGGG  
TCATGGCGTGCCTCACATGCTTGATCAGCTCGTCGAGTACCCGAAGAATTGCTTCGCCAGCCCCGCTTGG  
CAGCCACTCGCCAGACGCCAGCAGCTGACGCGGTTTCATGCAGCATGCTCTCCACATCGAGCCGCACCCGA  
TGTTGGAACCGCTTGTGAGGCCGATCTGATGAATGCGACCGAGGAAACGCCCCACCCATCAAGCTGAT  
CGAGATTATCCACCTCGAAGTGGCGGCCACCGACGCTCTGCCAGATGGCAAAGGGGTAGCCCTCGTGCTC  
CAGCAGGGTCTCGCCCCGGAAGGCGAGCGCGCGCCGACCGGGATCTCAGCCTCTGCGAGACGGGTGGCA  
AACTCGTGCTCCTCGAGGATCTGGGCCCGGCTCCAGCGGCCGGGACGGTAGAACTTCACCACATAGCGGC  
GACGATCCTCATCCTGAAACTGATAGACCCGGTTTTTCGTAGCTGTTGAGCTCGATAAGGCCGGAGTGCAG  
CCGCAGGCCACTGAGATCGAGCGCATCCATGATGAGGTGCGGATGAGGTGCGGAATAGTTGAAACGCATG  
TCATCCACCATAAGAAAGGGGCGCCGTTGCGCCCCATTTCTATCACTACTGGCCGGCATTGCCGTGCTCGC  
TGTTGACCGGACTGGTGTACGCCCCGCCCCGAGCCACACGCAGTTACAACCGGCTGATAAACTTGTGTC  
CCTGGCGCAGGTTGCCCTTGTGTCATCGGGCGCCGCCCTTCCGTTTCAGCACGAACCTGGATATCCAG  
CGCCGGCCGTTTTAGGTTGTAAGGATCGACCGCCAGACTGACCGGCAGGGTGTAGATCTCGCCCGCCTTC  
AGGGTCACTTCACGGGGGCCGAACCACTGATACTCGGGCAAGCCCTCCACATCCAGCTGGTAGGTCTGGG  
ACTGCAGGGTCTTGTGAGGATCTTGAGGGTGTAGGTGTTCTCAATCAGCCCCTCGCTATTTTCGCGGAA  
CAACTGGTTGCGATCCCGCAGGATATCGAGCCCCATCGGCATGATGGACATGGCGTTGTAGACAAAGACC  
CCCAGCATCACTGCCATCACCAAGCCGTAACCTATCAGCTTGGGCCGCGCCACATGGGTGGAGTCTGTTGG  
CCAGCTTGTGCTCTGTGGTGTAGCTGATGAGCCCTTTCGGGTAGCCCATCCGCTCCATGGTCTGGTTCGCA  
GGCATCGACGCAGGCGCCGAGTTGATGCACTCATACTGCAGGCCATCGCGGATGTCGATAACCGGTCCGGG  
CAGACCTGCACGCAGAGATCGCAGTCGATACAGTCAACCAATCCATCGCCTTGGGATCCGCCCTTGGCGG  
AGCGGGCGCCACGGGCTCTCGCCACGCTTGGTGTATAGCCGACGATGAAGGTGTCTTGTGCAACATGGC  
GGACTGGAAGCGGGCGTAGGGGCACATGTGGATACACATAATGGCGCGCATCCAGCTGCGTTGCCGTAG  
GTGATGATGGTGAAGAAGAGACCCAGAACAGCACCATCCGCTGGCCTGCAGGGTGAAGAGATCCGGCA  
CCAGTTTCACTACATCCTGGAAGTAGGCGACGAAGGTGAGGCCGTTACCCAGCGAGATCGCCAGCCAGGC  
CAGATGCTTGGCTCCCTTTCGCGGCCAGCTTCTCGCCGCTCCAGGGCGCCTCGTCCAGCTTTCGCGCCTTGG  
TTGGCGGGCCCTTCCAGCTTCTCTTCAAACAGATGAACATGAAGGTCCAGACCGTCTGCGGGCAGAGAT  
AACCACACCAGACCCGACCGAGGAAGGTGGTAATAAAGAAAGAGTCCGAAGGCGGGCATCATGAAGAGCCA  
GGCGAGCAGGGTCAGATCCTGCGGCCAGATGGTGGCGCCAAAGATATGGAACCTGCTGGTACCGAGGTGCG  
AACAGCACCGCCTGTGCCCCGTCGTAACGCAGCCAGGGCAGCAGCACGAACAGCGCCACAAAGAACCAGC  
CCATGGCCTTTCGCGCATCCGCTGCCAATACCTTTCTGGGCCCGCACATAGATGCGGTTGCCCGGGTTGAA  
TCTGTGCTGCTGGCTTTGAACGTATTGGGGTTGAAGGTCCCGGTTACGCCCTTGTGCGGTGACGTCTTGG  
ATATCGATTTTATCGTGGTTCGGCCATTGCAAGACATCGCTCCCTTATTTGTTATGGAGCGGATTATATCT  
TAAACAGCATGCTAATTGTGTGGATTAGATGTATCTAATATTGGGGTTGGATCGCAATTTTCGCGCAACAA  
AAAAGCGCATCACCCCGAGGTGATGCGCTTCCGATAAAGATTCACTTGATTCCGCGTGCCTTGAGCAGTG  
CCTCTTTGAAATCGGGCACATGATCCTTGGCCAGACCGGGGATCATCGCCTGCTTGTGCGGATTCCCGCAT  
CTTGAGGTGATAGATCAGCATGTGCTCGGTGAGCTCGGACAGAGGCCCTTCAAATCCCGCTTCTTGGGCC  
AGTTTGGCAACAACTGCACCAGGCTGAGATCCTGTTCTTTCATCCAGGCAGGCTGCAACAACTCCAGCA  
GCTCTTCGATAACGATGACATTGCATAGACAACCTCTTAACTGTGTCACGTTAAATTCAGGCAACCTTACC  
CATCAAGGCTACTTCGATTTCGATCCCGCCATTATGCTTGGCCTGATAGAGTGGCGCATCCGCTTTTTTGG  
ATCAAATCGGCGATTTTCATGCTGTTGTCCCGTATCAGTGTGCAACACCAAACTACATGTGACCCGAC  
CGGAGACCAGTGACTTCTGGTTCGGGATGGCCAGCTCCTTGAGTGCTGCGCACATTTGTCGGCCACCTG  
CAATGCCCCCTGCATGCCGTTGCAGGGCAGCAGCAGGGCGAACTCTTCGCCCGCCATAACGGGCCGCCAGA  
TCGTCTCGCGCCGCTCCACCTCGGCCAGCAAGCCCCGCCACCTGTTGCAGGCAGTCATCCCCCAGCTGAT  
GGCCGTAGAGATCGTTGAACTGCTTGAAGTAATCCACATCCACCAGCACCCAGCGACAACGGCGCCCGGGC  
GCGATGGCAGCGCCGCCAGGCCGCTCCAGAGAGTCTCAAGATGGGCACGGTTGGCGATGCCGGTCCAGG  
CCATCGAGGCGGGAGGTGAGACGCAAATGCTCGGAGACCGCTTCAGCTCGGCCACCAGTTCCGGCCTTGG  
AGAAACGGTGGTGGAGCGAGGCGATCTGATCCCGCCGATCCGGCGCAACAGGGTCGGCAAAAAGACAAA  
CAGATAGCCCCGCCAGCATGCAGGAGACAATCCGCTCCTGCTCGTTGCCATTGCCAGCTCGAACAGCATC  
GCCATGCCAGCGGCAGGGCGGAACCATAGAGGGTGCGGCGGCTACCAAACAGCATGATGGCGCTGCCGG  
TAAGAATGAGGCTGGAGAGCATCATCATGGCGGCCCGGTAGGTATCGGGCAGCTTGTCCATGTAGAGCAG  
CACCCCGAGGGCCAGATGATGGAGGTGATGGTGGCTCCGATAAAGAGCTCCCGCTCCAGCACTGGCAGC  
GGTGTCTGGTGCAGGCGGGCTCGACGCCAGCGCAGGTGCCAGCCCCGACCCAGCAGCCACAGGAAAGTAC  
CTGCCAGCCAACCGAGCGCTTCGATGGCGGGTAGATAGTCTGTAACAGCAGACTCCAGCCAAATGCCAA  
CACGCCCAAACAGGGGAGACTGAACGATGCATGGGTATAGAGCTGGGCC
